# Supplementary material for: To ERV Is Human: A Phenotype-Wide Scan Linking Polymorphic Human Endogenous Retrovirus-K Insertions to Complex Phenotypes
Source: PubMed Central journal article supplement (PMC6102640; doi:10.3389/fgene.2018.00298), 2018-08-14

**Table S1: Polymorphic HERV-K insertions identified with HERVnGoSeq, prevalence, and hiSNP set size, stratified by continental population**

| Polymorphic Reference HERV-K Insertions                          | African    |             | Amerindian |             | European   |             | East Asian |             | South Asian |             |
|------------------------------------------------------------------|------------|-------------|------------|-------------|------------|-------------|------------|-------------|-------------|-------------|
|                                                                  | Prevalence | hiSNP Count | Prevalence | hiSNP Count | Prevalence | hiSNP Count | Prevalence | hiSNP Count | Prevalence  | hiSNP Count |
| <b>Coordinate GRCh37/hg19</b>                                    |            |             |            |             |            |             |            |             |             |             |
| chr3:14132679                                                    | 0.87       | 453         | 0.97       | -           | 0.97       | -           | 0.98       | -           | 1.00        | -           |
| chr3:125609298*                                                  | 0.55       | 307         | 0.49       | 36          | 0.52       | 268         | 0.54       | 164         | 0.61        | -           |
| chr3:129776131*                                                  | 0.62       | 15          | 0.39       | 186         | 0.36       | 273         | 0.50       | 283         | 0.49        | 258         |
| chr3:195654395*                                                  | 0.99       | -           | 0.93       | 236         | 0.96       | 105         | 0.95       | 275         | 0.98        | -           |
| chr4:120263688*                                                  | 0.66       | 1593        | 0.63       | 1253        | 0.67       | 1431        | 0.62       | 1465        | 0.79        | 1337        |
| chr5:8937848                                                     | 0.82       | 306         | 0.81       | 337         | 0.73       | 389         | 0.91       | -           | 0.88        | 348         |
| chr6:32505702*, chr6_cox_hap2:3953713,<br>chr6_qbl_hap6:3740216  | 0.21       | 2407        | 0.10       | 1265        | 0.11       | 1862        | 0.12       | 1953        | 0.11        | 1600        |
| chr6:32746812*, chr6_ssto_hap7:4177515                           | 0.09       | -           | 0.09       | -           | 0.09       | 222         | 0.08       | -           | 0.07        | -           |
| chr7:16237347*                                                   | 0.84       | 130         | 0.87       | -           | 0.83       | -           | 0.65       | 387         | 0.84        | -           |
| chr7:158029477                                                   | 0.19       | 251         | 0.29       | 193         | 0.33       | 446         | 0.33       | 146         | 0.28        | 159         |
| chr8:7355392                                                     | 0.32       | 44          | 0.11       | 125         | 0.08       | 204         | 0.04       | -           | 0.12        | 57          |
| chr8:18651453                                                    | 0.65       | 203         | 0.42       | 116         | 0.26       | 238         | 0.76       | 263         | 0.51        | 175         |
| chr8:37050885                                                    | 0.48       | 182         | 0.22       | 110         | 0.18       | 150         | 0.33       | 110         | 0.40        | 75          |
| chr10:135355522                                                  | 0.06       | 88          | 0.23       | 107         | 0.22       | 132         | 0.17       | 292         | 0.22        | -           |
| chr11:71478951*                                                  | 0.88       | -           | 0.81       | -           | 0.78       | -           | 0.77       | 379         | 0.87        | -           |
| chr11:71875417                                                   | 0.90       | 93          | 0.88       | -           | 0.88       | -           | 0.82       | 187         | 0.91        | 72          |
| chr12:55727210                                                   | 0.68       | 279         | 0.84       | 317         | 0.83       | 365         | 0.60       | 618         | 0.83        | 348         |
| chr14:20552746*                                                  | 0.49       | 72          | 0.24       | 131         | 0.18       | 205         | 0.29       | 218         | 0.30        | 96          |
| chr17:44361947                                                   | 0.11       | -           | 0.19       | -           | 0.23       | 2300        | 0.11       | -           | 0.21        | -           |
| chr19:386675*                                                    | 0.18       | 18          | 0.05       | 18          | 0.05       | -           | 0.15       | 22          | 0.09        | -           |
| chr19:52924209*                                                  | 0.50       | 33          | 0.36       | -           | 0.32       | -           | 0.34       | -           | 0.42        | 41          |
| chr20:25215439*                                                  | 0.85       | 93          | 0.82       | -           | 0.82       | -           | 0.83       | -           | 0.88        | -           |
| chr21:15654234*                                                  | 0.70       | -           | 0.63       | -           | 0.62       | 19          | 0.60       | -           | 0.69        | -           |
| <b>Polymorphic Non-Reference HERV-K Insertions</b>               |            |             |            |             |            |             |            |             |             |             |
| chr1:106015875                                                   | 0.19       | 436         | 0.01       | -           | 0.00       | -           | 0.00       | -           | 0.00        | -           |
| chr1:111802592                                                   | 0.63       | 193         | 0.64       | 173         | 0.52       | 268         | 0.58       | 331         | 0.58        | 206         |
| chr1:223578304                                                   | 0.06       | 206         | 0.01       | -           | 0.00       | -           | 0.00       | -           | 0.00        | -           |
| chr4:9603240                                                     | 0.63       | 901         | 0.66       | 634         | 0.83       | 422         | 0.57       | 1306        | 0.66        | 1580        |
| chr4:9981605                                                     | 0.08       | 650         | 0.00       | -           | 0.00       | -           | 0.00       | -           | 0.00        | -           |
| chr5:4537604                                                     | 0.04       | 176         | 0.00       | -           | 0.00       | -           | 0.00       | -           | 0.00        | -           |
| chr5:64388440                                                    | 0.17       | 400         | 0.07       | 94          | 0.06       | 184         | 0.02       | -           | 0.02        | -           |
| chr5:80442266                                                    | 0.03       | 24          | 0.08       | 60          | 0.08       | 88          | 0.00       | -           | 0.05        | 24          |
| chr6:32648036, chr6_mann_hap4:4099133,<br>chr6_ssto_hap7:4073239 | 0.26       | 5287        | 0.42       | 3282        | 0.27       | 6113        | 0.33       | 3938        | 0.45        | 6206        |
| chr6:161270899                                                   | 0.81       | 446         | 0.83       | 472         | 0.67       | 874         | 0.98       | -           | 0.89        | 513         |
| chr7:158773385                                                   | 0.04       | 102         | 0.00       | -           | 0.00       | -           | 0.00       | -           | 0.00        | -           |
| chr11:60449890                                                   | 0.03       | 8           | 0.22       | 541         | 0.00       | -           | 0.09       | 328         | 0.01        | -           |
| chr12:44313657                                                   | 0.48       | 540         | 0.18       | 507         | 0.11       | 451         | 0.36       | 887         | 0.23        | 580         |
| chr12:124066477                                                  | 0.32       | 571         | 0.09       | 382         | 0.12       | 665         | 0.03       | 17          | 0.07        | 583         |
| chr13:90743183                                                   | 0.34       | 591         | 0.10       | 155         | 0.11       | 301         | 0.01       | -           | 0.04        | 120         |
| chr15:63374594                                                   | 0.64       | 224         | 0.56       | 156         | 0.63       | 481         | 0.86       | -           | 0.71        | 91          |
| chr19:21841536                                                   | 0.32       | 717         | 0.08       | 337         | 0.08       | 248         | 0.24       | 1342        | 0.29        | 423         |
| chr19:22414379                                                   | 0.64       | 626         | 0.35       | 1016        | 0.35       | 1306        | 0.35       | 1011        | 0.44        | 1007        |
| chr19:22457244                                                   | 0.04       | 907         | 0.00       | -           | 0.00       | -           | 0.00       | -           | 0.00        | -           |
| chr19:29855781                                                   | 0.62       | 604         | 0.48       | 578         | 0.51       | 547         | 0.72       | 575         | 0.43        | 377         |
| chr19:57996939                                                   | 0.07       | 191         | 0.01       | -           | 0.00       | -           | 0.00       | -           | 0.00        | -           |
| chr20:12402387                                                   | 0.12       | 271         | 0.01       | -           | 0.00       | -           | 0.00       | -           | 0.00        | -           |
| chrX:93606603                                                    | 0.06       | 186         | 0.02       | -           | 0.00       | -           | 0.00       | -           | 0.00        | -           |
| <b>Novel Sites Found in HNGS Not Previously Annotated</b>        |            |             |            |             |            |             |            |             |             |             |
| chr8:7671216*                                                    | 0.19       | 49          | 0.04       | -           | 0.04       | 112         | 0.02       | -           | 0.06        | 19          |

\*Not previously recognized as polymorphic

**Table S2: Number of hiSNPs identified via HERVnGoSeq and 1000 Genomes Structural Variant Group; European Super Population Only**

| <b>Insertion Site Coordinate<br/>GRCh37/hg19</b> | <b>1000 Genomes Variant ID</b> | <b>Number<br/>HERVnGoSeq<br/>hiSNPs</b> | <b>Number 1KG<br/>SV hiSNPs</b> | <b>Number<br/>SNPS<br/>LD &gt; 0.2</b> |
|--------------------------------------------------|--------------------------------|-----------------------------------------|---------------------------------|----------------------------------------|
| chr8_37050885_R_POST                             | DEL_pindel_25540               | 96                                      | 36                              | 64                                     |
| chr4_9603240_R_PRE                               | SVA_umary_SVA_205              | 321                                     | 370                             | 0                                      |
| chr5_64388440_F_POST                             | SVA_umary_SVA_245              | 33                                      | 31                              | 42                                     |
| chr5_80442266_R_PRE                              | SVA_umary_SVA_252              | 75                                      | 28                              | 8                                      |
| chr6_161270898_F_POST                            | SVA_umary_SVA_320              | 814                                     | 736                             | 258                                    |
| chr1_111802591_R_PRE                             | SVA_umary_SVA_45               | 243                                     | 240                             | 34                                     |
| chr12_44313657_F_POST                            | SVA_umary_SVA_540              | 377                                     | 289                             | 121                                    |
| chr12_124066477_R_PRE                            | SVA_umary_SVA_556              | 394                                     | 399                             | 103                                    |
| chr13_90743183_R_PRE                             | SVA_umary_SVA_583              | 221                                     | 236                             | 145                                    |
| chr15_63374594_R_PRE                             | SVA_umary_SVA_637              | 431                                     | 343                             | 40                                     |
| chr19_21841536_R_PRE                             | SVA_umary_SVA_745              | 193                                     | 176                             | 108                                    |
| chr19_29855781_R_PRE                             | SVA_umary_SVA_748              | 468                                     | 457                             | 295                                    |

**Table S3: Associations of hiSNPs with polymorphic HERV-K insertions with African super pc**

| CHROM | RSID        | SNP_POSITION | ALT | OR    | P-VAL    | HERV_POSITION    |
|-------|-------------|--------------|-----|-------|----------|------------------|
| 10    | rs1536828   | 135342315    | C   | 6.302 | 1.46E-08 | chr:10:135355522 |
| 10    | rs2480257   | 135352509    | A   | 6.231 | 1.80E-08 | chr:10:135355522 |
| 10    | rs2480254   | 135352869    | C   | 6.154 | 2.11E-08 | chr:10:135355522 |
| 10    | rs4240522   | 135355557    | T   | 6.154 | 2.11E-08 | chr:10:135355522 |
| 10    | rs4363513   | 135355534    | G   | 6.154 | 2.11E-08 | chr:10:135355522 |
| 10    | rs4542321   | 135355481    | C   | 6.154 | 2.11E-08 | chr:10:135355522 |
| 10    | rs61868336  | 135350060    | G   | 5.799 | 3.14E-08 | chr:10:135355522 |
| 10    | rs2987785   | 135365003    | T   | 5.732 | 5.29E-08 | chr:10:135355522 |
| 10    | rs8192776   | 135348187    | C   | 5.593 | 5.74E-08 | chr:10:135355522 |
| 10    | rs9418990   | 135337966    | T   | 5.569 | 7.06E-08 | chr:10:135355522 |
| 10    | rs4512750   | 135358664    | C   | 5.81  | 7.38E-08 | chr:10:135355522 |
| 10    | rs9418991   | 135362114    | A   | 5.801 | 9.77E-08 | chr:10:135355522 |
| 10    | rs112345496 | 135382591    | T   | 5.368 | 1.38E-07 | chr:10:135355522 |
| 10    | rs1536826   | 135357239    | C   | 5.138 | 1.41E-07 | chr:10:135355522 |
| 10    | rs2987792   | 135371466    | C   | 5.415 | 1.93E-07 | chr:10:135355522 |
| 10    | rs3020513   | 135364915    | C   | 5.415 | 1.93E-07 | chr:10:135355522 |
| 10    | rs3020501   | 135381592    | G   | 4.898 | 4.49E-07 | chr:10:135355522 |
| 10    | rs9629935   | 135398306    | T   | 4.604 | 6.79E-07 | chr:10:135355522 |
| 10    | rs2987796   | 135379688    | T   | 4.243 | 1.08E-06 | chr:10:135355522 |
| 10    | rs3020498   | 135379710    | C   | 4.135 | 1.80E-06 | chr:10:135355522 |
| 10    | rs4259784   | 135399192    | G   | 4.648 | 2.04E-06 | chr:10:135355522 |
| 10    | rs11101867  | 135400250    | G   | 4.595 | 2.23E-06 | chr:10:135355522 |
| 10    | rs4133041   | 135408387    | G   | 4.595 | 2.23E-06 | chr:10:135355522 |
| 10    | rs4351776   | 135415572    | G   | 4.572 | 2.29E-06 | chr:10:135355522 |
| 10    | rs11101857  | 135395359    | A   | 4.551 | 2.64E-06 | chr:10:135355522 |
| 10    | rs4129223   | 135403948    | A   | 4.551 | 2.64E-06 | chr:10:135355522 |
| 10    | rs4306261   | 135410989    | A   | 4.551 | 2.64E-06 | chr:10:135355522 |
| 10    | rs7084384   | 135412322    | A   | 4.551 | 2.64E-06 | chr:10:135355522 |
| 10    | rs7084391   | 135412344    | A   | 4.551 | 2.64E-06 | chr:10:135355522 |
| 10    | rs7093170   | 135402904    | C   | 4.551 | 2.64E-06 | chr:10:135355522 |
| 10    | rs7094588   | 135401586    | A   | 4.551 | 2.64E-06 | chr:10:135355522 |
| 10    | rs7907135   | 135410660    | T   | 4.551 | 2.64E-06 | chr:10:135355522 |
| 10    | rs3020504   | 135385782    | T   | 5.923 | 2.74E-06 | chr:10:135355522 |
| 10    | rs7080705   | 135426384    | G   | 4.582 | 2.90E-06 | chr:10:135355522 |
| 10    | rs117220052 | 135388573    | G   | 4.482 | 2.91E-06 | chr:10:135355522 |
| 10    | rs4454678   | 135431118    | A   | 4.56  | 3.13E-06 | chr:10:135355522 |
| 10    | rs4075721   | 135429761    | G   | 4.552 | 3.29E-06 | chr:10:135355522 |
| 10    | rs4379787   | 135429181    | T   | 4.552 | 3.29E-06 | chr:10:135355522 |
| 10    | rs59241138  | 135393140    | A   | 4.368 | 3.88E-06 | chr:10:135355522 |
| 10    | rs2987791   | 135370060    | C   | 3.909 | 4.55E-06 | chr:10:135355522 |
| 10    | rs77382433  | 135389919    | T   | 4.203 | 4.67E-06 | chr:10:135355522 |

|               |             |       |          |                  |
|---------------|-------------|-------|----------|------------------|
| 10 rs9630042  | 135433765 C | 4.433 | 4.77E-06 | chr:10:135355522 |
| 10 rs74514207 | 135386470 T | 5.218 | 4.99E-06 | chr:10:135355522 |
| 10 rs77360278 | 135386471 G | 5.218 | 4.99E-06 | chr:10:135355522 |
| 10 rs9630033  | 135418505 G | 4.091 | 5.32E-06 | chr:10:135355522 |
| 10 rs4556495  | 135422209 C | 4.351 | 5.41E-06 | chr:10:135355522 |
| 10 rs10857778 | 135432974 T | 4.181 | 6.12E-06 | chr:10:135355522 |
| 10 rs4528274  | 135429564 A | 4.216 | 6.79E-06 | chr:10:135355522 |
| 10 rs6537613  | 135412414 T | 4.005 | 7.25E-06 | chr:10:135355522 |
| 10 rs11101890 | 135421321 G | 4.17  | 8.47E-06 | chr:10:135355522 |
| 10 rs2070673  | 135340567 T | 3.236 | 1.19E-05 | chr:10:135355522 |
| 10 rs10857769 | 135405047 T | 3.886 | 1.20E-05 | chr:10:135355522 |
| 10 rs7075572  | 135404358 T | 3.886 | 1.20E-05 | chr:10:135355522 |
| 10 rs4335490  | 135402350 T | 3.865 | 1.24E-05 | chr:10:135355522 |
| 10 rs9630012  | 135397511 A | 3.865 | 1.28E-05 | chr:10:135355522 |
| 10 rs4450132  | 135427295 C | 4.013 | 1.32E-05 | chr:10:135355522 |
| 10 rs10857765 | 135394613 T | 3.858 | 1.33E-05 | chr:10:135355522 |
| 10 rs9629936  | 135398783 A | 3.858 | 1.33E-05 | chr:10:135355522 |
| 10 rs11101885 | 135417088 T | 3.884 | 1.42E-05 | chr:10:135355522 |
| 10 rs4589248  | 135429336 C | 3.982 | 1.48E-05 | chr:10:135355522 |
| 10 rs9630038  | 135429348 T | 3.982 | 1.48E-05 | chr:10:135355522 |
| 10 rs7922540  | 135395468 A | 3.822 | 1.54E-05 | chr:10:135355522 |
| 10 rs10745303 | 135432865 C | 4.018 | 1.54E-05 | chr:10:135355522 |
| 10 rs9418996  | 135423910 T | 3.962 | 1.59E-05 | chr:10:135355522 |
| 10 rs9629942  | 135430091 G | 3.829 | 1.88E-05 | chr:10:135355522 |
| 10 rs2987799  | 135380499 G | 3.559 | 2.06E-05 | chr:10:135355522 |
| 10 rs9418988  | 135327632 T | 3.509 | 2.16E-05 | chr:10:135355522 |
| 10 rs4463807  | 135425572 A | 3.849 | 2.30E-05 | chr:10:135355522 |
| 10 rs7090051  | 135430810 A | 3.852 | 2.31E-05 | chr:10:135355522 |
| 10 rs10857779 | 135432982 C | 3.826 | 2.56E-05 | chr:10:135355522 |
| 10 rs10857780 | 135432988 C | 3.826 | 2.56E-05 | chr:10:135355522 |
| 10 rs11101900 | 135432003 C | 3.826 | 2.56E-05 | chr:10:135355522 |
| 10 rs12261676 | 135433091 A | 3.826 | 2.56E-05 | chr:10:135355522 |
| 10 rs4628635  | 135430043 C | 3.826 | 2.56E-05 | chr:10:135355522 |
| 10 rs9629943  | 135433387 T | 3.826 | 2.56E-05 | chr:10:135355522 |
| 10 rs915906   | 135343738 T | 3.108 | 2.62E-05 | chr:10:135355522 |
| 10 rs10745304 | 135434988 G | 3.813 | 2.64E-05 | chr:10:135355522 |
| 10 rs6537618  | 135435995 G | 3.646 | 2.86E-05 | chr:10:135355522 |
| 10 rs7087703  | 135434565 T | 3.789 | 2.91E-05 | chr:10:135355522 |
| 10 rs3020502  | 135381623 C | 3.227 | 3.01E-05 | chr:10:135355522 |
| 10 rs2987800  | 135381927 G | 3.237 | 3.04E-05 | chr:10:135355522 |
| 10 rs3020503  | 135381766 T | 3.237 | 3.04E-05 | chr:10:135355522 |
| 10 rs10857776 | 135428908 A | 3.778 | 3.18E-05 | chr:10:135355522 |
| 10 rs3020499  | 135381215 G | 3.187 | 3.20E-05 | chr:10:135355522 |

|                |             |        |          |                  |
|----------------|-------------|--------|----------|------------------|
| 10 rs3020500   | 135381276 C | 3.187  | 3.20E-05 | chr:10:135355522 |
| 10 rs2987797   | 135379934 A | 3.174  | 4.21E-05 | chr:10:135355522 |
| 10 rs10857768  | 135402703 A | 3.689  | 4.47E-05 | chr:10:135355522 |
| 10 rs9418998   | 135437279 A | 3.112  | 5.02E-05 | chr:10:135355522 |
| 11 rs2054849   | 60364127 C  | 7.241  | 6.37E-06 | chr:11:60449890  |
| 11 rs56183826  | 60368846 A  | 6.488  | 1.22E-05 | chr:11:60449890  |
| 11 rs75515174  | 60596312 T  | 6.594  | 2.14E-05 | chr:11:60449890  |
| 11 rs7112307   | 60599009 T  | 6.577  | 2.25E-05 | chr:11:60449890  |
| 11 rs7112316   | 60596173 A  | 6.26   | 2.73E-05 | chr:11:60449890  |
| 11 rs61898779  | 60371542 T  | 5.716  | 2.95E-05 | chr:11:60449890  |
| 11 rs475601    | 60599397 A  | 6.009  | 5.14E-05 | chr:11:60449890  |
| 11 rs693716    | 60597793 A  | 5.957  | 5.22E-05 | chr:11:60449890  |
| 11 rs112843408 | 71879422 T  | 0.1239 | 1.38E-11 | chr:11:71875416  |
| 11 rs148742728 | 71876704 G  | 0.1239 | 1.38E-11 | chr:11:71875416  |
| 11 rs55693133  | 71878942 T  | 0.1239 | 1.38E-11 | chr:11:71875416  |
| 11 rs55853463  | 71878832 T  | 0.1239 | 1.38E-11 | chr:11:71875416  |
| 11 rs57561154  | 71879181 T  | 0.1239 | 1.38E-11 | chr:11:71875416  |
| 11 rs75576834  | 71877414 A  | 0.1239 | 1.38E-11 | chr:11:71875416  |
| 11 rs77672783  | 71880076 C  | 0.1239 | 1.38E-11 | chr:11:71875416  |
| 11 rs79775960  | 71878496 G  | 0.1239 | 1.38E-11 | chr:11:71875416  |
| 11 rs59894793  | 71874950 G  | 0.135  | 2.59E-11 | chr:11:71875416  |
| 11 rs61194383  | 71877877 T  | 0.1417 | 1.90E-10 | chr:11:71875416  |
| 11 rs111594394 | 71879773 T  | 0.145  | 2.57E-10 | chr:11:71875416  |
| 11 rs116700998 | 71874984 C  | 0.144  | 9.28E-10 | chr:11:71875416  |
| 11 rs116305805 | 71874606 T  | 0.1465 | 1.29E-09 | chr:11:71875416  |
| 11 rs117909722 | 71874660 C  | 0.1465 | 1.29E-09 | chr:11:71875416  |
| 11 rs79147044  | 71874466 A  | 0.1465 | 1.29E-09 | chr:11:71875416  |
| 11 rs111649414 | 71852971 C  | 0.1522 | 2.57E-09 | chr:11:71875416  |
| 11 rs142294082 | 71876741 G  | 0.1626 | 1.21E-08 | chr:11:71875416  |
| 11 rs147259385 | 71876632 T  | 0.1626 | 1.21E-08 | chr:11:71875416  |
| 11 rs149792914 | 71880782 G  | 0.1626 | 1.21E-08 | chr:11:71875416  |
| 11 rs192125273 | 71884785 T  | 0.1626 | 1.21E-08 | chr:11:71875416  |
| 11 rs76789088  | 71882311 T  | 0.1626 | 1.21E-08 | chr:11:71875416  |
| 11 rs78309837  | 71884566 G  | 0.1626 | 1.21E-08 | chr:11:71875416  |
| 11 rs116526259 | 71878266 T  | 0.1632 | 1.30E-08 | chr:11:71875416  |
| 11 rs114319082 | 71875068 T  | 0.1653 | 1.45E-08 | chr:11:71875416  |
| 11 rs114683364 | 71852019 C  | 0.1658 | 1.53E-08 | chr:11:71875416  |
| 11 rs77546838  | 71852460 C  | 0.1658 | 1.53E-08 | chr:11:71875416  |
| 11 rs80194607  | 71885949 A  | 0.1721 | 1.64E-08 | chr:11:71875416  |
| 11 rs111540831 | 71859396 G  | 0.1687 | 1.98E-08 | chr:11:71875416  |
| 11 rs146852285 | 71859549 T  | 0.1687 | 1.98E-08 | chr:11:71875416  |
| 11 rs77210719  | 71865739 T  | 0.1687 | 1.98E-08 | chr:11:71875416  |
| 11 rs77780241  | 71876935 C  | 0.2643 | 7.19E-07 | chr:11:71875416  |

|                |            |        |          |                 |
|----------------|------------|--------|----------|-----------------|
| 11 rs75128106  | 72004156 T | 0.1838 | 7.55E-07 | chr:11:71875416 |
| 11 rs140631166 | 71852895 C | 0.197  | 8.09E-07 | chr:11:71875416 |
| 11 rs147767496 | 71852892 G | 0.197  | 8.09E-07 | chr:11:71875416 |
| 11 rs536159778 | 71852888 T | 0.197  | 8.09E-07 | chr:11:71875416 |
| 11 rs550493985 | 71852885 T | 0.197  | 8.09E-07 | chr:11:71875416 |
| 11 rs568992955 | 71852886 C | 0.197  | 8.09E-07 | chr:11:71875416 |
| 11 rs78599455  | 71884396 A | 0.2706 | 1.13E-06 | chr:11:71875416 |
| 11 rs78580101  | 71956877 G | 0.1895 | 1.24E-06 | chr:11:71875416 |
| 11 rs79908580  | 71952045 C | 0.1895 | 1.24E-06 | chr:11:71875416 |
| 11 rs78688516  | 71995580 A | 0.1939 | 2.30E-06 | chr:11:71875416 |
| 11 rs115096686 | 71869064 G | 0.1833 | 2.55E-06 | chr:11:71875416 |
| 11 rs141992224 | 71987009 A | 0.1957 | 2.61E-06 | chr:11:71875416 |
| 11 rs75702062  | 71982624 C | 0.1957 | 2.61E-06 | chr:11:71875416 |
| 11 rs77421727  | 71973793 A | 0.1957 | 2.61E-06 | chr:11:71875416 |
| 11 rs181342317 | 72002964 A | 0.1975 | 2.84E-06 | chr:11:71875416 |
| 11 rs74593868  | 72010677 G | 0.1975 | 2.84E-06 | chr:11:71875416 |
| 11 rs75074654  | 72020705 A | 0.1975 | 2.84E-06 | chr:11:71875416 |
| 11 rs75570162  | 72004346 C | 0.1975 | 2.84E-06 | chr:11:71875416 |
| 11 rs76022773  | 72016588 C | 0.1975 | 2.84E-06 | chr:11:71875416 |
| 11 rs76758409  | 72011870 A | 0.1975 | 2.84E-06 | chr:11:71875416 |
| 11 rs77881445  | 72008416 A | 0.1975 | 2.84E-06 | chr:11:71875416 |
| 11 rs79458542  | 72004238 G | 0.1975 | 2.84E-06 | chr:11:71875416 |
| 11 rs80334675  | 72000581 C | 0.1975 | 2.84E-06 | chr:11:71875416 |
| 11 rs115105740 | 71994057 G | 0.1985 | 3.09E-06 | chr:11:71875416 |
| 11 rs79304956  | 71937883 A | 0.2049 | 3.28E-06 | chr:11:71875416 |
| 11 rs75059162  | 71969869 G | 0.2006 | 3.34E-06 | chr:11:71875416 |
| 11 rs533755950 | 71852901 C | 0.2079 | 3.41E-06 | chr:11:71875416 |
| 11 rs558716278 | 71852903 T | 0.2079 | 3.41E-06 | chr:11:71875416 |
| 11 rs576865116 | 71852904 G | 0.2079 | 3.41E-06 | chr:11:71875416 |
| 11 rs114261779 | 71929456 T | 0.2071 | 3.70E-06 | chr:11:71875416 |
| 11 rs79191067  | 71931855 A | 0.2071 | 3.70E-06 | chr:11:71875416 |
| 11 rs114119194 | 71915580 G | 0.2084 | 4.09E-06 | chr:11:71875416 |
| 11 rs182654654 | 71919032 G | 0.2084 | 4.09E-06 | chr:11:71875416 |
| 11 rs77718722  | 71909649 C | 0.2084 | 4.09E-06 | chr:11:71875416 |
| 11 rs115738909 | 71897200 A | 0.1935 | 4.20E-06 | chr:11:71875416 |
| 11 rs79023399  | 71945145 T | 0.237  | 5.59E-06 | chr:11:71875416 |
| 11 rs78861042  | 71999717 C | 0.2104 | 5.85E-06 | chr:11:71875416 |
| 11 rs7939435   | 71660391 G | 0.2037 | 6.72E-06 | chr:11:71875416 |
| 11 rs633738    | 71883540 G | 0.2922 | 7.29E-06 | chr:11:71875416 |
| 11 rs393561    | 72281162 A | 0.2864 | 1.49E-05 | chr:11:71875416 |
| 11 rs113107673 | 71899266 T | 0.3382 | 1.53E-05 | chr:11:71875416 |
| 11 rs76985467  | 71902337 G | 0.2256 | 1.59E-05 | chr:11:71875416 |
| 11 rs80101434  | 71881852 G | 0.3026 | 2.12E-05 | chr:11:71875416 |

|                |             |        |          |                  |
|----------------|-------------|--------|----------|------------------|
| 11 rs113654469 | 71875351 A  | 0.3541 | 2.22E-05 | chr:11:71875416  |
| 11 rs143497983 | 71881523 T  | 0.3045 | 2.33E-05 | chr:11:71875416  |
| 11 rs3750912   | 71726212 T  | 0.2834 | 2.55E-05 | chr:11:71875416  |
| 11 rs78370345  | 72012797 T  | 0.2208 | 2.58E-05 | chr:11:71875416  |
| 11 rs11235468  | 71923542 G  | 0.4074 | 2.74E-05 | chr:11:71875416  |
| 11 rs114451879 | 72054088 G  | 0.2251 | 3.13E-05 | chr:11:71875416  |
| 11 rs75516818  | 72053758 A  | 0.2251 | 3.13E-05 | chr:11:71875416  |
| 11 rs76421471  | 72047174 G  | 0.2251 | 3.13E-05 | chr:11:71875416  |
| 11 rs77508235  | 72046754 C  | 0.2251 | 3.13E-05 | chr:11:71875416  |
| 11 rs116146961 | 72067052 T  | 0.2041 | 3.15E-05 | chr:11:71875416  |
| 11 rs35567912  | 71724220 T  | 0.2689 | 3.59E-05 | chr:11:71875416  |
| 11 rs112068862 | 71885591 T  | 0.3142 | 3.70E-05 | chr:11:71875416  |
| 11 rs114480679 | 71883291 G  | 0.3142 | 3.70E-05 | chr:11:71875416  |
| 11 rs115282592 | 71885527 G  | 0.3142 | 3.70E-05 | chr:11:71875416  |
| 11 rs61427200  | 71882726 T  | 0.3142 | 3.70E-05 | chr:11:71875416  |
| 11 rs74498718  | 71886281 C  | 0.3142 | 3.70E-05 | chr:11:71875416  |
| 11 rs78222092  | 71884504 A  | 0.3142 | 3.70E-05 | chr:11:71875416  |
| 11 rs80285294  | 71883930 T  | 0.3142 | 3.70E-05 | chr:11:71875416  |
| 11 rs112587056 | 71687488 A  | 0.2714 | 3.98E-05 | chr:11:71875416  |
| 12 rs113088709 | 124095455 G | 46.01  | 3.12E-41 | chr:12:124066477 |
| 12 rs138318001 | 124054104 C | 58.85  | 4.32E-40 | chr:12:124066477 |
| 12 rs75468015  | 124054109 C | 58.85  | 4.32E-40 | chr:12:124066477 |
| 12 rs191430524 | 124048835 A | 44.61  | 6.11E-40 | chr:12:124066477 |
| 12 rs75700739  | 124084424 A | 44.97  | 6.23E-40 | chr:12:124066477 |
| 12 rs7964934   | 124058639 A | 44.41  | 8.16E-40 | chr:12:124066477 |
| 12 rs11829661  | 124059488 A | 47.44  | 1.06E-39 | chr:12:124066477 |
| 12 rs78068178  | 124059962 T | 47.44  | 1.06E-39 | chr:12:124066477 |
| 12 rs183835928 | 124048838 T | 47.56  | 1.13E-39 | chr:12:124066477 |
| 12 rs114613914 | 124089740 G | 59.79  | 6.51E-39 | chr:12:124066477 |
| 12 rs3850953   | 124091412 T | 59.79  | 6.51E-39 | chr:12:124066477 |
| 12 rs7973689   | 124090655 T | 59.79  | 6.51E-39 | chr:12:124066477 |
| 12 rs79847496  | 124089348 G | 59.79  | 6.51E-39 | chr:12:124066477 |
| 12 rs113620982 | 124086656 T | 58.82  | 1.14E-38 | chr:12:124066477 |
| 12 rs111482432 | 124078585 G | 66.16  | 1.48E-38 | chr:12:124066477 |
| 12 rs7965292   | 124081779 T | 66.16  | 1.48E-38 | chr:12:124066477 |
| 12 rs12099985  | 124065667 C | 65.79  | 1.79E-38 | chr:12:124066477 |
| 12 rs7973187   | 124068015 C | 65.79  | 1.79E-38 | chr:12:124066477 |
| 12 rs6488882   | 124056572 T | 48.1   | 2.71E-37 | chr:12:124066477 |
| 12 rs80260318  | 124048074 G | 43.37  | 3.78E-37 | chr:12:124066477 |
| 12 rs112931584 | 124044574 A | 42.47  | 5.74E-37 | chr:12:124066477 |
| 12 rs7297951   | 124053711 C | 46.3   | 7.63E-37 | chr:12:124066477 |
| 12 rs7308408   | 124053542 A | 46.3   | 7.63E-37 | chr:12:124066477 |
| 12 rs142306340 | 124048858 G | 51.57  | 1.32E-36 | chr:12:124066477 |

|                |             |       |          |                  |
|----------------|-------------|-------|----------|------------------|
| 12 rs7309150   | 124053413 T | 49.5  | 1.82E-36 | chr:12:124066477 |
| 12 rs7968699   | 124052243 A | 44.98 | 1.91E-36 | chr:12:124066477 |
| 12 rs111687827 | 124051096 C | 49.88 | 1.99E-36 | chr:12:124066477 |
| 12 rs111853781 | 124051065 G | 49.88 | 1.99E-36 | chr:12:124066477 |
| 12 rs113254073 | 124052945 A | 49.88 | 1.99E-36 | chr:12:124066477 |
| 12 rs113381757 | 124052913 C | 49.88 | 1.99E-36 | chr:12:124066477 |
| 12 rs11832820  | 124047285 C | 49.88 | 1.99E-36 | chr:12:124066477 |
| 12 rs145600453 | 124049196 G | 49.88 | 1.99E-36 | chr:12:124066477 |
| 12 rs1983274   | 124049736 A | 49.88 | 1.99E-36 | chr:12:124066477 |
| 12 rs1983275   | 124049759 A | 49.88 | 1.99E-36 | chr:12:124066477 |
| 12 rs7294379   | 124053430 G | 49.88 | 1.99E-36 | chr:12:124066477 |
| 12 rs7953401   | 124050042 A | 49.88 | 1.99E-36 | chr:12:124066477 |
| 12 rs7137130   | 124101981 C | 23.98 | 2.19E-36 | chr:12:124066477 |
| 12 rs78702455  | 124054015 G | 49.8  | 2.20E-36 | chr:12:124066477 |
| 12 rs7306906   | 124100486 A | 29.94 | 3.36E-36 | chr:12:124066477 |
| 12 rs2333828   | 124049030 T | 47.75 | 4.49E-36 | chr:12:124066477 |
| 12 rs112704788 | 124042091 G | 13.52 | 5.53E-33 | chr:12:124066477 |
| 12 rs112002563 | 124077902 T | 122.3 | 4.27E-30 | chr:12:124066477 |
| 12 rs7965466   | 124036188 C | 10.06 | 8.42E-30 | chr:12:124066477 |
| 12 rs7315041   | 124067244 A | 14.87 | 8.90E-30 | chr:12:124066477 |
| 12 rs11837236  | 124065116 G | 105.4 | 5.26E-29 | chr:12:124066477 |
| 12 rs7954782   | 124064537 G | 105.4 | 5.26E-29 | chr:12:124066477 |
| 12 rs7958153   | 124064998 G | 105.4 | 5.26E-29 | chr:12:124066477 |
| 12 rs7971779   | 124064918 T | 105.4 | 5.26E-29 | chr:12:124066477 |
| 12 rs35917561  | 124041472 T | 9.739 | 9.88E-29 | chr:12:124066477 |
| 12 rs112455213 | 124055507 A | 94.53 | 1.98E-28 | chr:12:124066477 |
| 12 rs116716383 | 124055605 G | 94.53 | 1.98E-28 | chr:12:124066477 |
| 12 rs34827093  | 124118248 G | 8.71  | 2.61E-28 | chr:12:124066477 |
| 12 rs4930715   | 124042949 C | 11.49 | 8.89E-28 | chr:12:124066477 |
| 12 rs111601834 | 124116169 G | 8.203 | 9.76E-28 | chr:12:124066477 |
| 12 rs7301031   | 124116808 G | 8.203 | 9.76E-28 | chr:12:124066477 |
| 12 rs79606093  | 124111062 A | 8.119 | 1.06E-27 | chr:12:124066477 |
| 12 rs11057298  | 124057112 A | 15.23 | 1.35E-27 | chr:12:124066477 |
| 12 rs112298489 | 124042646 C | 9.136 | 1.37E-27 | chr:12:124066477 |
| 12 rs11057306  | 124097766 G | 12.05 | 1.52E-27 | chr:12:124066477 |
| 12 rs146467055 | 124131997 T | 7.927 | 1.52E-27 | chr:12:124066477 |
| 12 rs10846533  | 124123564 T | 7.868 | 2.06E-27 | chr:12:124066477 |
| 12 rs11572946  | 124128650 T | 7.868 | 2.06E-27 | chr:12:124066477 |
| 12 rs11572939  | 124126163 C | 7.778 | 2.71E-27 | chr:12:124066477 |
| 12 rs116795979 | 124131902 G | 7.778 | 2.71E-27 | chr:12:124066477 |
| 12 rs7305096   | 124125481 C | 7.778 | 2.71E-27 | chr:12:124066477 |
| 12 rs11572945  | 124128502 T | 7.809 | 2.73E-27 | chr:12:124066477 |
| 12 rs114627783 | 124099713 A | 9.664 | 3.13E-27 | chr:12:124066477 |



|                |             |       |          |                  |
|----------------|-------------|-------|----------|------------------|
| 12 rs61678733  | 124094174 C | 49.58 | 4.00E-27 | chr:12:124066477 |
| 12 rs73414262  | 124093859 G | 49.58 | 4.00E-27 | chr:12:124066477 |
| 12 rs786437    | 124090814 G | 48.94 | 5.00E-27 | chr:12:124066477 |
| 12 rs11615300  | 124100423 G | 7.822 | 6.09E-27 | chr:12:124066477 |
| 12 rs6488881   | 124056441 G | 109.3 | 1.07E-26 | chr:12:124066477 |
| 12 rs7136101   | 124056685 A | 109.3 | 1.07E-26 | chr:12:124066477 |
| 12 rs11057315  | 124129924 A | 7.361 | 1.10E-26 | chr:12:124066477 |
| 12 rs7295064   | 124127725 A | 7.361 | 1.10E-26 | chr:12:124066477 |
| 12 rs34097324  | 124098269 G | 7.563 | 1.70E-26 | chr:12:124066477 |
| 12 rs114225771 | 124043332 G | 10.17 | 1.88E-26 | chr:12:124066477 |
| 12 rs7316613   | 124045580 T | 18.27 | 1.89E-26 | chr:12:124066477 |
| 12 rs1050448   | 124105925 A | 7.256 | 3.59E-26 | chr:12:124066477 |
| 12 rs7314792   | 124036984 G | 7.32  | 3.66E-26 | chr:12:124066477 |
| 12 rs786428    | 124086998 C | 56.05 | 3.99E-26 | chr:12:124066477 |
| 12 rs786450    | 124071765 C | 56.3  | 4.02E-26 | chr:12:124066477 |
| 12 rs786429    | 124087394 T | 56.23 | 4.08E-26 | chr:12:124066477 |
| 12 rs786430    | 124087988 G | 56.23 | 4.08E-26 | chr:12:124066477 |
| 12 rs786431    | 124088366 T | 56.23 | 4.08E-26 | chr:12:124066477 |
| 12 rs786432    | 124088532 T | 56.23 | 4.08E-26 | chr:12:124066477 |
| 12 rs786433    | 124089582 A | 56.23 | 4.08E-26 | chr:12:124066477 |
| 12 rs786434    | 124089793 T | 56.23 | 4.08E-26 | chr:12:124066477 |
| 12 rs786435    | 124090208 G | 56.23 | 4.08E-26 | chr:12:124066477 |
| 12 rs786439    | 124091460 G | 56.23 | 4.08E-26 | chr:12:124066477 |
| 12 rs74996347  | 124086528 G | 162.6 | 4.48E-26 | chr:12:124066477 |
| 12 rs7952920   | 124085011 T | 162.6 | 4.48E-26 | chr:12:124066477 |
| 12 rs7970545   | 124085080 G | 162.6 | 4.48E-26 | chr:12:124066477 |
| 12 rs786438    | 124091218 A | 55.26 | 5.08E-26 | chr:12:124066477 |
| 12 rs78955489  | 124068910 A | 156.6 | 1.11E-25 | chr:12:124066477 |
| 12 rs143269373 | 124071864 A | 152.8 | 1.35E-25 | chr:12:124066477 |
| 12 rs11057323  | 124142726 G | 6.841 | 1.78E-25 | chr:12:124066477 |
| 12 rs111507681 | 124088418 T | 210.7 | 1.06E-23 | chr:12:124066477 |
| 12 rs7303554   | 124079920 G | 210.7 | 1.06E-23 | chr:12:124066477 |
| 12 rs77592647  | 124084160 G | 210.7 | 1.06E-23 | chr:12:124066477 |
| 12 rs11057302  | 124070013 A | 210   | 1.15E-23 | chr:12:124066477 |
| 12 rs11610013  | 124069614 A | 210   | 1.15E-23 | chr:12:124066477 |
| 12 rs11834369  | 124059546 T | 210   | 1.15E-23 | chr:12:124066477 |
| 12 rs12099986  | 124065978 G | 210   | 1.15E-23 | chr:12:124066477 |
| 12 rs138708987 | 124058169 C | 210   | 1.15E-23 | chr:12:124066477 |
| 12 rs146539578 | 124071144 T | 210   | 1.15E-23 | chr:12:124066477 |
| 12 rs146936648 | 124074744 G | 210   | 1.15E-23 | chr:12:124066477 |
| 12 rs1877365   | 124061397 T | 210   | 1.15E-23 | chr:12:124066477 |
| 12 rs2340691   | 124061421 T | 210   | 1.15E-23 | chr:12:124066477 |
| 12 rs74643748  | 124075915 T | 210   | 1.15E-23 | chr:12:124066477 |

|                |             |                                 |
|----------------|-------------|---------------------------------|
| 12 rs77895354  | 124075111 G | 210 1.15E-23 chr:12:124066477   |
| 12 rs7960812   | 124062742 T | 210 1.15E-23 chr:12:124066477   |
| 12 rs7968040   | 124058937 A | 210 1.15E-23 chr:12:124066477   |
| 12 rs79933835  | 124073911 T | 210 1.15E-23 chr:12:124066477   |
| 12 rs952360    | 124076806 C | 210 1.15E-23 chr:12:124066477   |
| 12 rs12099981  | 124065428 C | 115.3 1.40E-23 chr:12:124066477 |
| 12 rs7301377   | 124076254 T | 206.8 1.47E-23 chr:12:124066477 |
| 12 rs111625397 | 124058009 A | 203.6 1.63E-23 chr:12:124066477 |
| 12 rs7308304   | 124100857 T | 5.547 1.90E-23 chr:12:124066477 |
| 12 rs35708602  | 124099704 C | 5.574 1.97E-23 chr:12:124066477 |
| 12 rs55705511  | 124105336 A | 5.457 2.55E-23 chr:12:124066477 |
| 12 rs6488884   | 124108620 A | 5.447 3.09E-23 chr:12:124066477 |
| 12 rs15587     | 124104049 G | 5.453 3.25E-23 chr:12:124066477 |
| 12 rs3190835   | 124105328 C | 5.453 3.25E-23 chr:12:124066477 |
| 12 rs66694750  | 124103579 T | 5.443 3.82E-23 chr:12:124066477 |
| 12 rs56675602  | 124101041 G | 5.426 4.03E-23 chr:12:124066477 |
| 12 rs3190836   | 124105226 T | 5.416 4.37E-23 chr:12:124066477 |
| 12 rs118111778 | 124083600 T | 188.2 4.58E-23 chr:12:124066477 |
| 12 rs11831129  | 124110675 G | 5.427 6.25E-23 chr:12:124066477 |
| 12 rs6488885   | 124119155 G | 5.427 6.25E-23 chr:12:124066477 |
| 12 rs113971302 | 124102801 T | 5.334 6.97E-23 chr:12:124066477 |
| 12 rs11833889  | 124103869 T | 5.334 6.97E-23 chr:12:124066477 |
| 12 rs3204541   | 124104686 A | 5.334 6.97E-23 chr:12:124066477 |
| 12 rs35867744  | 124103808 A | 5.334 6.97E-23 chr:12:124066477 |
| 12 rs59126974  | 124102656 T | 5.334 6.97E-23 chr:12:124066477 |
| 12 rs7137473   | 124102216 A | 5.334 6.97E-23 chr:12:124066477 |
| 12 rs68163141  | 124102871 C | 5.329 8.30E-23 chr:12:124066477 |
| 12 rs1050449   | 124105908 G | 5.261 1.06E-22 chr:12:124066477 |
| 12 rs34514002  | 124102920 C | 5.3 1.25E-22 chr:12:124066477   |
| 12 rs884892    | 124097528 G | 5.722 1.52E-22 chr:12:124066477 |
| 12 rs7134190   | 124116483 C | 5.228 2.13E-22 chr:12:124066477 |
| 12 rs530657685 | 124084061 G | 10.01 4.06E-22 chr:12:124066477 |
| 12 rs6488886   | 124120205 A | 6.413 4.36E-22 chr:12:124066477 |
| 12 rs7965502   | 124137418 G | 6.186 6.47E-22 chr:12:124066477 |
| 12 rs11572936  | 124125033 A | 6.133 9.29E-22 chr:12:124066477 |
| 12 rs116743016 | 124182567 T | 5.816 1.04E-21 chr:12:124066477 |
| 12 rs11830487  | 124178775 T | 5.816 1.04E-21 chr:12:124066477 |
| 12 rs7134863   | 124156762 A | 5.816 1.04E-21 chr:12:124066477 |
| 12 rs7304334   | 124177865 A | 5.816 1.04E-21 chr:12:124066477 |
| 12 rs114925278 | 124149456 A | 5.723 2.01E-21 chr:12:124066477 |
| 12 rs7965334   | 124036026 C | 4.841 2.97E-21 chr:12:124066477 |
| 12 rs28454032  | 124034703 G | 4.436 4.47E-20 chr:12:124066477 |
| 12 rs5027860   | 124032819 G | 4.436 4.47E-20 chr:12:124066477 |

|                |             |        |          |                  |
|----------------|-------------|--------|----------|------------------|
| 12 rs4534668   | 124029746 C | 4.453  | 1.18E-18 | chr:12:124066477 |
| 12 rs28743126  | 124028131 A | 4.425  | 1.55E-18 | chr:12:124066477 |
| 12 rs6488889   | 124144793 C | 3.771  | 5.03E-18 | chr:12:124066477 |
| 12 rs7139162   | 124102889 C | 0.2538 | 6.13E-18 | chr:12:124066477 |
| 12 rs113129322 | 124027872 A | 4.149  | 8.86E-18 | chr:12:124066477 |
| 12 rs28627432  | 124029137 C | 4.107  | 2.73E-17 | chr:12:124066477 |
| 12 rs139315135 | 124296141 A | 8.272  | 4.55E-17 | chr:12:124066477 |
| 12 rs12817861  | 124046540 C | 0.2308 | 4.98E-17 | chr:12:124066477 |
| 12 rs4310694   | 124050760 G | 0.2308 | 4.98E-17 | chr:12:124066477 |
| 12 rs2458115   | 124053902 A | 0.2301 | 5.07E-17 | chr:12:124066477 |
| 12 rs11831217  | 124167664 A | 5.385  | 5.26E-17 | chr:12:124066477 |
| 12 rs150012413 | 124157373 A | 5.385  | 5.26E-17 | chr:12:124066477 |
| 12 rs2048616   | 124049966 A | 0.2307 | 5.72E-17 | chr:12:124066477 |
| 12 rs11572996  | 124142295 A | 5.303  | 1.02E-16 | chr:12:124066477 |
| 12 rs11057301  | 124063905 A | 0.2588 | 1.45E-16 | chr:12:124066477 |
| 12 rs34369761  | 124073721 C | 0.2601 | 1.93E-16 | chr:12:124066477 |
| 12 rs4930714   | 124067197 A | 0.2601 | 1.93E-16 | chr:12:124066477 |
| 12 rs7973766   | 124070991 A | 0.2601 | 1.93E-16 | chr:12:124066477 |
| 12 rs4930713   | 124080619 A | 0.2632 | 3.05E-16 | chr:12:124066477 |
| 12 rs10846528  | 124052985 G | 0.2635 | 4.89E-16 | chr:12:124066477 |
| 12 rs10773021  | 124128424 T | 3.007  | 3.12E-15 | chr:12:124066477 |
| 12 rs10846534  | 124126652 T | 3.007  | 3.12E-15 | chr:12:124066477 |
| 12 rs11057313  | 124126064 A | 3.007  | 3.12E-15 | chr:12:124066477 |
| 12 rs11572940  | 124126180 G | 3.007  | 3.12E-15 | chr:12:124066477 |
| 12 rs2292702   | 124130128 C | 3.007  | 3.12E-15 | chr:12:124066477 |
| 12 rs6488887   | 124125018 A | 3.007  | 3.12E-15 | chr:12:124066477 |
| 12 rs7302177   | 124125757 G | 3.007  | 3.12E-15 | chr:12:124066477 |
| 12 rs7967780   | 124128989 T | 3.007  | 3.12E-15 | chr:12:124066477 |
| 12 rs2942079   | 124058053 A | 4.474  | 5.99E-15 | chr:12:124066477 |
| 12 rs57773235  | 124126090 G | 0.3378 | 1.91E-13 | chr:12:124066477 |
| 12 rs7974138   | 124011075 A | 3.205  | 2.28E-13 | chr:12:124066477 |
| 12 rs7296804   | 124153863 C | 2.833  | 2.42E-13 | chr:12:124066477 |
| 12 rs11834141  | 124150696 C | 2.808  | 3.53E-13 | chr:12:124066477 |
| 12 rs111682989 | 124116125 A | 0.3495 | 3.79E-13 | chr:12:124066477 |
| 12 rs3748270   | 124115200 A | 0.3495 | 3.79E-13 | chr:12:124066477 |
| 12 rs3923720   | 124117446 C | 0.3495 | 3.79E-13 | chr:12:124066477 |
| 12 rs7298287   | 124111723 T | 0.3495 | 3.79E-13 | chr:12:124066477 |
| 12 rs7316410   | 124116585 A | 0.3495 | 3.79E-13 | chr:12:124066477 |
| 12 rs114033770 | 124098056 A | 10.47  | 4.39E-13 | chr:12:124066477 |
| 12 rs78878823  | 124016535 A | 3.149  | 4.55E-13 | chr:12:124066477 |
| 12 rs3748268   | 124097824 A | 0.3162 | 4.70E-13 | chr:12:124066477 |
| 12 rs143138404 | 124019926 C | 3.193  | 6.39E-13 | chr:12:124066477 |
| 12 rs115152155 | 124090257 A | 10.27  | 7.60E-13 | chr:12:124066477 |

|                |             |        |          |                  |
|----------------|-------------|--------|----------|------------------|
| 12 rs11829472  | 124064580 A | 10.27  | 7.60E-13 | chr:12:124066477 |
| 12 rs141870968 | 124084630 T | 10.27  | 7.60E-13 | chr:12:124066477 |
| 12 rs7960056   | 124077212 C | 10.27  | 7.60E-13 | chr:12:124066477 |
| 12 rs115648674 | 124047990 T | 10.08  | 1.35E-12 | chr:12:124066477 |
| 12 rs191163652 | 124049692 T | 10.08  | 1.35E-12 | chr:12:124066477 |
| 12 rs7315326   | 124033885 A | 0.3573 | 2.76E-12 | chr:12:124066477 |
| 12 rs7957883   | 124064573 C | 6.209  | 3.71E-12 | chr:12:124066477 |
| 12 rs7968439   | 124064576 T | 6.209  | 3.71E-12 | chr:12:124066477 |
| 12 rs28668364  | 124026482 T | 3.291  | 3.83E-12 | chr:12:124066477 |
| 12 rs28711796  | 124008074 C | 2.929  | 4.41E-12 | chr:12:124066477 |
| 12 rs80351220  | 124107034 A | 10.13  | 5.01E-12 | chr:12:124066477 |
| 12 rs71458805  | 124017254 G | 3.15   | 7.17E-12 | chr:12:124066477 |
| 12 rs11612479  | 124155526 G | 2.555  | 7.56E-12 | chr:12:124066477 |
| 12 rs73416283  | 124149382 A | 2.774  | 8.14E-12 | chr:12:124066477 |
| 12 rs786441    | 124062743 A | 0.3089 | 8.14E-12 | chr:12:124066477 |
| 12 rs11057319  | 124140512 G | 6.98   | 8.40E-12 | chr:12:124066477 |
| 12 rs11572994  | 124141518 G | 6.98   | 8.40E-12 | chr:12:124066477 |
| 12 rs145889717 | 124148637 T | 6.98   | 8.40E-12 | chr:12:124066477 |
| 12 rs75331857  | 124153272 C | 6.98   | 8.40E-12 | chr:12:124066477 |
| 12 rs144036481 | 124290473 G | 3.294  | 9.33E-12 | chr:12:124066477 |
| 12 rs112673999 | 124292569 G | 3.293  | 1.15E-11 | chr:12:124066477 |
| 12 rs3850952   | 124090802 T | 0.3077 | 1.47E-11 | chr:12:124066477 |
| 12 rs79320889  | 124290233 C | 3.234  | 1.52E-11 | chr:12:124066477 |
| 12 rs7972380   | 124065474 G | 0.3123 | 2.12E-11 | chr:12:124066477 |
| 12 rs75889421  | 124298787 G | 2.884  | 2.42E-11 | chr:12:124066477 |
| 12 rs555037713 | 124281432 C | 7.765  | 2.65E-11 | chr:12:124066477 |
| 12 rs786426    | 124086086 C | 3.176  | 2.92E-11 | chr:12:124066477 |
| 12 rs11057300  | 124059096 T | 0.317  | 3.02E-11 | chr:12:124066477 |
| 12 rs577771405 | 124224753 C | 5.735  | 4.37E-11 | chr:12:124066477 |
| 12 rs114155449 | 124115491 C | 6.616  | 6.66E-11 | chr:12:124066477 |
| 12 rs7135660   | 124174234 A | 2.469  | 7.15E-11 | chr:12:124066477 |
| 12 rs79342289  | 124256095 G | 5.47   | 8.68E-11 | chr:12:124066477 |
| 12 rs2048802   | 124098780 T | 0.3404 | 9.99E-11 | chr:12:124066477 |
| 12 rs149885512 | 124164576 A | 6.312  | 1.04E-10 | chr:12:124066477 |
| 12 rs75181091  | 124292748 A | 3.278  | 1.30E-10 | chr:12:124066477 |
| 12 rs77682183  | 124291170 G | 3.278  | 1.30E-10 | chr:12:124066477 |
| 12 rs78648333  | 124252117 A | 5.242  | 1.48E-10 | chr:12:124066477 |
| 12 rs7302183   | 124104460 C | 0.3335 | 1.72E-10 | chr:12:124066477 |
| 12 rs112921890 | 124291095 G | 3.013  | 2.33E-10 | chr:12:124066477 |
| 12 rs4930708   | 124145697 T | 0.3886 | 3.42E-10 | chr:12:124066477 |
| 12 rs7133199   | 124159185 A | 0.3886 | 3.42E-10 | chr:12:124066477 |
| 12 rs11836898  | 124231853 A | 4.355  | 3.87E-10 | chr:12:124066477 |
| 12 rs114102316 | 124268435 G | 6.384  | 4.36E-10 | chr:12:124066477 |

|                |             |        |          |                  |
|----------------|-------------|--------|----------|------------------|
| 12 rs11832319  | 124269776 A | 6.384  | 4.36E-10 | chr:12:124066477 |
| 12 rs148051740 | 124263547 C | 6.13   | 4.72E-10 | chr:12:124066477 |
| 12 rs7134074   | 124159885 A | 0.3935 | 5.09E-10 | chr:12:124066477 |
| 12 rs7313140   | 124157188 T | 0.3935 | 5.09E-10 | chr:12:124066477 |
| 12 rs7313261   | 124166937 G | 0.3935 | 5.09E-10 | chr:12:124066477 |
| 12 rs115922900 | 124268788 T | 6.073  | 5.26E-10 | chr:12:124066477 |
| 12 rs35158437  | 124160764 C | 0.3953 | 6.03E-10 | chr:12:124066477 |
| 12 rs116357568 | 124302912 T | 7.661  | 6.08E-10 | chr:12:124066477 |
| 12 rs1051793   | 124144395 A | 0.3965 | 6.13E-10 | chr:12:124066477 |
| 12 rs116756952 | 124267615 T | 6.421  | 6.75E-10 | chr:12:124066477 |
| 12 rs114808264 | 124270904 G | 5.876  | 7.08E-10 | chr:12:124066477 |
| 12 rs115350765 | 124314005 A | 7.486  | 8.32E-10 | chr:12:124066477 |
| 12 rs112875110 | 124303111 T | 2.557  | 1.04E-09 | chr:12:124066477 |
| 12 rs141788165 | 124263705 C | 6.069  | 1.24E-09 | chr:12:124066477 |
| 12 rs115354182 | 124356481 C | 4.047  | 1.26E-09 | chr:12:124066477 |
| 12 rs150916971 | 124127485 T | 6.118  | 1.28E-09 | chr:12:124066477 |
| 12 rs116056046 | 124072693 G | 13.74  | 1.30E-09 | chr:12:124066477 |
| 12 rs116048436 | 124109108 G | 6.419  | 1.37E-09 | chr:12:124066477 |
| 12 rs6488883   | 124101347 G | 0.3108 | 1.42E-09 | chr:12:124066477 |
| 12 rs115259342 | 124056219 G | 11.9   | 1.48E-09 | chr:12:124066477 |
| 12 rs4456350   | 124058489 G | 0.3139 | 1.94E-09 | chr:12:124066477 |
| 12 rs11057305  | 124095447 G | 2.661  | 2.03E-09 | chr:12:124066477 |
| 12 rs150416099 | 124065185 G | 12.97  | 2.24E-09 | chr:12:124066477 |
| 12 rs6551      | 124082240 A | 0.3187 | 2.45E-09 | chr:12:124066477 |
| 12 rs786448    | 124070214 G | 0.3187 | 2.45E-09 | chr:12:124066477 |
| 12 rs786449    | 124071728 T | 0.3187 | 2.45E-09 | chr:12:124066477 |
| 12 rs74874384  | 124067102 A | 12.87  | 3.07E-09 | chr:12:124066477 |
| 12 rs116338737 | 124287243 T | 6.336  | 3.11E-09 | chr:12:124066477 |
| 12 rs151312164 | 124288849 A | 6.336  | 3.11E-09 | chr:12:124066477 |
| 12 rs116021417 | 124297270 T | 5.691  | 3.26E-09 | chr:12:124066477 |
| 12 rs786443    | 124063891 C | 0.3481 | 3.77E-09 | chr:12:124066477 |
| 12 rs7134896   | 124101858 C | 0.326  | 3.83E-09 | chr:12:124066477 |
| 12 rs1543075   | 124086448 A | 0.3277 | 4.37E-09 | chr:12:124066477 |
| 12 rs1543076   | 124086449 T | 0.3277 | 4.37E-09 | chr:12:124066477 |
| 12 rs786422    | 124083562 A | 0.3503 | 4.58E-09 | chr:12:124066477 |
| 12 rs786423    | 124083898 A | 0.3503 | 4.58E-09 | chr:12:124066477 |
| 12 rs786445    | 124068361 A | 0.3503 | 4.58E-09 | chr:12:124066477 |
| 12 rs786447    | 124069667 G | 0.3503 | 4.58E-09 | chr:12:124066477 |
| 12 rs114199292 | 124265429 A | 6.112  | 5.09E-09 | chr:12:124066477 |
| 12 rs150929624 | 124265338 G | 6.112  | 5.09E-09 | chr:12:124066477 |
| 12 rs7313628   | 124107015 G | 0.3304 | 5.25E-09 | chr:12:124066477 |
| 12 rs7305701   | 124150013 T | 0.4224 | 5.67E-09 | chr:12:124066477 |
| 12 rs116082071 | 124270365 A | 6.013  | 5.95E-09 | chr:12:124066477 |

|                            |             |        |          |                  |
|----------------------------|-------------|--------|----------|------------------|
| 12 rs185077712             | 124340945 A | 7.233  | 6.04E-09 | chr:12:124066477 |
| 12 rs10846537              | 124138346 C | 0.4256 | 7.24E-09 | chr:12:124066477 |
| 12 rs79683601              | 124307878 T | 7.68   | 7.62E-09 | chr:12:124066477 |
| 12 rs11057307              | 124098213 T | 0.355  | 8.18E-09 | chr:12:124066477 |
| 12 rs3748269               | 124099925 T | 0.355  | 8.18E-09 | chr:12:124066477 |
| 12 rs114910324             | 124330106 T | 6.77   | 8.40E-09 | chr:12:124066477 |
| 12 rs143454970             | 124329334 C | 6.77   | 8.40E-09 | chr:12:124066477 |
| 12 rs146985730             | 124334700 A | 6.77   | 8.40E-09 | chr:12:124066477 |
| 12 rs77251237              | 124329047 T | 6.77   | 8.40E-09 | chr:12:124066477 |
| 12 rs116167096             | 124323011 C | 4.414  | 8.74E-09 | chr:12:124066477 |
| 12 rs114185277             | 124308237 C | 7.568  | 9.45E-09 | chr:12:124066477 |
| 12 rs115569365             | 124228318 C | 5.596  | 1.15E-08 | chr:12:124066477 |
| 12 rs115756304             | 124225798 T | 5.596  | 1.15E-08 | chr:12:124066477 |
| 12 rs115294027             | 124226320 T | 3.909  | 1.46E-08 | chr:12:124066477 |
| 12 rs142761113             | 124225038 A | 3.909  | 1.46E-08 | chr:12:124066477 |
| 12 rs144294607             | 124227052 T | 3.909  | 1.46E-08 | chr:12:124066477 |
| 12 rs77005312              | 124311563 A | 4.542  | 1.47E-08 | chr:12:124066477 |
| 12 rs79980997              | 124310034 T | 4.542  | 1.47E-08 | chr:12:124066477 |
| 12 rs114520747             | 124328451 G | 6.273  | 1.48E-08 | chr:12:124066477 |
| 12 rs192264853             | 124271218 G | 5.293  | 1.50E-08 | chr:12:124066477 |
| 12 rs9919                  | 124105839 T | 0.4074 | 1.53E-08 | chr:12:124066477 |
| 12 rs114594614             | 124203097 A | 5.41   | 1.56E-08 | chr:12:124066477 |
| 12 rs76014889              | 124286312 T | 2.649  | 1.69E-08 | chr:12:124066477 |
| 12 rs7301065               | 124154838 T | 0.4382 | 1.69E-08 | chr:12:124066477 |
| 12 rs1515814               | 124108699 G | 0.3675 | 1.72E-08 | chr:12:124066477 |
| 12 rs12305741              | 124056432 T | 0.2296 | 1.74E-08 | chr:12:124066477 |
| 12 rs190060224;rs113977710 | 124299609 A | 2.824  | 1.79E-08 | chr:12:124066477 |
| 12 rs10846531              | 124098612 G | 0.3809 | 1.92E-08 | chr:12:124066477 |
| 12 rs11572935              | 124124627 A | 3.286  | 2.13E-08 | chr:12:124066477 |
| 12 rs116703046             | 124310498 C | 4.222  | 2.32E-08 | chr:12:124066477 |
| 12 rs541534012             | 124240646 C | 3.27   | 2.34E-08 | chr:12:124066477 |
| 12 rs116621164             | 124308231 T | 4.455  | 2.53E-08 | chr:12:124066477 |
| 12 rs149260700             | 124064418 A | 9.533  | 2.60E-08 | chr:12:124066477 |
| 12 rs11057326              | 124148478 G | 0.4439 | 2.95E-08 | chr:12:124066477 |
| 12 rs114272330             | 124313626 G | 4.381  | 3.21E-08 | chr:12:124066477 |
| 12 rs7972413               | 124108296 T | 0.3743 | 3.28E-08 | chr:12:124066477 |
| 12 rs11610473              | 124149975 G | 2.111  | 3.33E-08 | chr:12:124066477 |
| 12 rs11611354              | 124153639 T | 2.111  | 3.33E-08 | chr:12:124066477 |
| 12 rs115025821             | 124302624 G | 4.143  | 3.89E-08 | chr:12:124066477 |
| 12 rs115483454             | 124307392 G | 4.143  | 3.89E-08 | chr:12:124066477 |
| 12 rs142996691             | 124303149 A | 4.143  | 3.89E-08 | chr:12:124066477 |
| 12 rs146364969             | 124303033 A | 4.143  | 3.89E-08 | chr:12:124066477 |
| 12 rs1022320               | 124264319 G | 2.266  | 4.04E-08 | chr:12:124066477 |

|                |             |        |          |                  |
|----------------|-------------|--------|----------|------------------|
| 12 rs141811474 | 124360917 T | 6.953  | 4.20E-08 | chr:12:124066477 |
| 12 rs75866956  | 124256097 T | 6.445  | 4.53E-08 | chr:12:124066477 |
| 12 rs115362943 | 124052578 G | 6.383  | 5.93E-08 | chr:12:124066477 |
| 12 rs116771019 | 124046353 A | 6.383  | 5.93E-08 | chr:12:124066477 |
| 12 rs145614580 | 124043851 T | 6.383  | 5.93E-08 | chr:12:124066477 |
| 12 rs78440621  | 124302210 C | 2.431  | 6.99E-08 | chr:12:124066477 |
| 12 rs7960017   | 124165059 C | 2.043  | 9.42E-08 | chr:12:124066477 |
| 12 rs146499491 | 124309020 C | 3.939  | 9.75E-08 | chr:12:124066477 |
| 12 rs7294420   | 124118489 C | 3.635  | 1.03E-07 | chr:12:124066477 |
| 12 rs7979245   | 124124907 T | 3.635  | 1.03E-07 | chr:12:124066477 |
| 12 rs10846527  | 124043296 C | 3.125  | 1.25E-07 | chr:12:124066477 |
| 12 rs61154946  | 124061611 T | 0.3251 | 1.27E-07 | chr:12:124066477 |
| 12 rs73219037  | 124184482 C | 2.022  | 1.30E-07 | chr:12:124066477 |
| 12 rs7973155   | 124185948 G | 2.022  | 1.30E-07 | chr:12:124066477 |
| 12 rs11057297  | 124055090 T | 0.3442 | 1.44E-07 | chr:12:124066477 |
| 12 rs28834793  | 124040064 A | 0.4605 | 1.47E-07 | chr:12:124066477 |
| 12 rs10773034  | 124234253 G | 0.4345 | 1.53E-07 | chr:12:124066477 |
| 12 rs118004082 | 124169240 T | 2.012  | 1.61E-07 | chr:12:124066477 |
| 12 rs114208992 | 124169242 C | 2.01   | 1.62E-07 | chr:12:124066477 |
| 12 rs116040307 | 124234939 A | 5.414  | 1.67E-07 | chr:12:124066477 |
| 12 rs35946281  | 124177016 A | 1.998  | 1.87E-07 | chr:12:124066477 |
| 12 rs113310757 | 124161494 G | 2.005  | 1.89E-07 | chr:12:124066477 |
| 12 rs12820195  | 124162047 C | 2.005  | 1.89E-07 | chr:12:124066477 |
| 12 rs12822546  | 124157247 A | 2.005  | 1.89E-07 | chr:12:124066477 |
| 12 rs12824075  | 124157335 T | 2.005  | 1.89E-07 | chr:12:124066477 |
| 12 rs34534928  | 124160834 C | 2.005  | 1.89E-07 | chr:12:124066477 |
| 12 rs6488890   | 124158971 T | 2.005  | 1.89E-07 | chr:12:124066477 |
| 12 rs6488891   | 124163512 T | 2.005  | 1.89E-07 | chr:12:124066477 |
| 12 rs7133543   | 124159411 G | 2.005  | 1.89E-07 | chr:12:124066477 |
| 12 rs7138209   | 124157052 A | 2.005  | 1.89E-07 | chr:12:124066477 |
| 12 rs7302649   | 124159766 A | 2.005  | 1.89E-07 | chr:12:124066477 |
| 12 rs7953596   | 124158450 C | 2.005  | 1.89E-07 | chr:12:124066477 |
| 12 rs7953599   | 124158455 C | 2.005  | 1.89E-07 | chr:12:124066477 |
| 12 rs7959553   | 124162705 T | 2.005  | 1.89E-07 | chr:12:124066477 |
| 12 rs7963498   | 124158502 A | 2.005  | 1.89E-07 | chr:12:124066477 |
| 12 rs7968029   | 124182120 T | 2.005  | 1.89E-07 | chr:12:124066477 |
| 12 rs7969130   | 124161056 G | 2.005  | 1.89E-07 | chr:12:124066477 |
| 12 rs7969234   | 124161110 G | 2.005  | 1.89E-07 | chr:12:124066477 |
| 12 rs7973695   | 124162477 G | 2.005  | 1.89E-07 | chr:12:124066477 |
| 12 rs7975119   | 124157674 T | 2.005  | 1.89E-07 | chr:12:124066477 |
| 12 rs7975233   | 124157745 G | 2.005  | 1.89E-07 | chr:12:124066477 |
| 12 rs7978447   | 124158080 G | 2.005  | 1.89E-07 | chr:12:124066477 |
| 12 rs151085897 | 124037165 C | 5.471  | 1.94E-07 | chr:12:124066477 |

|               |             |       |          |                  |
|---------------|-------------|-------|----------|------------------|
| 12 rs11837257 | 124190394 C | 1.995 | 2.08E-07 | chr:12:124066477 |
| 12 rs11612030 | 124188064 T | 1.994 | 2.10E-07 | chr:12:124066477 |
| 12 rs11613632 | 124184065 A | 1.994 | 2.10E-07 | chr:12:124066477 |
| 12 rs11614468 | 124187924 C | 1.994 | 2.10E-07 | chr:12:124066477 |
| 12 rs11830462 | 124178665 T | 1.994 | 2.10E-07 | chr:12:124066477 |
| 12 rs11831536 | 124176748 G | 1.994 | 2.10E-07 | chr:12:124066477 |
| 12 rs11833604 | 124176472 A | 1.994 | 2.10E-07 | chr:12:124066477 |
| 12 rs11834492 | 124180011 C | 1.994 | 2.10E-07 | chr:12:124066477 |
| 12 rs11834808 | 124190582 T | 1.994 | 2.10E-07 | chr:12:124066477 |
| 12 rs11837256 | 124190393 T | 1.994 | 2.10E-07 | chr:12:124066477 |
| 12 rs12818596 | 124180474 C | 1.994 | 2.10E-07 | chr:12:124066477 |
| 12 rs12821242 | 124178329 A | 1.994 | 2.10E-07 | chr:12:124066477 |
| 12 rs12823866 | 124165111 C | 1.994 | 2.10E-07 | chr:12:124066477 |
| 12 rs12827074 | 124190836 C | 1.994 | 2.10E-07 | chr:12:124066477 |
| 12 rs12828408 | 124198718 C | 1.994 | 2.10E-07 | chr:12:124066477 |
| 12 rs12829984 | 124172307 T | 1.994 | 2.10E-07 | chr:12:124066477 |
| 12 rs12831081 | 124179739 G | 1.994 | 2.10E-07 | chr:12:124066477 |
| 12 rs2203500  | 124194710 G | 1.994 | 2.10E-07 | chr:12:124066477 |
| 12 rs2222060  | 124194438 G | 1.994 | 2.10E-07 | chr:12:124066477 |
| 12 rs35416308 | 124169461 G | 1.994 | 2.10E-07 | chr:12:124066477 |
| 12 rs3817309  | 124198721 T | 1.994 | 2.10E-07 | chr:12:124066477 |
| 12 rs6488892  | 124171826 C | 1.994 | 2.10E-07 | chr:12:124066477 |
| 12 rs6488893  | 124171903 G | 1.994 | 2.10E-07 | chr:12:124066477 |
| 12 rs6488894  | 124185124 T | 1.994 | 2.10E-07 | chr:12:124066477 |
| 12 rs66471742 | 124199006 A | 1.994 | 2.10E-07 | chr:12:124066477 |
| 12 rs66690784 | 124165677 G | 1.994 | 2.10E-07 | chr:12:124066477 |
| 12 rs67178535 | 124196299 A | 1.994 | 2.10E-07 | chr:12:124066477 |
| 12 rs7135267  | 124199120 C | 1.994 | 2.10E-07 | chr:12:124066477 |
| 12 rs71458814 | 124196891 G | 1.994 | 2.10E-07 | chr:12:124066477 |
| 12 rs7302788  | 124167021 C | 1.994 | 2.10E-07 | chr:12:124066477 |
| 12 rs7304052  | 124177643 A | 1.994 | 2.10E-07 | chr:12:124066477 |
| 12 rs7304837  | 124177538 T | 1.994 | 2.10E-07 | chr:12:124066477 |
| 12 rs7305838  | 124193471 A | 1.994 | 2.10E-07 | chr:12:124066477 |
| 12 rs7307343  | 124174365 G | 1.994 | 2.10E-07 | chr:12:124066477 |
| 12 rs7308234  | 124183804 T | 1.994 | 2.10E-07 | chr:12:124066477 |
| 12 rs7309528  | 124171658 T | 1.994 | 2.10E-07 | chr:12:124066477 |
| 12 rs7310918  | 124174656 C | 1.994 | 2.10E-07 | chr:12:124066477 |
| 12 rs7397160  | 124196219 A | 1.994 | 2.10E-07 | chr:12:124066477 |
| 12 rs7397230  | 124182659 G | 1.994 | 2.10E-07 | chr:12:124066477 |
| 12 rs7397930  | 124188581 A | 1.994 | 2.10E-07 | chr:12:124066477 |
| 12 rs7398152  | 124184639 G | 1.994 | 2.10E-07 | chr:12:124066477 |
| 12 rs7398298  | 124192728 T | 1.994 | 2.10E-07 | chr:12:124066477 |
| 12 rs7399224  | 124195856 T | 1.994 | 2.10E-07 | chr:12:124066477 |



|                |             |        |          |                  |
|----------------|-------------|--------|----------|------------------|
| 12 rs7963968   | 124166041 C | 1.994  | 2.10E-07 | chr:12:124066477 |
| 12 rs7969964   | 124165213 A | 1.994  | 2.10E-07 | chr:12:124066477 |
| 12 rs7979528   | 124181820 G | 1.994  | 2.10E-07 | chr:12:124066477 |
| 12 rs34586028  | 124187082 C | 1.99   | 2.30E-07 | chr:12:124066477 |
| 12 rs76618338  | 124302458 G | 5.321  | 2.32E-07 | chr:12:124066477 |
| 12 rs7977179   | 124315662 G | 5.321  | 2.32E-07 | chr:12:124066477 |
| 12 rs10773033  | 124231368 C | 0.4418 | 2.39E-07 | chr:12:124066477 |
| 12 rs79687357  | 124259487 T | 2.035  | 2.57E-07 | chr:12:124066477 |
| 12 rs112823641 | 124292928 G | 2.072  | 2.65E-07 | chr:12:124066477 |
| 12 rs7298440   | 124181049 T | 1.981  | 2.69E-07 | chr:12:124066477 |
| 12 rs12817757  | 124156487 T | 1.983  | 2.76E-07 | chr:12:124066477 |
| 12 rs10744162  | 124243707 C | 0.4434 | 2.91E-07 | chr:12:124066477 |
| 12 rs7976816   | 124315343 A | 2.188  | 2.93E-07 | chr:12:124066477 |
| 12 rs7307008   | 124160021 G | 1.977  | 3.01E-07 | chr:12:124066477 |
| 12 rs116647224 | 124282097 A | 5.432  | 3.21E-07 | chr:12:124066477 |
| 12 rs75844860  | 124295677 A | 2.082  | 3.34E-07 | chr:12:124066477 |
| 12 rs78883615  | 124296519 A | 2.082  | 3.34E-07 | chr:12:124066477 |
| 12 rs115048185 | 124146048 G | 3.457  | 3.46E-07 | chr:12:124066477 |
| 12 rs10161548  | 124088555 C | 0.3151 | 3.98E-07 | chr:12:124066477 |
| 12 rs2707      | 124105638 A | 0.315  | 4.04E-07 | chr:12:124066477 |
| 12 rs10773019  | 124104551 G | 0.3146 | 4.06E-07 | chr:12:124066477 |
| 12 rs10846530  | 124079831 C | 0.3146 | 4.06E-07 | chr:12:124066477 |
| 12 rs10846532  | 124105572 G | 0.3146 | 4.06E-07 | chr:12:124066477 |
| 12 rs11057299  | 124058287 A | 0.3146 | 4.06E-07 | chr:12:124066477 |
| 12 rs11057304  | 124095426 T | 0.3146 | 4.06E-07 | chr:12:124066477 |
| 12 rs12231444  | 124074365 T | 0.3146 | 4.06E-07 | chr:12:124066477 |
| 12 rs12308953  | 124080899 A | 0.3146 | 4.06E-07 | chr:12:124066477 |
| 12 rs12313119  | 124059924 T | 0.3146 | 4.06E-07 | chr:12:124066477 |
| 12 rs17840832  | 124069068 A | 0.3146 | 4.06E-07 | chr:12:124066477 |
| 12 rs73414223  | 124063614 A | 0.3146 | 4.06E-07 | chr:12:124066477 |
| 12 rs7358562   | 124096245 A | 0.3146 | 4.06E-07 | chr:12:124066477 |
| 12 rs4930731   | 124317416 G | 2.131  | 4.76E-07 | chr:12:124066477 |
| 12 rs4930732   | 124316091 C | 2.131  | 4.76E-07 | chr:12:124066477 |
| 12 rs12827680  | 124240645 C | 0.4451 | 5.26E-07 | chr:12:124066477 |
| 12 rs116217925 | 124273882 T | 2.971  | 5.93E-07 | chr:12:124066477 |
| 12 rs141506842 | 124274003 C | 2.971  | 5.93E-07 | chr:12:124066477 |
| 12 rs34996665  | 124134656 C | 0.4961 | 6.21E-07 | chr:12:124066477 |
| 12 rs73420364  | 124251160 T | 0.5213 | 7.84E-07 | chr:12:124066477 |
| 12 rs114636861 | 124055954 C | 10.43  | 9.01E-07 | chr:12:124066477 |
| 12 rs114333487 | 124004450 A | 4.411  | 9.60E-07 | chr:12:124066477 |
| 12 rs138487939 | 123900952 A | 3.309  | 1.04E-06 | chr:12:124066477 |
| 12 rs114018932 | 124249783 G | 3.969  | 1.06E-06 | chr:12:124066477 |
| 12 rs1139320   | 124197099 T | 1.891  | 1.22E-06 | chr:12:124066477 |

|                |             |        |          |                  |
|----------------|-------------|--------|----------|------------------|
| 12 rs7135459   | 124300526 C | 2.703  | 1.33E-06 | chr:12:124066477 |
| 12 rs35911711  | 124201087 T | 0.4417 | 1.34E-06 | chr:12:124066477 |
| 12 rs113771811 | 124388732 C | 3.116  | 1.39E-06 | chr:12:124066477 |
| 12 rs2333834   | 124246004 A | 0.4498 | 1.42E-06 | chr:12:124066477 |
| 12 rs148052336 | 124194519 C | 6.498  | 1.54E-06 | chr:12:124066477 |
| 12 rs149625182 | 124094218 G | 8.675  | 1.58E-06 | chr:12:124066477 |
| 12 rs7980300   | 124258143 C | 2.3    | 1.75E-06 | chr:12:124066477 |
| 12 rs12815746  | 124126086 G | 0.4602 | 1.83E-06 | chr:12:124066477 |
| 12 rs7309510   | 124342015 A | 3.76   | 2.04E-06 | chr:12:124066477 |
| 12 rs188907902 | 124186997 T | 4.686  | 2.15E-06 | chr:12:124066477 |
| 12 rs116452654 | 124165541 T | 3.292  | 2.27E-06 | chr:12:124066477 |
| 12 rs115302188 | 124083436 T | 7.465  | 2.28E-06 | chr:12:124066477 |
| 12 rs116232382 | 124055366 T | 7.465  | 2.28E-06 | chr:12:124066477 |
| 12 rs149506295 | 124041628 C | 14.44  | 2.46E-06 | chr:12:124066477 |
| 12 rs114490301 | 124161289 T | 6.295  | 2.61E-06 | chr:12:124066477 |
| 12 rs115385140 | 124176248 C | 6.295  | 2.61E-06 | chr:12:124066477 |
| 12 rs141986228 | 124157053 T | 6.295  | 2.61E-06 | chr:12:124066477 |
| 12 rs146725051 | 124164953 A | 6.295  | 2.61E-06 | chr:12:124066477 |
| 12 rs7302406   | 124252688 C | 0.5361 | 2.68E-06 | chr:12:124066477 |
| 12 rs11572957  | 124131049 C | 4.788  | 2.97E-06 | chr:12:124066477 |
| 12 rs113767728 | 124390447 A | 2.995  | 3.05E-06 | chr:12:124066477 |
| 12 rs77362442  | 124325302 T | 2.304  | 3.08E-06 | chr:12:124066477 |
| 12 rs28408980  | 124026942 A | 0.4169 | 3.26E-06 | chr:12:124066477 |
| 12 rs7298068   | 124015832 T | 0.4453 | 3.30E-06 | chr:12:124066477 |
| 12 rs74560309  | 124375725 G | 1.889  | 3.43E-06 | chr:12:124066477 |
| 12 rs61953553  | 124022068 C | 1.865  | 3.54E-06 | chr:12:124066477 |
| 12 rs114746659 | 123957446 A | 10.84  | 4.63E-06 | chr:12:124066477 |
| 12 rs141364216 | 123948881 C | 10.84  | 4.63E-06 | chr:12:124066477 |
| 12 rs150131617 | 123948369 C | 10.84  | 4.63E-06 | chr:12:124066477 |
| 12 rs76616545  | 123956557 C | 10.84  | 4.63E-06 | chr:12:124066477 |
| 12 rs80183396  | 123994250 G | 3.629  | 4.65E-06 | chr:12:124066477 |
| 12 rs114809836 | 124235217 A | 5.676  | 4.67E-06 | chr:12:124066477 |
| 12 rs115183932 | 124244416 C | 5.676  | 4.67E-06 | chr:12:124066477 |
| 12 rs144080565 | 124240225 C | 5.676  | 4.67E-06 | chr:12:124066477 |
| 12 rs145999411 | 124245289 A | 5.676  | 4.67E-06 | chr:12:124066477 |
| 12 rs146066975 | 124234143 T | 5.676  | 4.67E-06 | chr:12:124066477 |
| 12 rs7297473   | 124245936 C | 5.676  | 4.67E-06 | chr:12:124066477 |
| 12 rs7969410   | 124235775 A | 5.676  | 4.67E-06 | chr:12:124066477 |
| 12 rs7980215   | 124243643 A | 5.676  | 4.67E-06 | chr:12:124066477 |
| 12 rs77070660  | 124110044 A | 2.529  | 4.73E-06 | chr:12:124066477 |
| 12 rs114404549 | 124157298 G | 4.002  | 4.77E-06 | chr:12:124066477 |
| 12 rs115250621 | 124173613 G | 4.002  | 4.77E-06 | chr:12:124066477 |
| 12 rs11572982  | 124139827 T | 4.002  | 4.77E-06 | chr:12:124066477 |

|                |             |        |          |                  |
|----------------|-------------|--------|----------|------------------|
| 12 rs116452304 | 124196758 C | 4.002  | 4.77E-06 | chr:12:124066477 |
| 12 rs138728238 | 124166654 C | 4.002  | 4.77E-06 | chr:12:124066477 |
| 12 rs141540823 | 124176751 T | 4.002  | 4.77E-06 | chr:12:124066477 |
| 12 rs561163813 | 124196886 G | 4.002  | 4.77E-06 | chr:12:124066477 |
| 12 rs7308639   | 124162182 G | 4.002  | 4.77E-06 | chr:12:124066477 |
| 12 rs75514507  | 124179564 C | 4.002  | 4.77E-06 | chr:12:124066477 |
| 12 rs76854096  | 124184877 A | 4.002  | 4.77E-06 | chr:12:124066477 |
| 12 rs79639515  | 124162769 G | 4.002  | 4.77E-06 | chr:12:124066477 |
| 12 rs2333832   | 124020708 T | 1.846  | 4.87E-06 | chr:12:124066477 |
| 12 rs6488878   | 124023932 T | 1.846  | 4.87E-06 | chr:12:124066477 |
| 12 rs11572993  | 124141488 C | 3.223  | 4.89E-06 | chr:12:124066477 |
| 12 rs11572998  | 124143293 A | 3.223  | 4.89E-06 | chr:12:124066477 |
| 12 rs74320784  | 124188434 G | 3.223  | 4.89E-06 | chr:12:124066477 |
| 12 rs79884091  | 124166954 A | 3.223  | 4.89E-06 | chr:12:124066477 |
| 12 rs9723048   | 124006318 G | 0.5098 | 4.93E-06 | chr:12:124066477 |
| 12 rs61760955  | 123793863 C | 2.992  | 5.27E-06 | chr:12:124066477 |
| 12 rs7959714   | 124022720 C | 1.849  | 5.42E-06 | chr:12:124066477 |
| 12 rs76993175  | 123861292 C | 2.662  | 5.44E-06 | chr:12:124066477 |
| 12 rs116046657 | 124187720 A | 3.961  | 5.45E-06 | chr:12:124066477 |
| 12 rs115767062 | 124162628 T | 4.115  | 5.74E-06 | chr:12:124066477 |
| 12 rs147057636 | 124170576 G | 4.115  | 5.74E-06 | chr:12:124066477 |
| 12 rs76585413  | 124169830 C | 4.115  | 5.74E-06 | chr:12:124066477 |
| 12 rs28673982  | 124016464 C | 0.519  | 5.85E-06 | chr:12:124066477 |
| 12 rs7307227   | 124020098 T | 0.4975 | 5.85E-06 | chr:12:124066477 |
| 12 rs140212733 | 123985412 A | 9.023  | 6.14E-06 | chr:12:124066477 |
| 12 rs189575861 | 123986238 T | 9.023  | 6.14E-06 | chr:12:124066477 |
| 12 rs75553354  | 123973641 A | 9.023  | 6.14E-06 | chr:12:124066477 |
| 12 rs7980049   | 124291534 C | 1.857  | 6.20E-06 | chr:12:124066477 |
| 12 rs7300147   | 124116833 G | 0.4714 | 6.46E-06 | chr:12:124066477 |
| 12 rs7966882   | 124128965 G | 0.4659 | 6.48E-06 | chr:12:124066477 |
| 12 rs7971452   | 124126821 A | 0.4665 | 6.84E-06 | chr:12:124066477 |
| 12 rs7303956   | 124020050 T | 1.83   | 6.86E-06 | chr:12:124066477 |
| 12 rs2017181   | 124117257 T | 0.4663 | 6.89E-06 | chr:12:124066477 |
| 12 rs908373    | 124113319 C | 0.4663 | 6.89E-06 | chr:12:124066477 |
| 12 rs147974993 | 123936707 T | 10.46  | 7.33E-06 | chr:12:124066477 |
| 12 rs1533246   | 124019055 T | 1.817  | 7.41E-06 | chr:12:124066477 |
| 12 rs142676514 | 124194569 A | 3.116  | 7.68E-06 | chr:12:124066477 |
| 12 rs35016092  | 124022243 A | 1.82   | 7.73E-06 | chr:12:124066477 |
| 12 rs77765053  | 124245456 A | 3.017  | 8.30E-06 | chr:12:124066477 |
| 12 rs35970945  | 123955358 G | 0.427  | 8.73E-06 | chr:12:124066477 |
| 12 rs10846535  | 124130388 A | 0.475  | 1.01E-05 | chr:12:124066477 |
| 12 rs111260541 | 124226670 A | 3.582  | 1.01E-05 | chr:12:124066477 |
| 12 rs111291425 | 124204277 G | 3.582  | 1.01E-05 | chr:12:124066477 |

|                |             |        |          |                  |
|----------------|-------------|--------|----------|------------------|
| 12 rs111865336 | 124210872 T | 3.582  | 1.01E-05 | chr:12:124066477 |
| 12 rs112095096 | 124215340 G | 3.582  | 1.01E-05 | chr:12:124066477 |
| 12 rs112325438 | 124202498 A | 3.582  | 1.01E-05 | chr:12:124066477 |
| 12 rs112713519 | 124208643 C | 3.582  | 1.01E-05 | chr:12:124066477 |
| 12 rs113038752 | 124220799 A | 3.582  | 1.01E-05 | chr:12:124066477 |
| 12 rs113425875 | 124217119 T | 3.582  | 1.01E-05 | chr:12:124066477 |
| 12 rs116985162 | 124211857 A | 3.582  | 1.01E-05 | chr:12:124066477 |
| 12 rs151281380 | 124222810 A | 3.582  | 1.01E-05 | chr:12:124066477 |
| 12 rs74691387  | 124224357 C | 3.582  | 1.01E-05 | chr:12:124066477 |
| 12 rs77988284  | 124225324 T | 3.582  | 1.01E-05 | chr:12:124066477 |
| 12 rs78856277  | 124208524 A | 3.582  | 1.01E-05 | chr:12:124066477 |
| 12 rs79138426  | 124204768 G | 3.582  | 1.01E-05 | chr:12:124066477 |
| 12 rs10734904  | 124204158 G | 0.4877 | 1.14E-05 | chr:12:124066477 |
| 12 rs10773031  | 124222909 G | 1.795  | 1.15E-05 | chr:12:124066477 |
| 12 rs882563    | 124210549 T | 0.4881 | 1.22E-05 | chr:12:124066477 |
| 12 rs9788204   | 124207209 T | 0.4881 | 1.22E-05 | chr:12:124066477 |
| 12 rs146132801 | 123986945 T | 4.34   | 1.23E-05 | chr:12:124066477 |
| 12 rs9697543   | 124004990 C | 0.4517 | 1.24E-05 | chr:12:124066477 |
| 12 rs9697721   | 124005312 C | 0.4517 | 1.24E-05 | chr:12:124066477 |
| 12 rs13303107  | 123939487 T | 0.4379 | 1.25E-05 | chr:12:124066477 |
| 12 rs67516712  | 124201524 G | 0.4897 | 1.27E-05 | chr:12:124066477 |
| 12 rs141716858 | 124002914 T | 3.992  | 1.38E-05 | chr:12:124066477 |
| 12 rs2063629   | 124006842 C | 0.5314 | 1.41E-05 | chr:12:124066477 |
| 12 rs116310078 | 124270467 T | 9.679  | 1.47E-05 | chr:12:124066477 |
| 12 rs139909820 | 123934751 T | 7.353  | 1.67E-05 | chr:12:124066477 |
| 12 rs10734908  | 124219036 A | 0.497  | 1.83E-05 | chr:12:124066477 |
| 12 rs10744160  | 124225542 G | 0.497  | 1.83E-05 | chr:12:124066477 |
| 12 rs10773032  | 124226063 G | 0.497  | 1.83E-05 | chr:12:124066477 |
| 12 rs2333837   | 124220522 T | 0.497  | 1.83E-05 | chr:12:124066477 |
| 12 rs7398851   | 124215004 G | 0.497  | 1.83E-05 | chr:12:124066477 |
| 12 rs2292500   | 124008073 A | 0.5372 | 1.87E-05 | chr:12:124066477 |
| 12 rs7969641   | 44310268 T  | 19.23  | 2.34E-38 | chr:12:44313657  |
| 12 rs12301015  | 44321160 T  | 18.47  | 3.17E-38 | chr:12:44313657  |
| 12 rs12303804  | 44340018 A  | 18.27  | 5.60E-38 | chr:12:44313657  |
| 12 rs12309681  | 44343202 T  | 18.27  | 5.60E-38 | chr:12:44313657  |
| 12 rs11182326  | 44310333 G  | 18.48  | 7.91E-38 | chr:12:44313657  |
| 12 rs11182346  | 44350097 T  | 21.44  | 8.85E-38 | chr:12:44313657  |
| 12 rs10785477  | 44318723 G  | 22.41  | 9.04E-38 | chr:12:44313657  |
| 12 rs10880586  | 44310604 G  | 22.41  | 9.04E-38 | chr:12:44313657  |
| 12 rs11182328  | 44311277 G  | 22.41  | 9.04E-38 | chr:12:44313657  |
| 12 rs10785478  | 44320156 T  | 21.34  | 9.38E-38 | chr:12:44313657  |
| 12 rs11182327  | 44310418 A  | 21.77  | 1.21E-37 | chr:12:44313657  |
| 12 rs11182345  | 44347202 C  | 21.19  | 1.56E-37 | chr:12:44313657  |

|                |            |        |          |                 |
|----------------|------------|--------|----------|-----------------|
| 12 rs12315094  | 44345773 A | 21.19  | 1.56E-37 | chr:12:44313657 |
| 12 rs10785482  | 44342910 T | 22.95  | 1.57E-37 | chr:12:44313657 |
| 12 rs10880601  | 44343768 A | 22.9   | 1.67E-37 | chr:12:44313657 |
| 12 rs7312373   | 44332843 C | 21.05  | 1.75E-37 | chr:12:44313657 |
| 12 rs10880600  | 44343641 T | 21.02  | 1.85E-37 | chr:12:44313657 |
| 12 rs11829881  | 44322395 G | 19.36  | 1.16E-36 | chr:12:44313657 |
| 12 rs10880597  | 44336172 A | 38.98  | 2.35E-35 | chr:12:44313657 |
| 12 rs11182339  | 44331841 A | 38.75  | 3.54E-35 | chr:12:44313657 |
| 12 rs4417371   | 44327407 A | 38.62  | 3.67E-35 | chr:12:44313657 |
| 12 rs10880605  | 44349669 A | 38.76  | 3.70E-35 | chr:12:44313657 |
| 12 rs11182341  | 44339216 T | 38.02  | 5.86E-35 | chr:12:44313657 |
| 12 rs10785474  | 44318428 G | 42.26  | 9.16E-35 | chr:12:44313657 |
| 12 rs10785473  | 44316584 G | 41.26  | 1.52E-34 | chr:12:44313657 |
| 12 rs59709721  | 44362347 A | 10.19  | 1.18E-32 | chr:12:44313657 |
| 12 rs12318365  | 44352760 T | 10.5   | 1.29E-32 | chr:12:44313657 |
| 12 rs17093971  | 44359265 T | 10.05  | 2.23E-32 | chr:12:44313657 |
| 12 rs7308588   | 44356119 A | 9.894  | 4.17E-32 | chr:12:44313657 |
| 12 rs4768544   | 44309919 C | 9.446  | 7.45E-29 | chr:12:44313657 |
| 12 rs145822768 | 44350947 T | 8.286  | 1.99E-27 | chr:12:44313657 |
| 12 rs4499064   | 44315170 T | 105.8  | 6.12E-26 | chr:12:44313657 |
| 12 rs12297544  | 44319679 A | 7.957  | 2.93E-24 | chr:12:44313657 |
| 12 rs12297529  | 44319602 A | 8.083  | 2.95E-24 | chr:12:44313657 |
| 12 rs12301421  | 44346015 A | 7.887  | 4.92E-24 | chr:12:44313657 |
| 12 rs12302401  | 44333816 T | 7.88   | 1.01E-23 | chr:12:44313657 |
| 12 rs10880599  | 44337662 T | 111.9  | 2.69E-23 | chr:12:44313657 |
| 12 rs115692896 | 44349790 C | 7.511  | 2.81E-23 | chr:12:44313657 |
| 12 rs76876041  | 44355481 T | 7.511  | 2.81E-23 | chr:12:44313657 |
| 12 rs10880604  | 44349398 T | 0.1924 | 3.36E-23 | chr:12:44313657 |
| 12 rs11182337  | 44320875 G | 0.1968 | 4.31E-23 | chr:12:44313657 |
| 12 rs4238093   | 44315925 C | 0.2002 | 6.97E-23 | chr:12:44313657 |
| 12 rs7956825   | 44313718 G | 151.1  | 1.95E-21 | chr:12:44313657 |
| 12 rs12305959  | 44332618 G | 148.5  | 2.20E-21 | chr:12:44313657 |
| 12 rs10880598  | 44336375 T | 145.2  | 3.03E-21 | chr:12:44313657 |
| 12 rs10785479  | 44320184 G | 145.6  | 3.15E-21 | chr:12:44313657 |
| 12 rs3925073   | 44327736 A | 145.5  | 3.16E-21 | chr:12:44313657 |
| 12 rs3925072   | 44327565 C | 144.4  | 3.44E-21 | chr:12:44313657 |
| 12 rs73100975  | 44339016 T | 143.8  | 3.61E-21 | chr:12:44313657 |
| 12 rs10785489  | 44364261 C | 4.576  | 1.16E-20 | chr:12:44313657 |
| 12 rs78029959  | 44270446 T | 5.028  | 6.14E-19 | chr:12:44313657 |
| 12 rs10880592  | 44315171 A | 212.3  | 7.38E-19 | chr:12:44313657 |
| 12 rs10785471  | 44311998 A | 207.1  | 8.70E-19 | chr:12:44313657 |
| 12 rs12302508  | 44303914 C | 0.2693 | 1.00E-18 | chr:12:44313657 |
| 12 rs10748379  | 44315397 T | 204.9  | 1.02E-18 | chr:12:44313657 |

|                |            |        |          |                 |
|----------------|------------|--------|----------|-----------------|
| 12 rs10748380  | 44315492 G | 204.9  | 1.02E-18 | chr:12:44313657 |
| 12 rs10785470  | 44311983 A | 204.9  | 1.02E-18 | chr:12:44313657 |
| 12 rs10785472  | 44312774 T | 204.9  | 1.02E-18 | chr:12:44313657 |
| 12 rs10880588  | 44311787 T | 204.9  | 1.02E-18 | chr:12:44313657 |
| 12 rs10880589  | 44313193 T | 204.9  | 1.02E-18 | chr:12:44313657 |
| 12 rs10880591  | 44314630 T | 204.9  | 1.02E-18 | chr:12:44313657 |
| 12 rs11182329  | 44314564 A | 204.9  | 1.02E-18 | chr:12:44313657 |
| 12 rs12369569  | 44313000 T | 204.9  | 1.02E-18 | chr:12:44313657 |
| 12 rs2031056   | 44315008 A | 204.9  | 1.02E-18 | chr:12:44313657 |
| 12 rs73100931  | 44314388 C | 204.9  | 1.02E-18 | chr:12:44313657 |
| 12 rs73100933  | 44314453 T | 204.9  | 1.02E-18 | chr:12:44313657 |
| 12 rs73100935  | 44314454 G | 204.9  | 1.02E-18 | chr:12:44313657 |
| 12 rs7957074   | 44313906 T | 204.9  | 1.02E-18 | chr:12:44313657 |
| 12 rs7964465   | 44312649 G | 204.9  | 1.02E-18 | chr:12:44313657 |
| 12 rs7971487   | 44313830 G | 204.9  | 1.02E-18 | chr:12:44313657 |
| 12 rs7974501   | 44313794 C | 204.9  | 1.02E-18 | chr:12:44313657 |
| 12 rs10506232  | 44316485 A | 199.9  | 1.37E-18 | chr:12:44313657 |
| 12 rs10785475  | 44318632 G | 199.9  | 1.37E-18 | chr:12:44313657 |
| 12 rs10785476  | 44318633 A | 199.9  | 1.37E-18 | chr:12:44313657 |
| 12 rs10880590  | 44313636 G | 199.9  | 1.37E-18 | chr:12:44313657 |
| 12 rs80098499  | 44241292 T | 4.87   | 1.68E-18 | chr:12:44313657 |
| 12 rs11533717  | 44304261 C | 0.2785 | 2.53E-18 | chr:12:44313657 |
| 12 rs4238092   | 44315762 A | 0.3037 | 2.56E-16 | chr:12:44313657 |
| 12 rs11182294  | 44231539 T | 3.093  | 2.06E-15 | chr:12:44313657 |
| 12 rs1623829   | 44262745 G | 0.3027 | 1.08E-14 | chr:12:44313657 |
| 12 rs7958314   | 44302430 T | 2.993  | 1.63E-14 | chr:12:44313657 |
| 12 rs12311962  | 44237272 G | 0.3064 | 1.68E-14 | chr:12:44313657 |
| 12 rs12314126  | 44236455 A | 0.3071 | 1.78E-14 | chr:12:44313657 |
| 12 rs73098836  | 44286253 A | 2.948  | 2.67E-14 | chr:12:44313657 |
| 12 rs7957146   | 44306759 G | 2.948  | 2.67E-14 | chr:12:44313657 |
| 12 rs7971516   | 44353473 A | 0.3741 | 3.69E-13 | chr:12:44313657 |
| 12 rs7133994   | 44331464 C | 0.2767 | 4.04E-13 | chr:12:44313657 |
| 12 rs7979913   | 44355025 C | 0.2905 | 8.73E-13 | chr:12:44313657 |
| 12 rs7296367   | 44357427 A | 0.2939 | 8.99E-13 | chr:12:44313657 |
| 12 rs4768545   | 44313129 C | 0.2871 | 9.30E-13 | chr:12:44313657 |
| 12 rs7955667   | 44318739 C | 0.2871 | 9.30E-13 | chr:12:44313657 |
| 12 rs10748383  | 44355232 A | 0.2941 | 1.43E-12 | chr:12:44313657 |
| 12 rs10785486  | 44359539 A | 0.2941 | 1.43E-12 | chr:12:44313657 |
| 12 rs10785487  | 44359593 G | 0.2941 | 1.43E-12 | chr:12:44313657 |
| 12 rs6582492   | 44353602 A | 0.2941 | 1.43E-12 | chr:12:44313657 |
| 12 rs151267396 | 44246174 T | 2.696  | 2.31E-12 | chr:12:44313657 |
| 12 rs1731425   | 44282630 T | 2.647  | 2.45E-12 | chr:12:44313657 |
| 12 rs10748384  | 44359086 C | 0.3028 | 3.10E-12 | chr:12:44313657 |

|                |            |        |          |                 |
|----------------|------------|--------|----------|-----------------|
| 12 rs1675760   | 44282981 G | 2.636  | 3.20E-12 | chr:12:44313657 |
| 12 rs1675786   | 44292760 C | 2.636  | 3.20E-12 | chr:12:44313657 |
| 12 rs1675791   | 44290267 G | 2.636  | 3.20E-12 | chr:12:44313657 |
| 12 rs7966024   | 44297013 G | 2.636  | 3.20E-12 | chr:12:44313657 |
| 12 rs1675778   | 44263162 C | 0.3602 | 3.25E-12 | chr:12:44313657 |
| 12 rs10785469  | 44309459 A | 0.3621 | 4.03E-12 | chr:12:44313657 |
| 12 rs2447115   | 44254494 C | 0.3654 | 4.63E-12 | chr:12:44313657 |
| 12 rs1731422   | 44276369 G | 2.586  | 6.08E-12 | chr:12:44313657 |
| 12 rs10785468  | 44309434 T | 0.367  | 8.13E-12 | chr:12:44313657 |
| 12 rs115584644 | 44663575 G | 5.518  | 8.24E-12 | chr:12:44313657 |
| 12 rs10748373  | 44253386 G | 0.3705 | 8.72E-12 | chr:12:44313657 |
| 12 rs1675771   | 44252960 G | 0.3705 | 8.72E-12 | chr:12:44313657 |
| 12 rs1675774   | 44266575 T | 0.3705 | 8.72E-12 | chr:12:44313657 |
| 12 rs1675776   | 44265242 G | 0.3705 | 8.72E-12 | chr:12:44313657 |
| 12 rs1675777   | 44264215 A | 0.3705 | 8.72E-12 | chr:12:44313657 |
| 12 rs1675784   | 44257601 G | 0.3705 | 8.72E-12 | chr:12:44313657 |
| 12 rs1731439   | 44266559 A | 0.3705 | 8.72E-12 | chr:12:44313657 |
| 12 rs1731440   | 44265605 A | 0.3705 | 8.72E-12 | chr:12:44313657 |
| 12 rs2447116   | 44262529 G | 0.3705 | 8.72E-12 | chr:12:44313657 |
| 12 rs2951436   | 44261618 G | 0.3705 | 8.72E-12 | chr:12:44313657 |
| 12 rs12297031  | 44352609 A | 0.3094 | 9.04E-12 | chr:12:44313657 |
| 12 rs7965330   | 44309602 G | 0.374  | 1.77E-11 | chr:12:44313657 |
| 12 rs4768055   | 44317208 T | 0.3382 | 6.00E-11 | chr:12:44313657 |
| 12 rs1675782   | 44258841 T | 0.3872 | 6.33E-11 | chr:12:44313657 |
| 12 rs4768056   | 44322826 A | 0.3433 | 7.23E-11 | chr:12:44313657 |
| 12 rs1731455   | 44260900 G | 0.3969 | 7.50E-11 | chr:12:44313657 |
| 12 rs1057486   | 44260041 C | 0.3546 | 8.94E-11 | chr:12:44313657 |
| 12 rs10880587  | 44311477 G | 0.343  | 9.22E-11 | chr:12:44313657 |
| 12 rs1881926   | 44319047 C | 0.343  | 9.22E-11 | chr:12:44313657 |
| 12 rs1881927   | 44318922 A | 0.343  | 9.22E-11 | chr:12:44313657 |
| 12 rs1675788   | 44273779 G | 0.3981 | 9.49E-11 | chr:12:44313657 |
| 12 rs6582490   | 44329957 C | 0.348  | 1.08E-10 | chr:12:44313657 |
| 12 rs7133336   | 44261915 G | 2.413  | 1.09E-10 | chr:12:44313657 |
| 12 rs4768057   | 44332707 A | 0.348  | 1.23E-10 | chr:12:44313657 |
| 12 rs1851099   | 44657432 C | 2.442  | 1.28E-10 | chr:12:44313657 |
| 12 rs1731454   | 44251107 G | 0.3585 | 1.31E-10 | chr:12:44313657 |
| 12 rs7305609   | 44240652 G | 0.3585 | 1.31E-10 | chr:12:44313657 |
| 12 rs73096934  | 44241279 T | 0.3585 | 1.31E-10 | chr:12:44313657 |
| 12 rs11182312  | 44259319 G | 2.407  | 1.36E-10 | chr:12:44313657 |
| 12 rs80044299  | 44266866 A | 2.407  | 1.36E-10 | chr:12:44313657 |
| 12 rs7974214   | 44319517 C | 0.3478 | 1.44E-10 | chr:12:44313657 |
| 12 rs12307644  | 44273062 G | 2.399  | 1.45E-10 | chr:12:44313657 |
| 12 rs10785485  | 44355693 A | 0.349  | 1.67E-10 | chr:12:44313657 |

|                |            |        |          |                 |
|----------------|------------|--------|----------|-----------------|
| 12 rs12307180  | 44256942 T | 2.383  | 1.95E-10 | chr:12:44313657 |
| 12 rs1621279   | 44249011 T | 0.3642 | 2.17E-10 | chr:12:44313657 |
| 12 rs1675765   | 44244855 C | 0.3642 | 2.17E-10 | chr:12:44313657 |
| 12 rs1675769   | 44248400 A | 0.3642 | 2.17E-10 | chr:12:44313657 |
| 12 rs1731450   | 44246041 C | 0.3642 | 2.17E-10 | chr:12:44313657 |
| 12 rs1731452   | 44249745 T | 0.3642 | 2.17E-10 | chr:12:44313657 |
| 12 rs554923993 | 44504404 A | 2.449  | 2.26E-10 | chr:12:44313657 |
| 12 rs12319776  | 44454041 G | 3.958  | 2.46E-10 | chr:12:44313657 |
| 12 rs56105344  | 44318498 T | 0.3234 | 2.58E-10 | chr:12:44313657 |
| 12 rs61932981  | 44332524 A | 0.3234 | 2.58E-10 | chr:12:44313657 |
| 12 rs7969372   | 44309996 T | 0.4021 | 2.60E-10 | chr:12:44313657 |
| 12 rs73085708  | 44347955 T | 0.3123 | 2.87E-10 | chr:12:44313657 |
| 12 rs7965873   | 44354797 G | 0.3571 | 3.04E-10 | chr:12:44313657 |
| 12 rs7971628   | 44353583 T | 0.3571 | 3.04E-10 | chr:12:44313657 |
| 12 rs61932976  | 44317050 G | 0.3148 | 3.06E-10 | chr:12:44313657 |
| 12 rs61932977  | 44317683 G | 0.3148 | 3.06E-10 | chr:12:44313657 |
| 12 rs2407786   | 44300467 G | 0.4081 | 3.19E-10 | chr:12:44313657 |
| 12 rs1731458   | 44285969 C | 0.4104 | 3.53E-10 | chr:12:44313657 |
| 12 rs55656444  | 44350421 A | 0.3268 | 3.73E-10 | chr:12:44313657 |
| 12 rs12299112  | 44252616 A | 2.355  | 3.82E-10 | chr:12:44313657 |
| 12 rs58915539  | 44320865 T | 0.327  | 3.87E-10 | chr:12:44313657 |
| 12 rs60400993  | 44643306 C | 2.385  | 3.99E-10 | chr:12:44313657 |
| 12 rs10748377  | 44308151 C | 0.4118 | 4.45E-10 | chr:12:44313657 |
| 12 rs10748378  | 44308153 G | 0.4118 | 4.45E-10 | chr:12:44313657 |
| 12 rs10785462  | 44299067 G | 0.4118 | 4.45E-10 | chr:12:44313657 |
| 12 rs10785463  | 44299093 C | 0.4118 | 4.45E-10 | chr:12:44313657 |
| 12 rs10785466  | 44308052 G | 0.4118 | 4.45E-10 | chr:12:44313657 |
| 12 rs10880585  | 44307982 G | 0.4118 | 4.45E-10 | chr:12:44313657 |
| 12 rs11182324  | 44307868 T | 0.4118 | 4.45E-10 | chr:12:44313657 |
| 12 rs11182325  | 44307930 C | 0.4118 | 4.45E-10 | chr:12:44313657 |
| 12 rs1358705   | 44287850 T | 0.4118 | 4.45E-10 | chr:12:44313657 |
| 12 rs1609549   | 44306994 G | 0.4118 | 4.45E-10 | chr:12:44313657 |
| 12 rs1614042   | 44290018 T | 0.4118 | 4.45E-10 | chr:12:44313657 |
| 12 rs1675756   | 44279540 C | 0.4118 | 4.45E-10 | chr:12:44313657 |
| 12 rs1675781   | 44292513 C | 0.4118 | 4.45E-10 | chr:12:44313657 |
| 12 rs1675789   | 44290545 G | 0.4118 | 4.45E-10 | chr:12:44313657 |
| 12 rs1675790   | 44290447 T | 0.4118 | 4.45E-10 | chr:12:44313657 |
| 12 rs1731430   | 44280809 C | 0.4118 | 4.45E-10 | chr:12:44313657 |
| 12 rs1731456   | 44286932 G | 0.4118 | 4.45E-10 | chr:12:44313657 |
| 12 rs1731457   | 44286499 C | 0.4118 | 4.45E-10 | chr:12:44313657 |
| 12 rs1731459   | 44285844 T | 0.4118 | 4.45E-10 | chr:12:44313657 |
| 12 rs2407783   | 44300247 C | 0.4118 | 4.45E-10 | chr:12:44313657 |
| 12 rs2407784   | 44300347 C | 0.4118 | 4.45E-10 | chr:12:44313657 |



|                |            |        |          |                 |
|----------------|------------|--------|----------|-----------------|
| 12 rs2407785   | 44300358 G | 0.4118 | 4.45E-10 | chr:12:44313657 |
| 12 rs3990338   | 44300626 C | 0.4118 | 4.45E-10 | chr:12:44313657 |
| 12 rs4238089   | 44299688 G | 0.4118 | 4.45E-10 | chr:12:44313657 |
| 12 rs4238091   | 44299900 A | 0.4118 | 4.45E-10 | chr:12:44313657 |
| 12 rs4363674   | 44307404 G | 0.4118 | 4.45E-10 | chr:12:44313657 |
| 12 rs4469953   | 44307349 A | 0.4118 | 4.45E-10 | chr:12:44313657 |
| 12 rs4572198   | 44298071 T | 0.4118 | 4.45E-10 | chr:12:44313657 |
| 12 rs4572199   | 44298378 T | 0.4118 | 4.45E-10 | chr:12:44313657 |
| 12 rs4609659   | 44298550 T | 0.4118 | 4.45E-10 | chr:12:44313657 |
| 12 rs4768532   | 44279222 T | 0.4118 | 4.45E-10 | chr:12:44313657 |
| 12 rs4768535   | 44298917 T | 0.4118 | 4.45E-10 | chr:12:44313657 |
| 12 rs4768536   | 44298961 T | 0.4118 | 4.45E-10 | chr:12:44313657 |
| 12 rs5019975   | 44299370 A | 0.4118 | 4.45E-10 | chr:12:44313657 |
| 12 rs7295151   | 44308194 A | 0.4118 | 4.45E-10 | chr:12:44313657 |
| 12 rs11520309  | 44303103 G | 0.4117 | 4.47E-10 | chr:12:44313657 |
| 12 rs7974046   | 44306269 T | 0.4122 | 4.50E-10 | chr:12:44313657 |
| 12 rs7974045   | 44306266 A | 0.4127 | 4.91E-10 | chr:12:44313657 |
| 12 rs17094072  | 44491766 A | 2.402  | 5.43E-10 | chr:12:44313657 |
| 12 rs1610291   | 44307158 T | 0.4131 | 5.70E-10 | chr:12:44313657 |
| 12 rs10880579  | 44297491 G | 0.4133 | 5.74E-10 | chr:12:44313657 |
| 12 rs55900603  | 44323818 G | 0.3327 | 5.93E-10 | chr:12:44313657 |
| 12 rs4768538   | 44300011 G | 0.4152 | 6.19E-10 | chr:12:44313657 |
| 12 rs113686674 | 44600008 A | 2.368  | 8.14E-10 | chr:12:44313657 |
| 12 rs60985254  | 44596951 A | 2.368  | 8.14E-10 | chr:12:44313657 |
| 12 rs11830768  | 44524558 A | 2.364  | 8.59E-10 | chr:12:44313657 |
| 12 rs17094136  | 44526895 G | 2.364  | 8.59E-10 | chr:12:44313657 |
| 12 rs73288071  | 44525152 C | 2.364  | 8.59E-10 | chr:12:44313657 |
| 12 rs73288083  | 44530165 A | 2.364  | 8.59E-10 | chr:12:44313657 |
| 12 rs7954128   | 44484284 A | 2.364  | 8.59E-10 | chr:12:44313657 |
| 12 rs73290244  | 44558169 T | 2.352  | 9.20E-10 | chr:12:44313657 |
| 12 rs7956766   | 44277073 A | 2.287  | 9.37E-10 | chr:12:44313657 |
| 12 rs7969724   | 44280202 T | 2.287  | 9.37E-10 | chr:12:44313657 |
| 12 rs4768539   | 44303524 T | 0.421  | 1.03E-09 | chr:12:44313657 |
| 12 rs4768053   | 44309069 G | 0.4214 | 1.14E-09 | chr:12:44313657 |
| 12 rs73290254  | 44562515 C | 2.346  | 1.15E-09 | chr:12:44313657 |
| 12 rs113174127 | 44566796 A | 2.344  | 1.18E-09 | chr:12:44313657 |
| 12 rs113328477 | 44596665 T | 2.344  | 1.18E-09 | chr:12:44313657 |
| 12 rs11834090  | 44580711 C | 2.344  | 1.18E-09 | chr:12:44313657 |
| 12 rs7132031   | 44604999 T | 2.344  | 1.18E-09 | chr:12:44313657 |
| 12 rs73290243  | 44557607 T | 2.344  | 1.18E-09 | chr:12:44313657 |
| 12 rs73290245  | 44558992 T | 2.344  | 1.18E-09 | chr:12:44313657 |
| 12 rs73290256  | 44562879 T | 2.344  | 1.18E-09 | chr:12:44313657 |
| 12 rs73290257  | 44566508 C | 2.344  | 1.18E-09 | chr:12:44313657 |

|                |            |        |          |                 |
|----------------|------------|--------|----------|-----------------|
| 12 rs11833168  | 44548432 T | 2.343  | 1.21E-09 | chr:12:44313657 |
| 12 rs2062953   | 44528367 T | 2.341  | 1.23E-09 | chr:12:44313657 |
| 12 rs73288033  | 44499108 C | 2.341  | 1.23E-09 | chr:12:44313657 |
| 12 rs73288040  | 44499853 T | 2.341  | 1.23E-09 | chr:12:44313657 |
| 12 rs145249872 | 44285415 T | 2.267  | 1.30E-09 | chr:12:44313657 |
| 12 rs12320752  | 44294435 T | 2.269  | 1.32E-09 | chr:12:44313657 |
| 12 rs7307888   | 44280981 A | 2.261  | 1.42E-09 | chr:12:44313657 |
| 12 rs114920479 | 44562063 C | 2.339  | 1.44E-09 | chr:12:44313657 |
| 12 rs11182358  | 44363335 T | 2.181  | 1.59E-09 | chr:12:44313657 |
| 12 rs73290241  | 44557320 G | 2.321  | 1.69E-09 | chr:12:44313657 |
| 12 rs17094348  | 44645530 C | 2.309  | 1.80E-09 | chr:12:44313657 |
| 12 rs7954640   | 44301081 T | 0.4304 | 1.88E-09 | chr:12:44313657 |
| 12 rs7972025   | 44222722 G | 0.4432 | 1.88E-09 | chr:12:44313657 |
| 12 rs73274135  | 44651511 G | 2.314  | 2.11E-09 | chr:12:44313657 |
| 12 rs11182363  | 44381348 C | 3.466  | 2.39E-09 | chr:12:44313657 |
| 12 rs17094194  | 44582003 T | 2.298  | 2.50E-09 | chr:12:44313657 |
| 12 rs74830372  | 44588878 A | 2.296  | 2.53E-09 | chr:12:44313657 |
| 12 rs7954130   | 44301327 A | 0.4374 | 2.94E-09 | chr:12:44313657 |
| 12 rs2407787   | 44300709 A | 0.4332 | 3.67E-09 | chr:12:44313657 |
| 12 rs11182371  | 44394939 C | 3.379  | 3.75E-09 | chr:12:44313657 |
| 12 rs12320155  | 44394433 T | 3.379  | 3.75E-09 | chr:12:44313657 |
| 12 rs12299151  | 44302543 G | 2.206  | 4.03E-09 | chr:12:44313657 |
| 12 rs73089738  | 44438342 T | 2.665  | 4.56E-09 | chr:12:44313657 |
| 12 rs73087623  | 44395528 T | 2.816  | 4.67E-09 | chr:12:44313657 |
| 12 rs1406786   | 44274673 G | 2.185  | 5.01E-09 | chr:12:44313657 |
| 12 rs79916589  | 44289680 C | 0.4453 | 5.48E-09 | chr:12:44313657 |
| 12 rs11838118  | 44667066 A | 2.241  | 5.54E-09 | chr:12:44313657 |
| 12 rs11182332  | 44317599 A | 4.204  | 5.62E-09 | chr:12:44313657 |
| 12 rs12296939  | 44426290 T | 3.912  | 7.34E-09 | chr:12:44313657 |
| 12 rs12303870  | 44405114 G | 3.912  | 7.34E-09 | chr:12:44313657 |
| 12 rs74389423  | 44418402 A | 3.912  | 7.34E-09 | chr:12:44313657 |
| 12 rs73272295  | 44628133 G | 2.203  | 7.50E-09 | chr:12:44313657 |
| 12 rs12303163  | 44409858 T | 3.711  | 8.35E-09 | chr:12:44313657 |
| 12 rs11182293  | 44231482 G | 0.401  | 8.39E-09 | chr:12:44313657 |
| 12 rs10880578  | 44291513 T | 0.406  | 8.43E-09 | chr:12:44313657 |
| 12 rs1675787   | 44290928 G | 0.406  | 8.43E-09 | chr:12:44313657 |
| 12 rs1731432   | 44279783 C | 0.406  | 8.43E-09 | chr:12:44313657 |
| 12 rs1731435   | 44292195 G | 0.406  | 8.43E-09 | chr:12:44313657 |
| 12 rs2447113   | 44282785 A | 0.406  | 8.43E-09 | chr:12:44313657 |
| 12 rs2951435   | 44291174 A | 0.406  | 8.43E-09 | chr:12:44313657 |
| 12 rs73085705  | 44345490 T | 4.111  | 9.45E-09 | chr:12:44313657 |
| 12 rs7969754   | 44301580 G | 0.4387 | 9.59E-09 | chr:12:44313657 |
| 12 rs4768049   | 44256856 G | 0.4578 | 9.81E-09 | chr:12:44313657 |

|                |            |        |          |                 |
|----------------|------------|--------|----------|-----------------|
| 12 rs56973281  | 44625856 G | 2.18   | 1.06E-08 | chr:12:44313657 |
| 12 rs12298970  | 44237256 C | 0.4565 | 1.09E-08 | chr:12:44313657 |
| 12 rs1461568   | 44267583 C | 0.4565 | 1.09E-08 | chr:12:44313657 |
| 12 rs1731438   | 44267863 C | 0.4565 | 1.09E-08 | chr:12:44313657 |
| 12 rs1731448   | 44244270 A | 0.4565 | 1.09E-08 | chr:12:44313657 |
| 12 rs10785484  | 44353210 T | 0.4111 | 1.23E-08 | chr:12:44313657 |
| 12 rs10161163  | 44433103 C | 3.6    | 1.28E-08 | chr:12:44313657 |
| 12 rs10161301  | 44432919 A | 3.6    | 1.28E-08 | chr:12:44313657 |
| 12 rs11182376  | 44402498 G | 3.6    | 1.28E-08 | chr:12:44313657 |
| 12 rs11182389  | 44424153 A | 3.6    | 1.28E-08 | chr:12:44313657 |
| 12 rs114289528 | 44425403 C | 3.6    | 1.28E-08 | chr:12:44313657 |
| 12 rs114457407 | 44426674 T | 3.6    | 1.28E-08 | chr:12:44313657 |
| 12 rs114631781 | 44397804 A | 3.6    | 1.28E-08 | chr:12:44313657 |
| 12 rs114890225 | 44431883 A | 3.6    | 1.28E-08 | chr:12:44313657 |
| 12 rs115287223 | 44439789 G | 3.6    | 1.28E-08 | chr:12:44313657 |
| 12 rs116190624 | 44401433 A | 3.6    | 1.28E-08 | chr:12:44313657 |
| 12 rs12310801  | 44407385 A | 3.6    | 1.28E-08 | chr:12:44313657 |
| 12 rs12321149  | 44399814 G | 3.6    | 1.28E-08 | chr:12:44313657 |
| 12 rs76842947  | 44435161 T | 3.6    | 1.28E-08 | chr:12:44313657 |
| 12 rs7954384   | 44301587 A | 0.4439 | 1.38E-08 | chr:12:44313657 |
| 12 rs1675783   | 44257680 C | 0.4627 | 1.41E-08 | chr:12:44313657 |
| 12 rs1731442   | 44262606 C | 0.4627 | 1.41E-08 | chr:12:44313657 |
| 12 rs1731444   | 44262392 A | 0.4627 | 1.41E-08 | chr:12:44313657 |
| 12 rs2447114   | 44252015 C | 0.4627 | 1.41E-08 | chr:12:44313657 |
| 12 rs7965240   | 44309591 G | 0.4581 | 1.77E-08 | chr:12:44313657 |
| 12 rs138841149 | 44348027 G | 0.3152 | 1.90E-08 | chr:12:44313657 |
| 12 rs7961536   | 44674671 T | 2.207  | 2.13E-08 | chr:12:44313657 |
| 12 rs10785460  | 44264906 G | 0.466  | 2.22E-08 | chr:12:44313657 |
| 12 rs75523074  | 44635276 A | 6.215  | 2.40E-08 | chr:12:44313657 |
| 12 rs79894987  | 44312348 G | 6.581  | 2.61E-08 | chr:12:44313657 |
| 12 rs1731453   | 44250528 A | 0.4776 | 3.10E-08 | chr:12:44313657 |
| 12 rs7965635   | 44238903 G | 0.4776 | 3.10E-08 | chr:12:44313657 |
| 12 rs1731449   | 44244877 A | 0.4787 | 3.37E-08 | chr:12:44313657 |
| 12 rs115119835 | 44333536 G | 0.3252 | 3.49E-08 | chr:12:44313657 |
| 12 rs116245035 | 44323899 G | 0.3252 | 3.49E-08 | chr:12:44313657 |
| 12 rs116829442 | 44323913 G | 0.3252 | 3.49E-08 | chr:12:44313657 |
| 12 rs59285472  | 44358961 G | 0.3252 | 3.49E-08 | chr:12:44313657 |
| 12 rs7139062   | 44341173 G | 0.3252 | 3.49E-08 | chr:12:44313657 |
| 12 rs74811852  | 44380831 T | 6.047  | 4.00E-08 | chr:12:44313657 |
| 12 rs1675766   | 44244919 T | 0.4825 | 4.80E-08 | chr:12:44313657 |
| 12 rs11182396  | 44431156 A | 0.4879 | 5.07E-08 | chr:12:44313657 |
| 12 rs7955148   | 44301433 T | 0.4339 | 5.18E-08 | chr:12:44313657 |
| 12 rs10506233  | 44376031 C | 2.877  | 5.24E-08 | chr:12:44313657 |

|                |            |        |          |                 |
|----------------|------------|--------|----------|-----------------|
| 12 rs114245504 | 44337287 G | 0.3328 | 5.46E-08 | chr:12:44313657 |
| 12 rs139815405 | 44421888 T | 5.917  | 5.87E-08 | chr:12:44313657 |
| 12 rs114826743 | 44372500 A | 6.308  | 5.94E-08 | chr:12:44313657 |
| 12 rs75539343  | 44369962 T | 2.669  | 5.96E-08 | chr:12:44313657 |
| 12 rs1731447   | 44289250 T | 0.4831 | 6.20E-08 | chr:12:44313657 |
| 12 rs1731424   | 44282880 G | 2.033  | 6.25E-08 | chr:12:44313657 |
| 12 rs77544607  | 44472001 C | 5.901  | 6.93E-08 | chr:12:44313657 |
| 12 rs80019363  | 44465318 C | 5.901  | 6.93E-08 | chr:12:44313657 |
| 12 rs7953229   | 44239350 A | 0.48   | 6.95E-08 | chr:12:44313657 |
| 12 rs151082986 | 44611742 T | 6.717  | 7.87E-08 | chr:12:44313657 |
| 12 rs76099678  | 44560102 T | 6.717  | 7.87E-08 | chr:12:44313657 |
| 12 rs76980159  | 44609218 G | 6.717  | 7.87E-08 | chr:12:44313657 |
| 12 rs11182413  | 44470922 A | 5.837  | 8.77E-08 | chr:12:44313657 |
| 12 rs1798020   | 44739393 G | 0.4521 | 8.77E-08 | chr:12:44313657 |
| 12 rs1623667   | 44249258 A | 0.3799 | 9.26E-08 | chr:12:44313657 |
| 12 rs1675767   | 44247135 A | 0.3799 | 9.26E-08 | chr:12:44313657 |
| 12 rs1731434   | 44272915 G | 0.3799 | 9.26E-08 | chr:12:44313657 |
| 12 rs7971491   | 44536373 A | 1.986  | 9.62E-08 | chr:12:44313657 |
| 12 rs575976526 | 44546500 T | 6.127  | 9.69E-08 | chr:12:44313657 |
| 12 rs1675759   | 44280458 T | 2.015  | 1.02E-07 | chr:12:44313657 |
| 12 rs9668657   | 44302174 G | 0.4538 | 1.07E-07 | chr:12:44313657 |
| 12 rs76407496  | 44465020 A | 5.443  | 1.10E-07 | chr:12:44313657 |
| 12 rs12313365  | 44433578 G | 0.4899 | 1.33E-07 | chr:12:44313657 |
| 12 rs1406787   | 44274699 A | 0.4578 | 1.33E-07 | chr:12:44313657 |
| 12 rs80202231  | 44633337 A | 4.489  | 1.41E-07 | chr:12:44313657 |
| 12 rs1675755   | 44278773 A | 0.3785 | 1.48E-07 | chr:12:44313657 |
| 12 rs17094615  | 44801627 T | 4.842  | 1.63E-07 | chr:12:44313657 |
| 12 rs11834865  | 44582289 G | 5.298  | 1.72E-07 | chr:12:44313657 |
| 12 rs11835241  | 44539509 A | 5.298  | 1.72E-07 | chr:12:44313657 |
| 12 rs7132647   | 44540494 T | 5.298  | 1.72E-07 | chr:12:44313657 |
| 12 rs78068362  | 44570637 G | 5.298  | 1.72E-07 | chr:12:44313657 |
| 12 rs78906998  | 44625444 A | 5.298  | 1.72E-07 | chr:12:44313657 |
| 12 rs79904675  | 44512645 T | 5.298  | 1.72E-07 | chr:12:44313657 |
| 12 rs78887319  | 44358391 G | 4.943  | 1.89E-07 | chr:12:44313657 |
| 12 rs114285001 | 44475343 T | 5.033  | 1.90E-07 | chr:12:44313657 |
| 12 rs1731423   | 44278469 A | 0.4615 | 2.14E-07 | chr:12:44313657 |
| 12 rs7968777   | 44493182 G | 0.5325 | 2.39E-07 | chr:12:44313657 |
| 12 rs11830711  | 44500400 G | 4.923  | 2.83E-07 | chr:12:44313657 |
| 12 rs142242034 | 44507998 T | 4.923  | 2.83E-07 | chr:12:44313657 |
| 12 rs7301959   | 44518177 C | 4.923  | 2.83E-07 | chr:12:44313657 |
| 12 rs80337269  | 44497743 G | 4.923  | 2.83E-07 | chr:12:44313657 |
| 12 rs7972687   | 44463896 A | 5.079  | 3.35E-07 | chr:12:44313657 |
| 12 rs1675758   | 44280027 A | 0.3923 | 3.55E-07 | chr:12:44313657 |

|                |            |        |          |                 |
|----------------|------------|--------|----------|-----------------|
| 12 rs1731431   | 44279870 T | 0.3923 | 3.55E-07 | chr:12:44313657 |
| 12 rs7955615   | 44295861 T | 0.3923 | 3.55E-07 | chr:12:44313657 |
| 12 rs277199    | 44021691 C | 1.944  | 3.59E-07 | chr:12:44313657 |
| 12 rs55977905  | 44492668 A | 0.5378 | 3.64E-07 | chr:12:44313657 |
| 12 rs61930734  | 44304400 T | 0.5045 | 3.68E-07 | chr:12:44313657 |
| 12 rs116796240 | 44363905 G | 0.3809 | 3.73E-07 | chr:12:44313657 |
| 12 rs11830410  | 44322978 C | 4.222  | 4.04E-07 | chr:12:44313657 |
| 12 rs7976722   | 44312149 T | 4.222  | 4.04E-07 | chr:12:44313657 |
| 12 rs61933009  | 44363456 T | 0.3312 | 4.15E-07 | chr:12:44313657 |
| 12 rs4768054   | 44309743 A | 2.18   | 4.26E-07 | chr:12:44313657 |
| 12 rs277198    | 44019265 G | 1.908  | 4.50E-07 | chr:12:44313657 |
| 12 rs376975627 | 44503918 A | 2.065  | 4.57E-07 | chr:12:44313657 |
| 12 rs10880565  | 44146248 C | 1.861  | 4.64E-07 | chr:12:44313657 |
| 12 rs116645597 | 44656969 G | 4.57   | 5.05E-07 | chr:12:44313657 |
| 12 rs55782485  | 44492664 G | 0.5436 | 5.30E-07 | chr:12:44313657 |
| 12 rs10785467  | 44309433 C | 0.5123 | 5.81E-07 | chr:12:44313657 |
| 12 rs144610358 | 44317647 G | 4.674  | 6.15E-07 | chr:12:44313657 |
| 12 rs1731426   | 44281529 G | 0.3281 | 6.30E-07 | chr:12:44313657 |
| 12 rs10506230  | 44033769 A | 0.4542 | 6.86E-07 | chr:12:44313657 |
| 12 rs11182317  | 44300705 A | 1.872  | 6.87E-07 | chr:12:44313657 |
| 12 rs10082995  | 44232340 G | 0.5203 | 7.04E-07 | chr:12:44313657 |
| 12 rs79820024  | 44480564 G | 2.724  | 7.40E-07 | chr:12:44313657 |
| 12 rs1609547   | 44306939 T | 0.3447 | 7.84E-07 | chr:12:44313657 |
| 12 rs1675761   | 44288833 G | 0.3447 | 7.84E-07 | chr:12:44313657 |
| 12 rs1675763   | 44286872 A | 0.3447 | 7.84E-07 | chr:12:44313657 |
| 12 rs4488262   | 44298417 G | 0.3447 | 7.84E-07 | chr:12:44313657 |
| 12 rs7136340   | 44307577 G | 0.3447 | 7.84E-07 | chr:12:44313657 |
| 12 rs7294490   | 44307742 G | 0.3447 | 7.84E-07 | chr:12:44313657 |
| 12 rs10880616  | 44419249 G | 1.869  | 8.25E-07 | chr:12:44313657 |
| 12 rs10880617  | 44423914 T | 1.869  | 8.25E-07 | chr:12:44313657 |
| 12 rs12296857  | 44419592 A | 1.869  | 8.25E-07 | chr:12:44313657 |
| 12 rs184710207 | 44546292 A | 3.864  | 8.32E-07 | chr:12:44313657 |
| 12 rs1609548   | 44306947 A | 0.4104 | 8.82E-07 | chr:12:44313657 |
| 12 rs76875969  | 44309760 G | 5.436  | 8.88E-07 | chr:12:44313657 |
| 12 rs4238088   | 44299618 G | 0.3335 | 9.20E-07 | chr:12:44313657 |
| 12 rs1675775   | 44265524 T | 0.5273 | 9.75E-07 | chr:12:44313657 |
| 12 rs1731441   | 44265523 T | 0.5273 | 9.75E-07 | chr:12:44313657 |
| 12 rs12302873  | 44146579 T | 1.826  | 1.05E-06 | chr:12:44313657 |
| 12 rs75316382  | 44222578 G | 8.724  | 1.12E-06 | chr:12:44313657 |
| 12 rs551405916 | 44301953 C | 1.731  | 1.18E-06 | chr:12:44313657 |
| 12 rs4251483   | 44168884 T | 8.657  | 1.21E-06 | chr:12:44313657 |
| 12 rs76955045  | 44335946 T | 4.729  | 1.25E-06 | chr:12:44313657 |
| 12 rs1527318   | 44727080 G | 0.4334 | 1.26E-06 | chr:12:44313657 |

|                |            |        |          |                 |
|----------------|------------|--------|----------|-----------------|
| 12 rs2220726   | 44728224 G | 0.4334 | 1.26E-06 | chr:12:44313657 |
| 12 rs73085709  | 44350107 C | 0.3475 | 1.32E-06 | chr:12:44313657 |
| 12 rs840773    | 44732795 T | 0.413  | 1.34E-06 | chr:12:44313657 |
| 12 rs10880618  | 44427686 G | 0.4826 | 1.52E-06 | chr:12:44313657 |
| 12 rs200335190 | 44303107 G | 0.3759 | 1.59E-06 | chr:12:44313657 |
| 12 rs1675764   | 44285480 C | 0.5024 | 1.91E-06 | chr:12:44313657 |
| 12 rs1731433   | 44279776 A | 0.5024 | 1.91E-06 | chr:12:44313657 |
| 12 rs4537822   | 44299389 A | 0.5024 | 1.91E-06 | chr:12:44313657 |
| 12 rs7307771   | 44729719 G | 0.4481 | 2.10E-06 | chr:12:44313657 |
| 12 rs60221557  | 44318175 G | 0.3586 | 2.14E-06 | chr:12:44313657 |
| 12 rs1701083   | 44417904 G | 0.4886 | 2.16E-06 | chr:12:44313657 |
| 12 rs75106774  | 44665856 G | 2.267  | 2.19E-06 | chr:12:44313657 |
| 12 rs4768546   | 44336686 T | 0.4196 | 2.21E-06 | chr:12:44313657 |
| 12 rs5023324   | 44327148 T | 0.4196 | 2.21E-06 | chr:12:44313657 |
| 12 rs7311847   | 44315590 G | 0.4207 | 2.23E-06 | chr:12:44313657 |
| 12 rs10880547  | 44037576 C | 0.4748 | 2.24E-06 | chr:12:44313657 |
| 12 rs11182194  | 44034656 C | 0.4748 | 2.24E-06 | chr:12:44313657 |
| 12 rs10880562  | 44140311 G | 1.784  | 2.30E-06 | chr:12:44313657 |
| 12 rs10880573  | 44226111 C | 0.5151 | 2.35E-06 | chr:12:44313657 |
| 12 rs2464103   | 44279211 C | 0.4874 | 2.38E-06 | chr:12:44313657 |
| 12 rs277208    | 44025157 T | 1.82   | 2.40E-06 | chr:12:44313657 |
| 12 rs74567299  | 44132881 T | 2.584  | 2.48E-06 | chr:12:44313657 |
| 12 rs2219629   | 44235406 C | 0.5042 | 2.51E-06 | chr:12:44313657 |
| 12 rs115050158 | 44582807 A | 7.152  | 2.55E-06 | chr:12:44313657 |
| 12 rs79750447  | 44612456 C | 7.152  | 2.55E-06 | chr:12:44313657 |
| 12 rs4768543   | 44308978 G | 0.507  | 2.55E-06 | chr:12:44313657 |
| 12 rs114674781 | 44441306 T | 4.09   | 2.57E-06 | chr:12:44313657 |
| 12 rs115273395 | 44406871 C | 4.09   | 2.57E-06 | chr:12:44313657 |
| 12 rs11831160  | 44421935 A | 4.09   | 2.57E-06 | chr:12:44313657 |
| 12 rs74842261  | 44442544 A | 4.09   | 2.57E-06 | chr:12:44313657 |
| 12 rs75017466  | 44408294 T | 4.09   | 2.57E-06 | chr:12:44313657 |
| 12 rs75524777  | 44442225 C | 4.09   | 2.57E-06 | chr:12:44313657 |
| 12 rs75890365  | 44391765 G | 4.09   | 2.57E-06 | chr:12:44313657 |
| 12 rs78434487  | 44379562 T | 4.09   | 2.57E-06 | chr:12:44313657 |
| 12 rs7959602   | 44445526 C | 4.09   | 2.57E-06 | chr:12:44313657 |
| 12 rs80285345  | 44404121 T | 4.09   | 2.57E-06 | chr:12:44313657 |
| 12 rs550531    | 44031750 C | 0.568  | 2.66E-06 | chr:12:44313657 |
| 12 rs77142311  | 44362408 A | 5.255  | 2.67E-06 | chr:12:44313657 |
| 12 rs79186285  | 44361175 T | 5.255  | 2.67E-06 | chr:12:44313657 |
| 12 rs11182242  | 44135219 T | 0.5621 | 2.83E-06 | chr:12:44313657 |
| 12 rs113351059 | 44677925 G | 4.976  | 2.99E-06 | chr:12:44313657 |
| 12 rs2120597   | 44035785 A | 0.4794 | 2.99E-06 | chr:12:44313657 |
| 12 rs78933883  | 44419447 A | 3.91   | 3.02E-06 | chr:12:44313657 |

|                |            |        |          |                 |
|----------------|------------|--------|----------|-----------------|
| 12 rs76787060  | 44760231 G | 4.696  | 3.06E-06 | chr:12:44313657 |
| 12 rs115667463 | 44311743 C | 5.009  | 3.21E-06 | chr:12:44313657 |
| 12 rs1478617   | 44023917 G | 1.8    | 3.33E-06 | chr:12:44313657 |
| 12 rs1827427   | 44022936 A | 1.8    | 3.33E-06 | chr:12:44313657 |
| 12 rs202162002 | 44301820 G | 0.4409 | 3.35E-06 | chr:12:44313657 |
| 12 rs367898590 | 44301818 G | 0.4409 | 3.35E-06 | chr:12:44313657 |
| 12 rs375152458 | 44301817 C | 0.4409 | 3.35E-06 | chr:12:44313657 |
| 12 rs74608515  | 44579565 A | 2.219  | 3.35E-06 | chr:12:44313657 |
| 12 rs75656875  | 44589008 C | 2.219  | 3.35E-06 | chr:12:44313657 |
| 12 rs79000476  | 44613729 A | 2.219  | 3.35E-06 | chr:12:44313657 |
| 12 rs59165643  | 44764543 T | 0.4311 | 3.37E-06 | chr:12:44313657 |
| 12 rs10880545  | 44029301 A | 0.483  | 3.39E-06 | chr:12:44313657 |
| 12 rs79058280  | 44453973 T | 4.022  | 3.43E-06 | chr:12:44313657 |
| 12 rs7956667   | 44452878 G | 4.022  | 3.43E-06 | chr:12:44313657 |
| 12 rs2699992   | 44278013 T | 0.5445 | 3.50E-06 | chr:12:44313657 |
| 12 rs6582497   | 44476332 A | 1.745  | 3.68E-06 | chr:12:44313657 |
| 12 rs77141811  | 44582770 G | 4.941  | 3.74E-06 | chr:12:44313657 |
| 12 rs117447371 | 44754802 G | 4.897  | 3.84E-06 | chr:12:44313657 |
| 12 rs11837483  | 44761372 C | 4.897  | 3.84E-06 | chr:12:44313657 |
| 12 rs139453218 | 44739996 T | 4.897  | 3.84E-06 | chr:12:44313657 |
| 12 rs142552068 | 44747852 G | 4.897  | 3.84E-06 | chr:12:44313657 |
| 12 rs7310993   | 44739672 G | 4.897  | 3.84E-06 | chr:12:44313657 |
| 12 rs74318381  | 44714824 A | 4.897  | 3.84E-06 | chr:12:44313657 |
| 12 rs75368694  | 44723623 C | 4.897  | 3.84E-06 | chr:12:44313657 |
| 12 rs75751564  | 44782574 A | 4.897  | 3.84E-06 | chr:12:44313657 |
| 12 rs77126531  | 44715939 T | 4.897  | 3.84E-06 | chr:12:44313657 |
| 12 rs77860315  | 44761285 G | 4.897  | 3.84E-06 | chr:12:44313657 |
| 12 rs78725908  | 44717331 G | 4.897  | 3.84E-06 | chr:12:44313657 |
| 12 rs78835640  | 44701981 A | 4.897  | 3.84E-06 | chr:12:44313657 |
| 12 rs79008767  | 44695168 A | 4.897  | 3.84E-06 | chr:12:44313657 |
| 12 rs78649011  | 44785917 G | 4.847  | 3.95E-06 | chr:12:44313657 |
| 12 rs77526039  | 44047223 C | 11.75  | 4.05E-06 | chr:12:44313657 |
| 12 rs7312855   | 44370379 A | 3.731  | 4.18E-06 | chr:12:44313657 |
| 12 rs17094013  | 44421518 T | 0.5598 | 4.22E-06 | chr:12:44313657 |
| 12 rs7969016   | 44309726 G | 0.5056 | 4.24E-06 | chr:12:44313657 |
| 12 rs75577340  | 44138531 C | 11.58  | 4.29E-06 | chr:12:44313657 |
| 12 rs12310585  | 44133972 G | 1.75   | 4.32E-06 | chr:12:44313657 |
| 12 rs57781916  | 44367485 G | 0.445  | 4.66E-06 | chr:12:44313657 |
| 12 rs77894109  | 44685317 A | 4.647  | 4.76E-06 | chr:12:44313657 |
| 12 rs74804157  | 44813166 A | 4.13   | 4.90E-06 | chr:12:44313657 |
| 12 rs7979391   | 44295117 T | 0.548  | 5.12E-06 | chr:12:44313657 |
| 12 rs10880608  | 44371763 A | 0.4861 | 5.28E-06 | chr:12:44313657 |
| 12 rs3990339   | 44300728 A | 0.5144 | 5.32E-06 | chr:12:44313657 |

|                |            |        |          |                 |
|----------------|------------|--------|----------|-----------------|
| 12 rs75931944  | 44424831 T | 3.66   | 5.38E-06 | chr:12:44313657 |
| 12 rs4251481   | 44168365 G | 1.904  | 5.38E-06 | chr:12:44313657 |
| 12 rs4251488   | 44169901 C | 1.904  | 5.38E-06 | chr:12:44313657 |
| 12 rs7977654   | 44488570 T | 2.105  | 5.42E-06 | chr:12:44313657 |
| 12 rs142670960 | 44436427 C | 7.639  | 5.52E-06 | chr:12:44313657 |
| 12 rs11182240  | 44134755 C | 1.74   | 5.57E-06 | chr:12:44313657 |
| 12 rs7961078   | 44306167 G | 0.5522 | 5.79E-06 | chr:12:44313657 |
| 12 rs12308611  | 44132831 G | 1.734  | 5.86E-06 | chr:12:44313657 |
| 12 rs74433242  | 44493794 G | 2.159  | 5.87E-06 | chr:12:44313657 |
| 12 rs77002463  | 44489358 A | 2.159  | 5.87E-06 | chr:12:44313657 |
| 12 rs79143976  | 44476288 G | 2.159  | 5.87E-06 | chr:12:44313657 |
| 12 rs7310784   | 44755510 T | 4.503  | 6.01E-06 | chr:12:44313657 |
| 12 rs11829049  | 44763625 C | 4.502  | 6.03E-06 | chr:12:44313657 |
| 12 rs74569781  | 44622787 T | 7.557  | 6.14E-06 | chr:12:44313657 |
| 12 rs10736018  | 44387942 A | 0.4859 | 6.41E-06 | chr:12:44313657 |
| 12 rs2407788   | 44388354 G | 0.4859 | 6.41E-06 | chr:12:44313657 |
| 12 rs7963981   | 44306066 C | 0.49   | 6.41E-06 | chr:12:44313657 |
| 12 rs10467193  | 44016975 A | 1.764  | 6.76E-06 | chr:12:44313657 |
| 12 rs73272217  | 44596334 T | 1.794  | 6.77E-06 | chr:12:44313657 |
| 12 rs7961986   | 44604047 A | 1.794  | 6.77E-06 | chr:12:44313657 |
| 12 rs1731421   | 44285207 G | 0.5549 | 7.18E-06 | chr:12:44313657 |
| 12 rs1731429   | 44280899 G | 0.5549 | 7.18E-06 | chr:12:44313657 |
| 12 rs2614394   | 44282166 G | 0.5549 | 7.18E-06 | chr:12:44313657 |
| 12 rs4238090   | 44299833 C | 0.5549 | 7.18E-06 | chr:12:44313657 |
| 12 rs4354753   | 44293620 A | 0.5549 | 7.18E-06 | chr:12:44313657 |
| 12 rs4768052   | 44308910 G | 0.5549 | 7.18E-06 | chr:12:44313657 |
| 12 rs4768534   | 44298821 C | 0.5549 | 7.18E-06 | chr:12:44313657 |
| 12 rs75766105  | 44721240 C | 4.561  | 7.42E-06 | chr:12:44313657 |
| 12 rs7973886   | 44306134 A | 0.4624 | 7.43E-06 | chr:12:44313657 |
| 12 rs73090673  | 44764199 T | 0.4816 | 7.77E-06 | chr:12:44313657 |
| 12 rs7973769   | 44306028 T | 0.4915 | 7.81E-06 | chr:12:44313657 |
| 12 rs9669053   | 44301883 T | 0.4481 | 7.93E-06 | chr:12:44313657 |
| 12 rs76428704  | 44252743 T | 2.796  | 8.41E-06 | chr:12:44313657 |
| 12 rs73272204  | 44594198 T | 1.777  | 8.98E-06 | chr:12:44313657 |
| 12 rs10736017  | 44300037 G | 0.5583 | 9.04E-06 | chr:12:44313657 |
| 12 rs60165690  | 44015910 C | 2.602  | 9.47E-06 | chr:12:44313657 |
| 12 rs1731427   | 44281449 C | 0.5601 | 9.59E-06 | chr:12:44313657 |
| 12 rs7956245   | 44143520 T | 1.762  | 9.67E-06 | chr:12:44313657 |
| 12 rs9971859   | 44140776 C | 1.799  | 9.71E-06 | chr:12:44313657 |
| 12 rs10880580  | 44297492 A | 0.561  | 1.14E-05 | chr:12:44313657 |
| 12 rs57291280  | 44146799 C | 1.79   | 1.15E-05 | chr:12:44313657 |
| 12 rs77194961  | 44283770 A | 2.702  | 1.16E-05 | chr:12:44313657 |
| 12 rs12318086  | 44143692 G | 1.783  | 1.31E-05 | chr:12:44313657 |



|                |            |         |          |                 |
|----------------|------------|---------|----------|-----------------|
| 12 rs551422332 | 44296434 A | 0.339   | 1.43E-05 | chr:12:44313657 |
| 12 rs111562623 | 44284404 A | 0.3479  | 1.45E-05 | chr:12:44313657 |
| 12 rs113528455 | 44284575 T | 0.3479  | 1.45E-05 | chr:12:44313657 |
| 12 rs138874015 | 44296430 T | 0.3479  | 1.45E-05 | chr:12:44313657 |
| 12 rs151314246 | 44280746 T | 0.3479  | 1.45E-05 | chr:12:44313657 |
| 12 rs73098867  | 44295930 T | 0.3479  | 1.45E-05 | chr:12:44313657 |
| 12 rs73098870  | 44296033 A | 0.3479  | 1.45E-05 | chr:12:44313657 |
| 12 rs766962    | 44235814 C | 0.4584  | 1.46E-05 | chr:12:44313657 |
| 12 rs75443333  | 44053562 C | 13.92   | 1.51E-05 | chr:12:44313657 |
| 12 rs9668647   | 44301830 T | 0.4589  | 1.52E-05 | chr:12:44313657 |
| 12 rs17094314  | 44617501 G | 2.002   | 1.56E-05 | chr:12:44313657 |
| 12 rs7969835   | 44676227 G | 2.953   | 1.56E-05 | chr:12:44313657 |
| 12 rs7971053   | 55729947 C | 0.03444 | 1.48E-26 | chr:12:55727213 |
| 12 rs59466585  | 55722736 G | 0.03436 | 1.50E-26 | chr:12:55727213 |
| 12 rs61957887  | 55721734 T | 0.03436 | 1.50E-26 | chr:12:55727213 |
| 12 rs7960760   | 55722311 G | 0.03436 | 1.50E-26 | chr:12:55727213 |
| 12 rs7960719   | 55722035 A | 0.03453 | 1.70E-26 | chr:12:55727213 |
| 12 rs57757372  | 55718780 G | 0.08933 | 7.29E-26 | chr:12:55727213 |
| 12 rs58709231  | 55719090 C | 0.08933 | 7.29E-26 | chr:12:55727213 |
| 12 rs59097302  | 55719030 T | 0.08933 | 7.29E-26 | chr:12:55727213 |
| 12 rs60142559  | 55719192 G | 0.08933 | 7.29E-26 | chr:12:55727213 |
| 12 rs60220253  | 55717410 G | 0.08933 | 7.29E-26 | chr:12:55727213 |
| 12 rs61957879  | 55716971 C | 0.08933 | 7.29E-26 | chr:12:55727213 |
| 12 rs61249728  | 55728922 G | 0.0866  | 1.62E-24 | chr:12:55727213 |
| 12 rs11171416  | 55731490 A | 7.164   | 1.86E-24 | chr:12:55727213 |
| 12 rs12099811  | 55731200 T | 7.164   | 1.86E-24 | chr:12:55727213 |
| 12 rs55659159  | 55747754 C | 7.164   | 1.86E-24 | chr:12:55727213 |
| 12 rs59136392  | 55748204 C | 7.164   | 1.86E-24 | chr:12:55727213 |
| 12 rs59676560  | 55745425 T | 7.164   | 1.86E-24 | chr:12:55727213 |
| 12 rs61957898  | 55730423 T | 7.164   | 1.86E-24 | chr:12:55727213 |
| 12 rs61957902  | 55738064 G | 7.164   | 1.86E-24 | chr:12:55727213 |
| 12 rs61957924  | 55744100 T | 7.164   | 1.86E-24 | chr:12:55727213 |
| 12 rs61957933  | 55744710 T | 7.164   | 1.86E-24 | chr:12:55727213 |
| 12 rs61957936  | 55745719 A | 7.164   | 1.86E-24 | chr:12:55727213 |
| 12 rs7314118   | 55737403 A | 7.164   | 1.86E-24 | chr:12:55727213 |
| 12 rs7955088   | 55732963 G | 7.164   | 1.86E-24 | chr:12:55727213 |
| 12 rs11831714  | 55741742 A | 7.047   | 2.88E-24 | chr:12:55727213 |
| 12 rs61071395  | 55721228 C | 0.1444  | 1.76E-23 | chr:12:55727213 |
| 12 rs61957915  | 55742266 G | 6.2     | 3.15E-22 | chr:12:55727213 |
| 12 rs11835321  | 55725882 C | 0.1951  | 1.41E-19 | chr:12:55727213 |
| 12 rs201131895 | 55740725 A | 0.2554  | 2.44E-19 | chr:12:55727213 |
| 12 rs376987469 | 55740755 G | 0.2554  | 2.44E-19 | chr:12:55727213 |
| 12 rs77163619  | 55726662 G | 0.1931  | 5.63E-19 | chr:12:55727213 |

|                |            |        |          |                 |
|----------------|------------|--------|----------|-----------------|
| 12 rs4759141   | 55733274 G | 5.179  | 3.18E-18 | chr:12:55727213 |
| 12 rs55898514  | 55736238 G | 4.233  | 4.07E-18 | chr:12:55727213 |
| 12 rs61957899  | 55731971 C | 4.233  | 4.07E-18 | chr:12:55727213 |
| 12 rs73118998  | 55736659 T | 4.233  | 4.07E-18 | chr:12:55727213 |
| 12 rs73119000  | 55736662 G | 4.233  | 4.07E-18 | chr:12:55727213 |
| 12 rs7313465   | 55736863 C | 4.233  | 4.07E-18 | chr:12:55727213 |
| 12 rs7484556   | 55738427 A | 4.244  | 4.56E-18 | chr:12:55727213 |
| 12 rs7484522   | 55738240 A | 3.699  | 1.12E-16 | chr:12:55727213 |
| 12 rs537017437 | 55742569 A | 3.749  | 2.77E-16 | chr:12:55727213 |
| 12 rs7302469   | 55756809 G | 5.235  | 6.17E-16 | chr:12:55727213 |
| 12 rs10876746  | 55741796 A | 4.631  | 8.12E-16 | chr:12:55727213 |
| 12 rs7486972   | 55750386 T | 5.194  | 8.22E-16 | chr:12:55727213 |
| 12 rs12823727  | 55766379 C | 5.186  | 8.46E-16 | chr:12:55727213 |
| 12 rs4759143   | 55765950 A | 5.186  | 8.46E-16 | chr:12:55727213 |
| 12 rs11171417  | 55731998 C | 4.472  | 1.25E-15 | chr:12:55727213 |
| 12 rs4759138   | 55724302 C | 4.472  | 1.25E-15 | chr:12:55727213 |
| 12 rs4575375   | 55721803 T | 4.475  | 1.38E-15 | chr:12:55727213 |
| 12 rs4759137   | 55722755 G | 4.475  | 1.38E-15 | chr:12:55727213 |
| 12 rs6421181   | 55767525 A | 5      | 1.69E-15 | chr:12:55727213 |
| 12 rs4759144   | 55769452 A | 4.879  | 2.40E-15 | chr:12:55727213 |
| 12 rs556977514 | 55738632 A | 0.2263 | 1.42E-14 | chr:12:55727213 |
| 12 rs7485053   | 55770126 C | 0.2832 | 4.39E-14 | chr:12:55727213 |
| 12 rs10876748  | 55749921 T | 4.734  | 8.30E-14 | chr:12:55727213 |
| 12 rs6581035   | 55751346 T | 4.734  | 8.30E-14 | chr:12:55727213 |
| 12 rs7979557   | 55753210 T | 4.734  | 8.30E-14 | chr:12:55727213 |
| 12 rs12321043  | 55719281 A | 3.238  | 1.18E-13 | chr:12:55727213 |
| 12 rs7488143   | 55771062 A | 4.515  | 2.21E-13 | chr:12:55727213 |
| 12 rs7488163   | 55771125 A | 4.515  | 2.21E-13 | chr:12:55727213 |
| 12 rs7488164   | 55771126 A | 4.515  | 2.21E-13 | chr:12:55727213 |
| 12 rs7972297   | 55758671 A | 3.561  | 2.39E-12 | chr:12:55727213 |
| 12 rs11171443  | 55766882 G | 3.534  | 2.45E-12 | chr:12:55727213 |
| 12 rs11171442  | 55766707 A | 3.531  | 3.19E-12 | chr:12:55727213 |
| 12 rs7314701   | 55763504 T | 3.531  | 3.19E-12 | chr:12:55727213 |
| 12 rs7962135   | 55758832 T | 3.531  | 3.19E-12 | chr:12:55727213 |
| 12 rs11171435  | 55758053 T | 2.785  | 6.22E-12 | chr:12:55727213 |
| 12 rs12296692  | 55756851 T | 2.785  | 6.22E-12 | chr:12:55727213 |
| 12 rs12318683  | 55755024 A | 2.785  | 6.22E-12 | chr:12:55727213 |
| 12 rs146150551 | 55751301 T | 2.785  | 6.22E-12 | chr:12:55727213 |
| 12 rs149898597 | 55753436 T | 2.785  | 6.22E-12 | chr:12:55727213 |
| 12 rs56677471  | 55749967 T | 2.785  | 6.22E-12 | chr:12:55727213 |
| 12 rs61957943  | 55749330 A | 2.785  | 6.22E-12 | chr:12:55727213 |
| 12 rs79104523  | 55749220 T | 2.785  | 6.22E-12 | chr:12:55727213 |
| 12 rs58480409  | 55719221 T | 0.3219 | 6.88E-12 | chr:12:55727213 |

|                |            |        |          |                 |
|----------------|------------|--------|----------|-----------------|
| 12 rs61957878  | 55716754 T | 0.3219 | 6.88E-12 | chr:12:55727213 |
| 12 rs61957884  | 55720177 G | 0.3219 | 6.88E-12 | chr:12:55727213 |
| 12 rs61957885  | 55720876 G | 0.3219 | 6.88E-12 | chr:12:55727213 |
| 12 rs59347627  | 55758129 C | 2.726  | 1.25E-11 | chr:12:55727213 |
| 12 rs12578577  | 55716443 T | 0.3276 | 1.29E-11 | chr:12:55727213 |
| 12 rs57606846  | 55717650 G | 0.2701 | 2.18E-11 | chr:12:55727213 |
| 12 rs60439574  | 55716327 A | 0.2701 | 2.18E-11 | chr:12:55727213 |
| 12 rs10431495  | 55745942 C | 4.557  | 3.35E-11 | chr:12:55727213 |
| 12 rs10747741  | 55736841 C | 4.557  | 3.35E-11 | chr:12:55727213 |
| 12 rs10783726  | 55754954 G | 4.557  | 3.35E-11 | chr:12:55727213 |
| 12 rs4318060   | 55725690 T | 4.557  | 3.35E-11 | chr:12:55727213 |
| 12 rs4759139   | 55728454 T | 4.557  | 3.35E-11 | chr:12:55727213 |
| 12 rs6581034   | 55734390 T | 4.557  | 3.35E-11 | chr:12:55727213 |
| 12 rs74090652  | 55724831 C | 4.557  | 3.35E-11 | chr:12:55727213 |
| 12 rs7485740   | 55752364 G | 4.557  | 3.35E-11 | chr:12:55727213 |
| 12 rs7486500   | 55744545 T | 4.557  | 3.35E-11 | chr:12:55727213 |
| 12 rs7487174   | 55738093 T | 4.557  | 3.35E-11 | chr:12:55727213 |
| 12 rs7487798   | 55758491 C | 4.557  | 3.35E-11 | chr:12:55727213 |
| 12 rs7977099   | 55749499 A | 4.557  | 3.35E-11 | chr:12:55727213 |
| 12 rs7136402   | 55715837 C | 4.568  | 3.51E-11 | chr:12:55727213 |
| 12 rs57418635  | 55715985 C | 0.2763 | 3.79E-11 | chr:12:55727213 |
| 12 rs116376193 | 55735215 G | 0.2745 | 3.83E-11 | chr:12:55727213 |
| 12 rs116809705 | 55729540 T | 0.2745 | 3.83E-11 | chr:12:55727213 |
| 12 rs61506742  | 55734893 A | 0.2745 | 3.83E-11 | chr:12:55727213 |
| 12 rs74323417  | 55746784 T | 0.2745 | 3.83E-11 | chr:12:55727213 |
| 12 rs75098816  | 55720703 G | 0.2745 | 3.83E-11 | chr:12:55727213 |
| 12 rs77402184  | 55721781 T | 0.2745 | 3.83E-11 | chr:12:55727213 |
| 12 rs78582342  | 55746945 T | 0.2745 | 3.83E-11 | chr:12:55727213 |
| 12 rs79259146  | 55728773 A | 0.2745 | 3.83E-11 | chr:12:55727213 |
| 12 rs80243347  | 55728937 C | 0.2747 | 5.14E-11 | chr:12:55727213 |
| 12 rs114769789 | 55842426 G | 0.3824 | 7.72E-11 | chr:12:55727213 |
| 12 rs536367065 | 55842427 C | 0.3824 | 7.72E-11 | chr:12:55727213 |
| 12 rs7958605   | 55767149 G | 4.31   | 8.59E-11 | chr:12:55727213 |
| 12 rs7132600   | 55715048 T | 4.315  | 9.84E-11 | chr:12:55727213 |
| 12 rs55637917  | 55747565 C | 0.3524 | 2.12E-10 | chr:12:55727213 |
| 12 rs10747751  | 55788840 A | 4.069  | 2.35E-10 | chr:12:55727213 |
| 12 rs10783735  | 55799842 C | 4.069  | 2.35E-10 | chr:12:55727213 |
| 12 rs146854480 | 55752777 A | 0.264  | 2.71E-10 | chr:12:55727213 |
| 12 rs79963235  | 55745694 T | 0.2976 | 2.75E-10 | chr:12:55727213 |
| 12 rs75895729  | 55770854 C | 0.2652 | 3.14E-10 | chr:12:55727213 |
| 12 rs6581036   | 55757196 G | 4.409  | 3.16E-10 | chr:12:55727213 |
| 12 rs7971195   | 55785842 T | 3.945  | 3.82E-10 | chr:12:55727213 |
| 12 rs7311751   | 55748847 A | 2.502  | 5.85E-10 | chr:12:55727213 |

|                |            |        |          |                 |
|----------------|------------|--------|----------|-----------------|
| 12 rs10876757  | 55777863 A | 4.246  | 5.90E-10 | chr:12:55727213 |
| 12 rs80178612  | 55756147 C | 0.2673 | 8.52E-10 | chr:12:55727213 |
| 12 rs7966609   | 55799349 G | 3.989  | 1.40E-09 | chr:12:55727213 |
| 12 rs58254871  | 55750281 A | 0.3721 | 1.42E-09 | chr:12:55727213 |
| 12 rs7311967   | 55756278 A | 3.436  | 1.93E-09 | chr:12:55727213 |
| 12 rs6581037   | 55767310 T | 0.3833 | 3.91E-09 | chr:12:55727213 |
| 12 rs12301041  | 55718970 T | 3.472  | 4.40E-09 | chr:12:55727213 |
| 12 rs7956183   | 55785890 A | 3.323  | 4.87E-09 | chr:12:55727213 |
| 12 rs6581045   | 55809968 G | 4.351  | 5.90E-09 | chr:12:55727213 |
| 12 rs4511372   | 55722251 T | 3.398  | 6.04E-09 | chr:12:55727213 |
| 12 rs7958843   | 55726716 A | 3.398  | 6.04E-09 | chr:12:55727213 |
| 12 rs11171411  | 55719478 T | 3.38   | 7.11E-09 | chr:12:55727213 |
| 12 rs7971885   | 55795576 T | 0.4571 | 8.47E-09 | chr:12:55727213 |
| 12 rs6421182   | 55834019 A | 4.237  | 1.06E-08 | chr:12:55727213 |
| 12 rs10082848  | 55787328 G | 0.464  | 1.41E-08 | chr:12:55727213 |
| 12 rs10783733  | 55797327 C | 0.464  | 1.41E-08 | chr:12:55727213 |
| 12 rs10876762  | 55788510 A | 0.464  | 1.41E-08 | chr:12:55727213 |
| 12 rs10876765  | 55789546 A | 0.464  | 1.41E-08 | chr:12:55727213 |
| 12 rs10876766  | 55789598 T | 0.464  | 1.41E-08 | chr:12:55727213 |
| 12 rs6581039   | 55790117 T | 0.464  | 1.41E-08 | chr:12:55727213 |
| 12 rs6581040   | 55790945 C | 0.464  | 1.41E-08 | chr:12:55727213 |
| 12 rs6581041   | 55790976 A | 0.464  | 1.41E-08 | chr:12:55727213 |
| 12 rs6581042   | 55793092 T | 0.464  | 1.41E-08 | chr:12:55727213 |
| 12 rs6581044   | 55802724 G | 0.464  | 1.41E-08 | chr:12:55727213 |
| 12 rs7484724   | 55787682 A | 0.464  | 1.41E-08 | chr:12:55727213 |
| 12 rs7484798   | 55791192 A | 0.464  | 1.41E-08 | chr:12:55727213 |
| 12 rs7486042   | 55789332 C | 0.464  | 1.41E-08 | chr:12:55727213 |
| 12 rs7486820   | 55793748 T | 0.464  | 1.41E-08 | chr:12:55727213 |
| 12 rs7487537   | 55800332 A | 0.464  | 1.41E-08 | chr:12:55727213 |
| 12 rs7488269   | 55792543 C | 0.464  | 1.41E-08 | chr:12:55727213 |
| 12 rs7954814   | 55790750 T | 0.464  | 1.41E-08 | chr:12:55727213 |
| 12 rs7967395   | 55794264 G | 0.464  | 1.41E-08 | chr:12:55727213 |
| 12 rs7971073   | 55794976 G | 0.464  | 1.41E-08 | chr:12:55727213 |
| 12 rs10783736  | 55799934 T | 0.4631 | 1.48E-08 | chr:12:55727213 |
| 12 rs7485079   | 55800382 C | 0.4667 | 1.70E-08 | chr:12:55727213 |
| 12 rs10783732  | 55787355 T | 0.4687 | 1.88E-08 | chr:12:55727213 |
| 12 rs7486057   | 55796653 C | 0.4696 | 2.05E-08 | chr:12:55727213 |
| 12 rs56241451  | 55734249 T | 0.4504 | 2.98E-08 | chr:12:55727213 |
| 12 rs11171467  | 55846623 C | 4.634  | 4.38E-08 | chr:12:55727213 |
| 12 rs79462096  | 55845066 A | 4.445  | 7.65E-08 | chr:12:55727213 |
| 12 rs10876777  | 55832783 T | 2.637  | 2.08E-07 | chr:12:55727213 |
| 12 rs116723446 | 55761412 G | 0.3173 | 2.25E-07 | chr:12:55727213 |
| 12 rs58178495  | 55780661 C | 0.3167 | 2.25E-07 | chr:12:55727213 |

|                |            |        |          |                 |
|----------------|------------|--------|----------|-----------------|
| 12 rs11171430  | 55755254 A | 1.987  | 2.62E-07 | chr:12:55727213 |
| 12 rs11171431  | 55757609 G | 1.987  | 2.62E-07 | chr:12:55727213 |
| 12 rs11171432  | 55757696 G | 1.987  | 2.62E-07 | chr:12:55727213 |
| 12 rs11171434  | 55758018 C | 1.987  | 2.62E-07 | chr:12:55727213 |
| 12 rs11832308  | 55755506 C | 1.987  | 2.62E-07 | chr:12:55727213 |
| 12 rs13377995  | 55757380 C | 1.987  | 2.62E-07 | chr:12:55727213 |
| 12 rs59019100  | 55737459 C | 0.4758 | 2.62E-07 | chr:12:55727213 |
| 12 rs373941107 | 55740754 T | 0.3846 | 2.94E-07 | chr:12:55727213 |
| 12 rs79930882  | 55784616 C | 0.3006 | 3.14E-07 | chr:12:55727213 |
| 12 rs115530372 | 55749031 A | 0.3245 | 4.02E-07 | chr:12:55727213 |
| 12 rs116530165 | 55748782 G | 0.3245 | 4.02E-07 | chr:12:55727213 |
| 12 rs138972006 | 55766496 G | 0.3245 | 4.02E-07 | chr:12:55727213 |
| 12 rs75825283  | 55763461 C | 0.3245 | 4.02E-07 | chr:12:55727213 |
| 12 rs77870025  | 55757622 C | 0.3245 | 4.02E-07 | chr:12:55727213 |
| 12 rs78470098  | 55768374 A | 0.3245 | 4.02E-07 | chr:12:55727213 |
| 12 rs78818928  | 55758506 G | 0.3245 | 4.02E-07 | chr:12:55727213 |
| 12 rs61956272  | 55779559 T | 0.4341 | 5.22E-07 | chr:12:55727213 |
| 12 rs78378859  | 55867285 G | 4.047  | 5.63E-07 | chr:12:55727213 |
| 12 rs188428574 | 55872987 A | 4.187  | 5.72E-07 | chr:12:55727213 |
| 12 rs190999100 | 55878997 G | 4.187  | 5.72E-07 | chr:12:55727213 |
| 12 rs60979899  | 55879324 T | 4.187  | 5.72E-07 | chr:12:55727213 |
| 12 rs10783729  | 55763346 T | 2.129  | 7.13E-07 | chr:12:55727213 |
| 12 rs562310600 | 55883108 T | 4.128  | 7.28E-07 | chr:12:55727213 |
| 12 rs57742580  | 55879860 A | 4.128  | 7.28E-07 | chr:12:55727213 |
| 12 rs74844018  | 55766871 A | 0.4383 | 7.67E-07 | chr:12:55727213 |
| 12 rs10783727  | 55762242 T | 2.126  | 7.84E-07 | chr:12:55727213 |
| 12 rs12582005  | 55772837 A | 0.4409 | 9.28E-07 | chr:12:55727213 |
| 12 rs12099665  | 55731191 T | 0.4446 | 9.98E-07 | chr:12:55727213 |
| 12 rs12099808  | 55731178 A | 0.4446 | 9.98E-07 | chr:12:55727213 |
| 12 rs189794726 | 55743934 C | 0.4446 | 9.98E-07 | chr:12:55727213 |
| 12 rs112331945 | 55781657 T | 0.4429 | 1.08E-06 | chr:12:55727213 |
| 12 rs61566486  | 55781694 G | 0.4429 | 1.08E-06 | chr:12:55727213 |
| 12 rs11171433  | 55757797 C | 0.41   | 1.12E-06 | chr:12:55727213 |
| 12 rs59213907  | 55728911 T | 0.4474 | 1.21E-06 | chr:12:55727213 |
| 12 rs7959124   | 55726957 G | 0.4474 | 1.21E-06 | chr:12:55727213 |
| 12 rs115471673 | 55766516 G | 0.4465 | 1.30E-06 | chr:12:55727213 |
| 12 rs12579408  | 55764348 A | 0.4465 | 1.30E-06 | chr:12:55727213 |
| 12 rs12581916  | 55764409 C | 0.4465 | 1.30E-06 | chr:12:55727213 |
| 12 rs4448777   | 55724981 C | 0.4465 | 1.30E-06 | chr:12:55727213 |
| 12 rs4590978   | 55725086 T | 0.4465 | 1.30E-06 | chr:12:55727213 |
| 12 rs58780687  | 55736498 C | 0.4465 | 1.30E-06 | chr:12:55727213 |
| 12 rs60230359  | 55736550 C | 0.4465 | 1.30E-06 | chr:12:55727213 |
| 12 rs60249205  | 55758333 G | 0.4465 | 1.30E-06 | chr:12:55727213 |

|                |            |        |          |                 |
|----------------|------------|--------|----------|-----------------|
| 12 rs60586348  | 55745151 T | 0.4465 | 1.30E-06 | chr:12:55727213 |
| 12 rs60774348  | 55757717 G | 0.4465 | 1.30E-06 | chr:12:55727213 |
| 12 rs61556775  | 55745640 C | 0.4465 | 1.30E-06 | chr:12:55727213 |
| 12 rs61957937  | 55746850 C | 0.4465 | 1.30E-06 | chr:12:55727213 |
| 12 rs61957938  | 55747266 G | 0.4465 | 1.30E-06 | chr:12:55727213 |
| 12 rs61957941  | 55748058 A | 0.4465 | 1.30E-06 | chr:12:55727213 |
| 12 rs61957946  | 55755778 C | 0.4465 | 1.30E-06 | chr:12:55727213 |
| 12 rs67015069  | 55759968 A | 0.4465 | 1.30E-06 | chr:12:55727213 |
| 12 rs73326725  | 55749222 C | 0.4465 | 1.30E-06 | chr:12:55727213 |
| 12 rs7489047   | 55759851 G | 0.4465 | 1.30E-06 | chr:12:55727213 |
| 12 rs7976828   | 55726450 T | 0.4465 | 1.30E-06 | chr:12:55727213 |
| 12 rs11171643  | 56052997 A | 0.2214 | 1.70E-06 | chr:12:55727213 |
| 12 rs61956291  | 55797964 C | 0.4528 | 1.72E-06 | chr:12:55727213 |
| 12 rs66902680  | 55724080 C | 0.4513 | 1.74E-06 | chr:12:55727213 |
| 12 rs61957914  | 55742041 A | 0.4517 | 1.77E-06 | chr:12:55727213 |
| 12 rs113676509 | 56038548 T | 0.229  | 1.80E-06 | chr:12:55727213 |
| 12 rs79728885  | 56040066 G | 0.229  | 1.80E-06 | chr:12:55727213 |
| 12 rs7487419   | 55769801 G | 0.45   | 1.87E-06 | chr:12:55727213 |
| 12 rs7132347   | 55714876 C | 0.4492 | 1.97E-06 | chr:12:55727213 |
| 12 rs3935215   | 55792401 A | 0.4551 | 2.30E-06 | chr:12:55727213 |
| 12 rs61956290  | 55793833 G | 0.4551 | 2.30E-06 | chr:12:55727213 |
| 12 rs61956292  | 55803346 C | 0.4551 | 2.30E-06 | chr:12:55727213 |
| 12 rs7485979   | 55789043 A | 0.4551 | 2.30E-06 | chr:12:55727213 |
| 12 rs7132076   | 55808469 C | 2.504  | 2.55E-06 | chr:12:55727213 |
| 12 rs66516917  | 55749131 G | 0.5326 | 2.80E-06 | chr:12:55727213 |
| 12 rs115729288 | 56046717 C | 0.2415 | 2.84E-06 | chr:12:55727213 |
| 12 rs141508718 | 56049219 T | 0.2415 | 2.84E-06 | chr:12:55727213 |
| 12 rs80302115  | 55744558 A | 5.489  | 3.04E-06 | chr:12:55727213 |
| 12 rs7132916   | 55715119 G | 0.4529 | 3.05E-06 | chr:12:55727213 |
| 12 rs7488530   | 55902618 G | 2.2    | 3.11E-06 | chr:12:55727213 |
| 12 rs563055663 | 55827816 C | 0.4493 | 3.13E-06 | chr:12:55727213 |
| 12 rs147375537 | 56039853 A | 0.2301 | 3.29E-06 | chr:12:55727213 |
| 12 rs6581048   | 55833861 G | 2.467  | 3.35E-06 | chr:12:55727213 |
| 12 rs7133317   | 55824440 T | 2.467  | 3.35E-06 | chr:12:55727213 |
| 12 rs7295016   | 56040859 C | 0.4381 | 3.41E-06 | chr:12:55727213 |
| 12 rs12319326  | 55774663 C | 0.518  | 3.76E-06 | chr:12:55727213 |
| 12 rs79072749  | 55797626 G | 4.981  | 3.79E-06 | chr:12:55727213 |
| 12 rs61956269  | 55768023 T | 0.4773 | 4.04E-06 | chr:12:55727213 |
| 12 rs61957788  | 55883248 A | 0.5002 | 4.15E-06 | chr:12:55727213 |
| 12 rs116160069 | 55712406 C | 5.305  | 4.33E-06 | chr:12:55727213 |
| 12 rs61957765  | 55868561 C | 0.4999 | 4.52E-06 | chr:12:55727213 |
| 12 rs67290413  | 55869876 C | 0.4999 | 4.52E-06 | chr:12:55727213 |
| 12 rs7294659   | 55866519 C | 0.5004 | 5.15E-06 | chr:12:55727213 |

|                |            |        |          |                 |
|----------------|------------|--------|----------|-----------------|
| 12 rs375349885 | 55915679 C | 2.187  | 5.38E-06 | chr:12:55727213 |
| 12 rs112378702 | 56043445 T | 0.2508 | 5.64E-06 | chr:12:55727213 |
| 12 rs10876761  | 55786526 T | 0.5465 | 5.67E-06 | chr:12:55727213 |
| 12 rs139499289 | 55871562 G | 4.125  | 5.69E-06 | chr:12:55727213 |
| 12 rs76329398  | 55847247 T | 4.847  | 5.98E-06 | chr:12:55727213 |
| 12 rs4338633   | 55722153 T | 2.149  | 6.40E-06 | chr:12:55727213 |
| 12 rs114281059 | 55702021 A | 5.145  | 7.23E-06 | chr:12:55727213 |
| 12 rs7971600   | 55700241 T | 5.145  | 7.23E-06 | chr:12:55727213 |
| 12 rs6581046   | 55820121 C | 2.052  | 9.22E-06 | chr:12:55727213 |
| 12 rs77633032  | 55830899 T | 4.646  | 9.90E-06 | chr:12:55727213 |
| 12 rs56906045  | 55787548 T | 3.273  | 1.06E-05 | chr:12:55727213 |
| 12 rs12579346  | 55786856 G | 0.4875 | 1.13E-05 | chr:12:55727213 |
| 12 rs12580661  | 55803129 A | 0.4875 | 1.13E-05 | chr:12:55727213 |
| 12 rs12581060  | 55797484 C | 0.4875 | 1.13E-05 | chr:12:55727213 |
| 12 rs61956275  | 55786423 A | 0.4875 | 1.13E-05 | chr:12:55727213 |
| 12 rs67934812  | 55785591 G | 0.4875 | 1.13E-05 | chr:12:55727213 |
| 12 rs7485991   | 55789129 C | 0.4875 | 1.13E-05 | chr:12:55727213 |
| 12 rs7487895   | 55796720 C | 0.4875 | 1.13E-05 | chr:12:55727213 |
| 12 rs7488940   | 55802591 T | 0.4875 | 1.13E-05 | chr:12:55727213 |
| 12 rs6581038   | 55785441 T | 0.5434 | 1.17E-05 | chr:12:55727213 |
| 12 rs56911775  | 55818173 C | 0.3245 | 1.21E-05 | chr:12:55727213 |
| 12 rs74092309  | 55820104 A | 0.3245 | 1.21E-05 | chr:12:55727213 |
| 12 rs74092310  | 55820194 T | 0.3245 | 1.21E-05 | chr:12:55727213 |
| 12 rs78828715  | 55733980 A | 3.164  | 1.37E-05 | chr:12:55727213 |
| 12 rs60991522  | 55781529 T | 0.4941 | 1.43E-05 | chr:12:55727213 |
| 12 rs7959837   | 55734511 A | 0.5575 | 1.46E-05 | chr:12:55727213 |
| 12 rs11495497  | 55740640 C | 0.518  | 1.70E-05 | chr:12:55727213 |
| 12 rs12578879  | 55797773 T | 0.4976 | 1.71E-05 | chr:12:55727213 |
| 12 rs11830618  | 55789250 A | 3.111  | 1.76E-05 | chr:12:55727213 |
| 12 rs74090692  | 55792877 T | 3.111  | 1.76E-05 | chr:12:55727213 |
| 12 rs80247641  | 55797345 C | 3.111  | 1.76E-05 | chr:12:55727213 |
| 12 rs7977965   | 55860548 C | 2.081  | 1.86E-05 | chr:12:55727213 |
| 12 rs142811909 | 55987010 T | 0.2195 | 1.89E-05 | chr:12:55727213 |
| 13 rs533464869 | 90736937 G | 33.97  | 6.47E-36 | chr:13:90743183 |
| 13 rs7322297   | 90720522 A | 19.27  | 1.62E-35 | chr:13:90743183 |
| 13 rs2805699   | 90723189 A | 24.19  | 3.37E-35 | chr:13:90743183 |
| 13 rs113894290 | 90729661 C | 45.26  | 5.56E-31 | chr:13:90743183 |
| 13 rs1388190   | 90739471 A | 55.85  | 3.87E-29 | chr:13:90743183 |
| 13 rs75921720  | 90708825 C | 10.11  | 2.12E-28 | chr:13:90743183 |
| 13 rs9588850   | 90717634 A | 7.044  | 2.20E-27 | chr:13:90743183 |
| 13 rs2637400   | 90723289 T | 57.03  | 5.04E-27 | chr:13:90743183 |
| 13 rs2805701   | 90723284 A | 57.03  | 5.04E-27 | chr:13:90743183 |
| 13 rs78721625  | 90744516 T | 9.842  | 1.02E-26 | chr:13:90743183 |

|                |            |        |          |                 |
|----------------|------------|--------|----------|-----------------|
| 13 rs112632269 | 90731067 G | 9.552  | 1.84E-26 | chr:13:90743183 |
| 13 rs2805748   | 90747577 A | 9.215  | 3.58E-26 | chr:13:90743183 |
| 13 rs2637401   | 90723306 T | 68.07  | 4.43E-26 | chr:13:90743183 |
| 13 rs2805700   | 90723275 A | 67.21  | 5.73E-26 | chr:13:90743183 |
| 13 rs1491024   | 90715598 G | 6.197  | 7.34E-26 | chr:13:90743183 |
| 13 rs9588852   | 90719948 G | 6.197  | 7.34E-26 | chr:13:90743183 |
| 13 rs2805746   | 90746594 T | 66.34  | 7.69E-26 | chr:13:90743183 |
| 13 rs2805725   | 90741732 G | 80.28  | 1.46E-24 | chr:13:90743183 |
| 13 rs2637428   | 90741395 T | 79.63  | 1.60E-24 | chr:13:90743183 |
| 13 rs2805720   | 90740791 A | 79.63  | 1.60E-24 | chr:13:90743183 |
| 13 rs2805722   | 90741285 T | 79.63  | 1.60E-24 | chr:13:90743183 |
| 13 rs10161792  | 90731142 A | 79.36  | 1.67E-24 | chr:13:90743183 |
| 13 rs16943826  | 90710255 C | 9.349  | 2.01E-24 | chr:13:90743183 |
| 13 rs77191234  | 90719556 G | 9.124  | 3.20E-24 | chr:13:90743183 |
| 13 rs75863885  | 90740389 C | 57.75  | 3.68E-24 | chr:13:90743183 |
| 13 rs2805698   | 90722081 G | 75.49  | 4.80E-24 | chr:13:90743183 |
| 13 rs9588859   | 90725395 A | 73.49  | 7.85E-24 | chr:13:90743183 |
| 13 rs2637398   | 90722150 C | 0.1904 | 8.10E-24 | chr:13:90743183 |
| 13 rs2637426   | 90741000 G | 0.1996 | 4.65E-23 | chr:13:90743183 |
| 13 rs2805728   | 90742666 C | 0.1996 | 4.65E-23 | chr:13:90743183 |
| 13 rs2637421   | 90740082 A | 0.2018 | 9.07E-23 | chr:13:90743183 |
| 13 rs10161626  | 90731428 C | 96.07  | 1.11E-22 | chr:13:90743183 |
| 13 rs10161628  | 90731522 G | 96.07  | 1.11E-22 | chr:13:90743183 |
| 13 rs10162282  | 90731420 G | 96.07  | 1.11E-22 | chr:13:90743183 |
| 13 rs111826912 | 90730412 A | 96.07  | 1.11E-22 | chr:13:90743183 |
| 13 rs112726773 | 90729763 G | 96.07  | 1.11E-22 | chr:13:90743183 |
| 13 rs115559522 | 90729810 G | 96.07  | 1.11E-22 | chr:13:90743183 |
| 13 rs1388189   | 90739332 A | 96.07  | 1.11E-22 | chr:13:90743183 |
| 13 rs143968735 | 90729784 A | 96.07  | 1.11E-22 | chr:13:90743183 |
| 13 rs1491011   | 90737989 C | 96.07  | 1.11E-22 | chr:13:90743183 |
| 13 rs1491013   | 90738361 A | 96.07  | 1.11E-22 | chr:13:90743183 |
| 13 rs150882426 | 90729744 G | 96.07  | 1.11E-22 | chr:13:90743183 |
| 13 rs1546054   | 90733331 C | 96.07  | 1.11E-22 | chr:13:90743183 |
| 13 rs1972000   | 90733195 T | 96.07  | 1.11E-22 | chr:13:90743183 |
| 13 rs1972001   | 90733095 G | 96.07  | 1.11E-22 | chr:13:90743183 |
| 13 rs2130838   | 90728244 A | 96.07  | 1.11E-22 | chr:13:90743183 |
| 13 rs2637402   | 90723934 A | 96.07  | 1.11E-22 | chr:13:90743183 |
| 13 rs2637404   | 90734632 T | 96.07  | 1.11E-22 | chr:13:90743183 |
| 13 rs2637406   | 90734868 G | 96.07  | 1.11E-22 | chr:13:90743183 |
| 13 rs2637407   | 90735094 C | 96.07  | 1.11E-22 | chr:13:90743183 |
| 13 rs2637408   | 90735266 G | 96.07  | 1.11E-22 | chr:13:90743183 |
| 13 rs2637409   | 90735308 G | 96.07  | 1.11E-22 | chr:13:90743183 |
| 13 rs2637411   | 90735572 T | 96.07  | 1.11E-22 | chr:13:90743183 |



|              |            |                                |
|--------------|------------|--------------------------------|
| 13 rs2637413 | 90736221 T | 96.07 1.11E-22 chr:13:90743183 |
| 13 rs2637414 | 90736401 A | 96.07 1.11E-22 chr:13:90743183 |
| 13 rs2637415 | 90736503 T | 96.07 1.11E-22 chr:13:90743183 |
| 13 rs2637416 | 90736597 T | 96.07 1.11E-22 chr:13:90743183 |
| 13 rs2637417 | 90737783 T | 96.07 1.11E-22 chr:13:90743183 |
| 13 rs2637418 | 90737912 G | 96.07 1.11E-22 chr:13:90743183 |
| 13 rs2637420 | 90739804 G | 96.07 1.11E-22 chr:13:90743183 |
| 13 rs2637422 | 90740092 G | 96.07 1.11E-22 chr:13:90743183 |
| 13 rs2637423 | 90740769 G | 96.07 1.11E-22 chr:13:90743183 |
| 13 rs2637425 | 90740968 G | 96.07 1.11E-22 chr:13:90743183 |
| 13 rs2637433 | 90726357 G | 96.07 1.11E-22 chr:13:90743183 |
| 13 rs2637443 | 90731918 C | 96.07 1.11E-22 chr:13:90743183 |
| 13 rs2637445 | 90731659 A | 96.07 1.11E-22 chr:13:90743183 |
| 13 rs2637446 | 90731613 G | 96.07 1.11E-22 chr:13:90743183 |
| 13 rs2637452 | 90753085 G | 96.07 1.11E-22 chr:13:90743183 |
| 13 rs2637455 | 90729280 C | 96.07 1.11E-22 chr:13:90743183 |
| 13 rs2637458 | 90747295 T | 96.07 1.11E-22 chr:13:90743183 |
| 13 rs2637459 | 90729037 A | 96.07 1.11E-22 chr:13:90743183 |
| 13 rs2637461 | 90745275 A | 96.07 1.11E-22 chr:13:90743183 |
| 13 rs2637462 | 90745244 C | 96.07 1.11E-22 chr:13:90743183 |
| 13 rs2637463 | 90744056 A | 96.07 1.11E-22 chr:13:90743183 |
| 13 rs2637464 | 90728584 G | 96.07 1.11E-22 chr:13:90743183 |
| 13 rs2637466 | 90728427 C | 96.07 1.11E-22 chr:13:90743183 |
| 13 rs2637467 | 90728379 A | 96.07 1.11E-22 chr:13:90743183 |
| 13 rs2637476 | 90727846 T | 96.07 1.11E-22 chr:13:90743183 |
| 13 rs2805633 | 90755098 T | 96.07 1.11E-22 chr:13:90743183 |
| 13 rs2805703 | 90724219 T | 96.07 1.11E-22 chr:13:90743183 |
| 13 rs2805706 | 90727892 A | 96.07 1.11E-22 chr:13:90743183 |
| 13 rs2805707 | 90729005 A | 96.07 1.11E-22 chr:13:90743183 |
| 13 rs2805708 | 90731585 A | 96.07 1.11E-22 chr:13:90743183 |
| 13 rs2805710 | 90732260 T | 96.07 1.11E-22 chr:13:90743183 |
| 13 rs2805711 | 90734616 T | 96.07 1.11E-22 chr:13:90743183 |
| 13 rs2805712 | 90734708 A | 96.07 1.11E-22 chr:13:90743183 |
| 13 rs2805713 | 90736264 T | 96.07 1.11E-22 chr:13:90743183 |
| 13 rs2805714 | 90736468 T | 96.07 1.11E-22 chr:13:90743183 |
| 13 rs2805715 | 90737729 G | 96.07 1.11E-22 chr:13:90743183 |
| 13 rs2805716 | 90738789 A | 96.07 1.11E-22 chr:13:90743183 |
| 13 rs2805717 | 90739820 T | 96.07 1.11E-22 chr:13:90743183 |
| 13 rs2805718 | 90739830 T | 96.07 1.11E-22 chr:13:90743183 |
| 13 rs2805719 | 90740285 T | 96.07 1.11E-22 chr:13:90743183 |
| 13 rs2805721 | 90740809 C | 96.07 1.11E-22 chr:13:90743183 |
| 13 rs2805724 | 90741683 T | 96.07 1.11E-22 chr:13:90743183 |
| 13 rs2805727 | 90742608 C | 96.07 1.11E-22 chr:13:90743183 |

|                |            |        |          |                 |
|----------------|------------|--------|----------|-----------------|
| 13 rs2805729   | 90743323 T | 96.07  | 1.11E-22 | chr:13:90743183 |
| 13 rs2805730   | 90743490 A | 96.07  | 1.11E-22 | chr:13:90743183 |
| 13 rs2805731   | 90743620 C | 96.07  | 1.11E-22 | chr:13:90743183 |
| 13 rs2805732   | 90744055 C | 96.07  | 1.11E-22 | chr:13:90743183 |
| 13 rs2805733   | 90744227 G | 96.07  | 1.11E-22 | chr:13:90743183 |
| 13 rs2805734   | 90744235 A | 96.07  | 1.11E-22 | chr:13:90743183 |
| 13 rs2805735   | 90744305 A | 96.07  | 1.11E-22 | chr:13:90743183 |
| 13 rs2805736   | 90744645 T | 96.07  | 1.11E-22 | chr:13:90743183 |
| 13 rs2805738   | 90745081 G | 96.07  | 1.11E-22 | chr:13:90743183 |
| 13 rs2805739   | 90745491 T | 96.07  | 1.11E-22 | chr:13:90743183 |
| 13 rs2805741   | 90745796 A | 96.07  | 1.11E-22 | chr:13:90743183 |
| 13 rs2805743   | 90746158 G | 96.07  | 1.11E-22 | chr:13:90743183 |
| 13 rs2805747   | 90747181 A | 96.07  | 1.11E-22 | chr:13:90743183 |
| 13 rs2805750   | 90747917 C | 96.07  | 1.11E-22 | chr:13:90743183 |
| 13 rs2805754   | 90748891 G | 96.07  | 1.11E-22 | chr:13:90743183 |
| 13 rs2805755   | 90749022 T | 96.07  | 1.11E-22 | chr:13:90743183 |
| 13 rs2805758   | 90749261 A | 96.07  | 1.11E-22 | chr:13:90743183 |
| 13 rs2805759   | 90749514 A | 96.07  | 1.11E-22 | chr:13:90743183 |
| 13 rs2805761   | 90750031 G | 96.07  | 1.11E-22 | chr:13:90743183 |
| 13 rs28495463  | 90734124 A | 96.07  | 1.11E-22 | chr:13:90743183 |
| 13 rs28508421  | 90743437 T | 96.07  | 1.11E-22 | chr:13:90743183 |
| 13 rs73591319  | 90725907 A | 96.07  | 1.11E-22 | chr:13:90743183 |
| 13 rs73591321  | 90727136 G | 96.07  | 1.11E-22 | chr:13:90743183 |
| 13 rs76998954  | 90743210 A | 96.07  | 1.11E-22 | chr:13:90743183 |
| 13 rs78067562  | 90743391 C | 96.07  | 1.11E-22 | chr:13:90743183 |
| 13 rs9588860   | 90727484 G | 96.07  | 1.11E-22 | chr:13:90743183 |
| 13 rs9588861   | 90727552 A | 96.07  | 1.11E-22 | chr:13:90743183 |
| 13 rs79785623  | 90752549 T | 9.184  | 1.24E-22 | chr:13:90743183 |
| 13 rs2805627   | 90752272 A | 95.4   | 1.30E-22 | chr:13:90743183 |
| 13 rs2805740   | 90745675 A | 94.92  | 1.39E-22 | chr:13:90743183 |
| 13 rs2637439   | 90732217 A | 0.2039 | 1.66E-22 | chr:13:90743183 |
| 13 rs2805704   | 90727635 G | 0.208  | 2.12E-22 | chr:13:90743183 |
| 13 rs73593652  | 90755595 A | 91.64  | 2.66E-22 | chr:13:90743183 |
| 13 rs80233688  | 90723496 G | 10.65  | 5.12E-21 | chr:13:90743183 |
| 13 rs78975634  | 90720218 G | 10.46  | 1.10E-20 | chr:13:90743183 |
| 13 rs116763682 | 90743619 A | 8.908  | 1.19E-20 | chr:13:90743183 |
| 13 rs74507286  | 90738994 T | 8.908  | 1.19E-20 | chr:13:90743183 |
| 13 rs75805202  | 90735664 G | 8.908  | 1.19E-20 | chr:13:90743183 |
| 13 rs78645261  | 90754325 G | 8.908  | 1.19E-20 | chr:13:90743183 |
| 13 rs79110442  | 90748308 G | 8.908  | 1.19E-20 | chr:13:90743183 |
| 13 rs76202013  | 90714744 C | 8.741  | 2.59E-20 | chr:13:90743183 |
| 13 rs76936079  | 90744717 T | 11.21  | 5.60E-20 | chr:13:90743183 |
| 13 rs2805689   | 90715153 T | 0.2522 | 1.54E-18 | chr:13:90743183 |

|                |            |        |          |                 |
|----------------|------------|--------|----------|-----------------|
| 13 rs115029999 | 90669505 G | 8.046  | 4.28E-18 | chr:13:90743183 |
| 13 rs75635330  | 90668043 C | 8.046  | 4.28E-18 | chr:13:90743183 |
| 13 rs112945355 | 90680625 T | 7.821  | 1.01E-17 | chr:13:90743183 |
| 13 rs113169741 | 90685650 A | 7.821  | 1.01E-17 | chr:13:90743183 |
| 13 rs114498245 | 90667379 A | 7.821  | 1.01E-17 | chr:13:90743183 |
| 13 rs137989181 | 90676229 T | 7.821  | 1.01E-17 | chr:13:90743183 |
| 13 rs1987095   | 90681873 C | 7.821  | 1.01E-17 | chr:13:90743183 |
| 13 rs1987156   | 90681662 A | 7.821  | 1.01E-17 | chr:13:90743183 |
| 13 rs57346044  | 90704533 C | 7.821  | 1.01E-17 | chr:13:90743183 |
| 13 rs74565296  | 90691322 T | 7.821  | 1.01E-17 | chr:13:90743183 |
| 13 rs75410608  | 90693188 A | 7.821  | 1.01E-17 | chr:13:90743183 |
| 13 rs76901628  | 90699709 C | 7.821  | 1.01E-17 | chr:13:90743183 |
| 13 rs78545676  | 90677712 G | 7.821  | 1.01E-17 | chr:13:90743183 |
| 13 rs78585383  | 90673119 T | 7.821  | 1.01E-17 | chr:13:90743183 |
| 13 rs78693129  | 90673027 T | 7.821  | 1.01E-17 | chr:13:90743183 |
| 13 rs79671279  | 90682347 T | 7.821  | 1.01E-17 | chr:13:90743183 |
| 13 rs7985369   | 90671522 A | 7.821  | 1.01E-17 | chr:13:90743183 |
| 13 rs80014975  | 90678526 G | 7.821  | 1.01E-17 | chr:13:90743183 |
| 13 rs2350299   | 90728500 T | 0.2789 | 1.54E-16 | chr:13:90743183 |
| 13 rs2637419   | 90738557 A | 0.2789 | 1.54E-16 | chr:13:90743183 |
| 13 rs2637453   | 90752931 A | 0.2789 | 1.54E-16 | chr:13:90743183 |
| 13 rs2637456   | 90749441 C | 0.2789 | 1.54E-16 | chr:13:90743183 |
| 13 rs2637460   | 90745311 T | 0.2789 | 1.54E-16 | chr:13:90743183 |
| 13 rs2805628   | 90752802 T | 0.2789 | 1.54E-16 | chr:13:90743183 |
| 13 rs2805629   | 90753329 C | 0.2789 | 1.54E-16 | chr:13:90743183 |
| 13 rs2805631   | 90753606 A | 0.2789 | 1.54E-16 | chr:13:90743183 |
| 13 rs2805737   | 90745031 C | 0.2789 | 1.54E-16 | chr:13:90743183 |
| 13 rs2805751   | 90748336 T | 0.2789 | 1.54E-16 | chr:13:90743183 |
| 13 rs2805752   | 90748567 A | 0.2789 | 1.54E-16 | chr:13:90743183 |
| 13 rs2805753   | 90748842 A | 0.2789 | 1.54E-16 | chr:13:90743183 |
| 13 rs2805756   | 90749045 T | 0.2789 | 1.54E-16 | chr:13:90743183 |
| 13 rs9522840   | 90726082 A | 0.2789 | 1.54E-16 | chr:13:90743183 |
| 13 rs2637399   | 90722860 C | 0.2816 | 2.20E-16 | chr:13:90743183 |
| 13 rs7989242   | 90746294 T | 6.503  | 3.58E-16 | chr:13:90743183 |
| 13 rs80247605  | 90664690 G | 4.121  | 3.05E-15 | chr:13:90743183 |
| 13 rs16943737  | 90663135 G | 5.226  | 3.18E-15 | chr:13:90743183 |
| 13 rs41322051  | 90646840 G | 5.226  | 3.18E-15 | chr:13:90743183 |
| 13 rs41361347  | 90652322 G | 5.226  | 3.18E-15 | chr:13:90743183 |
| 13 rs74387961  | 90647017 A | 5.226  | 3.18E-15 | chr:13:90743183 |
| 13 rs74422803  | 90653835 T | 5.226  | 3.18E-15 | chr:13:90743183 |
| 13 rs74568779  | 90660687 A | 5.226  | 3.18E-15 | chr:13:90743183 |
| 13 rs76111549  | 90651195 A | 5.226  | 3.18E-15 | chr:13:90743183 |
| 13 rs76925939  | 90646777 T | 5.226  | 3.18E-15 | chr:13:90743183 |

|               |            |        |          |                 |
|---------------|------------|--------|----------|-----------------|
| 13 rs77555222 | 90662826 C | 5.226  | 3.18E-15 | chr:13:90743183 |
| 13 rs78076983 | 90651105 G | 5.226  | 3.18E-15 | chr:13:90743183 |
| 13 rs78172895 | 90663325 A | 5.226  | 3.18E-15 | chr:13:90743183 |
| 13 rs78641456 | 90653738 G | 5.226  | 3.18E-15 | chr:13:90743183 |
| 13 rs78680587 | 90654218 A | 5.226  | 3.18E-15 | chr:13:90743183 |
| 13 rs78905293 | 90647677 T | 5.226  | 3.18E-15 | chr:13:90743183 |
| 13 rs78992908 | 90651318 A | 5.226  | 3.18E-15 | chr:13:90743183 |
| 13 rs79494540 | 90648492 C | 5.226  | 3.18E-15 | chr:13:90743183 |
| 13 rs79603316 | 90660753 A | 5.226  | 3.18E-15 | chr:13:90743183 |
| 13 rs80350675 | 90647983 G | 5.226  | 3.18E-15 | chr:13:90743183 |
| 13 rs4142563  | 90722674 C | 0.2827 | 6.64E-15 | chr:13:90743183 |
| 13 rs78078484 | 90646090 A | 5.036  | 6.94E-15 | chr:13:90743183 |
| 13 rs2259699  | 90724908 G | 0.3077 | 6.16E-14 | chr:13:90743183 |
| 13 rs2805634  | 90755657 C | 0.3077 | 6.16E-14 | chr:13:90743183 |
| 13 rs2805686  | 90714000 T | 0.2983 | 1.24E-13 | chr:13:90743183 |
| 13 rs9560516  | 90648080 G | 4.903  | 2.93E-13 | chr:13:90743183 |
| 13 rs16943738 | 90664242 G | 4.211  | 3.39E-13 | chr:13:90743183 |
| 13 rs77851009 | 90633937 A | 4.513  | 8.28E-13 | chr:13:90743183 |
| 13 rs7330958  | 90724514 C | 0.3205 | 1.33E-12 | chr:13:90743183 |
| 13 rs9515679  | 90723917 C | 0.3205 | 1.33E-12 | chr:13:90743183 |
| 13 rs12858780 | 90735185 C | 0.3206 | 1.47E-12 | chr:13:90743183 |
| 13 rs1491012  | 90738253 T | 0.3206 | 1.47E-12 | chr:13:90743183 |
| 13 rs1586740  | 90747887 G | 0.3206 | 1.47E-12 | chr:13:90743183 |
| 13 rs2350300  | 90733811 C | 0.3206 | 1.47E-12 | chr:13:90743183 |
| 13 rs35414148 | 90749088 G | 0.3206 | 1.47E-12 | chr:13:90743183 |
| 13 rs3864991  | 90752677 A | 0.3206 | 1.47E-12 | chr:13:90743183 |
| 13 rs4093505  | 90755052 T | 0.3206 | 1.47E-12 | chr:13:90743183 |
| 13 rs4357809  | 90752644 A | 0.3206 | 1.47E-12 | chr:13:90743183 |
| 13 rs4773550  | 90754699 G | 0.3206 | 1.47E-12 | chr:13:90743183 |
| 13 rs7992099  | 90737810 C | 0.3206 | 1.47E-12 | chr:13:90743183 |
| 13 rs7994352  | 90737852 G | 0.3206 | 1.47E-12 | chr:13:90743183 |
| 13 rs9515680  | 90726064 A | 0.3206 | 1.47E-12 | chr:13:90743183 |
| 13 rs9515684  | 90735792 G | 0.3206 | 1.47E-12 | chr:13:90743183 |
| 13 rs9522843  | 90735691 C | 0.3206 | 1.47E-12 | chr:13:90743183 |
| 13 rs9522844  | 90738863 C | 0.3206 | 1.47E-12 | chr:13:90743183 |
| 13 rs9560547  | 90725963 C | 0.3206 | 1.47E-12 | chr:13:90743183 |
| 13 rs2262007  | 90719805 G | 0.3134 | 1.49E-12 | chr:13:90743183 |
| 13 rs2350296  | 90718492 T | 0.3134 | 1.49E-12 | chr:13:90743183 |
| 13 rs2805696  | 90720160 G | 0.317  | 2.15E-12 | chr:13:90743183 |
| 13 rs2637412  | 90735700 T | 0.3227 | 3.69E-12 | chr:13:90743183 |
| 13 rs2805705  | 90727717 G | 0.3227 | 3.69E-12 | chr:13:90743183 |
| 13 rs6492470  | 90731362 A | 0.3227 | 3.69E-12 | chr:13:90743183 |
| 13 rs7332177  | 90725070 T | 0.3227 | 3.69E-12 | chr:13:90743183 |

|                |            |        |          |                 |
|----------------|------------|--------|----------|-----------------|
| 13 rs2805757   | 90749182 T | 0.3251 | 4.80E-12 | chr:13:90743183 |
| 13 rs1361601   | 90651537 T | 2.966  | 4.91E-12 | chr:13:90743183 |
| 13 rs1417931   | 90652059 C | 2.966  | 4.91E-12 | chr:13:90743183 |
| 13 rs1417932   | 90651802 C | 2.966  | 4.91E-12 | chr:13:90743183 |
| 13 rs1857016   | 90653003 C | 2.966  | 4.91E-12 | chr:13:90743183 |
| 13 rs1935181   | 90649956 C | 2.966  | 4.91E-12 | chr:13:90743183 |
| 13 rs1935182   | 90649766 T | 2.966  | 4.91E-12 | chr:13:90743183 |
| 13 rs2805658   | 90652699 A | 2.966  | 4.91E-12 | chr:13:90743183 |
| 13 rs2805659   | 90652722 A | 2.966  | 4.91E-12 | chr:13:90743183 |
| 13 rs4773545   | 90650689 T | 2.966  | 4.91E-12 | chr:13:90743183 |
| 13 rs6492467   | 90646581 T | 2.966  | 4.91E-12 | chr:13:90743183 |
| 13 rs6492468   | 90650308 T | 2.966  | 4.91E-12 | chr:13:90743183 |
| 13 rs6492469   | 90650326 A | 2.966  | 4.91E-12 | chr:13:90743183 |
| 13 rs7987787   | 90648902 A | 2.966  | 4.91E-12 | chr:13:90743183 |
| 13 rs7986744   | 90693163 T | 2.559  | 6.44E-12 | chr:13:90743183 |
| 13 rs1388186   | 90720423 T | 0.332  | 7.29E-12 | chr:13:90743183 |
| 13 rs4771804   | 90756276 A | 0.3304 | 8.08E-12 | chr:13:90743183 |
| 13 rs2805632   | 90753714 A | 0.3293 | 9.08E-12 | chr:13:90743183 |
| 13 rs13378305  | 90713920 A | 6.119  | 9.75E-12 | chr:13:90743183 |
| 13 rs13378483  | 90717030 A | 6.119  | 9.75E-12 | chr:13:90743183 |
| 13 rs9583777   | 90715968 G | 6.119  | 9.75E-12 | chr:13:90743183 |
| 13 rs9583778   | 90716191 T | 6.119  | 9.75E-12 | chr:13:90743183 |
| 13 rs9588846   | 90710793 G | 6.119  | 9.75E-12 | chr:13:90743183 |
| 13 rs10161983  | 90732800 C | 6.118  | 1.02E-11 | chr:13:90743183 |
| 13 rs10161992  | 90733101 A | 6.118  | 1.02E-11 | chr:13:90743183 |
| 13 rs111863575 | 90726069 A | 6.118  | 1.02E-11 | chr:13:90743183 |
| 13 rs143776399 | 90746276 G | 6.118  | 1.02E-11 | chr:13:90743183 |
| 13 rs28693886  | 90743678 A | 6.118  | 1.02E-11 | chr:13:90743183 |
| 13 rs73591334  | 90729098 G | 6.118  | 1.02E-11 | chr:13:90743183 |
| 13 rs9583782   | 90726722 T | 6.118  | 1.02E-11 | chr:13:90743183 |
| 13 rs9588865   | 90740747 A | 6.118  | 1.02E-11 | chr:13:90743183 |
| 13 rs9588868   | 90752403 G | 6.118  | 1.02E-11 | chr:13:90743183 |
| 13 rs1341647   | 90653212 G | 2.867  | 1.12E-11 | chr:13:90743183 |
| 13 rs77736962  | 90558819 G | 4.252  | 1.31E-11 | chr:13:90743183 |
| 13 rs8001217   | 90717865 T | 0.3385 | 1.47E-11 | chr:13:90743183 |
| 13 rs9515678   | 90718301 G | 0.3385 | 1.47E-11 | chr:13:90743183 |
| 13 rs9522836   | 90718114 A | 0.3385 | 1.47E-11 | chr:13:90743183 |
| 13 rs1578539   | 90647385 A | 2.841  | 1.56E-11 | chr:13:90743183 |
| 13 rs7987946   | 90648926 A | 2.841  | 1.56E-11 | chr:13:90743183 |
| 13 rs7987947   | 90648931 A | 2.841  | 1.56E-11 | chr:13:90743183 |
| 13 rs9522811   | 90647140 C | 2.841  | 1.56E-11 | chr:13:90743183 |
| 13 rs16943521  | 90522552 T | 4.199  | 1.66E-11 | chr:13:90743183 |
| 13 rs143214514 | 90539432 T | 4.151  | 1.67E-11 | chr:13:90743183 |

|                |            |        |          |                 |
|----------------|------------|--------|----------|-----------------|
| 13 rs9583783   | 90742832 T | 5.837  | 1.75E-11 | chr:13:90743183 |
| 13 rs1388200   | 90712935 C | 2.419  | 2.70E-11 | chr:13:90743183 |
| 13 rs4379942   | 90821658 C | 3.214  | 4.34E-11 | chr:13:90743183 |
| 13 rs7982527   | 90819058 G | 3.214  | 4.34E-11 | chr:13:90743183 |
| 13 rs13378373  | 90722854 C | 5.072  | 8.25E-11 | chr:13:90743183 |
| 13 rs80012736  | 90756512 C | 5.148  | 8.42E-11 | chr:13:90743183 |
| 13 rs73593622  | 90745520 A | 5.923  | 1.57E-10 | chr:13:90743183 |
| 13 rs73593624  | 90746672 T | 5.923  | 1.57E-10 | chr:13:90743183 |
| 13 rs8000208   | 90738628 G | 5.923  | 1.57E-10 | chr:13:90743183 |
| 13 rs9588869   | 90754103 G | 5.923  | 1.57E-10 | chr:13:90743183 |
| 13 rs9588853   | 90721316 T | 0.3372 | 2.14E-10 | chr:13:90743183 |
| 13 rs1341654   | 90661565 A | 2.824  | 2.53E-10 | chr:13:90743183 |
| 13 rs74381025  | 90532314 T | 3.384  | 6.13E-10 | chr:13:90743183 |
| 13 rs140305879 | 90539479 A | 3.329  | 6.60E-10 | chr:13:90743183 |
| 13 rs9583774   | 90702237 C | 5.162  | 8.10E-10 | chr:13:90743183 |
| 13 rs2637482   | 90708243 C | 0.4385 | 1.77E-09 | chr:13:90743183 |
| 13 rs73591378  | 90736516 G | 7.69   | 2.19E-09 | chr:13:90743183 |
| 13 rs75979017  | 90631052 T | 6.912  | 2.22E-09 | chr:13:90743183 |
| 13 rs6492463   | 90630714 A | 2.393  | 3.13E-09 | chr:13:90743183 |
| 13 rs6492464   | 90630756 A | 2.393  | 3.13E-09 | chr:13:90743183 |
| 13 rs6492465   | 90630793 T | 2.393  | 3.13E-09 | chr:13:90743183 |
| 13 rs12323116  | 90788866 T | 2.299  | 3.23E-09 | chr:13:90743183 |
| 13 rs73591393  | 90740254 G | 7.492  | 3.73E-09 | chr:13:90743183 |
| 13 rs73593648  | 90754798 G | 7.492  | 3.73E-09 | chr:13:90743183 |
| 13 rs67627188  | 90791970 G | 2.814  | 5.87E-09 | chr:13:90743183 |
| 13 rs6492466   | 90642785 T | 2.432  | 6.76E-09 | chr:13:90743183 |
| 13 rs7330798   | 90643122 T | 2.432  | 6.76E-09 | chr:13:90743183 |
| 13 rs7336804   | 90643171 G | 2.432  | 6.76E-09 | chr:13:90743183 |
| 13 rs9555961   | 90643256 C | 2.432  | 6.76E-09 | chr:13:90743183 |
| 13 rs66977832  | 90814025 T | 0.4474 | 7.83E-09 | chr:13:90743183 |
| 13 rs34788777  | 90640624 G | 2.625  | 7.93E-09 | chr:13:90743183 |
| 13 rs7329747   | 90643225 A | 2.379  | 9.73E-09 | chr:13:90743183 |
| 13 rs9555962   | 90643465 T | 2.379  | 9.73E-09 | chr:13:90743183 |
| 13 rs115378073 | 90550877 C | 8.813  | 1.02E-08 | chr:13:90743183 |
| 13 rs11620232  | 90642326 G | 2.565  | 1.34E-08 | chr:13:90743183 |
| 13 rs11841913  | 90637307 T | 2.565  | 1.34E-08 | chr:13:90743183 |
| 13 rs11842101  | 90633545 G | 2.565  | 1.34E-08 | chr:13:90743183 |
| 13 rs12855674  | 90638634 G | 2.565  | 1.34E-08 | chr:13:90743183 |
| 13 rs12857525  | 90638814 G | 2.565  | 1.34E-08 | chr:13:90743183 |
| 13 rs35159467  | 90631767 A | 2.565  | 1.34E-08 | chr:13:90743183 |
| 13 rs2637430   | 90769517 C | 2.683  | 1.36E-08 | chr:13:90743183 |
| 13 rs190443016 | 90628332 C | 8.033  | 1.40E-08 | chr:13:90743183 |
| 13 rs73589586  | 90700899 T | 8.109  | 1.62E-08 | chr:13:90743183 |

|                |            |        |          |                 |
|----------------|------------|--------|----------|-----------------|
| 13 rs36107022  | 90633068 G | 2.265  | 1.74E-08 | chr:13:90743183 |
| 13 rs7322351   | 90639552 T | 2.523  | 2.31E-08 | chr:13:90743183 |
| 13 rs11617103  | 90631248 T | 2.252  | 2.45E-08 | chr:13:90743183 |
| 13 rs11840615  | 90633462 T | 2.252  | 2.45E-08 | chr:13:90743183 |
| 13 rs11842409  | 90633533 C | 2.252  | 2.45E-08 | chr:13:90743183 |
| 13 rs33978002  | 90631956 C | 2.252  | 2.45E-08 | chr:13:90743183 |
| 13 rs34913089  | 90631879 A | 2.252  | 2.45E-08 | chr:13:90743183 |
| 13 rs35389000  | 90631733 A | 2.252  | 2.45E-08 | chr:13:90743183 |
| 13 rs35478160  | 90631588 A | 2.252  | 2.45E-08 | chr:13:90743183 |
| 13 rs35544140  | 90632802 C | 2.252  | 2.45E-08 | chr:13:90743183 |
| 13 rs36035336  | 90632808 G | 2.252  | 2.45E-08 | chr:13:90743183 |
| 13 rs36088073  | 90632180 G | 2.252  | 2.45E-08 | chr:13:90743183 |
| 13 rs4483712   | 90631681 T | 2.252  | 2.45E-08 | chr:13:90743183 |
| 13 rs67925817  | 90634231 C | 2.252  | 2.45E-08 | chr:13:90743183 |
| 13 rs75355243  | 90632450 C | 2.252  | 2.45E-08 | chr:13:90743183 |
| 13 rs2637451   | 90756983 T | 2.2    | 3.48E-08 | chr:13:90743183 |
| 13 rs11842540  | 90634897 G | 2.484  | 3.49E-08 | chr:13:90743183 |
| 13 rs113533011 | 90712744 T | 6.339  | 3.49E-08 | chr:13:90743183 |
| 13 rs7332839   | 90552147 A | 2.604  | 3.52E-08 | chr:13:90743183 |
| 13 rs9560548   | 90732315 G | 0.3697 | 4.49E-08 | chr:13:90743183 |
| 13 rs138876275 | 90584825 T | 3.95   | 5.30E-08 | chr:13:90743183 |
| 13 rs150248833 | 90584824 T | 3.95   | 5.30E-08 | chr:13:90743183 |
| 13 rs73590700  | 90585491 A | 3.95   | 5.30E-08 | chr:13:90743183 |
| 13 rs73590702  | 90586548 T | 3.95   | 5.30E-08 | chr:13:90743183 |
| 13 rs73592606  | 90591394 G | 3.95   | 5.30E-08 | chr:13:90743183 |
| 13 rs6492462   | 90630593 G | 2.203  | 5.49E-08 | chr:13:90743183 |
| 13 rs11616837  | 90550930 C | 2.54   | 5.88E-08 | chr:13:90743183 |
| 13 rs34177160  | 90557890 A | 2.54   | 5.88E-08 | chr:13:90743183 |
| 13 rs73589556  | 90667440 G | 6.18   | 5.99E-08 | chr:13:90743183 |
| 13 rs141481669 | 90536135 C | 2.541  | 6.62E-08 | chr:13:90743183 |
| 13 rs16943606  | 90568012 C | 2.511  | 7.11E-08 | chr:13:90743183 |
| 13 rs34025086  | 90561699 T | 2.511  | 7.11E-08 | chr:13:90743183 |
| 13 rs35016897  | 90561702 C | 2.511  | 7.11E-08 | chr:13:90743183 |
| 13 rs7491874   | 90564889 A | 2.511  | 7.11E-08 | chr:13:90743183 |
| 13 rs4365161   | 90727687 G | 0.3762 | 7.27E-08 | chr:13:90743183 |
| 13 rs4630407   | 90727551 T | 0.3762 | 7.27E-08 | chr:13:90743183 |
| 13 rs7322597   | 90727900 T | 0.3762 | 7.27E-08 | chr:13:90743183 |
| 13 rs7323161   | 90728164 G | 0.3762 | 7.27E-08 | chr:13:90743183 |
| 13 rs764152    | 90739700 C | 0.3762 | 7.27E-08 | chr:13:90743183 |
| 13 rs9555976   | 90725792 A | 0.3762 | 7.27E-08 | chr:13:90743183 |
| 13 rs9560549   | 90732413 T | 0.3762 | 7.27E-08 | chr:13:90743183 |
| 13 rs73594629  | 90613906 A | 3.831  | 7.85E-08 | chr:13:90743183 |
| 13 rs11843666  | 90541866 C | 2.506  | 8.27E-08 | chr:13:90743183 |

|                |            |        |          |                 |
|----------------|------------|--------|----------|-----------------|
| 13 rs12860268  | 90540632 A | 2.506  | 8.27E-08 | chr:13:90743183 |
| 13 rs72635728  | 90549311 C | 2.506  | 8.27E-08 | chr:13:90743183 |
| 13 rs35536220  | 90721995 T | 0.3331 | 8.76E-08 | chr:13:90743183 |
| 13 rs35818222  | 90721996 T | 0.3331 | 8.76E-08 | chr:13:90743183 |
| 13 rs67813670  | 90635824 T | 2.373  | 8.94E-08 | chr:13:90743183 |
| 13 rs112268157 | 90602971 C | 3.8    | 9.03E-08 | chr:13:90743183 |
| 13 rs7332183   | 90690405 C | 5.724  | 1.01E-07 | chr:13:90743183 |
| 13 rs11841910  | 90637232 T | 2.347  | 1.08E-07 | chr:13:90743183 |
| 13 rs73592671  | 90594126 G | 3.825  | 1.11E-07 | chr:13:90743183 |
| 13 rs3962877   | 90743898 G | 0.3854 | 1.20E-07 | chr:13:90743183 |
| 13 rs3962897   | 90743725 G | 0.3854 | 1.20E-07 | chr:13:90743183 |
| 13 rs4033089   | 90743876 A | 0.3854 | 1.20E-07 | chr:13:90743183 |
| 13 rs4142564   | 90742508 G | 0.3854 | 1.20E-07 | chr:13:90743183 |
| 13 rs4397974   | 90744196 A | 0.3854 | 1.20E-07 | chr:13:90743183 |
| 13 rs4575402   | 90759420 G | 0.4795 | 1.20E-07 | chr:13:90743183 |
| 13 rs56085483  | 90742927 C | 0.3854 | 1.20E-07 | chr:13:90743183 |
| 13 rs9560552   | 90741176 T | 0.3854 | 1.20E-07 | chr:13:90743183 |
| 13 rs67849531  | 90635826 C | 2.363  | 1.22E-07 | chr:13:90743183 |
| 13 rs9560555   | 90759323 C | 0.4808 | 1.25E-07 | chr:13:90743183 |
| 13 rs112923054 | 90648444 G | 6.365  | 1.30E-07 | chr:13:90743183 |
| 13 rs113736761 | 90664093 G | 6.365  | 1.30E-07 | chr:13:90743183 |
| 13 rs114082106 | 90655972 A | 6.365  | 1.30E-07 | chr:13:90743183 |
| 13 rs114844703 | 90655971 T | 6.365  | 1.30E-07 | chr:13:90743183 |
| 13 rs73589536  | 90649073 T | 6.365  | 1.30E-07 | chr:13:90743183 |
| 13 rs73589537  | 90650192 G | 6.365  | 1.30E-07 | chr:13:90743183 |
| 13 rs11069955  | 90636907 C | 2.326  | 1.41E-07 | chr:13:90743183 |
| 13 rs11839010  | 90637082 T | 2.326  | 1.41E-07 | chr:13:90743183 |
| 13 rs35140659  | 90635765 G | 2.326  | 1.41E-07 | chr:13:90743183 |
| 13 rs7318758   | 90636318 A | 2.326  | 1.41E-07 | chr:13:90743183 |
| 13 rs7323349   | 90636352 A | 2.326  | 1.41E-07 | chr:13:90743183 |
| 13 rs7323973   | 90636677 A | 2.326  | 1.41E-07 | chr:13:90743183 |
| 13 rs9560506   | 90637400 T | 2.201  | 1.62E-07 | chr:13:90743183 |
| 13 rs73589592  | 90705949 T | 5.345  | 1.68E-07 | chr:13:90743183 |
| 13 rs12861166  | 90640920 G | 2.136  | 1.78E-07 | chr:13:90743183 |
| 13 rs12866996  | 90640832 A | 2.136  | 1.78E-07 | chr:13:90743183 |
| 13 rs12867329  | 90641063 C | 2.136  | 1.78E-07 | chr:13:90743183 |
| 13 rs34234059  | 90640734 C | 2.136  | 1.78E-07 | chr:13:90743183 |
| 13 rs34411621  | 90641297 A | 2.136  | 1.78E-07 | chr:13:90743183 |
| 13 rs34813353  | 90640801 A | 2.136  | 1.78E-07 | chr:13:90743183 |
| 13 rs4145191   | 90639915 G | 2.136  | 1.78E-07 | chr:13:90743183 |
| 13 rs4145192   | 90639854 T | 2.136  | 1.78E-07 | chr:13:90743183 |
| 13 rs7320872   | 90639825 A | 2.136  | 1.78E-07 | chr:13:90743183 |
| 13 rs9555960   | 90640282 G | 2.136  | 1.78E-07 | chr:13:90743183 |



|                |            |        |          |                 |
|----------------|------------|--------|----------|-----------------|
| 13 rs9560512   | 90641900 G | 2.136  | 1.78E-07 | chr:13:90743183 |
| 13 rs4512967   | 90759397 T | 0.4865 | 1.96E-07 | chr:13:90743183 |
| 13 rs12585871  | 90736906 G | 0.3788 | 2.10E-07 | chr:13:90743183 |
| 13 rs9583784   | 90745973 C | 0.3788 | 2.10E-07 | chr:13:90743183 |
| 13 rs7993692   | 90642252 G | 2.129  | 2.17E-07 | chr:13:90743183 |
| 13 rs7320537   | 90639720 C | 2.109  | 2.21E-07 | chr:13:90743183 |
| 13 rs9588800   | 90592361 A | 0.4345 | 2.25E-07 | chr:13:90743183 |
| 13 rs7984840   | 90719301 T | 0.3866 | 2.31E-07 | chr:13:90743183 |
| 13 rs4145193   | 90640172 G | 2.117  | 2.39E-07 | chr:13:90743183 |
| 13 rs111267159 | 90682583 T | 4.926  | 2.69E-07 | chr:13:90743183 |
| 13 rs7981899   | 90713975 G | 0.3564 | 2.74E-07 | chr:13:90743183 |
| 13 rs73591316  | 90724951 A | 0.3831 | 2.83E-07 | chr:13:90743183 |
| 13 rs111593143 | 90749467 G | 10.42  | 3.17E-07 | chr:13:90743183 |
| 13 rs1539155   | 90544523 C | 0.5084 | 3.81E-07 | chr:13:90743183 |
| 13 rs1578536   | 90543914 T | 0.5084 | 3.81E-07 | chr:13:90743183 |
| 13 rs2637449   | 90759178 A | 2.437  | 5.45E-07 | chr:13:90743183 |
| 13 rs9583779   | 90717701 G | 0.3623 | 5.55E-07 | chr:13:90743183 |
| 13 rs11618576  | 90531160 A | 1.98   | 5.81E-07 | chr:13:90743183 |
| 13 rs73593654  | 90756729 C | 0.3984 | 5.94E-07 | chr:13:90743183 |
| 13 rs9555953   | 90537427 T | 0.5138 | 6.43E-07 | chr:13:90743183 |
| 13 rs9515657   | 90557478 T | 1.935  | 6.57E-07 | chr:13:90743183 |
| 13 rs9560546   | 90720086 T | 0.3942 | 6.66E-07 | chr:13:90743183 |
| 13 rs12872730  | 90628330 T | 2.231  | 7.38E-07 | chr:13:90743183 |
| 13 rs1907428   | 90718633 C | 0.3945 | 7.43E-07 | chr:13:90743183 |
| 13 rs7992865   | 90709499 G | 0.3945 | 7.43E-07 | chr:13:90743183 |
| 13 rs9560544   | 90716307 C | 0.3945 | 7.43E-07 | chr:13:90743183 |
| 13 rs1388192   | 90767388 A | 1.96   | 7.77E-07 | chr:13:90743183 |
| 13 rs34711780  | 90536294 T | 1.985  | 7.90E-07 | chr:13:90743183 |
| 13 rs11619601  | 90630160 G | 2.203  | 7.92E-07 | chr:13:90743183 |
| 13 rs73590694  | 90584912 G | 8.591  | 8.29E-07 | chr:13:90743183 |
| 13 rs73594605  | 90606905 T | 8.591  | 8.29E-07 | chr:13:90743183 |
| 13 rs73589555  | 90665968 G | 3.548  | 8.87E-07 | chr:13:90743183 |
| 13 rs113523606 | 90770034 C | 4.226  | 9.04E-07 | chr:13:90743183 |
| 13 rs73593674  | 90764791 A | 4.226  | 9.04E-07 | chr:13:90743183 |
| 13 rs73593695  | 90769565 T | 4.226  | 9.04E-07 | chr:13:90743183 |
| 13 rs7981055   | 90765430 T | 4.226  | 9.04E-07 | chr:13:90743183 |
| 13 rs7997171   | 90764661 C | 4.226  | 9.04E-07 | chr:13:90743183 |
| 13 rs9515656   | 90556978 A | 1.898  | 9.83E-07 | chr:13:90743183 |
| 13 rs9522839   | 90725273 A | 0.4063 | 9.98E-07 | chr:13:90743183 |
| 13 rs950956    | 90581710 C | 2.199  | 1.02E-06 | chr:13:90743183 |
| 13 rs2637429   | 90765946 G | 1.948  | 1.05E-06 | chr:13:90743183 |
| 13 rs2637431   | 90773811 A | 0.4664 | 1.08E-06 | chr:13:90743183 |
| 13 rs971011    | 90777278 A | 0.4664 | 1.08E-06 | chr:13:90743183 |

|                |            |        |          |                 |
|----------------|------------|--------|----------|-----------------|
| 13 rs34721005  | 90628659 C | 2.204  | 1.11E-06 | chr:13:90743183 |
| 13 rs9560508   | 90637437 C | 2.021  | 1.28E-06 | chr:13:90743183 |
| 13 rs2637432   | 90774493 A | 0.4692 | 1.31E-06 | chr:13:90743183 |
| 13 rs2637437   | 90776365 C | 0.4692 | 1.31E-06 | chr:13:90743183 |
| 13 rs2637440   | 90777847 C | 0.4692 | 1.31E-06 | chr:13:90743183 |
| 13 rs724793    | 90778898 C | 0.4692 | 1.31E-06 | chr:13:90743183 |
| 13 rs9588826   | 90641387 T | 0.5293 | 1.36E-06 | chr:13:90743183 |
| 13 rs73589597  | 90708041 C | 3.89   | 1.44E-06 | chr:13:90743183 |
| 13 rs12585482  | 90562222 A | 0.5274 | 1.46E-06 | chr:13:90743183 |
| 13 rs35152474  | 90623202 T | 2.181  | 1.50E-06 | chr:13:90743183 |
| 13 rs67181673  | 90624858 G | 2.181  | 1.50E-06 | chr:13:90743183 |
| 13 rs11839415  | 90579846 T | 2.18   | 1.52E-06 | chr:13:90743183 |
| 13 rs12854096  | 90614128 G | 2.18   | 1.52E-06 | chr:13:90743183 |
| 13 rs12870592  | 90616121 T | 2.18   | 1.52E-06 | chr:13:90743183 |
| 13 rs17633242  | 90603523 A | 2.18   | 1.52E-06 | chr:13:90743183 |
| 13 rs34072176  | 90595015 G | 2.18   | 1.52E-06 | chr:13:90743183 |
| 13 rs35019682  | 90600049 G | 2.18   | 1.52E-06 | chr:13:90743183 |
| 13 rs36012183  | 90604597 C | 2.18   | 1.52E-06 | chr:13:90743183 |
| 13 rs67842803  | 90583574 G | 2.18   | 1.52E-06 | chr:13:90743183 |
| 13 rs8001179   | 90613977 G | 2.18   | 1.52E-06 | chr:13:90743183 |
| 13 rs9560491   | 90542236 T | 0.5286 | 1.55E-06 | chr:13:90743183 |
| 13 rs9560492   | 90542402 T | 0.5286 | 1.55E-06 | chr:13:90743183 |
| 13 rs35160629  | 90641021 G | 1.974  | 1.57E-06 | chr:13:90743183 |
| 13 rs9560507   | 90637423 A | 1.994  | 1.59E-06 | chr:13:90743183 |
| 13 rs73594641  | 90617801 T | 5.765  | 1.70E-06 | chr:13:90743183 |
| 13 rs74102220  | 90772886 G | 4.18   | 1.75E-06 | chr:13:90743183 |
| 13 rs9560542   | 90707966 A | 0.4163 | 1.82E-06 | chr:13:90743183 |
| 13 rs115159618 | 90747104 G | 7.216  | 1.83E-06 | chr:13:90743183 |
| 13 rs9588824   | 90633423 G | 0.5407 | 1.87E-06 | chr:13:90743183 |
| 13 rs59478734  | 90825311 A | 3.057  | 1.98E-06 | chr:13:90743183 |
| 13 rs73597471  | 90821777 T | 3.057  | 1.98E-06 | chr:13:90743183 |
| 13 rs73597491  | 90830101 T | 3.048  | 2.04E-06 | chr:13:90743183 |
| 13 rs61960173  | 90773350 G | 0.4692 | 2.16E-06 | chr:13:90743183 |
| 13 rs12856882  | 90638971 T | 1.995  | 2.22E-06 | chr:13:90743183 |
| 13 rs9560511   | 90637932 C | 1.995  | 2.22E-06 | chr:13:90743183 |
| 13 rs7984830   | 90718586 T | 0.3798 | 2.26E-06 | chr:13:90743183 |
| 13 rs115483767 | 90657352 C | 5.992  | 2.55E-06 | chr:13:90743183 |
| 13 rs60749084  | 90662586 G | 5.992  | 2.55E-06 | chr:13:90743183 |
| 13 rs73597482  | 90825069 G | 3.055  | 2.58E-06 | chr:13:90743183 |
| 13 rs74102250  | 90830341 C | 2.888  | 2.66E-06 | chr:13:90743183 |
| 13 rs57953905  | 90872130 G | 2.712  | 2.76E-06 | chr:13:90743183 |
| 13 rs1491010   | 90837913 A | 2.282  | 2.86E-06 | chr:13:90743183 |
| 13 rs2805646   | 90772617 G | 0.4866 | 2.90E-06 | chr:13:90743183 |

|                |            |        |          |                 |
|----------------|------------|--------|----------|-----------------|
| 13 rs2637478   | 90709431 C | 0.5184 | 2.92E-06 | chr:13:90743183 |
| 13 rs2805684   | 90712517 T | 0.5184 | 2.92E-06 | chr:13:90743183 |
| 13 rs55654710  | 90782777 T | 4.688  | 2.96E-06 | chr:13:90743183 |
| 13 rs74102230  | 90792973 T | 4.688  | 2.96E-06 | chr:13:90743183 |
| 13 rs112363253 | 90592057 T | 5.574  | 3.02E-06 | chr:13:90743183 |
| 13 rs113260853 | 90627086 G | 5.574  | 3.02E-06 | chr:13:90743183 |
| 13 rs113575165 | 90598445 T | 5.574  | 3.02E-06 | chr:13:90743183 |
| 13 rs73590665  | 90579572 A | 5.574  | 3.02E-06 | chr:13:90743183 |
| 13 rs73590670  | 90580024 C | 5.574  | 3.02E-06 | chr:13:90743183 |
| 13 rs73590682  | 90582229 G | 5.574  | 3.02E-06 | chr:13:90743183 |
| 13 rs73590684  | 90583224 A | 5.574  | 3.02E-06 | chr:13:90743183 |
| 13 rs73590691  | 90584739 A | 5.574  | 3.02E-06 | chr:13:90743183 |
| 13 rs73592604  | 90588007 G | 5.574  | 3.02E-06 | chr:13:90743183 |
| 13 rs73594610  | 90609667 A | 5.574  | 3.02E-06 | chr:13:90743183 |
| 13 rs73594672  | 90623800 A | 5.574  | 3.02E-06 | chr:13:90743183 |
| 13 rs9560509   | 90637790 G | 1.966  | 3.17E-06 | chr:13:90743183 |
| 13 rs55759961  | 90862725 A | 2.824  | 3.23E-06 | chr:13:90743183 |
| 13 rs7331225   | 90646484 C | 0.4941 | 3.32E-06 | chr:13:90743183 |
| 13 rs1907429   | 90772910 A | 0.4895 | 3.46E-06 | chr:13:90743183 |
| 13 rs2260330   | 90772341 G | 0.4895 | 3.46E-06 | chr:13:90743183 |
| 13 rs73583123  | 90863956 T | 2.703  | 3.68E-06 | chr:13:90743183 |
| 13 rs73583107  | 90847543 T | 2.815  | 4.04E-06 | chr:13:90743183 |
| 13 rs79414261  | 90843550 A | 2.815  | 4.04E-06 | chr:13:90743183 |
| 13 rs7491812   | 90752437 G | 0.3748 | 4.22E-06 | chr:13:90743183 |
| 13 rs73595615  | 90773157 G | 3.653  | 4.28E-06 | chr:13:90743183 |
| 13 rs2805641   | 90761259 G | 1.907  | 4.65E-06 | chr:13:90743183 |
| 13 rs113227446 | 90807925 G | 3.759  | 4.87E-06 | chr:13:90743183 |
| 13 rs113236793 | 90792905 T | 3.759  | 4.87E-06 | chr:13:90743183 |
| 13 rs113988025 | 90807223 T | 3.759  | 4.87E-06 | chr:13:90743183 |
| 13 rs116167725 | 90783382 C | 3.759  | 4.87E-06 | chr:13:90743183 |
| 13 rs116651730 | 90783384 G | 3.759  | 4.87E-06 | chr:13:90743183 |
| 13 rs144588438 | 90783823 G | 3.759  | 4.87E-06 | chr:13:90743183 |
| 13 rs73595636  | 90782881 A | 3.759  | 4.87E-06 | chr:13:90743183 |
| 13 rs73595658  | 90788533 A | 3.759  | 4.87E-06 | chr:13:90743183 |
| 13 rs73595666  | 90791754 A | 3.759  | 4.87E-06 | chr:13:90743183 |
| 13 rs73595678  | 90794729 C | 3.759  | 4.87E-06 | chr:13:90743183 |
| 13 rs73595692  | 90803673 A | 3.759  | 4.87E-06 | chr:13:90743183 |
| 13 rs73597431  | 90813633 G | 3.759  | 4.87E-06 | chr:13:90743183 |
| 13 rs75879175  | 90810098 T | 3.759  | 4.87E-06 | chr:13:90743183 |
| 13 rs77034014  | 90791980 T | 3.759  | 4.87E-06 | chr:13:90743183 |
| 13 rs80143767  | 90810663 G | 3.759  | 4.87E-06 | chr:13:90743183 |
| 13 rs9522837   | 90724010 C | 0.3756 | 5.16E-06 | chr:13:90743183 |
| 13 rs74102232  | 90794536 A | 4.098  | 5.18E-06 | chr:13:90743183 |

|                |            |        |          |                 |
|----------------|------------|--------|----------|-----------------|
| 13 rs955322    | 90568994 C | 0.5541 | 5.52E-06 | chr:13:90743183 |
| 13 rs574520393 | 90810145 A | 4.716  | 6.56E-06 | chr:13:90743183 |
| 13 rs7318897   | 90541300 T | 0.381  | 6.64E-06 | chr:13:90743183 |
| 13 rs74102239  | 90814460 A | 3.794  | 6.81E-06 | chr:13:90743183 |
| 13 rs9560569   | 90823825 T | 0.531  | 7.21E-06 | chr:13:90743183 |
| 13 rs73583129  | 90869753 G | 2.465  | 7.33E-06 | chr:13:90743183 |
| 13 rs72639682  | 90735400 A | 0.4144 | 7.38E-06 | chr:13:90743183 |
| 13 rs1539156   | 90548249 T | 0.5484 | 7.44E-06 | chr:13:90743183 |
| 13 rs9522835   | 90715112 G | 0.3868 | 7.45E-06 | chr:13:90743183 |
| 13 rs7996031   | 90822896 C | 0.5301 | 7.55E-06 | chr:13:90743183 |
| 13 rs8002817   | 90822912 C | 0.5301 | 7.55E-06 | chr:13:90743183 |
| 13 rs2805643   | 90762364 T | 1.872  | 7.61E-06 | chr:13:90743183 |
| 13 rs9560495   | 90562947 T | 0.5595 | 7.84E-06 | chr:13:90743183 |
| 13 rs9560497   | 90567654 T | 0.5595 | 7.84E-06 | chr:13:90743183 |
| 13 rs9583747   | 90567048 T | 0.5595 | 7.84E-06 | chr:13:90743183 |
| 13 rs9588794   | 90562433 A | 0.5595 | 7.84E-06 | chr:13:90743183 |
| 13 rs111375518 | 90775792 A | 3.577  | 7.92E-06 | chr:13:90743183 |
| 13 rs2637475   | 90712256 T | 0.5354 | 8.18E-06 | chr:13:90743183 |
| 13 rs12429707  | 90678379 C | 0.4193 | 8.87E-06 | chr:13:90743183 |
| 13 rs28837503  | 90675852 A | 0.4193 | 8.87E-06 | chr:13:90743183 |
| 13 rs72636938  | 90669783 G | 0.4193 | 8.87E-06 | chr:13:90743183 |
| 13 rs9555971   | 90697612 A | 0.4193 | 8.87E-06 | chr:13:90743183 |
| 13 rs9560523   | 90672204 C | 0.4193 | 8.87E-06 | chr:13:90743183 |
| 13 rs9560524   | 90674539 A | 0.4193 | 8.87E-06 | chr:13:90743183 |
| 13 rs9560537   | 90690924 G | 0.4193 | 8.87E-06 | chr:13:90743183 |
| 13 rs9560538   | 90691450 A | 0.4193 | 8.87E-06 | chr:13:90743183 |
| 13 rs9634613   | 90668112 G | 0.4193 | 8.87E-06 | chr:13:90743183 |
| 13 rs4142565   | 90742687 G | 0.419  | 9.39E-06 | chr:13:90743183 |
| 13 rs75426841  | 90822252 T | 4.879  | 9.46E-06 | chr:13:90743183 |
| 13 rs75197852  | 90814283 A | 3.01   | 9.61E-06 | chr:13:90743183 |
| 13 rs73595700  | 90804104 T | 3.708  | 9.63E-06 | chr:13:90743183 |
| 13 rs10161633  | 90653542 A | 0.4585 | 1.01E-05 | chr:13:90743183 |
| 13 rs1578543   | 90655155 A | 0.4585 | 1.01E-05 | chr:13:90743183 |
| 13 rs17664303  | 90659602 A | 0.4585 | 1.01E-05 | chr:13:90743183 |
| 13 rs60185893  | 90649244 G | 0.4585 | 1.01E-05 | chr:13:90743183 |
| 13 rs66656579  | 90656550 A | 0.4585 | 1.01E-05 | chr:13:90743183 |
| 13 rs9588831   | 90652104 G | 0.4585 | 1.01E-05 | chr:13:90743183 |
| 13 rs12428396  | 90753177 G | 0.4192 | 1.02E-05 | chr:13:90743183 |
| 13 rs9560554   | 90755079 G | 0.4192 | 1.02E-05 | chr:13:90743183 |
| 13 rs9560568   | 90823449 C | 0.5372 | 1.03E-05 | chr:13:90743183 |
| 13 rs141255381 | 90787561 T | 3.95   | 1.04E-05 | chr:13:90743183 |
| 13 rs80043791  | 90787299 G | 3.95   | 1.04E-05 | chr:13:90743183 |
| 13 rs9560486   | 90531354 A | 0.5554 | 1.06E-05 | chr:13:90743183 |

|                |            |        |          |                 |
|----------------|------------|--------|----------|-----------------|
| 13 rs72641506  | 90757010 C | 0.5151 | 1.07E-05 | chr:13:90743183 |
| 13 rs552641606 | 90795958 A | 3.778  | 1.12E-05 | chr:13:90743183 |
| 13 rs56987740  | 90687516 T | 2.905  | 1.17E-05 | chr:13:90743183 |
| 13 rs12184683  | 90618940 G | 0.4404 | 1.22E-05 | chr:13:90743183 |
| 13 rs7994080   | 90715892 C | 0.4145 | 1.23E-05 | chr:13:90743183 |
| 13 rs9515652   | 90541852 G | 1.794  | 1.27E-05 | chr:13:90743183 |
| 13 rs9522782   | 90539818 G | 1.794  | 1.27E-05 | chr:13:90743183 |
| 13 rs2805749   | 90747622 A | 0.4014 | 1.45E-05 | chr:13:90743183 |
| 13 rs9588821   | 90628299 T | 0.4443 | 1.50E-05 | chr:13:90743183 |
| 13 rs13378871  | 90632416 A | 0.4411 | 1.57E-05 | chr:13:90743183 |
| 13 rs12585323  | 90593476 C | 0.4458 | 1.60E-05 | chr:13:90743183 |
| 13 rs56166032  | 90599344 A | 0.4458 | 1.60E-05 | chr:13:90743183 |
| 13 rs7994571   | 90603122 A | 0.4458 | 1.60E-05 | chr:13:90743183 |
| 13 rs9301639   | 90591226 T | 0.4458 | 1.60E-05 | chr:13:90743183 |
| 13 rs9588801   | 90593093 T | 0.4458 | 1.60E-05 | chr:13:90743183 |
| 13 rs9588805   | 90604479 T | 0.4458 | 1.60E-05 | chr:13:90743183 |
| 13 rs9588807   | 90605464 C | 0.4458 | 1.60E-05 | chr:13:90743183 |
| 13 rs9588809   | 90615236 A | 0.4458 | 1.60E-05 | chr:13:90743183 |
| 13 rs9805197   | 90600767 T | 0.4458 | 1.60E-05 | chr:13:90743183 |
| 13 rs9805592   | 90600637 G | 0.4458 | 1.60E-05 | chr:13:90743183 |
| 13 rs9515665   | 90664547 G | 0.448  | 1.67E-05 | chr:13:90743183 |
| 13 rs9588825   | 90639634 G | 0.4454 | 1.70E-05 | chr:13:90743183 |
| 14 rs6573756   | 20555675 G | 17.05  | 1.15E-29 | chr:14:20552746 |
| 14 rs4360850   | 20558013 A | 14.95  | 1.16E-29 | chr:14:20552746 |
| 14 rs4438225   | 20557810 A | 14.8   | 1.45E-29 | chr:14:20552746 |
| 14 rs6573762   | 20555920 A | 16.75  | 1.75E-29 | chr:14:20552746 |
| 14 rs7401094   | 20555950 C | 16.75  | 1.75E-29 | chr:14:20552746 |
| 14 rs4297617   | 20557961 T | 15.67  | 2.29E-29 | chr:14:20552746 |
| 14 rs4572311   | 20557971 C | 15.67  | 2.29E-29 | chr:14:20552746 |
| 14 rs11158659  | 20556212 A | 17.88  | 3.45E-29 | chr:14:20552746 |
| 14 rs11158660  | 20556259 C | 17.88  | 3.45E-29 | chr:14:20552746 |
| 14 rs12434437  | 20556447 T | 17.88  | 3.45E-29 | chr:14:20552746 |
| 14 rs12434463  | 20556513 T | 17.88  | 3.45E-29 | chr:14:20552746 |
| 14 rs6573757   | 20555744 A | 17.88  | 3.45E-29 | chr:14:20552746 |
| 14 rs6573759   | 20555817 C | 17.88  | 3.45E-29 | chr:14:20552746 |
| 14 rs7151579   | 20556265 G | 17.88  | 3.45E-29 | chr:14:20552746 |
| 14 rs10136466  | 20550347 C | 6.826  | 8.51E-28 | chr:14:20552746 |
| 14 rs1958722   | 20562590 G | 5.664  | 1.51E-25 | chr:14:20552746 |
| 14 rs4981728   | 20560512 A | 0.1873 | 3.00E-25 | chr:14:20552746 |
| 14 rs12433363  | 20561341 T | 0.1857 | 3.11E-25 | chr:14:20552746 |
| 14 rs12586923  | 20559937 G | 0.1857 | 3.11E-25 | chr:14:20552746 |
| 14 rs12587536  | 20559906 C | 0.1857 | 3.11E-25 | chr:14:20552746 |
| 14 rs12881697  | 20560434 A | 0.1857 | 3.11E-25 | chr:14:20552746 |

|                           |            |        |          |                 |
|---------------------------|------------|--------|----------|-----------------|
| 14 rs4144239              | 20561922 G | 0.1857 | 3.11E-25 | chr:14:20552746 |
| 14 rs4144240              | 20561753 T | 0.1857 | 3.11E-25 | chr:14:20552746 |
| 14 rs57793822             | 20561481 C | 0.1857 | 3.11E-25 | chr:14:20552746 |
| 14 rs7148411              | 20559282 A | 0.1857 | 3.11E-25 | chr:14:20552746 |
| 14 rs7158086              | 20559451 A | 0.1857 | 3.11E-25 | chr:14:20552746 |
| 14 rs969774               | 20562080 C | 0.1857 | 3.11E-25 | chr:14:20552746 |
| 14 rs11158661             | 20556366 C | 0.1833 | 3.54E-25 | chr:14:20552746 |
| 14 rs4144238              | 20561971 T | 0.2071 | 3.02E-22 | chr:14:20552746 |
| 14 rs12890274             | 20560354 C | 0.21   | 3.10E-22 | chr:14:20552746 |
| 14 rs58618658             | 20549983 A | 4.4    | 2.09E-20 | chr:14:20552746 |
| 14 rs74037224             | 20549898 A | 4.4    | 2.09E-20 | chr:14:20552746 |
| 14 rs7153404              | 20550111 A | 0.2275 | 1.60E-18 | chr:14:20552746 |
| 14 rs12590521             | 20558876 G | 0.2404 | 1.77E-17 | chr:14:20552746 |
| 14 rs78783511             | 20555396 C | 3.665  | 1.02E-16 | chr:14:20552746 |
| 14 rs7152272              | 20559234 A | 2.528  | 5.35E-13 | chr:14:20552746 |
| 14 rs58368472             | 20561378 T | 2.245  | 1.54E-10 | chr:14:20552746 |
| 14 rs10150358             | 20552946 A | 0.478  | 2.15E-10 | chr:14:20552746 |
| 14 rs58438833             | 20552415 A | 0.478  | 2.15E-10 | chr:14:20552746 |
| 14 rs113445938            | 20550943 C | 0.4963 | 2.88E-10 | chr:14:20552746 |
| 14 rs114454848            | 20557868 C | 3.418  | 1.04E-09 | chr:14:20552746 |
| 14 rs75471823             | 20557468 C | 3.418  | 1.04E-09 | chr:14:20552746 |
| 14 rs12588910             | 20558938 T | 0.501  | 2.85E-08 | chr:14:20552746 |
| 14 rs56023234             | 20550049 A | 2.882  | 6.90E-08 | chr:14:20552746 |
| 14 rs8020394              | 20550495 C | 2.882  | 6.90E-08 | chr:14:20552746 |
| 14 rs182788079            | 20555663 T | 2.79   | 1.15E-07 | chr:14:20552746 |
| 14 rs190564533            | 20555662 A | 2.79   | 1.15E-07 | chr:14:20552746 |
| 14 rs374481570            | 20550995 A | 0.1298 | 1.36E-07 | chr:14:20552746 |
| 14 rs80060711             | 20549750 A | 2.787  | 2.87E-07 | chr:14:20552746 |
| 14 rs10141155             | 20557742 G | 0.4067 | 5.49E-07 | chr:14:20552746 |
| 14 rs74037232             | 20561953 T | 2.588  | 6.65E-07 | chr:14:20552746 |
| 14 rs7144218              | 20563139 G | 2.449  | 9.39E-07 | chr:14:20552746 |
| 14 rs10136940             | 20553166 G | 0.6104 | 9.57E-07 | chr:14:20552746 |
| 14 rs73575313             | 20550544 T | 0.4201 | 1.09E-06 | chr:14:20552746 |
| 14 rs10137015             | 20555241 T | 0.611  | 1.29E-06 | chr:14:20552746 |
| 14 rs12897224             | 20560235 C | 2.989  | 6.29E-06 | chr:14:20552746 |
| 14 rs138182926            | 20563062 A | 4.449  | 7.81E-06 | chr:14:20552746 |
| 14 rs2262356              | 20533972 A | 0.5    | 1.29E-05 | chr:14:20552746 |
| 14 rs138465439            | 20572188 T | 4.299  | 1.29E-05 | chr:14:20552746 |
| 14 rs578237295            | 20567485 C | 4.299  | 1.29E-05 | chr:14:20552746 |
| 14 rs78025773             | 20667485 A | 2.536  | 1.49E-05 | chr:14:20552746 |
| 14 rs141544050            | 20598438 A | 3.767  | 1.61E-05 | chr:14:20552746 |
| 14 rs72669100             | 20669659 T | 2.602  | 1.81E-05 | chr:14:20552746 |
| 14 rs77455669;rs573148833 | 20601712 A | 3.855  | 1.94E-05 | chr:14:20552746 |

|                |            |        |          |                 |
|----------------|------------|--------|----------|-----------------|
| 14 rs115548693 | 20669341 G | 2.497  | 2.08E-05 | chr:14:20552746 |
| 14 rs77527268  | 20668468 T | 2.497  | 2.08E-05 | chr:14:20552746 |
| 14 rs138738400 | 20594248 C | 3.956  | 2.19E-05 | chr:14:20552746 |
| 14 rs28404937  | 20556487 T | 3.247  | 2.58E-05 | chr:14:20552746 |
| 14 rs1805277   | 20533442 G | 0.5549 | 2.96E-05 | chr:14:20552746 |
| 14 rs1958719   | 20533586 A | 0.5549 | 2.96E-05 | chr:14:20552746 |
| 14 rs2775256   | 20533836 G | 0.5549 | 2.96E-05 | chr:14:20552746 |
| 14 rs562809940 | 20572294 T | 3.746  | 3.01E-05 | chr:14:20552746 |
| 15 rs2937855   | 63374677 G | 0.1314 | 1.11E-27 | chr:15:63374594 |
| 15 rs2652804   | 63374256 T | 0.1687 | 4.80E-25 | chr:15:63374594 |
| 15 rs2652805   | 63374129 A | 0.1687 | 4.80E-25 | chr:15:63374594 |
| 15 rs2652806   | 63374127 C | 0.1687 | 4.80E-25 | chr:15:63374594 |
| 15 rs2729805   | 63374289 A | 0.1722 | 1.25E-24 | chr:15:63374594 |
| 15 rs2729806   | 63373329 T | 0.1729 | 2.10E-24 | chr:15:63374594 |
| 15 rs2652832   | 63396928 T | 0.2581 | 1.80E-18 | chr:15:63374594 |
| 15 rs2729833   | 63397044 G | 0.2581 | 1.80E-18 | chr:15:63374594 |
| 15 rs2729801   | 63381095 A | 0.2583 | 2.28E-18 | chr:15:63374594 |
| 15 rs7182618   | 63398622 T | 0.2642 | 3.71E-18 | chr:15:63374594 |
| 15 rs78015421  | 63391406 A | 0.2664 | 5.64E-18 | chr:15:63374594 |
| 15 rs68088462  | 63397617 T | 0.2624 | 7.66E-18 | chr:15:63374594 |
| 15 rs28849975  | 63393922 T | 0.2677 | 8.90E-18 | chr:15:63374594 |
| 15 rs4344684   | 63397318 C | 0.2844 | 8.68E-17 | chr:15:63374594 |
| 15 rs2729804   | 63376659 T | 3.449  | 1.87E-16 | chr:15:63374594 |
| 15 rs34575783  | 63397686 G | 0.3033 | 1.02E-15 | chr:15:63374594 |
| 15 rs28872293  | 63394148 G | 0.3035 | 1.16E-15 | chr:15:63374594 |
| 15 rs2414811   | 63397725 C | 0.3016 | 1.47E-15 | chr:15:63374594 |
| 15 rs2729789   | 63400345 G | 0.3085 | 1.79E-15 | chr:15:63374594 |
| 15 rs8032104   | 63400584 A | 0.3085 | 1.79E-15 | chr:15:63374594 |
| 15 rs11637852  | 63397151 G | 0.3088 | 1.97E-15 | chr:15:63374594 |
| 15 rs2652833   | 63396885 C | 0.3088 | 1.97E-15 | chr:15:63374594 |
| 15 rs2652838   | 63396088 A | 0.3088 | 1.97E-15 | chr:15:63374594 |
| 15 rs2652840   | 63393220 T | 0.3088 | 1.97E-15 | chr:15:63374594 |
| 15 rs2652842   | 63391939 C | 0.3088 | 1.97E-15 | chr:15:63374594 |
| 15 rs2652843   | 63391648 T | 0.3088 | 1.97E-15 | chr:15:63374594 |
| 15 rs2652844   | 63391647 T | 0.3088 | 1.97E-15 | chr:15:63374594 |
| 15 rs2729830   | 63395812 G | 0.3088 | 1.97E-15 | chr:15:63374594 |
| 15 rs28768697  | 63394095 A | 0.3088 | 1.97E-15 | chr:15:63374594 |
| 15 rs34786874  | 63397504 A | 0.3088 | 1.97E-15 | chr:15:63374594 |
| 15 rs36116701  | 63397494 T | 0.3088 | 1.97E-15 | chr:15:63374594 |
| 15 rs76127683  | 63391362 G | 0.3088 | 1.97E-15 | chr:15:63374594 |
| 15 rs2134265   | 63398196 G | 0.3101 | 2.05E-15 | chr:15:63374594 |
| 15 rs7181141   | 63398552 A | 0.3101 | 2.05E-15 | chr:15:63374594 |
| 15 rs2652836   | 63396301 C | 0.3091 | 2.27E-15 | chr:15:63374594 |

|               |            |        |          |                 |
|---------------|------------|--------|----------|-----------------|
| 15 rs2729776  | 63392222 T | 0.3091 | 2.27E-15 | chr:15:63374594 |
| 15 rs2729834  | 63397047 G | 0.3091 | 2.27E-15 | chr:15:63374594 |
| 15 rs4775621  | 63395062 G | 0.3091 | 2.27E-15 | chr:15:63374594 |
| 15 rs8034620  | 63397155 C | 0.3091 | 2.27E-15 | chr:15:63374594 |
| 15 rs28860327 | 63393824 A | 0.31   | 2.49E-15 | chr:15:63374594 |
| 15 rs2729787  | 63401493 G | 0.3211 | 2.84E-15 | chr:15:63374594 |
| 15 rs2652835  | 63396408 T | 0.3143 | 3.77E-15 | chr:15:63374594 |
| 15 rs2729832  | 63396401 A | 0.3146 | 4.35E-15 | chr:15:63374594 |
| 15 rs2729788  | 63400378 G | 0.3218 | 4.62E-15 | chr:15:63374594 |
| 15 rs8034945  | 63397207 G | 0.3214 | 4.78E-15 | chr:15:63374594 |
| 15 rs12917357 | 63399793 C | 0.3222 | 5.30E-15 | chr:15:63374594 |
| 15 rs11637947 | 63397538 C | 0.3227 | 6.04E-15 | chr:15:63374594 |
| 15 rs12912721 | 63397385 T | 0.3227 | 6.04E-15 | chr:15:63374594 |
| 15 rs2652839  | 63395158 C | 0.3227 | 6.04E-15 | chr:15:63374594 |
| 15 rs2729829  | 63395484 C | 0.3227 | 6.04E-15 | chr:15:63374594 |
| 15 rs2729831  | 63396039 A | 0.3227 | 6.04E-15 | chr:15:63374594 |
| 15 rs35963767 | 63397601 G | 0.3227 | 6.04E-15 | chr:15:63374594 |
| 15 rs2652785  | 63397890 T | 0.3202 | 6.66E-15 | chr:15:63374594 |
| 15 rs9646207  | 63391235 C | 0.3302 | 7.08E-15 | chr:15:63374594 |
| 15 rs2652815  | 63401345 T | 0.3253 | 9.98E-15 | chr:15:63374594 |
| 15 rs4775620  | 63395043 C | 0.3304 | 1.37E-14 | chr:15:63374594 |
| 15 rs11071727 | 63390808 T | 0.3448 | 1.93E-14 | chr:15:63374594 |
| 15 rs4774472  | 63353760 C | 0.2999 | 6.31E-14 | chr:15:63374594 |
| 15 rs11071725 | 63390608 C | 0.3508 | 7.36E-14 | chr:15:63374594 |
| 15 rs10162675 | 63370358 C | 0.3121 | 2.52E-13 | chr:15:63374594 |
| 15 rs2729781  | 63404265 T | 0.3543 | 2.79E-13 | chr:15:63374594 |
| 15 rs2652816  | 63403368 C | 0.3555 | 3.51E-13 | chr:15:63374594 |
| 15 rs2729782  | 63403354 G | 0.3555 | 3.51E-13 | chr:15:63374594 |
| 15 rs2729783  | 63403316 G | 0.3555 | 3.51E-13 | chr:15:63374594 |
| 15 rs2729784  | 63402735 T | 0.3555 | 3.51E-13 | chr:15:63374594 |
| 15 rs6494394  | 63440938 A | 0.3551 | 5.33E-13 | chr:15:63374594 |
| 15 rs2729785  | 63402574 G | 0.3595 | 5.89E-13 | chr:15:63374594 |
| 15 rs2652813  | 63405366 G | 0.3657 | 6.64E-13 | chr:15:63374594 |
| 15 rs2937859  | 63366282 G | 0.3257 | 7.44E-13 | chr:15:63374594 |
| 15 rs2729780  | 63404639 C | 0.3625 | 7.65E-13 | chr:15:63374594 |
| 15 rs7175602  | 63367032 C | 0.3265 | 1.01E-12 | chr:15:63374594 |
| 15 rs2652834  | 63396867 A | 0.3418 | 1.29E-12 | chr:15:63374594 |
| 15 rs8038648  | 63379643 G | 0.3674 | 1.42E-12 | chr:15:63374594 |
| 15 rs7165016  | 63439590 T | 0.389  | 3.44E-12 | chr:15:63374594 |
| 15 rs12912328 | 63494235 A | 0.3799 | 1.13E-11 | chr:15:63374594 |
| 15 rs12595312 | 63494159 T | 0.3821 | 1.15E-11 | chr:15:63374594 |
| 15 rs7176597  | 63494482 G | 0.3821 | 1.15E-11 | chr:15:63374594 |
| 15 rs11071726 | 63390622 T | 0.404  | 1.19E-11 | chr:15:63374594 |



|                |            |        |          |                 |
|----------------|------------|--------|----------|-----------------|
| 15 rs11855609  | 63522691 C | 0.3984 | 4.44E-11 | chr:15:63374594 |
| 15 rs2729828   | 63361307 A | 0.3284 | 4.84E-11 | chr:15:63374594 |
| 15 rs16946416  | 63356721 T | 0.3293 | 6.53E-11 | chr:15:63374594 |
| 15 rs11071723  | 63355275 A | 0.3379 | 1.21E-10 | chr:15:63374594 |
| 15 rs28583444  | 63357852 T | 0.3419 | 1.71E-10 | chr:15:63374594 |
| 15 rs4238372   | 63351488 G | 0.3419 | 1.71E-10 | chr:15:63374594 |
| 15 rs6494396   | 63441248 C | 0.3836 | 2.04E-10 | chr:15:63374594 |
| 15 rs7170462   | 63345622 A | 0.343  | 2.32E-10 | chr:15:63374594 |
| 15 rs4774474   | 63405580 G | 0.4083 | 2.67E-10 | chr:15:63374594 |
| 15 rs12593078  | 63517347 A | 0.4191 | 2.93E-10 | chr:15:63374594 |
| 15 rs4775614   | 63351687 A | 0.3504 | 3.10E-10 | chr:15:63374594 |
| 15 rs2652824   | 63420001 C | 0.4012 | 3.57E-10 | chr:15:63374594 |
| 15 rs8032506   | 63371644 A | 0.3489 | 3.61E-10 | chr:15:63374594 |
| 15 rs4774478   | 63434763 A | 0.4216 | 4.16E-10 | chr:15:63374594 |
| 15 rs2729837   | 63430330 C | 0.4032 | 4.36E-10 | chr:15:63374594 |
| 15 rs2729827   | 63360564 G | 0.4279 | 4.75E-10 | chr:15:63374594 |
| 15 rs11853804  | 63528256 C | 0.4301 | 7.66E-10 | chr:15:63374594 |
| 15 rs11071735  | 63468114 T | 0.3932 | 1.02E-09 | chr:15:63374594 |
| 15 rs4238370   | 63347363 T | 0.4149 | 1.13E-09 | chr:15:63374594 |
| 15 rs2729779   | 63407173 T | 0.4094 | 1.39E-09 | chr:15:63374594 |
| 15 rs146054382 | 63508433 A | 0.4356 | 1.60E-09 | chr:15:63374594 |
| 15 rs78356111  | 63436955 C | 0.435  | 1.63E-09 | chr:15:63374594 |
| 15 rs6494391   | 63406785 T | 0.4305 | 1.70E-09 | chr:15:63374594 |
| 15 rs72747098  | 63525249 A | 2.296  | 2.12E-09 | chr:15:63374594 |
| 15 rs7163254   | 63439403 C | 0.4179 | 2.31E-09 | chr:15:63374594 |
| 15 rs6494392   | 63406863 G | 0.4158 | 2.41E-09 | chr:15:63374594 |
| 15 rs8468      | 63434110 C | 0.4301 | 5.24E-09 | chr:15:63374594 |
| 15 rs2652817   | 63483290 A | 0.3964 | 5.47E-09 | chr:15:63374594 |
| 15 rs2729791   | 63493057 G | 0.3964 | 5.47E-09 | chr:15:63374594 |
| 15 rs2729790   | 63466427 T | 0.4556 | 6.68E-09 | chr:15:63374594 |
| 15 rs13313493  | 63523855 C | 0.3993 | 6.95E-09 | chr:15:63374594 |
| 15 rs16946692  | 63531915 G | 0.3993 | 6.95E-09 | chr:15:63374594 |
| 15 rs2588862   | 63500195 A | 0.3993 | 6.95E-09 | chr:15:63374594 |
| 15 rs55976323  | 63523586 A | 0.3993 | 6.95E-09 | chr:15:63374594 |
| 15 rs7175974   | 63510113 G | 0.3993 | 6.95E-09 | chr:15:63374594 |
| 15 rs8032533   | 63516033 A | 0.3993 | 6.95E-09 | chr:15:63374594 |
| 15 rs4774476   | 63407390 T | 2.346  | 1.66E-08 | chr:15:63374594 |
| 15 rs7174466   | 63425019 A | 0.4379 | 1.74E-08 | chr:15:63374594 |
| 15 rs7175973   | 63425027 T | 0.4379 | 1.74E-08 | chr:15:63374594 |
| 15 rs12904537  | 63379726 T | 2.595  | 1.95E-08 | chr:15:63374594 |
| 15 rs9672258   | 63532459 C | 0.4205 | 2.60E-08 | chr:15:63374594 |
| 15 rs7177692   | 63379733 T | 2.555  | 2.79E-08 | chr:15:63374594 |
| 15 rs7177694   | 63379737 T | 2.555  | 2.79E-08 | chr:15:63374594 |

|                |            |        |          |                 |
|----------------|------------|--------|----------|-----------------|
| 15 rs2652795   | 63409265 T | 0.4464 | 2.85E-08 | chr:15:63374594 |
| 15 rs2652796   | 63408042 T | 0.4464 | 2.85E-08 | chr:15:63374594 |
| 15 rs2652797   | 63407578 C | 0.4464 | 2.85E-08 | chr:15:63374594 |
| 15 rs2652798   | 63407446 C | 0.4464 | 2.85E-08 | chr:15:63374594 |
| 15 rs2729778   | 63407332 T | 0.4464 | 2.85E-08 | chr:15:63374594 |
| 15 rs4775624   | 63408548 T | 0.4464 | 2.85E-08 | chr:15:63374594 |
| 15 rs10152434  | 63545352 C | 0.4236 | 3.52E-08 | chr:15:63374594 |
| 15 rs112196574 | 63545156 A | 0.4236 | 3.52E-08 | chr:15:63374594 |
| 15 rs12439988  | 63547217 A | 0.4236 | 3.52E-08 | chr:15:63374594 |
| 15 rs2062727   | 63472681 A | 0.4435 | 3.85E-08 | chr:15:63374594 |
| 15 rs16946690  | 63530492 A | 0.428  | 4.04E-08 | chr:15:63374594 |
| 15 rs2652818   | 63502378 C | 0.428  | 4.04E-08 | chr:15:63374594 |
| 15 rs4774475   | 63407357 T | 0.4693 | 5.23E-08 | chr:15:63374594 |
| 15 rs6494397   | 63460009 A | 0.4801 | 5.96E-08 | chr:15:63374594 |
| 15 rs62011182  | 63413115 A | 0.4615 | 7.78E-08 | chr:15:63374594 |
| 15 rs9888638   | 63410349 T | 0.4613 | 8.53E-08 | chr:15:63374594 |
| 15 rs9888735   | 63410141 G | 0.4613 | 8.53E-08 | chr:15:63374594 |
| 15 rs2652787   | 63415843 G | 0.4622 | 8.61E-08 | chr:15:63374594 |
| 15 rs2729819   | 63415849 C | 0.4622 | 8.61E-08 | chr:15:63374594 |
| 15 rs2652802   | 63377307 G | 0.2694 | 9.61E-08 | chr:15:63374594 |
| 15 rs28369547  | 63528924 T | 0.4417 | 9.75E-08 | chr:15:63374594 |
| 15 rs2652789   | 63415223 A | 0.4649 | 1.05E-07 | chr:15:63374594 |
| 15 rs11071733  | 63416481 G | 2.268  | 1.12E-07 | chr:15:63374594 |
| 15 rs2652819   | 63431175 A | 0.4705 | 1.31E-07 | chr:15:63374594 |
| 15 rs2652820   | 63430901 T | 0.4705 | 1.31E-07 | chr:15:63374594 |
| 15 rs10851724  | 63416702 T | 0.4678 | 1.36E-07 | chr:15:63374594 |
| 15 rs2652792   | 63411492 G | 0.4678 | 1.36E-07 | chr:15:63374594 |
| 15 rs2652794   | 63410872 C | 0.4678 | 1.36E-07 | chr:15:63374594 |
| 15 rs2729813   | 63412154 A | 0.4678 | 1.36E-07 | chr:15:63374594 |
| 15 rs2729815   | 63412843 A | 0.4678 | 1.36E-07 | chr:15:63374594 |
| 15 rs2729820   | 63416193 A | 0.4678 | 1.36E-07 | chr:15:63374594 |
| 15 rs34317102  | 63414083 A | 0.4678 | 1.36E-07 | chr:15:63374594 |
| 15 rs4551986   | 63424400 T | 0.4678 | 1.36E-07 | chr:15:63374594 |
| 15 rs2652812   | 63406170 C | 0.4829 | 1.44E-07 | chr:15:63374594 |
| 15 rs2729823   | 63420660 A | 0.4718 | 1.50E-07 | chr:15:63374594 |
| 15 rs2652807   | 63373942 G | 0.2742 | 1.54E-07 | chr:15:63374594 |
| 15 rs59768255  | 63436960 A | 0.5112 | 1.80E-07 | chr:15:63374594 |
| 15 rs61187203  | 63436958 C | 0.5112 | 1.80E-07 | chr:15:63374594 |
| 15 rs966331    | 63411927 T | 0.4883 | 1.86E-07 | chr:15:63374594 |
| 15 rs4775625   | 63410577 G | 0.4867 | 1.87E-07 | chr:15:63374594 |
| 15 rs1007075   | 63413501 A | 0.49   | 2.16E-07 | chr:15:63374594 |
| 15 rs1007076   | 63413371 T | 0.49   | 2.16E-07 | chr:15:63374594 |
| 15 rs12902237  | 63418188 C | 0.4899 | 2.18E-07 | chr:15:63374594 |

|                |            |        |          |                 |
|----------------|------------|--------|----------|-----------------|
| 15 rs55719615  | 63344167 G | 0.4438 | 2.73E-07 | chr:15:63374594 |
| 15 rs1972041   | 63360847 C | 2.024  | 2.77E-07 | chr:15:63374594 |
| 15 rs2729793   | 63483977 T | 0.4659 | 3.11E-07 | chr:15:63374594 |
| 15 rs12591282  | 63539475 G | 0.4638 | 3.88E-07 | chr:15:63374594 |
| 15 rs2173982   | 63361262 C | 1.989  | 4.76E-07 | chr:15:63374594 |
| 15 rs3784673   | 63547859 C | 0.4748 | 4.86E-07 | chr:15:63374594 |
| 15 rs11071721  | 63350218 T | 0.4735 | 5.18E-07 | chr:15:63374594 |
| 15 rs7166624   | 63348594 A | 0.4735 | 5.18E-07 | chr:15:63374594 |
| 15 rs4468558   | 63346681 T | 0.4765 | 6.33E-07 | chr:15:63374594 |
| 15 rs2062726   | 63472745 A | 0.5171 | 7.82E-07 | chr:15:63374594 |
| 15 rs62012880  | 63527162 G | 2.009  | 8.77E-07 | chr:15:63374594 |
| 15 rs113519012 | 63362525 A | 2.191  | 9.27E-07 | chr:15:63374594 |
| 15 rs4775628   | 63426463 A | 0.5135 | 9.29E-07 | chr:15:63374594 |
| 15 rs7175185   | 63425337 A | 0.5135 | 9.29E-07 | chr:15:63374594 |
| 15 rs920864    | 63474391 G | 0.5192 | 9.81E-07 | chr:15:63374594 |
| 15 rs1976433   | 63426912 T | 0.5216 | 1.17E-06 | chr:15:63374594 |
| 15 rs2729777   | 63468964 T | 0.5253 | 1.27E-06 | chr:15:63374594 |
| 15 rs10851723  | 63416335 G | 0.5182 | 1.32E-06 | chr:15:63374594 |
| 15 rs28565028  | 63397038 T | 2.123  | 1.34E-06 | chr:15:63374594 |
| 15 rs2588859   | 63469846 A | 0.5249 | 1.35E-06 | chr:15:63374594 |
| 15 rs2588860   | 63471333 G | 0.525  | 1.39E-06 | chr:15:63374594 |
| 15 rs11071739  | 63585896 T | 0.5164 | 1.40E-06 | chr:15:63374594 |
| 15 rs1017545   | 63553994 C | 1.975  | 1.66E-06 | chr:15:63374594 |
| 15 rs6494393   | 63426435 A | 0.5249 | 1.72E-06 | chr:15:63374594 |
| 15 rs4633662   | 63424286 G | 0.5284 | 1.72E-06 | chr:15:63374594 |
| 15 rs28656270  | 63374294 C | 3.334  | 2.01E-06 | chr:15:63374594 |
| 15 rs2729826   | 63360446 G | 0.5001 | 2.18E-06 | chr:15:63374594 |
| 15 rs1566660   | 63429258 C | 0.5354 | 2.59E-06 | chr:15:63374594 |
| 15 rs1126312   | 63427638 A | 0.5396 | 3.11E-06 | chr:15:63374594 |
| 15 rs9302231   | 63427394 G | 0.5396 | 3.11E-06 | chr:15:63374594 |
| 15 rs1126310   | 63428765 G | 0.5422 | 3.76E-06 | chr:15:63374594 |
| 15 rs11858666  | 63526239 C | 1.941  | 3.91E-06 | chr:15:63374594 |
| 15 rs2729803   | 63376661 T | 2.014  | 6.27E-06 | chr:15:63374594 |
| 15 rs147111390 | 63374643 T | 0.2212 | 6.51E-06 | chr:15:63374594 |
| 15 rs2134263   | 63365394 T | 1.901  | 6.95E-06 | chr:15:63374594 |
| 15 rs12324711  | 63409679 T | 0.2692 | 1.11E-05 | chr:15:63374594 |
| 15 rs7172246   | 63554824 A | 0.5775 | 1.35E-05 | chr:15:63374594 |
| 15 rs7170846   | 63449543 C | 2.451  | 1.43E-05 | chr:15:63374594 |
| 15 rs55862039  | 63451563 T | 2.223  | 1.48E-05 | chr:15:63374594 |
| 15 rs28394803  | 63443968 C | 1.944  | 1.57E-05 | chr:15:63374594 |
| 15 rs953978    | 63445144 T | 1.944  | 1.57E-05 | chr:15:63374594 |
| 15 rs56208666  | 63451858 G | 2.227  | 1.69E-05 | chr:15:63374594 |
| 15 rs34367270  | 63410912 A | 1.805  | 1.72E-05 | chr:15:63374594 |

|                |            |        |          |                 |
|----------------|------------|--------|----------|-----------------|
| 15 rs7162890   | 63492027 A | 2.13   | 1.88E-05 | chr:15:63374594 |
| 15 rs17829340  | 63546414 C | 2.271  | 2.08E-05 | chr:15:63374594 |
| 15 rs8041454   | 63485976 C | 2.151  | 2.23E-05 | chr:15:63374594 |
| 15 rs11071724  | 63370843 G | 2.136  | 2.23E-05 | chr:15:63374594 |
| 15 rs74025269  | 63543279 C | 0.2534 | 2.28E-05 | chr:15:63374594 |
| 15 rs2899691   | 63519088 A | 2.364  | 2.49E-05 | chr:15:63374594 |
| 15 rs74021919  | 63418773 T | 0.2618 | 2.57E-05 | chr:15:63374594 |
| 15 rs74024349  | 63395543 C | 0.3003 | 2.60E-05 | chr:15:63374594 |
| 15 rs74568001  | 63394792 T | 0.3003 | 2.60E-05 | chr:15:63374594 |
| 15 rs959125    | 63583159 G | 0.5664 | 2.66E-05 | chr:15:63374594 |
| 15 rs11636105  | 63371220 A | 2.125  | 2.73E-05 | chr:15:63374594 |
| 15 rs4984257   | 63561160 T | 1.905  | 2.81E-05 | chr:15:63374594 |
| 15 rs369161040 | 63573742 C | 0.5582 | 3.04E-05 | chr:15:63374594 |
| 15 rs4984273   | 63472714 T | 2.335  | 3.15E-05 | chr:15:63374594 |
| 15 rs4984274   | 63472715 T | 2.335  | 3.15E-05 | chr:15:63374594 |
| 15 rs17762798  | 63600603 A | 0.3762 | 3.27E-05 | chr:15:63374594 |
| 15 rs2937857   | 63369571 T | 1.709  | 3.34E-05 | chr:15:63374594 |
| 19 rs146500963 | 21849138 G | 53.34  | 4.48E-44 | chr:19:21841536 |
| 19 rs12460252  | 21846543 A | 50.83  | 6.51E-44 | chr:19:21841536 |
| 19 rs12461654  | 21849302 A | 50.83  | 6.51E-44 | chr:19:21841536 |
| 19 rs1829501   | 21847506 C | 50.83  | 6.51E-44 | chr:19:21841536 |
| 19 rs59984853  | 21848526 A | 50.83  | 6.51E-44 | chr:19:21841536 |
| 19 rs8105433   | 21840606 A | 47.15  | 7.84E-44 | chr:19:21841536 |
| 19 rs28669973  | 21842253 A | 49.2   | 8.25E-44 | chr:19:21841536 |
| 19 rs113277169 | 21843728 T | 48.98  | 4.99E-43 | chr:19:21841536 |
| 19 rs186258664 | 21844201 T | 48.98  | 4.99E-43 | chr:19:21841536 |
| 19 rs12052180  | 21850463 C | 46.09  | 7.87E-43 | chr:19:21841536 |
| 19 rs58339212  | 21861075 T | 46.46  | 7.95E-43 | chr:19:21841536 |
| 19 rs111517079 | 21838995 T | 46.05  | 8.42E-43 | chr:19:21841536 |
| 19 rs138320974 | 21834230 C | 46.05  | 8.42E-43 | chr:19:21841536 |
| 19 rs34069114  | 21838272 C | 46.05  | 8.42E-43 | chr:19:21841536 |
| 19 rs78554651  | 21838518 G | 46.05  | 8.42E-43 | chr:19:21841536 |
| 19 rs80147175  | 21839022 G | 46.05  | 8.42E-43 | chr:19:21841536 |
| 19 rs73546506  | 21860575 A | 44.29  | 8.55E-43 | chr:19:21841536 |
| 19 rs79961580  | 21860730 A | 44.29  | 8.55E-43 | chr:19:21841536 |
| 19 rs12462750  | 21850703 G | 45.82  | 9.96E-43 | chr:19:21841536 |
| 19 rs60312928  | 21838295 G | 43.91  | 1.44E-42 | chr:19:21841536 |
| 19 rs117182815 | 21825628 A | 25.52  | 4.95E-37 | chr:19:21841536 |
| 19 rs34891363  | 21825550 C | 24.82  | 4.97E-37 | chr:19:21841536 |
| 19 rs12460950  | 21824781 C | 25.63  | 5.74E-37 | chr:19:21841536 |
| 19 rs67673622  | 21825103 C | 25.63  | 5.74E-37 | chr:19:21841536 |
| 19 rs1589279   | 21847351 C | 22.65  | 7.86E-37 | chr:19:21841536 |
| 19 rs58621185  | 21858531 A | 22.01  | 1.77E-36 | chr:19:21841536 |

|                |            |        |          |                 |
|----------------|------------|--------|----------|-----------------|
| 19 rs116684909 | 21832378 T | 28.49  | 2.17E-36 | chr:19:21841536 |
| 19 rs111714111 | 21827774 A | 28.43  | 2.51E-36 | chr:19:21841536 |
| 19 rs113033092 | 21827530 C | 28.96  | 2.76E-36 | chr:19:21841536 |
| 19 rs77728877  | 21827833 G | 28.96  | 2.76E-36 | chr:19:21841536 |
| 19 rs7258332   | 21829769 G | 28.89  | 2.86E-36 | chr:19:21841536 |
| 19 rs112867628 | 21828269 A | 29.47  | 3.21E-36 | chr:19:21841536 |
| 19 rs35933524  | 21828299 G | 29.47  | 3.21E-36 | chr:19:21841536 |
| 19 rs4809168   | 21828794 A | 29.47  | 3.21E-36 | chr:19:21841536 |
| 19 rs7253097   | 21828936 C | 29.47  | 3.21E-36 | chr:19:21841536 |
| 19 rs7253361   | 21829123 G | 29.47  | 3.21E-36 | chr:19:21841536 |
| 19 rs7254224   | 21828967 C | 29.47  | 3.21E-36 | chr:19:21841536 |
| 19 rs7257314   | 21829542 A | 29.47  | 3.21E-36 | chr:19:21841536 |
| 19 rs7257929   | 21829488 C | 29.47  | 3.21E-36 | chr:19:21841536 |
| 19 rs58039129  | 21827133 A | 30.74  | 3.68E-36 | chr:19:21841536 |
| 19 rs2139533   | 21832590 T | 27.54  | 4.15E-36 | chr:19:21841536 |
| 19 rs111811317 | 21831260 A | 32.35  | 8.74E-36 | chr:19:21841536 |
| 19 rs12232857  | 21832320 A | 32.35  | 8.74E-36 | chr:19:21841536 |
| 19 rs35188146  | 21831014 G | 32.35  | 8.74E-36 | chr:19:21841536 |
| 19 rs35837179  | 21831140 A | 32.35  | 8.74E-36 | chr:19:21841536 |
| 19 rs57155685  | 21831116 T | 32.35  | 8.74E-36 | chr:19:21841536 |
| 19 rs57973828  | 21831115 C | 32.35  | 8.74E-36 | chr:19:21841536 |
| 19 rs59571905  | 21830875 T | 32.35  | 8.74E-36 | chr:19:21841536 |
| 19 rs7250456   | 21831585 T | 32.35  | 8.74E-36 | chr:19:21841536 |
| 19 rs7250875   | 21831905 T | 32.35  | 8.74E-36 | chr:19:21841536 |
| 19 rs61517956  | 21833407 A | 33.06  | 1.19E-35 | chr:19:21841536 |
| 19 rs1520075   | 21833741 C | 32.72  | 2.85E-35 | chr:19:21841536 |
| 19 rs75322575  | 21833798 A | 36.1   | 3.56E-35 | chr:19:21841536 |
| 19 rs115824809 | 21831481 T | 11.2   | 4.71E-34 | chr:19:21841536 |
| 19 rs2139534   | 21832567 G | 11.41  | 1.24E-33 | chr:19:21841536 |
| 19 rs12232815  | 21832363 C | 10.96  | 1.29E-33 | chr:19:21841536 |
| 19 rs2139531   | 21832736 A | 11.14  | 1.35E-33 | chr:19:21841536 |
| 19 rs7253108   | 21828955 G | 10.46  | 1.44E-33 | chr:19:21841536 |
| 19 rs117740054 | 21825672 T | 10.02  | 1.53E-33 | chr:19:21841536 |
| 19 rs2139532   | 21832597 C | 11.32  | 1.69E-33 | chr:19:21841536 |
| 19 rs111405107 | 21824157 A | 185    | 3.12E-33 | chr:19:21841536 |
| 19 rs111977553 | 21824165 T | 185    | 3.12E-33 | chr:19:21841536 |
| 19 rs7250867   | 21831884 T | 40.55  | 9.92E-32 | chr:19:21841536 |
| 19 rs59896423  | 21848375 T | 11.79  | 8.00E-31 | chr:19:21841536 |
| 19 rs7259645   | 21842436 T | 139.8  | 8.39E-25 | chr:19:21841536 |
| 19 rs144847660 | 21823693 T | 594.7  | 1.02E-23 | chr:19:21841536 |
| 19 rs10414424  | 21858966 C | 5.143  | 1.75E-23 | chr:19:21841536 |
| 19 rs145365305 | 21843419 A | 17.23  | 6.93E-23 | chr:19:21841536 |
| 19 rs7508279   | 21832973 T | 0.2297 | 1.23E-22 | chr:19:21841536 |

|                |            |        |          |                 |
|----------------|------------|--------|----------|-----------------|
| 19 rs12461975  | 21862108 A | 8.038  | 2.02E-22 | chr:19:21841536 |
| 19 rs144768538 | 21848501 G | 15.05  | 6.13E-22 | chr:19:21841536 |
| 19 rs12461397  | 21861309 G | 4.928  | 7.79E-22 | chr:19:21841536 |
| 19 rs2359397   | 21854270 A | 4.918  | 9.52E-22 | chr:19:21841536 |
| 19 rs115046417 | 21854616 G | 14.91  | 1.06E-21 | chr:19:21841536 |
| 19 rs116818044 | 21857932 A | 14.91  | 1.06E-21 | chr:19:21841536 |
| 19 rs12461437  | 21861314 A | 4.827  | 1.13E-21 | chr:19:21841536 |
| 19 rs1983379   | 21860203 T | 4.637  | 4.88E-21 | chr:19:21841536 |
| 19 rs1818694   | 21858673 T | 4.559  | 6.77E-21 | chr:19:21841536 |
| 19 rs1850933   | 21855208 C | 4.559  | 6.77E-21 | chr:19:21841536 |
| 19 rs2359391   | 21854015 A | 4.559  | 6.77E-21 | chr:19:21841536 |
| 19 rs12459639  | 21852800 T | 4.475  | 9.29E-21 | chr:19:21841536 |
| 19 rs10854058  | 21858846 T | 4.459  | 1.25E-20 | chr:19:21841536 |
| 19 rs9917005   | 21853097 G | 4.404  | 1.40E-20 | chr:19:21841536 |
| 19 rs114434735 | 21866989 T | 10.24  | 9.37E-20 | chr:19:21841536 |
| 19 rs116277680 | 21862920 T | 13.16  | 1.49E-19 | chr:19:21841536 |
| 19 rs116205961 | 21848939 A | 13.08  | 2.11E-19 | chr:19:21841536 |
| 19 rs1520074   | 21833928 C | 0.2023 | 5.92E-18 | chr:19:21841536 |
| 19 rs113367038 | 21827121 G | 6.817  | 1.45E-17 | chr:19:21841536 |
| 19 rs12984244  | 21833966 T | 0.2232 | 2.08E-17 | chr:19:21841536 |
| 19 rs116521177 | 21831596 T | 6.688  | 2.37E-17 | chr:19:21841536 |
| 19 rs113005217 | 21845172 T | 633.2  | 2.77E-17 | chr:19:21841536 |
| 19 rs113115412 | 21815922 T | 7.55   | 3.22E-17 | chr:19:21841536 |
| 19 rs113865693 | 21816425 T | 5.231  | 5.01E-17 | chr:19:21841536 |
| 19 rs145545138 | 21816252 A | 5.231  | 5.01E-17 | chr:19:21841536 |
| 19 rs146923867 | 21812763 T | 7.252  | 5.90E-17 | chr:19:21841536 |
| 19 rs7245831   | 21812746 C | 7.198  | 6.34E-17 | chr:19:21841536 |
| 19 rs10423041  | 21933943 C | 3.651  | 8.17E-17 | chr:19:21841536 |
| 19 rs12978641  | 21843780 A | 0.2622 | 8.44E-17 | chr:19:21841536 |
| 19 rs112769786 | 21895211 C | 6.744  | 9.22E-17 | chr:19:21841536 |
| 19 rs4467196   | 21950795 C | 3.65   | 9.75E-17 | chr:19:21841536 |
| 19 rs376690624 | 21817575 C | 7.035  | 1.05E-16 | chr:19:21841536 |
| 19 rs4808291   | 21841588 G | 0.2647 | 1.17E-16 | chr:19:21841536 |
| 19 rs6511282   | 21841076 T | 0.2647 | 1.17E-16 | chr:19:21841536 |
| 19 rs12971429  | 21843346 A | 0.2679 | 1.78E-16 | chr:19:21841536 |
| 19 rs12973368  | 21843305 T | 0.2679 | 1.78E-16 | chr:19:21841536 |
| 19 rs12977844  | 21843501 A | 0.2679 | 1.78E-16 | chr:19:21841536 |
| 19 rs12979639  | 21843427 T | 0.2679 | 1.78E-16 | chr:19:21841536 |
| 19 rs7253077   | 21844512 C | 0.2679 | 1.78E-16 | chr:19:21841536 |
| 19 rs7253101   | 21844592 A | 0.2679 | 1.78E-16 | chr:19:21841536 |
| 19 rs7253231   | 21844658 A | 0.2679 | 1.78E-16 | chr:19:21841536 |
| 19 rs7253259   | 21844719 A | 0.2679 | 1.78E-16 | chr:19:21841536 |
| 19 rs8100335   | 21842862 T | 0.2707 | 2.60E-16 | chr:19:21841536 |

|                |            |        |          |                 |
|----------------|------------|--------|----------|-----------------|
| 19 rs4352176   | 21924392 C | 3.571  | 2.60E-16 | chr:19:21841536 |
| 19 rs4569404   | 21924445 A | 3.571  | 2.60E-16 | chr:19:21841536 |
| 19 rs113293163 | 21914189 A | 3.606  | 2.67E-16 | chr:19:21841536 |
| 19 rs12978741  | 21843568 T | 0.2483 | 2.77E-16 | chr:19:21841536 |
| 19 rs12978776  | 21843616 A | 0.2483 | 2.77E-16 | chr:19:21841536 |
| 19 rs12980130  | 21843569 G | 0.2483 | 2.77E-16 | chr:19:21841536 |
| 19 rs28432246  | 21842163 C | 0.2483 | 2.77E-16 | chr:19:21841536 |
| 19 rs28520521  | 21842340 C | 0.2483 | 2.77E-16 | chr:19:21841536 |
| 19 rs115218875 | 21905585 G | 7.306  | 2.85E-16 | chr:19:21841536 |
| 19 rs12984552  | 21834092 G | 0.2535 | 3.21E-16 | chr:19:21841536 |
| 19 rs4808292   | 21841626 G | 0.2484 | 3.22E-16 | chr:19:21841536 |
| 19 rs4809171   | 21841170 C | 0.2484 | 3.22E-16 | chr:19:21841536 |
| 19 rs8105369   | 21840734 T | 0.2548 | 3.34E-16 | chr:19:21841536 |
| 19 rs8105649   | 21840765 C | 0.2548 | 3.34E-16 | chr:19:21841536 |
| 19 rs12979269  | 21843781 A | 0.2483 | 3.51E-16 | chr:19:21841536 |
| 19 rs12979139  | 21843901 T | 0.2497 | 3.55E-16 | chr:19:21841536 |
| 19 rs57699265  | 21844083 G | 0.2497 | 3.55E-16 | chr:19:21841536 |
| 19 rs8101035   | 21934556 C | 3.5    | 4.46E-16 | chr:19:21841536 |
| 19 rs11085493  | 21948748 T | 3.483  | 4.51E-16 | chr:19:21841536 |
| 19 rs56314966  | 21815935 A | 4.6    | 4.59E-16 | chr:19:21841536 |
| 19 rs10403795  | 21919081 A | 3.534  | 4.60E-16 | chr:19:21841536 |
| 19 rs10405142  | 21918928 T | 3.534  | 4.60E-16 | chr:19:21841536 |
| 19 rs10422982  | 21918221 C | 3.534  | 4.60E-16 | chr:19:21841536 |
| 19 rs4330044   | 21905838 T | 3.534  | 4.60E-16 | chr:19:21841536 |
| 19 rs77464908  | 21898805 A | 3.534  | 4.60E-16 | chr:19:21841536 |
| 19 rs10418334  | 21823931 C | 0.2603 | 5.35E-16 | chr:19:21841536 |
| 19 rs4809170   | 21836678 C | 0.2585 | 5.42E-16 | chr:19:21841536 |
| 19 rs10401456  | 21834185 G | 0.2575 | 5.49E-16 | chr:19:21841536 |
| 19 rs4808293   | 21841796 T | 0.2536 | 5.52E-16 | chr:19:21841536 |
| 19 rs10404030  | 21839783 G | 0.2584 | 5.90E-16 | chr:19:21841536 |
| 19 rs10405733  | 21834482 T | 0.2584 | 5.90E-16 | chr:19:21841536 |
| 19 rs10422946  | 21838785 T | 0.2584 | 5.90E-16 | chr:19:21841536 |
| 19 rs4808287   | 21835411 C | 0.2584 | 5.90E-16 | chr:19:21841536 |
| 19 rs4808289   | 21836844 G | 0.2584 | 5.90E-16 | chr:19:21841536 |
| 19 rs4808290   | 21837075 T | 0.2584 | 5.90E-16 | chr:19:21841536 |
| 19 rs6511279   | 21838240 A | 0.2584 | 5.90E-16 | chr:19:21841536 |
| 19 rs6511280   | 21838492 G | 0.2584 | 5.90E-16 | chr:19:21841536 |
| 19 rs6511281   | 21838565 C | 0.2584 | 5.90E-16 | chr:19:21841536 |
| 19 rs7351087   | 21838147 G | 0.2584 | 5.90E-16 | chr:19:21841536 |
| 19 rs7351088   | 21838146 T | 0.2584 | 5.90E-16 | chr:19:21841536 |
| 19 rs8106449   | 21835586 A | 0.2584 | 5.90E-16 | chr:19:21841536 |
| 19 rs9807876   | 21837709 A | 0.2584 | 5.90E-16 | chr:19:21841536 |
| 19 rs10422804  | 21838830 A | 0.2789 | 5.95E-16 | chr:19:21841536 |

|                |            |        |          |                 |
|----------------|------------|--------|----------|-----------------|
| 19 rs1520066   | 21836294 G | 0.2789 | 5.95E-16 | chr:19:21841536 |
| 19 rs2139528   | 21839114 G | 0.2789 | 5.95E-16 | chr:19:21841536 |
| 19 rs4808285   | 21835126 T | 0.2789 | 5.95E-16 | chr:19:21841536 |
| 19 rs4808286   | 21835201 C | 0.2789 | 5.95E-16 | chr:19:21841536 |
| 19 rs7351091   | 21838002 G | 0.2789 | 5.95E-16 | chr:19:21841536 |
| 19 rs7508494   | 21838657 G | 0.2789 | 5.95E-16 | chr:19:21841536 |
| 19 rs8101233   | 21839603 C | 0.2789 | 5.95E-16 | chr:19:21841536 |
| 19 rs8104094   | 21837228 C | 0.2789 | 5.95E-16 | chr:19:21841536 |
| 19 rs8106619   | 21840994 T | 0.2789 | 5.95E-16 | chr:19:21841536 |
| 19 rs9807872   | 21837639 C | 0.2789 | 5.95E-16 | chr:19:21841536 |
| 19 rs3795247   | 21906428 C | 3.507  | 6.42E-16 | chr:19:21841536 |
| 19 rs7252777   | 21907988 T | 3.507  | 6.42E-16 | chr:19:21841536 |
| 19 rs112092047 | 21911328 T | 6.785  | 6.43E-16 | chr:19:21841536 |
| 19 rs12979778  | 21843988 A | 0.2549 | 6.59E-16 | chr:19:21841536 |
| 19 rs78183809  | 21827463 A | 6.619  | 6.60E-16 | chr:19:21841536 |
| 19 rs2139526   | 21839252 T | 0.2791 | 6.77E-16 | chr:19:21841536 |
| 19 rs1520067   | 21836159 G | 0.2792 | 6.98E-16 | chr:19:21841536 |
| 19 rs4372817   | 21922642 A | 3.523  | 7.37E-16 | chr:19:21841536 |
| 19 rs4808288   | 21836742 A | 0.282  | 8.53E-16 | chr:19:21841536 |
| 19 rs8105808   | 21840952 G | 0.2824 | 9.32E-16 | chr:19:21841536 |
| 19 rs7508059   | 21838351 A | 0.2827 | 1.17E-15 | chr:19:21841536 |
| 19 rs4808297   | 21935700 A | 3.384  | 1.30E-15 | chr:19:21841536 |
| 19 rs115955398 | 21880407 G | 8.783  | 1.35E-15 | chr:19:21841536 |
| 19 rs4381720   | 21916526 A | 3.44   | 1.51E-15 | chr:19:21841536 |
| 19 rs73540393  | 21822034 C | 6.793  | 2.03E-15 | chr:19:21841536 |
| 19 rs113716628 | 21927468 A | 7.536  | 3.46E-15 | chr:19:21841536 |
| 19 rs113881962 | 21893988 G | 7.536  | 3.46E-15 | chr:19:21841536 |
| 19 rs115055800 | 21917565 A | 7.536  | 3.46E-15 | chr:19:21841536 |
| 19 rs115256934 | 21909875 A | 7.536  | 3.46E-15 | chr:19:21841536 |
| 19 rs116579333 | 21939341 G | 7.536  | 3.46E-15 | chr:19:21841536 |
| 19 rs141125734 | 21918157 A | 7.536  | 3.46E-15 | chr:19:21841536 |
| 19 rs143955976 | 21911765 G | 7.536  | 3.46E-15 | chr:19:21841536 |
| 19 rs10469371  | 21893614 T | 3.333  | 6.06E-15 | chr:19:21841536 |
| 19 rs114301054 | 21946383 C | 7.253  | 1.16E-14 | chr:19:21841536 |
| 19 rs58748216  | 21914122 T | 3.27   | 1.28E-14 | chr:19:21841536 |
| 19 rs58886507  | 21885499 G | 8.206  | 1.32E-14 | chr:19:21841536 |
| 19 rs56742849  | 21914115 T | 3.261  | 1.57E-14 | chr:19:21841536 |
| 19 rs4319879   | 21916767 G | 3.224  | 1.71E-14 | chr:19:21841536 |
| 19 rs4547465   | 21901056 A | 3.224  | 1.71E-14 | chr:19:21841536 |
| 19 rs8105002   | 21919934 A | 3.224  | 1.71E-14 | chr:19:21841536 |
| 19 rs8111464   | 21917939 G | 3.224  | 1.71E-14 | chr:19:21841536 |
| 19 rs10416553  | 21823771 C | 0.3093 | 1.93E-14 | chr:19:21841536 |
| 19 rs4436888   | 21916489 C | 3.218  | 1.97E-14 | chr:19:21841536 |



|                |            |        |          |                 |
|----------------|------------|--------|----------|-----------------|
| 19 rs7258859   | 21942723 G | 3.182  | 2.01E-14 | chr:19:21841536 |
| 19 rs566027145 | 21813440 C | 4.702  | 2.22E-14 | chr:19:21841536 |
| 19 rs115218914 | 21950948 G | 6.473  | 2.44E-14 | chr:19:21841536 |
| 19 rs112816324 | 21820984 T | 4.188  | 2.81E-14 | chr:19:21841536 |
| 19 rs141526653 | 21894950 A | 5.915  | 3.04E-14 | chr:19:21841536 |
| 19 rs115586860 | 21899429 G | 6.542  | 3.18E-14 | chr:19:21841536 |
| 19 rs116345357 | 21923374 T | 6.542  | 3.18E-14 | chr:19:21841536 |
| 19 rs116654331 | 21918591 A | 6.542  | 3.18E-14 | chr:19:21841536 |
| 19 rs144690685 | 21897717 G | 6.542  | 3.18E-14 | chr:19:21841536 |
| 19 rs150203019 | 21916698 A | 6.542  | 3.18E-14 | chr:19:21841536 |
| 19 rs56168029  | 21942877 A | 0.2875 | 3.49E-14 | chr:19:21841536 |
| 19 rs112450146 | 21821327 A | 8.407  | 3.76E-14 | chr:19:21841536 |
| 19 rs141892265 | 21965652 C | 4.815  | 4.06E-14 | chr:19:21841536 |
| 19 rs10421113  | 21929885 T | 3.108  | 4.33E-14 | chr:19:21841536 |
| 19 rs10421342  | 21930003 T | 3.108  | 4.33E-14 | chr:19:21841536 |
| 19 rs4808295   | 21930317 A | 3.108  | 4.33E-14 | chr:19:21841536 |
| 19 rs4809175   | 21938744 G | 3.108  | 4.33E-14 | chr:19:21841536 |
| 19 rs11085492  | 21945186 G | 3.116  | 4.52E-14 | chr:19:21841536 |
| 19 rs4613201   | 21927706 C | 3.098  | 5.47E-14 | chr:19:21841536 |
| 19 rs10405075  | 21943707 C | 3.073  | 6.62E-14 | chr:19:21841536 |
| 19 rs10412225  | 21944450 G | 3.073  | 6.62E-14 | chr:19:21841536 |
| 19 rs112439638 | 21962740 A | 5.483  | 9.24E-14 | chr:19:21841536 |
| 19 rs66562280  | 21833014 C | 0.1039 | 1.08E-13 | chr:19:21841536 |
| 19 rs115368414 | 22032475 T | 9.643  | 1.13E-13 | chr:19:21841536 |
| 19 rs114079879 | 21955405 A | 5.491  | 1.15E-13 | chr:19:21841536 |
| 19 rs114219279 | 21956161 A | 5.491  | 1.15E-13 | chr:19:21841536 |
| 19 rs115947529 | 21837849 T | 19.13  | 1.48E-13 | chr:19:21841536 |
| 19 rs116257175 | 21843303 A | 19.13  | 1.48E-13 | chr:19:21841536 |
| 19 rs111445324 | 21732011 A | 7.219  | 1.67E-13 | chr:19:21841536 |
| 19 rs113702555 | 21744151 G | 7.219  | 1.67E-13 | chr:19:21841536 |
| 19 rs61623191  | 21985264 A | 10.69  | 1.84E-13 | chr:19:21841536 |
| 19 rs139923873 | 22000997 A | 11.18  | 2.84E-13 | chr:19:21841536 |
| 19 rs145633375 | 22005464 A | 11.18  | 2.84E-13 | chr:19:21841536 |
| 19 rs57484704  | 21905719 G | 6.154  | 3.05E-13 | chr:19:21841536 |
| 19 rs116509034 | 21926427 A | 6.13   | 3.42E-13 | chr:19:21841536 |
| 19 rs60856228  | 21979630 C | 10.38  | 3.99E-13 | chr:19:21841536 |
| 19 rs562143535 | 21958356 T | 9.304  | 4.29E-13 | chr:19:21841536 |
| 19 rs111824582 | 21888348 T | 6.056  | 4.31E-13 | chr:19:21841536 |
| 19 rs113790434 | 21888363 A | 6.056  | 4.31E-13 | chr:19:21841536 |
| 19 rs148627677 | 21887779 G | 6.056  | 4.31E-13 | chr:19:21841536 |
| 19 rs183423536 | 21891022 G | 6.056  | 4.31E-13 | chr:19:21841536 |
| 19 rs150056857 | 21978913 A | 10.31  | 4.37E-13 | chr:19:21841536 |
| 19 rs73536651  | 21805053 C | 4.626  | 4.49E-13 | chr:19:21841536 |

|                |            |        |          |                 |
|----------------|------------|--------|----------|-----------------|
| 19 rs113232162 | 21897187 T | 5.833  | 4.72E-13 | chr:19:21841536 |
| 19 rs115624329 | 21961229 C | 9.276  | 4.93E-13 | chr:19:21841536 |
| 19 rs111585880 | 21913436 A | 5.933  | 5.31E-13 | chr:19:21841536 |
| 19 rs111610027 | 21927126 A | 5.933  | 5.31E-13 | chr:19:21841536 |
| 19 rs111733303 | 21894790 A | 5.933  | 5.31E-13 | chr:19:21841536 |
| 19 rs112621399 | 21933096 T | 5.933  | 5.31E-13 | chr:19:21841536 |
| 19 rs113489374 | 21897562 A | 5.933  | 5.31E-13 | chr:19:21841536 |
| 19 rs114302517 | 21922619 C | 5.933  | 5.31E-13 | chr:19:21841536 |
| 19 rs115620407 | 21923380 C | 5.933  | 5.31E-13 | chr:19:21841536 |
| 19 rs183171803 | 21937845 A | 5.933  | 5.31E-13 | chr:19:21841536 |
| 19 rs61467203  | 21925770 A | 5.933  | 5.31E-13 | chr:19:21841536 |
| 19 rs7250493   | 21941207 G | 5.933  | 5.31E-13 | chr:19:21841536 |
| 19 rs3942413   | 21848383 T | 0.3406 | 5.43E-13 | chr:19:21841536 |
| 19 rs12978078  | 21813444 G | 4.135  | 5.92E-13 | chr:19:21841536 |
| 19 rs1829500   | 21849298 T | 0.3375 | 6.03E-13 | chr:19:21841536 |
| 19 rs4278872   | 21850903 T | 0.3375 | 6.03E-13 | chr:19:21841536 |
| 19 rs7248709   | 21848686 T | 0.3375 | 6.03E-13 | chr:19:21841536 |
| 19 rs8108393   | 21846846 C | 0.3375 | 6.03E-13 | chr:19:21841536 |
| 19 rs141542153 | 21734291 C | 2.691  | 6.15E-13 | chr:19:21841536 |
| 19 rs58560061  | 21950179 T | 5.945  | 7.68E-13 | chr:19:21841536 |
| 19 rs9755064   | 21891183 G | 5.963  | 7.98E-13 | chr:19:21841536 |
| 19 rs148992091 | 21751206 C | 6.306  | 8.95E-13 | chr:19:21841536 |
| 19 rs10425489  | 21856926 A | 0.3442 | 9.96E-13 | chr:19:21841536 |
| 19 rs6511283   | 21867819 T | 0.3631 | 1.01E-12 | chr:19:21841536 |
| 19 rs60179888  | 21804408 G | 4.433  | 1.11E-12 | chr:19:21841536 |
| 19 rs2359402   | 21855832 C | 0.3443 | 1.49E-12 | chr:19:21841536 |
| 19 rs2359393   | 21854152 A | 0.3508 | 1.50E-12 | chr:19:21841536 |
| 19 rs116095496 | 21938262 C | 5.613  | 1.54E-12 | chr:19:21841536 |
| 19 rs76195912  | 21784376 G | 4.065  | 1.54E-12 | chr:19:21841536 |
| 19 rs60451543  | 21786214 A | 4.108  | 1.54E-12 | chr:19:21841536 |
| 19 rs8111885   | 21733334 G | 2.672  | 1.57E-12 | chr:19:21841536 |
| 19 rs1401926   | 21740932 T | 2.649  | 2.17E-12 | chr:19:21841536 |
| 19 rs1879237   | 21738727 G | 2.649  | 2.17E-12 | chr:19:21841536 |
| 19 rs1879238   | 21738753 C | 2.649  | 2.17E-12 | chr:19:21841536 |
| 19 rs7253559   | 21740602 A | 2.649  | 2.17E-12 | chr:19:21841536 |
| 19 rs8109536   | 21736351 C | 2.649  | 2.17E-12 | chr:19:21841536 |
| 19 rs8110459   | 21732379 A | 2.649  | 2.17E-12 | chr:19:21841536 |
| 19 rs57908208  | 21844047 A | 0.3407 | 2.27E-12 | chr:19:21841536 |
| 19 rs11085456  | 21725386 T | 2.642  | 2.59E-12 | chr:19:21841536 |
| 19 rs12973084  | 21723197 T | 2.642  | 2.59E-12 | chr:19:21841536 |
| 19 rs7251540   | 21727927 G | 2.642  | 2.59E-12 | chr:19:21841536 |
| 19 rs7251669   | 21728019 G | 2.642  | 2.59E-12 | chr:19:21841536 |
| 19 rs9789284   | 21727511 C | 2.642  | 2.59E-12 | chr:19:21841536 |

|                |            |        |          |                 |
|----------------|------------|--------|----------|-----------------|
| 19 rs73552497  | 21784106 C | 3.93   | 2.85E-12 | chr:19:21841536 |
| 19 rs2562496   | 21739870 C | 2.603  | 2.91E-12 | chr:19:21841536 |
| 19 rs4611587   | 21743971 G | 2.603  | 2.91E-12 | chr:19:21841536 |
| 19 rs78823434  | 21982409 G | 4.508  | 3.04E-12 | chr:19:21841536 |
| 19 rs115965563 | 21953738 T | 6.747  | 3.18E-12 | chr:19:21841536 |
| 19 rs34040704  | 21739464 G | 0.3807 | 4.37E-12 | chr:19:21841536 |
| 19 rs12710186  | 21958004 C | 0.3395 | 5.12E-12 | chr:19:21841536 |
| 19 rs12461802  | 21725407 A | 0.3816 | 5.19E-12 | chr:19:21841536 |
| 19 rs12973147  | 21860793 G | 0.3456 | 5.51E-12 | chr:19:21841536 |
| 19 rs12975447  | 21860974 G | 0.3456 | 5.51E-12 | chr:19:21841536 |
| 19 rs12985995  | 21723036 T | 0.3819 | 5.74E-12 | chr:19:21841536 |
| 19 rs149800591 | 22007547 G | 4.39   | 1.07E-11 | chr:19:21841536 |
| 19 rs114427176 | 22008878 C | 4.59   | 1.15E-11 | chr:19:21841536 |
| 19 rs114999467 | 22014978 G | 4.59   | 1.15E-11 | chr:19:21841536 |
| 19 rs115539747 | 21994401 C | 4.59   | 1.15E-11 | chr:19:21841536 |
| 19 rs116255808 | 22009296 C | 4.59   | 1.15E-11 | chr:19:21841536 |
| 19 rs116584441 | 21995470 T | 4.59   | 1.15E-11 | chr:19:21841536 |
| 19 rs116636330 | 22025850 C | 4.59   | 1.15E-11 | chr:19:21841536 |
| 19 rs8108565   | 21980435 T | 4.577  | 1.26E-11 | chr:19:21841536 |
| 19 rs116749192 | 21845739 A | 11.6   | 1.57E-11 | chr:19:21841536 |
| 19 rs116480376 | 22005732 C | 4.451  | 1.63E-11 | chr:19:21841536 |
| 19 rs62108422  | 21813454 G | 2.894  | 1.72E-11 | chr:19:21841536 |
| 19 rs11085494  | 21952631 T | 0.3863 | 1.76E-11 | chr:19:21841536 |
| 19 rs2015706   | 21858208 T | 2.659  | 1.79E-11 | chr:19:21841536 |
| 19 rs145764433 | 21834212 T | 19.74  | 2.67E-11 | chr:19:21841536 |
| 19 rs146308222 | 21842944 T | 19.74  | 2.67E-11 | chr:19:21841536 |
| 19 rs8103024   | 21835228 G | 19.74  | 2.67E-11 | chr:19:21841536 |
| 19 rs58952031  | 21804541 C | 2.557  | 2.73E-11 | chr:19:21841536 |
| 19 rs62109860  | 21833294 C | 0.2649 | 2.87E-11 | chr:19:21841536 |
| 19 rs116736619 | 22017198 C | 4.379  | 2.88E-11 | chr:19:21841536 |
| 19 rs111522182 | 21835996 C | 4.572  | 3.27E-11 | chr:19:21841536 |
| 19 rs113981438 | 21737410 G | 3.902  | 3.44E-11 | chr:19:21841536 |
| 19 rs57706029  | 21953161 T | 0.3325 | 3.45E-11 | chr:19:21841536 |
| 19 rs116811099 | 22034436 A | 4.177  | 3.66E-11 | chr:19:21841536 |
| 19 rs12610154  | 21676357 T | 2.519  | 3.85E-11 | chr:19:21841536 |
| 19 rs28898308  | 21696860 T | 0.398  | 4.13E-11 | chr:19:21841536 |
| 19 rs10408050  | 21852423 C | 0.3416 | 4.23E-11 | chr:19:21841536 |
| 19 rs115454713 | 21822330 T | 3.834  | 4.30E-11 | chr:19:21841536 |
| 19 rs116464036 | 21822329 T | 3.834  | 4.30E-11 | chr:19:21841536 |
| 19 rs12462082  | 21974486 T | 3.659  | 4.45E-11 | chr:19:21841536 |
| 19 rs1464295   | 21757867 C | 2.549  | 4.67E-11 | chr:19:21841536 |
| 19 rs114275324 | 22029050 T | 4.372  | 4.73E-11 | chr:19:21841536 |
| 19 rs116234413 | 22028375 A | 4.372  | 4.73E-11 | chr:19:21841536 |

|                |            |        |          |                 |
|----------------|------------|--------|----------|-----------------|
| 19 rs7248444   | 22032146 T | 4.372  | 4.73E-11 | chr:19:21841536 |
| 19 rs8113074   | 21775494 T | 2.619  | 4.83E-11 | chr:19:21841536 |
| 19 rs116340972 | 21876058 C | 12.07  | 5.21E-11 | chr:19:21841536 |
| 19 rs73552476  | 21776939 G | 4.343  | 6.51E-11 | chr:19:21841536 |
| 19 rs12975424  | 21698865 T | 2.509  | 8.06E-11 | chr:19:21841536 |
| 19 rs144386887 | 21825423 T | 6.065  | 8.26E-11 | chr:19:21841536 |
| 19 rs4381721   | 21951581 T | 0.3969 | 8.33E-11 | chr:19:21841536 |
| 19 rs4522535   | 21951615 T | 0.3972 | 8.49E-11 | chr:19:21841536 |
| 19 rs116605460 | 21847926 C | 10.62  | 9.21E-11 | chr:19:21841536 |
| 19 rs4574048   | 21743921 C | 2.444  | 1.10E-10 | chr:19:21841536 |
| 19 rs9676253   | 21969452 A | 0.3579 | 1.16E-10 | chr:19:21841536 |
| 19 rs73012155  | 21813922 G | 2.484  | 1.20E-10 | chr:19:21841536 |
| 19 rs149207035 | 21856312 T | 7.774  | 1.60E-10 | chr:19:21841536 |
| 19 rs12972593  | 21932574 C | 0.3921 | 1.65E-10 | chr:19:21841536 |
| 19 rs10412709  | 21865359 A | 0.4012 | 1.91E-10 | chr:19:21841536 |
| 19 rs11879643  | 21816374 A | 2.449  | 2.06E-10 | chr:19:21841536 |
| 19 rs11883066  | 21816179 T | 2.449  | 2.06E-10 | chr:19:21841536 |
| 19 rs11883127  | 21816337 A | 2.449  | 2.06E-10 | chr:19:21841536 |
| 19 rs4809160   | 21815548 A | 2.449  | 2.06E-10 | chr:19:21841536 |
| 19 rs4809161   | 21815823 G | 2.449  | 2.06E-10 | chr:19:21841536 |
| 19 rs55802558  | 21814240 T | 2.449  | 2.06E-10 | chr:19:21841536 |
| 19 rs56208843  | 21814116 A | 2.449  | 2.06E-10 | chr:19:21841536 |
| 19 rs56311814  | 21814190 T | 2.449  | 2.06E-10 | chr:19:21841536 |
| 19 rs7256368   | 21842236 G | 0.3756 | 2.27E-10 | chr:19:21841536 |
| 19 rs6511291   | 21950402 C | 0.3945 | 2.31E-10 | chr:19:21841536 |
| 19 rs35717293  | 21912755 G | 0.3846 | 2.66E-10 | chr:19:21841536 |
| 19 rs62108416  | 21812729 T | 2.546  | 2.71E-10 | chr:19:21841536 |
| 19 rs7245671   | 21812597 C | 2.546  | 2.71E-10 | chr:19:21841536 |
| 19 rs7260048   | 21812636 T | 2.546  | 2.71E-10 | chr:19:21841536 |
| 19 rs4319878   | 21924452 T | 0.3861 | 2.73E-10 | chr:19:21841536 |
| 19 rs7251810   | 21782572 A | 2.45   | 3.10E-10 | chr:19:21841536 |
| 19 rs113009301 | 21768087 A | 4.087  | 3.54E-10 | chr:19:21841536 |
| 19 rs73550367  | 21758542 G | 4.087  | 3.54E-10 | chr:19:21841536 |
| 19 rs73552443  | 21765384 G | 4.087  | 3.54E-10 | chr:19:21841536 |
| 19 rs73552446  | 21766756 G | 4.087  | 3.54E-10 | chr:19:21841536 |
| 19 rs62108418  | 21813273 G | 2.536  | 3.84E-10 | chr:19:21841536 |
| 19 rs62108419  | 21813299 T | 2.536  | 3.84E-10 | chr:19:21841536 |
| 19 rs62108420  | 21813354 C | 2.536  | 3.84E-10 | chr:19:21841536 |
| 19 rs73012144  | 21812991 A | 2.536  | 3.84E-10 | chr:19:21841536 |
| 19 rs113472792 | 21877404 T | 5.92   | 3.98E-10 | chr:19:21841536 |
| 19 rs8113652   | 21921709 C | 0.3989 | 4.05E-10 | chr:19:21841536 |
| 19 rs562777226 | 21812683 A | 2.505  | 4.15E-10 | chr:19:21841536 |
| 19 rs62108415  | 21812707 T | 2.505  | 4.15E-10 | chr:19:21841536 |

|                |            |        |          |                 |
|----------------|------------|--------|----------|-----------------|
| 19 rs11665855  | 21784516 C | 2.385  | 4.37E-10 | chr:19:21841536 |
| 19 rs34810593  | 21825360 G | 0.2819 | 4.93E-10 | chr:19:21841536 |
| 19 rs11881486  | 21813528 A | 2.414  | 4.98E-10 | chr:19:21841536 |
| 19 rs11881496  | 21813801 G | 2.414  | 4.98E-10 | chr:19:21841536 |
| 19 rs62108423  | 21813710 A | 2.414  | 4.98E-10 | chr:19:21841536 |
| 19 rs73552469  | 21772391 A | 3.877  | 5.00E-10 | chr:19:21841536 |
| 19 rs73536671  | 21813150 T | 2.5    | 5.56E-10 | chr:19:21841536 |
| 19 rs59039597  | 21877989 A | 27.47  | 5.71E-10 | chr:19:21841536 |
| 19 rs7246400   | 21909948 A | 0.3937 | 5.83E-10 | chr:19:21841536 |
| 19 rs56177049  | 21774271 G | 3.789  | 6.12E-10 | chr:19:21841536 |
| 19 rs61242234  | 21776305 T | 3.789  | 6.12E-10 | chr:19:21841536 |
| 19 rs7252798   | 21908053 C | 0.4052 | 6.26E-10 | chr:19:21841536 |
| 19 rs61037485  | 21924189 A | 0.3952 | 7.17E-10 | chr:19:21841536 |
| 19 rs74755925  | 21813062 T | 2.467  | 7.84E-10 | chr:19:21841536 |
| 19 rs8102320   | 21936885 G | 0.4095 | 8.66E-10 | chr:19:21841536 |
| 19 rs58267832  | 21864436 G | 9.546  | 9.07E-10 | chr:19:21841536 |
| 19 rs6511285   | 21890339 A | 0.2536 | 9.62E-10 | chr:19:21841536 |
| 19 rs115229801 | 21828695 G | 11.86  | 1.03E-09 | chr:19:21841536 |
| 19 rs58691880  | 21804749 G | 3.9    | 1.19E-09 | chr:19:21841536 |
| 19 rs34497957  | 21693426 C | 0.431  | 1.42E-09 | chr:19:21841536 |
| 19 rs7245571   | 21768899 G | 2.28   | 1.43E-09 | chr:19:21841536 |
| 19 rs4462731   | 21689603 T | 0.4315 | 1.47E-09 | chr:19:21841536 |
| 19 rs147044062 | 21694415 A | 0.4332 | 1.55E-09 | chr:19:21841536 |
| 19 rs35782355  | 21719401 C | 0.434  | 1.56E-09 | chr:19:21841536 |
| 19 rs7250360   | 21718822 G | 0.434  | 1.56E-09 | chr:19:21841536 |
| 19 rs12974329  | 21700400 T | 0.4304 | 1.70E-09 | chr:19:21841536 |
| 19 rs60559953  | 21793334 G | 3.857  | 1.86E-09 | chr:19:21841536 |
| 19 rs73931207  | 21794073 A | 3.857  | 1.86E-09 | chr:19:21841536 |
| 19 rs75788756  | 21755046 A | 3.95   | 1.95E-09 | chr:19:21841536 |
| 19 rs10411885  | 21840889 G | 0.3321 | 2.14E-09 | chr:19:21841536 |
| 19 rs6511255   | 21692027 G | 0.4352 | 2.18E-09 | chr:19:21841536 |
| 19 rs7252254   | 21687561 A | 0.4352 | 2.18E-09 | chr:19:21841536 |
| 19 rs7257186   | 21697444 A | 0.4352 | 2.18E-09 | chr:19:21841536 |
| 19 rs73017722  | 21688495 T | 0.4352 | 2.18E-09 | chr:19:21841536 |
| 19 rs116659024 | 21843617 C | 0.3229 | 2.25E-09 | chr:19:21841536 |
| 19 rs2435000   | 22011115 T | 0.2699 | 2.27E-09 | chr:19:21841536 |
| 19 rs8101900   | 21699047 C | 0.4346 | 2.38E-09 | chr:19:21841536 |
| 19 rs10406256  | 21839958 C | 0.3332 | 2.41E-09 | chr:19:21841536 |
| 19 rs11085489  | 21862213 G | 0.4188 | 2.58E-09 | chr:19:21841536 |
| 19 rs111470979 | 21761884 G | 3.649  | 2.58E-09 | chr:19:21841536 |
| 19 rs188552296 | 21760265 G | 3.649  | 2.58E-09 | chr:19:21841536 |
| 19 rs61563055  | 21761609 T | 3.649  | 2.58E-09 | chr:19:21841536 |
| 19 rs7254417   | 21771069 A | 3.649  | 2.58E-09 | chr:19:21841536 |

|                |            |        |          |                 |
|----------------|------------|--------|----------|-----------------|
| 19 rs2133822   | 21685102 A | 0.437  | 2.78E-09 | chr:19:21841536 |
| 19 rs7256389   | 21695797 T | 0.4358 | 2.88E-09 | chr:19:21841536 |
| 19 rs8106840   | 21696458 A | 0.4358 | 2.88E-09 | chr:19:21841536 |
| 19 rs10407311  | 21834510 C | 0.3368 | 3.25E-09 | chr:19:21841536 |
| 19 rs10409373  | 21836608 C | 0.3368 | 3.25E-09 | chr:19:21841536 |
| 19 rs8103138   | 21835313 G | 0.3368 | 3.25E-09 | chr:19:21841536 |
| 19 rs10407896  | 22019444 G | 0.288  | 3.39E-09 | chr:19:21841536 |
| 19 rs2244127   | 22016695 A | 0.288  | 3.39E-09 | chr:19:21841536 |
| 19 rs8103969   | 21835257 C | 0.3367 | 3.43E-09 | chr:19:21841536 |
| 19 rs8104073   | 21835293 C | 0.3367 | 3.43E-09 | chr:19:21841536 |
| 19 rs57073163  | 21876331 A | 2.837  | 3.45E-09 | chr:19:21841536 |
| 19 rs10416719  | 21823729 T | 0.3438 | 3.62E-09 | chr:19:21841536 |
| 19 rs10418097  | 21823792 G | 0.3438 | 3.62E-09 | chr:19:21841536 |
| 19 rs11085488  | 21862210 G | 0.4231 | 3.64E-09 | chr:19:21841536 |
| 19 rs201468350 | 21959256 T | 3.021  | 3.91E-09 | chr:19:21841536 |
| 19 rs111727989 | 21765946 T | 3.573  | 3.95E-09 | chr:19:21841536 |
| 19 rs12975399  | 21765794 C | 2.252  | 4.08E-09 | chr:19:21841536 |
| 19 rs8101089   | 21676173 A | 0.4405 | 4.10E-09 | chr:19:21841536 |
| 19 rs73550372  | 21760873 A | 3.561  | 4.21E-09 | chr:19:21841536 |
| 19 rs2457792   | 22030057 G | 0.2911 | 4.47E-09 | chr:19:21841536 |
| 19 rs11666680  | 21681788 T | 0.4416 | 4.84E-09 | chr:19:21841536 |
| 19 rs10416598  | 21823852 T | 0.3308 | 5.39E-09 | chr:19:21841536 |
| 19 rs116273517 | 21859087 C | 4.997  | 5.45E-09 | chr:19:21841536 |
| 19 rs116378385 | 21857155 A | 4.997  | 5.45E-09 | chr:19:21841536 |
| 19 rs9304991   | 21856732 T | 0.4409 | 5.51E-09 | chr:19:21841536 |
| 19 rs2457784   | 22026514 A | 0.2939 | 5.87E-09 | chr:19:21841536 |
| 19 rs58686910  | 21799119 A | 3.604  | 6.36E-09 | chr:19:21841536 |
| 19 rs10419466  | 21842094 G | 0.332  | 6.38E-09 | chr:19:21841536 |
| 19 rs9304990   | 21841379 C | 0.332  | 6.38E-09 | chr:19:21841536 |
| 19 rs62110790  | 21867868 C | 0.4218 | 6.57E-09 | chr:19:21841536 |
| 19 rs113759090 | 21850317 A | 7.505  | 9.30E-09 | chr:19:21841536 |
| 19 rs140359291 | 21853986 G | 7.505  | 9.30E-09 | chr:19:21841536 |
| 19 rs10425631  | 21839322 G | 0.3367 | 1.04E-08 | chr:19:21841536 |
| 19 rs1397579   | 21976964 C | 2.118  | 1.41E-08 | chr:19:21841536 |
| 19 rs12979686  | 21975817 C | 0.3161 | 1.43E-08 | chr:19:21841536 |
| 19 rs7258901   | 21701504 A | 0.4614 | 1.71E-08 | chr:19:21841536 |
| 19 rs58399826  | 21783395 T | 3.298  | 1.78E-08 | chr:19:21841536 |
| 19 rs114842582 | 22008572 C | 3.801  | 1.83E-08 | chr:19:21841536 |
| 19 rs35230828  | 21738391 T | 2.185  | 2.05E-08 | chr:19:21841536 |
| 19 rs12983787  | 21591035 T | 0.4575 | 2.61E-08 | chr:19:21841536 |
| 19 rs12462022  | 21502836 A | 0.4666 | 3.21E-08 | chr:19:21841536 |
| 19 rs7259993   | 21812403 T | 2.291  | 3.36E-08 | chr:19:21841536 |
| 19 rs138592457 | 21826867 T | 13.72  | 3.46E-08 | chr:19:21841536 |

|                |            |        |          |                 |
|----------------|------------|--------|----------|-----------------|
| 19 rs1818695   | 21858390 T | 0.4673 | 3.49E-08 | chr:19:21841536 |
| 19 rs10414467  | 21866004 A | 0.3401 | 5.33E-08 | chr:19:21841536 |
| 19 rs57197225  | 21722663 C | 2.899  | 5.44E-08 | chr:19:21841536 |
| 19 rs79602756  | 22045020 G | 2.781  | 6.51E-08 | chr:19:21841536 |
| 19 rs9304989   | 21824313 T | 0.1537 | 7.33E-08 | chr:19:21841536 |
| 19 rs35506714  | 21738138 C | 2.298  | 1.01E-07 | chr:19:21841536 |
| 19 rs140947336 | 21856697 A | 8.175  | 1.03E-07 | chr:19:21841536 |
| 19 rs7253749   | 21953828 T | 0.4275 | 1.15E-07 | chr:19:21841536 |
| 19 rs8101143   | 21956136 G | 0.4297 | 1.24E-07 | chr:19:21841536 |
| 19 rs111515495 | 21870482 T | 3.361  | 1.38E-07 | chr:19:21841536 |
| 19 rs12461329  | 21860597 T | 0.3264 | 1.46E-07 | chr:19:21841536 |
| 19 rs12973337  | 21860723 A | 0.3264 | 1.46E-07 | chr:19:21841536 |
| 19 rs7246819   | 21529440 G | 0.4829 | 1.55E-07 | chr:19:21841536 |
| 19 rs7257326   | 21532065 C | 0.4839 | 1.67E-07 | chr:19:21841536 |
| 19 rs10164399  | 21856722 T | 0.3196 | 1.79E-07 | chr:19:21841536 |
| 19 rs116497973 | 21860513 T | 25.11  | 1.79E-07 | chr:19:21841536 |
| 19 rs8110690   | 21549668 G | 0.485  | 1.91E-07 | chr:19:21841536 |
| 19 rs4075278   | 21961172 G | 0.4325 | 2.19E-07 | chr:19:21841536 |
| 19 rs11085450  | 21637051 T | 1.983  | 2.22E-07 | chr:19:21841536 |
| 19 rs189340667 | 21718301 T | 2.75   | 2.27E-07 | chr:19:21841536 |
| 19 rs73550345  | 21752141 T | 0.4642 | 2.27E-07 | chr:19:21841536 |
| 19 rs12459069  | 21852101 G | 0.3275 | 2.29E-07 | chr:19:21841536 |
| 19 rs2359394   | 21854169 G | 0.3296 | 2.35E-07 | chr:19:21841536 |
| 19 rs2359395   | 21854176 A | 0.3296 | 2.35E-07 | chr:19:21841536 |
| 19 rs2359396   | 21854179 A | 0.3296 | 2.35E-07 | chr:19:21841536 |
| 19 rs1080829   | 21461135 A | 0.4878 | 2.42E-07 | chr:19:21841536 |
| 19 rs7259739   | 21960407 C | 0.4384 | 2.52E-07 | chr:19:21841536 |
| 19 rs114757397 | 21976932 G | 7.522  | 2.56E-07 | chr:19:21841536 |
| 19 rs4808279   | 21752009 A | 0.4831 | 2.72E-07 | chr:19:21841536 |
| 19 rs2359401   | 21855732 A | 0.3319 | 2.74E-07 | chr:19:21841536 |
| 19 rs5924665   | 21865290 A | 0.4336 | 2.80E-07 | chr:19:21841536 |
| 19 rs7259051   | 21529237 A | 0.4902 | 2.85E-07 | chr:19:21841536 |
| 19 rs12986333  | 21821460 A | 0.429  | 2.92E-07 | chr:19:21841536 |
| 19 rs12982471  | 21816186 A | 0.4284 | 2.96E-07 | chr:19:21841536 |
| 19 rs10422054  | 21985317 T | 0.4437 | 3.03E-07 | chr:19:21841536 |
| 19 rs12459622  | 21852799 G | 0.3322 | 3.04E-07 | chr:19:21841536 |
| 19 rs12459640  | 21852807 T | 0.3322 | 3.04E-07 | chr:19:21841536 |
| 19 rs10164402  | 21856407 C | 0.3319 | 3.10E-07 | chr:19:21841536 |
| 19 rs10164404  | 21856699 C | 0.3319 | 3.10E-07 | chr:19:21841536 |
| 19 rs10854059  | 21859805 A | 0.3319 | 3.10E-07 | chr:19:21841536 |
| 19 rs12459105  | 21852322 C | 0.3319 | 3.10E-07 | chr:19:21841536 |
| 19 rs12459145  | 21852274 C | 0.3319 | 3.10E-07 | chr:19:21841536 |
| 19 rs12459146  | 21852286 A | 0.3319 | 3.10E-07 | chr:19:21841536 |

|                |            |        |          |                 |
|----------------|------------|--------|----------|-----------------|
| 19 rs12459607  | 21852601 T | 0.3319 | 3.10E-07 | chr:19:21841536 |
| 19 rs12459653  | 21852679 A | 0.3319 | 3.10E-07 | chr:19:21841536 |
| 19 rs12459663  | 21852921 A | 0.3319 | 3.10E-07 | chr:19:21841536 |
| 19 rs12460255  | 21853648 A | 0.3319 | 3.10E-07 | chr:19:21841536 |
| 19 rs12460259  | 21853849 G | 0.3319 | 3.10E-07 | chr:19:21841536 |
| 19 rs12460275  | 21853896 T | 0.3319 | 3.10E-07 | chr:19:21841536 |
| 19 rs12463364  | 21851610 G | 0.3319 | 3.10E-07 | chr:19:21841536 |
| 19 rs12972399  | 21850149 C | 0.3319 | 3.10E-07 | chr:19:21841536 |
| 19 rs12982600  | 21847694 A | 0.3319 | 3.10E-07 | chr:19:21841536 |
| 19 rs12983456  | 21855124 A | 0.3319 | 3.10E-07 | chr:19:21841536 |
| 19 rs12984472  | 21847713 C | 0.3319 | 3.10E-07 | chr:19:21841536 |
| 19 rs1818696   | 21850359 T | 0.3319 | 3.10E-07 | chr:19:21841536 |
| 19 rs1850931   | 21855226 A | 0.3319 | 3.10E-07 | chr:19:21841536 |
| 19 rs1850932   | 21855223 T | 0.3319 | 3.10E-07 | chr:19:21841536 |
| 19 rs1850934   | 21854928 C | 0.3319 | 3.10E-07 | chr:19:21841536 |
| 19 rs1850935   | 21854623 C | 0.3319 | 3.10E-07 | chr:19:21841536 |
| 19 rs2015715   | 21858115 T | 0.3319 | 3.10E-07 | chr:19:21841536 |
| 19 rs2015736   | 21857927 T | 0.3319 | 3.10E-07 | chr:19:21841536 |
| 19 rs2037356   | 21849559 T | 0.3319 | 3.10E-07 | chr:19:21841536 |
| 19 rs2359388   | 21851081 C | 0.3319 | 3.10E-07 | chr:19:21841536 |
| 19 rs2359389   | 21851157 G | 0.3319 | 3.10E-07 | chr:19:21841536 |
| 19 rs2359390   | 21851459 A | 0.3319 | 3.10E-07 | chr:19:21841536 |
| 19 rs2359392   | 21854136 G | 0.3319 | 3.10E-07 | chr:19:21841536 |
| 19 rs2359398   | 21854389 T | 0.3319 | 3.10E-07 | chr:19:21841536 |
| 19 rs2359399   | 21854394 T | 0.3319 | 3.10E-07 | chr:19:21841536 |
| 19 rs2359400   | 21855574 T | 0.3319 | 3.10E-07 | chr:19:21841536 |
| 19 rs2359405   | 21856187 T | 0.3319 | 3.10E-07 | chr:19:21841536 |
| 19 rs3946575   | 21848698 T | 0.3319 | 3.10E-07 | chr:19:21841536 |
| 19 rs4302166   | 21850861 T | 0.3319 | 3.10E-07 | chr:19:21841536 |
| 19 rs4310994   | 21850923 G | 0.3319 | 3.10E-07 | chr:19:21841536 |
| 19 rs4321314   | 21849668 A | 0.3319 | 3.10E-07 | chr:19:21841536 |
| 19 rs4490112   | 21850753 A | 0.3319 | 3.10E-07 | chr:19:21841536 |
| 19 rs4500887   | 21850985 A | 0.3319 | 3.10E-07 | chr:19:21841536 |
| 19 rs7259640   | 21848238 A | 0.3319 | 3.10E-07 | chr:19:21841536 |
| 19 rs8108289   | 21846845 G | 0.3319 | 3.10E-07 | chr:19:21841536 |
| 19 rs181740008 | 21844179 T | 16.32  | 3.13E-07 | chr:19:21841536 |
| 19 rs10084114  | 21821966 G | 0.4304 | 3.14E-07 | chr:19:21841536 |
| 19 rs58679179  | 21879499 A | 16.36  | 3.28E-07 | chr:19:21841536 |
| 19 rs143149382 | 21823568 T | 23.07  | 3.75E-07 | chr:19:21841536 |
| 19 rs1533675   | 21777706 A | 2.247  | 3.76E-07 | chr:19:21841536 |
| 19 rs7256700   | 21820763 T | 0.4341 | 3.82E-07 | chr:19:21841536 |
| 19 rs10164296  | 21856328 T | 0.3352 | 3.93E-07 | chr:19:21841536 |
| 19 rs12461611  | 21856280 T | 0.3352 | 3.93E-07 | chr:19:21841536 |



|                |            |        |          |                 |
|----------------|------------|--------|----------|-----------------|
| 19 rs34449776  | 21856309 G | 0.3352 | 3.93E-07 | chr:19:21841536 |
| 19 rs35091166  | 21856300 A | 0.3352 | 3.93E-07 | chr:19:21841536 |
| 19 rs12972511  | 21822010 T | 0.434  | 3.95E-07 | chr:19:21841536 |
| 19 rs2435023   | 22066349 C | 0.4792 | 3.95E-07 | chr:19:21841536 |
| 19 rs2435024   | 22066306 C | 0.4792 | 3.95E-07 | chr:19:21841536 |
| 19 rs2359403   | 21855836 T | 0.3361 | 3.99E-07 | chr:19:21841536 |
| 19 rs2359404   | 21855839 A | 0.3361 | 3.99E-07 | chr:19:21841536 |
| 19 rs4026206   | 21855856 A | 0.3361 | 3.99E-07 | chr:19:21841536 |
| 19 rs4075277   | 21961173 C | 0.443  | 4.11E-07 | chr:19:21841536 |
| 19 rs192866411 | 21890362 G | 7.331  | 4.20E-07 | chr:19:21841536 |
| 19 rs148893136 | 21824764 T | 9.732  | 4.35E-07 | chr:19:21841536 |
| 19 rs74762678  | 22019157 C | 9.335  | 4.48E-07 | chr:19:21841536 |
| 19 rs75937847  | 22031912 A | 9.335  | 4.48E-07 | chr:19:21841536 |
| 19 rs8111923   | 22021828 A | 9.335  | 4.48E-07 | chr:19:21841536 |
| 19 rs11085466  | 21751811 C | 0.4754 | 4.96E-07 | chr:19:21841536 |
| 19 rs11668774  | 21859863 G | 0.342  | 5.00E-07 | chr:19:21841536 |
| 19 rs1818693   | 21858687 G | 0.342  | 5.00E-07 | chr:19:21841536 |
| 19 rs2015476   | 21859110 C | 0.342  | 5.00E-07 | chr:19:21841536 |
| 19 rs2015481   | 21858994 G | 0.342  | 5.00E-07 | chr:19:21841536 |
| 19 rs68086564  | 21813877 A | 0.4395 | 5.34E-07 | chr:19:21841536 |
| 19 rs12710189  | 22006625 A | 0.453  | 5.41E-07 | chr:19:21841536 |
| 19 rs7251082   | 21669802 G | 1.948  | 5.59E-07 | chr:19:21841536 |
| 19 rs147394420 | 21836414 G | 22.11  | 6.06E-07 | chr:19:21841536 |
| 19 rs139828537 | 21823298 G | 12.19  | 6.07E-07 | chr:19:21841536 |
| 19 rs1829503   | 21869343 G | 1.94   | 6.15E-07 | chr:19:21841536 |
| 19 rs12609186  | 21984052 C | 0.5079 | 6.36E-07 | chr:19:21841536 |
| 19 rs11668682  | 21666161 C | 1.939  | 6.81E-07 | chr:19:21841536 |
| 19 rs56346453  | 21665484 G | 1.939  | 6.81E-07 | chr:19:21841536 |
| 19 rs7250838   | 21669642 G | 1.939  | 6.81E-07 | chr:19:21841536 |
| 19 rs7251620   | 21669681 T | 1.939  | 6.81E-07 | chr:19:21841536 |
| 19 rs9917101   | 21854552 G | 0.3745 | 7.36E-07 | chr:19:21841536 |
| 19 rs113751886 | 21713937 C | 2.115  | 7.65E-07 | chr:19:21841536 |
| 19 rs10425298  | 21847634 T | 0.5026 | 7.94E-07 | chr:19:21841536 |
| 19 rs60083403  | 21634949 T | 2.589  | 8.36E-07 | chr:19:21841536 |
| 19 rs115973453 | 21833961 T | 11.23  | 9.15E-07 | chr:19:21841536 |
| 19 rs73550355  | 21755034 A | 2.706  | 9.92E-07 | chr:19:21841536 |
| 19 rs557545096 | 21718308 C | 5.488  | 1.01E-06 | chr:19:21841536 |
| 19 rs1581300   | 21867835 G | 0.4822 | 1.01E-06 | chr:19:21841536 |
| 19 rs8107706   | 21636997 A | 2.436  | 1.06E-06 | chr:19:21841536 |
| 19 rs56217825  | 21709797 A | 2.681  | 1.10E-06 | chr:19:21841536 |
| 19 rs61115928  | 21692055 G | 2.681  | 1.10E-06 | chr:19:21841536 |
| 19 rs61663351  | 21709444 T | 2.681  | 1.10E-06 | chr:19:21841536 |
| 19 rs139810035 | 21858645 C | 15.32  | 1.12E-06 | chr:19:21841536 |

|                |            |        |          |                 |
|----------------|------------|--------|----------|-----------------|
| 19 rs8108605   | 21683011 G | 2.604  | 1.37E-06 | chr:19:21841536 |
| 19 rs113751359 | 21721174 T | 2.632  | 1.57E-06 | chr:19:21841536 |
| 19 rs12971307  | 21813063 C | 0.4914 | 1.57E-06 | chr:19:21841536 |
| 19 rs7257308   | 21644822 T | 2.575  | 1.61E-06 | chr:19:21841536 |
| 19 rs111409905 | 21838129 T | 14.06  | 1.74E-06 | chr:19:21841536 |
| 19 rs113249059 | 21687009 A | 2.604  | 1.93E-06 | chr:19:21841536 |
| 19 rs73926349  | 21686226 C | 2.619  | 1.98E-06 | chr:19:21841536 |
| 19 rs150234937 | 21913596 A | 6.81   | 2.13E-06 | chr:19:21841536 |
| 19 rs150575565 | 21915047 G | 6.81   | 2.13E-06 | chr:19:21841536 |
| 19 rs7248761   | 21866423 G | 0.5332 | 2.14E-06 | chr:19:21841536 |
| 19 rs140259531 | 21693877 T | 2.308  | 2.44E-06 | chr:19:21841536 |
| 19 rs4462730   | 21689276 G | 2.308  | 2.44E-06 | chr:19:21841536 |
| 19 rs1589280   | 21863419 C | 0.5346 | 2.45E-06 | chr:19:21841536 |
| 19 rs7249701   | 21866865 T | 0.5346 | 2.45E-06 | chr:19:21841536 |
| 19 rs8108212   | 21845320 A | 0.308  | 2.48E-06 | chr:19:21841536 |
| 19 rs150430144 | 21972159 G | 3.66   | 2.48E-06 | chr:19:21841536 |
| 19 rs138499271 | 21871425 T | 8.939  | 2.57E-06 | chr:19:21841536 |
| 19 rs138521730 | 21874443 T | 32.78  | 2.69E-06 | chr:19:21841536 |
| 19 rs34573540  | 21821470 C | 0.496  | 2.86E-06 | chr:19:21841536 |
| 19 rs59543267  | 21704335 C | 2.287  | 3.08E-06 | chr:19:21841536 |
| 19 rs7254975   | 21700744 T | 2.287  | 3.08E-06 | chr:19:21841536 |
| 19 rs73548606  | 21697397 G | 2.287  | 3.08E-06 | chr:19:21841536 |
| 19 rs73548618  | 21707058 A | 2.287  | 3.08E-06 | chr:19:21841536 |
| 19 rs73548628  | 21721540 C | 2.287  | 3.08E-06 | chr:19:21841536 |
| 19 rs7255176   | 21700682 C | 2.273  | 3.27E-06 | chr:19:21841536 |
| 19 rs11668453  | 21759357 A | 0.4826 | 3.41E-06 | chr:19:21841536 |
| 19 rs75079001  | 21757375 G | 0.4826 | 3.41E-06 | chr:19:21841536 |
| 19 rs75211977  | 21760201 A | 0.4826 | 3.41E-06 | chr:19:21841536 |
| 19 rs76881507  | 21762189 T | 0.4826 | 3.41E-06 | chr:19:21841536 |
| 19 rs8103528   | 21761273 T | 0.4826 | 3.41E-06 | chr:19:21841536 |
| 19 rs112471014 | 21683716 A | 2.513  | 3.49E-06 | chr:19:21841536 |
| 19 rs4462729   | 21689023 T | 2.513  | 3.49E-06 | chr:19:21841536 |
| 19 rs7259339   | 21693263 T | 2.513  | 3.49E-06 | chr:19:21841536 |
| 19 rs73546766  | 21673034 G | 2.513  | 3.49E-06 | chr:19:21841536 |
| 19 rs73546769  | 21675043 T | 2.513  | 3.49E-06 | chr:19:21841536 |
| 19 rs73546782  | 21683487 T | 2.513  | 3.49E-06 | chr:19:21841536 |
| 19 rs73546785  | 21684151 A | 2.513  | 3.49E-06 | chr:19:21841536 |
| 19 rs73546787  | 21684230 A | 2.513  | 3.49E-06 | chr:19:21841536 |
| 19 rs73546789  | 21687603 C | 2.513  | 3.49E-06 | chr:19:21841536 |
| 19 rs144073556 | 21872570 G | 31.47  | 3.61E-06 | chr:19:21841536 |
| 19 rs73552468  | 21772097 A | 0.4852 | 3.85E-06 | chr:19:21841536 |
| 19 rs10415147  | 21953645 C | 0.4103 | 3.88E-06 | chr:19:21841536 |
| 19 rs1818698   | 21867499 A | 0.5436 | 4.13E-06 | chr:19:21841536 |

|                |            |        |          |                 |
|----------------|------------|--------|----------|-----------------|
| 19 rs10423827  | 21957137 T | 0.4099 | 4.32E-06 | chr:19:21841536 |
| 19 rs13346947  | 21957309 T | 0.4099 | 4.32E-06 | chr:19:21841536 |
| 19 rs76695906  | 21766710 A | 0.4859 | 4.40E-06 | chr:19:21841536 |
| 19 rs1818697   | 21867497 T | 0.5445 | 4.48E-06 | chr:19:21841536 |
| 19 rs10413799  | 21953773 G | 0.4105 | 4.50E-06 | chr:19:21841536 |
| 19 rs10414913  | 21954204 T | 0.4105 | 4.50E-06 | chr:19:21841536 |
| 19 rs114861132 | 21852398 T | 0.3261 | 4.53E-06 | chr:19:21841536 |
| 19 rs73546778  | 21681944 G | 2.47   | 4.91E-06 | chr:19:21841536 |
| 19 rs3935082   | 21960911 T | 0.4    | 5.04E-06 | chr:19:21841536 |
| 19 rs3935083   | 21960619 T | 0.4    | 5.04E-06 | chr:19:21841536 |
| 19 rs4452078   | 21960577 A | 0.4    | 5.04E-06 | chr:19:21841536 |
| 19 rs6511294   | 21978569 G | 1.845  | 5.07E-06 | chr:19:21841536 |
| 19 rs12463222  | 21863913 T | 0.2909 | 5.43E-06 | chr:19:21841536 |
| 19 rs12985113  | 21864344 T | 0.2909 | 5.43E-06 | chr:19:21841536 |
| 19 rs112199629 | 21594395 A | 2.433  | 5.70E-06 | chr:19:21841536 |
| 19 rs73539898  | 21526435 C | 2.42   | 5.70E-06 | chr:19:21841536 |
| 19 rs112689818 | 21824443 C | 9.358  | 6.11E-06 | chr:19:21841536 |
| 19 rs543408085 | 21718140 C | 2.303  | 6.14E-06 | chr:19:21841536 |
| 19 rs58214336  | 21958607 A | 0.4039 | 6.27E-06 | chr:19:21841536 |
| 19 rs113878987 | 21491216 A | 2.394  | 6.36E-06 | chr:19:21841536 |
| 19 rs60543700  | 21473099 T | 2.394  | 6.36E-06 | chr:19:21841536 |
| 19 rs59391927  | 21783487 T | 0.4973 | 6.37E-06 | chr:19:21841536 |
| 19 rs115753254 | 21970269 C | 6.311  | 7.01E-06 | chr:19:21841536 |
| 19 rs563762240 | 21959213 T | 6.311  | 7.01E-06 | chr:19:21841536 |
| 19 rs9973270   | 21814919 T | 0.5047 | 7.10E-06 | chr:19:21841536 |
| 19 rs4399664   | 21778026 T | 0.5017 | 7.93E-06 | chr:19:21841536 |
| 19 rs10402184  | 21842973 A | 0.3649 | 7.93E-06 | chr:19:21841536 |
| 19 rs12985935  | 21821448 G | 0.512  | 8.30E-06 | chr:19:21841536 |
| 19 rs113788337 | 21850952 G | 27.72  | 8.58E-06 | chr:19:21841536 |
| 19 rs10084110  | 21821537 A | 0.5131 | 8.79E-06 | chr:19:21841536 |
| 19 rs146835848 | 21525805 T | 2.379  | 8.92E-06 | chr:19:21841536 |
| 19 rs59645800  | 21538453 C | 2.379  | 8.92E-06 | chr:19:21841536 |
| 19 rs6511236   | 21570590 T | 2.379  | 8.92E-06 | chr:19:21841536 |
| 19 rs73541828  | 21530791 C | 2.379  | 8.92E-06 | chr:19:21841536 |
| 19 rs73547786  | 21568888 G | 2.379  | 8.92E-06 | chr:19:21841536 |
| 19 rs73926973  | 21494541 A | 2.379  | 8.92E-06 | chr:19:21841536 |
| 19 rs11669043  | 21614714 T | 1.802  | 8.99E-06 | chr:19:21841536 |
| 19 rs73535998  | 21482386 T | 2.336  | 9.04E-06 | chr:19:21841536 |
| 19 rs113381212 | 21868580 T | 3.515  | 9.11E-06 | chr:19:21841536 |
| 19 rs2292986   | 21776332 A | 0.5034 | 9.19E-06 | chr:19:21841536 |
| 19 rs7252817   | 21783157 A | 0.4696 | 9.31E-06 | chr:19:21841536 |
| 19 rs12985947  | 21820111 C | 0.5272 | 9.41E-06 | chr:19:21841536 |
| 19 rs2435036   | 22039105 T | 0.4484 | 1.00E-05 | chr:19:21841536 |

|                |            |        |          |                 |
|----------------|------------|--------|----------|-----------------|
| 19 rs7257080   | 21820858 A | 0.5148 | 1.02E-05 | chr:19:21841536 |
| 19 rs12609376  | 21817102 G | 0.5186 | 1.02E-05 | chr:19:21841536 |
| 19 rs12611302  | 21817486 C | 0.5186 | 1.02E-05 | chr:19:21841536 |
| 19 rs144197730 | 21832349 T | 6.411  | 1.08E-05 | chr:19:21841536 |
| 19 rs112300130 | 21866056 C | 26.76  | 1.11E-05 | chr:19:21841536 |
| 19 rs141251254 | 21843366 T | 26.76  | 1.11E-05 | chr:19:21841536 |
| 19 rs142410630 | 21842348 T | 26.76  | 1.11E-05 | chr:19:21841536 |
| 19 rs148504899 | 21853608 T | 26.76  | 1.11E-05 | chr:19:21841536 |
| 19 rs182785858 | 21853425 T | 26.76  | 1.11E-05 | chr:19:21841536 |
| 19 rs549257374 | 21864596 A | 26.76  | 1.11E-05 | chr:19:21841536 |
| 19 rs60585877  | 21864195 G | 26.76  | 1.11E-05 | chr:19:21841536 |
| 19 rs12462709  | 21989391 C | 6.539  | 1.11E-05 | chr:19:21841536 |
| 19 rs58664716  | 21993467 G | 6.539  | 1.11E-05 | chr:19:21841536 |
| 19 rs76621431  | 22014914 C | 6.539  | 1.11E-05 | chr:19:21841536 |
| 19 rs77216709  | 21992940 G | 6.539  | 1.11E-05 | chr:19:21841536 |
| 19 rs12979060  | 21843727 A | 0.3405 | 1.12E-05 | chr:19:21841536 |
| 19 rs77115676  | 21985611 A | 7.19   | 1.14E-05 | chr:19:21841536 |
| 19 rs79327994  | 21993765 T | 7.19   | 1.14E-05 | chr:19:21841536 |
| 19 rs28498118  | 21647585 T | 1.791  | 1.14E-05 | chr:19:21841536 |
| 19 rs139946230 | 21851689 G | 4.762  | 1.15E-05 | chr:19:21841536 |
| 19 rs189120125 | 21851671 G | 4.762  | 1.15E-05 | chr:19:21841536 |
| 19 rs572947750 | 21851672 T | 4.762  | 1.15E-05 | chr:19:21841536 |
| 19 rs111549912 | 22051478 C | 2.551  | 1.16E-05 | chr:19:21841536 |
| 19 rs112444568 | 22051581 T | 2.551  | 1.16E-05 | chr:19:21841536 |
| 19 rs114651586 | 21978760 A | 5.599  | 1.19E-05 | chr:19:21841536 |
| 19 rs16997799  | 21567787 C | 2.344  | 1.19E-05 | chr:19:21841536 |
| 19 rs12971926  | 21837430 T | 0.3402 | 1.22E-05 | chr:19:21841536 |
| 19 rs12975766  | 21840005 C | 0.3402 | 1.22E-05 | chr:19:21841536 |
| 19 rs1850930   | 21839462 G | 0.3402 | 1.22E-05 | chr:19:21841536 |
| 19 rs2139527   | 21839211 T | 0.3402 | 1.22E-05 | chr:19:21841536 |
| 19 rs187935733 | 22059949 T | 2.559  | 1.23E-05 | chr:19:21841536 |
| 19 rs12972184  | 21835628 C | 0.3397 | 1.34E-05 | chr:19:21841536 |
| 19 rs11669130  | 21654213 C | 1.773  | 1.35E-05 | chr:19:21841536 |
| 19 rs138491703 | 21965859 G | 3.352  | 1.36E-05 | chr:19:21841536 |
| 19 rs12978917  | 21813834 A | 0.5381 | 1.40E-05 | chr:19:21841536 |
| 19 rs12979910  | 21814189 A | 0.5381 | 1.40E-05 | chr:19:21841536 |
| 19 rs11883081  | 21816114 G | 0.5361 | 1.40E-05 | chr:19:21841536 |
| 19 rs12985836  | 21819861 G | 0.5361 | 1.40E-05 | chr:19:21841536 |
| 19 rs4808284   | 21815748 G | 0.5361 | 1.40E-05 | chr:19:21841536 |
| 19 rs113704561 | 21828995 T | 4.83   | 1.42E-05 | chr:19:21841536 |
| 19 rs149036654 | 21828173 G | 4.83   | 1.42E-05 | chr:19:21841536 |
| 19 rs35605606  | 22059609 A | 2.253  | 1.46E-05 | chr:19:21841536 |
| 19 rs12150872  | 21793510 T | 0.5139 | 1.50E-05 | chr:19:21841536 |

|                |            |          |          |                 |
|----------------|------------|----------|----------|-----------------|
| 19 rs12150881  | 21793561 T | 0.5139   | 1.50E-05 | chr:19:21841536 |
| 19 rs12151328  | 21793265 A | 0.5139   | 1.50E-05 | chr:19:21841536 |
| 19 rs12972549  | 21822054 G | 0.5205   | 1.54E-05 | chr:19:21841536 |
| 19 rs150844285 | 22411568 G | 0.01025  | 1.04E-31 | chr:19:22414379 |
| 19 rs10425845  | 22370672 G | 0.02516  | 8.60E-31 | chr:19:22414379 |
| 19 rs55992911  | 22397853 C | 25.02    | 1.88E-26 | chr:19:22414379 |
| 19 rs463200    | 22327489 T | 0.004768 | 1.51E-24 | chr:19:22414379 |
| 19 rs557388    | 22353206 A | 0.0039   | 2.24E-24 | chr:19:22414379 |
| 19 rs10419384  | 22391239 G | 20.94    | 6.87E-24 | chr:19:22414379 |
| 19 rs1918161   | 22374023 T | 20.94    | 6.87E-24 | chr:19:22414379 |
| 19 rs2360002   | 22383362 A | 20.94    | 6.87E-24 | chr:19:22414379 |
| 19 rs281181    | 22396809 T | 20.94    | 6.87E-24 | chr:19:22414379 |
| 19 rs3934143   | 22392238 G | 20.94    | 6.87E-24 | chr:19:22414379 |
| 19 rs436431    | 22360919 T | 20.94    | 6.87E-24 | chr:19:22414379 |
| 19 rs7343077   | 22367925 T | 20.94    | 6.87E-24 | chr:19:22414379 |
| 19 rs281158    | 22416013 T | 23.33    | 7.19E-24 | chr:19:22414379 |
| 19 rs2606266   | 22409041 T | 21.5     | 8.07E-24 | chr:19:22414379 |
| 19 rs2606267   | 22409260 A | 21.5     | 8.07E-24 | chr:19:22414379 |
| 19 rs2606274   | 22413650 G | 21.5     | 8.07E-24 | chr:19:22414379 |
| 19 rs2694445   | 22408997 C | 21.5     | 8.07E-24 | chr:19:22414379 |
| 19 rs2548937   | 22413188 T | 21.47    | 8.84E-24 | chr:19:22414379 |
| 19 rs4025837   | 22413189 A | 21.47    | 8.84E-24 | chr:19:22414379 |
| 19 rs2694449   | 22404047 A | 20.94    | 9.41E-24 | chr:19:22414379 |
| 19 rs281193    | 22400609 A | 20.94    | 9.41E-24 | chr:19:22414379 |
| 19 rs281194    | 22400802 A | 20.94    | 9.41E-24 | chr:19:22414379 |
| 19 rs281195    | 22402480 T | 20.94    | 9.41E-24 | chr:19:22414379 |
| 19 rs281199    | 22405501 T | 20.94    | 9.41E-24 | chr:19:22414379 |
| 19 rs379619    | 22341905 C | 21.42    | 2.39E-23 | chr:19:22414379 |
| 19 rs113493783 | 22333975 G | 21.33    | 2.71E-23 | chr:19:22414379 |
| 19 rs142745046 | 22334261 C | 21.33    | 2.71E-23 | chr:19:22414379 |
| 19 rs411557    | 22333324 C | 21.33    | 2.71E-23 | chr:19:22414379 |
| 19 rs459017    | 22330531 C | 21.33    | 2.71E-23 | chr:19:22414379 |
| 19 rs459539    | 22330699 T | 21.33    | 2.71E-23 | chr:19:22414379 |
| 19 rs462577    | 22335500 A | 21.33    | 2.71E-23 | chr:19:22414379 |
| 19 rs462671    | 22328850 T | 21.33    | 2.71E-23 | chr:19:22414379 |
| 19 rs465978    | 22342421 A | 21.33    | 2.71E-23 | chr:19:22414379 |
| 19 rs78408635  | 22339824 G | 21.33    | 2.71E-23 | chr:19:22414379 |
| 19 rs79196382  | 22339817 A | 21.33    | 2.71E-23 | chr:19:22414379 |
| 19 rs281156    | 22414691 T | 13       | 6.71E-23 | chr:19:22414379 |
| 19 rs121382    | 22348657 C | 0.004717 | 9.10E-23 | chr:19:22414379 |
| 19 rs2522318   | 22350385 C | 0.004717 | 9.10E-23 | chr:19:22414379 |
| 19 rs366501    | 22352375 T | 0.004717 | 9.10E-23 | chr:19:22414379 |
| 19 rs399307    | 22345794 C | 0.004717 | 9.10E-23 | chr:19:22414379 |

|                |            |          |          |                 |
|----------------|------------|----------|----------|-----------------|
| 19 rs408240    | 22346403 A | 0.004717 | 9.10E-23 | chr:19:22414379 |
| 19 rs427343    | 22346138 G | 0.004717 | 9.10E-23 | chr:19:22414379 |
| 19 rs445788    | 22354323 G | 0.004717 | 9.10E-23 | chr:19:22414379 |
| 19 rs451905    | 22345649 G | 0.004717 | 9.10E-23 | chr:19:22414379 |
| 19 rs112297561 | 22341110 A | 0.004739 | 9.37E-23 | chr:19:22414379 |
| 19 rs112826254 | 22334192 G | 0.004739 | 9.37E-23 | chr:19:22414379 |
| 19 rs371540    | 22344391 A | 0.004739 | 9.37E-23 | chr:19:22414379 |
| 19 rs395410    | 22336307 C | 0.004739 | 9.37E-23 | chr:19:22414379 |
| 19 rs420977    | 22335762 G | 0.004739 | 9.37E-23 | chr:19:22414379 |
| 19 rs421180    | 22335719 G | 0.004739 | 9.37E-23 | chr:19:22414379 |
| 19 rs457504    | 22331109 G | 0.004739 | 9.37E-23 | chr:19:22414379 |
| 19 rs461312    | 22333288 T | 0.004739 | 9.37E-23 | chr:19:22414379 |
| 19 rs461804    | 22328560 T | 0.004739 | 9.37E-23 | chr:19:22414379 |
| 19 rs465150    | 22342486 T | 0.004739 | 9.37E-23 | chr:19:22414379 |
| 19 rs465380    | 22335068 A | 0.004739 | 9.37E-23 | chr:19:22414379 |
| 19 rs56256419  | 22345457 C | 0.004739 | 9.37E-23 | chr:19:22414379 |
| 19 rs56284384  | 22345461 A | 0.004739 | 9.37E-23 | chr:19:22414379 |
| 19 rs76608558  | 22334370 T | 0.004739 | 9.37E-23 | chr:19:22414379 |
| 19 rs400419    | 22345405 C | 0.004729 | 1.02E-22 | chr:19:22414379 |
| 19 rs400661    | 22345337 C | 0.004729 | 1.02E-22 | chr:19:22414379 |
| 19 rs416928    | 22345369 G | 0.004729 | 1.02E-22 | chr:19:22414379 |
| 19 rs447533    | 22345393 G | 0.004729 | 1.02E-22 | chr:19:22414379 |
| 19 rs458172    | 22329400 C | 0.01101  | 1.13E-22 | chr:19:22414379 |
| 19 rs2204581   | 22325017 C | 0.04556  | 1.38E-22 | chr:19:22414379 |
| 19 rs382357    | 22343507 A | 0.03135  | 1.63E-22 | chr:19:22414379 |
| 19 rs386720    | 22342796 A | 0.03135  | 1.63E-22 | chr:19:22414379 |
| 19 rs414385    | 22338577 G | 0.03135  | 1.63E-22 | chr:19:22414379 |
| 19 rs421261    | 22334418 T | 0.03135  | 1.63E-22 | chr:19:22414379 |
| 19 rs546256    | 22339777 C | 0.03135  | 1.63E-22 | chr:19:22414379 |
| 19 rs78957365  | 22341032 T | 0.03135  | 1.63E-22 | chr:19:22414379 |
| 19 rs111471672 | 22410364 G | 0.003013 | 3.03E-22 | chr:19:22414379 |
| 19 rs449891    | 22352161 T | 0.06121  | 6.71E-22 | chr:19:22414379 |
| 19 rs430560    | 22353560 T | 0.01489  | 1.15E-21 | chr:19:22414379 |
| 19 rs456246    | 22327192 G | 0.06004  | 1.21E-21 | chr:19:22414379 |
| 19 rs281190    | 22399788 A | 0.04143  | 2.64E-21 | chr:19:22414379 |
| 19 rs281189    | 22399448 G | 0.0415   | 2.90E-21 | chr:19:22414379 |
| 19 rs281185    | 22398525 A | 0.04177  | 3.93E-21 | chr:19:22414379 |
| 19 rs281201    | 22406201 T | 0.03725  | 1.17E-20 | chr:19:22414379 |
| 19 rs461661    | 22327559 C | 0.003494 | 1.50E-20 | chr:19:22414379 |
| 19 rs1852417   | 22324637 G | 0.03973  | 1.52E-20 | chr:19:22414379 |
| 19 rs605085    | 22355832 T | 0.08661  | 2.11E-20 | chr:19:22414379 |
| 19 rs1852418   | 22324418 C | 0.1307   | 3.18E-20 | chr:19:22414379 |
| 19 rs2214352   | 22350938 A | 0.02706  | 3.36E-20 | chr:19:22414379 |

|               |            |          |          |                 |
|---------------|------------|----------|----------|-----------------|
| 19 rs10421426 | 22366423 C | 0.02322  | 3.95E-20 | chr:19:22414379 |
| 19 rs2360001  | 22379587 G | 0.02322  | 3.95E-20 | chr:19:22414379 |
| 19 rs281184   | 22397099 T | 0.02322  | 3.95E-20 | chr:19:22414379 |
| 19 rs4932963  | 22388931 C | 0.02322  | 3.95E-20 | chr:19:22414379 |
| 19 rs2606273  | 22413654 G | 0.002202 | 5.05E-20 | chr:19:22414379 |
| 19 rs2606275  | 22413622 G | 0.002202 | 5.05E-20 | chr:19:22414379 |
| 19 rs281204   | 22407056 G | 0.002202 | 5.05E-20 | chr:19:22414379 |
| 19 rs281205   | 22407824 T | 0.002202 | 5.05E-20 | chr:19:22414379 |
| 19 rs4932966  | 22412232 A | 0.002202 | 5.05E-20 | chr:19:22414379 |
| 19 rs281202   | 22406331 A | 0.00224  | 7.76E-20 | chr:19:22414379 |
| 19 rs281161   | 22418243 G | 0.04166  | 8.79E-20 | chr:19:22414379 |
| 19 rs281197   | 22404604 A | 0.00219  | 8.84E-20 | chr:19:22414379 |
| 19 rs10403375 | 22389248 G | 0.002187 | 8.87E-20 | chr:19:22414379 |
| 19 rs10411854 | 22377604 C | 0.002187 | 8.87E-20 | chr:19:22414379 |
| 19 rs10412921 | 22386545 C | 0.002187 | 8.87E-20 | chr:19:22414379 |
| 19 rs10419666 | 22364492 A | 0.002187 | 8.87E-20 | chr:19:22414379 |
| 19 rs10419926 | 22364620 A | 0.002187 | 8.87E-20 | chr:19:22414379 |
| 19 rs12459032 | 22365552 G | 0.002187 | 8.87E-20 | chr:19:22414379 |
| 19 rs1852426  | 22385097 C | 0.002187 | 8.87E-20 | chr:19:22414379 |
| 19 rs1852428  | 22380017 G | 0.002187 | 8.87E-20 | chr:19:22414379 |
| 19 rs1918162  | 22373949 T | 0.002187 | 8.87E-20 | chr:19:22414379 |
| 19 rs1988038  | 22356993 T | 0.002187 | 8.87E-20 | chr:19:22414379 |
| 19 rs281176   | 22394319 C | 0.002187 | 8.87E-20 | chr:19:22414379 |
| 19 rs281178   | 22395581 G | 0.002187 | 8.87E-20 | chr:19:22414379 |
| 19 rs281179   | 22396158 C | 0.002187 | 8.87E-20 | chr:19:22414379 |
| 19 rs281180   | 22396190 A | 0.002187 | 8.87E-20 | chr:19:22414379 |
| 19 rs281183   | 22397080 C | 0.002187 | 8.87E-20 | chr:19:22414379 |
| 19 rs28760999 | 22365862 G | 0.002187 | 8.87E-20 | chr:19:22414379 |
| 19 rs2884867  | 22380662 G | 0.002187 | 8.87E-20 | chr:19:22414379 |
| 19 rs412658   | 22359440 C | 0.002187 | 8.87E-20 | chr:19:22414379 |
| 19 rs414983   | 22357747 T | 0.002187 | 8.87E-20 | chr:19:22414379 |
| 19 rs427945   | 22356325 T | 0.002187 | 8.87E-20 | chr:19:22414379 |
| 19 rs428455   | 22357247 G | 0.002187 | 8.87E-20 | chr:19:22414379 |
| 19 rs4584959  | 22368977 T | 0.002187 | 8.87E-20 | chr:19:22414379 |
| 19 rs8104929  | 22375868 C | 0.002187 | 8.87E-20 | chr:19:22414379 |
| 19 rs281186   | 22398960 G | 0.002198 | 9.22E-20 | chr:19:22414379 |
| 19 rs281187   | 22399362 G | 0.002198 | 9.22E-20 | chr:19:22414379 |
| 19 rs281188   | 22399389 T | 0.002198 | 9.22E-20 | chr:19:22414379 |
| 19 rs281191   | 22400166 T | 0.002198 | 9.22E-20 | chr:19:22414379 |
| 19 rs2021560  | 22373470 C | 7.969    | 9.65E-20 | chr:19:22414379 |
| 19 rs440539   | 22359330 G | 0.002376 | 1.15E-19 | chr:19:22414379 |
| 19 rs4371283  | 22373810 C | 0.002342 | 1.29E-19 | chr:19:22414379 |
| 19 rs11668081 | 22425615 A | 0.1354   | 2.54E-19 | chr:19:22414379 |

|                |            |          |          |                 |
|----------------|------------|----------|----------|-----------------|
| 19 rs4932965   | 22412224 T | 0.01987  | 2.62E-19 | chr:19:22414379 |
| 19 rs17470104  | 22424418 A | 0.1265   | 2.87E-19 | chr:19:22414379 |
| 19 rs10418058  | 22391275 C | 0.002572 | 1.47E-18 | chr:19:22414379 |
| 19 rs2522319   | 22356056 T | 0.002531 | 1.48E-18 | chr:19:22414379 |
| 19 rs111581976 | 22370897 C | 0.002554 | 1.65E-18 | chr:19:22414379 |
| 19 rs1526883   | 22366973 C | 0.002554 | 1.65E-18 | chr:19:22414379 |
| 19 rs1830172   | 22388211 A | 0.002554 | 1.65E-18 | chr:19:22414379 |
| 19 rs1852427   | 22375002 A | 0.002554 | 1.65E-18 | chr:19:22414379 |
| 19 rs2522321   | 22358014 T | 0.002554 | 1.65E-18 | chr:19:22414379 |
| 19 rs2522322   | 22358015 T | 0.002554 | 1.65E-18 | chr:19:22414379 |
| 19 rs281182    | 22396907 C | 0.002554 | 1.65E-18 | chr:19:22414379 |
| 19 rs28790613  | 22378639 C | 0.002554 | 1.65E-18 | chr:19:22414379 |
| 19 rs3855858   | 22385901 T | 0.002554 | 1.65E-18 | chr:19:22414379 |
| 19 rs409627    | 22357936 G | 0.002554 | 1.65E-18 | chr:19:22414379 |
| 19 rs427500    | 22356757 G | 0.002554 | 1.65E-18 | chr:19:22414379 |
| 19 rs446754    | 22361761 A | 0.002554 | 1.65E-18 | chr:19:22414379 |
| 19 rs453104    | 22354405 T | 0.002554 | 1.65E-18 | chr:19:22414379 |
| 19 rs682866    | 22360309 C | 0.002554 | 1.65E-18 | chr:19:22414379 |
| 19 rs7343076   | 22367903 G | 0.002554 | 1.65E-18 | chr:19:22414379 |
| 19 rs7343146   | 22369930 G | 0.002554 | 1.65E-18 | chr:19:22414379 |
| 19 rs8105545   | 22376246 G | 0.002554 | 1.65E-18 | chr:19:22414379 |
| 19 rs8106346   | 22376315 T | 0.002554 | 1.65E-18 | chr:19:22414379 |
| 19 rs281200    | 22405888 A | 0.002593 | 2.04E-18 | chr:19:22414379 |
| 19 rs56144642  | 22421516 C | 0.1289   | 4.43E-18 | chr:19:22414379 |
| 19 rs10417143  | 22373303 T | 0.009177 | 9.25E-18 | chr:19:22414379 |
| 19 rs281174    | 22392420 G | 0.009177 | 9.25E-18 | chr:19:22414379 |
| 19 rs383678    | 22361741 T | 0.009177 | 9.25E-18 | chr:19:22414379 |
| 19 rs436744    | 22355575 T | 0.009177 | 9.25E-18 | chr:19:22414379 |
| 19 rs4614861   | 22373841 T | 0.009177 | 9.25E-18 | chr:19:22414379 |
| 19 rs1922685   | 22287970 T | 0.1684   | 1.38E-17 | chr:19:22414379 |
| 19 rs11671130  | 22329455 C | 0.1341   | 9.82E-17 | chr:19:22414379 |
| 19 rs11671580  | 22326439 A | 0.1341   | 9.82E-17 | chr:19:22414379 |
| 19 rs149070103 | 22340413 G | 0.1341   | 9.82E-17 | chr:19:22414379 |
| 19 rs1830174   | 22344502 A | 0.1341   | 9.82E-17 | chr:19:22414379 |
| 19 rs4381717   | 22338981 A | 0.1341   | 9.82E-17 | chr:19:22414379 |
| 19 rs4602157   | 22339036 C | 0.1341   | 9.82E-17 | chr:19:22414379 |
| 19 rs4616412   | 22339005 G | 0.1341   | 9.82E-17 | chr:19:22414379 |
| 19 rs4932750   | 22333226 T | 0.1341   | 9.82E-17 | chr:19:22414379 |
| 19 rs4123726   | 22419677 T | 0.1353   | 9.88E-17 | chr:19:22414379 |
| 19 rs281172    | 22424697 T | 0.1716   | 1.09E-16 | chr:19:22414379 |
| 19 rs12609473  | 22378606 G | 0.1614   | 1.24E-16 | chr:19:22414379 |
| 19 rs1830175   | 22382080 A | 0.1614   | 1.24E-16 | chr:19:22414379 |
| 19 rs3951502   | 22368852 A | 0.1614   | 1.24E-16 | chr:19:22414379 |



|                |            |          |          |                 |
|----------------|------------|----------|----------|-----------------|
| 19 rs431628    | 22359024 T | 0.1614   | 1.24E-16 | chr:19:22414379 |
| 19 rs9304995   | 22366432 A | 0.1614   | 1.24E-16 | chr:19:22414379 |
| 19 rs11672659  | 22394767 T | 0.1368   | 1.58E-16 | chr:19:22414379 |
| 19 rs12609320  | 22390462 C | 0.1368   | 1.58E-16 | chr:19:22414379 |
| 19 rs1609037   | 22380261 C | 0.1368   | 1.58E-16 | chr:19:22414379 |
| 19 rs4390714   | 22369043 A | 0.1368   | 1.58E-16 | chr:19:22414379 |
| 19 rs4578792   | 22368982 G | 0.1368   | 1.58E-16 | chr:19:22414379 |
| 19 rs4932962   | 22372000 T | 0.1368   | 1.58E-16 | chr:19:22414379 |
| 19 rs1852420   | 22361902 T | 0.1388   | 2.25E-16 | chr:19:22414379 |
| 19 rs2522317   | 22339626 G | 0.177    | 2.34E-16 | chr:19:22414379 |
| 19 rs404793    | 22329632 A | 0.177    | 2.34E-16 | chr:19:22414379 |
| 19 rs424912    | 22347371 C | 0.177    | 2.34E-16 | chr:19:22414379 |
| 19 rs435638    | 22333121 A | 0.177    | 2.34E-16 | chr:19:22414379 |
| 19 rs448861    | 22353606 A | 0.177    | 2.34E-16 | chr:19:22414379 |
| 19 rs458515    | 22330126 T | 0.177    | 2.34E-16 | chr:19:22414379 |
| 19 rs2548936   | 22410178 C | 0.001518 | 6.48E-16 | chr:19:22414379 |
| 19 rs281192    | 22400404 T | 446      | 1.54E-15 | chr:19:22414379 |
| 19 rs2168491   | 22425589 G | 0.2017   | 2.34E-15 | chr:19:22414379 |
| 19 rs8111771   | 22287861 A | 0.2075   | 5.30E-15 | chr:19:22414379 |
| 19 rs10412312  | 22427134 C | 5.597    | 8.16E-15 | chr:19:22414379 |
| 19 rs172183    | 22405532 A | 0.1965   | 8.27E-15 | chr:19:22414379 |
| 19 rs281196    | 22403293 G | 0.1965   | 8.27E-15 | chr:19:22414379 |
| 19 rs281198    | 22405169 G | 0.1965   | 8.27E-15 | chr:19:22414379 |
| 19 rs281203    | 22406377 C | 0.1965   | 8.27E-15 | chr:19:22414379 |
| 19 rs464038    | 22335569 G | 0.2141   | 9.41E-15 | chr:19:22414379 |
| 19 rs62119970  | 22417828 G | 6.305    | 1.42E-14 | chr:19:22414379 |
| 19 rs61616269  | 22397866 C | 0.2234   | 1.58E-14 | chr:19:22414379 |
| 19 rs76490109  | 22330225 A | 0.1689   | 2.39E-14 | chr:19:22414379 |
| 19 rs150310626 | 22336147 T | 0.162    | 7.93E-14 | chr:19:22414379 |
| 19 rs281169    | 22423276 T | 0.2184   | 9.03E-14 | chr:19:22414379 |
| 19 rs10407936  | 22312059 A | 0.2017   | 1.56E-13 | chr:19:22414379 |
| 19 rs10415817  | 22313214 C | 0.2017   | 1.56E-13 | chr:19:22414379 |
| 19 rs281164    | 22419523 T | 0.2114   | 2.00E-13 | chr:19:22414379 |
| 19 rs366849    | 22234941 G | 0.2051   | 2.08E-13 | chr:19:22414379 |
| 19 rs7248898   | 22245354 G | 0.2377   | 2.36E-13 | chr:19:22414379 |
| 19 rs1978718   | 22293126 T | 0.2095   | 2.69E-13 | chr:19:22414379 |
| 19 rs2116895   | 22266669 T | 0.2095   | 2.69E-13 | chr:19:22414379 |
| 19 rs10403779  | 22258396 C | 0.2108   | 3.34E-13 | chr:19:22414379 |
| 19 rs2043318   | 22241615 G | 0.2108   | 3.34E-13 | chr:19:22414379 |
| 19 rs28881618  | 22254692 G | 0.2108   | 3.34E-13 | chr:19:22414379 |
| 19 rs3752163   | 22256396 G | 0.2108   | 3.34E-13 | chr:19:22414379 |
| 19 rs4932953   | 22249045 G | 0.2108   | 3.34E-13 | chr:19:22414379 |
| 19 rs6511318   | 22245745 A | 0.2108   | 3.34E-13 | chr:19:22414379 |

|               |            |           |          |                 |
|---------------|------------|-----------|----------|-----------------|
| 19 rs7251108  | 22250689 G | 0.2108    | 3.34E-13 | chr:19:22414379 |
| 19 rs7255666  | 22257264 T | 0.2108    | 3.34E-13 | chr:19:22414379 |
| 19 rs7258080  | 22257625 A | 0.2108    | 3.34E-13 | chr:19:22414379 |
| 19 rs8107039  | 22238990 G | 0.2108    | 3.34E-13 | chr:19:22414379 |
| 19 rs403850   | 22229593 T | 0.2117    | 3.67E-13 | chr:19:22414379 |
| 19 rs417331   | 22234478 T | 0.2117    | 3.67E-13 | chr:19:22414379 |
| 19 rs632709   | 22233096 C | 0.2117    | 3.67E-13 | chr:19:22414379 |
| 19 rs4244913  | 22239919 A | 0.2129    | 4.41E-13 | chr:19:22414379 |
| 19 rs2099347  | 22282614 T | 0.2124    | 4.89E-13 | chr:19:22414379 |
| 19 rs10411951 | 22309055 C | 0.2321    | 5.20E-13 | chr:19:22414379 |
| 19 rs6511334  | 22307267 C | 0.2321    | 5.20E-13 | chr:19:22414379 |
| 19 rs7258192  | 22264658 G | 0.2155    | 5.83E-13 | chr:19:22414379 |
| 19 rs7245790  | 22320009 C | 0.2137    | 6.71E-13 | chr:19:22414379 |
| 19 rs1036235  | 22279541 T | 0.2168    | 6.97E-13 | chr:19:22414379 |
| 19 rs8100438  | 22301003 C | 0.238     | 7.61E-13 | chr:19:22414379 |
| 19 rs987711   | 22300007 T | 0.238     | 7.61E-13 | chr:19:22414379 |
| 19 rs7254363  | 22257048 C | 0.2186    | 9.24E-13 | chr:19:22414379 |
| 19 rs6511332  | 22288391 A | 0.2209    | 9.67E-13 | chr:19:22414379 |
| 19 rs8103471  | 22317314 T | 0.2173    | 1.11E-12 | chr:19:22414379 |
| 19 rs10404620 | 22316577 A | 0.2484    | 3.00E-12 | chr:19:22414379 |
| 19 rs4244914  | 22315389 A | 0.2484    | 3.00E-12 | chr:19:22414379 |
| 19 rs8112637  | 22435375 T | 0.2329    | 3.02E-12 | chr:19:22414379 |
| 19 rs11085518 | 22434898 C | 0.2358    | 3.99E-12 | chr:19:22414379 |
| 19 rs11085520 | 22434988 G | 0.2358    | 3.99E-12 | chr:19:22414379 |
| 19 rs11085521 | 22435049 T | 0.2358    | 3.99E-12 | chr:19:22414379 |
| 19 rs8109519  | 22435128 T | 0.2358    | 3.99E-12 | chr:19:22414379 |
| 19 rs8109766  | 22435340 T | 0.2358    | 3.99E-12 | chr:19:22414379 |
| 19 rs8110568  | 22435291 C | 0.2358    | 3.99E-12 | chr:19:22414379 |
| 19 rs281166   | 22420798 G | 0.2373    | 4.25E-12 | chr:19:22414379 |
| 19 rs281168   | 22422638 A | 0.2373    | 4.25E-12 | chr:19:22414379 |
| 19 rs4123729  | 22418142 C | 0.1436    | 6.62E-12 | chr:19:22414379 |
| 19 rs55758909 | 22420558 A | 0.1436    | 6.62E-12 | chr:19:22414379 |
| 19 rs4372816  | 22328376 G | 0.1405    | 6.99E-12 | chr:19:22414379 |
| 19 rs74416263 | 22342767 T | 0.1405    | 6.99E-12 | chr:19:22414379 |
| 19 rs281155   | 22414594 G | 0.0006619 | 7.33E-12 | chr:19:22414379 |
| 19 rs4932747  | 22279252 C | 0.2821    | 8.51E-12 | chr:19:22414379 |
| 19 rs1378915  | 22362527 C | 0.0006537 | 8.67E-12 | chr:19:22414379 |
| 19 rs381995   | 22361666 T | 0.0006537 | 8.67E-12 | chr:19:22414379 |
| 19 rs11666326 | 22377109 A | 0.1451    | 1.02E-11 | chr:19:22414379 |
| 19 rs11667657 | 22393601 C | 0.1454    | 1.04E-11 | chr:19:22414379 |
| 19 rs1840718  | 22427586 T | 3.499     | 1.15E-11 | chr:19:22414379 |
| 19 rs10426106 | 22323268 T | 0.2313    | 1.40E-11 | chr:19:22414379 |
| 19 rs1865067  | 22323069 T | 0.2313    | 1.40E-11 | chr:19:22414379 |

|                |            |          |          |                 |
|----------------|------------|----------|----------|-----------------|
| 19 rs111684505 | 22401097 G | 0.1516   | 1.53E-11 | chr:19:22414379 |
| 19 rs11672740  | 22394859 A | 0.1499   | 1.65E-11 | chr:19:22414379 |
| 19 rs452707    | 22304145 T | 0.2452   | 2.12E-11 | chr:19:22414379 |
| 19 rs57051328  | 22435951 A | 0.2557   | 2.20E-11 | chr:19:22414379 |
| 19 rs57684949  | 22435886 C | 0.2557   | 2.20E-11 | chr:19:22414379 |
| 19 rs61387248  | 22435806 A | 0.2557   | 2.20E-11 | chr:19:22414379 |
| 19 rs617609    | 22326000 A | 0.2318   | 2.26E-11 | chr:19:22414379 |
| 19 rs28456336  | 22268779 T | 0.2692   | 3.00E-11 | chr:19:22414379 |
| 19 rs60200804  | 22283368 T | 0.2695   | 4.36E-11 | chr:19:22414379 |
| 19 rs1019938   | 22280954 T | 0.2716   | 5.44E-11 | chr:19:22414379 |
| 19 rs2359995   | 22280060 C | 0.2716   | 5.44E-11 | chr:19:22414379 |
| 19 rs4553749   | 22285063 C | 0.2716   | 5.44E-11 | chr:19:22414379 |
| 19 rs4932748   | 22279318 T | 0.2716   | 5.44E-11 | chr:19:22414379 |
| 19 rs4932954   | 22272454 T | 0.2716   | 5.44E-11 | chr:19:22414379 |
| 19 rs6511320   | 22267122 C | 0.2716   | 5.44E-11 | chr:19:22414379 |
| 19 rs6511323   | 22281914 T | 0.2716   | 5.44E-11 | chr:19:22414379 |
| 19 rs6511325   | 22284357 A | 0.2716   | 5.44E-11 | chr:19:22414379 |
| 19 rs6511326   | 22286679 T | 0.2716   | 5.44E-11 | chr:19:22414379 |
| 19 rs6511329   | 22287905 T | 0.2716   | 5.44E-11 | chr:19:22414379 |
| 19 rs9304994   | 22272743 G | 0.2716   | 5.44E-11 | chr:19:22414379 |
| 19 rs8109649   | 22435344 G | 0.2891   | 5.96E-11 | chr:19:22414379 |
| 19 rs1560718   | 22292212 C | 0.275    | 7.86E-11 | chr:19:22414379 |
| 19 rs3813590   | 22321273 T | 0.1616   | 7.90E-11 | chr:19:22414379 |
| 19 rs3813592   | 22321245 G | 0.1616   | 7.90E-11 | chr:19:22414379 |
| 19 rs12460025  | 22318230 G | 10.65    | 1.19E-10 | chr:19:22414379 |
| 19 rs281157    | 22415509 A | 0.001215 | 1.32E-10 | chr:19:22414379 |
| 19 rs281159    | 22416987 G | 0.001217 | 1.35E-10 | chr:19:22414379 |
| 19 rs281163    | 22419302 A | 0.3091   | 1.69E-10 | chr:19:22414379 |
| 19 rs1830173   | 22388037 T | 10.2     | 1.87E-10 | chr:19:22414379 |
| 19 rs281177    | 22394727 T | 10.2     | 1.87E-10 | chr:19:22414379 |
| 19 rs451793    | 22361286 G | 10.2     | 1.87E-10 | chr:19:22414379 |
| 19 rs62112446  | 22368828 A | 10.2     | 1.87E-10 | chr:19:22414379 |
| 19 rs7343144   | 22369824 T | 10.2     | 1.87E-10 | chr:19:22414379 |
| 19 rs387604    | 22332265 A | 9.116    | 1.92E-10 | chr:19:22414379 |
| 19 rs7253425   | 22381476 G | 10.18    | 1.93E-10 | chr:19:22414379 |
| 19 rs420218    | 22353589 T | 10.18    | 1.93E-10 | chr:19:22414379 |
| 19 rs281162    | 22418472 A | 7.922    | 3.20E-10 | chr:19:22414379 |
| 19 rs3813591   | 22321256 C | 13.37    | 3.38E-10 | chr:19:22414379 |
| 19 rs111352604 | 22314567 G | 0.1733   | 4.13E-10 | chr:19:22414379 |
| 19 rs281160    | 22418046 T | 6.782    | 4.17E-10 | chr:19:22414379 |
| 19 rs17554725  | 22317759 G | 13.06    | 4.37E-10 | chr:19:22414379 |
| 19 rs7257051   | 22319292 G | 13.06    | 4.37E-10 | chr:19:22414379 |
| 19 rs8113700   | 22319421 A | 13.06    | 4.37E-10 | chr:19:22414379 |

|                |            |        |          |                 |
|----------------|------------|--------|----------|-----------------|
| 19 rs4932951   | 22246352 C | 6.202  | 4.76E-10 | chr:19:22414379 |
| 19 rs12610367  | 22320848 T | 0.1794 | 5.03E-10 | chr:19:22414379 |
| 19 rs12460610  | 22291277 C | 6.156  | 5.06E-10 | chr:19:22414379 |
| 19 rs73019874  | 22267259 G | 6.156  | 5.06E-10 | chr:19:22414379 |
| 19 rs10422039  | 22422539 A | 3.271  | 5.46E-10 | chr:19:22414379 |
| 19 rs368652    | 22356811 A | 0.2535 | 9.60E-10 | chr:19:22414379 |
| 19 rs437284    | 22354875 T | 0.2535 | 9.60E-10 | chr:19:22414379 |
| 19 rs4436884   | 22285163 C | 5.356  | 1.06E-09 | chr:19:22414379 |
| 19 rs4932955   | 22272845 A | 5.356  | 1.06E-09 | chr:19:22414379 |
| 19 rs4932956   | 22273797 G | 5.356  | 1.06E-09 | chr:19:22414379 |
| 19 rs12610034  | 22314528 A | 0.1771 | 1.08E-09 | chr:19:22414379 |
| 19 rs73021832  | 22316144 C | 0.1771 | 1.08E-09 | chr:19:22414379 |
| 19 rs190030543 | 22291079 T | 5.579  | 1.22E-09 | chr:19:22414379 |
| 19 rs73021803  | 22286898 T | 5.339  | 1.29E-09 | chr:19:22414379 |
| 19 rs281170    | 22423336 T | 6.197  | 1.43E-09 | chr:19:22414379 |
| 19 rs11673195  | 22313814 C | 0.1825 | 1.64E-09 | chr:19:22414379 |
| 19 rs111270824 | 22234403 T | 0.2052 | 2.07E-09 | chr:19:22414379 |
| 19 rs61268244  | 22310130 T | 0.188  | 2.35E-09 | chr:19:22414379 |
| 19 rs112688861 | 22227973 A | 0.2093 | 2.93E-09 | chr:19:22414379 |
| 19 rs807954    | 22117663 C | 0.3618 | 3.78E-09 | chr:19:22414379 |
| 19 rs397538    | 22329889 A | 0.2631 | 4.19E-09 | chr:19:22414379 |
| 19 rs2548932   | 22436172 G | 3.133  | 4.36E-09 | chr:19:22414379 |
| 19 rs28702014  | 22436174 G | 3.133  | 4.36E-09 | chr:19:22414379 |
| 19 rs1526884   | 22303651 G | 0.1921 | 5.22E-09 | chr:19:22414379 |
| 19 rs4932957   | 22304745 T | 0.1921 | 5.22E-09 | chr:19:22414379 |
| 19 rs11669885  | 22397422 A | 0.2714 | 6.42E-09 | chr:19:22414379 |
| 19 rs56320331  | 22297657 T | 4.263  | 6.43E-09 | chr:19:22414379 |
| 19 rs57346017  | 22427336 G | 2.917  | 6.63E-09 | chr:19:22414379 |
| 19 rs11671416  | 22427254 T | 0.3932 | 9.57E-09 | chr:19:22414379 |
| 19 rs10420558  | 22422430 T | 2.884  | 1.27E-08 | chr:19:22414379 |
| 19 rs12461719  | 22292841 T | 3.875  | 1.48E-08 | chr:19:22414379 |
| 19 rs56242139  | 22295279 A | 3.875  | 1.48E-08 | chr:19:22414379 |
| 19 rs55635227  | 22298116 C | 3.88   | 1.54E-08 | chr:19:22414379 |
| 19 rs283146    | 22438180 C | 0.3276 | 1.60E-08 | chr:19:22414379 |
| 19 rs377054171 | 22290374 C | 5.192  | 1.84E-08 | chr:19:22414379 |
| 19 rs11561612  | 22432845 A | 0.1982 | 1.89E-08 | chr:19:22414379 |
| 19 rs147620331 | 22077709 T | 0.1911 | 1.91E-08 | chr:19:22414379 |
| 19 rs12980808  | 22374080 G | 0.2729 | 2.28E-08 | chr:19:22414379 |
| 19 rs34364151  | 22393367 T | 0.2729 | 2.28E-08 | chr:19:22414379 |
| 19 rs78993648  | 22230665 A | 0.1574 | 2.61E-08 | chr:19:22414379 |
| 19 rs57489232  | 22078207 T | 0.198  | 3.22E-08 | chr:19:22414379 |
| 19 rs11085516  | 22431751 T | 0.2089 | 3.35E-08 | chr:19:22414379 |
| 19 rs55784860  | 22431132 C | 0.2089 | 3.35E-08 | chr:19:22414379 |

|                |            |        |          |                 |
|----------------|------------|--------|----------|-----------------|
| 19 rs8106199   | 22421457 T | 2.733  | 4.87E-08 | chr:19:22414379 |
| 19 rs111575233 | 22430482 A | 0.2158 | 5.05E-08 | chr:19:22414379 |
| 19 rs74586061  | 22480025 A | 0.3146 | 5.28E-08 | chr:19:22414379 |
| 19 rs74459753  | 22458131 T | 0.3293 | 5.56E-08 | chr:19:22414379 |
| 19 rs11085517  | 22433283 T | 0.2083 | 6.59E-08 | chr:19:22414379 |
| 19 rs11085519  | 22434908 T | 0.2083 | 6.59E-08 | chr:19:22414379 |
| 19 rs55771377  | 22433422 G | 0.2083 | 6.59E-08 | chr:19:22414379 |
| 19 rs7253490   | 22293706 C | 0.4112 | 6.90E-08 | chr:19:22414379 |
| 19 rs12327815  | 22477891 C | 0.3194 | 7.54E-08 | chr:19:22414379 |
| 19 rs114200971 | 22459204 T | 0.3212 | 8.16E-08 | chr:19:22414379 |
| 19 rs74583609  | 22471607 T | 0.3212 | 8.16E-08 | chr:19:22414379 |
| 19 rs111451157 | 22480494 C | 0.3214 | 8.85E-08 | chr:19:22414379 |
| 19 rs150285219 | 22500252 G | 0.3214 | 8.85E-08 | chr:19:22414379 |
| 19 rs113226782 | 22468272 G | 0.3355 | 9.04E-08 | chr:19:22414379 |
| 19 rs7259785   | 22419378 A | 6.565  | 9.96E-08 | chr:19:22414379 |
| 19 rs568047338 | 22450475 A | 0.2638 | 1.01E-07 | chr:19:22414379 |
| 19 rs112194091 | 22421144 C | 6.564  | 1.01E-07 | chr:19:22414379 |
| 19 rs112285940 | 22462360 G | 0.3241 | 1.05E-07 | chr:19:22414379 |
| 19 rs114485288 | 22456655 A | 0.3258 | 1.10E-07 | chr:19:22414379 |
| 19 rs34312380  | 22390071 T | 0.2898 | 1.27E-07 | chr:19:22414379 |
| 19 rs34407605  | 22390084 T | 0.2898 | 1.27E-07 | chr:19:22414379 |
| 19 rs1961316   | 22426154 A | 3.45   | 1.28E-07 | chr:19:22414379 |
| 19 rs114487296 | 22450493 C | 0.2671 | 1.30E-07 | chr:19:22414379 |
| 19 rs115211114 | 22450434 G | 0.2671 | 1.30E-07 | chr:19:22414379 |
| 19 rs115402237 | 22446268 G | 0.2671 | 1.30E-07 | chr:19:22414379 |
| 19 rs116095172 | 22447297 A | 0.2671 | 1.30E-07 | chr:19:22414379 |
| 19 rs116116710 | 22450695 G | 0.2671 | 1.30E-07 | chr:19:22414379 |
| 19 rs116290379 | 22446479 A | 0.2671 | 1.30E-07 | chr:19:22414379 |
| 19 rs116505167 | 22450685 C | 0.2671 | 1.30E-07 | chr:19:22414379 |
| 19 rs116721114 | 22450482 T | 0.2671 | 1.30E-07 | chr:19:22414379 |
| 19 rs138350421 | 22447920 C | 0.2671 | 1.30E-07 | chr:19:22414379 |
| 19 rs139771475 | 22448256 T | 0.2671 | 1.30E-07 | chr:19:22414379 |
| 19 rs141860818 | 22448149 G | 0.2671 | 1.30E-07 | chr:19:22414379 |
| 19 rs183369013 | 22446254 A | 0.2671 | 1.30E-07 | chr:19:22414379 |
| 19 rs542721643 | 22447006 T | 0.2671 | 1.30E-07 | chr:19:22414379 |
| 19 rs560680679 | 22447007 G | 0.2671 | 1.30E-07 | chr:19:22414379 |
| 19 rs75134450  | 22447605 T | 0.2671 | 1.30E-07 | chr:19:22414379 |
| 19 rs76451239  | 22446557 T | 0.2671 | 1.30E-07 | chr:19:22414379 |
| 19 rs76963327  | 22446051 T | 0.2671 | 1.30E-07 | chr:19:22414379 |
| 19 rs78665120  | 22446079 T | 0.2671 | 1.30E-07 | chr:19:22414379 |
| 19 rs79135252  | 22446546 A | 0.2671 | 1.30E-07 | chr:19:22414379 |
| 19 rs80081358  | 22450977 G | 0.2671 | 1.30E-07 | chr:19:22414379 |
| 19 rs111639362 | 22463115 C | 0.328  | 1.36E-07 | chr:19:22414379 |

|                |            |        |          |                 |
|----------------|------------|--------|----------|-----------------|
| 19 rs10416663  | 22425363 A | 9.463  | 1.36E-07 | chr:19:22414379 |
| 19 rs114210862 | 22460366 A | 0.3295 | 1.41E-07 | chr:19:22414379 |
| 19 rs112569701 | 22473830 G | 0.3323 | 1.50E-07 | chr:19:22414379 |
| 19 rs116524376 | 22352448 A | 0.2115 | 1.71E-07 | chr:19:22414379 |
| 19 rs79490176  | 22351851 T | 0.2115 | 1.71E-07 | chr:19:22414379 |
| 19 rs139826378 | 22452654 G | 0.2718 | 1.81E-07 | chr:19:22414379 |
| 19 rs116565754 | 22456104 T | 0.3327 | 1.82E-07 | chr:19:22414379 |
| 19 rs112567736 | 22424051 T | 9.218  | 1.86E-07 | chr:19:22414379 |
| 19 rs73019902  | 22286707 A | 9.197  | 1.93E-07 | chr:19:22414379 |
| 19 rs73540924  | 22212627 G | 0.2327 | 1.99E-07 | chr:19:22414379 |
| 19 rs12461499  | 22304581 A | 8.086  | 2.13E-07 | chr:19:22414379 |
| 19 rs59020942  | 22427750 T | 0.2375 | 2.20E-07 | chr:19:22414379 |
| 19 rs59574273  | 22427752 T | 0.2375 | 2.20E-07 | chr:19:22414379 |
| 19 rs111724992 | 22282718 C | 9.097  | 2.22E-07 | chr:19:22414379 |
| 19 rs12459299  | 22296261 G | 9.097  | 2.22E-07 | chr:19:22414379 |
| 19 rs12460028  | 22284598 C | 9.097  | 2.22E-07 | chr:19:22414379 |
| 19 rs12460058  | 22284531 A | 9.097  | 2.22E-07 | chr:19:22414379 |
| 19 rs12461745  | 22262667 T | 9.097  | 2.22E-07 | chr:19:22414379 |
| 19 rs56138218  | 22279031 A | 9.097  | 2.22E-07 | chr:19:22414379 |
| 19 rs56183023  | 22269366 C | 9.097  | 2.22E-07 | chr:19:22414379 |
| 19 rs6511324   | 22283994 T | 9.097  | 2.22E-07 | chr:19:22414379 |
| 19 rs7260631   | 22282906 G | 9.097  | 2.22E-07 | chr:19:22414379 |
| 19 rs73019896  | 22286350 A | 9.097  | 2.22E-07 | chr:19:22414379 |
| 19 rs115943909 | 22452135 C | 0.2747 | 2.26E-07 | chr:19:22414379 |
| 19 rs115059058 | 22459742 G | 0.3365 | 2.32E-07 | chr:19:22414379 |
| 19 rs12461491  | 22304761 G | 9.3    | 2.44E-07 | chr:19:22414379 |
| 19 rs73019812  | 22232291 T | 9.041  | 2.48E-07 | chr:19:22414379 |
| 19 rs78455852  | 22446210 T | 0.1926 | 2.52E-07 | chr:19:22414379 |
| 19 rs34878133  | 22230331 A | 9.014  | 2.55E-07 | chr:19:22414379 |
| 19 rs12459277  | 22235908 T | 9.015  | 2.55E-07 | chr:19:22414379 |
| 19 rs3752168   | 22235478 C | 9.015  | 2.55E-07 | chr:19:22414379 |
| 19 rs73019829  | 22239600 A | 9.015  | 2.55E-07 | chr:19:22414379 |
| 19 rs73021825  | 22313577 A | 11.23  | 2.61E-07 | chr:19:22414379 |
| 19 rs56036277  | 22257574 A | 8.987  | 2.62E-07 | chr:19:22414379 |
| 19 rs73019862  | 22260969 T | 8.987  | 2.62E-07 | chr:19:22414379 |
| 19 rs8108310   | 22287184 T | 8.926  | 2.80E-07 | chr:19:22414379 |
| 19 rs76995772  | 22311909 A | 11.16  | 2.81E-07 | chr:19:22414379 |
| 19 rs73021823  | 22310164 A | 11.11  | 2.92E-07 | chr:19:22414379 |
| 19 rs114289956 | 22454001 T | 0.2786 | 2.93E-07 | chr:19:22414379 |
| 19 rs114422668 | 22453355 T | 0.2786 | 2.93E-07 | chr:19:22414379 |
| 19 rs114551844 | 22452452 T | 0.2786 | 2.93E-07 | chr:19:22414379 |
| 19 rs114612477 | 22451904 T | 0.2786 | 2.93E-07 | chr:19:22414379 |
| 19 rs115083572 | 22452285 G | 0.2786 | 2.93E-07 | chr:19:22414379 |

|                |            |        |          |                 |
|----------------|------------|--------|----------|-----------------|
| 19 rs116119620 | 22453015 T | 0.2786 | 2.93E-07 | chr:19:22414379 |
| 19 rs116279903 | 22452173 C | 0.2786 | 2.93E-07 | chr:19:22414379 |
| 19 rs139000614 | 22451845 T | 0.2786 | 2.93E-07 | chr:19:22414379 |
| 19 rs139097230 | 22452489 T | 0.2786 | 2.93E-07 | chr:19:22414379 |
| 19 rs141440964 | 22451251 T | 0.2786 | 2.93E-07 | chr:19:22414379 |
| 19 rs60604817  | 22427565 G | 0.2437 | 3.15E-07 | chr:19:22414379 |
| 19 rs56359043  | 22295283 G | 8.839  | 3.22E-07 | chr:19:22414379 |
| 19 rs114471536 | 22444439 G | 0.2098 | 3.46E-07 | chr:19:22414379 |
| 19 rs73019871  | 22265915 T | 8.744  | 3.65E-07 | chr:19:22414379 |
| 19 rs142536481 | 22451222 A | 0.2824 | 3.66E-07 | chr:19:22414379 |
| 19 rs141785726 | 22432469 T | 0.2765 | 3.89E-07 | chr:19:22414379 |
| 19 rs193035916 | 22453827 T | 0.2842 | 4.11E-07 | chr:19:22414379 |
| 19 rs73019831  | 22242013 T | 8.659  | 4.23E-07 | chr:19:22414379 |
| 19 rs148603054 | 22433487 T | 0.2803 | 4.98E-07 | chr:19:22414379 |
| 19 rs73550926  | 22378553 T | 10.48  | 5.50E-07 | chr:19:22414379 |
| 19 rs58752579  | 22109593 A | 0.4416 | 5.66E-07 | chr:19:22414379 |
| 19 rs9676804   | 22427959 C | 0.2816 | 5.76E-07 | chr:19:22414379 |
| 19 rs9676823   | 22427987 C | 0.2816 | 5.76E-07 | chr:19:22414379 |
| 19 rs9676835   | 22428179 A | 0.2816 | 5.76E-07 | chr:19:22414379 |
| 19 rs7253840   | 22160161 A | 0.2448 | 5.92E-07 | chr:19:22414379 |
| 19 rs6511312   | 22205349 T | 2.464  | 6.63E-07 | chr:19:22414379 |
| 19 rs115059290 | 22451632 A | 0.2887 | 6.79E-07 | chr:19:22414379 |
| 19 rs143243514 | 22451798 G | 0.289  | 6.94E-07 | chr:19:22414379 |
| 19 rs149576034 | 22451779 A | 0.289  | 6.94E-07 | chr:19:22414379 |
| 19 rs137981753 | 22434357 T | 0.2869 | 6.99E-07 | chr:19:22414379 |
| 19 rs11085515  | 22426520 C | 0.4451 | 7.53E-07 | chr:19:22414379 |
| 19 rs116577376 | 22453691 A | 0.2897 | 7.54E-07 | chr:19:22414379 |
| 19 rs77463219  | 22447877 C | 0.2795 | 7.86E-07 | chr:19:22414379 |
| 19 rs114837217 | 22446650 C | 0.2798 | 7.89E-07 | chr:19:22414379 |
| 19 rs114073147 | 22451639 T | 0.2924 | 8.54E-07 | chr:19:22414379 |
| 19 rs138243368 | 22451652 G | 0.2924 | 8.54E-07 | chr:19:22414379 |
| 19 rs149312129 | 22453905 G | 0.2409 | 8.71E-07 | chr:19:22414379 |
| 19 rs139037369 | 22423799 T | 0.2068 | 9.95E-07 | chr:19:22414379 |
| 19 rs73933927  | 22422487 C | 6.266  | 1.02E-06 | chr:19:22414379 |
| 19 rs75418407  | 22421000 G | 6.266  | 1.02E-06 | chr:19:22414379 |
| 19 rs75794199  | 22420031 A | 6.222  | 1.12E-06 | chr:19:22414379 |
| 19 rs10410168  | 22302211 A | 3.22   | 1.13E-06 | chr:19:22414379 |
| 19 rs113140998 | 22468903 C | 0.3543 | 1.21E-06 | chr:19:22414379 |
| 19 rs10419058  | 22309972 A | 0.4495 | 1.23E-06 | chr:19:22414379 |
| 19 rs10422317  | 22306604 A | 3.193  | 1.35E-06 | chr:19:22414379 |
| 19 rs149056579 | 22425321 C | 0.2151 | 1.45E-06 | chr:19:22414379 |
| 19 rs73548422  | 22306063 T | 3.173  | 1.57E-06 | chr:19:22414379 |
| 19 rs113181884 | 22586084 C | 0.3836 | 1.61E-06 | chr:19:22414379 |

|                |            |        |          |                 |
|----------------|------------|--------|----------|-----------------|
| 19 rs56768795  | 22586073 A | 0.3836 | 1.61E-06 | chr:19:22414379 |
| 19 rs10518283  | 22306086 G | 3.177  | 1.65E-06 | chr:19:22414379 |
| 19 rs114397370 | 22452941 C | 0.2998 | 1.69E-06 | chr:19:22414379 |
| 19 rs192010013 | 22310622 T | 0.1952 | 1.72E-06 | chr:19:22414379 |
| 19 rs112366241 | 22423026 G | 5.396  | 1.86E-06 | chr:19:22414379 |
| 19 rs150083716 | 22423796 C | 5.396  | 1.86E-06 | chr:19:22414379 |
| 19 rs73933930  | 22423321 T | 5.396  | 1.86E-06 | chr:19:22414379 |
| 19 rs75979312  | 22423590 C | 5.396  | 1.86E-06 | chr:19:22414379 |
| 19 rs28803922  | 22619836 G | 0.4493 | 1.88E-06 | chr:19:22414379 |
| 19 rs143591281 | 22494122 C | 0.2472 | 1.88E-06 | chr:19:22414379 |
| 19 rs11673212  | 22536050 C | 0.4391 | 1.97E-06 | chr:19:22414379 |
| 19 rs6511344   | 22535673 C | 0.4391 | 1.97E-06 | chr:19:22414379 |
| 19 rs555185638 | 22290846 C | 3.668  | 1.98E-06 | chr:19:22414379 |
| 19 rs12608536  | 22542058 A | 0.4419 | 2.04E-06 | chr:19:22414379 |
| 19 rs149005977 | 22452903 G | 0.3036 | 2.11E-06 | chr:19:22414379 |
| 19 rs2188969   | 22202783 A | 0.1891 | 2.17E-06 | chr:19:22414379 |
| 19 rs146011557 | 22327592 G | 0.2758 | 2.23E-06 | chr:19:22414379 |
| 19 rs543737598 | 22327590 T | 0.2758 | 2.23E-06 | chr:19:22414379 |
| 19 rs576238286 | 22327589 G | 0.2758 | 2.23E-06 | chr:19:22414379 |
| 19 rs115893105 | 22452937 A | 0.3053 | 2.25E-06 | chr:19:22414379 |
| 19 rs201113571 | 22290840 T | 4.364  | 2.31E-06 | chr:19:22414379 |
| 19 rs283150    | 22435172 G | 2.839  | 2.35E-06 | chr:19:22414379 |
| 19 rs147438265 | 22139021 T | 0.2741 | 2.45E-06 | chr:19:22414379 |
| 19 rs10422880  | 22314083 T | 3.152  | 2.48E-06 | chr:19:22414379 |
| 19 rs28552094  | 22312865 T | 3.152  | 2.48E-06 | chr:19:22414379 |
| 19 rs114469495 | 22343743 A | 0.2043 | 2.72E-06 | chr:19:22414379 |
| 19 rs146480504 | 22325896 T | 0.2043 | 2.72E-06 | chr:19:22414379 |
| 19 rs138748164 | 22432402 T | 0.2558 | 2.81E-06 | chr:19:22414379 |
| 19 rs112141066 | 22095496 T | 0.2426 | 2.88E-06 | chr:19:22414379 |
| 19 rs283149    | 22436268 G | 2.496  | 3.13E-06 | chr:19:22414379 |
| 19 rs140062581 | 22396642 G | 0.2064 | 3.15E-06 | chr:19:22414379 |
| 19 rs140589863 | 22368673 C | 0.2064 | 3.15E-06 | chr:19:22414379 |
| 19 rs142135317 | 22364627 C | 0.2064 | 3.15E-06 | chr:19:22414379 |
| 19 rs151087034 | 22383146 T | 0.2064 | 3.15E-06 | chr:19:22414379 |
| 19 rs145383649 | 22237089 T | 0.218  | 3.20E-06 | chr:19:22414379 |
| 19 rs115052425 | 22428855 T | 0.2587 | 3.33E-06 | chr:19:22414379 |
| 19 rs1654508   | 22219276 A | 0.1832 | 3.37E-06 | chr:19:22414379 |
| 19 rs11085524  | 22536422 G | 0.4502 | 3.81E-06 | chr:19:22414379 |
| 19 rs11879791  | 22536939 A | 0.4502 | 3.81E-06 | chr:19:22414379 |
| 19 rs12459636  | 22542439 A | 0.4502 | 3.81E-06 | chr:19:22414379 |
| 19 rs59598661  | 22537029 T | 0.4502 | 3.81E-06 | chr:19:22414379 |
| 19 rs113984339 | 22455231 A | 0.3422 | 4.33E-06 | chr:19:22414379 |
| 19 rs114951439 | 22226661 C | 0.2039 | 4.54E-06 | chr:19:22414379 |



|                |            |        |          |                 |
|----------------|------------|--------|----------|-----------------|
| 19 rs115104032 | 22232501 G | 0.2039 | 4.54E-06 | chr:19:22414379 |
| 19 rs116314323 | 22263188 G | 0.2039 | 4.54E-06 | chr:19:22414379 |
| 19 rs116684615 | 22258574 G | 0.2039 | 4.54E-06 | chr:19:22414379 |
| 19 rs116689744 | 22249435 T | 0.2039 | 4.54E-06 | chr:19:22414379 |
| 19 rs138062894 | 22240079 G | 0.2039 | 4.54E-06 | chr:19:22414379 |
| 19 rs138262894 | 22304541 T | 0.2039 | 4.54E-06 | chr:19:22414379 |
| 19 rs139498146 | 22259577 T | 0.2039 | 4.54E-06 | chr:19:22414379 |
| 19 rs139706424 | 22245204 A | 0.2039 | 4.54E-06 | chr:19:22414379 |
| 19 rs141718625 | 22301482 G | 0.2039 | 4.54E-06 | chr:19:22414379 |
| 19 rs144107018 | 22228069 T | 0.2039 | 4.54E-06 | chr:19:22414379 |
| 19 rs146174182 | 22246554 T | 0.2039 | 4.54E-06 | chr:19:22414379 |
| 19 rs146898264 | 22228968 T | 0.2039 | 4.54E-06 | chr:19:22414379 |
| 19 rs147115194 | 22261333 T | 0.2039 | 4.54E-06 | chr:19:22414379 |
| 19 rs147734923 | 22261485 G | 0.2039 | 4.54E-06 | chr:19:22414379 |
| 19 rs149531591 | 22305037 A | 0.2039 | 4.54E-06 | chr:19:22414379 |
| 19 rs182075189 | 22287899 T | 0.2039 | 4.54E-06 | chr:19:22414379 |
| 19 rs185089748 | 22229367 A | 0.2039 | 4.54E-06 | chr:19:22414379 |
| 19 rs189880041 | 22250567 T | 0.2039 | 4.54E-06 | chr:19:22414379 |
| 19 rs562407245 | 22287558 G | 0.2039 | 4.54E-06 | chr:19:22414379 |
| 19 rs61743214  | 22235321 A | 0.2039 | 4.54E-06 | chr:19:22414379 |
| 19 rs75477882  | 22307782 A | 0.2039 | 4.54E-06 | chr:19:22414379 |
| 19 rs76624361  | 22265310 A | 0.2039 | 4.54E-06 | chr:19:22414379 |
| 19 rs115822146 | 22351637 C | 0.2157 | 4.90E-06 | chr:19:22414379 |
| 19 rs138593069 | 22359173 G | 0.2157 | 4.90E-06 | chr:19:22414379 |
| 19 rs145669542 | 22349883 G | 0.2157 | 4.90E-06 | chr:19:22414379 |
| 19 rs151297934 | 22351897 G | 0.2157 | 4.90E-06 | chr:19:22414379 |
| 19 rs184806947 | 22349913 A | 0.2157 | 4.90E-06 | chr:19:22414379 |
| 19 rs189229342 | 22349917 A | 0.2157 | 4.90E-06 | chr:19:22414379 |
| 19 rs78880255  | 22377092 C | 0.2157 | 4.90E-06 | chr:19:22414379 |
| 19 rs150941289 | 22294382 C | 0.2054 | 5.03E-06 | chr:19:22414379 |
| 19 rs114710457 | 22439048 T | 0.2356 | 5.05E-06 | chr:19:22414379 |
| 19 rs10420483  | 22190378 A | 0.1944 | 5.38E-06 | chr:19:22414379 |
| 19 rs11085509  | 22204573 T | 0.1944 | 5.38E-06 | chr:19:22414379 |
| 19 rs2017962   | 22208751 T | 0.1944 | 5.38E-06 | chr:19:22414379 |
| 19 rs2078089   | 22209753 A | 0.1944 | 5.38E-06 | chr:19:22414379 |
| 19 rs2106869   | 22184693 C | 0.1944 | 5.38E-06 | chr:19:22414379 |
| 19 rs2188970   | 22200382 G | 0.1944 | 5.38E-06 | chr:19:22414379 |
| 19 rs2359821   | 22208314 C | 0.1944 | 5.38E-06 | chr:19:22414379 |
| 19 rs374537    | 22222802 G | 0.1944 | 5.38E-06 | chr:19:22414379 |
| 19 rs404822    | 22215967 A | 0.1944 | 5.38E-06 | chr:19:22414379 |
| 19 rs410794    | 22226159 A | 0.1944 | 5.38E-06 | chr:19:22414379 |
| 19 rs4244912   | 22203237 T | 0.1944 | 5.38E-06 | chr:19:22414379 |
| 19 rs429184    | 22214352 A | 0.1944 | 5.38E-06 | chr:19:22414379 |

|                |            |        |          |                 |
|----------------|------------|--------|----------|-----------------|
| 19 rs436039    | 22214873 T | 0.1944 | 5.38E-06 | chr:19:22414379 |
| 19 rs7249976   | 22183920 A | 0.1944 | 5.38E-06 | chr:19:22414379 |
| 19 rs149772697 | 22459904 T | 0.2754 | 5.64E-06 | chr:19:22414379 |
| 19 rs371889380 | 22289791 T | 0.1605 | 5.68E-06 | chr:19:22414379 |
| 19 rs73930533  | 22382933 A | 6.07   | 5.83E-06 | chr:19:22414379 |
| 19 rs10424854  | 22314278 C | 2.951  | 5.84E-06 | chr:19:22414379 |
| 19 rs11882755  | 22413432 C | 6.066  | 5.86E-06 | chr:19:22414379 |
| 19 rs114106545 | 22443451 C | 0.194  | 5.95E-06 | chr:19:22414379 |
| 19 rs114858177 | 22442210 T | 0.194  | 5.95E-06 | chr:19:22414379 |
| 19 rs114941840 | 22443558 G | 0.194  | 5.95E-06 | chr:19:22414379 |
| 19 rs115829048 | 22443428 G | 0.194  | 5.95E-06 | chr:19:22414379 |
| 19 rs116071570 | 22441750 T | 0.194  | 5.95E-06 | chr:19:22414379 |
| 19 rs116835709 | 22442196 A | 0.194  | 5.95E-06 | chr:19:22414379 |
| 19 rs138359687 | 22441889 T | 0.194  | 5.95E-06 | chr:19:22414379 |
| 19 rs142199394 | 22441613 A | 0.194  | 5.95E-06 | chr:19:22414379 |
| 19 rs142993500 | 22442940 G | 0.194  | 5.95E-06 | chr:19:22414379 |
| 19 rs150828150 | 22444017 T | 0.194  | 5.95E-06 | chr:19:22414379 |
| 19 rs151201308 | 22441615 G | 0.194  | 5.95E-06 | chr:19:22414379 |
| 19 rs74794076  | 22443741 C | 0.194  | 5.95E-06 | chr:19:22414379 |
| 19 rs76781024  | 22441776 C | 0.194  | 5.95E-06 | chr:19:22414379 |
| 19 rs78001040  | 22442909 C | 0.194  | 5.95E-06 | chr:19:22414379 |
| 19 rs62120010  | 22428480 A | 2.726  | 6.25E-06 | chr:19:22414379 |
| 19 rs13346237  | 22317838 C | 2.982  | 6.33E-06 | chr:19:22414379 |
| 19 rs79706549  | 22368499 C | 6.021  | 6.39E-06 | chr:19:22414379 |
| 19 rs7255829   | 22537311 C | 0.4605 | 6.47E-06 | chr:19:22414379 |
| 19 rs115560278 | 22117181 A | 0.3108 | 6.80E-06 | chr:19:22414379 |
| 19 rs139107619 | 22330909 T | 0.1874 | 6.83E-06 | chr:19:22414379 |
| 19 rs150671714 | 22671868 T | 0.2372 | 6.83E-06 | chr:19:22414379 |
| 19 rs80327586  | 22376285 T | 0.2241 | 7.19E-06 | chr:19:22414379 |
| 19 rs7248242   | 22575994 G | 0.4627 | 7.86E-06 | chr:19:22414379 |
| 19 rs10420646  | 22319061 T | 2.888  | 8.22E-06 | chr:19:22414379 |
| 19 rs10409819  | 22602919 T | 0.4612 | 8.35E-06 | chr:19:22414379 |
| 19 rs10406742  | 22323974 G | 2.877  | 9.05E-06 | chr:19:22414379 |
| 19 rs807952    | 22117758 A | 0.4714 | 9.14E-06 | chr:19:22414379 |
| 19 rs807953    | 22117746 G | 0.4714 | 9.14E-06 | chr:19:22414379 |
| 19 rs390730    | 22233509 C | 0.2493 | 9.46E-06 | chr:19:22414379 |
| 19 rs11669110  | 22296485 G | 0.2495 | 9.49E-06 | chr:19:22414379 |
| 19 rs12609368  | 22263996 C | 0.2495 | 9.49E-06 | chr:19:22414379 |
| 19 rs149975047 | 22287938 A | 0.2495 | 9.49E-06 | chr:19:22414379 |
| 19 rs17459246  | 22278121 C | 0.2495 | 9.49E-06 | chr:19:22414379 |
| 19 rs191067451 | 22288201 A | 0.2495 | 9.49E-06 | chr:19:22414379 |
| 19 rs1978719   | 22266101 A | 0.2495 | 9.49E-06 | chr:19:22414379 |
| 19 rs367972720 | 22291197 C | 0.2495 | 9.49E-06 | chr:19:22414379 |

|                |            |        |          |                 |
|----------------|------------|--------|----------|-----------------|
| 19 rs372140746 | 22291198 C | 0.2495 | 9.49E-06 | chr:19:22414379 |
| 19 rs372252339 | 22291126 T | 0.2495 | 9.49E-06 | chr:19:22414379 |
| 19 rs55728714  | 22262899 G | 0.2495 | 9.49E-06 | chr:19:22414379 |
| 19 rs55886600  | 22276437 A | 0.2495 | 9.49E-06 | chr:19:22414379 |
| 19 rs56073035  | 22276298 G | 0.2495 | 9.49E-06 | chr:19:22414379 |
| 19 rs56207853  | 22292357 T | 0.2495 | 9.49E-06 | chr:19:22414379 |
| 19 rs56369285  | 22267185 C | 0.2495 | 9.49E-06 | chr:19:22414379 |
| 19 rs72481609  | 22296819 C | 0.2495 | 9.49E-06 | chr:19:22414379 |
| 19 rs73019889  | 22277826 G | 0.2495 | 9.49E-06 | chr:19:22414379 |
| 19 rs8103088   | 22298322 G | 0.4747 | 9.70E-06 | chr:19:22414379 |
| 19 rs183543741 | 22289845 T | 0.2596 | 9.72E-06 | chr:19:22414379 |
| 19 rs193152926 | 22289796 A | 0.2596 | 9.72E-06 | chr:19:22414379 |
| 19 rs375012052 | 22289851 A | 0.2596 | 9.72E-06 | chr:19:22414379 |
| 19 rs808246    | 22430516 A | 2.709  | 9.98E-06 | chr:19:22414379 |
| 19 rs543507823 | 22444547 G | 0.3428 | 1.02E-05 | chr:19:22414379 |
| 19 rs554187827 | 22398607 T | 0.29   | 1.04E-05 | chr:19:22414379 |
| 19 rs59448173  | 22251554 T | 0.2609 | 1.04E-05 | chr:19:22414379 |
| 19 rs10426859  | 22400733 C | 7.74   | 1.05E-05 | chr:19:22414379 |
| 19 rs7248538   | 22393348 G | 7.74   | 1.05E-05 | chr:19:22414379 |
| 19 rs77684496  | 22123382 C | 0.2233 | 1.06E-05 | chr:19:22414379 |
| 19 rs10418173  | 22418962 T | 9.681  | 1.10E-05 | chr:19:22414379 |
| 19 rs10419517  | 22418957 A | 9.681  | 1.10E-05 | chr:19:22414379 |
| 19 rs10417756  | 22418917 C | 9.642  | 1.11E-05 | chr:19:22414379 |
| 19 rs10417759  | 22418919 C | 9.642  | 1.11E-05 | chr:19:22414379 |
| 19 rs114009852 | 22441147 T | 0.1833 | 1.15E-05 | chr:19:22414379 |
| 19 rs78326546  | 22441140 T | 0.1833 | 1.15E-05 | chr:19:22414379 |
| 19 rs78401147  | 22441182 A | 0.1833 | 1.15E-05 | chr:19:22414379 |
| 19 rs147395021 | 22217756 A | 87.79  | 2.31E-21 | chr:19:22457244 |
| 19 rs115365441 | 22441932 A | 76.01  | 3.65E-20 | chr:19:22457244 |
| 19 rs116421315 | 22441374 G | 76.01  | 3.65E-20 | chr:19:22457244 |
| 19 rs114106545 | 22443451 C | 54.61  | 6.25E-20 | chr:19:22457244 |
| 19 rs114858177 | 22442210 T | 54.61  | 6.25E-20 | chr:19:22457244 |
| 19 rs114941840 | 22443558 G | 54.61  | 6.25E-20 | chr:19:22457244 |
| 19 rs115829048 | 22443428 G | 54.61  | 6.25E-20 | chr:19:22457244 |
| 19 rs116071570 | 22441750 T | 54.61  | 6.25E-20 | chr:19:22457244 |
| 19 rs116835709 | 22442196 A | 54.61  | 6.25E-20 | chr:19:22457244 |
| 19 rs138359687 | 22441889 T | 54.61  | 6.25E-20 | chr:19:22457244 |
| 19 rs142199394 | 22441613 A | 54.61  | 6.25E-20 | chr:19:22457244 |
| 19 rs142993500 | 22442940 G | 54.61  | 6.25E-20 | chr:19:22457244 |
| 19 rs150828150 | 22444017 T | 54.61  | 6.25E-20 | chr:19:22457244 |
| 19 rs151201308 | 22441615 G | 54.61  | 6.25E-20 | chr:19:22457244 |
| 19 rs74794076  | 22443741 C | 54.61  | 6.25E-20 | chr:19:22457244 |
| 19 rs76781024  | 22441776 C | 54.61  | 6.25E-20 | chr:19:22457244 |

|                |            |       |          |                 |
|----------------|------------|-------|----------|-----------------|
| 19 rs78001040  | 22442909 C | 54.61 | 6.25E-20 | chr:19:22457244 |
| 19 rs142179493 | 22422064 A | 63.25 | 9.48E-20 | chr:19:22457244 |
| 19 rs114859869 | 22440062 T | 44.89 | 1.74E-19 | chr:19:22457244 |
| 19 rs116060696 | 22440074 G | 44.89 | 1.74E-19 | chr:19:22457244 |
| 19 rs116654604 | 22440069 C | 44.89 | 1.74E-19 | chr:19:22457244 |
| 19 rs79734070  | 22439863 G | 44.89 | 1.74E-19 | chr:19:22457244 |
| 19 rs115063713 | 22420253 C | 54.08 | 3.10E-19 | chr:19:22457244 |
| 19 rs141998357 | 22443528 A | 48.26 | 3.62E-19 | chr:19:22457244 |
| 19 rs116591487 | 22419605 C | 56.94 | 4.86E-19 | chr:19:22457244 |
| 19 rs75133779  | 22440947 C | 67.28 | 6.46E-19 | chr:19:22457244 |
| 19 rs114009852 | 22441147 T | 89.48 | 8.73E-19 | chr:19:22457244 |
| 19 rs78326546  | 22441140 T | 89.48 | 8.73E-19 | chr:19:22457244 |
| 19 rs78401147  | 22441182 A | 89.48 | 8.73E-19 | chr:19:22457244 |
| 19 rs184984485 | 22383032 T | 82.21 | 1.75E-18 | chr:19:22457244 |
| 19 rs114516156 | 22422372 C | 175.1 | 8.05E-18 | chr:19:22457244 |
| 19 rs115621962 | 22447031 G | 175.1 | 8.05E-18 | chr:19:22457244 |
| 19 rs115964434 | 22446473 A | 175.1 | 8.05E-18 | chr:19:22457244 |
| 19 rs139118076 | 22453443 C | 175.1 | 8.05E-18 | chr:19:22457244 |
| 19 rs148109247 | 22448147 G | 175.1 | 8.05E-18 | chr:19:22457244 |
| 19 rs150771286 | 22452177 G | 175.1 | 8.05E-18 | chr:19:22457244 |
| 19 rs151079335 | 22453101 A | 175.1 | 8.05E-18 | chr:19:22457244 |
| 19 rs375615347 | 22446472 C | 175.1 | 8.05E-18 | chr:19:22457244 |
| 19 rs74475732  | 22446215 T | 175.1 | 8.05E-18 | chr:19:22457244 |
| 19 rs75556934  | 22451107 A | 175.1 | 8.05E-18 | chr:19:22457244 |
| 19 rs115052365 | 22445846 G | 144.3 | 8.60E-18 | chr:19:22457244 |
| 19 rs115561260 | 22457093 A | 142.8 | 9.22E-18 | chr:19:22457244 |
| 19 rs114009036 | 22420460 C | 145.1 | 1.22E-17 | chr:19:22457244 |
| 19 rs145532709 | 22450480 C | 145.1 | 1.22E-17 | chr:19:22457244 |
| 19 rs114710457 | 22439048 T | 24.55 | 1.59E-17 | chr:19:22457244 |
| 19 rs116725110 | 22527192 T | 74.49 | 1.81E-17 | chr:19:22457244 |
| 19 rs116084977 | 22506409 T | 68.73 | 7.13E-17 | chr:19:22457244 |
| 19 rs146786232 | 22415272 A | 245   | 7.68E-17 | chr:19:22457244 |
| 19 rs78455852  | 22446210 T | 26.9  | 7.79E-17 | chr:19:22457244 |
| 19 rs115429983 | 22452748 T | 246.3 | 8.09E-17 | chr:19:22457244 |
| 19 rs181160079 | 22618570 A | 39.54 | 8.45E-17 | chr:19:22457244 |
| 19 rs141659586 | 22429781 C | 23.32 | 8.84E-17 | chr:19:22457244 |
| 19 rs187112112 | 22571835 C | 56.86 | 1.11E-16 | chr:19:22457244 |
| 19 rs111606427 | 22404384 T | 64.16 | 1.30E-16 | chr:19:22457244 |
| 19 rs115667831 | 22457297 A | 41.21 | 1.43E-16 | chr:19:22457244 |
| 19 rs111597600 | 22411958 C | 57.54 | 1.56E-16 | chr:19:22457244 |
| 19 rs111879339 | 22406839 C | 57.54 | 1.56E-16 | chr:19:22457244 |
| 19 rs112780443 | 22409102 C | 57.54 | 1.56E-16 | chr:19:22457244 |
| 19 rs113019152 | 22405484 G | 57.54 | 1.56E-16 | chr:19:22457244 |

|                |            |       |          |                 |
|----------------|------------|-------|----------|-----------------|
| 19 rs113231070 | 22404630 C | 57.54 | 1.56E-16 | chr:19:22457244 |
| 19 rs113678644 | 22405415 A | 57.54 | 1.56E-16 | chr:19:22457244 |
| 19 rs531059495 | 22450755 G | 83.2  | 2.14E-16 | chr:19:22457244 |
| 19 rs115179543 | 22417596 T | 220   | 2.18E-16 | chr:19:22457244 |
| 19 rs187117413 | 22414551 G | 119.9 | 2.61E-16 | chr:19:22457244 |
| 19 rs375269842 | 22544016 T | 57.23 | 3.24E-16 | chr:19:22457244 |
| 19 rs113984339 | 22455231 A | 46.76 | 6.21E-16 | chr:19:22457244 |
| 19 rs149415387 | 22437751 A | 47.8  | 8.45E-16 | chr:19:22457244 |
| 19 rs111645354 | 22347290 G | 56.76 | 8.50E-16 | chr:19:22457244 |
| 19 rs111896267 | 22337151 A | 56.76 | 8.50E-16 | chr:19:22457244 |
| 19 rs112380854 | 22330408 T | 56.76 | 8.50E-16 | chr:19:22457244 |
| 19 rs112885394 | 22335107 T | 56.76 | 8.50E-16 | chr:19:22457244 |
| 19 rs113246191 | 22323300 A | 50.49 | 1.00E-15 | chr:19:22457244 |
| 19 rs111231589 | 22359280 A | 50.9  | 1.12E-15 | chr:19:22457244 |
| 19 rs111405458 | 22383509 T | 50.9  | 1.12E-15 | chr:19:22457244 |
| 19 rs111451901 | 22384757 C | 50.9  | 1.12E-15 | chr:19:22457244 |
| 19 rs111497034 | 22395521 A | 50.9  | 1.12E-15 | chr:19:22457244 |
| 19 rs111649524 | 22387942 A | 50.9  | 1.12E-15 | chr:19:22457244 |
| 19 rs111843291 | 22383785 A | 50.9  | 1.12E-15 | chr:19:22457244 |
| 19 rs111847233 | 22357736 T | 50.9  | 1.12E-15 | chr:19:22457244 |
| 19 rs111943746 | 22382564 A | 50.9  | 1.12E-15 | chr:19:22457244 |
| 19 rs112045666 | 22378363 G | 50.9  | 1.12E-15 | chr:19:22457244 |
| 19 rs112135580 | 22385238 C | 50.9  | 1.12E-15 | chr:19:22457244 |
| 19 rs112197764 | 22394487 A | 50.9  | 1.12E-15 | chr:19:22457244 |
| 19 rs112203564 | 22365870 G | 50.9  | 1.12E-15 | chr:19:22457244 |
| 19 rs112282469 | 22390612 C | 50.9  | 1.12E-15 | chr:19:22457244 |
| 19 rs112294993 | 22373901 A | 50.9  | 1.12E-15 | chr:19:22457244 |
| 19 rs112408934 | 22382671 G | 50.9  | 1.12E-15 | chr:19:22457244 |
| 19 rs112526435 | 22393321 C | 50.9  | 1.12E-15 | chr:19:22457244 |
| 19 rs112583340 | 22392029 G | 50.9  | 1.12E-15 | chr:19:22457244 |
| 19 rs112722708 | 22375596 C | 50.9  | 1.12E-15 | chr:19:22457244 |
| 19 rs112745821 | 22364556 T | 50.9  | 1.12E-15 | chr:19:22457244 |
| 19 rs112813869 | 22380889 G | 50.9  | 1.12E-15 | chr:19:22457244 |
| 19 rs113029510 | 22367849 T | 50.9  | 1.12E-15 | chr:19:22457244 |
| 19 rs113191315 | 22368273 T | 50.9  | 1.12E-15 | chr:19:22457244 |
| 19 rs113279822 | 22375736 T | 50.9  | 1.12E-15 | chr:19:22457244 |
| 19 rs113528164 | 22369653 T | 50.9  | 1.12E-15 | chr:19:22457244 |
| 19 rs113582747 | 22359316 A | 50.9  | 1.12E-15 | chr:19:22457244 |
| 19 rs113679901 | 22396847 C | 50.9  | 1.12E-15 | chr:19:22457244 |
| 19 rs113695641 | 22380800 C | 50.9  | 1.12E-15 | chr:19:22457244 |
| 19 rs113820130 | 22392425 G | 50.9  | 1.12E-15 | chr:19:22457244 |
| 19 rs113832043 | 22371460 T | 50.9  | 1.12E-15 | chr:19:22457244 |
| 19 rs113847498 | 22359079 G | 50.9  | 1.12E-15 | chr:19:22457244 |

|                            |            |       |          |                 |
|----------------------------|------------|-------|----------|-----------------|
| 19 rs143032389             | 22370874 T | 50.9  | 1.12E-15 | chr:19:22457244 |
| 19 rs145894434             | 22365290 G | 50.9  | 1.12E-15 | chr:19:22457244 |
| 19 rs182740216             | 22366972 G | 50.9  | 1.12E-15 | chr:19:22457244 |
| 19 rs188552081             | 22383063 T | 50.9  | 1.12E-15 | chr:19:22457244 |
| 19 rs113296199             | 22382233 A | 46.06 | 1.24E-15 | chr:19:22457244 |
| 19 rs112326121             | 22374471 A | 46.13 | 1.27E-15 | chr:19:22457244 |
| 19 rs111716202             | 22389004 C | 58.96 | 1.28E-15 | chr:19:22457244 |
| 19 rs368868006;rs113543677 | 22356888 T | 50.11 | 1.50E-15 | chr:19:22457244 |
| 19 rs148613793             | 22549722 G | 149.5 | 2.50E-15 | chr:19:22457244 |
| 19 rs191121560             | 22571615 A | 138.3 | 3.21E-15 | chr:19:22457244 |
| 19 rs111445140             | 22415931 G | 151.7 | 3.84E-15 | chr:19:22457244 |
| 19 rs112319065             | 22532631 C | 131.9 | 3.96E-15 | chr:19:22457244 |
| 19 rs113011252             | 22532632 A | 131.9 | 3.96E-15 | chr:19:22457244 |
| 19 rs146534067             | 22464950 T | 139.6 | 5.26E-15 | chr:19:22457244 |
| 19 rs367813024             | 22612132 T | 36.73 | 9.05E-15 | chr:19:22457244 |
| 19 rs112273271             | 22550142 T | 220   | 9.98E-15 | chr:19:22457244 |
| 19 rs116117409             | 22422841 C | 49.52 | 1.38E-14 | chr:19:22457244 |
| 19 rs111947032             | 22356371 G | 136.4 | 1.83E-14 | chr:19:22457244 |
| 19 rs112370669             | 22360739 G | 136.4 | 1.83E-14 | chr:19:22457244 |
| 19 rs112930128             | 22395349 G | 136.4 | 1.83E-14 | chr:19:22457244 |
| 19 rs113445585             | 22374230 G | 136.4 | 1.83E-14 | chr:19:22457244 |
| 19 rs113912819             | 22382874 C | 136.4 | 1.83E-14 | chr:19:22457244 |
| 19 rs138778030             | 22384180 C | 136.4 | 1.83E-14 | chr:19:22457244 |
| 19 rs150364857             | 22386816 C | 136.4 | 1.83E-14 | chr:19:22457244 |
| 19 rs111229177             | 22416439 A | 197   | 2.63E-14 | chr:19:22457244 |
| 19 rs112747233             | 22414061 G | 197   | 2.63E-14 | chr:19:22457244 |
| 19 rs113228771             | 22423407 T | 197   | 2.63E-14 | chr:19:22457244 |
| 19 rs113913094             | 22422857 T | 197   | 2.63E-14 | chr:19:22457244 |
| 19 rs181917915             | 22412277 C | 197   | 2.63E-14 | chr:19:22457244 |
| 19 rs111337812             | 22608572 A | 201.1 | 2.77E-14 | chr:19:22457244 |
| 19 rs111379851             | 22553834 A | 201.1 | 2.77E-14 | chr:19:22457244 |
| 19 rs111533424             | 22601263 C | 201.1 | 2.77E-14 | chr:19:22457244 |
| 19 rs111537669             | 22545140 T | 201.1 | 2.77E-14 | chr:19:22457244 |
| 19 rs111538984             | 22554080 G | 201.1 | 2.77E-14 | chr:19:22457244 |
| 19 rs111575423             | 22593969 T | 201.1 | 2.77E-14 | chr:19:22457244 |
| 19 rs111602907             | 22564622 C | 201.1 | 2.77E-14 | chr:19:22457244 |
| 19 rs111619544             | 22550550 G | 201.1 | 2.77E-14 | chr:19:22457244 |
| 19 rs111626548             | 22560244 T | 201.1 | 2.77E-14 | chr:19:22457244 |
| 19 rs111765860             | 22625345 A | 201.1 | 2.77E-14 | chr:19:22457244 |
| 19 rs111814553             | 22567536 T | 201.1 | 2.77E-14 | chr:19:22457244 |
| 19 rs111816256             | 22542169 G | 201.1 | 2.77E-14 | chr:19:22457244 |
| 19 rs111830349             | 22555613 A | 201.1 | 2.77E-14 | chr:19:22457244 |
| 19 rs111912694             | 22597899 A | 201.1 | 2.77E-14 | chr:19:22457244 |

|                |            |                                |
|----------------|------------|--------------------------------|
| 19 rs112095922 | 22553682 G | 201.1 2.77E-14 chr:19:22457244 |
| 19 rs112229850 | 22557479 A | 201.1 2.77E-14 chr:19:22457244 |
| 19 rs112258846 | 22545879 A | 201.1 2.77E-14 chr:19:22457244 |
| 19 rs112481678 | 22595822 C | 201.1 2.77E-14 chr:19:22457244 |
| 19 rs112509518 | 22552293 T | 201.1 2.77E-14 chr:19:22457244 |
| 19 rs112561498 | 22541476 A | 201.1 2.77E-14 chr:19:22457244 |
| 19 rs112823838 | 22605733 T | 201.1 2.77E-14 chr:19:22457244 |
| 19 rs112866031 | 22590900 T | 201.1 2.77E-14 chr:19:22457244 |
| 19 rs112869442 | 22549291 T | 201.1 2.77E-14 chr:19:22457244 |
| 19 rs112928214 | 22549578 G | 201.1 2.77E-14 chr:19:22457244 |
| 19 rs112968058 | 22539254 C | 201.1 2.77E-14 chr:19:22457244 |
| 19 rs113042013 | 22593547 A | 201.1 2.77E-14 chr:19:22457244 |
| 19 rs113119758 | 22566695 C | 201.1 2.77E-14 chr:19:22457244 |
| 19 rs113123935 | 22551210 A | 201.1 2.77E-14 chr:19:22457244 |
| 19 rs113127476 | 22594838 C | 201.1 2.77E-14 chr:19:22457244 |
| 19 rs113164398 | 22551597 C | 201.1 2.77E-14 chr:19:22457244 |
| 19 rs113176625 | 22545460 A | 201.1 2.77E-14 chr:19:22457244 |
| 19 rs113272479 | 22557052 A | 201.1 2.77E-14 chr:19:22457244 |
| 19 rs113340875 | 22547756 G | 201.1 2.77E-14 chr:19:22457244 |
| 19 rs113425349 | 22550135 G | 201.1 2.77E-14 chr:19:22457244 |
| 19 rs113646091 | 22543329 A | 201.1 2.77E-14 chr:19:22457244 |
| 19 rs113656212 | 22593993 A | 201.1 2.77E-14 chr:19:22457244 |
| 19 rs113726304 | 22551534 G | 201.1 2.77E-14 chr:19:22457244 |
| 19 rs113730727 | 22545305 C | 201.1 2.77E-14 chr:19:22457244 |
| 19 rs113810256 | 22548456 T | 201.1 2.77E-14 chr:19:22457244 |
| 19 rs113821661 | 22539951 G | 201.1 2.77E-14 chr:19:22457244 |
| 19 rs113823121 | 22544913 T | 201.1 2.77E-14 chr:19:22457244 |
| 19 rs113977100 | 22552401 A | 201.1 2.77E-14 chr:19:22457244 |
| 19 rs113978061 | 22554526 T | 201.1 2.77E-14 chr:19:22457244 |
| 19 rs138835526 | 22569391 T | 201.1 2.77E-14 chr:19:22457244 |
| 19 rs139066965 | 22552874 G | 201.1 2.77E-14 chr:19:22457244 |
| 19 rs139210906 | 22641104 T | 201.1 2.77E-14 chr:19:22457244 |
| 19 rs142060148 | 22549939 G | 201.1 2.77E-14 chr:19:22457244 |
| 19 rs142323997 | 22554030 T | 201.1 2.77E-14 chr:19:22457244 |
| 19 rs142810110 | 22545244 A | 201.1 2.77E-14 chr:19:22457244 |
| 19 rs145673919 | 22568076 T | 201.1 2.77E-14 chr:19:22457244 |
| 19 rs146624571 | 22553225 T | 201.1 2.77E-14 chr:19:22457244 |
| 19 rs146893961 | 22642685 A | 201.1 2.77E-14 chr:19:22457244 |
| 19 rs149149769 | 22569253 T | 201.1 2.77E-14 chr:19:22457244 |
| 19 rs149646486 | 22563903 C | 201.1 2.77E-14 chr:19:22457244 |
| 19 rs151261211 | 22571631 T | 201.1 2.77E-14 chr:19:22457244 |
| 19 rs181891009 | 22532666 A | 201.1 2.77E-14 chr:19:22457244 |
| 19 rs184624181 | 22553364 A | 201.1 2.77E-14 chr:19:22457244 |

|                |            |       |          |                 |
|----------------|------------|-------|----------|-----------------|
| 19 rs186202171 | 22562458 G | 201.1 | 2.77E-14 | chr:19:22457244 |
| 19 rs188759472 | 22580731 A | 201.1 | 2.77E-14 | chr:19:22457244 |
| 19 rs190471430 | 22582187 G | 201.1 | 2.77E-14 | chr:19:22457244 |
| 19 rs538927712 | 22544940 A | 201.1 | 2.77E-14 | chr:19:22457244 |
| 19 rs550663184 | 22569428 A | 201.1 | 2.77E-14 | chr:19:22457244 |
| 19 rs555985277 | 22571044 G | 201.1 | 2.77E-14 | chr:19:22457244 |
| 19 rs558563281 | 22566100 C | 201.1 | 2.77E-14 | chr:19:22457244 |
| 19 rs562237600 | 22584717 G | 201.1 | 2.77E-14 | chr:19:22457244 |
| 19 rs571264982 | 22544939 C | 201.1 | 2.77E-14 | chr:19:22457244 |
| 19 rs571649137 | 22580395 T | 201.1 | 2.77E-14 | chr:19:22457244 |
| 19 rs78672622  | 22560817 A | 201.1 | 2.77E-14 | chr:19:22457244 |
| 19 rs74522409  | 22357958 T | 57.12 | 3.81E-14 | chr:19:22457244 |
| 19 rs183883031 | 22504759 A | 178.2 | 4.59E-14 | chr:19:22457244 |
| 19 rs116255882 | 22392527 A | 46.58 | 5.83E-14 | chr:19:22457244 |
| 19 rs143862226 | 22397331 A | 46.58 | 5.83E-14 | chr:19:22457244 |
| 19 rs184983951 | 22390797 C | 46.58 | 5.83E-14 | chr:19:22457244 |
| 19 rs111243802 | 22337716 G | 177.3 | 9.99E-14 | chr:19:22457244 |
| 19 rs111680755 | 22359378 T | 177.3 | 9.99E-14 | chr:19:22457244 |
| 19 rs112590977 | 22337679 G | 177.3 | 9.99E-14 | chr:19:22457244 |
| 19 rs113190051 | 22398150 A | 177.3 | 9.99E-14 | chr:19:22457244 |
| 19 rs113680427 | 22348139 T | 177.3 | 9.99E-14 | chr:19:22457244 |
| 19 rs113777797 | 22338914 A | 177.3 | 9.99E-14 | chr:19:22457244 |
| 19 rs145893290 | 22334144 G | 177.3 | 9.99E-14 | chr:19:22457244 |
| 19 rs186365374 | 22348627 T | 177.3 | 9.99E-14 | chr:19:22457244 |
| 19 rs77293225  | 22333577 T | 177.3 | 9.99E-14 | chr:19:22457244 |
| 19 rs112252305 | 22370021 G | 176.1 | 1.07E-13 | chr:19:22457244 |
| 19 rs186030003 | 22385984 C | 41.49 | 1.61E-13 | chr:19:22457244 |
| 19 rs116187005 | 22324206 C | 44.12 | 1.84E-13 | chr:19:22457244 |
| 19 rs147947686 | 22331745 T | 44.12 | 1.84E-13 | chr:19:22457244 |
| 19 rs372815775 | 22584624 C | 15.34 | 3.10E-13 | chr:19:22457244 |
| 19 rs150652573 | 22123378 A | 24.49 | 3.36E-13 | chr:19:22457244 |
| 19 rs114336280 | 22230853 G | 37.58 | 9.75E-13 | chr:19:22457244 |
| 19 rs114390555 | 22234503 A | 37.58 | 9.75E-13 | chr:19:22457244 |
| 19 rs115126226 | 22231618 A | 37.58 | 9.75E-13 | chr:19:22457244 |
| 19 rs115234699 | 22228872 C | 37.58 | 9.75E-13 | chr:19:22457244 |
| 19 rs115375842 | 22230349 T | 37.58 | 9.75E-13 | chr:19:22457244 |
| 19 rs116147909 | 22235388 C | 37.58 | 9.75E-13 | chr:19:22457244 |
| 19 rs116208631 | 22225820 A | 37.58 | 9.75E-13 | chr:19:22457244 |
| 19 rs116220073 | 22240979 G | 37.58 | 9.75E-13 | chr:19:22457244 |
| 19 rs116607420 | 22223810 A | 37.58 | 9.75E-13 | chr:19:22457244 |
| 19 rs116618266 | 22240054 A | 37.58 | 9.75E-13 | chr:19:22457244 |
| 19 rs138553855 | 22228574 C | 37.58 | 9.75E-13 | chr:19:22457244 |
| 19 rs182149206 | 22242278 A | 37.58 | 9.75E-13 | chr:19:22457244 |



|                |            |       |          |                 |
|----------------|------------|-------|----------|-----------------|
| 19 rs185846159 | 22238913 A | 37.58 | 9.75E-13 | chr:19:22457244 |
| 19 rs185852651 | 22243109 G | 37.58 | 9.75E-13 | chr:19:22457244 |
| 19 rs539325267 | 22224292 A | 37.58 | 9.75E-13 | chr:19:22457244 |
| 19 rs545672737 | 22249240 G | 37.58 | 9.75E-13 | chr:19:22457244 |
| 19 rs560401882 | 22240262 C | 37.58 | 9.75E-13 | chr:19:22457244 |
| 19 rs577835819 | 22236102 G | 37.58 | 9.75E-13 | chr:19:22457244 |
| 19 rs74924740  | 22228262 T | 37.58 | 9.75E-13 | chr:19:22457244 |
| 19 rs77041084  | 22244488 A | 37.58 | 9.75E-13 | chr:19:22457244 |
| 19 rs79357837  | 22231665 G | 37.58 | 9.75E-13 | chr:19:22457244 |
| 19 rs79459406  | 22227540 G | 37.58 | 9.75E-13 | chr:19:22457244 |
| 19 rs531553383 | 22234434 T | 32.89 | 1.43E-12 | chr:19:22457244 |
| 19 rs111331902 | 22523438 A | 307   | 1.62E-12 | chr:19:22457244 |
| 19 rs111347114 | 22528269 T | 307   | 1.62E-12 | chr:19:22457244 |
| 19 rs111347986 | 22465740 G | 307   | 1.62E-12 | chr:19:22457244 |
| 19 rs111348116 | 22491181 G | 307   | 1.62E-12 | chr:19:22457244 |
| 19 rs111353460 | 22470418 A | 307   | 1.62E-12 | chr:19:22457244 |
| 19 rs111392601 | 22466364 C | 307   | 1.62E-12 | chr:19:22457244 |
| 19 rs111405729 | 22461219 A | 307   | 1.62E-12 | chr:19:22457244 |
| 19 rs111584628 | 22472494 C | 307   | 1.62E-12 | chr:19:22457244 |
| 19 rs111589497 | 22468024 C | 307   | 1.62E-12 | chr:19:22457244 |
| 19 rs111599921 | 22462253 G | 307   | 1.62E-12 | chr:19:22457244 |
| 19 rs111628544 | 22475742 C | 307   | 1.62E-12 | chr:19:22457244 |
| 19 rs111675305 | 22476369 G | 307   | 1.62E-12 | chr:19:22457244 |
| 19 rs111685365 | 22467591 G | 307   | 1.62E-12 | chr:19:22457244 |
| 19 rs111791096 | 22486821 G | 307   | 1.62E-12 | chr:19:22457244 |
| 19 rs111794618 | 22512833 T | 307   | 1.62E-12 | chr:19:22457244 |
| 19 rs111833085 | 22503371 C | 307   | 1.62E-12 | chr:19:22457244 |
| 19 rs111841655 | 22458159 G | 307   | 1.62E-12 | chr:19:22457244 |
| 19 rs111878997 | 22458921 G | 307   | 1.62E-12 | chr:19:22457244 |
| 19 rs111881871 | 22463368 A | 307   | 1.62E-12 | chr:19:22457244 |
| 19 rs111928225 | 22465110 C | 307   | 1.62E-12 | chr:19:22457244 |
| 19 rs111935865 | 22468643 A | 307   | 1.62E-12 | chr:19:22457244 |
| 19 rs111980271 | 22468993 C | 307   | 1.62E-12 | chr:19:22457244 |
| 19 rs112079358 | 22466375 C | 307   | 1.62E-12 | chr:19:22457244 |
| 19 rs112086155 | 22523441 A | 307   | 1.62E-12 | chr:19:22457244 |
| 19 rs112093011 | 22508537 A | 307   | 1.62E-12 | chr:19:22457244 |
| 19 rs112117248 | 22461875 G | 307   | 1.62E-12 | chr:19:22457244 |
| 19 rs112279189 | 22482252 T | 307   | 1.62E-12 | chr:19:22457244 |
| 19 rs112318231 | 22508846 G | 307   | 1.62E-12 | chr:19:22457244 |
| 19 rs112330264 | 22463147 G | 307   | 1.62E-12 | chr:19:22457244 |
| 19 rs112366721 | 22467813 C | 307   | 1.62E-12 | chr:19:22457244 |
| 19 rs112369737 | 22482092 T | 307   | 1.62E-12 | chr:19:22457244 |
| 19 rs112484153 | 22463235 G | 307   | 1.62E-12 | chr:19:22457244 |

|                |            |                              |
|----------------|------------|------------------------------|
| 19 rs112511003 | 22487779 C | 307 1.62E-12 chr:19:22457244 |
| 19 rs112558538 | 22506445 T | 307 1.62E-12 chr:19:22457244 |
| 19 rs112611796 | 22480481 G | 307 1.62E-12 chr:19:22457244 |
| 19 rs112616360 | 22463970 C | 307 1.62E-12 chr:19:22457244 |
| 19 rs112732764 | 22506984 G | 307 1.62E-12 chr:19:22457244 |
| 19 rs112748886 | 22523715 T | 307 1.62E-12 chr:19:22457244 |
| 19 rs112760151 | 22518116 A | 307 1.62E-12 chr:19:22457244 |
| 19 rs112773780 | 22461453 A | 307 1.62E-12 chr:19:22457244 |
| 19 rs112778286 | 22467575 A | 307 1.62E-12 chr:19:22457244 |
| 19 rs112837545 | 22460829 G | 307 1.62E-12 chr:19:22457244 |
| 19 rs112869551 | 22492820 T | 307 1.62E-12 chr:19:22457244 |
| 19 rs112875406 | 22478544 G | 307 1.62E-12 chr:19:22457244 |
| 19 rs112933157 | 22482100 T | 307 1.62E-12 chr:19:22457244 |
| 19 rs112935650 | 22514292 T | 307 1.62E-12 chr:19:22457244 |
| 19 rs112975904 | 22493695 G | 307 1.62E-12 chr:19:22457244 |
| 19 rs112979619 | 22466267 G | 307 1.62E-12 chr:19:22457244 |
| 19 rs113007464 | 22488683 A | 307 1.62E-12 chr:19:22457244 |
| 19 rs113012175 | 22463167 C | 307 1.62E-12 chr:19:22457244 |
| 19 rs113017256 | 22457513 A | 307 1.62E-12 chr:19:22457244 |
| 19 rs113106657 | 22456984 A | 307 1.62E-12 chr:19:22457244 |
| 19 rs113183382 | 22476736 A | 307 1.62E-12 chr:19:22457244 |
| 19 rs113218411 | 22477083 A | 307 1.62E-12 chr:19:22457244 |
| 19 rs113225857 | 22502165 C | 307 1.62E-12 chr:19:22457244 |
| 19 rs113278147 | 22472449 A | 307 1.62E-12 chr:19:22457244 |
| 19 rs113408156 | 22523766 G | 307 1.62E-12 chr:19:22457244 |
| 19 rs113455707 | 22457553 A | 307 1.62E-12 chr:19:22457244 |
| 19 rs113505685 | 22516109 T | 307 1.62E-12 chr:19:22457244 |
| 19 rs113661007 | 22502029 A | 307 1.62E-12 chr:19:22457244 |
| 19 rs113661444 | 22468085 C | 307 1.62E-12 chr:19:22457244 |
| 19 rs113678276 | 22457485 C | 307 1.62E-12 chr:19:22457244 |
| 19 rs113757693 | 22490645 C | 307 1.62E-12 chr:19:22457244 |
| 19 rs113759458 | 22465492 A | 307 1.62E-12 chr:19:22457244 |
| 19 rs113760836 | 22459182 A | 307 1.62E-12 chr:19:22457244 |
| 19 rs113883320 | 22468005 G | 307 1.62E-12 chr:19:22457244 |
| 19 rs113983011 | 22458912 T | 307 1.62E-12 chr:19:22457244 |
| 19 rs138641734 | 22458090 T | 307 1.62E-12 chr:19:22457244 |
| 19 rs139826831 | 22482639 C | 307 1.62E-12 chr:19:22457244 |
| 19 rs139851550 | 22464361 T | 307 1.62E-12 chr:19:22457244 |
| 19 rs141591722 | 22456499 A | 307 1.62E-12 chr:19:22457244 |
| 19 rs141659125 | 22461369 C | 307 1.62E-12 chr:19:22457244 |
| 19 rs142383733 | 22481007 A | 307 1.62E-12 chr:19:22457244 |
| 19 rs142685011 | 22462196 A | 307 1.62E-12 chr:19:22457244 |
| 19 rs143231508 | 22457794 G | 307 1.62E-12 chr:19:22457244 |

|                |            |                                |
|----------------|------------|--------------------------------|
| 19 rs144875635 | 22457334 C | 307 1.62E-12 chr:19:22457244   |
| 19 rs145152229 | 22521124 A | 307 1.62E-12 chr:19:22457244   |
| 19 rs146187646 | 22456587 G | 307 1.62E-12 chr:19:22457244   |
| 19 rs147035832 | 22505163 T | 307 1.62E-12 chr:19:22457244   |
| 19 rs147918037 | 22457338 C | 307 1.62E-12 chr:19:22457244   |
| 19 rs150670728 | 22463994 A | 307 1.62E-12 chr:19:22457244   |
| 19 rs180721768 | 22458935 C | 307 1.62E-12 chr:19:22457244   |
| 19 rs181394053 | 22461788 C | 307 1.62E-12 chr:19:22457244   |
| 19 rs185929242 | 22458952 A | 307 1.62E-12 chr:19:22457244   |
| 19 rs187550228 | 22459794 T | 307 1.62E-12 chr:19:22457244   |
| 19 rs188358832 | 22489165 G | 307 1.62E-12 chr:19:22457244   |
| 19 rs190514044 | 22461779 C | 307 1.62E-12 chr:19:22457244   |
| 19 rs558518009 | 22465851 A | 307 1.62E-12 chr:19:22457244   |
| 19 rs570102314 | 22466800 T | 307 1.62E-12 chr:19:22457244   |
| 19 rs572997851 | 22463516 A | 307 1.62E-12 chr:19:22457244   |
| 19 rs576832782 | 22465852 A | 307 1.62E-12 chr:19:22457244   |
| 19 rs62120059  | 22504646 T | 307 1.62E-12 chr:19:22457244   |
| 19 rs145605064 | 22433722 G | 10.05 2.23E-12 chr:19:22457244 |
| 19 rs545861890 | 22172046 G | 38.59 2.33E-12 chr:19:22457244 |
| 19 rs114037048 | 22221311 G | 33.73 2.72E-12 chr:19:22457244 |
| 19 rs114154518 | 22209922 A | 33.73 2.72E-12 chr:19:22457244 |
| 19 rs114336104 | 22206569 T | 33.73 2.72E-12 chr:19:22457244 |
| 19 rs114376748 | 22187308 A | 33.73 2.72E-12 chr:19:22457244 |
| 19 rs114581494 | 22196629 T | 33.73 2.72E-12 chr:19:22457244 |
| 19 rs115108750 | 22219863 A | 33.73 2.72E-12 chr:19:22457244 |
| 19 rs115237687 | 22215491 A | 33.73 2.72E-12 chr:19:22457244 |
| 19 rs115279951 | 22161913 A | 33.73 2.72E-12 chr:19:22457244 |
| 19 rs115313005 | 22153742 C | 33.73 2.72E-12 chr:19:22457244 |
| 19 rs115714685 | 22143377 T | 33.73 2.72E-12 chr:19:22457244 |
| 19 rs115749454 | 22132841 T | 33.73 2.72E-12 chr:19:22457244 |
| 19 rs116451139 | 22206670 A | 33.73 2.72E-12 chr:19:22457244 |
| 19 rs116549366 | 22129081 A | 33.73 2.72E-12 chr:19:22457244 |
| 19 rs116635050 | 22214144 T | 33.73 2.72E-12 chr:19:22457244 |
| 19 rs139372710 | 22208245 T | 33.73 2.72E-12 chr:19:22457244 |
| 19 rs139712084 | 22134263 G | 33.73 2.72E-12 chr:19:22457244 |
| 19 rs139827854 | 22164537 C | 33.73 2.72E-12 chr:19:22457244 |
| 19 rs140692670 | 22135897 T | 33.73 2.72E-12 chr:19:22457244 |
| 19 rs141102799 | 22210911 C | 33.73 2.72E-12 chr:19:22457244 |
| 19 rs142038975 | 22218223 G | 33.73 2.72E-12 chr:19:22457244 |
| 19 rs143587172 | 22153672 T | 33.73 2.72E-12 chr:19:22457244 |
| 19 rs143881598 | 22144783 A | 33.73 2.72E-12 chr:19:22457244 |
| 19 rs143988685 | 22139456 G | 33.73 2.72E-12 chr:19:22457244 |
| 19 rs144949352 | 22210627 C | 33.73 2.72E-12 chr:19:22457244 |

|                |            |       |          |                 |
|----------------|------------|-------|----------|-----------------|
| 19 rs145551125 | 22154377 A | 33.73 | 2.72E-12 | chr:19:22457244 |
| 19 rs146152908 | 22220009 G | 33.73 | 2.72E-12 | chr:19:22457244 |
| 19 rs146173015 | 22219565 T | 33.73 | 2.72E-12 | chr:19:22457244 |
| 19 rs146209419 | 22139387 C | 33.73 | 2.72E-12 | chr:19:22457244 |
| 19 rs146855686 | 22214960 A | 33.73 | 2.72E-12 | chr:19:22457244 |
| 19 rs147885468 | 22196623 A | 33.73 | 2.72E-12 | chr:19:22457244 |
| 19 rs149665725 | 22135542 C | 33.73 | 2.72E-12 | chr:19:22457244 |
| 19 rs149777346 | 22174483 A | 33.73 | 2.72E-12 | chr:19:22457244 |
| 19 rs150225897 | 22165950 G | 33.73 | 2.72E-12 | chr:19:22457244 |
| 19 rs187824736 | 22139170 G | 33.73 | 2.72E-12 | chr:19:22457244 |
| 19 rs190926616 | 22127113 A | 33.73 | 2.72E-12 | chr:19:22457244 |
| 19 rs373553310 | 22172557 T | 33.73 | 2.72E-12 | chr:19:22457244 |
| 19 rs536004240 | 22221702 T | 33.73 | 2.72E-12 | chr:19:22457244 |
| 19 rs553282539 | 22180445 C | 33.73 | 2.72E-12 | chr:19:22457244 |
| 19 rs567799262 | 22166136 C | 33.73 | 2.72E-12 | chr:19:22457244 |
| 19 rs572272889 | 22136204 A | 33.73 | 2.72E-12 | chr:19:22457244 |
| 19 rs113995532 | 22311003 A | 35.39 | 3.06E-12 | chr:19:22457244 |
| 19 rs114265091 | 22305581 T | 35.39 | 3.06E-12 | chr:19:22457244 |
| 19 rs114268107 | 22299269 A | 35.39 | 3.06E-12 | chr:19:22457244 |
| 19 rs114333361 | 22254473 G | 35.39 | 3.06E-12 | chr:19:22457244 |
| 19 rs114536726 | 22277396 G | 35.39 | 3.06E-12 | chr:19:22457244 |
| 19 rs114912357 | 22304372 C | 35.39 | 3.06E-12 | chr:19:22457244 |
| 19 rs115315543 | 22312815 T | 35.39 | 3.06E-12 | chr:19:22457244 |
| 19 rs116364866 | 22257200 T | 35.39 | 3.06E-12 | chr:19:22457244 |
| 19 rs137982685 | 22308435 A | 35.39 | 3.06E-12 | chr:19:22457244 |
| 19 rs138520987 | 22284469 C | 35.39 | 3.06E-12 | chr:19:22457244 |
| 19 rs140411548 | 22274933 A | 35.39 | 3.06E-12 | chr:19:22457244 |
| 19 rs140940314 | 22286794 T | 35.39 | 3.06E-12 | chr:19:22457244 |
| 19 rs142024462 | 22251053 G | 35.39 | 3.06E-12 | chr:19:22457244 |
| 19 rs142376559 | 22283429 T | 35.39 | 3.06E-12 | chr:19:22457244 |
| 19 rs143226803 | 22252902 G | 35.39 | 3.06E-12 | chr:19:22457244 |
| 19 rs144582683 | 22281876 T | 35.39 | 3.06E-12 | chr:19:22457244 |
| 19 rs144804825 | 22280914 G | 35.39 | 3.06E-12 | chr:19:22457244 |
| 19 rs145432030 | 22252143 A | 35.39 | 3.06E-12 | chr:19:22457244 |
| 19 rs146601906 | 22268795 C | 35.39 | 3.06E-12 | chr:19:22457244 |
| 19 rs147630102 | 22279149 T | 35.39 | 3.06E-12 | chr:19:22457244 |
| 19 rs148716112 | 22252267 G | 35.39 | 3.06E-12 | chr:19:22457244 |
| 19 rs148864740 | 22283247 A | 35.39 | 3.06E-12 | chr:19:22457244 |
| 19 rs149144636 | 22307223 T | 35.39 | 3.06E-12 | chr:19:22457244 |
| 19 rs151294558 | 22303104 T | 35.39 | 3.06E-12 | chr:19:22457244 |
| 19 rs527521821 | 22287784 T | 35.39 | 3.06E-12 | chr:19:22457244 |
| 19 rs527538855 | 22276237 T | 35.39 | 3.06E-12 | chr:19:22457244 |
| 19 rs531901473 | 22308841 G | 35.39 | 3.06E-12 | chr:19:22457244 |

|                            |            |       |          |                 |
|----------------------------|------------|-------|----------|-----------------|
| 19 rs572201624             | 22288568 G | 35.39 | 3.06E-12 | chr:19:22457244 |
| 19 rs74546435              | 22286868 C | 35.39 | 3.06E-12 | chr:19:22457244 |
| 19 rs79716546              | 22278072 A | 35.39 | 3.06E-12 | chr:19:22457244 |
| 19 rs80197259              | 22268610 T | 35.39 | 3.06E-12 | chr:19:22457244 |
| 19 rs1808668               | 22518657 A | 8.192 | 3.19E-12 | chr:19:22457244 |
| 19 rs10221484              | 22455170 G | 7.707 | 3.19E-12 | chr:19:22457244 |
| 19 rs192813876             | 22503939 C | 295.9 | 3.33E-12 | chr:19:22457244 |
| 19 rs563897534             | 22504020 A | 295.9 | 3.33E-12 | chr:19:22457244 |
| 19 rs1397578               | 22112401 T | 8.544 | 3.62E-12 | chr:19:22457244 |
| 19 rs539718842             | 22288647 C | 31.52 | 3.89E-12 | chr:19:22457244 |
| 19 rs79980977              | 22275829 C | 32.48 | 4.07E-12 | chr:19:22457244 |
| 19 rs114864357             | 22261886 T | 29.22 | 5.89E-12 | chr:19:22457244 |
| 19 rs114053624             | 22315055 A | 28.54 | 6.07E-12 | chr:19:22457244 |
| 19 rs115212498             | 22315714 T | 28.54 | 6.07E-12 | chr:19:22457244 |
| 19 rs112883809             | 22360222 C | 13.55 | 6.61E-12 | chr:19:22457244 |
| 19 rs115445273             | 22320251 G | 25.45 | 7.45E-12 | chr:19:22457244 |
| 19 rs139237351             | 22444018 T | 66.79 | 7.71E-12 | chr:19:22457244 |
| 19 rs142883534             | 22414632 C | 66.79 | 7.71E-12 | chr:19:22457244 |
| 19 rs113726774             | 22610993 A | 260.2 | 1.15E-11 | chr:19:22457244 |
| 19 rs142612704             | 22612156 C | 260.2 | 1.15E-11 | chr:19:22457244 |
| 19 rs144689364             | 22610728 G | 260.2 | 1.15E-11 | chr:19:22457244 |
| 19 rs111580267             | 22531550 G | 6.704 | 1.26E-11 | chr:19:22457244 |
| 19 rs10221483              | 22455112 G | 6.533 | 1.60E-11 | chr:19:22457244 |
| 19 rs137956372             | 22252532 C | 29.38 | 1.77E-11 | chr:19:22457244 |
| 19 rs112823671             | 22404330 T | 228.2 | 2.28E-11 | chr:19:22457244 |
| 19 rs115841775             | 22378130 A | 15.98 | 2.93E-11 | chr:19:22457244 |
| 19 rs141333367             | 22550832 T | 248.7 | 3.00E-11 | chr:19:22457244 |
| 19 rs144186431             | 22653654 A | 248.7 | 3.00E-11 | chr:19:22457244 |
| 19 rs145714062             | 22621527 T | 248.7 | 3.00E-11 | chr:19:22457244 |
| 19 rs148604204             | 22569715 T | 248.7 | 3.00E-11 | chr:19:22457244 |
| 19 rs571428100             | 22244680 G | 18.43 | 3.73E-11 | chr:19:22457244 |
| 19 rs188116615             | 22660198 A | 254.3 | 3.86E-11 | chr:19:22457244 |
| 19 rs7249555               | 22114930 T | 6.731 | 6.43E-11 | chr:19:22457244 |
| 19 rs112140424             | 22358384 A | 196.6 | 7.23E-11 | chr:19:22457244 |
| 19 rs113985894             | 22344306 A | 196.6 | 7.23E-11 | chr:19:22457244 |
| 19 rs138892114             | 22341235 A | 196.6 | 7.23E-11 | chr:19:22457244 |
| 19 rs150434239             | 22329422 T | 196.6 | 7.23E-11 | chr:19:22457244 |
| 19 rs569524431;rs536123462 | 22398606 G | 196.6 | 7.23E-11 | chr:19:22457244 |
| 19 rs187985394             | 22764542 G | 26.09 | 1.32E-10 | chr:19:22457244 |
| 19 rs181154523             | 22580076 A | 29.08 | 1.35E-10 | chr:19:22457244 |
| 19 rs114487296             | 22450493 C | 7.763 | 1.82E-10 | chr:19:22457244 |
| 19 rs115211114             | 22450434 G | 7.763 | 1.82E-10 | chr:19:22457244 |
| 19 rs115402237             | 22446268 G | 7.763 | 1.82E-10 | chr:19:22457244 |

|                |            |       |          |                 |
|----------------|------------|-------|----------|-----------------|
| 19 rs116095172 | 22447297 A | 7.763 | 1.82E-10 | chr:19:22457244 |
| 19 rs116116710 | 22450695 G | 7.763 | 1.82E-10 | chr:19:22457244 |
| 19 rs116290379 | 22446479 A | 7.763 | 1.82E-10 | chr:19:22457244 |
| 19 rs116505167 | 22450685 C | 7.763 | 1.82E-10 | chr:19:22457244 |
| 19 rs116721114 | 22450482 T | 7.763 | 1.82E-10 | chr:19:22457244 |
| 19 rs138350421 | 22447920 C | 7.763 | 1.82E-10 | chr:19:22457244 |
| 19 rs139771475 | 22448256 T | 7.763 | 1.82E-10 | chr:19:22457244 |
| 19 rs141860818 | 22448149 G | 7.763 | 1.82E-10 | chr:19:22457244 |
| 19 rs183369013 | 22446254 A | 7.763 | 1.82E-10 | chr:19:22457244 |
| 19 rs542721643 | 22447006 T | 7.763 | 1.82E-10 | chr:19:22457244 |
| 19 rs560680679 | 22447007 G | 7.763 | 1.82E-10 | chr:19:22457244 |
| 19 rs75134450  | 22447605 T | 7.763 | 1.82E-10 | chr:19:22457244 |
| 19 rs76451239  | 22446557 T | 7.763 | 1.82E-10 | chr:19:22457244 |
| 19 rs76963327  | 22446051 T | 7.763 | 1.82E-10 | chr:19:22457244 |
| 19 rs78665120  | 22446079 T | 7.763 | 1.82E-10 | chr:19:22457244 |
| 19 rs79135252  | 22446546 A | 7.763 | 1.82E-10 | chr:19:22457244 |
| 19 rs80081358  | 22450977 G | 7.763 | 1.82E-10 | chr:19:22457244 |
| 19 rs140081547 | 22739626 A | 16.38 | 1.99E-10 | chr:19:22457244 |
| 19 rs144287912 | 22539692 G | 31.4  | 2.08E-10 | chr:19:22457244 |
| 19 rs144173274 | 22112846 G | 6.239 | 2.32E-10 | chr:19:22457244 |
| 19 rs184140040 | 22112850 A | 6.239 | 2.32E-10 | chr:19:22457244 |
| 19 rs188931733 | 22112851 C | 6.239 | 2.32E-10 | chr:19:22457244 |
| 19 rs58270429  | 22109607 T | 6.239 | 2.32E-10 | chr:19:22457244 |
| 19 rs73933106  | 22102242 C | 6.239 | 2.32E-10 | chr:19:22457244 |
| 19 rs73933107  | 22104518 C | 6.239 | 2.32E-10 | chr:19:22457244 |
| 19 rs114485832 | 22108198 C | 20.26 | 2.85E-10 | chr:19:22457244 |
| 19 rs138388412 | 22104647 C | 20.26 | 2.85E-10 | chr:19:22457244 |
| 19 rs139775535 | 22109977 C | 20.26 | 2.85E-10 | chr:19:22457244 |
| 19 rs142388513 | 22112305 T | 20.26 | 2.85E-10 | chr:19:22457244 |
| 19 rs143241439 | 22094493 A | 20.26 | 2.85E-10 | chr:19:22457244 |
| 19 rs145211946 | 22105330 A | 20.26 | 2.85E-10 | chr:19:22457244 |
| 19 rs145243020 | 22108175 G | 20.26 | 2.85E-10 | chr:19:22457244 |
| 19 rs149721195 | 22103306 A | 20.26 | 2.85E-10 | chr:19:22457244 |
| 19 rs149783246 | 22104896 G | 20.26 | 2.85E-10 | chr:19:22457244 |
| 19 rs541067957 | 22100366 T | 20.26 | 2.85E-10 | chr:19:22457244 |
| 19 rs114289956 | 22454001 T | 7.546 | 3.28E-10 | chr:19:22457244 |
| 19 rs114422668 | 22453355 T | 7.546 | 3.28E-10 | chr:19:22457244 |
| 19 rs114551844 | 22452452 T | 7.546 | 3.28E-10 | chr:19:22457244 |
| 19 rs114612477 | 22451904 T | 7.546 | 3.28E-10 | chr:19:22457244 |
| 19 rs115083572 | 22452285 G | 7.546 | 3.28E-10 | chr:19:22457244 |
| 19 rs116119620 | 22453015 T | 7.546 | 3.28E-10 | chr:19:22457244 |
| 19 rs116279903 | 22452173 C | 7.546 | 3.28E-10 | chr:19:22457244 |
| 19 rs139000614 | 22451845 T | 7.546 | 3.28E-10 | chr:19:22457244 |

|                |            |       |          |                 |
|----------------|------------|-------|----------|-----------------|
| 19 rs139097230 | 22452489 T | 7.546 | 3.28E-10 | chr:19:22457244 |
| 19 rs141440964 | 22451251 T | 7.546 | 3.28E-10 | chr:19:22457244 |
| 19 rs191403348 | 22559796 T | 21.59 | 3.30E-10 | chr:19:22457244 |
| 19 rs142536481 | 22451222 A | 7.426 | 4.11E-10 | chr:19:22457244 |
| 19 rs193035916 | 22453827 T | 7.425 | 4.21E-10 | chr:19:22457244 |
| 19 rs139399139 | 22416692 G | 61.75 | 5.35E-10 | chr:19:22457244 |
| 19 rs113750672 | 22327418 G | 8.838 | 5.48E-10 | chr:19:22457244 |
| 19 rs187062178 | 22559795 T | 18.89 | 6.84E-10 | chr:19:22457244 |
| 19 rs189961352 | 22177388 A | 126.8 | 8.36E-10 | chr:19:22457244 |
| 19 rs568047338 | 22450475 A | 7.046 | 9.31E-10 | chr:19:22457244 |
| 19 rs150780501 | 22233452 A | 127.4 | 9.61E-10 | chr:19:22457244 |
| 19 rs138189903 | 22567136 A | 17.03 | 9.99E-10 | chr:19:22457244 |
| 19 rs2957811   | 22658228 T | 8.571 | 1.12E-09 | chr:19:22457244 |
| 19 rs182106268 | 22803406 T | 23.29 | 1.12E-09 | chr:19:22457244 |
| 19 rs149005977 | 22452903 G | 7.056 | 1.14E-09 | chr:19:22457244 |
| 19 rs148003905 | 22492889 G | 28.31 | 1.24E-09 | chr:19:22457244 |
| 19 rs116015221 | 22293659 G | 24.58 | 1.38E-09 | chr:19:22457244 |
| 19 rs139816022 | 22310284 G | 24.58 | 1.38E-09 | chr:19:22457244 |
| 19 rs191142508 | 22337203 T | 24.58 | 1.38E-09 | chr:19:22457244 |
| 19 rs545003608 | 22311890 A | 24.58 | 1.38E-09 | chr:19:22457244 |
| 19 rs76194015  | 22353141 C | 24.58 | 1.38E-09 | chr:19:22457244 |
| 19 rs116577376 | 22453691 A | 6.978 | 1.42E-09 | chr:19:22457244 |
| 19 rs115943909 | 22452135 C | 6.895 | 1.56E-09 | chr:19:22457244 |
| 19 rs114073147 | 22451639 T | 6.876 | 1.58E-09 | chr:19:22457244 |
| 19 rs138243368 | 22451652 G | 6.876 | 1.58E-09 | chr:19:22457244 |
| 19 rs77463219  | 22447877 C | 7.323 | 2.35E-09 | chr:19:22457244 |
| 19 rs143224857 | 22427423 C | 10.12 | 2.45E-09 | chr:19:22457244 |
| 19 rs115687200 | 22157778 T | 11.5  | 3.05E-09 | chr:19:22457244 |
| 19 rs149966838 | 22756003 C | 38.71 | 3.20E-09 | chr:19:22457244 |
| 19 rs114939584 | 22175083 A | 21.05 | 3.70E-09 | chr:19:22457244 |
| 19 rs115215406 | 22149164 C | 21.05 | 3.70E-09 | chr:19:22457244 |
| 19 rs116608223 | 22182776 G | 21.05 | 3.70E-09 | chr:19:22457244 |
| 19 rs140414488 | 22159440 G | 21.05 | 3.70E-09 | chr:19:22457244 |
| 19 rs142063237 | 22138016 T | 21.05 | 3.70E-09 | chr:19:22457244 |
| 19 rs114397370 | 22452941 C | 6.442 | 5.57E-09 | chr:19:22457244 |
| 19 rs66562925  | 22158713 A | 3.903 | 6.79E-09 | chr:19:22457244 |
| 19 rs115893105 | 22452937 A | 6.344 | 6.94E-09 | chr:19:22457244 |
| 19 rs115059290 | 22451632 A | 6.284 | 7.66E-09 | chr:19:22457244 |
| 19 rs143243514 | 22451798 G | 6.276 | 7.84E-09 | chr:19:22457244 |
| 19 rs149576034 | 22451779 A | 6.276 | 7.84E-09 | chr:19:22457244 |
| 19 rs139826378 | 22452654 G | 6.256 | 8.04E-09 | chr:19:22457244 |
| 19 rs141299705 | 22055302 A | 17.67 | 8.91E-09 | chr:19:22457244 |
| 19 rs186354431 | 22791195 G | 14.74 | 1.09E-08 | chr:19:22457244 |

|                |            |       |          |                 |
|----------------|------------|-------|----------|-----------------|
| 19 rs112112152 | 22523100 C | 539.1 | 1.10E-08 | chr:19:22457244 |
| 19 rs145589124 | 22487608 A | 539.1 | 1.10E-08 | chr:19:22457244 |
| 19 rs148806686 | 22512253 A | 539.1 | 1.10E-08 | chr:19:22457244 |
| 19 rs149714315 | 22449905 T | 539.1 | 1.10E-08 | chr:19:22457244 |
| 19 rs150383049 | 22455754 T | 539.1 | 1.10E-08 | chr:19:22457244 |
| 19 rs563742399 | 22466626 A | 539.1 | 1.10E-08 | chr:19:22457244 |
| 19 rs11668081  | 22425615 A | 4.284 | 1.71E-08 | chr:19:22457244 |
| 19 rs540580081 | 22148238 T | 63.62 | 2.20E-08 | chr:19:22457244 |
| 19 rs532150113 | 22300732 A | 34.12 | 2.48E-08 | chr:19:22457244 |
| 19 rs116663366 | 22452335 G | 114.2 | 2.61E-08 | chr:19:22457244 |
| 19 rs190597217 | 22531263 A | 114.2 | 2.61E-08 | chr:19:22457244 |
| 19 rs190823937 | 22487007 C | 114.2 | 2.61E-08 | chr:19:22457244 |
| 19 rs191104857 | 22506678 G | 114.2 | 2.61E-08 | chr:19:22457244 |
| 19 rs538482571 | 22516648 T | 114.2 | 2.61E-08 | chr:19:22457244 |
| 19 rs557883619 | 22504635 T | 114.2 | 2.61E-08 | chr:19:22457244 |
| 19 rs2905572   | 22651073 T | 6.711 | 3.12E-08 | chr:19:22457244 |
| 19 rs1975172   | 22534603 A | 5.443 | 3.41E-08 | chr:19:22457244 |
| 19 rs114837217 | 22446650 C | 5.968 | 3.86E-08 | chr:19:22457244 |
| 19 rs137916796 | 22223262 A | 235.6 | 4.85E-08 | chr:19:22457244 |
| 19 rs138065010 | 22221080 G | 235.6 | 4.85E-08 | chr:19:22457244 |
| 19 rs138136455 | 22235094 G | 235.6 | 4.85E-08 | chr:19:22457244 |
| 19 rs138944622 | 22218813 A | 235.6 | 4.85E-08 | chr:19:22457244 |
| 19 rs139224264 | 22287539 C | 235.6 | 4.85E-08 | chr:19:22457244 |
| 19 rs139384201 | 22262701 G | 235.6 | 4.85E-08 | chr:19:22457244 |
| 19 rs139697093 | 22254360 A | 235.6 | 4.85E-08 | chr:19:22457244 |
| 19 rs139937682 | 22251675 C | 235.6 | 4.85E-08 | chr:19:22457244 |
| 19 rs140163563 | 22241747 G | 235.6 | 4.85E-08 | chr:19:22457244 |
| 19 rs140373029 | 22236373 G | 235.6 | 4.85E-08 | chr:19:22457244 |
| 19 rs140727836 | 22256795 T | 235.6 | 4.85E-08 | chr:19:22457244 |
| 19 rs140928310 | 22169601 T | 235.6 | 4.85E-08 | chr:19:22457244 |
| 19 rs140938169 | 22225775 C | 235.6 | 4.85E-08 | chr:19:22457244 |
| 19 rs141037224 | 22234862 T | 235.6 | 4.85E-08 | chr:19:22457244 |
| 19 rs141123787 | 22261209 T | 235.6 | 4.85E-08 | chr:19:22457244 |
| 19 rs141317016 | 22269142 T | 235.6 | 4.85E-08 | chr:19:22457244 |
| 19 rs141486459 | 22177998 G | 235.6 | 4.85E-08 | chr:19:22457244 |
| 19 rs142038665 | 22272262 C | 235.6 | 4.85E-08 | chr:19:22457244 |
| 19 rs142133953 | 22228297 T | 235.6 | 4.85E-08 | chr:19:22457244 |
| 19 rs142357912 | 22223320 T | 235.6 | 4.85E-08 | chr:19:22457244 |
| 19 rs142752732 | 22213290 A | 235.6 | 4.85E-08 | chr:19:22457244 |
| 19 rs142768412 | 22215751 G | 235.6 | 4.85E-08 | chr:19:22457244 |
| 19 rs143288664 | 22295865 G | 235.6 | 4.85E-08 | chr:19:22457244 |
| 19 rs143385332 | 22264278 C | 235.6 | 4.85E-08 | chr:19:22457244 |
| 19 rs144077097 | 22305273 C | 235.6 | 4.85E-08 | chr:19:22457244 |



|                |            |       |          |                 |
|----------------|------------|-------|----------|-----------------|
| 19 rs144122273 | 22216039 C | 235.6 | 4.85E-08 | chr:19:22457244 |
| 19 rs144220574 | 22236453 T | 235.6 | 4.85E-08 | chr:19:22457244 |
| 19 rs144361746 | 22268651 T | 235.6 | 4.85E-08 | chr:19:22457244 |
| 19 rs144418402 | 22218366 G | 235.6 | 4.85E-08 | chr:19:22457244 |
| 19 rs144604323 | 22300079 C | 235.6 | 4.85E-08 | chr:19:22457244 |
| 19 rs144620049 | 22284129 A | 235.6 | 4.85E-08 | chr:19:22457244 |
| 19 rs144621274 | 22213695 T | 235.6 | 4.85E-08 | chr:19:22457244 |
| 19 rs144960409 | 22260428 C | 235.6 | 4.85E-08 | chr:19:22457244 |
| 19 rs145325958 | 22252462 T | 235.6 | 4.85E-08 | chr:19:22457244 |
| 19 rs145394286 | 22168575 T | 235.6 | 4.85E-08 | chr:19:22457244 |
| 19 rs145757686 | 22218652 T | 235.6 | 4.85E-08 | chr:19:22457244 |
| 19 rs145962074 | 22198724 A | 235.6 | 4.85E-08 | chr:19:22457244 |
| 19 rs146027114 | 22230310 T | 235.6 | 4.85E-08 | chr:19:22457244 |
| 19 rs146184496 | 22310922 G | 235.6 | 4.85E-08 | chr:19:22457244 |
| 19 rs146400349 | 22312632 T | 235.6 | 4.85E-08 | chr:19:22457244 |
| 19 rs147113029 | 22257396 T | 235.6 | 4.85E-08 | chr:19:22457244 |
| 19 rs147412239 | 22270321 G | 235.6 | 4.85E-08 | chr:19:22457244 |
| 19 rs147785793 | 22263476 A | 235.6 | 4.85E-08 | chr:19:22457244 |
| 19 rs147884937 | 22246105 C | 235.6 | 4.85E-08 | chr:19:22457244 |
| 19 rs148436093 | 22293894 T | 235.6 | 4.85E-08 | chr:19:22457244 |
| 19 rs149151089 | 22172676 G | 235.6 | 4.85E-08 | chr:19:22457244 |
| 19 rs149208334 | 22214718 T | 235.6 | 4.85E-08 | chr:19:22457244 |
| 19 rs149759540 | 22254509 T | 235.6 | 4.85E-08 | chr:19:22457244 |
| 19 rs150070177 | 22168257 C | 235.6 | 4.85E-08 | chr:19:22457244 |
| 19 rs150165200 | 22282864 G | 235.6 | 4.85E-08 | chr:19:22457244 |
| 19 rs150370139 | 22249619 G | 235.6 | 4.85E-08 | chr:19:22457244 |
| 19 rs150572210 | 22263326 G | 235.6 | 4.85E-08 | chr:19:22457244 |
| 19 rs150850724 | 22226907 T | 235.6 | 4.85E-08 | chr:19:22457244 |
| 19 rs181537500 | 22277333 G | 235.6 | 4.85E-08 | chr:19:22457244 |
| 19 rs181602841 | 22310308 C | 235.6 | 4.85E-08 | chr:19:22457244 |
| 19 rs183209446 | 22213538 A | 235.6 | 4.85E-08 | chr:19:22457244 |
| 19 rs184357408 | 22284609 T | 235.6 | 4.85E-08 | chr:19:22457244 |
| 19 rs184379199 | 22264886 T | 235.6 | 4.85E-08 | chr:19:22457244 |
| 19 rs184412193 | 22154331 G | 235.6 | 4.85E-08 | chr:19:22457244 |
| 19 rs185830182 | 22282815 T | 235.6 | 4.85E-08 | chr:19:22457244 |
| 19 rs187083067 | 22284465 T | 235.6 | 4.85E-08 | chr:19:22457244 |
| 19 rs187681883 | 22155362 C | 235.6 | 4.85E-08 | chr:19:22457244 |
| 19 rs188101230 | 22270986 G | 235.6 | 4.85E-08 | chr:19:22457244 |
| 19 rs189140686 | 22286969 T | 235.6 | 4.85E-08 | chr:19:22457244 |
| 19 rs189304390 | 22171804 A | 235.6 | 4.85E-08 | chr:19:22457244 |
| 19 rs190107251 | 22286396 A | 235.6 | 4.85E-08 | chr:19:22457244 |
| 19 rs190155891 | 22282841 T | 235.6 | 4.85E-08 | chr:19:22457244 |
| 19 rs190466491 | 22237645 A | 235.6 | 4.85E-08 | chr:19:22457244 |

|                |            |       |          |                 |
|----------------|------------|-------|----------|-----------------|
| 19 rs192242698 | 22217954 T | 235.6 | 4.85E-08 | chr:19:22457244 |
| 19 rs540350961 | 22238826 T | 235.6 | 4.85E-08 | chr:19:22457244 |
| 19 rs549637656 | 22235566 G | 235.6 | 4.85E-08 | chr:19:22457244 |
| 19 rs561145349 | 22291241 T | 235.6 | 4.85E-08 | chr:19:22457244 |
| 19 rs578101931 | 22218970 A | 235.6 | 4.85E-08 | chr:19:22457244 |
| 19 rs2905574   | 22655531 G | 6.482 | 5.45E-08 | chr:19:22457244 |
| 19 rs2905575   | 22656127 A | 6.482 | 5.45E-08 | chr:19:22457244 |
| 19 rs2360621   | 22548669 C | 5.212 | 5.81E-08 | chr:19:22457244 |
| 19 rs8106611   | 22569618 G | 3.737 | 6.60E-08 | chr:19:22457244 |
| 19 rs1989120   | 22205528 T | 4.146 | 7.81E-08 | chr:19:22457244 |
| 19 rs114714889 | 22110780 G | 7.02  | 8.89E-08 | chr:19:22457244 |
| 19 rs114783112 | 22098748 A | 7.02  | 8.89E-08 | chr:19:22457244 |
| 19 rs114809292 | 22094232 T | 7.02  | 8.89E-08 | chr:19:22457244 |
| 19 rs115231855 | 22095693 G | 7.02  | 8.89E-08 | chr:19:22457244 |
| 19 rs192776996 | 22476682 G | 89.23 | 1.14E-07 | chr:19:22457244 |
| 19 rs187405198 | 22194270 C | 190.6 | 1.30E-07 | chr:19:22457244 |
| 19 rs11671804  | 22591216 C | 4.784 | 1.43E-07 | chr:19:22457244 |
| 19 rs12973769  | 22593223 C | 4.784 | 1.43E-07 | chr:19:22457244 |
| 19 rs150054286 | 22116842 G | 6.636 | 1.46E-07 | chr:19:22457244 |
| 19 rs1651572   | 22109563 A | 3.997 | 1.47E-07 | chr:19:22457244 |
| 19 rs11669254  | 22544805 A | 4.469 | 1.65E-07 | chr:19:22457244 |
| 19 rs140212785 | 22121675 T | 290.8 | 1.77E-07 | chr:19:22457244 |
| 19 rs147165335 | 22272039 C | 290.8 | 1.77E-07 | chr:19:22457244 |
| 19 rs148566913 | 22142435 A | 290.8 | 1.77E-07 | chr:19:22457244 |
| 19 rs68168074  | 22120333 T | 3.653 | 1.91E-07 | chr:19:22457244 |
| 19 rs138450162 | 22148674 A | 6.09  | 2.52E-07 | chr:19:22457244 |
| 19 rs146657049 | 22138227 C | 6.044 | 2.57E-07 | chr:19:22457244 |
| 19 rs138324788 | 22127166 A | 6.11  | 2.58E-07 | chr:19:22457244 |
| 19 rs76319388  | 22123380 A | 3.506 | 2.73E-07 | chr:19:22457244 |
| 19 rs114684241 | 22159941 A | 5.681 | 2.76E-07 | chr:19:22457244 |
| 19 rs115190567 | 22175786 T | 5.681 | 2.76E-07 | chr:19:22457244 |
| 19 rs115804972 | 22194494 T | 5.681 | 2.76E-07 | chr:19:22457244 |
| 19 rs116141646 | 22161755 T | 5.681 | 2.76E-07 | chr:19:22457244 |
| 19 rs116394195 | 22188702 G | 5.681 | 2.76E-07 | chr:19:22457244 |
| 19 rs141590519 | 22166246 A | 5.681 | 2.76E-07 | chr:19:22457244 |
| 19 rs145236020 | 22159069 T | 5.681 | 2.76E-07 | chr:19:22457244 |
| 19 rs146289217 | 22155844 T | 5.681 | 2.76E-07 | chr:19:22457244 |
| 19 rs146758677 | 22178933 G | 5.681 | 2.76E-07 | chr:19:22457244 |
| 19 rs148680320 | 22184686 G | 5.681 | 2.76E-07 | chr:19:22457244 |
| 19 rs150812540 | 22187753 C | 5.681 | 2.76E-07 | chr:19:22457244 |
| 19 rs151164349 | 22159776 T | 5.681 | 2.76E-07 | chr:19:22457244 |
| 19 rs151216289 | 22155922 A | 5.681 | 2.76E-07 | chr:19:22457244 |
| 19 rs189198732 | 22181216 T | 5.681 | 2.76E-07 | chr:19:22457244 |

|                |            |       |          |                 |
|----------------|------------|-------|----------|-----------------|
| 19 rs10421680  | 22614451 T | 4.656 | 2.90E-07 | chr:19:22457244 |
| 19 rs114405470 | 22150913 T | 5.967 | 3.10E-07 | chr:19:22457244 |
| 19 rs114443803 | 22135979 G | 5.967 | 3.10E-07 | chr:19:22457244 |
| 19 rs115563563 | 22132411 T | 5.967 | 3.10E-07 | chr:19:22457244 |
| 19 rs116267189 | 22134427 C | 5.967 | 3.10E-07 | chr:19:22457244 |
| 19 rs138257968 | 22138742 A | 5.967 | 3.10E-07 | chr:19:22457244 |
| 19 rs140726533 | 22138265 G | 5.967 | 3.10E-07 | chr:19:22457244 |
| 19 rs147703981 | 22142989 G | 5.967 | 3.10E-07 | chr:19:22457244 |
| 19 rs150619604 | 22134247 C | 5.967 | 3.10E-07 | chr:19:22457244 |
| 19 rs1973597   | 22142202 A | 5.967 | 3.10E-07 | chr:19:22457244 |
| 19 rs61659969  | 22133446 T | 5.967 | 3.10E-07 | chr:19:22457244 |
| 19 rs10409819  | 22602919 T | 3.49  | 3.34E-07 | chr:19:22457244 |
| 19 rs114091543 | 22183039 A | 5.57  | 3.41E-07 | chr:19:22457244 |
| 19 rs10405555  | 22617622 T | 4.109 | 3.59E-07 | chr:19:22457244 |
| 19 rs28787019  | 22617223 A | 4.109 | 3.59E-07 | chr:19:22457244 |
| 19 rs186894845 | 22452402 T | 293.9 | 3.61E-07 | chr:19:22457244 |
| 19 rs115855159 | 22100503 A | 5.861 | 3.70E-07 | chr:19:22457244 |
| 19 rs1828452   | 22112137 T | 5.861 | 3.70E-07 | chr:19:22457244 |
| 19 rs6511298   | 22111469 C | 5.861 | 3.70E-07 | chr:19:22457244 |
| 19 rs570488053 | 22413076 A | 76    | 3.83E-07 | chr:19:22457244 |
| 19 rs377000167 | 22190372 A | 5.478 | 4.42E-07 | chr:19:22457244 |
| 19 rs116474134 | 22090746 C | 5.87  | 5.56E-07 | chr:19:22457244 |
| 19 rs145444878 | 22096073 G | 13.43 | 5.58E-07 | chr:19:22457244 |
| 19 rs190626140 | 22093710 C | 13.43 | 5.58E-07 | chr:19:22457244 |
| 19 rs62119972  | 22425682 C | 4.898 | 5.64E-07 | chr:19:22457244 |
| 19 rs73924264  | 22730161 C | 4.536 | 5.99E-07 | chr:19:22457244 |
| 19 rs2885037   | 22606672 A | 4.591 | 6.07E-07 | chr:19:22457244 |
| 19 rs145146444 | 22451345 G | 4.896 | 6.27E-07 | chr:19:22457244 |
| 19 rs56927650  | 22805247 C | 5.434 | 7.21E-07 | chr:19:22457244 |
| 19 rs7253558   | 22101672 C | 3.229 | 7.59E-07 | chr:19:22457244 |
| 19 rs281155    | 22414594 G | 3.411 | 7.98E-07 | chr:19:22457244 |
| 19 rs111440289 | 22532918 A | 4.199 | 8.25E-07 | chr:19:22457244 |
| 19 rs56935667  | 22798098 T | 5.475 | 9.85E-07 | chr:19:22457244 |
| 19 rs140714593 | 22505024 C | 3.891 | 1.11E-06 | chr:19:22457244 |
| 19 rs190571209 | 22505025 G | 3.891 | 1.11E-06 | chr:19:22457244 |
| 19 rs192221778 | 22443087 T | 225.6 | 1.11E-06 | chr:19:22457244 |
| 19 rs115644378 | 22323470 A | 68.72 | 1.11E-06 | chr:19:22457244 |
| 19 rs145451705 | 22323004 T | 68.72 | 1.11E-06 | chr:19:22457244 |
| 19 rs180736225 | 22342040 A | 68.72 | 1.11E-06 | chr:19:22457244 |
| 19 rs187298748 | 22341468 T | 68.72 | 1.11E-06 | chr:19:22457244 |
| 19 rs113269615 | 22606977 A | 4.18  | 1.12E-06 | chr:19:22457244 |
| 19 rs10407093  | 22618285 A | 3.844 | 1.33E-06 | chr:19:22457244 |
| 19 rs10415112  | 22619052 C | 3.844 | 1.33E-06 | chr:19:22457244 |

|                |            |       |          |                 |
|----------------|------------|-------|----------|-----------------|
| 19 rs7257489   | 22113083 C | 5.516 | 1.34E-06 | chr:19:22457244 |
| 19 rs112258788 | 22669331 A | 14.44 | 1.42E-06 | chr:19:22457244 |
| 19 rs188121447 | 22666103 T | 14.44 | 1.42E-06 | chr:19:22457244 |
| 19 rs144168791 | 22150963 C | 5.388 | 1.42E-06 | chr:19:22457244 |
| 19 rs576475899 | 22572221 A | 40.53 | 1.49E-06 | chr:19:22457244 |
| 19 rs113181884 | 22586084 C | 3.275 | 1.53E-06 | chr:19:22457244 |
| 19 rs56768795  | 22586073 A | 3.275 | 1.53E-06 | chr:19:22457244 |
| 19 rs62121331  | 22809119 A | 5.157 | 1.59E-06 | chr:19:22457244 |
| 19 rs281173    | 22424997 A | 3.17  | 1.81E-06 | chr:19:22457244 |
| 19 rs115740412 | 22104738 G | 3.1   | 1.82E-06 | chr:19:22457244 |
| 19 rs7254293   | 22105469 C | 3.1   | 1.82E-06 | chr:19:22457244 |
| 19 rs73933109  | 22104602 T | 3.1   | 1.82E-06 | chr:19:22457244 |
| 19 rs73933112  | 22104993 T | 3.1   | 1.82E-06 | chr:19:22457244 |
| 19 rs78781407  | 22716995 G | 4.644 | 2.04E-06 | chr:19:22457244 |
| 19 rs111343581 | 22505121 A | 3.759 | 2.11E-06 | chr:19:22457244 |
| 19 rs111394256 | 22521445 G | 3.759 | 2.11E-06 | chr:19:22457244 |
| 19 rs111398872 | 22487132 C | 3.759 | 2.11E-06 | chr:19:22457244 |
| 19 rs111402663 | 22511428 T | 3.759 | 2.11E-06 | chr:19:22457244 |
| 19 rs111403022 | 22491809 G | 3.759 | 2.11E-06 | chr:19:22457244 |
| 19 rs111430028 | 22507923 T | 3.759 | 2.11E-06 | chr:19:22457244 |
| 19 rs111589669 | 22493334 C | 3.759 | 2.11E-06 | chr:19:22457244 |
| 19 rs111602603 | 22519137 G | 3.759 | 2.11E-06 | chr:19:22457244 |
| 19 rs111626129 | 22515060 T | 3.759 | 2.11E-06 | chr:19:22457244 |
| 19 rs111659459 | 22488651 C | 3.759 | 2.11E-06 | chr:19:22457244 |
| 19 rs111840114 | 22489991 C | 3.759 | 2.11E-06 | chr:19:22457244 |
| 19 rs111878522 | 22480384 C | 3.759 | 2.11E-06 | chr:19:22457244 |
| 19 rs111915770 | 22496189 C | 3.759 | 2.11E-06 | chr:19:22457244 |
| 19 rs111920900 | 22480534 G | 3.759 | 2.11E-06 | chr:19:22457244 |
| 19 rs112033021 | 22505136 T | 3.759 | 2.11E-06 | chr:19:22457244 |
| 19 rs112038831 | 22480770 A | 3.759 | 2.11E-06 | chr:19:22457244 |
| 19 rs112075571 | 22500405 T | 3.759 | 2.11E-06 | chr:19:22457244 |
| 19 rs112099028 | 22488225 A | 3.759 | 2.11E-06 | chr:19:22457244 |
| 19 rs112147518 | 22492556 G | 3.759 | 2.11E-06 | chr:19:22457244 |
| 19 rs112405385 | 22468863 C | 3.759 | 2.11E-06 | chr:19:22457244 |
| 19 rs112493995 | 22500985 T | 3.759 | 2.11E-06 | chr:19:22457244 |
| 19 rs112535242 | 22490303 T | 3.759 | 2.11E-06 | chr:19:22457244 |
| 19 rs112562889 | 22510641 T | 3.759 | 2.11E-06 | chr:19:22457244 |
| 19 rs112614989 | 22495601 T | 3.759 | 2.11E-06 | chr:19:22457244 |
| 19 rs112738992 | 22487087 T | 3.759 | 2.11E-06 | chr:19:22457244 |
| 19 rs112771592 | 22481643 A | 3.759 | 2.11E-06 | chr:19:22457244 |
| 19 rs112839081 | 22503731 T | 3.759 | 2.11E-06 | chr:19:22457244 |
| 19 rs112925452 | 22475485 G | 3.759 | 2.11E-06 | chr:19:22457244 |
| 19 rs112934506 | 22500998 G | 3.759 | 2.11E-06 | chr:19:22457244 |

|                |            |       |          |                 |
|----------------|------------|-------|----------|-----------------|
| 19 rs112976811 | 22470822 G | 3.759 | 2.11E-06 | chr:19:22457244 |
| 19 rs113010780 | 22494716 A | 3.759 | 2.11E-06 | chr:19:22457244 |
| 19 rs113099868 | 22508558 C | 3.759 | 2.11E-06 | chr:19:22457244 |
| 19 rs113106398 | 22488360 A | 3.759 | 2.11E-06 | chr:19:22457244 |
| 19 rs113179295 | 22489112 G | 3.759 | 2.11E-06 | chr:19:22457244 |
| 19 rs113183858 | 22480158 C | 3.759 | 2.11E-06 | chr:19:22457244 |
| 19 rs113277011 | 22506028 A | 3.759 | 2.11E-06 | chr:19:22457244 |
| 19 rs113345334 | 22480739 A | 3.759 | 2.11E-06 | chr:19:22457244 |
| 19 rs113427950 | 22482205 G | 3.759 | 2.11E-06 | chr:19:22457244 |
| 19 rs113443194 | 22470891 C | 3.759 | 2.11E-06 | chr:19:22457244 |
| 19 rs113493517 | 22491195 T | 3.759 | 2.11E-06 | chr:19:22457244 |
| 19 rs113525304 | 22506218 T | 3.759 | 2.11E-06 | chr:19:22457244 |
| 19 rs113588745 | 22514004 T | 3.759 | 2.11E-06 | chr:19:22457244 |
| 19 rs113594810 | 22487473 A | 3.759 | 2.11E-06 | chr:19:22457244 |
| 19 rs113675059 | 22488659 G | 3.759 | 2.11E-06 | chr:19:22457244 |
| 19 rs113880235 | 22530533 A | 3.759 | 2.11E-06 | chr:19:22457244 |
| 19 rs113978372 | 22519613 A | 3.759 | 2.11E-06 | chr:19:22457244 |
| 19 rs114769949 | 22489408 G | 3.759 | 2.11E-06 | chr:19:22457244 |
| 19 rs142839721 | 22504617 C | 3.759 | 2.11E-06 | chr:19:22457244 |
| 19 rs150276670 | 22503794 C | 3.759 | 2.11E-06 | chr:19:22457244 |
| 19 rs183724818 | 22504740 T | 3.759 | 2.11E-06 | chr:19:22457244 |
| 19 rs188095427 | 22504742 T | 3.759 | 2.11E-06 | chr:19:22457244 |
| 19 rs57772560  | 22474380 G | 3.759 | 2.11E-06 | chr:19:22457244 |
| 19 rs58410881  | 22492992 T | 3.759 | 2.11E-06 | chr:19:22457244 |
| 19 rs58457864  | 22503016 A | 3.759 | 2.11E-06 | chr:19:22457244 |
| 19 rs58512684  | 22503246 C | 3.759 | 2.11E-06 | chr:19:22457244 |
| 19 rs59332835  | 22503156 G | 3.759 | 2.11E-06 | chr:19:22457244 |
| 19 rs59578914  | 22505820 T | 3.759 | 2.11E-06 | chr:19:22457244 |
| 19 rs59621371  | 22472621 C | 3.759 | 2.11E-06 | chr:19:22457244 |
| 19 rs60233053  | 22472668 A | 3.759 | 2.11E-06 | chr:19:22457244 |
| 19 rs60583994  | 22518193 C | 3.759 | 2.11E-06 | chr:19:22457244 |
| 19 rs60837647  | 22511651 A | 3.759 | 2.11E-06 | chr:19:22457244 |
| 19 rs61377758  | 22487928 T | 3.759 | 2.11E-06 | chr:19:22457244 |
| 19 rs72481610  | 22521300 A | 3.759 | 2.11E-06 | chr:19:22457244 |
| 19 rs74578514  | 22512257 T | 3.759 | 2.11E-06 | chr:19:22457244 |
| 19 rs74583053  | 22516393 A | 3.759 | 2.11E-06 | chr:19:22457244 |
| 19 rs74583407  | 22495342 T | 3.759 | 2.11E-06 | chr:19:22457244 |
| 19 rs74724191  | 22514863 T | 3.759 | 2.11E-06 | chr:19:22457244 |
| 19 rs75167566  | 22510652 G | 3.759 | 2.11E-06 | chr:19:22457244 |
| 19 rs75351296  | 22514818 T | 3.759 | 2.11E-06 | chr:19:22457244 |
| 19 rs75451854  | 22513005 G | 3.759 | 2.11E-06 | chr:19:22457244 |
| 19 rs75855320  | 22514666 A | 3.759 | 2.11E-06 | chr:19:22457244 |
| 19 rs75917018  | 22514169 T | 3.759 | 2.11E-06 | chr:19:22457244 |

|                |            |       |          |                 |
|----------------|------------|-------|----------|-----------------|
| 19 rs76181558  | 22509045 G | 3.759 | 2.11E-06 | chr:19:22457244 |
| 19 rs76285566  | 22515640 C | 3.759 | 2.11E-06 | chr:19:22457244 |
| 19 rs76618973  | 22512967 G | 3.759 | 2.11E-06 | chr:19:22457244 |
| 19 rs76619922  | 22496282 T | 3.759 | 2.11E-06 | chr:19:22457244 |
| 19 rs76882085  | 22513715 G | 3.759 | 2.11E-06 | chr:19:22457244 |
| 19 rs76899249  | 22488129 C | 3.759 | 2.11E-06 | chr:19:22457244 |
| 19 rs77262019  | 22512544 A | 3.759 | 2.11E-06 | chr:19:22457244 |
| 19 rs77279152  | 22480135 G | 3.759 | 2.11E-06 | chr:19:22457244 |
| 19 rs77336446  | 22511992 A | 3.759 | 2.11E-06 | chr:19:22457244 |
| 19 rs77364752  | 22495292 T | 3.759 | 2.11E-06 | chr:19:22457244 |
| 19 rs77408464  | 22475802 T | 3.759 | 2.11E-06 | chr:19:22457244 |
| 19 rs77892334  | 22514175 C | 3.759 | 2.11E-06 | chr:19:22457244 |
| 19 rs77936818  | 22510441 T | 3.759 | 2.11E-06 | chr:19:22457244 |
| 19 rs77987565  | 22513394 T | 3.759 | 2.11E-06 | chr:19:22457244 |
| 19 rs78300029  | 22499853 G | 3.759 | 2.11E-06 | chr:19:22457244 |
| 19 rs78511685  | 22500713 T | 3.759 | 2.11E-06 | chr:19:22457244 |
| 19 rs78770026  | 22479009 T | 3.759 | 2.11E-06 | chr:19:22457244 |
| 19 rs78807780  | 22469259 T | 3.759 | 2.11E-06 | chr:19:22457244 |
| 19 rs78829247  | 22482490 C | 3.759 | 2.11E-06 | chr:19:22457244 |
| 19 rs78833242  | 22472768 G | 3.759 | 2.11E-06 | chr:19:22457244 |
| 19 rs79205652  | 22512138 C | 3.759 | 2.11E-06 | chr:19:22457244 |
| 19 rs79291199  | 22510138 G | 3.759 | 2.11E-06 | chr:19:22457244 |
| 19 rs79523019  | 22507475 G | 3.759 | 2.11E-06 | chr:19:22457244 |
| 19 rs80068572  | 22514201 G | 3.759 | 2.11E-06 | chr:19:22457244 |
| 19 rs639884    | 22104847 A | 3.068 | 2.19E-06 | chr:19:22457244 |
| 19 rs187257161 | 21977190 T | 16.52 | 2.32E-06 | chr:19:22457244 |
| 19 rs113212530 | 22490432 C | 3.734 | 2.39E-06 | chr:19:22457244 |
| 19 rs112661895 | 22480668 G | 3.73  | 2.43E-06 | chr:19:22457244 |
| 19 rs10420033  | 22611191 T | 4.295 | 2.46E-06 | chr:19:22457244 |
| 19 rs281202    | 22406331 A | 3.164 | 2.90E-06 | chr:19:22457244 |
| 19 rs62121869  | 22504698 C | 3.61  | 2.91E-06 | chr:19:22457244 |
| 19 rs111346474 | 22516745 A | 3.597 | 2.94E-06 | chr:19:22457244 |
| 19 rs2606273   | 22413654 G | 3.129 | 3.25E-06 | chr:19:22457244 |
| 19 rs2606275   | 22413622 G | 3.129 | 3.25E-06 | chr:19:22457244 |
| 19 rs281204    | 22407056 G | 3.129 | 3.25E-06 | chr:19:22457244 |
| 19 rs281205    | 22407824 T | 3.129 | 3.25E-06 | chr:19:22457244 |
| 19 rs4932966   | 22412232 A | 3.129 | 3.25E-06 | chr:19:22457244 |
| 19 rs112137052 | 22299648 T | 3.734 | 3.56E-06 | chr:19:22457244 |
| 19 rs11880424  | 22541239 C | 3.291 | 3.61E-06 | chr:19:22457244 |
| 19 rs111471672 | 22410364 G | 3.088 | 3.82E-06 | chr:19:22457244 |
| 19 rs75303808  | 22726897 C | 4.427 | 3.88E-06 | chr:19:22457244 |
| 19 rs2359817   | 22205523 A | 3.006 | 3.94E-06 | chr:19:22457244 |
| 19 rs115422672 | 22725140 G | 4.431 | 4.02E-06 | chr:19:22457244 |

|                |            |       |          |                 |
|----------------|------------|-------|----------|-----------------|
| 19 rs10423736  | 22596132 T | 2.987 | 4.03E-06 | chr:19:22457244 |
| 19 rs6511360   | 22727289 A | 4.39  | 4.31E-06 | chr:19:22457244 |
| 19 rs112913380 | 22626103 A | 3.698 | 4.60E-06 | chr:19:22457244 |
| 19 rs113719399 | 22628520 A | 3.698 | 4.60E-06 | chr:19:22457244 |
| 19 rs113768322 | 22626678 G | 3.698 | 4.60E-06 | chr:19:22457244 |
| 19 rs187858863 | 22447018 G | 164   | 4.64E-06 | chr:19:22457244 |
| 19 rs115004803 | 22103990 A | 4.398 | 4.78E-06 | chr:19:22457244 |
| 19 rs150844285 | 22411568 G | 3.072 | 4.83E-06 | chr:19:22457244 |
| 19 rs543630191 | 22504027 C | 3.635 | 4.86E-06 | chr:19:22457244 |
| 19 rs545769504 | 22504019 C | 3.635 | 4.86E-06 | chr:19:22457244 |
| 19 rs115961265 | 22629483 A | 3.674 | 5.19E-06 | chr:19:22457244 |
| 19 rs2195964   | 22538338 C | 2.961 | 5.40E-06 | chr:19:22457244 |
| 19 rs4932760   | 22540455 T | 2.961 | 5.40E-06 | chr:19:22457244 |
| 19 rs113616597 | 22621797 A | 3.654 | 5.66E-06 | chr:19:22457244 |
| 19 rs141397890 | 22504492 C | 3.58  | 6.12E-06 | chr:19:22457244 |
| 19 rs535198870 | 22504470 C | 3.58  | 6.12E-06 | chr:19:22457244 |
| 19 rs112235889 | 22623216 T | 3.62  | 6.47E-06 | chr:19:22457244 |
| 19 rs281197    | 22404604 A | 2.991 | 6.51E-06 | chr:19:22457244 |
| 19 rs73556461  | 22629854 A | 3.62  | 6.72E-06 | chr:19:22457244 |
| 19 rs463200    | 22327489 T | 2.947 | 7.07E-06 | chr:19:22457244 |
| 19 rs13382114  | 22545739 G | 2.919 | 7.09E-06 | chr:19:22457244 |
| 19 rs112485492 | 22488990 C | 3.518 | 7.26E-06 | chr:19:22457244 |
| 19 rs113454521 | 22488964 C | 3.518 | 7.26E-06 | chr:19:22457244 |
| 19 rs543507823 | 22444547 G | 4.015 | 7.83E-06 | chr:19:22457244 |
| 19 rs12608842  | 22548013 G | 2.884 | 7.85E-06 | chr:19:22457244 |
| 19 rs111616991 | 22508462 A | 3.496 | 7.92E-06 | chr:19:22457244 |
| 19 rs3867187   | 22570220 C | 3.563 | 8.38E-06 | chr:19:22457244 |
| 19 rs8107513   | 22564534 C | 2.851 | 8.78E-06 | chr:19:22457244 |
| 19 rs8107704   | 22564531 G | 2.851 | 8.78E-06 | chr:19:22457244 |
| 19 rs7508099   | 22556203 T | 2.85  | 8.80E-06 | chr:19:22457244 |
| 19 rs10402396  | 22601809 C | 2.849 | 9.07E-06 | chr:19:22457244 |
| 19 rs10406199  | 22584530 G | 2.849 | 9.07E-06 | chr:19:22457244 |
| 19 rs10407050  | 22584914 G | 2.849 | 9.07E-06 | chr:19:22457244 |
| 19 rs10408428  | 22578023 T | 2.849 | 9.07E-06 | chr:19:22457244 |
| 19 rs10414591  | 22600122 A | 2.849 | 9.07E-06 | chr:19:22457244 |
| 19 rs10417380  | 22596625 T | 2.849 | 9.07E-06 | chr:19:22457244 |
| 19 rs10420380  | 22600624 T | 2.849 | 9.07E-06 | chr:19:22457244 |
| 19 rs12151261  | 22587929 T | 2.849 | 9.07E-06 | chr:19:22457244 |
| 19 rs16999542  | 22573092 A | 2.849 | 9.07E-06 | chr:19:22457244 |
| 19 rs17391718  | 22554154 A | 2.849 | 9.07E-06 | chr:19:22457244 |
| 19 rs4024624   | 22568264 C | 2.849 | 9.07E-06 | chr:19:22457244 |
| 19 rs56027264  | 22554354 T | 2.849 | 9.07E-06 | chr:19:22457244 |
| 19 rs58374468  | 22562522 C | 2.849 | 9.07E-06 | chr:19:22457244 |

|                |            |        |          |                 |
|----------------|------------|--------|----------|-----------------|
| 19 rs7247220   | 22589489 G | 2.849  | 9.07E-06 | chr:19:22457244 |
| 19 rs7247735   | 22575488 T | 2.849  | 9.07E-06 | chr:19:22457244 |
| 19 rs7250710   | 22557231 G | 2.849  | 9.07E-06 | chr:19:22457244 |
| 19 rs7253315   | 22594439 T | 2.849  | 9.07E-06 | chr:19:22457244 |
| 19 rs7255934   | 22596865 C | 2.849  | 9.07E-06 | chr:19:22457244 |
| 19 rs75653200  | 22579503 T | 2.849  | 9.07E-06 | chr:19:22457244 |
| 19 rs8100077   | 22593112 T | 2.849  | 9.07E-06 | chr:19:22457244 |
| 19 rs8111665   | 22588559 T | 2.849  | 9.07E-06 | chr:19:22457244 |
| 19 rs2957848   | 22583747 G | 2.846  | 9.52E-06 | chr:19:22457244 |
| 19 rs7249374   | 22533465 C | 3.39   | 1.02E-05 | chr:19:22457244 |
| 19 rs11085514  | 22425837 A | 0.2628 | 1.04E-05 | chr:19:22457244 |
| 19 rs807952    | 22117758 A | 2.861  | 1.06E-05 | chr:19:22457244 |
| 19 rs807953    | 22117746 G | 2.861  | 1.06E-05 | chr:19:22457244 |
| 19 rs557388    | 22353206 A | 2.875  | 1.12E-05 | chr:19:22457244 |
| 19 rs1378915   | 22362527 C | 2.886  | 1.25E-05 | chr:19:22457244 |
| 19 rs381995    | 22361666 T | 2.886  | 1.25E-05 | chr:19:22457244 |
| 19 rs181072468 | 22590742 A | 48.91  | 1.34E-05 | chr:19:22457244 |
| 19 rs529629136 | 22584157 T | 48.91  | 1.34E-05 | chr:19:22457244 |
| 19 rs532030191 | 22568566 G | 48.91  | 1.34E-05 | chr:19:22457244 |
| 19 rs545541353 | 22467138 A | 48.91  | 1.34E-05 | chr:19:22457244 |
| 19 rs548682242 | 22625428 C | 48.91  | 1.34E-05 | chr:19:22457244 |
| 19 rs563059259 | 22584711 A | 48.91  | 1.34E-05 | chr:19:22457244 |
| 19 rs146669501 | 22427433 C | 4.367  | 1.36E-05 | chr:19:22457244 |
| 19 rs1634469   | 22101863 T | 2.768  | 1.48E-05 | chr:19:22457244 |
| 19 rs4024619   | 22586839 G | 2.797  | 1.50E-05 | chr:19:22457244 |
| 19 rs1230299   | 22624040 C | 3.384  | 1.52E-05 | chr:19:22457244 |
| 19 rs4932932   | 22203214 C | 0.3102 | 1.54E-05 | chr:19:22457244 |
| 19 rs8109237   | 22202739 A | 0.3102 | 1.54E-05 | chr:19:22457244 |
| 19 rs8100117   | 22195322 T | 0.3101 | 1.57E-05 | chr:19:22457244 |
| 19 rs4371283   | 22373810 C | 2.852  | 1.58E-05 | chr:19:22457244 |
| 19 rs8112041   | 22604565 T | 2.751  | 1.61E-05 | chr:19:22457244 |
| 19 rs201163831 | 29845670 T | 54.36  | 1.78E-44 | chr:19:29855781 |
| 19 rs200026439 | 29845668 T | 54.13  | 2.11E-44 | chr:19:29855781 |
| 19 rs62109919  | 29845666 T | 46.38  | 3.71E-43 | chr:19:29855781 |
| 19 rs62109918  | 29845664 T | 50.06  | 5.97E-43 | chr:19:29855781 |
| 19 rs12608817  | 29808821 A | 37.53  | 1.13E-42 | chr:19:29855781 |
| 19 rs12610707  | 29808907 C | 37.53  | 1.13E-42 | chr:19:29855781 |
| 19 rs12978558  | 29807938 C | 28.08  | 4.23E-42 | chr:19:29855781 |
| 19 rs200009518 | 29841360 G | 32.82  | 1.04E-40 | chr:19:29855781 |
| 19 rs200273877 | 29841554 A | 97.46  | 1.56E-39 | chr:19:29855781 |
| 19 rs201714995 | 29841536 A | 96.59  | 2.05E-39 | chr:19:29855781 |
| 19 rs10416302  | 29851854 C | 26.8   | 7.36E-39 | chr:19:29855781 |
| 19 rs7249741   | 29849562 G | 26.73  | 8.39E-39 | chr:19:29855781 |



|                |            |         |          |                 |
|----------------|------------|---------|----------|-----------------|
| 19 rs9789288   | 29806349 T | 23.71   | 3.32E-38 | chr:19:29855781 |
| 19 rs11881314  | 29830193 A | 105.9   | 3.13E-37 | chr:19:29855781 |
| 19 rs62108163  | 29828752 T | 114.8   | 3.41E-37 | chr:19:29855781 |
| 19 rs62108164  | 29828755 C | 114.3   | 3.76E-37 | chr:19:29855781 |
| 19 rs10401431  | 29829429 G | 113.7   | 4.10E-37 | chr:19:29855781 |
| 19 rs10407240  | 29829500 C | 113.7   | 4.10E-37 | chr:19:29855781 |
| 19 rs10409875  | 29827166 A | 113.7   | 4.10E-37 | chr:19:29855781 |
| 19 rs10410499  | 29827426 T | 113.7   | 4.10E-37 | chr:19:29855781 |
| 19 rs10419949  | 29828341 G | 113.7   | 4.10E-37 | chr:19:29855781 |
| 19 rs11881407  | 29829948 T | 113.7   | 4.10E-37 | chr:19:29855781 |
| 19 rs11881459  | 29830092 T | 113.7   | 4.10E-37 | chr:19:29855781 |
| 19 rs11881508  | 29830309 G | 113.7   | 4.10E-37 | chr:19:29855781 |
| 19 rs12610959  | 29827626 C | 113.7   | 4.10E-37 | chr:19:29855781 |
| 19 rs10413728  | 29833591 C | 22.92   | 4.15E-37 | chr:19:29855781 |
| 19 rs2193501   | 29834999 A | 22.92   | 4.15E-37 | chr:19:29855781 |
| 19 rs10853798  | 29821124 A | 22.6    | 7.71E-37 | chr:19:29855781 |
| 19 rs1119169   | 29850778 T | 23.2    | 5.96E-36 | chr:19:29855781 |
| 19 rs10409090  | 29823614 G | 135.7   | 1.52E-35 | chr:19:29855781 |
| 19 rs8099873   | 29808683 A | 19.1    | 2.55E-35 | chr:19:29855781 |
| 19 rs12150940  | 29840750 C | 128.3   | 2.60E-35 | chr:19:29855781 |
| 19 rs12151167  | 29840748 T | 128.3   | 2.60E-35 | chr:19:29855781 |
| 19 rs2111498   | 29822858 A | 140.2   | 5.27E-35 | chr:19:29855781 |
| 19 rs35184298  | 29830558 A | 21.54   | 1.78E-34 | chr:19:29855781 |
| 19 rs28488633  | 29823953 C | 159.7   | 1.79E-34 | chr:19:29855781 |
| 19 rs4805368   | 29828621 G | 21.58   | 1.86E-34 | chr:19:29855781 |
| 19 rs8102393   | 29820560 C | 149.5   | 2.63E-34 | chr:19:29855781 |
| 19 rs8107784   | 29824307 T | 154.6   | 4.94E-34 | chr:19:29855781 |
| 19 rs979413    | 29818635 A | 148.1   | 5.14E-34 | chr:19:29855781 |
| 19 rs28792508  | 29841216 C | 17.13   | 1.60E-33 | chr:19:29855781 |
| 19 rs200136359 | 29843211 T | 0.08887 | 3.44E-33 | chr:19:29855781 |
| 19 rs200658849 | 29843213 C | 0.08887 | 3.44E-33 | chr:19:29855781 |
| 19 rs76108985  | 29843218 T | 0.08887 | 3.44E-33 | chr:19:29855781 |
| 19 rs2216340   | 29823183 G | 159.9   | 4.30E-33 | chr:19:29855781 |
| 19 rs2865870   | 29821980 C | 174.9   | 4.75E-33 | chr:19:29855781 |
| 19 rs10417724  | 29819252 A | 174.9   | 4.94E-33 | chr:19:29855781 |
| 19 rs10404772  | 29821253 A | 174     | 5.31E-33 | chr:19:29855781 |
| 19 rs10408183  | 29823239 T | 174     | 5.31E-33 | chr:19:29855781 |
| 19 rs10423259  | 29820105 A | 174     | 5.31E-33 | chr:19:29855781 |
| 19 rs10853797  | 29821094 C | 174     | 5.31E-33 | chr:19:29855781 |
| 19 rs10853800  | 29821178 C | 174     | 5.31E-33 | chr:19:29855781 |
| 19 rs11083916  | 29821200 C | 174     | 5.31E-33 | chr:19:29855781 |
| 19 rs11083917  | 29821301 C | 174     | 5.31E-33 | chr:19:29855781 |
| 19 rs2111496   | 29822748 A | 174     | 5.31E-33 | chr:19:29855781 |

|                |            |         |          |                 |
|----------------|------------|---------|----------|-----------------|
| 19 rs2160716   | 29822600 C | 174     | 5.31E-33 | chr:19:29855781 |
| 19 rs2193497   | 29821737 A | 174     | 5.31E-33 | chr:19:29855781 |
| 19 rs2216339   | 29821569 G | 174     | 5.31E-33 | chr:19:29855781 |
| 19 rs28546871  | 29821491 C | 174     | 5.31E-33 | chr:19:29855781 |
| 19 rs2865869   | 29821979 T | 174     | 5.31E-33 | chr:19:29855781 |
| 19 rs2865871   | 29822061 T | 174     | 5.31E-33 | chr:19:29855781 |
| 19 rs5007513   | 29821553 A | 174     | 5.31E-33 | chr:19:29855781 |
| 19 rs8107378   | 29823430 C | 174     | 5.31E-33 | chr:19:29855781 |
| 19 rs8113732   | 29820742 G | 174     | 5.31E-33 | chr:19:29855781 |
| 19 rs1558363   | 29865313 C | 21.13   | 5.97E-33 | chr:19:29855781 |
| 19 rs142004081 | 29841268 A | 19.89   | 6.13E-33 | chr:19:29855781 |
| 19 rs979412    | 29818376 A | 168.7   | 6.84E-33 | chr:19:29855781 |
| 19 rs79585427  | 29843225 T | 0.09233 | 1.14E-32 | chr:19:29855781 |
| 19 rs10415948  | 29824022 G | 198.5   | 9.87E-32 | chr:19:29855781 |
| 19 rs10416173  | 29824125 T | 198.5   | 9.87E-32 | chr:19:29855781 |
| 19 rs2865875   | 29825068 A | 198.5   | 9.87E-32 | chr:19:29855781 |
| 19 rs2865876   | 29825093 A | 198.5   | 9.87E-32 | chr:19:29855781 |
| 19 rs2865877   | 29825180 C | 198.5   | 9.87E-32 | chr:19:29855781 |
| 19 rs727798    | 29811828 C | 21.43   | 1.01E-31 | chr:19:29855781 |
| 19 rs10425611  | 29813263 T | 21.46   | 1.04E-31 | chr:19:29855781 |
| 19 rs10419653  | 29812484 G | 21.35   | 1.12E-31 | chr:19:29855781 |
| 19 rs10425007  | 29812397 C | 21.35   | 1.12E-31 | chr:19:29855781 |
| 19 rs2216341   | 29812294 T | 21.35   | 1.12E-31 | chr:19:29855781 |
| 19 rs2865874   | 29825020 A | 189.3   | 1.28E-31 | chr:19:29855781 |
| 19 rs11880387  | 29810986 A | 20.92   | 1.83E-31 | chr:19:29855781 |
| 19 rs10422587  | 29869112 A | 20.06   | 2.04E-31 | chr:19:29855781 |
| 19 rs10411752  | 29826775 T | 0.09285 | 3.47E-31 | chr:19:29855781 |
| 19 rs10405460  | 29840781 A | 194.6   | 1.26E-30 | chr:19:29855781 |
| 19 rs10410829  | 29840787 T | 194.6   | 1.26E-30 | chr:19:29855781 |
| 19 rs10401757  | 29866045 T | 17.54   | 1.90E-30 | chr:19:29855781 |
| 19 rs10403590  | 29844676 C | 196.7   | 3.09E-30 | chr:19:29855781 |
| 19 rs8109855   | 29828233 A | 0.05409 | 3.23E-30 | chr:19:29855781 |
| 19 rs4591272   | 29841167 G | 0.1595  | 3.85E-30 | chr:19:29855781 |
| 19 rs10426495  | 29866098 C | 21.14   | 4.22E-30 | chr:19:29855781 |
| 19 rs1981676   | 29868320 A | 21.08   | 4.68E-30 | chr:19:29855781 |
| 19 rs28857523  | 29844100 G | 205     | 5.17E-30 | chr:19:29855781 |
| 19 rs28870995  | 29844110 C | 205     | 5.17E-30 | chr:19:29855781 |
| 19 rs200964938 | 29841291 G | 18.5    | 9.46E-30 | chr:19:29855781 |
| 19 rs34235250  | 29852282 C | 18.84   | 1.33E-29 | chr:19:29855781 |
| 19 rs1558364   | 29865345 A | 17.34   | 1.99E-29 | chr:19:29855781 |
| 19 rs2080613   | 29811982 A | 21.17   | 2.26E-29 | chr:19:29855781 |
| 19 rs1558365   | 29865746 C | 17.19   | 3.11E-29 | chr:19:29855781 |
| 19 rs1558366   | 29865847 T | 17.19   | 3.11E-29 | chr:19:29855781 |

|               |            |         |          |                 |
|---------------|------------|---------|----------|-----------------|
| 19 rs8100333  | 29866136 T | 17.19   | 3.11E-29 | chr:19:29855781 |
| 19 rs8100334  | 29866137 T | 17.19   | 3.11E-29 | chr:19:29855781 |
| 19 rs9916951  | 29865388 G | 17.19   | 3.11E-29 | chr:19:29855781 |
| 19 rs9749537  | 29844679 C | 0.04853 | 4.69E-29 | chr:19:29855781 |
| 19 rs28573811 | 29867469 T | 21.16   | 6.26E-29 | chr:19:29855781 |
| 19 rs74838486 | 29842509 G | 0.02811 | 6.35E-29 | chr:19:29855781 |
| 19 rs758770   | 29870136 G | 19.07   | 7.90E-29 | chr:19:29855781 |
| 19 rs12973626 | 29867364 C | 20.89   | 8.26E-29 | chr:19:29855781 |
| 19 rs12979587 | 29867327 A | 20.89   | 8.26E-29 | chr:19:29855781 |
| 19 rs12980588 | 29867736 A | 20.89   | 8.26E-29 | chr:19:29855781 |
| 19 rs12981862 | 29867527 G | 20.89   | 8.26E-29 | chr:19:29855781 |
| 19 rs12981877 | 29867555 T | 20.89   | 8.26E-29 | chr:19:29855781 |
| 19 rs1981675  | 29868188 T | 20.89   | 8.26E-29 | chr:19:29855781 |
| 19 rs1981677  | 29868499 A | 20.89   | 8.26E-29 | chr:19:29855781 |
| 19 rs4271695  | 29866742 A | 20.89   | 8.26E-29 | chr:19:29855781 |
| 19 rs4398199  | 29866833 C | 20.89   | 8.26E-29 | chr:19:29855781 |
| 19 rs4558517  | 29866993 T | 20.89   | 8.26E-29 | chr:19:29855781 |
| 19 rs4605284  | 29866673 T | 20.89   | 8.26E-29 | chr:19:29855781 |
| 19 rs8103925  | 29866287 G | 20.89   | 8.26E-29 | chr:19:29855781 |
| 19 rs35900872 | 29871153 A | 18.65   | 8.37E-29 | chr:19:29855781 |
| 19 rs4605285  | 29866853 G | 20.83   | 9.41E-29 | chr:19:29855781 |
| 19 rs10422614 | 29835503 G | 247.8   | 1.04E-28 | chr:19:29855781 |
| 19 rs10422144 | 29868886 A | 20.72   | 1.20E-28 | chr:19:29855781 |
| 19 rs17624933 | 29867883 T | 20.39   | 1.39E-28 | chr:19:29855781 |
| 19 rs10408748 | 29837390 T | 17.99   | 1.79E-28 | chr:19:29855781 |
| 19 rs2193500  | 29834892 G | 17.99   | 1.79E-28 | chr:19:29855781 |
| 19 rs10411884 | 29814875 T | 19.38   | 2.02E-28 | chr:19:29855781 |
| 19 rs10411489 | 29846018 C | 16.16   | 2.04E-28 | chr:19:29855781 |
| 19 rs13343404 | 29826240 A | 17.92   | 2.09E-28 | chr:19:29855781 |
| 19 rs10419817 | 29828620 T | 15.25   | 2.22E-28 | chr:19:29855781 |
| 19 rs10416313 | 29831461 G | 228.4   | 2.33E-28 | chr:19:29855781 |
| 19 rs13345888 | 29842781 C | 18.65   | 2.76E-28 | chr:19:29855781 |
| 19 rs28581734 | 29813167 T | 19.01   | 3.14E-28 | chr:19:29855781 |
| 19 rs10405922 | 29813264 C | 18.81   | 5.10E-28 | chr:19:29855781 |
| 19 rs10424492 | 29813431 A | 18.81   | 5.10E-28 | chr:19:29855781 |
| 19 rs17773647 | 29813079 G | 18.81   | 5.10E-28 | chr:19:29855781 |
| 19 rs8102048  | 29814240 A | 18.81   | 5.10E-28 | chr:19:29855781 |
| 19 rs8113604  | 29813727 G | 18.81   | 5.10E-28 | chr:19:29855781 |
| 19 rs10418201 | 29810677 G | 18.79   | 5.13E-28 | chr:19:29855781 |
| 19 rs2111497  | 29822857 T | 0.04176 | 5.17E-28 | chr:19:29855781 |
| 19 rs10423930 | 29810687 G | 18.67   | 5.42E-28 | chr:19:29855781 |
| 19 rs74181477 | 29840703 A | 232.9   | 6.40E-28 | chr:19:29855781 |
| 19 rs11880160 | 29810859 A | 18.52   | 8.25E-28 | chr:19:29855781 |

|                |            |         |          |                 |
|----------------|------------|---------|----------|-----------------|
| 19 rs8111179   | 29809968 C | 18.52   | 8.25E-28 | chr:19:29855781 |
| 19 rs10408576  | 29818131 A | 18.61   | 9.40E-28 | chr:19:29855781 |
| 19 rs10426484  | 29866090 A | 19.65   | 9.51E-28 | chr:19:29855781 |
| 19 rs10424375  | 29839089 A | 18.54   | 1.04E-27 | chr:19:29855781 |
| 19 rs11879307  | 29815370 A | 18.54   | 1.04E-27 | chr:19:29855781 |
| 19 rs2193499   | 29821859 A | 18.54   | 1.04E-27 | chr:19:29855781 |
| 19 rs7251831   | 29849926 G | 0.03814 | 1.69E-27 | chr:19:29855781 |
| 19 rs10410330  | 29827372 C | 18.16   | 1.79E-27 | chr:19:29855781 |
| 19 rs10413814  | 29859044 A | 17.95   | 2.26E-27 | chr:19:29855781 |
| 19 rs10413925  | 29851859 T | 17.95   | 2.26E-27 | chr:19:29855781 |
| 19 rs2865883   | 29837946 C | 0.03885 | 2.38E-27 | chr:19:29855781 |
| 19 rs1558362   | 29865141 T | 16.13   | 2.39E-27 | chr:19:29855781 |
| 19 rs7253279   | 29864696 A | 16.13   | 2.39E-27 | chr:19:29855781 |
| 19 rs13344183  | 29841038 A | 0.03888 | 2.44E-27 | chr:19:29855781 |
| 19 rs144395360 | 29843445 C | 0.03902 | 2.72E-27 | chr:19:29855781 |
| 19 rs8108111   | 29809851 G | 16      | 4.95E-27 | chr:19:29855781 |
| 19 rs6417157   | 29858422 C | 6.261   | 5.21E-27 | chr:19:29855781 |
| 19 rs12979074  | 29867103 A | 19.87   | 6.48E-27 | chr:19:29855781 |
| 19 rs10407026  | 29848625 T | 0.03485 | 8.82E-27 | chr:19:29855781 |
| 19 rs2159564   | 29851751 G | 0.03485 | 8.82E-27 | chr:19:29855781 |
| 19 rs2159565   | 29847643 G | 0.03485 | 8.82E-27 | chr:19:29855781 |
| 19 rs4804875   | 29853497 A | 0.03485 | 8.82E-27 | chr:19:29855781 |
| 19 rs4805373   | 29853498 A | 0.03485 | 8.82E-27 | chr:19:29855781 |
| 19 rs7252072   | 29855010 A | 0.03485 | 8.82E-27 | chr:19:29855781 |
| 19 rs10421910  | 29868808 A | 21.02   | 1.14E-26 | chr:19:29855781 |
| 19 rs8103862   | 29830747 C | 0.03553 | 1.15E-26 | chr:19:29855781 |
| 19 rs10404828  | 29826537 C | 0.03571 | 1.26E-26 | chr:19:29855781 |
| 19 rs10411272  | 29826524 T | 0.03571 | 1.26E-26 | chr:19:29855781 |
| 19 rs2865878   | 29825358 T | 0.03571 | 1.26E-26 | chr:19:29855781 |
| 19 rs8111162   | 29824369 T | 0.03571 | 1.26E-26 | chr:19:29855781 |
| 19 rs78286516  | 29843274 G | 0.03566 | 1.31E-26 | chr:19:29855781 |
| 19 rs78902520  | 29843271 T | 0.03566 | 1.31E-26 | chr:19:29855781 |
| 19 rs10853799  | 29821146 C | 0.0357  | 1.34E-26 | chr:19:29855781 |
| 19 rs2193498   | 29821753 C | 0.0357  | 1.34E-26 | chr:19:29855781 |
| 19 rs2865872   | 29822103 T | 0.0357  | 1.34E-26 | chr:19:29855781 |
| 19 rs2903113   | 29821703 C | 0.0357  | 1.34E-26 | chr:19:29855781 |
| 19 rs8113496   | 29820529 A | 0.0357  | 1.34E-26 | chr:19:29855781 |
| 19 rs10407922  | 29833571 A | 0.0358  | 1.47E-26 | chr:19:29855781 |
| 19 rs10421823  | 29835487 C | 0.0358  | 1.47E-26 | chr:19:29855781 |
| 19 rs8101272   | 29840005 G | 0.0358  | 1.47E-26 | chr:19:29855781 |
| 19 rs8105692   | 29840119 T | 0.0358  | 1.47E-26 | chr:19:29855781 |
| 19 rs8112567   | 29838763 T | 0.0358  | 1.47E-26 | chr:19:29855781 |
| 19 rs9749055   | 29845247 A | 0.0358  | 1.47E-26 | chr:19:29855781 |

|                |            |         |          |                 |
|----------------|------------|---------|----------|-----------------|
| 19 rs7258038   | 29844001 A | 0.03576 | 1.53E-26 | chr:19:29855781 |
| 19 rs12978201  | 29805534 G | 14.36   | 3.09E-26 | chr:19:29855781 |
| 19 rs150522295 | 29841311 G | 4.564   | 3.85E-26 | chr:19:29855781 |
| 19 rs10415631  | 29810562 C | 16.7    | 4.16E-26 | chr:19:29855781 |
| 19 rs10412642  | 29871720 A | 17.94   | 4.40E-26 | chr:19:29855781 |
| 19 rs10420835  | 29856760 C | 0.03161 | 5.64E-26 | chr:19:29855781 |
| 19 rs62108213  | 29830870 A | 293     | 1.92E-25 | chr:19:29855781 |
| 19 rs62108214  | 29830872 C | 293     | 1.92E-25 | chr:19:29855781 |
| 19 rs62108215  | 29830873 T | 293     | 1.92E-25 | chr:19:29855781 |
| 19 rs7260198   | 29813253 G | 0.1685  | 1.19E-24 | chr:19:29855781 |
| 19 rs72623834  | 29842510 A | 135.1   | 1.57E-24 | chr:19:29855781 |
| 19 rs11878559  | 29814222 A | 0.1703  | 2.36E-24 | chr:19:29855781 |
| 19 rs58676754  | 29810034 C | 0.1707  | 2.68E-24 | chr:19:29855781 |
| 19 rs73536008  | 29814409 A | 0.171   | 3.63E-24 | chr:19:29855781 |
| 19 rs28888132  | 29845104 T | 0.1757  | 9.01E-24 | chr:19:29855781 |
| 19 rs10402522  | 29861084 A | 4.838   | 4.18E-23 | chr:19:29855781 |
| 19 rs10403684  | 29860887 T | 4.838   | 4.18E-23 | chr:19:29855781 |
| 19 rs10404520  | 29860937 G | 4.838   | 4.18E-23 | chr:19:29855781 |
| 19 rs10404941  | 29861103 C | 4.838   | 4.18E-23 | chr:19:29855781 |
| 19 rs10422443  | 29860582 A | 4.838   | 4.18E-23 | chr:19:29855781 |
| 19 rs10424790  | 29860630 G | 4.838   | 4.18E-23 | chr:19:29855781 |
| 19 rs11880983  | 29859865 C | 4.838   | 4.18E-23 | chr:19:29855781 |
| 19 rs11882773  | 29859829 A | 4.838   | 4.18E-23 | chr:19:29855781 |
| 19 rs6509385   | 29861469 C | 4.838   | 4.18E-23 | chr:19:29855781 |
| 19 rs11880239  | 29816464 T | 0.1925  | 4.27E-23 | chr:19:29855781 |
| 19 rs16962709  | 29817187 T | 0.1925  | 4.27E-23 | chr:19:29855781 |
| 19 rs6509388   | 29861882 G | 4.769   | 6.42E-23 | chr:19:29855781 |
| 19 rs12709912  | 29859443 C | 4.753   | 8.35E-23 | chr:19:29855781 |
| 19 rs13344917  | 29859503 C | 4.722   | 9.87E-23 | chr:19:29855781 |
| 19 rs4805382   | 29873748 A | 4.915   | 2.42E-22 | chr:19:29855781 |
| 19 rs10405131  | 29845482 G | 415.4   | 2.56E-22 | chr:19:29855781 |
| 19 rs9797726   | 29842789 T | 404.6   | 2.88E-22 | chr:19:29855781 |
| 19 rs7258057   | 29844039 G | 413.5   | 3.13E-22 | chr:19:29855781 |
| 19 rs35379433  | 29834698 A | 393.2   | 3.87E-22 | chr:19:29855781 |
| 19 rs10405226  | 29840658 A | 388.9   | 4.13E-22 | chr:19:29855781 |
| 19 rs740880    | 29878436 C | 0.2346  | 4.19E-22 | chr:19:29855781 |
| 19 rs10500238  | 29818674 G | 0.2039  | 4.91E-22 | chr:19:29855781 |
| 19 rs10405212  | 29832150 G | 364.3   | 1.15E-21 | chr:19:29855781 |
| 19 rs150191335 | 29843058 T | 14.71   | 1.55E-21 | chr:19:29855781 |
| 19 rs12610720  | 29808999 C | 13.54   | 2.49E-21 | chr:19:29855781 |
| 19 rs7508357   | 29841738 C | 13.68   | 2.76E-21 | chr:19:29855781 |
| 19 rs67987964  | 29845533 G | 13.56   | 3.30E-21 | chr:19:29855781 |
| 19 rs62104320  | 29866335 A | 0.1928  | 4.71E-21 | chr:19:29855781 |

|                           |            |        |          |                 |
|---------------------------|------------|--------|----------|-----------------|
| 19 rs10406127             | 29826758 T | 13.24  | 5.18E-21 | chr:19:29855781 |
| 19 rs1122022              | 29825214 A | 13.24  | 5.18E-21 | chr:19:29855781 |
| 19 rs10500239             | 29829980 C | 13.13  | 5.19E-21 | chr:19:29855781 |
| 19 rs1558864              | 29823261 T | 0.193  | 6.25E-21 | chr:19:29855781 |
| 19 rs35308361             | 29830552 G | 0.193  | 6.25E-21 | chr:19:29855781 |
| 19 rs929691               | 29818042 A | 0.193  | 6.25E-21 | chr:19:29855781 |
| 19 rs7249123              | 29870685 A | 0.1947 | 6.67E-21 | chr:19:29855781 |
| 19 rs2903115              | 29837927 C | 0.1926 | 7.17E-21 | chr:19:29855781 |
| 19 rs10404303             | 29860663 T | 0.1937 | 7.41E-21 | chr:19:29855781 |
| 19 rs10421211             | 29852874 G | 0.1937 | 7.41E-21 | chr:19:29855781 |
| 19 rs4804876              | 29853605 G | 0.1937 | 7.41E-21 | chr:19:29855781 |
| 19 rs61631634             | 29852485 A | 0.1937 | 7.41E-21 | chr:19:29855781 |
| 19 rs7248644              | 29856939 T | 0.1937 | 7.41E-21 | chr:19:29855781 |
| 19 rs7252679              | 29863745 T | 0.1937 | 7.41E-21 | chr:19:29855781 |
| 19 rs7258342              | 29859947 A | 0.1937 | 7.41E-21 | chr:19:29855781 |
| 19 rs7257439              | 29816242 C | 0.194  | 9.26E-21 | chr:19:29855781 |
| 19 rs6509383              | 29857637 T | 0.1955 | 1.01E-20 | chr:19:29855781 |
| 19 rs10420966             | 29816663 G | 0.1964 | 1.28E-20 | chr:19:29855781 |
| 19 rs8107741              | 29858602 T | 0.1999 | 1.81E-20 | chr:19:29855781 |
| 19 rs8107456              | 29810347 G | 0.2    | 1.82E-20 | chr:19:29855781 |
| 19 rs7351109              | 29816574 A | 0.1974 | 2.06E-20 | chr:19:29855781 |
| 19 rs7249507              | 29858152 T | 0.191  | 3.85E-20 | chr:19:29855781 |
| 19 rs75470832             | 29846159 G | 0.1918 | 4.46E-20 | chr:19:29855781 |
| 19 rs7254145              | 29851810 G | 10.23  | 6.75E-20 | chr:19:29855781 |
| 19 rs8107989              | 29867796 C | 0.1981 | 7.02E-20 | chr:19:29855781 |
| 19 rs7255472              | 29811968 A | 0.2086 | 8.26E-20 | chr:19:29855781 |
| 19 rs73027078;rs531011943 | 29845662 C | 0.2002 | 9.32E-20 | chr:19:29855781 |
| 19 rs4805374              | 29862430 A | 0.2087 | 9.50E-20 | chr:19:29855781 |
| 19 rs73925542             | 29832199 T | 0.1952 | 1.03E-19 | chr:19:29855781 |
| 19 rs8100899              | 29808524 A | 0.2115 | 1.09E-19 | chr:19:29855781 |
| 19 rs10413763             | 29873400 A | 13.34  | 1.26E-19 | chr:19:29855781 |
| 19 rs73925543             | 29833506 C | 0.194  | 1.86E-19 | chr:19:29855781 |
| 19 rs73925544             | 29839016 G | 0.1991 | 2.05E-19 | chr:19:29855781 |
| 19 rs75568982             | 29819020 G | 0.1967 | 2.10E-19 | chr:19:29855781 |
| 19 rs77954688             | 29845223 T | 0.197  | 2.12E-19 | chr:19:29855781 |
| 19 rs16962671             | 29810905 T | 0.2016 | 3.07E-19 | chr:19:29855781 |
| 19 rs73925540             | 29818545 T | 0.2017 | 3.11E-19 | chr:19:29855781 |
| 19 rs10404884             | 29839279 T | 0.2064 | 3.88E-19 | chr:19:29855781 |
| 19 rs73925527             | 29804447 A | 0.197  | 4.11E-19 | chr:19:29855781 |
| 19 rs74604731             | 29845371 T | 0.2007 | 5.10E-19 | chr:19:29855781 |
| 19 rs7253662              | 29815722 C | 0.2236 | 1.12E-18 | chr:19:29855781 |
| 19 rs7258463              | 29869545 A | 0.1979 | 1.99E-18 | chr:19:29855781 |
| 19 rs56792186             | 29862953 T | 0.2044 | 2.42E-18 | chr:19:29855781 |

|                |            |        |          |                 |
|----------------|------------|--------|----------|-----------------|
| 19 rs1860573   | 29879749 A | 7.55   | 2.98E-18 | chr:19:29855781 |
| 19 rs12327590  | 29879321 T | 0.2082 | 4.23E-18 | chr:19:29855781 |
| 19 rs16962804  | 29876726 T | 0.2574 | 4.53E-18 | chr:19:29855781 |
| 19 rs2160717   | 29822729 T | 3.803  | 5.27E-18 | chr:19:29855781 |
| 19 rs17773922  | 29830629 C | 605.6  | 5.92E-18 | chr:19:29855781 |
| 19 rs111486428 | 29842638 T | 605.5  | 5.97E-18 | chr:19:29855781 |
| 19 rs140915866 | 29843043 G | 605.5  | 5.97E-18 | chr:19:29855781 |
| 19 rs147519792 | 29843490 G | 605.5  | 5.97E-18 | chr:19:29855781 |
| 19 rs148091885 | 29842847 A | 605.5  | 5.97E-18 | chr:19:29855781 |
| 19 rs2865888   | 29845818 C | 605.5  | 5.97E-18 | chr:19:29855781 |
| 19 rs62109915  | 29843088 T | 605.5  | 5.97E-18 | chr:19:29855781 |
| 19 rs7507405   | 29841956 C | 605.5  | 5.97E-18 | chr:19:29855781 |
| 19 rs7507511   | 29842044 T | 605.5  | 5.97E-18 | chr:19:29855781 |
| 19 rs7507537   | 29841906 G | 605.5  | 5.97E-18 | chr:19:29855781 |
| 19 rs7507869   | 29841938 C | 605.5  | 5.97E-18 | chr:19:29855781 |
| 19 rs9748962   | 29844809 A | 605.5  | 5.97E-18 | chr:19:29855781 |
| 19 rs10403475  | 29826676 C | 602.4  | 6.24E-18 | chr:19:29855781 |
| 19 rs10405069  | 29833324 A | 602.4  | 6.24E-18 | chr:19:29855781 |
| 19 rs10405105  | 29833373 T | 602.4  | 6.24E-18 | chr:19:29855781 |
| 19 rs10405177  | 29840592 C | 602.4  | 6.24E-18 | chr:19:29855781 |
| 19 rs10405550  | 29839527 C | 602.4  | 6.24E-18 | chr:19:29855781 |
| 19 rs10406530  | 29832689 C | 602.4  | 6.24E-18 | chr:19:29855781 |
| 19 rs10406567  | 29832755 C | 602.4  | 6.24E-18 | chr:19:29855781 |
| 19 rs10406707  | 29840277 C | 602.4  | 6.24E-18 | chr:19:29855781 |
| 19 rs10406756  | 29840591 T | 602.4  | 6.24E-18 | chr:19:29855781 |
| 19 rs10407234  | 29833261 C | 602.4  | 6.24E-18 | chr:19:29855781 |
| 19 rs10409965  | 29837251 T | 602.4  | 6.24E-18 | chr:19:29855781 |
| 19 rs10411073  | 29826427 C | 602.4  | 6.24E-18 | chr:19:29855781 |
| 19 rs10413525  | 29833498 C | 602.4  | 6.24E-18 | chr:19:29855781 |
| 19 rs10415713  | 29831541 T | 602.4  | 6.24E-18 | chr:19:29855781 |
| 19 rs10416004  | 29831681 T | 602.4  | 6.24E-18 | chr:19:29855781 |
| 19 rs10416725  | 29831649 C | 602.4  | 6.24E-18 | chr:19:29855781 |
| 19 rs10422084  | 29835604 G | 602.4  | 6.24E-18 | chr:19:29855781 |
| 19 rs10423486  | 29839393 A | 602.4  | 6.24E-18 | chr:19:29855781 |
| 19 rs10423994  | 29839675 A | 602.4  | 6.24E-18 | chr:19:29855781 |
| 19 rs10424081  | 29832472 A | 602.4  | 6.24E-18 | chr:19:29855781 |
| 19 rs10424145  | 29839694 T | 602.4  | 6.24E-18 | chr:19:29855781 |
| 19 rs10425325  | 29839190 C | 602.4  | 6.24E-18 | chr:19:29855781 |
| 19 rs10425546  | 29832398 T | 602.4  | 6.24E-18 | chr:19:29855781 |
| 19 rs10425705  | 29839737 T | 602.4  | 6.24E-18 | chr:19:29855781 |
| 19 rs10425993  | 29832603 G | 602.4  | 6.24E-18 | chr:19:29855781 |
| 19 rs111393122 | 29839832 C | 602.4  | 6.24E-18 | chr:19:29855781 |
| 19 rs13346790  | 29825511 A | 602.4  | 6.24E-18 | chr:19:29855781 |

|                |            |        |          |                 |
|----------------|------------|--------|----------|-----------------|
| 19 rs2865884   | 29837991 C | 602.4  | 6.24E-18 | chr:19:29855781 |
| 19 rs35615835  | 29827061 A | 602.4  | 6.24E-18 | chr:19:29855781 |
| 19 rs8103034   | 29830764 A | 602.4  | 6.24E-18 | chr:19:29855781 |
| 19 rs8106354   | 29831100 A | 602.4  | 6.24E-18 | chr:19:29855781 |
| 19 rs8108995   | 29838275 G | 602.4  | 6.24E-18 | chr:19:29855781 |
| 19 rs8109315   | 29838529 C | 602.4  | 6.24E-18 | chr:19:29855781 |
| 19 rs8112403   | 29838791 G | 602.4  | 6.24E-18 | chr:19:29855781 |
| 19 rs10410622  | 29826229 G | 599.1  | 6.60E-18 | chr:19:29855781 |
| 19 rs13345551  | 29826197 G | 599.1  | 6.60E-18 | chr:19:29855781 |
| 19 rs10406849  | 29833391 A | 602.5  | 6.99E-18 | chr:19:29855781 |
| 19 rs10402726  | 29826292 T | 587.4  | 8.22E-18 | chr:19:29855781 |
| 19 rs10405159  | 29826311 G | 587.4  | 8.22E-18 | chr:19:29855781 |
| 19 rs10404259  | 29840188 C | 575.2  | 8.77E-18 | chr:19:29855781 |
| 19 rs10410585  | 29837528 A | 575.9  | 8.86E-18 | chr:19:29855781 |
| 19 rs8113733   | 29807306 T | 0.229  | 9.09E-18 | chr:19:29855781 |
| 19 rs73925556  | 29872773 A | 0.2142 | 9.57E-18 | chr:19:29855781 |
| 19 rs7249606   | 29866089 T | 0.2783 | 9.72E-18 | chr:19:29855781 |
| 19 rs1981678   | 29868519 A | 0.2321 | 1.02E-17 | chr:19:29855781 |
| 19 rs35349289  | 29830485 G | 559.5  | 1.04E-17 | chr:19:29855781 |
| 19 rs8107043   | 29864213 A | 0.2804 | 1.25E-17 | chr:19:29855781 |
| 19 rs7253602   | 29864638 A | 0.2808 | 1.45E-17 | chr:19:29855781 |
| 19 rs10403689  | 29862797 A | 3.631  | 1.48E-17 | chr:19:29855781 |
| 19 rs10423850  | 29862444 A | 3.631  | 1.48E-17 | chr:19:29855781 |
| 19 rs11883246  | 29862074 G | 3.631  | 1.48E-17 | chr:19:29855781 |
| 19 rs56048673  | 29862967 A | 3.631  | 1.48E-17 | chr:19:29855781 |
| 19 rs6509386   | 29861649 T | 3.631  | 1.48E-17 | chr:19:29855781 |
| 19 rs6509387   | 29861707 A | 3.631  | 1.48E-17 | chr:19:29855781 |
| 19 rs6509389   | 29861958 G | 3.631  | 1.48E-17 | chr:19:29855781 |
| 19 rs6509390   | 29862034 T | 3.631  | 1.48E-17 | chr:19:29855781 |
| 19 rs7246620   | 29861360 C | 3.631  | 1.48E-17 | chr:19:29855781 |
| 19 rs7248809   | 29863240 G | 3.631  | 1.48E-17 | chr:19:29855781 |
| 19 rs7248884   | 29863662 T | 3.631  | 1.48E-17 | chr:19:29855781 |
| 19 rs7252555   | 29863630 C | 3.631  | 1.48E-17 | chr:19:29855781 |
| 19 rs7258498   | 29860387 T | 3.631  | 1.48E-17 | chr:19:29855781 |
| 19 rs7259512   | 29862045 G | 3.631  | 1.48E-17 | chr:19:29855781 |
| 19 rs7507344   | 29863087 A | 3.631  | 1.48E-17 | chr:19:29855781 |
| 19 rs7507798   | 29863083 C | 3.631  | 1.48E-17 | chr:19:29855781 |
| 19 rs8107249   | 29834648 G | 549.4  | 1.61E-17 | chr:19:29855781 |
| 19 rs10404170  | 29863044 C | 3.63   | 1.66E-17 | chr:19:29855781 |
| 19 rs4804878   | 29873579 A | 3.447  | 3.83E-17 | chr:19:29855781 |
| 19 rs57598720  | 29911930 G | 0.3001 | 5.75E-17 | chr:19:29855781 |
| 19 rs10420190  | 29873997 A | 5.789  | 7.91E-17 | chr:19:29855781 |
| 19 rs111546324 | 29885636 A | 0.2472 | 2.21E-16 | chr:19:29855781 |



|                |            |        |          |                 |
|----------------|------------|--------|----------|-----------------|
| 19 rs34786514  | 29878333 G | 11.94  | 2.70E-16 | chr:19:29855781 |
| 19 rs2865896   | 29872800 A | 0.3041 | 5.26E-16 | chr:19:29855781 |
| 19 rs4805381   | 29872627 T | 0.3141 | 1.79E-15 | chr:19:29855781 |
| 19 rs735285    | 29879116 G | 0.3411 | 3.77E-15 | chr:19:29855781 |
| 19 rs1990390   | 29859020 T | 0.2719 | 4.24E-15 | chr:19:29855781 |
| 19 rs58075202  | 29883248 A | 0.2523 | 8.70E-15 | chr:19:29855781 |
| 19 rs7258087   | 29869254 C | 0.2903 | 4.86E-14 | chr:19:29855781 |
| 19 rs8103504   | 29808196 T | 0.3165 | 4.93E-14 | chr:19:29855781 |
| 19 rs11882038  | 29894089 A | 0.2932 | 1.49E-13 | chr:19:29855781 |
| 19 rs10407706  | 29799613 T | 0.2739 | 1.60E-13 | chr:19:29855781 |
| 19 rs10407716  | 29799624 T | 0.2739 | 1.60E-13 | chr:19:29855781 |
| 19 rs2012095   | 29801230 A | 0.2738 | 1.95E-13 | chr:19:29855781 |
| 19 rs16962834  | 29888216 C | 0.305  | 2.27E-13 | chr:19:29855781 |
| 19 rs8102388   | 29863179 T | 0.2989 | 3.74E-13 | chr:19:29855781 |
| 19 rs8109517   | 29863857 A | 0.2989 | 3.74E-13 | chr:19:29855781 |
| 19 rs60913159  | 29887808 C | 0.3064 | 3.93E-13 | chr:19:29855781 |
| 19 rs7249485   | 29865998 C | 0.3069 | 7.61E-13 | chr:19:29855781 |
| 19 rs62109922  | 29852078 T | 1633   | 1.27E-12 | chr:19:29855781 |
| 19 rs4805366   | 29799264 A | 0.2893 | 1.38E-12 | chr:19:29855781 |
| 19 rs8105295   | 29846290 G | 1307   | 3.15E-12 | chr:19:29855781 |
| 19 rs8108803   | 29846308 G | 1307   | 3.15E-12 | chr:19:29855781 |
| 19 rs78869484  | 29876215 A | 0.2035 | 3.46E-12 | chr:19:29855781 |
| 19 rs74929396  | 29835148 T | 0.2199 | 4.70E-12 | chr:19:29855781 |
| 19 rs62104321  | 29866339 A | 0.2996 | 5.72E-12 | chr:19:29855781 |
| 19 rs12691091  | 29859430 T | 0.3807 | 6.25E-12 | chr:19:29855781 |
| 19 rs61584558  | 29839440 A | 0.3503 | 1.36E-11 | chr:19:29855781 |
| 19 rs114213191 | 29819476 G | 0.2314 | 1.38E-11 | chr:19:29855781 |
| 19 rs112652178 | 29839576 T | 7.272  | 1.71E-11 | chr:19:29855781 |
| 19 rs57627371  | 29825582 A | 7.272  | 1.72E-11 | chr:19:29855781 |
| 19 rs16962720  | 29822546 G | 7.219  | 2.11E-11 | chr:19:29855781 |
| 19 rs57891947  | 29835004 G | 7.219  | 2.11E-11 | chr:19:29855781 |
| 19 rs8103202   | 29823667 A | 7.219  | 2.11E-11 | chr:19:29855781 |
| 19 rs7254046   | 29910750 C | 0.4167 | 2.42E-11 | chr:19:29855781 |
| 19 rs7259598   | 29886029 C | 3.101  | 2.97E-11 | chr:19:29855781 |
| 19 rs61072957  | 29889358 T | 0.2546 | 4.18E-11 | chr:19:29855781 |
| 19 rs73539004  | 29890512 T | 0.404  | 4.19E-11 | chr:19:29855781 |
| 19 rs8107175   | 29864319 G | 0.3477 | 4.42E-11 | chr:19:29855781 |
| 19 rs892074    | 29912414 G | 0.4262 | 5.48E-11 | chr:19:29855781 |
| 19 rs957166    | 29882508 T | 4.157  | 8.99E-11 | chr:19:29855781 |
| 19 rs55637461  | 29890797 A | 0.4153 | 1.14E-10 | chr:19:29855781 |
| 19 rs11880044  | 29894462 C | 0.3683 | 1.43E-10 | chr:19:29855781 |
| 19 rs112201099 | 29831256 G | 6.793  | 1.57E-10 | chr:19:29855781 |
| 19 rs77053698  | 29834175 G | 6.793  | 1.57E-10 | chr:19:29855781 |

|                |            |        |          |                 |
|----------------|------------|--------|----------|-----------------|
| 19 rs78222687  | 29826354 G | 6.793  | 1.57E-10 | chr:19:29855781 |
| 19 rs8113093   | 29820574 G | 6.793  | 1.57E-10 | chr:19:29855781 |
| 19 rs9749184   | 29845316 C | 6.793  | 1.57E-10 | chr:19:29855781 |
| 19 rs36000040  | 29886930 A | 4.585  | 1.64E-10 | chr:19:29855781 |
| 19 rs35698420  | 29893992 G | 0.3701 | 2.02E-10 | chr:19:29855781 |
| 19 rs12984061  | 29885279 A | 2.975  | 2.67E-10 | chr:19:29855781 |
| 19 rs4805387   | 29885553 C | 2.975  | 2.67E-10 | chr:19:29855781 |
| 19 rs4805389   | 29885643 C | 2.975  | 2.67E-10 | chr:19:29855781 |
| 19 rs4805390   | 29885676 G | 2.975  | 2.67E-10 | chr:19:29855781 |
| 19 rs4805391   | 29885783 C | 2.975  | 2.67E-10 | chr:19:29855781 |
| 19 rs35788644  | 29886919 G | 5.082  | 3.36E-10 | chr:19:29855781 |
| 19 rs7259050   | 29799035 A | 2.314  | 3.46E-10 | chr:19:29855781 |
| 19 rs16962711  | 29817497 C | 6.186  | 3.57E-10 | chr:19:29855781 |
| 19 rs62109920  | 29846656 G | 6.296  | 4.81E-10 | chr:19:29855781 |
| 19 rs4592772   | 29825009 T | 5.617  | 5.15E-10 | chr:19:29855781 |
| 19 rs10401849  | 29860785 G | 0.4245 | 7.73E-10 | chr:19:29855781 |
| 19 rs1990391   | 29859164 C | 0.4245 | 7.73E-10 | chr:19:29855781 |
| 19 rs73925525  | 29800294 A | 0.2642 | 9.89E-10 | chr:19:29855781 |
| 19 rs73537194  | 29888691 T | 0.4387 | 1.02E-09 | chr:19:29855781 |
| 19 rs10409760  | 29927476 T | 2.744  | 1.10E-09 | chr:19:29855781 |
| 19 rs10408364  | 29927536 A | 2.743  | 1.20E-09 | chr:19:29855781 |
| 19 rs727741    | 29889308 C | 0.4401 | 1.39E-09 | chr:19:29855781 |
| 19 rs2011890   | 29801011 A | 2.79   | 1.42E-09 | chr:19:29855781 |
| 19 rs73018534  | 29925518 A | 0.2074 | 2.43E-09 | chr:19:29855781 |
| 19 rs111433330 | 29887508 C | 4.027  | 2.88E-09 | chr:19:29855781 |
| 19 rs34023514  | 29887063 G | 4.027  | 2.88E-09 | chr:19:29855781 |
| 19 rs34371256  | 29886875 G | 4.027  | 2.88E-09 | chr:19:29855781 |
| 19 rs34859114  | 29887178 T | 4.027  | 2.88E-09 | chr:19:29855781 |
| 19 rs35116778  | 29887181 T | 4.027  | 2.88E-09 | chr:19:29855781 |
| 19 rs36004537  | 29886979 C | 4.027  | 2.88E-09 | chr:19:29855781 |
| 19 rs74998164  | 29887409 A | 4.027  | 2.88E-09 | chr:19:29855781 |
| 19 rs79593711  | 29886856 G | 4.027  | 2.88E-09 | chr:19:29855781 |
| 19 rs111387261 | 29851256 T | 6.61   | 2.92E-09 | chr:19:29855781 |
| 19 rs58278243  | 29848560 A | 6.61   | 2.92E-09 | chr:19:29855781 |
| 19 rs58498480  | 29857056 C | 6.61   | 2.92E-09 | chr:19:29855781 |
| 19 rs75402952  | 29850166 T | 6.61   | 2.92E-09 | chr:19:29855781 |
| 19 rs58096217  | 29883779 T | 4.149  | 4.54E-09 | chr:19:29855781 |
| 19 rs16962829  | 29886534 A | 4.073  | 4.75E-09 | chr:19:29855781 |
| 19 rs59708874  | 29884080 T | 4.109  | 5.85E-09 | chr:19:29855781 |
| 19 rs114338054 | 29884514 T | 4.105  | 5.92E-09 | chr:19:29855781 |
| 19 rs115868467 | 29884511 A | 4.105  | 5.92E-09 | chr:19:29855781 |
| 19 rs76868820  | 29884335 G | 4.105  | 5.92E-09 | chr:19:29855781 |
| 19 rs77221124  | 29884276 G | 4.105  | 5.92E-09 | chr:19:29855781 |

|                |            |        |          |                 |
|----------------|------------|--------|----------|-----------------|
| 19 rs16962828  | 29886506 T | 4.068  | 6.38E-09 | chr:19:29855781 |
| 19 rs77348851  | 29887598 A | 4.069  | 6.38E-09 | chr:19:29855781 |
| 19 rs36032197  | 29813521 T | 0.4549 | 6.57E-09 | chr:19:29855781 |
| 19 rs71363971  | 29813517 C | 0.4549 | 6.57E-09 | chr:19:29855781 |
| 19 rs57992272  | 29884754 A | 4.065  | 7.62E-09 | chr:19:29855781 |
| 19 rs6509399   | 29874546 C | 2.16   | 9.13E-09 | chr:19:29855781 |
| 19 rs73923816  | 29907840 T | 0.4042 | 1.04E-08 | chr:19:29855781 |
| 19 rs78714471  | 29887469 T | 3.905  | 1.05E-08 | chr:19:29855781 |
| 19 rs34913300  | 29886724 G | 4.114  | 1.30E-08 | chr:19:29855781 |
| 19 rs10424195  | 29883577 T | 3.401  | 1.55E-08 | chr:19:29855781 |
| 19 rs181784529 | 29840974 A | 0.4578 | 1.76E-08 | chr:19:29855781 |
| 19 rs1012613   | 29796344 G | 0.4033 | 1.79E-08 | chr:19:29855781 |
| 19 rs17703419  | 29898487 G | 5.969  | 1.81E-08 | chr:19:29855781 |
| 19 rs79806042  | 29805218 C | 5.488  | 1.84E-08 | chr:19:29855781 |
| 19 rs10412806  | 29910330 A | 0.4192 | 2.27E-08 | chr:19:29855781 |
| 19 rs892073    | 29912294 T | 0.2511 | 2.51E-08 | chr:19:29855781 |
| 19 rs8103091   | 29923548 A | 2.318  | 3.34E-08 | chr:19:29855781 |
| 19 rs12150922  | 29879068 T | 2.48   | 3.74E-08 | chr:19:29855781 |
| 19 rs55976149  | 29911362 A | 0.4308 | 4.68E-08 | chr:19:29855781 |
| 19 rs10412090  | 30003113 T | 3.433  | 4.80E-08 | chr:19:29855781 |
| 19 rs59914048  | 29906011 T | 0.2655 | 5.64E-08 | chr:19:29855781 |
| 19 rs3960886   | 29878149 T | 0.4212 | 6.57E-08 | chr:19:29855781 |
| 19 rs13343981  | 29915466 G | 2.22   | 9.76E-08 | chr:19:29855781 |
| 19 rs881270    | 29927370 G | 0.2603 | 1.07E-07 | chr:19:29855781 |
| 19 rs10775550  | 29920202 G | 2.216  | 1.09E-07 | chr:19:29855781 |
| 19 rs1079335   | 29918435 T | 2.216  | 1.09E-07 | chr:19:29855781 |
| 19 rs1079336   | 29918517 G | 2.216  | 1.09E-07 | chr:19:29855781 |
| 19 rs10853808  | 29920041 C | 2.216  | 1.09E-07 | chr:19:29855781 |
| 19 rs10853809  | 29920113 T | 2.216  | 1.09E-07 | chr:19:29855781 |
| 19 rs17625222  | 29915445 T | 2.216  | 1.09E-07 | chr:19:29855781 |
| 19 rs4603687   | 29919576 T | 2.216  | 1.09E-07 | chr:19:29855781 |
| 19 rs873859    | 29919206 A | 2.216  | 1.09E-07 | chr:19:29855781 |
| 19 rs964314    | 29920424 T | 2.216  | 1.09E-07 | chr:19:29855781 |
| 19 rs6509401   | 29877643 T | 0.4279 | 1.10E-07 | chr:19:29855781 |
| 19 rs8109600   | 29877328 A | 0.4279 | 1.10E-07 | chr:19:29855781 |
| 19 rs10423905  | 29928853 C | 2.171  | 1.13E-07 | chr:19:29855781 |
| 19 rs10410292  | 29906715 A | 2.284  | 1.18E-07 | chr:19:29855781 |
| 19 rs73925555  | 29866763 T | 0.1947 | 1.22E-07 | chr:19:29855781 |
| 19 rs76847806  | 29809912 G | 5.024  | 1.28E-07 | chr:19:29855781 |
| 19 rs60623657  | 29792990 T | 3.47   | 1.50E-07 | chr:19:29855781 |
| 19 rs8110952   | 29919832 C | 2.191  | 1.55E-07 | chr:19:29855781 |
| 19 rs138628360 | 29881734 C | 0.3982 | 2.47E-07 | chr:19:29855781 |
| 19 rs377492537 | 29881785 C | 0.3982 | 2.47E-07 | chr:19:29855781 |

|                |            |        |          |                 |
|----------------|------------|--------|----------|-----------------|
| 19 rs76206311  | 29878417 A | 7.098  | 2.79E-07 | chr:19:29855781 |
| 19 rs8107933   | 29919507 T | 0.2792 | 2.85E-07 | chr:19:29855781 |
| 19 rs10413487  | 29911836 A | 2.571  | 2.90E-07 | chr:19:29855781 |
| 19 rs10417711  | 29928712 T | 2.1    | 4.22E-07 | chr:19:29855781 |
| 19 rs16962822  | 29884508 T | 3.713  | 4.54E-07 | chr:19:29855781 |
| 19 rs62111119  | 29795071 T | 1.92   | 4.67E-07 | chr:19:29855781 |
| 19 rs76928648  | 29883569 C | 3.91   | 4.73E-07 | chr:19:29855781 |
| 19 rs2111519   | 29794684 C | 0.4375 | 4.75E-07 | chr:19:29855781 |
| 19 rs58785326  | 29911925 A | 1.878  | 5.00E-07 | chr:19:29855781 |
| 19 rs59317515  | 29925332 A | 0.2458 | 5.63E-07 | chr:19:29855781 |
| 19 rs12983004  | 29931341 G | 0.4996 | 5.81E-07 | chr:19:29855781 |
| 19 rs115818685 | 29921786 A | 0.244  | 6.62E-07 | chr:19:29855781 |
| 19 rs114872814 | 29911326 G | 0.2673 | 6.85E-07 | chr:19:29855781 |
| 19 rs79425781  | 29883399 A | 3.827  | 7.00E-07 | chr:19:29855781 |
| 19 rs112068505 | 29932295 G | 0.2475 | 7.37E-07 | chr:19:29855781 |
| 19 rs881269    | 29927390 A | 0.3067 | 7.46E-07 | chr:19:29855781 |
| 19 rs73539045  | 29928129 T | 0.3439 | 7.53E-07 | chr:19:29855781 |
| 19 rs75380460  | 29637459 C | 0.4035 | 8.14E-07 | chr:19:29855781 |
| 19 rs2111518   | 29794622 T | 0.4456 | 9.81E-07 | chr:19:29855781 |
| 19 rs77502496  | 29883350 C | 3.756  | 9.88E-07 | chr:19:29855781 |
| 19 rs78912590  | 29883341 T | 3.756  | 9.88E-07 | chr:19:29855781 |
| 19 rs79489332  | 29883312 C | 3.756  | 9.88E-07 | chr:19:29855781 |
| 19 rs4805384   | 29874653 A | 7.299  | 1.00E-06 | chr:19:29855781 |
| 19 rs11671532  | 29888823 C | 0.5297 | 1.01E-06 | chr:19:29855781 |
| 19 rs73539047  | 29928466 A | 0.3507 | 1.06E-06 | chr:19:29855781 |
| 19 rs11882502  | 29847717 A | 0.3638 | 1.20E-06 | chr:19:29855781 |
| 19 rs57265693  | 29820612 T | 0.3057 | 1.35E-06 | chr:19:29855781 |
| 19 rs73543427  | 29866512 C | 0.3057 | 1.35E-06 | chr:19:29855781 |
| 19 rs56269880  | 29907259 G | 2.423  | 1.37E-06 | chr:19:29855781 |
| 19 rs9304679   | 29917132 A | 2.361  | 1.47E-06 | chr:19:29855781 |
| 19 rs61643444  | 29824416 G | 0.3031 | 1.48E-06 | chr:19:29855781 |
| 19 rs10402892  | 29961630 T | 2.044  | 1.56E-06 | chr:19:29855781 |
| 19 rs10404366  | 29956972 C | 2.044  | 1.56E-06 | chr:19:29855781 |
| 19 rs10404529  | 29956983 A | 2.044  | 1.56E-06 | chr:19:29855781 |
| 19 rs11667306  | 29879868 C | 1.941  | 1.82E-06 | chr:19:29855781 |
| 19 rs11880642  | 29847581 G | 0.3699 | 1.88E-06 | chr:19:29855781 |
| 19 rs11882449  | 29847512 A | 0.3699 | 1.88E-06 | chr:19:29855781 |
| 19 rs11882621  | 29847571 T | 0.3699 | 1.88E-06 | chr:19:29855781 |
| 19 rs59406130  | 29850574 G | 0.3699 | 1.88E-06 | chr:19:29855781 |
| 19 rs7259246   | 29853762 T | 0.3699 | 1.88E-06 | chr:19:29855781 |
| 19 rs73541380  | 29853023 T | 0.3699 | 1.88E-06 | chr:19:29855781 |
| 19 rs73542048  | 29849389 A | 0.3699 | 1.88E-06 | chr:19:29855781 |
| 19 rs73542050  | 29849800 A | 0.3699 | 1.88E-06 | chr:19:29855781 |

|                |            |        |          |                 |
|----------------|------------|--------|----------|-----------------|
| 19 rs73542053  | 29850273 T | 0.3699 | 1.88E-06 | chr:19:29855781 |
| 19 rs73542056  | 29851283 T | 0.3699 | 1.88E-06 | chr:19:29855781 |
| 19 rs73542063  | 29851794 C | 0.3699 | 1.88E-06 | chr:19:29855781 |
| 19 rs8105384   | 29854818 T | 0.3699 | 1.88E-06 | chr:19:29855781 |
| 19 rs77445168  | 29803772 T | 9.522  | 1.97E-06 | chr:19:29855781 |
| 19 rs73534196  | 29809176 A | 0.3152 | 2.07E-06 | chr:19:29855781 |
| 19 rs61680354  | 29922071 A | 0.4683 | 2.23E-06 | chr:19:29855781 |
| 19 rs8107813   | 29919427 A | 0.4683 | 2.23E-06 | chr:19:29855781 |
| 19 rs9676501   | 29918545 T | 0.4683 | 2.23E-06 | chr:19:29855781 |
| 19 rs9676571   | 29915029 T | 0.4683 | 2.23E-06 | chr:19:29855781 |
| 19 rs112194147 | 29837534 A | 0.313  | 2.30E-06 | chr:19:29855781 |
| 19 rs10409972  | 29905297 C | 2.322  | 2.45E-06 | chr:19:29855781 |
| 19 rs114483161 | 29881250 G | 4.888  | 2.48E-06 | chr:19:29855781 |
| 19 rs114911433 | 29881069 C | 4.888  | 2.48E-06 | chr:19:29855781 |
| 19 rs59336688  | 29841432 G | 0.3103 | 2.51E-06 | chr:19:29855781 |
| 19 rs114506886 | 29856995 C | 0.3784 | 2.52E-06 | chr:19:29855781 |
| 19 rs115392433 | 29856997 C | 0.3784 | 2.52E-06 | chr:19:29855781 |
| 19 rs116708338 | 29856993 C | 0.3784 | 2.52E-06 | chr:19:29855781 |
| 19 rs73541383  | 29855391 G | 0.3784 | 2.52E-06 | chr:19:29855781 |
| 19 rs73541385  | 29855644 A | 0.3784 | 2.52E-06 | chr:19:29855781 |
| 19 rs73541386  | 29856702 G | 0.3784 | 2.52E-06 | chr:19:29855781 |
| 19 rs73541387  | 29856831 G | 0.3784 | 2.52E-06 | chr:19:29855781 |
| 19 rs73541390  | 29856897 G | 0.3784 | 2.52E-06 | chr:19:29855781 |
| 19 rs74670598  | 29856961 C | 0.3784 | 2.52E-06 | chr:19:29855781 |
| 19 rs78225345  | 29856430 A | 0.3784 | 2.52E-06 | chr:19:29855781 |
| 19 rs79412487  | 29856954 T | 0.3784 | 2.52E-06 | chr:19:29855781 |
| 19 rs73923820  | 29914440 T | 0.4699 | 2.81E-06 | chr:19:29855781 |
| 19 rs55782117  | 29830846 C | 0.3065 | 2.92E-06 | chr:19:29855781 |
| 19 rs77841426  | 29878776 A | 6.674  | 2.96E-06 | chr:19:29855781 |
| 19 rs61282357  | 29850798 T | 0.38   | 3.13E-06 | chr:19:29855781 |
| 19 rs61094332  | 29809681 A | 0.3742 | 3.14E-06 | chr:19:29855781 |
| 19 rs73534200  | 29810221 A | 0.3227 | 3.45E-06 | chr:19:29855781 |
| 19 rs114182535 | 29812567 T | 4.66   | 3.73E-06 | chr:19:29855781 |
| 19 rs74880260  | 29799563 A | 3.84   | 4.39E-06 | chr:19:29855781 |
| 19 rs10422964  | 30007626 G | 2.333  | 5.04E-06 | chr:19:29855781 |
| 19 rs11880396  | 29803819 T | 0.3845 | 5.21E-06 | chr:19:29855781 |
| 19 rs73534194  | 29808022 T | 0.3845 | 5.21E-06 | chr:19:29855781 |
| 19 rs73539063  | 29932080 G | 0.3762 | 5.42E-06 | chr:19:29855781 |
| 19 rs11882858  | 29895527 T | 3.761  | 5.68E-06 | chr:19:29855781 |
| 19 rs8106906   | 29894204 C | 3.761  | 5.68E-06 | chr:19:29855781 |
| 19 rs76017112  | 29672619 A | 0.4107 | 6.29E-06 | chr:19:29855781 |
| 19 rs76420107  | 29672658 T | 0.4107 | 6.29E-06 | chr:19:29855781 |
| 19 rs73539049  | 29928755 G | 0.3919 | 6.57E-06 | chr:19:29855781 |

|                |            |        |          |                 |
|----------------|------------|--------|----------|-----------------|
| 19 rs73534191  | 29805756 C | 0.3921 | 7.39E-06 | chr:19:29855781 |
| 19 rs11668561  | 29886533 T | 0.2491 | 8.51E-06 | chr:19:29855781 |
| 19 rs78081748  | 29883523 G | 2.999  | 9.21E-06 | chr:19:29855781 |
| 19 rs4444446   | 29732702 T | 2.251  | 1.06E-05 | chr:19:29855781 |
| 19 rs59431805  | 29836706 C | 0.4069 | 1.24E-05 | chr:19:29855781 |
| 19 rs73542021  | 29833539 T | 0.4069 | 1.24E-05 | chr:19:29855781 |
| 19 rs73542025  | 29836159 A | 0.4069 | 1.24E-05 | chr:19:29855781 |
| 19 rs73542028  | 29836591 C | 0.4069 | 1.24E-05 | chr:19:29855781 |
| 19 rs74477241  | 29835720 G | 0.4069 | 1.24E-05 | chr:19:29855781 |
| 19 rs77977515  | 29835434 G | 0.4069 | 1.24E-05 | chr:19:29855781 |
| 19 rs8102327   | 29840232 T | 0.4069 | 1.24E-05 | chr:19:29855781 |
| 19 rs8103129   | 29840525 G | 0.4069 | 1.24E-05 | chr:19:29855781 |
| 19 rs116030630 | 29673309 T | 0.42   | 1.27E-05 | chr:19:29855781 |
| 19 rs75040595  | 29806368 A | 4.046  | 1.29E-05 | chr:19:29855781 |
| 19 rs58623111  | 29801673 A | 0.4369 | 1.33E-05 | chr:19:29855781 |
| 19 rs112905684 | 29864870 A | 0.3311 | 1.34E-05 | chr:19:29855781 |
| 19 rs113678597 | 29864992 T | 0.3311 | 1.34E-05 | chr:19:29855781 |
| 19 rs7253694   | 29858529 C | 0.545  | 1.68E-05 | chr:19:29855781 |
| 19 rs116423283 | 29666952 G | 0.4329 | 1.71E-05 | chr:19:29855781 |
| 19 rs77810432  | 29647026 T | 0.4329 | 1.71E-05 | chr:19:29855781 |
| 19 rs79351088  | 29660319 T | 0.4329 | 1.71E-05 | chr:19:29855781 |
| 19 rs80139316  | 29637756 T | 0.4329 | 1.71E-05 | chr:19:29855781 |
| 19 rs4545933   | 30005861 G | 0.5867 | 1.72E-05 | chr:19:29855781 |
| 19 rs112488290 | 29844372 G | 0.4145 | 1.74E-05 | chr:19:29855781 |
| 19 rs139736193 | 29843907 T | 0.4145 | 1.74E-05 | chr:19:29855781 |
| 19 rs142442997 | 29843149 T | 0.4145 | 1.74E-05 | chr:19:29855781 |
| 19 rs28767801  | 29845057 G | 0.4145 | 1.74E-05 | chr:19:29855781 |
| 19 rs73542039  | 29844055 A | 0.4145 | 1.74E-05 | chr:19:29855781 |
| 19 rs149724344 | 29813571 A | 6.536  | 1.80E-05 | chr:19:29855781 |
| 19 rs59806259  | 29872263 T | 0.4619 | 1.90E-05 | chr:19:29855781 |
| 19 rs58831774  | 29823559 T | 0.4148 | 1.97E-05 | chr:19:29855781 |
| 19 rs73540021  | 29822304 T | 0.4148 | 1.97E-05 | chr:19:29855781 |
| 19 rs73540047  | 29827049 G | 0.4148 | 1.97E-05 | chr:19:29855781 |
| 19 rs111857853 | 387614 G   | 2.943  | 4.07E-10 | chr:19:386675   |
| 19 rs144524516 | 388358 G   | 2.908  | 2.37E-09 | chr:19:386675   |
| 19 rs148483422 | 388359 G   | 2.908  | 2.37E-09 | chr:19:386675   |
| 19 rs73916946  | 387864 C   | 0.3813 | 2.32E-08 | chr:19:386675   |
| 19 rs62102076  | 389134 C   | 0.3997 | 8.88E-08 | chr:19:386675   |
| 19 rs55749078  | 387847 T   | 0.4299 | 6.92E-07 | chr:19:386675   |
| 19 rs62102075  | 389088 C   | 2.217  | 1.09E-06 | chr:19:386675   |
| 19 rs112912797 | 389216 C   | 0.4256 | 1.42E-06 | chr:19:386675   |
| 19 rs79881403  | 389217 A   | 0.4256 | 1.42E-06 | chr:19:386675   |
| 19 rs369380681 | 388030 C   | 2.173  | 3.13E-06 | chr:19:386675   |

|                |            |        |          |                 |
|----------------|------------|--------|----------|-----------------|
| 19 rs78540374  | 389290 T   | 2.103  | 3.50E-06 | chr:19:386675   |
| 19 rs529560773 | 388349 C   | 0.4482 | 4.57E-06 | chr:19:386675   |
| 19 rs549371497 | 388347 C   | 0.4482 | 4.57E-06 | chr:19:386675   |
| 19 rs562006336 | 388348 T   | 0.4482 | 4.57E-06 | chr:19:386675   |
| 19 rs77887742  | 389289 T   | 2.061  | 6.02E-06 | chr:19:386675   |
| 19 rs111688272 | 388012 A   | 0.4194 | 8.66E-06 | chr:19:386675   |
| 19 rs200520198 | 387268 A   | 0.4642 | 1.83E-05 | chr:19:386675   |
| 19 rs62102074  | 389061 A   | 0.4434 | 2.95E-05 | chr:19:386675   |
| 19 rs28462149  | 52925088 G | 2.769  | 2.68E-14 | chr:19:52924209 |
| 19 rs28375755  | 52925067 A | 2.742  | 3.96E-14 | chr:19:52924209 |
| 19 rs73934459  | 52924049 G | 2.698  | 1.15E-13 | chr:19:52924209 |
| 19 rs112694418 | 52924249 C | 2.73   | 1.27E-13 | chr:19:52924209 |
| 19 rs73934458  | 52924044 G | 2.713  | 1.34E-13 | chr:19:52924209 |
| 19 rs28528760  | 52924984 C | 2.639  | 1.75E-13 | chr:19:52924209 |
| 19 rs113590683 | 52924340 G | 2.621  | 1.87E-13 | chr:19:52924209 |
| 19 rs59950484  | 52924130 A | 0.3837 | 2.09E-13 | chr:19:52924209 |
| 19 rs61689498  | 52924136 G | 0.3837 | 2.09E-13 | chr:19:52924209 |
| 19 rs111240956 | 52924334 C | 2.687  | 2.55E-13 | chr:19:52924209 |
| 19 rs59318859  | 52924127 C | 0.3917 | 7.49E-13 | chr:19:52924209 |
| 19 rs73934456  | 52923808 G | 2.626  | 9.12E-13 | chr:19:52924209 |
| 19 rs558610644 | 52924875 T | 2.557  | 2.16E-12 | chr:19:52924209 |
| 19 rs60439793  | 52923753 C | 2.548  | 2.27E-12 | chr:19:52924209 |
| 19 rs73934457  | 52923971 G | 2.548  | 2.27E-12 | chr:19:52924209 |
| 19 rs369961637 | 52924884 A | 2.529  | 3.35E-12 | chr:19:52924209 |
| 19 rs371913657 | 52924859 A | 2.529  | 3.35E-12 | chr:19:52924209 |
| 19 rs7247111   | 52925118 G | 0.3975 | 8.29E-12 | chr:19:52924209 |
| 19 rs16983796  | 52925179 A | 2.464  | 1.05E-11 | chr:19:52924209 |
| 19 rs4085090   | 52924507 T | 2.416  | 1.13E-11 | chr:19:52924209 |
| 19 rs12461528  | 52925285 C | 2.439  | 1.65E-11 | chr:19:52924209 |
| 19 rs56902760  | 52924208 G | 0.3993 | 1.71E-11 | chr:19:52924209 |
| 19 rs55952958  | 52923189 G | 0.4236 | 5.80E-11 | chr:19:52924209 |
| 19 rs56236739  | 52923275 T | 0.4236 | 5.80E-11 | chr:19:52924209 |
| 19 rs548489689 | 52924755 T | 2.112  | 2.79E-08 | chr:19:52924209 |
| 19 rs567005277 | 52924766 C | 2.112  | 2.79E-08 | chr:19:52924209 |
| 19 rs146678829 | 52924581 C | 1.957  | 1.27E-07 | chr:19:52924209 |
| 19 rs572684466 | 52924733 T | 2.043  | 4.51E-07 | chr:19:52924209 |
| 19 rs324091    | 52905067 C | 0.5099 | 3.35E-06 | chr:19:52924209 |
| 19 rs569677324 | 52924640 T | 1.941  | 7.42E-06 | chr:19:52924209 |
| 19 rs140283810 | 52924629 G | 1.922  | 8.75E-06 | chr:19:52924209 |
| 19 rs375010966 | 52924628 C | 1.922  | 8.75E-06 | chr:19:52924209 |
| 19 rs8106133   | 52921057 G | 0.4741 | 5.02E-05 | chr:19:52924209 |
| 19 rs111934070 | 58038908 G | 72.68  | 9.85E-20 | chr:19:57996939 |
| 19 rs112656982 | 58040171 T | 37.09  | 3.48E-18 | chr:19:57996939 |

|                |            |       |          |                 |
|----------------|------------|-------|----------|-----------------|
| 19 rs186701804 | 58041008 G | 37.09 | 3.48E-18 | chr:19:57996939 |
| 19 rs199529440 | 57959782 A | 72.9  | 9.84E-18 | chr:19:57996939 |
| 19 rs139217049 | 57957290 A | 68.72 | 1.14E-17 | chr:19:57996939 |
| 19 rs142468478 | 57959266 A | 68.72 | 1.14E-17 | chr:19:57996939 |
| 19 rs114548890 | 58044044 A | 32.25 | 3.01E-17 | chr:19:57996939 |
| 19 rs193080271 | 58011847 G | 126.6 | 7.79E-17 | chr:19:57996939 |
| 19 rs113149928 | 57962253 C | 28.31 | 1.15E-16 | chr:19:57996939 |
| 19 rs114280019 | 58046047 T | 27.02 | 1.46E-16 | chr:19:57996939 |
| 19 rs75911968  | 58049368 C | 27.02 | 1.46E-16 | chr:19:57996939 |
| 19 rs76307110  | 58054737 C | 27.02 | 1.46E-16 | chr:19:57996939 |
| 19 rs79588559  | 58047419 T | 27.02 | 1.46E-16 | chr:19:57996939 |
| 19 rs115056216 | 58045466 C | 26.76 | 2.00E-16 | chr:19:57996939 |
| 19 rs150316756 | 58039634 G | 26.27 | 2.02E-16 | chr:19:57996939 |
| 19 rs529767732 | 57959794 T | 25.5  | 8.71E-16 | chr:19:57996939 |
| 19 rs111887346 | 58047732 C | 21.57 | 1.48E-15 | chr:19:57996939 |
| 19 rs142572042 | 57964713 G | 17.26 | 3.40E-15 | chr:19:57996939 |
| 19 rs7249326   | 57963238 G | 17.26 | 3.40E-15 | chr:19:57996939 |
| 19 rs2240037   | 57955719 A | 21.87 | 6.12E-15 | chr:19:57996939 |
| 19 rs141683327 | 57999717 G | 23.06 | 9.12E-15 | chr:19:57996939 |
| 19 rs76997017  | 57966578 C | 14.37 | 2.32E-14 | chr:19:57996939 |
| 19 rs117470965 | 58003359 T | 11.65 | 3.27E-14 | chr:19:57996939 |
| 19 rs2240038   | 57955729 A | 15.45 | 1.62E-13 | chr:19:57996939 |
| 19 rs2240039   | 57955971 T | 15.15 | 2.32E-13 | chr:19:57996939 |
| 19 rs78257981  | 58038933 C | 16.6  | 6.15E-13 | chr:19:57996939 |
| 19 rs144254809 | 58048573 A | 24.27 | 2.10E-12 | chr:19:57996939 |
| 19 rs58718038  | 57960628 T | 8.515 | 5.19E-12 | chr:19:57996939 |
| 19 rs560805565 | 57959791 T | 36.44 | 5.87E-12 | chr:19:57996939 |
| 19 rs151275866 | 57961406 T | 60.23 | 1.74E-10 | chr:19:57996939 |
| 19 rs143367206 | 58039265 T | 22.15 | 3.01E-10 | chr:19:57996939 |
| 19 rs116713673 | 57995726 G | 80.4  | 6.24E-10 | chr:19:57996939 |
| 19 rs139765863 | 57986056 C | 80.4  | 6.24E-10 | chr:19:57996939 |
| 19 rs140647909 | 57988960 A | 80.4  | 6.24E-10 | chr:19:57996939 |
| 19 rs568624310 | 57982399 T | 80.4  | 6.24E-10 | chr:19:57996939 |
| 19 rs74442817  | 58055907 C | 11.47 | 9.58E-10 | chr:19:57996939 |
| 19 rs12976560  | 57990916 C | 4.792 | 1.01E-09 | chr:19:57996939 |
| 19 rs12984815  | 57990569 C | 4.792 | 1.01E-09 | chr:19:57996939 |
| 19 rs12985337  | 57982983 C | 4.792 | 1.01E-09 | chr:19:57996939 |
| 19 rs2074066   | 57988396 T | 4.792 | 1.01E-09 | chr:19:57996939 |
| 19 rs34837812  | 57990115 G | 4.792 | 1.01E-09 | chr:19:57996939 |
| 19 rs35859595  | 57979815 A | 4.792 | 1.01E-09 | chr:19:57996939 |
| 19 rs7257644   | 57985889 C | 4.792 | 1.01E-09 | chr:19:57996939 |
| 19 rs139637370 | 58015322 C | 144.1 | 1.54E-09 | chr:19:57996939 |
| 19 rs144872330 | 58052509 A | 20.37 | 1.91E-09 | chr:19:57996939 |



|                |            |       |          |                 |
|----------------|------------|-------|----------|-----------------|
| 19 rs137980030 | 58030474 A | 75.92 | 1.96E-09 | chr:19:57996939 |
| 19 rs115366794 | 58057807 T | 13.33 | 2.00E-09 | chr:19:57996939 |
| 19 rs558258289 | 58010894 A | 85.21 | 2.32E-09 | chr:19:57996939 |
| 19 rs578220955 | 58010895 T | 85.21 | 2.32E-09 | chr:19:57996939 |
| 19 rs7254867   | 57989075 T | 4.388 | 4.13E-09 | chr:19:57996939 |
| 19 rs181196402 | 58055230 T | 52.42 | 7.29E-09 | chr:19:57996939 |
| 19 rs76623573  | 58040781 A | 6.891 | 7.78E-09 | chr:19:57996939 |
| 19 rs116069926 | 58042529 T | 6.863 | 8.48E-09 | chr:19:57996939 |
| 19 rs114738978 | 58103550 C | 45.06 | 1.05E-08 | chr:19:57996939 |
| 19 rs140265363 | 58111979 G | 45.06 | 1.05E-08 | chr:19:57996939 |
| 19 rs140453879 | 58074643 C | 45.06 | 1.05E-08 | chr:19:57996939 |
| 19 rs144851961 | 58067894 C | 45.06 | 1.05E-08 | chr:19:57996939 |
| 19 rs144917593 | 57987973 T | 45.06 | 1.05E-08 | chr:19:57996939 |
| 19 rs146388366 | 58103549 G | 45.06 | 1.05E-08 | chr:19:57996939 |
| 19 rs147657507 | 58084837 C | 45.06 | 1.05E-08 | chr:19:57996939 |
| 19 rs149472061 | 58103008 C | 45.06 | 1.05E-08 | chr:19:57996939 |
| 19 rs182411760 | 58059723 C | 45.06 | 1.05E-08 | chr:19:57996939 |
| 19 rs185241277 | 58097224 G | 45.06 | 1.05E-08 | chr:19:57996939 |
| 19 rs189139501 | 58085347 A | 45.06 | 1.05E-08 | chr:19:57996939 |
| 19 rs190672375 | 58104655 A | 45.06 | 1.05E-08 | chr:19:57996939 |
| 19 rs538973691 | 58090499 G | 45.06 | 1.05E-08 | chr:19:57996939 |
| 19 rs558702226 | 58068436 T | 45.06 | 1.05E-08 | chr:19:57996939 |
| 19 rs74451589  | 57987696 G | 45.06 | 1.05E-08 | chr:19:57996939 |
| 19 rs75462744  | 57987494 T | 45.06 | 1.05E-08 | chr:19:57996939 |
| 19 rs7259134   | 58062311 T | 35.15 | 1.14E-08 | chr:19:57996939 |
| 19 rs112258496 | 58044432 T | 71.86 | 1.58E-08 | chr:19:57996939 |
| 19 rs115113770 | 58044725 A | 71.86 | 1.58E-08 | chr:19:57996939 |
| 19 rs190095598 | 58052166 T | 71.86 | 1.58E-08 | chr:19:57996939 |
| 19 rs111373384 | 58065183 A | 23.01 | 2.70E-08 | chr:19:57996939 |
| 19 rs147266930 | 58068257 C | 23.01 | 2.70E-08 | chr:19:57996939 |
| 19 rs1548476   | 58058536 A | 4.211 | 2.92E-08 | chr:19:57996939 |
| 19 rs141763996 | 58052042 C | 6.009 | 3.38E-08 | chr:19:57996939 |
| 19 rs111637349 | 58070101 C | 20.46 | 3.60E-08 | chr:19:57996939 |
| 19 rs115123894 | 58114634 A | 14.88 | 3.62E-08 | chr:19:57996939 |
| 19 rs112656017 | 58116334 G | 7.006 | 4.10E-08 | chr:19:57996939 |
| 19 rs137934258 | 58069247 A | 91.53 | 7.88E-08 | chr:19:57996939 |
| 19 rs141955887 | 58085765 T | 91.53 | 7.88E-08 | chr:19:57996939 |
| 19 rs193172049 | 57974021 C | 91.53 | 7.88E-08 | chr:19:57996939 |
| 19 rs113721107 | 58056083 A | 9.584 | 8.47E-08 | chr:19:57996939 |
| 19 rs12978765  | 57970368 G | 3.668 | 1.10E-07 | chr:19:57996939 |
| 19 rs191182363 | 58026207 A | 91.25 | 1.32E-07 | chr:19:57996939 |
| 19 rs10425274  | 57995784 T | 4.053 | 2.01E-07 | chr:19:57996939 |
| 19 rs4801225   | 57993186 A | 4.053 | 2.01E-07 | chr:19:57996939 |

|                |            |        |          |                 |
|----------------|------------|--------|----------|-----------------|
| 19 rs6510078   | 57997218 T | 4.053  | 2.01E-07 | chr:19:57996939 |
| 19 rs7255357   | 57998012 C | 4.053  | 2.06E-07 | chr:19:57996939 |
| 19 rs3810132   | 57998879 C | 4.053  | 2.07E-07 | chr:19:57996939 |
| 19 rs115762769 | 58069603 C | 5.818  | 3.72E-07 | chr:19:57996939 |
| 19 rs144856611 | 58109979 C | 11.61  | 9.20E-07 | chr:19:57996939 |
| 19 rs147006795 | 58139866 T | 10.87  | 1.20E-06 | chr:19:57996939 |
| 19 rs6510070   | 57961612 A | 0.2595 | 1.50E-06 | chr:19:57996939 |
| 19 rs148982903 | 58021448 A | 56.2   | 1.53E-06 | chr:19:57996939 |
| 19 rs180863935 | 58029394 T | 176.2  | 3.45E-06 | chr:19:57996939 |
| 19 rs537906242 | 58036834 G | 176.2  | 3.45E-06 | chr:19:57996939 |
| 19 rs569344648 | 58036832 A | 176.2  | 3.45E-06 | chr:19:57996939 |
| 19 rs67586127  | 57969810 G | 3.037  | 4.05E-06 | chr:19:57996939 |
| 19 rs12981785  | 57965453 T | 2.985  | 4.42E-06 | chr:19:57996939 |
| 19 rs145749832 | 58060826 T | 7.169  | 4.89E-06 | chr:19:57996939 |
| 19 rs8109760   | 57968550 T | 2.96   | 5.01E-06 | chr:19:57996939 |
| 19 rs368071146 | 58011500 T | 154    | 5.21E-06 | chr:19:57996939 |
| 19 rs7254946   | 57964491 C | 2.945  | 5.51E-06 | chr:19:57996939 |
| 19 rs75763025  | 58231575 G | 4.347  | 5.78E-06 | chr:19:57996939 |
| 19 rs114686987 | 58069658 T | 61.35  | 5.81E-06 | chr:19:57996939 |
| 19 rs115397199 | 58099510 T | 61.35  | 5.81E-06 | chr:19:57996939 |
| 19 rs115443337 | 58004644 G | 61.35  | 5.81E-06 | chr:19:57996939 |
| 19 rs143191422 | 58066185 A | 61.35  | 5.81E-06 | chr:19:57996939 |
| 19 rs150631932 | 58041883 T | 61.35  | 5.81E-06 | chr:19:57996939 |
| 19 rs151014926 | 58016099 A | 61.35  | 5.81E-06 | chr:19:57996939 |
| 19 rs181200370 | 58085770 A | 61.35  | 5.81E-06 | chr:19:57996939 |
| 19 rs528301114 | 58059696 C | 61.35  | 5.81E-06 | chr:19:57996939 |
| 19 rs556667965 | 58027910 C | 61.35  | 5.81E-06 | chr:19:57996939 |
| 19 rs561682422 | 58036530 G | 61.35  | 5.81E-06 | chr:19:57996939 |
| 19 rs7245637   | 58036125 G | 61.35  | 5.81E-06 | chr:19:57996939 |
| 19 rs7247851   | 58091247 C | 61.35  | 5.81E-06 | chr:19:57996939 |
| 19 rs80005447  | 58086009 A | 61.35  | 5.81E-06 | chr:19:57996939 |
| 19 rs8110884   | 58035519 A | 61.35  | 5.81E-06 | chr:19:57996939 |
| 19 rs8112653   | 58032436 C | 61.35  | 5.81E-06 | chr:19:57996939 |
| 19 rs140933142 | 58073972 A | 8.181  | 6.08E-06 | chr:19:57996939 |
| 19 rs12973393  | 57971753 G | 2.935  | 6.18E-06 | chr:19:57996939 |
| 19 rs12974160  | 57971398 G | 2.935  | 6.18E-06 | chr:19:57996939 |
| 19 rs12975239  | 57971803 C | 2.935  | 6.18E-06 | chr:19:57996939 |
| 19 rs12979514  | 57971812 G | 2.935  | 6.18E-06 | chr:19:57996939 |
| 19 rs12981036  | 57972474 G | 2.935  | 6.18E-06 | chr:19:57996939 |
| 19 rs12981524  | 57971878 A | 2.935  | 6.18E-06 | chr:19:57996939 |
| 19 rs67307910  | 57999846 A | 0.2819 | 7.20E-06 | chr:19:57996939 |
| 19 rs140239177 | 58079063 G | 14.65  | 8.19E-06 | chr:19:57996939 |
| 19 rs188500682 | 58088656 A | 14.65  | 8.19E-06 | chr:19:57996939 |

|                |            |       |          |                 |
|----------------|------------|-------|----------|-----------------|
| 19 rs189728557 | 58066926 G | 14.65 | 8.19E-06 | chr:19:57996939 |
| 19 rs79747118  | 58060141 T | 14.65 | 8.19E-06 | chr:19:57996939 |
| 19 rs9676252   | 58117022 C | 5.914 | 8.57E-06 | chr:19:57996939 |
| 19 rs2240022   | 58038624 C | 3.115 | 8.71E-06 | chr:19:57996939 |
| 19 rs2051765   | 58035645 C | 2.958 | 9.83E-06 | chr:19:57996939 |
| 19 rs2051766   | 58035875 G | 2.958 | 9.83E-06 | chr:19:57996939 |
| 19 rs56076852  | 58035509 T | 2.958 | 9.83E-06 | chr:19:57996939 |
| 19 rs114688947 | 58130706 A | 25.78 | 1.11E-05 | chr:19:57996939 |
| 19 rs116193782 | 58130373 T | 25.78 | 1.11E-05 | chr:19:57996939 |
| 19 rs139480699 | 58121695 T | 25.78 | 1.11E-05 | chr:19:57996939 |
| 19 rs190588533 | 58136346 C | 25.78 | 1.11E-05 | chr:19:57996939 |
| 19 rs528742160 | 58123196 T | 25.78 | 1.11E-05 | chr:19:57996939 |
| 19 rs566246472 | 58123195 T | 25.78 | 1.11E-05 | chr:19:57996939 |
| 19 rs80323195  | 58128932 C | 25.78 | 1.11E-05 | chr:19:57996939 |
| 19 rs9304794   | 58129725 G | 25.78 | 1.11E-05 | chr:19:57996939 |
| 19 rs9676620   | 58124289 A | 25.78 | 1.11E-05 | chr:19:57996939 |
| 19 rs559349729 | 58149392 A | 6.252 | 1.21E-05 | chr:19:57996939 |
| 19 rs112485279 | 58084911 T | 6.532 | 1.22E-05 | chr:19:57996939 |
| 19 rs55903117  | 58019583 G | 2.879 | 1.42E-05 | chr:19:57996939 |
| 19 rs71333245  | 58003141 A | 2.956 | 1.43E-05 | chr:19:57996939 |
| 19 rs2106824   | 58028152 G | 2.875 | 1.49E-05 | chr:19:57996939 |
| 19 rs56366060  | 58019482 C | 2.875 | 1.49E-05 | chr:19:57996939 |
| 19 rs56796260  | 58020259 C | 2.875 | 1.49E-05 | chr:19:57996939 |
| 19 rs2360755   | 58025922 C | 2.873 | 1.53E-05 | chr:19:57996939 |
| 19 rs9676259   | 58117677 A | 5.637 | 1.60E-05 | chr:19:57996939 |
| 19 rs10409092  | 58009514 A | 2.881 | 2.16E-05 | chr:19:57996939 |
| 19 rs10409635  | 58009510 G | 2.881 | 2.16E-05 | chr:19:57996939 |
| 19 rs10221501  | 58006675 G | 2.878 | 2.24E-05 | chr:19:57996939 |
| 19 rs10221524  | 58006952 G | 2.878 | 2.24E-05 | chr:19:57996939 |
| 19 rs10853895  | 58008450 G | 2.878 | 2.24E-05 | chr:19:57996939 |
| 19 rs12978437  | 58007453 C | 2.878 | 2.24E-05 | chr:19:57996939 |
| 19 rs12979154  | 58008956 C | 2.878 | 2.24E-05 | chr:19:57996939 |
| 19 rs2074074   | 58003873 C | 2.878 | 2.24E-05 | chr:19:57996939 |
| 19 rs2074076   | 58004346 G | 2.878 | 2.24E-05 | chr:19:57996939 |
| 19 rs2360761   | 58007785 A | 2.878 | 2.24E-05 | chr:19:57996939 |
| 19 rs4801490   | 58006239 A | 2.878 | 2.24E-05 | chr:19:57996939 |
| 19 rs58155371  | 58009212 T | 2.878 | 2.24E-05 | chr:19:57996939 |
| 19 rs6510084   | 58002665 A | 2.878 | 2.24E-05 | chr:19:57996939 |
| 19 rs6510085   | 58002819 T | 2.878 | 2.24E-05 | chr:19:57996939 |
| 19 rs7248267   | 58005668 C | 2.878 | 2.24E-05 | chr:19:57996939 |
| 19 rs12461717  | 58009020 A | 2.877 | 2.30E-05 | chr:19:57996939 |
| 19 rs2074071   | 58003580 A | 2.876 | 2.33E-05 | chr:19:57996939 |
| 19 rs2074072   | 58003613 C | 2.876 | 2.33E-05 | chr:19:57996939 |

|                |             |       |          |                 |
|----------------|-------------|-------|----------|-----------------|
| 19 rs2074073   | 58003728 G  | 2.876 | 2.33E-05 | chr:19:57996939 |
| 19 rs2074075   | 58004158 C  | 2.876 | 2.33E-05 | chr:19:57996939 |
| 19 rs2074077   | 58004931 A  | 2.876 | 2.33E-05 | chr:19:57996939 |
| 19 rs7253260   | 58001096 G  | 2.876 | 2.36E-05 | chr:19:57996939 |
| 19 rs368257628 | 58121788 A  | 3.834 | 2.40E-05 | chr:19:57996939 |
| 19 rs12460048  | 58041703 C  | 2.886 | 2.49E-05 | chr:19:57996939 |
| 19 rs545252681 | 58375359 T  | 32.51 | 2.54E-05 | chr:19:57996939 |
| 19 rs73573431  | 58044998 C  | 6.061 | 2.63E-05 | chr:19:57996939 |
| 19 rs12609704  | 58060538 T  | 2.927 | 2.67E-05 | chr:19:57996939 |
| 19 rs150151592 | 58140290 G  | 11.16 | 2.75E-05 | chr:19:57996939 |
| 19 rs2019475   | 57999738 G  | 2.924 | 2.76E-05 | chr:19:57996939 |
| 19 rs573268019 | 58245334 C  | 6.113 | 2.82E-05 | chr:19:57996939 |
| 19 rs61138724  | 58081065 C  | 2.779 | 3.04E-05 | chr:19:57996939 |
| 19 rs111377500 | 58078770 T  | 6.453 | 3.24E-05 | chr:19:57996939 |
| 19 rs138572320 | 58071615 G  | 6.453 | 3.24E-05 | chr:19:57996939 |
| 19 rs139218209 | 58076804 A  | 6.453 | 3.24E-05 | chr:19:57996939 |
| 19 rs144124750 | 58078046 T  | 6.453 | 3.24E-05 | chr:19:57996939 |
| 1 rs1613391    | 106042790 T | 55.49 | 7.27E-34 | chr:1:106015875 |
| 1 rs115832392  | 106074857 T | 50.05 | 4.01E-33 | chr:1:106015875 |
| 1 rs116494820  | 106075693 T | 50.05 | 4.01E-33 | chr:1:106015875 |
| 1 rs1710796    | 106078422 T | 50.05 | 4.01E-33 | chr:1:106015875 |
| 1 rs11801857   | 106080328 A | 47.96 | 5.35E-33 | chr:1:106015875 |
| 1 rs1710794    | 106080269 A | 47.96 | 5.35E-33 | chr:1:106015875 |
| 1 rs1721566    | 106072947 G | 43.72 | 7.03E-33 | chr:1:106015875 |
| 1 rs1710788    | 106072791 T | 46.58 | 7.94E-33 | chr:1:106015875 |
| 1 rs116125878  | 106075962 A | 45.14 | 8.69E-33 | chr:1:106015875 |
| 1 rs1710777    | 106081969 G | 47.43 | 9.96E-33 | chr:1:106015875 |
| 1 rs777065     | 106084022 A | 47.43 | 9.96E-33 | chr:1:106015875 |
| 1 rs1850246    | 106068484 A | 75.92 | 1.19E-32 | chr:1:106015875 |
| 1 rs1623730    | 106079717 G | 40.96 | 1.67E-32 | chr:1:106015875 |
| 1 rs2501604    | 106000162 T | 67.91 | 1.82E-32 | chr:1:106015875 |
| 1 rs1710792    | 106071859 T | 74.74 | 1.89E-32 | chr:1:106015875 |
| 1 rs550158236  | 106064983 C | 74.74 | 1.89E-32 | chr:1:106015875 |
| 1 rs777098     | 106056842 C | 74.74 | 1.89E-32 | chr:1:106015875 |
| 1 rs777093     | 106060811 C | 73.56 | 3.28E-32 | chr:1:106015875 |
| 1 rs1971395    | 106038763 C | 852.6 | 4.90E-31 | chr:1:106015875 |
| 1 rs1516147    | 106004541 T | 19.03 | 9.44E-30 | chr:1:106015875 |
| 1 rs1516148    | 106004460 A | 19.03 | 9.44E-30 | chr:1:106015875 |
| 1 rs2222088    | 106008245 G | 19.09 | 1.22E-29 | chr:1:106015875 |
| 1 rs1516162    | 106028919 G | 1555  | 1.61E-29 | chr:1:106015875 |
| 1 rs1710769    | 106032610 A | 1555  | 1.61E-29 | chr:1:106015875 |
| 1 rs1710771    | 106032381 G | 1555  | 1.61E-29 | chr:1:106015875 |
| 1 rs151171804  | 106020156 T | 43.74 | 3.56E-28 | chr:1:106015875 |

|               |             |       |          |                 |
|---------------|-------------|-------|----------|-----------------|
| 1 rs777086    | 106022269 C | 43.93 | 3.70E-28 | chr:1:106015875 |
| 1 rs2502907   | 106018534 A | 45.61 | 3.89E-28 | chr:1:106015875 |
| 1 rs1721516   | 106028315 G | 180.9 | 2.37E-27 | chr:1:106015875 |
| 1 rs991009    | 106027353 A | 180.9 | 2.37E-27 | chr:1:106015875 |
| 1 rs2501579   | 105974218 C | 20.75 | 2.05E-26 | chr:1:106015875 |
| 1 rs115558666 | 105962319 G | 17.68 | 8.25E-26 | chr:1:106015875 |
| 1 rs2459321   | 105964755 A | 17.68 | 8.25E-26 | chr:1:106015875 |
| 1 rs12096040  | 106070032 C | 776.9 | 3.05E-25 | chr:1:106015875 |
| 1 rs1721541   | 106065836 T | 776.9 | 3.05E-25 | chr:1:106015875 |
| 1 rs2459330   | 106069314 T | 776.9 | 3.05E-25 | chr:1:106015875 |
| 1 rs6691386   | 106068934 G | 776.9 | 3.05E-25 | chr:1:106015875 |
| 1 rs79131044  | 106070515 T | 776.9 | 3.05E-25 | chr:1:106015875 |
| 1 rs116577727 | 105985398 G | 11.76 | 2.98E-24 | chr:1:106015875 |
| 1 rs2459319   | 106048674 C | 560   | 1.97E-23 | chr:1:106015875 |
| 1 rs11579317  | 106034326 A | 20.63 | 2.23E-23 | chr:1:106015875 |
| 1 rs12733456  | 106034035 G | 20.63 | 2.23E-23 | chr:1:106015875 |
| 1 rs12733465  | 106034046 G | 20.63 | 2.23E-23 | chr:1:106015875 |
| 1 rs1516154   | 106034669 A | 20.63 | 2.23E-23 | chr:1:106015875 |
| 1 rs1516155   | 106034597 G | 20.63 | 2.23E-23 | chr:1:106015875 |
| 1 rs1524123   | 106034389 A | 20.63 | 2.23E-23 | chr:1:106015875 |
| 1 rs1949338   | 106035398 A | 20.63 | 2.23E-23 | chr:1:106015875 |
| 1 rs2203575   | 106033671 T | 20.63 | 2.23E-23 | chr:1:106015875 |
| 1 rs2203576   | 106033660 C | 20.63 | 2.23E-23 | chr:1:106015875 |
| 1 rs2880133   | 106023408 C | 19.79 | 4.77E-23 | chr:1:106015875 |
| 1 rs1916824   | 106024122 G | 21.7  | 9.91E-23 | chr:1:106015875 |
| 1 rs1516163   | 106029319 T | 24.51 | 1.50E-22 | chr:1:106015875 |
| 1 rs1516164   | 106029434 T | 24.51 | 1.50E-22 | chr:1:106015875 |
| 1 rs2203577   | 106025524 A | 24.51 | 1.50E-22 | chr:1:106015875 |
| 1 rs4847045   | 106026809 A | 24.51 | 1.50E-22 | chr:1:106015875 |
| 1 rs11184582  | 106037458 C | 6.685 | 2.59E-22 | chr:1:106015875 |
| 1 rs11184583  | 106037459 C | 6.685 | 2.59E-22 | chr:1:106015875 |
| 1 rs11184581  | 106037417 G | 6.688 | 2.71E-22 | chr:1:106015875 |
| 1 rs12084140  | 106036483 C | 6.688 | 2.71E-22 | chr:1:106015875 |
| 1 rs1404034   | 106037161 G | 6.688 | 2.71E-22 | chr:1:106015875 |
| 1 rs1404036   | 106036839 C | 6.688 | 2.71E-22 | chr:1:106015875 |
| 1 rs28431449  | 106036281 C | 6.688 | 2.71E-22 | chr:1:106015875 |
| 1 rs28473029  | 106036486 A | 6.688 | 2.71E-22 | chr:1:106015875 |
| 1 rs12563882  | 106036145 A | 6.685 | 3.11E-22 | chr:1:106015875 |
| 1 rs2341710   | 106032936 C | 28.13 | 3.69E-22 | chr:1:106015875 |
| 1 rs9651162   | 106032690 G | 27.8  | 5.42E-22 | chr:1:106015875 |
| 1 rs1613491   | 106042753 T | 25.29 | 9.31E-22 | chr:1:106015875 |
| 1 rs2203573   | 106008029 C | 7.95  | 7.27E-21 | chr:1:106015875 |
| 1 rs2203574   | 106008091 G | 7.996 | 8.16E-21 | chr:1:106015875 |

|              |             |        |          |                 |
|--------------|-------------|--------|----------|-----------------|
| 1 rs7546059  | 106035197 T | 5.634  | 8.67E-21 | chr:1:106015875 |
| 1 rs777103   | 106054535 A | 1319   | 1.02E-20 | chr:1:106015875 |
| 1 rs2501587  | 105959269 T | 8.247  | 7.67E-20 | chr:1:106015875 |
| 1 rs12037064 | 106048945 T | 6.337  | 2.95E-19 | chr:1:106015875 |
| 1 rs1400100  | 106053322 A | 6.337  | 2.95E-19 | chr:1:106015875 |
| 1 rs1721531  | 106045217 A | 6.337  | 2.95E-19 | chr:1:106015875 |
| 1 rs1721533  | 106043860 A | 6.337  | 2.95E-19 | chr:1:106015875 |
| 1 rs2255422  | 106052011 C | 6.337  | 2.95E-19 | chr:1:106015875 |
| 1 rs2459318  | 106048663 C | 6.337  | 2.95E-19 | chr:1:106015875 |
| 1 rs2501598  | 106038410 G | 6.337  | 2.95E-19 | chr:1:106015875 |
| 1 rs777099   | 106056576 A | 6.337  | 2.95E-19 | chr:1:106015875 |
| 1 rs777102   | 106054543 T | 6.337  | 2.95E-19 | chr:1:106015875 |
| 1 rs1710772  | 106058864 A | 6.146  | 4.23E-19 | chr:1:106015875 |
| 1 rs12045534 | 106064926 A | 5.965  | 7.67E-19 | chr:1:106015875 |
| 1 rs1721542  | 106066105 A | 5.965  | 7.67E-19 | chr:1:106015875 |
| 1 rs2090336  | 106068107 T | 5.965  | 7.67E-19 | chr:1:106015875 |
| 1 rs2501596  | 106066693 G | 5.965  | 7.67E-19 | chr:1:106015875 |
| 1 rs777095   | 106063610 A | 5.965  | 7.67E-19 | chr:1:106015875 |
| 1 rs1721556  | 106081420 G | 5.319  | 9.51E-19 | chr:1:106015875 |
| 1 rs777070   | 106087275 T | 8.526  | 1.06E-18 | chr:1:106015875 |
| 1 rs1710790  | 106072410 G | 5.921  | 1.36E-18 | chr:1:106015875 |
| 1 rs10458526 | 106020558 G | 0.2215 | 2.51E-16 | chr:1:106015875 |
| 1 rs10458527 | 106020963 A | 0.2213 | 2.66E-16 | chr:1:106015875 |
| 1 rs6701452  | 106017505 T | 0.245  | 6.68E-16 | chr:1:106015875 |
| 1 rs2459316  | 106009279 G | 4.548  | 2.15E-15 | chr:1:106015875 |
| 1 rs2502867  | 106009415 C | 4.558  | 2.23E-15 | chr:1:106015875 |
| 1 rs2502869  | 106009370 T | 4.285  | 1.04E-14 | chr:1:106015875 |
| 1 rs6698864  | 105974470 C | 4.136  | 1.16E-14 | chr:1:106015875 |
| 1 rs951064   | 105975229 A | 4.136  | 1.16E-14 | chr:1:106015875 |
| 1 rs1160236  | 105958462 A | 4.1    | 1.65E-14 | chr:1:106015875 |
| 1 rs1516149  | 105956749 A | 4.1    | 1.65E-14 | chr:1:106015875 |
| 1 rs1516150  | 105956591 A | 4.1    | 1.65E-14 | chr:1:106015875 |
| 1 rs2018927  | 105958336 T | 4.1    | 1.65E-14 | chr:1:106015875 |
| 1 rs2018940  | 105958192 C | 4.1    | 1.65E-14 | chr:1:106015875 |
| 1 rs2501586  | 105959459 G | 4.1    | 1.65E-14 | chr:1:106015875 |
| 1 rs2459328  | 105968239 A | 4.094  | 1.66E-14 | chr:1:106015875 |
| 1 rs2459329  | 105968586 G | 4.094  | 1.66E-14 | chr:1:106015875 |
| 1 rs2501583  | 105967946 A | 4.094  | 1.66E-14 | chr:1:106015875 |
| 1 rs1546627  | 105950316 T | 4.158  | 1.68E-14 | chr:1:106015875 |
| 1 rs4356105  | 105954220 G | 4.158  | 1.68E-14 | chr:1:106015875 |
| 1 rs2459323  | 105961094 A | 4.08   | 1.96E-14 | chr:1:106015875 |
| 1 rs4522039  | 105963002 A | 4.08   | 1.96E-14 | chr:1:106015875 |
| 1 rs4847042  | 105963120 A | 4.08   | 1.96E-14 | chr:1:106015875 |

|               |             |        |          |                 |
|---------------|-------------|--------|----------|-----------------|
| 1 rs2459322   | 105961795 A | 3.99   | 2.90E-14 | chr:1:106015875 |
| 1 rs1516167   | 105944997 T | 4.065  | 2.94E-14 | chr:1:106015875 |
| 1 rs2341703   | 105952310 G | 4.065  | 2.94E-14 | chr:1:106015875 |
| 1 rs2501592   | 105950855 C | 4.065  | 2.94E-14 | chr:1:106015875 |
| 1 rs2502913   | 105948633 G | 4.065  | 2.94E-14 | chr:1:106015875 |
| 1 rs4423065   | 105962843 T | 4.045  | 3.44E-14 | chr:1:106015875 |
| 1 rs1516160   | 106011680 A | 4.039  | 4.81E-14 | chr:1:106015875 |
| 1 rs1616562   | 106033932 A | 2746   | 5.12E-14 | chr:1:106015875 |
| 1 rs1710763   | 106036401 C | 2746   | 5.12E-14 | chr:1:106015875 |
| 1 rs1710764   | 106036371 T | 2746   | 5.12E-14 | chr:1:106015875 |
| 1 rs1721588   | 106036430 A | 2746   | 5.12E-14 | chr:1:106015875 |
| 1 rs1721591   | 106034215 T | 2746   | 5.12E-14 | chr:1:106015875 |
| 1 rs1710762   | 106036654 C | 2718   | 5.46E-14 | chr:1:106015875 |
| 1 rs1721584   | 106036800 T | 2718   | 5.46E-14 | chr:1:106015875 |
| 1 rs1721585   | 106036787 T | 2718   | 5.46E-14 | chr:1:106015875 |
| 1 rs1516165   | 106039504 T | 2699   | 5.58E-14 | chr:1:106015875 |
| 1 rs10881295  | 105937528 T | 3.953  | 6.58E-14 | chr:1:106015875 |
| 1 rs11184550  | 105936193 G | 3.953  | 6.58E-14 | chr:1:106015875 |
| 1 rs77199289  | 105867471 G | 11.51  | 7.54E-14 | chr:1:106015875 |
| 1 rs11811336  | 105937215 A | 3.823  | 8.06E-14 | chr:1:106015875 |
| 1 rs2502915   | 106016319 T | 0.235  | 1.25E-13 | chr:1:106015875 |
| 1 rs1516169   | 105942480 T | 3.713  | 1.50E-13 | chr:1:106015875 |
| 1 rs1516170   | 105942265 C | 3.713  | 1.50E-13 | chr:1:106015875 |
| 1 rs2459310   | 106006312 T | 0.2859 | 1.45E-12 | chr:1:106015875 |
| 1 rs1913979   | 106026332 G | 0.2804 | 1.84E-12 | chr:1:106015875 |
| 1 rs61164181  | 105751026 T | 4.047  | 1.88E-12 | chr:1:106015875 |
| 1 rs3935799   | 106013859 A | 0.2926 | 5.29E-12 | chr:1:106015875 |
| 1 rs115474157 | 106083384 A | 74.92  | 6.07E-12 | chr:1:106015875 |
| 1 rs2502850   | 106012498 T | 0.3007 | 7.96E-12 | chr:1:106015875 |
| 1 rs139174365 | 105763925 C | 8.757  | 8.33E-12 | chr:1:106015875 |
| 1 rs12410557  | 105945707 C | 3.317  | 8.88E-12 | chr:1:106015875 |
| 1 rs2048839   | 105944301 A | 3.317  | 8.88E-12 | chr:1:106015875 |
| 1 rs66461932  | 105753684 C | 3.792  | 8.93E-12 | chr:1:106015875 |
| 1 rs202075201 | 106015815 T | 0.3001 | 1.23E-11 | chr:1:106015875 |
| 1 rs35570551  | 106066311 T | 0.2865 | 1.34E-11 | chr:1:106015875 |
| 1 rs7546711   | 106060014 C | 0.2865 | 1.34E-11 | chr:1:106015875 |
| 1 rs11184551  | 105937403 T | 3.296  | 1.54E-11 | chr:1:106015875 |
| 1 rs7520366   | 106071542 C | 0.2967 | 1.94E-11 | chr:1:106015875 |
| 1 rs58273107  | 106072932 A | 0.2912 | 2.19E-11 | chr:1:106015875 |
| 1 rs7520462   | 106071601 C | 0.2912 | 2.19E-11 | chr:1:106015875 |
| 1 rs34282524  | 106039986 T | 0.2995 | 2.30E-11 | chr:1:106015875 |
| 1 rs7416522   | 106056427 A | 0.2959 | 2.77E-11 | chr:1:106015875 |
| 1 rs11184575  | 106014131 T | 0.2772 | 2.92E-11 | chr:1:106015875 |

|               |             |        |          |                 |
|---------------|-------------|--------|----------|-----------------|
| 1 rs12736550  | 106037135 C | 0.2913 | 3.01E-11 | chr:1:106015875 |
| 1 rs12740117  | 106035061 G | 0.2913 | 3.01E-11 | chr:1:106015875 |
| 1 rs34763646  | 106037800 A | 0.2913 | 3.01E-11 | chr:1:106015875 |
| 1 rs11583556  | 106043955 A | 0.3019 | 3.10E-11 | chr:1:106015875 |
| 1 rs11585459  | 106049997 C | 0.3019 | 3.10E-11 | chr:1:106015875 |
| 1 rs12731640  | 106053411 T | 0.3019 | 3.10E-11 | chr:1:106015875 |
| 1 rs1524110   | 106056983 A | 0.3019 | 3.10E-11 | chr:1:106015875 |
| 1 rs17016041  | 106057104 T | 0.3019 | 3.10E-11 | chr:1:106015875 |
| 1 rs34086078  | 106045540 T | 0.3019 | 3.10E-11 | chr:1:106015875 |
| 1 rs35057076  | 106066099 A | 0.3019 | 3.10E-11 | chr:1:106015875 |
| 1 rs35663660  | 106052782 A | 0.3019 | 3.10E-11 | chr:1:106015875 |
| 1 rs35719854  | 106043937 G | 0.3019 | 3.10E-11 | chr:1:106015875 |
| 1 rs56672462  | 106065612 A | 0.3019 | 3.10E-11 | chr:1:106015875 |
| 1 rs2502905   | 105980618 G | 3.28   | 3.35E-11 | chr:1:106015875 |
| 1 rs11580189  | 106034938 G | 0.2914 | 3.38E-11 | chr:1:106015875 |
| 1 rs57386757  | 106065793 C | 0.3023 | 3.90E-11 | chr:1:106015875 |
| 1 rs11589718  | 106074279 C | 0.3026 | 4.21E-11 | chr:1:106015875 |
| 1 rs4847128   | 106073581 A | 0.3026 | 4.21E-11 | chr:1:106015875 |
| 1 rs4847129   | 106073809 A | 0.3026 | 4.21E-11 | chr:1:106015875 |
| 1 rs6582935   | 106074848 T | 0.3026 | 4.21E-11 | chr:1:106015875 |
| 1 rs7530092   | 106077085 A | 0.3026 | 4.21E-11 | chr:1:106015875 |
| 1 rs12739959  | 106035632 A | 0.2983 | 5.48E-11 | chr:1:106015875 |
| 1 rs34713228  | 106066393 A | 0.3115 | 6.57E-11 | chr:1:106015875 |
| 1 rs78465248  | 105742310 T | 5.456  | 1.31E-10 | chr:1:106015875 |
| 1 rs61799668  | 105821235 G | 4.741  | 1.35E-10 | chr:1:106015875 |
| 1 rs61801985  | 105797351 G | 4.741  | 1.35E-10 | chr:1:106015875 |
| 1 rs12025612  | 105747413 T | 3.733  | 1.44E-10 | chr:1:106015875 |
| 1 rs111784611 | 105918850 A | 6.78   | 2.09E-10 | chr:1:106015875 |
| 1 rs112735666 | 105922596 C | 6.78   | 2.09E-10 | chr:1:106015875 |
| 1 rs113509697 | 105921450 C | 6.78   | 2.09E-10 | chr:1:106015875 |
| 1 rs113749066 | 105914937 C | 6.78   | 2.09E-10 | chr:1:106015875 |
| 1 rs6691077   | 105913642 T | 6.78   | 2.09E-10 | chr:1:106015875 |
| 1 rs112274969 | 105923747 A | 9.333  | 2.23E-10 | chr:1:106015875 |
| 1 rs66706038  | 105741549 T | 3.677  | 2.35E-10 | chr:1:106015875 |
| 1 rs6681292   | 105913357 A | 6.5    | 3.26E-10 | chr:1:106015875 |
| 1 rs75169870  | 105770091 A | 4.692  | 3.37E-10 | chr:1:106015875 |
| 1 rs2653958   | 105794365 A | 4.517  | 3.40E-10 | chr:1:106015875 |
| 1 rs2251261   | 105903564 G | 6.453  | 3.52E-10 | chr:1:106015875 |
| 1 rs2455694   | 105894556 C | 6.453  | 3.52E-10 | chr:1:106015875 |
| 1 rs2491594   | 105903400 T | 6.453  | 3.52E-10 | chr:1:106015875 |
| 1 rs2491598   | 105898549 C | 6.453  | 3.52E-10 | chr:1:106015875 |
| 1 rs2491595   | 105902535 T | 6.179  | 3.73E-10 | chr:1:106015875 |
| 1 rs74397125  | 105858256 T | 5.39   | 4.61E-10 | chr:1:106015875 |



|               |             |        |          |                 |
|---------------|-------------|--------|----------|-----------------|
| 1 rs777064    | 106083957 T | 2.689  | 5.08E-10 | chr:1:106015875 |
| 1 rs2501584   | 105965571 C | 3.005  | 5.44E-10 | chr:1:106015875 |
| 1 rs75819272  | 105741790 T | 4.614  | 6.23E-10 | chr:1:106015875 |
| 1 rs114523650 | 105751676 T | 4.743  | 6.66E-10 | chr:1:106015875 |
| 1 rs7552941   | 105770337 C | 4.077  | 6.99E-10 | chr:1:106015875 |
| 1 rs141855967 | 105931476 T | 8.811  | 7.13E-10 | chr:1:106015875 |
| 1 rs987243    | 105957249 G | 2.761  | 7.15E-10 | chr:1:106015875 |
| 1 rs4598542   | 105724879 A | 3.854  | 7.19E-10 | chr:1:106015875 |
| 1 rs11576686  | 106023978 C | 0.3159 | 7.54E-10 | chr:1:106015875 |
| 1 rs2016033   | 106023753 C | 0.3159 | 7.54E-10 | chr:1:106015875 |
| 1 rs35921147  | 106026496 A | 0.3159 | 7.54E-10 | chr:1:106015875 |
| 1 rs61232173  | 106015774 T | 0.3159 | 7.54E-10 | chr:1:106015875 |
| 1 rs7415139   | 106026464 C | 0.3159 | 7.54E-10 | chr:1:106015875 |
| 1 rs4598541   | 106085602 A | 0.327  | 8.27E-10 | chr:1:106015875 |
| 1 rs11580550  | 106031366 G | 0.3176 | 9.30E-10 | chr:1:106015875 |
| 1 rs1913977   | 106035092 G | 0.3175 | 9.52E-10 | chr:1:106015875 |
| 1 rs61814796  | 106084764 A | 0.3315 | 9.74E-10 | chr:1:106015875 |
| 1 rs34695077  | 106082923 A | 0.3328 | 1.08E-09 | chr:1:106015875 |
| 1 rs143651669 | 105730556 T | 4.532  | 1.18E-09 | chr:1:106015875 |
| 1 rs61802870  | 105721358 A | 3.827  | 1.59E-09 | chr:1:106015875 |
| 1 rs11184553  | 105938462 C | 0.3423 | 1.88E-09 | chr:1:106015875 |
| 1 rs72685575  | 105742799 G | 4.303  | 2.06E-09 | chr:1:106015875 |
| 1 rs77726109  | 105754593 C | 4.202  | 2.22E-09 | chr:1:106015875 |
| 1 rs10785749  | 106024798 G | 0.3133 | 2.94E-09 | chr:1:106015875 |
| 1 rs11184558  | 105940737 G | 2.566  | 3.34E-09 | chr:1:106015875 |
| 1 rs2842202   | 105785079 G | 4.09   | 3.49E-09 | chr:1:106015875 |
| 1 rs61204110  | 105787019 A | 4.256  | 3.91E-09 | chr:1:106015875 |
| 1 rs17410084  | 105729213 G | 4.227  | 3.98E-09 | chr:1:106015875 |
| 1 rs2455670   | 105863366 A | 5.276  | 4.09E-09 | chr:1:106015875 |
| 1 rs2491634   | 105859257 A | 5.276  | 4.09E-09 | chr:1:106015875 |
| 1 rs2502887   | 105862250 G | 5.276  | 4.09E-09 | chr:1:106015875 |
| 1 rs113219798 | 105762498 G | 3.72   | 5.33E-09 | chr:1:106015875 |
| 1 rs115647603 | 105753833 G | 3.72   | 5.33E-09 | chr:1:106015875 |
| 1 rs1622623   | 106019590 A | 0.2792 | 6.06E-09 | chr:1:106015875 |
| 1 rs1710801   | 106019165 G | 0.2792 | 6.06E-09 | chr:1:106015875 |
| 1 rs1710800   | 106019088 A | 0.2333 | 6.17E-09 | chr:1:106015875 |
| 1 rs144456983 | 105849597 T | 5.565  | 6.34E-09 | chr:1:106015875 |
| 1 rs1400095   | 105998181 C | 2.656  | 6.75E-09 | chr:1:106015875 |
| 1 rs12217056  | 105726684 T | 3.242  | 7.02E-09 | chr:1:106015875 |
| 1 rs12217119  | 105726638 T | 3.242  | 7.02E-09 | chr:1:106015875 |
| 1 rs17015538  | 105727945 G | 3.242  | 7.02E-09 | chr:1:106015875 |
| 1 rs61100528  | 105727653 A | 3.242  | 7.02E-09 | chr:1:106015875 |
| 1 rs2341705   | 106022632 T | 0.2774 | 7.03E-09 | chr:1:106015875 |

|               |             |        |          |                 |
|---------------|-------------|--------|----------|-----------------|
| 1 rs2459334   | 105941906 G | 2.697  | 7.44E-09 | chr:1:106015875 |
| 1 rs10458525  | 106020469 A | 0.2793 | 7.77E-09 | chr:1:106015875 |
| 1 rs4387226   | 105940467 T | 2.574  | 8.02E-09 | chr:1:106015875 |
| 1 rs68122168  | 105728011 A | 3.606  | 1.71E-08 | chr:1:106015875 |
| 1 rs527895871 | 106018882 C | 71.53  | 1.90E-08 | chr:1:106015875 |
| 1 rs2491644   | 105853300 G | 4.667  | 3.18E-08 | chr:1:106015875 |
| 1 rs777096    | 106063748 T | 0.3612 | 4.49E-08 | chr:1:106015875 |
| 1 rs777071    | 106087588 C | 4.021  | 4.99E-08 | chr:1:106015875 |
| 1 rs994077    | 105946899 T | 2.492  | 5.16E-08 | chr:1:106015875 |
| 1 rs994078    | 105946707 T | 2.492  | 5.16E-08 | chr:1:106015875 |
| 1 rs6583129   | 105741765 A | 2.353  | 5.93E-08 | chr:1:106015875 |
| 1 rs61802371  | 106010993 G | 0.3059 | 6.44E-08 | chr:1:106015875 |
| 1 rs7515518   | 106007433 G | 0.3142 | 8.38E-08 | chr:1:106015875 |
| 1 rs60011126  | 106012101 G | 0.3118 | 9.81E-08 | chr:1:106015875 |
| 1 rs114611383 | 105722969 T | 3.733  | 1.06E-07 | chr:1:106015875 |
| 1 rs116221399 | 105722338 A | 3.733  | 1.06E-07 | chr:1:106015875 |
| 1 rs6694723   | 105914819 A | 3.903  | 1.07E-07 | chr:1:106015875 |
| 1 rs58901097  | 106012090 T | 0.314  | 1.14E-07 | chr:1:106015875 |
| 1 rs11184580  | 106031090 A | 0.3127 | 1.23E-07 | chr:1:106015875 |
| 1 rs1516156   | 106032070 G | 0.3127 | 1.23E-07 | chr:1:106015875 |
| 1 rs11184477  | 105754803 T | 13.23  | 1.32E-07 | chr:1:106015875 |
| 1 rs11184491  | 105762971 T | 13.23  | 1.32E-07 | chr:1:106015875 |
| 1 rs11184499  | 105775895 G | 13.23  | 1.32E-07 | chr:1:106015875 |
| 1 rs12057709  | 105759497 C | 13.23  | 1.32E-07 | chr:1:106015875 |
| 1 rs12062311  | 105801635 A | 13.23  | 1.32E-07 | chr:1:106015875 |
| 1 rs12066245  | 105809418 A | 13.23  | 1.32E-07 | chr:1:106015875 |
| 1 rs12073157  | 105777047 A | 13.23  | 1.32E-07 | chr:1:106015875 |
| 1 rs12079151  | 105794849 G | 13.23  | 1.32E-07 | chr:1:106015875 |
| 1 rs12088275  | 105801859 G | 13.23  | 1.32E-07 | chr:1:106015875 |
| 1 rs138392752 | 105793935 A | 13.23  | 1.32E-07 | chr:1:106015875 |
| 1 rs145270872 | 105787697 A | 13.23  | 1.32E-07 | chr:1:106015875 |
| 1 rs182198854 | 105792234 A | 13.23  | 1.32E-07 | chr:1:106015875 |
| 1 rs575693642 | 105732177 A | 13.23  | 1.32E-07 | chr:1:106015875 |
| 1 rs2501603   | 106007141 A | 0.3229 | 1.54E-07 | chr:1:106015875 |
| 1 rs12024969  | 106010402 C | 0.3171 | 1.56E-07 | chr:1:106015875 |
| 1 rs6583152   | 105939231 G | 0.3925 | 1.61E-07 | chr:1:106015875 |
| 1 rs17015519  | 105725199 C | 2.825  | 1.62E-07 | chr:1:106015875 |
| 1 rs12037250  | 106028291 G | 0.317  | 1.64E-07 | chr:1:106015875 |
| 1 rs1400098   | 106027601 G | 0.317  | 1.64E-07 | chr:1:106015875 |
| 1 rs1721555   | 106081513 A | 2.183  | 1.71E-07 | chr:1:106015875 |
| 1 rs11184578  | 106025908 A | 0.3189 | 1.88E-07 | chr:1:106015875 |
| 1 rs12089773  | 105799511 T | 11.13  | 2.00E-07 | chr:1:106015875 |
| 1 rs57204684  | 105741143 G | 2.465  | 2.26E-07 | chr:1:106015875 |

|               |             |        |          |                 |
|---------------|-------------|--------|----------|-----------------|
| 1 rs11184645  | 106146803 C | 2.885  | 2.77E-07 | chr:1:106015875 |
| 1 rs12061093  | 106142124 C | 2.885  | 2.77E-07 | chr:1:106015875 |
| 1 rs12061385  | 106142741 C | 2.885  | 2.77E-07 | chr:1:106015875 |
| 1 rs12073177  | 106143049 A | 2.885  | 2.77E-07 | chr:1:106015875 |
| 1 rs12095228  | 106145138 C | 2.885  | 2.77E-07 | chr:1:106015875 |
| 1 rs72978342  | 106147715 G | 2.885  | 2.77E-07 | chr:1:106015875 |
| 1 rs11184595  | 106057086 G | 204.2  | 2.82E-07 | chr:1:106015875 |
| 1 rs11184601  | 106068615 G | 204.2  | 2.82E-07 | chr:1:106015875 |
| 1 rs116119372 | 106048511 C | 204.2  | 2.82E-07 | chr:1:106015875 |
| 1 rs116403148 | 106076295 C | 204.2  | 2.82E-07 | chr:1:106015875 |
| 1 rs12088963  | 106052211 C | 204.2  | 2.82E-07 | chr:1:106015875 |
| 1 rs12096856  | 106050831 T | 204.2  | 2.82E-07 | chr:1:106015875 |
| 1 rs145993505 | 106076328 A | 204.2  | 2.82E-07 | chr:1:106015875 |
| 1 rs147177659 | 106070936 C | 204.2  | 2.82E-07 | chr:1:106015875 |
| 1 rs74465823  | 106056508 C | 204.2  | 2.82E-07 | chr:1:106015875 |
| 1 rs76840597  | 106055476 A | 204.2  | 2.82E-07 | chr:1:106015875 |
| 1 rs78421232  | 106044091 C | 204.2  | 2.82E-07 | chr:1:106015875 |
| 1 rs1710775   | 106081424 A | 2.151  | 2.94E-07 | chr:1:106015875 |
| 1 rs111944817 | 105686231 T | 6.329  | 3.45E-07 | chr:1:106015875 |
| 1 rs12095857  | 105824486 T | 7.127  | 3.58E-07 | chr:1:106015875 |
| 1 rs143822842 | 105834597 A | 7.127  | 3.58E-07 | chr:1:106015875 |
| 1 rs150869865 | 105833358 C | 7.127  | 3.58E-07 | chr:1:106015875 |
| 1 rs114208439 | 105716495 G | 3.44   | 4.01E-07 | chr:1:106015875 |
| 1 rs1710774   | 106081299 G | 2.127  | 4.39E-07 | chr:1:106015875 |
| 1 rs10881292  | 105887769 C | 3.692  | 4.61E-07 | chr:1:106015875 |
| 1 rs2455689   | 105888503 G | 3.692  | 4.61E-07 | chr:1:106015875 |
| 1 rs2455692   | 105893000 A | 3.692  | 4.61E-07 | chr:1:106015875 |
| 1 rs2491605   | 105879717 A | 3.692  | 4.61E-07 | chr:1:106015875 |
| 1 rs2502854   | 105891417 G | 3.692  | 4.61E-07 | chr:1:106015875 |
| 1 rs2502855   | 105890506 A | 3.692  | 4.61E-07 | chr:1:106015875 |
| 1 rs2502857   | 105888045 C | 3.692  | 4.61E-07 | chr:1:106015875 |
| 1 rs2502859   | 105886620 A | 3.692  | 4.61E-07 | chr:1:106015875 |
| 1 rs2502862   | 105881603 T | 3.692  | 4.61E-07 | chr:1:106015875 |
| 1 rs115086517 | 105817986 C | 6.842  | 5.17E-07 | chr:1:106015875 |
| 1 rs4554770   | 105997926 A | 2.285  | 5.41E-07 | chr:1:106015875 |
| 1 rs10127670  | 106012521 A | 2.198  | 5.85E-07 | chr:1:106015875 |
| 1 rs2340895   | 105886108 C | 3.618  | 6.21E-07 | chr:1:106015875 |
| 1 rs2653963   | 105793111 G | 2.241  | 6.46E-07 | chr:1:106015875 |
| 1 rs9787043   | 105729825 C | 2.553  | 6.53E-07 | chr:1:106015875 |
| 1 rs144007422 | 105902428 A | 14.75  | 6.61E-07 | chr:1:106015875 |
| 1 rs4381251   | 105761912 C | 0.3662 | 6.72E-07 | chr:1:106015875 |
| 1 rs4847106   | 105750245 C | 0.3679 | 6.75E-07 | chr:1:106015875 |
| 1 rs4471309   | 105742392 C | 0.3692 | 7.11E-07 | chr:1:106015875 |

|               |             |        |          |                 |
|---------------|-------------|--------|----------|-----------------|
| 1 rs12084501  | 105983963 G | 2.167  | 7.99E-07 | chr:1:106015875 |
| 1 rs12739546  | 106042643 A | 0.3995 | 8.43E-07 | chr:1:106015875 |
| 1 rs34671917  | 106042838 T | 0.3995 | 8.43E-07 | chr:1:106015875 |
| 1 rs35172839  | 106042833 A | 0.3995 | 8.43E-07 | chr:1:106015875 |
| 1 rs35725714  | 106043584 A | 0.3995 | 8.43E-07 | chr:1:106015875 |
| 1 rs61800477  | 106043510 T | 0.3995 | 8.43E-07 | chr:1:106015875 |
| 1 rs10785750  | 106032404 A | 0.3282 | 8.82E-07 | chr:1:106015875 |
| 1 rs4847124   | 106006734 T | 0.3183 | 9.16E-07 | chr:1:106015875 |
| 1 rs10158067  | 105982990 A | 2.148  | 9.62E-07 | chr:1:106015875 |
| 1 rs12025614  | 105747427 C | 0.3892 | 1.06E-06 | chr:1:106015875 |
| 1 rs2455684   | 105870249 T | 3.463  | 1.07E-06 | chr:1:106015875 |
| 1 rs4240951   | 105743667 C | 0.3767 | 1.12E-06 | chr:1:106015875 |
| 1 rs12120660  | 106086980 G | 0.437  | 1.16E-06 | chr:1:106015875 |
| 1 rs12062978  | 106026152 A | 154.5  | 1.21E-06 | chr:1:106015875 |
| 1 rs10736042  | 105764122 A | 0.3939 | 1.41E-06 | chr:1:106015875 |
| 1 rs7544453   | 105762322 C | 0.3939 | 1.41E-06 | chr:1:106015875 |
| 1 rs11184522  | 105848138 T | 10.11  | 1.51E-06 | chr:1:106015875 |
| 1 rs114503512 | 105852165 T | 10.11  | 1.51E-06 | chr:1:106015875 |
| 1 rs12068306  | 105847403 T | 10.11  | 1.51E-06 | chr:1:106015875 |
| 1 rs527649208 | 105848778 A | 10.11  | 1.51E-06 | chr:1:106015875 |
| 1 rs77248660  | 105854424 G | 10.11  | 1.51E-06 | chr:1:106015875 |
| 1 rs111375949 | 105685211 A | 4.295  | 1.61E-06 | chr:1:106015875 |
| 1 rs2455674   | 105867559 A | 3.36   | 1.67E-06 | chr:1:106015875 |
| 1 rs2502871   | 105868987 G | 3.36   | 1.67E-06 | chr:1:106015875 |
| 1 rs2502876   | 105867088 G | 3.36   | 1.67E-06 | chr:1:106015875 |
| 1 rs2502916   | 105941966 A | 2.21   | 1.69E-06 | chr:1:106015875 |
| 1 rs7540344   | 105766289 C | 0.3982 | 1.76E-06 | chr:1:106015875 |
| 1 rs2102765   | 105980430 C | 2.115  | 1.81E-06 | chr:1:106015875 |
| 1 rs6664964   | 105822668 A | 2.379  | 2.08E-06 | chr:1:106015875 |
| 1 rs12142840  | 105998320 C | 0.4283 | 2.13E-06 | chr:1:106015875 |
| 1 rs72690944  | 106034336 T | 0.3381 | 2.51E-06 | chr:1:106015875 |
| 1 rs2653970   | 105790671 C | 2.129  | 2.54E-06 | chr:1:106015875 |
| 1 rs2842205   | 105790865 G | 2.129  | 2.54E-06 | chr:1:106015875 |
| 1 rs17015975  | 106045394 G | 0.4114 | 2.74E-06 | chr:1:106015875 |
| 1 rs2653964   | 105792654 G | 2.114  | 2.88E-06 | chr:1:106015875 |
| 1 rs114176247 | 106036218 A | 0.3413 | 2.97E-06 | chr:1:106015875 |
| 1 rs12090701  | 106046094 T | 0.3413 | 2.97E-06 | chr:1:106015875 |
| 1 rs11184445  | 105678189 A | 12.39  | 3.04E-06 | chr:1:106015875 |
| 1 rs11184542  | 105899962 A | 35.37  | 3.29E-06 | chr:1:106015875 |
| 1 rs116477821 | 105884616 T | 35.37  | 3.29E-06 | chr:1:106015875 |
| 1 rs12073774  | 105856736 C | 35.37  | 3.29E-06 | chr:1:106015875 |
| 1 rs12081910  | 105867598 C | 35.37  | 3.29E-06 | chr:1:106015875 |
| 1 rs12089174  | 105872838 G | 35.37  | 3.29E-06 | chr:1:106015875 |

|               |             |        |          |                 |
|---------------|-------------|--------|----------|-----------------|
| 1 rs12094194  | 105880758 G | 35.37  | 3.29E-06 | chr:1:106015875 |
| 1 rs147587583 | 105863503 C | 35.37  | 3.29E-06 | chr:1:106015875 |
| 1 rs61799719  | 105921633 T | 2.125  | 3.45E-06 | chr:1:106015875 |
| 1 rs4520462   | 105724511 G | 2.339  | 3.50E-06 | chr:1:106015875 |
| 1 rs4520463   | 105724777 C | 2.339  | 3.50E-06 | chr:1:106015875 |
| 1 rs5023774   | 105724840 T | 2.339  | 3.50E-06 | chr:1:106015875 |
| 1 rs5023775   | 105724847 G | 2.339  | 3.50E-06 | chr:1:106015875 |
| 1 rs6695016   | 106040066 T | 0.344  | 3.60E-06 | chr:1:106015875 |
| 1 rs11184605  | 106078805 G | 0.3543 | 3.68E-06 | chr:1:106015875 |
| 1 rs12066943  | 105846636 T | 7.305  | 3.99E-06 | chr:1:106015875 |
| 1 rs2491592   | 105904728 A | 21.02  | 4.10E-06 | chr:1:106015875 |
| 1 rs4494191   | 105759207 G | 2.09   | 5.09E-06 | chr:1:106015875 |
| 1 rs2842215   | 105803955 T | 2.216  | 5.11E-06 | chr:1:106015875 |
| 1 rs12025289  | 106011628 G | 0.4206 | 6.05E-06 | chr:1:106015875 |
| 1 rs11184498  | 105775864 T | 32.11  | 6.66E-06 | chr:1:106015875 |
| 1 rs116086800 | 105771040 A | 32.11  | 6.66E-06 | chr:1:106015875 |
| 1 rs12072886  | 105829792 T | 32.11  | 6.66E-06 | chr:1:106015875 |
| 1 rs11184597  | 106064241 G | 0.3663 | 6.68E-06 | chr:1:106015875 |
| 1 rs12023854  | 106064845 A | 0.3663 | 6.68E-06 | chr:1:106015875 |
| 1 rs11184560  | 105947701 A | 2.025  | 6.85E-06 | chr:1:106015875 |
| 1 rs17420076  | 105949341 T | 2.025  | 6.85E-06 | chr:1:106015875 |
| 1 rs4847115   | 105949664 A | 2.025  | 6.85E-06 | chr:1:106015875 |
| 1 rs4847116   | 105949895 C | 2.025  | 6.85E-06 | chr:1:106015875 |
| 1 rs17015610  | 105821331 C | 2.205  | 7.63E-06 | chr:1:106015875 |
| 1 rs61802869  | 105716761 A | 2.299  | 7.65E-06 | chr:1:106015875 |
| 1 rs4356104   | 105940304 C | 0.4474 | 8.27E-06 | chr:1:106015875 |
| 1 rs12073686  | 105689610 T | 3.118  | 8.32E-06 | chr:1:106015875 |
| 1 rs12095042  | 105686805 G | 3.118  | 8.32E-06 | chr:1:106015875 |
| 1 rs1400099   | 106052389 C | 0.4051 | 9.00E-06 | chr:1:106015875 |
| 1 rs11184455  | 105705082 T | 30.4   | 9.39E-06 | chr:1:106015875 |
| 1 rs28408426  | 105715318 T | 30.4   | 9.39E-06 | chr:1:106015875 |
| 1 rs11184449  | 105691844 G | 3.901  | 9.46E-06 | chr:1:106015875 |
| 1 rs12091417  | 105542166 C | 18.63  | 9.60E-06 | chr:1:106015875 |
| 1 rs189019094 | 105538480 G | 18.63  | 9.60E-06 | chr:1:106015875 |
| 1 rs2262604   | 105795657 A | 2.158  | 1.05E-05 | chr:1:106015875 |
| 1 rs2653946   | 105801055 G | 2.158  | 1.05E-05 | chr:1:106015875 |
| 1 rs2653952   | 105797758 T | 2.158  | 1.05E-05 | chr:1:106015875 |
| 1 rs2653955   | 105796743 T | 2.158  | 1.05E-05 | chr:1:106015875 |
| 1 rs2653962   | 105793150 C | 2.158  | 1.05E-05 | chr:1:106015875 |
| 1 rs2809308   | 105806892 A | 2.158  | 1.05E-05 | chr:1:106015875 |
| 1 rs2809309   | 105804239 C | 2.158  | 1.05E-05 | chr:1:106015875 |
| 1 rs2809314   | 105802092 C | 2.158  | 1.05E-05 | chr:1:106015875 |
| 1 rs2809315   | 105801615 G | 2.158  | 1.05E-05 | chr:1:106015875 |

|               |             |         |          |                 |
|---------------|-------------|---------|----------|-----------------|
| 1 rs2809316   | 105801603 G | 2.158   | 1.05E-05 | chr:1:106015875 |
| 1 rs2809319   | 105800889 A | 2.158   | 1.05E-05 | chr:1:106015875 |
| 1 rs2809323   | 105800294 C | 2.158   | 1.05E-05 | chr:1:106015875 |
| 1 rs2809325   | 105799204 G | 2.158   | 1.05E-05 | chr:1:106015875 |
| 1 rs2809326   | 105799111 T | 2.158   | 1.05E-05 | chr:1:106015875 |
| 1 rs2809330   | 105796736 T | 2.158   | 1.05E-05 | chr:1:106015875 |
| 1 rs2809333   | 105795642 C | 2.158   | 1.05E-05 | chr:1:106015875 |
| 1 rs2842208   | 105795113 C | 2.158   | 1.05E-05 | chr:1:106015875 |
| 1 rs2842209   | 105795246 A | 2.158   | 1.05E-05 | chr:1:106015875 |
| 1 rs9435375   | 105795431 C | 2.158   | 1.05E-05 | chr:1:106015875 |
| 1 rs2653942   | 105803548 A | 2.148   | 1.19E-05 | chr:1:106015875 |
| 1 rs13374559  | 106082557 A | 0.4164  | 1.29E-05 | chr:1:106015875 |
| 1 rs1516168   | 105942573 G | 0.3674  | 1.37E-05 | chr:1:106015875 |
| 1 rs2501595   | 105942599 G | 0.3674  | 1.37E-05 | chr:1:106015875 |
| 1 rs11184651  | 106173159 A | 2.462   | 1.39E-05 | chr:1:106015875 |
| 1 rs12071793  | 106163378 G | 2.462   | 1.39E-05 | chr:1:106015875 |
| 1 rs12078346  | 106172976 T | 2.462   | 1.39E-05 | chr:1:106015875 |
| 1 rs2809329   | 105797309 C | 2.132   | 1.41E-05 | chr:1:106015875 |
| 1 rs11184450  | 105692228 G | 3.749   | 1.47E-05 | chr:1:106015875 |
| 1 rs7528406   | 105727098 C | 0.438   | 1.60E-05 | chr:1:106015875 |
| 1 rs2842216   | 105804507 A | 2.136   | 1.60E-05 | chr:1:106015875 |
| 1 rs149544970 | 106100694 T | 8.498   | 1.61E-05 | chr:1:106015875 |
| 1 rs11804803  | 106040837 T | 0.4197  | 1.61E-05 | chr:1:106015875 |
| 1 rs12048213  | 111821434 T | 23.85   | 1.65E-39 | chr:1:111802591 |
| 1 rs10857867  | 111810878 A | 35.34   | 2.04E-39 | chr:1:111802591 |
| 1 rs12139505  | 111816865 A | 24.14   | 1.06E-38 | chr:1:111802591 |
| 1 rs12034487  | 111805474 G | 55.15   | 7.67E-38 | chr:1:111802591 |
| 1 rs10857869  | 111822699 T | 23.4    | 4.05E-36 | chr:1:111802591 |
| 1 rs3118208   | 111812709 A | 43.04   | 6.20E-35 | chr:1:111802591 |
| 1 rs4259643   | 111814404 A | 43      | 6.73E-35 | chr:1:111802591 |
| 1 rs3118209   | 111812196 T | 42.72   | 7.11E-35 | chr:1:111802591 |
| 1 rs2104408   | 111810753 C | 46.59   | 1.93E-34 | chr:1:111802591 |
| 1 rs2820057   | 111811175 G | 46.59   | 1.93E-34 | chr:1:111802591 |
| 1 rs2820058   | 111811160 C | 46.59   | 1.93E-34 | chr:1:111802591 |
| 1 rs4240529   | 111824744 A | 16.23   | 1.23E-33 | chr:1:111802591 |
| 1 rs10857866  | 111810876 A | 11.86   | 1.95E-29 | chr:1:111802591 |
| 1 rs3122591   | 111810174 C | 0.1024  | 1.36E-28 | chr:1:111802591 |
| 1 rs2764548   | 111808585 T | 0.07971 | 2.14E-28 | chr:1:111802591 |
| 1 rs2820059   | 111808392 G | 0.07971 | 2.14E-28 | chr:1:111802591 |
| 1 rs3122593   | 111810965 A | 0.1117  | 2.95E-28 | chr:1:111802591 |
| 1 rs2494013   | 111813821 A | 0.1292  | 9.10E-28 | chr:1:111802591 |
| 1 rs3118206   | 111814461 G | 0.1292  | 9.10E-28 | chr:1:111802591 |
| 1 rs3122594   | 111813735 T | 0.1292  | 9.10E-28 | chr:1:111802591 |

|              |             |        |          |                 |
|--------------|-------------|--------|----------|-----------------|
| 1 rs3122595  | 111813951 T | 0.1292 | 9.10E-28 | chr:1:111802591 |
| 1 rs11102231 | 111817468 A | 0.1468 | 6.64E-27 | chr:1:111802591 |
| 1 rs4304581  | 111801635 G | 0.1518 | 1.25E-26 | chr:1:111802591 |
| 1 rs12139408 | 111816538 A | 9.881  | 2.29E-26 | chr:1:111802591 |
| 1 rs12728726 | 111819239 C | 9.852  | 2.46E-26 | chr:1:111802591 |
| 1 rs2820082  | 111800472 T | 0.177  | 8.68E-25 | chr:1:111802591 |
| 1 rs6687390  | 111825226 T | 0.1805 | 3.61E-24 | chr:1:111802591 |
| 1 rs10776720 | 111808276 A | 207.7  | 2.13E-23 | chr:1:111802591 |
| 1 rs10776722 | 111828464 C | 5.801  | 4.08E-22 | chr:1:111802591 |
| 1 rs7517252  | 111828817 A | 7.161  | 3.12E-21 | chr:1:111802591 |
| 1 rs6683292  | 111801402 A | 4.379  | 9.84E-21 | chr:1:111802591 |
| 1 rs4240528  | 111802958 C | 0.2218 | 1.42E-20 | chr:1:111802591 |
| 1 rs10776719 | 111808180 T | 280.5  | 1.91E-20 | chr:1:111802591 |
| 1 rs1853784  | 111804717 C | 280.5  | 1.91E-20 | chr:1:111802591 |
| 1 rs2494012  | 111808937 T | 280.5  | 1.91E-20 | chr:1:111802591 |
| 1 rs2764538  | 111804370 A | 280.5  | 1.91E-20 | chr:1:111802591 |
| 1 rs2764549  | 111808546 C | 280.5  | 1.91E-20 | chr:1:111802591 |
| 1 rs2820062  | 111805966 G | 280.5  | 1.91E-20 | chr:1:111802591 |
| 1 rs12140893 | 111812832 A | 7.927  | 3.93E-20 | chr:1:111802591 |
| 1 rs1590499  | 111804651 A | 260.5  | 4.37E-20 | chr:1:111802591 |
| 1 rs11809538 | 111801853 A | 0.2536 | 2.28E-18 | chr:1:111802591 |
| 1 rs6698373  | 111816497 A | 0.2578 | 3.02E-18 | chr:1:111802591 |
| 1 rs3927471  | 111802912 C | 0.2552 | 3.03E-18 | chr:1:111802591 |
| 1 rs61808280 | 111807687 C | 0.2552 | 3.03E-18 | chr:1:111802591 |
| 1 rs7550145  | 111804157 T | 0.2552 | 3.03E-18 | chr:1:111802591 |
| 1 rs9660405  | 111808946 C | 0.2552 | 3.03E-18 | chr:1:111802591 |
| 1 rs6702380  | 111818052 A | 0.2586 | 4.47E-18 | chr:1:111802591 |
| 1 rs6655936  | 111821516 G | 0.2587 | 4.49E-18 | chr:1:111802591 |
| 1 rs6671713  | 111815790 T | 0.2654 | 2.03E-17 | chr:1:111802591 |
| 1 rs7512322  | 111818550 A | 0.272  | 6.32E-17 | chr:1:111802591 |
| 1 rs41282488 | 111828423 T | 0.28   | 3.61E-16 | chr:1:111802591 |
| 1 rs10494131 | 111824711 C | 0.2833 | 1.05E-15 | chr:1:111802591 |
| 1 rs6688201  | 111826023 G | 0.2833 | 1.05E-15 | chr:1:111802591 |
| 1 rs6688325  | 111826175 T | 0.2833 | 1.05E-15 | chr:1:111802591 |
| 1 rs6537690  | 111824209 A | 0.2848 | 1.05E-15 | chr:1:111802591 |
| 1 rs6537691  | 111824255 T | 0.2848 | 1.05E-15 | chr:1:111802591 |
| 1 rs9659635  | 111808642 A | 0.2878 | 3.06E-15 | chr:1:111802591 |
| 1 rs11800770 | 111813650 T | 0.2912 | 8.24E-15 | chr:1:111802591 |
| 1 rs10857871 | 111829633 C | 6.415  | 4.12E-14 | chr:1:111802591 |
| 1 rs6703883  | 111820644 G | 0.3053 | 4.67E-14 | chr:1:111802591 |
| 1 rs6694890  | 111827901 T | 5.355  | 9.82E-14 | chr:1:111802591 |
| 1 rs4838897  | 111833661 T | 5.213  | 1.05E-12 | chr:1:111802591 |
| 1 rs4348720  | 111806066 A | 0.28   | 1.35E-12 | chr:1:111802591 |

|              |             |        |          |                 |
|--------------|-------------|--------|----------|-----------------|
| 1 rs4418594  | 111825261 A | 0.3526 | 1.53E-12 | chr:1:111802591 |
| 1 rs41281400 | 111827898 A | 0.3258 | 1.78E-12 | chr:1:111802591 |
| 1 rs4575084  | 111826609 A | 2.427  | 7.29E-11 | chr:1:111802591 |
| 1 rs11102233 | 111827749 T | 4.029  | 7.92E-11 | chr:1:111802591 |
| 1 rs4838899  | 111834050 G | 3.451  | 1.12E-10 | chr:1:111802591 |
| 1 rs6685226  | 111780604 G | 3.946  | 1.21E-10 | chr:1:111802591 |
| 1 rs12023459 | 111832973 T | 3.454  | 1.21E-10 | chr:1:111802591 |
| 1 rs41282484 | 111828379 C | 0.3025 | 1.43E-10 | chr:1:111802591 |
| 1 rs12724976 | 111813174 C | 0.2612 | 4.86E-10 | chr:1:111802591 |
| 1 rs35884994 | 111816144 C | 0.2594 | 5.80E-10 | chr:1:111802591 |
| 1 rs1575721  | 111804605 C | 0.2951 | 8.27E-10 | chr:1:111802591 |
| 1 rs1575723  | 111803817 T | 0.2951 | 8.27E-10 | chr:1:111802591 |
| 1 rs72981857 | 111812089 T | 5.299  | 9.93E-10 | chr:1:111802591 |
| 1 rs11102240 | 111844621 G | 2.642  | 1.24E-09 | chr:1:111802591 |
| 1 rs2820061  | 111806570 T | 0.3071 | 2.04E-09 | chr:1:111802591 |
| 1 rs7411387  | 111837135 C | 2.579  | 2.35E-09 | chr:1:111802591 |
| 1 rs7515475  | 111801948 C | 0.3124 | 2.50E-09 | chr:1:111802591 |
| 1 rs11588487 | 111812241 T | 0.2621 | 2.78E-09 | chr:1:111802591 |
| 1 rs75132719 | 111800925 C | 7.011  | 3.75E-09 | chr:1:111802591 |
| 1 rs11102229 | 111808446 G | 0.2686 | 4.21E-09 | chr:1:111802591 |
| 1 rs12733155 | 111812412 T | 0.2578 | 4.41E-09 | chr:1:111802591 |
| 1 rs59772828 | 111808783 A | 0.2668 | 6.21E-09 | chr:1:111802591 |
| 1 rs34487304 | 111804011 A | 0.2646 | 6.77E-09 | chr:1:111802591 |
| 1 rs12135216 | 111809857 G | 0.2838 | 8.22E-09 | chr:1:111802591 |
| 1 rs72981843 | 111808146 C | 5.025  | 9.46E-09 | chr:1:111802591 |
| 1 rs4838905  | 111840470 T | 2.847  | 1.05E-08 | chr:1:111802591 |
| 1 rs3118205  | 111814475 C | 0.3681 | 1.07E-08 | chr:1:111802591 |
| 1 rs3891601  | 111805489 G | 0.2728 | 1.11E-08 | chr:1:111802591 |
| 1 rs12738135 | 111809571 G | 0.3124 | 1.14E-08 | chr:1:111802591 |
| 1 rs4376736  | 111841944 T | 2.846  | 1.19E-08 | chr:1:111802591 |
| 1 rs2764541  | 111811430 C | 0.3774 | 2.20E-08 | chr:1:111802591 |
| 1 rs2147787  | 111820225 A | 0.3364 | 5.33E-08 | chr:1:111802591 |
| 1 rs11589375 | 111822887 G | 0.3398 | 5.95E-08 | chr:1:111802591 |
| 1 rs12758301 | 111822132 C | 0.3398 | 5.95E-08 | chr:1:111802591 |
| 1 rs4323713  | 111823220 T | 0.3398 | 5.95E-08 | chr:1:111802591 |
| 1 rs5029527  | 111818923 T | 0.3398 | 5.95E-08 | chr:1:111802591 |
| 1 rs10857872 | 111838382 A | 2.356  | 7.02E-08 | chr:1:111802591 |
| 1 rs11102232 | 111818450 C | 0.3465 | 8.87E-08 | chr:1:111802591 |
| 1 rs35693821 | 111816294 G | 0.3469 | 1.06E-07 | chr:1:111802591 |
| 1 rs6675853  | 111841598 C | 4.791  | 1.46E-07 | chr:1:111802591 |
| 1 rs6676797  | 111843174 T | 4.791  | 1.46E-07 | chr:1:111802591 |
| 1 rs12140873 | 111826055 G | 5.059  | 1.58E-07 | chr:1:111802591 |
| 1 rs12411206 | 111822962 C | 0.348  | 1.71E-07 | chr:1:111802591 |



|               |             |        |          |                 |
|---------------|-------------|--------|----------|-----------------|
| 1 rs12567865  | 111817250 A | 0.348  | 1.71E-07 | chr:1:111802591 |
| 1 rs58982671  | 111826007 T | 0.348  | 1.71E-07 | chr:1:111802591 |
| 1 rs6694264   | 111848628 G | 0.4459 | 1.88E-07 | chr:1:111802591 |
| 1 rs11589353  | 111822680 G | 0.3541 | 2.73E-07 | chr:1:111802591 |
| 1 rs74108969  | 111848742 G | 0.4534 | 3.09E-07 | chr:1:111802591 |
| 1 rs74108968  | 111847695 C | 0.4253 | 3.30E-07 | chr:1:111802591 |
| 1 rs6682169   | 111848975 T | 0.4526 | 3.91E-07 | chr:1:111802591 |
| 1 rs6697360   | 111849106 C | 0.4526 | 3.91E-07 | chr:1:111802591 |
| 1 rs7518496   | 111790311 G | 1.926  | 4.80E-07 | chr:1:111802591 |
| 1 rs6657000   | 111848961 A | 0.4559 | 4.89E-07 | chr:1:111802591 |
| 1 rs6657192   | 111849107 A | 0.4559 | 4.89E-07 | chr:1:111802591 |
| 1 rs12086232  | 111851186 T | 0.4556 | 5.43E-07 | chr:1:111802591 |
| 1 rs12128628  | 111850085 A | 0.4556 | 5.43E-07 | chr:1:111802591 |
| 1 rs114140388 | 111813706 T | 6.134  | 5.66E-07 | chr:1:111802591 |
| 1 rs7412290   | 111851040 A | 0.4589 | 6.78E-07 | chr:1:111802591 |
| 1 rs12071109  | 111851342 C | 0.4603 | 7.35E-07 | chr:1:111802591 |
| 1 rs28480609  | 111851572 T | 0.4603 | 7.35E-07 | chr:1:111802591 |
| 1 rs28531702  | 111851860 G | 0.4603 | 7.35E-07 | chr:1:111802591 |
| 1 rs56146935  | 111851403 T | 0.4603 | 7.35E-07 | chr:1:111802591 |
| 1 rs7531210   | 111852352 T | 0.4603 | 7.35E-07 | chr:1:111802591 |
| 1 rs7543074   | 111852600 G | 0.4603 | 7.35E-07 | chr:1:111802591 |
| 1 rs7545065   | 111852255 A | 0.4603 | 7.35E-07 | chr:1:111802591 |
| 1 rs7545343   | 111852527 G | 0.4603 | 7.35E-07 | chr:1:111802591 |
| 1 rs12125099  | 111855621 G | 0.4604 | 7.48E-07 | chr:1:111802591 |
| 1 rs12401376  | 111828474 A | 0.3752 | 7.65E-07 | chr:1:111802591 |
| 1 rs79950640  | 111787045 A | 0.4519 | 9.05E-07 | chr:1:111802591 |
| 1 rs10494133  | 111854688 C | 0.4647 | 9.74E-07 | chr:1:111802591 |
| 1 rs11102243  | 111854044 T | 0.4647 | 9.74E-07 | chr:1:111802591 |
| 1 rs11102244  | 111854076 T | 0.4647 | 9.74E-07 | chr:1:111802591 |
| 1 rs12128422  | 111855454 C | 0.4647 | 9.74E-07 | chr:1:111802591 |
| 1 rs12129604  | 111856561 A | 0.4647 | 9.74E-07 | chr:1:111802591 |
| 1 rs12131907  | 111853376 A | 0.4647 | 9.74E-07 | chr:1:111802591 |
| 1 rs12136028  | 111855396 T | 0.4647 | 9.74E-07 | chr:1:111802591 |
| 1 rs12137027  | 111856269 T | 0.4647 | 9.74E-07 | chr:1:111802591 |
| 1 rs12139473  | 111853377 T | 0.4647 | 9.74E-07 | chr:1:111802591 |
| 1 rs41282490  | 111854741 G | 0.4647 | 9.74E-07 | chr:1:111802591 |
| 1 rs41282494  | 111854895 A | 0.4647 | 9.74E-07 | chr:1:111802591 |
| 1 rs41282496  | 111854938 T | 0.4647 | 9.74E-07 | chr:1:111802591 |
| 1 rs74108971  | 111855149 T | 0.4647 | 9.74E-07 | chr:1:111802591 |
| 1 rs11583210  | 111781886 A | 3.221  | 1.10E-06 | chr:1:111802591 |
| 1 rs35599356  | 111782540 G | 3.221  | 1.10E-06 | chr:1:111802591 |
| 1 rs28536723  | 111851749 G | 0.4669 | 1.14E-06 | chr:1:111802591 |
| 1 rs12132538  | 111865013 A | 0.4615 | 1.52E-06 | chr:1:111802591 |

|               |             |        |          |                 |
|---------------|-------------|--------|----------|-----------------|
| 1 rs76388937  | 111785979 C | 4.534  | 1.73E-06 | chr:1:111802591 |
| 1 rs4284263   | 111823414 C | 6.914  | 2.09E-06 | chr:1:111802591 |
| 1 rs1056825   | 111785930 C | 2.339  | 2.10E-06 | chr:1:111802591 |
| 1 rs55737011  | 111852824 A | 0.4747 | 2.12E-06 | chr:1:111802591 |
| 1 rs76275224  | 111823994 T | 0.3722 | 2.53E-06 | chr:1:111802591 |
| 1 rs75367073  | 111791052 A | 0.4684 | 2.54E-06 | chr:1:111802591 |
| 1 rs115563824 | 111816883 C | 6.798  | 2.59E-06 | chr:1:111802591 |
| 1 rs41282492  | 111854889 G | 0.4821 | 2.60E-06 | chr:1:111802591 |
| 1 rs3738303   | 111894180 A | 2.83   | 3.33E-06 | chr:1:111802591 |
| 1 rs3738304   | 111890941 A | 2.83   | 3.33E-06 | chr:1:111802591 |
| 1 rs116638080 | 111764490 T | 5.057  | 3.42E-06 | chr:1:111802591 |
| 1 rs75868085  | 111762769 A | 5.057  | 3.42E-06 | chr:1:111802591 |
| 1 rs7541787   | 111850452 C | 1.853  | 3.69E-06 | chr:1:111802591 |
| 1 rs114382749 | 111803341 A | 0.1844 | 4.12E-06 | chr:1:111802591 |
| 1 rs17027081  | 111743468 T | 0.5546 | 4.95E-06 | chr:1:111802591 |
| 1 rs41281398  | 111827466 T | 0.3871 | 5.22E-06 | chr:1:111802591 |
| 1 rs41281404  | 111828148 C | 0.3871 | 5.22E-06 | chr:1:111802591 |
| 1 rs6696410   | 111840987 A | 0.5455 | 5.34E-06 | chr:1:111802591 |
| 1 rs11102249  | 111864700 A | 0.4825 | 5.98E-06 | chr:1:111802591 |
| 1 rs942692    | 111746697 T | 1.949  | 7.18E-06 | chr:1:111802591 |
| 1 rs12072791  | 111787872 G | 0.5469 | 7.35E-06 | chr:1:111802591 |
| 1 rs11102234  | 111832773 T | 7.116  | 7.36E-06 | chr:1:111802591 |
| 1 rs2820072   | 111857485 A | 0.5523 | 7.90E-06 | chr:1:111802591 |
| 1 rs113703527 | 111840317 A | 0.5423 | 9.69E-06 | chr:1:111802591 |
| 1 rs10857870  | 111829220 C | 0.5382 | 9.95E-06 | chr:1:111802591 |
| 1 rs79725626  | 111762028 T | 3.642  | 1.04E-05 | chr:1:111802591 |
| 1 rs12030461  | 111759662 T | 3.106  | 1.34E-05 | chr:1:111802591 |
| 1 rs9662740   | 111844526 C | 1.814  | 1.34E-05 | chr:1:111802591 |
| 1 rs12735522  | 111765722 A | 3.314  | 1.64E-05 | chr:1:111802591 |
| 1 rs112975376 | 111812293 C | 0.3279 | 1.64E-05 | chr:1:111802591 |
| 1 rs12077359  | 111787847 A | 0.5384 | 1.81E-05 | chr:1:111802591 |
| 1 rs60895025  | 112001163 A | 3.665  | 2.02E-05 | chr:1:111802591 |
| 1 rs12076798  | 111857512 A | 0.5061 | 2.10E-05 | chr:1:111802591 |
| 1 rs12094378  | 111862078 T | 0.5061 | 2.10E-05 | chr:1:111802591 |
| 1 rs7517352   | 111859050 G | 0.5061 | 2.10E-05 | chr:1:111802591 |
| 1 rs10494130  | 111797385 G | 2.579  | 2.12E-05 | chr:1:111802591 |
| 1 rs17014713  | 111763153 T | 3.023  | 2.18E-05 | chr:1:111802591 |
| 1 rs3887445   | 111761427 A | 3.023  | 2.18E-05 | chr:1:111802591 |
| 1 rs78462286  | 111763635 A | 3.023  | 2.18E-05 | chr:1:111802591 |
| 1 rs1541156   | 111858687 T | 0.5223 | 2.19E-05 | chr:1:111802591 |
| 1 rs12027550  | 111821946 G | 4.587  | 2.24E-05 | chr:1:111802591 |
| 1 rs12047673  | 111823173 C | 4.587  | 2.24E-05 | chr:1:111802591 |
| 1 rs58013456  | 111826483 G | 4.574  | 2.27E-05 | chr:1:111802591 |

|               |             |       |          |                 |
|---------------|-------------|-------|----------|-----------------|
| 1 rs116694952 | 111752904 A | 3.891 | 2.49E-05 | chr:1:111802591 |
| 1 rs113282546 | 223589739 G | 131.9 | 4.82E-18 | chr:1:223578304 |
| 1 rs148497163 | 223589636 A | 122.7 | 7.72E-18 | chr:1:223578304 |
| 1 rs113023892 | 223574695 T | 197.3 | 8.44E-18 | chr:1:223578304 |
| 1 rs148171220 | 223526935 G | 381.4 | 2.99E-17 | chr:1:223578304 |
| 1 rs139446310 | 223564326 G | 103.3 | 4.37E-17 | chr:1:223578304 |
| 1 rs142553074 | 223563828 T | 103.3 | 4.37E-17 | chr:1:223578304 |
| 1 rs149091195 | 223565422 G | 103.3 | 4.37E-17 | chr:1:223578304 |
| 1 rs150542653 | 223563940 A | 103.3 | 4.37E-17 | chr:1:223578304 |
| 1 rs114113533 | 223562286 A | 46.96 | 5.41E-17 | chr:1:223578304 |
| 1 rs113302908 | 223551701 C | 163.9 | 1.84E-15 | chr:1:223578304 |
| 1 rs112020523 | 223526862 T | 237.4 | 2.64E-15 | chr:1:223578304 |
| 1 rs113853048 | 223574880 T | 110.8 | 4.29E-15 | chr:1:223578304 |
| 1 rs141620413 | 223575930 G | 110.8 | 4.29E-15 | chr:1:223578304 |
| 1 rs146220066 | 223576091 T | 110.8 | 4.29E-15 | chr:1:223578304 |
| 1 rs544155730 | 223569138 T | 212.5 | 1.12E-14 | chr:1:223578304 |
| 1 rs113816059 | 223584961 G | 236.7 | 1.85E-14 | chr:1:223578304 |
| 1 rs115769114 | 223586270 T | 213.8 | 8.14E-14 | chr:1:223578304 |
| 1 rs548918742 | 223569460 G | 190.1 | 1.45E-13 | chr:1:223578304 |
| 1 rs555558273 | 223566737 C | 190.1 | 1.45E-13 | chr:1:223578304 |
| 1 rs564773873 | 223574253 A | 190.1 | 1.45E-13 | chr:1:223578304 |
| 1 rs572064621 | 223569123 C | 190.1 | 1.45E-13 | chr:1:223578304 |
| 1 rs1772270   | 223479060 C | 24.35 | 1.48E-13 | chr:1:223578304 |
| 1 rs1772271   | 223480141 C | 24.35 | 1.48E-13 | chr:1:223578304 |
| 1 rs1356480   | 223490036 T | 23.3  | 1.63E-13 | chr:1:223578304 |
| 1 rs1772273   | 223482173 G | 23.3  | 1.63E-13 | chr:1:223578304 |
| 1 rs1772275   | 223486502 C | 23.3  | 1.63E-13 | chr:1:223578304 |
| 1 rs825124    | 223488337 A | 23.3  | 1.63E-13 | chr:1:223578304 |
| 1 rs184232855 | 223549832 A | 181.6 | 2.12E-13 | chr:1:223578304 |
| 1 rs192160429 | 223549233 T | 181.6 | 2.12E-13 | chr:1:223578304 |
| 1 rs1713206   | 223486505 T | 20.65 | 5.71E-13 | chr:1:223578304 |
| 1 rs825125    | 223489079 T | 20.49 | 6.38E-13 | chr:1:223578304 |
| 1 rs112175683 | 223574758 A | 145.1 | 9.21E-13 | chr:1:223578304 |
| 1 rs148639077 | 223568849 C | 145.1 | 9.21E-13 | chr:1:223578304 |
| 1 rs111921471 | 223524835 A | 27.87 | 1.08E-12 | chr:1:223578304 |
| 1 rs111941553 | 223523663 G | 27.87 | 1.08E-12 | chr:1:223578304 |
| 1 rs116663149 | 223509790 T | 27.87 | 1.08E-12 | chr:1:223578304 |
| 1 rs1400962   | 223478509 A | 19.41 | 2.88E-12 | chr:1:223578304 |
| 1 rs115764077 | 223514984 A | 25.16 | 2.98E-12 | chr:1:223578304 |
| 1 rs1400960   | 223502811 T | 15.39 | 3.69E-12 | chr:1:223578304 |
| 1 rs377753813 | 223538113 T | 34.74 | 3.97E-12 | chr:1:223578304 |
| 1 rs142409482 | 223547357 G | 27.34 | 9.44E-12 | chr:1:223578304 |
| 1 rs564670573 | 223541689 G | 27.34 | 9.44E-12 | chr:1:223578304 |

|               |             |       |          |                 |
|---------------|-------------|-------|----------|-----------------|
| 1 rs825113    | 223498145 A | 13.12 | 1.41E-11 | chr:1:223578304 |
| 1 rs146999469 | 223631923 T | 30.48 | 1.52E-11 | chr:1:223578304 |
| 1 rs825114    | 223495647 A | 13.37 | 1.96E-11 | chr:1:223578304 |
| 1 rs17162003  | 223523808 C | 19.1  | 2.75E-11 | chr:1:223578304 |
| 1 rs142891705 | 223538778 A | 179.9 | 1.02E-10 | chr:1:223578304 |
| 1 rs144427708 | 223538543 T | 179.9 | 1.02E-10 | chr:1:223578304 |
| 1 rs187934431 | 223540037 G | 179.9 | 1.02E-10 | chr:1:223578304 |
| 1 rs541503964 | 223538000 T | 179.9 | 1.02E-10 | chr:1:223578304 |
| 1 rs11261268  | 223574537 C | 7.981 | 1.89E-10 | chr:1:223578304 |
| 1 rs12074782  | 223575111 C | 7.981 | 1.89E-10 | chr:1:223578304 |
| 1 rs12082133  | 223575202 C | 7.981 | 1.89E-10 | chr:1:223578304 |
| 1 rs6679661   | 223567267 T | 7.981 | 1.89E-10 | chr:1:223578304 |
| 1 rs79205040  | 223575371 T | 7.978 | 1.98E-10 | chr:1:223578304 |
| 1 rs144105833 | 223484757 T | 44.36 | 1.11E-09 | chr:1:223578304 |
| 1 rs184809316 | 223520175 A | 44.36 | 1.11E-09 | chr:1:223578304 |
| 1 rs187476584 | 223512123 C | 44.36 | 1.11E-09 | chr:1:223578304 |
| 1 rs4661241   | 223529815 C | 6.632 | 3.05E-09 | chr:1:223578304 |
| 1 rs1772285   | 223574646 G | 6.24  | 4.63E-09 | chr:1:223578304 |
| 1 rs111306873 | 223566859 C | 6.302 | 6.58E-09 | chr:1:223578304 |
| 1 rs114322253 | 223511018 T | 17.35 | 6.74E-09 | chr:1:223578304 |
| 1 rs182702369 | 223460069 T | 37.74 | 9.00E-09 | chr:1:223578304 |
| 1 rs188693245 | 223444688 A | 37.74 | 9.00E-09 | chr:1:223578304 |
| 1 rs541636260 | 223455262 G | 37.74 | 9.00E-09 | chr:1:223578304 |
| 1 rs2282399   | 223531803 T | 6.058 | 1.23E-08 | chr:1:223578304 |
| 1 rs145296796 | 223542049 C | 4.042 | 1.33E-08 | chr:1:223578304 |
| 1 rs2501982   | 223574483 G | 5.434 | 1.39E-08 | chr:1:223578304 |
| 1 rs569846351 | 223607681 C | 46.72 | 2.22E-08 | chr:1:223578304 |
| 1 rs144991841 | 223574229 C | 5.519 | 2.46E-08 | chr:1:223578304 |
| 1 rs1547788   | 223532570 C | 5.214 | 4.49E-08 | chr:1:223578304 |
| 1 rs145118686 | 223420257 A | 33.81 | 4.65E-08 | chr:1:223578304 |
| 1 rs1619227   | 223549683 C | 4.87  | 5.09E-08 | chr:1:223578304 |
| 1 rs185186335 | 223401837 G | 26.56 | 6.33E-08 | chr:1:223578304 |
| 1 rs1713219   | 223574801 T | 4.72  | 7.71E-08 | chr:1:223578304 |
| 1 rs1772284   | 223574563 G | 4.72  | 7.71E-08 | chr:1:223578304 |
| 1 rs116211782 | 223402343 C | 24.61 | 8.65E-08 | chr:1:223578304 |
| 1 rs7412054   | 223544706 G | 4.869 | 9.21E-08 | chr:1:223578304 |
| 1 rs9442046   | 223528843 G | 4.837 | 9.87E-08 | chr:1:223578304 |
| 1 rs870486    | 223525848 C | 5.075 | 1.03E-07 | chr:1:223578304 |
| 1 rs17163831  | 223526993 A | 4.837 | 1.10E-07 | chr:1:223578304 |
| 1 rs4611006   | 223545114 C | 4.778 | 1.38E-07 | chr:1:223578304 |
| 1 rs7555607   | 223547630 G | 4.778 | 1.38E-07 | chr:1:223578304 |
| 1 rs146954194 | 223367503 C | 18.52 | 1.40E-07 | chr:1:223578304 |
| 1 rs1713220   | 223562254 A | 4.802 | 1.42E-07 | chr:1:223578304 |

|               |             |       |          |                 |
|---------------|-------------|-------|----------|-----------------|
| 1 rs2487521   | 223561802 C | 4.799 | 1.55E-07 | chr:1:223578304 |
| 1 rs528799671 | 223623712 T | 327   | 1.78E-07 | chr:1:223578304 |
| 1 rs111544996 | 223603203 A | 40.3  | 1.79E-07 | chr:1:223578304 |
| 1 rs112387175 | 223606850 T | 40.3  | 1.79E-07 | chr:1:223578304 |
| 1 rs113564518 | 223602358 T | 40.3  | 1.79E-07 | chr:1:223578304 |
| 1 rs1772281   | 223556136 G | 4.728 | 1.79E-07 | chr:1:223578304 |
| 1 rs75549686  | 223606264 T | 40.3  | 1.79E-07 | chr:1:223578304 |
| 1 rs6604709   | 223549347 C | 4.653 | 1.94E-07 | chr:1:223578304 |
| 1 rs825116    | 223587515 A | 4.369 | 2.06E-07 | chr:1:223578304 |
| 1 rs1095167   | 223589689 C | 4.368 | 2.12E-07 | chr:1:223578304 |
| 1 rs368997392 | 223578085 C | 268.6 | 2.55E-07 | chr:1:223578304 |
| 1 rs2678377   | 223561839 G | 4.547 | 2.65E-07 | chr:1:223578304 |
| 1 rs12089137  | 223540478 A | 4.719 | 3.18E-07 | chr:1:223578304 |
| 1 rs190956088 | 223334678 A | 21.58 | 3.69E-07 | chr:1:223578304 |
| 1 rs114561020 | 223615999 A | 278.5 | 4.26E-07 | chr:1:223578304 |
| 1 rs115839657 | 223612161 G | 278.5 | 4.26E-07 | chr:1:223578304 |
| 1 rs140601483 | 223610098 C | 278.5 | 4.26E-07 | chr:1:223578304 |
| 1 rs141557867 | 223616035 T | 278.5 | 4.26E-07 | chr:1:223578304 |
| 1 rs142652637 | 223609064 C | 278.5 | 4.26E-07 | chr:1:223578304 |
| 1 rs148343754 | 223619557 C | 278.5 | 4.26E-07 | chr:1:223578304 |
| 1 rs151310629 | 223631012 C | 278.5 | 4.26E-07 | chr:1:223578304 |
| 1 rs185279945 | 223619577 C | 278.5 | 4.26E-07 | chr:1:223578304 |
| 1 rs188205217 | 223620022 A | 278.5 | 4.26E-07 | chr:1:223578304 |
| 1 rs189126138 | 223607106 T | 278.5 | 4.26E-07 | chr:1:223578304 |
| 1 rs192051318 | 223620487 T | 278.5 | 4.26E-07 | chr:1:223578304 |
| 1 rs545549072 | 223625224 T | 278.5 | 4.26E-07 | chr:1:223578304 |
| 1 rs549272720 | 223621320 T | 278.5 | 4.26E-07 | chr:1:223578304 |
| 1 rs571603807 | 223613100 C | 278.5 | 4.26E-07 | chr:1:223578304 |
| 1 rs1341286   | 223557615 A | 4.382 | 4.60E-07 | chr:1:223578304 |
| 1 rs531513655 | 223346577 G | 19.22 | 4.78E-07 | chr:1:223578304 |
| 1 rs533140692 | 223345701 T | 19.22 | 4.78E-07 | chr:1:223578304 |
| 1 rs1095175   | 223581814 G | 4.409 | 5.69E-07 | chr:1:223578304 |
| 1 rs1713208   | 223577888 C | 4.472 | 5.90E-07 | chr:1:223578304 |
| 1 rs2138964   | 223577741 G | 4.472 | 5.90E-07 | chr:1:223578304 |
| 1 rs825115    | 223586638 A | 4.472 | 5.90E-07 | chr:1:223578304 |
| 1 rs825130    | 223584719 T | 4.472 | 5.90E-07 | chr:1:223578304 |
| 1 rs825129    | 223584267 G | 4.474 | 5.94E-07 | chr:1:223578304 |
| 1 rs147650606 | 223387621 G | 25.32 | 6.41E-07 | chr:1:223578304 |
| 1 rs190773497 | 223385479 C | 25.32 | 6.41E-07 | chr:1:223578304 |
| 1 rs79163656  | 223599457 T | 8.365 | 6.93E-07 | chr:1:223578304 |
| 1 rs79992920  | 223599029 A | 8.365 | 6.93E-07 | chr:1:223578304 |
| 1 rs115065751 | 223431616 T | 36.25 | 7.27E-07 | chr:1:223578304 |
| 1 rs17163828  | 223524567 T | 4.38  | 7.96E-07 | chr:1:223578304 |

|               |             |       |          |                 |
|---------------|-------------|-------|----------|-----------------|
| 1 rs11800458  | 223614676 G | 3.689 | 8.68E-07 | chr:1:223578304 |
| 1 rs143874675 | 223428458 C | 18.72 | 8.84E-07 | chr:1:223578304 |
| 1 rs149377286 | 223372354 A | 21.85 | 9.34E-07 | chr:1:223578304 |
| 1 rs193298999 | 223382245 A | 21.85 | 9.34E-07 | chr:1:223578304 |
| 1 rs187443405 | 223375768 T | 16.57 | 1.13E-06 | chr:1:223578304 |
| 1 rs368556337 | 223392473 C | 16.57 | 1.13E-06 | chr:1:223578304 |
| 1 rs116237191 | 223428180 A | 12.87 | 1.18E-06 | chr:1:223578304 |
| 1 rs141325273 | 223585727 T | 207.9 | 1.20E-06 | chr:1:223578304 |
| 1 rs182453047 | 223581941 T | 207.9 | 1.20E-06 | chr:1:223578304 |
| 1 rs184127550 | 223551626 T | 207.9 | 1.20E-06 | chr:1:223578304 |
| 1 rs184872353 | 223583665 C | 207.9 | 1.20E-06 | chr:1:223578304 |
| 1 rs528523441 | 223552117 G | 207.9 | 1.20E-06 | chr:1:223578304 |
| 1 rs529704607 | 223574456 A | 207.9 | 1.20E-06 | chr:1:223578304 |
| 1 rs548354976 | 223613018 C | 67.16 | 1.20E-06 | chr:1:223578304 |
| 1 rs1713209   | 223578627 T | 4.161 | 1.41E-06 | chr:1:223578304 |
| 1 rs825131    | 223518146 C | 4.615 | 1.61E-06 | chr:1:223578304 |
| 1 rs113300713 | 223600333 T | 7.613 | 1.61E-06 | chr:1:223578304 |
| 1 rs1772294   | 223579973 G | 4.082 | 1.64E-06 | chr:1:223578304 |
| 1 rs116112887 | 223406902 A | 39.57 | 1.81E-06 | chr:1:223578304 |
| 1 rs142866025 | 223393056 G | 39.57 | 1.81E-06 | chr:1:223578304 |
| 1 rs146827894 | 223403403 A | 29.19 | 1.85E-06 | chr:1:223578304 |
| 1 rs150564478 | 223402681 T | 29.19 | 1.85E-06 | chr:1:223578304 |
| 1 rs180955231 | 223401559 G | 29.19 | 1.85E-06 | chr:1:223578304 |
| 1 rs182250497 | 223403453 T | 29.19 | 1.85E-06 | chr:1:223578304 |
| 1 rs540887665 | 223400590 T | 29.19 | 1.85E-06 | chr:1:223578304 |
| 1 rs577931892 | 223402174 C | 29.19 | 1.85E-06 | chr:1:223578304 |
| 1 rs61838249  | 223523185 G | 4.259 | 1.87E-06 | chr:1:223578304 |
| 1 rs2459849   | 223561765 A | 3.851 | 2.08E-06 | chr:1:223578304 |
| 1 rs17163824  | 223514945 T | 4.053 | 3.27E-06 | chr:1:223578304 |
| 1 rs140557200 | 223400001 C | 13.78 | 3.58E-06 | chr:1:223578304 |
| 1 rs141029080 | 223400712 G | 13.78 | 3.58E-06 | chr:1:223578304 |
| 1 rs184027824 | 223400086 G | 13.78 | 3.58E-06 | chr:1:223578304 |
| 1 rs186797349 | 223399925 G | 13.78 | 3.58E-06 | chr:1:223578304 |
| 1 rs564837872 | 223573293 G | 183.4 | 4.50E-06 | chr:1:223578304 |
| 1 rs145231501 | 223398704 T | 16.51 | 6.75E-06 | chr:1:223578304 |
| 1 rs185629877 | 223398693 T | 16.51 | 6.75E-06 | chr:1:223578304 |
| 1 rs5744134   | 223311003 A | 55.57 | 6.78E-06 | chr:1:223578304 |
| 1 rs11799394  | 223614397 A | 3.223 | 8.80E-06 | chr:1:223578304 |
| 1 rs1417748   | 223613551 T | 3.223 | 8.80E-06 | chr:1:223578304 |
| 1 rs6699902   | 223616212 C | 3.223 | 8.80E-06 | chr:1:223578304 |
| 1 rs17163825  | 223523854 C | 3.89  | 9.53E-06 | chr:1:223578304 |
| 1 rs185188251 | 223400662 C | 15.46 | 9.88E-06 | chr:1:223578304 |
| 1 rs191519537 | 223400591 C | 15.46 | 9.88E-06 | chr:1:223578304 |

|    |             |           |   |       |          |                 |
|----|-------------|-----------|---|-------|----------|-----------------|
| 1  | rs193141990 | 223401085 | G | 15.46 | 9.88E-06 | chr:1:223578304 |
| 1  | rs191167295 | 223562023 | G | 135.1 | 1.18E-05 | chr:1:223578304 |
| 1  | rs547598164 | 223537580 | C | 135.1 | 1.18E-05 | chr:1:223578304 |
| 1  | rs144789273 | 223423878 | G | 14.7  | 1.18E-05 | chr:1:223578304 |
| 1  | rs7551911   | 223617182 | C | 3.12  | 1.25E-05 | chr:1:223578304 |
| 1  | rs11577440  | 223621225 | G | 3.105 | 1.37E-05 | chr:1:223578304 |
| 1  | rs139633125 | 223407949 | C | 30.21 | 1.43E-05 | chr:1:223578304 |
| 1  | rs61838244  | 223519871 | C | 3.867 | 1.52E-05 | chr:1:223578304 |
| 1  | rs60933808  | 223563508 | T | 3.706 | 1.52E-05 | chr:1:223578304 |
| 1  | rs114791159 | 223439849 | C | 13.19 | 1.68E-05 | chr:1:223578304 |
| 1  | rs187375815 | 223371302 | G | 22.35 | 1.85E-05 | chr:1:223578304 |
| 1  | rs115335457 | 223497418 | T | 119.7 | 1.93E-05 | chr:1:223578304 |
| 1  | rs561556683 | 223476949 | A | 119.7 | 1.93E-05 | chr:1:223578304 |
| 1  | rs549926600 | 223613079 | C | 5.279 | 2.17E-05 | chr:1:223578304 |
| 1  | rs844069    | 223596251 | T | 3.085 | 2.23E-05 | chr:1:223578304 |
| 1  | rs2678370   | 223594054 | T | 3.081 | 2.31E-05 | chr:1:223578304 |
| 1  | rs2678369   | 223594072 | G | 3.06  | 2.72E-05 | chr:1:223578304 |
| 1  | rs61837868  | 223619301 | T | 3.328 | 3.28E-05 | chr:1:223578304 |
| 1  | rs536770077 | 223720607 | C | 15.2  | 3.30E-05 | chr:1:223578304 |
| 1  | rs141506504 | 223475098 | G | 11.24 | 3.40E-05 | chr:1:223578304 |
| 1  | rs145845253 | 223448121 | T | 11.24 | 3.40E-05 | chr:1:223578304 |
| 1  | rs147038656 | 223475370 | C | 11.24 | 3.40E-05 | chr:1:223578304 |
| 1  | rs111900949 | 223611619 | G | 3.769 | 3.69E-05 | chr:1:223578304 |
| 1  | rs112545135 | 223611178 | C | 3.769 | 3.69E-05 | chr:1:223578304 |
| 1  | rs113133820 | 223611836 | T | 3.769 | 3.69E-05 | chr:1:223578304 |
| 1  | rs113261136 | 223609917 | C | 3.769 | 3.69E-05 | chr:1:223578304 |
| 1  | rs114929456 | 223611018 | G | 3.769 | 3.69E-05 | chr:1:223578304 |
| 1  | rs17162092  | 223611148 | C | 3.769 | 3.69E-05 | chr:1:223578304 |
| 1  | rs182653141 | 223611943 | T | 3.769 | 3.69E-05 | chr:1:223578304 |
| 1  | rs185487965 | 223611944 | C | 3.769 | 3.69E-05 | chr:1:223578304 |
| 1  | rs74861303  | 223611353 | G | 3.769 | 3.69E-05 | chr:1:223578304 |
| 1  | rs77204463  | 223610460 | G | 3.769 | 3.69E-05 | chr:1:223578304 |
| 1  | rs77396066  | 223611100 | C | 3.769 | 3.69E-05 | chr:1:223578304 |
| 1  | rs78077769  | 223611604 | G | 3.769 | 3.69E-05 | chr:1:223578304 |
| 1  | rs79629094  | 223611702 | T | 3.769 | 3.69E-05 | chr:1:223578304 |
| 20 | rs6041366   | 12444867  | A | 70.46 | 1.84E-30 | chr:20:12402387 |
| 20 | rs1158442   | 12381568  | T | 55.19 | 6.83E-30 | chr:20:12402387 |
| 20 | rs6041319   | 12390696  | T | 52.02 | 9.52E-30 | chr:20:12402387 |
| 20 | rs112628379 | 12412353  | T | 151.4 | 1.35E-29 | chr:20:12402387 |
| 20 | rs6041328   | 12405323  | T | 151.4 | 1.35E-29 | chr:20:12402387 |
| 20 | rs78442554  | 12408034  | A | 151.4 | 1.35E-29 | chr:20:12402387 |
| 20 | rs111299735 | 12403766  | A | 302.3 | 2.67E-29 | chr:20:12402387 |
| 20 | rs113033767 | 12402863  | A | 302.3 | 2.67E-29 | chr:20:12402387 |

|                |            |       |          |                 |
|----------------|------------|-------|----------|-----------------|
| 20 rs113465587 | 12407728 G | 302.3 | 2.67E-29 | chr:20:12402387 |
| 20 rs113863736 | 12406435 T | 302.3 | 2.67E-29 | chr:20:12402387 |
| 20 rs115347228 | 12402868 T | 302.3 | 2.67E-29 | chr:20:12402387 |
| 20 rs6041324   | 12400987 A | 302.3 | 2.67E-29 | chr:20:12402387 |
| 20 rs6041327   | 12404063 G | 302.3 | 2.67E-29 | chr:20:12402387 |
| 20 rs6041329   | 12405489 C | 302.3 | 2.67E-29 | chr:20:12402387 |
| 20 rs6041331   | 12406866 T | 302.3 | 2.67E-29 | chr:20:12402387 |
| 20 rs6041332   | 12407362 C | 302.3 | 2.67E-29 | chr:20:12402387 |
| 20 rs6041334   | 12408582 T | 302.3 | 2.67E-29 | chr:20:12402387 |
| 20 rs6041335   | 12408807 T | 302.3 | 2.67E-29 | chr:20:12402387 |
| 20 rs6041336   | 12409056 T | 302.3 | 2.67E-29 | chr:20:12402387 |
| 20 rs76202039  | 12408077 T | 302.3 | 2.67E-29 | chr:20:12402387 |
| 20 rs76670390  | 12402832 T | 302.3 | 2.67E-29 | chr:20:12402387 |
| 20 rs79419664  | 12400697 A | 302.3 | 2.67E-29 | chr:20:12402387 |
| 20 rs6033415   | 12427403 G | 123.7 | 9.14E-29 | chr:20:12402387 |
| 20 rs6033418   | 12432061 C | 123.7 | 9.14E-29 | chr:20:12402387 |
| 20 rs6033419   | 12432357 C | 123.7 | 9.14E-29 | chr:20:12402387 |
| 20 rs6041345   | 12416478 T | 123.7 | 9.14E-29 | chr:20:12402387 |
| 20 rs75859773  | 12413891 T | 45.97 | 1.27E-28 | chr:20:12402387 |
| 20 rs79077592  | 12414053 G | 136.1 | 2.04E-28 | chr:20:12402387 |
| 20 rs6033411   | 12419544 A | 117.9 | 3.14E-28 | chr:20:12402387 |
| 20 rs6041346   | 12417695 T | 48.33 | 5.05E-28 | chr:20:12402387 |
| 20 rs78412784  | 12416970 A | 30.65 | 1.33E-26 | chr:20:12402387 |
| 20 rs6041343   | 12414696 T | 26.14 | 7.53E-25 | chr:20:12402387 |
| 20 rs6041344   | 12414723 C | 26.14 | 7.53E-25 | chr:20:12402387 |
| 20 rs79480718  | 12414804 T | 25.44 | 1.20E-24 | chr:20:12402387 |
| 20 rs79942557  | 12414865 G | 25.44 | 1.20E-24 | chr:20:12402387 |
| 20 rs112182228 | 12440251 G | 17.47 | 1.54E-22 | chr:20:12402387 |
| 20 rs76044905  | 12400273 G | 19.11 | 1.82E-20 | chr:20:12402387 |
| 20 rs6033404   | 12392718 G | 12.57 | 2.38E-19 | chr:20:12402387 |
| 20 rs982720    | 12415702 G | 10.85 | 1.02E-18 | chr:20:12402387 |
| 20 rs6033413   | 12420731 A | 8.471 | 6.94E-18 | chr:20:12402387 |
| 20 rs2208973   | 12394990 T | 9.824 | 9.93E-18 | chr:20:12402387 |
| 20 rs75214329  | 12394923 G | 75.15 | 1.71E-16 | chr:20:12402387 |
| 20 rs1543522   | 12378028 T | 70.04 | 4.39E-16 | chr:20:12402387 |
| 20 rs6033402   | 12385137 A | 70.04 | 4.39E-16 | chr:20:12402387 |
| 20 rs6041322   | 12393909 T | 70.04 | 4.39E-16 | chr:20:12402387 |
| 20 rs78031920  | 12381352 A | 70.04 | 4.39E-16 | chr:20:12402387 |
| 20 rs6041365   | 12443879 A | 22.45 | 1.01E-15 | chr:20:12402387 |
| 20 rs6033412   | 12420695 G | 48.31 | 1.01E-15 | chr:20:12402387 |
| 20 rs76913143  | 12423701 A | 48.31 | 1.01E-15 | chr:20:12402387 |
| 20 rs77315664  | 12440583 G | 48.31 | 1.01E-15 | chr:20:12402387 |
| 20 rs6041369   | 12448314 G | 8.062 | 3.03E-15 | chr:20:12402387 |



|                |            |        |          |                 |
|----------------|------------|--------|----------|-----------------|
| 20 rs79420216  | 12436078 T | 46.06  | 3.08E-15 | chr:20:12402387 |
| 20 rs6041403   | 12482361 A | 31.16  | 4.04E-15 | chr:20:12402387 |
| 20 rs114758761 | 12452082 G | 36.03  | 5.34E-15 | chr:20:12402387 |
| 20 rs116348168 | 12474818 G | 36.03  | 5.34E-15 | chr:20:12402387 |
| 20 rs6041397   | 12475659 T | 36.03  | 5.34E-15 | chr:20:12402387 |
| 20 rs79008745  | 12449661 A | 42.52  | 1.01E-14 | chr:20:12402387 |
| 20 rs75117931  | 12402099 G | 3309   | 7.07E-14 | chr:20:12402387 |
| 20 rs114584836 | 12495394 A | 21.68  | 7.58E-14 | chr:20:12402387 |
| 20 rs6033436   | 12491921 G | 21.68  | 7.58E-14 | chr:20:12402387 |
| 20 rs115598781 | 12484619 G | 54.87  | 1.08E-13 | chr:20:12402387 |
| 20 rs150802997 | 12477176 G | 54.87  | 1.08E-13 | chr:20:12402387 |
| 20 rs76084571  | 12479767 C | 54.87  | 1.08E-13 | chr:20:12402387 |
| 20 rs75164900  | 12391011 T | 78.33  | 1.46E-13 | chr:20:12402387 |
| 20 rs77796060  | 12397152 G | 78.33  | 1.46E-13 | chr:20:12402387 |
| 20 rs7347049   | 12426444 A | 11     | 5.26E-13 | chr:20:12402387 |
| 20 rs7347050   | 12426446 A | 11     | 5.26E-13 | chr:20:12402387 |
| 20 rs115757547 | 12485027 A | 25.15  | 5.84E-13 | chr:20:12402387 |
| 20 rs116466224 | 12455509 C | 72.63  | 9.51E-13 | chr:20:12402387 |
| 20 rs76075008  | 12455108 C | 72.63  | 9.51E-13 | chr:20:12402387 |
| 20 rs6074428   | 12421622 A | 29.55  | 1.55E-12 | chr:20:12402387 |
| 20 rs77796184  | 12464618 A | 67.55  | 1.81E-12 | chr:20:12402387 |
| 20 rs115249017 | 12482675 T | 15.08  | 3.54E-12 | chr:20:12402387 |
| 20 rs75995150  | 12412941 T | 99.29  | 4.38E-12 | chr:20:12402387 |
| 20 rs138242853 | 12427450 C | 96.92  | 7.38E-12 | chr:20:12402387 |
| 20 rs74748099  | 12367068 G | 96.92  | 7.38E-12 | chr:20:12402387 |
| 20 rs78485531  | 12422395 A | 96.92  | 7.38E-12 | chr:20:12402387 |
| 20 rs74597927  | 12301234 A | 13.57  | 1.44E-11 | chr:20:12402387 |
| 20 rs79405946  | 12345614 T | 17.17  | 2.98E-11 | chr:20:12402387 |
| 20 rs77957262  | 12353052 G | 16.21  | 4.30E-11 | chr:20:12402387 |
| 20 rs79322698  | 12352997 T | 16.21  | 4.30E-11 | chr:20:12402387 |
| 20 rs150663868 | 12461148 C | 8.657  | 4.34E-11 | chr:20:12402387 |
| 20 rs183697438 | 12468251 C | 8.657  | 4.34E-11 | chr:20:12402387 |
| 20 rs4814115   | 12406658 T | 4.196  | 1.21E-10 | chr:20:12402387 |
| 20 rs7273589   | 12318863 C | 8.771  | 4.38E-10 | chr:20:12402387 |
| 20 rs6033422   | 12440983 T | 3.382  | 4.77E-10 | chr:20:12402387 |
| 20 rs189911827 | 12325521 T | 8.525  | 4.79E-10 | chr:20:12402387 |
| 20 rs200749087 | 12324302 C | 8.212  | 6.65E-10 | chr:20:12402387 |
| 20 rs2423652   | 12414721 G | 3.772  | 7.08E-10 | chr:20:12402387 |
| 20 rs75283889  | 12456906 A | 6.054  | 1.25E-09 | chr:20:12402387 |
| 20 rs6033423   | 12441485 A | 3.435  | 2.49E-09 | chr:20:12402387 |
| 20 rs1076791   | 12414548 C | 24.41  | 4.14E-09 | chr:20:12402387 |
| 20 rs6078576   | 12418150 A | 24.41  | 4.14E-09 | chr:20:12402387 |
| 20 rs6041325   | 12401841 G | 0.2717 | 5.43E-09 | chr:20:12402387 |

|                |            |        |          |                 |
|----------------|------------|--------|----------|-----------------|
| 20 rs8121916   | 12401325 C | 0.2751 | 6.74E-09 | chr:20:12402387 |
| 20 rs961900    | 12412558 G | 0.275  | 7.15E-09 | chr:20:12402387 |
| 20 rs6109442   | 12492496 C | 25.27  | 7.69E-09 | chr:20:12402387 |
| 20 rs2423653   | 12415277 C | 0.2809 | 9.04E-09 | chr:20:12402387 |
| 20 rs6078572   | 12413317 A | 3.136  | 9.44E-09 | chr:20:12402387 |
| 20 rs73257928  | 12363286 T | 5.053  | 2.04E-08 | chr:20:12402387 |
| 20 rs17811681  | 12435803 C | 6.38   | 3.09E-08 | chr:20:12402387 |
| 20 rs62217077  | 12434581 A | 6.38   | 3.09E-08 | chr:20:12402387 |
| 20 rs2423650   | 12407307 C | 0.2768 | 4.17E-08 | chr:20:12402387 |
| 20 rs116927816 | 12430382 A | 5.881  | 4.25E-08 | chr:20:12402387 |
| 20 rs17225851  | 12433428 T | 5.881  | 4.25E-08 | chr:20:12402387 |
| 20 rs191153854 | 12430462 T | 5.881  | 4.25E-08 | chr:20:12402387 |
| 20 rs370510432 | 12430850 C | 5.881  | 4.25E-08 | chr:20:12402387 |
| 20 rs6078584   | 12427317 G | 5.881  | 4.25E-08 | chr:20:12402387 |
| 20 rs6078595   | 12433726 T | 5.881  | 4.25E-08 | chr:20:12402387 |
| 20 rs6104895   | 12423634 A | 5.881  | 4.25E-08 | chr:20:12402387 |
| 20 rs6104902   | 12431869 T | 5.881  | 4.25E-08 | chr:20:12402387 |
| 20 rs6109412   | 12427919 C | 5.881  | 4.25E-08 | chr:20:12402387 |
| 20 rs6109413   | 12429618 A | 5.881  | 4.25E-08 | chr:20:12402387 |
| 20 rs6109415   | 12429732 C | 5.881  | 4.25E-08 | chr:20:12402387 |
| 20 rs6109417   | 12433285 C | 5.881  | 4.25E-08 | chr:20:12402387 |
| 20 rs62217062  | 12429652 A | 5.881  | 4.25E-08 | chr:20:12402387 |
| 20 rs62217068  | 12430532 C | 5.881  | 4.25E-08 | chr:20:12402387 |
| 20 rs62217070  | 12430736 A | 5.881  | 4.25E-08 | chr:20:12402387 |
| 20 rs62217071  | 12430839 C | 5.881  | 4.25E-08 | chr:20:12402387 |
| 20 rs62217073  | 12431110 A | 5.881  | 4.25E-08 | chr:20:12402387 |
| 20 rs62217074  | 12431224 C | 5.881  | 4.25E-08 | chr:20:12402387 |
| 20 rs62217075  | 12431404 A | 5.881  | 4.25E-08 | chr:20:12402387 |
| 20 rs73086467  | 12429783 T | 5.881  | 4.25E-08 | chr:20:12402387 |
| 20 rs7354487   | 12433661 T | 5.881  | 4.25E-08 | chr:20:12402387 |
| 20 rs6033391   | 12357536 T | 4.991  | 5.03E-08 | chr:20:12402387 |
| 20 rs6078561   | 12400804 C | 0.3039 | 5.35E-08 | chr:20:12402387 |
| 20 rs180908033 | 12430463 C | 5.643  | 6.44E-08 | chr:20:12402387 |
| 20 rs62217072  | 12431100 A | 5.588  | 6.81E-08 | chr:20:12402387 |
| 20 rs6104897   | 12427834 G | 5.592  | 7.04E-08 | chr:20:12402387 |
| 20 rs6104898   | 12427840 T | 5.592  | 7.04E-08 | chr:20:12402387 |
| 20 rs115418369 | 12339013 G | 18.75  | 8.51E-08 | chr:20:12402387 |
| 20 rs142448219 | 12345691 G | 18.75  | 8.51E-08 | chr:20:12402387 |
| 20 rs151284840 | 12349804 G | 18.75  | 8.51E-08 | chr:20:12402387 |
| 20 rs184200562 | 12334974 A | 18.75  | 8.51E-08 | chr:20:12402387 |
| 20 rs184808643 | 12331832 C | 18.75  | 8.51E-08 | chr:20:12402387 |
| 20 rs188888725 | 12331858 A | 18.75  | 8.51E-08 | chr:20:12402387 |
| 20 rs189345805 | 12347114 C | 18.75  | 8.51E-08 | chr:20:12402387 |

|                |            |        |          |                 |
|----------------|------------|--------|----------|-----------------|
| 20 rs190202636 | 12337629 T | 18.75  | 8.51E-08 | chr:20:12402387 |
| 20 rs191702285 | 12352826 C | 18.75  | 8.51E-08 | chr:20:12402387 |
| 20 rs534143730 | 12340682 T | 18.75  | 8.51E-08 | chr:20:12402387 |
| 20 rs115446612 | 12330972 G | 12.73  | 8.84E-08 | chr:20:12402387 |
| 20 rs188647098 | 12325753 G | 12.73  | 8.84E-08 | chr:20:12402387 |
| 20 rs2423658   | 12418229 C | 0.2903 | 1.17E-07 | chr:20:12402387 |
| 20 rs532712527 | 12502632 A | 9.606  | 1.20E-07 | chr:20:12402387 |
| 20 rs180675070 | 12431897 A | 60.4   | 1.24E-07 | chr:20:12402387 |
| 20 rs184342578 | 12413537 A | 60.4   | 1.24E-07 | chr:20:12402387 |
| 20 rs192472764 | 12404826 C | 60.4   | 1.24E-07 | chr:20:12402387 |
| 20 rs549726688 | 12428639 C | 60.4   | 1.24E-07 | chr:20:12402387 |
| 20 rs75230420  | 12434749 A | 60.4   | 1.24E-07 | chr:20:12402387 |
| 20 rs7260674   | 12437164 C | 0.309  | 1.95E-07 | chr:20:12402387 |
| 20 rs557077506 | 12429449 T | 61.9   | 2.55E-07 | chr:20:12402387 |
| 20 rs761795    | 12413671 T | 0.2981 | 2.65E-07 | chr:20:12402387 |
| 20 rs761796    | 12413967 T | 0.2991 | 2.92E-07 | chr:20:12402387 |
| 20 rs2423654   | 12415338 C | 0.3096 | 3.66E-07 | chr:20:12402387 |
| 20 rs961902    | 12412258 A | 2.768  | 4.10E-07 | chr:20:12402387 |
| 20 rs117135667 | 12429471 T | 5.286  | 4.34E-07 | chr:20:12402387 |
| 20 rs372438680 | 12429595 A | 5.286  | 4.34E-07 | chr:20:12402387 |
| 20 rs76164157  | 12334041 G | 11.49  | 4.70E-07 | chr:20:12402387 |
| 20 rs2423669   | 12431381 C | 0.3082 | 4.95E-07 | chr:20:12402387 |
| 20 rs2423660   | 12418517 T | 0.3137 | 5.17E-07 | chr:20:12402387 |
| 20 rs6074432   | 12435756 T | 0.2982 | 5.73E-07 | chr:20:12402387 |
| 20 rs6078587   | 12428279 G | 5.096  | 5.95E-07 | chr:20:12402387 |
| 20 rs141045617 | 12284519 T | 13.19  | 6.01E-07 | chr:20:12402387 |
| 20 rs141365476 | 12274133 C | 13.19  | 6.01E-07 | chr:20:12402387 |
| 20 rs186764661 | 12373373 T | 29.03  | 6.22E-07 | chr:20:12402387 |
| 20 rs2423670   | 12431787 A | 0.3542 | 6.50E-07 | chr:20:12402387 |
| 20 rs536548796 | 12566222 A | 21.32  | 7.29E-07 | chr:20:12402387 |
| 20 rs114184436 | 12409313 T | 51.04  | 7.39E-07 | chr:20:12402387 |
| 20 rs112010423 | 12265725 T | 11.5   | 8.57E-07 | chr:20:12402387 |
| 20 rs113420386 | 12259124 T | 11.5   | 8.57E-07 | chr:20:12402387 |
| 20 rs116741844 | 12390032 A | 31.08  | 9.26E-07 | chr:20:12402387 |
| 20 rs145800996 | 12294403 T | 10.27  | 1.22E-06 | chr:20:12402387 |
| 20 rs112240038 | 12493179 C | 2.687  | 1.47E-06 | chr:20:12402387 |
| 20 rs6041350   | 12419332 G | 0.3755 | 1.59E-06 | chr:20:12402387 |
| 20 rs372486425 | 12365849 C | 44.19  | 1.59E-06 | chr:20:12402387 |
| 20 rs6033392   | 12361355 T | 3.602  | 1.74E-06 | chr:20:12402387 |
| 20 rs6033407   | 12397454 T | 0.3532 | 1.86E-06 | chr:20:12402387 |
| 20 rs142054272 | 12168523 G | 20.71  | 1.94E-06 | chr:20:12402387 |
| 20 rs2423667   | 12430414 G | 0.3293 | 1.96E-06 | chr:20:12402387 |
| 20 rs2423668   | 12430673 C | 0.3293 | 1.96E-06 | chr:20:12402387 |

|                |            |        |          |                 |
|----------------|------------|--------|----------|-----------------|
| 20 rs6078585   | 12428260 T | 0.3293 | 1.96E-06 | chr:20:12402387 |
| 20 rs6131338   | 12427932 T | 0.3293 | 1.96E-06 | chr:20:12402387 |
| 20 rs6131339   | 12427947 G | 0.3293 | 1.96E-06 | chr:20:12402387 |
| 20 rs16993185  | 12436775 T | 0.3644 | 2.01E-06 | chr:20:12402387 |
| 20 rs76871121  | 12488960 G | 4.583  | 2.21E-06 | chr:20:12402387 |
| 20 rs112814140 | 12326209 A | 7.108  | 2.55E-06 | chr:20:12402387 |
| 20 rs113352545 | 12326235 A | 7.108  | 2.55E-06 | chr:20:12402387 |
| 20 rs187957479 | 12529522 C | 18.84  | 2.74E-06 | chr:20:12402387 |
| 20 rs6109403   | 12421885 A | 4.011  | 2.92E-06 | chr:20:12402387 |
| 20 rs116158280 | 12389524 G | 41.88  | 3.00E-06 | chr:20:12402387 |
| 20 rs6109397   | 12401534 G | 0.3934 | 3.27E-06 | chr:20:12402387 |
| 20 rs6131334   | 12389853 T | 3.872  | 3.50E-06 | chr:20:12402387 |
| 20 rs113000297 | 12466277 G | 0.2736 | 4.18E-06 | chr:20:12402387 |
| 20 rs7264732   | 12481860 C | 0.407  | 4.36E-06 | chr:20:12402387 |
| 20 rs6041398   | 12478969 A | 2.811  | 4.90E-06 | chr:20:12402387 |
| 20 rs28458384  | 12371527 G | 0.3534 | 4.93E-06 | chr:20:12402387 |
| 20 rs6134540   | 12389312 C | 0.2881 | 5.18E-06 | chr:20:12402387 |
| 20 rs6134541   | 12389437 T | 0.2881 | 5.18E-06 | chr:20:12402387 |
| 20 rs184906859 | 12385101 C | 39.62  | 5.84E-06 | chr:20:12402387 |
| 20 rs6041395   | 12474644 T | 2.772  | 5.88E-06 | chr:20:12402387 |
| 20 rs6041396   | 12475525 C | 2.772  | 5.88E-06 | chr:20:12402387 |
| 20 rs6131348   | 12470922 A | 2.772  | 5.88E-06 | chr:20:12402387 |
| 20 rs6134573   | 12480470 T | 2.772  | 5.88E-06 | chr:20:12402387 |
| 20 rs6041318   | 12388209 A | 2.367  | 7.12E-06 | chr:20:12402387 |
| 20 rs747146    | 12396788 G | 0.3843 | 7.46E-06 | chr:20:12402387 |
| 20 rs2327547   | 12377703 A | 0.377  | 7.48E-06 | chr:20:12402387 |
| 20 rs137994263 | 12475296 C | 2.699  | 7.59E-06 | chr:20:12402387 |
| 20 rs142578022 | 12475299 G | 2.699  | 7.59E-06 | chr:20:12402387 |
| 20 rs28808402  | 12475302 T | 2.699  | 7.59E-06 | chr:20:12402387 |
| 20 rs6033405   | 12396625 A | 0.3844 | 7.79E-06 | chr:20:12402387 |
| 20 rs4814122   | 12452159 G | 0.2788 | 8.10E-06 | chr:20:12402387 |
| 20 rs6078613   | 12452346 C | 0.2788 | 8.10E-06 | chr:20:12402387 |
| 20 rs980615    | 12399726 A | 0.303  | 8.29E-06 | chr:20:12402387 |
| 20 rs6041378   | 12459832 G | 0.304  | 8.78E-06 | chr:20:12402387 |
| 20 rs6078558   | 12389058 C | 2.339  | 8.81E-06 | chr:20:12402387 |
| 20 rs6033434   | 12476495 G | 0.2888 | 8.90E-06 | chr:20:12402387 |
| 20 rs6104893   | 12390159 T | 2.334  | 9.17E-06 | chr:20:12402387 |
| 20 rs77577273  | 12179302 A | 17.34  | 9.26E-06 | chr:20:12402387 |
| 20 rs6134535   | 12375894 G | 0.2565 | 1.08E-05 | chr:20:12402387 |
| 20 rs6041374   | 12452895 T | 2.599  | 1.16E-05 | chr:20:12402387 |
| 20 rs6074421   | 12398729 G | 2.313  | 1.35E-05 | chr:20:12402387 |
| 20 rs6074420   | 12393920 G | 0.3016 | 1.45E-05 | chr:20:12402387 |
| 20 rs6041393   | 12473634 C | 0.2927 | 1.47E-05 | chr:20:12402387 |

|                |            |        |          |                 |
|----------------|------------|--------|----------|-----------------|
| 20 rs6134567   | 12470891 C | 0.3013 | 1.50E-05 | chr:20:12402387 |
| 20 rs6078568   | 12409405 C | 0.3243 | 1.59E-05 | chr:20:12402387 |
| 20 rs6041381   | 12463411 G | 0.3433 | 1.60E-05 | chr:20:12402387 |
| 20 rs6134564   | 12457214 T | 0.2917 | 1.61E-05 | chr:20:12402387 |
| 20 rs6041380   | 12463039 G | 0.3436 | 1.61E-05 | chr:20:12402387 |
| 20 rs2208974   | 12395136 C | 0.3733 | 1.62E-05 | chr:20:12402387 |
| 20 rs2006906   | 12412378 A | 0.3251 | 1.66E-05 | chr:20:12402387 |
| 20 rs2208972   | 12384473 A | 0.2879 | 1.70E-05 | chr:20:12402387 |
| 20 rs6078627   | 12476999 G | 0.3396 | 1.70E-05 | chr:20:12402387 |
| 20 rs6041361   | 12429416 T | 2.976  | 1.72E-05 | chr:20:12402387 |
| 20 rs6041385   | 12464327 C | 0.3039 | 1.75E-05 | chr:20:12402387 |
| 20 rs7273044   | 12485868 T | 0.4219 | 1.77E-05 | chr:20:12402387 |
| 20 rs7273048   | 12485891 G | 0.4219 | 1.77E-05 | chr:20:12402387 |
| 20 rs7352320   | 12476943 C | 0.3017 | 1.78E-05 | chr:20:12402387 |
| 20 rs13044477  | 12391123 T | 0.3064 | 1.79E-05 | chr:20:12402387 |
| 20 rs111506184 | 12461299 G | 2.504  | 1.83E-05 | chr:20:12402387 |
| 20 rs59788428  | 12473097 T | 2.504  | 1.83E-05 | chr:20:12402387 |
| 20 rs6041394   | 12473710 C | 2.504  | 1.83E-05 | chr:20:12402387 |
| 20 rs6041391   | 12471984 T | 0.3105 | 1.86E-05 | chr:20:12402387 |
| 20 rs6078636   | 12485481 C | 0.4029 | 1.87E-05 | chr:20:12402387 |
| 20 rs6041375   | 12453961 C | 0.3027 | 1.90E-05 | chr:20:12402387 |
| 20 rs1156962   | 12465287 A | 0.3058 | 1.90E-05 | chr:20:12402387 |
| 20 rs4814118   | 12451752 T | 0.2951 | 1.91E-05 | chr:20:12402387 |
| 20 rs4814120   | 12451800 A | 0.2951 | 1.91E-05 | chr:20:12402387 |
| 20 rs139677565 | 12431206 A | 37.46  | 1.98E-05 | chr:20:12402387 |
| 20 rs141378564 | 12432111 G | 37.46  | 1.98E-05 | chr:20:12402387 |
| 20 rs145523895 | 12416152 G | 37.46  | 1.98E-05 | chr:20:12402387 |
| 20 rs146334973 | 12421169 G | 37.46  | 1.98E-05 | chr:20:12402387 |
| 20 rs147927851 | 12419846 A | 37.46  | 1.98E-05 | chr:20:12402387 |
| 20 rs149752488 | 12422163 A | 37.46  | 1.98E-05 | chr:20:12402387 |
| 20 rs552496158 | 12422634 A | 37.46  | 1.98E-05 | chr:20:12402387 |
| 20 rs7263958   | 12484678 C | 2.767  | 1.99E-05 | chr:20:12402387 |
| 20 rs185987507 | 12432233 A | 37.45  | 2.00E-05 | chr:20:12402387 |
| 20 rs6033435   | 12482080 C | 0.3067 | 2.11E-05 | chr:20:12402387 |
| 20 rs73252166  | 12465468 T | 2.483  | 2.20E-05 | chr:20:12402387 |
| 20 rs1009414   | 12368613 T | 0.3117 | 2.33E-05 | chr:20:12402387 |
| 20 rs6078574   | 12414684 C | 0.3403 | 2.51E-05 | chr:20:12402387 |
| 20 rs533883396 | 12605663 G | 13.03  | 2.54E-05 | chr:20:12402387 |
| 20 rs13043996  | 12493242 G | 0.4271 | 2.78E-05 | chr:20:12402387 |
| 20 rs13045325  | 12493233 A | 0.4271 | 2.78E-05 | chr:20:12402387 |
| 20 rs2024776   | 12492186 G | 0.4297 | 3.04E-05 | chr:20:12402387 |
| 20 rs2024777   | 12492241 A | 0.4297 | 3.04E-05 | chr:20:12402387 |
| 20 rs2024778   | 12492397 C | 0.4297 | 3.04E-05 | chr:20:12402387 |

|                |            |        |          |                 |
|----------------|------------|--------|----------|-----------------|
| 20 rs2024779   | 12492398 A | 0.4297 | 3.04E-05 | chr:20:12402387 |
| 20 rs2024780   | 12492513 C | 0.4297 | 3.04E-05 | chr:20:12402387 |
| 20 rs2024781   | 12492607 T | 0.4297 | 3.04E-05 | chr:20:12402387 |
| 20 rs34825222  | 12491730 T | 0.4297 | 3.04E-05 | chr:20:12402387 |
| 20 rs141342790 | 12647822 A | 3.574  | 3.13E-05 | chr:20:12402387 |
| 20 rs75840140  | 25249311 C | 0.3064 | 4.83E-09 | chr:20:25215439 |
| 20 rs6037070   | 25241262 A | 0.3038 | 5.50E-09 | chr:20:25215439 |
| 20 rs6050510   | 25251815 T | 0.306  | 6.41E-09 | chr:20:25215439 |
| 20 rs11907515  | 25222282 A | 0.3071 | 7.86E-09 | chr:20:25215439 |
| 20 rs141382289 | 25222225 G | 0.3071 | 7.86E-09 | chr:20:25215439 |
| 20 rs28496800  | 25225171 A | 0.3071 | 7.86E-09 | chr:20:25215439 |
| 20 rs6050474   | 25220154 C | 0.3071 | 7.86E-09 | chr:20:25215439 |
| 20 rs6050476   | 25221010 C | 0.3071 | 7.86E-09 | chr:20:25215439 |
| 20 rs6050478   | 25221913 G | 0.3071 | 7.86E-09 | chr:20:25215439 |
| 20 rs7344105   | 25225945 G | 0.3071 | 7.86E-09 | chr:20:25215439 |
| 20 rs75374071  | 25226575 A | 0.3071 | 7.86E-09 | chr:20:25215439 |
| 20 rs111540814 | 25250437 C | 0.3088 | 8.25E-09 | chr:20:25215439 |
| 20 rs2387734   | 25248229 T | 0.3088 | 8.25E-09 | chr:20:25215439 |
| 20 rs28770021  | 25244243 C | 0.3088 | 8.25E-09 | chr:20:25215439 |
| 20 rs28881233  | 25244100 T | 0.3088 | 8.25E-09 | chr:20:25215439 |
| 20 rs6037071   | 25241483 G | 0.3088 | 8.25E-09 | chr:20:25215439 |
| 20 rs6037073   | 25245133 C | 0.3088 | 8.25E-09 | chr:20:25215439 |
| 20 rs6037075   | 25251855 A | 0.3088 | 8.25E-09 | chr:20:25215439 |
| 20 rs6050492   | 25241711 A | 0.3088 | 8.25E-09 | chr:20:25215439 |
| 20 rs6050493   | 25241749 G | 0.3088 | 8.25E-09 | chr:20:25215439 |
| 20 rs6050494   | 25242248 G | 0.3088 | 8.25E-09 | chr:20:25215439 |
| 20 rs6050502   | 25247253 C | 0.3088 | 8.25E-09 | chr:20:25215439 |
| 20 rs6050503   | 25247463 G | 0.3088 | 8.25E-09 | chr:20:25215439 |
| 20 rs6050504   | 25247557 G | 0.3088 | 8.25E-09 | chr:20:25215439 |
| 20 rs6050507   | 25250988 A | 0.3088 | 8.25E-09 | chr:20:25215439 |
| 20 rs6050508   | 25251190 G | 0.3088 | 8.25E-09 | chr:20:25215439 |
| 20 rs6050511   | 25252000 C | 0.3088 | 8.25E-09 | chr:20:25215439 |
| 20 rs7269045   | 25251580 G | 0.3088 | 8.25E-09 | chr:20:25215439 |
| 20 rs8118763   | 25239781 T | 0.3088 | 8.25E-09 | chr:20:25215439 |
| 20 rs8125437   | 25239780 G | 0.3088 | 8.25E-09 | chr:20:25215439 |
| 20 rs6050485   | 25229230 T | 0.3049 | 9.74E-09 | chr:20:25215439 |
| 20 rs6050486   | 25230841 G | 0.3113 | 1.05E-08 | chr:20:25215439 |
| 20 rs74407052  | 25238982 G | 0.311  | 1.05E-08 | chr:20:25215439 |
| 20 rs113949969 | 25237479 A | 0.3122 | 1.17E-08 | chr:20:25215439 |
| 20 rs116672236 | 25237036 C | 0.3122 | 1.17E-08 | chr:20:25215439 |
| 20 rs2145125   | 25231125 C | 0.3122 | 1.17E-08 | chr:20:25215439 |
| 20 rs2180596   | 25234777 A | 0.3122 | 1.17E-08 | chr:20:25215439 |
| 20 rs2180597   | 25235321 T | 0.3122 | 1.17E-08 | chr:20:25215439 |

|                |            |        |          |                 |
|----------------|------------|--------|----------|-----------------|
| 20 rs6037068   | 25229589 T | 0.3122 | 1.17E-08 | chr:20:25215439 |
| 20 rs6050487   | 25230924 G | 0.3122 | 1.17E-08 | chr:20:25215439 |
| 20 rs6050488   | 25232353 C | 0.3122 | 1.17E-08 | chr:20:25215439 |
| 20 rs6050490   | 25238235 T | 0.3122 | 1.17E-08 | chr:20:25215439 |
| 20 rs74749140  | 25237767 C | 0.3122 | 1.17E-08 | chr:20:25215439 |
| 20 rs74967589  | 25234732 G | 0.3122 | 1.17E-08 | chr:20:25215439 |
| 20 rs77959670  | 25237615 T | 0.3122 | 1.17E-08 | chr:20:25215439 |
| 20 rs79311385  | 25233074 G | 0.3122 | 1.17E-08 | chr:20:25215439 |
| 20 rs79783587  | 25231486 C | 0.3122 | 1.17E-08 | chr:20:25215439 |
| 20 rs79986863  | 25237531 G | 0.3122 | 1.17E-08 | chr:20:25215439 |
| 20 rs8125980   | 25236501 C | 0.3122 | 1.17E-08 | chr:20:25215439 |
| 20 rs77769033  | 25235235 G | 0.3126 | 1.25E-08 | chr:20:25215439 |
| 20 rs6050509   | 25251796 T | 0.3231 | 2.21E-08 | chr:20:25215439 |
| 20 rs6050495   | 25242336 T | 0.321  | 2.41E-08 | chr:20:25215439 |
| 20 rs6050505   | 25248982 C | 0.321  | 2.41E-08 | chr:20:25215439 |
| 20 rs6050512   | 25252899 G | 0.3354 | 3.05E-08 | chr:20:25215439 |
| 20 rs7269479   | 25216156 T | 0.3176 | 4.53E-08 | chr:20:25215439 |
| 20 rs79719043  | 25237559 G | 0.3305 | 5.18E-08 | chr:20:25215439 |
| 20 rs6050473   | 25219993 G | 0.3284 | 1.09E-07 | chr:20:25215439 |
| 20 rs6037061   | 25202863 T | 0.3468 | 2.04E-07 | chr:20:25215439 |
| 20 rs7273544   | 25253996 A | 0.3581 | 5.81E-07 | chr:20:25215439 |
| 20 rs11906864  | 25203460 A | 0.3603 | 6.17E-07 | chr:20:25215439 |
| 20 rs11906892  | 25203627 A | 0.3603 | 6.17E-07 | chr:20:25215439 |
| 20 rs6050459   | 25206290 C | 0.3603 | 6.17E-07 | chr:20:25215439 |
| 20 rs111795731 | 25221821 T | 0.4149 | 1.91E-06 | chr:20:25215439 |
| 20 rs6050460   | 25206497 T | 0.379  | 2.24E-06 | chr:20:25215439 |
| 20 rs111895469 | 25210163 C | 0.4111 | 2.55E-06 | chr:20:25215439 |
| 20 rs7274919   | 25254095 T | 0.4075 | 2.70E-06 | chr:20:25215439 |
| 20 rs113746429 | 25210002 T | 0.4154 | 3.39E-06 | chr:20:25215439 |
| 20 rs6050457   | 25202639 G | 0.4311 | 3.97E-06 | chr:20:25215439 |
| 20 rs115475072 | 25651557 T | 0.366  | 4.92E-06 | chr:20:25215439 |
| 20 rs77415996  | 25646484 C | 0.366  | 4.92E-06 | chr:20:25215439 |
| 20 rs6050471   | 25218814 G | 0.4315 | 6.05E-06 | chr:20:25215439 |
| 20 rs2227894   | 25255338 T | 0.4411 | 8.11E-06 | chr:20:25215439 |
| 20 rs6050515   | 25255551 G | 0.4411 | 8.11E-06 | chr:20:25215439 |
| 20 rs6050470   | 25217083 A | 0.4478 | 1.25E-05 | chr:20:25215439 |
| 20 rs111599962 | 25211363 A | 0.4522 | 1.50E-05 | chr:20:25215439 |
| 20 rs115815357 | 25415232 G | 0.3873 | 1.91E-05 | chr:20:25215439 |
| 20 rs143705499 | 25381805 T | 0.3873 | 1.91E-05 | chr:20:25215439 |
| 20 rs111291203 | 25213040 G | 0.4639 | 2.74E-05 | chr:20:25215439 |
| 20 rs111496137 | 25209726 A | 0.4639 | 2.74E-05 | chr:20:25215439 |
| 20 rs112367052 | 25212962 A | 0.4639 | 2.74E-05 | chr:20:25215439 |
| 20 rs113155740 | 25212521 A | 0.4639 | 2.74E-05 | chr:20:25215439 |

|                |             |        |          |                 |
|----------------|-------------|--------|----------|-----------------|
| 20 rs6037064   | 25206894 C  | 0.4639 | 2.74E-05 | chr:20:25215439 |
| 20 rs6050461   | 25207011 G  | 0.4639 | 2.74E-05 | chr:20:25215439 |
| 20 rs6050462   | 25207722 A  | 0.4639 | 2.74E-05 | chr:20:25215439 |
| 20 rs74630628  | 25210321 A  | 0.4639 | 2.74E-05 | chr:20:25215439 |
| 20 rs76026090  | 25212428 C  | 0.4639 | 2.74E-05 | chr:20:25215439 |
| 20 rs78169178  | 25211157 A  | 0.4639 | 2.74E-05 | chr:20:25215439 |
| 20 rs7272959   | 25263756 A  | 0.4763 | 2.78E-05 | chr:20:25215439 |
| 20 rs112837676 | 25214740 C  | 0.4643 | 2.81E-05 | chr:20:25215439 |
| 20 rs145676605 | 25214659 G  | 0.4643 | 2.81E-05 | chr:20:25215439 |
| 20 rs1044573   | 25206654 G  | 0.4919 | 2.93E-05 | chr:20:25215439 |
| 20 rs45587239  | 25255415 T  | 0.4699 | 3.26E-05 | chr:20:25215439 |
| 20 rs6050513   | 25254688 G  | 0.4693 | 3.58E-05 | chr:20:25215439 |
| 3 rs6767408    | 125623666 T | 3.39   | 2.20E-11 | chr:3:125609298 |
| 3 rs6767618    | 125623941 G | 3.39   | 2.20E-11 | chr:3:125609298 |
| 3 rs74470729   | 125621098 T | 3.39   | 2.20E-11 | chr:3:125609298 |
| 3 rs79143534   | 125622688 G | 3.39   | 2.20E-11 | chr:3:125609298 |
| 3 rs79647471   | 125622158 A | 3.39   | 2.20E-11 | chr:3:125609298 |
| 3 rs11925437   | 125599216 A | 3.4    | 2.23E-11 | chr:3:125609298 |
| 3 rs12633485   | 125605577 T | 3.4    | 2.23E-11 | chr:3:125609298 |
| 3 rs12637469   | 125600407 T | 3.4    | 2.23E-11 | chr:3:125609298 |
| 3 rs6772193    | 125597432 A | 3.4    | 2.23E-11 | chr:3:125609298 |
| 3 rs75313595   | 125601479 A | 3.4    | 2.23E-11 | chr:3:125609298 |
| 3 rs75687938   | 125600858 T | 3.4    | 2.23E-11 | chr:3:125609298 |
| 3 rs77342220   | 125608463 T | 3.4    | 2.23E-11 | chr:3:125609298 |
| 3 rs78438430   | 125607169 C | 3.4    | 2.23E-11 | chr:3:125609298 |
| 3 rs79584539   | 125600024 T | 3.4    | 2.23E-11 | chr:3:125609298 |
| 3 rs79780713   | 125596589 G | 3.4    | 2.23E-11 | chr:3:125609298 |
| 3 rs75431854   | 125601942 A | 3.343  | 3.50E-11 | chr:3:125609298 |
| 3 rs9714319    | 125612678 T | 3.314  | 3.84E-11 | chr:3:125609298 |
| 3 rs200006127  | 125610368 G | 3.288  | 5.24E-11 | chr:3:125609298 |
| 3 rs74494751   | 125615642 G | 3.288  | 5.24E-11 | chr:3:125609298 |
| 3 rs78795877   | 125617617 T | 3.288  | 5.24E-11 | chr:3:125609298 |
| 3 rs138126565  | 125649194 A | 3.023  | 5.80E-11 | chr:3:125609298 |
| 3 rs11917669   | 125599068 T | 3.298  | 5.91E-11 | chr:3:125609298 |
| 3 rs3828357    | 125648356 C | 2.973  | 8.06E-11 | chr:3:125609298 |
| 3 rs76697478   | 125622811 A | 3.256  | 8.35E-11 | chr:3:125609298 |
| 3 rs60487455   | 125619863 G | 3.171  | 1.49E-10 | chr:3:125609298 |
| 3 rs57115172   | 125635679 A | 0.3013 | 4.98E-10 | chr:3:125609298 |
| 3 rs34721907   | 125637285 A | 3.309  | 6.26E-10 | chr:3:125609298 |
| 3 rs58198667   | 125635719 T | 3.309  | 6.26E-10 | chr:3:125609298 |
| 3 rs75837707   | 125630833 T | 3.309  | 6.26E-10 | chr:3:125609298 |
| 3 rs80022059   | 125641856 A | 3.309  | 6.26E-10 | chr:3:125609298 |
| 3 rs74402623   | 125643173 A | 3.271  | 8.15E-10 | chr:3:125609298 |



|               |             |        |          |                 |
|---------------|-------------|--------|----------|-----------------|
| 3 rs73858993  | 125633175 A | 0.2931 | 8.69E-10 | chr:3:125609298 |
| 3 rs12634512  | 125631766 T | 2.815  | 8.98E-10 | chr:3:125609298 |
| 3 rs138475236 | 125630752 G | 0.3056 | 1.81E-09 | chr:3:125609298 |
| 3 rs78614478  | 125631020 G | 0.3056 | 1.81E-09 | chr:3:125609298 |
| 3 rs11721242  | 125578642 T | 3.336  | 1.82E-09 | chr:3:125609298 |
| 3 rs141959419 | 125572267 G | 3.336  | 1.82E-09 | chr:3:125609298 |
| 3 rs145364321 | 125633605 T | 0.3116 | 2.85E-09 | chr:3:125609298 |
| 3 rs148981044 | 125621428 A | 0.3159 | 4.97E-09 | chr:3:125609298 |
| 3 rs2134521   | 125609297 A | 0.3159 | 4.97E-09 | chr:3:125609298 |
| 3 rs4263243   | 125609585 C | 0.3159 | 4.97E-09 | chr:3:125609298 |
| 3 rs4467397   | 125609586 A | 0.3159 | 4.97E-09 | chr:3:125609298 |
| 3 rs4574234   | 125609062 C | 0.3159 | 4.97E-09 | chr:3:125609298 |
| 3 rs57062978  | 125597586 G | 0.3159 | 4.97E-09 | chr:3:125609298 |
| 3 rs59221171  | 125622286 A | 0.3159 | 4.97E-09 | chr:3:125609298 |
| 3 rs145754213 | 125595882 A | 0.3192 | 5.00E-09 | chr:3:125609298 |
| 3 rs2979929   | 125541332 T | 3.007  | 5.23E-09 | chr:3:125609298 |
| 3 rs73858992  | 125633146 T | 0.3258 | 5.53E-09 | chr:3:125609298 |
| 3 rs2947690   | 125547912 A | 2.98   | 5.88E-09 | chr:3:125609298 |
| 3 rs573653999 | 125632831 A | 0.3333 | 5.98E-09 | chr:3:125609298 |
| 3 rs143065094 | 125643940 G | 3.012  | 6.28E-09 | chr:3:125609298 |
| 3 rs148384950 | 125631858 C | 0.3254 | 6.80E-09 | chr:3:125609298 |
| 3 rs115967814 | 125583032 T | 0.3257 | 7.43E-09 | chr:3:125609298 |
| 3 rs373861381 | 125585240 T | 0.3257 | 7.43E-09 | chr:3:125609298 |
| 3 rs57632767  | 125594520 G | 0.3257 | 7.43E-09 | chr:3:125609298 |
| 3 rs2979947   | 125552507 T | 2.985  | 8.39E-09 | chr:3:125609298 |
| 3 rs60374286  | 125630173 T | 2.575  | 8.69E-09 | chr:3:125609298 |
| 3 rs115617027 | 125635484 T | 0.3372 | 1.01E-08 | chr:3:125609298 |
| 3 rs140980442 | 125632547 A | 0.3379 | 1.02E-08 | chr:3:125609298 |
| 3 rs145326567 | 125632497 A | 0.3379 | 1.02E-08 | chr:3:125609298 |
| 3 rs145899983 | 125632793 G | 0.3379 | 1.02E-08 | chr:3:125609298 |
| 3 rs147699921 | 125632533 G | 0.3379 | 1.02E-08 | chr:3:125609298 |
| 3 rs138816824 | 125637500 C | 0.3316 | 1.05E-08 | chr:3:125609298 |
| 3 rs140011834 | 125592925 A | 0.33   | 1.12E-08 | chr:3:125609298 |
| 3 rs138110582 | 125626294 C | 0.3847 | 1.13E-08 | chr:3:125609298 |
| 3 rs55799821  | 125628440 G | 0.3847 | 1.13E-08 | chr:3:125609298 |
| 3 rs34209763  | 125599595 A | 0.4488 | 1.19E-08 | chr:3:125609298 |
| 3 rs144451371 | 125581114 T | 0.3961 | 1.24E-08 | chr:3:125609298 |
| 3 rs1976462   | 125628199 T | 0.3914 | 1.36E-08 | chr:3:125609298 |
| 3 rs111743409 | 125637546 C | 0.344  | 1.55E-08 | chr:3:125609298 |
| 3 rs140098024 | 125636854 G | 0.344  | 1.55E-08 | chr:3:125609298 |
| 3 rs140551936 | 125634217 A | 0.344  | 1.55E-08 | chr:3:125609298 |
| 3 rs144371013 | 125634299 G | 0.344  | 1.55E-08 | chr:3:125609298 |
| 3 rs147184359 | 125635840 T | 0.344  | 1.55E-08 | chr:3:125609298 |

|               |             |        |          |                 |
|---------------|-------------|--------|----------|-----------------|
| 3 rs147995646 | 125635637 T | 0.344  | 1.55E-08 | chr:3:125609298 |
| 3 rs181799363 | 125634788 T | 0.344  | 1.55E-08 | chr:3:125609298 |
| 3 rs182646434 | 125635472 T | 0.344  | 1.55E-08 | chr:3:125609298 |
| 3 rs186969735 | 125635531 T | 0.344  | 1.55E-08 | chr:3:125609298 |
| 3 rs2333375   | 125636956 A | 0.344  | 1.55E-08 | chr:3:125609298 |
| 3 rs61669680  | 125635949 A | 0.344  | 1.55E-08 | chr:3:125609298 |
| 3 rs112294864 | 125630740 T | 0.3894 | 1.63E-08 | chr:3:125609298 |
| 3 rs11711436  | 125629149 T | 2.535  | 1.68E-08 | chr:3:125609298 |
| 3 rs13319798  | 125605232 A | 0.4519 | 1.70E-08 | chr:3:125609298 |
| 3 rs35390120  | 125599809 A | 0.4519 | 1.70E-08 | chr:3:125609298 |
| 3 rs149422308 | 125593018 G | 0.4006 | 1.81E-08 | chr:3:125609298 |
| 3 rs58678427  | 125587076 G | 0.4021 | 1.87E-08 | chr:3:125609298 |
| 3 rs79344588  | 125632117 A | 2.762  | 1.87E-08 | chr:3:125609298 |
| 3 rs57811915  | 125628849 G | 0.4058 | 1.89E-08 | chr:3:125609298 |
| 3 rs145810852 | 125632668 A | 0.3399 | 1.93E-08 | chr:3:125609298 |
| 3 rs6775423   | 125598255 A | 0.453  | 2.06E-08 | chr:3:125609298 |
| 3 rs144234599 | 125627279 G | 0.3965 | 2.18E-08 | chr:3:125609298 |
| 3 rs111243139 | 125586513 T | 0.4305 | 2.28E-08 | chr:3:125609298 |
| 3 rs149454477 | 125582797 T | 0.4305 | 2.28E-08 | chr:3:125609298 |
| 3 rs56401450  | 125585471 A | 0.4305 | 2.28E-08 | chr:3:125609298 |
| 3 rs9758507   | 125616428 T | 0.4589 | 2.64E-08 | chr:3:125609298 |
| 3 rs16834637  | 125605471 T | 0.4544 | 2.65E-08 | chr:3:125609298 |
| 3 rs115941261 | 125626815 C | 0.4007 | 3.12E-08 | chr:3:125609298 |
| 3 rs141213249 | 125626084 C | 0.4007 | 3.12E-08 | chr:3:125609298 |
| 3 rs141277436 | 125627531 T | 0.4007 | 3.12E-08 | chr:3:125609298 |
| 3 rs144154148 | 125626708 C | 0.4007 | 3.12E-08 | chr:3:125609298 |
| 3 rs146378940 | 125627019 G | 0.4007 | 3.12E-08 | chr:3:125609298 |
| 3 rs148261048 | 125626762 A | 0.4007 | 3.12E-08 | chr:3:125609298 |
| 3 rs28590611  | 125630308 A | 0.4007 | 3.12E-08 | chr:3:125609298 |
| 3 rs55869762  | 125625263 G | 0.4007 | 3.12E-08 | chr:3:125609298 |
| 3 rs55902320  | 125625416 T | 0.4007 | 3.12E-08 | chr:3:125609298 |
| 3 rs56389777  | 125625327 A | 0.4007 | 3.12E-08 | chr:3:125609298 |
| 3 rs565164860 | 125626618 A | 0.4007 | 3.12E-08 | chr:3:125609298 |
| 3 rs58316089  | 125625520 A | 0.4007 | 3.12E-08 | chr:3:125609298 |
| 3 rs60975495  | 125628365 T | 0.4007 | 3.12E-08 | chr:3:125609298 |
| 3 rs72973373  | 125627659 A | 0.4007 | 3.12E-08 | chr:3:125609298 |
| 3 rs72973375  | 125629675 G | 0.4007 | 3.12E-08 | chr:3:125609298 |
| 3 rs73858989  | 125626195 C | 0.4007 | 3.12E-08 | chr:3:125609298 |
| 3 rs77486061  | 125626922 G | 0.4007 | 3.12E-08 | chr:3:125609298 |
| 3 rs571842515 | 125636115 G | 0.3531 | 3.49E-08 | chr:3:125609298 |
| 3 rs58654168  | 125635668 T | 0.3531 | 3.49E-08 | chr:3:125609298 |
| 3 rs140061761 | 125573221 A | 2.575  | 3.73E-08 | chr:3:125609298 |
| 3 rs143347021 | 125642315 G | 0.3325 | 3.82E-08 | chr:3:125609298 |

|               |             |        |          |                 |
|---------------|-------------|--------|----------|-----------------|
| 3 rs144610597 | 125637650 A | 0.3325 | 3.82E-08 | chr:3:125609298 |
| 3 rs4414795   | 125628001 T | 0.4019 | 4.72E-08 | chr:3:125609298 |
| 3 rs35321002  | 125612065 C | 0.4615 | 5.45E-08 | chr:3:125609298 |
| 3 rs75212493  | 125633523 C | 2.508  | 5.65E-08 | chr:3:125609298 |
| 3 rs574674152 | 125585290 T | 0.3993 | 5.75E-08 | chr:3:125609298 |
| 3 rs148099594 | 125590940 A | 0.4244 | 6.02E-08 | chr:3:125609298 |
| 3 rs115157504 | 125596364 T | 0.337  | 6.53E-08 | chr:3:125609298 |
| 3 rs116579261 | 125617222 T | 0.337  | 6.53E-08 | chr:3:125609298 |
| 3 rs143740725 | 125613881 A | 0.337  | 6.53E-08 | chr:3:125609298 |
| 3 rs149956886 | 125620247 T | 0.337  | 6.53E-08 | chr:3:125609298 |
| 3 rs151153255 | 125614821 A | 0.337  | 6.53E-08 | chr:3:125609298 |
| 3 rs2202238   | 125602871 A | 0.337  | 6.53E-08 | chr:3:125609298 |
| 3 rs7430375   | 125600976 C | 0.337  | 6.53E-08 | chr:3:125609298 |
| 3 rs55918505  | 125635660 A | 0.3651 | 6.71E-08 | chr:3:125609298 |
| 3 rs181960287 | 125634374 T | 0.3468 | 6.89E-08 | chr:3:125609298 |
| 3 rs139355261 | 125627118 A | 0.415  | 7.99E-08 | chr:3:125609298 |
| 3 rs2979977   | 125599006 T | 2.019  | 9.52E-08 | chr:3:125609298 |
| 3 rs56888543  | 125628470 A | 0.4182 | 9.56E-08 | chr:3:125609298 |
| 3 rs61479612  | 125628441 C | 0.4182 | 9.56E-08 | chr:3:125609298 |
| 3 rs13071955  | 125624345 C | 0.482  | 1.03E-07 | chr:3:125609298 |
| 3 rs13321217  | 125631771 A | 0.5006 | 1.10E-07 | chr:3:125609298 |
| 3 rs34507765  | 125612424 T | 0.4889 | 1.17E-07 | chr:3:125609298 |
| 3 rs115888633 | 125608013 G | 0.3504 | 1.32E-07 | chr:3:125609298 |
| 3 rs9832909   | 125588352 T | 2.414  | 1.42E-07 | chr:3:125609298 |
| 3 rs12492188  | 125582423 C | 0.5063 | 1.72E-07 | chr:3:125609298 |
| 3 rs2971298   | 125602713 A | 0.4947 | 2.04E-07 | chr:3:125609298 |
| 3 rs112567450 | 125592200 T | 2.383  | 2.10E-07 | chr:3:125609298 |
| 3 rs11922653  | 125591569 A | 2.383  | 2.10E-07 | chr:3:125609298 |
| 3 rs35540257  | 125590518 A | 2.383  | 2.10E-07 | chr:3:125609298 |
| 3 rs138581232 | 125587746 A | 0.4653 | 2.64E-07 | chr:3:125609298 |
| 3 rs59014841  | 125584640 A | 2.356  | 2.93E-07 | chr:3:125609298 |
| 3 rs7624806   | 125599074 A | 0.5104 | 3.74E-07 | chr:3:125609298 |
| 3 rs9873689   | 125611796 A | 0.5025 | 3.77E-07 | chr:3:125609298 |
| 3 rs149827337 | 125571747 A | 0.4097 | 4.19E-07 | chr:3:125609298 |
| 3 rs4306815   | 125633863 T | 0.5238 | 4.30E-07 | chr:3:125609298 |
| 3 rs11915699  | 125632684 G | 0.5241 | 4.35E-07 | chr:3:125609298 |
| 3 rs13088308  | 125632263 C | 0.5241 | 4.35E-07 | chr:3:125609298 |
| 3 rs2979934   | 125546915 T | 2.326  | 4.45E-07 | chr:3:125609298 |
| 3 rs9840926   | 125635356 C | 0.5251 | 4.49E-07 | chr:3:125609298 |
| 3 rs77524584  | 125558110 C | 2.436  | 4.53E-07 | chr:3:125609298 |
| 3 rs9848299   | 125557678 C | 2.436  | 4.53E-07 | chr:3:125609298 |
| 3 rs36074052  | 125554457 A | 2.451  | 4.59E-07 | chr:3:125609298 |
| 3 rs36052298  | 125554425 A | 2.441  | 5.14E-07 | chr:3:125609298 |

|               |             |        |          |                 |
|---------------|-------------|--------|----------|-----------------|
| 3 rs151185137 | 125559746 T | 0.4451 | 5.51E-07 | chr:3:125609298 |
| 3 rs146152284 | 125579209 A | 0.4636 | 5.52E-07 | chr:3:125609298 |
| 3 rs71327727  | 125632977 C | 0.5253 | 5.62E-07 | chr:3:125609298 |
| 3 rs143658483 | 125567789 A | 0.4158 | 5.69E-07 | chr:3:125609298 |
| 3 rs12498003  | 125636189 G | 0.5294 | 5.98E-07 | chr:3:125609298 |
| 3 rs4047922   | 125636595 G | 0.5294 | 5.98E-07 | chr:3:125609298 |
| 3 rs4047937   | 125636446 C | 0.5294 | 5.98E-07 | chr:3:125609298 |
| 3 rs7644102   | 125634825 C | 0.5294 | 5.98E-07 | chr:3:125609298 |
| 3 rs7644184   | 125634873 C | 0.5294 | 5.98E-07 | chr:3:125609298 |
| 3 rs9841142   | 125635541 A | 0.5294 | 5.98E-07 | chr:3:125609298 |
| 3 rs28603219  | 125581860 C | 2.293  | 6.27E-07 | chr:3:125609298 |
| 3 rs76765944  | 125554804 A | 2.408  | 6.34E-07 | chr:3:125609298 |
| 3 rs73858982  | 125579723 G | 0.4873 | 6.47E-07 | chr:3:125609298 |
| 3 rs148413344 | 125576954 A | 0.4161 | 6.49E-07 | chr:3:125609298 |
| 3 rs568638136 | 125573937 A | 0.4161 | 6.49E-07 | chr:3:125609298 |
| 3 rs57837602  | 125560471 C | 0.4313 | 6.55E-07 | chr:3:125609298 |
| 3 rs78718797  | 125556575 C | 2.397  | 6.68E-07 | chr:3:125609298 |
| 3 rs60014637  | 125642557 G | 1.812  | 7.82E-07 | chr:3:125609298 |
| 3 rs115956393 | 125569904 C | 0.4089 | 8.29E-07 | chr:3:125609298 |
| 3 rs115904560 | 125599999 T | 0.3681 | 8.52E-07 | chr:3:125609298 |
| 3 rs9859596   | 125593349 T | 2.154  | 8.62E-07 | chr:3:125609298 |
| 3 rs11914298  | 125643772 G | 1.855  | 8.72E-07 | chr:3:125609298 |
| 3 rs534418903 | 125573938 C | 0.4212 | 8.98E-07 | chr:3:125609298 |
| 3 rs79335314  | 125643915 C | 0.3442 | 9.68E-07 | chr:3:125609298 |
| 3 rs533185188 | 125574482 G | 0.4193 | 9.85E-07 | chr:3:125609298 |
| 3 rs563914125 | 125574480 A | 0.4193 | 9.85E-07 | chr:3:125609298 |
| 3 rs142956830 | 125574053 G | 2.345  | 1.03E-06 | chr:3:125609298 |
| 3 rs79330036  | 125586222 A | 2.265  | 1.07E-06 | chr:3:125609298 |
| 3 rs12695469  | 125635682 G | 0.5395 | 1.13E-06 | chr:3:125609298 |
| 3 rs13100358  | 125643202 G | 1.92   | 1.29E-06 | chr:3:125609298 |
| 3 rs6764584   | 125564726 A | 2.305  | 1.41E-06 | chr:3:125609298 |
| 3 rs75945393  | 125566855 T | 2.305  | 1.41E-06 | chr:3:125609298 |
| 3 rs77521522  | 125566651 A | 2.305  | 1.41E-06 | chr:3:125609298 |
| 3 rs9847495   | 125566153 A | 2.305  | 1.41E-06 | chr:3:125609298 |
| 3 rs113525069 | 125573023 G | 2.301  | 1.60E-06 | chr:3:125609298 |
| 3 rs11708613  | 125577595 C | 2.301  | 1.60E-06 | chr:3:125609298 |
| 3 rs11713267  | 125578350 T | 2.301  | 1.60E-06 | chr:3:125609298 |
| 3 rs11720087  | 125577524 T | 2.301  | 1.60E-06 | chr:3:125609298 |
| 3 rs143489229 | 125573812 G | 2.301  | 1.60E-06 | chr:3:125609298 |
| 3 rs2877920   | 125578987 A | 2.301  | 1.60E-06 | chr:3:125609298 |
| 3 rs57482370  | 125577906 A | 2.301  | 1.60E-06 | chr:3:125609298 |
| 3 rs7614815   | 125571436 T | 2.301  | 1.60E-06 | chr:3:125609298 |
| 3 rs79951679  | 125575493 T | 2.301  | 1.60E-06 | chr:3:125609298 |

|               |             |        |          |                 |
|---------------|-------------|--------|----------|-----------------|
| 3 rs9872316   | 125576232 T | 2.301  | 1.60E-06 | chr:3:125609298 |
| 3 rs9883344   | 125569292 A | 2.301  | 1.60E-06 | chr:3:125609298 |
| 3 rs80067333  | 125559464 T | 2.343  | 1.63E-06 | chr:3:125609298 |
| 3 rs190156584 | 125577438 T | 0.4347 | 1.66E-06 | chr:3:125609298 |
| 3 rs191463608 | 125645394 T | 0.3327 | 1.66E-06 | chr:3:125609298 |
| 3 rs2062773   | 125639648 T | 1.872  | 1.75E-06 | chr:3:125609298 |
| 3 rs2333384   | 125640487 G | 1.872  | 1.75E-06 | chr:3:125609298 |
| 3 rs59757827  | 125571036 A | 0.5236 | 2.02E-06 | chr:3:125609298 |
| 3 rs151134413 | 125618379 T | 0.3083 | 2.07E-06 | chr:3:125609298 |
| 3 rs114237101 | 125567024 A | 0.4388 | 2.14E-06 | chr:3:125609298 |
| 3 rs6797253   | 125643329 G | 1.854  | 2.17E-06 | chr:3:125609298 |
| 3 rs6772482   | 125643332 A | 1.843  | 2.19E-06 | chr:3:125609298 |
| 3 rs59259948  | 125642901 A | 1.85   | 2.30E-06 | chr:3:125609298 |
| 3 rs2089011   | 125640396 T | 1.858  | 2.30E-06 | chr:3:125609298 |
| 3 rs11921945  | 125643719 A | 1.87   | 2.49E-06 | chr:3:125609298 |
| 3 rs2947695   | 125551048 A | 2.203  | 2.49E-06 | chr:3:125609298 |
| 3 rs2947696   | 125551372 A | 2.203  | 2.49E-06 | chr:3:125609298 |
| 3 rs2947699   | 125552053 G | 2.203  | 2.49E-06 | chr:3:125609298 |
| 3 rs2947701   | 125553160 A | 2.203  | 2.49E-06 | chr:3:125609298 |
| 3 rs2971246   | 125552502 C | 2.203  | 2.49E-06 | chr:3:125609298 |
| 3 rs2971247   | 125553347 C | 2.203  | 2.49E-06 | chr:3:125609298 |
| 3 rs2979952   | 125553514 T | 2.203  | 2.49E-06 | chr:3:125609298 |
| 3 rs141307437 | 125584187 C | 0.3898 | 2.60E-06 | chr:3:125609298 |
| 3 rs10934731  | 125649804 A | 0.3428 | 2.62E-06 | chr:3:125609298 |
| 3 rs13094642  | 125642587 A | 1.845  | 2.71E-06 | chr:3:125609298 |
| 3 rs13094793  | 125642621 C | 1.845  | 2.71E-06 | chr:3:125609298 |
| 3 rs13095106  | 125642614 G | 1.845  | 2.71E-06 | chr:3:125609298 |
| 3 rs13315434  | 125641394 T | 1.845  | 2.71E-06 | chr:3:125609298 |
| 3 rs4340656   | 125642350 A | 1.845  | 2.71E-06 | chr:3:125609298 |
| 3 rs4377449   | 125642330 G | 1.844  | 2.86E-06 | chr:3:125609298 |
| 3 rs13099404  | 125642929 A | 1.826  | 3.01E-06 | chr:3:125609298 |
| 3 rs184564121 | 125629157 T | 0.5059 | 4.00E-06 | chr:3:125609298 |
| 3 rs13074445  | 125642534 T | 1.767  | 4.68E-06 | chr:3:125609298 |
| 3 rs6793220   | 125641894 C | 1.808  | 4.74E-06 | chr:3:125609298 |
| 3 rs2947694   | 125549914 C | 2.116  | 4.85E-06 | chr:3:125609298 |
| 3 rs142168300 | 125459601 G | 4.338  | 5.43E-06 | chr:3:125609298 |
| 3 rs2947693   | 125549639 A | 2.132  | 6.59E-06 | chr:3:125609298 |
| 3 rs11706818  | 125579822 A | 2.055  | 6.75E-06 | chr:3:125609298 |
| 3 rs4465900   | 125580464 T | 2.055  | 6.75E-06 | chr:3:125609298 |
| 3 rs142313792 | 125477703 T | 4.274  | 7.00E-06 | chr:3:125609298 |
| 3 rs138332423 | 125557124 T | 0.4673 | 7.17E-06 | chr:3:125609298 |
| 3 rs138647908 | 125563160 A | 0.3358 | 7.58E-06 | chr:3:125609298 |
| 3 rs4334594   | 125642101 A | 1.79   | 7.86E-06 | chr:3:125609298 |

|               |             |        |          |                 |
|---------------|-------------|--------|----------|-----------------|
| 3 rs141585111 | 125560472 A | 0.4635 | 8.01E-06 | chr:3:125609298 |
| 3 rs151206333 | 125447850 T | 4.222  | 8.03E-06 | chr:3:125609298 |
| 3 rs188079237 | 125439780 A | 4.222  | 8.03E-06 | chr:3:125609298 |
| 3 rs4679462   | 125449701 A | 4.222  | 8.03E-06 | chr:3:125609298 |
| 3 rs2062772   | 125639885 C | 1.779  | 9.22E-06 | chr:3:125609298 |
| 3 rs2333387   | 125640610 G | 1.779  | 9.22E-06 | chr:3:125609298 |
| 3 rs28541533  | 125640490 C | 1.779  | 9.22E-06 | chr:3:125609298 |
| 3 rs62270469  | 125468544 C | 3.641  | 9.66E-06 | chr:3:125609298 |
| 3 rs62270472  | 125472187 T | 3.641  | 9.66E-06 | chr:3:125609298 |
| 3 rs62271932  | 125461055 T | 3.641  | 9.66E-06 | chr:3:125609298 |
| 3 rs60465123  | 125465458 T | 0.5938 | 9.66E-06 | chr:3:125609298 |
| 3 rs115135873 | 125551405 A | 0.4705 | 9.90E-06 | chr:3:125609298 |
| 3 rs143210907 | 125553118 G | 0.4705 | 9.90E-06 | chr:3:125609298 |
| 3 rs34428329  | 125552195 T | 0.4705 | 9.90E-06 | chr:3:125609298 |
| 3 rs35665654  | 125552213 C | 0.4705 | 9.90E-06 | chr:3:125609298 |
| 3 rs55797702  | 125624481 A | 0.5261 | 1.02E-05 | chr:3:125609298 |
| 3 rs60925467  | 125624482 A | 0.5261 | 1.02E-05 | chr:3:125609298 |
| 3 rs74589163  | 125651239 C | 0.49   | 1.03E-05 | chr:3:125609298 |
| 3 rs148827978 | 125461946 A | 0.5694 | 1.04E-05 | chr:3:125609298 |
| 3 rs73858994  | 125643933 G | 1.837  | 1.06E-05 | chr:3:125609298 |
| 3 rs146002711 | 125541483 A | 0.4724 | 1.07E-05 | chr:3:125609298 |
| 3 rs199860792 | 125459352 C | 0.5832 | 1.11E-05 | chr:3:125609298 |
| 3 rs116610378 | 125540021 T | 0.4723 | 1.18E-05 | chr:3:125609298 |
| 3 rs146575920 | 125560345 A | 0.4711 | 1.21E-05 | chr:3:125609298 |
| 3 rs28893337  | 125462572 T | 0.5775 | 1.22E-05 | chr:3:125609298 |
| 3 rs60718422  | 125624343 C | 0.5179 | 1.22E-05 | chr:3:125609298 |
| 3 rs28410080  | 125630331 G | 0.5698 | 1.26E-05 | chr:3:125609298 |
| 3 rs140492652 | 125560325 A | 0.4739 | 1.29E-05 | chr:3:125609298 |
| 3 rs112466111 | 125466546 G | 0.639  | 1.34E-05 | chr:3:125609298 |
| 3 rs113990589 | 125466549 C | 0.639  | 1.34E-05 | chr:3:125609298 |
| 3 rs2947651   | 125454228 A | 0.5768 | 1.34E-05 | chr:3:125609298 |
| 3 rs35396288  | 125640852 C | 1.757  | 1.34E-05 | chr:3:125609298 |
| 3 rs4047900   | 125640973 A | 1.757  | 1.34E-05 | chr:3:125609298 |
| 3 rs112104357 | 125464294 A | 0.5832 | 1.41E-05 | chr:3:125609298 |
| 3 rs148709673 | 125540599 A | 0.4789 | 1.44E-05 | chr:3:125609298 |
| 3 rs57481916  | 125549584 C | 0.4789 | 1.44E-05 | chr:3:125609298 |
| 3 rs112627655 | 125564745 A | 0.546  | 1.47E-05 | chr:3:125609298 |
| 3 rs147266302 | 125564877 T | 0.546  | 1.47E-05 | chr:3:125609298 |
| 3 rs147918515 | 125564955 T | 0.546  | 1.47E-05 | chr:3:125609298 |
| 3 rs111677873 | 125562984 T | 0.5461 | 1.48E-05 | chr:3:125609298 |
| 3 rs7622672   | 125459012 C | 0.5835 | 1.51E-05 | chr:3:125609298 |
| 3 rs2976825   | 125454769 T | 0.581  | 1.56E-05 | chr:3:125609298 |
| 3 rs2971275   | 125452679 A | 0.5827 | 1.56E-05 | chr:3:125609298 |

|               |             |         |          |                 |
|---------------|-------------|---------|----------|-----------------|
| 3 rs2947649   | 125453782 T | 0.5813  | 1.66E-05 | chr:3:125609298 |
| 3 rs2976821   | 125454299 T | 0.5821  | 1.74E-05 | chr:3:125609298 |
| 3 rs11916518  | 125462329 T | 0.5852  | 1.76E-05 | chr:3:125609298 |
| 3 rs35029093  | 125454162 G | 0.5933  | 1.77E-05 | chr:3:125609298 |
| 3 rs138718192 | 125464260 T | 0.5868  | 1.81E-05 | chr:3:125609298 |
| 3 rs2971254   | 125560461 A | 1.74    | 1.83E-05 | chr:3:125609298 |
| 3 rs12485974  | 125644009 G | 1.739   | 1.85E-05 | chr:3:125609298 |
| 3 rs2971272   | 125451353 T | 0.5847  | 1.87E-05 | chr:3:125609298 |
| 3 rs2976808   | 125451344 G | 0.5847  | 1.87E-05 | chr:3:125609298 |
| 3 rs112116911 | 125569717 G | 0.5565  | 1.88E-05 | chr:3:125609298 |
| 3 rs112824336 | 125569001 A | 0.5565  | 1.88E-05 | chr:3:125609298 |
| 3 rs113695174 | 125569248 A | 0.5565  | 1.88E-05 | chr:3:125609298 |
| 3 rs13079414  | 125642936 T | 1.741   | 1.93E-05 | chr:3:125609298 |
| 3 rs9825926   | 125454681 A | 0.5785  | 1.93E-05 | chr:3:125609298 |
| 3 rs144324739 | 125571352 G | 0.4571  | 1.93E-05 | chr:3:125609298 |
| 3 rs28699626  | 125630320 A | 0.5767  | 1.94E-05 | chr:3:125609298 |
| 3 rs7622267   | 125458591 C | 0.5881  | 1.94E-05 | chr:3:125609298 |
| 3 rs138407862 | 125461945 C | 0.5953  | 1.95E-05 | chr:3:125609298 |
| 3 rs11714778  | 129762082 C | 0.2834  | 2.05E-12 | chr:3:129776131 |
| 3 rs73208686  | 129762898 C | 0.2834  | 2.05E-12 | chr:3:129776131 |
| 3 rs12495049  | 129810234 T | 0.3024  | 4.09E-11 | chr:3:129776131 |
| 3 rs11718709  | 129811323 A | 0.3132  | 6.35E-11 | chr:3:129776131 |
| 3 rs111717650 | 129814301 A | 0.3237  | 7.92E-11 | chr:3:129776131 |
| 3 rs73210759  | 129813745 T | 0.3237  | 7.92E-11 | chr:3:129776131 |
| 3 rs11716622  | 129809592 A | 0.2984  | 2.82E-09 | chr:3:129776131 |
| 3 rs12634803  | 129807284 T | 0.4623  | 1.17E-07 | chr:3:129776131 |
| 3 rs146549952 | 129816552 T | 0.3994  | 1.44E-06 | chr:3:129776131 |
| 3 rs9713334   | 129822494 T | 0.4118  | 2.71E-06 | chr:3:129776131 |
| 3 rs150822181 | 129756230 T | 0.3471  | 1.38E-05 | chr:3:129776131 |
| 3 rs9758049   | 129814863 A | 0.3969  | 1.55E-05 | chr:3:129776131 |
| 3 rs150790892 | 129752818 T | 0.3499  | 1.56E-05 | chr:3:129776131 |
| 3 rs55891359  | 129760185 T | 0.5504  | 1.72E-05 | chr:3:129776131 |
| 3 rs9713340   | 129822492 A | 0.5002  | 3.35E-05 | chr:3:129776131 |
| 3 rs111649280 | 14112363 C  | 0.03653 | 1.61E-21 | chr:3:14132684  |
| 3 rs9815552   | 14112593 C  | 0.03653 | 1.61E-21 | chr:3:14132684  |
| 3 rs9812004   | 14145704 A  | 0.0538  | 7.80E-21 | chr:3:14132684  |
| 3 rs140999500 | 14146696 G  | 0.06186 | 9.47E-21 | chr:3:14132684  |
| 3 rs78278386  | 14144792 T  | 0.06186 | 9.47E-21 | chr:3:14132684  |
| 3 rs150494767 | 14134606 G  | 0.03713 | 1.38E-20 | chr:3:14132684  |
| 3 rs372874849 | 14134618 C  | 0.03713 | 1.38E-20 | chr:3:14132684  |
| 3 rs6800440   | 14126660 A  | 0.03228 | 1.94E-20 | chr:3:14132684  |
| 3 rs6775826   | 14126847 C  | 0.03003 | 1.99E-20 | chr:3:14132684  |
| 3 rs9310438   | 14105048 T  | 0.03143 | 2.18E-20 | chr:3:14132684  |

|               |            |         |          |                |
|---------------|------------|---------|----------|----------------|
| 3 rs569399702 | 14134859 A | 0.03256 | 2.56E-20 | chr:3:14132684 |
| 3 rs13314202  | 14141969 A | 0.03248 | 2.63E-20 | chr:3:14132684 |
| 3 rs13325293  | 14142078 A | 0.03248 | 2.63E-20 | chr:3:14132684 |
| 3 rs13326583  | 14143915 A | 0.03248 | 2.63E-20 | chr:3:14132684 |
| 3 rs28590293  | 14137568 T | 0.03248 | 2.63E-20 | chr:3:14132684 |
| 3 rs28657962  | 14137572 C | 0.03248 | 2.63E-20 | chr:3:14132684 |
| 3 rs28691764  | 14137871 T | 0.03248 | 2.63E-20 | chr:3:14132684 |
| 3 rs28729783  | 14137587 C | 0.03248 | 2.63E-20 | chr:3:14132684 |
| 3 rs6767978   | 14136755 A | 0.03248 | 2.63E-20 | chr:3:14132684 |
| 3 rs6768033   | 14137003 A | 0.03248 | 2.63E-20 | chr:3:14132684 |
| 3 rs6768047   | 14137044 T | 0.03248 | 2.63E-20 | chr:3:14132684 |
| 3 rs6770834   | 14137266 A | 0.03248 | 2.63E-20 | chr:3:14132684 |
| 3 rs6770939   | 14137398 C | 0.03248 | 2.63E-20 | chr:3:14132684 |
| 3 rs6774176   | 14138199 A | 0.03248 | 2.63E-20 | chr:3:14132684 |
| 3 rs6774208   | 14138377 G | 0.03248 | 2.63E-20 | chr:3:14132684 |
| 3 rs6780911   | 14137037 A | 0.03248 | 2.63E-20 | chr:3:14132684 |
| 3 rs6781010   | 14137119 C | 0.03248 | 2.63E-20 | chr:3:14132684 |
| 3 rs6787198   | 14138394 C | 0.03248 | 2.63E-20 | chr:3:14132684 |
| 3 rs6792123   | 14136737 G | 0.03248 | 2.63E-20 | chr:3:14132684 |
| 3 rs9824627   | 14135965 G | 0.03248 | 2.63E-20 | chr:3:14132684 |
| 3 rs9829180   | 14136563 T | 0.03248 | 2.63E-20 | chr:3:14132684 |
| 3 rs9844764   | 14139269 G | 0.03248 | 2.63E-20 | chr:3:14132684 |
| 3 rs9866433   | 14136054 A | 0.03248 | 2.63E-20 | chr:3:14132684 |
| 3 rs9866963   | 14136380 A | 0.03248 | 2.63E-20 | chr:3:14132684 |
| 3 rs1816425   | 13982518 G | 0.04999 | 2.71E-20 | chr:3:14132684 |
| 3 rs12330591  | 13981061 C | 0.05016 | 2.79E-20 | chr:3:14132684 |
| 3 rs1816424   | 13982379 T | 0.05016 | 2.79E-20 | chr:3:14132684 |
| 3 rs28810528  | 13991453 A | 0.05016 | 2.79E-20 | chr:3:14132684 |
| 3 rs9816802   | 13973637 T | 0.05016 | 2.79E-20 | chr:3:14132684 |
| 3 rs9825702   | 13980411 T | 0.05016 | 2.79E-20 | chr:3:14132684 |
| 3 rs9842881   | 13978272 T | 0.05016 | 2.79E-20 | chr:3:14132684 |
| 3 rs9863071   | 13987353 A | 0.05016 | 2.79E-20 | chr:3:14132684 |
| 3 rs9816646   | 13973502 G | 0.05508 | 2.92E-20 | chr:3:14132684 |
| 3 rs9867949   | 14009276 C | 0.05821 | 3.79E-20 | chr:3:14132684 |
| 3 rs6763196   | 14131474 G | 0.02801 | 4.68E-20 | chr:3:14132684 |
| 3 rs114404429 | 14100931 C | 0.02786 | 4.72E-20 | chr:3:14132684 |
| 3 rs9841035   | 14101872 T | 0.02786 | 4.72E-20 | chr:3:14132684 |
| 3 rs9841145   | 14101782 C | 0.02786 | 4.72E-20 | chr:3:14132684 |
| 3 rs9878216   | 14101678 G | 0.02786 | 4.72E-20 | chr:3:14132684 |
| 3 rs10510425  | 14131634 T | 0.02803 | 5.03E-20 | chr:3:14132684 |
| 3 rs11128682  | 14135592 G | 0.02803 | 5.03E-20 | chr:3:14132684 |
| 3 rs111878348 | 14124270 G | 0.02803 | 5.03E-20 | chr:3:14132684 |
| 3 rs113510537 | 14127749 A | 0.02803 | 5.03E-20 | chr:3:14132684 |



|               |            |         |          |                |
|---------------|------------|---------|----------|----------------|
| 3 rs113797200 | 14133687 T | 0.02803 | 5.03E-20 | chr:3:14132684 |
| 3 rs116434506 | 14124497 G | 0.02803 | 5.03E-20 | chr:3:14132684 |
| 3 rs137878649 | 14127432 C | 0.02803 | 5.03E-20 | chr:3:14132684 |
| 3 rs138479933 | 14127602 T | 0.02803 | 5.03E-20 | chr:3:14132684 |
| 3 rs144847211 | 14124364 T | 0.02803 | 5.03E-20 | chr:3:14132684 |
| 3 rs149488650 | 14127543 G | 0.02803 | 5.03E-20 | chr:3:14132684 |
| 3 rs150291853 | 14127391 C | 0.02803 | 5.03E-20 | chr:3:14132684 |
| 3 rs17038878  | 14126963 A | 0.02803 | 5.03E-20 | chr:3:14132684 |
| 3 rs17038888  | 14128537 G | 0.02803 | 5.03E-20 | chr:3:14132684 |
| 3 rs17038890  | 14128694 A | 0.02803 | 5.03E-20 | chr:3:14132684 |
| 3 rs17038897  | 14133753 G | 0.02803 | 5.03E-20 | chr:3:14132684 |
| 3 rs17038898  | 14133938 A | 0.02803 | 5.03E-20 | chr:3:14132684 |
| 3 rs28413653  | 14131866 T | 0.02803 | 5.03E-20 | chr:3:14132684 |
| 3 rs28459558  | 14131867 G | 0.02803 | 5.03E-20 | chr:3:14132684 |
| 3 rs57419163  | 14129180 C | 0.02803 | 5.03E-20 | chr:3:14132684 |
| 3 rs60912473  | 14129207 A | 0.02803 | 5.03E-20 | chr:3:14132684 |
| 3 rs6764655   | 14126881 C | 0.02803 | 5.03E-20 | chr:3:14132684 |
| 3 rs6765773   | 14130989 A | 0.02803 | 5.03E-20 | chr:3:14132684 |
| 3 rs6774501   | 14131459 G | 0.02803 | 5.03E-20 | chr:3:14132684 |
| 3 rs6800207   | 14126643 A | 0.02803 | 5.03E-20 | chr:3:14132684 |
| 3 rs75472977  | 14134186 G | 0.02803 | 5.03E-20 | chr:3:14132684 |
| 3 rs76800068  | 14127818 T | 0.02803 | 5.03E-20 | chr:3:14132684 |
| 3 rs76802227  | 14135538 A | 0.02803 | 5.03E-20 | chr:3:14132684 |
| 3 rs78737595  | 14127206 G | 0.02803 | 5.03E-20 | chr:3:14132684 |
| 3 rs79248858  | 14134365 C | 0.02803 | 5.03E-20 | chr:3:14132684 |
| 3 rs79551783  | 14127817 A | 0.02803 | 5.03E-20 | chr:3:14132684 |
| 3 rs79844615  | 14133898 C | 0.02803 | 5.03E-20 | chr:3:14132684 |
| 3 rs9814706   | 14128484 G | 0.02803 | 5.03E-20 | chr:3:14132684 |
| 3 rs9820661   | 14129934 G | 0.02803 | 5.03E-20 | chr:3:14132684 |
| 3 rs9823101   | 14135029 G | 0.02803 | 5.03E-20 | chr:3:14132684 |
| 3 rs9826257   | 14123547 A | 0.02803 | 5.03E-20 | chr:3:14132684 |
| 3 rs9835016   | 14130585 T | 0.02803 | 5.03E-20 | chr:3:14132684 |
| 3 rs9835296   | 14130573 A | 0.02803 | 5.03E-20 | chr:3:14132684 |
| 3 rs9851936   | 14128139 T | 0.02803 | 5.03E-20 | chr:3:14132684 |
| 3 rs9855211   | 14130686 C | 0.02803 | 5.03E-20 | chr:3:14132684 |
| 3 rs9855536   | 14130891 C | 0.02803 | 5.03E-20 | chr:3:14132684 |
| 3 rs9857759   | 14129422 T | 0.02803 | 5.03E-20 | chr:3:14132684 |
| 3 rs9857881   | 14122390 G | 0.02803 | 5.03E-20 | chr:3:14132684 |
| 3 rs9859522   | 14130999 G | 0.02803 | 5.03E-20 | chr:3:14132684 |
| 3 rs9865779   | 14132640 C | 0.02803 | 5.03E-20 | chr:3:14132684 |
| 3 rs9871949   | 14128174 C | 0.02803 | 5.03E-20 | chr:3:14132684 |
| 3 rs9872093   | 14128271 C | 0.02803 | 5.03E-20 | chr:3:14132684 |
| 3 rs9872723   | 14130606 C | 0.02803 | 5.03E-20 | chr:3:14132684 |

|               |            |         |          |                |
|---------------|------------|---------|----------|----------------|
| 3 rs9877696   | 14129399 C | 0.02803 | 5.03E-20 | chr:3:14132684 |
| 3 rs9878167   | 14129703 C | 0.02803 | 5.03E-20 | chr:3:14132684 |
| 3 rs144390287 | 14114504 G | 0.02797 | 5.06E-20 | chr:3:14132684 |
| 3 rs28629229  | 14109145 G | 0.02797 | 5.06E-20 | chr:3:14132684 |
| 3 rs4459883   | 14121381 C | 0.02797 | 5.06E-20 | chr:3:14132684 |
| 3 rs4603938   | 14121539 A | 0.02797 | 5.06E-20 | chr:3:14132684 |
| 3 rs9857415   | 14104960 T | 0.02797 | 5.06E-20 | chr:3:14132684 |
| 3 rs9872481   | 14107553 T | 0.02797 | 5.06E-20 | chr:3:14132684 |
| 3 rs112864358 | 13973257 A | 0.05235 | 5.22E-20 | chr:3:14132684 |
| 3 rs28729904  | 13992324 G | 0.04658 | 5.28E-20 | chr:3:14132684 |
| 3 rs115977684 | 14134096 T | 0.02803 | 5.29E-20 | chr:3:14132684 |
| 3 rs77316475  | 14089067 C | 0.04706 | 5.87E-20 | chr:3:14132684 |
| 3 rs9810909   | 14090930 A | 0.04706 | 5.87E-20 | chr:3:14132684 |
| 3 rs9812023   | 14085576 C | 0.04706 | 5.87E-20 | chr:3:14132684 |
| 3 rs9849894   | 14085904 G | 0.04706 | 5.87E-20 | chr:3:14132684 |
| 3 rs2101447   | 13992784 T | 0.04656 | 5.97E-20 | chr:3:14132684 |
| 3 rs28441118  | 14014066 T | 0.04656 | 5.97E-20 | chr:3:14132684 |
| 3 rs4435622   | 13996248 C | 0.04656 | 5.97E-20 | chr:3:14132684 |
| 3 rs77194165  | 14019828 T | 0.04656 | 5.97E-20 | chr:3:14132684 |
| 3 rs77801428  | 14017928 T | 0.04656 | 5.97E-20 | chr:3:14132684 |
| 3 rs80033779  | 14007913 C | 0.04656 | 5.97E-20 | chr:3:14132684 |
| 3 rs9848315   | 14009228 A | 0.04656 | 5.97E-20 | chr:3:14132684 |
| 3 rs9849692   | 13997131 G | 0.04656 | 5.97E-20 | chr:3:14132684 |
| 3 rs9862470   | 13992947 A | 0.04656 | 5.97E-20 | chr:3:14132684 |
| 3 rs9863644   | 14008860 C | 0.04656 | 5.97E-20 | chr:3:14132684 |
| 3 rs13318940  | 14100831 A | 0.04708 | 6.34E-20 | chr:3:14132684 |
| 3 rs2085488   | 14083660 G | 0.04725 | 6.40E-20 | chr:3:14132684 |
| 3 rs113645764 | 14006276 T | 0.04675 | 6.53E-20 | chr:3:14132684 |
| 3 rs28824550  | 14016250 A | 0.04675 | 6.53E-20 | chr:3:14132684 |
| 3 rs4047229   | 14004277 G | 0.04675 | 6.53E-20 | chr:3:14132684 |
| 3 rs9817521   | 14028186 A | 0.04675 | 6.53E-20 | chr:3:14132684 |
| 3 rs9822017   | 14004685 T | 0.04675 | 6.53E-20 | chr:3:14132684 |
| 3 rs9829954   | 14018283 G | 0.04675 | 6.53E-20 | chr:3:14132684 |
| 3 rs9833209   | 14006848 A | 0.04675 | 6.53E-20 | chr:3:14132684 |
| 3 rs9837062   | 14007143 T | 0.04675 | 6.53E-20 | chr:3:14132684 |
| 3 rs9842826   | 14008193 A | 0.04675 | 6.53E-20 | chr:3:14132684 |
| 3 rs9863652   | 14010799 G | 0.04675 | 6.53E-20 | chr:3:14132684 |
| 3 rs9852507   | 14091226 G | 0.04642 | 6.65E-20 | chr:3:14132684 |
| 3 rs28884184  | 14066612 C | 0.04705 | 7.63E-20 | chr:3:14132684 |
| 3 rs6803143   | 14044421 A | 0.04705 | 7.63E-20 | chr:3:14132684 |
| 3 rs7428486   | 14078749 T | 0.04705 | 7.63E-20 | chr:3:14132684 |
| 3 rs9817658   | 14049363 C | 0.04705 | 7.63E-20 | chr:3:14132684 |
| 3 rs9840631   | 14071508 T | 0.04705 | 7.63E-20 | chr:3:14132684 |

|               |            |         |          |                |
|---------------|------------|---------|----------|----------------|
| 3 rs9867120   | 14076266 A | 0.04705 | 7.63E-20 | chr:3:14132684 |
| 3 rs9880508   | 14052114 C | 0.04705 | 7.63E-20 | chr:3:14132684 |
| 3 rs9823450   | 14052571 G | 0.04701 | 7.87E-20 | chr:3:14132684 |
| 3 rs13322742  | 14104301 A | 0.04708 | 8.29E-20 | chr:3:14132684 |
| 3 rs150787267 | 14116452 G | 0.04708 | 8.29E-20 | chr:3:14132684 |
| 3 rs183483454 | 14116524 C | 0.04708 | 8.29E-20 | chr:3:14132684 |
| 3 rs28696078  | 14103504 A | 0.04708 | 8.29E-20 | chr:3:14132684 |
| 3 rs12108069  | 14055655 A | 0.04724 | 8.34E-20 | chr:3:14132684 |
| 3 rs12330658  | 14046295 T | 0.04724 | 8.34E-20 | chr:3:14132684 |
| 3 rs28590512  | 14080655 G | 0.04724 | 8.34E-20 | chr:3:14132684 |
| 3 rs6767254   | 14044385 G | 0.04724 | 8.34E-20 | chr:3:14132684 |
| 3 rs6776717   | 14061611 T | 0.04724 | 8.34E-20 | chr:3:14132684 |
| 3 rs9810787   | 14053241 A | 0.04724 | 8.34E-20 | chr:3:14132684 |
| 3 rs9812495   | 14057393 C | 0.04724 | 8.34E-20 | chr:3:14132684 |
| 3 rs9831699   | 14064613 T | 0.04724 | 8.34E-20 | chr:3:14132684 |
| 3 rs9865978   | 14053226 T | 0.04734 | 9.02E-20 | chr:3:14132684 |
| 3 rs7611337   | 14043474 G | 0.04724 | 9.75E-20 | chr:3:14132684 |
| 3 rs28761305  | 13998961 T | 0.04822 | 9.88E-20 | chr:3:14132684 |
| 3 rs7633184   | 13992358 A | 14.38   | 1.26E-19 | chr:3:14132684 |
| 3 rs6797200   | 14067250 A | 0.05181 | 1.85E-19 | chr:3:14132684 |
| 3 rs114748241 | 13997390 A | 0.04991 | 2.06E-19 | chr:3:14132684 |
| 3 rs9876468   | 14134697 C | 0.03649 | 4.09E-19 | chr:3:14132684 |
| 3 rs6767928   | 14136907 G | 0.09675 | 1.64E-17 | chr:3:14132684 |
| 3 rs145085143 | 14037234 T | 0.09896 | 1.88E-17 | chr:3:14132684 |
| 3 rs142887561 | 14021272 T | 0.09611 | 3.15E-17 | chr:3:14132684 |
| 3 rs76773010  | 14019928 G | 0.09611 | 3.15E-17 | chr:3:14132684 |
| 3 rs77000306  | 14017655 T | 0.09611 | 3.15E-17 | chr:3:14132684 |
| 3 rs79849273  | 14006999 A | 0.09611 | 3.15E-17 | chr:3:14132684 |
| 3 rs181388240 | 14032254 C | 0.09021 | 3.51E-17 | chr:3:14132684 |
| 3 rs111462297 | 14025712 G | 0.09851 | 3.87E-17 | chr:3:14132684 |
| 3 rs111981004 | 14012555 T | 0.09851 | 3.87E-17 | chr:3:14132684 |
| 3 rs112071682 | 14038589 G | 0.09851 | 3.87E-17 | chr:3:14132684 |
| 3 rs112594602 | 14027090 G | 0.09851 | 3.87E-17 | chr:3:14132684 |
| 3 rs113226436 | 14023913 C | 0.09851 | 3.87E-17 | chr:3:14132684 |
| 3 rs139015636 | 14035616 G | 0.09851 | 3.87E-17 | chr:3:14132684 |
| 3 rs112085579 | 14084458 G | 0.1028  | 4.58E-17 | chr:3:14132684 |
| 3 rs112507992 | 14099531 A | 0.1028  | 4.58E-17 | chr:3:14132684 |
| 3 rs17038849  | 14093586 A | 0.1028  | 4.58E-17 | chr:3:14132684 |
| 3 rs28870410  | 14085234 T | 0.1028  | 4.58E-17 | chr:3:14132684 |
| 3 rs74323071  | 14084576 C | 0.1028  | 4.58E-17 | chr:3:14132684 |
| 3 rs868305    | 14087896 A | 0.1028  | 4.58E-17 | chr:3:14132684 |
| 3 rs113152170 | 13984589 A | 0.1037  | 6.21E-17 | chr:3:14132684 |
| 3 rs17038787  | 13978137 T | 0.1037  | 6.21E-17 | chr:3:14132684 |

|               |            |         |          |                |
|---------------|------------|---------|----------|----------------|
| 3 rs112225787 | 14118633 G | 0.1022  | 6.38E-17 | chr:3:14132684 |
| 3 rs112488436 | 14110763 T | 0.1022  | 6.38E-17 | chr:3:14132684 |
| 3 rs113237279 | 14105023 G | 0.1022  | 6.38E-17 | chr:3:14132684 |
| 3 rs113415393 | 14049786 A | 0.1022  | 6.38E-17 | chr:3:14132684 |
| 3 rs113842726 | 14131971 G | 0.1022  | 6.38E-17 | chr:3:14132684 |
| 3 rs139614460 | 14112839 G | 0.1022  | 6.38E-17 | chr:3:14132684 |
| 3 rs145715963 | 14115465 G | 0.1022  | 6.38E-17 | chr:3:14132684 |
| 3 rs183941725 | 14117290 G | 0.1022  | 6.38E-17 | chr:3:14132684 |
| 3 rs558409036 | 14106203 A | 0.1022  | 6.38E-17 | chr:3:14132684 |
| 3 rs6800457   | 14044027 A | 0.1022  | 6.38E-17 | chr:3:14132684 |
| 3 rs77497299  | 14080626 G | 0.1022  | 6.38E-17 | chr:3:14132684 |
| 3 rs77513529  | 14047268 G | 0.1022  | 6.38E-17 | chr:3:14132684 |
| 3 rs78283775  | 14109923 T | 0.1022  | 6.38E-17 | chr:3:14132684 |
| 3 rs78379417  | 14064551 A | 0.1022  | 6.38E-17 | chr:3:14132684 |
| 3 rs80026241  | 14058780 T | 0.1022  | 6.38E-17 | chr:3:14132684 |
| 3 rs80039308  | 14134322 G | 0.1022  | 6.38E-17 | chr:3:14132684 |
| 3 rs80136382  | 14069151 G | 0.1022  | 6.38E-17 | chr:3:14132684 |
| 3 rs116446927 | 13952877 T | 0.1061  | 7.58E-17 | chr:3:14132684 |
| 3 rs28378280  | 13981010 G | 0.1061  | 7.58E-17 | chr:3:14132684 |
| 3 rs137936132 | 14023282 C | 0.09062 | 9.04E-17 | chr:3:14132684 |
| 3 rs149445713 | 14092523 G | 0.1114  | 9.10E-17 | chr:3:14132684 |
| 3 rs535198208 | 14106202 A | 0.1044  | 1.03E-16 | chr:3:14132684 |
| 3 rs75217305  | 14080912 A | 0.09821 | 1.54E-16 | chr:3:14132684 |
| 3 rs9756008   | 14115991 C | 0.1134  | 1.56E-16 | chr:3:14132684 |
| 3 rs6790932   | 14141537 G | 0.1092  | 1.80E-16 | chr:3:14132684 |
| 3 rs112384621 | 14055310 A | 0.09977 | 2.08E-16 | chr:3:14132684 |
| 3 rs113771892 | 13985798 T | 0.09866 | 3.14E-16 | chr:3:14132684 |
| 3 rs149117984 | 13985955 A | 0.09866 | 3.14E-16 | chr:3:14132684 |
| 3 rs567859105 | 13988444 T | 0.09866 | 3.14E-16 | chr:3:14132684 |
| 3 rs4487225   | 14079133 A | 0.09938 | 3.71E-16 | chr:3:14132684 |
| 3 rs9866178   | 14023272 T | 0.1561  | 4.78E-16 | chr:3:14132684 |
| 3 rs1077525   | 13929225 C | 0.1189  | 5.55E-16 | chr:3:14132684 |
| 3 rs564631976 | 14117370 G | 0.1152  | 7.24E-16 | chr:3:14132684 |
| 3 rs6783302   | 14063432 C | 0.1604  | 1.83E-15 | chr:3:14132684 |
| 3 rs570206947 | 14096727 A | 0.1229  | 2.81E-15 | chr:3:14132684 |
| 3 rs2731323   | 14125860 C | 0.03776 | 5.25E-15 | chr:3:14132684 |
| 3 rs189040807 | 14035562 T | 0.1411  | 8.45E-15 | chr:3:14132684 |
| 3 rs61976959  | 13968603 T | 0.1138  | 1.19E-14 | chr:3:14132684 |
| 3 rs9863367   | 14123434 G | 0.1024  | 1.39E-13 | chr:3:14132684 |
| 3 rs4685070   | 14126238 T | 7.09    | 1.04E-12 | chr:3:14132684 |
| 3 rs2879889   | 14100627 T | 7.076   | 1.05E-12 | chr:3:14132684 |
| 3 rs2607741   | 14147892 C | 0.2138  | 2.83E-12 | chr:3:14132684 |
| 3 rs79296261  | 13961704 A | 0.2065  | 3.74E-12 | chr:3:14132684 |

|               |            |        |          |                |
|---------------|------------|--------|----------|----------------|
| 3 rs9859264   | 14147316 G | 0.1682 | 3.78E-12 | chr:3:14132684 |
| 3 rs9883700   | 13926173 T | 0.1689 | 7.21E-12 | chr:3:14132684 |
| 3 rs141104612 | 14029807 T | 0.1484 | 8.79E-12 | chr:3:14132684 |
| 3 rs147847103 | 14032386 G | 0.1484 | 8.79E-12 | chr:3:14132684 |
| 3 rs150975467 | 14031399 C | 0.1484 | 8.79E-12 | chr:3:14132684 |
| 3 rs114894105 | 13977047 T | 0.1491 | 9.15E-12 | chr:3:14132684 |
| 3 rs114253217 | 14013750 A | 0.1515 | 1.23E-11 | chr:3:14132684 |
| 3 rs115249832 | 14013505 T | 0.1515 | 1.23E-11 | chr:3:14132684 |
| 3 rs116745088 | 14013702 T | 0.1515 | 1.23E-11 | chr:3:14132684 |
| 3 rs13323884  | 14075680 C | 0.1515 | 1.23E-11 | chr:3:14132684 |
| 3 rs13326796  | 14025875 A | 0.1515 | 1.23E-11 | chr:3:14132684 |
| 3 rs140684053 | 14037007 A | 0.1515 | 1.23E-11 | chr:3:14132684 |
| 3 rs143632765 | 14001634 A | 0.1515 | 1.23E-11 | chr:3:14132684 |
| 3 rs184888567 | 14035078 G | 0.1515 | 1.23E-11 | chr:3:14132684 |
| 3 rs28786533  | 14014309 G | 0.1515 | 1.23E-11 | chr:3:14132684 |
| 3 rs28817689  | 14068151 T | 0.1515 | 1.23E-11 | chr:3:14132684 |
| 3 rs549372188 | 14000614 C | 0.1515 | 1.23E-11 | chr:3:14132684 |
| 3 rs60724048  | 14058133 A | 0.1515 | 1.23E-11 | chr:3:14132684 |
| 3 rs74696324  | 14087986 A | 0.1515 | 1.23E-11 | chr:3:14132684 |
| 3 rs9810605   | 14023044 C | 0.1515 | 1.23E-11 | chr:3:14132684 |
| 3 rs9811854   | 14085401 A | 0.1515 | 1.23E-11 | chr:3:14132684 |
| 3 rs9818209   | 14051646 G | 0.1515 | 1.23E-11 | chr:3:14132684 |
| 3 rs9818431   | 14058942 A | 0.1515 | 1.23E-11 | chr:3:14132684 |
| 3 rs9823761   | 14022668 G | 0.1515 | 1.23E-11 | chr:3:14132684 |
| 3 rs9824059   | 13992720 G | 0.1515 | 1.23E-11 | chr:3:14132684 |
| 3 rs9832794   | 13976688 T | 0.1515 | 1.23E-11 | chr:3:14132684 |
| 3 rs9843754   | 14084399 G | 0.1515 | 1.23E-11 | chr:3:14132684 |
| 3 rs9857436   | 14069069 G | 0.1515 | 1.23E-11 | chr:3:14132684 |
| 3 rs9862109   | 13992794 A | 0.1515 | 1.23E-11 | chr:3:14132684 |
| 3 rs9863140   | 14047776 T | 0.1515 | 1.23E-11 | chr:3:14132684 |
| 3 rs9870470   | 13976748 G | 0.1515 | 1.23E-11 | chr:3:14132684 |
| 3 rs9876149   | 14000562 T | 0.1515 | 1.23E-11 | chr:3:14132684 |
| 3 rs9876776   | 13995109 T | 0.1515 | 1.23E-11 | chr:3:14132684 |
| 3 rs4684181   | 14126626 T | 5.308  | 1.28E-11 | chr:3:14132684 |
| 3 rs78541509  | 14126272 A | 0.1726 | 1.39E-11 | chr:3:14132684 |
| 3 rs9850096   | 13939593 T | 0.1526 | 1.41E-11 | chr:3:14132684 |
| 3 rs1816428   | 13962544 G | 0.15   | 1.61E-11 | chr:3:14132684 |
| 3 rs2607779   | 14106499 A | 4.951  | 1.65E-11 | chr:3:14132684 |
| 3 rs6773588   | 14113458 A | 4.951  | 1.65E-11 | chr:3:14132684 |
| 3 rs577819290 | 14113432 C | 0.174  | 1.71E-11 | chr:3:14132684 |
| 3 rs59247191  | 14115568 T | 0.174  | 1.71E-11 | chr:3:14132684 |
| 3 rs115668091 | 14103512 A | 0.1547 | 1.74E-11 | chr:3:14132684 |
| 3 rs13317006  | 14123362 T | 0.1547 | 1.74E-11 | chr:3:14132684 |

|               |            |        |          |                |
|---------------|------------|--------|----------|----------------|
| 3 rs137910229 | 14116926 C | 0.1547 | 1.74E-11 | chr:3:14132684 |
| 3 rs1840944   | 14109740 A | 0.1547 | 1.74E-11 | chr:3:14132684 |
| 3 rs77845295  | 14127928 C | 0.1547 | 1.74E-11 | chr:3:14132684 |
| 3 rs78496810  | 14126389 A | 0.1547 | 1.74E-11 | chr:3:14132684 |
| 3 rs9864588   | 14141076 A | 0.1547 | 1.74E-11 | chr:3:14132684 |
| 3 rs9865105   | 14132215 C | 0.1547 | 1.74E-11 | chr:3:14132684 |
| 3 rs9866363   | 14136194 T | 0.1547 | 1.74E-11 | chr:3:14132684 |
| 3 rs9866424   | 14102935 C | 0.1547 | 1.74E-11 | chr:3:14132684 |
| 3 rs9990360   | 14107071 T | 0.1547 | 1.74E-11 | chr:3:14132684 |
| 3 rs2607778   | 14108543 A | 4.916  | 1.93E-11 | chr:3:14132684 |
| 3 rs4607093   | 13957262 C | 0.177  | 2.32E-11 | chr:3:14132684 |
| 3 rs9812276   | 13932069 A | 0.177  | 2.32E-11 | chr:3:14132684 |
| 3 rs9813081   | 13967417 A | 0.177  | 2.32E-11 | chr:3:14132684 |
| 3 rs9836126   | 13954830 G | 0.177  | 2.32E-11 | chr:3:14132684 |
| 3 rs9837169   | 13949585 C | 0.177  | 2.32E-11 | chr:3:14132684 |
| 3 rs9841847   | 13925930 G | 0.177  | 2.32E-11 | chr:3:14132684 |
| 3 rs9845208   | 13931668 G | 0.177  | 2.32E-11 | chr:3:14132684 |
| 3 rs9866731   | 13963237 A | 0.177  | 2.32E-11 | chr:3:14132684 |
| 3 rs115679038 | 13951421 G | 0.1585 | 2.65E-11 | chr:3:14132684 |
| 3 rs13326555  | 13970839 A | 0.1585 | 2.65E-11 | chr:3:14132684 |
| 3 rs1836062   | 13927838 G | 0.1585 | 2.65E-11 | chr:3:14132684 |
| 3 rs4100202   | 13927553 G | 0.1585 | 2.65E-11 | chr:3:14132684 |
| 3 rs75058833  | 13937762 A | 0.1585 | 2.65E-11 | chr:3:14132684 |
| 3 rs9809239   | 13956505 A | 0.1585 | 2.65E-11 | chr:3:14132684 |
| 3 rs9809732   | 13956896 A | 0.1585 | 2.65E-11 | chr:3:14132684 |
| 3 rs9817282   | 13954033 C | 0.1585 | 2.65E-11 | chr:3:14132684 |
| 3 rs9828438   | 13926238 C | 0.1585 | 2.65E-11 | chr:3:14132684 |
| 3 rs9829583   | 13953037 T | 0.1585 | 2.65E-11 | chr:3:14132684 |
| 3 rs9846432   | 13940098 C | 0.1585 | 2.65E-11 | chr:3:14132684 |
| 3 rs9850906   | 13957016 G | 0.1585 | 2.65E-11 | chr:3:14132684 |
| 3 rs9850966   | 13939923 C | 0.1585 | 2.65E-11 | chr:3:14132684 |
| 3 rs9868342   | 13944541 C | 0.1585 | 2.65E-11 | chr:3:14132684 |
| 3 rs9870914   | 13936149 G | 0.1585 | 2.65E-11 | chr:3:14132684 |
| 3 rs9875035   | 13949553 T | 0.1585 | 2.65E-11 | chr:3:14132684 |
| 3 rs9859458   | 14110031 T | 0.1779 | 2.85E-11 | chr:3:14132684 |
| 3 rs116165837 | 14141476 T | 0.1798 | 2.99E-11 | chr:3:14132684 |
| 3 rs28611125  | 13942862 T | 0.1794 | 3.00E-11 | chr:3:14132684 |
| 3 rs575748852 | 13952289 T | 0.1794 | 3.00E-11 | chr:3:14132684 |
| 3 rs79210652  | 13951065 G | 0.1794 | 3.00E-11 | chr:3:14132684 |
| 3 rs9812797   | 13967277 C | 0.1794 | 3.00E-11 | chr:3:14132684 |
| 3 rs9817937   | 13954402 C | 0.1794 | 3.00E-11 | chr:3:14132684 |
| 3 rs9818205   | 13961369 G | 0.1794 | 3.00E-11 | chr:3:14132684 |
| 3 rs9819140   | 13968995 A | 0.1794 | 3.00E-11 | chr:3:14132684 |

|               |            |        |          |                |
|---------------|------------|--------|----------|----------------|
| 3 rs9830847   | 13953841 G | 0.1794 | 3.00E-11 | chr:3:14132684 |
| 3 rs9859141   | 13946543 T | 0.1794 | 3.00E-11 | chr:3:14132684 |
| 3 rs9833375   | 14142867 G | 0.1597 | 3.31E-11 | chr:3:14132684 |
| 3 rs1433360   | 13923058 A | 0.1311 | 3.63E-11 | chr:3:14132684 |
| 3 rs2733568   | 14137824 A | 4.648  | 6.07E-11 | chr:3:14132684 |
| 3 rs2733571   | 14140737 A | 4.648  | 6.07E-11 | chr:3:14132684 |
| 3 rs9866332   | 14023358 T | 0.1557 | 1.25E-10 | chr:3:14132684 |
| 3 rs528884598 | 14145075 C | 0.191  | 2.49E-10 | chr:3:14132684 |
| 3 rs79616045  | 13969716 A | 0.2601 | 4.85E-10 | chr:3:14132684 |
| 3 rs11924189  | 14037014 T | 7.754  | 6.06E-10 | chr:3:14132684 |
| 3 rs1386932   | 14061369 G | 7.697  | 6.99E-10 | chr:3:14132684 |
| 3 rs112517663 | 14037066 G | 7.668  | 7.19E-10 | chr:3:14132684 |
| 3 rs4684172   | 14036514 G | 7.668  | 7.19E-10 | chr:3:14132684 |
| 3 rs4685057   | 14028949 G | 7.668  | 7.19E-10 | chr:3:14132684 |
| 3 rs4685058   | 14030384 T | 7.662  | 7.23E-10 | chr:3:14132684 |
| 3 rs190558237 | 14034113 G | 6.225  | 8.82E-10 | chr:3:14132684 |
| 3 rs7636901   | 14030958 G | 6.905  | 1.20E-09 | chr:3:14132684 |
| 3 rs2607761   | 14091428 A | 0.2848 | 3.04E-09 | chr:3:14132684 |
| 3 rs7630488   | 13998984 C | 0.29   | 3.74E-09 | chr:3:14132684 |
| 3 rs11718142  | 14018793 G | 0.3001 | 7.30E-09 | chr:3:14132684 |
| 3 rs4684171   | 14028190 T | 0.3001 | 7.30E-09 | chr:3:14132684 |
| 3 rs9867041   | 14014615 T | 0.3001 | 7.30E-09 | chr:3:14132684 |
| 3 rs11927267  | 14073992 T | 0.2999 | 7.35E-09 | chr:3:14132684 |
| 3 rs7653289   | 13986333 C | 0.2993 | 7.74E-09 | chr:3:14132684 |
| 3 rs1077325   | 13992649 G | 0.3004 | 7.87E-09 | chr:3:14132684 |
| 3 rs2878160   | 14059571 A | 0.3004 | 7.87E-09 | chr:3:14132684 |
| 3 rs4685061   | 14043823 G | 0.3004 | 7.87E-09 | chr:3:14132684 |
| 3 rs6797895   | 14059009 T | 0.3004 | 7.87E-09 | chr:3:14132684 |
| 3 rs7645409   | 14056172 A | 0.3004 | 7.87E-09 | chr:3:14132684 |
| 3 rs9882317   | 14026356 T | 0.1801 | 7.91E-09 | chr:3:14132684 |
| 3 rs7651599   | 14010974 C | 0.2974 | 8.19E-09 | chr:3:14132684 |
| 3 rs4359796   | 14027681 T | 0.3018 | 8.24E-09 | chr:3:14132684 |
| 3 rs11128679  | 14075245 C | 0.3025 | 9.19E-09 | chr:3:14132684 |
| 3 rs2731305   | 14081342 T | 0.3025 | 9.19E-09 | chr:3:14132684 |
| 3 rs4684168   | 13981591 C | 0.303  | 9.40E-09 | chr:3:14132684 |
| 3 rs7373709   | 14114549 C | 4.116  | 9.85E-09 | chr:3:14132684 |
| 3 rs2607774   | 14112612 T | 4.121  | 1.07E-08 | chr:3:14132684 |
| 3 rs2607777   | 14110377 G | 4.121  | 1.07E-08 | chr:3:14132684 |
| 3 rs6773534   | 14113581 T | 4.121  | 1.07E-08 | chr:3:14132684 |
| 3 rs2733564   | 14134662 A | 4.058  | 1.37E-08 | chr:3:14132684 |
| 3 rs9874530   | 13915940 C | 0.3219 | 3.58E-08 | chr:3:14132684 |
| 3 rs12485272  | 13926324 A | 5.922  | 6.71E-08 | chr:3:14132684 |
| 3 rs12498112  | 13926288 A | 5.898  | 6.88E-08 | chr:3:14132684 |

|               |            |         |          |                |
|---------------|------------|---------|----------|----------------|
| 3 rs12629691  | 13927124 T | 5.848   | 8.17E-08 | chr:3:14132684 |
| 3 rs2607754   | 14123418 C | 8.493   | 9.92E-08 | chr:3:14132684 |
| 3 rs12488625  | 13926215 G | 5.43    | 1.02E-07 | chr:3:14132684 |
| 3 rs1873003   | 13926117 A | 5.381   | 1.35E-07 | chr:3:14132684 |
| 3 rs72624492  | 14273657 A | 0.3269  | 1.60E-07 | chr:3:14132684 |
| 3 rs12630468  | 13928145 T | 6.042   | 1.61E-07 | chr:3:14132684 |
| 3 rs2259815   | 14129625 T | 8.028   | 1.98E-07 | chr:3:14132684 |
| 3 rs2731321   | 14127075 T | 7.957   | 2.19E-07 | chr:3:14132684 |
| 3 rs7371922   | 14000094 A | 6.936   | 2.34E-07 | chr:3:14132684 |
| 3 rs111910231 | 13985222 A | 7.781   | 2.89E-07 | chr:3:14132684 |
| 3 rs2129882   | 13980817 G | 7.781   | 2.89E-07 | chr:3:14132684 |
| 3 rs9883041   | 13987555 T | 7.781   | 2.89E-07 | chr:3:14132684 |
| 3 rs1488375   | 14061563 G | 7.741   | 3.17E-07 | chr:3:14132684 |
| 3 rs1586514   | 14050157 G | 7.741   | 3.17E-07 | chr:3:14132684 |
| 3 rs2733559   | 14103235 G | 7.741   | 3.17E-07 | chr:3:14132684 |
| 3 rs28865280  | 14064958 C | 7.741   | 3.17E-07 | chr:3:14132684 |
| 3 rs12330714  | 14040342 A | 7.722   | 3.22E-07 | chr:3:14132684 |
| 3 rs1906538   | 14014169 C | 7.722   | 3.22E-07 | chr:3:14132684 |
| 3 rs7373624   | 14000032 C | 7.722   | 3.22E-07 | chr:3:14132684 |
| 3 rs7648345   | 14039901 G | 7.722   | 3.22E-07 | chr:3:14132684 |
| 3 rs9831774   | 14002932 T | 7.722   | 3.22E-07 | chr:3:14132684 |
| 3 rs1844108   | 14024328 A | 7.675   | 3.47E-07 | chr:3:14132684 |
| 3 rs56071023  | 14075920 G | 2.919   | 3.48E-07 | chr:3:14132684 |
| 3 rs9848934   | 13972580 G | 0.2562  | 4.04E-07 | chr:3:14132684 |
| 3 rs79626378  | 14031735 G | 6.628   | 4.74E-07 | chr:3:14132684 |
| 3 rs9811978   | 13972699 T | 0.2593  | 4.96E-07 | chr:3:14132684 |
| 3 rs80109649  | 14047674 C | 0.1777  | 5.31E-07 | chr:3:14132684 |
| 3 rs186563622 | 13973964 C | 0.08816 | 5.33E-07 | chr:3:14132684 |
| 3 rs2733573   | 14143515 G | 3.388   | 5.50E-07 | chr:3:14132684 |
| 3 rs2733574   | 14146811 A | 3.468   | 6.31E-07 | chr:3:14132684 |
| 3 rs4685075   | 14174146 T | 3.201   | 8.26E-07 | chr:3:14132684 |
| 3 rs2733555   | 14099649 C | 6.326   | 8.93E-07 | chr:3:14132684 |
| 3 rs116501880 | 14162865 G | 0.26    | 1.69E-06 | chr:3:14132684 |
| 3 rs1077524   | 13930133 C | 3.727   | 1.96E-06 | chr:3:14132684 |
| 3 rs2168718   | 14084157 G | 2.781   | 2.08E-06 | chr:3:14132684 |
| 3 rs7632937   | 14169079 T | 2.737   | 2.24E-06 | chr:3:14132684 |
| 3 rs11914294  | 14097070 C | 2.757   | 2.38E-06 | chr:3:14132684 |
| 3 rs1825902   | 14007730 A | 3.256   | 2.47E-06 | chr:3:14132684 |
| 3 rs66716710  | 13938728 G | 6.551   | 2.56E-06 | chr:3:14132684 |
| 3 rs1579551   | 13945571 C | 6.501   | 2.79E-06 | chr:3:14132684 |
| 3 rs6778297   | 13932143 T | 6.476   | 2.97E-06 | chr:3:14132684 |
| 3 rs62234597  | 13963780 A | 6.459   | 3.01E-06 | chr:3:14132684 |
| 3 rs9835402   | 13954396 A | 2.744   | 3.21E-06 | chr:3:14132684 |



|               |            |        |          |                |
|---------------|------------|--------|----------|----------------|
| 3 rs60536565  | 13989554 A | 3.707  | 3.28E-06 | chr:3:14132684 |
| 3 rs7638190   | 14182743 T | 0.2723 | 3.31E-06 | chr:3:14132684 |
| 3 rs11128674  | 14023301 C | 2.704  | 3.33E-06 | chr:3:14132684 |
| 3 rs12497139  | 14069587 C | 2.701  | 3.53E-06 | chr:3:14132684 |
| 3 rs6775534   | 14051001 T | 2.701  | 3.53E-06 | chr:3:14132684 |
| 3 rs6778884   | 14044681 G | 2.701  | 3.53E-06 | chr:3:14132684 |
| 3 rs2117039   | 13963330 T | 2.721  | 3.62E-06 | chr:3:14132684 |
| 3 rs76516763  | 14288865 T | 0.2955 | 3.71E-06 | chr:3:14132684 |
| 3 rs2607733   | 14144634 T | 3.809  | 3.84E-06 | chr:3:14132684 |
| 3 rs58484785  | 14025912 G | 3.538  | 4.05E-06 | chr:3:14132684 |
| 3 rs114945814 | 14155639 T | 0.317  | 4.05E-06 | chr:3:14132684 |
| 3 rs1545630   | 14154982 A | 0.317  | 4.05E-06 | chr:3:14132684 |
| 3 rs77941327  | 14154701 T | 0.317  | 4.05E-06 | chr:3:14132684 |
| 3 rs9875589   | 13961157 T | 2.693  | 4.22E-06 | chr:3:14132684 |
| 3 rs3731163   | 14189750 A | 0.2769 | 4.33E-06 | chr:3:14132684 |
| 3 rs78804891  | 14195939 A | 0.2769 | 4.33E-06 | chr:3:14132684 |
| 3 rs58619368  | 13983224 A | 3.533  | 4.34E-06 | chr:3:14132684 |
| 3 rs2125033   | 14121045 G | 3.527  | 4.44E-06 | chr:3:14132684 |
| 3 rs9681156   | 14116410 A | 3.527  | 4.44E-06 | chr:3:14132684 |
| 3 rs4684177   | 14070433 G | 3.508  | 4.62E-06 | chr:3:14132684 |
| 3 rs1586515   | 14007451 G | 3.512  | 4.74E-06 | chr:3:14132684 |
| 3 rs1601870   | 14024162 T | 7.23   | 4.79E-06 | chr:3:14132684 |
| 3 rs114645233 | 14164555 A | 0.3198 | 4.84E-06 | chr:3:14132684 |
| 3 rs114995436 | 14155753 T | 0.3203 | 4.84E-06 | chr:3:14132684 |
| 3 rs79249693  | 14162197 T | 0.3203 | 4.84E-06 | chr:3:14132684 |
| 3 rs79376214  | 14162212 C | 0.3203 | 4.84E-06 | chr:3:14132684 |
| 3 rs12490597  | 14131281 T | 3.501  | 4.96E-06 | chr:3:14132684 |
| 3 rs151198621 | 14166091 T | 0.3258 | 4.98E-06 | chr:3:14132684 |
| 3 rs80234167  | 14163921 G | 0.3205 | 5.03E-06 | chr:3:14132684 |
| 3 rs58025061  | 13988979 A | 3.508  | 5.07E-06 | chr:3:14132684 |
| 3 rs12490233  | 13977365 A | 2.631  | 5.32E-06 | chr:3:14132684 |
| 3 rs77851036  | 14238763 T | 0.2812 | 5.48E-06 | chr:3:14132684 |
| 3 rs2733577   | 14165929 C | 2.593  | 5.50E-06 | chr:3:14132684 |
| 3 rs80318592  | 13915410 T | 0.3166 | 5.58E-06 | chr:3:14132684 |
| 3 rs2341652   | 14118907 C | 3.462  | 5.74E-06 | chr:3:14132684 |
| 3 rs114671838 | 14269630 C | 0.2857 | 6.58E-06 | chr:3:14132684 |
| 3 rs75381945  | 14284754 A | 0.3061 | 6.61E-06 | chr:3:14132684 |
| 3 rs76958605  | 14278137 T | 0.3061 | 6.61E-06 | chr:3:14132684 |
| 3 rs79346909  | 14277369 T | 0.3061 | 6.61E-06 | chr:3:14132684 |
| 3 rs114248491 | 14267791 G | 0.2862 | 6.94E-06 | chr:3:14132684 |
| 3 rs6776709   | 13978803 G | 3.437  | 6.96E-06 | chr:3:14132684 |
| 3 rs2733566   | 14136506 G | 6.927  | 7.56E-06 | chr:3:14132684 |
| 3 rs9681152   | 14137485 A | 3.32   | 7.73E-06 | chr:3:14132684 |

|   |             |           |   |         |          |                 |
|---|-------------|-----------|---|---------|----------|-----------------|
| 3 | rs112418665 | 13918467  | C | 0.3273  | 9.28E-06 | chr:3:14132684  |
| 3 | rs2340920   | 14100412  | A | 2.827   | 9.29E-06 | chr:3:14132684  |
| 3 | rs114274907 | 14151299  | T | 0.2803  | 1.04E-05 | chr:3:14132684  |
| 3 | rs115199886 | 14151236  | C | 0.2803  | 1.04E-05 | chr:3:14132684  |
| 3 | rs6775584   | 13925728  | C | 3.017   | 1.04E-05 | chr:3:14132684  |
| 3 | rs76922809  | 14291338  | C | 0.3207  | 1.07E-05 | chr:3:14132684  |
| 3 | rs9823738   | 13934580  | A | 0.3995  | 1.09E-05 | chr:3:14132684  |
| 3 | rs9823887   | 13934666  | A | 0.3995  | 1.09E-05 | chr:3:14132684  |
| 3 | rs115308741 | 14294531  | A | 0.3025  | 1.67E-05 | chr:3:14132684  |
| 3 | rs114913553 | 13901623  | T | 0.2718  | 2.05E-05 | chr:3:14132684  |
| 3 | rs142954409 | 14271479  | C | 0.3345  | 2.26E-05 | chr:3:14132684  |
| 3 | rs115584242 | 14307401  | G | 0.3037  | 2.34E-05 | chr:3:14132684  |
| 3 | rs2128161   | 14308120  | C | 0.3037  | 2.34E-05 | chr:3:14132684  |
| 4 | rs201965045 | 120254952 | G | 0.134   | 1.96E-33 | chr:4:120263688 |
| 4 | rs13128774  | 120246282 | T | 0.1412  | 2.00E-33 | chr:4:120263688 |
| 4 | rs13128933  | 120246249 | A | 0.1311  | 8.28E-33 | chr:4:120263688 |
| 4 | rs190883674 | 120269780 | G | 0.1223  | 8.38E-33 | chr:4:120263688 |
| 4 | rs201764844 | 120269768 | C | 0.1223  | 8.38E-33 | chr:4:120263688 |
| 4 | rs77466269  | 120269755 | A | 0.1206  | 1.17E-32 | chr:4:120263688 |
| 4 | rs140305554 | 120247693 | C | 0.1271  | 2.12E-32 | chr:4:120263688 |
| 4 | rs373735748 | 120244580 | T | 0.128   | 3.37E-32 | chr:4:120263688 |
| 4 | rs55884612  | 120244577 | T | 0.128   | 3.37E-32 | chr:4:120263688 |
| 4 | rs12510923  | 120247381 | G | 0.1148  | 4.39E-32 | chr:4:120263688 |
| 4 | rs113263911 | 120255134 | T | 0.136   | 4.69E-32 | chr:4:120263688 |
| 4 | rs10006495  | 120263315 | G | 0.1334  | 5.37E-32 | chr:4:120263688 |
| 4 | rs200947437 | 120254755 | C | 0.1123  | 1.14E-31 | chr:4:120263688 |
| 4 | rs12503309  | 120247397 | A | 0.1214  | 1.35E-31 | chr:4:120263688 |
| 4 | rs10017001  | 120263293 | G | 0.1336  | 1.66E-31 | chr:4:120263688 |
| 4 | rs9994691   | 120263298 | A | 0.1336  | 1.66E-31 | chr:4:120263688 |
| 4 | rs12503276  | 120247329 | A | 0.1042  | 2.45E-31 | chr:4:120263688 |
| 4 | rs12503360  | 120247506 | C | 0.1041  | 3.47E-31 | chr:4:120263688 |
| 4 | rs534745130 | 120246059 | C | 0.1169  | 3.70E-31 | chr:4:120263688 |
| 4 | rs55816173  | 120247014 | T | 0.1398  | 5.07E-31 | chr:4:120263688 |
| 4 | rs10013042  | 120244482 | T | 0.09842 | 7.30E-31 | chr:4:120263688 |
| 4 | rs13101526  | 120244456 | T | 0.09842 | 7.30E-31 | chr:4:120263688 |
| 4 | rs140584472 | 120246695 | G | 0.1314  | 1.18E-30 | chr:4:120263688 |
| 4 | rs185481756 | 120246689 | C | 0.1314  | 1.18E-30 | chr:4:120263688 |
| 4 | rs143457155 | 120263622 | C | 0.07849 | 4.80E-30 | chr:4:120263688 |
| 4 | rs10006688  | 120263526 | C | 0.07878 | 5.57E-30 | chr:4:120263688 |
| 4 | rs34481394  | 120248374 | T | 0.09109 | 6.75E-30 | chr:4:120263688 |
| 4 | rs35231872  | 120248376 | T | 0.09109 | 6.75E-30 | chr:4:120263688 |
| 4 | rs35653026  | 120248378 | G | 0.09109 | 6.75E-30 | chr:4:120263688 |
| 4 | rs7672372   | 120248406 | G | 0.08788 | 1.22E-29 | chr:4:120263688 |

|              |             |         |          |                 |
|--------------|-------------|---------|----------|-----------------|
| 4 rs75420021 | 120246729 A | 0.08856 | 1.23E-29 | chr:4:120263688 |
| 4 rs7671759  | 120248094 C | 0.09662 | 1.40E-29 | chr:4:120263688 |
| 4 rs7672357  | 120248340 T | 0.0883  | 1.41E-29 | chr:4:120263688 |
| 4 rs28369503 | 120238925 A | 0.08037 | 1.56E-29 | chr:4:120263688 |
| 4 rs28458294 | 120238924 C | 0.08037 | 1.56E-29 | chr:4:120263688 |
| 4 rs9996501  | 120238918 A | 0.08037 | 1.56E-29 | chr:4:120263688 |
| 4 rs12503171 | 120247196 G | 0.08913 | 1.79E-29 | chr:4:120263688 |
| 4 rs12507283 | 120247218 A | 0.08913 | 1.79E-29 | chr:4:120263688 |
| 4 rs72676046 | 120254681 C | 0.0847  | 1.85E-29 | chr:4:120263688 |
| 4 rs7438634  | 120245754 C | 0.085   | 1.90E-29 | chr:4:120263688 |
| 4 rs13122153 | 120266585 C | 0.07656 | 2.12E-29 | chr:4:120263688 |
| 4 rs7671797  | 120248157 G | 0.08499 | 2.16E-29 | chr:4:120263688 |
| 4 rs28735977 | 120261738 T | 0.07672 | 2.18E-29 | chr:4:120263688 |
| 4 rs10212956 | 120254343 G | 0.08139 | 2.62E-29 | chr:4:120263688 |
| 4 rs1849457  | 120254355 G | 0.08139 | 2.62E-29 | chr:4:120263688 |
| 4 rs9996494  | 120238880 A | 0.07712 | 2.64E-29 | chr:4:120263688 |
| 4 rs9996644  | 120238877 T | 0.07712 | 2.64E-29 | chr:4:120263688 |
| 4 rs12507387 | 120247590 C | 0.07692 | 2.70E-29 | chr:4:120263688 |
| 4 rs7671978  | 120248218 G | 0.08561 | 2.77E-29 | chr:4:120263688 |
| 4 rs7672129  | 120248176 T | 0.08561 | 2.77E-29 | chr:4:120263688 |
| 4 rs10003931 | 120259052 G | 0.08143 | 2.79E-29 | chr:4:120263688 |
| 4 rs2036856  | 120249288 A | 0.0813  | 2.87E-29 | chr:4:120263688 |
| 4 rs2036857  | 120249240 C | 0.0813  | 2.87E-29 | chr:4:120263688 |
| 4 rs4443261  | 120249301 C | 0.0813  | 2.87E-29 | chr:4:120263688 |
| 4 rs4422403  | 120258194 T | 0.07758 | 3.68E-29 | chr:4:120263688 |
| 4 rs13121928 | 120266518 C | 0.06881 | 3.78E-29 | chr:4:120263688 |
| 4 rs1814814  | 120258124 G | 0.07758 | 3.90E-29 | chr:4:120263688 |
| 4 rs10213480 | 120254561 T | 0.07774 | 4.05E-29 | chr:4:120263688 |
| 4 rs35280960 | 120257059 A | 0.07734 | 4.09E-29 | chr:4:120263688 |
| 4 rs10024933 | 120253582 A | 0.07757 | 4.11E-29 | chr:4:120263688 |
| 4 rs10518300 | 120249499 G | 0.07772 | 4.26E-29 | chr:4:120263688 |
| 4 rs28643450 | 120245242 A | 0.07765 | 4.34E-29 | chr:4:120263688 |
| 4 rs28502463 | 120257023 C | 0.07788 | 4.66E-29 | chr:4:120263688 |
| 4 rs28622913 | 120261723 A | 0.06912 | 4.97E-29 | chr:4:120263688 |
| 4 rs10003567 | 120241674 T | 0.07387 | 5.82E-29 | chr:4:120263688 |
| 4 rs10005237 | 120237897 C | 0.07387 | 5.82E-29 | chr:4:120263688 |
| 4 rs10006259 | 120242145 T | 0.07387 | 5.82E-29 | chr:4:120263688 |
| 4 rs10212775 | 120239244 C | 0.07387 | 5.82E-29 | chr:4:120263688 |
| 4 rs10213267 | 120239074 G | 0.07387 | 5.82E-29 | chr:4:120263688 |
| 4 rs12506610 | 120241659 C | 0.07387 | 5.82E-29 | chr:4:120263688 |
| 4 rs12711071 | 120240934 C | 0.07387 | 5.82E-29 | chr:4:120263688 |
| 4 rs28652763 | 120242312 T | 0.07387 | 5.82E-29 | chr:4:120263688 |
| 4 rs2964     | 120240131 C | 0.07387 | 5.82E-29 | chr:4:120263688 |

|               |             |         |          |                 |
|---------------|-------------|---------|----------|-----------------|
| 4 rs878372    | 120238780 C | 0.07387 | 5.82E-29 | chr:4:120263688 |
| 4 rs907204    | 120238654 A | 0.07387 | 5.82E-29 | chr:4:120263688 |
| 4 rs907205    | 120238664 C | 0.07387 | 5.82E-29 | chr:4:120263688 |
| 4 rs9991166   | 120237851 A | 0.07387 | 5.82E-29 | chr:4:120263688 |
| 4 rs10213221  | 120255926 A | 0.07387 | 5.84E-29 | chr:4:120263688 |
| 4 rs10023641  | 120258410 G | 0.07401 | 6.36E-29 | chr:4:120263688 |
| 4 rs114866537 | 120258608 T | 0.07401 | 6.36E-29 | chr:4:120263688 |
| 4 rs10212714  | 120254302 C | 0.07406 | 6.80E-29 | chr:4:120263688 |
| 4 rs10212719  | 120254437 C | 0.07406 | 6.80E-29 | chr:4:120263688 |
| 4 rs10213158  | 120255829 T | 0.07406 | 6.80E-29 | chr:4:120263688 |
| 4 rs11098501  | 120252017 G | 0.07406 | 6.80E-29 | chr:4:120263688 |
| 4 rs11098502  | 120252063 A | 0.07406 | 6.80E-29 | chr:4:120263688 |
| 4 rs11724409  | 120252361 G | 0.07406 | 6.80E-29 | chr:4:120263688 |
| 4 rs11732087  | 120239831 G | 0.07406 | 6.80E-29 | chr:4:120263688 |
| 4 rs11732686  | 120252330 A | 0.07406 | 6.80E-29 | chr:4:120263688 |
| 4 rs12498994  | 120250818 C | 0.07406 | 6.80E-29 | chr:4:120263688 |
| 4 rs12507565  | 120251121 A | 0.07406 | 6.80E-29 | chr:4:120263688 |
| 4 rs12509621  | 120249660 C | 0.07406 | 6.80E-29 | chr:4:120263688 |
| 4 rs12511640  | 120251248 C | 0.07406 | 6.80E-29 | chr:4:120263688 |
| 4 rs12513083  | 120249612 T | 0.07406 | 6.80E-29 | chr:4:120263688 |
| 4 rs140387830 | 120247916 G | 0.07406 | 6.80E-29 | chr:4:120263688 |
| 4 rs145027390 | 120247827 G | 0.07406 | 6.80E-29 | chr:4:120263688 |
| 4 rs1511017   | 120250805 A | 0.07406 | 6.80E-29 | chr:4:120263688 |
| 4 rs1511025   | 120240238 C | 0.07406 | 6.80E-29 | chr:4:120263688 |
| 4 rs17049949  | 120255290 G | 0.07406 | 6.80E-29 | chr:4:120263688 |
| 4 rs1980024   | 120253047 T | 0.07406 | 6.80E-29 | chr:4:120263688 |
| 4 rs1980025   | 120252806 T | 0.07406 | 6.80E-29 | chr:4:120263688 |
| 4 rs1980026   | 120251643 A | 0.07406 | 6.80E-29 | chr:4:120263688 |
| 4 rs2002047   | 120257228 G | 0.07406 | 6.80E-29 | chr:4:120263688 |
| 4 rs2002049   | 120257417 G | 0.07406 | 6.80E-29 | chr:4:120263688 |
| 4 rs2036860   | 120248934 G | 0.07406 | 6.80E-29 | chr:4:120263688 |
| 4 rs28363929  | 120257103 G | 0.07406 | 6.80E-29 | chr:4:120263688 |
| 4 rs28373117  | 120253465 T | 0.07406 | 6.80E-29 | chr:4:120263688 |
| 4 rs28713555  | 120251995 T | 0.07406 | 6.80E-29 | chr:4:120263688 |
| 4 rs34425882  | 120253177 A | 0.07406 | 6.80E-29 | chr:4:120263688 |
| 4 rs3956464   | 120256764 C | 0.07406 | 6.80E-29 | chr:4:120263688 |
| 4 rs4107728   | 120253910 A | 0.07406 | 6.80E-29 | chr:4:120263688 |
| 4 rs7672594   | 120248543 C | 0.07406 | 6.80E-29 | chr:4:120263688 |
| 4 rs7672778   | 120248585 G | 0.07406 | 6.80E-29 | chr:4:120263688 |
| 4 rs7689729   | 120256192 G | 0.07406 | 6.80E-29 | chr:4:120263688 |
| 4 rs7690338   | 120256468 G | 0.07406 | 6.80E-29 | chr:4:120263688 |
| 4 rs9991959   | 120253773 C | 0.07406 | 6.80E-29 | chr:4:120263688 |
| 4 rs1546503   | 120241167 C | 0.07409 | 6.90E-29 | chr:4:120263688 |

|                         |             |         |          |                 |
|-------------------------|-------------|---------|----------|-----------------|
| 4 rs1546506             | 120241240 C | 0.07409 | 6.90E-29 | chr:4:120263688 |
| 4 rs12510269            | 120241646 G | 0.07416 | 7.01E-29 | chr:4:120263688 |
| 4 rs11735886            | 120290215 C | 0.09901 | 7.31E-29 | chr:4:120263688 |
| 4 rs4434233;rs542273973 | 120258229 A | 0.07434 | 7.74E-29 | chr:4:120263688 |
| 4 rs10005973            | 120271958 T | 0.1081  | 8.18E-29 | chr:4:120263688 |
| 4 rs13108589            | 120268102 C | 0.1081  | 8.18E-29 | chr:4:120263688 |
| 4 rs17595608            | 120250506 T | 0.1081  | 8.18E-29 | chr:4:120263688 |
| 4 rs1980027             | 120251577 T | 0.1081  | 8.18E-29 | chr:4:120263688 |
| 4 rs3864141             | 120266007 A | 0.1081  | 8.18E-29 | chr:4:120263688 |
| 4 rs66900435            | 120249425 A | 0.1081  | 8.18E-29 | chr:4:120263688 |
| 4 rs714899              | 120243035 A | 0.1081  | 8.18E-29 | chr:4:120263688 |
| 4 rs9999724             | 120239944 T | 0.1081  | 8.18E-29 | chr:4:120263688 |
| 4 rs7673476             | 120248683 A | 0.07431 | 8.78E-29 | chr:4:120263688 |
| 4 rs9993347             | 120258955 G | 0.1166  | 9.51E-29 | chr:4:120263688 |
| 4 rs148893841           | 120263621 G | 0.06587 | 1.04E-28 | chr:4:120263688 |
| 4 rs10213554            | 120260785 A | 0.1088  | 1.19E-28 | chr:4:120263688 |
| 4 rs3864143             | 120266428 C | 0.06607 | 1.44E-28 | chr:4:120263688 |
| 4 rs6815934             | 120267310 C | 0.06664 | 1.92E-28 | chr:4:120263688 |
| 4 rs12502393            | 120271228 T | 0.06668 | 1.96E-28 | chr:4:120263688 |
| 4 rs12506445            | 120271237 C | 0.06668 | 1.96E-28 | chr:4:120263688 |
| 4 rs6838457             | 120267367 G | 0.06666 | 2.07E-28 | chr:4:120263688 |
| 4 rs10000544            | 120270705 A | 0.06689 | 2.45E-28 | chr:4:120263688 |
| 4 rs10005542            | 120268302 C | 0.06689 | 2.45E-28 | chr:4:120263688 |
| 4 rs10006192            | 120263022 C | 0.06689 | 2.45E-28 | chr:4:120263688 |
| 4 rs10010355            | 120261043 G | 0.06689 | 2.45E-28 | chr:4:120263688 |
| 4 rs10012408            | 120270771 A | 0.06689 | 2.45E-28 | chr:4:120263688 |
| 4 rs10015579            | 120271802 C | 0.06689 | 2.45E-28 | chr:4:120263688 |
| 4 rs10015965            | 120268237 G | 0.06689 | 2.45E-28 | chr:4:120263688 |
| 4 rs10016241            | 120268553 C | 0.06689 | 2.45E-28 | chr:4:120263688 |
| 4 rs10022448            | 120270421 G | 0.06689 | 2.45E-28 | chr:4:120263688 |
| 4 rs10025925            | 120271744 T | 0.06689 | 2.45E-28 | chr:4:120263688 |
| 4 rs10028773            | 120265259 G | 0.06689 | 2.45E-28 | chr:4:120263688 |
| 4 rs12498657            | 120262866 C | 0.06689 | 2.45E-28 | chr:4:120263688 |
| 4 rs12502524            | 120271414 A | 0.06689 | 2.45E-28 | chr:4:120263688 |
| 4 rs12506487            | 120271361 G | 0.06689 | 2.45E-28 | chr:4:120263688 |
| 4 rs12510133            | 120271344 C | 0.06689 | 2.45E-28 | chr:4:120263688 |
| 4 rs17009144            | 120270795 G | 0.06689 | 2.45E-28 | chr:4:120263688 |
| 4 rs17517414            | 120262101 C | 0.06689 | 2.45E-28 | chr:4:120263688 |
| 4 rs2136911             | 120265859 A | 0.06689 | 2.45E-28 | chr:4:120263688 |
| 4 rs2175381             | 120265967 C | 0.06689 | 2.45E-28 | chr:4:120263688 |
| 4 rs28369518            | 120271630 C | 0.06689 | 2.45E-28 | chr:4:120263688 |
| 4 rs28396837            | 120271541 A | 0.06689 | 2.45E-28 | chr:4:120263688 |
| 4 rs28437684            | 120264849 A | 0.06689 | 2.45E-28 | chr:4:120263688 |

|               |             |         |          |                 |
|---------------|-------------|---------|----------|-----------------|
| 4 rs28546691  | 120262832 A | 0.06689 | 2.45E-28 | chr:4:120263688 |
| 4 rs28551750  | 120264901 T | 0.06689 | 2.45E-28 | chr:4:120263688 |
| 4 rs28589345  | 120269080 A | 0.06689 | 2.45E-28 | chr:4:120263688 |
| 4 rs28599836  | 120268809 T | 0.06689 | 2.45E-28 | chr:4:120263688 |
| 4 rs28616635  | 120261861 C | 0.06689 | 2.45E-28 | chr:4:120263688 |
| 4 rs28691602  | 120264770 C | 0.06689 | 2.45E-28 | chr:4:120263688 |
| 4 rs28714087  | 120270966 G | 0.06689 | 2.45E-28 | chr:4:120263688 |
| 4 rs28726222  | 120262672 C | 0.06689 | 2.45E-28 | chr:4:120263688 |
| 4 rs3864142   | 120266191 T | 0.06689 | 2.45E-28 | chr:4:120263688 |
| 4 rs3864144   | 120272605 T | 0.06689 | 2.45E-28 | chr:4:120263688 |
| 4 rs3986377   | 120260270 A | 0.06689 | 2.45E-28 | chr:4:120263688 |
| 4 rs4001390   | 120265783 C | 0.06689 | 2.45E-28 | chr:4:120263688 |
| 4 rs4473640   | 120260437 A | 0.06689 | 2.45E-28 | chr:4:120263688 |
| 4 rs55820750  | 120269168 C | 0.06689 | 2.45E-28 | chr:4:120263688 |
| 4 rs6815291   | 120266982 A | 0.06689 | 2.45E-28 | chr:4:120263688 |
| 4 rs6833140   | 120266822 A | 0.06689 | 2.45E-28 | chr:4:120263688 |
| 4 rs6838009   | 120267034 A | 0.06689 | 2.45E-28 | chr:4:120263688 |
| 4 rs79606892  | 120259606 C | 0.06689 | 2.45E-28 | chr:4:120263688 |
| 4 rs9307470   | 120261214 A | 0.06689 | 2.45E-28 | chr:4:120263688 |
| 4 rs9307471   | 120261262 A | 0.06689 | 2.45E-28 | chr:4:120263688 |
| 4 rs9995716   | 120264996 C | 0.06689 | 2.45E-28 | chr:4:120263688 |
| 4 rs1814813   | 120258207 G | 0.1223  | 2.70E-28 | chr:4:120263688 |
| 4 rs28572003  | 120268891 G | 0.067   | 2.77E-28 | chr:4:120263688 |
| 4 rs555773279 | 120269424 T | 0.06701 | 2.77E-28 | chr:4:120263688 |
| 4 rs6838968   | 120267311 A | 0.06725 | 2.98E-28 | chr:4:120263688 |
| 4 rs17595727  | 120262074 C | 0.06721 | 3.10E-28 | chr:4:120263688 |
| 4 rs12506421  | 120271167 C | 0.0629  | 4.00E-28 | chr:4:120263688 |
| 4 rs878376    | 120237702 A | 0.1372  | 1.48E-26 | chr:4:120263688 |
| 4 rs938056    | 120237453 T | 0.1372  | 1.48E-26 | chr:4:120263688 |
| 4 rs34818745  | 120257055 C | 0.1462  | 2.24E-26 | chr:4:120263688 |
| 4 rs371048191 | 120246107 C | 0.156   | 3.22E-26 | chr:4:120263688 |
| 4 rs4472123   | 120236630 A | 0.1592  | 4.97E-25 | chr:4:120263688 |
| 4 rs373699192 | 120246109 A | 0.1467  | 7.65E-25 | chr:4:120263688 |
| 4 rs9685057   | 120272333 T | 5.445   | 2.43E-24 | chr:4:120263688 |
| 4 rs78422072  | 120281042 T | 0.1697  | 2.43E-24 | chr:4:120263688 |
| 4 rs78971550  | 120281041 T | 0.1697  | 2.43E-24 | chr:4:120263688 |
| 4 rs10026436  | 120288904 A | 0.1627  | 2.49E-24 | chr:4:120263688 |
| 4 rs11735878  | 120290177 C | 0.1862  | 3.45E-24 | chr:4:120263688 |
| 4 rs6846966   | 120293208 G | 0.1675  | 3.57E-24 | chr:4:120263688 |
| 4 rs11722183  | 120280597 C | 0.1664  | 4.45E-24 | chr:4:120263688 |
| 4 rs4296662   | 120313440 G | 0.166   | 4.46E-24 | chr:4:120263688 |
| 4 rs4560394   | 120313435 G | 0.166   | 4.46E-24 | chr:4:120263688 |
| 4 rs10002914  | 120292081 A | 0.1674  | 4.67E-24 | chr:4:120263688 |

|              |             |        |          |                 |
|--------------|-------------|--------|----------|-----------------|
| 4 rs10013652 | 120292256 G | 0.1674 | 4.67E-24 | chr:4:120263688 |
| 4 rs10029303 | 120286755 A | 0.1674 | 4.67E-24 | chr:4:120263688 |
| 4 rs10517834 | 120286783 C | 0.1674 | 4.67E-24 | chr:4:120263688 |
| 4 rs10857066 | 120286596 T | 0.1674 | 4.67E-24 | chr:4:120263688 |
| 4 rs11098505 | 120284627 T | 0.1674 | 4.67E-24 | chr:4:120263688 |
| 4 rs11098506 | 120284971 G | 0.1674 | 4.67E-24 | chr:4:120263688 |
| 4 rs11098507 | 120288286 A | 0.1674 | 4.67E-24 | chr:4:120263688 |
| 4 rs12374244 | 120281972 T | 0.1674 | 4.67E-24 | chr:4:120263688 |
| 4 rs12374245 | 120282059 T | 0.1674 | 4.67E-24 | chr:4:120263688 |
| 4 rs12374346 | 120281705 A | 0.1674 | 4.67E-24 | chr:4:120263688 |
| 4 rs12374352 | 120281977 T | 0.1674 | 4.67E-24 | chr:4:120263688 |
| 4 rs12374396 | 120281619 C | 0.1674 | 4.67E-24 | chr:4:120263688 |
| 4 rs12499602 | 120284387 A | 0.1674 | 4.67E-24 | chr:4:120263688 |
| 4 rs12501602 | 120287935 T | 0.1674 | 4.67E-24 | chr:4:120263688 |
| 4 rs12503082 | 120284317 G | 0.1674 | 4.67E-24 | chr:4:120263688 |
| 4 rs12510451 | 120289143 T | 0.1674 | 4.67E-24 | chr:4:120263688 |
| 4 rs12510487 | 120289231 T | 0.1674 | 4.67E-24 | chr:4:120263688 |
| 4 rs12513310 | 120288039 A | 0.1674 | 4.67E-24 | chr:4:120263688 |
| 4 rs13104572 | 120285568 C | 0.1674 | 4.67E-24 | chr:4:120263688 |
| 4 rs13125526 | 120288019 A | 0.1674 | 4.67E-24 | chr:4:120263688 |
| 4 rs28470894 | 120289405 G | 0.1674 | 4.67E-24 | chr:4:120263688 |
| 4 rs28488261 | 120289396 C | 0.1674 | 4.67E-24 | chr:4:120263688 |
| 4 rs28501434 | 120283773 T | 0.1674 | 4.67E-24 | chr:4:120263688 |
| 4 rs28581362 | 120283548 A | 0.1674 | 4.67E-24 | chr:4:120263688 |
| 4 rs28594160 | 120289456 G | 0.1674 | 4.67E-24 | chr:4:120263688 |
| 4 rs28668103 | 120291372 T | 0.1674 | 4.67E-24 | chr:4:120263688 |
| 4 rs28687057 | 120280812 G | 0.1674 | 4.67E-24 | chr:4:120263688 |
| 4 rs55845118 | 120290913 C | 0.1674 | 4.67E-24 | chr:4:120263688 |
| 4 rs60378962 | 120280991 A | 0.1674 | 4.67E-24 | chr:4:120263688 |
| 4 rs67281037 | 120281157 C | 0.1674 | 4.67E-24 | chr:4:120263688 |
| 4 rs6824111  | 120285968 A | 0.1674 | 4.67E-24 | chr:4:120263688 |
| 4 rs6824169  | 120293175 C | 0.1674 | 4.67E-24 | chr:4:120263688 |
| 4 rs6847586  | 120286069 A | 0.1674 | 4.67E-24 | chr:4:120263688 |
| 4 rs6847778  | 120293582 G | 0.1674 | 4.67E-24 | chr:4:120263688 |
| 4 rs6847862  | 120286371 T | 0.1674 | 4.67E-24 | chr:4:120263688 |
| 4 rs6848081  | 120286443 T | 0.1674 | 4.67E-24 | chr:4:120263688 |
| 4 rs6848380  | 120286403 A | 0.1674 | 4.67E-24 | chr:4:120263688 |
| 4 rs6857892  | 120282696 T | 0.1674 | 4.67E-24 | chr:4:120263688 |
| 4 rs71610270 | 120287436 G | 0.1674 | 4.67E-24 | chr:4:120263688 |
| 4 rs72676059 | 120290828 G | 0.1674 | 4.67E-24 | chr:4:120263688 |
| 4 rs73842616 | 120290683 A | 0.1674 | 4.67E-24 | chr:4:120263688 |
| 4 rs7677068  | 120291704 T | 0.1674 | 4.67E-24 | chr:4:120263688 |
| 4 rs9991221  | 120292107 C | 0.1674 | 4.67E-24 | chr:4:120263688 |

|               |             |        |          |                 |
|---------------|-------------|--------|----------|-----------------|
| 4 rs9995136   | 120286845 G | 0.1674 | 4.67E-24 | chr:4:120263688 |
| 4 rs10003742  | 120271798 G | 5.445  | 4.94E-24 | chr:4:120263688 |
| 4 rs10015883  | 120268146 A | 5.445  | 4.94E-24 | chr:4:120263688 |
| 4 rs10213542  | 120260650 C | 5.445  | 4.94E-24 | chr:4:120263688 |
| 4 rs28439855  | 120262256 G | 5.445  | 4.94E-24 | chr:4:120263688 |
| 4 rs4643791   | 120265619 G | 5.445  | 4.94E-24 | chr:4:120263688 |
| 4 rs9307472   | 120261415 T | 5.445  | 4.94E-24 | chr:4:120263688 |
| 4 rs9637624   | 120274911 A | 5.445  | 4.94E-24 | chr:4:120263688 |
| 4 rs10857068  | 120317549 G | 0.1679 | 5.92E-24 | chr:4:120263688 |
| 4 rs11098513  | 120316075 G | 0.1679 | 5.92E-24 | chr:4:120263688 |
| 4 rs11098514  | 120317374 C | 0.1679 | 5.92E-24 | chr:4:120263688 |
| 4 rs11098516  | 120317978 C | 0.1679 | 5.92E-24 | chr:4:120263688 |
| 4 rs13116768  | 120318254 C | 0.1679 | 5.92E-24 | chr:4:120263688 |
| 4 rs28572238  | 120316686 G | 0.1679 | 5.92E-24 | chr:4:120263688 |
| 4 rs150131449 | 120288605 G | 0.1665 | 5.99E-24 | chr:4:120263688 |
| 4 rs13105020  | 120285688 T | 0.1696 | 6.03E-24 | chr:4:120263688 |
| 4 rs13132082  | 120285657 A | 0.1696 | 6.03E-24 | chr:4:120263688 |
| 4 rs10002083  | 120311152 T | 0.1675 | 6.20E-24 | chr:4:120263688 |
| 4 rs10010801  | 120310028 C | 0.1675 | 6.20E-24 | chr:4:120263688 |
| 4 rs10014748  | 120300988 G | 0.1675 | 6.20E-24 | chr:4:120263688 |
| 4 rs10014845  | 120301077 G | 0.1675 | 6.20E-24 | chr:4:120263688 |
| 4 rs10024844  | 120311528 G | 0.1675 | 6.20E-24 | chr:4:120263688 |
| 4 rs10025054  | 120311697 C | 0.1675 | 6.20E-24 | chr:4:120263688 |
| 4 rs10027498  | 120311987 C | 0.1675 | 6.20E-24 | chr:4:120263688 |
| 4 rs10027856  | 120304874 A | 0.1675 | 6.20E-24 | chr:4:120263688 |
| 4 rs10027976  | 120305042 T | 0.1675 | 6.20E-24 | chr:4:120263688 |
| 4 rs10222794  | 120302351 T | 0.1675 | 6.20E-24 | chr:4:120263688 |
| 4 rs10222801  | 120302350 T | 0.1675 | 6.20E-24 | chr:4:120263688 |
| 4 rs10440343  | 120309787 C | 0.1675 | 6.20E-24 | chr:4:120263688 |
| 4 rs10440402  | 120307813 G | 0.1675 | 6.20E-24 | chr:4:120263688 |
| 4 rs11098508  | 120306607 G | 0.1675 | 6.20E-24 | chr:4:120263688 |
| 4 rs11098509  | 120306670 C | 0.1675 | 6.20E-24 | chr:4:120263688 |
| 4 rs11098510  | 120306793 T | 0.1675 | 6.20E-24 | chr:4:120263688 |
| 4 rs11726097  | 120301499 T | 0.1675 | 6.20E-24 | chr:4:120263688 |
| 4 rs12498908  | 120308261 A | 0.1675 | 6.20E-24 | chr:4:120263688 |
| 4 rs12506452  | 120308083 C | 0.1675 | 6.20E-24 | chr:4:120263688 |
| 4 rs13113483  | 120309039 T | 0.1675 | 6.20E-24 | chr:4:120263688 |
| 4 rs13151285  | 120314741 A | 0.1675 | 6.20E-24 | chr:4:120263688 |
| 4 rs138611376 | 120306434 G | 0.1675 | 6.20E-24 | chr:4:120263688 |
| 4 rs140816585 | 120306228 C | 0.1675 | 6.20E-24 | chr:4:120263688 |
| 4 rs146523888 | 120308804 G | 0.1675 | 6.20E-24 | chr:4:120263688 |
| 4 rs150376940 | 120305404 A | 0.1675 | 6.20E-24 | chr:4:120263688 |
| 4 rs28751034  | 120307097 A | 0.1675 | 6.20E-24 | chr:4:120263688 |



|               |             |        |          |                 |
|---------------|-------------|--------|----------|-----------------|
| 4 rs28793658  | 120307214 C | 0.1675 | 6.20E-24 | chr:4:120263688 |
| 4 rs28812279  | 120304152 C | 0.1675 | 6.20E-24 | chr:4:120263688 |
| 4 rs28884220  | 120307211 G | 0.1675 | 6.20E-24 | chr:4:120263688 |
| 4 rs4309825   | 120314881 G | 0.1675 | 6.20E-24 | chr:4:120263688 |
| 4 rs4345162   | 120312959 A | 0.1675 | 6.20E-24 | chr:4:120263688 |
| 4 rs4373140   | 120307698 G | 0.1675 | 6.20E-24 | chr:4:120263688 |
| 4 rs4463052   | 120313258 C | 0.1675 | 6.20E-24 | chr:4:120263688 |
| 4 rs4507344   | 120307485 A | 0.1675 | 6.20E-24 | chr:4:120263688 |
| 4 rs4604043   | 120314921 T | 0.1675 | 6.20E-24 | chr:4:120263688 |
| 4 rs7437420   | 120312903 G | 0.1675 | 6.20E-24 | chr:4:120263688 |
| 4 rs7674544   | 120303714 G | 0.1675 | 6.20E-24 | chr:4:120263688 |
| 4 rs7677836   | 120310638 A | 0.1675 | 6.20E-24 | chr:4:120263688 |
| 4 rs7678238   | 120310832 C | 0.1675 | 6.20E-24 | chr:4:120263688 |
| 4 rs76990001  | 120302639 T | 0.1675 | 6.20E-24 | chr:4:120263688 |
| 4 rs78036070  | 120302802 A | 0.1675 | 6.20E-24 | chr:4:120263688 |
| 4 rs79704848  | 120309351 A | 0.1675 | 6.20E-24 | chr:4:120263688 |
| 4 rs9307474   | 120302496 A | 0.1675 | 6.20E-24 | chr:4:120263688 |
| 4 rs9994889   | 120305056 G | 0.1675 | 6.20E-24 | chr:4:120263688 |
| 4 rs6848580   | 120286492 A | 0.1705 | 6.62E-24 | chr:4:120263688 |
| 4 rs10004114  | 120259213 A | 5.362  | 7.76E-24 | chr:4:120263688 |
| 4 rs114019672 | 120306475 G | 0.1685 | 8.12E-24 | chr:4:120263688 |
| 4 rs7658181   | 120310873 G | 0.1677 | 8.14E-24 | chr:4:120263688 |
| 4 rs10011097  | 120310359 G | 0.1686 | 8.33E-24 | chr:4:120263688 |
| 4 rs13127114  | 120314664 C | 0.1685 | 8.39E-24 | chr:4:120263688 |
| 4 rs28668716  | 120309875 C | 0.169  | 8.77E-24 | chr:4:120263688 |
| 4 rs10021601  | 120282563 A | 0.1724 | 8.84E-24 | chr:4:120263688 |
| 4 rs7674500   | 120303593 T | 0.1693 | 8.95E-24 | chr:4:120263688 |
| 4 rs1814815   | 120258091 C | 5.362  | 8.97E-24 | chr:4:120263688 |
| 4 rs2017058   | 120257739 T | 5.362  | 8.97E-24 | chr:4:120263688 |
| 4 rs7665192   | 120247065 A | 0.1744 | 9.02E-24 | chr:4:120263688 |
| 4 rs10005644  | 120298477 C | 0.1702 | 9.07E-24 | chr:4:120263688 |
| 4 rs10016060  | 120298412 G | 0.1702 | 9.07E-24 | chr:4:120263688 |
| 4 rs10016448  | 120298845 G | 0.1702 | 9.07E-24 | chr:4:120263688 |
| 4 rs10020034  | 120294331 G | 0.1702 | 9.07E-24 | chr:4:120263688 |
| 4 rs10028423  | 120294909 T | 0.1702 | 9.07E-24 | chr:4:120263688 |
| 4 rs10031718  | 120295892 T | 0.1702 | 9.07E-24 | chr:4:120263688 |
| 4 rs1112817   | 120297800 C | 0.1702 | 9.07E-24 | chr:4:120263688 |
| 4 rs11729050  | 120300066 C | 0.1702 | 9.07E-24 | chr:4:120263688 |
| 4 rs2322021   | 120295030 A | 0.1702 | 9.07E-24 | chr:4:120263688 |
| 4 rs28429722  | 120300093 A | 0.1702 | 9.07E-24 | chr:4:120263688 |
| 4 rs28491261  | 120294900 A | 0.1702 | 9.07E-24 | chr:4:120263688 |
| 4 rs59394118  | 120295551 G | 0.1702 | 9.07E-24 | chr:4:120263688 |
| 4 rs59866101  | 120296591 G | 0.1702 | 9.07E-24 | chr:4:120263688 |

|               |             |        |          |                 |
|---------------|-------------|--------|----------|-----------------|
| 4 rs6832410   | 120296800 G | 0.1702 | 9.07E-24 | chr:4:120263688 |
| 4 rs6838617   | 120297423 T | 0.1702 | 9.07E-24 | chr:4:120263688 |
| 4 rs6858383   | 120296772 C | 0.1702 | 9.07E-24 | chr:4:120263688 |
| 4 rs9307473   | 120300221 T | 0.1702 | 9.07E-24 | chr:4:120263688 |
| 4 rs9996417   | 120295862 C | 0.1702 | 9.07E-24 | chr:4:120263688 |
| 4 rs9996569   | 120299004 C | 0.1702 | 9.07E-24 | chr:4:120263688 |
| 4 rs9996677   | 120299148 A | 0.1702 | 9.07E-24 | chr:4:120263688 |
| 4 rs9998953   | 120296169 C | 0.1702 | 9.07E-24 | chr:4:120263688 |
| 4 rs28714195  | 120316950 T | 0.1725 | 9.82E-24 | chr:4:120263688 |
| 4 rs12511625  | 120318135 G | 0.172  | 1.12E-23 | chr:4:120263688 |
| 4 rs10222798  | 120302419 T | 0.1728 | 1.24E-23 | chr:4:120263688 |
| 4 rs11724758  | 120239878 G | 5.309  | 1.26E-23 | chr:4:120263688 |
| 4 rs13117947  | 120257060 A | 5.251  | 1.43E-23 | chr:4:120263688 |
| 4 rs11723757  | 120299669 T | 0.1636 | 1.55E-23 | chr:4:120263688 |
| 4 rs56155624  | 120291026 G | 0.1771 | 1.60E-23 | chr:4:120263688 |
| 4 rs10434028  | 120294464 G | 0.1763 | 1.81E-23 | chr:4:120263688 |
| 4 rs7658368   | 120310922 T | 0.1747 | 2.46E-23 | chr:4:120263688 |
| 4 rs10017189  | 120263523 A | 4.887  | 2.56E-23 | chr:4:120263688 |
| 4 rs2036858   | 120249237 A | 5.168  | 3.14E-23 | chr:4:120263688 |
| 4 rs552865294 | 120246034 C | 4.2    | 4.94E-23 | chr:4:120263688 |
| 4 rs35239065  | 120325130 C | 0.1813 | 8.07E-23 | chr:4:120263688 |
| 4 rs35265692  | 120325135 C | 0.1813 | 8.07E-23 | chr:4:120263688 |
| 4 rs72676074  | 120359841 C | 0.2016 | 9.03E-23 | chr:4:120263688 |
| 4 rs3956463   | 120245748 G | 4.896  | 9.81E-23 | chr:4:120263688 |
| 4 rs200290730 | 120287492 A | 0.1681 | 1.34E-22 | chr:4:120263688 |
| 4 rs10020256  | 120287265 T | 0.1698 | 1.94E-22 | chr:4:120263688 |
| 4 rs11723550  | 120289961 C | 0.1906 | 2.88E-22 | chr:4:120263688 |
| 4 rs10440403  | 120308047 T | 0.195  | 5.32E-22 | chr:4:120263688 |
| 4 rs4001305   | 120359236 T | 0.2143 | 5.42E-22 | chr:4:120263688 |
| 4 rs71627788  | 120255728 C | 4.076  | 6.05E-22 | chr:4:120263688 |
| 4 rs71610285  | 120329953 C | 0.2073 | 1.45E-21 | chr:4:120263688 |
| 4 rs72916543  | 120254961 T | 0.2906 | 1.75E-21 | chr:4:120263688 |
| 4 rs10019309  | 120327085 T | 0.2094 | 3.37E-21 | chr:4:120263688 |
| 4 rs368938172 | 120330272 G | 0.2108 | 5.06E-21 | chr:4:120263688 |
| 4 rs71595380  | 120329294 T | 0.2048 | 5.75E-21 | chr:4:120263688 |
| 4 rs114860385 | 120355584 C | 0.2108 | 9.97E-21 | chr:4:120263688 |
| 4 rs28499576  | 120386677 A | 0.2121 | 9.98E-21 | chr:4:120263688 |
| 4 rs7356491   | 120381974 T | 0.2121 | 9.98E-21 | chr:4:120263688 |
| 4 rs7692994   | 120427489 A | 0.2294 | 1.06E-20 | chr:4:120263688 |
| 4 rs2389809   | 120377399 C | 0.2117 | 1.14E-20 | chr:4:120263688 |
| 4 rs73844769  | 120254829 A | 3.534  | 1.16E-20 | chr:4:120263688 |
| 4 rs10018726  | 120394010 G | 0.2167 | 1.88E-20 | chr:4:120263688 |
| 4 rs10020027  | 120381879 C | 0.2167 | 1.88E-20 | chr:4:120263688 |

|               |             |        |          |                 |
|---------------|-------------|--------|----------|-----------------|
| 4 rs13107475  | 120393011 T | 0.2167 | 1.88E-20 | chr:4:120263688 |
| 4 rs1809406   | 120377122 A | 0.2167 | 1.88E-20 | chr:4:120263688 |
| 4 rs2389803   | 120393511 A | 0.2167 | 1.88E-20 | chr:4:120263688 |
| 4 rs9994810   | 120381590 G | 0.2167 | 1.88E-20 | chr:4:120263688 |
| 4 rs11098534  | 120556772 G | 0.2378 | 2.29E-20 | chr:4:120263688 |
| 4 rs28408407  | 120376030 G | 0.2146 | 2.29E-20 | chr:4:120263688 |
| 4 rs28587175  | 120373172 C | 0.2146 | 2.29E-20 | chr:4:120263688 |
| 4 rs10034623  | 120397829 A | 0.2215 | 4.15E-20 | chr:4:120263688 |
| 4 rs6849171   | 120409549 A | 0.2215 | 4.15E-20 | chr:4:120263688 |
| 4 rs4001207   | 120331782 C | 0.2192 | 4.37E-20 | chr:4:120263688 |
| 4 rs9997340   | 120364809 C | 0.2192 | 4.37E-20 | chr:4:120263688 |
| 4 rs9998174   | 120366312 G | 0.2192 | 4.37E-20 | chr:4:120263688 |
| 4 rs3733520   | 120423480 G | 0.2211 | 4.44E-20 | chr:4:120263688 |
| 4 rs72918577  | 120326701 A | 0.2219 | 4.66E-20 | chr:4:120263688 |
| 4 rs7679468   | 120328333 C | 0.2218 | 5.59E-20 | chr:4:120263688 |
| 4 rs7654611   | 120328304 G | 0.2218 | 5.63E-20 | chr:4:120263688 |
| 4 rs34237553  | 120325273 C | 0.2204 | 5.63E-20 | chr:4:120263688 |
| 4 rs72918584  | 120362445 C | 0.2226 | 6.32E-20 | chr:4:120263688 |
| 4 rs201764925 | 120334210 A | 0.1804 | 7.41E-20 | chr:4:120263688 |
| 4 rs878374    | 120237564 G | 0.2492 | 7.85E-20 | chr:4:120263688 |
| 4 rs72918579  | 120333222 C | 0.2236 | 8.14E-20 | chr:4:120263688 |
| 4 rs10004484  | 120442428 T | 0.2289 | 8.18E-20 | chr:4:120263688 |
| 4 rs1397613   | 120242929 G | 4.187  | 8.60E-20 | chr:4:120263688 |
| 4 rs4834770   | 120241849 A | 4.187  | 8.60E-20 | chr:4:120263688 |
| 4 rs4834771   | 120242772 C | 4.187  | 8.60E-20 | chr:4:120263688 |
| 4 rs6823963   | 120242164 A | 4.187  | 8.60E-20 | chr:4:120263688 |
| 4 rs10518336  | 120522934 A | 0.244  | 1.01E-19 | chr:4:120263688 |
| 4 rs10034579  | 120244029 A | 4.183  | 1.03E-19 | chr:4:120263688 |
| 4 rs1973598   | 120243419 A | 4.183  | 1.03E-19 | chr:4:120263688 |
| 4 rs2282688   | 120243722 T | 4.183  | 1.03E-19 | chr:4:120263688 |
| 4 rs6857641   | 120243511 T | 4.183  | 1.03E-19 | chr:4:120263688 |
| 4 rs7655177   | 120328622 G | 0.2266 | 1.06E-19 | chr:4:120263688 |
| 4 rs6832740   | 120546136 C | 0.235  | 1.08E-19 | chr:4:120263688 |
| 4 rs7693919   | 120540571 A | 0.235  | 1.08E-19 | chr:4:120263688 |
| 4 rs28567749  | 120329211 C | 0.22   | 1.28E-19 | chr:4:120263688 |
| 4 rs17050695  | 120489527 T | 0.2339 | 1.38E-19 | chr:4:120263688 |
| 4 rs28735358  | 120482049 C | 0.2339 | 1.38E-19 | chr:4:120263688 |
| 4 rs6858592   | 120458692 A | 0.2339 | 1.38E-19 | chr:4:120263688 |
| 4 rs10050092  | 120532085 C | 0.237  | 1.55E-19 | chr:4:120263688 |
| 4 rs6855918   | 120546299 T | 0.2365 | 1.61E-19 | chr:4:120263688 |
| 4 rs1155576   | 120450159 C | 0.2355 | 1.91E-19 | chr:4:120263688 |
| 4 rs147267946 | 120307639 T | 0.1494 | 1.94E-19 | chr:4:120263688 |
| 4 rs10018280  | 120478139 G | 0.2357 | 1.95E-19 | chr:4:120263688 |

|               |             |        |          |                 |
|---------------|-------------|--------|----------|-----------------|
| 4 rs2127823   | 120485670 T | 0.2357 | 1.95E-19 | chr:4:120263688 |
| 4 rs3775858   | 120486028 G | 0.2357 | 1.95E-19 | chr:4:120263688 |
| 4 rs7680063   | 120479889 G | 0.2357 | 1.95E-19 | chr:4:120263688 |
| 4 rs9997631   | 120469995 G | 0.2357 | 1.95E-19 | chr:4:120263688 |
| 4 rs6534141   | 120485223 T | 0.2396 | 2.52E-19 | chr:4:120263688 |
| 4 rs28850368  | 120554313 A | 0.2632 | 3.39E-19 | chr:4:120263688 |
| 4 rs34835603  | 120553428 T | 0.2632 | 3.39E-19 | chr:4:120263688 |
| 4 rs75199754  | 120365198 A | 0.2304 | 3.75E-19 | chr:4:120263688 |
| 4 rs4145952   | 120155806 C | 4.113  | 1.87E-18 | chr:4:120263688 |
| 4 rs10014822  | 120280143 C | 3.488  | 6.66E-18 | chr:4:120263688 |
| 4 rs28787668  | 120554687 A | 0.2753 | 1.20E-17 | chr:4:120263688 |
| 4 rs7699346   | 120310542 T | 0.2492 | 1.49E-17 | chr:4:120263688 |
| 4 rs2389880   | 120559870 A | 0.2798 | 1.69E-17 | chr:4:120263688 |
| 4 rs6820115   | 120398182 C | 0.2857 | 3.72E-17 | chr:4:120263688 |
| 4 rs67265404  | 120359270 T | 0.2693 | 4.01E-17 | chr:4:120263688 |
| 4 rs3806808   | 120551085 C | 0.2889 | 4.04E-17 | chr:4:120263688 |
| 4 rs7676296   | 120555687 G | 0.2904 | 5.13E-17 | chr:4:120263688 |
| 4 rs10009566  | 120558608 C | 0.2934 | 6.08E-17 | chr:4:120263688 |
| 4 rs10012252  | 120559139 C | 0.2934 | 6.08E-17 | chr:4:120263688 |
| 4 rs55661135  | 120506153 A | 3.62   | 6.62E-17 | chr:4:120263688 |
| 4 rs55777923  | 120553264 T | 0.2822 | 7.26E-17 | chr:4:120263688 |
| 4 rs9998585   | 120396802 A | 0.2546 | 8.09E-17 | chr:4:120263688 |
| 4 rs10006793  | 120390791 G | 0.2566 | 1.11E-16 | chr:4:120263688 |
| 4 rs11098526  | 120390359 T | 0.2566 | 1.11E-16 | chr:4:120263688 |
| 4 rs11098527  | 120399906 G | 0.2566 | 1.11E-16 | chr:4:120263688 |
| 4 rs11934940  | 120389369 G | 0.2566 | 1.11E-16 | chr:4:120263688 |
| 4 rs12499324  | 120393786 T | 0.2566 | 1.11E-16 | chr:4:120263688 |
| 4 rs12505953  | 120385681 A | 0.2566 | 1.11E-16 | chr:4:120263688 |
| 4 rs34004415  | 120381140 A | 0.2566 | 1.11E-16 | chr:4:120263688 |
| 4 rs6822679   | 120402702 C | 0.2566 | 1.11E-16 | chr:4:120263688 |
| 4 rs6842762   | 120398236 T | 0.2566 | 1.11E-16 | chr:4:120263688 |
| 4 rs6848389   | 120402622 C | 0.2566 | 1.11E-16 | chr:4:120263688 |
| 4 rs71614443  | 120379388 C | 0.2566 | 1.11E-16 | chr:4:120263688 |
| 4 rs9994730   | 120381564 C | 0.2566 | 1.11E-16 | chr:4:120263688 |
| 4 rs368193355 | 120327846 C | 0.2339 | 1.34E-16 | chr:4:120263688 |
| 4 rs9995244   | 120321858 G | 0.2644 | 1.40E-16 | chr:4:120263688 |
| 4 rs13134132  | 120324615 A | 0.2981 | 1.57E-16 | chr:4:120263688 |
| 4 rs10017371  | 120293776 G | 0.2598 | 2.00E-16 | chr:4:120263688 |
| 4 rs11729991  | 120292700 T | 0.2598 | 2.00E-16 | chr:4:120263688 |
| 4 rs12505469  | 120249585 T | 0.2598 | 2.00E-16 | chr:4:120263688 |
| 4 rs10020141  | 120318870 C | 0.2645 | 2.04E-16 | chr:4:120263688 |
| 4 rs3775842   | 120427732 G | 3.807  | 2.19E-16 | chr:4:120263688 |
| 4 rs6844263   | 120433807 A | 3.807  | 2.19E-16 | chr:4:120263688 |

|               |             |        |          |                 |
|---------------|-------------|--------|----------|-----------------|
| 4 rs140982995 | 120455483 A | 3.805  | 2.57E-16 | chr:4:120263688 |
| 4 rs10008386  | 120318809 A | 0.2669 | 2.78E-16 | chr:4:120263688 |
| 4 rs10008392  | 120318839 A | 0.2669 | 2.78E-16 | chr:4:120263688 |
| 4 rs12504149  | 120318577 A | 0.2669 | 2.78E-16 | chr:4:120263688 |
| 4 rs12508173  | 120318526 C | 0.2669 | 2.78E-16 | chr:4:120263688 |
| 4 rs12509234  | 120319434 C | 0.2669 | 2.78E-16 | chr:4:120263688 |
| 4 rs6833815   | 120318921 A | 0.2669 | 2.78E-16 | chr:4:120263688 |
| 4 rs13104396  | 120285649 T | 0.2623 | 2.82E-16 | chr:4:120263688 |
| 4 rs1022145   | 120230979 G | 0.2623 | 2.84E-16 | chr:4:120263688 |
| 4 rs7674713   | 120322257 C | 0.2633 | 2.86E-16 | chr:4:120263688 |
| 4 rs10518328  | 120401779 A | 0.2612 | 2.86E-16 | chr:4:120263688 |
| 4 rs11940028  | 120411907 C | 0.2649 | 3.72E-16 | chr:4:120263688 |
| 4 rs4336213   | 120236469 T | 0.3106 | 3.75E-16 | chr:4:120263688 |
| 4 rs11098512  | 120314161 T | 0.2642 | 3.77E-16 | chr:4:120263688 |
| 4 rs71629403  | 120372567 T | 0.2626 | 3.94E-16 | chr:4:120263688 |
| 4 rs10006877  | 120242793 T | 0.2648 | 4.00E-16 | chr:4:120263688 |
| 4 rs1002152   | 120273387 A | 0.2648 | 4.00E-16 | chr:4:120263688 |
| 4 rs1546502   | 120235898 G | 0.2648 | 4.00E-16 | chr:4:120263688 |
| 4 rs878373    | 120237484 T | 0.2648 | 4.00E-16 | chr:4:120263688 |
| 4 rs3955380   | 120334410 A | 0.2629 | 4.00E-16 | chr:4:120263688 |
| 4 rs10014719  | 120320715 A | 0.2677 | 4.00E-16 | chr:4:120263688 |
| 4 rs12506148  | 120320348 T | 0.2677 | 4.00E-16 | chr:4:120263688 |
| 4 rs10028669  | 120295197 T | 0.2643 | 4.09E-16 | chr:4:120263688 |
| 4 rs71614437  | 120370156 C | 0.2634 | 4.24E-16 | chr:4:120263688 |
| 4 rs10006706  | 120409152 C | 0.2656 | 5.38E-16 | chr:4:120263688 |
| 4 rs10031483  | 120422636 C | 0.2656 | 5.38E-16 | chr:4:120263688 |
| 4 rs10031665  | 120422852 C | 0.2656 | 5.38E-16 | chr:4:120263688 |
| 4 rs11098530  | 120413154 T | 0.2656 | 5.38E-16 | chr:4:120263688 |
| 4 rs11729521  | 120416788 C | 0.2656 | 5.38E-16 | chr:4:120263688 |
| 4 rs11734241  | 120416872 G | 0.2656 | 5.38E-16 | chr:4:120263688 |
| 4 rs11935596  | 120412457 C | 0.2656 | 5.38E-16 | chr:4:120263688 |
| 4 rs12507964  | 120413061 A | 0.2656 | 5.38E-16 | chr:4:120263688 |
| 4 rs12510138  | 120423935 C | 0.2656 | 5.38E-16 | chr:4:120263688 |
| 4 rs2306455   | 120421969 A | 0.2656 | 5.38E-16 | chr:4:120263688 |
| 4 rs28685688  | 120420334 C | 0.2656 | 5.38E-16 | chr:4:120263688 |
| 4 rs28845498  | 120405186 A | 0.2656 | 5.38E-16 | chr:4:120263688 |
| 4 rs3733523   | 120423719 T | 0.2656 | 5.38E-16 | chr:4:120263688 |
| 4 rs4577559   | 120404043 G | 0.2656 | 5.38E-16 | chr:4:120263688 |
| 4 rs56270433  | 120406030 T | 0.2656 | 5.38E-16 | chr:4:120263688 |
| 4 rs6834796   | 120414693 C | 0.2656 | 5.38E-16 | chr:4:120263688 |
| 4 rs6849561   | 120409694 C | 0.2656 | 5.38E-16 | chr:4:120263688 |
| 4 rs7656252   | 120404268 C | 0.2656 | 5.38E-16 | chr:4:120263688 |
| 4 rs7681544   | 120411255 C | 0.2656 | 5.38E-16 | chr:4:120263688 |

|                          |             |        |          |                 |
|--------------------------|-------------|--------|----------|-----------------|
| 4 rs7687843              | 120421211 T | 0.2656 | 5.38E-16 | chr:4:120263688 |
| 4 rs6838236              | 120267229 G | 0.267  | 5.54E-16 | chr:4:120263688 |
| 4 rs13435162             | 120304634 A | 0.267  | 5.63E-16 | chr:4:120263688 |
| 4 rs28551662             | 120309556 A | 0.267  | 5.63E-16 | chr:4:120263688 |
| 4 rs7674556              | 120303729 G | 0.267  | 5.63E-16 | chr:4:120263688 |
| 4 rs7695996              | 120322033 T | 0.2701 | 5.63E-16 | chr:4:120263688 |
| 4 rs28441656             | 120376115 G | 0.2653 | 5.65E-16 | chr:4:120263688 |
| 4 rs1546504              | 120241179 T | 0.2675 | 5.76E-16 | chr:4:120263688 |
| 4 rs1546505              | 120241224 G | 0.2675 | 5.76E-16 | chr:4:120263688 |
| 4 rs71627800             | 120360532 G | 0.2116 | 6.04E-16 | chr:4:120263688 |
| 4 rs71610279             | 120326643 C | 0.2683 | 6.75E-16 | chr:4:120263688 |
| 4 rs79446934             | 120326713 C | 0.2683 | 6.75E-16 | chr:4:120263688 |
| 4 rs7696465              | 120322114 A | 0.2689 | 7.18E-16 | chr:4:120263688 |
| 4 rs7696649              | 120322177 A | 0.2689 | 7.18E-16 | chr:4:120263688 |
| 4 rs10016944             | 120320894 A | 0.274  | 7.41E-16 | chr:4:120263688 |
| 4 rs550069983;rs77653089 | 120359650 G | 0.2453 | 7.47E-16 | chr:4:120263688 |
| 4 rs7672493              | 120248260 A | 0.269  | 7.47E-16 | chr:4:120263688 |
| 4 rs2017057              | 120257711 G | 0.2693 | 7.71E-16 | chr:4:120263688 |
| 4 rs73842633             | 120375464 A | 0.2674 | 7.85E-16 | chr:4:120263688 |
| 4 rs79057525             | 120375389 G | 0.2674 | 7.85E-16 | chr:4:120263688 |
| 4 rs200149630            | 120356941 C | 0.2676 | 7.94E-16 | chr:4:120263688 |
| 4 rs34792640             | 120368627 A | 0.2676 | 7.94E-16 | chr:4:120263688 |
| 4 rs34913743             | 120324918 G | 0.2676 | 7.94E-16 | chr:4:120263688 |
| 4 rs3890049              | 120326283 A | 0.2676 | 7.94E-16 | chr:4:120263688 |
| 4 rs79244813             | 120354847 C | 0.2676 | 7.94E-16 | chr:4:120263688 |
| 4 rs9760442              | 120367951 G | 0.2676 | 7.94E-16 | chr:4:120263688 |
| 4 rs10017543             | 120321420 A | 0.2708 | 7.96E-16 | chr:4:120263688 |
| 4 rs28571712             | 120375980 A | 0.2678 | 8.01E-16 | chr:4:120263688 |
| 4 rs11723839             | 120299673 A | 0.2693 | 8.18E-16 | chr:4:120263688 |
| 4 rs28753180             | 120405367 T | 0.2699 | 9.92E-16 | chr:4:120263688 |
| 4 rs28789446             | 120405366 C | 0.2699 | 9.92E-16 | chr:4:120263688 |
| 4 rs202150896            | 120367650 T | 0.2689 | 1.01E-15 | chr:4:120263688 |
| 4 rs7696857              | 120322321 A | 0.2716 | 1.05E-15 | chr:4:120263688 |
| 4 rs199863129            | 120334013 T | 0.2622 | 1.07E-15 | chr:4:120263688 |
| 4 rs7654762              | 120328377 C | 0.2701 | 1.11E-15 | chr:4:120263688 |
| 4 rs9683450              | 120232144 G | 3.972  | 1.39E-15 | chr:4:120263688 |
| 4 rs12502423             | 120424172 C | 0.2699 | 1.40E-15 | chr:4:120263688 |
| 4 rs10019406             | 120364619 G | 0.2718 | 1.48E-15 | chr:4:120263688 |
| 4 rs35494005             | 120361142 C | 0.2718 | 1.48E-15 | chr:4:120263688 |
| 4 rs9685784              | 120366008 T | 0.2718 | 1.48E-15 | chr:4:120263688 |
| 4 rs2715026              | 120616805 C | 3.587  | 1.98E-15 | chr:4:120263688 |
| 4 rs4001198              | 120325264 T | 0.2762 | 2.00E-15 | chr:4:120263688 |
| 4 rs1480931              | 120395809 A | 0.2659 | 2.15E-15 | chr:4:120263688 |

|               |             |        |          |                 |
|---------------|-------------|--------|----------|-----------------|
| 4 rs1480933   | 120433248 C | 3.497  | 2.76E-15 | chr:4:120263688 |
| 4 rs71614435  | 120369711 A | 0.2753 | 3.03E-15 | chr:4:120263688 |
| 4 rs4563482   | 120354480 G | 0.3329 | 3.06E-15 | chr:4:120263688 |
| 4 rs185413498 | 120327707 T | 0.2769 | 3.08E-15 | chr:4:120263688 |
| 4 rs1155577   | 120449810 T | 3.494  | 3.26E-15 | chr:4:120263688 |
| 4 rs13104219  | 120438174 G | 3.494  | 3.26E-15 | chr:4:120263688 |
| 4 rs11098500  | 120219239 A | 0.2691 | 3.88E-15 | chr:4:120263688 |
| 4 rs58583086  | 120556362 G | 3.471  | 3.90E-15 | chr:4:120263688 |
| 4 rs2583609   | 120623111 T | 3.502  | 4.07E-15 | chr:4:120263688 |
| 4 rs2245564   | 120625812 T | 3.502  | 4.56E-15 | chr:4:120263688 |
| 4 rs2583608   | 120620379 C | 3.502  | 4.56E-15 | chr:4:120263688 |
| 4 rs7696875   | 120322358 T | 0.2727 | 4.58E-15 | chr:4:120263688 |
| 4 rs11726229  | 120211580 T | 0.2698 | 4.73E-15 | chr:4:120263688 |
| 4 rs12499598  | 120189303 C | 0.2698 | 4.73E-15 | chr:4:120263688 |
| 4 rs28419773  | 120211061 C | 0.2698 | 4.73E-15 | chr:4:120263688 |
| 4 rs28555550  | 120211040 G | 0.2698 | 4.73E-15 | chr:4:120263688 |
| 4 rs7659194   | 120207147 G | 0.2698 | 4.73E-15 | chr:4:120263688 |
| 4 rs56173225  | 120509972 A | 3.46   | 4.91E-15 | chr:4:120263688 |
| 4 rs2306457   | 120472839 A | 0.2853 | 5.09E-15 | chr:4:120263688 |
| 4 rs11722872  | 120233030 C | 0.271  | 5.15E-15 | chr:4:120263688 |
| 4 rs142328963 | 120498647 A | 3.432  | 5.92E-15 | chr:4:120263688 |
| 4 rs66887589  | 120509279 C | 3.432  | 5.92E-15 | chr:4:120263688 |
| 4 rs2892869   | 120521297 C | 3.43   | 6.74E-15 | chr:4:120263688 |
| 4 rs72920701  | 120513230 A | 3.43   | 6.74E-15 | chr:4:120263688 |
| 4 rs7678973   | 120511817 C | 3.43   | 6.74E-15 | chr:4:120263688 |
| 4 rs2248806   | 120621423 A | 3.456  | 7.50E-15 | chr:4:120263688 |
| 4 rs10012456  | 120274039 T | 0.2741 | 7.56E-15 | chr:4:120263688 |
| 4 rs6847075   | 120286043 T | 0.2741 | 7.56E-15 | chr:4:120263688 |
| 4 rs199816242 | 120199351 T | 0.2718 | 8.02E-15 | chr:4:120263688 |
| 4 rs13435370  | 120334666 C | 0.271  | 8.82E-15 | chr:4:120263688 |
| 4 rs11934328  | 120376744 T | 0.2733 | 8.94E-15 | chr:4:120263688 |
| 4 rs11098499  | 120187611 T | 0.2746 | 9.08E-15 | chr:4:120263688 |
| 4 rs58601355  | 120186367 C | 0.2746 | 9.08E-15 | chr:4:120263688 |
| 4 rs56843000  | 120516597 C | 3.403  | 9.24E-15 | chr:4:120263688 |
| 4 rs4504231   | 120586891 A | 0.3241 | 9.50E-15 | chr:4:120263688 |
| 4 rs12498539  | 120468370 T | 0.2906 | 1.04E-14 | chr:4:120263688 |
| 4 rs34308924  | 120481431 C | 0.2906 | 1.04E-14 | chr:4:120263688 |
| 4 rs3775854   | 120471971 T | 0.2906 | 1.04E-14 | chr:4:120263688 |
| 4 rs3822194   | 120471648 G | 0.2906 | 1.04E-14 | chr:4:120263688 |
| 4 rs3822195   | 120471660 T | 0.2906 | 1.04E-14 | chr:4:120263688 |
| 4 rs6829903   | 120506884 T | 0.2906 | 1.04E-14 | chr:4:120263688 |
| 4 rs7669520   | 120515278 C | 0.2906 | 1.04E-14 | chr:4:120263688 |
| 4 rs9884402   | 120489982 G | 0.2906 | 1.04E-14 | chr:4:120263688 |

|               |             |        |          |                 |
|---------------|-------------|--------|----------|-----------------|
| 4 rs9995026   | 120490499 A | 0.2906 | 1.04E-14 | chr:4:120263688 |
| 4 rs10026736  | 120384322 C | 0.2746 | 1.05E-14 | chr:4:120263688 |
| 4 rs12506546  | 120301618 C | 0.2766 | 1.07E-14 | chr:4:120263688 |
| 4 rs6853998   | 120475860 A | 0.2909 | 1.07E-14 | chr:4:120263688 |
| 4 rs6858777   | 120475966 G | 0.2909 | 1.07E-14 | chr:4:120263688 |
| 4 rs71614422  | 120359340 A | 0.32   | 1.08E-14 | chr:4:120263688 |
| 4 rs76525361  | 120359608 T | 0.32   | 1.08E-14 | chr:4:120263688 |
| 4 rs76651228  | 120359559 G | 0.32   | 1.08E-14 | chr:4:120263688 |
| 4 rs72676045  | 120254663 A | 0.2787 | 1.10E-14 | chr:4:120263688 |
| 4 rs2252565   | 120613111 T | 3.431  | 1.20E-14 | chr:4:120263688 |
| 4 rs6836219   | 120597941 T | 3.431  | 1.20E-14 | chr:4:120263688 |
| 4 rs34585914  | 120189194 T | 0.2772 | 1.27E-14 | chr:4:120263688 |
| 4 rs2389873   | 120554714 G | 3.278  | 1.45E-14 | chr:4:120263688 |
| 4 rs11731756  | 120478696 G | 0.2936 | 1.53E-14 | chr:4:120263688 |
| 4 rs11737395  | 120520704 G | 0.2936 | 1.53E-14 | chr:4:120263688 |
| 4 rs201236087 | 120474546 T | 0.2936 | 1.53E-14 | chr:4:120263688 |
| 4 rs2170276   | 120485824 C | 0.2936 | 1.53E-14 | chr:4:120263688 |
| 4 rs62322293  | 120330655 T | 3.52   | 1.65E-14 | chr:4:120263688 |
| 4 rs7658561   | 120479985 C | 0.2935 | 1.68E-14 | chr:4:120263688 |
| 4 rs7437666   | 120653063 C | 3.394  | 1.95E-14 | chr:4:120263688 |
| 4 rs201085338 | 120347661 A | 0.2877 | 1.96E-14 | chr:4:120263688 |
| 4 rs199865201 | 120332408 G | 3.461  | 2.14E-14 | chr:4:120263688 |
| 4 rs80259299  | 120336497 G | 0.2232 | 2.20E-14 | chr:4:120263688 |
| 4 rs9759478   | 120367998 A | 0.2803 | 2.25E-14 | chr:4:120263688 |
| 4 rs10027517  | 120372234 A | 3.462  | 2.59E-14 | chr:4:120263688 |
| 4 rs12505876  | 120385472 G | 3.462  | 2.59E-14 | chr:4:120263688 |
| 4 rs9307477   | 120421809 G | 3.462  | 2.59E-14 | chr:4:120263688 |
| 4 rs9684327   | 120365441 A | 3.462  | 2.59E-14 | chr:4:120263688 |
| 4 rs6843229   | 120424087 T | 3.518  | 2.62E-14 | chr:4:120263688 |
| 4 rs9762870   | 120367769 A | 0.3053 | 2.77E-14 | chr:4:120263688 |
| 4 rs2583616   | 120629473 A | 3.384  | 2.83E-14 | chr:4:120263688 |
| 4 rs9799664   | 120326678 C | 3.44   | 2.87E-14 | chr:4:120263688 |
| 4 rs75690486  | 120359788 A | 0.3234 | 3.21E-14 | chr:4:120263688 |
| 4 rs2714961   | 120628627 C | 3.322  | 3.50E-14 | chr:4:120263688 |
| 4 rs2583605   | 120659992 A | 3.317  | 3.70E-14 | chr:4:120263688 |
| 4 rs201664317 | 120330379 C | 0.3121 | 3.85E-14 | chr:4:120263688 |
| 4 rs4834792   | 120555696 A | 3.184  | 4.01E-14 | chr:4:120263688 |
| 4 rs2714978   | 120670213 G | 3.087  | 4.15E-14 | chr:4:120263688 |
| 4 rs2250346   | 120648078 T | 3.292  | 4.42E-14 | chr:4:120263688 |
| 4 rs2714980   | 120668765 T | 3.092  | 4.54E-14 | chr:4:120263688 |
| 4 rs6534135   | 120406302 A | 3.401  | 4.67E-14 | chr:4:120263688 |
| 4 rs2583617   | 120644194 A | 3.292  | 4.85E-14 | chr:4:120263688 |
| 4 rs2714960   | 120630872 C | 3.292  | 4.85E-14 | chr:4:120263688 |



|               |             |        |          |                 |
|---------------|-------------|--------|----------|-----------------|
| 4 rs9996586   | 120326942 A | 3.38   | 4.85E-14 | chr:4:120263688 |
| 4 rs41464847  | 120532401 G | 3.259  | 4.98E-14 | chr:4:120263688 |
| 4 rs59590064  | 120539753 C | 3.259  | 4.98E-14 | chr:4:120263688 |
| 4 rs6817317   | 120542827 G | 3.259  | 4.98E-14 | chr:4:120263688 |
| 4 rs7672519   | 120544112 T | 3.259  | 4.98E-14 | chr:4:120263688 |
| 4 rs7681980   | 120533223 A | 3.259  | 4.98E-14 | chr:4:120263688 |
| 4 rs78709015  | 120367728 T | 0.3103 | 5.07E-14 | chr:4:120263688 |
| 4 rs2583604   | 120660715 A | 3.32   | 5.14E-14 | chr:4:120263688 |
| 4 rs2714976   | 120670555 G | 3.287  | 5.15E-14 | chr:4:120263688 |
| 4 rs17006190  | 120418838 G | 0.2847 | 5.16E-14 | chr:4:120263688 |
| 4 rs3733519   | 120423448 G | 0.2847 | 5.16E-14 | chr:4:120263688 |
| 4 rs9683520   | 120368199 G | 3.247  | 5.24E-14 | chr:4:120263688 |
| 4 rs7680748   | 120479978 A | 0.3035 | 5.40E-14 | chr:4:120263688 |
| 4 rs725449    | 120656892 T | 3.249  | 6.21E-14 | chr:4:120263688 |
| 4 rs7661498   | 120408108 T | 3.373  | 6.32E-14 | chr:4:120263688 |
| 4 rs4001211   | 120331544 G | 0.302  | 6.57E-14 | chr:4:120263688 |
| 4 rs2715016   | 120452356 C | 3.304  | 6.65E-14 | chr:4:120263688 |
| 4 rs2256054   | 120669517 C | 3.05   | 7.24E-14 | chr:4:120263688 |
| 4 rs2583596   | 120670120 A | 3.045  | 8.53E-14 | chr:4:120263688 |
| 4 rs2583597   | 120670150 A | 3.045  | 8.53E-14 | chr:4:120263688 |
| 4 rs28571649  | 120388867 A | 0.3175 | 8.57E-14 | chr:4:120263688 |
| 4 rs13134517  | 120405262 G | 3.337  | 8.57E-14 | chr:4:120263688 |
| 4 rs17005489  | 120649070 A | 3.206  | 8.98E-14 | chr:4:120263688 |
| 4 rs11098524  | 120390032 G | 0.3183 | 9.03E-14 | chr:4:120263688 |
| 4 rs531826432 | 120327073 T | 0.313  | 9.87E-14 | chr:4:120263688 |
| 4 rs77222221  | 120329212 A | 0.2509 | 1.02E-13 | chr:4:120263688 |
| 4 rs10019421  | 120327198 C | 3.118  | 1.13E-13 | chr:4:120263688 |
| 4 rs10031129  | 120327201 T | 3.118  | 1.13E-13 | chr:4:120263688 |
| 4 rs550821123 | 120327079 T | 0.3174 | 1.25E-13 | chr:4:120263688 |
| 4 rs74529999  | 120327854 C | 0.3155 | 1.25E-13 | chr:4:120263688 |
| 4 rs2127820   | 120394534 A | 0.3209 | 1.49E-13 | chr:4:120263688 |
| 4 rs2127821   | 120394535 C | 0.3209 | 1.49E-13 | chr:4:120263688 |
| 4 rs10026493  | 120384194 G | 0.321  | 1.51E-13 | chr:4:120263688 |
| 4 rs28665282  | 120384186 T | 0.321  | 1.51E-13 | chr:4:120263688 |
| 4 rs2583619   | 120652805 T | 3.18   | 1.54E-13 | chr:4:120263688 |
| 4 rs74693727  | 120330155 T | 0.3238 | 1.69E-13 | chr:4:120263688 |
| 4 rs4511986   | 120354674 C | 0.3172 | 1.71E-13 | chr:4:120263688 |
| 4 rs10019522  | 120364728 G | 0.321  | 1.83E-13 | chr:4:120263688 |
| 4 rs4337717   | 120643040 C | 0.3575 | 1.84E-13 | chr:4:120263688 |
| 4 rs10009450  | 120391258 G | 0.3233 | 2.02E-13 | chr:4:120263688 |
| 4 rs10017335  | 120381523 G | 0.3233 | 2.02E-13 | chr:4:120263688 |
| 4 rs10017389  | 120381412 A | 0.3233 | 2.02E-13 | chr:4:120263688 |
| 4 rs10026748  | 120384357 A | 0.3233 | 2.02E-13 | chr:4:120263688 |

|               |             |        |          |                 |
|---------------|-------------|--------|----------|-----------------|
| 4 rs10026952  | 120384564 A | 0.3233 | 2.02E-13 | chr:4:120263688 |
| 4 rs10032151  | 120391628 T | 0.3233 | 2.02E-13 | chr:4:120263688 |
| 4 rs10032158  | 120391632 T | 0.3233 | 2.02E-13 | chr:4:120263688 |
| 4 rs11098525  | 120390152 A | 0.3233 | 2.02E-13 | chr:4:120263688 |
| 4 rs11941899  | 120382758 A | 0.3233 | 2.02E-13 | chr:4:120263688 |
| 4 rs11943877  | 120389047 T | 0.3233 | 2.02E-13 | chr:4:120263688 |
| 4 rs12502909  | 120377529 T | 0.3233 | 2.02E-13 | chr:4:120263688 |
| 4 rs12505878  | 120385485 A | 0.3233 | 2.02E-13 | chr:4:120263688 |
| 4 rs148358770 | 120382262 C | 0.3233 | 2.02E-13 | chr:4:120263688 |
| 4 rs150657109 | 120377707 T | 0.3233 | 2.02E-13 | chr:4:120263688 |
| 4 rs17046116  | 120387259 A | 0.3233 | 2.02E-13 | chr:4:120263688 |
| 4 rs17046118  | 120387496 G | 0.3233 | 2.02E-13 | chr:4:120263688 |
| 4 rs185466280 | 120377740 T | 0.3233 | 2.02E-13 | chr:4:120263688 |
| 4 rs28374462  | 120386597 G | 0.3233 | 2.02E-13 | chr:4:120263688 |
| 4 rs28444327  | 120387946 G | 0.3233 | 2.02E-13 | chr:4:120263688 |
| 4 rs28461559  | 120387932 A | 0.3233 | 2.02E-13 | chr:4:120263688 |
| 4 rs28479042  | 120386876 C | 0.3233 | 2.02E-13 | chr:4:120263688 |
| 4 rs28559989  | 120386627 T | 0.3233 | 2.02E-13 | chr:4:120263688 |
| 4 rs28587142  | 120386753 C | 0.3233 | 2.02E-13 | chr:4:120263688 |
| 4 rs28632018  | 120386730 C | 0.3233 | 2.02E-13 | chr:4:120263688 |
| 4 rs2892848   | 120381341 T | 0.3233 | 2.02E-13 | chr:4:120263688 |
| 4 rs34858317  | 120387110 C | 0.3233 | 2.02E-13 | chr:4:120263688 |
| 4 rs34858405  | 120381081 A | 0.3233 | 2.02E-13 | chr:4:120263688 |
| 4 rs35063680  | 120387102 C | 0.3233 | 2.02E-13 | chr:4:120263688 |
| 4 rs4001190   | 120377619 A | 0.3233 | 2.02E-13 | chr:4:120263688 |
| 4 rs6837828   | 120392084 T | 0.3233 | 2.02E-13 | chr:4:120263688 |
| 4 rs6838814   | 120392443 A | 0.3233 | 2.02E-13 | chr:4:120263688 |
| 4 rs71614442  | 120379346 T | 0.3233 | 2.02E-13 | chr:4:120263688 |
| 4 rs71614448  | 120387026 A | 0.3233 | 2.02E-13 | chr:4:120263688 |
| 4 rs71614449  | 120387055 T | 0.3233 | 2.02E-13 | chr:4:120263688 |
| 4 rs7436506   | 120393769 C | 0.3233 | 2.02E-13 | chr:4:120263688 |
| 4 rs74602693  | 120377647 T | 0.3233 | 2.02E-13 | chr:4:120263688 |
| 4 rs7654587   | 120388406 T | 0.3233 | 2.02E-13 | chr:4:120263688 |
| 4 rs7659336   | 120385341 C | 0.3233 | 2.02E-13 | chr:4:120263688 |
| 4 rs7681214   | 120385320 A | 0.3233 | 2.02E-13 | chr:4:120263688 |
| 4 rs7681978   | 120383775 C | 0.3233 | 2.02E-13 | chr:4:120263688 |
| 4 rs7688613   | 120384803 C | 0.3233 | 2.02E-13 | chr:4:120263688 |
| 4 rs9993199   | 120392873 A | 0.3233 | 2.02E-13 | chr:4:120263688 |
| 4 rs7664591   | 120627116 C | 0.3694 | 2.08E-13 | chr:4:120263688 |
| 4 rs2714973   | 120662172 A | 3.109  | 2.17E-13 | chr:4:120263688 |
| 4 rs4513552   | 120354657 C | 2.954  | 2.27E-13 | chr:4:120263688 |
| 4 rs9684723   | 120367735 A | 2.999  | 2.30E-13 | chr:4:120263688 |
| 4 rs58416902  | 120374639 G | 0.3215 | 2.48E-13 | chr:4:120263688 |

|               |             |        |          |                 |
|---------------|-------------|--------|----------|-----------------|
| 4 rs9684878   | 120368175 A | 3.076  | 2.54E-13 | chr:4:120263688 |
| 4 rs3736115   | 120488703 A | 0.3114 | 2.64E-13 | chr:4:120263688 |
| 4 rs58452170  | 120459674 T | 0.3094 | 2.68E-13 | chr:4:120263688 |
| 4 rs76568951  | 120355570 C | 0.3235 | 2.69E-13 | chr:4:120263688 |
| 4 rs1383533   | 120434576 A | 0.3115 | 2.71E-13 | chr:4:120263688 |
| 4 rs79870274  | 120382190 T | 0.3256 | 2.75E-13 | chr:4:120263688 |
| 4 rs10008459  | 120394231 C | 0.3257 | 2.76E-13 | chr:4:120263688 |
| 4 rs4834806   | 120656656 C | 0.3654 | 2.99E-13 | chr:4:120263688 |
| 4 rs187271184 | 120330448 A | 0.325  | 3.13E-13 | chr:4:120263688 |
| 4 rs190803766 | 120330449 A | 0.325  | 3.13E-13 | chr:4:120263688 |
| 4 rs7654529   | 120388230 A | 0.3294 | 3.33E-13 | chr:4:120263688 |
| 4 rs7654546   | 120388255 A | 0.3294 | 3.33E-13 | chr:4:120263688 |
| 4 rs10008791  | 120431469 C | 0.3122 | 3.70E-13 | chr:4:120263688 |
| 4 rs10009626  | 120470005 C | 0.3122 | 3.70E-13 | chr:4:120263688 |
| 4 rs10013305  | 120450424 A | 0.3122 | 3.70E-13 | chr:4:120263688 |
| 4 rs10030660  | 120436704 A | 0.3122 | 3.70E-13 | chr:4:120263688 |
| 4 rs10034450  | 120455649 G | 0.3122 | 3.70E-13 | chr:4:120263688 |
| 4 rs1010739   | 120463471 T | 0.3122 | 3.70E-13 | chr:4:120263688 |
| 4 rs1010740   | 120463409 C | 0.3122 | 3.70E-13 | chr:4:120263688 |
| 4 rs11098531  | 120465001 A | 0.3122 | 3.70E-13 | chr:4:120263688 |
| 4 rs11098532  | 120490726 A | 0.3122 | 3.70E-13 | chr:4:120263688 |
| 4 rs11736416  | 120431661 T | 0.3122 | 3.70E-13 | chr:4:120263688 |
| 4 rs12498599  | 120468503 T | 0.3122 | 3.70E-13 | chr:4:120263688 |
| 4 rs12502389  | 120454191 G | 0.3122 | 3.70E-13 | chr:4:120263688 |
| 4 rs13128602  | 120459366 G | 0.3122 | 3.70E-13 | chr:4:120263688 |
| 4 rs13134665  | 120426430 C | 0.3122 | 3.70E-13 | chr:4:120263688 |
| 4 rs13149407  | 120437825 G | 0.3122 | 3.70E-13 | chr:4:120263688 |
| 4 rs1383532   | 120434404 A | 0.3122 | 3.70E-13 | chr:4:120263688 |
| 4 rs1480936   | 120462861 T | 0.3122 | 3.70E-13 | chr:4:120263688 |
| 4 rs1480939   | 120456927 C | 0.3122 | 3.70E-13 | chr:4:120263688 |
| 4 rs1480940   | 120457682 C | 0.3122 | 3.70E-13 | chr:4:120263688 |
| 4 rs1552092   | 120488496 T | 0.3122 | 3.70E-13 | chr:4:120263688 |
| 4 rs1552095   | 120460306 C | 0.3122 | 3.70E-13 | chr:4:120263688 |
| 4 rs2291185   | 120434833 A | 0.3122 | 3.70E-13 | chr:4:120263688 |
| 4 rs2306456   | 120472422 G | 0.3122 | 3.70E-13 | chr:4:120263688 |
| 4 rs28718422  | 120466304 A | 0.3122 | 3.70E-13 | chr:4:120263688 |
| 4 rs34868248  | 120442430 G | 0.3122 | 3.70E-13 | chr:4:120263688 |
| 4 rs3733525   | 120447048 G | 0.3122 | 3.70E-13 | chr:4:120263688 |
| 4 rs3775843   | 120427844 C | 0.3122 | 3.70E-13 | chr:4:120263688 |
| 4 rs3775844   | 120428033 A | 0.3122 | 3.70E-13 | chr:4:120263688 |
| 4 rs3775845   | 120432447 C | 0.3122 | 3.70E-13 | chr:4:120263688 |
| 4 rs3775847   | 120447642 C | 0.3122 | 3.70E-13 | chr:4:120263688 |
| 4 rs3775848   | 120447724 T | 0.3122 | 3.70E-13 | chr:4:120263688 |

|               |             |        |          |                 |
|---------------|-------------|--------|----------|-----------------|
| 4 rs3775849   | 120450908 C | 0.3122 | 3.70E-13 | chr:4:120263688 |
| 4 rs3775852   | 120454556 G | 0.3122 | 3.70E-13 | chr:4:120263688 |
| 4 rs3822190   | 120428098 A | 0.3122 | 3.70E-13 | chr:4:120263688 |
| 4 rs3822191   | 120428101 T | 0.3122 | 3.70E-13 | chr:4:120263688 |
| 4 rs4596225   | 120496444 G | 0.3122 | 3.70E-13 | chr:4:120263688 |
| 4 rs6534140   | 120455311 T | 0.3122 | 3.70E-13 | chr:4:120263688 |
| 4 rs6835635   | 120458867 C | 0.3122 | 3.70E-13 | chr:4:120263688 |
| 4 rs6847818   | 120469250 T | 0.3122 | 3.70E-13 | chr:4:120263688 |
| 4 rs7657849   | 120455494 C | 0.3122 | 3.70E-13 | chr:4:120263688 |
| 4 rs7664986   | 120429952 C | 0.3122 | 3.70E-13 | chr:4:120263688 |
| 4 rs7678400   | 120461957 A | 0.3122 | 3.70E-13 | chr:4:120263688 |
| 4 rs7688802   | 120451668 A | 0.3122 | 3.70E-13 | chr:4:120263688 |
| 4 rs7695620   | 120452776 A | 0.3122 | 3.70E-13 | chr:4:120263688 |
| 4 rs7699064   | 120428309 T | 0.3122 | 3.70E-13 | chr:4:120263688 |
| 4 rs71612595  | 120331428 T | 0.3275 | 4.34E-13 | chr:4:120263688 |
| 4 rs142609610 | 120327032 A | 0.3278 | 4.42E-13 | chr:4:120263688 |
| 4 rs11728616  | 120440676 A | 0.3143 | 4.83E-13 | chr:4:120263688 |
| 4 rs35111518  | 120440682 G | 0.3143 | 4.83E-13 | chr:4:120263688 |
| 4 rs79026312  | 120440677 A | 0.3143 | 4.83E-13 | chr:4:120263688 |
| 4 rs71610280  | 120326648 G | 0.3311 | 5.16E-13 | chr:4:120263688 |
| 4 rs77299866  | 120326716 T | 0.3311 | 5.16E-13 | chr:4:120263688 |
| 4 rs11933966  | 120476715 A | 0.3158 | 5.50E-13 | chr:4:120263688 |
| 4 rs11947234  | 120474859 G | 0.3158 | 5.50E-13 | chr:4:120263688 |
| 4 rs13140391  | 120503437 G | 0.3158 | 5.50E-13 | chr:4:120263688 |
| 4 rs13140409  | 120503460 G | 0.3158 | 5.50E-13 | chr:4:120263688 |
| 4 rs2086450   | 120496217 A | 0.3158 | 5.50E-13 | chr:4:120263688 |
| 4 rs36040693  | 120477616 G | 0.3158 | 5.50E-13 | chr:4:120263688 |
| 4 rs55825515  | 120486402 G | 0.3158 | 5.50E-13 | chr:4:120263688 |
| 4 rs3872807   | 120360251 T | 3.015  | 5.72E-13 | chr:4:120263688 |
| 4 rs2714970   | 120657355 T | 3.041  | 5.87E-13 | chr:4:120263688 |
| 4 rs9683604   | 120363592 T | 0.3305 | 5.87E-13 | chr:4:120263688 |
| 4 rs9684938   | 120363595 G | 0.3305 | 5.87E-13 | chr:4:120263688 |
| 4 rs4001195   | 120329676 G | 0.3325 | 6.12E-13 | chr:4:120263688 |
| 4 rs10023569  | 120323316 T | 0.3307 | 6.29E-13 | chr:4:120263688 |
| 4 rs10518331  | 120323595 T | 0.3307 | 6.29E-13 | chr:4:120263688 |
| 4 rs11934314  | 120376540 A | 0.3307 | 6.29E-13 | chr:4:120263688 |
| 4 rs13133522  | 120324424 T | 0.3307 | 6.29E-13 | chr:4:120263688 |
| 4 rs139379776 | 120332234 A | 0.3307 | 6.29E-13 | chr:4:120263688 |
| 4 rs140750089 | 120330539 A | 0.3307 | 6.29E-13 | chr:4:120263688 |
| 4 rs149185281 | 120369277 A | 0.3307 | 6.29E-13 | chr:4:120263688 |
| 4 rs149826784 | 120330643 A | 0.3307 | 6.29E-13 | chr:4:120263688 |
| 4 rs200822665 | 120357250 A | 0.3307 | 6.29E-13 | chr:4:120263688 |
| 4 rs201742833 | 120356668 T | 0.3307 | 6.29E-13 | chr:4:120263688 |

|               |             |        |          |                 |
|---------------|-------------|--------|----------|-----------------|
| 4 rs2389802   | 120325732 A | 0.3307 | 6.29E-13 | chr:4:120263688 |
| 4 rs28394590  | 120373738 G | 0.3307 | 6.29E-13 | chr:4:120263688 |
| 4 rs28529639  | 120373104 T | 0.3307 | 6.29E-13 | chr:4:120263688 |
| 4 rs28653183  | 120372276 G | 0.3307 | 6.29E-13 | chr:4:120263688 |
| 4 rs28714318  | 120375830 T | 0.3307 | 6.29E-13 | chr:4:120263688 |
| 4 rs34378623  | 120368744 T | 0.3307 | 6.29E-13 | chr:4:120263688 |
| 4 rs35091806  | 120325529 A | 0.3307 | 6.29E-13 | chr:4:120263688 |
| 4 rs35111011  | 120366526 T | 0.3307 | 6.29E-13 | chr:4:120263688 |
| 4 rs35165976  | 120325630 A | 0.3307 | 6.29E-13 | chr:4:120263688 |
| 4 rs4001185   | 120376381 C | 0.3307 | 6.29E-13 | chr:4:120263688 |
| 4 rs66506550  | 120371445 A | 0.3307 | 6.29E-13 | chr:4:120263688 |
| 4 rs6820376   | 120324476 G | 0.3307 | 6.29E-13 | chr:4:120263688 |
| 4 rs6845714   | 120326138 T | 0.3307 | 6.29E-13 | chr:4:120263688 |
| 4 rs6846442   | 120326323 A | 0.3307 | 6.29E-13 | chr:4:120263688 |
| 4 rs71612596  | 120331743 A | 0.3307 | 6.29E-13 | chr:4:120263688 |
| 4 rs71612597  | 120331845 C | 0.3307 | 6.29E-13 | chr:4:120263688 |
| 4 rs71612601  | 120332595 T | 0.3307 | 6.29E-13 | chr:4:120263688 |
| 4 rs71612602  | 120332781 A | 0.3307 | 6.29E-13 | chr:4:120263688 |
| 4 rs71614434  | 120368975 T | 0.3307 | 6.29E-13 | chr:4:120263688 |
| 4 rs71614438  | 120371252 A | 0.3307 | 6.29E-13 | chr:4:120263688 |
| 4 rs71629404  | 120372724 G | 0.3307 | 6.29E-13 | chr:4:120263688 |
| 4 rs74772011  | 120332334 C | 0.3307 | 6.29E-13 | chr:4:120263688 |
| 4 rs7659501   | 120371552 T | 0.3307 | 6.29E-13 | chr:4:120263688 |
| 4 rs7659551   | 120371729 T | 0.3307 | 6.29E-13 | chr:4:120263688 |
| 4 rs7664458   | 120371967 G | 0.3307 | 6.29E-13 | chr:4:120263688 |
| 4 rs77934861  | 120324707 C | 0.3307 | 6.29E-13 | chr:4:120263688 |
| 4 rs35985971  | 120361596 G | 0.2885 | 6.30E-13 | chr:4:120263688 |
| 4 rs76837541  | 120375428 G | 0.3311 | 6.41E-13 | chr:4:120263688 |
| 4 rs71610281  | 120328001 C | 0.3337 | 6.50E-13 | chr:4:120263688 |
| 4 rs10026516  | 120384253 A | 0.3341 | 6.87E-13 | chr:4:120263688 |
| 4 rs115044484 | 120326887 G | 0.3331 | 7.87E-13 | chr:4:120263688 |
| 4 rs370222454 | 120359691 G | 0.3332 | 8.46E-13 | chr:4:120263688 |
| 4 rs532415426 | 120359632 A | 0.3332 | 8.46E-13 | chr:4:120263688 |
| 4 rs545772518 | 120359643 G | 0.3332 | 8.46E-13 | chr:4:120263688 |
| 4 rs559457335 | 120359644 G | 0.3332 | 8.46E-13 | chr:4:120263688 |
| 4 rs563816604 | 120359627 G | 0.3332 | 8.46E-13 | chr:4:120263688 |
| 4 rs28634456  | 120375778 G | 0.3337 | 8.51E-13 | chr:4:120263688 |
| 4 rs78332141  | 120375782 T | 0.3337 | 8.51E-13 | chr:4:120263688 |
| 4 rs12508504  | 120410607 C | 0.3357 | 8.57E-13 | chr:4:120263688 |
| 4 rs28626372  | 120373262 T | 0.3333 | 8.60E-13 | chr:4:120263688 |
| 4 rs7654984   | 120328520 G | 0.3337 | 8.65E-13 | chr:4:120263688 |
| 4 rs4834772   | 120272316 G | 2.358  | 9.00E-13 | chr:4:120263688 |
| 4 rs28394116  | 120524283 G | 0.322  | 9.24E-13 | chr:4:120263688 |

|               |             |        |          |                 |
|---------------|-------------|--------|----------|-----------------|
| 4 rs10027431  | 120372142 A | 2.846  | 9.45E-13 | chr:4:120263688 |
| 4 rs10027432  | 120372143 A | 2.846  | 9.45E-13 | chr:4:120263688 |
| 4 rs28655325  | 120372999 G | 0.3325 | 9.56E-13 | chr:4:120263688 |
| 4 rs28567426  | 120373354 G | 0.3371 | 1.04E-12 | chr:4:120263688 |
| 4 rs4368585   | 120354482 G | 0.336  | 1.04E-12 | chr:4:120263688 |
| 4 rs72489565  | 120326819 C | 0.3353 | 1.08E-12 | chr:4:120263688 |
| 4 rs34566984  | 120361270 A | 0.3358 | 1.12E-12 | chr:4:120263688 |
| 4 rs9683709   | 120365714 A | 0.3358 | 1.12E-12 | chr:4:120263688 |
| 4 rs9685777   | 120365965 A | 0.3358 | 1.12E-12 | chr:4:120263688 |
| 4 rs28495013  | 120375831 C | 0.3359 | 1.13E-12 | chr:4:120263688 |
| 4 rs75396180  | 120375727 A | 0.3359 | 1.13E-12 | chr:4:120263688 |
| 4 rs80242894  | 120375752 A | 0.3359 | 1.13E-12 | chr:4:120263688 |
| 4 rs192039339 | 120333191 C | 0.3361 | 1.15E-12 | chr:4:120263688 |
| 4 rs4001175   | 120500667 A | 0.3193 | 1.16E-12 | chr:4:120263688 |
| 4 rs10006525  | 120408931 G | 0.3369 | 1.19E-12 | chr:4:120263688 |
| 4 rs13145352  | 120409963 C | 0.337  | 1.21E-12 | chr:4:120263688 |
| 4 rs17005535  | 120411562 T | 0.3373 | 1.25E-12 | chr:4:120263688 |
| 4 rs181331234 | 120327890 C | 0.3359 | 1.31E-12 | chr:4:120263688 |
| 4 rs7655048   | 120328284 A | 0.3381 | 1.40E-12 | chr:4:120263688 |
| 4 rs76798497  | 120667915 C | 3.56   | 1.40E-12 | chr:4:120263688 |
| 4 rs6846620   | 120326404 A | 0.3395 | 1.43E-12 | chr:4:120263688 |
| 4 rs7655723   | 120328666 A | 0.3384 | 1.43E-12 | chr:4:120263688 |
| 4 rs71610282  | 120329093 C | 0.337  | 1.43E-12 | chr:4:120263688 |
| 4 rs7654700   | 120328125 A | 0.3382 | 1.44E-12 | chr:4:120263688 |
| 4 rs9683609   | 120363692 G | 0.3381 | 1.49E-12 | chr:4:120263688 |
| 4 rs115227179 | 120355773 T | 0.339  | 1.51E-12 | chr:4:120263688 |
| 4 rs75122014  | 120362426 C | 0.3389 | 1.57E-12 | chr:4:120263688 |
| 4 rs370990577 | 120327271 C | 0.3252 | 1.82E-12 | chr:4:120263688 |
| 4 rs11735819  | 120290194 C | 2.557  | 1.86E-12 | chr:4:120263688 |
| 4 rs76541370  | 120498280 C | 2.892  | 2.06E-12 | chr:4:120263688 |
| 4 rs116952757 | 120362969 C | 0.3412 | 2.08E-12 | chr:4:120263688 |
| 4 rs17009122  | 120362403 A | 0.3412 | 2.08E-12 | chr:4:120263688 |
| 4 rs527513020 | 120358891 C | 0.242  | 2.26E-12 | chr:4:120263688 |
| 4 rs201087782 | 120327650 G | 0.3449 | 2.36E-12 | chr:4:120263688 |
| 4 rs12648182  | 120503891 A | 2.877  | 2.37E-12 | chr:4:120263688 |
| 4 rs9760422   | 120354126 A | 2.816  | 2.50E-12 | chr:4:120263688 |
| 4 rs59182778  | 120374798 C | 0.3436 | 2.94E-12 | chr:4:120263688 |
| 4 rs28663988  | 120620388 C | 0.3846 | 3.06E-12 | chr:4:120263688 |
| 4 rs146531121 | 120174794 A | 0.306  | 3.68E-12 | chr:4:120263688 |
| 4 rs6814412   | 120170851 A | 0.306  | 3.68E-12 | chr:4:120263688 |
| 4 rs34147052  | 120361591 C | 0.3504 | 3.85E-12 | chr:4:120263688 |
| 4 rs34965784  | 120361586 C | 0.3504 | 3.85E-12 | chr:4:120263688 |
| 4 rs6841872   | 120158685 T | 3.018  | 4.00E-12 | chr:4:120263688 |

|               |             |        |          |                 |
|---------------|-------------|--------|----------|-----------------|
| 4 rs200207680 | 120338383 T | 0.3453 | 4.24E-12 | chr:4:120263688 |
| 4 rs370208580 | 120333619 G | 0.2168 | 4.42E-12 | chr:4:120263688 |
| 4 rs12512517  | 120173245 G | 0.3093 | 5.22E-12 | chr:4:120263688 |
| 4 rs28549914  | 120322781 A | 0.3555 | 6.77E-12 | chr:4:120263688 |
| 4 rs1511018   | 120161580 T | 0.3113 | 6.85E-12 | chr:4:120263688 |
| 4 rs1511019   | 120166007 G | 0.3113 | 6.85E-12 | chr:4:120263688 |
| 4 rs6837898   | 120179154 T | 0.3113 | 6.85E-12 | chr:4:120263688 |
| 4 rs56372521  | 120374431 T | 0.3354 | 7.07E-12 | chr:4:120263688 |
| 4 rs78958430  | 120338339 T | 0.3501 | 7.13E-12 | chr:4:120263688 |
| 4 rs79262354  | 120338335 T | 0.3501 | 7.13E-12 | chr:4:120263688 |
| 4 rs12644843  | 120169477 T | 2.996  | 8.37E-12 | chr:4:120263688 |
| 4 rs113574635 | 120279291 G | 0.2536 | 1.02E-11 | chr:4:120263688 |
| 4 rs9637625   | 120276345 G | 0.2536 | 1.02E-11 | chr:4:120263688 |
| 4 rs9637626   | 120276692 A | 0.2536 | 1.02E-11 | chr:4:120263688 |
| 4 rs6833334   | 120504227 T | 0.3287 | 1.05E-11 | chr:4:120263688 |
| 4 rs12509811  | 120635685 C | 0.3451 | 1.18E-11 | chr:4:120263688 |
| 4 rs6534139   | 120449456 A | 0.3384 | 1.25E-11 | chr:4:120263688 |
| 4 rs1511016   | 120170355 A | 2.86   | 1.35E-11 | chr:4:120263688 |
| 4 rs4496567   | 120175625 A | 2.86   | 1.35E-11 | chr:4:120263688 |
| 4 rs6534131   | 120180195 A | 2.86   | 1.35E-11 | chr:4:120263688 |
| 4 rs6823331   | 120180790 T | 2.86   | 1.35E-11 | chr:4:120263688 |
| 4 rs7676969   | 120173724 C | 2.86   | 1.35E-11 | chr:4:120263688 |
| 4 rs28504370  | 120388890 A | 0.362  | 1.49E-11 | chr:4:120263688 |
| 4 rs35434465  | 120169378 G | 0.3268 | 1.69E-11 | chr:4:120263688 |
| 4 rs3756156   | 120524841 A | 0.3396 | 2.28E-11 | chr:4:120263688 |
| 4 rs7656644   | 120228035 G | 2.707  | 2.46E-11 | chr:4:120263688 |
| 4 rs34954036  | 120366927 A | 0.3612 | 2.73E-11 | chr:4:120263688 |
| 4 rs13113112  | 120156040 T | 0.3258 | 2.76E-11 | chr:4:120263688 |
| 4 rs565835685 | 120358886 G | 0.2564 | 2.94E-11 | chr:4:120263688 |
| 4 rs13136462  | 120543173 T | 0.3424 | 3.02E-11 | chr:4:120263688 |
| 4 rs11723090  | 120490592 C | 0.3346 | 3.09E-11 | chr:4:120263688 |
| 4 rs4998488   | 120500841 C | 0.3346 | 3.09E-11 | chr:4:120263688 |
| 4 rs59732491  | 120489588 C | 0.3346 | 3.09E-11 | chr:4:120263688 |
| 4 rs200940395 | 120333454 C | 0.3213 | 3.13E-11 | chr:4:120263688 |
| 4 rs143700375 | 120254198 A | 0.2645 | 3.44E-11 | chr:4:120263688 |
| 4 rs12505735  | 120532956 A | 0.3454 | 4.11E-11 | chr:4:120263688 |
| 4 rs117030010 | 120333095 C | 0.3401 | 4.75E-11 | chr:4:120263688 |
| 4 rs10007283  | 120619656 G | 0.3982 | 4.81E-11 | chr:4:120263688 |
| 4 rs3956479   | 120360863 G | 2.472  | 4.98E-11 | chr:4:120263688 |
| 4 rs3956480   | 120360861 C | 2.472  | 4.98E-11 | chr:4:120263688 |
| 4 rs4001200   | 120378665 G | 0.1842 | 5.29E-11 | chr:4:120263688 |
| 4 rs4079144   | 120325432 T | 0.3962 | 5.61E-11 | chr:4:120263688 |
| 4 rs10034661  | 120244085 A | 2.966  | 5.81E-11 | chr:4:120263688 |

|               |             |        |          |                 |
|---------------|-------------|--------|----------|-----------------|
| 4 rs28535956  | 120536858 C | 0.3496 | 6.05E-11 | chr:4:120263688 |
| 4 rs6849889   | 120186348 C | 0.3954 | 6.48E-11 | chr:4:120263688 |
| 4 rs6534133   | 120270703 C | 3.303  | 7.99E-11 | chr:4:120263688 |
| 4 rs376876178 | 120333615 G | 0.2907 | 8.31E-11 | chr:4:120263688 |
| 4 rs13116504  | 120209412 C | 0.3978 | 8.51E-11 | chr:4:120263688 |
| 4 rs13133044  | 120201252 C | 0.3978 | 8.51E-11 | chr:4:120263688 |
| 4 rs35643470  | 120184948 C | 0.3978 | 8.51E-11 | chr:4:120263688 |
| 4 rs201495048 | 120333126 A | 0.3484 | 9.10E-11 | chr:4:120263688 |
| 4 rs28690296  | 120685139 C | 0.2494 | 9.27E-11 | chr:4:120263688 |
| 4 rs4834802   | 120614296 C | 0.408  | 9.29E-11 | chr:4:120263688 |
| 4 rs146743180 | 120497433 T | 2.572  | 9.59E-11 | chr:4:120263688 |
| 4 rs80052400  | 120498134 C | 2.572  | 9.59E-11 | chr:4:120263688 |
| 4 rs28578366  | 120536905 T | 0.35   | 9.77E-11 | chr:4:120263688 |
| 4 rs10023652  | 120662947 C | 0.4122 | 1.02E-10 | chr:4:120263688 |
| 4 rs36173322  | 120496491 T | 2.566  | 1.15E-10 | chr:4:120263688 |
| 4 rs2389903   | 120646281 G | 0.4199 | 1.25E-10 | chr:4:120263688 |
| 4 rs78716734  | 120642117 G | 0.4168 | 1.36E-10 | chr:4:120263688 |
| 4 rs59516282  | 120502016 A | 2.543  | 1.40E-10 | chr:4:120263688 |
| 4 rs202019903 | 120344304 C | 0.3175 | 1.56E-10 | chr:4:120263688 |
| 4 rs10518337  | 120574874 C | 2.853  | 1.58E-10 | chr:4:120263688 |
| 4 rs4094      | 120619421 G | 0.4211 | 1.63E-10 | chr:4:120263688 |
| 4 rs57597755  | 120640021 C | 0.4184 | 1.66E-10 | chr:4:120263688 |
| 4 rs7683474   | 120612853 C | 0.4115 | 1.83E-10 | chr:4:120263688 |
| 4 rs55876624  | 120629576 C | 0.4209 | 1.84E-10 | chr:4:120263688 |
| 4 rs35138262  | 120361169 G | 2.546  | 2.28E-10 | chr:4:120263688 |
| 4 rs569705290 | 120333521 C | 0.3638 | 2.43E-10 | chr:4:120263688 |
| 4 rs13122709  | 120555356 A | 0.3682 | 3.26E-10 | chr:4:120263688 |
| 4 rs12512646  | 120585733 A | 0.4145 | 3.58E-10 | chr:4:120263688 |
| 4 rs11737400  | 120279335 G | 0.4404 | 4.45E-10 | chr:4:120263688 |
| 4 rs13149954  | 120279041 A | 0.4404 | 4.45E-10 | chr:4:120263688 |
| 4 rs13150541  | 120279284 A | 0.4404 | 4.45E-10 | chr:4:120263688 |
| 4 rs28580295  | 120278873 T | 0.4404 | 4.45E-10 | chr:4:120263688 |
| 4 rs62320738  | 120279420 A | 0.4404 | 4.45E-10 | chr:4:120263688 |
| 4 rs62320739  | 120279459 C | 0.4404 | 4.45E-10 | chr:4:120263688 |
| 4 rs71627791  | 120278765 G | 0.4404 | 4.45E-10 | chr:4:120263688 |
| 4 rs28450134  | 120376318 C | 0.3883 | 4.49E-10 | chr:4:120263688 |
| 4 rs12499377  | 120587215 A | 0.4006 | 4.66E-10 | chr:4:120263688 |
| 4 rs4434234   | 120258230 T | 3.153  | 5.09E-10 | chr:4:120263688 |
| 4 rs11734863  | 120673259 G | 2.401  | 5.15E-10 | chr:4:120263688 |
| 4 rs62320740  | 120279486 A | 0.4417 | 5.25E-10 | chr:4:120263688 |
| 4 rs10029669  | 120619666 T | 0.4276 | 5.64E-10 | chr:4:120263688 |
| 4 rs9994488   | 120587781 T | 0.4229 | 5.72E-10 | chr:4:120263688 |
| 4 rs12504773  | 120562149 C | 0.3749 | 6.36E-10 | chr:4:120263688 |



|               |             |        |          |                 |
|---------------|-------------|--------|----------|-----------------|
| 4 rs7694773   | 120652993 A | 0.4111 | 6.70E-10 | chr:4:120263688 |
| 4 rs10014947  | 120280077 A | 0.4464 | 7.29E-10 | chr:4:120263688 |
| 4 rs2389875   | 120557014 T | 2.63   | 8.00E-10 | chr:4:120263688 |
| 4 rs558588080 | 120348891 A | 0.2044 | 8.44E-10 | chr:4:120263688 |
| 4 rs138401876 | 120370298 A | 0.3951 | 9.84E-10 | chr:4:120263688 |
| 4 rs7680914   | 120563053 G | 0.3805 | 1.07E-09 | chr:4:120263688 |
| 4 rs150043944 | 120278513 T | 3.11   | 1.09E-09 | chr:4:120263688 |
| 4 rs151273612 | 120288457 T | 3.11   | 1.09E-09 | chr:4:120263688 |
| 4 rs56082510  | 120288041 T | 3.11   | 1.09E-09 | chr:4:120263688 |
| 4 rs57842733  | 120285718 T | 3.11   | 1.09E-09 | chr:4:120263688 |
| 4 rs78716570  | 120281377 A | 3.11   | 1.09E-09 | chr:4:120263688 |
| 4 rs9994354   | 120263158 C | 3.11   | 1.09E-09 | chr:4:120263688 |
| 4 rs10026625  | 120280136 C | 0.4545 | 1.15E-09 | chr:4:120263688 |
| 4 rs28866816  | 120553935 T | 0.1823 | 1.41E-09 | chr:4:120263688 |
| 4 rs4833613   | 120150156 A | 0.4434 | 1.42E-09 | chr:4:120263688 |
| 4 rs1799883   | 120241902 T | 3.077  | 1.49E-09 | chr:4:120263688 |
| 4 rs11722660  | 120643106 C | 0.4259 | 1.54E-09 | chr:4:120263688 |
| 4 rs28651206  | 120316172 T | 0.1814 | 1.74E-09 | chr:4:120263688 |
| 4 rs4513553   | 120298549 G | 3.051  | 1.97E-09 | chr:4:120263688 |
| 4 rs4613552   | 120296250 A | 3.051  | 1.97E-09 | chr:4:120263688 |
| 4 rs57516093  | 120299780 G | 3.051  | 1.97E-09 | chr:4:120263688 |
| 4 rs74942216  | 120295084 G | 3.051  | 1.97E-09 | chr:4:120263688 |
| 4 rs368648502 | 120331079 G | 0.4226 | 2.03E-09 | chr:4:120263688 |
| 4 rs4476582   | 120313014 C | 3.507  | 2.25E-09 | chr:4:120263688 |
| 4 rs4833624   | 120585497 T | 0.43   | 2.32E-09 | chr:4:120263688 |
| 4 rs3775841   | 120425777 C | 0.4213 | 2.38E-09 | chr:4:120263688 |
| 4 rs1825061   | 120388902 T | 0.4143 | 2.50E-09 | chr:4:120263688 |
| 4 rs28877102  | 120555266 T | 0.1939 | 2.60E-09 | chr:4:120263688 |
| 4 rs4637383   | 120305966 A | 3.021  | 2.61E-09 | chr:4:120263688 |
| 4 rs12331776  | 120617412 A | 0.4447 | 2.67E-09 | chr:4:120263688 |
| 4 rs10155235  | 120544391 G | 0.1873 | 2.77E-09 | chr:4:120263688 |
| 4 rs60308574  | 120526037 C | 0.1873 | 2.77E-09 | chr:4:120263688 |
| 4 rs6816375   | 120297670 T | 3.414  | 2.92E-09 | chr:4:120263688 |
| 4 rs62321169  | 120591368 T | 2.322  | 2.93E-09 | chr:4:120263688 |
| 4 rs9994651   | 120587803 A | 0.4409 | 2.96E-09 | chr:4:120263688 |
| 4 rs374110121 | 120254786 A | 0.1977 | 2.97E-09 | chr:4:120263688 |
| 4 rs11946739  | 120266472 T | 4.08   | 3.09E-09 | chr:4:120263688 |
| 4 rs186992684 | 120336473 T | 0.4665 | 3.24E-09 | chr:4:120263688 |
| 4 rs2389874   | 120554991 A | 0.4496 | 3.35E-09 | chr:4:120263688 |
| 4 rs12646466  | 120268321 G | 4.107  | 3.44E-09 | chr:4:120263688 |
| 4 rs11935130  | 120241725 A | 4.12   | 3.49E-09 | chr:4:120263688 |
| 4 rs574704366 | 120246403 G | 4.12   | 3.49E-09 | chr:4:120263688 |
| 4 rs17295253  | 120613018 A | 0.4532 | 3.50E-09 | chr:4:120263688 |

|               |             |        |          |                 |
|---------------|-------------|--------|----------|-----------------|
| 4 rs11726524  | 120643124 C | 0.4418 | 3.89E-09 | chr:4:120263688 |
| 4 rs150332522 | 120361870 G | 0.2257 | 4.18E-09 | chr:4:120263688 |
| 4 rs78624933  | 120338651 C | 0.3925 | 4.87E-09 | chr:4:120263688 |
| 4 rs2389870   | 120522038 C | 0.3886 | 6.32E-09 | chr:4:120263688 |
| 4 rs6821717   | 120599661 C | 2.263  | 6.64E-09 | chr:4:120263688 |
| 4 rs6857105   | 120222298 G | 0.455  | 6.87E-09 | chr:4:120263688 |
| 4 rs11722624  | 120673096 T | 2.251  | 7.13E-09 | chr:4:120263688 |
| 4 rs9997209   | 120683244 G | 2.262  | 7.40E-09 | chr:4:120263688 |
| 4 rs6840053   | 120292233 A | 3.995  | 7.59E-09 | chr:4:120263688 |
| 4 rs62328426  | 120247732 C | 4.007  | 7.75E-09 | chr:4:120263688 |
| 4 rs115200920 | 120314057 A | 0.2363 | 8.49E-09 | chr:4:120263688 |
| 4 rs190330001 | 120386251 C | 0.2363 | 8.49E-09 | chr:4:120263688 |
| 4 rs548685104 | 120303483 C | 0.2363 | 8.49E-09 | chr:4:120263688 |
| 4 rs2252621   | 120675026 C | 2.382  | 9.03E-09 | chr:4:120263688 |
| 4 rs4001284   | 120334957 A | 1.963  | 9.38E-09 | chr:4:120263688 |
| 4 rs4440203   | 120265438 G | 3.479  | 9.89E-09 | chr:4:120263688 |
| 4 rs180772254 | 120257545 C | 0.2188 | 1.00E-08 | chr:4:120263688 |
| 4 rs10006850  | 120212521 G | 2.616  | 1.02E-08 | chr:4:120263688 |
| 4 rs11944880  | 120159334 T | 0.4478 | 1.06E-08 | chr:4:120263688 |
| 4 rs7675857   | 120680581 C | 2.239  | 1.11E-08 | chr:4:120263688 |
| 4 rs4001176   | 120500705 G | 0.4481 | 1.17E-08 | chr:4:120263688 |
| 4 rs11937425  | 120235999 C | 2.441  | 1.18E-08 | chr:4:120263688 |
| 4 rs6822909   | 120691218 T | 2.503  | 1.29E-08 | chr:4:120263688 |
| 4 rs7681373   | 120207076 G | 2.59   | 1.29E-08 | chr:4:120263688 |
| 4 rs142970247 | 120499656 C | 2.234  | 1.46E-08 | chr:4:120263688 |
| 4 rs59319494  | 120696060 A | 2.523  | 1.56E-08 | chr:4:120263688 |
| 4 rs7693769   | 120658676 C | 0.4642 | 1.70E-08 | chr:4:120263688 |
| 4 rs11725321  | 120611912 G | 0.4356 | 1.77E-08 | chr:4:120263688 |
| 4 rs6534149   | 120559292 G | 2.191  | 1.78E-08 | chr:4:120263688 |
| 4 rs10029750  | 120172543 G | 0.4488 | 1.86E-08 | chr:4:120263688 |
| 4 rs4834765   | 120168233 C | 2.525  | 2.08E-08 | chr:4:120263688 |
| 4 rs7356185   | 120167111 T | 2.525  | 2.08E-08 | chr:4:120263688 |
| 4 rs10005548  | 120298406 C | 0.1718 | 2.11E-08 | chr:4:120263688 |
| 4 rs10021584  | 120310390 G | 0.1718 | 2.11E-08 | chr:4:120263688 |
| 4 rs28590285  | 120314988 A | 0.1718 | 2.11E-08 | chr:4:120263688 |
| 4 rs28622207  | 120312520 A | 0.1718 | 2.11E-08 | chr:4:120263688 |
| 4 rs28805329  | 120305330 C | 0.1718 | 2.11E-08 | chr:4:120263688 |
| 4 rs28819763  | 120306716 C | 0.1718 | 2.11E-08 | chr:4:120263688 |
| 4 rs28847696  | 120307385 G | 0.1718 | 2.11E-08 | chr:4:120263688 |
| 4 rs28876736  | 120301564 T | 0.1718 | 2.11E-08 | chr:4:120263688 |
| 4 rs536614865 | 120305383 A | 0.1718 | 2.11E-08 | chr:4:120263688 |
| 4 rs72918555  | 120312875 A | 0.1718 | 2.11E-08 | chr:4:120263688 |
| 4 rs10000726  | 120210764 G | 2.523  | 2.30E-08 | chr:4:120263688 |

|               |             |        |          |                 |
|---------------|-------------|--------|----------|-----------------|
| 4 rs10010174  | 120206572 A | 2.523  | 2.30E-08 | chr:4:120263688 |
| 4 rs80162044  | 120229263 T | 0.2488 | 2.41E-08 | chr:4:120263688 |
| 4 rs77857888  | 120667614 A | 0.4041 | 2.42E-08 | chr:4:120263688 |
| 4 rs190040520 | 120269282 T | 0.2496 | 2.43E-08 | chr:4:120263688 |
| 4 rs2127822   | 120430787 G | 0.2775 | 2.46E-08 | chr:4:120263688 |
| 4 rs75475204  | 120442748 A | 0.2775 | 2.46E-08 | chr:4:120263688 |
| 4 rs146990217 | 120258389 C | 0.2499 | 2.49E-08 | chr:4:120263688 |
| 4 rs7694483   | 120405929 T | 2.199  | 2.52E-08 | chr:4:120263688 |
| 4 rs13139045  | 120168588 C | 0.4553 | 2.70E-08 | chr:4:120263688 |
| 4 rs10010696  | 120164303 C | 0.4547 | 2.97E-08 | chr:4:120263688 |
| 4 rs10022262  | 120175152 G | 0.4547 | 2.97E-08 | chr:4:120263688 |
| 4 rs10213342  | 120175237 G | 0.4547 | 2.97E-08 | chr:4:120263688 |
| 4 rs11098496  | 120167466 G | 0.4547 | 2.97E-08 | chr:4:120263688 |
| 4 rs11729897  | 120174453 T | 0.4547 | 2.97E-08 | chr:4:120263688 |
| 4 rs11734519  | 120171071 G | 0.4547 | 2.97E-08 | chr:4:120263688 |
| 4 rs12501610  | 120175763 T | 0.4547 | 2.97E-08 | chr:4:120263688 |
| 4 rs1397608   | 120161744 G | 0.4547 | 2.97E-08 | chr:4:120263688 |
| 4 rs1511015   | 120170473 C | 0.4547 | 2.97E-08 | chr:4:120263688 |
| 4 rs34630083  | 120174569 G | 0.4547 | 2.97E-08 | chr:4:120263688 |
| 4 rs35197422  | 120169314 G | 0.4547 | 2.97E-08 | chr:4:120263688 |
| 4 rs7684942   | 120162201 T | 0.4547 | 2.97E-08 | chr:4:120263688 |
| 4 rs7685268   | 120162188 A | 0.4547 | 2.97E-08 | chr:4:120263688 |
| 4 rs59867181  | 120556467 T | 2.151  | 2.99E-08 | chr:4:120263688 |
| 4 rs7699252   | 120659198 G | 0.4713 | 3.14E-08 | chr:4:120263688 |
| 4 rs2714985   | 120664142 G | 2.172  | 3.36E-08 | chr:4:120263688 |
| 4 rs5008452   | 120621752 T | 0.4648 | 3.43E-08 | chr:4:120263688 |
| 4 rs11737671  | 120686198 T | 0.447  | 3.57E-08 | chr:4:120263688 |
| 4 rs56324051  | 120633203 A | 0.269  | 3.60E-08 | chr:4:120263688 |
| 4 rs72680938  | 120629974 C | 0.269  | 3.60E-08 | chr:4:120263688 |
| 4 rs35271032  | 120156659 T | 0.454  | 3.61E-08 | chr:4:120263688 |
| 4 rs115559320 | 120277729 C | 0.257  | 3.64E-08 | chr:4:120263688 |
| 4 rs146281946 | 120277665 G | 0.257  | 3.64E-08 | chr:4:120263688 |
| 4 rs17050351  | 120233152 G | 0.257  | 3.64E-08 | chr:4:120263688 |
| 4 rs74628006  | 120238963 G | 0.257  | 3.64E-08 | chr:4:120263688 |
| 4 rs13435802  | 120177960 T | 0.4574 | 3.73E-08 | chr:4:120263688 |
| 4 rs12506395  | 120185094 T | 0.4576 | 3.82E-08 | chr:4:120263688 |
| 4 rs28374891  | 120183550 A | 0.4576 | 3.82E-08 | chr:4:120263688 |
| 4 rs878375    | 120237574 C | 0.4806 | 3.83E-08 | chr:4:120263688 |
| 4 rs953966    | 120171342 G | 2.459  | 3.88E-08 | chr:4:120263688 |
| 4 rs34616304  | 120169435 T | 0.4566 | 3.90E-08 | chr:4:120263688 |
| 4 rs114798996 | 120690303 G | 0.2508 | 4.05E-08 | chr:4:120263688 |
| 4 rs34209241  | 120634499 C | 0.4079 | 4.12E-08 | chr:4:120263688 |
| 4 rs4834804   | 120633428 T | 0.4079 | 4.12E-08 | chr:4:120263688 |

|               |             |        |          |                 |
|---------------|-------------|--------|----------|-----------------|
| 4 rs2389879   | 120557684 A | 2.128  | 4.18E-08 | chr:4:120263688 |
| 4 rs10857065  | 120183959 G | 2.457  | 4.29E-08 | chr:4:120263688 |
| 4 rs10000230  | 120261439 C | 0.1782 | 4.36E-08 | chr:4:120263688 |
| 4 rs10006040  | 120294970 G | 0.1782 | 4.36E-08 | chr:4:120263688 |
| 4 rs10010547  | 120261226 G | 0.1782 | 4.36E-08 | chr:4:120263688 |
| 4 rs10012406  | 120296884 G | 0.1782 | 4.36E-08 | chr:4:120263688 |
| 4 rs10022551  | 120300655 T | 0.1782 | 4.36E-08 | chr:4:120263688 |
| 4 rs10028634  | 120320939 A | 0.1782 | 4.36E-08 | chr:4:120263688 |
| 4 rs11098518  | 120319718 C | 0.1782 | 4.36E-08 | chr:4:120263688 |
| 4 rs11098519  | 120321396 G | 0.1782 | 4.36E-08 | chr:4:120263688 |
| 4 rs11098520  | 120321601 A | 0.1782 | 4.36E-08 | chr:4:120263688 |
| 4 rs28399227  | 120316205 A | 0.1782 | 4.36E-08 | chr:4:120263688 |
| 4 rs28619175  | 120273102 A | 0.1782 | 4.36E-08 | chr:4:120263688 |
| 4 rs55905129  | 120318838 T | 0.1782 | 4.36E-08 | chr:4:120263688 |
| 4 rs57469640  | 120291308 T | 0.1782 | 4.36E-08 | chr:4:120263688 |
| 4 rs58691470  | 120272539 C | 0.1782 | 4.36E-08 | chr:4:120263688 |
| 4 rs59116083  | 120317260 C | 0.1782 | 4.36E-08 | chr:4:120263688 |
| 4 rs61015090  | 120229944 T | 0.1782 | 4.36E-08 | chr:4:120263688 |
| 4 rs72914446  | 120236185 T | 0.1782 | 4.36E-08 | chr:4:120263688 |
| 4 rs72914498  | 120250420 G | 0.1782 | 4.36E-08 | chr:4:120263688 |
| 4 rs142536044 | 120344540 A | 0.2056 | 4.55E-08 | chr:4:120263688 |
| 4 rs114698504 | 120283063 A | 0.2566 | 4.81E-08 | chr:4:120263688 |
| 4 rs116283501 | 120281326 A | 0.2566 | 4.81E-08 | chr:4:120263688 |
| 4 rs116545339 | 120251911 A | 0.2566 | 4.81E-08 | chr:4:120263688 |
| 4 rs145397100 | 120297459 G | 0.2566 | 4.81E-08 | chr:4:120263688 |
| 4 rs1511024   | 120240181 T | 0.2566 | 4.81E-08 | chr:4:120263688 |
| 4 rs17050397  | 120226765 C | 0.2566 | 4.81E-08 | chr:4:120263688 |
| 4 rs78026991  | 120249930 T | 0.2566 | 4.81E-08 | chr:4:120263688 |
| 4 rs186438419 | 120268957 A | 0.2568 | 4.83E-08 | chr:4:120263688 |
| 4 rs74878216  | 120425940 C | 0.3225 | 4.84E-08 | chr:4:120263688 |
| 4 rs71610284  | 120329583 C | 0.2679 | 4.98E-08 | chr:4:120263688 |
| 4 rs146272386 | 120329743 A | 0.172  | 5.20E-08 | chr:4:120263688 |
| 4 rs188978315 | 120329666 A | 0.172  | 5.20E-08 | chr:4:120263688 |
| 4 rs28470408  | 120555668 T | 0.172  | 5.20E-08 | chr:4:120263688 |
| 4 rs6842973   | 120694059 A | 2.056  | 5.25E-08 | chr:4:120263688 |
| 4 rs184550151 | 120362915 A | 0.1743 | 5.61E-08 | chr:4:120263688 |
| 4 rs55685100  | 120641568 C | 0.4817 | 5.72E-08 | chr:4:120263688 |
| 4 rs1551      | 120158500 G | 0.4613 | 5.72E-08 | chr:4:120263688 |
| 4 rs111741197 | 120222451 G | 0.1947 | 5.78E-08 | chr:4:120263688 |
| 4 rs9307475   | 120368556 G | 2.105  | 6.17E-08 | chr:4:120263688 |
| 4 rs2714965   | 120676814 T | 2.416  | 6.30E-08 | chr:4:120263688 |
| 4 rs11931312  | 120159023 C | 0.4645 | 6.33E-08 | chr:4:120263688 |
| 4 rs13114751  | 120156617 A | 0.4645 | 6.33E-08 | chr:4:120263688 |

|               |             |        |          |                 |
|---------------|-------------|--------|----------|-----------------|
| 4 rs35916640  | 120155852 C | 0.4645 | 6.33E-08 | chr:4:120263688 |
| 4 rs4145951   | 120155817 G | 0.4645 | 6.33E-08 | chr:4:120263688 |
| 4 rs56386062  | 120155135 C | 0.4645 | 6.33E-08 | chr:4:120263688 |
| 4 rs6815725   | 120158410 A | 0.4645 | 6.33E-08 | chr:4:120263688 |
| 4 rs2583602   | 120679347 A | 2.277  | 6.58E-08 | chr:4:120263688 |
| 4 rs113380886 | 120386537 G | 0.1905 | 7.36E-08 | chr:4:120263688 |
| 4 rs79319059  | 120275733 T | 0.1827 | 7.48E-08 | chr:4:120263688 |
| 4 rs10023107  | 120328669 T | 0.1827 | 7.56E-08 | chr:4:120263688 |
| 4 rs184941991 | 120327437 T | 0.1827 | 7.56E-08 | chr:4:120263688 |
| 4 rs28552853  | 120329126 C | 0.1827 | 7.56E-08 | chr:4:120263688 |
| 4 rs66792078  | 120112924 C | 2.195  | 7.77E-08 | chr:4:120263688 |
| 4 rs138958717 | 120634176 C | 0.2799 | 7.84E-08 | chr:4:120263688 |
| 4 rs28510336  | 120262453 A | 0.1835 | 7.89E-08 | chr:4:120263688 |
| 4 rs2256834   | 120663939 T | 2.125  | 8.00E-08 | chr:4:120263688 |
| 4 rs11098515  | 120317844 G | 5.061  | 8.47E-08 | chr:4:120263688 |
| 4 rs2389957   | 120695322 C | 2.141  | 8.96E-08 | chr:4:120263688 |
| 4 rs4311295   | 120695280 A | 2.141  | 8.96E-08 | chr:4:120263688 |
| 4 rs2389958   | 120695256 C | 2.141  | 8.99E-08 | chr:4:120263688 |
| 4 rs2892892   | 120697553 G | 2.019  | 9.33E-08 | chr:4:120263688 |
| 4 rs539494480 | 120688288 A | 0.2678 | 9.65E-08 | chr:4:120263688 |
| 4 rs11732719  | 120611865 A | 0.4438 | 9.87E-08 | chr:4:120263688 |
| 4 rs145764064 | 120373542 G | 0.2666 | 1.03E-07 | chr:4:120263688 |
| 4 rs184130735 | 120380121 C | 0.2666 | 1.03E-07 | chr:4:120263688 |
| 4 rs4447844   | 120696623 A | 2.014  | 1.07E-07 | chr:4:120263688 |
| 4 rs6534134   | 120309946 A | 4.989  | 1.09E-07 | chr:4:120263688 |
| 4 rs13129661  | 120152909 G | 0.4702 | 1.10E-07 | chr:4:120263688 |
| 4 rs1962195   | 120575866 G | 0.4994 | 1.14E-07 | chr:4:120263688 |
| 4 rs62321166  | 120577103 A | 0.4994 | 1.14E-07 | chr:4:120263688 |
| 4 rs9991735   | 120572128 T | 0.4994 | 1.14E-07 | chr:4:120263688 |
| 4 rs925387    | 120111190 G | 2.164  | 1.19E-07 | chr:4:120263688 |
| 4 rs116517149 | 120366951 A | 0.2758 | 1.19E-07 | chr:4:120263688 |
| 4 rs540083319 | 120327712 T | 0.2208 | 1.21E-07 | chr:4:120263688 |
| 4 rs7655035   | 120617004 T | 0.4827 | 1.25E-07 | chr:4:120263688 |
| 4 rs6534150   | 120685502 A | 2.218  | 1.26E-07 | chr:4:120263688 |
| 4 rs539522533 | 120329584 A | 0.1951 | 1.29E-07 | chr:4:120263688 |
| 4 rs184933717 | 120362885 G | 0.218  | 1.34E-07 | chr:4:120263688 |
| 4 rs140053614 | 120380141 A | 0.2161 | 1.37E-07 | chr:4:120263688 |
| 4 rs150995791 | 120380540 C | 0.2161 | 1.37E-07 | chr:4:120263688 |
| 4 rs13103043  | 120665371 C | 0.4871 | 1.41E-07 | chr:4:120263688 |
| 4 rs10020420  | 120287431 C | 3.745  | 1.42E-07 | chr:4:120263688 |
| 4 rs7681328   | 120274496 T | 3.745  | 1.42E-07 | chr:4:120263688 |
| 4 rs72680927  | 120627177 C | 0.275  | 1.44E-07 | chr:4:120263688 |
| 4 rs72680937  | 120629959 T | 0.275  | 1.44E-07 | chr:4:120263688 |

|               |             |        |          |                 |
|---------------|-------------|--------|----------|-----------------|
| 4 rs72680944  | 120634198 C | 0.275  | 1.44E-07 | chr:4:120263688 |
| 4 rs2252625   | 120674899 T | 2.195  | 1.51E-07 | chr:4:120263688 |
| 4 rs72924312  | 120584019 A | 0.4215 | 1.52E-07 | chr:4:120263688 |
| 4 rs10213498  | 120421607 G | 0.2241 | 1.54E-07 | chr:4:120263688 |
| 4 rs115128297 | 120369947 A | 0.2757 | 1.60E-07 | chr:4:120263688 |
| 4 rs149721973 | 120386905 G | 0.2757 | 1.60E-07 | chr:4:120263688 |
| 4 rs377586222 | 120328165 G | 0.2757 | 1.60E-07 | chr:4:120263688 |
| 4 rs17049978  | 120112049 G | 2.144  | 1.73E-07 | chr:4:120263688 |
| 4 rs4834776   | 120306578 G | 4.875  | 1.74E-07 | chr:4:120263688 |
| 4 rs749526    | 120663649 T | 0.4775 | 1.75E-07 | chr:4:120263688 |
| 4 rs11731571  | 120221185 G | 1.953  | 1.82E-07 | chr:4:120263688 |
| 4 rs192625463 | 120359735 A | 0.2133 | 1.82E-07 | chr:4:120263688 |
| 4 rs541659266 | 120354371 C | 0.2133 | 1.82E-07 | chr:4:120263688 |
| 4 rs10032392  | 120515966 A | 0.2135 | 1.86E-07 | chr:4:120263688 |
| 4 rs28736368  | 120425076 G | 0.1815 | 1.89E-07 | chr:4:120263688 |
| 4 rs79549478  | 120632887 C | 0.4301 | 2.05E-07 | chr:4:120263688 |
| 4 rs7665086   | 120394985 G | 5.036  | 2.21E-07 | chr:4:120263688 |
| 4 rs72680928  | 120627183 T | 0.284  | 2.24E-07 | chr:4:120263688 |
| 4 rs72680929  | 120627288 C | 0.284  | 2.24E-07 | chr:4:120263688 |
| 4 rs147812813 | 120325093 T | 0.2274 | 2.26E-07 | chr:4:120263688 |
| 4 rs28610991  | 120569861 C | 0.5084 | 2.45E-07 | chr:4:120263688 |
| 4 rs186394904 | 120327983 A | 0.2856 | 2.53E-07 | chr:4:120263688 |
| 4 rs567467134 | 120359164 C | 0.2281 | 2.59E-07 | chr:4:120263688 |
| 4 rs17358860  | 120518064 A | 0.4347 | 2.64E-07 | chr:4:120263688 |
| 4 rs114276127 | 120484174 C | 0.2963 | 2.66E-07 | chr:4:120263688 |
| 4 rs149494214 | 120506268 C | 0.2963 | 2.66E-07 | chr:4:120263688 |
| 4 rs373952860 | 120499913 T | 0.2963 | 2.66E-07 | chr:4:120263688 |
| 4 rs28615474  | 120420932 A | 0.2299 | 2.66E-07 | chr:4:120263688 |
| 4 rs28864814  | 120404759 C | 0.2299 | 2.66E-07 | chr:4:120263688 |
| 4 rs28870820  | 120407023 G | 0.2299 | 2.66E-07 | chr:4:120263688 |
| 4 rs57295141  | 120403128 C | 0.2299 | 2.66E-07 | chr:4:120263688 |
| 4 rs72920607  | 120396853 T | 0.2299 | 2.66E-07 | chr:4:120263688 |
| 4 rs72920619  | 120409668 G | 0.2299 | 2.66E-07 | chr:4:120263688 |
| 4 rs12331661  | 120509981 T | 0.2232 | 2.67E-07 | chr:4:120263688 |
| 4 rs182295274 | 120364972 C | 0.2258 | 2.69E-07 | chr:4:120263688 |
| 4 rs185524670 | 120365146 T | 0.2258 | 2.69E-07 | chr:4:120263688 |
| 4 rs185987967 | 120361331 T | 0.2258 | 2.69E-07 | chr:4:120263688 |
| 4 rs186090164 | 120365072 A | 0.2258 | 2.69E-07 | chr:4:120263688 |
| 4 rs189764750 | 120361087 G | 0.2258 | 2.69E-07 | chr:4:120263688 |
| 4 rs28535588  | 120362194 C | 0.2258 | 2.69E-07 | chr:4:120263688 |
| 4 rs555275051 | 120365212 T | 0.2258 | 2.69E-07 | chr:4:120263688 |
| 4 rs56841438  | 120365478 T | 0.2258 | 2.69E-07 | chr:4:120263688 |
| 4 rs9993996   | 120363669 A | 0.2258 | 2.69E-07 | chr:4:120263688 |

|               |             |        |          |                 |
|---------------|-------------|--------|----------|-----------------|
| 4 rs564630005 | 120351897 T | 0.2379 | 2.71E-07 | chr:4:120263688 |
| 4 rs3905917   | 120268435 A | 3.647  | 2.72E-07 | chr:4:120263688 |
| 4 rs4834773   | 120277395 G | 3.647  | 2.72E-07 | chr:4:120263688 |
| 4 rs199515440 | 120372424 T | 0.3952 | 2.75E-07 | chr:4:120263688 |
| 4 rs10003953  | 120438731 C | 0.2239 | 2.81E-07 | chr:4:120263688 |
| 4 rs10010096  | 120440411 C | 0.2239 | 2.81E-07 | chr:4:120263688 |
| 4 rs10010097  | 120440413 C | 0.2239 | 2.81E-07 | chr:4:120263688 |
| 4 rs10015714  | 120509190 A | 0.2239 | 2.81E-07 | chr:4:120263688 |
| 4 rs10015999  | 120393442 G | 0.2239 | 2.81E-07 | chr:4:120263688 |
| 4 rs10021318  | 120507479 C | 0.2239 | 2.81E-07 | chr:4:120263688 |
| 4 rs10023384  | 120471256 G | 0.2239 | 2.81E-07 | chr:4:120263688 |
| 4 rs10027735  | 120490305 G | 0.2239 | 2.81E-07 | chr:4:120263688 |
| 4 rs10031328  | 120431656 T | 0.2239 | 2.81E-07 | chr:4:120263688 |
| 4 rs10031493  | 120366627 A | 0.2239 | 2.81E-07 | chr:4:120263688 |
| 4 rs10471013  | 120420247 G | 0.2239 | 2.81E-07 | chr:4:120263688 |
| 4 rs138837790 | 120496366 G | 0.2239 | 2.81E-07 | chr:4:120263688 |
| 4 rs141077493 | 120366930 T | 0.2239 | 2.81E-07 | chr:4:120263688 |
| 4 rs181233686 | 120374932 A | 0.2239 | 2.81E-07 | chr:4:120263688 |
| 4 rs183139683 | 120375913 A | 0.2239 | 2.81E-07 | chr:4:120263688 |
| 4 rs184784499 | 120371685 A | 0.2239 | 2.81E-07 | chr:4:120263688 |
| 4 rs187861314 | 120388040 A | 0.2239 | 2.81E-07 | chr:4:120263688 |
| 4 rs188395833 | 120338340 G | 0.2239 | 2.81E-07 | chr:4:120263688 |
| 4 rs189259285 | 120329870 T | 0.2239 | 2.81E-07 | chr:4:120263688 |
| 4 rs189415167 | 120389621 T | 0.2239 | 2.81E-07 | chr:4:120263688 |
| 4 rs28380652  | 120430952 C | 0.2239 | 2.81E-07 | chr:4:120263688 |
| 4 rs28419430  | 120547822 T | 0.2239 | 2.81E-07 | chr:4:120263688 |
| 4 rs28436005  | 120390576 A | 0.2239 | 2.81E-07 | chr:4:120263688 |
| 4 rs28461667  | 120435203 G | 0.2239 | 2.81E-07 | chr:4:120263688 |
| 4 rs28469881  | 120418490 C | 0.2239 | 2.81E-07 | chr:4:120263688 |
| 4 rs28576329  | 120456845 G | 0.2239 | 2.81E-07 | chr:4:120263688 |
| 4 rs28634062  | 120432555 G | 0.2239 | 2.81E-07 | chr:4:120263688 |
| 4 rs28639769  | 120388271 C | 0.2239 | 2.81E-07 | chr:4:120263688 |
| 4 rs28654414  | 120391595 A | 0.2239 | 2.81E-07 | chr:4:120263688 |
| 4 rs28661222  | 120377892 T | 0.2239 | 2.81E-07 | chr:4:120263688 |
| 4 rs28669906  | 120412590 A | 0.2239 | 2.81E-07 | chr:4:120263688 |
| 4 rs529382998 | 120338515 G | 0.2239 | 2.81E-07 | chr:4:120263688 |
| 4 rs537132872 | 120333467 T | 0.2239 | 2.81E-07 | chr:4:120263688 |
| 4 rs540253240 | 120338387 T | 0.2239 | 2.81E-07 | chr:4:120263688 |
| 4 rs548399597 | 120336898 T | 0.2239 | 2.81E-07 | chr:4:120263688 |
| 4 rs548630365 | 120341300 A | 0.2239 | 2.81E-07 | chr:4:120263688 |
| 4 rs556748979 | 120369383 T | 0.2239 | 2.81E-07 | chr:4:120263688 |
| 4 rs56191916  | 120407746 G | 0.2239 | 2.81E-07 | chr:4:120263688 |
| 4 rs564413275 | 120351192 C | 0.2239 | 2.81E-07 | chr:4:120263688 |

|               |             |        |          |                 |
|---------------|-------------|--------|----------|-----------------|
| 4 rs566386400 | 120379510 A | 0.2239 | 2.81E-07 | chr:4:120263688 |
| 4 rs57516186  | 120373425 T | 0.2239 | 2.81E-07 | chr:4:120263688 |
| 4 rs61655565  | 120497863 A | 0.2239 | 2.81E-07 | chr:4:120263688 |
| 4 rs61729464  | 120432277 G | 0.2239 | 2.81E-07 | chr:4:120263688 |
| 4 rs72918590  | 120375759 A | 0.2239 | 2.81E-07 | chr:4:120263688 |
| 4 rs72918597  | 120387237 C | 0.2239 | 2.81E-07 | chr:4:120263688 |
| 4 rs80029731  | 120386563 G | 0.2239 | 2.81E-07 | chr:4:120263688 |
| 4 rs9307478   | 120460662 T | 0.2239 | 2.81E-07 | chr:4:120263688 |
| 4 rs9884290   | 120458361 C | 0.2239 | 2.81E-07 | chr:4:120263688 |
| 4 rs9884542   | 120392244 G | 0.2239 | 2.81E-07 | chr:4:120263688 |
| 4 rs9996803   | 120452328 G | 0.2239 | 2.81E-07 | chr:4:120263688 |
| 4 rs9997423   | 120519207 C | 0.2239 | 2.81E-07 | chr:4:120263688 |
| 4 rs9998244   | 120500686 T | 0.2239 | 2.81E-07 | chr:4:120263688 |
| 4 rs28405434  | 120426371 G | 0.2165 | 2.84E-07 | chr:4:120263688 |
| 4 rs13101722  | 120555975 A | 1.99   | 3.17E-07 | chr:4:120263688 |
| 4 rs11731675  | 120212514 C | 0.5134 | 3.35E-07 | chr:4:120263688 |
| 4 rs1022146   | 120236103 G | 0.509  | 3.68E-07 | chr:4:120263688 |
| 4 rs2389747   | 120236102 T | 0.509  | 3.68E-07 | chr:4:120263688 |
| 4 rs12108288  | 120483022 G | 0.2951 | 3.84E-07 | chr:4:120263688 |
| 4 rs17050700  | 120489535 C | 0.2951 | 3.84E-07 | chr:4:120263688 |
| 4 rs80327561  | 120487478 A | 0.2951 | 3.84E-07 | chr:4:120263688 |
| 4 rs28639494  | 120512193 T | 0.2428 | 4.01E-07 | chr:4:120263688 |
| 4 rs10034691  | 120328726 C | 0.2342 | 4.19E-07 | chr:4:120263688 |
| 4 rs115479057 | 120324932 C | 0.2342 | 4.19E-07 | chr:4:120263688 |
| 4 rs188378849 | 120325022 A | 0.2342 | 4.19E-07 | chr:4:120263688 |
| 4 rs28619539  | 120328217 G | 0.2342 | 4.19E-07 | chr:4:120263688 |
| 4 rs28665114  | 120328177 C | 0.2342 | 4.19E-07 | chr:4:120263688 |
| 4 rs28709577  | 120324121 C | 0.2342 | 4.19E-07 | chr:4:120263688 |
| 4 rs61696977  | 120326010 T | 0.2342 | 4.19E-07 | chr:4:120263688 |
| 4 rs28450144  | 120418685 G | 0.2628 | 4.52E-07 | chr:4:120263688 |
| 4 rs6827780   | 120406415 G | 4.584  | 4.80E-07 | chr:4:120263688 |
| 4 rs6845402   | 120421158 G | 4.584  | 4.80E-07 | chr:4:120263688 |
| 4 rs78364210  | 120421396 A | 4.584  | 4.80E-07 | chr:4:120263688 |
| 4 rs187011726 | 120379474 T | 4.819  | 4.96E-07 | chr:4:120263688 |
| 4 rs6534136   | 120406771 T | 4.819  | 4.96E-07 | chr:4:120263688 |
| 4 rs6848530   | 120381808 G | 4.819  | 4.96E-07 | chr:4:120263688 |
| 4 rs72680912  | 120625246 C | 0.301  | 5.00E-07 | chr:4:120263688 |
| 4 rs572028672 | 120348896 T | 0.2305 | 5.07E-07 | chr:4:120263688 |
| 4 rs10029882  | 120466070 A | 0.2305 | 5.08E-07 | chr:4:120263688 |
| 4 rs545490844 | 120330912 T | 0.2316 | 5.48E-07 | chr:4:120263688 |
| 4 rs200974711 | 120468265 G | 0.5248 | 5.61E-07 | chr:4:120263688 |
| 4 rs111687566 | 120393977 A | 4.274  | 6.19E-07 | chr:4:120263688 |
| 4 rs141773781 | 120192032 G | 0.1815 | 6.32E-07 | chr:4:120263688 |



|               |             |        |          |                 |
|---------------|-------------|--------|----------|-----------------|
| 4 rs72680956  | 120641924 G | 0.3891 | 6.32E-07 | chr:4:120263688 |
| 4 rs9995234   | 120321827 G | 0.4174 | 6.51E-07 | chr:4:120263688 |
| 4 rs112880930 | 120327377 T | 0.2454 | 6.59E-07 | chr:4:120263688 |
| 4 rs752650    | 120632387 C | 0.4781 | 6.94E-07 | chr:4:120263688 |
| 4 rs12649773  | 120305262 A | 2.539  | 7.11E-07 | chr:4:120263688 |
| 4 rs142534042 | 120308936 C | 2.539  | 7.11E-07 | chr:4:120263688 |
| 4 rs4833617   | 120305176 A | 2.539  | 7.11E-07 | chr:4:120263688 |
| 4 rs55827028  | 120297059 A | 2.539  | 7.11E-07 | chr:4:120263688 |
| 4 rs62322286  | 120307242 G | 2.539  | 7.11E-07 | chr:4:120263688 |
| 4 rs56199127  | 120641341 C | 0.3926 | 7.54E-07 | chr:4:120263688 |
| 4 rs189022116 | 120375119 C | 0.2452 | 7.71E-07 | chr:4:120263688 |
| 4 rs11731926  | 120653012 G | 0.3773 | 7.86E-07 | chr:4:120263688 |
| 4 rs13122890  | 120601731 T | 1.995  | 7.89E-07 | chr:4:120263688 |
| 4 rs62322289  | 120314122 T | 2.502  | 8.07E-07 | chr:4:120263688 |
| 4 rs60899768  | 120320771 A | 2.869  | 8.68E-07 | chr:4:120263688 |
| 4 rs28723049  | 120620507 A | 0.5128 | 8.88E-07 | chr:4:120263688 |
| 4 rs62322280  | 120301120 A | 2.498  | 9.21E-07 | chr:4:120263688 |
| 4 rs11724055  | 120470035 A | 0.3483 | 9.35E-07 | chr:4:120263688 |
| 4 rs9684358   | 120622560 C | 0.5122 | 9.44E-07 | chr:4:120263688 |
| 4 rs28869613  | 120620588 A | 0.5132 | 9.87E-07 | chr:4:120263688 |
| 4 rs11098511  | 120306879 A | 0.4226 | 9.98E-07 | chr:4:120263688 |
| 4 rs113918125 | 120581639 G | 0.4727 | 1.03E-06 | chr:4:120263688 |
| 4 rs56905341  | 120576818 C | 2.712  | 1.19E-06 | chr:4:120263688 |
| 4 rs7684853   | 120581633 G | 0.5367 | 1.19E-06 | chr:4:120263688 |
| 4 rs10019674  | 120443489 C | 0.4232 | 1.22E-06 | chr:4:120263688 |
| 4 rs3822192   | 120445720 C | 0.4232 | 1.22E-06 | chr:4:120263688 |
| 4 rs7665125   | 120402079 G | 1.945  | 1.23E-06 | chr:4:120263688 |
| 4 rs13128673  | 120297304 A | 0.3271 | 1.26E-06 | chr:4:120263688 |
| 4 rs555486587 | 120351800 A | 0.2599 | 1.30E-06 | chr:4:120263688 |
| 4 rs559693063 | 120341279 C | 0.2608 | 1.30E-06 | chr:4:120263688 |
| 4 rs11732173  | 120327824 T | 0.3367 | 1.32E-06 | chr:4:120263688 |
| 4 rs114513627 | 120535428 T | 0.3125 | 1.34E-06 | chr:4:120263688 |
| 4 rs116420214 | 120557873 G | 0.3125 | 1.34E-06 | chr:4:120263688 |
| 4 rs75483765  | 120546586 T | 0.3125 | 1.34E-06 | chr:4:120263688 |
| 4 rs79141760  | 120555974 G | 0.3125 | 1.34E-06 | chr:4:120263688 |
| 4 rs2389871   | 120550639 A | 3.81   | 1.35E-06 | chr:4:120263688 |
| 4 rs6854072   | 120549435 T | 3.81   | 1.35E-06 | chr:4:120263688 |
| 4 rs9307480   | 120533707 T | 3.81   | 1.35E-06 | chr:4:120263688 |
| 4 rs10518329  | 120401835 A | 1.949  | 1.35E-06 | chr:4:120263688 |
| 4 rs874425    | 120664362 C | 0.518  | 1.39E-06 | chr:4:120263688 |
| 4 rs3775850   | 120451018 A | 0.3464 | 1.43E-06 | chr:4:120263688 |
| 4 rs2714966   | 120677425 A | 2.066  | 1.45E-06 | chr:4:120263688 |
| 4 rs2389891   | 120576177 G | 0.5408 | 1.51E-06 | chr:4:120263688 |

|               |             |        |          |                 |
|---------------|-------------|--------|----------|-----------------|
| 4 rs577516977 | 120264366 G | 0.1691 | 1.55E-06 | chr:4:120263688 |
| 4 rs13126596  | 120140729 G | 0.4114 | 1.56E-06 | chr:4:120263688 |
| 4 rs68128210  | 120137819 G | 0.4114 | 1.56E-06 | chr:4:120263688 |
| 4 rs2389872   | 120554040 C | 3.593  | 1.64E-06 | chr:4:120263688 |
| 4 rs28654836  | 120599090 T | 0.4794 | 1.65E-06 | chr:4:120263688 |
| 4 rs11732621  | 120212883 G | 0.5371 | 1.68E-06 | chr:4:120263688 |
| 4 rs2389883   | 120567635 C | 0.542  | 1.70E-06 | chr:4:120263688 |
| 4 rs2389892   | 120577583 C | 0.542  | 1.70E-06 | chr:4:120263688 |
| 4 rs7670803   | 120579321 C | 0.542  | 1.70E-06 | chr:4:120263688 |
| 4 rs7671191   | 120579548 C | 0.542  | 1.70E-06 | chr:4:120263688 |
| 4 rs17005515  | 120649610 C | 0.3191 | 1.72E-06 | chr:4:120263688 |
| 4 rs2036862   | 120135531 G | 2.107  | 1.76E-06 | chr:4:120263688 |
| 4 rs67110248  | 120139522 C | 2.107  | 1.76E-06 | chr:4:120263688 |
| 4 rs72673792  | 120141616 A | 2.107  | 1.76E-06 | chr:4:120263688 |
| 4 rs7678043   | 120698652 T | 1.989  | 1.78E-06 | chr:4:120263688 |
| 4 rs10013852  | 120533838 C | 3.626  | 1.79E-06 | chr:4:120263688 |
| 4 rs10021469  | 120540908 C | 3.626  | 1.79E-06 | chr:4:120263688 |
| 4 rs12504983  | 120532626 G | 3.626  | 1.79E-06 | chr:4:120263688 |
| 4 rs2389876   | 120557179 C | 3.626  | 1.79E-06 | chr:4:120263688 |
| 4 rs2389877   | 120557187 G | 3.626  | 1.79E-06 | chr:4:120263688 |
| 4 rs2389878   | 120557268 G | 3.626  | 1.79E-06 | chr:4:120263688 |
| 4 rs2953293   | 120547986 T | 3.626  | 1.79E-06 | chr:4:120263688 |
| 4 rs2953294   | 120547987 T | 3.626  | 1.79E-06 | chr:4:120263688 |
| 4 rs3109370   | 120546307 A | 3.626  | 1.79E-06 | chr:4:120263688 |
| 4 rs4287988   | 120543998 A | 3.626  | 1.79E-06 | chr:4:120263688 |
| 4 rs4833621   | 120544884 T | 3.626  | 1.79E-06 | chr:4:120263688 |
| 4 rs6534145   | 120537384 A | 3.626  | 1.79E-06 | chr:4:120263688 |
| 4 rs6534148   | 120544218 T | 3.626  | 1.79E-06 | chr:4:120263688 |
| 4 rs6831062   | 120544784 C | 3.626  | 1.79E-06 | chr:4:120263688 |
| 4 rs17051339  | 120573222 T | 0.3713 | 1.81E-06 | chr:4:120263688 |
| 4 rs10434034  | 120621676 T | 0.3089 | 1.95E-06 | chr:4:120263688 |
| 4 rs114569900 | 120624053 T | 0.3089 | 1.95E-06 | chr:4:120263688 |
| 4 rs115807288 | 120624153 A | 0.3089 | 1.95E-06 | chr:4:120263688 |
| 4 rs141894037 | 120620858 C | 0.3089 | 1.95E-06 | chr:4:120263688 |
| 4 rs72678599  | 120619817 C | 0.3089 | 1.95E-06 | chr:4:120263688 |
| 4 rs72678601  | 120619868 T | 0.3089 | 1.95E-06 | chr:4:120263688 |
| 4 rs72678602  | 120619989 A | 0.3089 | 1.95E-06 | chr:4:120263688 |
| 4 rs72680904  | 120622192 A | 0.3089 | 1.95E-06 | chr:4:120263688 |
| 4 rs72680906  | 120622479 A | 0.3089 | 1.95E-06 | chr:4:120263688 |
| 4 rs72680907  | 120622607 C | 0.3089 | 1.95E-06 | chr:4:120263688 |
| 4 rs72680908  | 120623268 G | 0.3089 | 1.95E-06 | chr:4:120263688 |
| 4 rs72680911  | 120625215 A | 0.3089 | 1.95E-06 | chr:4:120263688 |
| 4 rs72680914  | 120625473 C | 0.3089 | 1.95E-06 | chr:4:120263688 |

|               |             |        |          |                 |
|---------------|-------------|--------|----------|-----------------|
| 4 rs72680917  | 120625878 A | 0.3089 | 1.95E-06 | chr:4:120263688 |
| 4 rs72680918  | 120626166 C | 0.3089 | 1.95E-06 | chr:4:120263688 |
| 4 rs7659472   | 120620910 A | 0.3089 | 1.95E-06 | chr:4:120263688 |
| 4 rs7682153   | 120621278 G | 0.3089 | 1.95E-06 | chr:4:120263688 |
| 4 rs7682717   | 120621417 A | 0.3089 | 1.95E-06 | chr:4:120263688 |
| 4 rs10016938  | 120606183 C | 0.4819 | 1.97E-06 | chr:4:120263688 |
| 4 rs73842698  | 120602428 T | 0.4819 | 1.97E-06 | chr:4:120263688 |
| 4 rs17005698  | 120414009 A | 3.486  | 2.02E-06 | chr:4:120263688 |
| 4 rs77408616  | 120423274 G | 3.486  | 2.02E-06 | chr:4:120263688 |
| 4 rs2928991   | 120476677 C | 3.724  | 2.03E-06 | chr:4:120263688 |
| 4 rs73842685  | 120584839 A | 0.4655 | 2.07E-06 | chr:4:120263688 |
| 4 rs12233881  | 120318169 G | 2.397  | 2.13E-06 | chr:4:120263688 |
| 4 rs372426471 | 120344927 G | 0.3303 | 2.20E-06 | chr:4:120263688 |
| 4 rs4834787   | 120521526 T | 3.705  | 2.20E-06 | chr:4:120263688 |
| 4 rs2953290   | 120549138 A | 3.585  | 2.22E-06 | chr:4:120263688 |
| 4 rs11098497  | 120187068 T | 0.5407 | 2.25E-06 | chr:4:120263688 |
| 4 rs7659403   | 120207254 A | 0.5407 | 2.25E-06 | chr:4:120263688 |
| 4 rs62322295  | 120338592 C | 0.3452 | 2.29E-06 | chr:4:120263688 |
| 4 rs9996940   | 120364542 C | 1.907  | 2.33E-06 | chr:4:120263688 |
| 4 rs28633994  | 120276037 G | 0.4032 | 2.38E-06 | chr:4:120263688 |
| 4 rs13103899  | 120438302 G | 0.3538 | 2.41E-06 | chr:4:120263688 |
| 4 rs28562576  | 120760193 G | 0.5112 | 2.46E-06 | chr:4:120263688 |
| 4 rs67073020  | 120152557 T | 0.5069 | 2.54E-06 | chr:4:120263688 |
| 4 rs35264119  | 120422738 A | 0.3367 | 2.56E-06 | chr:4:120263688 |
| 4 rs62319578  | 120408421 G | 0.3367 | 2.56E-06 | chr:4:120263688 |
| 4 rs2256645   | 120458932 C | 3.798  | 2.61E-06 | chr:4:120263688 |
| 4 rs2622497   | 120463856 A | 3.798  | 2.61E-06 | chr:4:120263688 |
| 4 rs7694813   | 120445321 T | 3.798  | 2.61E-06 | chr:4:120263688 |
| 4 rs13119104  | 120523140 C | 3.667  | 2.65E-06 | chr:4:120263688 |
| 4 rs13125819  | 120523904 A | 3.667  | 2.65E-06 | chr:4:120263688 |
| 4 rs7439678   | 120526862 G | 3.667  | 2.65E-06 | chr:4:120263688 |
| 4 rs80125345  | 120447079 C | 3.667  | 2.65E-06 | chr:4:120263688 |
| 4 rs56838032  | 120329894 G | 1.815  | 2.66E-06 | chr:4:120263688 |
| 4 rs9996382   | 120151012 A | 0.4685 | 2.73E-06 | chr:4:120263688 |
| 4 rs34878806  | 120235904 A | 2.281  | 2.76E-06 | chr:4:120263688 |
| 4 rs116497468 | 120574824 C | 0.3206 | 2.77E-06 | chr:4:120263688 |
| 4 rs76490003  | 120568947 C | 0.3206 | 2.77E-06 | chr:4:120263688 |
| 4 rs372864183 | 120305645 G | 0.345  | 2.79E-06 | chr:4:120263688 |
| 4 rs72924305  | 120581152 C | 0.4162 | 2.81E-06 | chr:4:120263688 |
| 4 rs71614444  | 120379436 G | 0.4052 | 2.89E-06 | chr:4:120263688 |
| 4 rs907736    | 120289943 T | 0.5504 | 2.92E-06 | chr:4:120263688 |
| 4 rs12512171  | 120662564 T | 0.5362 | 2.96E-06 | chr:4:120263688 |
| 4 rs62319649  | 120522579 C | 2.038  | 2.97E-06 | chr:4:120263688 |

|               |             |        |          |                 |
|---------------|-------------|--------|----------|-----------------|
| 4 rs13140150  | 120473191 C | 0.3733 | 3.08E-06 | chr:4:120263688 |
| 4 rs139839559 | 120640908 G | 0.4085 | 3.09E-06 | chr:4:120263688 |
| 4 rs72680953  | 120640435 G | 0.4085 | 3.09E-06 | chr:4:120263688 |
| 4 rs72680959  | 120643960 C | 0.4085 | 3.09E-06 | chr:4:120263688 |
| 4 rs12331938  | 120679356 T | 0.29   | 3.11E-06 | chr:4:120263688 |
| 4 rs10031702  | 120625231 A | 0.2713 | 3.16E-06 | chr:4:120263688 |
| 4 rs73842702  | 120611013 C | 0.4904 | 3.26E-06 | chr:4:120263688 |
| 4 rs13126170  | 120323188 A | 0.3467 | 3.28E-06 | chr:4:120263688 |
| 4 rs62319570  | 120370058 T | 0.3467 | 3.28E-06 | chr:4:120263688 |
| 4 rs62319574  | 120392364 T | 0.3467 | 3.28E-06 | chr:4:120263688 |
| 4 rs28403131  | 120285806 T | 0.408  | 3.35E-06 | chr:4:120263688 |
| 4 rs138790146 | 120626770 T | 0.3173 | 3.48E-06 | chr:4:120263688 |
| 4 rs72680920  | 120626314 T | 0.3173 | 3.48E-06 | chr:4:120263688 |
| 4 rs72680921  | 120626325 G | 0.3173 | 3.48E-06 | chr:4:120263688 |
| 4 rs72680923  | 120626383 C | 0.3173 | 3.48E-06 | chr:4:120263688 |
| 4 rs2389884   | 120530449 C | 3.492  | 3.53E-06 | chr:4:120263688 |
| 4 rs4146266   | 120524990 C | 3.492  | 3.53E-06 | chr:4:120263688 |
| 4 rs143726128 | 120348512 A | 1.7    | 3.54E-06 | chr:4:120263688 |
| 4 rs28504181  | 120622530 G | 0.4842 | 3.54E-06 | chr:4:120263688 |
| 4 rs10434033  | 120582336 T | 0.4949 | 3.56E-06 | chr:4:120263688 |
| 4 rs62328420  | 120238189 C | 2.543  | 3.59E-06 | chr:4:120263688 |
| 4 rs2953291   | 120550144 A | 3.391  | 3.62E-06 | chr:4:120263688 |
| 4 rs201916895 | 120199348 C | 0.3176 | 3.74E-06 | chr:4:120263688 |
| 4 rs372896807 | 120566079 A | 0.5554 | 3.87E-06 | chr:4:120263688 |
| 4 rs375123133 | 120566082 A | 0.5554 | 3.87E-06 | chr:4:120263688 |
| 4 rs56381021  | 120566077 C | 0.5554 | 3.87E-06 | chr:4:120263688 |
| 4 rs7695292   | 120558446 G | 0.4111 | 3.90E-06 | chr:4:120263688 |
| 4 rs2036859   | 120249184 T | 2.542  | 3.96E-06 | chr:4:120263688 |
| 4 rs988146    | 120399505 G | 0.347  | 3.97E-06 | chr:4:120263688 |
| 4 rs56122576  | 120129336 G | 0.426  | 3.99E-06 | chr:4:120263688 |
| 4 rs200898556 | 120500426 T | 0.407  | 4.01E-06 | chr:4:120263688 |
| 4 rs3733524   | 120423729 C | 0.407  | 4.01E-06 | chr:4:120263688 |
| 4 rs9799694   | 120357017 T | 0.3388 | 4.02E-06 | chr:4:120263688 |
| 4 rs147174618 | 120247897 G | 0.2098 | 4.10E-06 | chr:4:120263688 |
| 4 rs554405164 | 120330730 A | 4.439  | 4.39E-06 | chr:4:120263688 |
| 4 rs13133969  | 120495479 C | 0.3641 | 4.49E-06 | chr:4:120263688 |
| 4 rs62319609  | 120491640 G | 0.3641 | 4.49E-06 | chr:4:120263688 |
| 4 rs4834786   | 120521360 G | 3.423  | 4.56E-06 | chr:4:120263688 |
| 4 rs17595769  | 120275103 T | 2.498  | 4.97E-06 | chr:4:120263688 |
| 4 rs59225699  | 120582821 T | 0.5023 | 4.98E-06 | chr:4:120263688 |
| 4 rs72920685  | 120506082 C | 0.158  | 5.27E-06 | chr:4:120263688 |
| 4 rs62320719  | 120274210 G | 2.551  | 5.32E-06 | chr:4:120263688 |
| 4 rs28478532  | 120622231 C | 0.4907 | 5.34E-06 | chr:4:120263688 |

|               |             |        |          |                 |
|---------------|-------------|--------|----------|-----------------|
| 4 rs9995045   | 120321636 T | 0.4256 | 5.38E-06 | chr:4:120263688 |
| 4 rs951570    | 120150467 T | 0.4858 | 5.42E-06 | chr:4:120263688 |
| 4 rs115001838 | 120686401 A | 0.2528 | 5.42E-06 | chr:4:120263688 |
| 4 rs115269783 | 120683979 G | 0.2528 | 5.42E-06 | chr:4:120263688 |
| 4 rs74577464  | 120689419 C | 0.2528 | 5.42E-06 | chr:4:120263688 |
| 4 rs75584233  | 120687002 C | 0.2528 | 5.42E-06 | chr:4:120263688 |
| 4 rs12641176  | 120688248 A | 0.5027 | 5.42E-06 | chr:4:120263688 |
| 4 rs10006304  | 120124305 G | 0.4318 | 5.45E-06 | chr:4:120263688 |
| 4 rs13138782  | 120124474 A | 0.4318 | 5.45E-06 | chr:4:120263688 |
| 4 rs28428953  | 120334911 T | 4.364  | 5.56E-06 | chr:4:120263688 |
| 4 rs541516897 | 120622296 C | 0.2949 | 5.67E-06 | chr:4:120263688 |
| 4 rs1011054   | 120202387 A | 0.4143 | 5.68E-06 | chr:4:120263688 |
| 4 rs79834186  | 120607253 G | 0.4975 | 5.97E-06 | chr:4:120263688 |
| 4 rs114974538 | 120640794 G | 0.2889 | 6.05E-06 | chr:4:120263688 |
| 4 rs6843509   | 120220196 A | 0.5599 | 6.12E-06 | chr:4:120263688 |
| 4 rs116343718 | 120277281 G | 2.474  | 6.19E-06 | chr:4:120263688 |
| 4 rs11727068  | 120277809 A | 2.474  | 6.19E-06 | chr:4:120263688 |
| 4 rs11728178  | 120272969 T | 2.474  | 6.19E-06 | chr:4:120263688 |
| 4 rs11735260  | 120277811 G | 2.474  | 6.19E-06 | chr:4:120263688 |
| 4 rs13122306  | 120275801 T | 2.474  | 6.19E-06 | chr:4:120263688 |
| 4 rs13139711  | 120265747 A | 2.474  | 6.19E-06 | chr:4:120263688 |
| 4 rs17517470  | 120276316 G | 2.474  | 6.19E-06 | chr:4:120263688 |
| 4 rs17595713  | 120261571 G | 2.474  | 6.19E-06 | chr:4:120263688 |
| 4 rs17595790  | 120276220 C | 2.474  | 6.19E-06 | chr:4:120263688 |
| 4 rs3817230   | 120275499 C | 2.474  | 6.19E-06 | chr:4:120263688 |
| 4 rs3817242   | 120274926 G | 2.474  | 6.19E-06 | chr:4:120263688 |
| 4 rs56818816  | 120275663 G | 2.474  | 6.19E-06 | chr:4:120263688 |
| 4 rs62320717  | 120272087 G | 2.474  | 6.19E-06 | chr:4:120263688 |
| 4 rs62320718  | 120273269 A | 2.474  | 6.19E-06 | chr:4:120263688 |
| 4 rs62320720  | 120274349 C | 2.474  | 6.19E-06 | chr:4:120263688 |
| 4 rs62320721  | 120274612 G | 2.474  | 6.19E-06 | chr:4:120263688 |
| 4 rs62320722  | 120274661 T | 2.474  | 6.19E-06 | chr:4:120263688 |
| 4 rs62320723  | 120274816 G | 2.474  | 6.19E-06 | chr:4:120263688 |
| 4 rs62320724  | 120274878 C | 2.474  | 6.19E-06 | chr:4:120263688 |
| 4 rs62320725  | 120275268 G | 2.474  | 6.19E-06 | chr:4:120263688 |
| 4 rs62320726  | 120275344 T | 2.474  | 6.19E-06 | chr:4:120263688 |
| 4 rs62320731  | 120276840 T | 2.474  | 6.19E-06 | chr:4:120263688 |
| 4 rs62320732  | 120276920 G | 2.474  | 6.19E-06 | chr:4:120263688 |
| 4 rs62320733  | 120277115 G | 2.474  | 6.19E-06 | chr:4:120263688 |
| 4 rs62320735  | 120277500 G | 2.474  | 6.19E-06 | chr:4:120263688 |
| 4 rs71610263  | 120261416 A | 2.474  | 6.19E-06 | chr:4:120263688 |
| 4 rs72918504  | 120275130 G | 2.474  | 6.19E-06 | chr:4:120263688 |
| 4 rs75186513  | 120275052 T | 2.474  | 6.19E-06 | chr:4:120263688 |

|               |             |        |          |                 |
|---------------|-------------|--------|----------|-----------------|
| 4 rs78504630  | 120275010 C | 2.474  | 6.19E-06 | chr:4:120263688 |
| 4 rs7436509   | 120120569 C | 1.992  | 6.32E-06 | chr:4:120263688 |
| 4 rs113988766 | 120632631 G | 0.4281 | 6.54E-06 | chr:4:120263688 |
| 4 rs3749591   | 120214030 G | 0.4224 | 6.73E-06 | chr:4:120263688 |
| 4 rs6856110   | 120759381 C | 0.529  | 6.88E-06 | chr:4:120263688 |
| 4 rs10002072  | 120626513 C | 0.2726 | 6.91E-06 | chr:4:120263688 |
| 4 rs4834775   | 120301232 A | 1.968  | 6.91E-06 | chr:4:120263688 |
| 4 rs10013032  | 120149419 C | 0.4892 | 7.13E-06 | chr:4:120263688 |
| 4 rs4833612   | 120147596 A | 0.4892 | 7.13E-06 | chr:4:120263688 |
| 4 rs115717214 | 120674999 C | 0.2708 | 7.36E-06 | chr:4:120263688 |
| 4 rs115320472 | 120015556 G | 0.3087 | 7.40E-06 | chr:4:120263688 |
| 4 rs78380139  | 120015922 C | 0.3087 | 7.40E-06 | chr:4:120263688 |
| 4 rs1052633   | 120215314 G | 0.5626 | 7.40E-06 | chr:4:120263688 |
| 4 rs2175383   | 120215836 A | 0.5626 | 7.40E-06 | chr:4:120263688 |
| 4 rs62320716  | 120271922 A | 2.47   | 7.54E-06 | chr:4:120263688 |
| 4 rs10022508  | 120115228 G | 0.4388 | 7.56E-06 | chr:4:120263688 |
| 4 rs28768140  | 120623578 C | 0.4951 | 7.80E-06 | chr:4:120263688 |
| 4 rs11727963  | 120278100 A | 2.424  | 8.09E-06 | chr:4:120263688 |
| 4 rs72680925  | 120626727 G | 0.3371 | 8.10E-06 | chr:4:120263688 |
| 4 rs10001829  | 120665293 C | 0.5518 | 8.47E-06 | chr:4:120263688 |
| 4 rs11098498  | 120187119 C | 0.5631 | 8.49E-06 | chr:4:120263688 |
| 4 rs191937876 | 120383692 C | 4.263  | 8.78E-06 | chr:4:120263688 |
| 4 rs11098517  | 120318039 C | 4.241  | 8.82E-06 | chr:4:120263688 |
| 4 rs116371598 | 120354769 G | 4.241  | 8.82E-06 | chr:4:120263688 |
| 4 rs11932826  | 120382707 C | 4.241  | 8.82E-06 | chr:4:120263688 |
| 4 rs140706157 | 120323724 G | 4.241  | 8.82E-06 | chr:4:120263688 |
| 4 rs182185985 | 120367355 T | 4.241  | 8.82E-06 | chr:4:120263688 |
| 4 rs188943095 | 120364004 C | 4.241  | 8.82E-06 | chr:4:120263688 |
| 4 rs4092729   | 120358556 C | 4.241  | 8.82E-06 | chr:4:120263688 |
| 4 rs61269662  | 120324317 A | 4.241  | 8.82E-06 | chr:4:120263688 |
| 4 rs75192334  | 120424699 C | 4.241  | 8.82E-06 | chr:4:120263688 |
| 4 rs7697294   | 120306313 T | 4.241  | 8.82E-06 | chr:4:120263688 |
| 4 rs9759494   | 120368186 A | 4.241  | 8.82E-06 | chr:4:120263688 |
| 4 rs9759724   | 120368997 A | 4.241  | 8.82E-06 | chr:4:120263688 |
| 4 rs6817738   | 120417022 T | 4.023  | 8.87E-06 | chr:4:120263688 |
| 4 rs561829266 | 120338531 T | 0.1751 | 8.91E-06 | chr:4:120263688 |
| 4 rs13107334  | 120424580 G | 0.3567 | 9.12E-06 | chr:4:120263688 |
| 4 rs547446471 | 120381152 C | 0.1623 | 9.18E-06 | chr:4:120263688 |
| 4 rs113643839 | 120561944 G | 0.3604 | 9.39E-06 | chr:4:120263688 |
| 4 rs2252708   | 120612158 A | 0.5326 | 9.50E-06 | chr:4:120263688 |
| 4 rs6832670   | 120118792 G | 0.4372 | 9.56E-06 | chr:4:120263688 |
| 4 rs6851169   | 120117510 C | 0.4372 | 9.56E-06 | chr:4:120263688 |
| 4 rs57391877  | 120587108 C | 0.4986 | 1.01E-05 | chr:4:120263688 |

|               |             |         |          |                 |
|---------------|-------------|---------|----------|-----------------|
| 4 rs13119815  | 120662321 A | 0.5444  | 1.01E-05 | chr:4:120263688 |
| 4 rs111663206 | 120122939 C | 1.949   | 1.04E-05 | chr:4:120263688 |
| 4 rs17049975  | 120115461 C | 1.949   | 1.04E-05 | chr:4:120263688 |
| 4 rs17051345  | 120576634 G | 0.4138  | 1.04E-05 | chr:4:120263688 |
| 4 rs73842682  | 120567388 G | 0.4138  | 1.04E-05 | chr:4:120263688 |
| 4 rs73842683  | 120573143 A | 0.4138  | 1.04E-05 | chr:4:120263688 |
| 4 rs4348074   | 120302119 G | 4.192   | 1.04E-05 | chr:4:120263688 |
| 4 rs71614451  | 120404460 T | 0.3571  | 1.04E-05 | chr:4:120263688 |
| 4 rs72680934  | 120628956 A | 0.4228  | 1.05E-05 | chr:4:120263688 |
| 4 rs17292047  | 120465851 A | 0.3187  | 1.09E-05 | chr:4:120263688 |
| 4 rs72680941  | 120631878 C | 0.4368  | 1.09E-05 | chr:4:120263688 |
| 4 rs12502503  | 120116255 T | 0.4439  | 1.30E-05 | chr:4:120263688 |
| 4 rs12509054  | 120115075 C | 0.4439  | 1.30E-05 | chr:4:120263688 |
| 4 rs6822498   | 120120183 C | 0.4439  | 1.30E-05 | chr:4:120263688 |
| 4 rs6838674   | 120119376 G | 0.4439  | 1.30E-05 | chr:4:120263688 |
| 4 rs2902921   | 9591436 C   | 13.58   | 3.77E-34 | chr:4:9603240   |
| 4 rs78121242  | 9591433 C   | 13.29   | 1.13E-33 | chr:4:9603240   |
| 4 rs138499118 | 9631591 C   | 0.147   | 7.19E-33 | chr:4:9603240   |
| 4 rs28851772  | 9630974 A   | 0.1496  | 1.15E-32 | chr:4:9603240   |
| 4 rs56787100  | 9631153 T   | 0.1496  | 1.15E-32 | chr:4:9603240   |
| 4 rs10031125  | 9625879 A   | 0.156   | 2.59E-32 | chr:4:9603240   |
| 4 rs10049735  | 9626409 C   | 0.156   | 2.59E-32 | chr:4:9603240   |
| 4 rs28648949  | 9626132 C   | 0.156   | 2.59E-32 | chr:4:9603240   |
| 4 rs10005582  | 9626791 A   | 0.1671  | 2.84E-32 | chr:4:9603240   |
| 4 rs28491253  | 9629512 T   | 0.1556  | 2.95E-32 | chr:4:9603240   |
| 4 rs73082825  | 9627676 A   | 0.1561  | 3.64E-32 | chr:4:9603240   |
| 4 rs115870066 | 9622163 A   | 0.1562  | 4.16E-32 | chr:4:9603240   |
| 4 rs151134492 | 9623039 A   | 0.1561  | 5.37E-32 | chr:4:9603240   |
| 4 rs7692046   | 9620128 G   | 0.1566  | 6.28E-32 | chr:4:9603240   |
| 4 rs114980491 | 9623328 T   | 0.1566  | 6.61E-32 | chr:4:9603240   |
| 4 rs147074482 | 9623653 T   | 0.1566  | 6.61E-32 | chr:4:9603240   |
| 4 rs6856351   | 9590718 T   | 11.56   | 1.02E-30 | chr:4:9603240   |
| 4 rs1842487   | 9597264 T   | 46.27   | 1.19E-30 | chr:4:9603240   |
| 4 rs6448859   | 9596488 T   | 46.27   | 1.19E-30 | chr:4:9603240   |
| 4 rs6837173   | 9590700 T   | 11.21   | 2.04E-30 | chr:4:9603240   |
| 4 rs28784595  | 9646182 C   | 0.04457 | 3.43E-30 | chr:4:9603240   |
| 4 rs9714994   | 9589698 T   | 11.02   | 8.83E-30 | chr:4:9603240   |
| 4 rs6811235   | 9594627 A   | 59.76   | 1.56E-29 | chr:4:9603240   |
| 4 rs2865075   | 9591384 A   | 10.35   | 7.31E-29 | chr:4:9603240   |
| 4 rs10019130  | 9597356 G   | 10.32   | 7.78E-29 | chr:4:9603240   |
| 4 rs13103207  | 9603672 T   | 9.85    | 1.14E-28 | chr:4:9603240   |
| 4 rs1842488   | 9601268 A   | 9.85    | 1.14E-28 | chr:4:9603240   |
| 4 rs2865079   | 9600388 A   | 9.85    | 1.16E-28 | chr:4:9603240   |

|               |           |          |          |               |
|---------------|-----------|----------|----------|---------------|
| 4 rs6855316   | 9596183 G | 9.989    | 1.20E-28 | chr:4:9603240 |
| 4 rs11728108  | 9590027 T | 10.06    | 1.22E-28 | chr:4:9603240 |
| 4 rs10212854  | 9590489 A | 10.07    | 1.27E-28 | chr:4:9603240 |
| 4 rs9714725   | 9589901 C | 8.497    | 9.19E-28 | chr:4:9603240 |
| 4 rs13136903  | 9694522 T | 6.66     | 2.13E-26 | chr:4:9603240 |
| 4 rs7700164   | 9690605 C | 7.86     | 2.20E-26 | chr:4:9603240 |
| 4 rs10017364  | 9692924 T | 7.803    | 3.91E-26 | chr:4:9603240 |
| 4 rs13434918  | 9692356 A | 7.612    | 6.68E-26 | chr:4:9603240 |
| 4 rs6843107   | 9692300 A | 7.612    | 6.68E-26 | chr:4:9603240 |
| 4 rs6843499   | 9692462 A | 7.612    | 6.68E-26 | chr:4:9603240 |
| 4 rs35735545  | 9600181 A | 0.01146  | 3.00E-24 | chr:4:9603240 |
| 4 rs12645445  | 9599283 G | 0.01153  | 3.38E-24 | chr:4:9603240 |
| 4 rs11729986  | 9605023 A | 7.619    | 7.35E-24 | chr:4:9603240 |
| 4 rs111921266 | 9591246 A | 0.1917   | 7.58E-23 | chr:4:9603240 |
| 4 rs34968063  | 9599535 T | 0.009451 | 1.54E-22 | chr:4:9603240 |
| 4 rs28728462  | 9700392 G | 4.969    | 1.88E-22 | chr:4:9603240 |
| 4 rs150602585 | 9621799 G | 0.1693   | 6.55E-22 | chr:4:9603240 |
| 4 rs10020849  | 9702608 T | 0.2198   | 4.08E-21 | chr:4:9603240 |
| 4 rs6852419   | 9711314 G | 4.316    | 1.50E-20 | chr:4:9603240 |
| 4 rs12501341  | 9589915 A | 0.2214   | 1.70E-20 | chr:4:9603240 |
| 4 rs12649073  | 9694490 A | 4.56     | 2.17E-20 | chr:4:9603240 |
| 4 rs6858200   | 9709531 C | 4.3      | 2.25E-20 | chr:4:9603240 |
| 4 rs111613333 | 9592284 A | 0.2109   | 2.27E-20 | chr:4:9603240 |
| 4 rs61485794  | 9592346 G | 0.2109   | 2.27E-20 | chr:4:9603240 |
| 4 rs11723205  | 9718677 G | 4.234    | 2.40E-20 | chr:4:9603240 |
| 4 rs55912423  | 9715435 G | 4.234    | 2.40E-20 | chr:4:9603240 |
| 4 rs6836384   | 9713148 C | 4.234    | 2.40E-20 | chr:4:9603240 |
| 4 rs10939465  | 9702053 C | 4.29     | 2.84E-20 | chr:4:9603240 |
| 4 rs6448856   | 9595797 A | 0.227    | 3.36E-20 | chr:4:9603240 |
| 4 rs6448858   | 9595918 T | 0.227    | 3.36E-20 | chr:4:9603240 |
| 4 rs7672211   | 9597825 A | 0.227    | 3.36E-20 | chr:4:9603240 |
| 4 rs6858393   | 9709577 C | 4.228    | 3.38E-20 | chr:4:9603240 |
| 4 rs73097911  | 9601929 A | 0.2146   | 4.97E-20 | chr:4:9603240 |
| 4 rs74183920  | 9603786 A | 0.2146   | 4.97E-20 | chr:4:9603240 |
| 4 rs3890174   | 9700774 C | 4.399    | 5.24E-20 | chr:4:9603240 |
| 4 rs6820385   | 9606357 G | 0.2315   | 6.60E-20 | chr:4:9603240 |
| 4 rs7683574   | 9719148 C | 4.162    | 6.76E-20 | chr:4:9603240 |
| 4 rs60761027  | 9645910 C | 6.729    | 6.97E-20 | chr:4:9603240 |
| 4 rs9992908   | 9649931 T | 6.729    | 6.97E-20 | chr:4:9603240 |
| 4 rs576487641 | 9712952 C | 4.127    | 9.47E-20 | chr:4:9603240 |
| 4 rs10003639  | 9591535 C | 8.284    | 1.01E-19 | chr:4:9603240 |
| 4 rs6825142   | 9592142 G | 8.282    | 1.01E-19 | chr:4:9603240 |
| 4 rs141950396 | 9589589 G | 8.254    | 1.08E-19 | chr:4:9603240 |



|               |           |        |          |               |
|---------------|-----------|--------|----------|---------------|
| 4 rs12645339  | 9596615 T | 8.227  | 1.17E-19 | chr:4:9603240 |
| 4 rs73805539  | 9591699 C | 0.2196 | 1.47E-19 | chr:4:9603240 |
| 4 rs7664612   | 9595727 A | 0.2316 | 1.62E-19 | chr:4:9603240 |
| 4 rs28872608  | 9600754 T | 8.123  | 1.73E-19 | chr:4:9603240 |
| 4 rs10034929  | 9602625 C | 7.689  | 1.78E-19 | chr:4:9603240 |
| 4 rs9684176   | 9716386 G | 4.658  | 1.91E-19 | chr:4:9603240 |
| 4 rs61267391  | 9600955 G | 0.2185 | 2.02E-19 | chr:4:9603240 |
| 4 rs9291584   | 9588616 T | 8.387  | 2.84E-19 | chr:4:9603240 |
| 4 rs59430272  | 9601484 C | 0.2211 | 2.99E-19 | chr:4:9603240 |
| 4 rs112839156 | 9601686 A | 0.2234 | 3.20E-19 | chr:4:9603240 |
| 4 rs12509677  | 9602724 A | 0.2234 | 3.20E-19 | chr:4:9603240 |
| 4 rs59507413  | 9606018 T | 0.2234 | 3.20E-19 | chr:4:9603240 |
| 4 rs60296945  | 9604068 T | 0.2234 | 3.20E-19 | chr:4:9603240 |
| 4 rs60990443  | 9601319 T | 0.2234 | 3.20E-19 | chr:4:9603240 |
| 4 rs12510176  | 9599593 G | 0.2247 | 4.04E-19 | chr:4:9603240 |
| 4 rs9917965   | 9614520 A | 0.2455 | 4.26E-19 | chr:4:9603240 |
| 4 rs112018355 | 9611157 A | 0.2251 | 5.74E-19 | chr:4:9603240 |
| 4 rs11723945  | 9735299 A | 0.2533 | 7.68E-19 | chr:4:9603240 |
| 4 rs28652624  | 9671614 G | 7.189  | 8.12E-19 | chr:4:9603240 |
| 4 rs113890812 | 9677773 T | 7.183  | 8.39E-19 | chr:4:9603240 |
| 4 rs11944562  | 9674314 A | 7.183  | 8.39E-19 | chr:4:9603240 |
| 4 rs150445004 | 9669197 G | 7.183  | 8.39E-19 | chr:4:9603240 |
| 4 rs36110035  | 9667699 A | 7.183  | 8.39E-19 | chr:4:9603240 |
| 4 rs6819225   | 9668489 T | 7.183  | 8.39E-19 | chr:4:9603240 |
| 4 rs6848322   | 9668369 A | 7.183  | 8.39E-19 | chr:4:9603240 |
| 4 rs10032448  | 9673179 T | 7.164  | 8.64E-19 | chr:4:9603240 |
| 4 rs6819589   | 9670971 A | 7.164  | 8.64E-19 | chr:4:9603240 |
| 4 rs6851901   | 9672668 T | 7.164  | 8.64E-19 | chr:4:9603240 |
| 4 rs55737007  | 9678275 C | 7.014  | 9.01E-19 | chr:4:9603240 |
| 4 rs10007313  | 9611894 G | 7.702  | 1.28E-18 | chr:4:9603240 |
| 4 rs28531949  | 9612273 G | 7.702  | 1.28E-18 | chr:4:9603240 |
| 4 rs139639883 | 9668986 A | 7.07   | 1.39E-18 | chr:4:9603240 |
| 4 rs28773308  | 9681879 A | 6.748  | 1.55E-18 | chr:4:9603240 |
| 4 rs28496830  | 9678778 A | 6.702  | 2.32E-18 | chr:4:9603240 |
| 4 rs148730952 | 9647892 T | 0.245  | 2.52E-18 | chr:4:9603240 |
| 4 rs6831476   | 9708183 T | 4.381  | 3.13E-18 | chr:4:9603240 |
| 4 rs6821653   | 9658781 A | 7.164  | 3.32E-18 | chr:4:9603240 |
| 4 rs11943931  | 9706478 A | 4.386  | 3.36E-18 | chr:4:9603240 |
| 4 rs7671464   | 9689915 A | 6.595  | 3.57E-18 | chr:4:9603240 |
| 4 rs6813074   | 9664848 A | 7.122  | 3.82E-18 | chr:4:9603240 |
| 4 rs28498401  | 9685887 A | 6.303  | 4.48E-18 | chr:4:9603240 |
| 4 rs28630379  | 9684419 A | 6.303  | 4.48E-18 | chr:4:9603240 |
| 4 rs35847996  | 9685530 T | 6.303  | 4.48E-18 | chr:4:9603240 |

|              |           |        |          |               |
|--------------|-----------|--------|----------|---------------|
| 4 rs36119953 | 9685253 G | 6.303  | 4.48E-18 | chr:4:9603240 |
| 4 rs6836851  | 9661477 A | 7.039  | 5.77E-18 | chr:4:9603240 |
| 4 rs28571083 | 9660883 G | 7.015  | 6.17E-18 | chr:4:9603240 |
| 4 rs6834366  | 9658004 A | 7.015  | 6.17E-18 | chr:4:9603240 |
| 4 rs6448961  | 9686837 A | 6.252  | 6.35E-18 | chr:4:9603240 |
| 4 rs1871717  | 9594100 G | 0.2498 | 8.22E-18 | chr:4:9603240 |
| 4 rs1871718  | 9594106 A | 0.2498 | 8.22E-18 | chr:4:9603240 |
| 4 rs11937931 | 9613699 C | 7.106  | 8.80E-18 | chr:4:9603240 |
| 4 rs6835200  | 9658382 T | 5.111  | 9.22E-18 | chr:4:9603240 |
| 4 rs73097914 | 9602324 T | 0.2497 | 9.55E-18 | chr:4:9603240 |
| 4 rs6842974  | 9654882 T | 6.766  | 9.65E-18 | chr:4:9603240 |
| 4 rs11721978 | 9643139 G | 6.609  | 1.07E-17 | chr:4:9603240 |
| 4 rs6830692  | 9589873 T | 0.2342 | 1.09E-17 | chr:4:9603240 |
| 4 rs10939395 | 9595105 T | 0.2514 | 1.10E-17 | chr:4:9603240 |
| 4 rs10939406 | 9603769 T | 0.2514 | 1.10E-17 | chr:4:9603240 |
| 4 rs1809400  | 9599703 T | 0.2514 | 1.10E-17 | chr:4:9603240 |
| 4 rs1809401  | 9599790 T | 0.2514 | 1.10E-17 | chr:4:9603240 |
| 4 rs1842489  | 9601365 C | 0.2514 | 1.10E-17 | chr:4:9603240 |
| 4 rs1871720  | 9594372 A | 0.2514 | 1.10E-17 | chr:4:9603240 |
| 4 rs4404541  | 9600193 G | 0.2514 | 1.10E-17 | chr:4:9603240 |
| 4 rs4974820  | 9604794 G | 0.2514 | 1.10E-17 | chr:4:9603240 |
| 4 rs4974821  | 9602901 A | 0.2514 | 1.10E-17 | chr:4:9603240 |
| 4 rs6814674  | 9594719 T | 0.2514 | 1.10E-17 | chr:4:9603240 |
| 4 rs6815282  | 9595018 T | 0.2514 | 1.10E-17 | chr:4:9603240 |
| 4 rs6855527  | 9596313 C | 0.2514 | 1.10E-17 | chr:4:9603240 |
| 4 rs7672393  | 9597912 A | 0.2514 | 1.10E-17 | chr:4:9603240 |
| 4 rs9993066  | 9602631 T | 0.2514 | 1.10E-17 | chr:4:9603240 |
| 4 rs11727674 | 9719981 C | 3.668  | 1.16E-17 | chr:4:9603240 |
| 4 rs6812634  | 9639831 T | 7.062  | 1.18E-17 | chr:4:9603240 |
| 4 rs55948575 | 9648084 A | 6.898  | 1.21E-17 | chr:4:9603240 |
| 4 rs10032063 | 9650944 A | 6.596  | 1.24E-17 | chr:4:9603240 |
| 4 rs11945043 | 9646794 T | 6.708  | 1.35E-17 | chr:4:9603240 |
| 4 rs4974822  | 9602787 A | 0.2535 | 1.44E-17 | chr:4:9603240 |
| 4 rs4974862  | 9602780 T | 0.2535 | 1.44E-17 | chr:4:9603240 |
| 4 rs13131693 | 9593418 T | 0.2537 | 1.47E-17 | chr:4:9603240 |
| 4 rs28735278 | 9614378 A | 0.2437 | 1.65E-17 | chr:4:9603240 |
| 4 rs6839392  | 9613589 T | 0.2437 | 1.65E-17 | chr:4:9603240 |
| 4 rs11736694 | 9607834 C | 0.2559 | 1.68E-17 | chr:4:9603240 |
| 4 rs13122952 | 9707740 A | 4.249  | 1.72E-17 | chr:4:9603240 |
| 4 rs10005638 | 9653852 A | 6.227  | 1.80E-17 | chr:4:9603240 |
| 4 rs10029398 | 9650482 C | 6.635  | 2.02E-17 | chr:4:9603240 |
| 4 rs10035053 | 9649605 G | 6.635  | 2.02E-17 | chr:4:9603240 |
| 4 rs55935416 | 9648989 T | 6.635  | 2.02E-17 | chr:4:9603240 |

|               |           |        |          |               |
|---------------|-----------|--------|----------|---------------|
| 4 rs9992888   | 9649863 T | 6.635  | 2.02E-17 | chr:4:9603240 |
| 4 rs4974860   | 9604201 T | 0.2609 | 2.04E-17 | chr:4:9603240 |
| 4 rs111802886 | 9643840 T | 6.618  | 2.05E-17 | chr:4:9603240 |
| 4 rs10939411  | 9606906 T | 0.256  | 2.15E-17 | chr:4:9603240 |
| 4 rs10939413  | 9607827 T | 0.256  | 2.15E-17 | chr:4:9603240 |
| 4 rs2004334   | 9609566 A | 0.256  | 2.15E-17 | chr:4:9603240 |
| 4 rs4974857   | 9607133 T | 0.256  | 2.15E-17 | chr:4:9603240 |
| 4 rs6849083   | 9606355 A | 0.256  | 2.15E-17 | chr:4:9603240 |
| 4 rs6855150   | 9606433 T | 0.256  | 2.15E-17 | chr:4:9603240 |
| 4 rs6855313   | 9606475 T | 0.256  | 2.15E-17 | chr:4:9603240 |
| 4 rs6855323   | 9606482 T | 0.256  | 2.15E-17 | chr:4:9603240 |
| 4 rs11737872  | 9608680 C | 0.2512 | 2.15E-17 | chr:4:9603240 |
| 4 rs28680396  | 9646707 A | 6.479  | 2.21E-17 | chr:4:9603240 |
| 4 rs9291586   | 9605658 A | 0.2546 | 2.36E-17 | chr:4:9603240 |
| 4 rs4974855   | 9608931 T | 0.2583 | 3.07E-17 | chr:4:9603240 |
| 4 rs145566624 | 9642951 A | 6.566  | 3.20E-17 | chr:4:9603240 |
| 4 rs10007322  | 9611939 T | 0.2594 | 3.85E-17 | chr:4:9603240 |
| 4 rs28546389  | 9703880 T | 0.2764 | 3.88E-17 | chr:4:9603240 |
| 4 rs6842111   | 9612572 A | 0.2598 | 3.89E-17 | chr:4:9603240 |
| 4 rs6448969   | 9700056 A | 4.176  | 4.65E-17 | chr:4:9603240 |
| 4 rs734628    | 9610085 G | 0.2667 | 6.95E-17 | chr:4:9603240 |
| 4 rs13141772  | 9575916 T | 4.899  | 7.66E-17 | chr:4:9603240 |
| 4 rs61199897  | 9657621 T | 0.2764 | 1.31E-16 | chr:4:9603240 |
| 4 rs4974814   | 9614162 T | 0.2702 | 1.31E-16 | chr:4:9603240 |
| 4 rs73095794  | 9596566 A | 0.2657 | 1.37E-16 | chr:4:9603240 |
| 4 rs61118685  | 9650877 A | 0.2612 | 1.38E-16 | chr:4:9603240 |
| 4 rs12506692  | 9596059 T | 0.2677 | 1.40E-16 | chr:4:9603240 |
| 4 rs6835175   | 9658351 T | 5.113  | 1.88E-16 | chr:4:9603240 |
| 4 rs56934553  | 9594735 A | 0.2699 | 1.94E-16 | chr:4:9603240 |
| 4 rs7691087   | 9595443 T | 0.2699 | 1.94E-16 | chr:4:9603240 |
| 4 rs111288527 | 9651346 G | 0.2645 | 2.10E-16 | chr:4:9603240 |
| 4 rs6831341   | 9592225 T | 0.2616 | 3.35E-16 | chr:4:9603240 |
| 4 rs111656532 | 9632606 G | 2.682  | 3.42E-16 | chr:4:9603240 |
| 4 rs13152842  | 9588960 T | 0.26   | 3.49E-16 | chr:4:9603240 |
| 4 rs58688978  | 9693903 A | 0.2687 | 3.65E-16 | chr:4:9603240 |
| 4 rs73802959  | 9694487 A | 0.2687 | 3.65E-16 | chr:4:9603240 |
| 4 rs57685354  | 9655782 T | 0.265  | 3.71E-16 | chr:4:9603240 |
| 4 rs145014366 | 9588718 C | 0.2716 | 3.93E-16 | chr:4:9603240 |
| 4 rs151311132 | 9646020 C | 0.2677 | 4.43E-16 | chr:4:9603240 |
| 4 rs113133387 | 9642181 T | 0.2809 | 4.65E-16 | chr:4:9603240 |
| 4 rs10939407  | 9604018 G | 0.2623 | 4.79E-16 | chr:4:9603240 |
| 4 rs1967000   | 9592111 G | 0.2623 | 4.79E-16 | chr:4:9603240 |
| 4 rs2086430   | 9598327 C | 0.2623 | 4.79E-16 | chr:4:9603240 |

|               |           |        |          |               |
|---------------|-----------|--------|----------|---------------|
| 4 rs2101074   | 9598414 A | 0.2623 | 4.79E-16 | chr:4:9603240 |
| 4 rs6448855   | 9595781 G | 0.2623 | 4.79E-16 | chr:4:9603240 |
| 4 rs6853345   | 9589192 A | 0.2623 | 4.79E-16 | chr:4:9603240 |
| 4 rs12512543  | 9608445 A | 0.2761 | 4.86E-16 | chr:4:9603240 |
| 4 rs6855818   | 9635008 A | 4.115  | 5.48E-16 | chr:4:9603240 |
| 4 rs149050104 | 9661523 T | 0.2683 | 5.67E-16 | chr:4:9603240 |
| 4 rs35352906  | 9670773 T | 0.2683 | 5.67E-16 | chr:4:9603240 |
| 4 rs4259062   | 9674245 T | 0.2683 | 5.67E-16 | chr:4:9603240 |
| 4 rs4417968   | 9667070 T | 0.2683 | 5.67E-16 | chr:4:9603240 |
| 4 rs4446308   | 9678379 A | 0.2683 | 5.67E-16 | chr:4:9603240 |
| 4 rs6822895   | 9681222 T | 0.2683 | 5.67E-16 | chr:4:9603240 |
| 4 rs6858190   | 9679430 G | 0.2683 | 5.67E-16 | chr:4:9603240 |
| 4 rs79367718  | 9673458 C | 0.2683 | 5.67E-16 | chr:4:9603240 |
| 4 rs61165916  | 9655464 A | 0.2685 | 5.78E-16 | chr:4:9603240 |
| 4 rs74821633  | 9690069 C | 0.2712 | 6.64E-16 | chr:4:9603240 |
| 4 rs10012992  | 9594197 A | 4.644  | 8.00E-16 | chr:4:9603240 |
| 4 rs10000206  | 9611952 C | 0.2668 | 9.24E-16 | chr:4:9603240 |
| 4 rs10939410  | 9606851 T | 0.2668 | 9.24E-16 | chr:4:9603240 |
| 4 rs2004333   | 9609411 T | 0.2668 | 9.24E-16 | chr:4:9603240 |
| 4 rs9917942   | 9612378 T | 0.2668 | 9.24E-16 | chr:4:9603240 |
| 4 rs28762742  | 9646007 G | 3.972  | 1.07E-15 | chr:4:9603240 |
| 4 rs112013141 | 9611339 G | 5.288  | 1.24E-15 | chr:4:9603240 |
| 4 rs9917943   | 9612413 C | 5.288  | 1.24E-15 | chr:4:9603240 |
| 4 rs58786763  | 9649755 A | 0.2747 | 1.77E-15 | chr:4:9603240 |
| 4 rs146531882 | 9653818 T | 0.2777 | 2.23E-15 | chr:4:9603240 |
| 4 rs13141264  | 9698240 A | 4.082  | 2.57E-15 | chr:4:9603240 |
| 4 rs60568234  | 9648674 T | 0.2879 | 2.61E-15 | chr:4:9603240 |
| 4 rs6824573   | 9589256 A | 0.293  | 2.62E-15 | chr:4:9603240 |
| 4 rs11730320  | 9719901 C | 0.3204 | 2.75E-15 | chr:4:9603240 |
| 4 rs4974817   | 9613000 A | 0.2844 | 3.01E-15 | chr:4:9603240 |
| 4 rs28886660  | 9644540 G | 0.2885 | 3.70E-15 | chr:4:9603240 |
| 4 rs58724508  | 9642207 T | 3.831  | 3.94E-15 | chr:4:9603240 |
| 4 rs6828382   | 9634594 C | 3.819  | 4.30E-15 | chr:4:9603240 |
| 4 rs28627624  | 9637607 C | 3.795  | 4.89E-15 | chr:4:9603240 |
| 4 rs9917891   | 9614633 C | 5.147  | 5.32E-15 | chr:4:9603240 |
| 4 rs9917966   | 9614537 G | 5.147  | 5.32E-15 | chr:4:9603240 |
| 4 rs4974852   | 9612877 C | 0.2797 | 5.63E-15 | chr:4:9603240 |
| 4 rs77118731  | 9633558 G | 0.2823 | 6.94E-15 | chr:4:9603240 |
| 4 rs2902922   | 9609380 G | 5.089  | 7.31E-15 | chr:4:9603240 |
| 4 rs143992647 | 9639055 T | 0.2833 | 7.50E-15 | chr:4:9603240 |
| 4 rs4974813   | 9614492 T | 0.2833 | 7.50E-15 | chr:4:9603240 |
| 4 rs142877628 | 9670746 T | 0.2905 | 7.65E-15 | chr:4:9603240 |
| 4 rs10032442  | 9578122 C | 0.2883 | 8.71E-15 | chr:4:9603240 |

|               |           |        |          |               |
|---------------|-----------|--------|----------|---------------|
| 4 rs13105133  | 9577464 T | 0.2883 | 8.71E-15 | chr:4:9603240 |
| 4 rs13120121  | 9577601 G | 0.2883 | 8.71E-15 | chr:4:9603240 |
| 4 rs13124988  | 9582385 C | 0.2883 | 8.71E-15 | chr:4:9603240 |
| 4 rs13135278  | 9582422 A | 0.2883 | 8.71E-15 | chr:4:9603240 |
| 4 rs13141294  | 9582314 T | 0.2883 | 8.71E-15 | chr:4:9603240 |
| 4 rs7439868   | 9575415 A | 0.2883 | 8.71E-15 | chr:4:9603240 |
| 4 rs7439897   | 9575506 A | 0.2883 | 8.71E-15 | chr:4:9603240 |
| 4 rs7683563   | 9574835 A | 0.2883 | 8.71E-15 | chr:4:9603240 |
| 4 rs9683873   | 9585416 A | 0.2883 | 8.71E-15 | chr:4:9603240 |
| 4 rs6827717   | 9695525 T | 0.304  | 1.00E-14 | chr:4:9603240 |
| 4 rs143900004 | 9636160 T | 0.2936 | 1.02E-14 | chr:4:9603240 |
| 4 rs142797284 | 9634436 T | 0.2872 | 1.06E-14 | chr:4:9603240 |
| 4 rs12648085  | 9572407 G | 0.2883 | 1.07E-14 | chr:4:9603240 |
| 4 rs35722426  | 9570769 C | 0.2883 | 1.07E-14 | chr:4:9603240 |
| 4 rs57504588  | 9570006 A | 0.2883 | 1.07E-14 | chr:4:9603240 |
| 4 rs72491232  | 9658479 G | 0.2857 | 1.16E-14 | chr:4:9603240 |
| 4 rs2046112   | 9584367 T | 0.2911 | 1.27E-14 | chr:4:9603240 |
| 4 rs150196562 | 9642725 G | 0.2875 | 1.35E-14 | chr:4:9603240 |
| 4 rs113258723 | 9643382 C | 0.2865 | 1.80E-14 | chr:4:9603240 |
| 4 rs73084845  | 9671025 T | 0.2984 | 1.84E-14 | chr:4:9603240 |
| 4 rs12505906  | 9636906 A | 0.2984 | 1.85E-14 | chr:4:9603240 |
| 4 rs73082901  | 9636762 C | 0.2984 | 1.85E-14 | chr:4:9603240 |
| 4 rs76266909  | 9636303 C | 0.2984 | 1.85E-14 | chr:4:9603240 |
| 4 rs57610759  | 9642093 G | 3.577  | 2.45E-14 | chr:4:9603240 |
| 4 rs10014826  | 9635408 C | 0.3006 | 2.47E-14 | chr:4:9603240 |
| 4 rs150921853 | 9639169 T | 0.3006 | 2.47E-14 | chr:4:9603240 |
| 4 rs137952419 | 9613766 G | 5.022  | 2.53E-14 | chr:4:9603240 |
| 4 rs10005931  | 9714347 C | 3.25   | 2.73E-14 | chr:4:9603240 |
| 4 rs28575773  | 9656525 A | 0.3042 | 3.35E-14 | chr:4:9603240 |
| 4 rs12501304  | 9682548 T | 0.3028 | 3.44E-14 | chr:4:9603240 |
| 4 rs73084842  | 9671015 T | 0.3028 | 3.44E-14 | chr:4:9603240 |
| 4 rs201078836 | 9680043 T | 0.3036 | 3.76E-14 | chr:4:9603240 |
| 4 rs182962990 | 9642562 T | 0.2856 | 3.93E-14 | chr:4:9603240 |
| 4 rs139020598 | 9656876 T | 0.2949 | 3.93E-14 | chr:4:9603240 |
| 4 rs57868742  | 9694076 G | 0.2994 | 4.43E-14 | chr:4:9603240 |
| 4 rs73802957  | 9694235 T | 0.2994 | 4.43E-14 | chr:4:9603240 |
| 4 rs73802958  | 9694236 T | 0.2994 | 4.43E-14 | chr:4:9603240 |
| 4 rs10026706  | 9674011 A | 0.305  | 4.58E-14 | chr:4:9603240 |
| 4 rs12171434  | 9647060 T | 0.305  | 4.58E-14 | chr:4:9603240 |
| 4 rs142277140 | 9648076 C | 0.305  | 4.58E-14 | chr:4:9603240 |
| 4 rs143079510 | 9665042 T | 0.305  | 4.58E-14 | chr:4:9603240 |
| 4 rs143459149 | 9674515 G | 0.305  | 4.58E-14 | chr:4:9603240 |
| 4 rs150693830 | 9665588 T | 0.305  | 4.58E-14 | chr:4:9603240 |

|               |           |        |          |               |
|---------------|-----------|--------|----------|---------------|
| 4 rs28380563  | 9658392 T | 0.305  | 4.58E-14 | chr:4:9603240 |
| 4 rs28577902  | 9650657 A | 0.305  | 4.58E-14 | chr:4:9603240 |
| 4 rs28643508  | 9659221 C | 0.305  | 4.58E-14 | chr:4:9603240 |
| 4 rs4518243   | 9664634 C | 0.305  | 4.58E-14 | chr:4:9603240 |
| 4 rs59312718  | 9669434 T | 0.305  | 4.58E-14 | chr:4:9603240 |
| 4 rs73084818  | 9648875 T | 0.305  | 4.58E-14 | chr:4:9603240 |
| 4 rs7684741   | 9661843 A | 0.305  | 4.58E-14 | chr:4:9603240 |
| 4 rs7693691   | 9652934 C | 0.305  | 4.58E-14 | chr:4:9603240 |
| 4 rs77025480  | 9657754 A | 0.305  | 4.58E-14 | chr:4:9603240 |
| 4 rs73084810  | 9642699 G | 0.3052 | 4.62E-14 | chr:4:9603240 |
| 4 rs74532861  | 9656067 C | 0.2956 | 4.67E-14 | chr:4:9603240 |
| 4 rs75965288  | 9656832 G | 0.2956 | 4.67E-14 | chr:4:9603240 |
| 4 rs7679526   | 9653286 T | 0.2956 | 4.67E-14 | chr:4:9603240 |
| 4 rs111953893 | 9645341 T | 3.636  | 4.78E-14 | chr:4:9603240 |
| 4 rs28546201  | 9684768 T | 0.3061 | 5.06E-14 | chr:4:9603240 |
| 4 rs28691200  | 9684552 A | 0.3061 | 5.06E-14 | chr:4:9603240 |
| 4 rs57478100  | 9652472 A | 0.2878 | 5.49E-14 | chr:4:9603240 |
| 4 rs141992178 | 9645431 A | 3.579  | 6.85E-14 | chr:4:9603240 |
| 4 rs111322624 | 9682780 T | 0.2993 | 7.04E-14 | chr:4:9603240 |
| 4 rs112611007 | 9667420 A | 0.2993 | 7.04E-14 | chr:4:9603240 |
| 4 rs35199477  | 9674995 A | 0.2993 | 7.04E-14 | chr:4:9603240 |
| 4 rs368426688 | 9667600 T | 0.2993 | 7.04E-14 | chr:4:9603240 |
| 4 rs4260536   | 9678079 G | 0.2993 | 7.04E-14 | chr:4:9603240 |
| 4 rs4264827   | 9664677 A | 0.2993 | 7.04E-14 | chr:4:9603240 |
| 4 rs4362821   | 9668941 T | 0.2993 | 7.04E-14 | chr:4:9603240 |
| 4 rs4550924   | 9674437 T | 0.2993 | 7.04E-14 | chr:4:9603240 |
| 4 rs6822851   | 9681151 A | 0.2993 | 7.04E-14 | chr:4:9603240 |
| 4 rs6838107   | 9679002 C | 0.2993 | 7.04E-14 | chr:4:9603240 |
| 4 rs75729554  | 9676179 T | 0.2993 | 7.04E-14 | chr:4:9603240 |
| 4 rs28718562  | 9659961 G | 0.3067 | 7.20E-14 | chr:4:9603240 |
| 4 rs9684206   | 9585751 T | 0.3203 | 8.66E-14 | chr:4:9603240 |
| 4 rs9996676   | 9678661 C | 0.3109 | 9.21E-14 | chr:4:9603240 |
| 4 rs150730953 | 9697831 C | 0.3027 | 9.28E-14 | chr:4:9603240 |
| 4 rs73802943  | 9663020 C | 0.3075 | 1.03E-13 | chr:4:9603240 |
| 4 rs28851574  | 9644580 C | 0.3121 | 1.06E-13 | chr:4:9603240 |
| 4 rs145156790 | 9671365 A | 0.2994 | 1.06E-13 | chr:4:9603240 |
| 4 rs10001941  | 9688516 A | 0.3126 | 1.10E-13 | chr:4:9603240 |
| 4 rs76078762  | 9656034 A | 0.3031 | 1.15E-13 | chr:4:9603240 |
| 4 rs79487290  | 9663694 A | 0.3034 | 1.20E-13 | chr:4:9603240 |
| 4 rs73088893  | 9695306 A | 0.3148 | 1.44E-13 | chr:4:9603240 |
| 4 rs116345678 | 9601756 G | 5.209  | 1.76E-13 | chr:4:9603240 |
| 4 rs58673888  | 9601558 T | 5.199  | 1.80E-13 | chr:4:9603240 |
| 4 rs116485634 | 9753365 T | 0.3652 | 1.86E-13 | chr:4:9603240 |

|               |           |        |          |               |
|---------------|-----------|--------|----------|---------------|
| 4 rs10024971  | 9694013 G | 0.3178 | 2.05E-13 | chr:4:9603240 |
| 4 rs6812913   | 9757848 T | 0.3609 | 2.08E-13 | chr:4:9603240 |
| 4 rs57553236  | 9688140 C | 0.3082 | 2.17E-13 | chr:4:9603240 |
| 4 rs6836522   | 9686823 T | 0.3082 | 2.17E-13 | chr:4:9603240 |
| 4 rs201440390 | 9697882 A | 0.3111 | 2.27E-13 | chr:4:9603240 |
| 4 rs12504246  | 9692932 A | 0.321  | 2.44E-13 | chr:4:9603240 |
| 4 rs57402803  | 9691353 T | 0.3148 | 2.98E-13 | chr:4:9603240 |
| 4 rs16898588  | 9595751 T | 0.2143 | 3.25E-13 | chr:4:9603240 |
| 4 rs9995735   | 9658789 T | 0.3254 | 3.30E-13 | chr:4:9603240 |
| 4 rs10006684  | 9694706 T | 5.014  | 3.71E-13 | chr:4:9603240 |
| 4 rs28765135  | 9644325 A | 3.653  | 4.01E-13 | chr:4:9603240 |
| 4 rs138647140 | 9621141 A | 3.272  | 4.20E-13 | chr:4:9603240 |
| 4 rs6816115   | 9585104 C | 0.305  | 4.29E-13 | chr:4:9603240 |
| 4 rs10012404  | 9621365 T | 3.275  | 4.63E-13 | chr:4:9603240 |
| 4 rs186527246 | 9621870 A | 3.275  | 4.63E-13 | chr:4:9603240 |
| 4 rs58820969  | 9607071 A | 4.958  | 4.83E-13 | chr:4:9603240 |
| 4 rs28783176  | 9645220 G | 3.649  | 4.86E-13 | chr:4:9603240 |
| 4 rs28866958  | 9644586 G | 3.649  | 4.86E-13 | chr:4:9603240 |
| 4 rs28624152  | 9626792 T | 2.919  | 4.91E-13 | chr:4:9603240 |
| 4 rs113905817 | 9626025 G | 3.276  | 5.06E-13 | chr:4:9603240 |
| 4 rs10013863  | 9667436 T | 0.3286 | 5.74E-13 | chr:4:9603240 |
| 4 rs9884683   | 9677137 A | 0.3286 | 5.74E-13 | chr:4:9603240 |
| 4 rs56264714  | 9624087 A | 3.277  | 5.76E-13 | chr:4:9603240 |
| 4 rs144989810 | 9612047 T | 4.923  | 6.31E-13 | chr:4:9603240 |
| 4 rs150289378 | 9753368 G | 0.373  | 6.58E-13 | chr:4:9603240 |
| 4 rs73802916  | 9604035 C | 0.2177 | 6.68E-13 | chr:4:9603240 |
| 4 rs113883509 | 9620223 A | 3.214  | 6.92E-13 | chr:4:9603240 |
| 4 rs149583330 | 9662001 T | 0.3007 | 6.93E-13 | chr:4:9603240 |
| 4 rs28840705  | 9631170 A | 3.211  | 7.11E-13 | chr:4:9603240 |
| 4 rs11729255  | 9744933 A | 0.3664 | 8.01E-13 | chr:4:9603240 |
| 4 rs11734448  | 9563381 C | 4.286  | 8.29E-13 | chr:4:9603240 |
| 4 rs10012148  | 9664294 A | 0.3321 | 8.39E-13 | chr:4:9603240 |
| 4 rs28796640  | 9663788 T | 0.3321 | 8.39E-13 | chr:4:9603240 |
| 4 rs115914537 | 9753369 C | 0.3753 | 9.72E-13 | chr:4:9603240 |
| 4 rs12503033  | 9732370 C | 0.3689 | 1.32E-12 | chr:4:9603240 |
| 4 rs6448846   | 9580937 G | 0.3639 | 1.42E-12 | chr:4:9603240 |
| 4 rs139901069 | 9582722 A | 0.2303 | 1.53E-12 | chr:4:9603240 |
| 4 rs77648749  | 9583407 A | 0.2303 | 1.53E-12 | chr:4:9603240 |
| 4 rs3864192   | 9573978 A | 0.3626 | 1.76E-12 | chr:4:9603240 |
| 4 rs7666771   | 9739268 T | 0.371  | 1.89E-12 | chr:4:9603240 |
| 4 rs10011678  | 9688689 C | 0.3399 | 1.95E-12 | chr:4:9603240 |
| 4 rs10021058  | 9733051 T | 0.374  | 2.02E-12 | chr:4:9603240 |
| 4 rs28711515  | 9731651 G | 0.374  | 2.02E-12 | chr:4:9603240 |

|               |           |        |          |               |
|---------------|-----------|--------|----------|---------------|
| 4 rs55768848  | 9740885 A | 0.3747 | 2.27E-12 | chr:4:9603240 |
| 4 rs11723541  | 9556165 T | 4.075  | 2.46E-12 | chr:4:9603240 |
| 4 rs11728441  | 9558041 C | 4.075  | 2.46E-12 | chr:4:9603240 |
| 4 rs12233678  | 9549951 C | 4.075  | 2.46E-12 | chr:4:9603240 |
| 4 rs12233771  | 9552965 A | 4.075  | 2.46E-12 | chr:4:9603240 |
| 4 rs12233884  | 9550045 A | 4.075  | 2.46E-12 | chr:4:9603240 |
| 4 rs80077135  | 9681299 G | 0.2357 | 3.06E-12 | chr:4:9603240 |
| 4 rs28673739  | 9677529 T | 0.234  | 3.19E-12 | chr:4:9603240 |
| 4 rs9291600   | 9675669 A | 0.234  | 3.19E-12 | chr:4:9603240 |
| 4 rs12233677  | 9549872 T | 4.034  | 3.46E-12 | chr:4:9603240 |
| 4 rs13152653  | 9556775 A | 4.034  | 3.46E-12 | chr:4:9603240 |
| 4 rs28793127  | 9660482 T | 0.3539 | 3.51E-12 | chr:4:9603240 |
| 4 rs7442338   | 9560945 T | 3.967  | 3.73E-12 | chr:4:9603240 |
| 4 rs10003452  | 9736893 A | 0.3765 | 3.98E-12 | chr:4:9603240 |
| 4 rs13107393  | 9562217 T | 3.969  | 4.16E-12 | chr:4:9603240 |
| 4 rs13116764  | 9561759 G | 3.969  | 4.16E-12 | chr:4:9603240 |
| 4 rs9715222   | 9564999 C | 3.969  | 4.16E-12 | chr:4:9603240 |
| 4 rs2030288   | 9751331 C | 0.387  | 5.39E-12 | chr:4:9603240 |
| 4 rs28695459  | 9750721 T | 0.387  | 5.39E-12 | chr:4:9603240 |
| 4 rs13152465  | 9556695 A | 3.927  | 5.89E-12 | chr:4:9603240 |
| 4 rs12508809  | 9748034 A | 0.3936 | 6.30E-12 | chr:4:9603240 |
| 4 rs12645989  | 9722133 T | 0.3838 | 6.36E-12 | chr:4:9603240 |
| 4 rs12233701  | 9552436 T | 3.764  | 7.32E-12 | chr:4:9603240 |
| 4 rs2176642   | 9752894 G | 0.3917 | 7.71E-12 | chr:4:9603240 |
| 4 rs6840249   | 9578971 G | 0.3815 | 9.17E-12 | chr:4:9603240 |
| 4 rs13136075  | 9714968 A | 3.299  | 1.21E-11 | chr:4:9603240 |
| 4 rs13151395  | 9709144 T | 3.311  | 1.41E-11 | chr:4:9603240 |
| 4 rs66534644  | 9711634 G | 3.264  | 1.75E-11 | chr:4:9603240 |
| 4 rs12510091  | 9708661 A | 3.276  | 1.99E-11 | chr:4:9603240 |
| 4 rs6843276   | 9714147 T | 3.232  | 2.04E-11 | chr:4:9603240 |
| 4 rs6813395   | 9758132 A | 0.4095 | 2.37E-11 | chr:4:9603240 |
| 4 rs12500632  | 9554039 A | 0.3496 | 2.51E-11 | chr:4:9603240 |
| 4 rs116386123 | 9593389 A | 4.487  | 2.59E-11 | chr:4:9603240 |
| 4 rs11722945  | 9758822 A | 0.4145 | 3.82E-11 | chr:4:9603240 |
| 4 rs34611252  | 9743467 T | 0.4099 | 4.08E-11 | chr:4:9603240 |
| 4 rs3900665   | 9756491 T | 0.4131 | 4.12E-11 | chr:4:9603240 |
| 4 rs28479165  | 9731689 T | 0.4088 | 4.27E-11 | chr:4:9603240 |
| 4 rs73802936  | 9629733 T | 0.2248 | 5.89E-11 | chr:4:9603240 |
| 4 rs11733200  | 9743037 C | 0.4132 | 6.05E-11 | chr:4:9603240 |
| 4 rs7667340   | 9739575 T | 0.4132 | 6.05E-11 | chr:4:9603240 |
| 4 rs10033951  | 9779580 T | 0.4183 | 6.71E-11 | chr:4:9603240 |
| 4 rs75086253  | 9588904 C | 6.503  | 6.87E-11 | chr:4:9603240 |
| 4 rs141814667 | 9634087 A | 4.314  | 7.11E-11 | chr:4:9603240 |



|               |           |        |          |               |
|---------------|-----------|--------|----------|---------------|
| 4 rs56044722  | 9717939 A | 0.3744 | 7.84E-11 | chr:4:9603240 |
| 4 rs35454046  | 9545545 A | 0.3611 | 8.04E-11 | chr:4:9603240 |
| 4 rs116422411 | 9632691 T | 3.094  | 8.97E-11 | chr:4:9603240 |
| 4 rs55978512  | 9594743 A | 6.388  | 1.01E-10 | chr:4:9603240 |
| 4 rs6448836   | 9577290 G | 0.4236 | 1.18E-10 | chr:4:9603240 |
| 4 rs113638151 | 9625676 T | 3.182  | 1.49E-10 | chr:4:9603240 |
| 4 rs139524483 | 9624221 G | 3.182  | 1.49E-10 | chr:4:9603240 |
| 4 rs183790214 | 9624079 A | 3.182  | 1.49E-10 | chr:4:9603240 |
| 4 rs188557791 | 9624282 A | 3.182  | 1.49E-10 | chr:4:9603240 |
| 4 rs189357301 | 9625543 T | 3.182  | 1.49E-10 | chr:4:9603240 |
| 4 rs73082817  | 9626178 A | 3.182  | 1.49E-10 | chr:4:9603240 |
| 4 rs73082823  | 9627543 A | 3.182  | 1.49E-10 | chr:4:9603240 |
| 4 rs73082831  | 9629850 A | 3.182  | 1.49E-10 | chr:4:9603240 |
| 4 rs13137196  | 9715456 A | 3.946  | 1.69E-10 | chr:4:9603240 |
| 4 rs10032846  | 9602708 G | 5.682  | 1.76E-10 | chr:4:9603240 |
| 4 rs34972086  | 9603493 T | 5.682  | 1.76E-10 | chr:4:9603240 |
| 4 rs112271793 | 9631492 G | 2.177  | 1.96E-10 | chr:4:9603240 |
| 4 rs12509448  | 9577884 T | 3.339  | 2.24E-10 | chr:4:9603240 |
| 4 rs111476545 | 9593148 G | 5.627  | 2.26E-10 | chr:4:9603240 |
| 4 rs12508394  | 9702186 T | 3.94   | 2.36E-10 | chr:4:9603240 |
| 4 rs111705356 | 9675394 C | 5.622  | 2.87E-10 | chr:4:9603240 |
| 4 rs12649271  | 9674750 G | 5.622  | 2.87E-10 | chr:4:9603240 |
| 4 rs56001555  | 9675049 T | 5.622  | 2.87E-10 | chr:4:9603240 |
| 4 rs61213314  | 9541933 G | 0.3778 | 3.27E-10 | chr:4:9603240 |
| 4 rs10027164  | 9574763 A | 0.4073 | 3.40E-10 | chr:4:9603240 |
| 4 rs28475805  | 9628806 G | 2.146  | 3.45E-10 | chr:4:9603240 |
| 4 rs1842497   | 9579673 G | 3.258  | 3.53E-10 | chr:4:9603240 |
| 4 rs149685592 | 9624404 G | 3.03   | 3.77E-10 | chr:4:9603240 |
| 4 rs9684707   | 9569057 C | 3.977  | 3.85E-10 | chr:4:9603240 |
| 4 rs142093617 | 9679891 T | 5.554  | 3.87E-10 | chr:4:9603240 |
| 4 rs144106725 | 9689812 G | 5.554  | 3.87E-10 | chr:4:9603240 |
| 4 rs6847920   | 9668143 T | 5.554  | 3.87E-10 | chr:4:9603240 |
| 4 rs7699789   | 9679534 T | 5.554  | 3.87E-10 | chr:4:9603240 |
| 4 rs10939476  | 9730105 G | 0.3763 | 4.05E-10 | chr:4:9603240 |
| 4 rs113032361 | 9654782 G | 5.522  | 4.19E-10 | chr:4:9603240 |
| 4 rs12639876  | 9648354 T | 5.522  | 4.19E-10 | chr:4:9603240 |
| 4 rs13115550  | 9651413 T | 5.522  | 4.19E-10 | chr:4:9603240 |
| 4 rs148454816 | 9654199 T | 5.522  | 4.19E-10 | chr:4:9603240 |
| 4 rs35050866  | 9654001 A | 5.522  | 4.19E-10 | chr:4:9603240 |
| 4 rs73221507  | 9661031 G | 5.522  | 4.19E-10 | chr:4:9603240 |
| 4 rs12640950  | 9674332 G | 5.29   | 4.83E-10 | chr:4:9603240 |
| 4 rs58667761  | 9524632 C | 0.3873 | 5.57E-10 | chr:4:9603240 |
| 4 rs9761072   | 9530984 T | 0.3873 | 5.57E-10 | chr:4:9603240 |

|               |           |        |          |               |
|---------------|-----------|--------|----------|---------------|
| 4 rs1871719   | 9594339 T | 5.788  | 5.82E-10 | chr:4:9603240 |
| 4 rs112846020 | 9639531 T | 5.434  | 6.00E-10 | chr:4:9603240 |
| 4 rs113007587 | 9637175 G | 5.434  | 6.00E-10 | chr:4:9603240 |
| 4 rs141954958 | 9636492 A | 5.434  | 6.00E-10 | chr:4:9603240 |
| 4 rs11735096  | 9747398 T | 0.4411 | 6.73E-10 | chr:4:9603240 |
| 4 rs34056993  | 9514776 T | 0.3924 | 7.03E-10 | chr:4:9603240 |
| 4 rs58522119  | 9525010 T | 0.3885 | 7.40E-10 | chr:4:9603240 |
| 4 rs112219402 | 9562271 G | 0.3778 | 7.51E-10 | chr:4:9603240 |
| 4 rs6448882   | 9621131 A | 2.732  | 8.46E-10 | chr:4:9603240 |
| 4 rs532514174 | 9632907 A | 0.1367 | 8.60E-10 | chr:4:9603240 |
| 4 rs564924473 | 9632906 A | 0.1367 | 8.60E-10 | chr:4:9603240 |
| 4 rs59229779  | 9750259 C | 0.4439 | 9.43E-10 | chr:4:9603240 |
| 4 rs28846731  | 9623693 G | 2.085  | 1.29E-09 | chr:4:9603240 |
| 4 rs7658772   | 9512477 A | 0.4004 | 1.35E-09 | chr:4:9603240 |
| 4 rs28578840  | 9629427 C | 2.077  | 1.41E-09 | chr:4:9603240 |
| 4 rs4698055   | 9627821 T | 2.064  | 1.74E-09 | chr:4:9603240 |
| 4 rs58768205  | 9511390 A | 0.4029 | 1.75E-09 | chr:4:9603240 |
| 4 rs181796209 | 9621911 A | 4.901  | 1.84E-09 | chr:4:9603240 |
| 4 rs10939425  | 9627380 G | 2.052  | 2.21E-09 | chr:4:9603240 |
| 4 rs6846234   | 9577203 C | 0.4422 | 2.42E-09 | chr:4:9603240 |
| 4 rs56306649  | 9510873 C | 0.4092 | 2.54E-09 | chr:4:9603240 |
| 4 rs56340722  | 9510913 G | 0.4092 | 2.54E-09 | chr:4:9603240 |
| 4 rs12505958  | 9560131 G | 3.487  | 2.64E-09 | chr:4:9603240 |
| 4 rs34004016  | 9697965 C | 0.3359 | 2.79E-09 | chr:4:9603240 |
| 4 rs9998193   | 9760106 A | 0.4617 | 2.80E-09 | chr:4:9603240 |
| 4 rs149036428 | 9619440 A | 0.3261 | 3.29E-09 | chr:4:9603240 |
| 4 rs375351318 | 9619439 C | 0.3261 | 3.29E-09 | chr:4:9603240 |
| 4 rs10939437  | 9647252 G | 3.529  | 3.89E-09 | chr:4:9603240 |
| 4 rs9994111   | 9558344 G | 2.224  | 4.19E-09 | chr:4:9603240 |
| 4 rs140186320 | 9595829 C | 6.078  | 4.39E-09 | chr:4:9603240 |
| 4 rs148856374 | 9604143 T | 6.078  | 4.39E-09 | chr:4:9603240 |
| 4 rs57631263  | 9601537 A | 6.078  | 4.39E-09 | chr:4:9603240 |
| 4 rs56202639  | 9725168 C | 0.4648 | 5.30E-09 | chr:4:9603240 |
| 4 rs113444477 | 9609487 A | 6.015  | 5.50E-09 | chr:4:9603240 |
| 4 rs61319849  | 9607459 A | 6.015  | 5.50E-09 | chr:4:9603240 |
| 4 rs4974827   | 9588288 C | 0.4281 | 5.56E-09 | chr:4:9603240 |
| 4 rs57867579  | 9725344 A | 0.4649 | 5.60E-09 | chr:4:9603240 |
| 4 rs13141297  | 9602103 T | 5.715  | 5.65E-09 | chr:4:9603240 |
| 4 rs111750522 | 9597976 A | 6.004  | 5.71E-09 | chr:4:9603240 |
| 4 rs11724606  | 9720444 A | 0.276  | 6.08E-09 | chr:4:9603240 |
| 4 rs11732596  | 9569361 T | 2.935  | 6.97E-09 | chr:4:9603240 |
| 4 rs28785196  | 9623514 G | 1.996  | 7.73E-09 | chr:4:9603240 |
| 4 rs28866204  | 9623513 G | 1.996  | 7.73E-09 | chr:4:9603240 |

|               |           |        |          |               |
|---------------|-----------|--------|----------|---------------|
| 4 rs61031859  | 9684806 T | 0.3259 | 7.93E-09 | chr:4:9603240 |
| 4 rs11734804  | 9734103 C | 0.2818 | 8.58E-09 | chr:4:9603240 |
| 4 rs4077928   | 9698985 C | 2.467  | 1.11E-08 | chr:4:9603240 |
| 4 rs12233883  | 9549927 C | 3.358  | 1.37E-08 | chr:4:9603240 |
| 4 rs7683831   | 9845079 T | 2.944  | 1.38E-08 | chr:4:9603240 |
| 4 rs2037314   | 9724578 T | 0.4756 | 1.44E-08 | chr:4:9603240 |
| 4 rs13110253  | 9558556 T | 3.341  | 1.47E-08 | chr:4:9603240 |
| 4 rs4613568   | 9862902 T | 2.931  | 1.53E-08 | chr:4:9603240 |
| 4 rs6852425   | 9856859 G | 2.931  | 1.53E-08 | chr:4:9603240 |
| 4 rs73802973  | 9722401 A | 0.2954 | 1.54E-08 | chr:4:9603240 |
| 4 rs189438022 | 9660440 G | 3.728  | 1.55E-08 | chr:4:9603240 |
| 4 rs1842490   | 9568457 T | 3.337  | 1.63E-08 | chr:4:9603240 |
| 4 rs13132153  | 9561479 A | 3.317  | 1.82E-08 | chr:4:9603240 |
| 4 rs13138276  | 9562004 A | 3.317  | 1.82E-08 | chr:4:9603240 |
| 4 rs1880831   | 9568145 T | 3.317  | 1.82E-08 | chr:4:9603240 |
| 4 rs1980219   | 9850621 T | 2.911  | 1.90E-08 | chr:4:9603240 |
| 4 rs6812007   | 9850220 C | 2.911  | 1.90E-08 | chr:4:9603240 |
| 4 rs6828040   | 9850480 T | 2.911  | 1.90E-08 | chr:4:9603240 |
| 4 rs6847858   | 9853059 T | 2.911  | 1.90E-08 | chr:4:9603240 |
| 4 rs6847871   | 9853074 T | 2.911  | 1.90E-08 | chr:4:9603240 |
| 4 rs10939561  | 9851542 T | 2.894  | 2.16E-08 | chr:4:9603240 |
| 4 rs60403942  | 9603452 C | 0.2362 | 2.16E-08 | chr:4:9603240 |
| 4 rs6448880   | 9621023 T | 2.169  | 2.35E-08 | chr:4:9603240 |
| 4 rs28591077  | 9863678 A | 2.865  | 2.47E-08 | chr:4:9603240 |
| 4 rs9684729   | 9862036 C | 2.865  | 2.47E-08 | chr:4:9603240 |
| 4 rs10939428  | 9630041 A | 2.8    | 2.48E-08 | chr:4:9603240 |
| 4 rs552244216 | 9633025 T | 0.2649 | 2.70E-08 | chr:4:9603240 |
| 4 rs10006208  | 9621927 G | 2.152  | 2.75E-08 | chr:4:9603240 |
| 4 rs10019518  | 9621923 A | 2.152  | 2.75E-08 | chr:4:9603240 |
| 4 rs6831137   | 9633547 C | 0.2468 | 2.84E-08 | chr:4:9603240 |
| 4 rs114237113 | 9547812 A | 0.3007 | 3.22E-08 | chr:4:9603240 |
| 4 rs13120116  | 9694454 T | 0.4841 | 3.32E-08 | chr:4:9603240 |
| 4 rs113251875 | 9621763 T | 1.961  | 3.32E-08 | chr:4:9603240 |
| 4 rs59551372  | 9718895 T | 0.2488 | 3.36E-08 | chr:4:9603240 |
| 4 rs4102942   | 9568478 T | 3.239  | 3.56E-08 | chr:4:9603240 |
| 4 rs192886753 | 9622824 A | 4.381  | 3.62E-08 | chr:4:9603240 |
| 4 rs4697691   | 9858485 A | 2.843  | 3.67E-08 | chr:4:9603240 |
| 4 rs4697900   | 9859976 A | 2.843  | 3.67E-08 | chr:4:9603240 |
| 4 rs190746279 | 9632929 G | 0.1861 | 3.78E-08 | chr:4:9603240 |
| 4 rs11726722  | 9637477 G | 3.16   | 4.06E-08 | chr:4:9603240 |
| 4 rs149367087 | 9609347 A | 7.211  | 4.26E-08 | chr:4:9603240 |
| 4 rs55876301  | 9608833 A | 0.2554 | 4.76E-08 | chr:4:9603240 |
| 4 rs4504249   | 9704927 T | 0.2566 | 4.92E-08 | chr:4:9603240 |

|               |           |        |          |               |
|---------------|-----------|--------|----------|---------------|
| 4 rs61045106  | 9702341 G | 0.2566 | 4.92E-08 | chr:4:9603240 |
| 4 rs7673959   | 9620145 G | 2.109  | 4.95E-08 | chr:4:9603240 |
| 4 rs138681522 | 9619447 A | 0.2832 | 5.36E-08 | chr:4:9603240 |
| 4 rs145781005 | 9619446 C | 0.2832 | 5.36E-08 | chr:4:9603240 |
| 4 rs147877123 | 9721552 G | 0.2585 | 5.77E-08 | chr:4:9603240 |
| 4 rs6448996   | 9791254 T | 0.4934 | 5.82E-08 | chr:4:9603240 |
| 4 rs73805506  | 9548880 T | 0.3046 | 5.84E-08 | chr:4:9603240 |
| 4 rs4622998   | 9621659 C | 2.087  | 6.23E-08 | chr:4:9603240 |
| 4 rs7686230   | 9657345 T | 3.345  | 6.39E-08 | chr:4:9603240 |
| 4 rs9685427   | 9793380 C | 0.4963 | 6.78E-08 | chr:4:9603240 |
| 4 rs9761429   | 9530799 A | 2.041  | 6.93E-08 | chr:4:9603240 |
| 4 rs73082809  | 9623322 A | 3.73   | 7.06E-08 | chr:4:9603240 |
| 4 rs12510906  | 9509153 T | 0.4325 | 7.27E-08 | chr:4:9603240 |
| 4 rs142793639 | 9594543 T | 0.3178 | 7.87E-08 | chr:4:9603240 |
| 4 rs55892720  | 9585091 G | 0.2648 | 7.94E-08 | chr:4:9603240 |
| 4 rs112905485 | 9621041 T | 3.694  | 8.47E-08 | chr:4:9603240 |
| 4 rs141186559 | 9632118 G | 3.694  | 8.47E-08 | chr:4:9603240 |
| 4 rs144061159 | 9622297 T | 3.694  | 8.47E-08 | chr:4:9603240 |
| 4 rs149842121 | 9622099 T | 3.694  | 8.47E-08 | chr:4:9603240 |
| 4 rs190262728 | 9624191 T | 3.694  | 8.47E-08 | chr:4:9603240 |
| 4 rs57999276  | 9630949 T | 3.694  | 8.47E-08 | chr:4:9603240 |
| 4 rs6833119   | 9520138 C | 0.3097 | 9.07E-08 | chr:4:9603240 |
| 4 rs57304521  | 9753374 C | 0.3432 | 9.63E-08 | chr:4:9603240 |
| 4 rs9291612   | 9735891 T | 0.42   | 1.06E-07 | chr:4:9603240 |
| 4 rs6815602   | 9592093 T | 4.808  | 1.11E-07 | chr:4:9603240 |
| 4 rs73097919  | 9603468 G | 7.536  | 1.22E-07 | chr:4:9603240 |
| 4 rs6856401   | 9664027 G | 3.255  | 1.26E-07 | chr:4:9603240 |
| 4 rs139582668 | 9671180 T | 5.755  | 1.34E-07 | chr:4:9603240 |
| 4 rs61216331  | 9605453 A | 7.433  | 1.50E-07 | chr:4:9603240 |
| 4 rs141703666 | 9510151 G | 0.4451 | 1.58E-07 | chr:4:9603240 |
| 4 rs78329286  | 9538878 A | 0.3198 | 1.58E-07 | chr:4:9603240 |
| 4 rs62409886  | 9642713 T | 3.514  | 1.60E-07 | chr:4:9603240 |
| 4 rs111965781 | 9595298 C | 5.675  | 1.61E-07 | chr:4:9603240 |
| 4 rs57995767  | 9510711 A | 0.4457 | 1.62E-07 | chr:4:9603240 |
| 4 rs149045417 | 9596105 T | 0.3392 | 1.83E-07 | chr:4:9603240 |
| 4 rs181297539 | 9652092 T | 5.636  | 1.87E-07 | chr:4:9603240 |
| 4 rs10939509  | 9772309 A | 0.5125 | 1.91E-07 | chr:4:9603240 |
| 4 rs13150941  | 9694401 A | 0.5137 | 2.16E-07 | chr:4:9603240 |
| 4 rs2004245   | 9532422 T | 0.3284 | 2.20E-07 | chr:4:9603240 |
| 4 rs11941979  | 9664162 T | 5.598  | 2.20E-07 | chr:4:9603240 |
| 4 rs149010044 | 9593436 A | 5.231  | 2.33E-07 | chr:4:9603240 |
| 4 rs58434858  | 9501245 A | 0.3084 | 2.42E-07 | chr:4:9603240 |
| 4 rs28450736  | 9410035 T | 4.903  | 2.51E-07 | chr:4:9603240 |

|               |           |        |          |               |
|---------------|-----------|--------|----------|---------------|
| 4 rs7655090   | 9765875 G | 0.5171 | 2.55E-07 | chr:4:9603240 |
| 4 rs2001392   | 9533092 C | 0.3406 | 2.61E-07 | chr:4:9603240 |
| 4 rs34172197  | 9634195 A | 3.384  | 2.63E-07 | chr:4:9603240 |
| 4 rs13123739  | 9604667 T | 5.619  | 2.65E-07 | chr:4:9603240 |
| 4 rs149920424 | 9700202 T | 6.431  | 2.72E-07 | chr:4:9603240 |
| 4 rs141319276 | 9622203 C | 2.705  | 2.88E-07 | chr:4:9603240 |
| 4 rs150327213 | 9624677 G | 2.705  | 2.88E-07 | chr:4:9603240 |
| 4 rs57881200  | 9518764 T | 0.3184 | 2.97E-07 | chr:4:9603240 |
| 4 rs10002614  | 9626095 T | 2.1    | 3.05E-07 | chr:4:9603240 |
| 4 rs6836718   | 9626703 A | 2.1    | 3.05E-07 | chr:4:9603240 |
| 4 rs6836875   | 9626757 A | 2.1    | 3.05E-07 | chr:4:9603240 |
| 4 rs7654517   | 9620028 A | 2.105  | 3.14E-07 | chr:4:9603240 |
| 4 rs147340410 | 9106171 A | 0.4712 | 3.15E-07 | chr:4:9603240 |
| 4 rs11730577  | 9592342 T | 5.566  | 3.22E-07 | chr:4:9603240 |
| 4 rs11732839  | 9597885 G | 5.566  | 3.22E-07 | chr:4:9603240 |
| 4 rs11737375  | 9607387 G | 5.566  | 3.22E-07 | chr:4:9603240 |
| 4 rs13105082  | 9604504 G | 5.566  | 3.22E-07 | chr:4:9603240 |
| 4 rs13108259  | 9603571 G | 5.566  | 3.22E-07 | chr:4:9603240 |
| 4 rs13120086  | 9599365 T | 5.566  | 3.22E-07 | chr:4:9603240 |
| 4 rs13124589  | 9590540 T | 5.566  | 3.22E-07 | chr:4:9603240 |
| 4 rs62409962  | 9600872 T | 5.566  | 3.22E-07 | chr:4:9603240 |
| 4 rs2865076   | 9591550 C | 0.514  | 3.27E-07 | chr:4:9603240 |
| 4 rs2867383   | 9787935 A | 0.5202 | 3.28E-07 | chr:4:9603240 |
| 4 rs2903564   | 9787937 A | 0.5202 | 3.28E-07 | chr:4:9603240 |
| 4 rs6813899   | 9654942 A | 5.153  | 3.34E-07 | chr:4:9603240 |
| 4 rs13147553  | 9610951 A | 5.019  | 3.57E-07 | chr:4:9603240 |
| 4 rs62293221  | 9763306 C | 0.5203 | 3.58E-07 | chr:4:9603240 |
| 4 rs4352476   | 9621475 C | 2.081  | 3.58E-07 | chr:4:9603240 |
| 4 rs4504250   | 9621700 T | 2.081  | 3.58E-07 | chr:4:9603240 |
| 4 rs4558872   | 9621642 A | 2.081  | 3.58E-07 | chr:4:9603240 |
| 4 rs13119059  | 9847860 C | 3.072  | 3.62E-07 | chr:4:9603240 |
| 4 rs60678461  | 9501499 G | 0.3098 | 3.64E-07 | chr:4:9603240 |
| 4 rs28826976  | 9631246 A | 2.079  | 3.71E-07 | chr:4:9603240 |
| 4 rs13120469  | 9623671 C | 2.076  | 4.20E-07 | chr:4:9603240 |
| 4 rs6448878   | 9620623 G | 2.076  | 4.20E-07 | chr:4:9603240 |
| 4 rs6448879   | 9620994 T | 2.076  | 4.20E-07 | chr:4:9603240 |
| 4 rs7661238   | 9620481 T | 2.076  | 4.20E-07 | chr:4:9603240 |
| 4 rs7693408   | 9623110 G | 2.076  | 4.20E-07 | chr:4:9603240 |
| 4 rs79887705  | 9622505 T | 2.076  | 4.20E-07 | chr:4:9603240 |
| 4 rs113222128 | 9626999 A | 2.631  | 4.21E-07 | chr:4:9603240 |
| 4 rs11729458  | 9630071 A | 2.075  | 4.25E-07 | chr:4:9603240 |
| 4 rs11933525  | 9630504 G | 2.075  | 4.25E-07 | chr:4:9603240 |
| 4 rs11939928  | 9630491 T | 2.075  | 4.25E-07 | chr:4:9603240 |

|               |           |        |          |               |
|---------------|-----------|--------|----------|---------------|
| 4 rs12505789  | 9630602 A | 2.075  | 4.25E-07 | chr:4:9603240 |
| 4 rs142275227 | 9631513 T | 2.075  | 4.25E-07 | chr:4:9603240 |
| 4 rs7666466   | 9629503 G | 2.075  | 4.25E-07 | chr:4:9603240 |
| 4 rs78469741  | 9631526 C | 2.075  | 4.25E-07 | chr:4:9603240 |
| 4 rs11733687  | 9643374 T | 3.379  | 4.26E-07 | chr:4:9603240 |
| 4 rs10939515  | 9773296 A | 0.4827 | 4.66E-07 | chr:4:9603240 |
| 4 rs10939600  | 9886931 A | 2.454  | 4.66E-07 | chr:4:9603240 |
| 4 rs6449089   | 9884258 G | 2.454  | 4.66E-07 | chr:4:9603240 |
| 4 rs6449090   | 9884536 T | 2.454  | 4.66E-07 | chr:4:9603240 |
| 4 rs6838891   | 9884114 C | 2.454  | 4.66E-07 | chr:4:9603240 |
| 4 rs6848689   | 9884197 A | 2.454  | 4.66E-07 | chr:4:9603240 |
| 4 rs4697908   | 9893282 T | 2.425  | 4.70E-07 | chr:4:9603240 |
| 4 rs13134147  | 9611368 G | 5.182  | 5.02E-07 | chr:4:9603240 |
| 4 rs116305119 | 9692931 T | 4.346  | 5.06E-07 | chr:4:9603240 |
| 4 rs7669444   | 9893577 A | 2.424  | 5.07E-07 | chr:4:9603240 |
| 4 rs141451880 | 9572788 T | 7.636  | 5.30E-07 | chr:4:9603240 |
| 4 rs28490020  | 9425351 T | 5.676  | 5.54E-07 | chr:4:9603240 |
| 4 rs6856161   | 9633826 G | 2.574  | 5.73E-07 | chr:4:9603240 |
| 4 rs6448960   | 9686586 T | 3.089  | 5.74E-07 | chr:4:9603240 |
| 4 rs7680572   | 9687543 A | 3.089  | 5.74E-07 | chr:4:9603240 |
| 4 rs145096741 | 9697413 T | 4.71   | 5.94E-07 | chr:4:9603240 |
| 4 rs4974864   | 9588259 G | 0.4916 | 5.96E-07 | chr:4:9603240 |
| 4 rs62409891  | 9643131 C | 2.573  | 6.11E-07 | chr:4:9603240 |
| 4 rs1947868   | 9584808 C | 4.765  | 6.12E-07 | chr:4:9603240 |
| 4 rs13114702  | 9895176 C | 3.086  | 6.17E-07 | chr:4:9603240 |
| 4 rs142574103 | 9646506 C | 4.295  | 6.19E-07 | chr:4:9603240 |
| 4 rs143069896 | 9647474 A | 4.295  | 6.19E-07 | chr:4:9603240 |
| 4 rs191365255 | 9645629 G | 4.295  | 6.19E-07 | chr:4:9603240 |
| 4 rs11733921  | 9632876 T | 2.064  | 6.41E-07 | chr:4:9603240 |
| 4 rs55901556  | 9492888 A | 0.4506 | 6.95E-07 | chr:4:9603240 |
| 4 rs6810574   | 9589675 A | 0.5201 | 6.98E-07 | chr:4:9603240 |
| 4 rs10011580  | 9634989 A | 2.554  | 7.08E-07 | chr:4:9603240 |
| 4 rs59114318  | 9634777 A | 2.554  | 7.08E-07 | chr:4:9603240 |
| 4 rs59245820  | 9634816 G | 2.554  | 7.08E-07 | chr:4:9603240 |
| 4 rs6813740   | 9635102 T | 2.554  | 7.08E-07 | chr:4:9603240 |
| 4 rs6836184   | 9633711 A | 2.554  | 7.08E-07 | chr:4:9603240 |
| 4 rs6837618   | 9634403 A | 2.554  | 7.08E-07 | chr:4:9603240 |
| 4 rs9291589   | 9633410 C | 2.554  | 7.08E-07 | chr:4:9603240 |
| 4 rs7688167   | 9893506 G | 2.38   | 7.23E-07 | chr:4:9603240 |
| 4 rs28430858  | 9626149 A | 2.022  | 7.23E-07 | chr:4:9603240 |
| 4 rs6842855   | 9633990 T | 2.549  | 7.34E-07 | chr:4:9603240 |
| 4 rs6448959   | 9683927 T | 3.053  | 7.49E-07 | chr:4:9603240 |
| 4 rs11727601  | 9637799 G | 2.543  | 7.76E-07 | chr:4:9603240 |

|               |           |        |          |               |
|---------------|-----------|--------|----------|---------------|
| 4 rs7696971   | 9884528 T | 2.349  | 7.86E-07 | chr:4:9603240 |
| 4 rs6843869   | 9634451 T | 2.553  | 7.92E-07 | chr:4:9603240 |
| 4 rs56653599  | 9642038 T | 2.541  | 8.35E-07 | chr:4:9603240 |
| 4 rs2061995   | 9561739 C | 1.913  | 8.75E-07 | chr:4:9603240 |
| 4 rs140698773 | 9656963 A | 4.056  | 8.78E-07 | chr:4:9603240 |
| 4 rs145155902 | 9655859 T | 4.056  | 8.78E-07 | chr:4:9603240 |
| 4 rs148558268 | 9650816 C | 4.056  | 8.78E-07 | chr:4:9603240 |
| 4 rs149901527 | 9650222 T | 4.056  | 8.78E-07 | chr:4:9603240 |
| 4 rs151010672 | 9653136 T | 4.056  | 8.78E-07 | chr:4:9603240 |
| 4 rs143116957 | 9710108 A | 5.961  | 9.06E-07 | chr:4:9603240 |
| 4 rs3864193   | 9584474 A | 4.66   | 9.12E-07 | chr:4:9603240 |
| 4 rs4102945   | 9581863 T | 4.656  | 9.27E-07 | chr:4:9603240 |
| 4 rs1811570   | 9587999 A | 0.5224 | 9.75E-07 | chr:4:9603240 |
| 4 rs563515175 | 9138173 G | 0.518  | 1.05E-06 | chr:4:9603240 |
| 4 rs9760761   | 9565469 C | 1.902  | 1.07E-06 | chr:4:9603240 |
| 4 rs11734592  | 9641381 T | 3.25   | 1.10E-06 | chr:4:9603240 |
| 4 rs62411071  | 9640314 A | 3.25   | 1.10E-06 | chr:4:9603240 |
| 4 rs190136506 | 9588618 T | 5.9    | 1.11E-06 | chr:4:9603240 |
| 4 rs576330935 | 9678540 G | 0.312  | 1.11E-06 | chr:4:9603240 |
| 4 rs143075413 | 9640102 T | 4.15   | 1.15E-06 | chr:4:9603240 |
| 4 rs148263591 | 9685524 A | 4.003  | 1.15E-06 | chr:4:9603240 |
| 4 rs150765292 | 9685713 C | 4.003  | 1.15E-06 | chr:4:9603240 |
| 4 rs151050464 | 9682970 C | 4.003  | 1.15E-06 | chr:4:9603240 |
| 4 rs4440216   | 9681531 T | 3.011  | 1.16E-06 | chr:4:9603240 |
| 4 rs79728548  | 9527286 G | 0.3604 | 1.19E-06 | chr:4:9603240 |
| 4 rs193204674 | 9138282 G | 0.522  | 1.21E-06 | chr:4:9603240 |
| 4 rs141494277 | 9675657 C | 3.983  | 1.22E-06 | chr:4:9603240 |
| 4 rs144614831 | 9671929 T | 3.983  | 1.22E-06 | chr:4:9603240 |
| 4 rs145492372 | 9675554 G | 3.983  | 1.22E-06 | chr:4:9603240 |
| 4 rs147715620 | 9672824 A | 3.983  | 1.22E-06 | chr:4:9603240 |
| 4 rs147423360 | 9138296 C | 0.5247 | 1.23E-06 | chr:4:9603240 |
| 4 rs11729203  | 9569091 T | 3.385  | 1.28E-06 | chr:4:9603240 |
| 4 rs13129232  | 9573407 T | 4.564  | 1.31E-06 | chr:4:9603240 |
| 4 rs13144634  | 9571273 G | 4.564  | 1.31E-06 | chr:4:9603240 |
| 4 rs114016786 | 9635321 T | 4.106  | 1.40E-06 | chr:4:9603240 |
| 4 rs148519502 | 9634313 C | 4.106  | 1.40E-06 | chr:4:9603240 |
| 4 rs112714712 | 9643479 G | 3.03   | 1.44E-06 | chr:4:9603240 |
| 4 rs77272440  | 9521226 C | 0.4723 | 1.50E-06 | chr:4:9603240 |
| 4 rs10006409  | 9559593 C | 1.938  | 1.52E-06 | chr:4:9603240 |
| 4 rs11728002  | 9632904 A | 2.712  | 1.54E-06 | chr:4:9603240 |
| 4 rs11731299  | 9632932 G | 2.712  | 1.54E-06 | chr:4:9603240 |
| 4 rs139494050 | 9576026 C | 4.721  | 1.55E-06 | chr:4:9603240 |
| 4 rs144095124 | 9578290 G | 4.721  | 1.55E-06 | chr:4:9603240 |

|               |           |        |          |               |
|---------------|-----------|--------|----------|---------------|
| 4 rs144745779 | 9582675 C | 4.721  | 1.55E-06 | chr:4:9603240 |
| 4 rs146486292 | 9579767 T | 4.721  | 1.55E-06 | chr:4:9603240 |
| 4 rs148129824 | 9578976 T | 4.721  | 1.55E-06 | chr:4:9603240 |
| 4 rs148656483 | 9579785 T | 4.721  | 1.55E-06 | chr:4:9603240 |
| 4 rs10005684  | 9626897 T | 2.008  | 1.56E-06 | chr:4:9603240 |
| 4 rs36027609  | 9541970 T | 0.3354 | 1.58E-06 | chr:4:9603240 |
| 4 rs9884669   | 9563294 C | 1.876  | 1.60E-06 | chr:4:9603240 |
| 4 rs114251526 | 9664763 A | 3.924  | 1.63E-06 | chr:4:9603240 |
| 4 rs141555885 | 9678916 A | 3.924  | 1.63E-06 | chr:4:9603240 |
| 4 rs141621221 | 9680742 T | 3.924  | 1.63E-06 | chr:4:9603240 |
| 4 rs148876755 | 9664792 C | 3.924  | 1.63E-06 | chr:4:9603240 |
| 4 rs80194314  | 9682611 T | 3.924  | 1.63E-06 | chr:4:9603240 |
| 4 rs10805307  | 9580141 A | 4.5    | 1.70E-06 | chr:4:9603240 |
| 4 rs10939373  | 9579571 T | 4.5    | 1.70E-06 | chr:4:9603240 |
| 4 rs11722510  | 9585639 A | 4.5    | 1.70E-06 | chr:4:9603240 |
| 4 rs11736658  | 9585855 T | 4.5    | 1.70E-06 | chr:4:9603240 |
| 4 rs13125486  | 9575367 T | 4.5    | 1.70E-06 | chr:4:9603240 |
| 4 rs6817939   | 9588339 A | 2.004  | 1.73E-06 | chr:4:9603240 |
| 4 rs13132135  | 9583284 T | 4.527  | 1.75E-06 | chr:4:9603240 |
| 4 rs141971639 | 9127659 C | 0.5204 | 1.75E-06 | chr:4:9603240 |
| 4 rs148459006 | 9138330 T | 0.5227 | 1.77E-06 | chr:4:9603240 |
| 4 rs13127386  | 9636309 T | 3.127  | 1.82E-06 | chr:4:9603240 |
| 4 rs6841523   | 9549516 G | 1.903  | 1.89E-06 | chr:4:9603240 |
| 4 rs1519094   | 9817286 T | 4.365  | 1.90E-06 | chr:4:9603240 |
| 4 rs12510498  | 9606546 A | 5.311  | 1.91E-06 | chr:4:9603240 |
| 4 rs4974831   | 9525674 T | 0.544  | 1.98E-06 | chr:4:9603240 |
| 4 rs6855095   | 9819977 G | 2.44   | 1.98E-06 | chr:4:9603240 |
| 4 rs190003305 | 9709175 T | 4.052  | 2.00E-06 | chr:4:9603240 |
| 4 rs11730777  | 9768556 T | 0.3566 | 2.08E-06 | chr:4:9603240 |
| 4 rs1904944   | 9144568 G | 0.5229 | 2.14E-06 | chr:4:9603240 |
| 4 rs1904945   | 9144504 G | 0.5229 | 2.14E-06 | chr:4:9603240 |
| 4 rs1964557   | 9565668 A | 0.3433 | 2.17E-06 | chr:4:9603240 |
| 4 rs34523133  | 9565010 C | 0.3433 | 2.17E-06 | chr:4:9603240 |
| 4 rs34672750  | 9551410 T | 0.3433 | 2.17E-06 | chr:4:9603240 |
| 4 rs34899372  | 9561627 T | 0.3433 | 2.17E-06 | chr:4:9603240 |
| 4 rs35848567  | 9549756 A | 0.3433 | 2.17E-06 | chr:4:9603240 |
| 4 rs35888628  | 9551409 A | 0.3433 | 2.17E-06 | chr:4:9603240 |
| 4 rs4974870   | 9566083 C | 0.3433 | 2.17E-06 | chr:4:9603240 |
| 4 rs55634110  | 9643904 T | 2.925  | 2.35E-06 | chr:4:9603240 |
| 4 rs10939258  | 9525869 A | 0.5474 | 2.36E-06 | chr:4:9603240 |
| 4 rs11727040  | 9657302 C | 0.5289 | 2.39E-06 | chr:4:9603240 |
| 4 rs188897845 | 9411622 A | 6.14   | 2.39E-06 | chr:4:9603240 |
| 4 rs34658640  | 9137757 T | 0.5259 | 2.41E-06 | chr:4:9603240 |



|               |           |        |          |               |
|---------------|-----------|--------|----------|---------------|
| 4 rs149139210 | 9146298 T | 0.5244 | 2.42E-06 | chr:4:9603240 |
| 4 rs35881783  | 9140558 T | 0.5262 | 2.46E-06 | chr:4:9603240 |
| 4 rs34377195  | 9140410 A | 0.5245 | 2.46E-06 | chr:4:9603240 |
| 4 rs187748995 | 9490915 T | 0.3218 | 2.52E-06 | chr:4:9603240 |
| 4 rs2865051   | 9552430 G | 1.898  | 2.70E-06 | chr:4:9603240 |
| 4 rs28408800  | 9565507 C | 1.84   | 2.74E-06 | chr:4:9603240 |
| 4 rs142595860 | 9138358 C | 0.5283 | 2.84E-06 | chr:4:9603240 |
| 4 rs13434403  | 9415059 T | 6.06   | 2.87E-06 | chr:4:9603240 |
| 4 rs11727477  | 9768621 A | 0.3697 | 2.88E-06 | chr:4:9603240 |
| 4 rs57480541  | 9712078 T | 4.498  | 2.89E-06 | chr:4:9603240 |
| 4 rs4274842   | 9676030 A | 0.5339 | 2.91E-06 | chr:4:9603240 |
| 4 rs4370138   | 9667026 T | 0.5339 | 2.91E-06 | chr:4:9603240 |
| 4 rs6449056   | 9377525 T | 5.541  | 2.94E-06 | chr:4:9603240 |
| 4 rs61166583  | 9778530 A | 0.5257 | 2.96E-06 | chr:4:9603240 |
| 4 rs10032544  | 9556417 G | 1.887  | 2.97E-06 | chr:4:9603240 |
| 4 rs7668047   | 9424418 T | 2.912  | 3.00E-06 | chr:4:9603240 |
| 4 rs116588617 | 9577543 G | 0.3618 | 3.03E-06 | chr:4:9603240 |
| 4 rs2086493   | 9135431 C | 0.5289 | 3.08E-06 | chr:4:9603240 |
| 4 rs10009248  | 9413239 A | 6.022  | 3.09E-06 | chr:4:9603240 |
| 4 rs115759716 | 9421961 G | 6.022  | 3.09E-06 | chr:4:9603240 |
| 4 rs9991609   | 9416843 C | 6.022  | 3.09E-06 | chr:4:9603240 |
| 4 rs10010621  | 9668706 G | 2.743  | 3.20E-06 | chr:4:9603240 |
| 4 rs4532233   | 9668924 G | 2.743  | 3.20E-06 | chr:4:9603240 |
| 4 rs6848526   | 9670487 T | 2.743  | 3.20E-06 | chr:4:9603240 |
| 4 rs7434744   | 9672688 A | 2.743  | 3.20E-06 | chr:4:9603240 |
| 4 rs9685755   | 9670178 T | 2.743  | 3.20E-06 | chr:4:9603240 |
| 4 rs143296337 | 9142775 T | 0.5281 | 3.26E-06 | chr:4:9603240 |
| 4 rs141420764 | 9137720 T | 0.5299 | 3.27E-06 | chr:4:9603240 |
| 4 rs34105649  | 9137737 A | 0.5299 | 3.27E-06 | chr:4:9603240 |
| 4 rs56000261  | 9704355 T | 0.416  | 3.33E-06 | chr:4:9603240 |
| 4 rs34433551  | 9556102 T | 0.3532 | 3.41E-06 | chr:4:9603240 |
| 4 rs143069383 | 9594711 G | 4.708  | 3.44E-06 | chr:4:9603240 |
| 4 rs11731224  | 9640971 G | 2.396  | 3.58E-06 | chr:4:9603240 |
| 4 rs184909457 | 9639179 A | 3.898  | 3.60E-06 | chr:4:9603240 |
| 4 rs28729253  | 9602291 A | 7.573  | 3.65E-06 | chr:4:9603240 |
| 4 rs62409885  | 9642489 T | 3.567  | 3.66E-06 | chr:4:9603240 |
| 4 rs13136319  | 9685017 T | 0.5373 | 3.68E-06 | chr:4:9603240 |
| 4 rs7658414   | 9687969 T | 0.5373 | 3.68E-06 | chr:4:9603240 |
| 4 rs11727873  | 9758469 C | 0.5292 | 3.69E-06 | chr:4:9603240 |
| 4 rs139337524 | 9414895 A | 5.939  | 3.73E-06 | chr:4:9603240 |
| 4 rs6825744   | 9553832 G | 1.873  | 3.74E-06 | chr:4:9603240 |
| 4 rs6849024   | 9553433 A | 1.873  | 3.74E-06 | chr:4:9603240 |
| 4 rs9683933   | 9594670 A | 2.425  | 3.85E-06 | chr:4:9603240 |

|               |           |        |          |               |
|---------------|-----------|--------|----------|---------------|
| 4 rs12108245  | 9418546 G | 5.921  | 3.85E-06 | chr:4:9603240 |
| 4 rs149732552 | 9417907 C | 5.921  | 3.85E-06 | chr:4:9603240 |
| 4 rs28617591  | 9417770 T | 5.921  | 3.85E-06 | chr:4:9603240 |
| 4 rs35554314  | 9148327 C | 0.538  | 3.88E-06 | chr:4:9603240 |
| 4 rs151336389 | 9146467 G | 0.5326 | 3.91E-06 | chr:4:9603240 |
| 4 rs28757760  | 9411386 A | 5.916  | 3.92E-06 | chr:4:9603240 |
| 4 rs149108994 | 9144349 C | 0.5342 | 4.01E-06 | chr:4:9603240 |
| 4 rs114982594 | 9599260 G | 7.478  | 4.06E-06 | chr:4:9603240 |
| 4 rs9291575   | 9550798 A | 1.896  | 4.09E-06 | chr:4:9603240 |
| 4 rs10011621  | 9760239 C | 0.5264 | 4.10E-06 | chr:4:9603240 |
| 4 rs1947867   | 9584773 A | 0.5432 | 4.11E-06 | chr:4:9603240 |
| 4 rs9684038   | 9585837 A | 0.5432 | 4.11E-06 | chr:4:9603240 |
| 4 rs34907188  | 9534556 T | 0.3487 | 4.15E-06 | chr:4:9603240 |
| 4 rs4974840   | 9143368 A | 0.5347 | 4.19E-06 | chr:4:9603240 |
| 4 rs4974841   | 9143357 G | 0.5347 | 4.19E-06 | chr:4:9603240 |
| 4 rs4260537   | 9678215 A | 2.708  | 4.29E-06 | chr:4:9603240 |
| 4 rs4485817   | 9674732 G | 2.708  | 4.29E-06 | chr:4:9603240 |
| 4 rs114198265 | 9699093 A | 3.602  | 4.30E-06 | chr:4:9603240 |
| 4 rs35143284  | 9139875 A | 0.5322 | 4.41E-06 | chr:4:9603240 |
| 4 rs1904942   | 9144778 A | 0.5352 | 4.44E-06 | chr:4:9603240 |
| 4 rs151275640 | 9138407 G | 0.5342 | 4.45E-06 | chr:4:9603240 |
| 4 rs11732272  | 9768258 G | 0.3734 | 4.47E-06 | chr:4:9603240 |
| 4 rs143633314 | 9126186 G | 0.5166 | 4.48E-06 | chr:4:9603240 |
| 4 rs62409887  | 9642748 G | 2.421  | 4.55E-06 | chr:4:9603240 |
| 4 rs13116244  | 9678901 C | 0.5405 | 4.57E-06 | chr:4:9603240 |
| 4 rs71509133  | 9138551 G | 0.5389 | 4.62E-06 | chr:4:9603240 |
| 4 rs13118016  | 9585215 A | 0.544  | 4.66E-06 | chr:4:9603240 |
| 4 rs13136183  | 9683883 T | 0.5423 | 4.70E-06 | chr:4:9603240 |
| 4 rs28537474  | 9594779 T | 8.71   | 4.81E-06 | chr:4:9603240 |
| 4 rs28504038  | 9603671 T | 7.358  | 4.92E-06 | chr:4:9603240 |
| 4 rs35007886  | 9526152 A | 0.3586 | 5.04E-06 | chr:4:9603240 |
| 4 rs4974877   | 9525399 A | 0.3586 | 5.04E-06 | chr:4:9603240 |
| 4 rs13434688  | 9415633 A | 5.803  | 5.06E-06 | chr:4:9603240 |
| 4 rs113919186 | 9561488 G | 1.856  | 5.08E-06 | chr:4:9603240 |
| 4 rs11942505  | 9564504 C | 1.856  | 5.08E-06 | chr:4:9603240 |
| 4 rs28733833  | 9564338 T | 1.856  | 5.08E-06 | chr:4:9603240 |
| 4 rs6812931   | 9566656 C | 1.856  | 5.08E-06 | chr:4:9603240 |
| 4 rs9884691   | 9561348 T | 1.856  | 5.08E-06 | chr:4:9603240 |
| 4 rs35860603  | 9141447 A | 0.539  | 5.19E-06 | chr:4:9603240 |
| 4 rs142185832 | 9144352 G | 0.5396 | 5.32E-06 | chr:4:9603240 |
| 4 rs146530806 | 9144304 C | 0.5396 | 5.32E-06 | chr:4:9603240 |
| 4 rs113534025 | 9590971 C | 2.701  | 5.37E-06 | chr:4:9603240 |
| 4 rs143713351 | 9142597 C | 0.5382 | 5.42E-06 | chr:4:9603240 |

|               |           |        |          |               |
|---------------|-----------|--------|----------|---------------|
| 4 rs112166230 | 9564464 C | 1.877  | 5.60E-06 | chr:4:9603240 |
| 4 rs113137430 | 9562106 T | 1.877  | 5.60E-06 | chr:4:9603240 |
| 4 rs113785368 | 9562216 C | 1.877  | 5.60E-06 | chr:4:9603240 |
| 4 rs9884664   | 9563037 C | 1.877  | 5.60E-06 | chr:4:9603240 |
| 4 rs9884684   | 9561232 T | 1.877  | 5.60E-06 | chr:4:9603240 |
| 4 rs9997903   | 9555405 A | 1.849  | 5.62E-06 | chr:4:9603240 |
| 4 rs138241899 | 9143654 G | 0.5395 | 5.78E-06 | chr:4:9603240 |
| 4 rs6820665   | 9553569 T | 0.337  | 5.87E-06 | chr:4:9603240 |
| 4 rs28857279  | 9416476 T | 5.731  | 5.91E-06 | chr:4:9603240 |
| 4 rs28445426  | 9412201 T | 5.732  | 5.93E-06 | chr:4:9603240 |
| 4 rs10222812  | 9424045 T | 7.212  | 6.28E-06 | chr:4:9603240 |
| 4 rs13435504  | 9415239 A | 7.212  | 6.28E-06 | chr:4:9603240 |
| 4 rs141859376 | 9421945 G | 7.212  | 6.28E-06 | chr:4:9603240 |
| 4 rs143093608 | 9422266 G | 7.212  | 6.28E-06 | chr:4:9603240 |
| 4 rs189998629 | 9423437 A | 7.212  | 6.28E-06 | chr:4:9603240 |
| 4 rs28569198  | 9417795 G | 7.212  | 6.28E-06 | chr:4:9603240 |
| 4 rs28588147  | 9420233 C | 7.212  | 6.28E-06 | chr:4:9603240 |
| 4 rs28699068  | 9422649 T | 7.212  | 6.28E-06 | chr:4:9603240 |
| 4 rs62412114  | 9557691 A | 3.415  | 6.29E-06 | chr:4:9603240 |
| 4 rs144362537 | 9135598 G | 0.5389 | 6.29E-06 | chr:4:9603240 |
| 4 rs35343103  | 9134625 C | 0.5389 | 6.29E-06 | chr:4:9603240 |
| 4 rs13142396  | 9722847 G | 2.642  | 6.35E-06 | chr:4:9603240 |
| 4 rs10000818  | 9758234 A | 0.4982 | 6.40E-06 | chr:4:9603240 |
| 4 rs34257804  | 9139679 G | 0.5409 | 6.41E-06 | chr:4:9603240 |
| 4 rs6814282   | 9692516 T | 0.5655 | 6.53E-06 | chr:4:9603240 |
| 4 rs143003203 | 9127749 C | 0.5334 | 6.75E-06 | chr:4:9603240 |
| 4 rs6858614   | 9889740 T | 2.08   | 6.76E-06 | chr:4:9603240 |
| 4 rs6825221   | 9589620 G | 0.5501 | 6.83E-06 | chr:4:9603240 |
| 4 rs1842494   | 9569460 A | 0.3613 | 6.87E-06 | chr:4:9603240 |
| 4 rs12500696  | 9554200 A | 0.5435 | 7.03E-06 | chr:4:9603240 |
| 4 rs7676603   | 9775710 G | 0.5412 | 7.11E-06 | chr:4:9603240 |
| 4 rs10008721  | 9568038 A | 7.065  | 7.30E-06 | chr:4:9603240 |
| 4 rs140042917 | 9564766 A | 7.065  | 7.30E-06 | chr:4:9603240 |
| 4 rs9884663   | 9562978 T | 7.065  | 7.30E-06 | chr:4:9603240 |
| 4 rs146768165 | 9142282 G | 0.5149 | 7.33E-06 | chr:4:9603240 |
| 4 rs13104360  | 9684804 C | 2.631  | 7.43E-06 | chr:4:9603240 |
| 4 rs188754540 | 9397975 T | 3.59   | 7.48E-06 | chr:4:9603240 |
| 4 rs10027585  | 9424582 T | 7.091  | 7.56E-06 | chr:4:9603240 |
| 4 rs544975809 | 9640380 T | 0.3984 | 7.63E-06 | chr:4:9603240 |
| 4 rs114501308 | 9523606 C | 0.3686 | 7.69E-06 | chr:4:9603240 |
| 4 rs141104069 | 9418469 G | 7.078  | 7.73E-06 | chr:4:9603240 |
| 4 rs10029901  | 9506829 T | 0.5473 | 8.32E-06 | chr:4:9603240 |
| 4 rs3857166   | 9136261 G | 0.5445 | 8.33E-06 | chr:4:9603240 |

|               |            |        |          |               |
|---------------|------------|--------|----------|---------------|
| 4 rs142136009 | 9715455 T  | 0.3231 | 8.33E-06 | chr:4:9603240 |
| 4 rs2865028   | 9499342 A  | 0.2337 | 8.38E-06 | chr:4:9603240 |
| 4 rs139343792 | 9572589 C  | 7.008  | 8.39E-06 | chr:4:9603240 |
| 4 rs28379551  | 9583509 C  | 7.008  | 8.39E-06 | chr:4:9603240 |
| 4 rs28569802  | 9587761 T  | 7.008  | 8.39E-06 | chr:4:9603240 |
| 4 rs9990816   | 9587343 A  | 7.008  | 8.39E-06 | chr:4:9603240 |
| 4 rs113168681 | 9692858 T  | 0.401  | 8.50E-06 | chr:4:9603240 |
| 4 rs181340952 | 9670537 T  | 0.401  | 8.50E-06 | chr:4:9603240 |
| 4 rs188176101 | 9631903 A  | 3.248  | 8.59E-06 | chr:4:9603240 |
| 4 rs28566607  | 9542165 A  | 6.948  | 8.72E-06 | chr:4:9603240 |
| 4 rs7437720   | 9510396 A  | 0.5188 | 8.80E-06 | chr:4:9603240 |
| 4 rs10034040  | 9413585 A  | 6.984  | 9.02E-06 | chr:4:9603240 |
| 4 rs10213123  | 9595433 G  | 8.201  | 9.14E-06 | chr:4:9603240 |
| 4 rs116801488 | 9994132 A  | 199.8  | 3.44E-23 | chr:4:9981605 |
| 4 rs116802845 | 10002728 G | 199.8  | 3.44E-23 | chr:4:9981605 |
| 4 rs16891964  | 9997686 G  | 199.8  | 3.44E-23 | chr:4:9981605 |
| 4 rs79070322  | 9989896 C  | 199.8  | 3.44E-23 | chr:4:9981605 |
| 4 rs16892124  | 10006832 A | 225.4  | 1.34E-22 | chr:4:9981605 |
| 4 rs79695094  | 10007924 T | 225.4  | 1.34E-22 | chr:4:9981605 |
| 4 rs78009136  | 9991231 A  | 285.9  | 3.96E-22 | chr:4:9981605 |
| 4 rs79014420  | 9999406 G  | 280.4  | 4.21E-22 | chr:4:9981605 |
| 4 rs115809052 | 9998603 C  | 339.2  | 4.13E-21 | chr:4:9981605 |
| 4 rs79893309  | 9985629 G  | 339.2  | 4.13E-21 | chr:4:9981605 |
| 4 rs13116337  | 9947669 A  | 35.68  | 3.80E-20 | chr:4:9981605 |
| 4 rs77459722  | 9947200 A  | 35.68  | 3.80E-20 | chr:4:9981605 |
| 4 rs114219058 | 9821684 T  | 59.84  | 7.82E-20 | chr:4:9981605 |
| 4 rs75315521  | 9832084 T  | 59.84  | 7.82E-20 | chr:4:9981605 |
| 4 rs75815764  | 9827738 C  | 59.84  | 7.82E-20 | chr:4:9981605 |
| 4 rs79056900  | 9825695 C  | 59.84  | 7.82E-20 | chr:4:9981605 |
| 4 rs115462081 | 9891797 A  | 65.03  | 8.01E-20 | chr:4:9981605 |
| 4 rs115989654 | 9846120 G  | 65.03  | 8.01E-20 | chr:4:9981605 |
| 4 rs116459080 | 9875776 G  | 65.03  | 8.01E-20 | chr:4:9981605 |
| 4 rs139372859 | 9886571 T  | 65.03  | 8.01E-20 | chr:4:9981605 |
| 4 rs6847291   | 9848487 T  | 65.03  | 8.01E-20 | chr:4:9981605 |
| 4 rs76482463  | 9853573 C  | 65.03  | 8.01E-20 | chr:4:9981605 |
| 4 rs7690760   | 9881572 A  | 65.03  | 8.01E-20 | chr:4:9981605 |
| 4 rs79026415  | 9873601 A  | 65.03  | 8.01E-20 | chr:4:9981605 |
| 4 rs115968953 | 9981233 T  | 430.6  | 8.66E-20 | chr:4:9981605 |
| 4 rs7669698   | 9942866 A  | 430.6  | 8.66E-20 | chr:4:9981605 |
| 4 rs77091057  | 9960471 C  | 430.6  | 8.66E-20 | chr:4:9981605 |
| 4 rs78676381  | 9947593 G  | 430.6  | 8.66E-20 | chr:4:9981605 |
| 4 rs79384197  | 9967504 G  | 430.6  | 8.66E-20 | chr:4:9981605 |
| 4 rs116574712 | 9860662 A  | 65.29  | 2.80E-19 | chr:4:9981605 |

|               |            |       |          |               |
|---------------|------------|-------|----------|---------------|
| 4 rs115124464 | 9806079 A  | 60.07 | 4.35E-19 | chr:4:9981605 |
| 4 rs76685428  | 9802355 G  | 60.07 | 4.35E-19 | chr:4:9981605 |
| 4 rs112432698 | 9817787 A  | 36.11 | 1.59E-18 | chr:4:9981605 |
| 4 rs76318215  | 9814434 T  | 36.11 | 1.59E-18 | chr:4:9981605 |
| 4 rs141052118 | 9792197 C  | 31.91 | 3.26E-18 | chr:4:9981605 |
| 4 rs2139238   | 9818655 A  | 30.75 | 3.77E-18 | chr:4:9981605 |
| 4 rs145718821 | 9792518 A  | 29.53 | 6.77E-18 | chr:4:9981605 |
| 4 rs7698519   | 9796745 A  | 29.53 | 6.77E-18 | chr:4:9981605 |
| 4 rs3796840   | 10008121 T | 119.2 | 9.02E-18 | chr:4:9981605 |
| 4 rs78465681  | 9810274 C  | 104.1 | 1.86E-17 | chr:4:9981605 |
| 4 rs74986450  | 9949603 A  | 17.83 | 1.73E-16 | chr:4:9981605 |
| 4 rs16891971  | 9998376 A  | 24.55 | 1.86E-15 | chr:4:9981605 |
| 4 rs67968745  | 10008749 A | 21.32 | 1.05E-14 | chr:4:9981605 |
| 4 rs73805854  | 9792921 C  | 14.55 | 2.40E-14 | chr:4:9981605 |
| 4 rs7678287   | 10000501 A | 11.18 | 2.80E-14 | chr:4:9981605 |
| 4 rs36058283  | 10008512 A | 30.35 | 3.06E-14 | chr:4:9981605 |
| 4 rs78550522  | 9974844 A  | 97.99 | 7.68E-14 | chr:4:9981605 |
| 4 rs78685278  | 9975590 T  | 97.99 | 7.68E-14 | chr:4:9981605 |
| 4 rs4697891   | 9822319 G  | 11.64 | 9.00E-14 | chr:4:9981605 |
| 4 rs9991278   | 10002665 T | 12.17 | 1.18E-13 | chr:4:9981605 |
| 4 rs116662392 | 9995726 T  | 309   | 1.24E-13 | chr:4:9981605 |
| 4 rs148448488 | 9969238 A  | 309   | 1.24E-13 | chr:4:9981605 |
| 4 rs150088572 | 9930273 A  | 309   | 1.24E-13 | chr:4:9981605 |
| 4 rs75985854  | 9898051 C  | 309   | 1.24E-13 | chr:4:9981605 |
| 4 rs79989591  | 10002517 C | 309   | 1.24E-13 | chr:4:9981605 |
| 4 rs13113918  | 9998493 A  | 9.303 | 2.11E-13 | chr:4:9981605 |
| 4 rs28592748  | 9998605 T  | 9.303 | 2.11E-13 | chr:4:9981605 |
| 4 rs7683856   | 10000947 A | 9.303 | 2.11E-13 | chr:4:9981605 |
| 4 rs115474850 | 9848833 C  | 293.4 | 2.38E-13 | chr:4:9981605 |
| 4 rs74991865  | 9887610 C  | 293.4 | 2.38E-13 | chr:4:9981605 |
| 4 rs76504720  | 9879304 A  | 293.4 | 2.38E-13 | chr:4:9981605 |
| 4 rs78190988  | 9865366 T  | 293.4 | 2.38E-13 | chr:4:9981605 |
| 4 rs7696983   | 9995829 A  | 9.303 | 2.45E-13 | chr:4:9981605 |
| 4 rs7694997   | 9947811 A  | 7.481 | 4.34E-13 | chr:4:9981605 |
| 4 rs4622999   | 10003395 G | 8.395 | 4.50E-13 | chr:4:9981605 |
| 4 rs6817961   | 9850779 A  | 276.4 | 4.52E-13 | chr:4:9981605 |
| 4 rs6849962   | 9986903 A  | 7.77  | 4.83E-13 | chr:4:9981605 |
| 4 rs1122142   | 9947548 G  | 6.926 | 1.00E-12 | chr:4:9981605 |
| 4 rs2018643   | 9947121 T  | 6.926 | 1.00E-12 | chr:4:9981605 |
| 4 rs4339211   | 9947658 C  | 6.926 | 1.00E-12 | chr:4:9981605 |
| 4 rs185949181 | 9764482 A  | 41.89 | 1.10E-12 | chr:4:9981605 |
| 4 rs78921276  | 10002138 A | 80.92 | 1.12E-12 | chr:4:9981605 |
| 4 rs141292564 | 9785521 A  | 36.09 | 1.16E-12 | chr:4:9981605 |

|               |            |       |          |               |
|---------------|------------|-------|----------|---------------|
| 4 rs150796194 | 9785584 G  | 36.09 | 1.16E-12 | chr:4:9981605 |
| 4 rs3733590   | 9987226 C  | 7.348 | 1.50E-12 | chr:4:9981605 |
| 4 rs3775949   | 9987667 G  | 7.348 | 1.50E-12 | chr:4:9981605 |
| 4 rs6836200   | 9986915 C  | 7.348 | 1.50E-12 | chr:4:9981605 |
| 4 rs73100621  | 9986339 G  | 7.348 | 1.50E-12 | chr:4:9981605 |
| 4 rs6849736   | 9986783 A  | 7.316 | 1.72E-12 | chr:4:9981605 |
| 4 rs35954357  | 9978758 C  | 6.645 | 3.10E-12 | chr:4:9981605 |
| 4 rs7696971   | 9884528 T  | 6.579 | 4.08E-12 | chr:4:9981605 |
| 4 rs6449158   | 9960459 T  | 6.285 | 6.61E-12 | chr:4:9981605 |
| 4 rs13145554  | 9979589 T  | 6.351 | 6.74E-12 | chr:4:9981605 |
| 4 rs10001964  | 9959275 C  | 6.289 | 6.76E-12 | chr:4:9981605 |
| 4 rs10939636  | 9972640 T  | 6.289 | 6.76E-12 | chr:4:9981605 |
| 4 rs113439739 | 9957984 G  | 6.289 | 6.76E-12 | chr:4:9981605 |
| 4 rs150258593 | 9957950 A  | 6.289 | 6.76E-12 | chr:4:9981605 |
| 4 rs4305511   | 9955545 T  | 6.289 | 6.76E-12 | chr:4:9981605 |
| 4 rs4455410   | 9953297 T  | 6.289 | 6.76E-12 | chr:4:9981605 |
| 4 rs4473653   | 9971058 A  | 6.289 | 6.76E-12 | chr:4:9981605 |
| 4 rs6449171   | 9965998 T  | 6.289 | 6.76E-12 | chr:4:9981605 |
| 4 rs6449174   | 9966422 C  | 6.289 | 6.76E-12 | chr:4:9981605 |
| 4 rs6449178   | 9968684 C  | 6.289 | 6.76E-12 | chr:4:9981605 |
| 4 rs6850684   | 9964380 G  | 6.289 | 6.76E-12 | chr:4:9981605 |
| 4 rs6852441   | 9973744 C  | 6.289 | 6.76E-12 | chr:4:9981605 |
| 4 rs7376948   | 9954708 G  | 6.289 | 6.76E-12 | chr:4:9981605 |
| 4 rs7437120   | 9967683 T  | 6.289 | 6.76E-12 | chr:4:9981605 |
| 4 rs9994937   | 9964799 G  | 6.289 | 6.76E-12 | chr:4:9981605 |
| 4 rs114799904 | 10419671 A | 61.18 | 7.59E-12 | chr:4:9981605 |
| 4 rs115133815 | 10437198 T | 61.18 | 7.59E-12 | chr:4:9981605 |
| 4 rs150360090 | 10434441 C | 61.18 | 7.59E-12 | chr:4:9981605 |
| 4 rs13103497  | 9979262 G  | 6.361 | 7.78E-12 | chr:4:9981605 |
| 4 rs74513897  | 9979852 T  | 157.8 | 7.83E-12 | chr:4:9981605 |
| 4 rs6449201   | 9973894 C  | 6.277 | 8.50E-12 | chr:4:9981605 |
| 4 rs147685156 | 9735702 G  | 22.68 | 9.25E-12 | chr:4:9981605 |
| 4 rs56296130  | 9975461 T  | 6.069 | 1.17E-11 | chr:4:9981605 |
| 4 rs112890065 | 9746653 A  | 18.49 | 1.31E-11 | chr:4:9981605 |
| 4 rs4276278   | 9948870 T  | 6.039 | 1.49E-11 | chr:4:9981605 |
| 4 rs4408959   | 9948868 C  | 6.039 | 1.49E-11 | chr:4:9981605 |
| 4 rs17245723  | 9962218 A  | 5.914 | 1.55E-11 | chr:4:9981605 |
| 4 rs112674844 | 9807999 T  | 7.694 | 1.95E-11 | chr:4:9981605 |
| 4 rs111502994 | 9767409 T  | 17.69 | 2.24E-11 | chr:4:9981605 |
| 4 rs149377109 | 9716721 A  | 19.39 | 2.28E-11 | chr:4:9981605 |
| 4 rs185579962 | 9709152 T  | 19.39 | 2.28E-11 | chr:4:9981605 |
| 4 rs113426638 | 9777694 A  | 17.4  | 2.33E-11 | chr:4:9981605 |
| 4 rs10018663  | 10004797 C | 7.386 | 2.40E-11 | chr:4:9981605 |

|               |            |       |          |               |
|---------------|------------|-------|----------|---------------|
| 4 rs751092    | 10005897 C | 6.954 | 2.65E-11 | chr:4:9981605 |
| 4 rs13141248  | 9845790 T  | 7.89  | 3.86E-11 | chr:4:9981605 |
| 4 rs150659411 | 9845787 T  | 7.89  | 3.86E-11 | chr:4:9981605 |
| 4 rs188926585 | 9710824 T  | 18.76 | 3.87E-11 | chr:4:9981605 |
| 4 rs141360566 | 9716030 A  | 7.905 | 5.48E-11 | chr:4:9981605 |
| 4 rs116063400 | 9733661 A  | 21.73 | 8.07E-11 | chr:4:9981605 |
| 4 rs1014290   | 10001861 G | 5.696 | 1.03E-10 | chr:4:9981605 |
| 4 rs11943372  | 9999346 T  | 5.245 | 1.34E-10 | chr:4:9981605 |
| 4 rs4529048   | 9997112 C  | 5.245 | 1.34E-10 | chr:4:9981605 |
| 4 rs62293225  | 9777387 T  | 33.68 | 1.40E-10 | chr:4:9981605 |
| 4 rs10939650  | 9998440 C  | 5.246 | 1.44E-10 | chr:4:9981605 |
| 4 rs3733588   | 9997303 G  | 5.24  | 1.60E-10 | chr:4:9981605 |
| 4 rs145096741 | 9697413 T  | 7.334 | 1.79E-10 | chr:4:9981605 |
| 4 rs7686538   | 9948077 C  | 5.354 | 2.19E-10 | chr:4:9981605 |
| 4 rs112889423 | 9743135 T  | 12.96 | 3.18E-10 | chr:4:9981605 |
| 4 rs142272392 | 9743090 A  | 12.96 | 3.18E-10 | chr:4:9981605 |
| 4 rs188814890 | 9740038 C  | 12.96 | 3.18E-10 | chr:4:9981605 |
| 4 rs12511438  | 9702289 C  | 8.027 | 3.36E-10 | chr:4:9981605 |
| 4 rs1401437   | 9819763 G  | 6.624 | 3.48E-10 | chr:4:9981605 |
| 4 rs1401441   | 9832304 T  | 6.624 | 3.48E-10 | chr:4:9981605 |
| 4 rs1401442   | 9839447 C  | 6.624 | 3.48E-10 | chr:4:9981605 |
| 4 rs1519092   | 9826801 T  | 6.624 | 3.48E-10 | chr:4:9981605 |
| 4 rs1519093   | 9824019 T  | 6.624 | 3.48E-10 | chr:4:9981605 |
| 4 rs1878277   | 9825143 T  | 6.624 | 3.48E-10 | chr:4:9981605 |
| 4 rs7656266   | 9820644 A  | 6.624 | 3.48E-10 | chr:4:9981605 |
| 4 rs939131    | 9820950 A  | 6.624 | 3.48E-10 | chr:4:9981605 |
| 4 rs3775946   | 9995256 A  | 4.908 | 5.55E-10 | chr:4:9981605 |
| 4 rs3775947   | 9995240 C  | 4.908 | 5.55E-10 | chr:4:9981605 |
| 4 rs7677006   | 10476374 T | 7.363 | 6.52E-10 | chr:4:9981605 |
| 4 rs78934234  | 9804560 A  | 5.954 | 7.66E-10 | chr:4:9981605 |
| 4 rs114537931 | 10190611 A | 37.43 | 9.16E-10 | chr:4:9981605 |
| 4 rs114739867 | 10195016 T | 37.43 | 9.16E-10 | chr:4:9981605 |
| 4 rs35201034  | 10007451 C | 4.553 | 1.05E-09 | chr:4:9981605 |
| 4 rs138027354 | 9923403 G  | 28.1  | 1.11E-09 | chr:4:9981605 |
| 4 rs139343650 | 9924976 C  | 28.1  | 1.11E-09 | chr:4:9981605 |
| 4 rs140338772 | 9919724 G  | 28.1  | 1.11E-09 | chr:4:9981605 |
| 4 rs143698928 | 9926104 A  | 28.1  | 1.11E-09 | chr:4:9981605 |
| 4 rs149517836 | 9923805 C  | 28.1  | 1.11E-09 | chr:4:9981605 |
| 4 rs150440092 | 9923303 A  | 28.1  | 1.11E-09 | chr:4:9981605 |
| 4 rs16891038  | 9925788 G  | 28.1  | 1.11E-09 | chr:4:9981605 |
| 4 rs181639772 | 9936791 T  | 28.1  | 1.11E-09 | chr:4:9981605 |
| 4 rs183991328 | 9928890 C  | 28.1  | 1.11E-09 | chr:4:9981605 |
| 4 rs540546895 | 9924547 G  | 28.1  | 1.11E-09 | chr:4:9981605 |

|               |            |       |          |               |
|---------------|------------|-------|----------|---------------|
| 4 rs551569822 | 9925918 T  | 28.1  | 1.11E-09 | chr:4:9981605 |
| 4 rs938560    | 9920545 A  | 28.1  | 1.11E-09 | chr:4:9981605 |
| 4 rs138679148 | 9738111 C  | 11.18 | 1.12E-09 | chr:4:9981605 |
| 4 rs149055696 | 9701327 A  | 15.92 | 1.61E-09 | chr:4:9981605 |
| 4 rs16890933  | 9918457 G  | 24.42 | 1.80E-09 | chr:4:9981605 |
| 4 rs16890938  | 9918845 T  | 24.42 | 1.80E-09 | chr:4:9981605 |
| 4 rs114235948 | 9772094 T  | 45.25 | 1.91E-09 | chr:4:9981605 |
| 4 rs114803892 | 9638698 T  | 45.25 | 1.91E-09 | chr:4:9981605 |
| 4 rs115102455 | 9691658 T  | 45.25 | 1.91E-09 | chr:4:9981605 |
| 4 rs116156748 | 9722016 A  | 45.25 | 1.91E-09 | chr:4:9981605 |
| 4 rs116532033 | 9762981 G  | 45.25 | 1.91E-09 | chr:4:9981605 |
| 4 rs138512934 | 9606124 A  | 45.25 | 1.91E-09 | chr:4:9981605 |
| 4 rs139128075 | 9604885 C  | 45.25 | 1.91E-09 | chr:4:9981605 |
| 4 rs139668726 | 9642133 T  | 45.25 | 1.91E-09 | chr:4:9981605 |
| 4 rs140014892 | 9682547 T  | 45.25 | 1.91E-09 | chr:4:9981605 |
| 4 rs140552624 | 9671544 T  | 45.25 | 1.91E-09 | chr:4:9981605 |
| 4 rs141975845 | 9687223 A  | 45.25 | 1.91E-09 | chr:4:9981605 |
| 4 rs143830660 | 9732131 A  | 45.25 | 1.91E-09 | chr:4:9981605 |
| 4 rs145616091 | 9669664 T  | 45.25 | 1.91E-09 | chr:4:9981605 |
| 4 rs145895721 | 9779900 T  | 45.25 | 1.91E-09 | chr:4:9981605 |
| 4 rs146196374 | 9678205 T  | 45.25 | 1.91E-09 | chr:4:9981605 |
| 4 rs148258101 | 9620330 A  | 45.25 | 1.91E-09 | chr:4:9981605 |
| 4 rs150608490 | 9660937 A  | 45.25 | 1.91E-09 | chr:4:9981605 |
| 4 rs150744301 | 9751219 A  | 45.25 | 1.91E-09 | chr:4:9981605 |
| 4 rs150798057 | 9748311 A  | 45.25 | 1.91E-09 | chr:4:9981605 |
| 4 rs151251975 | 9603489 A  | 45.25 | 1.91E-09 | chr:4:9981605 |
| 4 rs181352641 | 9640935 G  | 45.25 | 1.91E-09 | chr:4:9981605 |
| 4 rs185328312 | 9592216 G  | 45.25 | 1.91E-09 | chr:4:9981605 |
| 4 rs187417701 | 9646431 A  | 45.25 | 1.91E-09 | chr:4:9981605 |
| 4 rs187998987 | 9753216 A  | 45.25 | 1.91E-09 | chr:4:9981605 |
| 4 rs188063506 | 9679214 A  | 45.25 | 1.91E-09 | chr:4:9981605 |
| 4 rs192115928 | 9682144 T  | 45.25 | 1.91E-09 | chr:4:9981605 |
| 4 rs547498536 | 9666233 A  | 45.25 | 1.91E-09 | chr:4:9981605 |
| 4 rs555538409 | 9667589 G  | 45.25 | 1.91E-09 | chr:4:9981605 |
| 4 rs572808723 | 9680927 C  | 45.25 | 1.91E-09 | chr:4:9981605 |
| 4 rs6836477   | 9656054 C  | 45.25 | 1.91E-09 | chr:4:9981605 |
| 4 rs7655043   | 9762216 T  | 45.25 | 1.91E-09 | chr:4:9981605 |
| 4 rs7665831   | 9596933 G  | 45.25 | 1.91E-09 | chr:4:9981605 |
| 4 rs7671802   | 9745503 A  | 45.25 | 1.91E-09 | chr:4:9981605 |
| 4 rs7698544   | 9766720 A  | 45.25 | 1.91E-09 | chr:4:9981605 |
| 4 rs577897040 | 10137859 A | 62.1  | 2.01E-09 | chr:4:9981605 |
| 4 rs1519094   | 9817286 T  | 5.833 | 2.08E-09 | chr:4:9981605 |
| 4 rs115020739 | 9925821 T  | 117.5 | 2.09E-09 | chr:4:9981605 |



|               |            |       |          |               |
|---------------|------------|-------|----------|---------------|
| 4 rs7658183   | 9922657 T  | 117.5 | 2.09E-09 | chr:4:9981605 |
| 4 rs4697691   | 9858485 A  | 4.582 | 2.63E-09 | chr:4:9981605 |
| 4 rs4697900   | 9859976 A  | 4.582 | 2.63E-09 | chr:4:9981605 |
| 4 rs10939561  | 9851542 T  | 4.587 | 2.64E-09 | chr:4:9981605 |
| 4 rs1980219   | 9850621 T  | 4.586 | 2.66E-09 | chr:4:9981605 |
| 4 rs6812007   | 9850220 C  | 4.586 | 2.66E-09 | chr:4:9981605 |
| 4 rs6828040   | 9850480 T  | 4.586 | 2.66E-09 | chr:4:9981605 |
| 4 rs6847858   | 9853059 T  | 4.586 | 2.66E-09 | chr:4:9981605 |
| 4 rs6847871   | 9853074 T  | 4.586 | 2.66E-09 | chr:4:9981605 |
| 4 rs7683831   | 9845079 T  | 4.573 | 2.92E-09 | chr:4:9981605 |
| 4 rs4613568   | 9862902 T  | 4.57  | 2.96E-09 | chr:4:9981605 |
| 4 rs6852425   | 9856859 G  | 4.57  | 2.96E-09 | chr:4:9981605 |
| 4 rs1519099   | 9874130 T  | 5.567 | 3.19E-09 | chr:4:9981605 |
| 4 rs150393841 | 10142737 A | 18.92 | 3.35E-09 | chr:4:9981605 |
| 4 rs3775948   | 9995182 G  | 4.399 | 3.45E-09 | chr:4:9981605 |
| 4 rs28591077  | 9863678 A  | 4.548 | 3.46E-09 | chr:4:9981605 |
| 4 rs9684729   | 9862036 C  | 4.548 | 3.46E-09 | chr:4:9981605 |
| 4 rs146607046 | 9725354 A  | 10.07 | 3.98E-09 | chr:4:9981605 |
| 4 rs146524492 | 9712174 G  | 32.57 | 3.99E-09 | chr:4:9981605 |
| 4 rs149849338 | 9688109 C  | 32.57 | 3.99E-09 | chr:4:9981605 |
| 4 rs150078827 | 9770058 G  | 14.81 | 4.25E-09 | chr:4:9981605 |
| 4 rs116432931 | 9931162 C  | 6.212 | 5.64E-09 | chr:4:9981605 |
| 4 rs116658821 | 9931161 C  | 6.212 | 5.64E-09 | chr:4:9981605 |
| 4 rs114757726 | 9770040 G  | 13.68 | 6.10E-09 | chr:4:9981605 |
| 4 rs115503187 | 9782440 T  | 13.68 | 6.10E-09 | chr:4:9981605 |
| 4 rs141539501 | 9767488 T  | 13.68 | 6.10E-09 | chr:4:9981605 |
| 4 rs143543860 | 9773487 A  | 13.68 | 6.10E-09 | chr:4:9981605 |
| 4 rs150887297 | 9757360 T  | 13.68 | 6.10E-09 | chr:4:9981605 |
| 4 rs79155112  | 9764669 C  | 13.68 | 6.10E-09 | chr:4:9981605 |
| 4 rs75000154  | 9653588 A  | 17.3  | 6.34E-09 | chr:4:9981605 |
| 4 rs59024311  | 9810123 G  | 4.842 | 6.89E-09 | chr:4:9981605 |
| 4 rs141649879 | 9734132 G  | 57.34 | 6.99E-09 | chr:4:9981605 |
| 4 rs2867385   | 9795782 G  | 5.35  | 8.66E-09 | chr:4:9981605 |
| 4 rs181110448 | 9600723 A  | 16.69 | 8.84E-09 | chr:4:9981605 |
| 4 rs115531234 | 9755596 A  | 13.06 | 9.33E-09 | chr:4:9981605 |
| 4 rs7663032   | 9993838 C  | 4.141 | 1.04E-08 | chr:4:9981605 |
| 4 rs10006684  | 9694706 T  | 4.118 | 1.08E-08 | chr:4:9981605 |
| 4 rs114684248 | 9773367 G  | 8.102 | 1.10E-08 | chr:4:9981605 |
| 4 rs146491327 | 9772211 T  | 8.102 | 1.10E-08 | chr:4:9981605 |
| 4 rs182426026 | 9772485 C  | 8.102 | 1.10E-08 | chr:4:9981605 |
| 4 rs13136903  | 9694522 T  | 4.11  | 1.20E-08 | chr:4:9981605 |
| 4 rs115508089 | 10447254 A | 6     | 1.22E-08 | chr:4:9981605 |
| 4 rs6813899   | 9654942 A  | 5.955 | 1.22E-08 | chr:4:9981605 |

|               |            |       |          |               |
|---------------|------------|-------|----------|---------------|
| 4 rs4621431   | 9947590 G  | 3.804 | 1.38E-08 | chr:4:9981605 |
| 4 rs11941979  | 9664162 T  | 5.655 | 1.44E-08 | chr:4:9981605 |
| 4 rs151313439 | 9920006 A  | 23.92 | 1.55E-08 | chr:4:9981605 |
| 4 rs543937324 | 9764685 T  | 8.499 | 1.63E-08 | chr:4:9981605 |
| 4 rs115383005 | 9687419 T  | 10.88 | 1.81E-08 | chr:4:9981605 |
| 4 rs116272919 | 9688351 A  | 10.88 | 1.81E-08 | chr:4:9981605 |
| 4 rs143429481 | 9690318 C  | 10.88 | 1.81E-08 | chr:4:9981605 |
| 4 rs143715911 | 9684005 A  | 10.88 | 1.81E-08 | chr:4:9981605 |
| 4 rs187432052 | 9681383 T  | 10.88 | 1.81E-08 | chr:4:9981605 |
| 4 rs10939600  | 9886931 A  | 4.05  | 1.82E-08 | chr:4:9981605 |
| 4 rs6449089   | 9884258 G  | 4.05  | 1.82E-08 | chr:4:9981605 |
| 4 rs6449090   | 9884536 T  | 4.05  | 1.82E-08 | chr:4:9981605 |
| 4 rs6838891   | 9884114 C  | 4.05  | 1.82E-08 | chr:4:9981605 |
| 4 rs6848689   | 9884197 A  | 4.05  | 1.82E-08 | chr:4:9981605 |
| 4 rs7697692   | 9600852 C  | 29.21 | 2.00E-08 | chr:4:9981605 |
| 4 rs145767910 | 9671051 T  | 10.29 | 2.73E-08 | chr:4:9981605 |
| 4 rs147221486 | 9669099 A  | 10.29 | 2.73E-08 | chr:4:9981605 |
| 4 rs190436636 | 9679893 G  | 10.29 | 2.73E-08 | chr:4:9981605 |
| 4 rs6858093   | 9681650 G  | 10.43 | 2.98E-08 | chr:4:9981605 |
| 4 rs77017317  | 10462791 T | 5.788 | 3.13E-08 | chr:4:9981605 |
| 4 rs12506622  | 9690369 T  | 10.02 | 4.24E-08 | chr:4:9981605 |
| 4 rs6823671   | 9692517 A  | 10.02 | 4.24E-08 | chr:4:9981605 |
| 4 rs6829292   | 9692892 A  | 10.02 | 4.24E-08 | chr:4:9981605 |
| 4 rs6829800   | 9685856 A  | 10.02 | 4.24E-08 | chr:4:9981605 |
| 4 rs7678732   | 9693253 T  | 10.02 | 4.24E-08 | chr:4:9981605 |
| 4 rs144261609 | 9561844 A  | 27.51 | 5.06E-08 | chr:4:9981605 |
| 4 rs188966668 | 9510024 T  | 27.51 | 5.06E-08 | chr:4:9981605 |
| 4 rs4697908   | 9893282 T  | 3.901 | 5.43E-08 | chr:4:9981605 |
| 4 rs140456990 | 9569392 C  | 27.35 | 5.45E-08 | chr:4:9981605 |
| 4 rs187419952 | 9753263 T  | 7.438 | 5.64E-08 | chr:4:9981605 |
| 4 rs548255756 | 10136124 C | 5.526 | 5.73E-08 | chr:4:9981605 |
| 4 rs4077929   | 9698730 A  | 4.542 | 5.81E-08 | chr:4:9981605 |
| 4 rs4554077   | 9674736 G  | 9.479 | 6.08E-08 | chr:4:9981605 |
| 4 rs6812811   | 9672000 T  | 9.479 | 6.08E-08 | chr:4:9981605 |
| 4 rs7688167   | 9893506 G  | 3.883 | 6.25E-08 | chr:4:9981605 |
| 4 rs883041    | 9868346 C  | 3.703 | 6.40E-08 | chr:4:9981605 |
| 4 rs116608329 | 9697295 T  | 9.425 | 6.46E-08 | chr:4:9981605 |
| 4 rs75772786  | 10467331 G | 5.25  | 7.27E-08 | chr:4:9981605 |
| 4 rs114957772 | 9730698 C  | 6.938 | 7.83E-08 | chr:4:9981605 |
| 4 rs144742219 | 9700280 A  | 9.205 | 7.92E-08 | chr:4:9981605 |
| 4 rs79238430  | 9492635 T  | 5.383 | 8.57E-08 | chr:4:9981605 |
| 4 rs6448728   | 9541220 T  | 13.81 | 9.87E-08 | chr:4:9981605 |
| 4 rs10031836  | 9506539 C  | 5.602 | 1.01E-07 | chr:4:9981605 |

|               |            |       |          |               |
|---------------|------------|-------|----------|---------------|
| 4 rs10031907  | 9506545 C  | 5.602 | 1.01E-07 | chr:4:9981605 |
| 4 rs10034585  | 9506548 C  | 5.602 | 1.01E-07 | chr:4:9981605 |
| 4 rs149367087 | 9609347 A  | 4.954 | 1.02E-07 | chr:4:9981605 |
| 4 rs114758567 | 9739117 T  | 6.687 | 1.03E-07 | chr:4:9981605 |
| 4 rs115727367 | 9740960 G  | 6.687 | 1.03E-07 | chr:4:9981605 |
| 4 rs116528676 | 9733207 A  | 6.687 | 1.03E-07 | chr:4:9981605 |
| 4 rs138694626 | 9736408 T  | 6.687 | 1.03E-07 | chr:4:9981605 |
| 4 rs144508872 | 9734039 A  | 6.687 | 1.03E-07 | chr:4:9981605 |
| 4 rs145460666 | 9735643 A  | 6.687 | 1.03E-07 | chr:4:9981605 |
| 4 rs181763499 | 9737693 T  | 6.687 | 1.03E-07 | chr:4:9981605 |
| 4 rs115100475 | 9716472 T  | 43.41 | 1.07E-07 | chr:4:9981605 |
| 4 rs538733592 | 9643095 G  | 43.41 | 1.07E-07 | chr:4:9981605 |
| 4 rs544602607 | 9647853 C  | 43.41 | 1.07E-07 | chr:4:9981605 |
| 4 rs556137923 | 9643083 A  | 43.41 | 1.07E-07 | chr:4:9981605 |
| 4 rs560642590 | 9569518 T  | 43.41 | 1.07E-07 | chr:4:9981605 |
| 4 rs4697903   | 9865426 G  | 3.57  | 1.11E-07 | chr:4:9981605 |
| 4 rs28437340  | 9490580 T  | 5.428 | 1.15E-07 | chr:4:9981605 |
| 4 rs13107864  | 10418989 A | 4.326 | 1.17E-07 | chr:4:9981605 |
| 4 rs6810406   | 10418431 A | 4.326 | 1.17E-07 | chr:4:9981605 |
| 4 rs6858614   | 9889740 T  | 3.931 | 1.18E-07 | chr:4:9981605 |
| 4 rs10016075  | 10006663 G | 3.622 | 1.28E-07 | chr:4:9981605 |
| 4 rs138559943 | 10043590 G | 69    | 1.32E-07 | chr:4:9981605 |
| 4 rs143467853 | 10185209 G | 69    | 1.32E-07 | chr:4:9981605 |
| 4 rs144470017 | 10065738 G | 69    | 1.32E-07 | chr:4:9981605 |
| 4 rs145947196 | 10330045 G | 69    | 1.32E-07 | chr:4:9981605 |
| 4 rs181858096 | 10396022 G | 69    | 1.32E-07 | chr:4:9981605 |
| 4 rs551329964 | 10275829 C | 69    | 1.32E-07 | chr:4:9981605 |
| 4 rs28371074  | 9492403 T  | 5.367 | 1.41E-07 | chr:4:9981605 |
| 4 rs7669444   | 9893577 A  | 3.755 | 1.46E-07 | chr:4:9981605 |
| 4 rs28880651  | 9493311 A  | 5.347 | 1.47E-07 | chr:4:9981605 |
| 4 rs114360895 | 10154974 T | 13.07 | 1.72E-07 | chr:4:9981605 |
| 4 rs143048489 | 9492085 C  | 5.425 | 1.76E-07 | chr:4:9981605 |
| 4 rs6847375   | 9612811 G  | 9.379 | 1.83E-07 | chr:4:9981605 |
| 4 rs189941972 | 9792811 A  | 90.63 | 1.83E-07 | chr:4:9981605 |
| 4 rs10018119  | 9505877 A  | 5.25  | 1.87E-07 | chr:4:9981605 |
| 4 rs10027121  | 9506061 T  | 5.25  | 1.87E-07 | chr:4:9981605 |
| 4 rs114065417 | 9496389 T  | 5.25  | 1.87E-07 | chr:4:9981605 |
| 4 rs116049471 | 9497345 T  | 5.25  | 1.87E-07 | chr:4:9981605 |
| 4 rs142324132 | 9505654 A  | 5.25  | 1.87E-07 | chr:4:9981605 |
| 4 rs145592249 | 9509476 A  | 5.25  | 1.87E-07 | chr:4:9981605 |
| 4 rs148246352 | 9496314 A  | 5.25  | 1.87E-07 | chr:4:9981605 |
| 4 rs28409436  | 9503519 A  | 5.25  | 1.87E-07 | chr:4:9981605 |
| 4 rs28501113  | 9500762 A  | 5.25  | 1.87E-07 | chr:4:9981605 |

|               |            |        |          |               |
|---------------|------------|--------|----------|---------------|
| 4 rs28536787  | 9498858 T  | 5.25   | 1.87E-07 | chr:4:9981605 |
| 4 rs28551614  | 9500307 T  | 5.25   | 1.87E-07 | chr:4:9981605 |
| 4 rs28580561  | 9503589 C  | 5.25   | 1.87E-07 | chr:4:9981605 |
| 4 rs28628561  | 9494374 T  | 5.25   | 1.87E-07 | chr:4:9981605 |
| 4 rs28683702  | 9498629 A  | 5.25   | 1.87E-07 | chr:4:9981605 |
| 4 rs28685834  | 9498475 C  | 5.25   | 1.87E-07 | chr:4:9981605 |
| 4 rs28709857  | 9497873 A  | 5.25   | 1.87E-07 | chr:4:9981605 |
| 4 rs28744575  | 9500593 T  | 5.25   | 1.87E-07 | chr:4:9981605 |
| 4 rs9992409   | 9503798 T  | 5.25   | 1.87E-07 | chr:4:9981605 |
| 4 rs9992781   | 9504194 A  | 5.25   | 1.87E-07 | chr:4:9981605 |
| 4 rs114232342 | 9509298 C  | 5.364  | 2.07E-07 | chr:4:9981605 |
| 4 rs4575994   | 9997979 G  | 0.2324 | 2.21E-07 | chr:4:9981605 |
| 4 rs114576054 | 9496139 A  | 5.328  | 2.21E-07 | chr:4:9981605 |
| 4 rs146525859 | 9496391 A  | 5.328  | 2.21E-07 | chr:4:9981605 |
| 4 rs28421272  | 9497885 A  | 5.139  | 2.29E-07 | chr:4:9981605 |
| 4 rs4697906   | 9889896 T  | 246.3  | 2.62E-07 | chr:4:9981605 |
| 4 rs186692764 | 9626105 G  | 20.34  | 2.92E-07 | chr:4:9981605 |
| 4 rs574102947 | 9631433 G  | 20.34  | 2.92E-07 | chr:4:9981605 |
| 4 rs6826254   | 9814766 C  | 3.655  | 2.92E-07 | chr:4:9981605 |
| 4 rs115120277 | 10408446 T | 23.62  | 3.38E-07 | chr:4:9981605 |
| 4 rs150790389 | 9862815 T  | 27.38  | 4.13E-07 | chr:4:9981605 |
| 4 rs7669088   | 9699627 T  | 8.303  | 4.22E-07 | chr:4:9981605 |
| 4 rs7686375   | 9734974 A  | 5.853  | 5.15E-07 | chr:4:9981605 |
| 4 rs116615514 | 10113806 C | 23.01  | 5.39E-07 | chr:4:9981605 |
| 4 rs140448238 | 10116398 C | 23.01  | 5.39E-07 | chr:4:9981605 |
| 4 rs141154634 | 10089680 C | 23.01  | 5.39E-07 | chr:4:9981605 |
| 4 rs143195615 | 10089618 A | 23.01  | 5.39E-07 | chr:4:9981605 |
| 4 rs563248843 | 10089839 T | 23.01  | 5.39E-07 | chr:4:9981605 |
| 4 rs189549531 | 9535368 G  | 5.426  | 5.84E-07 | chr:4:9981605 |
| 4 rs28441988  | 9686419 T  | 5.48   | 6.04E-07 | chr:4:9981605 |
| 4 rs28532184  | 9638350 A  | 5.48   | 6.04E-07 | chr:4:9981605 |
| 4 rs144984865 | 9863240 T  | 36.02  | 6.16E-07 | chr:4:9981605 |
| 4 rs147530507 | 9855802 T  | 36.02  | 6.16E-07 | chr:4:9981605 |
| 4 rs147579671 | 9860554 T  | 36.02  | 6.16E-07 | chr:4:9981605 |
| 4 rs150266310 | 9861178 C  | 36.02  | 6.16E-07 | chr:4:9981605 |
| 4 rs180932754 | 9855760 G  | 36.02  | 6.16E-07 | chr:4:9981605 |
| 4 rs114137702 | 10440735 C | 13.5   | 6.39E-07 | chr:4:9981605 |
| 4 rs146838297 | 10467706 G | 13.5   | 6.39E-07 | chr:4:9981605 |
| 4 rs75900771  | 10478872 C | 13.5   | 6.39E-07 | chr:4:9981605 |
| 4 rs147526376 | 9542349 T  | 22.31  | 6.48E-07 | chr:4:9981605 |
| 4 rs79503885  | 10236369 C | 4.612  | 6.49E-07 | chr:4:9981605 |
| 4 rs56113653  | 9898052 G  | 3      | 6.58E-07 | chr:4:9981605 |
| 4 rs12649073  | 9694490 A  | 3.295  | 6.66E-07 | chr:4:9981605 |

|               |            |        |          |               |
|---------------|------------|--------|----------|---------------|
| 4 rs184691520 | 10012086 T | 46.97  | 6.78E-07 | chr:4:9981605 |
| 4 rs542277037 | 9569512 C  | 7.448  | 6.98E-07 | chr:4:9981605 |
| 4 rs192094959 | 9504170 G  | 4.814  | 7.03E-07 | chr:4:9981605 |
| 4 rs10022499  | 10006537 C | 3.379  | 7.11E-07 | chr:4:9981605 |
| 4 rs6853437   | 10005435 G | 3.379  | 7.11E-07 | chr:4:9981605 |
| 4 rs9291640   | 10007086 C | 3.379  | 7.11E-07 | chr:4:9981605 |
| 4 rs9291641   | 10007259 C | 3.379  | 7.11E-07 | chr:4:9981605 |
| 4 rs4697902   | 9863936 T  | 3.247  | 7.56E-07 | chr:4:9981605 |
| 4 rs10000913  | 9511660 T  | 5.257  | 7.70E-07 | chr:4:9981605 |
| 4 rs10007087  | 9521800 T  | 5.257  | 7.70E-07 | chr:4:9981605 |
| 4 rs10010068  | 9520235 T  | 5.257  | 7.70E-07 | chr:4:9981605 |
| 4 rs10028800  | 9524734 A  | 5.257  | 7.70E-07 | chr:4:9981605 |
| 4 rs114146209 | 9515191 A  | 5.257  | 7.70E-07 | chr:4:9981605 |
| 4 rs114586406 | 9511557 T  | 5.257  | 7.70E-07 | chr:4:9981605 |
| 4 rs12331300  | 9521411 A  | 5.257  | 7.70E-07 | chr:4:9981605 |
| 4 rs12331712  | 9521609 G  | 5.257  | 7.70E-07 | chr:4:9981605 |
| 4 rs142968757 | 9519884 G  | 5.257  | 7.70E-07 | chr:4:9981605 |
| 4 rs146238242 | 9520489 A  | 5.257  | 7.70E-07 | chr:4:9981605 |
| 4 rs147542152 | 9522495 A  | 5.257  | 7.70E-07 | chr:4:9981605 |
| 4 rs150463076 | 9518435 G  | 5.257  | 7.70E-07 | chr:4:9981605 |
| 4 rs187749189 | 9512003 C  | 5.257  | 7.70E-07 | chr:4:9981605 |
| 4 rs193097823 | 9518697 G  | 5.257  | 7.70E-07 | chr:4:9981605 |
| 4 rs371770940 | 9512400 A  | 5.257  | 7.70E-07 | chr:4:9981605 |
| 4 rs3975611   | 9522913 C  | 5.257  | 7.70E-07 | chr:4:9981605 |
| 4 rs9992237   | 9511902 A  | 5.257  | 7.70E-07 | chr:4:9981605 |
| 4 rs10012790  | 10421725 G | 3.734  | 7.86E-07 | chr:4:9981605 |
| 4 rs150759864 | 9620565 T  | 6.516  | 8.09E-07 | chr:4:9981605 |
| 4 rs11726102  | 9951664 C  | 0.2652 | 8.16E-07 | chr:4:9981605 |
| 4 rs11735831  | 9951591 A  | 0.2652 | 8.16E-07 | chr:4:9981605 |
| 4 rs10001324  | 9520425 T  | 5.225  | 8.32E-07 | chr:4:9981605 |
| 4 rs28832644  | 9510188 G  | 5.214  | 8.69E-07 | chr:4:9981605 |
| 4 rs116084164 | 9536050 A  | 5.193  | 9.27E-07 | chr:4:9981605 |
| 4 rs145749037 | 9535232 A  | 5.193  | 9.27E-07 | chr:4:9981605 |
| 4 rs28609060  | 9533954 A  | 5.193  | 9.27E-07 | chr:4:9981605 |
| 4 rs28644422  | 9502675 T  | 4.761  | 9.53E-07 | chr:4:9981605 |
| 4 rs10939702  | 10096692 T | 6.475  | 9.59E-07 | chr:4:9981605 |
| 4 rs7674723   | 9916202 C  | 3.066  | 1.01E-06 | chr:4:9981605 |
| 4 rs9994216   | 9984541 T  | 3.334  | 1.16E-06 | chr:4:9981605 |
| 4 rs114155565 | 10143654 G | 11.7   | 1.19E-06 | chr:4:9981605 |
| 4 rs115226953 | 10133399 G | 11.7   | 1.19E-06 | chr:4:9981605 |
| 4 rs115613509 | 10159536 G | 11.7   | 1.19E-06 | chr:4:9981605 |
| 4 rs116036122 | 10143370 T | 11.7   | 1.19E-06 | chr:4:9981605 |
| 4 rs138501326 | 10136903 T | 11.7   | 1.19E-06 | chr:4:9981605 |

|               |            |        |          |               |
|---------------|------------|--------|----------|---------------|
| 4 rs116138123 | 9648821 G  | 6.502  | 1.23E-06 | chr:4:9981605 |
| 4 rs28566607  | 9542165 A  | 5.023  | 1.25E-06 | chr:4:9981605 |
| 4 rs13150941  | 9694401 A  | 0.2256 | 1.25E-06 | chr:4:9981605 |
| 4 rs114137844 | 9948482 T  | 82.87  | 1.29E-06 | chr:4:9981605 |
| 4 rs114865151 | 9965145 A  | 82.87  | 1.29E-06 | chr:4:9981605 |
| 4 rs116477885 | 9969931 C  | 82.87  | 1.29E-06 | chr:4:9981605 |
| 4 rs140602684 | 9981019 A  | 82.87  | 1.29E-06 | chr:4:9981605 |
| 4 rs147608714 | 9960013 C  | 82.87  | 1.29E-06 | chr:4:9981605 |
| 4 rs181435538 | 9966797 C  | 82.87  | 1.29E-06 | chr:4:9981605 |
| 4 rs11734219  | 9977154 C  | 0.2876 | 1.31E-06 | chr:4:9981605 |
| 4 rs116189390 | 10178169 A | 11.3   | 1.35E-06 | chr:4:9981605 |
| 4 rs4697699   | 9945722 C  | 0.2724 | 1.37E-06 | chr:4:9981605 |
| 4 rs140701304 | 9636731 A  | 6.477  | 1.38E-06 | chr:4:9981605 |
| 4 rs140787992 | 9637047 A  | 6.477  | 1.38E-06 | chr:4:9981605 |
| 4 rs4697700   | 9945792 C  | 0.2753 | 1.38E-06 | chr:4:9981605 |
| 4 rs142806317 | 9865940 T  | 56.82  | 1.42E-06 | chr:4:9981605 |
| 4 rs4580649   | 9948461 G  | 3.035  | 1.47E-06 | chr:4:9981605 |
| 4 rs4697755   | 10436395 T | 3.491  | 1.48E-06 | chr:4:9981605 |
| 4 rs7698991   | 10437334 C | 3.491  | 1.48E-06 | chr:4:9981605 |
| 4 rs10939637  | 9977577 A  | 0.2901 | 1.52E-06 | chr:4:9981605 |
| 4 rs10939638  | 9977675 T  | 0.2901 | 1.52E-06 | chr:4:9981605 |
| 4 rs13102218  | 9976113 G  | 0.2901 | 1.52E-06 | chr:4:9981605 |
| 4 rs7682751   | 9976294 A  | 0.2901 | 1.52E-06 | chr:4:9981605 |
| 4 rs10023068  | 10004832 A | 3.236  | 1.55E-06 | chr:4:9981605 |
| 4 rs13125209  | 9982044 A  | 0.2905 | 1.57E-06 | chr:4:9981605 |
| 4 rs13145758  | 9981997 G  | 0.2905 | 1.57E-06 | chr:4:9981605 |
| 4 rs28479838  | 9619548 A  | 3.097  | 1.57E-06 | chr:4:9981605 |
| 4 rs4475146   | 9946656 A  | 0.2759 | 1.59E-06 | chr:4:9981605 |
| 4 rs10008721  | 9568038 A  | 4.959  | 1.60E-06 | chr:4:9981605 |
| 4 rs140042917 | 9564766 A  | 4.959  | 1.60E-06 | chr:4:9981605 |
| 4 rs9884663   | 9562978 T  | 4.959  | 1.60E-06 | chr:4:9981605 |
| 4 rs149501985 | 9894727 G  | 57.36  | 1.66E-06 | chr:4:9981605 |
| 4 rs187030607 | 9652686 T  | 5.419  | 1.71E-06 | chr:4:9981605 |
| 4 rs28451938  | 9652691 T  | 5.419  | 1.71E-06 | chr:4:9981605 |
| 4 rs28705142  | 9652682 C  | 5.419  | 1.71E-06 | chr:4:9981605 |
| 4 rs10014973  | 10438430 G | 3.043  | 1.75E-06 | chr:4:9981605 |
| 4 rs113257452 | 9537457 T  | 4.518  | 1.78E-06 | chr:4:9981605 |
| 4 rs187100546 | 9913827 C  | 165.6  | 1.84E-06 | chr:4:9981605 |
| 4 rs557170772 | 9846892 G  | 19.11  | 1.86E-06 | chr:4:9981605 |
| 4 rs60111228  | 9825823 A  | 19.11  | 1.86E-06 | chr:4:9981605 |
| 4 rs10018666  | 10004805 C | 3.214  | 1.89E-06 | chr:4:9981605 |
| 4 rs2192094   | 10291968 C | 7.701  | 1.93E-06 | chr:4:9981605 |
| 4 rs114726622 | 10012802 A | 10.69  | 1.93E-06 | chr:4:9981605 |

|               |            |        |          |               |
|---------------|------------|--------|----------|---------------|
| 4 rs115250951 | 10042556 C | 10.69  | 1.93E-06 | chr:4:9981605 |
| 4 rs116479950 | 10043188 T | 10.69  | 1.93E-06 | chr:4:9981605 |
| 4 rs139376229 | 10023659 T | 10.69  | 1.93E-06 | chr:4:9981605 |
| 4 rs190290723 | 10046675 C | 10.69  | 1.93E-06 | chr:4:9981605 |
| 4 rs142144404 | 9641021 T  | 5.288  | 1.93E-06 | chr:4:9981605 |
| 4 rs182393147 | 9681451 A  | 5.288  | 1.93E-06 | chr:4:9981605 |
| 4 rs28582691  | 9637824 A  | 5.288  | 1.93E-06 | chr:4:9981605 |
| 4 rs28880963  | 9665259 A  | 5.288  | 1.93E-06 | chr:4:9981605 |
| 4 rs6843809   | 9655294 G  | 6.245  | 1.97E-06 | chr:4:9981605 |
| 4 rs13141264  | 9698240 A  | 2.987  | 2.03E-06 | chr:4:9981605 |
| 4 rs56293131  | 9652279 G  | 6.149  | 2.10E-06 | chr:4:9981605 |
| 4 rs7440232   | 9651744 T  | 6.149  | 2.10E-06 | chr:4:9981605 |
| 4 rs116203571 | 10329158 A | 51.49  | 2.13E-06 | chr:4:9981605 |
| 4 rs114489981 | 10064751 A | 5.606  | 2.19E-06 | chr:4:9981605 |
| 4 rs115281176 | 10064638 C | 5.606  | 2.19E-06 | chr:4:9981605 |
| 4 rs56741911  | 9826492 A  | 16.27  | 2.25E-06 | chr:4:9981605 |
| 4 rs60026409  | 9826847 C  | 16.27  | 2.25E-06 | chr:4:9981605 |
| 4 rs73804391  | 9829784 A  | 16.27  | 2.25E-06 | chr:4:9981605 |
| 4 rs6814282   | 9692516 T  | 0.2185 | 2.27E-06 | chr:4:9981605 |
| 4 rs116613188 | 9634463 A  | 5.217  | 2.27E-06 | chr:4:9981605 |
| 4 rs74659337  | 9895235 G  | 8.814  | 2.30E-06 | chr:4:9981605 |
| 4 rs76065252  | 10405534 T | 4.151  | 2.34E-06 | chr:4:9981605 |
| 4 rs9684173   | 9691519 A  | 0.2192 | 2.37E-06 | chr:4:9981605 |
| 4 rs10002859  | 9653384 T  | 5.115  | 2.56E-06 | chr:4:9981605 |
| 4 rs143078048 | 9657322 T  | 5.115  | 2.56E-06 | chr:4:9981605 |
| 4 rs28461318  | 9653361 A  | 5.115  | 2.56E-06 | chr:4:9981605 |
| 4 rs12510091  | 9708661 A  | 3.039  | 2.61E-06 | chr:4:9981605 |
| 4 rs77233756  | 9837438 T  | 15.94  | 2.67E-06 | chr:4:9981605 |
| 4 rs13151395  | 9709144 T  | 3.026  | 2.89E-06 | chr:4:9981605 |
| 4 rs116348943 | 9852618 T  | 13.67  | 3.13E-06 | chr:4:9981605 |
| 4 rs73804390  | 9828756 G  | 13.67  | 3.13E-06 | chr:4:9981605 |
| 4 rs73804392  | 9830280 T  | 13.67  | 3.13E-06 | chr:4:9981605 |
| 4 rs73804734  | 9834978 G  | 13.67  | 3.13E-06 | chr:4:9981605 |
| 4 rs73804735  | 9838790 C  | 13.67  | 3.13E-06 | chr:4:9981605 |
| 4 rs73804738  | 9843552 A  | 13.67  | 3.13E-06 | chr:4:9981605 |
| 4 rs116612404 | 9748398 G  | 6.347  | 3.14E-06 | chr:4:9981605 |
| 4 rs145703344 | 9753072 A  | 6.347  | 3.14E-06 | chr:4:9981605 |
| 4 rs150571547 | 9746210 T  | 6.347  | 3.14E-06 | chr:4:9981605 |
| 4 rs150725431 | 9632263 T  | 4.454  | 3.19E-06 | chr:4:9981605 |
| 4 rs7698535   | 9744864 A  | 6.322  | 3.28E-06 | chr:4:9981605 |
| 4 rs10024256  | 9523614 G  | 4.776  | 3.36E-06 | chr:4:9981605 |
| 4 rs6839302   | 9884324 C  | 2.888  | 3.39E-06 | chr:4:9981605 |
| 4 rs139968201 | 9590506 C  | 24.88  | 3.42E-06 | chr:4:9981605 |

|               |            |       |          |               |
|---------------|------------|-------|----------|---------------|
| 4 rs142964081 | 9668827 A  | 24.88 | 3.42E-06 | chr:4:9981605 |
| 4 rs139343792 | 9572589 C  | 4.882 | 3.52E-06 | chr:4:9981605 |
| 4 rs28379551  | 9583509 C  | 4.882 | 3.52E-06 | chr:4:9981605 |
| 4 rs28569802  | 9587761 T  | 4.882 | 3.52E-06 | chr:4:9981605 |
| 4 rs9990816   | 9587343 A  | 4.882 | 3.52E-06 | chr:4:9981605 |
| 4 rs9998156   | 9886560 A  | 2.886 | 3.54E-06 | chr:4:9981605 |
| 4 rs10004353  | 10438091 A | 3.338 | 3.55E-06 | chr:4:9981605 |
| 4 rs28552686  | 9488838 C  | 3.861 | 3.68E-06 | chr:4:9981605 |
| 4 rs544702874 | 9671629 C  | 25.21 | 3.77E-06 | chr:4:9981605 |
| 4 rs544881013 | 9674615 A  | 25.21 | 3.77E-06 | chr:4:9981605 |
| 4 rs563493121 | 9654221 T  | 25.21 | 3.77E-06 | chr:4:9981605 |
| 4 rs66534644  | 9711634 G  | 2.947 | 3.87E-06 | chr:4:9981605 |
| 4 rs184211452 | 9497126 A  | 3.655 | 3.93E-06 | chr:4:9981605 |
| 4 rs6447956   | 10428207 A | 3.304 | 4.18E-06 | chr:4:9981605 |
| 4 rs16868313  | 10068064 T | 3.277 | 4.37E-06 | chr:4:9981605 |
| 4 rs181305798 | 9755199 G  | 157   | 4.50E-06 | chr:4:9981605 |
| 4 rs2867388   | 9796495 C  | 3.459 | 4.55E-06 | chr:4:9981605 |
| 4 rs139245561 | 9489991 A  | 3.801 | 4.55E-06 | chr:4:9981605 |
| 4 rs190560945 | 9489537 A  | 3.801 | 4.55E-06 | chr:4:9981605 |
| 4 rs10005931  | 9714347 C  | 3.088 | 4.56E-06 | chr:4:9981605 |
| 4 rs181141933 | 9577434 T  | 32.81 | 4.60E-06 | chr:4:9981605 |
| 4 rs182114516 | 9580619 C  | 32.81 | 4.60E-06 | chr:4:9981605 |
| 4 rs184957234 | 9644112 C  | 32.81 | 4.60E-06 | chr:4:9981605 |
| 4 rs186847077 | 9688974 T  | 32.81 | 4.60E-06 | chr:4:9981605 |
| 4 rs190891681 | 9610244 A  | 32.81 | 4.60E-06 | chr:4:9981605 |
| 4 rs527470627 | 9575377 A  | 32.81 | 4.60E-06 | chr:4:9981605 |
| 4 rs536266752 | 9682815 T  | 32.81 | 4.60E-06 | chr:4:9981605 |
| 4 rs546881120 | 9682807 T  | 32.81 | 4.60E-06 | chr:4:9981605 |
| 4 rs553986940 | 9643253 C  | 32.81 | 4.60E-06 | chr:4:9981605 |
| 4 rs569869716 | 9701016 C  | 32.81 | 4.60E-06 | chr:4:9981605 |
| 4 rs60106886  | 9814238 C  | 3.157 | 4.61E-06 | chr:4:9981605 |
| 4 rs535524011 | 9708745 G  | 32.71 | 4.67E-06 | chr:4:9981605 |
| 4 rs13136075  | 9714968 A  | 2.923 | 4.72E-06 | chr:4:9981605 |
| 4 rs188176101 | 9631903 A  | 2.938 | 4.80E-06 | chr:4:9981605 |
| 4 rs2867386   | 9795784 G  | 3.391 | 4.92E-06 | chr:4:9981605 |
| 4 rs2867387   | 9795786 G  | 3.391 | 4.92E-06 | chr:4:9981605 |
| 4 rs4543113   | 10008305 A | 2.923 | 4.96E-06 | chr:4:9981605 |
| 4 rs28378623  | 9488791 A  | 3.673 | 5.08E-06 | chr:4:9981605 |
| 4 rs28526410  | 9488632 G  | 3.673 | 5.08E-06 | chr:4:9981605 |
| 4 rs146073677 | 9672178 T  | 4.79  | 5.08E-06 | chr:4:9981605 |
| 4 rs6843276   | 9714147 T  | 2.915 | 5.14E-06 | chr:4:9981605 |
| 4 rs145615124 | 9644276 A  | 5.448 | 5.33E-06 | chr:4:9981605 |
| 4 rs6842702   | 9626659 C  | 2.914 | 5.73E-06 | chr:4:9981605 |



|               |            |        |          |               |
|---------------|------------|--------|----------|---------------|
| 4 rs6448969   | 9700056 A  | 2.747  | 5.90E-06 | chr:4:9981605 |
| 4 rs115299967 | 10081399 A | 8.764  | 5.90E-06 | chr:4:9981605 |
| 4 rs11942223  | 9962765 C  | 0.2952 | 5.93E-06 | chr:4:9981605 |
| 4 rs138225173 | 9492829 A  | 3.601  | 6.46E-06 | chr:4:9981605 |
| 4 rs28504038  | 9603671 T  | 4.596  | 6.53E-06 | chr:4:9981605 |
| 4 rs6811809   | 9918557 A  | 2.793  | 6.71E-06 | chr:4:9981605 |
| 4 rs140141642 | 9858536 C  | 51.77  | 6.82E-06 | chr:4:9981605 |
| 4 rs145359792 | 9816627 A  | 51.77  | 6.82E-06 | chr:4:9981605 |
| 4 rs187736581 | 9863971 A  | 51.77  | 6.82E-06 | chr:4:9981605 |
| 4 rs187946156 | 9892226 T  | 51.77  | 6.82E-06 | chr:4:9981605 |
| 4 rs542855663 | 9809871 C  | 51.77  | 6.82E-06 | chr:4:9981605 |
| 4 rs150081498 | 9738059 T  | 4.495  | 7.24E-06 | chr:4:9981605 |
| 4 rs114982594 | 9599260 G  | 4.548  | 7.36E-06 | chr:4:9981605 |
| 4 rs7671787   | 10439993 C | 3.269  | 7.39E-06 | chr:4:9981605 |
| 4 rs13131257  | 9981889 C  | 0.3124 | 7.51E-06 | chr:4:9981605 |
| 4 rs141646409 | 9904232 A  | 136.4  | 7.66E-06 | chr:4:9981605 |
| 4 rs149796755 | 9914445 T  | 136.4  | 7.66E-06 | chr:4:9981605 |
| 4 rs184663216 | 9913204 T  | 136.4  | 7.66E-06 | chr:4:9981605 |
| 4 rs186349586 | 9899122 G  | 136.4  | 7.66E-06 | chr:4:9981605 |
| 4 rs561329337 | 9913604 C  | 136.4  | 7.66E-06 | chr:4:9981605 |
| 4 rs6449173   | 9966105 G  | 0.3017 | 7.87E-06 | chr:4:9981605 |
| 4 rs7439210   | 9971749 G  | 0.3017 | 7.87E-06 | chr:4:9981605 |
| 4 rs7442295   | 9966380 G  | 0.3017 | 7.87E-06 | chr:4:9981605 |
| 4 rs115747737 | 9635174 A  | 4.733  | 7.87E-06 | chr:4:9981605 |
| 4 rs192870338 | 9634856 G  | 4.733  | 7.87E-06 | chr:4:9981605 |
| 4 rs74381295  | 9613314 C  | 4.733  | 7.87E-06 | chr:4:9981605 |
| 4 rs6848533   | 9690289 T  | 0.1943 | 8.00E-06 | chr:4:9981605 |
| 4 rs1071988   | 9974638 A  | 0.3149 | 8.45E-06 | chr:4:9981605 |
| 4 rs11722229  | 9980697 A  | 0.3149 | 8.45E-06 | chr:4:9981605 |
| 4 rs16868246  | 9978305 G  | 0.3149 | 8.45E-06 | chr:4:9981605 |
| 4 rs114230286 | 10282863 G | 8.147  | 8.60E-06 | chr:4:9981605 |
| 4 rs114418153 | 10300229 T | 8.147  | 8.60E-06 | chr:4:9981605 |
| 4 rs116711448 | 10269790 A | 8.147  | 8.60E-06 | chr:4:9981605 |
| 4 rs140190261 | 10259211 C | 8.147  | 8.60E-06 | chr:4:9981605 |
| 4 rs146359800 | 10278742 C | 8.147  | 8.60E-06 | chr:4:9981605 |
| 4 rs79855320  | 10261700 C | 8.147  | 8.60E-06 | chr:4:9981605 |
| 4 rs138840439 | 9891695 T  | 126.7  | 9.01E-06 | chr:4:9981605 |
| 4 rs140689554 | 9869100 A  | 126.7  | 9.01E-06 | chr:4:9981605 |
| 4 rs140762984 | 9879233 T  | 126.7  | 9.01E-06 | chr:4:9981605 |
| 4 rs141750553 | 9892413 A  | 126.7  | 9.01E-06 | chr:4:9981605 |
| 4 rs142451746 | 9876410 T  | 126.7  | 9.01E-06 | chr:4:9981605 |
| 4 rs143245597 | 9870146 C  | 126.7  | 9.01E-06 | chr:4:9981605 |
| 4 rs144094429 | 9882600 A  | 126.7  | 9.01E-06 | chr:4:9981605 |

|               |            |        |          |               |
|---------------|------------|--------|----------|---------------|
| 4 rs144303771 | 9887017 T  | 126.7  | 9.01E-06 | chr:4:9981605 |
| 4 rs144552028 | 9866346 A  | 126.7  | 9.01E-06 | chr:4:9981605 |
| 4 rs146225768 | 9878037 T  | 126.7  | 9.01E-06 | chr:4:9981605 |
| 4 rs147228890 | 9867790 G  | 126.7  | 9.01E-06 | chr:4:9981605 |
| 4 rs148082502 | 9888882 A  | 126.7  | 9.01E-06 | chr:4:9981605 |
| 4 rs149485235 | 9885828 T  | 126.7  | 9.01E-06 | chr:4:9981605 |
| 4 rs150633689 | 9889012 C  | 126.7  | 9.01E-06 | chr:4:9981605 |
| 4 rs185169758 | 9880838 A  | 126.7  | 9.01E-06 | chr:4:9981605 |
| 4 rs186371963 | 9879387 C  | 126.7  | 9.01E-06 | chr:4:9981605 |
| 4 rs192106108 | 9880818 C  | 126.7  | 9.01E-06 | chr:4:9981605 |
| 4 rs115188329 | 10173954 T | 132.2  | 9.03E-06 | chr:4:9981605 |
| 4 rs115663056 | 10283083 T | 132.2  | 9.03E-06 | chr:4:9981605 |
| 4 rs116140216 | 10160436 G | 132.2  | 9.03E-06 | chr:4:9981605 |
| 4 rs145265906 | 10199082 C | 132.2  | 9.03E-06 | chr:4:9981605 |
| 4 rs140671181 | 9700932 A  | 6.173  | 9.46E-06 | chr:4:9981605 |
| 4 rs6448959   | 9683927 T  | 3.497  | 1.01E-05 | chr:4:9981605 |
| 4 rs139416443 | 9977850 A  | 121.7  | 1.02E-05 | chr:4:9981605 |
| 4 rs28729253  | 9602291 A  | 4.419  | 1.04E-05 | chr:4:9981605 |
| 4 rs13125646  | 9982330 A  | 0.3086 | 1.07E-05 | chr:4:9981605 |
| 4 rs6448960   | 9686586 T  | 3.485  | 1.08E-05 | chr:4:9981605 |
| 4 rs7680572   | 9687543 A  | 3.485  | 1.08E-05 | chr:4:9981605 |
| 4 rs10433800  | 10433708 T | 3.356  | 1.09E-05 | chr:4:9981605 |
| 4 rs4467560   | 10427048 G | 3.116  | 1.09E-05 | chr:4:9981605 |
| 4 rs6838644   | 10252871 C | 6.851  | 1.13E-05 | chr:4:9981605 |
| 4 rs17409460  | 10286427 C | 6.834  | 1.18E-05 | chr:4:9981605 |
| 4 rs17475334  | 10287170 G | 6.834  | 1.18E-05 | chr:4:9981605 |
| 4 rs62286662  | 10290650 C | 6.834  | 1.18E-05 | chr:4:9981605 |
| 4 rs62288124  | 10287550 G | 6.834  | 1.18E-05 | chr:4:9981605 |
| 4 rs62288125  | 10287987 G | 6.834  | 1.18E-05 | chr:4:9981605 |
| 4 rs6834574   | 10300814 G | 6.834  | 1.18E-05 | chr:4:9981605 |
| 4 rs73224405  | 10287415 A | 6.834  | 1.18E-05 | chr:4:9981605 |
| 4 rs73224422  | 10303417 T | 6.834  | 1.18E-05 | chr:4:9981605 |
| 4 rs116028495 | 10047412 T | 9.6    | 1.21E-05 | chr:4:9981605 |
| 4 rs139032162 | 10388243 G | 123.8  | 1.22E-05 | chr:4:9981605 |
| 4 rs139118727 | 10080782 T | 123.8  | 1.22E-05 | chr:4:9981605 |
| 4 rs141488118 | 10122292 G | 123.8  | 1.22E-05 | chr:4:9981605 |
| 4 rs141545818 | 10083901 G | 123.8  | 1.22E-05 | chr:4:9981605 |
| 4 rs143690141 | 10126080 T | 123.8  | 1.22E-05 | chr:4:9981605 |
| 4 rs143883059 | 10193917 C | 123.8  | 1.22E-05 | chr:4:9981605 |
| 4 rs144039186 | 10167766 T | 123.8  | 1.22E-05 | chr:4:9981605 |
| 4 rs146172769 | 10080777 T | 123.8  | 1.22E-05 | chr:4:9981605 |
| 4 rs146567373 | 10274690 A | 123.8  | 1.22E-05 | chr:4:9981605 |
| 4 rs147119263 | 10112073 A | 123.8  | 1.22E-05 | chr:4:9981605 |

|   |             |          |   |        |          |               |
|---|-------------|----------|---|--------|----------|---------------|
| 4 | rs150149824 | 10351048 | T | 123.8  | 1.22E-05 | chr:4:9981605 |
| 4 | rs150328613 | 10098275 | T | 123.8  | 1.22E-05 | chr:4:9981605 |
| 4 | rs35313378  | 10089535 | T | 123.8  | 1.22E-05 | chr:4:9981605 |
| 4 | rs555294301 | 10106310 | G | 123.8  | 1.22E-05 | chr:4:9981605 |
| 4 | rs570462561 | 10171777 | C | 123.8  | 1.22E-05 | chr:4:9981605 |
| 4 | rs575327145 | 10095974 | G | 123.8  | 1.22E-05 | chr:4:9981605 |
| 4 | rs10008035  | 9999335  | T | 0.2837 | 1.38E-05 | chr:4:9981605 |
| 4 | rs3733587   | 9997434  | G | 0.2837 | 1.38E-05 | chr:4:9981605 |
| 4 | rs4547795   | 9997060  | T | 0.2837 | 1.38E-05 | chr:4:9981605 |
| 4 | rs7696536   | 10000236 | T | 0.2837 | 1.38E-05 | chr:4:9981605 |
| 4 | rs138724702 | 9632058  | T | 28.58  | 1.40E-05 | chr:4:9981605 |
| 4 | rs187370048 | 9619538  | G | 28.58  | 1.40E-05 | chr:4:9981605 |
| 4 | rs189459090 | 9626265  | T | 28.58  | 1.40E-05 | chr:4:9981605 |
| 4 | rs557786500 | 9627195  | T | 28.58  | 1.40E-05 | chr:4:9981605 |
| 4 | rs113997128 | 9728531  | T | 5.098  | 1.42E-05 | chr:4:9981605 |
| 4 | rs146868354 | 9723645  | G | 5.098  | 1.42E-05 | chr:4:9981605 |
| 4 | rs149630066 | 9740919  | T | 5.098  | 1.42E-05 | chr:4:9981605 |
| 4 | rs6837336   | 9932510  | A | 0.3272 | 1.43E-05 | chr:4:9981605 |
| 5 | rs7722775   | 4535127  | A | 38.8   | 2.44E-12 | chr:5:4537604 |
| 5 | rs146484535 | 4514639  | T | 74.64  | 1.65E-10 | chr:5:4537604 |
| 5 | rs146421892 | 4476399  | T | 96.57  | 3.47E-10 | chr:5:4537604 |
| 5 | rs73039356  | 4517661  | G | 17.55  | 7.19E-10 | chr:5:4537604 |
| 5 | rs138653012 | 4494823  | T | 27.26  | 8.92E-10 | chr:5:4537604 |
| 5 | rs139649600 | 4493454  | C | 27.26  | 8.92E-10 | chr:5:4537604 |
| 5 | rs182198218 | 4551131  | A | 104.1  | 9.39E-10 | chr:5:4537604 |
| 5 | rs59307706  | 4566661  | T | 104.1  | 9.39E-10 | chr:5:4537604 |
| 5 | rs141543792 | 4479625  | A | 144.5  | 9.39E-10 | chr:5:4537604 |
| 5 | rs144166982 | 4492103  | C | 144.5  | 9.39E-10 | chr:5:4537604 |
| 5 | rs151052133 | 4493723  | C | 144.5  | 9.39E-10 | chr:5:4537604 |
| 5 | rs139538106 | 4571719  | A | 164.9  | 1.05E-09 | chr:5:4537604 |
| 5 | rs77079202  | 4516476  | A | 15.43  | 1.22E-09 | chr:5:4537604 |
| 5 | rs114260245 | 4517351  | G | 15.64  | 1.92E-09 | chr:5:4537604 |
| 5 | rs16873544  | 4517207  | T | 15.64  | 1.92E-09 | chr:5:4537604 |
| 5 | rs16873547  | 4517314  | G | 15.64  | 1.92E-09 | chr:5:4537604 |
| 5 | rs16873551  | 4517352  | C | 15.64  | 1.92E-09 | chr:5:4537604 |
| 5 | rs73039355  | 4517412  | A | 15.57  | 2.02E-09 | chr:5:4537604 |
| 5 | rs921391    | 4515695  | G | 14.71  | 2.04E-09 | chr:5:4537604 |
| 5 | rs144712042 | 4504759  | T | 32.44  | 2.13E-09 | chr:5:4537604 |
| 5 | rs16873584  | 4533197  | G | 23.69  | 2.78E-09 | chr:5:4537604 |
| 5 | rs149248923 | 4482110  | C | 28.19  | 3.63E-09 | chr:5:4537604 |
| 5 | rs111880700 | 4565630  | G | 33.31  | 5.00E-09 | chr:5:4537604 |
| 5 | rs113720915 | 4567814  | T | 33.31  | 5.00E-09 | chr:5:4537604 |
| 5 | rs112424100 | 4463039  | C | 46.27  | 5.25E-09 | chr:5:4537604 |

|               |           |       |          |               |
|---------------|-----------|-------|----------|---------------|
| 5 rs559503215 | 4470756 C | 46.27 | 5.25E-09 | chr:5:4537604 |
| 5 rs73035319  | 4453910 C | 46.27 | 5.25E-09 | chr:5:4537604 |
| 5 rs73037348  | 4464580 A | 46.27 | 5.25E-09 | chr:5:4537604 |
| 5 rs73037349  | 4465113 T | 46.27 | 5.25E-09 | chr:5:4537604 |
| 5 rs16873592  | 4534318 G | 16.75 | 1.55E-08 | chr:5:4537604 |
| 5 rs138768507 | 4548011 C | 667.2 | 2.14E-08 | chr:5:4537604 |
| 5 rs145671511 | 4549537 C | 667.2 | 2.14E-08 | chr:5:4537604 |
| 5 rs544972940 | 4549560 G | 667.2 | 2.14E-08 | chr:5:4537604 |
| 5 rs569731758 | 4564002 T | 667.2 | 2.14E-08 | chr:5:4537604 |
| 5 rs34338737  | 4537914 A | 8.112 | 2.25E-08 | chr:5:4537604 |
| 5 rs930681    | 4537821 A | 8.112 | 2.25E-08 | chr:5:4537604 |
| 5 rs113107730 | 4558326 G | 21.21 | 3.15E-08 | chr:5:4537604 |
| 5 rs16873492  | 4509493 C | 15.76 | 3.55E-08 | chr:5:4537604 |
| 5 rs16873570  | 4530191 C | 9.075 | 3.75E-08 | chr:5:4537604 |
| 5 rs16873572  | 4530609 T | 9.075 | 3.75E-08 | chr:5:4537604 |
| 5 rs16873573  | 4531250 G | 9.075 | 3.75E-08 | chr:5:4537604 |
| 5 rs16873581  | 4532484 G | 8.988 | 4.26E-08 | chr:5:4537604 |
| 5 rs73043042  | 4528737 T | 8.988 | 4.26E-08 | chr:5:4537604 |
| 5 rs73037359  | 4473160 T | 29.82 | 4.63E-08 | chr:5:4537604 |
| 5 rs6861833   | 4515052 T | 9.852 | 5.67E-08 | chr:5:4537604 |
| 5 rs114402363 | 4522350 C | 14.18 | 9.56E-08 | chr:5:4537604 |
| 5 rs1897625   | 4467952 T | 10.32 | 1.28E-07 | chr:5:4537604 |
| 5 rs542306089 | 4554998 T | 9.826 | 1.86E-07 | chr:5:4537604 |
| 5 rs560585512 | 4554999 T | 9.826 | 1.86E-07 | chr:5:4537604 |
| 5 rs139338078 | 4675339 T | 60.23 | 2.28E-07 | chr:5:4537604 |
| 5 rs112379326 | 4555701 C | 17.55 | 3.35E-07 | chr:5:4537604 |
| 5 rs79019298  | 4533927 C | 9.327 | 3.44E-07 | chr:5:4537604 |
| 5 rs921392    | 4515553 C | 8.491 | 3.96E-07 | chr:5:4537604 |
| 5 rs112295341 | 4550276 T | 23.82 | 5.36E-07 | chr:5:4537604 |
| 5 rs75109680  | 4545782 C | 27.3  | 5.98E-07 | chr:5:4537604 |
| 5 rs147209721 | 4639365 T | 80.95 | 6.10E-07 | chr:5:4537604 |
| 5 rs144120378 | 5037511 T | 23.99 | 7.56E-07 | chr:5:4537604 |
| 5 rs138591903 | 5014686 G | 38.59 | 1.08E-06 | chr:5:4537604 |
| 5 rs139046999 | 5015324 T | 38.59 | 1.08E-06 | chr:5:4537604 |
| 5 rs139155662 | 5018264 C | 38.59 | 1.08E-06 | chr:5:4537604 |
| 5 rs139179575 | 5016665 T | 38.59 | 1.08E-06 | chr:5:4537604 |
| 5 rs140931123 | 5011709 A | 38.59 | 1.08E-06 | chr:5:4537604 |
| 5 rs141058381 | 5018999 C | 38.59 | 1.08E-06 | chr:5:4537604 |
| 5 rs142008226 | 5014883 T | 38.59 | 1.08E-06 | chr:5:4537604 |
| 5 rs142908515 | 5006256 A | 38.59 | 1.08E-06 | chr:5:4537604 |
| 5 rs143350759 | 5012985 G | 38.59 | 1.08E-06 | chr:5:4537604 |
| 5 rs144332423 | 5008884 A | 38.59 | 1.08E-06 | chr:5:4537604 |
| 5 rs145457117 | 5012490 T | 38.59 | 1.08E-06 | chr:5:4537604 |

|               |           |       |          |               |
|---------------|-----------|-------|----------|---------------|
| 5 rs145882382 | 5006625 A | 38.59 | 1.08E-06 | chr:5:4537604 |
| 5 rs145976967 | 5015598 T | 38.59 | 1.08E-06 | chr:5:4537604 |
| 5 rs146098924 | 5003253 G | 38.59 | 1.08E-06 | chr:5:4537604 |
| 5 rs146724599 | 5016224 T | 38.59 | 1.08E-06 | chr:5:4537604 |
| 5 rs149429735 | 5019214 C | 38.59 | 1.08E-06 | chr:5:4537604 |
| 5 rs369284119 | 5018551 T | 38.59 | 1.08E-06 | chr:5:4537604 |
| 5 rs373574890 | 5016756 G | 38.59 | 1.08E-06 | chr:5:4537604 |
| 5 rs73737852  | 4417914 C | 23.81 | 1.67E-06 | chr:5:4537604 |
| 5 rs138041255 | 4535737 T | 272.9 | 2.03E-06 | chr:5:4537604 |
| 5 rs140027317 | 4541442 G | 292.6 | 2.73E-06 | chr:5:4537604 |
| 5 rs76899300  | 4520100 A | 9.749 | 3.14E-06 | chr:5:4537604 |
| 5 rs144086962 | 5034018 C | 14.67 | 3.43E-06 | chr:5:4537604 |
| 5 rs138704568 | 4540505 A | 41.66 | 3.48E-06 | chr:5:4537604 |
| 5 rs141919616 | 4540076 A | 41.66 | 3.48E-06 | chr:5:4537604 |
| 5 rs139032928 | 4529123 A | 63.83 | 3.61E-06 | chr:5:4537604 |
| 5 rs150098946 | 4529718 A | 63.83 | 3.61E-06 | chr:5:4537604 |
| 5 rs539219236 | 4532020 T | 63.83 | 3.61E-06 | chr:5:4537604 |
| 5 rs554334358 | 4532021 G | 63.83 | 3.61E-06 | chr:5:4537604 |
| 5 rs6555295   | 4514732 A | 8.694 | 4.20E-06 | chr:5:4537604 |
| 5 rs73039400  | 4526380 C | 6.544 | 4.93E-06 | chr:5:4537604 |
| 5 rs73039402  | 4526401 G | 6.544 | 4.93E-06 | chr:5:4537604 |
| 5 rs75702524  | 4526348 G | 6.544 | 4.93E-06 | chr:5:4537604 |
| 5 rs7730143   | 4513357 A | 8.494 | 5.29E-06 | chr:5:4537604 |
| 5 rs6862133   | 4515370 A | 5.9   | 5.37E-06 | chr:5:4537604 |
| 5 rs570393286 | 4526155 A | 6.454 | 5.39E-06 | chr:5:4537604 |
| 5 rs7709410   | 4537293 G | 4.704 | 5.76E-06 | chr:5:4537604 |
| 5 rs73043054  | 4532584 A | 9.008 | 5.77E-06 | chr:5:4537604 |
| 5 rs6894984   | 4907084 A | 5.602 | 5.78E-06 | chr:5:4537604 |
| 5 rs7712214   | 4514243 C | 8.281 | 6.51E-06 | chr:5:4537604 |
| 5 rs9313085   | 4489021 T | 4.9   | 6.74E-06 | chr:5:4537604 |
| 5 rs112660579 | 4523769 C | 8.669 | 7.22E-06 | chr:5:4537604 |
| 5 rs112716024 | 4528763 T | 8.669 | 7.22E-06 | chr:5:4537604 |
| 5 rs73039388  | 4523923 T | 8.669 | 7.22E-06 | chr:5:4537604 |
| 5 rs73039391  | 4523979 A | 8.669 | 7.22E-06 | chr:5:4537604 |
| 5 rs73043055  | 4533215 C | 8.669 | 7.22E-06 | chr:5:4537604 |
| 5 rs16873575  | 4532072 T | 8.666 | 7.23E-06 | chr:5:4537604 |
| 5 rs112044989 | 4525870 A | 6.31  | 7.52E-06 | chr:5:4537604 |
| 5 rs113112159 | 4525949 C | 6.31  | 7.52E-06 | chr:5:4537604 |
| 5 rs73039394  | 4525290 C | 6.31  | 7.52E-06 | chr:5:4537604 |
| 5 rs73039395  | 4525365 A | 6.31  | 7.52E-06 | chr:5:4537604 |
| 5 rs73041207  | 4526541 A | 6.31  | 7.52E-06 | chr:5:4537604 |
| 5 rs671030    | 4941410 G | 31.7  | 7.62E-06 | chr:5:4537604 |
| 5 rs115255006 | 4520066 A | 8.6   | 8.36E-06 | chr:5:4537604 |

|               |           |       |          |               |
|---------------|-----------|-------|----------|---------------|
| 5 rs73039360  | 4520105 A | 8.6   | 8.36E-06 | chr:5:4537604 |
| 5 rs73039362  | 4520146 T | 8.6   | 8.36E-06 | chr:5:4537604 |
| 5 rs141292695 | 4637983 C | 13.01 | 1.06E-05 | chr:5:4537604 |
| 5 rs73737853  | 4421310 A | 11.52 | 1.09E-05 | chr:5:4537604 |
| 5 rs6555315   | 4750666 T | 5.172 | 1.12E-05 | chr:5:4537604 |
| 5 rs7710050   | 4750730 G | 5.172 | 1.12E-05 | chr:5:4537604 |
| 5 rs7727795   | 4751073 C | 5.172 | 1.12E-05 | chr:5:4537604 |
| 5 rs111505481 | 4520715 A | 8.244 | 1.12E-05 | chr:5:4537604 |
| 5 rs112048759 | 4521305 G | 8.244 | 1.12E-05 | chr:5:4537604 |
| 5 rs112475023 | 4521281 G | 8.244 | 1.12E-05 | chr:5:4537604 |
| 5 rs113871707 | 4522075 C | 8.244 | 1.12E-05 | chr:5:4537604 |
| 5 rs73039364  | 4520275 T | 8.244 | 1.12E-05 | chr:5:4537604 |
| 5 rs73039365  | 4520288 C | 8.244 | 1.12E-05 | chr:5:4537604 |
| 5 rs73039366  | 4520444 G | 8.244 | 1.12E-05 | chr:5:4537604 |
| 5 rs73039370  | 4520710 C | 8.244 | 1.12E-05 | chr:5:4537604 |
| 5 rs73039371  | 4520797 C | 8.244 | 1.12E-05 | chr:5:4537604 |
| 5 rs73039376  | 4523237 A | 8.244 | 1.12E-05 | chr:5:4537604 |
| 5 rs73039380  | 4523327 C | 8.244 | 1.12E-05 | chr:5:4537604 |
| 5 rs73039382  | 4523362 T | 8.244 | 1.12E-05 | chr:5:4537604 |
| 5 rs78794518  | 4522827 T | 8.244 | 1.12E-05 | chr:5:4537604 |
| 5 rs111513588 | 4749648 C | 5.157 | 1.19E-05 | chr:5:4537604 |
| 5 rs112815273 | 4740927 T | 5.157 | 1.19E-05 | chr:5:4537604 |
| 5 rs113758744 | 4740653 T | 5.157 | 1.19E-05 | chr:5:4537604 |
| 5 rs116242275 | 4740897 A | 5.157 | 1.19E-05 | chr:5:4537604 |
| 5 rs16873996  | 4740551 A | 5.157 | 1.19E-05 | chr:5:4537604 |
| 5 rs6870892   | 4738172 C | 5.157 | 1.19E-05 | chr:5:4537604 |
| 5 rs6875309   | 4738400 C | 5.157 | 1.19E-05 | chr:5:4537604 |
| 5 rs6875828   | 4738666 C | 5.157 | 1.19E-05 | chr:5:4537604 |
| 5 rs6876688   | 4739386 G | 5.157 | 1.19E-05 | chr:5:4537604 |
| 5 rs6890678   | 4738540 T | 5.157 | 1.19E-05 | chr:5:4537604 |
| 5 rs6891595   | 4739059 A | 5.157 | 1.19E-05 | chr:5:4537604 |
| 5 rs6894981   | 4739336 A | 5.157 | 1.19E-05 | chr:5:4537604 |
| 5 rs6896324   | 4739385 T | 5.157 | 1.19E-05 | chr:5:4537604 |
| 5 rs75313462  | 4743171 G | 5.157 | 1.19E-05 | chr:5:4537604 |
| 5 rs76871683  | 4742976 G | 5.157 | 1.19E-05 | chr:5:4537604 |
| 5 rs78391862  | 4741034 G | 5.157 | 1.19E-05 | chr:5:4537604 |
| 5 rs293089    | 4561821 C | 4.5   | 1.21E-05 | chr:5:4537604 |
| 5 rs78751262  | 4737980 A | 5.141 | 1.27E-05 | chr:5:4537604 |
| 5 rs6871795   | 4738913 G | 5.123 | 1.32E-05 | chr:5:4537604 |
| 5 rs142072081 | 4653080 C | 165.4 | 1.33E-05 | chr:5:4537604 |
| 5 rs293100    | 4571817 C | 4.485 | 1.34E-05 | chr:5:4537604 |
| 5 rs73737857  | 4429097 A | 6.235 | 1.37E-05 | chr:5:4537604 |
| 5 rs139568198 | 4919340 T | 23.19 | 1.38E-05 | chr:5:4537604 |

|               |            |       |          |                |
|---------------|------------|-------|----------|----------------|
| 5 rs184123477 | 4926596 T  | 23.19 | 1.38E-05 | chr:5:4537604  |
| 5 rs77244417  | 4432654 A  | 11.12 | 1.42E-05 | chr:5:4537604  |
| 5 rs7707506   | 4535291 C  | 9.154 | 1.66E-05 | chr:5:4537604  |
| 5 rs111603903 | 4965417 C  | 10.48 | 1.66E-05 | chr:5:4537604  |
| 5 rs112546024 | 4974965 A  | 10.48 | 1.66E-05 | chr:5:4537604  |
| 5 rs542980736 | 4866361 T  | 54.77 | 1.68E-05 | chr:5:4537604  |
| 5 rs1450820   | 4544462 A  | 4.395 | 1.80E-05 | chr:5:4537604  |
| 5 rs75956977  | 4746187 T  | 5.203 | 1.87E-05 | chr:5:4537604  |
| 5 rs144689697 | 4825503 C  | 58.77 | 1.87E-05 | chr:5:4537604  |
| 5 rs190013092 | 4816418 T  | 58.77 | 1.87E-05 | chr:5:4537604  |
| 5 rs7728048   | 4487664 C  | 8.503 | 1.92E-05 | chr:5:4537604  |
| 5 rs111562111 | 4555434 G  | 11.93 | 2.22E-05 | chr:5:4537604  |
| 5 rs184212488 | 4995779 A  | 10.8  | 2.25E-05 | chr:5:4537604  |
| 5 rs142421101 | 4496287 A  | 8.276 | 2.29E-05 | chr:5:4537604  |
| 5 rs17678610  | 4509088 C  | 8.276 | 2.29E-05 | chr:5:4537604  |
| 5 rs4701907   | 4503738 A  | 8.276 | 2.29E-05 | chr:5:4537604  |
| 5 rs62343516  | 4495407 A  | 8.276 | 2.29E-05 | chr:5:4537604  |
| 5 rs973156    | 4505421 C  | 8.276 | 2.29E-05 | chr:5:4537604  |
| 5 rs4701877   | 4455368 C  | 8.538 | 2.80E-05 | chr:5:4537604  |
| 5 rs145552461 | 4909599 A  | 9.593 | 2.89E-05 | chr:5:4537604  |
| 5 rs75139273  | 5031595 G  | 10.03 | 3.18E-05 | chr:5:4537604  |
| 5 rs7709922   | 4483433 C  | 7.832 | 3.63E-05 | chr:5:4537604  |
| 5 rs6898706   | 64415987 A | 87.02 | 5.02E-33 | chr:5:64388440 |
| 5 rs73103441  | 64421362 G | 87.02 | 5.02E-33 | chr:5:64388440 |
| 5 rs7729539   | 64417678 C | 87.02 | 5.02E-33 | chr:5:64388440 |
| 5 rs55853058  | 64436298 T | 37.71 | 8.60E-33 | chr:5:64388440 |
| 5 rs56246735  | 64434968 A | 37.71 | 8.60E-33 | chr:5:64388440 |
| 5 rs67024543  | 64439173 C | 37.71 | 8.60E-33 | chr:5:64388440 |
| 5 rs72758879  | 64437191 G | 37.71 | 8.60E-33 | chr:5:64388440 |
| 5 rs79124463  | 64437182 T | 36.35 | 1.19E-32 | chr:5:64388440 |
| 5 rs73095600  | 64373529 C | 27.38 | 3.59E-31 | chr:5:64388440 |
| 5 rs6865147   | 64395387 A | 310.6 | 2.50E-30 | chr:5:64388440 |
| 5 rs78329642  | 64401237 A | 48.36 | 2.77E-29 | chr:5:64388440 |
| 5 rs73103448  | 64427080 C | 75.13 | 8.04E-29 | chr:5:64388440 |
| 5 rs73101500  | 64401736 T | 167.7 | 9.90E-29 | chr:5:64388440 |
| 5 rs73097406  | 64377619 T | 382.6 | 1.34E-28 | chr:5:64388440 |
| 5 rs73097412  | 64383581 G | 359.6 | 2.53E-28 | chr:5:64388440 |
| 5 rs75867121  | 64439878 A | 21.08 | 5.07E-28 | chr:5:64388440 |
| 5 rs7710434   | 64388099 A | 1594  | 3.47E-26 | chr:5:64388440 |
| 5 rs61619383  | 64453265 T | 18.76 | 4.02E-26 | chr:5:64388440 |
| 5 rs371938786 | 64460027 A | 16.03 | 9.89E-26 | chr:5:64388440 |
| 5 rs73103483  | 64459559 T | 16.03 | 9.89E-26 | chr:5:64388440 |
| 5 rs7710427   | 64388091 T | 1539  | 1.15E-25 | chr:5:64388440 |

|               |            |       |          |                |
|---------------|------------|-------|----------|----------------|
| 5 rs140224833 | 64474892 T | 14.57 | 3.29E-24 | chr:5:64388440 |
| 5 rs264757    | 64380583 T | 14.12 | 5.35E-24 | chr:5:64388440 |
| 5 rs264760    | 64382737 A | 12.75 | 7.74E-23 | chr:5:64388440 |
| 5 rs73105104  | 64479565 G | 12.58 | 1.16E-22 | chr:5:64388440 |
| 5 rs264770    | 64391134 T | 19.34 | 2.17E-22 | chr:5:64388440 |
| 5 rs264775    | 64395359 G | 21.07 | 2.65E-22 | chr:5:64388440 |
| 5 rs4700662   | 64392906 C | 20.8  | 2.76E-22 | chr:5:64388440 |
| 5 rs190543    | 64391933 G | 20.91 | 2.96E-22 | chr:5:64388440 |
| 5 rs521074    | 64392198 C | 20.91 | 2.96E-22 | chr:5:64388440 |
| 5 rs111528700 | 64320024 T | 16.85 | 3.44E-22 | chr:5:64388440 |
| 5 rs73097416  | 64385303 T | 205.8 | 5.79E-22 | chr:5:64388440 |
| 5 rs65407     | 64375128 C | 15.03 | 9.96E-21 | chr:5:64388440 |
| 5 rs264752    | 64375502 T | 23.99 | 1.92E-20 | chr:5:64388440 |
| 5 rs155337    | 64375371 A | 23.92 | 2.19E-20 | chr:5:64388440 |
| 5 rs197138    | 64376615 G | 23.92 | 2.19E-20 | chr:5:64388440 |
| 5 rs264753    | 64375657 T | 23.92 | 2.19E-20 | chr:5:64388440 |
| 5 rs264754    | 64377290 A | 23.92 | 2.19E-20 | chr:5:64388440 |
| 5 rs264756    | 64380395 G | 23.92 | 2.19E-20 | chr:5:64388440 |
| 5 rs264762    | 64384386 A | 23.92 | 2.19E-20 | chr:5:64388440 |
| 5 rs264763    | 64384431 C | 23.92 | 2.19E-20 | chr:5:64388440 |
| 5 rs264766    | 64388979 T | 23.92 | 2.19E-20 | chr:5:64388440 |
| 5 rs73095522  | 64362357 G | 164.6 | 2.96E-20 | chr:5:64388440 |
| 5 rs73109219  | 64563151 A | 11.68 | 1.63E-19 | chr:5:64388440 |
| 5 rs533184079 | 64571243 G | 20.81 | 2.93E-19 | chr:5:64388440 |
| 5 rs73103471  | 64454874 T | 7.406 | 3.75E-19 | chr:5:64388440 |
| 5 rs73103478  | 64457644 C | 7.792 | 4.25E-19 | chr:5:64388440 |
| 5 rs73095585  | 64365707 T | 138.4 | 6.10E-19 | chr:5:64388440 |
| 5 rs73103472  | 64454906 T | 7.334 | 6.15E-19 | chr:5:64388440 |
| 5 rs144677474 | 64470809 T | 7.164 | 1.66E-18 | chr:5:64388440 |
| 5 rs6875154   | 64471415 A | 7.164 | 1.66E-18 | chr:5:64388440 |
| 5 rs73103487  | 64470165 T | 7.164 | 1.66E-18 | chr:5:64388440 |
| 5 rs11742800  | 64403371 T | 6.573 | 1.83E-18 | chr:5:64388440 |
| 5 rs73103481  | 64458204 T | 7.122 | 2.52E-18 | chr:5:64388440 |
| 5 rs111418391 | 64716056 G | 15.84 | 3.05E-18 | chr:5:64388440 |
| 5 rs112593123 | 64708584 T | 15.84 | 3.05E-18 | chr:5:64388440 |
| 5 rs73111166  | 64721188 T | 15.84 | 3.05E-18 | chr:5:64388440 |
| 5 rs7736365   | 64413591 C | 7.082 | 3.58E-18 | chr:5:64388440 |
| 5 rs73093236  | 64761742 G | 15.24 | 4.23E-18 | chr:5:64388440 |
| 5 rs192129646 | 64319677 A | 14.29 | 5.59E-18 | chr:5:64388440 |
| 5 rs58905231  | 64335255 A | 14.29 | 5.59E-18 | chr:5:64388440 |
| 5 rs73093175  | 64339354 A | 14.29 | 5.59E-18 | chr:5:64388440 |
| 5 rs73102795  | 64316619 G | 14.29 | 5.59E-18 | chr:5:64388440 |
| 5 rs73102800  | 64317492 A | 14.29 | 5.59E-18 | chr:5:64388440 |



|               |            |       |          |                |
|---------------|------------|-------|----------|----------------|
| 5 rs73104706  | 64319024 C | 14.29 | 5.59E-18 | chr:5:64388440 |
| 5 rs73104721  | 64322896 T | 14.29 | 5.59E-18 | chr:5:64388440 |
| 5 rs73104725  | 64326735 A | 14.29 | 5.59E-18 | chr:5:64388440 |
| 5 rs73104729  | 64329399 A | 14.29 | 5.59E-18 | chr:5:64388440 |
| 5 rs73104735  | 64331054 C | 14.29 | 5.59E-18 | chr:5:64388440 |
| 5 rs73104738  | 64331990 G | 14.29 | 5.59E-18 | chr:5:64388440 |
| 5 rs73104740  | 64333955 T | 14.29 | 5.59E-18 | chr:5:64388440 |
| 5 rs73104745  | 64337158 G | 14.29 | 5.59E-18 | chr:5:64388440 |
| 5 rs74998301  | 64318760 A | 14.29 | 5.59E-18 | chr:5:64388440 |
| 5 rs73093170  | 64338376 A | 13.21 | 1.06E-17 | chr:5:64388440 |
| 5 rs111294603 | 64475047 T | 6.801 | 1.38E-17 | chr:5:64388440 |
| 5 rs264774    | 64394535 G | 18.34 | 1.57E-17 | chr:5:64388440 |
| 5 rs73111136  | 64690636 C | 11.18 | 2.25E-17 | chr:5:64388440 |
| 5 rs73093219  | 64751698 C | 11.71 | 5.51E-17 | chr:5:64388440 |
| 5 rs264758    | 64381433 A | 5.333 | 7.56E-17 | chr:5:64388440 |
| 5 rs264765    | 64388548 C | 5.324 | 8.69E-17 | chr:5:64388440 |
| 5 rs6870898   | 64396495 C | 5.442 | 9.80E-17 | chr:5:64388440 |
| 5 rs6890401   | 64396791 T | 5.442 | 9.80E-17 | chr:5:64388440 |
| 5 rs73101485  | 64398297 G | 5.442 | 9.80E-17 | chr:5:64388440 |
| 5 rs113981089 | 64404264 A | 5.369 | 1.11E-16 | chr:5:64388440 |
| 5 rs6870195   | 64405273 G | 5.369 | 1.11E-16 | chr:5:64388440 |
| 5 rs6876719   | 64406481 T | 5.369 | 1.11E-16 | chr:5:64388440 |
| 5 rs73104743  | 64336890 C | 8.856 | 1.68E-16 | chr:5:64388440 |
| 5 rs264778    | 64395979 A | 5.708 | 1.93E-16 | chr:5:64388440 |
| 5 rs111398089 | 64686368 A | 6.996 | 4.03E-16 | chr:5:64388440 |
| 5 rs111792241 | 64691133 A | 6.996 | 4.03E-16 | chr:5:64388440 |
| 5 rs112491888 | 64684807 A | 6.996 | 4.03E-16 | chr:5:64388440 |
| 5 rs73111131  | 64688247 G | 6.996 | 4.03E-16 | chr:5:64388440 |
| 5 rs73111133  | 64690144 G | 6.996 | 4.03E-16 | chr:5:64388440 |
| 5 rs73111141  | 64692779 C | 6.996 | 4.03E-16 | chr:5:64388440 |
| 5 rs113193051 | 64410219 T | 5.161 | 4.24E-16 | chr:5:64388440 |
| 5 rs6449771   | 64425328 A | 5.126 | 5.51E-16 | chr:5:64388440 |
| 5 rs6883161   | 64407936 A | 5.126 | 5.51E-16 | chr:5:64388440 |
| 5 rs73103420  | 64409881 A | 5.126 | 5.51E-16 | chr:5:64388440 |
| 5 rs73103440  | 64420014 T | 5.126 | 5.51E-16 | chr:5:64388440 |
| 5 rs73103445  | 64426837 T | 5.126 | 5.51E-16 | chr:5:64388440 |
| 5 rs7716646   | 64413666 C | 5.126 | 5.51E-16 | chr:5:64388440 |
| 5 rs73111144  | 64694191 C | 6.858 | 5.88E-16 | chr:5:64388440 |
| 5 rs7716553   | 64397419 C | 4.937 | 8.04E-16 | chr:5:64388440 |
| 5 rs16893403  | 64421920 T | 5.064 | 8.73E-16 | chr:5:64388440 |
| 5 rs264779    | 64398181 C | 4.956 | 1.20E-15 | chr:5:64388440 |
| 5 rs7733210   | 64492383 A | 6.192 | 1.48E-15 | chr:5:64388440 |
| 5 rs111512786 | 64410024 G | 4.765 | 3.67E-15 | chr:5:64388440 |

|               |            |       |          |                |
|---------------|------------|-------|----------|----------------|
| 5 rs62370998  | 64322176 C | 5.526 | 5.38E-15 | chr:5:64388440 |
| 5 rs112112811 | 64302520 A | 33.24 | 6.26E-15 | chr:5:64388440 |
| 5 rs73093027  | 64283680 A | 33.24 | 6.26E-15 | chr:5:64388440 |
| 5 rs73093068  | 64293956 G | 33.24 | 6.26E-15 | chr:5:64388440 |
| 5 rs76208888  | 64300951 A | 33.24 | 6.26E-15 | chr:5:64388440 |
| 5 rs397044    | 64391972 C | 4.566 | 6.97E-15 | chr:5:64388440 |
| 5 rs111758288 | 64403718 A | 5.11  | 1.15E-14 | chr:5:64388440 |
| 5 rs73109580  | 64256585 G | 31.12 | 2.13E-14 | chr:5:64388440 |
| 5 rs73109582  | 64257492 G | 31.12 | 2.13E-14 | chr:5:64388440 |
| 5 rs73093221  | 64752599 G | 6.857 | 1.01E-13 | chr:5:64388440 |
| 5 rs58241836  | 64403328 C | 4.033 | 1.08E-13 | chr:5:64388440 |
| 5 rs6873085   | 64400885 G | 4.033 | 1.08E-13 | chr:5:64388440 |
| 5 rs12152909  | 64362074 C | 3.993 | 6.12E-13 | chr:5:64388440 |
| 5 rs7702739   | 64368803 T | 3.993 | 6.12E-13 | chr:5:64388440 |
| 5 rs111639834 | 64751882 C | 6.041 | 7.75E-13 | chr:5:64388440 |
| 5 rs77697244  | 64331684 C | 4.432 | 9.75E-13 | chr:5:64388440 |
| 5 rs441077    | 64356759 C | 3.546 | 1.86E-12 | chr:5:64388440 |
| 5 rs7713874   | 64330265 G | 4.213 | 2.19E-12 | chr:5:64388440 |
| 5 rs73097124  | 64874720 G | 12.85 | 5.33E-12 | chr:5:64388440 |
| 5 rs73097133  | 64878551 G | 12.85 | 5.33E-12 | chr:5:64388440 |
| 5 rs57076602  | 64310759 C | 5.397 | 5.83E-12 | chr:5:64388440 |
| 5 rs6867287   | 64312009 T | 5.397 | 5.83E-12 | chr:5:64388440 |
| 5 rs6889690   | 64308363 C | 5.397 | 5.83E-12 | chr:5:64388440 |
| 5 rs577544074 | 64526194 G | 4.516 | 8.64E-12 | chr:5:64388440 |
| 5 rs264739    | 64366053 C | 3.383 | 9.92E-12 | chr:5:64388440 |
| 5 rs264743    | 64368525 G | 3.383 | 9.92E-12 | chr:5:64388440 |
| 5 rs264745    | 64370547 G | 3.383 | 9.92E-12 | chr:5:64388440 |
| 5 rs264748    | 64371017 G | 3.383 | 9.92E-12 | chr:5:64388440 |
| 5 rs264749    | 64371183 C | 3.377 | 1.21E-11 | chr:5:64388440 |
| 5 rs264738    | 64363816 G | 3.352 | 1.26E-11 | chr:5:64388440 |
| 5 rs57237698  | 64790316 C | 10.62 | 1.31E-11 | chr:5:64388440 |
| 5 rs57788107  | 64790432 C | 10.62 | 1.31E-11 | chr:5:64388440 |
| 5 rs73107301  | 64239339 T | 15.34 | 2.10E-11 | chr:5:64388440 |
| 5 rs73094913  | 64826891 G | 9.929 | 2.23E-11 | chr:5:64388440 |
| 5 rs10940015  | 64318142 G | 3.849 | 2.93E-11 | chr:5:64388440 |
| 5 rs61571832  | 64318906 T | 3.849 | 2.93E-11 | chr:5:64388440 |
| 5 rs62370999  | 64322395 A | 3.849 | 2.93E-11 | chr:5:64388440 |
| 5 rs6882488   | 64319949 G | 3.849 | 2.93E-11 | chr:5:64388440 |
| 5 rs78822923  | 64359878 G | 3.452 | 2.98E-11 | chr:5:64388440 |
| 5 rs73094910  | 64822581 A | 9.73  | 3.07E-11 | chr:5:64388440 |
| 5 rs35841260  | 64360517 T | 3.255 | 3.10E-11 | chr:5:64388440 |
| 5 rs111889269 | 64091293 A | 13.78 | 3.12E-11 | chr:5:64388440 |
| 5 rs60609925  | 64217208 C | 13.78 | 3.12E-11 | chr:5:64388440 |

|               |            |       |          |                |
|---------------|------------|-------|----------|----------------|
| 5 rs6891515   | 64120706 T | 13.78 | 3.12E-11 | chr:5:64388440 |
| 5 rs73101363  | 64140059 A | 13.78 | 3.12E-11 | chr:5:64388440 |
| 5 rs73107206  | 64183606 T | 13.78 | 3.12E-11 | chr:5:64388440 |
| 5 rs73107280  | 64222633 C | 13.78 | 3.12E-11 | chr:5:64388440 |
| 5 rs11749451  | 64675233 C | 4.998 | 3.17E-11 | chr:5:64388440 |
| 5 rs11741552  | 64473033 G | 3.363 | 3.23E-11 | chr:5:64388440 |
| 5 rs73093173  | 64338468 A | 4.354 | 3.38E-11 | chr:5:64388440 |
| 5 rs438698    | 64358052 A | 3.226 | 3.58E-11 | chr:5:64388440 |
| 5 rs264734    | 64361949 G | 3.223 | 3.85E-11 | chr:5:64388440 |
| 5 rs266568    | 64358639 G | 3.223 | 3.85E-11 | chr:5:64388440 |
| 5 rs266569    | 64358540 A | 3.223 | 3.85E-11 | chr:5:64388440 |
| 5 rs403958    | 64357631 C | 3.223 | 3.85E-11 | chr:5:64388440 |
| 5 rs439327    | 64356942 T | 3.177 | 5.43E-11 | chr:5:64388440 |
| 5 rs266571    | 64358152 A | 3.134 | 1.06E-10 | chr:5:64388440 |
| 5 rs11749829  | 64467554 T | 3.188 | 1.29E-10 | chr:5:64388440 |
| 5 rs113576877 | 64850257 A | 8.057 | 1.36E-10 | chr:5:64388440 |
| 5 rs113654962 | 64857097 A | 8.057 | 1.36E-10 | chr:5:64388440 |
| 5 rs73097110  | 64852719 T | 8.057 | 1.36E-10 | chr:5:64388440 |
| 5 rs150630356 | 64384299 C | 26.81 | 1.79E-10 | chr:5:64388440 |
| 5 rs77079494  | 64345577 T | 3.211 | 1.81E-10 | chr:5:64388440 |
| 5 rs114436292 | 64385381 A | 25.09 | 4.25E-10 | chr:5:64388440 |
| 5 rs115073561 | 64377414 A | 25.09 | 4.25E-10 | chr:5:64388440 |
| 5 rs11743242  | 64375379 C | 25.09 | 4.25E-10 | chr:5:64388440 |
| 5 rs11746094  | 64387612 T | 25.09 | 4.25E-10 | chr:5:64388440 |
| 5 rs11746360  | 64375515 G | 25.09 | 4.25E-10 | chr:5:64388440 |
| 5 rs77434451  | 64380180 C | 25.09 | 4.25E-10 | chr:5:64388440 |
| 5 rs77669131  | 64385985 C | 25.09 | 4.25E-10 | chr:5:64388440 |
| 5 rs77982418  | 64383897 C | 25.09 | 4.25E-10 | chr:5:64388440 |
| 5 rs11741777  | 64377897 T | 25.04 | 4.34E-10 | chr:5:64388440 |
| 5 rs11743343  | 64467626 T | 3.045 | 4.69E-10 | chr:5:64388440 |
| 5 rs11747084  | 64501304 C | 3.462 | 6.14E-10 | chr:5:64388440 |
| 5 rs111682017 | 64090207 A | 4.988 | 1.84E-09 | chr:5:64388440 |
| 5 rs2194218   | 64347662 C | 2.712 | 2.00E-09 | chr:5:64388440 |
| 5 rs369965566 | 64398886 T | 16.82 | 2.34E-09 | chr:5:64388440 |
| 5 rs11953426  | 64497837 T | 3.46  | 2.72E-09 | chr:5:64388440 |
| 5 rs11959921  | 64497937 G | 3.46  | 2.72E-09 | chr:5:64388440 |
| 5 rs60924651  | 64519047 G | 3.46  | 2.86E-09 | chr:5:64388440 |
| 5 rs139126213 | 64355569 T | 18.07 | 2.88E-09 | chr:5:64388440 |
| 5 rs75261655  | 64354080 G | 18.07 | 2.88E-09 | chr:5:64388440 |
| 5 rs10940019  | 64501468 T | 3.426 | 3.49E-09 | chr:5:64388440 |
| 5 rs62369565  | 64499949 G | 3.426 | 3.49E-09 | chr:5:64388440 |
| 5 rs7708553   | 64505744 A | 3.426 | 3.49E-09 | chr:5:64388440 |
| 5 rs7720673   | 64502727 T | 3.426 | 3.49E-09 | chr:5:64388440 |

|               |            |        |          |                |
|---------------|------------|--------|----------|----------------|
| 5 rs7728957   | 64505977 G | 3.426  | 3.49E-09 | chr:5:64388440 |
| 5 rs78676550  | 64504629 T | 3.426  | 3.49E-09 | chr:5:64388440 |
| 5 rs56385905  | 64515187 T | 3.357  | 4.12E-09 | chr:5:64388440 |
| 5 rs7707398   | 64518254 T | 3.357  | 4.12E-09 | chr:5:64388440 |
| 5 rs62369571  | 64514734 C | 3.392  | 4.50E-09 | chr:5:64388440 |
| 5 rs73105135  | 64514187 G | 3.392  | 4.50E-09 | chr:5:64388440 |
| 5 rs7714577   | 64330480 C | 3.096  | 4.92E-09 | chr:5:64388440 |
| 5 rs10940018  | 64496326 T | 3.326  | 4.92E-09 | chr:5:64388440 |
| 5 rs182061015 | 64380725 A | 20.42  | 6.29E-09 | chr:5:64388440 |
| 5 rs192546362 | 64380724 C | 20.42  | 6.29E-09 | chr:5:64388440 |
| 5 rs11958777  | 64509115 C | 3.253  | 7.12E-09 | chr:5:64388440 |
| 5 rs73101344  | 64122953 G | 4.733  | 7.42E-09 | chr:5:64388440 |
| 5 rs59929214  | 64065184 A | 6.562  | 1.72E-08 | chr:5:64388440 |
| 5 rs113164834 | 64233211 G | 6.198  | 2.28E-08 | chr:5:64388440 |
| 5 rs11738990  | 64487371 A | 3.105  | 2.55E-08 | chr:5:64388440 |
| 5 rs58631792  | 63968421 C | 5.854  | 4.43E-08 | chr:5:64388440 |
| 5 rs434882    | 64353312 G | 0.3763 | 4.44E-08 | chr:5:64388440 |
| 5 rs10065275  | 64380353 T | 0.3413 | 5.02E-08 | chr:5:64388440 |
| 5 rs62368036  | 64486143 C | 3.025  | 5.07E-08 | chr:5:64388440 |
| 5 rs17206232  | 64433400 A | 14.19  | 7.51E-08 | chr:5:64388440 |
| 5 rs4700668   | 64435732 A | 14.19  | 7.51E-08 | chr:5:64388440 |
| 5 rs55762587  | 64436355 C | 14.19  | 7.51E-08 | chr:5:64388440 |
| 5 rs72758880  | 64440519 A | 14.19  | 7.51E-08 | chr:5:64388440 |
| 5 rs7718684   | 64371841 G | 2.503  | 8.24E-08 | chr:5:64388440 |
| 5 rs264750    | 64373264 T | 0.3566 | 9.14E-08 | chr:5:64388440 |
| 5 rs400088    | 64355340 C | 0.3678 | 9.28E-08 | chr:5:64388440 |
| 5 rs423139    | 64355873 T | 0.3678 | 9.28E-08 | chr:5:64388440 |
| 5 rs60464373  | 64366609 G | 2.477  | 1.03E-07 | chr:5:64388440 |
| 5 rs1423352   | 64450308 A | 2.436  | 1.07E-07 | chr:5:64388440 |
| 5 rs1117707   | 64389665 G | 0.3394 | 1.09E-07 | chr:5:64388440 |
| 5 rs10434530  | 64376348 C | 0.3396 | 1.11E-07 | chr:5:64388440 |
| 5 rs11746271  | 64522124 C | 2.76   | 1.32E-07 | chr:5:64388440 |
| 5 rs6884602   | 64529521 C | 2.738  | 1.64E-07 | chr:5:64388440 |
| 5 rs7735639   | 64337793 T | 0.3998 | 1.86E-07 | chr:5:64388440 |
| 5 rs12656072  | 64535627 C | 2.694  | 1.96E-07 | chr:5:64388440 |
| 5 rs112645559 | 64051127 C | 5.199  | 2.18E-07 | chr:5:64388440 |
| 5 rs73097700  | 64051869 T | 5.199  | 2.18E-07 | chr:5:64388440 |
| 5 rs73099505  | 64055838 G | 5.199  | 2.18E-07 | chr:5:64388440 |
| 5 rs398407    | 64357523 C | 0.3387 | 2.19E-07 | chr:5:64388440 |
| 5 rs111451874 | 64231443 A | 4.846  | 2.31E-07 | chr:5:64388440 |
| 5 rs111565859 | 64135412 A | 4.846  | 2.31E-07 | chr:5:64388440 |
| 5 rs111595032 | 64125848 T | 4.846  | 2.31E-07 | chr:5:64388440 |
| 5 rs111833618 | 64224034 T | 4.846  | 2.31E-07 | chr:5:64388440 |

|               |            |        |          |                |
|---------------|------------|--------|----------|----------------|
| 5 rs111852072 | 64207658 C | 4.846  | 2.31E-07 | chr:5:64388440 |
| 5 rs112142048 | 64155007 T | 4.846  | 2.31E-07 | chr:5:64388440 |
| 5 rs112720600 | 64227271 G | 4.846  | 2.31E-07 | chr:5:64388440 |
| 5 rs116662026 | 64164730 A | 4.846  | 2.31E-07 | chr:5:64388440 |
| 5 rs116756607 | 64164729 T | 4.846  | 2.31E-07 | chr:5:64388440 |
| 5 rs149392464 | 64230924 G | 4.846  | 2.31E-07 | chr:5:64388440 |
| 5 rs57519034  | 64085801 G | 4.846  | 2.31E-07 | chr:5:64388440 |
| 5 rs57625412  | 64188178 T | 4.846  | 2.31E-07 | chr:5:64388440 |
| 5 rs59674870  | 64125266 G | 4.846  | 2.31E-07 | chr:5:64388440 |
| 5 rs73101310  | 64094856 G | 4.846  | 2.31E-07 | chr:5:64388440 |
| 5 rs73101321  | 64099565 C | 4.846  | 2.31E-07 | chr:5:64388440 |
| 5 rs73101347  | 64124354 T | 4.846  | 2.31E-07 | chr:5:64388440 |
| 5 rs73101359  | 64135506 T | 4.846  | 2.31E-07 | chr:5:64388440 |
| 5 rs73103381  | 64143471 G | 4.846  | 2.31E-07 | chr:5:64388440 |
| 5 rs73103385  | 64148814 G | 4.846  | 2.31E-07 | chr:5:64388440 |
| 5 rs73103391  | 64151470 T | 4.846  | 2.31E-07 | chr:5:64388440 |
| 5 rs73105205  | 64158117 C | 4.846  | 2.31E-07 | chr:5:64388440 |
| 5 rs73105207  | 64160560 T | 4.846  | 2.31E-07 | chr:5:64388440 |
| 5 rs73105209  | 64163334 T | 4.846  | 2.31E-07 | chr:5:64388440 |
| 5 rs73105224  | 64168437 C | 4.846  | 2.31E-07 | chr:5:64388440 |
| 5 rs73105301  | 64181380 A | 4.846  | 2.31E-07 | chr:5:64388440 |
| 5 rs73107213  | 64186153 A | 4.846  | 2.31E-07 | chr:5:64388440 |
| 5 rs73107218  | 64195349 T | 4.846  | 2.31E-07 | chr:5:64388440 |
| 5 rs73107224  | 64197482 T | 4.846  | 2.31E-07 | chr:5:64388440 |
| 5 rs73107248  | 64207769 T | 4.846  | 2.31E-07 | chr:5:64388440 |
| 5 rs73107259  | 64211768 T | 4.846  | 2.31E-07 | chr:5:64388440 |
| 5 rs73107282  | 64223646 C | 4.846  | 2.31E-07 | chr:5:64388440 |
| 5 rs73107283  | 64224030 T | 4.846  | 2.31E-07 | chr:5:64388440 |
| 5 rs73107295  | 64228871 T | 4.846  | 2.31E-07 | chr:5:64388440 |
| 5 rs73107296  | 64229609 T | 4.846  | 2.31E-07 | chr:5:64388440 |
| 5 rs7705022   | 64086067 A | 4.846  | 2.31E-07 | chr:5:64388440 |
| 5 rs7714464   | 64124895 T | 4.846  | 2.31E-07 | chr:5:64388440 |
| 5 rs7716164   | 64161328 A | 4.846  | 2.31E-07 | chr:5:64388440 |
| 5 rs10514977  | 64373956 T | 0.3565 | 2.40E-07 | chr:5:64388440 |
| 5 rs395850    | 64356894 A | 0.3418 | 2.66E-07 | chr:5:64388440 |
| 5 rs16893587  | 64547732 A | 2.32   | 2.75E-07 | chr:5:64388440 |
| 5 rs112033424 | 64058256 G | 4.657  | 3.04E-07 | chr:5:64388440 |
| 5 rs112703509 | 64442318 A | 26.96  | 3.05E-07 | chr:5:64388440 |
| 5 rs114159386 | 64441782 T | 26.96  | 3.05E-07 | chr:5:64388440 |
| 5 rs150497068 | 64519615 T | 10.13  | 3.38E-07 | chr:5:64388440 |
| 5 rs57522743  | 64058911 T | 4.559  | 3.81E-07 | chr:5:64388440 |
| 5 rs11746174  | 64470594 C | 0.426  | 4.24E-07 | chr:5:64388440 |
| 5 rs111987601 | 63985624 G | 4.697  | 4.61E-07 | chr:5:64388440 |

|               |            |        |          |                |
|---------------|------------|--------|----------|----------------|
| 5 rs73097612  | 63997090 T | 4.697  | 4.61E-07 | chr:5:64388440 |
| 5 rs73097629  | 64025457 C | 4.697  | 4.61E-07 | chr:5:64388440 |
| 5 rs3776042   | 64558111 C | 2.625  | 5.01E-07 | chr:5:64388440 |
| 5 rs17811610  | 64428506 C | 25.45  | 5.17E-07 | chr:5:64388440 |
| 5 rs7719056   | 64542430 A | 2.262  | 5.38E-07 | chr:5:64388440 |
| 5 rs4019318   | 64403833 T | 0.4241 | 5.77E-07 | chr:5:64388440 |
| 5 rs10940022  | 64549606 A | 2.61   | 5.81E-07 | chr:5:64388440 |
| 5 rs62369607  | 64553490 A | 2.61   | 5.81E-07 | chr:5:64388440 |
| 5 rs34272107  | 64401030 T | 0.4274 | 6.45E-07 | chr:5:64388440 |
| 5 rs4700664   | 64401205 G | 0.4274 | 6.45E-07 | chr:5:64388440 |
| 5 rs62369611  | 64558325 G | 2.602  | 6.53E-07 | chr:5:64388440 |
| 5 rs62369581  | 64548881 A | 2.277  | 6.87E-07 | chr:5:64388440 |
| 5 rs166473    | 64340353 G | 2.336  | 7.09E-07 | chr:5:64388440 |
| 5 rs2886900   | 64405243 T | 0.4282 | 7.20E-07 | chr:5:64388440 |
| 5 rs34202375  | 64405041 T | 0.4282 | 7.20E-07 | chr:5:64388440 |
| 5 rs6650949   | 64408372 G | 0.4282 | 7.20E-07 | chr:5:64388440 |
| 5 rs10940003  | 64027108 G | 4.509  | 7.30E-07 | chr:5:64388440 |
| 5 rs111731999 | 64010858 C | 4.509  | 7.30E-07 | chr:5:64388440 |
| 5 rs112604774 | 63996319 G | 4.509  | 7.30E-07 | chr:5:64388440 |
| 5 rs28460304  | 64011903 C | 4.509  | 7.30E-07 | chr:5:64388440 |
| 5 rs57045767  | 64024842 G | 4.509  | 7.30E-07 | chr:5:64388440 |
| 5 rs57517937  | 64024850 C | 4.509  | 7.30E-07 | chr:5:64388440 |
| 5 rs57758714  | 64013212 C | 4.509  | 7.30E-07 | chr:5:64388440 |
| 5 rs58202736  | 64010242 A | 4.509  | 7.30E-07 | chr:5:64388440 |
| 5 rs61133380  | 64024141 A | 4.509  | 7.30E-07 | chr:5:64388440 |
| 5 rs73097631  | 64025654 C | 4.509  | 7.30E-07 | chr:5:64388440 |
| 5 rs73097692  | 64027248 A | 4.509  | 7.30E-07 | chr:5:64388440 |
| 5 rs80216318  | 64028142 A | 4.509  | 7.30E-07 | chr:5:64388440 |
| 5 rs10035191  | 64411156 T | 0.4299 | 7.43E-07 | chr:5:64388440 |
| 5 rs10040605  | 64410558 T | 0.4299 | 7.43E-07 | chr:5:64388440 |
| 5 rs12187984  | 64411249 T | 0.4299 | 7.43E-07 | chr:5:64388440 |
| 5 rs16893246  | 64220712 G | 3.536  | 7.71E-07 | chr:5:64388440 |
| 5 rs59349085  | 64216048 A | 3.536  | 7.71E-07 | chr:5:64388440 |
| 5 rs73097633  | 64026118 C | 4.485  | 8.00E-07 | chr:5:64388440 |
| 5 rs12186551  | 64411371 G | 0.4306 | 8.17E-07 | chr:5:64388440 |
| 5 rs1035489   | 64424183 G | 0.4306 | 8.23E-07 | chr:5:64388440 |
| 5 rs10461501  | 64329894 C | 0.4275 | 8.42E-07 | chr:5:64388440 |
| 5 rs10061727  | 64426461 C | 0.4309 | 8.68E-07 | chr:5:64388440 |
| 5 rs111843652 | 64043866 G | 4.413  | 9.08E-07 | chr:5:64388440 |
| 5 rs113667536 | 64053681 C | 4.413  | 9.08E-07 | chr:5:64388440 |
| 5 rs1812553   | 64474640 T | 2.446  | 1.04E-06 | chr:5:64388440 |
| 5 rs62369608  | 64554899 A | 2.262  | 1.19E-06 | chr:5:64388440 |
| 5 rs62370996  | 64319202 C | 0.4394 | 1.19E-06 | chr:5:64388440 |

|               |            |        |          |                |
|---------------|------------|--------|----------|----------------|
| 5 rs7701134   | 64542365 T | 0.3977 | 1.24E-06 | chr:5:64388440 |
| 5 rs115751157 | 64477426 C | 23.28  | 1.30E-06 | chr:5:64388440 |
| 5 rs140009968 | 64448114 C | 23.28  | 1.30E-06 | chr:5:64388440 |
| 5 rs9291831   | 64419511 A | 0.4375 | 1.32E-06 | chr:5:64388440 |
| 5 rs115596035 | 64394182 A | 40.35  | 1.34E-06 | chr:5:64388440 |
| 5 rs11750581  | 64392324 T | 40.35  | 1.34E-06 | chr:5:64388440 |
| 5 rs114005099 | 64540574 A | 11.45  | 1.43E-06 | chr:5:64388440 |
| 5 rs114736328 | 64536310 T | 11.45  | 1.43E-06 | chr:5:64388440 |
| 5 rs114939548 | 64534078 C | 11.45  | 1.43E-06 | chr:5:64388440 |
| 5 rs115360677 | 64534860 T | 11.45  | 1.43E-06 | chr:5:64388440 |
| 5 rs115362675 | 64541831 T | 11.45  | 1.43E-06 | chr:5:64388440 |
| 5 rs116147829 | 64547379 C | 11.45  | 1.43E-06 | chr:5:64388440 |
| 5 rs116316884 | 64545764 A | 11.45  | 1.43E-06 | chr:5:64388440 |
| 5 rs138022970 | 64536118 G | 11.45  | 1.43E-06 | chr:5:64388440 |
| 5 rs138415199 | 64523850 T | 11.45  | 1.43E-06 | chr:5:64388440 |
| 5 rs143018035 | 64523951 G | 11.45  | 1.43E-06 | chr:5:64388440 |
| 5 rs150774675 | 64528745 T | 11.45  | 1.43E-06 | chr:5:64388440 |
| 5 rs150897403 | 64543939 G | 11.45  | 1.43E-06 | chr:5:64388440 |
| 5 rs13153005  | 64460096 T | 0.4142 | 1.50E-06 | chr:5:64388440 |
| 5 rs11960938  | 64322549 A | 0.4411 | 1.50E-06 | chr:5:64388440 |
| 5 rs12653052  | 64544676 C | 2.473  | 1.50E-06 | chr:5:64388440 |
| 5 rs41268423  | 64556697 C | 2.468  | 1.61E-06 | chr:5:64388440 |
| 5 rs16893613  | 64552199 T | 2.487  | 1.66E-06 | chr:5:64388440 |
| 5 rs17206008  | 64427970 A | 38.73  | 1.66E-06 | chr:5:64388440 |
| 5 rs1862565   | 64457083 C | 0.4518 | 1.70E-06 | chr:5:64388440 |
| 5 rs2081115   | 64459861 C | 0.4518 | 1.70E-06 | chr:5:64388440 |
| 5 rs7445643   | 64459475 G | 0.4518 | 1.70E-06 | chr:5:64388440 |
| 5 rs1549249   | 64455558 C | 0.4524 | 1.82E-06 | chr:5:64388440 |
| 5 rs10940021  | 64542667 T | 2.454  | 1.85E-06 | chr:5:64388440 |
| 5 rs10461506  | 64828559 G | 2.361  | 1.97E-06 | chr:5:64388440 |
| 5 rs2367239   | 64459691 A | 0.3991 | 2.20E-06 | chr:5:64388440 |
| 5 rs112624903 | 64014536 A | 4.252  | 2.30E-06 | chr:5:64388440 |
| 5 rs16893338  | 64361357 T | 0.4481 | 2.61E-06 | chr:5:64388440 |
| 5 rs61174743  | 64464557 A | 0.4515 | 2.61E-06 | chr:5:64388440 |
| 5 rs114007286 | 64556450 A | 21.61  | 2.72E-06 | chr:5:64388440 |
| 5 rs114808253 | 64549430 G | 21.61  | 2.72E-06 | chr:5:64388440 |
| 5 rs76294348  | 64401590 C | 36.05  | 2.94E-06 | chr:5:64388440 |
| 5 rs79066328  | 64400793 T | 36.05  | 2.94E-06 | chr:5:64388440 |
| 5 rs28582519  | 63986449 A | 4.552  | 2.95E-06 | chr:5:64388440 |
| 5 rs56724345  | 64475749 C | 21.76  | 2.96E-06 | chr:5:64388440 |
| 5 rs528375954 | 64460151 A | 21.23  | 3.05E-06 | chr:5:64388440 |
| 5 rs6880009   | 64535590 A | 2.129  | 3.26E-06 | chr:5:64388440 |
| 5 rs59167602  | 63989036 G | 3.714  | 3.40E-06 | chr:5:64388440 |

|               |            |        |          |                |
|---------------|------------|--------|----------|----------------|
| 5 rs245525    | 64761316 C | 2.16   | 4.05E-06 | chr:5:64388440 |
| 5 rs60278863  | 64021519 C | 3.646  | 4.28E-06 | chr:5:64388440 |
| 5 rs6889661   | 64522219 T | 2.101  | 4.33E-06 | chr:5:64388440 |
| 5 rs56666062  | 63974265 G | 2.637  | 5.36E-06 | chr:5:64388440 |
| 5 rs62369575  | 64519862 C | 2.091  | 5.43E-06 | chr:5:64388440 |
| 5 rs9291824   | 64084504 A | 0.4567 | 5.47E-06 | chr:5:64388440 |
| 5 rs10471310  | 64548961 T | 0.389  | 5.78E-06 | chr:5:64388440 |
| 5 rs531905188 | 64351431 T | 33.08  | 5.97E-06 | chr:5:64388440 |
| 5 rs562948183 | 64351430 G | 33.08  | 5.97E-06 | chr:5:64388440 |
| 5 rs266597    | 64342992 C | 0.4234 | 7.26E-06 | chr:5:64388440 |
| 5 rs11739864  | 64550037 C | 2.024  | 7.72E-06 | chr:5:64388440 |
| 5 rs116457699 | 64342570 T | 8.373  | 7.80E-06 | chr:5:64388440 |
| 5 rs1309513   | 64341929 C | 0.4261 | 8.16E-06 | chr:5:64388440 |
| 5 rs181752    | 64791876 A | 2.201  | 9.23E-06 | chr:5:64388440 |
| 5 rs245519    | 64792839 A | 2.201  | 9.23E-06 | chr:5:64388440 |
| 5 rs245520    | 64792219 A | 2.201  | 9.23E-06 | chr:5:64388440 |
| 5 rs1309512   | 64342040 T | 0.4297 | 9.71E-06 | chr:5:64388440 |
| 5 rs245521    | 64789949 G | 2.187  | 1.09E-05 | chr:5:64388440 |
| 5 rs13157797  | 64830790 C | 2.185  | 1.15E-05 | chr:5:64388440 |
| 5 rs66889039  | 64843262 T | 2.185  | 1.15E-05 | chr:5:64388440 |
| 5 rs66971305  | 64832439 A | 2.185  | 1.15E-05 | chr:5:64388440 |
| 5 rs150864020 | 64342989 T | 8.96   | 1.22E-05 | chr:5:64388440 |
| 5 rs186573598 | 64342180 C | 8.96   | 1.22E-05 | chr:5:64388440 |
| 5 rs6861406   | 64599365 T | 0.3286 | 1.44E-05 | chr:5:64388440 |
| 5 rs13170899  | 64848738 C | 2.155  | 1.47E-05 | chr:5:64388440 |
| 5 rs16893364  | 64372897 G | 0.3866 | 1.61E-05 | chr:5:64388440 |
| 5 rs1423427   | 64560698 A | 2.146  | 1.74E-05 | chr:5:64388440 |
| 5 rs28412757  | 64597775 T | 0.3415 | 1.96E-05 | chr:5:64388440 |
| 5 rs115677911 | 64328851 C | 28.39  | 1.98E-05 | chr:5:64388440 |
| 5 rs149269547 | 64327102 T | 28.39  | 1.98E-05 | chr:5:64388440 |
| 5 rs149208    | 64865405 A | 2.144  | 1.99E-05 | chr:5:64388440 |
| 5 rs10940017  | 64475275 T | 0.4186 | 2.00E-05 | chr:5:64388440 |
| 5 rs62371025  | 64359888 A | 0.3916 | 2.01E-05 | chr:5:64388440 |
| 5 rs371636404 | 64766521 A | 2.215  | 2.01E-05 | chr:5:64388440 |
| 5 rs2047071   | 64604810 T | 0.337  | 2.21E-05 | chr:5:64388440 |
| 5 rs10474649  | 80461296 A | 57.71  | 5.20E-12 | chr:5:80442266 |
| 5 rs10474027  | 80464374 T | 30.71  | 3.71E-09 | chr:5:80442266 |
| 5 rs10474650  | 80463398 C | 30.71  | 3.71E-09 | chr:5:80442266 |
| 5 rs140600790 | 80414322 G | 88.52  | 9.77E-08 | chr:5:80442266 |
| 5 rs575940861 | 80419646 A | 88.52  | 9.77E-08 | chr:5:80442266 |
| 5 rs76184782  | 80446151 T | 17.28  | 2.59E-07 | chr:5:80442266 |
| 5 rs144473584 | 80476321 C | 34.96  | 3.36E-07 | chr:5:80442266 |
| 5 rs185956472 | 80437592 G | 392.7  | 9.23E-07 | chr:5:80442266 |



|               |            |         |          |                |
|---------------|------------|---------|----------|----------------|
| 5 rs539995180 | 80456405 T | 22.47   | 1.73E-06 | chr:5:80442266 |
| 5 rs182112055 | 80472411 T | 20.54   | 3.39E-06 | chr:5:80442266 |
| 5 rs6891857   | 80464684 G | 6.859   | 3.64E-06 | chr:5:80442266 |
| 5 rs16878472  | 80409407 G | 6.89    | 9.57E-06 | chr:5:80442266 |
| 5 rs76307934  | 80408244 C | 6.89    | 9.57E-06 | chr:5:80442266 |
| 5 rs151126633 | 80477390 G | 14.08   | 1.11E-05 | chr:5:80442266 |
| 5 rs13361744  | 80455667 G | 7.059   | 1.29E-05 | chr:5:80442266 |
| 5 rs150081879 | 80428497 A | 191     | 1.43E-05 | chr:5:80442266 |
| 5 rs190782674 | 80400793 A | 9.729   | 2.81E-05 | chr:5:80442266 |
| 5 rs114292556 | 80356685 T | 19.18   | 3.35E-05 | chr:5:80442266 |
| 5 rs114628076 | 80340625 A | 19.18   | 3.35E-05 | chr:5:80442266 |
| 5 rs115564889 | 80434343 A | 11.74   | 3.85E-05 | chr:5:80442266 |
| 5 rs140963806 | 80389585 A | 8.983   | 4.21E-05 | chr:5:80442266 |
| 5 rs7703538   | 80386534 G | 8.983   | 4.21E-05 | chr:5:80442266 |
| 5 rs17213955  | 80437241 T | 6.341   | 4.73E-05 | chr:5:80442266 |
| 5 rs145371027 | 80263753 A | 70.68   | 4.99E-05 | chr:5:80442266 |
| 5 rs80193320  | 8941404 C  | 0.07778 | 2.76E-22 | chr:5:8937853  |
| 5 rs6555586   | 8935800 A  | 0.0628  | 6.29E-22 | chr:5:8937853  |
| 5 rs13160367  | 8936774 A  | 0.05714 | 6.81E-22 | chr:5:8937853  |
| 5 rs6861103   | 8928381 A  | 0.06194 | 9.76E-22 | chr:5:8937853  |
| 5 rs11949503  | 8937804 C  | 0.05805 | 1.10E-21 | chr:5:8937853  |
| 5 rs11955429  | 8941715 A  | 0.05805 | 1.10E-21 | chr:5:8937853  |
| 5 rs12186849  | 8933088 C  | 0.05805 | 1.10E-21 | chr:5:8937853  |
| 5 rs13157678  | 8931378 C  | 0.05805 | 1.10E-21 | chr:5:8937853  |
| 5 rs13166892  | 8931212 C  | 0.05805 | 1.10E-21 | chr:5:8937853  |
| 5 rs13168801  | 8943312 A  | 0.05805 | 1.10E-21 | chr:5:8937853  |
| 5 rs13169109  | 8943532 C  | 0.05805 | 1.10E-21 | chr:5:8937853  |
| 5 rs13170524  | 8934862 G  | 0.05805 | 1.10E-21 | chr:5:8937853  |
| 5 rs13180198  | 8936074 C  | 0.05805 | 1.10E-21 | chr:5:8937853  |
| 5 rs13181039  | 8936810 C  | 0.05805 | 1.10E-21 | chr:5:8937853  |
| 5 rs13181188  | 8936871 G  | 0.05805 | 1.10E-21 | chr:5:8937853  |
| 5 rs13185206  | 8943046 G  | 0.05805 | 1.10E-21 | chr:5:8937853  |
| 5 rs13186994  | 8930953 C  | 0.05805 | 1.10E-21 | chr:5:8937853  |
| 5 rs34108904  | 8943745 T  | 0.05805 | 1.10E-21 | chr:5:8937853  |
| 5 rs35376107  | 8942188 G  | 0.05805 | 1.10E-21 | chr:5:8937853  |
| 5 rs35951584  | 8943375 A  | 0.05805 | 1.10E-21 | chr:5:8937853  |
| 5 rs36075104  | 8937389 A  | 0.05805 | 1.10E-21 | chr:5:8937853  |
| 5 rs4495147   | 8933733 T  | 0.05805 | 1.10E-21 | chr:5:8937853  |
| 5 rs4505924   | 8936629 A  | 0.05805 | 1.10E-21 | chr:5:8937853  |
| 5 rs4526080   | 8941529 G  | 0.05805 | 1.10E-21 | chr:5:8937853  |
| 5 rs4563593   | 8933794 G  | 0.05805 | 1.10E-21 | chr:5:8937853  |
| 5 rs4585412   | 8941705 G  | 0.05805 | 1.10E-21 | chr:5:8937853  |
| 5 rs6555580   | 8932263 C  | 0.05805 | 1.10E-21 | chr:5:8937853  |

|              |           |         |          |               |
|--------------|-----------|---------|----------|---------------|
| 5 rs6555585  | 8935651 G | 0.05805 | 1.10E-21 | chr:5:8937853 |
| 5 rs6862593  | 8928550 T | 0.05805 | 1.10E-21 | chr:5:8937853 |
| 5 rs6866047  | 8932660 T | 0.05805 | 1.10E-21 | chr:5:8937853 |
| 5 rs6870451  | 8938885 G | 0.05805 | 1.10E-21 | chr:5:8937853 |
| 5 rs6870477  | 8938935 G | 0.05805 | 1.10E-21 | chr:5:8937853 |
| 5 rs6884096  | 8932523 A | 0.05805 | 1.10E-21 | chr:5:8937853 |
| 5 rs6885789  | 8932782 T | 0.05805 | 1.10E-21 | chr:5:8937853 |
| 5 rs6888819  | 8929239 C | 0.05805 | 1.10E-21 | chr:5:8937853 |
| 5 rs6894834  | 8930468 G | 0.05805 | 1.10E-21 | chr:5:8937853 |
| 5 rs71611354 | 8942703 T | 0.05805 | 1.10E-21 | chr:5:8937853 |
| 5 rs76109783 | 8939954 A | 0.05805 | 1.10E-21 | chr:5:8937853 |
| 5 rs7735641  | 8935206 A | 0.05805 | 1.10E-21 | chr:5:8937853 |
| 5 rs34251442 | 8942645 C | 0.05821 | 1.24E-21 | chr:5:8937853 |
| 5 rs35495516 | 8942635 C | 0.05821 | 1.24E-21 | chr:5:8937853 |
| 5 rs13160595 | 8929697 C | 0.05838 | 1.41E-21 | chr:5:8937853 |
| 5 rs13189384 | 8943321 G | 0.0588  | 1.58E-21 | chr:5:8937853 |
| 5 rs34626780 | 8943339 T | 0.0588  | 1.58E-21 | chr:5:8937853 |
| 5 rs13165792 | 8943070 T | 0.059   | 1.70E-21 | chr:5:8937853 |
| 5 rs2962735  | 8942095 G | 0.07901 | 1.44E-20 | chr:5:8937853 |
| 5 rs6555581  | 8932337 T | 0.1199  | 1.83E-20 | chr:5:8937853 |
| 5 rs36068583 | 8942585 A | 0.1206  | 2.24E-20 | chr:5:8937853 |
| 5 rs13155565 | 8965540 T | 0.1458  | 2.36E-19 | chr:5:8937853 |
| 5 rs7730808  | 8977997 T | 0.1462  | 3.09E-19 | chr:5:8937853 |
| 5 rs7730809  | 8977998 C | 0.1462  | 3.09E-19 | chr:5:8937853 |
| 5 rs6883368  | 8968144 C | 0.1462  | 3.25E-19 | chr:5:8937853 |
| 5 rs1947583  | 8980189 C | 0.15    | 4.24E-19 | chr:5:8937853 |
| 5 rs6876180  | 8977231 T | 0.1511  | 4.55E-19 | chr:5:8937853 |
| 5 rs12513755 | 8958879 A | 0.1581  | 4.62E-19 | chr:5:8937853 |
| 5 rs6863109  | 8966159 T | 0.1356  | 4.63E-19 | chr:5:8937853 |
| 5 rs10040864 | 8965550 A | 0.1394  | 9.91E-19 | chr:5:8937853 |
| 5 rs13355363 | 8960849 A | 0.1394  | 9.91E-19 | chr:5:8937853 |
| 5 rs6861946  | 8966209 T | 0.1394  | 9.91E-19 | chr:5:8937853 |
| 5 rs7723950  | 8959250 C | 0.1395  | 1.14E-18 | chr:5:8937853 |
| 5 rs7728475  | 8969172 A | 0.1446  | 1.37E-18 | chr:5:8937853 |
| 5 rs59676981 | 8968807 T | 0.1446  | 1.44E-18 | chr:5:8937853 |
| 5 rs6869638  | 8968467 G | 0.1446  | 1.44E-18 | chr:5:8937853 |
| 5 rs6872524  | 8972999 T | 0.1445  | 1.59E-18 | chr:5:8937853 |
| 5 rs7726068  | 8971413 G | 0.1445  | 1.59E-18 | chr:5:8937853 |
| 5 rs34352770 | 8970561 A | 0.1487  | 3.30E-18 | chr:5:8937853 |
| 5 rs6869307  | 8968310 G | 0.1673  | 6.17E-18 | chr:5:8937853 |
| 5 rs34814654 | 8958042 A | 0.168   | 6.61E-18 | chr:5:8937853 |
| 5 rs2963382  | 8948523 C | 0.1679  | 2.07E-17 | chr:5:8937853 |
| 5 rs2963363  | 8928893 A | 0.1811  | 2.10E-17 | chr:5:8937853 |

|              |           |        |          |               |
|--------------|-----------|--------|----------|---------------|
| 5 rs2963326  | 8933452 A | 0.1959 | 1.31E-16 | chr:5:8937853 |
| 5 rs2962650  | 8937165 G | 0.2122 | 4.34E-16 | chr:5:8937853 |
| 5 rs2963376  | 8942864 T | 0.2122 | 4.64E-16 | chr:5:8937853 |
| 5 rs2963327  | 8934159 G | 0.2231 | 2.65E-15 | chr:5:8937853 |
| 5 rs2963380  | 8945194 A | 0.2231 | 2.82E-15 | chr:5:8937853 |
| 5 rs2962654  | 8931393 A | 0.2158 | 6.67E-15 | chr:5:8937853 |
| 5 rs2963384  | 8950534 T | 0.2297 | 7.71E-15 | chr:5:8937853 |
| 5 rs6863266  | 8966162 T | 0.2143 | 1.03E-14 | chr:5:8937853 |
| 5 rs6883897  | 8966181 G | 0.2143 | 1.03E-14 | chr:5:8937853 |
| 5 rs6862506  | 8965836 T | 0.2205 | 1.64E-14 | chr:5:8937853 |
| 5 rs10038936 | 8965436 A | 0.2208 | 1.97E-14 | chr:5:8937853 |
| 5 rs1585204  | 8974023 A | 0.2379 | 2.10E-14 | chr:5:8937853 |
| 5 rs10056871 | 8964318 C | 0.2206 | 2.33E-14 | chr:5:8937853 |
| 5 rs10058520 | 8964357 C | 0.2206 | 2.33E-14 | chr:5:8937853 |
| 5 rs10512999 | 8963885 C | 0.2206 | 2.33E-14 | chr:5:8937853 |
| 5 rs13175700 | 8967537 T | 0.2206 | 2.33E-14 | chr:5:8937853 |
| 5 rs13185652 | 8967225 C | 0.2206 | 2.33E-14 | chr:5:8937853 |
| 5 rs1902806  | 8965016 C | 0.2206 | 2.33E-14 | chr:5:8937853 |
| 5 rs4431316  | 8964778 T | 0.2206 | 2.33E-14 | chr:5:8937853 |
| 5 rs4432854  | 8966865 C | 0.2206 | 2.33E-14 | chr:5:8937853 |
| 5 rs6866139  | 8966309 C | 0.2206 | 2.33E-14 | chr:5:8937853 |
| 5 rs6875463  | 8963376 C | 0.2206 | 2.33E-14 | chr:5:8937853 |
| 5 rs9313264  | 8961561 T | 0.2206 | 2.33E-14 | chr:5:8937853 |
| 5 rs9313265  | 8964069 G | 0.2206 | 2.33E-14 | chr:5:8937853 |
| 5 rs1902807  | 8964963 A | 0.2206 | 2.45E-14 | chr:5:8937853 |
| 5 rs1902808  | 8964937 T | 0.2206 | 2.45E-14 | chr:5:8937853 |
| 5 rs4624764  | 8958031 T | 0.2207 | 2.48E-14 | chr:5:8937853 |
| 5 rs12521690 | 8967716 A | 0.2251 | 3.50E-14 | chr:5:8937853 |
| 5 rs2388006  | 8968700 C | 0.2251 | 3.50E-14 | chr:5:8937853 |
| 5 rs2388007  | 8968699 C | 0.2251 | 3.50E-14 | chr:5:8937853 |
| 5 rs2388008  | 8968479 C | 0.2251 | 3.50E-14 | chr:5:8937853 |
| 5 rs34958715 | 8970889 G | 0.2251 | 3.50E-14 | chr:5:8937853 |
| 5 rs58854317 | 8968867 C | 0.2251 | 3.50E-14 | chr:5:8937853 |
| 5 rs6555587  | 8969296 G | 0.2251 | 3.50E-14 | chr:5:8937853 |
| 5 rs6880066  | 8969679 C | 0.2251 | 3.50E-14 | chr:5:8937853 |
| 5 rs6880574  | 8969997 G | 0.2251 | 3.50E-14 | chr:5:8937853 |
| 5 rs6884680  | 8968261 T | 0.2251 | 3.50E-14 | chr:5:8937853 |
| 5 rs13188103 | 8964519 T | 0.2245 | 3.51E-14 | chr:5:8937853 |
| 5 rs6871960  | 8963871 C | 0.2245 | 3.51E-14 | chr:5:8937853 |
| 5 rs10062754 | 8972259 C | 0.225  | 3.84E-14 | chr:5:8937853 |
| 5 rs16881756 | 8976859 G | 0.225  | 3.84E-14 | chr:5:8937853 |
| 5 rs1947587  | 8974402 A | 0.225  | 3.84E-14 | chr:5:8937853 |
| 5 rs2219397  | 8971713 T | 0.225  | 3.84E-14 | chr:5:8937853 |

|               |           |        |          |               |
|---------------|-----------|--------|----------|---------------|
| 5 rs2219398   | 8971683 C | 0.225  | 3.84E-14 | chr:5:8937853 |
| 5 rs3921964   | 8972146 G | 0.225  | 3.84E-14 | chr:5:8937853 |
| 5 rs6555588   | 8977866 G | 0.225  | 3.84E-14 | chr:5:8937853 |
| 5 rs6870017   | 8977512 A | 0.225  | 3.84E-14 | chr:5:8937853 |
| 5 rs6880494   | 8977180 G | 0.225  | 3.84E-14 | chr:5:8937853 |
| 5 rs13164654  | 8972492 T | 0.2251 | 4.37E-14 | chr:5:8937853 |
| 5 rs6884293   | 8968011 T | 0.2275 | 4.68E-14 | chr:5:8937853 |
| 5 rs1947586   | 8974532 C | 0.2275 | 5.12E-14 | chr:5:8937853 |
| 5 rs6877048   | 8973265 T | 0.2284 | 5.52E-14 | chr:5:8937853 |
| 5 rs4627964   | 8968639 C | 0.2282 | 5.61E-14 | chr:5:8937853 |
| 5 rs2962651   | 8935871 A | 0.2289 | 6.44E-14 | chr:5:8937853 |
| 5 rs2962733   | 8945736 C | 0.2289 | 6.44E-14 | chr:5:8937853 |
| 5 rs11954862  | 8949344 C | 0.213  | 7.16E-14 | chr:5:8937853 |
| 5 rs6873594   | 8930306 A | 0.213  | 7.16E-14 | chr:5:8937853 |
| 5 rs1947584   | 8980099 C | 0.2055 | 8.17E-14 | chr:5:8937853 |
| 5 rs74482613  | 8927592 C | 0.2149 | 9.51E-14 | chr:5:8937853 |
| 5 rs2963325   | 8933269 T | 0.2467 | 1.01E-13 | chr:5:8937853 |
| 5 rs6889183   | 8968532 A | 0.2122 | 2.11E-13 | chr:5:8937853 |
| 5 rs75014751  | 8965335 C | 0.2122 | 2.11E-13 | chr:5:8937853 |
| 5 rs75281373  | 8964076 A | 0.2122 | 2.11E-13 | chr:5:8937853 |
| 5 rs79740539  | 8969856 C | 0.2122 | 2.11E-13 | chr:5:8937853 |
| 5 rs115606914 | 8942429 T | 0.2024 | 2.25E-13 | chr:5:8937853 |
| 5 rs140461872 | 8942428 C | 0.2024 | 2.25E-13 | chr:5:8937853 |
| 5 rs2963370   | 8940538 A | 4.16   | 3.16E-13 | chr:5:8937853 |
| 5 rs2963371   | 8940701 A | 4.16   | 3.16E-13 | chr:5:8937853 |
| 5 rs2963337   | 8935632 T | 4.16   | 4.29E-13 | chr:5:8937853 |
| 5 rs2963324   | 8933130 C | 0.2653 | 4.45E-13 | chr:5:8937853 |
| 5 rs76169939  | 8934848 T | 0.2116 | 4.76E-13 | chr:5:8937853 |
| 5 rs13163334  | 8962662 T | 4.127  | 5.43E-13 | chr:5:8937853 |
| 5 rs12658301  | 8927212 C | 0.2937 | 1.49E-12 | chr:5:8937853 |
| 5 rs2085514   | 9001414 A | 0.2891 | 4.27E-12 | chr:5:8937853 |
| 5 rs6868644   | 8981136 C | 0.2987 | 1.89E-11 | chr:5:8937853 |
| 5 rs2963375   | 8942567 A | 3.541  | 8.29E-11 | chr:5:8937853 |
| 5 rs577492066 | 8948517 T | 0.2452 | 8.86E-11 | chr:5:8937853 |
| 5 rs61036506  | 8981340 A | 3.197  | 3.62E-10 | chr:5:8937853 |
| 5 rs2925903   | 8983680 C | 0.328  | 3.98E-10 | chr:5:8937853 |
| 5 rs2925905   | 8985794 T | 0.3278 | 4.52E-10 | chr:5:8937853 |
| 5 rs2925908   | 8991487 T | 0.3344 | 7.05E-10 | chr:5:8937853 |
| 5 rs2925909   | 8992098 C | 0.3346 | 7.51E-10 | chr:5:8937853 |
| 5 rs2962705   | 8997304 C | 0.3346 | 7.51E-10 | chr:5:8937853 |
| 5 rs2100641   | 9014968 A | 0.3423 | 7.57E-10 | chr:5:8937853 |
| 5 rs12188723  | 8952085 C | 0.1657 | 7.74E-10 | chr:5:8937853 |
| 5 rs75949059  | 8948201 T | 0.1657 | 7.74E-10 | chr:5:8937853 |

|               |           |        |          |               |
|---------------|-----------|--------|----------|---------------|
| 5 rs4452535   | 8958034 T | 3.183  | 1.10E-09 | chr:5:8937853 |
| 5 rs2962707   | 8990084 G | 0.344  | 1.29E-09 | chr:5:8937853 |
| 5 rs16881678  | 8920805 T | 0.3188 | 1.57E-09 | chr:5:8937853 |
| 5 rs2962724   | 8952042 C | 2.931  | 7.77E-09 | chr:5:8937853 |
| 5 rs2925910   | 8992745 C | 2.881  | 9.99E-09 | chr:5:8937853 |
| 5 rs111603494 | 8976335 T | 0.1284 | 1.03E-08 | chr:5:8937853 |
| 5 rs113779456 | 8954029 C | 0.1284 | 1.03E-08 | chr:5:8937853 |
| 5 rs112164098 | 8961299 A | 0.1355 | 1.54E-08 | chr:5:8937853 |
| 5 rs112735467 | 8956946 T | 0.1355 | 1.54E-08 | chr:5:8937853 |
| 5 rs113044593 | 8961853 T | 0.1355 | 1.54E-08 | chr:5:8937853 |
| 5 rs114049874 | 8958877 G | 0.2492 | 1.93E-08 | chr:5:8937853 |
| 5 rs11750358  | 8999971 T | 0.3929 | 3.35E-08 | chr:5:8937853 |
| 5 rs16881803  | 8983995 C | 0.3417 | 3.64E-08 | chr:5:8937853 |
| 5 rs11750315  | 8999860 A | 0.3491 | 4.96E-08 | chr:5:8937853 |
| 5 rs77037743  | 8991632 T | 0.3491 | 4.96E-08 | chr:5:8937853 |
| 5 rs11750361  | 9000007 G | 0.3972 | 5.07E-08 | chr:5:8937853 |
| 5 rs11738920  | 8991968 C | 0.3495 | 5.14E-08 | chr:5:8937853 |
| 5 rs7720782   | 8994422 C | 0.3511 | 5.79E-08 | chr:5:8937853 |
| 5 rs114656264 | 8942423 T | 0.3104 | 1.47E-07 | chr:5:8937853 |
| 5 rs115883187 | 8942422 C | 0.3104 | 1.47E-07 | chr:5:8937853 |
| 5 rs2963349   | 8915030 C | 0.2575 | 1.55E-07 | chr:5:8937853 |
| 5 rs3111057   | 8915303 C | 0.2575 | 1.55E-07 | chr:5:8937853 |
| 5 rs4702602   | 9014396 G | 0.43   | 2.23E-07 | chr:5:8937853 |
| 5 rs2963341   | 8908533 G | 0.2375 | 2.39E-07 | chr:5:8937853 |
| 5 rs2963344   | 8909428 G | 0.2375 | 2.39E-07 | chr:5:8937853 |
| 5 rs2963345   | 8909508 T | 0.2375 | 2.39E-07 | chr:5:8937853 |
| 5 rs2963347   | 8910873 C | 0.2375 | 2.39E-07 | chr:5:8937853 |
| 5 rs112110914 | 9006527 C | 0.4314 | 2.55E-07 | chr:5:8937853 |
| 5 rs12517597  | 9002094 C | 0.4314 | 2.55E-07 | chr:5:8937853 |
| 5 rs1379567   | 9016944 C | 0.4314 | 2.55E-07 | chr:5:8937853 |
| 5 rs1379568   | 9016763 G | 0.4314 | 2.55E-07 | chr:5:8937853 |
| 5 rs1379569   | 9016719 C | 0.4314 | 2.55E-07 | chr:5:8937853 |
| 5 rs1379570   | 9016694 C | 0.4314 | 2.55E-07 | chr:5:8937853 |
| 5 rs1379573   | 9013983 T | 0.4314 | 2.55E-07 | chr:5:8937853 |
| 5 rs1598825   | 9021566 C | 0.4314 | 2.55E-07 | chr:5:8937853 |
| 5 rs2085512   | 9014812 C | 0.4314 | 2.55E-07 | chr:5:8937853 |
| 5 rs2925919   | 9001913 G | 0.4314 | 2.55E-07 | chr:5:8937853 |
| 5 rs2925920   | 9004597 T | 0.4314 | 2.55E-07 | chr:5:8937853 |
| 5 rs2925921   | 9005353 T | 0.4314 | 2.55E-07 | chr:5:8937853 |
| 5 rs2925922   | 9010282 T | 0.4314 | 2.55E-07 | chr:5:8937853 |
| 5 rs2925923   | 9012388 T | 0.4314 | 2.55E-07 | chr:5:8937853 |
| 5 rs2925924   | 9019816 C | 0.4314 | 2.55E-07 | chr:5:8937853 |
| 5 rs2925928   | 9032400 G | 0.4314 | 2.55E-07 | chr:5:8937853 |

|               |           |        |          |               |
|---------------|-----------|--------|----------|---------------|
| 5 rs2962718   | 9008955 G | 0.4314 | 2.55E-07 | chr:5:8937853 |
| 5 rs2962719   | 9009465 G | 0.4314 | 2.55E-07 | chr:5:8937853 |
| 5 rs2962720   | 9009675 C | 0.4314 | 2.55E-07 | chr:5:8937853 |
| 5 rs2962721   | 9010331 A | 0.4314 | 2.55E-07 | chr:5:8937853 |
| 5 rs74980194  | 9003526 T | 0.4314 | 2.55E-07 | chr:5:8937853 |
| 5 rs78490007  | 9003525 G | 0.4314 | 2.55E-07 | chr:5:8937853 |
| 5 rs79211599  | 9003402 A | 0.4314 | 2.55E-07 | chr:5:8937853 |
| 5 rs146470969 | 9001510 C | 0.4061 | 2.57E-07 | chr:5:8937853 |
| 5 rs148681757 | 9001509 C | 0.4061 | 2.57E-07 | chr:5:8937853 |
| 5 rs2962702   | 9025608 G | 2.533  | 2.72E-07 | chr:5:8937853 |
| 5 rs10037735  | 9004192 T | 2.519  | 3.20E-07 | chr:5:8937853 |
| 5 rs2962675   | 8913429 C | 0.3882 | 3.59E-07 | chr:5:8937853 |
| 5 rs1505067   | 9036790 T | 2.499  | 3.61E-07 | chr:5:8937853 |
| 5 rs2100642   | 9014917 T | 2.482  | 4.37E-07 | chr:5:8937853 |
| 5 rs142622218 | 9001560 C | 0.2534 | 5.18E-07 | chr:5:8937853 |
| 5 rs34968754  | 8959664 G | 0.2051 | 9.41E-07 | chr:5:8937853 |
| 5 rs72739858  | 8983300 G | 2.412  | 9.88E-07 | chr:5:8937853 |
| 5 rs10041221  | 9004208 T | 0.4585 | 1.06E-06 | chr:5:8937853 |
| 5 rs6883135   | 8944432 T | 0.2184 | 1.12E-06 | chr:5:8937853 |
| 5 rs376060904 | 9001673 A | 0.3997 | 1.14E-06 | chr:5:8937853 |
| 5 rs12517703  | 9011519 T | 0.4005 | 1.19E-06 | chr:5:8937853 |
| 5 rs16881838  | 9012115 T | 0.4005 | 1.19E-06 | chr:5:8937853 |
| 5 rs111387677 | 9004023 A | 0.4025 | 1.36E-06 | chr:5:8937853 |
| 5 rs143252128 | 9006280 T | 0.4025 | 1.36E-06 | chr:5:8937853 |
| 5 rs6897203   | 9002771 C | 0.4025 | 1.36E-06 | chr:5:8937853 |
| 5 rs75432582  | 9010227 T | 0.4025 | 1.36E-06 | chr:5:8937853 |
| 5 rs112854697 | 9006793 C | 0.4043 | 1.52E-06 | chr:5:8937853 |
| 5 rs10512996  | 8916550 A | 0.1805 | 1.55E-06 | chr:5:8937853 |
| 5 rs35191363  | 8912793 T | 0.1805 | 1.55E-06 | chr:5:8937853 |
| 5 rs71611351  | 8896933 T | 0.1805 | 1.55E-06 | chr:5:8937853 |
| 5 rs16881671  | 8917970 G | 0.2601 | 1.75E-06 | chr:5:8937853 |
| 5 rs16881672  | 8918651 G | 0.2601 | 1.75E-06 | chr:5:8937853 |
| 5 rs6555577   | 8924770 A | 0.2601 | 1.75E-06 | chr:5:8937853 |
| 5 rs9313260   | 8919349 G | 0.2601 | 1.75E-06 | chr:5:8937853 |
| 5 rs35592900  | 8942245 T | 0.2164 | 2.63E-06 | chr:5:8937853 |
| 5 rs35817870  | 8939620 G | 0.2164 | 2.63E-06 | chr:5:8937853 |
| 5 rs4583857   | 8941558 G | 0.2164 | 2.63E-06 | chr:5:8937853 |
| 5 rs71611355  | 8950617 A | 0.2164 | 2.63E-06 | chr:5:8937853 |
| 5 rs77781846  | 8941171 G | 0.2164 | 2.63E-06 | chr:5:8937853 |
| 5 rs2925902   | 8982517 T | 0.4565 | 2.65E-06 | chr:5:8937853 |
| 5 rs11134341  | 8989290 C | 0.4655 | 2.93E-06 | chr:5:8937853 |
| 5 rs7703582   | 8988714 T | 0.4655 | 2.93E-06 | chr:5:8937853 |
| 5 rs7723456   | 8989021 G | 0.4655 | 2.93E-06 | chr:5:8937853 |

|               |           |        |          |               |
|---------------|-----------|--------|----------|---------------|
| 5 rs7727402   | 8988961 G | 0.4655 | 2.93E-06 | chr:5:8937853 |
| 5 rs77709148  | 8988682 G | 0.4655 | 2.93E-06 | chr:5:8937853 |
| 5 rs11134342  | 8991036 A | 0.4689 | 3.39E-06 | chr:5:8937853 |
| 5 rs7712850   | 8990532 A | 0.4689 | 3.39E-06 | chr:5:8937853 |
| 5 rs7733108   | 8990306 G | 0.4689 | 3.39E-06 | chr:5:8937853 |
| 5 rs6861563   | 8926391 G | 0.4041 | 3.47E-06 | chr:5:8937853 |
| 5 rs11134343  | 8999304 C | 0.4698 | 3.66E-06 | chr:5:8937853 |
| 5 rs11951651  | 8995163 C | 0.4698 | 3.66E-06 | chr:5:8937853 |
| 5 rs11952933  | 8993747 T | 0.4698 | 3.66E-06 | chr:5:8937853 |
| 5 rs12186781  | 8998527 G | 0.4698 | 3.66E-06 | chr:5:8937853 |
| 5 rs146404047 | 8998963 T | 0.4698 | 3.66E-06 | chr:5:8937853 |
| 5 rs6870588   | 8993002 C | 0.4698 | 3.66E-06 | chr:5:8937853 |
| 5 rs74864061  | 8993179 G | 0.4698 | 3.66E-06 | chr:5:8937853 |
| 5 rs77430208  | 8997524 G | 0.4698 | 3.66E-06 | chr:5:8937853 |
| 5 rs79649573  | 8997977 T | 0.4698 | 3.66E-06 | chr:5:8937853 |
| 5 rs1354570   | 9059223 G | 0.4038 | 3.87E-06 | chr:5:8937853 |
| 5 rs12189149  | 8998699 G | 0.4707 | 3.93E-06 | chr:5:8937853 |
| 5 rs556660023 | 8990404 A | 0.1459 | 4.00E-06 | chr:5:8937853 |
| 5 rs10512995  | 8916360 G | 0.3215 | 4.62E-06 | chr:5:8937853 |
| 5 rs1457768   | 9034674 G | 0.2248 | 4.72E-06 | chr:5:8937853 |
| 5 rs1457773   | 8978530 A | 0.2294 | 5.44E-06 | chr:5:8937853 |
| 5 rs112032434 | 9014459 T | 0.2231 | 6.51E-06 | chr:5:8937853 |
| 5 rs114501856 | 8991577 A | 0.2231 | 6.51E-06 | chr:5:8937853 |
| 5 rs12189367  | 8987361 A | 0.2231 | 6.51E-06 | chr:5:8937853 |
| 5 rs17235037  | 9013608 T | 0.2231 | 6.51E-06 | chr:5:8937853 |
| 5 rs74984858  | 8986951 C | 0.2231 | 6.51E-06 | chr:5:8937853 |
| 5 rs7709752   | 8990196 G | 0.2231 | 6.51E-06 | chr:5:8937853 |
| 5 rs77207173  | 8984484 A | 0.2231 | 6.51E-06 | chr:5:8937853 |
| 5 rs77213924  | 8984873 G | 0.2231 | 6.51E-06 | chr:5:8937853 |
| 5 rs77865922  | 9034181 C | 0.2231 | 6.51E-06 | chr:5:8937853 |
| 5 rs139408148 | 8956642 G | 0.1269 | 7.73E-06 | chr:5:8937853 |
| 5 rs114493044 | 8980394 A | 0.1625 | 8.23E-06 | chr:5:8937853 |
| 5 rs17237125  | 9097230 G | 0.2743 | 8.63E-06 | chr:5:8937853 |
| 5 rs17309469  | 9100211 A | 0.2743 | 8.63E-06 | chr:5:8937853 |
| 5 rs76447168  | 8967849 G | 0.1842 | 8.85E-06 | chr:5:8937853 |
| 5 rs143959340 | 9002474 A | 0.2317 | 8.90E-06 | chr:5:8937853 |
| 5 rs75952224  | 9153291 C | 0.221  | 1.01E-05 | chr:5:8937853 |
| 5 rs2963351   | 8915179 T | 0.4563 | 1.07E-05 | chr:5:8937853 |
| 5 rs79101386  | 8996698 T | 0.2496 | 1.09E-05 | chr:5:8937853 |
| 5 rs73740342  | 9128407 C | 0.2961 | 1.15E-05 | chr:5:8937853 |
| 5 rs116598534 | 8929687 G | 0.12   | 1.17E-05 | chr:5:8937853 |
| 5 rs10037162  | 8902858 T | 0.3845 | 1.31E-05 | chr:5:8937853 |
| 5 rs10061810  | 8898595 A | 0.3845 | 1.31E-05 | chr:5:8937853 |

|               |             |         |          |                 |
|---------------|-------------|---------|----------|-----------------|
| 5 rs73740340  | 9127330 T   | 0.3018  | 1.44E-05 | chr:5:8937853   |
| 5 rs79499339  | 9051312 T   | 0.3044  | 1.48E-05 | chr:5:8937853   |
| 5 rs17237055  | 9093482 G   | 0.2335  | 1.57E-05 | chr:5:8937853   |
| 5 rs17316598  | 9120407 T   | 0.2335  | 1.57E-05 | chr:5:8937853   |
| 5 rs41283163  | 9108135 A   | 0.2335  | 1.57E-05 | chr:5:8937853   |
| 5 rs79065199  | 9091308 A   | 0.2335  | 1.57E-05 | chr:5:8937853   |
| 5 rs73740338  | 9127236 C   | 0.3055  | 1.67E-05 | chr:5:8937853   |
| 5 rs74385970  | 9013525 T   | 0.2764  | 1.68E-05 | chr:5:8937853   |
| 5 rs12518501  | 8982887 T   | 0.4594  | 1.71E-05 | chr:5:8937853   |
| 5 rs12521160  | 8982888 G   | 0.4594  | 1.71E-05 | chr:5:8937853   |
| 5 rs75435196  | 8987064 G   | 0.4697  | 1.74E-05 | chr:5:8937853   |
| 5 rs17238609  | 9136646 G   | 0.2923  | 1.83E-05 | chr:5:8937853   |
| 5 rs61181903  | 9135540 A   | 0.2923  | 1.83E-05 | chr:5:8937853   |
| 5 rs73740343  | 9129804 T   | 0.2923  | 1.83E-05 | chr:5:8937853   |
| 5 rs73740345  | 9135285 A   | 0.2923  | 1.83E-05 | chr:5:8937853   |
| 5 rs73740346  | 9136174 A   | 0.2923  | 1.83E-05 | chr:5:8937853   |
| 5 rs76859700  | 9135470 C   | 0.2923  | 1.83E-05 | chr:5:8937853   |
| 5 rs372303759 | 8927200 C   | 0.1983  | 1.89E-05 | chr:5:8937853   |
| 5 rs115127228 | 8913358 T   | 0.385   | 1.92E-05 | chr:5:8937853   |
| 5 rs113334166 | 9135393 T   | 0.2991  | 2.38E-05 | chr:5:8937853   |
| 5 rs74370667  | 8988253 C   | 0.4734  | 2.38E-05 | chr:5:8937853   |
| 6 rs73603096  | 161272870 C | 37.5    | 1.08E-32 | chr:6:161270898 |
| 6 rs75211522  | 161266022 T | 0.06158 | 1.70E-28 | chr:6:161270898 |
| 6 rs13208565  | 161268025 A | 0.05062 | 5.36E-28 | chr:6:161270898 |
| 6 rs13208570  | 161268029 A | 0.05062 | 5.36E-28 | chr:6:161270898 |
| 6 rs13208572  | 161268036 A | 0.05062 | 5.36E-28 | chr:6:161270898 |
| 6 rs76259860  | 161263334 G | 0.06149 | 2.24E-27 | chr:6:161270898 |
| 6 rs6908103   | 161274560 T | 16.17   | 4.77E-27 | chr:6:161270898 |
| 6 rs28515783  | 161268702 C | 0.06368 | 8.67E-27 | chr:6:161270898 |
| 6 rs376433866 | 161274602 G | 0.04402 | 2.16E-26 | chr:6:161270898 |
| 6 rs9346839   | 161255046 C | 0.07091 | 4.76E-26 | chr:6:161270898 |
| 6 rs373446157 | 161274587 A | 0.0332  | 6.50E-26 | chr:6:161270898 |
| 6 rs62435319  | 161274589 A | 0.0332  | 6.50E-26 | chr:6:161270898 |
| 6 rs146201099 | 161274582 T | 0.03305 | 6.53E-26 | chr:6:161270898 |
| 6 rs28594774  | 161271666 T | 0.02575 | 9.90E-26 | chr:6:161270898 |
| 6 rs9456600   | 161272696 T | 0.01332 | 7.09E-25 | chr:6:161270898 |
| 6 rs9765937   | 161268118 C | 0.026   | 9.93E-25 | chr:6:161270898 |
| 6 rs9766526   | 161268119 T | 0.026   | 9.93E-25 | chr:6:161270898 |
| 6 rs139452685 | 161263330 C | 0.02423 | 1.08E-23 | chr:6:161270898 |
| 6 rs147841394 | 161263331 A | 0.02423 | 1.08E-23 | chr:6:161270898 |
| 6 rs5013439   | 161283060 G | 0.06193 | 4.38E-23 | chr:6:161270898 |
| 6 rs5013440   | 161283064 A | 0.06193 | 4.38E-23 | chr:6:161270898 |
| 6 rs5013441   | 161283071 A | 0.06193 | 4.38E-23 | chr:6:161270898 |



|               |             |         |          |                 |
|---------------|-------------|---------|----------|-----------------|
| 6 rs5013438   | 161283051 A | 0.06216 | 5.05E-23 | chr:6:161270898 |
| 6 rs13220254  | 161269958 T | 0.02295 | 5.45E-23 | chr:6:161270898 |
| 6 rs144015366 | 161274617 A | 0.01873 | 1.15E-22 | chr:6:161270898 |
| 6 rs370624331 | 161274612 T | 0.01873 | 1.15E-22 | chr:6:161270898 |
| 6 rs538674856 | 161274614 T | 0.01873 | 1.15E-22 | chr:6:161270898 |
| 6 rs558873783 | 161274615 A | 0.01873 | 1.15E-22 | chr:6:161270898 |
| 6 rs573457182 | 161274613 G | 0.01873 | 1.15E-22 | chr:6:161270898 |
| 6 rs144320744 | 161265076 T | 10.46   | 1.67E-22 | chr:6:161270898 |
| 6 rs75664940  | 161265073 C | 10.46   | 1.67E-22 | chr:6:161270898 |
| 6 rs76731838  | 161265072 T | 10.46   | 1.67E-22 | chr:6:161270898 |
| 6 rs765351    | 161252685 C | 0.1198  | 4.10E-22 | chr:6:161270898 |
| 6 rs2465859   | 161282713 C | 0.05121 | 6.75E-22 | chr:6:161270898 |
| 6 rs2489951   | 161259799 T | 0.01467 | 7.63E-22 | chr:6:161270898 |
| 6 rs76926711  | 161270283 C | 0.01665 | 1.25E-21 | chr:6:161270898 |
| 6 rs59536962  | 161264131 A | 0.01578 | 1.52E-21 | chr:6:161270898 |
| 6 rs2953494   | 161283178 G | 0.1444  | 2.60E-21 | chr:6:161270898 |
| 6 rs2953495   | 161283183 C | 0.1444  | 2.60E-21 | chr:6:161270898 |
| 6 rs2997094   | 161283135 T | 0.1474  | 3.46E-21 | chr:6:161270898 |
| 6 rs2997095   | 161283204 A | 0.1478  | 3.50E-21 | chr:6:161270898 |
| 6 rs7383738   | 161276047 A | 0.05768 | 6.08E-21 | chr:6:161270898 |
| 6 rs2489938   | 161282377 G | 0.05808 | 7.21E-21 | chr:6:161270898 |
| 6 rs2997093   | 161283133 T | 0.1535  | 7.84E-21 | chr:6:161270898 |
| 6 rs2489948   | 161259549 G | 0.1312  | 8.39E-21 | chr:6:161270898 |
| 6 rs2465846   | 161258027 C | 0.1314  | 9.66E-21 | chr:6:161270898 |
| 6 rs2489942   | 161257961 G | 0.1314  | 9.66E-21 | chr:6:161270898 |
| 6 rs28544460  | 161271777 T | 0.014   | 1.20E-20 | chr:6:161270898 |
| 6 rs28655734  | 161271783 T | 0.014   | 1.20E-20 | chr:6:161270898 |
| 6 rs66561051  | 161265144 C | 0.01408 | 1.22E-20 | chr:6:161270898 |
| 6 rs67613705  | 161265155 T | 0.01408 | 1.22E-20 | chr:6:161270898 |
| 6 rs2489965   | 161262607 C | 0.0142  | 1.33E-20 | chr:6:161270898 |
| 6 rs9347453   | 161270866 C | 0.01415 | 1.36E-20 | chr:6:161270898 |
| 6 rs9347454   | 161270870 C | 0.01415 | 1.36E-20 | chr:6:161270898 |
| 6 rs73604919  | 161277020 A | 0.014   | 1.36E-20 | chr:6:161270898 |
| 6 rs9347458   | 161277046 C | 0.01405 | 1.37E-20 | chr:6:161270898 |
| 6 rs67368974  | 161264124 A | 0.01339 | 1.53E-20 | chr:6:161270898 |
| 6 rs1652471   | 161254403 T | 0.1377  | 2.79E-20 | chr:6:161270898 |
| 6 rs1937479   | 161255544 C | 0.1377  | 2.79E-20 | chr:6:161270898 |
| 6 rs67391812  | 161273234 T | 0.05544 | 8.97E-20 | chr:6:161270898 |
| 6 rs2465857   | 161282500 C | 0.03407 | 1.04E-19 | chr:6:161270898 |
| 6 rs10945703  | 161279258 G | 0.1839  | 1.29E-19 | chr:6:161270898 |
| 6 rs59450759  | 161279302 A | 0.1839  | 1.29E-19 | chr:6:161270898 |
| 6 rs1892347   | 161281358 A | 0.01123 | 1.50E-19 | chr:6:161270898 |
| 6 rs62435318  | 161274301 C | 0.01123 | 2.04E-19 | chr:6:161270898 |

|              |             |         |          |                 |
|--------------|-------------|---------|----------|-----------------|
| 6 rs9347456  | 161276965 C | 0.01134 | 2.08E-19 | chr:6:161270898 |
| 6 rs7383363  | 161274962 A | 0.01137 | 2.19E-19 | chr:6:161270898 |
| 6 rs2489961  | 161261383 T | 0.01141 | 2.25E-19 | chr:6:161270898 |
| 6 rs2489958  | 161261109 T | 0.01139 | 2.26E-19 | chr:6:161270898 |
| 6 rs12153973 | 161273891 T | 0.01138 | 2.27E-19 | chr:6:161270898 |
| 6 rs9355844  | 161268967 T | 0.0114  | 2.30E-19 | chr:6:161270898 |
| 6 rs2489969  | 161264604 T | 0.01145 | 2.31E-19 | chr:6:161270898 |
| 6 rs55968870 | 161264803 A | 0.01145 | 2.31E-19 | chr:6:161270898 |
| 6 rs10945701 | 161266812 C | 0.01142 | 2.33E-19 | chr:6:161270898 |
| 6 rs10945702 | 161267174 A | 0.01142 | 2.33E-19 | chr:6:161270898 |
| 6 rs11753103 | 161267086 A | 0.01142 | 2.33E-19 | chr:6:161270898 |
| 6 rs11753537 | 161267022 T | 0.01142 | 2.33E-19 | chr:6:161270898 |
| 6 rs11753560 | 161267122 T | 0.01142 | 2.33E-19 | chr:6:161270898 |
| 6 rs12153845 | 161273987 C | 0.01142 | 2.33E-19 | chr:6:161270898 |
| 6 rs12173853 | 161266428 A | 0.01142 | 2.33E-19 | chr:6:161270898 |
| 6 rs12173859 | 161266513 A | 0.01142 | 2.33E-19 | chr:6:161270898 |
| 6 rs12176296 | 161266407 C | 0.01142 | 2.33E-19 | chr:6:161270898 |
| 6 rs12189741 | 161263528 T | 0.01142 | 2.33E-19 | chr:6:161270898 |
| 6 rs12191314 | 161263721 T | 0.01142 | 2.33E-19 | chr:6:161270898 |
| 6 rs12194479 | 161263485 G | 0.01142 | 2.33E-19 | chr:6:161270898 |
| 6 rs12196112 | 161264064 G | 0.01142 | 2.33E-19 | chr:6:161270898 |
| 6 rs12209829 | 161263938 C | 0.01142 | 2.33E-19 | chr:6:161270898 |
| 6 rs12215233 | 161263453 A | 0.01142 | 2.33E-19 | chr:6:161270898 |
| 6 rs13192981 | 161275824 T | 0.01142 | 2.33E-19 | chr:6:161270898 |
| 6 rs13200798 | 161275510 C | 0.01142 | 2.33E-19 | chr:6:161270898 |
| 6 rs13203412 | 161275871 G | 0.01142 | 2.33E-19 | chr:6:161270898 |
| 6 rs13203427 | 161275892 G | 0.01142 | 2.33E-19 | chr:6:161270898 |
| 6 rs13219765 | 161275516 T | 0.01142 | 2.33E-19 | chr:6:161270898 |
| 6 rs2465855  | 161270619 G | 0.01142 | 2.33E-19 | chr:6:161270898 |
| 6 rs2465856  | 161271369 C | 0.01142 | 2.33E-19 | chr:6:161270898 |
| 6 rs2465861  | 161261486 T | 0.01142 | 2.33E-19 | chr:6:161270898 |
| 6 rs2465862  | 161261198 G | 0.01142 | 2.33E-19 | chr:6:161270898 |
| 6 rs2465863  | 161260969 A | 0.01142 | 2.33E-19 | chr:6:161270898 |
| 6 rs2465864  | 161273785 G | 0.01142 | 2.33E-19 | chr:6:161270898 |
| 6 rs2465865  | 161273576 G | 0.01142 | 2.33E-19 | chr:6:161270898 |
| 6 rs2465866  | 161273489 G | 0.01142 | 2.33E-19 | chr:6:161270898 |
| 6 rs2489930  | 161271311 G | 0.01142 | 2.33E-19 | chr:6:161270898 |
| 6 rs2489931  | 161273628 A | 0.01142 | 2.33E-19 | chr:6:161270898 |
| 6 rs2489932  | 161273637 C | 0.01142 | 2.33E-19 | chr:6:161270898 |
| 6 rs2489960  | 161261315 C | 0.01142 | 2.33E-19 | chr:6:161270898 |
| 6 rs2489966  | 161262874 T | 0.01142 | 2.33E-19 | chr:6:161270898 |
| 6 rs2489968  | 161264408 G | 0.01142 | 2.33E-19 | chr:6:161270898 |
| 6 rs28448569 | 161271706 T | 0.01142 | 2.33E-19 | chr:6:161270898 |

|              |             |         |          |                 |
|--------------|-------------|---------|----------|-----------------|
| 6 rs28488549 | 161266035 A | 0.01142 | 2.33E-19 | chr:6:161270898 |
| 6 rs28533078 | 161268730 G | 0.01142 | 2.33E-19 | chr:6:161270898 |
| 6 rs28597670 | 161271643 C | 0.01142 | 2.33E-19 | chr:6:161270898 |
| 6 rs28670241 | 161268736 C | 0.01142 | 2.33E-19 | chr:6:161270898 |
| 6 rs28698869 | 161265892 C | 0.01142 | 2.33E-19 | chr:6:161270898 |
| 6 rs28711930 | 161272157 A | 0.01142 | 2.33E-19 | chr:6:161270898 |
| 6 rs28715036 | 161266045 G | 0.01142 | 2.33E-19 | chr:6:161270898 |
| 6 rs2997097  | 161263200 G | 0.01142 | 2.33E-19 | chr:6:161270898 |
| 6 rs55900705 | 161264920 G | 0.01142 | 2.33E-19 | chr:6:161270898 |
| 6 rs56238146 | 161264866 G | 0.01142 | 2.33E-19 | chr:6:161270898 |
| 6 rs57127570 | 161272996 C | 0.01142 | 2.33E-19 | chr:6:161270898 |
| 6 rs59942091 | 161263402 A | 0.01142 | 2.33E-19 | chr:6:161270898 |
| 6 rs62435277 | 161265332 C | 0.01142 | 2.33E-19 | chr:6:161270898 |
| 6 rs62435278 | 161265459 C | 0.01142 | 2.33E-19 | chr:6:161270898 |
| 6 rs62435280 | 161265620 C | 0.01142 | 2.33E-19 | chr:6:161270898 |
| 6 rs62435284 | 161268570 A | 0.01142 | 2.33E-19 | chr:6:161270898 |
| 6 rs66533808 | 161273302 C | 0.01142 | 2.33E-19 | chr:6:161270898 |
| 6 rs66940842 | 161265190 C | 0.01142 | 2.33E-19 | chr:6:161270898 |
| 6 rs67136969 | 161273433 T | 0.01142 | 2.33E-19 | chr:6:161270898 |
| 6 rs67591610 | 161268474 C | 0.01142 | 2.33E-19 | chr:6:161270898 |
| 6 rs67721200 | 161265209 C | 0.01142 | 2.33E-19 | chr:6:161270898 |
| 6 rs67876803 | 161268321 G | 0.01142 | 2.33E-19 | chr:6:161270898 |
| 6 rs67998011 | 161273327 G | 0.01142 | 2.33E-19 | chr:6:161270898 |
| 6 rs68027339 | 161272813 G | 0.01142 | 2.33E-19 | chr:6:161270898 |
| 6 rs68142848 | 161273257 T | 0.01142 | 2.33E-19 | chr:6:161270898 |
| 6 rs73029748 | 161268408 C | 0.01142 | 2.33E-19 | chr:6:161270898 |
| 6 rs7381442  | 161276215 T | 0.01142 | 2.33E-19 | chr:6:161270898 |
| 6 rs7381975  | 161275254 G | 0.01142 | 2.33E-19 | chr:6:161270898 |
| 6 rs7382318  | 161276128 G | 0.01142 | 2.33E-19 | chr:6:161270898 |
| 6 rs7382435  | 161276434 C | 0.01142 | 2.33E-19 | chr:6:161270898 |
| 6 rs7382456  | 161276583 C | 0.01142 | 2.33E-19 | chr:6:161270898 |
| 6 rs74199274 | 161274567 G | 0.01142 | 2.33E-19 | chr:6:161270898 |
| 6 rs9295132  | 161267909 G | 0.01142 | 2.33E-19 | chr:6:161270898 |
| 6 rs9347447  | 161269371 G | 0.01142 | 2.33E-19 | chr:6:161270898 |
| 6 rs9347451  | 161270100 T | 0.01142 | 2.33E-19 | chr:6:161270898 |
| 6 rs9347452  | 161270827 C | 0.01142 | 2.33E-19 | chr:6:161270898 |
| 6 rs9347455  | 161276752 C | 0.01142 | 2.33E-19 | chr:6:161270898 |
| 6 rs9355320  | 161269256 A | 0.01142 | 2.33E-19 | chr:6:161270898 |
| 6 rs9355841  | 161267335 A | 0.01142 | 2.33E-19 | chr:6:161270898 |
| 6 rs9355842  | 161267442 C | 0.01142 | 2.33E-19 | chr:6:161270898 |
| 6 rs9355845  | 161269097 A | 0.01142 | 2.33E-19 | chr:6:161270898 |
| 6 rs9355846  | 161269204 C | 0.01142 | 2.33E-19 | chr:6:161270898 |
| 6 rs9365219  | 161270070 A | 0.01142 | 2.33E-19 | chr:6:161270898 |

|               |             |         |          |                 |
|---------------|-------------|---------|----------|-----------------|
| 6 rs9365221   | 161276676 G | 0.01142 | 2.33E-19 | chr:6:161270898 |
| 6 rs9456598   | 161272283 A | 0.01142 | 2.33E-19 | chr:6:161270898 |
| 6 rs9456599   | 161272401 A | 0.01142 | 2.33E-19 | chr:6:161270898 |
| 6 rs9458045   | 161262083 A | 0.01142 | 2.33E-19 | chr:6:161270898 |
| 6 rs9458046   | 161262133 G | 0.01142 | 2.33E-19 | chr:6:161270898 |
| 6 rs9458047   | 161262336 A | 0.01142 | 2.33E-19 | chr:6:161270898 |
| 6 rs9458048   | 161272317 A | 0.01142 | 2.33E-19 | chr:6:161270898 |
| 6 rs9765938   | 161268135 C | 0.01142 | 2.33E-19 | chr:6:161270898 |
| 6 rs9766397   | 161267843 A | 0.01142 | 2.33E-19 | chr:6:161270898 |
| 6 rs9766412   | 161268255 A | 0.01142 | 2.33E-19 | chr:6:161270898 |
| 6 rs9766533   | 161268200 T | 0.01142 | 2.33E-19 | chr:6:161270898 |
| 6 rs2953496   | 161263032 A | 0.01134 | 2.34E-19 | chr:6:161270898 |
| 6 rs1806449   | 161280932 G | 0.01146 | 2.35E-19 | chr:6:161270898 |
| 6 rs1892348   | 161281390 T | 0.01146 | 2.35E-19 | chr:6:161270898 |
| 6 rs2243944   | 161280766 C | 0.01146 | 2.35E-19 | chr:6:161270898 |
| 6 rs2465848   | 161280023 C | 0.01146 | 2.35E-19 | chr:6:161270898 |
| 6 rs2465849   | 161280167 C | 0.01146 | 2.35E-19 | chr:6:161270898 |
| 6 rs2465850   | 161281175 T | 0.01146 | 2.35E-19 | chr:6:161270898 |
| 6 rs2489936   | 161280325 G | 0.01146 | 2.35E-19 | chr:6:161270898 |
| 6 rs2489949   | 161259718 T | 0.01146 | 2.35E-19 | chr:6:161270898 |
| 6 rs2186128   | 161269751 T | 0.01145 | 2.37E-19 | chr:6:161270898 |
| 6 rs9347448   | 161269737 C | 0.01145 | 2.37E-19 | chr:6:161270898 |
| 6 rs9347449   | 161269740 C | 0.01145 | 2.37E-19 | chr:6:161270898 |
| 6 rs28446193  | 161272078 A | 0.01147 | 2.39E-19 | chr:6:161270898 |
| 6 rs13216274  | 161275309 A | 0.01146 | 2.40E-19 | chr:6:161270898 |
| 6 rs12196838  | 161272765 A | 0.01147 | 2.42E-19 | chr:6:161270898 |
| 6 rs3949208   | 161269749 T | 0.01144 | 2.43E-19 | chr:6:161270898 |
| 6 rs10945699  | 161266748 G | 0.01148 | 2.46E-19 | chr:6:161270898 |
| 6 rs10945700  | 161266764 T | 0.01148 | 2.46E-19 | chr:6:161270898 |
| 6 rs9355843   | 161268805 G | 0.01239 | 3.29E-19 | chr:6:161270898 |
| 6 rs9365215   | 161268788 A | 0.01239 | 3.29E-19 | chr:6:161270898 |
| 6 rs9365216   | 161268818 G | 0.01239 | 3.29E-19 | chr:6:161270898 |
| 6 rs11753819  | 161264775 G | 0.01216 | 3.58E-19 | chr:6:161270898 |
| 6 rs9365217   | 161269849 T | 0.01214 | 3.61E-19 | chr:6:161270898 |
| 6 rs12176297  | 161266417 C | 0.01186 | 3.66E-19 | chr:6:161270898 |
| 6 rs9347450   | 161269890 A | 0.01217 | 3.66E-19 | chr:6:161270898 |
| 6 rs9365218   | 161269903 A | 0.01217 | 3.66E-19 | chr:6:161270898 |
| 6 rs13201433  | 161269959 C | 0.01222 | 3.76E-19 | chr:6:161270898 |
| 6 rs13217026  | 161269951 A | 0.01222 | 3.76E-19 | chr:6:161270898 |
| 6 rs2489967   | 161262877 G | 0.01174 | 3.79E-19 | chr:6:161270898 |
| 6 rs377289957 | 161277231 C | 6.946   | 6.30E-19 | chr:6:161270898 |
| 6 rs1652463   | 161237204 C | 0.161   | 6.86E-19 | chr:6:161270898 |
| 6 rs783154    | 161229780 G | 0.1606  | 2.86E-18 | chr:6:161270898 |

|                          |             |          |          |                 |
|--------------------------|-------------|----------|----------|-----------------|
| 6 rs812482               | 161227652 G | 0.1725   | 3.62E-18 | chr:6:161270898 |
| 6 rs1740448              | 161230370 T | 0.1672   | 5.43E-18 | chr:6:161270898 |
| 6 rs60507137             | 161273066 A | 0.174    | 1.15E-17 | chr:6:161270898 |
| 6 rs66542006             | 161273252 C | 0.174    | 1.15E-17 | chr:6:161270898 |
| 6 rs2465860              | 161261813 C | 0.2271   | 8.16E-17 | chr:6:161270898 |
| 6 rs9456593              | 161261833 C | 0.2164   | 1.23E-16 | chr:6:161270898 |
| 6 rs13206496             | 161279478 C | 5.208    | 1.47E-16 | chr:6:161270898 |
| 6 rs1406890              | 161187335 C | 0.2155   | 1.54E-16 | chr:6:161270898 |
| 6 rs62435345             | 161283600 T | 0.22     | 1.56E-16 | chr:6:161270898 |
| 6 rs1247555              | 161189018 A | 0.212    | 1.61E-16 | chr:6:161270898 |
| 6 rs1406891              | 161187080 T | 0.2164   | 1.82E-16 | chr:6:161270898 |
| 6 rs1782625              | 161290812 T | 0.2144   | 2.31E-16 | chr:6:161270898 |
| 6 rs9347462              | 161279599 A | 5.736    | 2.58E-16 | chr:6:161270898 |
| 6 rs1782624              | 161290595 G | 0.2152   | 2.85E-16 | chr:6:161270898 |
| 6 rs1937484              | 161286950 T | 0.2152   | 2.85E-16 | chr:6:161270898 |
| 6 rs2489943              | 161288640 C | 0.2152   | 2.85E-16 | chr:6:161270898 |
| 6 rs2953492              | 161289895 G | 0.2152   | 2.85E-16 | chr:6:161270898 |
| 6 rs9456594              | 161261839 A | 4.521    | 4.94E-16 | chr:6:161270898 |
| 6 rs2802358              | 161243584 C | 0.2049   | 4.97E-16 | chr:6:161270898 |
| 6 rs1629794              | 161246303 G | 0.2079   | 5.98E-16 | chr:6:161270898 |
| 6 rs2802357              | 161242350 T | 0.2059   | 6.09E-16 | chr:6:161270898 |
| 6 rs2565724              | 161241889 A | 0.208    | 6.11E-16 | chr:6:161270898 |
| 6 rs1247541              | 161253485 T | 0.2086   | 6.37E-16 | chr:6:161270898 |
| 6 rs71551166;rs149448086 | 161266025 G | 0.005193 | 7.70E-16 | chr:6:161270898 |
| 6 rs9365224              | 161279539 A | 5.608    | 8.38E-16 | chr:6:161270898 |
| 6 rs202074609            | 161261844 C | 4.431    | 8.70E-16 | chr:6:161270898 |
| 6 rs9456595              | 161261845 T | 4.431    | 8.70E-16 | chr:6:161270898 |
| 6 rs1247553              | 161188103 A | 0.2352   | 8.95E-16 | chr:6:161270898 |
| 6 rs2953493              | 161291617 C | 0.2253   | 1.10E-15 | chr:6:161270898 |
| 6 rs2802354              | 161245752 G | 0.2092   | 1.23E-15 | chr:6:161270898 |
| 6 rs9365226              | 161279734 G | 5.834    | 1.72E-15 | chr:6:161270898 |
| 6 rs9347463              | 161279690 T | 5.788    | 2.04E-15 | chr:6:161270898 |
| 6 rs62435324             | 161276911 T | 6.217    | 4.20E-15 | chr:6:161270898 |
| 6 rs72501802             | 161263496 C | 6.217    | 4.20E-15 | chr:6:161270898 |
| 6 rs76838390             | 161272755 G | 6.217    | 4.20E-15 | chr:6:161270898 |
| 6 rs62435300             | 161269523 T | 6.204    | 4.21E-15 | chr:6:161270898 |
| 6 rs2489952              | 161260530 G | 6.207    | 4.26E-15 | chr:6:161270898 |
| 6 rs9346838              | 161247649 G | 0.2461   | 9.96E-15 | chr:6:161270898 |
| 6 rs200406291            | 161261860 G | 4.395    | 1.02E-14 | chr:6:161270898 |
| 6 rs9456596              | 161261870 A | 4.395    | 1.02E-14 | chr:6:161270898 |
| 6 rs2565721              | 161235098 A | 0.2372   | 1.95E-14 | chr:6:161270898 |
| 6 rs4709473              | 161278938 C | 4.921    | 2.22E-14 | chr:6:161270898 |
| 6 rs9689560              | 161279081 T | 0.3413   | 2.85E-14 | chr:6:161270898 |

|               |             |        |          |                 |
|---------------|-------------|--------|----------|-----------------|
| 6 rs1782618   | 161230368 A | 0.2451 | 3.49E-14 | chr:6:161270898 |
| 6 rs9689453   | 161278910 G | 4.951  | 5.40E-14 | chr:6:161270898 |
| 6 rs59754710  | 161187850 C | 0.2726 | 5.69E-14 | chr:6:161270898 |
| 6 rs2465868   | 161287333 C | 0.2617 | 8.06E-14 | chr:6:161270898 |
| 6 rs201418433 | 161261865 A | 4.433  | 8.24E-14 | chr:6:161270898 |
| 6 rs58508475  | 161279395 A | 0.3021 | 1.21E-13 | chr:6:161270898 |
| 6 rs1937487   | 161284779 T | 0.2637 | 3.22E-13 | chr:6:161270898 |
| 6 rs9365225   | 161279685 G | 7.064  | 3.63E-13 | chr:6:161270898 |
| 6 rs783153    | 161229578 T | 0.2816 | 6.33E-13 | chr:6:161270898 |
| 6 rs783156    | 161231177 T | 0.2816 | 6.33E-13 | chr:6:161270898 |
| 6 rs1652482   | 161197885 A | 4      | 9.13E-13 | chr:6:161270898 |
| 6 rs148378598 | 161290870 C | 0.2151 | 2.19E-12 | chr:6:161270898 |
| 6 rs79538248  | 161291744 A | 0.2151 | 2.19E-12 | chr:6:161270898 |
| 6 rs62435283  | 161267489 T | 5.292  | 5.45E-12 | chr:6:161270898 |
| 6 rs1740432   | 161210470 A | 0.2637 | 7.34E-12 | chr:6:161270898 |
| 6 rs1247558   | 161190199 A | 0.3035 | 9.29E-12 | chr:6:161270898 |
| 6 rs1247556   | 161189595 G | 0.3036 | 1.01E-11 | chr:6:161270898 |
| 6 rs62436729  | 161210806 T | 0.2767 | 1.32E-11 | chr:6:161270898 |
| 6 rs9456592   | 161231592 T | 4.926  | 1.57E-11 | chr:6:161270898 |
| 6 rs9458040   | 161232224 C | 4.908  | 1.83E-11 | chr:6:161270898 |
| 6 rs1247520   | 161312344 T | 0.2422 | 2.33E-11 | chr:6:161270898 |
| 6 rs1247570   | 161208957 T | 0.2797 | 2.51E-11 | chr:6:161270898 |
| 6 rs2255792   | 161284473 C | 0.3305 | 5.07E-11 | chr:6:161270898 |
| 6 rs4252181   | 161175004 T | 0.2099 | 6.14E-11 | chr:6:161270898 |
| 6 rs9456580   | 161185380 T | 0.2099 | 6.14E-11 | chr:6:161270898 |
| 6 rs73782325  | 161295855 C | 0.241  | 7.02E-11 | chr:6:161270898 |
| 6 rs73782326  | 161306601 G | 0.242  | 7.59E-11 | chr:6:161270898 |
| 6 rs73782327  | 161308469 G | 0.242  | 7.59E-11 | chr:6:161270898 |
| 6 rs1621801   | 161196966 A | 0.3385 | 7.82E-11 | chr:6:161270898 |
| 6 rs1614840   | 161197845 A | 0.3389 | 8.51E-11 | chr:6:161270898 |
| 6 rs1740442   | 161197558 T | 0.3389 | 8.51E-11 | chr:6:161270898 |
| 6 rs1652466   | 161249569 T | 0.3216 | 8.58E-11 | chr:6:161270898 |
| 6 rs1782632   | 161249412 A | 0.3216 | 8.58E-11 | chr:6:161270898 |
| 6 rs115067610 | 161274512 T | 5.55   | 1.12E-10 | chr:6:161270898 |
| 6 rs74200112  | 161274513 C | 5.55   | 1.12E-10 | chr:6:161270898 |
| 6 rs2565725   | 161244359 A | 0.3235 | 1.13E-10 | chr:6:161270898 |
| 6 rs56262039  | 161183455 A | 0.2182 | 1.19E-10 | chr:6:161270898 |
| 6 rs57848140  | 161299240 C | 0.2523 | 1.72E-10 | chr:6:161270898 |
| 6 rs1937486   | 161284845 G | 0.3463 | 1.90E-10 | chr:6:161270898 |
| 6 rs13219777  | 161275735 G | 5.357  | 2.02E-10 | chr:6:161270898 |
| 6 rs60198722  | 161181980 A | 0.2262 | 2.23E-10 | chr:6:161270898 |
| 6 rs1937485   | 161284895 A | 0.3428 | 2.39E-10 | chr:6:161270898 |
| 6 rs66507368  | 161271537 T | 5.296  | 2.46E-10 | chr:6:161270898 |

|               |             |        |          |                 |
|---------------|-------------|--------|----------|-----------------|
| 6 rs111906830 | 161242033 A | 0.1987 | 2.56E-10 | chr:6:161270898 |
| 6 rs76436475  | 161247828 T | 0.1987 | 2.56E-10 | chr:6:161270898 |
| 6 rs112603661 | 161276925 T | 0.2039 | 2.62E-10 | chr:6:161270898 |
| 6 rs151060299 | 161281678 C | 0.2039 | 2.62E-10 | chr:6:161270898 |
| 6 rs79090443  | 161269153 A | 0.2039 | 2.62E-10 | chr:6:161270898 |
| 6 rs1652465   | 161248552 T | 0.3344 | 2.92E-10 | chr:6:161270898 |
| 6 rs71551165  | 161263039 G | 5.248  | 3.09E-10 | chr:6:161270898 |
| 6 rs112898058 | 161274433 A | 5.207  | 3.25E-10 | chr:6:161270898 |
| 6 rs2802356   | 161238215 G | 0.3356 | 3.42E-10 | chr:6:161270898 |
| 6 rs12190057  | 161264201 G | 5.217  | 3.62E-10 | chr:6:161270898 |
| 6 rs12195948  | 161263790 A | 5.217  | 3.62E-10 | chr:6:161270898 |
| 6 rs9355840   | 161251350 C | 5.194  | 3.83E-10 | chr:6:161270898 |
| 6 rs28402939  | 161168949 T | 0.228  | 3.87E-10 | chr:6:161270898 |
| 6 rs9347445   | 161257418 G | 5.19   | 3.97E-10 | chr:6:161270898 |
| 6 rs66514671  | 161268507 T | 4.485  | 4.50E-10 | chr:6:161270898 |
| 6 rs66746245  | 161270505 G | 4.485  | 4.50E-10 | chr:6:161270898 |
| 6 rs9365214   | 161267556 C | 4.485  | 4.50E-10 | chr:6:161270898 |
| 6 rs9365222   | 161276870 T | 4.485  | 4.50E-10 | chr:6:161270898 |
| 6 rs10945698  | 161237551 C | 5.155  | 4.57E-10 | chr:6:161270898 |
| 6 rs6925542   | 161241864 A | 5.155  | 4.57E-10 | chr:6:161270898 |
| 6 rs9458022   | 161171682 A | 0.2429 | 5.08E-10 | chr:6:161270898 |
| 6 rs783145    | 161152449 G | 0.3325 | 5.17E-10 | chr:6:161270898 |
| 6 rs4708894   | 161243370 C | 4.959  | 5.18E-10 | chr:6:161270898 |
| 6 rs6690      | 161174138 A | 0.3562 | 6.01E-10 | chr:6:161270898 |
| 6 rs783168    | 161174594 A | 0.3562 | 6.01E-10 | chr:6:161270898 |
| 6 rs783171    | 161173610 A | 0.3562 | 6.01E-10 | chr:6:161270898 |
| 6 rs11060     | 161173946 T | 0.3565 | 6.47E-10 | chr:6:161270898 |
| 6 rs783173    | 161172942 C | 0.3565 | 6.47E-10 | chr:6:161270898 |
| 6 rs77409175  | 161278861 A | 0.2177 | 8.40E-10 | chr:6:161270898 |
| 6 rs13218423  | 161267283 T | 4.365  | 8.98E-10 | chr:6:161270898 |
| 6 rs9355847   | 161276847 G | 4.365  | 8.98E-10 | chr:6:161270898 |
| 6 rs56055227  | 161264940 G | 4.359  | 8.99E-10 | chr:6:161270898 |
| 6 rs1247513   | 161280379 T | 0.3059 | 1.12E-09 | chr:6:161270898 |
| 6 rs6926947   | 161272676 T | 0.1672 | 1.62E-09 | chr:6:161270898 |
| 6 rs73029749  | 161268411 T | 0.1672 | 1.62E-09 | chr:6:161270898 |
| 6 rs36162229  | 161265356 A | 4.172  | 1.70E-09 | chr:6:161270898 |
| 6 rs1620921   | 161197087 A | 0.3657 | 1.73E-09 | chr:6:161270898 |
| 6 rs1740443   | 161197042 T | 0.3657 | 1.73E-09 | chr:6:161270898 |
| 6 rs2024839   | 161233418 C | 4.377  | 2.40E-09 | chr:6:161270898 |
| 6 rs1835345   | 161240330 T | 4.949  | 2.51E-09 | chr:6:161270898 |
| 6 rs1317216   | 161282102 C | 5.086  | 4.28E-09 | chr:6:161270898 |
| 6 rs4252096   | 161134273 G | 0.2391 | 5.43E-09 | chr:6:161270898 |
| 6 rs4252107   | 161137518 C | 0.2391 | 5.43E-09 | chr:6:161270898 |

|               |             |        |          |                 |
|---------------|-------------|--------|----------|-----------------|
| 6 rs62439804  | 161134805 C | 0.2391 | 5.43E-09 | chr:6:161270898 |
| 6 rs1261931   | 161311849 T | 0.2866 | 5.48E-09 | chr:6:161270898 |
| 6 rs114581531 | 161237090 T | 5.253  | 6.50E-09 | chr:6:161270898 |
| 6 rs115032617 | 161237091 G | 5.253  | 6.50E-09 | chr:6:161270898 |
| 6 rs143687018 | 161237088 C | 5.253  | 6.50E-09 | chr:6:161270898 |
| 6 rs370751318 | 161237096 G | 5.253  | 6.50E-09 | chr:6:161270898 |
| 6 rs373974575 | 161237097 A | 5.253  | 6.50E-09 | chr:6:161270898 |
| 6 rs376125603 | 161237094 C | 5.253  | 6.50E-09 | chr:6:161270898 |
| 6 rs13202192  | 161233181 T | 4.305  | 7.43E-09 | chr:6:161270898 |
| 6 rs1247519   | 161303720 A | 0.2914 | 7.73E-09 | chr:6:161270898 |
| 6 rs2997096   | 161298263 T | 0.2914 | 7.73E-09 | chr:6:161270898 |
| 6 rs4252066   | 161127125 A | 0.2447 | 7.77E-09 | chr:6:161270898 |
| 6 rs4252130   | 161153080 C | 0.247  | 7.89E-09 | chr:6:161270898 |
| 6 rs4252134   | 161153527 C | 0.247  | 7.89E-09 | chr:6:161270898 |
| 6 rs12191929  | 161234926 G | 4.24   | 1.02E-08 | chr:6:161270898 |
| 6 rs56387679  | 161154878 A | 0.2621 | 1.05E-08 | chr:6:161270898 |
| 6 rs1247557   | 161189670 G | 2.671  | 1.43E-08 | chr:6:161270898 |
| 6 rs9458041   | 161235710 T | 3.953  | 1.61E-08 | chr:6:161270898 |
| 6 rs45485198  | 161237998 C | 0.1893 | 1.69E-08 | chr:6:161270898 |
| 6 rs4252135   | 161154232 T | 0.2555 | 1.93E-08 | chr:6:161270898 |
| 6 rs56093624  | 161156667 A | 0.2555 | 1.93E-08 | chr:6:161270898 |
| 6 rs9458019   | 161153561 C | 0.2555 | 1.93E-08 | chr:6:161270898 |
| 6 rs9458020   | 161156296 T | 0.2555 | 1.93E-08 | chr:6:161270898 |
| 6 rs783155    | 161229797 G | 0.3387 | 2.29E-08 | chr:6:161270898 |
| 6 rs783177    | 161169815 C | 0.4128 | 2.70E-08 | chr:6:161270898 |
| 6 rs783178    | 161169739 C | 0.4128 | 2.70E-08 | chr:6:161270898 |
| 6 rs4252126   | 161152294 G | 0.267  | 4.13E-08 | chr:6:161270898 |
| 6 rs4252117   | 161143376 G | 0.2667 | 5.47E-08 | chr:6:161270898 |
| 6 rs9456578   | 161147368 T | 0.2667 | 5.47E-08 | chr:6:161270898 |
| 6 rs9458016   | 161144800 G | 0.2667 | 5.47E-08 | chr:6:161270898 |
| 6 rs34620274  | 161266021 T | 7.781  | 6.78E-08 | chr:6:161270898 |
| 6 rs73782329  | 161312474 G | 0.2932 | 7.23E-08 | chr:6:161270898 |
| 6 rs3846778   | 161230801 C | 0.1371 | 9.06E-08 | chr:6:161270898 |
| 6 rs114592559 | 161259990 C | 4.039  | 1.01E-07 | chr:6:161270898 |
| 6 rs1084655   | 161181923 T | 2.421  | 1.16E-07 | chr:6:161270898 |
| 6 rs1247551   | 161187517 C | 2.421  | 1.16E-07 | chr:6:161270898 |
| 6 rs783162    | 161182954 G | 2.421  | 1.16E-07 | chr:6:161270898 |
| 6 rs783165    | 161177842 C | 2.421  | 1.16E-07 | chr:6:161270898 |
| 6 rs45475797  | 161237891 A | 0.1309 | 1.21E-07 | chr:6:161270898 |
| 6 rs34052962  | 161283211 G | 4.544  | 1.23E-07 | chr:6:161270898 |
| 6 rs112806054 | 161183522 A | 0.0345 | 1.35E-07 | chr:6:161270898 |
| 6 rs1084659   | 161163777 A | 0.4317 | 1.43E-07 | chr:6:161270898 |
| 6 rs1084658   | 161180477 A | 2.358  | 2.38E-07 | chr:6:161270898 |



|               |             |         |          |                 |
|---------------|-------------|---------|----------|-----------------|
| 6 rs1247552   | 161187744 T | 2.358   | 2.38E-07 | chr:6:161270898 |
| 6 rs783159    | 161185325 A | 2.358   | 2.38E-07 | chr:6:161270898 |
| 6 rs1247514   | 161283586 C | 0.1288  | 2.42E-07 | chr:6:161270898 |
| 6 rs2144727   | 161194814 C | 3.126   | 2.47E-07 | chr:6:161270898 |
| 6 rs12194271  | 161195895 G | 3.128   | 2.58E-07 | chr:6:161270898 |
| 6 rs12214168  | 161195801 T | 3.128   | 2.58E-07 | chr:6:161270898 |
| 6 rs12214254  | 161195932 A | 3.128   | 2.58E-07 | chr:6:161270898 |
| 6 rs9885597   | 161227692 A | 4.5     | 2.64E-07 | chr:6:161270898 |
| 6 rs150380099 | 161314966 G | 0.3066  | 2.66E-07 | chr:6:161270898 |
| 6 rs1084654   | 161182100 A | 2.35    | 3.04E-07 | chr:6:161270898 |
| 6 rs1344730   | 161204995 A | 3.102   | 3.10E-07 | chr:6:161270898 |
| 6 rs9458039   | 161225730 T | 3.789   | 3.60E-07 | chr:6:161270898 |
| 6 rs1853020   | 161221417 G | 3.764   | 4.23E-07 | chr:6:161270898 |
| 6 rs111629110 | 161269927 A | 0.2606  | 7.34E-07 | chr:6:161270898 |
| 6 rs783174    | 161171919 T | 2.272   | 7.63E-07 | chr:6:161270898 |
| 6 rs9458044   | 161259988 C | 3.766   | 7.89E-07 | chr:6:161270898 |
| 6 rs783180    | 161168961 T | 2.262   | 8.12E-07 | chr:6:161270898 |
| 6 rs783182    | 161168548 A | 2.262   | 8.12E-07 | chr:6:161270898 |
| 6 rs75415422  | 161280642 A | 5.255   | 8.58E-07 | chr:6:161270898 |
| 6 rs4252047   | 161121513 A | 0.3112  | 8.96E-07 | chr:6:161270898 |
| 6 rs11902     | 161174871 G | 2.257   | 9.06E-07 | chr:6:161270898 |
| 6 rs1247565   | 161206910 A | 2.995   | 1.72E-06 | chr:6:161270898 |
| 6 rs783169    | 161174579 C | 2.197   | 1.92E-06 | chr:6:161270898 |
| 6 rs149318841 | 161123894 A | 0.3172  | 2.01E-06 | chr:6:161270898 |
| 6 rs560909528 | 161262726 A | 0.04542 | 2.02E-06 | chr:6:161270898 |
| 6 rs1247518   | 161305051 T | 0.4706  | 2.12E-06 | chr:6:161270898 |
| 6 rs1652455   | 161210349 C | 0.4654  | 2.27E-06 | chr:6:161270898 |
| 6 rs783163    | 161182401 T | 2.863   | 2.38E-06 | chr:6:161270898 |
| 6 rs1652454   | 161210256 G | 0.4659  | 2.92E-06 | chr:6:161270898 |
| 6 rs1247308   | 161337202 G | 2.719   | 2.94E-06 | chr:6:161270898 |
| 6 rs4252043   | 161121161 C | 0.3226  | 3.30E-06 | chr:6:161270898 |
| 6 rs4252048   | 161121514 T | 0.3226  | 3.30E-06 | chr:6:161270898 |
| 6 rs73782431  | 161125556 C | 0.3288  | 3.52E-06 | chr:6:161270898 |
| 6 rs1615527   | 161211095 G | 0.3769  | 3.70E-06 | chr:6:161270898 |
| 6 rs7771298   | 161239477 C | 0.04999 | 4.83E-06 | chr:6:161270898 |
| 6 rs13206066  | 161167452 G | 2.4     | 5.78E-06 | chr:6:161270898 |
| 6 rs112580052 | 161249898 T | 0.2745  | 5.85E-06 | chr:6:161270898 |
| 6 rs73782311  | 161259297 G | 0.3322  | 6.06E-06 | chr:6:161270898 |
| 6 rs73782315  | 161265102 A | 0.3322  | 6.06E-06 | chr:6:161270898 |
| 6 rs79548693  | 161249510 T | 0.2906  | 6.22E-06 | chr:6:161270898 |
| 6 rs74854775  | 161268389 G | 0.339   | 7.13E-06 | chr:6:161270898 |
| 6 rs783160    | 161183722 C | 0.3874  | 7.36E-06 | chr:6:161270898 |
| 6 rs7454268   | 161166502 T | 2.363   | 8.33E-06 | chr:6:161270898 |

|               |             |         |          |                 |
|---------------|-------------|---------|----------|-----------------|
| 6 rs61200572  | 161282034 A | 4.565   | 8.47E-06 | chr:6:161270898 |
| 6 rs73782366  | 161345303 A | 0.4209  | 9.22E-06 | chr:6:161270898 |
| 6 rs4252076   | 161128922 G | 0.4841  | 9.24E-06 | chr:6:161270898 |
| 6 rs4440440   | 161183424 C | 2.428   | 9.27E-06 | chr:6:161270898 |
| 6 rs7450979   | 161186889 T | 2.428   | 9.27E-06 | chr:6:161270898 |
| 6 rs9458023   | 161176256 A | 2.428   | 9.27E-06 | chr:6:161270898 |
| 6 rs73782428  | 161112870 T | 0.4277  | 9.52E-06 | chr:6:161270898 |
| 6 rs4252165   | 161161559 A | 0.422   | 1.00E-05 | chr:6:161270898 |
| 6 rs9456579   | 161148937 G | 0.1444  | 1.05E-05 | chr:6:161270898 |
| 6 rs577902960 | 161285239 C | 0.1058  | 1.08E-05 | chr:6:161270898 |
| 6 rs112880342 | 161137155 C | 0.1457  | 1.15E-05 | chr:6:161270898 |
| 6 rs9689609   | 161101652 A | 0.4374  | 1.27E-05 | chr:6:161270898 |
| 6 rs73782425  | 161109672 A | 0.4371  | 1.32E-05 | chr:6:161270898 |
| 6 rs73782424  | 161109242 T | 0.4445  | 1.36E-05 | chr:6:161270898 |
| 6 rs4252072   | 161128264 T | 0.4929  | 1.50E-05 | chr:6:161270898 |
| 6 rs7760010   | 161106603 A | 0.4374  | 1.54E-05 | chr:6:161270898 |
| 6 rs115279925 | 161269479 A | 4.402   | 1.59E-05 | chr:6:161270898 |
| 6 rs783161    | 161183665 A | 0.3868  | 1.65E-05 | chr:6:161270898 |
| 6 rs1247539   | 161252795 T | 0.3095  | 1.68E-05 | chr:6:161270898 |
| 6 rs62436701  | 161194298 T | 0.4391  | 1.74E-05 | chr:6:161270898 |
| 6 rs62436702  | 161196562 C | 0.4391  | 1.74E-05 | chr:6:161270898 |
| 6 rs150098363 | 161289826 C | 3.201   | 1.84E-05 | chr:6:161270898 |
| 6 rs62436933  | 161346830 A | 0.2402  | 1.85E-05 | chr:6:161270898 |
| 6 rs1740446   | 161194278 C | 0.5143  | 2.16E-05 | chr:6:161270898 |
| 6 rs1620875   | 161201175 A | 0.4234  | 2.27E-05 | chr:6:161270898 |
| 6 rs143110183 | 161273008 T | 0.07656 | 2.31E-05 | chr:6:161270898 |
| 6 rs143577715 | 161236112 T | 0.07656 | 2.31E-05 | chr:6:161270898 |
| 6 rs144714092 | 161215008 T | 0.07656 | 2.31E-05 | chr:6:161270898 |
| 6 rs146619810 | 161218089 G | 0.07656 | 2.31E-05 | chr:6:161270898 |
| 6 rs146721784 | 161206112 A | 0.07656 | 2.31E-05 | chr:6:161270898 |
| 6 rs148742681 | 161237753 G | 0.07656 | 2.31E-05 | chr:6:161270898 |
| 6 rs151100736 | 161197737 T | 0.07656 | 2.31E-05 | chr:6:161270898 |
| 6 rs370897911 | 161210487 A | 0.07656 | 2.31E-05 | chr:6:161270898 |
| 6 rs578009304 | 161289118 C | 0.07656 | 2.31E-05 | chr:6:161270898 |
| 6 rs79772203  | 161224947 A | 0.07656 | 2.31E-05 | chr:6:161270898 |
| 6 rs598306    | 161357756 A | 0.3092  | 2.43E-05 | chr:6:161270898 |
| 6 rs622215    | 161363231 T | 0.3092  | 2.43E-05 | chr:6:161270898 |
| 6 rs114987387 | 32502131 A  | 0.2405  | 5.41E-15 | chr:6:32505702  |
| 6 rs116316731 | 32502097 C  | 0.2399  | 7.00E-15 | chr:6:32505702  |
| 6 rs9269561   | 32544405 C  | 0.2368  | 7.05E-15 | chr:6:32505702  |
| 6 rs9269560   | 32544371 A  | 0.241   | 8.88E-15 | chr:6:32505702  |
| 6 rs35957455  | 32521195 G  | 0.233   | 9.38E-15 | chr:6:32505702  |
| 6 rs74485644  | 32501421 C  | 0.2486  | 9.73E-15 | chr:6:32505702  |

|               |            |        |          |                |
|---------------|------------|--------|----------|----------------|
| 6 rs114034298 | 32505797 C | 2.848  | 1.01E-14 | chr:6:32505702 |
| 6 rs72492314  | 32512421 T | 0.2441 | 1.11E-14 | chr:6:32505702 |
| 6 rs112457394 | 32469073 T | 0.2359 | 1.13E-14 | chr:6:32505702 |
| 6 rs66497315  | 32512407 T | 0.2439 | 1.17E-14 | chr:6:32505702 |
| 6 rs114302967 | 32503839 T | 0.3137 | 1.22E-14 | chr:6:32505702 |
| 6 rs73727960  | 32508989 A | 0.2395 | 1.24E-14 | chr:6:32505702 |
| 6 rs113225456 | 32521406 C | 0.2337 | 1.34E-14 | chr:6:32505702 |
| 6 rs72844187  | 32521419 C | 0.2337 | 1.34E-14 | chr:6:32505702 |
| 6 rs76054694  | 32503840 G | 0.316  | 1.54E-14 | chr:6:32505702 |
| 6 rs112155110 | 32501417 C | 0.2475 | 1.66E-14 | chr:6:32505702 |
| 6 rs72851025  | 32501459 T | 0.2458 | 1.68E-14 | chr:6:32505702 |
| 6 rs72844188  | 32521427 T | 0.2351 | 1.76E-14 | chr:6:32505702 |
| 6 rs73729745  | 32469136 T | 0.2442 | 1.88E-14 | chr:6:32505702 |
| 6 rs72853983  | 32511854 G | 0.2376 | 1.91E-14 | chr:6:32505702 |
| 6 rs72844152  | 32519652 T | 0.2427 | 1.95E-14 | chr:6:32505702 |
| 6 rs5016923   | 32502028 A | 0.2375 | 1.98E-14 | chr:6:32505702 |
| 6 rs74937819  | 32502037 G | 0.2375 | 1.98E-14 | chr:6:32505702 |
| 6 rs114353707 | 32513535 T | 0.237  | 2.04E-14 | chr:6:32505702 |
| 6 rs116817148 | 32513534 A | 0.237  | 2.04E-14 | chr:6:32505702 |
| 6 rs73727980  | 32511774 T | 0.2372 | 2.08E-14 | chr:6:32505702 |
| 6 rs73727981  | 32511791 A | 0.2372 | 2.08E-14 | chr:6:32505702 |
| 6 rs72853927  | 32508474 A | 0.3253 | 2.11E-14 | chr:6:32505702 |
| 6 rs115806221 | 32514401 A | 0.2367 | 2.15E-14 | chr:6:32505702 |
| 6 rs66521709  | 32509829 G | 0.2365 | 2.18E-14 | chr:6:32505702 |
| 6 rs34615209  | 32513862 G | 0.2368 | 2.19E-14 | chr:6:32505702 |
| 6 rs35687625  | 32513840 T | 0.2368 | 2.19E-14 | chr:6:32505702 |
| 6 rs112180912 | 32518436 C | 0.2647 | 2.19E-14 | chr:6:32505702 |
| 6 rs72508464  | 32504341 C | 0.2644 | 2.25E-14 | chr:6:32505702 |
| 6 rs115712701 | 32501737 T | 0.2372 | 2.26E-14 | chr:6:32505702 |
| 6 rs66706092  | 32513915 C | 0.2369 | 2.26E-14 | chr:6:32505702 |
| 6 rs72844111  | 32513938 T | 0.2369 | 2.26E-14 | chr:6:32505702 |
| 6 rs67529500  | 32504757 G | 0.2471 | 2.26E-14 | chr:6:32505702 |
| 6 rs66534143  | 32512601 T | 0.2477 | 2.32E-14 | chr:6:32505702 |
| 6 rs34369284  | 32514144 C | 0.2368 | 2.41E-14 | chr:6:32505702 |
| 6 rs72492319  | 32511987 C | 0.2368 | 2.41E-14 | chr:6:32505702 |
| 6 rs75141783  | 32511944 G | 0.2368 | 2.41E-14 | chr:6:32505702 |
| 6 rs72844171  | 32520749 G | 0.2366 | 2.46E-14 | chr:6:32505702 |
| 6 rs113460787 | 32518089 C | 0.24   | 2.57E-14 | chr:6:32505702 |
| 6 rs66796862  | 32521664 T | 0.2389 | 2.60E-14 | chr:6:32505702 |
| 6 rs77783340  | 32514313 C | 0.2437 | 2.64E-14 | chr:6:32505702 |
| 6 rs73397416  | 32521951 A | 0.2383 | 2.69E-14 | chr:6:32505702 |
| 6 rs74207695  | 32502631 C | 2.688  | 2.70E-14 | chr:6:32505702 |
| 6 rs74194578  | 32517590 C | 0.2418 | 2.71E-14 | chr:6:32505702 |

|               |            |        |          |                |
|---------------|------------|--------|----------|----------------|
| 6 rs75861594  | 32518103 T | 0.2398 | 2.71E-14 | chr:6:32505702 |
| 6 rs35301884  | 32513638 T | 0.2383 | 2.75E-14 | chr:6:32505702 |
| 6 rs67081540  | 32512359 T | 0.2379 | 2.78E-14 | chr:6:32505702 |
| 6 rs115123240 | 32519919 A | 0.2385 | 2.80E-14 | chr:6:32505702 |
| 6 rs67721312  | 32517556 C | 0.2417 | 2.86E-14 | chr:6:32505702 |
| 6 rs111340421 | 32517174 C | 0.2376 | 2.88E-14 | chr:6:32505702 |
| 6 rs72851044  | 32501886 T | 0.2392 | 2.90E-14 | chr:6:32505702 |
| 6 rs72492327  | 32520465 A | 0.2387 | 3.01E-14 | chr:6:32505702 |
| 6 rs66738149  | 32501898 T | 0.2389 | 3.05E-14 | chr:6:32505702 |
| 6 rs72853989  | 32512321 C | 0.2463 | 3.09E-14 | chr:6:32505702 |
| 6 rs73728002  | 32513993 G | 0.2397 | 3.22E-14 | chr:6:32505702 |
| 6 rs113017160 | 32503834 A | 0.3233 | 3.24E-14 | chr:6:32505702 |
| 6 rs72853928  | 32508486 C | 0.3319 | 3.26E-14 | chr:6:32505702 |
| 6 rs66924955  | 32507855 A | 0.2736 | 3.27E-14 | chr:6:32505702 |
| 6 rs72853919  | 32507852 T | 0.2736 | 3.27E-14 | chr:6:32505702 |
| 6 rs72851077  | 32504624 T | 0.315  | 3.42E-14 | chr:6:32505702 |
| 6 rs200263528 | 32509009 G | 0.2565 | 3.50E-14 | chr:6:32505702 |
| 6 rs72851028  | 32501615 C | 0.2459 | 3.51E-14 | chr:6:32505702 |
| 6 rs79364663  | 32504085 C | 2.896  | 3.51E-14 | chr:6:32505702 |
| 6 rs67774869  | 32508794 T | 0.2534 | 3.52E-14 | chr:6:32505702 |
| 6 rs534064478 | 32512189 C | 0.2967 | 3.61E-14 | chr:6:32505702 |
| 6 rs546382275 | 32512190 A | 0.2967 | 3.61E-14 | chr:6:32505702 |
| 6 rs67717173  | 32520137 C | 0.2405 | 3.65E-14 | chr:6:32505702 |
| 6 rs72492325  | 32520151 T | 0.2405 | 3.65E-14 | chr:6:32505702 |
| 6 rs67916930  | 32508823 A | 0.2538 | 3.73E-14 | chr:6:32505702 |
| 6 rs76723065  | 32510591 C | 0.2544 | 3.74E-14 | chr:6:32505702 |
| 6 rs116132127 | 32503328 G | 0.3305 | 3.75E-14 | chr:6:32505702 |
| 6 rs78622201  | 32518405 G | 0.2584 | 3.82E-14 | chr:6:32505702 |
| 6 rs114840252 | 32504071 T | 2.848  | 3.93E-14 | chr:6:32505702 |
| 6 rs114821537 | 32503522 C | 0.3062 | 4.20E-14 | chr:6:32505702 |
| 6 rs72851029  | 32501639 C | 0.235  | 4.22E-14 | chr:6:32505702 |
| 6 rs73727973  | 32509691 A | 0.2476 | 4.24E-14 | chr:6:32505702 |
| 6 rs73727961  | 32509022 G | 0.2561 | 4.27E-14 | chr:6:32505702 |
| 6 rs79604868  | 32504073 A | 2.847  | 4.28E-14 | chr:6:32505702 |
| 6 rs115296342 | 32503526 A | 0.3063 | 4.31E-14 | chr:6:32505702 |
| 6 rs115217308 | 32520296 C | 0.2426 | 4.38E-14 | chr:6:32505702 |
| 6 rs116173033 | 32520295 A | 0.2426 | 4.38E-14 | chr:6:32505702 |
| 6 rs111559749 | 32509012 C | 0.2562 | 4.40E-14 | chr:6:32505702 |
| 6 rs3828852   | 32520595 G | 0.2539 | 4.48E-14 | chr:6:32505702 |
| 6 rs73729138  | 32520854 A | 0.2439 | 4.57E-14 | chr:6:32505702 |
| 6 rs72853979  | 32511572 A | 0.2454 | 4.60E-14 | chr:6:32505702 |
| 6 rs73729131  | 32520313 G | 0.2424 | 4.61E-14 | chr:6:32505702 |
| 6 rs73729122  | 32519777 A | 0.2684 | 4.66E-14 | chr:6:32505702 |

|               |            |        |          |                |
|---------------|------------|--------|----------|----------------|
| 6 rs369883062 | 32519734 T | 0.2672 | 4.70E-14 | chr:6:32505702 |
| 6 rs76317804  | 32469375 T | 2.869  | 4.83E-14 | chr:6:32505702 |
| 6 rs68175425  | 32517446 A | 0.2503 | 4.83E-14 | chr:6:32505702 |
| 6 rs115202951 | 32501311 C | 0.2744 | 4.86E-14 | chr:6:32505702 |
| 6 rs529580232 | 32512136 T | 0.2892 | 4.95E-14 | chr:6:32505702 |
| 6 rs551034683 | 32512138 G | 0.2892 | 4.95E-14 | chr:6:32505702 |
| 6 rs113850533 | 32516839 G | 0.2436 | 4.98E-14 | chr:6:32505702 |
| 6 rs114520912 | 32517504 C | 0.2582 | 5.04E-14 | chr:6:32505702 |
| 6 rs116645664 | 32517505 T | 0.2582 | 5.04E-14 | chr:6:32505702 |
| 6 rs115303801 | 32512229 T | 0.2911 | 5.12E-14 | chr:6:32505702 |
| 6 rs28819746  | 32509579 G | 0.2473 | 5.21E-14 | chr:6:32505702 |
| 6 rs73729111  | 32517525 G | 0.2481 | 5.23E-14 | chr:6:32505702 |
| 6 rs545949191 | 32502900 A | 2.872  | 5.25E-14 | chr:6:32505702 |
| 6 rs115878723 | 32503335 A | 2.919  | 5.28E-14 | chr:6:32505702 |
| 6 rs116225018 | 32503380 T | 0.3397 | 5.28E-14 | chr:6:32505702 |
| 6 rs531982544 | 32503334 C | 2.919  | 5.28E-14 | chr:6:32505702 |
| 6 rs72851063  | 32503901 C | 0.2697 | 5.29E-14 | chr:6:32505702 |
| 6 rs72508473  | 32508399 A | 0.3004 | 5.30E-14 | chr:6:32505702 |
| 6 rs202231764 | 32508412 A | 0.3005 | 5.35E-14 | chr:6:32505702 |
| 6 rs75820413  | 32508505 G | 2.947  | 5.40E-14 | chr:6:32505702 |
| 6 rs112458679 | 32512167 C | 0.2969 | 5.50E-14 | chr:6:32505702 |
| 6 rs68126668  | 32509603 T | 0.2471 | 5.59E-14 | chr:6:32505702 |
| 6 rs66532036  | 32519319 T | 0.2478 | 5.64E-14 | chr:6:32505702 |
| 6 rs112709345 | 32501541 C | 0.2428 | 5.80E-14 | chr:6:32505702 |
| 6 rs72492303  | 32509061 G | 0.256  | 5.85E-14 | chr:6:32505702 |
| 6 rs193201719 | 32505807 T | 2.618  | 5.86E-14 | chr:6:32505702 |
| 6 rs75174683  | 32504101 G | 2.881  | 5.96E-14 | chr:6:32505702 |
| 6 rs116675816 | 32512131 T | 0.2892 | 6.02E-14 | chr:6:32505702 |
| 6 rs111901878 | 32516893 C | 0.2451 | 6.07E-14 | chr:6:32505702 |
| 6 rs7765211   | 32502346 A | 2.764  | 6.11E-14 | chr:6:32505702 |
| 6 rs62405640  | 32516729 C | 0.2459 | 6.15E-14 | chr:6:32505702 |
| 6 rs76033762  | 32516702 T | 0.2459 | 6.15E-14 | chr:6:32505702 |
| 6 rs72492315  | 32512466 T | 0.3071 | 6.22E-14 | chr:6:32505702 |
| 6 rs72851052  | 32502249 C | 0.2927 | 6.46E-14 | chr:6:32505702 |
| 6 rs72851053  | 32502250 A | 0.2927 | 6.46E-14 | chr:6:32505702 |
| 6 rs114769197 | 32538217 A | 2.826  | 6.62E-14 | chr:6:32505702 |
| 6 rs115724613 | 32538216 C | 2.826  | 6.62E-14 | chr:6:32505702 |
| 6 rs74950807  | 32513375 C | 0.2566 | 6.88E-14 | chr:6:32505702 |
| 6 rs76818741  | 32513378 G | 0.2566 | 6.88E-14 | chr:6:32505702 |
| 6 rs75519123  | 32469404 G | 2.83   | 6.96E-14 | chr:6:32505702 |
| 6 rs73727944  | 32504713 C | 0.2984 | 7.15E-14 | chr:6:32505702 |
| 6 rs74211958  | 32469040 A | 0.3302 | 7.38E-14 | chr:6:32505702 |
| 6 rs112349327 | 32502948 A | 2.85   | 7.41E-14 | chr:6:32505702 |

|               |            |        |          |                |
|---------------|------------|--------|----------|----------------|
| 6 rs114015220 | 32510599 C | 0.2629 | 7.46E-14 | chr:6:32505702 |
| 6 rs114472333 | 32510598 G | 0.2629 | 7.46E-14 | chr:6:32505702 |
| 6 rs112815590 | 32504110 T | 2.876  | 7.56E-14 | chr:6:32505702 |
| 6 rs111945767 | 32517045 G | 0.2488 | 7.66E-14 | chr:6:32505702 |
| 6 rs111289870 | 32512269 A | 0.2652 | 7.70E-14 | chr:6:32505702 |
| 6 rs7743846   | 32505600 T | 0.3332 | 7.95E-14 | chr:6:32505702 |
| 6 rs114198395 | 32502961 T | 2.84   | 8.11E-14 | chr:6:32505702 |
| 6 rs72853940  | 32508945 G | 0.2648 | 8.21E-14 | chr:6:32505702 |
| 6 rs9269749   | 32548136 T | 0.2326 | 8.39E-14 | chr:6:32505702 |
| 6 rs115095329 | 32503497 G | 0.3258 | 8.52E-14 | chr:6:32505702 |
| 6 rs116133469 | 32503492 C | 0.3258 | 8.52E-14 | chr:6:32505702 |
| 6 rs72851056  | 32502944 A | 2.847  | 8.58E-14 | chr:6:32505702 |
| 6 rs74394760  | 32513078 T | 0.2641 | 8.80E-14 | chr:6:32505702 |
| 6 rs72851046  | 32501957 T | 0.2509 | 9.21E-14 | chr:6:32505702 |
| 6 rs72851047  | 32501962 G | 0.2509 | 9.21E-14 | chr:6:32505702 |
| 6 rs74221689  | 32501936 C | 0.2509 | 9.21E-14 | chr:6:32505702 |
| 6 rs72853926  | 32508451 A | 0.322  | 9.31E-14 | chr:6:32505702 |
| 6 rs111626267 | 32502273 G | 0.3008 | 1.00E-13 | chr:6:32505702 |
| 6 rs74375951  | 32500923 A | 0.2603 | 1.01E-13 | chr:6:32505702 |
| 6 rs72492311  | 32509979 C | 0.2565 | 1.02E-13 | chr:6:32505702 |
| 6 rs201439475 | 32502968 A | 2.836  | 1.02E-13 | chr:6:32505702 |
| 6 rs66678933  | 32509320 C | 0.2502 | 1.03E-13 | chr:6:32505702 |
| 6 rs72492304  | 32509311 T | 0.2502 | 1.03E-13 | chr:6:32505702 |
| 6 rs116190325 | 32510039 C | 0.2564 | 1.06E-13 | chr:6:32505702 |
| 6 rs116405199 | 32504367 C | 0.2886 | 1.08E-13 | chr:6:32505702 |
| 6 rs78994392  | 32504362 G | 0.2886 | 1.08E-13 | chr:6:32505702 |
| 6 rs115573660 | 32502277 T | 0.3007 | 1.09E-13 | chr:6:32505702 |
| 6 rs3828848   | 32520665 A | 0.2559 | 1.09E-13 | chr:6:32505702 |
| 6 rs547409849 | 32503365 T | 2.861  | 1.11E-13 | chr:6:32505702 |
| 6 rs565770331 | 32503366 C | 2.861  | 1.11E-13 | chr:6:32505702 |
| 6 rs72849282  | 32469335 C | 0.3378 | 1.11E-13 | chr:6:32505702 |
| 6 rs115077688 | 32503287 C | 0.2733 | 1.12E-13 | chr:6:32505702 |
| 6 rs62405642  | 32517759 A | 0.2504 | 1.16E-13 | chr:6:32505702 |
| 6 rs114653292 | 32503516 T | 0.3206 | 1.18E-13 | chr:6:32505702 |
| 6 rs199506689 | 32504701 C | 0.3133 | 1.18E-13 | chr:6:32505702 |
| 6 rs75088009  | 32504884 A | 0.2951 | 1.21E-13 | chr:6:32505702 |
| 6 rs111979375 | 32538231 T | 2.746  | 1.21E-13 | chr:6:32505702 |
| 6 rs112004746 | 32518155 C | 0.2594 | 1.22E-13 | chr:6:32505702 |
| 6 rs35697584  | 32522151 C | 0.2594 | 1.23E-13 | chr:6:32505702 |
| 6 rs142393802 | 32508021 T | 2.475  | 1.24E-13 | chr:6:32505702 |
| 6 rs555706008 | 32507953 G | 2.455  | 1.31E-13 | chr:6:32505702 |
| 6 rs140538649 | 32507946 T | 2.455  | 1.35E-13 | chr:6:32505702 |
| 6 rs539226504 | 32507944 A | 2.455  | 1.35E-13 | chr:6:32505702 |

|               |            |        |          |                |
|---------------|------------|--------|----------|----------------|
| 6 rs571430728 | 32507938 T | 2.455  | 1.35E-13 | chr:6:32505702 |
| 6 rs76034941  | 32503498 A | 0.331  | 1.36E-13 | chr:6:32505702 |
| 6 rs67041740  | 32509273 T | 0.2547 | 1.37E-13 | chr:6:32505702 |
| 6 rs76662624  | 32503880 G | 0.3096 | 1.38E-13 | chr:6:32505702 |
| 6 rs113209512 | 32508875 C | 0.2775 | 1.42E-13 | chr:6:32505702 |
| 6 rs532050307 | 32469431 C | 2.729  | 1.46E-13 | chr:6:32505702 |
| 6 rs571525080 | 32469429 A | 2.729  | 1.46E-13 | chr:6:32505702 |
| 6 rs72492310  | 32509867 A | 0.2688 | 1.46E-13 | chr:6:32505702 |
| 6 rs530662953 | 32504587 G | 0.3283 | 1.46E-13 | chr:6:32505702 |
| 6 rs72851060  | 32503560 A | 0.2991 | 1.46E-13 | chr:6:32505702 |
| 6 rs147668426 | 32507931 G | 2.453  | 1.48E-13 | chr:6:32505702 |
| 6 rs185520080 | 32505872 C | 2.321  | 1.48E-13 | chr:6:32505702 |
| 6 rs115524254 | 32503565 A | 0.2992 | 1.50E-13 | chr:6:32505702 |
| 6 rs72851061  | 32503672 T | 0.2906 | 1.52E-13 | chr:6:32505702 |
| 6 rs545379090 | 32469285 C | 0.3412 | 1.54E-13 | chr:6:32505702 |
| 6 rs376327303 | 32520719 G | 0.2663 | 1.56E-13 | chr:6:32505702 |
| 6 rs115663137 | 32502992 C | 2.789  | 1.57E-13 | chr:6:32505702 |
| 6 rs73727954  | 32508902 G | 0.2773 | 1.60E-13 | chr:6:32505702 |
| 6 rs112471393 | 32538228 T | 2.739  | 1.61E-13 | chr:6:32505702 |
| 6 rs78806801  | 32503403 C | 2.848  | 1.62E-13 | chr:6:32505702 |
| 6 rs112300533 | 32517237 C | 0.2583 | 1.63E-13 | chr:6:32505702 |
| 6 rs74821931  | 32517233 G | 0.2583 | 1.63E-13 | chr:6:32505702 |
| 6 rs67860869  | 32508349 T | 0.3083 | 1.64E-13 | chr:6:32505702 |
| 6 rs72851100  | 32505511 T | 0.3061 | 1.72E-13 | chr:6:32505702 |
| 6 rs73397403  | 32519849 A | 0.276  | 1.73E-13 | chr:6:32505702 |
| 6 rs111725169 | 32512223 A | 0.3067 | 1.76E-13 | chr:6:32505702 |
| 6 rs115726960 | 32503171 C | 0.2811 | 1.76E-13 | chr:6:32505702 |
| 6 rs72492322  | 32519628 A | 0.2671 | 1.77E-13 | chr:6:32505702 |
| 6 rs79338946  | 32502822 T | 2.569  | 1.82E-13 | chr:6:32505702 |
| 6 rs376217655 | 32505666 T | 2.395  | 1.82E-13 | chr:6:32505702 |
| 6 rs550051341 | 32505851 C | 2.316  | 1.84E-13 | chr:6:32505702 |
| 6 rs571586981 | 32505852 A | 2.316  | 1.84E-13 | chr:6:32505702 |
| 6 rs78278896  | 32508647 A | 0.281  | 1.89E-13 | chr:6:32505702 |
| 6 rs116474488 | 32469226 T | 2.777  | 1.92E-13 | chr:6:32505702 |
| 6 rs540049194 | 32503078 A | 2.521  | 1.92E-13 | chr:6:32505702 |
| 6 rs536146370 | 32519759 G | 0.2856 | 2.02E-13 | chr:6:32505702 |
| 6 rs72492306  | 32509510 T | 0.2649 | 2.04E-13 | chr:6:32505702 |
| 6 rs72492307  | 32509519 T | 0.2649 | 2.04E-13 | chr:6:32505702 |
| 6 rs114638791 | 32538268 C | 0.352  | 2.10E-13 | chr:6:32505702 |
| 6 rs374408836 | 32507582 C | 2.62   | 2.12E-13 | chr:6:32505702 |
| 6 rs72851064  | 32503928 G | 0.2772 | 2.14E-13 | chr:6:32505702 |
| 6 rs72492317  | 32512501 G | 0.3022 | 2.18E-13 | chr:6:32505702 |
| 6 rs201795916 | 32514567 A | 0.2719 | 2.33E-13 | chr:6:32505702 |

|               |            |        |          |                |
|---------------|------------|--------|----------|----------------|
| 6 rs72844118  | 32514539 C | 0.2719 | 2.33E-13 | chr:6:32505702 |
| 6 rs192164737 | 32508091 G | 2.394  | 2.43E-13 | chr:6:32505702 |
| 6 rs72853968  | 32509883 T | 0.2775 | 2.47E-13 | chr:6:32505702 |
| 6 rs73726852  | 32538295 T | 0.3421 | 2.54E-13 | chr:6:32505702 |
| 6 rs113900769 | 32503887 G | 0.3103 | 2.56E-13 | chr:6:32505702 |
| 6 rs113353313 | 32538242 A | 0.3462 | 2.56E-13 | chr:6:32505702 |
| 6 rs114831840 | 32501301 G | 0.2968 | 2.57E-13 | chr:6:32505702 |
| 6 rs115303308 | 32501296 G | 0.2968 | 2.57E-13 | chr:6:32505702 |
| 6 rs115664796 | 32508758 T | 0.2812 | 2.60E-13 | chr:6:32505702 |
| 6 rs115696138 | 32504460 T | 0.3335 | 2.64E-13 | chr:6:32505702 |
| 6 rs112944992 | 32510457 T | 0.3265 | 2.64E-13 | chr:6:32505702 |
| 6 rs113648142 | 32508762 G | 0.2812 | 2.68E-13 | chr:6:32505702 |
| 6 rs147023195 | 32518295 C | 0.288  | 2.76E-13 | chr:6:32505702 |
| 6 rs74535936  | 32510547 A | 0.2868 | 2.82E-13 | chr:6:32505702 |
| 6 rs556337500 | 32503531 A | 2.784  | 2.86E-13 | chr:6:32505702 |
| 6 rs571499647 | 32503532 G | 2.784  | 2.86E-13 | chr:6:32505702 |
| 6 rs114362560 | 32504503 C | 0.3513 | 2.89E-13 | chr:6:32505702 |
| 6 rs114961271 | 32503352 A | 0.357  | 2.91E-13 | chr:6:32505702 |
| 6 rs114629945 | 32503717 G | 2.669  | 2.99E-13 | chr:6:32505702 |
| 6 rs116103612 | 32503716 A | 2.669  | 2.99E-13 | chr:6:32505702 |
| 6 rs116422126 | 32504500 T | 0.3514 | 3.11E-13 | chr:6:32505702 |
| 6 rs150423066 | 32506995 A | 2.696  | 3.11E-13 | chr:6:32505702 |
| 6 rs180942055 | 32507976 T | 2.392  | 3.17E-13 | chr:6:32505702 |
| 6 rs186170828 | 32507977 G | 2.392  | 3.17E-13 | chr:6:32505702 |
| 6 rs573629697 | 32507971 G | 2.392  | 3.17E-13 | chr:6:32505702 |
| 6 rs562624040 | 32513024 T | 0.3135 | 3.22E-13 | chr:6:32505702 |
| 6 rs74786163  | 32507780 T | 2.548  | 3.40E-13 | chr:6:32505702 |
| 6 rs111649944 | 32518268 C | 0.2837 | 3.41E-13 | chr:6:32505702 |
| 6 rs112515515 | 32513422 G | 0.2763 | 3.45E-13 | chr:6:32505702 |
| 6 rs557288207 | 32504452 C | 0.34   | 3.55E-13 | chr:6:32505702 |
| 6 rs74205903  | 32501249 T | 0.3052 | 3.60E-13 | chr:6:32505702 |
| 6 rs544353633 | 32507596 G | 2.578  | 3.61E-13 | chr:6:32505702 |
| 6 rs116520213 | 32504424 A | 0.3402 | 3.65E-13 | chr:6:32505702 |
| 6 rs546636941 | 32504421 C | 0.3402 | 3.65E-13 | chr:6:32505702 |
| 6 rs66502326  | 32509411 C | 0.2676 | 3.66E-13 | chr:6:32505702 |
| 6 rs76940575  | 32502590 T | 0.3526 | 3.72E-13 | chr:6:32505702 |
| 6 rs72853949  | 32509435 A | 0.2649 | 3.74E-13 | chr:6:32505702 |
| 6 rs74197151  | 32469035 C | 0.3576 | 3.75E-13 | chr:6:32505702 |
| 6 rs76509141  | 32504529 T | 0.3501 | 3.83E-13 | chr:6:32505702 |
| 6 rs9269252   | 32454293 T | 0.225  | 3.84E-13 | chr:6:32505702 |
| 6 rs116609655 | 32503059 C | 2.498  | 4.08E-13 | chr:6:32505702 |
| 6 rs532618689 | 32508064 T | 2.385  | 4.16E-13 | chr:6:32505702 |
| 6 rs549780202 | 32508055 T | 2.385  | 4.16E-13 | chr:6:32505702 |



|               |            |        |          |                |
|---------------|------------|--------|----------|----------------|
| 6 rs564974789 | 32508061 A | 2.385  | 4.16E-13 | chr:6:32505702 |
| 6 rs180756398 | 32458010 A | 2.513  | 4.28E-13 | chr:6:32505702 |
| 6 rs115084652 | 32468978 T | 2.62   | 4.30E-13 | chr:6:32505702 |
| 6 rs2157337   | 32501144 C | 0.2992 | 4.31E-13 | chr:6:32505702 |
| 6 rs542536566 | 32457959 T | 2.47   | 4.35E-13 | chr:6:32505702 |
| 6 rs561971374 | 32503086 A | 2.477  | 4.72E-13 | chr:6:32505702 |
| 6 rs114246255 | 32509461 A | 0.2849 | 4.75E-13 | chr:6:32505702 |
| 6 rs115704383 | 32509460 C | 0.2849 | 4.75E-13 | chr:6:32505702 |
| 6 rs72853950  | 32509472 G | 0.2849 | 4.75E-13 | chr:6:32505702 |
| 6 rs186217224 | 32457967 C | 2.468  | 4.84E-13 | chr:6:32505702 |
| 6 rs530370261 | 32519826 C | 0.2966 | 4.94E-13 | chr:6:32505702 |
| 6 rs113727677 | 32517010 T | 0.269  | 4.98E-13 | chr:6:32505702 |
| 6 rs113434238 | 32501204 C | 0.3127 | 4.99E-13 | chr:6:32505702 |
| 6 rs141020324 | 32469001 A | 2.553  | 5.01E-13 | chr:6:32505702 |
| 6 rs144975609 | 32468997 A | 2.553  | 5.01E-13 | chr:6:32505702 |
| 6 rs116209683 | 32510508 T | 0.298  | 5.02E-13 | chr:6:32505702 |
| 6 rs74211571  | 32502566 C | 0.3547 | 5.19E-13 | chr:6:32505702 |
| 6 rs113085907 | 32510224 C | 0.3436 | 5.32E-13 | chr:6:32505702 |
| 6 rs7765332   | 32502374 A | 2.537  | 5.33E-13 | chr:6:32505702 |
| 6 rs73726810  | 32522857 G | 0.2378 | 5.50E-13 | chr:6:32505702 |
| 6 rs73726819  | 32526540 A | 0.2575 | 5.57E-13 | chr:6:32505702 |
| 6 rs72508474  | 32508738 T | 0.2896 | 5.59E-13 | chr:6:32505702 |
| 6 rs199636459 | 32507758 A | 2.394  | 5.71E-13 | chr:6:32505702 |
| 6 rs72853970  | 32509919 G | 0.2802 | 5.76E-13 | chr:6:32505702 |
| 6 rs72853971  | 32509938 G | 0.2802 | 5.76E-13 | chr:6:32505702 |
| 6 rs113232784 | 32518256 G | 0.2875 | 5.77E-13 | chr:6:32505702 |
| 6 rs113220298 | 32510369 C | 0.3191 | 5.96E-13 | chr:6:32505702 |
| 6 rs535043779 | 32497358 A | 2.367  | 6.01E-13 | chr:6:32505702 |
| 6 rs552507937 | 32497354 A | 2.367  | 6.01E-13 | chr:6:32505702 |
| 6 rs570739482 | 32497356 C | 2.367  | 6.01E-13 | chr:6:32505702 |
| 6 rs34405098  | 32523269 C | 0.2798 | 6.03E-13 | chr:6:32505702 |
| 6 rs73726814  | 32523235 T | 0.2798 | 6.03E-13 | chr:6:32505702 |
| 6 rs72851065  | 32504213 C | 0.3366 | 7.13E-13 | chr:6:32505702 |
| 6 rs72851066  | 32504216 A | 0.3366 | 7.13E-13 | chr:6:32505702 |
| 6 rs113787446 | 32518630 A | 0.298  | 7.20E-13 | chr:6:32505702 |
| 6 rs114776163 | 32518625 A | 0.298  | 7.20E-13 | chr:6:32505702 |
| 6 rs115910196 | 32502304 C | 0.3572 | 7.58E-13 | chr:6:32505702 |
| 6 rs78942674  | 32509897 G | 0.2888 | 7.69E-13 | chr:6:32505702 |
| 6 rs149589923 | 32500818 G | 0.2996 | 7.71E-13 | chr:6:32505702 |
| 6 rs544527733 | 32503091 T | 2.479  | 7.77E-13 | chr:6:32505702 |
| 6 rs115380393 | 32503020 T | 2.649  | 7.83E-13 | chr:6:32505702 |
| 6 rs67461697  | 32518767 T | 0.2927 | 7.93E-13 | chr:6:32505702 |
| 6 rs538116343 | 32521742 T | 3.026  | 8.03E-13 | chr:6:32505702 |

|               |            |        |          |                |
|---------------|------------|--------|----------|----------------|
| 6 rs114565678 | 32469224 G | 0.3673 | 8.16E-13 | chr:6:32505702 |
| 6 rs114233058 | 32517386 C | 0.285  | 8.21E-13 | chr:6:32505702 |
| 6 rs115916707 | 32517387 A | 0.285  | 8.21E-13 | chr:6:32505702 |
| 6 rs114682516 | 32503702 C | 2.674  | 8.34E-13 | chr:6:32505702 |
| 6 rs72853925  | 32508330 A | 0.3229 | 8.84E-13 | chr:6:32505702 |
| 6 rs555383676 | 32507771 A | 2.382  | 8.97E-13 | chr:6:32505702 |
| 6 rs35179057  | 32523349 T | 0.2676 | 9.11E-13 | chr:6:32505702 |
| 6 rs113133909 | 32457928 T | 2.456  | 9.34E-13 | chr:6:32505702 |
| 6 rs534859262 | 32457931 T | 2.456  | 9.34E-13 | chr:6:32505702 |
| 6 rs77173653  | 32508587 G | 2.608  | 9.53E-13 | chr:6:32505702 |
| 6 rs540194362 | 32507768 G | 2.362  | 9.67E-13 | chr:6:32505702 |
| 6 rs80083020  | 32510439 T | 0.3403 | 1.00E-12 | chr:6:32505702 |
| 6 rs116048339 | 32468982 T | 2.507  | 1.02E-12 | chr:6:32505702 |
| 6 rs116380301 | 32468983 T | 2.507  | 1.02E-12 | chr:6:32505702 |
| 6 rs67816706  | 32517266 A | 0.2738 | 1.02E-12 | chr:6:32505702 |
| 6 rs3828844   | 32520755 A | 0.3024 | 1.06E-12 | chr:6:32505702 |
| 6 rs116224274 | 32508583 C | 2.605  | 1.07E-12 | chr:6:32505702 |
| 6 rs537977627 | 32510140 G | 0.3314 | 1.08E-12 | chr:6:32505702 |
| 6 rs77149458  | 32487130 A | 3.517  | 1.10E-12 | chr:6:32505702 |
| 6 rs9270121   | 32555009 A | 0.2433 | 1.11E-12 | chr:6:32505702 |
| 6 rs547631481 | 32507531 A | 2.441  | 1.14E-12 | chr:6:32505702 |
| 6 rs373664556 | 32508561 C | 2.569  | 1.18E-12 | chr:6:32505702 |
| 6 rs553897781 | 32505335 A | 2.406  | 1.20E-12 | chr:6:32505702 |
| 6 rs111890942 | 32458131 T | 0.3056 | 1.20E-12 | chr:6:32505702 |
| 6 rs74202712  | 32502546 A | 0.3683 | 1.21E-12 | chr:6:32505702 |
| 6 rs116241189 | 32506751 G | 0.356  | 1.21E-12 | chr:6:32505702 |
| 6 rs72853911  | 32506759 A | 0.356  | 1.21E-12 | chr:6:32505702 |
| 6 rs9269750   | 32548141 T | 0.2605 | 1.25E-12 | chr:6:32505702 |
| 6 rs74290599  | 32518785 A | 0.2973 | 1.28E-12 | chr:6:32505702 |
| 6 rs71534520  | 32510146 C | 0.3347 | 1.29E-12 | chr:6:32505702 |
| 6 rs112111526 | 32510317 G | 0.3417 | 1.30E-12 | chr:6:32505702 |
| 6 rs76325796  | 32507653 A | 2.621  | 1.31E-12 | chr:6:32505702 |
| 6 rs77077499  | 32507652 T | 2.621  | 1.31E-12 | chr:6:32505702 |
| 6 rs112280675 | 32522066 G | 0.278  | 1.34E-12 | chr:6:32505702 |
| 6 rs201954564 | 32497824 C | 0.2401 | 1.37E-12 | chr:6:32505702 |
| 6 rs73727946  | 32504967 C | 2.608  | 1.37E-12 | chr:6:32505702 |
| 6 rs140120971 | 32510343 T | 0.3417 | 1.42E-12 | chr:6:32505702 |
| 6 rs143822887 | 32510344 G | 0.3417 | 1.42E-12 | chr:6:32505702 |
| 6 rs9269327   | 32540001 C | 0.3423 | 1.45E-12 | chr:6:32505702 |
| 6 rs538879571 | 32503698 A | 2.662  | 1.47E-12 | chr:6:32505702 |
| 6 rs68009841  | 32507731 T | 2.582  | 1.48E-12 | chr:6:32505702 |
| 6 rs76376937  | 32508568 G | 2.564  | 1.49E-12 | chr:6:32505702 |
| 6 rs184358099 | 32500832 A | 0.3056 | 1.51E-12 | chr:6:32505702 |

|               |            |        |          |                |
|---------------|------------|--------|----------|----------------|
| 6 rs144411837 | 32510337 T | 0.3419 | 1.57E-12 | chr:6:32505702 |
| 6 rs571341495 | 32505326 G | 2.401  | 1.61E-12 | chr:6:32505702 |
| 6 rs191423596 | 32506888 C | 2.24   | 1.63E-12 | chr:6:32505702 |
| 6 rs116413420 | 32509466 C | 0.292  | 1.73E-12 | chr:6:32505702 |
| 6 rs114899212 | 32524951 A | 0.3032 | 1.77E-12 | chr:6:32505702 |
| 6 rs72849267  | 32468923 A | 0.3635 | 1.77E-12 | chr:6:32505702 |
| 6 rs112465099 | 32510430 A | 0.348  | 1.82E-12 | chr:6:32505702 |
| 6 rs112103446 | 32522679 C | 6.995  | 1.82E-12 | chr:6:32505702 |
| 6 rs556173675 | 32508202 G | 2.285  | 1.97E-12 | chr:6:32505702 |
| 6 rs572581776 | 32526776 A | 0.3349 | 2.01E-12 | chr:6:32505702 |
| 6 rs538727527 | 32505332 T | 2.372  | 2.01E-12 | chr:6:32505702 |
| 6 rs183777110 | 32505375 T | 2.358  | 2.06E-12 | chr:6:32505702 |
| 6 rs77413629  | 32505374 G | 2.358  | 2.06E-12 | chr:6:32505702 |
| 6 rs562852671 | 32512142 T | 2.403  | 2.16E-12 | chr:6:32505702 |
| 6 rs182987687 | 32506870 C | 2.223  | 2.27E-12 | chr:6:32505702 |
| 6 rs73727940  | 32503738 C | 0.3689 | 2.28E-12 | chr:6:32505702 |
| 6 rs115673628 | 32505419 G | 2.333  | 2.36E-12 | chr:6:32505702 |
| 6 rs538718414 | 32508207 T | 2.28   | 2.39E-12 | chr:6:32505702 |
| 6 rs9269985   | 32552532 C | 0.3035 | 2.41E-12 | chr:6:32505702 |
| 6 rs188426982 | 32506878 A | 2.222  | 2.51E-12 | chr:6:32505702 |
| 6 rs368398419 | 32510709 C | 2.43   | 2.54E-12 | chr:6:32505702 |
| 6 rs371989616 | 32510718 T | 2.43   | 2.54E-12 | chr:6:32505702 |
| 6 rs6905161   | 32505249 A | 2.382  | 2.56E-12 | chr:6:32505702 |
| 6 rs189968693 | 32506863 A | 2.214  | 2.59E-12 | chr:6:32505702 |
| 6 rs114015803 | 32485879 T | 2.957  | 2.60E-12 | chr:6:32505702 |
| 6 rs114693948 | 32485873 T | 2.957  | 2.60E-12 | chr:6:32505702 |
| 6 rs544548886 | 32505381 T | 2.351  | 2.66E-12 | chr:6:32505702 |
| 6 rs182374257 | 32525306 A | 0.3726 | 2.74E-12 | chr:6:32505702 |
| 6 rs72849265  | 32458208 C | 0.3303 | 2.75E-12 | chr:6:32505702 |
| 6 rs80216275  | 32469383 G | 0.3617 | 2.95E-12 | chr:6:32505702 |
| 6 rs9269563   | 32544456 C | 0.2638 | 3.00E-12 | chr:6:32505702 |
| 6 rs72851055  | 32502814 C | 2.427  | 3.04E-12 | chr:6:32505702 |
| 6 rs566710022 | 32507505 T | 2.389  | 3.13E-12 | chr:6:32505702 |
| 6 rs114171624 | 32514706 A | 0.3342 | 3.31E-12 | chr:6:32505702 |
| 6 rs111590055 | 32510177 T | 0.3697 | 3.33E-12 | chr:6:32505702 |
| 6 rs569509899 | 32507490 G | 2.365  | 3.36E-12 | chr:6:32505702 |
| 6 rs74197584  | 32502717 T | 2.191  | 3.50E-12 | chr:6:32505702 |
| 6 rs72508469  | 32505309 C | 2.405  | 3.56E-12 | chr:6:32505702 |
| 6 rs73726842  | 32533029 G | 0.3167 | 3.65E-12 | chr:6:32505702 |
| 6 rs73726843  | 32533042 G | 0.3167 | 3.65E-12 | chr:6:32505702 |
| 6 rs529484704 | 32507478 C | 2.363  | 3.78E-12 | chr:6:32505702 |
| 6 rs9269328   | 32540018 G | 0.3507 | 3.86E-12 | chr:6:32505702 |
| 6 rs562045282 | 32502681 T | 2.173  | 4.12E-12 | chr:6:32505702 |

|               |            |        |          |                |
|---------------|------------|--------|----------|----------------|
| 6 rs111896611 | 32511183 G | 0.3784 | 4.26E-12 | chr:6:32505702 |
| 6 rs187395433 | 32510968 G | 2.346  | 4.31E-12 | chr:6:32505702 |
| 6 rs74197204  | 32507695 A | 0.3806 | 4.32E-12 | chr:6:32505702 |
| 6 rs73401349  | 32458094 G | 0.3677 | 4.45E-12 | chr:6:32505702 |
| 6 rs114020016 | 32524824 T | 2.459  | 4.50E-12 | chr:6:32505702 |
| 6 rs76571178  | 32525159 G | 0.3974 | 4.55E-12 | chr:6:32505702 |
| 6 rs9270529   | 32559658 C | 0.3182 | 4.55E-12 | chr:6:32505702 |
| 6 rs114435848 | 32532546 C | 0.3545 | 4.79E-12 | chr:6:32505702 |
| 6 rs115104630 | 32502387 A | 2.451  | 4.84E-12 | chr:6:32505702 |
| 6 rs147266303 | 32510268 G | 0.3521 | 4.91E-12 | chr:6:32505702 |
| 6 rs150117381 | 32505388 C | 2.296  | 5.01E-12 | chr:6:32505702 |
| 6 rs72853923  | 32508222 G | 2.264  | 5.05E-12 | chr:6:32505702 |
| 6 rs541499994 | 32510983 C | 2.315  | 5.14E-12 | chr:6:32505702 |
| 6 rs534024500 | 32507307 G | 2.176  | 5.15E-12 | chr:6:32505702 |
| 6 rs116085924 | 32514884 C | 0.3868 | 5.40E-12 | chr:6:32505702 |
| 6 rs72657675  | 32532955 A | 0.362  | 5.49E-12 | chr:6:32505702 |
| 6 rs72508465  | 32505141 C | 0.388  | 5.57E-12 | chr:6:32505702 |
| 6 rs116335331 | 32532577 C | 0.3548 | 5.75E-12 | chr:6:32505702 |
| 6 rs67011649  | 32532599 A | 0.339  | 5.77E-12 | chr:6:32505702 |
| 6 rs112427949 | 32511164 C | 0.3824 | 5.86E-12 | chr:6:32505702 |
| 6 rs116102092 | 32538672 A | 3.354  | 5.92E-12 | chr:6:32505702 |
| 6 rs72853924  | 32508239 G | 2.277  | 5.97E-12 | chr:6:32505702 |
| 6 rs543093016 | 32532533 T | 0.3555 | 6.00E-12 | chr:6:32505702 |
| 6 rs114905947 | 32533016 G | 0.3231 | 6.05E-12 | chr:6:32505702 |
| 6 rs72508466  | 32505166 G | 2.54   | 6.08E-12 | chr:6:32505702 |
| 6 rs76235954  | 32512815 A | 2.484  | 6.08E-12 | chr:6:32505702 |
| 6 rs116473597 | 32482374 T | 2.176  | 6.28E-12 | chr:6:32505702 |
| 6 rs556568526 | 32482353 T | 2.176  | 6.28E-12 | chr:6:32505702 |
| 6 rs578020847 | 32482368 C | 2.176  | 6.28E-12 | chr:6:32505702 |
| 6 rs112780153 | 32510301 A | 0.3643 | 6.66E-12 | chr:6:32505702 |
| 6 rs536387398 | 32507125 A | 2.203  | 6.86E-12 | chr:6:32505702 |
| 6 rs573273966 | 32507131 C | 2.203  | 6.86E-12 | chr:6:32505702 |
| 6 rs115137792 | 32510114 T | 0.3481 | 7.03E-12 | chr:6:32505702 |
| 6 rs9270570   | 32560978 A | 0.2511 | 7.15E-12 | chr:6:32505702 |
| 6 rs68146539  | 32532928 A | 0.3629 | 7.19E-12 | chr:6:32505702 |
| 6 rs72508468  | 32505288 C | 2.386  | 7.68E-12 | chr:6:32505702 |
| 6 rs9270045   | 32553662 A | 0.2637 | 7.87E-12 | chr:6:32505702 |
| 6 rs199616440 | 32510115 A | 0.3502 | 7.90E-12 | chr:6:32505702 |
| 6 rs550643609 | 32502794 A | 2.278  | 7.97E-12 | chr:6:32505702 |
| 6 rs76259812  | 32524672 A | 0.3852 | 8.07E-12 | chr:6:32505702 |
| 6 rs142475334 | 32533988 G | 0.3774 | 8.17E-12 | chr:6:32505702 |
| 6 rs66467908  | 32509787 C | 0.2158 | 8.34E-12 | chr:6:32505702 |
| 6 rs72492309  | 32509754 T | 0.2158 | 8.34E-12 | chr:6:32505702 |

|               |            |        |          |                |
|---------------|------------|--------|----------|----------------|
| 6 rs114084676 | 32505216 C | 2.494  | 8.36E-12 | chr:6:32505702 |
| 6 rs73729106  | 32514288 G | 0.2482 | 8.37E-12 | chr:6:32505702 |
| 6 rs9269324   | 32539978 A | 0.347  | 8.95E-12 | chr:6:32505702 |
| 6 rs72492332  | 32523085 C | 0.2738 | 8.98E-12 | chr:6:32505702 |
| 6 rs9269565   | 32544500 G | 0.2846 | 9.05E-12 | chr:6:32505702 |
| 6 rs79740987  | 32507712 G | 2.513  | 9.17E-12 | chr:6:32505702 |
| 6 rs545256869 | 32512858 T | 2.402  | 9.39E-12 | chr:6:32505702 |
| 6 rs72508413  | 32454597 A | 0.303  | 9.59E-12 | chr:6:32505702 |
| 6 rs183703563 | 32498913 A | 2.214  | 1.00E-11 | chr:6:32505702 |
| 6 rs147819405 | 32533096 G | 0.3517 | 1.02E-11 | chr:6:32505702 |
| 6 rs535381236 | 32468870 G | 2.382  | 1.04E-11 | chr:6:32505702 |
| 6 rs559249402 | 32468864 C | 2.382  | 1.04E-11 | chr:6:32505702 |
| 6 rs577621741 | 32468866 A | 2.382  | 1.04E-11 | chr:6:32505702 |
| 6 rs73727912  | 32496944 T | 0.3747 | 1.07E-11 | chr:6:32505702 |
| 6 rs546964381 | 32511275 C | 0.3298 | 1.14E-11 | chr:6:32505702 |
| 6 rs558956689 | 32511276 A | 0.3298 | 1.14E-11 | chr:6:32505702 |
| 6 rs200819822 | 32505189 G | 2.462  | 1.14E-11 | chr:6:32505702 |
| 6 rs116585903 | 32487688 T | 3.398  | 1.14E-11 | chr:6:32505702 |
| 6 rs370864292 | 32532975 C | 0.382  | 1.16E-11 | chr:6:32505702 |
| 6 rs560693076 | 32532972 G | 0.382  | 1.25E-11 | chr:6:32505702 |
| 6 rs114327439 | 32505202 A | 2.459  | 1.28E-11 | chr:6:32505702 |
| 6 rs72508430  | 32487172 T | 2.75   | 1.28E-11 | chr:6:32505702 |
| 6 rs67515384  | 32505271 A | 2.372  | 1.31E-11 | chr:6:32505702 |
| 6 rs116526477 | 32468879 C | 0.4063 | 1.32E-11 | chr:6:32505702 |
| 6 rs114164335 | 32532128 T | 0.3634 | 1.38E-11 | chr:6:32505702 |
| 6 rs74715621  | 32508285 G | 2.315  | 1.38E-11 | chr:6:32505702 |
| 6 rs181244719 | 32498916 C | 2.199  | 1.39E-11 | chr:6:32505702 |
| 6 rs184303918 | 32529976 C | 0.2694 | 1.40E-11 | chr:6:32505702 |
| 6 rs72845745  | 32529961 C | 0.2694 | 1.40E-11 | chr:6:32505702 |
| 6 rs113871699 | 32509693 A | 0.2512 | 1.48E-11 | chr:6:32505702 |
| 6 rs73727972  | 32509683 C | 0.2512 | 1.48E-11 | chr:6:32505702 |
| 6 rs9270556   | 32560606 G | 0.264  | 1.49E-11 | chr:6:32505702 |
| 6 rs78085354  | 32529981 A | 0.2692 | 1.53E-11 | chr:6:32505702 |
| 6 rs34508462  | 32523476 T | 0.2995 | 1.57E-11 | chr:6:32505702 |
| 6 rs9270589   | 32561390 C | 0.2623 | 1.60E-11 | chr:6:32505702 |
| 6 rs9270590   | 32561392 G | 0.2623 | 1.60E-11 | chr:6:32505702 |
| 6 rs9270592   | 32561429 A | 0.2623 | 1.60E-11 | chr:6:32505702 |
| 6 rs9270593   | 32561445 A | 0.2623 | 1.60E-11 | chr:6:32505702 |
| 6 rs9270578   | 32561093 G | 0.2643 | 1.68E-11 | chr:6:32505702 |
| 6 rs374264352 | 32532969 C | 0.3828 | 1.70E-11 | chr:6:32505702 |
| 6 rs536463096 | 32510951 G | 2.295  | 1.70E-11 | chr:6:32505702 |
| 6 rs36218423  | 32524832 C | 2.373  | 1.71E-11 | chr:6:32505702 |
| 6 rs9270572   | 32561010 G | 0.266  | 1.71E-11 | chr:6:32505702 |

|               |            |        |          |                |
|---------------|------------|--------|----------|----------------|
| 6 rs115946871 | 32530011 T | 0.2712 | 1.73E-11 | chr:6:32505702 |
| 6 rs9269254   | 32454327 C | 0.2639 | 1.75E-11 | chr:6:32505702 |
| 6 rs9270558   | 32560667 G | 0.2635 | 1.77E-11 | chr:6:32505702 |
| 6 rs9269549   | 32544202 T | 0.2356 | 1.78E-11 | chr:6:32505702 |
| 6 rs9269532   | 32543825 T | 0.288  | 1.80E-11 | chr:6:32505702 |
| 6 rs114715427 | 32538850 C | 0.3431 | 1.82E-11 | chr:6:32505702 |
| 6 rs9269250   | 32454269 C | 0.243  | 1.83E-11 | chr:6:32505702 |
| 6 rs113405235 | 32521796 C | 2.904  | 1.83E-11 | chr:6:32505702 |
| 6 rs72844144  | 32519125 A | 3.402  | 1.85E-11 | chr:6:32505702 |
| 6 rs112720311 | 32529995 G | 0.2683 | 1.86E-11 | chr:6:32505702 |
| 6 rs115077617 | 32532645 G | 0.3391 | 1.94E-11 | chr:6:32505702 |
| 6 rs114106672 | 32532692 G | 0.2699 | 1.97E-11 | chr:6:32505702 |
| 6 rs74615215  | 32458389 A | 0.4083 | 2.01E-11 | chr:6:32505702 |
| 6 rs113432958 | 32538366 C | 0.3283 | 2.07E-11 | chr:6:32505702 |
| 6 rs536038224 | 32523371 G | 0.3029 | 2.08E-11 | chr:6:32505702 |
| 6 rs111383925 | 32532741 T | 0.2568 | 2.10E-11 | chr:6:32505702 |
| 6 rs111566749 | 32532746 G | 0.2568 | 2.10E-11 | chr:6:32505702 |
| 6 rs116541769 | 32524870 T | 2.399  | 2.11E-11 | chr:6:32505702 |
| 6 rs115081905 | 32508276 T | 2.264  | 2.12E-11 | chr:6:32505702 |
| 6 rs139726276 | 32524769 G | 2.392  | 2.12E-11 | chr:6:32505702 |
| 6 rs9270574   | 32561028 G | 0.2686 | 2.21E-11 | chr:6:32505702 |
| 6 rs115978041 | 32522923 T | 0.3212 | 2.27E-11 | chr:6:32505702 |
| 6 rs183134414 | 32511069 T | 2.28   | 2.38E-11 | chr:6:32505702 |
| 6 rs112780983 | 32511348 C | 0.2605 | 2.38E-11 | chr:6:32505702 |
| 6 rs111786536 | 32523589 T | 0.3004 | 2.40E-11 | chr:6:32505702 |
| 6 rs9269880   | 32550916 A | 0.3026 | 2.42E-11 | chr:6:32505702 |
| 6 rs187316544 | 32500462 C | 2.085  | 2.45E-11 | chr:6:32505702 |
| 6 rs113504992 | 32531418 G | 0.2503 | 2.48E-11 | chr:6:32505702 |
| 6 rs146436875 | 32498948 G | 2.172  | 2.57E-11 | chr:6:32505702 |
| 6 rs148879657 | 32498940 G | 2.172  | 2.57E-11 | chr:6:32505702 |
| 6 rs527678609 | 32530435 G | 0.3011 | 2.74E-11 | chr:6:32505702 |
| 6 rs9269555   | 32544311 G | 0.267  | 2.75E-11 | chr:6:32505702 |
| 6 rs113573823 | 32532719 G | 0.2681 | 2.78E-11 | chr:6:32505702 |
| 6 rs9270576   | 32561068 C | 0.2719 | 2.86E-11 | chr:6:32505702 |
| 6 rs9269276   | 32539244 T | 0.3035 | 2.88E-11 | chr:6:32505702 |
| 6 rs115127109 | 32530038 C | 0.2811 | 2.98E-11 | chr:6:32505702 |
| 6 rs9270562   | 32560757 G | 0.278  | 3.00E-11 | chr:6:32505702 |
| 6 rs72845755  | 32530385 A | 0.2519 | 3.07E-11 | chr:6:32505702 |
| 6 rs72845749  | 32530081 C | 0.255  | 3.10E-11 | chr:6:32505702 |
| 6 rs73729140  | 32521290 A | 0.3078 | 3.14E-11 | chr:6:32505702 |
| 6 rs114328264 | 32534675 C | 0.4006 | 3.16E-11 | chr:6:32505702 |
| 6 rs181549666 | 32482352 A | 2.144  | 3.16E-11 | chr:6:32505702 |
| 6 rs72853904  | 32505575 C | 0.2976 | 3.23E-11 | chr:6:32505702 |

|               |            |        |          |                |
|---------------|------------|--------|----------|----------------|
| 6 rs72845750  | 32530093 T | 0.2544 | 3.35E-11 | chr:6:32505702 |
| 6 rs139201366 | 32513186 G | 0.3248 | 3.36E-11 | chr:6:32505702 |
| 6 rs80011743  | 32531770 A | 0.2922 | 3.39E-11 | chr:6:32505702 |
| 6 rs142670190 | 32532172 C | 0.3889 | 3.40E-11 | chr:6:32505702 |
| 6 rs144412121 | 32532179 A | 0.3889 | 3.40E-11 | chr:6:32505702 |
| 6 rs115010442 | 32505229 C | 2.401  | 3.42E-11 | chr:6:32505702 |
| 6 rs537722644 | 32525112 C | 0.4289 | 3.48E-11 | chr:6:32505702 |
| 6 rs9269275   | 32539172 A | 0.2755 | 3.52E-11 | chr:6:32505702 |
| 6 rs111342306 | 32531091 T | 0.3348 | 3.52E-11 | chr:6:32505702 |
| 6 rs113209820 | 32531088 C | 0.3348 | 3.52E-11 | chr:6:32505702 |
| 6 rs556200726 | 32525900 T | 0.4297 | 3.58E-11 | chr:6:32505702 |
| 6 rs9269274   | 32539170 T | 0.2753 | 3.65E-11 | chr:6:32505702 |
| 6 rs142127023 | 32532178 C | 0.389  | 3.66E-11 | chr:6:32505702 |
| 6 rs9270363   | 32558137 C | 0.2758 | 3.78E-11 | chr:6:32505702 |
| 6 rs542648047 | 32535499 T | 2.346  | 3.82E-11 | chr:6:32505702 |
| 6 rs113051760 | 32521691 G | 2.709  | 3.86E-11 | chr:6:32505702 |
| 6 rs540951197 | 32530439 G | 0.3111 | 3.86E-11 | chr:6:32505702 |
| 6 rs562335725 | 32530443 G | 0.3111 | 3.86E-11 | chr:6:32505702 |
| 6 rs35255303  | 32536356 G | 0.3039 | 3.91E-11 | chr:6:32505702 |
| 6 rs9269317   | 32539767 C | 0.3508 | 4.01E-11 | chr:6:32505702 |
| 6 rs72845747  | 32530054 C | 0.28   | 4.02E-11 | chr:6:32505702 |
| 6 rs537678001 | 32527268 G | 2.515  | 4.04E-11 | chr:6:32505702 |
| 6 rs76454806  | 32530145 T | 0.267  | 4.08E-11 | chr:6:32505702 |
| 6 rs80142174  | 32530144 A | 0.267  | 4.08E-11 | chr:6:32505702 |
| 6 rs72845752  | 32530285 C | 0.2526 | 4.28E-11 | chr:6:32505702 |
| 6 rs72845754  | 32530286 A | 0.2526 | 4.28E-11 | chr:6:32505702 |
| 6 rs74201443  | 32530321 C | 0.2526 | 4.28E-11 | chr:6:32505702 |
| 6 rs72492356  | 32538899 G | 0.3283 | 4.31E-11 | chr:6:32505702 |
| 6 rs9270538   | 32559758 C | 0.2946 | 4.34E-11 | chr:6:32505702 |
| 6 rs114758808 | 32457997 C | 0.4318 | 4.49E-11 | chr:6:32505702 |
| 6 rs546033671 | 32498932 G | 2.17   | 4.61E-11 | chr:6:32505702 |
| 6 rs9269515   | 32543469 T | 0.2794 | 4.65E-11 | chr:6:32505702 |
| 6 rs77501456  | 32523627 A | 0.3403 | 4.71E-11 | chr:6:32505702 |
| 6 rs72845759  | 32531182 A | 0.334  | 4.89E-11 | chr:6:32505702 |
| 6 rs111632178 | 32511149 C | 2.448  | 4.92E-11 | chr:6:32505702 |
| 6 rs9270583   | 32561229 A | 0.2746 | 4.95E-11 | chr:6:32505702 |
| 6 rs142142101 | 32534657 T | 0.4074 | 4.98E-11 | chr:6:32505702 |
| 6 rs9270547   | 32559951 A | 0.3515 | 5.01E-11 | chr:6:32505702 |
| 6 rs3828832   | 32521083 T | 0.3282 | 5.04E-11 | chr:6:32505702 |
| 6 rs115469967 | 32530190 G | 0.2657 | 5.08E-11 | chr:6:32505702 |
| 6 rs77340266  | 32530200 G | 0.2657 | 5.08E-11 | chr:6:32505702 |
| 6 rs113955073 | 32522932 A | 0.3301 | 5.11E-11 | chr:6:32505702 |
| 6 rs73397495  | 32534640 T | 0.4061 | 5.17E-11 | chr:6:32505702 |

|               |            |        |          |                |
|---------------|------------|--------|----------|----------------|
| 6 rs9269578   | 32544743 A | 0.3369 | 5.19E-11 | chr:6:32505702 |
| 6 rs111948873 | 32531081 A | 0.344  | 5.42E-11 | chr:6:32505702 |
| 6 rs111847217 | 32511131 G | 2.445  | 5.44E-11 | chr:6:32505702 |
| 6 rs72845757  | 32530563 G | 0.2756 | 5.58E-11 | chr:6:32505702 |
| 6 rs67283303  | 32531253 C | 0.2986 | 5.61E-11 | chr:6:32505702 |
| 6 rs182771482 | 32500178 C | 2.06   | 5.64E-11 | chr:6:32505702 |
| 6 rs116180191 | 32534588 T | 0.3526 | 5.65E-11 | chr:6:32505702 |
| 6 rs537366043 | 32531076 A | 0.3531 | 5.73E-11 | chr:6:32505702 |
| 6 rs570295314 | 32531074 A | 0.3531 | 5.73E-11 | chr:6:32505702 |
| 6 rs9269314   | 32539715 A | 0.3405 | 5.78E-11 | chr:6:32505702 |
| 6 rs115278245 | 32531057 G | 0.3345 | 5.84E-11 | chr:6:32505702 |
| 6 rs115407919 | 32531056 A | 0.3345 | 5.84E-11 | chr:6:32505702 |
| 6 rs115065497 | 32530466 T | 0.3112 | 6.02E-11 | chr:6:32505702 |
| 6 rs111596698 | 32487123 G | 2.899  | 6.25E-11 | chr:6:32505702 |
| 6 rs9270598   | 32561618 T | 0.2744 | 6.34E-11 | chr:6:32505702 |
| 6 rs72492343  | 32532385 C | 0.3022 | 6.34E-11 | chr:6:32505702 |
| 6 rs139128138 | 32533420 T | 0.3817 | 6.35E-11 | chr:6:32505702 |
| 6 rs576314890 | 32523379 A | 0.2751 | 6.35E-11 | chr:6:32505702 |
| 6 rs111843909 | 32531043 C | 0.3242 | 6.46E-11 | chr:6:32505702 |
| 6 rs559286232 | 32527271 C | 2.497  | 6.60E-11 | chr:6:32505702 |
| 6 rs73726834  | 32531111 T | 0.3344 | 6.61E-11 | chr:6:32505702 |
| 6 rs541088090 | 32533411 G | 0.3835 | 6.74E-11 | chr:6:32505702 |
| 6 rs9270548   | 32559960 C | 0.3523 | 6.75E-11 | chr:6:32505702 |
| 6 rs78274956  | 32526351 C | 0.3523 | 6.87E-11 | chr:6:32505702 |
| 6 rs141404431 | 32538578 T | 2.841  | 6.92E-11 | chr:6:32505702 |
| 6 rs143027966 | 32538579 T | 2.841  | 6.92E-11 | chr:6:32505702 |
| 6 rs151286796 | 32538577 T | 2.841  | 6.92E-11 | chr:6:32505702 |
| 6 rs115089463 | 32525092 G | 0.4261 | 6.95E-11 | chr:6:32505702 |
| 6 rs72845758  | 32531178 T | 0.3434 | 6.98E-11 | chr:6:32505702 |
| 6 rs116465569 | 32536986 T | 0.3689 | 7.16E-11 | chr:6:32505702 |
| 6 rs112310670 | 32531136 T | 0.3337 | 7.31E-11 | chr:6:32505702 |
| 6 rs9269277   | 32539265 G | 0.3378 | 7.31E-11 | chr:6:32505702 |
| 6 rs115640078 | 32538839 T | 2.849  | 7.33E-11 | chr:6:32505702 |
| 6 rs139796058 | 32531715 T | 0.3342 | 7.36E-11 | chr:6:32505702 |
| 6 rs11752506  | 32520273 A | 2.646  | 7.41E-11 | chr:6:32505702 |
| 6 rs149932905 | 32533421 A | 0.3837 | 7.49E-11 | chr:6:32505702 |
| 6 rs116350000 | 32523418 C | 0.3134 | 7.67E-11 | chr:6:32505702 |
| 6 rs112649230 | 32531140 A | 0.3337 | 7.81E-11 | chr:6:32505702 |
| 6 rs9270530   | 32559686 G | 0.3552 | 7.86E-11 | chr:6:32505702 |
| 6 rs9269465   | 32542247 A | 0.2741 | 7.94E-11 | chr:6:32505702 |
| 6 rs115141943 | 32538830 C | 2.843  | 8.47E-11 | chr:6:32505702 |
| 6 rs3828826   | 32485988 A | 2.963  | 8.47E-11 | chr:6:32505702 |
| 6 rs9270565   | 32560774 C | 0.2988 | 8.51E-11 | chr:6:32505702 |



|               |            |        |          |                |
|---------------|------------|--------|----------|----------------|
| 6 rs9270566   | 32560775 A | 0.2988 | 8.51E-11 | chr:6:32505702 |
| 6 rs66754072  | 32532402 G | 0.3013 | 8.63E-11 | chr:6:32505702 |
| 6 rs9269299   | 32539541 T | 0.3645 | 8.68E-11 | chr:6:32505702 |
| 6 rs112083186 | 32531320 T | 0.2891 | 8.77E-11 | chr:6:32505702 |
| 6 rs138253052 | 32536103 C | 0.3835 | 8.78E-11 | chr:6:32505702 |
| 6 rs72492351  | 32538451 C | 3.236  | 8.87E-11 | chr:6:32505702 |
| 6 rs9269886   | 32550976 T | 0.348  | 9.14E-11 | chr:6:32505702 |
| 6 rs17424325  | 32521644 T | 2.643  | 9.22E-11 | chr:6:32505702 |
| 6 rs112715773 | 32530608 T | 0.2836 | 9.34E-11 | chr:6:32505702 |
| 6 rs9270549   | 32560440 G | 0.2975 | 9.54E-11 | chr:6:32505702 |
| 6 rs9270550   | 32560441 A | 0.2975 | 9.54E-11 | chr:6:32505702 |
| 6 rs9270567   | 32560801 T | 0.285  | 9.63E-11 | chr:6:32505702 |
| 6 rs148619571 | 32536155 T | 0.3564 | 9.63E-11 | chr:6:32505702 |
| 6 rs111548649 | 32533365 A | 0.3783 | 9.87E-11 | chr:6:32505702 |
| 6 rs9269885   | 32550971 A | 0.348  | 9.92E-11 | chr:6:32505702 |
| 6 rs9270580   | 32561123 T | 0.2832 | 9.94E-11 | chr:6:32505702 |
| 6 rs563850361 | 32531744 A | 0.3434 | 9.94E-11 | chr:6:32505702 |
| 6 rs9270126   | 32555052 G | 0.3249 | 1.00E-10 | chr:6:32505702 |
| 6 rs112302151 | 32530628 C | 0.2858 | 1.02E-10 | chr:6:32505702 |
| 6 rs12660259  | 32531709 G | 0.3382 | 1.05E-10 | chr:6:32505702 |
| 6 rs140209363 | 32492971 G | 0.4267 | 1.05E-10 | chr:6:32505702 |
| 6 rs373666709 | 32531748 G | 0.3433 | 1.05E-10 | chr:6:32505702 |
| 6 rs182090170 | 32537941 G | 2.28   | 1.05E-10 | chr:6:32505702 |
| 6 rs190345143 | 32537926 G | 2.279  | 1.06E-10 | chr:6:32505702 |
| 6 rs111749494 | 32532432 T | 0.3006 | 1.08E-10 | chr:6:32505702 |
| 6 rs112501266 | 32532428 A | 0.3006 | 1.08E-10 | chr:6:32505702 |
| 6 rs112236587 | 32530615 T | 0.2856 | 1.08E-10 | chr:6:32505702 |
| 6 rs145177101 | 32536632 A | 0.419  | 1.10E-10 | chr:6:32505702 |
| 6 rs535694878 | 32512216 G | 0.3473 | 1.11E-10 | chr:6:32505702 |
| 6 rs556986229 | 32512217 A | 0.3473 | 1.11E-10 | chr:6:32505702 |
| 6 rs9270521   | 32559529 A | 0.3005 | 1.14E-10 | chr:6:32505702 |
| 6 rs72492340  | 32531385 T | 0.2953 | 1.15E-10 | chr:6:32505702 |
| 6 rs72845768  | 32531377 T | 0.2953 | 1.15E-10 | chr:6:32505702 |
| 6 rs148612288 | 32498953 G | 2.134  | 1.16E-10 | chr:6:32505702 |
| 6 rs114633631 | 32531706 C | 0.3336 | 1.16E-10 | chr:6:32505702 |
| 6 rs146621647 | 32531602 C | 0.3217 | 1.19E-10 | chr:6:32505702 |
| 6 rs9269642   | 32545877 G | 0.2412 | 1.19E-10 | chr:6:32505702 |
| 6 rs201947932 | 32534556 A | 0.364  | 1.24E-10 | chr:6:32505702 |
| 6 rs9269278   | 32539269 G | 0.3523 | 1.24E-10 | chr:6:32505702 |
| 6 rs138940568 | 32536635 C | 0.4195 | 1.29E-10 | chr:6:32505702 |
| 6 rs556948697 | 32531729 T | 0.353  | 1.29E-10 | chr:6:32505702 |
| 6 rs184981897 | 32486966 A | 2.255  | 1.30E-10 | chr:6:32505702 |
| 6 rs143742917 | 32533480 G | 0.4055 | 1.30E-10 | chr:6:32505702 |

|               |            |        |          |                |
|---------------|------------|--------|----------|----------------|
| 6 rs9269281   | 32539309 G | 0.3523 | 1.30E-10 | chr:6:32505702 |
| 6 rs35479797  | 32535900 C | 0.3407 | 1.36E-10 | chr:6:32505702 |
| 6 rs151210153 | 32531734 G | 0.3528 | 1.36E-10 | chr:6:32505702 |
| 6 rs115980757 | 32536914 A | 0.4184 | 1.36E-10 | chr:6:32505702 |
| 6 rs9270004   | 32552795 G | 0.2904 | 1.38E-10 | chr:6:32505702 |
| 6 rs116017457 | 32521909 T | 2.546  | 1.40E-10 | chr:6:32505702 |
| 6 rs113908137 | 32523500 A | 0.3247 | 1.40E-10 | chr:6:32505702 |
| 6 rs34166207  | 32523510 G | 0.3247 | 1.40E-10 | chr:6:32505702 |
| 6 rs111425203 | 32534872 C | 0.3979 | 1.40E-10 | chr:6:32505702 |
| 6 rs371994404 | 32532317 G | 0.4085 | 1.41E-10 | chr:6:32505702 |
| 6 rs575209356 | 32525806 G | 0.4459 | 1.43E-10 | chr:6:32505702 |
| 6 rs113737511 | 32533392 A | 0.3852 | 1.43E-10 | chr:6:32505702 |
| 6 rs72492335  | 32526460 T | 0.383  | 1.45E-10 | chr:6:32505702 |
| 6 rs142592433 | 32511392 C | 0.2941 | 1.51E-10 | chr:6:32505702 |
| 6 rs138129967 | 32532324 G | 0.4086 | 1.51E-10 | chr:6:32505702 |
| 6 rs9270533   | 32559709 C | 0.3658 | 1.52E-10 | chr:6:32505702 |
| 6 rs115018431 | 32534360 A | 0.402  | 1.53E-10 | chr:6:32505702 |
| 6 rs146783438 | 32533483 C | 0.4076 | 1.54E-10 | chr:6:32505702 |
| 6 rs148743468 | 32533479 T | 0.4076 | 1.54E-10 | chr:6:32505702 |
| 6 rs9269921   | 32551568 C | 0.3864 | 1.58E-10 | chr:6:32505702 |
| 6 rs9270540   | 32559848 T | 0.3319 | 1.61E-10 | chr:6:32505702 |
| 6 rs545853065 | 32531737 A | 0.3583 | 1.63E-10 | chr:6:32505702 |
| 6 rs140569663 | 32530944 G | 0.3869 | 1.64E-10 | chr:6:32505702 |
| 6 rs149685121 | 32530946 T | 0.3869 | 1.64E-10 | chr:6:32505702 |
| 6 rs72845756  | 32530545 T | 0.3086 | 1.64E-10 | chr:6:32505702 |
| 6 rs111338570 | 32533670 T | 0.32   | 1.67E-10 | chr:6:32505702 |
| 6 rs113042858 | 32533666 C | 0.32   | 1.67E-10 | chr:6:32505702 |
| 6 rs139013960 | 32531606 C | 0.3235 | 1.71E-10 | chr:6:32505702 |
| 6 rs186325882 | 32499990 A | 2.007  | 1.72E-10 | chr:6:32505702 |
| 6 rs72492344  | 32532494 G | 0.3327 | 1.74E-10 | chr:6:32505702 |
| 6 rs72492341  | 32531636 C | 0.3062 | 1.76E-10 | chr:6:32505702 |
| 6 rs112999094 | 32511386 C | 0.296  | 1.77E-10 | chr:6:32505702 |
| 6 rs139868705 | 32532075 C | 0.3947 | 1.80E-10 | chr:6:32505702 |
| 6 rs142162694 | 32532071 C | 0.3947 | 1.80E-10 | chr:6:32505702 |
| 6 rs115277180 | 32533468 T | 0.4079 | 1.81E-10 | chr:6:32505702 |
| 6 rs112719175 | 32533401 C | 0.3938 | 1.83E-10 | chr:6:32505702 |
| 6 rs199893280 | 32531226 A | 0.3587 | 1.83E-10 | chr:6:32505702 |
| 6 rs9269506   | 32543187 G | 0.2863 | 1.87E-10 | chr:6:32505702 |
| 6 rs187085470 | 32533998 T | 0.4301 | 1.89E-10 | chr:6:32505702 |
| 6 rs9269279   | 32539274 A | 0.3616 | 1.90E-10 | chr:6:32505702 |
| 6 rs111938555 | 32509707 T | 2.528  | 1.97E-10 | chr:6:32505702 |
| 6 rs78107833  | 32531807 A | 0.3327 | 2.02E-10 | chr:6:32505702 |
| 6 rs142891616 | 32534325 C | 0.4317 | 2.05E-10 | chr:6:32505702 |

|               |            |        |          |                |
|---------------|------------|--------|----------|----------------|
| 6 rs544574563 | 32534337 A | 0.4317 | 2.05E-10 | chr:6:32505702 |
| 6 rs9269508   | 32543248 C | 0.2701 | 2.06E-10 | chr:6:32505702 |
| 6 rs182767311 | 32533523 T | 0.4272 | 2.06E-10 | chr:6:32505702 |
| 6 rs77178107  | 32533511 A | 0.4209 | 2.07E-10 | chr:6:32505702 |
| 6 rs200402299 | 32458349 T | 0.4336 | 2.10E-10 | chr:6:32505702 |
| 6 rs116152468 | 32536921 C | 0.4157 | 2.10E-10 | chr:6:32505702 |
| 6 rs115711695 | 32495994 A | 2.072  | 2.12E-10 | chr:6:32505702 |
| 6 rs114452447 | 32532262 G | 0.4396 | 2.13E-10 | chr:6:32505702 |
| 6 rs543107154 | 32532351 T | 0.4097 | 2.17E-10 | chr:6:32505702 |
| 6 rs561232678 | 32532352 G | 0.4097 | 2.17E-10 | chr:6:32505702 |
| 6 rs569119670 | 32532359 T | 0.4097 | 2.17E-10 | chr:6:32505702 |
| 6 rs201766754 | 32531843 A | 0.3607 | 2.18E-10 | chr:6:32505702 |
| 6 rs9269280   | 32539279 T | 0.3616 | 2.21E-10 | chr:6:32505702 |
| 6 rs76415310  | 32513232 T | 2.525  | 2.23E-10 | chr:6:32505702 |
| 6 rs182890820 | 32527218 T | 2.286  | 2.31E-10 | chr:6:32505702 |
| 6 rs9270154   | 32555389 A | 0.364  | 2.33E-10 | chr:6:32505702 |
| 6 rs138991250 | 32534855 A | 0.413  | 2.35E-10 | chr:6:32505702 |
| 6 rs193053660 | 32530503 G | 0.341  | 2.40E-10 | chr:6:32505702 |
| 6 rs533498287 | 32530506 T | 0.341  | 2.40E-10 | chr:6:32505702 |
| 6 rs566699769 | 32530505 C | 0.341  | 2.40E-10 | chr:6:32505702 |
| 6 rs115156211 | 32533440 C | 0.4033 | 2.43E-10 | chr:6:32505702 |
| 6 rs113655203 | 32533247 C | 0.3328 | 2.43E-10 | chr:6:32505702 |
| 6 rs9270597   | 32561598 T | 0.2903 | 2.44E-10 | chr:6:32505702 |
| 6 rs115232480 | 32536206 A | 0.3636 | 2.44E-10 | chr:6:32505702 |
| 6 rs78918008  | 32532281 G | 0.4347 | 2.47E-10 | chr:6:32505702 |
| 6 rs77814554  | 32533509 T | 0.4245 | 2.51E-10 | chr:6:32505702 |
| 6 rs189233809 | 32530497 A | 0.3409 | 2.54E-10 | chr:6:32505702 |
| 6 rs9269873   | 32550796 C | 0.2762 | 2.59E-10 | chr:6:32505702 |
| 6 rs552472567 | 32533447 A | 0.4034 | 2.63E-10 | chr:6:32505702 |
| 6 rs570478088 | 32533448 G | 0.4034 | 2.63E-10 | chr:6:32505702 |
| 6 rs9270535   | 32559714 G | 0.3729 | 2.66E-10 | chr:6:32505702 |
| 6 rs190614023 | 32500626 G | 2.057  | 2.73E-10 | chr:6:32505702 |
| 6 rs9270387   | 32558317 T | 0.2992 | 2.76E-10 | chr:6:32505702 |
| 6 rs9270559   | 32560698 T | 0.2873 | 2.84E-10 | chr:6:32505702 |
| 6 rs72844157  | 32520071 A | 0.2476 | 2.91E-10 | chr:6:32505702 |
| 6 rs145219524 | 32533964 A | 0.4356 | 2.91E-10 | chr:6:32505702 |
| 6 rs533614924 | 32532227 T | 0.4407 | 2.92E-10 | chr:6:32505702 |
| 6 rs145245177 | 32530955 G | 0.3879 | 2.94E-10 | chr:6:32505702 |
| 6 rs145520715 | 32530952 C | 0.3879 | 2.94E-10 | chr:6:32505702 |
| 6 rs148812784 | 32530954 T | 0.3879 | 2.94E-10 | chr:6:32505702 |
| 6 rs537686051 | 32531213 C | 0.3846 | 2.97E-10 | chr:6:32505702 |
| 6 rs552586675 | 32531215 T | 0.3846 | 2.97E-10 | chr:6:32505702 |
| 6 rs571171259 | 32531218 A | 0.3846 | 2.97E-10 | chr:6:32505702 |

|               |            |        |          |                |
|---------------|------------|--------|----------|----------------|
| 6 rs138912409 | 32533684 C | 0.35   | 2.98E-10 | chr:6:32505702 |
| 6 rs143506542 | 32533686 G | 0.35   | 2.98E-10 | chr:6:32505702 |
| 6 rs75503609  | 32530929 G | 0.3958 | 3.03E-10 | chr:6:32505702 |
| 6 rs113204386 | 32531339 A | 0.3297 | 3.03E-10 | chr:6:32505702 |
| 6 rs75404103  | 32531348 T | 0.3297 | 3.03E-10 | chr:6:32505702 |
| 6 rs9270504   | 32559184 C | 0.301  | 3.08E-10 | chr:6:32505702 |
| 6 rs114451225 | 32538025 T | 0.387  | 3.09E-10 | chr:6:32505702 |
| 6 rs9269481   | 32542582 G | 0.2547 | 3.13E-10 | chr:6:32505702 |
| 6 rs116299701 | 32534068 G | 0.4493 | 3.15E-10 | chr:6:32505702 |
| 6 rs73403117  | 32468956 T | 2.191  | 3.25E-10 | chr:6:32505702 |
| 6 rs534655111 | 32531220 A | 0.3848 | 3.25E-10 | chr:6:32505702 |
| 6 rs201648725 | 32538024 T | 0.387  | 3.29E-10 | chr:6:32505702 |
| 6 rs181939518 | 32533977 T | 0.4364 | 3.31E-10 | chr:6:32505702 |
| 6 rs9270317   | 32557643 G | 0.2799 | 3.34E-10 | chr:6:32505702 |
| 6 rs9270524   | 32559588 G | 0.3839 | 3.34E-10 | chr:6:32505702 |
| 6 rs9270003   | 32552779 C | 0.299  | 3.43E-10 | chr:6:32505702 |
| 6 rs34966632  | 32536306 A | 0.3914 | 3.43E-10 | chr:6:32505702 |
| 6 rs73727909  | 32496036 T | 2.074  | 3.44E-10 | chr:6:32505702 |
| 6 rs9269237   | 32453583 C | 0.3178 | 3.68E-10 | chr:6:32505702 |
| 6 rs9269574   | 32544711 T | 0.3774 | 3.72E-10 | chr:6:32505702 |
| 6 rs66501603  | 32538002 G | 0.3915 | 3.77E-10 | chr:6:32505702 |
| 6 rs9270503   | 32559181 C | 0.3031 | 3.77E-10 | chr:6:32505702 |
| 6 rs12665549  | 32517141 A | 2.502  | 3.82E-10 | chr:6:32505702 |
| 6 rs536708130 | 32518949 G | 2.658  | 3.90E-10 | chr:6:32505702 |
| 6 rs74997284  | 32518934 G | 2.658  | 3.90E-10 | chr:6:32505702 |
| 6 rs78326230  | 32518935 A | 2.658  | 3.90E-10 | chr:6:32505702 |
| 6 rs189832895 | 32533972 C | 0.4408 | 4.06E-10 | chr:6:32505702 |
| 6 rs575033700 | 32533973 C | 0.4408 | 4.06E-10 | chr:6:32505702 |
| 6 rs199798245 | 32530708 T | 0.3772 | 4.10E-10 | chr:6:32505702 |
| 6 rs200856733 | 32530709 G | 0.3772 | 4.10E-10 | chr:6:32505702 |
| 6 rs543318785 | 32530714 T | 0.3772 | 4.10E-10 | chr:6:32505702 |
| 6 rs572746069 | 32530713 G | 0.3772 | 4.10E-10 | chr:6:32505702 |
| 6 rs9270541   | 32559864 G | 0.3594 | 4.11E-10 | chr:6:32505702 |
| 6 rs9270599   | 32561656 G | 0.2834 | 4.23E-10 | chr:6:32505702 |
| 6 rs7771747   | 32498931 G | 0.4576 | 4.28E-10 | chr:6:32505702 |
| 6 rs533779530 | 32453612 G | 2.742  | 4.31E-10 | chr:6:32505702 |
| 6 rs372618919 | 32529918 T | 0.395  | 4.32E-10 | chr:6:32505702 |
| 6 rs201024350 | 32536869 T | 0.4046 | 4.34E-10 | chr:6:32505702 |
| 6 rs9270115   | 32554934 C | 0.3036 | 4.52E-10 | chr:6:32505702 |
| 6 rs76533559  | 32554897 C | 0.3509 | 4.79E-10 | chr:6:32505702 |
| 6 rs185436529 | 32530740 C | 0.394  | 4.84E-10 | chr:6:32505702 |
| 6 rs531336617 | 32530792 T | 0.4307 | 4.95E-10 | chr:6:32505702 |
| 6 rs549516674 | 32530793 G | 0.4307 | 4.95E-10 | chr:6:32505702 |

|               |            |        |          |                |
|---------------|------------|--------|----------|----------------|
| 6 rs567265210 | 32530790 C | 0.4307 | 4.95E-10 | chr:6:32505702 |
| 6 rs112009323 | 32532001 T | 0.434  | 4.99E-10 | chr:6:32505702 |
| 6 rs112562347 | 32532004 C | 0.434  | 4.99E-10 | chr:6:32505702 |
| 6 rs149581890 | 32530684 T | 0.3405 | 5.00E-10 | chr:6:32505702 |
| 6 rs11757123  | 32520094 T | 0.3848 | 5.00E-10 | chr:6:32505702 |
| 6 rs202075303 | 32496326 T | 2.111  | 5.15E-10 | chr:6:32505702 |
| 6 rs12661707  | 32531245 C | 0.4296 | 5.22E-10 | chr:6:32505702 |
| 6 rs193192981 | 32533553 A | 0.4477 | 5.37E-10 | chr:6:32505702 |
| 6 rs9269272   | 32539114 G | 0.3477 | 5.46E-10 | chr:6:32505702 |
| 6 rs543726509 | 32493208 G | 0.3675 | 5.53E-10 | chr:6:32505702 |
| 6 rs76666064  | 32530841 G | 0.4299 | 5.71E-10 | chr:6:32505702 |
| 6 rs115774308 | 32530778 G | 0.423  | 5.85E-10 | chr:6:32505702 |
| 6 rs138296162 | 32536852 A | 0.4068 | 5.90E-10 | chr:6:32505702 |
| 6 rs557163190 | 32526172 C | 0.4467 | 5.98E-10 | chr:6:32505702 |
| 6 rs369369329 | 32533784 T | 0.452  | 6.06E-10 | chr:6:32505702 |
| 6 rs9269651   | 32546074 C | 0.2703 | 6.09E-10 | chr:6:32505702 |
| 6 rs74207277  | 32560091 G | 0.4382 | 6.28E-10 | chr:6:32505702 |
| 6 rs112882980 | 32533222 G | 0.359  | 6.92E-10 | chr:6:32505702 |
| 6 rs115742569 | 32516464 C | 3.334  | 7.04E-10 | chr:6:32505702 |
| 6 rs185884622 | 32526169 T | 0.4418 | 7.14E-10 | chr:6:32505702 |
| 6 rs9270520   | 32559493 A | 0.3033 | 7.35E-10 | chr:6:32505702 |
| 6 rs147315656 | 32530869 A | 0.4247 | 7.38E-10 | chr:6:32505702 |
| 6 rs145896370 | 32533718 C | 0.4095 | 7.58E-10 | chr:6:32505702 |
| 6 rs563246799 | 32533766 A | 0.4599 | 7.69E-10 | chr:6:32505702 |
| 6 rs72847615  | 32536863 G | 0.4076 | 7.83E-10 | chr:6:32505702 |
| 6 rs73729129  | 32520092 T | 0.2578 | 7.84E-10 | chr:6:32505702 |
| 6 rs9270555   | 32560584 C | 0.2944 | 7.90E-10 | chr:6:32505702 |
| 6 rs9269879   | 32550906 A | 0.3309 | 7.93E-10 | chr:6:32505702 |
| 6 rs116609988 | 32522988 A | 2.463  | 7.95E-10 | chr:6:32505702 |
| 6 rs552961071 | 32533756 C | 0.4612 | 8.22E-10 | chr:6:32505702 |
| 6 rs574369672 | 32533757 A | 0.4612 | 8.22E-10 | chr:6:32505702 |
| 6 rs112621731 | 32501245 G | 2.303  | 8.25E-10 | chr:6:32505702 |
| 6 rs575744181 | 32533771 G | 0.4602 | 8.33E-10 | chr:6:32505702 |
| 6 rs34645444  | 32522634 T | 0.2508 | 8.52E-10 | chr:6:32505702 |
| 6 rs116748457 | 32514768 A | 0.3407 | 8.52E-10 | chr:6:32505702 |
| 6 rs116490940 | 32503056 T | 2.183  | 8.64E-10 | chr:6:32505702 |
| 6 rs68152293  | 32561020 C | 0.4361 | 9.14E-10 | chr:6:32505702 |
| 6 rs9269636   | 32545772 A | 0.266  | 9.22E-10 | chr:6:32505702 |
| 6 rs528792740 | 32533803 A | 0.4584 | 9.22E-10 | chr:6:32505702 |
| 6 rs546913114 | 32533805 A | 0.4584 | 9.22E-10 | chr:6:32505702 |
| 6 rs532508742 | 32530749 T | 0.4105 | 9.26E-10 | chr:6:32505702 |
| 6 rs9270525   | 32559595 A | 0.4101 | 9.31E-10 | chr:6:32505702 |
| 6 rs9270526   | 32559597 G | 0.4101 | 9.31E-10 | chr:6:32505702 |

|               |            |        |          |                |
|---------------|------------|--------|----------|----------------|
| 6 rs9270527   | 32559600 G | 0.4101 | 9.31E-10 | chr:6:32505702 |
| 6 rs9270528   | 32559603 T | 0.4101 | 9.31E-10 | chr:6:32505702 |
| 6 rs114293611 | 32487353 T | 0.4183 | 9.43E-10 | chr:6:32505702 |
| 6 rs116551340 | 32527461 C | 2.653  | 9.52E-10 | chr:6:32505702 |
| 6 rs9270276   | 32557240 A | 0.2785 | 9.56E-10 | chr:6:32505702 |
| 6 rs536343459 | 32468799 C | 0.4316 | 9.62E-10 | chr:6:32505702 |
| 6 rs565374501 | 32468798 C | 0.4316 | 9.62E-10 | chr:6:32505702 |
| 6 rs183667786 | 32533749 T | 0.4623 | 9.92E-10 | chr:6:32505702 |
| 6 rs558887953 | 32533750 G | 0.4623 | 9.92E-10 | chr:6:32505702 |
| 6 rs73729339  | 32560017 C | 0.4402 | 9.99E-10 | chr:6:32505702 |
| 6 rs545154111 | 32530754 T | 0.4107 | 9.99E-10 | chr:6:32505702 |
| 6 rs111769716 | 32530819 C | 0.4378 | 1.00E-09 | chr:6:32505702 |
| 6 rs562082330 | 32533812 A | 0.4589 | 1.01E-09 | chr:6:32505702 |
| 6 rs151297998 | 32530904 T | 0.4273 | 1.03E-09 | chr:6:32505702 |
| 6 rs548006827 | 32468802 T | 0.4319 | 1.04E-09 | chr:6:32505702 |
| 6 rs9269813   | 32549681 G | 0.2392 | 1.05E-09 | chr:6:32505702 |
| 6 rs79638048  | 32519391 A | 2.431  | 1.06E-09 | chr:6:32505702 |
| 6 rs72492350  | 32538088 A | 0.3655 | 1.06E-09 | chr:6:32505702 |
| 6 rs9269635   | 32545720 A | 0.2679 | 1.06E-09 | chr:6:32505702 |
| 6 rs561942189 | 32496432 T | 0.4269 | 1.09E-09 | chr:6:32505702 |
| 6 rs558696616 | 32530898 T | 0.4325 | 1.13E-09 | chr:6:32505702 |
| 6 rs577240453 | 32530899 G | 0.4325 | 1.13E-09 | chr:6:32505702 |
| 6 rs143426018 | 32536888 A | 0.4231 | 1.15E-09 | chr:6:32505702 |
| 6 rs72845725  | 32525566 T | 0.4168 | 1.15E-09 | chr:6:32505702 |
| 6 rs9270485   | 32559064 T | 0.351  | 1.15E-09 | chr:6:32505702 |
| 6 rs576810845 | 32530891 C | 0.4329 | 1.17E-09 | chr:6:32505702 |
| 6 rs115493349 | 32527153 G | 2.337  | 1.19E-09 | chr:6:32505702 |
| 6 rs73729340  | 32560155 G | 0.4483 | 1.21E-09 | chr:6:32505702 |
| 6 rs9269392   | 32541163 T | 0.4374 | 1.21E-09 | chr:6:32505702 |
| 6 rs541874222 | 32533761 T | 0.4669 | 1.21E-09 | chr:6:32505702 |
| 6 rs551009500 | 32533836 C | 0.4599 | 1.23E-09 | chr:6:32505702 |
| 6 rs569299936 | 32533837 G | 0.4599 | 1.23E-09 | chr:6:32505702 |
| 6 rs34539464  | 32560339 A | 0.4499 | 1.25E-09 | chr:6:32505702 |
| 6 rs72492347  | 32533142 G | 2.114  | 1.28E-09 | chr:6:32505702 |
| 6 rs141503043 | 32485915 T | 2.698  | 1.30E-09 | chr:6:32505702 |
| 6 rs146222234 | 32485916 G | 2.698  | 1.30E-09 | chr:6:32505702 |
| 6 rs115573308 | 32533118 T | 2.113  | 1.30E-09 | chr:6:32505702 |
| 6 rs114418909 | 32531852 T | 0.413  | 1.38E-09 | chr:6:32505702 |
| 6 rs116479032 | 32531853 G | 0.413  | 1.38E-09 | chr:6:32505702 |
| 6 rs140527559 | 32536500 A | 0.4417 | 1.39E-09 | chr:6:32505702 |
| 6 rs147611303 | 32536497 G | 0.4417 | 1.39E-09 | chr:6:32505702 |
| 6 rs9270080   | 32554197 T | 0.3581 | 1.40E-09 | chr:6:32505702 |
| 6 rs145319447 | 32536492 T | 0.4418 | 1.40E-09 | chr:6:32505702 |

|               |            |        |          |                |
|---------------|------------|--------|----------|----------------|
| 6 rs75019606  | 32531924 A | 0.4561 | 1.42E-09 | chr:6:32505702 |
| 6 rs541505856 | 32490394 C | 0.4576 | 1.44E-09 | chr:6:32505702 |
| 6 rs189557518 | 32526205 G | 0.462  | 1.45E-09 | chr:6:32505702 |
| 6 rs116659316 | 32527386 A | 0.2944 | 1.45E-09 | chr:6:32505702 |
| 6 rs72492338  | 32527408 G | 2.817  | 1.47E-09 | chr:6:32505702 |
| 6 rs188327097 | 32533734 T | 0.4658 | 1.48E-09 | chr:6:32505702 |
| 6 rs144064415 | 32536140 C | 0.3781 | 1.49E-09 | chr:6:32505702 |
| 6 rs72492329  | 32521136 A | 3.327  | 1.51E-09 | chr:6:32505702 |
| 6 rs113725551 | 32511420 A | 0.3074 | 1.51E-09 | chr:6:32505702 |
| 6 rs73726177  | 32490762 C | 0.3737 | 1.53E-09 | chr:6:32505702 |
| 6 rs146382271 | 32511291 T | 2.206  | 1.56E-09 | chr:6:32505702 |
| 6 rs559903629 | 32510984 A | 2.032  | 1.57E-09 | chr:6:32505702 |
| 6 rs71542414  | 32560247 A | 0.4511 | 1.62E-09 | chr:6:32505702 |
| 6 rs9270505   | 32559216 A | 0.3078 | 1.64E-09 | chr:6:32505702 |
| 6 rs111529629 | 32533843 A | 0.4613 | 1.70E-09 | chr:6:32505702 |
| 6 rs115055593 | 32468827 T | 0.4398 | 1.73E-09 | chr:6:32505702 |
| 6 rs71542413  | 32560240 C | 0.4517 | 1.79E-09 | chr:6:32505702 |
| 6 rs9269284   | 32539381 A | 0.4064 | 1.80E-09 | chr:6:32505702 |
| 6 rs28366259  | 32559516 T | 0.3236 | 1.80E-09 | chr:6:32505702 |
| 6 rs112479577 | 32533856 C | 0.4604 | 1.81E-09 | chr:6:32505702 |
| 6 rs71542415  | 32560298 T | 0.4565 | 1.82E-09 | chr:6:32505702 |
| 6 rs17203839  | 32555926 C | 3.71   | 1.84E-09 | chr:6:32505702 |
| 6 rs36207014  | 32560332 G | 0.4565 | 1.85E-09 | chr:6:32505702 |
| 6 rs34376317  | 32536678 T | 2.3    | 1.96E-09 | chr:6:32505702 |
| 6 rs527285388 | 32535496 T | 2.044  | 1.97E-09 | chr:6:32505702 |
| 6 rs74921648  | 32560307 G | 0.4569 | 1.99E-09 | chr:6:32505702 |
| 6 rs628754    | 32574787 G | 0.3908 | 2.03E-09 | chr:6:32505702 |
| 6 rs9270861   | 32570979 G | 0.4127 | 2.07E-09 | chr:6:32505702 |
| 6 rs9270862   | 32570981 T | 0.4127 | 2.07E-09 | chr:6:32505702 |
| 6 rs9270863   | 32570982 G | 0.4127 | 2.07E-09 | chr:6:32505702 |
| 6 rs34265294  | 32489118 G | 0.4001 | 2.09E-09 | chr:6:32505702 |
| 6 rs9269293   | 32539463 A | 0.4148 | 2.15E-09 | chr:6:32505702 |
| 6 rs11758321  | 32533413 G | 2.089  | 2.21E-09 | chr:6:32505702 |
| 6 rs9269393   | 32541222 G | 0.4465 | 2.26E-09 | chr:6:32505702 |
| 6 rs114020553 | 32527480 A | 0.3956 | 2.27E-09 | chr:6:32505702 |
| 6 rs538174489 | 32508201 T | 1.989  | 2.32E-09 | chr:6:32505702 |
| 6 rs76483802  | 32454913 A | 0.3884 | 2.36E-09 | chr:6:32505702 |
| 6 rs540141541 | 32487480 G | 2.346  | 2.43E-09 | chr:6:32505702 |
| 6 rs150860760 | 32486709 T | 0.3816 | 2.45E-09 | chr:6:32505702 |
| 6 rs201840950 | 32487091 G | 3.212  | 2.47E-09 | chr:6:32505702 |
| 6 rs201917227 | 32531870 A | 0.4482 | 2.48E-09 | chr:6:32505702 |
| 6 rs73726176  | 32490760 A | 0.3833 | 2.53E-09 | chr:6:32505702 |
| 6 rs111631740 | 32518161 G | 0.2692 | 2.55E-09 | chr:6:32505702 |

|               |            |        |          |                |
|---------------|------------|--------|----------|----------------|
| 6 rs9270171   | 32555685 A | 0.2875 | 2.55E-09 | chr:6:32505702 |
| 6 rs9270172   | 32555687 G | 0.2875 | 2.55E-09 | chr:6:32505702 |
| 6 rs34824555  | 32525680 C | 0.3419 | 2.62E-09 | chr:6:32505702 |
| 6 rs116160472 | 32485643 G | 2.094  | 2.66E-09 | chr:6:32505702 |
| 6 rs369376349 | 32458425 G | 0.4248 | 2.67E-09 | chr:6:32505702 |
| 6 rs111705290 | 32513412 A | 2.372  | 2.70E-09 | chr:6:32505702 |
| 6 rs183231933 | 32524320 C | 0.475  | 2.75E-09 | chr:6:32505702 |
| 6 rs141124032 | 32533299 A | 0.4261 | 2.82E-09 | chr:6:32505702 |
| 6 rs9270743   | 32568242 A | 0.3386 | 2.85E-09 | chr:6:32505702 |
| 6 rs185087225 | 32480024 C | 0.4777 | 2.90E-09 | chr:6:32505702 |
| 6 rs138636844 | 32486961 A | 2.256  | 3.00E-09 | chr:6:32505702 |
| 6 rs72844120  | 32514540 A | 2.318  | 3.04E-09 | chr:6:32505702 |
| 6 rs9269326   | 32539996 A | 0.351  | 3.18E-09 | chr:6:32505702 |
| 6 rs146280841 | 32533291 T | 0.427  | 3.23E-09 | chr:6:32505702 |
| 6 rs148731245 | 32533293 T | 0.427  | 3.23E-09 | chr:6:32505702 |
| 6 rs143321288 | 32531487 G | 0.4014 | 3.25E-09 | chr:6:32505702 |
| 6 rs9270481   | 32559045 T | 0.3658 | 3.30E-09 | chr:6:32505702 |
| 6 rs9270474   | 32559003 A | 0.3717 | 3.31E-09 | chr:6:32505702 |
| 6 rs144230348 | 32512832 G | 0.4812 | 3.54E-09 | chr:6:32505702 |
| 6 rs533688361 | 32480016 A | 0.4789 | 3.55E-09 | chr:6:32505702 |
| 6 rs9269580   | 32544784 C | 0.3757 | 3.66E-09 | chr:6:32505702 |
| 6 rs9270034   | 32553418 T | 0.3368 | 3.74E-09 | chr:6:32505702 |
| 6 rs566973051 | 32531876 T | 0.4559 | 3.86E-09 | chr:6:32505702 |
| 6 rs9269582   | 32544787 C | 0.3958 | 3.89E-09 | chr:6:32505702 |
| 6 rs539796570 | 32526182 A | 0.4553 | 3.92E-09 | chr:6:32505702 |
| 6 rs142198554 | 32531887 C | 0.4664 | 4.14E-09 | chr:6:32505702 |
| 6 rs546856170 | 32531888 A | 0.4664 | 4.14E-09 | chr:6:32505702 |
| 6 rs139029897 | 32454882 A | 0.4462 | 4.26E-09 | chr:6:32505702 |
| 6 rs9270782   | 32569119 A | 0.4192 | 4.32E-09 | chr:6:32505702 |
| 6 rs71542412  | 32560190 T | 0.4584 | 4.36E-09 | chr:6:32505702 |
| 6 rs9269310   | 32539628 G | 0.4344 | 4.46E-09 | chr:6:32505702 |
| 6 rs679243    | 32570959 C | 0.3884 | 4.49E-09 | chr:6:32505702 |
| 6 rs111290332 | 32533327 G | 0.4313 | 4.58E-09 | chr:6:32505702 |
| 6 rs28584364  | 32512048 C | 0.3106 | 4.62E-09 | chr:6:32505702 |
| 6 rs149234868 | 32454921 A | 0.4393 | 4.81E-09 | chr:6:32505702 |
| 6 rs74208414  | 32501649 G | 2.288  | 4.99E-09 | chr:6:32505702 |
| 6 rs112348509 | 32523585 T | 0.3413 | 5.03E-09 | chr:6:32505702 |
| 6 rs149088066 | 32453495 C | 0.2638 | 5.07E-09 | chr:6:32505702 |
| 6 rs79140398  | 32527093 C | 2.591  | 5.09E-09 | chr:6:32505702 |
| 6 rs115833135 | 32489672 A | 2.77   | 5.11E-09 | chr:6:32505702 |
| 6 rs9270157   | 32555411 C | 0.3099 | 5.33E-09 | chr:6:32505702 |
| 6 rs114758692 | 32523431 G | 0.3046 | 5.44E-09 | chr:6:32505702 |
| 6 rs115010858 | 32523430 T | 0.3046 | 5.44E-09 | chr:6:32505702 |



|               |            |        |          |                |
|---------------|------------|--------|----------|----------------|
| 6 rs568869869 | 32502799 G | 1.993  | 5.48E-09 | chr:6:32505702 |
| 6 rs116640755 | 32532556 G | 0.4075 | 5.53E-09 | chr:6:32505702 |
| 6 rs9269629   | 32545635 G | 0.329  | 5.59E-09 | chr:6:32505702 |
| 6 rs9269630   | 32545644 C | 0.329  | 5.59E-09 | chr:6:32505702 |
| 6 rs28613510  | 32518507 G | 0.3245 | 5.61E-09 | chr:6:32505702 |
| 6 rs191442117 | 32525886 T | 0.471  | 5.62E-09 | chr:6:32505702 |
| 6 rs9378212   | 32445691 T | 0.2703 | 5.69E-09 | chr:6:32505702 |
| 6 rs34452456  | 32450678 C | 0.2455 | 5.75E-09 | chr:6:32505702 |
| 6 rs9269501   | 32543118 C | 0.3276 | 5.77E-09 | chr:6:32505702 |
| 6 rs561017744 | 32547528 C | 0.4109 | 5.89E-09 | chr:6:32505702 |
| 6 rs115627609 | 32485579 T | 2.038  | 5.90E-09 | chr:6:32505702 |
| 6 rs72492339  | 32527472 G | 0.4062 | 5.92E-09 | chr:6:32505702 |
| 6 rs72508441  | 32490752 G | 0.3738 | 6.00E-09 | chr:6:32505702 |
| 6 rs34041546  | 32522872 C | 0.2868 | 6.01E-09 | chr:6:32505702 |
| 6 rs148866368 | 32531582 A | 2.034  | 6.09E-09 | chr:6:32505702 |
| 6 rs181190479 | 32533905 A | 0.4832 | 6.10E-09 | chr:6:32505702 |
| 6 rs188265524 | 32533903 A | 0.4832 | 6.10E-09 | chr:6:32505702 |
| 6 rs647467    | 32576726 T | 2.32   | 6.23E-09 | chr:6:32505702 |
| 6 rs72844196  | 32522843 C | 0.2868 | 6.31E-09 | chr:6:32505702 |
| 6 rs116542866 | 32521907 T | 0.2917 | 6.40E-09 | chr:6:32505702 |
| 6 rs9269292   | 32539450 C | 0.4325 | 6.52E-09 | chr:6:32505702 |
| 6 rs142886879 | 32497484 C | 2.032  | 6.62E-09 | chr:6:32505702 |
| 6 rs73727917  | 32497510 A | 2.032  | 6.71E-09 | chr:6:32505702 |
| 6 rs551270191 | 32453854 T | 2.715  | 6.76E-09 | chr:6:32505702 |
| 6 rs553177248 | 32529916 A | 2.053  | 6.78E-09 | chr:6:32505702 |
| 6 rs647455    | 32576721 A | 2.317  | 6.83E-09 | chr:6:32505702 |
| 6 rs531476760 | 32490069 C | 2.019  | 6.94E-09 | chr:6:32505702 |
| 6 rs540907103 | 32525757 T | 0.4621 | 6.97E-09 | chr:6:32505702 |
| 6 rs111823263 | 32482045 T | 0.4735 | 6.97E-09 | chr:6:32505702 |
| 6 rs554443954 | 32496557 C | 0.4494 | 7.08E-09 | chr:6:32505702 |
| 6 rs112507860 | 32496083 G | 0.4968 | 7.13E-09 | chr:6:32505702 |
| 6 rs34801804  | 32555892 G | 4.484  | 7.15E-09 | chr:6:32505702 |
| 6 rs73729756  | 32482020 C | 0.4637 | 7.15E-09 | chr:6:32505702 |
| 6 rs115022629 | 32534590 A | 0.3449 | 7.24E-09 | chr:6:32505702 |
| 6 rs72844197  | 32523020 T | 0.2892 | 7.34E-09 | chr:6:32505702 |
| 6 rs116541446 | 32497494 T | 2.029  | 7.45E-09 | chr:6:32505702 |
| 6 rs35767951  | 32522982 C | 0.2893 | 7.49E-09 | chr:6:32505702 |
| 6 rs72492323  | 32519715 G | 0.2966 | 7.50E-09 | chr:6:32505702 |
| 6 rs71536568  | 32531151 G | 0.3608 | 7.60E-09 | chr:6:32505702 |
| 6 rs73728000  | 32512552 C | 0.2875 | 7.63E-09 | chr:6:32505702 |
| 6 rs112219021 | 32518085 C | 0.2743 | 7.69E-09 | chr:6:32505702 |
| 6 rs112940468 | 32536389 G | 0.3593 | 7.72E-09 | chr:6:32505702 |
| 6 rs34559116  | 32536304 T | 0.3864 | 7.72E-09 | chr:6:32505702 |

|               |            |        |          |                |
|---------------|------------|--------|----------|----------------|
| 6 rs114769669 | 32532149 G | 0.3999 | 7.91E-09 | chr:6:32505702 |
| 6 rs9270657   | 32566021 T | 0.3763 | 8.04E-09 | chr:6:32505702 |
| 6 rs77712892  | 32503570 T | 2.195  | 8.12E-09 | chr:6:32505702 |
| 6 rs11751146  | 32514899 T | 2.063  | 8.14E-09 | chr:6:32505702 |
| 6 rs139849303 | 32511307 G | 0.3613 | 8.17E-09 | chr:6:32505702 |
| 6 rs146103980 | 32493373 G | 2.561  | 8.24E-09 | chr:6:32505702 |
| 6 rs2760994   | 32574308 C | 0.3136 | 8.32E-09 | chr:6:32505702 |
| 6 rs72508426  | 32485598 G | 2.026  | 8.34E-09 | chr:6:32505702 |
| 6 rs72851018  | 32501379 C | 0.2829 | 8.34E-09 | chr:6:32505702 |
| 6 rs111672423 | 32523581 A | 0.3459 | 8.40E-09 | chr:6:32505702 |
| 6 rs34668202  | 32523477 A | 0.3319 | 8.53E-09 | chr:6:32505702 |
| 6 rs148573031 | 32530691 T | 0.4601 | 8.55E-09 | chr:6:32505702 |
| 6 rs549042477 | 32547505 A | 0.4279 | 8.76E-09 | chr:6:32505702 |
| 6 rs111774342 | 32532112 C | 0.3907 | 8.80E-09 | chr:6:32505702 |
| 6 rs9269998   | 32552721 A | 0.4321 | 9.20E-09 | chr:6:32505702 |
| 6 rs552461365 | 32482115 C | 1.95   | 9.31E-09 | chr:6:32505702 |
| 6 rs150598903 | 32489395 A | 0.4556 | 9.42E-09 | chr:6:32505702 |
| 6 rs115333128 | 32485804 T | 0.4713 | 9.52E-09 | chr:6:32505702 |
| 6 rs72853909  | 32505798 G | 0.3847 | 9.52E-09 | chr:6:32505702 |
| 6 rs144415016 | 32511298 A | 0.3724 | 9.53E-09 | chr:6:32505702 |
| 6 rs67534237  | 32513587 G | 0.2817 | 9.68E-09 | chr:6:32505702 |
| 6 rs73727927  | 32501214 A | 0.3681 | 9.76E-09 | chr:6:32505702 |
| 6 rs190202109 | 32525736 A | 0.4587 | 1.01E-08 | chr:6:32505702 |
| 6 rs572428148 | 32532532 A | 0.4162 | 1.01E-08 | chr:6:32505702 |
| 6 rs9270806   | 32569563 C | 0.3768 | 1.01E-08 | chr:6:32505702 |
| 6 rs9270807   | 32569572 G | 0.3768 | 1.01E-08 | chr:6:32505702 |
| 6 rs9270787   | 32569174 C | 0.4247 | 1.02E-08 | chr:6:32505702 |
| 6 rs187058069 | 32486665 C | 0.4687 | 1.03E-08 | chr:6:32505702 |
| 6 rs9270884   | 32571734 T | 0.426  | 1.04E-08 | chr:6:32505702 |
| 6 rs561623787 | 32452602 T | 0.268  | 1.04E-08 | chr:6:32505702 |
| 6 rs191239160 | 32525992 G | 0.4874 | 1.07E-08 | chr:6:32505702 |
| 6 rs476775    | 32569722 G | 0.3747 | 1.09E-08 | chr:6:32505702 |
| 6 rs476602    | 32569792 T | 0.3746 | 1.10E-08 | chr:6:32505702 |
| 6 rs9269673   | 32546447 C | 0.3005 | 1.11E-08 | chr:6:32505702 |
| 6 rs41287328  | 32552698 G | 2.242  | 1.12E-08 | chr:6:32505702 |
| 6 rs1136756   | 32552134 G | 2.871  | 1.13E-08 | chr:6:32505702 |
| 6 rs77087101  | 32534605 A | 0.3565 | 1.16E-08 | chr:6:32505702 |
| 6 rs547797725 | 32487827 G | 0.4613 | 1.17E-08 | chr:6:32505702 |
| 6 rs67704526  | 32536650 T | 2.007  | 1.17E-08 | chr:6:32505702 |
| 6 rs555503640 | 32486477 C | 0.4939 | 1.18E-08 | chr:6:32505702 |
| 6 rs11751496  | 32533549 T | 1.921  | 1.20E-08 | chr:6:32505702 |
| 6 rs9269286   | 32539396 G | 0.4466 | 1.21E-08 | chr:6:32505702 |
| 6 rs148620529 | 32525509 A | 0.4803 | 1.21E-08 | chr:6:32505702 |

|               |            |        |          |                |
|---------------|------------|--------|----------|----------------|
| 6 rs72851098  | 32505477 T | 0.3549 | 1.22E-08 | chr:6:32505702 |
| 6 rs75999763  | 32523206 G | 0.284  | 1.25E-08 | chr:6:32505702 |
| 6 rs112996372 | 32517005 G | 0.2832 | 1.25E-08 | chr:6:32505702 |
| 6 rs115623335 | 32532578 A | 0.4185 | 1.26E-08 | chr:6:32505702 |
| 6 rs111372196 | 32516995 A | 0.2829 | 1.28E-08 | chr:6:32505702 |
| 6 rs115249219 | 32479677 C | 0.4308 | 1.28E-08 | chr:6:32505702 |
| 6 rs9270543   | 32559881 C | 0.435  | 1.29E-08 | chr:6:32505702 |
| 6 rs9270544   | 32559882 C | 0.435  | 1.29E-08 | chr:6:32505702 |
| 6 rs66931410  | 32518235 T | 0.3298 | 1.29E-08 | chr:6:32505702 |
| 6 rs140993369 | 32535968 G | 0.3684 | 1.29E-08 | chr:6:32505702 |
| 6 rs115005201 | 32501172 G | 0.3813 | 1.31E-08 | chr:6:32505702 |
| 6 rs673336    | 32577858 G | 0.3851 | 1.31E-08 | chr:6:32505702 |
| 6 rs116611418 | 32459595 A | 0.4996 | 1.35E-08 | chr:6:32505702 |
| 6 rs73397417  | 32521988 G | 0.2734 | 1.36E-08 | chr:6:32505702 |
| 6 rs139910587 | 32490483 A | 0.4333 | 1.36E-08 | chr:6:32505702 |
| 6 rs113369856 | 32532508 G | 0.376  | 1.36E-08 | chr:6:32505702 |
| 6 rs9270739   | 32568150 C | 0.4106 | 1.37E-08 | chr:6:32505702 |
| 6 rs9269697   | 32546953 G | 0.2825 | 1.38E-08 | chr:6:32505702 |
| 6 rs67672162  | 32503251 T | 0.2992 | 1.38E-08 | chr:6:32505702 |
| 6 rs113409465 | 32511143 T | 2.116  | 1.39E-08 | chr:6:32505702 |
| 6 rs113787140 | 32502901 T | 0.4239 | 1.41E-08 | chr:6:32505702 |
| 6 rs9270876   | 32571314 T | 0.4243 | 1.41E-08 | chr:6:32505702 |
| 6 rs7452937   | 32446484 A | 0.2704 | 1.41E-08 | chr:6:32505702 |
| 6 rs68148149  | 32511725 C | 0.2741 | 1.42E-08 | chr:6:32505702 |
| 6 rs138921502 | 32538132 A | 0.3595 | 1.43E-08 | chr:6:32505702 |
| 6 rs9271492   | 32589122 A | 0.3885 | 1.45E-08 | chr:6:32505702 |
| 6 rs11970219  | 32500925 C | 2.189  | 1.48E-08 | chr:6:32505702 |
| 6 rs115707905 | 32516930 G | 0.2811 | 1.49E-08 | chr:6:32505702 |
| 6 rs116184728 | 32516935 T | 0.2811 | 1.49E-08 | chr:6:32505702 |
| 6 rs67497288  | 32503221 A | 0.2968 | 1.50E-08 | chr:6:32505702 |
| 6 rs68174286  | 32503204 T | 0.2968 | 1.50E-08 | chr:6:32505702 |
| 6 rs34720636  | 32523260 C | 0.2815 | 1.50E-08 | chr:6:32505702 |
| 6 rs28732246  | 32447219 A | 0.2721 | 1.51E-08 | chr:6:32505702 |
| 6 rs29001620  | 32447216 T | 0.2721 | 1.51E-08 | chr:6:32505702 |
| 6 rs28895249  | 32444021 T | 0.2716 | 1.53E-08 | chr:6:32505702 |
| 6 rs115563246 | 32489734 A | 2.68   | 1.54E-08 | chr:6:32505702 |
| 6 rs9269381   | 32540927 T | 0.4347 | 1.55E-08 | chr:6:32505702 |
| 6 rs116531157 | 32547565 A | 0.4049 | 1.56E-08 | chr:6:32505702 |
| 6 rs67408570  | 32508874 C | 0.3055 | 1.57E-08 | chr:6:32505702 |
| 6 rs531128975 | 32497352 C | 2.474  | 1.61E-08 | chr:6:32505702 |
| 6 rs112512219 | 32532021 G | 1.966  | 1.64E-08 | chr:6:32505702 |
| 6 rs116830840 | 32537945 C | 0.4822 | 1.65E-08 | chr:6:32505702 |
| 6 rs9269493   | 32542990 T | 0.2839 | 1.68E-08 | chr:6:32505702 |

|                         |            |        |          |                |
|-------------------------|------------|--------|----------|----------------|
| 6 rs72844166            | 32520632 G | 0.2799 | 1.68E-08 | chr:6:32505702 |
| 6 rs114437875           | 32534943 C | 0.4559 | 1.72E-08 | chr:6:32505702 |
| 6 rs149521915           | 32489639 T | 2.554  | 1.73E-08 | chr:6:32505702 |
| 6 rs72844167            | 32520642 T | 0.2791 | 1.74E-08 | chr:6:32505702 |
| 6 rs77993032            | 32518093 C | 0.2789 | 1.74E-08 | chr:6:32505702 |
| 6 rs36088464            | 32513497 A | 0.2788 | 1.75E-08 | chr:6:32505702 |
| 6 rs111739306           | 32516848 T | 0.2788 | 1.77E-08 | chr:6:32505702 |
| 6 rs9269288             | 32539408 G | 0.4553 | 1.78E-08 | chr:6:32505702 |
| 6 rs9269484             | 32542711 C | 0.2888 | 1.78E-08 | chr:6:32505702 |
| 6 rs9269717             | 32547303 G | 0.4293 | 1.78E-08 | chr:6:32505702 |
| 6 rs72492345            | 32532615 T | 0.4015 | 1.79E-08 | chr:6:32505702 |
| 6 rs72853984            | 32511866 C | 0.2794 | 1.79E-08 | chr:6:32505702 |
| 6 rs66466672            | 32508913 A | 0.304  | 1.84E-08 | chr:6:32505702 |
| 6 rs71534519            | 32508893 A | 0.304  | 1.84E-08 | chr:6:32505702 |
| 6 rs67426377            | 32514457 C | 0.2784 | 1.85E-08 | chr:6:32505702 |
| 6 rs28732244            | 32444096 T | 0.275  | 1.85E-08 | chr:6:32505702 |
| 6 rs9270632             | 32565533 G | 0.4073 | 1.85E-08 | chr:6:32505702 |
| 6 rs185236820           | 32488776 A | 0.4882 | 1.86E-08 | chr:6:32505702 |
| 6 rs190526848           | 32488781 T | 0.4882 | 1.86E-08 | chr:6:32505702 |
| 6 rs559294646           | 32525834 T | 0.4855 | 1.86E-08 | chr:6:32505702 |
| 6 rs369885796           | 32511529 G | 0.3326 | 1.87E-08 | chr:6:32505702 |
| 6 rs2858873;rs531438466 | 32566769 G | 0.3705 | 1.90E-08 | chr:6:32505702 |
| 6 rs12194148            | 32444198 T | 0.2746 | 1.90E-08 | chr:6:32505702 |
| 6 rs12195589            | 32444584 T | 0.2746 | 1.90E-08 | chr:6:32505702 |
| 6 rs12207473            | 32444330 C | 0.2746 | 1.90E-08 | chr:6:32505702 |
| 6 rs13194665            | 32451526 G | 0.2746 | 1.90E-08 | chr:6:32505702 |
| 6 rs13211921            | 32442836 G | 0.2746 | 1.90E-08 | chr:6:32505702 |
| 6 rs17203619            | 32446922 C | 0.2746 | 1.90E-08 | chr:6:32505702 |
| 6 rs17203626            | 32446994 A | 0.2746 | 1.90E-08 | chr:6:32505702 |
| 6 rs17203636            | 32447014 A | 0.2746 | 1.90E-08 | chr:6:32505702 |
| 6 rs28895247            | 32443890 A | 0.2746 | 1.90E-08 | chr:6:32505702 |
| 6 rs28895255            | 32445079 T | 0.2746 | 1.90E-08 | chr:6:32505702 |
| 6 rs28895257            | 32445114 G | 0.2746 | 1.90E-08 | chr:6:32505702 |
| 6 rs28895258            | 32445117 T | 0.2746 | 1.90E-08 | chr:6:32505702 |
| 6 rs28895259            | 32445258 G | 0.2746 | 1.90E-08 | chr:6:32505702 |
| 6 rs28895264            | 32445792 T | 0.2746 | 1.90E-08 | chr:6:32505702 |
| 6 rs28895265            | 32445793 G | 0.2746 | 1.90E-08 | chr:6:32505702 |
| 6 rs28895266            | 32445799 G | 0.2746 | 1.90E-08 | chr:6:32505702 |
| 6 rs29001478            | 32447162 A | 0.2746 | 1.90E-08 | chr:6:32505702 |
| 6 rs29001568            | 32447341 A | 0.2746 | 1.90E-08 | chr:6:32505702 |
| 6 rs29001652            | 32447111 G | 0.2746 | 1.90E-08 | chr:6:32505702 |
| 6 rs4994854             | 32447900 C | 0.2746 | 1.90E-08 | chr:6:32505702 |
| 6 rs4994855             | 32447873 G | 0.2746 | 1.90E-08 | chr:6:32505702 |

|               |            |        |          |                |
|---------------|------------|--------|----------|----------------|
| 6 rs554832027 | 32444708 A | 0.2746 | 1.90E-08 | chr:6:32505702 |
| 6 rs71543453  | 32452361 T | 0.2746 | 1.90E-08 | chr:6:32505702 |
| 6 rs9378213   | 32448398 G | 0.2742 | 1.90E-08 | chr:6:32505702 |
| 6 rs9378264   | 32443451 A | 0.2746 | 1.90E-08 | chr:6:32505702 |
| 6 rs9391879   | 32443172 T | 0.2746 | 1.90E-08 | chr:6:32505702 |
| 6 rs9391881   | 32443432 G | 0.2746 | 1.90E-08 | chr:6:32505702 |
| 6 rs72844114  | 32514030 G | 0.2782 | 1.90E-08 | chr:6:32505702 |
| 6 rs72492326  | 32520420 T | 0.2782 | 1.90E-08 | chr:6:32505702 |
| 6 rs68017248  | 32519262 A | 0.2769 | 1.91E-08 | chr:6:32505702 |
| 6 rs72851102  | 32505568 A | 0.328  | 1.92E-08 | chr:6:32505702 |
| 6 rs112582516 | 32481392 A | 0.5269 | 1.93E-08 | chr:6:32505702 |
| 6 rs35882239  | 32522576 A | 0.2791 | 1.94E-08 | chr:6:32505702 |
| 6 rs2516050   | 32570352 G | 0.3849 | 1.94E-08 | chr:6:32505702 |
| 6 rs538439966 | 32536033 T | 0.417  | 1.95E-08 | chr:6:32505702 |
| 6 rs553961126 | 32536034 A | 0.417  | 1.95E-08 | chr:6:32505702 |
| 6 rs572166536 | 32536035 T | 0.417  | 1.95E-08 | chr:6:32505702 |
| 6 rs9270796   | 32569293 G | 0.4273 | 1.96E-08 | chr:6:32505702 |
| 6 rs3828840   | 32520907 T | 0.2779 | 1.96E-08 | chr:6:32505702 |
| 6 rs9270894   | 32571872 A | 0.4398 | 2.01E-08 | chr:6:32505702 |
| 6 rs141563474 | 32536045 T | 0.4152 | 2.09E-08 | chr:6:32505702 |
| 6 rs71543454  | 32452399 A | 0.2737 | 2.12E-08 | chr:6:32505702 |
| 6 rs71543455  | 32452409 C | 0.2737 | 2.12E-08 | chr:6:32505702 |
| 6 rs79401736  | 32503843 A | 0.3616 | 2.13E-08 | chr:6:32505702 |
| 6 rs17203514  | 32446071 G | 0.2758 | 2.14E-08 | chr:6:32505702 |
| 6 rs17209887  | 32446051 C | 0.2758 | 2.14E-08 | chr:6:32505702 |
| 6 rs618095    | 32574736 G | 0.431  | 2.15E-08 | chr:6:32505702 |
| 6 rs28895242  | 32443666 C | 0.2768 | 2.16E-08 | chr:6:32505702 |
| 6 rs72844177  | 32520990 G | 0.2766 | 2.16E-08 | chr:6:32505702 |
| 6 rs111662020 | 32518444 A | 0.3279 | 2.17E-08 | chr:6:32505702 |
| 6 rs34207893  | 32447616 C | 0.2715 | 2.18E-08 | chr:6:32505702 |
| 6 rs67870913  | 32503258 T | 0.3093 | 2.20E-08 | chr:6:32505702 |
| 6 rs9270210   | 32556475 C | 0.4272 | 2.20E-08 | chr:6:32505702 |
| 6 rs4457186   | 32447653 G | 0.2723 | 2.24E-08 | chr:6:32505702 |
| 6 rs112080536 | 32521594 A | 0.3112 | 2.24E-08 | chr:6:32505702 |
| 6 rs34523106  | 32513724 C | 0.2804 | 2.24E-08 | chr:6:32505702 |
| 6 rs4410767   | 32448129 C | 0.2763 | 2.25E-08 | chr:6:32505702 |
| 6 rs17209866  | 32445992 A | 0.2751 | 2.25E-08 | chr:6:32505702 |
| 6 rs9270272   | 32557213 G | 0.2827 | 2.26E-08 | chr:6:32505702 |
| 6 rs566775437 | 32525993 G | 0.4994 | 2.28E-08 | chr:6:32505702 |
| 6 rs373289038 | 32535643 A | 2.089  | 2.29E-08 | chr:6:32505702 |
| 6 rs72851021  | 32501395 T | 0.2961 | 2.29E-08 | chr:6:32505702 |
| 6 rs9269579   | 32544772 G | 0.3902 | 2.30E-08 | chr:6:32505702 |
| 6 rs112532723 | 32518151 G | 0.2972 | 2.30E-08 | chr:6:32505702 |

|               |            |        |          |                |
|---------------|------------|--------|----------|----------------|
| 6 rs4994859   | 32447715 G | 0.2772 | 2.32E-08 | chr:6:32505702 |
| 6 rs17203563  | 32446459 A | 0.2775 | 2.33E-08 | chr:6:32505702 |
| 6 rs34673795  | 32513988 G | 0.2808 | 2.34E-08 | chr:6:32505702 |
| 6 rs201211315 | 32525040 A | 0.4653 | 2.37E-08 | chr:6:32505702 |
| 6 rs9394099   | 32449160 T | 0.2738 | 2.41E-08 | chr:6:32505702 |
| 6 rs112403925 | 32525183 G | 0.4587 | 2.42E-08 | chr:6:32505702 |
| 6 rs149705942 | 32532078 T | 0.4291 | 2.43E-08 | chr:6:32505702 |
| 6 rs140747244 | 32488784 T | 0.4898 | 2.43E-08 | chr:6:32505702 |
| 6 rs79912140  | 32519729 A | 0.3137 | 2.46E-08 | chr:6:32505702 |
| 6 rs9270877   | 32571318 A | 0.4332 | 2.46E-08 | chr:6:32505702 |
| 6 rs9270878   | 32571320 G | 0.4332 | 2.46E-08 | chr:6:32505702 |
| 6 rs28662053  | 32453107 G | 0.2749 | 2.50E-08 | chr:6:32505702 |
| 6 rs62405566  | 32453095 T | 0.2749 | 2.50E-08 | chr:6:32505702 |
| 6 rs9269302   | 32539574 G | 0.4593 | 2.53E-08 | chr:6:32505702 |
| 6 rs72844134  | 32518196 G | 0.2963 | 2.54E-08 | chr:6:32505702 |
| 6 rs141056608 | 32537440 C | 1.926  | 2.56E-08 | chr:6:32505702 |
| 6 rs146946148 | 32537444 T | 1.926  | 2.56E-08 | chr:6:32505702 |
| 6 rs35772438  | 32530407 C | 0.2719 | 2.57E-08 | chr:6:32505702 |
| 6 rs9270302   | 32557479 A | 3.459  | 2.58E-08 | chr:6:32505702 |
| 6 rs35321667  | 32501534 C | 0.2915 | 2.60E-08 | chr:6:32505702 |
| 6 rs9269653   | 32546080 A | 0.2983 | 2.60E-08 | chr:6:32505702 |
| 6 rs77498463  | 32517198 T | 0.2965 | 2.62E-08 | chr:6:32505702 |
| 6 rs5020947   | 32450033 T | 0.2723 | 2.69E-08 | chr:6:32505702 |
| 6 rs5020946   | 32450089 T | 0.2727 | 2.69E-08 | chr:6:32505702 |
| 6 rs1964995   | 32449411 C | 0.2733 | 2.70E-08 | chr:6:32505702 |
| 6 rs72844151  | 32519650 A | 0.2953 | 2.73E-08 | chr:6:32505702 |
| 6 rs79881121  | 32502324 G | 0.4271 | 2.75E-08 | chr:6:32505702 |
| 6 rs112234874 | 32527439 G | 0.3287 | 2.78E-08 | chr:6:32505702 |
| 6 rs9269413   | 32541458 C | 0.301  | 2.79E-08 | chr:6:32505702 |
| 6 rs5018660   | 32449293 G | 0.2748 | 2.80E-08 | chr:6:32505702 |
| 6 rs112861810 | 32494029 T | 0.4633 | 2.84E-08 | chr:6:32505702 |
| 6 rs147034082 | 32539600 G | 0.4599 | 2.85E-08 | chr:6:32505702 |
| 6 rs9269965   | 32552219 G | 2.298  | 2.86E-08 | chr:6:32505702 |
| 6 rs374248993 | 32496534 G | 0.4604 | 2.88E-08 | chr:6:32505702 |
| 6 rs67587495  | 32518728 A | 0.2943 | 3.00E-08 | chr:6:32505702 |
| 6 rs5020944   | 32450140 G | 0.2723 | 3.04E-08 | chr:6:32505702 |
| 6 rs9269405   | 32541348 A | 0.3596 | 3.06E-08 | chr:6:32505702 |
| 6 rs2395192   | 32447644 T | 0.2827 | 3.06E-08 | chr:6:32505702 |
| 6 rs9269709   | 32547237 G | 0.3664 | 3.07E-08 | chr:6:32505702 |
| 6 rs73729117  | 32519600 A | 0.294  | 3.20E-08 | chr:6:32505702 |
| 6 rs62405573  | 32458239 G | 0.4659 | 3.20E-08 | chr:6:32505702 |
| 6 rs13194770  | 32451570 T | 0.2712 | 3.21E-08 | chr:6:32505702 |
| 6 rs377599643 | 32536107 C | 0.4207 | 3.21E-08 | chr:6:32505702 |

|               |            |        |          |                |
|---------------|------------|--------|----------|----------------|
| 6 rs9269390   | 32541123 C | 0.4249 | 3.23E-08 | chr:6:32505702 |
| 6 rs9269708   | 32547232 C | 0.3664 | 3.26E-08 | chr:6:32505702 |
| 6 rs76566406  | 32518913 T | 0.3141 | 3.28E-08 | chr:6:32505702 |
| 6 rs5020950   | 32449965 C | 0.2704 | 3.29E-08 | chr:6:32505702 |
| 6 rs79268162  | 32517493 G | 0.3104 | 3.30E-08 | chr:6:32505702 |
| 6 rs9270423   | 32558580 G | 0.4655 | 3.31E-08 | chr:6:32505702 |
| 6 rs72492308  | 32509570 T | 0.2937 | 3.32E-08 | chr:6:32505702 |
| 6 rs560625026 | 32546591 C | 0.2898 | 3.33E-08 | chr:6:32505702 |
| 6 rs371747477 | 32489266 C | 0.4147 | 3.35E-08 | chr:6:32505702 |
| 6 rs371638245 | 32525191 G | 0.4643 | 3.40E-08 | chr:6:32505702 |
| 6 rs78279385  | 32451758 A | 0.2698 | 3.40E-08 | chr:6:32505702 |
| 6 rs9269586   | 32544844 T | 0.3842 | 3.40E-08 | chr:6:32505702 |
| 6 rs201885513 | 32512459 C | 0.3803 | 3.42E-08 | chr:6:32505702 |
| 6 rs549610120 | 32525308 G | 0.4636 | 3.43E-08 | chr:6:32505702 |
| 6 rs72853943  | 32509260 C | 0.2939 | 3.43E-08 | chr:6:32505702 |
| 6 rs28895254  | 32444946 T | 0.2825 | 3.43E-08 | chr:6:32505702 |
| 6 rs531127489 | 32453036 A | 0.2652 | 3.44E-08 | chr:6:32505702 |
| 6 rs552565118 | 32453037 T | 0.2652 | 3.44E-08 | chr:6:32505702 |
| 6 rs113260943 | 32509550 T | 0.2934 | 3.46E-08 | chr:6:32505702 |
| 6 rs112323850 | 32521804 T | 0.3476 | 3.52E-08 | chr:6:32505702 |
| 6 rs73395587  | 32518339 T | 0.3117 | 3.56E-08 | chr:6:32505702 |
| 6 rs9270631   | 32565505 A | 0.4278 | 3.57E-08 | chr:6:32505702 |
| 6 rs376459798 | 32535644 A | 2.065  | 3.59E-08 | chr:6:32505702 |
| 6 rs9269713   | 32547252 G | 0.39   | 3.59E-08 | chr:6:32505702 |
| 6 rs9269311   | 32539654 G | 0.4474 | 3.59E-08 | chr:6:32505702 |
| 6 rs9270869   | 32571155 T | 0.425  | 3.60E-08 | chr:6:32505702 |
| 6 rs9270871   | 32571160 A | 0.425  | 3.60E-08 | chr:6:32505702 |
| 6 rs75259234  | 32453338 T | 0.2728 | 3.67E-08 | chr:6:32505702 |
| 6 rs181664429 | 32525903 T | 0.4961 | 3.71E-08 | chr:6:32505702 |
| 6 rs72508418  | 32459868 C | 0.431  | 3.71E-08 | chr:6:32505702 |
| 6 rs9269969   | 32552272 C | 2.547  | 3.72E-08 | chr:6:32505702 |
| 6 rs28895261  | 32445306 A | 0.2881 | 3.72E-08 | chr:6:32505702 |
| 6 rs111485252 | 32518374 T | 0.3115 | 3.74E-08 | chr:6:32505702 |
| 6 rs28732247  | 32447474 G | 0.2829 | 3.76E-08 | chr:6:32505702 |
| 6 rs35007143  | 32447518 A | 0.2829 | 3.76E-08 | chr:6:32505702 |
| 6 rs9270626   | 32565443 G | 0.4298 | 3.77E-08 | chr:6:32505702 |
| 6 rs115187291 | 32525223 G | 0.4661 | 3.80E-08 | chr:6:32505702 |
| 6 rs116088388 | 32488961 G | 0.4515 | 3.82E-08 | chr:6:32505702 |
| 6 rs139007218 | 32488958 G | 0.4515 | 3.82E-08 | chr:6:32505702 |
| 6 rs72508422  | 32481498 G | 0.5354 | 3.83E-08 | chr:6:32505702 |
| 6 rs28895253  | 32444910 A | 0.2835 | 3.89E-08 | chr:6:32505702 |
| 6 rs9269562   | 32544407 A | 0.2839 | 3.89E-08 | chr:6:32505702 |
| 6 rs146123957 | 32525913 T | 0.4919 | 3.93E-08 | chr:6:32505702 |

|               |            |        |          |                |
|---------------|------------|--------|----------|----------------|
| 6 rs185112674 | 32525915 A | 0.4919 | 3.93E-08 | chr:6:32505702 |
| 6 rs115729463 | 32514301 C | 0.3043 | 3.94E-08 | chr:6:32505702 |
| 6 rs79138148  | 32516351 C | 0.2922 | 3.96E-08 | chr:6:32505702 |
| 6 rs182191708 | 32490480 A | 0.4527 | 3.97E-08 | chr:6:32505702 |
| 6 rs547043452 | 32525326 G | 0.4659 | 4.02E-08 | chr:6:32505702 |
| 6 rs9270433   | 32558670 G | 0.4844 | 4.06E-08 | chr:6:32505702 |
| 6 rs9270773   | 32568990 A | 0.4305 | 4.07E-08 | chr:6:32505702 |
| 6 rs117090280 | 32489265 A | 0.4751 | 4.08E-08 | chr:6:32505702 |
| 6 rs576554734 | 32525219 C | 0.4673 | 4.11E-08 | chr:6:32505702 |
| 6 rs72844137  | 32518615 G | 0.3108 | 4.11E-08 | chr:6:32505702 |
| 6 rs9270803   | 32569415 G | 0.4212 | 4.13E-08 | chr:6:32505702 |
| 6 rs68109409  | 32518552 G | 0.3107 | 4.14E-08 | chr:6:32505702 |
| 6 rs74217355  | 32519018 A | 0.3257 | 4.19E-08 | chr:6:32505702 |
| 6 rs528864352 | 32452626 G | 0.2785 | 4.19E-08 | chr:6:32505702 |
| 6 rs182968054 | 32536067 T | 0.4409 | 4.19E-08 | chr:6:32505702 |
| 6 rs190321460 | 32536065 G | 0.4409 | 4.19E-08 | chr:6:32505702 |
| 6 rs184792502 | 32525876 C | 0.4942 | 4.22E-08 | chr:6:32505702 |
| 6 rs186639906 | 32525878 T | 0.4942 | 4.22E-08 | chr:6:32505702 |
| 6 rs659204    | 32577001 G | 2.295  | 4.22E-08 | chr:6:32505702 |
| 6 rs9270250   | 32557001 C | 2.783  | 4.30E-08 | chr:6:32505702 |
| 6 rs9270251   | 32557003 A | 2.783  | 4.30E-08 | chr:6:32505702 |
| 6 rs73727962  | 32509050 A | 0.3109 | 4.30E-08 | chr:6:32505702 |
| 6 rs76722140  | 32509053 C | 0.3109 | 4.30E-08 | chr:6:32505702 |
| 6 rs72845727  | 32525674 A | 0.3717 | 4.31E-08 | chr:6:32505702 |
| 6 rs77236357  | 32459844 G | 0.4318 | 4.33E-08 | chr:6:32505702 |
| 6 rs62405572  | 32458232 A | 0.4617 | 4.36E-08 | chr:6:32505702 |
| 6 rs72849274  | 32469068 T | 0.2931 | 4.39E-08 | chr:6:32505702 |
| 6 rs73729116  | 32519558 C | 0.2919 | 4.41E-08 | chr:6:32505702 |
| 6 rs9269291   | 32539445 G | 0.4681 | 4.41E-08 | chr:6:32505702 |
| 6 rs9269304   | 32539585 C | 0.4679 | 4.44E-08 | chr:6:32505702 |
| 6 rs9270046   | 32553683 A | 0.3359 | 4.46E-08 | chr:6:32505702 |
| 6 rs28454881  | 32451351 G | 0.2714 | 4.56E-08 | chr:6:32505702 |
| 6 rs529763782 | 32493737 C | 0.4277 | 4.56E-08 | chr:6:32505702 |
| 6 rs9380309   | 32449820 G | 0.2726 | 4.59E-08 | chr:6:32505702 |
| 6 rs9269874   | 32550828 G | 0.287  | 4.59E-08 | chr:6:32505702 |
| 6 rs9394098   | 32449138 T | 0.2793 | 4.75E-08 | chr:6:32505702 |
| 6 rs9269518   | 32543594 T | 0.2937 | 4.78E-08 | chr:6:32505702 |
| 6 rs67642277  | 32538067 G | 0.4009 | 4.79E-08 | chr:6:32505702 |
| 6 rs558057632 | 32526072 G | 0.4891 | 4.86E-08 | chr:6:32505702 |
| 6 rs76517385  | 32519067 A | 0.3095 | 4.87E-08 | chr:6:32505702 |
| 6 rs559109541 | 32493714 C | 0.4319 | 4.93E-08 | chr:6:32505702 |
| 6 rs72844190  | 32521785 T | 0.3032 | 4.93E-08 | chr:6:32505702 |
| 6 rs554833162 | 32525208 G | 0.472  | 4.95E-08 | chr:6:32505702 |



|               |            |        |          |                |
|---------------|------------|--------|----------|----------------|
| 6 rs71536524  | 32520841 T | 0.3559 | 5.07E-08 | chr:6:32505702 |
| 6 rs545350177 | 32565668 T | 0.4449 | 5.09E-08 | chr:6:32505702 |
| 6 rs9391786   | 32448561 G | 0.2684 | 5.11E-08 | chr:6:32505702 |
| 6 rs192638533 | 32526085 T | 0.4911 | 5.16E-08 | chr:6:32505702 |
| 6 rs9269524   | 32543671 T | 0.4095 | 5.20E-08 | chr:6:32505702 |
| 6 rs35875942  | 32447563 C | 0.2846 | 5.23E-08 | chr:6:32505702 |
| 6 rs73403121  | 32469012 C | 0.4117 | 5.25E-08 | chr:6:32505702 |
| 6 rs62405645  | 32517934 G | 0.303  | 5.34E-08 | chr:6:32505702 |
| 6 rs148633289 | 32487229 T | 2.626  | 5.40E-08 | chr:6:32505702 |
| 6 rs9269783   | 32549001 A | 0.2826 | 5.41E-08 | chr:6:32505702 |
| 6 rs36189266  | 32526768 G | 0.4131 | 5.43E-08 | chr:6:32505702 |
| 6 rs9270728   | 32567956 T | 0.4165 | 5.50E-08 | chr:6:32505702 |
| 6 rs17203570  | 32446674 T | 0.2831 | 5.52E-08 | chr:6:32505702 |
| 6 rs111353892 | 32525928 T | 0.492  | 5.56E-08 | chr:6:32505702 |
| 6 rs547755130 | 32486547 T | 0.5003 | 5.59E-08 | chr:6:32505702 |
| 6 rs565956329 | 32486548 G | 0.5003 | 5.59E-08 | chr:6:32505702 |
| 6 rs78241440  | 32509180 G | 0.3059 | 5.61E-08 | chr:6:32505702 |
| 6 rs78650231  | 32525698 G | 0.3942 | 5.65E-08 | chr:6:32505702 |
| 6 rs182651216 | 32526060 G | 0.4885 | 5.68E-08 | chr:6:32505702 |
| 6 rs74528572  | 32525502 G | 0.4988 | 5.69E-08 | chr:6:32505702 |
| 6 rs76087961  | 32525501 A | 0.4988 | 5.69E-08 | chr:6:32505702 |
| 6 rs115772619 | 32519757 C | 0.3472 | 5.73E-08 | chr:6:32505702 |
| 6 rs9270658   | 32566072 T | 0.4227 | 5.76E-08 | chr:6:32505702 |
| 6 rs9270769   | 32568907 T | 0.4199 | 5.79E-08 | chr:6:32505702 |
| 6 rs9270770   | 32568910 T | 0.4199 | 5.79E-08 | chr:6:32505702 |
| 6 rs9270369   | 32558183 T | 0.3269 | 5.84E-08 | chr:6:32505702 |
| 6 rs74324607  | 32525646 A | 0.385  | 5.90E-08 | chr:6:32505702 |
| 6 rs116151010 | 32514763 G | 0.3801 | 5.90E-08 | chr:6:32505702 |
| 6 rs114924039 | 32514794 C | 0.3801 | 5.95E-08 | chr:6:32505702 |
| 6 rs9270642   | 32565707 G | 0.4269 | 5.97E-08 | chr:6:32505702 |
| 6 rs79251508  | 32453632 G | 0.2806 | 6.01E-08 | chr:6:32505702 |
| 6 rs146363280 | 32524765 A | 0.4751 | 6.03E-08 | chr:6:32505702 |
| 6 rs17209907  | 32446261 T | 0.2807 | 6.07E-08 | chr:6:32505702 |
| 6 rs188008023 | 32526074 T | 0.4921 | 6.12E-08 | chr:6:32505702 |
| 6 rs28732268  | 32548352 G | 0.3088 | 6.21E-08 | chr:6:32505702 |
| 6 rs541172392 | 32525830 T | 0.4955 | 6.31E-08 | chr:6:32505702 |
| 6 rs9269269   | 32539055 G | 0.4717 | 6.42E-08 | chr:6:32505702 |
| 6 rs116258010 | 32524772 A | 0.4755 | 6.45E-08 | chr:6:32505702 |
| 6 rs78987802  | 32503728 T | 0.3858 | 6.47E-08 | chr:6:32505702 |
| 6 rs9270374   | 32558216 G | 0.3027 | 6.61E-08 | chr:6:32505702 |
| 6 rs9269725   | 32547359 T | 0.4562 | 6.61E-08 | chr:6:32505702 |
| 6 rs188912067 | 32525865 G | 0.505  | 6.61E-08 | chr:6:32505702 |
| 6 rs36165851  | 32489981 G | 0.492  | 6.68E-08 | chr:6:32505702 |

|               |            |        |          |                |
|---------------|------------|--------|----------|----------------|
| 6 rs72492336  | 32527112 C | 0.3081 | 6.68E-08 | chr:6:32505702 |
| 6 rs534705706 | 32562023 A | 2.054  | 6.72E-08 | chr:6:32505702 |
| 6 rs573046310 | 32525827 A | 0.4958 | 6.73E-08 | chr:6:32505702 |
| 6 rs565566670 | 32525229 C | 0.4762 | 6.76E-08 | chr:6:32505702 |
| 6 rs80048124  | 32503729 G | 0.3857 | 6.79E-08 | chr:6:32505702 |
| 6 rs67062152  | 32527025 T | 0.3081 | 6.79E-08 | chr:6:32505702 |
| 6 rs73401326  | 32454783 A | 0.4395 | 6.91E-08 | chr:6:32505702 |
| 6 rs541391839 | 32525244 T | 0.4763 | 7.01E-08 | chr:6:32505702 |
| 6 rs9269726   | 32547360 G | 0.4564 | 7.03E-08 | chr:6:32505702 |
| 6 rs9270634   | 32565625 C | 0.4198 | 7.08E-08 | chr:6:32505702 |
| 6 rs9270282   | 32557271 A | 0.2817 | 7.08E-08 | chr:6:32505702 |
| 6 rs9270621   | 32565283 G | 0.4196 | 7.11E-08 | chr:6:32505702 |
| 6 rs190044159 | 32525843 T | 0.5014 | 7.11E-08 | chr:6:32505702 |
| 6 rs9269968   | 32552251 G | 0.4138 | 7.20E-08 | chr:6:32505702 |
| 6 rs79346779  | 32453655 A | 0.2827 | 7.21E-08 | chr:6:32505702 |
| 6 rs116708952 | 32486590 T | 0.4986 | 7.37E-08 | chr:6:32505702 |
| 6 rs67738935  | 32521230 C | 0.2695 | 7.47E-08 | chr:6:32505702 |
| 6 rs9270436   | 32558693 C | 0.5008 | 7.51E-08 | chr:6:32505702 |
| 6 rs9269962   | 32552177 A | 2.651  | 7.52E-08 | chr:6:32505702 |
| 6 rs9270653   | 32565940 G | 0.4198 | 7.55E-08 | chr:6:32505702 |
| 6 rs9270654   | 32565946 T | 0.4198 | 7.55E-08 | chr:6:32505702 |
| 6 rs9270655   | 32565966 A | 0.4198 | 7.55E-08 | chr:6:32505702 |
| 6 rs535866271 | 32486668 C | 0.4926 | 7.59E-08 | chr:6:32505702 |
| 6 rs9270772   | 32568967 C | 2.319  | 7.63E-08 | chr:6:32505702 |
| 6 rs9269547   | 32544173 T | 0.267  | 7.77E-08 | chr:6:32505702 |
| 6 rs78387908  | 32503391 A | 0.3922 | 7.81E-08 | chr:6:32505702 |
| 6 rs74587827  | 32567757 G | 0.4185 | 7.84E-08 | chr:6:32505702 |
| 6 rs78896800  | 32525473 A | 0.5037 | 7.84E-08 | chr:6:32505702 |
| 6 rs115817940 | 32489735 T | 2.344  | 7.84E-08 | chr:6:32505702 |
| 6 rs143796398 | 32536259 T | 1.929  | 7.87E-08 | chr:6:32505702 |
| 6 rs559593099 | 32525759 T | 0.4963 | 7.91E-08 | chr:6:32505702 |
| 6 rs77469652  | 32453532 C | 0.284  | 7.91E-08 | chr:6:32505702 |
| 6 rs182032087 | 32525821 T | 0.4967 | 8.06E-08 | chr:6:32505702 |
| 6 rs79485855  | 32527253 T | 0.4421 | 8.11E-08 | chr:6:32505702 |
| 6 rs28895267  | 32445916 T | 0.3292 | 8.13E-08 | chr:6:32505702 |
| 6 rs370779031 | 32535688 A | 2.037  | 8.19E-08 | chr:6:32505702 |
| 6 rs375377896 | 32535693 A | 2.037  | 8.19E-08 | chr:6:32505702 |
| 6 rs111338793 | 32486248 C | 0.5163 | 8.22E-08 | chr:6:32505702 |
| 6 rs539141868 | 32524620 C | 0.4944 | 8.23E-08 | chr:6:32505702 |
| 6 rs9270651   | 32565884 C | 0.4204 | 8.31E-08 | chr:6:32505702 |
| 6 rs9270652   | 32565905 C | 0.4204 | 8.31E-08 | chr:6:32505702 |
| 6 rs113523485 | 32489302 C | 2.044  | 8.40E-08 | chr:6:32505702 |
| 6 rs9269296   | 32539509 G | 1.982  | 8.40E-08 | chr:6:32505702 |

|               |            |        |          |                |
|---------------|------------|--------|----------|----------------|
| 6 rs116670844 | 32490925 T | 1.884  | 8.43E-08 | chr:6:32505702 |
| 6 rs200582841 | 32453810 A | 2.721  | 8.46E-08 | chr:6:32505702 |
| 6 rs554566424 | 32496605 C | 0.4829 | 8.51E-08 | chr:6:32505702 |
| 6 rs75518178  | 32505100 T | 0.3675 | 8.57E-08 | chr:6:32505702 |
| 6 rs112112734 | 32453853 C | 0.2931 | 8.73E-08 | chr:6:32505702 |
| 6 rs116504658 | 32537906 A | 0.4868 | 8.87E-08 | chr:6:32505702 |
| 6 rs76415507  | 32492589 T | 0.5054 | 8.87E-08 | chr:6:32505702 |
| 6 rs549643018 | 32525126 G | 0.4854 | 8.99E-08 | chr:6:32505702 |
| 6 rs62405632  | 32514561 G | 0.3244 | 9.17E-08 | chr:6:32505702 |
| 6 rs9268839   | 32428772 G | 0.2945 | 9.25E-08 | chr:6:32505702 |
| 6 rs9270591   | 32561424 C | 0.2864 | 9.35E-08 | chr:6:32505702 |
| 6 rs71534530  | 32511211 G | 0.4305 | 9.35E-08 | chr:6:32505702 |
| 6 rs137953098 | 32534097 T | 0.5071 | 9.36E-08 | chr:6:32505702 |
| 6 rs646159    | 32576446 C | 0.4347 | 9.46E-08 | chr:6:32505702 |
| 6 rs1064717   | 32546615 G | 0.322  | 9.63E-08 | chr:6:32505702 |
| 6 rs680061    | 32571098 A | 0.4197 | 9.64E-08 | chr:6:32505702 |
| 6 rs9270585   | 32561300 C | 0.2869 | 9.65E-08 | chr:6:32505702 |
| 6 rs9270588   | 32561327 C | 0.2869 | 9.65E-08 | chr:6:32505702 |
| 6 rs78533241  | 32502317 A | 0.3908 | 9.67E-08 | chr:6:32505702 |
| 6 rs75252378  | 32502610 T | 0.402  | 9.79E-08 | chr:6:32505702 |
| 6 rs9270659   | 32566076 C | 0.4322 | 9.87E-08 | chr:6:32505702 |
| 6 rs9270660   | 32566077 A | 0.4322 | 9.87E-08 | chr:6:32505702 |
| 6 rs148817433 | 32493266 T | 0.4242 | 9.92E-08 | chr:6:32505702 |
| 6 rs73726821  | 32526767 G | 0.4126 | 1.01E-07 | chr:6:32505702 |
| 6 rs142518779 | 32524817 G | 0.4913 | 1.02E-07 | chr:6:32505702 |
| 6 rs9378266   | 32448189 T | 0.3241 | 1.05E-07 | chr:6:32505702 |
| 6 rs66499101  | 32517332 A | 0.3184 | 1.05E-07 | chr:6:32505702 |
| 6 rs137976440 | 32489630 T | 2.408  | 1.05E-07 | chr:6:32505702 |
| 6 rs34665982  | 32560306 T | 0.4957 | 1.06E-07 | chr:6:32505702 |
| 6 rs9270368   | 32558182 C | 0.3335 | 1.06E-07 | chr:6:32505702 |
| 6 rs57172910  | 32529365 C | 0.537  | 1.06E-07 | chr:6:32505702 |
| 6 rs9270661   | 32566087 A | 0.4326 | 1.07E-07 | chr:6:32505702 |
| 6 rs9270746   | 32568284 C | 0.45   | 1.07E-07 | chr:6:32505702 |
| 6 rs141572443 | 32525395 C | 0.5106 | 1.07E-07 | chr:6:32505702 |
| 6 rs9269934   | 32551721 T | 0.4623 | 1.07E-07 | chr:6:32505702 |
| 6 rs147613123 | 32518296 A | 0.3547 | 1.07E-07 | chr:6:32505702 |
| 6 rs481245    | 32576114 A | 0.4239 | 1.09E-07 | chr:6:32505702 |
| 6 rs72508417  | 32459813 G | 0.4544 | 1.09E-07 | chr:6:32505702 |
| 6 rs2858867   | 32575325 A | 0.4303 | 1.10E-07 | chr:6:32505702 |
| 6 rs541195    | 32567321 A | 0.4311 | 1.11E-07 | chr:6:32505702 |
| 6 rs9270636   | 32565648 C | 2.173  | 1.11E-07 | chr:6:32505702 |
| 6 rs9270637   | 32565650 G | 2.173  | 1.11E-07 | chr:6:32505702 |
| 6 rs9270638   | 32565657 C | 2.173  | 1.11E-07 | chr:6:32505702 |

|               |            |        |          |                |
|---------------|------------|--------|----------|----------------|
| 6 rs115789421 | 32526805 A | 0.4138 | 1.11E-07 | chr:6:32505702 |
| 6 rs9270414   | 32558497 C | 0.4714 | 1.11E-07 | chr:6:32505702 |
| 6 rs74999184  | 32508306 C | 0.382  | 1.12E-07 | chr:6:32505702 |
| 6 rs67405590  | 32525542 T | 0.4763 | 1.12E-07 | chr:6:32505702 |
| 6 rs540520708 | 32534266 G | 0.4818 | 1.12E-07 | chr:6:32505702 |
| 6 rs573056492 | 32534265 T | 0.4818 | 1.12E-07 | chr:6:32505702 |
| 6 rs74290590  | 32510539 C | 0.3373 | 1.12E-07 | chr:6:32505702 |
| 6 rs112740757 | 32481965 A | 0.479  | 1.13E-07 | chr:6:32505702 |
| 6 rs9269301   | 32539561 C | 0.4818 | 1.13E-07 | chr:6:32505702 |
| 6 rs115009756 | 32526800 A | 0.4139 | 1.13E-07 | chr:6:32505702 |
| 6 rs9270647   | 32565805 A | 0.4341 | 1.13E-07 | chr:6:32505702 |
| 6 rs9270649   | 32565808 G | 0.4341 | 1.13E-07 | chr:6:32505702 |
| 6 rs9269792   | 32549128 C | 0.2393 | 1.14E-07 | chr:6:32505702 |
| 6 rs566861    | 32576538 T | 0.4285 | 1.14E-07 | chr:6:32505702 |
| 6 rs113068532 | 32518301 G | 0.3547 | 1.15E-07 | chr:6:32505702 |
| 6 rs9270667   | 32566306 T | 0.4246 | 1.15E-07 | chr:6:32505702 |
| 6 rs114500718 | 32524694 G | 0.4412 | 1.15E-07 | chr:6:32505702 |
| 6 rs9270575   | 32561049 A | 0.2588 | 1.16E-07 | chr:6:32505702 |
| 6 rs28404276  | 32510355 G | 0.413  | 1.17E-07 | chr:6:32505702 |
| 6 rs2858866   | 32575391 G | 0.4243 | 1.18E-07 | chr:6:32505702 |
| 6 rs9271142   | 32577090 T | 0.3033 | 1.18E-07 | chr:6:32505702 |
| 6 rs112483249 | 32526924 A | 0.4025 | 1.19E-07 | chr:6:32505702 |
| 6 rs143442815 | 32489863 C | 2.138  | 1.19E-07 | chr:6:32505702 |
| 6 rs9270618   | 32565236 C | 0.4261 | 1.19E-07 | chr:6:32505702 |
| 6 rs9270413   | 32558495 C | 0.4718 | 1.20E-07 | chr:6:32505702 |
| 6 rs542233442 | 32535702 A | 2.013  | 1.20E-07 | chr:6:32505702 |
| 6 rs143237673 | 32525386 A | 0.5124 | 1.21E-07 | chr:6:32505702 |
| 6 rs72845733  | 32527305 A | 0.4217 | 1.22E-07 | chr:6:32505702 |
| 6 rs530218062 | 32525091 A | 0.4924 | 1.22E-07 | chr:6:32505702 |
| 6 rs114146939 | 32459890 C | 0.5239 | 1.23E-07 | chr:6:32505702 |
| 6 rs116587947 | 32459889 C | 0.5239 | 1.23E-07 | chr:6:32505702 |
| 6 rs73726822  | 32527272 G | 0.4396 | 1.24E-07 | chr:6:32505702 |
| 6 rs554894601 | 32497146 C | 0.4036 | 1.24E-07 | chr:6:32505702 |
| 6 rs553260480 | 32538534 A | 0.2614 | 1.24E-07 | chr:6:32505702 |
| 6 rs11752277  | 32537771 G | 1.84   | 1.24E-07 | chr:6:32505702 |
| 6 rs9270190   | 32556064 G | 0.2573 | 1.25E-07 | chr:6:32505702 |
| 6 rs74894552  | 32502589 C | 0.4027 | 1.26E-07 | chr:6:32505702 |
| 6 rs71549282  | 32504906 C | 0.4612 | 1.26E-07 | chr:6:32505702 |
| 6 rs28838605  | 32510279 C | 0.3781 | 1.27E-07 | chr:6:32505702 |
| 6 rs17209873  | 32446010 C | 0.3421 | 1.27E-07 | chr:6:32505702 |
| 6 rs71549283  | 32505038 A | 0.3687 | 1.28E-07 | chr:6:32505702 |
| 6 rs146356328 | 32535965 C | 0.5059 | 1.31E-07 | chr:6:32505702 |
| 6 rs9270612   | 32565106 T | 0.4323 | 1.32E-07 | chr:6:32505702 |

|               |            |        |          |                |
|---------------|------------|--------|----------|----------------|
| 6 rs9270614   | 32565115 C | 0.4323 | 1.32E-07 | chr:6:32505702 |
| 6 rs615719    | 32574204 G | 0.4344 | 1.35E-07 | chr:6:32505702 |
| 6 rs28357078  | 32556991 G | 0.2875 | 1.36E-07 | chr:6:32505702 |
| 6 rs9270248   | 32556993 A | 0.2875 | 1.36E-07 | chr:6:32505702 |
| 6 rs9270249   | 32556996 C | 0.2875 | 1.36E-07 | chr:6:32505702 |
| 6 rs576371337 | 32493199 C | 0.3633 | 1.36E-07 | chr:6:32505702 |
| 6 rs549069478 | 32526275 A | 0.43   | 1.38E-07 | chr:6:32505702 |
| 6 rs34596578  | 32536450 G | 0.4807 | 1.39E-07 | chr:6:32505702 |
| 6 rs615698    | 32574190 A | 0.4291 | 1.40E-07 | chr:6:32505702 |
| 6 rs687675    | 32567316 T | 0.4329 | 1.40E-07 | chr:6:32505702 |
| 6 rs9270771   | 32568964 G | 0.4407 | 1.44E-07 | chr:6:32505702 |
| 6 rs486912    | 32575493 C | 0.4257 | 1.45E-07 | chr:6:32505702 |
| 6 rs9269388   | 32541102 T | 2.06   | 1.47E-07 | chr:6:32505702 |
| 6 rs9270663   | 32566101 A | 0.4349 | 1.48E-07 | chr:6:32505702 |
| 6 rs2858875   | 32566649 T | 0.4288 | 1.49E-07 | chr:6:32505702 |
| 6 rs114590821 | 32526035 A | 0.5033 | 1.50E-07 | chr:6:32505702 |
| 6 rs566252979 | 32496600 G | 0.493  | 1.51E-07 | chr:6:32505702 |
| 6 rs614437    | 32573941 A | 0.4276 | 1.52E-07 | chr:6:32505702 |
| 6 rs74945612  | 32505901 C | 0.5206 | 1.53E-07 | chr:6:32505702 |
| 6 rs12665158  | 32482007 C | 0.516  | 1.53E-07 | chr:6:32505702 |
| 6 rs367997563 | 32535716 C | 1.999  | 1.55E-07 | chr:6:32505702 |
| 6 rs560908329 | 32535706 G | 1.999  | 1.55E-07 | chr:6:32505702 |
| 6 rs680151    | 32571166 A | 0.4589 | 1.55E-07 | chr:6:32505702 |
| 6 rs115572650 | 32524778 T | 0.4916 | 1.58E-07 | chr:6:32505702 |
| 6 rs615672    | 32574171 G | 0.4282 | 1.58E-07 | chr:6:32505702 |
| 6 rs185231254 | 32535257 A | 0.499  | 1.58E-07 | chr:6:32505702 |
| 6 rs9271527   | 32589867 T | 2.238  | 1.58E-07 | chr:6:32505702 |
| 6 rs545827965 | 32525807 A | 0.51   | 1.60E-07 | chr:6:32505702 |
| 6 rs62405562  | 32451834 G | 0.3173 | 1.60E-07 | chr:6:32505702 |
| 6 rs115428373 | 32526116 G | 0.5057 | 1.63E-07 | chr:6:32505702 |
| 6 rs9270976   | 32573728 A | 0.4363 | 1.65E-07 | chr:6:32505702 |
| 6 rs114133813 | 32526300 T | 0.4041 | 1.66E-07 | chr:6:32505702 |
| 6 rs536237965 | 32535621 C | 0.4809 | 1.68E-07 | chr:6:32505702 |
| 6 rs9269732   | 32547425 A | 0.4875 | 1.68E-07 | chr:6:32505702 |
| 6 rs114710684 | 32521237 G | 7.281  | 1.69E-07 | chr:6:32505702 |
| 6 rs72853912  | 32506766 T | 0.3961 | 1.69E-07 | chr:6:32505702 |
| 6 rs116100204 | 32531556 C | 0.4104 | 1.69E-07 | chr:6:32505702 |
| 6 rs72847623  | 32538044 A | 0.4695 | 1.70E-07 | chr:6:32505702 |
| 6 rs9271522   | 32589791 C | 2.236  | 1.72E-07 | chr:6:32505702 |
| 6 rs74223623  | 32492102 C | 0.4692 | 1.75E-07 | chr:6:32505702 |
| 6 rs79645566  | 32505836 T | 0.4907 | 1.76E-07 | chr:6:32505702 |
| 6 rs9269736   | 32547440 C | 0.4878 | 1.80E-07 | chr:6:32505702 |
| 6 rs9269394   | 32541275 C | 0.4591 | 1.80E-07 | chr:6:32505702 |

|               |            |        |          |                |
|---------------|------------|--------|----------|----------------|
| 6 rs114624001 | 32525083 A | 0.4991 | 1.80E-07 | chr:6:32505702 |
| 6 rs113045771 | 32503092 A | 0.4482 | 1.81E-07 | chr:6:32505702 |
| 6 rs140036576 | 32478632 T | 2.038  | 1.83E-07 | chr:6:32505702 |
| 6 rs534227738 | 32525995 A | 0.5153 | 1.84E-07 | chr:6:32505702 |
| 6 rs557442991 | 32534238 C | 0.4975 | 1.86E-07 | chr:6:32505702 |
| 6 rs182965163 | 32454827 G | 0.4844 | 1.88E-07 | chr:6:32505702 |
| 6 rs202162787 | 32454828 C | 0.4844 | 1.88E-07 | chr:6:32505702 |
| 6 rs114835436 | 32524789 A | 0.5088 | 1.89E-07 | chr:6:32505702 |
| 6 rs369257183 | 32525068 G | 0.4993 | 1.90E-07 | chr:6:32505702 |
| 6 rs116525270 | 32522921 T | 0.3937 | 1.90E-07 | chr:6:32505702 |
| 6 rs111293660 | 32503087 C | 0.4488 | 1.90E-07 | chr:6:32505702 |
| 6 rs9269728   | 32547385 A | 0.4697 | 1.91E-07 | chr:6:32505702 |
| 6 rs9270451   | 32558838 G | 0.4778 | 1.93E-07 | chr:6:32505702 |
| 6 rs73731412  | 32454215 G | 8.06   | 1.94E-07 | chr:6:32505702 |
| 6 rs201624597 | 32527297 G | 0.4326 | 1.95E-07 | chr:6:32505702 |
| 6 rs545503784 | 32537034 A | 1.916  | 1.95E-07 | chr:6:32505702 |
| 6 rs560891265 | 32537038 C | 1.916  | 1.95E-07 | chr:6:32505702 |
| 6 rs578162447 | 32537032 G | 1.916  | 1.95E-07 | chr:6:32505702 |
| 6 rs17203612  | 32446853 T | 0.3299 | 1.96E-07 | chr:6:32505702 |
| 6 rs9270143   | 32555256 C | 0.4252 | 1.99E-07 | chr:6:32505702 |
| 6 rs71536560  | 32529163 A | 0.5224 | 2.00E-07 | chr:6:32505702 |
| 6 rs9269906   | 32551309 G | 0.4911 | 2.00E-07 | chr:6:32505702 |
| 6 rs192020001 | 32525799 T | 0.5053 | 2.00E-07 | chr:6:32505702 |
| 6 rs9269986   | 32552553 C | 0.4012 | 2.02E-07 | chr:6:32505702 |
| 6 rs9271379   | 32587333 T | 2.243  | 2.04E-07 | chr:6:32505702 |
| 6 rs145092566 | 32454838 G | 0.494  | 2.07E-07 | chr:6:32505702 |
| 6 rs9270560   | 32560741 T | 0.3044 | 2.08E-07 | chr:6:32505702 |
| 6 rs9269234   | 32451788 C | 2.272  | 2.10E-07 | chr:6:32505702 |
| 6 rs112993783 | 32478652 A | 2.032  | 2.12E-07 | chr:6:32505702 |
| 6 rs9270609   | 32565051 A | 0.4425 | 2.13E-07 | chr:6:32505702 |
| 6 rs78316776  | 32508012 T | 0.4727 | 2.13E-07 | chr:6:32505702 |
| 6 rs9270448   | 32558819 A | 0.4836 | 2.14E-07 | chr:6:32505702 |
| 6 rs75876220  | 32454297 C | 0.2569 | 2.16E-07 | chr:6:32505702 |
| 6 rs116229360 | 32526811 A | 0.4255 | 2.16E-07 | chr:6:32505702 |
| 6 rs544126617 | 32510976 A | 0.4806 | 2.17E-07 | chr:6:32505702 |
| 6 rs577174379 | 32510979 G | 0.4806 | 2.17E-07 | chr:6:32505702 |
| 6 rs9270613   | 32565109 T | 0.2199 | 2.17E-07 | chr:6:32505702 |
| 6 rs184149877 | 32525731 A | 0.4912 | 2.17E-07 | chr:6:32505702 |
| 6 rs116181884 | 32487509 T | 0.4528 | 2.19E-07 | chr:6:32505702 |
| 6 rs142795234 | 32487593 T | 0.467  | 2.20E-07 | chr:6:32505702 |
| 6 rs9270382   | 32558285 G | 0.4228 | 2.21E-07 | chr:6:32505702 |
| 6 rs529924829 | 32486993 G | 2.649  | 2.22E-07 | chr:6:32505702 |
| 6 rs141114903 | 32487814 C | 0.4687 | 2.24E-07 | chr:6:32505702 |

|               |            |        |          |                |
|---------------|------------|--------|----------|----------------|
| 6 rs186648552 | 32525996 T | 0.52   | 2.24E-07 | chr:6:32505702 |
| 6 rs9270616   | 32565154 C | 0.4383 | 2.25E-07 | chr:6:32505702 |
| 6 rs560277143 | 32547480 T | 0.514  | 2.27E-07 | chr:6:32505702 |
| 6 rs9269502   | 32543121 G | 2.579  | 2.27E-07 | chr:6:32505702 |
| 6 rs540304678 | 32536503 C | 1.893  | 2.28E-07 | chr:6:32505702 |
| 6 rs72849269  | 32468939 A | 0.3966 | 2.30E-07 | chr:6:32505702 |
| 6 rs141022812 | 32533567 G | 0.4616 | 2.33E-07 | chr:6:32505702 |
| 6 rs9270026   | 32553262 A | 0.2826 | 2.33E-07 | chr:6:32505702 |
| 6 rs571832998 | 32535560 G | 0.4533 | 2.37E-07 | chr:6:32505702 |
| 6 rs141684647 | 32507289 C | 0.5029 | 2.41E-07 | chr:6:32505702 |
| 6 rs201843924 | 32486878 T | 0.3864 | 2.48E-07 | chr:6:32505702 |
| 6 rs9269720   | 32547319 T | 0.4675 | 2.52E-07 | chr:6:32505702 |
| 6 rs545728465 | 32547479 C | 0.516  | 2.52E-07 | chr:6:32505702 |
| 6 rs199507577 | 32524985 C | 0.4155 | 2.52E-07 | chr:6:32505702 |
| 6 rs201400520 | 32524983 C | 0.4155 | 2.52E-07 | chr:6:32505702 |
| 6 rs9269564   | 32544471 C | 0.354  | 2.53E-07 | chr:6:32505702 |
| 6 rs574264514 | 32547472 A | 0.5153 | 2.53E-07 | chr:6:32505702 |
| 6 rs569972115 | 32535638 G | 0.4875 | 2.57E-07 | chr:6:32505702 |
| 6 rs9270606   | 32564869 C | 0.4389 | 2.62E-07 | chr:6:32505702 |
| 6 rs374949924 | 32534231 G | 0.5054 | 2.66E-07 | chr:6:32505702 |
| 6 rs9269581   | 32544785 A | 0.4176 | 2.67E-07 | chr:6:32505702 |
| 6 rs80296745  | 32478683 T | 2.025  | 2.69E-07 | chr:6:32505702 |
| 6 rs78776915  | 32469380 T | 0.3518 | 2.71E-07 | chr:6:32505702 |
| 6 rs372568767 | 32535570 C | 0.454  | 2.72E-07 | chr:6:32505702 |
| 6 rs112652539 | 32503128 G | 0.3919 | 2.73E-07 | chr:6:32505702 |
| 6 rs9270582   | 32561161 T | 0.2713 | 2.74E-07 | chr:6:32505702 |
| 6 rs77932549  | 32524736 G | 0.474  | 2.74E-07 | chr:6:32505702 |
| 6 rs78025613  | 32524735 A | 0.474  | 2.74E-07 | chr:6:32505702 |
| 6 rs9270326   | 32557812 C | 0.2905 | 2.74E-07 | chr:6:32505702 |
| 6 rs140542936 | 32525780 C | 0.4985 | 2.75E-07 | chr:6:32505702 |
| 6 rs62405649  | 32534491 G | 0.4004 | 2.76E-07 | chr:6:32505702 |
| 6 rs146225755 | 32491807 G | 0.5055 | 2.77E-07 | chr:6:32505702 |
| 6 rs9270388   | 32558343 C | 0.4944 | 2.79E-07 | chr:6:32505702 |
| 6 rs116715716 | 32506910 C | 0.5314 | 2.79E-07 | chr:6:32505702 |
| 6 rs9271489   | 32589051 A | 2.215  | 2.81E-07 | chr:6:32505702 |
| 6 rs148728069 | 32496097 C | 0.5269 | 2.81E-07 | chr:6:32505702 |
| 6 rs181916895 | 32525947 G | 1.82   | 2.82E-07 | chr:6:32505702 |
| 6 rs542755566 | 32525942 G | 1.82   | 2.82E-07 | chr:6:32505702 |
| 6 rs116783886 | 32521236 T | 7.02   | 2.82E-07 | chr:6:32505702 |
| 6 rs59066278  | 32510239 T | 0.4113 | 2.83E-07 | chr:6:32505702 |
| 6 rs9270484   | 32559063 A | 0.2748 | 2.85E-07 | chr:6:32505702 |
| 6 rs72845730  | 32526731 A | 0.3793 | 2.85E-07 | chr:6:32505702 |
| 6 rs139447342 | 32526123 C | 0.5256 | 2.86E-07 | chr:6:32505702 |

|                          |            |        |          |                |
|--------------------------|------------|--------|----------|----------------|
| 6 rs115834108            | 32459908 G | 0.5419 | 2.88E-07 | chr:6:32505702 |
| 6 rs9269588              | 32544887 G | 0.3954 | 2.89E-07 | chr:6:32505702 |
| 6 rs9269589              | 32544890 C | 0.3954 | 2.89E-07 | chr:6:32505702 |
| 6 rs533418679            | 32526140 A | 1.819  | 2.90E-07 | chr:6:32505702 |
| 6 rs147962567;rs35980928 | 32557378 C | 3.36   | 2.96E-07 | chr:6:32505702 |
| 6 rs701831               | 32549401 T | 0.2388 | 3.12E-07 | chr:6:32505702 |
| 6 rs112114145            | 32535188 A | 0.4985 | 3.14E-07 | chr:6:32505702 |
| 6 rs139296575            | 32469233 A | 0.3801 | 3.15E-07 | chr:6:32505702 |
| 6 rs547245894            | 32469227 C | 0.3801 | 3.15E-07 | chr:6:32505702 |
| 6 rs146797212            | 32507206 G | 0.5022 | 3.19E-07 | chr:6:32505702 |
| 6 rs9271533              | 32589952 T | 2.139  | 3.22E-07 | chr:6:32505702 |
| 6 rs9269295              | 32539475 C | 1.891  | 3.22E-07 | chr:6:32505702 |
| 6 rs9269715              | 32547278 T | 0.4962 | 3.22E-07 | chr:6:32505702 |
| 6 rs9269723              | 32547336 T | 0.4764 | 3.22E-07 | chr:6:32505702 |
| 6 rs114278037            | 32507173 G | 0.5025 | 3.24E-07 | chr:6:32505702 |
| 6 rs115824930            | 32507172 T | 0.5025 | 3.24E-07 | chr:6:32505702 |
| 6 rs181471921            | 32507163 A | 0.5025 | 3.24E-07 | chr:6:32505702 |
| 6 rs28437337             | 32451484 T | 0.2917 | 3.25E-07 | chr:6:32505702 |
| 6 rs548599006            | 32522315 C | 0.2926 | 3.31E-07 | chr:6:32505702 |
| 6 rs9269587              | 32544880 C | 0.3957 | 3.34E-07 | chr:6:32505702 |
| 6 rs73729123             | 32519811 T | 0.3904 | 3.37E-07 | chr:6:32505702 |
| 6 rs9269964              | 32552212 T | 2.213  | 3.41E-07 | chr:6:32505702 |
| 6 rs115254515            | 32491895 C | 0.5027 | 3.47E-07 | chr:6:32505702 |
| 6 rs141961165            | 32506799 C | 0.4693 | 3.48E-07 | chr:6:32505702 |
| 6 rs9271539              | 32590028 A | 2.185  | 3.49E-07 | chr:6:32505702 |
| 6 rs9271508              | 32589410 T | 2.193  | 3.51E-07 | chr:6:32505702 |
| 6 rs73727915             | 32497046 C | 0.446  | 3.52E-07 | chr:6:32505702 |
| 6 rs9269380              | 32540922 A | 0.4708 | 3.60E-07 | chr:6:32505702 |
| 6 rs74583807             | 32469214 T | 0.3839 | 3.60E-07 | chr:6:32505702 |
| 6 rs80293621             | 32469218 T | 0.3839 | 3.60E-07 | chr:6:32505702 |
| 6 rs9271558              | 32590348 G | 2.17   | 3.65E-07 | chr:6:32505702 |
| 6 rs2760981              | 32565465 G | 0.3466 | 3.65E-07 | chr:6:32505702 |
| 6 rs2395225              | 32590624 C | 2.186  | 3.67E-07 | chr:6:32505702 |
| 6 rs189560008            | 32526138 T | 0.5205 | 3.69E-07 | chr:6:32505702 |
| 6 rs79601580             | 32507591 G | 0.4541 | 3.76E-07 | chr:6:32505702 |
| 6 rs9270406              | 32558448 G | 0.4899 | 3.77E-07 | chr:6:32505702 |
| 6 rs115176251            | 32538129 G | 0.3743 | 3.80E-07 | chr:6:32505702 |
| 6 rs144578241            | 32536479 A | 1.877  | 3.81E-07 | chr:6:32505702 |
| 6 rs9270965              | 32573471 A | 0.2972 | 3.85E-07 | chr:6:32505702 |
| 6 rs28952268             | 32446724 T | 0.2996 | 3.86E-07 | chr:6:32505702 |
| 6 rs575449137            | 32536491 A | 1.875  | 3.87E-07 | chr:6:32505702 |
| 6 rs79749596             | 32534021 T | 0.4485 | 3.88E-07 | chr:6:32505702 |
| 6 rs9268846              | 32429245 G | 0.3543 | 3.91E-07 | chr:6:32505702 |



|               |            |        |          |                |
|---------------|------------|--------|----------|----------------|
| 6 rs28559730  | 32526366 T | 0.2943 | 3.93E-07 | chr:6:32505702 |
| 6 rs28438482  | 32451243 G | 0.2805 | 3.94E-07 | chr:6:32505702 |
| 6 rs28627501  | 32451242 G | 0.2805 | 3.94E-07 | chr:6:32505702 |
| 6 rs9270123   | 32555032 G | 0.3672 | 3.98E-07 | chr:6:32505702 |
| 6 rs9269523   | 32543647 C | 0.3272 | 3.99E-07 | chr:6:32505702 |
| 6 rs9269905   | 32551291 T | 0.4317 | 4.00E-07 | chr:6:32505702 |
| 6 rs112675983 | 32469251 T | 0.3851 | 4.01E-07 | chr:6:32505702 |
| 6 rs114944990 | 32526885 C | 0.445  | 4.13E-07 | chr:6:32505702 |
| 6 rs9269525   | 32543676 C | 0.3271 | 4.16E-07 | chr:6:32505702 |
| 6 rs9271535   | 32589959 T | 2.127  | 4.17E-07 | chr:6:32505702 |
| 6 rs673002    | 32577814 G | 0.1904 | 4.20E-07 | chr:6:32505702 |
| 6 rs113496464 | 32494011 A | 0.4495 | 4.23E-07 | chr:6:32505702 |
| 6 rs75287767  | 32521735 T | 0.4005 | 4.29E-07 | chr:6:32505702 |
| 6 rs9270366   | 32558175 C | 0.3423 | 4.34E-07 | chr:6:32505702 |
| 6 rs9270745   | 32568264 G | 0.4727 | 4.35E-07 | chr:6:32505702 |
| 6 rs371700873 | 32514900 A | 0.4894 | 4.36E-07 | chr:6:32505702 |
| 6 rs79878723  | 32505682 C | 0.497  | 4.39E-07 | chr:6:32505702 |
| 6 rs371337007 | 32493146 G | 0.4431 | 4.40E-07 | chr:6:32505702 |
| 6 rs9269541   | 32544010 A | 0.3191 | 4.52E-07 | chr:6:32505702 |
| 6 rs62405643  | 32517807 C | 2.021  | 4.56E-07 | chr:6:32505702 |
| 6 rs616187    | 32574305 G | 0.4265 | 4.57E-07 | chr:6:32505702 |
| 6 rs72508432  | 32487524 G | 0.464  | 4.60E-07 | chr:6:32505702 |
| 6 rs180713844 | 32526141 A | 0.5221 | 4.65E-07 | chr:6:32505702 |
| 6 rs58769847  | 32481122 C | 0.563  | 4.68E-07 | chr:6:32505702 |
| 6 rs528638684 | 32490600 G | 0.5173 | 4.69E-07 | chr:6:32505702 |
| 6 rs9270362   | 32558135 T | 0.3234 | 4.69E-07 | chr:6:32505702 |
| 6 rs9271130   | 32576894 A | 0.4307 | 4.71E-07 | chr:6:32505702 |
| 6 rs9269567   | 32544572 A | 0.3239 | 4.76E-07 | chr:6:32505702 |
| 6 rs9269568   | 32544577 C | 0.3239 | 4.76E-07 | chr:6:32505702 |
| 6 rs35121819  | 32453318 C | 0.3616 | 4.78E-07 | chr:6:32505702 |
| 6 rs9269722   | 32547328 A | 0.4859 | 4.82E-07 | chr:6:32505702 |
| 6 rs3021303   | 32575746 G | 0.4465 | 4.92E-07 | chr:6:32505702 |
| 6 rs9269566   | 32544561 G | 0.3237 | 4.96E-07 | chr:6:32505702 |
| 6 rs527679389 | 32526147 T | 0.5225 | 4.98E-07 | chr:6:32505702 |
| 6 rs115814063 | 32492093 T | 0.4919 | 5.05E-07 | chr:6:32505702 |
| 6 rs192994337 | 32511083 A | 0.4951 | 5.11E-07 | chr:6:32505702 |
| 6 rs112550762 | 32507514 A | 0.4719 | 5.21E-07 | chr:6:32505702 |
| 6 rs9270511   | 32559371 T | 0.3579 | 5.25E-07 | chr:6:32505702 |
| 6 rs9269409   | 32541426 G | 0.3238 | 5.25E-07 | chr:6:32505702 |
| 6 rs9269485   | 32542728 T | 0.3235 | 5.25E-07 | chr:6:32505702 |
| 6 rs36101847  | 32550431 T | 0.2565 | 5.27E-07 | chr:6:32505702 |
| 6 rs5004278   | 32582401 G | 0.4208 | 5.31E-07 | chr:6:32505702 |
| 6 rs5004279   | 32582406 G | 0.4208 | 5.31E-07 | chr:6:32505702 |

|               |            |        |          |                |
|---------------|------------|--------|----------|----------------|
| 6 rs528723549 | 32490420 A | 0.5265 | 5.33E-07 | chr:6:32505702 |
| 6 rs9270357   | 32558092 C | 0.3228 | 5.35E-07 | chr:6:32505702 |
| 6 rs9270358   | 32558096 A | 0.3228 | 5.35E-07 | chr:6:32505702 |
| 6 rs530004672 | 32526841 T | 0.473  | 5.35E-07 | chr:6:32505702 |
| 6 rs77951594  | 32499128 A | 0.5236 | 5.37E-07 | chr:6:32505702 |
| 6 rs9271526   | 32589862 A | 2.132  | 5.43E-07 | chr:6:32505702 |
| 6 rs9269693   | 32546866 T | 0.3229 | 5.48E-07 | chr:6:32505702 |
| 6 rs9269527   | 32543691 A | 0.3258 | 5.49E-07 | chr:6:32505702 |
| 6 rs9269649   | 32546067 C | 0.323  | 5.49E-07 | chr:6:32505702 |
| 6 rs9269669   | 32546418 C | 0.339  | 5.51E-07 | chr:6:32505702 |
| 6 rs115024757 | 32526836 C | 0.4567 | 5.51E-07 | chr:6:32505702 |
| 6 rs1064701   | 32546795 T | 0.3229 | 5.53E-07 | chr:6:32505702 |
| 6 rs9269916   | 32551468 A | 0.3709 | 5.54E-07 | chr:6:32505702 |
| 6 rs9269917   | 32551469 G | 0.3709 | 5.54E-07 | chr:6:32505702 |
| 6 rs112013291 | 32536551 G | 0.5481 | 5.56E-07 | chr:6:32505702 |
| 6 rs75236519  | 32460670 T | 0.5614 | 5.59E-07 | chr:6:32505702 |
| 6 rs201614260 | 32557436 G | 3.039  | 5.67E-07 | chr:6:32505702 |
| 6 rs9270512   | 32559380 G | 0.358  | 5.69E-07 | chr:6:32505702 |
| 6 rs140190321 | 32511008 T | 0.4998 | 5.74E-07 | chr:6:32505702 |
| 6 rs572123865 | 32497098 G | 0.4334 | 5.78E-07 | chr:6:32505702 |
| 6 rs9269536   | 32543923 C | 0.3167 | 5.78E-07 | chr:6:32505702 |
| 6 rs9269486   | 32542791 C | 0.3227 | 5.83E-07 | chr:6:32505702 |
| 6 rs9269480   | 32542568 T | 0.3184 | 5.83E-07 | chr:6:32505702 |
| 6 rs77233532  | 32510740 A | 0.4847 | 5.88E-07 | chr:6:32505702 |
| 6 rs9270242   | 32556964 C | 0.3076 | 5.97E-07 | chr:6:32505702 |
| 6 rs9270243   | 32556965 T | 0.3076 | 5.97E-07 | chr:6:32505702 |
| 6 rs9270244   | 32556967 T | 0.3076 | 5.97E-07 | chr:6:32505702 |
| 6 rs9269478   | 32542551 G | 0.3182 | 5.99E-07 | chr:6:32505702 |
| 6 rs137863146 | 32489871 G | 2.031  | 6.00E-07 | chr:6:32505702 |
| 6 rs191795965 | 32455073 T | 0.3952 | 6.00E-07 | chr:6:32505702 |
| 6 rs538742897 | 32526773 C | 0.4271 | 6.00E-07 | chr:6:32505702 |
| 6 rs72849254  | 32454200 T | 0.2451 | 6.05E-07 | chr:6:32505702 |
| 6 rs373964410 | 32497086 C | 0.4335 | 6.05E-07 | chr:6:32505702 |
| 6 rs567608492 | 32526161 A | 0.5213 | 6.07E-07 | chr:6:32505702 |
| 6 rs9269705   | 32547182 T | 2.274  | 6.08E-07 | chr:6:32505702 |
| 6 rs9270507   | 32559326 T | 0.3843 | 6.08E-07 | chr:6:32505702 |
| 6 rs9269396   | 32541290 G | 0.4928 | 6.08E-07 | chr:6:32505702 |
| 6 rs9270508   | 32559347 G | 0.3844 | 6.09E-07 | chr:6:32505702 |
| 6 rs9270509   | 32559355 A | 0.3844 | 6.09E-07 | chr:6:32505702 |
| 6 rs9270514   | 32559418 G | 0.3411 | 6.11E-07 | chr:6:32505702 |
| 6 rs9269611   | 32545248 C | 0.3412 | 6.16E-07 | chr:6:32505702 |
| 6 rs9269454   | 32542086 A | 0.3214 | 6.18E-07 | chr:6:32505702 |
| 6 rs76133616  | 32506895 A | 0.5106 | 6.23E-07 | chr:6:32505702 |

|               |            |        |          |                |
|---------------|------------|--------|----------|----------------|
| 6 rs9269476   | 32542501 T | 0.318  | 6.27E-07 | chr:6:32505702 |
| 6 rs73407208  | 32491721 T | 1.978  | 6.29E-07 | chr:6:32505702 |
| 6 rs9271328   | 32582548 A | 0.4219 | 6.34E-07 | chr:6:32505702 |
| 6 rs189723252 | 32494948 T | 1.809  | 6.47E-07 | chr:6:32505702 |
| 6 rs140849564 | 32490607 A | 0.4953 | 6.51E-07 | chr:6:32505702 |
| 6 rs9269655   | 32546132 G | 0.3223 | 6.51E-07 | chr:6:32505702 |
| 6 rs9270639   | 32565658 T | 2.034  | 6.53E-07 | chr:6:32505702 |
| 6 rs111779823 | 32491965 C | 0.5022 | 6.56E-07 | chr:6:32505702 |
| 6 rs549407206 | 32526160 G | 0.527  | 6.57E-07 | chr:6:32505702 |
| 6 rs9270391   | 32558361 G | 0.5155 | 6.57E-07 | chr:6:32505702 |
| 6 rs9269544   | 32544129 G | 0.3259 | 6.61E-07 | chr:6:32505702 |
| 6 rs34288859  | 32545996 A | 0.322  | 6.69E-07 | chr:6:32505702 |
| 6 rs72851096  | 32505357 A | 0.475  | 6.74E-07 | chr:6:32505702 |
| 6 rs9270695   | 32567154 A | 0.2977 | 6.76E-07 | chr:6:32505702 |
| 6 rs9270696   | 32567155 G | 0.2977 | 6.76E-07 | chr:6:32505702 |
| 6 rs199973717 | 32493600 A | 0.4058 | 6.76E-07 | chr:6:32505702 |
| 6 rs113321784 | 32493147 T | 0.436  | 6.76E-07 | chr:6:32505702 |
| 6 rs114895810 | 32473514 C | 2.443  | 6.77E-07 | chr:6:32505702 |
| 6 rs140070075 | 32498899 A | 0.4499 | 6.79E-07 | chr:6:32505702 |
| 6 rs116711613 | 32492041 C | 0.5027 | 6.83E-07 | chr:6:32505702 |
| 6 rs60378094  | 32493690 C | 0.4527 | 6.87E-07 | chr:6:32505702 |
| 6 rs9269545   | 32544145 T | 0.3257 | 6.88E-07 | chr:6:32505702 |
| 6 rs9269634   | 32545706 A | 0.3216 | 6.90E-07 | chr:6:32505702 |
| 6 rs74508474  | 32454156 C | 0.2473 | 7.00E-07 | chr:6:32505702 |
| 6 rs79973795  | 32505443 A | 0.4966 | 7.01E-07 | chr:6:32505702 |
| 6 rs9271340   | 32582932 T | 0.4226 | 7.03E-07 | chr:6:32505702 |
| 6 rs9269607   | 32545168 G | 0.341  | 7.03E-07 | chr:6:32505702 |
| 6 rs145606733 | 32491959 A | 0.5026 | 7.05E-07 | chr:6:32505702 |
| 6 rs113319840 | 32507441 T | 0.4821 | 7.06E-07 | chr:6:32505702 |
| 6 rs34544636  | 32503879 T | 0.2752 | 7.13E-07 | chr:6:32505702 |
| 6 rs9269348   | 32540474 C | 0.4841 | 7.17E-07 | chr:6:32505702 |
| 6 rs9269332   | 32540077 A | 0.3522 | 7.18E-07 | chr:6:32505702 |
| 6 rs75700544  | 32469300 T | 0.4727 | 7.21E-07 | chr:6:32505702 |
| 6 rs9269668   | 32546394 G | 0.3417 | 7.24E-07 | chr:6:32505702 |
| 6 rs114085331 | 32479430 A | 2.006  | 7.33E-07 | chr:6:32505702 |
| 6 rs35773267  | 32555944 T | 0.2624 | 7.34E-07 | chr:6:32505702 |
| 6 rs557756256 | 32526179 T | 0.5282 | 7.41E-07 | chr:6:32505702 |
| 6 rs1064707   | 32546743 C | 0.3212 | 7.44E-07 | chr:6:32505702 |
| 6 rs9269923   | 32551604 T | 2.022  | 7.51E-07 | chr:6:32505702 |
| 6 rs9269785   | 32549053 T | 2.454  | 7.52E-07 | chr:6:32505702 |
| 6 rs9269787   | 32549070 G | 2.454  | 7.52E-07 | chr:6:32505702 |
| 6 rs28895241  | 32443665 C | 0.3735 | 7.54E-07 | chr:6:32505702 |
| 6 rs9269553   | 32544287 C | 0.3197 | 7.58E-07 | chr:6:32505702 |

|               |            |        |          |                |
|---------------|------------|--------|----------|----------------|
| 6 rs112062732 | 32453936 C | 0.3059 | 7.65E-07 | chr:6:32505702 |
| 6 rs186995982 | 32494270 C | 0.5352 | 7.76E-07 | chr:6:32505702 |
| 6 rs75953322  | 32506798 T | 0.4304 | 7.80E-07 | chr:6:32505702 |
| 6 rs9269881   | 32550918 C | 0.3743 | 7.81E-07 | chr:6:32505702 |
| 6 rs9269529   | 32543733 T | 0.3226 | 7.92E-07 | chr:6:32505702 |
| 6 rs9269530   | 32543734 T | 0.3226 | 7.92E-07 | chr:6:32505702 |
| 6 rs531950386 | 32486540 T | 1.818  | 8.00E-07 | chr:6:32505702 |
| 6 rs9269489   | 32542832 T | 0.3199 | 8.17E-07 | chr:6:32505702 |
| 6 rs145316959 | 32521201 T | 5.098  | 8.18E-07 | chr:6:32505702 |
| 6 rs9270487   | 32559076 G | 2.012  | 8.18E-07 | chr:6:32505702 |
| 6 rs75969927  | 32502416 T | 0.4794 | 8.25E-07 | chr:6:32505702 |
| 6 rs111478896 | 32507910 T | 1.812  | 8.36E-07 | chr:6:32505702 |
| 6 rs9269897   | 32551112 G | 0.4352 | 8.45E-07 | chr:6:32505702 |
| 6 rs9269876   | 32550860 T | 0.3258 | 8.55E-07 | chr:6:32505702 |
| 6 rs9269701   | 32547053 A | 0.32   | 8.57E-07 | chr:6:32505702 |
| 6 rs9271153   | 32577549 A | 0.298  | 8.58E-07 | chr:6:32505702 |
| 6 rs9271156   | 32577590 G | 0.298  | 8.58E-07 | chr:6:32505702 |
| 6 rs9269622   | 32545523 G | 0.3204 | 8.61E-07 | chr:6:32505702 |
| 6 rs9269471   | 32542322 A | 0.3374 | 8.69E-07 | chr:6:32505702 |
| 6 rs9270047   | 32553697 T | 0.4574 | 8.71E-07 | chr:6:32505702 |
| 6 rs35747774  | 32487050 C | 2.578  | 8.74E-07 | chr:6:32505702 |
| 6 rs9271225   | 32579420 C | 0.3188 | 8.79E-07 | chr:6:32505702 |
| 6 rs9271003   | 32574527 T | 0.3423 | 8.80E-07 | chr:6:32505702 |
| 6 rs9269492   | 32542924 C | 0.3179 | 8.87E-07 | chr:6:32505702 |
| 6 rs9271066   | 32575631 A | 0.2985 | 8.92E-07 | chr:6:32505702 |
| 6 rs9269891   | 32551017 C | 0.5114 | 8.92E-07 | chr:6:32505702 |
| 6 rs9269491   | 32542844 A | 0.3189 | 8.94E-07 | chr:6:32505702 |
| 6 rs75499602  | 32506794 C | 0.4312 | 8.94E-07 | chr:6:32505702 |
| 6 rs9270209   | 32556443 A | 0.3582 | 8.98E-07 | chr:6:32505702 |
| 6 rs113749865 | 32481973 T | 0.5047 | 8.99E-07 | chr:6:32505702 |
| 6 rs2760982   | 32565495 G | 0.4452 | 9.18E-07 | chr:6:32505702 |
| 6 rs9271063   | 32575584 A | 0.2982 | 9.21E-07 | chr:6:32505702 |
| 6 rs9271064   | 32575601 A | 0.2982 | 9.21E-07 | chr:6:32505702 |
| 6 rs9270446   | 32558775 C | 0.5286 | 9.24E-07 | chr:6:32505702 |
| 6 rs9269576   | 32544724 A | 0.3994 | 9.29E-07 | chr:6:32505702 |
| 6 rs9270563   | 32560764 T | 0.3172 | 9.33E-07 | chr:6:32505702 |
| 6 rs9269427   | 32541581 T | 0.3402 | 9.41E-07 | chr:6:32505702 |
| 6 rs9269431   | 32541655 C | 0.3402 | 9.41E-07 | chr:6:32505702 |
| 6 rs71549285  | 32505371 T | 0.4769 | 9.63E-07 | chr:6:32505702 |
| 6 rs9270516   | 32559468 T | 0.3184 | 9.63E-07 | chr:6:32505702 |
| 6 rs9270517   | 32559472 T | 0.3184 | 9.63E-07 | chr:6:32505702 |
| 6 rs539676807 | 32526174 A | 0.53   | 9.66E-07 | chr:6:32505702 |
| 6 rs569049066 | 32526173 A | 0.53   | 9.66E-07 | chr:6:32505702 |

|               |            |        |          |                |
|---------------|------------|--------|----------|----------------|
| 6 rs9269505   | 32543169 T | 0.3424 | 9.69E-07 | chr:6:32505702 |
| 6 rs9269558   | 32544351 A | 0.3203 | 9.86E-07 | chr:6:32505702 |
| 6 rs113698180 | 32518798 C | 0.4039 | 9.91E-07 | chr:6:32505702 |
| 6 rs9271106   | 32576595 G | 0.3175 | 9.91E-07 | chr:6:32505702 |
| 6 rs9271107   | 32576604 A | 0.3175 | 9.91E-07 | chr:6:32505702 |
| 6 rs9270513   | 32559400 T | 0.3575 | 9.98E-07 | chr:6:32505702 |
| 6 rs9269734   | 32547433 T | 0.5242 | 1.00E-06 | chr:6:32505702 |
| 6 rs186020633 | 32535771 A | 1.977  | 1.01E-06 | chr:6:32505702 |
| 6 rs67407114  | 32526500 A | 0.3927 | 1.01E-06 | chr:6:32505702 |
| 6 rs9269470   | 32542305 G | 0.3405 | 1.02E-06 | chr:6:32505702 |
| 6 rs111685796 | 32504453 G | 0.3798 | 1.02E-06 | chr:6:32505702 |
| 6 rs143945008 | 32513183 T | 2.063  | 1.02E-06 | chr:6:32505702 |
| 6 rs192052326 | 32528176 T | 1.678  | 1.03E-06 | chr:6:32505702 |
| 6 rs59447698  | 32481125 G | 1.72   | 1.03E-06 | chr:6:32505702 |
| 6 rs9270271   | 32557209 T | 0.3175 | 1.03E-06 | chr:6:32505702 |
| 6 rs573138176 | 32526180 A | 0.5305 | 1.03E-06 | chr:6:32505702 |
| 6 rs112399032 | 32510947 T | 0.4987 | 1.04E-06 | chr:6:32505702 |
| 6 rs9271233   | 32579533 C | 0.3177 | 1.06E-06 | chr:6:32505702 |
| 6 rs41287329  | 32552728 G | 1.91   | 1.08E-06 | chr:6:32505702 |
| 6 rs41287330  | 32552730 A | 1.91   | 1.08E-06 | chr:6:32505702 |
| 6 rs9271108   | 32576633 G | 0.3172 | 1.08E-06 | chr:6:32505702 |
| 6 rs186911188 | 32510905 G | 0.5054 | 1.09E-06 | chr:6:32505702 |
| 6 rs9270054   | 32553871 A | 0.3174 | 1.09E-06 | chr:6:32505702 |
| 6 rs9270948   | 32572972 C | 0.3377 | 1.09E-06 | chr:6:32505702 |
| 6 rs9270949   | 32572975 T | 0.3377 | 1.09E-06 | chr:6:32505702 |
| 6 rs9269656   | 32546203 A | 0.3377 | 1.10E-06 | chr:6:32505702 |
| 6 rs9269657   | 32546205 A | 0.3377 | 1.10E-06 | chr:6:32505702 |
| 6 rs9269575   | 32544714 G | 0.3996 | 1.10E-06 | chr:6:32505702 |
| 6 rs9270624   | 32565413 G | 0.3165 | 1.11E-06 | chr:6:32505702 |
| 6 rs72849268  | 32468931 A | 0.3723 | 1.11E-06 | chr:6:32505702 |
| 6 rs9271234   | 32579549 G | 0.3169 | 1.11E-06 | chr:6:32505702 |
| 6 rs71536581  | 32533030 C | 0.2992 | 1.13E-06 | chr:6:32505702 |
| 6 rs9271210   | 32579070 C | 0.3139 | 1.13E-06 | chr:6:32505702 |
| 6 rs9271211   | 32579078 C | 0.3139 | 1.13E-06 | chr:6:32505702 |
| 6 rs9271212   | 32579079 A | 0.3139 | 1.13E-06 | chr:6:32505702 |
| 6 rs9271417   | 32587818 C | 2.087  | 1.13E-06 | chr:6:32505702 |
| 6 rs9271018   | 32574807 T | 0.3701 | 1.14E-06 | chr:6:32505702 |
| 6 rs9271019   | 32574808 G | 0.3701 | 1.14E-06 | chr:6:32505702 |
| 6 rs7756647   | 32582843 G | 2.178  | 1.14E-06 | chr:6:32505702 |
| 6 rs9270213   | 32556494 A | 0.3995 | 1.14E-06 | chr:6:32505702 |
| 6 rs536803934 | 32526907 T | 2.145  | 1.14E-06 | chr:6:32505702 |
| 6 rs9271105   | 32576577 T | 0.3157 | 1.15E-06 | chr:6:32505702 |
| 6 rs9269439   | 32541898 C | 0.3384 | 1.15E-06 | chr:6:32505702 |

|               |            |        |          |                |
|---------------|------------|--------|----------|----------------|
| 6 rs9270648   | 32565807 A | 0.3157 | 1.15E-06 | chr:6:32505702 |
| 6 rs72508415  | 32459793 A | 1.812  | 1.16E-06 | chr:6:32505702 |
| 6 rs9271453   | 32588416 A | 0.3871 | 1.17E-06 | chr:6:32505702 |
| 6 rs563226460 | 32490851 G | 0.5561 | 1.17E-06 | chr:6:32505702 |
| 6 rs9269309   | 32539625 T | 0.4472 | 1.17E-06 | chr:6:32505702 |
| 6 rs9270335   | 32557913 A | 0.3693 | 1.17E-06 | chr:6:32505702 |
| 6 rs9271550   | 32590274 A | 2.085  | 1.18E-06 | chr:6:32505702 |
| 6 rs9271154   | 32577563 G | 0.3178 | 1.18E-06 | chr:6:32505702 |
| 6 rs72508434  | 32487563 C | 0.4785 | 1.18E-06 | chr:6:32505702 |
| 6 rs9270062   | 32553995 G | 0.3729 | 1.19E-06 | chr:6:32505702 |
| 6 rs9270232   | 32556811 C | 0.3136 | 1.20E-06 | chr:6:32505702 |
| 6 rs142206489 | 32536167 A | 2.027  | 1.20E-06 | chr:6:32505702 |
| 6 rs9269829   | 32549915 T | 0.3357 | 1.21E-06 | chr:6:32505702 |
| 6 rs9269830   | 32549936 G | 0.3357 | 1.21E-06 | chr:6:32505702 |
| 6 rs79996892  | 32507051 C | 0.5261 | 1.21E-06 | chr:6:32505702 |
| 6 rs9270646   | 32565779 A | 0.3157 | 1.21E-06 | chr:6:32505702 |
| 6 rs9270010   | 32552930 T | 0.3334 | 1.21E-06 | chr:6:32505702 |
| 6 rs75202782  | 32538419 A | 0.3157 | 1.22E-06 | chr:6:32505702 |
| 6 rs200864308 | 32518611 G | 0.4102 | 1.23E-06 | chr:6:32505702 |
| 6 rs71536570  | 32531422 C | 0.3015 | 1.23E-06 | chr:6:32505702 |
| 6 rs9271111   | 32576699 G | 0.3702 | 1.24E-06 | chr:6:32505702 |
| 6 rs28383200  | 32574540 A | 0.3074 | 1.25E-06 | chr:6:32505702 |
| 6 rs71534527  | 32510978 A | 0.4857 | 1.25E-06 | chr:6:32505702 |
| 6 rs76564265  | 32530582 G | 0.3062 | 1.25E-06 | chr:6:32505702 |
| 6 rs9269246   | 32454098 C | 2.523  | 1.25E-06 | chr:6:32505702 |
| 6 rs9269499   | 32543091 C | 0.3389 | 1.26E-06 | chr:6:32505702 |
| 6 rs6933740   | 32537804 T | 1.762  | 1.26E-06 | chr:6:32505702 |
| 6 rs9270841   | 32570418 T | 0.3161 | 1.26E-06 | chr:6:32505702 |
| 6 rs9270940   | 32572850 A | 0.3154 | 1.27E-06 | chr:6:32505702 |
| 6 rs9270941   | 32572851 G | 0.3154 | 1.27E-06 | chr:6:32505702 |
| 6 rs35855915  | 32532691 G | 0.3297 | 1.27E-06 | chr:6:32505702 |
| 6 rs9270077   | 32554178 T | 0.3164 | 1.28E-06 | chr:6:32505702 |
| 6 rs9271562   | 32590411 A | 2.08   | 1.30E-06 | chr:6:32505702 |
| 6 rs9270831   | 32570221 G | 0.3153 | 1.31E-06 | chr:6:32505702 |
| 6 rs9270832   | 32570228 T | 0.3153 | 1.31E-06 | chr:6:32505702 |
| 6 rs201854374 | 32507311 C | 0.5292 | 1.31E-06 | chr:6:32505702 |
| 6 rs9270211   | 32556487 T | 0.4025 | 1.31E-06 | chr:6:32505702 |
| 6 rs9271209   | 32579035 G | 0.3153 | 1.32E-06 | chr:6:32505702 |
| 6 rs9271412   | 32587685 T | 2.087  | 1.32E-06 | chr:6:32505702 |
| 6 rs9270944   | 32572911 A | 0.3367 | 1.33E-06 | chr:6:32505702 |
| 6 rs9270208   | 32556402 G | 0.3674 | 1.33E-06 | chr:6:32505702 |
| 6 rs569962367 | 32485726 T | 0.5385 | 1.34E-06 | chr:6:32505702 |
| 6 rs9271051   | 32575290 T | 0.3148 | 1.35E-06 | chr:6:32505702 |

|               |            |        |          |                |
|---------------|------------|--------|----------|----------------|
| 6 rs9271020   | 32574840 T | 0.3365 | 1.35E-06 | chr:6:32505702 |
| 6 rs539509361 | 32594399 G | 1.967  | 1.35E-06 | chr:6:32505702 |
| 6 rs9271219   | 32579354 C | 0.3571 | 1.35E-06 | chr:6:32505702 |
| 6 rs9271220   | 32579355 A | 0.3571 | 1.35E-06 | chr:6:32505702 |
| 6 rs9270712   | 32567380 T | 0.3359 | 1.36E-06 | chr:6:32505702 |
| 6 rs9270713   | 32567381 G | 0.3359 | 1.36E-06 | chr:6:32505702 |
| 6 rs9269407   | 32541376 T | 0.3572 | 1.36E-06 | chr:6:32505702 |
| 6 rs9270162   | 32555560 A | 2.693  | 1.37E-06 | chr:6:32505702 |
| 6 rs149361627 | 32486988 G | 0.416  | 1.38E-06 | chr:6:32505702 |
| 6 rs187402303 | 32486990 A | 0.416  | 1.38E-06 | chr:6:32505702 |
| 6 rs542087123 | 32486994 A | 0.416  | 1.38E-06 | chr:6:32505702 |
| 6 rs180731180 | 32535770 C | 1.964  | 1.38E-06 | chr:6:32505702 |
| 6 rs9271049   | 32575265 T | 0.3145 | 1.38E-06 | chr:6:32505702 |
| 6 rs9271050   | 32575275 G | 0.3145 | 1.38E-06 | chr:6:32505702 |
| 6 rs9271218   | 32579327 G | 0.357  | 1.39E-06 | chr:6:32505702 |
| 6 rs9270236   | 32556887 C | 0.3153 | 1.40E-06 | chr:6:32505702 |
| 6 rs9270237   | 32556908 C | 0.3153 | 1.40E-06 | chr:6:32505702 |
| 6 rs9270158   | 32555460 G | 0.3159 | 1.42E-06 | chr:6:32505702 |
| 6 rs9270323   | 32557782 G | 0.3154 | 1.42E-06 | chr:6:32505702 |
| 6 rs67927015  | 32531442 T | 0.3043 | 1.42E-06 | chr:6:32505702 |
| 6 rs145437633 | 32487776 G | 0.4804 | 1.43E-06 | chr:6:32505702 |
| 6 rs9270233   | 32556829 G | 0.3154 | 1.43E-06 | chr:6:32505702 |
| 6 rs77117066  | 32535516 C | 0.4857 | 1.43E-06 | chr:6:32505702 |
| 6 rs9270854   | 32570809 A | 0.3153 | 1.43E-06 | chr:6:32505702 |
| 6 rs9270979   | 32573780 A | 0.3152 | 1.43E-06 | chr:6:32505702 |
| 6 rs9270833   | 32570238 T | 0.3144 | 1.43E-06 | chr:6:32505702 |
| 6 rs9270735   | 32568096 T | 0.3094 | 1.43E-06 | chr:6:32505702 |
| 6 rs9270736   | 32568097 G | 0.3094 | 1.43E-06 | chr:6:32505702 |
| 6 rs9270842   | 32570461 C | 0.3139 | 1.43E-06 | chr:6:32505702 |
| 6 rs9270843   | 32570478 A | 0.3139 | 1.43E-06 | chr:6:32505702 |
| 6 rs9271144   | 32577220 G | 0.3146 | 1.44E-06 | chr:6:32505702 |
| 6 rs9271145   | 32577224 C | 0.3146 | 1.44E-06 | chr:6:32505702 |
| 6 rs9271424   | 32587922 C | 2.073  | 1.44E-06 | chr:6:32505702 |
| 6 rs9271425   | 32587923 G | 2.073  | 1.44E-06 | chr:6:32505702 |
| 6 rs9270608   | 32565042 A | 0.3162 | 1.44E-06 | chr:6:32505702 |
| 6 rs9271439   | 32588234 G | 2.048  | 1.44E-06 | chr:6:32505702 |
| 6 rs9270225   | 32556683 G | 0.3119 | 1.44E-06 | chr:6:32505702 |
| 6 rs9270859   | 32570894 T | 0.3145 | 1.46E-06 | chr:6:32505702 |
| 6 rs9271227   | 32579480 A | 0.3143 | 1.47E-06 | chr:6:32505702 |
| 6 rs9271228   | 32579481 A | 0.3143 | 1.47E-06 | chr:6:32505702 |
| 6 rs559863405 | 32536118 G | 1.968  | 1.47E-06 | chr:6:32505702 |
| 6 rs9270498   | 32559134 A | 0.3195 | 1.47E-06 | chr:6:32505702 |
| 6 rs9270622   | 32565329 C | 0.3142 | 1.47E-06 | chr:6:32505702 |

|               |            |        |          |                |
|---------------|------------|--------|----------|----------------|
| 6 rs9270852   | 32570797 G | 0.315  | 1.47E-06 | chr:6:32505702 |
| 6 rs9270853   | 32570800 G | 0.315  | 1.47E-06 | chr:6:32505702 |
| 6 rs71536584  | 32533116 C | 0.412  | 1.49E-06 | chr:6:32505702 |
| 6 rs565682004 | 32526900 G | 2.129  | 1.49E-06 | chr:6:32505702 |
| 6 rs66491634  | 32528457 G | 0.5073 | 1.49E-06 | chr:6:32505702 |
| 6 rs9270816   | 32569879 T | 0.3094 | 1.49E-06 | chr:6:32505702 |
| 6 rs9270817   | 32569911 A | 0.3094 | 1.49E-06 | chr:6:32505702 |
| 6 rs9270780   | 32569108 C | 0.3878 | 1.49E-06 | chr:6:32505702 |
| 6 rs9270962   | 32573434 C | 0.318  | 1.49E-06 | chr:6:32505702 |
| 6 rs9270963   | 32573441 A | 0.318  | 1.49E-06 | chr:6:32505702 |
| 6 rs9270964   | 32573442 T | 0.318  | 1.49E-06 | chr:6:32505702 |
| 6 rs9270753   | 32568429 C | 0.3142 | 1.50E-06 | chr:6:32505702 |
| 6 rs9270125   | 32555049 A | 0.3102 | 1.51E-06 | chr:6:32505702 |
| 6 rs9270610   | 32565053 C | 0.318  | 1.51E-06 | chr:6:32505702 |
| 6 rs9271437   | 32588166 A | 2.071  | 1.51E-06 | chr:6:32505702 |
| 6 rs189503580 | 32488022 G | 2.491  | 1.51E-06 | chr:6:32505702 |
| 6 rs577424330 | 32488029 T | 2.491  | 1.51E-06 | chr:6:32505702 |
| 6 rs9271086   | 32576165 T | 0.3179 | 1.51E-06 | chr:6:32505702 |
| 6 rs9271087   | 32576170 C | 0.3179 | 1.51E-06 | chr:6:32505702 |
| 6 rs9271088   | 32576175 A | 0.3179 | 1.51E-06 | chr:6:32505702 |
| 6 rs9271089   | 32576177 T | 0.3179 | 1.51E-06 | chr:6:32505702 |
| 6 rs376533971 | 32540407 T | 1.782  | 1.51E-06 | chr:6:32505702 |
| 6 rs9271001   | 32574493 A | 0.3395 | 1.51E-06 | chr:6:32505702 |
| 6 rs9271002   | 32574497 T | 0.3395 | 1.51E-06 | chr:6:32505702 |
| 6 rs9270830   | 32570181 G | 0.3142 | 1.52E-06 | chr:6:32505702 |
| 6 rs9270857   | 32570849 G | 0.3142 | 1.52E-06 | chr:6:32505702 |
| 6 rs9270858   | 32570859 C | 0.3142 | 1.52E-06 | chr:6:32505702 |
| 6 rs75219938  | 32454278 T | 0.262  | 1.53E-06 | chr:6:32505702 |
| 6 rs9271140   | 32577083 C | 0.3111 | 1.53E-06 | chr:6:32505702 |
| 6 rs9271141   | 32577084 T | 0.3111 | 1.53E-06 | chr:6:32505702 |
| 6 rs9270727   | 32567954 T | 0.3145 | 1.53E-06 | chr:6:32505702 |
| 6 rs9270729   | 32567960 G | 0.3145 | 1.53E-06 | chr:6:32505702 |
| 6 rs66859861  | 32539012 T | 0.3169 | 1.53E-06 | chr:6:32505702 |
| 6 rs7768875   | 32560752 T | 2.007  | 1.54E-06 | chr:6:32505702 |
| 6 rs9271249   | 32580229 G | 0.318  | 1.54E-06 | chr:6:32505702 |
| 6 rs9270931   | 32572547 A | 0.3141 | 1.54E-06 | chr:6:32505702 |
| 6 rs79128700  | 32454275 C | 0.2615 | 1.54E-06 | chr:6:32505702 |
| 6 rs9272012   | 32598156 A | 1.84   | 1.55E-06 | chr:6:32505702 |
| 6 rs9270851   | 32570776 C | 0.3143 | 1.55E-06 | chr:6:32505702 |
| 6 rs9269857   | 32550407 G | 0.315  | 1.55E-06 | chr:6:32505702 |
| 6 rs9269858   | 32550426 G | 0.315  | 1.55E-06 | chr:6:32505702 |
| 6 rs9270909   | 32572179 A | 0.3185 | 1.56E-06 | chr:6:32505702 |
| 6 rs73726198  | 32492262 T | 0.4833 | 1.57E-06 | chr:6:32505702 |



|               |            |        |          |                |
|---------------|------------|--------|----------|----------------|
| 6 rs9270675   | 32566647 A | 0.2982 | 1.57E-06 | chr:6:32505702 |
| 6 rs73399473  | 32538959 C | 0.3169 | 1.57E-06 | chr:6:32505702 |
| 6 rs9269458   | 32542148 A | 0.3572 | 1.58E-06 | chr:6:32505702 |
| 6 rs9269461   | 32542161 C | 0.3572 | 1.58E-06 | chr:6:32505702 |
| 6 rs9269867   | 32550683 G | 0.3374 | 1.58E-06 | chr:6:32505702 |
| 6 rs9270322   | 32557776 C | 0.3137 | 1.58E-06 | chr:6:32505702 |
| 6 rs9270971   | 32573598 T | 0.3175 | 1.59E-06 | chr:6:32505702 |
| 6 rs9269282   | 32539339 A | 0.4542 | 1.59E-06 | chr:6:32505702 |
| 6 rs9270615   | 32565152 T | 0.3138 | 1.59E-06 | chr:6:32505702 |
| 6 rs9269661   | 32546259 C | 0.4128 | 1.59E-06 | chr:6:32505702 |
| 6 rs9270595   | 32561579 C | 0.3179 | 1.60E-06 | chr:6:32505702 |
| 6 rs9270168   | 32555641 A | 0.3138 | 1.60E-06 | chr:6:32505702 |
| 6 rs9270723   | 32567798 G | 0.3134 | 1.60E-06 | chr:6:32505702 |
| 6 rs9270724   | 32567820 A | 0.3134 | 1.60E-06 | chr:6:32505702 |
| 6 rs199514452 | 32557489 T | 2.891  | 1.61E-06 | chr:6:32505702 |
| 6 rs201540428 | 32557486 A | 2.891  | 1.61E-06 | chr:6:32505702 |
| 6 rs7758269   | 32598812 C | 1.973  | 1.61E-06 | chr:6:32505702 |
| 6 rs530242049 | 32536125 C | 1.966  | 1.61E-06 | chr:6:32505702 |
| 6 rs9270939   | 32572806 G | 0.3136 | 1.61E-06 | chr:6:32505702 |
| 6 rs9270180   | 32555805 A | 0.314  | 1.61E-06 | chr:6:32505702 |
| 6 rs9270754   | 32568471 G | 0.3135 | 1.62E-06 | chr:6:32505702 |
| 6 rs9270278   | 32557253 C | 0.3141 | 1.63E-06 | chr:6:32505702 |
| 6 rs9270281   | 32557267 A | 0.3141 | 1.63E-06 | chr:6:32505702 |
| 6 rs9271422   | 32587860 G | 0.3173 | 1.63E-06 | chr:6:32505702 |
| 6 rs9271083   | 32576102 T | 0.3135 | 1.63E-06 | chr:6:32505702 |
| 6 rs9271213   | 32579211 G | 0.3135 | 1.63E-06 | chr:6:32505702 |
| 6 rs9269391   | 32541128 G | 0.468  | 1.64E-06 | chr:6:32505702 |
| 6 rs9270670   | 32566533 A | 0.3131 | 1.64E-06 | chr:6:32505702 |
| 6 rs9270671   | 32566549 T | 0.3131 | 1.64E-06 | chr:6:32505702 |
| 6 rs9270672   | 32566557 G | 0.3131 | 1.64E-06 | chr:6:32505702 |
| 6 rs112221534 | 32453603 A | 0.2914 | 1.64E-06 | chr:6:32505702 |
| 6 rs9270937   | 32572757 A | 0.3133 | 1.65E-06 | chr:6:32505702 |
| 6 rs9271115   | 32576731 C | 0.4001 | 1.65E-06 | chr:6:32505702 |
| 6 rs9270856   | 32570839 A | 0.3137 | 1.65E-06 | chr:6:32505702 |
| 6 rs62405575  | 32458259 A | 0.502  | 1.65E-06 | chr:6:32505702 |
| 6 rs9270933   | 32572659 C | 0.3132 | 1.65E-06 | chr:6:32505702 |
| 6 rs9270934   | 32572695 G | 0.3132 | 1.65E-06 | chr:6:32505702 |
| 6 rs9270935   | 32572701 A | 0.3132 | 1.65E-06 | chr:6:32505702 |
| 6 rs4341046   | 32567880 C | 0.3136 | 1.65E-06 | chr:6:32505702 |
| 6 rs72508409  | 32451073 G | 17.24  | 1.66E-06 | chr:6:32505702 |
| 6 rs9271058   | 32575406 A | 0.3131 | 1.66E-06 | chr:6:32505702 |
| 6 rs9270778   | 32569050 A | 0.3131 | 1.67E-06 | chr:6:32505702 |
| 6 rs9270581   | 32561143 C | 0.3137 | 1.67E-06 | chr:6:32505702 |

|               |            |        |          |                |
|---------------|------------|--------|----------|----------------|
| 6 rs9270813   | 32569790 C | 0.3131 | 1.67E-06 | chr:6:32505702 |
| 6 rs9271205   | 32578941 G | 0.313  | 1.67E-06 | chr:6:32505702 |
| 6 rs9270908   | 32572148 G | 0.3178 | 1.68E-06 | chr:6:32505702 |
| 6 rs9270786   | 32569164 C | 0.3132 | 1.68E-06 | chr:6:32505702 |
| 6 rs9270165   | 32555627 A | 0.3143 | 1.68E-06 | chr:6:32505702 |
| 6 rs9270166   | 32555633 G | 0.3143 | 1.68E-06 | chr:6:32505702 |
| 6 rs9270405   | 32558444 G | 0.5389 | 1.68E-06 | chr:6:32505702 |
| 6 rs9270875   | 32571310 A | 0.358  | 1.68E-06 | chr:6:32505702 |
| 6 rs9271079   | 32576052 G | 0.3132 | 1.69E-06 | chr:6:32505702 |
| 6 rs9271255   | 32580357 C | 0.3121 | 1.69E-06 | chr:6:32505702 |
| 6 rs9271068   | 32575674 C | 0.313  | 1.69E-06 | chr:6:32505702 |
| 6 rs9269815   | 32549726 A | 0.3133 | 1.70E-06 | chr:6:32505702 |
| 6 rs9269816   | 32549727 T | 0.3133 | 1.70E-06 | chr:6:32505702 |
| 6 rs9269817   | 32549746 A | 0.3133 | 1.70E-06 | chr:6:32505702 |
| 6 rs9269819   | 32549782 C | 0.3133 | 1.70E-06 | chr:6:32505702 |
| 6 rs9270781   | 32569111 G | 1.922  | 1.70E-06 | chr:6:32505702 |
| 6 rs9270579   | 32561098 A | 0.313  | 1.70E-06 | chr:6:32505702 |
| 6 rs9270924   | 32572408 G | 0.3364 | 1.70E-06 | chr:6:32505702 |
| 6 rs116360287 | 32482303 G | 0.5193 | 1.71E-06 | chr:6:32505702 |
| 6 rs9269854   | 32550331 T | 0.3129 | 1.71E-06 | chr:6:32505702 |
| 6 rs73726189  | 32492008 T | 3.789  | 1.71E-06 | chr:6:32505702 |
| 6 rs9271221   | 32579363 G | 0.3566 | 1.72E-06 | chr:6:32505702 |
| 6 rs9270811   | 32569721 A | 0.3128 | 1.72E-06 | chr:6:32505702 |
| 6 rs9271149   | 32577455 A | 0.3134 | 1.72E-06 | chr:6:32505702 |
| 6 rs9271150   | 32577470 T | 0.3134 | 1.72E-06 | chr:6:32505702 |
| 6 rs9271151   | 32577474 T | 0.3134 | 1.72E-06 | chr:6:32505702 |
| 6 rs9271239   | 32579769 T | 0.3128 | 1.72E-06 | chr:6:32505702 |
| 6 rs9271097   | 32576439 C | 0.3134 | 1.73E-06 | chr:6:32505702 |
| 6 rs9271098   | 32576440 T | 0.3134 | 1.73E-06 | chr:6:32505702 |
| 6 rs9270810   | 32569659 T | 0.3128 | 1.73E-06 | chr:6:32505702 |
| 6 rs9270791   | 32569232 C | 0.3128 | 1.73E-06 | chr:6:32505702 |
| 6 rs9270792   | 32569233 A | 0.3128 | 1.73E-06 | chr:6:32505702 |
| 6 rs9271135   | 32577002 A | 0.3128 | 1.74E-06 | chr:6:32505702 |
| 6 rs9270981   | 32573932 A | 0.3134 | 1.74E-06 | chr:6:32505702 |
| 6 rs9269774   | 32548802 G | 0.3128 | 1.74E-06 | chr:6:32505702 |
| 6 rs9270071   | 32554097 G | 0.4716 | 1.74E-06 | chr:6:32505702 |
| 6 rs9270719   | 32567586 A | 0.3128 | 1.74E-06 | chr:6:32505702 |
| 6 rs9270720   | 32567627 T | 0.3128 | 1.74E-06 | chr:6:32505702 |
| 6 rs9270569   | 32560899 C | 0.3134 | 1.74E-06 | chr:6:32505702 |
| 6 rs9270668   | 32566308 A | 0.3128 | 1.75E-06 | chr:6:32505702 |
| 6 rs9270914   | 32572249 A | 0.3394 | 1.75E-06 | chr:6:32505702 |
| 6 rs9270953   | 32573045 C | 0.3129 | 1.75E-06 | chr:6:32505702 |
| 6 rs9271139   | 32577038 T | 0.3128 | 1.75E-06 | chr:6:32505702 |

|               |            |        |          |                |
|---------------|------------|--------|----------|----------------|
| 6 rs9270998   | 32574379 A | 0.3129 | 1.76E-06 | chr:6:32505702 |
| 6 rs9271021   | 32574863 G | 0.3395 | 1.76E-06 | chr:6:32505702 |
| 6 rs9271100   | 32576478 T | 0.313  | 1.76E-06 | chr:6:32505702 |
| 6 rs9271016   | 32574767 C | 0.4003 | 1.77E-06 | chr:6:32505702 |
| 6 rs9270124   | 32555040 C | 0.3135 | 1.77E-06 | chr:6:32505702 |
| 6 rs542465996 | 32485661 A | 0.5358 | 1.77E-06 | chr:6:32505702 |
| 6 rs563816645 | 32485662 C | 0.5358 | 1.77E-06 | chr:6:32505702 |
| 6 rs575576508 | 32485670 G | 0.5358 | 1.77E-06 | chr:6:32505702 |
| 6 rs113014982 | 32536382 T | 0.5326 | 1.77E-06 | chr:6:32505702 |
| 6 rs9271223   | 32579372 T | 0.313  | 1.78E-06 | chr:6:32505702 |
| 6 rs9270972   | 32573621 C | 0.3166 | 1.78E-06 | chr:6:32505702 |
| 6 rs9270552   | 32560520 G | 0.3178 | 1.79E-06 | chr:6:32505702 |
| 6 rs9270553   | 32560523 A | 0.3178 | 1.79E-06 | chr:6:32505702 |
| 6 rs9270983   | 32573973 T | 0.3131 | 1.79E-06 | chr:6:32505702 |
| 6 rs9271538   | 32589983 A | 2.033  | 1.80E-06 | chr:6:32505702 |
| 6 rs145260193 | 32455012 G | 0.3349 | 1.80E-06 | chr:6:32505702 |
| 6 rs3997874   | 32580741 A | 0.3125 | 1.80E-06 | chr:6:32505702 |
| 6 rs9270258   | 32557060 G | 0.3125 | 1.80E-06 | chr:6:32505702 |
| 6 rs9270584   | 32561277 C | 0.3125 | 1.80E-06 | chr:6:32505702 |
| 6 rs9270650   | 32565854 C | 0.3125 | 1.80E-06 | chr:6:32505702 |
| 6 rs9270678   | 32566686 T | 0.3125 | 1.80E-06 | chr:6:32505702 |
| 6 rs9270692   | 32567006 C | 0.3125 | 1.80E-06 | chr:6:32505702 |
| 6 rs9270693   | 32567007 A | 0.3125 | 1.80E-06 | chr:6:32505702 |
| 6 rs9270694   | 32567024 C | 0.3125 | 1.80E-06 | chr:6:32505702 |
| 6 rs9270768   | 32568805 T | 0.3125 | 1.80E-06 | chr:6:32505702 |
| 6 rs9270985   | 32574027 T | 0.3125 | 1.80E-06 | chr:6:32505702 |
| 6 rs9270987   | 32574127 T | 0.3125 | 1.80E-06 | chr:6:32505702 |
| 6 rs9270988   | 32574130 A | 0.3125 | 1.80E-06 | chr:6:32505702 |
| 6 rs9271029   | 32575077 A | 0.3125 | 1.80E-06 | chr:6:32505702 |
| 6 rs9271060   | 32575513 C | 0.3125 | 1.80E-06 | chr:6:32505702 |
| 6 rs9271073   | 32575803 G | 0.3125 | 1.80E-06 | chr:6:32505702 |
| 6 rs9271075   | 32575852 A | 0.3125 | 1.80E-06 | chr:6:32505702 |
| 6 rs9271076   | 32575873 G | 0.3125 | 1.80E-06 | chr:6:32505702 |
| 6 rs9271146   | 32577282 A | 0.3125 | 1.80E-06 | chr:6:32505702 |
| 6 rs9271240   | 32579833 T | 0.3125 | 1.80E-06 | chr:6:32505702 |
| 6 rs9271260   | 32580507 A | 0.3125 | 1.80E-06 | chr:6:32505702 |
| 6 rs9270922   | 32572388 T | 0.3363 | 1.81E-06 | chr:6:32505702 |
| 6 rs79119980  | 32505272 C | 0.4714 | 1.81E-06 | chr:6:32505702 |
| 6 rs9270805   | 32569556 T | 0.3159 | 1.81E-06 | chr:6:32505702 |
| 6 rs9270594   | 32561526 C | 0.3159 | 1.83E-06 | chr:6:32505702 |
| 6 rs9271112   | 32576717 T | 0.3965 | 1.83E-06 | chr:6:32505702 |
| 6 rs9271022   | 32574881 A | 0.3393 | 1.83E-06 | chr:6:32505702 |
| 6 rs9270554   | 32560546 C | 0.3174 | 1.83E-06 | chr:6:32505702 |

|               |            |        |          |                |
|---------------|------------|--------|----------|----------------|
| 6 rs77115076  | 32454361 T | 0.31   | 1.84E-06 | chr:6:32505702 |
| 6 rs78358922  | 32454360 A | 0.31   | 1.84E-06 | chr:6:32505702 |
| 6 rs9270912   | 32572224 A | 0.3391 | 1.84E-06 | chr:6:32505702 |
| 6 rs9270913   | 32572229 A | 0.3391 | 1.84E-06 | chr:6:32505702 |
| 6 rs574714830 | 32494119 G | 0.4963 | 1.85E-06 | chr:6:32505702 |
| 6 rs372319444 | 32526876 A | 0.4621 | 1.86E-06 | chr:6:32505702 |
| 6 rs9271405   | 32587584 C | 2.056  | 1.87E-06 | chr:6:32505702 |
| 6 rs9270925   | 32572433 A | 0.3361 | 1.88E-06 | chr:6:32505702 |
| 6 rs9270926   | 32572435 C | 0.3361 | 1.88E-06 | chr:6:32505702 |
| 6 rs71536582  | 32533078 G | 0.3825 | 1.89E-06 | chr:6:32505702 |
| 6 rs9270808   | 32569607 G | 0.3156 | 1.90E-06 | chr:6:32505702 |
| 6 rs9270809   | 32569608 G | 0.3156 | 1.90E-06 | chr:6:32505702 |
| 6 rs74203767  | 32491593 G | 2.4    | 1.90E-06 | chr:6:32505702 |
| 6 rs9270551   | 32560501 G | 0.3172 | 1.91E-06 | chr:6:32505702 |
| 6 rs72492362  | 32543969 C | 0.458  | 1.91E-06 | chr:6:32505702 |
| 6 rs111842802 | 32538450 G | 0.3116 | 1.91E-06 | chr:6:32505702 |
| 6 rs112232311 | 32538454 A | 0.3116 | 1.91E-06 | chr:6:32505702 |
| 6 rs146618240 | 32482102 A | 0.5662 | 1.93E-06 | chr:6:32505702 |
| 6 rs191018606 | 32488081 T | 0.4027 | 1.93E-06 | chr:6:32505702 |
| 6 rs9271251   | 32580241 C | 0.316  | 1.94E-06 | chr:6:32505702 |
| 6 rs9271392   | 32587456 G | 2.024  | 1.94E-06 | chr:6:32505702 |
| 6 rs9271410   | 32587645 G | 2.053  | 1.95E-06 | chr:6:32505702 |
| 6 rs9270230   | 32556787 C | 0.316  | 1.95E-06 | chr:6:32505702 |
| 6 rs9271094   | 32576347 G | 0.3159 | 1.96E-06 | chr:6:32505702 |
| 6 rs9271250   | 32580234 G | 0.3158 | 1.97E-06 | chr:6:32505702 |
| 6 rs9270951   | 32573039 C | 0.3359 | 1.97E-06 | chr:6:32505702 |
| 6 rs9270950   | 32573027 T | 0.3358 | 1.97E-06 | chr:6:32505702 |
| 6 rs9270945   | 32572948 A | 0.3545 | 1.98E-06 | chr:6:32505702 |
| 6 rs9270946   | 32572952 G | 0.3545 | 1.98E-06 | chr:6:32505702 |
| 6 rs9270489   | 32559077 C | 0.3157 | 1.99E-06 | chr:6:32505702 |
| 6 rs9270081   | 32554243 T | 0.3902 | 1.99E-06 | chr:6:32505702 |
| 6 rs9270385   | 32558314 T | 0.439  | 2.00E-06 | chr:6:32505702 |
| 6 rs9270885   | 32571771 G | 0.4128 | 2.00E-06 | chr:6:32505702 |
| 6 rs9271252   | 32580288 C | 0.3157 | 2.00E-06 | chr:6:32505702 |
| 6 rs9269373   | 32540873 G | 1.794  | 2.00E-06 | chr:6:32505702 |
| 6 rs113395139 | 32538431 C | 0.3235 | 2.01E-06 | chr:6:32505702 |
| 6 rs116218325 | 32526611 G | 0.4343 | 2.01E-06 | chr:6:32505702 |
| 6 rs201277028 | 32526612 T | 0.4343 | 2.01E-06 | chr:6:32505702 |
| 6 rs77858388  | 32526619 A | 0.4343 | 2.01E-06 | chr:6:32505702 |
| 6 rs74973088  | 32457874 C | 0.4773 | 2.01E-06 | chr:6:32505702 |
| 6 rs9269888   | 32550980 C | 0.4493 | 2.01E-06 | chr:6:32505702 |
| 6 rs9270947   | 32572961 G | 0.3546 | 2.01E-06 | chr:6:32505702 |
| 6 rs9270078   | 32554179 A | 0.4018 | 2.02E-06 | chr:6:32505702 |

|               |            |        |          |                |
|---------------|------------|--------|----------|----------------|
| 6 rs34812354  | 32530046 T | 0.3475 | 2.03E-06 | chr:6:32505702 |
| 6 rs9271091   | 32576275 G | 0.3156 | 2.03E-06 | chr:6:32505702 |
| 6 rs9271092   | 32576296 A | 0.3156 | 2.03E-06 | chr:6:32505702 |
| 6 rs9271162   | 32577715 G | 0.3164 | 2.04E-06 | chr:6:32505702 |
| 6 rs9271163   | 32577733 C | 0.3164 | 2.04E-06 | chr:6:32505702 |
| 6 rs9271174   | 32578040 C | 0.3164 | 2.06E-06 | chr:6:32505702 |
| 6 rs114375471 | 32493854 A | 0.4791 | 2.07E-06 | chr:6:32505702 |
| 6 rs116684175 | 32493853 C | 0.4791 | 2.07E-06 | chr:6:32505702 |
| 6 rs36152293  | 32526410 T | 1.894  | 2.08E-06 | chr:6:32505702 |
| 6 rs9271242   | 32579940 T | 0.3151 | 2.08E-06 | chr:6:32505702 |
| 6 rs9271243   | 32579951 C | 0.3151 | 2.08E-06 | chr:6:32505702 |
| 6 rs9271246   | 32580084 A | 0.3151 | 2.08E-06 | chr:6:32505702 |
| 6 rs9271247   | 32580112 A | 0.3151 | 2.08E-06 | chr:6:32505702 |
| 6 rs9271248   | 32580157 C | 0.3151 | 2.08E-06 | chr:6:32505702 |
| 6 rs9270952   | 32573040 A | 0.3357 | 2.08E-06 | chr:6:32505702 |
| 6 rs9270999   | 32574438 G | 0.3157 | 2.09E-06 | chr:6:32505702 |
| 6 rs9271023   | 32574895 T | 0.3386 | 2.10E-06 | chr:6:32505702 |
| 6 rs66814015  | 32505258 A | 0.4722 | 2.10E-06 | chr:6:32505702 |
| 6 rs35464393  | 32530198 T | 0.3267 | 2.11E-06 | chr:6:32505702 |
| 6 rs9270102   | 32554621 G | 0.3151 | 2.11E-06 | chr:6:32505702 |
| 6 rs9270605   | 32564861 A | 0.3152 | 2.11E-06 | chr:6:32505702 |
| 6 rs9271171   | 32577907 C | 0.3162 | 2.11E-06 | chr:6:32505702 |
| 6 rs9271172   | 32577975 C | 0.3162 | 2.11E-06 | chr:6:32505702 |
| 6 rs9271173   | 32577981 A | 0.3162 | 2.11E-06 | chr:6:32505702 |
| 6 rs9271170   | 32577889 T | 0.3161 | 2.13E-06 | chr:6:32505702 |
| 6 rs9271090   | 32576247 T | 0.3153 | 2.13E-06 | chr:6:32505702 |
| 6 rs9271192   | 32578530 C | 0.3154 | 2.14E-06 | chr:6:32505702 |
| 6 rs71534526  | 32510974 T | 0.5367 | 2.15E-06 | chr:6:32505702 |
| 6 rs28724008  | 32550550 G | 0.2871 | 2.15E-06 | chr:6:32505702 |
| 6 rs9269890   | 32551010 G | 0.4703 | 2.16E-06 | chr:6:32505702 |
| 6 rs71536585  | 32533131 G | 0.4257 | 2.17E-06 | chr:6:32505702 |
| 6 rs9270625   | 32565438 C | 0.3552 | 2.17E-06 | chr:6:32505702 |
| 6 rs9270627   | 32565447 T | 0.3552 | 2.17E-06 | chr:6:32505702 |
| 6 rs9270628   | 32565448 C | 0.3552 | 2.17E-06 | chr:6:32505702 |
| 6 rs9269884   | 32550969 A | 0.4497 | 2.17E-06 | chr:6:32505702 |
| 6 rs142972412 | 32454837 T | 0.4548 | 2.18E-06 | chr:6:32505702 |
| 6 rs9270586   | 32561302 G | 0.3157 | 2.18E-06 | chr:6:32505702 |
| 6 rs9270587   | 32561305 T | 0.3157 | 2.18E-06 | chr:6:32505702 |
| 6 rs9271164   | 32577784 C | 0.3158 | 2.19E-06 | chr:6:32505702 |
| 6 rs9271165   | 32577785 A | 0.3158 | 2.19E-06 | chr:6:32505702 |
| 6 rs9271166   | 32577811 C | 0.3158 | 2.19E-06 | chr:6:32505702 |
| 6 rs9271168   | 32577854 G | 0.3158 | 2.19E-06 | chr:6:32505702 |
| 6 rs12195582  | 32444544 T | 0.4012 | 2.19E-06 | chr:6:32505702 |

|               |            |        |          |                |
|---------------|------------|--------|----------|----------------|
| 6 rs9270265   | 32557127 A | 0.3151 | 2.19E-06 | chr:6:32505702 |
| 6 rs9271201   | 32578818 C | 0.316  | 2.20E-06 | chr:6:32505702 |
| 6 rs9271202   | 32578837 A | 0.316  | 2.20E-06 | chr:6:32505702 |
| 6 rs9270557   | 32560645 A | 0.3159 | 2.20E-06 | chr:6:32505702 |
| 6 rs115830407 | 32482484 T | 0.5551 | 2.20E-06 | chr:6:32505702 |
| 6 rs9270118   | 32554983 C | 0.3007 | 2.21E-06 | chr:6:32505702 |
| 6 rs9270119   | 32554987 A | 0.3007 | 2.21E-06 | chr:6:32505702 |
| 6 rs9270120   | 32554990 C | 0.3007 | 2.21E-06 | chr:6:32505702 |
| 6 rs9271484   | 32588905 T | 2.045  | 2.22E-06 | chr:6:32505702 |
| 6 rs9270644   | 32565745 G | 0.3345 | 2.25E-06 | chr:6:32505702 |
| 6 rs9270887   | 32571789 C | 0.413  | 2.25E-06 | chr:6:32505702 |
| 6 rs71538524  | 32536592 G | 0.5151 | 2.27E-06 | chr:6:32505702 |
| 6 rs541082691 | 32536247 T | 0.5301 | 2.27E-06 | chr:6:32505702 |
| 6 rs9271053   | 32575319 C | 0.332  | 2.28E-06 | chr:6:32505702 |
| 6 rs9271077   | 32575925 G | 0.3168 | 2.28E-06 | chr:6:32505702 |
| 6 rs9271078   | 32575930 C | 0.3168 | 2.28E-06 | chr:6:32505702 |
| 6 rs9270954   | 32573058 C | 0.3347 | 2.30E-06 | chr:6:32505702 |
| 6 rs79788626  | 32490246 A | 0.5439 | 2.32E-06 | chr:6:32505702 |
| 6 rs9271407   | 32587605 T | 2.037  | 2.32E-06 | chr:6:32505702 |
| 6 rs9270086   | 32554283 G | 0.4287 | 2.32E-06 | chr:6:32505702 |
| 6 rs9271236   | 32579645 C | 0.3195 | 2.34E-06 | chr:6:32505702 |
| 6 rs145704749 | 32454744 C | 0.2806 | 2.35E-06 | chr:6:32505702 |
| 6 rs66988465  | 32523109 C | 0.2468 | 2.35E-06 | chr:6:32505702 |
| 6 rs113947393 | 32537950 C | 0.5205 | 2.38E-06 | chr:6:32505702 |
| 6 rs570595530 | 32525770 T | 1.732  | 2.39E-06 | chr:6:32505702 |
| 6 rs9270847   | 32570602 G | 0.3292 | 2.39E-06 | chr:6:32505702 |
| 6 rs9270848   | 32570609 C | 0.3292 | 2.39E-06 | chr:6:32505702 |
| 6 rs9272081   | 32599655 C | 1.793  | 2.42E-06 | chr:6:32505702 |
| 6 rs9269958   | 32552143 C | 0.4206 | 2.42E-06 | chr:6:32505702 |
| 6 rs9269959   | 32552144 A | 0.4206 | 2.42E-06 | chr:6:32505702 |
| 6 rs9270458   | 32558900 A | 0.5274 | 2.43E-06 | chr:6:32505702 |
| 6 rs78121285  | 32502174 A | 0.3287 | 2.45E-06 | chr:6:32505702 |
| 6 rs9270438   | 32558703 G | 0.5322 | 2.47E-06 | chr:6:32505702 |
| 6 rs9272285   | 32603688 G | 2.012  | 2.49E-06 | chr:6:32505702 |
| 6 rs9271185   | 32578286 G | 0.3225 | 2.50E-06 | chr:6:32505702 |
| 6 rs9271186   | 32578297 A | 0.3225 | 2.50E-06 | chr:6:32505702 |
| 6 rs111358198 | 32547489 T | 0.438  | 2.50E-06 | chr:6:32505702 |
| 6 rs9270927   | 32572451 A | 0.334  | 2.51E-06 | chr:6:32505702 |
| 6 rs71538525  | 32536630 A | 0.5094 | 2.52E-06 | chr:6:32505702 |
| 6 rs9270710   | 32567368 C | 0.3531 | 2.53E-06 | chr:6:32505702 |
| 6 rs9270231   | 32556788 A | 0.3348 | 2.54E-06 | chr:6:32505702 |
| 6 rs9271024   | 32574954 T | 0.3378 | 2.55E-06 | chr:6:32505702 |
| 6 rs9270687   | 32566871 G | 0.3217 | 2.56E-06 | chr:6:32505702 |

|               |            |        |          |                |
|---------------|------------|--------|----------|----------------|
| 6 rs9270688   | 32566872 T | 0.3217 | 2.56E-06 | chr:6:32505702 |
| 6 rs9270839   | 32570375 A | 0.3336 | 2.56E-06 | chr:6:32505702 |
| 6 rs9270840   | 32570377 C | 0.3336 | 2.56E-06 | chr:6:32505702 |
| 6 rs9271178   | 32578191 C | 0.3217 | 2.56E-06 | chr:6:32505702 |
| 6 rs9271179   | 32578196 G | 0.3217 | 2.56E-06 | chr:6:32505702 |
| 6 rs9270690   | 32566948 G | 0.3184 | 2.57E-06 | chr:6:32505702 |
| 6 rs9270691   | 32566972 G | 0.3184 | 2.57E-06 | chr:6:32505702 |
| 6 rs9270069   | 32554080 T | 0.4159 | 2.58E-06 | chr:6:32505702 |
| 6 rs76731120  | 32454239 C | 0.2117 | 2.58E-06 | chr:6:32505702 |
| 6 rs3104416   | 32581502 C | 0.3187 | 2.58E-06 | chr:6:32505702 |
| 6 rs9269995   | 32552681 C | 1.857  | 2.59E-06 | chr:6:32505702 |
| 6 rs9270607   | 32564915 T | 0.3387 | 2.60E-06 | chr:6:32505702 |
| 6 rs9271117   | 32576795 C | 0.4337 | 2.60E-06 | chr:6:32505702 |
| 6 rs9271118   | 32576796 A | 0.4337 | 2.60E-06 | chr:6:32505702 |
| 6 rs9271193   | 32578566 T | 0.3188 | 2.61E-06 | chr:6:32505702 |
| 6 rs9271194   | 32578612 T | 0.3188 | 2.61E-06 | chr:6:32505702 |
| 6 rs9270097   | 32554506 C | 0.3338 | 2.61E-06 | chr:6:32505702 |
| 6 rs9270098   | 32554517 T | 0.3338 | 2.61E-06 | chr:6:32505702 |
| 6 rs569686853 | 32525767 G | 1.73   | 2.62E-06 | chr:6:32505702 |
| 6 rs111976080 | 32538814 T | 0.3564 | 2.64E-06 | chr:6:32505702 |
| 6 rs9270711   | 32567375 A | 0.353  | 2.64E-06 | chr:6:32505702 |
| 6 rs28366320  | 32561551 A | 0.3408 | 2.65E-06 | chr:6:32505702 |
| 6 rs9271104   | 32576561 G | 0.3332 | 2.65E-06 | chr:6:32505702 |
| 6 rs77102498  | 32572583 G | 0.3341 | 2.65E-06 | chr:6:32505702 |
| 6 rs9270845   | 32570571 T | 0.3336 | 2.67E-06 | chr:6:32505702 |
| 6 rs9271189   | 32578357 C | 0.322  | 2.67E-06 | chr:6:32505702 |
| 6 rs9271052   | 32575309 T | 0.3339 | 2.68E-06 | chr:6:32505702 |
| 6 rs73728637  | 32594420 C | 2.023  | 2.69E-06 | chr:6:32505702 |
| 6 rs9270564   | 32560773 G | 0.3539 | 2.69E-06 | chr:6:32505702 |
| 6 rs9270424   | 32558594 G | 0.51   | 2.72E-06 | chr:6:32505702 |
| 6 rs182336149 | 32494269 C | 0.5255 | 2.73E-06 | chr:6:32505702 |
| 6 rs9269385   | 32541036 C | 0.3891 | 2.73E-06 | chr:6:32505702 |
| 6 rs9270689   | 32566909 A | 0.3212 | 2.73E-06 | chr:6:32505702 |
| 6 rs9270788   | 32569205 G | 0.3258 | 2.74E-06 | chr:6:32505702 |
| 6 rs9270604   | 32564800 T | 0.4799 | 2.74E-06 | chr:6:32505702 |
| 6 rs3997871   | 32580456 G | 0.3198 | 2.75E-06 | chr:6:32505702 |
| 6 rs9271257   | 32580444 G | 0.3198 | 2.75E-06 | chr:6:32505702 |
| 6 rs9271258   | 32580446 G | 0.3198 | 2.75E-06 | chr:6:32505702 |
| 6 rs148940091 | 32507101 T | 0.5694 | 2.75E-06 | chr:6:32505702 |
| 6 rs146344255 | 32490158 C | 0.5388 | 2.75E-06 | chr:6:32505702 |
| 6 rs9270967   | 32573543 C | 0.3368 | 2.75E-06 | chr:6:32505702 |
| 6 rs9270968   | 32573554 C | 0.3368 | 2.75E-06 | chr:6:32505702 |
| 6 rs9270568   | 32560808 G | 0.3335 | 2.79E-06 | chr:6:32505702 |

|               |            |        |          |                |
|---------------|------------|--------|----------|----------------|
| 6 rs9270978   | 32573754 T | 0.3338 | 2.79E-06 | chr:6:32505702 |
| 6 rs9269372   | 32540809 G | 0.5485 | 2.79E-06 | chr:6:32505702 |
| 6 rs1059546   | 32557552 A | 0.1862 | 2.80E-06 | chr:6:32505702 |
| 6 rs9270874   | 32571227 G | 0.3335 | 2.80E-06 | chr:6:32505702 |
| 6 rs72847626  | 32538224 G | 0.4401 | 2.80E-06 | chr:6:32505702 |
| 6 rs9271026   | 32574994 T | 0.3373 | 2.80E-06 | chr:6:32505702 |
| 6 rs147610934 | 32455033 C | 0.3443 | 2.81E-06 | chr:6:32505702 |
| 6 rs9270846   | 32570577 A | 0.3335 | 2.81E-06 | chr:6:32505702 |
| 6 rs9270844   | 32570550 T | 0.3329 | 2.83E-06 | chr:6:32505702 |
| 6 rs9270419   | 32558559 T | 0.5171 | 2.84E-06 | chr:6:32505702 |
| 6 rs9270396   | 32558385 T | 0.5035 | 2.84E-06 | chr:6:32505702 |
| 6 rs9270522   | 32559541 T | 0.3543 | 2.84E-06 | chr:6:32505702 |
| 6 rs9270955   | 32573167 G | 0.3619 | 2.84E-06 | chr:6:32505702 |
| 6 rs9270956   | 32573170 T | 0.3619 | 2.84E-06 | chr:6:32505702 |
| 6 rs17209280  | 32440269 G | 2.611  | 2.85E-06 | chr:6:32505702 |
| 6 rs9270991   | 32574200 G | 0.3357 | 2.85E-06 | chr:6:32505702 |
| 6 rs9270992   | 32574202 C | 0.3357 | 2.85E-06 | chr:6:32505702 |
| 6 rs9271143   | 32577165 T | 0.3334 | 2.86E-06 | chr:6:32505702 |
| 6 rs9270969   | 32573560 A | 0.3366 | 2.87E-06 | chr:6:32505702 |
| 6 rs114553448 | 32537139 A | 0.5276 | 2.89E-06 | chr:6:32505702 |
| 6 rs9272208   | 32601967 G | 1.916  | 2.89E-06 | chr:6:32505702 |
| 6 rs72508440  | 32489908 G | 0.4942 | 2.90E-06 | chr:6:32505702 |
| 6 rs9270738   | 32568118 T | 0.3549 | 2.91E-06 | chr:6:32505702 |
| 6 rs79267592  | 32578673 A | 0.3218 | 2.91E-06 | chr:6:32505702 |
| 6 rs9270732   | 32568018 C | 0.3334 | 2.95E-06 | chr:6:32505702 |
| 6 rs17204294  | 32492179 T | 0.4715 | 2.96E-06 | chr:6:32505702 |
| 6 rs9271229   | 32579515 A | 0.3331 | 2.97E-06 | chr:6:32505702 |
| 6 rs9271230   | 32579519 C | 0.3331 | 2.97E-06 | chr:6:32505702 |
| 6 rs9271231   | 32579520 T | 0.3331 | 2.97E-06 | chr:6:32505702 |
| 6 rs9270756   | 32568538 A | 0.3324 | 2.97E-06 | chr:6:32505702 |
| 6 rs9270827   | 32570132 C | 0.333  | 2.97E-06 | chr:6:32505702 |
| 6 rs9270828   | 32570144 T | 0.333  | 2.97E-06 | chr:6:32505702 |
| 6 rs72847627  | 32538512 A | 0.3535 | 2.98E-06 | chr:6:32505702 |
| 6 rs9269283   | 32539355 G | 0.4671 | 2.99E-06 | chr:6:32505702 |
| 6 rs9270834   | 32570266 C | 0.3335 | 2.99E-06 | chr:6:32505702 |
| 6 rs9270774   | 32569012 G | 0.3816 | 2.99E-06 | chr:6:32505702 |
| 6 rs9270303   | 32557483 T | 0.3169 | 2.99E-06 | chr:6:32505702 |
| 6 rs9270970   | 32573574 C | 0.3364 | 2.99E-06 | chr:6:32505702 |
| 6 rs572264676 | 32490134 T | 0.5565 | 3.03E-06 | chr:6:32505702 |
| 6 rs9270737   | 32568107 A | 0.3548 | 3.04E-06 | chr:6:32505702 |
| 6 rs9271103   | 32576540 T | 0.3326 | 3.04E-06 | chr:6:32505702 |
| 6 rs9271198   | 32578726 G | 0.3215 | 3.05E-06 | chr:6:32505702 |
| 6 rs9271199   | 32578735 A | 0.3215 | 3.05E-06 | chr:6:32505702 |



|               |            |        |          |                |
|---------------|------------|--------|----------|----------------|
| 6 rs9271200   | 32578756 C | 0.3215 | 3.05E-06 | chr:6:32505702 |
| 6 rs9270466   | 32558929 C | 0.5344 | 3.05E-06 | chr:6:32505702 |
| 6 rs9270765   | 32568740 G | 0.3532 | 3.06E-06 | chr:6:32505702 |
| 6 rs9270766   | 32568763 G | 0.3532 | 3.06E-06 | chr:6:32505702 |
| 6 rs9270767   | 32568770 T | 0.3532 | 3.06E-06 | chr:6:32505702 |
| 6 rs189371992 | 32498895 A | 0.4622 | 3.06E-06 | chr:6:32505702 |
| 6 rs35652190  | 32544828 T | 0.488  | 3.08E-06 | chr:6:32505702 |
| 6 rs373652084 | 32562127 T | 1.911  | 3.09E-06 | chr:6:32505702 |
| 6 rs74503228  | 32454246 T | 0.2149 | 3.09E-06 | chr:6:32505702 |
| 6 rs9270426   | 32558632 T | 0.5182 | 3.10E-06 | chr:6:32505702 |
| 6 rs9270452   | 32558851 A | 0.4665 | 3.13E-06 | chr:6:32505702 |
| 6 rs9270453   | 32558852 C | 0.4665 | 3.13E-06 | chr:6:32505702 |
| 6 rs9270835   | 32570281 G | 0.3333 | 3.13E-06 | chr:6:32505702 |
| 6 rs9270838   | 32570353 C | 0.3327 | 3.15E-06 | chr:6:32505702 |
| 6 rs9270226   | 32556689 G | 0.3298 | 3.15E-06 | chr:6:32505702 |
| 6 rs9270450   | 32558837 T | 0.4764 | 3.16E-06 | chr:6:32505702 |
| 6 rs9270762   | 32568686 A | 0.3424 | 3.18E-06 | chr:6:32505702 |
| 6 rs9270206   | 32556367 G | 0.3295 | 3.19E-06 | chr:6:32505702 |
| 6 rs66869156  | 32531295 T | 0.3449 | 3.19E-06 | chr:6:32505702 |
| 6 rs9270401   | 32558414 T | 0.5048 | 3.20E-06 | chr:6:32505702 |
| 6 rs9270904   | 32572060 T | 0.3927 | 3.25E-06 | chr:6:32505702 |
| 6 rs9270974   | 32573713 C | 0.3361 | 3.26E-06 | chr:6:32505702 |
| 6 rs9271101   | 32576493 C | 0.3324 | 3.27E-06 | chr:6:32505702 |
| 6 rs9270755   | 32568522 G | 0.3321 | 3.28E-06 | chr:6:32505702 |
| 6 rs9270420   | 32558569 C | 0.5181 | 3.29E-06 | chr:6:32505702 |
| 6 rs9271712   | 32593432 G | 0.5348 | 3.31E-06 | chr:6:32505702 |
| 6 rs9270198   | 32556227 C | 0.3965 | 3.31E-06 | chr:6:32505702 |
| 6 rs553518894 | 32486504 C | 0.521  | 3.31E-06 | chr:6:32505702 |
| 6 rs34303755  | 32450613 C | 0.3078 | 3.31E-06 | chr:6:32505702 |
| 6 rs9270099   | 32554540 A | 0.3323 | 3.32E-06 | chr:6:32505702 |
| 6 rs72845704  | 32523228 T | 0.2943 | 3.36E-06 | chr:6:32505702 |
| 6 rs73726847  | 32537646 C | 0.5434 | 3.36E-06 | chr:6:32505702 |
| 6 rs67240795  | 32530458 C | 0.3801 | 3.37E-06 | chr:6:32505702 |
| 6 rs9270960   | 32573288 T | 0.3304 | 3.37E-06 | chr:6:32505702 |
| 6 rs9270961   | 32573289 G | 0.3304 | 3.37E-06 | chr:6:32505702 |
| 6 rs76675915  | 32555554 T | 2.619  | 3.41E-06 | chr:6:32505702 |
| 6 rs9270836   | 32570325 A | 0.3323 | 3.41E-06 | chr:6:32505702 |
| 6 rs9270392   | 32558372 A | 0.5048 | 3.41E-06 | chr:6:32505702 |
| 6 rs9269609   | 32545211 T | 0.424  | 3.41E-06 | chr:6:32505702 |
| 6 rs9269610   | 32545218 C | 0.424  | 3.41E-06 | chr:6:32505702 |
| 6 rs9270619   | 32565243 A | 0.3322 | 3.43E-06 | chr:6:32505702 |
| 6 rs541218925 | 32488717 A | 0.5416 | 3.44E-06 | chr:6:32505702 |
| 6 rs9269389   | 32541106 C | 0.4885 | 3.45E-06 | chr:6:32505702 |

|               |            |        |          |                |
|---------------|------------|--------|----------|----------------|
| 6 rs9270577   | 32561074 A | 0.3321 | 3.46E-06 | chr:6:32505702 |
| 6 rs9270215   | 32556548 G | 0.4415 | 3.48E-06 | chr:6:32505702 |
| 6 rs9269913   | 32551406 A | 0.4149 | 3.50E-06 | chr:6:32505702 |
| 6 rs71534539  | 32512754 G | 0.505  | 3.50E-06 | chr:6:32505702 |
| 6 rs9270674   | 32566598 C | 0.3319 | 3.51E-06 | chr:6:32505702 |
| 6 rs9270417   | 32558546 T | 0.5188 | 3.53E-06 | chr:6:32505702 |
| 6 rs9270418   | 32558550 C | 0.5188 | 3.53E-06 | chr:6:32505702 |
| 6 rs9270421   | 32558574 T | 0.5188 | 3.55E-06 | chr:6:32505702 |
| 6 rs9270422   | 32558577 A | 0.5188 | 3.55E-06 | chr:6:32505702 |
| 6 rs9269907   | 32551324 A | 0.5228 | 3.56E-06 | chr:6:32505702 |
| 6 rs9271096   | 32576426 A | 0.3542 | 3.61E-06 | chr:6:32505702 |
| 6 rs138535752 | 32489520 G | 1.921  | 3.64E-06 | chr:6:32505702 |
| 6 rs9270066   | 32554025 A | 0.4168 | 3.68E-06 | chr:6:32505702 |
| 6 rs557048    | 32587001 T | 2.023  | 3.69E-06 | chr:6:32505702 |
| 6 rs200623105 | 32540757 G | 0.4965 | 3.72E-06 | chr:6:32505702 |
| 6 rs9270377   | 32558260 G | 0.473  | 3.75E-06 | chr:6:32505702 |
| 6 rs9270677   | 32566655 T | 0.3317 | 3.75E-06 | chr:6:32505702 |
| 6 rs9270340   | 32557969 C | 0.3528 | 3.77E-06 | chr:6:32505702 |
| 6 rs9270341   | 32557970 C | 0.3528 | 3.77E-06 | chr:6:32505702 |
| 6 rs9271011   | 32574676 A | 0.3762 | 3.79E-06 | chr:6:32505702 |
| 6 rs9270777   | 32569038 T | 0.4117 | 3.79E-06 | chr:6:32505702 |
| 6 rs9269914   | 32551416 G | 0.4151 | 3.82E-06 | chr:6:32505702 |
| 6 rs9270403   | 32558434 A | 0.5097 | 3.85E-06 | chr:6:32505702 |
| 6 rs9269727   | 32547371 T | 0.5405 | 3.85E-06 | chr:6:32505702 |
| 6 rs9270202   | 32556246 G | 0.4119 | 3.85E-06 | chr:6:32505702 |
| 6 rs9270425   | 32558627 G | 0.5254 | 3.93E-06 | chr:6:32505702 |
| 6 rs146758209 | 32496618 G | 0.5109 | 3.93E-06 | chr:6:32505702 |
| 6 rs9270734   | 32568085 T | 0.3539 | 3.97E-06 | chr:6:32505702 |
| 6 rs9270196   | 32556200 T | 0.3943 | 4.00E-06 | chr:6:32505702 |
| 6 rs9268960   | 32434130 C | 0.3417 | 4.01E-06 | chr:6:32505702 |
| 6 rs9268961   | 32434135 A | 0.3417 | 4.01E-06 | chr:6:32505702 |
| 6 rs9270864   | 32571001 T | 0.3668 | 4.03E-06 | chr:6:32505702 |
| 6 rs9270204   | 32556277 T | 0.4036 | 4.11E-06 | chr:6:32505702 |
| 6 rs9270714   | 32567488 A | 0.3346 | 4.16E-06 | chr:6:32505702 |
| 6 rs9270716   | 32567502 A | 0.3346 | 4.16E-06 | chr:6:32505702 |
| 6 rs113128948 | 32507129 C | 0.5734 | 4.19E-06 | chr:6:32505702 |
| 6 rs554654579 | 32644070 C | 11.72  | 5.88E-38 | chr:6:32648036 |
| 6 rs28755212  | 32644094 C | 10.41  | 6.57E-38 | chr:6:32648036 |
| 6 rs28755213  | 32644099 G | 10.41  | 6.57E-38 | chr:6:32648036 |
| 6 rs28755214  | 32644111 C | 10.41  | 6.57E-38 | chr:6:32648036 |
| 6 rs28755216  | 32644135 A | 11.28  | 7.25E-38 | chr:6:32648036 |
| 6 rs28755215  | 32644128 G | 10.96  | 7.38E-38 | chr:6:32648036 |
| 6 rs28755209  | 32644049 T | 12.55  | 9.35E-38 | chr:6:32648036 |

|              |            |       |          |                |
|--------------|------------|-------|----------|----------------|
| 6 rs28755208 | 32644036 C | 11.7  | 9.57E-38 | chr:6:32648036 |
| 6 rs9275018  | 32643139 T | 10.36 | 1.01E-37 | chr:6:32648036 |
| 6 rs9275017  | 32643130 T | 10.4  | 1.12E-37 | chr:6:32648036 |
| 6 rs28755220 | 32644238 C | 11.79 | 1.16E-37 | chr:6:32648036 |
| 6 rs28755221 | 32644239 A | 11.79 | 1.16E-37 | chr:6:32648036 |
| 6 rs28755255 | 32644915 G | 10.06 | 1.20E-37 | chr:6:32648036 |
| 6 rs28755256 | 32644919 G | 10.06 | 1.20E-37 | chr:6:32648036 |
| 6 rs9275019  | 32643166 T | 12.28 | 1.23E-37 | chr:6:32648036 |
| 6 rs28755222 | 32644264 C | 10.8  | 1.25E-37 | chr:6:32648036 |
| 6 rs28755268 | 32645469 A | 11.94 | 1.30E-37 | chr:6:32648036 |
| 6 rs9275020  | 32643184 T | 12.71 | 1.35E-37 | chr:6:32648036 |
| 6 rs28755364 | 32647133 T | 10.15 | 1.46E-37 | chr:6:32648036 |
| 6 rs28755219 | 32644226 C | 11.71 | 1.49E-37 | chr:6:32648036 |
| 6 rs28755270 | 32645489 A | 12.22 | 1.56E-37 | chr:6:32648036 |
| 6 rs28755271 | 32645497 T | 12.16 | 1.73E-37 | chr:6:32648036 |
| 6 rs28755272 | 32645529 C | 12.77 | 1.73E-37 | chr:6:32648036 |
| 6 rs28755273 | 32645534 A | 12.77 | 1.73E-37 | chr:6:32648036 |
| 6 rs28371222 | 32647611 T | 11.17 | 2.14E-37 | chr:6:32648036 |
| 6 rs28371223 | 32647617 G | 10.82 | 2.16E-37 | chr:6:32648036 |
| 6 rs28371224 | 32647628 A | 10.82 | 2.16E-37 | chr:6:32648036 |
| 6 rs28371225 | 32647640 A | 10.82 | 2.16E-37 | chr:6:32648036 |
| 6 rs28755217 | 32644159 C | 12.83 | 2.34E-37 | chr:6:32648036 |
| 6 rs28755225 | 32644290 T | 9.777 | 2.35E-37 | chr:6:32648036 |
| 6 rs9275021  | 32643220 A | 11.62 | 2.35E-37 | chr:6:32648036 |
| 6 rs28755300 | 32646132 A | 9.868 | 2.37E-37 | chr:6:32648036 |
| 6 rs28755301 | 32646134 A | 9.868 | 2.37E-37 | chr:6:32648036 |
| 6 rs28755257 | 32644953 T | 9.694 | 2.43E-37 | chr:6:32648036 |
| 6 rs28755258 | 32644958 C | 9.694 | 2.43E-37 | chr:6:32648036 |
| 6 rs28755340 | 32646830 G | 9.584 | 2.43E-37 | chr:6:32648036 |
| 6 rs28755299 | 32646107 A | 9.912 | 2.50E-37 | chr:6:32648036 |
| 6 rs28755365 | 32647150 C | 11.33 | 2.64E-37 | chr:6:32648036 |
| 6 rs28755263 | 32645109 A | 10.61 | 2.72E-37 | chr:6:32648036 |
| 6 rs28755259 | 32644983 A | 11.8  | 2.84E-37 | chr:6:32648036 |
| 6 rs28755266 | 32645432 T | 10.01 | 2.85E-37 | chr:6:32648036 |
| 6 rs28371243 | 32647946 C | 10.92 | 2.88E-37 | chr:6:32648036 |
| 6 rs28755294 | 32646047 C | 10.4  | 2.97E-37 | chr:6:32648036 |
| 6 rs28755218 | 32644190 T | 13.39 | 2.97E-37 | chr:6:32648036 |
| 6 rs28755341 | 32646837 C | 9.869 | 3.00E-37 | chr:6:32648036 |
| 6 rs28755224 | 32644285 T | 9.545 | 3.15E-37 | chr:6:32648036 |
| 6 rs9275022  | 32643251 G | 9.389 | 3.19E-37 | chr:6:32648036 |
| 6 rs28755234 | 32644391 T | 11.62 | 3.21E-37 | chr:6:32648036 |
| 6 rs28755302 | 32646143 G | 9.64  | 3.28E-37 | chr:6:32648036 |
| 6 rs28755303 | 32646145 G | 9.64  | 3.28E-37 | chr:6:32648036 |

|              |            |       |          |                |
|--------------|------------|-------|----------|----------------|
| 6 rs28755264 | 32645131 G | 9.749 | 3.34E-37 | chr:6:32648036 |
| 6 rs28755206 | 32644010 G | 14.18 | 3.34E-37 | chr:6:32648036 |
| 6 rs28755327 | 32646604 A | 10.81 | 3.38E-37 | chr:6:32648036 |
| 6 rs28371242 | 32647935 G | 11.73 | 3.41E-37 | chr:6:32648036 |
| 6 rs28755223 | 32644276 A | 9.514 | 3.47E-37 | chr:6:32648036 |
| 6 rs28755296 | 32646085 G | 9.762 | 3.50E-37 | chr:6:32648036 |
| 6 rs28755297 | 32646087 G | 9.762 | 3.50E-37 | chr:6:32648036 |
| 6 rs28755265 | 32645144 A | 9.512 | 3.53E-37 | chr:6:32648036 |
| 6 rs28755229 | 32644305 A | 9.272 | 3.66E-37 | chr:6:32648036 |
| 6 rs28371241 | 32647906 G | 12.15 | 3.73E-37 | chr:6:32648036 |
| 6 rs28755244 | 32644631 A | 12.36 | 3.79E-37 | chr:6:32648036 |
| 6 rs28755342 | 32646861 T | 10.01 | 3.94E-37 | chr:6:32648036 |
| 6 rs28755343 | 32646866 A | 10.01 | 3.94E-37 | chr:6:32648036 |
| 6 rs28755298 | 32646094 T | 9.88  | 3.96E-37 | chr:6:32648036 |
| 6 rs28755295 | 32646054 A | 10.26 | 3.98E-37 | chr:6:32648036 |
| 6 rs28755226 | 32644297 G | 9.076 | 4.12E-37 | chr:6:32648036 |
| 6 rs28755227 | 32644299 C | 9.076 | 4.12E-37 | chr:6:32648036 |
| 6 rs28755228 | 32644300 A | 9.076 | 4.12E-37 | chr:6:32648036 |
| 6 rs28755362 | 32647119 C | 8.67  | 4.17E-37 | chr:6:32648036 |
| 6 rs28755363 | 32647120 T | 8.67  | 4.17E-37 | chr:6:32648036 |
| 6 rs28755262 | 32645088 T | 11.48 | 4.18E-37 | chr:6:32648036 |
| 6 rs28755267 | 32645446 C | 10.3  | 4.20E-37 | chr:6:32648036 |
| 6 rs28755334 | 32646759 G | 11.38 | 4.23E-37 | chr:6:32648036 |
| 6 rs28755335 | 32646763 T | 11.38 | 4.23E-37 | chr:6:32648036 |
| 6 rs28755326 | 32646588 A | 11.69 | 4.29E-37 | chr:6:32648036 |
| 6 rs28755235 | 32644423 T | 12.06 | 4.32E-37 | chr:6:32648036 |
| 6 rs28755236 | 32644428 G | 12.06 | 4.32E-37 | chr:6:32648036 |
| 6 rs28755260 | 32645073 C | 12.42 | 4.54E-37 | chr:6:32648036 |
| 6 rs28755261 | 32645075 G | 12.42 | 4.54E-37 | chr:6:32648036 |
| 6 rs28371213 | 32646059 G | 9.757 | 4.77E-37 | chr:6:32648036 |
| 6 rs28371214 | 32646061 G | 9.757 | 4.77E-37 | chr:6:32648036 |
| 6 rs28755333 | 32646691 G | 11.46 | 5.13E-37 | chr:6:32648036 |
| 6 rs28755245 | 32644658 T | 12.47 | 5.15E-37 | chr:6:32648036 |
| 6 rs28755233 | 32644350 C | 9.781 | 5.48E-37 | chr:6:32648036 |
| 6 rs28755242 | 32644577 G | 12.84 | 5.49E-37 | chr:6:32648036 |
| 6 rs28755246 | 32644670 C | 12.39 | 5.63E-37 | chr:6:32648036 |
| 6 rs28755247 | 32644680 T | 12.39 | 5.63E-37 | chr:6:32648036 |
| 6 rs28755231 | 32644337 G | 9.563 | 5.71E-37 | chr:6:32648036 |
| 6 rs28755324 | 32646494 T | 12.36 | 5.91E-37 | chr:6:32648036 |
| 6 rs28755361 | 32647113 G | 8.479 | 5.98E-37 | chr:6:32648036 |
| 6 rs28755243 | 32644594 A | 12.77 | 6.00E-37 | chr:6:32648036 |
| 6 rs28755344 | 32646904 C | 10.42 | 6.31E-37 | chr:6:32648036 |
| 6 rs7775228  | 32658079 C | 47.17 | 6.65E-37 | chr:6:32648036 |

|               |            |       |          |                |
|---------------|------------|-------|----------|----------------|
| 6 rs28371226  | 32647665 T | 8.666 | 6.90E-37 | chr:6:32648036 |
| 6 rs28371227  | 32647666 G | 8.666 | 6.90E-37 | chr:6:32648036 |
| 6 rs28755253  | 32644869 T | 13.97 | 7.29E-37 | chr:6:32648036 |
| 6 rs28755254  | 32644878 C | 13.97 | 7.29E-37 | chr:6:32648036 |
| 6 rs28755230  | 32644328 G | 9.326 | 7.33E-37 | chr:6:32648036 |
| 6 rs116493570 | 32643860 T | 14.25 | 7.62E-37 | chr:6:32648036 |
| 6 rs114557541 | 32643844 T | 14.15 | 7.82E-37 | chr:6:32648036 |
| 6 rs28755370  | 32647353 G | 12.94 | 7.88E-37 | chr:6:32648036 |
| 6 rs28755371  | 32647357 C | 12.94 | 7.88E-37 | chr:6:32648036 |
| 6 rs28371219  | 32647510 A | 9.831 | 7.90E-37 | chr:6:32648036 |
| 6 rs28755304  | 32646193 T | 9.054 | 8.04E-37 | chr:6:32648036 |
| 6 rs28755249  | 32644701 A | 12.88 | 8.14E-37 | chr:6:32648036 |
| 6 rs3129713   | 32657255 T | 46.8  | 8.38E-37 | chr:6:32648036 |
| 6 rs3129715   | 32657281 T | 46.8  | 8.38E-37 | chr:6:32648036 |
| 6 rs28755360  | 32647099 C | 8.365 | 8.58E-37 | chr:6:32648036 |
| 6 rs28755325  | 32646521 A | 13.33 | 8.97E-37 | chr:6:32648036 |
| 6 rs28371220  | 32647546 A | 13.39 | 9.17E-37 | chr:6:32648036 |
| 6 rs28371221  | 32647556 C | 13.39 | 9.17E-37 | chr:6:32648036 |
| 6 rs28755372  | 32647383 A | 9.631 | 9.65E-37 | chr:6:32648036 |
| 6 rs28371218  | 32647508 C | 9.586 | 9.73E-37 | chr:6:32648036 |
| 6 rs28755323  | 32646469 A | 9.113 | 9.76E-37 | chr:6:32648036 |
| 6 rs9275031   | 32643420 A | 9.808 | 9.87E-37 | chr:6:32648036 |
| 6 rs28755277  | 32645598 T | 13.81 | 1.02E-36 | chr:6:32648036 |
| 6 rs28755278  | 32645599 G | 13.81 | 1.02E-36 | chr:6:32648036 |
| 6 rs28755279  | 32645626 C | 13.81 | 1.02E-36 | chr:6:32648036 |
| 6 rs28755305  | 32646232 G | 8.601 | 1.03E-36 | chr:6:32648036 |
| 6 rs28755306  | 32646238 T | 8.601 | 1.03E-36 | chr:6:32648036 |
| 6 rs28755307  | 32646241 A | 8.601 | 1.03E-36 | chr:6:32648036 |
| 6 rs141967600 | 32643824 T | 14.7  | 1.04E-36 | chr:6:32648036 |
| 6 rs199945715 | 32645744 T | 14.61 | 1.11E-36 | chr:6:32648036 |
| 6 rs28755339  | 32646817 G | 8.425 | 1.27E-36 | chr:6:32648036 |
| 6 rs28755276  | 32645578 C | 14.33 | 1.31E-36 | chr:6:32648036 |
| 6 rs28755240  | 32644562 A | 13.95 | 1.37E-36 | chr:6:32648036 |
| 6 rs28755308  | 32646274 C | 8.51  | 1.43E-36 | chr:6:32648036 |
| 6 rs116005148 | 32645766 A | 14.52 | 1.46E-36 | chr:6:32648036 |
| 6 rs202178406 | 32645770 G | 14.52 | 1.46E-36 | chr:6:32648036 |
| 6 rs28755373  | 32647388 A | 9.448 | 1.46E-36 | chr:6:32648036 |
| 6 rs28755366  | 32647187 T | 14.31 | 1.47E-36 | chr:6:32648036 |
| 6 rs28755293  | 32646010 T | 14.92 | 1.49E-36 | chr:6:32648036 |
| 6 rs28755309  | 32646279 G | 8.369 | 1.55E-36 | chr:6:32648036 |
| 6 rs201805319 | 32645737 G | 15.26 | 1.70E-36 | chr:6:32648036 |
| 6 rs28755367  | 32647215 A | 14.28 | 1.74E-36 | chr:6:32648036 |
| 6 rs28371215  | 32647476 G | 8.725 | 1.75E-36 | chr:6:32648036 |

|               |            |       |          |                |
|---------------|------------|-------|----------|----------------|
| 6 rs28755186  | 32643479 C | 14.38 | 1.80E-36 | chr:6:32648036 |
| 6 rs9275023   | 32643276 T | 7.987 | 1.90E-36 | chr:6:32648036 |
| 6 rs3129778   | 32646252 T | 8.205 | 1.95E-36 | chr:6:32648036 |
| 6 rs2858327   | 32658935 G | 39.48 | 2.18E-36 | chr:6:32648036 |
| 6 rs140232909 | 32643883 A | 14.93 | 2.34E-36 | chr:6:32648036 |
| 6 rs28755239  | 32644463 C | 15    | 2.50E-36 | chr:6:32648036 |
| 6 rs28755187  | 32643516 A | 14.84 | 2.53E-36 | chr:6:32648036 |
| 6 rs28755203  | 32643947 G | 14.83 | 2.55E-36 | chr:6:32648036 |
| 6 rs28755204  | 32643953 T | 14.83 | 2.55E-36 | chr:6:32648036 |
| 6 rs28371239  | 32647854 C | 8.302 | 2.56E-36 | chr:6:32648036 |
| 6 rs113838733 | 32645825 C | 14.94 | 2.58E-36 | chr:6:32648036 |
| 6 rs114954038 | 32645693 T | 15.75 | 2.59E-36 | chr:6:32648036 |
| 6 rs115932399 | 32645695 T | 15.75 | 2.59E-36 | chr:6:32648036 |
| 6 rs28755345  | 32646930 C | 9.072 | 2.61E-36 | chr:6:32648036 |
| 6 rs28755202  | 32643894 G | 14.86 | 2.69E-36 | chr:6:32648036 |
| 6 rs28371216  | 32647491 C | 8.553 | 2.73E-36 | chr:6:32648036 |
| 6 rs28371217  | 32647495 A | 8.553 | 2.73E-36 | chr:6:32648036 |
| 6 rs113898828 | 32643755 T | 15.67 | 2.82E-36 | chr:6:32648036 |
| 6 rs114642759 | 32643766 T | 15.67 | 2.82E-36 | chr:6:32648036 |
| 6 rs28755251  | 32644775 T | 14.91 | 2.83E-36 | chr:6:32648036 |
| 6 rs28755252  | 32644806 G | 14.91 | 2.83E-36 | chr:6:32648036 |
| 6 rs28755369  | 32647313 G | 14.91 | 2.83E-36 | chr:6:32648036 |
| 6 rs28755188  | 32643548 C | 14.8  | 2.88E-36 | chr:6:32648036 |
| 6 rs28755189  | 32643552 C | 14.8  | 2.88E-36 | chr:6:32648036 |
| 6 rs112838245 | 32645820 G | 14.95 | 2.97E-36 | chr:6:32648036 |
| 6 rs9275024   | 32643281 A | 7.843 | 3.01E-36 | chr:6:32648036 |
| 6 rs28755250  | 32644755 G | 15.1  | 3.19E-36 | chr:6:32648036 |
| 6 rs28371211  | 32637528 A | 26.88 | 3.20E-36 | chr:6:32648036 |
| 6 rs28755351  | 32647012 G | 8.444 | 3.23E-36 | chr:6:32648036 |
| 6 rs28755338  | 32646804 T | 7.808 | 3.27E-36 | chr:6:32648036 |
| 6 rs28755352  | 32647027 T | 8.295 | 3.38E-36 | chr:6:32648036 |
| 6 rs28755280  | 32645660 A | 15.66 | 3.53E-36 | chr:6:32648036 |
| 6 rs28755290  | 32645871 C | 15.49 | 3.60E-36 | chr:6:32648036 |
| 6 rs28755291  | 32645906 G | 15.49 | 3.60E-36 | chr:6:32648036 |
| 6 rs28755292  | 32645974 A | 15.49 | 3.60E-36 | chr:6:32648036 |
| 6 rs28755346  | 32646940 T | 8.557 | 3.86E-36 | chr:6:32648036 |
| 6 rs28755353  | 32647040 A | 8.255 | 3.87E-36 | chr:6:32648036 |
| 6 rs28755191  | 32643584 G | 15.5  | 4.14E-36 | chr:6:32648036 |
| 6 rs28755192  | 32643687 T | 15.5  | 4.14E-36 | chr:6:32648036 |
| 6 rs28755193  | 32643704 C | 15.5  | 4.14E-36 | chr:6:32648036 |
| 6 rs28755368  | 32647280 C | 15.5  | 4.14E-36 | chr:6:32648036 |
| 6 rs9275064   | 32648381 T | 31.74 | 4.49E-36 | chr:6:32648036 |
| 6 rs28755349  | 32646978 C | 8.227 | 5.86E-36 | chr:6:32648036 |

|               |            |       |          |                |
|---------------|------------|-------|----------|----------------|
| 6 rs28371228  | 32647698 A | 7.51  | 6.52E-36 | chr:6:32648036 |
| 6 rs9275015   | 32643108 A | 8.837 | 6.85E-36 | chr:6:32648036 |
| 6 rs9275016   | 32643109 G | 8.837 | 6.85E-36 | chr:6:32648036 |
| 6 rs28371238  | 32647846 C | 7.654 | 7.01E-36 | chr:6:32648036 |
| 6 rs28755350  | 32646997 G | 8.1   | 7.44E-36 | chr:6:32648036 |
| 6 rs17212014  | 32637472 T | 24.5  | 7.73E-36 | chr:6:32648036 |
| 6 rs28755190  | 32643583 C | 16.23 | 8.15E-36 | chr:6:32648036 |
| 6 rs28755310  | 32646304 T | 7.979 | 9.29E-36 | chr:6:32648036 |
| 6 rs9275066   | 32648404 T | 28.9  | 1.01E-35 | chr:6:32648036 |
| 6 rs9275067   | 32648414 C | 28.27 | 1.05E-35 | chr:6:32648036 |
| 6 rs9275025   | 32643303 T | 7.485 | 1.13E-35 | chr:6:32648036 |
| 6 rs28755354  | 32647045 T | 7.776 | 1.16E-35 | chr:6:32648036 |
| 6 rs28755328  | 32646616 C | 7.723 | 1.42E-35 | chr:6:32648036 |
| 6 rs28755329  | 32646617 A | 7.723 | 1.42E-35 | chr:6:32648036 |
| 6 rs28755311  | 32646309 C | 7.632 | 1.82E-35 | chr:6:32648036 |
| 6 rs28755331  | 32646647 A | 7.874 | 1.87E-35 | chr:6:32648036 |
| 6 rs28755332  | 32646648 T | 7.874 | 1.87E-35 | chr:6:32648036 |
| 6 rs141881212 | 32639387 G | 32.58 | 2.69E-35 | chr:6:32648036 |
| 6 rs28755356  | 32647059 G | 7.447 | 2.77E-35 | chr:6:32648036 |
| 6 rs28755330  | 32646637 A | 7.48  | 2.88E-35 | chr:6:32648036 |
| 6 rs139025169 | 32639390 A | 34.76 | 3.04E-35 | chr:6:32648036 |
| 6 rs28755374  | 32647404 T | 7.322 | 3.96E-35 | chr:6:32648036 |
| 6 rs28755375  | 32647411 C | 7.322 | 3.96E-35 | chr:6:32648036 |
| 6 rs28755376  | 32647412 A | 7.322 | 3.96E-35 | chr:6:32648036 |
| 6 rs28755357  | 32647061 C | 7.282 | 4.05E-35 | chr:6:32648036 |
| 6 rs28755315  | 32646369 G | 7.043 | 5.50E-35 | chr:6:32648036 |
| 6 rs9275075   | 32648550 A | 39.61 | 5.88E-35 | chr:6:32648036 |
| 6 rs9275076   | 32648553 G | 39.61 | 5.88E-35 | chr:6:32648036 |
| 6 rs9274858   | 32640546 A | 37.23 | 6.89E-35 | chr:6:32648036 |
| 6 rs9274860   | 32640556 A | 37.23 | 6.89E-35 | chr:6:32648036 |
| 6 rs28755312  | 32646342 T | 7.073 | 7.26E-35 | chr:6:32648036 |
| 6 rs28755313  | 32646343 G | 7.073 | 7.26E-35 | chr:6:32648036 |
| 6 rs9274716   | 32637404 A | 39.61 | 7.45E-35 | chr:6:32648036 |
| 6 rs28755314  | 32646366 G | 6.898 | 8.92E-35 | chr:6:32648036 |
| 6 rs9274856   | 32640539 T | 36.7  | 1.05E-34 | chr:6:32648036 |
| 6 rs144949632 | 32639331 A | 27.43 | 1.13E-34 | chr:6:32648036 |
| 6 rs148651202 | 32639332 T | 27.43 | 1.13E-34 | chr:6:32648036 |
| 6 rs9274816   | 32639621 A | 22.71 | 1.18E-34 | chr:6:32648036 |
| 6 rs9274817   | 32639623 T | 22.71 | 1.18E-34 | chr:6:32648036 |
| 6 rs112819910 | 32639344 T | 29.04 | 1.45E-34 | chr:6:32648036 |
| 6 rs2856678   | 32655830 A | 17.77 | 1.50E-34 | chr:6:32648036 |
| 6 rs9275002   | 32642761 A | 43.61 | 1.56E-34 | chr:6:32648036 |
| 6 rs9275030   | 32643351 T | 6.842 | 1.91E-34 | chr:6:32648036 |

|               |            |       |          |                |
|---------------|------------|-------|----------|----------------|
| 6 rs9274819   | 32639646 C | 21    | 1.95E-34 | chr:6:32648036 |
| 6 rs9275192   | 32656305 A | 18.32 | 2.41E-34 | chr:6:32648036 |
| 6 rs9275193   | 32656306 A | 18.32 | 2.41E-34 | chr:6:32648036 |
| 6 rs28371229  | 32647728 C | 6.59  | 2.85E-34 | chr:6:32648036 |
| 6 rs28371230  | 32647729 C | 6.59  | 2.85E-34 | chr:6:32648036 |
| 6 rs28371231  | 32647735 A | 6.59  | 2.85E-34 | chr:6:32648036 |
| 6 rs9275003   | 32642769 C | 47.9  | 3.21E-34 | chr:6:32648036 |
| 6 rs9275026   | 32643318 T | 6.705 | 3.30E-34 | chr:6:32648036 |
| 6 rs9275027   | 32643320 C | 6.705 | 3.30E-34 | chr:6:32648036 |
| 6 rs9275028   | 32643328 C | 6.705 | 3.30E-34 | chr:6:32648036 |
| 6 rs28755316  | 32646395 G | 6.645 | 3.65E-34 | chr:6:32648036 |
| 6 rs28755317  | 32646396 G | 6.645 | 3.65E-34 | chr:6:32648036 |
| 6 rs9274874   | 32640849 T | 21.12 | 4.09E-34 | chr:6:32648036 |
| 6 rs9274825   | 32639710 C | 23.15 | 4.61E-34 | chr:6:32648036 |
| 6 rs9274818   | 32639624 G | 21.01 | 4.80E-34 | chr:6:32648036 |
| 6 rs9274966   | 32642019 A | 20.36 | 5.55E-34 | chr:6:32648036 |
| 6 rs9274737   | 32637907 C | 49.46 | 6.22E-34 | chr:6:32648036 |
| 6 rs9274964   | 32641972 T | 18.89 | 7.26E-34 | chr:6:32648036 |
| 6 rs9274965   | 32641984 A | 18.89 | 7.26E-34 | chr:6:32648036 |
| 6 rs9274823   | 32639695 T | 22.85 | 7.44E-34 | chr:6:32648036 |
| 6 rs9274821   | 32639670 G | 21.04 | 7.56E-34 | chr:6:32648036 |
| 6 rs9274826   | 32639725 A | 22.65 | 7.64E-34 | chr:6:32648036 |
| 6 rs9274827   | 32639726 T | 22.65 | 7.64E-34 | chr:6:32648036 |
| 6 rs201341530 | 32639456 C | 33.87 | 8.13E-34 | chr:6:32648036 |
| 6 rs202086737 | 32639459 G | 33.87 | 8.13E-34 | chr:6:32648036 |
| 6 rs9275029   | 32643336 A | 6.436 | 8.19E-34 | chr:6:32648036 |
| 6 rs9274706   | 32637265 G | 30.88 | 8.26E-34 | chr:6:32648036 |
| 6 rs9274982   | 32642335 A | 19.84 | 8.81E-34 | chr:6:32648036 |
| 6 rs9274983   | 32642337 C | 19.84 | 8.81E-34 | chr:6:32648036 |
| 6 rs28755319  | 32646445 C | 6.525 | 1.01E-33 | chr:6:32648036 |
| 6 rs28755347  | 32646955 T | 6.721 | 1.05E-33 | chr:6:32648036 |
| 6 rs28755322  | 32646455 A | 6.423 | 1.11E-33 | chr:6:32648036 |
| 6 rs9274868   | 32640752 G | 33.39 | 1.11E-33 | chr:6:32648036 |
| 6 rs9274812   | 32639573 T | 52.16 | 1.16E-33 | chr:6:32648036 |
| 6 rs9274970   | 32642095 T | 63.03 | 1.63E-33 | chr:6:32648036 |
| 6 rs9274981   | 32642313 G | 19.14 | 2.46E-33 | chr:6:32648036 |
| 6 rs9274876   | 32640864 G | 15.82 | 3.15E-33 | chr:6:32648036 |
| 6 rs9275077   | 32648565 C | 54.71 | 3.70E-33 | chr:6:32648036 |
| 6 rs9274735   | 32637896 A | 52.7  | 3.75E-33 | chr:6:32648036 |
| 6 rs28755320  | 32646449 C | 6.427 | 4.00E-33 | chr:6:32648036 |
| 6 rs28755321  | 32646451 T | 6.427 | 4.00E-33 | chr:6:32648036 |
| 6 rs9274936   | 32641625 T | 25.93 | 4.06E-33 | chr:6:32648036 |
| 6 rs9274989   | 32642424 A | 18.99 | 4.17E-33 | chr:6:32648036 |



|              |            |       |          |                |
|--------------|------------|-------|----------|----------------|
| 6 rs28755318 | 32646416 T | 6.072 | 4.74E-33 | chr:6:32648036 |
| 6 rs28371232 | 32647761 T | 6.056 | 5.25E-33 | chr:6:32648036 |
| 6 rs28371233 | 32647762 G | 6.056 | 5.25E-33 | chr:6:32648036 |
| 6 rs9274709  | 32637275 G | 37.14 | 5.95E-33 | chr:6:32648036 |
| 6 rs9274879  | 32640918 G | 29.64 | 6.58E-33 | chr:6:32648036 |
| 6 rs9275072  | 32648502 T | 60.68 | 7.12E-33 | chr:6:32648036 |
| 6 rs9274979  | 32642280 T | 17.51 | 9.89E-33 | chr:6:32648036 |
| 6 rs9274945  | 32641796 C | 15.34 | 1.13E-32 | chr:6:32648036 |
| 6 rs9274704  | 32637213 G | 40.39 | 1.19E-32 | chr:6:32648036 |
| 6 rs9275009  | 32642958 A | 63.05 | 1.19E-32 | chr:6:32648036 |
| 6 rs28755336 | 32646798 A | 10.66 | 1.58E-32 | chr:6:32648036 |
| 6 rs28755337 | 32646799 C | 10.66 | 1.58E-32 | chr:6:32648036 |
| 6 rs9275000  | 32642719 T | 59.83 | 1.62E-32 | chr:6:32648036 |
| 6 rs9274847  | 32640143 G | 59.31 | 1.79E-32 | chr:6:32648036 |
| 6 rs9274992  | 32642577 G | 50.78 | 2.06E-32 | chr:6:32648036 |
| 6 rs9274938  | 32641673 C | 39.24 | 2.88E-32 | chr:6:32648036 |
| 6 rs9274862  | 32640595 T | 48.94 | 4.63E-32 | chr:6:32648036 |
| 6 rs9274711  | 32637289 T | 49.39 | 5.12E-32 | chr:6:32648036 |
| 6 rs28371235 | 32647786 G | 5.669 | 5.51E-32 | chr:6:32648036 |
| 6 rs9274939  | 32641751 A | 14.8  | 6.38E-32 | chr:6:32648036 |
| 6 rs9274993  | 32642582 A | 55.54 | 8.64E-32 | chr:6:32648036 |
| 6 rs28371234 | 32647779 A | 5.685 | 9.40E-32 | chr:6:32648036 |
| 6 rs9274984  | 32642378 C | 15.56 | 1.08E-31 | chr:6:32648036 |
| 6 rs9274985  | 32642379 A | 15.56 | 1.08E-31 | chr:6:32648036 |
| 6 rs9274700  | 32637180 G | 47.6  | 1.19E-31 | chr:6:32648036 |
| 6 rs28371236 | 32647803 G | 5.493 | 1.46E-31 | chr:6:32648036 |
| 6 rs28371237 | 32647816 G | 5.493 | 1.46E-31 | chr:6:32648036 |
| 6 rs9274972  | 32642126 T | 66.75 | 2.18E-31 | chr:6:32648036 |
| 6 rs9274948  | 32641847 T | 13.85 | 2.47E-31 | chr:6:32648036 |
| 6 rs9274863  | 32640611 C | 53.43 | 2.58E-31 | chr:6:32648036 |
| 6 rs2935909  | 32655962 G | 28.48 | 2.94E-31 | chr:6:32648036 |
| 6 rs3021056  | 32655921 T | 28.48 | 2.94E-31 | chr:6:32648036 |
| 6 rs9274688  | 32636900 T | 53.41 | 3.08E-31 | chr:6:32648036 |
| 6 rs9274882  | 32641066 T | 8.979 | 3.33E-31 | chr:6:32648036 |
| 6 rs9274947  | 32641832 A | 13.9  | 3.51E-31 | chr:6:32648036 |
| 6 rs9274793  | 32639247 C | 64.57 | 3.68E-31 | chr:6:32648036 |
| 6 rs9274963  | 32641942 C | 14.47 | 4.17E-31 | chr:6:32648036 |
| 6 rs9274941  | 32641755 G | 13.23 | 4.45E-31 | chr:6:32648036 |
| 6 rs9275079  | 32648614 C | 65.06 | 4.52E-31 | chr:6:32648036 |
| 6 rs9275080  | 32648627 T | 65.06 | 4.52E-31 | chr:6:32648036 |
| 6 rs9274888  | 32641142 A | 7.28  | 2.00E-30 | chr:6:32648036 |
| 6 rs28755355 | 32647058 C | 8.615 | 2.27E-30 | chr:6:32648036 |
| 6 rs28755358 | 32647062 A | 8.615 | 2.27E-30 | chr:6:32648036 |

|              |            |       |          |                |
|--------------|------------|-------|----------|----------------|
| 6 rs28755359 | 32647064 T | 8.615 | 2.27E-30 | chr:6:32648036 |
| 6 rs9274950  | 32641864 T | 12.29 | 2.50E-30 | chr:6:32648036 |
| 6 rs9274890  | 32641148 A | 6.988 | 3.33E-30 | chr:6:32648036 |
| 6 rs9275083  | 32648694 C | 70.48 | 3.35E-30 | chr:6:32648036 |
| 6 rs9274777  | 32638686 G | 5.371 | 4.37E-30 | chr:6:32648036 |
| 6 rs9274783  | 32638816 G | 5.371 | 4.37E-30 | chr:6:32648036 |
| 6 rs9274924  | 32641403 T | 5.353 | 7.16E-30 | chr:6:32648036 |
| 6 rs9274842  | 32640095 A | 65.58 | 7.42E-30 | chr:6:32648036 |
| 6 rs9274742  | 32638037 C | 86.09 | 7.60E-30 | chr:6:32648036 |
| 6 rs9275157  | 32652552 A | 36.98 | 1.02E-29 | chr:6:32648036 |
| 6 rs9275156  | 32652486 C | 42.42 | 1.74E-29 | chr:6:32648036 |
| 6 rs9274976  | 32642220 A | 82.68 | 2.06E-29 | chr:6:32648036 |
| 6 rs9274925  | 32641411 T | 5.199 | 2.15E-29 | chr:6:32648036 |
| 6 rs9274885  | 32641081 T | 7.595 | 2.91E-29 | chr:6:32648036 |
| 6 rs9274975  | 32642187 G | 81.32 | 2.94E-29 | chr:6:32648036 |
| 6 rs9274789  | 32639143 C | 50.95 | 3.00E-29 | chr:6:32648036 |
| 6 rs9274892  | 32641161 G | 6.424 | 4.50E-29 | chr:6:32648036 |
| 6 rs9275187  | 32656038 C | 5.414 | 5.23E-29 | chr:6:32648036 |
| 6 rs9274884  | 32641078 C | 7.559 | 5.33E-29 | chr:6:32648036 |
| 6 rs9275190  | 32656228 G | 5.347 | 5.36E-29 | chr:6:32648036 |
| 6 rs9275191  | 32656235 C | 5.347 | 5.36E-29 | chr:6:32648036 |
| 6 rs9275194  | 32656334 C | 5.326 | 6.12E-29 | chr:6:32648036 |
| 6 rs9275006  | 32642852 T | 80.79 | 6.20E-29 | chr:6:32648036 |
| 6 rs9274791  | 32639163 T | 60.69 | 6.25E-29 | chr:6:32648036 |
| 6 rs9274893  | 32641165 T | 6.301 | 7.96E-29 | chr:6:32648036 |
| 6 rs9274728  | 32637772 G | 80.88 | 8.60E-29 | chr:6:32648036 |
| 6 rs9274928  | 32641484 T | 7.669 | 9.13E-29 | chr:6:32648036 |
| 6 rs9274897  | 32641195 C | 5.405 | 1.41E-28 | chr:6:32648036 |
| 6 rs9274712  | 32637298 T | 19.44 | 1.43E-28 | chr:6:32648036 |
| 6 rs9274921  | 32641341 T | 5.024 | 1.75E-28 | chr:6:32648036 |
| 6 rs9275090  | 32648971 G | 73.16 | 2.84E-28 | chr:6:32648036 |
| 6 rs9274699  | 32637096 A | 72.54 | 3.07E-28 | chr:6:32648036 |
| 6 rs9274920  | 32641328 A | 4.977 | 3.80E-28 | chr:6:32648036 |
| 6 rs9274894  | 32641180 G | 5.795 | 6.41E-28 | chr:6:32648036 |
| 6 rs9275004  | 32642839 G | 92.38 | 1.13E-27 | chr:6:32648036 |
| 6 rs9274811  | 32639511 T | 89.45 | 1.29E-27 | chr:6:32648036 |
| 6 rs7750477  | 32651707 G | 66.59 | 1.42E-27 | chr:6:32648036 |
| 6 rs9274903  | 32641221 A | 4.887 | 1.67E-27 | chr:6:32648036 |
| 6 rs9275159  | 32652607 T | 65.65 | 1.84E-27 | chr:6:32648036 |
| 6 rs17205373 | 32626210 G | 10.99 | 3.70E-27 | chr:6:32648036 |
| 6 rs9273508  | 32628439 A | 10.88 | 5.58E-27 | chr:6:32648036 |
| 6 rs9274958  | 32641915 G | 10.26 | 6.43E-27 | chr:6:32648036 |
| 6 rs9274959  | 32641916 C | 10.26 | 6.43E-27 | chr:6:32648036 |

|               |            |       |          |                |
|---------------|------------|-------|----------|----------------|
| 6 rs9274960   | 32641917 A | 10.26 | 6.43E-27 | chr:6:32648036 |
| 6 rs1048027   | 32609169 C | 8.284 | 6.51E-27 | chr:6:32648036 |
| 6 rs9275318   | 32666173 G | 14.02 | 6.98E-27 | chr:6:32648036 |
| 6 rs9275319   | 32666295 G | 14.02 | 6.98E-27 | chr:6:32648036 |
| 6 rs3021062   | 32651741 T | 80.83 | 9.04E-27 | chr:6:32648036 |
| 6 rs9275183   | 32654502 G | 13.9  | 9.14E-27 | chr:6:32648036 |
| 6 rs9273471   | 32628030 A | 8.149 | 1.02E-26 | chr:6:32648036 |
| 6 rs2516006   | 32650268 C | 11.32 | 1.24E-26 | chr:6:32648036 |
| 6 rs9275205   | 32657560 C | 11.32 | 1.24E-26 | chr:6:32648036 |
| 6 rs1049087   | 32629889 A | 11.09 | 1.35E-26 | chr:6:32648036 |
| 6 rs9274757   | 32638280 C | 111.4 | 1.50E-26 | chr:6:32648036 |
| 6 rs9275188   | 32656136 T | 5.239 | 2.02E-26 | chr:6:32648036 |
| 6 rs9275189   | 32656137 G | 5.239 | 2.02E-26 | chr:6:32648036 |
| 6 rs2647082   | 32628146 A | 7.884 | 2.10E-26 | chr:6:32648036 |
| 6 rs9274840   | 32640035 T | 109.1 | 2.18E-26 | chr:6:32648036 |
| 6 rs9274841   | 32640059 A | 109.1 | 2.18E-26 | chr:6:32648036 |
| 6 rs9274767   | 32638541 G | 109.4 | 2.30E-26 | chr:6:32648036 |
| 6 rs9274768   | 32638544 C | 109.4 | 2.30E-26 | chr:6:32648036 |
| 6 rs281874807 | 32631448 G | 5.859 | 2.51E-26 | chr:6:32648036 |
| 6 rs9273866   | 32629639 C | 12.92 | 2.98E-26 | chr:6:32648036 |
| 6 rs9274906   | 32641252 A | 4.489 | 3.28E-26 | chr:6:32648036 |
| 6 rs9274880   | 32641011 G | 5.1   | 3.82E-26 | chr:6:32648036 |
| 6 rs9274779   | 32638726 A | 74.72 | 3.88E-26 | chr:6:32648036 |
| 6 rs3021059   | 32652344 T | 74.66 | 3.91E-26 | chr:6:32648036 |
| 6 rs79471319  | 32627777 C | 13.25 | 4.62E-26 | chr:6:32648036 |
| 6 rs9274782   | 32638795 C | 73.62 | 4.94E-26 | chr:6:32648036 |
| 6 rs3830059   | 32634007 G | 12.97 | 5.09E-26 | chr:6:32648036 |
| 6 rs9274854   | 32640473 T | 102.9 | 5.81E-26 | chr:6:32648036 |
| 6 rs1130373   | 32634301 C | 12.89 | 6.21E-26 | chr:6:32648036 |
| 6 rs9273502   | 32628389 C | 12.58 | 7.65E-26 | chr:6:32648036 |
| 6 rs9273503   | 32628390 T | 12.58 | 7.65E-26 | chr:6:32648036 |
| 6 rs9274935   | 32641580 C | 4.517 | 8.13E-26 | chr:6:32648036 |
| 6 rs79350521  | 32503147 T | 8.214 | 9.39E-26 | chr:6:32648036 |
| 6 rs3828796   | 32635974 G | 12.29 | 1.07E-25 | chr:6:32648036 |
| 6 rs3828800   | 32636063 A | 12.26 | 1.10E-25 | chr:6:32648036 |
| 6 rs3828801   | 32636071 T | 12.26 | 1.10E-25 | chr:6:32648036 |
| 6 rs9275211   | 32657844 C | 10.39 | 1.23E-25 | chr:6:32648036 |
| 6 rs28383432  | 32608880 A | 6.281 | 1.29E-25 | chr:6:32648036 |
| 6 rs28746846  | 32634261 T | 12.61 | 1.51E-25 | chr:6:32648036 |
| 6 rs28746847  | 32634262 G | 12.61 | 1.51E-25 | chr:6:32648036 |
| 6 rs28371247  | 32648003 C | 11.77 | 1.56E-25 | chr:6:32648036 |
| 6 rs9274654   | 32636280 T | 12.08 | 1.59E-25 | chr:6:32648036 |
| 6 rs9274655   | 32636289 C | 12.08 | 1.59E-25 | chr:6:32648036 |

|               |            |       |          |                |
|---------------|------------|-------|----------|----------------|
| 6 rs9274656   | 32636351 C | 12.08 | 1.59E-25 | chr:6:32648036 |
| 6 rs9274661   | 32636443 C | 12.08 | 1.59E-25 | chr:6:32648036 |
| 6 rs9274785   | 32638907 C | 97.52 | 1.81E-25 | chr:6:32648036 |
| 6 rs2856677   | 32656815 T | 97.55 | 1.95E-25 | chr:6:32648036 |
| 6 rs9274784   | 32638878 G | 96.88 | 2.05E-25 | chr:6:32648036 |
| 6 rs28746835  | 32633959 C | 13.04 | 2.29E-25 | chr:6:32648036 |
| 6 rs3828799   | 32636062 C | 11.94 | 2.80E-25 | chr:6:32648036 |
| 6 rs9274937   | 32641631 A | 4.675 | 3.02E-25 | chr:6:32648036 |
| 6 rs1694122   | 32642845 G | 10.43 | 3.08E-25 | chr:6:32648036 |
| 6 rs3828792   | 32635828 C | 11.91 | 3.12E-25 | chr:6:32648036 |
| 6 rs9275347   | 32667623 A | 11.88 | 3.19E-25 | chr:6:32648036 |
| 6 rs9275149   | 32651616 T | 94.16 | 3.34E-25 | chr:6:32648036 |
| 6 rs9275150   | 32651617 G | 94.16 | 3.34E-25 | chr:6:32648036 |
| 6 rs9273495   | 32628273 A | 6.616 | 3.39E-25 | chr:6:32648036 |
| 6 rs9274917   | 32641317 C | 4.451 | 4.12E-25 | chr:6:32648036 |
| 6 rs9274918   | 32641318 A | 4.451 | 4.12E-25 | chr:6:32648036 |
| 6 rs201639066 | 32516705 T | 6.834 | 4.71E-25 | chr:6:32648036 |
| 6 rs9275165   | 32652956 G | 93.19 | 4.89E-25 | chr:6:32648036 |
| 6 rs9275166   | 32652963 C | 93.19 | 4.89E-25 | chr:6:32648036 |
| 6 rs9274691   | 32636957 C | 5.044 | 5.27E-25 | chr:6:32648036 |
| 6 rs9274692   | 32636958 A | 5.044 | 5.27E-25 | chr:6:32648036 |
| 6 rs9275164   | 32652929 C | 92.42 | 5.52E-25 | chr:6:32648036 |
| 6 rs9274649   | 32636217 A | 11.39 | 7.45E-25 | chr:6:32648036 |
| 6 rs9274919   | 32641320 G | 4.326 | 8.78E-25 | chr:6:32648036 |
| 6 rs3828809   | 32636172 T | 11.71 | 8.78E-25 | chr:6:32648036 |
| 6 rs28746825  | 32633472 G | 11.94 | 9.03E-25 | chr:6:32648036 |
| 6 rs9272316   | 32604050 T | 6.666 | 9.08E-25 | chr:6:32648036 |
| 6 rs9274780   | 32638741 G | 89.24 | 9.35E-25 | chr:6:32648036 |
| 6 rs9275195   | 32656405 C | 5.056 | 1.03E-24 | chr:6:32648036 |
| 6 rs9275196   | 32656406 A | 5.056 | 1.03E-24 | chr:6:32648036 |
| 6 rs3828787   | 32635743 C | 11.92 | 1.20E-24 | chr:6:32648036 |
| 6 rs3828788   | 32635749 G | 11.92 | 1.20E-24 | chr:6:32648036 |
| 6 rs3828808   | 32636138 G | 11.45 | 1.22E-24 | chr:6:32648036 |
| 6 rs9274640   | 32636154 G | 11.45 | 1.22E-24 | chr:6:32648036 |
| 6 rs28746838  | 32634057 T | 11.53 | 1.22E-24 | chr:6:32648036 |
| 6 rs9274693   | 32636972 T | 5.104 | 1.44E-24 | chr:6:32648036 |
| 6 rs9274765   | 32638510 T | 130.3 | 2.07E-24 | chr:6:32648036 |
| 6 rs9274766   | 32638512 A | 130.3 | 2.07E-24 | chr:6:32648036 |
| 6 rs28383373  | 32607193 C | 4.404 | 2.30E-24 | chr:6:32648036 |
| 6 rs1049072   | 32634355 A | 10.99 | 2.35E-24 | chr:6:32648036 |
| 6 rs28383372  | 32607174 T | 4.375 | 2.74E-24 | chr:6:32648036 |
| 6 rs1049070   | 32634425 T | 11    | 3.00E-24 | chr:6:32648036 |
| 6 rs9274739   | 32637940 T | 129.2 | 3.23E-24 | chr:6:32648036 |

|               |            |       |          |                |
|---------------|------------|-------|----------|----------------|
| 6 rs9273371   | 32626565 T | 7.945 | 3.34E-24 | chr:6:32648036 |
| 6 rs28724252  | 32629549 A | 11.89 | 4.25E-24 | chr:6:32648036 |
| 6 rs281863614 | 32630788 A | 4.904 | 4.78E-24 | chr:6:32648036 |
| 6 rs9274787   | 32639028 A | 125.9 | 4.96E-24 | chr:6:32648036 |
| 6 rs9274788   | 32639036 C | 125.9 | 4.96E-24 | chr:6:32648036 |
| 6 rs28746834  | 32633899 C | 12.47 | 5.08E-24 | chr:6:32648036 |
| 6 rs9274775   | 32638643 G | 123   | 5.65E-24 | chr:6:32648036 |
| 6 rs2856683   | 32655218 G | 122.8 | 6.11E-24 | chr:6:32648036 |
| 6 rs7774434   | 32657578 C | 6.34  | 6.13E-24 | chr:6:32648036 |
| 6 rs281874979 | 32631295 A | 4.784 | 7.66E-24 | chr:6:32648036 |
| 6 rs4947342   | 32653070 A | 120.6 | 8.07E-24 | chr:6:32648036 |
| 6 rs9275171   | 32653972 G | 77.28 | 9.47E-24 | chr:6:32648036 |
| 6 rs9275175   | 32654147 A | 75.59 | 1.42E-23 | chr:6:32648036 |
| 6 rs9275176   | 32654157 G | 75.59 | 1.42E-23 | chr:6:32648036 |
| 6 rs9275147   | 32651557 T | 117   | 1.43E-23 | chr:6:32648036 |
| 6 rs9273513   | 32628506 A | 12.22 | 1.72E-23 | chr:6:32648036 |
| 6 rs9273821   | 32629543 C | 11.28 | 1.82E-23 | chr:6:32648036 |
| 6 rs9274710   | 32637287 G | 5.019 | 2.52E-23 | chr:6:32648036 |
| 6 rs9273491   | 32628221 A | 13.39 | 2.53E-23 | chr:6:32648036 |
| 6 rs28746845  | 32634150 C | 10.04 | 2.72E-23 | chr:6:32648036 |
| 6 rs28746851  | 32634506 T | 10.96 | 2.81E-23 | chr:6:32648036 |
| 6 rs11568830  | 32634556 A | 11.35 | 3.06E-23 | chr:6:32648036 |
| 6 rs9275155   | 32652484 A | 5.151 | 3.09E-23 | chr:6:32648036 |
| 6 rs7745002   | 32615421 G | 4.309 | 3.89E-23 | chr:6:32648036 |
| 6 rs9274815   | 32639620 G | 3.57  | 3.93E-23 | chr:6:32648036 |
| 6 rs115749644 | 32627818 A | 13.22 | 4.87E-23 | chr:6:32648036 |
| 6 rs9272518   | 32606446 C | 48.18 | 4.92E-23 | chr:6:32648036 |
| 6 rs1770      | 32627833 G | 5.169 | 5.02E-23 | chr:6:32648036 |
| 6 rs1049073   | 32632717 A | 5.974 | 5.63E-23 | chr:6:32648036 |
| 6 rs9273537   | 32628765 T | 4.898 | 5.92E-23 | chr:6:32648036 |
| 6 rs3021057   | 32652363 T | 5.196 | 5.98E-23 | chr:6:32648036 |
| 6 rs9274696   | 32637007 C | 5.108 | 6.11E-23 | chr:6:32648036 |
| 6 rs9273528   | 32628633 C | 10.67 | 6.29E-23 | chr:6:32648036 |
| 6 rs281863219 | 32631570 A | 10.33 | 6.59E-23 | chr:6:32648036 |
| 6 rs76585788  | 32637493 A | 13.02 | 7.34E-23 | chr:6:32648036 |
| 6 rs9274702   | 32637184 A | 5.335 | 7.39E-23 | chr:6:32648036 |
| 6 rs28383356  | 32606646 C | 3.916 | 7.72E-23 | chr:6:32648036 |
| 6 rs11568831  | 32634545 A | 11.07 | 7.98E-23 | chr:6:32648036 |
| 6 rs281863304 | 32631473 T | 9.915 | 8.76E-23 | chr:6:32648036 |
| 6 rs9274748   | 32638086 A | 5.502 | 1.01E-22 | chr:6:32648036 |
| 6 rs9274749   | 32638094 A | 5.502 | 1.01E-22 | chr:6:32648036 |
| 6 rs9273489   | 32628189 G | 14.24 | 1.05E-22 | chr:6:32648036 |
| 6 rs28724258  | 32630093 T | 7.583 | 1.09E-22 | chr:6:32648036 |

|               |            |       |          |                |
|---------------|------------|-------|----------|----------------|
| 6 rs9274062   | 32630094 G | 7.583 | 1.09E-22 | chr:6:32648036 |
| 6 rs9274065   | 32630099 T | 7.583 | 1.09E-22 | chr:6:32648036 |
| 6 rs9274697   | 32637016 G | 5.087 | 1.21E-22 | chr:6:32648036 |
| 6 rs9273492   | 32628229 A | 11.77 | 1.23E-22 | chr:6:32648036 |
| 6 rs281863734 | 32630620 T | 8.787 | 1.29E-22 | chr:6:32648036 |
| 6 rs28383400  | 32607950 A | 4.697 | 1.47E-22 | chr:6:32648036 |
| 6 rs9275158   | 32652582 A | 5.043 | 1.56E-22 | chr:6:32648036 |
| 6 rs9274705   | 32637245 A | 4.654 | 1.79E-22 | chr:6:32648036 |
| 6 rs9275154   | 32652435 T | 5.138 | 1.83E-22 | chr:6:32648036 |
| 6 rs3129783   | 32655730 G | 5.372 | 1.87E-22 | chr:6:32648036 |
| 6 rs28746829  | 32633767 T | 11.23 | 2.00E-22 | chr:6:32648036 |
| 6 rs28746830  | 32633781 T | 11.23 | 2.00E-22 | chr:6:32648036 |
| 6 rs9274731   | 32637823 G | 4.733 | 2.38E-22 | chr:6:32648036 |
| 6 rs9274707   | 32637266 G | 4.471 | 2.88E-22 | chr:6:32648036 |
| 6 rs9272365   | 32604621 C | 4.276 | 3.05E-22 | chr:6:32648036 |
| 6 rs9274730   | 32637817 A | 4.729 | 3.20E-22 | chr:6:32648036 |
| 6 rs28746843  | 32634137 C | 9.66  | 3.23E-22 | chr:6:32648036 |
| 6 rs28746844  | 32634139 T | 9.66  | 3.23E-22 | chr:6:32648036 |
| 6 rs28383387  | 32607575 T | 3.773 | 3.28E-22 | chr:6:32648036 |
| 6 rs9274778   | 32638694 A | 5.146 | 3.36E-22 | chr:6:32648036 |
| 6 rs9274708   | 32637267 A | 4.461 | 3.58E-22 | chr:6:32648036 |
| 6 rs28746841  | 32634094 C | 9.252 | 3.60E-22 | chr:6:32648036 |
| 6 rs28746842  | 32634098 G | 9.252 | 3.60E-22 | chr:6:32648036 |
| 6 rs9274907   | 32641281 A | 5.016 | 4.29E-22 | chr:6:32648036 |
| 6 rs28746852  | 32634593 C | 10.86 | 4.70E-22 | chr:6:32648036 |
| 6 rs2856688   | 32654640 T | 163.4 | 4.97E-22 | chr:6:32648036 |
| 6 rs9274750   | 32638114 C | 164.3 | 4.97E-22 | chr:6:32648036 |
| 6 rs9275113   | 32649825 G | 162.2 | 5.13E-22 | chr:6:32648036 |
| 6 rs9273818   | 32629531 G | 10.49 | 5.55E-22 | chr:6:32648036 |
| 6 rs28746839  | 32634090 C | 9.373 | 5.84E-22 | chr:6:32648036 |
| 6 rs28746840  | 32634091 C | 9.373 | 5.84E-22 | chr:6:32648036 |
| 6 rs17206238  | 32665761 T | 10.53 | 6.28E-22 | chr:6:32648036 |
| 6 rs1794495   | 32649347 C | 10.53 | 6.28E-22 | chr:6:32648036 |
| 6 rs1794497   | 32649180 C | 10.53 | 6.28E-22 | chr:6:32648036 |
| 6 rs2646994   | 32665813 T | 10.53 | 6.28E-22 | chr:6:32648036 |
| 6 rs2646995   | 32650492 A | 10.53 | 6.28E-22 | chr:6:32648036 |
| 6 rs2647002   | 32657082 G | 10.53 | 6.28E-22 | chr:6:32648036 |
| 6 rs2647005   | 32664760 G | 10.53 | 6.28E-22 | chr:6:32648036 |
| 6 rs2647007   | 32664677 G | 10.53 | 6.28E-22 | chr:6:32648036 |
| 6 rs2647014   | 32664279 T | 10.53 | 6.28E-22 | chr:6:32648036 |
| 6 rs2647015   | 32664093 G | 10.53 | 6.28E-22 | chr:6:32648036 |
| 6 rs2647017   | 32663772 G | 10.53 | 6.28E-22 | chr:6:32648036 |
| 6 rs28371252  | 32653732 A | 10.53 | 6.28E-22 | chr:6:32648036 |

|              |            |       |          |                |
|--------------|------------|-------|----------|----------------|
| 6 rs28371258 | 32658513 C | 10.53 | 6.28E-22 | chr:6:32648036 |
| 6 rs28371267 | 32663578 T | 10.53 | 6.28E-22 | chr:6:32648036 |
| 6 rs2856669  | 32663360 A | 10.53 | 6.28E-22 | chr:6:32648036 |
| 6 rs2856673  | 32659822 T | 10.53 | 6.28E-22 | chr:6:32648036 |
| 6 rs2858303  | 32650550 C | 10.53 | 6.28E-22 | chr:6:32648036 |
| 6 rs2858313  | 32663919 G | 10.53 | 6.28E-22 | chr:6:32648036 |
| 6 rs2858325  | 32660366 G | 10.53 | 6.28E-22 | chr:6:32648036 |
| 6 rs74379773 | 32662724 C | 10.53 | 6.28E-22 | chr:6:32648036 |
| 6 rs3129784  | 32656608 T | 5.109 | 6.31E-22 | chr:6:32648036 |
| 6 rs2647025  | 32635949 A | 162.6 | 6.49E-22 | chr:6:32648036 |
| 6 rs2858316  | 32662501 T | 10.32 | 6.78E-22 | chr:6:32648036 |
| 6 rs9274740  | 32637968 T | 5.778 | 7.11E-22 | chr:6:32648036 |
| 6 rs9274878  | 32640889 G | 3.992 | 7.18E-22 | chr:6:32648036 |
| 6 rs9272362  | 32604564 T | 4.18  | 7.44E-22 | chr:6:32648036 |
| 6 rs9273558  | 32628965 G | 4.918 | 8.32E-22 | chr:6:32648036 |
| 6 rs9275144  | 32651218 A | 157.2 | 8.42E-22 | chr:6:32648036 |
| 6 rs28746827 | 32633636 A | 12.41 | 8.45E-22 | chr:6:32648036 |
| 6 rs9274690  | 32636940 C | 4.913 | 8.65E-22 | chr:6:32648036 |
| 6 rs9275068  | 32648418 C | 10.04 | 8.82E-22 | chr:6:32648036 |
| 6 rs2856691  | 32653435 A | 155.9 | 9.41E-22 | chr:6:32648036 |
| 6 rs1694111  | 32648753 T | 11.12 | 1.01E-21 | chr:6:32648036 |
| 6 rs9272358  | 32604538 A | 4.12  | 1.01E-21 | chr:6:32648036 |
| 6 rs2858323  | 32660707 T | 10.36 | 1.02E-21 | chr:6:32648036 |
| 6 rs9275140  | 32651018 A | 155.4 | 1.03E-21 | chr:6:32648036 |
| 6 rs9274715  | 32637391 A | 4.321 | 1.08E-21 | chr:6:32648036 |
| 6 rs9274689  | 32636930 C | 4.9   | 1.18E-21 | chr:6:32648036 |
| 6 rs9274698  | 32637095 C | 5.603 | 1.22E-21 | chr:6:32648036 |
| 6 rs9274679  | 32636653 C | 5.023 | 1.25E-21 | chr:6:32648036 |
| 6 rs9273526  | 32628617 C | 9.815 | 1.32E-21 | chr:6:32648036 |
| 6 rs28746853 | 32634646 C | 10.74 | 1.40E-21 | chr:6:32648036 |
| 6 rs9274713  | 32637341 T | 4.962 | 1.56E-21 | chr:6:32648036 |
| 6 rs28371265 | 32659263 C | 10.31 | 1.60E-21 | chr:6:32648036 |
| 6 rs9274790  | 32639155 G | 4.989 | 1.63E-21 | chr:6:32648036 |
| 6 rs9274683  | 32636780 A | 5.6   | 1.66E-21 | chr:6:32648036 |
| 6 rs9274684  | 32636785 T | 5.6   | 1.66E-21 | chr:6:32648036 |
| 6 rs28724250 | 32629530 T | 10.05 | 1.88E-21 | chr:6:32648036 |
| 6 rs1794491  | 32640041 A | 10.69 | 1.95E-21 | chr:6:32648036 |
| 6 rs9273525  | 32628605 C | 9.869 | 2.16E-21 | chr:6:32648036 |
| 6 rs3997848  | 32682394 G | 5.964 | 2.32E-21 | chr:6:32648036 |
| 6 rs28746861 | 32635120 A | 10.65 | 2.46E-21 | chr:6:32648036 |
| 6 rs9274875  | 32640863 G | 3.597 | 2.50E-21 | chr:6:32648036 |
| 6 rs522308   | 32581922 T | 6.721 | 2.52E-21 | chr:6:32648036 |
| 6 rs76164808 | 32637390 C | 12.89 | 2.60E-21 | chr:6:32648036 |

|               |            |       |          |                |
|---------------|------------|-------|----------|----------------|
| 6 rs9274943   | 32641784 T | 3.226 | 3.10E-21 | chr:6:32648036 |
| 6 rs9274685   | 32636844 C | 5.42  | 3.14E-21 | chr:6:32648036 |
| 6 rs2856680   | 32655606 G | 9.819 | 3.15E-21 | chr:6:32648036 |
| 6 rs2856682   | 32655405 T | 9.819 | 3.15E-21 | chr:6:32648036 |
| 6 rs2647008   | 32661515 C | 9.829 | 3.16E-21 | chr:6:32648036 |
| 6 rs2647009   | 32661615 A | 9.829 | 3.16E-21 | chr:6:32648036 |
| 6 rs2647010   | 32661641 G | 9.829 | 3.16E-21 | chr:6:32648036 |
| 6 rs9275180   | 32654278 T | 5.116 | 3.18E-21 | chr:6:32648036 |
| 6 rs28746824  | 32633398 C | 8.897 | 3.22E-21 | chr:6:32648036 |
| 6 rs9274877   | 32640877 G | 3.736 | 3.31E-21 | chr:6:32648036 |
| 6 rs9274687   | 32636882 T | 5.417 | 3.33E-21 | chr:6:32648036 |
| 6 rs9275168   | 32653676 C | 5.11  | 4.12E-21 | chr:6:32648036 |
| 6 rs9275179   | 32654275 G | 141.1 | 4.18E-21 | chr:6:32648036 |
| 6 rs2856690   | 32654536 A | 5.284 | 4.34E-21 | chr:6:32648036 |
| 6 rs9274944   | 32641786 A | 3.216 | 4.50E-21 | chr:6:32648036 |
| 6 rs6927022   | 32612397 G | 3.853 | 4.75E-21 | chr:6:32648036 |
| 6 rs9274725   | 32637573 T | 5.339 | 4.86E-21 | chr:6:32648036 |
| 6 rs9274726   | 32637593 G | 5.339 | 4.86E-21 | chr:6:32648036 |
| 6 rs2935908   | 32652606 C | 9.564 | 4.86E-21 | chr:6:32648036 |
| 6 rs28746865  | 32635248 T | 10.43 | 5.00E-21 | chr:6:32648036 |
| 6 rs9274743   | 32638042 G | 5.01  | 5.17E-21 | chr:6:32648036 |
| 6 rs9272502   | 32606244 T | 3.36  | 5.58E-21 | chr:6:32648036 |
| 6 rs28371253  | 32654257 T | 9.169 | 5.88E-21 | chr:6:32648036 |
| 6 rs9273477   | 32628079 A | 10.52 | 6.84E-21 | chr:6:32648036 |
| 6 rs12192514  | 32674240 T | 9.079 | 8.59E-21 | chr:6:32648036 |
| 6 rs17212616  | 32674617 A | 9.079 | 8.59E-21 | chr:6:32648036 |
| 6 rs2647049   | 32672681 A | 9.079 | 8.59E-21 | chr:6:32648036 |
| 6 rs28371270  | 32674296 G | 9.079 | 8.59E-21 | chr:6:32648036 |
| 6 rs2856705   | 32670956 T | 9.079 | 8.59E-21 | chr:6:32648036 |
| 6 rs9275169   | 32653721 A | 5.111 | 9.16E-21 | chr:6:32648036 |
| 6 rs5019292   | 32733719 A | 6.581 | 9.22E-21 | chr:6:32648036 |
| 6 rs9275146   | 32651495 T | 5.127 | 9.24E-21 | chr:6:32648036 |
| 6 rs281863357 | 32631142 G | 4.656 | 9.48E-21 | chr:6:32648036 |
| 6 rs9275148   | 32651585 C | 5.146 | 9.78E-21 | chr:6:32648036 |
| 6 rs1826961   | 32603866 T | 7.772 | 9.82E-21 | chr:6:32648036 |
| 6 rs9275170   | 32653726 A | 5.104 | 1.08E-20 | chr:6:32648036 |
| 6 rs9275161   | 32652636 C | 5.036 | 1.15E-20 | chr:6:32648036 |
| 6 rs2856689   | 32654551 G | 5.117 | 1.15E-20 | chr:6:32648036 |
| 6 rs10456068  | 32659419 C | 9.835 | 1.16E-20 | chr:6:32648036 |
| 6 rs28371254  | 32657452 C | 9.835 | 1.16E-20 | chr:6:32648036 |
| 6 rs2856665   | 32665597 G | 9.835 | 1.16E-20 | chr:6:32648036 |
| 6 rs2856696   | 32651868 T | 9.835 | 1.16E-20 | chr:6:32648036 |
| 6 rs3021175   | 32651404 C | 9.835 | 1.16E-20 | chr:6:32648036 |



|               |            |       |          |                |
|---------------|------------|-------|----------|----------------|
| 6 rs55673904  | 32645076 T | 5.534 | 1.21E-20 | chr:6:32648036 |
| 6 rs3021058   | 32652359 C | 5.092 | 1.22E-20 | chr:6:32648036 |
| 6 rs28371274  | 32674558 C | 8.915 | 1.24E-20 | chr:6:32648036 |
| 6 rs3997832   | 32637497 C | 4.451 | 1.25E-20 | chr:6:32648036 |
| 6 rs1130420   | 32627852 A | 4.086 | 1.28E-20 | chr:6:32648036 |
| 6 rs9274773   | 32638620 G | 5.122 | 1.42E-20 | chr:6:32648036 |
| 6 rs9274774   | 32638630 G | 5.122 | 1.42E-20 | chr:6:32648036 |
| 6 rs9274155   | 32630288 C | 9.123 | 1.43E-20 | chr:6:32648036 |
| 6 rs1694116   | 32647839 A | 5.66  | 1.46E-20 | chr:6:32648036 |
| 6 rs9275199   | 32656680 T | 5.108 | 1.55E-20 | chr:6:32648036 |
| 6 rs3021176   | 32652469 A | 8.952 | 1.71E-20 | chr:6:32648036 |
| 6 rs115341895 | 32649824 T | 13.7  | 1.79E-20 | chr:6:32648036 |
| 6 rs9274744   | 32638054 A | 4.737 | 1.84E-20 | chr:6:32648036 |
| 6 rs9274746   | 32638060 A | 4.737 | 1.84E-20 | chr:6:32648036 |
| 6 rs9274717   | 32637454 A | 4.43  | 1.85E-20 | chr:6:32648036 |
| 6 rs9274852   | 32640289 A | 126.1 | 1.93E-20 | chr:6:32648036 |
| 6 rs9273496   | 32628283 A | 10.48 | 1.96E-20 | chr:6:32648036 |
| 6 rs3104361   | 32652278 C | 4.465 | 2.03E-20 | chr:6:32648036 |
| 6 rs9275177   | 32654174 T | 5.098 | 2.08E-20 | chr:6:32648036 |
| 6 rs9275178   | 32654181 A | 5.098 | 2.08E-20 | chr:6:32648036 |
| 6 rs9274865   | 32640671 T | 4.714 | 2.34E-20 | chr:6:32648036 |
| 6 rs6928482   | 32626249 C | 5.143 | 2.46E-20 | chr:6:32648036 |
| 6 rs111903208 | 32661432 G | 13.06 | 2.48E-20 | chr:6:32648036 |
| 6 rs112117693 | 32662754 T | 13.06 | 2.48E-20 | chr:6:32648036 |
| 6 rs112317305 | 32667199 C | 13.06 | 2.48E-20 | chr:6:32648036 |
| 6 rs112535219 | 32662613 T | 13.06 | 2.48E-20 | chr:6:32648036 |
| 6 rs112574398 | 32658610 T | 13.06 | 2.48E-20 | chr:6:32648036 |
| 6 rs112608098 | 32665270 A | 13.06 | 2.48E-20 | chr:6:32648036 |
| 6 rs112670480 | 32661440 T | 13.06 | 2.48E-20 | chr:6:32648036 |
| 6 rs113138578 | 32661335 G | 13.06 | 2.48E-20 | chr:6:32648036 |
| 6 rs114218404 | 32664119 T | 13.06 | 2.48E-20 | chr:6:32648036 |
| 6 rs114325417 | 32666222 A | 13.06 | 2.48E-20 | chr:6:32648036 |
| 6 rs114744294 | 32660866 G | 13.06 | 2.48E-20 | chr:6:32648036 |
| 6 rs114801596 | 32663093 G | 13.06 | 2.48E-20 | chr:6:32648036 |
| 6 rs114996593 | 32658360 C | 13.06 | 2.48E-20 | chr:6:32648036 |
| 6 rs115262684 | 32666235 A | 13.06 | 2.48E-20 | chr:6:32648036 |
| 6 rs115577932 | 32663819 T | 13.06 | 2.48E-20 | chr:6:32648036 |
| 6 rs115777056 | 32664154 A | 13.06 | 2.48E-20 | chr:6:32648036 |
| 6 rs115842332 | 32666213 A | 13.06 | 2.48E-20 | chr:6:32648036 |
| 6 rs116147199 | 32658355 G | 13.06 | 2.48E-20 | chr:6:32648036 |
| 6 rs116459302 | 32666559 T | 13.06 | 2.48E-20 | chr:6:32648036 |
| 6 rs141748883 | 32663156 C | 13.06 | 2.48E-20 | chr:6:32648036 |
| 6 rs1694113   | 32650101 A | 13.06 | 2.48E-20 | chr:6:32648036 |

|               |            |        |          |                |
|---------------|------------|--------|----------|----------------|
| 6 rs17427494  | 32665001 A | 13.06  | 2.48E-20 | chr:6:32648036 |
| 6 rs199923808 | 32663798 G | 13.06  | 2.48E-20 | chr:6:32648036 |
| 6 rs4713586   | 32659582 G | 13.06  | 2.48E-20 | chr:6:32648036 |
| 6 rs568935162 | 32662076 G | 13.06  | 2.48E-20 | chr:6:32648036 |
| 6 rs74756176  | 32664373 T | 13.06  | 2.48E-20 | chr:6:32648036 |
| 6 rs77537414  | 32664356 C | 13.06  | 2.48E-20 | chr:6:32648036 |
| 6 rs7754496   | 32657893 T | 13.06  | 2.48E-20 | chr:6:32648036 |
| 6 rs7775055   | 32657916 C | 13.06  | 2.48E-20 | chr:6:32648036 |
| 6 rs79951097  | 32662954 C | 13.06  | 2.48E-20 | chr:6:32648036 |
| 6 rs28371272  | 32674440 C | 8.81   | 2.50E-20 | chr:6:32648036 |
| 6 rs28371273  | 32674442 C | 8.81   | 2.50E-20 | chr:6:32648036 |
| 6 rs10456069  | 32659520 T | 9.331  | 2.53E-20 | chr:6:32648036 |
| 6 rs10456070  | 32659527 A | 9.331  | 2.53E-20 | chr:6:32648036 |
| 6 rs9272574   | 32607281 A | 3.304  | 2.74E-20 | chr:6:32648036 |
| 6 rs530423766 | 32610152 T | 4.584  | 2.80E-20 | chr:6:32648036 |
| 6 rs28746866  | 32635266 G | 10.01  | 2.94E-20 | chr:6:32648036 |
| 6 rs9274969   | 32642073 T | 4.225  | 3.01E-20 | chr:6:32648036 |
| 6 rs9274752   | 32638163 A | 4.978  | 3.05E-20 | chr:6:32648036 |
| 6 rs9274834   | 32639895 G | 5.128  | 3.27E-20 | chr:6:32648036 |
| 6 rs28746864  | 32635230 A | 9.888  | 3.28E-20 | chr:6:32648036 |
| 6 rs9274753   | 32638176 T | 4.982  | 3.30E-20 | chr:6:32648036 |
| 6 rs9274751   | 32638138 C | 4.974  | 3.30E-20 | chr:6:32648036 |
| 6 rs143607013 | 32658807 T | 12.88  | 3.33E-20 | chr:6:32648036 |
| 6 rs145250786 | 32658793 A | 12.88  | 3.33E-20 | chr:6:32648036 |
| 6 rs9275143   | 32651192 T | 5.097  | 3.73E-20 | chr:6:32648036 |
| 6 rs9274995   | 32642615 T | 4.718  | 3.78E-20 | chr:6:32648036 |
| 6 rs9275088   | 32648931 A | 5.097  | 3.83E-20 | chr:6:32648036 |
| 6 rs17211699  | 32626037 T | 9.195  | 3.88E-20 | chr:6:32648036 |
| 6 rs17211713  | 32626179 C | 9.195  | 3.88E-20 | chr:6:32648036 |
| 6 rs9275162   | 32652687 C | 5.061  | 3.94E-20 | chr:6:32648036 |
| 6 rs9275172   | 32653997 A | 0.1957 | 3.98E-20 | chr:6:32648036 |
| 6 rs9275173   | 32654037 T | 0.1957 | 3.98E-20 | chr:6:32648036 |
| 6 rs9275139   | 32651005 A | 5.11   | 4.04E-20 | chr:6:32648036 |
| 6 rs2858330   | 32658715 C | 5.184  | 4.10E-20 | chr:6:32648036 |
| 6 rs9275358   | 32667895 G | 6.444  | 4.13E-20 | chr:6:32648036 |
| 6 rs9274864   | 32640646 G | 4.707  | 4.34E-20 | chr:6:32648036 |
| 6 rs9274836   | 32639956 A | 5.128  | 4.35E-20 | chr:6:32648036 |
| 6 rs9275119   | 32650031 A | 5.123  | 4.66E-20 | chr:6:32648036 |
| 6 rs2647000   | 32656890 C | 5.103  | 4.71E-20 | chr:6:32648036 |
| 6 rs9275202   | 32656869 G | 5.103  | 4.71E-20 | chr:6:32648036 |
| 6 rs9275114   | 32649897 A | 5.268  | 4.79E-20 | chr:6:32648036 |
| 6 rs2856684   | 32655095 C | 5.11   | 4.94E-20 | chr:6:32648036 |
| 6 rs116540263 | 32671372 A | 12.85  | 5.06E-20 | chr:6:32648036 |

|               |            |       |          |                |
|---------------|------------|-------|----------|----------------|
| 6 rs12527228  | 32679992 T | 12.85 | 5.06E-20 | chr:6:32648036 |
| 6 rs140882479 | 32663083 G | 12.85 | 5.06E-20 | chr:6:32648036 |
| 6 rs4713588   | 32659502 A | 12.85 | 5.06E-20 | chr:6:32648036 |
| 6 rs199884023 | 32639449 A | 4.1   | 5.27E-20 | chr:6:32648036 |
| 6 rs9274846   | 32640142 T | 4.328 | 5.39E-20 | chr:6:32648036 |
| 6 rs2856676   | 32656833 A | 5.04  | 5.47E-20 | chr:6:32648036 |
| 6 rs9275008   | 32642944 C | 4.818 | 5.54E-20 | chr:6:32648036 |
| 6 rs2856685   | 32655072 T | 5.11  | 5.55E-20 | chr:6:32648036 |
| 6 rs9274720   | 32637479 A | 4.164 | 5.67E-20 | chr:6:32648036 |
| 6 rs9274843   | 32640096 G | 4.727 | 5.71E-20 | chr:6:32648036 |
| 6 rs9274848   | 32640149 G | 4.326 | 6.10E-20 | chr:6:32648036 |
| 6 rs9274849   | 32640157 T | 4.326 | 6.10E-20 | chr:6:32648036 |
| 6 rs113194380 | 32671391 T | 11.75 | 6.12E-20 | chr:6:32648036 |
| 6 rs115276762 | 32674178 T | 11.75 | 6.12E-20 | chr:6:32648036 |
| 6 rs115911154 | 32674194 G | 11.75 | 6.12E-20 | chr:6:32648036 |
| 6 rs117296796 | 32674192 G | 11.75 | 6.12E-20 | chr:6:32648036 |
| 6 rs12525220  | 32675470 A | 11.75 | 6.12E-20 | chr:6:32648036 |
| 6 rs138256019 | 32673055 A | 11.75 | 6.12E-20 | chr:6:32648036 |
| 6 rs141345764 | 32673811 T | 11.75 | 6.12E-20 | chr:6:32648036 |
| 6 rs149005483 | 32674166 T | 11.75 | 6.12E-20 | chr:6:32648036 |
| 6 rs36030018  | 32667964 C | 11.75 | 6.12E-20 | chr:6:32648036 |
| 6 rs146335245 | 32662357 C | 12.65 | 6.62E-20 | chr:6:32648036 |
| 6 rs3129774   | 32603825 T | 4.291 | 6.65E-20 | chr:6:32648036 |
| 6 rs112032264 | 32660115 C | 12.59 | 7.13E-20 | chr:6:32648036 |
| 6 rs112466823 | 32660104 T | 12.59 | 7.13E-20 | chr:6:32648036 |
| 6 rs2647045   | 32668100 A | 69.36 | 7.18E-20 | chr:6:32648036 |
| 6 rs9274845   | 32640134 T | 4.322 | 7.18E-20 | chr:6:32648036 |
| 6 rs9273748   | 32629394 A | 10.14 | 7.20E-20 | chr:6:32648036 |
| 6 rs9275118   | 32649996 G | 5.12  | 7.27E-20 | chr:6:32648036 |
| 6 rs9275138   | 32650958 G | 5.101 | 7.53E-20 | chr:6:32648036 |
| 6 rs9275112   | 32649773 A | 5.109 | 7.60E-20 | chr:6:32648036 |
| 6 rs9274771   | 32638581 C | 4.973 | 7.79E-20 | chr:6:32648036 |
| 6 rs9274772   | 32638583 C | 4.973 | 7.79E-20 | chr:6:32648036 |
| 6 rs113529604 | 32652971 A | 12.05 | 8.20E-20 | chr:6:32648036 |
| 6 rs9275116   | 32649952 C | 5.183 | 8.85E-20 | chr:6:32648036 |
| 6 rs3210176   | 32627850 C | 4.003 | 8.94E-20 | chr:6:32648036 |
| 6 rs146797694 | 32658866 T | 12.41 | 9.25E-20 | chr:6:32648036 |
| 6 rs9272553   | 32607008 T | 3.286 | 9.86E-20 | chr:6:32648036 |
| 6 rs114079314 | 32580716 T | 12.81 | 1.00E-19 | chr:6:32648036 |
| 6 rs9274734   | 32637887 C | 4.361 | 1.01E-19 | chr:6:32648036 |
| 6 rs9272545   | 32606885 T | 4.432 | 1.05E-19 | chr:6:32648036 |
| 6 rs9275013   | 32643011 C | 4.257 | 1.05E-19 | chr:6:32648036 |
| 6 rs9274763   | 32638427 T | 5.113 | 1.05E-19 | chr:6:32648036 |

|               |            |        |          |                |
|---------------|------------|--------|----------|----------------|
| 6 rs28755392  | 32678021 C | 8.61   | 1.06E-19 | chr:6:32648036 |
| 6 rs111937677 | 32639316 G | 4.113  | 1.09E-19 | chr:6:32648036 |
| 6 rs2856681   | 32655524 T | 8.214  | 1.09E-19 | chr:6:32648036 |
| 6 rs7754885   | 32657858 A | 5.102  | 1.13E-19 | chr:6:32648036 |
| 6 rs2856693   | 32653283 T | 5.054  | 1.15E-19 | chr:6:32648036 |
| 6 rs2856679   | 32655615 A | 5.1    | 1.19E-19 | chr:6:32648036 |
| 6 rs115064018 | 32643752 A | 5.983  | 1.20E-19 | chr:6:32648036 |
| 6 rs9274759   | 32638315 A | 4.962  | 1.20E-19 | chr:6:32648036 |
| 6 rs9275312   | 32665728 G | 6.379  | 1.21E-19 | chr:6:32648036 |
| 6 rs9275328   | 32666822 T | 6.379  | 1.21E-19 | chr:6:32648036 |
| 6 rs9275330   | 32666875 G | 6.379  | 1.21E-19 | chr:6:32648036 |
| 6 rs9275331   | 32666899 G | 6.379  | 1.21E-19 | chr:6:32648036 |
| 6 rs9275333   | 32666968 C | 6.379  | 1.21E-19 | chr:6:32648036 |
| 6 rs9275338   | 32667343 T | 6.379  | 1.21E-19 | chr:6:32648036 |
| 6 rs2856695   | 32651894 G | 5.094  | 1.21E-19 | chr:6:32648036 |
| 6 rs9274754   | 32638261 C | 4.825  | 1.23E-19 | chr:6:32648036 |
| 6 rs9274755   | 32638262 A | 4.825  | 1.23E-19 | chr:6:32648036 |
| 6 rs281874968 | 32631308 A | 8.351  | 1.24E-19 | chr:6:32648036 |
| 6 rs9274792   | 32639224 C | 4.702  | 1.24E-19 | chr:6:32648036 |
| 6 rs2858329   | 32658801 G | 4.874  | 1.25E-19 | chr:6:32648036 |
| 6 rs9275007   | 32642921 A | 4.826  | 1.29E-19 | chr:6:32648036 |
| 6 rs9275089   | 32648947 T | 4.792  | 1.33E-19 | chr:6:32648036 |
| 6 rs2856686   | 32654869 C | 5.104  | 1.34E-19 | chr:6:32648036 |
| 6 rs9275087   | 32648893 C | 5.107  | 1.39E-19 | chr:6:32648036 |
| 6 rs17212937  | 32681339 T | 9.523  | 1.42E-19 | chr:6:32648036 |
| 6 rs7764819   | 32680576 G | 9.523  | 1.42E-19 | chr:6:32648036 |
| 6 rs7765379   | 32680928 G | 9.523  | 1.42E-19 | chr:6:32648036 |
| 6 rs9275141   | 32651117 G | 5.099  | 1.42E-19 | chr:6:32648036 |
| 6 rs9275014   | 32643023 A | 4.161  | 1.42E-19 | chr:6:32648036 |
| 6 rs75098126  | 32636108 G | 12.1   | 1.43E-19 | chr:6:32648036 |
| 6 rs75128960  | 32636087 A | 12.1   | 1.43E-19 | chr:6:32648036 |
| 6 rs9274758   | 32638290 G | 4.82   | 1.43E-19 | chr:6:32648036 |
| 6 rs113374318 | 32639415 A | 3.998  | 1.49E-19 | chr:6:32648036 |
| 6 rs16898262  | 32677397 G | 8.438  | 1.50E-19 | chr:6:32648036 |
| 6 rs17212846  | 32675581 T | 8.438  | 1.50E-19 | chr:6:32648036 |
| 6 rs2856697   | 32673230 T | 8.438  | 1.50E-19 | chr:6:32648036 |
| 6 rs9274741   | 32637994 T | 0.1961 | 1.51E-19 | chr:6:32648036 |
| 6 rs9272380   | 32604732 A | 3.519  | 1.51E-19 | chr:6:32648036 |
| 6 rs9274718   | 32637469 C | 3.99   | 1.53E-19 | chr:6:32648036 |
| 6 rs9274719   | 32637470 C | 3.99   | 1.53E-19 | chr:6:32648036 |
| 6 rs2856667   | 32665079 C | 5.103  | 1.55E-19 | chr:6:32648036 |
| 6 rs9275145   | 32651363 C | 0.1957 | 1.56E-19 | chr:6:32648036 |
| 6 rs3104367   | 32603487 C | 4.388  | 1.57E-19 | chr:6:32648036 |

|               |            |        |          |                |
|---------------|------------|--------|----------|----------------|
| 6 rs9275105   | 32649416 C | 0.196  | 1.60E-19 | chr:6:32648036 |
| 6 rs9275101   | 32649355 G | 0.1959 | 1.62E-19 | chr:6:32648036 |
| 6 rs9275102   | 32649361 G | 0.1959 | 1.62E-19 | chr:6:32648036 |
| 6 rs9274839   | 32640015 G | 4.885  | 1.64E-19 | chr:6:32648036 |
| 6 rs9275327   | 32666802 T | 6.313  | 1.66E-19 | chr:6:32648036 |
| 6 rs9274853   | 32640420 A | 4.966  | 1.73E-19 | chr:6:32648036 |
| 6 rs9275091   | 32648972 T | 4.794  | 1.74E-19 | chr:6:32648036 |
| 6 rs7754464   | 32657818 A | 0.1961 | 1.76E-19 | chr:6:32648036 |
| 6 rs9275103   | 32649386 T | 0.1959 | 1.78E-19 | chr:6:32648036 |
| 6 rs9275106   | 32649475 T | 0.196  | 1.80E-19 | chr:6:32648036 |
| 6 rs9275123   | 32650256 T | 5.025  | 1.81E-19 | chr:6:32648036 |
| 6 rs9275125   | 32650293 T | 5.025  | 1.81E-19 | chr:6:32648036 |
| 6 rs9275126   | 32650307 T | 5.025  | 1.81E-19 | chr:6:32648036 |
| 6 rs113666293 | 32656477 C | 11.66  | 1.83E-19 | chr:6:32648036 |
| 6 rs9275135   | 32650736 T | 0.196  | 1.85E-19 | chr:6:32648036 |
| 6 rs9275136   | 32650757 C | 0.196  | 1.85E-19 | chr:6:32648036 |
| 6 rs1049092   | 32629802 G | 4.821  | 1.89E-19 | chr:6:32648036 |
| 6 rs9275360   | 32667937 T | 6.268  | 1.92E-19 | chr:6:32648036 |
| 6 rs9275362   | 32667957 T | 6.268  | 1.92E-19 | chr:6:32648036 |
| 6 rs9275365   | 32668125 A | 6.268  | 1.92E-19 | chr:6:32648036 |
| 6 rs9274736   | 32637905 C | 4.261  | 1.94E-19 | chr:6:32648036 |
| 6 rs4642516   | 32657543 G | 0.196  | 2.01E-19 | chr:6:32648036 |
| 6 rs143801964 | 32645680 C | 5.908  | 2.02E-19 | chr:6:32648036 |
| 6 rs28746867  | 32635293 G | 11.42  | 2.03E-19 | chr:6:32648036 |
| 6 rs9272468   | 32605708 A | 3.945  | 2.05E-19 | chr:6:32648036 |
| 6 rs9274833   | 32639885 T | 225.6  | 2.09E-19 | chr:6:32648036 |
| 6 rs9274838   | 32639973 G | 225.6  | 2.09E-19 | chr:6:32648036 |
| 6 rs1049124   | 32627713 A | 8.784  | 2.19E-19 | chr:6:32648036 |
| 6 rs9272716   | 32609367 G | 5.81   | 2.20E-19 | chr:6:32648036 |
| 6 rs9275131   | 32650467 T | 5.014  | 2.22E-19 | chr:6:32648036 |
| 6 rs149999552 | 32658763 C | 11.65  | 2.27E-19 | chr:6:32648036 |
| 6 rs9274996   | 32642641 T | 4.819  | 2.28E-19 | chr:6:32648036 |
| 6 rs1794510   | 32652171 A | 11.68  | 2.29E-19 | chr:6:32648036 |
| 6 rs9274760   | 32638348 G | 4.887  | 2.34E-19 | chr:6:32648036 |
| 6 rs17843717  | 32630798 A | 9.897  | 2.38E-19 | chr:6:32648036 |
| 6 rs9274738   | 32637909 C | 4.255  | 2.39E-19 | chr:6:32648036 |
| 6 rs9274832   | 32639875 T | 223.5  | 2.43E-19 | chr:6:32648036 |
| 6 rs9274806   | 32639441 G | 3.92   | 2.46E-19 | chr:6:32648036 |
| 6 rs9275130   | 32650409 C | 4.942  | 2.48E-19 | chr:6:32648036 |
| 6 rs9274761   | 32638371 G | 224.9  | 2.48E-19 | chr:6:32648036 |
| 6 rs9274762   | 32638411 G | 224.9  | 2.48E-19 | chr:6:32648036 |
| 6 rs148781980 | 32667577 G | 10.32  | 2.49E-19 | chr:6:32648036 |
| 6 rs75084410  | 32636018 A | 11.94  | 2.52E-19 | chr:6:32648036 |

|               |            |        |          |                |
|---------------|------------|--------|----------|----------------|
| 6 rs9274946   | 32641828 G | 3.053  | 2.55E-19 | chr:6:32648036 |
| 6 rs9274764   | 32638490 G | 4.951  | 2.64E-19 | chr:6:32648036 |
| 6 rs9274873   | 32640818 C | 3.843  | 2.75E-19 | chr:6:32648036 |
| 6 rs9274889   | 32641143 G | 2.881  | 2.76E-19 | chr:6:32648036 |
| 6 rs28383346  | 32605326 G | 8.429  | 2.78E-19 | chr:6:32648036 |
| 6 rs9275108   | 32649609 A | 222.4  | 2.82E-19 | chr:6:32648036 |
| 6 rs281863287 | 32631496 A | 3.373  | 2.90E-19 | chr:6:32648036 |
| 6 rs9274855   | 32640494 A | 4.688  | 2.96E-19 | chr:6:32648036 |
| 6 rs9275110   | 32649723 C | 220.8  | 3.11E-19 | chr:6:32648036 |
| 6 rs9275111   | 32649735 T | 220.8  | 3.11E-19 | chr:6:32648036 |
| 6 rs28746818  | 32633307 C | 8.708  | 3.17E-19 | chr:6:32648036 |
| 6 rs9275133   | 32650588 A | 0.1993 | 3.22E-19 | chr:6:32648036 |
| 6 rs9274805   | 32639429 T | 3.917  | 3.23E-19 | chr:6:32648036 |
| 6 rs9274756   | 32638269 T | 4.679  | 3.27E-19 | chr:6:32648036 |
| 6 rs9272467   | 32605705 T | 3.94   | 3.37E-19 | chr:6:32648036 |
| 6 rs2856692   | 32653385 G | 218.9  | 3.46E-19 | chr:6:32648036 |
| 6 rs3021060   | 32651846 C | 218.9  | 3.46E-19 | chr:6:32648036 |
| 6 rs3021061   | 32651839 G | 218.9  | 3.46E-19 | chr:6:32648036 |
| 6 rs3129785   | 32656724 T | 218.9  | 3.46E-19 | chr:6:32648036 |
| 6 rs9275100   | 32649308 G | 218.9  | 3.46E-19 | chr:6:32648036 |
| 6 rs9275104   | 32649388 C | 218.9  | 3.46E-19 | chr:6:32648036 |
| 6 rs9275107   | 32649508 G | 218.9  | 3.46E-19 | chr:6:32648036 |
| 6 rs9275121   | 32650185 G | 218.9  | 3.46E-19 | chr:6:32648036 |
| 6 rs9275122   | 32650233 C | 218.9  | 3.46E-19 | chr:6:32648036 |
| 6 rs9275127   | 32650314 T | 218.9  | 3.46E-19 | chr:6:32648036 |
| 6 rs9275132   | 32650500 A | 218.9  | 3.46E-19 | chr:6:32648036 |
| 6 rs9275134   | 32650612 G | 218.9  | 3.46E-19 | chr:6:32648036 |
| 6 rs9273408   | 32627221 G | 10.96  | 3.66E-19 | chr:6:32648036 |
| 6 rs77329518  | 32637136 T | 12.34  | 3.69E-19 | chr:6:32648036 |
| 6 rs9272736   | 32609671 A | 4.351  | 3.70E-19 | chr:6:32648036 |
| 6 rs9272737   | 32609673 A | 4.351  | 3.70E-19 | chr:6:32648036 |
| 6 rs9274973   | 32642147 G | 4.83   | 3.72E-19 | chr:6:32648036 |
| 6 rs9275115   | 32649941 C | 217.3  | 3.81E-19 | chr:6:32648036 |
| 6 rs9275117   | 32649965 T | 217.3  | 3.81E-19 | chr:6:32648036 |
| 6 rs9275093   | 32649047 T | 217.2  | 3.83E-19 | chr:6:32648036 |
| 6 rs9275094   | 32649062 C | 217.2  | 3.83E-19 | chr:6:32648036 |
| 6 rs9275096   | 32649096 T | 217.2  | 3.83E-19 | chr:6:32648036 |
| 6 rs3864306   | 32635012 A | 9.659  | 4.09E-19 | chr:6:32648036 |
| 6 rs9275086   | 32648809 G | 4.937  | 4.11E-19 | chr:6:32648036 |
| 6 rs9275182   | 32654390 T | 216.5  | 4.20E-19 | chr:6:32648036 |
| 6 rs3104362   | 32656697 G | 215.7  | 4.21E-19 | chr:6:32648036 |
| 6 rs28383306  | 32586739 T | 8.47   | 4.25E-19 | chr:6:32648036 |
| 6 rs9273354   | 32625952 G | 4.167  | 4.25E-19 | chr:6:32648036 |

|               |            |        |          |                |
|---------------|------------|--------|----------|----------------|
| 6 rs9273355   | 32625960 G | 4.165  | 4.35E-19 | chr:6:32648036 |
| 6 rs9274727   | 32637696 G | 215.2  | 4.46E-19 | chr:6:32648036 |
| 6 rs9273370   | 32626492 G | 0.2068 | 4.58E-19 | chr:6:32648036 |
| 6 rs9501606   | 32196440 A | 5.884  | 4.61E-19 | chr:6:32648036 |
| 6 rs9275137   | 32650880 C | 214.1  | 4.62E-19 | chr:6:32648036 |
| 6 rs4321864   | 32399187 A | 5.019  | 4.64E-19 | chr:6:32648036 |
| 6 rs28383330  | 32600340 G | 8.445  | 4.67E-19 | chr:6:32648036 |
| 6 rs9275181   | 32654325 G | 213.8  | 4.68E-19 | chr:6:32648036 |
| 6 rs281863284 | 32631499 A | 3.342  | 4.71E-19 | chr:6:32648036 |
| 6 rs6914573   | 32639368 T | 4.046  | 4.72E-19 | chr:6:32648036 |
| 6 rs7774573   | 32657627 C | 9.24   | 4.80E-19 | chr:6:32648036 |
| 6 rs9274974   | 32642152 T | 4.739  | 4.81E-19 | chr:6:32648036 |
| 6 rs112453089 | 32639270 G | 4.355  | 5.01E-19 | chr:6:32648036 |
| 6 rs9275010   | 32642966 T | 4.161  | 5.05E-19 | chr:6:32648036 |
| 6 rs9275011   | 32642969 T | 4.161  | 5.05E-19 | chr:6:32648036 |
| 6 rs28383458  | 32609476 C | 8.389  | 5.26E-19 | chr:6:32648036 |
| 6 rs9274861   | 32640592 G | 4.334  | 5.34E-19 | chr:6:32648036 |
| 6 rs28383318  | 32590352 T | 9.027  | 5.39E-19 | chr:6:32648036 |
| 6 rs10947320  | 32581491 T | 8.31   | 5.56E-19 | chr:6:32648036 |
| 6 rs28746854  | 32634755 T | 9.037  | 5.72E-19 | chr:6:32648036 |
| 6 rs28746855  | 32634756 G | 9.037  | 5.72E-19 | chr:6:32648036 |
| 6 rs1140343   | 32629137 G | 3.26   | 5.94E-19 | chr:6:32648036 |
| 6 rs9272725   | 32609513 G | 0.2135 | 5.99E-19 | chr:6:32648036 |
| 6 rs2858308   | 32670000 T | 8.49   | 6.09E-19 | chr:6:32648036 |
| 6 rs3828806   | 32636130 T | 4.33   | 6.10E-19 | chr:6:32648036 |
| 6 rs3828807   | 32636131 C | 4.33   | 6.10E-19 | chr:6:32648036 |
| 6 rs9274769   | 32638547 C | 4.663  | 7.09E-19 | chr:6:32648036 |
| 6 rs9272441   | 32605380 T | 0.2167 | 7.20E-19 | chr:6:32648036 |
| 6 rs34719927  | 32609514 C | 0.2167 | 7.58E-19 | chr:6:32648036 |
| 6 rs281875029 | 32631237 A | 8.108  | 7.59E-19 | chr:6:32648036 |
| 6 rs1694123   | 32642759 G | 9.839  | 7.86E-19 | chr:6:32648036 |
| 6 rs9273374   | 32626614 A | 0.2165 | 8.00E-19 | chr:6:32648036 |
| 6 rs9275085   | 32648735 A | 4.686  | 8.09E-19 | chr:6:32648036 |
| 6 rs9272578   | 32607389 C | 4.133  | 8.10E-19 | chr:6:32648036 |
| 6 rs9274794   | 32639264 G | 4.343  | 8.17E-19 | chr:6:32648036 |
| 6 rs375846271 | 32640725 T | 12.27  | 8.32E-19 | chr:6:32648036 |
| 6 rs562092898 | 32629544 A | 13.17  | 8.47E-19 | chr:6:32648036 |
| 6 rs12192104  | 32580703 C | 8.158  | 8.52E-19 | chr:6:32648036 |
| 6 rs12206257  | 32576036 T | 8.158  | 8.52E-19 | chr:6:32648036 |
| 6 rs13193798  | 32574991 A | 8.158  | 8.52E-19 | chr:6:32648036 |
| 6 rs13206639  | 32578100 A | 8.158  | 8.52E-19 | chr:6:32648036 |
| 6 rs17211475  | 32602285 G | 8.158  | 8.52E-19 | chr:6:32648036 |
| 6 rs28383226  | 32583899 G | 8.158  | 8.52E-19 | chr:6:32648036 |

|               |            |        |          |                |
|---------------|------------|--------|----------|----------------|
| 6 rs28383229  | 32584024 G | 8.158  | 8.52E-19 | chr:6:32648036 |
| 6 rs28383315  | 32587281 G | 8.158  | 8.52E-19 | chr:6:32648036 |
| 6 rs28383319  | 32591038 G | 8.158  | 8.52E-19 | chr:6:32648036 |
| 6 rs28383325  | 32596310 C | 8.158  | 8.52E-19 | chr:6:32648036 |
| 6 rs28383327  | 32599077 C | 8.158  | 8.52E-19 | chr:6:32648036 |
| 6 rs28383348  | 32605825 A | 8.158  | 8.52E-19 | chr:6:32648036 |
| 6 rs28383459  | 32609520 A | 8.158  | 8.52E-19 | chr:6:32648036 |
| 6 rs28383467  | 32610330 T | 8.158  | 8.52E-19 | chr:6:32648036 |
| 6 rs28752513  | 32583459 C | 8.158  | 8.52E-19 | chr:6:32648036 |
| 6 rs9273444   | 32627635 T | 0.2225 | 8.70E-19 | chr:6:32648036 |
| 6 rs9273372   | 32626590 C | 0.2165 | 8.79E-19 | chr:6:32648036 |
| 6 rs9273373   | 32626601 A | 0.2165 | 8.79E-19 | chr:6:32648036 |
| 6 rs147328574 | 32643801 G | 5.947  | 8.80E-19 | chr:6:32648036 |
| 6 rs2308891   | 32610009 G | 4.467  | 8.89E-19 | chr:6:32648036 |
| 6 rs113773636 | 32673719 G | 11.16  | 8.94E-19 | chr:6:32648036 |
| 6 rs143895212 | 32673761 T | 11.16  | 8.94E-19 | chr:6:32648036 |
| 6 rs9274660   | 32636434 A | 0.2166 | 9.04E-19 | chr:6:32648036 |
| 6 rs28383344  | 32605067 G | 8.093  | 9.16E-19 | chr:6:32648036 |
| 6 rs9274997   | 32642673 T | 4.546  | 9.34E-19 | chr:6:32648036 |
| 6 rs28383335  | 32602892 T | 8.093  | 9.41E-19 | chr:6:32648036 |
| 6 rs28477203  | 32599509 T | 8.093  | 9.41E-19 | chr:6:32648036 |
| 6 rs111335405 | 32655722 G | 10.76  | 9.54E-19 | chr:6:32648036 |
| 6 rs9273445   | 32627646 A | 0.2226 | 9.73E-19 | chr:6:32648036 |
| 6 rs6919468   | 32582903 T | 13.59  | 1.02E-18 | chr:6:32648036 |
| 6 rs1049086   | 32629904 A | 0.2165 | 1.06E-18 | chr:6:32648036 |
| 6 rs1130034   | 32605274 T | 0.2165 | 1.06E-18 | chr:6:32648036 |
| 6 rs9273053   | 32612050 T | 2.968  | 1.10E-18 | chr:6:32648036 |
| 6 rs281863425 | 32631044 A | 9.189  | 1.13E-18 | chr:6:32648036 |
| 6 rs281863426 | 32631043 C | 9.189  | 1.13E-18 | chr:6:32648036 |
| 6 rs9274881   | 32641065 C | 3.059  | 1.14E-18 | chr:6:32648036 |
| 6 rs111983899 | 32639389 T | 3.827  | 1.21E-18 | chr:6:32648036 |
| 6 rs28383345  | 32605234 A | 8.022  | 1.21E-18 | chr:6:32648036 |
| 6 rs9274891   | 32641152 C | 2.809  | 1.21E-18 | chr:6:32648036 |
| 6 rs114816840 | 32610214 C | 3.955  | 1.28E-18 | chr:6:32648036 |
| 6 rs116613962 | 32610220 G | 3.955  | 1.28E-18 | chr:6:32648036 |
| 6 rs28383300  | 32586611 T | 8.891  | 1.35E-18 | chr:6:32648036 |
| 6 rs9273509   | 32628473 T | 0.2325 | 1.35E-18 | chr:6:32648036 |
| 6 rs9273510   | 32628474 G | 0.2325 | 1.35E-18 | chr:6:32648036 |
| 6 rs9272528   | 32606617 G | 2.992  | 1.37E-18 | chr:6:32648036 |
| 6 rs28383321  | 32591411 C | 8.156  | 1.39E-18 | chr:6:32648036 |
| 6 rs1063355   | 32627714 T | 0.2224 | 1.41E-18 | chr:6:32648036 |
| 6 rs1794489   | 32641718 C | 9.223  | 1.42E-18 | chr:6:32648036 |
| 6 rs34826728  | 32610109 A | 0.223  | 1.45E-18 | chr:6:32648036 |



|               |            |        |          |                |
|---------------|------------|--------|----------|----------------|
| 6 rs34843907  | 32610059 T | 0.223  | 1.45E-18 | chr:6:32648036 |
| 6 rs9272756   | 32610047 T | 0.223  | 1.45E-18 | chr:6:32648036 |
| 6 rs9274977   | 32642247 G | 4.593  | 1.46E-18 | chr:6:32648036 |
| 6 rs9273376   | 32626801 C | 0.2229 | 1.48E-18 | chr:6:32648036 |
| 6 rs184950714 | 32636728 A | 10.66  | 1.56E-18 | chr:6:32648036 |
| 6 rs114913214 | 32418321 A | 11.66  | 1.58E-18 | chr:6:32648036 |
| 6 rs115445135 | 32431116 C | 11.66  | 1.58E-18 | chr:6:32648036 |
| 6 rs115756433 | 32446937 A | 11.66  | 1.58E-18 | chr:6:32648036 |
| 6 rs181080594 | 32414647 G | 11.66  | 1.58E-18 | chr:6:32648036 |
| 6 rs6910553   | 32425778 G | 11.66  | 1.58E-18 | chr:6:32648036 |
| 6 rs17613340  | 32621966 G | 4.541  | 1.63E-18 | chr:6:32648036 |
| 6 rs9274106   | 32630176 A | 3.674  | 1.64E-18 | chr:6:32648036 |
| 6 rs9274501   | 32634032 G | 4.252  | 1.75E-18 | chr:6:32648036 |
| 6 rs3104364   | 32603968 G | 4.148  | 1.77E-18 | chr:6:32648036 |
| 6 rs558998942 | 32637290 G | 12.37  | 1.80E-18 | chr:6:32648036 |
| 6 rs9275084   | 32648722 G | 4.55   | 1.81E-18 | chr:6:32648036 |
| 6 rs2935907   | 32651136 A | 10.54  | 1.84E-18 | chr:6:32648036 |
| 6 rs199526678 | 32653823 G | 9.947  | 1.85E-18 | chr:6:32648036 |
| 6 rs114196722 | 32408151 A | 11.31  | 1.90E-18 | chr:6:32648036 |
| 6 rs114248983 | 32394443 T | 11.31  | 1.90E-18 | chr:6:32648036 |
| 6 rs114304312 | 32391470 G | 11.31  | 1.90E-18 | chr:6:32648036 |
| 6 rs114453949 | 32390377 T | 11.31  | 1.90E-18 | chr:6:32648036 |
| 6 rs114656303 | 32395244 G | 11.31  | 1.90E-18 | chr:6:32648036 |
| 6 rs114657744 | 32395626 G | 11.31  | 1.90E-18 | chr:6:32648036 |
| 6 rs114901373 | 32394802 T | 11.31  | 1.90E-18 | chr:6:32648036 |
| 6 rs115098399 | 32396787 A | 11.31  | 1.90E-18 | chr:6:32648036 |
| 6 rs115291739 | 32409286 T | 11.31  | 1.90E-18 | chr:6:32648036 |
| 6 rs115353337 | 32394827 A | 11.31  | 1.90E-18 | chr:6:32648036 |
| 6 rs115573784 | 32394279 C | 11.31  | 1.90E-18 | chr:6:32648036 |
| 6 rs115622881 | 32401908 A | 11.31  | 1.90E-18 | chr:6:32648036 |
| 6 rs115661515 | 32395428 T | 11.31  | 1.90E-18 | chr:6:32648036 |
| 6 rs115678364 | 32395201 C | 11.31  | 1.90E-18 | chr:6:32648036 |
| 6 rs115877957 | 32394547 G | 11.31  | 1.90E-18 | chr:6:32648036 |
| 6 rs115956975 | 32400230 G | 11.31  | 1.90E-18 | chr:6:32648036 |
| 6 rs116025413 | 32391800 A | 11.31  | 1.90E-18 | chr:6:32648036 |
| 6 rs116297629 | 32393915 G | 11.31  | 1.90E-18 | chr:6:32648036 |
| 6 rs116393604 | 32394448 A | 11.31  | 1.90E-18 | chr:6:32648036 |
| 6 rs116705089 | 32395914 G | 11.31  | 1.90E-18 | chr:6:32648036 |
| 6 rs116706331 | 32394622 C | 11.31  | 1.90E-18 | chr:6:32648036 |
| 6 rs116721964 | 32398322 T | 11.31  | 1.90E-18 | chr:6:32648036 |
| 6 rs140938009 | 32394121 A | 11.31  | 1.90E-18 | chr:6:32648036 |
| 6 rs141144670 | 32390484 T | 11.31  | 1.90E-18 | chr:6:32648036 |
| 6 rs144608450 | 32390924 T | 11.31  | 1.90E-18 | chr:6:32648036 |

|               |            |       |          |                |
|---------------|------------|-------|----------|----------------|
| 6 rs145199103 | 32390559 G | 11.31 | 1.90E-18 | chr:6:32648036 |
| 6 rs148205919 | 32390464 G | 11.31 | 1.90E-18 | chr:6:32648036 |
| 6 rs16822567  | 32407260 A | 11.31 | 1.90E-18 | chr:6:32648036 |
| 6 rs16822586  | 32407773 C | 11.31 | 1.90E-18 | chr:6:32648036 |
| 6 rs16822587  | 32407855 C | 11.31 | 1.90E-18 | chr:6:32648036 |
| 6 rs16822602  | 32409697 A | 11.31 | 1.90E-18 | chr:6:32648036 |
| 6 rs16822614  | 32409953 G | 11.31 | 1.90E-18 | chr:6:32648036 |
| 6 rs3763324   | 32406901 G | 11.31 | 1.90E-18 | chr:6:32648036 |
| 6 rs6911791   | 32396288 T | 11.31 | 1.90E-18 | chr:6:32648036 |
| 6 rs6912072   | 32396265 A | 11.31 | 1.90E-18 | chr:6:32648036 |
| 6 rs6915350   | 32392720 C | 11.31 | 1.90E-18 | chr:6:32648036 |
| 6 rs6930615   | 32392205 A | 11.31 | 1.90E-18 | chr:6:32648036 |
| 6 rs6935319   | 32392570 T | 11.31 | 1.90E-18 | chr:6:32648036 |
| 6 rs6936170   | 32392821 A | 11.31 | 1.90E-18 | chr:6:32648036 |
| 6 rs7753500   | 32393354 G | 11.31 | 1.90E-18 | chr:6:32648036 |
| 6 rs7754263   | 32397096 G | 11.31 | 1.90E-18 | chr:6:32648036 |
| 6 rs7754635   | 32397028 A | 11.31 | 1.90E-18 | chr:6:32648036 |
| 6 rs7754753   | 32397401 T | 11.31 | 1.90E-18 | chr:6:32648036 |
| 6 rs9273050   | 32612035 G | 4.579 | 1.97E-18 | chr:6:32648036 |
| 6 rs9273014   | 32611650 A | 3.954 | 1.99E-18 | chr:6:32648036 |
| 6 rs28383235  | 32584184 C | 8.24  | 2.03E-18 | chr:6:32648036 |
| 6 rs114466578 | 32635501 G | 9.085 | 2.04E-18 | chr:6:32648036 |
| 6 rs114995226 | 32645799 A | 5.315 | 2.14E-18 | chr:6:32648036 |
| 6 rs13205658  | 32577607 T | 7.972 | 2.14E-18 | chr:6:32648036 |
| 6 rs7743412   | 32625884 T | 13.49 | 2.20E-18 | chr:6:32648036 |
| 6 rs281874783 | 32632660 G | 4.682 | 2.29E-18 | chr:6:32648036 |
| 6 rs9274390   | 32632659 T | 4.682 | 2.29E-18 | chr:6:32648036 |
| 6 rs28383320  | 32591368 C | 7.921 | 2.36E-18 | chr:6:32648036 |
| 6 rs116315927 | 32565977 T | 11.41 | 2.42E-18 | chr:6:32648036 |
| 6 rs9272498   | 32606217 A | 4.285 | 2.45E-18 | chr:6:32648036 |
| 6 rs28383399  | 32607872 G | 8.047 | 2.53E-18 | chr:6:32648036 |
| 6 rs9273352   | 32625928 T | 3.875 | 2.62E-18 | chr:6:32648036 |
| 6 rs9273523   | 32628571 T | 10.31 | 2.66E-18 | chr:6:32648036 |
| 6 rs28383438  | 32609038 T | 7.877 | 2.76E-18 | chr:6:32648036 |
| 6 rs16822610  | 32409844 A | 10.84 | 2.83E-18 | chr:6:32648036 |
| 6 rs9274857   | 32640542 G | 3.864 | 2.83E-18 | chr:6:32648036 |
| 6 rs9275348   | 32667638 A | 5.746 | 2.85E-18 | chr:6:32648036 |
| 6 rs28746860  | 32635033 G | 8.703 | 2.87E-18 | chr:6:32648036 |
| 6 rs9271394   | 32587480 T | 5.14  | 2.99E-18 | chr:6:32648036 |
| 6 rs9273356   | 32625989 G | 4.15  | 3.12E-18 | chr:6:32648036 |
| 6 rs1766      | 32627795 G | 3.677 | 3.16E-18 | chr:6:32648036 |
| 6 rs28383326  | 32598671 C | 7.663 | 3.20E-18 | chr:6:32648036 |
| 6 rs142420626 | 32630303 C | 7.971 | 3.23E-18 | chr:6:32648036 |

|               |            |        |          |                |
|---------------|------------|--------|----------|----------------|
| 6 rs2647042   | 32667548 C | 0.2158 | 3.32E-18 | chr:6:32648036 |
| 6 rs9273584   | 32629064 T | 2.989  | 3.40E-18 | chr:6:32648036 |
| 6 rs9272368   | 32604642 G | 3.497  | 3.43E-18 | chr:6:32648036 |
| 6 rs9272370   | 32604644 A | 3.497  | 3.43E-18 | chr:6:32648036 |
| 6 rs9274999   | 32642709 A | 4.368  | 3.49E-18 | chr:6:32648036 |
| 6 rs28746798  | 32632558 C | 5.759  | 3.49E-18 | chr:6:32648036 |
| 6 rs28746859  | 32635007 A | 8.162  | 3.54E-18 | chr:6:32648036 |
| 6 rs116704735 | 32407206 T | 11.12  | 3.61E-18 | chr:6:32648036 |
| 6 rs3129730   | 32681839 G | 7.811  | 3.75E-18 | chr:6:32648036 |
| 6 rs28383347  | 32605689 A | 7.53   | 3.76E-18 | chr:6:32648036 |
| 6 rs28746863  | 32635172 T | 9.826  | 3.78E-18 | chr:6:32648036 |
| 6 rs3828811   | 32636221 G | 4.102  | 3.85E-18 | chr:6:32648036 |
| 6 rs9274967   | 32642030 C | 3.573  | 3.88E-18 | chr:6:32648036 |
| 6 rs9274949   | 32641855 G | 2.979  | 3.90E-18 | chr:6:32648036 |
| 6 rs13206219  | 32577847 T | 7.658  | 3.96E-18 | chr:6:32648036 |
| 6 rs28746809  | 32633159 C | 7.209  | 4.20E-18 | chr:6:32648036 |
| 6 rs180828183 | 32644430 T | 5.694  | 4.40E-18 | chr:6:32648036 |
| 6 rs185091810 | 32644431 A | 5.694  | 4.40E-18 | chr:6:32648036 |
| 6 rs28383410  | 32608289 A | 4.773  | 4.51E-18 | chr:6:32648036 |
| 6 rs3828798   | 32636038 A | 0.2314 | 4.57E-18 | chr:6:32648036 |
| 6 rs199617354 | 32644563 G | 5.449  | 4.60E-18 | chr:6:32648036 |
| 6 rs76384124  | 32653855 A | 9.016  | 4.60E-18 | chr:6:32648036 |
| 6 rs9274869   | 32640759 T | 3.934  | 4.73E-18 | chr:6:32648036 |
| 6 rs9274733   | 32637874 T | 4.181  | 4.87E-18 | chr:6:32648036 |
| 6 rs28383405  | 32608108 T | 4.675  | 4.92E-18 | chr:6:32648036 |
| 6 rs9275001   | 32642738 T | 4.254  | 4.92E-18 | chr:6:32648036 |
| 6 rs1694126   | 32640905 A | 7.394  | 4.94E-18 | chr:6:32648036 |
| 6 rs9274283   | 32631763 C | 2.609  | 5.32E-18 | chr:6:32648036 |
| 6 rs1130430   | 32629161 G | 3.105  | 5.70E-18 | chr:6:32648036 |
| 6 rs9274951   | 32641867 G | 2.921  | 6.03E-18 | chr:6:32648036 |
| 6 rs9274952   | 32641868 G | 2.921  | 6.03E-18 | chr:6:32648036 |
| 6 rs9272733   | 32609652 A | 4.444  | 6.15E-18 | chr:6:32648036 |
| 6 rs9272734   | 32609654 A | 4.444  | 6.15E-18 | chr:6:32648036 |
| 6 rs9272735   | 32609655 G | 4.444  | 6.15E-18 | chr:6:32648036 |
| 6 rs9271398   | 32587508 C | 5.099  | 6.20E-18 | chr:6:32648036 |
| 6 rs28755181  | 32642013 A | 10.38  | 6.34E-18 | chr:6:32648036 |
| 6 rs9272482   | 32605920 G | 0.2381 | 6.44E-18 | chr:6:32648036 |
| 6 rs28746819  | 32633320 C | 7.89   | 6.51E-18 | chr:6:32648036 |
| 6 rs9274867   | 32640745 A | 3.929  | 6.53E-18 | chr:6:32648036 |
| 6 rs28383317  | 32590281 A | 7.851  | 6.65E-18 | chr:6:32648036 |
| 6 rs9271416   | 32587812 A | 5.056  | 6.68E-18 | chr:6:32648036 |
| 6 rs9272411   | 32604980 C | 3.535  | 6.76E-18 | chr:6:32648036 |
| 6 rs3828790   | 32635809 T | 0.232  | 6.78E-18 | chr:6:32648036 |

|               |            |        |          |                |
|---------------|------------|--------|----------|----------------|
| 6 rs3828791   | 32635813 A | 0.232  | 6.78E-18 | chr:6:32648036 |
| 6 rs28383411  | 32608308 C | 4.734  | 6.81E-18 | chr:6:32648036 |
| 6 rs9274257   | 32631415 C | 9.743  | 6.91E-18 | chr:6:32648036 |
| 6 rs28383357  | 32606732 A | 3.152  | 7.04E-18 | chr:6:32648036 |
| 6 rs28383390  | 32607657 C | 8.893  | 7.06E-18 | chr:6:32648036 |
| 6 rs28383466  | 32610277 G | 7.615  | 7.15E-18 | chr:6:32648036 |
| 6 rs9273013   | 32611649 T | 3.468  | 7.37E-18 | chr:6:32648036 |
| 6 rs28746810  | 32633185 T | 7.208  | 7.54E-18 | chr:6:32648036 |
| 6 rs9273021   | 32611725 G | 2.969  | 7.66E-18 | chr:6:32648036 |
| 6 rs28746808  | 32633130 A | 7.195  | 7.70E-18 | chr:6:32648036 |
| 6 rs9272586   | 32607492 C | 3.195  | 7.72E-18 | chr:6:32648036 |
| 6 rs28724246  | 32629422 C | 8.432  | 7.89E-18 | chr:6:32648036 |
| 6 rs9272994   | 32611450 T | 2.744  | 8.20E-18 | chr:6:32648036 |
| 6 rs9271408   | 32587613 T | 4.986  | 8.28E-18 | chr:6:32648036 |
| 6 rs28746815  | 32633253 G | 7.436  | 8.36E-18 | chr:6:32648036 |
| 6 rs28746816  | 32633261 A | 7.436  | 8.36E-18 | chr:6:32648036 |
| 6 rs9272492   | 32606052 G | 4.021  | 8.46E-18 | chr:6:32648036 |
| 6 rs9275073   | 32648513 G | 4.406  | 8.49E-18 | chr:6:32648036 |
| 6 rs9274745   | 32638058 T | 4.168  | 8.98E-18 | chr:6:32648036 |
| 6 rs78074767  | 32611472 G | 2.681  | 9.02E-18 | chr:6:32648036 |
| 6 rs9273020   | 32611723 T | 2.964  | 9.04E-18 | chr:6:32648036 |
| 6 rs9271411   | 32587661 A | 4.988  | 9.04E-18 | chr:6:32648036 |
| 6 rs2395191   | 32447085 C | 4.482  | 9.30E-18 | chr:6:32648036 |
| 6 rs9378268   | 32450915 C | 4.482  | 9.30E-18 | chr:6:32648036 |
| 6 rs549783155 | 32448180 C | 11.1   | 9.37E-18 | chr:6:32648036 |
| 6 rs9274922   | 32641350 G | 2.632  | 9.53E-18 | chr:6:32648036 |
| 6 rs281863638 | 32630750 A | 10.18  | 9.85E-18 | chr:6:32648036 |
| 6 rs9272442   | 32605400 C | 0.2419 | 9.93E-18 | chr:6:32648036 |
| 6 rs17843626  | 32621013 A | 2.912  | 9.96E-18 | chr:6:32648036 |
| 6 rs115211911 | 32389614 T | 10.8   | 1.00E-17 | chr:6:32648036 |
| 6 rs116227556 | 32389618 G | 10.8   | 1.00E-17 | chr:6:32648036 |
| 6 rs146771984 | 32390142 A | 10.8   | 1.00E-17 | chr:6:32648036 |
| 6 rs150022449 | 32389908 A | 10.8   | 1.00E-17 | chr:6:32648036 |
| 6 rs28383419  | 32608622 A | 4.424  | 1.00E-17 | chr:6:32648036 |
| 6 rs9501620   | 32383027 A | 10.8   | 1.00E-17 | chr:6:32648036 |
| 6 rs9272393   | 32604826 A | 2.99   | 1.01E-17 | chr:6:32648036 |
| 6 rs9296026   | 32368075 A | 11.31  | 1.03E-17 | chr:6:32648036 |
| 6 rs9469107   | 32366226 A | 11.31  | 1.03E-17 | chr:6:32648036 |
| 6 rs28383316  | 32589687 C | 7.723  | 1.03E-17 | chr:6:32648036 |
| 6 rs9275082   | 32648684 C | 4.36   | 1.09E-17 | chr:6:32648036 |
| 6 rs9272538   | 32606809 C | 2.812  | 1.09E-17 | chr:6:32648036 |
| 6 rs1071630   | 32609126 T | 0.2422 | 1.10E-17 | chr:6:32648036 |
| 6 rs9272416   | 32605043 T | 3.814  | 1.10E-17 | chr:6:32648036 |

|               |            |        |          |                |
|---------------|------------|--------|----------|----------------|
| 6 rs28383401  | 32607973 A | 4.342  | 1.12E-17 | chr:6:32648036 |
| 6 rs28383463  | 32610105 G | 7.415  | 1.16E-17 | chr:6:32648036 |
| 6 rs9272556   | 32607046 T | 3.068  | 1.17E-17 | chr:6:32648036 |
| 6 rs116712006 | 32389671 C | 10.03  | 1.17E-17 | chr:6:32648036 |
| 6 rs9275071   | 32648490 A | 4.348  | 1.20E-17 | chr:6:32648036 |
| 6 rs34100078  | 32653792 G | 7.123  | 1.20E-17 | chr:6:32648036 |
| 6 rs114267247 | 32652593 T | 9.257  | 1.20E-17 | chr:6:32648036 |
| 6 rs9271409   | 32587628 C | 4.92   | 1.25E-17 | chr:6:32648036 |
| 6 rs9274954   | 32641878 T | 2.977  | 1.26E-17 | chr:6:32648036 |
| 6 rs115218431 | 32611504 C | 2.712  | 1.27E-17 | chr:6:32648036 |
| 6 rs6929590   | 32391851 G | 9.409  | 1.28E-17 | chr:6:32648036 |
| 6 rs2002778   | 32601647 C | 7.102  | 1.32E-17 | chr:6:32648036 |
| 6 rs9271540   | 32590029 C | 4.862  | 1.33E-17 | chr:6:32648036 |
| 6 rs28383408  | 32608251 G | 4.599  | 1.37E-17 | chr:6:32648036 |
| 6 rs551235432 | 32352762 A | 11.18  | 1.38E-17 | chr:6:32648036 |
| 6 rs6927077   | 32375909 A | 11.18  | 1.38E-17 | chr:6:32648036 |
| 6 rs6940690   | 32341367 T | 11.18  | 1.38E-17 | chr:6:32648036 |
| 6 rs7759813   | 32354073 G | 11.18  | 1.38E-17 | chr:6:32648036 |
| 6 rs7771136   | 32356409 C | 11.18  | 1.38E-17 | chr:6:32648036 |
| 6 rs9501619   | 32346075 A | 11.18  | 1.38E-17 | chr:6:32648036 |
| 6 rs727939    | 32623463 G | 3.114  | 1.42E-17 | chr:6:32648036 |
| 6 rs9271486   | 32588980 T | 4.928  | 1.50E-17 | chr:6:32648036 |
| 6 rs9273024   | 32611757 C | 2.846  | 1.51E-17 | chr:6:32648036 |
| 6 rs9271582   | 32590774 C | 4.909  | 1.53E-17 | chr:6:32648036 |
| 6 rs9271583   | 32590780 C | 4.909  | 1.53E-17 | chr:6:32648036 |
| 6 rs28383402  | 32607985 G | 4.309  | 1.55E-17 | chr:6:32648036 |
| 6 rs9271504   | 32589368 A | 4.925  | 1.56E-17 | chr:6:32648036 |
| 6 rs28383462  | 32609619 T | 6.041  | 1.63E-17 | chr:6:32648036 |
| 6 rs2858301   | 32643201 T | 5.585  | 1.65E-17 | chr:6:32648036 |
| 6 rs9272510   | 32606367 G | 3.511  | 1.68E-17 | chr:6:32648036 |
| 6 rs9275078   | 32648592 C | 4.324  | 1.68E-17 | chr:6:32648036 |
| 6 rs9271400   | 32587520 T | 4.936  | 1.76E-17 | chr:6:32648036 |
| 6 rs28746797  | 32632544 A | 5.375  | 1.77E-17 | chr:6:32648036 |
| 6 rs9272474   | 32605754 A | 3.284  | 1.77E-17 | chr:6:32648036 |
| 6 rs1129740   | 32609105 G | 0.2515 | 1.91E-17 | chr:6:32648036 |
| 6 rs28383415  | 32608473 A | 4.712  | 1.92E-17 | chr:6:32648036 |
| 6 rs28724244  | 32629398 C | 8.789  | 1.96E-17 | chr:6:32648036 |
| 6 rs28383324  | 32594211 T | 7.314  | 1.97E-17 | chr:6:32648036 |
| 6 rs9271511   | 32589483 A | 4.876  | 1.98E-17 | chr:6:32648036 |
| 6 rs9271584   | 32590870 C | 4.876  | 1.98E-17 | chr:6:32648036 |
| 6 rs9271585   | 32590879 A | 4.876  | 1.98E-17 | chr:6:32648036 |
| 6 rs9271589   | 32591128 A | 4.876  | 1.98E-17 | chr:6:32648036 |
| 6 rs9271592   | 32591173 T | 4.876  | 1.98E-17 | chr:6:32648036 |

|               |            |        |          |                |
|---------------|------------|--------|----------|----------------|
| 6 rs9271607   | 32591566 G | 4.876  | 1.98E-17 | chr:6:32648036 |
| 6 rs9271609   | 32591597 C | 4.876  | 1.98E-17 | chr:6:32648036 |
| 6 rs9273488   | 32628159 G | 9.505  | 2.03E-17 | chr:6:32648036 |
| 6 rs28383417  | 32608507 G | 8.782  | 2.06E-17 | chr:6:32648036 |
| 6 rs9273052   | 32612041 G | 4.741  | 2.10E-17 | chr:6:32648036 |
| 6 rs143374644 | 32521059 A | 11.11  | 2.13E-17 | chr:6:32648036 |
| 6 rs9272366   | 32604622 A | 3.484  | 2.19E-17 | chr:6:32648036 |
| 6 rs9272584   | 32607470 T | 3.229  | 2.23E-17 | chr:6:32648036 |
| 6 rs28746792  | 32632503 T | 2.55   | 2.25E-17 | chr:6:32648036 |
| 6 rs9272476   | 32605759 A | 3.28   | 2.25E-17 | chr:6:32648036 |
| 6 rs3134993   | 32637778 G | 0.2484 | 2.31E-17 | chr:6:32648036 |
| 6 rs9272473   | 32605738 A | 3.368  | 2.31E-17 | chr:6:32648036 |
| 6 rs281863414 | 32631058 G | 7.36   | 2.32E-17 | chr:6:32648036 |
| 6 rs28383333  | 32601786 A | 7.718  | 2.33E-17 | chr:6:32648036 |
| 6 rs116685323 | 32611510 C | 2.679  | 2.35E-17 | chr:6:32648036 |
| 6 rs149654721 | 32611509 C | 2.679  | 2.35E-17 | chr:6:32648036 |
| 6 rs28383404  | 32608090 T | 7.39   | 2.37E-17 | chr:6:32648036 |
| 6 rs9274895   | 32641184 G | 2.602  | 2.38E-17 | chr:6:32648036 |
| 6 rs9274896   | 32641185 G | 2.602  | 2.38E-17 | chr:6:32648036 |
| 6 rs9272583   | 32607453 T | 3.416  | 2.39E-17 | chr:6:32648036 |
| 6 rs28746823  | 32633373 T | 7.331  | 2.39E-17 | chr:6:32648036 |
| 6 rs9274934   | 32641529 T | 2.695  | 2.44E-17 | chr:6:32648036 |
| 6 rs3828789   | 32635754 G | 0.243  | 2.48E-17 | chr:6:32648036 |
| 6 rs9273033   | 32611873 C | 2.981  | 2.53E-17 | chr:6:32648036 |
| 6 rs9273034   | 32611874 T | 2.981  | 2.53E-17 | chr:6:32648036 |
| 6 rs28383413  | 32608417 A | 4.603  | 2.54E-17 | chr:6:32648036 |
| 6 rs9273535   | 32628760 A | 7.993  | 2.56E-17 | chr:6:32648036 |
| 6 rs9272484   | 32605943 G | 0.2512 | 2.58E-17 | chr:6:32648036 |
| 6 rs9271560   | 32590381 T | 4.866  | 2.60E-17 | chr:6:32648036 |
| 6 rs9272555   | 32607042 A | 3.018  | 2.76E-17 | chr:6:32648036 |
| 6 rs28383397  | 32607820 T | 4.5    | 2.79E-17 | chr:6:32648036 |
| 6 rs28383398  | 32607828 T | 4.5    | 2.79E-17 | chr:6:32648036 |
| 6 rs281863770 | 32630557 A | 3.687  | 2.82E-17 | chr:6:32648036 |
| 6 rs281863778 | 32630543 T | 3.687  | 2.82E-17 | chr:6:32648036 |
| 6 rs115081558 | 32681272 G | 10.88  | 2.92E-17 | chr:6:32648036 |
| 6 rs9272503   | 32606286 C | 3.617  | 2.97E-17 | chr:6:32648036 |
| 6 rs9273350   | 32625885 G | 3.622  | 3.01E-17 | chr:6:32648036 |
| 6 rs9271604   | 32591430 G | 4.819  | 3.08E-17 | chr:6:32648036 |
| 6 rs9271605   | 32591448 A | 4.819  | 3.08E-17 | chr:6:32648036 |
| 6 rs9273022   | 32611737 C | 3.918  | 3.12E-17 | chr:6:32648036 |
| 6 rs9274828   | 32639737 G | 3.312  | 3.12E-17 | chr:6:32648036 |
| 6 rs9271561   | 32590393 G | 4.807  | 3.18E-17 | chr:6:32648036 |
| 6 rs28383331  | 32600772 A | 6.511  | 3.33E-17 | chr:6:32648036 |

|               |            |        |          |                |
|---------------|------------|--------|----------|----------------|
| 6 rs9272491   | 32606046 C | 3.452  | 3.34E-17 | chr:6:32648036 |
| 6 rs9274289   | 32631817 C | 4.029  | 3.47E-17 | chr:6:32648036 |
| 6 rs9273351   | 32625906 C | 3.617  | 3.62E-17 | chr:6:32648036 |
| 6 rs28746796  | 32632536 T | 5.227  | 3.62E-17 | chr:6:32648036 |
| 6 rs9273443   | 32627600 G | 0.2551 | 3.68E-17 | chr:6:32648036 |
| 6 rs9274898   | 32641199 T | 2.584  | 3.80E-17 | chr:6:32648036 |
| 6 rs9274899   | 32641203 T | 2.584  | 3.80E-17 | chr:6:32648036 |
| 6 rs28746793  | 32632528 T | 4.664  | 3.83E-17 | chr:6:32648036 |
| 6 rs9274900   | 32641207 A | 2.585  | 3.86E-17 | chr:6:32648036 |
| 6 rs2395520   | 32601462 G | 6.707  | 3.86E-17 | chr:6:32648036 |
| 6 rs28383414  | 32608467 A | 4.614  | 3.98E-17 | chr:6:32648036 |
| 6 rs9273541   | 32628787 T | 7.695  | 4.08E-17 | chr:6:32648036 |
| 6 rs9271554   | 32590317 G | 4.785  | 4.18E-17 | chr:6:32648036 |
| 6 rs9272347   | 32604394 C | 3.557  | 4.25E-17 | chr:6:32648036 |
| 6 rs28746805  | 32633050 G | 7.005  | 4.27E-17 | chr:6:32648036 |
| 6 rs1130381   | 32632691 A | 8.007  | 4.41E-17 | chr:6:32648036 |
| 6 rs9271488   | 32589000 T | 4.753  | 4.44E-17 | chr:6:32648036 |
| 6 rs9272793   | 32610495 G | 3.861  | 4.46E-17 | chr:6:32648036 |
| 6 rs281863735 | 32630619 A | 3.486  | 4.48E-17 | chr:6:32648036 |
| 6 rs9271497   | 32589245 T | 4.808  | 4.59E-17 | chr:6:32648036 |
| 6 rs9271485   | 32588953 G | 4.745  | 4.66E-17 | chr:6:32648036 |
| 6 rs116567952 | 32601006 C | 9.544  | 4.69E-17 | chr:6:32648036 |
| 6 rs28383349  | 32606266 C | 6.439  | 4.73E-17 | chr:6:32648036 |
| 6 rs9273800   | 32629496 T | 3.8    | 4.82E-17 | chr:6:32648036 |
| 6 rs9274883   | 32641072 T | 2.802  | 4.90E-17 | chr:6:32648036 |
| 6 rs28746807  | 32633085 G | 6.795  | 4.99E-17 | chr:6:32648036 |
| 6 rs9273049   | 32612034 T | 2.704  | 5.04E-17 | chr:6:32648036 |
| 6 rs9274871   | 32640792 G | 3.472  | 5.07E-17 | chr:6:32648036 |
| 6 rs9274872   | 32640793 G | 3.472  | 5.07E-17 | chr:6:32648036 |
| 6 rs9272389   | 32604793 C | 2.87   | 5.19E-17 | chr:6:32648036 |
| 6 rs9275081   | 32648669 T | 4.117  | 5.25E-17 | chr:6:32648036 |
| 6 rs7751376   | 32605437 G | 3.752  | 5.32E-17 | chr:6:32648036 |
| 6 rs9271595   | 32591235 G | 4.639  | 5.33E-17 | chr:6:32648036 |
| 6 rs9271596   | 32591237 G | 4.639  | 5.33E-17 | chr:6:32648036 |
| 6 rs9271426   | 32587973 A | 4.758  | 5.36E-17 | chr:6:32648036 |
| 6 rs1140342   | 32629141 T | 3.097  | 5.49E-17 | chr:6:32648036 |
| 6 rs9274607   | 32635713 T | 0.2497 | 5.58E-17 | chr:6:32648036 |
| 6 rs114213887 | 32681343 C | 9.689  | 5.77E-17 | chr:6:32648036 |
| 6 rs563774374 | 32506022 T | 2.696  | 5.90E-17 | chr:6:32648036 |
| 6 rs9274352   | 32632433 G | 5.289  | 6.04E-17 | chr:6:32648036 |
| 6 rs9272568   | 32607209 G | 2.685  | 6.07E-17 | chr:6:32648036 |
| 6 rs9272847   | 32610695 T | 3.476  | 6.24E-17 | chr:6:32648036 |
| 6 rs9273046   | 32612003 T | 2.8    | 6.29E-17 | chr:6:32648036 |

|               |            |       |          |                |
|---------------|------------|-------|----------|----------------|
| 6 rs9274351   | 32632425 A | 5.191 | 6.56E-17 | chr:6:32648036 |
| 6 rs9272387   | 32604776 C | 2.838 | 6.59E-17 | chr:6:32648036 |
| 6 rs9274278   | 32631711 T | 2.679 | 6.78E-17 | chr:6:32648036 |
| 6 rs114279634 | 32392481 G | 8.234 | 6.85E-17 | chr:6:32648036 |
| 6 rs17612640  | 32615754 A | 3.664 | 7.08E-17 | chr:6:32648036 |
| 6 rs1064173   | 32627480 A | 5.112 | 7.09E-17 | chr:6:32648036 |
| 6 rs28383416  | 32608483 C | 4.559 | 7.11E-17 | chr:6:32648036 |
| 6 rs116080026 | 32637492 T | 11.39 | 7.13E-17 | chr:6:32648036 |
| 6 rs9271430   | 32588002 C | 4.726 | 7.25E-17 | chr:6:32648036 |
| 6 rs9272435   | 32605336 A | 4.532 | 7.29E-17 | chr:6:32648036 |
| 6 rs17612802  | 32620359 T | 2.83  | 7.29E-17 | chr:6:32648036 |
| 6 rs1130382   | 32632672 A | 8.075 | 7.39E-17 | chr:6:32648036 |
| 6 rs12208101  | 32576812 A | 7.549 | 7.73E-17 | chr:6:32648036 |
| 6 rs77032877  | 32501811 C | 5.081 | 7.84E-17 | chr:6:32648036 |
| 6 rs28383418  | 32608537 C | 4.504 | 7.85E-17 | chr:6:32648036 |
| 6 rs281861609 | 32633350 A | 7.254 | 7.86E-17 | chr:6:32648036 |
| 6 rs28746821  | 32633348 G | 7.254 | 7.86E-17 | chr:6:32648036 |
| 6 rs114001299 | 32394511 A | 8.147 | 8.12E-17 | chr:6:32648036 |
| 6 rs114188689 | 32391589 A | 8.147 | 8.12E-17 | chr:6:32648036 |
| 6 rs114404972 | 32393686 A | 8.147 | 8.12E-17 | chr:6:32648036 |
| 6 rs114594015 | 32394690 C | 8.147 | 8.12E-17 | chr:6:32648036 |
| 6 rs114637082 | 32392282 A | 8.147 | 8.12E-17 | chr:6:32648036 |
| 6 rs114913290 | 32390676 T | 8.147 | 8.12E-17 | chr:6:32648036 |
| 6 rs115045614 | 32394615 C | 8.147 | 8.12E-17 | chr:6:32648036 |
| 6 rs115472206 | 32392433 T | 8.147 | 8.12E-17 | chr:6:32648036 |
| 6 rs115617611 | 32391301 G | 8.147 | 8.12E-17 | chr:6:32648036 |
| 6 rs115861456 | 32391503 T | 8.147 | 8.12E-17 | chr:6:32648036 |
| 6 rs116103816 | 32395236 A | 8.147 | 8.12E-17 | chr:6:32648036 |
| 6 rs116276080 | 32391514 C | 8.147 | 8.12E-17 | chr:6:32648036 |
| 6 rs116414794 | 32391485 C | 8.147 | 8.12E-17 | chr:6:32648036 |
| 6 rs116514685 | 32393768 T | 8.147 | 8.12E-17 | chr:6:32648036 |
| 6 rs116610730 | 32394370 G | 8.147 | 8.12E-17 | chr:6:32648036 |
| 6 rs148258492 | 32394177 C | 8.147 | 8.12E-17 | chr:6:32648036 |
| 6 rs148519138 | 32390934 C | 8.147 | 8.12E-17 | chr:6:32648036 |
| 6 rs186973048 | 32391050 C | 8.147 | 8.12E-17 | chr:6:32648036 |
| 6 rs191868117 | 32391084 C | 8.147 | 8.12E-17 | chr:6:32648036 |
| 6 rs6457579   | 32393093 G | 8.147 | 8.12E-17 | chr:6:32648036 |
| 6 rs6457580   | 32393141 T | 8.147 | 8.12E-17 | chr:6:32648036 |
| 6 rs6929953   | 32391988 T | 8.147 | 8.12E-17 | chr:6:32648036 |
| 6 rs6930108   | 32392054 T | 8.147 | 8.12E-17 | chr:6:32648036 |
| 6 rs6936008   | 32392764 C | 8.147 | 8.12E-17 | chr:6:32648036 |
| 6 rs7771308   | 32393259 T | 8.147 | 8.12E-17 | chr:6:32648036 |
| 6 rs9272514   | 32606385 T | 3.41  | 8.39E-17 | chr:6:32648036 |



|               |            |        |          |                |
|---------------|------------|--------|----------|----------------|
| 6 rs9271624   | 32591921 T | 4.619  | 8.47E-17 | chr:6:32648036 |
| 6 rs28383308  | 32586782 T | 6.221  | 8.49E-17 | chr:6:32648036 |
| 6 rs28383309  | 32586783 T | 6.221  | 8.49E-17 | chr:6:32648036 |
| 6 rs6938008   | 32604743 C | 2.818  | 8.51E-17 | chr:6:32648036 |
| 6 rs28383338  | 32603897 G | 6.366  | 8.57E-17 | chr:6:32648036 |
| 6 rs9271574   | 32590590 G | 4.638  | 8.77E-17 | chr:6:32648036 |
| 6 rs9271576   | 32590612 C | 4.638  | 8.77E-17 | chr:6:32648036 |
| 6 rs570194309 | 32590602 C | 4.66   | 8.79E-17 | chr:6:32648036 |
| 6 rs9271549   | 32590248 C | 4.684  | 8.80E-17 | chr:6:32648036 |
| 6 rs28371245  | 32647982 C | 2.853  | 8.92E-17 | chr:6:32648036 |
| 6 rs3104363   | 32604000 T | 3.745  | 9.02E-17 | chr:6:32648036 |
| 6 rs9272525   | 32606559 A | 2.665  | 9.08E-17 | chr:6:32648036 |
| 6 rs28383336  | 32603729 G | 6.082  | 9.28E-17 | chr:6:32648036 |
| 6 rs9272420   | 32605101 G | 4.518  | 9.35E-17 | chr:6:32648036 |
| 6 rs6900039   | 32623235 T | 11.24  | 9.60E-17 | chr:6:32648036 |
| 6 rs9272443   | 32605418 A | 4.187  | 9.76E-17 | chr:6:32648036 |
| 6 rs9272444   | 32605419 C | 4.187  | 9.76E-17 | chr:6:32648036 |
| 6 rs28383391  | 32607659 T | 4.521  | 1.00E-16 | chr:6:32648036 |
| 6 rs28383392  | 32607660 G | 4.521  | 1.00E-16 | chr:6:32648036 |
| 6 rs28383403  | 32608035 C | 4.21   | 1.01E-16 | chr:6:32648036 |
| 6 rs28383440  | 32609046 T | 7.147  | 1.06E-16 | chr:6:32648036 |
| 6 rs9274662   | 32636494 T | 0.2378 | 1.06E-16 | chr:6:32648036 |
| 6 rs377552899 | 32630344 C | 6.295  | 1.06E-16 | chr:6:32648036 |
| 6 rs535051941 | 32635364 C | 3.123  | 1.06E-16 | chr:6:32648036 |
| 6 rs28746790  | 32632459 C | 5.008  | 1.07E-16 | chr:6:32648036 |
| 6 rs9274926   | 32641416 C | 2.627  | 1.16E-16 | chr:6:32648036 |
| 6 rs9274927   | 32641419 C | 2.627  | 1.16E-16 | chr:6:32648036 |
| 6 rs1794500   | 32647442 C | 4.914  | 1.17E-16 | chr:6:32648036 |
| 6 rs28383457  | 32609456 T | 4.535  | 1.17E-16 | chr:6:32648036 |
| 6 rs9271563   | 32590428 C | 4.601  | 1.24E-16 | chr:6:32648036 |
| 6 rs9271628   | 32591971 G | 4.524  | 1.24E-16 | chr:6:32648036 |
| 6 rs9273324   | 32623156 T | 2.614  | 1.26E-16 | chr:6:32648036 |
| 6 rs9274930   | 32641505 C | 2.625  | 1.28E-16 | chr:6:32648036 |
| 6 rs9274931   | 32641506 A | 2.625  | 1.28E-16 | chr:6:32648036 |
| 6 rs9274932   | 32641509 G | 2.625  | 1.28E-16 | chr:6:32648036 |
| 6 rs9274933   | 32641513 C | 2.625  | 1.28E-16 | chr:6:32648036 |
| 6 rs9271544   | 32590120 A | 4.61   | 1.29E-16 | chr:6:32648036 |
| 6 rs1130391   | 32632624 T | 8.129  | 1.30E-16 | chr:6:32648036 |
| 6 rs9272323   | 32604151 T | 3.738  | 1.30E-16 | chr:6:32648036 |
| 6 rs28746802  | 32632980 T | 5.623  | 1.31E-16 | chr:6:32648036 |
| 6 rs28746803  | 32632983 T | 5.623  | 1.31E-16 | chr:6:32648036 |
| 6 rs3188543   | 32610403 A | 4.453  | 1.34E-16 | chr:6:32648036 |
| 6 rs9272488   | 32606005 G | 3.319  | 1.38E-16 | chr:6:32648036 |

|               |            |       |          |                |
|---------------|------------|-------|----------|----------------|
| 6 rs9273048   | 32612008 C | 4.308 | 1.38E-16 | chr:6:32648036 |
| 6 rs9274886   | 32641086 C | 2.738 | 1.39E-16 | chr:6:32648036 |
| 6 rs9274887   | 32641089 G | 2.738 | 1.39E-16 | chr:6:32648036 |
| 6 rs9272379   | 32604727 C | 2.715 | 1.43E-16 | chr:6:32648036 |
| 6 rs28383386  | 32607567 A | 3.159 | 1.44E-16 | chr:6:32648036 |
| 6 rs9272661   | 32608680 T | 3.106 | 1.45E-16 | chr:6:32648036 |
| 6 rs9272350   | 32604410 A | 3.024 | 1.46E-16 | chr:6:32648036 |
| 6 rs9272563   | 32607158 C | 2.64  | 1.49E-16 | chr:6:32648036 |
| 6 rs9272472   | 32605724 G | 3.944 | 1.49E-16 | chr:6:32648036 |
| 6 rs9273329   | 32623242 A | 3.656 | 1.51E-16 | chr:6:32648036 |
| 6 rs537750078 | 32661051 A | 5.502 | 1.51E-16 | chr:6:32648036 |
| 6 rs17612625  | 32615702 C | 3.581 | 1.54E-16 | chr:6:32648036 |
| 6 rs17612633  | 32615710 C | 3.581 | 1.54E-16 | chr:6:32648036 |
| 6 rs28752536  | 32598140 T | 6.276 | 1.55E-16 | chr:6:32648036 |
| 6 rs9271472   | 32588700 T | 4.591 | 1.59E-16 | chr:6:32648036 |
| 6 rs9271474   | 32588707 A | 4.591 | 1.59E-16 | chr:6:32648036 |
| 6 rs9274357   | 32632457 G | 4.836 | 1.63E-16 | chr:6:32648036 |
| 6 rs9272565   | 32607169 G | 2.639 | 1.65E-16 | chr:6:32648036 |
| 6 rs9271674   | 32592845 C | 4.39  | 1.66E-16 | chr:6:32648036 |
| 6 rs9271735   | 32593649 A | 3.642 | 1.67E-16 | chr:6:32648036 |
| 6 rs28383365  | 32606942 A | 3.295 | 1.69E-16 | chr:6:32648036 |
| 6 rs116312062 | 32527045 G | 7.472 | 1.72E-16 | chr:6:32648036 |
| 6 rs9274955   | 32641890 G | 2.861 | 1.74E-16 | chr:6:32648036 |
| 6 rs9271516   | 32589668 A | 4.562 | 1.76E-16 | chr:6:32648036 |
| 6 rs28383304  | 32586720 T | 6.108 | 1.77E-16 | chr:6:32648036 |
| 6 rs9272647   | 32608508 T | 3.501 | 1.93E-16 | chr:6:32648036 |
| 6 rs9272567   | 32607200 C | 2.639 | 1.94E-16 | chr:6:32648036 |
| 6 rs28383381  | 32607288 A | 3.458 | 1.95E-16 | chr:6:32648036 |
| 6 rs535097245 | 32218625 A | 9.62  | 1.95E-16 | chr:6:32648036 |
| 6 rs28383389  | 32607596 A | 4.384 | 1.96E-16 | chr:6:32648036 |
| 6 rs9272637   | 32608213 A | 3.204 | 1.96E-16 | chr:6:32648036 |
| 6 rs9272318   | 32604059 G | 4.128 | 2.01E-16 | chr:6:32648036 |
| 6 rs116808893 | 32652418 C | 9.345 | 2.02E-16 | chr:6:32648036 |
| 6 rs1049057   | 32634350 C | 3.507 | 2.04E-16 | chr:6:32648036 |
| 6 rs372253974 | 32630329 C | 6.123 | 2.06E-16 | chr:6:32648036 |
| 6 rs28383383  | 32607368 C | 4.6   | 2.09E-16 | chr:6:32648036 |
| 6 rs1063348   | 32627923 G | 3.651 | 2.10E-16 | chr:6:32648036 |
| 6 rs9272731   | 32609645 C | 4.199 | 2.14E-16 | chr:6:32648036 |
| 6 rs9272732   | 32609647 G | 4.199 | 2.14E-16 | chr:6:32648036 |
| 6 rs9275062   | 32648337 C | 3.794 | 2.18E-16 | chr:6:32648036 |
| 6 rs9271769   | 32594217 T | 4.453 | 2.22E-16 | chr:6:32648036 |
| 6 rs3205916   | 32609106 C | 4.526 | 2.22E-16 | chr:6:32648036 |
| 6 rs28383350  | 32606320 A | 6.262 | 2.23E-16 | chr:6:32648036 |

|               |            |        |          |                |
|---------------|------------|--------|----------|----------------|
| 6 rs3187964   | 32605207 G | 3.601  | 2.24E-16 | chr:6:32648036 |
| 6 rs9272463   | 32605646 G | 4.236  | 2.27E-16 | chr:6:32648036 |
| 6 rs9273441   | 32627573 G | 3.572  | 2.27E-16 | chr:6:32648036 |
| 6 rs9271438   | 32588193 G | 4.553  | 2.28E-16 | chr:6:32648036 |
| 6 rs3134998   | 32636757 T | 0.2375 | 2.30E-16 | chr:6:32648036 |
| 6 rs9273326   | 32623219 C | 3.576  | 2.38E-16 | chr:6:32648036 |
| 6 rs9271532   | 32589945 C | 4.516  | 2.45E-16 | chr:6:32648036 |
| 6 rs9273328   | 32623233 A | 3.575  | 2.46E-16 | chr:6:32648036 |
| 6 rs28746804  | 32632989 G | 5.482  | 2.47E-16 | chr:6:32648036 |
| 6 rs7760514   | 32746309 A | 8.825  | 2.50E-16 | chr:6:32648036 |
| 6 rs9271643   | 32592229 A | 4.402  | 2.57E-16 | chr:6:32648036 |
| 6 rs9274470   | 32633617 A | 3.059  | 2.60E-16 | chr:6:32648036 |
| 6 rs9272346   | 32604372 A | 3.354  | 2.65E-16 | chr:6:32648036 |
| 6 rs9271637   | 32592124 G | 4.424  | 2.75E-16 | chr:6:32648036 |
| 6 rs281863860 | 32630427 C | 5.752  | 2.80E-16 | chr:6:32648036 |
| 6 rs76282264  | 32628635 T | 10.25  | 2.88E-16 | chr:6:32648036 |
| 6 rs2856713   | 32620422 T | 2.721  | 2.88E-16 | chr:6:32648036 |
| 6 rs28383358  | 32606779 A | 4.676  | 2.90E-16 | chr:6:32648036 |
| 6 rs9275070   | 32648449 T | 3.874  | 2.91E-16 | chr:6:32648036 |
| 6 rs9271736   | 32593688 A | 3.298  | 2.93E-16 | chr:6:32648036 |
| 6 rs9272357   | 32604522 A | 2.837  | 2.95E-16 | chr:6:32648036 |
| 6 rs28366275  | 32560114 A | 3.685  | 2.97E-16 | chr:6:32648036 |
| 6 rs28383328  | 32599554 T | 5.487  | 2.97E-16 | chr:6:32648036 |
| 6 rs9272730   | 32609634 G | 4.151  | 3.10E-16 | chr:6:32648036 |
| 6 rs9272378   | 32604718 G | 3.022  | 3.12E-16 | chr:6:32648036 |
| 6 rs9271602   | 32591383 G | 4.449  | 3.19E-16 | chr:6:32648036 |
| 6 rs28383340  | 32604431 T | 5.672  | 3.25E-16 | chr:6:32648036 |
| 6 rs9271693   | 32593033 T | 4.282  | 3.31E-16 | chr:6:32648036 |
| 6 rs28383460  | 32609586 G | 4.404  | 3.39E-16 | chr:6:32648036 |
| 6 rs9273493   | 32628247 T | 0.2725 | 3.46E-16 | chr:6:32648036 |
| 6 rs17205647  | 32637418 A | 3.446  | 3.48E-16 | chr:6:32648036 |
| 6 rs9274669   | 32636591 A | 0.2694 | 3.49E-16 | chr:6:32648036 |
| 6 rs2856675   | 32658768 A | 5.627  | 3.56E-16 | chr:6:32648036 |
| 6 rs9271675   | 32592862 C | 4.286  | 3.59E-16 | chr:6:32648036 |
| 6 rs28383342  | 32604924 T | 6.015  | 3.60E-16 | chr:6:32648036 |
| 6 rs28383337  | 32603732 G | 7.665  | 3.62E-16 | chr:6:32648036 |
| 6 rs10947319  | 32581454 T | 5.728  | 3.64E-16 | chr:6:32648036 |
| 6 rs9274929   | 32641487 C | 2.571  | 3.69E-16 | chr:6:32648036 |
| 6 rs281861394 | 32633608 G | 11.86  | 3.71E-16 | chr:6:32648036 |
| 6 rs9272355   | 32604515 C | 2.829  | 3.92E-16 | chr:6:32648036 |
| 6 rs9272599   | 32607638 G | 2.836  | 3.93E-16 | chr:6:32648036 |
| 6 rs28383301  | 32586631 T | 6.081  | 4.03E-16 | chr:6:32648036 |
| 6 rs28383302  | 32586639 G | 6.081  | 4.03E-16 | chr:6:32648036 |

|               |            |        |          |                |
|---------------|------------|--------|----------|----------------|
| 6 rs28383303  | 32586648 G | 6.081  | 4.03E-16 | chr:6:32648036 |
| 6 rs9273002   | 32611513 G | 3.675  | 4.06E-16 | chr:6:32648036 |
| 6 rs116105128 | 32511456 C | 6.123  | 4.15E-16 | chr:6:32648036 |
| 6 rs9273007   | 32611537 T | 3.772  | 4.17E-16 | chr:6:32648036 |
| 6 rs115487398 | 32390206 C | 7.782  | 4.21E-16 | chr:6:32648036 |
| 6 rs9273045   | 32611982 C | 4.15   | 4.23E-16 | chr:6:32648036 |
| 6 rs9272485   | 32605972 G | 3.941  | 4.23E-16 | chr:6:32648036 |
| 6 rs9271564   | 32590436 T | 4.438  | 4.25E-16 | chr:6:32648036 |
| 6 rs9271565   | 32590437 G | 4.438  | 4.25E-16 | chr:6:32648036 |
| 6 rs6932265   | 32579441 T | 5.764  | 4.39E-16 | chr:6:32648036 |
| 6 rs9272540   | 32606834 C | 2.579  | 4.48E-16 | chr:6:32648036 |
| 6 rs9272656   | 32608629 G | 2.956  | 4.50E-16 | chr:6:32648036 |
| 6 rs9272376   | 32604697 T | 2.638  | 4.55E-16 | chr:6:32648036 |
| 6 rs9272377   | 32604699 T | 2.638  | 4.55E-16 | chr:6:32648036 |
| 6 rs2133035   | 32596475 A | 4.184  | 4.72E-16 | chr:6:32648036 |
| 6 rs28400568  | 32610557 A | 7.377  | 4.75E-16 | chr:6:32648036 |
| 6 rs28400569  | 32610567 T | 7.377  | 4.75E-16 | chr:6:32648036 |
| 6 rs17613542  | 32630717 A | 8.844  | 4.79E-16 | chr:6:32648036 |
| 6 rs9272025   | 32598581 A | 4.097  | 4.86E-16 | chr:6:32648036 |
| 6 rs9272744   | 32609746 T | 3.873  | 4.95E-16 | chr:6:32648036 |
| 6 rs28383343  | 32604974 T | 6.049  | 4.96E-16 | chr:6:32648036 |
| 6 rs28383407  | 32608187 T | 4.07   | 5.00E-16 | chr:6:32648036 |
| 6 rs35979303  | 32450721 C | 3.719  | 5.00E-16 | chr:6:32648036 |
| 6 rs28371240  | 32647856 A | 5.167  | 5.13E-16 | chr:6:32648036 |
| 6 rs1048414   | 32610478 G | 4.342  | 5.17E-16 | chr:6:32648036 |
| 6 rs1048419   | 32610481 C | 4.342  | 5.17E-16 | chr:6:32648036 |
| 6 rs9273036   | 32611898 G | 4.044  | 5.22E-16 | chr:6:32648036 |
| 6 rs9272581   | 32607411 A | 3.221  | 5.22E-16 | chr:6:32648036 |
| 6 rs12212951  | 32581233 C | 5.628  | 5.43E-16 | chr:6:32648036 |
| 6 rs3134996   | 32636866 A | 0.2449 | 5.57E-16 | chr:6:32648036 |
| 6 rs9273044   | 32611971 C | 4.111  | 5.60E-16 | chr:6:32648036 |
| 6 rs28383382  | 32607320 C | 3.795  | 5.87E-16 | chr:6:32648036 |
| 6 rs17843573  | 32615400 T | 3.227  | 5.88E-16 | chr:6:32648036 |
| 6 rs9272601   | 32607652 T | 2.802  | 5.88E-16 | chr:6:32648036 |
| 6 rs1129735   | 32605295 T | 4.28   | 5.88E-16 | chr:6:32648036 |
| 6 rs75076975  | 32610134 A | 4.199  | 6.03E-16 | chr:6:32648036 |
| 6 rs17205640  | 32637413 A | 3.11   | 6.04E-16 | chr:6:32648036 |
| 6 rs17843578  | 32615520 A | 2.978  | 6.09E-16 | chr:6:32648036 |
| 6 rs9274565   | 32635067 A | 2.8    | 6.15E-16 | chr:6:32648036 |
| 6 rs28383406  | 32608179 C | 4.34   | 6.15E-16 | chr:6:32648036 |
| 6 rs17843625  | 32620909 G | 2.834  | 6.19E-16 | chr:6:32648036 |
| 6 rs9272642   | 32608303 C | 2.766  | 6.20E-16 | chr:6:32648036 |
| 6 rs9272643   | 32608304 A | 2.766  | 6.20E-16 | chr:6:32648036 |

|               |            |        |          |                |
|---------------|------------|--------|----------|----------------|
| 6 rs17612858  | 32620622 T | 2.886  | 6.21E-16 | chr:6:32648036 |
| 6 rs568480451 | 32609789 G | 7.604  | 6.25E-16 | chr:6:32648036 |
| 6 rs28383395  | 32607713 T | 4.223  | 6.25E-16 | chr:6:32648036 |
| 6 rs28383396  | 32607714 G | 4.223  | 6.25E-16 | chr:6:32648036 |
| 6 rs28383426  | 32608785 C | 8.406  | 6.35E-16 | chr:6:32648036 |
| 6 rs28383313  | 32587117 G | 4.292  | 6.41E-16 | chr:6:32648036 |
| 6 rs9271542   | 32590091 G | 4.394  | 6.58E-16 | chr:6:32648036 |
| 6 rs9272513   | 32606380 G | 2.766  | 6.59E-16 | chr:6:32648036 |
| 6 rs17843577  | 32615510 T | 2.976  | 6.60E-16 | chr:6:32648036 |
| 6 rs9272546   | 32606941 C | 2.897  | 6.71E-16 | chr:6:32648036 |
| 6 rs28383393  | 32607698 G | 7.455  | 6.72E-16 | chr:6:32648036 |
| 6 rs28383394  | 32607700 T | 7.455  | 6.72E-16 | chr:6:32648036 |
| 6 rs13204672  | 32582796 G | 5.648  | 6.93E-16 | chr:6:32648036 |
| 6 rs13212015  | 32580580 C | 5.648  | 6.93E-16 | chr:6:32648036 |
| 6 rs28383216  | 32580596 C | 5.648  | 6.93E-16 | chr:6:32648036 |
| 6 rs28383222  | 32583405 A | 5.648  | 6.93E-16 | chr:6:32648036 |
| 6 rs28383225  | 32583824 C | 5.648  | 6.93E-16 | chr:6:32648036 |
| 6 rs28383227  | 32583982 A | 5.648  | 6.93E-16 | chr:6:32648036 |
| 6 rs28383228  | 32583993 A | 5.648  | 6.93E-16 | chr:6:32648036 |
| 6 rs28383232  | 32584108 T | 5.648  | 6.93E-16 | chr:6:32648036 |
| 6 rs28752517  | 32584583 A | 5.648  | 6.93E-16 | chr:6:32648036 |
| 6 rs28752518  | 32584588 G | 5.648  | 6.93E-16 | chr:6:32648036 |
| 6 rs28752521  | 32584767 T | 5.648  | 6.93E-16 | chr:6:32648036 |
| 6 rs570600579 | 32584768 A | 5.648  | 6.93E-16 | chr:6:32648036 |
| 6 rs9273524   | 32628595 T | 0.2763 | 7.07E-16 | chr:6:32648036 |
| 6 rs9461744   | 32388317 G | 7.496  | 7.08E-16 | chr:6:32648036 |
| 6 rs9272335   | 32604259 T | 3.223  | 7.15E-16 | chr:6:32648036 |
| 6 rs9271621   | 32591841 A | 4.384  | 7.18E-16 | chr:6:32648036 |
| 6 rs9272774   | 32610255 A | 4.186  | 7.32E-16 | chr:6:32648036 |
| 6 rs9272507   | 32606324 C | 2.676  | 7.33E-16 | chr:6:32648036 |
| 6 rs9272776   | 32610270 T | 0.2713 | 7.38E-16 | chr:6:32648036 |
| 6 rs9272871   | 32610747 C | 4.142  | 7.43E-16 | chr:6:32648036 |
| 6 rs9271764   | 32594159 A | 4.318  | 7.44E-16 | chr:6:32648036 |
| 6 rs9271765   | 32594166 G | 4.318  | 7.44E-16 | chr:6:32648036 |
| 6 rs9271773   | 32594304 C | 3.479  | 7.48E-16 | chr:6:32648036 |
| 6 rs9272602   | 32607666 A | 2.795  | 7.55E-16 | chr:6:32648036 |
| 6 rs28752524  | 32584862 A | 5.703  | 7.74E-16 | chr:6:32648036 |
| 6 rs28752525  | 32584868 C | 5.703  | 7.74E-16 | chr:6:32648036 |
| 6 rs281861581 | 32633380 A | 2.637  | 8.21E-16 | chr:6:32648036 |
| 6 rs28383329  | 32599645 T | 4.536  | 8.40E-16 | chr:6:32648036 |
| 6 rs28383439  | 32609042 A | 4.27   | 8.41E-16 | chr:6:32648036 |
| 6 rs28383369  | 32607087 T | 5.89   | 8.47E-16 | chr:6:32648036 |
| 6 rs9272976   | 32611341 A | 2.584  | 8.73E-16 | chr:6:32648036 |

|               |            |       |          |                |
|---------------|------------|-------|----------|----------------|
| 6 rs9272865   | 32610736 A | 4.1   | 9.05E-16 | chr:6:32648036 |
| 6 rs9271676   | 32592868 C | 4.172 | 9.06E-16 | chr:6:32648036 |
| 6 rs9273042   | 32611964 T | 4.015 | 9.08E-16 | chr:6:32648036 |
| 6 rs9273040   | 32611958 G | 3.994 | 9.15E-16 | chr:6:32648036 |
| 6 rs9274459   | 32633409 A | 2.786 | 9.38E-16 | chr:6:32648036 |
| 6 rs9273043   | 32611968 T | 2.786 | 9.42E-16 | chr:6:32648036 |
| 6 rs17612555  | 32615366 A | 3.235 | 9.48E-16 | chr:6:32648036 |
| 6 rs115793615 | 32206725 T | 8.425 | 9.55E-16 | chr:6:32648036 |
| 6 rs9272310   | 32603939 T | 3.221 | 9.67E-16 | chr:6:32648036 |
| 6 rs9272509   | 32606357 A | 2.757 | 9.87E-16 | chr:6:32648036 |
| 6 rs28371261  | 32658727 A | 5.267 | 9.95E-16 | chr:6:32648036 |
| 6 rs17843584  | 32615668 T | 3.244 | 1.01E-15 | chr:6:32648036 |
| 6 rs9274510   | 32634184 G | 2.956 | 1.03E-15 | chr:6:32648036 |
| 6 rs28371168  | 32610751 G | 4.091 | 1.05E-15 | chr:6:32648036 |
| 6 rs28383263  | 32585843 T | 6.104 | 1.05E-15 | chr:6:32648036 |
| 6 rs9274561   | 32634953 G | 3.358 | 1.09E-15 | chr:6:32648036 |
| 6 rs9271523   | 32589806 G | 4.336 | 1.10E-15 | chr:6:32648036 |
| 6 rs2308890   | 32610008 T | 4.095 | 1.11E-15 | chr:6:32648036 |
| 6 rs138512769 | 32324390 G | 8.291 | 1.13E-15 | chr:6:32648036 |
| 6 rs541367648 | 32251332 C | 8.291 | 1.13E-15 | chr:6:32648036 |
| 6 rs9501169   | 32232184 G | 8.291 | 1.13E-15 | chr:6:32648036 |
| 6 rs9272645   | 32608331 G | 2.748 | 1.18E-15 | chr:6:32648036 |
| 6 rs9271469   | 32588630 C | 4.351 | 1.19E-15 | chr:6:32648036 |
| 6 rs9271470   | 32588662 T | 4.322 | 1.20E-15 | chr:6:32648036 |
| 6 rs28383247  | 32584525 A | 5.565 | 1.23E-15 | chr:6:32648036 |
| 6 rs534644711 | 32552719 C | 6.327 | 1.24E-15 | chr:6:32648036 |
| 6 rs1063349   | 32627906 C | 3.477 | 1.27E-15 | chr:6:32648036 |
| 6 rs28383339  | 32604395 G | 5.291 | 1.28E-15 | chr:6:32648036 |
| 6 rs10080962  | 32214285 C | 8.01  | 1.35E-15 | chr:6:32648036 |
| 6 rs114165089 | 32219611 T | 8.01  | 1.35E-15 | chr:6:32648036 |
| 6 rs114901188 | 32316209 A | 8.01  | 1.35E-15 | chr:6:32648036 |
| 6 rs115169690 | 32313182 G | 8.01  | 1.35E-15 | chr:6:32648036 |
| 6 rs115739548 | 32245836 T | 8.01  | 1.35E-15 | chr:6:32648036 |
| 6 rs116054853 | 32315807 G | 8.01  | 1.35E-15 | chr:6:32648036 |
| 6 rs13437404  | 32277153 C | 8.01  | 1.35E-15 | chr:6:32648036 |
| 6 rs2395148   | 32321554 T | 8.01  | 1.35E-15 | chr:6:32648036 |
| 6 rs375566997 | 32297653 T | 8.01  | 1.35E-15 | chr:6:32648036 |
| 6 rs6914179   | 32309876 C | 8.01  | 1.35E-15 | chr:6:32648036 |
| 6 rs9469099   | 32308908 A | 8.01  | 1.35E-15 | chr:6:32648036 |
| 6 rs9501171   | 32233354 T | 8.01  | 1.35E-15 | chr:6:32648036 |
| 6 rs9501175   | 32283333 C | 8.01  | 1.35E-15 | chr:6:32648036 |
| 6 rs9271503   | 32589326 A | 4.362 | 1.35E-15 | chr:6:32648036 |
| 6 rs9275043   | 32648061 C | 2.866 | 1.37E-15 | chr:6:32648036 |

|               |            |        |          |                |
|---------------|------------|--------|----------|----------------|
| 6 rs9272319   | 32604108 C | 3.724  | 1.38E-15 | chr:6:32648036 |
| 6 rs281863884 | 32630401 T | 2.471  | 1.40E-15 | chr:6:32648036 |
| 6 rs9272407   | 32604931 A | 3.54   | 1.42E-15 | chr:6:32648036 |
| 6 rs28383271  | 32586134 T | 5.545  | 1.46E-15 | chr:6:32648036 |
| 6 rs9275069   | 32648437 G | 3.675  | 1.48E-15 | chr:6:32648036 |
| 6 rs9271677   | 32592898 A | 3.913  | 1.49E-15 | chr:6:32648036 |
| 6 rs17612788  | 32620344 A | 2.608  | 1.50E-15 | chr:6:32648036 |
| 6 rs3020625   | 32628835 C | 2.822  | 1.51E-15 | chr:6:32648036 |
| 6 rs9272317   | 32604051 T | 4.2    | 1.52E-15 | chr:6:32648036 |
| 6 rs9273710   | 32629314 A | 2.708  | 1.56E-15 | chr:6:32648036 |
| 6 rs9271767   | 32594176 T | 4.184  | 1.57E-15 | chr:6:32648036 |
| 6 rs9272547   | 32606949 C | 2.815  | 1.57E-15 | chr:6:32648036 |
| 6 rs114263604 | 32644859 T | 4.977  | 1.60E-15 | chr:6:32648036 |
| 6 rs1130161   | 32610994 A | 4.143  | 1.63E-15 | chr:6:32648036 |
| 6 rs9272609   | 32607750 C | 3.069  | 1.65E-15 | chr:6:32648036 |
| 6 rs13204933  | 32583026 G | 5.508  | 1.66E-15 | chr:6:32648036 |
| 6 rs9273009   | 32611579 G | 3.843  | 1.66E-15 | chr:6:32648036 |
| 6 rs9274279   | 32631712 G | 2.516  | 1.73E-15 | chr:6:32648036 |
| 6 rs28752519  | 32584705 C | 5.501  | 1.75E-15 | chr:6:32648036 |
| 6 rs28383429  | 32608844 G | 4.505  | 1.76E-15 | chr:6:32648036 |
| 6 rs28752528  | 32585007 T | 6.152  | 1.78E-15 | chr:6:32648036 |
| 6 rs17843580  | 32615551 G | 2.885  | 1.80E-15 | chr:6:32648036 |
| 6 rs28383273  | 32586221 T | 5.664  | 1.81E-15 | chr:6:32648036 |
| 6 rs9273544   | 32628833 G | 2.803  | 1.84E-15 | chr:6:32648036 |
| 6 rs9272779   | 32610314 C | 3.396  | 1.84E-15 | chr:6:32648036 |
| 6 rs3134988   | 32640772 G | 0.2863 | 1.94E-15 | chr:6:32648036 |
| 6 rs9271644   | 32592337 A | 3.888  | 1.96E-15 | chr:6:32648036 |
| 6 rs28383272  | 32586207 A | 5.648  | 1.96E-15 | chr:6:32648036 |
| 6 rs9274962   | 32641936 A | 2.785  | 1.98E-15 | chr:6:32648036 |
| 6 rs17843575  | 32615427 T | 2.816  | 2.03E-15 | chr:6:32648036 |
| 6 rs17843576  | 32615431 A | 2.816  | 2.03E-15 | chr:6:32648036 |
| 6 rs28383368  | 32607047 G | 3.241  | 2.09E-15 | chr:6:32648036 |
| 6 rs6925976   | 32755092 G | 8.583  | 2.12E-15 | chr:6:32648036 |
| 6 rs9501212   | 32760006 G | 8.583  | 2.12E-15 | chr:6:32648036 |
| 6 rs9501213   | 32760383 T | 8.583  | 2.12E-15 | chr:6:32648036 |
| 6 rs17612583  | 32615470 A | 2.798  | 2.15E-15 | chr:6:32648036 |
| 6 rs17840121  | 32577693 C | 5.377  | 2.19E-15 | chr:6:32648036 |
| 6 rs9271571   | 32590483 T | 4.25   | 2.19E-15 | chr:6:32648036 |
| 6 rs75490552  | 32389552 G | 7.069  | 2.20E-15 | chr:6:32648036 |
| 6 rs28371212  | 32637538 A | 3.125  | 2.23E-15 | chr:6:32648036 |
| 6 rs28383334  | 32601969 A | 4.737  | 2.25E-15 | chr:6:32648036 |
| 6 rs9272497   | 32606176 T | 3.342  | 2.26E-15 | chr:6:32648036 |
| 6 rs28383431  | 32608856 C | 4.521  | 2.27E-15 | chr:6:32648036 |

|               |            |       |          |                |
|---------------|------------|-------|----------|----------------|
| 6 rs28383341  | 32604744 A | 4.871 | 2.28E-15 | chr:6:32648036 |
| 6 rs1048726   | 32611012 T | 2.416 | 2.32E-15 | chr:6:32648036 |
| 6 rs9272613   | 32607829 G | 3.217 | 2.35E-15 | chr:6:32648036 |
| 6 rs281863879 | 32630407 G | 2.446 | 2.38E-15 | chr:6:32648036 |
| 6 rs1065036   | 32611029 C | 2.418 | 2.39E-15 | chr:6:32648036 |
| 6 rs9272905   | 32610836 T | 3.965 | 2.41E-15 | chr:6:32648036 |
| 6 rs281863167 | 32631632 A | 2.605 | 2.42E-15 | chr:6:32648036 |
| 6 rs9272974   | 32611315 T | 2.546 | 2.46E-15 | chr:6:32648036 |
| 6 rs9273008   | 32611572 A | 3.81  | 2.48E-15 | chr:6:32648036 |
| 6 rs558693707 | 32644578 A | 5.079 | 2.49E-15 | chr:6:32648036 |
| 6 rs28724240  | 32629328 A | 9.436 | 2.51E-15 | chr:6:32648036 |
| 6 rs28724241  | 32629330 T | 9.436 | 2.51E-15 | chr:6:32648036 |
| 6 rs9271568   | 32590463 A | 4.219 | 2.59E-15 | chr:6:32648036 |
| 6 rs622137    | 32569852 A | 4.17  | 2.61E-15 | chr:6:32648036 |
| 6 rs9273025   | 32611760 T | 3.566 | 2.65E-15 | chr:6:32648036 |
| 6 rs9273027   | 32611783 G | 2.565 | 2.72E-15 | chr:6:32648036 |
| 6 rs28383332  | 32601128 A | 5.231 | 2.82E-15 | chr:6:32648036 |
| 6 rs28383246  | 32584482 A | 5.437 | 2.92E-15 | chr:6:32648036 |
| 6 rs9273056   | 32612097 G | 2.738 | 2.96E-15 | chr:6:32648036 |
| 6 rs9271682   | 32592923 G | 3.907 | 2.99E-15 | chr:6:32648036 |
| 6 rs28383262  | 32585773 T | 5.521 | 3.06E-15 | chr:6:32648036 |
| 6 rs9273038   | 32611931 T | 2.776 | 3.11E-15 | chr:6:32648036 |
| 6 rs2516051   | 32570184 T | 4.128 | 3.13E-15 | chr:6:32648036 |
| 6 rs9273547   | 32628844 C | 2.806 | 3.15E-15 | chr:6:32648036 |
| 6 rs9273084   | 32612396 C | 2.684 | 3.18E-15 | chr:6:32648036 |
| 6 rs3104389   | 32595097 A | 3.812 | 3.19E-15 | chr:6:32648036 |
| 6 rs11752027  | 32512534 A | 5.571 | 3.24E-15 | chr:6:32648036 |
| 6 rs617578    | 32574603 A | 9.153 | 3.24E-15 | chr:6:32648036 |
| 6 rs9271776   | 32594341 C | 3.35  | 3.34E-15 | chr:6:32648036 |
| 6 rs9272290   | 32603713 C | 3.281 | 3.36E-15 | chr:6:32648036 |
| 6 rs281863177 | 32631620 T | 2.649 | 3.43E-15 | chr:6:32648036 |
| 6 rs9271480   | 32588831 A | 4.233 | 3.47E-15 | chr:6:32648036 |
| 6 rs17843606  | 32620399 T | 2.536 | 3.52E-15 | chr:6:32648036 |
| 6 rs28383243  | 32584410 G | 5.395 | 3.54E-15 | chr:6:32648036 |
| 6 rs9271521   | 32589783 T | 4.187 | 3.56E-15 | chr:6:32648036 |
| 6 rs114544105 | 32635629 A | 4.442 | 3.72E-15 | chr:6:32648036 |
| 6 rs9274348   | 32632381 C | 2.397 | 3.72E-15 | chr:6:32648036 |
| 6 rs114816309 | 32182875 C | 6.44  | 3.73E-15 | chr:6:32648036 |
| 6 rs114484741 | 32699757 C | 8.998 | 3.79E-15 | chr:6:32648036 |
| 6 rs9273086   | 32612410 T | 2.679 | 3.89E-15 | chr:6:32648036 |
| 6 rs28371250  | 32648039 T | 2.706 | 4.09E-15 | chr:6:32648036 |
| 6 rs17843605  | 32620391 T | 2.532 | 4.16E-15 | chr:6:32648036 |
| 6 rs397843773 | 32610171 T | 3.921 | 4.21E-15 | chr:6:32648036 |



|               |            |        |          |                |
|---------------|------------|--------|----------|----------------|
| 6 rs9271685   | 32592970 C | 3.874  | 4.22E-15 | chr:6:32648036 |
| 6 rs9273321   | 32623096 G | 2.399  | 4.42E-15 | chr:6:32648036 |
| 6 rs2516052   | 32570147 G | 4.09   | 4.43E-15 | chr:6:32648036 |
| 6 rs9273419   | 32627365 C | 2.804  | 4.50E-15 | chr:6:32648036 |
| 6 rs17612576  | 32615458 A | 2.615  | 4.57E-15 | chr:6:32648036 |
| 6 rs9274824   | 32639702 T | 3.094  | 4.69E-15 | chr:6:32648036 |
| 6 rs3129766   | 32594441 G | 3.659  | 4.72E-15 | chr:6:32648036 |
| 6 rs9271734   | 32593639 A | 4.499  | 4.78E-15 | chr:6:32648036 |
| 6 rs9272899   | 32610809 T | 3.999  | 4.83E-15 | chr:6:32648036 |
| 6 rs28752531  | 32585031 T | 7.661  | 4.89E-15 | chr:6:32648036 |
| 6 rs9272670   | 32608820 T | 2.992  | 4.94E-15 | chr:6:32648036 |
| 6 rs6457594   | 32443961 A | 0.2397 | 5.12E-15 | chr:6:32648036 |
| 6 rs28383181  | 32571669 T | 4.107  | 5.16E-15 | chr:6:32648036 |
| 6 rs559469172 | 32503489 A | 5.499  | 5.26E-15 | chr:6:32648036 |
| 6 rs114201912 | 32519431 A | 9.665  | 5.31E-15 | chr:6:32648036 |
| 6 rs9272990   | 32611427 A | 3.606  | 5.31E-15 | chr:6:32648036 |
| 6 rs477515    | 32569691 A | 4.047  | 5.37E-15 | chr:6:32648036 |
| 6 rs9272664   | 32608710 T | 2.943  | 5.52E-15 | chr:6:32648036 |
| 6 rs116022266 | 32610201 A | 3.898  | 5.57E-15 | chr:6:32648036 |
| 6 rs79351547  | 32610196 A | 3.898  | 5.57E-15 | chr:6:32648036 |
| 6 rs28383367  | 32607031 T | 3.166  | 5.62E-15 | chr:6:32648036 |
| 6 rs9273264   | 32614303 G | 2.346  | 5.71E-15 | chr:6:32648036 |
| 6 rs568924277 | 32606505 C | 5.555  | 5.82E-15 | chr:6:32648036 |
| 6 rs9501609   | 32209157 A | 7.099  | 5.87E-15 | chr:6:32648036 |
| 6 rs9272520   | 32606475 A | 2.593  | 5.96E-15 | chr:6:32648036 |
| 6 rs17612562  | 32615446 G | 2.61   | 5.97E-15 | chr:6:32648036 |
| 6 rs9274503   | 32634103 C | 2.742  | 6.10E-15 | chr:6:32648036 |
| 6 rs76858292  | 32776358 G | 8.195  | 6.14E-15 | chr:6:32648036 |
| 6 rs9273424   | 32627394 T | 2.741  | 6.19E-15 | chr:6:32648036 |
| 6 rs9273425   | 32627396 T | 2.741  | 6.19E-15 | chr:6:32648036 |
| 6 rs9273319   | 32623050 T | 2.38   | 6.22E-15 | chr:6:32648036 |
| 6 rs28371169  | 32610819 G | 3.945  | 6.26E-15 | chr:6:32648036 |
| 6 rs9272948   | 32611107 C | 2.322  | 6.35E-15 | chr:6:32648036 |
| 6 rs9273320   | 32623072 G | 2.388  | 6.36E-15 | chr:6:32648036 |
| 6 rs9273418   | 32627362 C | 2.779  | 6.48E-15 | chr:6:32648036 |
| 6 rs9274564   | 32635048 A | 2.741  | 6.52E-15 | chr:6:32648036 |
| 6 rs9273497   | 32628297 C | 3.313  | 6.54E-15 | chr:6:32648036 |
| 6 rs28371256  | 32658366 C | 4.769  | 6.62E-15 | chr:6:32648036 |
| 6 rs28371257  | 32658375 G | 4.769  | 6.62E-15 | chr:6:32648036 |
| 6 rs9275046   | 32648080 C | 2.813  | 6.71E-15 | chr:6:32648036 |
| 6 rs9275047   | 32648084 G | 2.813  | 6.71E-15 | chr:6:32648036 |
| 6 rs9272611   | 32607780 T | 3.075  | 7.02E-15 | chr:6:32648036 |
| 6 rs78556970  | 32626865 C | 2.976  | 7.12E-15 | chr:6:32648036 |

|               |            |        |          |                |
|---------------|------------|--------|----------|----------------|
| 6 rs9273417   | 32627352 G | 2.774  | 7.22E-15 | chr:6:32648036 |
| 6 rs28383244  | 32584462 A | 5.297  | 7.29E-15 | chr:6:32648036 |
| 6 rs28383245  | 32584479 C | 5.297  | 7.29E-15 | chr:6:32648036 |
| 6 rs9271853   | 32595117 T | 3.415  | 7.29E-15 | chr:6:32648036 |
| 6 rs80108580  | 32763128 G | 8.082  | 7.35E-15 | chr:6:32648036 |
| 6 rs9296045   | 32766405 A | 8.082  | 7.35E-15 | chr:6:32648036 |
| 6 rs9501214   | 32771929 T | 8.082  | 7.35E-15 | chr:6:32648036 |
| 6 rs9986640   | 32764970 A | 8.082  | 7.35E-15 | chr:6:32648036 |
| 6 rs112464670 | 32683018 C | 7.72   | 7.48E-15 | chr:6:32648036 |
| 6 rs564176274 | 32642025 T | 10.18  | 7.50E-15 | chr:6:32648036 |
| 6 rs9271498   | 32589282 A | 4.164  | 8.11E-15 | chr:6:32648036 |
| 6 rs28383264  | 32585901 T | 5.423  | 8.13E-15 | chr:6:32648036 |
| 6 rs28383265  | 32585924 T | 5.423  | 8.13E-15 | chr:6:32648036 |
| 6 rs9272962   | 32611229 T | 2.72   | 8.20E-15 | chr:6:32648036 |
| 6 rs9272896   | 32610806 C | 3.977  | 8.23E-15 | chr:6:32648036 |
| 6 rs9274506   | 32634141 C | 2.782  | 8.23E-15 | chr:6:32648036 |
| 6 rs9272940   | 32611081 C | 4.307  | 8.23E-15 | chr:6:32648036 |
| 6 rs61729683  | 32185818 T | 6.022  | 8.24E-15 | chr:6:32648036 |
| 6 rs28755178  | 32641503 G | 7.134  | 8.37E-15 | chr:6:32648036 |
| 6 rs9273132   | 32612800 G | 2.506  | 8.47E-15 | chr:6:32648036 |
| 6 rs9272634   | 32608184 T | 2.944  | 8.59E-15 | chr:6:32648036 |
| 6 rs113140854 | 32634588 T | 10.23  | 8.79E-15 | chr:6:32648036 |
| 6 rs9272995   | 32611466 G | 3.458  | 8.88E-15 | chr:6:32648036 |
| 6 rs9272950   | 32611117 G | 2.305  | 8.94E-15 | chr:6:32648036 |
| 6 rs28383351  | 32606464 C | 4.713  | 9.17E-15 | chr:6:32648036 |
| 6 rs2858300   | 32643261 A | 4.725  | 9.48E-15 | chr:6:32648036 |
| 6 rs28383366  | 32606980 A | 4.543  | 9.57E-15 | chr:6:32648036 |
| 6 rs17843620  | 32620800 G | 2.708  | 9.62E-15 | chr:6:32648036 |
| 6 rs28746794  | 32632532 C | 2.403  | 9.65E-15 | chr:6:32648036 |
| 6 rs28383380  | 32607253 A | 3.099  | 9.65E-15 | chr:6:32648036 |
| 6 rs9271762   | 32594028 G | 3.942  | 9.73E-15 | chr:6:32648036 |
| 6 rs9273704   | 32629297 C | 2.619  | 9.78E-15 | chr:6:32648036 |
| 6 rs3207983   | 32609213 A | 4.359  | 9.79E-15 | chr:6:32648036 |
| 6 rs9272943   | 32611092 G | 2.306  | 9.83E-15 | chr:6:32648036 |
| 6 rs535440044 | 32683306 G | 7.174  | 9.86E-15 | chr:6:32648036 |
| 6 rs2858878   | 32620487 G | 2.494  | 9.88E-15 | chr:6:32648036 |
| 6 rs3104393   | 32594403 T | 3.146  | 1.01E-14 | chr:6:32648036 |
| 6 rs5002178   | 32611590 G | 0.3108 | 1.05E-14 | chr:6:32648036 |
| 6 rs9274371   | 32632553 G | 2.446  | 1.05E-14 | chr:6:32648036 |
| 6 rs9274372   | 32632555 A | 2.446  | 1.05E-14 | chr:6:32648036 |
| 6 rs9271660   | 32592602 G | 3.555  | 1.07E-14 | chr:6:32648036 |
| 6 rs9272989   | 32611418 C | 3.54   | 1.07E-14 | chr:6:32648036 |
| 6 rs201414107 | 32647866 A | 4.334  | 1.08E-14 | chr:6:32648036 |

|               |            |       |          |                |
|---------------|------------|-------|----------|----------------|
| 6 rs9271758   | 32593997 A | 2.496 | 1.10E-14 | chr:6:32648036 |
| 6 rs9271759   | 32594006 A | 2.496 | 1.10E-14 | chr:6:32648036 |
| 6 rs28383378  | 32607239 A | 3.126 | 1.10E-14 | chr:6:32648036 |
| 6 rs28383379  | 32607242 A | 3.126 | 1.10E-14 | chr:6:32648036 |
| 6 rs9273174   | 32613237 G | 4.203 | 1.11E-14 | chr:6:32648036 |
| 6 rs17843699  | 32622238 G | 2.285 | 1.17E-14 | chr:6:32648036 |
| 6 rs9274986   | 32642386 A | 3.069 | 1.17E-14 | chr:6:32648036 |
| 6 rs185812018 | 32632514 T | 2.402 | 1.17E-14 | chr:6:32648036 |
| 6 rs12192221  | 32580928 G | 5.241 | 1.19E-14 | chr:6:32648036 |
| 6 rs9272371   | 32604654 C | 2.568 | 1.24E-14 | chr:6:32648036 |
| 6 rs9271520   | 32589771 G | 4.053 | 1.24E-14 | chr:6:32648036 |
| 6 rs9272598   | 32607611 T | 2.58  | 1.24E-14 | chr:6:32648036 |
| 6 rs9272494   | 32606085 T | 3.021 | 1.27E-14 | chr:6:32648036 |
| 6 rs28383274  | 32586246 G | 5.409 | 1.28E-14 | chr:6:32648036 |
| 6 rs199705602 | 32606584 G | 2.522 | 1.32E-14 | chr:6:32648036 |
| 6 rs28383251  | 32585567 T | 5.246 | 1.32E-14 | chr:6:32648036 |
| 6 rs28383252  | 32585574 T | 5.246 | 1.32E-14 | chr:6:32648036 |
| 6 rs28383377  | 32607227 G | 3.146 | 1.32E-14 | chr:6:32648036 |
| 6 rs9271760   | 32594012 T | 2.49  | 1.36E-14 | chr:6:32648036 |
| 6 rs9273330   | 32623300 T | 2.651 | 1.37E-14 | chr:6:32648036 |
| 6 rs9274368   | 32632518 G | 2.398 | 1.37E-14 | chr:6:32648036 |
| 6 rs28383250  | 32585525 T | 5.321 | 1.38E-14 | chr:6:32648036 |
| 6 rs1056316   | 32627494 C | 4.187 | 1.41E-14 | chr:6:32648036 |
| 6 rs9272983   | 32611392 T | 3.411 | 1.42E-14 | chr:6:32648036 |
| 6 rs9272984   | 32611393 G | 3.411 | 1.42E-14 | chr:6:32648036 |
| 6 rs9272614   | 32607859 T | 3.115 | 1.44E-14 | chr:6:32648036 |
| 6 rs9272597   | 32607605 G | 2.577 | 1.45E-14 | chr:6:32648036 |
| 6 rs9273268   | 32614334 C | 2.333 | 1.46E-14 | chr:6:32648036 |
| 6 rs9272607   | 32607735 A | 2.772 | 1.47E-14 | chr:6:32648036 |
| 6 rs1064993   | 32611181 A | 3.618 | 1.48E-14 | chr:6:32648036 |
| 6 rs9271661   | 32592605 A | 3.53  | 1.49E-14 | chr:6:32648036 |
| 6 rs9274987   | 32642405 T | 3.006 | 1.50E-14 | chr:6:32648036 |
| 6 rs9274988   | 32642406 T | 3.006 | 1.50E-14 | chr:6:32648036 |
| 6 rs585305    | 32572048 T | 4.099 | 1.51E-14 | chr:6:32648036 |
| 6 rs17843701  | 32622256 T | 2.263 | 1.53E-14 | chr:6:32648036 |
| 6 rs9272533   | 32606665 T | 2.556 | 1.54E-14 | chr:6:32648036 |
| 6 rs9273185   | 32613340 G | 2.471 | 1.54E-14 | chr:6:32648036 |
| 6 rs9272958   | 32611170 A | 2.445 | 1.57E-14 | chr:6:32648036 |
| 6 rs9271432   | 32588056 T | 4.045 | 1.58E-14 | chr:6:32648036 |
| 6 rs9271433   | 32588057 G | 4.045 | 1.58E-14 | chr:6:32648036 |
| 6 rs9500908   | 32770666 A | 7.861 | 1.67E-14 | chr:6:32648036 |
| 6 rs28383360  | 32606824 A | 4.237 | 1.70E-14 | chr:6:32648036 |
| 6 rs9273257   | 32614240 G | 2.293 | 1.70E-14 | chr:6:32648036 |

|               |            |        |          |                |
|---------------|------------|--------|----------|----------------|
| 6 rs9272981   | 32611373 A | 2.44   | 1.75E-14 | chr:6:32648036 |
| 6 rs77287921  | 32816216 C | 7.286  | 1.77E-14 | chr:6:32648036 |
| 6 rs187265184 | 32525769 G | 3.006  | 1.83E-14 | chr:6:32648036 |
| 6 rs9273685   | 32629269 T | 8.239  | 1.87E-14 | chr:6:32648036 |
| 6 rs9272998   | 32611474 A | 3.356  | 1.89E-14 | chr:6:32648036 |
| 6 rs9272339   | 32604274 A | 0.3382 | 1.92E-14 | chr:6:32648036 |
| 6 rs281863704 | 32630661 C | 2.746  | 1.94E-14 | chr:6:32648036 |
| 6 rs191032570 | 32610632 A | 5.226  | 1.98E-14 | chr:6:32648036 |
| 6 rs9272987   | 32611403 A | 3.366  | 1.99E-14 | chr:6:32648036 |
| 6 rs9273380   | 32626895 A | 2.86   | 1.99E-14 | chr:6:32648036 |
| 6 rs9271517   | 32589740 G | 4.032  | 2.04E-14 | chr:6:32648036 |
| 6 rs9271519   | 32589751 C | 4.032  | 2.04E-14 | chr:6:32648036 |
| 6 rs9273331   | 32623307 T | 2.579  | 2.04E-14 | chr:6:32648036 |
| 6 rs9273772   | 32629438 C | 2.829  | 2.06E-14 | chr:6:32648036 |
| 6 rs9272571   | 32607251 T | 2.519  | 2.07E-14 | chr:6:32648036 |
| 6 rs9273172   | 32613224 C | 2.978  | 2.08E-14 | chr:6:32648036 |
| 6 rs17843613  | 32620658 T | 2.364  | 2.09E-14 | chr:6:32648036 |
| 6 rs9273266   | 32614326 A | 2.316  | 2.09E-14 | chr:6:32648036 |
| 6 rs115624624 | 32599083 A | 4.979  | 2.09E-14 | chr:6:32648036 |
| 6 rs116202168 | 32599088 T | 4.979  | 2.09E-14 | chr:6:32648036 |
| 6 rs9273030   | 32611805 A | 2.459  | 2.18E-14 | chr:6:32648036 |
| 6 rs35779483  | 32626702 G | 3.296  | 2.18E-14 | chr:6:32648036 |
| 6 rs7744001   | 32626086 A | 3.296  | 2.18E-14 | chr:6:32648036 |
| 6 rs7744020   | 32626130 A | 3.296  | 2.18E-14 | chr:6:32648036 |
| 6 rs9271761   | 32594022 A | 3.619  | 2.20E-14 | chr:6:32648036 |
| 6 rs707947    | 32611068 G | 4.219  | 2.25E-14 | chr:6:32648036 |
| 6 rs28383384  | 32607414 A | 3.981  | 2.28E-14 | chr:6:32648036 |
| 6 rs28383385  | 32607416 A | 3.981  | 2.28E-14 | chr:6:32648036 |
| 6 rs9273274   | 32614405 T | 2.298  | 2.29E-14 | chr:6:32648036 |
| 6 rs9273275   | 32614407 G | 2.298  | 2.29E-14 | chr:6:32648036 |
| 6 rs9271465   | 32588554 T | 4.041  | 2.31E-14 | chr:6:32648036 |
| 6 rs12722061  | 32609221 C | 4.34   | 2.37E-14 | chr:6:32648036 |
| 6 rs9273317   | 32623003 C | 2.314  | 2.38E-14 | chr:6:32648036 |
| 6 rs9273318   | 32623004 C | 2.314  | 2.38E-14 | chr:6:32648036 |
| 6 rs9273244   | 32614108 G | 2.523  | 2.41E-14 | chr:6:32648036 |
| 6 rs9273245   | 32614110 A | 2.523  | 2.41E-14 | chr:6:32648036 |
| 6 rs28383253  | 32585589 T | 5.159  | 2.42E-14 | chr:6:32648036 |
| 6 rs9273267   | 32614330 C | 2.312  | 2.46E-14 | chr:6:32648036 |
| 6 rs9273088   | 32612488 C | 2.417  | 2.49E-14 | chr:6:32648036 |
| 6 rs9271744   | 32593755 A | 3.161  | 2.50E-14 | chr:6:32648036 |
| 6 rs281874798 | 32631843 T | 2.329  | 2.54E-14 | chr:6:32648036 |
| 6 rs9272851   | 32610704 C | 2.991  | 2.60E-14 | chr:6:32648036 |
| 6 rs115601017 | 32191428 G | 4.552  | 2.61E-14 | chr:6:32648036 |

|               |            |       |          |                |
|---------------|------------|-------|----------|----------------|
| 6 rs17843586  | 32615801 G | 2.355 | 2.64E-14 | chr:6:32648036 |
| 6 rs17843587  | 32615802 T | 2.355 | 2.64E-14 | chr:6:32648036 |
| 6 rs17843588  | 32615807 G | 2.355 | 2.64E-14 | chr:6:32648036 |
| 6 rs17843614  | 32620661 G | 2.348 | 2.64E-14 | chr:6:32648036 |
| 6 rs115691564 | 32610122 T | 5.226 | 2.67E-14 | chr:6:32648036 |
| 6 rs17843607  | 32620435 A | 2.458 | 2.74E-14 | chr:6:32648036 |
| 6 rs28383435  | 32608972 T | 4.007 | 2.77E-14 | chr:6:32648036 |
| 6 rs9273269   | 32614343 A | 2.3   | 2.91E-14 | chr:6:32648036 |
| 6 rs2228110   | 32816889 A | 6.834 | 2.91E-14 | chr:6:32648036 |
| 6 rs9273026   | 32611769 C | 3.428 | 2.92E-14 | chr:6:32648036 |
| 6 rs28724138  | 32552617 A | 3.858 | 2.93E-14 | chr:6:32648036 |
| 6 rs9273259   | 32614269 G | 2.28  | 2.94E-14 | chr:6:32648036 |
| 6 rs9273260   | 32614270 G | 2.28  | 2.94E-14 | chr:6:32648036 |
| 6 rs76855996  | 32880673 A | 6.653 | 2.95E-14 | chr:6:32648036 |
| 6 rs28371246  | 32647995 C | 2.483 | 2.95E-14 | chr:6:32648036 |
| 6 rs9273261   | 32614284 G | 2.273 | 2.96E-14 | chr:6:32648036 |
| 6 rs9272675   | 32608888 T | 2.9   | 2.96E-14 | chr:6:32648036 |
| 6 rs9272955   | 32611145 A | 3.582 | 2.99E-14 | chr:6:32648036 |
| 6 rs1064985   | 32611034 A | 4.161 | 3.11E-14 | chr:6:32648036 |
| 6 rs9268159   | 32269487 T | 4.159 | 3.13E-14 | chr:6:32648036 |
| 6 rs1140321   | 32632581 G | 2.44  | 3.13E-14 | chr:6:32648036 |
| 6 rs1140322   | 32632578 G | 2.44  | 3.13E-14 | chr:6:32648036 |
| 6 rs1140318   | 32632593 T | 2.44  | 3.17E-14 | chr:6:32648036 |
| 6 rs1140319   | 32632592 G | 2.44  | 3.17E-14 | chr:6:32648036 |
| 6 rs1140320   | 32632589 G | 2.44  | 3.17E-14 | chr:6:32648036 |
| 6 rs9273311   | 32622967 A | 2.321 | 3.17E-14 | chr:6:32648036 |
| 6 rs28383420  | 32608707 C | 3.822 | 3.18E-14 | chr:6:32648036 |
| 6 rs28383254  | 32585638 C | 5.163 | 3.23E-14 | chr:6:32648036 |
| 6 rs28383255  | 32585641 A | 5.163 | 3.23E-14 | chr:6:32648036 |
| 6 rs17613292  | 32621861 A | 2.345 | 3.33E-14 | chr:6:32648036 |
| 6 rs368699425 | 32602553 A | 4.982 | 3.33E-14 | chr:6:32648036 |
| 6 rs9273767   | 32629432 G | 2.814 | 3.35E-14 | chr:6:32648036 |
| 6 rs9272054   | 32599164 A | 0.286 | 3.44E-14 | chr:6:32648036 |
| 6 rs147774651 | 32853253 C | 6.583 | 3.44E-14 | chr:6:32648036 |
| 6 rs9273314   | 32622986 C | 2.324 | 3.46E-14 | chr:6:32648036 |
| 6 rs9273315   | 32622990 T | 2.324 | 3.46E-14 | chr:6:32648036 |
| 6 rs6936669   | 32799554 C | 7.79  | 3.47E-14 | chr:6:32648036 |
| 6 rs9274623   | 32635998 T | 4.449 | 3.49E-14 | chr:6:32648036 |
| 6 rs9272951   | 32611125 C | 3.731 | 3.55E-14 | chr:6:32648036 |
| 6 rs9273556   | 32628953 G | 2.551 | 3.58E-14 | chr:6:32648036 |
| 6 rs9273271   | 32614382 C | 2.29  | 3.58E-14 | chr:6:32648036 |
| 6 rs191329273 | 32627227 C | 10.34 | 3.64E-14 | chr:6:32648036 |
| 6 rs115910284 | 32601655 A | 4.717 | 3.65E-14 | chr:6:32648036 |

|               |            |        |          |                |
|---------------|------------|--------|----------|----------------|
| 6 rs9271707   | 32593356 T | 0.2826 | 3.66E-14 | chr:6:32648036 |
| 6 rs9272957   | 32611152 A | 3.558  | 3.67E-14 | chr:6:32648036 |
| 6 rs9273559   | 32628967 T | 2.517  | 3.69E-14 | chr:6:32648036 |
| 6 rs28383370  | 32607152 C | 3.128  | 3.76E-14 | chr:6:32648036 |
| 6 rs28383371  | 32607154 T | 3.128  | 3.76E-14 | chr:6:32648036 |
| 6 rs3020628   | 32628784 A | 2.817  | 3.76E-14 | chr:6:32648036 |
| 6 rs17843600  | 32620148 G | 2.261  | 3.81E-14 | chr:6:32648036 |
| 6 rs9271741   | 32593734 T | 2.452  | 3.82E-14 | chr:6:32648036 |
| 6 rs17612654  | 32615813 T | 2.324  | 3.82E-14 | chr:6:32648036 |
| 6 rs17612661  | 32615814 G | 2.324  | 3.82E-14 | chr:6:32648036 |
| 6 rs115139056 | 32603425 A | 4.861  | 3.85E-14 | chr:6:32648036 |
| 6 rs535476317 | 32570019 A | 3.783  | 3.94E-14 | chr:6:32648036 |
| 6 rs9273415   | 32627310 T | 2.662  | 3.96E-14 | chr:6:32648036 |
| 6 rs9272971   | 32611302 C | 2.42   | 4.01E-14 | chr:6:32648036 |
| 6 rs141274999 | 32608808 G | 4.727  | 4.09E-14 | chr:6:32648036 |
| 6 rs9273273   | 32614392 T | 2.28   | 4.16E-14 | chr:6:32648036 |
| 6 rs9273096   | 32612540 C | 2.337  | 4.30E-14 | chr:6:32648036 |
| 6 rs114027542 | 32602231 T | 5.023  | 4.34E-14 | chr:6:32648036 |
| 6 rs114799674 | 32602880 A | 4.885  | 4.36E-14 | chr:6:32648036 |
| 6 rs115503527 | 32602899 A | 4.885  | 4.36E-14 | chr:6:32648036 |
| 6 rs115573799 | 32602884 C | 4.885  | 4.36E-14 | chr:6:32648036 |
| 6 rs9275054   | 32648208 G | 2.786  | 4.45E-14 | chr:6:32648036 |
| 6 rs9275055   | 32648220 C | 2.786  | 4.45E-14 | chr:6:32648036 |
| 6 rs28421666  | 32592737 G | 4.877  | 4.46E-14 | chr:6:32648036 |
| 6 rs9273382   | 32626925 G | 2.825  | 4.50E-14 | chr:6:32648036 |
| 6 rs12205706  | 32580999 T | 4.915  | 4.51E-14 | chr:6:32648036 |
| 6 rs9274453   | 32633369 A | 2.409  | 4.76E-14 | chr:6:32648036 |
| 6 rs559673115 | 32629239 G | 2.43   | 4.76E-14 | chr:6:32648036 |
| 6 rs9272662   | 32608681 G | 2.836  | 4.76E-14 | chr:6:32648036 |
| 6 rs576909786 | 32569270 T | 9.247  | 4.77E-14 | chr:6:32648036 |
| 6 rs16822516  | 32552092 T | 4.137  | 4.81E-14 | chr:6:32648036 |
| 6 rs9273432   | 32627485 C | 2.669  | 4.89E-14 | chr:6:32648036 |
| 6 rs9273433   | 32627489 G | 2.669  | 4.89E-14 | chr:6:32648036 |
| 6 rs114307619 | 32596625 A | 4.895  | 5.10E-14 | chr:6:32648036 |
| 6 rs148819373 | 32598624 G | 4.895  | 5.10E-14 | chr:6:32648036 |
| 6 rs201980192 | 32609063 T | 4.895  | 5.10E-14 | chr:6:32648036 |
| 6 rs564621439 | 32598986 A | 4.895  | 5.10E-14 | chr:6:32648036 |
| 6 rs78798979  | 32593094 T | 4.895  | 5.10E-14 | chr:6:32648036 |
| 6 rs574582728 | 32608989 T | 4.665  | 5.18E-14 | chr:6:32648036 |
| 6 rs36206058  | 32626920 G | 2.82   | 5.26E-14 | chr:6:32648036 |
| 6 rs9273313   | 32622979 C | 2.303  | 5.26E-14 | chr:6:32648036 |
| 6 rs9273534   | 32628751 T | 2.81   | 5.30E-14 | chr:6:32648036 |
| 6 rs17613424  | 32622195 T | 2.233  | 5.34E-14 | chr:6:32648036 |

|               |            |        |          |                |
|---------------|------------|--------|----------|----------------|
| 6 rs9274300   | 32631970 G | 2.238  | 5.37E-14 | chr:6:32648036 |
| 6 rs9273414   | 32627299 T | 2.622  | 5.39E-14 | chr:6:32648036 |
| 6 rs576530137 | 32629015 C | 2.296  | 5.44E-14 | chr:6:32648036 |
| 6 rs116178934 | 32605904 T | 5.116  | 5.44E-14 | chr:6:32648036 |
| 6 rs17612489  | 32614749 A | 2.233  | 5.51E-14 | chr:6:32648036 |
| 6 rs145878889 | 32609446 C | 5.262  | 5.70E-14 | chr:6:32648036 |
| 6 rs533028614 | 32609452 C | 5.262  | 5.70E-14 | chr:6:32648036 |
| 6 rs28383256  | 32585675 C | 5.301  | 5.72E-14 | chr:6:32648036 |
| 6 rs28383257  | 32585680 T | 5.301  | 5.72E-14 | chr:6:32648036 |
| 6 rs28383449  | 32609228 A | 7.79   | 5.73E-14 | chr:6:32648036 |
| 6 rs3188043   | 32609233 C | 7.79   | 5.73E-14 | chr:6:32648036 |
| 6 rs139025277 | 32646859 G | 4.21   | 5.75E-14 | chr:6:32648036 |
| 6 rs73738964  | 32900760 A | 6.418  | 5.79E-14 | chr:6:32648036 |
| 6 rs9273339   | 32623430 A | 2.3    | 5.92E-14 | chr:6:32648036 |
| 6 rs28383362  | 32606864 C | 2.97   | 5.95E-14 | chr:6:32648036 |
| 6 rs28383363  | 32606868 C | 2.97   | 5.95E-14 | chr:6:32648036 |
| 6 rs3104385   | 32597538 G | 2.769  | 6.11E-14 | chr:6:32648036 |
| 6 rs9274358   | 32632469 C | 2.354  | 6.11E-14 | chr:6:32648036 |
| 6 rs9272561   | 32607141 A | 2.563  | 6.23E-14 | chr:6:32648036 |
| 6 rs9274980   | 32642290 T | 3.062  | 6.28E-14 | chr:6:32648036 |
| 6 rs9273255   | 32614228 G | 2.255  | 6.36E-14 | chr:6:32648036 |
| 6 rs17613437  | 32622282 C | 2.209  | 6.38E-14 | chr:6:32648036 |
| 6 rs9271742   | 32593747 T | 2.431  | 6.62E-14 | chr:6:32648036 |
| 6 rs9271743   | 32593751 G | 2.431  | 6.62E-14 | chr:6:32648036 |
| 6 rs17843616  | 32620667 C | 2.305  | 6.64E-14 | chr:6:32648036 |
| 6 rs9273309   | 32622949 G | 2.265  | 6.68E-14 | chr:6:32648036 |
| 6 rs707951    | 32609813 T | 0.3019 | 6.70E-14 | chr:6:32648036 |
| 6 rs115421755 | 32647108 A | 4.25   | 6.73E-14 | chr:6:32648036 |
| 6 rs9273332   | 32623317 T | 2.495  | 6.77E-14 | chr:6:32648036 |
| 6 rs9273333   | 32623325 C | 2.495  | 6.77E-14 | chr:6:32648036 |
| 6 rs185835704 | 32728576 A | 5.592  | 6.98E-14 | chr:6:32648036 |
| 6 rs9267858   | 32196575 T | 3.473  | 7.05E-14 | chr:6:32648036 |
| 6 rs28383258  | 32585701 T | 5.23   | 7.08E-14 | chr:6:32648036 |
| 6 rs555685178 | 32609581 T | 5.204  | 7.12E-14 | chr:6:32648036 |
| 6 rs9271893   | 32595859 T | 0.2897 | 7.13E-14 | chr:6:32648036 |
| 6 rs9273277   | 32614414 A | 2.253  | 7.26E-14 | chr:6:32648036 |
| 6 rs9273278   | 32614415 C | 2.253  | 7.26E-14 | chr:6:32648036 |
| 6 rs9273134   | 32612807 T | 2.407  | 7.33E-14 | chr:6:32648036 |
| 6 rs9271745   | 32593786 G | 2.416  | 7.36E-14 | chr:6:32648036 |
| 6 rs28752533  | 32585058 A | 6.319  | 7.45E-14 | chr:6:32648036 |
| 6 rs17206287  | 32674725 G | 4.426  | 7.50E-14 | chr:6:32648036 |
| 6 rs17612809  | 32620459 T | 2.324  | 7.55E-14 | chr:6:32648036 |
| 6 rs28383434  | 32608925 T | 3.908  | 7.97E-14 | chr:6:32648036 |

|               |            |        |          |                |
|---------------|------------|--------|----------|----------------|
| 6 rs17843615  | 32620663 C | 2.299  | 7.97E-14 | chr:6:32648036 |
| 6 rs9273243   | 32614091 A | 2.521  | 7.98E-14 | chr:6:32648036 |
| 6 rs28383424  | 32608756 G | 3.842  | 8.07E-14 | chr:6:32648036 |
| 6 rs28383425  | 32608761 C | 3.842  | 8.07E-14 | chr:6:32648036 |
| 6 rs9273413   | 32627292 G | 2.591  | 8.09E-14 | chr:6:32648036 |
| 6 rs115296161 | 32603463 T | 4.812  | 8.31E-14 | chr:6:32648036 |
| 6 rs143117432 | 32598186 T | 4.372  | 8.34E-14 | chr:6:32648036 |
| 6 rs9272629   | 32608096 T | 2.975  | 8.37E-14 | chr:6:32648036 |
| 6 rs371537406 | 32602839 G | 4.738  | 8.43E-14 | chr:6:32648036 |
| 6 rs9272044   | 32598971 A | 0.2912 | 8.51E-14 | chr:6:32648036 |
| 6 rs9273250   | 32614180 T | 2.25   | 8.58E-14 | chr:6:32648036 |
| 6 rs144238786 | 32601770 T | 4.845  | 8.67E-14 | chr:6:32648036 |
| 6 rs186564411 | 32601771 G | 4.845  | 8.67E-14 | chr:6:32648036 |
| 6 rs9271912   | 32596207 T | 0.2941 | 8.69E-14 | chr:6:32648036 |
| 6 rs116728358 | 32600062 G | 4.734  | 8.75E-14 | chr:6:32648036 |
| 6 rs115315696 | 32599028 G | 4.664  | 8.77E-14 | chr:6:32648036 |
| 6 rs139692935 | 32598983 A | 4.664  | 8.77E-14 | chr:6:32648036 |
| 6 rs546460367 | 32598985 A | 4.664  | 8.77E-14 | chr:6:32648036 |
| 6 rs550642974 | 32599041 G | 4.664  | 8.77E-14 | chr:6:32648036 |
| 6 rs9271757   | 32593969 A | 2.399  | 8.79E-14 | chr:6:32648036 |
| 6 rs28383279  | 32586318 T | 6.143  | 8.84E-14 | chr:6:32648036 |
| 6 rs9271907   | 32596123 T | 0.2931 | 8.95E-14 | chr:6:32648036 |
| 6 rs9271908   | 32596131 T | 0.2931 | 8.95E-14 | chr:6:32648036 |
| 6 rs9273416   | 32627321 G | 2.629  | 8.95E-14 | chr:6:32648036 |
| 6 rs116334170 | 32598500 A | 4.18   | 9.14E-14 | chr:6:32648036 |
| 6 rs116517496 | 32595773 A | 4.708  | 9.17E-14 | chr:6:32648036 |
| 6 rs9273279   | 32614426 T | 2.246  | 9.22E-14 | chr:6:32648036 |
| 6 rs9273514   | 32628538 T | 2.823  | 9.26E-14 | chr:6:32648036 |
| 6 rs9273515   | 32628539 A | 2.823  | 9.26E-14 | chr:6:32648036 |
| 6 rs114352945 | 32602648 T | 4.809  | 9.31E-14 | chr:6:32648036 |
| 6 rs28383375  | 32607203 A | 3.076  | 9.33E-14 | chr:6:32648036 |
| 6 rs9273312   | 32622973 T | 2.28   | 9.37E-14 | chr:6:32648036 |
| 6 rs17613410  | 32622186 C | 2.209  | 9.43E-14 | chr:6:32648036 |
| 6 rs17613417  | 32622190 G | 2.209  | 9.43E-14 | chr:6:32648036 |
| 6 rs9271464   | 32588544 T | 3.859  | 9.52E-14 | chr:6:32648036 |
| 6 rs9273335   | 32623348 G | 2.288  | 9.60E-14 | chr:6:32648036 |
| 6 rs114025574 | 32603230 A | 4.835  | 9.60E-14 | chr:6:32648036 |
| 6 rs114774960 | 32603234 T | 4.835  | 9.60E-14 | chr:6:32648036 |
| 6 rs9273101   | 32612564 A | 2.307  | 9.68E-14 | chr:6:32648036 |
| 6 rs9272628   | 32608093 C | 2.972  | 9.72E-14 | chr:6:32648036 |
| 6 rs28383179  | 32571116 A | 3.204  | 9.72E-14 | chr:6:32648036 |
| 6 rs28383180  | 32571118 C | 3.204  | 9.72E-14 | chr:6:32648036 |
| 6 rs9469093   | 32191544 T | 3.917  | 9.78E-14 | chr:6:32648036 |



|               |            |        |          |                |
|---------------|------------|--------|----------|----------------|
| 6 rs9273135   | 32612816 G | 2.387  | 9.80E-14 | chr:6:32648036 |
| 6 rs3115567   | 32227506 T | 3.792  | 9.82E-14 | chr:6:32648036 |
| 6 rs9274902   | 32641220 C | 2.358  | 9.88E-14 | chr:6:32648036 |
| 6 rs2647023   | 32643325 T | 4.466  | 9.94E-14 | chr:6:32648036 |
| 6 rs114929610 | 32602075 A | 5.069  | 1.00E-13 | chr:6:32648036 |
| 6 rs17613431  | 32622203 T | 2.215  | 1.00E-13 | chr:6:32648036 |
| 6 rs6909790   | 32282979 G | 3.642  | 1.00E-13 | chr:6:32648036 |
| 6 rs1130162   | 32610997 G | 3.981  | 1.01E-13 | chr:6:32648036 |
| 6 rs9269140   | 32445249 T | 3.293  | 1.01E-13 | chr:6:32648036 |
| 6 rs9273209   | 32613610 T | 2.207  | 1.01E-13 | chr:6:32648036 |
| 6 rs9273242   | 32614080 C | 2.532  | 1.04E-13 | chr:6:32648036 |
| 6 rs576628433 | 32598750 C | 4.231  | 1.07E-13 | chr:6:32648036 |
| 6 rs9272055   | 32599176 A | 0.2964 | 1.07E-13 | chr:6:32648036 |
| 6 rs113695046 | 32522072 T | 6.731  | 1.08E-13 | chr:6:32648036 |
| 6 rs9273306   | 32622928 A | 2.246  | 1.12E-13 | chr:6:32648036 |
| 6 rs9273307   | 32622929 C | 2.246  | 1.12E-13 | chr:6:32648036 |
| 6 rs9274537   | 32634655 A | 2.617  | 1.12E-13 | chr:6:32648036 |
| 6 rs281875048 | 32631217 T | 8.084  | 1.12E-13 | chr:6:32648036 |
| 6 rs9273191   | 32613424 T | 2.29   | 1.12E-13 | chr:6:32648036 |
| 6 rs182585640 | 32644906 C | 4.715  | 1.14E-13 | chr:6:32648036 |
| 6 rs28383423  | 32608752 T | 3.802  | 1.14E-13 | chr:6:32648036 |
| 6 rs115596571 | 32602104 T | 4.906  | 1.14E-13 | chr:6:32648036 |
| 6 rs17612496  | 32614752 G | 2.207  | 1.15E-13 | chr:6:32648036 |
| 6 rs143229898 | 32214785 A | 5.758  | 1.17E-13 | chr:6:32648036 |
| 6 rs17612935  | 32620992 G | 2.237  | 1.17E-13 | chr:6:32648036 |
| 6 rs9296013   | 32216147 C | 5.758  | 1.17E-13 | chr:6:32648036 |
| 6 rs9273412   | 32627263 C | 2.586  | 1.18E-13 | chr:6:32648036 |
| 6 rs536322397 | 32605366 C | 4.767  | 1.18E-13 | chr:6:32648036 |
| 6 rs77455945  | 32608798 G | 4.612  | 1.18E-13 | chr:6:32648036 |
| 6 rs9274362   | 32632486 C | 2.335  | 1.19E-13 | chr:6:32648036 |
| 6 rs9272913   | 32610860 T | 3.67   | 1.20E-13 | chr:6:32648036 |
| 6 rs9272914   | 32610863 G | 3.67   | 1.20E-13 | chr:6:32648036 |
| 6 rs114762033 | 32602753 A | 4.762  | 1.20E-13 | chr:6:32648036 |
| 6 rs1065043   | 32611234 T | 3.452  | 1.21E-13 | chr:6:32648036 |
| 6 rs1065044   | 32611243 T | 3.452  | 1.21E-13 | chr:6:32648036 |
| 6 rs373813924 | 32602332 T | 4.97   | 1.21E-13 | chr:6:32648036 |
| 6 rs2854273   | 32628776 A | 2.725  | 1.21E-13 | chr:6:32648036 |
| 6 rs9272980   | 32611357 T | 3.21   | 1.21E-13 | chr:6:32648036 |
| 6 rs9272064   | 32599338 T | 0.2947 | 1.22E-13 | chr:6:32648036 |
| 6 rs9273031   | 32611849 C | 3.52   | 1.22E-13 | chr:6:32648036 |
| 6 rs9380317   | 32620740 T | 2.33   | 1.23E-13 | chr:6:32648036 |
| 6 rs79473311  | 32601382 G | 4.468  | 1.23E-13 | chr:6:32648036 |
| 6 rs79573551  | 32601416 T | 4.468  | 1.23E-13 | chr:6:32648036 |

|               |            |        |          |                |
|---------------|------------|--------|----------|----------------|
| 6 rs114612036 | 32607350 C | 4.984  | 1.24E-13 | chr:6:32648036 |
| 6 rs9272108   | 32600228 C | 0.3005 | 1.26E-13 | chr:6:32648036 |
| 6 rs17843654  | 32621378 A | 2.239  | 1.26E-13 | chr:6:32648036 |
| 6 rs17843570  | 32614946 G | 2.188  | 1.33E-13 | chr:6:32648036 |
| 6 rs116172932 | 32596385 T | 4.676  | 1.35E-13 | chr:6:32648036 |
| 6 rs28383433  | 32608887 G | 3.922  | 1.35E-13 | chr:6:32648036 |
| 6 rs1130151   | 32610935 G | 2.267  | 1.36E-13 | chr:6:32648036 |
| 6 rs9274978   | 32642277 C | 2.997  | 1.37E-13 | chr:6:32648036 |
| 6 rs72851058  | 32503213 T | 3.494  | 1.38E-13 | chr:6:32648036 |
| 6 rs9273105   | 32612601 A | 2.347  | 1.39E-13 | chr:6:32648036 |
| 6 rs9501166   | 32202999 G | 4.564  | 1.39E-13 | chr:6:32648036 |
| 6 rs114310549 | 32600248 A | 4.576  | 1.40E-13 | chr:6:32648036 |
| 6 rs28724234  | 32627535 T | 2.573  | 1.40E-13 | chr:6:32648036 |
| 6 rs115938440 | 32503420 A | 4.974  | 1.41E-13 | chr:6:32648036 |
| 6 rs116765893 | 32503445 A | 4.974  | 1.41E-13 | chr:6:32648036 |
| 6 rs115493697 | 32603359 A | 4.742  | 1.42E-13 | chr:6:32648036 |
| 6 rs115240119 | 32605945 T | 5.035  | 1.43E-13 | chr:6:32648036 |
| 6 rs9272146   | 32600914 C | 0.301  | 1.44E-13 | chr:6:32648036 |
| 6 rs79136294  | 32899882 A | 5.703  | 1.45E-13 | chr:6:32648036 |
| 6 rs9394107   | 32620720 G | 2.328  | 1.45E-13 | chr:6:32648036 |
| 6 rs9272917   | 32610892 G | 2.289  | 1.46E-13 | chr:6:32648036 |
| 6 rs9272918   | 32610893 A | 2.289  | 1.46E-13 | chr:6:32648036 |
| 6 rs17612928  | 32620976 G | 2.23   | 1.46E-13 | chr:6:32648036 |
| 6 rs17612748  | 32620174 G | 2.254  | 1.46E-13 | chr:6:32648036 |
| 6 rs17612816  | 32620469 G | 2.307  | 1.47E-13 | chr:6:32648036 |
| 6 rs9272305   | 32603879 A | 4.987  | 1.47E-13 | chr:6:32648036 |
| 6 rs9274298   | 32631902 T | 2.266  | 1.48E-13 | chr:6:32648036 |
| 6 rs2157051   | 32658624 G | 3.224  | 1.49E-13 | chr:6:32648036 |
| 6 rs9271722   | 32593522 G | 3.001  | 1.50E-13 | chr:6:32648036 |
| 6 rs9274562   | 32635000 G | 2.816  | 1.51E-13 | chr:6:32648036 |
| 6 rs9273239   | 32613998 T | 2.324  | 1.53E-13 | chr:6:32648036 |
| 6 rs115609519 | 32596968 G | 4.775  | 1.53E-13 | chr:6:32648036 |
| 6 rs9271615   | 32591686 G | 0.2985 | 1.54E-13 | chr:6:32648036 |
| 6 rs28383361  | 32606846 A | 2.789  | 1.54E-13 | chr:6:32648036 |
| 6 rs9271909   | 32596177 T | 0.2996 | 1.55E-13 | chr:6:32648036 |
| 6 rs9274540   | 32634676 T | 2.573  | 1.55E-13 | chr:6:32648036 |
| 6 rs17843608  | 32620454 C | 2.294  | 1.56E-13 | chr:6:32648036 |
| 6 rs17613381  | 32622130 T | 2.195  | 1.56E-13 | chr:6:32648036 |
| 6 rs114260654 | 32871520 G | 6.057  | 1.57E-13 | chr:6:32648036 |
| 6 rs114814601 | 32871521 T | 6.057  | 1.57E-13 | chr:6:32648036 |
| 6 rs17612831  | 32620507 T | 2.324  | 1.57E-13 | chr:6:32648036 |
| 6 rs17843624  | 32620885 T | 2.203  | 1.57E-13 | chr:6:32648036 |
| 6 rs9274438   | 32633181 C | 2.748  | 1.57E-13 | chr:6:32648036 |

|               |            |        |          |                |
|---------------|------------|--------|----------|----------------|
| 6 rs115711192 | 32602161 T | 4.9    | 1.59E-13 | chr:6:32648036 |
| 6 rs9272973   | 32611312 T | 3.129  | 1.59E-13 | chr:6:32648036 |
| 6 rs28383290  | 32586475 T | 6.149  | 1.61E-13 | chr:6:32648036 |
| 6 rs28383291  | 32586476 G | 6.149  | 1.61E-13 | chr:6:32648036 |
| 6 rs1048173   | 32609855 C | 3.592  | 1.65E-13 | chr:6:32648036 |
| 6 rs9273098   | 32612556 G | 2.283  | 1.67E-13 | chr:6:32648036 |
| 6 rs9273100   | 32612559 G | 2.283  | 1.67E-13 | chr:6:32648036 |
| 6 rs17843696  | 32622178 G | 2.188  | 1.67E-13 | chr:6:32648036 |
| 6 rs9279900   | 32607583 T | 2.375  | 1.72E-13 | chr:6:32648036 |
| 6 rs9271913   | 32596222 A | 0.3019 | 1.73E-13 | chr:6:32648036 |
| 6 rs17843692  | 32622103 G | 2.192  | 1.74E-13 | chr:6:32648036 |
| 6 rs17612533  | 32615307 G | 2.31   | 1.74E-13 | chr:6:32648036 |
| 6 rs17612541  | 32615308 T | 2.31   | 1.74E-13 | chr:6:32648036 |
| 6 rs17612548  | 32615312 A | 2.31   | 1.74E-13 | chr:6:32648036 |
| 6 rs9271945   | 32597034 A | 0.2971 | 1.77E-13 | chr:6:32648036 |
| 6 rs9273427   | 32627441 C | 2.561  | 1.81E-13 | chr:6:32648036 |
| 6 rs17613285  | 32621828 A | 2.342  | 1.82E-13 | chr:6:32648036 |
| 6 rs9271910   | 32596183 C | 0.3018 | 1.83E-13 | chr:6:32648036 |
| 6 rs35789108  | 32550126 G | 6.809  | 1.84E-13 | chr:6:32648036 |
| 6 rs9273251   | 32614193 G | 2.215  | 1.86E-13 | chr:6:32648036 |
| 6 rs281874991 | 32631281 T | 2.649  | 1.87E-13 | chr:6:32648036 |
| 6 rs9272067   | 32599401 A | 0.2991 | 1.87E-13 | chr:6:32648036 |
| 6 rs28383427  | 32608792 T | 3.849  | 1.87E-13 | chr:6:32648036 |
| 6 rs17843609  | 32620513 C | 2.32   | 1.90E-13 | chr:6:32648036 |
| 6 rs9271919   | 32596423 G | 0.3007 | 1.91E-13 | chr:6:32648036 |
| 6 rs9273188   | 32613384 T | 2.386  | 1.92E-13 | chr:6:32648036 |
| 6 rs9272059   | 32599223 C | 0.2995 | 1.93E-13 | chr:6:32648036 |
| 6 rs9273438   | 32627523 G | 2.563  | 1.93E-13 | chr:6:32648036 |
| 6 rs9273240   | 32614000 T | 2.318  | 1.94E-13 | chr:6:32648036 |
| 6 rs17612590  | 32615578 A | 2.351  | 1.95E-13 | chr:6:32648036 |
| 6 rs9273436   | 32627517 G | 2.562  | 1.95E-13 | chr:6:32648036 |
| 6 rs60601161  | 32783387 T | 4.345  | 1.97E-13 | chr:6:32648036 |
| 6 rs17843568  | 32614941 T | 2.175  | 2.02E-13 | chr:6:32648036 |
| 6 rs17612727  | 32616003 T | 2.225  | 2.03E-13 | chr:6:32648036 |
| 6 rs17612734  | 32616004 G | 2.225  | 2.03E-13 | chr:6:32648036 |
| 6 rs9271922   | 32596444 A | 0.2985 | 2.04E-13 | chr:6:32648036 |
| 6 rs116236894 | 32603461 A | 4.602  | 2.04E-13 | chr:6:32648036 |
| 6 rs9272120   | 32600501 G | 0.3029 | 2.06E-13 | chr:6:32648036 |
| 6 rs9273426   | 32627434 C | 2.558  | 2.06E-13 | chr:6:32648036 |
| 6 rs9272117   | 32600411 T | 0.2978 | 2.06E-13 | chr:6:32648036 |
| 6 rs9273430   | 32627460 G | 2.57   | 2.07E-13 | chr:6:32648036 |
| 6 rs9274306   | 32632006 G | 2.217  | 2.09E-13 | chr:6:32648036 |
| 6 rs17843593  | 32615950 C | 2.226  | 2.09E-13 | chr:6:32648036 |

|               |            |        |          |                |
|---------------|------------|--------|----------|----------------|
| 6 rs17843594  | 32615952 C | 2.226  | 2.09E-13 | chr:6:32648036 |
| 6 rs9272049   | 32599045 G | 0.3033 | 2.14E-13 | chr:6:32648036 |
| 6 rs115214276 | 32600032 C | 4.548  | 2.15E-13 | chr:6:32648036 |
| 6 rs17612482  | 32614726 T | 2.198  | 2.15E-13 | chr:6:32648036 |
| 6 rs9273305   | 32622927 C | 2.429  | 2.15E-13 | chr:6:32648036 |
| 6 rs115231411 | 32600409 T | 4.511  | 2.17E-13 | chr:6:32648036 |
| 6 rs116485389 | 32600457 G | 4.511  | 2.17E-13 | chr:6:32648036 |
| 6 rs9272969   | 32611289 G | 2.391  | 2.17E-13 | chr:6:32648036 |
| 6 rs9273344   | 32623458 C | 2.268  | 2.19E-13 | chr:6:32648036 |
| 6 rs17612838  | 32620538 C | 2.304  | 2.19E-13 | chr:6:32648036 |
| 6 rs17843612  | 32620536 A | 2.304  | 2.19E-13 | chr:6:32648036 |
| 6 rs17612475  | 32614706 A | 2.197  | 2.20E-13 | chr:6:32648036 |
| 6 rs17843563  | 32614705 G | 2.197  | 2.20E-13 | chr:6:32648036 |
| 6 rs9274575   | 32635226 G | 2.703  | 2.23E-13 | chr:6:32648036 |
| 6 rs9273247   | 32614166 C | 2.211  | 2.25E-13 | chr:6:32648036 |
| 6 rs9273248   | 32614167 C | 2.211  | 2.25E-13 | chr:6:32648036 |
| 6 rs9273249   | 32614168 A | 2.211  | 2.25E-13 | chr:6:32648036 |
| 6 rs9273224   | 32613804 T | 2.22   | 2.29E-13 | chr:6:32648036 |
| 6 rs9272459   | 32605578 A | 2.92   | 2.30E-13 | chr:6:32648036 |
| 6 rs9268142   | 32256418 C | 3.528  | 2.30E-13 | chr:6:32648036 |
| 6 rs17612518  | 32614927 T | 2.177  | 2.35E-13 | chr:6:32648036 |
| 6 rs17613278  | 32621810 G | 2.334  | 2.37E-13 | chr:6:32648036 |
| 6 rs114309058 | 32594470 A | 0.3096 | 2.39E-13 | chr:6:32648036 |
| 6 rs10456411  | 32615904 A | 3.567  | 2.40E-13 | chr:6:32648036 |
| 6 rs1130158   | 32610972 A | 2.219  | 2.43E-13 | chr:6:32648036 |
| 6 rs114866528 | 32599267 C | 4.496  | 2.44E-13 | chr:6:32648036 |
| 6 rs116633385 | 32599268 A | 4.496  | 2.44E-13 | chr:6:32648036 |
| 6 rs199950886 | 32603075 G | 4.686  | 2.45E-13 | chr:6:32648036 |
| 6 rs28383278  | 32586312 C | 5.917  | 2.49E-13 | chr:6:32648036 |
| 6 rs685810    | 32584952 G | 3.442  | 2.51E-13 | chr:6:32648036 |
| 6 rs281875005 | 32631266 G | 2.502  | 2.52E-13 | chr:6:32648036 |
| 6 rs9272515   | 32606406 A | 2.635  | 2.54E-13 | chr:6:32648036 |
| 6 rs17612719  | 32615990 C | 2.233  | 2.55E-13 | chr:6:32648036 |
| 6 rs28383376  | 32607219 A | 5.179  | 2.61E-13 | chr:6:32648036 |
| 6 rs550204266 | 32615268 C | 2.217  | 2.64E-13 | chr:6:32648036 |
| 6 rs114308959 | 32599445 G | 4.489  | 2.65E-13 | chr:6:32648036 |
| 6 rs115290336 | 32605107 G | 4.712  | 2.68E-13 | chr:6:32648036 |
| 6 rs17612712  | 32615945 T | 2.22   | 2.72E-13 | chr:6:32648036 |
| 6 rs9271892   | 32595813 C | 0.3032 | 2.72E-13 | chr:6:32648036 |
| 6 rs3208105   | 32609222 T | 2.651  | 2.75E-13 | chr:6:32648036 |
| 6 rs28383455  | 32609380 T | 4.246  | 2.77E-13 | chr:6:32648036 |
| 6 rs17612597  | 32615582 C | 2.33   | 2.79E-13 | chr:6:32648036 |
| 6 rs9273136   | 32612823 C | 2.346  | 2.82E-13 | chr:6:32648036 |

|               |            |        |          |                |
|---------------|------------|--------|----------|----------------|
| 6 rs9273137   | 32612827 A | 2.346  | 2.82E-13 | chr:6:32648036 |
| 6 rs1018434   | 32281360 C | 3.544  | 2.83E-13 | chr:6:32648036 |
| 6 rs9273410   | 32627250 A | 2.538  | 2.85E-13 | chr:6:32648036 |
| 6 rs9273343   | 32623445 C | 2.243  | 2.86E-13 | chr:6:32648036 |
| 6 rs9271896   | 32595907 A | 0.3029 | 2.87E-13 | chr:6:32648036 |
| 6 rs7747236   | 32502399 T | 5.153  | 2.88E-13 | chr:6:32648036 |
| 6 rs111247469 | 32503071 T | 4.109  | 2.91E-13 | chr:6:32648036 |
| 6 rs9272359   | 32604544 T | 2.459  | 2.92E-13 | chr:6:32648036 |
| 6 rs3096669   | 32236608 T | 3.546  | 2.93E-13 | chr:6:32648036 |
| 6 rs9271890   | 32595779 A | 0.3043 | 2.97E-13 | chr:6:32648036 |
| 6 rs9271891   | 32595783 T | 0.3043 | 2.97E-13 | chr:6:32648036 |
| 6 rs281875010 | 32631261 T | 2.499  | 2.98E-13 | chr:6:32648036 |
| 6 rs9271383   | 32587391 C | 0.3087 | 2.99E-13 | chr:6:32648036 |
| 6 rs17613153  | 32621505 G | 2.173  | 3.05E-13 | chr:6:32648036 |
| 6 rs17613167  | 32621513 T | 2.173  | 3.05E-13 | chr:6:32648036 |
| 6 rs17613174  | 32621515 A | 2.173  | 3.05E-13 | chr:6:32648036 |
| 6 rs17843610  | 32620529 C | 2.295  | 3.08E-13 | chr:6:32648036 |
| 6 rs17843611  | 32620531 C | 2.295  | 3.08E-13 | chr:6:32648036 |
| 6 rs9273287   | 32614495 G | 2.163  | 3.10E-13 | chr:6:32648036 |
| 6 rs9272028   | 32598706 T | 0.3042 | 3.10E-13 | chr:6:32648036 |
| 6 rs9272029   | 32598707 G | 0.3042 | 3.10E-13 | chr:6:32648036 |
| 6 rs9273560   | 32628996 A | 2.321  | 3.10E-13 | chr:6:32648036 |
| 6 rs9273225   | 32613817 G | 2.21   | 3.11E-13 | chr:6:32648036 |
| 6 rs9273226   | 32613824 T | 2.21   | 3.11E-13 | chr:6:32648036 |
| 6 rs17613326  | 32621949 C | 2.169  | 3.15E-13 | chr:6:32648036 |
| 6 rs17843683  | 32621947 C | 2.169  | 3.15E-13 | chr:6:32648036 |
| 6 rs17843684  | 32621948 A | 2.169  | 3.15E-13 | chr:6:32648036 |
| 6 rs9274529   | 32634514 G | 2.714  | 3.16E-13 | chr:6:32648036 |
| 6 rs9273482   | 32628127 C | 2.798  | 3.18E-13 | chr:6:32648036 |
| 6 rs9272625   | 32608014 C | 2.647  | 3.20E-13 | chr:6:32648036 |
| 6 rs192482979 | 32643386 G | 4.616  | 3.22E-13 | chr:6:32648036 |
| 6 rs9271914   | 32596238 C | 0.3087 | 3.26E-13 | chr:6:32648036 |
| 6 rs17612676  | 32615841 A | 2.25   | 3.30E-13 | chr:6:32648036 |
| 6 rs17843589  | 32615843 A | 2.25   | 3.30E-13 | chr:6:32648036 |
| 6 rs1130156   | 32610968 G | 3.719  | 3.31E-13 | chr:6:32648036 |
| 6 rs115368651 | 32602040 G | 5.147  | 3.32E-13 | chr:6:32648036 |
| 6 rs115170333 | 32552322 C | 4.459  | 3.32E-13 | chr:6:32648036 |
| 6 rs566656642 | 32552339 A | 4.459  | 3.32E-13 | chr:6:32648036 |
| 6 rs9273124   | 32612752 G | 2.329  | 3.33E-13 | chr:6:32648036 |
| 6 rs9273125   | 32612754 G | 2.329  | 3.33E-13 | chr:6:32648036 |
| 6 rs1130155   | 32610951 G | 2.225  | 3.34E-13 | chr:6:32648036 |
| 6 rs17613243  | 32621683 G | 2.158  | 3.34E-13 | chr:6:32648036 |
| 6 rs17843671  | 32621682 T | 2.158  | 3.34E-13 | chr:6:32648036 |

|               |            |        |          |                |
|---------------|------------|--------|----------|----------------|
| 6 rs17613250  | 32621699 C | 2.162  | 3.36E-13 | chr:6:32648036 |
| 6 rs28720766  | 32595063 T | 4.023  | 3.42E-13 | chr:6:32648036 |
| 6 rs9272061   | 32599250 A | 0.3052 | 3.44E-13 | chr:6:32648036 |
| 6 rs9272593   | 32607558 G | 2.395  | 3.45E-13 | chr:6:32648036 |
| 6 rs9272594   | 32607561 T | 2.395  | 3.45E-13 | chr:6:32648036 |
| 6 rs9271889   | 32595747 A | 0.3051 | 3.46E-13 | chr:6:32648036 |
| 6 rs9271939   | 32596921 C | 0.3061 | 3.46E-13 | chr:6:32648036 |
| 6 rs2858328   | 32658911 C | 0.2643 | 3.47E-13 | chr:6:32648036 |
| 6 rs6905282   | 32626015 A | 3.026  | 3.51E-13 | chr:6:32648036 |
| 6 rs9273358   | 32626019 T | 3.026  | 3.51E-13 | chr:6:32648036 |
| 6 rs9272143   | 32600803 C | 0.313  | 3.54E-13 | chr:6:32648036 |
| 6 rs2515895   | 32628960 C | 3.244  | 3.59E-13 | chr:6:32648036 |
| 6 rs17613395  | 32622167 A | 2.156  | 3.61E-13 | chr:6:32648036 |
| 6 rs17843694  | 32622173 C | 2.156  | 3.61E-13 | chr:6:32648036 |
| 6 rs9270910   | 32572180 G | 0.3016 | 3.65E-13 | chr:6:32648036 |
| 6 rs558095162 | 32598504 T | 0.3126 | 3.74E-13 | chr:6:32648036 |
| 6 rs9273338   | 32623393 T | 2.228  | 3.77E-13 | chr:6:32648036 |
| 6 rs2454138   | 32570401 A | 3.604  | 3.77E-13 | chr:6:32648036 |
| 6 rs2516049   | 32570400 C | 3.604  | 3.77E-13 | chr:6:32648036 |
| 6 rs17613181  | 32621550 G | 2.167  | 3.78E-13 | chr:6:32648036 |
| 6 rs17843661  | 32621526 C | 2.167  | 3.78E-13 | chr:6:32648036 |
| 6 rs17843662  | 32621529 A | 2.167  | 3.78E-13 | chr:6:32648036 |
| 6 rs9273234   | 32613954 G | 2.204  | 3.80E-13 | chr:6:32648036 |
| 6 rs139025848 | 32613234 T | 4.61   | 3.80E-13 | chr:6:32648036 |
| 6 rs526784    | 32572030 A | 3.602  | 3.81E-13 | chr:6:32648036 |
| 6 rs112443719 | 32884252 A | 5.705  | 3.81E-13 | chr:6:32648036 |
| 6 rs112492913 | 32872978 T | 5.705  | 3.81E-13 | chr:6:32648036 |
| 6 rs76041302  | 32880374 T | 5.705  | 3.81E-13 | chr:6:32648036 |
| 6 rs78906256  | 32881325 A | 5.705  | 3.81E-13 | chr:6:32648036 |
| 6 rs9272013   | 32598224 T | 0.306  | 3.83E-13 | chr:6:32648036 |
| 6 rs9271897   | 32595954 A | 0.3058 | 3.84E-13 | chr:6:32648036 |
| 6 rs9271898   | 32595972 A | 0.3058 | 3.84E-13 | chr:6:32648036 |
| 6 rs9273399   | 32627117 A | 2.318  | 3.87E-13 | chr:6:32648036 |
| 6 rs9274957   | 32641914 C | 2.439  | 3.90E-13 | chr:6:32648036 |
| 6 rs9271404   | 32587553 A | 3.373  | 3.95E-13 | chr:6:32648036 |
| 6 rs17612878  | 32620733 T | 2.226  | 3.96E-13 | chr:6:32648036 |
| 6 rs114354029 | 32598764 G | 0.3139 | 4.00E-13 | chr:6:32648036 |
| 6 rs9268202   | 32279340 T | 3.489  | 4.10E-13 | chr:6:32648036 |
| 6 rs1142328   | 32609216 T | 2.63   | 4.12E-13 | chr:6:32648036 |
| 6 rs9273235   | 32613957 A | 2.202  | 4.14E-13 | chr:6:32648036 |
| 6 rs9273253   | 32614207 G | 2.179  | 4.17E-13 | chr:6:32648036 |
| 6 rs3021302   | 32623150 C | 4      | 4.22E-13 | chr:6:32648036 |
| 6 rs7142      | 32610825 G | 2.366  | 4.24E-13 | chr:6:32648036 |

|               |            |        |          |                |
|---------------|------------|--------|----------|----------------|
| 6 rs9272422   | 32605132 C | 3.411  | 4.26E-13 | chr:6:32648036 |
| 6 rs9271918   | 32596352 T | 0.306  | 4.28E-13 | chr:6:32648036 |
| 6 rs28383277  | 32586300 T | 6.049  | 4.28E-13 | chr:6:32648036 |
| 6 rs9273290   | 32614552 T | 2.148  | 4.30E-13 | chr:6:32648036 |
| 6 rs9273291   | 32614555 C | 2.148  | 4.30E-13 | chr:6:32648036 |
| 6 rs544749594 | 32605025 G | 5.168  | 4.35E-13 | chr:6:32648036 |
| 6 rs17612781  | 32620311 C | 2.513  | 4.36E-13 | chr:6:32648036 |
| 6 rs371989651 | 32598510 C | 3.688  | 4.37E-13 | chr:6:32648036 |
| 6 rs9272775   | 32610257 C | 3.34   | 4.37E-13 | chr:6:32648036 |
| 6 rs9273214   | 32613703 T | 2.164  | 4.43E-13 | chr:6:32648036 |
| 6 rs9271906   | 32596048 A | 0.3086 | 4.46E-13 | chr:6:32648036 |
| 6 rs115682612 | 32848897 T | 5.568  | 4.46E-13 | chr:6:32648036 |
| 6 rs112313206 | 32598405 T | 0.3132 | 4.47E-13 | chr:6:32648036 |
| 6 rs74606007  | 32603973 C | 4.739  | 4.47E-13 | chr:6:32648036 |
| 6 rs9271699   | 32593179 G | 0.3128 | 4.55E-13 | chr:6:32648036 |
| 6 rs9273348   | 32623487 G | 2.256  | 4.56E-13 | chr:6:32648036 |
| 6 rs3129714   | 32657279 A | 3.105  | 4.58E-13 | chr:6:32648036 |
| 6 rs115908946 | 32600615 C | 4.347  | 4.61E-13 | chr:6:32648036 |
| 6 rs559861992 | 32603447 T | 4.428  | 4.62E-13 | chr:6:32648036 |
| 6 rs9274557   | 32634887 T | 2.382  | 4.66E-13 | chr:6:32648036 |
| 6 rs9273241   | 32614025 T | 2.374  | 4.66E-13 | chr:6:32648036 |
| 6 rs9272130   | 32600638 G | 0.3094 | 4.67E-13 | chr:6:32648036 |
| 6 rs9274664   | 32636528 G | 2.922  | 4.76E-13 | chr:6:32648036 |
| 6 rs9270911   | 32572202 C | 0.3024 | 4.78E-13 | chr:6:32648036 |
| 6 rs9274573   | 32635205 T | 2.628  | 4.83E-13 | chr:6:32648036 |
| 6 rs4538748   | 32657505 C | 3.103  | 4.97E-13 | chr:6:32648036 |
| 6 rs9272109   | 32600253 T | 0.3131 | 5.00E-13 | chr:6:32648036 |
| 6 rs17612887  | 32620739 T | 2.213  | 5.01E-13 | chr:6:32648036 |
| 6 rs115738641 | 32599980 G | 4.358  | 5.02E-13 | chr:6:32648036 |
| 6 rs28755177  | 32641412 A | 4.623  | 5.06E-13 | chr:6:32648036 |
| 6 rs9271888   | 32595732 C | 0.3085 | 5.08E-13 | chr:6:32648036 |
| 6 rs17613271  | 32621778 G | 2.29   | 5.12E-13 | chr:6:32648036 |
| 6 rs111618128 | 32830426 T | 5.603  | 5.12E-13 | chr:6:32648036 |
| 6 rs115273200 | 32826794 A | 5.603  | 5.12E-13 | chr:6:32648036 |
| 6 rs9271753   | 32593901 C | 2.333  | 5.17E-13 | chr:6:32648036 |
| 6 rs9271754   | 32593913 G | 2.333  | 5.17E-13 | chr:6:32648036 |
| 6 rs9272103   | 32599896 T | 0.3142 | 5.21E-13 | chr:6:32648036 |
| 6 rs9273236   | 32613973 C | 2.197  | 5.23E-13 | chr:6:32648036 |
| 6 rs9273237   | 32613976 T | 2.197  | 5.23E-13 | chr:6:32648036 |
| 6 rs115616896 | 32862370 C | 5.605  | 5.25E-13 | chr:6:32648036 |
| 6 rs149631651 | 32853458 A | 5.605  | 5.25E-13 | chr:6:32648036 |
| 6 rs76436617  | 32849339 C | 5.605  | 5.25E-13 | chr:6:32648036 |
| 6 rs78183691  | 32848569 C | 5.605  | 5.25E-13 | chr:6:32648036 |

|               |            |        |          |                |
|---------------|------------|--------|----------|----------------|
| 6 rs146650659 | 32646807 G | 3.947  | 5.28E-13 | chr:6:32648036 |
| 6 rs9272026   | 32598618 G | 0.3087 | 5.33E-13 | chr:6:32648036 |
| 6 rs9272027   | 32598622 G | 0.3087 | 5.33E-13 | chr:6:32648036 |
| 6 rs114307375 | 32597081 G | 4.066  | 5.36E-13 | chr:6:32648036 |
| 6 rs115350662 | 32597078 T | 4.066  | 5.36E-13 | chr:6:32648036 |
| 6 rs115016190 | 32600959 C | 4.104  | 5.37E-13 | chr:6:32648036 |
| 6 rs9271387   | 32587424 C | 0.3185 | 5.39E-13 | chr:6:32648036 |
| 6 rs78692977  | 32601164 A | 3.702  | 5.39E-13 | chr:6:32648036 |
| 6 rs114088880 | 32600279 G | 4.359  | 5.46E-13 | chr:6:32648036 |
| 6 rs9273398   | 32627115 T | 2.301  | 5.46E-13 | chr:6:32648036 |
| 6 rs9271917   | 32596336 G | 0.3085 | 5.46E-13 | chr:6:32648036 |
| 6 rs17612741  | 32616036 G | 2.178  | 5.46E-13 | chr:6:32648036 |
| 6 rs9273346   | 32623475 G | 2.252  | 5.48E-13 | chr:6:32648036 |
| 6 rs9272141   | 32600797 A | 0.3169 | 5.56E-13 | chr:6:32648036 |
| 6 rs114968544 | 32596711 C | 4.321  | 5.66E-13 | chr:6:32648036 |
| 6 rs9501608   | 32201803 C | 4.629  | 5.68E-13 | chr:6:32648036 |
| 6 rs9273160   | 32613104 G | 2.255  | 5.69E-13 | chr:6:32648036 |
| 6 rs1018433   | 32281510 T | 3.469  | 5.75E-13 | chr:6:32648036 |
| 6 rs111257207 | 32226126 C | 3.469  | 5.75E-13 | chr:6:32648036 |
| 6 rs112845108 | 32226352 T | 3.469  | 5.75E-13 | chr:6:32648036 |
| 6 rs140566858 | 32226520 G | 3.469  | 5.75E-13 | chr:6:32648036 |
| 6 rs142071717 | 32226256 G | 3.469  | 5.75E-13 | chr:6:32648036 |
| 6 rs1559873   | 32243129 C | 3.469  | 5.75E-13 | chr:6:32648036 |
| 6 rs2069026   | 32281958 T | 3.469  | 5.75E-13 | chr:6:32648036 |
| 6 rs281863610 | 32630794 G | 2.482  | 5.75E-13 | chr:6:32648036 |
| 6 rs28367008  | 32283214 T | 3.469  | 5.75E-13 | chr:6:32648036 |
| 6 rs3096672   | 32237748 A | 3.469  | 5.75E-13 | chr:6:32648036 |
| 6 rs3096674   | 32238219 A | 3.469  | 5.75E-13 | chr:6:32648036 |
| 6 rs3096677   | 32239050 C | 3.469  | 5.75E-13 | chr:6:32648036 |
| 6 rs3096678   | 32239314 A | 3.469  | 5.75E-13 | chr:6:32648036 |
| 6 rs3115557   | 32239651 T | 3.469  | 5.75E-13 | chr:6:32648036 |
| 6 rs3115558   | 32239427 A | 3.469  | 5.75E-13 | chr:6:32648036 |
| 6 rs3115565   | 32230344 A | 3.469  | 5.75E-13 | chr:6:32648036 |
| 6 rs3130331   | 32231483 T | 3.469  | 5.75E-13 | chr:6:32648036 |
| 6 rs3130336   | 32238428 T | 3.469  | 5.75E-13 | chr:6:32648036 |
| 6 rs3130337   | 32241203 A | 3.469  | 5.75E-13 | chr:6:32648036 |
| 6 rs3132927   | 32231407 A | 3.469  | 5.75E-13 | chr:6:32648036 |
| 6 rs3132931   | 32235895 G | 3.469  | 5.75E-13 | chr:6:32648036 |
| 6 rs3864299   | 32271674 T | 3.469  | 5.75E-13 | chr:6:32648036 |
| 6 rs3864300   | 32271807 T | 3.469  | 5.75E-13 | chr:6:32648036 |
| 6 rs3864301   | 32271955 T | 3.469  | 5.75E-13 | chr:6:32648036 |
| 6 rs3864303   | 32281621 G | 3.469  | 5.75E-13 | chr:6:32648036 |
| 6 rs6457536   | 32273765 G | 3.469  | 5.75E-13 | chr:6:32648036 |



|             |            |       |          |                |
|-------------|------------|-------|----------|----------------|
| 6 rs6910275 | 32283114 A | 3.469 | 5.75E-13 | chr:6:32648036 |
| 6 rs6915455 | 32283494 A | 3.469 | 5.75E-13 | chr:6:32648036 |
| 6 rs6915879 | 32273198 T | 3.469 | 5.75E-13 | chr:6:32648036 |
| 6 rs6927529 | 32258088 G | 3.469 | 5.75E-13 | chr:6:32648036 |
| 6 rs6927856 | 32258043 A | 3.469 | 5.75E-13 | chr:6:32648036 |
| 6 rs6934429 | 32279622 T | 3.469 | 5.75E-13 | chr:6:32648036 |
| 6 rs6934546 | 32279952 G | 3.469 | 5.75E-13 | chr:6:32648036 |
| 6 rs6934776 | 32279816 A | 3.469 | 5.75E-13 | chr:6:32648036 |
| 6 rs6939410 | 32280182 G | 3.469 | 5.75E-13 | chr:6:32648036 |
| 6 rs7341270 | 32273487 A | 3.469 | 5.75E-13 | chr:6:32648036 |
| 6 rs7742654 | 32271443 G | 3.469 | 5.75E-13 | chr:6:32648036 |
| 6 rs7757711 | 32256807 T | 3.469 | 5.75E-13 | chr:6:32648036 |
| 6 rs7758030 | 32257035 T | 3.469 | 5.75E-13 | chr:6:32648036 |
| 6 rs9268013 | 32224828 C | 3.469 | 5.75E-13 | chr:6:32648036 |
| 6 rs9268059 | 32230678 T | 3.469 | 5.75E-13 | chr:6:32648036 |
| 6 rs9268116 | 32249177 G | 3.469 | 5.75E-13 | chr:6:32648036 |
| 6 rs9268117 | 32249524 C | 3.469 | 5.75E-13 | chr:6:32648036 |
| 6 rs9268121 | 32251435 C | 3.469 | 5.75E-13 | chr:6:32648036 |
| 6 rs9268125 | 32252678 C | 3.469 | 5.75E-13 | chr:6:32648036 |
| 6 rs9268131 | 32254452 G | 3.469 | 5.75E-13 | chr:6:32648036 |
| 6 rs9268137 | 32255269 A | 3.469 | 5.75E-13 | chr:6:32648036 |
| 6 rs9268140 | 32255594 C | 3.469 | 5.75E-13 | chr:6:32648036 |
| 6 rs9268163 | 32270875 T | 3.469 | 5.75E-13 | chr:6:32648036 |
| 6 rs9268165 | 32272327 G | 3.469 | 5.75E-13 | chr:6:32648036 |
| 6 rs9268168 | 32272510 T | 3.469 | 5.75E-13 | chr:6:32648036 |
| 6 rs9268169 | 32272707 G | 3.469 | 5.75E-13 | chr:6:32648036 |
| 6 rs9268170 | 32272711 G | 3.469 | 5.75E-13 | chr:6:32648036 |
| 6 rs9268172 | 32273085 T | 3.469 | 5.75E-13 | chr:6:32648036 |
| 6 rs9268175 | 32274067 A | 3.469 | 5.75E-13 | chr:6:32648036 |
| 6 rs9268176 | 32274079 T | 3.469 | 5.75E-13 | chr:6:32648036 |
| 6 rs9268179 | 32275629 T | 3.469 | 5.75E-13 | chr:6:32648036 |
| 6 rs9268180 | 32275841 T | 3.469 | 5.75E-13 | chr:6:32648036 |
| 6 rs9268181 | 32276009 C | 3.469 | 5.75E-13 | chr:6:32648036 |
| 6 rs9268182 | 32276027 G | 3.469 | 5.75E-13 | chr:6:32648036 |
| 6 rs9268183 | 32276172 A | 3.469 | 5.75E-13 | chr:6:32648036 |
| 6 rs9268187 | 32276549 C | 3.469 | 5.75E-13 | chr:6:32648036 |
| 6 rs9268188 | 32276735 C | 3.469 | 5.75E-13 | chr:6:32648036 |
| 6 rs9268190 | 32276795 T | 3.469 | 5.75E-13 | chr:6:32648036 |
| 6 rs9268191 | 32277025 A | 3.469 | 5.75E-13 | chr:6:32648036 |
| 6 rs9268192 | 32277211 T | 3.469 | 5.75E-13 | chr:6:32648036 |
| 6 rs9268194 | 32277548 A | 3.469 | 5.75E-13 | chr:6:32648036 |
| 6 rs9268195 | 32277555 A | 3.469 | 5.75E-13 | chr:6:32648036 |
| 6 rs9268196 | 32277834 T | 3.469 | 5.75E-13 | chr:6:32648036 |

|               |            |        |          |                |
|---------------|------------|--------|----------|----------------|
| 6 rs9268197   | 32277934 A | 3.469  | 5.75E-13 | chr:6:32648036 |
| 6 rs9268198   | 32278187 T | 3.469  | 5.75E-13 | chr:6:32648036 |
| 6 rs9268204   | 32279500 T | 3.469  | 5.75E-13 | chr:6:32648036 |
| 6 rs9268207   | 32280462 T | 3.469  | 5.75E-13 | chr:6:32648036 |
| 6 rs9268212   | 32281889 C | 3.469  | 5.75E-13 | chr:6:32648036 |
| 6 rs9268213   | 32282081 G | 3.469  | 5.75E-13 | chr:6:32648036 |
| 6 rs9268214   | 32282466 G | 3.469  | 5.75E-13 | chr:6:32648036 |
| 6 rs9268215   | 32282471 G | 3.469  | 5.75E-13 | chr:6:32648036 |
| 6 rs9268218   | 32283699 G | 3.469  | 5.75E-13 | chr:6:32648036 |
| 6 rs9268222   | 32285228 A | 3.469  | 5.75E-13 | chr:6:32648036 |
| 6 rs1130152   | 32610946 T | 2.202  | 5.75E-13 | chr:6:32648036 |
| 6 rs17612865  | 32620723 T | 2.214  | 5.92E-13 | chr:6:32648036 |
| 6 rs17612872  | 32620726 C | 2.214  | 5.92E-13 | chr:6:32648036 |
| 6 rs17843681  | 32621928 A | 2.153  | 5.94E-13 | chr:6:32648036 |
| 6 rs17843682  | 32621932 C | 2.153  | 5.94E-13 | chr:6:32648036 |
| 6 rs112008201 | 32884838 G | 5.572  | 5.94E-13 | chr:6:32648036 |
| 6 rs17612610  | 32615611 T | 2.31   | 5.96E-13 | chr:6:32648036 |
| 6 rs17612617  | 32615613 T | 2.31   | 5.96E-13 | chr:6:32648036 |
| 6 rs111477174 | 32594457 G | 0.321  | 6.23E-13 | chr:6:32648036 |
| 6 rs111634228 | 32594452 G | 0.321  | 6.23E-13 | chr:6:32648036 |
| 6 rs9272110   | 32600287 C | 0.3138 | 6.35E-13 | chr:6:32648036 |
| 6 rs9272113   | 32600291 C | 0.3138 | 6.35E-13 | chr:6:32648036 |
| 6 rs9273215   | 32613712 A | 2.167  | 6.41E-13 | chr:6:32648036 |
| 6 rs17613299  | 32621901 G | 2.156  | 6.50E-13 | chr:6:32648036 |
| 6 rs28383270  | 32586024 G | 4.838  | 6.52E-13 | chr:6:32648036 |
| 6 rs116135263 | 32517913 A | 6.464  | 6.53E-13 | chr:6:32648036 |
| 6 rs28371173  | 32612057 A | 7.271  | 6.53E-13 | chr:6:32648036 |
| 6 rs9271899   | 32596007 G | 0.3109 | 6.53E-13 | chr:6:32648036 |
| 6 rs9271901   | 32596027 T | 0.3109 | 6.53E-13 | chr:6:32648036 |
| 6 rs17612604  | 32615597 C | 2.296  | 6.53E-13 | chr:6:32648036 |
| 6 rs17843618  | 32620743 T | 2.206  | 6.54E-13 | chr:6:32648036 |
| 6 rs9272330   | 32604213 C | 0.3435 | 6.56E-13 | chr:6:32648036 |
| 6 rs9275059   | 32648298 A | 2.898  | 6.69E-13 | chr:6:32648036 |
| 6 rs9273294   | 32614575 A | 2.131  | 6.84E-13 | chr:6:32648036 |
| 6 rs9271915   | 32596294 C | 0.3125 | 6.86E-13 | chr:6:32648036 |
| 6 rs3096684   | 32234345 T | 3.45   | 6.88E-13 | chr:6:32648036 |
| 6 rs1063346   | 32627967 G | 2.576  | 6.93E-13 | chr:6:32648036 |
| 6 rs3204428   | 32627969 T | 2.576  | 6.93E-13 | chr:6:32648036 |
| 6 rs9271857   | 32595147 T | 0.3204 | 6.95E-13 | chr:6:32648036 |
| 6 rs9272719   | 32609387 A | 2.285  | 7.00E-13 | chr:6:32648036 |
| 6 rs9272720   | 32609389 T | 2.285  | 7.00E-13 | chr:6:32648036 |
| 6 rs9268096   | 32240611 G | 3.451  | 7.00E-13 | chr:6:32648036 |
| 6 rs4713589   | 32659435 G | 0.2742 | 7.01E-13 | chr:6:32648036 |

|               |            |        |          |                |
|---------------|------------|--------|----------|----------------|
| 6 rs28383275  | 32586281 G | 5.809  | 7.14E-13 | chr:6:32648036 |
| 6 rs28383276  | 32586282 G | 5.809  | 7.14E-13 | chr:6:32648036 |
| 6 rs9271948   | 32597105 A | 0.3113 | 7.14E-13 | chr:6:32648036 |
| 6 rs9268135   | 32255230 G | 3.442  | 7.16E-13 | chr:6:32648036 |
| 6 rs9273213   | 32613696 A | 2.159  | 7.16E-13 | chr:6:32648036 |
| 6 rs3096687   | 32230056 T | 3.448  | 7.19E-13 | chr:6:32648036 |
| 6 rs9271960   | 32597385 T | 0.3193 | 7.34E-13 | chr:6:32648036 |
| 6 rs9273325   | 32623193 A | 3.801  | 7.36E-13 | chr:6:32648036 |
| 6 rs9273479   | 32628093 C | 2.653  | 7.38E-13 | chr:6:32648036 |
| 6 rs28534011  | 32602947 A | 4.505  | 7.54E-13 | chr:6:32648036 |
| 6 rs17205970  | 32651923 C | 8.069  | 7.58E-13 | chr:6:32648036 |
| 6 rs553340154 | 32525778 G | 2.985  | 7.68E-13 | chr:6:32648036 |
| 6 rs9268184   | 32276203 A | 3.453  | 7.72E-13 | chr:6:32648036 |
| 6 rs9273232   | 32613944 T | 2.187  | 7.72E-13 | chr:6:32648036 |
| 6 rs9273163   | 32613114 T | 2.243  | 7.84E-13 | chr:6:32648036 |
| 6 rs116573360 | 32598366 G | 4.037  | 8.00E-13 | chr:6:32648036 |
| 6 rs147493459 | 32598335 G | 4.037  | 8.00E-13 | chr:6:32648036 |
| 6 rs9271934   | 32596773 T | 0.3151 | 8.13E-13 | chr:6:32648036 |
| 6 rs3132951   | 32247315 T | 3.427  | 8.13E-13 | chr:6:32648036 |
| 6 rs8227      | 32610757 A | 0.3366 | 8.19E-13 | chr:6:32648036 |
| 6 rs9273337   | 32623377 T | 2.205  | 8.30E-13 | chr:6:32648036 |
| 6 rs9271935   | 32596831 C | 0.3156 | 8.37E-13 | chr:6:32648036 |
| 6 rs9273483   | 32628138 A | 2.8    | 8.43E-13 | chr:6:32648036 |
| 6 rs9276498   | 32719081 A | 3.151  | 8.45E-13 | chr:6:32648036 |
| 6 rs7754119   | 32449858 C | 4.333  | 8.50E-13 | chr:6:32648036 |
| 6 rs116109088 | 32599900 T | 3.622  | 8.60E-13 | chr:6:32648036 |
| 6 rs9271756   | 32593933 G | 2.307  | 8.62E-13 | chr:6:32648036 |
| 6 rs113192265 | 32511884 C | 5.502  | 8.74E-13 | chr:6:32648036 |
| 6 rs148437409 | 32598479 C | 0.3225 | 8.79E-13 | chr:6:32648036 |
| 6 rs17843679  | 32621888 G | 2.148  | 8.97E-13 | chr:6:32648036 |
| 6 rs17843680  | 32621893 G | 2.148  | 8.97E-13 | chr:6:32648036 |
| 6 rs9271959   | 32597377 C | 0.3207 | 9.00E-13 | chr:6:32648036 |
| 6 rs9273078   | 32612309 A | 2.226  | 9.00E-13 | chr:6:32648036 |
| 6 rs114895321 | 32603154 G | 4.551  | 9.12E-13 | chr:6:32648036 |
| 6 rs9271920   | 32596430 G | 0.3106 | 9.15E-13 | chr:6:32648036 |
| 6 rs9271921   | 32596431 G | 0.3106 | 9.15E-13 | chr:6:32648036 |
| 6 rs9274536   | 32634634 T | 2.546  | 9.18E-13 | chr:6:32648036 |
| 6 rs9272022   | 32598529 G | 0.3222 | 9.19E-13 | chr:6:32648036 |
| 6 rs17843567  | 32614866 G | 2.137  | 9.19E-13 | chr:6:32648036 |
| 6 rs9271739   | 32593692 T | 0.3057 | 9.23E-13 | chr:6:32648036 |
| 6 rs28755168  | 32621793 T | 2.426  | 9.24E-13 | chr:6:32648036 |
| 6 rs115222936 | 32605039 T | 4.987  | 9.25E-13 | chr:6:32648036 |
| 6 rs3130321   | 32223418 T | 3.424  | 9.29E-13 | chr:6:32648036 |

|               |            |        |          |                |
|---------------|------------|--------|----------|----------------|
| 6 rs3132966   | 32223632 A | 3.424  | 9.29E-13 | chr:6:32648036 |
| 6 rs17843595  | 32615971 A | 2.176  | 9.30E-13 | chr:6:32648036 |
| 6 rs17843596  | 32615972 A | 2.176  | 9.30E-13 | chr:6:32648036 |
| 6 rs1130116   | 32610535 A | 0.3516 | 9.40E-13 | chr:6:32648036 |
| 6 rs9271927   | 32596647 C | 0.3169 | 9.43E-13 | chr:6:32648036 |
| 6 rs9271928   | 32596648 A | 0.3169 | 9.43E-13 | chr:6:32648036 |
| 6 rs17612510  | 32614883 T | 2.136  | 9.46E-13 | chr:6:32648036 |
| 6 rs17613257  | 32621726 T | 2.13   | 9.47E-13 | chr:6:32648036 |
| 6 rs17613264  | 32621727 G | 2.13   | 9.47E-13 | chr:6:32648036 |
| 6 rs9272009   | 32598063 T | 0.315  | 9.52E-13 | chr:6:32648036 |
| 6 rs9273123   | 32612733 A | 2.293  | 9.83E-13 | chr:6:32648036 |
| 6 rs115544552 | 32711318 T | 4.715  | 9.86E-13 | chr:6:32648036 |
| 6 rs17843621  | 32620827 T | 2.166  | 9.87E-13 | chr:6:32648036 |
| 6 rs7753228   | 32503794 T | 4.838  | 9.89E-13 | chr:6:32648036 |
| 6 rs9273231   | 32613937 A | 2.174  | 9.94E-13 | chr:6:32648036 |
| 6 rs9273288   | 32614511 A | 2.129  | 1.01E-12 | chr:6:32648036 |
| 6 rs9271937   | 32596870 G | 0.3159 | 1.01E-12 | chr:6:32648036 |
| 6 rs9271663   | 32592636 A | 0.3143 | 1.01E-12 | chr:6:32648036 |
| 6 rs28752526  | 32584918 G | 3.22   | 1.01E-12 | chr:6:32648036 |
| 6 rs7750783   | 32268080 T | 3.404  | 1.02E-12 | chr:6:32648036 |
| 6 rs76822178  | 32601188 T | 3.593  | 1.03E-12 | chr:6:32648036 |
| 6 rs9271755   | 32593926 C | 2.303  | 1.04E-12 | chr:6:32648036 |
| 6 rs9273065   | 32612205 G | 2.356  | 1.04E-12 | chr:6:32648036 |
| 6 rs9272076   | 32599624 T | 0.2923 | 1.05E-12 | chr:6:32648036 |
| 6 rs9272077   | 32599625 G | 0.2923 | 1.05E-12 | chr:6:32648036 |
| 6 rs1063343   | 32627992 C | 2.593  | 1.07E-12 | chr:6:32648036 |
| 6 rs74824383  | 32624731 G | 2.118  | 1.07E-12 | chr:6:32648036 |
| 6 rs9274543   | 32634695 A | 2.423  | 1.09E-12 | chr:6:32648036 |
| 6 rs9271955   | 32597281 A | 0.3161 | 1.09E-12 | chr:6:32648036 |
| 6 rs7341300   | 32275027 T | 3.402  | 1.11E-12 | chr:6:32648036 |
| 6 rs7341328   | 32275194 A | 3.402  | 1.11E-12 | chr:6:32648036 |
| 6 rs17613305  | 32621908 C | 2.135  | 1.11E-12 | chr:6:32648036 |
| 6 rs17613312  | 32621911 A | 2.135  | 1.11E-12 | chr:6:32648036 |
| 6 rs9271403   | 32587536 G | 3.274  | 1.11E-12 | chr:6:32648036 |
| 6 rs28383312  | 32587090 T | 3.295  | 1.12E-12 | chr:6:32648036 |
| 6 rs9272119   | 32600470 C | 0.3175 | 1.13E-12 | chr:6:32648036 |
| 6 rs9271930   | 32596677 G | 0.318  | 1.13E-12 | chr:6:32648036 |
| 6 rs17843619  | 32620775 A | 2.182  | 1.14E-12 | chr:6:32648036 |
| 6 rs1559874   | 32243155 A | 3.395  | 1.15E-12 | chr:6:32648036 |
| 6 rs9273081   | 32612336 A | 2.221  | 1.15E-12 | chr:6:32648036 |
| 6 rs9268166   | 32272433 C | 3.399  | 1.15E-12 | chr:6:32648036 |
| 6 rs9274555   | 32634882 T | 2.33   | 1.16E-12 | chr:6:32648036 |
| 6 rs9274556   | 32634883 T | 2.33   | 1.16E-12 | chr:6:32648036 |

|               |            |        |          |                |
|---------------|------------|--------|----------|----------------|
| 6 rs9271961   | 32597412 A | 0.3215 | 1.16E-12 | chr:6:32648036 |
| 6 rs17843564  | 32614842 G | 2.125  | 1.17E-12 | chr:6:32648036 |
| 6 rs17843565  | 32614847 G | 2.125  | 1.17E-12 | chr:6:32648036 |
| 6 rs113011827 | 32513453 T | 5.532  | 1.18E-12 | chr:6:32648036 |
| 6 rs113568276 | 32513127 A | 5.532  | 1.18E-12 | chr:6:32648036 |
| 6 rs9273179   | 32613305 G | 2.323  | 1.18E-12 | chr:6:32648036 |
| 6 rs2395255   | 32721639 C | 3.112  | 1.18E-12 | chr:6:32648036 |
| 6 rs3667      | 32610934 G | 3.527  | 1.20E-12 | chr:6:32648036 |
| 6 rs9272134   | 32600705 G | 0.3212 | 1.22E-12 | chr:6:32648036 |
| 6 rs9272016   | 32598346 T | 0.3199 | 1.22E-12 | chr:6:32648036 |
| 6 rs9273121   | 32612725 T | 2.266  | 1.24E-12 | chr:6:32648036 |
| 6 rs9273122   | 32612726 G | 2.266  | 1.24E-12 | chr:6:32648036 |
| 6 rs12192620  | 32674318 A | 3.056  | 1.25E-12 | chr:6:32648036 |
| 6 rs28371271  | 32674343 A | 3.056  | 1.25E-12 | chr:6:32648036 |
| 6 rs17843676  | 32621759 G | 2.156  | 1.27E-12 | chr:6:32648036 |
| 6 rs75237145  | 32594295 T | 0.3296 | 1.30E-12 | chr:6:32648036 |
| 6 rs9272618   | 32607927 T | 2.48   | 1.34E-12 | chr:6:32648036 |
| 6 rs2114435   | 32242838 G | 3.316  | 1.34E-12 | chr:6:32648036 |
| 6 rs372332783 | 32603074 T | 4.504  | 1.34E-12 | chr:6:32648036 |
| 6 rs1065047   | 32611260 G | 3.233  | 1.35E-12 | chr:6:32648036 |
| 6 rs1065048   | 32611265 T | 3.233  | 1.35E-12 | chr:6:32648036 |
| 6 rs1063345   | 32627976 A | 2.587  | 1.35E-12 | chr:6:32648036 |
| 6 rs534490668 | 32433399 A | 0.317  | 1.36E-12 | chr:6:32648036 |
| 6 rs6931740   | 32647469 G | 0.3681 | 1.37E-12 | chr:6:32648036 |
| 6 rs9273082   | 32612339 T | 2.216  | 1.38E-12 | chr:6:32648036 |
| 6 rs536081339 | 32600597 T | 4.044  | 1.38E-12 | chr:6:32648036 |
| 6 rs9276448   | 32715629 G | 3.137  | 1.39E-12 | chr:6:32648036 |
| 6 rs116707510 | 32605552 C | 4.881  | 1.39E-12 | chr:6:32648036 |
| 6 rs17612893  | 32620836 T | 2.148  | 1.42E-12 | chr:6:32648036 |
| 6 rs9272031   | 32598779 C | 0.3263 | 1.43E-12 | chr:6:32648036 |
| 6 rs12722069  | 32609231 G | 4.097  | 1.44E-12 | chr:6:32648036 |
| 6 rs3207985   | 32609227 C | 4.097  | 1.44E-12 | chr:6:32648036 |
| 6 rs563316064 | 32602809 C | 4.323  | 1.47E-12 | chr:6:32648036 |
| 6 rs575430623 | 32602810 T | 4.323  | 1.47E-12 | chr:6:32648036 |
| 6 rs9273218   | 32613756 A | 2.16   | 1.51E-12 | chr:6:32648036 |
| 6 rs9273220   | 32613759 T | 2.16   | 1.51E-12 | chr:6:32648036 |
| 6 rs9274544   | 32634699 A | 2.383  | 1.52E-12 | chr:6:32648036 |
| 6 rs9274545   | 32634702 C | 2.383  | 1.52E-12 | chr:6:32648036 |
| 6 rs12527746  | 32620237 A | 3.942  | 1.54E-12 | chr:6:32648036 |
| 6 rs114598250 | 32605458 T | 4.727  | 1.54E-12 | chr:6:32648036 |
| 6 rs567798325 | 32605450 C | 4.727  | 1.54E-12 | chr:6:32648036 |
| 6 rs9273066   | 32612208 A | 2.331  | 1.55E-12 | chr:6:32648036 |
| 6 rs9271929   | 32596650 C | 0.3151 | 1.57E-12 | chr:6:32648036 |

|               |            |        |          |                |
|---------------|------------|--------|----------|----------------|
| 6 rs9274554   | 32634870 G | 2.335  | 1.60E-12 | chr:6:32648036 |
| 6 rs9272798   | 32610574 T | 2.456  | 1.60E-12 | chr:6:32648036 |
| 6 rs9272799   | 32610576 T | 2.456  | 1.60E-12 | chr:6:32648036 |
| 6 rs9272800   | 32610581 G | 2.456  | 1.60E-12 | chr:6:32648036 |
| 6 rs9272801   | 32610584 C | 2.456  | 1.60E-12 | chr:6:32648036 |
| 6 rs28383269  | 32585995 C | 4.697  | 1.63E-12 | chr:6:32648036 |
| 6 rs281863631 | 32630761 T | 2.353  | 1.64E-12 | chr:6:32648036 |
| 6 rs367728179 | 32600771 G | 3.813  | 1.66E-12 | chr:6:32648036 |
| 6 rs9271957   | 32597335 C | 0.3202 | 1.69E-12 | chr:6:32648036 |
| 6 rs28362367  | 32590364 T | 4.02   | 1.70E-12 | chr:6:32648036 |
| 6 rs116230912 | 32601690 G | 4.468  | 1.71E-12 | chr:6:32648036 |
| 6 rs9271854   | 32595118 A | 0.3293 | 1.72E-12 | chr:6:32648036 |
| 6 rs9271855   | 32595119 C | 0.3293 | 1.72E-12 | chr:6:32648036 |
| 6 rs9271856   | 32595120 A | 0.3293 | 1.72E-12 | chr:6:32648036 |
| 6 rs139455771 | 32631775 T | 4.323  | 1.75E-12 | chr:6:32648036 |
| 6 rs9272032   | 32598782 G | 0.3286 | 1.80E-12 | chr:6:32648036 |
| 6 rs146406015 | 32598870 T | 4.021  | 1.83E-12 | chr:6:32648036 |
| 6 rs9272135   | 32600723 A | 0.3249 | 1.84E-12 | chr:6:32648036 |
| 6 rs9271752   | 32593868 C | 2.274  | 1.85E-12 | chr:6:32648036 |
| 6 rs9269079   | 32440910 T | 0.3162 | 1.94E-12 | chr:6:32648036 |
| 6 rs9271951   | 32597172 A | 0.3271 | 1.94E-12 | chr:6:32648036 |
| 6 rs9273083   | 32612343 C | 2.202  | 1.94E-12 | chr:6:32648036 |
| 6 rs58879393  | 32903733 T | 5.584  | 1.95E-12 | chr:6:32648036 |
| 6 rs116607676 | 32604139 A | 4.591  | 1.96E-12 | chr:6:32648036 |
| 6 rs9276461   | 32716167 A | 3.062  | 1.97E-12 | chr:6:32648036 |
| 6 rs9276462   | 32716170 C | 3.062  | 1.97E-12 | chr:6:32648036 |
| 6 rs9276463   | 32716181 C | 3.062  | 1.97E-12 | chr:6:32648036 |
| 6 rs9276464   | 32716294 T | 3.062  | 1.97E-12 | chr:6:32648036 |
| 6 rs9276465   | 32716409 G | 3.062  | 1.97E-12 | chr:6:32648036 |
| 6 rs9271932   | 32596714 C | 0.3268 | 1.99E-12 | chr:6:32648036 |
| 6 rs9271933   | 32596717 A | 0.3268 | 1.99E-12 | chr:6:32648036 |
| 6 rs9273310   | 32622954 A | 2.633  | 2.00E-12 | chr:6:32648036 |
| 6 rs4642463   | 32721783 T | 3.07   | 2.03E-12 | chr:6:32648036 |
| 6 rs763028    | 32721484 A | 3.07   | 2.03E-12 | chr:6:32648036 |
| 6 rs763029    | 32721174 C | 3.07   | 2.03E-12 | chr:6:32648036 |
| 6 rs7757475   | 32724499 C | 3.07   | 2.03E-12 | chr:6:32648036 |
| 6 rs7774929   | 32724147 A | 3.07   | 2.03E-12 | chr:6:32648036 |
| 6 rs7774954   | 32724189 A | 3.07   | 2.03E-12 | chr:6:32648036 |
| 6 rs7774973   | 32724267 G | 3.07   | 2.03E-12 | chr:6:32648036 |
| 6 rs7775664   | 32724447 C | 3.07   | 2.03E-12 | chr:6:32648036 |
| 6 rs9276545   | 32722020 T | 3.07   | 2.03E-12 | chr:6:32648036 |
| 6 rs9276554   | 32722702 T | 3.07   | 2.03E-12 | chr:6:32648036 |
| 6 rs9273397   | 32627109 G | 2.275  | 2.04E-12 | chr:6:32648036 |

|               |            |        |          |                |
|---------------|------------|--------|----------|----------------|
| 6 rs9273187   | 32613376 T | 4.035  | 2.07E-12 | chr:6:32648036 |
| 6 rs17843603  | 32620241 A | 2.415  | 2.08E-12 | chr:6:32648036 |
| 6 rs77639852  | 32601094 T | 3.734  | 2.11E-12 | chr:6:32648036 |
| 6 rs142901825 | 32713602 C | 7.792  | 2.14E-12 | chr:6:32648036 |
| 6 rs80235202  | 32503831 G | 4.291  | 2.15E-12 | chr:6:32648036 |
| 6 rs187142834 | 32643333 A | 4.22   | 2.17E-12 | chr:6:32648036 |
| 6 rs28383267  | 32585978 G | 4.703  | 2.20E-12 | chr:6:32648036 |
| 6 rs375608727 | 32608735 G | 4.243  | 2.22E-12 | chr:6:32648036 |
| 6 rs7453649   | 32440160 T | 0.3125 | 2.27E-12 | chr:6:32648036 |
| 6 rs9271720   | 32593507 A | 0.3094 | 2.30E-12 | chr:6:32648036 |
| 6 rs9272007   | 32598038 T | 0.3252 | 2.31E-12 | chr:6:32648036 |
| 6 rs9272008   | 32598042 A | 0.3252 | 2.31E-12 | chr:6:32648036 |
| 6 rs9273074   | 32612287 G | 2.214  | 2.31E-12 | chr:6:32648036 |
| 6 rs9273075   | 32612288 G | 2.214  | 2.31E-12 | chr:6:32648036 |
| 6 rs9269109   | 32443266 T | 0.3174 | 2.34E-12 | chr:6:32648036 |
| 6 rs117055012 | 32602628 G | 4.358  | 2.35E-12 | chr:6:32648036 |
| 6 rs9268881   | 32431606 T | 0.3148 | 2.36E-12 | chr:6:32648036 |
| 6 rs9268883   | 32431638 T | 0.3148 | 2.36E-12 | chr:6:32648036 |
| 6 rs17612900  | 32620838 C | 2.128  | 2.40E-12 | chr:6:32648036 |
| 6 rs9273396   | 32627105 A | 2.27   | 2.42E-12 | chr:6:32648036 |
| 6 rs6457530   | 32248176 T | 2.803  | 2.45E-12 | chr:6:32648036 |
| 6 rs7757760   | 32247710 G | 2.803  | 2.45E-12 | chr:6:32648036 |
| 6 rs7776041   | 32247771 A | 2.803  | 2.45E-12 | chr:6:32648036 |
| 6 rs9268109   | 32247505 T | 2.803  | 2.45E-12 | chr:6:32648036 |
| 6 rs9275057   | 32648253 G | 2.667  | 2.54E-12 | chr:6:32648036 |
| 6 rs9268852   | 32429594 A | 0.3164 | 2.59E-12 | chr:6:32648036 |
| 6 rs115717621 | 32603163 T | 4.38   | 2.61E-12 | chr:6:32648036 |
| 6 rs185234644 | 32514792 C | 5.995  | 2.66E-12 | chr:6:32648036 |
| 6 rs9274583   | 32635361 A | 2.463  | 2.71E-12 | chr:6:32648036 |
| 6 rs77701583  | 32435699 C | 0.333  | 2.74E-12 | chr:6:32648036 |
| 6 rs4548006   | 32717604 A | 3.047  | 2.75E-12 | chr:6:32648036 |
| 6 rs4585553   | 32716736 G | 3.047  | 2.75E-12 | chr:6:32648036 |
| 6 rs9276453   | 32715775 C | 3.047  | 2.75E-12 | chr:6:32648036 |
| 6 rs9271718   | 32593465 T | 2.737  | 2.77E-12 | chr:6:32648036 |
| 6 rs9276488   | 32718602 G | 3.046  | 2.82E-12 | chr:6:32648036 |
| 6 rs9276489   | 32718620 T | 3.046  | 2.82E-12 | chr:6:32648036 |
| 6 rs9273069   | 32612233 T | 2.211  | 2.87E-12 | chr:6:32648036 |
| 6 rs2647011   | 32661915 C | 0.3048 | 2.88E-12 | chr:6:32648036 |
| 6 rs9271388   | 32587426 A | 0.304  | 2.92E-12 | chr:6:32648036 |
| 6 rs558652356 | 32608548 A | 4.347  | 2.92E-12 | chr:6:32648036 |
| 6 rs17612907  | 32620852 A | 2.111  | 2.99E-12 | chr:6:32648036 |
| 6 rs7755212   | 32441408 C | 0.318  | 3.00E-12 | chr:6:32648036 |
| 6 rs9273156   | 32613050 A | 2.306  | 3.07E-12 | chr:6:32648036 |

|               |            |        |          |                |
|---------------|------------|--------|----------|----------------|
| 6 rs9273158   | 32613062 C | 2.305  | 3.15E-12 | chr:6:32648036 |
| 6 rs527369852 | 32453191 C | 3.112  | 3.16E-12 | chr:6:32648036 |
| 6 rs548656751 | 32601705 T | 4.39   | 3.20E-12 | chr:6:32648036 |
| 6 rs17843591  | 32615856 C | 2.146  | 3.23E-12 | chr:6:32648036 |
| 6 rs9271717   | 32593453 G | 0.33   | 3.24E-12 | chr:6:32648036 |
| 6 rs17612683  | 32615877 G | 2.135  | 3.29E-12 | chr:6:32648036 |
| 6 rs17612704  | 32615921 T | 2.708  | 3.32E-12 | chr:6:32648036 |
| 6 rs9274546   | 32634736 T | 2.374  | 3.35E-12 | chr:6:32648036 |
| 6 rs9269042   | 32438387 C | 0.3192 | 3.35E-12 | chr:6:32648036 |
| 6 rs9272970   | 32611301 T | 2.894  | 3.37E-12 | chr:6:32648036 |
| 6 rs9268209   | 32280620 C | 3.316  | 3.38E-12 | chr:6:32648036 |
| 6 rs2022544   | 32321004 T | 4.374  | 3.38E-12 | chr:6:32648036 |
| 6 rs2073048   | 32335433 A | 4.374  | 3.38E-12 | chr:6:32648036 |
| 6 rs2078290   | 32312655 A | 4.374  | 3.38E-12 | chr:6:32648036 |
| 6 rs55967581  | 32315496 C | 4.374  | 3.38E-12 | chr:6:32648036 |
| 6 rs6457549   | 32326844 G | 4.374  | 3.38E-12 | chr:6:32648036 |
| 6 rs6457553   | 32330695 G | 4.374  | 3.38E-12 | chr:6:32648036 |
| 6 rs6907757   | 32325358 T | 4.374  | 3.38E-12 | chr:6:32648036 |
| 6 rs7770048   | 32334754 T | 4.374  | 3.38E-12 | chr:6:32648036 |
| 6 rs10947251  | 32261952 A | 4.611  | 3.40E-12 | chr:6:32648036 |
| 6 rs11751697  | 32266425 T | 4.611  | 3.40E-12 | chr:6:32648036 |
| 6 rs11755505  | 32277479 T | 4.611  | 3.40E-12 | chr:6:32648036 |
| 6 rs11759575  | 32269848 T | 4.611  | 3.40E-12 | chr:6:32648036 |
| 6 rs11759612  | 32270009 T | 4.611  | 3.40E-12 | chr:6:32648036 |
| 6 rs28394230  | 32294069 A | 4.611  | 3.40E-12 | chr:6:32648036 |
| 6 rs3749967   | 32283844 C | 4.611  | 3.40E-12 | chr:6:32648036 |
| 6 rs529358641 | 32225729 A | 4.611  | 3.40E-12 | chr:6:32648036 |
| 6 rs9271691   | 32593006 G | 0.3344 | 3.40E-12 | chr:6:32648036 |
| 6 rs9271692   | 32593010 A | 0.3344 | 3.40E-12 | chr:6:32648036 |
| 6 rs9501173   | 32279902 A | 4.611  | 3.40E-12 | chr:6:32648036 |
| 6 rs9501174   | 32283014 A | 4.611  | 3.40E-12 | chr:6:32648036 |
| 6 rs9501176   | 32286944 C | 4.611  | 3.40E-12 | chr:6:32648036 |
| 6 rs9501178   | 32292917 C | 4.611  | 3.40E-12 | chr:6:32648036 |
| 6 rs980605    | 32289662 T | 4.611  | 3.40E-12 | chr:6:32648036 |
| 6 rs9268912   | 32432509 C | 0.3193 | 3.40E-12 | chr:6:32648036 |
| 6 rs4351242   | 32717722 T | 3.033  | 3.42E-12 | chr:6:32648036 |
| 6 rs4370403   | 32717515 A | 3.033  | 3.42E-12 | chr:6:32648036 |
| 6 rs4394272   | 32717771 T | 3.033  | 3.42E-12 | chr:6:32648036 |
| 6 rs4415152   | 32717024 C | 3.033  | 3.42E-12 | chr:6:32648036 |
| 6 rs5014418   | 32719381 C | 3.033  | 3.42E-12 | chr:6:32648036 |
| 6 rs5017093   | 32717339 A | 3.033  | 3.42E-12 | chr:6:32648036 |
| 6 rs555798526 | 32718907 T | 3.033  | 3.42E-12 | chr:6:32648036 |
| 6 rs9276436   | 32714083 C | 3.033  | 3.42E-12 | chr:6:32648036 |



|               |            |        |          |                |
|---------------|------------|--------|----------|----------------|
| 6 rs9276438   | 32714516 A | 3.033  | 3.42E-12 | chr:6:32648036 |
| 6 rs9276439   | 32714603 T | 3.033  | 3.42E-12 | chr:6:32648036 |
| 6 rs9276442   | 32714901 T | 3.033  | 3.42E-12 | chr:6:32648036 |
| 6 rs9276446   | 32715448 G | 3.033  | 3.42E-12 | chr:6:32648036 |
| 6 rs9276449   | 32715653 T | 3.033  | 3.42E-12 | chr:6:32648036 |
| 6 rs9276450   | 32715682 A | 3.033  | 3.42E-12 | chr:6:32648036 |
| 6 rs9276451   | 32715685 T | 3.033  | 3.42E-12 | chr:6:32648036 |
| 6 rs9276452   | 32715722 G | 3.033  | 3.42E-12 | chr:6:32648036 |
| 6 rs9276455   | 32715933 A | 3.033  | 3.42E-12 | chr:6:32648036 |
| 6 rs9276457   | 32715993 T | 3.033  | 3.42E-12 | chr:6:32648036 |
| 6 rs9276458   | 32716000 A | 3.033  | 3.42E-12 | chr:6:32648036 |
| 6 rs9276459   | 32716034 C | 3.033  | 3.42E-12 | chr:6:32648036 |
| 6 rs9276460   | 32716127 G | 3.033  | 3.42E-12 | chr:6:32648036 |
| 6 rs9276472   | 32717224 G | 3.033  | 3.42E-12 | chr:6:32648036 |
| 6 rs9276483   | 32718329 C | 3.033  | 3.42E-12 | chr:6:32648036 |
| 6 rs115032171 | 32501241 G | 7.121  | 3.43E-12 | chr:6:32648036 |
| 6 rs9268932   | 32433290 T | 0.3194 | 3.56E-12 | chr:6:32648036 |
| 6 rs17843582  | 32615651 A | 2.37   | 3.56E-12 | chr:6:32648036 |
| 6 rs17843583  | 32615652 C | 2.37   | 3.56E-12 | chr:6:32648036 |
| 6 rs2858879   | 32719117 G | 3.005  | 3.56E-12 | chr:6:32648036 |
| 6 rs9272606   | 32607729 T | 2.501  | 3.64E-12 | chr:6:32648036 |
| 6 rs9274584   | 32635365 A | 2.421  | 3.69E-12 | chr:6:32648036 |
| 6 rs9273112   | 32612648 T | 2.218  | 3.72E-12 | chr:6:32648036 |
| 6 rs2647032   | 32629905 C | 3.713  | 3.77E-12 | chr:6:32648036 |
| 6 rs17843581  | 32615638 C | 2.298  | 3.78E-12 | chr:6:32648036 |
| 6 rs9271711   | 32593430 T | 0.33   | 3.78E-12 | chr:6:32648036 |
| 6 rs9271714   | 32593434 G | 0.33   | 3.78E-12 | chr:6:32648036 |
| 6 rs189546613 | 32601735 C | 4.424  | 3.78E-12 | chr:6:32648036 |
| 6 rs7739357   | 32441641 A | 0.3207 | 3.80E-12 | chr:6:32648036 |
| 6 rs7773030   | 32441396 G | 0.3195 | 3.80E-12 | chr:6:32648036 |
| 6 rs9268863   | 32430289 A | 0.3195 | 3.80E-12 | chr:6:32648036 |
| 6 rs9268888   | 32431867 G | 0.3195 | 3.80E-12 | chr:6:32648036 |
| 6 rs9268979   | 32435044 T | 0.3195 | 3.80E-12 | chr:6:32648036 |
| 6 rs9269082   | 32441178 A | 0.3195 | 3.80E-12 | chr:6:32648036 |
| 6 rs9269084   | 32441199 A | 0.3195 | 3.80E-12 | chr:6:32648036 |
| 6 rs9269086   | 32441268 G | 0.3195 | 3.80E-12 | chr:6:32648036 |
| 6 rs7749242   | 32449030 A | 0.2959 | 3.89E-12 | chr:6:32648036 |
| 6 rs9271947   | 32597095 T | 0.3199 | 3.90E-12 | chr:6:32648036 |
| 6 rs28724238  | 32629066 C | 8.668  | 3.95E-12 | chr:6:32648036 |
| 6 rs17612852  | 32620572 G | 0.3135 | 3.99E-12 | chr:6:32648036 |
| 6 rs9271653   | 32592556 C | 0.3269 | 4.02E-12 | chr:6:32648036 |
| 6 rs113208447 | 32503314 A | 5.261  | 4.05E-12 | chr:6:32648036 |
| 6 rs9272004   | 32597964 A | 0.3299 | 4.12E-12 | chr:6:32648036 |

|               |            |        |          |                |
|---------------|------------|--------|----------|----------------|
| 6 rs4959031   | 32597411 T | 3.558  | 4.16E-12 | chr:6:32648036 |
| 6 rs9273113   | 32612655 G | 2.224  | 4.34E-12 | chr:6:32648036 |
| 6 rs5014413   | 32719502 G | 2.99   | 4.35E-12 | chr:6:32648036 |
| 6 rs9274587   | 32635377 A | 2.429  | 4.36E-12 | chr:6:32648036 |
| 6 rs1041885   | 32412809 A | 3.803  | 4.42E-12 | chr:6:32648036 |
| 6 rs1051336   | 32412592 A | 3.803  | 4.42E-12 | chr:6:32648036 |
| 6 rs1131541   | 32412566 A | 3.803  | 4.42E-12 | chr:6:32648036 |
| 6 rs3129884   | 32410210 C | 3.803  | 4.42E-12 | chr:6:32648036 |
| 6 rs3129885   | 32410215 C | 3.803  | 4.42E-12 | chr:6:32648036 |
| 6 rs3135386   | 32415426 G | 3.803  | 4.42E-12 | chr:6:32648036 |
| 6 rs7762077   | 32416467 A | 3.803  | 4.42E-12 | chr:6:32648036 |
| 6 rs9272562   | 32607151 G | 2.252  | 4.43E-12 | chr:6:32648036 |
| 6 rs9272001   | 32597901 G | 0.3341 | 4.45E-12 | chr:6:32648036 |
| 6 rs9273146   | 32612979 T | 2.531  | 4.50E-12 | chr:6:32648036 |
| 6 rs9273147   | 32612981 G | 2.531  | 4.50E-12 | chr:6:32648036 |
| 6 rs7763192   | 32338885 G | 4.32   | 4.51E-12 | chr:6:32648036 |
| 6 rs9276497   | 32719027 A | 2.997  | 4.52E-12 | chr:6:32648036 |
| 6 rs17843592  | 32615863 G | 2.129  | 4.56E-12 | chr:6:32648036 |
| 6 rs7749057   | 32448904 G | 3.78   | 4.59E-12 | chr:6:32648036 |
| 6 rs9272015   | 32598299 A | 0.334  | 4.62E-12 | chr:6:32648036 |
| 6 rs9271715   | 32593441 T | 0.333  | 4.80E-12 | chr:6:32648036 |
| 6 rs9271716   | 32593442 G | 0.333  | 4.80E-12 | chr:6:32648036 |
| 6 rs17612697  | 32615919 A | 2.115  | 4.85E-12 | chr:6:32648036 |
| 6 rs148909685 | 32550776 T | 13.99  | 4.89E-12 | chr:6:32648036 |
| 6 rs9273230   | 32613930 A | 2.113  | 4.89E-12 | chr:6:32648036 |
| 6 rs28362132  | 32595276 T | 3.231  | 4.96E-12 | chr:6:32648036 |
| 6 rs9272712   | 32609341 T | 2.251  | 5.00E-12 | chr:6:32648036 |
| 6 rs281864453 | 32628065 G | 2.485  | 5.03E-12 | chr:6:32648036 |
| 6 rs9273176   | 32613300 A | 2.277  | 5.06E-12 | chr:6:32648036 |
| 6 rs2021905   | 32281201 G | 4.618  | 5.07E-12 | chr:6:32648036 |
| 6 rs2395254   | 32716837 C | 2.978  | 5.13E-12 | chr:6:32648036 |
| 6 rs112616809 | 32946921 T | 5.152  | 5.19E-12 | chr:6:32648036 |
| 6 rs9272138   | 32600757 A | 0.3399 | 5.25E-12 | chr:6:32648036 |
| 6 rs9272622   | 32607986 C | 2.641  | 5.34E-12 | chr:6:32648036 |
| 6 rs9276496   | 32719017 A | 2.986  | 5.35E-12 | chr:6:32648036 |
| 6 rs113536666 | 32719362 G | 2.976  | 5.41E-12 | chr:6:32648036 |
| 6 rs5014411   | 32719634 G | 2.976  | 5.41E-12 | chr:6:32648036 |
| 6 rs5014412   | 32719573 A | 2.976  | 5.41E-12 | chr:6:32648036 |
| 6 rs5014414   | 32719440 G | 2.976  | 5.41E-12 | chr:6:32648036 |
| 6 rs527659718 | 32719414 A | 2.976  | 5.41E-12 | chr:6:32648036 |
| 6 rs535308210 | 32719439 T | 2.976  | 5.41E-12 | chr:6:32648036 |
| 6 rs572884610 | 32719411 C | 2.976  | 5.41E-12 | chr:6:32648036 |
| 6 rs9276502   | 32719666 C | 2.976  | 5.41E-12 | chr:6:32648036 |

|               |            |        |          |                |
|---------------|------------|--------|----------|----------------|
| 6 rs386621302 | 32718908 C | 3.012  | 5.43E-12 | chr:6:32648036 |
| 6 rs9276484   | 32718452 G | 2.99   | 5.44E-12 | chr:6:32648036 |
| 6 rs9276485   | 32718479 T | 2.99   | 5.44E-12 | chr:6:32648036 |
| 6 rs9276486   | 32718481 C | 2.99   | 5.44E-12 | chr:6:32648036 |
| 6 rs28383453  | 32609358 T | 3.852  | 5.51E-12 | chr:6:32648036 |
| 6 rs7773182   | 32441422 T | 0.3244 | 5.61E-12 | chr:6:32648036 |
| 6 rs9272075   | 32599593 G | 0.3312 | 5.62E-12 | chr:6:32648036 |
| 6 rs2239806   | 32411307 T | 3.767  | 5.67E-12 | chr:6:32648036 |
| 6 rs116708054 | 32603761 C | 4.02   | 5.69E-12 | chr:6:32648036 |
| 6 rs3104405   | 32682308 C | 0.3019 | 5.76E-12 | chr:6:32648036 |
| 6 rs9275051   | 32648153 C | 2.405  | 5.84E-12 | chr:6:32648036 |
| 6 rs76391884  | 32604085 G | 4.338  | 5.88E-12 | chr:6:32648036 |
| 6 rs115223053 | 32602624 C | 4.221  | 5.96E-12 | chr:6:32648036 |
| 6 rs9269078   | 32440879 C | 0.3201 | 6.04E-12 | chr:6:32648036 |
| 6 rs17612690  | 32615918 C | 2.105  | 6.09E-12 | chr:6:32648036 |
| 6 rs115805770 | 32608432 T | 4.247  | 6.21E-12 | chr:6:32648036 |
| 6 rs116093550 | 32594395 G | 0.3447 | 6.24E-12 | chr:6:32648036 |
| 6 rs116361489 | 32594396 T | 0.3447 | 6.24E-12 | chr:6:32648036 |
| 6 rs76934421  | 32503722 T | 4.657  | 6.24E-12 | chr:6:32648036 |
| 6 rs2894291   | 32716827 C | 2.964  | 6.36E-12 | chr:6:32648036 |
| 6 rs6903608   | 32428285 C | 0.3036 | 6.37E-12 | chr:6:32648036 |
| 6 rs6923504   | 32428186 G | 0.3036 | 6.37E-12 | chr:6:32648036 |
| 6 rs9271954   | 32597216 C | 0.3422 | 6.41E-12 | chr:6:32648036 |
| 6 rs111365964 | 32517646 G | 5.062  | 6.52E-12 | chr:6:32648036 |
| 6 rs9268893   | 32431927 C | 0.3277 | 6.61E-12 | chr:6:32648036 |
| 6 rs9272454   | 32605525 C | 0.332  | 6.85E-12 | chr:6:32648036 |
| 6 rs9271999   | 32597832 G | 0.3403 | 6.96E-12 | chr:6:32648036 |
| 6 rs9272000   | 32597834 T | 0.3403 | 6.96E-12 | chr:6:32648036 |
| 6 rs28366362  | 32565213 C | 3.005  | 6.96E-12 | chr:6:32648036 |
| 6 rs28366352  | 32564993 C | 2.992  | 7.15E-12 | chr:6:32648036 |
| 6 rs28366353  | 32565004 G | 2.992  | 7.15E-12 | chr:6:32648036 |
| 6 rs9276487   | 32718594 A | 2.966  | 7.22E-12 | chr:6:32648036 |
| 6 rs139599717 | 32604992 T | 4.779  | 7.30E-12 | chr:6:32648036 |
| 6 rs536151678 | 32453543 G | 2.895  | 7.37E-12 | chr:6:32648036 |
| 6 rs9276491   | 32718827 G | 3.001  | 7.39E-12 | chr:6:32648036 |
| 6 rs9276492   | 32718828 T | 3.001  | 7.39E-12 | chr:6:32648036 |
| 6 rs9276493   | 32718869 G | 3.001  | 7.39E-12 | chr:6:32648036 |
| 6 rs9272151   | 32601005 G | 0.3466 | 7.39E-12 | chr:6:32648036 |
| 6 rs9272152   | 32601007 A | 0.3466 | 7.39E-12 | chr:6:32648036 |
| 6 rs9271648   | 32592358 T | 0.341  | 7.40E-12 | chr:6:32648036 |
| 6 rs9272136   | 32600730 T | 0.3402 | 7.48E-12 | chr:6:32648036 |
| 6 rs9271848   | 32595027 G | 0.3432 | 7.51E-12 | chr:6:32648036 |
| 6 rs9274286   | 32631802 A | 2.175  | 7.51E-12 | chr:6:32648036 |

|               |            |        |          |                |
|---------------|------------|--------|----------|----------------|
| 6 rs184315023 | 32599644 T | 3.035  | 7.55E-12 | chr:6:32648036 |
| 6 rs181562347 | 32601738 G | 4.225  | 7.63E-12 | chr:6:32648036 |
| 6 rs183885674 | 32601732 G | 4.225  | 7.63E-12 | chr:6:32648036 |
| 6 rs191517186 | 32606859 C | 5.001  | 7.70E-12 | chr:6:32648036 |
| 6 rs535777    | 32577633 C | 3.796  | 7.71E-12 | chr:6:32648036 |
| 6 rs9271751   | 32593857 A | 2.221  | 7.77E-12 | chr:6:32648036 |
| 6 rs9268200   | 32278670 T | 3.106  | 7.91E-12 | chr:6:32648036 |
| 6 rs9268877   | 32431147 A | 0.328  | 7.95E-12 | chr:6:32648036 |
| 6 rs9274580   | 32635345 A | 2.387  | 7.97E-12 | chr:6:32648036 |
| 6 rs9274581   | 32635347 C | 2.387  | 7.97E-12 | chr:6:32648036 |
| 6 rs9274582   | 32635348 C | 2.387  | 7.97E-12 | chr:6:32648036 |
| 6 rs9272148   | 32600980 C | 0.3485 | 8.02E-12 | chr:6:32648036 |
| 6 rs9272156   | 32601081 C | 0.3481 | 8.10E-12 | chr:6:32648036 |
| 6 rs9274592   | 32635400 G | 2.417  | 8.15E-12 | chr:6:32648036 |
| 6 rs9271768   | 32594188 T | 2.974  | 8.26E-12 | chr:6:32648036 |
| 6 rs9276437   | 32714168 G | 3.133  | 8.30E-12 | chr:6:32648036 |
| 6 rs7739375   | 32441679 A | 0.3214 | 8.33E-12 | chr:6:32648036 |
| 6 rs3129882   | 32409530 G | 0.3299 | 8.42E-12 | chr:6:32648036 |
| 6 rs1129808   | 32609312 C | 2.24   | 8.50E-12 | chr:6:32648036 |
| 6 rs9272161   | 32601139 G | 0.3472 | 8.70E-12 | chr:6:32648036 |
| 6 rs9272162   | 32601140 A | 0.3472 | 8.70E-12 | chr:6:32648036 |
| 6 rs200951960 | 32510600 G | 4.87   | 8.78E-12 | chr:6:32648036 |
| 6 rs9272633   | 32608181 G | 2.55   | 8.80E-12 | chr:6:32648036 |
| 6 rs9271931   | 32596698 G | 0.3108 | 8.85E-12 | chr:6:32648036 |
| 6 rs561918072 | 32607733 A | 4.329  | 9.03E-12 | chr:6:32648036 |
| 6 rs9274550   | 32634795 A | 2.27   | 9.21E-12 | chr:6:32648036 |
| 6 rs9272174   | 32601307 T | 0.3427 | 9.34E-12 | chr:6:32648036 |
| 6 rs7739203   | 32441555 A | 0.3303 | 9.41E-12 | chr:6:32648036 |
| 6 rs4959110   | 32597599 C | 3.99   | 9.42E-12 | chr:6:32648036 |
| 6 rs9272153   | 32601018 C | 0.3498 | 9.48E-12 | chr:6:32648036 |
| 6 rs9272679   | 32608931 C | 3.425  | 9.48E-12 | chr:6:32648036 |
| 6 rs7600      | 32610769 A | 0.3676 | 9.54E-12 | chr:6:32648036 |
| 6 rs9406389   | 32517764 C | 7.983  | 9.56E-12 | chr:6:32648036 |
| 6 rs9274551   | 32634834 T | 2.271  | 9.76E-12 | chr:6:32648036 |
| 6 rs9274552   | 32634838 C | 2.271  | 9.76E-12 | chr:6:32648036 |
| 6 rs9269144   | 32445519 A | 0.3058 | 9.83E-12 | chr:6:32648036 |
| 6 rs115124923 | 32510482 A | 4.937  | 9.85E-12 | chr:6:32648036 |
| 6 rs9501179   | 32292993 A | 4.38   | 9.91E-12 | chr:6:32648036 |
| 6 rs9272522   | 32606490 A | 2.528  | 1.01E-11 | chr:6:32648036 |
| 6 rs6919855   | 32429011 C | 0.308  | 1.03E-11 | chr:6:32648036 |
| 6 rs9272150   | 32601000 A | 0.3507 | 1.03E-11 | chr:6:32648036 |
| 6 rs9272158   | 32601122 A | 0.3489 | 1.04E-11 | chr:6:32648036 |
| 6 rs3188642   | 32610553 A | 3.506  | 1.06E-11 | chr:6:32648036 |

|               |            |        |          |                |
|---------------|------------|--------|----------|----------------|
| 6 rs28383182  | 32571811 A | 3.25   | 1.07E-11 | chr:6:32648036 |
| 6 rs9273119   | 32612699 A | 2.188  | 1.07E-11 | chr:6:32648036 |
| 6 rs9272128   | 32600601 A | 0.347  | 1.08E-11 | chr:6:32648036 |
| 6 rs9272129   | 32600602 T | 0.347  | 1.08E-11 | chr:6:32648036 |
| 6 rs9272163   | 32601146 T | 0.3496 | 1.11E-11 | chr:6:32648036 |
| 6 rs111374340 | 32509477 G | 5.18   | 1.13E-11 | chr:6:32648036 |
| 6 rs9271858   | 32595223 G | 0.3391 | 1.16E-11 | chr:6:32648036 |
| 6 rs9271859   | 32595231 G | 0.3391 | 1.16E-11 | chr:6:32648036 |
| 6 rs574901905 | 32452501 C | 4.321  | 1.17E-11 | chr:6:32648036 |
| 6 rs9272037   | 32598844 C | 0.3485 | 1.19E-11 | chr:6:32648036 |
| 6 rs2856687   | 32654822 T | 0.2854 | 1.21E-11 | chr:6:32648036 |
| 6 rs9273114   | 32612664 G | 2.179  | 1.22E-11 | chr:6:32648036 |
| 6 rs9271843   | 32594957 T | 0.2592 | 1.24E-11 | chr:6:32648036 |
| 6 rs9271794   | 32594855 A | 0.3048 | 1.27E-11 | chr:6:32648036 |
| 6 rs28393315  | 32603177 G | 3.456  | 1.30E-11 | chr:6:32648036 |
| 6 rs9272508   | 32606325 A | 2.292  | 1.30E-11 | chr:6:32648036 |
| 6 rs9271746   | 32593804 C | 2.204  | 1.32E-11 | chr:6:32648036 |
| 6 rs7453703   | 32440158 A | 0.3218 | 1.35E-11 | chr:6:32648036 |
| 6 rs75074972  | 32607264 G | 5.302  | 1.37E-11 | chr:6:32648036 |
| 6 rs28366351  | 32564990 A | 2.939  | 1.37E-11 | chr:6:32648036 |
| 6 rs9272521   | 32606479 A | 2.512  | 1.39E-11 | chr:6:32648036 |
| 6 rs9268882   | 32431623 T | 0.3075 | 1.39E-11 | chr:6:32648036 |
| 6 rs2894292   | 32721656 A | 2.924  | 1.39E-11 | chr:6:32648036 |
| 6 rs2858317   | 32662280 C | 0.3171 | 1.40E-11 | chr:6:32648036 |
| 6 rs9273554   | 32628941 C | 6.324  | 1.46E-11 | chr:6:32648036 |
| 6 rs62405567  | 32453372 G | 3.165  | 1.50E-11 | chr:6:32648036 |
| 6 rs9271846   | 32594980 A | 0.263  | 1.50E-11 | chr:6:32648036 |
| 6 rs72848212  | 32594898 T | 0.2887 | 1.51E-11 | chr:6:32648036 |
| 6 rs373880870 | 32599763 T | 2.72   | 1.52E-11 | chr:6:32648036 |
| 6 rs9272137   | 32600738 C | 0.3499 | 1.52E-11 | chr:6:32648036 |
| 6 rs9273407   | 32627211 C | 2.288  | 1.54E-11 | chr:6:32648036 |
| 6 rs9269135   | 32445030 T | 0.3106 | 1.57E-11 | chr:6:32648036 |
| 6 rs9273117   | 32612688 G | 2.172  | 1.59E-11 | chr:6:32648036 |
| 6 rs181107089 | 32599677 T | 2.922  | 1.60E-11 | chr:6:32648036 |
| 6 rs187272234 | 32599617 C | 2.995  | 1.61E-11 | chr:6:32648036 |
| 6 rs12191360  | 32451361 C | 0.3095 | 1.62E-11 | chr:6:32648036 |
| 6 rs9260      | 32610461 A | 0.2747 | 1.62E-11 | chr:6:32648036 |
| 6 rs9269080   | 32440969 G | 0.335  | 1.73E-11 | chr:6:32648036 |
| 6 rs9276513   | 32720144 G | 2.907  | 1.75E-11 | chr:6:32648036 |
| 6 rs9271842   | 32594953 A | 0.2686 | 1.76E-11 | chr:6:32648036 |
| 6 rs138238823 | 32598837 C | 3.436  | 1.78E-11 | chr:6:32648036 |
| 6 rs138816958 | 32598798 C | 3.436  | 1.78E-11 | chr:6:32648036 |
| 6 rs9269143   | 32445499 T | 2.835  | 1.79E-11 | chr:6:32648036 |

|               |            |        |          |                |
|---------------|------------|--------|----------|----------------|
| 6 rs9271442   | 32588260 A | 3.03   | 1.82E-11 | chr:6:32648036 |
| 6 rs9271382   | 32587375 G | 0.3315 | 1.85E-11 | chr:6:32648036 |
| 6 rs2856670   | 32662904 G | 0.2846 | 1.86E-11 | chr:6:32648036 |
| 6 rs9276508   | 32720004 C | 2.903  | 1.86E-11 | chr:6:32648036 |
| 6 rs9276509   | 32720005 A | 2.903  | 1.86E-11 | chr:6:32648036 |
| 6 rs9276511   | 32720037 G | 2.903  | 1.86E-11 | chr:6:32648036 |
| 6 rs2858318   | 32661302 T | 0.2876 | 1.89E-11 | chr:6:32648036 |
| 6 rs2858319   | 32661294 T | 0.2876 | 1.89E-11 | chr:6:32648036 |
| 6 rs9268847   | 32429277 G | 0.3244 | 1.90E-11 | chr:6:32648036 |
| 6 rs9271962   | 32597434 C | 0.3514 | 1.91E-11 | chr:6:32648036 |
| 6 rs9273404   | 32627160 G | 2.129  | 1.93E-11 | chr:6:32648036 |
| 6 rs2647020   | 32663256 T | 0.2847 | 1.95E-11 | chr:6:32648036 |
| 6 rs2647021   | 32663151 T | 0.2847 | 1.95E-11 | chr:6:32648036 |
| 6 rs151304730 | 32554227 A | 7.475  | 1.97E-11 | chr:6:32648036 |
| 6 rs9269072   | 32440508 G | 0.3228 | 1.98E-11 | chr:6:32648036 |
| 6 rs9271788   | 32594734 G | 0.3469 | 1.99E-11 | chr:6:32648036 |
| 6 rs2647080   | 32566646 A | 2.939  | 1.99E-11 | chr:6:32648036 |
| 6 rs28752490  | 32567897 A | 2.939  | 1.99E-11 | chr:6:32648036 |
| 6 rs75783927  | 32566712 C | 2.939  | 1.99E-11 | chr:6:32648036 |
| 6 rs2646998   | 32665367 T | 0.2846 | 1.99E-11 | chr:6:32648036 |
| 6 rs2647001   | 32665086 C | 0.2846 | 1.99E-11 | chr:6:32648036 |
| 6 rs2647003   | 32664880 T | 0.2846 | 1.99E-11 | chr:6:32648036 |
| 6 rs2647013   | 32664284 C | 0.2846 | 1.99E-11 | chr:6:32648036 |
| 6 rs2647016   | 32663925 C | 0.2846 | 1.99E-11 | chr:6:32648036 |
| 6 rs2647018   | 32663447 T | 0.2846 | 1.99E-11 | chr:6:32648036 |
| 6 rs2647022   | 32663004 A | 0.2846 | 1.99E-11 | chr:6:32648036 |
| 6 rs2856666   | 32665285 G | 0.2846 | 1.99E-11 | chr:6:32648036 |
| 6 rs2856668   | 32663606 G | 0.2846 | 1.99E-11 | chr:6:32648036 |
| 6 rs2856727   | 32666397 C | 0.2846 | 1.99E-11 | chr:6:32648036 |
| 6 rs2858324   | 32660375 A | 0.2846 | 1.99E-11 | chr:6:32648036 |
| 6 rs9275212   | 32658327 G | 0.2846 | 1.99E-11 | chr:6:32648036 |
| 6 rs528827703 | 32452406 G | 3.529  | 2.00E-11 | chr:6:32648036 |
| 6 rs9276518   | 32720385 G | 2.896  | 2.02E-11 | chr:6:32648036 |
| 6 rs9276520   | 32720415 T | 2.896  | 2.02E-11 | chr:6:32648036 |
| 6 rs9276549   | 32722242 T | 2.895  | 2.04E-11 | chr:6:32648036 |
| 6 rs17612669  | 32615816 A | 2.161  | 2.05E-11 | chr:6:32648036 |
| 6 rs3135385   | 32416366 A | 0.3107 | 2.08E-11 | chr:6:32648036 |
| 6 rs7382085   | 32414420 G | 0.3107 | 2.08E-11 | chr:6:32648036 |
| 6 rs7382354   | 32414639 G | 0.3107 | 2.08E-11 | chr:6:32648036 |
| 6 rs28752496  | 32568321 C | 2.87   | 2.08E-11 | chr:6:32648036 |
| 6 rs536493456 | 32674838 G | 0.2867 | 2.10E-11 | chr:6:32648036 |
| 6 rs9271847   | 32594993 G | 0.2882 | 2.10E-11 | chr:6:32648036 |
| 6 rs9268671   | 32414290 A | 0.313  | 2.14E-11 | chr:6:32648036 |

|              |            |        |          |                |
|--------------|------------|--------|----------|----------------|
| 6 rs9273551  | 32628913 T | 6.538  | 2.16E-11 | chr:6:32648036 |
| 6 rs9273552  | 32628916 A | 6.538  | 2.16E-11 | chr:6:32648036 |
| 6 rs9271970  | 32597550 A | 0.342  | 2.18E-11 | chr:6:32648036 |
| 6 rs9274349  | 32632408 T | 2.181  | 2.19E-11 | chr:6:32648036 |
| 6 rs9269175  | 32447451 G | 0.3132 | 2.19E-11 | chr:6:32648036 |
| 6 rs9269176  | 32447545 T | 0.3132 | 2.19E-11 | chr:6:32648036 |
| 6 rs9269178  | 32447598 A | 0.3132 | 2.19E-11 | chr:6:32648036 |
| 6 rs482162   | 32576019 C | 2.95   | 2.20E-11 | chr:6:32648036 |
| 6 rs482205   | 32576009 G | 2.95   | 2.20E-11 | chr:6:32648036 |
| 6 rs9272084  | 32599680 T | 0.3294 | 2.21E-11 | chr:6:32648036 |
| 6 rs9271968  | 32597529 G | 0.3378 | 2.21E-11 | chr:6:32648036 |
| 6 rs75016307 | 32435767 C | 0.3591 | 2.22E-11 | chr:6:32648036 |
| 6 rs9273115  | 32612672 A | 2.167  | 2.24E-11 | chr:6:32648036 |
| 6 rs2894261  | 32447769 C | 0.3132 | 2.27E-11 | chr:6:32648036 |
| 6 rs2894262  | 32447816 A | 0.3132 | 2.27E-11 | chr:6:32648036 |
| 6 rs9268880  | 32431358 T | 0.3132 | 2.27E-11 | chr:6:32648036 |
| 6 rs9269110  | 32443269 A | 0.3132 | 2.27E-11 | chr:6:32648036 |
| 6 rs9269114  | 32443425 A | 0.3132 | 2.27E-11 | chr:6:32648036 |
| 6 rs9269157  | 32446483 T | 0.3132 | 2.27E-11 | chr:6:32648036 |
| 6 rs9269172  | 32447154 C | 0.3132 | 2.27E-11 | chr:6:32648036 |
| 6 rs9269174  | 32447364 T | 0.3132 | 2.27E-11 | chr:6:32648036 |
| 6 rs9273409  | 32627235 T | 2.283  | 2.29E-11 | chr:6:32648036 |
| 6 rs28383310 | 32586930 A | 3.617  | 2.30E-11 | chr:6:32648036 |
| 6 rs4470886  | 32721020 T | 2.886  | 2.35E-11 | chr:6:32648036 |
| 6 rs4498415  | 32720986 T | 2.886  | 2.35E-11 | chr:6:32648036 |
| 6 rs7774644  | 32724075 G | 2.886  | 2.35E-11 | chr:6:32648036 |
| 6 rs9276516  | 32720302 C | 2.886  | 2.35E-11 | chr:6:32648036 |
| 6 rs9276517  | 32720366 C | 2.886  | 2.35E-11 | chr:6:32648036 |
| 6 rs9276526  | 32720589 T | 2.886  | 2.35E-11 | chr:6:32648036 |
| 6 rs9276527  | 32720637 A | 2.886  | 2.35E-11 | chr:6:32648036 |
| 6 rs9276528  | 32720934 T | 2.886  | 2.35E-11 | chr:6:32648036 |
| 6 rs9276529  | 32720971 T | 2.886  | 2.35E-11 | chr:6:32648036 |
| 6 rs9276546  | 32722129 T | 2.886  | 2.35E-11 | chr:6:32648036 |
| 6 rs9276547  | 32722155 A | 2.886  | 2.35E-11 | chr:6:32648036 |
| 6 rs9276548  | 32722220 C | 2.886  | 2.35E-11 | chr:6:32648036 |
| 6 rs17203846 | 32555989 A | 3.637  | 2.37E-11 | chr:6:32648036 |
| 6 rs9271782  | 32594562 A | 0.326  | 2.39E-11 | chr:6:32648036 |
| 6 rs9271784  | 32594704 A | 0.3152 | 2.40E-11 | chr:6:32648036 |
| 6 rs9271786  | 32594709 T | 0.3152 | 2.40E-11 | chr:6:32648036 |
| 6 rs9275032  | 32643839 T | 0.3347 | 2.41E-11 | chr:6:32648036 |
| 6 rs12722051 | 32609147 T | 3.536  | 2.43E-11 | chr:6:32648036 |
| 6 rs9271781  | 32594547 A | 0.3293 | 2.44E-11 | chr:6:32648036 |
| 6 rs9272072  | 32599563 G | 0.3482 | 2.44E-11 | chr:6:32648036 |

|               |            |        |          |                |
|---------------|------------|--------|----------|----------------|
| 6 rs9272073   | 32599570 T | 0.3482 | 2.44E-11 | chr:6:32648036 |
| 6 rs9269142   | 32445423 G | 0.3133 | 2.46E-11 | chr:6:32648036 |
| 6 rs9272086   | 32599688 T | 0.3326 | 2.46E-11 | chr:6:32648036 |
| 6 rs28417660  | 32603044 T | 4.014  | 2.49E-11 | chr:6:32648036 |
| 6 rs28635391  | 32603048 A | 4.014  | 2.49E-11 | chr:6:32648036 |
| 6 rs9271386   | 32587416 T | 0.3084 | 2.55E-11 | chr:6:32648036 |
| 6 rs9272121   | 32600556 C | 0.3564 | 2.55E-11 | chr:6:32648036 |
| 6 rs7739432   | 32198474 T | 2.862  | 2.56E-11 | chr:6:32648036 |
| 6 rs375703547 | 32608217 C | 4.838  | 2.59E-11 | chr:6:32648036 |
| 6 rs9273258   | 32614268 G | 2.05   | 2.59E-11 | chr:6:32648036 |
| 6 rs9269137   | 32445147 C | 0.3214 | 2.60E-11 | chr:6:32648036 |
| 6 rs9269138   | 32445155 A | 0.3214 | 2.60E-11 | chr:6:32648036 |
| 6 rs9269139   | 32445156 G | 0.3214 | 2.60E-11 | chr:6:32648036 |
| 6 rs28383174  | 32566288 A | 2.904  | 2.60E-11 | chr:6:32648036 |
| 6 rs552704888 | 32554994 T | 3.827  | 2.65E-11 | chr:6:32648036 |
| 6 rs2647012   | 32664458 T | 0.2875 | 2.66E-11 | chr:6:32648036 |
| 6 rs9272165   | 32601170 C | 0.3597 | 2.68E-11 | chr:6:32648036 |
| 6 rs540590778 | 32453500 G | 2.947  | 2.68E-11 | chr:6:32648036 |
| 6 rs9273118   | 32612691 G | 2.153  | 2.72E-11 | chr:6:32648036 |
| 6 rs578222092 | 32720017 C | 2.885  | 2.73E-11 | chr:6:32648036 |
| 6 rs9269083   | 32441193 A | 0.3412 | 2.75E-11 | chr:6:32648036 |
| 6 rs9272035   | 32598814 T | 0.3578 | 2.80E-11 | chr:6:32648036 |
| 6 rs9271787   | 32594718 C | 0.3393 | 2.86E-11 | chr:6:32648036 |
| 6 rs9269141   | 32445270 C | 0.315  | 2.87E-11 | chr:6:32648036 |
| 6 rs9272803   | 32610591 T | 3.123  | 2.89E-11 | chr:6:32648036 |
| 6 rs115317719 | 32412005 T | 3.657  | 2.91E-11 | chr:6:32648036 |
| 6 rs539718048 | 32412004 C | 3.657  | 2.91E-11 | chr:6:32648036 |
| 6 rs202207567 | 32512533 T | 3.128  | 2.92E-11 | chr:6:32648036 |
| 6 rs377093    | 32194077 G | 0.3431 | 2.96E-11 | chr:6:32648036 |
| 6 rs3132948   | 32197219 T | 2.8    | 2.96E-11 | chr:6:32648036 |
| 6 rs9267857   | 32196569 A | 2.8    | 2.96E-11 | chr:6:32648036 |
| 6 rs9267861   | 32196648 G | 2.8    | 2.96E-11 | chr:6:32648036 |
| 6 rs5026743   | 32439964 G | 0.3242 | 3.01E-11 | chr:6:32648036 |
| 6 rs9271963   | 32597453 A | 0.3456 | 3.03E-11 | chr:6:32648036 |
| 6 rs72492305  | 32509333 C | 0.3284 | 3.13E-11 | chr:6:32648036 |
| 6 rs17843693  | 32622122 A | 3.203  | 3.18E-11 | chr:6:32648036 |
| 6 rs9272102   | 32599830 C | 0.3551 | 3.20E-11 | chr:6:32648036 |
| 6 rs9271748   | 32593830 G | 2.167  | 3.21E-11 | chr:6:32648036 |
| 6 rs9271749   | 32593836 T | 2.167  | 3.21E-11 | chr:6:32648036 |
| 6 rs9271750   | 32593837 G | 2.167  | 3.21E-11 | chr:6:32648036 |
| 6 rs9273057   | 32612104 T | 3.61   | 3.22E-11 | chr:6:32648036 |
| 6 rs9271823   | 32594915 G | 0.2769 | 3.25E-11 | chr:6:32648036 |
| 6 rs9271824   | 32594916 G | 0.2769 | 3.25E-11 | chr:6:32648036 |



|               |            |        |          |                |
|---------------|------------|--------|----------|----------------|
| 6 rs9269234   | 32451788 C | 0.3129 | 3.26E-11 | chr:6:32648036 |
| 6 rs7755774   | 32444932 G | 0.3137 | 3.33E-11 | chr:6:32648036 |
| 6 rs9275109   | 32649676 G | 0.2809 | 3.43E-11 | chr:6:32648036 |
| 6 rs9271886   | 32595633 T | 0.3576 | 3.44E-11 | chr:6:32648036 |
| 6 rs536427156 | 32453103 G | 3.03   | 3.45E-11 | chr:6:32648036 |
| 6 rs643889    | 32575918 T | 2.893  | 3.49E-11 | chr:6:32648036 |
| 6 rs9273166   | 32613146 G | 2.185  | 3.55E-11 | chr:6:32648036 |
| 6 rs138487125 | 32599812 T | 2.89   | 3.57E-11 | chr:6:32648036 |
| 6 rs9273170   | 32613177 G | 2.224  | 3.61E-11 | chr:6:32648036 |
| 6 rs2856725   | 32666738 C | 0.292  | 3.61E-11 | chr:6:32648036 |
| 6 rs113422598 | 32626508 T | 3.463  | 3.62E-11 | chr:6:32648036 |
| 6 rs17211741  | 32626346 A | 3.463  | 3.62E-11 | chr:6:32648036 |
| 6 rs79638487  | 32626664 A | 3.463  | 3.62E-11 | chr:6:32648036 |
| 6 rs9271399   | 32587510 C | 0.3485 | 3.62E-11 | chr:6:32648036 |
| 6 rs9276503   | 32719731 A | 2.835  | 3.62E-11 | chr:6:32648036 |
| 6 rs9276504   | 32719745 C | 2.835  | 3.62E-11 | chr:6:32648036 |
| 6 rs550286428 | 32452407 T | 4.167  | 3.66E-11 | chr:6:32648036 |
| 6 rs601148    | 32573265 T | 4.859  | 3.68E-11 | chr:6:32648036 |
| 6 rs9269074   | 32440792 A | 3.675  | 3.70E-11 | chr:6:32648036 |
| 6 rs13193606  | 32575044 T | 2.882  | 3.71E-11 | chr:6:32648036 |
| 6 rs75872455  | 32502638 C | 2.371  | 3.71E-11 | chr:6:32648036 |
| 6 rs2840230   | 32596145 A | 3.252  | 3.74E-11 | chr:6:32648036 |
| 6 rs481139    | 32576145 A | 2.901  | 3.75E-11 | chr:6:32648036 |
| 6 rs139727756 | 32603562 A | 4.029  | 3.81E-11 | chr:6:32648036 |
| 6 rs549131306 | 32603558 T | 4.029  | 3.81E-11 | chr:6:32648036 |
| 6 rs9274548   | 32634785 G | 2.194  | 3.82E-11 | chr:6:32648036 |
| 6 rs9274549   | 32634786 G | 2.194  | 3.82E-11 | chr:6:32648036 |
| 6 rs9271780   | 32594535 C | 0.3363 | 3.83E-11 | chr:6:32648036 |
| 6 rs9273167   | 32613163 A | 2.19   | 3.85E-11 | chr:6:32648036 |
| 6 rs9274595   | 32635450 A | 2.351  | 3.90E-11 | chr:6:32648036 |
| 6 rs200004305 | 32605204 G | 4.679  | 3.90E-11 | chr:6:32648036 |
| 6 rs9271883   | 32595610 A | 0.3607 | 3.91E-11 | chr:6:32648036 |
| 6 rs560849611 | 32478729 A | 5.485  | 3.92E-11 | chr:6:32648036 |
| 6 rs17605238  | 32299908 C | 3.848  | 3.94E-11 | chr:6:32648036 |
| 6 rs2022536   | 32301960 C | 3.848  | 3.94E-11 | chr:6:32648036 |
| 6 rs7765585   | 32304025 G | 3.848  | 3.94E-11 | chr:6:32648036 |
| 6 rs9469098   | 32296382 T | 3.848  | 3.94E-11 | chr:6:32648036 |
| 6 rs28366363  | 32565355 A | 5.625  | 3.96E-11 | chr:6:32648036 |
| 6 rs28366344  | 32564813 C | 2.822  | 3.96E-11 | chr:6:32648036 |
| 6 rs2395184   | 32432646 A | 3.307  | 4.03E-11 | chr:6:32648036 |
| 6 rs6901541   | 32442261 C | 2.726  | 4.03E-11 | chr:6:32648036 |
| 6 rs28752497  | 32568481 A | 2.879  | 4.04E-11 | chr:6:32648036 |
| 6 rs9271964   | 32597464 C | 0.3486 | 4.05E-11 | chr:6:32648036 |

|               |            |        |          |                |
|---------------|------------|--------|----------|----------------|
| 6 rs543713    | 32573934 T | 2.873  | 4.09E-11 | chr:6:32648036 |
| 6 rs28383461  | 32609607 A | 3.593  | 4.13E-11 | chr:6:32648036 |
| 6 rs138574269 | 32507114 A | 2.285  | 4.13E-11 | chr:6:32648036 |
| 6 rs9272171   | 32601249 G | 0.3599 | 4.25E-11 | chr:6:32648036 |
| 6 rs9271389   | 32587431 T | 0.3487 | 4.27E-11 | chr:6:32648036 |
| 6 rs9274346   | 32632367 T | 2.113  | 4.29E-11 | chr:6:32648036 |
| 6 rs9271966   | 32597507 T | 0.3604 | 4.29E-11 | chr:6:32648036 |
| 6 rs9272124   | 32600581 A | 0.3622 | 4.32E-11 | chr:6:32648036 |
| 6 rs28383173  | 32566287 C | 2.848  | 4.46E-11 | chr:6:32648036 |
| 6 rs9269085   | 32441202 C | 0.3462 | 4.49E-11 | chr:6:32648036 |
| 6 rs28383409  | 32608279 G | 2.617  | 4.54E-11 | chr:6:32648036 |
| 6 rs2858310   | 32668323 G | 0.2917 | 4.73E-11 | chr:6:32648036 |
| 6 rs576125530 | 32522109 G | 3.618  | 4.73E-11 | chr:6:32648036 |
| 6 rs9271881   | 32595604 A | 0.3629 | 4.80E-11 | chr:6:32648036 |
| 6 rs9271882   | 32595605 T | 0.3629 | 4.80E-11 | chr:6:32648036 |
| 6 rs28724264  | 32631937 G | 2.176  | 4.81E-11 | chr:6:32648036 |
| 6 rs2647040   | 32667280 A | 0.2916 | 4.85E-11 | chr:6:32648036 |
| 6 rs614348    | 32573877 C | 2.863  | 4.99E-11 | chr:6:32648036 |
| 6 rs9272005   | 32597992 G | 0.3609 | 5.00E-11 | chr:6:32648036 |
| 6 rs9272006   | 32597993 T | 0.3609 | 5.00E-11 | chr:6:32648036 |
| 6 rs9269102   | 32442741 C | 2.725  | 5.01E-11 | chr:6:32648036 |
| 6 rs2647046   | 32668336 A | 0.2915 | 5.07E-11 | chr:6:32648036 |
| 6 rs2647048   | 32668705 A | 0.2915 | 5.07E-11 | chr:6:32648036 |
| 6 rs2647051   | 32670897 T | 0.2915 | 5.07E-11 | chr:6:32648036 |
| 6 rs2856699   | 32671765 A | 0.2915 | 5.07E-11 | chr:6:32648036 |
| 6 rs2856717   | 32670308 A | 0.2915 | 5.07E-11 | chr:6:32648036 |
| 6 rs2858305   | 32670464 G | 0.2915 | 5.07E-11 | chr:6:32648036 |
| 6 rs2858309   | 32668713 C | 0.2915 | 5.07E-11 | chr:6:32648036 |
| 6 rs9275389   | 32669132 C | 0.2915 | 5.07E-11 | chr:6:32648036 |
| 6 rs28383311  | 32587011 T | 3.528  | 5.10E-11 | chr:6:32648036 |
| 6 rs1142331   | 32609254 T | 2.242  | 5.11E-11 | chr:6:32648036 |
| 6 rs1142332   | 32609255 T | 2.242  | 5.11E-11 | chr:6:32648036 |
| 6 rs9272702   | 32609253 A | 2.242  | 5.11E-11 | chr:6:32648036 |
| 6 rs7776032   | 32444896 C | 0.316  | 5.11E-11 | chr:6:32648036 |
| 6 rs9269126   | 32444915 C | 0.316  | 5.11E-11 | chr:6:32648036 |
| 6 rs9273168   | 32613173 C | 2.201  | 5.23E-11 | chr:6:32648036 |
| 6 rs28752493  | 32568165 C | 2.838  | 5.26E-11 | chr:6:32648036 |
| 6 rs9271884   | 32595628 C | 0.3626 | 5.29E-11 | chr:6:32648036 |
| 6 rs9271885   | 32595629 T | 0.3626 | 5.29E-11 | chr:6:32648036 |
| 6 rs6924676   | 32445727 T | 0.3204 | 5.32E-11 | chr:6:32648036 |
| 6 rs28752501  | 32568995 A | 2.768  | 5.38E-11 | chr:6:32648036 |
| 6 rs4193      | 32609236 A | 2.281  | 5.43E-11 | chr:6:32648036 |
| 6 rs538680043 | 32444933 T | 0.3162 | 5.52E-11 | chr:6:32648036 |

|                          |            |        |          |                |
|--------------------------|------------|--------|----------|----------------|
| 6 rs9272012              | 32598156 A | 0.3598 | 5.79E-11 | chr:6:32648036 |
| 6 rs9269118              | 32443641 G | 0.314  | 5.81E-11 | chr:6:32648036 |
| 6 rs563837736            | 32660582 A | 0.3055 | 5.82E-11 | chr:6:32648036 |
| 6 rs28752498             | 32568652 A | 2.818  | 6.05E-11 | chr:6:32648036 |
| 6 rs9272140              | 32600780 G | 3.254  | 6.08E-11 | chr:6:32648036 |
| 6 rs75351515             | 32635420 A | 2.286  | 6.09E-11 | chr:6:32648036 |
| 6 rs601481               | 32573293 C | 2.84   | 6.10E-11 | chr:6:32648036 |
| 6 rs9270797              | 32569297 A | 0.3702 | 6.10E-11 | chr:6:32648036 |
| 6 rs601006               | 32573173 A | 2.825  | 6.11E-11 | chr:6:32648036 |
| 6 rs9269163              | 32446833 A | 0.3233 | 6.16E-11 | chr:6:32648036 |
| 6 rs9269165              | 32446843 A | 0.3233 | 6.16E-11 | chr:6:32648036 |
| 6 rs2157334              | 32392543 C | 3.344  | 6.28E-11 | chr:6:32648036 |
| 6 rs2395170              | 32394313 C | 3.344  | 6.28E-11 | chr:6:32648036 |
| 6 rs2395171              | 32394537 T | 3.344  | 6.28E-11 | chr:6:32648036 |
| 6 rs3129842              | 32394060 C | 3.344  | 6.28E-11 | chr:6:32648036 |
| 6 rs3135349              | 32394027 G | 3.344  | 6.28E-11 | chr:6:32648036 |
| 6 rs541986750            | 32391192 C | 3.344  | 6.28E-11 | chr:6:32648036 |
| 6 rs9272770              | 32610226 A | 3.285  | 6.29E-11 | chr:6:32648036 |
| 6 rs9272166              | 32601209 C | 0.3663 | 6.34E-11 | chr:6:32648036 |
| 6 rs7770017              | 32237463 A | 2.754  | 6.35E-11 | chr:6:32648036 |
| 6 rs2856722              | 32667958 A | 0.2946 | 6.42E-11 | chr:6:32648036 |
| 6 rs116023697;rs28986256 | 32717799 C | 3.217  | 6.45E-11 | chr:6:32648036 |
| 6 rs9270664              | 32566149 G | 0.3372 | 6.45E-11 | chr:6:32648036 |
| 6 rs28383201             | 32574869 G | 2.823  | 6.46E-11 | chr:6:32648036 |
| 6 rs9275521              | 32674952 T | 0.2951 | 6.77E-11 | chr:6:32648036 |
| 6 rs2856723              | 32667762 A | 0.2944 | 6.89E-11 | chr:6:32648036 |
| 6 rs9272092              | 32599756 C | 0.3241 | 6.95E-11 | chr:6:32648036 |
| 6 rs139558884            | 32604167 C | 4.098  | 6.99E-11 | chr:6:32648036 |
| 6 rs2894260              | 32447058 T | 2.689  | 7.03E-11 | chr:6:32648036 |
| 6 rs4993690              | 32446971 A | 2.689  | 7.03E-11 | chr:6:32648036 |
| 6 rs550108049            | 32445145 G | 2.689  | 7.03E-11 | chr:6:32648036 |
| 6 rs9268861              | 32429894 A | 2.689  | 7.03E-11 | chr:6:32648036 |
| 6 rs9269049              | 32438850 C | 2.689  | 7.03E-11 | chr:6:32648036 |
| 6 rs9269171              | 32447120 A | 2.689  | 7.03E-11 | chr:6:32648036 |
| 6 rs28752500             | 32568769 T | 2.824  | 7.12E-11 | chr:6:32648036 |
| 6 rs602457               | 32573562 C | 4.751  | 7.19E-11 | chr:6:32648036 |
| 6 rs548718231            | 32641196 A | 3.917  | 7.20E-11 | chr:6:32648036 |
| 6 rs9271368              | 32586934 G | 0.3331 | 7.31E-11 | chr:6:32648036 |
| 6 rs3115574              | 32217413 T | 2.841  | 7.34E-11 | chr:6:32648036 |
| 6 rs6936204              | 32217092 T | 2.841  | 7.34E-11 | chr:6:32648036 |
| 6 rs9273059              | 32612111 A | 3.543  | 7.49E-11 | chr:6:32648036 |
| 6 rs17210202             | 32555987 C | 3.675  | 7.72E-11 | chr:6:32648036 |
| 6 rs28366354             | 32565044 G | 2.779  | 7.96E-11 | chr:6:32648036 |

|               |            |        |          |                |
|---------------|------------|--------|----------|----------------|
| 6 rs370055    | 32194259 C | 0.3592 | 7.97E-11 | chr:6:32648036 |
| 6 rs9273149   | 32612987 A | 3.199  | 8.21E-11 | chr:6:32648036 |
| 6 rs200501057 | 32487088 T | 5.706  | 8.24E-11 | chr:6:32648036 |
| 6 rs7453498   | 32446717 T | 0.3531 | 8.26E-11 | chr:6:32648036 |
| 6 rs28366212  | 32557259 T | 3.25   | 8.31E-11 | chr:6:32648036 |
| 6 rs28366213  | 32557263 A | 3.25   | 8.31E-11 | chr:6:32648036 |
| 6 rs1612904   | 32669018 C | 0.2876 | 8.37E-11 | chr:6:32648036 |
| 6 rs34276369  | 32614037 T | 3.356  | 8.40E-11 | chr:6:32648036 |
| 6 rs9269201   | 32449345 C | 0.314  | 8.55E-11 | chr:6:32648036 |
| 6 rs9269164   | 32446840 C | 2.682  | 8.59E-11 | chr:6:32648036 |
| 6 rs190293957 | 32641526 A | 4.601  | 8.64E-11 | chr:6:32648036 |
| 6 rs574897295 | 32548550 A | 5.805  | 9.02E-11 | chr:6:32648036 |
| 6 rs112894757 | 32510777 T | 2.431  | 9.02E-11 | chr:6:32648036 |
| 6 rs9273139   | 32612860 G | 2.219  | 9.25E-11 | chr:6:32648036 |
| 6 rs447903    | 32193945 T | 0.3601 | 9.29E-11 | chr:6:32648036 |
| 6 rs499691    | 32194339 T | 0.3601 | 9.29E-11 | chr:6:32648036 |
| 6 rs535195653 | 32453064 G | 3.79   | 9.33E-11 | chr:6:32648036 |
| 6 rs2647043   | 32667549 A | 0.2986 | 9.40E-11 | chr:6:32648036 |
| 6 rs9269104   | 32443032 A | 2.668  | 9.47E-11 | chr:6:32648036 |
| 6 rs9269105   | 32443034 C | 2.668  | 9.47E-11 | chr:6:32648036 |
| 6 rs7450278   | 32439048 T | 2.66   | 9.49E-11 | chr:6:32648036 |
| 6 rs112628749 | 32510769 T | 2.45   | 9.53E-11 | chr:6:32648036 |
| 6 rs113766057 | 32510772 A | 2.45   | 9.53E-11 | chr:6:32648036 |
| 6 rs9271791   | 32594810 A | 0.3719 | 9.53E-11 | chr:6:32648036 |
| 6 rs9273406   | 32627180 C | 2.084  | 9.81E-11 | chr:6:32648036 |
| 6 rs4959112   | 32597747 T | 2.537  | 9.99E-11 | chr:6:32648036 |
| 6 rs9273405   | 32627175 C | 2.083  | 1.01E-10 | chr:6:32648036 |
| 6 rs28724262  | 32631889 C | 2.159  | 1.03E-10 | chr:6:32648036 |
| 6 rs376975457 | 32630317 G | 2.335  | 1.04E-10 | chr:6:32648036 |
| 6 rs6906021   | 32626311 T | 0.369  | 1.08E-10 | chr:6:32648036 |
| 6 rs3129721   | 32676251 C | 0.2912 | 1.09E-10 | chr:6:32648036 |
| 6 rs9273140   | 32612868 C | 2.214  | 1.10E-10 | chr:6:32648036 |
| 6 rs527493854 | 32675902 T | 0.2935 | 1.12E-10 | chr:6:32648036 |
| 6 rs113220099 | 32510823 T | 2.447  | 1.12E-10 | chr:6:32648036 |
| 6 rs201117812 | 32610286 A | 3.314  | 1.13E-10 | chr:6:32648036 |
| 6 rs28383170  | 32565722 T | 2.778  | 1.13E-10 | chr:6:32648036 |
| 6 rs28383171  | 32565735 T | 2.778  | 1.13E-10 | chr:6:32648036 |
| 6 rs549070097 | 32516282 G | 3.068  | 1.15E-10 | chr:6:32648036 |
| 6 rs9269119   | 32443797 G | 2.69   | 1.17E-10 | chr:6:32648036 |
| 6 rs28752492  | 32568138 A | 2.779  | 1.17E-10 | chr:6:32648036 |
| 6 rs28366341  | 32564784 C | 2.724  | 1.19E-10 | chr:6:32648036 |
| 6 rs28366343  | 32564803 C | 2.724  | 1.19E-10 | chr:6:32648036 |
| 6 rs9271989   | 32597729 T | 0.3488 | 1.22E-10 | chr:6:32648036 |

|               |            |        |          |                |
|---------------|------------|--------|----------|----------------|
| 6 rs9272587   | 32607510 A | 2.091  | 1.24E-10 | chr:6:32648036 |
| 6 rs146130478 | 32499213 C | 2.524  | 1.25E-10 | chr:6:32648036 |
| 6 rs9273192   | 32613437 A | 2.036  | 1.27E-10 | chr:6:32648036 |
| 6 rs113663338 | 32624847 T | 2.11   | 1.27E-10 | chr:6:32648036 |
| 6 rs35983205  | 32624829 C | 2.11   | 1.27E-10 | chr:6:32648036 |
| 6 rs28383172  | 32565979 G | 5.212  | 1.32E-10 | chr:6:32648036 |
| 6 rs13193700  | 32575078 T | 2.777  | 1.32E-10 | chr:6:32648036 |
| 6 rs574170    | 32572904 A | 2.792  | 1.33E-10 | chr:6:32648036 |
| 6 rs4947345   | 32678260 T | 0.3055 | 1.34E-10 | chr:6:32648036 |
| 6 rs9269027   | 32437466 A | 0.3265 | 1.39E-10 | chr:6:32648036 |
| 6 rs9269081   | 32441100 A | 0.3265 | 1.39E-10 | chr:6:32648036 |
| 6 rs9271995   | 32597777 A | 0.3671 | 1.40E-10 | chr:6:32648036 |
| 6 rs9272718   | 32609379 T | 2.072  | 1.41E-10 | chr:6:32648036 |
| 6 rs28490182  | 32592476 T | 0.3622 | 1.42E-10 | chr:6:32648036 |
| 6 rs3132949   | 32195935 T | 2.69   | 1.43E-10 | chr:6:32648036 |
| 6 rs9271789   | 32594768 A | 0.3778 | 1.43E-10 | chr:6:32648036 |
| 6 rs9269159   | 32446691 G | 0.3423 | 1.44E-10 | chr:6:32648036 |
| 6 rs1894553   | 32502866 A | 3.171  | 1.45E-10 | chr:6:32648036 |
| 6 rs9274639   | 32636146 T | 0.3208 | 1.46E-10 | chr:6:32648036 |
| 6 rs387071    | 32193449 C | 0.3649 | 1.46E-10 | chr:6:32648036 |
| 6 rs3129758   | 32584625 A | 0.3119 | 1.52E-10 | chr:6:32648036 |
| 6 rs9394104   | 32620203 G | 2.161  | 1.52E-10 | chr:6:32648036 |
| 6 rs9394105   | 32620206 T | 2.161  | 1.52E-10 | chr:6:32648036 |
| 6 rs112838474 | 32295816 T | 3.773  | 1.56E-10 | chr:6:32648036 |
| 6 rs28383280  | 32586342 G | 4.868  | 1.61E-10 | chr:6:32648036 |
| 6 rs28383281  | 32586344 G | 4.868  | 1.61E-10 | chr:6:32648036 |
| 6 rs9274596   | 32635467 T | 2.274  | 1.63E-10 | chr:6:32648036 |
| 6 rs9271445   | 32588299 T | 2.846  | 1.63E-10 | chr:6:32648036 |
| 6 rs9275766   | 32689362 G | 4.86   | 1.63E-10 | chr:6:32648036 |
| 6 rs28752502  | 32569051 G | 5.303  | 1.63E-10 | chr:6:32648036 |
| 6 rs9269162   | 32446737 A | 0.3551 | 1.66E-10 | chr:6:32648036 |
| 6 rs1142338   | 32609322 T | 4.132  | 1.66E-10 | chr:6:32648036 |
| 6 rs118038025 | 32625692 C | 3.566  | 1.67E-10 | chr:6:32648036 |
| 6 rs9271990   | 32597735 T | 0.3554 | 1.68E-10 | chr:6:32648036 |
| 6 rs9271991   | 32597738 G | 0.3554 | 1.68E-10 | chr:6:32648036 |
| 6 rs185295622 | 32510840 A | 2.327  | 1.70E-10 | chr:6:32648036 |
| 6 rs9271988   | 32597725 A | 0.3523 | 1.71E-10 | chr:6:32648036 |
| 6 rs9272099   | 32599813 G | 0.3657 | 1.71E-10 | chr:6:32648036 |
| 6 rs9273286   | 32614494 A | 1.949  | 1.75E-10 | chr:6:32648036 |
| 6 rs9272093   | 32599777 T | 0.314  | 1.76E-10 | chr:6:32648036 |
| 6 rs78017592  | 32508455 C | 3.365  | 1.76E-10 | chr:6:32648036 |
| 6 rs9269116   | 32443458 T | 0.3164 | 1.83E-10 | chr:6:32648036 |
| 6 rs113534515 | 32460798 C | 3.731  | 1.86E-10 | chr:6:32648036 |

|               |            |        |          |                |
|---------------|------------|--------|----------|----------------|
| 6 rs6905297   | 32446100 C | 0.319  | 1.86E-10 | chr:6:32648036 |
| 6 rs9273141   | 32612883 G | 2.211  | 1.87E-10 | chr:6:32648036 |
| 6 rs138222522 | 32510733 T | 2.455  | 1.88E-10 | chr:6:32648036 |
| 6 rs79936591  | 32503543 A | 4.1    | 1.89E-10 | chr:6:32648036 |
| 6 rs9273190   | 32613418 A | 2.067  | 1.91E-10 | chr:6:32648036 |
| 6 rs9273549   | 32628873 T | 2.615  | 1.91E-10 | chr:6:32648036 |
| 6 rs182013486 | 32603534 C | 3.838  | 1.93E-10 | chr:6:32648036 |
| 6 rs9273157   | 32613052 G | 3.454  | 1.94E-10 | chr:6:32648036 |
| 6 rs28366357  | 32565138 T | 2.739  | 1.95E-10 | chr:6:32648036 |
| 6 rs28366360  | 32565176 C | 2.746  | 1.97E-10 | chr:6:32648036 |
| 6 rs3130320   | 32223258 T | 2.75   | 1.98E-10 | chr:6:32648036 |
| 6 rs9275596   | 32681631 C | 0.2955 | 2.03E-10 | chr:6:32648036 |
| 6 rs9272097   | 32599786 T | 0.3071 | 2.05E-10 | chr:6:32648036 |
| 6 rs4999342   | 32448098 T | 0.3274 | 2.07E-10 | chr:6:32648036 |
| 6 rs28366361  | 32565197 A | 2.733  | 2.07E-10 | chr:6:32648036 |
| 6 rs116150265 | 32607526 C | 2.051  | 2.13E-10 | chr:6:32648036 |
| 6 rs9272589   | 32607524 C | 2.051  | 2.13E-10 | chr:6:32648036 |
| 6 rs1694129   | 32637743 T | 6.031  | 2.16E-10 | chr:6:32648036 |
| 6 rs9269076   | 32440805 C | 0.3512 | 2.18E-10 | chr:6:32648036 |
| 6 rs9269077   | 32440806 C | 0.3512 | 2.18E-10 | chr:6:32648036 |
| 6 rs74929336  | 32502585 A | 2.502  | 2.19E-10 | chr:6:32648036 |
| 6 rs9271434   | 32588058 A | 2.802  | 2.19E-10 | chr:6:32648036 |
| 6 rs17884945  | 32552029 T | 3.168  | 2.25E-10 | chr:6:32648036 |
| 6 rs9273142   | 32612886 C | 2.205  | 2.28E-10 | chr:6:32648036 |
| 6 rs2133037   | 32667596 A | 5.915  | 2.32E-10 | chr:6:32648036 |
| 6 rs9271924   | 32596498 A | 0.313  | 2.35E-10 | chr:6:32648036 |
| 6 rs9273143   | 32612899 G | 2.219  | 2.35E-10 | chr:6:32648036 |
| 6 rs28752494  | 32568240 A | 2.72   | 2.36E-10 | chr:6:32648036 |
| 6 rs9268914   | 32432556 C | 0.3361 | 2.42E-10 | chr:6:32648036 |
| 6 rs3134981   | 32646900 A | 0.3765 | 2.44E-10 | chr:6:32648036 |
| 6 rs115966492 | 32478811 T | 3.749  | 2.46E-10 | chr:6:32648036 |
| 6 rs80072299  | 32459923 G | 2.167  | 2.46E-10 | chr:6:32648036 |
| 6 rs28752491  | 32568127 C | 5.198  | 2.52E-10 | chr:6:32648036 |
| 6 rs3135362   | 32389747 G | 3.192  | 2.55E-10 | chr:6:32648036 |
| 6 rs7758269   | 32598812 C | 0.3564 | 2.56E-10 | chr:6:32648036 |
| 6 rs35984981  | 32554725 T | 3.36   | 2.58E-10 | chr:6:32648036 |
| 6 rs6922257   | 32595682 A | 3.185  | 2.66E-10 | chr:6:32648036 |
| 6 rs111343297 | 32520080 G | 3.156  | 2.67E-10 | chr:6:32648036 |
| 6 rs28366355  | 32565056 G | 2.67   | 2.70E-10 | chr:6:32648036 |
| 6 rs201181224 | 32429810 T | 0.3073 | 2.72E-10 | chr:6:32648036 |
| 6 rs28366308  | 32561043 T | 3.3    | 2.74E-10 | chr:6:32648036 |
| 6 rs28366309  | 32561048 T | 3.3    | 2.74E-10 | chr:6:32648036 |
| 6 rs28383456  | 32609453 T | 3.959  | 2.80E-10 | chr:6:32648036 |

|               |            |        |          |                |
|---------------|------------|--------|----------|----------------|
| 6 rs9272095   | 32599782 A | 0.3163 | 2.82E-10 | chr:6:32648036 |
| 6 rs9272098   | 32599787 G | 0.3163 | 2.82E-10 | chr:6:32648036 |
| 6 rs9271986   | 32597700 A | 0.353  | 2.92E-10 | chr:6:32648036 |
| 6 rs3134975   | 32652581 T | 0.2986 | 2.94E-10 | chr:6:32648036 |
| 6 rs9274594   | 32635435 T | 2.225  | 2.98E-10 | chr:6:32648036 |
| 6 rs4713575   | 32627039 G | 2.201  | 3.04E-10 | chr:6:32648036 |
| 6 rs9271984   | 32597669 G | 0.3398 | 3.05E-10 | chr:6:32648036 |
| 6 rs28752495  | 32568315 T | 2.692  | 3.14E-10 | chr:6:32648036 |
| 6 rs3129780   | 32647701 T | 0.3801 | 3.14E-10 | chr:6:32648036 |
| 6 rs7749043   | 32574952 T | 3.141  | 3.16E-10 | chr:6:32648036 |
| 6 rs9271976   | 32597617 C | 0.3681 | 3.23E-10 | chr:6:32648036 |
| 6 rs9271977   | 32597623 A | 0.3681 | 3.23E-10 | chr:6:32648036 |
| 6 rs6925580   | 32446203 C | 2.877  | 3.27E-10 | chr:6:32648036 |
| 6 rs281874819 | 32631428 C | 2.306  | 3.32E-10 | chr:6:32648036 |
| 6 rs537205676 | 32586383 T | 3.89   | 3.37E-10 | chr:6:32648036 |
| 6 rs34075049  | 32554935 A | 3.293  | 3.48E-10 | chr:6:32648036 |
| 6 rs9269205   | 32449851 T | 0.3166 | 3.53E-10 | chr:6:32648036 |
| 6 rs9273062   | 32612161 A | 3.189  | 3.60E-10 | chr:6:32648036 |
| 6 rs9273063   | 32612166 T | 3.189  | 3.60E-10 | chr:6:32648036 |
| 6 rs9271987   | 32597716 G | 0.3588 | 3.61E-10 | chr:6:32648036 |
| 6 rs9272666   | 32608737 C | 2.259  | 3.66E-10 | chr:6:32648036 |
| 6 rs527371188 | 32453819 T | 3.174  | 3.75E-10 | chr:6:32648036 |
| 6 rs41287333  | 32555046 T | 3.748  | 3.78E-10 | chr:6:32648036 |
| 6 rs9271985   | 32597679 T | 0.3456 | 3.92E-10 | chr:6:32648036 |
| 6 rs28383359  | 32606794 C | 2.093  | 3.94E-10 | chr:6:32648036 |
| 6 rs9273155   | 32613042 C | 3.371  | 3.98E-10 | chr:6:32648036 |
| 6 rs115591310 | 32511009 A | 2.329  | 4.06E-10 | chr:6:32648036 |
| 6 rs554768713 | 32444943 G | 0.3515 | 4.06E-10 | chr:6:32648036 |
| 6 rs9269130   | 32444940 T | 0.3515 | 4.06E-10 | chr:6:32648036 |
| 6 rs1048381   | 32610445 A | 3.049  | 4.08E-10 | chr:6:32648036 |
| 6 rs9275511   | 32674329 A | 0.3599 | 4.10E-10 | chr:6:32648036 |
| 6 rs74719989  | 32502664 A | 2.144  | 4.17E-10 | chr:6:32648036 |
| 6 rs116513958 | 32478809 G | 3.669  | 4.22E-10 | chr:6:32648036 |
| 6 rs13213605  | 32647764 C | 0.4649 | 4.26E-10 | chr:6:32648036 |
| 6 rs28366347  | 32564908 G | 2.604  | 4.28E-10 | chr:6:32648036 |
| 6 rs556025    | 32570880 T | 2.783  | 4.35E-10 | chr:6:32648036 |
| 6 rs146825681 | 32512918 G | 4.549  | 4.42E-10 | chr:6:32648036 |
| 6 rs9272195   | 32601830 G | 0.4047 | 4.51E-10 | chr:6:32648036 |
| 6 rs9271981   | 32597639 C | 0.3598 | 4.69E-10 | chr:6:32648036 |
| 6 rs77697582  | 32502517 T | 2.281  | 4.91E-10 | chr:6:32648036 |
| 6 rs9271385   | 32587409 A | 0.3611 | 4.95E-10 | chr:6:32648036 |
| 6 rs9271420   | 32587852 A | 0.3464 | 4.96E-10 | chr:6:32648036 |
| 6 rs28366349  | 32564916 T | 2.592  | 4.97E-10 | chr:6:32648036 |

|               |            |        |          |                |
|---------------|------------|--------|----------|----------------|
| 6 rs28366350  | 32564918 A | 2.592  | 4.97E-10 | chr:6:32648036 |
| 6 rs574335595 | 32564914 G | 2.592  | 4.97E-10 | chr:6:32648036 |
| 6 rs3210168   | 32629146 A | 2.827  | 5.11E-10 | chr:6:32648036 |
| 6 rs9269037   | 32437958 T | 0.3716 | 5.11E-10 | chr:6:32648036 |
| 6 rs35359983  | 32555022 A | 3.469  | 5.11E-10 | chr:6:32648036 |
| 6 rs1049163   | 32629193 T | 2.345  | 5.25E-10 | chr:6:32648036 |
| 6 rs28672722  | 32626537 T | 0.303  | 5.30E-10 | chr:6:32648036 |
| 6 rs7748454   | 32448698 C | 3.575  | 5.31E-10 | chr:6:32648036 |
| 6 rs148416818 | 32850055 T | 3.479  | 5.33E-10 | chr:6:32648036 |
| 6 rs28752504  | 32569162 C | 2.654  | 5.35E-10 | chr:6:32648036 |
| 6 rs148395623 | 32524801 A | 2.952  | 5.47E-10 | chr:6:32648036 |
| 6 rs9271878   | 32595474 C | 0.3908 | 5.54E-10 | chr:6:32648036 |
| 6 rs201326238 | 32517754 T | 3.507  | 5.66E-10 | chr:6:32648036 |
| 6 rs111838566 | 32517727 G | 3.049  | 5.75E-10 | chr:6:32648036 |
| 6 rs112296425 | 32521984 G | 3.386  | 5.76E-10 | chr:6:32648036 |
| 6 rs28445646  | 32593952 G | 2.34   | 5.77E-10 | chr:6:32648036 |
| 6 rs9269210   | 32450037 C | 0.3149 | 5.83E-10 | chr:6:32648036 |
| 6 rs28366312  | 32561175 C | 3.231  | 5.89E-10 | chr:6:32648036 |
| 6 rs28366313  | 32561186 A | 3.231  | 5.89E-10 | chr:6:32648036 |
| 6 rs116585338 | 32512812 G | 4.398  | 5.96E-10 | chr:6:32648036 |
| 6 rs9274094   | 32630155 A | 2.432  | 6.03E-10 | chr:6:32648036 |
| 6 rs28479136  | 32625051 A | 3.122  | 6.29E-10 | chr:6:32648036 |
| 6 rs111403760 | 32517303 C | 3.01   | 6.36E-10 | chr:6:32648036 |
| 6 rs9271877   | 32595469 C | 0.3929 | 6.55E-10 | chr:6:32648036 |
| 6 rs115754308 | 32518466 T | 2.927  | 6.56E-10 | chr:6:32648036 |
| 6 rs28366306  | 32560990 A | 3.232  | 6.62E-10 | chr:6:32648036 |
| 6 rs6457598   | 32444475 T | 0.3288 | 6.66E-10 | chr:6:32648036 |
| 6 rs564014805 | 32614277 A | 3.547  | 6.70E-10 | chr:6:32648036 |
| 6 rs3129717   | 32659308 T | 0.276  | 6.90E-10 | chr:6:32648036 |
| 6 rs9271978   | 32597632 C | 0.3743 | 6.93E-10 | chr:6:32648036 |
| 6 rs35095850  | 32549935 G | 3.271  | 6.94E-10 | chr:6:32648036 |
| 6 rs111665695 | 32479429 G | 2.213  | 7.05E-10 | chr:6:32648036 |
| 6 rs74324877  | 32517782 C | 2.977  | 7.10E-10 | chr:6:32648036 |
| 6 rs9269020   | 32436934 G | 2.301  | 7.12E-10 | chr:6:32648036 |
| 6 rs79207037  | 32509294 A | 2.909  | 7.14E-10 | chr:6:32648036 |
| 6 rs563648725 | 32613130 G | 3.618  | 7.15E-10 | chr:6:32648036 |
| 6 rs9269070   | 32440451 G | 0.3372 | 7.16E-10 | chr:6:32648036 |
| 6 rs28366315  | 32561207 T | 3.207  | 7.22E-10 | chr:6:32648036 |
| 6 rs9273542   | 32628812 T | 2.648  | 7.34E-10 | chr:6:32648036 |
| 6 rs28366316  | 32561246 C | 3.194  | 7.41E-10 | chr:6:32648036 |
| 6 rs28366359  | 32565169 T | 2.642  | 7.43E-10 | chr:6:32648036 |
| 6 rs281875165 | 32628559 C | 2.765  | 7.63E-10 | chr:6:32648036 |
| 6 rs539555344 | 32628560 T | 2.765  | 7.63E-10 | chr:6:32648036 |



|               |            |        |          |                |
|---------------|------------|--------|----------|----------------|
| 6 rs9273519   | 32628558 A | 2.765  | 7.63E-10 | chr:6:32648036 |
| 6 rs34902284  | 32556300 T | 3.268  | 7.71E-10 | chr:6:32648036 |
| 6 rs111343881 | 32521022 C | 3.269  | 7.72E-10 | chr:6:32648036 |
| 6 rs113459411 | 32521026 G | 3.269  | 7.72E-10 | chr:6:32648036 |
| 6 rs3135363   | 32389648 G | 3.008  | 7.89E-10 | chr:6:32648036 |
| 6 rs34835435  | 32549966 G | 3.16   | 7.91E-10 | chr:6:32648036 |
| 6 rs28772724  | 32509357 T | 2.905  | 7.96E-10 | chr:6:32648036 |
| 6 rs79957603  | 32509348 A | 2.905  | 7.96E-10 | chr:6:32648036 |
| 6 rs9269111   | 32443358 G | 2.531  | 8.01E-10 | chr:6:32648036 |
| 6 rs9271879   | 32595489 T | 0.3987 | 8.02E-10 | chr:6:32648036 |
| 6 rs79508322  | 32512049 A | 2.93   | 8.14E-10 | chr:6:32648036 |
| 6 rs534262225 | 32646454 T | 0.3888 | 8.21E-10 | chr:6:32648036 |
| 6 rs9271876   | 32595448 G | 0.3928 | 8.29E-10 | chr:6:32648036 |
| 6 rs28366358  | 32565164 G | 2.636  | 8.31E-10 | chr:6:32648036 |
| 6 rs149690859 | 32511135 A | 2.447  | 8.32E-10 | chr:6:32648036 |
| 6 rs28371177  | 32612990 T | 5.603  | 8.36E-10 | chr:6:32648036 |
| 6 rs143811457 | 32507112 A | 2.142  | 8.40E-10 | chr:6:32648036 |
| 6 rs116333937 | 32517381 T | 3.005  | 8.43E-10 | chr:6:32648036 |
| 6 rs111621461 | 32520050 T | 2.938  | 9.01E-10 | chr:6:32648036 |
| 6 rs115135140 | 32554855 G | 3.264  | 9.19E-10 | chr:6:32648036 |
| 6 rs2647026   | 32635705 T | 5.534  | 9.20E-10 | chr:6:32648036 |
| 6 rs9269071   | 32440467 T | 0.3685 | 9.24E-10 | chr:6:32648036 |
| 6 rs12206125  | 32575605 A | 2.99   | 9.26E-10 | chr:6:32648036 |
| 6 rs9269207   | 32449896 C | 0.3035 | 9.27E-10 | chr:6:32648036 |
| 6 rs7748293   | 32448622 T | 0.3097 | 9.27E-10 | chr:6:32648036 |
| 6 rs113528607 | 32500928 G | 2.828  | 9.68E-10 | chr:6:32648036 |
| 6 rs1130399   | 32629755 A | 2.624  | 9.71E-10 | chr:6:32648036 |
| 6 rs114954902 | 32517768 A | 2.95   | 9.72E-10 | chr:6:32648036 |
| 6 rs28366365  | 32565560 C | 2.606  | 9.84E-10 | chr:6:32648036 |
| 6 rs28366367  | 32565571 A | 2.606  | 9.84E-10 | chr:6:32648036 |
| 6 rs28383168  | 32565588 C | 2.606  | 9.84E-10 | chr:6:32648036 |
| 6 rs3135006   | 32667119 T | 0.2813 | 9.87E-10 | chr:6:32648036 |
| 6 rs74635045  | 32502745 C | 2.109  | 9.87E-10 | chr:6:32648036 |
| 6 rs9271447   | 32588357 A | 2.697  | 1.01E-09 | chr:6:32648036 |
| 6 rs9271448   | 32588368 A | 2.697  | 1.01E-09 | chr:6:32648036 |
| 6 rs35448211  | 32555067 T | 3.657  | 1.01E-09 | chr:6:32648036 |
| 6 rs35456626  | 32555066 A | 3.657  | 1.01E-09 | chr:6:32648036 |
| 6 rs9269147   | 32445650 A | 2.546  | 1.03E-09 | chr:6:32648036 |
| 6 rs9269148   | 32445658 T | 2.546  | 1.03E-09 | chr:6:32648036 |
| 6 rs6457544   | 32296057 T | 2.772  | 1.03E-09 | chr:6:32648036 |
| 6 rs7452864   | 32439077 T | 0.3561 | 1.03E-09 | chr:6:32648036 |
| 6 rs369952885 | 32539033 C | 2.535  | 1.04E-09 | chr:6:32648036 |
| 6 rs35239661  | 32549923 T | 3.251  | 1.04E-09 | chr:6:32648036 |

|               |            |        |          |                |
|---------------|------------|--------|----------|----------------|
| 6 rs75635252  | 32509332 G | 2.88   | 1.05E-09 | chr:6:32648036 |
| 6 rs554350950 | 32522108 A | 2.974  | 1.05E-09 | chr:6:32648036 |
| 6 rs9271983   | 32597647 T | 0.3731 | 1.05E-09 | chr:6:32648036 |
| 6 rs281863739 | 32630610 A | 2.34   | 1.07E-09 | chr:6:32648036 |
| 6 rs9271866   | 32595367 T | 0.3823 | 1.07E-09 | chr:6:32648036 |
| 6 rs9271867   | 32595368 G | 0.3823 | 1.07E-09 | chr:6:32648036 |
| 6 rs547505909 | 32478806 T | 3.597  | 1.07E-09 | chr:6:32648036 |
| 6 rs550717566 | 32609094 T | 2.586  | 1.07E-09 | chr:6:32648036 |
| 6 rs116384190 | 32520337 G | 2.911  | 1.08E-09 | chr:6:32648036 |
| 6 rs189711091 | 32478943 C | 2.92   | 1.09E-09 | chr:6:32648036 |
| 6 rs370791576 | 32517082 A | 2.926  | 1.09E-09 | chr:6:32648036 |
| 6 rs28366304  | 32560981 G | 3.176  | 1.10E-09 | chr:6:32648036 |
| 6 rs28366305  | 32560982 T | 3.176  | 1.10E-09 | chr:6:32648036 |
| 6 rs9268944   | 32433654 T | 0.4336 | 1.10E-09 | chr:6:32648036 |
| 6 rs113049351 | 32511024 T | 2.278  | 1.11E-09 | chr:6:32648036 |
| 6 rs1987305   | 32401996 T | 2.494  | 1.14E-09 | chr:6:32648036 |
| 6 rs4348358   | 32399092 A | 2.494  | 1.14E-09 | chr:6:32648036 |
| 6 rs4612206   | 32404093 T | 2.494  | 1.14E-09 | chr:6:32648036 |
| 6 rs7753264   | 32402440 G | 2.494  | 1.14E-09 | chr:6:32648036 |
| 6 rs7756262   | 32398675 A | 2.494  | 1.14E-09 | chr:6:32648036 |
| 6 rs7773756   | 32402464 C | 2.494  | 1.14E-09 | chr:6:32648036 |
| 6 rs7774047   | 32398563 A | 2.494  | 1.14E-09 | chr:6:32648036 |
| 6 rs9268588   | 32397794 G | 2.494  | 1.14E-09 | chr:6:32648036 |
| 6 rs9268589   | 32398202 A | 2.494  | 1.14E-09 | chr:6:32648036 |
| 6 rs9268605   | 32399833 A | 2.494  | 1.14E-09 | chr:6:32648036 |
| 6 rs9268606   | 32400070 A | 2.494  | 1.14E-09 | chr:6:32648036 |
| 6 rs9268607   | 32400538 G | 2.494  | 1.14E-09 | chr:6:32648036 |
| 6 rs9268608   | 32400865 T | 2.494  | 1.14E-09 | chr:6:32648036 |
| 6 rs9268609   | 32401261 A | 2.494  | 1.14E-09 | chr:6:32648036 |
| 6 rs9268610   | 32401263 C | 2.494  | 1.14E-09 | chr:6:32648036 |
| 6 rs9268613   | 32402692 T | 2.494  | 1.14E-09 | chr:6:32648036 |
| 6 rs9268615   | 32402889 A | 2.494  | 1.14E-09 | chr:6:32648036 |
| 6 rs9268634   | 32406530 A | 2.494  | 1.14E-09 | chr:6:32648036 |
| 6 rs9268645   | 32408527 G | 2.494  | 1.14E-09 | chr:6:32648036 |
| 6 rs960736    | 32402225 C | 2.494  | 1.14E-09 | chr:6:32648036 |
| 6 rs9276010   | 32694686 T | 4.744  | 1.14E-09 | chr:6:32648036 |
| 6 rs111517012 | 32554675 G | 3.143  | 1.14E-09 | chr:6:32648036 |
| 6 rs35675330  | 32554653 A | 3.143  | 1.14E-09 | chr:6:32648036 |
| 6 rs9273480   | 32628103 T | 2.854  | 1.15E-09 | chr:6:32648036 |
| 6 rs3129782   | 32648719 G | 0.2874 | 1.16E-09 | chr:6:32648036 |
| 6 rs76752213  | 32509416 A | 2.846  | 1.17E-09 | chr:6:32648036 |
| 6 rs28366364  | 32565532 G | 2.594  | 1.19E-09 | chr:6:32648036 |
| 6 rs9273608   | 32629110 T | 2.361  | 1.21E-09 | chr:6:32648036 |

|               |            |        |          |                |
|---------------|------------|--------|----------|----------------|
| 6 rs199882626 | 32517752 A | 2.925  | 1.24E-09 | chr:6:32648036 |
| 6 rs74768610  | 32509868 C | 2.797  | 1.25E-09 | chr:6:32648036 |
| 6 rs79215033  | 32509858 G | 2.797  | 1.25E-09 | chr:6:32648036 |
| 6 rs9270697   | 32567296 G | 0.384  | 1.26E-09 | chr:6:32648036 |
| 6 rs112654908 | 32519968 C | 2.897  | 1.27E-09 | chr:6:32648036 |
| 6 rs112956435 | 32519929 C | 2.897  | 1.27E-09 | chr:6:32648036 |
| 6 rs281874906 | 32631381 T | 2.273  | 1.30E-09 | chr:6:32648036 |
| 6 rs28366307  | 32560995 C | 3.146  | 1.31E-09 | chr:6:32648036 |
| 6 rs115630465 | 32482032 A | 2.382  | 1.32E-09 | chr:6:32648036 |
| 6 rs111797109 | 32511650 T | 2.91   | 1.35E-09 | chr:6:32648036 |
| 6 rs9271406   | 32587588 G | 2.548  | 1.36E-09 | chr:6:32648036 |
| 6 rs28723989  | 32550116 T | 3.484  | 1.38E-09 | chr:6:32648036 |
| 6 rs548548482 | 32608153 A | 3.884  | 1.39E-09 | chr:6:32648036 |
| 6 rs9272739   | 32609698 C | 3.215  | 1.39E-09 | chr:6:32648036 |
| 6 rs6935999   | 32392757 A | 3.244  | 1.41E-09 | chr:6:32648036 |
| 6 rs78668102  | 32507091 T | 2.114  | 1.41E-09 | chr:6:32648036 |
| 6 rs112796795 | 32505471 C | 2.383  | 1.41E-09 | chr:6:32648036 |
| 6 rs28366311  | 32561137 G | 3.165  | 1.42E-09 | chr:6:32648036 |
| 6 rs6457595   | 32444040 A | 2.655  | 1.44E-09 | chr:6:32648036 |
| 6 rs9271865   | 32595360 T | 0.3885 | 1.45E-09 | chr:6:32648036 |
| 6 rs28366314  | 32561201 G | 3.144  | 1.47E-09 | chr:6:32648036 |
| 6 rs28407950  | 32626348 T | 0.3284 | 1.48E-09 | chr:6:32648036 |
| 6 rs28515515  | 32626432 T | 0.3284 | 1.48E-09 | chr:6:32648036 |
| 6 rs28724200  | 32556248 G | 3.459  | 1.49E-09 | chr:6:32648036 |
| 6 rs111432098 | 32520940 G | 2.89   | 1.50E-09 | chr:6:32648036 |
| 6 rs9274129   | 32630230 C | 2.335  | 1.50E-09 | chr:6:32648036 |
| 6 rs111989182 | 32510924 G | 2.237  | 1.51E-09 | chr:6:32648036 |
| 6 rs113547679 | 32510914 T | 2.237  | 1.51E-09 | chr:6:32648036 |
| 6 rs181435903 | 32510903 A | 2.237  | 1.51E-09 | chr:6:32648036 |
| 6 rs9274464   | 32633489 T | 0.3194 | 1.51E-09 | chr:6:32648036 |
| 6 rs28366274  | 32560107 T | 3.411  | 1.51E-09 | chr:6:32648036 |
| 6 rs9276300   | 32703185 T | 4.653  | 1.52E-09 | chr:6:32648036 |
| 6 rs28732284  | 32548667 C | 3.257  | 1.57E-09 | chr:6:32648036 |
| 6 rs537501315 | 32516973 A | 3.39   | 1.57E-09 | chr:6:32648036 |
| 6 rs75420369  | 32511920 A | 2.929  | 1.58E-09 | chr:6:32648036 |
| 6 rs3129767   | 32594975 G | 0.3095 | 1.59E-09 | chr:6:32648036 |
| 6 rs28366302  | 32560934 C | 3.093  | 1.60E-09 | chr:6:32648036 |
| 6 rs181351497 | 32478944 C | 2.887  | 1.62E-09 | chr:6:32648036 |
| 6 rs9271862   | 32595333 C | 0.3848 | 1.64E-09 | chr:6:32648036 |
| 6 rs9271863   | 32595334 A | 0.3848 | 1.64E-09 | chr:6:32648036 |
| 6 rs535852    | 32577604 T | 2.506  | 1.66E-09 | chr:6:32648036 |
| 6 rs3129720   | 32663631 T | 0.2903 | 1.67E-09 | chr:6:32648036 |
| 6 rs113586210 | 32517050 T | 2.896  | 1.72E-09 | chr:6:32648036 |

|               |            |        |          |                |
|---------------|------------|--------|----------|----------------|
| 6 rs35840159  | 32556332 G | 3.157  | 1.73E-09 | chr:6:32648036 |
| 6 rs9269056   | 32439123 T | 0.3695 | 1.74E-09 | chr:6:32648036 |
| 6 rs9271868   | 32595375 C | 0.3243 | 1.75E-09 | chr:6:32648036 |
| 6 rs9271869   | 32595376 A | 0.3243 | 1.75E-09 | chr:6:32648036 |
| 6 rs9271870   | 32595377 T | 0.3243 | 1.75E-09 | chr:6:32648036 |
| 6 rs116254278 | 32521312 A | 2.929  | 1.78E-09 | chr:6:32648036 |
| 6 rs113521434 | 32520460 T | 2.862  | 1.80E-09 | chr:6:32648036 |
| 6 rs113686014 | 32509551 A | 2.862  | 1.80E-09 | chr:6:32648036 |
| 6 rs202038991 | 32509105 C | 2.926  | 1.81E-09 | chr:6:32648036 |
| 6 rs565113427 | 32647098 C | 0.414  | 1.82E-09 | chr:6:32648036 |
| 6 rs9274150   | 32630276 G | 2.295  | 1.82E-09 | chr:6:32648036 |
| 6 rs78733108  | 32517511 G | 2.874  | 1.83E-09 | chr:6:32648036 |
| 6 rs28366328  | 32561766 G | 3.08   | 1.85E-09 | chr:6:32648036 |
| 6 rs28366356  | 32565091 T | 2.56   | 1.90E-09 | chr:6:32648036 |
| 6 rs80247743  | 32527206 G | 2.613  | 1.90E-09 | chr:6:32648036 |
| 6 rs28366345  | 32564896 G | 2.499  | 1.92E-09 | chr:6:32648036 |
| 6 rs28366346  | 32564898 G | 2.499  | 1.92E-09 | chr:6:32648036 |
| 6 rs3828805   | 32636120 T | 0.3044 | 1.95E-09 | chr:6:32648036 |
| 6 rs659244    | 32577033 C | 2.475  | 1.98E-09 | chr:6:32648036 |
| 6 rs3129719   | 32661779 T | 0.2934 | 2.00E-09 | chr:6:32648036 |
| 6 rs190411898 | 32511180 T | 2.385  | 2.00E-09 | chr:6:32648036 |
| 6 rs17612845  | 32620541 A | 2.045  | 2.04E-09 | chr:6:32648036 |
| 6 rs1049133   | 32629847 A | 0.2929 | 2.09E-09 | chr:6:32648036 |
| 6 rs9273841   | 32629582 C | 0.2929 | 2.09E-09 | chr:6:32648036 |
| 6 rs78182729  | 32502322 T | 2.344  | 2.10E-09 | chr:6:32648036 |
| 6 rs2621320   | 32790940 A | 2.582  | 2.14E-09 | chr:6:32648036 |
| 6 rs28724260  | 32630240 G | 2.311  | 2.14E-09 | chr:6:32648036 |
| 6 rs115872586 | 32604933 A | 3.939  | 2.17E-09 | chr:6:32648036 |
| 6 rs11966146  | 32487739 A | 3.215  | 2.17E-09 | chr:6:32648036 |
| 6 rs1135085   | 32522477 C | 3.823  | 2.18E-09 | chr:6:32648036 |
| 6 rs28366300  | 32560875 T | 3.153  | 2.19E-09 | chr:6:32648036 |
| 6 rs28366301  | 32560883 A | 3.153  | 2.19E-09 | chr:6:32648036 |
| 6 rs375350961 | 32521793 G | 2.966  | 2.21E-09 | chr:6:32648036 |
| 6 rs28366317  | 32561411 T | 3.019  | 2.25E-09 | chr:6:32648036 |
| 6 rs59350153  | 32509935 T | 2.787  | 2.29E-09 | chr:6:32648036 |
| 6 rs113961302 | 32514219 G | 2.833  | 2.33E-09 | chr:6:32648036 |
| 6 rs3200830   | 32520774 T | 2.833  | 2.33E-09 | chr:6:32648036 |
| 6 rs34481656  | 32501664 G | 2.833  | 2.33E-09 | chr:6:32648036 |
| 6 rs62405598  | 32513708 C | 2.833  | 2.33E-09 | chr:6:32648036 |
| 6 rs62405629  | 32513885 T | 2.833  | 2.33E-09 | chr:6:32648036 |
| 6 rs75170544  | 32513285 T | 2.833  | 2.33E-09 | chr:6:32648036 |
| 6 rs78450703  | 32513216 T | 2.833  | 2.33E-09 | chr:6:32648036 |
| 6 rs9271461   | 32588500 A | 2.621  | 2.33E-09 | chr:6:32648036 |

|               |            |        |          |                |
|---------------|------------|--------|----------|----------------|
| 6 rs574642751 | 32525837 T | 3.194  | 2.33E-09 | chr:6:32648036 |
| 6 rs536810    | 32577497 T | 2.483  | 2.36E-09 | chr:6:32648036 |
| 6 rs147317423 | 32516905 T | 2.87   | 2.40E-09 | chr:6:32648036 |
| 6 rs189139309 | 32516915 G | 2.87   | 2.40E-09 | chr:6:32648036 |
| 6 rs190685297 | 32458514 C | 2.97   | 2.42E-09 | chr:6:32648036 |
| 6 rs9269054   | 32439120 T | 0.3745 | 2.45E-09 | chr:6:32648036 |
| 6 rs112692718 | 32685027 T | 3.248  | 2.46E-09 | chr:6:32648036 |
| 6 rs3828849   | 32520664 A | 2.824  | 2.48E-09 | chr:6:32648036 |
| 6 rs34127991  | 32559131 A | 2.953  | 2.49E-09 | chr:6:32648036 |
| 6 rs34788621  | 32559124 C | 2.953  | 2.49E-09 | chr:6:32648036 |
| 6 rs281863362 | 32631133 T | 2.152  | 2.49E-09 | chr:6:32648036 |
| 6 rs62405638  | 32516715 T | 2.833  | 2.52E-09 | chr:6:32648036 |
| 6 rs62405639  | 32516724 C | 2.833  | 2.52E-09 | chr:6:32648036 |
| 6 rs3129771   | 32597202 G | 0.2911 | 2.58E-09 | chr:6:32648036 |
| 6 rs546788946 | 32511223 A | 2.373  | 2.62E-09 | chr:6:32648036 |
| 6 rs34614226  | 32554963 A | 3.034  | 2.65E-09 | chr:6:32648036 |
| 6 rs9269016   | 32436670 G | 0.4189 | 2.66E-09 | chr:6:32648036 |
| 6 rs114277609 | 32478731 T | 2.432  | 2.66E-09 | chr:6:32648036 |
| 6 rs28724031  | 32550819 A | 3.215  | 2.66E-09 | chr:6:32648036 |
| 6 rs202015091 | 32520214 C | 2.828  | 2.68E-09 | chr:6:32648036 |
| 6 rs28383183  | 32571829 A | 2.971  | 2.69E-09 | chr:6:32648036 |
| 6 rs9270891   | 32571828 G | 2.971  | 2.69E-09 | chr:6:32648036 |
| 6 rs9270892   | 32571830 T | 2.971  | 2.69E-09 | chr:6:32648036 |
| 6 rs28366299  | 32560870 A | 3.128  | 2.72E-09 | chr:6:32648036 |
| 6 rs9274626   | 32636040 T | 0.3031 | 2.80E-09 | chr:6:32648036 |
| 6 rs586610    | 32572311 C | 3.042  | 2.80E-09 | chr:6:32648036 |
| 6 rs77789453  | 32512013 C | 2.913  | 2.81E-09 | chr:6:32648036 |
| 6 rs540912133 | 32553011 G | 3.388  | 2.83E-09 | chr:6:32648036 |
| 6 rs573504840 | 32553010 T | 3.388  | 2.83E-09 | chr:6:32648036 |
| 6 rs9269068   | 32440270 A | 0.3384 | 2.84E-09 | chr:6:32648036 |
| 6 rs151027857 | 32521366 C | 3.067  | 2.84E-09 | chr:6:32648036 |
| 6 rs4713534   | 32445926 T | 2.869  | 2.85E-09 | chr:6:32648036 |
| 6 rs552189104 | 32485744 T | 3.018  | 2.85E-09 | chr:6:32648036 |
| 6 rs9273494   | 32628256 T | 2.734  | 2.88E-09 | chr:6:32648036 |
| 6 rs9273154   | 32613028 A | 3.036  | 2.90E-09 | chr:6:32648036 |
| 6 rs113484779 | 32514162 T | 2.797  | 2.91E-09 | chr:6:32648036 |
| 6 rs9273127   | 32612762 A | 3.154  | 2.94E-09 | chr:6:32648036 |
| 6 rs6457543   | 32296029 G | 2.646  | 2.96E-09 | chr:6:32648036 |
| 6 rs1049055   | 32634387 C | 0.3206 | 2.97E-09 | chr:6:32648036 |
| 6 rs36172419  | 32507766 A | 2.147  | 2.98E-09 | chr:6:32648036 |
| 6 rs9273093   | 32612514 A | 3.401  | 2.99E-09 | chr:6:32648036 |
| 6 rs34004019  | 32626403 G | 0.3397 | 3.01E-09 | chr:6:32648036 |
| 6 rs34983241  | 32626397 T | 0.3397 | 3.01E-09 | chr:6:32648036 |

|               |            |        |          |                |
|---------------|------------|--------|----------|----------------|
| 6 rs568483267 | 32626392 C | 0.3397 | 3.01E-09 | chr:6:32648036 |
| 6 rs9273070   | 32612241 T | 3.12   | 3.01E-09 | chr:6:32648036 |
| 6 rs281874937 | 32631345 C | 2.217  | 3.06E-09 | chr:6:32648036 |
| 6 rs28366323  | 32561609 G | 3.084  | 3.11E-09 | chr:6:32648036 |
| 6 rs77506702  | 32518704 G | 2.784  | 3.14E-09 | chr:6:32648036 |
| 6 rs3830058   | 32634010 G | 0.3065 | 3.16E-09 | chr:6:32648036 |
| 6 rs9273079   | 32612326 T | 3.2    | 3.17E-09 | chr:6:32648036 |
| 6 rs9273103   | 32612576 C | 3.447  | 3.19E-09 | chr:6:32648036 |
| 6 rs28366310  | 32561128 C | 3.076  | 3.25E-09 | chr:6:32648036 |
| 6 rs9274339   | 32632319 A | 1.851  | 3.28E-09 | chr:6:32648036 |
| 6 rs9269073   | 32440771 G | 2.615  | 3.31E-09 | chr:6:32648036 |
| 6 rs79136305  | 32505292 G | 2.255  | 3.31E-09 | chr:6:32648036 |
| 6 rs77495163  | 32517859 G | 2.757  | 3.37E-09 | chr:6:32648036 |
| 6 rs116519496 | 32607762 T | 3.809  | 3.38E-09 | chr:6:32648036 |
| 6 rs74958579  | 32459971 T | 2.977  | 3.38E-09 | chr:6:32648036 |
| 6 rs76870762  | 32459972 G | 2.977  | 3.38E-09 | chr:6:32648036 |
| 6 rs9273073   | 32612279 C | 3.117  | 3.40E-09 | chr:6:32648036 |
| 6 rs552085814 | 32554985 T | 4.222  | 3.43E-09 | chr:6:32648036 |
| 6 rs57588792  | 32510012 A | 2.774  | 3.44E-09 | chr:6:32648036 |
| 6 rs28732302  | 32548855 C | 3.015  | 3.45E-09 | chr:6:32648036 |
| 6 rs115712530 | 32517414 A | 2.898  | 3.54E-09 | chr:6:32648036 |
| 6 rs77594561  | 32501273 G | 2.816  | 3.54E-09 | chr:6:32648036 |
| 6 rs77604461  | 32501282 C | 2.816  | 3.54E-09 | chr:6:32648036 |
| 6 rs28680981  | 32606579 A | 2.189  | 3.57E-09 | chr:6:32648036 |
| 6 rs111484816 | 32509034 G | 2.824  | 3.57E-09 | chr:6:32648036 |
| 6 rs115622534 | 32553023 G | 3.299  | 3.64E-09 | chr:6:32648036 |
| 6 rs138825368 | 32518375 A | 2.782  | 3.65E-09 | chr:6:32648036 |
| 6 rs559236302 | 32486992 G | 2.709  | 3.68E-09 | chr:6:32648036 |
| 6 rs3104376   | 32600003 T | 0.3072 | 3.69E-09 | chr:6:32648036 |
| 6 rs9269067   | 32440242 G | 0.339  | 3.77E-09 | chr:6:32648036 |
| 6 rs77891198  | 32506670 A | 2      | 3.79E-09 | chr:6:32648036 |
| 6 rs62405631  | 32514500 C | 2.764  | 3.80E-09 | chr:6:32648036 |
| 6 rs9276179   | 32699090 A | 2.442  | 3.93E-09 | chr:6:32648036 |
| 6 rs532385    | 32195359 A | 0.398  | 3.95E-09 | chr:6:32648036 |
| 6 rs370787440 | 32521596 G | 2.798  | 3.96E-09 | chr:6:32648036 |
| 6 rs555862602 | 32565799 G | 12.41  | 3.97E-09 | chr:6:32648036 |
| 6 rs9269202   | 32449523 T | 0.35   | 3.98E-09 | chr:6:32648036 |
| 6 rs9273217   | 32613747 G | 1.929  | 3.99E-09 | chr:6:32648036 |
| 6 rs9273133   | 32612801 C | 3.054  | 4.00E-09 | chr:6:32648036 |
| 6 rs532162239 | 32558725 T | 3.222  | 4.01E-09 | chr:6:32648036 |
| 6 rs547202137 | 32558728 A | 3.222  | 4.01E-09 | chr:6:32648036 |
| 6 rs140215683 | 32607806 T | 3.99   | 4.04E-09 | chr:6:32648036 |
| 6 rs145266520 | 32607812 G | 3.99   | 4.04E-09 | chr:6:32648036 |

|               |            |        |          |                |
|---------------|------------|--------|----------|----------------|
| 6 rs528153410 | 32507211 G | 2.047  | 4.05E-09 | chr:6:32648036 |
| 6 rs28383169  | 32565652 G | 2.339  | 4.05E-09 | chr:6:32648036 |
| 6 rs9273129   | 32612774 A | 3.132  | 4.07E-09 | chr:6:32648036 |
| 6 rs9273130   | 32612775 A | 3.132  | 4.07E-09 | chr:6:32648036 |
| 6 rs1049225   | 32627747 A | 0.3054 | 4.18E-09 | chr:6:32648036 |
| 6 rs34282199  | 32556218 T | 3.281  | 4.23E-09 | chr:6:32648036 |
| 6 rs3135001   | 32670136 T | 0.2998 | 4.33E-09 | chr:6:32648036 |
| 6 rs62405630  | 32513942 T | 2.781  | 4.34E-09 | chr:6:32648036 |
| 6 rs34594152  | 32556124 C | 4.015  | 4.35E-09 | chr:6:32648036 |
| 6 rs34756259  | 32556121 T | 4.015  | 4.35E-09 | chr:6:32648036 |
| 6 rs9274488   | 32633852 A | 0.3799 | 4.37E-09 | chr:6:32648036 |
| 6 rs2894257   | 32433276 G | 0.2577 | 4.40E-09 | chr:6:32648036 |
| 6 rs79890132  | 32517668 A | 2.756  | 4.42E-09 | chr:6:32648036 |
| 6 rs9268833   | 32428062 T | 2.688  | 4.46E-09 | chr:6:32648036 |
| 6 rs9268834   | 32428079 A | 2.688  | 4.46E-09 | chr:6:32648036 |
| 6 rs9268835   | 32428115 A | 2.688  | 4.46E-09 | chr:6:32648036 |
| 6 rs2395196   | 32450154 T | 6.182  | 4.48E-09 | chr:6:32648036 |
| 6 rs3828851   | 32520621 A | 2.767  | 4.48E-09 | chr:6:32648036 |
| 6 rs557371502 | 32520639 A | 2.767  | 4.48E-09 | chr:6:32648036 |
| 6 rs9274490   | 32633879 G | 2.707  | 4.52E-09 | chr:6:32648036 |
| 6 rs76207819  | 32507365 G | 1.997  | 4.54E-09 | chr:6:32648036 |
| 6 rs111410640 | 32521831 A | 2.773  | 4.59E-09 | chr:6:32648036 |
| 6 rs9271997   | 32597801 A | 0.3665 | 4.59E-09 | chr:6:32648036 |
| 6 rs202187184 | 32519848 C | 2.803  | 4.61E-09 | chr:6:32648036 |
| 6 rs530790448 | 32519846 T | 2.803  | 4.61E-09 | chr:6:32648036 |
| 6 rs17612942  | 32620999 G | 1.914  | 4.72E-09 | chr:6:32648036 |
| 6 rs559062197 | 32452802 T | 0.306  | 4.73E-09 | chr:6:32648036 |
| 6 rs9272071   | 32599487 C | 0.3805 | 4.92E-09 | chr:6:32648036 |
| 6 rs9394106   | 32620232 G | 2.055  | 5.01E-09 | chr:6:32648036 |
| 6 rs112360905 | 32509019 G | 2.786  | 5.05E-09 | chr:6:32648036 |
| 6 rs138925158 | 32493114 A | 3.309  | 5.05E-09 | chr:6:32648036 |
| 6 rs9273102   | 32612566 C | 3.4    | 5.06E-09 | chr:6:32648036 |
| 6 rs28732291  | 32548697 G | 3.031  | 5.08E-09 | chr:6:32648036 |
| 6 rs58537387  | 32510176 T | 2.365  | 5.24E-09 | chr:6:32648036 |
| 6 rs9269160   | 32446711 C | 2.427  | 5.27E-09 | chr:6:32648036 |
| 6 rs3135190   | 32667946 T | 0.303  | 5.28E-09 | chr:6:32648036 |
| 6 rs3891176   | 32634318 A | 2.718  | 5.35E-09 | chr:6:32648036 |
| 6 rs3134966   | 32674298 T | 0.3035 | 5.39E-09 | chr:6:32648036 |
| 6 rs75928817  | 32559212 G | 2.879  | 5.41E-09 | chr:6:32648036 |
| 6 rs9273219   | 32613758 A | 1.919  | 5.43E-09 | chr:6:32648036 |
| 6 rs3134997   | 32672039 T | 0.3034 | 5.54E-09 | chr:6:32648036 |
| 6 rs201150249 | 32522103 C | 2.752  | 5.54E-09 | chr:6:32648036 |
| 6 rs9273128   | 32612769 C | 3.08   | 5.59E-09 | chr:6:32648036 |

|               |            |        |          |                |
|---------------|------------|--------|----------|----------------|
| 6 rs112158360 | 32514050 G | 2.794  | 5.60E-09 | chr:6:32648036 |
| 6 rs112587701 | 32514041 A | 2.794  | 5.60E-09 | chr:6:32648036 |
| 6 rs206017    | 32176211 G | 2.347  | 5.69E-09 | chr:6:32648036 |
| 6 rs3130290   | 32174957 T | 2.347  | 5.69E-09 | chr:6:32648036 |
| 6 rs9273071   | 32612251 G | 3.008  | 5.73E-09 | chr:6:32648036 |
| 6 rs646984    | 32576592 C | 2.407  | 5.84E-09 | chr:6:32648036 |
| 6 rs9273668   | 32629237 G | 2.509  | 5.85E-09 | chr:6:32648036 |
| 6 rs114580448 | 32507538 T | 2.157  | 5.93E-09 | chr:6:32648036 |
| 6 rs138296677 | 32713598 C | 3.68   | 5.95E-09 | chr:6:32648036 |
| 6 rs79905009  | 32479493 G | 2.116  | 5.97E-09 | chr:6:32648036 |
| 6 rs111757290 | 32517856 T | 3.403  | 6.07E-09 | chr:6:32648036 |
| 6 rs77048791  | 32503986 T | 2.62   | 6.09E-09 | chr:6:32648036 |
| 6 rs9271667   | 32592710 C | 0.3626 | 6.11E-09 | chr:6:32648036 |
| 6 rs9378165   | 32510651 G | 2.623  | 6.12E-09 | chr:6:32648036 |
| 6 rs9274637   | 32636137 A | 0.3289 | 6.19E-09 | chr:6:32648036 |
| 6 rs373804788 | 32521591 T | 2.775  | 6.23E-09 | chr:6:32648036 |
| 6 rs562347537 | 32446227 A | 0.243  | 6.31E-09 | chr:6:32648036 |
| 6 rs28366319  | 32561495 A | 2.928  | 6.36E-09 | chr:6:32648036 |
| 6 rs1894411   | 32792973 C | 2.498  | 6.40E-09 | chr:6:32648036 |
| 6 rs76270534  | 32497232 G | 2.418  | 6.47E-09 | chr:6:32648036 |
| 6 rs200930495 | 32612460 A | 3.218  | 6.48E-09 | chr:6:32648036 |
| 6 rs28746993  | 32654030 C | 0.3332 | 6.50E-09 | chr:6:32648036 |
| 6 rs111899294 | 32517912 C | 3.071  | 6.54E-09 | chr:6:32648036 |
| 6 rs546722932 | 32507223 T | 2.027  | 6.56E-09 | chr:6:32648036 |
| 6 rs77794095  | 32502471 T | 2.023  | 6.71E-09 | chr:6:32648036 |
| 6 rs28366294  | 32560715 A | 2.97   | 6.71E-09 | chr:6:32648036 |
| 6 rs28366295  | 32560716 C | 2.97   | 6.71E-09 | chr:6:32648036 |
| 6 rs28366296  | 32560727 A | 2.97   | 6.71E-09 | chr:6:32648036 |
| 6 rs281863349 | 32631152 A | 2.1    | 6.75E-09 | chr:6:32648036 |
| 6 rs28366303  | 32560963 G | 2.948  | 6.85E-09 | chr:6:32648036 |
| 6 rs436388    | 32186264 T | 2.355  | 6.90E-09 | chr:6:32648036 |
| 6 rs17210258  | 32556130 T | 3.889  | 6.97E-09 | chr:6:32648036 |
| 6 rs2857107   | 32785515 T | 2.498  | 7.00E-09 | chr:6:32648036 |
| 6 rs10807106  | 32450851 G | 2.736  | 7.03E-09 | chr:6:32648036 |
| 6 rs28366327  | 32561678 A | 2.96   | 7.06E-09 | chr:6:32648036 |
| 6 rs281863514 | 32630930 G | 0.3547 | 7.10E-09 | chr:6:32648036 |
| 6 rs9270092   | 32554420 T | 0.3207 | 7.33E-09 | chr:6:32648036 |
| 6 rs113096063 | 32503161 T | 2.579  | 7.35E-09 | chr:6:32648036 |
| 6 rs113351668 | 32503167 A | 2.579  | 7.35E-09 | chr:6:32648036 |
| 6 rs28533694  | 32587235 T | 0.3767 | 7.37E-09 | chr:6:32648036 |
| 6 rs28383364  | 32606912 G | 2.388  | 7.37E-09 | chr:6:32648036 |
| 6 rs9273104   | 32612595 T | 3.289  | 7.40E-09 | chr:6:32648036 |
| 6 rs9271703   | 32593280 T | 0.3606 | 7.47E-09 | chr:6:32648036 |



|               |            |        |          |                |
|---------------|------------|--------|----------|----------------|
| 6 rs75876652  | 32505224 T | 2.351  | 7.54E-09 | chr:6:32648036 |
| 6 rs115885380 | 32502972 A | 2.247  | 7.59E-09 | chr:6:32648036 |
| 6 rs116299636 | 32502974 C | 2.247  | 7.59E-09 | chr:6:32648036 |
| 6 rs9271708   | 32593386 A | 0.3507 | 7.60E-09 | chr:6:32648036 |
| 6 rs9271709   | 32593392 A | 0.3507 | 7.60E-09 | chr:6:32648036 |
| 6 rs114680412 | 32520248 A | 2.764  | 7.66E-09 | chr:6:32648036 |
| 6 rs115706291 | 32520256 A | 2.764  | 7.66E-09 | chr:6:32648036 |
| 6 rs6457663   | 32739312 A | 4.397  | 7.72E-09 | chr:6:32648036 |
| 6 rs6919798   | 32732890 G | 4.397  | 7.72E-09 | chr:6:32648036 |
| 6 rs557630457 | 32554837 T | 3.183  | 7.73E-09 | chr:6:32648036 |
| 6 rs576005883 | 32554840 T | 3.183  | 7.73E-09 | chr:6:32648036 |
| 6 rs28724164  | 32555762 C | 3.56   | 7.76E-09 | chr:6:32648036 |
| 6 rs9271925   | 32596540 G | 0.3332 | 7.95E-09 | chr:6:32648036 |
| 6 rs9271926   | 32596566 T | 0.3332 | 7.95E-09 | chr:6:32648036 |
| 6 rs35399335  | 32556338 G | 2.841  | 8.02E-09 | chr:6:32648036 |
| 6 rs540527828 | 32459250 T | 2.961  | 8.17E-09 | chr:6:32648036 |
| 6 rs9273108   | 32612626 T | 3.215  | 8.20E-09 | chr:6:32648036 |
| 6 rs62405591  | 32508704 A | 2.711  | 8.22E-09 | chr:6:32648036 |
| 6 rs9273786   | 32629462 A | 2.562  | 8.40E-09 | chr:6:32648036 |
| 6 rs9271618   | 32591752 A | 0.3673 | 8.58E-09 | chr:6:32648036 |
| 6 rs281863226 | 32631563 T | 0.3618 | 8.81E-09 | chr:6:32648036 |
| 6 rs4367411   | 32571929 T | 2.45   | 8.84E-09 | chr:6:32648036 |
| 6 rs28366298  | 32560859 C | 2.956  | 8.87E-09 | chr:6:32648036 |
| 6 rs116752065 | 32482564 G | 3.098  | 8.89E-09 | chr:6:32648036 |
| 6 rs28746817  | 32633287 T | 2.199  | 8.97E-09 | chr:6:32648036 |
| 6 rs192090456 | 32482101 C | 2.065  | 8.98E-09 | chr:6:32648036 |
| 6 rs113154956 | 32537479 C | 5.925  | 9.04E-09 | chr:6:32648036 |
| 6 rs9271894   | 32595874 T | 0.3665 | 9.20E-09 | chr:6:32648036 |
| 6 rs9273111   | 32612643 A | 3.142  | 9.29E-09 | chr:6:32648036 |
| 6 rs74498391  | 32505267 C | 2.206  | 9.37E-09 | chr:6:32648036 |
| 6 rs78543540  | 32457762 A | 2.466  | 9.48E-09 | chr:6:32648036 |
| 6 rs79044903  | 32457771 A | 2.466  | 9.48E-09 | chr:6:32648036 |
| 6 rs115466102 | 32507168 C | 1.981  | 9.55E-09 | chr:6:32648036 |
| 6 rs115272081 | 32519782 A | 2.782  | 9.59E-09 | chr:6:32648036 |
| 6 rs115888968 | 32521309 G | 2.63   | 9.59E-09 | chr:6:32648036 |
| 6 rs9273110   | 32612633 C | 3.13   | 9.61E-09 | chr:6:32648036 |
| 6 rs9273107   | 32612620 G | 3.172  | 9.72E-09 | chr:6:32648036 |
| 6 rs9269129   | 32444938 G | 0.267  | 9.76E-09 | chr:6:32648036 |
| 6 rs9273660   | 32629227 T | 2.482  | 9.77E-09 | chr:6:32648036 |
| 6 rs67612510  | 32526436 A | 2.19   | 9.80E-09 | chr:6:32648036 |
| 6 rs3129726   | 32678206 G | 0.3166 | 1.01E-08 | chr:6:32648036 |
| 6 rs9271376   | 32587113 G | 0.3266 | 1.01E-08 | chr:6:32648036 |
| 6 rs647035    | 32576626 A | 2.372  | 1.01E-08 | chr:6:32648036 |

|               |            |        |          |                |
|---------------|------------|--------|----------|----------------|
| 6 rs9273403   | 32627159 T | 1.915  | 1.01E-08 | chr:6:32648036 |
| 6 rs9271662   | 32592628 A | 0.3446 | 1.01E-08 | chr:6:32648036 |
| 6 rs9269204   | 32449797 C | 0.3331 | 1.01E-08 | chr:6:32648036 |
| 6 rs28366325  | 32561659 C | 2.936  | 1.02E-08 | chr:6:32648036 |
| 6 rs534964517 | 32517795 C | 3.421  | 1.02E-08 | chr:6:32648036 |
| 6 rs570640158 | 32517793 C | 3.421  | 1.02E-08 | chr:6:32648036 |
| 6 rs551251088 | 32507235 A | 2.013  | 1.03E-08 | chr:6:32648036 |
| 6 rs112895453 | 32510602 G | 2.588  | 1.05E-08 | chr:6:32648036 |
| 6 rs114645331 | 32554776 T | 3.194  | 1.05E-08 | chr:6:32648036 |
| 6 rs281863522 | 32630920 C | 2.282  | 1.06E-08 | chr:6:32648036 |
| 6 rs78294251  | 32503336 A | 2.238  | 1.06E-08 | chr:6:32648036 |
| 6 rs9271733   | 32593633 A | 0.3382 | 1.07E-08 | chr:6:32648036 |
| 6 rs41270929  | 32630868 T | 0.3578 | 1.07E-08 | chr:6:32648036 |
| 6 rs113823631 | 32553037 T | 3.127  | 1.08E-08 | chr:6:32648036 |
| 6 rs113623173 | 32510438 T | 2.37   | 1.08E-08 | chr:6:32648036 |
| 6 rs536189184 | 32558823 A | 3.031  | 1.11E-08 | chr:6:32648036 |
| 6 rs9273539   | 32628779 T | 2.488  | 1.11E-08 | chr:6:32648036 |
| 6 rs138087636 | 32517031 T | 2.729  | 1.12E-08 | chr:6:32648036 |
| 6 rs185282713 | 32517018 C | 2.729  | 1.12E-08 | chr:6:32648036 |
| 6 rs28772272  | 32656980 T | 0.3494 | 1.12E-08 | chr:6:32648036 |
| 6 rs9378274   | 32656983 A | 0.3494 | 1.12E-08 | chr:6:32648036 |
| 6 rs9391891   | 32656975 A | 0.3494 | 1.12E-08 | chr:6:32648036 |
| 6 rs9275642   | 32684935 C | 0.4377 | 1.12E-08 | chr:6:32648036 |
| 6 rs75211336  | 32502934 G | 2.202  | 1.15E-08 | chr:6:32648036 |
| 6 rs28366267  | 32559781 C | 2.736  | 1.15E-08 | chr:6:32648036 |
| 6 rs9273807   | 32629514 A | 2.523  | 1.19E-08 | chr:6:32648036 |
| 6 rs35081742  | 32553608 T | 3.208  | 1.19E-08 | chr:6:32648036 |
| 6 rs74587162  | 32509455 C | 2.647  | 1.19E-08 | chr:6:32648036 |
| 6 rs4570006   | 32657257 T | 0.3529 | 1.21E-08 | chr:6:32648036 |
| 6 rs17210293  | 32556165 T | 3.504  | 1.22E-08 | chr:6:32648036 |
| 6 rs74791653  | 32499185 T | 1.937  | 1.24E-08 | chr:6:32648036 |
| 6 rs9273402   | 32627155 A | 1.908  | 1.24E-08 | chr:6:32648036 |
| 6 rs71549252  | 32501613 C | 2.904  | 1.24E-08 | chr:6:32648036 |
| 6 rs114969562 | 32594299 A | 0.3406 | 1.26E-08 | chr:6:32648036 |
| 6 rs71549253  | 32501882 C | 2.826  | 1.27E-08 | chr:6:32648036 |
| 6 rs71549254  | 32501887 G | 2.826  | 1.27E-08 | chr:6:32648036 |
| 6 rs1626993   | 32636991 T | 2.217  | 1.28E-08 | chr:6:32648036 |
| 6 rs9273229   | 32613914 C | 1.895  | 1.28E-08 | chr:6:32648036 |
| 6 rs35971290  | 32550235 G | 3.234  | 1.29E-08 | chr:6:32648036 |
| 6 rs9273498   | 32628301 T | 0.3316 | 1.30E-08 | chr:6:32648036 |
| 6 rs9469195   | 32585012 G | 0.2798 | 1.33E-08 | chr:6:32648036 |
| 6 rs538187149 | 32591690 C | 0.3177 | 1.33E-08 | chr:6:32648036 |
| 6 rs74323244  | 32503921 C | 2.544  | 1.33E-08 | chr:6:32648036 |

|               |            |        |          |                |
|---------------|------------|--------|----------|----------------|
| 6 rs9271694   | 32593051 C | 0.3724 | 1.33E-08 | chr:6:32648036 |
| 6 rs28366256  | 32559499 G | 2.994  | 1.34E-08 | chr:6:32648036 |
| 6 rs28746964  | 32653083 G | 0.3523 | 1.34E-08 | chr:6:32648036 |
| 6 rs114031016 | 32520035 T | 3.093  | 1.34E-08 | chr:6:32648036 |
| 6 rs62405643  | 32517807 C | 0.3993 | 1.34E-08 | chr:6:32648036 |
| 6 rs111680800 | 32507452 A | 2.053  | 1.35E-08 | chr:6:32648036 |
| 6 rs111897614 | 32503177 T | 2.54   | 1.35E-08 | chr:6:32648036 |
| 6 rs7749092   | 32449050 T | 0.3414 | 1.37E-08 | chr:6:32648036 |
| 6 rs1049213   | 32627773 A | 0.331  | 1.40E-08 | chr:6:32648036 |
| 6 rs17212104  | 32650883 G | 0.3528 | 1.41E-08 | chr:6:32648036 |
| 6 rs140590517 | 32518282 A | 2.652  | 1.41E-08 | chr:6:32648036 |
| 6 rs34977583  | 32555377 A | 3.935  | 1.45E-08 | chr:6:32648036 |
| 6 rs9273391   | 32627043 G | 4.651  | 1.47E-08 | chr:6:32648036 |
| 6 rs17212279  | 32651713 G | 0.3515 | 1.50E-08 | chr:6:32648036 |
| 6 rs9272608   | 32607737 C | 3.258  | 1.50E-08 | chr:6:32648036 |
| 6 rs9271623   | 32591914 C | 0.377  | 1.54E-08 | chr:6:32648036 |
| 6 rs113141487 | 32524887 G | 2.959  | 1.55E-08 | chr:6:32648036 |
| 6 rs28891493  | 32662509 T | 0.355  | 1.55E-08 | chr:6:32648036 |
| 6 rs9276557   | 32723614 T | 4.201  | 1.55E-08 | chr:6:32648036 |
| 6 rs9274514   | 32634243 A | 2.622  | 1.55E-08 | chr:6:32648036 |
| 6 rs77122291  | 32559019 A | 2.674  | 1.64E-08 | chr:6:32648036 |
| 6 rs28366288  | 32560432 T | 2.768  | 1.65E-08 | chr:6:32648036 |
| 6 rs9268945   | 32433701 T | 0.4494 | 1.65E-08 | chr:6:32648036 |
| 6 rs113182435 | 32518236 A | 2.632  | 1.65E-08 | chr:6:32648036 |
| 6 rs9273504   | 32628407 C | 2.618  | 1.65E-08 | chr:6:32648036 |
| 6 rs28747006  | 32654453 T | 0.3565 | 1.66E-08 | chr:6:32648036 |
| 6 rs28747007  | 32654475 A | 0.3565 | 1.66E-08 | chr:6:32648036 |
| 6 rs9271630   | 32591989 G | 0.3761 | 1.66E-08 | chr:6:32648036 |
| 6 rs28747028  | 32654989 T | 0.3568 | 1.66E-08 | chr:6:32648036 |
| 6 rs79476956  | 32508173 G | 1.997  | 1.68E-08 | chr:6:32648036 |
| 6 rs17205696  | 32650587 T | 0.3594 | 1.68E-08 | chr:6:32648036 |
| 6 rs13208475  | 32583255 T | 2.632  | 1.69E-08 | chr:6:32648036 |
| 6 rs13208697  | 32583274 T | 2.632  | 1.69E-08 | chr:6:32648036 |
| 6 rs17210265  | 32556141 A | 3.691  | 1.70E-08 | chr:6:32648036 |
| 6 rs547758749 | 32558755 T | 3.043  | 1.70E-08 | chr:6:32648036 |
| 6 rs28746963  | 32653079 T | 0.3556 | 1.71E-08 | chr:6:32648036 |
| 6 rs116813230 | 32524784 A | 2.778  | 1.72E-08 | chr:6:32648036 |
| 6 rs112177836 | 32503658 A | 2.527  | 1.76E-08 | chr:6:32648036 |
| 6 rs28746910  | 32649127 G | 0.3571 | 1.76E-08 | chr:6:32648036 |
| 6 rs75046889  | 32507835 C | 3.103  | 1.77E-08 | chr:6:32648036 |
| 6 rs28746994  | 32654094 A | 0.3483 | 1.79E-08 | chr:6:32648036 |
| 6 rs28366258  | 32559513 C | 2.985  | 1.81E-08 | chr:6:32648036 |
| 6 rs554943670 | 32516971 G | 2.696  | 1.82E-08 | chr:6:32648036 |

|               |            |        |          |                |
|---------------|------------|--------|----------|----------------|
| 6 rs6901665   | 32442167 G | 2.863  | 1.86E-08 | chr:6:32648036 |
| 6 rs149253766 | 32507305 T | 1.974  | 1.88E-08 | chr:6:32648036 |
| 6 rs28746916  | 32649579 A | 0.3603 | 1.89E-08 | chr:6:32648036 |
| 6 rs9271900   | 32596013 G | 0.3756 | 1.94E-08 | chr:6:32648036 |
| 6 rs113654440 | 32596946 A | 0.3773 | 1.95E-08 | chr:6:32648036 |
| 6 rs28724149  | 32555334 G | 3.849  | 1.95E-08 | chr:6:32648036 |
| 6 rs17212062  | 32650648 G | 0.3603 | 2.01E-08 | chr:6:32648036 |
| 6 rs17212069  | 32650667 G | 0.3603 | 2.01E-08 | chr:6:32648036 |
| 6 rs17212090  | 32650809 T | 0.3603 | 2.01E-08 | chr:6:32648036 |
| 6 rs4538747   | 32657334 A | 0.3603 | 2.01E-08 | chr:6:32648036 |
| 6 rs75375346  | 32596908 C | 0.3768 | 2.01E-08 | chr:6:32648036 |
| 6 rs9273803   | 32629504 T | 2.48   | 2.05E-08 | chr:6:32648036 |
| 6 rs3828829   | 32521233 T | 3.296  | 2.06E-08 | chr:6:32648036 |
| 6 rs9272002   | 32597924 G | 0.4002 | 2.07E-08 | chr:6:32648036 |
| 6 rs9272003   | 32597940 G | 0.4002 | 2.07E-08 | chr:6:32648036 |
| 6 rs9273536   | 32628764 T | 2.447  | 2.08E-08 | chr:6:32648036 |
| 6 rs534819727 | 32481692 T | 3.068  | 2.10E-08 | chr:6:32648036 |
| 6 rs376271339 | 32517804 C | 3.277  | 2.10E-08 | chr:6:32648036 |
| 6 rs17202787  | 32428397 A | 4.304  | 2.12E-08 | chr:6:32648036 |
| 6 rs28752487  | 32417433 T | 4.304  | 2.12E-08 | chr:6:32648036 |
| 6 rs28752488  | 32419006 A | 4.304  | 2.12E-08 | chr:6:32648036 |
| 6 rs62405588  | 32508468 G | 2.205  | 2.13E-08 | chr:6:32648036 |
| 6 rs78539884  | 32513224 A | 2.594  | 2.16E-08 | chr:6:32648036 |
| 6 rs116427677 | 32493456 T | 2.508  | 2.16E-08 | chr:6:32648036 |
| 6 rs206018    | 32177880 G | 2.421  | 2.16E-08 | chr:6:32648036 |
| 6 rs149038762 | 32475948 A | 1.915  | 2.18E-08 | chr:6:32648036 |
| 6 rs3129299   | 32900787 T | 2.268  | 2.19E-08 | chr:6:32648036 |
| 6 rs111409670 | 32518069 C | 2.682  | 2.19E-08 | chr:6:32648036 |
| 6 rs9273873   | 32629650 C | 2.595  | 2.20E-08 | chr:6:32648036 |
| 6 rs9273902   | 32629716 C | 2.595  | 2.20E-08 | chr:6:32648036 |
| 6 rs9271979   | 32597635 C | 0.3463 | 2.22E-08 | chr:6:32648036 |
| 6 rs9273695   | 32629281 T | 2.455  | 2.23E-08 | chr:6:32648036 |
| 6 rs9273696   | 32629282 T | 2.455  | 2.23E-08 | chr:6:32648036 |
| 6 rs9348889   | 32620255 C | 2.722  | 2.24E-08 | chr:6:32648036 |
| 6 rs9348890   | 32620256 C | 2.722  | 2.24E-08 | chr:6:32648036 |
| 6 rs116432881 | 32514385 G | 2.688  | 2.26E-08 | chr:6:32648036 |
| 6 rs9271654   | 32592565 A | 0.3518 | 2.28E-08 | chr:6:32648036 |
| 6 rs9271657   | 32592582 C | 0.3518 | 2.28E-08 | chr:6:32648036 |
| 6 rs9405042   | 32657020 G | 0.3622 | 2.34E-08 | chr:6:32648036 |
| 6 rs541764084 | 32522223 G | 3.585  | 2.34E-08 | chr:6:32648036 |
| 6 rs281863686 | 32630689 C | 2.092  | 2.35E-08 | chr:6:32648036 |
| 6 rs281863689 | 32630684 T | 2.092  | 2.35E-08 | chr:6:32648036 |
| 6 rs2023222   | 32194083 T | 2.299  | 2.36E-08 | chr:6:32648036 |

|               |            |        |          |                |
|---------------|------------|--------|----------|----------------|
| 6 rs3132950   | 32194740 C | 2.299  | 2.36E-08 | chr:6:32648036 |
| 6 rs9267845   | 32193698 A | 2.299  | 2.36E-08 | chr:6:32648036 |
| 6 rs17205717  | 32650746 C | 0.3623 | 2.37E-08 | chr:6:32648036 |
| 6 rs17212076  | 32650724 G | 0.3623 | 2.37E-08 | chr:6:32648036 |
| 6 rs28746903  | 32648768 T | 0.3641 | 2.37E-08 | chr:6:32648036 |
| 6 rs28746904  | 32648773 C | 0.3641 | 2.37E-08 | chr:6:32648036 |
| 6 rs28746936  | 32651393 A | 0.3574 | 2.38E-08 | chr:6:32648036 |
| 6 rs28746937  | 32651401 T | 0.3574 | 2.38E-08 | chr:6:32648036 |
| 6 rs79005639  | 32510582 C | 2.515  | 2.39E-08 | chr:6:32648036 |
| 6 rs75924712  | 32506761 A | 2.252  | 2.40E-08 | chr:6:32648036 |
| 6 rs75387045  | 32508213 T | 2.004  | 2.42E-08 | chr:6:32648036 |
| 6 rs537206245 | 32514754 C | 2.636  | 2.46E-08 | chr:6:32648036 |
| 6 rs539579029 | 32514764 T | 2.636  | 2.46E-08 | chr:6:32648036 |
| 6 rs28746970  | 32653259 C | 0.3587 | 2.51E-08 | chr:6:32648036 |
| 6 rs113712140 | 32485972 G | 3.186  | 2.53E-08 | chr:6:32648036 |
| 6 rs9271972   | 32597567 T | 0.3838 | 2.53E-08 | chr:6:32648036 |
| 6 rs113938016 | 32517898 C | 3.165  | 2.55E-08 | chr:6:32648036 |
| 6 rs4587163   | 32593167 T | 2.313  | 2.55E-08 | chr:6:32648036 |
| 6 rs28747004  | 32654379 A | 0.3625 | 2.55E-08 | chr:6:32648036 |
| 6 rs28747005  | 32654401 G | 0.3625 | 2.55E-08 | chr:6:32648036 |
| 6 rs28772280  | 32673899 T | 0.3626 | 2.56E-08 | chr:6:32648036 |
| 6 rs28772285  | 32674380 T | 0.3626 | 2.56E-08 | chr:6:32648036 |
| 6 rs28772286  | 32674385 C | 0.3626 | 2.56E-08 | chr:6:32648036 |
| 6 rs28772287  | 32674400 C | 0.3626 | 2.56E-08 | chr:6:32648036 |
| 6 rs28437335  | 32657644 C | 0.363  | 2.56E-08 | chr:6:32648036 |
| 6 rs9405119   | 32657681 G | 0.363  | 2.56E-08 | chr:6:32648036 |
| 6 rs9273698   | 32629289 A | 2.439  | 2.57E-08 | chr:6:32648036 |
| 6 rs3104391   | 32594901 T | 0.3439 | 2.58E-08 | chr:6:32648036 |
| 6 rs28746996  | 32654214 C | 0.3482 | 2.60E-08 | chr:6:32648036 |
| 6 rs28746912  | 32649451 G | 0.3644 | 2.64E-08 | chr:6:32648036 |
| 6 rs146702867 | 32524800 G | 2.625  | 2.65E-08 | chr:6:32648036 |
| 6 rs28675927  | 32603488 G | 0.355  | 2.66E-08 | chr:6:32648036 |
| 6 rs281863331 | 32631178 A | 2.046  | 2.68E-08 | chr:6:32648036 |
| 6 rs551468481 | 32518258 G | 2.594  | 2.68E-08 | chr:6:32648036 |
| 6 rs75658193  | 32503375 A | 2.156  | 2.69E-08 | chr:6:32648036 |
| 6 rs17205738  | 32650762 G | 0.3639 | 2.71E-08 | chr:6:32648036 |
| 6 rs62405574  | 32458246 G | 2.544  | 2.71E-08 | chr:6:32648036 |
| 6 rs535188034 | 32558790 T | 2.946  | 2.72E-08 | chr:6:32648036 |
| 6 rs553643750 | 32558791 G | 2.946  | 2.72E-08 | chr:6:32648036 |
| 6 rs28772284  | 32674313 T | 0.3633 | 2.77E-08 | chr:6:32648036 |
| 6 rs28746911  | 32649200 C | 0.3641 | 2.78E-08 | chr:6:32648036 |
| 6 rs28891483  | 32649254 T | 0.3641 | 2.78E-08 | chr:6:32648036 |
| 6 rs28891484  | 32649261 A | 0.3641 | 2.78E-08 | chr:6:32648036 |

|               |            |        |          |                |
|---------------|------------|--------|----------|----------------|
| 6 rs28891485  | 32649274 T | 0.3641 | 2.78E-08 | chr:6:32648036 |
| 6 rs28747026  | 32654860 G | 0.3624 | 2.80E-08 | chr:6:32648036 |
| 6 rs28746939  | 32651416 C | 0.3596 | 2.83E-08 | chr:6:32648036 |
| 6 rs111875855 | 32489668 T | 3.339  | 2.84E-08 | chr:6:32648036 |
| 6 rs28746971  | 32653272 A | 0.3617 | 2.87E-08 | chr:6:32648036 |
| 6 rs411326    | 32211317 T | 2.284  | 2.89E-08 | chr:6:32648036 |
| 6 rs9271887   | 32595679 A | 0.3814 | 2.90E-08 | chr:6:32648036 |
| 6 rs28366339  | 32564725 G | 2.382  | 2.91E-08 | chr:6:32648036 |
| 6 rs28366340  | 32564727 G | 2.382  | 2.91E-08 | chr:6:32648036 |
| 6 rs28724146  | 32555303 G | 3.809  | 2.92E-08 | chr:6:32648036 |
| 6 rs9271738   | 32593691 G | 0.3427 | 2.92E-08 | chr:6:32648036 |
| 6 rs35130701  | 32594199 G | 0.3843 | 2.95E-08 | chr:6:32648036 |
| 6 rs5020949   | 32449974 T | 3.028  | 2.97E-08 | chr:6:32648036 |
| 6 rs28746966  | 32653145 C | 0.3642 | 3.00E-08 | chr:6:32648036 |
| 6 rs33927408  | 32550420 T | 3.283  | 3.02E-08 | chr:6:32648036 |
| 6 rs115286318 | 32573911 A | 11.01  | 3.05E-08 | chr:6:32648036 |
| 6 rs150548684 | 32507293 T | 1.954  | 3.06E-08 | chr:6:32648036 |
| 6 rs17205747  | 32650911 T | 0.3642 | 3.09E-08 | chr:6:32648036 |
| 6 rs28746905  | 32648842 T | 0.3659 | 3.09E-08 | chr:6:32648036 |
| 6 rs76867075  | 32459748 T | 2.308  | 3.10E-08 | chr:6:32648036 |
| 6 rs5000634   | 32663564 G | 2.244  | 3.13E-08 | chr:6:32648036 |
| 6 rs17843709  | 32622409 G | 1.977  | 3.21E-08 | chr:6:32648036 |
| 6 rs28891486  | 32649408 T | 0.3667 | 3.21E-08 | chr:6:32648036 |
| 6 rs9271850   | 32595060 G | 0.3762 | 3.21E-08 | chr:6:32648036 |
| 6 rs12055602  | 32622382 C | 1.97   | 3.21E-08 | chr:6:32648036 |
| 6 rs6935578   | 32683552 G | 2.946  | 3.26E-08 | chr:6:32648036 |
| 6 rs7770879   | 32598423 A | 0.3171 | 3.27E-08 | chr:6:32648036 |
| 6 rs7771138   | 32598419 A | 0.3171 | 3.27E-08 | chr:6:32648036 |
| 6 rs74395243  | 32608116 A | 3.324  | 3.32E-08 | chr:6:32648036 |
| 6 rs28747050  | 32655674 C | 0.3645 | 3.33E-08 | chr:6:32648036 |
| 6 rs28826696  | 32617628 C | 1.804  | 3.34E-08 | chr:6:32648036 |
| 6 rs574347579 | 32514817 A | 2.594  | 3.35E-08 | chr:6:32648036 |
| 6 rs116384287 | 32482031 T | 2.131  | 3.38E-08 | chr:6:32648036 |
| 6 rs572418566 | 32670172 C | 2.394  | 3.38E-08 | chr:6:32648036 |
| 6 rs9275446   | 32671841 G | 2.287  | 3.39E-08 | chr:6:32648036 |
| 6 rs9275448   | 32671848 T | 2.287  | 3.39E-08 | chr:6:32648036 |
| 6 rs9275449   | 32671869 T | 2.287  | 3.39E-08 | chr:6:32648036 |
| 6 rs531218774 | 32629372 A | 2.482  | 3.41E-08 | chr:6:32648036 |
| 6 rs9273736   | 32629371 G | 2.482  | 3.41E-08 | chr:6:32648036 |
| 6 rs113602321 | 32468804 A | 2.039  | 3.41E-08 | chr:6:32648036 |
| 6 rs12055445  | 32626739 A | 0.4396 | 3.42E-08 | chr:6:32648036 |
| 6 rs28746913  | 32649517 A | 0.3688 | 3.45E-08 | chr:6:32648036 |
| 6 rs28746914  | 32649536 C | 0.3688 | 3.45E-08 | chr:6:32648036 |

|               |            |        |          |                |
|---------------|------------|--------|----------|----------------|
| 6 rs28746915  | 32649543 A | 0.3688 | 3.45E-08 | chr:6:32648036 |
| 6 rs9271454   | 32588422 T | 2.479  | 3.48E-08 | chr:6:32648036 |
| 6 rs9271455   | 32588423 G | 2.479  | 3.48E-08 | chr:6:32648036 |
| 6 rs78512156  | 32458168 C | 3.338  | 3.49E-08 | chr:6:32648036 |
| 6 rs78947187  | 32458169 A | 3.338  | 3.49E-08 | chr:6:32648036 |
| 6 rs28747047  | 32655578 T | 0.3681 | 3.53E-08 | chr:6:32648036 |
| 6 rs28747013  | 32654596 A | 0.3674 | 3.53E-08 | chr:6:32648036 |
| 6 rs76342965  | 32508008 T | 2      | 3.55E-08 | chr:6:32648036 |
| 6 rs9271688   | 32592992 G | 0.3827 | 3.61E-08 | chr:6:32648036 |
| 6 rs2395106   | 32193220 A | 2.269  | 3.61E-08 | chr:6:32648036 |
| 6 rs3096691   | 32194854 G | 2.269  | 3.61E-08 | chr:6:32648036 |
| 6 rs564551505 | 32644523 C | 0.3537 | 3.62E-08 | chr:6:32648036 |
| 6 rs28746906  | 32648863 A | 0.3678 | 3.63E-08 | chr:6:32648036 |
| 6 rs35744187  | 32637756 A | 0.365  | 3.63E-08 | chr:6:32648036 |
| 6 rs17205949  | 32651816 A | 0.3688 | 3.65E-08 | chr:6:32648036 |
| 6 rs17212286  | 32651819 A | 0.3688 | 3.65E-08 | chr:6:32648036 |
| 6 rs35877117  | 32501719 T | 3.071  | 3.66E-08 | chr:6:32648036 |
| 6 rs3104377   | 32599689 C | 0.3724 | 3.68E-08 | chr:6:32648036 |
| 6 rs78273580  | 32506779 T | 2.233  | 3.69E-08 | chr:6:32648036 |
| 6 rs4403294   | 32634922 A | 0.379  | 3.69E-08 | chr:6:32648036 |
| 6 rs9268805   | 32423399 G | 0.4184 | 3.70E-08 | chr:6:32648036 |
| 6 rs75459649  | 32505390 G | 2.065  | 3.70E-08 | chr:6:32648036 |
| 6 rs1475960   | 32194751 T | 2.27   | 3.73E-08 | chr:6:32648036 |
| 6 rs1475961   | 32194609 A | 2.27   | 3.73E-08 | chr:6:32648036 |
| 6 rs114618396 | 32608053 T | 3.399  | 3.74E-08 | chr:6:32648036 |
| 6 rs9273442   | 32627582 T | 0.3566 | 3.74E-08 | chr:6:32648036 |
| 6 rs28746934  | 32650436 C | 0.3713 | 3.75E-08 | chr:6:32648036 |
| 6 rs28746931  | 32650194 G | 0.3705 | 3.80E-08 | chr:6:32648036 |
| 6 rs28746932  | 32650217 A | 0.3705 | 3.80E-08 | chr:6:32648036 |
| 6 rs28746883  | 32638392 T | 0.3696 | 3.81E-08 | chr:6:32648036 |
| 6 rs28746884  | 32638395 T | 0.3696 | 3.81E-08 | chr:6:32648036 |
| 6 rs9274326   | 32632237 C | 0.5277 | 3.84E-08 | chr:6:32648036 |
| 6 rs9269041   | 32438243 G | 0.3735 | 3.84E-08 | chr:6:32648036 |
| 6 rs75730517  | 32503697 A | 2.168  | 3.85E-08 | chr:6:32648036 |
| 6 rs17204659  | 32557321 T | 3.305  | 3.88E-08 | chr:6:32648036 |
| 6 rs9271681   | 32592918 T | 0.3966 | 3.91E-08 | chr:6:32648036 |
| 6 rs3104383   | 32598784 G | 0.3228 | 3.91E-08 | chr:6:32648036 |
| 6 rs28746925  | 32649932 G | 0.368  | 3.93E-08 | chr:6:32648036 |
| 6 rs9272018   | 32598460 T | 0.3267 | 3.95E-08 | chr:6:32648036 |
| 6 rs572081630 | 32512882 T | 2.542  | 3.96E-08 | chr:6:32648036 |
| 6 rs147842166 | 32485952 G | 3.225  | 3.97E-08 | chr:6:32648036 |
| 6 rs147192780 | 32489642 C | 3.11   | 3.98E-08 | chr:6:32648036 |
| 6 rs28747048  | 32655584 T | 0.3694 | 3.98E-08 | chr:6:32648036 |

|               |            |        |          |                |
|---------------|------------|--------|----------|----------------|
| 6 rs9271727   | 32593585 A | 0.3599 | 3.99E-08 | chr:6:32648036 |
| 6 rs28891489  | 32650362 C | 0.3799 | 4.02E-08 | chr:6:32648036 |
| 6 rs1109771   | 32187605 A | 2.177  | 4.02E-08 | chr:6:32648036 |
| 6 rs28891488  | 32650345 T | 0.3735 | 4.03E-08 | chr:6:32648036 |
| 6 rs72848204  | 32594073 T | 0.3907 | 4.08E-08 | chr:6:32648036 |
| 6 rs112530924 | 32552590 C | 2.783  | 4.14E-08 | chr:6:32648036 |
| 6 rs9272266   | 32603416 A | 0.3579 | 4.17E-08 | chr:6:32648036 |
| 6 rs78923832  | 32507947 A | 1.998  | 4.23E-08 | chr:6:32648036 |
| 6 rs9274112   | 32630194 T | 0.3962 | 4.23E-08 | chr:6:32648036 |
| 6 rs9273138   | 32612843 T | 2.811  | 4.24E-08 | chr:6:32648036 |
| 6 rs35635216  | 32501743 A | 3.055  | 4.25E-08 | chr:6:32648036 |
| 6 rs2395105   | 32192978 T | 2.253  | 4.28E-08 | chr:6:32648036 |
| 6 rs28891403  | 32640257 C | 0.3698 | 4.28E-08 | chr:6:32648036 |
| 6 rs28891404  | 32640268 A | 0.3698 | 4.28E-08 | chr:6:32648036 |
| 6 rs9275052   | 32648156 G | 0.4829 | 4.29E-08 | chr:6:32648036 |
| 6 rs28891487  | 32650312 T | 0.3727 | 4.30E-08 | chr:6:32648036 |
| 6 rs186302965 | 32498947 A | 1.969  | 4.31E-08 | chr:6:32648036 |
| 6 rs190230688 | 32498937 T | 1.969  | 4.31E-08 | chr:6:32648036 |
| 6 rs17205942  | 32651798 T | 0.3704 | 4.31E-08 | chr:6:32648036 |
| 6 rs9273440   | 32627561 T | 0.3679 | 4.32E-08 | chr:6:32648036 |
| 6 rs9271378   | 32587300 G | 2.233  | 4.33E-08 | chr:6:32648036 |
| 6 rs542371727 | 32554817 T | 2.969  | 4.34E-08 | chr:6:32648036 |
| 6 rs9275447   | 32671843 C | 2.273  | 4.34E-08 | chr:6:32648036 |
| 6 rs9272154   | 32601019 A | 0.3447 | 4.37E-08 | chr:6:32648036 |
| 6 rs17205858  | 32651297 C | 0.3701 | 4.38E-08 | chr:6:32648036 |
| 6 rs28747064  | 32656770 G | 0.3709 | 4.38E-08 | chr:6:32648036 |
| 6 rs4993691   | 32446981 G | 0.3019 | 4.39E-08 | chr:6:32648036 |
| 6 rs28746997  | 32654225 T | 0.3549 | 4.39E-08 | chr:6:32648036 |
| 6 rs17212160  | 32651097 G | 0.3609 | 4.39E-08 | chr:6:32648036 |
| 6 rs28746962  | 32652979 A | 0.3614 | 4.41E-08 | chr:6:32648036 |
| 6 rs28746967  | 32653231 C | 0.3691 | 4.46E-08 | chr:6:32648036 |
| 6 rs6689      | 32627700 G | 0.3616 | 4.48E-08 | chr:6:32648036 |
| 6 rs28366265  | 32559708 A | 2.46   | 4.53E-08 | chr:6:32648036 |
| 6 rs113046257 | 32512753 T | 2.55   | 4.55E-08 | chr:6:32648036 |
| 6 rs113085203 | 32512789 G | 2.55   | 4.55E-08 | chr:6:32648036 |
| 6 rs9273206   | 32613573 T | 0.3908 | 4.60E-08 | chr:6:32648036 |
| 6 rs28747032  | 32655180 C | 0.372  | 4.65E-08 | chr:6:32648036 |
| 6 rs28746968  | 32653247 T | 0.3673 | 4.66E-08 | chr:6:32648036 |
| 6 rs28746969  | 32653248 G | 0.3673 | 4.66E-08 | chr:6:32648036 |
| 6 rs76264710  | 32569305 A | 0.4101 | 4.72E-08 | chr:6:32648036 |
| 6 rs28747023  | 32654807 A | 0.3756 | 4.74E-08 | chr:6:32648036 |
| 6 rs9271728   | 32593592 C | 0.3622 | 4.75E-08 | chr:6:32648036 |
| 6 rs532946202 | 32537465 T | 6.025  | 4.80E-08 | chr:6:32648036 |



|               |            |        |          |                |
|---------------|------------|--------|----------|----------------|
| 6 rs28747024  | 32654830 A | 0.3682 | 4.81E-08 | chr:6:32648036 |
| 6 rs28747025  | 32654831 C | 0.3682 | 4.81E-08 | chr:6:32648036 |
| 6 rs28357082  | 32558176 A | 2.693  | 4.83E-08 | chr:6:32648036 |
| 6 rs76931568  | 32459665 A | 2.002  | 4.86E-08 | chr:6:32648036 |
| 6 rs530246116 | 32517244 C | 2.611  | 4.94E-08 | chr:6:32648036 |
| 6 rs9269011   | 32436299 C | 1.969  | 4.95E-08 | chr:6:32648036 |
| 6 rs17205928  | 32651737 G | 0.3715 | 4.95E-08 | chr:6:32648036 |
| 6 rs28891405  | 32640288 T | 0.3716 | 4.96E-08 | chr:6:32648036 |
| 6 rs28891406  | 32640336 A | 0.3716 | 4.96E-08 | chr:6:32648036 |
| 6 rs17212350  | 32652173 G | 0.3652 | 4.96E-08 | chr:6:32648036 |
| 6 rs17212357  | 32652174 T | 0.3652 | 4.96E-08 | chr:6:32648036 |
| 6 rs17212364  | 32652176 G | 0.3652 | 4.96E-08 | chr:6:32648036 |
| 6 rs542891748 | 32526778 C | 2.604  | 4.97E-08 | chr:6:32648036 |
| 6 rs78097306  | 32499148 T | 1.891  | 4.97E-08 | chr:6:32648036 |
| 6 rs115736509 | 32554782 T | 4.535  | 5.03E-08 | chr:6:32648036 |
| 6 rs28747031  | 32655125 A | 0.3711 | 5.05E-08 | chr:6:32648036 |
| 6 rs28747066  | 32656817 A | 0.3694 | 5.08E-08 | chr:6:32648036 |
| 6 rs75262655  | 32459811 G | 2.291  | 5.09E-08 | chr:6:32648036 |
| 6 rs79420263  | 32459803 C | 2.291  | 5.09E-08 | chr:6:32648036 |
| 6 rs28747049  | 32655659 C | 0.3721 | 5.11E-08 | chr:6:32648036 |
| 6 rs28746998  | 32654246 T | 0.3546 | 5.11E-08 | chr:6:32648036 |
| 6 rs9275488   | 32673269 A | 2.265  | 5.13E-08 | chr:6:32648036 |
| 6 rs9275489   | 32673272 T | 2.265  | 5.13E-08 | chr:6:32648036 |
| 6 rs17212343  | 32652147 G | 0.3715 | 5.14E-08 | chr:6:32648036 |
| 6 rs370710514 | 32562498 G | 2.025  | 5.16E-08 | chr:6:32648036 |
| 6 rs9275451   | 32671908 T | 2.262  | 5.17E-08 | chr:6:32648036 |
| 6 rs539509361 | 32594399 G | 0.3497 | 5.19E-08 | chr:6:32648036 |
| 6 rs72848263  | 32602065 C | 0.3624 | 5.20E-08 | chr:6:32648036 |
| 6 rs79591888  | 32503704 A | 2.141  | 5.22E-08 | chr:6:32648036 |
| 6 rs28414666  | 32626451 A | 0.3393 | 5.22E-08 | chr:6:32648036 |
| 6 rs17205809  | 32651135 A | 0.3683 | 5.23E-08 | chr:6:32648036 |
| 6 rs28747014  | 32654658 C | 0.3731 | 5.26E-08 | chr:6:32648036 |
| 6 rs28747015  | 32654673 T | 0.3731 | 5.26E-08 | chr:6:32648036 |
| 6 rs62405568  | 32453409 C | 2.565  | 5.27E-08 | chr:6:32648036 |
| 6 rs17206005  | 32652069 G | 0.3736 | 5.31E-08 | chr:6:32648036 |
| 6 rs17206012  | 32652077 C | 0.3736 | 5.31E-08 | chr:6:32648036 |
| 6 rs9274115   | 32630205 T | 0.4063 | 5.41E-08 | chr:6:32648036 |
| 6 rs542744272 | 32556027 A | 16.2   | 5.41E-08 | chr:6:32648036 |
| 6 rs62405589  | 32508516 G | 2.142  | 5.42E-08 | chr:6:32648036 |
| 6 rs9271729   | 32593600 A | 0.3639 | 5.44E-08 | chr:6:32648036 |
| 6 rs9274247   | 32631332 A | 0.4066 | 5.47E-08 | chr:6:32648036 |
| 6 rs552154060 | 32458032 G | 4.12   | 5.50E-08 | chr:6:32648036 |
| 6 rs9275501   | 32673920 T | 2.261  | 5.50E-08 | chr:6:32648036 |

|               |            |        |          |                |
|---------------|------------|--------|----------|----------------|
| 6 rs9275502   | 32673921 G | 2.261  | 5.50E-08 | chr:6:32648036 |
| 6 rs9275504   | 32673986 T | 2.261  | 5.50E-08 | chr:6:32648036 |
| 6 rs17212251  | 32651629 C | 0.3693 | 5.56E-08 | chr:6:32648036 |
| 6 rs201699945 | 32485856 C | 3.802  | 5.60E-08 | chr:6:32648036 |
| 6 rs376789262 | 32727002 G | 3.223  | 5.62E-08 | chr:6:32648036 |
| 6 rs17846798  | 32150498 A | 2.732  | 5.65E-08 | chr:6:32648036 |
| 6 rs28747051  | 32655686 T | 0.3728 | 5.78E-08 | chr:6:32648036 |
| 6 rs28747052  | 32655703 T | 0.3728 | 5.78E-08 | chr:6:32648036 |
| 6 rs9273529   | 32628698 T | 2.483  | 5.79E-08 | chr:6:32648036 |
| 6 rs9273530   | 32628699 G | 2.483  | 5.79E-08 | chr:6:32648036 |
| 6 rs201628145 | 32489913 G | 5.646  | 5.83E-08 | chr:6:32648036 |
| 6 rs570919834 | 32481691 T | 2.959  | 5.83E-08 | chr:6:32648036 |
| 6 rs76902085  | 32507945 C | 1.98   | 5.84E-08 | chr:6:32648036 |
| 6 rs17205977  | 32651927 C | 0.3731 | 5.87E-08 | chr:6:32648036 |
| 6 rs28891407  | 32640359 T | 0.374  | 5.93E-08 | chr:6:32648036 |
| 6 rs17212153  | 32651092 T | 0.3661 | 5.99E-08 | chr:6:32648036 |
| 6 rs75684124  | 32503488 T | 2.212  | 6.02E-08 | chr:6:32648036 |
| 6 rs28891410  | 32640424 G | 0.3743 | 6.04E-08 | chr:6:32648036 |
| 6 rs77587106  | 32508001 A | 1.977  | 6.08E-08 | chr:6:32648036 |
| 6 rs28746961  | 32652968 G | 0.3656 | 6.15E-08 | chr:6:32648036 |
| 6 rs17205754  | 32650930 C | 0.3738 | 6.19E-08 | chr:6:32648036 |
| 6 rs17205761  | 32650934 A | 0.3738 | 6.19E-08 | chr:6:32648036 |
| 6 rs17205768  | 32650937 C | 0.3738 | 6.19E-08 | chr:6:32648036 |
| 6 rs28746933  | 32650411 G | 0.3791 | 6.20E-08 | chr:6:32648036 |
| 6 rs9272024   | 32598559 A | 0.3235 | 6.28E-08 | chr:6:32648036 |
| 6 rs36046522  | 32550931 A | 3.149  | 6.29E-08 | chr:6:32648036 |
| 6 rs6902805   | 32193568 T | 0.4158 | 6.29E-08 | chr:6:32648036 |
| 6 rs9296012   | 32195332 T | 0.4158 | 6.29E-08 | chr:6:32648036 |
| 6 rs75438654  | 32459749 G | 2.406  | 6.41E-08 | chr:6:32648036 |
| 6 rs542882860 | 32670178 C | 2.343  | 6.62E-08 | chr:6:32648036 |
| 6 rs28891408  | 32640382 A | 0.3754 | 6.66E-08 | chr:6:32648036 |
| 6 rs28891409  | 32640401 G | 0.3754 | 6.66E-08 | chr:6:32648036 |
| 6 rs34061722  | 32599337 T | 0.3534 | 6.71E-08 | chr:6:32648036 |
| 6 rs9271414   | 32587782 C | 0.3899 | 6.71E-08 | chr:6:32648036 |
| 6 rs9271415   | 32587786 C | 0.3899 | 6.71E-08 | chr:6:32648036 |
| 6 rs28747061  | 32656653 T | 0.3673 | 6.72E-08 | chr:6:32648036 |
| 6 rs28747062  | 32656661 C | 0.3673 | 6.72E-08 | chr:6:32648036 |
| 6 rs28747063  | 32656668 C | 0.3673 | 6.72E-08 | chr:6:32648036 |
| 6 rs28772268  | 32656872 A | 0.3719 | 6.73E-08 | chr:6:32648036 |
| 6 rs28772269  | 32656878 C | 0.3719 | 6.73E-08 | chr:6:32648036 |
| 6 rs28772270  | 32656881 T | 0.3719 | 6.73E-08 | chr:6:32648036 |
| 6 rs9273757   | 32629417 C | 2.369  | 6.76E-08 | chr:6:32648036 |
| 6 rs376740117 | 32506081 T | 1.897  | 6.76E-08 | chr:6:32648036 |

|               |            |        |          |                |
|---------------|------------|--------|----------|----------------|
| 6 rs17205844  | 32651254 G | 0.3763 | 6.81E-08 | chr:6:32648036 |
| 6 rs17205851  | 32651265 C | 0.3763 | 6.81E-08 | chr:6:32648036 |
| 6 rs28746918  | 32649769 T | 0.3772 | 6.87E-08 | chr:6:32648036 |
| 6 rs281875058 | 32631207 T | 2.017  | 6.90E-08 | chr:6:32648036 |
| 6 rs4568495   | 32672246 C | 2.248  | 6.91E-08 | chr:6:32648036 |
| 6 rs9275377   | 32668667 G | 2.248  | 6.91E-08 | chr:6:32648036 |
| 6 rs9275378   | 32668729 G | 2.248  | 6.91E-08 | chr:6:32648036 |
| 6 rs9275379   | 32668804 T | 2.248  | 6.91E-08 | chr:6:32648036 |
| 6 rs9275396   | 32669528 A | 2.248  | 6.91E-08 | chr:6:32648036 |
| 6 rs9275397   | 32669552 G | 2.248  | 6.91E-08 | chr:6:32648036 |
| 6 rs9275399   | 32669712 G | 2.248  | 6.91E-08 | chr:6:32648036 |
| 6 rs9275464   | 32672082 G | 2.248  | 6.91E-08 | chr:6:32648036 |
| 6 rs9275468   | 32672412 A | 2.248  | 6.91E-08 | chr:6:32648036 |
| 6 rs9275469   | 32672430 G | 2.248  | 6.91E-08 | chr:6:32648036 |
| 6 rs9275481   | 32672913 A | 2.248  | 6.91E-08 | chr:6:32648036 |
| 6 rs9275482   | 32672932 T | 2.248  | 6.91E-08 | chr:6:32648036 |
| 6 rs9275485   | 32673077 A | 2.248  | 6.91E-08 | chr:6:32648036 |
| 6 rs9275487   | 32673174 T | 2.248  | 6.91E-08 | chr:6:32648036 |
| 6 rs9275491   | 32673424 T | 2.248  | 6.91E-08 | chr:6:32648036 |
| 6 rs9275492   | 32673446 T | 2.248  | 6.91E-08 | chr:6:32648036 |
| 6 rs9275507   | 32674130 A | 2.248  | 6.91E-08 | chr:6:32648036 |
| 6 rs9275508   | 32674159 G | 2.248  | 6.91E-08 | chr:6:32648036 |
| 6 rs28746972  | 32653406 G | 0.378  | 6.93E-08 | chr:6:32648036 |
| 6 rs113453333 | 32522490 A | 2.588  | 6.93E-08 | chr:6:32648036 |
| 6 rs77931438  | 32505762 A | 2.08   | 6.94E-08 | chr:6:32648036 |
| 6 rs28746999  | 32654258 A | 0.3621 | 7.02E-08 | chr:6:32648036 |
| 6 rs78434421  | 32627652 G | 2.233  | 7.10E-08 | chr:6:32648036 |
| 6 rs9275483   | 32673051 C | 2.252  | 7.11E-08 | chr:6:32648036 |
| 6 rs9275484   | 32673052 T | 2.252  | 7.11E-08 | chr:6:32648036 |
| 6 rs9274507   | 32634152 G | 0.4105 | 7.12E-08 | chr:6:32648036 |
| 6 rs17211601  | 32602817 G | 0.3554 | 7.13E-08 | chr:6:32648036 |
| 6 rs28533091  | 32602864 A | 0.3554 | 7.13E-08 | chr:6:32648036 |
| 6 rs75563047  | 32485492 T | 2.264  | 7.15E-08 | chr:6:32648036 |
| 6 rs552547617 | 32479301 A | 1.883  | 7.17E-08 | chr:6:32648036 |
| 6 rs28357084  | 32559483 G | 2.842  | 7.22E-08 | chr:6:32648036 |
| 6 rs28366254  | 32559481 G | 2.842  | 7.22E-08 | chr:6:32648036 |
| 6 rs28366255  | 32559482 T | 2.842  | 7.22E-08 | chr:6:32648036 |
| 6 rs9273650   | 32629194 A | 3.213  | 7.25E-08 | chr:6:32648036 |
| 6 rs144537734 | 32513476 A | 0.4031 | 7.27E-08 | chr:6:32648036 |
| 6 rs9273546   | 32628841 A | 0.4182 | 7.32E-08 | chr:6:32648036 |
| 6 rs79705220  | 32507930 C | 1.971  | 7.32E-08 | chr:6:32648036 |
| 6 rs17191234  | 32564681 C | 2.314  | 7.36E-08 | chr:6:32648036 |
| 6 rs17212132  | 32651008 A | 0.3738 | 7.38E-08 | chr:6:32648036 |

|               |            |        |          |                |
|---------------|------------|--------|----------|----------------|
| 6 rs3763317   | 32376788 C | 0.4513 | 7.43E-08 | chr:6:32648036 |
| 6 rs28746946  | 32652715 A | 0.3692 | 7.44E-08 | chr:6:32648036 |
| 6 rs6926894   | 32612430 C | 2.405  | 7.46E-08 | chr:6:32648036 |
| 6 rs2071288   | 32149260 T | 2.699  | 7.66E-08 | chr:6:32648036 |
| 6 rs17211510  | 32602430 A | 0.3554 | 7.70E-08 | chr:6:32648036 |
| 6 rs28747033  | 32655213 C | 0.3793 | 7.71E-08 | chr:6:32648036 |
| 6 rs9271293   | 32581459 G | 0.4474 | 7.85E-08 | chr:6:32648036 |
| 6 rs9271294   | 32581461 A | 0.4474 | 7.85E-08 | chr:6:32648036 |
| 6 rs9271295   | 32581467 T | 0.4474 | 7.85E-08 | chr:6:32648036 |
| 6 rs9273270   | 32614361 C | 0.5192 | 7.86E-08 | chr:6:32648036 |
| 6 rs9271456   | 32588435 T | 2.401  | 7.99E-08 | chr:6:32648036 |
| 6 rs28746944  | 32652651 A | 0.3719 | 8.00E-08 | chr:6:32648036 |
| 6 rs113600317 | 32553125 T | 2.782  | 8.06E-08 | chr:6:32648036 |
| 6 rs35331833  | 32556635 A | 3.23   | 8.07E-08 | chr:6:32648036 |
| 6 rs28747035  | 32655316 C | 0.3789 | 8.08E-08 | chr:6:32648036 |
| 6 rs9273817   | 32629529 T | 0.3627 | 8.12E-08 | chr:6:32648036 |
| 6 rs9271871   | 32595383 C | 0.3178 | 8.13E-08 | chr:6:32648036 |
| 6 rs115976249 | 32608013 A | 3.868  | 8.13E-08 | chr:6:32648036 |
| 6 rs28746928  | 32650060 G | 0.3809 | 8.15E-08 | chr:6:32648036 |
| 6 rs17205802  | 32651072 G | 0.3687 | 8.28E-08 | chr:6:32648036 |
| 6 rs28371174  | 32612524 T | 5.748  | 8.29E-08 | chr:6:32648036 |
| 6 rs28746995  | 32654116 A | 0.3706 | 8.32E-08 | chr:6:32648036 |
| 6 rs9271874   | 32595424 T | 0.3437 | 8.34E-08 | chr:6:32648036 |
| 6 rs9268948   | 32433746 G | 0.4663 | 8.38E-08 | chr:6:32648036 |
| 6 rs79100516  | 32503452 T | 2.086  | 8.40E-08 | chr:6:32648036 |
| 6 rs4311549   | 32635091 T | 0.4276 | 8.43E-08 | chr:6:32648036 |
| 6 rs9273463   | 32627934 A | 2.494  | 8.45E-08 | chr:6:32648036 |
| 6 rs138081466 | 32607906 C | 4.16   | 8.47E-08 | chr:6:32648036 |
| 6 rs560708392 | 32607901 C | 4.16   | 8.47E-08 | chr:6:32648036 |
| 6 rs28746973  | 32653442 A | 0.3803 | 8.57E-08 | chr:6:32648036 |
| 6 rs28746974  | 32653443 A | 0.3803 | 8.57E-08 | chr:6:32648036 |
| 6 rs9271441   | 32588245 T | 0.4245 | 8.60E-08 | chr:6:32648036 |
| 6 rs3135387   | 32415109 T | 0.3834 | 8.61E-08 | chr:6:32648036 |
| 6 rs28366297  | 32560829 C | 2.743  | 8.62E-08 | chr:6:32648036 |
| 6 rs17212188  | 32651216 A | 0.3814 | 8.68E-08 | chr:6:32648036 |
| 6 rs200526004 | 32486059 T | 3.054  | 8.71E-08 | chr:6:32648036 |
| 6 rs67838634  | 32662128 G | 0.4288 | 8.74E-08 | chr:6:32648036 |
| 6 rs17205907  | 32651649 G | 0.3764 | 8.85E-08 | chr:6:32648036 |
| 6 rs547199103 | 32606006 A | 3.463  | 8.85E-08 | chr:6:32648036 |
| 6 rs561917905 | 32606007 G | 3.463  | 8.85E-08 | chr:6:32648036 |
| 6 rs17205782  | 32651051 T | 0.3718 | 8.87E-08 | chr:6:32648036 |
| 6 rs17205788  | 32651056 A | 0.3718 | 8.87E-08 | chr:6:32648036 |
| 6 rs28747003  | 32654322 C | 0.3791 | 8.88E-08 | chr:6:32648036 |

|               |            |        |          |                |
|---------------|------------|--------|----------|----------------|
| 6 rs3104380   | 32599042 G | 0.3218 | 8.90E-08 | chr:6:32648036 |
| 6 rs7764856   | 32680640 A | 2.229  | 8.91E-08 | chr:6:32648036 |
| 6 rs28772271  | 32656901 C | 0.3768 | 8.95E-08 | chr:6:32648036 |
| 6 rs9469220   | 32658310 G | 0.4428 | 8.97E-08 | chr:6:32648036 |
| 6 rs17205177  | 32602518 G | 0.3575 | 9.02E-08 | chr:6:32648036 |
| 6 rs28747043  | 32655508 G | 0.3737 | 9.02E-08 | chr:6:32648036 |
| 6 rs28747038  | 32655368 A | 0.3813 | 9.02E-08 | chr:6:32648036 |
| 6 rs9271490   | 32589060 A | 0.3895 | 9.06E-08 | chr:6:32648036 |
| 6 rs9271491   | 32589061 A | 0.3895 | 9.06E-08 | chr:6:32648036 |
| 6 rs9271493   | 32589158 A | 0.3895 | 9.06E-08 | chr:6:32648036 |
| 6 rs9271512   | 32589510 A | 0.3895 | 9.06E-08 | chr:6:32648036 |
| 6 rs9274079   | 32630131 T | 2.453  | 9.10E-08 | chr:6:32648036 |
| 6 rs74867743  | 32502819 T | 2.017  | 9.11E-08 | chr:6:32648036 |
| 6 rs17211105  | 32557606 A | 3.951  | 9.14E-08 | chr:6:32648036 |
| 6 rs114852415 | 32524759 A | 2.558  | 9.25E-08 | chr:6:32648036 |
| 6 rs9273713   | 32629320 A | 0.4399 | 9.31E-08 | chr:6:32648036 |
| 6 rs9272451   | 32605501 G | 2.193  | 9.33E-08 | chr:6:32648036 |
| 6 rs35779452  | 32599272 G | 0.3582 | 9.50E-08 | chr:6:32648036 |
| 6 rs28891480  | 32642843 G | 0.3846 | 9.55E-08 | chr:6:32648036 |
| 6 rs28718232  | 32626750 G | 0.3523 | 9.66E-08 | chr:6:32648036 |
| 6 rs9271705   | 32593321 T | 0.3978 | 9.69E-08 | chr:6:32648036 |
| 6 rs9271704   | 32593317 G | 0.3914 | 9.72E-08 | chr:6:32648036 |
| 6 rs9269069   | 32440362 C | 0.4244 | 9.73E-08 | chr:6:32648036 |
| 6 rs10093     | 32609173 G | 2.176  | 9.78E-08 | chr:6:32648036 |
| 6 rs34927613  | 32600211 A | 0.3533 | 9.78E-08 | chr:6:32648036 |
| 6 rs28366270  | 32559934 G | 2.352  | 9.79E-08 | chr:6:32648036 |
| 6 rs28747034  | 32655257 T | 0.3821 | 9.81E-08 | chr:6:32648036 |
| 6 rs34801804  | 32555892 G | 0.3475 | 9.85E-08 | chr:6:32648036 |
| 6 rs28362368  | 32594040 G | 0.4021 | 9.93E-08 | chr:6:32648036 |
| 6 rs11963017  | 32657863 C | 0.3845 | 9.94E-08 | chr:6:32648036 |
| 6 rs11967921  | 32657855 A | 0.3845 | 9.94E-08 | chr:6:32648036 |
| 6 rs11967958  | 32657849 A | 0.3845 | 9.94E-08 | chr:6:32648036 |
| 6 rs17205114  | 32602196 G | 0.3603 | 9.94E-08 | chr:6:32648036 |
| 6 rs17205128  | 32602217 G | 0.3603 | 9.94E-08 | chr:6:32648036 |
| 6 rs17205135  | 32602222 G | 0.3603 | 9.94E-08 | chr:6:32648036 |
| 6 rs9271956   | 32597313 T | 0.3212 | 9.95E-08 | chr:6:32648036 |
| 6 rs17205795  | 32651066 T | 0.3721 | 9.98E-08 | chr:6:32648036 |
| 6 rs192002545 | 32517227 A | 2.536  | 1.00E-07 | chr:6:32648036 |
| 6 rs145365399 | 32517715 G | 8.11   | 1.01E-07 | chr:6:32648036 |
| 6 rs9275471   | 32672491 A | 2.219  | 1.01E-07 | chr:6:32648036 |
| 6 rs9275472   | 32672494 A | 2.219  | 1.01E-07 | chr:6:32648036 |
| 6 rs9275473   | 32672523 T | 2.219  | 1.01E-07 | chr:6:32648036 |
| 6 rs9275474   | 32672529 T | 2.219  | 1.01E-07 | chr:6:32648036 |

|               |            |        |          |                |
|---------------|------------|--------|----------|----------------|
| 6 rs9275475   | 32672556 G | 2.219  | 1.01E-07 | chr:6:32648036 |
| 6 rs2395517   | 32597792 A | 0.3213 | 1.01E-07 | chr:6:32648036 |
| 6 rs183870834 | 32517228 C | 2.526  | 1.03E-07 | chr:6:32648036 |
| 6 rs9271557   | 32590331 T | 0.4015 | 1.03E-07 | chr:6:32648036 |
| 6 rs28746929  | 32650068 G | 0.3843 | 1.04E-07 | chr:6:32648036 |
| 6 rs28746930  | 32650074 A | 0.3843 | 1.04E-07 | chr:6:32648036 |
| 6 rs9274442   | 32633231 C | 2.442  | 1.04E-07 | chr:6:32648036 |
| 6 rs436845    | 32197736 G | 0.3997 | 1.04E-07 | chr:6:32648036 |
| 6 rs3104370   | 32602341 G | 0.3212 | 1.04E-07 | chr:6:32648036 |
| 6 rs968155    | 32380715 C | 0.4521 | 1.04E-07 | chr:6:32648036 |
| 6 rs9271291   | 32581335 G | 0.4497 | 1.05E-07 | chr:6:32648036 |
| 6 rs9271292   | 32581350 T | 0.4497 | 1.05E-07 | chr:6:32648036 |
| 6 rs9271880   | 32595596 C | 0.399  | 1.06E-07 | chr:6:32648036 |
| 6 rs2213287   | 32605508 T | 2.187  | 1.07E-07 | chr:6:32648036 |
| 6 rs9275478   | 32672654 T | 2.216  | 1.07E-07 | chr:6:32648036 |
| 6 rs9275479   | 32672659 T | 2.216  | 1.07E-07 | chr:6:32648036 |
| 6 rs9275480   | 32672668 A | 2.216  | 1.07E-07 | chr:6:32648036 |
| 6 rs9271684   | 32592953 T | 0.4002 | 1.07E-07 | chr:6:32648036 |
| 6 rs201415661 | 32526386 T | 2.708  | 1.07E-07 | chr:6:32648036 |
| 6 rs35366682  | 32594354 C | 0.3627 | 1.08E-07 | chr:6:32648036 |
| 6 rs28747044  | 32655516 C | 0.3763 | 1.09E-07 | chr:6:32648036 |
| 6 rs28891377  | 32638888 C | 0.3804 | 1.09E-07 | chr:6:32648036 |
| 6 rs28891378  | 32638894 T | 0.3804 | 1.09E-07 | chr:6:32648036 |
| 6 rs28747037  | 32655336 C | 0.384  | 1.10E-07 | chr:6:32648036 |
| 6 rs199516615 | 32493510 A | 2.382  | 1.10E-07 | chr:6:32648036 |
| 6 rs28746902  | 32648713 A | 0.3873 | 1.11E-07 | chr:6:32648036 |
| 6 rs17205837  | 32651222 C | 0.3848 | 1.11E-07 | chr:6:32648036 |
| 6 rs17211580  | 32602754 A | 0.3639 | 1.11E-07 | chr:6:32648036 |
| 6 rs9271286   | 32581221 G | 0.4523 | 1.11E-07 | chr:6:32648036 |
| 6 rs9271287   | 32581253 A | 0.4523 | 1.11E-07 | chr:6:32648036 |
| 6 rs9271288   | 32581260 A | 0.4523 | 1.11E-07 | chr:6:32648036 |
| 6 rs9273651   | 32629199 C | 3.156  | 1.11E-07 | chr:6:32648036 |
| 6 rs114202038 | 32493438 C | 2.433  | 1.12E-07 | chr:6:32648036 |
| 6 rs11751908  | 32599862 G | 0.3392 | 1.12E-07 | chr:6:32648036 |
| 6 rs9271336   | 32582877 G | 0.4543 | 1.12E-07 | chr:6:32648036 |
| 6 rs9271337   | 32582881 C | 0.4543 | 1.12E-07 | chr:6:32648036 |
| 6 rs9271338   | 32582885 T | 0.4543 | 1.12E-07 | chr:6:32648036 |
| 6 rs9271339   | 32582891 T | 0.4543 | 1.12E-07 | chr:6:32648036 |
| 6 rs111437237 | 32537608 C | 1.861  | 1.13E-07 | chr:6:32648036 |
| 6 rs379464    | 32186348 T | 2.339  | 1.13E-07 | chr:6:32648036 |
| 6 rs116292100 | 32482576 C | 1.867  | 1.14E-07 | chr:6:32648036 |
| 6 rs3104386   | 32596937 G | 0.3209 | 1.14E-07 | chr:6:32648036 |
| 6 rs112716963 | 32485815 A | 2.32   | 1.14E-07 | chr:6:32648036 |

|               |            |        |          |                |
|---------------|------------|--------|----------|----------------|
| 6 rs78510027  | 32505075 G | 2.298  | 1.15E-07 | chr:6:32648036 |
| 6 rs2395223   | 32581778 C | 0.4531 | 1.15E-07 | chr:6:32648036 |
| 6 rs28746899  | 32648646 A | 0.3908 | 1.16E-07 | chr:6:32648036 |
| 6 rs28746900  | 32648652 G | 0.3908 | 1.16E-07 | chr:6:32648036 |
| 6 rs34290324  | 32550947 G | 2.988  | 1.16E-07 | chr:6:32648036 |
| 6 rs28746901  | 32648681 T | 0.3909 | 1.17E-07 | chr:6:32648036 |
| 6 rs28747067  | 32656832 T | 0.3831 | 1.18E-07 | chr:6:32648036 |
| 6 rs113522240 | 32512591 G | 2.512  | 1.19E-07 | chr:6:32648036 |
| 6 rs9271646   | 32592351 G | 0.4006 | 1.19E-07 | chr:6:32648036 |
| 6 rs9271647   | 32592354 G | 0.4006 | 1.19E-07 | chr:6:32648036 |
| 6 rs9271649   | 32592359 G | 0.4006 | 1.19E-07 | chr:6:32648036 |
| 6 rs527606121 | 32452051 G | 2.247  | 1.21E-07 | chr:6:32648036 |
| 6 rs79186433  | 32479883 T | 1.9    | 1.23E-07 | chr:6:32648036 |
| 6 rs28891376  | 32638788 C | 0.3517 | 1.24E-07 | chr:6:32648036 |
| 6 rs17205998  | 32652050 G | 0.3857 | 1.24E-07 | chr:6:32648036 |
| 6 rs9271296   | 32581501 A | 0.4524 | 1.25E-07 | chr:6:32648036 |
| 6 rs17211454  | 32602179 A | 0.3625 | 1.25E-07 | chr:6:32648036 |
| 6 rs3104379   | 32599114 G | 0.3205 | 1.27E-07 | chr:6:32648036 |
| 6 rs28694749  | 32603029 C | 0.3687 | 1.27E-07 | chr:6:32648036 |
| 6 rs9271182   | 32578230 A | 0.3429 | 1.28E-07 | chr:6:32648036 |
| 6 rs77456373  | 32598853 T | 0.3068 | 1.28E-07 | chr:6:32648036 |
| 6 rs28407322  | 32603355 C | 0.3652 | 1.28E-07 | chr:6:32648036 |
| 6 rs34403271  | 32550220 C | 2.768  | 1.29E-07 | chr:6:32648036 |
| 6 rs113296631 | 32478885 T | 1.881  | 1.29E-07 | chr:6:32648036 |
| 6 rs9271289   | 32581305 C | 0.4536 | 1.29E-07 | chr:6:32648036 |
| 6 rs576836627 | 32624327 T | 3.333  | 1.29E-07 | chr:6:32648036 |
| 6 rs34232122  | 32556706 C | 3.106  | 1.30E-07 | chr:6:32648036 |
| 6 rs9271302   | 32581621 T | 0.4559 | 1.32E-07 | chr:6:32648036 |
| 6 rs17212265  | 32651694 T | 0.3796 | 1.32E-07 | chr:6:32648036 |
| 6 rs28747000  | 32654280 A | 0.3718 | 1.32E-07 | chr:6:32648036 |
| 6 rs28747001  | 32654284 G | 0.3718 | 1.32E-07 | chr:6:32648036 |
| 6 rs9274478   | 32633744 C | 0.3982 | 1.32E-07 | chr:6:32648036 |
| 6 rs482044    | 32576064 C | 2.203  | 1.33E-07 | chr:6:32648036 |
| 6 rs3104406   | 32682443 G | 0.4585 | 1.33E-07 | chr:6:32648036 |
| 6 rs2856698   | 32636376 G | 0.3986 | 1.34E-07 | chr:6:32648036 |
| 6 rs9271436   | 32588110 C | 0.3997 | 1.34E-07 | chr:6:32648036 |
| 6 rs9271431   | 32588031 A | 2.172  | 1.34E-07 | chr:6:32648036 |
| 6 rs9272068   | 32599404 C | 0.3127 | 1.36E-07 | chr:6:32648036 |
| 6 rs3891175   | 32634467 T | 2.46   | 1.36E-07 | chr:6:32648036 |
| 6 rs28747022  | 32654785 A | 0.3857 | 1.37E-07 | chr:6:32648036 |
| 6 rs9271507   | 32589394 C | 0.3992 | 1.38E-07 | chr:6:32648036 |
| 6 rs79428469  | 32602034 C | 0.3715 | 1.38E-07 | chr:6:32648036 |
| 6 rs28747045  | 32655537 C | 0.3818 | 1.38E-07 | chr:6:32648036 |

|               |            |        |          |                |
|---------------|------------|--------|----------|----------------|
| 6 rs28747046  | 32655539 G | 0.3818 | 1.38E-07 | chr:6:32648036 |
| 6 rs9273595   | 32629091 G | 2.245  | 1.39E-07 | chr:6:32648036 |
| 6 rs9275499   | 32673778 G | 2.192  | 1.39E-07 | chr:6:32648036 |
| 6 rs28747065  | 32656806 C | 0.3868 | 1.41E-07 | chr:6:32648036 |
| 6 rs28747016  | 32654706 A | 0.3869 | 1.42E-07 | chr:6:32648036 |
| 6 rs77339454  | 32503567 A | 2.259  | 1.44E-07 | chr:6:32648036 |
| 6 rs9296035   | 32657888 G | 0.3902 | 1.44E-07 | chr:6:32648036 |
| 6 rs1063321   | 32629955 T | 2.205  | 1.44E-07 | chr:6:32648036 |
| 6 rs28746885  | 32638871 G | 0.3854 | 1.46E-07 | chr:6:32648036 |
| 6 rs3104392   | 32594425 C | 0.3384 | 1.47E-07 | chr:6:32648036 |
| 6 rs111848494 | 32486020 G | 2.801  | 1.47E-07 | chr:6:32648036 |
| 6 rs9271505   | 32589375 T | 0.402  | 1.48E-07 | chr:6:32648036 |
| 6 rs9271506   | 32589380 C | 0.402  | 1.48E-07 | chr:6:32648036 |
| 6 rs28746886  | 32639083 C | 0.3861 | 1.50E-07 | chr:6:32648036 |
| 6 rs111357164 | 32482638 A | 1.889  | 1.50E-07 | chr:6:32648036 |
| 6 rs28747029  | 32655096 A | 0.3869 | 1.50E-07 | chr:6:32648036 |
| 6 rs28747030  | 32655104 A | 0.3869 | 1.50E-07 | chr:6:32648036 |
| 6 rs116176269 | 32490519 C | 2.596  | 1.51E-07 | chr:6:32648036 |
| 6 rs6929057   | 32597005 C | 0.3821 | 1.51E-07 | chr:6:32648036 |
| 6 rs9271327   | 32582533 G | 0.4555 | 1.51E-07 | chr:6:32648036 |
| 6 rs9275496   | 32673714 C | 2.181  | 1.53E-07 | chr:6:32648036 |
| 6 rs9275497   | 32673726 G | 2.181  | 1.53E-07 | chr:6:32648036 |
| 6 rs9275498   | 32673749 T | 2.181  | 1.53E-07 | chr:6:32648036 |
| 6 rs9271620   | 32591777 T | 2.21   | 1.54E-07 | chr:6:32648036 |
| 6 rs281863486 | 32630967 C | 0.4047 | 1.56E-07 | chr:6:32648036 |
| 6 rs112550762 | 32507514 A | 0.4792 | 1.57E-07 | chr:6:32648036 |
| 6 rs1465651   | 32901351 T | 2.36   | 1.58E-07 | chr:6:32648036 |
| 6 rs74768985  | 32518175 C | 2.76   | 1.58E-07 | chr:6:32648036 |
| 6 rs9274465   | 32633490 C | 2.322  | 1.58E-07 | chr:6:32648036 |
| 6 rs9271591   | 32591141 A | 2.208  | 1.60E-07 | chr:6:32648036 |
| 6 rs2894275   | 32581754 T | 0.4573 | 1.60E-07 | chr:6:32648036 |
| 6 rs28747018  | 32654739 C | 0.3879 | 1.61E-07 | chr:6:32648036 |
| 6 rs146080923 | 32605997 C | 3.321  | 1.62E-07 | chr:6:32648036 |
| 6 rs9271510   | 32589467 T | 0.4004 | 1.62E-07 | chr:6:32648036 |
| 6 rs34145408  | 32602124 T | 0.3722 | 1.63E-07 | chr:6:32648036 |
| 6 rs35360625  | 32599435 C | 0.3684 | 1.63E-07 | chr:6:32648036 |
| 6 rs35744886  | 32600084 T | 0.3515 | 1.63E-07 | chr:6:32648036 |
| 6 rs9274364   | 32632495 G | 1.804  | 1.63E-07 | chr:6:32648036 |
| 6 rs17882028  | 32551911 A | 2.304  | 1.65E-07 | chr:6:32648036 |
| 6 rs17885482  | 32551912 C | 2.304  | 1.65E-07 | chr:6:32648036 |
| 6 rs28366268  | 32559874 G | 2.314  | 1.65E-07 | chr:6:32648036 |
| 6 rs531642165 | 32472248 A | 3.689  | 1.65E-07 | chr:6:32648036 |
| 6 rs561310579 | 32472247 T | 3.689  | 1.65E-07 | chr:6:32648036 |



|               |            |        |          |                |
|---------------|------------|--------|----------|----------------|
| 6 rs9271284   | 32581190 T | 0.4576 | 1.66E-07 | chr:6:32648036 |
| 6 rs9271285   | 32581193 A | 0.4576 | 1.66E-07 | chr:6:32648036 |
| 6 rs28746887  | 32639096 T | 0.3873 | 1.66E-07 | chr:6:32648036 |
| 6 rs28891379  | 32639107 C | 0.3873 | 1.66E-07 | chr:6:32648036 |
| 6 rs9273148   | 32612982 A | 2.902  | 1.66E-07 | chr:6:32648036 |
| 6 rs1063323   | 32629891 T | 2.197  | 1.66E-07 | chr:6:32648036 |
| 6 rs1130398   | 32629764 T | 2.197  | 1.66E-07 | chr:6:32648036 |
| 6 rs9271482   | 32588880 C | 0.4092 | 1.68E-07 | chr:6:32648036 |
| 6 rs9271483   | 32588882 G | 0.4092 | 1.68E-07 | chr:6:32648036 |
| 6 rs9273392   | 32627046 A | 3.004  | 1.68E-07 | chr:6:32648036 |
| 6 rs9273393   | 32627050 A | 3.004  | 1.68E-07 | chr:6:32648036 |
| 6 rs3135461   | 32680122 G | 0.3499 | 1.69E-07 | chr:6:32648036 |
| 6 rs9275376   | 32668633 T | 2.191  | 1.69E-07 | chr:6:32648036 |
| 6 rs7451962   | 32582435 G | 0.4563 | 1.70E-07 | chr:6:32648036 |
| 6 rs9271324   | 32582482 C | 0.4563 | 1.70E-07 | chr:6:32648036 |
| 6 rs28891373  | 32638744 A | 0.3587 | 1.72E-07 | chr:6:32648036 |
| 6 rs9271419   | 32587846 T | 2.166  | 1.72E-07 | chr:6:32648036 |
| 6 rs17205914  | 32651680 G | 0.3833 | 1.73E-07 | chr:6:32648036 |
| 6 rs17205921  | 32651685 T | 0.3833 | 1.73E-07 | chr:6:32648036 |
| 6 rs17212258  | 32651690 T | 0.3833 | 1.73E-07 | chr:6:32648036 |
| 6 rs9270430   | 32558661 T | 4.773  | 1.76E-07 | chr:6:32648036 |
| 6 rs554680493 | 32611362 T | 3.329  | 1.77E-07 | chr:6:32648036 |
| 6 rs17211545  | 32602608 C | 0.3709 | 1.78E-07 | chr:6:32648036 |
| 6 rs34107231  | 32600074 G | 0.3532 | 1.78E-07 | chr:6:32648036 |
| 6 rs115508098 | 32608981 G | 1.918  | 1.78E-07 | chr:6:32648036 |
| 6 rs9273777   | 32629443 T | 0.4134 | 1.79E-07 | chr:6:32648036 |
| 6 rs9271555   | 32590319 T | 0.4128 | 1.80E-07 | chr:6:32648036 |
| 6 rs9271556   | 32590324 T | 0.4128 | 1.80E-07 | chr:6:32648036 |
| 6 rs9271277   | 32580998 T | 0.4779 | 1.80E-07 | chr:6:32648036 |
| 6 rs3134982   | 32646884 T | 0.4274 | 1.81E-07 | chr:6:32648036 |
| 6 rs9271458   | 32588453 A | 2.331  | 1.81E-07 | chr:6:32648036 |
| 6 rs9271586   | 32590899 T | 2.201  | 1.82E-07 | chr:6:32648036 |
| 6 rs9271587   | 32590916 G | 2.201  | 1.82E-07 | chr:6:32648036 |
| 6 rs9271588   | 32590953 C | 2.201  | 1.82E-07 | chr:6:32648036 |
| 6 rs567470347 | 32525111 C | 2.694  | 1.83E-07 | chr:6:32648036 |
| 6 rs41285651  | 32551785 G | 0.4716 | 1.83E-07 | chr:6:32648036 |
| 6 rs115405728 | 32481749 C | 1.817  | 1.83E-07 | chr:6:32648036 |
| 6 rs74345507  | 32459572 C | 1.983  | 1.83E-07 | chr:6:32648036 |
| 6 rs79893879  | 32459554 A | 1.983  | 1.83E-07 | chr:6:32648036 |
| 6 rs35242582  | 32600057 G | 0.357  | 1.85E-07 | chr:6:32648036 |
| 6 rs9274107   | 32630178 A | 2.383  | 1.86E-07 | chr:6:32648036 |
| 6 rs28891398  | 32639857 A | 0.3908 | 1.86E-07 | chr:6:32648036 |
| 6 rs28891399  | 32639876 C | 0.3908 | 1.86E-07 | chr:6:32648036 |

|               |            |        |          |                |
|---------------|------------|--------|----------|----------------|
| 6 rs2858859   | 32582275 G | 0.4571 | 1.87E-07 | chr:6:32648036 |
| 6 rs5004275   | 32582190 G | 0.4571 | 1.87E-07 | chr:6:32648036 |
| 6 rs5004276   | 32582332 G | 0.4571 | 1.87E-07 | chr:6:32648036 |
| 6 rs5004277   | 32582354 C | 0.4571 | 1.87E-07 | chr:6:32648036 |
| 6 rs521512    | 32581982 T | 0.4571 | 1.87E-07 | chr:6:32648036 |
| 6 rs641685    | 32582003 G | 0.4571 | 1.87E-07 | chr:6:32648036 |
| 6 rs9271331   | 32582672 C | 0.4571 | 1.87E-07 | chr:6:32648036 |
| 6 rs9271332   | 32582674 T | 0.4571 | 1.87E-07 | chr:6:32648036 |
| 6 rs11970000  | 32598291 G | 0.3655 | 1.89E-07 | chr:6:32648036 |
| 6 rs9271278   | 32581016 A | 0.4782 | 1.89E-07 | chr:6:32648036 |
| 6 rs9271279   | 32581018 A | 0.4782 | 1.89E-07 | chr:6:32648036 |
| 6 rs2894266   | 32485924 A | 3.376  | 1.91E-07 | chr:6:32648036 |
| 6 rs9271268   | 32580806 G | 0.4608 | 1.91E-07 | chr:6:32648036 |
| 6 rs77572094  | 32502885 T | 2.075  | 1.91E-07 | chr:6:32648036 |
| 6 rs28366283  | 32560288 C | 2.064  | 1.92E-07 | chr:6:32648036 |
| 6 rs28746984  | 32653819 A | 0.3737 | 1.93E-07 | chr:6:32648036 |
| 6 rs9273505   | 32628420 T | 2.18   | 1.93E-07 | chr:6:32648036 |
| 6 rs9273781   | 32629447 A | 0.4137 | 1.94E-07 | chr:6:32648036 |
| 6 rs183872958 | 32552538 T | 2.993  | 1.94E-07 | chr:6:32648036 |
| 6 rs9272320   | 32604124 A | 2.065  | 1.94E-07 | chr:6:32648036 |
| 6 rs9273265   | 32614318 G | 0.5295 | 1.95E-07 | chr:6:32648036 |
| 6 rs73728637  | 32594420 C | 0.3597 | 1.96E-07 | chr:6:32648036 |
| 6 rs35635298  | 32600079 C | 0.3546 | 1.97E-07 | chr:6:32648036 |
| 6 rs3997849   | 32682402 T | 2.357  | 1.98E-07 | chr:6:32648036 |
| 6 rs281863660 | 32630721 G | 1.964  | 1.99E-07 | chr:6:32648036 |
| 6 rs281863661 | 32630720 T | 1.964  | 1.99E-07 | chr:6:32648036 |
| 6 rs79293578  | 32503561 T | 2.223  | 2.02E-07 | chr:6:32648036 |
| 6 rs9271299   | 32581537 G | 0.4592 | 2.03E-07 | chr:6:32648036 |
| 6 rs180852758 | 32459251 G | 2.554  | 2.04E-07 | chr:6:32648036 |
| 6 rs9271724   | 32593552 C | 0.3903 | 2.07E-07 | chr:6:32648036 |
| 6 rs116586023 | 32473199 T | 2.135  | 2.07E-07 | chr:6:32648036 |
| 6 rs2395195   | 32447989 A | 0.3641 | 2.08E-07 | chr:6:32648036 |
| 6 rs9271393   | 32587457 G | 0.4122 | 2.08E-07 | chr:6:32648036 |
| 6 rs3134976   | 32652305 A | 0.346  | 2.09E-07 | chr:6:32648036 |
| 6 rs2002779   | 32601684 T | 0.3402 | 2.10E-07 | chr:6:32648036 |
| 6 rs4988889   | 32634952 T | 2.379  | 2.11E-07 | chr:6:32648036 |
| 6 rs113319840 | 32507441 T | 0.4887 | 2.12E-07 | chr:6:32648036 |
| 6 rs141506183 | 32485776 A | 2.58   | 2.13E-07 | chr:6:32648036 |
| 6 rs9271495   | 32589242 C | 0.41   | 2.13E-07 | chr:6:32648036 |
| 6 rs9271496   | 32589244 C | 0.41   | 2.13E-07 | chr:6:32648036 |
| 6 rs9273754   | 32629409 A | 0.4344 | 2.16E-07 | chr:6:32648036 |
| 6 rs281875047 | 32631218 G | 1.963  | 2.17E-07 | chr:6:32648036 |
| 6 rs3134992   | 32638783 T | 0.3465 | 2.18E-07 | chr:6:32648036 |

|               |            |        |          |                |
|---------------|------------|--------|----------|----------------|
| 6 rs9274905   | 32641251 T | 0.5582 | 2.19E-07 | chr:6:32648036 |
| 6 rs28747017  | 32654723 G | 0.3938 | 2.19E-07 | chr:6:32648036 |
| 6 rs28891375  | 32638757 A | 0.3631 | 2.21E-07 | chr:6:32648036 |
| 6 rs9271307   | 32581694 G | 0.4646 | 2.23E-07 | chr:6:32648036 |
| 6 rs281863485 | 32630968 C | 2.147  | 2.24E-07 | chr:6:32648036 |
| 6 rs62405569  | 32454061 T | 2.257  | 2.24E-07 | chr:6:32648036 |
| 6 rs540965243 | 32511378 C | 4.56   | 2.25E-07 | chr:6:32648036 |
| 6 rs576708145 | 32511375 C | 4.56   | 2.25E-07 | chr:6:32648036 |
| 6 rs35426875  | 32600135 C | 0.3708 | 2.25E-07 | chr:6:32648036 |
| 6 rs9275452   | 32671930 T | 2.158  | 2.26E-07 | chr:6:32648036 |
| 6 rs77296290  | 32635296 T | 2.391  | 2.28E-07 | chr:6:32648036 |
| 6 rs74955625  | 32502871 A | 2.065  | 2.31E-07 | chr:6:32648036 |
| 6 rs75288201  | 32541031 A | 2.41   | 2.34E-07 | chr:6:32648036 |
| 6 rs72844151  | 32519650 A | 0.3773 | 2.37E-07 | chr:6:32648036 |
| 6 rs17212336  | 32652026 A | 0.395  | 2.38E-07 | chr:6:32648036 |
| 6 rs535905056 | 32511341 G | 4.108  | 2.38E-07 | chr:6:32648036 |
| 6 rs553395545 | 32511337 A | 4.108  | 2.38E-07 | chr:6:32648036 |
| 6 rs571140115 | 32511322 T | 4.108  | 2.38E-07 | chr:6:32648036 |
| 6 rs574932946 | 32511340 T | 4.108  | 2.38E-07 | chr:6:32648036 |
| 6 rs9273144   | 32612915 C | 2.62   | 2.39E-07 | chr:6:32648036 |
| 6 rs9274579   | 32635312 A | 0.4139 | 2.42E-07 | chr:6:32648036 |
| 6 rs28746926  | 32650026 C | 0.3969 | 2.42E-07 | chr:6:32648036 |
| 6 rs28746927  | 32650029 T | 0.3969 | 2.42E-07 | chr:6:32648036 |
| 6 rs28747021  | 32654772 G | 0.3945 | 2.44E-07 | chr:6:32648036 |
| 6 rs9271610   | 32591601 T | 0.4192 | 2.45E-07 | chr:6:32648036 |
| 6 rs9271611   | 32591609 G | 0.4192 | 2.45E-07 | chr:6:32648036 |
| 6 rs34180045  | 32600066 G | 0.3613 | 2.46E-07 | chr:6:32648036 |
| 6 rs9271494   | 32589240 C | 6.973  | 2.47E-07 | chr:6:32648036 |
| 6 rs35305772  | 32556662 C | 3.04   | 2.49E-07 | chr:6:32648036 |
| 6 rs9275454   | 32671939 A | 2.152  | 2.51E-07 | chr:6:32648036 |
| 6 rs17212216  | 32651509 C | 0.3878 | 2.51E-07 | chr:6:32648036 |
| 6 rs2395204   | 32452005 G | 2.356  | 2.51E-07 | chr:6:32648036 |
| 6 rs28746921  | 32649831 A | 0.398  | 2.53E-07 | chr:6:32648036 |
| 6 rs114217086 | 32552954 G | 2.794  | 2.56E-07 | chr:6:32648036 |
| 6 rs116743472 | 32552953 T | 2.794  | 2.56E-07 | chr:6:32648036 |
| 6 rs28747019  | 32654757 A | 0.3953 | 2.57E-07 | chr:6:32648036 |
| 6 rs28747020  | 32654760 C | 0.3953 | 2.57E-07 | chr:6:32648036 |
| 6 rs28891414  | 32640593 T | 0.3886 | 2.62E-07 | chr:6:32648036 |
| 6 rs188413732 | 32498914 T | 2.163  | 2.65E-07 | chr:6:32648036 |
| 6 rs28366330  | 32561846 C | 2.693  | 2.65E-07 | chr:6:32648036 |
| 6 rs35321667  | 32501534 C | 0.3751 | 2.67E-07 | chr:6:32648036 |
| 6 rs17205879  | 32651576 C | 0.3892 | 2.69E-07 | chr:6:32648036 |
| 6 rs17205886  | 32651578 A | 0.3892 | 2.69E-07 | chr:6:32648036 |

|               |            |        |          |                |
|---------------|------------|--------|----------|----------------|
| 6 rs3134967   | 32659315 A | 0.3223 | 2.69E-07 | chr:6:32648036 |
| 6 rs9271276   | 32580971 A | 0.4828 | 2.70E-07 | chr:6:32648036 |
| 6 rs35828545  | 32600099 C | 0.3682 | 2.73E-07 | chr:6:32648036 |
| 6 rs9271487   | 32588985 G | 0.4118 | 2.73E-07 | chr:6:32648036 |
| 6 rs9275033   | 32644388 A | 0.4301 | 2.74E-07 | chr:6:32648036 |
| 6 rs28746989  | 32653873 T | 0.3768 | 2.75E-07 | chr:6:32648036 |
| 6 rs28371354  | 32710555 G | 4.178  | 2.75E-07 | chr:6:32648036 |
| 6 rs28371355  | 32710557 T | 4.178  | 2.75E-07 | chr:6:32648036 |
| 6 rs28891369  | 32638602 T | 0.3976 | 2.76E-07 | chr:6:32648036 |
| 6 rs71536523  | 32520594 A | 0.3394 | 2.76E-07 | chr:6:32648036 |
| 6 rs75287767  | 32521735 T | 0.4254 | 2.78E-07 | chr:6:32648036 |
| 6 rs28891374  | 32638750 G | 0.3668 | 2.80E-07 | chr:6:32648036 |
| 6 rs9273501   | 32628361 A | 2.16   | 2.81E-07 | chr:6:32648036 |
| 6 rs75496002  | 32459855 C | 2.084  | 2.83E-07 | chr:6:32648036 |
| 6 rs9273067   | 32612213 C | 0.5043 | 2.85E-07 | chr:6:32648036 |
| 6 rs28599891  | 32452470 C | 0.3927 | 2.87E-07 | chr:6:32648036 |
| 6 rs13211123  | 32600249 C | 0.3717 | 2.90E-07 | chr:6:32648036 |
| 6 rs3134987   | 32642050 A | 0.3485 | 2.93E-07 | chr:6:32648036 |
| 6 rs9271329   | 32582635 A | 0.4665 | 2.98E-07 | chr:6:32648036 |
| 6 rs73729117  | 32519600 A | 0.3773 | 2.98E-07 | chr:6:32648036 |
| 6 rs17212230  | 32651588 A | 0.3926 | 3.00E-07 | chr:6:32648036 |
| 6 rs543622960 | 32511362 C | 4.236  | 3.00E-07 | chr:6:32648036 |
| 6 rs558497977 | 32511365 A | 4.236  | 3.00E-07 | chr:6:32648036 |
| 6 rs2239802   | 32411846 C | 0.3832 | 3.03E-07 | chr:6:32648036 |
| 6 rs2395182   | 32413317 G | 0.3832 | 3.03E-07 | chr:6:32648036 |
| 6 rs7196      | 32412571 A | 0.3832 | 3.03E-07 | chr:6:32648036 |
| 6 rs241410    | 32861651 C | 2.12   | 3.03E-07 | chr:6:32648036 |
| 6 rs112337463 | 32479229 G | 1.851  | 3.05E-07 | chr:6:32648036 |
| 6 rs28746992  | 32653919 G | 0.3777 | 3.05E-07 | chr:6:32648036 |
| 6 rs35326979  | 32653917 G | 0.3777 | 3.05E-07 | chr:6:32648036 |
| 6 rs75640879  | 32541021 T | 2.39   | 3.06E-07 | chr:6:32648036 |
| 6 rs74729326  | 32506796 T | 2.085  | 3.07E-07 | chr:6:32648036 |
| 6 rs9271553   | 32590299 T | 0.422  | 3.08E-07 | chr:6:32648036 |
| 6 rs75251583  | 32889082 G | 2.452  | 3.08E-07 | chr:6:32648036 |
| 6 rs281863466 | 32630996 T | 2.359  | 3.08E-07 | chr:6:32648036 |
| 6 rs540002313 | 32599555 A | 0.3333 | 3.10E-07 | chr:6:32648036 |
| 6 rs28746919  | 32649806 A | 0.4011 | 3.11E-07 | chr:6:32648036 |
| 6 rs28746920  | 32649813 A | 0.4011 | 3.11E-07 | chr:6:32648036 |
| 6 rs4959108   | 32591922 G | 0.3178 | 3.12E-07 | chr:6:32648036 |
| 6 rs12204922  | 32451613 C | 2.427  | 3.13E-07 | chr:6:32648036 |
| 6 rs74729795  | 32892138 C | 2.452  | 3.16E-07 | chr:6:32648036 |
| 6 rs419132    | 32210799 A | 2.133  | 3.17E-07 | chr:6:32648036 |
| 6 rs68148149  | 32511725 C | 0.3728 | 3.18E-07 | chr:6:32648036 |

|               |            |        |          |                |
|---------------|------------|--------|----------|----------------|
| 6 rs28746960  | 32652938 G | 0.3919 | 3.18E-07 | chr:6:32648036 |
| 6 rs6908032   | 32643739 A | 0.3799 | 3.19E-07 | chr:6:32648036 |
| 6 rs145649164 | 32601918 A | 0.2879 | 3.21E-07 | chr:6:32648036 |
| 6 rs3830060   | 32633971 G | 6.479  | 3.25E-07 | chr:6:32648036 |
| 6 rs9271971   | 32597561 A | 0.4032 | 3.27E-07 | chr:6:32648036 |
| 6 rs6916779   | 32684317 C | 0.4299 | 3.28E-07 | chr:6:32648036 |
| 6 rs9271269   | 32580820 G | 0.4699 | 3.29E-07 | chr:6:32648036 |
| 6 rs114335201 | 32473206 C | 2.062  | 3.29E-07 | chr:6:32648036 |
| 6 rs9275638   | 32684760 T | 0.427  | 3.33E-07 | chr:6:32648036 |
| 6 rs9271687   | 32592985 A | 0.3384 | 3.33E-07 | chr:6:32648036 |
| 6 rs4246055   | 32592360 T | 2.31   | 3.35E-07 | chr:6:32648036 |
| 6 rs144353907 | 32552226 C | 3.256  | 3.36E-07 | chr:6:32648036 |
| 6 rs149614319 | 32552223 A | 3.256  | 3.36E-07 | chr:6:32648036 |
| 6 rs1383265   | 32739888 C | 0.449  | 3.36E-07 | chr:6:32648036 |
| 6 rs17205872  | 32651558 A | 0.3896 | 3.44E-07 | chr:6:32648036 |
| 6 rs571321362 | 32183599 T | 0.4053 | 3.46E-07 | chr:6:32648036 |
| 6 rs915896    | 32187721 T | 0.4551 | 3.48E-07 | chr:6:32648036 |
| 6 rs72492308  | 32509570 T | 0.378  | 3.51E-07 | chr:6:32648036 |
| 6 rs9271390   | 32587440 A | 0.423  | 3.52E-07 | chr:6:32648036 |
| 6 rs9271391   | 32587442 G | 0.423  | 3.52E-07 | chr:6:32648036 |
| 6 rs115462544 | 32552229 A | 3.656  | 3.53E-07 | chr:6:32648036 |
| 6 rs73397417  | 32521988 G | 0.3746 | 3.55E-07 | chr:6:32648036 |
| 6 rs115397315 | 32525087 C | 2.574  | 3.57E-07 | chr:6:32648036 |
| 6 rs535667342 | 32485778 T | 2.54   | 3.58E-07 | chr:6:32648036 |
| 6 rs552798572 | 32485775 C | 2.54   | 3.58E-07 | chr:6:32648036 |
| 6 rs28383206  | 32575167 G | 2.696  | 3.60E-07 | chr:6:32648036 |
| 6 rs9271374   | 32587041 G | 0.3473 | 3.60E-07 | chr:6:32648036 |
| 6 rs72853984  | 32511866 C | 0.3784 | 3.61E-07 | chr:6:32648036 |
| 6 rs9271303   | 32581647 A | 0.4733 | 3.62E-07 | chr:6:32648036 |
| 6 rs9271304   | 32581648 G | 0.4733 | 3.62E-07 | chr:6:32648036 |
| 6 rs9271305   | 32581649 C | 0.4733 | 3.62E-07 | chr:6:32648036 |
| 6 rs9271306   | 32581658 A | 0.4733 | 3.62E-07 | chr:6:32648036 |
| 6 rs9271548   | 32590234 A | 0.4166 | 3.63E-07 | chr:6:32648036 |
| 6 rs3132132   | 32901934 A | 2.297  | 3.63E-07 | chr:6:32648036 |
| 6 rs113260943 | 32509550 T | 0.3779 | 3.64E-07 | chr:6:32648036 |
| 6 rs9271861   | 32595287 T | 0.4901 | 3.64E-07 | chr:6:32648036 |
| 6 rs28366329  | 32561819 A | 2.63   | 3.64E-07 | chr:6:32648036 |
| 6 rs72844167  | 32520642 T | 0.378  | 3.65E-07 | chr:6:32648036 |
| 6 rs9274526   | 32634485 A | 0.4263 | 3.67E-07 | chr:6:32648036 |
| 6 rs552324616 | 32569207 T | 9.39   | 3.74E-07 | chr:6:32648036 |
| 6 rs559285850 | 32435549 A | 1.92   | 3.74E-07 | chr:6:32648036 |
| 6 rs9271980   | 32597636 A | 0.3685 | 3.76E-07 | chr:6:32648036 |
| 6 rs111372196 | 32516995 A | 0.3945 | 3.77E-07 | chr:6:32648036 |

|               |            |        |          |                |
|---------------|------------|--------|----------|----------------|
| 6 rs77993032  | 32518093 C | 0.378  | 3.78E-07 | chr:6:32648036 |
| 6 rs915894    | 32190390 G | 0.4556 | 3.78E-07 | chr:6:32648036 |
| 6 rs9272159   | 32601129 A | 0.3507 | 3.80E-07 | chr:6:32648036 |
| 6 rs147613123 | 32518296 A | 0.4132 | 3.81E-07 | chr:6:32648036 |
| 6 rs36088464  | 32513497 A | 0.378  | 3.81E-07 | chr:6:32648036 |
| 6 rs28747011  | 32654554 G | 0.3963 | 3.83E-07 | chr:6:32648036 |
| 6 rs28747012  | 32654558 C | 0.3963 | 3.83E-07 | chr:6:32648036 |
| 6 rs561142110 | 32654552 G | 0.3963 | 3.83E-07 | chr:6:32648036 |
| 6 rs9271873   | 32595421 A | 0.39   | 3.85E-07 | chr:6:32648036 |
| 6 rs17205823  | 32651168 T | 0.4013 | 3.88E-07 | chr:6:32648036 |
| 6 rs17205830  | 32651180 C | 0.4013 | 3.88E-07 | chr:6:32648036 |
| 6 rs28371353  | 32710510 G | 4.047  | 3.95E-07 | chr:6:32648036 |
| 6 rs9274498   | 32633941 G | 2.329  | 3.96E-07 | chr:6:32648036 |
| 6 rs4959030   | 32591751 A | 0.3208 | 3.97E-07 | chr:6:32648036 |
| 6 rs113068532 | 32518301 G | 0.4133 | 4.00E-07 | chr:6:32648036 |
| 6 rs281863148 | 32631652 A | 0.5016 | 4.01E-07 | chr:6:32648036 |
| 6 rs9271578   | 32590635 T | 2.136  | 4.03E-07 | chr:6:32648036 |
| 6 rs1265795   | 32184024 T | 0.4098 | 4.03E-07 | chr:6:32648036 |
| 6 rs206014    | 32183701 G | 0.4098 | 4.03E-07 | chr:6:32648036 |
| 6 rs384247    | 32184574 A | 0.4098 | 4.03E-07 | chr:6:32648036 |
| 6 rs404860    | 32184345 C | 0.4098 | 4.03E-07 | chr:6:32648036 |
| 6 rs431541    | 32186193 C | 0.4098 | 4.03E-07 | chr:6:32648036 |
| 6 rs74347248  | 32459878 T | 2.074  | 4.04E-07 | chr:6:32648036 |
| 6 rs28746909  | 32648975 A | 0.4035 | 4.08E-07 | chr:6:32648036 |
| 6 rs74728615  | 32459866 A | 2.048  | 4.10E-07 | chr:6:32648036 |
| 6 rs111940905 | 32473454 G | 2.17   | 4.12E-07 | chr:6:32648036 |
| 6 rs67426377  | 32514457 C | 0.3782 | 4.14E-07 | chr:6:32648036 |
| 6 rs9274535   | 32634620 T | 0.4356 | 4.16E-07 | chr:6:32648036 |
| 6 rs3134970   | 32654202 T | 0.3441 | 4.25E-07 | chr:6:32648036 |
| 6 rs28724247  | 32629467 A | 2.074  | 4.25E-07 | chr:6:32648036 |
| 6 rs113276642 | 32525000 G | 2.996  | 4.27E-07 | chr:6:32648036 |
| 6 rs35063846  | 32550733 C | 2.954  | 4.28E-07 | chr:6:32648036 |
| 6 rs9271737   | 32593690 C | 1.933  | 4.29E-07 | chr:6:32648036 |
| 6 rs9274114   | 32630201 C | 2.313  | 4.30E-07 | chr:6:32648036 |
| 6 rs9271275   | 32580961 A | 0.4909 | 4.33E-07 | chr:6:32648036 |
| 6 rs28891411  | 32640509 A | 0.4032 | 4.40E-07 | chr:6:32648036 |
| 6 rs9275222   | 32659516 T | 0.4547 | 4.41E-07 | chr:6:32648036 |
| 6 rs3129871   | 32406342 C | 2.127  | 4.45E-07 | chr:6:32648036 |
| 6 rs72492326  | 32520420 T | 0.3783 | 4.46E-07 | chr:6:32648036 |
| 6 rs28746907  | 32648937 A | 0.405  | 4.46E-07 | chr:6:32648036 |
| 6 rs143722527 | 32479580 C | 1.909  | 4.51E-07 | chr:6:32648036 |
| 6 rs281863143 | 32631657 T | 0.5025 | 4.53E-07 | chr:6:32648036 |
| 6 rs28891435  | 32641241 G | 0.5094 | 4.56E-07 | chr:6:32648036 |

|               |            |        |          |                |
|---------------|------------|--------|----------|----------------|
| 6 rs17613367  | 32622063 A | 1.723  | 4.57E-07 | chr:6:32648036 |
| 6 rs550053442 | 32599693 A | 0.2974 | 4.57E-07 | chr:6:32648036 |
| 6 rs2760985   | 32566398 A | 7.035  | 4.58E-07 | chr:6:32648036 |
| 6 rs114803358 | 32601708 A | 0.3937 | 4.59E-07 | chr:6:32648036 |
| 6 rs77233532  | 32510740 A | 0.5071 | 4.60E-07 | chr:6:32648036 |
| 6 rs3828840   | 32520907 T | 0.3783 | 4.60E-07 | chr:6:32648036 |
| 6 rs2256594   | 32186872 G | 0.4115 | 4.61E-07 | chr:6:32648036 |
| 6 rs438475    | 32186245 A | 0.4114 | 4.62E-07 | chr:6:32648036 |
| 6 rs9271982   | 32597640 A | 0.372  | 4.63E-07 | chr:6:32648036 |
| 6 rs281863676 | 32630701 T | 1.941  | 4.64E-07 | chr:6:32648036 |
| 6 rs9268830   | 32427572 G | 0.3736 | 4.64E-07 | chr:6:32648036 |
| 6 rs9273500   | 32628342 T | 0.3323 | 4.66E-07 | chr:6:32648036 |
| 6 rs114567049 | 32601719 A | 0.3951 | 4.66E-07 | chr:6:32648036 |
| 6 rs9271696   | 32593085 C | 0.4304 | 4.73E-07 | chr:6:32648036 |
| 6 rs116079706 | 32479557 C | 1.911  | 4.74E-07 | chr:6:32648036 |
| 6 rs28891471  | 32642473 G | 0.413  | 4.79E-07 | chr:6:32648036 |
| 6 rs72848261  | 32601790 C | 0.3971 | 4.79E-07 | chr:6:32648036 |
| 6 rs9271872   | 32595418 G | 0.394  | 4.79E-07 | chr:6:32648036 |
| 6 rs552568377 | 32511319 C | 3.859  | 4.80E-07 | chr:6:32648036 |
| 6 rs115707905 | 32516930 G | 0.3912 | 4.82E-07 | chr:6:32648036 |
| 6 rs116184728 | 32516935 T | 0.3912 | 4.82E-07 | chr:6:32648036 |
| 6 rs260547    | 32907278 C | 2.512  | 4.83E-07 | chr:6:32648036 |
| 6 rs9272328   | 32604196 T | 0.394  | 4.86E-07 | chr:6:32648036 |
| 6 rs113608847 | 32554284 G | 2.871  | 4.87E-07 | chr:6:32648036 |
| 6 rs114034156 | 32479305 G | 1.83   | 4.91E-07 | chr:6:32648036 |
| 6 rs34523106  | 32513724 C | 0.3807 | 4.91E-07 | chr:6:32648036 |
| 6 rs201854374 | 32507311 C | 0.535  | 4.92E-07 | chr:6:32648036 |
| 6 rs281863430 | 32631039 A | 0.4234 | 4.96E-07 | chr:6:32648036 |
| 6 rs9274497   | 32633928 A | 2.308  | 4.98E-07 | chr:6:32648036 |
| 6 rs28724237  | 32629046 C | 2.044  | 5.06E-07 | chr:6:32648036 |
| 6 rs4502931   | 32380782 T | 0.4482 | 5.11E-07 | chr:6:32648036 |
| 6 rs5007259   | 32379101 T | 0.4482 | 5.11E-07 | chr:6:32648036 |
| 6 rs5007263   | 32378982 A | 0.4482 | 5.11E-07 | chr:6:32648036 |
| 6 rs5007264   | 32378877 C | 0.4482 | 5.11E-07 | chr:6:32648036 |
| 6 rs5007265   | 32378866 T | 0.4482 | 5.11E-07 | chr:6:32648036 |
| 6 rs5007266   | 32378834 T | 0.4482 | 5.11E-07 | chr:6:32648036 |
| 6 rs6911383   | 32379682 T | 0.4482 | 5.11E-07 | chr:6:32648036 |
| 6 rs6918317   | 32381210 T | 0.4482 | 5.11E-07 | chr:6:32648036 |
| 6 rs6932542   | 32380262 A | 0.4482 | 5.11E-07 | chr:6:32648036 |
| 6 rs6932810   | 32380190 G | 0.4482 | 5.11E-07 | chr:6:32648036 |
| 6 rs6938337   | 32381041 C | 0.4482 | 5.11E-07 | chr:6:32648036 |
| 6 rs7759742   | 32381736 T | 0.4482 | 5.11E-07 | chr:6:32648036 |
| 6 rs9268503   | 32377061 C | 0.4482 | 5.11E-07 | chr:6:32648036 |

|               |            |        |          |                |
|---------------|------------|--------|----------|----------------|
| 6 rs9268504   | 32377116 C | 0.4482 | 5.11E-07 | chr:6:32648036 |
| 6 rs9268506   | 32377470 C | 0.4482 | 5.11E-07 | chr:6:32648036 |
| 6 rs9268507   | 32377539 A | 0.4482 | 5.11E-07 | chr:6:32648036 |
| 6 rs9268508   | 32377588 T | 0.4482 | 5.11E-07 | chr:6:32648036 |
| 6 rs9268513   | 32378787 T | 0.4482 | 5.11E-07 | chr:6:32648036 |
| 6 rs9268518   | 32380818 A | 0.4482 | 5.11E-07 | chr:6:32648036 |
| 6 rs9268519   | 32380826 G | 0.4482 | 5.11E-07 | chr:6:32648036 |
| 6 rs9268520   | 32380860 C | 0.4482 | 5.11E-07 | chr:6:32648036 |
| 6 rs968154    | 32380785 G | 0.4482 | 5.11E-07 | chr:6:32648036 |
| 6 rs28891481  | 32642899 A | 0.4092 | 5.12E-07 | chr:6:32648036 |
| 6 rs28891482  | 32642906 A | 0.4092 | 5.12E-07 | chr:6:32648036 |
| 6 rs9271965   | 32597473 C | 0.4053 | 5.14E-07 | chr:6:32648036 |
| 6 rs77158649  | 32459875 C | 2.06   | 5.15E-07 | chr:6:32648036 |
| 6 rs78091375  | 32459877 G | 2.06   | 5.15E-07 | chr:6:32648036 |
| 6 rs9273561   | 32628998 C | 2.07   | 5.17E-07 | chr:6:32648036 |
| 6 rs78241440  | 32509180 G | 0.3877 | 5.29E-07 | chr:6:32648036 |
| 6 rs181280314 | 32481838 C | 5.275  | 5.30E-07 | chr:6:32648036 |
| 6 rs569932079 | 32481837 T | 5.275  | 5.30E-07 | chr:6:32648036 |
| 6 rs9274430   | 32633054 C | 0.5214 | 5.31E-07 | chr:6:32648036 |
| 6 rs76924329  | 32541094 G | 2.287  | 5.31E-07 | chr:6:32648036 |
| 6 rs28746908  | 32648963 A | 0.4076 | 5.35E-07 | chr:6:32648036 |
| 6 rs17208902  | 32379547 T | 2.246  | 5.37E-07 | chr:6:32648036 |
| 6 rs9275203   | 32656947 A | 6.887  | 5.40E-07 | chr:6:32648036 |
| 6 rs553858906 | 32183602 C | 0.4112 | 5.41E-07 | chr:6:32648036 |
| 6 rs9274747   | 32638071 A | 6.867  | 5.42E-07 | chr:6:32648036 |
| 6 rs545019763 | 32183815 A | 0.4109 | 5.44E-07 | chr:6:32648036 |
| 6 rs9271543   | 32590097 A | 0.4208 | 5.44E-07 | chr:6:32648036 |
| 6 rs73729116  | 32519558 C | 0.3787 | 5.48E-07 | chr:6:32648036 |
| 6 rs5007258   | 32379239 A | 0.4488 | 5.52E-07 | chr:6:32648036 |
| 6 rs5007260   | 32379047 G | 0.4488 | 5.52E-07 | chr:6:32648036 |
| 6 rs5007261   | 32379031 G | 0.4488 | 5.52E-07 | chr:6:32648036 |
| 6 rs5007262   | 32379011 A | 0.4488 | 5.52E-07 | chr:6:32648036 |
| 6 rs3104373   | 32600375 T | 0.3267 | 5.55E-07 | chr:6:32648036 |
| 6 rs28891472  | 32642515 C | 0.4154 | 5.62E-07 | chr:6:32648036 |
| 6 rs28891473  | 32642525 T | 0.4154 | 5.62E-07 | chr:6:32648036 |
| 6 rs9271281   | 32581059 C | 0.4913 | 5.63E-07 | chr:6:32648036 |
| 6 rs9271282   | 32581062 T | 0.4913 | 5.63E-07 | chr:6:32648036 |
| 6 rs541685416 | 32558854 C | 2.583  | 5.66E-07 | chr:6:32648036 |
| 6 rs563619413 | 32558855 A | 2.583  | 5.66E-07 | chr:6:32648036 |
| 6 rs431722    | 32187722 C | 2.048  | 5.66E-07 | chr:6:32648036 |
| 6 rs13202749  | 32585299 G | 0.3406 | 5.68E-07 | chr:6:32648036 |
| 6 rs9271514   | 32589613 A | 0.4219 | 5.72E-07 | chr:6:32648036 |
| 6 rs9271515   | 32589645 A | 0.4219 | 5.72E-07 | chr:6:32648036 |



|               |            |        |          |                |
|---------------|------------|--------|----------|----------------|
| 6 rs28371176  | 32612839 G | 4.679  | 5.72E-07 | chr:6:32648036 |
| 6 rs9271274   | 32580935 A | 0.4915 | 5.74E-07 | chr:6:32648036 |
| 6 rs9271176   | 32578127 A | 0.3607 | 5.74E-07 | chr:6:32648036 |
| 6 rs3134979   | 32650178 A | 0.3431 | 5.78E-07 | chr:6:32648036 |
| 6 rs1136787   | 32487427 A | 0.4953 | 5.78E-07 | chr:6:32648036 |
| 6 rs35117964  | 32568146 G | 6.145  | 5.80E-07 | chr:6:32648036 |
| 6 rs72844177  | 32520990 G | 0.3784 | 5.83E-07 | chr:6:32648036 |
| 6 rs72848254  | 32601375 G | 0.364  | 5.83E-07 | chr:6:32648036 |
| 6 rs9275151   | 32651936 T | 6.26   | 5.84E-07 | chr:6:32648036 |
| 6 rs9275167   | 32653263 G | 6.26   | 5.84E-07 | chr:6:32648036 |
| 6 rs28746922  | 32649844 G | 0.4121 | 5.87E-07 | chr:6:32648036 |
| 6 rs577650925 | 32183813 G | 0.4174 | 5.92E-07 | chr:6:32648036 |
| 6 rs79350467  | 32527476 T | 1.952  | 5.97E-07 | chr:6:32648036 |
| 6 rs3763349   | 32808232 A | 2.07   | 5.98E-07 | chr:6:32648036 |
| 6 rs116575354 | 32524989 C | 2.939  | 5.98E-07 | chr:6:32648036 |
| 6 rs28471056  | 32603563 G | 0.3548 | 5.98E-07 | chr:6:32648036 |
| 6 rs2647066   | 32571122 T | 6.132  | 6.00E-07 | chr:6:32648036 |
| 6 rs2760990   | 32571110 A | 6.132  | 6.00E-07 | chr:6:32648036 |
| 6 rs111480903 | 32478848 A | 1.815  | 6.02E-07 | chr:6:32648036 |
| 6 rs28724243  | 32629347 C | 2.028  | 6.06E-07 | chr:6:32648036 |
| 6 rs28746882  | 32638175 A | 0.4072 | 6.07E-07 | chr:6:32648036 |
| 6 rs281874998 | 32631273 T | 1.9    | 6.08E-07 | chr:6:32648036 |
| 6 rs112218095 | 32490813 T | 4.69   | 6.09E-07 | chr:6:32648036 |
| 6 rs112572344 | 32473495 G | 1.926  | 6.11E-07 | chr:6:32648036 |
| 6 rs28746943  | 32652634 A | 0.4035 | 6.14E-07 | chr:6:32648036 |
| 6 rs17212329  | 32652005 T | 0.4102 | 6.15E-07 | chr:6:32648036 |
| 6 rs111813052 | 32554277 A | 2.892  | 6.18E-07 | chr:6:32648036 |
| 6 rs72844166  | 32520632 G | 0.3918 | 6.20E-07 | chr:6:32648036 |
| 6 rs6906730   | 32379445 T | 0.4515 | 6.20E-07 | chr:6:32648036 |
| 6 rs35597441  | 32555545 T | 8.048  | 6.20E-07 | chr:6:32648036 |
| 6 rs73728598  | 32601447 G | 0.3702 | 6.21E-07 | chr:6:32648036 |
| 6 rs281874818 | 32631430 G | 0.4462 | 6.21E-07 | chr:6:32648036 |
| 6 rs112996372 | 32517005 G | 0.4072 | 6.24E-07 | chr:6:32648036 |
| 6 rs28746923  | 32649849 G | 0.4123 | 6.26E-07 | chr:6:32648036 |
| 6 rs28746924  | 32649854 A | 0.4123 | 6.26E-07 | chr:6:32648036 |
| 6 rs116277371 | 32392330 A | 6.012  | 6.28E-07 | chr:6:32648036 |
| 6 rs5024432   | 32684468 T | 2.224  | 6.32E-07 | chr:6:32648036 |
| 6 rs527409566 | 32684514 G | 2.224  | 6.32E-07 | chr:6:32648036 |
| 6 rs76733997  | 32453590 A | 2.27   | 6.32E-07 | chr:6:32648036 |
| 6 rs68109409  | 32518552 G | 0.4035 | 6.52E-07 | chr:6:32648036 |
| 6 rs73727962  | 32509050 A | 0.4038 | 6.52E-07 | chr:6:32648036 |
| 6 rs76722140  | 32509053 C | 0.4038 | 6.52E-07 | chr:6:32648036 |
| 6 rs113301125 | 32458328 G | 0.4788 | 6.52E-07 | chr:6:32648036 |

|               |            |        |          |                |
|---------------|------------|--------|----------|----------------|
| 6 rs9275476   | 32672624 C | 6.733  | 6.61E-07 | chr:6:32648036 |
| 6 rs9275477   | 32672641 C | 6.733  | 6.61E-07 | chr:6:32648036 |
| 6 rs111830089 | 32496843 A | 7.49   | 6.65E-07 | chr:6:32648036 |
| 6 rs17879995  | 32552072 G | 7.49   | 6.65E-07 | chr:6:32648036 |
| 6 rs72845733  | 32527305 A | 0.4876 | 6.65E-07 | chr:6:32648036 |
| 6 rs76699014  | 32555838 T | 0.4001 | 6.68E-07 | chr:6:32648036 |
| 6 rs28619202  | 32451650 T | 0.4548 | 6.70E-07 | chr:6:32648036 |
| 6 rs3134994   | 32637680 T | 0.3426 | 6.75E-07 | chr:6:32648036 |
| 6 rs281863431 | 32631038 G | 2.293  | 6.78E-07 | chr:6:32648036 |
| 6 rs72853943  | 32509260 C | 0.3921 | 6.84E-07 | chr:6:32648036 |
| 6 rs28371352  | 32708220 T | 3.996  | 6.84E-07 | chr:6:32648036 |
| 6 rs143845848 | 32481954 A | 2.119  | 6.90E-07 | chr:6:32648036 |
| 6 rs199720289 | 32481962 A | 2.119  | 6.90E-07 | chr:6:32648036 |
| 6 rs201894254 | 32481961 C | 2.119  | 6.90E-07 | chr:6:32648036 |
| 6 rs35670775  | 32544455 T | 2.456  | 6.97E-07 | chr:6:32648036 |
| 6 rs3129962   | 32379383 C | 2.228  | 6.99E-07 | chr:6:32648036 |
| 6 rs72492336  | 32527112 C | 0.3915 | 6.99E-07 | chr:6:32648036 |
| 6 rs9271283   | 32581092 T | 0.4861 | 7.02E-07 | chr:6:32648036 |
| 6 rs72844134  | 32518196 G | 0.4041 | 7.02E-07 | chr:6:32648036 |
| 6 rs533779530 | 32453612 G | 0.4627 | 7.18E-07 | chr:6:32648036 |
| 6 rs28891437  | 32641342 A | 0.5119 | 7.20E-07 | chr:6:32648036 |
| 6 rs9268501   | 32376882 T | 0.453  | 7.22E-07 | chr:6:32648036 |
| 6 rs9268502   | 32376932 C | 0.453  | 7.22E-07 | chr:6:32648036 |
| 6 rs281875006 | 32631265 T | 1.889  | 7.23E-07 | chr:6:32648036 |
| 6 rs77932549  | 32524736 G | 0.5212 | 7.24E-07 | chr:6:32648036 |
| 6 rs78025613  | 32524735 A | 0.5212 | 7.24E-07 | chr:6:32648036 |
| 6 rs2454139   | 32566635 C | 6.418  | 7.33E-07 | chr:6:32648036 |
| 6 rs2647059   | 32569362 C | 6.418  | 7.33E-07 | chr:6:32648036 |
| 6 rs2760983   | 32565601 G | 6.418  | 7.33E-07 | chr:6:32648036 |
| 6 rs34039593  | 32570311 G | 6.418  | 7.33E-07 | chr:6:32648036 |
| 6 rs34331363  | 32568439 T | 6.418  | 7.33E-07 | chr:6:32648036 |
| 6 rs35226637  | 32568448 A | 6.418  | 7.33E-07 | chr:6:32648036 |
| 6 rs687308    | 32567256 T | 6.418  | 7.33E-07 | chr:6:32648036 |
| 6 rs28746880  | 32638146 A | 0.4114 | 7.35E-07 | chr:6:32648036 |
| 6 rs553392189 | 32441275 C | 5.364  | 7.39E-07 | chr:6:32648036 |
| 6 rs577192394 | 32451875 G | 5.364  | 7.39E-07 | chr:6:32648036 |
| 6 rs9269562   | 32544407 A | 0.3763 | 7.39E-07 | chr:6:32648036 |
| 6 rs552672286 | 32554258 C | 2.932  | 7.41E-07 | chr:6:32648036 |
| 6 rs113556768 | 32496926 G | 8.1    | 7.47E-07 | chr:6:32648036 |
| 6 rs74290590  | 32510539 C | 0.4124 | 7.55E-07 | chr:6:32648036 |
| 6 rs3763314   | 32376618 C | 0.448  | 7.55E-07 | chr:6:32648036 |
| 6 rs9272337   | 32604273 A | 2.921  | 7.61E-07 | chr:6:32648036 |
| 6 rs560259947 | 32458033 C | 2.437  | 7.62E-07 | chr:6:32648036 |

|               |            |        |          |                |
|---------------|------------|--------|----------|----------------|
| 6 rs200094698 | 32532973 A | 2.468  | 7.76E-07 | chr:6:32648036 |
| 6 rs34350244  | 32561465 T | 7.284  | 7.80E-07 | chr:6:32648036 |
| 6 rs35118762  | 32560631 T | 7.284  | 7.80E-07 | chr:6:32648036 |
| 6 rs35265698  | 32561334 G | 7.284  | 7.80E-07 | chr:6:32648036 |
| 6 rs35294087  | 32561466 G | 7.284  | 7.80E-07 | chr:6:32648036 |
| 6 rs35525122  | 32561283 A | 7.284  | 7.80E-07 | chr:6:32648036 |
| 6 rs111662020 | 32518444 A | 0.4435 | 7.81E-07 | chr:6:32648036 |
| 6 rs28746955  | 32652858 C | 0.3897 | 7.82E-07 | chr:6:32648036 |
| 6 rs34928543  | 32560695 C | 7.915  | 7.87E-07 | chr:6:32648036 |
| 6 rs138002663 | 32473542 C | 1.949  | 8.07E-07 | chr:6:32648036 |
| 6 rs199690134 | 32487449 T | 2.95   | 8.09E-07 | chr:6:32648036 |
| 6 rs371225543 | 32601968 T | 0.4076 | 8.10E-07 | chr:6:32648036 |
| 6 rs28746947  | 32652747 A | 0.4013 | 8.13E-07 | chr:6:32648036 |
| 6 rs534494500 | 32709338 G | 4.777  | 8.18E-07 | chr:6:32648036 |
| 6 rs549426719 | 32709341 G | 4.777  | 8.18E-07 | chr:6:32648036 |
| 6 rs567649680 | 32709343 G | 4.777  | 8.18E-07 | chr:6:32648036 |
| 6 rs9274284   | 32631783 G | 0.5306 | 8.18E-07 | chr:6:32648036 |
| 6 rs116218325 | 32526611 G | 0.445  | 8.26E-07 | chr:6:32648036 |
| 6 rs201277028 | 32526612 T | 0.445  | 8.26E-07 | chr:6:32648036 |
| 6 rs77858388  | 32526619 A | 0.445  | 8.26E-07 | chr:6:32648036 |
| 6 rs409687    | 32195750 T | 0.4584 | 8.30E-07 | chr:6:32648036 |
| 6 rs9271446   | 32588344 A | 0.4558 | 8.34E-07 | chr:6:32648036 |
| 6 rs9268505   | 32377408 T | 0.3847 | 8.38E-07 | chr:6:32648036 |
| 6 rs111739306 | 32516848 T | 0.3925 | 8.47E-07 | chr:6:32648036 |
| 6 rs9270161   | 32555558 A | 0.3937 | 8.49E-07 | chr:6:32648036 |
| 6 rs111693298 | 32518251 T | 2.245  | 8.50E-07 | chr:6:32648036 |
| 6 rs9274436   | 32633131 C | 0.4703 | 8.62E-07 | chr:6:32648036 |
| 6 rs9274428   | 32633041 T | 0.5285 | 8.62E-07 | chr:6:32648036 |
| 6 rs6905975   | 32626139 C | 0.4685 | 8.63E-07 | chr:6:32648036 |
| 6 rs3129759   | 32585163 G | 0.4823 | 8.70E-07 | chr:6:32648036 |
| 6 rs35882239  | 32522576 A | 0.3967 | 8.73E-07 | chr:6:32648036 |
| 6 rs373544996 | 32663873 G | 6.336  | 8.73E-07 | chr:6:32648036 |
| 6 rs3957146   | 32681530 C | 6.336  | 8.73E-07 | chr:6:32648036 |
| 6 rs4273728   | 32678491 C | 6.336  | 8.73E-07 | chr:6:32648036 |
| 6 rs9274619   | 32635954 A | 6.336  | 8.73E-07 | chr:6:32648036 |
| 6 rs9274830   | 32639836 A | 6.336  | 8.73E-07 | chr:6:32648036 |
| 6 rs9274835   | 32639931 T | 6.336  | 8.73E-07 | chr:6:32648036 |
| 6 rs9274837   | 32639972 T | 6.336  | 8.73E-07 | chr:6:32648036 |
| 6 rs9275092   | 32648987 T | 6.336  | 8.73E-07 | chr:6:32648036 |
| 6 rs9275095   | 32649088 G | 6.336  | 8.73E-07 | chr:6:32648036 |
| 6 rs9275097   | 32649126 G | 6.336  | 8.73E-07 | chr:6:32648036 |
| 6 rs9275098   | 32649161 T | 6.336  | 8.73E-07 | chr:6:32648036 |
| 6 rs9275184   | 32654714 C | 6.336  | 8.73E-07 | chr:6:32648036 |

|              |            |        |          |                |
|--------------|------------|--------|----------|----------------|
| 6 rs9275185  | 32655305 T | 6.336  | 8.73E-07 | chr:6:32648036 |
| 6 rs9275201  | 32656723 A | 6.336  | 8.73E-07 | chr:6:32648036 |
| 6 rs9275206  | 32657565 G | 6.336  | 8.73E-07 | chr:6:32648036 |
| 6 rs9275207  | 32657710 G | 6.336  | 8.73E-07 | chr:6:32648036 |
| 6 rs9275213  | 32658335 C | 6.336  | 8.73E-07 | chr:6:32648036 |
| 6 rs9275214  | 32658665 A | 6.336  | 8.73E-07 | chr:6:32648036 |
| 6 rs9275221  | 32659099 C | 6.336  | 8.73E-07 | chr:6:32648036 |
| 6 rs9275223  | 32659839 A | 6.336  | 8.73E-07 | chr:6:32648036 |
| 6 rs9275275  | 32662607 A | 6.336  | 8.73E-07 | chr:6:32648036 |
| 6 rs9275293  | 32663308 C | 6.336  | 8.73E-07 | chr:6:32648036 |
| 6 rs9275296  | 32663431 C | 6.336  | 8.73E-07 | chr:6:32648036 |
| 6 rs9275300  | 32664126 G | 6.336  | 8.73E-07 | chr:6:32648036 |
| 6 rs9275307  | 32664990 T | 6.336  | 8.73E-07 | chr:6:32648036 |
| 6 rs9275308  | 32665255 A | 6.336  | 8.73E-07 | chr:6:32648036 |
| 6 rs9275310  | 32665319 G | 6.336  | 8.73E-07 | chr:6:32648036 |
| 6 rs9275311  | 32665640 T | 6.336  | 8.73E-07 | chr:6:32648036 |
| 6 rs9275313  | 32665759 T | 6.336  | 8.73E-07 | chr:6:32648036 |
| 6 rs9275315  | 32665912 A | 6.336  | 8.73E-07 | chr:6:32648036 |
| 6 rs9275334  | 32667107 C | 6.336  | 8.73E-07 | chr:6:32648036 |
| 6 rs9275356  | 32667850 G | 6.336  | 8.73E-07 | chr:6:32648036 |
| 6 rs9275387  | 32669013 C | 6.336  | 8.73E-07 | chr:6:32648036 |
| 6 rs9275394  | 32669454 C | 6.336  | 8.73E-07 | chr:6:32648036 |
| 6 rs9275395  | 32669483 G | 6.336  | 8.73E-07 | chr:6:32648036 |
| 6 rs9275400  | 32669761 G | 6.336  | 8.73E-07 | chr:6:32648036 |
| 6 rs9275422  | 32670548 A | 6.336  | 8.73E-07 | chr:6:32648036 |
| 6 rs9275426  | 32670912 C | 6.336  | 8.73E-07 | chr:6:32648036 |
| 6 rs9275429  | 32671057 A | 6.336  | 8.73E-07 | chr:6:32648036 |
| 6 rs9275430  | 32671086 T | 6.336  | 8.73E-07 | chr:6:32648036 |
| 6 rs9275434  | 32671247 T | 6.336  | 8.73E-07 | chr:6:32648036 |
| 6 rs9275435  | 32671332 C | 6.336  | 8.73E-07 | chr:6:32648036 |
| 6 rs9275437  | 32671412 T | 6.336  | 8.73E-07 | chr:6:32648036 |
| 6 rs9275442  | 32671755 A | 6.336  | 8.73E-07 | chr:6:32648036 |
| 6 rs9275445  | 32671811 A | 6.336  | 8.73E-07 | chr:6:32648036 |
| 6 rs9275486  | 32673099 A | 6.336  | 8.73E-07 | chr:6:32648036 |
| 6 rs9275495  | 32673574 T | 6.336  | 8.73E-07 | chr:6:32648036 |
| 6 rs9275503  | 32673931 G | 6.336  | 8.73E-07 | chr:6:32648036 |
| 6 rs9275530  | 32675523 C | 6.336  | 8.73E-07 | chr:6:32648036 |
| 6 rs9275532  | 32675634 G | 6.336  | 8.73E-07 | chr:6:32648036 |
| 6 rs9275541  | 32676159 G | 6.336  | 8.73E-07 | chr:6:32648036 |
| 6 rs9275583  | 32680299 A | 6.336  | 8.73E-07 | chr:6:32648036 |
| 6 rs9275592  | 32680620 T | 6.336  | 8.73E-07 | chr:6:32648036 |
| 6 rs9273200  | 32613537 C | 0.5726 | 8.73E-07 | chr:6:32648036 |
| 6 rs72844190 | 32521785 T | 0.3982 | 8.76E-07 | chr:6:32648036 |

|               |            |        |          |                |
|---------------|------------|--------|----------|----------------|
| 6 rs72844114  | 32514030 G | 0.3924 | 8.81E-07 | chr:6:32648036 |
| 6 rs28629976  | 32625221 C | 2.997  | 8.81E-07 | chr:6:32648036 |
| 6 rs9272458   | 32605558 G | 0.3813 | 8.89E-07 | chr:6:32648036 |
| 6 rs59281193  | 32423601 T | 0.3897 | 8.90E-07 | chr:6:32648036 |
| 6 rs79138148  | 32516351 C | 0.3922 | 9.00E-07 | chr:6:32648036 |
| 6 rs3763313   | 32376471 C | 2.24   | 9.03E-07 | chr:6:32648036 |
| 6 rs28747056  | 32656544 G | 0.4081 | 9.06E-07 | chr:6:32648036 |
| 6 rs9275608   | 32683708 G | 0.4499 | 9.06E-07 | chr:6:32648036 |
| 6 rs9275609   | 32683713 G | 0.4499 | 9.06E-07 | chr:6:32648036 |
| 6 rs28891479  | 32642750 A | 0.4249 | 9.07E-07 | chr:6:32648036 |
| 6 rs564968289 | 32558618 A | 2.978  | 9.07E-07 | chr:6:32648036 |
| 6 rs142244845 | 32472941 A | 3.058  | 9.08E-07 | chr:6:32648036 |
| 6 rs4377824   | 32635491 T | 0.4454 | 9.13E-07 | chr:6:32648036 |
| 6 rs241413    | 32859000 G | 0.4643 | 9.20E-07 | chr:6:32648036 |
| 6 rs28724142  | 32555235 A | 2.92   | 9.24E-07 | chr:6:32648036 |
| 6 rs28724143  | 32555236 T | 2.92   | 9.24E-07 | chr:6:32648036 |
| 6 rs34855541  | 32559825 G | 7.155  | 9.27E-07 | chr:6:32648036 |
| 6 rs6907291   | 32950934 T | 2.455  | 9.28E-07 | chr:6:32648036 |
| 6 rs9276943   | 32956454 C | 2.455  | 9.28E-07 | chr:6:32648036 |
| 6 rs73395587  | 32518339 T | 0.4161 | 9.32E-07 | chr:6:32648036 |
| 6 rs9271272   | 32580894 T | 0.4963 | 9.40E-07 | chr:6:32648036 |
| 6 rs9271273   | 32580902 G | 0.4963 | 9.40E-07 | chr:6:32648036 |
| 6 rs114281696 | 32525925 G | 3.207  | 9.51E-07 | chr:6:32648036 |
| 6 rs9274304   | 32631986 G | 0.5586 | 9.54E-07 | chr:6:32648036 |
| 6 rs9275163   | 32652880 C | 6.203  | 9.55E-07 | chr:6:32648036 |
| 6 rs112382456 | 32554296 C | 2.82   | 9.57E-07 | chr:6:32648036 |
| 6 rs281863401 | 32631075 C | 1.912  | 9.68E-07 | chr:6:32648036 |
| 6 rs9273531   | 32628712 T | 6.723  | 9.69E-07 | chr:6:32648036 |
| 6 rs115729463 | 32514301 C | 0.4084 | 9.69E-07 | chr:6:32648036 |
| 6 rs28772273  | 32659314 T | 0.4097 | 9.81E-07 | chr:6:32648036 |
| 6 rs57723712  | 32423409 C | 0.3901 | 9.82E-07 | chr:6:32648036 |
| 6 rs6457590   | 32421798 T | 0.3901 | 9.82E-07 | chr:6:32648036 |
| 6 rs6938382   | 32418227 A | 0.3901 | 9.82E-07 | chr:6:32648036 |
| 6 rs7760260   | 32421071 A | 0.3901 | 9.82E-07 | chr:6:32648036 |
| 6 rs7764351   | 32421631 G | 0.3901 | 9.82E-07 | chr:6:32648036 |
| 6 rs7776297   | 32424108 T | 0.3901 | 9.82E-07 | chr:6:32648036 |
| 6 rs9461748   | 32418948 C | 0.3901 | 9.82E-07 | chr:6:32648036 |
| 6 rs9767620   | 32426100 C | 0.3901 | 9.82E-07 | chr:6:32648036 |
| 6 rs9275416   | 32670196 T | 2.068  | 9.83E-07 | chr:6:32648036 |
| 6 rs201624597 | 32527297 G | 0.4968 | 1.00E-06 | chr:6:32648036 |
| 6 rs601945    | 32573415 G | 6.575  | 1.00E-06 | chr:6:32648036 |
| 6 rs111485252 | 32518374 T | 0.4163 | 1.00E-06 | chr:6:32648036 |
| 6 rs112927854 | 32663259 T | 0.346  | 1.01E-06 | chr:6:32648036 |

|               |            |        |          |                |
|---------------|------------|--------|----------|----------------|
| 6 rs530460066 | 32629240 G | 0.5043 | 1.01E-06 | chr:6:32648036 |
| 6 rs2395206   | 32452176 G | 0.458  | 1.01E-06 | chr:6:32648036 |
| 6 rs149432428 | 32485861 G | 2.197  | 1.02E-06 | chr:6:32648036 |
| 6 rs9273394   | 32627082 A | 0.516  | 1.02E-06 | chr:6:32648036 |
| 6 rs9274443   | 32633239 C | 0.4969 | 1.03E-06 | chr:6:32648036 |
| 6 rs9275610   | 32683750 C | 0.4509 | 1.03E-06 | chr:6:32648036 |
| 6 rs546173503 | 32523200 C | 2.571  | 1.04E-06 | chr:6:32648036 |
| 6 rs28891397  | 32639777 A | 0.4215 | 1.05E-06 | chr:6:32648036 |
| 6 rs9268926   | 32433067 G | 2.682  | 1.05E-06 | chr:6:32648036 |
| 6 rs17613535  | 32630674 C | 0.4781 | 1.05E-06 | chr:6:32648036 |
| 6 rs200864308 | 32518611 G | 0.4358 | 1.06E-06 | chr:6:32648036 |
| 6 rs28746956  | 32652877 G | 0.3983 | 1.07E-06 | chr:6:32648036 |
| 6 rs116630455 | 32601946 C | 0.4094 | 1.08E-06 | chr:6:32648036 |
| 6 rs67587495  | 32518728 A | 0.4049 | 1.09E-06 | chr:6:32648036 |
| 6 rs111405624 | 32554254 T | 2.867  | 1.09E-06 | chr:6:32648036 |
| 6 rs34673795  | 32513988 G | 0.3962 | 1.10E-06 | chr:6:32648036 |
| 6 rs28746881  | 32638153 T | 0.4177 | 1.11E-06 | chr:6:32648036 |
| 6 rs72844137  | 32518615 G | 0.4164 | 1.11E-06 | chr:6:32648036 |
| 6 rs28746897  | 32648396 G | 0.4408 | 1.11E-06 | chr:6:32648036 |
| 6 rs113014982 | 32536382 T | 0.5486 | 1.11E-06 | chr:6:32648036 |
| 6 rs62405645  | 32517934 G | 0.401  | 1.12E-06 | chr:6:32648036 |
| 6 rs546068737 | 32517854 C | 5.405  | 1.13E-06 | chr:6:32648036 |
| 6 rs17206049  | 32652336 A | 0.3973 | 1.13E-06 | chr:6:32648036 |
| 6 rs9268143   | 32256473 G | 2.059  | 1.14E-06 | chr:6:32648036 |
| 6 rs28747057  | 32656553 T | 0.4116 | 1.14E-06 | chr:6:32648036 |
| 6 rs28747058  | 32656554 G | 0.4116 | 1.14E-06 | chr:6:32648036 |
| 6 rs28747059  | 32656558 G | 0.4116 | 1.14E-06 | chr:6:32648036 |
| 6 rs79996892  | 32507051 C | 0.548  | 1.14E-06 | chr:6:32648036 |
| 6 rs191277720 | 32458048 C | 2.416  | 1.14E-06 | chr:6:32648036 |
| 6 rs9276931   | 32928984 G | 2.192  | 1.14E-06 | chr:6:32648036 |
| 6 rs72848256  | 32601531 G | 0.3832 | 1.16E-06 | chr:6:32648036 |
| 6 rs28724242  | 32629331 G | 1.983  | 1.16E-06 | chr:6:32648036 |
| 6 rs111685796 | 32504453 G | 0.4132 | 1.17E-06 | chr:6:32648036 |
| 6 rs28746957  | 32652893 C | 0.4063 | 1.17E-06 | chr:6:32648036 |
| 6 rs9274237   | 32631256 G | 2.324  | 1.17E-06 | chr:6:32648036 |
| 6 rs563197321 | 32458258 T | 2.374  | 1.18E-06 | chr:6:32648036 |
| 6 rs28746958  | 32652913 C | 0.409  | 1.20E-06 | chr:6:32648036 |
| 6 rs28746959  | 32652914 A | 0.409  | 1.20E-06 | chr:6:32648036 |
| 6 rs9275340   | 32667458 T | 2.034  | 1.21E-06 | chr:6:32648036 |
| 6 rs533524385 | 32522291 G | 2.33   | 1.21E-06 | chr:6:32648036 |
| 6 rs559757855 | 32522285 C | 2.33   | 1.21E-06 | chr:6:32648036 |
| 6 rs5020945   | 32450134 C | 3.35   | 1.21E-06 | chr:6:32648036 |
| 6 rs184149877 | 32525731 A | 0.5483 | 1.21E-06 | chr:6:32648036 |

|               |            |        |          |                |
|---------------|------------|--------|----------|----------------|
| 6 rs9271467   | 32588613 T | 0.4468 | 1.21E-06 | chr:6:32648036 |
| 6 rs9271468   | 32588616 G | 0.4468 | 1.21E-06 | chr:6:32648036 |
| 6 rs34553045  | 32561565 C | 7.619  | 1.21E-06 | chr:6:32648036 |
| 6 rs28747008  | 32654530 T | 0.4169 | 1.21E-06 | chr:6:32648036 |
| 6 rs28747009  | 32654531 A | 0.4169 | 1.21E-06 | chr:6:32648036 |
| 6 rs146320947 | 32534206 A | 2.411  | 1.22E-06 | chr:6:32648036 |
| 6 rs28688825  | 32587157 G | 0.349  | 1.24E-06 | chr:6:32648036 |
| 6 rs368833717 | 32485705 G | 2.031  | 1.25E-06 | chr:6:32648036 |
| 6 rs112216801 | 32601838 A | 0.4261 | 1.27E-06 | chr:6:32648036 |
| 6 rs56051108  | 32645530 A | 6.528  | 1.28E-06 | chr:6:32648036 |
| 6 rs112532723 | 32518151 G | 0.4209 | 1.30E-06 | chr:6:32648036 |
| 6 rs28366331  | 32561880 G | 2.554  | 1.31E-06 | chr:6:32648036 |
| 6 rs28366332  | 32561885 A | 2.554  | 1.31E-06 | chr:6:32648036 |
| 6 rs28366333  | 32561887 C | 2.554  | 1.31E-06 | chr:6:32648036 |
| 6 rs112740890 | 32473461 G | 2.031  | 1.31E-06 | chr:6:32648036 |
| 6 rs9274295   | 32631866 A | 0.5363 | 1.31E-06 | chr:6:32648036 |
| 6 rs547043452 | 32525326 G | 0.5551 | 1.32E-06 | chr:6:32648036 |
| 6 rs17212371  | 32652259 A | 0.4036 | 1.32E-06 | chr:6:32648036 |
| 6 rs77274878  | 32523348 A | 2.322  | 1.33E-06 | chr:6:32648036 |
| 6 rs55722612  | 32647158 G | 5.802  | 1.34E-06 | chr:6:32648036 |
| 6 rs9271534   | 32589953 C | 0.4631 | 1.34E-06 | chr:6:32648036 |
| 6 rs9274361   | 32632483 A | 0.5438 | 1.35E-06 | chr:6:32648036 |
| 6 rs9273423   | 32627390 T | 0.48   | 1.35E-06 | chr:6:32648036 |
| 6 rs6905775   | 32626021 A | 5.427  | 1.36E-06 | chr:6:32648036 |
| 6 rs9274528   | 32634508 C | 0.4507 | 1.37E-06 | chr:6:32648036 |
| 6 rs113441266 | 32479312 A | 2.416  | 1.38E-06 | chr:6:32648036 |
| 6 rs148598843 | 32479311 A | 2.416  | 1.38E-06 | chr:6:32648036 |
| 6 rs2395179   | 32407302 G | 2.149  | 1.38E-06 | chr:6:32648036 |
| 6 rs2395180   | 32407310 G | 2.149  | 1.38E-06 | chr:6:32648036 |
| 6 rs2395181   | 32407404 C | 2.149  | 1.38E-06 | chr:6:32648036 |
| 6 rs3129845   | 32396277 G | 2.149  | 1.38E-06 | chr:6:32648036 |
| 6 rs3129846   | 32396475 G | 2.149  | 1.38E-06 | chr:6:32648036 |
| 6 rs3129875   | 32407468 C | 2.149  | 1.38E-06 | chr:6:32648036 |
| 6 rs3129879   | 32408907 A | 2.149  | 1.38E-06 | chr:6:32648036 |
| 6 rs3135343   | 32396313 T | 2.149  | 1.38E-06 | chr:6:32648036 |
| 6 rs34117221  | 32568324 G | 6.185  | 1.39E-06 | chr:6:32648036 |
| 6 rs67062152  | 32527025 T | 0.4057 | 1.39E-06 | chr:6:32648036 |
| 6 rs28732242  | 32444078 A | 2.363  | 1.39E-06 | chr:6:32648036 |
| 6 rs72851021  | 32501395 T | 0.4174 | 1.40E-06 | chr:6:32648036 |
| 6 rs62405632  | 32514561 G | 0.4173 | 1.40E-06 | chr:6:32648036 |
| 6 rs34977123  | 32555736 G | 7.336  | 1.41E-06 | chr:6:32648036 |
| 6 rs62405649  | 32534491 G | 0.4613 | 1.41E-06 | chr:6:32648036 |
| 6 rs78316776  | 32508012 T | 0.5332 | 1.42E-06 | chr:6:32648036 |

|               |            |        |          |                |
|---------------|------------|--------|----------|----------------|
| 6 rs79579660  | 32543433 G | 2.565  | 1.42E-06 | chr:6:32648036 |
| 6 rs9274195   | 32630758 A | 1.886  | 1.44E-06 | chr:6:32648036 |
| 6 rs17879599  | 32551959 G | 0.3486 | 1.44E-06 | chr:6:32648036 |
| 6 rs9273131   | 32612793 T | 1.779  | 1.46E-06 | chr:6:32648036 |
| 6 rs145586726 | 32489796 T | 3.221  | 1.46E-06 | chr:6:32648036 |
| 6 rs28891372  | 32638727 A | 0.403  | 1.47E-06 | chr:6:32648036 |
| 6 rs28891400  | 32640074 T | 0.4222 | 1.48E-06 | chr:6:32648036 |
| 6 rs28891401  | 32640075 G | 0.4222 | 1.48E-06 | chr:6:32648036 |
| 6 rs679242    | 32570958 T | 5.834  | 1.48E-06 | chr:6:32648036 |
| 6 rs553195173 | 32566329 C | 6.147  | 1.48E-06 | chr:6:32648036 |
| 6 rs72845730  | 32526731 A | 0.4459 | 1.49E-06 | chr:6:32648036 |
| 6 rs9274505   | 32634126 A | 2.327  | 1.49E-06 | chr:6:32648036 |
| 6 rs78387908  | 32503391 A | 0.4879 | 1.49E-06 | chr:6:32648036 |
| 6 rs115965987 | 32538598 G | 0.4157 | 1.49E-06 | chr:6:32648036 |
| 6 rs116555998 | 32538590 T | 0.4157 | 1.49E-06 | chr:6:32648036 |
| 6 rs200591586 | 32485857 A | 2.16   | 1.49E-06 | chr:6:32648036 |
| 6 rs6926737   | 32375745 G | 0.4598 | 1.50E-06 | chr:6:32648036 |
| 6 rs35599691  | 32543117 G | 0.4721 | 1.50E-06 | chr:6:32648036 |
| 6 rs9274336   | 32632287 G | 1.663  | 1.52E-06 | chr:6:32648036 |
| 6 rs151005270 | 32601874 T | 0.4284 | 1.53E-06 | chr:6:32648036 |
| 6 rs76517385  | 32519067 A | 0.4171 | 1.54E-06 | chr:6:32648036 |
| 6 rs9272336   | 32604264 G | 0.4266 | 1.54E-06 | chr:6:32648036 |
| 6 rs9271444   | 32588281 A | 0.4608 | 1.54E-06 | chr:6:32648036 |
| 6 rs59066278  | 32510239 T | 0.4766 | 1.54E-06 | chr:6:32648036 |
| 6 rs28636516  | 32606701 G | 0.4637 | 1.54E-06 | chr:6:32648036 |
| 6 rs4713572   | 32626952 C | 2.129  | 1.57E-06 | chr:6:32648036 |
| 6 rs533608307 | 32633023 T | 0.5382 | 1.58E-06 | chr:6:32648036 |
| 6 rs543964824 | 32677572 T | 0.3593 | 1.58E-06 | chr:6:32648036 |
| 6 rs6917212   | 32583005 C | 0.4898 | 1.59E-06 | chr:6:32648036 |
| 6 rs9469108   | 32380892 T | 2.153  | 1.59E-06 | chr:6:32648036 |
| 6 rs28746983  | 32653760 T | 0.4215 | 1.59E-06 | chr:6:32648036 |
| 6 rs1049053   | 32634405 C | 0.4756 | 1.59E-06 | chr:6:32648036 |
| 6 rs35653258  | 32568783 A | 6.519  | 1.59E-06 | chr:6:32648036 |
| 6 rs9271530   | 32589938 A | 0.4666 | 1.60E-06 | chr:6:32648036 |
| 6 rs9271531   | 32589939 A | 0.4666 | 1.60E-06 | chr:6:32648036 |
| 6 rs56347793  | 32646963 T | 6.009  | 1.60E-06 | chr:6:32648036 |
| 6 rs17206035  | 32652224 C | 0.4125 | 1.61E-06 | chr:6:32648036 |
| 6 rs68017248  | 32519262 A | 0.3902 | 1.63E-06 | chr:6:32648036 |
| 6 rs2647079   | 32566502 A | 2.157  | 1.65E-06 | chr:6:32648036 |
| 6 rs146797212 | 32507206 G | 0.5536 | 1.65E-06 | chr:6:32648036 |
| 6 rs17211091  | 32557585 C | 17.38  | 1.65E-06 | chr:6:32648036 |
| 6 rs9274447   | 32633282 C | 2.252  | 1.65E-06 | chr:6:32648036 |
| 6 rs3129886   | 32410576 T | 0.4156 | 1.65E-06 | chr:6:32648036 |



|               |            |        |          |                |
|---------------|------------|--------|----------|----------------|
| 6 rs9268652   | 32409056 A | 0.4156 | 1.65E-06 | chr:6:32648036 |
| 6 rs5000807   | 32496471 A | 1.945  | 1.65E-06 | chr:6:32648036 |
| 6 rs75876639  | 32457809 T | 2.266  | 1.66E-06 | chr:6:32648036 |
| 6 rs113861133 | 32601911 C | 0.4204 | 1.66E-06 | chr:6:32648036 |
| 6 rs28891474  | 32642565 T | 0.4343 | 1.67E-06 | chr:6:32648036 |
| 6 rs28891475  | 32642570 C | 0.4343 | 1.67E-06 | chr:6:32648036 |
| 6 rs3129724   | 32677560 A | 0.359  | 1.68E-06 | chr:6:32648036 |
| 6 rs35062987  | 32590735 T | 0.3934 | 1.68E-06 | chr:6:32648036 |
| 6 rs28772275  | 32663439 A | 0.4123 | 1.70E-06 | chr:6:32648036 |
| 6 rs5000632   | 32663688 C | 0.4123 | 1.70E-06 | chr:6:32648036 |
| 6 rs6935069   | 32666156 A | 0.4123 | 1.70E-06 | chr:6:32648036 |
| 6 rs9348891   | 32664971 G | 0.4123 | 1.70E-06 | chr:6:32648036 |
| 6 rs9357152   | 32664960 G | 0.4123 | 1.70E-06 | chr:6:32648036 |
| 6 rs9394110   | 32658471 G | 0.4123 | 1.70E-06 | chr:6:32648036 |
| 6 rs2395202   | 32451906 T | 0.4783 | 1.72E-06 | chr:6:32648036 |
| 6 rs11967891  | 32500957 T | 2.03   | 1.72E-06 | chr:6:32648036 |
| 6 rs79912140  | 32519729 A | 0.4398 | 1.73E-06 | chr:6:32648036 |
| 6 rs3129883   | 32410137 T | 0.4157 | 1.74E-06 | chr:6:32648036 |
| 6 rs3132970   | 32230208 A | 2.033  | 1.76E-06 | chr:6:32648036 |
| 6 rs35074855  | 32561140 G | 7.489  | 1.76E-06 | chr:6:32648036 |
| 6 rs9268073   | 32232758 C | 2.042  | 1.77E-06 | chr:6:32648036 |
| 6 rs115773472 | 32486484 G | 2.918  | 1.78E-06 | chr:6:32648036 |
| 6 rs558721    | 32570573 T | 6.069  | 1.79E-06 | chr:6:32648036 |
| 6 rs1130456   | 32627379 T | 0.4886 | 1.80E-06 | chr:6:32648036 |
| 6 rs28732243  | 32444088 G | 2.359  | 1.80E-06 | chr:6:32648036 |
| 6 rs9272410   | 32604969 A | 0.4306 | 1.80E-06 | chr:6:32648036 |
| 6 rs9269211   | 32450058 C | 0.4447 | 1.81E-06 | chr:6:32648036 |
| 6 rs2071465   | 32805470 G | 0.4739 | 1.82E-06 | chr:6:32648036 |
| 6 rs78055135  | 32517412 A | 2.207  | 1.82E-06 | chr:6:32648036 |
| 6 rs114849159 | 32552788 C | 2.561  | 1.82E-06 | chr:6:32648036 |
| 6 rs9269661   | 32546259 C | 0.4415 | 1.82E-06 | chr:6:32648036 |
| 6 rs78232591  | 32458419 T | 1.805  | 1.83E-06 | chr:6:32648036 |
| 6 rs73726822  | 32527272 G | 0.5197 | 1.83E-06 | chr:6:32648036 |
| 6 rs535514039 | 32490360 C | 3.617  | 1.84E-06 | chr:6:32648036 |
| 6 rs79438035  | 32457830 G | 2.234  | 1.84E-06 | chr:6:32648036 |
| 6 rs79584190  | 32457822 T | 2.234  | 1.84E-06 | chr:6:32648036 |
| 6 rs281874787 | 32632165 A | 0.5635 | 1.84E-06 | chr:6:32648036 |
| 6 rs9275314   | 32665909 A | 5.748  | 1.84E-06 | chr:6:32648036 |
| 6 rs112324351 | 32457338 C | 2.081  | 1.85E-06 | chr:6:32648036 |
| 6 rs140190321 | 32511008 T | 0.5462 | 1.86E-06 | chr:6:32648036 |
| 6 rs2395232   | 32640217 A | 0.3604 | 1.88E-06 | chr:6:32648036 |
| 6 rs79601580  | 32507591 G | 0.5141 | 1.89E-06 | chr:6:32648036 |
| 6 rs17211965  | 32637355 G | 0.419  | 1.90E-06 | chr:6:32648036 |

|               |            |        |          |                |
|---------------|------------|--------|----------|----------------|
| 6 rs3134995   | 32672089 T | 0.359  | 1.92E-06 | chr:6:32648036 |
| 6 rs12528622  | 32658259 A | 0.3602 | 1.92E-06 | chr:6:32648036 |
| 6 rs13206007  | 32663442 G | 0.3602 | 1.92E-06 | chr:6:32648036 |
| 6 rs13206018  | 32663497 T | 0.3602 | 1.92E-06 | chr:6:32648036 |
| 6 rs17206252  | 32665915 C | 0.3602 | 1.92E-06 | chr:6:32648036 |
| 6 rs17427431  | 32663644 A | 0.3602 | 1.92E-06 | chr:6:32648036 |
| 6 rs35122881  | 32663677 T | 0.3602 | 1.92E-06 | chr:6:32648036 |
| 6 rs68067315  | 32663340 A | 0.3602 | 1.92E-06 | chr:6:32648036 |
| 6 rs546957361 | 32224456 C | 2.017  | 1.93E-06 | chr:6:32648036 |
| 6 rs568672155 | 32224457 A | 2.017  | 1.93E-06 | chr:6:32648036 |
| 6 rs6908464   | 32224445 G | 2.017  | 1.93E-06 | chr:6:32648036 |
| 6 rs6908903   | 32224439 A | 2.017  | 1.93E-06 | chr:6:32648036 |
| 6 rs6931322   | 32224463 C | 2.017  | 1.93E-06 | chr:6:32648036 |
| 6 rs28724245  | 32629400 G | 1.958  | 1.93E-06 | chr:6:32648036 |
| 6 rs112323850 | 32521804 T | 0.4444 | 1.94E-06 | chr:6:32648036 |
| 6 rs6934185   | 32673233 G | 0.4147 | 1.94E-06 | chr:6:32648036 |
| 6 rs6934347   | 32673223 G | 0.4147 | 1.94E-06 | chr:6:32648036 |
| 6 rs9273472   | 32628045 C | 0.5105 | 1.94E-06 | chr:6:32648036 |
| 6 rs28895250  | 32444022 C | 2.316  | 1.95E-06 | chr:6:32648036 |
| 6 rs28891476  | 32642584 A | 0.4337 | 1.95E-06 | chr:6:32648036 |
| 6 rs200582841 | 32453810 A | 0.4321 | 1.96E-06 | chr:6:32648036 |
| 6 rs41270871  | 32628224 A | 0.4155 | 1.96E-06 | chr:6:32648036 |
| 6 rs9271440   | 32588240 C | 0.4624 | 1.96E-06 | chr:6:32648036 |
| 6 rs68027833  | 32630028 A | 0.4689 | 1.98E-06 | chr:6:32648036 |
| 6 rs9275402   | 32669837 C | 1.988  | 1.99E-06 | chr:6:32648036 |
| 6 rs9275403   | 32669838 T | 1.988  | 1.99E-06 | chr:6:32648036 |
| 6 rs28732205  | 32377712 T | 2.12   | 1.99E-06 | chr:6:32648036 |
| 6 rs114746879 | 32487080 T | 5.965  | 1.99E-06 | chr:6:32648036 |
| 6 rs116067927 | 32487074 G | 5.965  | 1.99E-06 | chr:6:32648036 |
| 6 rs535648472 | 32487066 T | 5.965  | 1.99E-06 | chr:6:32648036 |
| 6 rs9275324   | 32666635 T | 6.056  | 2.00E-06 | chr:6:32648036 |
| 6 rs9275325   | 32666651 T | 6.056  | 2.00E-06 | chr:6:32648036 |
| 6 rs9275326   | 32666660 T | 6.056  | 2.00E-06 | chr:6:32648036 |
| 6 rs28772281  | 32674086 A | 0.4149 | 2.01E-06 | chr:6:32648036 |
| 6 rs554742089 | 32451822 T | 2.585  | 2.03E-06 | chr:6:32648036 |
| 6 rs567852525 | 32452110 T | 2.585  | 2.03E-06 | chr:6:32648036 |
| 6 rs17205170  | 32602483 T | 0.3784 | 2.05E-06 | chr:6:32648036 |
| 6 rs547199864 | 32558886 T | 2.453  | 2.05E-06 | chr:6:32648036 |
| 6 rs183847206 | 32490350 T | 2.32   | 2.06E-06 | chr:6:32648036 |
| 6 rs111675168 | 32487104 G | 5.052  | 2.06E-06 | chr:6:32648036 |
| 6 rs112080536 | 32521594 A | 0.4472 | 2.09E-06 | chr:6:32648036 |
| 6 rs4713598   | 32806786 G | 0.4635 | 2.10E-06 | chr:6:32648036 |
| 6 rs377506388 | 32487038 G | 6.095  | 2.10E-06 | chr:6:32648036 |

|               |            |        |          |                |
|---------------|------------|--------|----------|----------------|
| 6 rs1130457   | 32627367 T | 0.4898 | 2.10E-06 | chr:6:32648036 |
| 6 rs13191875  | 32663403 A | 0.3616 | 2.11E-06 | chr:6:32648036 |
| 6 rs532817093 | 32522191 G | 2.332  | 2.11E-06 | chr:6:32648036 |
| 6 rs9275351   | 32667793 A | 5.995  | 2.12E-06 | chr:6:32648036 |
| 6 rs17212643  | 32674865 T | 0.4151 | 2.12E-06 | chr:6:32648036 |
| 6 rs28772282  | 32674136 G | 0.4151 | 2.12E-06 | chr:6:32648036 |
| 6 rs6906698   | 32673425 T | 0.4151 | 2.12E-06 | chr:6:32648036 |
| 6 rs6907114   | 32673361 A | 0.4151 | 2.12E-06 | chr:6:32648036 |
| 6 rs9272349   | 32604402 G | 0.4427 | 2.13E-06 | chr:6:32648036 |
| 6 rs544126617 | 32510976 A | 0.5474 | 2.13E-06 | chr:6:32648036 |
| 6 rs577174379 | 32510979 G | 0.5474 | 2.13E-06 | chr:6:32648036 |
| 6 rs2760980   | 32565201 A | 5.86   | 2.13E-06 | chr:6:32648036 |
| 6 rs536757162 | 32684641 A | 1.978  | 2.16E-06 | chr:6:32648036 |
| 6 rs552183536 | 32684630 C | 1.978  | 2.16E-06 | chr:6:32648036 |
| 6 rs77592650  | 32457835 C | 2.219  | 2.16E-06 | chr:6:32648036 |
| 6 rs28891490  | 32660697 A | 0.4167 | 2.17E-06 | chr:6:32648036 |
| 6 rs28891491  | 32661080 A | 0.4165 | 2.17E-06 | chr:6:32648036 |
| 6 rs77867566  | 32485524 A | 2.575  | 2.17E-06 | chr:6:32648036 |
| 6 rs9275401   | 32669827 G | 1.983  | 2.17E-06 | chr:6:32648036 |
| 6 rs112219021 | 32518085 C | 0.4204 | 2.18E-06 | chr:6:32648036 |
| 6 rs538742897 | 32526773 C | 0.482  | 2.20E-06 | chr:6:32648036 |
| 6 rs28746965  | 32653136 G | 0.4154 | 2.21E-06 | chr:6:32648036 |
| 6 rs3096670   | 32236609 G | 2.013  | 2.21E-06 | chr:6:32648036 |
| 6 rs114500718 | 32524694 G | 0.5279 | 2.22E-06 | chr:6:32648036 |
| 6 rs34535888  | 32561527 C | 7.327  | 2.23E-06 | chr:6:32648036 |
| 6 rs28891470  | 32642454 T | 0.4439 | 2.23E-06 | chr:6:32648036 |
| 6 rs9274674   | 32636610 A | 0.4375 | 2.24E-06 | chr:6:32648036 |
| 6 rs17206042  | 32652244 A | 0.4174 | 2.24E-06 | chr:6:32648036 |
| 6 rs531329164 | 32496942 C | 7.52   | 2.25E-06 | chr:6:32648036 |
| 6 rs9368738   | 32658750 A | 0.4168 | 2.26E-06 | chr:6:32648036 |
| 6 rs9268130   | 32254312 C | 2.011  | 2.28E-06 | chr:6:32648036 |
| 6 rs141890570 | 32667412 A | 0.3605 | 2.30E-06 | chr:6:32648036 |
| 6 rs9275607   | 32683645 G | 0.4688 | 2.30E-06 | chr:6:32648036 |
| 6 rs601020    | 32573179 A | 2.505  | 2.34E-06 | chr:6:32648036 |
| 6 rs372568412 | 32523041 T | 2.606  | 2.35E-06 | chr:6:32648036 |
| 6 rs200519021 | 32537816 T | 0.5817 | 2.35E-06 | chr:6:32648036 |
| 6 rs113176001 | 32571483 C | 1.708  | 2.36E-06 | chr:6:32648036 |
| 6 rs28891492  | 32662451 T | 0.4135 | 2.41E-06 | chr:6:32648036 |
| 6 rs9274130   | 32630232 A | 2.168  | 2.41E-06 | chr:6:32648036 |
| 6 rs9274134   | 32630242 C | 2.168  | 2.41E-06 | chr:6:32648036 |
| 6 rs3135002   | 32668439 A | 0.3636 | 2.43E-06 | chr:6:32648036 |
| 6 rs375955233 | 32603002 T | 3.356  | 2.43E-06 | chr:6:32648036 |
| 6 rs34153824  | 32627627 T | 0.3927 | 2.43E-06 | chr:6:32648036 |

|               |            |        |          |                |
|---------------|------------|--------|----------|----------------|
| 6 rs115795737 | 32459515 C | 4.081  | 2.44E-06 | chr:6:32648036 |
| 6 rs9269986   | 32552553 C | 0.4841 | 2.44E-06 | chr:6:32648036 |
| 6 rs9274384   | 32632635 C | 1.757  | 2.45E-06 | chr:6:32648036 |
| 6 rs17843590  | 32615850 G | 1.719  | 2.46E-06 | chr:6:32648036 |
| 6 rs2647058   | 32569304 T | 2.117  | 2.47E-06 | chr:6:32648036 |
| 6 rs9391747   | 32806949 T | 0.4648 | 2.48E-06 | chr:6:32648036 |
| 6 rs112477119 | 32489269 T | 2.382  | 2.48E-06 | chr:6:32648036 |
| 6 rs78633917  | 32501658 A | 2.014  | 2.48E-06 | chr:6:32648036 |
| 6 rs9368739   | 32669945 T | 0.4177 | 2.49E-06 | chr:6:32648036 |
| 6 rs9501648   | 32668886 G | 0.4177 | 2.49E-06 | chr:6:32648036 |
| 6 rs552525356 | 32453000 G | 2.538  | 2.50E-06 | chr:6:32648036 |
| 6 rs4988888   | 32635197 C | 2.206  | 2.50E-06 | chr:6:32648036 |
| 6 rs74973088  | 32457874 C | 1.72   | 2.50E-06 | chr:6:32648036 |
| 6 rs28383282  | 32586375 T | 2.38   | 2.52E-06 | chr:6:32648036 |
| 6 rs17205612  | 32637333 T | 0.4264 | 2.52E-06 | chr:6:32648036 |
| 6 rs74999184  | 32508306 C | 0.4856 | 2.55E-06 | chr:6:32648036 |
| 6 rs28724008  | 32550550 G | 2.237  | 2.55E-06 | chr:6:32648036 |
| 6 rs56435053  | 32623277 T | 4.701  | 2.57E-06 | chr:6:32648036 |
| 6 rs113923037 | 32457315 A | 2.052  | 2.58E-06 | chr:6:32648036 |
| 6 rs17881965  | 32551961 C | 0.3629 | 2.59E-06 | chr:6:32648036 |
| 6 rs17885388  | 32551962 T | 0.3629 | 2.59E-06 | chr:6:32648036 |
| 6 rs34958241  | 32559575 G | 5.718  | 2.60E-06 | chr:6:32648036 |
| 6 rs557617439 | 32523181 G | 2.557  | 2.62E-06 | chr:6:32648036 |
| 6 rs281874914 | 32631372 G | 4.484  | 2.63E-06 | chr:6:32648036 |
| 6 rs434841    | 32191041 A | 0.4631 | 2.64E-06 | chr:6:32648036 |
| 6 rs140539100 | 32227258 A | 2.001  | 2.66E-06 | chr:6:32648036 |
| 6 rs200269610 | 32227259 G | 2.001  | 2.66E-06 | chr:6:32648036 |
| 6 rs6908927   | 32224489 A | 2.001  | 2.66E-06 | chr:6:32648036 |
| 6 rs9268034   | 32227262 G | 2.001  | 2.66E-06 | chr:6:32648036 |
| 6 rs28746982  | 32653703 A | 0.433  | 2.68E-06 | chr:6:32648036 |
| 6 rs192994337 | 32511083 A | 0.5551 | 2.69E-06 | chr:6:32648036 |
| 6 rs9394113   | 32665167 G | 0.4206 | 2.69E-06 | chr:6:32648036 |
| 6 rs549954104 | 32554096 A | 2.75   | 2.70E-06 | chr:6:32648036 |
| 6 rs34784936  | 32559648 T | 6.433  | 2.71E-06 | chr:6:32648036 |
| 6 rs9274226   | 32631458 C | 5.496  | 2.72E-06 | chr:6:32648036 |
| 6 rs3115569   | 32224139 A | 2.003  | 2.73E-06 | chr:6:32648036 |
| 6 rs9394111   | 32658744 T | 0.4218 | 2.73E-06 | chr:6:32648036 |
| 6 rs549610120 | 32525308 G | 0.5678 | 2.74E-06 | chr:6:32648036 |
| 6 rs2071544   | 32806121 C | 0.4945 | 2.76E-06 | chr:6:32648036 |
| 6 rs9270523   | 32559584 T | 0.4389 | 2.76E-06 | chr:6:32648036 |
| 6 rs498422    | 32286761 G | 0.4582 | 2.77E-06 | chr:6:32648036 |
| 6 rs114651315 | 32601278 T | 0.3904 | 2.78E-06 | chr:6:32648036 |
| 6 rs72848251  | 32601288 A | 0.3904 | 2.78E-06 | chr:6:32648036 |

|               |             |        |          |                 |
|---------------|-------------|--------|----------|-----------------|
| 6 rs34400217  | 32637750 T  | 0.4173 | 2.78E-06 | chr:6:32648036  |
| 6 rs77498463  | 32517198 T  | 0.4322 | 2.79E-06 | chr:6:32648036  |
| 6 rs28891412  | 32640538 T  | 0.4314 | 2.79E-06 | chr:6:32648036  |
| 6 rs28772303  | 32680558 A  | 0.4157 | 2.79E-06 | chr:6:32648036  |
| 6 rs9268560   | 32389512 C  | 1.984  | 2.80E-06 | chr:6:32648036  |
| 6 rs1018430   | 32281688 T  | 1.998  | 2.81E-06 | chr:6:32648036  |
| 6 rs183972385 | 32497183 G  | 2.289  | 2.82E-06 | chr:6:32648036  |
| 6 rs28891413  | 32640548 T  | 0.4412 | 2.83E-06 | chr:6:32648036  |
| 6 rs200330306 | 32496048 A  | 1.754  | 2.84E-06 | chr:6:32648036  |
| 6 rs557355024 | 32630464 T  | 1.733  | 2.86E-06 | chr:6:32648036  |
| 6 rs114211044 | 32394840 G  | 4.627  | 2.87E-06 | chr:6:32648036  |
| 6 rs141377480 | 32426020 A  | 4.627  | 2.87E-06 | chr:6:32648036  |
| 6 rs3129876   | 32408012 A  | 2.083  | 2.90E-06 | chr:6:32648036  |
| 6 rs17843708  | 32622396 A  | 1.734  | 2.90E-06 | chr:6:32648036  |
| 6 rs2646993   | 32620489 T  | 1.757  | 2.92E-06 | chr:6:32648036  |
| 6 rs2647062   | 32570417 C  | 5.921  | 2.93E-06 | chr:6:32648036  |
| 6 rs17209950  | 32446588 A  | 2.211  | 2.94E-06 | chr:6:32648036  |
| 6 rs3134969   | 32674027 C  | 0.3674 | 2.95E-06 | chr:6:32648036  |
| 6 rs199980256 | 32540924 A  | 1.856  | 3.00E-06 | chr:6:32648036  |
| 6 rs1049107   | 32629936 T  | 0.3932 | 3.00E-06 | chr:6:32648036  |
| 6 rs9271763   | 32594061 G  | 1.983  | 3.01E-06 | chr:6:32648036  |
| 6 rs9274450   | 32633334 A  | 0.5321 | 3.01E-06 | chr:6:32648036  |
| 6 rs17212427  | 32652425 C  | 0.4191 | 3.03E-06 | chr:6:32648036  |
| 6 rs34647096  | 32561681 A  | 6.662  | 3.03E-06 | chr:6:32648036  |
| 6 rs28724151  | 32555378 T  | 2.919  | 3.04E-06 | chr:6:32648036  |
| 6 rs35113548  | 32546299 A  | 2.815  | 3.05E-06 | chr:6:32648036  |
| 6 rs28731358  | 32626883 C  | 0.515  | 3.05E-06 | chr:6:32648036  |
| 6 rs281863375 | 32631113 C  | 0.4924 | 3.06E-06 | chr:6:32648036  |
| 6 rs76566406  | 32518913 T  | 0.4437 | 3.07E-06 | chr:6:32648036  |
| 6 rs34415150  | 32560477 G  | 6.686  | 3.07E-06 | chr:6:32648036  |
| 6 rs34496598  | 32560455 T  | 6.686  | 3.07E-06 | chr:6:32648036  |
| 6 rs34924558  | 32560446 T  | 6.686  | 3.07E-06 | chr:6:32648036  |
| 6 rs113786400 | 32485794 T  | 1.967  | 3.09E-06 | chr:6:32648036  |
| 6 rs9275357   | 32667891 C  | 1.984  | 3.10E-06 | chr:6:32648036  |
| 7 rs67340855  | 158028782 C | 79.16  | 3.35E-35 | chr:7:158029482 |
| 7 rs67515424  | 158028692 T | 79.16  | 3.35E-35 | chr:7:158029482 |
| 7 rs67463190  | 158029292 T | 32.9   | 7.38E-33 | chr:7:158029482 |
| 7 rs55821220  | 158022462 G | 17.51  | 2.06E-18 | chr:7:158029482 |
| 7 rs73176110  | 158016190 T | 33.17  | 2.72E-18 | chr:7:158029482 |
| 7 rs73176115  | 158017202 C | 33.17  | 2.72E-18 | chr:7:158029482 |
| 7 rs73176116  | 158018041 T | 33.17  | 2.72E-18 | chr:7:158029482 |
| 7 rs73176117  | 158018530 A | 33.17  | 2.72E-18 | chr:7:158029482 |
| 7 rs73176118  | 158018536 A | 33.17  | 2.72E-18 | chr:7:158029482 |

|               |             |       |          |                 |
|---------------|-------------|-------|----------|-----------------|
| 7 rs73176123  | 158026203 G | 37.73 | 4.88E-18 | chr:7:158029482 |
| 7 rs73173702  | 157996475 G | 52.83 | 5.56E-17 | chr:7:158029482 |
| 7 rs73173694  | 157983465 A | 12.46 | 1.26E-16 | chr:7:158029482 |
| 7 rs73173701  | 157993472 C | 8.654 | 1.47E-15 | chr:7:158029482 |
| 7 rs571148131 | 158047093 A | 8.709 | 2.83E-15 | chr:7:158029482 |
| 7 rs73176109  | 158014524 G | 8.071 | 5.72E-15 | chr:7:158029482 |
| 7 rs55633973  | 158000392 A | 7.314 | 3.01E-14 | chr:7:158029482 |
| 7 rs12154635  | 158000947 G | 6.885 | 1.02E-13 | chr:7:158029482 |
| 7 rs73176108  | 158009978 A | 6.545 | 2.18E-13 | chr:7:158029482 |
| 7 rs56215385  | 158008987 A | 6.372 | 3.70E-13 | chr:7:158029482 |
| 7 rs10245306  | 158029340 G | 3.53  | 5.62E-13 | chr:7:158029482 |
| 7 rs114212832 | 158010048 A | 15.99 | 2.67E-12 | chr:7:158029482 |
| 7 rs114397225 | 158026708 T | 15.99 | 2.67E-12 | chr:7:158029482 |
| 7 rs116425675 | 158025376 G | 15.99 | 2.67E-12 | chr:7:158029482 |
| 7 rs146336615 | 158005141 T | 15.99 | 2.67E-12 | chr:7:158029482 |
| 7 rs148230980 | 158027778 G | 15.99 | 2.67E-12 | chr:7:158029482 |
| 7 rs149721773 | 158023785 A | 15.99 | 2.67E-12 | chr:7:158029482 |
| 7 rs185955717 | 158027592 C | 15.99 | 2.67E-12 | chr:7:158029482 |
| 7 rs75127652  | 158002441 C | 15.99 | 2.67E-12 | chr:7:158029482 |
| 7 rs78431013  | 158011436 G | 15.99 | 2.67E-12 | chr:7:158029482 |
| 7 rs79488857  | 158006433 G | 15.99 | 2.67E-12 | chr:7:158029482 |
| 7 rs76837643  | 157998303 T | 27.36 | 2.80E-12 | chr:7:158029482 |
| 7 rs114730739 | 158018607 C | 5.454 | 4.13E-12 | chr:7:158029482 |
| 7 rs114814237 | 158007454 T | 32.72 | 6.40E-12 | chr:7:158029482 |
| 7 rs114925757 | 158010221 C | 32.72 | 6.40E-12 | chr:7:158029482 |
| 7 rs148551986 | 158005447 C | 32.72 | 6.40E-12 | chr:7:158029482 |
| 7 rs78028556  | 158020232 A | 32.72 | 6.40E-12 | chr:7:158029482 |
| 7 rs78569708  | 158019350 A | 32.72 | 6.40E-12 | chr:7:158029482 |
| 7 rs116662371 | 157983459 A | 15.5  | 6.54E-12 | chr:7:158029482 |
| 7 rs6952594   | 157983739 G | 15.5  | 6.54E-12 | chr:7:158029482 |
| 7 rs6956043   | 157984240 T | 15.5  | 6.54E-12 | chr:7:158029482 |
| 7 rs114073477 | 157987166 A | 13.91 | 9.55E-12 | chr:7:158029482 |
| 7 rs147418646 | 157996189 A | 13.91 | 9.55E-12 | chr:7:158029482 |
| 7 rs147434829 | 157993831 T | 13.91 | 9.55E-12 | chr:7:158029482 |
| 7 rs6945026   | 157989420 A | 13.91 | 9.55E-12 | chr:7:158029482 |
| 7 rs6953725   | 157986343 C | 13.91 | 9.55E-12 | chr:7:158029482 |
| 7 rs6966499   | 157986139 A | 13.91 | 9.55E-12 | chr:7:158029482 |
| 7 rs6968048   | 157986390 T | 13.91 | 9.55E-12 | chr:7:158029482 |
| 7 rs6972865   | 157987793 A | 13.91 | 9.55E-12 | chr:7:158029482 |
| 7 rs6977406   | 157988246 A | 13.91 | 9.55E-12 | chr:7:158029482 |
| 7 rs75229314  | 157996659 T | 13.91 | 9.55E-12 | chr:7:158029482 |
| 7 rs77498718  | 157992348 A | 13.91 | 9.55E-12 | chr:7:158029482 |
| 7 rs79422776  | 157992820 A | 13.91 | 9.55E-12 | chr:7:158029482 |

|               |             |        |          |                 |
|---------------|-------------|--------|----------|-----------------|
| 7 rs79575378  | 157988653 A | 13.91  | 9.55E-12 | chr:7:158029482 |
| 7 rs191668503 | 157879438 C | 12.54  | 1.20E-11 | chr:7:158029482 |
| 7 rs115782456 | 157886102 A | 15.51  | 1.44E-11 | chr:7:158029482 |
| 7 rs146283516 | 157921007 G | 15.51  | 1.44E-11 | chr:7:158029482 |
| 7 rs180930685 | 157919353 T | 15.51  | 1.44E-11 | chr:7:158029482 |
| 7 rs185372713 | 157906466 T | 15.51  | 1.44E-11 | chr:7:158029482 |
| 7 rs536608866 | 157917813 T | 15.51  | 1.44E-11 | chr:7:158029482 |
| 7 rs554321308 | 157921838 T | 15.51  | 1.44E-11 | chr:7:158029482 |
| 7 rs554322023 | 157925176 T | 15.51  | 1.44E-11 | chr:7:158029482 |
| 7 rs74911888  | 157903474 A | 15.51  | 1.44E-11 | chr:7:158029482 |
| 7 rs76336600  | 157927761 A | 15.51  | 1.44E-11 | chr:7:158029482 |
| 7 rs76534082  | 157886828 A | 15.51  | 1.44E-11 | chr:7:158029482 |
| 7 rs78068415  | 157919982 T | 15.51  | 1.44E-11 | chr:7:158029482 |
| 7 rs78118820  | 157895991 A | 15.51  | 1.44E-11 | chr:7:158029482 |
| 7 rs6972212   | 157952535 A | 21.57  | 1.49E-11 | chr:7:158029482 |
| 7 rs74355306  | 157971701 G | 21.57  | 1.49E-11 | chr:7:158029482 |
| 7 rs79391313  | 157962842 A | 21.57  | 1.49E-11 | chr:7:158029482 |
| 7 rs74703160  | 157985626 A | 12.33  | 1.72E-11 | chr:7:158029482 |
| 7 rs73176112  | 158016362 G | 3.344  | 1.96E-11 | chr:7:158029482 |
| 7 rs76642817  | 157890996 T | 13.85  | 2.33E-11 | chr:7:158029482 |
| 7 rs75174369  | 157977058 T | 12.3   | 3.10E-11 | chr:7:158029482 |
| 7 rs78576374  | 157972674 T | 12.3   | 3.10E-11 | chr:7:158029482 |
| 7 rs115154220 | 157992431 A | 10.83  | 3.45E-11 | chr:7:158029482 |
| 7 rs116101671 | 158002764 G | 39.88  | 3.53E-11 | chr:7:158029482 |
| 7 rs145872346 | 158030555 C | 39.88  | 3.53E-11 | chr:7:158029482 |
| 7 rs74746824  | 158024336 C | 39.88  | 3.53E-11 | chr:7:158029482 |
| 7 rs114513220 | 157967575 T | 14.26  | 3.78E-11 | chr:7:158029482 |
| 7 rs114729797 | 157937056 A | 14.26  | 3.78E-11 | chr:7:158029482 |
| 7 rs116265641 | 157939554 A | 14.26  | 3.78E-11 | chr:7:158029482 |
| 7 rs116369472 | 157969228 A | 14.26  | 3.78E-11 | chr:7:158029482 |
| 7 rs138770773 | 157937061 A | 14.26  | 3.78E-11 | chr:7:158029482 |
| 7 rs6971835   | 157952257 C | 14.26  | 3.78E-11 | chr:7:158029482 |
| 7 rs74559595  | 157933765 T | 14.26  | 3.78E-11 | chr:7:158029482 |
| 7 rs75482412  | 157935378 T | 14.26  | 3.78E-11 | chr:7:158029482 |
| 7 rs78774372  | 157968332 A | 11.95  | 4.69E-11 | chr:7:158029482 |
| 7 rs17847433  | 157997673 A | 4.778  | 4.87E-11 | chr:7:158029482 |
| 7 rs114958462 | 157903797 T | 14.1   | 6.25E-11 | chr:7:158029482 |
| 7 rs55917540  | 157999549 C | 4.646  | 9.25E-11 | chr:7:158029482 |
| 7 rs6964342   | 158031807 G | 3.349  | 9.41E-11 | chr:7:158029482 |
| 7 rs115300653 | 157932042 T | 10.68  | 1.09E-10 | chr:7:158029482 |
| 7 rs10271837  | 157985998 C | 0.2872 | 1.38E-10 | chr:7:158029482 |
| 7 rs10268228  | 157985479 A | 0.2896 | 1.70E-10 | chr:7:158029482 |
| 7 rs10271711  | 157985854 A | 0.2896 | 1.70E-10 | chr:7:158029482 |

|               |             |        |          |                 |
|---------------|-------------|--------|----------|-----------------|
| 7 rs1806611   | 157986440 T | 0.2955 | 2.20E-10 | chr:7:158029482 |
| 7 rs80332916  | 157934646 A | 9.959  | 2.70E-10 | chr:7:158029482 |
| 7 rs3800856   | 157984992 A | 0.2912 | 3.13E-10 | chr:7:158029482 |
| 7 rs3800855   | 157985149 G | 0.2918 | 3.35E-10 | chr:7:158029482 |
| 7 rs10263846  | 157990941 T | 0.2931 | 3.92E-10 | chr:7:158029482 |
| 7 rs10275911  | 157990608 G | 0.2931 | 3.92E-10 | chr:7:158029482 |
| 7 rs10949702  | 157986125 C | 0.2944 | 4.03E-10 | chr:7:158029482 |
| 7 rs10249710  | 158030463 A | 0.3018 | 4.60E-10 | chr:7:158029482 |
| 7 rs77954122  | 157994745 G | 6.971  | 5.91E-10 | chr:7:158029482 |
| 7 rs10258997  | 158016559 G | 0.2999 | 6.58E-10 | chr:7:158029482 |
| 7 rs142201058 | 158020635 T | 10.81  | 7.72E-10 | chr:7:158029482 |
| 7 rs78090661  | 158020353 A | 10.81  | 7.72E-10 | chr:7:158029482 |
| 7 rs73512359  | 157906542 T | 11.56  | 1.00E-09 | chr:7:158029482 |
| 7 rs114392747 | 157994452 C | 6.561  | 1.09E-09 | chr:7:158029482 |
| 7 rs116046269 | 157994801 C | 6.561  | 1.09E-09 | chr:7:158029482 |
| 7 rs116368464 | 157995072 G | 6.561  | 1.09E-09 | chr:7:158029482 |
| 7 rs142912440 | 157994234 C | 6.561  | 1.09E-09 | chr:7:158029482 |
| 7 rs144548501 | 157993316 T | 6.561  | 1.09E-09 | chr:7:158029482 |
| 7 rs148965653 | 157994024 G | 6.561  | 1.09E-09 | chr:7:158029482 |
| 7 rs73520513  | 158033774 T | 7.908  | 1.12E-09 | chr:7:158029482 |
| 7 rs67598038  | 158028778 A | 0.3104 | 1.18E-09 | chr:7:158029482 |
| 7 rs59804289  | 158006512 G | 4.123  | 1.76E-09 | chr:7:158029482 |
| 7 rs150310484 | 158033865 A | 15.31  | 2.02E-09 | chr:7:158029482 |
| 7 rs6950346   | 158025658 T | 0.311  | 3.36E-09 | chr:7:158029482 |
| 7 rs10231253  | 157983353 A | 0.3177 | 3.54E-09 | chr:7:158029482 |
| 7 rs4909061   | 158103810 C | 2.674  | 4.18E-09 | chr:7:158029482 |
| 7 rs185047359 | 158032606 C | 23.36  | 4.57E-09 | chr:7:158029482 |
| 7 rs7789111   | 158021519 C | 0.319  | 5.25E-09 | chr:7:158029482 |
| 7 rs112569024 | 157944883 T | 6.283  | 5.67E-09 | chr:7:158029482 |
| 7 rs115431284 | 158014743 G | 9.959  | 6.87E-09 | chr:7:158029482 |
| 7 rs76699966  | 158008670 C | 9.959  | 6.87E-09 | chr:7:158029482 |
| 7 rs185271170 | 158047448 G | 19.6   | 6.88E-09 | chr:7:158029482 |
| 7 rs375602633 | 158040173 T | 19.6   | 6.88E-09 | chr:7:158029482 |
| 7 rs376264880 | 158041701 T | 19.6   | 6.88E-09 | chr:7:158029482 |
| 7 rs75391892  | 158044882 A | 19.6   | 6.88E-09 | chr:7:158029482 |
| 7 rs113800399 | 157954168 A | 14.3   | 1.18E-08 | chr:7:158029482 |
| 7 rs10227009  | 158027455 C | 0.3346 | 1.42E-08 | chr:7:158029482 |
| 7 rs58825421  | 158021882 A | 5.52   | 1.49E-08 | chr:7:158029482 |
| 7 rs116112670 | 157978049 G | 6.008  | 1.65E-08 | chr:7:158029482 |
| 7 rs192283162 | 157955561 T | 12.28  | 2.00E-08 | chr:7:158029482 |
| 7 rs59137399  | 158027849 T | 5.331  | 2.12E-08 | chr:7:158029482 |
| 7 rs114084009 | 158039743 T | 40.03  | 2.47E-08 | chr:7:158029482 |
| 7 rs114913762 | 158044106 A | 40.03  | 2.47E-08 | chr:7:158029482 |



|               |             |       |          |                 |
|---------------|-------------|-------|----------|-----------------|
| 7 rs147332266 | 158041045 A | 40.03 | 2.47E-08 | chr:7:158029482 |
| 7 rs74895395  | 158039244 T | 40.03 | 2.47E-08 | chr:7:158029482 |
| 7 rs116453618 | 158034494 A | 8.108 | 2.56E-08 | chr:7:158029482 |
| 7 rs57418975  | 158008236 T | 5.179 | 2.84E-08 | chr:7:158029482 |
| 7 rs73518440  | 158004550 T | 5.179 | 2.84E-08 | chr:7:158029482 |
| 7 rs114658547 | 158019418 T | 66.26 | 3.78E-08 | chr:7:158029482 |
| 7 rs139241072 | 158020035 G | 66.26 | 3.78E-08 | chr:7:158029482 |
| 7 rs139449578 | 158019174 T | 66.26 | 3.78E-08 | chr:7:158029482 |
| 7 rs147886434 | 158024207 T | 66.26 | 3.78E-08 | chr:7:158029482 |
| 7 rs75833406  | 158019784 A | 66.26 | 3.78E-08 | chr:7:158029482 |
| 7 rs79437632  | 158025064 G | 66.26 | 3.78E-08 | chr:7:158029482 |
| 7 rs139962222 | 157976021 A | 15.85 | 4.60E-08 | chr:7:158029482 |
| 7 rs369667396 | 157964187 T | 15.62 | 5.34E-08 | chr:7:158029482 |
| 7 rs59308052  | 158012401 T | 4.544 | 5.35E-08 | chr:7:158029482 |
| 7 rs138941200 | 158026684 G | 63.77 | 5.56E-08 | chr:7:158029482 |
| 7 rs4416779   | 157987251 T | 2.55  | 7.12E-08 | chr:7:158029482 |
| 7 rs185089183 | 157986725 T | 62.08 | 7.88E-08 | chr:7:158029482 |
| 7 rs546693958 | 157991425 C | 62.08 | 7.88E-08 | chr:7:158029482 |
| 7 rs78436390  | 157989783 A | 62.08 | 7.88E-08 | chr:7:158029482 |
| 7 rs115563191 | 158006928 G | 61.26 | 8.54E-08 | chr:7:158029482 |
| 7 rs115010930 | 157967313 A | 14.93 | 1.16E-07 | chr:7:158029482 |
| 7 rs137902222 | 157968097 A | 14.93 | 1.16E-07 | chr:7:158029482 |
| 7 rs181064733 | 157967576 A | 14.93 | 1.16E-07 | chr:7:158029482 |
| 7 rs184836979 | 157946720 A | 14.93 | 1.16E-07 | chr:7:158029482 |
| 7 rs368277902 | 157967275 G | 14.93 | 1.16E-07 | chr:7:158029482 |
| 7 rs369886862 | 157959528 T | 14.93 | 1.16E-07 | chr:7:158029482 |
| 7 rs77448247  | 157960029 A | 14.93 | 1.16E-07 | chr:7:158029482 |
| 7 rs79350926  | 157955419 T | 14.93 | 1.16E-07 | chr:7:158029482 |
| 7 rs10949707  | 158070635 C | 3.226 | 1.26E-07 | chr:7:158029482 |
| 7 rs4909062   | 158103844 A | 2.377 | 1.51E-07 | chr:7:158029482 |
| 7 rs12533146  | 158073096 A | 3.077 | 1.53E-07 | chr:7:158029482 |
| 7 rs13231012  | 158072540 A | 3.136 | 1.62E-07 | chr:7:158029482 |
| 7 rs114246372 | 157934539 C | 12.56 | 1.69E-07 | chr:7:158029482 |
| 7 rs150094352 | 157935774 A | 12.56 | 1.69E-07 | chr:7:158029482 |
| 7 rs186893056 | 157929280 G | 12.56 | 1.69E-07 | chr:7:158029482 |
| 7 rs182904034 | 157955513 A | 12.39 | 1.87E-07 | chr:7:158029482 |
| 7 rs13230783  | 158072330 A | 3.111 | 1.88E-07 | chr:7:158029482 |
| 7 rs73176114  | 158017101 G | 3.043 | 2.05E-07 | chr:7:158029482 |
| 7 rs115380396 | 157978423 A | 4.4   | 2.20E-07 | chr:7:158029482 |
| 7 rs79707592  | 158039220 T | 7.325 | 2.50E-07 | chr:7:158029482 |
| 7 rs146404159 | 157905389 T | 19.17 | 3.96E-07 | chr:7:158029482 |
| 7 rs148418754 | 157910241 C | 19.17 | 3.96E-07 | chr:7:158029482 |
| 7 rs78055072  | 157935566 T | 3.937 | 4.13E-07 | chr:7:158029482 |

|                         |             |        |          |                 |
|-------------------------|-------------|--------|----------|-----------------|
| 7 rs115829202           | 157943365 T | 7.176  | 4.29E-07 | chr:7:158029482 |
| 7 rs569803815           | 158046905 T | 4.674  | 4.70E-07 | chr:7:158029482 |
| 7 rs192147010           | 157942364 T | 26.35  | 4.93E-07 | chr:7:158029482 |
| 7 rs114251824           | 157925408 A | 11.68  | 4.96E-07 | chr:7:158029482 |
| 7 rs17847428            | 157926349 G | 0.4331 | 5.16E-07 | chr:7:158029482 |
| 7 rs60639062            | 157982851 T | 18.36  | 5.99E-07 | chr:7:158029482 |
| 7 rs34664051            | 158069257 A | 2.945  | 6.11E-07 | chr:7:158029482 |
| 7 rs141625384           | 157966763 G | 7.224  | 6.25E-07 | chr:7:158029482 |
| 7 rs147187810           | 157952409 T | 8.104  | 6.81E-07 | chr:7:158029482 |
| 7 rs9691217             | 158044083 C | 6.838  | 8.05E-07 | chr:7:158029482 |
| 7 rs4909162             | 158058663 T | 13.68  | 9.46E-07 | chr:7:158029482 |
| 7 rs143899134           | 157960718 C | 39.95  | 1.39E-06 | chr:7:158029482 |
| 7 rs10247985            | 158017478 C | 0.4211 | 1.39E-06 | chr:7:158029482 |
| 7 rs111360395           | 158046892 C | 4.74   | 1.50E-06 | chr:7:158029482 |
| 7 rs76583176            | 157969959 A | 23.39  | 1.55E-06 | chr:7:158029482 |
| 7 rs150519493           | 158096747 C | 27.95  | 1.58E-06 | chr:7:158029482 |
| 7 rs112290031           | 157914431 A | 10.74  | 1.59E-06 | chr:7:158029482 |
| 7 rs148636805           | 157960723 C | 6.84   | 1.64E-06 | chr:7:158029482 |
| 7 rs149077451           | 157958690 T | 6.84   | 1.64E-06 | chr:7:158029482 |
| 7 rs73176107            | 158004804 G | 2.749  | 1.73E-06 | chr:7:158029482 |
| 7 rs114057722           | 157932924 A | 7.567  | 1.91E-06 | chr:7:158029482 |
| 7 rs116058122           | 157935823 A | 7.567  | 1.91E-06 | chr:7:158029482 |
| 7 rs141237994           | 157934588 A | 7.567  | 1.91E-06 | chr:7:158029482 |
| 7 rs369805479           | 157900543 T | 8.463  | 2.02E-06 | chr:7:158029482 |
| 7 rs113100148           | 158046896 G | 3.795  | 2.08E-06 | chr:7:158029482 |
| 7 rs7784655             | 157880105 C | 2.138  | 2.43E-06 | chr:7:158029482 |
| 7 rs191914941           | 157939369 T | 6.625  | 2.88E-06 | chr:7:158029482 |
| 7 rs531614647           | 157917975 T | 8.586  | 3.11E-06 | chr:7:158029482 |
| 7 rs116828492           | 158023888 C | 129.7  | 3.47E-06 | chr:7:158029482 |
| 7 rs141144502           | 158022984 T | 129.7  | 3.47E-06 | chr:7:158029482 |
| 7 rs183214705           | 158002555 G | 129.7  | 3.47E-06 | chr:7:158029482 |
| 7 rs190367380           | 157996656 T | 129.7  | 3.47E-06 | chr:7:158029482 |
| 7 rs547208450           | 157999698 A | 129.7  | 3.47E-06 | chr:7:158029482 |
| 7 rs1982450             | 158074146 T | 2.52   | 4.19E-06 | chr:7:158029482 |
| 7 rs6963124             | 158023589 T | 0.3921 | 4.65E-06 | chr:7:158029482 |
| 7 rs111618217           | 157946585 C | 0.3495 | 4.79E-06 | chr:7:158029482 |
| 7 rs10215745            | 158015262 T | 2.07   | 4.83E-06 | chr:7:158029482 |
| 7 rs2335834;rs528512480 | 157967182 G | 3.095  | 5.07E-06 | chr:7:158029482 |
| 7 rs111852013           | 157973020 T | 2.107  | 5.16E-06 | chr:7:158029482 |
| 7 rs12698190            | 158051753 T | 2.135  | 5.25E-06 | chr:7:158029482 |
| 7 rs546309641           | 157919286 A | 7.034  | 5.36E-06 | chr:7:158029482 |
| 7 rs77030049            | 157970376 T | 2.109  | 5.47E-06 | chr:7:158029482 |
| 7 rs535124812           | 158119083 G | 24.05  | 5.52E-06 | chr:7:158029482 |

|               |             |        |          |                 |
|---------------|-------------|--------|----------|-----------------|
| 7 rs10215991  | 158015263 G | 2.057  | 5.72E-06 | chr:7:158029482 |
| 7 rs10215992  | 158015273 G | 2.057  | 5.72E-06 | chr:7:158029482 |
| 7 rs77439951  | 157850032 A | 5.897  | 6.08E-06 | chr:7:158029482 |
| 7 rs56211164  | 158016764 A | 2.084  | 6.64E-06 | chr:7:158029482 |
| 7 rs10257230  | 158015030 T | 2.041  | 7.48E-06 | chr:7:158029482 |
| 7 rs10215289  | 158015301 C | 2.032  | 8.60E-06 | chr:7:158029482 |
| 7 rs140744744 | 157861117 C | 6.347  | 8.83E-06 | chr:7:158029482 |
| 7 rs142686554 | 157850685 C | 6.347  | 8.83E-06 | chr:7:158029482 |
| 7 rs10238207  | 157870788 C | 2.715  | 1.14E-05 | chr:7:158029482 |
| 7 rs146059562 | 157919343 G | 0.4835 | 1.15E-05 | chr:7:158029482 |
| 7 rs140405611 | 157911297 G | 6.012  | 1.21E-05 | chr:7:158029482 |
| 7 rs141581691 | 157913360 C | 6.012  | 1.21E-05 | chr:7:158029482 |
| 7 rs73173689  | 157981830 A | 2.484  | 1.31E-05 | chr:7:158029482 |
| 7 rs13234832  | 158014979 C | 2.011  | 1.43E-05 | chr:7:158029482 |
| 7 rs140231094 | 158056865 A | 105.5  | 1.55E-05 | chr:7:158029482 |
| 7 rs538008579 | 158061457 A | 105.5  | 1.55E-05 | chr:7:158029482 |
| 7 rs145200244 | 157931404 G | 4.881  | 1.59E-05 | chr:7:158029482 |
| 7 rs150955375 | 158010507 C | 100.1  | 1.60E-05 | chr:7:158029482 |
| 7 rs28501236  | 157913697 C | 2.915  | 1.98E-05 | chr:7:158029482 |
| 7 rs3752372   | 158031556 C | 0.4876 | 2.01E-05 | chr:7:158029482 |
| 7 rs138665655 | 157889846 A | 5.551  | 2.16E-05 | chr:7:158029482 |
| 7 rs11763127  | 157931893 C | 2.662  | 2.27E-05 | chr:7:158029482 |
| 7 rs10228083  | 157912213 T | 2.625  | 2.29E-05 | chr:7:158029482 |
| 7 rs3800860   | 157903504 T | 2.625  | 2.29E-05 | chr:7:158029482 |
| 7 rs10277112  | 157916913 A | 2.685  | 2.38E-05 | chr:7:158029482 |
| 7 rs553467466 | 157568780 T | 3.983  | 2.41E-05 | chr:7:158029482 |
| 7 rs10262127  | 158016574 T | 0.3996 | 2.46E-05 | chr:7:158029482 |
| 7 rs138523799 | 158793571 A | 102.3  | 1.12E-13 | chr:7:158773385 |
| 7 rs148191983 | 158794102 T | 102.3  | 1.12E-13 | chr:7:158773385 |
| 7 rs142970495 | 158771425 G | 176.8  | 3.67E-13 | chr:7:158773385 |
| 7 rs115752605 | 158807960 T | 106.9  | 1.00E-12 | chr:7:158773385 |
| 7 rs138320299 | 158808687 C | 106.9  | 1.00E-12 | chr:7:158773385 |
| 7 rs138720434 | 158812703 C | 106.9  | 1.00E-12 | chr:7:158773385 |
| 7 rs139925274 | 158799701 T | 106.9  | 1.00E-12 | chr:7:158773385 |
| 7 rs143423400 | 158775838 T | 244.5  | 1.06E-12 | chr:7:158773385 |
| 7 rs145602338 | 158785863 T | 244.5  | 1.06E-12 | chr:7:158773385 |
| 7 rs149504192 | 158779093 A | 244.5  | 1.06E-12 | chr:7:158773385 |
| 7 rs149754911 | 158785737 A | 244.5  | 1.06E-12 | chr:7:158773385 |
| 7 rs189570458 | 158776040 T | 244.5  | 1.06E-12 | chr:7:158773385 |
| 7 rs535727050 | 158782451 G | 244.5  | 1.06E-12 | chr:7:158773385 |
| 7 rs555673551 | 158782453 C | 244.5  | 1.06E-12 | chr:7:158773385 |
| 7 rs139015389 | 158813767 A | 67.48  | 1.45E-12 | chr:7:158773385 |
| 7 rs180729474 | 158766864 T | 38.03  | 3.24E-12 | chr:7:158773385 |

|               |             |       |          |                 |
|---------------|-------------|-------|----------|-----------------|
| 7 rs115436222 | 158819451 A | 298.8 | 3.70E-11 | chr:7:158773385 |
| 7 rs116064411 | 158807651 C | 298.8 | 3.70E-11 | chr:7:158773385 |
| 7 rs139689953 | 158819670 C | 298.8 | 3.70E-11 | chr:7:158773385 |
| 7 rs141350254 | 158857415 T | 48.11 | 5.44E-10 | chr:7:158773385 |
| 7 rs114801328 | 158695613 A | 23.45 | 2.20E-09 | chr:7:158773385 |
| 7 rs149349671 | 158682570 T | 23.45 | 2.20E-09 | chr:7:158773385 |
| 7 rs558399897 | 158685625 G | 23.45 | 2.20E-09 | chr:7:158773385 |
| 7 rs139692502 | 158766761 C | 13.49 | 2.37E-09 | chr:7:158773385 |
| 7 rs140852796 | 158656731 T | 40.84 | 9.99E-09 | chr:7:158773385 |
| 7 rs151115445 | 158710907 G | 48.95 | 1.03E-08 | chr:7:158773385 |
| 7 rs147534657 | 158751295 G | 67.32 | 1.11E-08 | chr:7:158773385 |
| 7 rs142012004 | 158670477 G | 84.78 | 1.14E-08 | chr:7:158773385 |
| 7 rs139436013 | 158897519 C | 17.94 | 1.23E-08 | chr:7:158773385 |
| 7 rs190931491 | 158897523 T | 17.94 | 1.23E-08 | chr:7:158773385 |
| 7 rs144174529 | 158752191 G | 37.22 | 1.51E-08 | chr:7:158773385 |
| 7 rs115496394 | 158645732 C | 10.75 | 3.75E-08 | chr:7:158773385 |
| 7 rs116285782 | 158645630 T | 10.75 | 3.75E-08 | chr:7:158773385 |
| 7 rs114910333 | 158657200 C | 13.82 | 4.32E-08 | chr:7:158773385 |
| 7 rs140088911 | 158655377 A | 13.82 | 4.32E-08 | chr:7:158773385 |
| 7 rs76689482  | 158654079 T | 13.4  | 5.15E-08 | chr:7:158773385 |
| 7 rs140244843 | 158782360 T | 244.9 | 5.36E-08 | chr:7:158773385 |
| 7 rs140596100 | 158677277 T | 66.76 | 8.06E-08 | chr:7:158773385 |
| 7 rs138414941 | 158756362 A | 75.82 | 1.05E-07 | chr:7:158773385 |
| 7 rs149141966 | 158785912 C | 75.82 | 1.05E-07 | chr:7:158773385 |
| 7 rs568688013 | 158789844 C | 75.82 | 1.05E-07 | chr:7:158773385 |
| 7 rs115563954 | 158741968 G | 17.28 | 1.48E-07 | chr:7:158773385 |
| 7 rs148690898 | 158757302 G | 31.04 | 1.65E-07 | chr:7:158773385 |
| 7 rs576890241 | 158671184 C | 117.7 | 1.73E-07 | chr:7:158773385 |
| 7 rs2730234   | 158782584 A | 6.602 | 2.14E-07 | chr:7:158773385 |
| 7 rs140376692 | 158750624 T | 18.4  | 2.18E-07 | chr:7:158773385 |
| 7 rs114018982 | 158723083 C | 16.16 | 2.36E-07 | chr:7:158773385 |
| 7 rs114093570 | 158662154 T | 15.81 | 2.63E-07 | chr:7:158773385 |
| 7 rs114305528 | 158695812 C | 15.81 | 2.63E-07 | chr:7:158773385 |
| 7 rs115035685 | 158662412 A | 15.81 | 2.63E-07 | chr:7:158773385 |
| 7 rs116479089 | 158658864 A | 15.81 | 2.63E-07 | chr:7:158773385 |
| 7 rs116625827 | 158662642 A | 15.81 | 2.63E-07 | chr:7:158773385 |
| 7 rs116627160 | 158657594 G | 15.81 | 2.63E-07 | chr:7:158773385 |
| 7 rs138339913 | 158666510 T | 15.81 | 2.63E-07 | chr:7:158773385 |
| 7 rs151236919 | 158696868 G | 15.81 | 2.63E-07 | chr:7:158773385 |
| 7 rs59277300  | 158686315 G | 15.81 | 2.63E-07 | chr:7:158773385 |
| 7 rs61212889  | 158665399 G | 15.81 | 2.63E-07 | chr:7:158773385 |
| 7 rs6948415   | 158763881 G | 6.017 | 3.13E-07 | chr:7:158773385 |
| 7 rs2657407   | 158782543 T | 6.363 | 3.24E-07 | chr:7:158773385 |

|               |             |       |          |                 |
|---------------|-------------|-------|----------|-----------------|
| 7 rs114650465 | 158755171 C | 10.95 | 4.15E-07 | chr:7:158773385 |
| 7 rs2247274   | 158765682 G | 6.527 | 4.16E-07 | chr:7:158773385 |
| 7 rs142443822 | 158704746 G | 14.01 | 4.47E-07 | chr:7:158773385 |
| 7 rs138066846 | 158676646 T | 8.976 | 5.76E-07 | chr:7:158773385 |
| 7 rs147478471 | 158836620 A | 38.92 | 1.00E-06 | chr:7:158773385 |
| 7 rs370299428 | 158831322 T | 38.92 | 1.00E-06 | chr:7:158773385 |
| 7 rs150871010 | 158689749 A | 9.68  | 2.00E-06 | chr:7:158773385 |
| 7 rs114154718 | 158675517 G | 8.144 | 2.54E-06 | chr:7:158773385 |
| 7 rs6459916   | 158770117 A | 5.618 | 2.54E-06 | chr:7:158773385 |
| 7 rs116277468 | 158673748 C | 8.078 | 2.88E-06 | chr:7:158773385 |
| 7 rs116397049 | 158701546 C | 7.872 | 3.58E-06 | chr:7:158773385 |
| 7 rs114580586 | 158701147 G | 7.82  | 3.89E-06 | chr:7:158773385 |
| 7 rs262136    | 158764915 T | 5.429 | 4.59E-06 | chr:7:158773385 |
| 7 rs10259521  | 158740307 T | 9.714 | 5.37E-06 | chr:7:158773385 |
| 7 rs2657399   | 158784591 C | 5.846 | 5.83E-06 | chr:7:158773385 |
| 7 rs114475809 | 158716221 C | 9.465 | 6.61E-06 | chr:7:158773385 |
| 7 rs115436921 | 158716224 C | 9.465 | 6.61E-06 | chr:7:158773385 |
| 7 rs116339161 | 158710422 T | 9.465 | 6.61E-06 | chr:7:158773385 |
| 7 rs10256002  | 158739841 T | 9.333 | 7.37E-06 | chr:7:158773385 |
| 7 rs10276354  | 158737815 T | 9.333 | 7.37E-06 | chr:7:158773385 |
| 7 rs28770291  | 158733181 A | 9.333 | 7.37E-06 | chr:7:158773385 |
| 7 rs565059270 | 158775061 T | 179.1 | 7.79E-06 | chr:7:158773385 |
| 7 rs116206273 | 158895513 T | 7.843 | 8.76E-06 | chr:7:158773385 |
| 7 rs10247405  | 158790004 G | 6.036 | 9.68E-06 | chr:7:158773385 |
| 7 rs147867742 | 158671306 A | 6.679 | 1.95E-05 | chr:7:158773385 |
| 7 rs115022047 | 158881022 A | 7.954 | 2.11E-05 | chr:7:158773385 |
| 7 rs143508100 | 158864823 C | 6.884 | 2.22E-05 | chr:7:158773385 |
| 7 rs7791538   | 158855367 G | 6.219 | 2.25E-05 | chr:7:158773385 |
| 7 rs565435826 | 158527283 T | 107.5 | 2.27E-05 | chr:7:158773385 |
| 7 rs115551956 | 158869490 T | 7.754 | 2.52E-05 | chr:7:158773385 |
| 7 rs116529881 | 158847310 C | 7.672 | 2.55E-05 | chr:7:158773385 |
| 7 rs532960886 | 158882893 T | 7.063 | 2.60E-05 | chr:7:158773385 |
| 7 rs114653951 | 158845976 A | 7.618 | 2.65E-05 | chr:7:158773385 |
| 7 rs113277054 | 158775082 T | 52.97 | 2.88E-05 | chr:7:158773385 |
| 7 rs28854817  | 158688729 G | 5.944 | 2.92E-05 | chr:7:158773385 |
| 7 rs114465751 | 158902783 A | 7.579 | 2.92E-05 | chr:7:158773385 |
| 7 rs116546283 | 158906836 C | 7.579 | 2.92E-05 | chr:7:158773385 |
| 7 rs561469257 | 158893794 A | 7.579 | 2.92E-05 | chr:7:158773385 |
| 7 rs115435859 | 158850790 A | 7.4   | 3.49E-05 | chr:7:158773385 |
| 7 rs115332713 | 158861394 T | 7.401 | 3.52E-05 | chr:7:158773385 |
| 7 rs140553521 | 158864478 T | 7.401 | 3.52E-05 | chr:7:158773385 |
| 7 rs567437775 | 158779892 C | 81.65 | 3.53E-05 | chr:7:158773385 |
| 7 rs115459879 | 158890347 A | 7.316 | 3.92E-05 | chr:7:158773385 |

|               |            |        |          |                |
|---------------|------------|--------|----------|----------------|
| 7 rs78569357  | 16241435 C | 0.1767 | 2.85E-11 | chr:7:16237347 |
| 7 rs80148995  | 16240992 A | 0.1767 | 2.85E-11 | chr:7:16237347 |
| 7 rs114237814 | 16203354 A | 0.1964 | 1.49E-10 | chr:7:16237347 |
| 7 rs139906888 | 16202233 G | 0.1995 | 2.00E-10 | chr:7:16237347 |
| 7 rs149192706 | 16200558 C | 0.1995 | 2.00E-10 | chr:7:16237347 |
| 7 rs17169288  | 16193288 A | 0.1995 | 2.00E-10 | chr:7:16237347 |
| 7 rs17169290  | 16194207 G | 0.1995 | 2.00E-10 | chr:7:16237347 |
| 7 rs17169295  | 16206239 A | 0.1995 | 2.00E-10 | chr:7:16237347 |
| 7 rs59124001  | 16191337 C | 0.1995 | 2.00E-10 | chr:7:16237347 |
| 7 rs59951504  | 16201410 A | 0.1995 | 2.00E-10 | chr:7:16237347 |
| 7 rs60412407  | 16189893 G | 0.1995 | 2.00E-10 | chr:7:16237347 |
| 7 rs74666326  | 16188224 G | 0.1995 | 2.00E-10 | chr:7:16237347 |
| 7 rs75093879  | 16200177 A | 0.1995 | 2.00E-10 | chr:7:16237347 |
| 7 rs75798894  | 16204714 A | 0.1995 | 2.00E-10 | chr:7:16237347 |
| 7 rs76635530  | 16220088 A | 0.1983 | 2.85E-10 | chr:7:16237347 |
| 7 rs17169327  | 16231028 C | 0.2148 | 3.49E-10 | chr:7:16237347 |
| 7 rs59510115  | 16150162 A | 0.2052 | 4.33E-10 | chr:7:16237347 |
| 7 rs7787953   | 16160986 C | 0.2052 | 4.33E-10 | chr:7:16237347 |
| 7 rs79608769  | 16159898 A | 0.2052 | 4.33E-10 | chr:7:16237347 |
| 7 rs59618653  | 16186627 T | 0.2064 | 4.63E-10 | chr:7:16237347 |
| 7 rs60082144  | 16184639 G | 0.2064 | 4.63E-10 | chr:7:16237347 |
| 7 rs75844841  | 16184554 C | 0.2064 | 4.63E-10 | chr:7:16237347 |
| 7 rs57213749  | 16147064 C | 0.2238 | 5.43E-10 | chr:7:16237347 |
| 7 rs77332294  | 16145345 A | 0.2238 | 5.43E-10 | chr:7:16237347 |
| 7 rs143528089 | 16142507 A | 0.2076 | 5.44E-10 | chr:7:16237347 |
| 7 rs59529774  | 16141140 G | 0.2076 | 5.44E-10 | chr:7:16237347 |
| 7 rs60525181  | 16148477 A | 0.2076 | 5.44E-10 | chr:7:16237347 |
| 7 rs61059482  | 16147246 C | 0.2076 | 5.44E-10 | chr:7:16237347 |
| 7 rs75872145  | 16169991 A | 0.2095 | 5.90E-10 | chr:7:16237347 |
| 7 rs7809306   | 16225174 A | 0.252  | 8.36E-10 | chr:7:16237347 |
| 7 rs76015838  | 16128754 C | 0.2084 | 9.75E-10 | chr:7:16237347 |
| 7 rs79391915  | 16138889 A | 0.2084 | 9.75E-10 | chr:7:16237347 |
| 7 rs79430054  | 16137524 A | 0.2084 | 9.75E-10 | chr:7:16237347 |
| 7 rs116237660 | 16180993 A | 0.2115 | 1.03E-09 | chr:7:16237347 |
| 7 rs10487914  | 16219670 G | 0.2803 | 1.93E-09 | chr:7:16237347 |
| 7 rs113407083 | 16199382 G | 0.2803 | 1.93E-09 | chr:7:16237347 |
| 7 rs17169286  | 16182262 T | 0.2188 | 2.35E-09 | chr:7:16237347 |
| 7 rs73304822  | 16216110 T | 0.2829 | 2.47E-09 | chr:7:16237347 |
| 7 rs114368585 | 16313273 A | 0.1806 | 4.98E-09 | chr:7:16237347 |
| 7 rs111701134 | 16292180 A | 0.1912 | 1.15E-08 | chr:7:16237347 |
| 7 rs111940941 | 16289931 G | 0.1912 | 1.15E-08 | chr:7:16237347 |
| 7 rs112143154 | 16293361 T | 0.1912 | 1.15E-08 | chr:7:16237347 |
| 7 rs112414690 | 16307612 T | 0.1912 | 1.15E-08 | chr:7:16237347 |

|               |            |        |          |                |
|---------------|------------|--------|----------|----------------|
| 7 rs146152412 | 16290109 A | 0.1912 | 1.15E-08 | chr:7:16237347 |
| 7 rs78681820  | 16304439 G | 0.1912 | 1.15E-08 | chr:7:16237347 |
| 7 rs79555541  | 16301626 A | 0.1912 | 1.15E-08 | chr:7:16237347 |
| 7 rs79796679  | 16301634 C | 0.1912 | 1.15E-08 | chr:7:16237347 |
| 7 rs1034960   | 16212032 T | 0.2624 | 1.16E-08 | chr:7:16237347 |
| 7 rs115298402 | 16308143 A | 0.1886 | 1.40E-08 | chr:7:16237347 |
| 7 rs116677605 | 16312795 G | 0.1886 | 1.40E-08 | chr:7:16237347 |
| 7 rs75096853  | 16108857 G | 0.182  | 1.45E-08 | chr:7:16237347 |
| 7 rs79939484  | 16099542 A | 0.182  | 1.45E-08 | chr:7:16237347 |
| 7 rs77137406  | 16251332 C | 0.1822 | 1.50E-08 | chr:7:16237347 |
| 7 rs62440440  | 16294388 A | 0.1942 | 2.04E-08 | chr:7:16237347 |
| 7 rs140036716 | 16313848 C | 0.1969 | 2.52E-08 | chr:7:16237347 |
| 7 rs75499884  | 16072209 G | 0.1813 | 3.79E-08 | chr:7:16237347 |
| 7 rs12670694  | 16233741 G | 0.3153 | 5.38E-08 | chr:7:16237347 |
| 7 rs75658037  | 16065241 G | 0.1665 | 5.58E-08 | chr:7:16237347 |
| 7 rs115011307 | 16286071 C | 0.1961 | 6.05E-08 | chr:7:16237347 |
| 7 rs141283607 | 16290730 G | 0.1961 | 6.05E-08 | chr:7:16237347 |
| 7 rs148517152 | 16296005 G | 0.1961 | 6.05E-08 | chr:7:16237347 |
| 7 rs150186974 | 16291439 G | 0.1961 | 6.05E-08 | chr:7:16237347 |
| 7 rs77398067  | 16296632 G | 0.1961 | 6.05E-08 | chr:7:16237347 |
| 7 rs6963052   | 16211529 T | 0.3708 | 7.36E-08 | chr:7:16237347 |
| 7 rs12699772  | 16226615 T | 0.322  | 7.64E-08 | chr:7:16237347 |
| 7 rs35978678  | 16232776 T | 0.3164 | 7.90E-08 | chr:7:16237347 |
| 7 rs201756228 | 16128987 G | 0.324  | 1.40E-07 | chr:7:16237347 |
| 7 rs13237999  | 16126709 T | 0.2403 | 1.41E-07 | chr:7:16237347 |
| 7 rs199541295 | 16128992 T | 0.3177 | 1.64E-07 | chr:7:16237347 |
| 7 rs200989147 | 16128994 C | 0.3177 | 1.64E-07 | chr:7:16237347 |
| 7 rs201774908 | 16128995 A | 0.3177 | 1.64E-07 | chr:7:16237347 |
| 7 rs76570626  | 16158229 C | 0.2036 | 2.07E-07 | chr:7:16237347 |
| 7 rs537249407 | 16171775 T | 0.3566 | 2.12E-07 | chr:7:16237347 |
| 7 rs558512300 | 16171776 G | 0.3566 | 2.12E-07 | chr:7:16237347 |
| 7 rs569856115 | 16171774 C | 0.3566 | 2.12E-07 | chr:7:16237347 |
| 7 rs79447373  | 16147444 C | 0.2085 | 2.77E-07 | chr:7:16237347 |
| 7 rs11760631  | 16159780 T | 0.4014 | 3.26E-07 | chr:7:16237347 |
| 7 rs11760717  | 16159827 T | 0.4014 | 3.26E-07 | chr:7:16237347 |
| 7 rs77772901  | 16285138 T | 0.2189 | 3.42E-07 | chr:7:16237347 |
| 7 rs1527205   | 16160617 G | 0.4033 | 3.72E-07 | chr:7:16237347 |
| 7 rs78057051  | 16220568 A | 0.204  | 3.78E-07 | chr:7:16237347 |
| 7 rs115842586 | 16219510 T | 0.2092 | 5.20E-07 | chr:7:16237347 |
| 7 rs140445980 | 16293927 A | 0.2198 | 7.99E-07 | chr:7:16237347 |
| 7 rs76453672  | 16314532 G | 0.2198 | 7.99E-07 | chr:7:16237347 |
| 7 rs6976322   | 16231830 A | 0.3955 | 8.89E-07 | chr:7:16237347 |
| 7 rs4721478   | 16227094 A | 0.4017 | 1.17E-06 | chr:7:16237347 |

|               |            |        |          |                |
|---------------|------------|--------|----------|----------------|
| 7 rs10950602  | 16136846 C | 0.4032 | 1.30E-06 | chr:7:16237347 |
| 7 rs17355113  | 16073067 G | 0.3173 | 1.62E-06 | chr:7:16237347 |
| 7 rs12216568  | 16261975 T | 0.3491 | 1.93E-06 | chr:7:16237347 |
| 7 rs12699773  | 16268937 C | 0.3491 | 1.93E-06 | chr:7:16237347 |
| 7 rs1589987   | 16267776 C | 0.3491 | 1.93E-06 | chr:7:16237347 |
| 7 rs7790551   | 16270388 A | 0.3491 | 1.93E-06 | chr:7:16237347 |
| 7 rs7807183   | 16267316 G | 0.3491 | 1.93E-06 | chr:7:16237347 |
| 7 rs78667415  | 15958939 T | 0.2355 | 2.70E-06 | chr:7:16237347 |
| 7 rs74350728  | 16272186 C | 0.3379 | 3.38E-06 | chr:7:16237347 |
| 7 rs78114589  | 16271386 G | 0.3379 | 3.38E-06 | chr:7:16237347 |
| 7 rs78251392  | 16264027 G | 0.3379 | 3.38E-06 | chr:7:16237347 |
| 7 rs79531512  | 16269690 C | 0.3379 | 3.38E-06 | chr:7:16237347 |
| 7 rs529813497 | 15917542 C | 0.2597 | 3.97E-06 | chr:7:16237347 |
| 7 rs1528145   | 16062820 A | 0.3249 | 4.25E-06 | chr:7:16237347 |
| 7 rs78947322  | 15895364 C | 0.2352 | 4.29E-06 | chr:7:16237347 |
| 7 rs79140626  | 16282404 A | 0.34   | 4.40E-06 | chr:7:16237347 |
| 7 rs78334563  | 15893721 C | 0.2439 | 4.43E-06 | chr:7:16237347 |
| 7 rs111449414 | 16278514 A | 0.3411 | 4.56E-06 | chr:7:16237347 |
| 7 rs74901096  | 16262857 C | 0.3411 | 4.56E-06 | chr:7:16237347 |
| 7 rs75942460  | 16274783 C | 0.3411 | 4.56E-06 | chr:7:16237347 |
| 7 rs78374272  | 16255641 C | 0.3411 | 4.56E-06 | chr:7:16237347 |
| 7 rs79096699  | 16275120 C | 0.3411 | 4.56E-06 | chr:7:16237347 |
| 7 rs80024336  | 16280063 C | 0.228  | 4.56E-06 | chr:7:16237347 |
| 7 rs28602776  | 16398883 C | 0.3055 | 4.70E-06 | chr:7:16237347 |
| 7 rs13240803  | 16227939 C | 0.45   | 4.93E-06 | chr:7:16237347 |
| 7 rs77256425  | 15881557 G | 0.2469 | 5.15E-06 | chr:7:16237347 |
| 7 rs74974254  | 16304404 C | 0.1799 | 5.25E-06 | chr:7:16237347 |
| 7 rs78294159  | 16275741 G | 0.3441 | 5.51E-06 | chr:7:16237347 |
| 7 rs553363007 | 16256767 T | 0.3384 | 5.91E-06 | chr:7:16237347 |
| 7 rs6461230   | 16242151 T | 0.4548 | 9.83E-06 | chr:7:16237347 |
| 7 rs12673171  | 16387848 C | 0.3777 | 1.05E-05 | chr:7:16237347 |
| 7 rs6461229   | 16238691 C | 0.4579 | 1.09E-05 | chr:7:16237347 |
| 7 rs17286602  | 16152174 A | 0.4409 | 1.18E-05 | chr:7:16237347 |
| 7 rs1918854   | 16073545 C | 0.358  | 1.36E-05 | chr:7:16237347 |
| 7 rs2389578   | 16066289 T | 0.3492 | 1.41E-05 | chr:7:16237347 |
| 7 rs7459076   | 16066542 T | 0.3492 | 1.41E-05 | chr:7:16237347 |
| 7 rs1528164   | 16077871 G | 0.3503 | 2.51E-05 | chr:7:16237347 |
| 7 rs35331274  | 16077251 C | 0.3503 | 2.51E-05 | chr:7:16237347 |
| 7 rs12699784  | 16396248 C | 0.3964 | 2.70E-05 | chr:7:16237347 |
| 7 rs17169439  | 16394128 A | 0.3082 | 2.79E-05 | chr:7:16237347 |
| 7 rs6461239   | 16371533 T | 0.3082 | 2.79E-05 | chr:7:16237347 |
| 7 rs6946720   | 16377435 T | 0.3082 | 2.79E-05 | chr:7:16237347 |
| 7 rs77301988  | 16387646 G | 0.3059 | 3.58E-05 | chr:7:16237347 |



|              |            |         |          |                |
|--------------|------------|---------|----------|----------------|
| 7 rs4236287  | 16393464 C | 0.4031  | 3.66E-05 | chr:7:16237347 |
| 8 rs2129702  | 18656090 G | 17.92   | 5.50E-37 | chr:8:18651457 |
| 8 rs28696248 | 18656314 G | 52.48   | 4.66E-33 | chr:8:18651457 |
| 8 rs13261634 | 18653020 T | 121.9   | 6.50E-32 | chr:8:18651457 |
| 8 rs2632852  | 18656224 T | 13.25   | 7.93E-32 | chr:8:18651457 |
| 8 rs335256   | 18650834 C | 8.888   | 2.17E-30 | chr:8:18651457 |
| 8 rs10111304 | 18650904 C | 0.05162 | 1.10E-29 | chr:8:18651457 |
| 8 rs13254153 | 18655330 C | 9.798   | 2.56E-29 | chr:8:18651457 |
| 8 rs17467874 | 18652744 C | 0.1002  | 3.75E-29 | chr:8:18651457 |
| 8 rs11203998 | 18654206 C | 157.1   | 1.63E-28 | chr:8:18651457 |
| 8 rs10503635 | 18654329 T | 97.48   | 2.28E-28 | chr:8:18651457 |
| 8 rs11996790 | 18656238 C | 0.1264  | 3.96E-28 | chr:8:18651457 |
| 8 rs12549858 | 18654478 A | 0.1142  | 5.54E-28 | chr:8:18651457 |
| 8 rs60746929 | 18654480 T | 0.1183  | 6.60E-28 | chr:8:18651457 |
| 8 rs11777761 | 18652934 T | 0.01971 | 1.51E-27 | chr:8:18651457 |
| 8 rs60508084 | 18652637 T | 0.01971 | 1.51E-27 | chr:8:18651457 |
| 8 rs10503633 | 18653742 A | 0.02702 | 9.61E-27 | chr:8:18651457 |
| 8 rs10503634 | 18654293 T | 0.01271 | 1.01E-26 | chr:8:18651457 |
| 8 rs10094591 | 18653299 C | 0.02297 | 2.48E-26 | chr:8:18651457 |
| 8 rs11785249 | 18653313 A | 0.02297 | 2.48E-26 | chr:8:18651457 |
| 8 rs13250313 | 18652812 A | 9.313   | 1.28E-25 | chr:8:18651457 |
| 8 rs11780872 | 18651376 T | 248.6   | 4.16E-24 | chr:8:18651457 |
| 8 rs11780185 | 18651428 A | 248.1   | 4.35E-24 | chr:8:18651457 |
| 8 rs57290482 | 18652460 T | 248.1   | 4.35E-24 | chr:8:18651457 |
| 8 rs57931874 | 18652499 C | 248.1   | 4.35E-24 | chr:8:18651457 |
| 8 rs73199983 | 18628075 C | 9.282   | 1.79E-21 | chr:8:18651457 |
| 8 rs335234   | 18637444 C | 4.387   | 3.37E-21 | chr:8:18651457 |
| 8 rs335238   | 18642319 G | 7.631   | 2.45E-20 | chr:8:18651457 |
| 8 rs7824662  | 18635135 C | 0.2182  | 6.87E-19 | chr:8:18651457 |
| 8 rs6586764  | 18632093 T | 0.2611  | 1.97E-17 | chr:8:18651457 |
| 8 rs6586763  | 18632062 T | 0.2692  | 4.59E-17 | chr:8:18651457 |
| 8 rs11775676 | 18665492 C | 0.2428  | 8.67E-17 | chr:8:18651457 |
| 8 rs11774752 | 18664654 C | 0.2451  | 1.23E-16 | chr:8:18651457 |
| 8 rs12680447 | 18654653 T | 3.649   | 3.23E-16 | chr:8:18651457 |
| 8 rs335244   | 18645147 A | 0.3201  | 2.06E-15 | chr:8:18651457 |
| 8 rs2632845  | 18660720 C | 0.3046  | 2.56E-15 | chr:8:18651457 |
| 8 rs2632848  | 18659780 T | 0.3135  | 9.36E-15 | chr:8:18651457 |
| 8 rs79153013 | 18632687 T | 0.2705  | 1.63E-14 | chr:8:18651457 |
| 8 rs335232   | 18636126 A | 0.3419  | 2.09E-14 | chr:8:18651457 |
| 8 rs4921961  | 18638070 T | 6.049   | 2.57E-14 | chr:8:18651457 |
| 8 rs11775742 | 18665710 C | 0.287   | 2.82E-14 | chr:8:18651457 |
| 8 rs4921958  | 18634096 A | 6.046   | 2.99E-14 | chr:8:18651457 |
| 8 rs11786921 | 18657985 C | 0.2784  | 3.36E-14 | chr:8:18651457 |

|               |            |        |          |                |
|---------------|------------|--------|----------|----------------|
| 8 rs11786923  | 18658007 G | 0.2784 | 3.36E-14 | chr:8:18651457 |
| 8 rs11986109  | 18657632 C | 0.2784 | 3.36E-14 | chr:8:18651457 |
| 8 rs11993401  | 18657427 T | 0.2784 | 3.36E-14 | chr:8:18651457 |
| 8 rs11993467  | 18657661 T | 0.2784 | 3.36E-14 | chr:8:18651457 |
| 8 rs11997879  | 18657450 A | 0.2784 | 3.36E-14 | chr:8:18651457 |
| 8 rs13276530  | 18658346 G | 0.2784 | 3.36E-14 | chr:8:18651457 |
| 8 rs34059664  | 18657698 G | 0.2784 | 3.36E-14 | chr:8:18651457 |
| 8 rs11774165  | 18658950 G | 0.275  | 3.52E-14 | chr:8:18651457 |
| 8 rs73595755  | 18661545 T | 0.2728 | 4.80E-14 | chr:8:18651457 |
| 8 rs73595757  | 18661575 A | 0.2728 | 4.80E-14 | chr:8:18651457 |
| 8 rs4341203   | 18646154 C | 2.95   | 8.10E-14 | chr:8:18651457 |
| 8 rs36085278  | 18659470 G | 0.2943 | 1.13E-13 | chr:8:18651457 |
| 8 rs28656462  | 18606367 T | 3.105  | 1.90E-13 | chr:8:18651457 |
| 8 rs73666715  | 18639853 C | 5.186  | 1.96E-13 | chr:8:18651457 |
| 8 rs56062960  | 18637485 C | 5.178  | 2.15E-13 | chr:8:18651457 |
| 8 rs10108047  | 18650597 T | 10.88  | 2.18E-13 | chr:8:18651457 |
| 8 rs28791302  | 18629428 T | 3.545  | 2.23E-13 | chr:8:18651457 |
| 8 rs10086769  | 18664962 C | 7.006  | 2.91E-13 | chr:8:18651457 |
| 8 rs3988322   | 18614526 A | 0.3296 | 3.13E-13 | chr:8:18651457 |
| 8 rs74614121  | 18666968 G | 0.2725 | 3.46E-13 | chr:8:18651457 |
| 8 rs12676642  | 18637208 C | 4.59   | 4.15E-13 | chr:8:18651457 |
| 8 rs7836892   | 18635256 C | 4.579  | 4.23E-13 | chr:8:18651457 |
| 8 rs73199955  | 18607756 C | 3.059  | 5.14E-13 | chr:8:18651457 |
| 8 rs112738876 | 18633882 A | 4.524  | 5.69E-13 | chr:8:18651457 |
| 8 rs61255116  | 18663146 G | 0.2772 | 7.30E-13 | chr:8:18651457 |
| 8 rs67028998  | 18628162 A | 3.274  | 7.52E-13 | chr:8:18651457 |
| 8 rs10102692  | 18665202 C | 6.774  | 7.85E-13 | chr:8:18651457 |
| 8 rs79441119  | 18632939 G | 5.03   | 8.97E-13 | chr:8:18651457 |
| 8 rs12335185  | 18623326 G | 0.3599 | 9.19E-13 | chr:8:18651457 |
| 8 rs58325516  | 18662764 T | 0.2789 | 9.97E-13 | chr:8:18651457 |
| 8 rs2638625   | 18659269 C | 0.3593 | 1.07E-12 | chr:8:18651457 |
| 8 rs73595748  | 18658096 C | 0.2838 | 1.56E-12 | chr:8:18651457 |
| 8 rs73595749  | 18658207 C | 0.2838 | 1.56E-12 | chr:8:18651457 |
| 8 rs7831166   | 18639675 T | 8.521  | 1.64E-12 | chr:8:18651457 |
| 8 rs12682382  | 18637762 G | 8.511  | 1.66E-12 | chr:8:18651457 |
| 8 rs73595731  | 18647294 T | 0.2512 | 1.74E-12 | chr:8:18651457 |
| 8 rs11993322  | 18657165 G | 0.2857 | 2.09E-12 | chr:8:18651457 |
| 8 rs111241636 | 18623207 C | 8.004  | 2.50E-12 | chr:8:18651457 |
| 8 rs1386692   | 18658750 A | 0.368  | 2.75E-12 | chr:8:18651457 |
| 8 rs335248    | 18646733 C | 0.3818 | 3.19E-12 | chr:8:18651457 |
| 8 rs57557661  | 18637442 C | 4.094  | 3.44E-12 | chr:8:18651457 |
| 8 rs4921959   | 18635578 G | 4.086  | 3.44E-12 | chr:8:18651457 |
| 8 rs7830088   | 18636444 C | 4.086  | 3.44E-12 | chr:8:18651457 |

|               |            |        |          |                |
|---------------|------------|--------|----------|----------------|
| 8 rs12677280  | 18638660 C | 4.048  | 4.25E-12 | chr:8:18651457 |
| 8 rs10100475  | 18642757 G | 4.581  | 5.16E-12 | chr:8:18651457 |
| 8 rs73666724  | 18662204 A | 7.47   | 8.85E-12 | chr:8:18651457 |
| 8 rs73595733  | 18651305 G | 0.2715 | 1.54E-11 | chr:8:18651457 |
| 8 rs13439022  | 18636649 C | 3.717  | 2.79E-11 | chr:8:18651457 |
| 8 rs10093710  | 18611809 G | 2.582  | 3.03E-11 | chr:8:18651457 |
| 8 rs28502684  | 18608723 A | 2.594  | 3.33E-11 | chr:8:18651457 |
| 8 rs9792382   | 18620570 T | 0.3933 | 3.80E-11 | chr:8:18651457 |
| 8 rs335231    | 18629355 C | 0.401  | 3.89E-11 | chr:8:18651457 |
| 8 rs35764685  | 18661342 A | 6.042  | 4.02E-11 | chr:8:18651457 |
| 8 rs6994455   | 18618764 G | 2.573  | 4.38E-11 | chr:8:18651457 |
| 8 rs73595770  | 18665183 C | 0.321  | 4.75E-11 | chr:8:18651457 |
| 8 rs151157085 | 18608740 C | 2.573  | 4.84E-11 | chr:8:18651457 |
| 8 rs73595741  | 18654254 C | 0.2835 | 5.15E-11 | chr:8:18651457 |
| 8 rs335237    | 18641291 C | 0.4096 | 6.00E-11 | chr:8:18651457 |
| 8 rs2638650   | 18661521 T | 0.3951 | 6.89E-11 | chr:8:18651457 |
| 8 rs111514843 | 18608851 A | 2.543  | 6.90E-11 | chr:8:18651457 |
| 8 rs13255143  | 18661844 G | 5.238  | 7.27E-11 | chr:8:18651457 |
| 8 rs4921960   | 18635804 A | 2.478  | 8.27E-11 | chr:8:18651457 |
| 8 rs6987329   | 18616376 T | 0.4017 | 9.03E-11 | chr:8:18651457 |
| 8 rs7001013   | 18615974 C | 0.4017 | 9.03E-11 | chr:8:18651457 |
| 8 rs6998281   | 18618557 T | 0.4014 | 9.10E-11 | chr:8:18651457 |
| 8 rs7012496   | 18618427 C | 0.4014 | 9.10E-11 | chr:8:18651457 |
| 8 rs7012651   | 18618539 C | 0.4014 | 9.10E-11 | chr:8:18651457 |
| 8 rs1487745   | 18621332 C | 0.4056 | 1.10E-10 | chr:8:18651457 |
| 8 rs2638653   | 18666210 A | 0.4059 | 1.20E-10 | chr:8:18651457 |
| 8 rs78292221  | 18621253 A | 0.255  | 1.35E-10 | chr:8:18651457 |
| 8 rs7012633   | 18618503 C | 0.4104 | 1.39E-10 | chr:8:18651457 |
| 8 rs4921611   | 18617581 T | 0.4076 | 1.53E-10 | chr:8:18651457 |
| 8 rs6996801   | 18615696 G | 2.483  | 1.86E-10 | chr:8:18651457 |
| 8 rs73595761  | 18662625 G | 0.3369 | 2.43E-10 | chr:8:18651457 |
| 8 rs2638654   | 18666503 G | 0.4305 | 2.52E-10 | chr:8:18651457 |
| 8 rs12544207  | 18619231 A | 0.4144 | 4.04E-10 | chr:8:18651457 |
| 8 rs73199965  | 18616604 A | 2.431  | 4.48E-10 | chr:8:18651457 |
| 8 rs35809948  | 18647701 G | 3.322  | 4.61E-10 | chr:8:18651457 |
| 8 rs73666719  | 18648350 T | 3.948  | 8.05E-10 | chr:8:18651457 |
| 8 rs79076024  | 18614548 A | 0.3942 | 8.07E-10 | chr:8:18651457 |
| 8 rs73580705  | 18670105 C | 0.3569 | 8.30E-10 | chr:8:18651457 |
| 8 rs74936387  | 18649527 T | 3.931  | 9.70E-10 | chr:8:18651457 |
| 8 rs7814472   | 18632776 C | 2.912  | 9.97E-10 | chr:8:18651457 |
| 8 rs11988744  | 18617621 T | 0.2841 | 1.08E-09 | chr:8:18651457 |
| 8 rs10106772  | 18612008 A | 2.397  | 1.16E-09 | chr:8:18651457 |
| 8 rs78564754  | 18650296 C | 4.215  | 1.26E-09 | chr:8:18651457 |

|               |            |        |          |                |
|---------------|------------|--------|----------|----------------|
| 8 rs73199966  | 18616606 A | 2.351  | 1.42E-09 | chr:8:18651457 |
| 8 rs6586762   | 18615706 C | 0.3261 | 1.57E-09 | chr:8:18651457 |
| 8 rs4320588   | 18615090 G | 0.4327 | 2.82E-09 | chr:8:18651457 |
| 8 rs55884038  | 18618142 C | 2.307  | 3.14E-09 | chr:8:18651457 |
| 8 rs7012188   | 18618272 T | 2.307  | 3.14E-09 | chr:8:18651457 |
| 8 rs335216    | 18627417 T | 0.4322 | 3.22E-09 | chr:8:18651457 |
| 8 rs79683508  | 18649812 A | 4.074  | 3.32E-09 | chr:8:18651457 |
| 8 rs28702887  | 18609522 C | 2.288  | 3.88E-09 | chr:8:18651457 |
| 8 rs10110943  | 18612612 A | 2.258  | 7.06E-09 | chr:8:18651457 |
| 8 rs73670009  | 18611236 A | 4.514  | 7.77E-09 | chr:8:18651457 |
| 8 rs73670007  | 18605496 C | 4.272  | 1.35E-08 | chr:8:18651457 |
| 8 rs10097648  | 18606611 T | 0.4745 | 2.38E-08 | chr:8:18651457 |
| 8 rs74525630  | 18612870 A | 4.657  | 2.71E-08 | chr:8:18651457 |
| 8 rs4921956   | 18620761 A | 2.254  | 8.87E-08 | chr:8:18651457 |
| 8 rs73670008  | 18606909 C | 3.603  | 1.18E-07 | chr:8:18651457 |
| 8 rs2306825   | 18656805 A | 2.445  | 1.38E-07 | chr:8:18651457 |
| 8 rs11778064  | 18665597 T | 2.578  | 1.49E-07 | chr:8:18651457 |
| 8 rs60806935  | 18656644 T | 4.696  | 2.92E-07 | chr:8:18651457 |
| 8 rs73666721  | 18648435 T | 3.54   | 5.69E-07 | chr:8:18651457 |
| 8 rs335243    | 18643985 C | 19.14  | 6.73E-07 | chr:8:18651457 |
| 8 rs335240    | 18642610 G | 19.03  | 7.02E-07 | chr:8:18651457 |
| 8 rs7839578   | 18640791 A | 2.117  | 7.73E-07 | chr:8:18651457 |
| 8 rs79655476  | 18630599 A | 0.3788 | 1.07E-06 | chr:8:18651457 |
| 8 rs335249    | 18646833 T | 18.05  | 1.11E-06 | chr:8:18651457 |
| 8 rs335253    | 18648477 T | 4.18   | 1.19E-06 | chr:8:18651457 |
| 8 rs111637875 | 18648034 G | 0.3032 | 1.20E-06 | chr:8:18651457 |
| 8 rs335242    | 18642711 A | 17.85  | 1.25E-06 | chr:8:18651457 |
| 8 rs77385050  | 18651205 C | 0.2449 | 1.42E-06 | chr:8:18651457 |
| 8 rs79606369  | 18657012 G | 0.3344 | 1.43E-06 | chr:8:18651457 |
| 8 rs111852071 | 18650213 C | 0.2627 | 1.55E-06 | chr:8:18651457 |
| 8 rs335226    | 18632945 T | 0.5059 | 1.73E-06 | chr:8:18651457 |
| 8 rs73593598  | 18627240 C | 0.2185 | 2.00E-06 | chr:8:18651457 |
| 8 rs11988686  | 18617442 C | 0.5349 | 2.90E-06 | chr:8:18651457 |
| 8 rs335233    | 18636629 A | 4.75   | 3.36E-06 | chr:8:18651457 |
| 8 rs59437212  | 18610782 T | 1.844  | 3.90E-06 | chr:8:18651457 |
| 8 rs335255    | 18649785 C | 3.565  | 4.12E-06 | chr:8:18651457 |
| 8 rs565693019 | 18609240 A | 2.346  | 4.20E-06 | chr:8:18651457 |
| 8 rs2638621   | 18656416 T | 15.15  | 5.01E-06 | chr:8:18651457 |
| 8 rs718418    | 18552276 T | 0.5493 | 5.03E-06 | chr:8:18651457 |
| 8 rs7000474   | 18551363 G | 0.5508 | 5.32E-06 | chr:8:18651457 |
| 8 rs182460095 | 18610167 A | 3.365  | 5.74E-06 | chr:8:18651457 |
| 8 rs57625991  | 18646741 G | 2.767  | 6.05E-06 | chr:8:18651457 |
| 8 rs17127179  | 18632112 T | 2.179  | 6.11E-06 | chr:8:18651457 |

|               |            |        |          |                |
|---------------|------------|--------|----------|----------------|
| 8 rs77553985  | 18629003 C | 0.2493 | 6.27E-06 | chr:8:18651457 |
| 8 rs73199994  | 18646365 T | 0.3874 | 6.41E-06 | chr:8:18651457 |
| 8 rs335254    | 18649213 C | 3.354  | 6.69E-06 | chr:8:18651457 |
| 8 rs7837043   | 18577584 C | 2.637  | 6.94E-06 | chr:8:18651457 |
| 8 rs2016076   | 18552328 C | 0.5546 | 7.38E-06 | chr:8:18651457 |
| 8 rs77492095  | 18635805 T | 0.2962 | 7.38E-06 | chr:8:18651457 |
| 8 rs73593542  | 18593078 T | 2.432  | 8.99E-06 | chr:8:18651457 |
| 8 rs10503636  | 18654794 C | 0.2952 | 1.09E-05 | chr:8:18651457 |
| 8 rs335252    | 18647969 C | 2.503  | 1.17E-05 | chr:8:18651457 |
| 8 rs2632846   | 18660016 C | 2.041  | 1.19E-05 | chr:8:18651457 |
| 8 rs10503629  | 18556729 T | 0.5403 | 1.23E-05 | chr:8:18651457 |
| 8 rs57109550  | 18581347 C | 2.62   | 1.37E-05 | chr:8:18651457 |
| 8 rs7837572   | 18665140 T | 1.802  | 1.38E-05 | chr:8:18651457 |
| 8 rs77656612  | 18644639 C | 0.2622 | 1.42E-05 | chr:8:18651457 |
| 8 rs1492285   | 18655251 A | 22.74  | 1.51E-05 | chr:8:18651457 |
| 8 rs62495853  | 18604017 A | 0.5187 | 1.64E-05 | chr:8:18651457 |
| 8 rs1976160   | 18366489 C | 1.804  | 1.67E-05 | chr:8:18651457 |
| 8 rs1487748   | 18580153 A | 2.55   | 1.75E-05 | chr:8:18651457 |
| 8 rs73666698  | 18578566 A | 2.55   | 1.75E-05 | chr:8:18651457 |
| 8 rs17127182  | 18645394 C | 0.2409 | 1.79E-05 | chr:8:18651457 |
| 8 rs73595725  | 18643037 C | 0.2409 | 1.79E-05 | chr:8:18651457 |
| 8 rs150105022 | 18625560 A | 0.2725 | 1.85E-05 | chr:8:18651457 |
| 8 rs78614964  | 18555581 T | 0.542  | 1.91E-05 | chr:8:18651457 |
| 8 rs78680425  | 18651256 T | 0.2615 | 2.02E-05 | chr:8:18651457 |
| 8 rs1826767   | 18366560 G | 1.79   | 2.06E-05 | chr:8:18651457 |
| 8 rs17383368  | 18655746 T | 0.3016 | 2.16E-05 | chr:8:18651457 |
| 8 rs111916415 | 18656221 T | 0.3042 | 2.31E-05 | chr:8:18651457 |
| 8 rs35884486  | 18656382 C | 0.3042 | 2.31E-05 | chr:8:18651457 |
| 8 rs335225    | 18633305 A | 21.1   | 2.37E-05 | chr:8:18651457 |
| 8 rs66672830  | 18601318 C | 2.343  | 2.38E-05 | chr:8:18651457 |
| 8 rs1487765   | 18543277 T | 0.5637 | 2.39E-05 | chr:8:18651457 |
| 8 rs233197    | 18640628 A | 20.88  | 2.51E-05 | chr:8:18651457 |
| 8 rs527270    | 37059026 A | 41.74  | 6.60E-47 | chr:8:37050885 |
| 8 rs519407    | 37062657 T | 23.83  | 6.14E-43 | chr:8:37050885 |
| 8 rs574667    | 37070657 C | 21.89  | 6.97E-42 | chr:8:37050885 |
| 8 rs575360    | 37072211 T | 21.89  | 6.97E-42 | chr:8:37050885 |
| 8 rs507136    | 37066554 C | 21.23  | 1.37E-41 | chr:8:37050885 |
| 8 rs562346    | 37058605 C | 30.74  | 1.70E-41 | chr:8:37050885 |
| 8 rs514719    | 37063207 T | 20.69  | 1.98E-41 | chr:8:37050885 |
| 8 rs56097134  | 37067371 G | 20.6   | 2.27E-41 | chr:8:37050885 |
| 8 rs551464    | 37068041 T | 20.15  | 3.59E-41 | chr:8:37050885 |
| 8 rs496362    | 37073368 T | 18.84  | 2.92E-40 | chr:8:37050885 |
| 8 rs526765    | 37080954 A | 18.25  | 3.07E-40 | chr:8:37050885 |

|              |            |        |          |                |
|--------------|------------|--------|----------|----------------|
| 8 rs2697894  | 37076650 C | 17.67  | 7.87E-40 | chr:8:37050885 |
| 8 rs2843834  | 37078884 T | 17.67  | 7.87E-40 | chr:8:37050885 |
| 8 rs501761   | 37073910 C | 17.67  | 7.87E-40 | chr:8:37050885 |
| 8 rs547855   | 37078106 A | 17.67  | 7.87E-40 | chr:8:37050885 |
| 8 rs575589   | 37077120 A | 17.67  | 7.87E-40 | chr:8:37050885 |
| 8 rs2843835  | 37078820 T | 17.37  | 8.11E-40 | chr:8:37050885 |
| 8 rs571788   | 37078413 T | 17.41  | 1.29E-39 | chr:8:37050885 |
| 8 rs473160   | 37073161 C | 17.37  | 1.47E-39 | chr:8:37050885 |
| 8 rs500960   | 37073841 G | 17.37  | 1.47E-39 | chr:8:37050885 |
| 8 rs473969   | 37055831 G | 38.33  | 2.39E-39 | chr:8:37050885 |
| 8 rs571824   | 37077544 G | 16.98  | 3.28E-39 | chr:8:37050885 |
| 8 rs577113   | 37077012 G | 16.98  | 3.28E-39 | chr:8:37050885 |
| 8 rs491607   | 37054032 G | 36.82  | 9.26E-39 | chr:8:37050885 |
| 8 rs510561   | 37055719 T | 36.82  | 9.26E-39 | chr:8:37050885 |
| 8 rs240524   | 37088271 T | 15.64  | 1.83E-38 | chr:8:37050885 |
| 8 rs495428   | 37079790 A | 15.45  | 3.71E-38 | chr:8:37050885 |
| 8 rs509011   | 37084128 C | 15.45  | 3.71E-38 | chr:8:37050885 |
| 8 rs525751   | 37080834 A | 15.45  | 3.71E-38 | chr:8:37050885 |
| 8 rs579858   | 37072747 C | 15.45  | 3.71E-38 | chr:8:37050885 |
| 8 rs493477   | 37053824 C | 34.09  | 6.03E-38 | chr:8:37050885 |
| 8 rs539797   | 37077235 G | 15.25  | 6.35E-38 | chr:8:37050885 |
| 8 rs240521   | 37086908 A | 14.8   | 1.43E-37 | chr:8:37050885 |
| 8 rs240522   | 37087609 T | 14.8   | 1.43E-37 | chr:8:37050885 |
| 8 rs240518   | 37085509 C | 13.9   | 6.66E-37 | chr:8:37050885 |
| 8 rs493539   | 37069825 G | 19.7   | 6.75E-28 | chr:8:37050885 |
| 8 rs567469   | 37064847 G | 6.061  | 5.92E-26 | chr:8:37050885 |
| 8 rs4739484  | 37082138 A | 16.48  | 1.12E-24 | chr:8:37050885 |
| 8 rs28452965 | 37062127 C | 0.2204 | 2.88E-20 | chr:8:37050885 |
| 8 rs537583   | 37058174 G | 815.5  | 2.55E-19 | chr:8:37050885 |
| 8 rs473731   | 37082568 A | 0.2458 | 1.38E-18 | chr:8:37050885 |
| 8 rs494545   | 37079696 T | 0.2458 | 1.38E-18 | chr:8:37050885 |
| 8 rs543162   | 37078419 T | 0.2458 | 1.38E-18 | chr:8:37050885 |
| 8 rs2697887  | 37078928 A | 0.2462 | 1.53E-18 | chr:8:37050885 |
| 8 rs553163   | 37085269 G | 0.2458 | 1.63E-18 | chr:8:37050885 |
| 8 rs240520   | 37086850 G | 0.2458 | 1.98E-18 | chr:8:37050885 |
| 8 rs240523   | 37087732 C | 0.2458 | 1.98E-18 | chr:8:37050885 |
| 8 rs6468397  | 37087364 C | 0.2689 | 6.08E-18 | chr:8:37050885 |
| 8 rs7014438  | 37088100 G | 0.2689 | 6.08E-18 | chr:8:37050885 |
| 8 rs10504000 | 37075320 A | 0.2641 | 6.31E-18 | chr:8:37050885 |
| 8 rs7010606  | 37088266 G | 0.2698 | 1.18E-17 | chr:8:37050885 |
| 8 rs542245   | 37062505 T | 465.5  | 4.40E-17 | chr:8:37050885 |
| 8 rs10107112 | 37079810 G | 0.2793 | 5.93E-17 | chr:8:37050885 |
| 8 rs6993545  | 37084686 G | 0.3013 | 5.02E-16 | chr:8:37050885 |

|               |            |        |          |                |
|---------------|------------|--------|----------|----------------|
| 8 rs7012524   | 37084943 T | 0.3035 | 7.11E-16 | chr:8:37050885 |
| 8 rs7818972   | 37083118 C | 0.3051 | 7.98E-16 | chr:8:37050885 |
| 8 rs74571086  | 37049958 G | 18.68  | 1.22E-15 | chr:8:37050885 |
| 8 rs10105918  | 37084184 T | 0.3108 | 1.41E-15 | chr:8:37050885 |
| 8 rs10092203  | 37084145 G | 0.3164 | 2.43E-15 | chr:8:37050885 |
| 8 rs6468396   | 37083079 T | 0.3164 | 2.43E-15 | chr:8:37050885 |
| 8 rs34456013  | 37049781 A | 22.25  | 2.78E-14 | chr:8:37050885 |
| 8 rs990711    | 37058871 T | 0.3146 | 4.13E-14 | chr:8:37050885 |
| 8 rs16886251  | 37086493 A | 18.8   | 4.37E-14 | chr:8:37050885 |
| 8 rs113776709 | 37057199 A | 15.4   | 7.73E-14 | chr:8:37050885 |
| 8 rs13439621  | 37058555 C | 0.2761 | 1.19E-13 | chr:8:37050885 |
| 8 rs2843836   | 37076582 C | 0.3095 | 8.16E-13 | chr:8:37050885 |
| 8 rs115677542 | 37056997 A | 14.9   | 2.59E-12 | chr:8:37050885 |
| 8 rs41464350  | 37061196 T | 14.6   | 3.80E-12 | chr:8:37050885 |
| 8 rs78334371  | 37053704 T | 14.27  | 6.37E-12 | chr:8:37050885 |
| 8 rs75081645  | 37065559 C | 18.81  | 3.40E-11 | chr:8:37050885 |
| 8 rs9942819   | 37077283 G | 18.81  | 3.40E-11 | chr:8:37050885 |
| 8 rs116544019 | 37099310 A | 4.969  | 4.58E-11 | chr:8:37050885 |
| 8 rs511629    | 37060493 T | 8.663  | 6.14E-11 | chr:8:37050885 |
| 8 rs10098775  | 37027048 C | 3.014  | 2.77E-10 | chr:8:37050885 |
| 8 rs16886107  | 37021020 A | 3.014  | 2.77E-10 | chr:8:37050885 |
| 8 rs16886109  | 37022009 C | 3.014  | 2.77E-10 | chr:8:37050885 |
| 8 rs28445234  | 37025250 T | 3.014  | 2.77E-10 | chr:8:37050885 |
| 8 rs10088440  | 37034372 T | 2.966  | 3.49E-10 | chr:8:37050885 |
| 8 rs9886466   | 37123919 T | 3.617  | 3.64E-10 | chr:8:37050885 |
| 8 rs16886104  | 37018915 A | 2.976  | 3.90E-10 | chr:8:37050885 |
| 8 rs146959665 | 37031849 G | 2.928  | 4.78E-10 | chr:8:37050885 |
| 8 rs471141    | 37067066 G | 3.522  | 1.26E-09 | chr:8:37050885 |
| 8 rs490827    | 37079275 G | 3.522  | 1.26E-09 | chr:8:37050885 |
| 8 rs526525    | 37080867 C | 3.522  | 1.26E-09 | chr:8:37050885 |
| 8 rs16886139  | 37037716 A | 13.96  | 2.82E-09 | chr:8:37050885 |
| 8 rs16886310  | 37117101 A | 5.213  | 3.19E-09 | chr:8:37050885 |
| 8 rs10109088  | 37114613 G | 5.879  | 3.53E-09 | chr:8:37050885 |
| 8 rs114445131 | 37119249 T | 5.879  | 3.53E-09 | chr:8:37050885 |
| 8 rs116372178 | 37119598 A | 5.879  | 3.53E-09 | chr:8:37050885 |
| 8 rs9642715   | 37038245 T | 0.3938 | 4.34E-09 | chr:8:37050885 |
| 8 rs115350687 | 37098527 A | 5.102  | 4.41E-09 | chr:8:37050885 |
| 8 rs16886292  | 37103781 G | 5.129  | 4.71E-09 | chr:8:37050885 |
| 8 rs76313110  | 37107769 T | 21.39  | 7.33E-09 | chr:8:37050885 |
| 8 rs12675666  | 37166328 T | 3.037  | 7.90E-09 | chr:8:37050885 |
| 8 rs77533443  | 37107398 G | 20.82  | 9.26E-09 | chr:8:37050885 |
| 8 rs16886110  | 37022683 G | 10.86  | 1.08E-08 | chr:8:37050885 |
| 8 rs17388043  | 37069029 A | 20.36  | 1.28E-08 | chr:8:37050885 |

|               |            |        |          |                |
|---------------|------------|--------|----------|----------------|
| 8 rs114786140 | 37097021 T | 20.06  | 1.40E-08 | chr:8:37050885 |
| 8 rs114825594 | 37100090 G | 20.06  | 1.40E-08 | chr:8:37050885 |
| 8 rs4739483   | 37076718 C | 0.3738 | 1.59E-08 | chr:8:37050885 |
| 8 rs479974    | 37039730 C | 6.111  | 2.39E-08 | chr:8:37050885 |
| 8 rs16886161  | 37067053 A | 18.88  | 3.14E-08 | chr:8:37050885 |
| 8 rs511544    | 37076504 A | 0.4854 | 4.81E-08 | chr:8:37050885 |
| 8 rs16886316  | 37118921 C | 2.154  | 5.61E-08 | chr:8:37050885 |
| 8 rs116055059 | 37060727 A | 25.57  | 8.39E-08 | chr:8:37050885 |
| 8 rs116182831 | 37058103 C | 25.57  | 8.39E-08 | chr:8:37050885 |
| 8 rs116371587 | 37061780 C | 25.57  | 8.39E-08 | chr:8:37050885 |
| 8 rs116452276 | 37058758 T | 25.57  | 8.39E-08 | chr:8:37050885 |
| 8 rs16886146  | 37054359 G | 25.57  | 8.39E-08 | chr:8:37050885 |
| 8 rs11985899  | 37083414 C | 16.88  | 9.78E-08 | chr:8:37050885 |
| 8 rs80144412  | 37001208 G | 8.271  | 1.04E-07 | chr:8:37050885 |
| 8 rs490027    | 37079215 T | 0.4959 | 1.04E-07 | chr:8:37050885 |
| 8 rs80074131  | 37088052 A | 24.74  | 1.06E-07 | chr:8:37050885 |
| 8 rs532022    | 37074938 C | 0.4979 | 1.32E-07 | chr:8:37050885 |
| 8 rs557361    | 37075388 G | 0.4979 | 1.32E-07 | chr:8:37050885 |
| 8 rs114935497 | 37075718 A | 23.8   | 1.56E-07 | chr:8:37050885 |
| 8 rs115614079 | 37073903 A | 23.8   | 1.56E-07 | chr:8:37050885 |
| 8 rs16875922  | 37048590 T | 23.8   | 1.56E-07 | chr:8:37050885 |
| 8 rs16886184  | 37075925 C | 23.8   | 1.56E-07 | chr:8:37050885 |
| 8 rs16886208  | 37078627 A | 23.8   | 1.56E-07 | chr:8:37050885 |
| 8 rs16886221  | 37079378 T | 23.8   | 1.56E-07 | chr:8:37050885 |
| 8 rs16886224  | 37079569 G | 23.8   | 1.56E-07 | chr:8:37050885 |
| 8 rs16886246  | 37083636 C | 23.8   | 1.56E-07 | chr:8:37050885 |
| 8 rs534138    | 37038476 T | 4.818  | 1.92E-07 | chr:8:37050885 |
| 8 rs540668    | 37037736 G | 2.222  | 2.01E-07 | chr:8:37050885 |
| 8 rs240517    | 37085448 G | 0.505  | 2.28E-07 | chr:8:37050885 |
| 8 rs16886046  | 37008070 A | 3.106  | 2.32E-07 | chr:8:37050885 |
| 8 rs41523746  | 37038507 A | 2.891  | 3.14E-07 | chr:8:37050885 |
| 8 rs7016400   | 37041193 A | 2.904  | 3.48E-07 | chr:8:37050885 |
| 8 rs74815246  | 37052254 A | 21.46  | 3.66E-07 | chr:8:37050885 |
| 8 rs16875904  | 37042654 G | 2.86   | 4.38E-07 | chr:8:37050885 |
| 8 rs536020    | 37038246 A | 4.224  | 6.26E-07 | chr:8:37050885 |
| 8 rs114890013 | 37127765 C | 14.14  | 7.67E-07 | chr:8:37050885 |
| 8 rs116120465 | 37124624 T | 14.14  | 7.67E-07 | chr:8:37050885 |
| 8 rs79314359  | 37127740 A | 14.14  | 7.67E-07 | chr:8:37050885 |
| 8 rs77212681  | 37075679 C | 35.61  | 1.04E-06 | chr:8:37050885 |
| 8 rs79340345  | 37101154 C | 19.46  | 1.11E-06 | chr:8:37050885 |
| 8 rs78663547  | 37171192 T | 13.51  | 1.26E-06 | chr:8:37050885 |
| 8 rs114268034 | 37128838 C | 19.06  | 1.36E-06 | chr:8:37050885 |
| 8 rs115621925 | 37128756 A | 19.06  | 1.36E-06 | chr:8:37050885 |



|                         |            |        |          |                |
|-------------------------|------------|--------|----------|----------------|
| 8 rs114935936           | 37091894 A | 19     | 1.39E-06 | chr:8:37050885 |
| 8 rs116729280           | 37075079 T | 10.24  | 1.45E-06 | chr:8:37050885 |
| 8 rs573219083           | 37037395 T | 2.337  | 1.98E-06 | chr:8:37050885 |
| 8 rs28631916            | 37085115 T | 0.5427 | 2.30E-06 | chr:8:37050885 |
| 8 rs115838954           | 37035473 T | 9.52   | 3.34E-06 | chr:8:37050885 |
| 8 rs140102131           | 36996904 T | 9.591  | 3.34E-06 | chr:8:37050885 |
| 8 rs16886306            | 37114117 C | 4.481  | 3.74E-06 | chr:8:37050885 |
| 8 rs16886317            | 37119197 C | 4.481  | 3.74E-06 | chr:8:37050885 |
| 8 rs76369532            | 37109388 A | 4.481  | 3.74E-06 | chr:8:37050885 |
| 8 rs7843213;rs565336389 | 37045329 A | 0.4494 | 3.79E-06 | chr:8:37050885 |
| 8 rs240519              | 37085713 C | 0.5509 | 3.89E-06 | chr:8:37050885 |
| 8 rs114187905           | 37354897 T | 4.435  | 4.01E-06 | chr:8:37050885 |
| 8 rs10092766            | 37141088 A | 4.806  | 4.50E-06 | chr:8:37050885 |
| 8 rs10098526            | 37129657 A | 4.806  | 4.50E-06 | chr:8:37050885 |
| 8 rs13439666            | 37125761 A | 4.806  | 4.50E-06 | chr:8:37050885 |
| 8 rs139794406           | 37131663 T | 4.806  | 4.50E-06 | chr:8:37050885 |
| 8 rs150650554           | 37131662 T | 4.806  | 4.50E-06 | chr:8:37050885 |
| 8 rs143997725           | 37345866 T | 3.969  | 7.63E-06 | chr:8:37050885 |
| 8 rs576019              | 37044187 T | 2.075  | 7.91E-06 | chr:8:37050885 |
| 8 rs12334605            | 37045753 G | 2.084  | 8.00E-06 | chr:8:37050885 |
| 8 rs7835227             | 37076680 T | 0.2916 | 8.29E-06 | chr:8:37050885 |
| 8 rs405459              | 37170113 A | 1.853  | 8.84E-06 | chr:8:37050885 |
| 8 rs12334611            | 37045986 C | 2.061  | 9.27E-06 | chr:8:37050885 |
| 8 rs16875909            | 37043868 T | 2.058  | 1.15E-05 | chr:8:37050885 |
| 8 rs116542566           | 37064744 T | 0.3489 | 1.18E-05 | chr:8:37050885 |
| 8 rs75672461            | 37053797 A | 24.46  | 1.22E-05 | chr:8:37050885 |
| 8 rs16886141            | 37038562 T | 0.337  | 1.51E-05 | chr:8:37050885 |
| 8 rs4739476             | 37046991 A | 2.003  | 1.60E-05 | chr:8:37050885 |
| 8 rs72639371            | 37210037 G | 2.129  | 1.68E-05 | chr:8:37050885 |
| 8 rs140888150           | 37351085 T | 3.591  | 1.69E-05 | chr:8:37050885 |
| 8 rs562322              | 37036994 C | 0.5799 | 2.25E-05 | chr:8:37050885 |
| 8 rs4237086             | 37088022 G | 0.3844 | 2.70E-05 | chr:8:37050885 |
| 8 rs59787506            | 37113679 T | 0.4626 | 2.86E-05 | chr:8:37050885 |
| 8 rs73595262            | 37108512 A | 0.4626 | 2.86E-05 | chr:8:37050885 |
| 8 rs73595266            | 37108993 T | 0.4626 | 2.86E-05 | chr:8:37050885 |
| 8 rs73595270            | 37109513 T | 0.4626 | 2.86E-05 | chr:8:37050885 |
| 8 rs73673154            | 37112782 A | 0.4626 | 2.86E-05 | chr:8:37050885 |
| 8 rs3958649             | 37174113 A | 0.3353 | 2.87E-05 | chr:8:37050885 |
| 8 rs11776866            | 37137268 A | 3.483  | 2.91E-05 | chr:8:37050885 |
| 8 rs7814754             | 37128956 A | 3.483  | 2.91E-05 | chr:8:37050885 |
| 8 rs75881701            | 37072693 A | 0.4192 | 3.17E-05 | chr:8:37050885 |
| 8 rs80257076            | 37072523 T | 0.4192 | 3.17E-05 | chr:8:37050885 |
| 8 rs111999509           | 7355419 A  | 32.55  | 3.46E-28 | chr:8:7355397  |

|               |           |        |          |               |
|---------------|-----------|--------|----------|---------------|
| 8 rs62639800  | 7372247 T | 5.349  | 1.06E-27 | chr:8:7355397 |
| 8 rs76206197  | 7371208 C | 4.992  | 1.79E-27 | chr:8:7355397 |
| 8 rs74787406  | 7360893 G | 41.41  | 4.08E-27 | chr:8:7355397 |
| 8 rs562847555 | 7354734 A | 39.85  | 3.83E-23 | chr:8:7355397 |
| 8 rs28548808  | 7341290 C | 6.647  | 4.43E-21 | chr:8:7355397 |
| 8 rs2737983   | 7365975 A | 4.492  | 8.50E-20 | chr:8:7355397 |
| 8 rs144460864 | 7336269 C | 5.157  | 2.94E-18 | chr:8:7355397 |
| 8 rs148764079 | 7370001 A | 8.299  | 6.67E-17 | chr:8:7355397 |
| 8 rs544637792 | 7352785 C | 4.096  | 8.65E-17 | chr:8:7355397 |
| 8 rs370867537 | 7371467 A | 5.623  | 2.80E-16 | chr:8:7355397 |
| 8 rs140959028 | 7443705 T | 4.32   | 1.01E-13 | chr:8:7355397 |
| 8 rs141973795 | 7663771 A | 4.061  | 6.89E-13 | chr:8:7355397 |
| 8 rs566529784 | 7360744 G | 5.428  | 2.07E-11 | chr:8:7355397 |
| 8 rs76122916  | 7455141 C | 2.745  | 4.15E-11 | chr:8:7355397 |
| 8 rs74375471  | 7455070 A | 2.655  | 8.94E-11 | chr:8:7355397 |
| 8 rs191332947 | 7364475 G | 47.17  | 2.66E-10 | chr:8:7355397 |
| 8 rs189903431 | 7373837 C | 21.64  | 1.87E-08 | chr:8:7355397 |
| 8 rs369910328 | 7454478 G | 2.183  | 2.55E-08 | chr:8:7355397 |
| 8 rs527934971 | 7467707 A | 3.247  | 5.10E-08 | chr:8:7355397 |
| 8 rs149317882 | 7781800 T | 14.7   | 5.39E-08 | chr:8:7355397 |
| 8 rs62639797  | 7367263 G | 2.185  | 2.38E-07 | chr:8:7355397 |
| 8 rs201256319 | 7353480 T | 0.2541 | 3.11E-07 | chr:8:7355397 |
| 8 rs115213243 | 7334665 G | 5.814  | 3.73E-07 | chr:8:7355397 |
| 8 rs529245338 | 7553177 G | 2.929  | 3.98E-07 | chr:8:7355397 |
| 8 rs572078497 | 7448887 T | 0.328  | 4.66E-07 | chr:8:7355397 |
| 8 rs552674485 | 7375209 G | 2.164  | 7.34E-07 | chr:8:7355397 |
| 8 rs77333779  | 7375207 A | 2.164  | 7.34E-07 | chr:8:7355397 |
| 8 rs141402280 | 7388108 A | 0.3034 | 1.02E-06 | chr:8:7355397 |
| 8 rs76675735  | 7463745 G | 2.039  | 1.13E-06 | chr:8:7355397 |
| 8 rs148154904 | 7385844 T | 0.3588 | 1.18E-06 | chr:8:7355397 |
| 8 rs60249228  | 7693605 C | 2.404  | 2.22E-06 | chr:8:7355397 |
| 8 rs11786478  | 7388186 A | 0.3556 | 3.97E-06 | chr:8:7355397 |
| 8 rs536198816 | 7674567 G | 1.862  | 6.31E-06 | chr:8:7355397 |
| 8 rs369528899 | 7154084 G | 2.072  | 1.40E-05 | chr:8:7355397 |
| 8 rs553568302 | 7046965 G | 10.99  | 1.73E-05 | chr:8:7355397 |
| 8 rs569623292 | 7292914 T | 2.687  | 1.85E-05 | chr:8:7355397 |
| 8 rs145467665 | 7009245 T | 4.518  | 1.92E-05 | chr:8:7355397 |
| 8 rs141701100 | 7684747 A | 1.776  | 2.10E-05 | chr:8:7355397 |
| 8 rs150530577 | 7684750 T | 1.776  | 2.10E-05 | chr:8:7355397 |
| 8 rs77605644  | 7448886 T | 0.3191 | 3.27E-05 | chr:8:7355397 |
| 8 rs77049685  | 7723630 T | 1.77   | 4.88E-05 | chr:8:7355397 |
| 8 rs62636823  | 7239240 T | 0.3144 | 5.06E-05 | chr:8:7355397 |
| 8 rs2680513   | 7691765 T | 1.793  | 5.65E-05 | chr:8:7355397 |

**Table S3: Associations of hiSNPs with polymorphic HERV-K insertions with Amerindian super popul**

| CHROM | RSID       | POS       | ALT | OR     | P-VAL    | HERV             |
|-------|------------|-----------|-----|--------|----------|------------------|
| 10    | rs1854455  | 135354874 | A   | 0.2105 | 6.41E-08 | chr:10:135355522 |
| 10    | rs4615946  | 135355394 | G   | 0.2105 | 6.41E-08 | chr:10:135355522 |
| 10    | rs8192781  | 135354251 | T   | 0.2105 | 6.41E-08 | chr:10:135355522 |
| 10    | rs2480256  | 135352514 | A   | 0.2097 | 6.46E-08 | chr:10:135355522 |
| 10    | rs10857739 | 135352697 | G   | 0.2101 | 6.49E-08 | chr:10:135355522 |
| 10    | rs8192780  | 135354125 | T   | 0.2101 | 6.49E-08 | chr:10:135355522 |
| 10    | rs1952467  | 135353499 | T   | 0.2169 | 9.80E-08 | chr:10:135355522 |
| 10    | rs2480258  | 135352100 | T   | 0.2169 | 9.80E-08 | chr:10:135355522 |
| 10    | rs2480259  | 135352076 | A   | 0.2169 | 9.80E-08 | chr:10:135355522 |
| 10    | rs2515642  | 135352013 | C   | 0.2169 | 9.80E-08 | chr:10:135355522 |
| 10    | rs2515644  | 135353079 | A   | 0.2169 | 9.80E-08 | chr:10:135355522 |
| 10    | rs4838771  | 135355007 | C   | 0.2211 | 1.24E-07 | chr:10:135355522 |
| 10    | rs2987794  | 135378612 | G   | 0.2195 | 1.29E-07 | chr:10:135355522 |
| 10    | rs2480255  | 135352855 | T   | 0.2289 | 1.61E-07 | chr:10:135355522 |
| 10    | rs8192776  | 135348187 | T   | 0.2367 | 1.70E-07 | chr:10:135355522 |
| 10    | rs4838693  | 135354714 | G   | 0.2325 | 1.91E-07 | chr:10:135355522 |
| 10    | rs61868336 | 135350060 | C   | 0.2386 | 2.00E-07 | chr:10:135355522 |
| 10    | rs4240522  | 135355557 | C   | 0.2458 | 2.91E-07 | chr:10:135355522 |
| 10    | rs4363513  | 135355534 | A   | 0.2458 | 2.91E-07 | chr:10:135355522 |
| 10    | rs4542321  | 135355481 | T   | 0.2458 | 2.91E-07 | chr:10:135355522 |
| 10    | rs1536826  | 135357239 | A   | 0.2415 | 2.93E-07 | chr:10:135355522 |
| 10    | rs2480254  | 135352869 | T   | 0.2455 | 2.98E-07 | chr:10:135355522 |
| 10    | rs2480257  | 135352509 | T   | 0.2451 | 3.01E-07 | chr:10:135355522 |
| 10    | rs10857768 | 135402703 | G   | 0.2495 | 3.26E-07 | chr:10:135355522 |
| 10    | rs3020513  | 135364915 | T   | 0.2462 | 3.33E-07 | chr:10:135355522 |
| 10    | rs2987792  | 135371466 | T   | 0.2459 | 3.34E-07 | chr:10:135355522 |
| 10    | rs4512750  | 135358664 | T   | 0.2459 | 3.34E-07 | chr:10:135355522 |
| 10    | rs3020501  | 135381592 | C   | 0.2485 | 4.02E-07 | chr:10:135355522 |
| 10    | rs11101867 | 135400250 | A   | 0.2554 | 4.29E-07 | chr:10:135355522 |
| 10    | rs11101890 | 135421321 | A   | 0.2554 | 4.29E-07 | chr:10:135355522 |
| 10    | rs4129223  | 135403948 | G   | 0.2554 | 4.29E-07 | chr:10:135355522 |
| 10    | rs4133041  | 135408387 | A   | 0.2554 | 4.29E-07 | chr:10:135355522 |
| 10    | rs4259784  | 135399192 | A   | 0.2554 | 4.29E-07 | chr:10:135355522 |
| 10    | rs4306261  | 135410989 | G   | 0.2554 | 4.29E-07 | chr:10:135355522 |
| 10    | rs4351776  | 135415572 | T   | 0.2554 | 4.29E-07 | chr:10:135355522 |
| 10    | rs7084384  | 135412322 | G   | 0.2554 | 4.29E-07 | chr:10:135355522 |
| 10    | rs7084391  | 135412344 | C   | 0.2554 | 4.29E-07 | chr:10:135355522 |
| 10    | rs77382433 | 135389919 | C   | 0.2554 | 4.29E-07 | chr:10:135355522 |
| 10    | rs7907135  | 135410660 | C   | 0.2554 | 4.29E-07 | chr:10:135355522 |
| 10    | rs7093170  | 135402904 | T   | 0.2551 | 4.31E-07 | chr:10:135355522 |
| 10    | rs2987799  | 135380499 | T   | 0.2487 | 4.63E-07 | chr:10:135355522 |

|                |             |        |          |                  |
|----------------|-------------|--------|----------|------------------|
| 10 rs10857765  | 135394613 C | 0.2568 | 4.87E-07 | chr:10:135355522 |
| 10 rs10857769  | 135405047 C | 0.2568 | 4.87E-07 | chr:10:135355522 |
| 10 rs4335490   | 135402350 C | 0.2568 | 4.87E-07 | chr:10:135355522 |
| 10 rs6537613   | 135412414 G | 0.2568 | 4.87E-07 | chr:10:135355522 |
| 10 rs7075572   | 135404358 C | 0.2568 | 4.87E-07 | chr:10:135355522 |
| 10 rs9629936   | 135398783 G | 0.2568 | 4.87E-07 | chr:10:135355522 |
| 10 rs9630012   | 135397511 T | 0.2568 | 4.87E-07 | chr:10:135355522 |
| 10 rs9630033   | 135418505 T | 0.2568 | 4.87E-07 | chr:10:135355522 |
| 10 rs7922540   | 135395468 T | 0.2566 | 4.89E-07 | chr:10:135355522 |
| 10 rs9629935   | 135398306 C | 0.2578 | 5.28E-07 | chr:10:135355522 |
| 10 rs4556495   | 135422209 T | 0.266  | 7.06E-07 | chr:10:135355522 |
| 10 rs117220052 | 135388573 A | 0.288  | 9.97E-07 | chr:10:135355522 |
| 10 rs12218790  | 135434551 A | 0.2361 | 1.08E-06 | chr:10:135355522 |
| 10 rs9418991   | 135362114 C | 0.2556 | 1.14E-06 | chr:10:135355522 |
| 10 rs61868695  | 135380408 G | 0.2757 | 1.38E-06 | chr:10:135355522 |
| 10 rs61868696  | 135380409 C | 0.2757 | 1.38E-06 | chr:10:135355522 |
| 10 rs61868697  | 135380410 A | 0.2757 | 1.38E-06 | chr:10:135355522 |
| 10 rs2987785   | 135365003 C | 0.283  | 1.60E-06 | chr:10:135355522 |
| 10 rs11101857  | 135395359 G | 0.2933 | 2.36E-06 | chr:10:135355522 |
| 10 rs7094588   | 135401586 G | 0.2933 | 2.36E-06 | chr:10:135355522 |
| 10 rs2243909   | 135279810 T | 0.2566 | 2.64E-06 | chr:10:135355522 |
| 10 rs11101870  | 135402702 T | 0.2318 | 3.26E-06 | chr:10:135355522 |
| 10 rs1536828   | 135342315 G | 0.3138 | 3.70E-06 | chr:10:135355522 |
| 10 rs7092584   | 135348257 T | 0.2215 | 4.12E-06 | chr:10:135355522 |
| 10 rs2026047   | 135329616 C | 0.3099 | 7.90E-06 | chr:10:135355522 |
| 10 rs1854458   | 135313815 G | 0.3156 | 9.34E-06 | chr:10:135355522 |
| 10 rs2274665   | 135295630 T | 0.3156 | 9.34E-06 | chr:10:135355522 |
| 10 rs4838687   | 135295396 C | 0.3156 | 9.34E-06 | chr:10:135355522 |
| 10 rs7097581   | 135295350 A | 0.3156 | 9.34E-06 | chr:10:135355522 |
| 10 rs9418982   | 135320622 C | 0.3156 | 9.34E-06 | chr:10:135355522 |
| 10 rs9418984   | 135322356 G | 0.3156 | 9.34E-06 | chr:10:135355522 |
| 10 rs9418987   | 135324409 A | 0.3156 | 9.34E-06 | chr:10:135355522 |
| 10 rs9419072   | 135310445 G | 0.3156 | 9.34E-06 | chr:10:135355522 |
| 10 rs142168980 | 135389786 C | 0.3309 | 9.87E-06 | chr:10:135355522 |
| 10 rs2070673   | 135340567 A | 0.3137 | 1.13E-05 | chr:10:135355522 |
| 10 rs2247214   | 135285337 C | 0.3069 | 1.31E-05 | chr:10:135355522 |
| 10 rs9419079   | 135326985 G | 0.3239 | 1.35E-05 | chr:10:135355522 |
| 10 rs2070675   | 135346696 T | 0.3021 | 1.39E-05 | chr:10:135355522 |
| 10 rs1581934   | 135327410 T | 0.3088 | 1.84E-05 | chr:10:135355522 |
| 10 rs4543900   | 135310808 G | 0.3036 | 1.92E-05 | chr:10:135355522 |
| 10 rs9418986   | 135324276 T | 0.3046 | 2.04E-05 | chr:10:135355522 |
| 10 rs11101794  | 135307667 C | 0.3064 | 2.15E-05 | chr:10:135355522 |
| 10 rs7907225   | 135320905 G | 0.3061 | 2.17E-05 | chr:10:135355522 |

|                |             |        |          |                  |
|----------------|-------------|--------|----------|------------------|
| 10 rs9419082   | 135333772 A | 0.2728 | 2.31E-05 | chr:10:135355522 |
| 10 rs10857730  | 135326822 G | 0.3217 | 2.55E-05 | chr:10:135355522 |
| 10 rs10857736  | 135336514 G | 0.2886 | 2.86E-05 | chr:10:135355522 |
| 10 rs9418990   | 135337966 C | 0.3474 | 2.87E-05 | chr:10:135355522 |
| 10 rs10776685  | 135327317 C | 0.3245 | 2.90E-05 | chr:10:135355522 |
| 10 rs11815623  | 135329133 G | 0.3245 | 2.90E-05 | chr:10:135355522 |
| 10 rs7095379   | 135328532 A | 0.3245 | 2.90E-05 | chr:10:135355522 |
| 10 rs7095996   | 135328948 A | 0.3245 | 2.90E-05 | chr:10:135355522 |
| 10 rs9418988   | 135327632 C | 0.3473 | 2.91E-05 | chr:10:135355522 |
| 10 rs915907    | 135346927 A | 0.3016 | 3.28E-05 | chr:10:135355522 |
| 10 rs2247229   | 135285880 T | 0.331  | 3.72E-05 | chr:10:135355522 |
| 10 rs1590820   | 135296816 A | 0.3557 | 3.95E-05 | chr:10:135355522 |
| 10 rs2149618   | 135288814 G | 0.3309 | 4.36E-05 | chr:10:135355522 |
| 10 rs6537609   | 135323084 G | 0.3406 | 4.77E-05 | chr:10:135355522 |
| 10 rs7083073   | 135322956 A | 0.3406 | 4.77E-05 | chr:10:135355522 |
| 10 rs7092634   | 135322977 A | 0.3406 | 4.77E-05 | chr:10:135355522 |
| 10 rs7911139   | 135323525 C | 0.3406 | 4.77E-05 | chr:10:135355522 |
| 10 rs8192766   | 135339385 G | 0.3018 | 5.11E-05 | chr:10:135355522 |
| 10 rs10857735  | 135336230 A | 0.3014 | 5.13E-05 | chr:10:135355522 |
| 10 rs10857737  | 135336716 A | 0.3014 | 5.13E-05 | chr:10:135355522 |
| 10 rs11101807  | 135335647 C | 0.3014 | 5.13E-05 | chr:10:135355522 |
| 10 rs11101809  | 135335746 T | 0.3014 | 5.13E-05 | chr:10:135355522 |
| 10 rs7077457   | 135324370 A | 0.3445 | 5.29E-05 | chr:10:135355522 |
| 11 rs140837952 | 60315830 C  | 140.2  | 4.74E-22 | chr:11:60449890  |
| 11 rs80331353  | 60276293 T  | 132.8  | 1.58E-21 | chr:11:60449890  |
| 11 rs4939385   | 60275473 T  | 94.98  | 3.38E-21 | chr:11:60449890  |
| 11 rs4939386   | 60275719 A  | 118    | 3.71E-21 | chr:11:60449890  |
| 11 rs17155107  | 60275273 C  | 110.7  | 3.91E-21 | chr:11:60449890  |
| 11 rs1941022   | 60272887 A  | 61.3   | 3.81E-20 | chr:11:60449890  |
| 11 rs76860074  | 60472292 G  | 313.5  | 4.66E-20 | chr:11:60449890  |
| 11 rs376103871 | 60434536 G  | 454.4  | 7.09E-20 | chr:11:60449890  |
| 11 rs61898831  | 60518070 A  | 40.87  | 9.52E-20 | chr:11:60449890  |
| 11 rs139710185 | 60386332 C  | 329.3  | 1.05E-19 | chr:11:60449890  |
| 11 rs74976810  | 60280059 T  | 82.59  | 2.21E-19 | chr:11:60449890  |
| 11 rs76701960  | 60281519 C  | 82.59  | 2.21E-19 | chr:11:60449890  |
| 11 rs569629432 | 60514937 G  | 42.95  | 3.22E-19 | chr:11:60449890  |
| 11 rs61898828  | 60513780 T  | 42.95  | 3.22E-19 | chr:11:60449890  |
| 11 rs4939434   | 60413170 T  | 358.1  | 3.32E-19 | chr:11:60449890  |
| 11 rs150026789 | 60240149 C  | 32.99  | 3.46E-19 | chr:11:60449890  |
| 11 rs17155034  | 60237378 A  | 32.99  | 3.46E-19 | chr:11:60449890  |
| 11 rs17155041  | 60237414 G  | 32.99  | 3.46E-19 | chr:11:60449890  |
| 11 rs185777027 | 60252475 A  | 32.99  | 3.46E-19 | chr:11:60449890  |
| 11 rs4617613   | 60250648 T  | 32.99  | 3.46E-19 | chr:11:60449890  |

|                |            |       |          |                 |
|----------------|------------|-------|----------|-----------------|
| 11 rs4939365   | 60238824 A | 32.99 | 3.46E-19 | chr:11:60449890 |
| 11 rs7112881   | 60235600 C | 32.99 | 3.46E-19 | chr:11:60449890 |
| 11 rs7129314   | 60235459 G | 32.99 | 3.46E-19 | chr:11:60449890 |
| 11 rs74237978  | 60254725 G | 32.99 | 3.46E-19 | chr:11:60449890 |
| 11 rs76814174  | 60256208 A | 32.99 | 3.46E-19 | chr:11:60449890 |
| 11 rs77828735  | 60251575 C | 32.99 | 3.46E-19 | chr:11:60449890 |
| 11 rs75976166  | 60511961 T | 250.6 | 5.12E-19 | chr:11:60449890 |
| 11 rs925010    | 60512786 T | 250.6 | 5.12E-19 | chr:11:60449890 |
| 11 rs925011    | 60512497 T | 250.6 | 5.12E-19 | chr:11:60449890 |
| 11 rs150759751 | 60243215 C | 28.6  | 5.69E-19 | chr:11:60449890 |
| 11 rs557131820 | 60243025 G | 28.6  | 5.69E-19 | chr:11:60449890 |
| 11 rs1395401   | 60415354 C | 475   | 6.84E-19 | chr:11:60449890 |
| 11 rs146864929 | 60419881 T | 475   | 6.84E-19 | chr:11:60449890 |
| 11 rs183839528 | 60419770 C | 475   | 6.84E-19 | chr:11:60449890 |
| 11 rs4939436   | 60424565 A | 475   | 6.84E-19 | chr:11:60449890 |
| 11 rs75177700  | 60420926 A | 475   | 6.84E-19 | chr:11:60449890 |
| 11 rs75606468  | 60413595 G | 475   | 6.84E-19 | chr:11:60449890 |
| 11 rs78401374  | 60425155 G | 475   | 6.84E-19 | chr:11:60449890 |
| 11 rs79053314  | 60409541 A | 475   | 6.84E-19 | chr:11:60449890 |
| 11 rs80322405  | 60425758 T | 475   | 6.84E-19 | chr:11:60449890 |
| 11 rs76753770  | 60426674 A | 444.4 | 7.22E-19 | chr:11:60449890 |
| 11 rs78897592  | 60426552 T | 444.4 | 7.22E-19 | chr:11:60449890 |
| 11 rs111662795 | 60420336 T | 436.7 | 8.91E-19 | chr:11:60449890 |
| 11 rs112026902 | 60420507 T | 436.7 | 8.91E-19 | chr:11:60449890 |
| 11 rs112061705 | 60414568 T | 436.7 | 8.91E-19 | chr:11:60449890 |
| 11 rs112285293 | 60419923 C | 436.7 | 8.91E-19 | chr:11:60449890 |
| 11 rs112410934 | 60420346 A | 436.7 | 8.91E-19 | chr:11:60449890 |
| 11 rs113304615 | 60420369 C | 436.7 | 8.91E-19 | chr:11:60449890 |
| 11 rs113359775 | 60413824 C | 436.7 | 8.91E-19 | chr:11:60449890 |
| 11 rs113646818 | 60420205 T | 436.7 | 8.91E-19 | chr:11:60449890 |
| 11 rs114299280 | 60419780 T | 436.7 | 8.91E-19 | chr:11:60449890 |
| 11 rs114357683 | 60422696 G | 436.7 | 8.91E-19 | chr:11:60449890 |
| 11 rs115069163 | 60419768 T | 436.7 | 8.91E-19 | chr:11:60449890 |
| 11 rs115943468 | 60413681 C | 436.7 | 8.91E-19 | chr:11:60449890 |
| 11 rs1354770   | 60416509 A | 436.7 | 8.91E-19 | chr:11:60449890 |
| 11 rs1354771   | 60416483 C | 436.7 | 8.91E-19 | chr:11:60449890 |
| 11 rs1354772   | 60416327 C | 436.7 | 8.91E-19 | chr:11:60449890 |
| 11 rs1354773   | 60416315 A | 436.7 | 8.91E-19 | chr:11:60449890 |
| 11 rs138028975 | 60420106 C | 436.7 | 8.91E-19 | chr:11:60449890 |
| 11 rs1395399   | 60415721 T | 436.7 | 8.91E-19 | chr:11:60449890 |
| 11 rs1395400   | 60415572 T | 436.7 | 8.91E-19 | chr:11:60449890 |
| 11 rs1395402   | 60421420 A | 436.7 | 8.91E-19 | chr:11:60449890 |
| 11 rs1395404   | 60421807 A | 436.7 | 8.91E-19 | chr:11:60449890 |

|                |            |       |          |                 |
|----------------|------------|-------|----------|-----------------|
| 11 rs1395405   | 60422296 T | 436.7 | 8.91E-19 | chr:11:60449890 |
| 11 rs140613292 | 60418035 T | 436.7 | 8.91E-19 | chr:11:60449890 |
| 11 rs143370276 | 60420110 A | 436.7 | 8.91E-19 | chr:11:60449890 |
| 11 rs17155185  | 60415989 C | 436.7 | 8.91E-19 | chr:11:60449890 |
| 11 rs17155186  | 60416072 C | 436.7 | 8.91E-19 | chr:11:60449890 |
| 11 rs17155188  | 60416175 G | 436.7 | 8.91E-19 | chr:11:60449890 |
| 11 rs2129786   | 60423103 G | 436.7 | 8.91E-19 | chr:11:60449890 |
| 11 rs2129787   | 60423827 T | 436.7 | 8.91E-19 | chr:11:60449890 |
| 11 rs2129788   | 60423946 T | 436.7 | 8.91E-19 | chr:11:60449890 |
| 11 rs2171485   | 60422921 A | 436.7 | 8.91E-19 | chr:11:60449890 |
| 11 rs4304796   | 60415413 G | 436.7 | 8.91E-19 | chr:11:60449890 |
| 11 rs4938968   | 60422399 T | 436.7 | 8.91E-19 | chr:11:60449890 |
| 11 rs4938969   | 60422434 G | 436.7 | 8.91E-19 | chr:11:60449890 |
| 11 rs4939429   | 60412257 T | 436.7 | 8.91E-19 | chr:11:60449890 |
| 11 rs4939430   | 60412276 A | 436.7 | 8.91E-19 | chr:11:60449890 |
| 11 rs4939431   | 60412331 T | 436.7 | 8.91E-19 | chr:11:60449890 |
| 11 rs4939432   | 60412583 G | 436.7 | 8.91E-19 | chr:11:60449890 |
| 11 rs4939435   | 60419373 G | 436.7 | 8.91E-19 | chr:11:60449890 |
| 11 rs74237988  | 60419683 A | 436.7 | 8.91E-19 | chr:11:60449890 |
| 11 rs74551327  | 60422947 C | 436.7 | 8.91E-19 | chr:11:60449890 |
| 11 rs74658643  | 60425757 G | 436.7 | 8.91E-19 | chr:11:60449890 |
| 11 rs7479031   | 60415822 C | 436.7 | 8.91E-19 | chr:11:60449890 |
| 11 rs74793391  | 60420807 T | 436.7 | 8.91E-19 | chr:11:60449890 |
| 11 rs7483244   | 60421757 C | 436.7 | 8.91E-19 | chr:11:60449890 |
| 11 rs75598587  | 60422757 G | 436.7 | 8.91E-19 | chr:11:60449890 |
| 11 rs75841265  | 60420812 T | 436.7 | 8.91E-19 | chr:11:60449890 |
| 11 rs76365878  | 60425214 C | 436.7 | 8.91E-19 | chr:11:60449890 |
| 11 rs77026665  | 60417687 A | 436.7 | 8.91E-19 | chr:11:60449890 |
| 11 rs77125902  | 60425141 T | 436.7 | 8.91E-19 | chr:11:60449890 |
| 11 rs77663416  | 60426250 G | 436.7 | 8.91E-19 | chr:11:60449890 |
| 11 rs77726795  | 60425419 G | 436.7 | 8.91E-19 | chr:11:60449890 |
| 11 rs78392907  | 60411069 C | 436.7 | 8.91E-19 | chr:11:60449890 |
| 11 rs78474464  | 60418171 T | 436.7 | 8.91E-19 | chr:11:60449890 |
| 11 rs78637342  | 60426005 C | 436.7 | 8.91E-19 | chr:11:60449890 |
| 11 rs79513455  | 60426156 A | 436.7 | 8.91E-19 | chr:11:60449890 |
| 11 rs79568121  | 60426280 C | 436.7 | 8.91E-19 | chr:11:60449890 |
| 11 rs80082757  | 60420883 A | 436.7 | 8.91E-19 | chr:11:60449890 |
| 11 rs80102522  | 60425369 G | 436.7 | 8.91E-19 | chr:11:60449890 |
| 11 rs80255668  | 60415835 T | 436.7 | 8.91E-19 | chr:11:60449890 |
| 11 rs36043646  | 60404929 A | 168.9 | 1.16E-18 | chr:11:60449890 |
| 11 rs4939428   | 60404458 G | 168.9 | 1.16E-18 | chr:11:60449890 |
| 11 rs11823491  | 60398174 T | 166.7 | 1.31E-18 | chr:11:60449890 |
| 11 rs181323223 | 60389622 G | 166.7 | 1.31E-18 | chr:11:60449890 |

|                |            |       |          |                 |
|----------------|------------|-------|----------|-----------------|
| 11 rs12223063  | 60309438 T | 104.9 | 1.60E-18 | chr:11:60449890 |
| 11 rs4938955   | 60298963 G | 104.9 | 1.60E-18 | chr:11:60449890 |
| 11 rs4939398   | 60298580 C | 104.9 | 1.60E-18 | chr:11:60449890 |
| 11 rs79002350  | 60285803 T | 104.9 | 1.60E-18 | chr:11:60449890 |
| 11 rs61898829  | 60514367 C | 49.17 | 1.63E-18 | chr:11:60449890 |
| 11 rs73492994  | 60515078 T | 49.17 | 1.63E-18 | chr:11:60449890 |
| 11 rs10501387  | 60386979 T | 444.7 | 1.76E-18 | chr:11:60449890 |
| 11 rs375531665 | 60389366 T | 444.7 | 1.76E-18 | chr:11:60449890 |
| 11 rs536155208 | 60389985 T | 444.7 | 1.76E-18 | chr:11:60449890 |
| 11 rs552861910 | 60390547 A | 444.7 | 1.76E-18 | chr:11:60449890 |
| 11 rs74237985  | 60397751 C | 444.7 | 1.76E-18 | chr:11:60449890 |
| 11 rs74362668  | 60377300 A | 444.7 | 1.76E-18 | chr:11:60449890 |
| 11 rs74796030  | 60373039 C | 444.7 | 1.76E-18 | chr:11:60449890 |
| 11 rs75858171  | 60377478 C | 444.7 | 1.76E-18 | chr:11:60449890 |
| 11 rs76118857  | 60397070 G | 444.7 | 1.76E-18 | chr:11:60449890 |
| 11 rs77082032  | 60380341 C | 444.7 | 1.76E-18 | chr:11:60449890 |
| 11 rs77624740  | 60364445 T | 444.7 | 1.76E-18 | chr:11:60449890 |
| 11 rs77713821  | 60394593 G | 444.7 | 1.76E-18 | chr:11:60449890 |
| 11 rs77948025  | 60385189 C | 444.7 | 1.76E-18 | chr:11:60449890 |
| 11 rs79192023  | 60398204 C | 444.7 | 1.76E-18 | chr:11:60449890 |
| 11 rs79250688  | 60397495 A | 444.7 | 1.76E-18 | chr:11:60449890 |
| 11 rs79465298  | 60403208 G | 444.7 | 1.76E-18 | chr:11:60449890 |
| 11 rs79519698  | 60384232 A | 444.7 | 1.76E-18 | chr:11:60449890 |
| 11 rs80043843  | 60368375 C | 444.7 | 1.76E-18 | chr:11:60449890 |
| 11 rs75071466  | 60405537 C | 405.2 | 1.85E-18 | chr:11:60449890 |
| 11 rs1395403   | 60421492 A | 427.6 | 2.34E-18 | chr:11:60449890 |
| 11 rs1588034   | 60406972 A | 359.4 | 4.40E-18 | chr:11:60449890 |
| 11 rs1588035   | 60407020 A | 359.4 | 4.40E-18 | chr:11:60449890 |
| 11 rs76524444  | 60405169 C | 359.4 | 4.40E-18 | chr:11:60449890 |
| 11 rs4589322   | 60357024 T | 101.1 | 4.61E-18 | chr:11:60449890 |
| 11 rs12284014  | 60391203 G | 115.2 | 9.98E-18 | chr:11:60449890 |
| 11 rs184359733 | 60389486 C | 115.2 | 9.98E-18 | chr:11:60449890 |
| 11 rs475320    | 60394279 C | 115.2 | 9.98E-18 | chr:11:60449890 |
| 11 rs79718080  | 60379115 T | 241.3 | 1.00E-17 | chr:11:60449890 |
| 11 rs12271356  | 60379030 T | 114.4 | 1.39E-17 | chr:11:60449890 |
| 11 rs78827449  | 60338319 G | 155.2 | 1.68E-17 | chr:11:60449890 |
| 11 rs10897100  | 60345552 A | 146.3 | 2.40E-17 | chr:11:60449890 |
| 11 rs11230386  | 60333542 C | 146.3 | 2.40E-17 | chr:11:60449890 |
| 11 rs11230393  | 60346890 A | 146.3 | 2.40E-17 | chr:11:60449890 |
| 11 rs11230410  | 60358407 T | 146.3 | 2.40E-17 | chr:11:60449890 |
| 11 rs149005040 | 60349048 T | 146.3 | 2.40E-17 | chr:11:60449890 |
| 11 rs4939409   | 60331285 A | 146.3 | 2.40E-17 | chr:11:60449890 |
| 11 rs4939411   | 60331584 C | 146.3 | 2.40E-17 | chr:11:60449890 |



|                |            |       |          |                 |
|----------------|------------|-------|----------|-----------------|
| 11 rs4939419   | 60363677 A | 146.3 | 2.40E-17 | chr:11:60449890 |
| 11 rs880517    | 60327093 C | 146.3 | 2.40E-17 | chr:11:60449890 |
| 11 rs11535815  | 60322719 C | 135.4 | 2.51E-17 | chr:11:60449890 |
| 11 rs12222676  | 60320591 T | 135.4 | 2.51E-17 | chr:11:60449890 |
| 11 rs148027662 | 60319226 C | 135.4 | 2.51E-17 | chr:11:60449890 |
| 11 rs4939401   | 60313437 T | 135.4 | 2.51E-17 | chr:11:60449890 |
| 11 rs11230416  | 60358917 T | 128.3 | 5.64E-17 | chr:11:60449890 |
| 11 rs112420146 | 60352340 A | 128.3 | 5.64E-17 | chr:11:60449890 |
| 11 rs79994929  | 60342896 A | 128.3 | 5.64E-17 | chr:11:60449890 |
| 11 rs80197220  | 60360315 T | 128.3 | 5.64E-17 | chr:11:60449890 |
| 11 rs12269769  | 60378488 G | 63.44 | 1.45E-16 | chr:11:60449890 |
| 11 rs117052092 | 60277975 T | 65.96 | 1.76E-16 | chr:11:60449890 |
| 11 rs78293538  | 60313053 T | 106.3 | 1.86E-16 | chr:11:60449890 |
| 11 rs1075193   | 60357882 G | 117.9 | 1.92E-16 | chr:11:60449890 |
| 11 rs10897099  | 60345446 A | 117.9 | 1.92E-16 | chr:11:60449890 |
| 11 rs112266959 | 60350831 T | 117.9 | 1.92E-16 | chr:11:60449890 |
| 11 rs11230389  | 60344066 A | 117.9 | 1.92E-16 | chr:11:60449890 |
| 11 rs11230390  | 60345907 C | 117.9 | 1.92E-16 | chr:11:60449890 |
| 11 rs11230392  | 60346342 T | 117.9 | 1.92E-16 | chr:11:60449890 |
| 11 rs11230395  | 60347928 C | 117.9 | 1.92E-16 | chr:11:60449890 |
| 11 rs11230396  | 60348289 C | 117.9 | 1.92E-16 | chr:11:60449890 |
| 11 rs11230398  | 60348665 A | 117.9 | 1.92E-16 | chr:11:60449890 |
| 11 rs11230401  | 60354064 T | 117.9 | 1.92E-16 | chr:11:60449890 |
| 11 rs11230402  | 60354355 G | 117.9 | 1.92E-16 | chr:11:60449890 |
| 11 rs11230404  | 60354440 T | 117.9 | 1.92E-16 | chr:11:60449890 |
| 11 rs11230405  | 60354446 G | 117.9 | 1.92E-16 | chr:11:60449890 |
| 11 rs11230406  | 60355032 G | 117.9 | 1.92E-16 | chr:11:60449890 |
| 11 rs11230407  | 60355215 T | 117.9 | 1.92E-16 | chr:11:60449890 |
| 11 rs11230408  | 60356188 T | 117.9 | 1.92E-16 | chr:11:60449890 |
| 11 rs11230409  | 60356955 C | 117.9 | 1.92E-16 | chr:11:60449890 |
| 11 rs11230411  | 60358502 C | 117.9 | 1.92E-16 | chr:11:60449890 |
| 11 rs11230412  | 60358517 G | 117.9 | 1.92E-16 | chr:11:60449890 |
| 11 rs11230413  | 60358600 G | 117.9 | 1.92E-16 | chr:11:60449890 |
| 11 rs11230414  | 60358669 C | 117.9 | 1.92E-16 | chr:11:60449890 |
| 11 rs11230415  | 60358744 T | 117.9 | 1.92E-16 | chr:11:60449890 |
| 11 rs113438455 | 60352321 C | 117.9 | 1.92E-16 | chr:11:60449890 |
| 11 rs12574473  | 60344427 C | 117.9 | 1.92E-16 | chr:11:60449890 |
| 11 rs12577546  | 60350014 T | 117.9 | 1.92E-16 | chr:11:60449890 |
| 11 rs192160182 | 60359598 A | 117.9 | 1.92E-16 | chr:11:60449890 |
| 11 rs4938959   | 60341383 C | 117.9 | 1.92E-16 | chr:11:60449890 |
| 11 rs4939414   | 60355673 C | 117.9 | 1.92E-16 | chr:11:60449890 |
| 11 rs75074202  | 60361575 G | 117.9 | 1.92E-16 | chr:11:60449890 |
| 11 rs75259753  | 60360747 C | 117.9 | 1.92E-16 | chr:11:60449890 |

|                |            |       |          |                 |
|----------------|------------|-------|----------|-----------------|
| 11 rs75847459  | 60361128 A | 117.9 | 1.92E-16 | chr:11:60449890 |
| 11 rs76962588  | 60361563 G | 117.9 | 1.92E-16 | chr:11:60449890 |
| 11 rs77815918  | 60342648 G | 117.9 | 1.92E-16 | chr:11:60449890 |
| 11 rs73492997  | 60515364 T | 28.09 | 2.44E-16 | chr:11:60449890 |
| 11 rs11230417  | 60359982 T | 112   | 2.54E-16 | chr:11:60449890 |
| 11 rs11230420  | 60363961 A | 116.3 | 2.79E-16 | chr:11:60449890 |
| 11 rs55752280  | 60239957 T | 14.78 | 4.96E-16 | chr:11:60449890 |
| 11 rs7124085   | 60239723 G | 14.78 | 4.96E-16 | chr:11:60449890 |
| 11 rs7124717   | 60243714 C | 14.78 | 4.96E-16 | chr:11:60449890 |
| 11 rs60684765  | 60472310 C | 30.55 | 1.38E-15 | chr:11:60449890 |
| 11 rs10897102  | 60364051 G | 56.83 | 1.95E-15 | chr:11:60449890 |
| 11 rs111747950 | 60495986 G | 23.34 | 3.53E-15 | chr:11:60449890 |
| 11 rs17155019  | 60229677 T | 20.76 | 6.41E-15 | chr:11:60449890 |
| 11 rs78619545  | 60230270 T | 20.76 | 6.41E-15 | chr:11:60449890 |
| 11 rs1443249   | 60224044 G | 18.61 | 9.96E-15 | chr:11:60449890 |
| 11 rs74478918  | 60221936 A | 18.61 | 9.96E-15 | chr:11:60449890 |
| 11 rs79350662  | 60222269 G | 18.61 | 9.96E-15 | chr:11:60449890 |
| 11 rs1567083   | 60473821 T | 13.68 | 1.46E-14 | chr:11:60449890 |
| 11 rs10736709  | 60455094 C | 13.88 | 1.48E-14 | chr:11:60449890 |
| 11 rs10897107  | 60438001 T | 13.88 | 1.48E-14 | chr:11:60449890 |
| 11 rs474347    | 60394379 A | 11.6  | 1.49E-14 | chr:11:60449890 |
| 11 rs533273    | 60392597 G | 11.6  | 1.49E-14 | chr:11:60449890 |
| 11 rs556374    | 60395210 G | 11.6  | 1.49E-14 | chr:11:60449890 |
| 11 rs58686875  | 60389219 G | 11.6  | 1.49E-14 | chr:11:60449890 |
| 11 rs59782110  | 60388974 C | 11.6  | 1.49E-14 | chr:11:60449890 |
| 11 rs79794327  | 60408059 C | 16.49 | 1.53E-14 | chr:11:60449890 |
| 11 rs1532900   | 60486121 G | 13.46 | 1.81E-14 | chr:11:60449890 |
| 11 rs11230434  | 60379726 A | 11.56 | 1.83E-14 | chr:11:60449890 |
| 11 rs12274091  | 60375565 C | 11.56 | 1.83E-14 | chr:11:60449890 |
| 11 rs7119769   | 60372678 A | 11.56 | 1.83E-14 | chr:11:60449890 |
| 11 rs6591614   | 60419949 C | 15.76 | 1.83E-14 | chr:11:60449890 |
| 11 rs4939433   | 60412685 G | 12.72 | 1.83E-14 | chr:11:60449890 |
| 11 rs7128058   | 60409995 C | 12.72 | 1.83E-14 | chr:11:60449890 |
| 11 rs7130322   | 60414821 G | 12.72 | 1.83E-14 | chr:11:60449890 |
| 11 rs1588033   | 60406661 C | 12.68 | 2.10E-14 | chr:11:60449890 |
| 11 rs72643556  | 60397090 C | 12.68 | 2.10E-14 | chr:11:60449890 |
| 11 rs2087236   | 60411080 A | 15.72 | 2.17E-14 | chr:11:60449890 |
| 11 rs484858    | 60439530 C | 16.57 | 2.31E-14 | chr:11:60449890 |
| 11 rs518778    | 60440909 C | 16.57 | 2.31E-14 | chr:11:60449890 |
| 11 rs528002    | 60461496 A | 16.36 | 2.64E-14 | chr:11:60449890 |
| 11 rs664114    | 60470538 A | 16.36 | 2.64E-14 | chr:11:60449890 |
| 11 rs6591612   | 60407822 C | 17.81 | 3.07E-14 | chr:11:60449890 |
| 11 rs10897101  | 60347964 C | 10.75 | 3.75E-14 | chr:11:60449890 |

|               |            |       |          |                 |
|---------------|------------|-------|----------|-----------------|
| 11 rs4939412  | 60346987 T | 10.75 | 3.75E-14 | chr:11:60449890 |
| 11 rs12222298 | 60289836 T | 11.99 | 3.89E-14 | chr:11:60449890 |
| 11 rs2868222  | 60344075 T | 10.74 | 4.14E-14 | chr:11:60449890 |
| 11 rs7113073  | 60478793 G | 18.39 | 4.78E-14 | chr:11:60449890 |
| 11 rs2306836  | 60482329 C | 18.53 | 4.86E-14 | chr:11:60449890 |
| 11 rs10897089 | 60316296 A | 8.012 | 5.11E-14 | chr:11:60449890 |
| 11 rs11494164 | 60316659 C | 8.012 | 5.11E-14 | chr:11:60449890 |
| 11 rs2509514  | 60318700 C | 8.012 | 5.11E-14 | chr:11:60449890 |
| 11 rs7948426  | 60314241 G | 8.012 | 5.11E-14 | chr:11:60449890 |
| 11 rs2186916  | 60332013 C | 8.871 | 5.54E-14 | chr:11:60449890 |
| 11 rs2847210  | 60337966 C | 8.871 | 5.54E-14 | chr:11:60449890 |
| 11 rs6591606  | 60351183 T | 8.871 | 5.54E-14 | chr:11:60449890 |
| 11 rs12278643 | 60352288 C | 8.874 | 6.00E-14 | chr:11:60449890 |
| 11 rs12285680 | 60361616 A | 8.854 | 6.20E-14 | chr:11:60449890 |
| 11 rs11230365 | 60298171 T | 8.222 | 6.45E-14 | chr:11:60449890 |
| 11 rs4121607  | 60306301 G | 8.222 | 6.45E-14 | chr:11:60449890 |
| 11 rs6591595  | 60291413 C | 8.222 | 6.45E-14 | chr:11:60449890 |
| 11 rs72643555 | 60280001 A | 10.54 | 7.33E-14 | chr:11:60449890 |
| 11 rs10750940 | 60282019 G | 7.985 | 9.26E-14 | chr:11:60449890 |
| 11 rs10897076 | 60278980 C | 7.985 | 9.26E-14 | chr:11:60449890 |
| 11 rs17155261 | 60511789 G | 11.43 | 9.91E-14 | chr:11:60449890 |
| 11 rs1941026  | 60312462 A | 9.751 | 1.02E-13 | chr:11:60449890 |
| 11 rs10897079 | 60290960 G | 9.002 | 1.12E-13 | chr:11:60449890 |
| 11 rs10897080 | 60294184 A | 9.002 | 1.12E-13 | chr:11:60449890 |
| 11 rs10897081 | 60295202 G | 9.002 | 1.12E-13 | chr:11:60449890 |
| 11 rs10897082 | 60295234 G | 9.002 | 1.12E-13 | chr:11:60449890 |
| 11 rs10897083 | 60299838 G | 9.002 | 1.12E-13 | chr:11:60449890 |
| 11 rs11230375 | 60306767 A | 9.002 | 1.12E-13 | chr:11:60449890 |
| 11 rs11230376 | 60306877 A | 9.002 | 1.12E-13 | chr:11:60449890 |
| 11 rs12282328 | 60289291 C | 9.002 | 1.12E-13 | chr:11:60449890 |
| 11 rs12284816 | 60291548 G | 9.002 | 1.12E-13 | chr:11:60449890 |
| 11 rs12286993 | 60289473 T | 9.002 | 1.12E-13 | chr:11:60449890 |
| 11 rs12578017 | 60299330 A | 9.002 | 1.12E-13 | chr:11:60449890 |
| 11 rs2077468  | 60308202 T | 9.002 | 1.12E-13 | chr:11:60449890 |
| 11 rs4938952  | 60290348 T | 9.002 | 1.12E-13 | chr:11:60449890 |
| 11 rs4938953  | 60295986 T | 9.002 | 1.12E-13 | chr:11:60449890 |
| 11 rs4938954  | 60298660 T | 9.002 | 1.12E-13 | chr:11:60449890 |
| 11 rs4938956  | 60299129 T | 9.002 | 1.12E-13 | chr:11:60449890 |
| 11 rs4939393  | 60290352 C | 9.002 | 1.12E-13 | chr:11:60449890 |
| 11 rs4939395  | 60298443 C | 9.002 | 1.12E-13 | chr:11:60449890 |
| 11 rs4939396  | 60298541 C | 9.002 | 1.12E-13 | chr:11:60449890 |
| 11 rs4939397  | 60298564 T | 9.002 | 1.12E-13 | chr:11:60449890 |
| 11 rs4939399  | 60298745 G | 9.002 | 1.12E-13 | chr:11:60449890 |

|                |            |       |          |                 |
|----------------|------------|-------|----------|-----------------|
| 11 rs750939    | 60308039 C | 9.002 | 1.12E-13 | chr:11:60449890 |
| 11 rs4939391   | 60290223 T | 8.989 | 1.28E-13 | chr:11:60449890 |
| 11 rs12277712  | 60282204 T | 8.298 | 1.32E-13 | chr:11:60449890 |
| 11 rs4939388   | 60280204 G | 8.298 | 1.32E-13 | chr:11:60449890 |
| 11 rs59358103  | 60279328 T | 8.298 | 1.32E-13 | chr:11:60449890 |
| 11 rs66506129  | 60279921 T | 8.298 | 1.32E-13 | chr:11:60449890 |
| 11 rs766111    | 60280875 A | 8.298 | 1.32E-13 | chr:11:60449890 |
| 11 rs10897109  | 60518182 T | 7.548 | 1.42E-13 | chr:11:60449890 |
| 11 rs75655826  | 60516738 T | 9.488 | 1.43E-13 | chr:11:60449890 |
| 11 rs10897086  | 60309071 G | 8.938 | 1.50E-13 | chr:11:60449890 |
| 11 rs11230358  | 60292172 G | 8.325 | 1.53E-13 | chr:11:60449890 |
| 11 rs7934771   | 60286038 A | 7.372 | 1.54E-13 | chr:11:60449890 |
| 11 rs10897078  | 60285528 G | 7.849 | 2.54E-13 | chr:11:60449890 |
| 11 rs11230355  | 60284522 G | 7.849 | 2.54E-13 | chr:11:60449890 |
| 11 rs7110684   | 60500843 C | 23.48 | 2.71E-13 | chr:11:60449890 |
| 11 rs113789171 | 60481588 G | 23.27 | 4.24E-13 | chr:11:60449890 |
| 11 rs61898830  | 60515774 G | 7.793 | 6.27E-13 | chr:11:60449890 |
| 11 rs7948556   | 60517887 G | 7.53  | 2.15E-12 | chr:11:60449890 |
| 11 rs575559715 | 60301959 T | 39.07 | 5.68E-12 | chr:11:60449890 |
| 11 rs549412940 | 60303581 G | 8.836 | 1.58E-11 | chr:11:60449890 |
| 11 rs116954371 | 60484942 A | 2269  | 3.45E-11 | chr:11:60449890 |
| 11 rs149904169 | 60218249 A | 10.95 | 7.56E-11 | chr:11:60449890 |
| 11 rs150164831 | 60214698 T | 10.95 | 7.56E-11 | chr:11:60449890 |
| 11 rs77182118  | 60214076 A | 10.95 | 7.56E-11 | chr:11:60449890 |
| 11 rs77831294  | 60216599 T | 10.95 | 7.56E-11 | chr:11:60449890 |
| 11 rs372464052 | 60218891 G | 10.5  | 1.14E-10 | chr:11:60449890 |
| 11 rs76907727  | 60215737 C | 10.44 | 1.18E-10 | chr:11:60449890 |
| 11 rs576832473 | 60219175 C | 10.12 | 1.33E-10 | chr:11:60449890 |
| 11 rs113897778 | 60461655 C | 984.5 | 1.69E-10 | chr:11:60449890 |
| 11 rs11822213  | 60452469 C | 984.5 | 1.69E-10 | chr:11:60449890 |
| 11 rs4938975   | 60465691 A | 984.5 | 1.69E-10 | chr:11:60449890 |
| 11 rs6591617   | 60443177 A | 984.5 | 1.69E-10 | chr:11:60449890 |
| 11 rs78504056  | 60464475 G | 984.5 | 1.69E-10 | chr:11:60449890 |
| 11 rs74973858  | 60473529 T | 946.1 | 2.16E-10 | chr:11:60449890 |
| 11 rs17155222  | 60467175 G | 890.6 | 2.17E-10 | chr:11:60449890 |
| 11 rs74588793  | 60479991 G | 917.8 | 2.22E-10 | chr:11:60449890 |
| 11 rs191364573 | 60430925 G | 28.74 | 8.55E-10 | chr:11:60449890 |
| 11 rs148096621 | 60460770 G | 596.7 | 1.42E-09 | chr:11:60449890 |
| 11 rs573441235 | 60515380 T | 7.301 | 2.30E-09 | chr:11:60449890 |
| 11 rs111523940 | 60472332 C | 368.3 | 1.17E-08 | chr:11:60449890 |
| 11 rs75851712  | 60535363 A | 5.168 | 3.87E-08 | chr:11:60449890 |
| 11 rs532683805 | 60241237 T | 20.3  | 7.35E-08 | chr:11:60449890 |
| 11 rs4534600   | 60203177 A | 7.799 | 7.42E-08 | chr:11:60449890 |

|                |            |        |          |                 |
|----------------|------------|--------|----------|-----------------|
| 11 rs75272964  | 60277488 T | 0.2742 | 7.96E-08 | chr:11:60449890 |
| 11 rs12417644  | 60277063 C | 0.2742 | 1.08E-07 | chr:11:60449890 |
| 11 rs143837385 | 60178507 T | 7.301  | 1.10E-07 | chr:11:60449890 |
| 11 rs1443243   | 60184840 C | 7.301  | 1.10E-07 | chr:11:60449890 |
| 11 rs145918292 | 60180189 A | 7.301  | 1.10E-07 | chr:11:60449890 |
| 11 rs17154981  | 60201102 A | 7.301  | 1.10E-07 | chr:11:60449890 |
| 11 rs4939355   | 60182571 G | 7.301  | 1.10E-07 | chr:11:60449890 |
| 11 rs4939356   | 60189627 C | 7.301  | 1.10E-07 | chr:11:60449890 |
| 11 rs7935330   | 60185334 C | 7.301  | 1.10E-07 | chr:11:60449890 |
| 11 rs150289543 | 60210476 C | 6.625  | 1.21E-07 | chr:11:60449890 |
| 11 rs57765637  | 60320019 T | 0.2675 | 1.40E-07 | chr:11:60449890 |
| 11 rs78443804  | 60322247 G | 0.2675 | 1.40E-07 | chr:11:60449890 |
| 11 rs11230450  | 60470119 A | 0.223  | 1.43E-07 | chr:11:60449890 |
| 11 rs1224311   | 60417361 A | 0.2259 | 1.55E-07 | chr:11:60449890 |
| 11 rs523318    | 60414669 T | 0.2259 | 1.55E-07 | chr:11:60449890 |
| 11 rs12362061  | 60446715 C | 0.2232 | 1.64E-07 | chr:11:60449890 |
| 11 rs1848089   | 60429426 G | 0.2232 | 1.64E-07 | chr:11:60449890 |
| 11 rs11230454  | 60484893 A | 0.2261 | 1.75E-07 | chr:11:60449890 |
| 11 rs111330485 | 60810157 C | 4.923  | 1.79E-07 | chr:11:60449890 |
| 11 rs2233247   | 60154167 C | 6.324  | 1.80E-07 | chr:11:60449890 |
| 11 rs2233255   | 60160423 C | 6.324  | 1.80E-07 | chr:11:60449890 |
| 11 rs72472148  | 60157500 C | 6.324  | 1.80E-07 | chr:11:60449890 |
| 11 rs74693377  | 60162233 T | 6.324  | 1.80E-07 | chr:11:60449890 |
| 11 rs75408079  | 60162813 A | 6.324  | 1.80E-07 | chr:11:60449890 |
| 11 rs76402001  | 60151580 G | 6.324  | 1.80E-07 | chr:11:60449890 |
| 11 rs77256998  | 60155557 C | 6.324  | 1.80E-07 | chr:11:60449890 |
| 11 rs78824219  | 60158249 G | 6.324  | 1.80E-07 | chr:11:60449890 |
| 11 rs80196453  | 60158841 T | 6.324  | 1.80E-07 | chr:11:60449890 |
| 11 rs141950944 | 60151021 C | 6.085  | 2.36E-07 | chr:11:60449890 |
| 11 rs12420937  | 60323768 C | 0.2723 | 2.37E-07 | chr:11:60449890 |
| 11 rs75538311  | 60185044 C | 6.461  | 2.50E-07 | chr:11:60449890 |
| 11 rs76274884  | 60196877 T | 6.461  | 2.50E-07 | chr:11:60449890 |
| 11 rs77626314  | 60191284 G | 6.461  | 2.50E-07 | chr:11:60449890 |
| 11 rs534362559 | 60460600 C | 16.55  | 2.51E-07 | chr:11:60449890 |
| 11 rs139686528 | 60172693 T | 6.065  | 2.58E-07 | chr:11:60449890 |
| 11 rs75332833  | 60165502 A | 6.065  | 2.58E-07 | chr:11:60449890 |
| 11 rs76943117  | 60165816 A | 6.065  | 2.58E-07 | chr:11:60449890 |
| 11 rs4939449   | 60520624 G | 3.426  | 2.64E-07 | chr:11:60449890 |
| 11 rs482386    | 60400154 C | 0.2383 | 2.92E-07 | chr:11:60449890 |
| 11 rs716562    | 60312456 A | 0.2865 | 3.22E-07 | chr:11:60449890 |
| 11 rs2226681   | 60311515 T | 0.2862 | 3.28E-07 | chr:11:60449890 |
| 11 rs116841458 | 60148566 T | 5.825  | 3.43E-07 | chr:11:60449890 |
| 11 rs117655631 | 60133639 A | 5.825  | 3.43E-07 | chr:11:60449890 |

|                |            |        |          |                 |
|----------------|------------|--------|----------|-----------------|
| 11 rs117961609 | 60148570 T | 5.825  | 3.43E-07 | chr:11:60449890 |
| 11 rs138775550 | 60143481 T | 5.825  | 3.43E-07 | chr:11:60449890 |
| 11 rs146149101 | 60147398 A | 5.825  | 3.43E-07 | chr:11:60449890 |
| 11 rs17154830  | 60122229 A | 5.825  | 3.43E-07 | chr:11:60449890 |
| 11 rs2017738   | 60110746 T | 5.825  | 3.43E-07 | chr:11:60449890 |
| 11 rs4938938   | 60119633 C | 5.825  | 3.43E-07 | chr:11:60449890 |
| 11 rs4939341   | 60111430 A | 5.825  | 3.43E-07 | chr:11:60449890 |
| 11 rs4939351   | 60139906 A | 5.825  | 3.43E-07 | chr:11:60449890 |
| 11 rs7112972   | 60139846 T | 5.825  | 3.43E-07 | chr:11:60449890 |
| 11 rs74603923  | 60141495 A | 5.825  | 3.43E-07 | chr:11:60449890 |
| 11 rs74836746  | 60147294 T | 5.825  | 3.43E-07 | chr:11:60449890 |
| 11 rs75301877  | 60149538 G | 5.825  | 3.43E-07 | chr:11:60449890 |
| 11 rs75443562  | 60144484 T | 5.825  | 3.43E-07 | chr:11:60449890 |
| 11 rs75812155  | 60126923 G | 5.825  | 3.43E-07 | chr:11:60449890 |
| 11 rs77833123  | 60128200 A | 5.825  | 3.43E-07 | chr:11:60449890 |
| 11 rs77904860  | 60115695 T | 5.825  | 3.43E-07 | chr:11:60449890 |
| 11 rs78474912  | 60127722 A | 5.825  | 3.43E-07 | chr:11:60449890 |
| 11 rs78843981  | 60146055 A | 5.825  | 3.43E-07 | chr:11:60449890 |
| 11 rs79926162  | 60132686 G | 5.825  | 3.43E-07 | chr:11:60449890 |
| 11 rs962813    | 60110542 A | 5.825  | 3.43E-07 | chr:11:60449890 |
| 11 rs17154674  | 60051768 C | 3.956  | 3.82E-07 | chr:11:60449890 |
| 11 rs556448    | 60395181 G | 0.239  | 4.05E-07 | chr:11:60449890 |
| 11 rs12417095  | 60295245 A | 0.288  | 4.13E-07 | chr:11:60449890 |
| 11 rs12419383  | 60289988 G | 0.288  | 4.13E-07 | chr:11:60449890 |
| 11 rs7105958   | 60289057 G | 0.288  | 4.13E-07 | chr:11:60449890 |
| 11 rs112073301 | 60371040 G | 0.2387 | 4.27E-07 | chr:11:60449890 |
| 11 rs61900812  | 60322946 A | 0.2783 | 4.27E-07 | chr:11:60449890 |
| 11 rs17154846  | 60126725 C | 5.613  | 4.54E-07 | chr:11:60449890 |
| 11 rs76757698  | 60148991 A | 5.559  | 4.90E-07 | chr:11:60449890 |
| 11 rs11230283  | 60112476 T | 5.574  | 4.93E-07 | chr:11:60449890 |
| 11 rs4938940   | 60169827 T | 5.087  | 4.99E-07 | chr:11:60449890 |
| 11 rs1552474   | 60388078 A | 0.2426 | 5.00E-07 | chr:11:60449890 |
| 11 rs61900774  | 60299652 T | 0.2923 | 5.29E-07 | chr:11:60449890 |
| 11 rs11230424  | 60368782 C | 0.2425 | 5.33E-07 | chr:11:60449890 |
| 11 rs1238233   | 60392174 T | 0.2425 | 5.33E-07 | chr:11:60449890 |
| 11 rs1994457   | 60387600 G | 0.2425 | 5.33E-07 | chr:11:60449890 |
| 11 rs7479522   | 60390389 A | 0.2425 | 5.33E-07 | chr:11:60449890 |
| 11 rs78540235  | 60389656 T | 0.2425 | 5.33E-07 | chr:11:60449890 |
| 11 rs7933702   | 60364916 C | 0.2425 | 5.33E-07 | chr:11:60449890 |
| 11 rs2054851   | 60380272 T | 0.2424 | 5.59E-07 | chr:11:60449890 |
| 11 rs75627175  | 60005825 C | 3.746  | 5.91E-07 | chr:11:60449890 |
| 11 rs6591572   | 60115559 A | 4.717  | 7.09E-07 | chr:11:60449890 |
| 11 rs766112    | 60280544 C | 0.3059 | 8.79E-07 | chr:11:60449890 |

|                |            |        |          |                 |
|----------------|------------|--------|----------|-----------------|
| 11 rs2299651   | 60757542 T | 3.39   | 9.23E-07 | chr:11:60449890 |
| 11 rs540028    | 60836408 A | 0.2805 | 1.04E-06 | chr:11:60449890 |
| 11 rs12421597  | 60505846 A | 0.2409 | 1.04E-06 | chr:11:60449890 |
| 11 rs11230378  | 60310083 T | 0.3017 | 1.06E-06 | chr:11:60449890 |
| 11 rs11230394  | 60346932 G | 0.2556 | 1.23E-06 | chr:11:60449890 |
| 11 rs4614472   | 60336949 C | 0.2556 | 1.23E-06 | chr:11:60449890 |
| 11 rs59379022  | 60328417 C | 0.2556 | 1.23E-06 | chr:11:60449890 |
| 11 rs190728254 | 60025977 T | 5.305  | 1.29E-06 | chr:11:60449890 |
| 11 rs1373061   | 60125647 A | 4.569  | 1.29E-06 | chr:11:60449890 |
| 11 rs1373062   | 60125591 A | 4.569  | 1.29E-06 | chr:11:60449890 |
| 11 rs1899573   | 60123837 T | 4.569  | 1.29E-06 | chr:11:60449890 |
| 11 rs2034080   | 60121869 T | 4.569  | 1.29E-06 | chr:11:60449890 |
| 11 rs2034081   | 60121670 C | 4.569  | 1.29E-06 | chr:11:60449890 |
| 11 rs7945371   | 60308128 A | 0.3066 | 1.36E-06 | chr:11:60449890 |
| 11 rs507550    | 60804962 A | 3.351  | 1.40E-06 | chr:11:60449890 |
| 11 rs4938977   | 60521424 A | 0.3163 | 1.41E-06 | chr:11:60449890 |
| 11 rs11230548  | 60751569 A | 3.253  | 1.93E-06 | chr:11:60449890 |
| 11 rs187852876 | 60051142 C | 5.242  | 2.19E-06 | chr:11:60449890 |
| 11 rs185807105 | 59989832 G | 5.06   | 2.32E-06 | chr:11:60449890 |
| 11 rs509936    | 60858031 G | 0.3379 | 2.54E-06 | chr:11:60449890 |
| 11 rs55929020  | 60391817 T | 0.2749 | 2.73E-06 | chr:11:60449890 |
| 11 rs59497469  | 60390801 C | 0.2749 | 2.73E-06 | chr:11:60449890 |
| 11 rs7937466   | 60389305 A | 0.2749 | 2.73E-06 | chr:11:60449890 |
| 11 rs61900768  | 60283627 G | 0.32   | 2.89E-06 | chr:11:60449890 |
| 11 rs7482102   | 60390467 A | 0.2749 | 3.00E-06 | chr:11:60449890 |
| 11 rs199581697 | 60369457 T | 0.2956 | 3.15E-06 | chr:11:60449890 |
| 11 rs2054849   | 60364127 C | 0.2779 | 3.26E-06 | chr:11:60449890 |
| 11 rs56183826  | 60368846 A | 0.2779 | 3.26E-06 | chr:11:60449890 |
| 11 rs61898779  | 60371542 T | 0.2779 | 3.26E-06 | chr:11:60449890 |
| 11 rs12421253  | 60889474 C | 7.838  | 3.99E-06 | chr:11:60449890 |
| 11 rs12418015  | 60343295 A | 0.2742 | 4.03E-06 | chr:11:60449890 |
| 11 rs12274840  | 60275870 G | 0.3583 | 4.34E-06 | chr:11:60449890 |
| 11 rs61898795  | 60441783 C | 0.2891 | 4.92E-06 | chr:11:60449890 |
| 11 rs612342    | 60495124 T | 0.2895 | 5.40E-06 | chr:11:60449890 |
| 11 rs2509511   | 60335761 A | 0.2735 | 5.91E-06 | chr:11:60449890 |
| 11 rs2633279   | 60337668 A | 0.2735 | 5.91E-06 | chr:11:60449890 |
| 11 rs2847216   | 60332894 A | 0.2735 | 5.91E-06 | chr:11:60449890 |
| 11 rs1050922   | 60785352 G | 0.3124 | 5.93E-06 | chr:11:60449890 |
| 11 rs2074232   | 60785038 G | 0.3124 | 5.93E-06 | chr:11:60449890 |
| 11 rs485303    | 60590145 A | 0.3427 | 5.93E-06 | chr:11:60449890 |
| 11 rs520569    | 60590947 G | 0.3427 | 5.93E-06 | chr:11:60449890 |
| 11 rs11604104  | 60257301 G | 0.3099 | 6.08E-06 | chr:11:60449890 |
| 11 rs4939366   | 60255867 C | 0.3099 | 6.08E-06 | chr:11:60449890 |

|                |            |        |          |                 |
|----------------|------------|--------|----------|-----------------|
| 11 rs4939368   | 60256048 A | 0.3099 | 6.08E-06 | chr:11:60449890 |
| 11 rs4939370   | 60257400 C | 0.3099 | 6.08E-06 | chr:11:60449890 |
| 11 rs55820209  | 60256974 G | 0.3099 | 6.08E-06 | chr:11:60449890 |
| 11 rs55924472  | 60254603 A | 0.3099 | 6.08E-06 | chr:11:60449890 |
| 11 rs150826565 | 60389460 T | 0.2907 | 7.21E-06 | chr:11:60449890 |
| 11 rs199639640 | 60259428 G | 0.3141 | 7.26E-06 | chr:11:60449890 |
| 11 rs7951049   | 60262342 G | 0.3141 | 7.26E-06 | chr:11:60449890 |
| 11 rs145490027 | 59956241 A | 3.228  | 7.89E-06 | chr:11:60449890 |
| 11 rs6591611   | 60405172 C | 0.3036 | 8.60E-06 | chr:11:60449890 |
| 11 rs2051770   | 60804710 A | 2.963  | 9.17E-06 | chr:11:60449890 |
| 11 rs999297    | 60801310 A | 2.963  | 9.17E-06 | chr:11:60449890 |
| 11 rs4939372   | 60257801 C | 0.3173 | 9.27E-06 | chr:11:60449890 |
| 11 rs11230344  | 60264409 G | 0.3221 | 9.65E-06 | chr:11:60449890 |
| 11 rs3019558   | 60784275 G | 0.3222 | 1.06E-05 | chr:11:60449890 |
| 11 rs188388424 | 60259290 C | 0.3165 | 1.19E-05 | chr:11:60449890 |
| 11 rs191577916 | 60259291 C | 0.3165 | 1.19E-05 | chr:11:60449890 |
| 11 rs11230388  | 60340422 A | 0.2983 | 1.24E-05 | chr:11:60449890 |
| 11 rs113104783 | 60348915 C | 0.2983 | 1.24E-05 | chr:11:60449890 |
| 11 rs612415    | 60859886 T | 0.3595 | 1.30E-05 | chr:11:60449890 |
| 11 rs3016171   | 60803588 G | 0.3448 | 1.34E-05 | chr:11:60449890 |
| 11 rs202037444 | 60258570 G | 0.3228 | 1.38E-05 | chr:11:60449890 |
| 11 rs2000636   | 60220947 A | 2.461  | 1.41E-05 | chr:11:60449890 |
| 11 rs7944716   | 60579522 A | 0.3604 | 1.41E-05 | chr:11:60449890 |
| 11 rs12576721  | 60442427 T | 0.3129 | 1.51E-05 | chr:11:60449890 |
| 11 rs4939446   | 60465161 T | 0.3129 | 1.51E-05 | chr:11:60449890 |
| 11 rs2298559   | 60274640 T | 0.3439 | 1.53E-05 | chr:11:60449890 |
| 11 rs2298558   | 60274393 G | 0.3457 | 1.58E-05 | chr:11:60449890 |
| 11 rs61898791  | 60400024 T | 0.3067 | 1.60E-05 | chr:11:60449890 |
| 11 rs146548256 | 60259218 T | 0.3195 | 1.60E-05 | chr:11:60449890 |
| 11 rs1080719   | 60422891 A | 0.3069 | 1.65E-05 | chr:11:60449890 |
| 11 rs4939383   | 60272374 G | 0.323  | 1.68E-05 | chr:11:60449890 |
| 11 rs117239525 | 60755203 C | 0.337  | 1.75E-05 | chr:11:60449890 |
| 11 rs138993612 | 60755200 T | 0.337  | 1.75E-05 | chr:11:60449890 |
| 11 rs141668624 | 60755201 T | 0.337  | 1.75E-05 | chr:11:60449890 |
| 11 rs151039602 | 60755202 T | 0.337  | 1.75E-05 | chr:11:60449890 |
| 11 rs2905510   | 60757857 C | 0.337  | 1.75E-05 | chr:11:60449890 |
| 11 rs3019538   | 60756175 G | 0.337  | 1.75E-05 | chr:11:60449890 |
| 11 rs75152709  | 60755197 C | 0.337  | 1.75E-05 | chr:11:60449890 |
| 11 rs78689918  | 60755196 T | 0.337  | 1.75E-05 | chr:11:60449890 |
| 11 rs61198976  | 60538309 A | 2.575  | 1.81E-05 | chr:11:60449890 |
| 11 rs113289170 | 60259320 A | 0.3234 | 1.86E-05 | chr:11:60449890 |
| 11 rs10897105  | 60431482 C | 0.2634 | 1.88E-05 | chr:11:60449890 |
| 11 rs11533252  | 60439134 G | 0.2634 | 1.88E-05 | chr:11:60449890 |



|                |            |        |          |                 |
|----------------|------------|--------|----------|-----------------|
| 11 rs8181503   | 60264303 C | 0.3208 | 1.91E-05 | chr:11:60449890 |
| 11 rs10897069  | 60250742 A | 0.3237 | 1.91E-05 | chr:11:60449890 |
| 11 rs10897072  | 60258082 A | 0.3237 | 2.00E-05 | chr:11:60449890 |
| 11 rs10897073  | 60258169 C | 0.3237 | 2.00E-05 | chr:11:60449890 |
| 11 rs4939367   | 60255890 A | 0.3237 | 2.00E-05 | chr:11:60449890 |
| 11 rs4939369   | 60257335 A | 0.3237 | 2.00E-05 | chr:11:60449890 |
| 11 rs4939371   | 60257542 T | 0.3237 | 2.00E-05 | chr:11:60449890 |
| 11 rs56077595  | 60254796 A | 0.3237 | 2.00E-05 | chr:11:60449890 |
| 11 rs7937986   | 60256130 T | 0.3237 | 2.00E-05 | chr:11:60449890 |
| 11 rs9667216   | 60259689 G | 0.3232 | 2.03E-05 | chr:11:60449890 |
| 11 rs4471445   | 60232838 A | 0.3249 | 2.13E-05 | chr:11:60449890 |
| 11 rs4633490   | 60232766 T | 0.3249 | 2.13E-05 | chr:11:60449890 |
| 11 rs112292723 | 60258868 C | 0.3277 | 2.20E-05 | chr:11:60449890 |
| 11 rs113783397 | 60258658 T | 0.3277 | 2.20E-05 | chr:11:60449890 |
| 11 rs4394855   | 60262591 A | 0.3488 | 2.21E-05 | chr:11:60449890 |
| 11 rs17627788  | 60384540 A | 0.3209 | 2.24E-05 | chr:11:60449890 |
| 11 rs1506682   | 60549966 A | 2.538  | 2.24E-05 | chr:11:60449890 |
| 11 rs2089343   | 60547604 A | 2.538  | 2.24E-05 | chr:11:60449890 |
| 11 rs2905507   | 60751277 G | 0.3429 | 2.24E-05 | chr:11:60449890 |
| 11 rs112740539 | 60259113 G | 0.3287 | 2.34E-05 | chr:11:60449890 |
| 11 rs11230343  | 60262251 C | 0.328  | 2.37E-05 | chr:11:60449890 |
| 11 rs11604619  | 60261376 A | 0.328  | 2.37E-05 | chr:11:60449890 |
| 11 rs140618814 | 60258923 C | 0.328  | 2.37E-05 | chr:11:60449890 |
| 11 rs200899867 | 60258569 T | 0.328  | 2.37E-05 | chr:11:60449890 |
| 11 rs4939374   | 60261732 G | 0.328  | 2.37E-05 | chr:11:60449890 |
| 11 rs4939375   | 60261738 T | 0.328  | 2.37E-05 | chr:11:60449890 |
| 11 rs4939376   | 60261906 C | 0.328  | 2.37E-05 | chr:11:60449890 |
| 11 rs4939377   | 60262172 A | 0.328  | 2.37E-05 | chr:11:60449890 |
| 11 rs6591592   | 60260570 T | 0.328  | 2.37E-05 | chr:11:60449890 |
| 11 rs6591593   | 60262382 C | 0.328  | 2.37E-05 | chr:11:60449890 |
| 11 rs7941935   | 60263157 A | 0.328  | 2.37E-05 | chr:11:60449890 |
| 11 rs7942553   | 60259981 G | 0.328  | 2.37E-05 | chr:11:60449890 |
| 11 rs7942906   | 60260318 G | 0.328  | 2.37E-05 | chr:11:60449890 |
| 11 rs7951316   | 60262627 G | 0.328  | 2.37E-05 | chr:11:60449890 |
| 11 rs9666114   | 60259845 C | 0.328  | 2.37E-05 | chr:11:60449890 |
| 11 rs1941032   | 60247925 G | 0.3285 | 2.46E-05 | chr:11:60449890 |
| 11 rs58707312  | 60254591 G | 0.3285 | 2.46E-05 | chr:11:60449890 |
| 11 rs7396755   | 60240699 A | 0.3285 | 2.46E-05 | chr:11:60449890 |
| 11 rs75805701  | 60141605 T | 3.591  | 2.51E-05 | chr:11:60449890 |
| 11 rs4939373   | 60257821 G | 0.3276 | 2.51E-05 | chr:11:60449890 |
| 11 rs139608122 | 60562904 T | 2.915  | 2.58E-05 | chr:11:60449890 |
| 11 rs151164269 | 60562903 C | 2.915  | 2.58E-05 | chr:11:60449890 |
| 11 rs2298551   | 60264755 G | 0.3197 | 2.58E-05 | chr:11:60449890 |

|                |             |        |          |                  |
|----------------|-------------|--------|----------|------------------|
| 11 rs111971056 | 60258633 A  | 0.3325 | 2.69E-05 | chr:11:60449890  |
| 11 rs145082841 | 60566525 C  | 2.903  | 2.73E-05 | chr:11:60449890  |
| 11 rs4939392   | 60290257 C  | 0.3519 | 2.78E-05 | chr:11:60449890  |
| 11 rs9666659   | 60259733 A  | 0.3328 | 2.89E-05 | chr:11:60449890  |
| 11 rs34752191  | 60262644 T  | 0.3414 | 3.21E-05 | chr:11:60449890  |
| 12 rs78072538  | 124074848 T | 48.04  | 2.02E-12 | chr:12:124066477 |
| 12 rs117887064 | 124074320 T | 35.58  | 5.76E-12 | chr:12:124066477 |
| 12 rs137909390 | 124078791 A | 35.58  | 5.76E-12 | chr:12:124066477 |
| 12 rs141542281 | 124075268 A | 35.58  | 5.76E-12 | chr:12:124066477 |
| 12 rs34099549  | 124085062 A | 35.58  | 5.76E-12 | chr:12:124066477 |
| 12 rs146502362 | 124041729 C | 42.44  | 7.58E-12 | chr:12:124066477 |
| 12 rs77699179  | 124092437 A | 34.33  | 8.64E-12 | chr:12:124066477 |
| 12 rs111516966 | 124035781 A | 40.65  | 1.06E-11 | chr:12:124066477 |
| 12 rs11615043  | 124056715 C | 33.37  | 1.14E-11 | chr:12:124066477 |
| 12 rs143130669 | 124046424 T | 33.37  | 1.14E-11 | chr:12:124066477 |
| 12 rs188848881 | 124042516 A | 33.37  | 1.14E-11 | chr:12:124066477 |
| 12 rs74844896  | 124068924 C | 33.37  | 1.14E-11 | chr:12:124066477 |
| 12 rs76100851  | 124067280 T | 33.37  | 1.14E-11 | chr:12:124066477 |
| 12 rs78067009  | 124019231 T | 27.51  | 2.16E-11 | chr:12:124066477 |
| 12 rs111790379 | 124022967 T | 38.36  | 2.17E-11 | chr:12:124066477 |
| 12 rs145594864 | 124024519 A | 38.36  | 2.17E-11 | chr:12:124066477 |
| 12 rs28691687  | 124023020 T | 38.36  | 2.17E-11 | chr:12:124066477 |
| 12 rs6488879   | 124027372 T | 38.36  | 2.17E-11 | chr:12:124066477 |
| 12 rs10082874  | 124051951 A | 26.64  | 3.61E-11 | chr:12:124066477 |
| 12 rs2458449   | 124053767 C | 26.64  | 3.61E-11 | chr:12:124066477 |
| 12 rs786455    | 124054766 T | 26.64  | 3.61E-11 | chr:12:124066477 |
| 12 rs11057311  | 124121429 T | 41.54  | 6.21E-11 | chr:12:124066477 |
| 12 rs11572966  | 124134802 T | 41.54  | 6.21E-11 | chr:12:124066477 |
| 12 rs10846527  | 124043296 C | 35.03  | 6.66E-11 | chr:12:124066477 |
| 12 rs79370578  | 124007431 T | 23.6   | 1.35E-10 | chr:12:124066477 |
| 12 rs2048614   | 124011429 T | 21.47  | 1.71E-10 | chr:12:124066477 |
| 12 rs28361405  | 124012714 A | 21.47  | 1.71E-10 | chr:12:124066477 |
| 12 rs147460725 | 124038535 T | 28.36  | 1.86E-10 | chr:12:124066477 |
| 12 rs28880346  | 124038995 C | 28.36  | 1.86E-10 | chr:12:124066477 |
| 12 rs118111778 | 124083600 T | 164.8  | 6.45E-10 | chr:12:124066477 |
| 12 rs117209788 | 124014251 T | 22.51  | 8.53E-10 | chr:12:124066477 |
| 12 rs143928387 | 124013220 T | 22.51  | 8.53E-10 | chr:12:124066477 |
| 12 rs883503    | 124008897 C | 16.77  | 1.00E-09 | chr:12:124066477 |
| 12 rs786426    | 124086086 C | 17.17  | 1.25E-09 | chr:12:124066477 |
| 12 rs884892    | 124097528 G | 61.93  | 3.79E-09 | chr:12:124066477 |
| 12 rs530657685 | 124084061 G | 18.93  | 6.72E-09 | chr:12:124066477 |
| 12 rs7316613   | 124045580 T | 28.35  | 6.78E-09 | chr:12:124066477 |
| 12 rs112002563 | 124077902 T | 19.82  | 7.09E-09 | chr:12:124066477 |

|                |             |       |          |                  |
|----------------|-------------|-------|----------|------------------|
| 12 rs9697379   | 124005129 A | 14.85 | 8.69E-09 | chr:12:124066477 |
| 12 rs3748268   | 124097824 G | 57.61 | 1.06E-08 | chr:12:124066477 |
| 12 rs61953538  | 124005708 T | 13.43 | 1.11E-08 | chr:12:124066477 |
| 12 rs10846531  | 124098612 G | 11.82 | 1.27E-08 | chr:12:124066477 |
| 12 rs11057298  | 124057112 A | 86    | 1.54E-08 | chr:12:124066477 |
| 12 rs4930715   | 124042949 C | 39.5  | 1.58E-08 | chr:12:124066477 |
| 12 rs28454032  | 124034703 G | 24.78 | 2.53E-08 | chr:12:124066477 |
| 12 rs5027860   | 124032819 G | 24.78 | 2.53E-08 | chr:12:124066477 |
| 12 rs542038648 | 124086080 A | 13.88 | 2.63E-08 | chr:12:124066477 |
| 12 rs7307227   | 124020098 T | 12.46 | 2.72E-08 | chr:12:124066477 |
| 12 rs2048802   | 124098780 T | 10.94 | 2.95E-08 | chr:12:124066477 |
| 12 rs7965466   | 124036188 C | 71    | 4.13E-08 | chr:12:124066477 |
| 12 rs7314792   | 124036984 G | 69.74 | 4.68E-08 | chr:12:124066477 |
| 12 rs11057302  | 124070013 A | 429.6 | 6.09E-08 | chr:12:124066477 |
| 12 rs111507681 | 124088418 T | 429.6 | 6.09E-08 | chr:12:124066477 |
| 12 rs143269373 | 124071864 A | 429.6 | 6.09E-08 | chr:12:124066477 |
| 12 rs146539578 | 124071144 T | 429.6 | 6.09E-08 | chr:12:124066477 |
| 12 rs146936648 | 124074744 G | 429.6 | 6.09E-08 | chr:12:124066477 |
| 12 rs7301377   | 124076254 T | 429.6 | 6.09E-08 | chr:12:124066477 |
| 12 rs7303554   | 124079920 G | 429.6 | 6.09E-08 | chr:12:124066477 |
| 12 rs74643748  | 124075915 T | 429.6 | 6.09E-08 | chr:12:124066477 |
| 12 rs74996347  | 124086528 G | 429.6 | 6.09E-08 | chr:12:124066477 |
| 12 rs77592647  | 124084160 G | 429.6 | 6.09E-08 | chr:12:124066477 |
| 12 rs77895354  | 124075111 G | 429.6 | 6.09E-08 | chr:12:124066477 |
| 12 rs7952920   | 124085011 T | 429.6 | 6.09E-08 | chr:12:124066477 |
| 12 rs7970545   | 124085080 G | 429.6 | 6.09E-08 | chr:12:124066477 |
| 12 rs79933835  | 124073911 T | 429.6 | 6.09E-08 | chr:12:124066477 |
| 12 rs952360    | 124076806 C | 429.6 | 6.09E-08 | chr:12:124066477 |
| 12 rs71458805  | 124017254 G | 8.985 | 6.20E-08 | chr:12:124066477 |
| 12 rs7965334   | 124036026 C | 35.28 | 6.32E-08 | chr:12:124066477 |
| 12 rs28673982  | 124016464 C | 10.74 | 6.42E-08 | chr:12:124066477 |
| 12 rs7315326   | 124033885 G | 6.979 | 6.72E-08 | chr:12:124066477 |
| 12 rs2292500   | 124008073 A | 10.69 | 6.87E-08 | chr:12:124066477 |
| 12 rs2063629   | 124006842 C | 10.6  | 8.06E-08 | chr:12:124066477 |
| 12 rs9723048   | 124006318 G | 10.6  | 8.06E-08 | chr:12:124066477 |
| 12 rs111625397 | 124058009 A | 395.3 | 8.34E-08 | chr:12:124066477 |
| 12 rs11610013  | 124069614 A | 395.3 | 8.34E-08 | chr:12:124066477 |
| 12 rs11834369  | 124059546 T | 395.3 | 8.34E-08 | chr:12:124066477 |
| 12 rs11837236  | 124065116 G | 395.3 | 8.34E-08 | chr:12:124066477 |
| 12 rs12099986  | 124065978 G | 395.3 | 8.34E-08 | chr:12:124066477 |
| 12 rs138708987 | 124058169 C | 395.3 | 8.34E-08 | chr:12:124066477 |
| 12 rs1877365   | 124061397 T | 395.3 | 8.34E-08 | chr:12:124066477 |
| 12 rs2340691   | 124061421 T | 395.3 | 8.34E-08 | chr:12:124066477 |

|                |             |       |          |                  |
|----------------|-------------|-------|----------|------------------|
| 12 rs78955489  | 124068910 A | 395.3 | 8.34E-08 | chr:12:124066477 |
| 12 rs7954782   | 124064537 G | 395.3 | 8.34E-08 | chr:12:124066477 |
| 12 rs7958153   | 124064998 G | 395.3 | 8.34E-08 | chr:12:124066477 |
| 12 rs7960812   | 124062742 T | 395.3 | 8.34E-08 | chr:12:124066477 |
| 12 rs7968040   | 124058937 A | 395.3 | 8.34E-08 | chr:12:124066477 |
| 12 rs7971779   | 124064918 T | 395.3 | 8.34E-08 | chr:12:124066477 |
| 12 rs10846528  | 124052985 A | 7.184 | 8.96E-08 | chr:12:124066477 |
| 12 rs12099981  | 124065428 C | 390.5 | 9.92E-08 | chr:12:124066477 |
| 12 rs112455213 | 124055507 A | 379.3 | 1.00E-07 | chr:12:124066477 |
| 12 rs116716383 | 124055605 G | 379.3 | 1.00E-07 | chr:12:124066477 |
| 12 rs6488881   | 124056441 G | 379.3 | 1.00E-07 | chr:12:124066477 |
| 12 rs7136101   | 124056685 A | 379.3 | 1.00E-07 | chr:12:124066477 |
| 12 rs61678733  | 124094174 C | 323.7 | 1.09E-07 | chr:12:124066477 |
| 12 rs73414262  | 124093859 G | 323.7 | 1.09E-07 | chr:12:124066477 |
| 12 rs786428    | 124086998 C | 323.7 | 1.09E-07 | chr:12:124066477 |
| 12 rs786429    | 124087394 T | 323.7 | 1.09E-07 | chr:12:124066477 |
| 12 rs786430    | 124087988 G | 323.7 | 1.09E-07 | chr:12:124066477 |
| 12 rs786431    | 124088366 T | 323.7 | 1.09E-07 | chr:12:124066477 |
| 12 rs786432    | 124088532 T | 323.7 | 1.09E-07 | chr:12:124066477 |
| 12 rs786433    | 124089582 A | 323.7 | 1.09E-07 | chr:12:124066477 |
| 12 rs786434    | 124089793 T | 323.7 | 1.09E-07 | chr:12:124066477 |
| 12 rs786435    | 124090208 G | 323.7 | 1.09E-07 | chr:12:124066477 |
| 12 rs786437    | 124090814 G | 323.7 | 1.09E-07 | chr:12:124066477 |
| 12 rs786438    | 124091218 A | 323.7 | 1.09E-07 | chr:12:124066477 |
| 12 rs786439    | 124091460 G | 323.7 | 1.09E-07 | chr:12:124066477 |
| 12 rs786450    | 124071765 C | 323.7 | 1.09E-07 | chr:12:124066477 |
| 12 rs28834793  | 124040064 G | 6.406 | 1.19E-07 | chr:12:124066477 |
| 12 rs28711456  | 124012763 T | 8.606 | 1.21E-07 | chr:12:124066477 |
| 12 rs7313179   | 124009190 T | 8.606 | 1.21E-07 | chr:12:124066477 |
| 12 rs7959727   | 124022758 G | 6.924 | 1.21E-07 | chr:12:124066477 |
| 12 rs4930716   | 124013306 A | 7.989 | 1.23E-07 | chr:12:124066477 |
| 12 rs2458115   | 124053902 T | 6.375 | 1.36E-07 | chr:12:124066477 |
| 12 rs12817861  | 124046540 T | 6.367 | 1.38E-07 | chr:12:124066477 |
| 12 rs2048616   | 124049966 G | 6.375 | 1.41E-07 | chr:12:124066477 |
| 12 rs11057306  | 124097766 G | 314.3 | 1.71E-07 | chr:12:124066477 |
| 12 rs4310694   | 124050760 A | 6.08  | 3.24E-07 | chr:12:124066477 |
| 12 rs786454    | 124055358 C | 5.157 | 6.53E-07 | chr:12:124066477 |
| 12 rs7305701   | 124150013 C | 5.567 | 6.71E-07 | chr:12:124066477 |
| 12 rs34996665  | 124134656 T | 5.559 | 1.02E-06 | chr:12:124066477 |
| 12 rs786452    | 124057169 C | 5.387 | 1.13E-06 | chr:12:124066477 |
| 12 rs10744161  | 124231355 A | 4.797 | 1.23E-06 | chr:12:124066477 |
| 12 rs11615300  | 124100423 G | 4.991 | 1.29E-06 | chr:12:124066477 |
| 12 rs7301065   | 124154838 A | 5.07  | 1.53E-06 | chr:12:124066477 |

|                |             |       |          |                  |
|----------------|-------------|-------|----------|------------------|
| 12 rs7295552   | 124223844 T | 4.847 | 1.57E-06 | chr:12:124066477 |
| 12 rs35158437  | 124160764 T | 5.074 | 1.63E-06 | chr:12:124066477 |
| 12 rs7133199   | 124159185 C | 5.074 | 1.63E-06 | chr:12:124066477 |
| 12 rs7134074   | 124159885 T | 5.074 | 1.63E-06 | chr:12:124066477 |
| 12 rs7313140   | 124157188 G | 5.074 | 1.63E-06 | chr:12:124066477 |
| 12 rs7313261   | 124166937 A | 5.074 | 1.63E-06 | chr:12:124066477 |
| 12 rs1051793   | 124144395 G | 5.039 | 1.64E-06 | chr:12:124066477 |
| 12 rs10846537  | 124138346 T | 5.039 | 1.64E-06 | chr:12:124066477 |
| 12 rs4930708   | 124145697 C | 5.039 | 1.64E-06 | chr:12:124066477 |
| 12 rs11610473  | 124149975 G | 5.112 | 1.74E-06 | chr:12:124066477 |
| 12 rs11834141  | 124150696 C | 4.972 | 2.09E-06 | chr:12:124066477 |
| 12 rs7296804   | 124153863 C | 4.972 | 2.09E-06 | chr:12:124066477 |
| 12 rs28752288  | 124020681 A | 6.147 | 2.21E-06 | chr:12:124066477 |
| 12 rs11612479  | 124155526 G | 4.971 | 2.23E-06 | chr:12:124066477 |
| 12 rs7398082   | 124225073 A | 4.62  | 2.31E-06 | chr:12:124066477 |
| 12 rs12580486  | 124224335 T | 4.612 | 2.39E-06 | chr:12:124066477 |
| 12 rs7308398   | 124226800 T | 4.612 | 2.39E-06 | chr:12:124066477 |
| 12 rs7399128   | 124225211 G | 4.612 | 2.39E-06 | chr:12:124066477 |
| 12 rs7135660   | 124174234 A | 4.745 | 2.68E-06 | chr:12:124066477 |
| 12 rs66647364  | 124197280 C | 4.881 | 2.73E-06 | chr:12:124066477 |
| 12 rs7960951   | 124165829 A | 4.728 | 2.79E-06 | chr:12:124066477 |
| 12 rs147639128 | 124176516 G | 14.5  | 2.85E-06 | chr:12:124066477 |
| 12 rs74936044  | 124177506 C | 14.5  | 2.85E-06 | chr:12:124066477 |
| 12 rs10773031  | 124222909 G | 4.559 | 3.02E-06 | chr:12:124066477 |
| 12 rs11829958  | 124173005 G | 4.709 | 3.23E-06 | chr:12:124066477 |
| 12 rs12825800  | 124193666 C | 4.709 | 3.23E-06 | chr:12:124066477 |
| 12 rs12828633  | 124179620 A | 4.709 | 3.23E-06 | chr:12:124066477 |
| 12 rs35114195  | 124176013 C | 4.709 | 3.23E-06 | chr:12:124066477 |
| 12 rs6488897   | 124195483 C | 4.709 | 3.23E-06 | chr:12:124066477 |
| 12 rs7138503   | 124183827 G | 4.709 | 3.23E-06 | chr:12:124066477 |
| 12 rs7298831   | 124172555 T | 4.709 | 3.23E-06 | chr:12:124066477 |
| 12 rs7306549   | 124156897 G | 4.709 | 3.23E-06 | chr:12:124066477 |
| 12 rs7964443   | 124166500 C | 4.709 | 3.23E-06 | chr:12:124066477 |
| 12 rs28478308  | 124017569 A | 4.516 | 3.25E-06 | chr:12:124066477 |
| 12 rs28662057  | 124017568 A | 4.516 | 3.25E-06 | chr:12:124066477 |
| 12 rs35649708  | 124151439 G | 4.68  | 3.45E-06 | chr:12:124066477 |
| 12 rs11609591  | 124174065 A | 4.707 | 3.48E-06 | chr:12:124066477 |
| 12 rs11614659  | 124167956 T | 4.707 | 3.48E-06 | chr:12:124066477 |
| 12 rs12819746  | 124193574 G | 4.707 | 3.48E-06 | chr:12:124066477 |
| 12 rs7297576   | 124171323 C | 4.707 | 3.48E-06 | chr:12:124066477 |
| 12 rs7308862   | 124171151 T | 4.707 | 3.48E-06 | chr:12:124066477 |
| 12 rs7313032   | 124172731 A | 4.707 | 3.48E-06 | chr:12:124066477 |
| 12 rs7958693   | 124162750 A | 4.707 | 3.48E-06 | chr:12:124066477 |

|                |             |       |          |                  |
|----------------|-------------|-------|----------|------------------|
| 12 rs7974279   | 124166411 T | 4.707 | 3.48E-06 | chr:12:124066477 |
| 12 rs2222060   | 124194438 G | 4.691 | 3.68E-06 | chr:12:124066477 |
| 12 rs10846549  | 124222687 C | 4.39  | 3.87E-06 | chr:12:124066477 |
| 12 rs10846550  | 124222695 T | 4.384 | 3.99E-06 | chr:12:124066477 |
| 12 rs786441    | 124062743 G | 4.508 | 4.10E-06 | chr:12:124066477 |
| 12 rs11611354  | 124153639 T | 4.668 | 4.16E-06 | chr:12:124066477 |
| 12 rs2333838   | 124220354 A | 4.356 | 4.49E-06 | chr:12:124066477 |
| 12 rs113310757 | 124161494 G | 4.662 | 4.58E-06 | chr:12:124066477 |
| 12 rs114208992 | 124169242 C | 4.662 | 4.58E-06 | chr:12:124066477 |
| 12 rs11612030  | 124188064 T | 4.662 | 4.58E-06 | chr:12:124066477 |
| 12 rs11613632  | 124184065 A | 4.662 | 4.58E-06 | chr:12:124066477 |
| 12 rs11614468  | 124187924 C | 4.662 | 4.58E-06 | chr:12:124066477 |
| 12 rs118004082 | 124169240 T | 4.662 | 4.58E-06 | chr:12:124066477 |
| 12 rs11830462  | 124178665 T | 4.662 | 4.58E-06 | chr:12:124066477 |
| 12 rs11831536  | 124176748 G | 4.662 | 4.58E-06 | chr:12:124066477 |
| 12 rs11833604  | 124176472 A | 4.662 | 4.58E-06 | chr:12:124066477 |
| 12 rs11834492  | 124180011 C | 4.662 | 4.58E-06 | chr:12:124066477 |
| 12 rs11834808  | 124190582 T | 4.662 | 4.58E-06 | chr:12:124066477 |
| 12 rs11837256  | 124190393 T | 4.662 | 4.58E-06 | chr:12:124066477 |
| 12 rs12817757  | 124156487 T | 4.662 | 4.58E-06 | chr:12:124066477 |
| 12 rs12818596  | 124180474 C | 4.662 | 4.58E-06 | chr:12:124066477 |
| 12 rs12820195  | 124162047 C | 4.662 | 4.58E-06 | chr:12:124066477 |
| 12 rs12821242  | 124178329 A | 4.662 | 4.58E-06 | chr:12:124066477 |
| 12 rs12822546  | 124157247 A | 4.662 | 4.58E-06 | chr:12:124066477 |
| 12 rs12823866  | 124165111 C | 4.662 | 4.58E-06 | chr:12:124066477 |
| 12 rs12824075  | 124157335 T | 4.662 | 4.58E-06 | chr:12:124066477 |
| 12 rs12827074  | 124190836 C | 4.662 | 4.58E-06 | chr:12:124066477 |
| 12 rs12828408  | 124198718 C | 4.662 | 4.58E-06 | chr:12:124066477 |
| 12 rs12829984  | 124172307 T | 4.662 | 4.58E-06 | chr:12:124066477 |
| 12 rs12831081  | 124179739 G | 4.662 | 4.58E-06 | chr:12:124066477 |
| 12 rs2203500   | 124194710 G | 4.662 | 4.58E-06 | chr:12:124066477 |
| 12 rs34534928  | 124160834 C | 4.662 | 4.58E-06 | chr:12:124066477 |
| 12 rs35416308  | 124169461 G | 4.662 | 4.58E-06 | chr:12:124066477 |
| 12 rs35946281  | 124177016 A | 4.662 | 4.58E-06 | chr:12:124066477 |
| 12 rs3817309   | 124198721 T | 4.662 | 4.58E-06 | chr:12:124066477 |
| 12 rs6488890   | 124158971 T | 4.662 | 4.58E-06 | chr:12:124066477 |
| 12 rs6488891   | 124163512 T | 4.662 | 4.58E-06 | chr:12:124066477 |
| 12 rs6488892   | 124171826 C | 4.662 | 4.58E-06 | chr:12:124066477 |
| 12 rs6488893   | 124171903 G | 4.662 | 4.58E-06 | chr:12:124066477 |
| 12 rs6488894   | 124185124 T | 4.662 | 4.58E-06 | chr:12:124066477 |
| 12 rs66471742  | 124199006 A | 4.662 | 4.58E-06 | chr:12:124066477 |
| 12 rs66690784  | 124165677 G | 4.662 | 4.58E-06 | chr:12:124066477 |
| 12 rs67178535  | 124196299 A | 4.662 | 4.58E-06 | chr:12:124066477 |

|               |             |       |          |                  |
|---------------|-------------|-------|----------|------------------|
| 12 rs7133543  | 124159411 G | 4.662 | 4.58E-06 | chr:12:124066477 |
| 12 rs7135267  | 124199120 C | 4.662 | 4.58E-06 | chr:12:124066477 |
| 12 rs7138209  | 124157052 A | 4.662 | 4.58E-06 | chr:12:124066477 |
| 12 rs71458814 | 124196891 G | 4.662 | 4.58E-06 | chr:12:124066477 |
| 12 rs7298440  | 124181049 T | 4.662 | 4.58E-06 | chr:12:124066477 |
| 12 rs7302649  | 124159766 A | 4.662 | 4.58E-06 | chr:12:124066477 |
| 12 rs7302788  | 124167021 C | 4.662 | 4.58E-06 | chr:12:124066477 |
| 12 rs7304052  | 124177643 A | 4.662 | 4.58E-06 | chr:12:124066477 |
| 12 rs7304837  | 124177538 T | 4.662 | 4.58E-06 | chr:12:124066477 |
| 12 rs7305838  | 124193471 A | 4.662 | 4.58E-06 | chr:12:124066477 |
| 12 rs7307008  | 124160021 G | 4.662 | 4.58E-06 | chr:12:124066477 |
| 12 rs7307343  | 124174365 G | 4.662 | 4.58E-06 | chr:12:124066477 |
| 12 rs7308234  | 124183804 T | 4.662 | 4.58E-06 | chr:12:124066477 |
| 12 rs7309528  | 124171658 T | 4.662 | 4.58E-06 | chr:12:124066477 |
| 12 rs7310918  | 124174656 C | 4.662 | 4.58E-06 | chr:12:124066477 |
| 12 rs73219037 | 124184482 C | 4.662 | 4.58E-06 | chr:12:124066477 |
| 12 rs7397160  | 124196219 A | 4.662 | 4.58E-06 | chr:12:124066477 |
| 12 rs7397230  | 124182659 G | 4.662 | 4.58E-06 | chr:12:124066477 |
| 12 rs7397930  | 124188581 A | 4.662 | 4.58E-06 | chr:12:124066477 |
| 12 rs7398152  | 124184639 G | 4.662 | 4.58E-06 | chr:12:124066477 |
| 12 rs7398298  | 124192728 T | 4.662 | 4.58E-06 | chr:12:124066477 |
| 12 rs7399224  | 124195856 T | 4.662 | 4.58E-06 | chr:12:124066477 |
| 12 rs7953596  | 124158450 C | 4.662 | 4.58E-06 | chr:12:124066477 |
| 12 rs7953599  | 124158455 C | 4.662 | 4.58E-06 | chr:12:124066477 |
| 12 rs7959553  | 124162705 T | 4.662 | 4.58E-06 | chr:12:124066477 |
| 12 rs7963498  | 124158502 A | 4.662 | 4.58E-06 | chr:12:124066477 |
| 12 rs7963968  | 124166041 C | 4.662 | 4.58E-06 | chr:12:124066477 |
| 12 rs7968029  | 124182120 T | 4.662 | 4.58E-06 | chr:12:124066477 |
| 12 rs7969130  | 124161056 G | 4.662 | 4.58E-06 | chr:12:124066477 |
| 12 rs7969234  | 124161110 G | 4.662 | 4.58E-06 | chr:12:124066477 |
| 12 rs7969964  | 124165213 A | 4.662 | 4.58E-06 | chr:12:124066477 |
| 12 rs7973155  | 124185948 G | 4.662 | 4.58E-06 | chr:12:124066477 |
| 12 rs7973695  | 124162477 G | 4.662 | 4.58E-06 | chr:12:124066477 |
| 12 rs7975119  | 124157674 T | 4.662 | 4.58E-06 | chr:12:124066477 |
| 12 rs7975233  | 124157745 G | 4.662 | 4.58E-06 | chr:12:124066477 |
| 12 rs7978447  | 124158080 G | 4.662 | 4.58E-06 | chr:12:124066477 |
| 12 rs7979528  | 124181820 G | 4.662 | 4.58E-06 | chr:12:124066477 |
| 12 rs1040156  | 124223364 A | 4.349 | 4.64E-06 | chr:12:124066477 |
| 12 rs10732574 | 124219121 A | 4.349 | 4.64E-06 | chr:12:124066477 |
| 12 rs10846551 | 124222811 G | 4.349 | 4.64E-06 | chr:12:124066477 |
| 12 rs2271661  | 124219910 T | 4.349 | 4.64E-06 | chr:12:124066477 |
| 12 rs2333835  | 124220879 T | 4.349 | 4.64E-06 | chr:12:124066477 |
| 12 rs2333839  | 124216852 T | 4.349 | 4.64E-06 | chr:12:124066477 |

|                |             |       |          |                  |
|----------------|-------------|-------|----------|------------------|
| 12 rs7300721   | 124219595 T | 4.349 | 4.64E-06 | chr:12:124066477 |
| 12 rs2271660   | 124220055 T | 4.345 | 4.68E-06 | chr:12:124066477 |
| 12 rs117222175 | 124244936 T | 54.45 | 5.09E-06 | chr:12:124066477 |
| 12 rs2333836   | 124220543 C | 4.346 | 5.12E-06 | chr:12:124066477 |
| 12 rs786443    | 124063891 T | 4.358 | 5.39E-06 | chr:12:124066477 |
| 12 rs786445    | 124068361 C | 4.358 | 5.39E-06 | chr:12:124066477 |
| 12 rs786447    | 124069667 A | 4.358 | 5.39E-06 | chr:12:124066477 |
| 12 rs35900897  | 124148892 G | 4.594 | 5.49E-06 | chr:12:124066477 |
| 12 rs2048615   | 124011285 C | 4.327 | 5.80E-06 | chr:12:124066477 |
| 12 rs6488888   | 124142591 G | 4.586 | 6.02E-06 | chr:12:124066477 |
| 12 rs7294984   | 124141749 G | 4.586 | 6.02E-06 | chr:12:124066477 |
| 12 rs4456350   | 124058489 A | 4.251 | 6.12E-06 | chr:12:124066477 |
| 12 rs908373    | 124113319 G | 4.334 | 6.21E-06 | chr:12:124066477 |
| 12 rs12813758  | 124201294 T | 4.597 | 7.21E-06 | chr:12:124066477 |
| 12 rs28580741  | 124013216 C | 4.173 | 7.35E-06 | chr:12:124066477 |
| 12 rs28741988  | 124013264 C | 4.173 | 7.35E-06 | chr:12:124066477 |
| 12 rs13303364  | 124006100 G | 4.541 | 7.44E-06 | chr:12:124066477 |
| 12 rs9697536   | 123995023 T | 4.469 | 7.72E-06 | chr:12:124066477 |
| 12 rs1057879   | 124013406 A | 4.17  | 7.89E-06 | chr:12:124066477 |
| 12 rs2333831   | 124012316 G | 4.17  | 7.89E-06 | chr:12:124066477 |
| 12 rs28371124  | 124012558 T | 4.17  | 7.89E-06 | chr:12:124066477 |
| 12 rs28430750  | 124012197 G | 4.17  | 7.89E-06 | chr:12:124066477 |
| 12 rs28450070  | 124013120 G | 4.17  | 7.89E-06 | chr:12:124066477 |
| 12 rs28478446  | 124014177 T | 4.17  | 7.89E-06 | chr:12:124066477 |
| 12 rs28497190  | 124012223 T | 4.17  | 7.89E-06 | chr:12:124066477 |
| 12 rs28535055  | 124014073 C | 4.17  | 7.89E-06 | chr:12:124066477 |
| 12 rs28605072  | 124011804 G | 4.17  | 7.89E-06 | chr:12:124066477 |
| 12 rs28701527  | 124011923 C | 4.17  | 7.89E-06 | chr:12:124066477 |
| 12 rs28707421  | 124010185 T | 4.17  | 7.89E-06 | chr:12:124066477 |
| 12 rs1060637   | 124110122 T | 4.458 | 8.22E-06 | chr:12:124066477 |
| 12 rs1060639   | 124109988 A | 4.458 | 8.22E-06 | chr:12:124066477 |
| 12 rs11572920  | 124119983 A | 4.458 | 8.22E-06 | chr:12:124066477 |
| 12 rs36018806  | 124114552 A | 4.458 | 8.22E-06 | chr:12:124066477 |
| 12 rs7302183   | 124104460 G | 4.16  | 8.23E-06 | chr:12:124066477 |
| 12 rs11522338  | 124004918 C | 4.174 | 8.26E-06 | chr:12:124066477 |
| 12 rs11522339  | 124004948 A | 4.174 | 8.26E-06 | chr:12:124066477 |
| 12 rs28496079  | 124006841 C | 4.174 | 8.26E-06 | chr:12:124066477 |
| 12 rs28712858  | 124007762 C | 4.174 | 8.26E-06 | chr:12:124066477 |
| 12 rs7970602   | 124165056 T | 4.372 | 8.35E-06 | chr:12:124066477 |
| 12 rs35911711  | 124201087 T | 4.405 | 8.50E-06 | chr:12:124066477 |
| 12 rs1515815   | 124111999 C | 4.458 | 8.68E-06 | chr:12:124066477 |
| 12 rs11057326  | 124148478 T | 4.294 | 9.14E-06 | chr:12:124066477 |
| 12 rs34586028  | 124187082 C | 4.438 | 9.86E-06 | chr:12:124066477 |



|                |             |       |          |                  |
|----------------|-------------|-------|----------|------------------|
| 12 rs12830927  | 124120991 T | 4.432 | 1.01E-05 | chr:12:124066477 |
| 12 rs786444    | 124065416 T | 4.083 | 1.04E-05 | chr:12:124066477 |
| 12 rs11572952  | 124129809 A | 4.341 | 1.13E-05 | chr:12:124066477 |
| 12 rs11611450  | 124148207 G | 4.341 | 1.13E-05 | chr:12:124066477 |
| 12 rs11612927  | 124131727 C | 4.341 | 1.13E-05 | chr:12:124066477 |
| 12 rs11615162  | 124131929 A | 4.341 | 1.13E-05 | chr:12:124066477 |
| 12 rs12817576  | 124126339 T | 4.341 | 1.13E-05 | chr:12:124066477 |
| 12 rs2017181   | 124117257 G | 4.266 | 1.18E-05 | chr:12:124066477 |
| 12 rs111707562 | 124164355 C | 4.333 | 1.22E-05 | chr:12:124066477 |
| 12 rs11614155  | 124167175 T | 4.333 | 1.22E-05 | chr:12:124066477 |
| 12 rs12811354  | 124192415 A | 4.333 | 1.22E-05 | chr:12:124066477 |
| 12 rs12829893  | 124166978 T | 4.333 | 1.22E-05 | chr:12:124066477 |
| 12 rs35804181  | 124162344 C | 4.333 | 1.22E-05 | chr:12:124066477 |
| 12 rs7133734   | 124196735 C | 4.333 | 1.22E-05 | chr:12:124066477 |
| 12 rs7136939   | 124189657 C | 4.333 | 1.22E-05 | chr:12:124066477 |
| 12 rs11057307  | 124098213 C | 4.01  | 1.24E-05 | chr:12:124066477 |
| 12 rs3748269   | 124099925 C | 4.01  | 1.24E-05 | chr:12:124066477 |
| 12 rs786422    | 124083562 G | 4.01  | 1.24E-05 | chr:12:124066477 |
| 12 rs786423    | 124083898 G | 4.01  | 1.24E-05 | chr:12:124066477 |
| 12 rs1139320   | 124197099 T | 4.219 | 1.29E-05 | chr:12:124066477 |
| 12 rs1543075   | 124086448 G | 3.926 | 1.35E-05 | chr:12:124066477 |
| 12 rs1543076   | 124086449 C | 3.926 | 1.35E-05 | chr:12:124066477 |
| 12 rs12813346  | 124201114 G | 4.222 | 1.38E-05 | chr:12:124066477 |
| 12 rs11522337  | 124004843 C | 4     | 1.39E-05 | chr:12:124066477 |
| 12 rs6488883   | 124101347 C | 3.919 | 1.41E-05 | chr:12:124066477 |
| 12 rs6551      | 124082240 C | 3.919 | 1.41E-05 | chr:12:124066477 |
| 12 rs7134896   | 124101858 A | 3.919 | 1.41E-05 | chr:12:124066477 |
| 12 rs786448    | 124070214 A | 3.919 | 1.41E-05 | chr:12:124066477 |
| 12 rs786449    | 124071728 C | 3.919 | 1.41E-05 | chr:12:124066477 |
| 12 rs10846540  | 124169093 G | 4.227 | 1.44E-05 | chr:12:124066477 |
| 12 rs1969272   | 124170293 G | 4.227 | 1.44E-05 | chr:12:124066477 |
| 12 rs2222061   | 124194929 T | 4.227 | 1.44E-05 | chr:12:124066477 |
| 12 rs56176939  | 124184829 G | 4.227 | 1.44E-05 | chr:12:124066477 |
| 12 rs7137946   | 124177289 C | 4.227 | 1.44E-05 | chr:12:124066477 |
| 12 rs7139193   | 124171176 G | 4.227 | 1.44E-05 | chr:12:124066477 |
| 12 rs7301907   | 124172342 C | 4.227 | 1.44E-05 | chr:12:124066477 |
| 12 rs7302449   | 124172746 C | 4.227 | 1.44E-05 | chr:12:124066477 |
| 12 rs7316011   | 124185212 T | 4.227 | 1.44E-05 | chr:12:124066477 |
| 12 rs10846535  | 124130388 G | 4.201 | 1.46E-05 | chr:12:124066477 |
| 12 rs11057320  | 124141362 G | 4.201 | 1.46E-05 | chr:12:124066477 |
| 12 rs7971452   | 124126821 G | 4.201 | 1.46E-05 | chr:12:124066477 |
| 12 rs7966882   | 124128965 A | 4.193 | 1.53E-05 | chr:12:124066477 |
| 12 rs10846541  | 124176286 T | 4.225 | 1.54E-05 | chr:12:124066477 |

|                |             |       |          |                  |
|----------------|-------------|-------|----------|------------------|
| 12 rs7960017   | 124165059 C | 4.414 | 1.68E-05 | chr:12:124066477 |
| 12 rs111482432 | 124078585 G | 22.85 | 1.72E-05 | chr:12:124066477 |
| 12 rs113088709 | 124095455 G | 22.85 | 1.72E-05 | chr:12:124066477 |
| 12 rs113620982 | 124086656 T | 22.85 | 1.72E-05 | chr:12:124066477 |
| 12 rs114613914 | 124089740 G | 22.85 | 1.72E-05 | chr:12:124066477 |
| 12 rs12099985  | 124065667 C | 22.85 | 1.72E-05 | chr:12:124066477 |
| 12 rs3850953   | 124091412 T | 22.85 | 1.72E-05 | chr:12:124066477 |
| 12 rs75700739  | 124084424 A | 22.85 | 1.72E-05 | chr:12:124066477 |
| 12 rs78068178  | 124059962 T | 22.85 | 1.72E-05 | chr:12:124066477 |
| 12 rs7964934   | 124058639 A | 22.85 | 1.72E-05 | chr:12:124066477 |
| 12 rs7965292   | 124081779 T | 22.85 | 1.72E-05 | chr:12:124066477 |
| 12 rs7973187   | 124068015 C | 22.85 | 1.72E-05 | chr:12:124066477 |
| 12 rs7973689   | 124090655 T | 22.85 | 1.72E-05 | chr:12:124066477 |
| 12 rs79847496  | 124089348 G | 22.85 | 1.72E-05 | chr:12:124066477 |
| 12 rs12821219  | 124178290 C | 4.09  | 1.75E-05 | chr:12:124066477 |
| 12 rs67516712  | 124201524 A | 3.981 | 1.84E-05 | chr:12:124066477 |
| 12 rs11057376  | 124348065 T | 15.11 | 1.84E-05 | chr:12:124066477 |
| 12 rs6488898   | 124203832 G | 15.53 | 1.86E-05 | chr:12:124066477 |
| 12 rs137963709 | 124020685 A | 11.07 | 1.89E-05 | chr:12:124066477 |
| 12 rs11837257  | 124190394 C | 4.312 | 1.90E-05 | chr:12:124066477 |
| 12 rs10846546  | 124187886 G | 4.199 | 1.90E-05 | chr:12:124066477 |
| 12 rs7966867   | 124179417 C | 4.199 | 1.90E-05 | chr:12:124066477 |
| 12 rs1515814   | 124108699 A | 3.903 | 2.05E-05 | chr:12:124066477 |
| 12 rs117336016 | 124196606 A | 5.514 | 2.07E-05 | chr:12:124066477 |
| 12 rs146184147 | 124196604 A | 5.514 | 2.07E-05 | chr:12:124066477 |
| 12 rs11611540  | 124187606 T | 11.54 | 2.41E-05 | chr:12:124066477 |
| 12 rs117871720 | 124052384 G | 22.45 | 2.54E-05 | chr:12:124066477 |
| 12 rs7972413   | 124108296 C | 3.8   | 2.68E-05 | chr:12:124066477 |
| 12 rs7135624   | 124147831 G | 3.998 | 2.71E-05 | chr:12:124066477 |
| 12 rs138318001 | 124054104 C | 20.77 | 2.73E-05 | chr:12:124066477 |
| 12 rs6488882   | 124056572 T | 20.77 | 2.73E-05 | chr:12:124066477 |
| 12 rs7306906   | 124100486 A | 20.77 | 2.73E-05 | chr:12:124066477 |
| 12 rs75468015  | 124054109 C | 20.77 | 2.73E-05 | chr:12:124066477 |
| 12 rs78702455  | 124054015 G | 20.77 | 2.73E-05 | chr:12:124066477 |
| 12 rs4040225   | 124096673 A | 3.805 | 2.94E-05 | chr:12:124066477 |
| 12 rs786425    | 124085502 G | 3.805 | 2.94E-05 | chr:12:124066477 |
| 12 rs12815746  | 124126086 T | 4.249 | 3.01E-05 | chr:12:124066477 |
| 12 rs10744162  | 124243707 T | 3.513 | 3.89E-05 | chr:12:124066477 |
| 12 rs10773033  | 124231368 T | 3.513 | 3.89E-05 | chr:12:124066477 |
| 12 rs10773034  | 124234253 A | 3.513 | 3.89E-05 | chr:12:124066477 |
| 12 rs10744160  | 124225542 A | 3.554 | 3.90E-05 | chr:12:124066477 |
| 12 rs7313628   | 124107015 A | 3.639 | 4.00E-05 | chr:12:124066477 |
| 12 rs6488886   | 124120205 A | 15.65 | 4.03E-05 | chr:12:124066477 |

|                |            |       |          |                 |
|----------------|------------|-------|----------|-----------------|
| 12 rs10785482  | 44342910 T | 152.2 | 8.43E-18 | chr:12:44313657 |
| 12 rs10880597  | 44336172 A | 152.2 | 8.43E-18 | chr:12:44313657 |
| 12 rs10880600  | 44343641 T | 152.2 | 8.43E-18 | chr:12:44313657 |
| 12 rs10880601  | 44343768 A | 152.2 | 8.43E-18 | chr:12:44313657 |
| 12 rs11182339  | 44331841 A | 152.2 | 8.43E-18 | chr:12:44313657 |
| 12 rs11182341  | 44339216 T | 152.2 | 8.43E-18 | chr:12:44313657 |
| 12 rs11182346  | 44350097 T | 152.2 | 8.43E-18 | chr:12:44313657 |
| 12 rs7312373   | 44332843 C | 152.2 | 8.43E-18 | chr:12:44313657 |
| 12 rs10880605  | 44349669 A | 141.9 | 1.30E-17 | chr:12:44313657 |
| 12 rs10785473  | 44316584 G | 202.8 | 6.85E-17 | chr:12:44313657 |
| 12 rs10785474  | 44318428 G | 202.8 | 6.85E-17 | chr:12:44313657 |
| 12 rs10785477  | 44318723 G | 202.8 | 6.85E-17 | chr:12:44313657 |
| 12 rs10785478  | 44320156 T | 202.8 | 6.85E-17 | chr:12:44313657 |
| 12 rs10880586  | 44310604 G | 202.8 | 6.85E-17 | chr:12:44313657 |
| 12 rs11182327  | 44310418 A | 202.8 | 6.85E-17 | chr:12:44313657 |
| 12 rs4417371   | 44327407 A | 202.8 | 6.85E-17 | chr:12:44313657 |
| 12 rs4768544   | 44309919 C | 269.1 | 2.03E-16 | chr:12:44313657 |
| 12 rs11182358  | 44363335 T | 32.72 | 2.79E-16 | chr:12:44313657 |
| 12 rs200356917 | 44301684 A | 6.282 | 3.06E-16 | chr:12:44313657 |
| 12 rs201614323 | 44301725 T | 5.828 | 1.21E-15 | chr:12:44313657 |
| 12 rs1731447   | 44289250 A | 32.29 | 1.25E-15 | chr:12:44313657 |
| 12 rs77056193  | 44225895 T | 46.77 | 1.72E-15 | chr:12:44313657 |
| 12 rs9668752   | 44302117 T | 5.715 | 2.05E-15 | chr:12:44313657 |
| 12 rs10785467  | 44309433 T | 21.07 | 2.63E-15 | chr:12:44313657 |
| 12 rs7350559   | 44362805 G | 31.74 | 2.95E-15 | chr:12:44313657 |
| 12 rs7979391   | 44295117 G | 20.64 | 3.72E-15 | chr:12:44313657 |
| 12 rs10736017  | 44300037 A | 19.9  | 5.42E-15 | chr:12:44313657 |
| 12 rs10880580  | 44297492 G | 19.9  | 5.42E-15 | chr:12:44313657 |
| 12 rs1731421   | 44285207 A | 19.9  | 5.42E-15 | chr:12:44313657 |
| 12 rs1731427   | 44281449 T | 19.9  | 5.42E-15 | chr:12:44313657 |
| 12 rs1731429   | 44280899 T | 19.9  | 5.42E-15 | chr:12:44313657 |
| 12 rs2614394   | 44282166 A | 19.9  | 5.42E-15 | chr:12:44313657 |
| 12 rs4238090   | 44299833 T | 19.9  | 5.42E-15 | chr:12:44313657 |
| 12 rs4354753   | 44293620 G | 19.9  | 5.42E-15 | chr:12:44313657 |
| 12 rs4768052   | 44308910 T | 19.9  | 5.42E-15 | chr:12:44313657 |
| 12 rs4768534   | 44298821 T | 19.9  | 5.42E-15 | chr:12:44313657 |
| 12 rs7296222   | 44238104 A | 39.2  | 5.51E-15 | chr:12:44313657 |
| 12 rs75842033  | 44228587 A | 42.28 | 6.42E-15 | chr:12:44313657 |
| 12 rs9668657   | 44302174 A | 6.222 | 6.59E-15 | chr:12:44313657 |
| 12 rs7973886   | 44306134 G | 6.436 | 6.77E-15 | chr:12:44313657 |
| 12 rs7961078   | 44306167 A | 19.71 | 7.00E-15 | chr:12:44313657 |
| 12 rs12318365  | 44352760 T | 55.15 | 8.73E-15 | chr:12:44313657 |
| 12 rs7963981   | 44306066 T | 5.891 | 9.20E-15 | chr:12:44313657 |

|                |            |       |          |                 |
|----------------|------------|-------|----------|-----------------|
| 12 rs7973769   | 44306028 G | 5.891 | 9.20E-15 | chr:12:44313657 |
| 12 rs199957779 | 44302961 T | 6.595 | 1.18E-14 | chr:12:44313657 |
| 12 rs201324668 | 44302939 C | 6.595 | 1.18E-14 | chr:12:44313657 |
| 12 rs7973774   | 44306044 G | 5.847 | 1.29E-14 | chr:12:44313657 |
| 12 rs12302508  | 44303914 A | 23.44 | 1.30E-14 | chr:12:44313657 |
| 12 rs199914146 | 44303005 G | 6.154 | 1.43E-14 | chr:12:44313657 |
| 12 rs201261552 | 44302974 C | 6.154 | 1.43E-14 | chr:12:44313657 |
| 12 rs9668647   | 44301830 A | 5.741 | 1.52E-14 | chr:12:44313657 |
| 12 rs9669053   | 44301883 G | 5.542 | 1.55E-14 | chr:12:44313657 |
| 12 rs11182298  | 44248189 A | 49.85 | 1.68E-14 | chr:12:44313657 |
| 12 rs11182300  | 44249025 T | 49.85 | 1.68E-14 | chr:12:44313657 |
| 12 rs11182301  | 44249779 C | 49.85 | 1.68E-14 | chr:12:44313657 |
| 12 rs11182304  | 44250895 A | 49.85 | 1.68E-14 | chr:12:44313657 |
| 12 rs11182305  | 44250958 G | 49.85 | 1.68E-14 | chr:12:44313657 |
| 12 rs113386845 | 44239075 T | 49.85 | 1.68E-14 | chr:12:44313657 |
| 12 rs113451227 | 44247014 G | 49.85 | 1.68E-14 | chr:12:44313657 |
| 12 rs115601996 | 44242554 T | 49.85 | 1.68E-14 | chr:12:44313657 |
| 12 rs116608528 | 44239556 C | 49.85 | 1.68E-14 | chr:12:44313657 |
| 12 rs116609893 | 44241652 G | 49.85 | 1.68E-14 | chr:12:44313657 |
| 12 rs117577677 | 44246366 C | 49.85 | 1.68E-14 | chr:12:44313657 |
| 12 rs12230284  | 44245217 G | 49.85 | 1.68E-14 | chr:12:44313657 |
| 12 rs12230296  | 44245365 T | 49.85 | 1.68E-14 | chr:12:44313657 |
| 12 rs12230727  | 44247063 C | 49.85 | 1.68E-14 | chr:12:44313657 |
| 12 rs12230751  | 44247312 C | 49.85 | 1.68E-14 | chr:12:44313657 |
| 12 rs12231953  | 44245366 G | 49.85 | 1.68E-14 | chr:12:44313657 |
| 12 rs140628578 | 44239252 T | 49.85 | 1.68E-14 | chr:12:44313657 |
| 12 rs142324451 | 44246163 C | 49.85 | 1.68E-14 | chr:12:44313657 |
| 12 rs144999308 | 44241733 A | 49.85 | 1.68E-14 | chr:12:44313657 |
| 12 rs146784200 | 44239223 T | 49.85 | 1.68E-14 | chr:12:44313657 |
| 12 rs149174850 | 44246158 T | 49.85 | 1.68E-14 | chr:12:44313657 |
| 12 rs151064202 | 44242351 C | 49.85 | 1.68E-14 | chr:12:44313657 |
| 12 rs61930682  | 44240177 T | 49.85 | 1.68E-14 | chr:12:44313657 |
| 12 rs74373254  | 44240769 A | 49.85 | 1.68E-14 | chr:12:44313657 |
| 12 rs74775231  | 44246985 T | 49.85 | 1.68E-14 | chr:12:44313657 |
| 12 rs76240216  | 44244168 T | 49.85 | 1.68E-14 | chr:12:44313657 |
| 12 rs77161382  | 44241297 T | 49.85 | 1.68E-14 | chr:12:44313657 |
| 12 rs77556291  | 44246646 C | 49.85 | 1.68E-14 | chr:12:44313657 |
| 12 rs77708558  | 44240597 G | 49.85 | 1.68E-14 | chr:12:44313657 |
| 12 rs78339833  | 44236763 G | 49.85 | 1.68E-14 | chr:12:44313657 |
| 12 rs78388987  | 44244204 C | 49.85 | 1.68E-14 | chr:12:44313657 |
| 12 rs79074543  | 44246752 C | 49.85 | 1.68E-14 | chr:12:44313657 |
| 12 rs79425253  | 44241126 T | 49.85 | 1.68E-14 | chr:12:44313657 |
| 12 rs79716923  | 44236764 C | 49.85 | 1.68E-14 | chr:12:44313657 |

|                |            |       |          |                 |
|----------------|------------|-------|----------|-----------------|
| 12 rs79970551  | 44244859 A | 49.85 | 1.68E-14 | chr:12:44313657 |
| 12 rs80099331  | 44240349 T | 49.85 | 1.68E-14 | chr:12:44313657 |
| 12 rs202162002 | 44301820 A | 5.492 | 1.77E-14 | chr:12:44313657 |
| 12 rs367898590 | 44301818 C | 5.492 | 1.77E-14 | chr:12:44313657 |
| 12 rs375152458 | 44301817 T | 5.492 | 1.77E-14 | chr:12:44313657 |
| 12 rs11533717  | 44304261 G | 21.86 | 1.92E-14 | chr:12:44313657 |
| 12 rs11182303  | 44250800 A | 45.85 | 2.40E-14 | chr:12:44313657 |
| 12 rs150307762 | 44246320 G | 47.71 | 2.82E-14 | chr:12:44313657 |
| 12 rs10880604  | 44349398 G | 135   | 3.12E-14 | chr:12:44313657 |
| 12 rs4519146   | 44327240 A | 67.33 | 3.73E-14 | chr:12:44313657 |
| 12 rs201066998 | 44303041 G | 5.338 | 3.90E-14 | chr:12:44313657 |
| 12 rs11182299  | 44248269 A | 46.96 | 5.56E-14 | chr:12:44313657 |
| 12 rs7968199   | 44212237 G | 15.11 | 5.89E-14 | chr:12:44313657 |
| 12 rs7971516   | 44353473 G | 115.6 | 1.08E-13 | chr:12:44313657 |
| 12 rs10785468  | 44309434 G | 20.84 | 1.65E-13 | chr:12:44313657 |
| 12 rs10785469  | 44309459 G | 20.84 | 1.65E-13 | chr:12:44313657 |
| 12 rs7956245   | 44143520 T | 16.33 | 1.88E-13 | chr:12:44313657 |
| 12 rs3990338   | 44300626 T | 18.92 | 1.97E-13 | chr:12:44313657 |
| 12 rs766961    | 44236021 G | 39.73 | 2.09E-13 | chr:12:44313657 |
| 12 rs7965240   | 44309591 A | 12.73 | 2.29E-13 | chr:12:44313657 |
| 12 rs7965330   | 44309602 A | 25.39 | 2.30E-13 | chr:12:44313657 |
| 12 rs11520309  | 44303103 A | 19.01 | 2.40E-13 | chr:12:44313657 |
| 12 rs7971628   | 44353583 G | 14.78 | 2.49E-13 | chr:12:44313657 |
| 12 rs3990339   | 44300728 G | 13.42 | 2.50E-13 | chr:12:44313657 |
| 12 rs11182326  | 44310333 G | 51.51 | 2.54E-13 | chr:12:44313657 |
| 12 rs11182328  | 44311277 G | 51.51 | 2.54E-13 | chr:12:44313657 |
| 12 rs11182345  | 44347202 C | 51.51 | 2.54E-13 | chr:12:44313657 |
| 12 rs11829881  | 44322395 G | 51.51 | 2.54E-13 | chr:12:44313657 |
| 12 rs12301015  | 44321160 T | 51.51 | 2.54E-13 | chr:12:44313657 |
| 12 rs12303804  | 44340018 A | 51.51 | 2.54E-13 | chr:12:44313657 |
| 12 rs12309681  | 44343202 T | 51.51 | 2.54E-13 | chr:12:44313657 |
| 12 rs12315094  | 44345773 A | 51.51 | 2.54E-13 | chr:12:44313657 |
| 12 rs7969641   | 44310268 T | 51.51 | 2.54E-13 | chr:12:44313657 |
| 12 rs4768539   | 44303524 C | 16.8  | 2.72E-13 | chr:12:44313657 |
| 12 rs17093971  | 44359265 T | 32.03 | 2.76E-13 | chr:12:44313657 |
| 12 rs7308588   | 44356119 A | 32.03 | 2.76E-13 | chr:12:44313657 |
| 12 rs2407787   | 44300709 G | 13.91 | 2.77E-13 | chr:12:44313657 |
| 12 rs10748377  | 44308151 T | 18.22 | 2.86E-13 | chr:12:44313657 |
| 12 rs10748378  | 44308153 A | 18.22 | 2.86E-13 | chr:12:44313657 |
| 12 rs10785462  | 44299067 A | 18.22 | 2.86E-13 | chr:12:44313657 |
| 12 rs10785463  | 44299093 T | 18.22 | 2.86E-13 | chr:12:44313657 |
| 12 rs10785466  | 44308052 A | 18.22 | 2.86E-13 | chr:12:44313657 |
| 12 rs10880579  | 44297491 A | 18.22 | 2.86E-13 | chr:12:44313657 |

|               |            |       |          |                 |
|---------------|------------|-------|----------|-----------------|
| 12 rs10880585 | 44307982 C | 18.22 | 2.86E-13 | chr:12:44313657 |
| 12 rs11182324 | 44307868 C | 18.22 | 2.86E-13 | chr:12:44313657 |
| 12 rs11182325 | 44307930 G | 18.22 | 2.86E-13 | chr:12:44313657 |
| 12 rs1358705  | 44287850 C | 18.22 | 2.86E-13 | chr:12:44313657 |
| 12 rs1609549  | 44306994 A | 18.22 | 2.86E-13 | chr:12:44313657 |
| 12 rs1610291  | 44307158 A | 18.22 | 2.86E-13 | chr:12:44313657 |
| 12 rs1614042  | 44290018 C | 18.22 | 2.86E-13 | chr:12:44313657 |
| 12 rs1675756  | 44279540 T | 18.22 | 2.86E-13 | chr:12:44313657 |
| 12 rs1675781  | 44292513 A | 18.22 | 2.86E-13 | chr:12:44313657 |
| 12 rs1675789  | 44290545 A | 18.22 | 2.86E-13 | chr:12:44313657 |
| 12 rs1675790  | 44290447 C | 18.22 | 2.86E-13 | chr:12:44313657 |
| 12 rs1731430  | 44280809 A | 18.22 | 2.86E-13 | chr:12:44313657 |
| 12 rs1731456  | 44286932 A | 18.22 | 2.86E-13 | chr:12:44313657 |
| 12 rs1731457  | 44286499 T | 18.22 | 2.86E-13 | chr:12:44313657 |
| 12 rs1731458  | 44285969 T | 18.22 | 2.86E-13 | chr:12:44313657 |
| 12 rs1731459  | 44285844 C | 18.22 | 2.86E-13 | chr:12:44313657 |
| 12 rs2407783  | 44300247 G | 18.22 | 2.86E-13 | chr:12:44313657 |
| 12 rs2407786  | 44300467 A | 18.22 | 2.86E-13 | chr:12:44313657 |
| 12 rs4238089  | 44299688 A | 18.22 | 2.86E-13 | chr:12:44313657 |
| 12 rs4238091  | 44299900 T | 18.22 | 2.86E-13 | chr:12:44313657 |
| 12 rs4363674  | 44307404 C | 18.22 | 2.86E-13 | chr:12:44313657 |
| 12 rs4469953  | 44307349 T | 18.22 | 2.86E-13 | chr:12:44313657 |
| 12 rs4572198  | 44298071 G | 18.22 | 2.86E-13 | chr:12:44313657 |
| 12 rs4572199  | 44298378 G | 18.22 | 2.86E-13 | chr:12:44313657 |
| 12 rs4609659  | 44298550 C | 18.22 | 2.86E-13 | chr:12:44313657 |
| 12 rs4768053  | 44309069 C | 18.22 | 2.86E-13 | chr:12:44313657 |
| 12 rs4768532  | 44279222 C | 18.22 | 2.86E-13 | chr:12:44313657 |
| 12 rs4768535  | 44298917 C | 18.22 | 2.86E-13 | chr:12:44313657 |
| 12 rs4768538  | 44300011 A | 18.22 | 2.86E-13 | chr:12:44313657 |
| 12 rs7295151  | 44308194 G | 18.22 | 2.86E-13 | chr:12:44313657 |
| 12 rs7974045  | 44306266 G | 18.22 | 2.86E-13 | chr:12:44313657 |
| 12 rs7974046  | 44306269 G | 18.22 | 2.86E-13 | chr:12:44313657 |
| 12 rs7954640  | 44301081 C | 12.42 | 2.97E-13 | chr:12:44313657 |
| 12 rs10880578 | 44291513 C | 22.27 | 2.99E-13 | chr:12:44313657 |
| 12 rs1675787  | 44290928 T | 22.27 | 2.99E-13 | chr:12:44313657 |
| 12 rs1731432  | 44279783 T | 22.27 | 2.99E-13 | chr:12:44313657 |
| 12 rs1731435  | 44292195 A | 22.27 | 2.99E-13 | chr:12:44313657 |
| 12 rs2447113  | 44282785 G | 22.27 | 2.99E-13 | chr:12:44313657 |
| 12 rs2951435  | 44291174 G | 22.27 | 2.99E-13 | chr:12:44313657 |
| 12 rs1675764  | 44285480 T | 17.33 | 3.12E-13 | chr:12:44313657 |
| 12 rs1731433  | 44279776 G | 17.33 | 3.12E-13 | chr:12:44313657 |
| 12 rs4537822  | 44299389 C | 17.33 | 3.12E-13 | chr:12:44313657 |
| 12 rs4768543  | 44308978 A | 17.33 | 3.12E-13 | chr:12:44313657 |

|                |            |       |          |                 |
|----------------|------------|-------|----------|-----------------|
| 12 rs2614395   | 44291851 G | 19.3  | 3.19E-13 | chr:12:44313657 |
| 12 rs1406787   | 44274699 T | 18.9  | 3.61E-13 | chr:12:44313657 |
| 12 rs79916589  | 44289680 T | 15.53 | 3.63E-13 | chr:12:44313657 |
| 12 rs5019975   | 44299370 G | 17.98 | 3.65E-13 | chr:12:44313657 |
| 12 rs2407784   | 44300347 T | 17.97 | 3.69E-13 | chr:12:44313657 |
| 12 rs2407785   | 44300358 A | 17.97 | 3.69E-13 | chr:12:44313657 |
| 12 rs151265567 | 44318897 T | 54.56 | 4.21E-13 | chr:12:44313657 |
| 12 rs7965873   | 44354797 A | 20.17 | 4.34E-13 | chr:12:44313657 |
| 12 rs7954130   | 44301327 G | 11.86 | 4.76E-13 | chr:12:44313657 |
| 12 rs1731423   | 44278469 G | 21.99 | 4.89E-13 | chr:12:44313657 |
| 12 rs1675755   | 44278773 G | 25.83 | 5.09E-13 | chr:12:44313657 |
| 12 rs147015726 | 44303495 G | 53.1  | 5.61E-13 | chr:12:44313657 |
| 12 rs1731455   | 44260900 A | 14.14 | 5.71E-13 | chr:12:44313657 |
| 12 rs11182331  | 44317153 C | 49.93 | 5.86E-13 | chr:12:44313657 |
| 12 rs11182334  | 44318590 G | 49.93 | 5.86E-13 | chr:12:44313657 |
| 12 rs11182336  | 44320611 G | 49.93 | 5.86E-13 | chr:12:44313657 |
| 12 rs1057486   | 44260041 G | 20.56 | 5.99E-13 | chr:12:44313657 |
| 12 rs11182293  | 44231482 A | 20.56 | 5.99E-13 | chr:12:44313657 |
| 12 rs1621279   | 44249011 C | 20.56 | 5.99E-13 | chr:12:44313657 |
| 12 rs1675765   | 44244855 T | 20.56 | 5.99E-13 | chr:12:44313657 |
| 12 rs1675769   | 44248400 T | 20.56 | 5.99E-13 | chr:12:44313657 |
| 12 rs1731450   | 44246041 T | 20.56 | 5.99E-13 | chr:12:44313657 |
| 12 rs1731452   | 44249745 C | 20.56 | 5.99E-13 | chr:12:44313657 |
| 12 rs1731454   | 44251107 T | 20.56 | 5.99E-13 | chr:12:44313657 |
| 12 rs7305609   | 44240652 A | 20.56 | 5.99E-13 | chr:12:44313657 |
| 12 rs73096934  | 44241279 G | 20.56 | 5.99E-13 | chr:12:44313657 |
| 12 rs2219629   | 44235406 T | 15.65 | 6.28E-13 | chr:12:44313657 |
| 12 rs1623667   | 44249258 T | 20.23 | 6.78E-13 | chr:12:44313657 |
| 12 rs1675767   | 44247135 G | 20.23 | 6.78E-13 | chr:12:44313657 |
| 12 rs1731434   | 44272915 A | 20.23 | 6.78E-13 | chr:12:44313657 |
| 12 rs11182323  | 44306528 G | 48.67 | 7.79E-13 | chr:12:44313657 |
| 12 rs116930265 | 44299125 C | 48.67 | 7.79E-13 | chr:12:44313657 |
| 12 rs12230228  | 44303195 A | 48.67 | 7.79E-13 | chr:12:44313657 |
| 12 rs139946355 | 44282948 C | 48.67 | 7.79E-13 | chr:12:44313657 |
| 12 rs28758958  | 44306264 A | 48.67 | 7.79E-13 | chr:12:44313657 |
| 12 rs367990382 | 44301261 T | 48.67 | 7.79E-13 | chr:12:44313657 |
| 12 rs528423997 | 44303078 G | 48.67 | 7.79E-13 | chr:12:44313657 |
| 12 rs542685597 | 44303937 T | 48.67 | 7.79E-13 | chr:12:44313657 |
| 12 rs566058745 | 44300960 A | 48.67 | 7.79E-13 | chr:12:44313657 |
| 12 rs75158834  | 44280690 T | 48.67 | 7.79E-13 | chr:12:44313657 |
| 12 rs79110324  | 44296458 G | 48.67 | 7.79E-13 | chr:12:44313657 |
| 12 rs1609548   | 44306947 G | 25.29 | 8.05E-13 | chr:12:44313657 |
| 12 rs1623829   | 44262745 A | 25.24 | 8.97E-13 | chr:12:44313657 |

|                |            |       |          |                 |
|----------------|------------|-------|----------|-----------------|
| 12 rs11182340  | 44335190 G | 40.39 | 1.05E-12 | chr:12:44313657 |
| 12 rs11182343  | 44344206 A | 40.39 | 1.05E-12 | chr:12:44313657 |
| 12 rs11182347  | 44353617 G | 40.39 | 1.05E-12 | chr:12:44313657 |
| 12 rs11182349  | 44357759 G | 40.39 | 1.05E-12 | chr:12:44313657 |
| 12 rs11182351  | 44358078 T | 40.39 | 1.05E-12 | chr:12:44313657 |
| 12 rs11182352  | 44361158 G | 40.39 | 1.05E-12 | chr:12:44313657 |
| 12 rs116884551 | 44340736 C | 40.39 | 1.05E-12 | chr:12:44313657 |
| 12 rs117528618 | 44350676 G | 40.39 | 1.05E-12 | chr:12:44313657 |
| 12 rs140180348 | 44336849 T | 40.39 | 1.05E-12 | chr:12:44313657 |
| 12 rs146427438 | 44339234 T | 40.39 | 1.05E-12 | chr:12:44313657 |
| 12 rs150694122 | 44336742 A | 40.39 | 1.05E-12 | chr:12:44313657 |
| 12 rs186989426 | 44344787 C | 40.39 | 1.05E-12 | chr:12:44313657 |
| 12 rs200338856 | 44340179 G | 40.39 | 1.05E-12 | chr:12:44313657 |
| 12 rs78675197  | 44360787 A | 40.39 | 1.05E-12 | chr:12:44313657 |
| 12 rs79112229  | 44361616 G | 40.39 | 1.05E-12 | chr:12:44313657 |
| 12 rs79163779  | 44361704 T | 40.39 | 1.05E-12 | chr:12:44313657 |
| 12 rs80120468  | 44344737 G | 40.39 | 1.05E-12 | chr:12:44313657 |
| 12 rs80251371  | 44328497 T | 40.39 | 1.05E-12 | chr:12:44313657 |
| 12 rs146868110 | 44293933 G | 43.48 | 1.08E-12 | chr:12:44313657 |
| 12 rs61930734  | 44304400 C | 11.26 | 1.39E-12 | chr:12:44313657 |
| 12 rs1622590   | 44288061 G | 30.85 | 2.10E-12 | chr:12:44313657 |
| 12 rs1675758   | 44280027 G | 30.85 | 2.10E-12 | chr:12:44313657 |
| 12 rs1675785   | 44292747 G | 30.85 | 2.10E-12 | chr:12:44313657 |
| 12 rs1731431   | 44279870 G | 30.85 | 2.10E-12 | chr:12:44313657 |
| 12 rs7955615   | 44295861 C | 30.85 | 2.10E-12 | chr:12:44313657 |
| 12 rs10785460  | 44264906 T | 11.16 | 2.40E-12 | chr:12:44313657 |
| 12 rs6582490   | 44329957 G | 29.29 | 2.50E-12 | chr:12:44313657 |
| 12 rs7979691   | 44142588 A | 14.14 | 2.53E-12 | chr:12:44313657 |
| 12 rs4768546   | 44336686 C | 28.88 | 2.72E-12 | chr:12:44313657 |
| 12 rs4768057   | 44332707 G | 29.03 | 2.80E-12 | chr:12:44313657 |
| 12 rs12298711  | 44206759 T | 10.18 | 2.84E-12 | chr:12:44313657 |
| 12 rs11182337  | 44320875 A | 210.1 | 2.85E-12 | chr:12:44313657 |
| 12 rs4238093   | 44315925 A | 210.1 | 2.85E-12 | chr:12:44313657 |
| 12 rs10880573  | 44226111 G | 9.409 | 2.96E-12 | chr:12:44313657 |
| 12 rs112105382 | 44241680 T | 12.32 | 3.26E-12 | chr:12:44313657 |
| 12 rs4768536   | 44298961 A | 17.59 | 3.60E-12 | chr:12:44313657 |
| 12 rs7972025   | 44222722 T | 9.311 | 4.50E-12 | chr:12:44313657 |
| 12 rs11182314  | 44260848 T | 41.84 | 5.53E-12 | chr:12:44313657 |
| 12 rs4238092   | 44315762 C | 15.47 | 6.91E-12 | chr:12:44313657 |
| 12 rs115482982 | 44250485 G | 28.91 | 8.94E-12 | chr:12:44313657 |
| 12 rs12229940  | 44244636 A | 28.91 | 8.94E-12 | chr:12:44313657 |
| 12 rs137888888 | 44246356 C | 28.91 | 8.94E-12 | chr:12:44313657 |
| 12 rs138541393 | 44246210 C | 28.91 | 8.94E-12 | chr:12:44313657 |



|                |            |       |          |                 |
|----------------|------------|-------|----------|-----------------|
| 12 rs143317429 | 44239623 T | 28.91 | 8.94E-12 | chr:12:44313657 |
| 12 rs76048883  | 44250719 T | 28.91 | 8.94E-12 | chr:12:44313657 |
| 12 rs76350700  | 44240040 G | 28.91 | 8.94E-12 | chr:12:44313657 |
| 12 rs77952333  | 44240015 A | 28.91 | 8.94E-12 | chr:12:44313657 |
| 12 rs78170106  | 44250279 G | 28.91 | 8.94E-12 | chr:12:44313657 |
| 12 rs78179678  | 44239907 C | 28.91 | 8.94E-12 | chr:12:44313657 |
| 12 rs79392152  | 44250626 C | 28.91 | 8.94E-12 | chr:12:44313657 |
| 12 rs79783862  | 44244432 A | 28.91 | 8.94E-12 | chr:12:44313657 |
| 12 rs10880587  | 44311477 T | 37.04 | 1.17E-11 | chr:12:44313657 |
| 12 rs1881926   | 44319047 G | 37.04 | 1.17E-11 | chr:12:44313657 |
| 12 rs1881927   | 44318922 G | 37.04 | 1.17E-11 | chr:12:44313657 |
| 12 rs4768055   | 44317208 G | 37.04 | 1.17E-11 | chr:12:44313657 |
| 12 rs4768056   | 44322826 T | 37.04 | 1.17E-11 | chr:12:44313657 |
| 12 rs7974214   | 44319517 T | 37.04 | 1.17E-11 | chr:12:44313657 |
| 12 rs10785481  | 44325061 G | 36.5  | 1.28E-11 | chr:12:44313657 |
| 12 rs5023324   | 44327148 C | 36.5  | 1.28E-11 | chr:12:44313657 |
| 12 rs7311847   | 44315590 A | 36.5  | 1.28E-11 | chr:12:44313657 |
| 12 rs112006889 | 44196125 C | 18.28 | 1.48E-11 | chr:12:44313657 |
| 12 rs202009693 | 44267522 T | 31.25 | 1.54E-11 | chr:12:44313657 |
| 12 rs12315211  | 44133668 A | 10.89 | 1.68E-11 | chr:12:44313657 |
| 12 rs11182306  | 44251130 A | 39.29 | 2.11E-11 | chr:12:44313657 |
| 12 rs7954384   | 44301587 G | 5.16  | 2.22E-11 | chr:12:44313657 |
| 12 rs7969754   | 44301580 A | 5.16  | 2.22E-11 | chr:12:44313657 |
| 12 rs11504469  | 44096699 A | 10.4  | 2.31E-11 | chr:12:44313657 |
| 12 rs12301056  | 44098701 G | 10.4  | 2.31E-11 | chr:12:44313657 |
| 12 rs60029414  | 44096996 G | 10.4  | 2.31E-11 | chr:12:44313657 |
| 12 rs201859105 | 44232358 C | 11.83 | 2.35E-11 | chr:12:44313657 |
| 12 rs117709201 | 44224088 T | 22.89 | 2.58E-11 | chr:12:44313657 |
| 12 rs11182308  | 44252969 G | 38    | 2.62E-11 | chr:12:44313657 |
| 12 rs11182310  | 44255992 A | 38    | 2.62E-11 | chr:12:44313657 |
| 12 rs116861561 | 44256819 T | 38    | 2.62E-11 | chr:12:44313657 |
| 12 rs117137831 | 44254126 G | 38    | 2.62E-11 | chr:12:44313657 |
| 12 rs117543763 | 44264051 A | 38    | 2.62E-11 | chr:12:44313657 |
| 12 rs118062126 | 44243952 T | 38    | 2.62E-11 | chr:12:44313657 |
| 12 rs12227646  | 44245640 C | 38    | 2.62E-11 | chr:12:44313657 |
| 12 rs12229491  | 44255465 A | 38    | 2.62E-11 | chr:12:44313657 |
| 12 rs12231136  | 44268262 T | 38    | 2.62E-11 | chr:12:44313657 |
| 12 rs140988631 | 44242531 C | 38    | 2.62E-11 | chr:12:44313657 |
| 12 rs17093804  | 44272622 G | 38    | 2.62E-11 | chr:12:44313657 |
| 12 rs183971901 | 44228578 A | 38    | 2.62E-11 | chr:12:44313657 |
| 12 rs186673154 | 44261933 T | 38    | 2.62E-11 | chr:12:44313657 |
| 12 rs1948516   | 44238723 A | 38    | 2.62E-11 | chr:12:44313657 |
| 12 rs2199390   | 44235245 C | 38    | 2.62E-11 | chr:12:44313657 |

|                |            |       |          |                 |
|----------------|------------|-------|----------|-----------------|
| 12 rs3829807   | 44255108 A | 38    | 2.62E-11 | chr:12:44313657 |
| 12 rs720944    | 44237303 C | 38    | 2.62E-11 | chr:12:44313657 |
| 12 rs74423632  | 44229154 T | 38    | 2.62E-11 | chr:12:44313657 |
| 12 rs74888682  | 44237950 C | 38    | 2.62E-11 | chr:12:44313657 |
| 12 rs76030944  | 44226085 A | 38    | 2.62E-11 | chr:12:44313657 |
| 12 rs76737056  | 44244225 G | 38    | 2.62E-11 | chr:12:44313657 |
| 12 rs11182219  | 44099521 T | 14.73 | 3.38E-11 | chr:12:44313657 |
| 12 rs141598641 | 44249695 T | 36.72 | 3.54E-11 | chr:12:44313657 |
| 12 rs17093639  | 44132928 C | 10.64 | 3.85E-11 | chr:12:44313657 |
| 12 rs12228658  | 44277314 C | 11.94 | 4.05E-11 | chr:12:44313657 |
| 12 rs147802186 | 44187010 T | 27.94 | 5.56E-11 | chr:12:44313657 |
| 12 rs10785485  | 44355693 A | 12.47 | 7.75E-11 | chr:12:44313657 |
| 12 rs118045375 | 44185257 A | 18.61 | 8.28E-11 | chr:12:44313657 |
| 12 rs141317022 | 44195765 G | 18.61 | 8.28E-11 | chr:12:44313657 |
| 12 rs150213649 | 44195782 A | 18.61 | 8.28E-11 | chr:12:44313657 |
| 12 rs17093732  | 44191475 G | 18.61 | 8.28E-11 | chr:12:44313657 |
| 12 rs17093734  | 44194265 G | 18.61 | 8.28E-11 | chr:12:44313657 |
| 12 rs1802561   | 44189129 C | 18.61 | 8.28E-11 | chr:12:44313657 |
| 12 rs79866180  | 44193532 G | 18.61 | 8.28E-11 | chr:12:44313657 |
| 12 rs17121283  | 44185593 T | 7.255 | 9.42E-11 | chr:12:44313657 |
| 12 rs6582484   | 44190630 C | 7.135 | 9.81E-11 | chr:12:44313657 |
| 12 rs17093747  | 44205459 G | 17.06 | 1.12E-10 | chr:12:44313657 |
| 12 rs17093754  | 44209423 A | 17.06 | 1.12E-10 | chr:12:44313657 |
| 12 rs2166063   | 44202450 G | 17.06 | 1.12E-10 | chr:12:44313657 |
| 12 rs4251475   | 44167093 G | 15.11 | 1.38E-10 | chr:12:44313657 |
| 12 rs7961537   | 44102333 T | 14.55 | 1.53E-10 | chr:12:44313657 |
| 12 rs9849      | 44182951 C | 7.087 | 1.55E-10 | chr:12:44313657 |
| 12 rs145873486 | 44401507 T | 27.58 | 1.75E-10 | chr:12:44313657 |
| 12 rs10880598  | 44336375 T | 1191  | 1.95E-10 | chr:12:44313657 |
| 12 rs12305959  | 44332618 G | 1191  | 1.95E-10 | chr:12:44313657 |
| 12 rs73100975  | 44339016 T | 1191  | 1.95E-10 | chr:12:44313657 |
| 12 rs73100933  | 44314453 T | 1426  | 2.33E-10 | chr:12:44313657 |
| 12 rs73100935  | 44314454 G | 1426  | 2.33E-10 | chr:12:44313657 |
| 12 rs11182290  | 44221032 A | 6.17  | 2.44E-10 | chr:12:44313657 |
| 12 rs11182280  | 44209584 C | 6.075 | 2.93E-10 | chr:12:44313657 |
| 12 rs12301506  | 44129636 G | 6.074 | 3.43E-10 | chr:12:44313657 |
| 12 rs10506231  | 44206027 T | 5.787 | 5.18E-10 | chr:12:44313657 |
| 12 rs11182275  | 44206289 G | 5.787 | 5.18E-10 | chr:12:44313657 |
| 12 rs3764004   | 44201451 C | 5.787 | 5.18E-10 | chr:12:44313657 |
| 12 rs10880599  | 44337662 T | 789.1 | 5.38E-10 | chr:12:44313657 |
| 12 rs11182273  | 44202901 C | 5.769 | 5.60E-10 | chr:12:44313657 |
| 12 rs142119333 | 44462402 C | 20.09 | 6.36E-10 | chr:12:44313657 |
| 12 rs12312338  | 44340209 T | 8.514 | 7.00E-10 | chr:12:44313657 |

|                |            |       |          |                 |
|----------------|------------|-------|----------|-----------------|
| 12 rs75725665  | 44340195 T | 8.514 | 7.00E-10 | chr:12:44313657 |
| 12 rs10880571  | 44207279 C | 5.317 | 1.23E-09 | chr:12:44313657 |
| 12 rs116999385 | 44173427 A | 13.45 | 1.53E-09 | chr:12:44313657 |
| 12 rs117008835 | 44158656 G | 13.45 | 1.53E-09 | chr:12:44313657 |
| 12 rs117068074 | 44160759 T | 13.45 | 1.53E-09 | chr:12:44313657 |
| 12 rs117132545 | 44103892 A | 13.45 | 1.53E-09 | chr:12:44313657 |
| 12 rs117307608 | 44088553 A | 13.45 | 1.53E-09 | chr:12:44313657 |
| 12 rs117344023 | 44136757 T | 13.45 | 1.53E-09 | chr:12:44313657 |
| 12 rs117417075 | 44108549 T | 13.45 | 1.53E-09 | chr:12:44313657 |
| 12 rs117903595 | 44137098 T | 13.45 | 1.53E-09 | chr:12:44313657 |
| 12 rs118070124 | 44132815 C | 13.45 | 1.53E-09 | chr:12:44313657 |
| 12 rs11832281  | 44128220 C | 13.45 | 1.53E-09 | chr:12:44313657 |
| 12 rs138820383 | 44180086 G | 13.45 | 1.53E-09 | chr:12:44313657 |
| 12 rs139229724 | 44098042 A | 13.45 | 1.53E-09 | chr:12:44313657 |
| 12 rs139612761 | 44126233 C | 13.45 | 1.53E-09 | chr:12:44313657 |
| 12 rs140672847 | 44089882 T | 13.45 | 1.53E-09 | chr:12:44313657 |
| 12 rs144126457 | 44121102 A | 13.45 | 1.53E-09 | chr:12:44313657 |
| 12 rs144270751 | 44098631 G | 13.45 | 1.53E-09 | chr:12:44313657 |
| 12 rs144539565 | 44089765 C | 13.45 | 1.53E-09 | chr:12:44313657 |
| 12 rs146605165 | 44141210 C | 13.45 | 1.53E-09 | chr:12:44313657 |
| 12 rs150424915 | 44158977 G | 13.45 | 1.53E-09 | chr:12:44313657 |
| 12 rs17093630  | 44125736 C | 13.45 | 1.53E-09 | chr:12:44313657 |
| 12 rs17093632  | 44126508 A | 13.45 | 1.53E-09 | chr:12:44313657 |
| 12 rs181407925 | 44112509 T | 13.45 | 1.53E-09 | chr:12:44313657 |
| 12 rs1870765   | 44147491 C | 13.45 | 1.53E-09 | chr:12:44313657 |
| 12 rs191905705 | 44158574 C | 13.45 | 1.53E-09 | chr:12:44313657 |
| 12 rs3805199   | 44176015 G | 13.45 | 1.53E-09 | chr:12:44313657 |
| 12 rs4251490   | 44169965 A | 13.45 | 1.53E-09 | chr:12:44313657 |
| 12 rs532722540 | 44158576 A | 13.45 | 1.53E-09 | chr:12:44313657 |
| 12 rs55973711  | 44167023 A | 13.45 | 1.53E-09 | chr:12:44313657 |
| 12 rs74890729  | 44143065 G | 13.45 | 1.53E-09 | chr:12:44313657 |
| 12 rs74928789  | 44138445 G | 13.45 | 1.53E-09 | chr:12:44313657 |
| 12 rs75519831  | 44113847 T | 13.45 | 1.53E-09 | chr:12:44313657 |
| 12 rs75860385  | 44137050 C | 13.45 | 1.53E-09 | chr:12:44313657 |
| 12 rs76779572  | 44162600 G | 13.45 | 1.53E-09 | chr:12:44313657 |
| 12 rs79154645  | 44173982 T | 13.45 | 1.53E-09 | chr:12:44313657 |
| 12 rs79595727  | 44122193 A | 13.45 | 1.53E-09 | chr:12:44313657 |
| 12 rs79734937  | 44098365 G | 13.45 | 1.53E-09 | chr:12:44313657 |
| 12 rs1057190   | 44148259 C | 5.709 | 2.05E-09 | chr:12:44313657 |
| 12 rs10880557  | 44131697 C | 5.709 | 2.05E-09 | chr:12:44313657 |
| 12 rs10880563  | 44141593 T | 5.709 | 2.05E-09 | chr:12:44313657 |
| 12 rs10880566  | 44146392 G | 5.709 | 2.05E-09 | chr:12:44313657 |
| 12 rs11182246  | 44139805 T | 5.709 | 2.05E-09 | chr:12:44313657 |

|                |            |       |          |                 |
|----------------|------------|-------|----------|-----------------|
| 12 rs11182249  | 44145654 C | 5.709 | 2.05E-09 | chr:12:44313657 |
| 12 rs12312327  | 44134417 C | 5.709 | 2.05E-09 | chr:12:44313657 |
| 12 rs12319024  | 44135647 A | 5.709 | 2.05E-09 | chr:12:44313657 |
| 12 rs7311465   | 44141164 T | 5.709 | 2.05E-09 | chr:12:44313657 |
| 12 rs7969729   | 44142547 A | 5.709 | 2.05E-09 | chr:12:44313657 |
| 12 rs9783418   | 44144643 A | 5.709 | 2.05E-09 | chr:12:44313657 |
| 12 rs4251497   | 44171131 A | 5.469 | 2.52E-09 | chr:12:44313657 |
| 12 rs4251495   | 44171096 G | 5.29  | 2.83E-09 | chr:12:44313657 |
| 12 rs4251496   | 44171097 C | 5.29  | 2.83E-09 | chr:12:44313657 |
| 12 rs3794262   | 44165430 A | 5.349 | 3.14E-09 | chr:12:44313657 |
| 12 rs3805198   | 44175934 T | 5.349 | 3.14E-09 | chr:12:44313657 |
| 12 rs4251459   | 44162566 C | 5.349 | 3.14E-09 | chr:12:44313657 |
| 12 rs4251460   | 44162768 C | 5.349 | 3.14E-09 | chr:12:44313657 |
| 12 rs4251465   | 44164169 T | 5.349 | 3.14E-09 | chr:12:44313657 |
| 12 rs4251532   | 44178083 T | 5.349 | 3.14E-09 | chr:12:44313657 |
| 12 rs4251533   | 44178175 G | 5.349 | 3.14E-09 | chr:12:44313657 |
| 12 rs4251555   | 44182312 C | 5.349 | 3.14E-09 | chr:12:44313657 |
| 12 rs11182250  | 44147174 G | 5.342 | 5.28E-09 | chr:12:44313657 |
| 12 rs11182242  | 44135219 C | 5.389 | 5.84E-09 | chr:12:44313657 |
| 12 rs7954843   | 44113010 A | 4.566 | 1.61E-08 | chr:12:44313657 |
| 12 rs4251489   | 44169945 T | 5.287 | 1.93E-08 | chr:12:44313657 |
| 12 rs7955148   | 44301433 C | 5.856 | 2.16E-08 | chr:12:44313657 |
| 12 rs2464103   | 44279211 T | 12.71 | 2.69E-08 | chr:12:44313657 |
| 12 rs544503047 | 44291853 G | 9.136 | 2.94E-08 | chr:12:44313657 |
| 12 rs4251463   | 44163295 T | 5.086 | 3.17E-08 | chr:12:44313657 |
| 12 rs4251545   | 44180295 A | 5.086 | 3.17E-08 | chr:12:44313657 |
| 12 rs10880565  | 44146248 C | 4.635 | 3.78E-08 | chr:12:44313657 |
| 12 rs4768054   | 44309743 A | 6.235 | 3.89E-08 | chr:12:44313657 |
| 12 rs4251540   | 44179579 T | 4.987 | 4.21E-08 | chr:12:44313657 |
| 12 rs59709721  | 44362347 A | 27.51 | 4.65E-08 | chr:12:44313657 |
| 12 rs10880562  | 44140311 G | 4.605 | 5.55E-08 | chr:12:44313657 |
| 12 rs11182240  | 44134755 C | 4.605 | 5.55E-08 | chr:12:44313657 |
| 12 rs12308611  | 44132831 G | 4.605 | 5.55E-08 | chr:12:44313657 |
| 12 rs12310585  | 44133972 G | 4.605 | 5.55E-08 | chr:12:44313657 |
| 12 rs11182332  | 44317599 A | 30.91 | 6.42E-08 | chr:12:44313657 |
| 12 rs73085705  | 44345490 T | 30.91 | 6.42E-08 | chr:12:44313657 |
| 12 rs10880558  | 44132250 A | 4.536 | 6.97E-08 | chr:12:44313657 |
| 12 rs10785489  | 44364261 C | 5.999 | 7.14E-08 | chr:12:44313657 |
| 12 rs144535012 | 44182278 A | 7.636 | 7.32E-08 | chr:12:44313657 |
| 12 rs12311962  | 44237272 A | 5.92  | 8.20E-08 | chr:12:44313657 |
| 12 rs12314126  | 44236455 G | 5.92  | 8.20E-08 | chr:12:44313657 |
| 12 rs1731422   | 44276369 G | 9.327 | 8.85E-08 | chr:12:44313657 |
| 12 rs12302873  | 44146579 T | 4.352 | 1.04E-07 | chr:12:44313657 |

|                |            |        |          |                 |
|----------------|------------|--------|----------|-----------------|
| 12 rs10880559  | 44137338 G | 4.538  | 1.20E-07 | chr:12:44313657 |
| 12 rs10880560  | 44137382 C | 4.538  | 1.20E-07 | chr:12:44313657 |
| 12 rs10880561  | 44137426 T | 4.538  | 1.20E-07 | chr:12:44313657 |
| 12 rs73098836  | 44286253 A | 9.769  | 1.26E-07 | chr:12:44313657 |
| 12 rs7957146   | 44306759 G | 9.769  | 1.26E-07 | chr:12:44313657 |
| 12 rs7958314   | 44302430 T | 9.769  | 1.26E-07 | chr:12:44313657 |
| 12 rs7954870   | 44143149 A | 4.374  | 1.28E-07 | chr:12:44313657 |
| 12 rs4251466   | 44164441 T | 4.598  | 1.66E-07 | chr:12:44313657 |
| 12 rs11182294  | 44231539 T | 9.916  | 2.24E-07 | chr:12:44313657 |
| 12 rs4251473   | 44166318 A | 4.413  | 3.72E-07 | chr:12:44313657 |
| 12 rs11182419  | 44500239 T | 9.822  | 3.73E-07 | chr:12:44313657 |
| 12 rs4251431   | 44154690 T | 4.273  | 3.96E-07 | chr:12:44313657 |
| 12 rs10880583  | 44305868 T | 0.2112 | 4.47E-07 | chr:12:44313657 |
| 12 rs1675778   | 44263162 G | 5.428  | 4.59E-07 | chr:12:44313657 |
| 12 rs1675760   | 44282981 G | 8.182  | 4.73E-07 | chr:12:44313657 |
| 12 rs1675786   | 44292760 C | 8.182  | 4.73E-07 | chr:12:44313657 |
| 12 rs1675791   | 44290267 G | 8.182  | 4.73E-07 | chr:12:44313657 |
| 12 rs1731425   | 44282630 T | 8.182  | 4.73E-07 | chr:12:44313657 |
| 12 rs7966024   | 44297013 G | 8.182  | 4.73E-07 | chr:12:44313657 |
| 12 rs148798873 | 44653722 G | 9.509  | 1.07E-06 | chr:12:44313657 |
| 12 rs10748373  | 44253386 A | 5.024  | 1.14E-06 | chr:12:44313657 |
| 12 rs1675771   | 44252960 A | 5.024  | 1.14E-06 | chr:12:44313657 |
| 12 rs1675774   | 44266575 G | 5.024  | 1.14E-06 | chr:12:44313657 |
| 12 rs1675776   | 44265242 A | 5.024  | 1.14E-06 | chr:12:44313657 |
| 12 rs1675777   | 44264215 G | 5.024  | 1.14E-06 | chr:12:44313657 |
| 12 rs1675782   | 44258841 C | 5.024  | 1.14E-06 | chr:12:44313657 |
| 12 rs1675784   | 44257601 A | 5.024  | 1.14E-06 | chr:12:44313657 |
| 12 rs1675788   | 44273779 C | 5.024  | 1.14E-06 | chr:12:44313657 |
| 12 rs1731439   | 44266559 G | 5.024  | 1.14E-06 | chr:12:44313657 |
| 12 rs1731440   | 44265605 T | 5.024  | 1.14E-06 | chr:12:44313657 |
| 12 rs2447115   | 44254494 A | 5.024  | 1.14E-06 | chr:12:44313657 |
| 12 rs2447116   | 44262529 A | 5.024  | 1.14E-06 | chr:12:44313657 |
| 12 rs2951436   | 44261618 A | 5.024  | 1.14E-06 | chr:12:44313657 |
| 12 rs4251513   | 44174204 C | 3.256  | 1.95E-06 | chr:12:44313657 |
| 12 rs11830410  | 44322978 C | 28.45  | 2.15E-06 | chr:12:44313657 |
| 12 rs12371940  | 44319060 C | 28.45  | 2.15E-06 | chr:12:44313657 |
| 12 rs73100979  | 44345424 T | 28.45  | 2.15E-06 | chr:12:44313657 |
| 12 rs7976722   | 44312149 T | 28.45  | 2.15E-06 | chr:12:44313657 |
| 12 rs11182287  | 44218539 C | 21.25  | 2.59E-06 | chr:12:44313657 |
| 12 rs1675775   | 44265524 A | 5.584  | 4.24E-06 | chr:12:44313657 |
| 12 rs1731441   | 44265523 G | 5.584  | 4.24E-06 | chr:12:44313657 |
| 12 rs1731449   | 44244877 T | 5.584  | 4.24E-06 | chr:12:44313657 |
| 12 rs1731453   | 44250528 G | 5.584  | 4.24E-06 | chr:12:44313657 |

|                |            |        |          |                 |
|----------------|------------|--------|----------|-----------------|
| 12 rs7953229   | 44239350 T | 5.584  | 4.24E-06 | chr:12:44313657 |
| 12 rs7965635   | 44238903 A | 5.584  | 4.24E-06 | chr:12:44313657 |
| 12 rs149139340 | 44304397 T | 43.29  | 4.43E-06 | chr:12:44313657 |
| 12 rs7315408   | 44308709 C | 43.29  | 4.43E-06 | chr:12:44313657 |
| 12 rs11182371  | 44394939 C | 26.57  | 4.74E-06 | chr:12:44313657 |
| 12 rs12320155  | 44394433 T | 26.57  | 4.74E-06 | chr:12:44313657 |
| 12 rs2407782   | 44278489 A | 3.061  | 4.96E-06 | chr:12:44313657 |
| 12 rs11608602  | 44215732 C | 5.472  | 5.02E-06 | chr:12:44313657 |
| 12 rs11182363  | 44381348 C | 18.52  | 6.61E-06 | chr:12:44313657 |
| 12 rs10082995  | 44232340 T | 5.335  | 6.62E-06 | chr:12:44313657 |
| 12 rs2699992   | 44278013 C | 5.283  | 8.24E-06 | chr:12:44313657 |
| 12 rs145822768 | 44350947 T | 33.88  | 9.06E-06 | chr:12:44313657 |
| 12 rs111789075 | 44352673 C | 10.97  | 9.95E-06 | chr:12:44313657 |
| 12 rs11182348  | 44354835 C | 10.97  | 9.95E-06 | chr:12:44313657 |
| 12 rs11182353  | 44361688 T | 10.97  | 9.95E-06 | chr:12:44313657 |
| 12 rs11182354  | 44361712 G | 10.97  | 9.95E-06 | chr:12:44313657 |
| 12 rs11182355  | 44362091 G | 10.97  | 9.95E-06 | chr:12:44313657 |
| 12 rs11182359  | 44363956 T | 10.97  | 9.95E-06 | chr:12:44313657 |
| 12 rs1675766   | 44244919 C | 5.596  | 1.07E-05 | chr:12:44313657 |
| 12 rs112350998 | 44141631 A | 9.694  | 1.08E-05 | chr:12:44313657 |
| 12 rs1842044   | 44113667 G | 2.846  | 1.25E-05 | chr:12:44313657 |
| 12 rs2083956   | 44100278 G | 2.846  | 1.25E-05 | chr:12:44313657 |
| 12 rs2407659   | 44099786 C | 2.846  | 1.25E-05 | chr:12:44313657 |
| 12 rs6582480   | 44103230 A | 2.846  | 1.25E-05 | chr:12:44313657 |
| 12 rs11182284  | 44217312 A | 5.038  | 1.56E-05 | chr:12:44313657 |
| 12 rs11182286  | 44217342 C | 5.038  | 1.56E-05 | chr:12:44313657 |
| 12 rs12230695  | 44215935 G | 5.038  | 1.56E-05 | chr:12:44313657 |
| 12 rs11182221  | 44101967 G | 2.739  | 2.14E-05 | chr:12:44313657 |
| 12 rs1585716   | 44103302 G | 2.739  | 2.14E-05 | chr:12:44313657 |
| 12 rs1814173   | 44101092 A | 2.739  | 2.14E-05 | chr:12:44313657 |
| 12 rs1824817   | 44098594 G | 2.739  | 2.14E-05 | chr:12:44313657 |
| 12 rs6582481   | 44103477 T | 2.739  | 2.14E-05 | chr:12:44313657 |
| 12 rs10506233  | 44376031 C | 11.1   | 2.21E-05 | chr:12:44313657 |
| 12 rs547527570 | 44301398 C | 0.2518 | 2.46E-05 | chr:12:44313657 |
| 12 rs7485053   | 55770126 C | 0.1152 | 8.23E-11 | chr:12:55727213 |
| 12 rs61957915  | 55742266 C | 0.12   | 8.87E-11 | chr:12:55727213 |
| 12 rs59466585  | 55722736 G | 0.1119 | 9.23E-11 | chr:12:55727213 |
| 12 rs61957887  | 55721734 T | 0.1119 | 9.23E-11 | chr:12:55727213 |
| 12 rs7960760   | 55722311 G | 0.1119 | 9.23E-11 | chr:12:55727213 |
| 12 rs7971053   | 55729947 C | 0.1119 | 9.23E-11 | chr:12:55727213 |
| 12 rs7484522   | 55738240 G | 0.1243 | 1.02E-10 | chr:12:55727213 |
| 12 rs11171416  | 55731490 G | 0.1204 | 1.02E-10 | chr:12:55727213 |
| 12 rs11831714  | 55741742 G | 0.1204 | 1.02E-10 | chr:12:55727213 |

|                |            |        |          |                 |
|----------------|------------|--------|----------|-----------------|
| 12 rs12099811  | 55731200 A | 0.1204 | 1.02E-10 | chr:12:55727213 |
| 12 rs55659159  | 55747754 T | 0.1204 | 1.02E-10 | chr:12:55727213 |
| 12 rs59136392  | 55748204 T | 0.1204 | 1.02E-10 | chr:12:55727213 |
| 12 rs59676560  | 55745425 C | 0.1204 | 1.02E-10 | chr:12:55727213 |
| 12 rs61957898  | 55730423 C | 0.1204 | 1.02E-10 | chr:12:55727213 |
| 12 rs61957924  | 55744100 C | 0.1204 | 1.02E-10 | chr:12:55727213 |
| 12 rs61957933  | 55744710 G | 0.1204 | 1.02E-10 | chr:12:55727213 |
| 12 rs61957936  | 55745719 G | 0.1204 | 1.02E-10 | chr:12:55727213 |
| 12 rs7314118   | 55737403 C | 0.1204 | 1.02E-10 | chr:12:55727213 |
| 12 rs7955088   | 55732963 T | 0.1204 | 1.02E-10 | chr:12:55727213 |
| 12 rs61957902  | 55738064 C | 0.1208 | 1.16E-10 | chr:12:55727213 |
| 12 rs7960719   | 55722035 A | 0.1122 | 1.41E-10 | chr:12:55727213 |
| 12 rs11171435  | 55758053 C | 0.1217 | 2.02E-10 | chr:12:55727213 |
| 12 rs12318683  | 55755024 C | 0.1217 | 2.02E-10 | chr:12:55727213 |
| 12 rs146150551 | 55751301 C | 0.1217 | 2.02E-10 | chr:12:55727213 |
| 12 rs56677471  | 55749967 A | 0.1217 | 2.02E-10 | chr:12:55727213 |
| 12 rs59347627  | 55758129 G | 0.1217 | 2.02E-10 | chr:12:55727213 |
| 12 rs61957943  | 55749330 G | 0.1217 | 2.02E-10 | chr:12:55727213 |
| 12 rs79104523  | 55749220 C | 0.1217 | 2.02E-10 | chr:12:55727213 |
| 12 rs537017437 | 55742569 T | 0.1322 | 2.09E-10 | chr:12:55727213 |
| 12 rs6581037   | 55767310 T | 0.1238 | 2.10E-10 | chr:12:55727213 |
| 12 rs57757372  | 55718780 G | 0.1234 | 2.10E-10 | chr:12:55727213 |
| 12 rs58709231  | 55719090 C | 0.1234 | 2.10E-10 | chr:12:55727213 |
| 12 rs59097302  | 55719030 T | 0.1234 | 2.10E-10 | chr:12:55727213 |
| 12 rs60142559  | 55719192 G | 0.1234 | 2.10E-10 | chr:12:55727213 |
| 12 rs60220253  | 55717410 G | 0.1234 | 2.10E-10 | chr:12:55727213 |
| 12 rs61957879  | 55716971 C | 0.1234 | 2.10E-10 | chr:12:55727213 |
| 12 rs12296692  | 55756851 C | 0.124  | 2.49E-10 | chr:12:55727213 |
| 12 rs149898597 | 55753436 A | 0.123  | 2.49E-10 | chr:12:55727213 |
| 12 rs7310335   | 55884439 T | 0.1348 | 2.54E-10 | chr:12:55727213 |
| 12 rs61249728  | 55728922 G | 0.1222 | 2.64E-10 | chr:12:55727213 |
| 12 rs7311751   | 55748847 G | 0.1228 | 2.68E-10 | chr:12:55727213 |
| 12 rs55898514  | 55736238 A | 0.1334 | 3.48E-10 | chr:12:55727213 |
| 12 rs61957899  | 55731971 T | 0.1334 | 3.48E-10 | chr:12:55727213 |
| 12 rs73118998  | 55736659 C | 0.1334 | 3.48E-10 | chr:12:55727213 |
| 12 rs73119000  | 55736662 A | 0.1334 | 3.48E-10 | chr:12:55727213 |
| 12 rs7313465   | 55736863 T | 0.1334 | 3.48E-10 | chr:12:55727213 |
| 12 rs7484556   | 55738427 G | 0.1334 | 3.48E-10 | chr:12:55727213 |
| 12 rs201554506 | 55826869 A | 0.1268 | 3.63E-10 | chr:12:55727213 |
| 12 rs112331945 | 55781657 T | 0.1312 | 4.47E-10 | chr:12:55727213 |
| 12 rs61566486  | 55781694 G | 0.1312 | 4.47E-10 | chr:12:55727213 |
| 12 rs115471673 | 55766516 G | 0.1348 | 4.49E-10 | chr:12:55727213 |
| 12 rs12099665  | 55731191 T | 0.1348 | 4.49E-10 | chr:12:55727213 |

|                |            |        |          |                 |
|----------------|------------|--------|----------|-----------------|
| 12 rs12099808  | 55731178 A | 0.1348 | 4.49E-10 | chr:12:55727213 |
| 12 rs12578879  | 55797773 T | 0.1348 | 4.49E-10 | chr:12:55727213 |
| 12 rs12579346  | 55786856 G | 0.1348 | 4.49E-10 | chr:12:55727213 |
| 12 rs12580661  | 55803129 A | 0.1348 | 4.49E-10 | chr:12:55727213 |
| 12 rs12581060  | 55797484 C | 0.1348 | 4.49E-10 | chr:12:55727213 |
| 12 rs12581916  | 55764409 C | 0.1348 | 4.49E-10 | chr:12:55727213 |
| 12 rs12582005  | 55772837 A | 0.1348 | 4.49E-10 | chr:12:55727213 |
| 12 rs189794726 | 55743934 C | 0.1348 | 4.49E-10 | chr:12:55727213 |
| 12 rs3935215   | 55792401 A | 0.1348 | 4.49E-10 | chr:12:55727213 |
| 12 rs4448777   | 55724981 C | 0.1348 | 4.49E-10 | chr:12:55727213 |
| 12 rs4590978   | 55725086 T | 0.1348 | 4.49E-10 | chr:12:55727213 |
| 12 rs55637917  | 55747565 C | 0.1348 | 4.49E-10 | chr:12:55727213 |
| 12 rs58254871  | 55750281 A | 0.1348 | 4.49E-10 | chr:12:55727213 |
| 12 rs58780687  | 55736498 C | 0.1348 | 4.49E-10 | chr:12:55727213 |
| 12 rs59213907  | 55728911 T | 0.1348 | 4.49E-10 | chr:12:55727213 |
| 12 rs60230359  | 55736550 C | 0.1348 | 4.49E-10 | chr:12:55727213 |
| 12 rs60249205  | 55758333 G | 0.1348 | 4.49E-10 | chr:12:55727213 |
| 12 rs60586348  | 55745151 T | 0.1348 | 4.49E-10 | chr:12:55727213 |
| 12 rs60774348  | 55757717 G | 0.1348 | 4.49E-10 | chr:12:55727213 |
| 12 rs61556775  | 55745640 C | 0.1348 | 4.49E-10 | chr:12:55727213 |
| 12 rs61956269  | 55768023 T | 0.1348 | 4.49E-10 | chr:12:55727213 |
| 12 rs61956272  | 55779559 T | 0.1348 | 4.49E-10 | chr:12:55727213 |
| 12 rs61956275  | 55786423 A | 0.1348 | 4.49E-10 | chr:12:55727213 |
| 12 rs61956290  | 55793833 G | 0.1348 | 4.49E-10 | chr:12:55727213 |
| 12 rs61956291  | 55797964 C | 0.1348 | 4.49E-10 | chr:12:55727213 |
| 12 rs61956292  | 55803346 C | 0.1348 | 4.49E-10 | chr:12:55727213 |
| 12 rs61957937  | 55746850 C | 0.1348 | 4.49E-10 | chr:12:55727213 |
| 12 rs61957938  | 55747266 G | 0.1348 | 4.49E-10 | chr:12:55727213 |
| 12 rs61957941  | 55748058 A | 0.1348 | 4.49E-10 | chr:12:55727213 |
| 12 rs61957946  | 55755778 C | 0.1348 | 4.49E-10 | chr:12:55727213 |
| 12 rs66902680  | 55724080 C | 0.1348 | 4.49E-10 | chr:12:55727213 |
| 12 rs67015069  | 55759968 A | 0.1348 | 4.49E-10 | chr:12:55727213 |
| 12 rs67934812  | 55785591 G | 0.1348 | 4.49E-10 | chr:12:55727213 |
| 12 rs73326725  | 55749222 C | 0.1348 | 4.49E-10 | chr:12:55727213 |
| 12 rs74844018  | 55766871 A | 0.1348 | 4.49E-10 | chr:12:55727213 |
| 12 rs7485979   | 55789043 A | 0.1348 | 4.49E-10 | chr:12:55727213 |
| 12 rs7485991   | 55789129 C | 0.1348 | 4.49E-10 | chr:12:55727213 |
| 12 rs7487419   | 55769801 G | 0.1348 | 4.49E-10 | chr:12:55727213 |
| 12 rs7487895   | 55796720 C | 0.1348 | 4.49E-10 | chr:12:55727213 |
| 12 rs7488940   | 55802591 T | 0.1348 | 4.49E-10 | chr:12:55727213 |
| 12 rs7489047   | 55759851 G | 0.1348 | 4.49E-10 | chr:12:55727213 |
| 12 rs7959124   | 55726957 G | 0.1348 | 4.49E-10 | chr:12:55727213 |
| 12 rs7976828   | 55726450 T | 0.1348 | 4.49E-10 | chr:12:55727213 |



|                |            |        |          |                 |
|----------------|------------|--------|----------|-----------------|
| 12 rs7959837   | 55734511 A | 0.1371 | 4.64E-10 | chr:12:55727213 |
| 12 rs61957765  | 55868561 C | 0.1351 | 4.95E-10 | chr:12:55727213 |
| 12 rs67290413  | 55869876 C | 0.1351 | 4.95E-10 | chr:12:55727213 |
| 12 rs7294659   | 55866519 C | 0.1351 | 4.95E-10 | chr:12:55727213 |
| 12 rs61957914  | 55742041 A | 0.1401 | 5.52E-10 | chr:12:55727213 |
| 12 rs12579408  | 55764348 A | 0.1374 | 5.59E-10 | chr:12:55727213 |
| 12 rs61071395  | 55721228 C | 0.1336 | 6.35E-10 | chr:12:55727213 |
| 12 rs11171431  | 55757609 T | 0.1349 | 6.61E-10 | chr:12:55727213 |
| 12 rs11171432  | 55757696 C | 0.1349 | 6.61E-10 | chr:12:55727213 |
| 12 rs11171434  | 55758018 T | 0.1349 | 6.61E-10 | chr:12:55727213 |
| 12 rs11832308  | 55755506 A | 0.1349 | 6.61E-10 | chr:12:55727213 |
| 12 rs13377995  | 55757380 G | 0.1349 | 6.61E-10 | chr:12:55727213 |
| 12 rs200704134 | 55879280 T | 0.1402 | 6.82E-10 | chr:12:55727213 |
| 12 rs201855666 | 55879919 A | 0.1402 | 6.82E-10 | chr:12:55727213 |
| 12 rs61957788  | 55883248 A | 0.1356 | 7.09E-10 | chr:12:55727213 |
| 12 rs60991522  | 55781529 T | 0.1346 | 7.09E-10 | chr:12:55727213 |
| 12 rs142753382 | 55872931 T | 0.1534 | 7.81E-10 | chr:12:55727213 |
| 12 rs12582120  | 55830064 G | 0.1384 | 7.89E-10 | chr:12:55727213 |
| 12 rs201409163 | 55827180 C | 0.1384 | 7.89E-10 | chr:12:55727213 |
| 12 rs4318592   | 55837124 A | 0.1384 | 7.89E-10 | chr:12:55727213 |
| 12 rs55797706  | 55836585 A | 0.1384 | 7.89E-10 | chr:12:55727213 |
| 12 rs61956325  | 55827707 A | 0.1384 | 7.89E-10 | chr:12:55727213 |
| 12 rs61956326  | 55827735 A | 0.1384 | 7.89E-10 | chr:12:55727213 |
| 12 rs61956327  | 55828708 T | 0.1384 | 7.89E-10 | chr:12:55727213 |
| 12 rs6581047   | 55832001 G | 0.1384 | 7.89E-10 | chr:12:55727213 |
| 12 rs7311929   | 55834833 G | 0.1384 | 7.89E-10 | chr:12:55727213 |
| 12 rs7957446   | 55839631 C | 0.1384 | 7.89E-10 | chr:12:55727213 |
| 12 rs11171430  | 55755254 G | 0.1433 | 8.32E-10 | chr:12:55727213 |
| 12 rs12578577  | 55716443 T | 0.14   | 8.48E-10 | chr:12:55727213 |
| 12 rs58480409  | 55719221 T | 0.14   | 8.48E-10 | chr:12:55727213 |
| 12 rs61957878  | 55716754 T | 0.14   | 8.48E-10 | chr:12:55727213 |
| 12 rs61957884  | 55720177 G | 0.14   | 8.48E-10 | chr:12:55727213 |
| 12 rs61957885  | 55720876 G | 0.14   | 8.48E-10 | chr:12:55727213 |
| 12 rs4130004   | 55860773 T | 0.1432 | 8.87E-10 | chr:12:55727213 |
| 12 rs4343668   | 55868936 T | 0.1432 | 8.87E-10 | chr:12:55727213 |
| 12 rs4356858   | 55867290 T | 0.1432 | 8.87E-10 | chr:12:55727213 |
| 12 rs56840674  | 55887691 T | 0.1432 | 8.87E-10 | chr:12:55727213 |
| 12 rs60066834  | 55877998 T | 0.1432 | 8.87E-10 | chr:12:55727213 |
| 12 rs60450959  | 55861373 T | 0.1432 | 8.87E-10 | chr:12:55727213 |
| 12 rs60683621  | 55863224 G | 0.1432 | 8.87E-10 | chr:12:55727213 |
| 12 rs61957764  | 55867916 A | 0.1432 | 8.87E-10 | chr:12:55727213 |
| 12 rs7304753   | 55886489 A | 0.1432 | 8.87E-10 | chr:12:55727213 |
| 12 rs61956300  | 55812640 G | 0.1394 | 9.46E-10 | chr:12:55727213 |

|                |            |        |          |                 |
|----------------|------------|--------|----------|-----------------|
| 12 rs12579852  | 55716569 A | 0.144  | 9.98E-10 | chr:12:55727213 |
| 12 rs60873827  | 55717769 C | 0.144  | 9.98E-10 | chr:12:55727213 |
| 12 rs61957763  | 55867540 A | 0.1436 | 1.03E-09 | chr:12:55727213 |
| 12 rs60643523  | 55842928 G | 0.139  | 1.10E-09 | chr:12:55727213 |
| 12 rs61956331  | 55840856 A | 0.139  | 1.10E-09 | chr:12:55727213 |
| 12 rs7966770   | 55844717 C | 0.139  | 1.10E-09 | chr:12:55727213 |
| 12 rs7971742   | 55848486 G | 0.139  | 1.10E-09 | chr:12:55727213 |
| 12 rs7980098   | 55844694 G | 0.139  | 1.10E-09 | chr:12:55727213 |
| 12 rs61957760  | 55859957 T | 0.146  | 1.18E-09 | chr:12:55727213 |
| 12 rs11171433  | 55757797 T | 0.1115 | 1.21E-09 | chr:12:55727213 |
| 12 rs145535298 | 55873030 C | 0.1539 | 1.25E-09 | chr:12:55727213 |
| 12 rs4376077   | 55872442 G | 0.1539 | 1.25E-09 | chr:12:55727213 |
| 12 rs66516917  | 55749131 G | 0.1393 | 1.33E-09 | chr:12:55727213 |
| 12 rs12579181  | 55887087 T | 0.1393 | 1.43E-09 | chr:12:55727213 |
| 12 rs59003108  | 55888940 T | 0.1393 | 1.43E-09 | chr:12:55727213 |
| 12 rs7316594   | 55887407 A | 0.1393 | 1.43E-09 | chr:12:55727213 |
| 12 rs59438785  | 55811665 G | 0.1493 | 1.69E-09 | chr:12:55727213 |
| 12 rs61547125  | 55814082 G | 0.1493 | 1.69E-09 | chr:12:55727213 |
| 12 rs61956303  | 55818071 A | 0.1493 | 1.69E-09 | chr:12:55727213 |
| 12 rs57361193  | 55883572 A | 0.1433 | 1.73E-09 | chr:12:55727213 |
| 12 rs57050414  | 55776926 A | 0.1474 | 1.75E-09 | chr:12:55727213 |
| 12 rs4453888   | 55887808 C | 0.1392 | 1.79E-09 | chr:12:55727213 |
| 12 rs112892991 | 55808749 T | 0.1502 | 1.99E-09 | chr:12:55727213 |
| 12 rs12579005  | 55853230 A | 0.1499 | 2.01E-09 | chr:12:55727213 |
| 12 rs61956358  | 55852286 T | 0.1499 | 2.01E-09 | chr:12:55727213 |
| 12 rs4309772   | 55888672 C | 0.151  | 2.05E-09 | chr:12:55727213 |
| 12 rs4479639   | 55888719 G | 0.1521 | 3.23E-09 | chr:12:55727213 |
| 12 rs67246762  | 55889642 T | 0.1678 | 4.25E-09 | chr:12:55727213 |
| 12 rs143455470 | 55879325 A | 0.1788 | 5.64E-09 | chr:12:55727213 |
| 12 rs12581959  | 55787311 A | 0.1766 | 1.64E-08 | chr:12:55727213 |
| 12 rs11171583  | 55980116 G | 0.1807 | 2.19E-08 | chr:12:55727213 |
| 12 rs11534917  | 55984049 C | 0.1807 | 2.19E-08 | chr:12:55727213 |
| 12 rs11536179  | 55997655 C | 0.1807 | 2.19E-08 | chr:12:55727213 |
| 12 rs58285384  | 55981220 A | 0.1807 | 2.19E-08 | chr:12:55727213 |
| 12 rs9669106   | 55975508 C | 0.1807 | 2.19E-08 | chr:12:55727213 |
| 12 rs201131895 | 55740725 A | 0.2114 | 3.14E-08 | chr:12:55727213 |
| 12 rs376987469 | 55740755 G | 0.2114 | 3.14E-08 | chr:12:55727213 |
| 12 rs148541886 | 55996016 G | 0.2118 | 5.77E-08 | chr:12:55727213 |
| 12 rs11171610  | 55998903 T | 0.1939 | 6.93E-08 | chr:12:55727213 |
| 12 rs11531173  | 55987253 G | 0.1939 | 6.93E-08 | chr:12:55727213 |
| 12 rs11531175  | 55993045 T | 0.1939 | 6.93E-08 | chr:12:55727213 |
| 12 rs11532451  | 55993192 T | 0.1939 | 6.93E-08 | chr:12:55727213 |
| 12 rs11537921  | 55985909 T | 0.1939 | 6.93E-08 | chr:12:55727213 |

|                |            |        |          |                 |
|----------------|------------|--------|----------|-----------------|
| 12 rs11537924  | 55986259 C | 0.1939 | 6.93E-08 | chr:12:55727213 |
| 12 rs9668674   | 55975665 C | 0.1939 | 6.93E-08 | chr:12:55727213 |
| 12 rs1316899   | 55966101 A | 0.2244 | 1.96E-07 | chr:12:55727213 |
| 12 rs61957868  | 55695527 A | 0.283  | 5.95E-07 | chr:12:55727213 |
| 12 rs373941107 | 55740754 T | 0.219  | 9.27E-07 | chr:12:55727213 |
| 12 rs12579030  | 55689194 C | 0.2728 | 1.02E-06 | chr:12:55727213 |
| 12 rs12580194  | 55696558 A | 0.2728 | 1.02E-06 | chr:12:55727213 |
| 12 rs12582734  | 55689572 A | 0.2728 | 1.02E-06 | chr:12:55727213 |
| 12 rs7971451   | 55699950 A | 0.2728 | 1.02E-06 | chr:12:55727213 |
| 12 rs4262806   | 55711562 A | 0.2753 | 1.22E-06 | chr:12:55727213 |
| 12 rs58332180  | 55711353 A | 0.2753 | 1.22E-06 | chr:12:55727213 |
| 12 rs7308316   | 55709162 A | 0.2753 | 1.22E-06 | chr:12:55727213 |
| 12 rs12579915  | 55696789 C | 0.2938 | 1.25E-06 | chr:12:55727213 |
| 12 rs4491341   | 55697838 A | 0.2938 | 1.25E-06 | chr:12:55727213 |
| 12 rs56380243  | 55690727 G | 0.2938 | 1.25E-06 | chr:12:55727213 |
| 12 rs58408480  | 55699186 T | 0.2938 | 1.25E-06 | chr:12:55727213 |
| 12 rs61539173  | 55703206 T | 0.2938 | 1.25E-06 | chr:12:55727213 |
| 12 rs7968881   | 55694434 C | 0.2938 | 1.25E-06 | chr:12:55727213 |
| 12 rs7974051   | 55713210 C | 0.3024 | 2.24E-06 | chr:12:55727213 |
| 12 rs7974512   | 55713606 G | 0.3128 | 3.00E-06 | chr:12:55727213 |
| 12 rs7486167   | 55783942 T | 0.306  | 4.41E-06 | chr:12:55727213 |
| 12 rs11171441  | 55766596 T | 0.3291 | 4.50E-06 | chr:12:55727213 |
| 12 rs10783728  | 55762519 G | 0.3267 | 4.58E-06 | chr:12:55727213 |
| 12 rs10783730  | 55763463 G | 0.3267 | 4.58E-06 | chr:12:55727213 |
| 12 rs7133826   | 55939629 G | 0.3293 | 4.72E-06 | chr:12:55727213 |
| 12 rs11171523  | 55901413 T | 0.329  | 4.81E-06 | chr:12:55727213 |
| 12 rs1124741   | 55967941 T | 0.2401 | 4.87E-06 | chr:12:55727213 |
| 12 rs7487315   | 55782690 C | 0.3189 | 5.43E-06 | chr:12:55727213 |
| 12 rs7487832   | 55782814 A | 0.3189 | 5.43E-06 | chr:12:55727213 |
| 12 rs7487833   | 55782819 A | 0.3189 | 5.43E-06 | chr:12:55727213 |
| 12 rs11171576  | 55972314 C | 0.2315 | 5.56E-06 | chr:12:55727213 |
| 12 rs7313943   | 55972705 T | 0.2315 | 5.56E-06 | chr:12:55727213 |
| 12 rs7294677   | 55800713 T | 0.3212 | 5.90E-06 | chr:12:55727213 |
| 12 rs10747746  | 55769082 T | 0.3211 | 5.99E-06 | chr:12:55727213 |
| 12 rs10747747  | 55772188 T | 0.3211 | 5.99E-06 | chr:12:55727213 |
| 12 rs10747748  | 55774581 G | 0.3211 | 5.99E-06 | chr:12:55727213 |
| 12 rs7488140   | 55770771 G | 0.3211 | 5.99E-06 | chr:12:55727213 |
| 12 rs7488178   | 55770918 G | 0.3211 | 5.99E-06 | chr:12:55727213 |
| 12 rs11171625  | 56026816 T | 0.259  | 6.22E-06 | chr:12:55727213 |
| 12 rs10783731  | 55767702 T | 0.3228 | 6.27E-06 | chr:12:55727213 |
| 12 rs10876749  | 55754085 G | 0.3228 | 6.27E-06 | chr:12:55727213 |
| 12 rs11171437  | 55761078 A | 0.3228 | 6.27E-06 | chr:12:55727213 |
| 12 rs10747752  | 55793235 A | 0.3221 | 6.46E-06 | chr:12:55727213 |

|                |            |        |          |                 |
|----------------|------------|--------|----------|-----------------|
| 12 rs10783737  | 55802733 G | 0.3221 | 6.46E-06 | chr:12:55727213 |
| 12 rs11171449  | 55789447 A | 0.3221 | 6.46E-06 | chr:12:55727213 |
| 12 rs28881605  | 55914354 G | 0.3199 | 7.14E-06 | chr:12:55727213 |
| 12 rs4759147   | 55770418 A | 0.3357 | 7.31E-06 | chr:12:55727213 |
| 12 rs10747743  | 55755226 A | 0.3246 | 7.38E-06 | chr:12:55727213 |
| 12 rs10876750  | 55757559 C | 0.3246 | 7.38E-06 | chr:12:55727213 |
| 12 rs10876751  | 55759878 A | 0.3246 | 7.38E-06 | chr:12:55727213 |
| 12 rs10876754  | 55767295 G | 0.3246 | 7.38E-06 | chr:12:55727213 |
| 12 rs11171444  | 55766896 C | 0.3246 | 7.38E-06 | chr:12:55727213 |
| 12 rs4758999   | 55756597 T | 0.3246 | 7.38E-06 | chr:12:55727213 |
| 12 rs11534885  | 55993114 C | 0.2332 | 7.53E-06 | chr:12:55727213 |
| 12 rs11534920  | 55989137 T | 0.2332 | 7.53E-06 | chr:12:55727213 |
| 12 rs10735862  | 55763034 T | 0.3349 | 7.88E-06 | chr:12:55727213 |
| 12 rs10735861  | 55762857 G | 0.3459 | 7.92E-06 | chr:12:55727213 |
| 12 rs10876837  | 56028546 A | 0.2437 | 7.94E-06 | chr:12:55727213 |
| 12 rs58316942  | 55718919 A | 0.2488 | 8.04E-06 | chr:12:55727213 |
| 12 rs61957889  | 55724456 T | 0.2488 | 8.04E-06 | chr:12:55727213 |
| 12 rs10747744  | 55768014 T | 0.3379 | 8.34E-06 | chr:12:55727213 |
| 12 rs10747745  | 55768086 A | 0.3379 | 8.34E-06 | chr:12:55727213 |
| 12 rs10876753  | 55767068 T | 0.3379 | 8.34E-06 | chr:12:55727213 |
| 12 rs4759000   | 55766037 C | 0.3379 | 8.34E-06 | chr:12:55727213 |
| 12 rs4759145   | 55769542 A | 0.3379 | 8.34E-06 | chr:12:55727213 |
| 12 rs4759146   | 55770047 T | 0.3379 | 8.34E-06 | chr:12:55727213 |
| 12 rs12305626  | 55441747 G | 0.2132 | 8.53E-06 | chr:12:55727213 |
| 12 rs10783756  | 55920314 C | 0.3442 | 8.72E-06 | chr:12:55727213 |
| 12 rs11171521  | 55901314 T | 0.344  | 8.93E-06 | chr:12:55727213 |
| 12 rs181265801 | 55900112 C | 0.344  | 8.93E-06 | chr:12:55727213 |
| 12 rs7138601   | 55895730 A | 0.344  | 8.93E-06 | chr:12:55727213 |
| 12 rs11171427  | 55742270 T | 0.3297 | 9.02E-06 | chr:12:55727213 |
| 12 rs11171631  | 56031611 G | 0.2626 | 9.42E-06 | chr:12:55727213 |
| 12 rs10431547  | 55745950 G | 0.3303 | 9.75E-06 | chr:12:55727213 |
| 12 rs10735860  | 55732664 C | 0.3303 | 9.75E-06 | chr:12:55727213 |
| 12 rs10783721  | 55732060 G | 0.3303 | 9.75E-06 | chr:12:55727213 |
| 12 rs10783723  | 55738137 G | 0.3303 | 9.75E-06 | chr:12:55727213 |
| 12 rs10783724  | 55746910 G | 0.3303 | 9.75E-06 | chr:12:55727213 |
| 12 rs10876741  | 55723575 C | 0.3303 | 9.75E-06 | chr:12:55727213 |
| 12 rs10876742  | 55737616 T | 0.3303 | 9.75E-06 | chr:12:55727213 |
| 12 rs10876747  | 55745162 A | 0.3303 | 9.75E-06 | chr:12:55727213 |
| 12 rs4759140   | 55733080 A | 0.3303 | 9.75E-06 | chr:12:55727213 |
| 12 rs7138676   | 55734240 G | 0.3303 | 9.75E-06 | chr:12:55727213 |
| 12 rs7486665   | 55741380 A | 0.3303 | 9.75E-06 | chr:12:55727213 |
| 12 rs9795610   | 55740956 A | 0.3303 | 9.75E-06 | chr:12:55727213 |
| 12 rs7960547   | 55898639 C | 0.3453 | 1.01E-05 | chr:12:55727213 |

|                |            |        |          |                 |
|----------------|------------|--------|----------|-----------------|
| 12 rs10876806  | 55914022 G | 0.3458 | 1.02E-05 | chr:12:55727213 |
| 12 rs11171411  | 55719478 C | 0.3311 | 1.15E-05 | chr:12:55727213 |
| 12 rs12301041  | 55718970 C | 0.3311 | 1.15E-05 | chr:12:55727213 |
| 12 rs4511372   | 55722251 C | 0.3311 | 1.15E-05 | chr:12:55727213 |
| 12 rs7958843   | 55726716 T | 0.3311 | 1.15E-05 | chr:12:55727213 |
| 12 rs11543034  | 55959971 C | 0.3472 | 1.16E-05 | chr:12:55727213 |
| 12 rs1896044   | 55953670 A | 0.3472 | 1.16E-05 | chr:12:55727213 |
| 12 rs1896045   | 55953568 G | 0.3472 | 1.16E-05 | chr:12:55727213 |
| 12 rs4302411   | 55938276 T | 0.3472 | 1.16E-05 | chr:12:55727213 |
| 12 rs6581066   | 55926695 A | 0.3472 | 1.16E-05 | chr:12:55727213 |
| 12 rs7297323   | 55941692 C | 0.3472 | 1.16E-05 | chr:12:55727213 |
| 12 rs7963839   | 55936468 G | 0.3472 | 1.16E-05 | chr:12:55727213 |
| 12 rs7964180   | 55957169 G | 0.3472 | 1.16E-05 | chr:12:55727213 |
| 12 rs4336160   | 55891377 T | 0.3321 | 1.21E-05 | chr:12:55727213 |
| 12 rs7304684   | 55895538 T | 0.3321 | 1.21E-05 | chr:12:55727213 |
| 12 rs10876767  | 55797331 C | 0.3314 | 1.22E-05 | chr:12:55727213 |
| 12 rs7960126   | 55813605 G | 0.257  | 1.26E-05 | chr:12:55727213 |
| 12 rs10747742  | 55748509 A | 0.3409 | 1.32E-05 | chr:12:55727213 |
| 12 rs11171535  | 55914635 A | 0.3341 | 1.39E-05 | chr:12:55727213 |
| 12 rs11532447  | 55957772 T | 0.3341 | 1.39E-05 | chr:12:55727213 |
| 12 rs12230513  | 55916780 G | 0.3341 | 1.39E-05 | chr:12:55727213 |
| 12 rs139464426 | 55958278 C | 0.3341 | 1.39E-05 | chr:12:55727213 |
| 12 rs146073724 | 55958414 A | 0.3341 | 1.39E-05 | chr:12:55727213 |
| 12 rs183973202 | 55935021 A | 0.3341 | 1.39E-05 | chr:12:55727213 |
| 12 rs76179834  | 55936746 T | 0.3341 | 1.39E-05 | chr:12:55727213 |
| 12 rs76783572  | 55936752 A | 0.3341 | 1.39E-05 | chr:12:55727213 |
| 12 rs11171556  | 55949852 A | 0.3448 | 1.63E-05 | chr:12:55727213 |
| 12 rs4324500   | 55935029 A | 0.3448 | 1.63E-05 | chr:12:55727213 |
| 12 rs77755732  | 55924293 T | 0.3448 | 1.63E-05 | chr:12:55727213 |
| 12 rs10876836  | 56028489 T | 0.2824 | 1.74E-05 | chr:12:55727213 |
| 12 rs11171629  | 56029005 C | 0.2824 | 1.74E-05 | chr:12:55727213 |
| 12 rs3922689   | 55647750 A | 0.1994 | 1.83E-05 | chr:12:55727213 |
| 12 rs7978249   | 55649103 A | 0.1994 | 1.83E-05 | chr:12:55727213 |
| 12 rs11171561  | 55960184 T | 0.3564 | 1.86E-05 | chr:12:55727213 |
| 12 rs11171562  | 55961414 C | 0.3564 | 1.86E-05 | chr:12:55727213 |
| 12 rs11171569  | 55967018 G | 0.3399 | 2.13E-05 | chr:12:55727213 |
| 12 rs10783734  | 55799682 G | 0.3444 | 2.31E-05 | chr:12:55727213 |
| 12 rs10876764  | 55789304 G | 0.3444 | 2.31E-05 | chr:12:55727213 |
| 12 rs10876768  | 55797728 A | 0.3444 | 2.31E-05 | chr:12:55727213 |
| 12 rs10876758  | 55781712 G | 0.3669 | 2.46E-05 | chr:12:55727213 |
| 12 rs10876759  | 55781717 A | 0.3669 | 2.46E-05 | chr:12:55727213 |
| 12 rs11171550  | 55933641 C | 0.3653 | 2.52E-05 | chr:12:55727213 |
| 12 rs7976741   | 55696028 A | 0.382  | 2.62E-05 | chr:12:55727213 |

|                |            |        |          |                 |
|----------------|------------|--------|----------|-----------------|
| 12 rs10506341  | 55448678 A | 0.1876 | 2.73E-05 | chr:12:55727213 |
| 12 rs12297677  | 55460614 T | 0.1876 | 2.73E-05 | chr:12:55727213 |
| 12 rs17116877  | 55451189 C | 0.1876 | 2.73E-05 | chr:12:55727213 |
| 12 rs11171426  | 55741827 T | 0.3511 | 2.74E-05 | chr:12:55727213 |
| 12 rs11611990  | 55644365 G | 0.1444 | 2.83E-05 | chr:12:55727213 |
| 12 rs73322883  | 55641920 A | 0.1444 | 2.83E-05 | chr:12:55727213 |
| 12 rs79812609  | 55645396 A | 0.1444 | 2.83E-05 | chr:12:55727213 |
| 13 rs112632269 | 90731067 G | 120    | 3.40E-15 | chr:13:90743183 |
| 13 rs78721625  | 90744516 T | 120    | 3.40E-15 | chr:13:90743183 |
| 13 rs16943826  | 90710255 C | 117.6  | 1.00E-14 | chr:13:90743183 |
| 13 rs77191234  | 90719556 G | 117.6  | 1.00E-14 | chr:13:90743183 |
| 13 rs75921720  | 90708825 C | 212.2  | 3.20E-14 | chr:13:90743183 |
| 13 rs74507286  | 90738994 T | 73.24  | 3.67E-14 | chr:13:90743183 |
| 13 rs79785623  | 90752549 T | 67.62  | 4.68E-14 | chr:13:90743183 |
| 13 rs2805748   | 90747577 A | 79.88  | 5.16E-14 | chr:13:90743183 |
| 13 rs112945355 | 90680625 T | 65.7   | 1.14E-13 | chr:13:90743183 |
| 13 rs113169741 | 90685650 A | 65.7   | 1.14E-13 | chr:13:90743183 |
| 13 rs116763682 | 90743619 A | 65.7   | 1.14E-13 | chr:13:90743183 |
| 13 rs137989181 | 90676229 T | 65.7   | 1.14E-13 | chr:13:90743183 |
| 13 rs1987095   | 90681873 C | 65.7   | 1.14E-13 | chr:13:90743183 |
| 13 rs1987156   | 90681662 A | 65.7   | 1.14E-13 | chr:13:90743183 |
| 13 rs57346044  | 90704533 C | 65.7   | 1.14E-13 | chr:13:90743183 |
| 13 rs74565296  | 90691322 T | 65.7   | 1.14E-13 | chr:13:90743183 |
| 13 rs75410608  | 90693188 A | 65.7   | 1.14E-13 | chr:13:90743183 |
| 13 rs75805202  | 90735664 G | 65.7   | 1.14E-13 | chr:13:90743183 |
| 13 rs76202013  | 90714744 C | 65.7   | 1.14E-13 | chr:13:90743183 |
| 13 rs76901628  | 90699709 C | 65.7   | 1.14E-13 | chr:13:90743183 |
| 13 rs78545676  | 90677712 G | 65.7   | 1.14E-13 | chr:13:90743183 |
| 13 rs78645261  | 90754325 G | 65.7   | 1.14E-13 | chr:13:90743183 |
| 13 rs78975634  | 90720218 G | 65.7   | 1.14E-13 | chr:13:90743183 |
| 13 rs79671279  | 90682347 T | 65.7   | 1.14E-13 | chr:13:90743183 |
| 13 rs80014975  | 90678526 G | 65.7   | 1.14E-13 | chr:13:90743183 |
| 13 rs80233688  | 90723496 G | 65.7   | 1.14E-13 | chr:13:90743183 |
| 13 rs79110442  | 90748308 G | 53.73  | 3.11E-13 | chr:13:90743183 |
| 13 rs114498245 | 90667379 A | 57.97  | 3.38E-13 | chr:13:90743183 |
| 13 rs115029999 | 90669505 G | 57.97  | 3.38E-13 | chr:13:90743183 |
| 13 rs75635330  | 90668043 C | 57.97  | 3.38E-13 | chr:13:90743183 |
| 13 rs78585383  | 90673119 T | 57.97  | 3.38E-13 | chr:13:90743183 |
| 13 rs78693129  | 90673027 T | 57.97  | 3.38E-13 | chr:13:90743183 |
| 13 rs7985369   | 90671522 A | 57.97  | 3.38E-13 | chr:13:90743183 |
| 13 rs16943737  | 90663135 G | 48.65  | 1.22E-12 | chr:13:90743183 |
| 13 rs16943738  | 90664242 G | 48.65  | 1.22E-12 | chr:13:90743183 |
| 13 rs41322051  | 90646840 G | 48.65  | 1.22E-12 | chr:13:90743183 |

|                |            |       |          |                 |
|----------------|------------|-------|----------|-----------------|
| 13 rs41361347  | 90652322 G | 48.65 | 1.22E-12 | chr:13:90743183 |
| 13 rs74422803  | 90653835 T | 48.65 | 1.22E-12 | chr:13:90743183 |
| 13 rs74568779  | 90660687 A | 48.65 | 1.22E-12 | chr:13:90743183 |
| 13 rs76111549  | 90651195 A | 48.65 | 1.22E-12 | chr:13:90743183 |
| 13 rs76925939  | 90646777 T | 48.65 | 1.22E-12 | chr:13:90743183 |
| 13 rs77555222  | 90662826 C | 48.65 | 1.22E-12 | chr:13:90743183 |
| 13 rs78076983  | 90651105 G | 48.65 | 1.22E-12 | chr:13:90743183 |
| 13 rs78078484  | 90646090 A | 48.65 | 1.22E-12 | chr:13:90743183 |
| 13 rs78172895  | 90663325 A | 48.65 | 1.22E-12 | chr:13:90743183 |
| 13 rs78641456  | 90653738 G | 48.65 | 1.22E-12 | chr:13:90743183 |
| 13 rs78680587  | 90654218 A | 48.65 | 1.22E-12 | chr:13:90743183 |
| 13 rs78905293  | 90647677 T | 48.65 | 1.22E-12 | chr:13:90743183 |
| 13 rs78992908  | 90651318 A | 48.65 | 1.22E-12 | chr:13:90743183 |
| 13 rs79494540  | 90648492 C | 48.65 | 1.22E-12 | chr:13:90743183 |
| 13 rs79603316  | 90660753 A | 48.65 | 1.22E-12 | chr:13:90743183 |
| 13 rs80350675  | 90647983 G | 48.65 | 1.22E-12 | chr:13:90743183 |
| 13 rs2805699   | 90723189 A | 326.7 | 1.32E-12 | chr:13:90743183 |
| 13 rs74387961  | 90647017 A | 44.84 | 1.90E-12 | chr:13:90743183 |
| 13 rs80247605  | 90664690 G | 43.62 | 2.15E-12 | chr:13:90743183 |
| 13 rs76821422  | 90696710 T | 38    | 1.33E-11 | chr:13:90743183 |
| 13 rs74593387  | 90592567 A | 35.34 | 1.34E-11 | chr:13:90743183 |
| 13 rs117605767 | 90638149 G | 32.85 | 5.40E-11 | chr:13:90743183 |
| 13 rs76245692  | 90623318 T | 30.72 | 5.64E-11 | chr:13:90743183 |
| 13 rs1341647   | 90653212 G | 29.89 | 1.31E-10 | chr:13:90743183 |
| 13 rs1361601   | 90651537 T | 29.89 | 1.31E-10 | chr:13:90743183 |
| 13 rs1417931   | 90652059 C | 29.89 | 1.31E-10 | chr:13:90743183 |
| 13 rs1417932   | 90651802 C | 29.89 | 1.31E-10 | chr:13:90743183 |
| 13 rs1578539   | 90647385 A | 29.89 | 1.31E-10 | chr:13:90743183 |
| 13 rs1857016   | 90653003 C | 29.89 | 1.31E-10 | chr:13:90743183 |
| 13 rs1935181   | 90649956 C | 29.89 | 1.31E-10 | chr:13:90743183 |
| 13 rs1935182   | 90649766 T | 29.89 | 1.31E-10 | chr:13:90743183 |
| 13 rs2805658   | 90652699 A | 29.89 | 1.31E-10 | chr:13:90743183 |
| 13 rs2805659   | 90652722 A | 29.89 | 1.31E-10 | chr:13:90743183 |
| 13 rs4773545   | 90650689 T | 29.89 | 1.31E-10 | chr:13:90743183 |
| 13 rs6492467   | 90646581 T | 29.89 | 1.31E-10 | chr:13:90743183 |
| 13 rs6492468   | 90650308 T | 29.89 | 1.31E-10 | chr:13:90743183 |
| 13 rs6492469   | 90650326 A | 29.89 | 1.31E-10 | chr:13:90743183 |
| 13 rs7987787   | 90648902 A | 29.89 | 1.31E-10 | chr:13:90743183 |
| 13 rs7987946   | 90648926 A | 29.89 | 1.31E-10 | chr:13:90743183 |
| 13 rs7987947   | 90648931 A | 29.89 | 1.31E-10 | chr:13:90743183 |
| 13 rs9522811   | 90647140 C | 29.89 | 1.31E-10 | chr:13:90743183 |
| 13 rs1341654   | 90661565 A | 25.67 | 1.32E-10 | chr:13:90743183 |
| 13 rs76200599  | 90606676 T | 26.97 | 2.60E-10 | chr:13:90743183 |

|                |            |       |          |                 |
|----------------|------------|-------|----------|-----------------|
| 13 rs7321841   | 90645244 A | 27.29 | 2.99E-10 | chr:13:90743183 |
| 13 rs7326085   | 90645471 C | 27.29 | 2.99E-10 | chr:13:90743183 |
| 13 rs7322297   | 90720522 A | 683.2 | 1.60E-09 | chr:13:90743183 |
| 13 rs1491024   | 90715598 G | 28.82 | 2.95E-09 | chr:13:90743183 |
| 13 rs9588850   | 90717634 A | 28.82 | 2.95E-09 | chr:13:90743183 |
| 13 rs9588852   | 90719948 G | 28.82 | 2.95E-09 | chr:13:90743183 |
| 13 rs1987096   | 90681823 T | 10.08 | 6.31E-08 | chr:13:90743183 |
| 13 rs11842540  | 90634897 G | 10.35 | 1.47E-07 | chr:13:90743183 |
| 13 rs11842101  | 90633545 G | 10.14 | 1.65E-07 | chr:13:90743183 |
| 13 rs76649938  | 90799618 T | 16.23 | 1.94E-07 | chr:13:90743183 |
| 13 rs11620232  | 90642326 G | 9.934 | 2.04E-07 | chr:13:90743183 |
| 13 rs11841913  | 90637307 T | 9.934 | 2.04E-07 | chr:13:90743183 |
| 13 rs12855674  | 90638634 G | 9.934 | 2.04E-07 | chr:13:90743183 |
| 13 rs12857525  | 90638814 G | 9.934 | 2.04E-07 | chr:13:90743183 |
| 13 rs34788777  | 90640624 G | 9.934 | 2.04E-07 | chr:13:90743183 |
| 13 rs35159467  | 90631767 A | 9.934 | 2.04E-07 | chr:13:90743183 |
| 13 rs7322351   | 90639552 T | 9.934 | 2.04E-07 | chr:13:90743183 |
| 13 rs2805689   | 90715153 G | 6.953 | 2.88E-07 | chr:13:90743183 |
| 13 rs186610268 | 90795129 A | 14.2  | 3.63E-07 | chr:13:90743183 |
| 13 rs1602410   | 90699029 A | 7.397 | 4.94E-07 | chr:13:90743183 |
| 13 rs4142563   | 90722674 G | 7.041 | 5.76E-07 | chr:13:90743183 |
| 13 rs77533677  | 90798005 T | 12.86 | 5.77E-07 | chr:13:90743183 |
| 13 rs2637398   | 90722150 T | 5.837 | 6.09E-07 | chr:13:90743183 |
| 13 rs2637421   | 90740082 T | 5.837 | 6.09E-07 | chr:13:90743183 |
| 13 rs2637426   | 90741000 A | 5.837 | 6.09E-07 | chr:13:90743183 |
| 13 rs2637439   | 90732217 G | 5.837 | 6.09E-07 | chr:13:90743183 |
| 13 rs2805704   | 90727635 A | 5.837 | 6.09E-07 | chr:13:90743183 |
| 13 rs2805728   | 90742666 A | 5.837 | 6.09E-07 | chr:13:90743183 |
| 13 rs8001179   | 90613977 G | 8.84  | 7.94E-07 | chr:13:90743183 |
| 13 rs12858780  | 90735185 T | 6.004 | 1.16E-06 | chr:13:90743183 |
| 13 rs1491012   | 90738253 C | 6.004 | 1.16E-06 | chr:13:90743183 |
| 13 rs1586740   | 90747887 C | 6.004 | 1.16E-06 | chr:13:90743183 |
| 13 rs2350300   | 90733811 G | 6.004 | 1.16E-06 | chr:13:90743183 |
| 13 rs35414148  | 90749088 A | 6.004 | 1.16E-06 | chr:13:90743183 |
| 13 rs3864991   | 90752677 G | 6.004 | 1.16E-06 | chr:13:90743183 |
| 13 rs4093505   | 90755052 G | 6.004 | 1.16E-06 | chr:13:90743183 |
| 13 rs4771804   | 90756276 G | 6.004 | 1.16E-06 | chr:13:90743183 |
| 13 rs4773550   | 90754699 T | 6.004 | 1.16E-06 | chr:13:90743183 |
| 13 rs7330958   | 90724514 T | 6.004 | 1.16E-06 | chr:13:90743183 |
| 13 rs7992099   | 90737810 G | 6.004 | 1.16E-06 | chr:13:90743183 |
| 13 rs7994352   | 90737852 A | 6.004 | 1.16E-06 | chr:13:90743183 |
| 13 rs9515679   | 90723917 T | 6.004 | 1.16E-06 | chr:13:90743183 |
| 13 rs9515680   | 90726064 G | 6.004 | 1.16E-06 | chr:13:90743183 |



|                |            |       |          |                 |
|----------------|------------|-------|----------|-----------------|
| 13 rs9515684   | 90735792 A | 6.004 | 1.16E-06 | chr:13:90743183 |
| 13 rs9522843   | 90735691 A | 6.004 | 1.16E-06 | chr:13:90743183 |
| 13 rs9522844   | 90738863 T | 6.004 | 1.16E-06 | chr:13:90743183 |
| 13 rs9560547   | 90725963 T | 6.004 | 1.16E-06 | chr:13:90743183 |
| 13 rs113355173 | 90805755 A | 12.7  | 1.25E-06 | chr:13:90743183 |
| 13 rs74734778  | 90805574 G | 12.7  | 1.25E-06 | chr:13:90743183 |
| 13 rs11619601  | 90630160 G | 7.942 | 1.51E-06 | chr:13:90743183 |
| 13 rs11839415  | 90579846 T | 7.942 | 1.51E-06 | chr:13:90743183 |
| 13 rs12854096  | 90614128 G | 7.942 | 1.51E-06 | chr:13:90743183 |
| 13 rs12872730  | 90628330 T | 7.942 | 1.51E-06 | chr:13:90743183 |
| 13 rs17633242  | 90603523 A | 7.942 | 1.51E-06 | chr:13:90743183 |
| 13 rs34072176  | 90595015 G | 7.942 | 1.51E-06 | chr:13:90743183 |
| 13 rs34721005  | 90628659 C | 7.942 | 1.51E-06 | chr:13:90743183 |
| 13 rs35019682  | 90600049 G | 7.942 | 1.51E-06 | chr:13:90743183 |
| 13 rs35152474  | 90623202 T | 7.942 | 1.51E-06 | chr:13:90743183 |
| 13 rs36012183  | 90604597 C | 7.942 | 1.51E-06 | chr:13:90743183 |
| 13 rs67181673  | 90624858 G | 7.942 | 1.51E-06 | chr:13:90743183 |
| 13 rs67842803  | 90583574 G | 7.942 | 1.51E-06 | chr:13:90743183 |
| 13 rs950956    | 90581710 C | 7.942 | 1.51E-06 | chr:13:90743183 |
| 13 rs2637400   | 90723289 T | 159   | 1.91E-06 | chr:13:90743183 |
| 13 rs2805701   | 90723284 A | 159   | 1.91E-06 | chr:13:90743183 |
| 13 rs12870592  | 90616121 T | 7.599 | 2.48E-06 | chr:13:90743183 |
| 13 rs4357809   | 90752644 C | 5.304 | 2.86E-06 | chr:13:90743183 |
| 13 rs7991374   | 90713284 G | 4.383 | 6.14E-06 | chr:13:90743183 |
| 13 rs1388186   | 90720423 A | 4.86  | 6.70E-06 | chr:13:90743183 |
| 13 rs8001217   | 90717865 C | 4.86  | 6.70E-06 | chr:13:90743183 |
| 13 rs9515678   | 90718301 A | 4.86  | 6.70E-06 | chr:13:90743183 |
| 13 rs9522836   | 90718114 T | 4.86  | 6.70E-06 | chr:13:90743183 |
| 13 rs113524432 | 90747494 T | 33.38 | 7.27E-06 | chr:13:90743183 |
| 13 rs113894290 | 90729661 C | 3450  | 1.54E-05 | chr:13:90743183 |
| 13 rs1388190   | 90739471 A | 3450  | 1.54E-05 | chr:13:90743183 |
| 13 rs112552157 | 90523437 T | 27.13 | 2.22E-05 | chr:13:90743183 |
| 13 rs112892478 | 90523407 A | 27.13 | 2.22E-05 | chr:13:90743183 |
| 14 rs78783511  | 20555396 C | 19.14 | 8.21E-16 | chr:14:20552746 |
| 14 rs7153404   | 20550111 C | 14.36 | 3.74E-15 | chr:14:20552746 |
| 14 rs58368472  | 20561378 T | 15.77 | 3.82E-15 | chr:14:20552746 |
| 14 rs4144238   | 20561971 C | 14.96 | 3.86E-15 | chr:14:20552746 |
| 14 rs12590521  | 20558876 T | 14.34 | 3.91E-15 | chr:14:20552746 |
| 14 rs4144240   | 20561753 C | 15.57 | 3.99E-15 | chr:14:20552746 |
| 14 rs12588910  | 20558938 C | 16.15 | 4.06E-15 | chr:14:20552746 |
| 14 rs12890274  | 20560354 T | 17.07 | 4.20E-15 | chr:14:20552746 |
| 14 rs4144239   | 20561922 C | 17.45 | 4.38E-15 | chr:14:20552746 |
| 14 rs57793822  | 20561481 A | 17.45 | 4.38E-15 | chr:14:20552746 |

|                |            |        |          |                 |
|----------------|------------|--------|----------|-----------------|
| 14 rs969774    | 20562080 T | 17.45  | 4.38E-15 | chr:14:20552746 |
| 14 rs7152272   | 20559234 A | 20.27  | 4.45E-15 | chr:14:20552746 |
| 14 rs11158661  | 20556366 T | 19.62  | 4.67E-15 | chr:14:20552746 |
| 14 rs12433363  | 20561341 A | 17.5   | 4.67E-15 | chr:14:20552746 |
| 14 rs4981728   | 20560512 C | 24.72  | 4.98E-15 | chr:14:20552746 |
| 14 rs12586923  | 20559937 A | 20.13  | 5.21E-15 | chr:14:20552746 |
| 14 rs12587536  | 20559906 T | 20.13  | 5.21E-15 | chr:14:20552746 |
| 14 rs7158086   | 20559451 T | 20.13  | 5.21E-15 | chr:14:20552746 |
| 14 rs12881697  | 20560434 G | 20.2   | 5.50E-15 | chr:14:20552746 |
| 14 rs7148411   | 20559282 G | 20.2   | 5.50E-15 | chr:14:20552746 |
| 14 rs4297617   | 20557961 T | 31.3   | 6.38E-15 | chr:14:20552746 |
| 14 rs4360850   | 20558013 A | 31.3   | 6.38E-15 | chr:14:20552746 |
| 14 rs4438225   | 20557810 A | 31.3   | 6.38E-15 | chr:14:20552746 |
| 14 rs4572311   | 20557971 C | 31.3   | 6.38E-15 | chr:14:20552746 |
| 14 rs1958722   | 20562590 G | 24.7   | 6.51E-15 | chr:14:20552746 |
| 14 rs10136466  | 20550347 C | 40.08  | 8.28E-15 | chr:14:20552746 |
| 14 rs11158659  | 20556212 A | 38.61  | 1.21E-14 | chr:14:20552746 |
| 14 rs11158660  | 20556259 C | 38.61  | 1.21E-14 | chr:14:20552746 |
| 14 rs12434437  | 20556447 T | 38.61  | 1.21E-14 | chr:14:20552746 |
| 14 rs12434463  | 20556513 T | 38.61  | 1.21E-14 | chr:14:20552746 |
| 14 rs6573756   | 20555675 G | 38.61  | 1.21E-14 | chr:14:20552746 |
| 14 rs6573757   | 20555744 A | 38.61  | 1.21E-14 | chr:14:20552746 |
| 14 rs6573759   | 20555817 C | 38.61  | 1.21E-14 | chr:14:20552746 |
| 14 rs6573762   | 20555920 A | 38.61  | 1.21E-14 | chr:14:20552746 |
| 14 rs7151579   | 20556265 G | 38.61  | 1.21E-14 | chr:14:20552746 |
| 14 rs7401094   | 20555950 C | 38.61  | 1.21E-14 | chr:14:20552746 |
| 14 rs12897224  | 20560235 C | 5.903  | 1.28E-10 | chr:14:20552746 |
| 14 rs72669071  | 20568482 C | 12.19  | 2.56E-09 | chr:14:20552746 |
| 14 rs369097102 | 20621303 G | 10.66  | 6.15E-09 | chr:14:20552746 |
| 14 rs1959651   | 20548729 C | 4.432  | 1.91E-08 | chr:14:20552746 |
| 14 rs61993646  | 20574305 G | 4.726  | 3.88E-08 | chr:14:20552746 |
| 14 rs7144896   | 20563540 A | 3.521  | 6.34E-08 | chr:14:20552746 |
| 14 rs7158044   | 20563508 C | 3.439  | 8.74E-08 | chr:14:20552746 |
| 14 rs113297121 | 20546983 T | 4.602  | 8.99E-08 | chr:14:20552746 |
| 14 rs2225388   | 20563664 C | 3.403  | 1.18E-07 | chr:14:20552746 |
| 14 rs7156270   | 20564435 T | 3.403  | 1.18E-07 | chr:14:20552746 |
| 14 rs7156816   | 20564737 T | 3.403  | 1.18E-07 | chr:14:20552746 |
| 14 rs7150862   | 20564461 A | 3.417  | 1.19E-07 | chr:14:20552746 |
| 14 rs58438833  | 20552415 C | 2.828  | 1.23E-07 | chr:14:20552746 |
| 14 rs7140825   | 20563466 C | 0.2914 | 1.50E-07 | chr:14:20552746 |
| 14 rs7150250   | 20563495 C | 0.2914 | 1.50E-07 | chr:14:20552746 |
| 14 rs12890060  | 20565461 G | 3.346  | 1.78E-07 | chr:14:20552746 |
| 14 rs1958724   | 20565487 T | 3.346  | 1.78E-07 | chr:14:20552746 |

|                |            |         |          |                 |
|----------------|------------|---------|----------|-----------------|
| 14 rs1958725   | 20565515 G | 3.346   | 1.78E-07 | chr:14:20552746 |
| 14 rs4303403   | 20565381 C | 3.346   | 1.78E-07 | chr:14:20552746 |
| 14 rs12892241  | 20563896 C | 0.2966  | 2.09E-07 | chr:14:20552746 |
| 14 rs10150358  | 20552946 G | 2.735   | 2.12E-07 | chr:14:20552746 |
| 14 rs12895600  | 20566286 A | 0.2974  | 2.43E-07 | chr:14:20552746 |
| 14 rs1958726   | 20565683 C | 0.3031  | 3.24E-07 | chr:14:20552746 |
| 14 rs1958727   | 20565936 C | 0.3031  | 3.24E-07 | chr:14:20552746 |
| 14 rs7152008   | 20566893 A | 0.3027  | 3.70E-07 | chr:14:20552746 |
| 14 rs4981088   | 20665840 A | 0.3047  | 3.98E-07 | chr:14:20552746 |
| 14 rs2318480   | 20591214 A | 3.573   | 4.42E-07 | chr:14:20552746 |
| 14 rs4981822   | 20665790 A | 0.3093  | 4.88E-07 | chr:14:20552746 |
| 14 rs35344717  | 20568046 T | 0.3085  | 4.93E-07 | chr:14:20552746 |
| 14 rs4981066   | 20570809 A | 0.3085  | 4.93E-07 | chr:14:20552746 |
| 14 rs60649626  | 20568452 T | 0.3085  | 4.93E-07 | chr:14:20552746 |
| 14 rs67680230  | 20569553 A | 0.3085  | 4.93E-07 | chr:14:20552746 |
| 14 rs9707258   | 20573142 T | 0.3085  | 4.93E-07 | chr:14:20552746 |
| 14 rs17242467  | 20608329 A | 3.411   | 1.08E-06 | chr:14:20552746 |
| 14 rs61993653  | 20633961 A | 3.411   | 1.08E-06 | chr:14:20552746 |
| 14 rs72638470  | 20636475 T | 3.411   | 1.08E-06 | chr:14:20552746 |
| 14 rs36126932  | 20576705 T | 0.329   | 1.31E-06 | chr:14:20552746 |
| 14 rs36142459  | 20576716 T | 0.329   | 1.31E-06 | chr:14:20552746 |
| 14 rs10149475  | 20565183 T | 0.3311  | 1.33E-06 | chr:14:20552746 |
| 14 rs11844863  | 20568135 C | 2.943   | 1.81E-06 | chr:14:20552746 |
| 14 rs149352702 | 20634977 C | 9.273   | 1.88E-06 | chr:14:20552746 |
| 14 rs202152920 | 20575655 G | 2.857   | 2.07E-06 | chr:14:20552746 |
| 14 rs12887942  | 20577454 T | 0.3378  | 2.19E-06 | chr:14:20552746 |
| 14 rs7159862   | 20569410 G | 0.3378  | 2.19E-06 | chr:14:20552746 |
| 14 rs374481570 | 20550995 A | 0.05707 | 3.12E-06 | chr:14:20552746 |
| 14 rs2210191   | 20563840 G | 2.812   | 3.47E-06 | chr:14:20552746 |
| 14 rs111429016 | 20577519 A | 0.3461  | 3.48E-06 | chr:14:20552746 |
| 14 rs145789052 | 20577567 G | 0.3461  | 3.48E-06 | chr:14:20552746 |
| 14 rs7143710   | 20577918 T | 2.803   | 3.52E-06 | chr:14:20552746 |
| 14 rs7159989   | 20577910 A | 2.803   | 3.52E-06 | chr:14:20552746 |
| 14 rs113231632 | 20551103 A | 3.11    | 3.57E-06 | chr:14:20552746 |
| 14 rs11850994  | 20577628 A | 2.741   | 5.01E-06 | chr:14:20552746 |
| 14 rs7151455   | 20577818 G | 2.741   | 5.01E-06 | chr:14:20552746 |
| 14 rs201183120 | 20575571 G | 2.65    | 5.85E-06 | chr:14:20552746 |
| 14 rs72669057  | 20548996 G | 3.638   | 5.99E-06 | chr:14:20552746 |
| 14 rs72669049  | 20538585 G | 3.22    | 6.44E-06 | chr:14:20552746 |
| 14 rs72669051  | 20540257 T | 3.22    | 6.44E-06 | chr:14:20552746 |
| 14 rs17122640  | 20503541 A | 3.502   | 6.46E-06 | chr:14:20552746 |
| 14 rs9743620   | 20573576 A | 2.66    | 7.61E-06 | chr:14:20552746 |
| 14 rs112874053 | 20572537 A | 2.624   | 9.87E-06 | chr:14:20552746 |

|                |            |         |          |                 |
|----------------|------------|---------|----------|-----------------|
| 14 rs190993235 | 20574230 A | 2.624   | 9.87E-06 | chr:14:20552746 |
| 14 rs9743609   | 20573071 A | 2.624   | 9.87E-06 | chr:14:20552746 |
| 14 rs3939209   | 20578244 G | 2.619   | 1.07E-05 | chr:14:20552746 |
| 14 rs28887469  | 20577050 C | 0.4027  | 1.51E-05 | chr:14:20552746 |
| 14 rs375935149 | 20576375 T | 0.2807  | 1.51E-05 | chr:14:20552746 |
| 14 rs573217071 | 20576361 G | 0.2807  | 1.51E-05 | chr:14:20552746 |
| 14 rs72669052  | 20540663 T | 2.995   | 1.59E-05 | chr:14:20552746 |
| 14 rs72669053  | 20540701 G | 2.995   | 1.59E-05 | chr:14:20552746 |
| 14 rs36074339  | 20572229 T | 2.576   | 1.74E-05 | chr:14:20552746 |
| 14 rs111268396 | 20546863 G | 3.645   | 1.79E-05 | chr:14:20552746 |
| 14 rs7156327   | 20578170 G | 2.542   | 2.09E-05 | chr:14:20552746 |
| 14 rs56327453  | 20529148 C | 3.075   | 2.21E-05 | chr:14:20552746 |
| 14 rs7152931   | 20527032 T | 3.075   | 2.21E-05 | chr:14:20552746 |
| 14 rs7161355   | 20526287 C | 3.075   | 2.21E-05 | chr:14:20552746 |
| 14 rs72669025  | 20526239 C | 3.075   | 2.21E-05 | chr:14:20552746 |
| 14 rs72669031  | 20527127 C | 3.075   | 2.21E-05 | chr:14:20552746 |
| 14 rs72669032  | 20527202 C | 3.075   | 2.21E-05 | chr:14:20552746 |
| 14 rs72669033  | 20527443 C | 3.075   | 2.21E-05 | chr:14:20552746 |
| 14 rs72669037  | 20529550 A | 3.075   | 2.21E-05 | chr:14:20552746 |
| 14 rs78059363  | 20529431 T | 3.075   | 2.21E-05 | chr:14:20552746 |
| 14 rs28750505  | 20577068 G | 0.4148  | 2.65E-05 | chr:14:20552746 |
| 14 rs45584133  | 20528250 T | 3.06    | 2.84E-05 | chr:14:20552746 |
| 14 rs45585336  | 20528682 C | 3.06    | 2.84E-05 | chr:14:20552746 |
| 14 rs55893849  | 20524035 C | 3.06    | 2.84E-05 | chr:14:20552746 |
| 14 rs72669017  | 20523568 G | 3.06    | 2.84E-05 | chr:14:20552746 |
| 14 rs72669018  | 20523598 T | 3.06    | 2.84E-05 | chr:14:20552746 |
| 14 rs72669019  | 20524309 C | 3.06    | 2.84E-05 | chr:14:20552746 |
| 14 rs72669021  | 20524956 A | 3.06    | 2.84E-05 | chr:14:20552746 |
| 14 rs72669022  | 20525093 G | 3.06    | 2.84E-05 | chr:14:20552746 |
| 14 rs72638473  | 20650246 A | 2.816   | 2.96E-05 | chr:14:20552746 |
| 14 rs72669013  | 20518709 C | 3.266   | 3.05E-05 | chr:14:20552746 |
| 14 rs72669014  | 20518781 C | 3.266   | 3.05E-05 | chr:14:20552746 |
| 14 rs76503330  | 20576401 C | 0.3263  | 4.33E-05 | chr:14:20552746 |
| 14 rs72669042  | 20533319 G | 2.807   | 4.79E-05 | chr:14:20552746 |
| 14 rs995249    | 20534313 A | 2.807   | 4.79E-05 | chr:14:20552746 |
| 15 rs2937855   | 63374677 G | 0.09013 | 4.03E-16 | chr:15:63374594 |
| 15 rs2652805   | 63374129 A | 0.1001  | 4.16E-16 | chr:15:63374594 |
| 15 rs2652806   | 63374127 C | 0.1001  | 4.16E-16 | chr:15:63374594 |
| 15 rs2652804   | 63374256 T | 0.09427 | 5.41E-16 | chr:15:63374594 |
| 15 rs2729805   | 63374289 A | 0.09427 | 5.41E-16 | chr:15:63374594 |
| 15 rs2729806   | 63373329 T | 0.1147  | 1.41E-15 | chr:15:63374594 |
| 15 rs2937857   | 63369571 A | 0.162   | 6.27E-14 | chr:15:63374594 |
| 15 rs1071646   | 63351840 C | 0.1662  | 1.28E-13 | chr:15:63374594 |

|                |            |        |          |                 |
|----------------|------------|--------|----------|-----------------|
| 15 rs1966032   | 63365471 C | 0.1662 | 1.28E-13 | chr:15:63374594 |
| 15 rs1966033   | 63365444 T | 0.1662 | 1.28E-13 | chr:15:63374594 |
| 15 rs11071726  | 63390622 T | 0.1912 | 1.44E-13 | chr:15:63374594 |
| 15 rs2729811   | 63364783 T | 0.1723 | 1.44E-13 | chr:15:63374594 |
| 15 rs76119457  | 63376829 A | 0.1571 | 2.01E-13 | chr:15:63374594 |
| 15 rs6738      | 63363901 C | 0.1749 | 2.09E-13 | chr:15:63374594 |
| 15 rs11071722  | 63350422 A | 0.1771 | 2.30E-13 | chr:15:63374594 |
| 15 rs1574311   | 63346320 G | 0.1779 | 2.38E-13 | chr:15:63374594 |
| 15 rs4238371   | 63347403 G | 0.1779 | 2.38E-13 | chr:15:63374594 |
| 15 rs6494387   | 63345526 A | 0.1846 | 2.52E-13 | chr:15:63374594 |
| 15 rs1135403   | 63344958 G | 0.185  | 2.79E-13 | chr:15:63374594 |
| 15 rs8519      | 63363654 A | 0.179  | 2.98E-13 | chr:15:63374594 |
| 15 rs16946372  | 63347876 G | 0.1793 | 3.04E-13 | chr:15:63374594 |
| 15 rs16953467  | 63347997 A | 0.1793 | 3.04E-13 | chr:15:63374594 |
| 15 rs4450350   | 63349952 A | 0.1793 | 3.04E-13 | chr:15:63374594 |
| 15 rs7166724   | 63348395 G | 0.1793 | 3.04E-13 | chr:15:63374594 |
| 15 rs7173072   | 63349564 C | 0.1793 | 3.04E-13 | chr:15:63374594 |
| 15 rs8037564   | 63379822 A | 0.1656 | 4.32E-13 | chr:15:63374594 |
| 15 rs2729807   | 63370329 A | 0.189  | 1.32E-12 | chr:15:63374594 |
| 15 rs17826629  | 63365680 G | 0.1885 | 5.70E-12 | chr:15:63374594 |
| 15 rs76862276  | 63380427 A | 0.1847 | 7.30E-12 | chr:15:63374594 |
| 15 rs17826683  | 63365911 A | 0.1941 | 1.13E-11 | chr:15:63374594 |
| 15 rs2652814   | 63401020 T | 0.1959 | 2.21E-11 | chr:15:63374594 |
| 15 rs80349772  | 63350471 A | 0.2101 | 2.86E-11 | chr:15:63374594 |
| 15 rs9888699   | 63387709 T | 0.2021 | 3.31E-11 | chr:15:63374594 |
| 15 rs8042050   | 63355871 G | 0.2223 | 3.67E-11 | chr:15:63374594 |
| 15 rs2729803   | 63376661 T | 4.183  | 3.80E-11 | chr:15:63374594 |
| 15 rs146600192 | 63385070 A | 0.1989 | 4.24E-11 | chr:15:63374594 |
| 15 rs28485524  | 63349132 A | 0.2291 | 8.09E-11 | chr:15:63374594 |
| 15 rs62012880  | 63527162 A | 0.2749 | 8.48E-11 | chr:15:63374594 |
| 15 rs2652841   | 63392707 C | 0.214  | 9.18E-11 | chr:15:63374594 |
| 15 rs28862017  | 63393846 G | 0.214  | 9.18E-11 | chr:15:63374594 |
| 15 rs17753220  | 63349726 A | 0.2303 | 9.25E-11 | chr:15:63374594 |
| 15 rs28645615  | 63348601 T | 0.2303 | 9.25E-11 | chr:15:63374594 |
| 15 rs2729840   | 63391744 G | 0.2155 | 9.43E-11 | chr:15:63374594 |
| 15 rs28660606  | 63356181 A | 0.2309 | 9.79E-11 | chr:15:63374594 |
| 15 rs75449003  | 63355797 T | 0.2298 | 1.01E-10 | chr:15:63374594 |
| 15 rs77372534  | 63360126 T | 0.2298 | 1.01E-10 | chr:15:63374594 |
| 15 rs12440281  | 63382513 G | 0.1926 | 1.07E-10 | chr:15:63374594 |
| 15 rs117932747 | 63399767 A | 0.2152 | 1.30E-10 | chr:15:63374594 |
| 15 rs34607951  | 63397625 A | 0.2152 | 1.30E-10 | chr:15:63374594 |
| 15 rs11630639  | 63399250 T | 0.217  | 1.35E-10 | chr:15:63374594 |
| 15 rs11630737  | 63399556 G | 0.217  | 1.35E-10 | chr:15:63374594 |

|                |            |        |          |                 |
|----------------|------------|--------|----------|-----------------|
| 15 rs77273812  | 63391248 A | 0.2174 | 1.39E-10 | chr:15:63374594 |
| 15 rs76960849  | 63389834 G | 0.2189 | 1.42E-10 | chr:15:63374594 |
| 15 rs2729804   | 63376659 T | 3.949  | 1.73E-10 | chr:15:63374594 |
| 15 rs2937856   | 63369742 G | 0.2423 | 1.91E-10 | chr:15:63374594 |
| 15 rs80220017  | 63366161 T | 0.2467 | 2.16E-10 | chr:15:63374594 |
| 15 rs2729793   | 63483977 T | 0.2762 | 2.17E-10 | chr:15:63374594 |
| 15 rs376848493 | 63365312 G | 0.241  | 2.24E-10 | chr:15:63374594 |
| 15 rs28531385  | 63350604 C | 0.2367 | 2.38E-10 | chr:15:63374594 |
| 15 rs11636549  | 63357288 G | 0.2475 | 2.48E-10 | chr:15:63374594 |
| 15 rs28512289  | 63359185 A | 0.2475 | 2.48E-10 | chr:15:63374594 |
| 15 rs17826341  | 63359302 A | 0.2491 | 2.88E-10 | chr:15:63374594 |
| 15 rs78729321  | 63366160 G | 0.2491 | 2.88E-10 | chr:15:63374594 |
| 15 rs8040219   | 63360814 G | 0.2491 | 2.88E-10 | chr:15:63374594 |
| 15 rs1050255   | 63363631 T | 0.2528 | 3.19E-10 | chr:15:63374594 |
| 15 rs7178040   | 63364098 T | 0.2528 | 3.19E-10 | chr:15:63374594 |
| 15 rs9920576   | 63363013 C | 0.2528 | 3.19E-10 | chr:15:63374594 |
| 15 rs3803502   | 63352140 T | 0.249  | 3.19E-10 | chr:15:63374594 |
| 15 rs28735896  | 63359199 A | 0.2491 | 3.32E-10 | chr:15:63374594 |
| 15 rs1017545   | 63553994 C | 3.616  | 3.33E-10 | chr:15:63374594 |
| 15 rs707602    | 63363737 C | 0.2617 | 9.68E-10 | chr:15:63374594 |
| 15 rs2729786   | 63401605 A | 0.2577 | 1.41E-09 | chr:15:63374594 |
| 15 rs12912328  | 63494235 A | 0.3063 | 1.47E-09 | chr:15:63374594 |
| 15 rs7176597   | 63494482 G | 0.3063 | 1.47E-09 | chr:15:63374594 |
| 15 rs12595312  | 63494159 T | 0.3143 | 2.25E-09 | chr:15:63374594 |
| 15 rs149883367 | 63372180 C | 0.205  | 3.92E-09 | chr:15:63374594 |
| 15 rs2729835   | 63433766 G | 0.3324 | 4.50E-09 | chr:15:63374594 |
| 15 rs8468      | 63434110 C | 0.327  | 4.57E-09 | chr:15:63374594 |
| 15 rs9672258   | 63532459 C | 0.3053 | 4.68E-09 | chr:15:63374594 |
| 15 rs8032533   | 63516033 A | 0.3038 | 5.02E-09 | chr:15:63374594 |
| 15 rs10152434  | 63545352 C | 0.3137 | 5.47E-09 | chr:15:63374594 |
| 15 rs12439988  | 63547217 A | 0.3137 | 5.47E-09 | chr:15:63374594 |
| 15 rs2588862   | 63500195 A | 0.3093 | 5.65E-09 | chr:15:63374594 |
| 15 rs2652817   | 63483290 A | 0.3016 | 5.92E-09 | chr:15:63374594 |
| 15 rs6494396   | 63441248 C | 0.3193 | 6.87E-09 | chr:15:63374594 |
| 15 rs13313493  | 63523855 C | 0.3071 | 6.92E-09 | chr:15:63374594 |
| 15 rs55976323  | 63523586 A | 0.3071 | 6.92E-09 | chr:15:63374594 |
| 15 rs4619348   | 63359564 C | 3.354  | 8.04E-09 | chr:15:63374594 |
| 15 rs16946692  | 63531915 G | 0.3143 | 8.68E-09 | chr:15:63374594 |
| 15 rs7175974   | 63510113 G | 0.3143 | 8.68E-09 | chr:15:63374594 |
| 15 rs112196574 | 63545156 A | 0.3241 | 9.49E-09 | chr:15:63374594 |
| 15 rs2134263   | 63365394 T | 3.262  | 1.05E-08 | chr:15:63374594 |
| 15 rs78356111  | 63436955 C | 0.3294 | 1.15E-08 | chr:15:63374594 |
| 15 rs2729791   | 63493057 G | 0.3162 | 1.19E-08 | chr:15:63374594 |

|                |            |        |          |                 |
|----------------|------------|--------|----------|-----------------|
| 15 rs4775613   | 63349096 A | 3.227  | 1.25E-08 | chr:15:63374594 |
| 15 rs7163254   | 63439403 C | 0.3286 | 1.28E-08 | chr:15:63374594 |
| 15 rs59768255  | 63436960 A | 0.3486 | 1.42E-08 | chr:15:63374594 |
| 15 rs61187203  | 63436958 C | 0.3486 | 1.42E-08 | chr:15:63374594 |
| 15 rs12591282  | 63539475 G | 0.3139 | 1.48E-08 | chr:15:63374594 |
| 15 rs28369547  | 63528924 T | 0.3139 | 1.48E-08 | chr:15:63374594 |
| 15 rs4774478   | 63434763 A | 0.3327 | 1.50E-08 | chr:15:63374594 |
| 15 rs16953475  | 63348087 G | 3.158  | 1.89E-08 | chr:15:63374594 |
| 15 rs6494394   | 63440938 A | 0.3382 | 2.21E-08 | chr:15:63374594 |
| 15 rs12148828  | 63355339 T | 3.147  | 2.62E-08 | chr:15:63374594 |
| 15 rs60160488  | 63587233 G | 0.3452 | 2.64E-08 | chr:15:63374594 |
| 15 rs55729424  | 63571779 T | 0.3491 | 2.74E-08 | chr:15:63374594 |
| 15 rs2062727   | 63472681 A | 0.3282 | 2.75E-08 | chr:15:63374594 |
| 15 rs8023653   | 63571209 T | 0.337  | 3.50E-08 | chr:15:63374594 |
| 15 rs58698989  | 63582095 T | 0.3528 | 4.09E-08 | chr:15:63374594 |
| 15 rs11855609  | 63522691 C | 0.347  | 4.12E-08 | chr:15:63374594 |
| 15 rs16946690  | 63530492 A | 0.3343 | 4.56E-08 | chr:15:63374594 |
| 15 rs7170409   | 63567238 T | 0.3592 | 6.01E-08 | chr:15:63374594 |
| 15 rs11858666  | 63526239 C | 2.881  | 6.10E-08 | chr:15:63374594 |
| 15 rs2652818   | 63502378 C | 0.3372 | 6.11E-08 | chr:15:63374594 |
| 15 rs4984257   | 63561160 T | 2.864  | 6.90E-08 | chr:15:63374594 |
| 15 rs72747098  | 63525249 A | 2.845  | 6.94E-08 | chr:15:63374594 |
| 15 rs11071739  | 63585896 T | 0.3633 | 6.95E-08 | chr:15:63374594 |
| 15 rs12904537  | 63379726 T | 2.835  | 7.30E-08 | chr:15:63374594 |
| 15 rs7177692   | 63379733 T | 2.835  | 7.30E-08 | chr:15:63374594 |
| 15 rs7177694   | 63379737 T | 2.835  | 7.30E-08 | chr:15:63374594 |
| 15 rs3803501   | 63352092 A | 2.899  | 8.29E-08 | chr:15:63374594 |
| 15 rs11857703  | 63379592 A | 2.86   | 8.61E-08 | chr:15:63374594 |
| 15 rs2068143   | 63588662 A | 0.3756 | 8.91E-08 | chr:15:63374594 |
| 15 rs959125    | 63583159 G | 0.3677 | 9.19E-08 | chr:15:63374594 |
| 15 rs11071735  | 63468114 T | 0.3496 | 9.94E-08 | chr:15:63374594 |
| 15 rs7165016   | 63439590 T | 0.3979 | 1.11E-07 | chr:15:63374594 |
| 15 rs28386949  | 63596440 A | 0.3574 | 1.57E-07 | chr:15:63374594 |
| 15 rs1027647   | 63374825 A | 3.061  | 2.25E-07 | chr:15:63374594 |
| 15 rs146054382 | 63508433 T | 2.669  | 2.37E-07 | chr:15:63374594 |
| 15 rs28565028  | 63397038 T | 2.715  | 2.87E-07 | chr:15:63374594 |
| 15 rs6494397   | 63460009 A | 0.378  | 3.59E-07 | chr:15:63374594 |
| 15 rs3803499   | 63343318 C | 0.3677 | 3.92E-07 | chr:15:63374594 |
| 15 rs17762798  | 63600603 A | 0.3652 | 3.95E-07 | chr:15:63374594 |
| 15 rs11071732  | 63407656 A | 0.3384 | 4.00E-07 | chr:15:63374594 |
| 15 rs12441822  | 63424532 T | 0.3384 | 4.00E-07 | chr:15:63374594 |
| 15 rs11853804  | 63528256 A | 2.626  | 5.40E-07 | chr:15:63374594 |
| 15 rs55703462  | 63395428 G | 2.609  | 6.78E-07 | chr:15:63374594 |

|                |            |        |          |                 |
|----------------|------------|--------|----------|-----------------|
| 15 rs2018400   | 63626540 T | 0.412  | 6.95E-07 | chr:15:63374594 |
| 15 rs11071733  | 63416481 G | 2.506  | 8.80E-07 | chr:15:63374594 |
| 15 rs12593078  | 63517347 G | 2.545  | 9.88E-07 | chr:15:63374594 |
| 15 rs369161040 | 63573742 C | 0.3885 | 1.13E-06 | chr:15:63374594 |
| 15 rs10851727  | 63603486 G | 0.4064 | 1.41E-06 | chr:15:63374594 |
| 15 rs62011183  | 63413119 G | 0.3659 | 1.76E-06 | chr:15:63374594 |
| 15 rs4774476   | 63407390 T | 2.433  | 1.81E-06 | chr:15:63374594 |
| 15 rs7162890   | 63492027 A | 2.472  | 2.22E-06 | chr:15:63374594 |
| 15 rs12708477  | 63605954 A | 0.4206 | 2.91E-06 | chr:15:63374594 |
| 15 rs8041454   | 63485976 C | 2.438  | 3.08E-06 | chr:15:63374594 |
| 15 rs16946801  | 63605080 T | 2.171  | 5.36E-06 | chr:15:63374594 |
| 15 rs117973732 | 63530247 G | 0.3363 | 7.18E-06 | chr:15:63374594 |
| 15 rs34367270  | 63410912 A | 2.256  | 9.03E-06 | chr:15:63374594 |
| 15 rs1039289   | 63636121 A | 0.443  | 1.06E-05 | chr:15:63374594 |
| 15 rs35763222  | 63641361 G | 0.4385 | 1.16E-05 | chr:15:63374594 |
| 15 rs2729802   | 63377304 T | 0.451  | 1.67E-05 | chr:15:63374594 |
| 15 rs200962701 | 63417378 T | 2.171  | 2.21E-05 | chr:15:63374594 |
| 15 rs920864    | 63474391 T | 2.051  | 2.86E-05 | chr:15:63374594 |
| 15 rs4775635   | 63456307 C | 2.45   | 3.24E-05 | chr:15:63374594 |
| 19 rs12461975  | 21862108 A | 102.6  | 1.61E-13 | chr:19:21841536 |
| 19 rs117865432 | 21866980 G | 108.1  | 9.78E-13 | chr:19:21841536 |
| 19 rs12461755  | 21874224 G | 108.1  | 9.78E-13 | chr:19:21841536 |
| 19 rs138289834 | 21852693 C | 108.1  | 9.78E-13 | chr:19:21841536 |
| 19 rs75639671  | 21875393 C | 108.1  | 9.78E-13 | chr:19:21841536 |
| 19 rs1589279   | 21847351 C | 178    | 1.13E-12 | chr:19:21841536 |
| 19 rs58621185  | 21858531 A | 178    | 1.13E-12 | chr:19:21841536 |
| 19 rs12052180  | 21850463 C | 266.7  | 1.86E-12 | chr:19:21841536 |
| 19 rs12460252  | 21846543 A | 266.7  | 1.86E-12 | chr:19:21841536 |
| 19 rs12461654  | 21849302 A | 266.7  | 1.86E-12 | chr:19:21841536 |
| 19 rs12462750  | 21850703 G | 266.7  | 1.86E-12 | chr:19:21841536 |
| 19 rs146500963 | 21849138 G | 266.7  | 1.86E-12 | chr:19:21841536 |
| 19 rs1829501   | 21847506 C | 266.7  | 1.86E-12 | chr:19:21841536 |
| 19 rs58339212  | 21861075 T | 266.7  | 1.86E-12 | chr:19:21841536 |
| 19 rs59984853  | 21848526 A | 266.7  | 1.86E-12 | chr:19:21841536 |
| 19 rs73546506  | 21860575 A | 266.7  | 1.86E-12 | chr:19:21841536 |
| 19 rs79961580  | 21860730 A | 266.7  | 1.86E-12 | chr:19:21841536 |
| 19 rs114434735 | 21866989 T | 235.6  | 1.97E-12 | chr:19:21841536 |
| 19 rs115046417 | 21854616 G | 235.6  | 1.97E-12 | chr:19:21841536 |
| 19 rs116818044 | 21857932 A | 235.6  | 1.97E-12 | chr:19:21841536 |
| 19 rs144768538 | 21848501 G | 235.6  | 1.97E-12 | chr:19:21841536 |
| 19 rs145365305 | 21843419 A | 235.6  | 1.97E-12 | chr:19:21841536 |
| 19 rs59896423  | 21848375 T | 130    | 2.14E-12 | chr:19:21841536 |
| 19 rs12232863  | 21832380 G | 16.34  | 2.27E-12 | chr:19:21841536 |



|                |            |       |          |                 |
|----------------|------------|-------|----------|-----------------|
| 19 rs59724594  | 21831057 C | 16.34 | 2.27E-12 | chr:19:21841536 |
| 19 rs113367038 | 21827121 G | 19.45 | 2.29E-12 | chr:19:21841536 |
| 19 rs116521177 | 21831596 T | 19.49 | 2.56E-12 | chr:19:21841536 |
| 19 rs186336934 | 21890720 G | 109.1 | 3.41E-12 | chr:19:21841536 |
| 19 rs8105433   | 21840606 A | 243.3 | 3.48E-12 | chr:19:21841536 |
| 19 rs12459784  | 21941306 C | 44.4  | 5.57E-12 | chr:19:21841536 |
| 19 rs12459852  | 21935851 A | 44.4  | 5.57E-12 | chr:19:21841536 |
| 19 rs12461775  | 21932062 C | 44.4  | 5.57E-12 | chr:19:21841536 |
| 19 rs12463030  | 21947607 C | 44.4  | 5.57E-12 | chr:19:21841536 |
| 19 rs17701305  | 21948020 G | 44.4  | 5.57E-12 | chr:19:21841536 |
| 19 rs75204354  | 21913614 A | 44.4  | 5.57E-12 | chr:19:21841536 |
| 19 rs2139533   | 21832590 T | 21.21 | 9.20E-12 | chr:19:21841536 |
| 19 rs10413152  | 21937846 A | 37.37 | 1.00E-11 | chr:19:21841536 |
| 19 rs11671415  | 21944782 A | 37.37 | 1.00E-11 | chr:19:21841536 |
| 19 rs146261958 | 21911514 A | 37.37 | 1.00E-11 | chr:19:21841536 |
| 19 rs7258769   | 21942872 A | 37.37 | 1.00E-11 | chr:19:21841536 |
| 19 rs74814265  | 21912203 G | 37.37 | 1.00E-11 | chr:19:21841536 |
| 19 rs115824809 | 21831481 T | 21.59 | 1.29E-11 | chr:19:21841536 |
| 19 rs12232815  | 21832363 C | 21.59 | 1.29E-11 | chr:19:21841536 |
| 19 rs2139531   | 21832736 A | 21.59 | 1.29E-11 | chr:19:21841536 |
| 19 rs2139532   | 21832597 C | 21.59 | 1.29E-11 | chr:19:21841536 |
| 19 rs7253108   | 21828955 G | 21.59 | 1.29E-11 | chr:19:21841536 |
| 19 rs111405107 | 21824157 A | 146.9 | 1.43E-11 | chr:19:21841536 |
| 19 rs111977553 | 21824165 T | 146.9 | 1.43E-11 | chr:19:21841536 |
| 19 rs1520075   | 21833741 C | 21.16 | 1.48E-11 | chr:19:21841536 |
| 19 rs117740054 | 21825672 T | 21.13 | 1.50E-11 | chr:19:21841536 |
| 19 rs111517079 | 21838995 T | 381.8 | 1.86E-11 | chr:19:21841536 |
| 19 rs138320974 | 21834230 C | 381.8 | 1.86E-11 | chr:19:21841536 |
| 19 rs28669973  | 21842253 A | 381.8 | 1.86E-11 | chr:19:21841536 |
| 19 rs34069114  | 21838272 C | 381.8 | 1.86E-11 | chr:19:21841536 |
| 19 rs60312928  | 21838295 G | 381.8 | 1.86E-11 | chr:19:21841536 |
| 19 rs78554651  | 21838518 G | 381.8 | 1.86E-11 | chr:19:21841536 |
| 19 rs80147175  | 21839022 G | 381.8 | 1.86E-11 | chr:19:21841536 |
| 19 rs113277169 | 21843728 T | 356.6 | 2.58E-11 | chr:19:21841536 |
| 19 rs186258664 | 21844201 T | 362.6 | 2.83E-11 | chr:19:21841536 |
| 19 rs112076231 | 21834099 G | 360.8 | 3.98E-11 | chr:19:21841536 |
| 19 rs75322575  | 21833798 A | 28.77 | 4.06E-11 | chr:19:21841536 |
| 19 rs111714111 | 21827774 A | 26.19 | 4.37E-11 | chr:19:21841536 |
| 19 rs112867628 | 21828269 A | 26.19 | 4.37E-11 | chr:19:21841536 |
| 19 rs113033092 | 21827530 C | 26.19 | 4.37E-11 | chr:19:21841536 |
| 19 rs35933524  | 21828299 G | 26.19 | 4.37E-11 | chr:19:21841536 |
| 19 rs58039129  | 21827133 A | 26.19 | 4.37E-11 | chr:19:21841536 |
| 19 rs77728877  | 21827833 G | 26.19 | 4.37E-11 | chr:19:21841536 |

|                |            |       |          |                 |
|----------------|------------|-------|----------|-----------------|
| 19 rs111811317 | 21831260 A | 26.36 | 4.69E-11 | chr:19:21841536 |
| 19 rs12232857  | 21832320 A | 26.36 | 4.69E-11 | chr:19:21841536 |
| 19 rs35188146  | 21831014 G | 26.36 | 4.69E-11 | chr:19:21841536 |
| 19 rs35837179  | 21831140 A | 26.36 | 4.69E-11 | chr:19:21841536 |
| 19 rs57155685  | 21831116 T | 26.36 | 4.69E-11 | chr:19:21841536 |
| 19 rs57973828  | 21831115 C | 26.36 | 4.69E-11 | chr:19:21841536 |
| 19 rs59571905  | 21830875 T | 26.36 | 4.69E-11 | chr:19:21841536 |
| 19 rs61517956  | 21833407 A | 26.36 | 4.69E-11 | chr:19:21841536 |
| 19 rs7250456   | 21831585 T | 26.36 | 4.69E-11 | chr:19:21841536 |
| 19 rs7253097   | 21828936 C | 26.36 | 4.69E-11 | chr:19:21841536 |
| 19 rs7253361   | 21829123 G | 26.36 | 4.69E-11 | chr:19:21841536 |
| 19 rs7254224   | 21828967 C | 26.36 | 4.69E-11 | chr:19:21841536 |
| 19 rs7257314   | 21829542 A | 26.36 | 4.69E-11 | chr:19:21841536 |
| 19 rs7257929   | 21829488 C | 26.36 | 4.69E-11 | chr:19:21841536 |
| 19 rs7258332   | 21829769 G | 26.36 | 4.69E-11 | chr:19:21841536 |
| 19 rs117182815 | 21825628 A | 25.9  | 4.95E-11 | chr:19:21841536 |
| 19 rs12460950  | 21824781 C | 25.9  | 4.95E-11 | chr:19:21841536 |
| 19 rs34891363  | 21825550 C | 25.9  | 4.95E-11 | chr:19:21841536 |
| 19 rs7250875   | 21831905 T | 26.45 | 6.19E-11 | chr:19:21841536 |
| 19 rs4809168   | 21828794 A | 26.47 | 6.40E-11 | chr:19:21841536 |
| 19 rs67673622  | 21825103 C | 26.02 | 6.41E-11 | chr:19:21841536 |
| 19 rs11085493  | 21948748 T | 19.29 | 1.92E-10 | chr:19:21841536 |
| 19 rs7250867   | 21831884 T | 31.5  | 2.46E-10 | chr:19:21841536 |
| 19 rs78823434  | 21982409 G | 25.76 | 2.53E-10 | chr:19:21841536 |
| 19 rs10414424  | 21858966 C | 100.8 | 4.52E-10 | chr:19:21841536 |
| 19 rs12462082  | 21974486 T | 19.18 | 1.47E-09 | chr:19:21841536 |
| 19 rs9917005   | 21853097 G | 32.43 | 1.81E-09 | chr:19:21841536 |
| 19 rs75823388  | 21385874 A | 24.7  | 2.86E-09 | chr:19:21841536 |
| 19 rs2139534   | 21832567 G | 57.33 | 4.80E-09 | chr:19:21841536 |
| 19 rs112439638 | 21962740 A | 20.06 | 6.08E-09 | chr:19:21841536 |
| 19 rs111912937 | 21844349 C | 1074  | 8.62E-09 | chr:19:21841536 |
| 19 rs113005217 | 21845172 T | 1074  | 8.62E-09 | chr:19:21841536 |
| 19 rs113310470 | 21844534 A | 1074  | 8.62E-09 | chr:19:21841536 |
| 19 rs116001081 | 21842717 T | 1074  | 8.62E-09 | chr:19:21841536 |
| 19 rs12232782  | 21835070 C | 1074  | 8.62E-09 | chr:19:21841536 |
| 19 rs12461057  | 21839205 G | 1074  | 8.62E-09 | chr:19:21841536 |
| 19 rs12463094  | 21839243 G | 1074  | 8.62E-09 | chr:19:21841536 |
| 19 rs144847660 | 21823693 T | 1074  | 8.62E-09 | chr:19:21841536 |
| 19 rs147688845 | 21842839 A | 1074  | 8.62E-09 | chr:19:21841536 |
| 19 rs149505407 | 21839099 A | 1074  | 8.62E-09 | chr:19:21841536 |
| 19 rs28537769  | 21842349 A | 1074  | 8.62E-09 | chr:19:21841536 |
| 19 rs28640930  | 21842166 T | 1074  | 8.62E-09 | chr:19:21841536 |
| 19 rs57660329  | 21841175 C | 1074  | 8.62E-09 | chr:19:21841536 |

|                |            |       |          |                 |
|----------------|------------|-------|----------|-----------------|
| 19 rs58919976  | 21836187 A | 1074  | 8.62E-09 | chr:19:21841536 |
| 19 rs61023946  | 21843077 T | 1074  | 8.62E-09 | chr:19:21841536 |
| 19 rs7256336   | 21842016 A | 1074  | 8.62E-09 | chr:19:21841536 |
| 19 rs7260114   | 21842561 A | 1074  | 8.62E-09 | chr:19:21841536 |
| 19 rs78207079  | 21838528 T | 1074  | 8.62E-09 | chr:19:21841536 |
| 19 rs79867595  | 21837552 C | 1074  | 8.62E-09 | chr:19:21841536 |
| 19 rs8101178   | 21839402 A | 1074  | 8.62E-09 | chr:19:21841536 |
| 19 rs8101397   | 21839802 G | 1074  | 8.62E-09 | chr:19:21841536 |
| 19 rs8105107   | 21840531 G | 1074  | 8.62E-09 | chr:19:21841536 |
| 19 rs8105700   | 21840972 T | 1074  | 8.62E-09 | chr:19:21841536 |
| 19 rs8105732   | 21841123 G | 1074  | 8.62E-09 | chr:19:21841536 |
| 19 rs8105957   | 21841052 A | 1074  | 8.62E-09 | chr:19:21841536 |
| 19 rs141892265 | 21965652 C | 17.34 | 1.24E-08 | chr:19:21841536 |
| 19 rs145782450 | 22007917 A | 50.39 | 1.25E-08 | chr:19:21841536 |
| 19 rs17769057  | 22026170 C | 50.39 | 1.25E-08 | chr:19:21841536 |
| 19 rs12979778  | 21843988 G | 9.366 | 1.32E-08 | chr:19:21841536 |
| 19 rs57699265  | 21844083 C | 9.366 | 1.32E-08 | chr:19:21841536 |
| 19 rs115635903 | 21844038 T | 935   | 1.33E-08 | chr:19:21841536 |
| 19 rs4569404   | 21924445 A | 8.934 | 2.31E-08 | chr:19:21841536 |
| 19 rs117229321 | 21875814 T | 48.2  | 2.35E-08 | chr:19:21841536 |
| 19 rs10403795  | 21919081 A | 8.785 | 2.90E-08 | chr:19:21841536 |
| 19 rs10405142  | 21918928 T | 8.785 | 2.90E-08 | chr:19:21841536 |
| 19 rs10422982  | 21918221 C | 8.785 | 2.90E-08 | chr:19:21841536 |
| 19 rs113293163 | 21914189 A | 8.785 | 2.90E-08 | chr:19:21841536 |
| 19 rs4352176   | 21924392 C | 8.785 | 2.90E-08 | chr:19:21841536 |
| 19 rs4372817   | 21922642 A | 8.785 | 2.90E-08 | chr:19:21841536 |
| 19 rs4808297   | 21935700 A | 8.785 | 2.90E-08 | chr:19:21841536 |
| 19 rs77464908  | 21898805 A | 8.785 | 2.90E-08 | chr:19:21841536 |
| 19 rs8101035   | 21934556 C | 8.785 | 2.90E-08 | chr:19:21841536 |
| 19 rs12979139  | 21843901 C | 8.675 | 3.03E-08 | chr:19:21841536 |
| 19 rs3795247   | 21906428 C | 8.556 | 4.08E-08 | chr:19:21841536 |
| 19 rs4330044   | 21905838 T | 8.556 | 4.08E-08 | chr:19:21841536 |
| 19 rs7252777   | 21907988 T | 8.556 | 4.08E-08 | chr:19:21841536 |
| 19 rs117301126 | 21965998 A | 19.87 | 4.42E-08 | chr:19:21841536 |
| 19 rs144038920 | 21965965 A | 19.87 | 4.42E-08 | chr:19:21841536 |
| 19 rs145830617 | 21965007 A | 19.87 | 4.42E-08 | chr:19:21841536 |
| 19 rs56904798  | 21962115 A | 19.87 | 4.42E-08 | chr:19:21841536 |
| 19 rs75477359  | 21966566 A | 19.87 | 4.42E-08 | chr:19:21841536 |
| 19 rs6511279   | 21838240 C | 8.184 | 4.49E-08 | chr:19:21841536 |
| 19 rs10418334  | 21823931 T | 8.246 | 4.83E-08 | chr:19:21841536 |
| 19 rs10401456  | 21834185 T | 8.252 | 5.03E-08 | chr:19:21841536 |
| 19 rs10404030  | 21839783 A | 8.252 | 5.03E-08 | chr:19:21841536 |
| 19 rs10405733  | 21834482 C | 8.252 | 5.03E-08 | chr:19:21841536 |

|                |            |       |          |                 |
|----------------|------------|-------|----------|-----------------|
| 19 rs10422946  | 21838785 C | 8.252 | 5.03E-08 | chr:19:21841536 |
| 19 rs4808287   | 21835411 T | 8.252 | 5.03E-08 | chr:19:21841536 |
| 19 rs4808289   | 21836844 T | 8.252 | 5.03E-08 | chr:19:21841536 |
| 19 rs4808290   | 21837075 C | 8.252 | 5.03E-08 | chr:19:21841536 |
| 19 rs4809170   | 21836678 T | 8.252 | 5.03E-08 | chr:19:21841536 |
| 19 rs6511280   | 21838492 C | 8.252 | 5.03E-08 | chr:19:21841536 |
| 19 rs6511281   | 21838565 T | 8.252 | 5.03E-08 | chr:19:21841536 |
| 19 rs7351087   | 21838147 A | 8.252 | 5.03E-08 | chr:19:21841536 |
| 19 rs7351088   | 21838146 C | 8.252 | 5.03E-08 | chr:19:21841536 |
| 19 rs8105369   | 21840734 C | 8.252 | 5.03E-08 | chr:19:21841536 |
| 19 rs8105649   | 21840765 G | 8.252 | 5.03E-08 | chr:19:21841536 |
| 19 rs8106449   | 21835586 C | 8.252 | 5.03E-08 | chr:19:21841536 |
| 19 rs9807876   | 21837709 G | 8.252 | 5.03E-08 | chr:19:21841536 |
| 19 rs12978741  | 21843568 G | 7.93  | 6.97E-08 | chr:19:21841536 |
| 19 rs12978776  | 21843616 G | 7.93  | 6.97E-08 | chr:19:21841536 |
| 19 rs12980130  | 21843569 T | 7.93  | 6.97E-08 | chr:19:21841536 |
| 19 rs28432246  | 21842163 T | 7.93  | 6.97E-08 | chr:19:21841536 |
| 19 rs28520521  | 21842340 T | 7.93  | 6.97E-08 | chr:19:21841536 |
| 19 rs4808292   | 21841626 C | 7.93  | 6.97E-08 | chr:19:21841536 |
| 19 rs4808293   | 21841796 G | 7.93  | 6.97E-08 | chr:19:21841536 |
| 19 rs4809171   | 21841170 A | 7.93  | 6.97E-08 | chr:19:21841536 |
| 19 rs12460998  | 21973146 C | 16.39 | 8.83E-08 | chr:19:21841536 |
| 19 rs12462120  | 21974940 T | 16.39 | 8.83E-08 | chr:19:21841536 |
| 19 rs17701347  | 21980434 T | 16.39 | 8.83E-08 | chr:19:21841536 |
| 19 rs59958574  | 21971589 T | 16.39 | 8.83E-08 | chr:19:21841536 |
| 19 rs75614465  | 21980134 A | 16.39 | 8.83E-08 | chr:19:21841536 |
| 19 rs77340617  | 21982326 T | 16.39 | 8.83E-08 | chr:19:21841536 |
| 19 rs78077628  | 21971443 C | 16.39 | 8.83E-08 | chr:19:21841536 |
| 19 rs12984244  | 21833966 A | 7.694 | 8.87E-08 | chr:19:21841536 |
| 19 rs12984552  | 21834092 A | 7.117 | 1.06E-07 | chr:19:21841536 |
| 19 rs183320661 | 21641850 G | 20.09 | 1.11E-07 | chr:19:21841536 |
| 19 rs12979269  | 21843781 G | 7.978 | 1.21E-07 | chr:19:21841536 |
| 19 rs192495107 | 21383454 T | 17.56 | 1.73E-07 | chr:19:21841536 |
| 19 rs117010520 | 22016401 A | 14.83 | 1.82E-07 | chr:19:21841536 |
| 19 rs117329296 | 21988033 T | 14.83 | 1.82E-07 | chr:19:21841536 |
| 19 rs117733188 | 22016400 A | 14.83 | 1.82E-07 | chr:19:21841536 |
| 19 rs117783733 | 22006570 T | 14.83 | 1.82E-07 | chr:19:21841536 |
| 19 rs118189822 | 21984558 C | 14.83 | 1.82E-07 | chr:19:21841536 |
| 19 rs12460775  | 21985091 C | 14.83 | 1.82E-07 | chr:19:21841536 |
| 19 rs12463064  | 21985132 G | 14.83 | 1.82E-07 | chr:19:21841536 |
| 19 rs141171541 | 22011873 T | 14.83 | 1.82E-07 | chr:19:21841536 |
| 19 rs142185394 | 21984590 A | 14.83 | 1.82E-07 | chr:19:21841536 |
| 19 rs147875950 | 21988064 A | 14.83 | 1.82E-07 | chr:19:21841536 |

|                |            |       |          |                 |
|----------------|------------|-------|----------|-----------------|
| 19 rs17701366  | 21985740 G | 14.83 | 1.82E-07 | chr:19:21841536 |
| 19 rs3764576   | 22005000 G | 14.83 | 1.82E-07 | chr:19:21841536 |
| 19 rs60272092  | 22006953 A | 14.83 | 1.82E-07 | chr:19:21841536 |
| 19 rs74606132  | 22019517 T | 14.83 | 1.82E-07 | chr:19:21841536 |
| 19 rs75290521  | 22000435 G | 14.83 | 1.82E-07 | chr:19:21841536 |
| 19 rs77086661  | 22032924 G | 14.83 | 1.82E-07 | chr:19:21841536 |
| 19 rs77310041  | 21986116 G | 14.83 | 1.82E-07 | chr:19:21841536 |
| 19 rs77751145  | 22006138 G | 14.83 | 1.82E-07 | chr:19:21841536 |
| 19 rs78033062  | 21986636 A | 14.83 | 1.82E-07 | chr:19:21841536 |
| 19 rs78773989  | 22009807 G | 14.83 | 1.82E-07 | chr:19:21841536 |
| 19 rs1520074   | 21833928 G | 6.188 | 1.87E-07 | chr:19:21841536 |
| 19 rs12973147  | 21860793 C | 6.727 | 1.95E-07 | chr:19:21841536 |
| 19 rs71333857  | 21844171 G | 7.125 | 2.32E-07 | chr:19:21841536 |
| 19 rs11085492  | 21945186 G | 8.21  | 2.59E-07 | chr:19:21841536 |
| 19 rs10405075  | 21943707 C | 7.542 | 2.84E-07 | chr:19:21841536 |
| 19 rs10412225  | 21944450 G | 7.542 | 2.84E-07 | chr:19:21841536 |
| 19 rs12979060  | 21843727 G | 6.961 | 3.06E-07 | chr:19:21841536 |
| 19 rs17768510  | 21349536 C | 9.385 | 3.09E-07 | chr:19:21841536 |
| 19 rs9304989   | 21824313 A | 16.95 | 3.31E-07 | chr:19:21841536 |
| 19 rs10423041  | 21933943 C | 7.368 | 3.55E-07 | chr:19:21841536 |
| 19 rs8105002   | 21919934 A | 7.368 | 3.55E-07 | chr:19:21841536 |
| 19 rs10854059  | 21859805 G | 5.889 | 3.96E-07 | chr:19:21841536 |
| 19 rs11668774  | 21859863 A | 5.889 | 3.96E-07 | chr:19:21841536 |
| 19 rs12461329  | 21860597 G | 5.889 | 3.96E-07 | chr:19:21841536 |
| 19 rs12973337  | 21860723 G | 5.889 | 3.96E-07 | chr:19:21841536 |
| 19 rs1818693   | 21858687 A | 5.889 | 3.96E-07 | chr:19:21841536 |
| 19 rs2015476   | 21859110 A | 5.889 | 3.96E-07 | chr:19:21841536 |
| 19 rs2015481   | 21858994 A | 5.889 | 3.96E-07 | chr:19:21841536 |
| 19 rs2015715   | 21858115 C | 5.889 | 3.96E-07 | chr:19:21841536 |
| 19 rs2015736   | 21857927 C | 5.889 | 3.96E-07 | chr:19:21841536 |
| 19 rs118006675 | 22030918 T | 12.66 | 4.38E-07 | chr:19:21841536 |
| 19 rs12462709  | 21989391 C | 12.66 | 4.38E-07 | chr:19:21841536 |
| 19 rs58664716  | 21993467 G | 12.66 | 4.38E-07 | chr:19:21841536 |
| 19 rs74762678  | 22019157 C | 12.66 | 4.38E-07 | chr:19:21841536 |
| 19 rs75937847  | 22031912 A | 12.66 | 4.38E-07 | chr:19:21841536 |
| 19 rs76621431  | 22014914 C | 12.66 | 4.38E-07 | chr:19:21841536 |
| 19 rs77115676  | 21985611 A | 12.66 | 4.38E-07 | chr:19:21841536 |
| 19 rs77216709  | 21992940 G | 12.66 | 4.38E-07 | chr:19:21841536 |
| 19 rs79327994  | 21993765 T | 12.66 | 4.38E-07 | chr:19:21841536 |
| 19 rs8111923   | 22021828 A | 12.66 | 4.38E-07 | chr:19:21841536 |
| 19 rs2359392   | 21854136 A | 5.716 | 4.39E-07 | chr:19:21841536 |
| 19 rs12459622  | 21852799 A | 5.705 | 4.47E-07 | chr:19:21841536 |
| 19 rs12459640  | 21852807 C | 5.705 | 4.47E-07 | chr:19:21841536 |

|                |            |       |          |                 |
|----------------|------------|-------|----------|-----------------|
| 19 rs11879157  | 21900898 T | 6.141 | 4.48E-07 | chr:19:21841536 |
| 19 rs4808296   | 21931214 A | 6.141 | 4.48E-07 | chr:19:21841536 |
| 19 rs147379978 | 21544008 T | 9.856 | 4.55E-07 | chr:19:21841536 |
| 19 rs12975447  | 21860974 T | 5.671 | 4.59E-07 | chr:19:21841536 |
| 19 rs10164296  | 21856328 A | 5.699 | 4.87E-07 | chr:19:21841536 |
| 19 rs10164399  | 21856722 C | 5.699 | 4.87E-07 | chr:19:21841536 |
| 19 rs10164402  | 21856407 T | 5.699 | 4.87E-07 | chr:19:21841536 |
| 19 rs10164404  | 21856699 T | 5.699 | 4.87E-07 | chr:19:21841536 |
| 19 rs12459069  | 21852101 A | 5.699 | 4.87E-07 | chr:19:21841536 |
| 19 rs12459105  | 21852322 A | 5.699 | 4.87E-07 | chr:19:21841536 |
| 19 rs12459145  | 21852274 G | 5.699 | 4.87E-07 | chr:19:21841536 |
| 19 rs12459146  | 21852286 G | 5.699 | 4.87E-07 | chr:19:21841536 |
| 19 rs12459607  | 21852601 C | 5.699 | 4.87E-07 | chr:19:21841536 |
| 19 rs12459653  | 21852679 G | 5.699 | 4.87E-07 | chr:19:21841536 |
| 19 rs12459663  | 21852921 C | 5.699 | 4.87E-07 | chr:19:21841536 |
| 19 rs12460255  | 21853648 G | 5.699 | 4.87E-07 | chr:19:21841536 |
| 19 rs12460259  | 21853849 C | 5.699 | 4.87E-07 | chr:19:21841536 |
| 19 rs12460275  | 21853896 C | 5.699 | 4.87E-07 | chr:19:21841536 |
| 19 rs12461611  | 21856280 G | 5.699 | 4.87E-07 | chr:19:21841536 |
| 19 rs12463364  | 21851610 A | 5.699 | 4.87E-07 | chr:19:21841536 |
| 19 rs12972399  | 21850149 T | 5.699 | 4.87E-07 | chr:19:21841536 |
| 19 rs12983456  | 21855124 G | 5.699 | 4.87E-07 | chr:19:21841536 |
| 19 rs1818696   | 21850359 C | 5.699 | 4.87E-07 | chr:19:21841536 |
| 19 rs1850931   | 21855226 G | 5.699 | 4.87E-07 | chr:19:21841536 |
| 19 rs1850932   | 21855223 C | 5.699 | 4.87E-07 | chr:19:21841536 |
| 19 rs1850934   | 21854928 T | 5.699 | 4.87E-07 | chr:19:21841536 |
| 19 rs1850935   | 21854623 T | 5.699 | 4.87E-07 | chr:19:21841536 |
| 19 rs2037356   | 21849559 C | 5.699 | 4.87E-07 | chr:19:21841536 |
| 19 rs2359388   | 21851081 T | 5.699 | 4.87E-07 | chr:19:21841536 |
| 19 rs2359389   | 21851157 A | 5.699 | 4.87E-07 | chr:19:21841536 |
| 19 rs2359398   | 21854389 C | 5.699 | 4.87E-07 | chr:19:21841536 |
| 19 rs2359399   | 21854394 C | 5.699 | 4.87E-07 | chr:19:21841536 |
| 19 rs2359400   | 21855574 C | 5.699 | 4.87E-07 | chr:19:21841536 |
| 19 rs2359401   | 21855732 G | 5.699 | 4.87E-07 | chr:19:21841536 |
| 19 rs2359403   | 21855836 C | 5.699 | 4.87E-07 | chr:19:21841536 |
| 19 rs2359404   | 21855839 G | 5.699 | 4.87E-07 | chr:19:21841536 |
| 19 rs2359405   | 21856187 G | 5.699 | 4.87E-07 | chr:19:21841536 |
| 19 rs34449776  | 21856309 A | 5.699 | 4.87E-07 | chr:19:21841536 |
| 19 rs35091166  | 21856300 G | 5.699 | 4.87E-07 | chr:19:21841536 |
| 19 rs3946575   | 21848698 C | 5.699 | 4.87E-07 | chr:19:21841536 |
| 19 rs4026206   | 21855856 G | 5.699 | 4.87E-07 | chr:19:21841536 |
| 19 rs4302166   | 21850861 C | 5.699 | 4.87E-07 | chr:19:21841536 |
| 19 rs4310994   | 21850923 A | 5.699 | 4.87E-07 | chr:19:21841536 |

|                |            |       |          |                 |
|----------------|------------|-------|----------|-----------------|
| 19 rs4321314   | 21849668 C | 5.699 | 4.87E-07 | chr:19:21841536 |
| 19 rs4490112   | 21850753 T | 5.699 | 4.87E-07 | chr:19:21841536 |
| 19 rs4500887   | 21850985 G | 5.699 | 4.87E-07 | chr:19:21841536 |
| 19 rs7259640   | 21848238 G | 5.699 | 4.87E-07 | chr:19:21841536 |
| 19 rs8108212   | 21845320 G | 6.128 | 4.95E-07 | chr:19:21841536 |
| 19 rs2359394   | 21854169 A | 5.537 | 5.58E-07 | chr:19:21841536 |
| 19 rs2359395   | 21854176 G | 5.537 | 5.58E-07 | chr:19:21841536 |
| 19 rs2359396   | 21854179 G | 5.537 | 5.58E-07 | chr:19:21841536 |
| 19 rs12982600  | 21847694 C | 5.58  | 6.41E-07 | chr:19:21841536 |
| 19 rs12984472  | 21847713 T | 5.58  | 6.41E-07 | chr:19:21841536 |
| 19 rs8108289   | 21846845 A | 5.58  | 6.41E-07 | chr:19:21841536 |
| 19 rs12971926  | 21837430 C | 6.365 | 7.12E-07 | chr:19:21841536 |
| 19 rs12972184  | 21835628 T | 6.365 | 7.12E-07 | chr:19:21841536 |
| 19 rs12975766  | 21840005 G | 6.365 | 7.12E-07 | chr:19:21841536 |
| 19 rs1850930   | 21839462 A | 6.365 | 7.12E-07 | chr:19:21841536 |
| 19 rs2139527   | 21839211 C | 6.365 | 7.12E-07 | chr:19:21841536 |
| 19 rs28711730  | 21842387 G | 6.365 | 7.12E-07 | chr:19:21841536 |
| 19 rs7258859   | 21942723 G | 6.544 | 7.33E-07 | chr:19:21841536 |
| 19 rs10469371  | 21893614 T | 6.482 | 7.46E-07 | chr:19:21841536 |
| 19 rs10421113  | 21929885 T | 6.402 | 9.21E-07 | chr:19:21841536 |
| 19 rs10421342  | 21930003 T | 6.402 | 9.21E-07 | chr:19:21841536 |
| 19 rs4436888   | 21916489 C | 6.402 | 9.21E-07 | chr:19:21841536 |
| 19 rs4547465   | 21901056 A | 6.402 | 9.21E-07 | chr:19:21841536 |
| 19 rs4613201   | 21927706 C | 6.402 | 9.21E-07 | chr:19:21841536 |
| 19 rs4808295   | 21930317 A | 6.402 | 9.21E-07 | chr:19:21841536 |
| 19 rs4809175   | 21938744 G | 6.402 | 9.21E-07 | chr:19:21841536 |
| 19 rs8111464   | 21917939 G | 6.402 | 9.21E-07 | chr:19:21841536 |
| 19 rs2359390   | 21851459 G | 5.254 | 1.14E-06 | chr:19:21841536 |
| 19 rs4319879   | 21916767 G | 6.321 | 1.16E-06 | chr:19:21841536 |
| 19 rs58748216  | 21914122 T | 6.306 | 1.17E-06 | chr:19:21841536 |
| 19 rs1397579   | 21976964 C | 6.847 | 1.28E-06 | chr:19:21841536 |
| 19 rs56742849  | 21914115 T | 6.222 | 1.41E-06 | chr:19:21841536 |
| 19 rs62109860  | 21833294 T | 7.093 | 1.68E-06 | chr:19:21841536 |
| 19 rs11085494  | 21952631 G | 5.244 | 2.00E-06 | chr:19:21841536 |
| 19 rs11670736  | 21952736 G | 6.297 | 2.03E-06 | chr:19:21841536 |
| 19 rs7248525   | 21996571 A | 10.14 | 2.05E-06 | chr:19:21841536 |
| 19 rs149927315 | 22084628 A | 21.3  | 2.59E-06 | chr:19:21841536 |
| 19 rs34810593  | 21825360 A | 7.196 | 3.08E-06 | chr:19:21841536 |
| 19 rs8113652   | 21921709 T | 4.379 | 4.36E-06 | chr:19:21841536 |
| 19 rs76369868  | 21653264 G | 6.651 | 5.15E-06 | chr:19:21841536 |
| 19 rs143275412 | 21494843 C | 6.525 | 6.01E-06 | chr:19:21841536 |
| 19 rs12232841  | 21857227 T | 4.762 | 6.70E-06 | chr:19:21841536 |
| 19 rs12984679  | 21856993 A | 4.762 | 6.70E-06 | chr:19:21841536 |

|                |            |       |          |                 |
|----------------|------------|-------|----------|-----------------|
| 19 rs149586901 | 21901959 A | 26.84 | 7.54E-06 | chr:19:21841536 |
| 19 rs150839878 | 22023299 A | 26.84 | 7.54E-06 | chr:19:21841536 |
| 19 rs181060267 | 22027447 T | 26.84 | 7.54E-06 | chr:19:21841536 |
| 19 rs4381721   | 21951581 C | 4.763 | 8.72E-06 | chr:19:21841536 |
| 19 rs4522535   | 21951615 A | 4.763 | 8.72E-06 | chr:19:21841536 |
| 19 rs184125080 | 21694128 A | 6.542 | 9.24E-06 | chr:19:21841536 |
| 19 rs6511294   | 21978569 G | 4.588 | 1.04E-05 | chr:19:21841536 |
| 19 rs10412066  | 21950337 C | 4.828 | 1.50E-05 | chr:19:21841536 |
| 19 rs66562280  | 21833014 T | 4.863 | 1.56E-05 | chr:19:21841536 |
| 19 rs6511291   | 21950402 T | 4.113 | 1.63E-05 | chr:19:21841536 |
| 19 rs8102320   | 21936885 A | 4.065 | 1.94E-05 | chr:19:21841536 |
| 19 rs7252798   | 21908053 T | 4.061 | 1.97E-05 | chr:19:21841536 |
| 19 rs3813591   | 22321256 C | 69.26 | 1.94E-27 | chr:19:22414379 |
| 19 rs62119970  | 22417828 G | 152.2 | 2.20E-26 | chr:19:22414379 |
| 19 rs1830173   | 22388037 T | 158.2 | 2.53E-26 | chr:19:22414379 |
| 19 rs387604    | 22332265 A | 158.2 | 2.53E-26 | chr:19:22414379 |
| 19 rs451793    | 22361286 G | 158.2 | 2.53E-26 | chr:19:22414379 |
| 19 rs62112446  | 22368828 A | 158.2 | 2.53E-26 | chr:19:22414379 |
| 19 rs7253425   | 22381476 G | 158.2 | 2.53E-26 | chr:19:22414379 |
| 19 rs7343144   | 22369824 T | 158.2 | 2.53E-26 | chr:19:22414379 |
| 19 rs420218    | 22353589 T | 156.8 | 3.05E-26 | chr:19:22414379 |
| 19 rs17554725  | 22317759 G | 59.61 | 3.28E-26 | chr:19:22414379 |
| 19 rs7253490   | 22293706 A | 53.5  | 4.76E-26 | chr:19:22414379 |
| 19 rs281177    | 22394727 T | 149.7 | 4.82E-26 | chr:19:22414379 |
| 19 rs281160    | 22418046 T | 182.4 | 8.33E-26 | chr:19:22414379 |
| 19 rs281162    | 22418472 A | 182.4 | 8.33E-26 | chr:19:22414379 |
| 19 rs281170    | 22423336 T | 182.4 | 8.33E-26 | chr:19:22414379 |
| 19 rs12460025  | 22318230 G | 59.27 | 9.31E-26 | chr:19:22414379 |
| 19 rs8113700   | 22319421 A | 59.27 | 9.31E-26 | chr:19:22414379 |
| 19 rs7257051   | 22319292 G | 58.87 | 1.07E-25 | chr:19:22414379 |
| 19 rs7248898   | 22245354 A | 47.41 | 1.87E-25 | chr:19:22414379 |
| 19 rs1922685   | 22287970 C | 66.51 | 2.76E-25 | chr:19:22414379 |
| 19 rs281163    | 22419302 G | 176.7 | 3.24E-25 | chr:19:22414379 |
| 19 rs281158    | 22416013 T | 256.3 | 4.25E-25 | chr:19:22414379 |
| 19 rs57346017  | 22427336 G | 149.9 | 4.64E-25 | chr:19:22414379 |
| 19 rs2548937   | 22413188 T | 255.5 | 5.91E-25 | chr:19:22414379 |
| 19 rs4025837   | 22413189 A | 255.5 | 5.91E-25 | chr:19:22414379 |
| 19 rs808246    | 22430516 A | 148.2 | 8.41E-25 | chr:19:22414379 |
| 19 rs62120010  | 22428480 A | 147.4 | 1.00E-24 | chr:19:22414379 |
| 19 rs2606266   | 22409041 T | 256.2 | 1.44E-24 | chr:19:22414379 |
| 19 rs2694445   | 22408997 C | 256.2 | 1.44E-24 | chr:19:22414379 |
| 19 rs281156    | 22414691 T | 259.5 | 1.67E-24 | chr:19:22414379 |
| 19 rs2606267   | 22409260 A | 290.5 | 2.11E-24 | chr:19:22414379 |



|                |            |       |          |                 |
|----------------|------------|-------|----------|-----------------|
| 19 rs1840718   | 22427586 T | 152   | 2.38E-24 | chr:19:22414379 |
| 19 rs2606274   | 22413650 G | 288.4 | 2.40E-24 | chr:19:22414379 |
| 19 rs2694449   | 22404047 A | 242.7 | 3.12E-24 | chr:19:22414379 |
| 19 rs281193    | 22400609 A | 242.7 | 3.12E-24 | chr:19:22414379 |
| 19 rs281194    | 22400802 A | 242.7 | 3.12E-24 | chr:19:22414379 |
| 19 rs281195    | 22402480 T | 242.7 | 3.12E-24 | chr:19:22414379 |
| 19 rs281199    | 22405501 T | 240.4 | 3.61E-24 | chr:19:22414379 |
| 19 rs7343077   | 22367925 T | 221.5 | 5.33E-24 | chr:19:22414379 |
| 19 rs11671416  | 22427254 C | 179.3 | 9.82E-24 | chr:19:22414379 |
| 19 rs1961316   | 22426154 A | 165.2 | 1.18E-23 | chr:19:22414379 |
| 19 rs283163    | 22455077 C | 35.96 | 1.60E-23 | chr:19:22414379 |
| 19 rs1912576   | 22121293 C | 22.33 | 2.40E-23 | chr:19:22414379 |
| 19 rs2021560   | 22373470 C | 162.8 | 3.40E-23 | chr:19:22414379 |
| 19 rs8105767   | 22215441 G | 20.57 | 4.51E-23 | chr:19:22414379 |
| 19 rs1969193   | 22120269 C | 19.74 | 7.35E-23 | chr:19:22414379 |
| 19 rs10419384  | 22391239 G | 305.2 | 8.43E-23 | chr:19:22414379 |
| 19 rs113493783 | 22333975 G | 305.2 | 8.43E-23 | chr:19:22414379 |
| 19 rs142745046 | 22334261 C | 305.2 | 8.43E-23 | chr:19:22414379 |
| 19 rs1918161   | 22374023 T | 305.2 | 8.43E-23 | chr:19:22414379 |
| 19 rs2360002   | 22383362 A | 305.2 | 8.43E-23 | chr:19:22414379 |
| 19 rs281181    | 22396809 T | 305.2 | 8.43E-23 | chr:19:22414379 |
| 19 rs379619    | 22341905 C | 305.2 | 8.43E-23 | chr:19:22414379 |
| 19 rs3934143   | 22392238 G | 305.2 | 8.43E-23 | chr:19:22414379 |
| 19 rs411557    | 22333324 C | 305.2 | 8.43E-23 | chr:19:22414379 |
| 19 rs436431    | 22360919 T | 305.2 | 8.43E-23 | chr:19:22414379 |
| 19 rs459017    | 22330531 C | 305.2 | 8.43E-23 | chr:19:22414379 |
| 19 rs459539    | 22330699 T | 305.2 | 8.43E-23 | chr:19:22414379 |
| 19 rs462577    | 22335500 A | 305.2 | 8.43E-23 | chr:19:22414379 |
| 19 rs462671    | 22328850 T | 305.2 | 8.43E-23 | chr:19:22414379 |
| 19 rs465978    | 22342421 A | 305.2 | 8.43E-23 | chr:19:22414379 |
| 19 rs78408635  | 22339824 G | 305.2 | 8.43E-23 | chr:19:22414379 |
| 19 rs1634466   | 22103726 G | 20.15 | 8.92E-23 | chr:19:22414379 |
| 19 rs79196382  | 22339817 A | 250   | 1.49E-22 | chr:19:22414379 |
| 19 rs1852418   | 22324418 A | 294.3 | 2.85E-22 | chr:19:22414379 |
| 19 rs17769372  | 22114704 C | 14.79 | 8.20E-22 | chr:19:22414379 |
| 19 rs1848994   | 22111366 A | 14.79 | 8.20E-22 | chr:19:22414379 |
| 19 rs385774    | 22096075 A | 14.79 | 8.20E-22 | chr:19:22414379 |
| 19 rs10404322  | 22110669 G | 15.02 | 1.14E-21 | chr:19:22414379 |
| 19 rs369128    | 22107866 T | 14.53 | 1.26E-21 | chr:19:22414379 |
| 19 rs440597    | 22096519 C | 14.78 | 1.61E-21 | chr:19:22414379 |
| 19 rs461804    | 22328560 C | 297.5 | 2.83E-21 | chr:19:22414379 |
| 19 rs8108027   | 22115901 C | 14.22 | 3.96E-21 | chr:19:22414379 |
| 19 rs10416248  | 22115865 A | 13.4  | 1.47E-20 | chr:19:22414379 |

|                |            |        |          |                 |
|----------------|------------|--------|----------|-----------------|
| 19 rs283147    | 22438069 C | 20.18  | 1.68E-19 | chr:19:22414379 |
| 19 rs283142    | 22445651 T | 15.74  | 1.94E-19 | chr:19:22414379 |
| 19 rs283140    | 22447450 G | 14.46  | 2.73E-19 | chr:19:22414379 |
| 19 rs283139    | 22448069 T | 14.68  | 3.15E-19 | chr:19:22414379 |
| 19 rs10425845  | 22370672 A | 560.8  | 6.40E-19 | chr:19:22414379 |
| 19 rs283144    | 22439446 T | 15.87  | 1.67E-18 | chr:19:22414379 |
| 19 rs283145    | 22438782 T | 17.03  | 3.17E-18 | chr:19:22414379 |
| 19 rs452556    | 22469057 A | 0.1029 | 3.45E-18 | chr:19:22414379 |
| 19 rs808373    | 22469233 G | 8.263  | 1.84E-17 | chr:19:22414379 |
| 19 rs36123644  | 22444780 C | 0.1465 | 5.15E-17 | chr:19:22414379 |
| 19 rs553185985 | 22444776 T | 0.1465 | 5.15E-17 | chr:19:22414379 |
| 19 rs570214927 | 22444775 C | 0.1465 | 5.15E-17 | chr:19:22414379 |
| 19 rs1987409   | 22647287 T | 8.465  | 5.41E-17 | chr:19:22414379 |
| 19 rs8104705   | 22498943 T | 0.1328 | 5.81E-17 | chr:19:22414379 |
| 19 rs808369    | 22474282 T | 0.1232 | 5.92E-17 | chr:19:22414379 |
| 19 rs539301358 | 22444826 A | 0.1653 | 7.11E-17 | chr:19:22414379 |
| 19 rs557677690 | 22444827 A | 0.1653 | 7.11E-17 | chr:19:22414379 |
| 19 rs71333870  | 22444823 G | 0.1653 | 7.11E-17 | chr:19:22414379 |
| 19 rs1975174   | 22515251 G | 0.1332 | 7.35E-17 | chr:19:22414379 |
| 19 rs12459636  | 22542439 A | 0.1312 | 1.04E-16 | chr:19:22414379 |
| 19 rs12608536  | 22542058 A | 0.1312 | 1.04E-16 | chr:19:22414379 |
| 19 rs7255829   | 22537311 C | 0.1325 | 1.10E-16 | chr:19:22414379 |
| 19 rs2163846   | 22505844 C | 0.1399 | 1.17E-16 | chr:19:22414379 |
| 19 rs7259376   | 22507705 A | 0.1399 | 1.17E-16 | chr:19:22414379 |
| 19 rs11085524  | 22536422 G | 0.1295 | 1.28E-16 | chr:19:22414379 |
| 19 rs11673212  | 22536050 C | 0.1295 | 1.28E-16 | chr:19:22414379 |
| 19 rs11879791  | 22536939 A | 0.1295 | 1.28E-16 | chr:19:22414379 |
| 19 rs59598661  | 22537029 T | 0.1295 | 1.28E-16 | chr:19:22414379 |
| 19 rs6511344   | 22535673 C | 0.1295 | 1.28E-16 | chr:19:22414379 |
| 19 rs11879966  | 22443852 G | 0.1288 | 1.30E-16 | chr:19:22414379 |
| 19 rs7252056   | 22494052 T | 0.1404 | 1.47E-16 | chr:19:22414379 |
| 19 rs12972854  | 22444812 C | 0.14   | 1.56E-16 | chr:19:22414379 |
| 19 rs12973144  | 22439646 A | 0.1331 | 1.71E-16 | chr:19:22414379 |
| 19 rs1975173   | 22534538 C | 0.1359 | 1.76E-16 | chr:19:22414379 |
| 19 rs11668269  | 22513960 G | 0.148  | 1.82E-16 | chr:19:22414379 |
| 19 rs12985757  | 22444652 A | 0.1398 | 1.84E-16 | chr:19:22414379 |
| 19 rs12986108  | 22444577 T | 0.1418 | 1.91E-16 | chr:19:22414379 |
| 19 rs10409609  | 22439127 A | 0.138  | 1.98E-16 | chr:19:22414379 |
| 19 rs11666460  | 22442350 C | 0.138  | 1.98E-16 | chr:19:22414379 |
| 19 rs12608491  | 22541627 A | 0.1383 | 2.35E-16 | chr:19:22414379 |
| 19 rs2082479   | 22539847 T | 0.1383 | 2.35E-16 | chr:19:22414379 |
| 19 rs2082480   | 22538650 G | 0.1383 | 2.35E-16 | chr:19:22414379 |
| 19 rs2099354   | 22539532 C | 0.1383 | 2.35E-16 | chr:19:22414379 |

|                |            |        |          |                 |
|----------------|------------|--------|----------|-----------------|
| 19 rs2195964   | 22538338 C | 0.1383 | 2.35E-16 | chr:19:22414379 |
| 19 rs2195965   | 22538111 C | 0.1383 | 2.35E-16 | chr:19:22414379 |
| 19 rs4932759   | 22540105 C | 0.1383 | 2.35E-16 | chr:19:22414379 |
| 19 rs4932760   | 22540455 T | 0.1383 | 2.35E-16 | chr:19:22414379 |
| 19 rs4932986   | 22540437 A | 0.1383 | 2.35E-16 | chr:19:22414379 |
| 19 rs57501688  | 22540597 G | 0.1383 | 2.35E-16 | chr:19:22414379 |
| 19 rs58170323  | 22539115 T | 0.1383 | 2.35E-16 | chr:19:22414379 |
| 19 rs6511345   | 22537436 T | 0.1383 | 2.35E-16 | chr:19:22414379 |
| 19 rs7259269   | 22441171 T | 0.1388 | 2.53E-16 | chr:19:22414379 |
| 19 rs12973509  | 22439581 A | 0.1385 | 2.66E-16 | chr:19:22414379 |
| 19 rs12982551  | 22439042 C | 0.1385 | 2.66E-16 | chr:19:22414379 |
| 19 rs8108630   | 22535177 G | 0.1382 | 2.73E-16 | chr:19:22414379 |
| 19 rs12610469  | 22454617 A | 0.1305 | 2.87E-16 | chr:19:22414379 |
| 19 rs7249374   | 22533465 C | 0.1379 | 3.09E-16 | chr:19:22414379 |
| 19 rs11667886  | 22430941 T | 0.1368 | 3.88E-16 | chr:19:22414379 |
| 19 rs56227660  | 22533543 A | 0.14   | 4.22E-16 | chr:19:22414379 |
| 19 rs13382114  | 22545739 G | 0.1477 | 4.38E-16 | chr:19:22414379 |
| 19 rs12610462  | 22551462 C | 0.1468 | 4.52E-16 | chr:19:22414379 |
| 19 rs16999064  | 22552602 A | 0.1468 | 4.52E-16 | chr:19:22414379 |
| 19 rs8111537   | 22535545 C | 0.1472 | 6.40E-16 | chr:19:22414379 |
| 19 rs10221483  | 22455112 G | 0.1616 | 7.49E-16 | chr:19:22414379 |
| 19 rs12460610  | 22291277 C | 16.59  | 7.63E-16 | chr:19:22414379 |
| 19 rs190030543 | 22291079 T | 16.59  | 7.63E-16 | chr:19:22414379 |
| 19 rs56320331  | 22297657 T | 16.59  | 7.63E-16 | chr:19:22414379 |
| 19 rs12608842  | 22548013 G | 0.154  | 8.09E-16 | chr:19:22414379 |
| 19 rs34556219  | 22382294 C | 23.82  | 8.83E-16 | chr:19:22414379 |
| 19 rs374309    | 22332298 G | 23.82  | 8.83E-16 | chr:19:22414379 |
| 19 rs62118584  | 22541142 G | 0.1536 | 1.02E-15 | chr:19:22414379 |
| 19 rs2168491   | 22425589 G | 0.1464 | 1.04E-15 | chr:19:22414379 |
| 19 rs2885035   | 22549124 T | 0.1543 | 1.09E-15 | chr:19:22414379 |
| 19 rs61657442  | 22552178 A | 0.1543 | 1.09E-15 | chr:19:22414379 |
| 19 rs7258446   | 22550341 A | 0.1543 | 1.09E-15 | chr:19:22414379 |
| 19 rs11085515  | 22426520 C | 0.1524 | 1.14E-15 | chr:19:22414379 |
| 19 rs10221484  | 22455170 G | 0.1694 | 1.18E-15 | chr:19:22414379 |
| 19 rs6511324   | 22283994 T | 17.78  | 1.22E-15 | chr:19:22414379 |
| 19 rs73019896  | 22286350 A | 17.78  | 1.22E-15 | chr:19:22414379 |
| 19 rs73019902  | 22286707 A | 17.78  | 1.22E-15 | chr:19:22414379 |
| 19 rs8108310   | 22287184 T | 17.78  | 1.22E-15 | chr:19:22414379 |
| 19 rs10409819  | 22602919 T | 0.1599 | 1.26E-15 | chr:19:22414379 |
| 19 rs12984257  | 22590664 A | 0.1599 | 1.26E-15 | chr:19:22414379 |
| 19 rs7248242   | 22575994 G | 0.1599 | 1.26E-15 | chr:19:22414379 |
| 19 rs281172    | 22424697 T | 0.1525 | 1.35E-15 | chr:19:22414379 |
| 19 rs436971    | 22461218 T | 0.1757 | 1.41E-15 | chr:19:22414379 |

|                |            |        |          |                 |
|----------------|------------|--------|----------|-----------------|
| 19 rs808372    | 22470368 T | 0.1757 | 1.41E-15 | chr:19:22414379 |
| 19 rs11085526  | 22563880 C | 0.1604 | 1.62E-15 | chr:19:22414379 |
| 19 rs111724992 | 22282718 C | 16.08  | 1.70E-15 | chr:19:22414379 |
| 19 rs12459299  | 22296261 G | 16.08  | 1.70E-15 | chr:19:22414379 |
| 19 rs12460028  | 22284598 C | 16.08  | 1.70E-15 | chr:19:22414379 |
| 19 rs12460058  | 22284531 A | 16.08  | 1.70E-15 | chr:19:22414379 |
| 19 rs12461491  | 22304761 G | 16.08  | 1.70E-15 | chr:19:22414379 |
| 19 rs12461499  | 22304581 A | 16.08  | 1.70E-15 | chr:19:22414379 |
| 19 rs56359043  | 22295283 G | 16.08  | 1.70E-15 | chr:19:22414379 |
| 19 rs7260631   | 22282906 G | 16.08  | 1.70E-15 | chr:19:22414379 |
| 19 rs73021825  | 22313577 A | 16.08  | 1.70E-15 | chr:19:22414379 |
| 19 rs76995772  | 22311909 A | 16.08  | 1.70E-15 | chr:19:22414379 |
| 19 rs7256745   | 22537287 T | 0.1721 | 1.70E-15 | chr:19:22414379 |
| 19 rs4024623   | 22568065 A | 0.1557 | 1.71E-15 | chr:19:22414379 |
| 19 rs4932951   | 22246352 C | 14.36  | 1.77E-15 | chr:19:22414379 |
| 19 rs73019874  | 22267259 G | 14.36  | 1.77E-15 | chr:19:22414379 |
| 19 rs73021803  | 22286898 T | 14.23  | 1.79E-15 | chr:19:22414379 |
| 19 rs458515    | 22330126 T | 0.147  | 1.85E-15 | chr:19:22414379 |
| 19 rs10418203  | 22567144 A | 0.1669 | 1.89E-15 | chr:19:22414379 |
| 19 rs11671470  | 22599468 T | 0.1669 | 1.89E-15 | chr:19:22414379 |
| 19 rs11673228  | 22596084 A | 0.1669 | 1.89E-15 | chr:19:22414379 |
| 19 rs11881957  | 22573251 T | 0.1669 | 1.89E-15 | chr:19:22414379 |
| 19 rs12978477  | 22577709 G | 0.1669 | 1.89E-15 | chr:19:22414379 |
| 19 rs1865073   | 22554980 T | 0.1669 | 1.89E-15 | chr:19:22414379 |
| 19 rs1865074   | 22554949 G | 0.1669 | 1.89E-15 | chr:19:22414379 |
| 19 rs7256749   | 22592289 G | 0.1669 | 1.89E-15 | chr:19:22414379 |
| 19 rs7260210   | 22504803 A | 0.1619 | 2.07E-15 | chr:19:22414379 |
| 19 rs281164    | 22419523 T | 0.1457 | 2.07E-15 | chr:19:22414379 |
| 19 rs281166    | 22420798 G | 0.1457 | 2.07E-15 | chr:19:22414379 |
| 19 rs281168    | 22422638 A | 0.1457 | 2.07E-15 | chr:19:22414379 |
| 19 rs10425699  | 22576384 T | 0.1617 | 2.08E-15 | chr:19:22414379 |
| 19 rs605085    | 22355832 T | 0.1527 | 2.12E-15 | chr:19:22414379 |
| 19 rs172183    | 22405532 A | 0.1514 | 2.15E-15 | chr:19:22414379 |
| 19 rs1830175   | 22382080 A | 0.1514 | 2.15E-15 | chr:19:22414379 |
| 19 rs281196    | 22403293 G | 0.1514 | 2.15E-15 | chr:19:22414379 |
| 19 rs281198    | 22405169 G | 0.1514 | 2.15E-15 | chr:19:22414379 |
| 19 rs281203    | 22406377 C | 0.1514 | 2.15E-15 | chr:19:22414379 |
| 19 rs431628    | 22359024 T | 0.1514 | 2.15E-15 | chr:19:22414379 |
| 19 rs73021823  | 22310164 A | 15.93  | 2.21E-15 | chr:19:22414379 |
| 19 rs8103765   | 22569105 T | 0.1611 | 2.23E-15 | chr:19:22414379 |
| 19 rs12461719  | 22292841 T | 14.03  | 2.27E-15 | chr:19:22414379 |
| 19 rs4436884   | 22285163 C | 14.03  | 2.27E-15 | chr:19:22414379 |
| 19 rs55635227  | 22298116 C | 14.03  | 2.27E-15 | chr:19:22414379 |

|                |            |        |          |                 |
|----------------|------------|--------|----------|-----------------|
| 19 rs56242139  | 22295279 A | 14.03  | 2.27E-15 | chr:19:22414379 |
| 19 rs34364151  | 22393367 T | 0.1485 | 2.31E-15 | chr:19:22414379 |
| 19 rs281169    | 22423276 T | 0.1516 | 2.32E-15 | chr:19:22414379 |
| 19 rs10419506  | 22561519 G | 0.1682 | 2.61E-15 | chr:19:22414379 |
| 19 rs73019829  | 22239600 A | 15.24  | 2.65E-15 | chr:19:22414379 |
| 19 rs73019831  | 22242013 T | 15.24  | 2.65E-15 | chr:19:22414379 |
| 19 rs1091182   | 22475622 A | 0.163  | 2.67E-15 | chr:19:22414379 |
| 19 rs12609473  | 22378606 G | 0.1529 | 3.00E-15 | chr:19:22414379 |
| 19 rs2522317   | 22339626 G | 0.1529 | 3.00E-15 | chr:19:22414379 |
| 19 rs3951502   | 22368852 A | 0.1529 | 3.00E-15 | chr:19:22414379 |
| 19 rs424912    | 22347371 C | 0.1529 | 3.00E-15 | chr:19:22414379 |
| 19 rs435638    | 22333121 A | 0.1529 | 3.00E-15 | chr:19:22414379 |
| 19 rs448861    | 22353606 A | 0.1529 | 3.00E-15 | chr:19:22414379 |
| 19 rs9304995   | 22366432 A | 0.1529 | 3.00E-15 | chr:19:22414379 |
| 19 rs2217666   | 22565048 A | 0.1734 | 3.06E-15 | chr:19:22414379 |
| 19 rs10426106  | 22323268 T | 0.1474 | 3.08E-15 | chr:19:22414379 |
| 19 rs1865067   | 22323069 T | 0.1474 | 3.08E-15 | chr:19:22414379 |
| 19 rs1897613   | 22573575 G | 0.1679 | 3.09E-15 | chr:19:22414379 |
| 19 rs10402396  | 22601809 C | 0.1679 | 3.11E-15 | chr:19:22414379 |
| 19 rs10406199  | 22584530 G | 0.1679 | 3.11E-15 | chr:19:22414379 |
| 19 rs10407050  | 22584914 G | 0.1679 | 3.11E-15 | chr:19:22414379 |
| 19 rs10407485  | 22585087 T | 0.1679 | 3.11E-15 | chr:19:22414379 |
| 19 rs10408428  | 22578023 T | 0.1679 | 3.11E-15 | chr:19:22414379 |
| 19 rs10413240  | 22591317 C | 0.1679 | 3.11E-15 | chr:19:22414379 |
| 19 rs10414591  | 22600122 A | 0.1679 | 3.11E-15 | chr:19:22414379 |
| 19 rs10417380  | 22596625 T | 0.1679 | 3.11E-15 | chr:19:22414379 |
| 19 rs10420380  | 22600624 T | 0.1679 | 3.11E-15 | chr:19:22414379 |
| 19 rs10423736  | 22596132 T | 0.1679 | 3.11E-15 | chr:19:22414379 |
| 19 rs10454118  | 22559605 G | 0.1679 | 3.11E-15 | chr:19:22414379 |
| 19 rs12151261  | 22587929 T | 0.1679 | 3.11E-15 | chr:19:22414379 |
| 19 rs12461060  | 22566085 T | 0.1679 | 3.11E-15 | chr:19:22414379 |
| 19 rs12977605  | 22566997 T | 0.1679 | 3.11E-15 | chr:19:22414379 |
| 19 rs12983542  | 22590585 G | 0.1679 | 3.11E-15 | chr:19:22414379 |
| 19 rs1368476   | 22586192 G | 0.1679 | 3.11E-15 | chr:19:22414379 |
| 19 rs139019650 | 22566671 T | 0.1679 | 3.11E-15 | chr:19:22414379 |
| 19 rs16999542  | 22573092 A | 0.1679 | 3.11E-15 | chr:19:22414379 |
| 19 rs17391718  | 22554154 A | 0.1679 | 3.11E-15 | chr:19:22414379 |
| 19 rs1865075   | 22554854 T | 0.1679 | 3.11E-15 | chr:19:22414379 |
| 19 rs2360622   | 22570622 T | 0.1679 | 3.11E-15 | chr:19:22414379 |
| 19 rs2360625   | 22592860 G | 0.1679 | 3.11E-15 | chr:19:22414379 |
| 19 rs2957848   | 22583747 G | 0.1679 | 3.11E-15 | chr:19:22414379 |
| 19 rs4024624   | 22568264 C | 0.1679 | 3.11E-15 | chr:19:22414379 |
| 19 rs5014503   | 22568340 A | 0.1679 | 3.11E-15 | chr:19:22414379 |

|                |            |        |          |                 |
|----------------|------------|--------|----------|-----------------|
| 19 rs56027264  | 22554354 T | 0.1679 | 3.11E-15 | chr:19:22414379 |
| 19 rs56376504  | 22562520 C | 0.1679 | 3.11E-15 | chr:19:22414379 |
| 19 rs58374468  | 22562522 C | 0.1679 | 3.11E-15 | chr:19:22414379 |
| 19 rs6511350   | 22594697 G | 0.1679 | 3.11E-15 | chr:19:22414379 |
| 19 rs7247085   | 22589367 G | 0.1679 | 3.11E-15 | chr:19:22414379 |
| 19 rs7247220   | 22589489 G | 0.1679 | 3.11E-15 | chr:19:22414379 |
| 19 rs7247735   | 22575488 T | 0.1679 | 3.11E-15 | chr:19:22414379 |
| 19 rs7250541   | 22557093 G | 0.1679 | 3.11E-15 | chr:19:22414379 |
| 19 rs7250710   | 22557231 G | 0.1679 | 3.11E-15 | chr:19:22414379 |
| 19 rs7253315   | 22594439 T | 0.1679 | 3.11E-15 | chr:19:22414379 |
| 19 rs7255934   | 22596865 C | 0.1679 | 3.11E-15 | chr:19:22414379 |
| 19 rs7508099   | 22556203 T | 0.1679 | 3.11E-15 | chr:19:22414379 |
| 19 rs75653200  | 22579503 T | 0.1679 | 3.11E-15 | chr:19:22414379 |
| 19 rs8100077   | 22593112 T | 0.1679 | 3.11E-15 | chr:19:22414379 |
| 19 rs8106611   | 22569618 G | 0.1679 | 3.11E-15 | chr:19:22414379 |
| 19 rs8107513   | 22564534 C | 0.1679 | 3.11E-15 | chr:19:22414379 |
| 19 rs8107704   | 22564531 G | 0.1679 | 3.11E-15 | chr:19:22414379 |
| 19 rs8111665   | 22588559 T | 0.1679 | 3.11E-15 | chr:19:22414379 |
| 19 rs8112246   | 22567447 C | 0.1679 | 3.11E-15 | chr:19:22414379 |
| 19 rs368652    | 22356811 A | 0.1514 | 3.32E-15 | chr:19:22414379 |
| 19 rs55983151  | 22552936 T | 0.1632 | 3.33E-15 | chr:19:22414379 |
| 19 rs8110854   | 22549453 C | 0.1632 | 3.33E-15 | chr:19:22414379 |
| 19 rs56064722  | 22312293 T | 17.25  | 3.67E-15 | chr:19:22414379 |
| 19 rs437284    | 22354875 T | 0.1512 | 3.82E-15 | chr:19:22414379 |
| 19 rs7259586   | 22537862 C | 0.1706 | 3.83E-15 | chr:19:22414379 |
| 19 rs201005223 | 22574818 C | 0.1515 | 3.84E-15 | chr:19:22414379 |
| 19 rs4024619   | 22586839 G | 0.1687 | 3.87E-15 | chr:19:22414379 |
| 19 rs12459277  | 22235908 T | 13.9   | 4.10E-15 | chr:19:22414379 |
| 19 rs34878133  | 22230331 A | 13.9   | 4.10E-15 | chr:19:22414379 |
| 19 rs3752168   | 22235478 C | 13.9   | 4.10E-15 | chr:19:22414379 |
| 19 rs56183023  | 22269366 C | 13.9   | 4.10E-15 | chr:19:22414379 |
| 19 rs73019812  | 22232291 T | 13.9   | 4.10E-15 | chr:19:22414379 |
| 19 rs8101997   | 22568432 A | 0.1686 | 4.23E-15 | chr:19:22414379 |
| 19 rs56036277  | 22257574 A | 15     | 4.25E-15 | chr:19:22414379 |
| 19 rs73019871  | 22265915 T | 15     | 4.25E-15 | chr:19:22414379 |
| 19 rs201113571 | 22290840 T | 14.79  | 4.30E-15 | chr:19:22414379 |
| 19 rs4358065   | 22521132 A | 0.1613 | 4.36E-15 | chr:19:22414379 |
| 19 rs7256861   | 22561484 T | 0.1697 | 4.40E-15 | chr:19:22414379 |
| 19 rs61237480  | 22306505 T | 13.27  | 4.59E-15 | chr:19:22414379 |
| 19 rs73021816  | 22306321 A | 13.27  | 4.59E-15 | chr:19:22414379 |
| 19 rs11669885  | 22397422 A | 0.153  | 4.71E-15 | chr:19:22414379 |
| 19 rs12980808  | 22374080 G | 0.153  | 4.71E-15 | chr:19:22414379 |
| 19 rs397538    | 22329889 A | 0.153  | 4.71E-15 | chr:19:22414379 |

|               |            |        |          |                 |
|---------------|------------|--------|----------|-----------------|
| 19 rs617609   | 22326000 A | 0.153  | 4.71E-15 | chr:19:22414379 |
| 19 rs464038   | 22335569 G | 0.1597 | 5.02E-15 | chr:19:22414379 |
| 19 rs56226428 | 22229075 C | 15.09  | 5.10E-15 | chr:19:22414379 |
| 19 rs404793   | 22329632 A | 0.1607 | 5.21E-15 | chr:19:22414379 |
| 19 rs4932955  | 22272845 A | 12.3   | 5.35E-15 | chr:19:22414379 |
| 19 rs4932956  | 22273797 G | 12.3   | 5.35E-15 | chr:19:22414379 |
| 19 rs11085514 | 22425837 A | 0.165  | 5.38E-15 | chr:19:22414379 |
| 19 rs4932763  | 22603922 A | 0.1696 | 5.59E-15 | chr:19:22414379 |
| 19 rs2195967  | 22564922 T | 0.1727 | 6.25E-15 | chr:19:22414379 |
| 19 rs12461745 | 22262667 T | 13.66  | 6.63E-15 | chr:19:22414379 |
| 19 rs56138218 | 22279031 A | 13.66  | 6.63E-15 | chr:19:22414379 |
| 19 rs73019862 | 22260969 T | 13.66  | 6.63E-15 | chr:19:22414379 |
| 19 rs1985135  | 22523578 A | 0.164  | 7.19E-15 | chr:19:22414379 |
| 19 rs12971375 | 22599963 A | 0.1795 | 7.36E-15 | chr:19:22414379 |
| 19 rs73019807 | 22231484 G | 14.76  | 8.27E-15 | chr:19:22414379 |
| 19 rs10420149 | 22582925 G | 0.1704 | 8.41E-15 | chr:19:22414379 |
| 19 rs1808668  | 22518657 A | 0.1854 | 8.52E-15 | chr:19:22414379 |
| 19 rs3862494  | 22519522 G | 0.1854 | 8.52E-15 | chr:19:22414379 |
| 19 rs1975175  | 22515239 G | 0.1905 | 9.69E-15 | chr:19:22414379 |
| 19 rs10409520 | 22512477 C | 0.1848 | 9.69E-15 | chr:19:22414379 |
| 19 rs2116919  | 22491706 C | 0.1848 | 9.69E-15 | chr:19:22414379 |
| 19 rs71333873 | 22581471 T | 0.1767 | 9.70E-15 | chr:19:22414379 |
| 19 rs8100087  | 22601359 C | 0.1767 | 9.70E-15 | chr:19:22414379 |
| 19 rs8110636  | 22600827 A | 0.1767 | 9.70E-15 | chr:19:22414379 |
| 19 rs720893   | 22426404 G | 0.1696 | 1.03E-14 | chr:19:22414379 |
| 19 rs11085522 | 22505167 T | 0.1929 | 1.05E-14 | chr:19:22414379 |
| 19 rs4932990  | 22583691 A | 0.1659 | 1.26E-14 | chr:19:22414379 |
| 19 rs10404225 | 22493082 G | 0.1929 | 1.33E-14 | chr:19:22414379 |
| 19 rs10409947 | 22512518 G | 0.1929 | 1.33E-14 | chr:19:22414379 |
| 19 rs1991830  | 22514730 G | 0.1929 | 1.33E-14 | chr:19:22414379 |
| 19 rs4932755  | 22494816 A | 0.1929 | 1.33E-14 | chr:19:22414379 |
| 19 rs7254434  | 22500033 G | 0.1929 | 1.33E-14 | chr:19:22414379 |
| 19 rs8106639  | 22509614 C | 0.1929 | 1.33E-14 | chr:19:22414379 |
| 19 rs9304996  | 22486535 A | 0.1929 | 1.33E-14 | chr:19:22414379 |
| 19 rs12462177 | 22509486 G | 13.79  | 1.39E-14 | chr:19:22414379 |
| 19 rs61216675 | 22561510 C | 0.1784 | 1.41E-14 | chr:19:22414379 |
| 19 rs7257134  | 22540857 A | 0.1711 | 1.43E-14 | chr:19:22414379 |
| 19 rs283158   | 22458714 A | 12.48  | 1.67E-14 | chr:19:22414379 |
| 19 rs283159   | 22457776 T | 12.48  | 1.67E-14 | chr:19:22414379 |
| 19 rs383451   | 22463231 T | 12.48  | 1.67E-14 | chr:19:22414379 |
| 19 rs58164690 | 22504773 A | 11.18  | 1.80E-14 | chr:19:22414379 |
| 19 rs4932984  | 22533255 T | 0.1759 | 1.91E-14 | chr:19:22414379 |
| 19 rs10404620 | 22316577 A | 0.1765 | 1.92E-14 | chr:19:22414379 |

|                |            |        |          |                 |
|----------------|------------|--------|----------|-----------------|
| 19 rs10411951  | 22309055 C | 0.1765 | 1.92E-14 | chr:19:22414379 |
| 19 rs4244914   | 22315389 A | 0.1765 | 1.92E-14 | chr:19:22414379 |
| 19 rs6511334   | 22307267 C | 0.1765 | 1.92E-14 | chr:19:22414379 |
| 19 rs12459631  | 22477395 G | 13.67  | 1.98E-14 | chr:19:22414379 |
| 19 rs4932975   | 22491072 C | 13.67  | 1.98E-14 | chr:19:22414379 |
| 19 rs4932976   | 22494878 T | 13.67  | 1.98E-14 | chr:19:22414379 |
| 19 rs56955437  | 22504518 T | 13.67  | 1.98E-14 | chr:19:22414379 |
| 19 rs7253033   | 22503203 C | 13.67  | 1.98E-14 | chr:19:22414379 |
| 19 rs12983035  | 22590392 T | 0.1877 | 2.05E-14 | chr:19:22414379 |
| 19 rs7255484   | 22184978 C | 12.22  | 2.10E-14 | chr:19:22414379 |
| 19 rs10407936  | 22312059 A | 0.1769 | 2.49E-14 | chr:19:22414379 |
| 19 rs10415817  | 22313214 C | 0.1769 | 2.49E-14 | chr:19:22414379 |
| 19 rs7245790   | 22320009 C | 0.1769 | 2.49E-14 | chr:19:22414379 |
| 19 rs8103471   | 22317314 T | 0.1769 | 2.49E-14 | chr:19:22414379 |
| 19 rs55701013  | 22479996 G | 11.01  | 2.81E-14 | chr:19:22414379 |
| 19 rs8103990   | 22476027 A | 11.01  | 2.81E-14 | chr:19:22414379 |
| 19 rs59870410  | 22483963 G | 12.59  | 2.93E-14 | chr:19:22414379 |
| 19 rs1975172   | 22534603 A | 0.181  | 3.52E-14 | chr:19:22414379 |
| 19 rs12459526  | 22216669 T | 10.73  | 3.57E-14 | chr:19:22414379 |
| 19 rs2359827   | 22220016 C | 10.73  | 3.57E-14 | chr:19:22414379 |
| 19 rs4932940   | 22216366 G | 10.73  | 3.57E-14 | chr:19:22414379 |
| 19 rs7251237   | 22220858 A | 10.73  | 3.57E-14 | chr:19:22414379 |
| 19 rs8103503   | 22216828 A | 10.73  | 3.57E-14 | chr:19:22414379 |
| 19 rs4932977   | 22520694 T | 11.52  | 3.68E-14 | chr:19:22414379 |
| 19 rs80117552  | 22171367 C | 11.37  | 3.98E-14 | chr:19:22414379 |
| 19 rs61590737  | 22094470 G | 0.1736 | 3.98E-14 | chr:19:22414379 |
| 19 rs12460715  | 22523304 A | 11.94  | 4.34E-14 | chr:19:22414379 |
| 19 rs17769191  | 22094348 C | 0.1737 | 5.03E-14 | chr:19:22414379 |
| 19 rs2435012   | 22093800 A | 0.1737 | 5.03E-14 | chr:19:22414379 |
| 19 rs1229924   | 22092288 A | 0.1709 | 5.20E-14 | chr:19:22414379 |
| 19 rs112237385 | 22162147 C | 9.588  | 5.81E-14 | chr:19:22414379 |
| 19 rs4456632   | 22153634 A | 9.588  | 5.81E-14 | chr:19:22414379 |
| 19 rs55674738  | 22196576 T | 9.588  | 5.81E-14 | chr:19:22414379 |
| 19 rs56408994  | 22162618 C | 9.588  | 5.81E-14 | chr:19:22414379 |
| 19 rs60871663  | 22194240 T | 9.588  | 5.81E-14 | chr:19:22414379 |
| 19 rs6511310   | 22197285 A | 9.588  | 5.81E-14 | chr:19:22414379 |
| 19 rs7246239   | 22183049 A | 9.588  | 5.81E-14 | chr:19:22414379 |
| 19 rs7246992   | 22192047 A | 9.588  | 5.81E-14 | chr:19:22414379 |
| 19 rs7248938   | 22166196 G | 9.588  | 5.81E-14 | chr:19:22414379 |
| 19 rs7258270   | 22155520 G | 9.588  | 5.81E-14 | chr:19:22414379 |
| 19 rs73017852  | 22189239 G | 9.588  | 5.81E-14 | chr:19:22414379 |
| 19 rs12460852  | 22226289 T | 10.23  | 5.87E-14 | chr:19:22414379 |
| 19 rs6511346   | 22537574 T | 0.1916 | 5.91E-14 | chr:19:22414379 |



|                |            |        |          |                 |
|----------------|------------|--------|----------|-----------------|
| 19 rs12462668  | 22156943 A | 10.45  | 6.48E-14 | chr:19:22414379 |
| 19 rs2359829   | 22222155 G | 10.45  | 6.48E-14 | chr:19:22414379 |
| 19 rs67441682  | 22194829 C | 10.45  | 6.48E-14 | chr:19:22414379 |
| 19 rs67458228  | 22191841 T | 10.45  | 6.48E-14 | chr:19:22414379 |
| 19 rs68118096  | 22200804 T | 10.45  | 6.48E-14 | chr:19:22414379 |
| 19 rs8104333   | 22153801 C | 10.45  | 6.48E-14 | chr:19:22414379 |
| 19 rs73015567  | 22128077 A | 10.81  | 6.75E-14 | chr:19:22414379 |
| 19 rs73015578  | 22132084 A | 10.81  | 6.75E-14 | chr:19:22414379 |
| 19 rs10411720  | 22308919 C | 0.1886 | 7.09E-14 | chr:19:22414379 |
| 19 rs12462173  | 22120728 T | 10.66  | 7.59E-14 | chr:19:22414379 |
| 19 rs118032465 | 22521394 C | 11.94  | 8.29E-14 | chr:19:22414379 |
| 19 rs200200120 | 22521387 T | 11.94  | 8.29E-14 | chr:19:22414379 |
| 19 rs11881638  | 22107837 A | 0.1805 | 8.46E-14 | chr:19:22414379 |
| 19 rs1813242   | 22101473 G | 0.1805 | 8.46E-14 | chr:19:22414379 |
| 19 rs1848996   | 22111809 A | 0.1805 | 8.46E-14 | chr:19:22414379 |
| 19 rs1965611   | 22113197 A | 0.1805 | 8.46E-14 | chr:19:22414379 |
| 19 rs2203034   | 22101710 C | 0.1805 | 8.46E-14 | chr:19:22414379 |
| 19 rs413873    | 22100192 A | 0.1805 | 8.46E-14 | chr:19:22414379 |
| 19 rs438100    | 22101205 C | 0.1805 | 8.46E-14 | chr:19:22414379 |
| 19 rs807957    | 22115990 A | 0.1805 | 8.46E-14 | chr:19:22414379 |
| 19 rs807959    | 22115835 G | 0.1805 | 8.46E-14 | chr:19:22414379 |
| 19 rs807965    | 22114669 T | 0.1805 | 8.46E-14 | chr:19:22414379 |
| 19 rs975712    | 22098471 C | 0.1805 | 8.46E-14 | chr:19:22414379 |
| 19 rs281173    | 22424997 G | 0.1918 | 9.38E-14 | chr:19:22414379 |
| 19 rs34044431  | 22128382 G | 9.962  | 1.11E-13 | chr:19:22414379 |
| 19 rs4932854   | 22143597 G | 9.962  | 1.11E-13 | chr:19:22414379 |
| 19 rs68053498  | 22131813 A | 9.962  | 1.11E-13 | chr:19:22414379 |
| 19 rs12460903  | 22210184 C | 9.598  | 1.11E-13 | chr:19:22414379 |
| 19 rs12461536  | 22207464 G | 9.598  | 1.11E-13 | chr:19:22414379 |
| 19 rs12462824  | 22209767 G | 9.598  | 1.11E-13 | chr:19:22414379 |
| 19 rs1975167   | 22215066 T | 9.598  | 1.11E-13 | chr:19:22414379 |
| 19 rs55638635  | 22210647 A | 9.598  | 1.11E-13 | chr:19:22414379 |
| 19 rs55772746  | 22224720 G | 9.598  | 1.11E-13 | chr:19:22414379 |
| 19 rs58132720  | 22225014 A | 9.598  | 1.11E-13 | chr:19:22414379 |
| 19 rs7247687   | 22214420 T | 9.598  | 1.11E-13 | chr:19:22414379 |
| 19 rs7255179   | 22213130 G | 9.598  | 1.11E-13 | chr:19:22414379 |
| 19 rs7258843   | 22213701 C | 9.598  | 1.11E-13 | chr:19:22414379 |
| 19 rs7259460   | 22213945 A | 9.598  | 1.11E-13 | chr:19:22414379 |
| 19 rs7259527   | 22214257 G | 9.598  | 1.11E-13 | chr:19:22414379 |
| 19 rs8103879   | 22211437 G | 9.598  | 1.11E-13 | chr:19:22414379 |
| 19 rs8106352   | 22208611 T | 9.598  | 1.11E-13 | chr:19:22414379 |
| 19 rs807956    | 22117292 A | 0.1822 | 1.14E-13 | chr:19:22414379 |
| 19 rs11878178  | 22577079 A | 0.2418 | 1.18E-13 | chr:19:22414379 |

|                |            |        |          |                 |
|----------------|------------|--------|----------|-----------------|
| 19 rs11883405  | 22577080 T | 0.2418 | 1.18E-13 | chr:19:22414379 |
| 19 rs11669254  | 22544805 A | 0.2045 | 1.18E-13 | chr:19:22414379 |
| 19 rs2078136   | 22113503 A | 0.1857 | 1.19E-13 | chr:19:22414379 |
| 19 rs7245491   | 22532793 C | 0.1994 | 1.27E-13 | chr:19:22414379 |
| 19 rs7245492   | 22532796 C | 0.1994 | 1.27E-13 | chr:19:22414379 |
| 19 rs1912575   | 22100319 A | 0.1823 | 1.34E-13 | chr:19:22414379 |
| 19 rs1912574   | 22125733 C | 9.183  | 1.95E-13 | chr:19:22414379 |
| 19 rs1995934   | 22128656 T | 9.183  | 1.95E-13 | chr:19:22414379 |
| 19 rs56061708  | 22128775 T | 9.183  | 1.95E-13 | chr:19:22414379 |
| 19 rs1229922   | 22092875 T | 0.1851 | 1.98E-13 | chr:19:22414379 |
| 19 rs2360621   | 22548669 C | 0.2054 | 2.00E-13 | chr:19:22414379 |
| 19 rs2079063   | 22160674 T | 9.339  | 2.01E-13 | chr:19:22414379 |
| 19 rs2359826   | 22214993 T | 9.339  | 2.01E-13 | chr:19:22414379 |
| 19 rs57286877  | 22172618 G | 9.339  | 2.01E-13 | chr:19:22414379 |
| 19 rs7260454   | 22166739 T | 9.339  | 2.01E-13 | chr:19:22414379 |
| 19 rs73538835  | 22161066 A | 9.339  | 2.01E-13 | chr:19:22414379 |
| 19 rs28420503  | 22316713 A | 0.2045 | 2.39E-13 | chr:19:22414379 |
| 19 rs2359828   | 22220287 G | 8.987  | 2.48E-13 | chr:19:22414379 |
| 19 rs57420056  | 22094309 A | 5.52   | 2.56E-13 | chr:19:22414379 |
| 19 rs113181884 | 22586084 C | 0.2597 | 2.87E-13 | chr:19:22414379 |
| 19 rs56768795  | 22586073 A | 0.2597 | 2.87E-13 | chr:19:22414379 |
| 19 rs4932983   | 22533167 A | 0.2098 | 2.90E-13 | chr:19:22414379 |
| 19 rs77808832  | 22120260 T | 8.906  | 3.14E-13 | chr:19:22414379 |
| 19 rs12461800  | 22145006 C | 8.933  | 3.55E-13 | chr:19:22414379 |
| 19 rs56058873  | 22142542 C | 8.933  | 3.55E-13 | chr:19:22414379 |
| 19 rs68061456  | 22142308 A | 8.933  | 3.55E-13 | chr:19:22414379 |
| 19 rs10417635  | 22146123 G | 8.541  | 3.98E-13 | chr:19:22414379 |
| 19 rs66814910  | 22148202 A | 8.541  | 3.98E-13 | chr:19:22414379 |
| 19 rs2885036   | 22560484 T | 0.2204 | 5.51E-13 | chr:19:22414379 |
| 19 rs2188967   | 22095513 A | 0.2038 | 5.90E-13 | chr:19:22414379 |
| 19 rs8111771   | 22287861 A | 0.2129 | 5.96E-13 | chr:19:22414379 |
| 19 rs2905572   | 22651073 T | 7.244  | 6.39E-13 | chr:19:22414379 |
| 19 rs2905574   | 22655531 G | 7.244  | 6.39E-13 | chr:19:22414379 |
| 19 rs2905575   | 22656127 A | 7.244  | 6.39E-13 | chr:19:22414379 |
| 19 rs2957811   | 22658228 T | 7.244  | 6.39E-13 | chr:19:22414379 |
| 19 rs34312380  | 22390071 T | 0.1937 | 6.72E-13 | chr:19:22414379 |
| 19 rs34407605  | 22390084 T | 0.1937 | 6.72E-13 | chr:19:22414379 |
| 19 rs4932932   | 22203214 T | 7.297  | 6.80E-13 | chr:19:22414379 |
| 19 rs8100117   | 22195322 C | 7.297  | 6.80E-13 | chr:19:22414379 |
| 19 rs8109237   | 22202739 G | 7.297  | 6.80E-13 | chr:19:22414379 |
| 19 rs4932988   | 22560235 A | 0.2207 | 7.00E-13 | chr:19:22414379 |
| 19 rs6511348   | 22557374 G | 0.2207 | 7.00E-13 | chr:19:22414379 |
| 19 rs7252785   | 22561287 G | 0.2207 | 7.00E-13 | chr:19:22414379 |

|               |            |        |          |                 |
|---------------|------------|--------|----------|-----------------|
| 19 rs8113208  | 22553888 A | 0.2207 | 7.00E-13 | chr:19:22414379 |
| 19 rs11671804 | 22591216 C | 0.2251 | 7.82E-13 | chr:19:22414379 |
| 19 rs12973769 | 22593223 C | 0.2251 | 7.82E-13 | chr:19:22414379 |
| 19 rs3867187  | 22570220 C | 0.2251 | 7.82E-13 | chr:19:22414379 |
| 19 rs4932747  | 22279252 C | 0.2078 | 7.86E-13 | chr:19:22414379 |
| 19 rs7248507  | 22214366 C | 8.137  | 7.89E-13 | chr:19:22414379 |
| 19 rs7248542  | 22214447 C | 8.137  | 7.89E-13 | chr:19:22414379 |
| 19 rs7253170  | 22209228 G | 8.137  | 7.89E-13 | chr:19:22414379 |
| 19 rs73930941 | 22123495 C | 8.043  | 9.86E-13 | chr:19:22414379 |
| 19 rs807966   | 22113827 C | 4.952  | 1.23E-12 | chr:19:22414379 |
| 19 rs8100438  | 22301003 C | 0.2229 | 1.32E-12 | chr:19:22414379 |
| 19 rs987711   | 22300007 T | 0.2229 | 1.32E-12 | chr:19:22414379 |
| 19 rs28456336 | 22268779 T | 0.2267 | 1.35E-12 | chr:19:22414379 |
| 19 rs68168074 | 22120333 T | 7.739  | 1.68E-12 | chr:19:22414379 |
| 19 rs1019938  | 22280954 T | 0.224  | 1.77E-12 | chr:19:22414379 |
| 19 rs1560718  | 22292212 C | 0.224  | 1.77E-12 | chr:19:22414379 |
| 19 rs1978718  | 22293126 T | 0.224  | 1.77E-12 | chr:19:22414379 |
| 19 rs2099347  | 22282614 T | 0.224  | 1.77E-12 | chr:19:22414379 |
| 19 rs452707   | 22304145 T | 0.224  | 1.77E-12 | chr:19:22414379 |
| 19 rs4553749  | 22285063 C | 0.224  | 1.77E-12 | chr:19:22414379 |
| 19 rs6511323  | 22281914 T | 0.224  | 1.77E-12 | chr:19:22414379 |
| 19 rs6511325  | 22284357 A | 0.224  | 1.77E-12 | chr:19:22414379 |
| 19 rs6511326  | 22286679 T | 0.224  | 1.77E-12 | chr:19:22414379 |
| 19 rs6511329  | 22287905 T | 0.224  | 1.77E-12 | chr:19:22414379 |
| 19 rs4932954  | 22272454 T | 0.2282 | 1.91E-12 | chr:19:22414379 |
| 19 rs9304994  | 22272743 G | 0.2282 | 1.91E-12 | chr:19:22414379 |
| 19 rs2043318  | 22241615 G | 0.2286 | 1.93E-12 | chr:19:22414379 |
| 19 rs3752163  | 22256396 G | 0.2286 | 1.93E-12 | chr:19:22414379 |
| 19 rs4932953  | 22249045 G | 0.2286 | 1.93E-12 | chr:19:22414379 |
| 19 rs6511318  | 22245745 A | 0.2286 | 1.93E-12 | chr:19:22414379 |
| 19 rs7251108  | 22250689 G | 0.2286 | 1.93E-12 | chr:19:22414379 |
| 19 rs2116895  | 22266669 T | 0.2298 | 1.94E-12 | chr:19:22414379 |
| 19 rs6511320  | 22267122 C | 0.2298 | 1.94E-12 | chr:19:22414379 |
| 19 rs7258192  | 22264658 G | 0.2298 | 1.94E-12 | chr:19:22414379 |
| 19 rs2082478  | 22539848 A | 8.01   | 2.08E-12 | chr:19:22414379 |
| 19 rs4932758  | 22540094 A | 8.01   | 2.08E-12 | chr:19:22414379 |
| 19 rs55851405 | 22541686 C | 8.01   | 2.08E-12 | chr:19:22414379 |
| 19 rs1704019  | 22633165 T | 6.018  | 2.20E-12 | chr:19:22414379 |
| 19 rs1692595  | 22634726 T | 5.983  | 2.20E-12 | chr:19:22414379 |
| 19 rs55921217 | 22296943 C | 0.2246 | 2.23E-12 | chr:19:22414379 |
| 19 rs2957817  | 22637364 A | 6.036  | 2.34E-12 | chr:19:22414379 |
| 19 rs60200804 | 22283368 T | 0.2266 | 2.42E-12 | chr:19:22414379 |
| 19 rs12460293 | 22543380 A | 7.782  | 2.48E-12 | chr:19:22414379 |

|                |            |        |          |                 |
|----------------|------------|--------|----------|-----------------|
| 19 rs403850    | 22229593 T | 0.2296 | 2.52E-12 | chr:19:22414379 |
| 19 rs417331    | 22234478 T | 0.2296 | 2.52E-12 | chr:19:22414379 |
| 19 rs4244913   | 22239919 A | 0.2296 | 2.52E-12 | chr:19:22414379 |
| 19 rs632709    | 22233096 C | 0.2296 | 2.52E-12 | chr:19:22414379 |
| 19 rs6511332   | 22288391 A | 0.2272 | 2.52E-12 | chr:19:22414379 |
| 19 rs8107039   | 22238990 G | 0.2296 | 2.52E-12 | chr:19:22414379 |
| 19 rs2359995   | 22280060 C | 0.2298 | 2.55E-12 | chr:19:22414379 |
| 19 rs12459747  | 22542982 G | 7.666  | 2.73E-12 | chr:19:22414379 |
| 19 rs4932748   | 22279318 T | 0.2313 | 2.73E-12 | chr:19:22414379 |
| 19 rs10403779  | 22258396 C | 0.2317 | 2.77E-12 | chr:19:22414379 |
| 19 rs28881618  | 22254692 G | 0.2317 | 2.77E-12 | chr:19:22414379 |
| 19 rs7254363   | 22257048 C | 0.2317 | 2.77E-12 | chr:19:22414379 |
| 19 rs7255666   | 22257264 T | 0.2317 | 2.77E-12 | chr:19:22414379 |
| 19 rs7258080   | 22257625 A | 0.2317 | 2.77E-12 | chr:19:22414379 |
| 19 rs1692593   | 22633259 T | 5.852  | 2.90E-12 | chr:19:22414379 |
| 19 rs2453888   | 22632145 G | 5.852  | 2.90E-12 | chr:19:22414379 |
| 19 rs639356    | 22104986 T | 0.2156 | 3.08E-12 | chr:19:22414379 |
| 19 rs1692598   | 22635052 A | 5.869  | 3.11E-12 | chr:19:22414379 |
| 19 rs1036235   | 22279541 T | 0.2324 | 3.49E-12 | chr:19:22414379 |
| 19 rs366849    | 22234941 G | 0.2319 | 3.50E-12 | chr:19:22414379 |
| 19 rs6511333   | 22298363 T | 0.2344 | 4.42E-12 | chr:19:22414379 |
| 19 rs8103088   | 22298322 G | 0.2344 | 4.42E-12 | chr:19:22414379 |
| 19 rs56149942  | 22541575 G | 7.49   | 4.62E-12 | chr:19:22414379 |
| 19 rs73027904  | 22533823 T | 7.593  | 4.73E-12 | chr:19:22414379 |
| 19 rs12462488  | 22565096 C | 6.924  | 5.45E-12 | chr:19:22414379 |
| 19 rs1603765   | 22635852 T | 5.622  | 5.81E-12 | chr:19:22414379 |
| 19 rs1704015   | 22636585 G | 5.622  | 5.81E-12 | chr:19:22414379 |
| 19 rs1230299   | 22624040 C | 5.518  | 6.03E-12 | chr:19:22414379 |
| 19 rs10408261  | 22298225 T | 0.236  | 6.04E-12 | chr:19:22414379 |
| 19 rs111498572 | 22583766 A | 0.2356 | 8.18E-12 | chr:19:22414379 |
| 19 rs1651558   | 22089575 T | 5.333  | 8.89E-12 | chr:19:22414379 |
| 19 rs4932992   | 22628842 T | 5.26   | 9.20E-12 | chr:19:22414379 |
| 19 rs1692590   | 22629695 T | 5.269  | 1.06E-11 | chr:19:22414379 |
| 19 rs1704017   | 22629868 C | 5.312  | 1.13E-11 | chr:19:22414379 |
| 19 rs281159    | 22416987 A | 2576   | 1.16E-11 | chr:19:22414379 |
| 19 rs2935281   | 22630650 A | 5.154  | 1.34E-11 | chr:19:22414379 |
| 19 rs73029815  | 22623948 T | 6.328  | 1.59E-11 | chr:19:22414379 |
| 19 rs7249109   | 22577764 C | 6.73   | 1.62E-11 | chr:19:22414379 |
| 19 rs903937    | 22609988 G | 6.085  | 1.64E-11 | chr:19:22414379 |
| 19 rs17461312  | 22554107 T | 6.39   | 1.66E-11 | chr:19:22414379 |
| 19 rs2957824   | 22579316 T | 6.39   | 1.66E-11 | chr:19:22414379 |
| 19 rs3867189   | 22581121 C | 6.39   | 1.66E-11 | chr:19:22414379 |
| 19 rs6511352   | 22599758 A | 6.39   | 1.66E-11 | chr:19:22414379 |

|                |            |        |          |                 |
|----------------|------------|--------|----------|-----------------|
| 19 rs8107578   | 22564441 A | 6.39   | 1.66E-11 | chr:19:22414379 |
| 19 rs8108891   | 22595082 T | 6.39   | 1.66E-11 | chr:19:22414379 |
| 19 rs8112170   | 22565967 A | 6.39   | 1.66E-11 | chr:19:22414379 |
| 19 rs10401339  | 22210401 T | 0.2497 | 1.67E-11 | chr:19:22414379 |
| 19 rs403997    | 22220543 C | 0.2497 | 1.67E-11 | chr:19:22414379 |
| 19 rs424066    | 22222884 C | 0.2497 | 1.67E-11 | chr:19:22414379 |
| 19 rs437192    | 22219510 G | 0.2497 | 1.67E-11 | chr:19:22414379 |
| 19 rs452459    | 22216712 G | 0.2497 | 1.67E-11 | chr:19:22414379 |
| 19 rs1985744   | 22208601 T | 0.2514 | 1.78E-11 | chr:19:22414379 |
| 19 rs2158106   | 22186710 T | 0.2514 | 1.78E-11 | chr:19:22414379 |
| 19 rs417947    | 22224030 A | 0.2514 | 1.78E-11 | chr:19:22414379 |
| 19 rs12985553  | 22150868 T | 0.2507 | 1.82E-11 | chr:19:22414379 |
| 19 rs1809825   | 22608943 A | 6.123  | 1.94E-11 | chr:19:22414379 |
| 19 rs12975751  | 22156482 T | 0.254  | 1.96E-11 | chr:19:22414379 |
| 19 rs12979885  | 22160709 T | 0.254  | 1.96E-11 | chr:19:22414379 |
| 19 rs12980606  | 22169549 G | 0.254  | 1.96E-11 | chr:19:22414379 |
| 19 rs4265943   | 22173740 A | 0.254  | 1.96E-11 | chr:19:22414379 |
| 19 rs1692591   | 22632743 G | 4.98   | 2.36E-11 | chr:19:22414379 |
| 19 rs1692592   | 22632854 G | 4.98   | 2.36E-11 | chr:19:22414379 |
| 19 rs440539    | 22359330 A | 2310   | 2.46E-11 | chr:19:22414379 |
| 19 rs10410114  | 22192671 T | 0.2539 | 2.46E-11 | chr:19:22414379 |
| 19 rs11667684  | 22129638 T | 0.2534 | 2.53E-11 | chr:19:22414379 |
| 19 rs12971688  | 22144040 A | 0.2534 | 2.53E-11 | chr:19:22414379 |
| 19 rs2428382   | 22137765 G | 0.2534 | 2.53E-11 | chr:19:22414379 |
| 19 rs2666454   | 22127730 A | 0.2534 | 2.53E-11 | chr:19:22414379 |
| 19 rs2359816   | 22198676 A | 0.2539 | 2.54E-11 | chr:19:22414379 |
| 19 rs4458136   | 22197603 T | 0.2539 | 2.54E-11 | chr:19:22414379 |
| 19 rs113242209 | 22547737 T | 6.28   | 2.63E-11 | chr:19:22414379 |
| 19 rs12608935  | 22145147 C | 0.256  | 2.78E-11 | chr:19:22414379 |
| 19 rs1606063   | 22134408 A | 0.256  | 2.78E-11 | chr:19:22414379 |
| 19 rs1849005   | 22142743 C | 0.256  | 2.78E-11 | chr:19:22414379 |
| 19 rs2188972   | 22149458 G | 0.256  | 2.78E-11 | chr:19:22414379 |
| 19 rs2666455   | 22127535 G | 0.256  | 2.78E-11 | chr:19:22414379 |
| 19 rs11085508  | 22193986 C | 0.2536 | 2.80E-11 | chr:19:22414379 |
| 19 rs4550595   | 22153808 T | 0.2536 | 2.80E-11 | chr:19:22414379 |
| 19 rs12976630  | 22590340 A | 6.342  | 3.22E-11 | chr:19:22414379 |
| 19 rs6511351   | 22595741 C | 6.342  | 3.22E-11 | chr:19:22414379 |
| 19 rs67769716  | 22567459 A | 6.342  | 3.22E-11 | chr:19:22414379 |
| 19 rs7343076   | 22367903 C | 2397   | 3.62E-11 | chr:19:22414379 |
| 19 rs10403375  | 22389248 T | 2613   | 3.77E-11 | chr:19:22414379 |
| 19 rs2935279   | 22626467 C | 4.726  | 4.25E-11 | chr:19:22414379 |
| 19 rs2935280   | 22628754 C | 4.742  | 4.39E-11 | chr:19:22414379 |
| 19 rs2023338   | 22443261 T | 20.87  | 4.46E-11 | chr:19:22414379 |

|                          |            |        |          |                 |
|--------------------------|------------|--------|----------|-----------------|
| 19 rs374195570           | 22598418 T | 5.405  | 4.82E-11 | chr:19:22414379 |
| 19 rs377199228           | 22598420 C | 5.405  | 4.82E-11 | chr:19:22414379 |
| 19 rs150844285           | 22411568 T | 3846   | 5.06E-11 | chr:19:22414379 |
| 19 rs11668920            | 22182053 C | 0.2612 | 5.31E-11 | chr:19:22414379 |
| 19 rs699639              | 22120805 C | 0.264  | 5.75E-11 | chr:19:22414379 |
| 19 rs34643838            | 22608433 T | 0.2866 | 6.21E-11 | chr:19:22414379 |
| 19 rs10410914            | 22192884 A | 0.2651 | 7.29E-11 | chr:19:22414379 |
| 19 rs8105991             | 22193131 C | 0.2651 | 7.29E-11 | chr:19:22414379 |
| 19 rs2666441             | 22139230 A | 0.2726 | 7.81E-11 | chr:19:22414379 |
| 19 rs10415826            | 22248317 T | 12.73  | 8.22E-11 | chr:19:22414379 |
| 19 rs10415080            | 22150937 C | 0.2661 | 8.63E-11 | chr:19:22414379 |
| 19 rs10425763            | 22155918 C | 0.2688 | 8.98E-11 | chr:19:22414379 |
| 19 rs10426971            | 22158167 A | 0.2688 | 8.98E-11 | chr:19:22414379 |
| 19 rs2214298             | 22163606 C | 0.2688 | 8.98E-11 | chr:19:22414379 |
| 19 rs74776957            | 22172805 G | 0.2688 | 8.98E-11 | chr:19:22414379 |
| 19 rs75181699            | 22172720 G | 0.2688 | 8.98E-11 | chr:19:22414379 |
| 19 rs10404998            | 22608374 C | 0.2946 | 9.34E-11 | chr:19:22414379 |
| 19 rs10405295            | 22608556 C | 0.2946 | 9.34E-11 | chr:19:22414379 |
| 19 rs10416278            | 22607031 T | 0.2946 | 9.34E-11 | chr:19:22414379 |
| 19 rs8112041             | 22604565 T | 0.2946 | 9.34E-11 | chr:19:22414379 |
| 19 rs1624967             | 22634476 T | 4.906  | 1.05E-10 | chr:19:22414379 |
| 19 rs1849007             | 22142930 T | 0.2711 | 1.28E-10 | chr:19:22414379 |
| 19 rs2136888             | 22134791 G | 0.2711 | 1.28E-10 | chr:19:22414379 |
| 19 rs2175367             | 22125889 G | 0.2711 | 1.28E-10 | chr:19:22414379 |
| 19 rs2666451             | 22130481 C | 0.2711 | 1.28E-10 | chr:19:22414379 |
| 19 rs7251413             | 22609759 T | 0.3018 | 1.35E-10 | chr:19:22414379 |
| 19 rs10854064            | 22206129 T | 0.2743 | 1.75E-10 | chr:19:22414379 |
| 19 rs408124              | 22225337 G | 0.2743 | 1.75E-10 | chr:19:22414379 |
| 19 rs441017              | 22214122 C | 0.2743 | 1.75E-10 | chr:19:22414379 |
| 19 rs10408585            | 22613247 A | 5.322  | 1.91E-10 | chr:19:22414379 |
| 19 rs931608              | 22614122 A | 5.322  | 1.91E-10 | chr:19:22414379 |
| 19 rs2168492;rs568148804 | 22425645 T | 0.207  | 1.94E-10 | chr:19:22414379 |
| 19 rs11669179            | 22604729 G | 0.3039 | 2.18E-10 | chr:19:22414379 |
| 19 rs11669270            | 22604816 A | 0.3039 | 2.18E-10 | chr:19:22414379 |
| 19 rs11669353            | 22605103 C | 0.3039 | 2.18E-10 | chr:19:22414379 |
| 19 rs11879678            | 22607312 A | 0.3039 | 2.18E-10 | chr:19:22414379 |
| 19 rs11879697            | 22607206 A | 0.3039 | 2.18E-10 | chr:19:22414379 |
| 19 rs34787405            | 22608148 A | 0.3039 | 2.18E-10 | chr:19:22414379 |
| 19 rs1912572             | 22140878 C | 0.2786 | 2.76E-10 | chr:19:22414379 |
| 19 rs11669356            | 22605120 T | 0.3075 | 2.76E-10 | chr:19:22414379 |
| 19 rs1654509             | 22219163 T | 0.2789 | 2.82E-10 | chr:19:22414379 |
| 19 rs34187872            | 22607883 A | 0.307  | 2.84E-10 | chr:19:22414379 |
| 19 rs8101947             | 22605640 T | 0.3074 | 3.10E-10 | chr:19:22414379 |

|               |            |        |          |                 |
|---------------|------------|--------|----------|-----------------|
| 19 rs2664067  | 22638066 C | 0.3175 | 3.40E-10 | chr:19:22414379 |
| 19 rs55992911 | 22397853 C | 29.82  | 3.66E-10 | chr:19:22414379 |
| 19 rs1230297  | 22622753 G | 4.911  | 3.88E-10 | chr:19:22414379 |
| 19 rs56144642 | 22421516 C | 0.2493 | 4.03E-10 | chr:19:22414379 |
| 19 rs10424932 | 22194604 T | 0.2741 | 4.53E-10 | chr:19:22414379 |
| 19 rs17470104 | 22424418 A | 0.2539 | 5.18E-10 | chr:19:22414379 |
| 19 rs10401167 | 22291942 A | 12.64  | 5.85E-10 | chr:19:22414379 |
| 19 rs10418804 | 22273015 C | 12.64  | 5.85E-10 | chr:19:22414379 |
| 19 rs10423457 | 22279267 C | 12.64  | 5.85E-10 | chr:19:22414379 |
| 19 rs10424447 | 22274042 G | 12.64  | 5.85E-10 | chr:19:22414379 |
| 19 rs2043319  | 22274595 G | 12.64  | 5.85E-10 | chr:19:22414379 |
| 19 rs28374572 | 22276478 C | 12.64  | 5.85E-10 | chr:19:22414379 |
| 19 rs62111040 | 22287511 A | 12.64  | 5.85E-10 | chr:19:22414379 |
| 19 rs6511321  | 22270068 G | 12.64  | 5.85E-10 | chr:19:22414379 |
| 19 rs6511328  | 22286979 A | 12.64  | 5.85E-10 | chr:19:22414379 |
| 19 rs8100768  | 22270468 C | 12.64  | 5.85E-10 | chr:19:22414379 |
| 19 rs2522097  | 22123140 C | 0.2928 | 6.99E-10 | chr:19:22414379 |
| 19 rs2666458  | 22123138 A | 0.2928 | 6.99E-10 | chr:19:22414379 |
| 19 rs7259807  | 22291476 G | 12.33  | 8.56E-10 | chr:19:22414379 |
| 19 rs11085534 | 22613229 T | 4.552  | 9.85E-10 | chr:19:22414379 |
| 19 rs10417916 | 22272615 C | 10.08  | 9.88E-10 | chr:19:22414379 |
| 19 rs10425828 | 22283077 G | 10.08  | 9.88E-10 | chr:19:22414379 |
| 19 rs10426159 | 22267324 A | 10.08  | 9.88E-10 | chr:19:22414379 |
| 19 rs1968446  | 22279047 C | 10.08  | 9.88E-10 | chr:19:22414379 |
| 19 rs28547927 | 22277137 A | 10.08  | 9.88E-10 | chr:19:22414379 |
| 19 rs28600030 | 22268443 A | 10.08  | 9.88E-10 | chr:19:22414379 |
| 19 rs7256462  | 22281993 C | 10.08  | 9.88E-10 | chr:19:22414379 |
| 19 rs8103279  | 22284340 G | 10.08  | 9.88E-10 | chr:19:22414379 |
| 19 rs8103374  | 22284319 T | 10.08  | 9.88E-10 | chr:19:22414379 |
| 19 rs8106762  | 22284736 T | 10.08  | 9.88E-10 | chr:19:22414379 |
| 19 rs10401922 | 22253252 A | 12.15  | 9.94E-10 | chr:19:22414379 |
| 19 rs10404669 | 22241218 C | 12.15  | 9.94E-10 | chr:19:22414379 |
| 19 rs10405613 | 22244772 T | 12.15  | 9.94E-10 | chr:19:22414379 |
| 19 rs10405673 | 22244890 G | 12.15  | 9.94E-10 | chr:19:22414379 |
| 19 rs10406119 | 22245009 A | 12.15  | 9.94E-10 | chr:19:22414379 |
| 19 rs10406485 | 22245002 T | 12.15  | 9.94E-10 | chr:19:22414379 |
| 19 rs10406551 | 22244520 A | 12.15  | 9.94E-10 | chr:19:22414379 |
| 19 rs10406553 | 22237801 T | 12.15  | 9.94E-10 | chr:19:22414379 |
| 19 rs10406653 | 22238023 T | 12.15  | 9.94E-10 | chr:19:22414379 |
| 19 rs10407173 | 22246663 T | 12.15  | 9.94E-10 | chr:19:22414379 |
| 19 rs10407250 | 22238151 A | 12.15  | 9.94E-10 | chr:19:22414379 |
| 19 rs10408150 | 22245225 C | 12.15  | 9.94E-10 | chr:19:22414379 |
| 19 rs10412953 | 22238482 G | 12.15  | 9.94E-10 | chr:19:22414379 |

|               |            |       |          |                 |
|---------------|------------|-------|----------|-----------------|
| 19 rs10413784 | 22246191 G | 12.15 | 9.94E-10 | chr:19:22414379 |
| 19 rs10414685 | 22247749 T | 12.15 | 9.94E-10 | chr:19:22414379 |
| 19 rs10414861 | 22247761 G | 12.15 | 9.94E-10 | chr:19:22414379 |
| 19 rs10415794 | 22248221 T | 12.15 | 9.94E-10 | chr:19:22414379 |
| 19 rs10415930 | 22248088 A | 12.15 | 9.94E-10 | chr:19:22414379 |
| 19 rs10417285 | 22248184 C | 12.15 | 9.94E-10 | chr:19:22414379 |
| 19 rs10419142 | 22252262 T | 12.15 | 9.94E-10 | chr:19:22414379 |
| 19 rs10419184 | 22252342 G | 12.15 | 9.94E-10 | chr:19:22414379 |
| 19 rs10420019 | 22251905 A | 12.15 | 9.94E-10 | chr:19:22414379 |
| 19 rs10420898 | 22252331 C | 12.15 | 9.94E-10 | chr:19:22414379 |
| 19 rs10422289 | 22256060 T | 12.15 | 9.94E-10 | chr:19:22414379 |
| 19 rs10423114 | 22249289 G | 12.15 | 9.94E-10 | chr:19:22414379 |
| 19 rs10423522 | 22243448 T | 12.15 | 9.94E-10 | chr:19:22414379 |
| 19 rs10423881 | 22243422 A | 12.15 | 9.94E-10 | chr:19:22414379 |
| 19 rs2043316  | 22251204 T | 12.15 | 9.94E-10 | chr:19:22414379 |
| 19 rs2043317  | 22251096 C | 12.15 | 9.94E-10 | chr:19:22414379 |
| 19 rs2163835  | 22242679 T | 12.15 | 9.94E-10 | chr:19:22414379 |
| 19 rs2163836  | 22242277 T | 12.15 | 9.94E-10 | chr:19:22414379 |
| 19 rs2163837  | 22242236 A | 12.15 | 9.94E-10 | chr:19:22414379 |
| 19 rs2359833  | 22242221 G | 12.15 | 9.94E-10 | chr:19:22414379 |
| 19 rs28822164 | 22245108 A | 12.15 | 9.94E-10 | chr:19:22414379 |
| 19 rs28857211 | 22243104 C | 12.15 | 9.94E-10 | chr:19:22414379 |
| 19 rs28894669 | 22243264 A | 12.15 | 9.94E-10 | chr:19:22414379 |
| 19 rs4257328  | 22240090 A | 12.15 | 9.94E-10 | chr:19:22414379 |
| 19 rs4510150  | 22239669 G | 12.15 | 9.94E-10 | chr:19:22414379 |
| 19 rs4542784  | 22239751 A | 12.15 | 9.94E-10 | chr:19:22414379 |
| 19 rs6511315  | 22236503 A | 12.15 | 9.94E-10 | chr:19:22414379 |
| 19 rs6511316  | 22237629 C | 12.15 | 9.94E-10 | chr:19:22414379 |
| 19 rs7247147  | 22249858 C | 12.15 | 9.94E-10 | chr:19:22414379 |
| 19 rs7247228  | 22250136 T | 12.15 | 9.94E-10 | chr:19:22414379 |
| 19 rs7248305  | 22250271 A | 12.15 | 9.94E-10 | chr:19:22414379 |
| 19 rs7250852  | 22250510 A | 12.15 | 9.94E-10 | chr:19:22414379 |
| 19 rs7250905  | 22250743 T | 12.15 | 9.94E-10 | chr:19:22414379 |
| 19 rs7251660  | 22250614 C | 12.15 | 9.94E-10 | chr:19:22414379 |
| 19 rs7251884  | 22245530 T | 12.15 | 9.94E-10 | chr:19:22414379 |
| 19 rs7252023  | 22245646 G | 12.15 | 9.94E-10 | chr:19:22414379 |
| 19 rs7252550  | 22246017 T | 12.15 | 9.94E-10 | chr:19:22414379 |
| 19 rs7259971  | 22237319 G | 12.15 | 9.94E-10 | chr:19:22414379 |
| 19 rs8103518  | 22246952 C | 12.15 | 9.94E-10 | chr:19:22414379 |
| 19 rs8104144  | 22246913 C | 12.15 | 9.94E-10 | chr:19:22414379 |
| 19 rs8104630  | 22247277 C | 12.15 | 9.94E-10 | chr:19:22414379 |
| 19 rs8108651  | 22251464 G | 12.15 | 9.94E-10 | chr:19:22414379 |
| 19 rs8108976  | 22251701 A | 12.15 | 9.94E-10 | chr:19:22414379 |



|                |            |        |          |                 |
|----------------|------------|--------|----------|-----------------|
| 19 rs9653142   | 22249596 G | 12.15  | 9.94E-10 | chr:19:22414379 |
| 19 rs9653157   | 22249490 C | 12.15  | 9.94E-10 | chr:19:22414379 |
| 19 rs9973249   | 22242160 A | 12.15  | 9.94E-10 | chr:19:22414379 |
| 19 rs13344143  | 22531045 T | 4.762  | 1.02E-09 | chr:19:22414379 |
| 19 rs28635943  | 22268712 T | 9.977  | 1.04E-09 | chr:19:22414379 |
| 19 rs17701615  | 22102137 G | 0.2798 | 1.05E-09 | chr:19:22414379 |
| 19 rs11671130  | 22329455 C | 0.2586 | 1.13E-09 | chr:19:22414379 |
| 19 rs11672659  | 22394767 T | 0.2586 | 1.13E-09 | chr:19:22414379 |
| 19 rs149070103 | 22340413 G | 0.2586 | 1.13E-09 | chr:19:22414379 |
| 19 rs1852420   | 22361902 T | 0.2586 | 1.13E-09 | chr:19:22414379 |
| 19 rs4390714   | 22369043 A | 0.2586 | 1.13E-09 | chr:19:22414379 |
| 19 rs4578792   | 22368982 G | 0.2586 | 1.13E-09 | chr:19:22414379 |
| 19 rs4602157   | 22339036 C | 0.2586 | 1.13E-09 | chr:19:22414379 |
| 19 rs4616412   | 22339005 G | 0.2586 | 1.13E-09 | chr:19:22414379 |
| 19 rs4932750   | 22333226 T | 0.2586 | 1.13E-09 | chr:19:22414379 |
| 19 rs76490109  | 22330225 A | 0.2586 | 1.13E-09 | chr:19:22414379 |
| 19 rs8110969   | 22240222 T | 13.82  | 1.15E-09 | chr:19:22414379 |
| 19 rs62112369  | 22313901 T | 13.04  | 1.17E-09 | chr:19:22414379 |
| 19 rs62119972  | 22425682 C | 10.59  | 1.23E-09 | chr:19:22414379 |
| 19 rs11668081  | 22425615 A | 0.2684 | 1.35E-09 | chr:19:22414379 |
| 19 rs8111854   | 22240213 C | 11.96  | 1.35E-09 | chr:19:22414379 |
| 19 rs4123726   | 22419677 T | 0.2642 | 1.35E-09 | chr:19:22414379 |
| 19 rs11085533  | 22612880 T | 4.463  | 1.50E-09 | chr:19:22414379 |
| 19 rs1830174   | 22344502 A | 0.2641 | 1.67E-09 | chr:19:22414379 |
| 19 rs4381717   | 22338981 A | 0.2649 | 1.70E-09 | chr:19:22414379 |
| 19 rs10411943  | 22259782 G | 9.688  | 1.73E-09 | chr:19:22414379 |
| 19 rs10420042  | 22251926 A | 9.688  | 1.73E-09 | chr:19:22414379 |
| 19 rs2043315   | 22252823 C | 9.688  | 1.73E-09 | chr:19:22414379 |
| 19 rs62110990  | 22260441 T | 9.688  | 1.73E-09 | chr:19:22414379 |
| 19 rs6511314   | 22236395 A | 9.688  | 1.73E-09 | chr:19:22414379 |
| 19 rs7247041   | 22249790 A | 9.688  | 1.73E-09 | chr:19:22414379 |
| 19 rs7249591   | 22245345 C | 9.688  | 1.73E-09 | chr:19:22414379 |
| 19 rs7253053   | 22245685 C | 9.688  | 1.73E-09 | chr:19:22414379 |
| 19 rs8110047   | 22239502 G | 9.688  | 1.73E-09 | chr:19:22414379 |
| 19 rs8110841   | 22239436 C | 9.688  | 1.73E-09 | chr:19:22414379 |
| 19 rs12609320  | 22390462 C | 0.2656 | 1.85E-09 | chr:19:22414379 |
| 19 rs1609037   | 22380261 C | 0.2656 | 1.85E-09 | chr:19:22414379 |
| 19 rs4932962   | 22372000 T | 0.2656 | 1.85E-09 | chr:19:22414379 |
| 19 rs6511327   | 22286899 A | 13.14  | 1.90E-09 | chr:19:22414379 |
| 19 rs11671580  | 22326439 A | 0.2649 | 1.95E-09 | chr:19:22414379 |
| 19 rs10411275  | 22259469 G | 9.572  | 2.04E-09 | chr:19:22414379 |
| 19 rs1230296   | 22622638 G | 4.216  | 2.09E-09 | chr:19:22414379 |
| 19 rs74416263  | 22342767 T | 0.2681 | 2.54E-09 | chr:19:22414379 |

|                |            |        |          |                 |
|----------------|------------|--------|----------|-----------------|
| 19 rs10405452  | 22529868 T | 3.966  | 3.03E-09 | chr:19:22414379 |
| 19 rs16999012  | 22522950 G | 3.925  | 3.04E-09 | chr:19:22414379 |
| 19 rs11666326  | 22377109 A | 0.2683 | 3.25E-09 | chr:19:22414379 |
| 19 rs11672740  | 22394859 A | 0.2683 | 3.25E-09 | chr:19:22414379 |
| 19 rs4372816   | 22328376 G | 0.2683 | 3.25E-09 | chr:19:22414379 |
| 19 rs1230294   | 22620820 T | 4.122  | 3.40E-09 | chr:19:22414379 |
| 19 rs1230298   | 22622846 C | 4.122  | 3.40E-09 | chr:19:22414379 |
| 19 rs111790701 | 22438463 T | 17.71  | 3.87E-09 | chr:19:22414379 |
| 19 rs4123729   | 22418142 C | 0.2748 | 3.98E-09 | chr:19:22414379 |
| 19 rs55758909  | 22420558 A | 0.2748 | 3.98E-09 | chr:19:22414379 |
| 19 rs7246007   | 22240596 C | 14.66  | 4.43E-09 | chr:19:22414379 |
| 19 rs1230295   | 22621678 C | 0.361  | 4.56E-09 | chr:19:22414379 |
| 19 rs5827519   | 22280532 G | 10.94  | 4.74E-09 | chr:19:22414379 |
| 19 rs1976314   | 22608853 T | 0.3463 | 4.77E-09 | chr:19:22414379 |
| 19 rs17554694  | 22317148 A | 23.03  | 4.93E-09 | chr:19:22414379 |
| 19 rs7247584   | 22529565 T | 3.834  | 5.06E-09 | chr:19:22414379 |
| 19 rs78646027  | 22257410 T | 10.94  | 5.12E-09 | chr:19:22414379 |
| 19 rs1118049   | 22642131 T | 0.367  | 5.34E-09 | chr:19:22414379 |
| 19 rs1230304   | 22641598 C | 0.367  | 5.34E-09 | chr:19:22414379 |
| 19 rs1230305   | 22641917 C | 0.367  | 5.34E-09 | chr:19:22414379 |
| 19 rs1230307   | 22642684 T | 0.367  | 5.34E-09 | chr:19:22414379 |
| 19 rs1230308   | 22642916 C | 0.367  | 5.34E-09 | chr:19:22414379 |
| 19 rs11667657  | 22393601 C | 0.2756 | 5.36E-09 | chr:19:22414379 |
| 19 rs12977311  | 22606001 A | 0.3055 | 5.45E-09 | chr:19:22414379 |
| 19 rs62112373  | 22319825 A | 22.83  | 5.52E-09 | chr:19:22414379 |
| 19 rs2885037   | 22606672 A | 0.3107 | 6.15E-09 | chr:19:22414379 |
| 19 rs555185638 | 22290846 C | 13.82  | 6.52E-09 | chr:19:22414379 |
| 19 rs66562925  | 22158713 A | 4.171  | 6.74E-09 | chr:19:22414379 |
| 19 rs12982366  | 22449420 G | 0.2712 | 6.89E-09 | chr:19:22414379 |
| 19 rs2957849   | 22583761 A | 0.3337 | 7.58E-09 | chr:19:22414379 |
| 19 rs111684505 | 22401097 G | 0.2825 | 8.45E-09 | chr:19:22414379 |
| 19 rs2645164   | 22638080 T | 0.3716 | 9.62E-09 | chr:19:22414379 |
| 19 rs2957814   | 22637580 T | 0.375  | 1.33E-08 | chr:19:22414379 |
| 19 rs61616269  | 22397866 A | 3.977  | 1.82E-08 | chr:19:22414379 |
| 19 rs12986319  | 22364233 T | 0.2763 | 2.06E-08 | chr:19:22414379 |
| 19 rs11878866  | 22144367 C | 15.84  | 2.12E-08 | chr:19:22414379 |
| 19 rs12609595  | 22614478 T | 0.3352 | 2.56E-08 | chr:19:22414379 |
| 19 rs7260331   | 22291771 T | 30.02  | 2.65E-08 | chr:19:22414379 |
| 19 rs62112374  | 22329197 T | 59.48  | 2.90E-08 | chr:19:22414379 |
| 19 rs62112416  | 22343674 C | 59.48  | 2.90E-08 | chr:19:22414379 |
| 19 rs3867185   | 22413097 T | 58.79  | 3.13E-08 | chr:19:22414379 |
| 19 rs60866819  | 22334909 C | 58.79  | 3.13E-08 | chr:19:22414379 |
| 19 rs62112420  | 22351653 G | 58.79  | 3.13E-08 | chr:19:22414379 |

|                |            |        |          |                 |
|----------------|------------|--------|----------|-----------------|
| 19 rs62112447  | 22379833 G | 58.79  | 3.13E-08 | chr:19:22414379 |
| 19 rs62118346  | 22396430 A | 58.79  | 3.13E-08 | chr:19:22414379 |
| 19 rs62119969  | 22405446 C | 58.79  | 3.13E-08 | chr:19:22414379 |
| 19 rs12976555  | 22434811 T | 0.2842 | 3.26E-08 | chr:19:22414379 |
| 19 rs58950778  | 22432275 T | 57.87  | 3.57E-08 | chr:19:22414379 |
| 19 rs12151358  | 22282608 A | 19.26  | 3.68E-08 | chr:19:22414379 |
| 19 rs145591522 | 22282893 G | 19.26  | 3.68E-08 | chr:19:22414379 |
| 19 rs16998834  | 22267037 C | 19.26  | 3.68E-08 | chr:19:22414379 |
| 19 rs1975169   | 22292098 A | 19.26  | 3.68E-08 | chr:19:22414379 |
| 19 rs62110993  | 22268260 A | 19.26  | 3.68E-08 | chr:19:22414379 |
| 19 rs62111027  | 22269019 C | 19.26  | 3.68E-08 | chr:19:22414379 |
| 19 rs62111028  | 22272397 T | 19.26  | 3.68E-08 | chr:19:22414379 |
| 19 rs62111029  | 22276601 A | 19.26  | 3.68E-08 | chr:19:22414379 |
| 19 rs62111030  | 22279375 A | 19.26  | 3.68E-08 | chr:19:22414379 |
| 19 rs62111032  | 22281349 G | 19.26  | 3.68E-08 | chr:19:22414379 |
| 19 rs62111033  | 22283395 A | 19.26  | 3.68E-08 | chr:19:22414379 |
| 19 rs62111034  | 22284720 C | 19.26  | 3.68E-08 | chr:19:22414379 |
| 19 rs62111037  | 22286563 T | 19.26  | 3.68E-08 | chr:19:22414379 |
| 19 rs62111039  | 22287336 G | 19.26  | 3.68E-08 | chr:19:22414379 |
| 19 rs62112362  | 22293113 G | 19.26  | 3.68E-08 | chr:19:22414379 |
| 19 rs62112364  | 22294903 A | 19.26  | 3.68E-08 | chr:19:22414379 |
| 19 rs7252547   | 22305481 C | 19.26  | 3.68E-08 | chr:19:22414379 |
| 19 rs7254050   | 22286741 A | 19.26  | 3.68E-08 | chr:19:22414379 |
| 19 rs959908    | 22281893 C | 19.26  | 3.68E-08 | chr:19:22414379 |
| 19 rs8104559   | 22205167 C | 10.5   | 3.68E-08 | chr:19:22414379 |
| 19 rs117638181 | 22163014 G | 19.18  | 4.76E-08 | chr:19:22414379 |
| 19 rs11881563  | 22144992 T | 19.18  | 4.76E-08 | chr:19:22414379 |
| 19 rs11882234  | 22145727 T | 19.18  | 4.76E-08 | chr:19:22414379 |
| 19 rs1849004   | 22142455 C | 19.18  | 4.76E-08 | chr:19:22414379 |
| 19 rs2359820   | 22208114 T | 19.18  | 4.76E-08 | chr:19:22414379 |
| 19 rs57912102  | 22136043 C | 19.18  | 4.76E-08 | chr:19:22414379 |
| 19 rs62112865  | 22172333 T | 19.18  | 4.76E-08 | chr:19:22414379 |
| 19 rs62112870  | 22175976 A | 19.18  | 4.76E-08 | chr:19:22414379 |
| 19 rs62112871  | 22185295 C | 19.18  | 4.76E-08 | chr:19:22414379 |
| 19 rs62112872  | 22192425 C | 19.18  | 4.76E-08 | chr:19:22414379 |
| 19 rs75167249  | 22128655 T | 19.18  | 4.76E-08 | chr:19:22414379 |
| 19 rs8100042   | 22127841 A | 19.18  | 4.76E-08 | chr:19:22414379 |
| 19 rs8113460   | 22128006 T | 19.18  | 4.76E-08 | chr:19:22414379 |
| 19 rs116220423 | 22237041 A | 18.63  | 5.31E-08 | chr:19:22414379 |
| 19 rs62121863  | 22504673 A | 12.02  | 6.79E-08 | chr:19:22414379 |
| 19 rs62120019  | 22493958 T | 10.17  | 8.35E-08 | chr:19:22414379 |
| 19 rs11881224  | 22220340 A | 25.75  | 1.21E-07 | chr:19:22414379 |
| 19 rs12150930  | 22223687 C | 25.75  | 1.21E-07 | chr:19:22414379 |

|                |            |        |          |                 |
|----------------|------------|--------|----------|-----------------|
| 19 rs17450788  | 22224755 C | 25.75  | 1.21E-07 | chr:19:22414379 |
| 19 rs2078180   | 22209846 A | 25.75  | 1.21E-07 | chr:19:22414379 |
| 19 rs60548522  | 22214874 A | 25.75  | 1.21E-07 | chr:19:22414379 |
| 19 rs62112907  | 22209569 G | 25.75  | 1.21E-07 | chr:19:22414379 |
| 19 rs62112908  | 22213956 G | 25.75  | 1.21E-07 | chr:19:22414379 |
| 19 rs62112913  | 22221067 G | 25.75  | 1.21E-07 | chr:19:22414379 |
| 19 rs62112915  | 22223179 A | 25.75  | 1.21E-07 | chr:19:22414379 |
| 19 rs6511313   | 22215905 A | 25.75  | 1.21E-07 | chr:19:22414379 |
| 19 rs8105895   | 22215457 T | 25.75  | 1.21E-07 | chr:19:22414379 |
| 19 rs8112751   | 22222458 T | 25.75  | 1.21E-07 | chr:19:22414379 |
| 19 rs369217217 | 22289248 C | 25.19  | 1.22E-07 | chr:19:22414379 |
| 19 rs62111036  | 22286451 G | 8.712  | 1.40E-07 | chr:19:22414379 |
| 19 rs76584077  | 22286457 C | 8.712  | 1.40E-07 | chr:19:22414379 |
| 19 rs59020942  | 22427750 T | 0.3418 | 1.66E-07 | chr:19:22414379 |
| 19 rs59574273  | 22427752 T | 0.3418 | 1.66E-07 | chr:19:22414379 |
| 19 rs111575233 | 22430482 A | 0.3487 | 2.04E-07 | chr:19:22414379 |
| 19 rs55784860  | 22431132 C | 0.3487 | 2.04E-07 | chr:19:22414379 |
| 19 rs148710998 | 22577980 G | 3.419  | 2.53E-07 | chr:19:22414379 |
| 19 rs550066332 | 22577974 C | 3.419  | 2.53E-07 | chr:19:22414379 |
| 19 rs60604817  | 22427565 G | 0.3482 | 2.56E-07 | chr:19:22414379 |
| 19 rs11561612  | 22432845 A | 0.3462 | 3.15E-07 | chr:19:22414379 |
| 19 rs28792372  | 22096971 C | 0.3683 | 3.90E-07 | chr:19:22414379 |
| 19 rs4932761   | 22546375 A | 0.3272 | 4.55E-07 | chr:19:22414379 |
| 19 rs11085516  | 22431751 T | 0.3504 | 4.62E-07 | chr:19:22414379 |
| 19 rs62118563  | 22529531 A | 6.722  | 4.66E-07 | chr:19:22414379 |
| 19 rs79005568  | 22288069 G | 40.11  | 5.16E-07 | chr:19:22414379 |
| 19 rs117976739 | 22445319 T | 8.666  | 5.57E-07 | chr:19:22414379 |
| 19 rs113023530 | 22261617 A | 0.351  | 5.81E-07 | chr:19:22414379 |
| 19 rs3813590   | 22321273 T | 0.3522 | 6.34E-07 | chr:19:22414379 |
| 19 rs3813592   | 22321245 G | 0.3522 | 6.34E-07 | chr:19:22414379 |
| 19 rs12104137  | 22659822 G | 0.4335 | 6.43E-07 | chr:19:22414379 |
| 19 rs10411905  | 22427035 G | 0.392  | 6.88E-07 | chr:19:22414379 |
| 19 rs1526884   | 22303651 G | 0.3571 | 7.14E-07 | chr:19:22414379 |
| 19 rs410794    | 22226159 A | 0.3545 | 7.44E-07 | chr:19:22414379 |
| 19 rs79846980  | 22141343 C | 38.34  | 7.59E-07 | chr:19:22414379 |
| 19 rs12610034  | 22314528 A | 0.3588 | 7.69E-07 | chr:19:22414379 |
| 19 rs8107022   | 22618698 T | 2.966  | 1.03E-06 | chr:19:22414379 |
| 19 rs111352604 | 22314567 G | 0.3654 | 1.17E-06 | chr:19:22414379 |
| 19 rs11669110  | 22296485 G | 0.3654 | 1.17E-06 | chr:19:22414379 |
| 19 rs11673195  | 22313814 C | 0.3654 | 1.17E-06 | chr:19:22414379 |
| 19 rs149975047 | 22287938 A | 0.3654 | 1.17E-06 | chr:19:22414379 |
| 19 rs191067451 | 22288201 A | 0.3654 | 1.17E-06 | chr:19:22414379 |
| 19 rs367972720 | 22291197 C | 0.3654 | 1.17E-06 | chr:19:22414379 |

|                |            |        |          |                 |
|----------------|------------|--------|----------|-----------------|
| 19 rs372140746 | 22291198 C | 0.3654 | 1.17E-06 | chr:19:22414379 |
| 19 rs372252339 | 22291126 T | 0.3654 | 1.17E-06 | chr:19:22414379 |
| 19 rs4932957   | 22304745 T | 0.3654 | 1.17E-06 | chr:19:22414379 |
| 19 rs56207853  | 22292357 T | 0.3654 | 1.17E-06 | chr:19:22414379 |
| 19 rs61268244  | 22310130 T | 0.3654 | 1.17E-06 | chr:19:22414379 |
| 19 rs72481609  | 22296819 C | 0.3654 | 1.17E-06 | chr:19:22414379 |
| 19 rs73019900  | 22286680 A | 0.3654 | 1.17E-06 | chr:19:22414379 |
| 19 rs73021832  | 22316144 C | 0.3654 | 1.17E-06 | chr:19:22414379 |
| 19 rs62112863  | 22164515 G | 35.93  | 1.19E-06 | chr:19:22414379 |
| 19 rs1230293   | 22620302 T | 2.924  | 1.58E-06 | chr:19:22414379 |
| 19 rs17459246  | 22278121 C | 0.3673 | 1.61E-06 | chr:19:22414379 |
| 19 rs55886600  | 22276437 A | 0.3673 | 1.61E-06 | chr:19:22414379 |
| 19 rs56073035  | 22276298 G | 0.3673 | 1.61E-06 | chr:19:22414379 |
| 19 rs73019889  | 22277826 G | 0.3673 | 1.61E-06 | chr:19:22414379 |
| 19 rs12610367  | 22320848 T | 0.3775 | 1.66E-06 | chr:19:22414379 |
| 19 rs183543741 | 22289845 T | 0.3774 | 1.69E-06 | chr:19:22414379 |
| 19 rs193152926 | 22289796 A | 0.3774 | 1.69E-06 | chr:19:22414379 |
| 19 rs375012052 | 22289851 A | 0.3774 | 1.69E-06 | chr:19:22414379 |
| 19 rs199643795 | 22291325 A | 0.3723 | 1.72E-06 | chr:19:22414379 |
| 19 rs10426665  | 22428809 G | 0.3999 | 2.10E-06 | chr:19:22414379 |
| 19 rs283161    | 22456131 A | 2.72   | 2.22E-06 | chr:19:22414379 |
| 19 rs7246504   | 22532831 G | 5.04   | 2.32E-06 | chr:19:22414379 |
| 19 rs4932949   | 22238666 A | 0.38   | 2.45E-06 | chr:19:22414379 |
| 19 rs11671180  | 22184030 C | 0.304  | 2.54E-06 | chr:19:22414379 |
| 19 rs12609368  | 22263996 C | 0.3756 | 2.58E-06 | chr:19:22414379 |
| 19 rs1978719   | 22266101 A | 0.3756 | 2.58E-06 | chr:19:22414379 |
| 19 rs56369285  | 22267185 C | 0.3756 | 2.58E-06 | chr:19:22414379 |
| 19 rs283136    | 22466736 A | 2.633  | 2.65E-06 | chr:19:22414379 |
| 19 rs808371    | 22471055 T | 2.633  | 2.65E-06 | chr:19:22414379 |
| 19 rs12608810  | 22342002 A | 0.314  | 3.13E-06 | chr:19:22414379 |
| 19 rs4932746   | 22269847 T | 0.3784 | 3.44E-06 | chr:19:22414379 |
| 19 rs283137    | 22464916 G | 2.608  | 3.66E-06 | chr:19:22414379 |
| 19 rs11667209  | 22259467 G | 0.3877 | 3.68E-06 | chr:19:22414379 |
| 19 rs11667274  | 22259666 G | 0.3877 | 3.68E-06 | chr:19:22414379 |
| 19 rs149619063 | 22248189 G | 0.3877 | 3.68E-06 | chr:19:22414379 |
| 19 rs4932950   | 22243488 G | 0.3877 | 3.68E-06 | chr:19:22414379 |
| 19 rs4932952   | 22246788 A | 0.3877 | 3.68E-06 | chr:19:22414379 |
| 19 rs55735642  | 22241176 T | 0.3877 | 3.68E-06 | chr:19:22414379 |
| 19 rs73019838  | 22247732 A | 0.3877 | 3.68E-06 | chr:19:22414379 |
| 19 rs148747862 | 22177981 C | 6.038  | 3.70E-06 | chr:19:22414379 |
| 19 rs55728714  | 22262899 G | 0.3825 | 3.71E-06 | chr:19:22414379 |
| 19 rs112205850 | 22261876 A | 0.3835 | 3.87E-06 | chr:19:22414379 |
| 19 rs1091172   | 22432373 C | 0.4103 | 4.38E-06 | chr:19:22414379 |

|                |            |        |          |                 |
|----------------|------------|--------|----------|-----------------|
| 19 rs145534553 | 22459643 T | 6.223  | 4.62E-06 | chr:19:22414379 |
| 19 rs1018912   | 22156585 G | 0.3922 | 4.69E-06 | chr:19:22414379 |
| 19 rs142623791 | 22173025 A | 0.3922 | 4.69E-06 | chr:19:22414379 |
| 19 rs2017521   | 22126138 T | 0.3922 | 4.69E-06 | chr:19:22414379 |
| 19 rs2175366   | 22128279 C | 0.3922 | 4.69E-06 | chr:19:22414379 |
| 19 rs2522104   | 22140849 T | 0.3922 | 4.69E-06 | chr:19:22414379 |
| 19 rs2666447   | 22132868 T | 0.3922 | 4.69E-06 | chr:19:22414379 |
| 19 rs4290587   | 22164646 A | 0.3922 | 4.69E-06 | chr:19:22414379 |
| 19 rs6511309   | 22174292 T | 0.3922 | 4.69E-06 | chr:19:22414379 |
| 19 rs765527    | 22129555 C | 0.3922 | 4.69E-06 | chr:19:22414379 |
| 19 rs9636187   | 22173370 T | 0.3922 | 4.69E-06 | chr:19:22414379 |
| 19 rs183691981 | 22291525 C | 0.3995 | 5.54E-06 | chr:19:22414379 |
| 19 rs73019842  | 22249909 G | 0.4011 | 5.96E-06 | chr:19:22414379 |
| 19 rs73019844  | 22249925 C | 0.4011 | 5.96E-06 | chr:19:22414379 |
| 19 rs1989120   | 22205528 T | 0.4037 | 6.11E-06 | chr:19:22414379 |
| 19 rs10420483  | 22190378 A | 0.3945 | 6.17E-06 | chr:19:22414379 |
| 19 rs11085509  | 22204573 T | 0.3945 | 6.17E-06 | chr:19:22414379 |
| 19 rs1654508   | 22219276 A | 0.3945 | 6.17E-06 | chr:19:22414379 |
| 19 rs2017962   | 22208751 T | 0.3945 | 6.17E-06 | chr:19:22414379 |
| 19 rs2078089   | 22209753 A | 0.3945 | 6.17E-06 | chr:19:22414379 |
| 19 rs2106869   | 22184693 C | 0.3945 | 6.17E-06 | chr:19:22414379 |
| 19 rs2188969   | 22202783 A | 0.3945 | 6.17E-06 | chr:19:22414379 |
| 19 rs2188970   | 22200382 G | 0.3945 | 6.17E-06 | chr:19:22414379 |
| 19 rs2359821   | 22208314 C | 0.3945 | 6.17E-06 | chr:19:22414379 |
| 19 rs374537    | 22222802 G | 0.3945 | 6.17E-06 | chr:19:22414379 |
| 19 rs404822    | 22215967 A | 0.3945 | 6.17E-06 | chr:19:22414379 |
| 19 rs4244912   | 22203237 T | 0.3945 | 6.17E-06 | chr:19:22414379 |
| 19 rs429184    | 22214352 A | 0.3945 | 6.17E-06 | chr:19:22414379 |
| 19 rs436039    | 22214873 T | 0.3945 | 6.17E-06 | chr:19:22414379 |
| 19 rs7249976   | 22183920 A | 0.3945 | 6.17E-06 | chr:19:22414379 |
| 19 rs76446294  | 22269313 G | 5.799  | 6.50E-06 | chr:19:22414379 |
| 19 rs2262909   | 22135270 A | 0.4045 | 7.58E-06 | chr:19:22414379 |
| 19 rs58038983  | 22544165 T | 2.844  | 7.81E-06 | chr:19:22414379 |
| 19 rs390730    | 22233509 C | 0.4077 | 9.87E-06 | chr:19:22414379 |
| 19 rs408687    | 22231123 T | 0.4077 | 9.87E-06 | chr:19:22414379 |
| 19 rs409439    | 22227432 C | 0.4077 | 9.87E-06 | chr:19:22414379 |
| 19 rs409835    | 22230671 T | 0.4077 | 9.87E-06 | chr:19:22414379 |
| 19 rs411020    | 22231102 G | 0.4077 | 9.87E-06 | chr:19:22414379 |
| 19 rs422344    | 22230956 G | 0.4077 | 9.87E-06 | chr:19:22414379 |
| 19 rs425781    | 22229306 A | 0.4077 | 9.87E-06 | chr:19:22414379 |
| 19 rs436662    | 22232107 C | 0.4077 | 9.87E-06 | chr:19:22414379 |
| 19 rs62110991  | 22260842 T | 88.92  | 1.09E-05 | chr:19:22414379 |
| 19 rs564862240 | 22397855 C | 10.81  | 1.11E-05 | chr:19:22414379 |

|                |            |        |          |                 |
|----------------|------------|--------|----------|-----------------|
| 19 rs143692149 | 22478366 A | 5.618  | 1.44E-05 | chr:19:22414379 |
| 19 rs76695697  | 22344687 A | 0.3056 | 1.58E-05 | chr:19:22414379 |
| 19 rs1560716   | 22305901 G | 81.27  | 1.64E-05 | chr:19:22414379 |
| 19 rs1560717   | 22292247 G | 81.27  | 1.64E-05 | chr:19:22414379 |
| 19 rs1975168   | 22305826 T | 81.27  | 1.64E-05 | chr:19:22414379 |
| 19 rs62110992  | 22261516 G | 81.27  | 1.64E-05 | chr:19:22414379 |
| 19 rs62111038  | 22286614 G | 81.27  | 1.64E-05 | chr:19:22414379 |
| 19 rs62112368  | 22306775 A | 81.27  | 1.64E-05 | chr:19:22414379 |
| 19 rs2359835   | 22242690 G | 79.01  | 1.87E-05 | chr:19:22414379 |
| 19 rs368701052 | 22255803 A | 79.01  | 1.87E-05 | chr:19:22414379 |
| 19 rs377529013 | 22242455 A | 79.01  | 1.87E-05 | chr:19:22414379 |
| 19 rs62110979  | 22245152 C | 79.01  | 1.87E-05 | chr:19:22414379 |
| 19 rs62110980  | 22245191 A | 79.01  | 1.87E-05 | chr:19:22414379 |
| 19 rs62110981  | 22246013 G | 79.01  | 1.87E-05 | chr:19:22414379 |
| 19 rs62110984  | 22252332 A | 79.01  | 1.87E-05 | chr:19:22414379 |
| 19 rs62110985  | 22256077 G | 79.01  | 1.87E-05 | chr:19:22414379 |
| 19 rs62110986  | 22256771 A | 79.01  | 1.87E-05 | chr:19:22414379 |
| 19 rs62110987  | 22257295 C | 79.01  | 1.87E-05 | chr:19:22414379 |
| 19 rs62110988  | 22259956 T | 79.01  | 1.87E-05 | chr:19:22414379 |
| 19 rs62110989  | 22260299 G | 79.01  | 1.87E-05 | chr:19:22414379 |
| 19 rs62112957  | 22238259 T | 79.01  | 1.87E-05 | chr:19:22414379 |
| 19 rs62112958  | 22239118 G | 79.01  | 1.87E-05 | chr:19:22414379 |
| 19 rs7252220   | 22245564 A | 79.01  | 1.87E-05 | chr:19:22414379 |
| 19 rs7252380   | 22245715 A | 79.01  | 1.87E-05 | chr:19:22414379 |
| 19 rs7252772   | 22245459 A | 79.01  | 1.87E-05 | chr:19:22414379 |
| 19 rs8110289   | 22239717 G | 79.01  | 1.87E-05 | chr:19:22414379 |
| 19 rs8110975   | 22240233 G | 77.73  | 2.03E-05 | chr:19:22414379 |
| 19 rs62112917  | 22226580 T | 77.87  | 2.05E-05 | chr:19:22414379 |
| 19 rs371889380 | 22289791 T | 0.3804 | 2.07E-05 | chr:19:22414379 |
| 19 rs988211    | 22302536 T | 74.51  | 2.39E-05 | chr:19:22414379 |
| 19 rs62112956  | 22235910 A | 74.1   | 2.48E-05 | chr:19:22414379 |
| 19 rs200235951 | 22368291 A | 0.2603 | 2.60E-05 | chr:19:22414379 |
| 19 rs62112918  | 22227079 T | 73.22  | 2.62E-05 | chr:19:22414379 |
| 19 rs62112919  | 22227145 C | 73.22  | 2.62E-05 | chr:19:22414379 |
| 19 rs62112920  | 22227149 G | 73.22  | 2.62E-05 | chr:19:22414379 |
| 19 rs62112921  | 22227577 C | 73.22  | 2.62E-05 | chr:19:22414379 |
| 19 rs62112922  | 22228340 T | 73.22  | 2.62E-05 | chr:19:22414379 |
| 19 rs62112955  | 22234959 T | 73.22  | 2.62E-05 | chr:19:22414379 |
| 19 rs75025987  | 22230669 A | 73.22  | 2.62E-05 | chr:19:22414379 |
| 19 rs200026439 | 29845668 T | 57.68  | 3.27E-25 | chr:19:29855781 |
| 19 rs201163831 | 29845670 T | 57.68  | 3.27E-25 | chr:19:29855781 |
| 19 rs62109918  | 29845664 T | 50.99  | 2.69E-24 | chr:19:29855781 |
| 19 rs62109919  | 29845666 T | 50.99  | 2.69E-24 | chr:19:29855781 |

|                |            |       |          |                 |
|----------------|------------|-------|----------|-----------------|
| 19 rs200273877 | 29841554 A | 31.1  | 8.59E-24 | chr:19:29855781 |
| 19 rs201714995 | 29841536 A | 31.1  | 8.59E-24 | chr:19:29855781 |
| 19 rs62104321  | 29866339 C | 27.57 | 1.02E-23 | chr:19:29855781 |
| 19 rs10426495  | 29866098 C | 39.13 | 7.14E-23 | chr:19:29855781 |
| 19 rs9789288   | 29806349 T | 43.54 | 1.16E-22 | chr:19:29855781 |
| 19 rs78286516  | 29843274 C | 48.24 | 3.82E-22 | chr:19:29855781 |
| 19 rs78902520  | 29843271 A | 48.24 | 3.82E-22 | chr:19:29855781 |
| 19 rs35900872  | 29871153 A | 60.1  | 9.42E-22 | chr:19:29855781 |
| 19 rs1981676   | 29868320 A | 59.68 | 1.03E-21 | chr:19:29855781 |
| 19 rs758770    | 29870136 G | 59.68 | 1.03E-21 | chr:19:29855781 |
| 19 rs10401757  | 29866045 T | 58.9  | 1.21E-21 | chr:19:29855781 |
| 19 rs79585427  | 29843225 C | 17.36 | 2.03E-21 | chr:19:29855781 |
| 19 rs1558363   | 29865313 C | 70.42 | 4.49E-21 | chr:19:29855781 |
| 19 rs200009518 | 29841360 G | 15.99 | 4.62E-21 | chr:19:29855781 |
| 19 rs200136359 | 29843211 G | 15.87 | 4.94E-21 | chr:19:29855781 |
| 19 rs200658849 | 29843213 T | 15.87 | 4.94E-21 | chr:19:29855781 |
| 19 rs76108985  | 29843218 C | 15.87 | 4.94E-21 | chr:19:29855781 |
| 19 rs2193501   | 29834999 A | 78.42 | 4.96E-21 | chr:19:29855781 |
| 19 rs9749537   | 29844679 A | 58.18 | 5.30E-21 | chr:19:29855781 |
| 19 rs7249606   | 29866089 C | 51.72 | 6.07E-21 | chr:19:29855781 |
| 19 rs10403590  | 29844676 C | 84.52 | 6.22E-21 | chr:19:29855781 |
| 19 rs6417157   | 29858422 C | 63.08 | 6.35E-21 | chr:19:29855781 |
| 19 rs10853798  | 29821124 A | 79.02 | 7.18E-21 | chr:19:29855781 |
| 19 rs1119169   | 29850778 T | 17.32 | 1.31E-20 | chr:19:29855781 |
| 19 rs10411752  | 29826775 C | 65.73 | 1.64E-20 | chr:19:29855781 |
| 19 rs35184298  | 29830558 A | 99.79 | 1.80E-20 | chr:19:29855781 |
| 19 rs4805368   | 29828621 G | 99.79 | 1.80E-20 | chr:19:29855781 |
| 19 rs12150940  | 29840750 C | 110.3 | 2.32E-20 | chr:19:29855781 |
| 19 rs12151167  | 29840748 T | 110.3 | 2.32E-20 | chr:19:29855781 |
| 19 rs2903117   | 29847324 T | 105.7 | 2.92E-20 | chr:19:29855781 |
| 19 rs7254854   | 29847388 A | 105.7 | 2.92E-20 | chr:19:29855781 |
| 19 rs7256256   | 29847424 G | 105.7 | 2.92E-20 | chr:19:29855781 |
| 19 rs4805366   | 29799264 G | 35.02 | 3.01E-20 | chr:19:29855781 |
| 19 rs10413728  | 29833591 C | 99.27 | 3.08E-20 | chr:19:29855781 |
| 19 rs11883012  | 29874196 G | 51.2  | 3.15E-20 | chr:19:29855781 |
| 19 rs7255472   | 29811968 C | 50.3  | 3.41E-20 | chr:19:29855781 |
| 19 rs10500239  | 29829980 C | 16.6  | 3.93E-20 | chr:19:29855781 |
| 19 rs12608817  | 29808821 A | 16.32 | 3.94E-20 | chr:19:29855781 |
| 19 rs12610707  | 29808907 C | 16.32 | 3.94E-20 | chr:19:29855781 |
| 19 rs62108213  | 29830870 A | 114.7 | 4.19E-20 | chr:19:29855781 |
| 19 rs62108214  | 29830872 C | 114.7 | 4.19E-20 | chr:19:29855781 |
| 19 rs62108215  | 29830873 T | 114.7 | 4.19E-20 | chr:19:29855781 |
| 19 rs150191335 | 29843058 T | 16.51 | 4.49E-20 | chr:19:29855781 |



|               |            |       |          |                 |
|---------------|------------|-------|----------|-----------------|
| 19 rs67987964 | 29845533 G | 16.51 | 4.49E-20 | chr:19:29855781 |
| 19 rs7508357  | 29841738 C | 16.51 | 4.49E-20 | chr:19:29855781 |
| 19 rs10413814 | 29859044 A | 15.71 | 4.63E-20 | chr:19:29855781 |
| 19 rs10413925 | 29851859 T | 15.71 | 4.63E-20 | chr:19:29855781 |
| 19 rs34235250 | 29852282 C | 15.71 | 4.63E-20 | chr:19:29855781 |
| 19 rs8103504  | 29808196 C | 53.02 | 5.21E-20 | chr:19:29855781 |
| 19 rs9797726  | 29842789 T | 108   | 5.35E-20 | chr:19:29855781 |
| 19 rs10422443 | 29860582 A | 15.88 | 5.62E-20 | chr:19:29855781 |
| 19 rs10424790 | 29860630 G | 15.88 | 5.62E-20 | chr:19:29855781 |
| 19 rs11880983 | 29859865 C | 15.88 | 5.62E-20 | chr:19:29855781 |
| 19 rs11882773 | 29859829 A | 15.88 | 5.62E-20 | chr:19:29855781 |
| 19 rs12709912 | 29859443 C | 15.88 | 5.62E-20 | chr:19:29855781 |
| 19 rs13344917 | 29859503 C | 15.88 | 5.62E-20 | chr:19:29855781 |
| 19 rs7253279  | 29864696 A | 14.93 | 6.48E-20 | chr:19:29855781 |
| 19 rs1558362  | 29865141 T | 14.84 | 6.76E-20 | chr:19:29855781 |
| 19 rs1558364  | 29865345 A | 14.84 | 6.76E-20 | chr:19:29855781 |
| 19 rs9916951  | 29865388 G | 14.84 | 6.76E-20 | chr:19:29855781 |
| 19 rs10407706 | 29799613 C | 41.13 | 6.80E-20 | chr:19:29855781 |
| 19 rs10407716 | 29799624 G | 41.13 | 6.80E-20 | chr:19:29855781 |
| 19 rs10406127 | 29826758 T | 15.46 | 6.90E-20 | chr:19:29855781 |
| 19 rs1122022  | 29825214 A | 15.46 | 6.90E-20 | chr:19:29855781 |
| 19 rs10408748 | 29837390 T | 15.26 | 7.05E-20 | chr:19:29855781 |
| 19 rs10410330 | 29827372 C | 15.26 | 7.05E-20 | chr:19:29855781 |
| 19 rs10419817 | 29828620 T | 15.26 | 7.05E-20 | chr:19:29855781 |
| 19 rs2012095  | 29801230 G | 45.6  | 7.72E-20 | chr:19:29855781 |
| 19 rs10411489 | 29846018 C | 15.18 | 7.94E-20 | chr:19:29855781 |
| 19 rs10424375 | 29839089 A | 15.18 | 7.94E-20 | chr:19:29855781 |
| 19 rs10402522 | 29861084 A | 15.1  | 8.05E-20 | chr:19:29855781 |
| 19 rs10403684 | 29860887 T | 15.1  | 8.05E-20 | chr:19:29855781 |
| 19 rs10404520 | 29860937 G | 15.1  | 8.05E-20 | chr:19:29855781 |
| 19 rs10404941 | 29861103 C | 15.1  | 8.05E-20 | chr:19:29855781 |
| 19 rs6509385  | 29861469 C | 15.1  | 8.05E-20 | chr:19:29855781 |
| 19 rs1558365  | 29865746 C | 14.72 | 8.06E-20 | chr:19:29855781 |
| 19 rs1558366  | 29865847 T | 14.72 | 8.06E-20 | chr:19:29855781 |
| 19 rs6509388  | 29861882 G | 15.15 | 8.63E-20 | chr:19:29855781 |
| 19 rs8100899  | 29808524 G | 57.68 | 8.86E-20 | chr:19:29855781 |
| 19 rs8107456  | 29810347 C | 57.68 | 8.86E-20 | chr:19:29855781 |
| 19 rs10412642 | 29871720 A | 14.13 | 1.09E-19 | chr:19:29855781 |
| 19 rs7258038  | 29844001 G | 85.43 | 1.17E-19 | chr:19:29855781 |
| 19 rs10421910 | 29868808 A | 14.06 | 1.20E-19 | chr:19:29855781 |
| 19 rs10422144 | 29868886 A | 14.06 | 1.20E-19 | chr:19:29855781 |
| 19 rs10422587 | 29869112 A | 14.06 | 1.20E-19 | chr:19:29855781 |
| 19 rs12973626 | 29867364 C | 14.06 | 1.20E-19 | chr:19:29855781 |

|               |            |       |          |                 |
|---------------|------------|-------|----------|-----------------|
| 19 rs12979074 | 29867103 A | 14.06 | 1.20E-19 | chr:19:29855781 |
| 19 rs12979587 | 29867327 A | 14.06 | 1.20E-19 | chr:19:29855781 |
| 19 rs12980588 | 29867736 A | 14.06 | 1.20E-19 | chr:19:29855781 |
| 19 rs12981862 | 29867527 G | 14.06 | 1.20E-19 | chr:19:29855781 |
| 19 rs12981877 | 29867555 T | 14.06 | 1.20E-19 | chr:19:29855781 |
| 19 rs1981675  | 29868188 T | 14.06 | 1.20E-19 | chr:19:29855781 |
| 19 rs1981677  | 29868499 A | 14.06 | 1.20E-19 | chr:19:29855781 |
| 19 rs4271695  | 29866742 A | 14.06 | 1.20E-19 | chr:19:29855781 |
| 19 rs4398199  | 29866833 C | 14.06 | 1.20E-19 | chr:19:29855781 |
| 19 rs4558517  | 29866993 T | 14.06 | 1.20E-19 | chr:19:29855781 |
| 19 rs4605284  | 29866673 T | 14.06 | 1.20E-19 | chr:19:29855781 |
| 19 rs4605285  | 29866853 G | 14.06 | 1.20E-19 | chr:19:29855781 |
| 19 rs8103925  | 29866287 G | 14.06 | 1.20E-19 | chr:19:29855781 |
| 19 rs10408576 | 29818131 A | 14.29 | 1.22E-19 | chr:19:29855781 |
| 19 rs11879307 | 29815370 A | 14.29 | 1.22E-19 | chr:19:29855781 |
| 19 rs2193499  | 29821859 A | 14.29 | 1.22E-19 | chr:19:29855781 |
| 19 rs10416302 | 29851854 C | 118.4 | 1.24E-19 | chr:19:29855781 |
| 19 rs7249741  | 29849562 G | 118.4 | 1.24E-19 | chr:19:29855781 |
| 19 rs13343404 | 29826240 A | 14.22 | 1.36E-19 | chr:19:29855781 |
| 19 rs12978558 | 29807938 C | 14.28 | 1.37E-19 | chr:19:29855781 |
| 19 rs17624933 | 29867883 T | 13.88 | 1.37E-19 | chr:19:29855781 |
| 19 rs8100334  | 29866137 T | 13.99 | 1.42E-19 | chr:19:29855781 |
| 19 rs8105692  | 29840119 C | 87.75 | 1.42E-19 | chr:19:29855781 |
| 19 rs10419653 | 29812484 G | 14.87 | 1.44E-19 | chr:19:29855781 |
| 19 rs10425007 | 29812397 C | 14.87 | 1.44E-19 | chr:19:29855781 |
| 19 rs10425611 | 29813263 T | 14.87 | 1.44E-19 | chr:19:29855781 |
| 19 rs11880387 | 29810986 A | 14.87 | 1.44E-19 | chr:19:29855781 |
| 19 rs2216341  | 29812294 T | 14.87 | 1.44E-19 | chr:19:29855781 |
| 19 rs727798   | 29811828 C | 14.87 | 1.44E-19 | chr:19:29855781 |
| 19 rs34786514 | 29878333 G | 13.85 | 1.67E-19 | chr:19:29855781 |
| 19 rs2111497  | 29822857 C | 85.88 | 1.68E-19 | chr:19:29855781 |
| 19 rs2193498  | 29821753 G | 85.88 | 1.68E-19 | chr:19:29855781 |
| 19 rs2865872  | 29822103 C | 85.88 | 1.68E-19 | chr:19:29855781 |
| 19 rs2903113  | 29821703 T | 85.88 | 1.68E-19 | chr:19:29855781 |
| 19 rs8113496  | 29820529 G | 85.88 | 1.68E-19 | chr:19:29855781 |
| 19 rs7258498  | 29860387 T | 14.37 | 1.76E-19 | chr:19:29855781 |
| 19 rs10411884 | 29814875 T | 13.94 | 2.08E-19 | chr:19:29855781 |
| 19 rs8102048  | 29814240 A | 13.94 | 2.08E-19 | chr:19:29855781 |
| 19 rs8100333  | 29866136 T | 13.13 | 2.24E-19 | chr:19:29855781 |
| 19 rs28573811 | 29867469 T | 58.09 | 2.40E-19 | chr:19:29855781 |
| 19 rs2193500  | 29834892 G | 13.87 | 2.43E-19 | chr:19:29855781 |
| 19 rs6509386  | 29861649 T | 13.69 | 2.54E-19 | chr:19:29855781 |
| 19 rs6509387  | 29861707 A | 13.69 | 2.54E-19 | chr:19:29855781 |

|               |            |       |          |                 |
|---------------|------------|-------|----------|-----------------|
| 19 rs7246620  | 29861360 C | 13.69 | 2.54E-19 | chr:19:29855781 |
| 19 rs10403689 | 29862797 A | 13.68 | 2.60E-19 | chr:19:29855781 |
| 19 rs10404170 | 29863044 C | 13.68 | 2.60E-19 | chr:19:29855781 |
| 19 rs10423850 | 29862444 A | 13.68 | 2.60E-19 | chr:19:29855781 |
| 19 rs11883246 | 29862074 G | 13.68 | 2.60E-19 | chr:19:29855781 |
| 19 rs56048673 | 29862967 A | 13.68 | 2.60E-19 | chr:19:29855781 |
| 19 rs6509389  | 29861958 G | 13.68 | 2.60E-19 | chr:19:29855781 |
| 19 rs6509390  | 29862034 T | 13.68 | 2.60E-19 | chr:19:29855781 |
| 19 rs7248809  | 29863240 G | 13.68 | 2.60E-19 | chr:19:29855781 |
| 19 rs7248884  | 29863662 T | 13.68 | 2.60E-19 | chr:19:29855781 |
| 19 rs7252555  | 29863630 C | 13.68 | 2.60E-19 | chr:19:29855781 |
| 19 rs7259512  | 29862045 G | 13.68 | 2.60E-19 | chr:19:29855781 |
| 19 rs7507344  | 29863087 A | 13.68 | 2.60E-19 | chr:19:29855781 |
| 19 rs7507798  | 29863083 C | 13.68 | 2.60E-19 | chr:19:29855781 |
| 19 rs10853799 | 29821146 A | 84.9  | 2.80E-19 | chr:19:29855781 |
| 19 rs7351109  | 29816574 C | 65.27 | 2.81E-19 | chr:19:29855781 |
| 19 rs13345888 | 29842781 C | 13.96 | 2.87E-19 | chr:19:29855781 |
| 19 rs8113733  | 29807306 C | 22.01 | 3.20E-19 | chr:19:29855781 |
| 19 rs12610720 | 29808999 C | 14.06 | 3.47E-19 | chr:19:29855781 |
| 19 rs2111519  | 29794684 T | 20.05 | 3.76E-19 | chr:19:29855781 |
| 19 rs2080613  | 29811982 A | 13.38 | 3.90E-19 | chr:19:29855781 |
| 19 rs4805382  | 29873748 A | 18.91 | 4.46E-19 | chr:19:29855781 |
| 19 rs2160717  | 29822729 T | 13.1  | 4.52E-19 | chr:19:29855781 |
| 19 rs10405922 | 29813264 C | 13.08 | 5.29E-19 | chr:19:29855781 |
| 19 rs10415631 | 29810562 C | 13.08 | 5.29E-19 | chr:19:29855781 |
| 19 rs10418201 | 29810677 G | 13.08 | 5.29E-19 | chr:19:29855781 |
| 19 rs10423930 | 29810687 G | 13.08 | 5.29E-19 | chr:19:29855781 |
| 19 rs10424492 | 29813431 A | 13.08 | 5.29E-19 | chr:19:29855781 |
| 19 rs11880160 | 29810859 A | 13.08 | 5.29E-19 | chr:19:29855781 |
| 19 rs12978201 | 29805534 G | 13.08 | 5.29E-19 | chr:19:29855781 |
| 19 rs17773647 | 29813079 G | 13.08 | 5.29E-19 | chr:19:29855781 |
| 19 rs28581734 | 29813167 T | 13.08 | 5.29E-19 | chr:19:29855781 |
| 19 rs8099873  | 29808683 A | 13.08 | 5.29E-19 | chr:19:29855781 |
| 19 rs8108111  | 29809851 G | 13.08 | 5.29E-19 | chr:19:29855781 |
| 19 rs8111179  | 29809968 C | 13.08 | 5.29E-19 | chr:19:29855781 |
| 19 rs8113604  | 29813727 G | 13.08 | 5.29E-19 | chr:19:29855781 |
| 19 rs7258057  | 29844039 G | 134   | 5.93E-19 | chr:19:29855781 |
| 19 rs7507405  | 29841956 C | 134.8 | 6.14E-19 | chr:19:29855781 |
| 19 rs10424081 | 29832472 A | 139.3 | 6.57E-19 | chr:19:29855781 |
| 19 rs2216339  | 29821569 G | 123.3 | 7.14E-19 | chr:19:29855781 |
| 19 rs5007513  | 29821553 A | 123.3 | 7.14E-19 | chr:19:29855781 |
| 19 rs10413763 | 29873400 A | 12.68 | 7.23E-19 | chr:19:29855781 |
| 19 rs10404772 | 29821253 A | 134.1 | 7.58E-19 | chr:19:29855781 |

|               |            |       |          |                 |
|---------------|------------|-------|----------|-----------------|
| 19 rs10408183 | 29823239 T | 134.1 | 7.58E-19 | chr:19:29855781 |
| 19 rs10409090 | 29823614 G | 134.1 | 7.58E-19 | chr:19:29855781 |
| 19 rs10415948 | 29824022 G | 134.1 | 7.58E-19 | chr:19:29855781 |
| 19 rs10417724 | 29819252 A | 134.1 | 7.58E-19 | chr:19:29855781 |
| 19 rs10423259 | 29820105 A | 134.1 | 7.58E-19 | chr:19:29855781 |
| 19 rs10853797 | 29821094 C | 134.1 | 7.58E-19 | chr:19:29855781 |
| 19 rs11083917 | 29821301 C | 134.1 | 7.58E-19 | chr:19:29855781 |
| 19 rs2111496  | 29822748 A | 134.1 | 7.58E-19 | chr:19:29855781 |
| 19 rs2111498  | 29822858 A | 134.1 | 7.58E-19 | chr:19:29855781 |
| 19 rs2160716  | 29822600 C | 134.1 | 7.58E-19 | chr:19:29855781 |
| 19 rs2193497  | 29821737 A | 134.1 | 7.58E-19 | chr:19:29855781 |
| 19 rs2216340  | 29823183 G | 134.1 | 7.58E-19 | chr:19:29855781 |
| 19 rs28488633 | 29823953 C | 134.1 | 7.58E-19 | chr:19:29855781 |
| 19 rs28546871 | 29821491 C | 134.1 | 7.58E-19 | chr:19:29855781 |
| 19 rs2865869  | 29821979 T | 134.1 | 7.58E-19 | chr:19:29855781 |
| 19 rs2865870  | 29821980 C | 134.1 | 7.58E-19 | chr:19:29855781 |
| 19 rs2865871  | 29822061 T | 134.1 | 7.58E-19 | chr:19:29855781 |
| 19 rs8102393  | 29820560 C | 134.1 | 7.58E-19 | chr:19:29855781 |
| 19 rs8107378  | 29823430 C | 134.1 | 7.58E-19 | chr:19:29855781 |
| 19 rs8113732  | 29820742 G | 134.1 | 7.58E-19 | chr:19:29855781 |
| 19 rs979412   | 29818376 A | 134.1 | 7.58E-19 | chr:19:29855781 |
| 19 rs10404259 | 29840188 C | 139.3 | 7.71E-19 | chr:19:29855781 |
| 19 rs35379433 | 29834698 A | 129.8 | 8.37E-19 | chr:19:29855781 |
| 19 rs1012613  | 29796344 A | 13.19 | 9.18E-19 | chr:19:29855781 |
| 19 rs4804878  | 29873579 A | 17.23 | 9.22E-19 | chr:19:29855781 |
| 19 rs72623834 | 29842510 A | 128.1 | 1.10E-18 | chr:19:29855781 |
| 19 rs979413   | 29818635 A | 132.6 | 1.10E-18 | chr:19:29855781 |
| 19 rs28857523 | 29844100 G | 134.4 | 1.12E-18 | chr:19:29855781 |
| 19 rs10404828 | 29826537 T | 99.61 | 1.16E-18 | chr:19:29855781 |
| 19 rs10411272 | 29826524 A | 99.61 | 1.16E-18 | chr:19:29855781 |
| 19 rs2865878  | 29825358 C | 99.61 | 1.16E-18 | chr:19:29855781 |
| 19 rs8111162  | 29824369 C | 99.61 | 1.16E-18 | chr:19:29855781 |
| 19 rs4805383  | 29873963 G | 19.85 | 1.22E-18 | chr:19:29855781 |
| 19 rs10853800 | 29821178 C | 133   | 1.26E-18 | chr:19:29855781 |
| 19 rs11083916 | 29821200 C | 133   | 1.26E-18 | chr:19:29855781 |
| 19 rs10421823 | 29835487 A | 109.5 | 1.34E-18 | chr:19:29855781 |
| 19 rs8103862  | 29830747 A | 109.5 | 1.34E-18 | chr:19:29855781 |
| 19 rs8109855  | 29828233 T | 109.5 | 1.34E-18 | chr:19:29855781 |
| 19 rs74838486 | 29842509 A | 109.9 | 1.35E-18 | chr:19:29855781 |
| 19 rs10420966 | 29816663 T | 76.9  | 1.41E-18 | chr:19:29855781 |
| 19 rs1558864  | 29823261 A | 76.9  | 1.41E-18 | chr:19:29855781 |
| 19 rs7253662  | 29815722 T | 76.9  | 1.41E-18 | chr:19:29855781 |
| 19 rs929691   | 29818042 C | 76.9  | 1.41E-18 | chr:19:29855781 |

|                |            |       |          |                 |
|----------------|------------|-------|----------|-----------------|
| 19 rs10407026  | 29848625 C | 108.6 | 1.45E-18 | chr:19:29855781 |
| 19 rs10420835  | 29856760 T | 108.6 | 1.45E-18 | chr:19:29855781 |
| 19 rs13344183  | 29841038 T | 108.6 | 1.45E-18 | chr:19:29855781 |
| 19 rs144395360 | 29843445 T | 108.6 | 1.45E-18 | chr:19:29855781 |
| 19 rs2159564   | 29851751 A | 108.6 | 1.45E-18 | chr:19:29855781 |
| 19 rs2159565   | 29847643 A | 108.6 | 1.45E-18 | chr:19:29855781 |
| 19 rs4804875   | 29853497 G | 108.6 | 1.45E-18 | chr:19:29855781 |
| 19 rs4805373   | 29853498 C | 108.6 | 1.45E-18 | chr:19:29855781 |
| 19 rs7251831   | 29849926 A | 108.6 | 1.45E-18 | chr:19:29855781 |
| 19 rs7252072   | 29855010 G | 108.6 | 1.45E-18 | chr:19:29855781 |
| 19 rs8101272   | 29840005 C | 108.6 | 1.45E-18 | chr:19:29855781 |
| 19 rs8112567   | 29838763 G | 108.6 | 1.45E-18 | chr:19:29855781 |
| 19 rs9749055   | 29845247 G | 108.6 | 1.45E-18 | chr:19:29855781 |
| 19 rs2865883   | 29837946 T | 108.6 | 1.47E-18 | chr:19:29855781 |
| 19 rs28870995  | 29844110 C | 134.6 | 1.64E-18 | chr:19:29855781 |
| 19 rs7257439   | 29816242 A | 79.32 | 1.66E-18 | chr:19:29855781 |
| 19 rs62104320  | 29866335 T | 70.05 | 1.71E-18 | chr:19:29855781 |
| 19 rs10404884  | 29839279 A | 24.85 | 1.87E-18 | chr:19:29855781 |
| 19 rs10407922  | 29833571 C | 109.5 | 2.17E-18 | chr:19:29855781 |
| 19 rs1981678   | 29868519 G | 67.24 | 2.72E-18 | chr:19:29855781 |
| 19 rs8107989   | 29867796 G | 67.24 | 2.72E-18 | chr:19:29855781 |
| 19 rs1860573   | 29879749 A | 10.45 | 3.34E-18 | chr:19:29855781 |
| 19 rs10426484  | 29866090 A | 11.63 | 4.95E-18 | chr:19:29855781 |
| 19 rs4805381   | 29872627 C | 102.9 | 6.36E-18 | chr:19:29855781 |
| 19 rs10402726  | 29826292 T | 159.7 | 7.75E-18 | chr:19:29855781 |
| 19 rs10403475  | 29826676 C | 159.7 | 7.75E-18 | chr:19:29855781 |
| 19 rs10405159  | 29826311 G | 159.7 | 7.75E-18 | chr:19:29855781 |
| 19 rs10410622  | 29826229 G | 159.7 | 7.75E-18 | chr:19:29855781 |
| 19 rs10411073  | 29826427 C | 159.7 | 7.75E-18 | chr:19:29855781 |
| 19 rs13345551  | 29826197 G | 159.7 | 7.75E-18 | chr:19:29855781 |
| 19 rs13346790  | 29825511 A | 159.7 | 7.75E-18 | chr:19:29855781 |
| 19 rs2865874   | 29825020 A | 159.7 | 7.75E-18 | chr:19:29855781 |
| 19 rs2865875   | 29825068 A | 159.7 | 7.75E-18 | chr:19:29855781 |
| 19 rs2865876   | 29825093 A | 159.7 | 7.75E-18 | chr:19:29855781 |
| 19 rs2865877   | 29825180 C | 159.7 | 7.75E-18 | chr:19:29855781 |
| 19 rs8107784   | 29824307 T | 159.7 | 7.75E-18 | chr:19:29855781 |
| 19 rs12691091  | 29859430 C | 97.92 | 7.76E-18 | chr:19:29855781 |
| 19 rs3960886   | 29878149 C | 26.99 | 8.79E-18 | chr:19:29855781 |
| 19 rs6509401   | 29877643 C | 26.99 | 8.79E-18 | chr:19:29855781 |
| 19 rs8109600   | 29877328 G | 26.99 | 8.79E-18 | chr:19:29855781 |
| 19 rs2903115   | 29837927 T | 97.21 | 9.54E-18 | chr:19:29855781 |
| 19 rs35308361  | 29830552 T | 97.21 | 9.54E-18 | chr:19:29855781 |
| 19 rs10404303  | 29860663 C | 96.36 | 1.02E-17 | chr:19:29855781 |

|               |            |       |          |                 |
|---------------|------------|-------|----------|-----------------|
| 19 rs10421211 | 29852874 A | 96.36 | 1.02E-17 | chr:19:29855781 |
| 19 rs1990391  | 29859164 T | 96.36 | 1.02E-17 | chr:19:29855781 |
| 19 rs4804876  | 29853605 A | 96.36 | 1.02E-17 | chr:19:29855781 |
| 19 rs61631634 | 29852485 C | 96.36 | 1.02E-17 | chr:19:29855781 |
| 19 rs6509383  | 29857637 C | 96.36 | 1.02E-17 | chr:19:29855781 |
| 19 rs7248644  | 29856939 C | 96.36 | 1.02E-17 | chr:19:29855781 |
| 19 rs7258342  | 29859947 C | 96.36 | 1.02E-17 | chr:19:29855781 |
| 19 rs8107741  | 29858602 G | 96.36 | 1.02E-17 | chr:19:29855781 |
| 19 rs10416173 | 29824125 T | 152.9 | 1.09E-17 | chr:19:29855781 |
| 19 rs10401849 | 29860785 T | 91.39 | 1.32E-17 | chr:19:29855781 |
| 19 rs10401431 | 29829429 G | 183.3 | 1.41E-17 | chr:19:29855781 |
| 19 rs10405212 | 29832150 G | 183.3 | 1.41E-17 | chr:19:29855781 |
| 19 rs10407240 | 29829500 C | 183.3 | 1.41E-17 | chr:19:29855781 |
| 19 rs10409875 | 29827166 A | 183.3 | 1.41E-17 | chr:19:29855781 |
| 19 rs10409965 | 29837251 T | 183.3 | 1.41E-17 | chr:19:29855781 |
| 19 rs10410499 | 29827426 T | 183.3 | 1.41E-17 | chr:19:29855781 |
| 19 rs10410585 | 29837528 A | 183.3 | 1.41E-17 | chr:19:29855781 |
| 19 rs10416004 | 29831681 T | 183.3 | 1.41E-17 | chr:19:29855781 |
| 19 rs10416725 | 29831649 C | 183.3 | 1.41E-17 | chr:19:29855781 |
| 19 rs10419949 | 29828341 G | 183.3 | 1.41E-17 | chr:19:29855781 |
| 19 rs10422084 | 29835604 G | 183.3 | 1.41E-17 | chr:19:29855781 |
| 19 rs10422614 | 29835503 G | 183.3 | 1.41E-17 | chr:19:29855781 |
| 19 rs10425546 | 29832398 T | 183.3 | 1.41E-17 | chr:19:29855781 |
| 19 rs10425993 | 29832603 G | 183.3 | 1.41E-17 | chr:19:29855781 |
| 19 rs11881314 | 29830193 A | 183.3 | 1.41E-17 | chr:19:29855781 |
| 19 rs11881407 | 29829948 T | 183.3 | 1.41E-17 | chr:19:29855781 |
| 19 rs11881459 | 29830092 T | 183.3 | 1.41E-17 | chr:19:29855781 |
| 19 rs11881508 | 29830309 G | 183.3 | 1.41E-17 | chr:19:29855781 |
| 19 rs12610959 | 29827626 C | 183.3 | 1.41E-17 | chr:19:29855781 |
| 19 rs17773922 | 29830629 C | 183.3 | 1.41E-17 | chr:19:29855781 |
| 19 rs2865884  | 29837991 C | 183.3 | 1.41E-17 | chr:19:29855781 |
| 19 rs35349289 | 29830485 G | 183.3 | 1.41E-17 | chr:19:29855781 |
| 19 rs35615835 | 29827061 A | 183.3 | 1.41E-17 | chr:19:29855781 |
| 19 rs62108163 | 29828752 T | 183.3 | 1.41E-17 | chr:19:29855781 |
| 19 rs62108164 | 29828755 C | 183.3 | 1.41E-17 | chr:19:29855781 |
| 19 rs8103034  | 29830764 A | 183.3 | 1.41E-17 | chr:19:29855781 |
| 19 rs8106354  | 29831100 A | 183.3 | 1.41E-17 | chr:19:29855781 |
| 19 rs35270224 | 29849348 G | 182.1 | 1.44E-17 | chr:19:29855781 |
| 19 rs10405177 | 29840592 C | 181.7 | 1.53E-17 | chr:19:29855781 |
| 19 rs10405226 | 29840658 A | 181.7 | 1.53E-17 | chr:19:29855781 |
| 19 rs10405460 | 29840781 A | 181.7 | 1.53E-17 | chr:19:29855781 |
| 19 rs10405550 | 29839527 C | 181.7 | 1.53E-17 | chr:19:29855781 |
| 19 rs10406707 | 29840277 C | 181.7 | 1.53E-17 | chr:19:29855781 |

|                |            |                                |
|----------------|------------|--------------------------------|
| 19 rs10406756  | 29840591 T | 181.7 1.53E-17 chr:19:29855781 |
| 19 rs10410829  | 29840787 T | 181.7 1.53E-17 chr:19:29855781 |
| 19 rs10412879  | 29848889 A | 181.7 1.53E-17 chr:19:29855781 |
| 19 rs10423486  | 29839393 A | 181.7 1.53E-17 chr:19:29855781 |
| 19 rs10423515  | 29853162 T | 181.7 1.53E-17 chr:19:29855781 |
| 19 rs10423608  | 29852639 G | 181.7 1.53E-17 chr:19:29855781 |
| 19 rs10423847  | 29852955 T | 181.7 1.53E-17 chr:19:29855781 |
| 19 rs10423994  | 29839675 A | 181.7 1.53E-17 chr:19:29855781 |
| 19 rs10424058  | 29853036 G | 181.7 1.53E-17 chr:19:29855781 |
| 19 rs10424145  | 29839694 T | 181.7 1.53E-17 chr:19:29855781 |
| 19 rs10424499  | 29848304 T | 181.7 1.53E-17 chr:19:29855781 |
| 19 rs10425325  | 29839190 C | 181.7 1.53E-17 chr:19:29855781 |
| 19 rs10425388  | 29848770 T | 181.7 1.53E-17 chr:19:29855781 |
| 19 rs10425705  | 29839737 T | 181.7 1.53E-17 chr:19:29855781 |
| 19 rs10426238  | 29848399 A | 181.7 1.53E-17 chr:19:29855781 |
| 19 rs111393122 | 29839832 C | 181.7 1.53E-17 chr:19:29855781 |
| 19 rs111486428 | 29842638 T | 181.7 1.53E-17 chr:19:29855781 |
| 19 rs1119168   | 29850635 C | 181.7 1.53E-17 chr:19:29855781 |
| 19 rs113093811 | 29852096 A | 181.7 1.53E-17 chr:19:29855781 |
| 19 rs140915866 | 29843043 G | 181.7 1.53E-17 chr:19:29855781 |
| 19 rs147519792 | 29843490 G | 181.7 1.53E-17 chr:19:29855781 |
| 19 rs148091885 | 29842847 A | 181.7 1.53E-17 chr:19:29855781 |
| 19 rs2159563   | 29851209 C | 181.7 1.53E-17 chr:19:29855781 |
| 19 rs2865888   | 29845818 C | 181.7 1.53E-17 chr:19:29855781 |
| 19 rs2865889   | 29847080 A | 181.7 1.53E-17 chr:19:29855781 |
| 19 rs2865890   | 29847162 T | 181.7 1.53E-17 chr:19:29855781 |
| 19 rs2903118   | 29853727 C | 181.7 1.53E-17 chr:19:29855781 |
| 19 rs35754631  | 29852145 C | 181.7 1.53E-17 chr:19:29855781 |
| 19 rs4517901   | 29850859 G | 181.7 1.53E-17 chr:19:29855781 |
| 19 rs4517902   | 29851078 C | 181.7 1.53E-17 chr:19:29855781 |
| 19 rs4517903   | 29851162 C | 181.7 1.53E-17 chr:19:29855781 |
| 19 rs4804877   | 29853608 A | 181.7 1.53E-17 chr:19:29855781 |
| 19 rs4805371   | 29853296 T | 181.7 1.53E-17 chr:19:29855781 |
| 19 rs4805372   | 29853415 C | 181.7 1.53E-17 chr:19:29855781 |
| 19 rs62109915  | 29843088 T | 181.7 1.53E-17 chr:19:29855781 |
| 19 rs62109922  | 29852078 T | 181.7 1.53E-17 chr:19:29855781 |
| 19 rs713444    | 29847933 C | 181.7 1.53E-17 chr:19:29855781 |
| 19 rs7249621   | 29849475 G | 181.7 1.53E-17 chr:19:29855781 |
| 19 rs7249732   | 29849544 G | 181.7 1.53E-17 chr:19:29855781 |
| 19 rs7252876   | 29851938 A | 181.7 1.53E-17 chr:19:29855781 |
| 19 rs7253264   | 29849954 G | 181.7 1.53E-17 chr:19:29855781 |
| 19 rs7253600   | 29850196 C | 181.7 1.53E-17 chr:19:29855781 |
| 19 rs74181477  | 29840703 A | 181.7 1.53E-17 chr:19:29855781 |

|               |            |       |          |                 |
|---------------|------------|-------|----------|-----------------|
| 19 rs7507511  | 29842044 T | 181.7 | 1.53E-17 | chr:19:29855781 |
| 19 rs7507537  | 29841906 G | 181.7 | 1.53E-17 | chr:19:29855781 |
| 19 rs7507869  | 29841938 C | 181.7 | 1.53E-17 | chr:19:29855781 |
| 19 rs8105295  | 29846290 G | 181.7 | 1.53E-17 | chr:19:29855781 |
| 19 rs8105878  | 29846471 G | 181.7 | 1.53E-17 | chr:19:29855781 |
| 19 rs8106019  | 29846532 T | 181.7 | 1.53E-17 | chr:19:29855781 |
| 19 rs8108489  | 29846043 C | 181.7 | 1.53E-17 | chr:19:29855781 |
| 19 rs8108803  | 29846308 G | 181.7 | 1.53E-17 | chr:19:29855781 |
| 19 rs8108995  | 29838275 G | 181.7 | 1.53E-17 | chr:19:29855781 |
| 19 rs8109140  | 29846602 C | 181.7 | 1.53E-17 | chr:19:29855781 |
| 19 rs8109315  | 29838529 C | 181.7 | 1.53E-17 | chr:19:29855781 |
| 19 rs8112403  | 29838791 G | 181.7 | 1.53E-17 | chr:19:29855781 |
| 19 rs9748962  | 29844809 A | 181.7 | 1.53E-17 | chr:19:29855781 |
| 19 rs4805374  | 29862430 G | 87.16 | 1.56E-17 | chr:19:29855781 |
| 19 rs7249123  | 29870685 G | 87.16 | 1.56E-17 | chr:19:29855781 |
| 19 rs7252679  | 29863745 C | 87.16 | 1.56E-17 | chr:19:29855781 |
| 19 rs8107249  | 29834648 G | 181.2 | 1.62E-17 | chr:19:29855781 |
| 19 rs11670844 | 29800673 T | 11.45 | 1.63E-17 | chr:19:29855781 |
| 19 rs10415713 | 29831541 T | 175   | 1.85E-17 | chr:19:29855781 |
| 19 rs10405069 | 29833324 A | 185.8 | 2.12E-17 | chr:19:29855781 |
| 19 rs10405105 | 29833373 T | 185.8 | 2.12E-17 | chr:19:29855781 |
| 19 rs10406530 | 29832689 C | 185.8 | 2.12E-17 | chr:19:29855781 |
| 19 rs10406567 | 29832755 C | 185.8 | 2.12E-17 | chr:19:29855781 |
| 19 rs10406849 | 29833391 A | 185.8 | 2.12E-17 | chr:19:29855781 |
| 19 rs10407234 | 29833261 C | 185.8 | 2.12E-17 | chr:19:29855781 |
| 19 rs10413525 | 29833498 C | 185.8 | 2.12E-17 | chr:19:29855781 |
| 19 rs10405131 | 29845482 G | 179.2 | 2.14E-17 | chr:19:29855781 |
| 19 rs12150922 | 29879068 T | 9.9   | 2.24E-17 | chr:19:29855781 |
| 19 rs7259050  | 29799035 A | 10.36 | 3.50E-17 | chr:19:29855781 |
| 19 rs4591272  | 29841167 A | 10.06 | 4.19E-17 | chr:19:29855781 |
| 19 rs2011890  | 29801011 A | 10.91 | 4.27E-17 | chr:19:29855781 |
| 19 rs10424195 | 29883577 T | 8.968 | 1.18E-16 | chr:19:29855781 |
| 19 rs35980661 | 29798605 G | 9.312 | 1.20E-16 | chr:19:29855781 |
| 19 rs2865896  | 29872800 T | 136.6 | 1.27E-16 | chr:19:29855781 |
| 19 rs7253602  | 29864638 G | 136.6 | 1.27E-16 | chr:19:29855781 |
| 19 rs8107043  | 29864213 G | 136.6 | 1.27E-16 | chr:19:29855781 |
| 19 rs957166   | 29882508 T | 8.399 | 2.58E-16 | chr:19:29855781 |
| 19 rs10416313 | 29831461 G | 287.6 | 5.83E-16 | chr:19:29855781 |
| 19 rs10422053 | 29881070 T | 8.187 | 7.93E-16 | chr:19:29855781 |
| 19 rs13346371 | 29880687 G | 8.187 | 7.93E-16 | chr:19:29855781 |
| 19 rs17703317 | 29880615 A | 8.187 | 7.93E-16 | chr:19:29855781 |
| 19 rs55711025 | 29880437 G | 8.187 | 7.93E-16 | chr:19:29855781 |
| 19 rs9748993  | 29881310 C | 8.187 | 7.93E-16 | chr:19:29855781 |



|                |            |        |          |                 |
|----------------|------------|--------|----------|-----------------|
| 19 rs111164000 | 29881600 C | 7.378  | 1.20E-15 | chr:19:29855781 |
| 19 rs56091016  | 29880529 C | 7.378  | 1.20E-15 | chr:19:29855781 |
| 19 rs17703299  | 29880277 A | 7.353  | 1.45E-15 | chr:19:29855781 |
| 19 rs8107864   | 29882147 T | 7.549  | 1.48E-15 | chr:19:29855781 |
| 19 rs28792508  | 29841216 C | 8.747  | 1.95E-15 | chr:19:29855781 |
| 19 rs56097453  | 29881537 A | 7.215  | 2.14E-15 | chr:19:29855781 |
| 19 rs13344861  | 29881433 A | 7.211  | 2.68E-15 | chr:19:29855781 |
| 19 rs2111518   | 29794622 C | 6.909  | 3.30E-15 | chr:19:29855781 |
| 19 rs10420190  | 29873997 A | 6.977  | 3.59E-15 | chr:19:29855781 |
| 19 rs957165    | 29882525 G | 6.635  | 5.43E-15 | chr:19:29855781 |
| 19 rs1076416   | 29879196 A | 6.333  | 1.61E-14 | chr:19:29855781 |
| 19 rs13344206  | 29880707 A | 6.007  | 2.61E-14 | chr:19:29855781 |
| 19 rs55645533  | 29880453 T | 5.83   | 3.87E-14 | chr:19:29855781 |
| 19 rs142004081 | 29841268 A | 7.672  | 4.52E-14 | chr:19:29855781 |
| 19 rs150522295 | 29841311 G | 6.165  | 8.48E-13 | chr:19:29855781 |
| 19 rs200964938 | 29841291 G | 6.567  | 2.28E-12 | chr:19:29855781 |
| 19 rs62111119  | 29795071 T | 6.098  | 4.53E-12 | chr:19:29855781 |
| 19 rs8103720   | 29800499 C | 0.2124 | 5.62E-12 | chr:19:29855781 |
| 19 rs10425210  | 29792094 A | 5.862  | 1.05E-11 | chr:19:29855781 |
| 19 rs10408404  | 29739729 T | 4.063  | 2.32E-10 | chr:19:29855781 |
| 19 rs7253429   | 29748848 T | 4.065  | 2.71E-10 | chr:19:29855781 |
| 19 rs4805357   | 29742669 A | 3.977  | 3.47E-10 | chr:19:29855781 |
| 19 rs741449    | 29738641 C | 3.88   | 5.62E-10 | chr:19:29855781 |
| 19 rs36032197  | 29813521 T | 0.2593 | 5.70E-10 | chr:19:29855781 |
| 19 rs71363971  | 29813517 C | 0.2593 | 5.70E-10 | chr:19:29855781 |
| 19 rs8101728   | 29883875 A | 3.562  | 8.75E-10 | chr:19:29855781 |
| 19 rs11671699  | 29882003 A | 4.514  | 9.18E-10 | chr:19:29855781 |
| 19 rs10401191  | 29792311 C | 0.2834 | 2.18E-09 | chr:19:29855781 |
| 19 rs17773425  | 29793493 A | 10.82  | 4.34E-09 | chr:19:29855781 |
| 19 rs75806877  | 29797051 A | 10.82  | 4.34E-09 | chr:19:29855781 |
| 19 rs12460892  | 29764708 T | 3.159  | 6.07E-09 | chr:19:29855781 |
| 19 rs10408136  | 29762996 C | 3.149  | 7.43E-09 | chr:19:29855781 |
| 19 rs12460869  | 29764587 T | 3.149  | 7.43E-09 | chr:19:29855781 |
| 19 rs888301    | 29761748 T | 3.149  | 7.43E-09 | chr:19:29855781 |
| 19 rs10425413  | 29752395 T | 3.821  | 1.11E-08 | chr:19:29855781 |
| 19 rs4805362   | 29785242 C | 2.958  | 3.64E-08 | chr:19:29855781 |
| 19 rs4805365   | 29786535 G | 2.958  | 3.64E-08 | chr:19:29855781 |
| 19 rs9789269   | 29784311 G | 2.905  | 5.57E-08 | chr:19:29855781 |
| 19 rs11083885  | 29767726 G | 2.898  | 5.65E-08 | chr:19:29855781 |
| 19 rs7254145   | 29851810 G | 15.33  | 5.99E-08 | chr:19:29855781 |
| 19 rs112915449 | 29743176 T | 2.878  | 6.29E-08 | chr:19:29855781 |
| 19 rs11879318  | 29745578 T | 2.878  | 6.29E-08 | chr:19:29855781 |
| 19 rs7246203   | 29748022 A | 2.878  | 6.29E-08 | chr:19:29855781 |

|                |            |        |          |                 |
|----------------|------------|--------|----------|-----------------|
| 19 rs10407731  | 29769563 T | 2.854  | 8.41E-08 | chr:19:29855781 |
| 19 rs62109951  | 29854071 T | 8.896  | 1.05E-07 | chr:19:29855781 |
| 19 rs8182564   | 29873348 A | 13.97  | 1.59E-07 | chr:19:29855781 |
| 19 rs17624382  | 29788630 G | 2.91   | 1.69E-07 | chr:19:29855781 |
| 19 rs76154346  | 29894876 A | 8.433  | 1.70E-07 | chr:19:29855781 |
| 19 rs10404352  | 29787431 A | 2.944  | 1.75E-07 | chr:19:29855781 |
| 19 rs10409564  | 29787207 T | 2.944  | 1.75E-07 | chr:19:29855781 |
| 19 rs10423387  | 29788813 T | 2.944  | 1.75E-07 | chr:19:29855781 |
| 19 rs12981362  | 29787976 C | 2.944  | 1.75E-07 | chr:19:29855781 |
| 19 rs77238668  | 29865051 T | 14.07  | 1.91E-07 | chr:19:29855781 |
| 19 rs4805384   | 29874653 A | 11.29  | 2.33E-07 | chr:19:29855781 |
| 19 rs16962782  | 29864581 T | 7.035  | 2.44E-07 | chr:19:29855781 |
| 19 rs73925551  | 29864616 A | 7.035  | 2.44E-07 | chr:19:29855781 |
| 19 rs76396068  | 29864627 G | 7.035  | 2.44E-07 | chr:19:29855781 |
| 19 rs79014341  | 29864990 C | 7.035  | 2.44E-07 | chr:19:29855781 |
| 19 rs79187580  | 29864921 A | 7.035  | 2.44E-07 | chr:19:29855781 |
| 19 rs8107191   | 29864362 G | 7.035  | 2.44E-07 | chr:19:29855781 |
| 19 rs10406799  | 29783563 T | 2.923  | 2.46E-07 | chr:19:29855781 |
| 19 rs73024995  | 29822198 G | 0.1985 | 2.92E-07 | chr:19:29855781 |
| 19 rs12608692  | 29744597 C | 0.387  | 3.64E-07 | chr:19:29855781 |
| 19 rs17773524  | 29809488 G | 12.88  | 4.71E-07 | chr:19:29855781 |
| 19 rs117512512 | 29825745 A | 12.75  | 5.19E-07 | chr:19:29855781 |
| 19 rs138998402 | 29842631 C | 12.75  | 5.19E-07 | chr:19:29855781 |
| 19 rs139240069 | 29839857 A | 12.75  | 5.19E-07 | chr:19:29855781 |
| 19 rs149465522 | 29840076 T | 12.75  | 5.19E-07 | chr:19:29855781 |
| 19 rs17717108  | 29827335 T | 12.75  | 5.19E-07 | chr:19:29855781 |
| 19 rs190579845 | 29844147 A | 12.75  | 5.19E-07 | chr:19:29855781 |
| 19 rs4805375   | 29863126 T | 12.75  | 5.19E-07 | chr:19:29855781 |
| 19 rs4805378   | 29871813 T | 12.75  | 5.19E-07 | chr:19:29855781 |
| 19 rs4805379   | 29871922 T | 12.75  | 5.19E-07 | chr:19:29855781 |
| 19 rs4805380   | 29872523 A | 12.75  | 5.19E-07 | chr:19:29855781 |
| 19 rs57982463  | 29829642 G | 12.75  | 5.19E-07 | chr:19:29855781 |
| 19 rs740877    | 29869744 A | 12.75  | 5.19E-07 | chr:19:29855781 |
| 19 rs740878    | 29869768 T | 12.75  | 5.19E-07 | chr:19:29855781 |
| 19 rs740879    | 29869987 T | 12.75  | 5.19E-07 | chr:19:29855781 |
| 19 rs74453232  | 29833126 T | 12.75  | 5.19E-07 | chr:19:29855781 |
| 19 rs74578189  | 29836809 C | 12.75  | 5.19E-07 | chr:19:29855781 |
| 19 rs74647649  | 29868729 T | 12.75  | 5.19E-07 | chr:19:29855781 |
| 19 rs75224979  | 29864019 T | 12.75  | 5.19E-07 | chr:19:29855781 |
| 19 rs75530548  | 29856937 T | 12.75  | 5.19E-07 | chr:19:29855781 |
| 19 rs76278131  | 29867556 C | 12.75  | 5.19E-07 | chr:19:29855781 |
| 19 rs76807138  | 29868440 A | 12.75  | 5.19E-07 | chr:19:29855781 |
| 19 rs76963036  | 29833845 C | 12.75  | 5.19E-07 | chr:19:29855781 |

|                |            |        |          |                 |
|----------------|------------|--------|----------|-----------------|
| 19 rs77337188  | 29869175 T | 12.75  | 5.19E-07 | chr:19:29855781 |
| 19 rs77430465  | 29824472 G | 12.75  | 5.19E-07 | chr:19:29855781 |
| 19 rs79470954  | 29854408 C | 12.75  | 5.19E-07 | chr:19:29855781 |
| 19 rs79857271  | 29865827 A | 12.75  | 5.19E-07 | chr:19:29855781 |
| 19 rs8182542   | 29873087 A | 12.75  | 5.19E-07 | chr:19:29855781 |
| 19 rs11881661  | 29858638 T | 5.498  | 5.80E-07 | chr:19:29855781 |
| 19 rs17716667  | 29789974 T | 10.85  | 6.22E-07 | chr:19:29855781 |
| 19 rs11083910  | 29814201 T | 12.59  | 6.32E-07 | chr:19:29855781 |
| 19 rs116957117 | 29805109 T | 12.59  | 6.32E-07 | chr:19:29855781 |
| 19 rs151173630 | 29805108 G | 12.59  | 6.32E-07 | chr:19:29855781 |
| 19 rs17773499  | 29807131 T | 12.59  | 6.32E-07 | chr:19:29855781 |
| 19 rs17773551  | 29810625 C | 12.59  | 6.32E-07 | chr:19:29855781 |
| 19 rs4804873   | 29802033 C | 12.59  | 6.32E-07 | chr:19:29855781 |
| 19 rs4804874   | 29802246 A | 12.59  | 6.32E-07 | chr:19:29855781 |
| 19 rs4805367   | 29808147 T | 12.59  | 6.32E-07 | chr:19:29855781 |
| 19 rs74575010  | 29809332 A | 12.59  | 6.32E-07 | chr:19:29855781 |
| 19 rs75040595  | 29806368 A | 12.59  | 6.32E-07 | chr:19:29855781 |
| 19 rs75553465  | 29823919 A | 12.59  | 6.32E-07 | chr:19:29855781 |
| 19 rs79702327  | 29820070 C | 12.59  | 6.32E-07 | chr:19:29855781 |
| 19 rs7253694   | 29858529 C | 6.492  | 7.33E-07 | chr:19:29855781 |
| 19 rs8106978   | 29864521 T | 6.492  | 7.33E-07 | chr:19:29855781 |
| 19 rs79988957  | 29818879 A | 10.28  | 7.88E-07 | chr:19:29855781 |
| 19 rs79137305  | 29784246 T | 5.012  | 8.46E-07 | chr:19:29855781 |
| 19 rs4805385   | 29875032 A | 10.28  | 8.49E-07 | chr:19:29855781 |
| 19 rs74792053  | 29877463 C | 10.28  | 8.49E-07 | chr:19:29855781 |
| 19 rs75131508  | 29877447 T | 10.28  | 8.49E-07 | chr:19:29855781 |
| 19 rs78214929  | 29876346 T | 10.28  | 8.49E-07 | chr:19:29855781 |
| 19 rs78258505  | 29877345 C | 10.28  | 8.49E-07 | chr:19:29855781 |
| 19 rs12984061  | 29885279 A | 0.3559 | 9.31E-07 | chr:19:29855781 |
| 19 rs4805387   | 29885553 C | 0.3559 | 9.31E-07 | chr:19:29855781 |
| 19 rs4805389   | 29885643 C | 0.3559 | 9.31E-07 | chr:19:29855781 |
| 19 rs4805390   | 29885676 G | 0.3559 | 9.31E-07 | chr:19:29855781 |
| 19 rs4805391   | 29885783 C | 0.3559 | 9.31E-07 | chr:19:29855781 |
| 19 rs75461522  | 29798875 A | 10.09  | 9.33E-07 | chr:19:29855781 |
| 19 rs186502397 | 29806312 G | 12.04  | 1.02E-06 | chr:19:29855781 |
| 19 rs73028769  | 29870748 C | 0.2193 | 1.03E-06 | chr:19:29855781 |
| 19 rs17716836  | 29812000 C | 11.93  | 1.07E-06 | chr:19:29855781 |
| 19 rs569196726 | 29881464 A | 4.827  | 1.11E-06 | chr:19:29855781 |
| 19 rs79231989  | 29790947 C | 10.04  | 1.13E-06 | chr:19:29855781 |
| 19 rs8102600   | 29793077 G | 0.2302 | 2.48E-06 | chr:19:29855781 |
| 19 rs148037882 | 29717889 T | 3.66   | 3.05E-06 | chr:19:29855781 |
| 19 rs76738117  | 29717976 T | 3.66   | 3.05E-06 | chr:19:29855781 |
| 19 rs11671788  | 29937565 G | 2.338  | 3.51E-06 | chr:19:29855781 |

|                |            |        |          |                 |
|----------------|------------|--------|----------|-----------------|
| 19 rs59817498  | 29720661 T | 3.518  | 5.40E-06 | chr:19:29855781 |
| 19 rs8108536   | 29837645 T | 0.3047 | 7.03E-06 | chr:19:29855781 |
| 19 rs11670999  | 29730014 A | 2.259  | 7.24E-06 | chr:19:29855781 |
| 19 rs12972635  | 29897019 C | 0.3834 | 7.38E-06 | chr:19:29855781 |
| 19 rs11669309  | 29892297 T | 0.3889 | 7.81E-06 | chr:19:29855781 |
| 19 rs62109920  | 29846656 G | 5.971  | 8.45E-06 | chr:19:29855781 |
| 19 rs17717398  | 29902465 A | 0.3902 | 8.80E-06 | chr:19:29855781 |
| 19 rs111353402 | 29872155 A | 0.3883 | 9.22E-06 | chr:19:29855781 |
| 19 rs73027098  | 29850863 C | 0.3883 | 9.22E-06 | chr:19:29855781 |
| 19 rs73028737  | 29864112 T | 0.3883 | 9.22E-06 | chr:19:29855781 |
| 19 rs12460899  | 29899675 A | 0.3868 | 9.53E-06 | chr:19:29855781 |
| 19 rs36060857  | 29898561 A | 0.3868 | 9.53E-06 | chr:19:29855781 |
| 19 rs73014561  | 29899008 A | 0.3868 | 9.53E-06 | chr:19:29855781 |
| 19 rs1558880   | 29754331 C | 2.384  | 9.98E-06 | chr:19:29855781 |
| 19 rs11666114  | 29690571 T | 3.364  | 1.08E-05 | chr:19:29855781 |
| 19 rs34894094  | 29894875 T | 0.3973 | 1.22E-05 | chr:19:29855781 |
| 19 rs759632    | 29780738 T | 2.168  | 1.33E-05 | chr:19:29855781 |
| 19 rs73024933  | 29806342 T | 0.4016 | 1.42E-05 | chr:19:29855781 |
| 19 rs11083894  | 29784467 C | 2.154  | 1.64E-05 | chr:19:29855781 |
| 19 rs11083896  | 29784489 C | 2.154  | 1.64E-05 | chr:19:29855781 |
| 19 rs4805364   | 29786472 G | 2.154  | 1.64E-05 | chr:19:29855781 |
| 19 rs9789270   | 29784331 G | 2.154  | 1.64E-05 | chr:19:29855781 |
| 19 rs9789277   | 29784391 A | 2.154  | 1.64E-05 | chr:19:29855781 |
| 19 rs10426577  | 29731860 T | 2.182  | 1.65E-05 | chr:19:29855781 |
| 19 rs17691420  | 29730876 C | 2.182  | 1.65E-05 | chr:19:29855781 |
| 19 rs11083881  | 29760043 A | 2.302  | 1.72E-05 | chr:19:29855781 |
| 19 rs11880619  | 29759803 A | 2.302  | 1.72E-05 | chr:19:29855781 |
| 19 rs2193516   | 29757697 G | 2.302  | 1.72E-05 | chr:19:29855781 |
| 19 rs17691755  | 29793376 G | 0.3222 | 1.84E-05 | chr:19:29855781 |
| 19 rs73024931  | 29805085 A | 0.4101 | 2.04E-05 | chr:19:29855781 |
| 19 rs741450    | 29805084 A | 0.4101 | 2.04E-05 | chr:19:29855781 |
| 19 rs11667078  | 29610994 A | 2.609  | 2.22E-05 | chr:19:29855781 |
| 19 rs10421985  | 29771310 T | 2.125  | 2.24E-05 | chr:19:29855781 |
| 19 rs10422218  | 29771407 T | 2.125  | 2.24E-05 | chr:19:29855781 |
| 19 rs12462410  | 29771524 C | 2.125  | 2.24E-05 | chr:19:29855781 |
| 19 rs2016528   | 29770679 A | 2.125  | 2.24E-05 | chr:19:29855781 |
| 19 rs7408479   | 29784673 A | 2.11   | 2.33E-05 | chr:19:29855781 |
| 19 rs6509333   | 29776409 T | 2.118  | 2.36E-05 | chr:19:29855781 |
| 19 rs759629    | 29760667 T | 2.27   | 2.66E-05 | chr:19:29855781 |
| 19 rs759630    | 29760672 T | 2.27   | 2.66E-05 | chr:19:29855781 |
| 19 rs1014693   | 29775562 C | 2.104  | 2.92E-05 | chr:19:29855781 |
| 19 rs10405196  | 29774956 C | 2.104  | 2.92E-05 | chr:19:29855781 |
| 19 rs10406223  | 29775025 A | 2.104  | 2.92E-05 | chr:19:29855781 |

|                |             |         |          |                 |
|----------------|-------------|---------|----------|-----------------|
| 19 rs10426189  | 29778171 G  | 2.104   | 2.92E-05 | chr:19:29855781 |
| 19 rs12983202  | 29773877 A  | 2.104   | 2.92E-05 | chr:19:29855781 |
| 19 rs17691536  | 29773976 G  | 2.104   | 2.92E-05 | chr:19:29855781 |
| 19 rs4343393   | 29781692 C  | 2.104   | 2.92E-05 | chr:19:29855781 |
| 19 rs4524053   | 29781699 C  | 2.104   | 2.92E-05 | chr:19:29855781 |
| 19 rs7249738   | 29779653 G  | 2.104   | 2.92E-05 | chr:19:29855781 |
| 19 rs7252907   | 29776619 C  | 2.104   | 2.92E-05 | chr:19:29855781 |
| 19 rs7260650   | 29777327 T  | 2.104   | 2.92E-05 | chr:19:29855781 |
| 19 rs759631    | 29780521 C  | 2.104   | 2.92E-05 | chr:19:29855781 |
| 19 rs888304    | 29781352 T  | 2.104   | 2.92E-05 | chr:19:29855781 |
| 19 rs888305    | 29781623 G  | 2.104   | 2.92E-05 | chr:19:29855781 |
| 19 rs888306    | 29781632 C  | 2.104   | 2.92E-05 | chr:19:29855781 |
| 19 rs888307    | 29781673 G  | 2.104   | 2.92E-05 | chr:19:29855781 |
| 19 rs2011889   | 29800978 T  | 5.838   | 2.96E-05 | chr:19:29855781 |
| 19 rs8104456   | 29772205 C  | 2.093   | 3.19E-05 | chr:19:29855781 |
| 19 rs546946831 | 389293 G    | 13.19   | 7.10E-07 | chr:19:386675   |
| 19 rs571529934 | 389295 C    | 13.19   | 7.10E-07 | chr:19:386675   |
| 19 rs111857853 | 387614 G    | 8.9     | 7.93E-07 | chr:19:386675   |
| 19 rs73916946  | 387864 T    | 8.318   | 1.12E-06 | chr:19:386675   |
| 19 rs9710605   | 398547 T    | 16.41   | 1.45E-06 | chr:19:386675   |
| 19 rs374432840 | 387197 T    | 9.859   | 1.60E-06 | chr:19:386675   |
| 19 rs369380681 | 388030 C    | 7.768   | 1.84E-06 | chr:19:386675   |
| 19 rs529560773 | 388349 T    | 11.74   | 7.89E-06 | chr:19:386675   |
| 19 rs549371497 | 388347 T    | 11.74   | 7.89E-06 | chr:19:386675   |
| 19 rs562006336 | 388348 G    | 11.74   | 7.89E-06 | chr:19:386675   |
| 19 rs115964175 | 405159 T    | 9.174   | 1.11E-05 | chr:19:386675   |
| 19 rs731335    | 402491 A    | 9.012   | 1.12E-05 | chr:19:386675   |
| 19 rs75887790  | 402953 A    | 9.012   | 1.12E-05 | chr:19:386675   |
| 19 rs78950283  | 403202 A    | 9.012   | 1.12E-05 | chr:19:386675   |
| 19 rs74564490  | 403591 A    | 8.649   | 1.37E-05 | chr:19:386675   |
| 19 rs55749078  | 387847 C    | 6.551   | 1.64E-05 | chr:19:386675   |
| 19 rs111688272 | 388012 G    | 7.07    | 4.15E-05 | chr:19:386675   |
| 19 rs75787341  | 370630 A    | 12.6    | 5.08E-05 | chr:19:386675   |
| 1 rs10857872   | 111838382 A | 7.916   | 5.62E-16 | chr:1:111802591 |
| 1 rs11102240   | 111844621 G | 7.916   | 5.62E-16 | chr:1:111802591 |
| 1 rs7411387    | 111837135 C | 7.916   | 5.62E-16 | chr:1:111802591 |
| 1 rs4259643    | 111814404 G | 0.02528 | 6.03E-14 | chr:1:111802591 |
| 1 rs11102233   | 111827749 T | 6.215   | 9.71E-14 | chr:1:111802591 |
| 1 rs11102229   | 111808446 G | 0.1691  | 1.29E-13 | chr:1:111802591 |
| 1 rs34487304   | 111804011 A | 0.1691  | 1.29E-13 | chr:1:111802591 |
| 1 rs3891601    | 111805489 G | 0.1691  | 1.29E-13 | chr:1:111802591 |
| 1 rs59772828   | 111808783 A | 0.1691  | 1.29E-13 | chr:1:111802591 |
| 1 rs2820057    | 111811175 A | 0.01716 | 1.74E-13 | chr:1:111802591 |

|               |             |         |          |                 |
|---------------|-------------|---------|----------|-----------------|
| 1 rs2820058   | 111811160 T | 0.01716 | 1.74E-13 | chr:1:111802591 |
| 1 rs3118208   | 111812709 G | 0.01716 | 1.74E-13 | chr:1:111802591 |
| 1 rs3118209   | 111812196 C | 0.01716 | 1.74E-13 | chr:1:111802591 |
| 1 rs4240528   | 111802958 C | 0.1725  | 1.99E-13 | chr:1:111802591 |
| 1 rs1575722   | 111803894 C | 7.128   | 2.01E-13 | chr:1:111802591 |
| 1 rs2477577   | 111809238 C | 7.128   | 2.01E-13 | chr:1:111802591 |
| 1 rs2764550   | 111808478 A | 7.128   | 2.01E-13 | chr:1:111802591 |
| 1 rs2820060   | 111807851 C | 7.128   | 2.01E-13 | chr:1:111802591 |
| 1 rs2494011   | 111806553 G | 7.187   | 2.15E-13 | chr:1:111802591 |
| 1 rs11588487  | 111812241 T | 0.1868  | 6.19E-13 | chr:1:111802591 |
| 1 rs12733155  | 111812412 T | 0.1868  | 6.19E-13 | chr:1:111802591 |
| 1 rs12724976  | 111813174 C | 0.1941  | 1.20E-12 | chr:1:111802591 |
| 1 rs2104408   | 111810753 C | 95.01   | 1.23E-12 | chr:1:111802591 |
| 1 rs12135216  | 111809857 G | 0.2122  | 3.41E-12 | chr:1:111802591 |
| 1 rs58982671  | 111826007 T | 0.1951  | 3.73E-12 | chr:1:111802591 |
| 1 rs11102232  | 111818450 C | 0.1997  | 4.50E-12 | chr:1:111802591 |
| 1 rs11589353  | 111822680 G | 0.1997  | 4.50E-12 | chr:1:111802591 |
| 1 rs11589375  | 111822887 G | 0.1997  | 4.50E-12 | chr:1:111802591 |
| 1 rs12411206  | 111822962 C | 0.1997  | 4.50E-12 | chr:1:111802591 |
| 1 rs12567865  | 111817250 A | 0.1997  | 4.50E-12 | chr:1:111802591 |
| 1 rs12758301  | 111822132 C | 0.1997  | 4.50E-12 | chr:1:111802591 |
| 1 rs35693821  | 111816294 G | 0.1997  | 4.50E-12 | chr:1:111802591 |
| 1 rs35884994  | 111816144 C | 0.1997  | 4.50E-12 | chr:1:111802591 |
| 1 rs4323713   | 111823220 T | 0.1997  | 4.50E-12 | chr:1:111802591 |
| 1 rs5029527   | 111818923 T | 0.1997  | 4.50E-12 | chr:1:111802591 |
| 1 rs12401376  | 111828474 A | 0.195   | 4.57E-12 | chr:1:111802591 |
| 1 rs3118204   | 111810952 A | 5.532   | 4.79E-12 | chr:1:111802591 |
| 1 rs17027272  | 111823851 A | 5.334   | 7.55E-12 | chr:1:111802591 |
| 1 rs1925358   | 111820367 T | 5.334   | 7.55E-12 | chr:1:111802591 |
| 1 rs2494014   | 111819921 G | 5.334   | 7.55E-12 | chr:1:111802591 |
| 1 rs4838895   | 111821459 T | 5.334   | 7.55E-12 | chr:1:111802591 |
| 1 rs61803493  | 111820997 C | 5.334   | 7.55E-12 | chr:1:111802591 |
| 1 rs9429593   | 111823315 T | 5.334   | 7.55E-12 | chr:1:111802591 |
| 1 rs12738135  | 111809571 G | 0.2257  | 9.06E-12 | chr:1:111802591 |
| 1 rs4272622   | 111825435 C | 5.174   | 1.13E-11 | chr:1:111802591 |
| 1 rs4351635   | 111825754 T | 5.174   | 1.13E-11 | chr:1:111802591 |
| 1 rs117495492 | 111815317 A | 5.213   | 1.16E-11 | chr:1:111802591 |
| 1 rs12028469  | 111822648 A | 5.255   | 1.30E-11 | chr:1:111802591 |
| 1 rs11102238  | 111843082 G | 5.334   | 2.21E-11 | chr:1:111802591 |
| 1 rs12026810  | 111846599 G | 5.311   | 2.27E-11 | chr:1:111802591 |
| 1 rs41281400  | 111827898 A | 0.2163  | 2.69E-11 | chr:1:111802591 |
| 1 rs2494012   | 111808937 T | 179.3   | 2.80E-11 | chr:1:111802591 |
| 1 rs10776720  | 111808276 A | 162.8   | 3.18E-11 | chr:1:111802591 |

|              |             |        |          |                 |
|--------------|-------------|--------|----------|-----------------|
| 1 rs10776719 | 111808180 T | 162.6  | 4.75E-11 | chr:1:111802591 |
| 1 rs1590499  | 111804651 A | 162.6  | 4.75E-11 | chr:1:111802591 |
| 1 rs1853784  | 111804717 C | 162.6  | 4.75E-11 | chr:1:111802591 |
| 1 rs2764538  | 111804370 A | 162.6  | 4.75E-11 | chr:1:111802591 |
| 1 rs2764549  | 111808546 C | 162.6  | 4.75E-11 | chr:1:111802591 |
| 1 rs2820062  | 111805966 G | 162.6  | 4.75E-11 | chr:1:111802591 |
| 1 rs76437095 | 111842681 C | 0.2705 | 4.37E-10 | chr:1:111802591 |
| 1 rs75510830 | 111842692 C | 0.2792 | 8.31E-10 | chr:1:111802591 |
| 1 rs79096750 | 111842693 A | 0.2792 | 8.31E-10 | chr:1:111802591 |
| 1 rs12752158 | 111833937 A | 0.2771 | 1.03E-09 | chr:1:111802591 |
| 1 rs12736391 | 111844599 C | 0.2776 | 1.04E-09 | chr:1:111802591 |
| 1 rs11578207 | 111837366 C | 0.2877 | 2.15E-09 | chr:1:111802591 |
| 1 rs11578209 | 111837382 A | 0.2877 | 2.15E-09 | chr:1:111802591 |
| 1 rs11584291 | 111846803 T | 0.2877 | 2.15E-09 | chr:1:111802591 |
| 1 rs12402658 | 111840855 G | 0.2877 | 2.15E-09 | chr:1:111802591 |
| 1 rs12410579 | 111835047 G | 0.2877 | 2.15E-09 | chr:1:111802591 |
| 1 rs12410848 | 111834984 C | 0.2877 | 2.15E-09 | chr:1:111802591 |
| 1 rs12562861 | 111838002 A | 0.2877 | 2.15E-09 | chr:1:111802591 |
| 1 rs12562929 | 111846331 G | 0.2877 | 2.15E-09 | chr:1:111802591 |
| 1 rs12563147 | 111846300 C | 0.2877 | 2.15E-09 | chr:1:111802591 |
| 1 rs12563158 | 111846416 G | 0.2877 | 2.15E-09 | chr:1:111802591 |
| 1 rs12727314 | 111846533 T | 0.2877 | 2.15E-09 | chr:1:111802591 |
| 1 rs12734016 | 111842985 C | 0.2877 | 2.15E-09 | chr:1:111802591 |
| 1 rs12735055 | 111842947 A | 0.2877 | 2.15E-09 | chr:1:111802591 |
| 1 rs12735944 | 111844348 T | 0.2877 | 2.15E-09 | chr:1:111802591 |
| 1 rs12739716 | 111836168 T | 0.2877 | 2.15E-09 | chr:1:111802591 |
| 1 rs12739896 | 111844175 G | 0.2877 | 2.15E-09 | chr:1:111802591 |
| 1 rs12751372 | 111846603 C | 0.2877 | 2.15E-09 | chr:1:111802591 |
| 1 rs12753801 | 111844522 C | 0.2877 | 2.15E-09 | chr:1:111802591 |
| 1 rs12755026 | 111844556 T | 0.2877 | 2.15E-09 | chr:1:111802591 |
| 1 rs12755376 | 111836023 T | 0.2877 | 2.15E-09 | chr:1:111802591 |
| 1 rs12758947 | 111842897 A | 0.2877 | 2.15E-09 | chr:1:111802591 |
| 1 rs28805711 | 111844103 T | 0.2877 | 2.15E-09 | chr:1:111802591 |
| 1 rs28826608 | 111843891 T | 0.2877 | 2.15E-09 | chr:1:111802591 |
| 1 rs28849976 | 111844011 A | 0.2877 | 2.15E-09 | chr:1:111802591 |
| 1 rs28857204 | 111844087 T | 0.2877 | 2.15E-09 | chr:1:111802591 |
| 1 rs28889692 | 111844007 G | 0.2877 | 2.15E-09 | chr:1:111802591 |
| 1 rs34971749 | 111845082 T | 0.2877 | 2.15E-09 | chr:1:111802591 |
| 1 rs35360118 | 111839319 T | 0.2877 | 2.15E-09 | chr:1:111802591 |
| 1 rs35764762 | 111843214 G | 0.2877 | 2.15E-09 | chr:1:111802591 |
| 1 rs35779360 | 111839515 G | 0.2877 | 2.15E-09 | chr:1:111802591 |
| 1 rs35888305 | 111845241 C | 0.2877 | 2.15E-09 | chr:1:111802591 |
| 1 rs4406630  | 111834733 T | 0.2877 | 2.15E-09 | chr:1:111802591 |

|               |             |        |          |                 |
|---------------|-------------|--------|----------|-----------------|
| 1 rs4546920   | 111836846 T | 0.2877 | 2.15E-09 | chr:1:111802591 |
| 1 rs4546921   | 111836868 T | 0.2877 | 2.15E-09 | chr:1:111802591 |
| 1 rs4562620   | 111835713 A | 0.2877 | 2.15E-09 | chr:1:111802591 |
| 1 rs4838901   | 111838605 G | 0.2877 | 2.15E-09 | chr:1:111802591 |
| 1 rs4838902   | 111838694 T | 0.2877 | 2.15E-09 | chr:1:111802591 |
| 1 rs4838903   | 111838832 T | 0.2877 | 2.15E-09 | chr:1:111802591 |
| 1 rs4838904   | 111838962 C | 0.2877 | 2.15E-09 | chr:1:111802591 |
| 1 rs4839117   | 111839037 G | 0.2877 | 2.15E-09 | chr:1:111802591 |
| 1 rs61382086  | 111842094 T | 0.2877 | 2.15E-09 | chr:1:111802591 |
| 1 rs66475510  | 111845588 A | 0.2877 | 2.15E-09 | chr:1:111802591 |
| 1 rs6669614   | 111840130 T | 0.2877 | 2.15E-09 | chr:1:111802591 |
| 1 rs6688167   | 111841315 C | 0.2877 | 2.15E-09 | chr:1:111802591 |
| 1 rs6688184   | 111841367 C | 0.2877 | 2.15E-09 | chr:1:111802591 |
| 1 rs6699184   | 111841409 A | 0.2877 | 2.15E-09 | chr:1:111802591 |
| 1 rs7413908   | 111842524 T | 0.2877 | 2.15E-09 | chr:1:111802591 |
| 1 rs7514165   | 111836591 G | 0.2877 | 2.15E-09 | chr:1:111802591 |
| 1 rs7525672   | 111836444 G | 0.2877 | 2.15E-09 | chr:1:111802591 |
| 1 rs7539071   | 111841089 G | 0.2877 | 2.15E-09 | chr:1:111802591 |
| 1 rs77805328  | 111842813 A | 0.2877 | 2.15E-09 | chr:1:111802591 |
| 1 rs78611689  | 111840605 G | 0.2877 | 2.15E-09 | chr:1:111802591 |
| 1 rs4460637   | 111847226 T | 0.2952 | 3.30E-09 | chr:1:111802591 |
| 1 rs34306809  | 111845903 A | 0.2956 | 3.74E-09 | chr:1:111802591 |
| 1 rs142458373 | 111842752 C | 0.2971 | 4.08E-09 | chr:1:111802591 |
| 1 rs6688274   | 111841418 G | 0.3145 | 1.07E-08 | chr:1:111802591 |
| 1 rs9659635   | 111808642 A | 0.2585 | 4.61E-08 | chr:1:111802591 |
| 1 rs11809538  | 111801853 A | 0.2693 | 7.46E-08 | chr:1:111802591 |
| 1 rs3927471   | 111802912 C | 0.2693 | 7.46E-08 | chr:1:111802591 |
| 1 rs9660405   | 111808946 C | 0.2779 | 9.71E-08 | chr:1:111802591 |
| 1 rs61808280  | 111807687 C | 0.2805 | 1.70E-07 | chr:1:111802591 |
| 1 rs7550145   | 111804157 T | 0.2805 | 1.70E-07 | chr:1:111802591 |
| 1 rs11800770  | 111813650 T | 0.2752 | 1.72E-07 | chr:1:111802591 |
| 1 rs12034487  | 111805474 G | 5.656  | 2.81E-07 | chr:1:111802591 |
| 1 rs6703883   | 111820644 G | 0.2861 | 3.81E-07 | chr:1:111802591 |
| 1 rs2764548   | 111808585 T | 0.3115 | 3.82E-07 | chr:1:111802591 |
| 1 rs2820059   | 111808392 G | 0.3115 | 3.82E-07 | chr:1:111802591 |
| 1 rs6671713   | 111815790 T | 0.2985 | 6.08E-07 | chr:1:111802591 |
| 1 rs10857867  | 111810878 A | 5.29   | 6.12E-07 | chr:1:111802591 |
| 1 rs6655936   | 111821516 G | 0.3107 | 1.32E-06 | chr:1:111802591 |
| 1 rs6698373   | 111816497 A | 0.3107 | 1.32E-06 | chr:1:111802591 |
| 1 rs6702380   | 111818052 A | 0.3107 | 1.32E-06 | chr:1:111802591 |
| 1 rs7512322   | 111818550 A | 0.3107 | 1.32E-06 | chr:1:111802591 |
| 1 rs2494013   | 111813821 A | 0.3369 | 1.49E-06 | chr:1:111802591 |
| 1 rs3118206   | 111814461 G | 0.3369 | 1.49E-06 | chr:1:111802591 |



|   |             |           |   |        |          |                 |
|---|-------------|-----------|---|--------|----------|-----------------|
| 1 | rs3122594   | 111813735 | T | 0.3369 | 1.49E-06 | chr:1:111802591 |
| 1 | rs3122595   | 111813951 | T | 0.3369 | 1.49E-06 | chr:1:111802591 |
| 1 | rs78346400  | 111844342 | G | 0.408  | 1.68E-06 | chr:1:111802591 |
| 1 | rs11102231  | 111817468 | A | 0.3428 | 2.05E-06 | chr:1:111802591 |
| 1 | rs3122593   | 111810965 | A | 0.3421 | 2.05E-06 | chr:1:111802591 |
| 1 | rs3122591   | 111810174 | C | 0.348  | 2.80E-06 | chr:1:111802591 |
| 1 | rs6696410   | 111840987 | A | 0.3791 | 6.84E-06 | chr:1:111802591 |
| 1 | rs7525014   | 111835498 | A | 0.3791 | 6.84E-06 | chr:1:111802591 |
| 1 | rs10494131  | 111824711 | C | 0.3334 | 7.29E-06 | chr:1:111802591 |
| 1 | rs41282488  | 111828423 | T | 0.3334 | 7.29E-06 | chr:1:111802591 |
| 1 | rs6537690   | 111824209 | A | 0.3334 | 7.29E-06 | chr:1:111802591 |
| 1 | rs6688201   | 111826023 | G | 0.3334 | 7.29E-06 | chr:1:111802591 |
| 1 | rs6688325   | 111826175 | T | 0.3334 | 7.29E-06 | chr:1:111802591 |
| 1 | rs12048213  | 111821434 | T | 3.702  | 8.45E-06 | chr:1:111802591 |
| 1 | rs12139505  | 111816865 | A | 3.702  | 8.45E-06 | chr:1:111802591 |
| 1 | rs6537691   | 111824255 | T | 0.3394 | 9.75E-06 | chr:1:111802591 |
| 1 | rs2783441   | 111751534 | T | 2.302  | 1.04E-05 | chr:1:111802591 |
| 1 | rs2783442   | 111754616 | T | 2.292  | 1.05E-05 | chr:1:111802591 |
| 1 | rs10857870  | 111829220 | C | 0.3438 | 1.11E-05 | chr:1:111802591 |
| 1 | rs12064178  | 111841263 | G | 0.3592 | 1.18E-05 | chr:1:111802591 |
| 1 | rs113703527 | 111840317 | A | 0.367  | 1.69E-05 | chr:1:111802591 |
| 1 | rs2820082   | 111800472 | T | 0.347  | 1.77E-05 | chr:1:111802591 |
| 1 | rs1361049   | 111908713 | C | 0.4207 | 2.24E-05 | chr:1:111802591 |
| 1 | rs10494132  | 111832223 | C | 0.3756 | 2.36E-05 | chr:1:111802591 |
| 1 | rs12144594  | 111834306 | A | 0.3756 | 2.36E-05 | chr:1:111802591 |
| 1 | rs10857869  | 111822699 | T | 3.24   | 3.02E-05 | chr:1:111802591 |
| 1 | rs6687390   | 111825226 | T | 0.39   | 3.12E-05 | chr:1:111802591 |
| 1 | rs6537695   | 111854223 | C | 0.4452 | 4.10E-05 | chr:1:111802591 |
| 1 | rs80303510  | 111823697 | C | 0.1332 | 4.18E-05 | chr:1:111802591 |
| 1 | rs3886706   | 111788779 | T | 0.4697 | 4.24E-05 | chr:1:111802591 |
| 1 | rs2783440   | 111748488 | G | 0.4493 | 4.36E-05 | chr:1:111802591 |
| 1 | rs11485090  | 111846123 | T | 0.3939 | 4.87E-05 | chr:1:111802591 |
| 1 | rs6671210   | 111845463 | T | 0.3939 | 4.87E-05 | chr:1:111802591 |
| 1 | rs12082033  | 111798711 | C | 0.3422 | 5.49E-05 | chr:1:111802591 |
| 3 | rs78795877  | 125617617 | T | 4.022  | 8.07E-07 | chr:3:125609298 |
| 3 | rs11917669  | 125599068 | T | 3.954  | 1.16E-06 | chr:3:125609298 |
| 3 | rs11925437  | 125599216 | A | 3.954  | 1.16E-06 | chr:3:125609298 |
| 3 | rs12633485  | 125605577 | T | 3.954  | 1.16E-06 | chr:3:125609298 |
| 3 | rs12634512  | 125631766 | T | 3.954  | 1.16E-06 | chr:3:125609298 |
| 3 | rs12637469  | 125600407 | T | 3.954  | 1.16E-06 | chr:3:125609298 |
| 3 | rs200006127 | 125610368 | G | 3.954  | 1.16E-06 | chr:3:125609298 |
| 3 | rs6767408   | 125623666 | T | 3.954  | 1.16E-06 | chr:3:125609298 |
| 3 | rs6767618   | 125623941 | G | 3.954  | 1.16E-06 | chr:3:125609298 |

|               |             |        |          |                 |
|---------------|-------------|--------|----------|-----------------|
| 3 rs6772193   | 125597432 A | 3.954  | 1.16E-06 | chr:3:125609298 |
| 3 rs74470729  | 125621098 T | 3.954  | 1.16E-06 | chr:3:125609298 |
| 3 rs74494751  | 125615642 G | 3.954  | 1.16E-06 | chr:3:125609298 |
| 3 rs75313595  | 125601479 A | 3.954  | 1.16E-06 | chr:3:125609298 |
| 3 rs75431854  | 125601942 A | 3.954  | 1.16E-06 | chr:3:125609298 |
| 3 rs75687938  | 125600858 T | 3.954  | 1.16E-06 | chr:3:125609298 |
| 3 rs77342220  | 125608463 T | 3.954  | 1.16E-06 | chr:3:125609298 |
| 3 rs78438430  | 125607169 C | 3.954  | 1.16E-06 | chr:3:125609298 |
| 3 rs79143534  | 125622688 G | 3.954  | 1.16E-06 | chr:3:125609298 |
| 3 rs79584539  | 125600024 T | 3.954  | 1.16E-06 | chr:3:125609298 |
| 3 rs79647471  | 125622158 A | 3.954  | 1.16E-06 | chr:3:125609298 |
| 3 rs79780713  | 125596589 G | 3.954  | 1.16E-06 | chr:3:125609298 |
| 3 rs9714319   | 125612678 T | 3.954  | 1.16E-06 | chr:3:125609298 |
| 3 rs34721907  | 125637285 A | 3.938  | 1.40E-06 | chr:3:125609298 |
| 3 rs58198667  | 125635719 T | 3.938  | 1.40E-06 | chr:3:125609298 |
| 3 rs74402623  | 125643173 A | 3.938  | 1.40E-06 | chr:3:125609298 |
| 3 rs80022059  | 125641856 A | 3.938  | 1.40E-06 | chr:3:125609298 |
| 3 rs76697478  | 125622811 A | 3.88   | 1.45E-06 | chr:3:125609298 |
| 3 rs75837707  | 125630833 T | 3.779  | 2.29E-06 | chr:3:125609298 |
| 3 rs79344588  | 125632117 A | 3.749  | 2.33E-06 | chr:3:125609298 |
| 3 rs60487455  | 125619863 G | 3.784  | 2.46E-06 | chr:3:125609298 |
| 3 rs60374286  | 125630173 T | 3.475  | 4.26E-06 | chr:3:125609298 |
| 3 rs112567450 | 125592200 T | 3.532  | 5.32E-06 | chr:3:125609298 |
| 3 rs11922653  | 125591569 A | 3.532  | 5.32E-06 | chr:3:125609298 |
| 3 rs35540257  | 125590518 A | 3.532  | 5.32E-06 | chr:3:125609298 |
| 3 rs11711436  | 125629149 T | 3.363  | 6.60E-06 | chr:3:125609298 |
| 3 rs9859596   | 125593349 T | 3.277  | 1.28E-05 | chr:3:125609298 |
| 3 rs11714778  | 129762082 C | 0.1675 | 1.68E-14 | chr:3:129776131 |
| 3 rs12495049  | 129810234 T | 0.1675 | 1.68E-14 | chr:3:129776131 |
| 3 rs73208686  | 129762898 C | 0.1675 | 1.68E-14 | chr:3:129776131 |
| 3 rs11716622  | 129809592 A | 0.1671 | 1.77E-14 | chr:3:129776131 |
| 3 rs12634803  | 129807284 T | 0.1713 | 1.84E-14 | chr:3:129776131 |
| 3 rs11718709  | 129811323 A | 0.1822 | 6.54E-14 | chr:3:129776131 |
| 3 rs111717650 | 129814301 A | 0.1837 | 9.60E-14 | chr:3:129776131 |
| 3 rs73210759  | 129813745 T | 0.1859 | 9.98E-14 | chr:3:129776131 |
| 3 rs9758049   | 129814863 A | 0.1949 | 1.03E-12 | chr:3:129776131 |
| 3 rs73866092  | 129815599 C | 0.2471 | 5.40E-11 | chr:3:129776131 |
| 3 rs75630148  | 129821465 T | 0.2443 | 1.07E-10 | chr:3:129776131 |
| 3 rs73210760  | 129818875 A | 0.264  | 1.28E-10 | chr:3:129776131 |
| 3 rs56088005  | 129821650 A | 0.257  | 1.36E-10 | chr:3:129776131 |
| 3 rs12632200  | 129816368 T | 0.2507 | 1.50E-10 | chr:3:129776131 |
| 3 rs113679585 | 129819332 A | 0.2525 | 1.58E-10 | chr:3:129776131 |
| 3 rs146549952 | 129816552 T | 0.2527 | 1.87E-10 | chr:3:129776131 |

|               |             |        |          |                 |
|---------------|-------------|--------|----------|-----------------|
| 3 rs6804887   | 129820568 A | 0.2615 | 2.28E-10 | chr:3:129776131 |
| 3 rs112581710 | 129820151 A | 0.2615 | 2.58E-10 | chr:3:129776131 |
| 3 rs12637557  | 129815930 A | 0.2615 | 2.58E-10 | chr:3:129776131 |
| 3 rs78806708  | 129822616 C | 0.2636 | 3.14E-10 | chr:3:129776131 |
| 3 rs9713340   | 129822492 A | 0.2636 | 3.14E-10 | chr:3:129776131 |
| 3 rs9713334   | 129822494 T | 0.2639 | 3.72E-10 | chr:3:129776131 |
| 3 rs118004362 | 129820231 T | 0.2783 | 4.21E-10 | chr:3:129776131 |
| 3 rs56218598  | 129823899 A | 0.2725 | 5.02E-10 | chr:3:129776131 |
| 3 rs9713344   | 129822552 A | 0.2725 | 5.02E-10 | chr:3:129776131 |
| 3 rs9713346   | 129822634 A | 0.2725 | 5.02E-10 | chr:3:129776131 |
| 3 rs111270043 | 129820915 T | 0.2729 | 5.21E-10 | chr:3:129776131 |
| 3 rs61073628  | 129817316 T | 0.2731 | 5.43E-10 | chr:3:129776131 |
| 3 rs74203764  | 129817379 T | 0.2731 | 5.43E-10 | chr:3:129776131 |
| 3 rs112577058 | 129818750 G | 0.2858 | 6.98E-10 | chr:3:129776131 |
| 3 rs12638292  | 129816961 T | 0.2858 | 6.98E-10 | chr:3:129776131 |
| 3 rs56039375  | 129818509 G | 0.2858 | 6.98E-10 | chr:3:129776131 |
| 3 rs56235703  | 129818389 G | 0.2858 | 6.98E-10 | chr:3:129776131 |
| 3 rs6788479   | 129817708 G | 0.2899 | 8.37E-10 | chr:3:129776131 |
| 3 rs34158162  | 129828454 C | 0.2758 | 9.15E-10 | chr:3:129776131 |
| 3 rs7428344   | 129826100 T | 0.2758 | 9.15E-10 | chr:3:129776131 |
| 3 rs9681064   | 129846313 C | 0.2911 | 9.88E-10 | chr:3:129776131 |
| 3 rs6804728   | 129820580 T | 0.2786 | 1.06E-09 | chr:3:129776131 |
| 3 rs73210763  | 129827901 G | 0.2762 | 1.08E-09 | chr:3:129776131 |
| 3 rs112987689 | 129824001 T | 0.2962 | 1.28E-09 | chr:3:129776131 |
| 3 rs6808888   | 129822441 A | 0.2962 | 1.28E-09 | chr:3:129776131 |
| 3 rs12497818  | 129843254 C | 0.2807 | 1.30E-09 | chr:3:129776131 |
| 3 rs9754694   | 129844166 T | 0.2807 | 1.30E-09 | chr:3:129776131 |
| 3 rs75177871  | 129821816 G | 0.2847 | 1.42E-09 | chr:3:129776131 |
| 3 rs111775688 | 129826402 T | 0.2853 | 1.48E-09 | chr:3:129776131 |
| 3 rs113674105 | 129830064 A | 0.2853 | 1.48E-09 | chr:3:129776131 |
| 3 rs137960198 | 129828560 T | 0.2853 | 1.48E-09 | chr:3:129776131 |
| 3 rs149652485 | 129830726 A | 0.2853 | 1.48E-09 | chr:3:129776131 |
| 3 rs7428346   | 129826002 T | 0.2853 | 1.48E-09 | chr:3:129776131 |
| 3 rs12491391  | 129843530 G | 0.281  | 1.55E-09 | chr:3:129776131 |
| 3 rs28477611  | 129844824 A | 0.2994 | 1.55E-09 | chr:3:129776131 |
| 3 rs28754684  | 129844800 C | 0.2994 | 1.55E-09 | chr:3:129776131 |
| 3 rs12495527  | 129822950 G | 0.3023 | 1.91E-09 | chr:3:129776131 |
| 3 rs113747501 | 129826513 C | 0.2992 | 1.95E-09 | chr:3:129776131 |
| 3 rs9713120   | 129850043 T | 0.3029 | 2.04E-09 | chr:3:129776131 |
| 3 rs10934908  | 129840300 T | 0.2901 | 2.09E-09 | chr:3:129776131 |
| 3 rs113421391 | 129830961 C | 0.2901 | 2.09E-09 | chr:3:129776131 |
| 3 rs12233562  | 129845749 A | 0.2901 | 2.09E-09 | chr:3:129776131 |
| 3 rs28442137  | 129840485 T | 0.2901 | 2.09E-09 | chr:3:129776131 |

|               |             |        |          |                 |
|---------------|-------------|--------|----------|-----------------|
| 3 rs4569696   | 129834986 A | 0.2901 | 2.09E-09 | chr:3:129776131 |
| 3 rs55908933  | 129835084 T | 0.2901 | 2.09E-09 | chr:3:129776131 |
| 3 rs56171265  | 129833240 T | 0.2901 | 2.09E-09 | chr:3:129776131 |
| 3 rs56292584  | 129833209 T | 0.2901 | 2.09E-09 | chr:3:129776131 |
| 3 rs56314950  | 129833031 T | 0.2901 | 2.09E-09 | chr:3:129776131 |
| 3 rs56957706  | 129845338 C | 0.2901 | 2.09E-09 | chr:3:129776131 |
| 3 rs60352193  | 129830922 C | 0.2901 | 2.09E-09 | chr:3:129776131 |
| 3 rs6809980   | 129847462 A | 0.2901 | 2.09E-09 | chr:3:129776131 |
| 3 rs9754720   | 129844403 T | 0.2901 | 2.09E-09 | chr:3:129776131 |
| 3 rs12497879  | 129843468 T | 0.3034 | 2.29E-09 | chr:3:129776131 |
| 3 rs6784328   | 129822059 G | 0.3074 | 2.56E-09 | chr:3:129776131 |
| 3 rs6769324   | 129820903 G | 0.3055 | 2.61E-09 | chr:3:129776131 |
| 3 rs112405295 | 129824844 A | 0.2867 | 2.61E-09 | chr:3:129776131 |
| 3 rs13083073  | 129819247 C | 0.2959 | 2.66E-09 | chr:3:129776131 |
| 3 rs59443817  | 129817290 G | 0.2959 | 2.66E-09 | chr:3:129776131 |
| 3 rs9815579   | 129755175 T | 0.2927 | 2.87E-09 | chr:3:129776131 |
| 3 rs113076563 | 129818689 C | 0.2962 | 3.07E-09 | chr:3:129776131 |
| 3 rs55773357  | 129849781 T | 0.2915 | 3.23E-09 | chr:3:129776131 |
| 3 rs56312715  | 129849847 A | 0.2915 | 3.23E-09 | chr:3:129776131 |
| 3 rs10934907  | 129830493 C | 0.3105 | 3.84E-09 | chr:3:129776131 |
| 3 rs12107141  | 129844617 C | 0.3105 | 3.84E-09 | chr:3:129776131 |
| 3 rs12233374  | 129845660 A | 0.3105 | 3.84E-09 | chr:3:129776131 |
| 3 rs12487314  | 129842009 C | 0.3105 | 3.84E-09 | chr:3:129776131 |
| 3 rs12487371  | 129842190 G | 0.3105 | 3.84E-09 | chr:3:129776131 |
| 3 rs12491387  | 129843518 G | 0.3105 | 3.84E-09 | chr:3:129776131 |
| 3 rs12491430  | 129843630 G | 0.3105 | 3.84E-09 | chr:3:129776131 |
| 3 rs12636674  | 129834567 A | 0.3105 | 3.84E-09 | chr:3:129776131 |
| 3 rs17735722  | 129843196 G | 0.3105 | 3.84E-09 | chr:3:129776131 |
| 3 rs28475731  | 129844692 T | 0.3105 | 3.84E-09 | chr:3:129776131 |
| 3 rs28567533  | 129845174 A | 0.3105 | 3.84E-09 | chr:3:129776131 |
| 3 rs28798137  | 129845247 A | 0.3105 | 3.84E-09 | chr:3:129776131 |
| 3 rs35543987  | 129842031 A | 0.3105 | 3.84E-09 | chr:3:129776131 |
| 3 rs376047039 | 129845958 G | 0.3105 | 3.84E-09 | chr:3:129776131 |
| 3 rs4072146   | 129829463 A | 0.3105 | 3.84E-09 | chr:3:129776131 |
| 3 rs4337672   | 129839907 T | 0.3105 | 3.84E-09 | chr:3:129776131 |
| 3 rs55977977  | 129831316 G | 0.3105 | 3.84E-09 | chr:3:129776131 |
| 3 rs56274321  | 129834254 A | 0.3105 | 3.84E-09 | chr:3:129776131 |
| 3 rs57173421  | 129843153 G | 0.3105 | 3.84E-09 | chr:3:129776131 |
| 3 rs59318782  | 129842972 G | 0.3105 | 3.84E-09 | chr:3:129776131 |
| 3 rs61433746  | 129836538 T | 0.3105 | 3.84E-09 | chr:3:129776131 |
| 3 rs6795939   | 129842885 T | 0.3105 | 3.84E-09 | chr:3:129776131 |
| 3 rs6796054   | 129842995 A | 0.3105 | 3.84E-09 | chr:3:129776131 |
| 3 rs6796132   | 129842958 A | 0.3105 | 3.84E-09 | chr:3:129776131 |

|                         |             |        |          |                 |
|-------------------------|-------------|--------|----------|-----------------|
| 3 rs6796817             | 129837836 T | 0.3105 | 3.84E-09 | chr:3:129776131 |
| 3 rs6808274             | 129842797 C | 0.3105 | 3.84E-09 | chr:3:129776131 |
| 3 rs6808384             | 129842900 C | 0.3105 | 3.84E-09 | chr:3:129776131 |
| 3 rs72990317            | 129830425 G | 0.3105 | 3.84E-09 | chr:3:129776131 |
| 3 rs73210765            | 129841875 A | 0.3105 | 3.84E-09 | chr:3:129776131 |
| 3 rs7432233             | 129825955 G | 0.3105 | 3.84E-09 | chr:3:129776131 |
| 3 rs9289355             | 129838184 G | 0.3105 | 3.84E-09 | chr:3:129776131 |
| 3 rs9754713             | 129837151 C | 0.3105 | 3.84E-09 | chr:3:129776131 |
| 3 rs9757129             | 129844461 G | 0.3105 | 3.84E-09 | chr:3:129776131 |
| 3 rs11708901            | 129847846 C | 0.3108 | 4.03E-09 | chr:3:129776131 |
| 3 rs11720489            | 129848042 T | 0.3108 | 4.03E-09 | chr:3:129776131 |
| 3 rs11720599            | 129848148 A | 0.3108 | 4.03E-09 | chr:3:129776131 |
| 3 rs147534743           | 129849886 G | 0.3108 | 4.03E-09 | chr:3:129776131 |
| 3 rs34086701            | 129846916 C | 0.3108 | 4.03E-09 | chr:3:129776131 |
| 3 rs4491951             | 129850208 C | 0.3108 | 4.03E-09 | chr:3:129776131 |
| 3 rs4619822             | 129850342 A | 0.3108 | 4.03E-09 | chr:3:129776131 |
| 3 rs56279301            | 129848747 T | 0.3108 | 4.03E-09 | chr:3:129776131 |
| 3 rs59667515            | 129848796 C | 0.3108 | 4.03E-09 | chr:3:129776131 |
| 3 rs6776708             | 129847555 C | 0.3108 | 4.03E-09 | chr:3:129776131 |
| 3 rs74442213            | 129846119 A | 0.3108 | 4.03E-09 | chr:3:129776131 |
| 3 rs9682942             | 129846098 T | 0.3108 | 4.03E-09 | chr:3:129776131 |
| 3 rs9682954             | 129846247 G | 0.3108 | 4.03E-09 | chr:3:129776131 |
| 3 rs9713121             | 129850044 G | 0.3108 | 4.03E-09 | chr:3:129776131 |
| 3 rs9713819             | 129849956 G | 0.3108 | 4.03E-09 | chr:3:129776131 |
| 3 rs56086823            | 129841378 A | 0.3106 | 4.29E-09 | chr:3:129776131 |
| 3 rs10934909            | 129849297 T | 0.3147 | 4.69E-09 | chr:3:129776131 |
| 3 rs10934912            | 129849479 T | 0.3171 | 6.10E-09 | chr:3:129776131 |
| 3 rs35523538            | 129832419 C | 0.2677 | 6.38E-09 | chr:3:129776131 |
| 3 rs28726131            | 129844802 G | 0.3245 | 7.21E-09 | chr:3:129776131 |
| 3 rs34831897            | 129759914 T | 0.3115 | 7.82E-09 | chr:3:129776131 |
| 3 rs12497877            | 129843458 A | 0.3316 | 9.94E-09 | chr:3:129776131 |
| 3 rs72990312            | 129826675 C | 0.311  | 1.09E-08 | chr:3:129776131 |
| 3 rs11712662            | 129848252 G | 0.3344 | 1.70E-08 | chr:3:129776131 |
| 3 rs112319225           | 129826344 G | 0.3353 | 1.71E-08 | chr:3:129776131 |
| 3 rs113111443           | 129826394 C | 0.3353 | 1.71E-08 | chr:3:129776131 |
| 3 rs12233436            | 129845766 G | 0.3353 | 1.71E-08 | chr:3:129776131 |
| 3 rs6774812             | 129844022 G | 0.3353 | 1.71E-08 | chr:3:129776131 |
| 3 rs11721284;rs57423551 | 129844950 G | 0.3061 | 1.73E-08 | chr:3:129776131 |
| 3 rs6809088             | 129837584 C | 0.3382 | 2.04E-08 | chr:3:129776131 |
| 3 rs7428327             | 129826031 T | 0.3363 | 2.51E-08 | chr:3:129776131 |
| 3 rs57573544            | 129845394 G | 0.3396 | 2.57E-08 | chr:3:129776131 |
| 3 rs58593172            | 129845403 G | 0.3396 | 2.57E-08 | chr:3:129776131 |
| 3 rs61532278            | 129844947 G | 0.2703 | 2.68E-08 | chr:3:129776131 |

|               |             |         |          |                 |
|---------------|-------------|---------|----------|-----------------|
| 3 rs59803194  | 129845429 A | 0.3507  | 4.44E-08 | chr:3:129776131 |
| 3 rs55891359  | 129760185 C | 2.81    | 4.91E-08 | chr:3:129776131 |
| 3 rs187016983 | 129845427 A | 0.3518  | 5.36E-08 | chr:3:129776131 |
| 3 rs60351474  | 129845423 G | 0.3518  | 5.36E-08 | chr:3:129776131 |
| 3 rs10934910  | 129849334 G | 0.3681  | 1.16E-07 | chr:3:129776131 |
| 3 rs10934911  | 129849366 C | 0.3681  | 1.16E-07 | chr:3:129776131 |
| 3 rs34233228  | 129750876 A | 2.707   | 1.26E-07 | chr:3:129776131 |
| 3 rs35882657  | 129750735 C | 2.707   | 1.26E-07 | chr:3:129776131 |
| 3 rs56110318  | 129849681 G | 0.3679  | 1.42E-07 | chr:3:129776131 |
| 3 rs9713134   | 129850080 A | 0.3677  | 1.70E-07 | chr:3:129776131 |
| 3 rs13093111  | 129754672 A | 2.562   | 2.59E-07 | chr:3:129776131 |
| 3 rs2403477   | 129864875 T | 0.3241  | 2.95E-07 | chr:3:129776131 |
| 3 rs12488592  | 129752490 C | 2.473   | 5.29E-07 | chr:3:129776131 |
| 3 rs6799884   | 129814251 T | 0.3094  | 1.29E-06 | chr:3:129776131 |
| 3 rs9863859   | 129814862 T | 2.763   | 2.13E-06 | chr:3:129776131 |
| 3 rs35695300  | 129760923 T | 2.806   | 2.42E-06 | chr:3:129776131 |
| 3 rs9832290   | 129758522 C | 2.806   | 2.42E-06 | chr:3:129776131 |
| 3 rs9879964   | 129760340 T | 2.806   | 2.42E-06 | chr:3:129776131 |
| 3 rs11914710  | 129810346 C | 2.894   | 2.57E-06 | chr:3:129776131 |
| 3 rs13061782  | 129810800 A | 2.894   | 2.57E-06 | chr:3:129776131 |
| 3 rs13081624  | 129810799 G | 2.894   | 2.57E-06 | chr:3:129776131 |
| 3 rs6767964   | 129809899 A | 2.894   | 2.57E-06 | chr:3:129776131 |
| 3 rs6803922   | 129810158 T | 2.894   | 2.57E-06 | chr:3:129776131 |
| 3 rs6804080   | 129810128 A | 2.894   | 2.57E-06 | chr:3:129776131 |
| 3 rs7644173   | 129808755 T | 2.894   | 2.57E-06 | chr:3:129776131 |
| 3 rs9849970   | 129807203 T | 2.894   | 2.57E-06 | chr:3:129776131 |
| 3 rs9846907   | 129757554 T | 2.279   | 2.59E-06 | chr:3:129776131 |
| 3 rs9864424   | 129815139 A | 2.625   | 4.89E-06 | chr:3:129776131 |
| 3 rs6791923   | 129706392 G | 2.273   | 6.39E-06 | chr:3:129776131 |
| 3 rs12632095  | 129757870 C | 2.232   | 8.54E-06 | chr:3:129776131 |
| 3 rs4610271   | 129813301 G | 2.221   | 9.02E-06 | chr:3:129776131 |
| 3 rs9812409   | 129814502 T | 2.795   | 1.03E-05 | chr:3:129776131 |
| 3 rs11707425  | 129749980 G | 2.402   | 1.15E-05 | chr:3:129776131 |
| 3 rs10934906  | 129813062 T | 2.181   | 1.21E-05 | chr:3:129776131 |
| 3 rs4487280   | 129813361 G | 2.181   | 1.21E-05 | chr:3:129776131 |
| 3 rs10934901  | 129747902 T | 2.219   | 1.25E-05 | chr:3:129776131 |
| 3 rs58302754  | 129763329 A | 2.168   | 1.52E-05 | chr:3:129776131 |
| 3 rs7625942   | 129951454 G | 2.392   | 1.69E-05 | chr:3:129776131 |
| 3 rs11708560  | 129809131 A | 2.093   | 2.54E-05 | chr:3:129776131 |
| 3 rs6806210   | 129807027 T | 2.093   | 2.54E-05 | chr:3:129776131 |
| 3 rs7622131   | 129808869 A | 2.093   | 2.54E-05 | chr:3:129776131 |
| 3 rs12487635  | 195672459 T | 0.02666 | 2.01E-09 | chr:3:195654394 |
| 3 rs12497996  | 195672534 C | 0.02666 | 2.01E-09 | chr:3:195654394 |

|               |             |         |          |                 |
|---------------|-------------|---------|----------|-----------------|
| 3 rs141789999 | 195676214 G | 0.02666 | 2.01E-09 | chr:3:195654394 |
| 3 rs146447703 | 195672685 A | 0.02666 | 2.01E-09 | chr:3:195654394 |
| 3 rs72499654  | 195662770 C | 0.01375 | 2.44E-09 | chr:3:195654394 |
| 3 rs4927814   | 195684297 C | 0.03707 | 2.82E-09 | chr:3:195654394 |
| 3 rs111452973 | 195683167 C | 0.02814 | 3.11E-09 | chr:3:195654394 |
| 3 rs72499666  | 195683479 G | 0.02399 | 3.12E-09 | chr:3:195654394 |
| 3 rs111857020 | 195684226 A | 0.03748 | 3.15E-09 | chr:3:195654394 |
| 3 rs112372218 | 195684599 T | 0.03748 | 3.15E-09 | chr:3:195654394 |
| 3 rs12488793  | 195682872 G | 0.03748 | 3.15E-09 | chr:3:195654394 |
| 3 rs12489547  | 195682747 C | 0.03748 | 3.15E-09 | chr:3:195654394 |
| 3 rs77298109  | 195683022 G | 0.03748 | 3.15E-09 | chr:3:195654394 |
| 3 rs111237905 | 195683159 A | 0.02838 | 3.16E-09 | chr:3:195654394 |
| 3 rs111529852 | 195683186 C | 0.02838 | 3.16E-09 | chr:3:195654394 |
| 3 rs113181724 | 195683118 A | 0.02838 | 3.16E-09 | chr:3:195654394 |
| 3 rs111569452 | 195683174 C | 0.02872 | 3.19E-09 | chr:3:195654394 |
| 3 rs12489913  | 195673933 G | 0.02946 | 3.26E-09 | chr:3:195654394 |
| 3 rs7372023   | 195674317 T | 0.03586 | 3.33E-09 | chr:3:195654394 |
| 3 rs74406097  | 195658661 C | 0.01484 | 3.34E-09 | chr:3:195654394 |
| 3 rs74894130  | 195660697 T | 0.01484 | 3.34E-09 | chr:3:195654394 |
| 3 rs76268338  | 195661315 G | 0.01484 | 3.34E-09 | chr:3:195654394 |
| 3 rs77570361  | 195659561 G | 0.01484 | 3.34E-09 | chr:3:195654394 |
| 3 rs78128847  | 195653985 T | 0.01484 | 3.34E-09 | chr:3:195654394 |
| 3 rs78809271  | 195659736 A | 0.01484 | 3.34E-09 | chr:3:195654394 |
| 3 rs79026789  | 195660712 A | 0.01484 | 3.34E-09 | chr:3:195654394 |
| 3 rs79516196  | 195658662 A | 0.01484 | 3.34E-09 | chr:3:195654394 |
| 3 rs62285304  | 195675478 T | 0.02905 | 4.21E-09 | chr:3:195654394 |
| 3 rs7371976   | 195684515 A | 0.04509 | 4.80E-09 | chr:3:195654394 |
| 3 rs141586514 | 195688130 C | 0.03577 | 6.35E-09 | chr:3:195654394 |
| 3 rs112619958 | 195693191 G | 0.03828 | 6.66E-09 | chr:3:195654394 |
| 3 rs112957249 | 195693236 T | 0.03828 | 6.66E-09 | chr:3:195654394 |
| 3 rs149593867 | 195688363 C | 0.03828 | 6.66E-09 | chr:3:195654394 |
| 3 rs78320742  | 195689817 T | 0.03828 | 6.66E-09 | chr:3:195654394 |
| 3 rs113310924 | 195734614 T | 0.02413 | 6.72E-09 | chr:3:195654394 |
| 3 rs140057626 | 195728317 A | 0.02413 | 6.72E-09 | chr:3:195654394 |
| 3 rs146692935 | 195723648 C | 0.02413 | 6.72E-09 | chr:3:195654394 |
| 3 rs2593984   | 195725621 A | 0.02413 | 6.72E-09 | chr:3:195654394 |
| 3 rs34254399  | 195740067 T | 0.02413 | 6.72E-09 | chr:3:195654394 |
| 3 rs4927846   | 195732325 G | 0.02413 | 6.72E-09 | chr:3:195654394 |
| 3 rs4927847   | 195736627 C | 0.02413 | 6.72E-09 | chr:3:195654394 |
| 3 rs72499671  | 195724614 C | 0.02413 | 6.72E-09 | chr:3:195654394 |
| 3 rs72499672  | 195726839 G | 0.02413 | 6.72E-09 | chr:3:195654394 |
| 3 rs72499680  | 195730979 A | 0.02413 | 6.72E-09 | chr:3:195654394 |
| 3 rs75342758  | 195737511 T | 0.02413 | 6.72E-09 | chr:3:195654394 |

|               |             |         |          |                 |
|---------------|-------------|---------|----------|-----------------|
| 3 rs75962942  | 195728678 G | 0.02413 | 6.72E-09 | chr:3:195654394 |
| 3 rs76499913  | 195729028 T | 0.02413 | 6.72E-09 | chr:3:195654394 |
| 3 rs76655042  | 195736059 T | 0.02413 | 6.72E-09 | chr:3:195654394 |
| 3 rs78147044  | 195745484 A | 0.02413 | 6.72E-09 | chr:3:195654394 |
| 3 rs147267489 | 195693977 G | 0.03869 | 6.77E-09 | chr:3:195654394 |
| 3 rs188069625 | 195692975 A | 0.02804 | 7.24E-09 | chr:3:195654394 |
| 3 rs147038037 | 195688166 C | 0.03667 | 7.28E-09 | chr:3:195654394 |
| 3 rs538034368 | 195683992 A | 0.06219 | 7.41E-09 | chr:3:195654394 |
| 3 rs575022724 | 195684009 G | 0.06219 | 7.41E-09 | chr:3:195654394 |
| 3 rs114155151 | 195688314 G | 0.03923 | 7.64E-09 | chr:3:195654394 |
| 3 rs79698107  | 195760322 A | 0.02842 | 8.59E-09 | chr:3:195654394 |
| 3 rs4927856   | 195756474 T | 0.02825 | 8.72E-09 | chr:3:195654394 |
| 3 rs77192409  | 195751543 C | 0.02825 | 8.72E-09 | chr:3:195654394 |
| 3 rs79238342  | 195757954 A | 0.02825 | 8.72E-09 | chr:3:195654394 |
| 3 rs140893852 | 195691373 T | 0.03993 | 9.32E-09 | chr:3:195654394 |
| 3 rs143076671 | 195692843 A | 0.03993 | 9.32E-09 | chr:3:195654394 |
| 3 rs145435068 | 195693305 T | 0.03993 | 9.32E-09 | chr:3:195654394 |
| 3 rs148761326 | 195691637 A | 0.03993 | 9.32E-09 | chr:3:195654394 |
| 3 rs150157283 | 195691387 C | 0.03993 | 9.32E-09 | chr:3:195654394 |
| 3 rs201250247 | 195691199 G | 0.03993 | 9.32E-09 | chr:3:195654394 |
| 3 rs77759126  | 195692828 C | 0.03993 | 9.32E-09 | chr:3:195654394 |
| 3 rs368599720 | 195668122 A | 0.01594 | 9.34E-09 | chr:3:195654394 |
| 3 rs368905451 | 195729075 T | 0.03402 | 9.38E-09 | chr:3:195654394 |
| 3 rs138213397 | 195676057 A | 0.03206 | 9.97E-09 | chr:3:195654394 |
| 3 rs371452292 | 195710165 C | 0.03956 | 1.11E-08 | chr:3:195654394 |
| 3 rs183890720 | 195684486 G | 0.05014 | 1.12E-08 | chr:3:195654394 |
| 3 rs191821895 | 195684485 G | 0.05014 | 1.12E-08 | chr:3:195654394 |
| 3 rs7619087   | 195676518 A | 0.02784 | 1.23E-08 | chr:3:195654394 |
| 3 rs200631070 | 195671274 T | 0.03369 | 1.43E-08 | chr:3:195654394 |
| 3 rs189722989 | 195690118 A | 0.03862 | 1.48E-08 | chr:3:195654394 |
| 3 rs28660371  | 195690105 G | 0.03862 | 1.48E-08 | chr:3:195654394 |
| 3 rs12495891  | 195762306 G | 0.03254 | 1.54E-08 | chr:3:195654394 |
| 3 rs76633380  | 195762727 A | 0.03254 | 1.54E-08 | chr:3:195654394 |
| 3 rs75737544  | 195771900 G | 0.0323  | 1.55E-08 | chr:3:195654394 |
| 3 rs113488782 | 195684121 C | 0.043   | 1.55E-08 | chr:3:195654394 |
| 3 rs4927855   | 195754452 T | 0.03213 | 1.61E-08 | chr:3:195654394 |
| 3 rs1080211   | 195764711 C | 0.0326  | 1.69E-08 | chr:3:195654394 |
| 3 rs55990110  | 195768472 T | 0.0326  | 1.69E-08 | chr:3:195654394 |
| 3 rs62284005  | 195768079 T | 0.0326  | 1.69E-08 | chr:3:195654394 |
| 3 rs62284007  | 195770947 A | 0.0326  | 1.69E-08 | chr:3:195654394 |
| 3 rs62284008  | 195771155 A | 0.0326  | 1.69E-08 | chr:3:195654394 |
| 3 rs78587262  | 195717867 G | 0.0419  | 1.82E-08 | chr:3:195654394 |
| 3 rs200743347 | 195722294 A | 0.04058 | 2.31E-08 | chr:3:195654394 |



|               |             |         |          |                 |
|---------------|-------------|---------|----------|-----------------|
| 3 rs138904938 | 195667637 T | 0.02068 | 2.84E-08 | chr:3:195654394 |
| 3 rs79540055  | 195692516 T | 0.05406 | 3.79E-08 | chr:3:195654394 |
| 3 rs72499659  | 195667840 C | 0.02053 | 3.85E-08 | chr:3:195654394 |
| 3 rs113876944 | 195682180 A | 0.04889 | 4.08E-08 | chr:3:195654394 |
| 3 rs142455000 | 195831362 C | 0.05184 | 4.24E-08 | chr:3:195654394 |
| 3 rs9823320   | 195771629 G | 0.07471 | 4.94E-08 | chr:3:195654394 |
| 3 rs62284010  | 195773092 T | 0.05218 | 5.19E-08 | chr:3:195654394 |
| 3 rs73208016  | 195650120 A | 0.05158 | 6.23E-08 | chr:3:195654394 |
| 3 rs7372331   | 195684523 G | 0.07047 | 6.80E-08 | chr:3:195654394 |
| 3 rs112788096 | 195682140 T | 0.05243 | 8.05E-08 | chr:3:195654394 |
| 3 rs113786804 | 195682145 G | 0.05243 | 8.05E-08 | chr:3:195654394 |
| 3 rs73208017  | 195650428 G | 0.08354 | 8.22E-08 | chr:3:195654394 |
| 3 rs145575126 | 195683366 T | 0.04069 | 8.45E-08 | chr:3:195654394 |
| 3 rs3107709   | 195683255 C | 0.06118 | 8.57E-08 | chr:3:195654394 |
| 3 rs112586036 | 195762470 A | 0.06276 | 8.63E-08 | chr:3:195654394 |
| 3 rs9325402   | 195400498 T | 18.53   | 9.59E-08 | chr:3:195654394 |
| 3 rs114004364 | 195682365 G | 0.06633 | 1.05E-07 | chr:3:195654394 |
| 3 rs113809427 | 195762456 T | 0.06427 | 1.07E-07 | chr:3:195654394 |
| 3 rs200402998 | 195676577 A | 0.0638  | 1.07E-07 | chr:3:195654394 |
| 3 rs4927707   | 195771725 T | 0.0815  | 1.07E-07 | chr:3:195654394 |
| 3 rs4927705   | 195751397 T | 0.0741  | 1.13E-07 | chr:3:195654394 |
| 3 rs370983839 | 195668043 C | 0.03364 | 1.28E-07 | chr:3:195654394 |
| 3 rs7610260   | 195682526 A | 0.09585 | 1.42E-07 | chr:3:195654394 |
| 3 rs4927706   | 195771722 G | 0.08023 | 1.46E-07 | chr:3:195654394 |
| 3 rs2044599   | 195736740 G | 0.09302 | 1.55E-07 | chr:3:195654394 |
| 3 rs4927704   | 195738228 C | 0.09302 | 1.55E-07 | chr:3:195654394 |
| 3 rs4927848   | 195738406 A | 0.09302 | 1.55E-07 | chr:3:195654394 |
| 3 rs79088388  | 195812194 T | 0.08549 | 1.55E-07 | chr:3:195654394 |
| 3 rs10881563  | 195750225 A | 0.09283 | 1.65E-07 | chr:3:195654394 |
| 3 rs4632575   | 195744978 A | 0.09283 | 1.65E-07 | chr:3:195654394 |
| 3 rs1679296   | 195732647 A | 0.09813 | 1.69E-07 | chr:3:195654394 |
| 3 rs6799572   | 195740408 C | 0.09244 | 1.71E-07 | chr:3:195654394 |
| 3 rs62285392  | 195824420 C | 0.08613 | 1.74E-07 | chr:3:195654394 |
| 3 rs62285393  | 195824554 T | 0.08613 | 1.74E-07 | chr:3:195654394 |
| 3 rs9834211   | 195743762 A | 0.09283 | 1.77E-07 | chr:3:195654394 |
| 3 rs10881564  | 195750326 C | 0.09224 | 1.80E-07 | chr:3:195654394 |
| 3 rs7624638   | 195748729 C | 0.09224 | 1.80E-07 | chr:3:195654394 |
| 3 rs7624831   | 195748924 C | 0.09224 | 1.80E-07 | chr:3:195654394 |
| 3 rs7625570   | 195747398 A | 0.09224 | 1.80E-07 | chr:3:195654394 |
| 3 rs7627407   | 195749357 C | 0.09224 | 1.80E-07 | chr:3:195654394 |
| 3 rs201898153 | 195697848 C | 0.0515  | 1.86E-07 | chr:3:195654394 |
| 3 rs2300779   | 195790691 A | 0.08793 | 1.92E-07 | chr:3:195654394 |
| 3 rs3761716   | 195798097 G | 0.08793 | 1.92E-07 | chr:3:195654394 |

|               |             |         |          |                 |
|---------------|-------------|---------|----------|-----------------|
| 3 rs3804138   | 195807688 C | 0.08793 | 1.92E-07 | chr:3:195654394 |
| 3 rs3804141   | 195796908 T | 0.08793 | 1.92E-07 | chr:3:195654394 |
| 3 rs3827556   | 195796574 T | 0.08793 | 1.92E-07 | chr:3:195654394 |
| 3 rs41299394  | 195775824 T | 0.08793 | 1.92E-07 | chr:3:195654394 |
| 3 rs41300427  | 195804449 T | 0.08793 | 1.92E-07 | chr:3:195654394 |
| 3 rs41301353  | 195801426 A | 0.08793 | 1.92E-07 | chr:3:195654394 |
| 3 rs570       | 195776240 T | 0.08793 | 1.92E-07 | chr:3:195654394 |
| 3 rs62284053  | 195783481 T | 0.08793 | 1.92E-07 | chr:3:195654394 |
| 3 rs62285381  | 195806641 T | 0.08793 | 1.92E-07 | chr:3:195654394 |
| 3 rs6763092   | 195808024 G | 0.08793 | 1.92E-07 | chr:3:195654394 |
| 3 rs7645812   | 195781325 T | 0.08793 | 1.92E-07 | chr:3:195654394 |
| 3 rs1004860   | 195820247 A | 0.08879 | 1.97E-07 | chr:3:195654394 |
| 3 rs1004992   | 195821666 A | 0.08879 | 1.97E-07 | chr:3:195654394 |
| 3 rs12491771  | 195821441 G | 0.08879 | 1.97E-07 | chr:3:195654394 |
| 3 rs62285382  | 195813920 T | 0.08879 | 1.97E-07 | chr:3:195654394 |
| 3 rs62285387  | 195819505 A | 0.08879 | 1.97E-07 | chr:3:195654394 |
| 3 rs41259844  | 195781684 T | 0.09033 | 2.17E-07 | chr:3:195654394 |
| 3 rs41297523  | 195784648 C | 0.1183  | 2.20E-07 | chr:3:195654394 |
| 3 rs202025333 | 195695717 G | 0.05005 | 2.26E-07 | chr:3:195654394 |
| 3 rs4927792   | 195652315 C | 0.08185 | 2.27E-07 | chr:3:195654394 |
| 3 rs374823901 | 195685831 A | 0.06181 | 2.49E-07 | chr:3:195654394 |
| 3 rs376696582 | 195685832 G | 0.06181 | 2.49E-07 | chr:3:195654394 |
| 3 rs4927817   | 195693798 G | 0.05098 | 2.82E-07 | chr:3:195654394 |
| 3 rs13093426  | 195828806 T | 0.0918  | 3.26E-07 | chr:3:195654394 |
| 3 rs78219813  | 195831188 G | 0.0918  | 3.26E-07 | chr:3:195654394 |
| 3 rs12493933  | 195818769 T | 0.09551 | 3.48E-07 | chr:3:195654394 |
| 3 rs62285403  | 195834947 C | 0.122   | 3.55E-07 | chr:3:195654394 |
| 3 rs544737559 | 195825972 C | 0.1028  | 3.76E-07 | chr:3:195654394 |
| 3 rs78758916  | 195691752 G | 0.07957 | 3.76E-07 | chr:3:195654394 |
| 3 rs12490842  | 195816783 T | 0.09655 | 3.77E-07 | chr:3:195654394 |
| 3 rs200007926 | 195682077 T | 0.07134 | 3.86E-07 | chr:3:195654394 |
| 3 rs200191712 | 195682112 A | 0.07134 | 3.86E-07 | chr:3:195654394 |
| 3 rs201335223 | 195682102 T | 0.07134 | 3.86E-07 | chr:3:195654394 |
| 3 rs201963939 | 195682106 C | 0.07134 | 3.86E-07 | chr:3:195654394 |
| 3 rs557551051 | 195682108 T | 0.07134 | 3.86E-07 | chr:3:195654394 |
| 3 rs1975582   | 195751439 G | 0.1009  | 3.93E-07 | chr:3:195654394 |
| 3 rs4361313   | 195752260 A | 0.1009  | 3.93E-07 | chr:3:195654394 |
| 3 rs4927851   | 195751853 A | 0.1009  | 3.93E-07 | chr:3:195654394 |
| 3 rs7614767   | 195753451 G | 0.1009  | 3.93E-07 | chr:3:195654394 |
| 3 rs7627706   | 195753353 A | 0.1009  | 3.93E-07 | chr:3:195654394 |
| 3 rs7627868   | 195753473 A | 0.1009  | 3.93E-07 | chr:3:195654394 |
| 3 rs7630489   | 195753401 T | 0.1009  | 3.93E-07 | chr:3:195654394 |
| 3 rs7630875   | 195753766 T | 0.1009  | 3.93E-07 | chr:3:195654394 |

|               |             |         |          |                 |
|---------------|-------------|---------|----------|-----------------|
| 3 rs6800500   | 195833507 T | 0.0795  | 4.31E-07 | chr:3:195654394 |
| 3 rs9872347   | 195831237 T | 0.0795  | 4.31E-07 | chr:3:195654394 |
| 3 rs9877493   | 195832147 T | 0.0795  | 4.31E-07 | chr:3:195654394 |
| 3 rs7618864   | 195749561 G | 0.1024  | 4.60E-07 | chr:3:195654394 |
| 3 rs7624460   | 195748530 C | 0.1024  | 4.60E-07 | chr:3:195654394 |
| 3 rs2121818   | 195744988 G | 0.1131  | 4.65E-07 | chr:3:195654394 |
| 3 rs115223322 | 195733933 A | 0.06151 | 4.73E-07 | chr:3:195654394 |
| 3 rs147852061 | 195733925 C | 0.06151 | 4.73E-07 | chr:3:195654394 |
| 3 rs11709120  | 195671861 T | 0.1339  | 5.76E-07 | chr:3:195654394 |
| 3 rs12487702  | 195775991 A | 0.1378  | 6.10E-07 | chr:3:195654394 |
| 3 rs4927850   | 195751630 T | 0.1019  | 6.50E-07 | chr:3:195654394 |
| 3 rs2620600   | 195708880 C | 23.93   | 6.74E-07 | chr:3:195654394 |
| 3 rs3933      | 195784997 A | 0.1075  | 6.81E-07 | chr:3:195654394 |
| 3 rs41298097  | 195779155 T | 0.1075  | 6.81E-07 | chr:3:195654394 |
| 3 rs492288    | 195784210 T | 0.1075  | 6.81E-07 | chr:3:195654394 |
| 3 rs492349    | 195784192 A | 0.1075  | 6.81E-07 | chr:3:195654394 |
| 3 rs493661    | 195786489 A | 0.1075  | 6.81E-07 | chr:3:195654394 |
| 3 rs539816    | 195784076 A | 0.1075  | 6.81E-07 | chr:3:195654394 |
| 3 rs366268    | 195782177 G | 0.1075  | 7.01E-07 | chr:3:195654394 |
| 3 rs419059    | 195782184 T | 0.1075  | 7.01E-07 | chr:3:195654394 |
| 3 rs419068    | 195782176 T | 0.1075  | 7.01E-07 | chr:3:195654394 |
| 3 rs557527    | 195780709 A | 0.1073  | 7.12E-07 | chr:3:195654394 |
| 3 rs58381328  | 195442180 C | 14.25   | 7.33E-07 | chr:3:195654394 |
| 3 rs28427561  | 195733814 G | 0.1136  | 7.39E-07 | chr:3:195654394 |
| 3 rs406271    | 195776976 C | 0.1117  | 8.38E-07 | chr:3:195654394 |
| 3 rs12489052  | 195673049 G | 0.1214  | 9.42E-07 | chr:3:195654394 |
| 3 rs6772320   | 195774541 A | 0.1809  | 1.02E-06 | chr:3:195654394 |
| 3 rs7630825   | 195753740 T | 0.1126  | 1.08E-06 | chr:3:195654394 |
| 3 rs11925423  | 195734217 G | 0.1247  | 1.95E-06 | chr:3:195654394 |
| 3 rs34906439  | 195779706 G | 0.1306  | 2.03E-06 | chr:3:195654394 |
| 3 rs41298087  | 195779736 T | 0.1306  | 2.03E-06 | chr:3:195654394 |
| 3 rs62408943  | 195838810 G | 0.1246  | 2.03E-06 | chr:3:195654394 |
| 3 rs2638914   | 195663197 A | 0.07859 | 2.20E-06 | chr:3:195654394 |
| 3 rs4927711   | 195775449 T | 0.09695 | 2.39E-06 | chr:3:195654394 |
| 3 rs4927870   | 195820576 A | 0.1684  | 2.95E-06 | chr:3:195654394 |
| 3 rs191361199 | 195825973 G | 0.1421  | 3.10E-06 | chr:3:195654394 |
| 3 rs9817514   | 195775038 G | 0.1373  | 3.33E-06 | chr:3:195654394 |
| 3 rs9816784   | 195834303 T | 0.1442  | 3.63E-06 | chr:3:195654394 |
| 3 rs73082696  | 195414194 T | 10.78   | 3.64E-06 | chr:3:195654394 |
| 3 rs200021430 | 195684953 G | 0.1064  | 3.69E-06 | chr:3:195654394 |
| 3 rs201067908 | 195684954 G | 0.1064  | 3.69E-06 | chr:3:195654394 |
| 3 rs35653288  | 195684958 A | 0.1064  | 3.69E-06 | chr:3:195654394 |
| 3 rs71207509  | 195830355 C | 0.1873  | 3.82E-06 | chr:3:195654394 |

|               |             |         |          |                 |
|---------------|-------------|---------|----------|-----------------|
| 3 rs79368819  | 195720855 G | 0.1685  | 4.08E-06 | chr:3:195654394 |
| 3 rs11717368  | 195834357 G | 0.149   | 4.86E-06 | chr:3:195654394 |
| 3 rs28512347  | 195733884 C | 0.1565  | 5.69E-06 | chr:3:195654394 |
| 3 rs28594263  | 195733883 C | 0.1565  | 5.69E-06 | chr:3:195654394 |
| 3 rs73072305  | 195830690 T | 0.1715  | 7.23E-06 | chr:3:195654394 |
| 3 rs9878952   | 195410304 C | 9.286   | 8.49E-06 | chr:3:195654394 |
| 3 rs12490036  | 195816195 T | 0.1643  | 9.43E-06 | chr:3:195654394 |
| 3 rs139965737 | 195678158 G | 0.1219  | 1.20E-05 | chr:3:195654394 |
| 3 rs9866168   | 195830310 T | 8.338   | 1.29E-05 | chr:3:195654394 |
| 3 rs62408944  | 195843979 C | 0.1874  | 1.48E-05 | chr:3:195654394 |
| 3 rs150999632 | 195619120 C | 0.1455  | 1.54E-05 | chr:3:195654394 |
| 3 rs6769547   | 195416501 G | 8.738   | 1.79E-05 | chr:3:195654394 |
| 3 rs1965192   | 195852427 A | 0.1866  | 2.59E-05 | chr:3:195654394 |
| 3 rs60148746  | 195823008 T | 0.1904  | 2.70E-05 | chr:3:195654394 |
| 3 rs6778081   | 195819205 T | 0.1853  | 2.78E-05 | chr:3:195654394 |
| 3 rs6774560   | 195818126 G | 0.1911  | 3.72E-05 | chr:3:195654394 |
| 3 rs6784311   | 195733721 C | 0.1176  | 3.88E-05 | chr:3:195654394 |
| 3 rs12497208  | 195672011 A | 0.09361 | 4.71E-05 | chr:3:195654394 |
| 3 rs56134127  | 195646976 T | 9.952   | 5.01E-05 | chr:3:195654394 |
| 4 rs143457155 | 120263622 C | 0.1072  | 6.90E-17 | chr:4:120263688 |
| 4 rs10006688  | 120263526 C | 0.1125  | 7.12E-17 | chr:4:120263688 |
| 4 rs28622913  | 120261723 A | 0.1048  | 7.72E-17 | chr:4:120263688 |
| 4 rs28735977  | 120261738 T | 0.1063  | 9.99E-17 | chr:4:120263688 |
| 4 rs6833140   | 120266822 A | 0.1003  | 1.37E-16 | chr:4:120263688 |
| 4 rs13122153  | 120266585 C | 0.1098  | 2.44E-16 | chr:4:120263688 |
| 4 rs3864142   | 120266191 T | 0.1037  | 2.44E-16 | chr:4:120263688 |
| 4 rs13121928  | 120266518 C | 0.1157  | 2.47E-16 | chr:4:120263688 |
| 4 rs148893841 | 120263621 G | 0.1055  | 2.70E-16 | chr:4:120263688 |
| 4 rs28691602  | 120264770 C | 0.1055  | 2.70E-16 | chr:4:120263688 |
| 4 rs10000544  | 120270705 A | 0.1057  | 2.75E-16 | chr:4:120263688 |
| 4 rs10005542  | 120268302 C | 0.1057  | 2.75E-16 | chr:4:120263688 |
| 4 rs10012408  | 120270771 A | 0.1057  | 2.75E-16 | chr:4:120263688 |
| 4 rs10015579  | 120271802 C | 0.1057  | 2.75E-16 | chr:4:120263688 |
| 4 rs10015965  | 120268237 G | 0.1057  | 2.75E-16 | chr:4:120263688 |
| 4 rs10016241  | 120268553 C | 0.1057  | 2.75E-16 | chr:4:120263688 |
| 4 rs10022448  | 120270421 G | 0.1057  | 2.75E-16 | chr:4:120263688 |
| 4 rs10025925  | 120271744 T | 0.1057  | 2.75E-16 | chr:4:120263688 |
| 4 rs12502393  | 120271228 T | 0.1057  | 2.75E-16 | chr:4:120263688 |
| 4 rs12502524  | 120271414 A | 0.1057  | 2.75E-16 | chr:4:120263688 |
| 4 rs12506421  | 120271167 C | 0.1057  | 2.75E-16 | chr:4:120263688 |
| 4 rs12506445  | 120271237 C | 0.1057  | 2.75E-16 | chr:4:120263688 |
| 4 rs12506487  | 120271361 G | 0.1057  | 2.75E-16 | chr:4:120263688 |
| 4 rs12510133  | 120271344 C | 0.1057  | 2.75E-16 | chr:4:120263688 |

|               |             |        |          |                 |
|---------------|-------------|--------|----------|-----------------|
| 4 rs17009144  | 120270795 G | 0.1057 | 2.75E-16 | chr:4:120263688 |
| 4 rs28369518  | 120271630 C | 0.1057 | 2.75E-16 | chr:4:120263688 |
| 4 rs28396837  | 120271541 A | 0.1057 | 2.75E-16 | chr:4:120263688 |
| 4 rs28572003  | 120268891 G | 0.1057 | 2.75E-16 | chr:4:120263688 |
| 4 rs28589345  | 120269080 A | 0.1057 | 2.75E-16 | chr:4:120263688 |
| 4 rs28599836  | 120268809 T | 0.1057 | 2.75E-16 | chr:4:120263688 |
| 4 rs28714087  | 120270966 G | 0.1057 | 2.75E-16 | chr:4:120263688 |
| 4 rs3864144   | 120272605 T | 0.1057 | 2.75E-16 | chr:4:120263688 |
| 4 rs55820750  | 120269168 C | 0.1057 | 2.75E-16 | chr:4:120263688 |
| 4 rs10017001  | 120263293 G | 0.1499 | 2.94E-16 | chr:4:120263688 |
| 4 rs9994691   | 120263298 A | 0.1499 | 2.94E-16 | chr:4:120263688 |
| 4 rs12498657  | 120262866 C | 0.1064 | 3.07E-16 | chr:4:120263688 |
| 4 rs2175381   | 120265967 C | 0.1104 | 3.25E-16 | chr:4:120263688 |
| 4 rs10006192  | 120263022 C | 0.1065 | 3.43E-16 | chr:4:120263688 |
| 4 rs10010355  | 120261043 G | 0.1065 | 3.43E-16 | chr:4:120263688 |
| 4 rs10023641  | 120258410 G | 0.1065 | 3.43E-16 | chr:4:120263688 |
| 4 rs10028773  | 120265259 G | 0.1065 | 3.43E-16 | chr:4:120263688 |
| 4 rs114866537 | 120258608 T | 0.1065 | 3.43E-16 | chr:4:120263688 |
| 4 rs17517414  | 120262101 C | 0.1065 | 3.43E-16 | chr:4:120263688 |
| 4 rs17595727  | 120262074 C | 0.1065 | 3.43E-16 | chr:4:120263688 |
| 4 rs1814814   | 120258124 G | 0.1065 | 3.43E-16 | chr:4:120263688 |
| 4 rs2136911   | 120265859 A | 0.1065 | 3.43E-16 | chr:4:120263688 |
| 4 rs28437684  | 120264849 A | 0.1065 | 3.43E-16 | chr:4:120263688 |
| 4 rs28546691  | 120262832 A | 0.1065 | 3.43E-16 | chr:4:120263688 |
| 4 rs28551750  | 120264901 T | 0.1065 | 3.43E-16 | chr:4:120263688 |
| 4 rs28616635  | 120261861 C | 0.1065 | 3.43E-16 | chr:4:120263688 |
| 4 rs28726222  | 120262672 C | 0.1065 | 3.43E-16 | chr:4:120263688 |
| 4 rs3986377   | 120260270 A | 0.1065 | 3.43E-16 | chr:4:120263688 |
| 4 rs4001390   | 120265783 C | 0.1065 | 3.43E-16 | chr:4:120263688 |
| 4 rs4473640   | 120260437 A | 0.1065 | 3.43E-16 | chr:4:120263688 |
| 4 rs6815291   | 120266982 A | 0.1065 | 3.43E-16 | chr:4:120263688 |
| 4 rs6815934   | 120267310 C | 0.1065 | 3.43E-16 | chr:4:120263688 |
| 4 rs6838009   | 120267034 A | 0.1065 | 3.43E-16 | chr:4:120263688 |
| 4 rs6838457   | 120267367 G | 0.1065 | 3.43E-16 | chr:4:120263688 |
| 4 rs79606892  | 120259606 C | 0.1065 | 3.43E-16 | chr:4:120263688 |
| 4 rs9307470   | 120261214 A | 0.1065 | 3.43E-16 | chr:4:120263688 |
| 4 rs9307471   | 120261262 A | 0.1065 | 3.43E-16 | chr:4:120263688 |
| 4 rs9995716   | 120264996 C | 0.1065 | 3.43E-16 | chr:4:120263688 |
| 4 rs11735886  | 120290215 C | 0.1228 | 4.16E-16 | chr:4:120263688 |
| 4 rs4422403   | 120258194 T | 0.1134 | 4.71E-16 | chr:4:120263688 |
| 4 rs28584388  | 120261788 C | 0.1078 | 4.88E-16 | chr:4:120263688 |
| 4 rs555773279 | 120269424 T | 0.1107 | 7.59E-16 | chr:4:120263688 |
| 4 rs1814813   | 120258207 G | 0.1156 | 7.63E-16 | chr:4:120263688 |

|               |             |        |          |                 |
|---------------|-------------|--------|----------|-----------------|
| 4 rs3864143   | 120266428 C | 0.1396 | 9.28E-16 | chr:4:120263688 |
| 4 rs190883674 | 120269780 G | 0.1693 | 1.64E-15 | chr:4:120263688 |
| 4 rs201764844 | 120269768 C | 0.1693 | 1.64E-15 | chr:4:120263688 |
| 4 rs77466269  | 120269755 A | 0.1724 | 2.02E-15 | chr:4:120263688 |
| 4 rs200947437 | 120254755 C | 0.1625 | 2.10E-15 | chr:4:120263688 |
| 4 rs75420021  | 120246729 A | 0.1444 | 3.82E-15 | chr:4:120263688 |
| 4 rs2389874   | 120554991 A | 0.1494 | 4.18E-15 | chr:4:120263688 |
| 4 rs10212714  | 120254302 C | 0.143  | 4.18E-15 | chr:4:120263688 |
| 4 rs10212719  | 120254437 C | 0.143  | 4.18E-15 | chr:4:120263688 |
| 4 rs10212956  | 120254343 G | 0.143  | 4.18E-15 | chr:4:120263688 |
| 4 rs10213480  | 120254561 T | 0.143  | 4.18E-15 | chr:4:120263688 |
| 4 rs72676046  | 120254681 C | 0.143  | 4.18E-15 | chr:4:120263688 |
| 4 rs10006495  | 120263315 G | 0.178  | 4.73E-15 | chr:4:120263688 |
| 4 rs1546503   | 120241167 C | 0.144  | 4.75E-15 | chr:4:120263688 |
| 4 rs1546506   | 120241240 C | 0.144  | 4.75E-15 | chr:4:120263688 |
| 4 rs10003567  | 120241674 T | 0.1444 | 5.54E-15 | chr:4:120263688 |
| 4 rs10005237  | 120237897 C | 0.1444 | 5.54E-15 | chr:4:120263688 |
| 4 rs10006259  | 120242145 T | 0.1444 | 5.54E-15 | chr:4:120263688 |
| 4 rs10024933  | 120253582 A | 0.1444 | 5.54E-15 | chr:4:120263688 |
| 4 rs10212775  | 120239244 C | 0.1444 | 5.54E-15 | chr:4:120263688 |
| 4 rs10213158  | 120255829 T | 0.1444 | 5.54E-15 | chr:4:120263688 |
| 4 rs10213267  | 120239074 G | 0.1444 | 5.54E-15 | chr:4:120263688 |
| 4 rs10518300  | 120249499 G | 0.1444 | 5.54E-15 | chr:4:120263688 |
| 4 rs11098501  | 120252017 G | 0.1444 | 5.54E-15 | chr:4:120263688 |
| 4 rs11098502  | 120252063 A | 0.1444 | 5.54E-15 | chr:4:120263688 |
| 4 rs11724409  | 120252361 G | 0.1444 | 5.54E-15 | chr:4:120263688 |
| 4 rs11732686  | 120252330 A | 0.1444 | 5.54E-15 | chr:4:120263688 |
| 4 rs12498994  | 120250818 C | 0.1444 | 5.54E-15 | chr:4:120263688 |
| 4 rs12506610  | 120241659 C | 0.1444 | 5.54E-15 | chr:4:120263688 |
| 4 rs12507565  | 120251121 A | 0.1444 | 5.54E-15 | chr:4:120263688 |
| 4 rs12509621  | 120249660 C | 0.1444 | 5.54E-15 | chr:4:120263688 |
| 4 rs12510269  | 120241646 G | 0.1444 | 5.54E-15 | chr:4:120263688 |
| 4 rs12511640  | 120251248 C | 0.1444 | 5.54E-15 | chr:4:120263688 |
| 4 rs12513083  | 120249612 T | 0.1444 | 5.54E-15 | chr:4:120263688 |
| 4 rs12711071  | 120240934 C | 0.1444 | 5.54E-15 | chr:4:120263688 |
| 4 rs1511017   | 120250805 A | 0.1444 | 5.54E-15 | chr:4:120263688 |
| 4 rs1511025   | 120240238 C | 0.1444 | 5.54E-15 | chr:4:120263688 |
| 4 rs17049949  | 120255290 G | 0.1444 | 5.54E-15 | chr:4:120263688 |
| 4 rs1980024   | 120253047 T | 0.1444 | 5.54E-15 | chr:4:120263688 |
| 4 rs1980025   | 120252806 T | 0.1444 | 5.54E-15 | chr:4:120263688 |
| 4 rs1980026   | 120251643 A | 0.1444 | 5.54E-15 | chr:4:120263688 |
| 4 rs2002047   | 120257228 G | 0.1444 | 5.54E-15 | chr:4:120263688 |
| 4 rs2002049   | 120257417 G | 0.1444 | 5.54E-15 | chr:4:120263688 |

|               |             |        |          |                 |
|---------------|-------------|--------|----------|-----------------|
| 4 rs2036856   | 120249288 A | 0.1444 | 5.54E-15 | chr:4:120263688 |
| 4 rs2036860   | 120248934 G | 0.1444 | 5.54E-15 | chr:4:120263688 |
| 4 rs28363929  | 120257103 G | 0.1444 | 5.54E-15 | chr:4:120263688 |
| 4 rs28502463  | 120257023 C | 0.1444 | 5.54E-15 | chr:4:120263688 |
| 4 rs28643450  | 120245242 A | 0.1444 | 5.54E-15 | chr:4:120263688 |
| 4 rs28652763  | 120242312 T | 0.1444 | 5.54E-15 | chr:4:120263688 |
| 4 rs28713555  | 120251995 T | 0.1444 | 5.54E-15 | chr:4:120263688 |
| 4 rs2964      | 120240131 C | 0.1444 | 5.54E-15 | chr:4:120263688 |
| 4 rs34425882  | 120253177 A | 0.1444 | 5.54E-15 | chr:4:120263688 |
| 4 rs3956464   | 120256764 C | 0.1444 | 5.54E-15 | chr:4:120263688 |
| 4 rs4107728   | 120253910 A | 0.1444 | 5.54E-15 | chr:4:120263688 |
| 4 rs4443261   | 120249301 C | 0.1444 | 5.54E-15 | chr:4:120263688 |
| 4 rs7672594   | 120248543 C | 0.1444 | 5.54E-15 | chr:4:120263688 |
| 4 rs7672778   | 120248585 G | 0.1444 | 5.54E-15 | chr:4:120263688 |
| 4 rs7689729   | 120256192 G | 0.1444 | 5.54E-15 | chr:4:120263688 |
| 4 rs7690338   | 120256468 G | 0.1444 | 5.54E-15 | chr:4:120263688 |
| 4 rs878372    | 120238780 C | 0.1444 | 5.54E-15 | chr:4:120263688 |
| 4 rs878376    | 120237702 A | 0.1444 | 5.54E-15 | chr:4:120263688 |
| 4 rs907204    | 120238654 A | 0.1444 | 5.54E-15 | chr:4:120263688 |
| 4 rs907205    | 120238664 C | 0.1444 | 5.54E-15 | chr:4:120263688 |
| 4 rs938056    | 120237453 T | 0.1444 | 5.54E-15 | chr:4:120263688 |
| 4 rs9991166   | 120237851 A | 0.1444 | 5.54E-15 | chr:4:120263688 |
| 4 rs9991959   | 120253773 C | 0.1444 | 5.54E-15 | chr:4:120263688 |
| 4 rs17595608  | 120250506 T | 0.1479 | 5.86E-15 | chr:4:120263688 |
| 4 rs7438634   | 120245754 C | 0.1439 | 5.94E-15 | chr:4:120263688 |
| 4 rs60378962  | 120280991 A | 0.1459 | 7.11E-15 | chr:4:120263688 |
| 4 rs12507283  | 120247218 A | 0.1517 | 7.13E-15 | chr:4:120263688 |
| 4 rs1849457   | 120254355 G | 0.1502 | 7.28E-15 | chr:4:120263688 |
| 4 rs28373117  | 120253465 T | 0.145  | 7.98E-15 | chr:4:120263688 |
| 4 rs58583086  | 120556362 A | 0.1489 | 8.09E-15 | chr:4:120263688 |
| 4 rs534745130 | 120246059 C | 0.1563 | 8.16E-15 | chr:4:120263688 |
| 4 rs11732087  | 120239831 G | 0.1514 | 8.27E-15 | chr:4:120263688 |
| 4 rs12503171  | 120247196 G | 0.152  | 8.34E-15 | chr:4:120263688 |
| 4 rs10005973  | 120271958 T | 0.1545 | 8.48E-15 | chr:4:120263688 |
| 4 rs13108589  | 120268102 C | 0.1545 | 8.48E-15 | chr:4:120263688 |
| 4 rs4472123   | 120236630 A | 0.1479 | 8.65E-15 | chr:4:120263688 |
| 4 rs140387830 | 120247916 G | 0.1502 | 8.90E-15 | chr:4:120263688 |
| 4 rs145027390 | 120247827 G | 0.1502 | 8.90E-15 | chr:4:120263688 |
| 4 rs7671797   | 120248157 G | 0.1502 | 8.90E-15 | chr:4:120263688 |
| 4 rs7671978   | 120248218 G | 0.1502 | 8.90E-15 | chr:4:120263688 |
| 4 rs7672129   | 120248176 T | 0.1502 | 8.90E-15 | chr:4:120263688 |
| 4 rs140584472 | 120246695 G | 0.1615 | 9.29E-15 | chr:4:120263688 |
| 4 rs185481756 | 120246689 C | 0.1615 | 9.29E-15 | chr:4:120263688 |

|              |             |        |          |                 |
|--------------|-------------|--------|----------|-----------------|
| 4 rs2036857  | 120249240 C | 0.1509 | 9.62E-15 | chr:4:120263688 |
| 4 rs7671759  | 120248094 C | 0.1539 | 9.84E-15 | chr:4:120263688 |
| 4 rs10434028 | 120294464 G | 0.1425 | 1.02E-14 | chr:4:120263688 |
| 4 rs7673476  | 120248683 A | 0.1615 | 1.07E-14 | chr:4:120263688 |
| 4 rs10213554 | 120260785 A | 0.1556 | 1.08E-14 | chr:4:120263688 |
| 4 rs1980027  | 120251577 T | 0.1556 | 1.08E-14 | chr:4:120263688 |
| 4 rs66900435 | 120249425 A | 0.1556 | 1.08E-14 | chr:4:120263688 |
| 4 rs714899   | 120243035 A | 0.1556 | 1.08E-14 | chr:4:120263688 |
| 4 rs9993347  | 120258955 G | 0.1556 | 1.08E-14 | chr:4:120263688 |
| 4 rs9999724  | 120239944 T | 0.1556 | 1.08E-14 | chr:4:120263688 |
| 4 rs7672357  | 120248340 T | 0.1533 | 1.09E-14 | chr:4:120263688 |
| 4 rs10002914 | 120292081 A | 0.1501 | 1.10E-14 | chr:4:120263688 |
| 4 rs10021601 | 120282563 A | 0.1501 | 1.10E-14 | chr:4:120263688 |
| 4 rs10029303 | 120286755 A | 0.1501 | 1.10E-14 | chr:4:120263688 |
| 4 rs10517834 | 120286783 C | 0.1501 | 1.10E-14 | chr:4:120263688 |
| 4 rs10857066 | 120286596 T | 0.1501 | 1.10E-14 | chr:4:120263688 |
| 4 rs11098505 | 120284627 T | 0.1501 | 1.10E-14 | chr:4:120263688 |
| 4 rs12374244 | 120281972 T | 0.1501 | 1.10E-14 | chr:4:120263688 |
| 4 rs12374245 | 120282059 T | 0.1501 | 1.10E-14 | chr:4:120263688 |
| 4 rs12374346 | 120281705 A | 0.1501 | 1.10E-14 | chr:4:120263688 |
| 4 rs12374352 | 120281977 T | 0.1501 | 1.10E-14 | chr:4:120263688 |
| 4 rs12374396 | 120281619 C | 0.1501 | 1.10E-14 | chr:4:120263688 |
| 4 rs12499602 | 120284387 A | 0.1501 | 1.10E-14 | chr:4:120263688 |
| 4 rs12503082 | 120284317 G | 0.1501 | 1.10E-14 | chr:4:120263688 |
| 4 rs12510451 | 120289143 T | 0.1501 | 1.10E-14 | chr:4:120263688 |
| 4 rs12510487 | 120289231 T | 0.1501 | 1.10E-14 | chr:4:120263688 |
| 4 rs12513310 | 120288039 A | 0.1501 | 1.10E-14 | chr:4:120263688 |
| 4 rs13104572 | 120285568 C | 0.1501 | 1.10E-14 | chr:4:120263688 |
| 4 rs13105020 | 120285688 T | 0.1501 | 1.10E-14 | chr:4:120263688 |
| 4 rs13125526 | 120288019 A | 0.1501 | 1.10E-14 | chr:4:120263688 |
| 4 rs13132082 | 120285657 A | 0.1501 | 1.10E-14 | chr:4:120263688 |
| 4 rs28470894 | 120289405 G | 0.1501 | 1.10E-14 | chr:4:120263688 |
| 4 rs28488261 | 120289396 C | 0.1501 | 1.10E-14 | chr:4:120263688 |
| 4 rs28501434 | 120283773 T | 0.1501 | 1.10E-14 | chr:4:120263688 |
| 4 rs28581362 | 120283548 A | 0.1501 | 1.10E-14 | chr:4:120263688 |
| 4 rs28594160 | 120289456 G | 0.1501 | 1.10E-14 | chr:4:120263688 |
| 4 rs28668103 | 120291372 T | 0.1501 | 1.10E-14 | chr:4:120263688 |
| 4 rs28687057 | 120280812 G | 0.1501 | 1.10E-14 | chr:4:120263688 |
| 4 rs55845118 | 120290913 C | 0.1501 | 1.10E-14 | chr:4:120263688 |
| 4 rs67281037 | 120281157 C | 0.1501 | 1.10E-14 | chr:4:120263688 |
| 4 rs6824111  | 120285968 A | 0.1501 | 1.10E-14 | chr:4:120263688 |
| 4 rs6824169  | 120293175 C | 0.1501 | 1.10E-14 | chr:4:120263688 |
| 4 rs6846966  | 120293208 G | 0.1501 | 1.10E-14 | chr:4:120263688 |



|               |             |        |          |                 |
|---------------|-------------|--------|----------|-----------------|
| 4 rs6847586   | 120286069 A | 0.1501 | 1.10E-14 | chr:4:120263688 |
| 4 rs6847778   | 120293582 G | 0.1501 | 1.10E-14 | chr:4:120263688 |
| 4 rs6847862   | 120286371 T | 0.1501 | 1.10E-14 | chr:4:120263688 |
| 4 rs6848081   | 120286443 T | 0.1501 | 1.10E-14 | chr:4:120263688 |
| 4 rs6848380   | 120286403 A | 0.1501 | 1.10E-14 | chr:4:120263688 |
| 4 rs6857892   | 120282696 T | 0.1501 | 1.10E-14 | chr:4:120263688 |
| 4 rs71610270  | 120287436 G | 0.1501 | 1.10E-14 | chr:4:120263688 |
| 4 rs72676059  | 120290828 G | 0.1501 | 1.10E-14 | chr:4:120263688 |
| 4 rs73842616  | 120290683 A | 0.1501 | 1.10E-14 | chr:4:120263688 |
| 4 rs7677068   | 120291704 T | 0.1501 | 1.10E-14 | chr:4:120263688 |
| 4 rs9991221   | 120292107 C | 0.1501 | 1.10E-14 | chr:4:120263688 |
| 4 rs9995136   | 120286845 G | 0.1501 | 1.10E-14 | chr:4:120263688 |
| 4 rs78422072  | 120281042 T | 0.1515 | 1.20E-14 | chr:4:120263688 |
| 4 rs78971550  | 120281041 T | 0.1515 | 1.20E-14 | chr:4:120263688 |
| 4 rs3864141   | 120266007 A | 0.1582 | 1.26E-14 | chr:4:120263688 |
| 4 rs13101722  | 120555975 C | 0.1605 | 1.30E-14 | chr:4:120263688 |
| 4 rs59867181  | 120556467 C | 0.1605 | 1.30E-14 | chr:4:120263688 |
| 4 rs10213221  | 120255926 A | 0.1584 | 1.37E-14 | chr:4:120263688 |
| 4 rs11098507  | 120288286 A | 0.1519 | 1.42E-14 | chr:4:120263688 |
| 4 rs28787668  | 120554687 A | 0.1616 | 1.44E-14 | chr:4:120263688 |
| 4 rs7676296   | 120555687 G | 0.1616 | 1.44E-14 | chr:4:120263688 |
| 4 rs35280960  | 120257059 A | 0.1593 | 1.48E-14 | chr:4:120263688 |
| 4 rs56155624  | 120291026 G | 0.1569 | 1.49E-14 | chr:4:120263688 |
| 4 rs7672372   | 120248406 G | 0.1565 | 1.52E-14 | chr:4:120263688 |
| 4 rs9996494   | 120238880 A | 0.1617 | 1.65E-14 | chr:4:120263688 |
| 4 rs9996644   | 120238877 T | 0.1617 | 1.65E-14 | chr:4:120263688 |
| 4 rs2389879   | 120557684 G | 0.1626 | 1.78E-14 | chr:4:120263688 |
| 4 rs6534149   | 120559292 T | 0.1626 | 1.78E-14 | chr:4:120263688 |
| 4 rs28369503  | 120238925 A | 0.167  | 1.82E-14 | chr:4:120263688 |
| 4 rs28458294  | 120238924 C | 0.167  | 1.82E-14 | chr:4:120263688 |
| 4 rs9996501   | 120238918 A | 0.167  | 1.82E-14 | chr:4:120263688 |
| 4 rs10050092  | 120532085 C | 0.1636 | 1.92E-14 | chr:4:120263688 |
| 4 rs6832740   | 120546136 C | 0.1636 | 1.92E-14 | chr:4:120263688 |
| 4 rs6855918   | 120546299 T | 0.1636 | 1.92E-14 | chr:4:120263688 |
| 4 rs7693919   | 120540571 A | 0.1636 | 1.92E-14 | chr:4:120263688 |
| 4 rs113263911 | 120255134 T | 0.1759 | 2.04E-14 | chr:4:120263688 |
| 4 rs28850368  | 120554313 A | 0.1649 | 2.36E-14 | chr:4:120263688 |
| 4 rs34835603  | 120553428 T | 0.1649 | 2.36E-14 | chr:4:120263688 |
| 4 rs55777923  | 120553264 T | 0.1739 | 2.65E-14 | chr:4:120263688 |
| 4 rs4145952   | 120155806 A | 0.1895 | 2.65E-14 | chr:4:120263688 |
| 4 rs12507387  | 120247590 C | 0.1507 | 2.88E-14 | chr:4:120263688 |
| 4 rs11098534  | 120556772 G | 0.1678 | 3.39E-14 | chr:4:120263688 |
| 4 rs74693727  | 120330155 T | 0.1616 | 3.62E-14 | chr:4:120263688 |

|               |             |        |          |                 |
|---------------|-------------|--------|----------|-----------------|
| 4 rs10013652  | 120292256 G | 0.1708 | 3.73E-14 | chr:4:120263688 |
| 4 rs6820115   | 120398182 C | 0.169  | 3.91E-14 | chr:4:120263688 |
| 4 rs7692994   | 120427489 A | 0.1655 | 4.12E-14 | chr:4:120263688 |
| 4 rs10020256  | 120287265 T | 0.1587 | 4.83E-14 | chr:4:120263688 |
| 4 rs200290730 | 120287492 A | 0.1587 | 4.83E-14 | chr:4:120263688 |
| 4 rs34481394  | 120248374 T | 0.1741 | 5.30E-14 | chr:4:120263688 |
| 4 rs35231872  | 120248376 T | 0.1741 | 5.30E-14 | chr:4:120263688 |
| 4 rs35653026  | 120248378 G | 0.1741 | 5.30E-14 | chr:4:120263688 |
| 4 rs3806808   | 120551085 C | 0.1714 | 6.78E-14 | chr:4:120263688 |
| 4 rs201965045 | 120254952 G | 0.1808 | 6.87E-14 | chr:4:120263688 |
| 4 rs12503360  | 120247506 C | 0.1781 | 7.61E-14 | chr:4:120263688 |
| 4 rs10009566  | 120558608 C | 0.1744 | 9.68E-14 | chr:4:120263688 |
| 4 rs10012252  | 120559139 C | 0.1744 | 9.68E-14 | chr:4:120263688 |
| 4 rs2389880   | 120559870 A | 0.1744 | 9.68E-14 | chr:4:120263688 |
| 4 rs13134132  | 120324615 A | 0.1834 | 1.41E-13 | chr:4:120263688 |
| 4 rs10857068  | 120317549 G | 0.1725 | 1.63E-13 | chr:4:120263688 |
| 4 rs11098514  | 120317374 C | 0.1725 | 1.63E-13 | chr:4:120263688 |
| 4 rs13116768  | 120318254 C | 0.1725 | 1.63E-13 | chr:4:120263688 |
| 4 rs28572238  | 120316686 G | 0.1725 | 1.63E-13 | chr:4:120263688 |
| 4 rs28714195  | 120316950 T | 0.1725 | 1.63E-13 | chr:4:120263688 |
| 4 rs72676074  | 120359841 C | 0.1739 | 1.84E-13 | chr:4:120263688 |
| 4 rs9307475   | 120368556 A | 0.19   | 1.86E-13 | chr:4:120263688 |
| 4 rs4563482   | 120354480 G | 0.1881 | 1.89E-13 | chr:4:120263688 |
| 4 rs75199754  | 120365198 A | 0.1765 | 1.98E-13 | chr:4:120263688 |
| 4 rs35239065  | 120325130 C | 0.1745 | 2.13E-13 | chr:4:120263688 |
| 4 rs35265692  | 120325135 C | 0.1745 | 2.13E-13 | chr:4:120263688 |
| 4 rs56838032  | 120329894 A | 0.2025 | 2.17E-13 | chr:4:120263688 |
| 4 rs72918579  | 120333222 C | 0.1762 | 2.25E-13 | chr:4:120263688 |
| 4 rs55661135  | 120506153 G | 0.1906 | 2.31E-13 | chr:4:120263688 |
| 4 rs201664317 | 120330379 C | 0.178  | 2.35E-13 | chr:4:120263688 |
| 4 rs7695996   | 120322033 T | 0.1795 | 2.73E-13 | chr:4:120263688 |
| 4 rs11098513  | 120316075 G | 0.175  | 2.77E-13 | chr:4:120263688 |
| 4 rs9996940   | 120364542 T | 0.1929 | 2.98E-13 | chr:4:120263688 |
| 4 rs34954036  | 120366927 A | 0.1792 | 3.04E-13 | chr:4:120263688 |
| 4 rs10013032  | 120149419 C | 0.2075 | 3.09E-13 | chr:4:120263688 |
| 4 rs4833612   | 120147596 A | 0.2075 | 3.09E-13 | chr:4:120263688 |
| 4 rs2203039   | 120132347 T | 0.201  | 3.13E-13 | chr:4:120263688 |
| 4 rs10014719  | 120320715 A | 0.1797 | 3.13E-13 | chr:4:120263688 |
| 4 rs10016944  | 120320894 A | 0.1797 | 3.13E-13 | chr:4:120263688 |
| 4 rs10017543  | 120321420 A | 0.1797 | 3.13E-13 | chr:4:120263688 |
| 4 rs12504149  | 120318577 A | 0.1797 | 3.13E-13 | chr:4:120263688 |
| 4 rs12508173  | 120318526 C | 0.1797 | 3.13E-13 | chr:4:120263688 |
| 4 rs12509234  | 120319434 C | 0.1797 | 3.13E-13 | chr:4:120263688 |

|               |             |        |          |                 |
|---------------|-------------|--------|----------|-----------------|
| 4 rs12511625  | 120318135 G | 0.1798 | 3.24E-13 | chr:4:120263688 |
| 4 rs10002083  | 120311152 T | 0.18   | 3.24E-13 | chr:4:120263688 |
| 4 rs10005644  | 120298477 C | 0.18   | 3.24E-13 | chr:4:120263688 |
| 4 rs10010801  | 120310028 C | 0.18   | 3.24E-13 | chr:4:120263688 |
| 4 rs10011097  | 120310359 G | 0.18   | 3.24E-13 | chr:4:120263688 |
| 4 rs10014748  | 120300988 G | 0.18   | 3.24E-13 | chr:4:120263688 |
| 4 rs10014845  | 120301077 G | 0.18   | 3.24E-13 | chr:4:120263688 |
| 4 rs10016060  | 120298412 G | 0.18   | 3.24E-13 | chr:4:120263688 |
| 4 rs10016448  | 120298845 G | 0.18   | 3.24E-13 | chr:4:120263688 |
| 4 rs10024844  | 120311528 G | 0.18   | 3.24E-13 | chr:4:120263688 |
| 4 rs10025054  | 120311697 C | 0.18   | 3.24E-13 | chr:4:120263688 |
| 4 rs10027498  | 120311987 C | 0.18   | 3.24E-13 | chr:4:120263688 |
| 4 rs10027856  | 120304874 A | 0.18   | 3.24E-13 | chr:4:120263688 |
| 4 rs10027976  | 120305042 T | 0.18   | 3.24E-13 | chr:4:120263688 |
| 4 rs10222798  | 120302419 T | 0.18   | 3.24E-13 | chr:4:120263688 |
| 4 rs10440343  | 120309787 C | 0.18   | 3.24E-13 | chr:4:120263688 |
| 4 rs10440402  | 120307813 G | 0.18   | 3.24E-13 | chr:4:120263688 |
| 4 rs11098508  | 120306607 G | 0.18   | 3.24E-13 | chr:4:120263688 |
| 4 rs11098509  | 120306670 C | 0.18   | 3.24E-13 | chr:4:120263688 |
| 4 rs11098510  | 120306793 T | 0.18   | 3.24E-13 | chr:4:120263688 |
| 4 rs1112817   | 120297800 C | 0.18   | 3.24E-13 | chr:4:120263688 |
| 4 rs114019672 | 120306475 G | 0.18   | 3.24E-13 | chr:4:120263688 |
| 4 rs11726097  | 120301499 T | 0.18   | 3.24E-13 | chr:4:120263688 |
| 4 rs11729050  | 120300066 C | 0.18   | 3.24E-13 | chr:4:120263688 |
| 4 rs12498908  | 120308261 A | 0.18   | 3.24E-13 | chr:4:120263688 |
| 4 rs12506452  | 120308083 C | 0.18   | 3.24E-13 | chr:4:120263688 |
| 4 rs13113483  | 120309039 T | 0.18   | 3.24E-13 | chr:4:120263688 |
| 4 rs13127114  | 120314664 C | 0.18   | 3.24E-13 | chr:4:120263688 |
| 4 rs13151285  | 120314741 A | 0.18   | 3.24E-13 | chr:4:120263688 |
| 4 rs138611376 | 120306434 G | 0.18   | 3.24E-13 | chr:4:120263688 |
| 4 rs140816585 | 120306228 C | 0.18   | 3.24E-13 | chr:4:120263688 |
| 4 rs146523888 | 120308804 G | 0.18   | 3.24E-13 | chr:4:120263688 |
| 4 rs150376940 | 120305404 A | 0.18   | 3.24E-13 | chr:4:120263688 |
| 4 rs28429722  | 120300093 A | 0.18   | 3.24E-13 | chr:4:120263688 |
| 4 rs28668716  | 120309875 C | 0.18   | 3.24E-13 | chr:4:120263688 |
| 4 rs28751034  | 120307097 A | 0.18   | 3.24E-13 | chr:4:120263688 |
| 4 rs28793658  | 120307214 C | 0.18   | 3.24E-13 | chr:4:120263688 |
| 4 rs28812279  | 120304152 C | 0.18   | 3.24E-13 | chr:4:120263688 |
| 4 rs28884220  | 120307211 G | 0.18   | 3.24E-13 | chr:4:120263688 |
| 4 rs4309825   | 120314881 G | 0.18   | 3.24E-13 | chr:4:120263688 |
| 4 rs4345162   | 120312959 A | 0.18   | 3.24E-13 | chr:4:120263688 |
| 4 rs4373140   | 120307698 G | 0.18   | 3.24E-13 | chr:4:120263688 |
| 4 rs4463052   | 120313258 C | 0.18   | 3.24E-13 | chr:4:120263688 |

|               |             |        |          |                 |
|---------------|-------------|--------|----------|-----------------|
| 4 rs4507344   | 120307485 A | 0.18   | 3.24E-13 | chr:4:120263688 |
| 4 rs4604043   | 120314921 T | 0.18   | 3.24E-13 | chr:4:120263688 |
| 4 rs59866101  | 120296591 G | 0.18   | 3.24E-13 | chr:4:120263688 |
| 4 rs6832410   | 120296800 G | 0.18   | 3.24E-13 | chr:4:120263688 |
| 4 rs6838617   | 120297423 T | 0.18   | 3.24E-13 | chr:4:120263688 |
| 4 rs6858383   | 120296772 C | 0.18   | 3.24E-13 | chr:4:120263688 |
| 4 rs7437420   | 120312903 G | 0.18   | 3.24E-13 | chr:4:120263688 |
| 4 rs7658181   | 120310873 G | 0.18   | 3.24E-13 | chr:4:120263688 |
| 4 rs7674500   | 120303593 T | 0.18   | 3.24E-13 | chr:4:120263688 |
| 4 rs7674544   | 120303714 G | 0.18   | 3.24E-13 | chr:4:120263688 |
| 4 rs7677836   | 120310638 A | 0.18   | 3.24E-13 | chr:4:120263688 |
| 4 rs7678238   | 120310832 C | 0.18   | 3.24E-13 | chr:4:120263688 |
| 4 rs76990001  | 120302639 T | 0.18   | 3.24E-13 | chr:4:120263688 |
| 4 rs78036070  | 120302802 A | 0.18   | 3.24E-13 | chr:4:120263688 |
| 4 rs79704848  | 120309351 A | 0.18   | 3.24E-13 | chr:4:120263688 |
| 4 rs9307473   | 120300221 T | 0.18   | 3.24E-13 | chr:4:120263688 |
| 4 rs9307474   | 120302496 A | 0.18   | 3.24E-13 | chr:4:120263688 |
| 4 rs9994889   | 120305056 G | 0.18   | 3.24E-13 | chr:4:120263688 |
| 4 rs9996417   | 120295862 C | 0.18   | 3.24E-13 | chr:4:120263688 |
| 4 rs9996569   | 120299004 C | 0.18   | 3.24E-13 | chr:4:120263688 |
| 4 rs9996677   | 120299148 A | 0.18   | 3.24E-13 | chr:4:120263688 |
| 4 rs9998953   | 120296169 C | 0.18   | 3.24E-13 | chr:4:120263688 |
| 4 rs12648182  | 120503891 T | 0.1939 | 3.27E-13 | chr:4:120263688 |
| 4 rs11098516  | 120317978 C | 0.1809 | 3.34E-13 | chr:4:120263688 |
| 4 rs6829903   | 120506884 T | 0.1837 | 3.37E-13 | chr:4:120263688 |
| 4 rs28408407  | 120376030 G | 0.181  | 3.44E-13 | chr:4:120263688 |
| 4 rs28587175  | 120373172 C | 0.181  | 3.44E-13 | chr:4:120263688 |
| 4 rs72918577  | 120326701 A | 0.181  | 3.44E-13 | chr:4:120263688 |
| 4 rs72918584  | 120362445 C | 0.181  | 3.44E-13 | chr:4:120263688 |
| 4 rs9998174   | 120366312 G | 0.181  | 3.44E-13 | chr:4:120263688 |
| 4 rs7655048   | 120328284 A | 0.1881 | 3.55E-13 | chr:4:120263688 |
| 4 rs10013042  | 120244482 T | 0.2049 | 3.83E-13 | chr:4:120263688 |
| 4 rs13101526  | 120244456 T | 0.2049 | 3.83E-13 | chr:4:120263688 |
| 4 rs10031718  | 120295892 T | 0.1797 | 3.86E-13 | chr:4:120263688 |
| 4 rs10518329  | 120401835 G | 0.1952 | 4.10E-13 | chr:4:120263688 |
| 4 rs7665125   | 120402079 T | 0.1952 | 4.10E-13 | chr:4:120263688 |
| 4 rs10019522  | 120364728 G | 0.183  | 4.30E-13 | chr:4:120263688 |
| 4 rs149826784 | 120330643 A | 0.183  | 4.30E-13 | chr:4:120263688 |
| 4 rs9683604   | 120363592 T | 0.183  | 4.30E-13 | chr:4:120263688 |
| 4 rs9683609   | 120363692 G | 0.183  | 4.30E-13 | chr:4:120263688 |
| 4 rs9684938   | 120363595 G | 0.183  | 4.30E-13 | chr:4:120263688 |
| 4 rs192039339 | 120333191 C | 0.1835 | 4.32E-13 | chr:4:120263688 |
| 4 rs6851130   | 120133712 G | 0.2079 | 4.33E-13 | chr:4:120263688 |

|                          |             |        |          |                 |
|--------------------------|-------------|--------|----------|-----------------|
| 4 rs202150896            | 120367650 T | 0.1831 | 4.39E-13 | chr:4:120263688 |
| 4 rs9760442              | 120367951 G | 0.1831 | 4.39E-13 | chr:4:120263688 |
| 4 rs550069983;rs77653089 | 120359650 G | 0.1827 | 4.46E-13 | chr:4:120263688 |
| 4 rs4296662              | 120313440 G | 0.1852 | 4.50E-13 | chr:4:120263688 |
| 4 rs4560394              | 120313435 G | 0.1852 | 4.50E-13 | chr:4:120263688 |
| 4 rs2127823              | 120485670 T | 0.188  | 4.57E-13 | chr:4:120263688 |
| 4 rs2322021              | 120295030 A | 0.1857 | 4.60E-13 | chr:4:120263688 |
| 4 rs71614437             | 120370156 C | 0.1839 | 4.65E-13 | chr:4:120263688 |
| 4 rs11722183             | 120280597 C | 0.1823 | 4.69E-13 | chr:4:120263688 |
| 4 rs4001305              | 120359236 T | 0.1842 | 4.74E-13 | chr:4:120263688 |
| 4 rs951570               | 120150467 T | 0.2095 | 4.74E-13 | chr:4:120263688 |
| 4 rs187271184            | 120330448 A | 0.1827 | 4.82E-13 | chr:4:120263688 |
| 4 rs190803766            | 120330449 A | 0.1827 | 4.82E-13 | chr:4:120263688 |
| 4 rs12502423             | 120424172 C | 0.1857 | 4.86E-13 | chr:4:120263688 |
| 4 rs28441656             | 120376115 G | 0.1857 | 4.86E-13 | chr:4:120263688 |
| 4 rs28571712             | 120375980 A | 0.1857 | 4.86E-13 | chr:4:120263688 |
| 4 rs370222454            | 120359691 G | 0.1855 | 4.89E-13 | chr:4:120263688 |
| 4 rs7441137              | 120133221 G | 0.2099 | 4.97E-13 | chr:4:120263688 |
| 4 rs9884728              | 120127079 C | 0.2099 | 4.97E-13 | chr:4:120263688 |
| 4 rs1546504              | 120241179 T | 0.1833 | 5.09E-13 | chr:4:120263688 |
| 4 rs11723757             | 120299669 T | 0.1811 | 5.12E-13 | chr:4:120263688 |
| 4 rs10018726             | 120394010 G | 0.1851 | 5.14E-13 | chr:4:120263688 |
| 4 rs10020027             | 120381879 C | 0.1851 | 5.14E-13 | chr:4:120263688 |
| 4 rs10034623             | 120397829 A | 0.1851 | 5.14E-13 | chr:4:120263688 |
| 4 rs13107475             | 120393011 T | 0.1851 | 5.14E-13 | chr:4:120263688 |
| 4 rs1809406              | 120377122 A | 0.1851 | 5.14E-13 | chr:4:120263688 |
| 4 rs2389803              | 120393511 A | 0.1851 | 5.14E-13 | chr:4:120263688 |
| 4 rs2389809              | 120377399 C | 0.1851 | 5.14E-13 | chr:4:120263688 |
| 4 rs3733520              | 120423480 G | 0.1851 | 5.14E-13 | chr:4:120263688 |
| 4 rs7356491              | 120381974 T | 0.1851 | 5.14E-13 | chr:4:120263688 |
| 4 rs9994810              | 120381590 G | 0.1851 | 5.14E-13 | chr:4:120263688 |
| 4 rs10008386             | 120318809 A | 0.1857 | 5.39E-13 | chr:4:120263688 |
| 4 rs10008392             | 120318839 A | 0.1857 | 5.39E-13 | chr:4:120263688 |
| 4 rs1155577              | 120449810 C | 0.1982 | 5.45E-13 | chr:4:120263688 |
| 4 rs13104219             | 120438174 T | 0.1982 | 5.45E-13 | chr:4:120263688 |
| 4 rs140982995            | 120455483 T | 0.1982 | 5.45E-13 | chr:4:120263688 |
| 4 rs142328963            | 120498647 T | 0.1982 | 5.45E-13 | chr:4:120263688 |
| 4 rs1480933              | 120433248 T | 0.1982 | 5.45E-13 | chr:4:120263688 |
| 4 rs2892869              | 120521297 T | 0.1982 | 5.45E-13 | chr:4:120263688 |
| 4 rs3775842              | 120427732 A | 0.1982 | 5.45E-13 | chr:4:120263688 |
| 4 rs56173225             | 120509972 G | 0.1982 | 5.45E-13 | chr:4:120263688 |
| 4 rs6844263              | 120433807 G | 0.1982 | 5.45E-13 | chr:4:120263688 |
| 4 rs72920701             | 120513230 G | 0.1982 | 5.45E-13 | chr:4:120263688 |

|               |             |        |          |                 |
|---------------|-------------|--------|----------|-----------------|
| 4 rs7678973   | 120511817 T | 0.1982 | 5.45E-13 | chr:4:120263688 |
| 4 rs12506148  | 120320348 T | 0.1824 | 5.57E-13 | chr:4:120263688 |
| 4 rs146743180 | 120497433 C | 0.2023 | 5.71E-13 | chr:4:120263688 |
| 4 rs36173322  | 120496491 C | 0.2023 | 5.71E-13 | chr:4:120263688 |
| 4 rs59516282  | 120502016 G | 0.2023 | 5.71E-13 | chr:4:120263688 |
| 4 rs80052400  | 120498134 G | 0.2023 | 5.71E-13 | chr:4:120263688 |
| 4 rs1552092   | 120488496 T | 0.1876 | 5.75E-13 | chr:4:120263688 |
| 4 rs4001207   | 120331782 C | 0.1854 | 5.89E-13 | chr:4:120263688 |
| 4 rs10222794  | 120302351 T | 0.1862 | 5.90E-13 | chr:4:120263688 |
| 4 rs10222801  | 120302350 T | 0.1862 | 5.90E-13 | chr:4:120263688 |
| 4 rs9997340   | 120364809 C | 0.1866 | 6.15E-13 | chr:4:120263688 |
| 4 rs11729521  | 120416788 C | 0.1859 | 6.18E-13 | chr:4:120263688 |
| 4 rs10440403  | 120308047 T | 0.1872 | 6.21E-13 | chr:4:120263688 |
| 4 rs10019406  | 120364619 G | 0.1873 | 6.26E-13 | chr:4:120263688 |
| 4 rs10020034  | 120294331 G | 0.1873 | 6.26E-13 | chr:4:120263688 |
| 4 rs10028669  | 120295197 T | 0.1873 | 6.26E-13 | chr:4:120263688 |
| 4 rs11098512  | 120314161 T | 0.1873 | 6.26E-13 | chr:4:120263688 |
| 4 rs11723839  | 120299673 A | 0.1873 | 6.26E-13 | chr:4:120263688 |
| 4 rs13435162  | 120304634 A | 0.1873 | 6.26E-13 | chr:4:120263688 |
| 4 rs200149630 | 120356941 C | 0.1873 | 6.26E-13 | chr:4:120263688 |
| 4 rs28551662  | 120309556 A | 0.1873 | 6.26E-13 | chr:4:120263688 |
| 4 rs34792640  | 120368627 A | 0.1873 | 6.26E-13 | chr:4:120263688 |
| 4 rs34913743  | 120324918 G | 0.1873 | 6.26E-13 | chr:4:120263688 |
| 4 rs35494005  | 120361142 C | 0.1873 | 6.26E-13 | chr:4:120263688 |
| 4 rs3890049   | 120326283 A | 0.1873 | 6.26E-13 | chr:4:120263688 |
| 4 rs3955380   | 120334410 A | 0.1873 | 6.26E-13 | chr:4:120263688 |
| 4 rs59394118  | 120295551 G | 0.1873 | 6.26E-13 | chr:4:120263688 |
| 4 rs67265404  | 120359270 T | 0.1873 | 6.26E-13 | chr:4:120263688 |
| 4 rs71610279  | 120326643 C | 0.1873 | 6.26E-13 | chr:4:120263688 |
| 4 rs71629403  | 120372567 T | 0.1873 | 6.26E-13 | chr:4:120263688 |
| 4 rs7674556   | 120303729 G | 0.1873 | 6.26E-13 | chr:4:120263688 |
| 4 rs7696465   | 120322114 A | 0.1873 | 6.26E-13 | chr:4:120263688 |
| 4 rs7696649   | 120322177 A | 0.1873 | 6.26E-13 | chr:4:120263688 |
| 4 rs7696857   | 120322321 A | 0.1873 | 6.26E-13 | chr:4:120263688 |
| 4 rs79446934  | 120326713 C | 0.1873 | 6.26E-13 | chr:4:120263688 |
| 4 rs9685784   | 120366008 T | 0.1873 | 6.26E-13 | chr:4:120263688 |
| 4 rs10004484  | 120442428 T | 0.1902 | 6.31E-13 | chr:4:120263688 |
| 4 rs10018280  | 120478139 G | 0.1902 | 6.31E-13 | chr:4:120263688 |
| 4 rs1155576   | 120450159 C | 0.1902 | 6.31E-13 | chr:4:120263688 |
| 4 rs17050695  | 120489527 T | 0.1902 | 6.31E-13 | chr:4:120263688 |
| 4 rs28735358  | 120482049 C | 0.1902 | 6.31E-13 | chr:4:120263688 |
| 4 rs3775858   | 120486028 G | 0.1902 | 6.31E-13 | chr:4:120263688 |
| 4 rs6534141   | 120485223 T | 0.1902 | 6.31E-13 | chr:4:120263688 |

|               |             |        |          |                 |
|---------------|-------------|--------|----------|-----------------|
| 4 rs6858592   | 120458692 A | 0.1902 | 6.31E-13 | chr:4:120263688 |
| 4 rs7680063   | 120479889 G | 0.1902 | 6.31E-13 | chr:4:120263688 |
| 4 rs9997631   | 120469995 G | 0.1902 | 6.31E-13 | chr:4:120263688 |
| 4 rs9759478   | 120367998 A | 0.1836 | 6.33E-13 | chr:4:120263688 |
| 4 rs7654611   | 120328304 G | 0.1899 | 6.34E-13 | chr:4:120263688 |
| 4 rs11731756  | 120478696 G | 0.1906 | 6.38E-13 | chr:4:120263688 |
| 4 rs11737395  | 120520704 G | 0.1906 | 6.38E-13 | chr:4:120263688 |
| 4 rs12498539  | 120468370 T | 0.1906 | 6.38E-13 | chr:4:120263688 |
| 4 rs201236087 | 120474546 T | 0.1906 | 6.38E-13 | chr:4:120263688 |
| 4 rs2170276   | 120485824 C | 0.1906 | 6.38E-13 | chr:4:120263688 |
| 4 rs2306457   | 120472839 A | 0.1906 | 6.38E-13 | chr:4:120263688 |
| 4 rs34308924  | 120481431 C | 0.1906 | 6.38E-13 | chr:4:120263688 |
| 4 rs3775854   | 120471971 T | 0.1906 | 6.38E-13 | chr:4:120263688 |
| 4 rs3822194   | 120471648 G | 0.1906 | 6.38E-13 | chr:4:120263688 |
| 4 rs6853998   | 120475860 A | 0.1906 | 6.38E-13 | chr:4:120263688 |
| 4 rs6858777   | 120475966 G | 0.1906 | 6.38E-13 | chr:4:120263688 |
| 4 rs7669520   | 120515278 C | 0.1906 | 6.38E-13 | chr:4:120263688 |
| 4 rs7680748   | 120479978 A | 0.1906 | 6.38E-13 | chr:4:120263688 |
| 4 rs9884402   | 120489982 G | 0.1906 | 6.38E-13 | chr:4:120263688 |
| 4 rs9995026   | 120490499 A | 0.1906 | 6.38E-13 | chr:4:120263688 |
| 4 rs114860385 | 120355584 C | 0.1874 | 6.43E-13 | chr:4:120263688 |
| 4 rs9996382   | 120151012 A | 0.2129 | 6.51E-13 | chr:4:120263688 |
| 4 rs28499576  | 120386677 A | 0.194  | 6.62E-13 | chr:4:120263688 |
| 4 rs10023569  | 120323316 T | 0.1884 | 6.63E-13 | chr:4:120263688 |
| 4 rs10518331  | 120323595 T | 0.1884 | 6.63E-13 | chr:4:120263688 |
| 4 rs115044484 | 120326887 G | 0.1884 | 6.63E-13 | chr:4:120263688 |
| 4 rs11934314  | 120376540 A | 0.1884 | 6.63E-13 | chr:4:120263688 |
| 4 rs13133522  | 120324424 T | 0.1884 | 6.63E-13 | chr:4:120263688 |
| 4 rs139379776 | 120332234 A | 0.1884 | 6.63E-13 | chr:4:120263688 |
| 4 rs140750089 | 120330539 A | 0.1884 | 6.63E-13 | chr:4:120263688 |
| 4 rs142609610 | 120327032 A | 0.1884 | 6.63E-13 | chr:4:120263688 |
| 4 rs149185281 | 120369277 A | 0.1884 | 6.63E-13 | chr:4:120263688 |
| 4 rs17009122  | 120362403 A | 0.1884 | 6.63E-13 | chr:4:120263688 |
| 4 rs200822665 | 120357250 A | 0.1884 | 6.63E-13 | chr:4:120263688 |
| 4 rs201742833 | 120356668 T | 0.1884 | 6.63E-13 | chr:4:120263688 |
| 4 rs2389802   | 120325732 A | 0.1884 | 6.63E-13 | chr:4:120263688 |
| 4 rs28394590  | 120373738 G | 0.1884 | 6.63E-13 | chr:4:120263688 |
| 4 rs28495013  | 120375831 C | 0.1884 | 6.63E-13 | chr:4:120263688 |
| 4 rs28529639  | 120373104 T | 0.1884 | 6.63E-13 | chr:4:120263688 |
| 4 rs28567426  | 120373354 G | 0.1884 | 6.63E-13 | chr:4:120263688 |
| 4 rs28626372  | 120373262 T | 0.1884 | 6.63E-13 | chr:4:120263688 |
| 4 rs28653183  | 120372276 G | 0.1884 | 6.63E-13 | chr:4:120263688 |
| 4 rs28714318  | 120375830 T | 0.1884 | 6.63E-13 | chr:4:120263688 |

|               |             |        |          |                 |
|---------------|-------------|--------|----------|-----------------|
| 4 rs34147052  | 120361591 C | 0.1884 | 6.63E-13 | chr:4:120263688 |
| 4 rs34378623  | 120368744 T | 0.1884 | 6.63E-13 | chr:4:120263688 |
| 4 rs34566984  | 120361270 A | 0.1884 | 6.63E-13 | chr:4:120263688 |
| 4 rs34965784  | 120361586 C | 0.1884 | 6.63E-13 | chr:4:120263688 |
| 4 rs35091806  | 120325529 A | 0.1884 | 6.63E-13 | chr:4:120263688 |
| 4 rs35111011  | 120366526 T | 0.1884 | 6.63E-13 | chr:4:120263688 |
| 4 rs35165976  | 120325630 A | 0.1884 | 6.63E-13 | chr:4:120263688 |
| 4 rs532415426 | 120359632 A | 0.1884 | 6.63E-13 | chr:4:120263688 |
| 4 rs545772518 | 120359643 G | 0.1884 | 6.63E-13 | chr:4:120263688 |
| 4 rs559457335 | 120359644 G | 0.1884 | 6.63E-13 | chr:4:120263688 |
| 4 rs563816604 | 120359627 G | 0.1884 | 6.63E-13 | chr:4:120263688 |
| 4 rs66506550  | 120371445 A | 0.1884 | 6.63E-13 | chr:4:120263688 |
| 4 rs6820376   | 120324476 G | 0.1884 | 6.63E-13 | chr:4:120263688 |
| 4 rs6845714   | 120326138 T | 0.1884 | 6.63E-13 | chr:4:120263688 |
| 4 rs6846442   | 120326323 A | 0.1884 | 6.63E-13 | chr:4:120263688 |
| 4 rs6846620   | 120326404 A | 0.1884 | 6.63E-13 | chr:4:120263688 |
| 4 rs71610280  | 120326648 G | 0.1884 | 6.63E-13 | chr:4:120263688 |
| 4 rs71612602  | 120332781 A | 0.1884 | 6.63E-13 | chr:4:120263688 |
| 4 rs71614422  | 120359340 A | 0.1884 | 6.63E-13 | chr:4:120263688 |
| 4 rs71614434  | 120368975 T | 0.1884 | 6.63E-13 | chr:4:120263688 |
| 4 rs71614438  | 120371252 A | 0.1884 | 6.63E-13 | chr:4:120263688 |
| 4 rs71629404  | 120372724 G | 0.1884 | 6.63E-13 | chr:4:120263688 |
| 4 rs72489565  | 120326819 C | 0.1884 | 6.63E-13 | chr:4:120263688 |
| 4 rs74772011  | 120332334 C | 0.1884 | 6.63E-13 | chr:4:120263688 |
| 4 rs75122014  | 120362426 C | 0.1884 | 6.63E-13 | chr:4:120263688 |
| 4 rs75396180  | 120375727 A | 0.1884 | 6.63E-13 | chr:4:120263688 |
| 4 rs75690486  | 120359788 A | 0.1884 | 6.63E-13 | chr:4:120263688 |
| 4 rs76525361  | 120359608 T | 0.1884 | 6.63E-13 | chr:4:120263688 |
| 4 rs7659501   | 120371552 T | 0.1884 | 6.63E-13 | chr:4:120263688 |
| 4 rs7659551   | 120371729 T | 0.1884 | 6.63E-13 | chr:4:120263688 |
| 4 rs7664458   | 120371967 G | 0.1884 | 6.63E-13 | chr:4:120263688 |
| 4 rs76651228  | 120359559 G | 0.1884 | 6.63E-13 | chr:4:120263688 |
| 4 rs77299866  | 120326716 T | 0.1884 | 6.63E-13 | chr:4:120263688 |
| 4 rs9683709   | 120365714 A | 0.1884 | 6.63E-13 | chr:4:120263688 |
| 4 rs9685777   | 120365965 A | 0.1884 | 6.63E-13 | chr:4:120263688 |
| 4 rs28479042  | 120386876 C | 0.1916 | 6.67E-13 | chr:4:120263688 |
| 4 rs34858317  | 120387110 C | 0.1916 | 6.67E-13 | chr:4:120263688 |
| 4 rs35063680  | 120387102 C | 0.1916 | 6.67E-13 | chr:4:120263688 |
| 4 rs71614448  | 120387026 A | 0.1916 | 6.67E-13 | chr:4:120263688 |
| 4 rs71614449  | 120387055 T | 0.1916 | 6.67E-13 | chr:4:120263688 |
| 4 rs34237553  | 120325273 C | 0.1887 | 6.78E-13 | chr:4:120263688 |
| 4 rs7665192   | 120247065 A | 0.188  | 6.78E-13 | chr:4:120263688 |
| 4 rs71610285  | 120329953 C | 0.1442 | 6.87E-13 | chr:4:120263688 |



|               |             |        |          |                 |
|---------------|-------------|--------|----------|-----------------|
| 4 rs142970247 | 120499656 T | 0.2043 | 6.89E-13 | chr:4:120263688 |
| 4 rs10026736  | 120384322 C | 0.1862 | 7.00E-13 | chr:4:120263688 |
| 4 rs17006190  | 120418838 G | 0.1862 | 7.00E-13 | chr:4:120263688 |
| 4 rs3733519   | 120423448 G | 0.1862 | 7.00E-13 | chr:4:120263688 |
| 4 rs10017371  | 120293776 G | 0.1867 | 7.11E-13 | chr:4:120263688 |
| 4 rs1002152   | 120273387 A | 0.1867 | 7.11E-13 | chr:4:120263688 |
| 4 rs10026436  | 120288904 A | 0.1867 | 7.11E-13 | chr:4:120263688 |
| 4 rs11729991  | 120292700 T | 0.1867 | 7.11E-13 | chr:4:120263688 |
| 4 rs13104396  | 120285649 T | 0.1867 | 7.11E-13 | chr:4:120263688 |
| 4 rs6848580   | 120286492 A | 0.1867 | 7.11E-13 | chr:4:120263688 |
| 4 rs1546505   | 120241224 G | 0.1863 | 7.12E-13 | chr:4:120263688 |
| 4 rs76541370  | 120498280 A | 0.1998 | 7.15E-13 | chr:4:120263688 |
| 4 rs2389873   | 120554714 A | 0.2113 | 7.15E-13 | chr:4:120263688 |
| 4 rs4834792   | 120555696 T | 0.2113 | 7.15E-13 | chr:4:120263688 |
| 4 rs11728616  | 120440676 A | 0.1956 | 7.16E-13 | chr:4:120263688 |
| 4 rs35111518  | 120440682 G | 0.1956 | 7.16E-13 | chr:4:120263688 |
| 4 rs79026312  | 120440677 A | 0.1956 | 7.16E-13 | chr:4:120263688 |
| 4 rs10006793  | 120390791 G | 0.19   | 7.29E-13 | chr:4:120263688 |
| 4 rs10031483  | 120422636 C | 0.19   | 7.29E-13 | chr:4:120263688 |
| 4 rs10031665  | 120422852 C | 0.19   | 7.29E-13 | chr:4:120263688 |
| 4 rs11098526  | 120390359 T | 0.19   | 7.29E-13 | chr:4:120263688 |
| 4 rs11098527  | 120399906 G | 0.19   | 7.29E-13 | chr:4:120263688 |
| 4 rs11934940  | 120389369 G | 0.19   | 7.29E-13 | chr:4:120263688 |
| 4 rs12499324  | 120393786 T | 0.19   | 7.29E-13 | chr:4:120263688 |
| 4 rs12505953  | 120385681 A | 0.19   | 7.29E-13 | chr:4:120263688 |
| 4 rs12510138  | 120423935 C | 0.19   | 7.29E-13 | chr:4:120263688 |
| 4 rs2306455   | 120421969 A | 0.19   | 7.29E-13 | chr:4:120263688 |
| 4 rs28685688  | 120420334 C | 0.19   | 7.29E-13 | chr:4:120263688 |
| 4 rs34004415  | 120381140 A | 0.19   | 7.29E-13 | chr:4:120263688 |
| 4 rs3733523   | 120423719 T | 0.19   | 7.29E-13 | chr:4:120263688 |
| 4 rs6842762   | 120398236 T | 0.19   | 7.29E-13 | chr:4:120263688 |
| 4 rs71614443  | 120379388 C | 0.19   | 7.29E-13 | chr:4:120263688 |
| 4 rs7687843   | 120421211 T | 0.19   | 7.29E-13 | chr:4:120263688 |
| 4 rs9994730   | 120381564 C | 0.19   | 7.29E-13 | chr:4:120263688 |
| 4 rs9998585   | 120396802 A | 0.19   | 7.29E-13 | chr:4:120263688 |
| 4 rs6849171   | 120409549 A | 0.1885 | 7.45E-13 | chr:4:120263688 |
| 4 rs55816173  | 120247014 T | 0.2062 | 7.52E-13 | chr:4:120263688 |
| 4 rs56843000  | 120516597 T | 0.2035 | 7.69E-13 | chr:4:120263688 |
| 4 rs7699346   | 120310542 T | 0.1888 | 7.71E-13 | chr:4:120263688 |
| 4 rs7654762   | 120328377 C | 0.1902 | 8.27E-13 | chr:4:120263688 |
| 4 rs116952757 | 120362969 C | 0.1883 | 8.46E-13 | chr:4:120263688 |
| 4 rs4001185   | 120376381 C | 0.1906 | 8.59E-13 | chr:4:120263688 |
| 4 rs6534130   | 120131339 A | 0.2171 | 8.63E-13 | chr:4:120263688 |

|               |             |        |          |                 |
|---------------|-------------|--------|----------|-----------------|
| 4 rs9995244   | 120321858 G | 0.182  | 8.90E-13 | chr:4:120263688 |
| 4 rs28549914  | 120322781 A | 0.1905 | 8.98E-13 | chr:4:120263688 |
| 4 rs4368585   | 120354482 G | 0.1915 | 9.07E-13 | chr:4:120263688 |
| 4 rs28655325  | 120372999 G | 0.1891 | 9.08E-13 | chr:4:120263688 |
| 4 rs12506546  | 120301618 C | 0.188  | 9.09E-13 | chr:4:120263688 |
| 4 rs199863129 | 120334013 T | 0.188  | 9.09E-13 | chr:4:120263688 |
| 4 rs7696875   | 120322358 T | 0.188  | 9.09E-13 | chr:4:120263688 |
| 4 rs10006877  | 120242793 T | 0.189  | 9.22E-13 | chr:4:120263688 |
| 4 rs1022145   | 120230979 G | 0.189  | 9.22E-13 | chr:4:120263688 |
| 4 rs12505469  | 120249585 T | 0.189  | 9.22E-13 | chr:4:120263688 |
| 4 rs1546502   | 120235898 G | 0.189  | 9.22E-13 | chr:4:120263688 |
| 4 rs2017057   | 120257711 G | 0.189  | 9.22E-13 | chr:4:120263688 |
| 4 rs6838236   | 120267229 G | 0.189  | 9.22E-13 | chr:4:120263688 |
| 4 rs878373    | 120237484 T | 0.189  | 9.22E-13 | chr:4:120263688 |
| 4 rs41464847  | 120532401 A | 0.2049 | 9.31E-13 | chr:4:120263688 |
| 4 rs59590064  | 120539753 T | 0.2049 | 9.31E-13 | chr:4:120263688 |
| 4 rs6817317   | 120542827 A | 0.2049 | 9.31E-13 | chr:4:120263688 |
| 4 rs7672519   | 120544112 C | 0.2049 | 9.31E-13 | chr:4:120263688 |
| 4 rs7681980   | 120533223 G | 0.2049 | 9.31E-13 | chr:4:120263688 |
| 4 rs58416902  | 120374639 G | 0.1916 | 9.40E-13 | chr:4:120263688 |
| 4 rs72676045  | 120254663 A | 0.1873 | 9.48E-13 | chr:4:120263688 |
| 4 rs3822195   | 120471660 T | 0.1971 | 9.53E-13 | chr:4:120263688 |
| 4 rs35138262  | 120361169 T | 0.2134 | 9.66E-13 | chr:4:120263688 |
| 4 rs3872807   | 120360251 A | 0.2134 | 9.66E-13 | chr:4:120263688 |
| 4 rs11934328  | 120376744 T | 0.1913 | 9.91E-13 | chr:4:120263688 |
| 4 rs10008459  | 120394231 C | 0.1927 | 9.93E-13 | chr:4:120263688 |
| 4 rs10009450  | 120391258 G | 0.1927 | 9.93E-13 | chr:4:120263688 |
| 4 rs10017389  | 120381412 A | 0.1927 | 9.93E-13 | chr:4:120263688 |
| 4 rs10026493  | 120384194 G | 0.1927 | 9.93E-13 | chr:4:120263688 |
| 4 rs10026516  | 120384253 A | 0.1927 | 9.93E-13 | chr:4:120263688 |
| 4 rs10026748  | 120384357 A | 0.1927 | 9.93E-13 | chr:4:120263688 |
| 4 rs10026952  | 120384564 A | 0.1927 | 9.93E-13 | chr:4:120263688 |
| 4 rs10032151  | 120391628 T | 0.1927 | 9.93E-13 | chr:4:120263688 |
| 4 rs10032158  | 120391632 T | 0.1927 | 9.93E-13 | chr:4:120263688 |
| 4 rs11098524  | 120390032 G | 0.1927 | 9.93E-13 | chr:4:120263688 |
| 4 rs11098525  | 120390152 A | 0.1927 | 9.93E-13 | chr:4:120263688 |
| 4 rs11941899  | 120382758 A | 0.1927 | 9.93E-13 | chr:4:120263688 |
| 4 rs11943877  | 120389047 T | 0.1927 | 9.93E-13 | chr:4:120263688 |
| 4 rs12502909  | 120377529 T | 0.1927 | 9.93E-13 | chr:4:120263688 |
| 4 rs148358770 | 120382262 C | 0.1927 | 9.93E-13 | chr:4:120263688 |
| 4 rs150657109 | 120377707 T | 0.1927 | 9.93E-13 | chr:4:120263688 |
| 4 rs17046116  | 120387259 A | 0.1927 | 9.93E-13 | chr:4:120263688 |
| 4 rs17046118  | 120387496 G | 0.1927 | 9.93E-13 | chr:4:120263688 |

|               |             |        |          |                 |
|---------------|-------------|--------|----------|-----------------|
| 4 rs185466280 | 120377740 T | 0.1927 | 9.93E-13 | chr:4:120263688 |
| 4 rs2127820   | 120394534 A | 0.1927 | 9.93E-13 | chr:4:120263688 |
| 4 rs2127821   | 120394535 C | 0.1927 | 9.93E-13 | chr:4:120263688 |
| 4 rs28444327  | 120387946 G | 0.1927 | 9.93E-13 | chr:4:120263688 |
| 4 rs28461559  | 120387932 A | 0.1927 | 9.93E-13 | chr:4:120263688 |
| 4 rs28665282  | 120384186 T | 0.1927 | 9.93E-13 | chr:4:120263688 |
| 4 rs2892848   | 120381341 T | 0.1927 | 9.93E-13 | chr:4:120263688 |
| 4 rs34858405  | 120381081 A | 0.1927 | 9.93E-13 | chr:4:120263688 |
| 4 rs4001190   | 120377619 A | 0.1927 | 9.93E-13 | chr:4:120263688 |
| 4 rs6837828   | 120392084 T | 0.1927 | 9.93E-13 | chr:4:120263688 |
| 4 rs6838814   | 120392443 A | 0.1927 | 9.93E-13 | chr:4:120263688 |
| 4 rs71614442  | 120379346 T | 0.1927 | 9.93E-13 | chr:4:120263688 |
| 4 rs7436506   | 120393769 C | 0.1927 | 9.93E-13 | chr:4:120263688 |
| 4 rs74602693  | 120377647 T | 0.1927 | 9.93E-13 | chr:4:120263688 |
| 4 rs7654529   | 120388230 A | 0.1927 | 9.93E-13 | chr:4:120263688 |
| 4 rs7654546   | 120388255 A | 0.1927 | 9.93E-13 | chr:4:120263688 |
| 4 rs7654587   | 120388406 T | 0.1927 | 9.93E-13 | chr:4:120263688 |
| 4 rs7659336   | 120385341 C | 0.1927 | 9.93E-13 | chr:4:120263688 |
| 4 rs7681214   | 120385320 A | 0.1927 | 9.93E-13 | chr:4:120263688 |
| 4 rs7681978   | 120383775 C | 0.1927 | 9.93E-13 | chr:4:120263688 |
| 4 rs7688613   | 120384803 C | 0.1927 | 9.93E-13 | chr:4:120263688 |
| 4 rs79870274  | 120382190 T | 0.1927 | 9.93E-13 | chr:4:120263688 |
| 4 rs9993199   | 120392873 A | 0.1927 | 9.93E-13 | chr:4:120263688 |
| 4 rs4001195   | 120329676 G | 0.1896 | 1.04E-12 | chr:4:120263688 |
| 4 rs10012456  | 120274039 T | 0.1876 | 1.04E-12 | chr:4:120263688 |
| 4 rs6847075   | 120286043 T | 0.1876 | 1.04E-12 | chr:4:120263688 |
| 4 rs2389875   | 120557014 G | 0.2098 | 1.05E-12 | chr:4:120263688 |
| 4 rs7655177   | 120328622 G | 0.1926 | 1.05E-12 | chr:4:120263688 |
| 4 rs1480931   | 120395809 A | 0.1906 | 1.05E-12 | chr:4:120263688 |
| 4 rs66887589  | 120509279 T | 0.2004 | 1.06E-12 | chr:4:120263688 |
| 4 rs10006706  | 120409152 C | 0.1934 | 1.06E-12 | chr:4:120263688 |
| 4 rs10518328  | 120401779 A | 0.1934 | 1.06E-12 | chr:4:120263688 |
| 4 rs11098530  | 120413154 T | 0.1934 | 1.06E-12 | chr:4:120263688 |
| 4 rs11734241  | 120416872 G | 0.1934 | 1.06E-12 | chr:4:120263688 |
| 4 rs11935596  | 120412457 C | 0.1934 | 1.06E-12 | chr:4:120263688 |
| 4 rs11940028  | 120411907 C | 0.1934 | 1.06E-12 | chr:4:120263688 |
| 4 rs12507964  | 120413061 A | 0.1934 | 1.06E-12 | chr:4:120263688 |
| 4 rs28753180  | 120405367 T | 0.1934 | 1.06E-12 | chr:4:120263688 |
| 4 rs28789446  | 120405366 C | 0.1934 | 1.06E-12 | chr:4:120263688 |
| 4 rs28845498  | 120405186 A | 0.1934 | 1.06E-12 | chr:4:120263688 |
| 4 rs4577559   | 120404043 G | 0.1934 | 1.06E-12 | chr:4:120263688 |
| 4 rs56270433  | 120406030 T | 0.1934 | 1.06E-12 | chr:4:120263688 |
| 4 rs6822679   | 120402702 C | 0.1934 | 1.06E-12 | chr:4:120263688 |

|              |             |        |          |                 |
|--------------|-------------|--------|----------|-----------------|
| 4 rs6834796  | 120414693 C | 0.1934 | 1.06E-12 | chr:4:120263688 |
| 4 rs6848389  | 120402622 C | 0.1934 | 1.06E-12 | chr:4:120263688 |
| 4 rs6849561  | 120409694 C | 0.1934 | 1.06E-12 | chr:4:120263688 |
| 4 rs7656252  | 120404268 C | 0.1934 | 1.06E-12 | chr:4:120263688 |
| 4 rs7681544  | 120411255 C | 0.1934 | 1.06E-12 | chr:4:120263688 |
| 4 rs10020141 | 120318870 C | 0.193  | 1.08E-12 | chr:4:120263688 |
| 4 rs6833815  | 120318921 A | 0.193  | 1.08E-12 | chr:4:120263688 |
| 4 rs10028423 | 120294909 T | 0.1908 | 1.10E-12 | chr:4:120263688 |
| 4 rs28491261 | 120294900 A | 0.1908 | 1.10E-12 | chr:4:120263688 |
| 4 rs80242894 | 120375752 A | 0.1967 | 1.11E-12 | chr:4:120263688 |
| 4 rs11723090 | 120490592 C | 0.1919 | 1.12E-12 | chr:4:120263688 |
| 4 rs4998488  | 120500841 C | 0.1919 | 1.12E-12 | chr:4:120263688 |
| 4 rs59732491 | 120489588 C | 0.1919 | 1.12E-12 | chr:4:120263688 |
| 4 rs71612595 | 120331428 T | 0.1929 | 1.14E-12 | chr:4:120263688 |
| 4 rs71612596 | 120331743 A | 0.1929 | 1.14E-12 | chr:4:120263688 |
| 4 rs71612597 | 120331845 C | 0.1929 | 1.14E-12 | chr:4:120263688 |
| 4 rs13139045 | 120168588 C | 0.2172 | 1.14E-12 | chr:4:120263688 |
| 4 rs10008791 | 120431469 C | 0.1958 | 1.16E-12 | chr:4:120263688 |
| 4 rs10009626 | 120470005 C | 0.1958 | 1.16E-12 | chr:4:120263688 |
| 4 rs10013305 | 120450424 A | 0.1958 | 1.16E-12 | chr:4:120263688 |
| 4 rs10030660 | 120436704 A | 0.1958 | 1.16E-12 | chr:4:120263688 |
| 4 rs10034450 | 120455649 G | 0.1958 | 1.16E-12 | chr:4:120263688 |
| 4 rs1010739  | 120463471 T | 0.1958 | 1.16E-12 | chr:4:120263688 |
| 4 rs1010740  | 120463409 C | 0.1958 | 1.16E-12 | chr:4:120263688 |
| 4 rs11098531 | 120465001 A | 0.1958 | 1.16E-12 | chr:4:120263688 |
| 4 rs11098532 | 120490726 A | 0.1958 | 1.16E-12 | chr:4:120263688 |
| 4 rs11736416 | 120431661 T | 0.1958 | 1.16E-12 | chr:4:120263688 |
| 4 rs11933966 | 120476715 A | 0.1958 | 1.16E-12 | chr:4:120263688 |
| 4 rs11947234 | 120474859 G | 0.1958 | 1.16E-12 | chr:4:120263688 |
| 4 rs12498599 | 120468503 T | 0.1958 | 1.16E-12 | chr:4:120263688 |
| 4 rs12502389 | 120454191 G | 0.1958 | 1.16E-12 | chr:4:120263688 |
| 4 rs13128602 | 120459366 G | 0.1958 | 1.16E-12 | chr:4:120263688 |
| 4 rs13134665 | 120426430 C | 0.1958 | 1.16E-12 | chr:4:120263688 |
| 4 rs13140391 | 120503437 G | 0.1958 | 1.16E-12 | chr:4:120263688 |
| 4 rs13140409 | 120503460 G | 0.1958 | 1.16E-12 | chr:4:120263688 |
| 4 rs13149407 | 120437825 G | 0.1958 | 1.16E-12 | chr:4:120263688 |
| 4 rs1383532  | 120434404 A | 0.1958 | 1.16E-12 | chr:4:120263688 |
| 4 rs1383533  | 120434576 A | 0.1958 | 1.16E-12 | chr:4:120263688 |
| 4 rs1480936  | 120462861 T | 0.1958 | 1.16E-12 | chr:4:120263688 |
| 4 rs1480939  | 120456927 C | 0.1958 | 1.16E-12 | chr:4:120263688 |
| 4 rs1480940  | 120457682 C | 0.1958 | 1.16E-12 | chr:4:120263688 |
| 4 rs1552095  | 120460306 C | 0.1958 | 1.16E-12 | chr:4:120263688 |
| 4 rs2086450  | 120496217 A | 0.1958 | 1.16E-12 | chr:4:120263688 |

|               |             |        |          |                 |
|---------------|-------------|--------|----------|-----------------|
| 4 rs2291185   | 120434833 A | 0.1958 | 1.16E-12 | chr:4:120263688 |
| 4 rs2306456   | 120472422 G | 0.1958 | 1.16E-12 | chr:4:120263688 |
| 4 rs28718422  | 120466304 A | 0.1958 | 1.16E-12 | chr:4:120263688 |
| 4 rs34868248  | 120442430 G | 0.1958 | 1.16E-12 | chr:4:120263688 |
| 4 rs36040693  | 120477616 G | 0.1958 | 1.16E-12 | chr:4:120263688 |
| 4 rs3733525   | 120447048 G | 0.1958 | 1.16E-12 | chr:4:120263688 |
| 4 rs3736115   | 120488703 A | 0.1958 | 1.16E-12 | chr:4:120263688 |
| 4 rs3775843   | 120427844 C | 0.1958 | 1.16E-12 | chr:4:120263688 |
| 4 rs3775844   | 120428033 A | 0.1958 | 1.16E-12 | chr:4:120263688 |
| 4 rs3775845   | 120432447 C | 0.1958 | 1.16E-12 | chr:4:120263688 |
| 4 rs3775847   | 120447642 C | 0.1958 | 1.16E-12 | chr:4:120263688 |
| 4 rs3775848   | 120447724 T | 0.1958 | 1.16E-12 | chr:4:120263688 |
| 4 rs3775849   | 120450908 C | 0.1958 | 1.16E-12 | chr:4:120263688 |
| 4 rs3775852   | 120454556 G | 0.1958 | 1.16E-12 | chr:4:120263688 |
| 4 rs3822190   | 120428098 A | 0.1958 | 1.16E-12 | chr:4:120263688 |
| 4 rs3822191   | 120428101 T | 0.1958 | 1.16E-12 | chr:4:120263688 |
| 4 rs4596225   | 120496444 G | 0.1958 | 1.16E-12 | chr:4:120263688 |
| 4 rs58452170  | 120459674 T | 0.1958 | 1.16E-12 | chr:4:120263688 |
| 4 rs6534139   | 120449456 A | 0.1958 | 1.16E-12 | chr:4:120263688 |
| 4 rs6534140   | 120455311 T | 0.1958 | 1.16E-12 | chr:4:120263688 |
| 4 rs6835635   | 120458867 C | 0.1958 | 1.16E-12 | chr:4:120263688 |
| 4 rs6847818   | 120469250 T | 0.1958 | 1.16E-12 | chr:4:120263688 |
| 4 rs7657849   | 120455494 C | 0.1958 | 1.16E-12 | chr:4:120263688 |
| 4 rs7664986   | 120429952 C | 0.1958 | 1.16E-12 | chr:4:120263688 |
| 4 rs7678400   | 120461957 A | 0.1958 | 1.16E-12 | chr:4:120263688 |
| 4 rs7688802   | 120451668 A | 0.1958 | 1.16E-12 | chr:4:120263688 |
| 4 rs7695620   | 120452776 A | 0.1958 | 1.16E-12 | chr:4:120263688 |
| 4 rs7699064   | 120428309 T | 0.1958 | 1.16E-12 | chr:4:120263688 |
| 4 rs71610282  | 120329093 C | 0.194  | 1.17E-12 | chr:4:120263688 |
| 4 rs7654700   | 120328125 A | 0.194  | 1.17E-12 | chr:4:120263688 |
| 4 rs7654984   | 120328520 G | 0.194  | 1.17E-12 | chr:4:120263688 |
| 4 rs7655723   | 120328666 A | 0.194  | 1.17E-12 | chr:4:120263688 |
| 4 rs79244813  | 120354847 C | 0.1936 | 1.18E-12 | chr:4:120263688 |
| 4 rs62322293  | 120330655 G | 0.2145 | 1.19E-12 | chr:4:120263688 |
| 4 rs73842633  | 120375464 A | 0.1938 | 1.21E-12 | chr:4:120263688 |
| 4 rs12505878  | 120385485 A | 0.1938 | 1.22E-12 | chr:4:120263688 |
| 4 rs7694483   | 120405929 A | 0.2154 | 1.24E-12 | chr:4:120263688 |
| 4 rs77934861  | 120324707 C | 0.195  | 1.24E-12 | chr:4:120263688 |
| 4 rs76568951  | 120355570 C | 0.1949 | 1.25E-12 | chr:4:120263688 |
| 4 rs150131449 | 120288605 G | 0.1892 | 1.26E-12 | chr:4:120263688 |
| 4 rs28374462  | 120386597 G | 0.2015 | 1.27E-12 | chr:4:120263688 |
| 4 rs28559989  | 120386627 T | 0.2015 | 1.27E-12 | chr:4:120263688 |
| 4 rs28587142  | 120386753 C | 0.2015 | 1.27E-12 | chr:4:120263688 |

|               |             |        |          |                 |
|---------------|-------------|--------|----------|-----------------|
| 4 rs28632018  | 120386730 C | 0.2015 | 1.27E-12 | chr:4:120263688 |
| 4 rs3733524   | 120423729 C | 0.1888 | 1.27E-12 | chr:4:120263688 |
| 4 rs71614444  | 120379436 G | 0.1888 | 1.27E-12 | chr:4:120263688 |
| 4 rs76837541  | 120375428 G | 0.195  | 1.28E-12 | chr:4:120263688 |
| 4 rs11722872  | 120233030 C | 0.1899 | 1.35E-12 | chr:4:120263688 |
| 4 rs10027517  | 120372234 G | 0.2162 | 1.40E-12 | chr:4:120263688 |
| 4 rs34818745  | 120257055 C | 0.1938 | 1.41E-12 | chr:4:120263688 |
| 4 rs10006525  | 120408931 G | 0.1961 | 1.44E-12 | chr:4:120263688 |
| 4 rs12508504  | 120410607 C | 0.1961 | 1.44E-12 | chr:4:120263688 |
| 4 rs13145352  | 120409963 C | 0.1961 | 1.44E-12 | chr:4:120263688 |
| 4 rs17005535  | 120411562 T | 0.1961 | 1.44E-12 | chr:4:120263688 |
| 4 rs10017335  | 120381523 G | 0.1961 | 1.44E-12 | chr:4:120263688 |
| 4 rs115227179 | 120355773 T | 0.1991 | 1.49E-12 | chr:4:120263688 |
| 4 rs7679468   | 120328333 C | 0.202  | 1.50E-12 | chr:4:120263688 |
| 4 rs71610281  | 120328001 C | 0.1939 | 1.51E-12 | chr:4:120263688 |
| 4 rs55825515  | 120486402 G | 0.196  | 1.52E-12 | chr:4:120263688 |
| 4 rs56372521  | 120374431 T | 0.1901 | 1.61E-12 | chr:4:120263688 |
| 4 rs79057525  | 120375389 G | 0.1975 | 1.62E-12 | chr:4:120263688 |
| 4 rs13134517  | 120405262 A | 0.2164 | 1.62E-12 | chr:4:120263688 |
| 4 rs6534135   | 120406302 G | 0.2164 | 1.62E-12 | chr:4:120263688 |
| 4 rs7661498   | 120408108 C | 0.2164 | 1.62E-12 | chr:4:120263688 |
| 4 rs9307477   | 120421809 A | 0.2164 | 1.62E-12 | chr:4:120263688 |
| 4 rs9684327   | 120365441 G | 0.2164 | 1.62E-12 | chr:4:120263688 |
| 4 rs9799664   | 120326678 T | 0.2164 | 1.62E-12 | chr:4:120263688 |
| 4 rs9996586   | 120326942 G | 0.2164 | 1.62E-12 | chr:4:120263688 |
| 4 rs7672493   | 120248260 A | 0.1946 | 1.65E-12 | chr:4:120263688 |
| 4 rs6843229   | 120424087 C | 0.2143 | 1.65E-12 | chr:4:120263688 |
| 4 rs6833334   | 120504227 T | 0.1966 | 1.69E-12 | chr:4:120263688 |
| 4 rs199865201 | 120332408 A | 0.2223 | 1.77E-12 | chr:4:120263688 |
| 4 rs12505876  | 120385472 A | 0.2165 | 1.79E-12 | chr:4:120263688 |
| 4 rs368938172 | 120330272 G | 0.1926 | 1.80E-12 | chr:4:120263688 |
| 4 rs71614435  | 120369711 A | 0.2038 | 1.83E-12 | chr:4:120263688 |
| 4 rs28403131  | 120285806 T | 0.1901 | 1.90E-12 | chr:4:120263688 |
| 4 rs28633994  | 120276037 G | 0.1901 | 1.90E-12 | chr:4:120263688 |
| 4 rs28634456  | 120375778 G | 0.2029 | 1.92E-12 | chr:4:120263688 |
| 4 rs78332141  | 120375782 T | 0.2029 | 1.92E-12 | chr:4:120263688 |
| 4 rs9995045   | 120321636 T | 0.1938 | 1.93E-12 | chr:4:120263688 |
| 4 rs11098506  | 120284971 G | 0.1807 | 2.01E-12 | chr:4:120263688 |
| 4 rs200898556 | 120500426 T | 0.1943 | 2.02E-12 | chr:4:120263688 |
| 4 rs3775841   | 120425777 C | 0.2003 | 2.02E-12 | chr:4:120263688 |
| 4 rs185413498 | 120327707 T | 0.199  | 2.08E-12 | chr:4:120263688 |
| 4 rs201087782 | 120327650 G | 0.2005 | 2.20E-12 | chr:4:120263688 |
| 4 rs4079144   | 120325432 T | 0.2065 | 2.23E-12 | chr:4:120263688 |

|               |             |        |          |                 |
|---------------|-------------|--------|----------|-----------------|
| 4 rs59182778  | 120374798 C | 0.2018 | 2.29E-12 | chr:4:120263688 |
| 4 rs28394116  | 120524283 G | 0.2038 | 2.31E-12 | chr:4:120263688 |
| 4 rs11098511  | 120306879 A | 0.1952 | 2.40E-12 | chr:4:120263688 |
| 4 rs13435370  | 120334666 C | 0.1724 | 2.48E-12 | chr:4:120263688 |
| 4 rs12504773  | 120562149 C | 0.2012 | 2.50E-12 | chr:4:120263688 |
| 4 rs13122709  | 120555356 A | 0.2012 | 2.50E-12 | chr:4:120263688 |
| 4 rs7680914   | 120563053 G | 0.2012 | 2.50E-12 | chr:4:120263688 |
| 4 rs10017189  | 120263523 C | 0.2333 | 2.69E-12 | chr:4:120263688 |
| 4 rs4001198   | 120325264 T | 0.1981 | 2.71E-12 | chr:4:120263688 |
| 4 rs4001175   | 120500667 A | 0.2036 | 2.77E-12 | chr:4:120263688 |
| 4 rs11735878  | 120290177 C | 0.2093 | 2.82E-12 | chr:4:120263688 |
| 4 rs10019309  | 120327085 T | 0.2048 | 2.90E-12 | chr:4:120263688 |
| 4 rs10019674  | 120443489 C | 0.1989 | 2.93E-12 | chr:4:120263688 |
| 4 rs3822192   | 120445720 C | 0.1989 | 2.93E-12 | chr:4:120263688 |
| 4 rs10003742  | 120271798 C | 0.2199 | 3.30E-12 | chr:4:120263688 |
| 4 rs10015883  | 120268146 G | 0.2199 | 3.30E-12 | chr:4:120263688 |
| 4 rs9637624   | 120274911 G | 0.2199 | 3.30E-12 | chr:4:120263688 |
| 4 rs13136462  | 120543173 T | 0.2048 | 3.40E-12 | chr:4:120263688 |
| 4 rs28535956  | 120536858 C | 0.2048 | 3.40E-12 | chr:4:120263688 |
| 4 rs28578366  | 120536905 T | 0.2048 | 3.40E-12 | chr:4:120263688 |
| 4 rs10031033  | 120151452 T | 0.2407 | 3.41E-12 | chr:4:120263688 |
| 4 rs12503276  | 120247329 A | 0.2202 | 3.42E-12 | chr:4:120263688 |
| 4 rs9995234   | 120321827 G | 0.1986 | 3.43E-12 | chr:4:120263688 |
| 4 rs1825061   | 120388902 T | 0.2031 | 3.61E-12 | chr:4:120263688 |
| 4 rs10027431  | 120372142 G | 0.2381 | 3.84E-12 | chr:4:120263688 |
| 4 rs10027432  | 120372143 C | 0.2381 | 3.84E-12 | chr:4:120263688 |
| 4 rs10004114  | 120259213 G | 0.2207 | 3.89E-12 | chr:4:120263688 |
| 4 rs10213542  | 120260650 T | 0.2207 | 3.89E-12 | chr:4:120263688 |
| 4 rs1814815   | 120258091 T | 0.2207 | 3.89E-12 | chr:4:120263688 |
| 4 rs2017058   | 120257739 C | 0.2207 | 3.89E-12 | chr:4:120263688 |
| 4 rs28439855  | 120262256 A | 0.2207 | 3.89E-12 | chr:4:120263688 |
| 4 rs4643791   | 120265619 A | 0.2207 | 3.89E-12 | chr:4:120263688 |
| 4 rs9307472   | 120261415 C | 0.2207 | 3.89E-12 | chr:4:120263688 |
| 4 rs28450134  | 120376318 C | 0.2002 | 4.04E-12 | chr:4:120263688 |
| 4 rs550821123 | 120327079 T | 0.2064 | 4.07E-12 | chr:4:120263688 |
| 4 rs6857105   | 120222298 G | 0.2102 | 4.25E-12 | chr:4:120263688 |
| 4 rs28571649  | 120388867 A | 0.2065 | 4.43E-12 | chr:4:120263688 |
| 4 rs9683520   | 120368199 C | 0.2472 | 4.46E-12 | chr:4:120263688 |
| 4 rs7695292   | 120558446 G | 0.2038 | 4.54E-12 | chr:4:120263688 |
| 4 rs9684878   | 120368175 C | 0.2472 | 4.91E-12 | chr:4:120263688 |
| 4 rs4001211   | 120331544 G | 0.1723 | 5.01E-12 | chr:4:120263688 |
| 4 rs28504370  | 120388890 A | 0.2091 | 5.28E-12 | chr:4:120263688 |
| 4 rs9760422   | 120354126 G | 0.2441 | 5.28E-12 | chr:4:120263688 |

|               |             |        |          |                 |
|---------------|-------------|--------|----------|-----------------|
| 4 rs3756156   | 120524841 A | 0.2099 | 5.95E-12 | chr:4:120263688 |
| 4 rs12505735  | 120532956 A | 0.2105 | 6.15E-12 | chr:4:120263688 |
| 4 rs12503309  | 120247397 A | 0.226  | 6.47E-12 | chr:4:120263688 |
| 4 rs12510923  | 120247381 G | 0.226  | 6.47E-12 | chr:4:120263688 |
| 4 rs13128933  | 120246249 A | 0.2202 | 6.69E-12 | chr:4:120263688 |
| 4 rs10518336  | 120522934 A | 0.2411 | 7.32E-12 | chr:4:120263688 |
| 4 rs78709015  | 120367728 T | 0.2165 | 7.40E-12 | chr:4:120263688 |
| 4 rs7674713   | 120322257 C | 0.2263 | 7.52E-12 | chr:4:120263688 |
| 4 rs13128774  | 120246282 T | 0.1961 | 7.83E-12 | chr:4:120263688 |
| 4 rs9762870   | 120367769 A | 0.2165 | 8.78E-12 | chr:4:120263688 |
| 4 rs11728730  | 120275003 C | 0.2022 | 9.64E-12 | chr:4:120263688 |
| 4 rs11098499  | 120187611 T | 0.2219 | 1.01E-11 | chr:4:120263688 |
| 4 rs11098500  | 120219239 A | 0.2219 | 1.01E-11 | chr:4:120263688 |
| 4 rs12499598  | 120189303 C | 0.2219 | 1.01E-11 | chr:4:120263688 |
| 4 rs12512517  | 120173245 G | 0.2219 | 1.01E-11 | chr:4:120263688 |
| 4 rs146531121 | 120174794 A | 0.2219 | 1.01E-11 | chr:4:120263688 |
| 4 rs1511018   | 120161580 T | 0.2219 | 1.01E-11 | chr:4:120263688 |
| 4 rs1511019   | 120166007 G | 0.2219 | 1.01E-11 | chr:4:120263688 |
| 4 rs199816242 | 120199351 T | 0.2219 | 1.01E-11 | chr:4:120263688 |
| 4 rs28419773  | 120211061 C | 0.2219 | 1.01E-11 | chr:4:120263688 |
| 4 rs28555550  | 120211040 G | 0.2219 | 1.01E-11 | chr:4:120263688 |
| 4 rs34585914  | 120189194 T | 0.2219 | 1.01E-11 | chr:4:120263688 |
| 4 rs35434465  | 120169378 G | 0.2219 | 1.01E-11 | chr:4:120263688 |
| 4 rs6814412   | 120170851 A | 0.2219 | 1.01E-11 | chr:4:120263688 |
| 4 rs6837898   | 120179154 T | 0.2219 | 1.01E-11 | chr:4:120263688 |
| 4 rs7659194   | 120207147 G | 0.2219 | 1.01E-11 | chr:4:120263688 |
| 4 rs7658368   | 120310922 T | 0.2157 | 1.01E-11 | chr:4:120263688 |
| 4 rs371048191 | 120246107 C | 0.2053 | 1.03E-11 | chr:4:120263688 |
| 4 rs58601355  | 120186367 C | 0.2243 | 1.06E-11 | chr:4:120263688 |
| 4 rs4001176   | 120500705 G | 0.2193 | 1.24E-11 | chr:4:120263688 |
| 4 rs531826432 | 120327073 T | 0.2188 | 1.25E-11 | chr:4:120263688 |
| 4 rs78958430  | 120338339 T | 0.2224 | 1.26E-11 | chr:4:120263688 |
| 4 rs79262354  | 120338335 T | 0.2224 | 1.26E-11 | chr:4:120263688 |
| 4 rs4511986   | 120354674 C | 0.2145 | 1.27E-11 | chr:4:120263688 |
| 4 rs13117947  | 120257060 G | 0.2442 | 1.34E-11 | chr:4:120263688 |
| 4 rs6851169   | 120117510 C | 0.2226 | 1.59E-11 | chr:4:120263688 |
| 4 rs68128210  | 120137819 G | 0.2283 | 1.63E-11 | chr:4:120263688 |
| 4 rs373699192 | 120246109 A | 0.197  | 1.71E-11 | chr:4:120263688 |
| 4 rs3956479   | 120360863 T | 0.2795 | 1.76E-11 | chr:4:120263688 |
| 4 rs3956480   | 120360861 T | 0.2795 | 1.76E-11 | chr:4:120263688 |
| 4 rs11726229  | 120211580 T | 0.2317 | 1.79E-11 | chr:4:120263688 |
| 4 rs13113112  | 120156040 T | 0.2251 | 1.79E-11 | chr:4:120263688 |
| 4 rs1011054   | 120202387 A | 0.2254 | 1.89E-11 | chr:4:120263688 |



|               |             |        |          |                 |
|---------------|-------------|--------|----------|-----------------|
| 4 rs3749591   | 120214030 G | 0.2254 | 1.89E-11 | chr:4:120263688 |
| 4 rs201085338 | 120347661 A | 0.2237 | 1.99E-11 | chr:4:120263688 |
| 4 rs6847248   | 120225955 G | 0.2098 | 2.22E-11 | chr:4:120263688 |
| 4 rs200207680 | 120338383 T | 0.228  | 2.22E-11 | chr:4:120263688 |
| 4 rs181331234 | 120327890 C | 0.2142 | 2.23E-11 | chr:4:120263688 |
| 4 rs13126596  | 120140729 G | 0.2297 | 2.48E-11 | chr:4:120263688 |
| 4 rs12501602  | 120287935 T | 0.2252 | 2.99E-11 | chr:4:120263688 |
| 4 rs10022508  | 120115228 G | 0.2296 | 3.01E-11 | chr:4:120263688 |
| 4 rs12502503  | 120116255 T | 0.2296 | 3.01E-11 | chr:4:120263688 |
| 4 rs12509054  | 120115075 C | 0.2296 | 3.01E-11 | chr:4:120263688 |
| 4 rs6822498   | 120120183 C | 0.2296 | 3.01E-11 | chr:4:120263688 |
| 4 rs6832670   | 120118792 G | 0.2296 | 3.01E-11 | chr:4:120263688 |
| 4 rs6838674   | 120119376 G | 0.2296 | 3.01E-11 | chr:4:120263688 |
| 4 rs4833613   | 120150156 A | 0.2602 | 3.26E-11 | chr:4:120263688 |
| 4 rs201495048 | 120333126 A | 0.2267 | 3.72E-11 | chr:4:120263688 |
| 4 rs4513552   | 120354657 T | 0.2819 | 3.76E-11 | chr:4:120263688 |
| 4 rs138401876 | 120370298 A | 0.2375 | 4.10E-11 | chr:4:120263688 |
| 4 rs6845702   | 120120453 G | 0.2312 | 4.52E-11 | chr:4:120263688 |
| 4 rs13123591  | 120105990 G | 0.2347 | 4.62E-11 | chr:4:120263688 |
| 4 rs17839089  | 120111069 G | 0.2347 | 4.62E-11 | chr:4:120263688 |
| 4 rs6826823   | 120112098 C | 0.2347 | 4.62E-11 | chr:4:120263688 |
| 4 rs7661020   | 120106982 C | 0.2347 | 4.62E-11 | chr:4:120263688 |
| 4 rs9995277   | 120108603 A | 0.2347 | 4.62E-11 | chr:4:120263688 |
| 4 rs117030010 | 120333095 C | 0.2318 | 5.10E-11 | chr:4:120263688 |
| 4 rs10006304  | 120124305 G | 0.2357 | 5.34E-11 | chr:4:120263688 |
| 4 rs13138782  | 120124474 A | 0.2357 | 5.34E-11 | chr:4:120263688 |
| 4 rs9684723   | 120367735 C | 0.2957 | 5.62E-11 | chr:4:120263688 |
| 4 rs10019421  | 120327198 T | 0.287  | 5.81E-11 | chr:4:120263688 |
| 4 rs10031129  | 120327201 C | 0.287  | 5.81E-11 | chr:4:120263688 |
| 4 rs56122576  | 120129336 G | 0.2342 | 6.05E-11 | chr:4:120263688 |
| 4 rs10213342  | 120175237 G | 0.256  | 6.17E-11 | chr:4:120263688 |
| 4 rs2715016   | 120452356 T | 0.2529 | 6.40E-11 | chr:4:120263688 |
| 4 rs2389885   | 120533931 T | 0.2276 | 7.16E-11 | chr:4:120263688 |
| 4 rs370990577 | 120327271 C | 0.2381 | 7.88E-11 | chr:4:120263688 |
| 4 rs552865294 | 120246034 A | 0.2875 | 9.99E-11 | chr:4:120263688 |
| 4 rs11723550  | 120289961 C | 0.2583 | 1.01E-10 | chr:4:120263688 |
| 4 rs28452522  | 120110784 G | 0.2406 | 1.06E-10 | chr:4:120263688 |
| 4 rs10010696  | 120164303 C | 0.2642 | 1.17E-10 | chr:4:120263688 |
| 4 rs10022262  | 120175152 G | 0.2642 | 1.17E-10 | chr:4:120263688 |
| 4 rs10029750  | 120172543 G | 0.2642 | 1.17E-10 | chr:4:120263688 |
| 4 rs11098496  | 120167466 G | 0.2642 | 1.17E-10 | chr:4:120263688 |
| 4 rs11729897  | 120174453 T | 0.2642 | 1.17E-10 | chr:4:120263688 |
| 4 rs11734519  | 120171071 G | 0.2642 | 1.17E-10 | chr:4:120263688 |

|               |             |        |          |                 |
|---------------|-------------|--------|----------|-----------------|
| 4 rs11944880  | 120159334 T | 0.2642 | 1.17E-10 | chr:4:120263688 |
| 4 rs12501610  | 120175763 T | 0.2642 | 1.17E-10 | chr:4:120263688 |
| 4 rs12506395  | 120185094 T | 0.2642 | 1.17E-10 | chr:4:120263688 |
| 4 rs13116504  | 120209412 C | 0.2642 | 1.17E-10 | chr:4:120263688 |
| 4 rs13133044  | 120201252 C | 0.2642 | 1.17E-10 | chr:4:120263688 |
| 4 rs13435802  | 120177960 T | 0.2642 | 1.17E-10 | chr:4:120263688 |
| 4 rs1397608   | 120161744 G | 0.2642 | 1.17E-10 | chr:4:120263688 |
| 4 rs1511015   | 120170473 C | 0.2642 | 1.17E-10 | chr:4:120263688 |
| 4 rs28374891  | 120183550 A | 0.2642 | 1.17E-10 | chr:4:120263688 |
| 4 rs34630083  | 120174569 G | 0.2642 | 1.17E-10 | chr:4:120263688 |
| 4 rs35197422  | 120169314 G | 0.2642 | 1.17E-10 | chr:4:120263688 |
| 4 rs35643470  | 120184948 C | 0.2642 | 1.17E-10 | chr:4:120263688 |
| 4 rs7684942   | 120162201 T | 0.2642 | 1.17E-10 | chr:4:120263688 |
| 4 rs6849889   | 120186348 C | 0.2668 | 1.24E-10 | chr:4:120263688 |
| 4 rs7685268   | 120162188 A | 0.2685 | 1.61E-10 | chr:4:120263688 |
| 4 rs368648502 | 120331079 G | 0.2427 | 1.70E-10 | chr:4:120263688 |
| 4 rs34616304  | 120169435 T | 0.2664 | 1.80E-10 | chr:4:120263688 |
| 4 rs11931312  | 120159023 C | 0.2684 | 2.08E-10 | chr:4:120263688 |
| 4 rs13114751  | 120156617 A | 0.2684 | 2.08E-10 | chr:4:120263688 |
| 4 rs13129661  | 120152909 G | 0.2684 | 2.08E-10 | chr:4:120263688 |
| 4 rs1551      | 120158500 G | 0.2684 | 2.08E-10 | chr:4:120263688 |
| 4 rs35271032  | 120156659 T | 0.2684 | 2.08E-10 | chr:4:120263688 |
| 4 rs35916640  | 120155852 C | 0.2684 | 2.08E-10 | chr:4:120263688 |
| 4 rs4145951   | 120155817 G | 0.2684 | 2.08E-10 | chr:4:120263688 |
| 4 rs56386062  | 120155135 C | 0.2684 | 2.08E-10 | chr:4:120263688 |
| 4 rs67073020  | 120152557 T | 0.2684 | 2.08E-10 | chr:4:120263688 |
| 4 rs6815725   | 120158410 A | 0.2684 | 2.08E-10 | chr:4:120263688 |
| 4 rs373735748 | 120244580 T | 0.2736 | 2.34E-10 | chr:4:120263688 |
| 4 rs55884612  | 120244577 T | 0.2736 | 2.34E-10 | chr:4:120263688 |
| 4 rs80259299  | 120336497 G | 0.2052 | 2.56E-10 | chr:4:120263688 |
| 4 rs140305554 | 120247693 C | 0.2012 | 2.61E-10 | chr:4:120263688 |
| 4 rs73844769  | 120254829 C | 0.3173 | 2.69E-10 | chr:4:120263688 |
| 4 rs368193355 | 120327846 C | 0.2459 | 3.89E-10 | chr:4:120263688 |
| 4 rs150408742 | 120122911 A | 0.2546 | 4.49E-10 | chr:4:120263688 |
| 4 rs10003931  | 120259052 G | 0.2142 | 5.03E-10 | chr:4:120263688 |
| 4 rs3956463   | 120245748 A | 0.279  | 5.11E-10 | chr:4:120263688 |
| 4 rs62319649  | 120522579 C | 3.628  | 5.70E-10 | chr:4:120263688 |
| 4 rs11724758  | 120239878 A | 0.2852 | 6.12E-10 | chr:4:120263688 |
| 4 rs74529999  | 120327854 C | 0.2565 | 6.68E-10 | chr:4:120263688 |
| 4 rs2036858   | 120249237 C | 0.2875 | 7.46E-10 | chr:4:120263688 |
| 4 rs12186259  | 120152039 T | 0.283  | 8.47E-10 | chr:4:120263688 |
| 4 rs200940395 | 120333454 C | 0.1862 | 1.15E-09 | chr:4:120263688 |
| 4 rs569705290 | 120333521 C | 0.1898 | 1.20E-09 | chr:4:120263688 |

|               |             |        |          |                 |
|---------------|-------------|--------|----------|-----------------|
| 4 rs4001284   | 120334957 G | 0.3348 | 1.27E-09 | chr:4:120263688 |
| 4 rs10014822  | 120280143 T | 0.3021 | 1.43E-09 | chr:4:120263688 |
| 4 rs11098493  | 120104113 G | 0.294  | 1.43E-09 | chr:4:120263688 |
| 4 rs9994651   | 120587803 A | 0.2858 | 1.83E-09 | chr:4:120263688 |
| 4 rs9994488   | 120587781 T | 0.2893 | 2.52E-09 | chr:4:120263688 |
| 4 rs4452411   | 120700609 A | 0.2959 | 2.54E-09 | chr:4:120263688 |
| 4 rs4287989   | 120700480 G | 3.309  | 2.55E-09 | chr:4:120263688 |
| 4 rs71612601  | 120332595 T | 0.2921 | 3.30E-09 | chr:4:120263688 |
| 4 rs11937425  | 120235999 C | 3.499  | 3.30E-09 | chr:4:120263688 |
| 4 rs11732403  | 120234725 G | 3.469  | 3.67E-09 | chr:4:120263688 |
| 4 rs34049297  | 120234722 C | 3.469  | 3.67E-09 | chr:4:120263688 |
| 4 rs10518301  | 120235125 C | 3.462  | 4.21E-09 | chr:4:120263688 |
| 4 rs11722847  | 120233121 T | 3.462  | 4.21E-09 | chr:4:120263688 |
| 4 rs13118936  | 120234402 A | 3.462  | 4.21E-09 | chr:4:120263688 |
| 4 rs13139118  | 120233640 C | 3.462  | 4.21E-09 | chr:4:120263688 |
| 4 rs4364243   | 120230860 T | 3.462  | 4.21E-09 | chr:4:120263688 |
| 4 rs9685057   | 120272333 G | 0.3603 | 5.50E-09 | chr:4:120263688 |
| 4 rs78624933  | 120338651 C | 0.2658 | 6.09E-09 | chr:4:120263688 |
| 4 rs72916543  | 120254961 T | 0.3606 | 6.37E-09 | chr:4:120263688 |
| 4 rs201764925 | 120334210 A | 0.2001 | 6.76E-09 | chr:4:120263688 |
| 4 rs11729978  | 120079387 A | 0.3125 | 7.00E-09 | chr:4:120263688 |
| 4 rs11731008  | 120079925 A | 0.3125 | 7.00E-09 | chr:4:120263688 |
| 4 rs11733525  | 120082417 T | 0.3125 | 7.00E-09 | chr:4:120263688 |
| 4 rs12508316  | 120081291 A | 0.3125 | 7.00E-09 | chr:4:120263688 |
| 4 rs4334737   | 120080346 C | 0.3125 | 7.00E-09 | chr:4:120263688 |
| 4 rs7696877   | 120081869 T | 0.3125 | 7.00E-09 | chr:4:120263688 |
| 4 rs370208580 | 120333619 G | 0.2473 | 7.44E-09 | chr:4:120263688 |
| 4 rs11098490  | 120086883 A | 0.3185 | 9.66E-09 | chr:4:120263688 |
| 4 rs11098486  | 120066810 A | 0.3196 | 1.12E-08 | chr:4:120263688 |
| 4 rs11098489  | 120081606 G | 0.3196 | 1.12E-08 | chr:4:120263688 |
| 4 rs11098491  | 120088542 T | 0.3196 | 1.12E-08 | chr:4:120263688 |
| 4 rs11098492  | 120095260 A | 0.3196 | 1.12E-08 | chr:4:120263688 |
| 4 rs11733239  | 120087698 T | 0.3196 | 1.12E-08 | chr:4:120263688 |
| 4 rs12513191  | 120096821 C | 0.3196 | 1.12E-08 | chr:4:120263688 |
| 4 rs13120560  | 120090246 C | 0.3196 | 1.12E-08 | chr:4:120263688 |
| 4 rs2036861   | 120102289 G | 0.3196 | 1.12E-08 | chr:4:120263688 |
| 4 rs4355373   | 120084955 C | 0.3196 | 1.12E-08 | chr:4:120263688 |
| 4 rs9993110   | 120092088 T | 0.3196 | 1.12E-08 | chr:4:120263688 |
| 4 rs186992684 | 120336473 T | 0.3434 | 1.14E-08 | chr:4:120263688 |
| 4 rs4834779   | 120425246 A | 0.2539 | 1.19E-08 | chr:4:120263688 |
| 4 rs6842973   | 120694059 A | 3.197  | 1.25E-08 | chr:4:120263688 |
| 4 rs376876178 | 120333615 G | 0.2636 | 1.32E-08 | chr:4:120263688 |
| 4 rs199515440 | 120372424 T | 0.2295 | 1.46E-08 | chr:4:120263688 |

|               |             |        |          |                 |
|---------------|-------------|--------|----------|-----------------|
| 4 rs1033087   | 120103401 C | 0.3237 | 1.55E-08 | chr:4:120263688 |
| 4 rs7678043   | 120698652 T | 3.071  | 1.68E-08 | chr:4:120263688 |
| 4 rs28567749  | 120329211 C | 0.2872 | 1.93E-08 | chr:4:120263688 |
| 4 rs11730138  | 120079800 A | 0.3273 | 1.99E-08 | chr:4:120263688 |
| 4 rs184174836 | 120196561 G | 0.3452 | 2.05E-08 | chr:4:120263688 |
| 4 rs4504231   | 120586891 A | 0.3312 | 2.26E-08 | chr:4:120263688 |
| 4 rs71595380  | 120329294 T | 0.292  | 2.47E-08 | chr:4:120263688 |
| 4 rs2389957   | 120695322 C | 3.043  | 2.75E-08 | chr:4:120263688 |
| 4 rs77222221  | 120329212 A | 0.2939 | 3.36E-08 | chr:4:120263688 |
| 4 rs10518337  | 120574874 C | 3.049  | 3.60E-08 | chr:4:120263688 |
| 4 rs4593113   | 120697811 A | 2.936  | 3.86E-08 | chr:4:120263688 |
| 4 rs527513020 | 120358891 C | 0.2365 | 3.93E-08 | chr:4:120263688 |
| 4 rs565835685 | 120358886 G | 0.2365 | 3.93E-08 | chr:4:120263688 |
| 4 rs202019903 | 120344304 C | 0.275  | 4.24E-08 | chr:4:120263688 |
| 4 rs12499377  | 120587215 A | 0.3373 | 4.27E-08 | chr:4:120263688 |
| 4 rs71627788  | 120255728 G | 0.3736 | 5.75E-08 | chr:4:120263688 |
| 4 rs11735819  | 120290194 C | 2.82   | 5.95E-08 | chr:4:120263688 |
| 4 rs2389958   | 120695256 C | 2.916  | 6.44E-08 | chr:4:120263688 |
| 4 rs2892892   | 120697553 G | 2.916  | 6.44E-08 | chr:4:120263688 |
| 4 rs4311295   | 120695280 A | 2.916  | 6.44E-08 | chr:4:120263688 |
| 4 rs4447844   | 120696623 A | 2.916  | 6.44E-08 | chr:4:120263688 |
| 4 rs1459055   | 120056815 A | 0.3389 | 6.45E-08 | chr:4:120263688 |
| 4 rs558588080 | 120348891 A | 0.2531 | 6.65E-08 | chr:4:120263688 |
| 4 rs13136593  | 120101772 A | 0.3402 | 7.59E-08 | chr:4:120263688 |
| 4 rs12512646  | 120585733 A | 0.3443 | 7.69E-08 | chr:4:120263688 |
| 4 rs4833624   | 120585497 T | 0.3443 | 7.69E-08 | chr:4:120263688 |
| 4 rs6822909   | 120691218 T | 3.072  | 8.76E-08 | chr:4:120263688 |
| 4 rs62320739  | 120279459 C | 0.3609 | 1.15E-07 | chr:4:120263688 |
| 4 rs10014947  | 120280077 A | 0.3636 | 1.44E-07 | chr:4:120263688 |
| 4 rs11737400  | 120279335 G | 0.3636 | 1.44E-07 | chr:4:120263688 |
| 4 rs13149954  | 120279041 A | 0.3636 | 1.44E-07 | chr:4:120263688 |
| 4 rs13150541  | 120279284 A | 0.3636 | 1.44E-07 | chr:4:120263688 |
| 4 rs28580295  | 120278873 T | 0.3636 | 1.44E-07 | chr:4:120263688 |
| 4 rs62320738  | 120279420 A | 0.3636 | 1.44E-07 | chr:4:120263688 |
| 4 rs62320740  | 120279486 A | 0.3636 | 1.44E-07 | chr:4:120263688 |
| 4 rs71627791  | 120278765 G | 0.3636 | 1.44E-07 | chr:4:120263688 |
| 4 rs1480934   | 120476006 C | 3.121  | 1.46E-07 | chr:4:120263688 |
| 4 rs2622496   | 120470255 T | 3.121  | 1.46E-07 | chr:4:120263688 |
| 4 rs140263405 | 120325820 A | 0.2067 | 1.47E-07 | chr:4:120263688 |
| 4 rs10001829  | 120665293 C | 0.3492 | 1.55E-07 | chr:4:120263688 |
| 4 rs13103043  | 120665371 C | 0.3492 | 1.55E-07 | chr:4:120263688 |
| 4 rs59319494  | 120696060 A | 2.97   | 1.71E-07 | chr:4:120263688 |
| 4 rs12512171  | 120662564 T | 0.35   | 1.72E-07 | chr:4:120263688 |

|               |             |        |          |                 |
|---------------|-------------|--------|----------|-----------------|
| 4 rs2714966   | 120677425 A | 2.923  | 1.78E-07 | chr:4:120263688 |
| 4 rs13122890  | 120601731 G | 0.3456 | 1.84E-07 | chr:4:120263688 |
| 4 rs2252708   | 120612158 A | 0.3456 | 1.84E-07 | chr:4:120263688 |
| 4 rs11731675  | 120212514 C | 0.3663 | 2.03E-07 | chr:4:120263688 |
| 4 rs10026625  | 120280136 C | 0.3723 | 2.38E-07 | chr:4:120263688 |
| 4 rs4337717   | 120643040 C | 0.3586 | 2.50E-07 | chr:4:120263688 |
| 4 rs12503809  | 120472922 T | 0.1994 | 2.66E-07 | chr:4:120263688 |
| 4 rs187593210 | 120549862 C | 0.1994 | 2.66E-07 | chr:4:120263688 |
| 4 rs12498792  | 120097358 T | 0.1888 | 2.72E-07 | chr:4:120263688 |
| 4 rs180904825 | 120127516 A | 0.1902 | 2.74E-07 | chr:4:120263688 |
| 4 rs2256834   | 120663939 C | 0.3564 | 2.76E-07 | chr:4:120263688 |
| 4 rs2714985   | 120664142 A | 0.3564 | 2.76E-07 | chr:4:120263688 |
| 4 rs7683474   | 120612853 C | 0.3497 | 2.78E-07 | chr:4:120263688 |
| 4 rs10518330  | 120401969 C | 0.2018 | 2.94E-07 | chr:4:120263688 |
| 4 rs200974711 | 120468265 G | 0.3916 | 2.94E-07 | chr:4:120263688 |
| 4 rs12506537  | 120220465 T | 0.2031 | 3.12E-07 | chr:4:120263688 |
| 4 rs6821717   | 120599661 T | 0.3538 | 3.36E-07 | chr:4:120263688 |
| 4 rs10032299  | 120206419 T | 0.3759 | 3.45E-07 | chr:4:120263688 |
| 4 rs1052633   | 120215314 G | 0.3759 | 3.45E-07 | chr:4:120263688 |
| 4 rs11098497  | 120187068 T | 0.3759 | 3.45E-07 | chr:4:120263688 |
| 4 rs11732621  | 120212883 G | 0.3759 | 3.45E-07 | chr:4:120263688 |
| 4 rs2175383   | 120215836 A | 0.3759 | 3.45E-07 | chr:4:120263688 |
| 4 rs6843509   | 120220196 A | 0.3759 | 3.45E-07 | chr:4:120263688 |
| 4 rs7659403   | 120207254 A | 0.3759 | 3.45E-07 | chr:4:120263688 |
| 4 rs2714965   | 120676814 T | 2.842  | 4.17E-07 | chr:4:120263688 |
| 4 rs2583602   | 120679347 A | 2.725  | 4.32E-07 | chr:4:120263688 |
| 4 rs12500145  | 120688312 A | 0.3653 | 4.35E-07 | chr:4:120263688 |
| 4 rs7655035   | 120617004 T | 0.3676 | 5.08E-07 | chr:4:120263688 |
| 4 rs4447843   | 120680950 G | 0.3728 | 5.13E-07 | chr:4:120263688 |
| 4 rs2389959   | 120689407 C | 2.805  | 5.14E-07 | chr:4:120263688 |
| 4 rs11098498  | 120187119 C | 0.3821 | 5.40E-07 | chr:4:120263688 |
| 4 rs6822808   | 120217365 A | 0.3821 | 5.40E-07 | chr:4:120263688 |
| 4 rs113409736 | 120195841 T | 2.839  | 5.99E-07 | chr:4:120263688 |
| 4 rs148150770 | 120421312 G | 0.219  | 6.60E-07 | chr:4:120263688 |
| 4 rs6534150   | 120685502 A | 2.668  | 6.86E-07 | chr:4:120263688 |
| 4 rs7675857   | 120680581 C | 2.668  | 6.86E-07 | chr:4:120263688 |
| 4 rs9997209   | 120683244 G | 2.668  | 6.86E-07 | chr:4:120263688 |
| 4 rs12507089  | 120025722 T | 0.2063 | 6.97E-07 | chr:4:120263688 |
| 4 rs2389903   | 120646281 G | 0.3771 | 7.06E-07 | chr:4:120263688 |
| 4 rs7693769   | 120658676 C | 0.3724 | 7.09E-07 | chr:4:120263688 |
| 4 rs140383661 | 120646775 G | 0.2213 | 7.67E-07 | chr:4:120263688 |
| 4 rs147458152 | 120640760 C | 0.2213 | 7.67E-07 | chr:4:120263688 |
| 4 rs62321169  | 120591368 C | 0.3692 | 7.71E-07 | chr:4:120263688 |

|               |             |        |          |                 |
|---------------|-------------|--------|----------|-----------------|
| 4 rs11736455  | 120685312 T | 0.3787 | 7.83E-07 | chr:4:120263688 |
| 4 rs7674894   | 120680189 G | 0.3787 | 7.83E-07 | chr:4:120263688 |
| 4 rs7676064   | 120680560 A | 0.3787 | 7.83E-07 | chr:4:120263688 |
| 4 rs7679245   | 120328196 T | 2.91   | 8.10E-07 | chr:4:120263688 |
| 4 rs11722624  | 120673096 T | 2.649  | 8.90E-07 | chr:4:120263688 |
| 4 rs11734863  | 120673259 G | 2.649  | 8.90E-07 | chr:4:120263688 |
| 4 rs2252621   | 120675026 C | 2.649  | 8.90E-07 | chr:4:120263688 |
| 4 rs2252625   | 120674899 T | 2.649  | 8.90E-07 | chr:4:120263688 |
| 4 rs28663988  | 120620388 C | 0.3828 | 9.20E-07 | chr:4:120263688 |
| 4 rs7664591   | 120627116 C | 0.3835 | 9.99E-07 | chr:4:120263688 |
| 4 rs9884655   | 120700717 C | 2.612  | 1.17E-06 | chr:4:120263688 |
| 4 rs144920716 | 120566010 G | 0.2324 | 1.22E-06 | chr:4:120263688 |
| 4 rs12647635  | 120226932 T | 2.719  | 1.29E-06 | chr:4:120263688 |
| 4 rs28421394  | 120229248 A | 2.719  | 1.29E-06 | chr:4:120263688 |
| 4 rs28848291  | 120229356 G | 2.719  | 1.29E-06 | chr:4:120263688 |
| 4 rs28864107  | 120229153 G | 2.719  | 1.29E-06 | chr:4:120263688 |
| 4 rs4834768   | 120228641 G | 2.719  | 1.29E-06 | chr:4:120263688 |
| 4 rs56344202  | 120228425 T | 2.719  | 1.29E-06 | chr:4:120263688 |
| 4 rs4094      | 120619421 G | 0.388  | 1.54E-06 | chr:4:120263688 |
| 4 rs2714973   | 120662172 A | 2.606  | 1.56E-06 | chr:4:120263688 |
| 4 rs2256054   | 120669517 C | 2.546  | 1.61E-06 | chr:4:120263688 |
| 4 rs2583596   | 120670120 A | 2.546  | 1.61E-06 | chr:4:120263688 |
| 4 rs2583597   | 120670150 A | 2.546  | 1.61E-06 | chr:4:120263688 |
| 4 rs2714978   | 120670213 G | 2.546  | 1.61E-06 | chr:4:120263688 |
| 4 rs2714980   | 120668765 T | 2.546  | 1.61E-06 | chr:4:120263688 |
| 4 rs12649773  | 120305262 A | 2.807  | 1.71E-06 | chr:4:120263688 |
| 4 rs142534042 | 120308936 C | 2.807  | 1.71E-06 | chr:4:120263688 |
| 4 rs4833617   | 120305176 A | 2.807  | 1.71E-06 | chr:4:120263688 |
| 4 rs55827028  | 120297059 A | 2.807  | 1.71E-06 | chr:4:120263688 |
| 4 rs62322286  | 120307242 G | 2.807  | 1.71E-06 | chr:4:120263688 |
| 4 rs2714970   | 120657355 T | 2.586  | 1.88E-06 | chr:4:120263688 |
| 4 rs725449    | 120656892 T | 2.586  | 1.88E-06 | chr:4:120263688 |
| 4 rs13111751  | 120050762 G | 0.3684 | 1.95E-06 | chr:4:120263688 |
| 4 rs2714976   | 120670555 G | 2.59   | 1.98E-06 | chr:4:120263688 |
| 4 rs13113885  | 120221176 C | 0.3982 | 2.14E-06 | chr:4:120263688 |
| 4 rs4834771   | 120242772 C | 2.773  | 2.22E-06 | chr:4:120263688 |
| 4 rs2583605   | 120659992 A | 2.57   | 2.38E-06 | chr:4:120263688 |
| 4 rs10023652  | 120662947 C | 0.3952 | 2.43E-06 | chr:4:120263688 |
| 4 rs11731571  | 120221185 A | 0.4142 | 2.77E-06 | chr:4:120263688 |
| 4 rs10011928  | 120662973 G | 0.3973 | 2.86E-06 | chr:4:120263688 |
| 4 rs874425    | 120664362 C | 0.3973 | 2.86E-06 | chr:4:120263688 |
| 4 rs878374    | 120237564 A | 2.733  | 2.90E-06 | chr:4:120263688 |
| 4 rs2583604   | 120660715 A | 2.536  | 2.99E-06 | chr:4:120263688 |

|               |             |        |          |                 |
|---------------|-------------|--------|----------|-----------------|
| 4 rs1511016   | 120170355 A | 2.887  | 3.29E-06 | chr:4:120263688 |
| 4 rs4496567   | 120175625 A | 2.887  | 3.29E-06 | chr:4:120263688 |
| 4 rs6534131   | 120180195 A | 2.887  | 3.29E-06 | chr:4:120263688 |
| 4 rs6823331   | 120180790 T | 2.887  | 3.29E-06 | chr:4:120263688 |
| 4 rs7676969   | 120173724 C | 2.887  | 3.29E-06 | chr:4:120263688 |
| 4 rs12510467  | 120618359 A | 0.4004 | 3.34E-06 | chr:4:120263688 |
| 4 rs5008452   | 120621752 T | 0.4004 | 3.34E-06 | chr:4:120263688 |
| 4 rs10034579  | 120244029 A | 2.713  | 3.41E-06 | chr:4:120263688 |
| 4 rs1397613   | 120242929 G | 2.713  | 3.41E-06 | chr:4:120263688 |
| 4 rs2282688   | 120243722 T | 2.713  | 3.41E-06 | chr:4:120263688 |
| 4 rs6823963   | 120242164 A | 2.713  | 3.41E-06 | chr:4:120263688 |
| 4 rs6857641   | 120243511 T | 2.713  | 3.41E-06 | chr:4:120263688 |
| 4 rs12642411  | 120580525 C | 0.3975 | 3.50E-06 | chr:4:120263688 |
| 4 rs6836219   | 120597941 T | 2.504  | 3.53E-06 | chr:4:120263688 |
| 4 rs2252565   | 120613111 T | 2.5    | 3.58E-06 | chr:4:120263688 |
| 4 rs76798497  | 120667915 C | 3.053  | 3.71E-06 | chr:4:120263688 |
| 4 rs17005489  | 120649070 A | 2.488  | 3.77E-06 | chr:4:120263688 |
| 4 rs531119820 | 120247694 A | 0.164  | 3.94E-06 | chr:4:120263688 |
| 4 rs4834772   | 120272316 A | 0.4786 | 4.30E-06 | chr:4:120263688 |
| 4 rs10031010  | 120035180 A | 2.942  | 4.31E-06 | chr:4:120263688 |
| 4 rs28455602  | 120034116 G | 2.942  | 4.31E-06 | chr:4:120263688 |
| 4 rs28690965  | 120034317 C | 2.942  | 4.31E-06 | chr:4:120263688 |
| 4 rs61391192  | 120036209 G | 2.942  | 4.31E-06 | chr:4:120263688 |
| 4 rs2102541   | 120115379 G | 2.583  | 4.63E-06 | chr:4:120263688 |
| 4 rs62326348  | 120114659 G | 2.583  | 4.63E-06 | chr:4:120263688 |
| 4 rs62326349  | 120116225 T | 2.583  | 4.63E-06 | chr:4:120263688 |
| 4 rs7699252   | 120659198 G | 0.4054 | 4.63E-06 | chr:4:120263688 |
| 4 rs10022185  | 120571765 G | 0.4034 | 4.67E-06 | chr:4:120263688 |
| 4 rs17051352  | 120581427 A | 0.4034 | 4.67E-06 | chr:4:120263688 |
| 4 rs2389882   | 120566733 C | 0.4034 | 4.67E-06 | chr:4:120263688 |
| 4 rs2389886   | 120570422 A | 0.4034 | 4.67E-06 | chr:4:120263688 |
| 4 rs2389887   | 120570644 C | 0.4034 | 4.67E-06 | chr:4:120263688 |
| 4 rs34278750  | 120571136 A | 0.4034 | 4.67E-06 | chr:4:120263688 |
| 4 rs7671096   | 120579317 A | 0.4034 | 4.67E-06 | chr:4:120263688 |
| 4 rs2250346   | 120648078 T | 2.472  | 4.76E-06 | chr:4:120263688 |
| 4 rs2583617   | 120644194 A | 2.472  | 4.76E-06 | chr:4:120263688 |
| 4 rs2583619   | 120652805 T | 2.497  | 4.76E-06 | chr:4:120263688 |
| 4 rs2714961   | 120628627 C | 2.486  | 4.78E-06 | chr:4:120263688 |
| 4 rs9884581   | 120699261 A | 0.4082 | 5.05E-06 | chr:4:120263688 |
| 4 rs55732167  | 120141507 T | 2.586  | 5.22E-06 | chr:4:120263688 |
| 4 rs10007283  | 120619656 G | 0.4104 | 5.41E-06 | chr:4:120263688 |
| 4 rs4834770   | 120241849 A | 2.644  | 5.42E-06 | chr:4:120263688 |
| 4 rs7437666   | 120653063 C | 2.475  | 5.65E-06 | chr:4:120263688 |

|               |             |        |          |                 |
|---------------|-------------|--------|----------|-----------------|
| 4 rs62326344  | 120106420 G | 2.574  | 5.65E-06 | chr:4:120263688 |
| 4 rs62326345  | 120107683 A | 2.574  | 5.65E-06 | chr:4:120263688 |
| 4 rs62326346  | 120108263 A | 2.574  | 5.65E-06 | chr:4:120263688 |
| 4 rs62326347  | 120109440 T | 2.574  | 5.65E-06 | chr:4:120263688 |
| 4 rs12645079  | 120194512 C | 2.549  | 5.93E-06 | chr:4:120263688 |
| 4 rs12645965  | 120204761 A | 2.549  | 5.93E-06 | chr:4:120263688 |
| 4 rs12649811  | 120183939 T | 2.549  | 5.93E-06 | chr:4:120263688 |
| 4 rs12650267  | 120195411 A | 2.549  | 5.93E-06 | chr:4:120263688 |
| 4 rs17049968  | 120159916 A | 2.549  | 5.93E-06 | chr:4:120263688 |
| 4 rs200134651 | 120200519 A | 2.549  | 5.93E-06 | chr:4:120263688 |
| 4 rs35372126  | 120181724 G | 2.549  | 5.93E-06 | chr:4:120263688 |
| 4 rs4833614   | 120176338 T | 2.549  | 5.93E-06 | chr:4:120263688 |
| 4 rs56072232  | 120193715 T | 2.549  | 5.93E-06 | chr:4:120263688 |
| 4 rs62328371  | 120165690 G | 2.549  | 5.93E-06 | chr:4:120263688 |
| 4 rs62328372  | 120166809 G | 2.549  | 5.93E-06 | chr:4:120263688 |
| 4 rs62328373  | 120167453 C | 2.549  | 5.93E-06 | chr:4:120263688 |
| 4 rs62328374  | 120168837 A | 2.549  | 5.93E-06 | chr:4:120263688 |
| 4 rs62328376  | 120171735 G | 2.549  | 5.93E-06 | chr:4:120263688 |
| 4 rs62328377  | 120173569 A | 2.549  | 5.93E-06 | chr:4:120263688 |
| 4 rs62328379  | 120178193 C | 2.549  | 5.93E-06 | chr:4:120263688 |
| 4 rs62328398  | 120201031 A | 2.549  | 5.93E-06 | chr:4:120263688 |
| 4 rs76969560  | 120206724 T | 2.549  | 5.93E-06 | chr:4:120263688 |
| 4 rs12644283  | 120133549 G | 2.546  | 6.13E-06 | chr:4:120263688 |
| 4 rs9684358   | 120622560 C | 0.4125 | 6.33E-06 | chr:4:120263688 |
| 4 rs2248806   | 120621423 A | 2.441  | 6.36E-06 | chr:4:120263688 |
| 4 rs2583609   | 120623111 T | 2.441  | 6.36E-06 | chr:4:120263688 |
| 4 rs2715026   | 120616805 C | 2.441  | 6.36E-06 | chr:4:120263688 |
| 4 rs4834802   | 120614296 C | 0.4165 | 6.49E-06 | chr:4:120263688 |
| 4 rs62328369  | 120151494 A | 2.532  | 6.58E-06 | chr:4:120263688 |
| 4 rs187392552 | 120200618 C | 2.544  | 6.66E-06 | chr:4:120263688 |
| 4 rs878375    | 120237574 T | 2.581  | 6.83E-06 | chr:4:120263688 |
| 4 rs2714960   | 120630872 C | 2.434  | 6.84E-06 | chr:4:120263688 |
| 4 rs12642042  | 120310479 T | 2.629  | 6.92E-06 | chr:4:120263688 |
| 4 rs62322279  | 120298548 T | 2.629  | 6.92E-06 | chr:4:120263688 |
| 4 rs62322287  | 120312172 A | 2.629  | 6.92E-06 | chr:4:120263688 |
| 4 rs1973598   | 120243419 A | 2.551  | 7.17E-06 | chr:4:120263688 |
| 4 rs907736    | 120289943 C | 2.379  | 7.20E-06 | chr:4:120263688 |
| 4 rs4834762   | 120132690 T | 2.526  | 7.22E-06 | chr:4:120263688 |
| 4 rs62326352  | 120127046 C | 2.526  | 7.22E-06 | chr:4:120263688 |
| 4 rs7664440   | 120578540 G | 0.4123 | 7.50E-06 | chr:4:120263688 |
| 4 rs4001200   | 120378665 G | 0.1512 | 7.78E-06 | chr:4:120263688 |
| 4 rs2245564   | 120625812 T | 2.417  | 7.83E-06 | chr:4:120263688 |
| 4 rs17642800  | 120219534 C | 2.509  | 8.01E-06 | chr:4:120263688 |



|               |             |         |          |                 |
|---------------|-------------|---------|----------|-----------------|
| 4 rs2583608   | 120620379 C | 2.41    | 8.01E-06 | chr:4:120263688 |
| 4 rs77377547  | 120217711 G | 2.509   | 8.01E-06 | chr:4:120263688 |
| 4 rs10018308  | 120657899 G | 0.4042  | 8.77E-06 | chr:4:120263688 |
| 4 rs532905339 | 120195910 T | 2.553   | 9.06E-06 | chr:4:120263688 |
| 4 rs749526    | 120663649 T | 0.4234  | 9.60E-06 | chr:4:120263688 |
| 4 rs7694773   | 120652993 A | 0.413   | 9.97E-06 | chr:4:120263688 |
| 4 rs28723049  | 120620507 A | 0.4246  | 1.04E-05 | chr:4:120263688 |
| 4 rs28869613  | 120620588 A | 0.4246  | 1.04E-05 | chr:4:120263688 |
| 4 rs4834749   | 120042718 A | 2.769   | 1.04E-05 | chr:4:120263688 |
| 4 rs17051356  | 120585308 T | 0.4187  | 1.08E-05 | chr:4:120263688 |
| 4 rs10029669  | 120619666 T | 0.4281  | 1.08E-05 | chr:4:120263688 |
| 4 rs12331776  | 120617412 A | 0.4281  | 1.08E-05 | chr:4:120263688 |
| 4 rs6534133   | 120270703 C | 3.004   | 1.33E-05 | chr:4:120263688 |
| 4 rs62326879  | 120029060 C | 2.708   | 1.34E-05 | chr:4:120263688 |
| 4 rs11098543  | 120748542 G | 0.4201  | 1.41E-05 | chr:4:120263688 |
| 4 rs4834817   | 120752566 C | 0.4201  | 1.41E-05 | chr:4:120263688 |
| 4 rs6534157   | 120753056 G | 0.4201  | 1.41E-05 | chr:4:120263688 |
| 4 rs6858155   | 120754216 T | 0.4201  | 1.41E-05 | chr:4:120263688 |
| 4 rs143726128 | 120348512 C | 0.5065  | 1.58E-05 | chr:4:120263688 |
| 4 rs62326359  | 120143266 A | 2.244   | 1.67E-05 | chr:4:120263688 |
| 4 rs13119815  | 120662321 A | 0.435   | 1.68E-05 | chr:4:120263688 |
| 4 rs144910036 | 120498353 C | 0.3783  | 1.74E-05 | chr:4:120263688 |
| 4 rs11737790  | 120751664 T | 0.4248  | 1.83E-05 | chr:4:120263688 |
| 4 rs2389919   | 120756095 G | 0.4248  | 1.83E-05 | chr:4:120263688 |
| 4 rs72682879  | 120754392 G | 0.4248  | 1.83E-05 | chr:4:120263688 |
| 4 rs2902921   | 9591436 A   | 0.07505 | 2.88E-15 | chr:4:9603240   |
| 4 rs12645445  | 9599283 G   | 0.06264 | 3.26E-15 | chr:4:9603240   |
| 4 rs1842487   | 9597264 C   | 0.06264 | 3.26E-15 | chr:4:9603240   |
| 4 rs6448859   | 9596488 C   | 0.06264 | 3.26E-15 | chr:4:9603240   |
| 4 rs6811235   | 9594627 G   | 0.06264 | 3.26E-15 | chr:4:9603240   |
| 4 rs35735545  | 9600181 A   | 0.06312 | 4.20E-15 | chr:4:9603240   |
| 4 rs34968063  | 9599535 T   | 0.06315 | 4.32E-15 | chr:4:9603240   |
| 4 rs7664612   | 9595727 A   | 0.1076  | 8.87E-15 | chr:4:9603240   |
| 4 rs78121242  | 9591433 A   | 0.0852  | 9.41E-15 | chr:4:9603240   |
| 4 rs2865075   | 9591384 C   | 0.09316 | 1.22E-14 | chr:4:9603240   |
| 4 rs10019130  | 9597356 A   | 0.09377 | 1.44E-14 | chr:4:9603240   |
| 4 rs10212854  | 9590489 G   | 0.09377 | 1.44E-14 | chr:4:9603240   |
| 4 rs11728108  | 9590027 C   | 0.09377 | 1.44E-14 | chr:4:9603240   |
| 4 rs13103207  | 9603672 C   | 0.09377 | 1.44E-14 | chr:4:9603240   |
| 4 rs1842488   | 9601268 G   | 0.09377 | 1.44E-14 | chr:4:9603240   |
| 4 rs2865079   | 9600388 G   | 0.09377 | 1.44E-14 | chr:4:9603240   |
| 4 rs6837173   | 9590700 G   | 0.09377 | 1.44E-14 | chr:4:9603240   |
| 4 rs6855316   | 9596183 C   | 0.09377 | 1.44E-14 | chr:4:9603240   |

|               |           |        |          |               |
|---------------|-----------|--------|----------|---------------|
| 4 rs9714994   | 9589698 C | 0.0859 | 1.76E-14 | chr:4:9603240 |
| 4 rs6856351   | 9590718 C | 0.1028 | 1.79E-14 | chr:4:9603240 |
| 4 rs111921266 | 9591246 A | 0.1092 | 2.45E-14 | chr:4:9603240 |
| 4 rs11729986  | 9605023 G | 0.1455 | 6.67E-13 | chr:4:9603240 |
| 4 rs6448969   | 9700056 G | 0.1844 | 1.01E-12 | chr:4:9603240 |
| 4 rs9714725   | 9589901 G | 0.1144 | 1.61E-12 | chr:4:9603240 |
| 4 rs12501341  | 9589915 A | 0.1324 | 1.77E-12 | chr:4:9603240 |
| 4 rs1871719   | 9594339 T | 5.88   | 3.41E-12 | chr:4:9603240 |
| 4 rs6811619   | 9613669 A | 5.607  | 4.79E-12 | chr:4:9603240 |
| 4 rs13141264  | 9698240 A | 5.501  | 6.21E-12 | chr:4:9603240 |
| 4 rs13134147  | 9611368 G | 5.72   | 6.41E-12 | chr:4:9603240 |
| 4 rs13133557  | 9609114 A | 5.651  | 6.84E-12 | chr:4:9603240 |
| 4 rs10939455  | 9672007 T | 5.698  | 7.03E-12 | chr:4:9603240 |
| 4 rs11726932  | 9656993 G | 5.52   | 7.87E-12 | chr:4:9603240 |
| 4 rs11732839  | 9597885 G | 5.568  | 8.71E-12 | chr:4:9603240 |
| 4 rs11730577  | 9592342 T | 5.566  | 9.47E-12 | chr:4:9603240 |
| 4 rs11737375  | 9607387 G | 5.566  | 9.47E-12 | chr:4:9603240 |
| 4 rs12510498  | 9606546 A | 5.566  | 9.47E-12 | chr:4:9603240 |
| 4 rs13105082  | 9604504 G | 5.566  | 9.47E-12 | chr:4:9603240 |
| 4 rs13108259  | 9603571 G | 5.566  | 9.47E-12 | chr:4:9603240 |
| 4 rs13120086  | 9599365 T | 5.566  | 9.47E-12 | chr:4:9603240 |
| 4 rs13123739  | 9604667 T | 5.566  | 9.47E-12 | chr:4:9603240 |
| 4 rs13124589  | 9590540 T | 5.566  | 9.47E-12 | chr:4:9603240 |
| 4 rs13141297  | 9602103 T | 5.566  | 9.47E-12 | chr:4:9603240 |
| 4 rs62409962  | 9600872 T | 5.566  | 9.47E-12 | chr:4:9603240 |
| 4 rs35497679  | 9636851 T | 5.294  | 1.04E-11 | chr:4:9603240 |
| 4 rs13147553  | 9610951 A | 5.374  | 1.12E-11 | chr:4:9603240 |
| 4 rs62409885  | 9642489 T | 6.38   | 1.46E-11 | chr:4:9603240 |
| 4 rs9761193   | 9669715 C | 5.368  | 1.50E-11 | chr:4:9603240 |
| 4 rs12511479  | 9650516 A | 5.087  | 1.65E-11 | chr:4:9603240 |
| 4 rs13129232  | 9573407 G | 0.1853 | 1.67E-11 | chr:4:9603240 |
| 4 rs13144634  | 9571273 A | 0.1853 | 1.67E-11 | chr:4:9603240 |
| 4 rs11723247  | 9656338 T | 5.172  | 1.70E-11 | chr:4:9603240 |
| 4 rs11726037  | 9657179 G | 5.172  | 1.70E-11 | chr:4:9603240 |
| 4 rs112404663 | 9624480 T | 0.2103 | 1.86E-11 | chr:4:9603240 |
| 4 rs34793939  | 9674154 A | 5.177  | 1.92E-11 | chr:4:9603240 |
| 4 rs6831476   | 9708183 T | 4.732  | 1.98E-11 | chr:4:9603240 |
| 4 rs10805307  | 9580141 G | 0.1855 | 1.99E-11 | chr:4:9603240 |
| 4 rs10939373  | 9579571 G | 0.1855 | 1.99E-11 | chr:4:9603240 |
| 4 rs11722510  | 9585639 C | 0.1855 | 1.99E-11 | chr:4:9603240 |
| 4 rs3864193   | 9584474 G | 0.1855 | 1.99E-11 | chr:4:9603240 |
| 4 rs4102945   | 9581863 G | 0.1855 | 1.99E-11 | chr:4:9603240 |
| 4 rs1812335   | 9608440 G | 5.312  | 2.08E-11 | chr:4:9603240 |

|               |           |        |          |               |
|---------------|-----------|--------|----------|---------------|
| 4 rs6856685   | 9665482 G | 5.165  | 2.08E-11 | chr:4:9603240 |
| 4 rs13122952  | 9707740 A | 4.578  | 2.10E-11 | chr:4:9603240 |
| 4 rs11736658  | 9585855 G | 0.1855 | 2.16E-11 | chr:4:9603240 |
| 4 rs13125486  | 9575367 C | 0.186  | 2.68E-11 | chr:4:9603240 |
| 4 rs9684683   | 9691507 T | 4.868  | 3.09E-11 | chr:4:9603240 |
| 4 rs62409900  | 9652583 A | 4.872  | 3.11E-11 | chr:4:9603240 |
| 4 rs1947868   | 9584808 G | 0.1903 | 3.11E-11 | chr:4:9603240 |
| 4 rs13103452  | 9694662 C | 4.985  | 3.26E-11 | chr:4:9603240 |
| 4 rs6815602   | 9592093 T | 5.093  | 3.46E-11 | chr:4:9603240 |
| 4 rs9684596   | 9695983 G | 4.864  | 3.49E-11 | chr:4:9603240 |
| 4 rs13117329  | 9684608 T | 4.871  | 3.66E-11 | chr:4:9603240 |
| 4 rs11734592  | 9641381 T | 4.863  | 3.68E-11 | chr:4:9603240 |
| 4 rs13127386  | 9636309 T | 4.863  | 3.68E-11 | chr:4:9603240 |
| 4 rs62411071  | 9640314 A | 4.863  | 3.68E-11 | chr:4:9603240 |
| 4 rs62409901  | 9652707 C | 4.858  | 3.85E-11 | chr:4:9603240 |
| 4 rs12233698  | 9680271 C | 4.87   | 3.94E-11 | chr:4:9603240 |
| 4 rs12645053  | 9668769 A | 4.87   | 3.94E-11 | chr:4:9603240 |
| 4 rs12647495  | 9668881 A | 4.87   | 3.94E-11 | chr:4:9603240 |
| 4 rs12649399  | 9668775 A | 4.87   | 3.94E-11 | chr:4:9603240 |
| 4 rs4274844   | 9676059 T | 4.87   | 3.94E-11 | chr:4:9603240 |
| 4 rs6827470   | 9667892 C | 4.87   | 3.94E-11 | chr:4:9603240 |
| 4 rs62409886  | 9642713 T | 4.875  | 4.23E-11 | chr:4:9603240 |
| 4 rs13132135  | 9583284 T | 5.28   | 4.39E-11 | chr:4:9603240 |
| 4 rs11943931  | 9706478 A | 4.584  | 4.51E-11 | chr:4:9603240 |
| 4 rs11733344  | 9670097 T | 4.85   | 4.52E-11 | chr:4:9603240 |
| 4 rs34172197  | 9634195 A | 4.854  | 4.75E-11 | chr:4:9603240 |
| 4 rs11728002  | 9632904 G | 0.2243 | 4.90E-11 | chr:4:9603240 |
| 4 rs11731299  | 9632932 C | 0.2243 | 4.90E-11 | chr:4:9603240 |
| 4 rs13107086  | 9628088 G | 0.2363 | 5.82E-11 | chr:4:9603240 |
| 4 rs150084672 | 9619998 C | 0.2363 | 5.82E-11 | chr:4:9603240 |
| 4 rs34407913  | 9627405 C | 0.2363 | 5.82E-11 | chr:4:9603240 |
| 4 rs76746438  | 9631273 C | 0.2363 | 5.82E-11 | chr:4:9603240 |
| 4 rs12502039  | 9658319 G | 4.714  | 6.11E-11 | chr:4:9603240 |
| 4 rs12647777  | 9664000 T | 4.714  | 6.11E-11 | chr:4:9603240 |
| 4 rs56141152  | 9661423 A | 4.714  | 6.11E-11 | chr:4:9603240 |
| 4 rs13115277  | 9683696 A | 4.713  | 6.22E-11 | chr:4:9603240 |
| 4 rs10939461  | 9681893 G | 4.816  | 7.39E-11 | chr:4:9603240 |
| 4 rs13141594  | 9690088 T | 4.568  | 8.20E-11 | chr:4:9603240 |
| 4 rs13102980  | 9697402 T | 4.49   | 8.41E-11 | chr:4:9603240 |
| 4 rs11731648  | 9691863 T | 4.468  | 8.97E-11 | chr:4:9603240 |
| 4 rs13135989  | 9692108 A | 4.468  | 8.97E-11 | chr:4:9603240 |
| 4 rs11724211  | 9695175 C | 4.474  | 9.14E-11 | chr:4:9603240 |
| 4 rs55634110  | 9643904 T | 4.62   | 9.30E-11 | chr:4:9603240 |

|               |           |        |          |               |
|---------------|-----------|--------|----------|---------------|
| 4 rs34113970  | 9686479 A | 4.56   | 9.43E-11 | chr:4:9603240 |
| 4 rs6821253   | 9690731 G | 4.546  | 9.80E-11 | chr:4:9603240 |
| 4 rs62411066  | 9638987 A | 4.518  | 1.01E-10 | chr:4:9603240 |
| 4 rs62411067  | 9639340 T | 4.518  | 1.01E-10 | chr:4:9603240 |
| 4 rs13101545  | 9684171 C | 4.556  | 1.08E-10 | chr:4:9603240 |
| 4 rs12509448  | 9577884 G | 0.2096 | 1.15E-10 | chr:4:9603240 |
| 4 rs1842497   | 9579673 A | 0.2096 | 1.15E-10 | chr:4:9603240 |
| 4 rs112714712 | 9643479 G | 4.574  | 1.23E-10 | chr:4:9603240 |
| 4 rs57746863  | 9645578 A | 4.486  | 1.23E-10 | chr:4:9603240 |
| 4 rs12510096  | 9646171 G | 4.474  | 1.60E-10 | chr:4:9603240 |
| 4 rs13141772  | 9575916 T | 6.102  | 1.85E-10 | chr:4:9603240 |
| 4 rs11727921  | 9632675 G | 0.2525 | 1.96E-10 | chr:4:9603240 |
| 4 rs13129861  | 9626802 A | 0.2525 | 1.96E-10 | chr:4:9603240 |
| 4 rs13130488  | 9627077 A | 0.2525 | 1.96E-10 | chr:4:9603240 |
| 4 rs13150819  | 9626909 G | 0.2525 | 1.96E-10 | chr:4:9603240 |
| 4 rs13151183  | 9627066 G | 0.2525 | 1.96E-10 | chr:4:9603240 |
| 4 rs74920290  | 9631759 A | 0.2525 | 1.96E-10 | chr:4:9603240 |
| 4 rs75000854  | 9631079 A | 0.2525 | 1.96E-10 | chr:4:9603240 |
| 4 rs75569331  | 9631942 G | 0.2525 | 1.96E-10 | chr:4:9603240 |
| 4 rs75957763  | 9631643 C | 0.2525 | 1.96E-10 | chr:4:9603240 |
| 4 rs7693695   | 9629380 A | 0.2525 | 1.96E-10 | chr:4:9603240 |
| 4 rs77675792  | 9632008 A | 0.2525 | 1.96E-10 | chr:4:9603240 |
| 4 rs78943848  | 9624005 T | 0.2525 | 1.96E-10 | chr:4:9603240 |
| 4 rs11734220  | 9634271 C | 4.173  | 2.33E-10 | chr:4:9603240 |
| 4 rs13140984  | 9637886 A | 4.173  | 2.33E-10 | chr:4:9603240 |
| 4 rs71615596  | 9635011 C | 4.173  | 2.33E-10 | chr:4:9603240 |
| 4 rs12510091  | 9708661 A | 4.205  | 2.48E-10 | chr:4:9603240 |
| 4 rs11732596  | 9569361 T | 4.69   | 2.48E-10 | chr:4:9603240 |
| 4 rs34554083  | 9634203 T | 4.173  | 2.52E-10 | chr:4:9603240 |
| 4 rs11733687  | 9643374 T | 4.48   | 2.80E-10 | chr:4:9603240 |
| 4 rs13151395  | 9709144 T | 4.197  | 2.85E-10 | chr:4:9603240 |
| 4 rs35737782  | 9674263 A | 4.223  | 3.03E-10 | chr:4:9603240 |
| 4 rs13115165  | 9624808 A | 0.2488 | 3.14E-10 | chr:4:9603240 |
| 4 rs13123398  | 9677837 A | 4.219  | 3.38E-10 | chr:4:9603240 |
| 4 rs62409888  | 9642756 A | 4.133  | 3.49E-10 | chr:4:9603240 |
| 4 rs13123294  | 9614786 C | 4.101  | 3.92E-10 | chr:4:9603240 |
| 4 rs13134507  | 9697356 A | 4.11   | 4.04E-10 | chr:4:9603240 |
| 4 rs13136075  | 9714968 A | 3.971  | 8.39E-10 | chr:4:9603240 |
| 4 rs66534644  | 9711634 G | 3.971  | 8.39E-10 | chr:4:9603240 |
| 4 rs6843276   | 9714147 T | 3.971  | 8.39E-10 | chr:4:9603240 |
| 4 rs12508394  | 9702186 T | 3.947  | 9.41E-10 | chr:4:9603240 |
| 4 rs112873333 | 9623915 T | 3.531  | 1.18E-09 | chr:4:9603240 |
| 4 rs143193345 | 9622281 A | 3.531  | 1.18E-09 | chr:4:9603240 |

|               |           |        |          |               |
|---------------|-----------|--------|----------|---------------|
| 4 rs13137196  | 9715456 A | 3.855  | 1.42E-09 | chr:4:9603240 |
| 4 rs9997490   | 9529506 G | 0.175  | 1.44E-09 | chr:4:9603240 |
| 4 rs13147802  | 9572720 A | 3.882  | 1.52E-09 | chr:4:9603240 |
| 4 rs4077929   | 9698730 A | 3.843  | 1.55E-09 | chr:4:9603240 |
| 4 rs11734448  | 9563381 T | 0.2695 | 1.59E-09 | chr:4:9603240 |
| 4 rs13145994  | 9623518 A | 3.484  | 1.61E-09 | chr:4:9603240 |
| 4 rs12233884  | 9550045 G | 0.2699 | 1.67E-09 | chr:4:9603240 |
| 4 rs13136973  | 9574572 A | 3.876  | 1.80E-09 | chr:4:9603240 |
| 4 rs12512447  | 9586313 A | 3.868  | 2.09E-09 | chr:4:9603240 |
| 4 rs12233701  | 9552436 C | 0.2778 | 2.21E-09 | chr:4:9603240 |
| 4 rs13152465  | 9556695 G | 0.2747 | 2.48E-09 | chr:4:9603240 |
| 4 rs10939447  | 9659957 T | 3.728  | 2.68E-09 | chr:4:9603240 |
| 4 rs11723541  | 9556165 C | 0.28   | 2.85E-09 | chr:4:9603240 |
| 4 rs11728441  | 9558041 T | 0.28   | 2.85E-09 | chr:4:9603240 |
| 4 rs12233677  | 9549872 A | 0.28   | 2.85E-09 | chr:4:9603240 |
| 4 rs12233678  | 9549951 A | 0.28   | 2.85E-09 | chr:4:9603240 |
| 4 rs12233771  | 9552965 T | 0.28   | 2.85E-09 | chr:4:9603240 |
| 4 rs13107393  | 9562217 C | 0.28   | 2.85E-09 | chr:4:9603240 |
| 4 rs13116764  | 9561759 A | 0.28   | 2.85E-09 | chr:4:9603240 |
| 4 rs13152653  | 9556775 G | 0.28   | 2.85E-09 | chr:4:9603240 |
| 4 rs7442338   | 9560945 C | 0.28   | 2.85E-09 | chr:4:9603240 |
| 4 rs9715222   | 9564999 T | 0.28   | 2.85E-09 | chr:4:9603240 |
| 4 rs6448964   | 9690292 G | 4.336  | 3.10E-09 | chr:4:9603240 |
| 4 rs1842490   | 9568457 G | 0.2897 | 5.54E-09 | chr:4:9603240 |
| 4 rs7434710   | 9700062 A | 3.563  | 5.64E-09 | chr:4:9603240 |
| 4 rs11735687  | 9523738 T | 0.2878 | 5.67E-09 | chr:4:9603240 |
| 4 rs12505958  | 9560131 A | 0.2932 | 6.33E-09 | chr:4:9603240 |
| 4 rs9917965   | 9614520 A | 0.2377 | 6.59E-09 | chr:4:9603240 |
| 4 rs13138961  | 9585147 T | 3.687  | 7.01E-09 | chr:4:9603240 |
| 4 rs9684707   | 9569057 G | 0.2916 | 7.40E-09 | chr:4:9603240 |
| 4 rs12641450  | 9529244 G | 0.2921 | 8.29E-09 | chr:4:9603240 |
| 4 rs13124998  | 9530491 G | 0.2921 | 8.29E-09 | chr:4:9603240 |
| 4 rs13136346  | 9528694 C | 0.2921 | 8.29E-09 | chr:4:9603240 |
| 4 rs13144880  | 9530438 C | 0.2921 | 8.29E-09 | chr:4:9603240 |
| 4 rs9684176   | 9716386 G | 3.426  | 8.99E-09 | chr:4:9603240 |
| 4 rs6820385   | 9606357 G | 0.2423 | 9.72E-09 | chr:4:9603240 |
| 4 rs12233883  | 9549927 G | 0.3003 | 9.85E-09 | chr:4:9603240 |
| 4 rs13110253  | 9558556 G | 0.3003 | 9.85E-09 | chr:4:9603240 |
| 4 rs13132153  | 9561479 G | 0.3003 | 9.85E-09 | chr:4:9603240 |
| 4 rs13138276  | 9562004 G | 0.3003 | 9.85E-09 | chr:4:9603240 |
| 4 rs1880831   | 9568145 C | 0.3003 | 9.85E-09 | chr:4:9603240 |
| 4 rs4102942   | 9568478 C | 0.3003 | 9.85E-09 | chr:4:9603240 |
| 4 rs113906552 | 9635435 C | 4.207  | 1.07E-08 | chr:4:9603240 |

|               |           |        |          |               |
|---------------|-----------|--------|----------|---------------|
| 4 rs13137016  | 9715392 A | 3.508  | 1.10E-08 | chr:4:9603240 |
| 4 rs11731863  | 9495756 C | 3.351  | 1.15E-08 | chr:4:9603240 |
| 4 rs7692046   | 9620128 G | 0.2606 | 1.18E-08 | chr:4:9603240 |
| 4 rs138499118 | 9631591 C | 0.2622 | 1.21E-08 | chr:4:9603240 |
| 4 rs6448856   | 9595797 A | 0.2442 | 1.22E-08 | chr:4:9603240 |
| 4 rs7672211   | 9597825 A | 0.2442 | 1.22E-08 | chr:4:9603240 |
| 4 rs10939182  | 9511068 A | 0.2946 | 1.52E-08 | chr:4:9603240 |
| 4 rs2127796   | 9510832 C | 0.2946 | 1.52E-08 | chr:4:9603240 |
| 4 rs10031125  | 9625879 A | 0.2653 | 1.60E-08 | chr:4:9603240 |
| 4 rs10049735  | 9626409 C | 0.2653 | 1.60E-08 | chr:4:9603240 |
| 4 rs114980491 | 9623328 T | 0.2653 | 1.60E-08 | chr:4:9603240 |
| 4 rs115870066 | 9622163 A | 0.2653 | 1.60E-08 | chr:4:9603240 |
| 4 rs147074482 | 9623653 T | 0.2653 | 1.60E-08 | chr:4:9603240 |
| 4 rs150602585 | 9621799 G | 0.2653 | 1.60E-08 | chr:4:9603240 |
| 4 rs151134492 | 9623039 A | 0.2653 | 1.60E-08 | chr:4:9603240 |
| 4 rs28491253  | 9629512 T | 0.2653 | 1.60E-08 | chr:4:9603240 |
| 4 rs28648949  | 9626132 C | 0.2653 | 1.60E-08 | chr:4:9603240 |
| 4 rs28851772  | 9630974 A | 0.2653 | 1.60E-08 | chr:4:9603240 |
| 4 rs56787100  | 9631153 T | 0.2653 | 1.60E-08 | chr:4:9603240 |
| 4 rs73082825  | 9627676 A | 0.2653 | 1.60E-08 | chr:4:9603240 |
| 4 rs13118864  | 9521311 T | 0.3069 | 1.61E-08 | chr:4:9603240 |
| 4 rs11733952  | 9508241 G | 0.2978 | 1.69E-08 | chr:4:9603240 |
| 4 rs12513044  | 9506678 A | 0.2978 | 1.69E-08 | chr:4:9603240 |
| 4 rs62410329  | 9504003 C | 0.2978 | 1.69E-08 | chr:4:9603240 |
| 4 rs28784595  | 9646182 C | 0.252  | 1.90E-08 | chr:4:9603240 |
| 4 rs13150941  | 9694401 G | 0.2985 | 1.91E-08 | chr:4:9603240 |
| 4 rs9790487   | 9516638 T | 0.2964 | 2.06E-08 | chr:4:9603240 |
| 4 rs6448858   | 9595918 T | 0.2516 | 2.21E-08 | chr:4:9603240 |
| 4 rs10939280  | 9529545 T | 0.3029 | 2.29E-08 | chr:4:9603240 |
| 4 rs11724460  | 9509698 A | 0.2998 | 2.41E-08 | chr:4:9603240 |
| 4 rs11722359  | 9508214 A | 0.3036 | 2.52E-08 | chr:4:9603240 |
| 4 rs11737117  | 9507890 C | 0.3036 | 2.52E-08 | chr:4:9603240 |
| 4 rs13120116  | 9694454 C | 0.3158 | 2.99E-08 | chr:4:9603240 |
| 4 rs11722239  | 9482356 C | 3.337  | 3.04E-08 | chr:4:9603240 |
| 4 rs6848533   | 9690289 T | 3.742  | 3.17E-08 | chr:4:9603240 |
| 4 rs10007689  | 9487133 G | 3.339  | 4.17E-08 | chr:4:9603240 |
| 4 rs1811570   | 9587999 A | 0.2761 | 4.37E-08 | chr:4:9603240 |
| 4 rs28694172  | 9628973 C | 0.2669 | 4.43E-08 | chr:4:9603240 |
| 4 rs11722202  | 9443894 T | 3.263  | 4.84E-08 | chr:4:9603240 |
| 4 rs12645738  | 9529669 A | 0.3198 | 4.85E-08 | chr:4:9603240 |
| 4 rs7437720   | 9510396 A | 0.3007 | 4.94E-08 | chr:4:9603240 |
| 4 rs7692776   | 9506201 G | 3.239  | 5.00E-08 | chr:4:9603240 |
| 4 rs6842850   | 9788598 A | 0.3173 | 5.42E-08 | chr:4:9603240 |

|               |           |        |          |               |
|---------------|-----------|--------|----------|---------------|
| 4 rs13147425  | 9492966 A | 3.227  | 5.46E-08 | chr:4:9603240 |
| 4 rs12506692  | 9596059 T | 0.2715 | 6.13E-08 | chr:4:9603240 |
| 4 rs12648831  | 9447802 A | 3.201  | 6.55E-08 | chr:4:9603240 |
| 4 rs10938806  | 9439761 C | 3.286  | 6.60E-08 | chr:4:9603240 |
| 4 rs6840249   | 9578971 G | 0.2702 | 7.30E-08 | chr:4:9603240 |
| 4 rs111613333 | 9592284 A | 0.2722 | 7.62E-08 | chr:4:9603240 |
| 4 rs12510176  | 9599593 G | 0.2722 | 7.62E-08 | chr:4:9603240 |
| 4 rs61485794  | 9592346 G | 0.2722 | 7.62E-08 | chr:4:9603240 |
| 4 rs73097911  | 9601929 A | 0.2722 | 7.62E-08 | chr:4:9603240 |
| 4 rs74183920  | 9603786 A | 0.2722 | 7.62E-08 | chr:4:9603240 |
| 4 rs13139813  | 9547169 C | 0.3346 | 7.70E-08 | chr:4:9603240 |
| 4 rs6814282   | 9692516 C | 0.3326 | 7.83E-08 | chr:4:9603240 |
| 4 rs9684173   | 9691519 G | 0.3326 | 7.83E-08 | chr:4:9603240 |
| 4 rs55760760  | 9503473 G | 3.144  | 8.24E-08 | chr:4:9603240 |
| 4 rs61175357  | 9434500 A | 3.199  | 9.94E-08 | chr:4:9603240 |
| 4 rs12501880  | 9717975 T | 3.061  | 1.04E-07 | chr:4:9603240 |
| 4 rs28851574  | 9644580 C | 0.2707 | 1.07E-07 | chr:4:9603240 |
| 4 rs11735679  | 9585384 G | 0.2919 | 1.12E-07 | chr:4:9603240 |
| 4 rs13118242  | 9585316 A | 0.2919 | 1.12E-07 | chr:4:9603240 |
| 4 rs1947866   | 9584747 G | 0.2919 | 1.12E-07 | chr:4:9603240 |
| 4 rs6855045   | 9583518 T | 0.2919 | 1.12E-07 | chr:4:9603240 |
| 4 rs9685853   | 9585655 G | 0.2919 | 1.12E-07 | chr:4:9603240 |
| 4 rs4698055   | 9627821 A | 0.3459 | 1.15E-07 | chr:4:9603240 |
| 4 rs6448981   | 9740325 G | 0.3267 | 1.16E-07 | chr:4:9603240 |
| 4 rs13119693  | 9451151 T | 3.17   | 1.17E-07 | chr:4:9603240 |
| 4 rs10938861  | 9450013 C | 3.231  | 1.22E-07 | chr:4:9603240 |
| 4 rs59507413  | 9606018 T | 0.2749 | 1.35E-07 | chr:4:9603240 |
| 4 rs1976792   | 9846309 A | 0.2956 | 1.42E-07 | chr:4:9603240 |
| 4 rs145014366 | 9588718 C | 0.2783 | 1.45E-07 | chr:4:9603240 |
| 4 rs6830692   | 9589873 T | 0.1732 | 1.47E-07 | chr:4:9603240 |
| 4 rs13114077  | 9413105 C | 3.166  | 1.49E-07 | chr:4:9603240 |
| 4 rs112839156 | 9601686 A | 0.2826 | 1.57E-07 | chr:4:9603240 |
| 4 rs12509677  | 9602724 A | 0.2826 | 1.57E-07 | chr:4:9603240 |
| 4 rs56934553  | 9594735 A | 0.2826 | 1.57E-07 | chr:4:9603240 |
| 4 rs60296945  | 9604068 T | 0.2826 | 1.57E-07 | chr:4:9603240 |
| 4 rs60990443  | 9601319 T | 0.2826 | 1.57E-07 | chr:4:9603240 |
| 4 rs73805539  | 9591699 C | 0.2826 | 1.57E-07 | chr:4:9603240 |
| 4 rs7691087   | 9595443 T | 0.2826 | 1.57E-07 | chr:4:9603240 |
| 4 rs11724549  | 9484511 A | 3.129  | 1.59E-07 | chr:4:9603240 |
| 4 rs10014826  | 9635408 C | 0.279  | 1.71E-07 | chr:4:9603240 |
| 4 rs12505906  | 9636906 A | 0.279  | 1.71E-07 | chr:4:9603240 |
| 4 rs143900004 | 9636160 T | 0.279  | 1.71E-07 | chr:4:9603240 |
| 4 rs150921853 | 9639169 T | 0.279  | 1.71E-07 | chr:4:9603240 |

|               |           |        |          |               |
|---------------|-----------|--------|----------|---------------|
| 4 rs28735278  | 9614378 A | 0.279  | 1.71E-07 | chr:4:9603240 |
| 4 rs6839392   | 9613589 T | 0.279  | 1.71E-07 | chr:4:9603240 |
| 4 rs73082901  | 9636762 C | 0.279  | 1.71E-07 | chr:4:9603240 |
| 4 rs73084810  | 9642699 G | 0.279  | 1.71E-07 | chr:4:9603240 |
| 4 rs76266909  | 9636303 C | 0.279  | 1.71E-07 | chr:4:9603240 |
| 4 rs142277140 | 9648076 C | 0.2797 | 1.77E-07 | chr:4:9603240 |
| 4 rs28577902  | 9650657 A | 0.2797 | 1.77E-07 | chr:4:9603240 |
| 4 rs73084818  | 9648875 T | 0.2797 | 1.77E-07 | chr:4:9603240 |
| 4 rs10011678  | 9688689 C | 0.2803 | 1.80E-07 | chr:4:9603240 |
| 4 rs13148606  | 9660864 C | 0.2527 | 1.80E-07 | chr:4:9603240 |
| 4 rs13131004  | 9612911 C | 0.308  | 1.89E-07 | chr:4:9603240 |
| 4 rs185725801 | 9588562 C | 0.2465 | 2.02E-07 | chr:4:9603240 |
| 4 rs112018355 | 9611157 A | 0.2809 | 2.07E-07 | chr:4:9603240 |
| 4 rs2865009   | 9522285 A | 2.886  | 2.16E-07 | chr:4:9603240 |
| 4 rs13110996  | 9726276 C | 0.3373 | 2.18E-07 | chr:4:9603240 |
| 4 rs12171434  | 9647060 T | 0.2831 | 2.31E-07 | chr:4:9603240 |
| 4 rs6817739   | 9442163 T | 3.019  | 2.37E-07 | chr:4:9603240 |
| 4 rs16898588  | 9595751 T | 0.2884 | 2.38E-07 | chr:4:9603240 |
| 4 rs59430272  | 9601484 C | 0.2884 | 2.38E-07 | chr:4:9603240 |
| 4 rs61267391  | 9600955 G | 0.2884 | 2.38E-07 | chr:4:9603240 |
| 4 rs73095794  | 9596566 A | 0.2884 | 2.38E-07 | chr:4:9603240 |
| 4 rs73802916  | 9604035 C | 0.2884 | 2.38E-07 | chr:4:9603240 |
| 4 rs28886660  | 9644540 G | 0.284  | 2.40E-07 | chr:4:9603240 |
| 4 rs11729203  | 9569091 T | 2.949  | 2.53E-07 | chr:4:9603240 |
| 4 rs10005582  | 9626791 A | 0.3066 | 2.65E-07 | chr:4:9603240 |
| 4 rs2865076   | 9591550 C | 0.3041 | 2.65E-07 | chr:4:9603240 |
| 4 rs6845333   | 9614058 C | 0.3139 | 2.66E-07 | chr:4:9603240 |
| 4 rs10939423  | 9627362 A | 0.2711 | 2.95E-07 | chr:4:9603240 |
| 4 rs113355114 | 9631117 A | 0.2711 | 2.95E-07 | chr:4:9603240 |
| 4 rs11939895  | 9630402 T | 0.2711 | 2.95E-07 | chr:4:9603240 |
| 4 rs6448881   | 9621124 T | 0.2711 | 2.95E-07 | chr:4:9603240 |
| 4 rs9995183   | 9625793 C | 0.2711 | 2.95E-07 | chr:4:9603240 |
| 4 rs9998663   | 9627053 C | 0.2711 | 2.95E-07 | chr:4:9603240 |
| 4 rs4482762   | 9615140 A | 0.3125 | 3.00E-07 | chr:4:9603240 |
| 4 rs10001941  | 9688516 A | 0.2884 | 3.02E-07 | chr:4:9603240 |
| 4 rs10024971  | 9694013 G | 0.2884 | 3.02E-07 | chr:4:9603240 |
| 4 rs12504246  | 9692932 A | 0.2884 | 3.02E-07 | chr:4:9603240 |
| 4 rs73088893  | 9695306 A | 0.2884 | 3.02E-07 | chr:4:9603240 |
| 4 rs139901069 | 9582722 A | 0.2899 | 3.20E-07 | chr:4:9603240 |
| 4 rs77648749  | 9583407 A | 0.2899 | 3.20E-07 | chr:4:9603240 |
| 4 rs10027164  | 9574763 A | 0.2917 | 3.28E-07 | chr:4:9603240 |
| 4 rs6448846   | 9580937 G | 0.2917 | 3.28E-07 | chr:4:9603240 |
| 4 rs73084845  | 9671025 T | 0.2938 | 3.84E-07 | chr:4:9603240 |



|               |           |        |          |               |
|---------------|-----------|--------|----------|---------------|
| 4 rs143582873 | 9624071 G | 0.2782 | 3.87E-07 | chr:4:9603240 |
| 4 rs36162019  | 9625137 C | 0.2782 | 3.87E-07 | chr:4:9603240 |
| 4 rs6837106   | 9626304 T | 0.2782 | 3.87E-07 | chr:4:9603240 |
| 4 rs6837700   | 9626577 T | 0.2782 | 3.87E-07 | chr:4:9603240 |
| 4 rs9999630   | 9625826 A | 0.2782 | 3.87E-07 | chr:4:9603240 |
| 4 rs73097914  | 9602324 T | 0.2986 | 3.88E-07 | chr:4:9603240 |
| 4 rs10026706  | 9674011 A | 0.2933 | 4.02E-07 | chr:4:9603240 |
| 4 rs12501304  | 9682548 T | 0.2933 | 4.02E-07 | chr:4:9603240 |
| 4 rs143459149 | 9674515 G | 0.2933 | 4.02E-07 | chr:4:9603240 |
| 4 rs201078836 | 9680043 T | 0.2933 | 4.02E-07 | chr:4:9603240 |
| 4 rs28546201  | 9684768 T | 0.2933 | 4.02E-07 | chr:4:9603240 |
| 4 rs28673739  | 9677529 T | 0.2933 | 4.02E-07 | chr:4:9603240 |
| 4 rs28691200  | 9684552 A | 0.2933 | 4.02E-07 | chr:4:9603240 |
| 4 rs80077135  | 9681299 G | 0.2933 | 4.02E-07 | chr:4:9603240 |
| 4 rs9291600   | 9675669 A | 0.2933 | 4.02E-07 | chr:4:9603240 |
| 4 rs28793127  | 9660482 T | 0.2913 | 4.12E-07 | chr:4:9603240 |
| 4 rs73805537  | 9588589 C | 0.2556 | 4.30E-07 | chr:4:9603240 |
| 4 rs7693691   | 9652934 C | 0.2954 | 4.47E-07 | chr:4:9603240 |
| 4 rs3864192   | 9573978 A | 0.2985 | 4.64E-07 | chr:4:9603240 |
| 4 rs373327909 | 9241924 T | 2.944  | 4.86E-07 | chr:4:9603240 |
| 4 rs10013863  | 9667436 T | 0.2962 | 4.91E-07 | chr:4:9603240 |
| 4 rs9884683   | 9677137 A | 0.2962 | 4.91E-07 | chr:4:9603240 |
| 4 rs59312718  | 9669434 T | 0.2979 | 5.13E-07 | chr:4:9603240 |
| 4 rs73084842  | 9671015 T | 0.2979 | 5.13E-07 | chr:4:9603240 |
| 4 rs884573    | 9869734 C | 0.3205 | 5.17E-07 | chr:4:9603240 |
| 4 rs4406018   | 9645618 A | 0.2651 | 5.35E-07 | chr:4:9603240 |
| 4 rs13129974  | 9779526 C | 2.901  | 5.69E-07 | chr:4:9603240 |
| 4 rs143079510 | 9665042 T | 0.2988 | 5.76E-07 | chr:4:9603240 |
| 4 rs150693830 | 9665588 T | 0.2988 | 5.76E-07 | chr:4:9603240 |
| 4 rs28575773  | 9656525 A | 0.2988 | 5.76E-07 | chr:4:9603240 |
| 4 rs28643508  | 9659221 C | 0.2988 | 5.76E-07 | chr:4:9603240 |
| 4 rs28718562  | 9659961 G | 0.2988 | 5.76E-07 | chr:4:9603240 |
| 4 rs4518243   | 9664634 C | 0.2988 | 5.76E-07 | chr:4:9603240 |
| 4 rs73802943  | 9663020 C | 0.2988 | 5.76E-07 | chr:4:9603240 |
| 4 rs77025480  | 9657754 A | 0.2988 | 5.76E-07 | chr:4:9603240 |
| 4 rs55988830  | 9588757 C | 0.2622 | 5.94E-07 | chr:4:9603240 |
| 4 rs73802915  | 9603200 A | 0.2635 | 6.59E-07 | chr:4:9603240 |
| 4 rs56323944  | 9642872 T | 0.2657 | 6.97E-07 | chr:4:9603240 |
| 4 rs10012148  | 9664294 A | 0.3017 | 7.02E-07 | chr:4:9603240 |
| 4 rs28796640  | 9663788 T | 0.3017 | 7.02E-07 | chr:4:9603240 |
| 4 rs146389512 | 9597589 A | 0.264  | 7.14E-07 | chr:4:9603240 |
| 4 rs6824573   | 9589256 A | 0.3117 | 7.70E-07 | chr:4:9603240 |
| 4 rs28380563  | 9658392 T | 0.3008 | 7.82E-07 | chr:4:9603240 |

|               |           |        |          |               |
|---------------|-----------|--------|----------|---------------|
| 4 rs12643412  | 9420974 G | 2.799  | 7.95E-07 | chr:4:9603240 |
| 4 rs12512543  | 9608445 A | 0.3076 | 8.02E-07 | chr:4:9603240 |
| 4 rs9996676   | 9678661 C | 0.3084 | 8.04E-07 | chr:4:9603240 |
| 4 rs11734925  | 9644507 G | 0.2721 | 8.07E-07 | chr:4:9603240 |
| 4 rs7668654   | 9744591 T | 0.366  | 8.45E-07 | chr:4:9603240 |
| 4 rs13112576  | 9781183 T | 2.839  | 8.67E-07 | chr:4:9603240 |
| 4 rs6835741   | 9778911 A | 2.839  | 8.67E-07 | chr:4:9603240 |
| 4 rs10002984  | 9680733 T | 0.2738 | 8.82E-07 | chr:4:9603240 |
| 4 rs10014571  | 9662181 C | 0.2738 | 8.82E-07 | chr:4:9603240 |
| 4 rs10939458  | 9677951 T | 0.2738 | 8.82E-07 | chr:4:9603240 |
| 4 rs6844051   | 9677232 C | 0.2738 | 8.82E-07 | chr:4:9603240 |
| 4 rs6855355   | 9672120 A | 0.2738 | 8.82E-07 | chr:4:9603240 |
| 4 rs4974853   | 9609115 C | 0.273  | 8.82E-07 | chr:4:9603240 |
| 4 rs4547793   | 9591708 C | 0.2728 | 9.48E-07 | chr:4:9603240 |
| 4 rs10939427  | 9628538 G | 0.28   | 9.53E-07 | chr:4:9603240 |
| 4 rs114344194 | 9606720 C | 0.273  | 1.00E-06 | chr:4:9603240 |
| 4 rs11724183  | 9609894 G | 0.273  | 1.00E-06 | chr:4:9603240 |
| 4 rs11726515  | 9611214 C | 0.273  | 1.00E-06 | chr:4:9603240 |
| 4 rs11733660  | 9608377 C | 0.273  | 1.00E-06 | chr:4:9603240 |
| 4 rs11735475  | 9614926 T | 0.273  | 1.00E-06 | chr:4:9603240 |
| 4 rs13128072  | 9636572 G | 0.273  | 1.00E-06 | chr:4:9603240 |
| 4 rs139590336 | 9612695 A | 0.273  | 1.00E-06 | chr:4:9603240 |
| 4 rs142443233 | 9605502 T | 0.273  | 1.00E-06 | chr:4:9603240 |
| 4 rs143734288 | 9611958 C | 0.273  | 1.00E-06 | chr:4:9603240 |
| 4 rs1961552   | 9608306 C | 0.273  | 1.00E-06 | chr:4:9603240 |
| 4 rs2077679   | 9608089 A | 0.273  | 1.00E-06 | chr:4:9603240 |
| 4 rs4974812   | 9614598 C | 0.273  | 1.00E-06 | chr:4:9603240 |
| 4 rs4974816   | 9613067 A | 0.273  | 1.00E-06 | chr:4:9603240 |
| 4 rs4974818   | 9612995 T | 0.273  | 1.00E-06 | chr:4:9603240 |
| 4 rs4974854   | 9609087 G | 0.273  | 1.00E-06 | chr:4:9603240 |
| 4 rs4974856   | 9607691 C | 0.273  | 1.00E-06 | chr:4:9603240 |
| 4 rs4974858   | 9607122 G | 0.273  | 1.00E-06 | chr:4:9603240 |
| 4 rs55934031  | 9613756 A | 0.273  | 1.00E-06 | chr:4:9603240 |
| 4 rs56746271  | 9610873 T | 0.273  | 1.00E-06 | chr:4:9603240 |
| 4 rs56873393  | 9606840 A | 0.273  | 1.00E-06 | chr:4:9603240 |
| 4 rs62409884  | 9642370 T | 0.273  | 1.00E-06 | chr:4:9603240 |
| 4 rs62411065  | 9638952 C | 0.273  | 1.00E-06 | chr:4:9603240 |
| 4 rs6836196   | 9633728 A | 0.273  | 1.00E-06 | chr:4:9603240 |
| 4 rs6837988   | 9634543 A | 0.273  | 1.00E-06 | chr:4:9603240 |
| 4 rs7375281   | 9609506 T | 0.273  | 1.00E-06 | chr:4:9603240 |
| 4 rs7375292   | 9609618 T | 0.273  | 1.00E-06 | chr:4:9603240 |
| 4 rs9799674   | 9606025 C | 0.273  | 1.00E-06 | chr:4:9603240 |
| 4 rs1048252   | 9870535 T | 0.3294 | 1.01E-06 | chr:4:9603240 |

|               |           |        |          |               |
|---------------|-----------|--------|----------|---------------|
| 4 rs57235613  | 9867708 T | 0.3294 | 1.01E-06 | chr:4:9603240 |
| 4 rs141090236 | 9597872 G | 0.2695 | 1.02E-06 | chr:4:9603240 |
| 4 rs28728462  | 9700392 A | 0.3438 | 1.11E-06 | chr:4:9603240 |
| 4 rs112878601 | 9643563 G | 0.2731 | 1.11E-06 | chr:4:9603240 |
| 4 rs7684741   | 9661843 A | 0.3054 | 1.11E-06 | chr:4:9603240 |
| 4 rs13131893  | 9744301 G | 0.3785 | 1.20E-06 | chr:4:9603240 |
| 4 rs114290083 | 9597994 T | 0.2731 | 1.22E-06 | chr:4:9603240 |
| 4 rs114945335 | 9598191 T | 0.2731 | 1.22E-06 | chr:4:9603240 |
| 4 rs115282360 | 9593376 T | 0.2731 | 1.22E-06 | chr:4:9603240 |
| 4 rs115893429 | 9593818 A | 0.2731 | 1.22E-06 | chr:4:9603240 |
| 4 rs116079424 | 9593204 C | 0.2731 | 1.22E-06 | chr:4:9603240 |
| 4 rs116509172 | 9594123 G | 0.2731 | 1.22E-06 | chr:4:9603240 |
| 4 rs116614494 | 9592153 T | 0.2731 | 1.22E-06 | chr:4:9603240 |
| 4 rs11730426  | 9600216 T | 0.2731 | 1.22E-06 | chr:4:9603240 |
| 4 rs11731628  | 9601348 T | 0.2731 | 1.22E-06 | chr:4:9603240 |
| 4 rs11734986  | 9601497 T | 0.2731 | 1.22E-06 | chr:4:9603240 |
| 4 rs11735905  | 9601757 G | 0.2731 | 1.22E-06 | chr:4:9603240 |
| 4 rs11737520  | 9601215 C | 0.2731 | 1.22E-06 | chr:4:9603240 |
| 4 rs117496616 | 9597238 C | 0.2731 | 1.22E-06 | chr:4:9603240 |
| 4 rs137855378 | 9594243 T | 0.2731 | 1.22E-06 | chr:4:9603240 |
| 4 rs138143241 | 9596395 T | 0.2731 | 1.22E-06 | chr:4:9603240 |
| 4 rs138542917 | 9592759 G | 0.2731 | 1.22E-06 | chr:4:9603240 |
| 4 rs139555537 | 9593067 T | 0.2731 | 1.22E-06 | chr:4:9603240 |
| 4 rs141001435 | 9598071 C | 0.2731 | 1.22E-06 | chr:4:9603240 |
| 4 rs142642407 | 9591168 A | 0.2731 | 1.22E-06 | chr:4:9603240 |
| 4 rs143023917 | 9596151 G | 0.2731 | 1.22E-06 | chr:4:9603240 |
| 4 rs143167350 | 9594342 T | 0.2731 | 1.22E-06 | chr:4:9603240 |
| 4 rs144619625 | 9593363 C | 0.2731 | 1.22E-06 | chr:4:9603240 |
| 4 rs147268581 | 9593254 T | 0.2731 | 1.22E-06 | chr:4:9603240 |
| 4 rs147777706 | 9597845 A | 0.2731 | 1.22E-06 | chr:4:9603240 |
| 4 rs148075169 | 9599421 A | 0.2731 | 1.22E-06 | chr:4:9603240 |
| 4 rs148536222 | 9592032 T | 0.2731 | 1.22E-06 | chr:4:9603240 |
| 4 rs149064572 | 9592378 A | 0.2731 | 1.22E-06 | chr:4:9603240 |
| 4 rs149095671 | 9597966 C | 0.2731 | 1.22E-06 | chr:4:9603240 |
| 4 rs149737988 | 9599039 A | 0.2731 | 1.22E-06 | chr:4:9603240 |
| 4 rs149930076 | 9591979 T | 0.2731 | 1.22E-06 | chr:4:9603240 |
| 4 rs150736073 | 9590365 C | 0.2731 | 1.22E-06 | chr:4:9603240 |
| 4 rs185210675 | 9598974 G | 0.2731 | 1.22E-06 | chr:4:9603240 |
| 4 rs190948268 | 9591497 T | 0.2731 | 1.22E-06 | chr:4:9603240 |
| 4 rs200437010 | 9592158 G | 0.2731 | 1.22E-06 | chr:4:9603240 |
| 4 rs34495260  | 9595324 C | 0.2731 | 1.22E-06 | chr:4:9603240 |
| 4 rs34587049  | 9594498 T | 0.2731 | 1.22E-06 | chr:4:9603240 |
| 4 rs35023412  | 9594927 G | 0.2731 | 1.22E-06 | chr:4:9603240 |

|               |           |        |          |               |
|---------------|-----------|--------|----------|---------------|
| 4 rs35228193  | 9595003 T | 0.2731 | 1.22E-06 | chr:4:9603240 |
| 4 rs35332449  | 9594812 G | 0.2731 | 1.22E-06 | chr:4:9603240 |
| 4 rs35509001  | 9594871 A | 0.2731 | 1.22E-06 | chr:4:9603240 |
| 4 rs35583251  | 9595042 C | 0.2731 | 1.22E-06 | chr:4:9603240 |
| 4 rs35870323  | 9600326 C | 0.2731 | 1.22E-06 | chr:4:9603240 |
| 4 rs4974823   | 9602719 A | 0.2731 | 1.22E-06 | chr:4:9603240 |
| 4 rs4974824   | 9602608 C | 0.2731 | 1.22E-06 | chr:4:9603240 |
| 4 rs4974825   | 9602228 T | 0.2731 | 1.22E-06 | chr:4:9603240 |
| 4 rs4974826   | 9602042 T | 0.2731 | 1.22E-06 | chr:4:9603240 |
| 4 rs4974859   | 9604519 T | 0.2731 | 1.22E-06 | chr:4:9603240 |
| 4 rs4974861   | 9604139 T | 0.2731 | 1.22E-06 | chr:4:9603240 |
| 4 rs4974863   | 9590979 T | 0.2731 | 1.22E-06 | chr:4:9603240 |
| 4 rs552645918 | 9594483 A | 0.2731 | 1.22E-06 | chr:4:9603240 |
| 4 rs55813730  | 9595618 A | 0.2731 | 1.22E-06 | chr:4:9603240 |
| 4 rs55916508  | 9589334 A | 0.2731 | 1.22E-06 | chr:4:9603240 |
| 4 rs56055745  | 9595453 T | 0.2731 | 1.22E-06 | chr:4:9603240 |
| 4 rs56411540  | 9595441 C | 0.2731 | 1.22E-06 | chr:4:9603240 |
| 4 rs57171822  | 9596455 A | 0.2731 | 1.22E-06 | chr:4:9603240 |
| 4 rs59747264  | 9595447 G | 0.2731 | 1.22E-06 | chr:4:9603240 |
| 4 rs73802912  | 9602497 A | 0.2731 | 1.22E-06 | chr:4:9603240 |
| 4 rs73805538  | 9591438 C | 0.2731 | 1.22E-06 | chr:4:9603240 |
| 4 rs73805540  | 9593964 G | 0.2731 | 1.22E-06 | chr:4:9603240 |
| 4 rs75043790  | 9597656 G | 0.2731 | 1.22E-06 | chr:4:9603240 |
| 4 rs76304666  | 9590479 A | 0.2731 | 1.22E-06 | chr:4:9603240 |
| 4 rs76469957  | 9597617 G | 0.2731 | 1.22E-06 | chr:4:9603240 |
| 4 rs76738832  | 9597809 A | 0.2731 | 1.22E-06 | chr:4:9603240 |
| 4 rs78422890  | 9600765 T | 0.2731 | 1.22E-06 | chr:4:9603240 |
| 4 rs9799500   | 9595891 A | 0.2731 | 1.22E-06 | chr:4:9603240 |
| 4 rs9799502   | 9595942 A | 0.2731 | 1.22E-06 | chr:4:9603240 |
| 4 rs9799575   | 9592812 A | 0.2731 | 1.22E-06 | chr:4:9603240 |
| 4 rs9799622   | 9595641 G | 0.2731 | 1.22E-06 | chr:4:9603240 |
| 4 rs9799684   | 9592993 T | 0.2731 | 1.22E-06 | chr:4:9603240 |
| 4 rs9799753   | 9592618 A | 0.2731 | 1.22E-06 | chr:4:9603240 |
| 4 rs9995735   | 9658789 T | 0.3112 | 1.24E-06 | chr:4:9603240 |
| 4 rs188796369 | 9854038 A | 0.3342 | 1.27E-06 | chr:4:9603240 |
| 4 rs73802906  | 9598448 T | 0.2721 | 1.36E-06 | chr:4:9603240 |
| 4 rs4974815   | 9614158 T | 0.2735 | 1.37E-06 | chr:4:9603240 |
| 4 rs13109135  | 9549749 T | 2.616  | 1.41E-06 | chr:4:9603240 |
| 4 rs1825043   | 9573740 G | 0.3324 | 1.42E-06 | chr:4:9603240 |
| 4 rs531217356 | 9591411 A | 0.2769 | 1.44E-06 | chr:4:9603240 |
| 4 rs60403942  | 9603452 G | 0.2756 | 1.44E-06 | chr:4:9603240 |
| 4 rs112123699 | 9624028 G | 0.2833 | 1.59E-06 | chr:4:9603240 |
| 4 rs7654169   | 9654071 T | 0.2841 | 1.64E-06 | chr:4:9603240 |

|               |           |        |          |               |
|---------------|-----------|--------|----------|---------------|
| 4 rs16898647  | 9599609 A | 0.2801 | 1.66E-06 | chr:4:9603240 |
| 4 rs149630666 | 9598726 T | 0.2718 | 1.68E-06 | chr:4:9603240 |
| 4 rs4563493   | 9743604 G | 0.3835 | 1.70E-06 | chr:4:9603240 |
| 4 rs7435681   | 9743362 T | 0.3835 | 1.70E-06 | chr:4:9603240 |
| 4 rs13119328  | 9751860 C | 0.3752 | 1.81E-06 | chr:4:9603240 |
| 4 rs13150238  | 9751763 G | 0.3752 | 1.81E-06 | chr:4:9603240 |
| 4 rs11942665  | 9742852 G | 0.3886 | 1.90E-06 | chr:4:9603240 |
| 4 rs9799747   | 9592874 C | 0.281  | 1.92E-06 | chr:4:9603240 |
| 4 rs9799779   | 9592870 A | 0.281  | 1.92E-06 | chr:4:9603240 |
| 4 rs56293131  | 9652279 G | 0.3018 | 2.17E-06 | chr:4:9603240 |
| 4 rs10014408  | 9695145 T | 0.2924 | 2.24E-06 | chr:4:9603240 |
| 4 rs6853779   | 9684468 A | 0.2924 | 2.24E-06 | chr:4:9603240 |
| 4 rs9761757   | 9696996 T | 0.2924 | 2.24E-06 | chr:4:9603240 |
| 4 rs6848710   | 9670562 T | 0.3441 | 2.30E-06 | chr:4:9603240 |
| 4 rs13101778  | 9521143 T | 2.777  | 2.40E-06 | chr:4:9603240 |
| 4 rs34441511  | 9738007 G | 0.3926 | 2.41E-06 | chr:4:9603240 |
| 4 rs4594723   | 9700910 A | 0.3085 | 2.44E-06 | chr:4:9603240 |
| 4 rs10022843  | 9604948 C | 0.3506 | 2.69E-06 | chr:4:9603240 |
| 4 rs11733905  | 9603159 A | 0.291  | 2.70E-06 | chr:4:9603240 |
| 4 rs142223268 | 9624727 C | 0.329  | 2.73E-06 | chr:4:9603240 |
| 4 rs4697892   | 9823837 A | 0.366  | 2.94E-06 | chr:4:9603240 |
| 4 rs57731161  | 9825847 T | 0.3751 | 3.14E-06 | chr:4:9603240 |
| 4 rs7440232   | 9651744 T | 0.3038 | 3.25E-06 | chr:4:9603240 |
| 4 rs10939390  | 9590105 G | 0.3543 | 3.34E-06 | chr:4:9603240 |
| 4 rs13101251  | 9588969 T | 0.3543 | 3.34E-06 | chr:4:9603240 |
| 4 rs6824806   | 9589427 G | 0.3543 | 3.34E-06 | chr:4:9603240 |
| 4 rs12506622  | 9690369 T | 0.3057 | 3.85E-06 | chr:4:9603240 |
| 4 rs10939424  | 9627379 G | 0.346  | 3.85E-06 | chr:4:9603240 |
| 4 rs13150882  | 9621101 T | 2.626  | 4.11E-06 | chr:4:9603240 |
| 4 rs56884786  | 9736751 C | 0.4048 | 4.23E-06 | chr:4:9603240 |
| 4 rs9291604   | 9696677 T | 0.3087 | 4.34E-06 | chr:4:9603240 |
| 4 rs10005112  | 9732610 G | 0.4054 | 4.45E-06 | chr:4:9603240 |
| 4 rs10939481  | 9735100 C | 0.4054 | 4.45E-06 | chr:4:9603240 |
| 4 rs10939482  | 9735217 C | 0.4054 | 4.45E-06 | chr:4:9603240 |
| 4 rs13127001  | 9731215 G | 0.4054 | 4.45E-06 | chr:4:9603240 |
| 4 rs13132835  | 9729181 C | 0.4054 | 4.45E-06 | chr:4:9603240 |
| 4 rs10939457  | 9677914 T | 0.3594 | 4.46E-06 | chr:4:9603240 |
| 4 rs13138869  | 9674967 T | 0.3594 | 4.46E-06 | chr:4:9603240 |
| 4 rs13139079  | 9675072 T | 0.3594 | 4.46E-06 | chr:4:9603240 |
| 4 rs7435906   | 9673736 A | 0.3594 | 4.46E-06 | chr:4:9603240 |
| 4 rs9884921   | 9676740 A | 0.3594 | 4.46E-06 | chr:4:9603240 |
| 4 rs13113655  | 9751629 C | 0.398  | 4.58E-06 | chr:4:9603240 |
| 4 rs13122793  | 9748511 G | 0.4025 | 4.60E-06 | chr:4:9603240 |

|               |           |        |          |               |
|---------------|-----------|--------|----------|---------------|
| 4 rs7677159   | 9745919 C | 0.4025 | 4.60E-06 | chr:4:9603240 |
| 4 rs58934247  | 9589730 C | 0.3049 | 4.65E-06 | chr:4:9603240 |
| 4 rs6448296   | 9478331 C | 0.4233 | 4.68E-06 | chr:4:9603240 |
| 4 rs16889260  | 9834896 T | 0.3754 | 4.82E-06 | chr:4:9603240 |
| 4 rs4554077   | 9674736 G | 0.3128 | 5.15E-06 | chr:4:9603240 |
| 4 rs6812811   | 9672000 T | 0.3128 | 5.15E-06 | chr:4:9603240 |
| 4 rs6843809   | 9655294 G | 0.3128 | 5.15E-06 | chr:4:9603240 |
| 4 rs6858093   | 9681650 G | 0.3128 | 5.15E-06 | chr:4:9603240 |
| 4 rs7690455   | 9758860 A | 0.3975 | 5.29E-06 | chr:4:9603240 |
| 4 rs3890174   | 9700774 G | 0.3718 | 5.33E-06 | chr:4:9603240 |
| 4 rs13140838  | 9732930 G | 0.4105 | 5.38E-06 | chr:4:9603240 |
| 4 rs1967550   | 9785265 T | 2.544  | 5.52E-06 | chr:4:9603240 |
| 4 rs11728148  | 9718971 C | 0.3596 | 5.62E-06 | chr:4:9603240 |
| 4 rs34027818  | 9605709 G | 0.325  | 5.67E-06 | chr:4:9603240 |
| 4 rs113957727 | 9840568 G | 0.3717 | 5.73E-06 | chr:4:9603240 |
| 4 rs7673959   | 9620145 G | 0.3694 | 5.81E-06 | chr:4:9603240 |
| 4 rs13106539  | 9797703 T | 2.509  | 5.93E-06 | chr:4:9603240 |
| 4 rs2280206   | 9799237 C | 2.509  | 5.93E-06 | chr:4:9603240 |
| 4 rs2280207   | 9799776 C | 2.509  | 5.93E-06 | chr:4:9603240 |
| 4 rs2867394   | 9872475 A | 0.413  | 5.96E-06 | chr:4:9603240 |
| 4 rs114809283 | 9578006 A | 0.2607 | 6.21E-06 | chr:4:9603240 |
| 4 rs9685067   | 9535838 T | 0.2843 | 6.32E-06 | chr:4:9603240 |
| 4 rs4554078   | 9701544 A | 0.3126 | 6.67E-06 | chr:4:9603240 |
| 4 rs950310    | 9842850 A | 0.3749 | 6.91E-06 | chr:4:9603240 |
| 4 rs13124305  | 9773273 G | 0.4129 | 6.92E-06 | chr:4:9603240 |
| 4 rs4697692   | 9893197 T | 0.414  | 7.18E-06 | chr:4:9603240 |
| 4 rs10009838  | 9833882 G | 0.4225 | 7.64E-06 | chr:4:9603240 |
| 4 rs10012516  | 9797178 A | 2.496  | 7.68E-06 | chr:4:9603240 |
| 4 rs1829413   | 9792339 A | 2.496  | 7.68E-06 | chr:4:9603240 |
| 4 rs58724508  | 9642207 G | 0.3884 | 7.98E-06 | chr:4:9603240 |
| 4 rs140355667 | 9578231 G | 0.28   | 8.40E-06 | chr:4:9603240 |
| 4 rs12644047  | 9893403 A | 0.4225 | 8.48E-06 | chr:4:9603240 |
| 4 rs6448880   | 9621023 T | 0.373  | 8.78E-06 | chr:4:9603240 |
| 4 rs374118392 | 9176144 G | 0.5048 | 8.88E-06 | chr:4:9603240 |
| 4 rs368238943 | 9590182 T | 0.2959 | 8.92E-06 | chr:4:9603240 |
| 4 rs6823671   | 9692517 A | 0.3252 | 9.12E-06 | chr:4:9603240 |
| 4 rs6829292   | 9692892 A | 0.3252 | 9.12E-06 | chr:4:9603240 |
| 4 rs7678732   | 9693253 T | 0.3252 | 9.12E-06 | chr:4:9603240 |
| 4 rs7671706   | 9749742 T | 0.4111 | 9.13E-06 | chr:4:9603240 |
| 4 rs10939567  | 9854749 A | 0.4202 | 9.21E-06 | chr:4:9603240 |
| 4 rs4622998   | 9621659 C | 0.3831 | 9.32E-06 | chr:4:9603240 |
| 4 rs10022923  | 9773438 G | 0.4187 | 9.78E-06 | chr:4:9603240 |
| 4 rs4621429   | 9826870 G | 0.392  | 9.96E-06 | chr:4:9603240 |

|               |           |        |          |               |
|---------------|-----------|--------|----------|---------------|
| 4 rs4697895   | 9828484 C | 0.392  | 9.96E-06 | chr:4:9603240 |
| 4 rs10939552  | 9838548 A | 0.3991 | 1.00E-05 | chr:4:9603240 |
| 4 rs12505312  | 9837090 G | 0.3991 | 1.00E-05 | chr:4:9603240 |
| 4 rs2139243   | 9867502 G | 0.4281 | 1.05E-05 | chr:4:9603240 |
| 4 rs115723792 | 9570902 G | 0.2702 | 1.05E-05 | chr:4:9603240 |
| 4 rs11729940  | 9574743 A | 0.2702 | 1.05E-05 | chr:4:9603240 |
| 4 rs140501910 | 9578396 C | 0.2702 | 1.05E-05 | chr:4:9603240 |
| 4 rs28729250  | 9584227 A | 0.2702 | 1.05E-05 | chr:4:9603240 |
| 4 rs4974828   | 9572320 G | 0.2702 | 1.05E-05 | chr:4:9603240 |
| 4 rs4974829   | 9571976 T | 0.2702 | 1.05E-05 | chr:4:9603240 |
| 4 rs4974865   | 9587937 A | 0.2702 | 1.05E-05 | chr:4:9603240 |
| 4 rs4974868   | 9572178 A | 0.2702 | 1.05E-05 | chr:4:9603240 |
| 4 rs11721988  | 9848899 G | 0.3951 | 1.09E-05 | chr:4:9603240 |
| 4 rs11723024  | 9848849 A | 0.3951 | 1.09E-05 | chr:4:9603240 |
| 4 rs2176644   | 9849528 T | 0.3951 | 1.09E-05 | chr:4:9603240 |
| 4 rs4697898   | 9851827 T | 0.3951 | 1.09E-05 | chr:4:9603240 |
| 4 rs4697899   | 9851875 A | 0.3951 | 1.09E-05 | chr:4:9603240 |
| 4 rs4407504   | 9717360 C | 0.3303 | 1.09E-05 | chr:4:9603240 |
| 4 rs10939599  | 9886860 A | 0.4225 | 1.15E-05 | chr:4:9603240 |
| 4 rs6840999   | 9880169 A | 0.4225 | 1.15E-05 | chr:4:9603240 |
| 4 rs938562    | 9891031 T | 0.4225 | 1.15E-05 | chr:4:9603240 |
| 4 rs10001006  | 9788498 T | 2.443  | 1.15E-05 | chr:4:9603240 |
| 4 rs10006201  | 9621908 G | 0.3671 | 1.15E-05 | chr:4:9603240 |
| 4 rs13118112  | 9794580 T | 2.443  | 1.15E-05 | chr:4:9603240 |
| 4 rs12507861  | 9777590 G | 0.4212 | 1.17E-05 | chr:4:9603240 |
| 4 rs6856661   | 9689011 T | 0.3824 | 1.19E-05 | chr:4:9603240 |
| 4 rs7671092   | 9687441 C | 0.3824 | 1.19E-05 | chr:4:9603240 |
| 4 rs7686078   | 9687410 T | 0.3824 | 1.19E-05 | chr:4:9603240 |
| 4 rs6829800   | 9685856 A | 0.3323 | 1.20E-05 | chr:4:9603240 |
| 4 rs7691166   | 9687673 T | 0.3323 | 1.20E-05 | chr:4:9603240 |
| 4 rs140729951 | 9521179 A | 0.3449 | 1.22E-05 | chr:4:9603240 |
| 4 rs10012224  | 9569324 A | 0.3479 | 1.29E-05 | chr:4:9603240 |
| 4 rs1107710   | 9890708 G | 0.4246 | 1.35E-05 | chr:4:9603240 |
| 4 rs6818572   | 9889448 A | 0.4246 | 1.35E-05 | chr:4:9603240 |
| 4 rs1980220   | 9824636 A | 0.4009 | 1.36E-05 | chr:4:9603240 |
| 4 rs77388911  | 9842207 A | 0.4051 | 1.38E-05 | chr:4:9603240 |
| 4 rs13105347  | 9537183 C | 0.279  | 1.42E-05 | chr:4:9603240 |
| 4 rs6822409   | 9536012 T | 0.279  | 1.42E-05 | chr:4:9603240 |
| 4 rs6815039   | 9777809 T | 0.4236 | 1.42E-05 | chr:4:9603240 |
| 4 rs1568318   | 9871541 C | 0.4291 | 1.43E-05 | chr:4:9603240 |
| 4 rs13124141  | 9773237 G | 0.4259 | 1.46E-05 | chr:4:9603240 |
| 4 rs6825221   | 9589620 G | 0.3781 | 1.49E-05 | chr:4:9603240 |
| 4 rs13143667  | 9781230 T | 2.468  | 1.53E-05 | chr:4:9603240 |

|   |             |          |   |        |          |                |
|---|-------------|----------|---|--------|----------|----------------|
| 4 | rs75856105  | 9666491  | T | 0.35   | 1.53E-05 | chr:4:9603240  |
| 4 | rs11729914  | 9721691  | C | 0.4356 | 1.53E-05 | chr:4:9603240  |
| 4 | rs28627624  | 9637607  | T | 0.4033 | 1.55E-05 | chr:4:9603240  |
| 4 | rs13141123  | 9757904  | T | 0.426  | 1.56E-05 | chr:4:9603240  |
| 4 | rs188525933 | 9575159  | A | 0.28   | 1.58E-05 | chr:4:9603240  |
| 4 | rs56205495  | 9789501  | C | 2.458  | 1.61E-05 | chr:4:9603240  |
| 4 | rs28430858  | 9626149  | A | 0.3856 | 1.63E-05 | chr:4:9603240  |
| 4 | rs1106058   | 9861524  | A | 0.4329 | 1.66E-05 | chr:4:9603240  |
| 4 | rs9685887   | 9706342  | T | 0.3436 | 1.73E-05 | chr:4:9603240  |
| 4 | rs6822889   | 9826757  | C | 0.4399 | 1.74E-05 | chr:4:9603240  |
| 4 | rs11726476  | 9858303  | T | 0.4301 | 1.77E-05 | chr:4:9603240  |
| 4 | rs6812563   | 9852757  | C | 0.4084 | 1.78E-05 | chr:4:9603240  |
| 4 | rs10939362  | 9553684  | T | 0.3651 | 1.79E-05 | chr:4:9603240  |
| 4 | rs192546093 | 9170261  | T | 0.5142 | 1.79E-05 | chr:4:9603240  |
| 5 | rs76603114  | 64451012 | C | 208.2  | 6.76E-12 | chr:5:64388440 |
| 5 | rs79627297  | 64431526 | C | 66.96  | 9.98E-12 | chr:5:64388440 |
| 5 | rs147069896 | 64474153 | T | 92.68  | 5.35E-11 | chr:5:64388440 |
| 5 | rs114436292 | 64385381 | A | 1453   | 1.11E-09 | chr:5:64388440 |
| 5 | rs369965566 | 64398886 | T | 1306   | 1.30E-09 | chr:5:64388440 |
| 5 | rs139126213 | 64355569 | T | 110.3  | 2.53E-09 | chr:5:64388440 |
| 5 | rs55853058  | 64436298 | T | 21.12  | 6.92E-09 | chr:5:64388440 |
| 5 | rs56246735  | 64434968 | A | 21.12  | 6.92E-09 | chr:5:64388440 |
| 5 | rs67024543  | 64439173 | C | 21.12  | 6.92E-09 | chr:5:64388440 |
| 5 | rs72758879  | 64437191 | G | 21.12  | 6.92E-09 | chr:5:64388440 |
| 5 | rs79124463  | 64437182 | T | 21.12  | 6.92E-09 | chr:5:64388440 |
| 5 | rs115073561 | 64377414 | A | 3117   | 1.40E-08 | chr:5:64388440 |
| 5 | rs11743242  | 64375379 | C | 3117   | 1.40E-08 | chr:5:64388440 |
| 5 | rs11746094  | 64387612 | T | 3117   | 1.40E-08 | chr:5:64388440 |
| 5 | rs11746360  | 64375515 | G | 3117   | 1.40E-08 | chr:5:64388440 |
| 5 | rs150630356 | 64384299 | C | 3117   | 1.40E-08 | chr:5:64388440 |
| 5 | rs182061015 | 64380725 | A | 3117   | 1.40E-08 | chr:5:64388440 |
| 5 | rs192546362 | 64380724 | C | 3117   | 1.40E-08 | chr:5:64388440 |
| 5 | rs77434451  | 64380180 | C | 3117   | 1.40E-08 | chr:5:64388440 |
| 5 | rs77669131  | 64385985 | C | 3117   | 1.40E-08 | chr:5:64388440 |
| 5 | rs77982418  | 64383897 | C | 3117   | 1.40E-08 | chr:5:64388440 |
| 5 | rs75261655  | 64354080 | G | 187.6  | 2.31E-08 | chr:5:64388440 |
| 5 | rs17206232  | 64433400 | A | 13.08  | 3.94E-08 | chr:5:64388440 |
| 5 | rs4700668   | 64435732 | A | 13.08  | 3.94E-08 | chr:5:64388440 |
| 5 | rs55762587  | 64436355 | C | 13.08  | 3.94E-08 | chr:5:64388440 |
| 5 | rs72758880  | 64440519 | A | 13.08  | 3.94E-08 | chr:5:64388440 |
| 5 | rs17812505  | 64454782 | A | 126    | 4.48E-08 | chr:5:64388440 |
| 5 | rs115153571 | 64501108 | T | 68.32  | 5.75E-08 | chr:5:64388440 |
| 5 | rs115596035 | 64394182 | A | 3679   | 9.03E-08 | chr:5:64388440 |



|               |            |       |          |                |
|---------------|------------|-------|----------|----------------|
| 5 rs11750581  | 64392324 T | 3679  | 9.03E-08 | chr:5:64388440 |
| 5 rs17206008  | 64427970 A | 3679  | 9.03E-08 | chr:5:64388440 |
| 5 rs17811610  | 64428506 C | 3679  | 9.03E-08 | chr:5:64388440 |
| 5 rs76294348  | 64401590 C | 3679  | 9.03E-08 | chr:5:64388440 |
| 5 rs79066328  | 64400793 T | 3679  | 9.03E-08 | chr:5:64388440 |
| 5 rs72758876  | 64434562 T | 11.56 | 1.04E-07 | chr:5:64388440 |
| 5 rs72758884  | 64452214 G | 12.12 | 1.29E-07 | chr:5:64388440 |
| 5 rs112170622 | 64456245 T | 11.82 | 1.53E-07 | chr:5:64388440 |
| 5 rs112408822 | 64469647 G | 11.82 | 1.53E-07 | chr:5:64388440 |
| 5 rs56375618  | 64471186 G | 11.82 | 1.53E-07 | chr:5:64388440 |
| 5 rs57027704  | 64470833 C | 11.82 | 1.53E-07 | chr:5:64388440 |
| 5 rs11742800  | 64403371 T | 377.4 | 1.96E-07 | chr:5:64388440 |
| 5 rs7736365   | 64413591 C | 377.4 | 1.96E-07 | chr:5:64388440 |
| 5 rs115434958 | 64475274 A | 9.948 | 4.15E-07 | chr:5:64388440 |
| 5 rs6861157   | 64428747 T | 8.33  | 4.61E-07 | chr:5:64388440 |
| 5 rs11739329  | 64429954 A | 8.181 | 6.14E-07 | chr:5:64388440 |
| 5 rs11742881  | 64373645 A | 14.32 | 9.19E-07 | chr:5:64388440 |
| 5 rs434882    | 64353312 A | 6.453 | 4.73E-06 | chr:5:64388440 |
| 5 rs140796023 | 64733914 T | 15.14 | 7.28E-06 | chr:5:64388440 |
| 5 rs2640715   | 64673742 T | 8.456 | 1.21E-05 | chr:5:64388440 |
| 5 rs114627939 | 64411854 A | 132.6 | 1.25E-05 | chr:5:64388440 |
| 5 rs264733    | 64359607 G | 5.691 | 1.31E-05 | chr:5:64388440 |
| 5 rs264737    | 64363583 A | 5.65  | 1.48E-05 | chr:5:64388440 |
| 5 rs264741    | 64367179 T | 5.65  | 1.48E-05 | chr:5:64388440 |
| 5 rs264742    | 64368149 T | 5.65  | 1.48E-05 | chr:5:64388440 |
| 5 rs266591    | 64347543 G | 5.65  | 1.48E-05 | chr:5:64388440 |
| 5 rs381652    | 64352334 C | 5.65  | 1.48E-05 | chr:5:64388440 |
| 5 rs143761847 | 64601150 T | 13.14 | 1.50E-05 | chr:5:64388440 |
| 5 rs190543    | 64391933 G | 5.447 | 1.50E-05 | chr:5:64388440 |
| 5 rs264770    | 64391134 T | 5.447 | 1.50E-05 | chr:5:64388440 |
| 5 rs264775    | 64395359 G | 5.447 | 1.50E-05 | chr:5:64388440 |
| 5 rs4700662   | 64392906 C | 5.447 | 1.50E-05 | chr:5:64388440 |
| 5 rs521074    | 64392198 C | 5.447 | 1.50E-05 | chr:5:64388440 |
| 5 rs264766    | 64388979 T | 5.428 | 1.52E-05 | chr:5:64388440 |
| 5 rs264778    | 64395979 A | 5.291 | 1.52E-05 | chr:5:64388440 |
| 5 rs1363921   | 64496183 T | 6.058 | 1.54E-05 | chr:5:64388440 |
| 5 rs155337    | 64375371 A | 5.425 | 1.62E-05 | chr:5:64388440 |
| 5 rs197138    | 64376615 G | 5.425 | 1.62E-05 | chr:5:64388440 |
| 5 rs264752    | 64375502 T | 5.425 | 1.62E-05 | chr:5:64388440 |
| 5 rs264753    | 64375657 T | 5.425 | 1.62E-05 | chr:5:64388440 |
| 5 rs264754    | 64377290 A | 5.425 | 1.62E-05 | chr:5:64388440 |
| 5 rs264756    | 64380395 G | 5.425 | 1.62E-05 | chr:5:64388440 |
| 5 rs264762    | 64384386 A | 5.425 | 1.62E-05 | chr:5:64388440 |

|               |            |       |          |                |
|---------------|------------|-------|----------|----------------|
| 5 rs264763    | 64384431 C | 5.425 | 1.62E-05 | chr:5:64388440 |
| 5 rs65407     | 64375128 C | 5.425 | 1.62E-05 | chr:5:64388440 |
| 5 rs146117686 | 64347580 A | 28.39 | 2.08E-05 | chr:5:64388440 |
| 5 rs58335637  | 64506243 T | 6.261 | 2.09E-05 | chr:5:64388440 |
| 5 rs2161559   | 64493852 C | 5.283 | 2.47E-05 | chr:5:64388440 |
| 5 rs397044    | 64391972 C | 4.982 | 2.78E-05 | chr:5:64388440 |
| 5 rs264758    | 64381433 A | 4.97  | 2.79E-05 | chr:5:64388440 |
| 5 rs264765    | 64388548 C | 4.97  | 2.79E-05 | chr:5:64388440 |
| 5 rs264779    | 64398181 C | 4.786 | 2.92E-05 | chr:5:64388440 |
| 5 rs1862570   | 64480933 T | 6.447 | 2.99E-05 | chr:5:64388440 |
| 5 rs426628    | 64351318 T | 4.906 | 3.03E-05 | chr:5:64388440 |
| 5 rs266571    | 64358152 A | 5.042 | 3.14E-05 | chr:5:64388440 |
| 5 rs67057805  | 64497594 G | 5.188 | 3.41E-05 | chr:5:64388440 |
| 5 rs67872027  | 64517189 C | 5.468 | 3.58E-05 | chr:5:64388440 |
| 5 rs16893492  | 64494637 C | 5.124 | 3.88E-05 | chr:5:64388440 |
| 5 rs16893504  | 64495736 G | 5.124 | 3.88E-05 | chr:5:64388440 |
| 5 rs16893539  | 64506320 G | 5.124 | 3.88E-05 | chr:5:64388440 |
| 5 rs114465479 | 64572030 C | 9.5   | 4.07E-05 | chr:5:64388440 |
| 5 rs4700670   | 64505218 C | 5.378 | 4.20E-05 | chr:5:64388440 |
| 5 rs560140895 | 63996509 T | 16.39 | 5.19E-05 | chr:5:64388440 |
| 5 rs16893495  | 64494702 G | 5.249 | 5.26E-05 | chr:5:64388440 |
| 5 rs6867844   | 64503815 C | 5.249 | 5.26E-05 | chr:5:64388440 |
| 5 rs62364962  | 80465734 G | 44.37 | 6.29E-10 | chr:5:80442266 |
| 5 rs6881941   | 80467902 G | 44.37 | 6.29E-10 | chr:5:80442266 |
| 5 rs6880350   | 80470499 T | 38.71 | 8.68E-10 | chr:5:80442266 |
| 5 rs12697915  | 80458973 G | 37.79 | 1.08E-09 | chr:5:80442266 |
| 5 rs13159681  | 80467140 G | 28.7  | 1.09E-09 | chr:5:80442266 |
| 5 rs6895645   | 80470495 C | 25.46 | 1.45E-09 | chr:5:80442266 |
| 5 rs4144527   | 80467798 C | 24.71 | 1.94E-09 | chr:5:80442266 |
| 5 rs10474654  | 80464099 T | 12.77 | 1.99E-09 | chr:5:80442266 |
| 5 rs6872444   | 80464801 A | 12.77 | 1.99E-09 | chr:5:80442266 |
| 5 rs73130824  | 80475341 C | 54.12 | 2.23E-09 | chr:5:80442266 |
| 5 rs4704705   | 80463635 G | 12.65 | 2.67E-09 | chr:5:80442266 |
| 5 rs6890433   | 80463887 C | 12.65 | 2.67E-09 | chr:5:80442266 |
| 5 rs4703824   | 80466298 T | 12.46 | 2.80E-09 | chr:5:80442266 |
| 5 rs13159648  | 80467069 G | 18.24 | 3.82E-09 | chr:5:80442266 |
| 5 rs113138533 | 80516504 A | 20.97 | 4.64E-09 | chr:5:80442266 |
| 5 rs79837333  | 80512632 C | 20.97 | 4.64E-09 | chr:5:80442266 |
| 5 rs6891229   | 80448345 G | 40.8  | 9.80E-09 | chr:5:80442266 |
| 5 rs6863422   | 80474998 G | 70.29 | 2.04E-08 | chr:5:80442266 |
| 5 rs6878238   | 80474599 T | 70.29 | 2.04E-08 | chr:5:80442266 |
| 5 rs73130821  | 80474424 C | 70.29 | 2.04E-08 | chr:5:80442266 |
| 5 rs79215865  | 80476220 A | 70.29 | 2.04E-08 | chr:5:80442266 |

|               |            |         |          |                |
|---------------|------------|---------|----------|----------------|
| 5 rs116063300 | 80444722 C | 844.7   | 4.91E-08 | chr:5:80442266 |
| 5 rs7707396   | 80433658 G | 18.52   | 8.91E-08 | chr:5:80442266 |
| 5 rs115860918 | 80393475 T | 62.26   | 9.23E-08 | chr:5:80442266 |
| 5 rs147665836 | 80382832 C | 62.26   | 9.23E-08 | chr:5:80442266 |
| 5 rs112680973 | 80546851 G | 14.5    | 1.06E-07 | chr:5:80442266 |
| 5 rs115017698 | 80424934 A | 50.72   | 1.16E-07 | chr:5:80442266 |
| 5 rs143086439 | 80424848 T | 50.72   | 1.16E-07 | chr:5:80442266 |
| 5 rs145198622 | 80414774 T | 34.01   | 2.02E-07 | chr:5:80442266 |
| 5 rs80015185  | 80435871 A | 13.41   | 2.16E-07 | chr:5:80442266 |
| 5 rs26897     | 80416882 C | 10.97   | 4.40E-07 | chr:5:80442266 |
| 5 rs111531198 | 80550110 T | 26.12   | 6.10E-07 | chr:5:80442266 |
| 5 rs115568758 | 80416113 C | 16.67   | 1.15E-06 | chr:5:80442266 |
| 5 rs116503403 | 80427691 A | 12.24   | 2.45E-06 | chr:5:80442266 |
| 5 rs111809751 | 80316223 G | 15.2    | 2.79E-06 | chr:5:80442266 |
| 5 rs11949363  | 80509137 G | 5.516   | 3.69E-06 | chr:5:80442266 |
| 5 rs76834320  | 80416108 G | 12.59   | 3.94E-06 | chr:5:80442266 |
| 5 rs540564    | 80403392 A | 4.793   | 5.28E-06 | chr:5:80442266 |
| 5 rs17212948  | 80406756 C | 4.786   | 5.60E-06 | chr:5:80442266 |
| 5 rs6882101   | 80458283 T | 5.863   | 6.68E-06 | chr:5:80442266 |
| 5 rs34121     | 80438915 G | 4.996   | 7.82E-06 | chr:5:80442266 |
| 5 rs111796768 | 80299334 A | 8.189   | 1.23E-05 | chr:5:80442266 |
| 5 rs12697916  | 80462439 G | 4.992   | 1.27E-05 | chr:5:80442266 |
| 5 rs13353953  | 80462407 A | 4.993   | 1.29E-05 | chr:5:80442266 |
| 5 rs190585232 | 80356070 T | 13.28   | 1.29E-05 | chr:5:80442266 |
| 5 rs10942943  | 80462935 G | 4.929   | 1.46E-05 | chr:5:80442266 |
| 5 rs10942944  | 80462963 G | 4.929   | 1.46E-05 | chr:5:80442266 |
| 5 rs39628     | 80075674 T | 5.577   | 1.46E-05 | chr:5:80442266 |
| 5 rs33010     | 80083631 G | 5.519   | 1.66E-05 | chr:5:80442266 |
| 5 rs190339    | 80431615 C | 4.472   | 1.75E-05 | chr:5:80442266 |
| 5 rs193786    | 80441637 T | 4.516   | 1.85E-05 | chr:5:80442266 |
| 5 rs34116     | 80441999 C | 4.516   | 1.85E-05 | chr:5:80442266 |
| 5 rs34120     | 80440146 G | 4.516   | 1.85E-05 | chr:5:80442266 |
| 5 rs245403    | 80069930 A | 5.437   | 1.94E-05 | chr:5:80442266 |
| 5 rs245408    | 80072451 G | 5.437   | 1.94E-05 | chr:5:80442266 |
| 5 rs40300     | 80067803 T | 5.437   | 1.94E-05 | chr:5:80442266 |
| 5 rs12188759  | 80462147 C | 4.654   | 2.01E-05 | chr:5:80442266 |
| 5 rs4703822   | 80411221 A | 4.012   | 2.62E-05 | chr:5:80442266 |
| 5 rs12186554  | 80462184 T | 4.184   | 3.45E-05 | chr:5:80442266 |
| 5 rs17277408  | 80379572 T | 5.843   | 5.15E-05 | chr:5:80442266 |
| 5 rs13160367  | 8936774 A  | 0.08443 | 6.41E-12 | chr:5:8937853  |
| 5 rs2963382   | 8948523 C  | 0.1102  | 6.51E-12 | chr:5:8937853  |
| 5 rs6861103   | 8928381 A  | 0.1008  | 6.63E-12 | chr:5:8937853  |
| 5 rs11949503  | 8937804 C  | 0.08644 | 8.61E-12 | chr:5:8937853  |

|              |           |         |          |               |
|--------------|-----------|---------|----------|---------------|
| 5 rs11955429 | 8941715 A | 0.08644 | 8.61E-12 | chr:5:8937853 |
| 5 rs12186849 | 8933088 C | 0.08644 | 8.61E-12 | chr:5:8937853 |
| 5 rs13157678 | 8931378 C | 0.08644 | 8.61E-12 | chr:5:8937853 |
| 5 rs13160595 | 8929697 C | 0.08644 | 8.61E-12 | chr:5:8937853 |
| 5 rs13165792 | 8943070 T | 0.08644 | 8.61E-12 | chr:5:8937853 |
| 5 rs13166892 | 8931212 C | 0.08644 | 8.61E-12 | chr:5:8937853 |
| 5 rs13169109 | 8943532 C | 0.08644 | 8.61E-12 | chr:5:8937853 |
| 5 rs13170524 | 8934862 G | 0.08644 | 8.61E-12 | chr:5:8937853 |
| 5 rs13180198 | 8936074 C | 0.08644 | 8.61E-12 | chr:5:8937853 |
| 5 rs13181039 | 8936810 C | 0.08644 | 8.61E-12 | chr:5:8937853 |
| 5 rs13181188 | 8936871 G | 0.08644 | 8.61E-12 | chr:5:8937853 |
| 5 rs13185206 | 8943046 G | 0.08644 | 8.61E-12 | chr:5:8937853 |
| 5 rs13186994 | 8930953 C | 0.08644 | 8.61E-12 | chr:5:8937853 |
| 5 rs2962735  | 8942095 G | 0.08644 | 8.61E-12 | chr:5:8937853 |
| 5 rs34108904 | 8943745 T | 0.08644 | 8.61E-12 | chr:5:8937853 |
| 5 rs35376107 | 8942188 G | 0.08644 | 8.61E-12 | chr:5:8937853 |
| 5 rs36075104 | 8937389 A | 0.08644 | 8.61E-12 | chr:5:8937853 |
| 5 rs4495147  | 8933733 T | 0.08644 | 8.61E-12 | chr:5:8937853 |
| 5 rs4505924  | 8936629 A | 0.08644 | 8.61E-12 | chr:5:8937853 |
| 5 rs4526080  | 8941529 G | 0.08644 | 8.61E-12 | chr:5:8937853 |
| 5 rs4563593  | 8933794 G | 0.08644 | 8.61E-12 | chr:5:8937853 |
| 5 rs4585412  | 8941705 G | 0.08644 | 8.61E-12 | chr:5:8937853 |
| 5 rs6555580  | 8932263 C | 0.08644 | 8.61E-12 | chr:5:8937853 |
| 5 rs6555585  | 8935651 G | 0.08644 | 8.61E-12 | chr:5:8937853 |
| 5 rs6555586  | 8935800 A | 0.08644 | 8.61E-12 | chr:5:8937853 |
| 5 rs6862593  | 8928550 T | 0.08644 | 8.61E-12 | chr:5:8937853 |
| 5 rs6866047  | 8932660 T | 0.08644 | 8.61E-12 | chr:5:8937853 |
| 5 rs6870451  | 8938885 G | 0.08644 | 8.61E-12 | chr:5:8937853 |
| 5 rs6870477  | 8938935 G | 0.08644 | 8.61E-12 | chr:5:8937853 |
| 5 rs6884096  | 8932523 A | 0.08644 | 8.61E-12 | chr:5:8937853 |
| 5 rs6885789  | 8932782 T | 0.08644 | 8.61E-12 | chr:5:8937853 |
| 5 rs6888819  | 8929239 C | 0.08644 | 8.61E-12 | chr:5:8937853 |
| 5 rs6894834  | 8930468 G | 0.08644 | 8.61E-12 | chr:5:8937853 |
| 5 rs71611354 | 8942703 T | 0.08644 | 8.61E-12 | chr:5:8937853 |
| 5 rs76109783 | 8939954 A | 0.08644 | 8.61E-12 | chr:5:8937853 |
| 5 rs7735641  | 8935206 A | 0.08644 | 8.61E-12 | chr:5:8937853 |
| 5 rs34251442 | 8942645 C | 0.09611 | 1.03E-11 | chr:5:8937853 |
| 5 rs35495516 | 8942635 C | 0.09611 | 1.03E-11 | chr:5:8937853 |
| 5 rs80193320 | 8941404 C | 0.09002 | 1.38E-11 | chr:5:8937853 |
| 5 rs13168801 | 8943312 A | 0.1086  | 1.45E-11 | chr:5:8937853 |
| 5 rs13189384 | 8943321 G | 0.1086  | 1.45E-11 | chr:5:8937853 |
| 5 rs34626780 | 8943339 T | 0.1086  | 1.45E-11 | chr:5:8937853 |
| 5 rs35951584 | 8943375 A | 0.1086  | 1.45E-11 | chr:5:8937853 |

|               |           |        |          |               |
|---------------|-----------|--------|----------|---------------|
| 5 rs6555581   | 8932337 T | 0.122  | 1.63E-11 | chr:5:8937853 |
| 5 rs115606914 | 8942429 T | 0.1016 | 1.84E-11 | chr:5:8937853 |
| 5 rs140461872 | 8942428 C | 0.1016 | 1.84E-11 | chr:5:8937853 |
| 5 rs2963325   | 8933269 T | 0.1373 | 1.89E-11 | chr:5:8937853 |
| 5 rs2963363   | 8928893 A | 0.1384 | 2.10E-11 | chr:5:8937853 |
| 5 rs10040864  | 8965550 A | 0.1316 | 2.44E-11 | chr:5:8937853 |
| 5 rs13355363  | 8960849 A | 0.1316 | 2.44E-11 | chr:5:8937853 |
| 5 rs34352770  | 8970561 A | 0.1316 | 2.44E-11 | chr:5:8937853 |
| 5 rs59676981  | 8968807 T | 0.1316 | 2.44E-11 | chr:5:8937853 |
| 5 rs6861946   | 8966209 T | 0.1316 | 2.44E-11 | chr:5:8937853 |
| 5 rs6863109   | 8966159 T | 0.1316 | 2.44E-11 | chr:5:8937853 |
| 5 rs6869638   | 8968467 G | 0.1316 | 2.44E-11 | chr:5:8937853 |
| 5 rs6872524   | 8972999 T | 0.1316 | 2.44E-11 | chr:5:8937853 |
| 5 rs7723950   | 8959250 C | 0.1316 | 2.44E-11 | chr:5:8937853 |
| 5 rs7726068   | 8971413 G | 0.1316 | 2.44E-11 | chr:5:8937853 |
| 5 rs7728475   | 8969172 A | 0.1316 | 2.44E-11 | chr:5:8937853 |
| 5 rs12513755  | 8958879 A | 0.131  | 2.46E-11 | chr:5:8937853 |
| 5 rs13155565  | 8965540 T | 0.131  | 2.46E-11 | chr:5:8937853 |
| 5 rs1947583   | 8980189 C | 0.131  | 2.46E-11 | chr:5:8937853 |
| 5 rs6876180   | 8977231 T | 0.131  | 2.46E-11 | chr:5:8937853 |
| 5 rs6883368   | 8968144 C | 0.131  | 2.46E-11 | chr:5:8937853 |
| 5 rs7730808   | 8977997 T | 0.131  | 2.46E-11 | chr:5:8937853 |
| 5 rs7730809   | 8977998 C | 0.131  | 2.46E-11 | chr:5:8937853 |
| 5 rs36068583  | 8942585 A | 0.1316 | 2.80E-11 | chr:5:8937853 |
| 5 rs2962724   | 8952042 T | 0.1355 | 2.90E-11 | chr:5:8937853 |
| 5 rs2962654   | 8931393 A | 0.1406 | 2.93E-11 | chr:5:8937853 |
| 5 rs2963326   | 8933452 A | 0.1412 | 3.36E-11 | chr:5:8937853 |
| 5 rs2963337   | 8935632 G | 0.1402 | 3.38E-11 | chr:5:8937853 |
| 5 rs2962650   | 8937165 G | 0.1404 | 3.38E-11 | chr:5:8937853 |
| 5 rs2963384   | 8950534 T | 0.1353 | 3.80E-11 | chr:5:8937853 |
| 5 rs2963376   | 8942864 T | 0.1413 | 3.89E-11 | chr:5:8937853 |
| 5 rs6869307   | 8968310 G | 0.1273 | 4.09E-11 | chr:5:8937853 |
| 5 rs6868644   | 8981136 C | 0.1634 | 4.23E-11 | chr:5:8937853 |
| 5 rs2962651   | 8935871 A | 0.1425 | 4.67E-11 | chr:5:8937853 |
| 5 rs2962733   | 8945736 C | 0.1425 | 4.67E-11 | chr:5:8937853 |
| 5 rs2963370   | 8940538 C | 0.1429 | 5.09E-11 | chr:5:8937853 |
| 5 rs2963371   | 8940701 G | 0.1429 | 5.09E-11 | chr:5:8937853 |
| 5 rs2963327   | 8934159 G | 0.1431 | 5.37E-11 | chr:5:8937853 |
| 5 rs2963380   | 8945194 A | 0.1431 | 5.37E-11 | chr:5:8937853 |
| 5 rs2963375   | 8942567 T | 0.1516 | 6.09E-11 | chr:5:8937853 |
| 5 rs2963324   | 8933130 C | 0.146  | 6.75E-11 | chr:5:8937853 |
| 5 rs34814654  | 8958042 A | 0.1359 | 7.31E-11 | chr:5:8937853 |
| 5 rs13163334  | 8962662 C | 0.1638 | 7.43E-11 | chr:5:8937853 |

|              |           |        |          |               |
|--------------|-----------|--------|----------|---------------|
| 5 rs61036506 | 8981340 G | 0.1655 | 7.48E-11 | chr:5:8937853 |
| 5 rs10038936 | 8965436 A | 0.1756 | 1.54E-10 | chr:5:8937853 |
| 5 rs10062754 | 8972259 C | 0.1756 | 1.54E-10 | chr:5:8937853 |
| 5 rs12521690 | 8967716 A | 0.1756 | 1.54E-10 | chr:5:8937853 |
| 5 rs13164654 | 8972492 T | 0.1756 | 1.54E-10 | chr:5:8937853 |
| 5 rs13185652 | 8967225 C | 0.1756 | 1.54E-10 | chr:5:8937853 |
| 5 rs13188103 | 8964519 T | 0.1756 | 1.54E-10 | chr:5:8937853 |
| 5 rs16881756 | 8976859 G | 0.1756 | 1.54E-10 | chr:5:8937853 |
| 5 rs1902806  | 8965016 C | 0.1756 | 1.54E-10 | chr:5:8937853 |
| 5 rs1902807  | 8964963 A | 0.1756 | 1.54E-10 | chr:5:8937853 |
| 5 rs1902808  | 8964937 T | 0.1756 | 1.54E-10 | chr:5:8937853 |
| 5 rs1947586  | 8974532 C | 0.1756 | 1.54E-10 | chr:5:8937853 |
| 5 rs1947587  | 8974402 A | 0.1756 | 1.54E-10 | chr:5:8937853 |
| 5 rs2219397  | 8971713 T | 0.1756 | 1.54E-10 | chr:5:8937853 |
| 5 rs2219398  | 8971683 C | 0.1756 | 1.54E-10 | chr:5:8937853 |
| 5 rs2388008  | 8968479 C | 0.1756 | 1.54E-10 | chr:5:8937853 |
| 5 rs34958715 | 8970889 G | 0.1756 | 1.54E-10 | chr:5:8937853 |
| 5 rs3921964  | 8972146 G | 0.1756 | 1.54E-10 | chr:5:8937853 |
| 5 rs4431316  | 8964778 T | 0.1756 | 1.54E-10 | chr:5:8937853 |
| 5 rs4432854  | 8966865 C | 0.1756 | 1.54E-10 | chr:5:8937853 |
| 5 rs58854317 | 8968867 C | 0.1756 | 1.54E-10 | chr:5:8937853 |
| 5 rs6555587  | 8969296 G | 0.1756 | 1.54E-10 | chr:5:8937853 |
| 5 rs6555588  | 8977866 G | 0.1756 | 1.54E-10 | chr:5:8937853 |
| 5 rs6862506  | 8965836 T | 0.1756 | 1.54E-10 | chr:5:8937853 |
| 5 rs6863266  | 8966162 T | 0.1756 | 1.54E-10 | chr:5:8937853 |
| 5 rs6870017  | 8977512 A | 0.1756 | 1.54E-10 | chr:5:8937853 |
| 5 rs6875463  | 8963376 C | 0.1756 | 1.54E-10 | chr:5:8937853 |
| 5 rs6877048  | 8973265 T | 0.1756 | 1.54E-10 | chr:5:8937853 |
| 5 rs6880494  | 8977180 G | 0.1756 | 1.54E-10 | chr:5:8937853 |
| 5 rs6880574  | 8969997 G | 0.1756 | 1.54E-10 | chr:5:8937853 |
| 5 rs6883897  | 8966181 G | 0.1756 | 1.54E-10 | chr:5:8937853 |
| 5 rs6884293  | 8968011 T | 0.1756 | 1.54E-10 | chr:5:8937853 |
| 5 rs6884680  | 8968261 T | 0.1756 | 1.54E-10 | chr:5:8937853 |
| 5 rs9313264  | 8961561 T | 0.1756 | 1.54E-10 | chr:5:8937853 |
| 5 rs9313265  | 8964069 G | 0.1756 | 1.54E-10 | chr:5:8937853 |
| 5 rs4624764  | 8958031 T | 0.175  | 1.59E-10 | chr:5:8937853 |
| 5 rs12518501 | 8982887 T | 0.1273 | 1.61E-10 | chr:5:8937853 |
| 5 rs12521160 | 8982888 G | 0.1273 | 1.61E-10 | chr:5:8937853 |
| 5 rs4452535  | 8958034 C | 0.1769 | 1.67E-10 | chr:5:8937853 |
| 5 rs13175700 | 8967537 T | 0.1765 | 1.71E-10 | chr:5:8937853 |
| 5 rs1585204  | 8974023 A | 0.1774 | 1.77E-10 | chr:5:8937853 |
| 5 rs6880066  | 8969679 C | 0.1774 | 2.00E-10 | chr:5:8937853 |
| 5 rs2388006  | 8968700 C | 0.1853 | 2.09E-10 | chr:5:8937853 |

|               |           |        |          |               |
|---------------|-----------|--------|----------|---------------|
| 5 rs2388007   | 8968699 C | 0.1853 | 2.09E-10 | chr:5:8937853 |
| 5 rs6866139   | 8966309 C | 0.1796 | 2.22E-10 | chr:5:8937853 |
| 5 rs10056871  | 8964318 C | 0.1772 | 2.31E-10 | chr:5:8937853 |
| 5 rs10058520  | 8964357 C | 0.1772 | 2.31E-10 | chr:5:8937853 |
| 5 rs4627964   | 8968639 C | 0.178  | 2.38E-10 | chr:5:8937853 |
| 5 rs10512999  | 8963885 C | 0.184  | 2.43E-10 | chr:5:8937853 |
| 5 rs6871960   | 8963871 C | 0.184  | 2.43E-10 | chr:5:8937853 |
| 5 rs114656264 | 8942423 T | 0.111  | 2.46E-10 | chr:5:8937853 |
| 5 rs115883187 | 8942422 C | 0.111  | 2.46E-10 | chr:5:8937853 |
| 5 rs2962717   | 8978826 G | 0.1771 | 3.08E-10 | chr:5:8937853 |
| 5 rs11738920  | 8991968 C | 0.1376 | 5.03E-10 | chr:5:8937853 |
| 5 rs11750315  | 8999860 A | 0.1376 | 5.03E-10 | chr:5:8937853 |
| 5 rs77037743  | 8991632 T | 0.1376 | 5.03E-10 | chr:5:8937853 |
| 5 rs7720782   | 8994422 C | 0.1376 | 5.03E-10 | chr:5:8937853 |
| 5 rs16881803  | 8983995 C | 0.1368 | 5.66E-10 | chr:5:8937853 |
| 5 rs11134342  | 8991036 A | 0.1725 | 6.10E-10 | chr:5:8937853 |
| 5 rs11134343  | 8999304 C | 0.1725 | 6.10E-10 | chr:5:8937853 |
| 5 rs11951651  | 8995163 C | 0.1725 | 6.10E-10 | chr:5:8937853 |
| 5 rs11952933  | 8993747 T | 0.1725 | 6.10E-10 | chr:5:8937853 |
| 5 rs12186781  | 8998527 G | 0.1725 | 6.10E-10 | chr:5:8937853 |
| 5 rs12189149  | 8998699 G | 0.1725 | 6.10E-10 | chr:5:8937853 |
| 5 rs6870588   | 8993002 C | 0.1725 | 6.10E-10 | chr:5:8937853 |
| 5 rs74864061  | 8993179 G | 0.1725 | 6.10E-10 | chr:5:8937853 |
| 5 rs7712850   | 8990532 A | 0.1725 | 6.10E-10 | chr:5:8937853 |
| 5 rs7733108   | 8990306 G | 0.1725 | 6.10E-10 | chr:5:8937853 |
| 5 rs77430208  | 8997524 G | 0.1725 | 6.10E-10 | chr:5:8937853 |
| 5 rs79649573  | 8997977 T | 0.1725 | 6.10E-10 | chr:5:8937853 |
| 5 rs111387677 | 9004023 A | 0.1405 | 6.10E-10 | chr:5:8937853 |
| 5 rs112854697 | 9006793 C | 0.1405 | 6.10E-10 | chr:5:8937853 |
| 5 rs12517703  | 9011519 T | 0.1405 | 6.10E-10 | chr:5:8937853 |
| 5 rs143252128 | 9006280 T | 0.1405 | 6.10E-10 | chr:5:8937853 |
| 5 rs16881838  | 9012115 T | 0.1405 | 6.10E-10 | chr:5:8937853 |
| 5 rs376060904 | 9001673 A | 0.1405 | 6.10E-10 | chr:5:8937853 |
| 5 rs6897203   | 9002771 C | 0.1405 | 6.10E-10 | chr:5:8937853 |
| 5 rs75432582  | 9010227 T | 0.1405 | 6.10E-10 | chr:5:8937853 |
| 5 rs74370667  | 8988253 C | 0.1394 | 6.56E-10 | chr:5:8937853 |
| 5 rs75435196  | 8987064 G | 0.1394 | 6.56E-10 | chr:5:8937853 |
| 5 rs11134341  | 8989290 C | 0.1722 | 7.47E-10 | chr:5:8937853 |
| 5 rs7703582   | 8988714 T | 0.1722 | 7.47E-10 | chr:5:8937853 |
| 5 rs7723456   | 8989021 G | 0.1722 | 7.47E-10 | chr:5:8937853 |
| 5 rs7727402   | 8988961 G | 0.1722 | 7.47E-10 | chr:5:8937853 |
| 5 rs77709148  | 8988682 G | 0.1722 | 7.47E-10 | chr:5:8937853 |
| 5 rs74482613  | 8927592 C | 0.1029 | 8.82E-10 | chr:5:8937853 |

|               |           |        |          |               |
|---------------|-----------|--------|----------|---------------|
| 5 rs11750358  | 8999971 T | 0.1746 | 8.99E-10 | chr:5:8937853 |
| 5 rs11750361  | 9000007 G | 0.1746 | 8.99E-10 | chr:5:8937853 |
| 5 rs146404047 | 8998963 T | 0.1841 | 1.03E-09 | chr:5:8937853 |
| 5 rs146470969 | 9001510 C | 0.1795 | 1.39E-09 | chr:5:8937853 |
| 5 rs148681757 | 9001509 C | 0.1795 | 1.39E-09 | chr:5:8937853 |
| 5 rs1379574   | 8991576 A | 0.1866 | 4.23E-09 | chr:5:8937853 |
| 5 rs11134347  | 9029842 C | 0.1862 | 4.89E-09 | chr:5:8937853 |
| 5 rs11134338  | 8983721 A | 0.1864 | 5.27E-09 | chr:5:8937853 |
| 5 rs11134339  | 8987697 A | 0.1864 | 5.27E-09 | chr:5:8937853 |
| 5 rs11134340  | 8987726 T | 0.1864 | 5.27E-09 | chr:5:8937853 |
| 5 rs1124255   | 8984662 G | 0.1864 | 5.27E-09 | chr:5:8937853 |
| 5 rs1124256   | 8984616 T | 0.1864 | 5.27E-09 | chr:5:8937853 |
| 5 rs11738634  | 8983818 C | 0.1864 | 5.27E-09 | chr:5:8937853 |
| 5 rs12187003  | 8986008 A | 0.1864 | 5.27E-09 | chr:5:8937853 |
| 5 rs12187849  | 8987501 A | 0.1864 | 5.27E-09 | chr:5:8937853 |
| 5 rs12188659  | 8987572 G | 0.1864 | 5.27E-09 | chr:5:8937853 |
| 5 rs12189462  | 8986146 G | 0.1864 | 5.27E-09 | chr:5:8937853 |
| 5 rs12523277  | 8987940 T | 0.1864 | 5.27E-09 | chr:5:8937853 |
| 5 rs1457772   | 8985553 A | 0.1864 | 5.27E-09 | chr:5:8937853 |
| 5 rs16881805  | 8984147 A | 0.1864 | 5.27E-09 | chr:5:8937853 |
| 5 rs4472235   | 8984391 G | 0.1864 | 5.27E-09 | chr:5:8937853 |
| 5 rs4612031   | 8984728 G | 0.1864 | 5.27E-09 | chr:5:8937853 |
| 5 rs74774935  | 8985010 C | 0.1864 | 5.27E-09 | chr:5:8937853 |
| 5 rs75926318  | 8986713 T | 0.1864 | 5.27E-09 | chr:5:8937853 |
| 5 rs76025485  | 8986886 C | 0.1864 | 5.27E-09 | chr:5:8937853 |
| 5 rs76811960  | 8987051 A | 0.1864 | 5.27E-09 | chr:5:8937853 |
| 5 rs77557093  | 8987082 T | 0.1864 | 5.27E-09 | chr:5:8937853 |
| 5 rs78982025  | 8984905 T | 0.1864 | 5.27E-09 | chr:5:8937853 |
| 5 rs79028086  | 8984958 G | 0.1864 | 5.27E-09 | chr:5:8937853 |
| 5 rs80323589  | 8986254 A | 0.1864 | 5.27E-09 | chr:5:8937853 |
| 5 rs76169939  | 8934848 T | 0.1231 | 6.20E-09 | chr:5:8937853 |
| 5 rs11743644  | 9000098 A | 0.1888 | 6.32E-09 | chr:5:8937853 |
| 5 rs11954862  | 8949344 C | 0.13   | 9.33E-09 | chr:5:8937853 |
| 5 rs6873594   | 8930306 A | 0.13   | 9.33E-09 | chr:5:8937853 |
| 5 rs1947584   | 8980099 C | 0.1394 | 1.56E-08 | chr:5:8937853 |
| 5 rs75014751  | 8965335 C | 0.1394 | 1.56E-08 | chr:5:8937853 |
| 5 rs79740539  | 8969856 C | 0.1394 | 1.56E-08 | chr:5:8937853 |
| 5 rs6889183   | 8968532 A | 0.1387 | 1.98E-08 | chr:5:8937853 |
| 5 rs75281373  | 8964076 A | 0.1387 | 1.98E-08 | chr:5:8937853 |
| 5 rs116066804 | 8918507 G | 0.1032 | 5.92E-08 | chr:5:8937853 |
| 5 rs76897293  | 8923448 A | 0.1598 | 1.09E-07 | chr:5:8937853 |
| 5 rs577492066 | 8948517 T | 0.1536 | 1.35E-07 | chr:5:8937853 |
| 5 rs77025081  | 8892865 A | 0.1682 | 1.82E-07 | chr:5:8937853 |



|               |           |        |          |               |
|---------------|-----------|--------|----------|---------------|
| 5 rs2100642   | 9014917 C | 0.2759 | 3.92E-07 | chr:5:8937853 |
| 5 rs2962705   | 8997304 C | 0.2763 | 4.27E-07 | chr:5:8937853 |
| 5 rs2925910   | 8992745 A | 0.2831 | 5.08E-07 | chr:5:8937853 |
| 5 rs1505067   | 9036790 C | 0.2753 | 5.18E-07 | chr:5:8937853 |
| 5 rs2925908   | 8991487 T | 0.277  | 5.22E-07 | chr:5:8937853 |
| 5 rs2925909   | 8992098 C | 0.277  | 5.22E-07 | chr:5:8937853 |
| 5 rs2962707   | 8990084 G | 0.277  | 5.22E-07 | chr:5:8937853 |
| 5 rs2085514   | 9001414 A | 0.2678 | 5.91E-07 | chr:5:8937853 |
| 5 rs10037735  | 9004192 C | 0.2865 | 6.03E-07 | chr:5:8937853 |
| 5 rs2962702   | 9025608 A | 0.2865 | 6.03E-07 | chr:5:8937853 |
| 5 rs2925902   | 8982517 T | 0.2862 | 6.28E-07 | chr:5:8937853 |
| 5 rs2925903   | 8983680 C | 0.2784 | 6.87E-07 | chr:5:8937853 |
| 5 rs2925905   | 8985794 T | 0.2784 | 6.87E-07 | chr:5:8937853 |
| 5 rs12188723  | 8952085 C | 0.1817 | 1.11E-06 | chr:5:8937853 |
| 5 rs75949059  | 8948201 T | 0.1817 | 1.11E-06 | chr:5:8937853 |
| 5 rs2962701   | 9025032 T | 0.3076 | 1.25E-06 | chr:5:8937853 |
| 5 rs72739858  | 8983300 A | 0.292  | 1.27E-06 | chr:5:8937853 |
| 5 rs2100641   | 9014968 A | 0.2685 | 1.49E-06 | chr:5:8937853 |
| 5 rs1379566   | 9019532 A | 0.3111 | 1.78E-06 | chr:5:8937853 |
| 5 rs16881715  | 8960556 G | 0.2121 | 1.86E-06 | chr:5:8937853 |
| 5 rs1379572   | 9014114 G | 0.3123 | 1.95E-06 | chr:5:8937853 |
| 5 rs1598826   | 9021310 T | 0.3123 | 1.95E-06 | chr:5:8937853 |
| 5 rs2925927   | 9031436 T | 0.3123 | 1.95E-06 | chr:5:8937853 |
| 5 rs7712539   | 8990300 A | 0.3127 | 2.23E-06 | chr:5:8937853 |
| 5 rs2198981   | 9028370 C | 0.3185 | 2.90E-06 | chr:5:8937853 |
| 5 rs2963351   | 8915179 T | 0.2115 | 3.32E-06 | chr:5:8937853 |
| 5 rs112032434 | 9014459 T | 0.1786 | 3.70E-06 | chr:5:8937853 |
| 5 rs113605265 | 9002446 A | 0.1786 | 3.70E-06 | chr:5:8937853 |
| 5 rs114501856 | 8991577 A | 0.1786 | 3.70E-06 | chr:5:8937853 |
| 5 rs12189367  | 8987361 A | 0.1786 | 3.70E-06 | chr:5:8937853 |
| 5 rs143959340 | 9002474 A | 0.1786 | 3.70E-06 | chr:5:8937853 |
| 5 rs1457768   | 9034674 G | 0.1786 | 3.70E-06 | chr:5:8937853 |
| 5 rs17235037  | 9013608 T | 0.1786 | 3.70E-06 | chr:5:8937853 |
| 5 rs74984858  | 8986951 C | 0.1786 | 3.70E-06 | chr:5:8937853 |
| 5 rs7709752   | 8990196 G | 0.1786 | 3.70E-06 | chr:5:8937853 |
| 5 rs77207173  | 8984484 A | 0.1786 | 3.70E-06 | chr:5:8937853 |
| 5 rs77213924  | 8984873 G | 0.1786 | 3.70E-06 | chr:5:8937853 |
| 5 rs77865922  | 9034181 C | 0.1786 | 3.70E-06 | chr:5:8937853 |
| 5 rs79101386  | 8996698 T | 0.1786 | 3.70E-06 | chr:5:8937853 |
| 5 rs12516982  | 9038951 T | 0.2183 | 3.95E-06 | chr:5:8937853 |
| 5 rs34968754  | 8959664 G | 0.199  | 4.05E-06 | chr:5:8937853 |
| 5 rs35592900  | 8942245 T | 0.199  | 4.05E-06 | chr:5:8937853 |
| 5 rs35817870  | 8939620 G | 0.199  | 4.05E-06 | chr:5:8937853 |

|               |           |        |          |               |
|---------------|-----------|--------|----------|---------------|
| 5 rs4583857   | 8941558 G | 0.199  | 4.05E-06 | chr:5:8937853 |
| 5 rs77781846  | 8941171 G | 0.199  | 4.05E-06 | chr:5:8937853 |
| 5 rs76397895  | 9058287 A | 0.2339 | 5.12E-06 | chr:5:8937853 |
| 5 rs2925923   | 9012388 T | 0.3041 | 5.21E-06 | chr:5:8937853 |
| 5 rs112110914 | 9006527 C | 0.3052 | 5.49E-06 | chr:5:8937853 |
| 5 rs12517597  | 9002094 C | 0.3052 | 5.49E-06 | chr:5:8937853 |
| 5 rs1379573   | 9013983 T | 0.3052 | 5.49E-06 | chr:5:8937853 |
| 5 rs1598825   | 9021566 C | 0.3052 | 5.49E-06 | chr:5:8937853 |
| 5 rs2085512   | 9014812 C | 0.3052 | 5.49E-06 | chr:5:8937853 |
| 5 rs2925919   | 9001913 G | 0.3052 | 5.49E-06 | chr:5:8937853 |
| 5 rs2925920   | 9004597 T | 0.3052 | 5.49E-06 | chr:5:8937853 |
| 5 rs2925921   | 9005353 T | 0.3052 | 5.49E-06 | chr:5:8937853 |
| 5 rs2925922   | 9010282 T | 0.3052 | 5.49E-06 | chr:5:8937853 |
| 5 rs2925924   | 9019816 C | 0.3052 | 5.49E-06 | chr:5:8937853 |
| 5 rs2925928   | 9032400 G | 0.3052 | 5.49E-06 | chr:5:8937853 |
| 5 rs2962718   | 9008955 G | 0.3052 | 5.49E-06 | chr:5:8937853 |
| 5 rs2962719   | 9009465 G | 0.3052 | 5.49E-06 | chr:5:8937853 |
| 5 rs2962720   | 9009675 C | 0.3052 | 5.49E-06 | chr:5:8937853 |
| 5 rs2962721   | 9010331 A | 0.3052 | 5.49E-06 | chr:5:8937853 |
| 5 rs4702602   | 9014396 G | 0.3052 | 5.49E-06 | chr:5:8937853 |
| 5 rs74980194  | 9003526 T | 0.3052 | 5.49E-06 | chr:5:8937853 |
| 5 rs78490007  | 9003525 G | 0.3052 | 5.49E-06 | chr:5:8937853 |
| 5 rs79211599  | 9003402 A | 0.3052 | 5.49E-06 | chr:5:8937853 |
| 5 rs2962669   | 8919975 G | 2.995  | 6.20E-06 | chr:5:8937853 |
| 5 rs16881678  | 8920805 T | 0.2169 | 7.04E-06 | chr:5:8937853 |
| 5 rs113479415 | 9007713 C | 5.255  | 7.28E-06 | chr:5:8937853 |
| 5 rs2962675   | 8913429 C | 0.2242 | 7.46E-06 | chr:5:8937853 |
| 5 rs2962662   | 8923967 C | 2.937  | 8.12E-06 | chr:5:8937853 |
| 5 rs2962670   | 8918843 A | 2.937  | 8.12E-06 | chr:5:8937853 |
| 5 rs2963354   | 8918219 C | 2.937  | 8.12E-06 | chr:5:8937853 |
| 5 rs10041221  | 9004208 T | 0.3236 | 8.24E-06 | chr:5:8937853 |
| 5 rs11742324  | 9059996 G | 0.2413 | 8.52E-06 | chr:5:8937853 |
| 5 rs11745238  | 9059696 C | 0.2413 | 8.52E-06 | chr:5:8937853 |
| 5 rs1354570   | 9059223 G | 0.2413 | 8.52E-06 | chr:5:8937853 |
| 5 rs16881898  | 9058104 G | 0.2413 | 8.52E-06 | chr:5:8937853 |
| 5 rs2388004   | 8996618 C | 0.2214 | 9.27E-06 | chr:5:8937853 |
| 5 rs2388005   | 8996523 T | 0.2214 | 9.27E-06 | chr:5:8937853 |
| 5 rs2963340   | 8907028 G | 0.346  | 9.90E-06 | chr:5:8937853 |
| 5 rs116545555 | 8975424 C | 0.1896 | 9.93E-06 | chr:5:8937853 |
| 5 rs12521925  | 9068974 T | 0.2288 | 1.02E-05 | chr:5:8937853 |
| 5 rs16881875  | 9038043 A | 0.2288 | 1.02E-05 | chr:5:8937853 |
| 5 rs16881928  | 9078372 A | 0.2288 | 1.02E-05 | chr:5:8937853 |
| 5 rs75330064  | 9068818 A | 0.2288 | 1.02E-05 | chr:5:8937853 |

|   |             |           |   |         |          |                 |
|---|-------------|-----------|---|---------|----------|-----------------|
| 5 | rs1457773   | 8978530   | A | 0.2122  | 1.03E-05 | chr:5:8937853   |
| 5 | rs6883135   | 8944432   | T | 0.2122  | 1.03E-05 | chr:5:8937853   |
| 5 | rs71611355  | 8950617   | A | 0.2122  | 1.03E-05 | chr:5:8937853   |
| 5 | rs1379567   | 9016944   | C | 0.3158  | 1.09E-05 | chr:5:8937853   |
| 5 | rs1379568   | 9016763   | G | 0.3158  | 1.09E-05 | chr:5:8937853   |
| 5 | rs1379569   | 9016719   | C | 0.3158  | 1.09E-05 | chr:5:8937853   |
| 5 | rs1379570   | 9016694   | C | 0.3158  | 1.09E-05 | chr:5:8937853   |
| 5 | rs2962681   | 8904650   | T | 2.855   | 1.12E-05 | chr:5:8937853   |
| 5 | rs2962682   | 8904189   | T | 2.855   | 1.12E-05 | chr:5:8937853   |
| 5 | rs2962688   | 8898369   | C | 2.855   | 1.12E-05 | chr:5:8937853   |
| 5 | rs2962691   | 8892647   | T | 2.855   | 1.12E-05 | chr:5:8937853   |
| 5 | rs12520615  | 9074053   | A | 0.2283  | 1.23E-05 | chr:5:8937853   |
| 5 | rs140571419 | 9003153   | T | 0.2283  | 1.23E-05 | chr:5:8937853   |
| 5 | rs147259526 | 9005371   | T | 0.2283  | 1.23E-05 | chr:5:8937853   |
| 5 | rs1902809   | 9021827   | A | 0.2283  | 1.23E-05 | chr:5:8937853   |
| 5 | rs6871654   | 9002625   | T | 0.2283  | 1.23E-05 | chr:5:8937853   |
| 5 | rs78251142  | 9013906   | C | 0.2283  | 1.23E-05 | chr:5:8937853   |
| 5 | rs2963339   | 8906295   | C | 0.3516  | 1.25E-05 | chr:5:8937853   |
| 5 | rs2962664   | 8922521   | T | 2.833   | 1.29E-05 | chr:5:8937853   |
| 5 | rs2962666   | 8922072   | G | 2.833   | 1.29E-05 | chr:5:8937853   |
| 5 | rs2962674   | 8915589   | A | 2.833   | 1.29E-05 | chr:5:8937853   |
| 5 | rs2962676   | 8912731   | A | 2.833   | 1.29E-05 | chr:5:8937853   |
| 5 | rs2963343   | 8908896   | G | 2.833   | 1.29E-05 | chr:5:8937853   |
| 5 | rs2963352   | 8915809   | C | 2.833   | 1.29E-05 | chr:5:8937853   |
| 5 | rs2963353   | 8916950   | A | 2.833   | 1.29E-05 | chr:5:8937853   |
| 5 | rs76643870  | 9072905   | G | 0.2391  | 1.86E-05 | chr:5:8937853   |
| 5 | rs12658301  | 8927212   | C | 0.3574  | 1.89E-05 | chr:5:8937853   |
| 5 | rs2962683   | 8903736   | G | 0.3737  | 2.33E-05 | chr:5:8937853   |
| 5 | rs11134348  | 9073742   | A | 0.254   | 2.59E-05 | chr:5:8937853   |
| 5 | rs16881901  | 9062943   | A | 0.254   | 2.59E-05 | chr:5:8937853   |
| 5 | rs79769433  | 9058460   | T | 0.254   | 2.59E-05 | chr:5:8937853   |
| 5 | rs142852646 | 9076188   | A | 0.2638  | 3.10E-05 | chr:5:8937853   |
| 6 | rs5013438   | 161283051 | A | 0.0915  | 1.64E-12 | chr:6:161270898 |
| 6 | rs5013439   | 161283060 | G | 0.0915  | 1.64E-12 | chr:6:161270898 |
| 6 | rs5013440   | 161283064 | A | 0.0915  | 1.64E-12 | chr:6:161270898 |
| 6 | rs5013441   | 161283071 | A | 0.0915  | 1.64E-12 | chr:6:161270898 |
| 6 | rs62435319  | 161274589 | A | 0.0898  | 2.09E-12 | chr:6:161270898 |
| 6 | rs373446157 | 161274587 | A | 0.09047 | 2.24E-12 | chr:6:161270898 |
| 6 | rs146201099 | 161274582 | T | 0.09113 | 2.30E-12 | chr:6:161270898 |
| 6 | rs13208565  | 161268025 | A | 0.124   | 2.57E-12 | chr:6:161270898 |
| 6 | rs13208570  | 161268029 | A | 0.124   | 2.57E-12 | chr:6:161270898 |
| 6 | rs13208572  | 161268036 | A | 0.124   | 2.57E-12 | chr:6:161270898 |
| 6 | rs147841394 | 161263331 | A | 0.07123 | 3.08E-12 | chr:6:161270898 |

|               |             |         |          |                 |
|---------------|-------------|---------|----------|-----------------|
| 6 rs9347458   | 161277046 C | 0.0579  | 3.20E-12 | chr:6:161270898 |
| 6 rs76259860  | 161263334 G | 0.07124 | 3.23E-12 | chr:6:161270898 |
| 6 rs62435345  | 161283600 T | 0.07986 | 3.32E-12 | chr:6:161270898 |
| 6 rs2953494   | 161283178 G | 0.09349 | 3.36E-12 | chr:6:161270898 |
| 6 rs2997093   | 161283133 T | 0.09349 | 3.36E-12 | chr:6:161270898 |
| 6 rs2997094   | 161283135 T | 0.09349 | 3.36E-12 | chr:6:161270898 |
| 6 rs2953495   | 161283183 C | 0.08719 | 3.40E-12 | chr:6:161270898 |
| 6 rs2997095   | 161283204 A | 0.08719 | 3.40E-12 | chr:6:161270898 |
| 6 rs28544460  | 161271777 T | 0.05112 | 3.65E-12 | chr:6:161270898 |
| 6 rs28655734  | 161271783 T | 0.05112 | 3.65E-12 | chr:6:161270898 |
| 6 rs139452685 | 161263330 C | 0.07173 | 4.37E-12 | chr:6:161270898 |
| 6 rs2465859   | 161282713 C | 0.06298 | 5.29E-12 | chr:6:161270898 |
| 6 rs73604919  | 161277020 A | 0.05033 | 7.24E-12 | chr:6:161270898 |
| 6 rs2465857   | 161282500 C | 0.05513 | 8.35E-12 | chr:6:161270898 |
| 6 rs2489938   | 161282377 G | 0.05584 | 8.90E-12 | chr:6:161270898 |
| 6 rs9347453   | 161270866 C | 0.05499 | 8.98E-12 | chr:6:161270898 |
| 6 rs9347454   | 161270870 C | 0.05499 | 8.98E-12 | chr:6:161270898 |
| 6 rs59536962  | 161264131 A | 0.05152 | 9.22E-12 | chr:6:161270898 |
| 6 rs67368974  | 161264124 A | 0.05152 | 9.22E-12 | chr:6:161270898 |
| 6 rs9765937   | 161268118 C | 0.05241 | 9.71E-12 | chr:6:161270898 |
| 6 rs9766526   | 161268119 T | 0.05241 | 9.71E-12 | chr:6:161270898 |
| 6 rs7383738   | 161276047 A | 0.05631 | 1.01E-11 | chr:6:161270898 |
| 6 rs9346839   | 161255046 C | 0.05607 | 1.07E-11 | chr:6:161270898 |
| 6 rs67391812  | 161273234 T | 0.0562  | 1.14E-11 | chr:6:161270898 |
| 6 rs376433866 | 161274602 G | 0.04458 | 1.22E-11 | chr:6:161270898 |
| 6 rs144015366 | 161274617 A | 0.04558 | 1.23E-11 | chr:6:161270898 |
| 6 rs370624331 | 161274612 T | 0.04558 | 1.23E-11 | chr:6:161270898 |
| 6 rs538674856 | 161274614 T | 0.04558 | 1.23E-11 | chr:6:161270898 |
| 6 rs558873783 | 161274615 A | 0.04558 | 1.23E-11 | chr:6:161270898 |
| 6 rs573457182 | 161274613 G | 0.04558 | 1.23E-11 | chr:6:161270898 |
| 6 rs76926711  | 161270283 C | 0.04523 | 1.42E-11 | chr:6:161270898 |
| 6 rs60507137  | 161273066 A | 0.06737 | 1.65E-11 | chr:6:161270898 |
| 6 rs66542006  | 161273252 C | 0.06737 | 1.65E-11 | chr:6:161270898 |
| 6 rs1806449   | 161280932 G | 0.04596 | 1.68E-11 | chr:6:161270898 |
| 6 rs1892347   | 161281358 A | 0.04596 | 1.68E-11 | chr:6:161270898 |
| 6 rs1892348   | 161281390 T | 0.04596 | 1.68E-11 | chr:6:161270898 |
| 6 rs2243944   | 161280766 C | 0.04596 | 1.68E-11 | chr:6:161270898 |
| 6 rs2465850   | 161281175 T | 0.04596 | 1.68E-11 | chr:6:161270898 |
| 6 rs2489936   | 161280325 G | 0.04596 | 1.68E-11 | chr:6:161270898 |
| 6 rs9347450   | 161269890 A | 0.04672 | 1.75E-11 | chr:6:161270898 |
| 6 rs9365218   | 161269903 A | 0.04672 | 1.75E-11 | chr:6:161270898 |
| 6 rs1247541   | 161253485 T | 0.06865 | 1.82E-11 | chr:6:161270898 |
| 6 rs1629794   | 161246303 G | 0.06865 | 1.82E-11 | chr:6:161270898 |

|              |             |         |          |                 |
|--------------|-------------|---------|----------|-----------------|
| 6 rs1652463  | 161237204 C | 0.06865 | 1.82E-11 | chr:6:161270898 |
| 6 rs2565724  | 161241889 A | 0.06865 | 1.82E-11 | chr:6:161270898 |
| 6 rs2802357  | 161242350 T | 0.06865 | 1.82E-11 | chr:6:161270898 |
| 6 rs2802358  | 161243584 C | 0.06865 | 1.82E-11 | chr:6:161270898 |
| 6 rs73029748 | 161268408 C | 0.04654 | 1.83E-11 | chr:6:161270898 |
| 6 rs10945699 | 161266748 G | 0.04667 | 1.85E-11 | chr:6:161270898 |
| 6 rs10945700 | 161266764 T | 0.04667 | 1.85E-11 | chr:6:161270898 |
| 6 rs10945701 | 161266812 C | 0.04667 | 1.85E-11 | chr:6:161270898 |
| 6 rs10945702 | 161267174 A | 0.04667 | 1.85E-11 | chr:6:161270898 |
| 6 rs11753103 | 161267086 A | 0.04667 | 1.85E-11 | chr:6:161270898 |
| 6 rs11753537 | 161267022 T | 0.04667 | 1.85E-11 | chr:6:161270898 |
| 6 rs11753560 | 161267122 T | 0.04667 | 1.85E-11 | chr:6:161270898 |
| 6 rs11753819 | 161264775 G | 0.04667 | 1.85E-11 | chr:6:161270898 |
| 6 rs12153845 | 161273987 C | 0.04667 | 1.85E-11 | chr:6:161270898 |
| 6 rs12153973 | 161273891 T | 0.04667 | 1.85E-11 | chr:6:161270898 |
| 6 rs12173853 | 161266428 A | 0.04667 | 1.85E-11 | chr:6:161270898 |
| 6 rs12173859 | 161266513 A | 0.04667 | 1.85E-11 | chr:6:161270898 |
| 6 rs12176296 | 161266407 C | 0.04667 | 1.85E-11 | chr:6:161270898 |
| 6 rs12176297 | 161266417 C | 0.04667 | 1.85E-11 | chr:6:161270898 |
| 6 rs12189741 | 161263528 T | 0.04667 | 1.85E-11 | chr:6:161270898 |
| 6 rs12191314 | 161263721 T | 0.04667 | 1.85E-11 | chr:6:161270898 |
| 6 rs12194479 | 161263485 G | 0.04667 | 1.85E-11 | chr:6:161270898 |
| 6 rs12196112 | 161264064 G | 0.04667 | 1.85E-11 | chr:6:161270898 |
| 6 rs12196838 | 161272765 A | 0.04667 | 1.85E-11 | chr:6:161270898 |
| 6 rs12209829 | 161263938 C | 0.04667 | 1.85E-11 | chr:6:161270898 |
| 6 rs12215233 | 161263453 A | 0.04667 | 1.85E-11 | chr:6:161270898 |
| 6 rs13192981 | 161275824 T | 0.04667 | 1.85E-11 | chr:6:161270898 |
| 6 rs13200798 | 161275510 C | 0.04667 | 1.85E-11 | chr:6:161270898 |
| 6 rs13201433 | 161269959 C | 0.04667 | 1.85E-11 | chr:6:161270898 |
| 6 rs13203412 | 161275871 G | 0.04667 | 1.85E-11 | chr:6:161270898 |
| 6 rs13203427 | 161275892 G | 0.04667 | 1.85E-11 | chr:6:161270898 |
| 6 rs13216274 | 161275309 A | 0.04667 | 1.85E-11 | chr:6:161270898 |
| 6 rs13217026 | 161269951 A | 0.04667 | 1.85E-11 | chr:6:161270898 |
| 6 rs13219765 | 161275516 T | 0.04667 | 1.85E-11 | chr:6:161270898 |
| 6 rs2186128  | 161269751 T | 0.04667 | 1.85E-11 | chr:6:161270898 |
| 6 rs2465848  | 161280023 C | 0.04667 | 1.85E-11 | chr:6:161270898 |
| 6 rs2465849  | 161280167 C | 0.04667 | 1.85E-11 | chr:6:161270898 |
| 6 rs2465855  | 161270619 G | 0.04667 | 1.85E-11 | chr:6:161270898 |
| 6 rs2465856  | 161271369 C | 0.04667 | 1.85E-11 | chr:6:161270898 |
| 6 rs2465861  | 161261486 T | 0.04667 | 1.85E-11 | chr:6:161270898 |
| 6 rs2465862  | 161261198 G | 0.04667 | 1.85E-11 | chr:6:161270898 |
| 6 rs2465863  | 161260969 A | 0.04667 | 1.85E-11 | chr:6:161270898 |
| 6 rs2465864  | 161273785 G | 0.04667 | 1.85E-11 | chr:6:161270898 |

|              |             |         |          |                 |
|--------------|-------------|---------|----------|-----------------|
| 6 rs2465865  | 161273576 G | 0.04667 | 1.85E-11 | chr:6:161270898 |
| 6 rs2489930  | 161271311 G | 0.04667 | 1.85E-11 | chr:6:161270898 |
| 6 rs2489931  | 161273628 A | 0.04667 | 1.85E-11 | chr:6:161270898 |
| 6 rs2489932  | 161273637 C | 0.04667 | 1.85E-11 | chr:6:161270898 |
| 6 rs2489958  | 161261109 T | 0.04667 | 1.85E-11 | chr:6:161270898 |
| 6 rs2489960  | 161261315 C | 0.04667 | 1.85E-11 | chr:6:161270898 |
| 6 rs2489961  | 161261383 T | 0.04667 | 1.85E-11 | chr:6:161270898 |
| 6 rs2489965  | 161262607 C | 0.04667 | 1.85E-11 | chr:6:161270898 |
| 6 rs2489966  | 161262874 T | 0.04667 | 1.85E-11 | chr:6:161270898 |
| 6 rs2489968  | 161264408 G | 0.04667 | 1.85E-11 | chr:6:161270898 |
| 6 rs2489969  | 161264604 T | 0.04667 | 1.85E-11 | chr:6:161270898 |
| 6 rs28446193 | 161272078 A | 0.04667 | 1.85E-11 | chr:6:161270898 |
| 6 rs28448569 | 161271706 T | 0.04667 | 1.85E-11 | chr:6:161270898 |
| 6 rs28488549 | 161266035 A | 0.04667 | 1.85E-11 | chr:6:161270898 |
| 6 rs28533078 | 161268730 G | 0.04667 | 1.85E-11 | chr:6:161270898 |
| 6 rs28597670 | 161271643 C | 0.04667 | 1.85E-11 | chr:6:161270898 |
| 6 rs28670241 | 161268736 C | 0.04667 | 1.85E-11 | chr:6:161270898 |
| 6 rs28698869 | 161265892 C | 0.04667 | 1.85E-11 | chr:6:161270898 |
| 6 rs28711930 | 161272157 A | 0.04667 | 1.85E-11 | chr:6:161270898 |
| 6 rs28715036 | 161266045 G | 0.04667 | 1.85E-11 | chr:6:161270898 |
| 6 rs2997097  | 161263200 G | 0.04667 | 1.85E-11 | chr:6:161270898 |
| 6 rs55900705 | 161264920 G | 0.04667 | 1.85E-11 | chr:6:161270898 |
| 6 rs55968870 | 161264803 A | 0.04667 | 1.85E-11 | chr:6:161270898 |
| 6 rs56238146 | 161264866 G | 0.04667 | 1.85E-11 | chr:6:161270898 |
| 6 rs57127570 | 161272996 C | 0.04667 | 1.85E-11 | chr:6:161270898 |
| 6 rs59942091 | 161263402 A | 0.04667 | 1.85E-11 | chr:6:161270898 |
| 6 rs62435278 | 161265459 C | 0.04667 | 1.85E-11 | chr:6:161270898 |
| 6 rs62435280 | 161265620 C | 0.04667 | 1.85E-11 | chr:6:161270898 |
| 6 rs62435284 | 161268570 A | 0.04667 | 1.85E-11 | chr:6:161270898 |
| 6 rs66533808 | 161273302 C | 0.04667 | 1.85E-11 | chr:6:161270898 |
| 6 rs67136969 | 161273433 T | 0.04667 | 1.85E-11 | chr:6:161270898 |
| 6 rs67591610 | 161268474 C | 0.04667 | 1.85E-11 | chr:6:161270898 |
| 6 rs67721200 | 161265209 C | 0.04667 | 1.85E-11 | chr:6:161270898 |
| 6 rs67876803 | 161268321 G | 0.04667 | 1.85E-11 | chr:6:161270898 |
| 6 rs67998011 | 161273327 G | 0.04667 | 1.85E-11 | chr:6:161270898 |
| 6 rs68027339 | 161272813 G | 0.04667 | 1.85E-11 | chr:6:161270898 |
| 6 rs68142848 | 161273257 T | 0.04667 | 1.85E-11 | chr:6:161270898 |
| 6 rs7381442  | 161276215 T | 0.04667 | 1.85E-11 | chr:6:161270898 |
| 6 rs7381975  | 161275254 G | 0.04667 | 1.85E-11 | chr:6:161270898 |
| 6 rs7382318  | 161276128 G | 0.04667 | 1.85E-11 | chr:6:161270898 |
| 6 rs7382435  | 161276434 C | 0.04667 | 1.85E-11 | chr:6:161270898 |
| 6 rs7382456  | 161276583 C | 0.04667 | 1.85E-11 | chr:6:161270898 |
| 6 rs74199274 | 161274567 G | 0.04667 | 1.85E-11 | chr:6:161270898 |

|              |             |         |          |                 |
|--------------|-------------|---------|----------|-----------------|
| 6 rs9295132  | 161267909 G | 0.04667 | 1.85E-11 | chr:6:161270898 |
| 6 rs9347447  | 161269371 G | 0.04667 | 1.85E-11 | chr:6:161270898 |
| 6 rs9347448  | 161269737 C | 0.04667 | 1.85E-11 | chr:6:161270898 |
| 6 rs9347449  | 161269740 C | 0.04667 | 1.85E-11 | chr:6:161270898 |
| 6 rs9347451  | 161270100 T | 0.04667 | 1.85E-11 | chr:6:161270898 |
| 6 rs9347452  | 161270827 C | 0.04667 | 1.85E-11 | chr:6:161270898 |
| 6 rs9347455  | 161276752 C | 0.04667 | 1.85E-11 | chr:6:161270898 |
| 6 rs9347456  | 161276965 C | 0.04667 | 1.85E-11 | chr:6:161270898 |
| 6 rs9355320  | 161269256 A | 0.04667 | 1.85E-11 | chr:6:161270898 |
| 6 rs9355841  | 161267335 A | 0.04667 | 1.85E-11 | chr:6:161270898 |
| 6 rs9355842  | 161267442 C | 0.04667 | 1.85E-11 | chr:6:161270898 |
| 6 rs9355843  | 161268805 G | 0.04667 | 1.85E-11 | chr:6:161270898 |
| 6 rs9355844  | 161268967 T | 0.04667 | 1.85E-11 | chr:6:161270898 |
| 6 rs9355845  | 161269097 A | 0.04667 | 1.85E-11 | chr:6:161270898 |
| 6 rs9355846  | 161269204 C | 0.04667 | 1.85E-11 | chr:6:161270898 |
| 6 rs9365215  | 161268788 A | 0.04667 | 1.85E-11 | chr:6:161270898 |
| 6 rs9365216  | 161268818 G | 0.04667 | 1.85E-11 | chr:6:161270898 |
| 6 rs9365219  | 161270070 A | 0.04667 | 1.85E-11 | chr:6:161270898 |
| 6 rs9365221  | 161276676 G | 0.04667 | 1.85E-11 | chr:6:161270898 |
| 6 rs9456598  | 161272283 A | 0.04667 | 1.85E-11 | chr:6:161270898 |
| 6 rs9456599  | 161272401 A | 0.04667 | 1.85E-11 | chr:6:161270898 |
| 6 rs9458045  | 161262083 A | 0.04667 | 1.85E-11 | chr:6:161270898 |
| 6 rs9458046  | 161262133 G | 0.04667 | 1.85E-11 | chr:6:161270898 |
| 6 rs9458047  | 161262336 A | 0.04667 | 1.85E-11 | chr:6:161270898 |
| 6 rs9458048  | 161272317 A | 0.04667 | 1.85E-11 | chr:6:161270898 |
| 6 rs9765938  | 161268135 C | 0.04667 | 1.85E-11 | chr:6:161270898 |
| 6 rs9766397  | 161267843 A | 0.04667 | 1.85E-11 | chr:6:161270898 |
| 6 rs9766412  | 161268255 A | 0.04667 | 1.85E-11 | chr:6:161270898 |
| 6 rs9766533  | 161268200 T | 0.04667 | 1.85E-11 | chr:6:161270898 |
| 6 rs28594774 | 161271666 T | 0.04656 | 1.89E-11 | chr:6:161270898 |
| 6 rs3949208  | 161269749 T | 0.04668 | 1.91E-11 | chr:6:161270898 |
| 6 rs9365217  | 161269849 T | 0.04709 | 1.92E-11 | chr:6:161270898 |
| 6 rs2489951  | 161259799 T | 0.04761 | 1.98E-11 | chr:6:161270898 |
| 6 rs13220254 | 161269958 T | 0.04674 | 2.05E-11 | chr:6:161270898 |
| 6 rs1652465  | 161248552 T | 0.07977 | 2.08E-11 | chr:6:161270898 |
| 6 rs1652466  | 161249569 T | 0.07977 | 2.08E-11 | chr:6:161270898 |
| 6 rs1782632  | 161249412 A | 0.07977 | 2.08E-11 | chr:6:161270898 |
| 6 rs2565725  | 161244359 A | 0.07977 | 2.08E-11 | chr:6:161270898 |
| 6 rs2802356  | 161238215 G | 0.07977 | 2.08E-11 | chr:6:161270898 |
| 6 rs7383363  | 161274962 A | 0.04743 | 2.09E-11 | chr:6:161270898 |
| 6 rs62435277 | 161265332 C | 0.04826 | 2.09E-11 | chr:6:161270898 |
| 6 rs2489949  | 161259718 T | 0.0482  | 2.14E-11 | chr:6:161270898 |
| 6 rs58508475 | 161279395 A | 0.08762 | 2.35E-11 | chr:6:161270898 |

|              |             |         |          |                 |
|--------------|-------------|---------|----------|-----------------|
| 6 rs66940842 | 161265190 C | 0.04839 | 2.50E-11 | chr:6:161270898 |
| 6 rs1652471  | 161254403 T | 0.05836 | 2.51E-11 | chr:6:161270898 |
| 6 rs1937479  | 161255544 C | 0.05836 | 2.51E-11 | chr:6:161270898 |
| 6 rs2465846  | 161258027 C | 0.05836 | 2.51E-11 | chr:6:161270898 |
| 6 rs2489942  | 161257961 G | 0.05836 | 2.51E-11 | chr:6:161270898 |
| 6 rs2489948  | 161259549 G | 0.05836 | 2.51E-11 | chr:6:161270898 |
| 6 rs66561051 | 161265144 C | 0.04902 | 2.76E-11 | chr:6:161270898 |
| 6 rs67613705 | 161265155 T | 0.04902 | 2.76E-11 | chr:6:161270898 |
| 6 rs2953496  | 161263032 A | 0.04816 | 3.38E-11 | chr:6:161270898 |
| 6 rs783153   | 161229578 T | 0.09799 | 3.69E-11 | chr:6:161270898 |
| 6 rs783156   | 161231177 T | 0.09799 | 3.69E-11 | chr:6:161270898 |
| 6 rs2465866  | 161273489 G | 0.05467 | 3.82E-11 | chr:6:161270898 |
| 6 rs1740448  | 161230370 T | 0.07282 | 3.94E-11 | chr:6:161270898 |
| 6 rs783154   | 161229780 G | 0.07282 | 3.94E-11 | chr:6:161270898 |
| 6 rs62435318 | 161274301 C | 0.05069 | 5.23E-11 | chr:6:161270898 |
| 6 rs1782618  | 161230368 A | 0.07817 | 1.12E-10 | chr:6:161270898 |
| 6 rs812482   | 161227652 G | 0.07817 | 1.12E-10 | chr:6:161270898 |
| 6 rs73603096 | 161272870 C | 11.12   | 1.22E-10 | chr:6:161270898 |
| 6 rs2565721  | 161235098 A | 0.09038 | 1.44E-10 | chr:6:161270898 |
| 6 rs1406890  | 161187335 C | 0.1012  | 1.62E-10 | chr:6:161270898 |
| 6 rs1406891  | 161187080 T | 0.1012  | 1.62E-10 | chr:6:161270898 |
| 6 rs1652482  | 161197885 G | 0.1035  | 1.92E-10 | chr:6:161270898 |
| 6 rs9456600  | 161272696 T | 0.05431 | 2.24E-10 | chr:6:161270898 |
| 6 rs1937484  | 161286950 T | 0.121   | 2.24E-10 | chr:6:161270898 |
| 6 rs1247555  | 161189018 A | 0.1019  | 2.28E-10 | chr:6:161270898 |
| 6 rs1937487  | 161284779 T | 0.1424  | 4.18E-10 | chr:6:161270898 |
| 6 rs62436729 | 161210806 T | 0.08612 | 4.57E-10 | chr:6:161270898 |
| 6 rs1652502  | 161194542 C | 0.1321  | 4.93E-10 | chr:6:161270898 |
| 6 rs1247556  | 161189595 G | 0.1315  | 5.07E-10 | chr:6:161270898 |
| 6 rs1247558  | 161190199 A | 0.1315  | 5.07E-10 | chr:6:161270898 |
| 6 rs1247557  | 161189670 A | 0.1321  | 5.14E-10 | chr:6:161270898 |
| 6 rs1740432  | 161210470 A | 0.09843 | 5.53E-10 | chr:6:161270898 |
| 6 rs1937485  | 161284895 A | 0.1508  | 5.69E-10 | chr:6:161270898 |
| 6 rs1247553  | 161188103 A | 0.1059  | 5.94E-10 | chr:6:161270898 |
| 6 rs28515783 | 161268702 C | 0.1621  | 6.05E-10 | chr:6:161270898 |
| 6 rs1652455  | 161210349 C | 0.09835 | 6.06E-10 | chr:6:161270898 |
| 6 rs1247570  | 161208957 T | 0.09866 | 6.26E-10 | chr:6:161270898 |
| 6 rs2255792  | 161284473 C | 0.1485  | 6.45E-10 | chr:6:161270898 |
| 6 rs59754710 | 161187850 C | 0.1171  | 6.69E-10 | chr:6:161270898 |
| 6 rs1937486  | 161284845 G | 0.1552  | 7.58E-10 | chr:6:161270898 |
| 6 rs6690     | 161174138 A | 0.1402  | 7.63E-10 | chr:6:161270898 |
| 6 rs783168   | 161174594 A | 0.1402  | 7.63E-10 | chr:6:161270898 |
| 6 rs783171   | 161173610 A | 0.1402  | 7.63E-10 | chr:6:161270898 |



|               |             |         |          |                 |
|---------------|-------------|---------|----------|-----------------|
| 6 rs783169    | 161174579 T | 0.1402  | 7.67E-10 | chr:6:161270898 |
| 6 rs1782624   | 161290595 G | 0.1479  | 7.74E-10 | chr:6:161270898 |
| 6 rs1782625   | 161290812 T | 0.1479  | 7.74E-10 | chr:6:161270898 |
| 6 rs2489943   | 161288640 C | 0.1479  | 7.74E-10 | chr:6:161270898 |
| 6 rs2953492   | 161289895 G | 0.1479  | 7.74E-10 | chr:6:161270898 |
| 6 rs765351    | 161252685 C | 0.1728  | 8.48E-10 | chr:6:161270898 |
| 6 rs2953493   | 161291617 C | 0.1485  | 8.92E-10 | chr:6:161270898 |
| 6 rs783173    | 161172942 C | 0.1441  | 8.94E-10 | chr:6:161270898 |
| 6 rs1615527   | 161211095 G | 0.08913 | 1.02E-09 | chr:6:161270898 |
| 6 rs1621801   | 161196966 A | 0.1227  | 1.10E-09 | chr:6:161270898 |
| 6 rs2465868   | 161287333 C | 0.1521  | 1.14E-09 | chr:6:161270898 |
| 6 rs1614840   | 161197845 A | 0.1228  | 1.17E-09 | chr:6:161270898 |
| 6 rs1620921   | 161197087 A | 0.1228  | 1.17E-09 | chr:6:161270898 |
| 6 rs1740442   | 161197558 T | 0.1228  | 1.17E-09 | chr:6:161270898 |
| 6 rs1740443   | 161197042 T | 0.1228  | 1.17E-09 | chr:6:161270898 |
| 6 rs783145    | 161152449 G | 0.1264  | 1.32E-09 | chr:6:161270898 |
| 6 rs1084655   | 161181923 C | 0.1543  | 1.43E-09 | chr:6:161270898 |
| 6 rs1084658   | 161180477 G | 0.1543  | 1.43E-09 | chr:6:161270898 |
| 6 rs1247551   | 161187517 T | 0.1543  | 1.43E-09 | chr:6:161270898 |
| 6 rs1247552   | 161187744 G | 0.1543  | 1.43E-09 | chr:6:161270898 |
| 6 rs783159    | 161185325 G | 0.1543  | 1.43E-09 | chr:6:161270898 |
| 6 rs783162    | 161182954 A | 0.1543  | 1.43E-09 | chr:6:161270898 |
| 6 rs783165    | 161177842 A | 0.1543  | 1.43E-09 | chr:6:161270898 |
| 6 rs11902     | 161174871 C | 0.1544  | 1.47E-09 | chr:6:161270898 |
| 6 rs783174    | 161171919 C | 0.1544  | 1.47E-09 | chr:6:161270898 |
| 6 rs783177    | 161169815 C | 0.1567  | 1.51E-09 | chr:6:161270898 |
| 6 rs783178    | 161169739 C | 0.1567  | 1.51E-09 | chr:6:161270898 |
| 6 rs9346838   | 161247649 G | 0.187   | 1.92E-09 | chr:6:161270898 |
| 6 rs11060     | 161173946 T | 0.1531  | 2.06E-09 | chr:6:161270898 |
| 6 rs1652454   | 161210256 G | 0.1301  | 2.32E-09 | chr:6:161270898 |
| 6 rs1084654   | 161182100 G | 0.1689  | 2.49E-09 | chr:6:161270898 |
| 6 rs144320744 | 161265076 T | 7.531   | 2.63E-09 | chr:6:161270898 |
| 6 rs75664940  | 161265073 C | 7.531   | 2.63E-09 | chr:6:161270898 |
| 6 rs76731838  | 161265072 T | 7.531   | 2.63E-09 | chr:6:161270898 |
| 6 rs6908103   | 161274560 T | 8.933   | 3.07E-09 | chr:6:161270898 |
| 6 rs783180    | 161168961 G | 0.1708  | 3.13E-09 | chr:6:161270898 |
| 6 rs783182    | 161168548 G | 0.1708  | 3.13E-09 | chr:6:161270898 |
| 6 rs1740446   | 161194278 C | 0.1575  | 3.21E-09 | chr:6:161270898 |
| 6 rs2997096   | 161298263 T | 0.1571  | 3.68E-09 | chr:6:161270898 |
| 6 rs2465860   | 161261813 C | 0.2543  | 5.14E-09 | chr:6:161270898 |
| 6 rs1247514   | 161283586 C | 0.1482  | 5.52E-09 | chr:6:161270898 |
| 6 rs200406291 | 161261860 A | 0.2554  | 6.79E-09 | chr:6:161270898 |
| 6 rs9456596   | 161261870 T | 0.2554  | 6.79E-09 | chr:6:161270898 |

|               |             |        |          |                 |
|---------------|-------------|--------|----------|-----------------|
| 6 rs9347445   | 161257418 A | 0.189  | 8.69E-09 | chr:6:161270898 |
| 6 rs9355840   | 161251350 G | 0.189  | 8.69E-09 | chr:6:161270898 |
| 6 rs4708894   | 161243370 T | 0.1889 | 9.01E-09 | chr:6:161270898 |
| 6 rs783163    | 161182401 A | 0.1118 | 1.02E-08 | chr:6:161270898 |
| 6 rs10945698  | 161237551 A | 0.1932 | 1.04E-08 | chr:6:161270898 |
| 6 rs202074609 | 161261844 A | 0.2675 | 1.12E-08 | chr:6:161270898 |
| 6 rs9456593   | 161261833 C | 0.2675 | 1.12E-08 | chr:6:161270898 |
| 6 rs9456594   | 161261839 T | 0.2675 | 1.12E-08 | chr:6:161270898 |
| 6 rs9456595   | 161261845 C | 0.2675 | 1.12E-08 | chr:6:161270898 |
| 6 rs201418433 | 161261865 T | 0.2593 | 1.17E-08 | chr:6:161270898 |
| 6 rs13218423  | 161267283 G | 0.1878 | 1.22E-08 | chr:6:161270898 |
| 6 rs36162229  | 161265356 G | 0.1878 | 1.22E-08 | chr:6:161270898 |
| 6 rs56055227  | 161264940 C | 0.1878 | 1.22E-08 | chr:6:161270898 |
| 6 rs66514671  | 161268507 C | 0.1878 | 1.22E-08 | chr:6:161270898 |
| 6 rs66746245  | 161270505 A | 0.1878 | 1.22E-08 | chr:6:161270898 |
| 6 rs9365214   | 161267556 G | 0.1878 | 1.22E-08 | chr:6:161270898 |
| 6 rs9365222   | 161276870 A | 0.1878 | 1.22E-08 | chr:6:161270898 |
| 6 rs75211522  | 161266022 G | 6.548  | 1.25E-08 | chr:6:161270898 |
| 6 rs6925542   | 161241864 G | 0.197  | 1.27E-08 | chr:6:161270898 |
| 6 rs9355847   | 161276847 A | 0.1874 | 1.31E-08 | chr:6:161270898 |
| 6 rs10945703  | 161279258 G | 0.2324 | 1.41E-08 | chr:6:161270898 |
| 6 rs59450759  | 161279302 A | 0.2324 | 1.41E-08 | chr:6:161270898 |
| 6 rs12190057  | 161264201 A | 0.1893 | 1.42E-08 | chr:6:161270898 |
| 6 rs12195948  | 161263790 G | 0.1893 | 1.42E-08 | chr:6:161270898 |
| 6 rs66507368  | 161271537 C | 0.1893 | 1.42E-08 | chr:6:161270898 |
| 6 rs71551165  | 161263039 T | 0.1893 | 1.42E-08 | chr:6:161270898 |
| 6 rs13219777  | 161275735 A | 0.1893 | 1.48E-08 | chr:6:161270898 |
| 6 rs45475797  | 161237891 A | 0.1635 | 1.68E-08 | chr:6:161270898 |
| 6 rs62436736  | 161244838 C | 0.1635 | 1.68E-08 | chr:6:161270898 |
| 6 rs9347462   | 161279599 G | 0.2307 | 1.81E-08 | chr:6:161270898 |
| 6 rs73029749  | 161268411 T | 0.1648 | 2.00E-08 | chr:6:161270898 |
| 6 rs13206496  | 161279478 T | 0.2283 | 2.04E-08 | chr:6:161270898 |
| 6 rs45485198  | 161237998 C | 0.1634 | 2.10E-08 | chr:6:161270898 |
| 6 rs9347463   | 161279690 C | 0.2353 | 2.13E-08 | chr:6:161270898 |
| 6 rs9365226   | 161279734 A | 0.2353 | 2.13E-08 | chr:6:161270898 |
| 6 rs9365224   | 161279539 G | 0.2365 | 2.75E-08 | chr:6:161270898 |
| 6 rs6926947   | 161272676 T | 0.1671 | 2.85E-08 | chr:6:161270898 |
| 6 rs112898058 | 161274433 A | 6.619  | 4.96E-08 | chr:6:161270898 |
| 6 rs1835345   | 161240330 A | 0.2222 | 5.02E-08 | chr:6:161270898 |
| 6 rs34052962  | 161283211 C | 0.2122 | 5.50E-08 | chr:6:161270898 |
| 6 rs377289957 | 161277231 C | 6.217  | 5.83E-08 | chr:6:161270898 |
| 6 rs114581531 | 161237090 C | 0.228  | 5.94E-08 | chr:6:161270898 |
| 6 rs115032617 | 161237091 C | 0.228  | 5.94E-08 | chr:6:161270898 |

|               |             |        |          |                 |
|---------------|-------------|--------|----------|-----------------|
| 6 rs143687018 | 161237088 A | 0.228  | 5.94E-08 | chr:6:161270898 |
| 6 rs370751318 | 161237096 A | 0.228  | 5.94E-08 | chr:6:161270898 |
| 6 rs373974575 | 161237097 C | 0.228  | 5.94E-08 | chr:6:161270898 |
| 6 rs376125603 | 161237094 A | 0.228  | 5.94E-08 | chr:6:161270898 |
| 6 rs9456588   | 161212564 C | 0.2174 | 6.83E-08 | chr:6:161270898 |
| 6 rs12194271  | 161195895 A | 0.2228 | 7.65E-08 | chr:6:161270898 |
| 6 rs12214168  | 161195801 C | 0.2228 | 7.65E-08 | chr:6:161270898 |
| 6 rs12214254  | 161195932 C | 0.2228 | 7.65E-08 | chr:6:161270898 |
| 6 rs1344730   | 161204995 G | 0.2228 | 7.65E-08 | chr:6:161270898 |
| 6 rs2144727   | 161194814 T | 0.2228 | 7.65E-08 | chr:6:161270898 |
| 6 rs9689560   | 161279081 T | 0.2635 | 8.08E-08 | chr:6:161270898 |
| 6 rs9458040   | 161232224 T | 0.2172 | 9.46E-08 | chr:6:161270898 |
| 6 rs2024839   | 161233418 G | 0.2172 | 9.59E-08 | chr:6:161270898 |
| 6 rs13202192  | 161233181 C | 0.2171 | 9.60E-08 | chr:6:161270898 |
| 6 rs115067610 | 161274512 T | 6.328  | 1.05E-07 | chr:6:161270898 |
| 6 rs74200112  | 161274513 C | 6.328  | 1.05E-07 | chr:6:161270898 |
| 6 rs1358755   | 161213427 T | 0.2272 | 1.06E-07 | chr:6:161270898 |
| 6 rs9456589   | 161212704 G | 0.2272 | 1.06E-07 | chr:6:161270898 |
| 6 rs1853020   | 161221417 C | 0.224  | 1.09E-07 | chr:6:161270898 |
| 6 rs9456592   | 161231592 C | 0.2172 | 1.26E-07 | chr:6:161270898 |
| 6 rs4440440   | 161183424 A | 0.2315 | 1.39E-07 | chr:6:161270898 |
| 6 rs7450979   | 161186889 G | 0.2315 | 1.39E-07 | chr:6:161270898 |
| 6 rs9458023   | 161176256 C | 0.2315 | 1.39E-07 | chr:6:161270898 |
| 6 rs1247520   | 161312344 T | 0.2223 | 1.42E-07 | chr:6:161270898 |
| 6 rs1261931   | 161311849 T | 0.2223 | 1.42E-07 | chr:6:161270898 |
| 6 rs4709473   | 161278938 T | 0.2701 | 1.47E-07 | chr:6:161270898 |
| 6 rs9689453   | 161278910 A | 0.2701 | 1.47E-07 | chr:6:161270898 |
| 6 rs1247519   | 161303720 A | 0.223  | 1.56E-07 | chr:6:161270898 |
| 6 rs4252165   | 161161559 A | 0.2071 | 1.59E-07 | chr:6:161270898 |
| 6 rs1084659   | 161163777 A | 0.2447 | 1.88E-07 | chr:6:161270898 |
| 6 rs4708886   | 161206350 G | 0.2235 | 2.45E-07 | chr:6:161270898 |
| 6 rs62436701  | 161194298 T | 0.1992 | 2.53E-07 | chr:6:161270898 |
| 6 rs62436702  | 161196562 C | 0.1992 | 2.53E-07 | chr:6:161270898 |
| 6 rs12191929  | 161234926 A | 0.2353 | 2.55E-07 | chr:6:161270898 |
| 6 rs1853022   | 161213636 T | 0.2431 | 2.68E-07 | chr:6:161270898 |
| 6 rs4709470   | 161216023 G | 0.2431 | 2.68E-07 | chr:6:161270898 |
| 6 rs9456590   | 161215252 A | 0.2431 | 2.68E-07 | chr:6:161270898 |
| 6 rs9458041   | 161235710 C | 0.2348 | 2.70E-07 | chr:6:161270898 |
| 6 rs62436703  | 161198379 T | 0.2001 | 2.90E-07 | chr:6:161270898 |
| 6 rs62436704  | 161199736 T | 0.2001 | 2.90E-07 | chr:6:161270898 |
| 6 rs62436705  | 161200486 T | 0.2001 | 2.90E-07 | chr:6:161270898 |
| 6 rs3846778   | 161230801 C | 0.2011 | 2.99E-07 | chr:6:161270898 |
| 6 rs9458028   | 161209716 C | 0.2501 | 3.53E-07 | chr:6:161270898 |

|                          |             |         |          |                 |
|--------------------------|-------------|---------|----------|-----------------|
| 6 rs9458029              | 161209717 A | 0.2501  | 3.53E-07 | chr:6:161270898 |
| 6 rs71551166;rs149448086 | 161266025 G | 0.03365 | 3.57E-07 | chr:6:161270898 |
| 6 rs9458036              | 161213047 T | 0.2506  | 3.74E-07 | chr:6:161270898 |
| 6 rs4252181              | 161175004 T | 0.2103  | 3.88E-07 | chr:6:161270898 |
| 6 rs56262039             | 161183455 A | 0.2103  | 3.88E-07 | chr:6:161270898 |
| 6 rs9456580              | 161185380 T | 0.2103  | 3.88E-07 | chr:6:161270898 |
| 6 rs9458022              | 161171682 A | 0.2103  | 3.88E-07 | chr:6:161270898 |
| 6 rs9458030              | 161209985 G | 0.256   | 4.40E-07 | chr:6:161270898 |
| 6 rs4708892              | 161209101 T | 0.258   | 4.92E-07 | chr:6:161270898 |
| 6 rs4708893              | 161209245 A | 0.258   | 4.92E-07 | chr:6:161270898 |
| 6 rs13206066             | 161167452 G | 4.06    | 5.29E-07 | chr:6:161270898 |
| 6 rs7454268              | 161166502 T | 4.06    | 5.29E-07 | chr:6:161270898 |
| 6 rs13203571             | 161208765 A | 0.2587  | 5.93E-07 | chr:6:161270898 |
| 6 rs4708889              | 161208868 A | 0.2587  | 5.93E-07 | chr:6:161270898 |
| 6 rs4708891              | 161209020 A | 0.2587  | 5.93E-07 | chr:6:161270898 |
| 6 rs9885597              | 161227692 A | 4.055   | 6.46E-07 | chr:6:161270898 |
| 6 rs60198722             | 161181980 A | 0.2193  | 6.49E-07 | chr:6:161270898 |
| 6 rs9458032              | 161210205 G | 0.266   | 6.78E-07 | chr:6:161270898 |
| 6 rs4252135              | 161154232 T | 0.226   | 7.51E-07 | chr:6:161270898 |
| 6 rs9458039              | 161225730 T | 3.995   | 7.96E-07 | chr:6:161270898 |
| 6 rs4252066              | 161127125 A | 0.2317  | 8.02E-07 | chr:6:161270898 |
| 6 rs34145009             | 161208656 C | 0.2604  | 8.58E-07 | chr:6:161270898 |
| 6 rs9456585              | 161207448 G | 0.269   | 8.90E-07 | chr:6:161270898 |
| 6 rs11756055             | 161210622 C | 0.2679  | 8.94E-07 | chr:6:161270898 |
| 6 rs11758404             | 161210455 A | 0.2679  | 8.94E-07 | chr:6:161270898 |
| 6 rs28408689             | 161210522 C | 0.2679  | 8.94E-07 | chr:6:161270898 |
| 6 rs35332231             | 161210871 T | 0.2679  | 8.94E-07 | chr:6:161270898 |
| 6 rs66496533             | 161210741 T | 0.2679  | 8.94E-07 | chr:6:161270898 |
| 6 rs10455783             | 161208580 G | 0.2658  | 9.45E-07 | chr:6:161270898 |
| 6 rs10455784             | 161208584 C | 0.2658  | 9.45E-07 | chr:6:161270898 |
| 6 rs2115869              | 161207892 G | 0.2724  | 1.05E-06 | chr:6:161270898 |
| 6 rs2115870              | 161207992 A | 0.2724  | 1.05E-06 | chr:6:161270898 |
| 6 rs2115871              | 161208007 C | 0.2724  | 1.05E-06 | chr:6:161270898 |
| 6 rs9456586              | 161207643 G | 0.2724  | 1.05E-06 | chr:6:161270898 |
| 6 rs4709467              | 161203079 G | 0.2781  | 1.10E-06 | chr:6:161270898 |
| 6 rs9456587              | 161211226 T | 0.2759  | 1.11E-06 | chr:6:161270898 |
| 6 rs9458035              | 161211234 G | 0.2759  | 1.11E-06 | chr:6:161270898 |
| 6 rs4252096              | 161134273 G | 0.2322  | 1.14E-06 | chr:6:161270898 |
| 6 rs4252107              | 161137518 C | 0.2322  | 1.14E-06 | chr:6:161270898 |
| 6 rs62439804             | 161134805 C | 0.2322  | 1.14E-06 | chr:6:161270898 |
| 6 rs28402939             | 161168949 T | 0.2322  | 1.15E-06 | chr:6:161270898 |
| 6 rs9458031              | 161210119 G | 0.2752  | 1.23E-06 | chr:6:161270898 |
| 6 rs11756434             | 161201356 T | 0.2789  | 1.26E-06 | chr:6:161270898 |

|              |             |        |          |                 |
|--------------|-------------|--------|----------|-----------------|
| 6 rs11758027 | 161201112 G | 0.2789 | 1.26E-06 | chr:6:161270898 |
| 6 rs12526591 | 161204311 T | 0.2789 | 1.26E-06 | chr:6:161270898 |
| 6 rs13196302 | 161201783 A | 0.2789 | 1.26E-06 | chr:6:161270898 |
| 6 rs13196324 | 161201842 A | 0.2789 | 1.26E-06 | chr:6:161270898 |
| 6 rs13199812 | 161201960 T | 0.2789 | 1.26E-06 | chr:6:161270898 |
| 6 rs13216458 | 161204262 T | 0.2789 | 1.26E-06 | chr:6:161270898 |
| 6 rs1344729  | 161204841 C | 0.2789 | 1.26E-06 | chr:6:161270898 |
| 6 rs1344731  | 161205037 G | 0.2789 | 1.26E-06 | chr:6:161270898 |
| 6 rs1549741  | 161204783 G | 0.2789 | 1.26E-06 | chr:6:161270898 |
| 6 rs1965092  | 161204889 C | 0.2789 | 1.26E-06 | chr:6:161270898 |
| 6 rs1991598  | 161204488 G | 0.2789 | 1.26E-06 | chr:6:161270898 |
| 6 rs1991599  | 161204643 C | 0.2789 | 1.26E-06 | chr:6:161270898 |
| 6 rs34797199 | 161203769 C | 0.2789 | 1.26E-06 | chr:6:161270898 |
| 6 rs4708878  | 161203026 A | 0.2789 | 1.26E-06 | chr:6:161270898 |
| 6 rs4708882  | 161203182 C | 0.2789 | 1.26E-06 | chr:6:161270898 |
| 6 rs4708884  | 161206213 C | 0.2789 | 1.26E-06 | chr:6:161270898 |
| 6 rs4708885  | 161206349 A | 0.2789 | 1.26E-06 | chr:6:161270898 |
| 6 rs4708887  | 161206387 A | 0.2789 | 1.26E-06 | chr:6:161270898 |
| 6 rs4708888  | 161206490 A | 0.2789 | 1.26E-06 | chr:6:161270898 |
| 6 rs4709466  | 161202419 A | 0.2789 | 1.26E-06 | chr:6:161270898 |
| 6 rs4709469  | 161206484 G | 0.2789 | 1.26E-06 | chr:6:161270898 |
| 6 rs9458025  | 161203435 T | 0.2789 | 1.26E-06 | chr:6:161270898 |
| 6 rs9458026  | 161203466 C | 0.2789 | 1.26E-06 | chr:6:161270898 |
| 6 rs4252117  | 161143376 G | 0.2337 | 1.28E-06 | chr:6:161270898 |
| 6 rs4252126  | 161152294 G | 0.2337 | 1.28E-06 | chr:6:161270898 |
| 6 rs4252130  | 161153080 C | 0.2337 | 1.28E-06 | chr:6:161270898 |
| 6 rs4252134  | 161153527 C | 0.2337 | 1.28E-06 | chr:6:161270898 |
| 6 rs56093624 | 161156667 A | 0.2337 | 1.28E-06 | chr:6:161270898 |
| 6 rs9456578  | 161147368 T | 0.2337 | 1.28E-06 | chr:6:161270898 |
| 6 rs9458016  | 161144800 G | 0.2337 | 1.28E-06 | chr:6:161270898 |
| 6 rs9458019  | 161153561 C | 0.2337 | 1.28E-06 | chr:6:161270898 |
| 6 rs9458020  | 161156296 T | 0.2337 | 1.28E-06 | chr:6:161270898 |
| 6 rs12206847 | 161207395 T | 0.2808 | 1.48E-06 | chr:6:161270898 |
| 6 rs56387679 | 161154878 A | 0.2352 | 1.50E-06 | chr:6:161270898 |
| 6 rs4708880  | 161203148 G | 0.2838 | 1.51E-06 | chr:6:161270898 |
| 6 rs4708881  | 161203159 C | 0.2838 | 1.51E-06 | chr:6:161270898 |
| 6 rs4709468  | 161203142 T | 0.2838 | 1.51E-06 | chr:6:161270898 |
| 6 rs56376510 | 161203138 T | 0.2838 | 1.51E-06 | chr:6:161270898 |
| 6 rs1835344  | 161223773 A | 0.2753 | 1.55E-06 | chr:6:161270898 |
| 6 rs4252120  | 161143608 C | 0.2407 | 1.59E-06 | chr:6:161270898 |
| 6 rs4252125  | 161152240 A | 0.2407 | 1.59E-06 | chr:6:161270898 |
| 6 rs9458017  | 161150251 T | 0.2407 | 1.59E-06 | chr:6:161270898 |
| 6 rs14224    | 161137779 C | 4.773  | 1.99E-06 | chr:6:161270898 |

|               |             |        |          |                 |
|---------------|-------------|--------|----------|-----------------|
| 6 rs3778217   | 161139058 T | 4.773  | 1.99E-06 | chr:6:161270898 |
| 6 rs114592559 | 161259990 C | 4.542  | 2.19E-06 | chr:6:161270898 |
| 6 rs13206887  | 161201651 G | 0.2901 | 2.45E-06 | chr:6:161270898 |
| 6 rs1247513   | 161280379 T | 0.2131 | 2.68E-06 | chr:6:161270898 |
| 6 rs13231     | 161139857 G | 0.2555 | 2.94E-06 | chr:6:161270898 |
| 6 rs4252109   | 161137663 G | 0.2555 | 2.94E-06 | chr:6:161270898 |
| 6 rs1247565   | 161206910 A | 3.744  | 2.96E-06 | chr:6:161270898 |
| 6 rs1613037   | 161210911 G | 3.661  | 5.07E-06 | chr:6:161270898 |
| 6 rs783155    | 161229797 G | 0.2294 | 7.01E-06 | chr:6:161270898 |
| 6 rs1590185   | 161225303 T | 0.3019 | 8.27E-06 | chr:6:161270898 |
| 6 rs4252076   | 161128922 G | 0.291  | 9.61E-06 | chr:6:161270898 |
| 6 rs4252072   | 161128264 T | 0.2915 | 9.95E-06 | chr:6:161270898 |
| 6 rs13192114  | 161210258 G | 0.3281 | 1.13E-05 | chr:6:161270898 |
| 6 rs13192211  | 161210266 G | 0.3281 | 1.13E-05 | chr:6:161270898 |
| 6 rs1247515   | 161302267 A | 0.3269 | 1.56E-05 | chr:6:161270898 |
| 6 rs2465833   | 161302883 G | 0.3269 | 1.56E-05 | chr:6:161270898 |
| 6 rs1972748   | 161154717 C | 0.3136 | 1.75E-05 | chr:6:161270898 |
| 6 rs4708895   | 161309155 T | 0.3299 | 1.91E-05 | chr:6:161270898 |
| 6 rs10945684  | 161110273 T | 0.3188 | 1.98E-05 | chr:6:161270898 |
| 6 rs1130656   | 161139480 T | 4.212  | 2.21E-05 | chr:6:161270898 |
| 6 rs2295368   | 161139502 A | 4.212  | 2.21E-05 | chr:6:161270898 |
| 6 rs3757019   | 161135111 T | 4.212  | 2.21E-05 | chr:6:161270898 |
| 6 rs3798903   | 161133335 C | 4.212  | 2.21E-05 | chr:6:161270898 |
| 6 rs4252092   | 161133651 A | 4.212  | 2.21E-05 | chr:6:161270898 |
| 6 rs4252105   | 161136058 A | 4.212  | 2.21E-05 | chr:6:161270898 |
| 6 rs4709458   | 161141158 C | 4.212  | 2.21E-05 | chr:6:161270898 |
| 6 rs4252150   | 161159006 C | 0.3206 | 2.64E-05 | chr:6:161270898 |
| 6 rs4252151   | 161159016 G | 0.3206 | 2.64E-05 | chr:6:161270898 |
| 6 rs1247571   | 161218651 A | 0.2546 | 3.01E-05 | chr:6:161270898 |
| 6 rs1321201   | 161138181 C | 4.155  | 3.19E-05 | chr:6:161270898 |
| 6 rs34126283  | 161130002 A | 0.317  | 3.20E-05 | chr:6:161270898 |
| 6 rs568869869 | 32502799 G  | 7.688  | 1.17E-10 | chr:6:32505702  |
| 6 rs142393802 | 32508021 T  | 6.84   | 3.20E-10 | chr:6:32505702  |
| 6 rs534024500 | 32507307 G  | 6.078  | 3.23E-10 | chr:6:32505702  |
| 6 rs192164737 | 32508091 G  | 6.11   | 3.74E-10 | chr:6:32505702  |
| 6 rs532618689 | 32508064 T  | 6.11   | 3.74E-10 | chr:6:32505702  |
| 6 rs549780202 | 32508055 T  | 6.11   | 3.74E-10 | chr:6:32505702  |
| 6 rs564974789 | 32508061 A  | 6.11   | 3.74E-10 | chr:6:32505702  |
| 6 rs559903629 | 32510984 A  | 7.256  | 4.02E-10 | chr:6:32505702  |
| 6 rs74207695  | 32502631 C  | 6.598  | 4.05E-10 | chr:6:32505702  |
| 6 rs182987687 | 32506870 C  | 5.312  | 4.31E-10 | chr:6:32505702  |
| 6 rs188426982 | 32506878 A  | 5.312  | 4.31E-10 | chr:6:32505702  |
| 6 rs189968693 | 32506863 A  | 5.312  | 4.31E-10 | chr:6:32505702  |

|               |            |       |          |                |
|---------------|------------|-------|----------|----------------|
| 6 rs191423596 | 32506888 C | 5.312 | 4.31E-10 | chr:6:32505702 |
| 6 rs72508430  | 32487172 T | 18.69 | 4.97E-10 | chr:6:32505702 |
| 6 rs186217224 | 32457967 C | 7.207 | 5.43E-10 | chr:6:32505702 |
| 6 rs185520080 | 32505872 C | 5.136 | 5.63E-10 | chr:6:32505702 |
| 6 rs550051341 | 32505851 C | 5.136 | 5.63E-10 | chr:6:32505702 |
| 6 rs571586981 | 32505852 A | 5.136 | 5.63E-10 | chr:6:32505702 |
| 6 rs550643609 | 32502794 A | 6.454 | 6.91E-10 | chr:6:32505702 |
| 6 rs113133909 | 32457928 T | 6.535 | 6.98E-10 | chr:6:32505702 |
| 6 rs534859262 | 32457931 T | 6.535 | 6.98E-10 | chr:6:32505702 |
| 6 rs180756398 | 32458010 A | 7.244 | 6.99E-10 | chr:6:32505702 |
| 6 rs180942055 | 32507976 T | 5.694 | 7.06E-10 | chr:6:32505702 |
| 6 rs186170828 | 32507977 G | 5.694 | 7.06E-10 | chr:6:32505702 |
| 6 rs573629697 | 32507971 G | 5.694 | 7.06E-10 | chr:6:32505702 |
| 6 rs542536566 | 32457959 T | 6.548 | 7.19E-10 | chr:6:32505702 |
| 6 rs113051760 | 32521691 G | 18.82 | 8.26E-10 | chr:6:32505702 |
| 6 rs72851055  | 32502814 C | 7.818 | 8.40E-10 | chr:6:32505702 |
| 6 rs115711695 | 32495994 A | 5.427 | 8.87E-10 | chr:6:32505702 |
| 6 rs146436875 | 32498948 G | 5.345 | 9.10E-10 | chr:6:32505702 |
| 6 rs115081905 | 32508276 T | 6.175 | 9.44E-10 | chr:6:32505702 |
| 6 rs148879657 | 32498940 G | 5.343 | 9.87E-10 | chr:6:32505702 |
| 6 rs111705290 | 32513412 A | 15.4  | 1.04E-09 | chr:6:32505702 |
| 6 rs538174489 | 32508201 T | 5.509 | 1.04E-09 | chr:6:32505702 |
| 6 rs74715621  | 32508285 G | 6.199 | 1.06E-09 | chr:6:32505702 |
| 6 rs72844120  | 32514540 A | 18.04 | 1.07E-09 | chr:6:32505702 |
| 6 rs116017457 | 32521909 T | 19.02 | 1.10E-09 | chr:6:32505702 |
| 6 rs17424325  | 32521644 T | 18.14 | 1.16E-09 | chr:6:32505702 |
| 6 rs376217655 | 32505666 T | 5.361 | 1.17E-09 | chr:6:32505702 |
| 6 rs115104630 | 32502387 A | 7.993 | 1.18E-09 | chr:6:32505702 |
| 6 rs76415310  | 32513232 T | 17.59 | 1.19E-09 | chr:6:32505702 |
| 6 rs111938555 | 32509707 T | 17.97 | 1.19E-09 | chr:6:32505702 |
| 6 rs79638048  | 32519391 A | 17.94 | 1.21E-09 | chr:6:32505702 |
| 6 rs116132127 | 32503328 A | 8.44  | 1.26E-09 | chr:6:32505702 |
| 6 rs74202712  | 32502546 G | 9.351 | 1.26E-09 | chr:6:32505702 |
| 6 rs181244719 | 32498916 C | 5.3   | 1.26E-09 | chr:6:32505702 |
| 6 rs557288207 | 32504452 T | 9.551 | 1.26E-09 | chr:6:32505702 |
| 6 rs562045282 | 32502681 T | 4.82  | 1.29E-09 | chr:6:32505702 |
| 6 rs566710022 | 32507505 T | 7.199 | 1.30E-09 | chr:6:32505702 |
| 6 rs115878723 | 32503335 A | 7.473 | 1.30E-09 | chr:6:32505702 |
| 6 rs114302967 | 32503839 C | 8.991 | 1.30E-09 | chr:6:32505702 |
| 6 rs76054694  | 32503840 T | 8.991 | 1.30E-09 | chr:6:32505702 |
| 6 rs569509899 | 32507490 G | 6.57  | 1.32E-09 | chr:6:32505702 |
| 6 rs531982544 | 32503334 C | 7.48  | 1.32E-09 | chr:6:32505702 |
| 6 rs11757123  | 32520094 C | 20.83 | 1.32E-09 | chr:6:32505702 |

|               |            |       |          |                |
|---------------|------------|-------|----------|----------------|
| 6 rs116520213 | 32504424 T | 13.13 | 1.37E-09 | chr:6:32505702 |
| 6 rs546636941 | 32504421 T | 13.13 | 1.37E-09 | chr:6:32505702 |
| 6 rs74197584  | 32502717 T | 4.803 | 1.38E-09 | chr:6:32505702 |
| 6 rs113017160 | 32503834 G | 9.002 | 1.41E-09 | chr:6:32505702 |
| 6 rs547631481 | 32507531 A | 7.196 | 1.45E-09 | chr:6:32505702 |
| 6 rs536387398 | 32507125 A | 4.759 | 1.49E-09 | chr:6:32505702 |
| 6 rs573273966 | 32507131 C | 4.759 | 1.49E-09 | chr:6:32505702 |
| 6 rs115696138 | 32504460 C | 9.674 | 1.52E-09 | chr:6:32505702 |
| 6 rs76940575  | 32502590 C | 8.172 | 1.57E-09 | chr:6:32505702 |
| 6 rs74211571  | 32502566 T | 9.34  | 1.57E-09 | chr:6:32505702 |
| 6 rs116609655 | 32503059 C | 5.859 | 1.58E-09 | chr:6:32505702 |
| 6 rs535381236 | 32468870 G | 6.665 | 1.66E-09 | chr:6:32505702 |
| 6 rs559249402 | 32468864 C | 6.665 | 1.66E-09 | chr:6:32505702 |
| 6 rs577621741 | 32468866 A | 6.665 | 1.66E-09 | chr:6:32505702 |
| 6 rs544527733 | 32503091 T | 5.786 | 1.68E-09 | chr:6:32505702 |
| 6 rs535043779 | 32497358 A | 5.742 | 1.75E-09 | chr:6:32505702 |
| 6 rs552507937 | 32497354 A | 5.742 | 1.75E-09 | chr:6:32505702 |
| 6 rs570739482 | 32497356 C | 5.742 | 1.75E-09 | chr:6:32505702 |
| 6 rs199636459 | 32507758 A | 5.433 | 1.80E-09 | chr:6:32505702 |
| 6 rs540194362 | 32507768 G | 5.433 | 1.80E-09 | chr:6:32505702 |
| 6 rs73727912  | 32496944 C | 8.74  | 1.80E-09 | chr:6:32505702 |
| 6 rs72508465  | 32505141 T | 9.251 | 1.81E-09 | chr:6:32505702 |
| 6 rs544353633 | 32507596 G | 7.021 | 1.86E-09 | chr:6:32505702 |
| 6 rs72508466  | 32505166 G | 9.167 | 1.87E-09 | chr:6:32505702 |
| 6 rs540141541 | 32487480 G | 8.778 | 1.90E-09 | chr:6:32505702 |
| 6 rs183703563 | 32498913 A | 5.014 | 1.91E-09 | chr:6:32505702 |
| 6 rs529484704 | 32507478 C | 6.018 | 1.95E-09 | chr:6:32505702 |
| 6 rs181549666 | 32482352 A | 4.844 | 2.03E-09 | chr:6:32505702 |
| 6 rs150423066 | 32506995 A | 7.773 | 2.06E-09 | chr:6:32505702 |
| 6 rs374408836 | 32507582 C | 7.017 | 2.08E-09 | chr:6:32505702 |
| 6 rs72844188  | 32521427 C | 15.88 | 2.09E-09 | chr:6:32505702 |
| 6 rs113225456 | 32521406 T | 15.69 | 2.16E-09 | chr:6:32505702 |
| 6 rs72844187  | 32521419 G | 15.69 | 2.16E-09 | chr:6:32505702 |
| 6 rs116225018 | 32503380 C | 6.57  | 2.16E-09 | chr:6:32505702 |
| 6 rs74290599  | 32518785 T | 18.06 | 2.18E-09 | chr:6:32505702 |
| 6 rs67461697  | 32518767 C | 18.14 | 2.19E-09 | chr:6:32505702 |
| 6 rs532050307 | 32469431 C | 7.532 | 2.22E-09 | chr:6:32505702 |
| 6 rs571525080 | 32469429 A | 7.532 | 2.22E-09 | chr:6:32505702 |
| 6 rs199506689 | 32504701 T | 11.79 | 2.22E-09 | chr:6:32505702 |
| 6 rs11751146  | 32514899 T | 9.407 | 2.23E-09 | chr:6:32505702 |
| 6 rs200819822 | 32505189 G | 8.047 | 2.24E-09 | chr:6:32505702 |
| 6 rs73729138  | 32520854 G | 15.81 | 2.25E-09 | chr:6:32505702 |
| 6 rs116473597 | 32482374 T | 4.708 | 2.25E-09 | chr:6:32505702 |



|               |            |         |          |                |
|---------------|------------|---------|----------|----------------|
| 6 rs556568526 | 32482353 T | 4.708   | 2.25E-09 | chr:6:32505702 |
| 6 rs578020847 | 32482368 C | 4.708   | 2.25E-09 | chr:6:32505702 |
| 6 rs9270121   | 32555009 C | 21.34   | 2.26E-09 | chr:6:32505702 |
| 6 rs3828852   | 32520595 A | 13.17   | 2.27E-09 | chr:6:32505702 |
| 6 rs114084676 | 32505216 C | 8.111   | 2.29E-09 | chr:6:32505702 |
| 6 rs12665549  | 32517141 A | 17.05   | 2.32E-09 | chr:6:32505702 |
| 6 rs114961271 | 32503352 T | 6.573   | 2.35E-09 | chr:6:32505702 |
| 6 rs73727944  | 32504713 T | 11.95   | 2.41E-09 | chr:6:32505702 |
| 6 rs140538649 | 32507946 T | 4.956   | 2.48E-09 | chr:6:32505702 |
| 6 rs147668426 | 32507931 G | 4.956   | 2.48E-09 | chr:6:32505702 |
| 6 rs539226504 | 32507944 A | 4.956   | 2.48E-09 | chr:6:32505702 |
| 6 rs555706008 | 32507953 G | 4.956   | 2.48E-09 | chr:6:32505702 |
| 6 rs571430728 | 32507938 T | 4.956   | 2.48E-09 | chr:6:32505702 |
| 6 rs73727940  | 32503738 T | 7.955   | 2.48E-09 | chr:6:32505702 |
| 6 rs73727909  | 32496036 T | 5.089   | 2.49E-09 | chr:6:32505702 |
| 6 rs114327439 | 32505202 A | 8.094   | 2.50E-09 | chr:6:32505702 |
| 6 rs541499994 | 32510983 C | 6.139   | 2.53E-09 | chr:6:32505702 |
| 6 rs547409849 | 32503365 T | 6.567   | 2.60E-09 | chr:6:32505702 |
| 6 rs565770331 | 32503366 C | 6.567   | 2.60E-09 | chr:6:32505702 |
| 6 rs114629945 | 32503717 G | 6.4     | 2.62E-09 | chr:6:32505702 |
| 6 rs116103612 | 32503716 A | 6.4     | 2.62E-09 | chr:6:32505702 |
| 6 rs115010442 | 32505229 C | 8.128   | 2.68E-09 | chr:6:32505702 |
| 6 rs11752506  | 32520273 A | 15.73   | 2.68E-09 | chr:6:32505702 |
| 6 rs9269750   | 32548141 G | 20.25   | 2.74E-09 | chr:6:32505702 |
| 6 rs73727946  | 32504967 C | 6.094   | 2.76E-09 | chr:6:32505702 |
| 6 rs201954564 | 32497824 C | 0.05905 | 2.77E-09 | chr:6:32505702 |
| 6 rs116405199 | 32504367 T | 14.27   | 2.77E-09 | chr:6:32505702 |
| 6 rs72508464  | 32504341 T | 14.27   | 2.77E-09 | chr:6:32505702 |
| 6 rs78994392  | 32504362 T | 14.27   | 2.77E-09 | chr:6:32505702 |
| 6 rs9270047   | 32553697 C | 19.53   | 2.79E-09 | chr:6:32505702 |
| 6 rs113209512 | 32508875 T | 14.45   | 2.82E-09 | chr:6:32505702 |
| 6 rs67529500  | 32504757 C | 14.77   | 2.88E-09 | chr:6:32505702 |
| 6 rs3828848   | 32520665 C | 15.36   | 2.90E-09 | chr:6:32505702 |
| 6 rs73397416  | 32521951 C | 15.52   | 2.94E-09 | chr:6:32505702 |
| 6 rs116241189 | 32506751 A | 7.821   | 2.95E-09 | chr:6:32505702 |
| 6 rs72853911  | 32506759 G | 7.821   | 2.95E-09 | chr:6:32505702 |
| 6 rs72844171  | 32520749 C | 15.34   | 3.00E-09 | chr:6:32505702 |
| 6 rs112515515 | 32513422 T | 12.84   | 3.02E-09 | chr:6:32505702 |
| 6 rs76317804  | 32469375 T | 7.597   | 3.03E-09 | chr:6:32505702 |
| 6 rs72851044  | 32501886 A | 15.86   | 3.03E-09 | chr:6:32505702 |
| 6 rs35957455  | 32521195 T | 14.77   | 3.09E-09 | chr:6:32505702 |
| 6 rs75519123  | 32469404 G | 7.447   | 3.12E-09 | chr:6:32505702 |
| 6 rs193201719 | 32505807 T | 5.838   | 3.13E-09 | chr:6:32505702 |

|               |            |       |          |                |
|---------------|------------|-------|----------|----------------|
| 6 rs115910196 | 32502304 T | 8.018 | 3.24E-09 | chr:6:32505702 |
| 6 rs187395433 | 32510968 G | 6.052 | 3.24E-09 | chr:6:32505702 |
| 6 rs74950807  | 32513375 T | 13.68 | 3.25E-09 | chr:6:32505702 |
| 6 rs76818741  | 32513378 A | 13.68 | 3.25E-09 | chr:6:32505702 |
| 6 rs74197151  | 32469035 T | 6.681 | 3.26E-09 | chr:6:32505702 |
| 6 rs115303801 | 32512229 G | 14.17 | 3.27E-09 | chr:6:32505702 |
| 6 rs9270556   | 32560606 A | 19.73 | 3.27E-09 | chr:6:32505702 |
| 6 rs72844118  | 32514539 T | 15.13 | 3.27E-09 | chr:6:32505702 |
| 6 rs201795916 | 32514567 C | 15.07 | 3.32E-09 | chr:6:32505702 |
| 6 rs73727960  | 32508989 G | 14.33 | 3.33E-09 | chr:6:32505702 |
| 6 rs74485644  | 32501421 T | 14.76 | 3.35E-09 | chr:6:32505702 |
| 6 rs74211958  | 32469040 G | 7.442 | 3.41E-09 | chr:6:32505702 |
| 6 rs77173653  | 32508587 G | 6.233 | 3.42E-09 | chr:6:32505702 |
| 6 rs73727961  | 32509022 A | 14.55 | 3.43E-09 | chr:6:32505702 |
| 6 rs200263528 | 32509009 C | 14.49 | 3.44E-09 | chr:6:32505702 |
| 6 rs112815590 | 32504110 T | 6.463 | 3.45E-09 | chr:6:32505702 |
| 6 rs75174683  | 32504101 G | 6.463 | 3.45E-09 | chr:6:32505702 |
| 6 rs72851025  | 32501459 C | 14.91 | 3.50E-09 | chr:6:32505702 |
| 6 rs530370261 | 32519826 T | 17.7  | 3.51E-09 | chr:6:32505702 |
| 6 rs183134414 | 32511069 T | 6.087 | 3.51E-09 | chr:6:32505702 |
| 6 rs369883062 | 32519734 G | 14.28 | 3.54E-09 | chr:6:32505702 |
| 6 rs72853989  | 32512321 T | 14.83 | 3.55E-09 | chr:6:32505702 |
| 6 rs66924955  | 32507855 G | 12.23 | 3.55E-09 | chr:6:32505702 |
| 6 rs72853919  | 32507852 C | 12.23 | 3.55E-09 | chr:6:32505702 |
| 6 rs73727973  | 32509691 G | 15.17 | 3.56E-09 | chr:6:32505702 |
| 6 rs67774869  | 32508794 C | 15.02 | 3.60E-09 | chr:6:32505702 |
| 6 rs116526477 | 32468879 T | 6.673 | 3.61E-09 | chr:6:32505702 |
| 6 rs67916930  | 32508823 G | 14.96 | 3.61E-09 | chr:6:32505702 |
| 6 rs72851046  | 32501957 G | 15.04 | 3.63E-09 | chr:6:32505702 |
| 6 rs72851047  | 32501962 T | 15.04 | 3.63E-09 | chr:6:32505702 |
| 6 rs74221689  | 32501936 A | 15.04 | 3.63E-09 | chr:6:32505702 |
| 6 rs78806801  | 32503403 C | 6.006 | 3.63E-09 | chr:6:32505702 |
| 6 rs66738149  | 32501898 C | 14.98 | 3.64E-09 | chr:6:32505702 |
| 6 rs66521709  | 32509829 A | 15    | 3.65E-09 | chr:6:32505702 |
| 6 rs114246255 | 32509461 G | 13.88 | 3.65E-09 | chr:6:32505702 |
| 6 rs115704383 | 32509460 T | 13.88 | 3.65E-09 | chr:6:32505702 |
| 6 rs72853950  | 32509472 T | 13.88 | 3.65E-09 | chr:6:32505702 |
| 6 rs73397403  | 32519849 G | 17.19 | 3.65E-09 | chr:6:32505702 |
| 6 rs73727954  | 32508902 T | 11.73 | 3.66E-09 | chr:6:32505702 |
| 6 rs72853940  | 32508945 T | 14.2  | 3.68E-09 | chr:6:32505702 |
| 6 rs72853979  | 32511572 T | 15.23 | 3.69E-09 | chr:6:32505702 |
| 6 rs73727980  | 32511774 C | 15.15 | 3.69E-09 | chr:6:32505702 |
| 6 rs115077688 | 32503287 T | 14.49 | 3.69E-09 | chr:6:32505702 |

|               |            |       |          |                |
|---------------|------------|-------|----------|----------------|
| 6 rs111289870 | 32512269 C | 14.74 | 3.70E-09 | chr:6:32505702 |
| 6 rs72851065  | 32504213 T | 8.374 | 3.71E-09 | chr:6:32505702 |
| 6 rs72851066  | 32504216 T | 8.374 | 3.71E-09 | chr:6:32505702 |
| 6 rs35301884  | 32513638 C | 15.29 | 3.72E-09 | chr:6:32505702 |
| 6 rs66796862  | 32521664 C | 15.29 | 3.72E-09 | chr:6:32505702 |
| 6 rs112465099 | 32510430 G | 11.29 | 3.73E-09 | chr:6:32505702 |
| 6 rs80083020  | 32510439 C | 11.29 | 3.73E-09 | chr:6:32505702 |
| 6 rs75141783  | 32511944 A | 15.2  | 3.73E-09 | chr:6:32505702 |
| 6 rs73728002  | 32513993 A | 15.4  | 3.73E-09 | chr:6:32505702 |
| 6 rs28819746  | 32509579 C | 15.12 | 3.75E-09 | chr:6:32505702 |
| 6 rs68126668  | 32509603 A | 15.12 | 3.75E-09 | chr:6:32505702 |
| 6 rs116224274 | 32508583 C | 6.234 | 3.76E-09 | chr:6:32505702 |
| 6 rs373664556 | 32508561 C | 6.234 | 3.76E-09 | chr:6:32505702 |
| 6 rs76376937  | 32508568 G | 6.234 | 3.76E-09 | chr:6:32505702 |
| 6 rs34369284  | 32514144 T | 15.23 | 3.77E-09 | chr:6:32505702 |
| 6 rs5016923   | 32502028 G | 14.82 | 3.78E-09 | chr:6:32505702 |
| 6 rs74937819  | 32502037 A | 14.82 | 3.78E-09 | chr:6:32505702 |
| 6 rs72492306  | 32509510 A | 14.98 | 3.78E-09 | chr:6:32505702 |
| 6 rs72492307  | 32509519 C | 14.98 | 3.78E-09 | chr:6:32505702 |
| 6 rs67717173  | 32520137 T | 15.18 | 3.81E-09 | chr:6:32505702 |
| 6 rs72492325  | 32520151 C | 15.18 | 3.81E-09 | chr:6:32505702 |
| 6 rs73727981  | 32511791 C | 15.04 | 3.82E-09 | chr:6:32505702 |
| 6 rs72492311  | 32509979 T | 14.91 | 3.82E-09 | chr:6:32505702 |
| 6 rs376327303 | 32520719 A | 13.13 | 3.82E-09 | chr:6:32505702 |
| 6 rs114682516 | 32503702 C | 6.993 | 3.82E-09 | chr:6:32505702 |
| 6 rs72492303  | 32509061 T | 14.95 | 3.83E-09 | chr:6:32505702 |
| 6 rs115123240 | 32519919 G | 14.96 | 3.83E-09 | chr:6:32505702 |
| 6 rs111725169 | 32512223 C | 14.21 | 3.84E-09 | chr:6:32505702 |
| 6 rs111590055 | 32510177 C | 10.8  | 3.85E-09 | chr:6:32505702 |
| 6 rs78622201  | 32518405 A | 14.86 | 3.94E-09 | chr:6:32505702 |
| 6 rs112180912 | 32518436 A | 14.56 | 3.95E-09 | chr:6:32505702 |
| 6 rs562624040 | 32513024 C | 10.95 | 3.96E-09 | chr:6:32505702 |
| 6 rs116413420 | 32509466 T | 14.41 | 3.97E-09 | chr:6:32505702 |
| 6 rs2157337   | 32501144 T | 11.74 | 4.01E-09 | chr:6:32505702 |
| 6 rs114353707 | 32513535 C | 15.33 | 4.02E-09 | chr:6:32505702 |
| 6 rs114653292 | 32503516 G | 8.275 | 4.02E-09 | chr:6:32505702 |
| 6 rs116817148 | 32513534 G | 15.33 | 4.02E-09 | chr:6:32505702 |
| 6 rs116190325 | 32510039 A | 15    | 4.02E-09 | chr:6:32505702 |
| 6 rs113405235 | 32521796 C | 14.41 | 4.03E-09 | chr:6:32505702 |
| 6 rs66502326  | 32509411 T | 14.62 | 4.04E-09 | chr:6:32505702 |
| 6 rs9269749   | 32548136 G | 15.66 | 4.04E-09 | chr:6:32505702 |
| 6 rs115673628 | 32505419 G | 4.792 | 4.05E-09 | chr:6:32505702 |
| 6 rs9270045   | 32553662 G | 19.87 | 4.06E-09 | chr:6:32505702 |

|               |            |       |          |                |
|---------------|------------|-------|----------|----------------|
| 6 rs538727527 | 32505332 T | 4.959 | 4.06E-09 | chr:6:32505702 |
| 6 rs553897781 | 32505335 A | 4.959 | 4.06E-09 | chr:6:32505702 |
| 6 rs74394760  | 32513078 C | 13.58 | 4.07E-09 | chr:6:32505702 |
| 6 rs112944992 | 32510457 C | 11.17 | 4.08E-09 | chr:6:32505702 |
| 6 rs72853949  | 32509435 T | 14.86 | 4.08E-09 | chr:6:32505702 |
| 6 rs72492310  | 32509867 G | 14.55 | 4.14E-09 | chr:6:32505702 |
| 6 rs115806221 | 32514401 G | 15.11 | 4.21E-09 | chr:6:32505702 |
| 6 rs72853968  | 32509883 C | 14.39 | 4.26E-09 | chr:6:32505702 |
| 6 rs77783340  | 32514313 T | 14.99 | 4.28E-09 | chr:6:32505702 |
| 6 rs62405640  | 32516729 T | 14.03 | 4.29E-09 | chr:6:32505702 |
| 6 rs76033762  | 32516702 C | 14.03 | 4.29E-09 | chr:6:32505702 |
| 6 rs67081540  | 32512359 C | 15.13 | 4.34E-09 | chr:6:32505702 |
| 6 rs538879571 | 32503698 A | 7.038 | 4.36E-09 | chr:6:32505702 |
| 6 rs114821537 | 32503522 G | 8.265 | 4.37E-09 | chr:6:32505702 |
| 6 rs115296342 | 32503526 C | 8.265 | 4.37E-09 | chr:6:32505702 |
| 6 rs34615209  | 32513862 T | 14.32 | 4.41E-09 | chr:6:32505702 |
| 6 rs35687625  | 32513840 A | 14.32 | 4.41E-09 | chr:6:32505702 |
| 6 rs66706092  | 32513915 T | 14.32 | 4.41E-09 | chr:6:32505702 |
| 6 rs72844111  | 32513938 C | 14.32 | 4.41E-09 | chr:6:32505702 |
| 6 rs537977627 | 32510140 A | 13.73 | 4.42E-09 | chr:6:32505702 |
| 6 rs368398419 | 32510709 C | 5.609 | 4.46E-09 | chr:6:32505702 |
| 6 rs371989616 | 32510718 T | 5.609 | 4.46E-09 | chr:6:32505702 |
| 6 rs112280675 | 32522066 A | 11.94 | 4.48E-09 | chr:6:32505702 |
| 6 rs74375951  | 32500923 G | 14.15 | 4.48E-09 | chr:6:32505702 |
| 6 rs113648142 | 32508762 T | 14.49 | 4.52E-09 | chr:6:32505702 |
| 6 rs115380393 | 32503020 T | 5.878 | 4.53E-09 | chr:6:32505702 |
| 6 rs71534520  | 32510146 G | 12.81 | 4.55E-09 | chr:6:32505702 |
| 6 rs112155110 | 32501417 T | 15.59 | 4.56E-09 | chr:6:32505702 |
| 6 rs114520912 | 32517504 T | 13.75 | 4.57E-09 | chr:6:32505702 |
| 6 rs116645664 | 32517505 C | 13.75 | 4.57E-09 | chr:6:32505702 |
| 6 rs72492327  | 32520465 G | 15    | 4.62E-09 | chr:6:32505702 |
| 6 rs9270302   | 32557479 A | 21.33 | 4.65E-09 | chr:6:32505702 |
| 6 rs115663137 | 32502992 C | 5.94  | 4.68E-09 | chr:6:32505702 |
| 6 rs562852671 | 32512142 T | 5.142 | 4.68E-09 | chr:6:32505702 |
| 6 rs115712701 | 32501737 C | 14.23 | 4.69E-09 | chr:6:32505702 |
| 6 rs7743846   | 32505600 C | 9.227 | 4.69E-09 | chr:6:32505702 |
| 6 rs114362560 | 32504503 A | 6.311 | 4.69E-09 | chr:6:32505702 |
| 6 rs116422126 | 32504500 G | 6.311 | 4.69E-09 | chr:6:32505702 |
| 6 rs73729111  | 32517525 T | 13.9  | 4.71E-09 | chr:6:32505702 |
| 6 rs72508474  | 32508738 C | 14.55 | 4.75E-09 | chr:6:32505702 |
| 6 rs536146370 | 32519759 A | 12.46 | 4.78E-09 | chr:6:32505702 |
| 6 rs74194578  | 32517590 T | 14.29 | 4.79E-09 | chr:6:32505702 |
| 6 rs67721312  | 32517556 T | 14.16 | 4.85E-09 | chr:6:32505702 |

|               |            |       |          |                |
|---------------|------------|-------|----------|----------------|
| 6 rs114840252 | 32504071 T | 5.817 | 4.86E-09 | chr:6:32505702 |
| 6 rs9269237   | 32453583 T | 17.14 | 4.89E-09 | chr:6:32505702 |
| 6 rs111559749 | 32509012 T | 14.38 | 4.90E-09 | chr:6:32505702 |
| 6 rs556173675 | 32508202 G | 4.887 | 4.91E-09 | chr:6:32505702 |
| 6 rs536463096 | 32510951 G | 6.047 | 4.95E-09 | chr:6:32505702 |
| 6 rs111596698 | 32487123 G | 14.96 | 4.97E-09 | chr:6:32505702 |
| 6 rs72851063  | 32503901 T | 11.48 | 4.99E-09 | chr:6:32505702 |
| 6 rs79604868  | 32504073 A | 5.843 | 5.02E-09 | chr:6:32505702 |
| 6 rs75088009  | 32504884 G | 8.529 | 5.10E-09 | chr:6:32505702 |
| 6 rs72851028  | 32501615 A | 14.18 | 5.10E-09 | chr:6:32505702 |
| 6 rs114015220 | 32510599 T | 14.37 | 5.15E-09 | chr:6:32505702 |
| 6 rs114472333 | 32510598 T | 14.37 | 5.15E-09 | chr:6:32505702 |
| 6 rs76723065  | 32510591 G | 14.37 | 5.15E-09 | chr:6:32505702 |
| 6 rs72492319  | 32511987 T | 12.89 | 5.18E-09 | chr:6:32505702 |
| 6 rs140209363 | 32492971 C | 7.069 | 5.26E-09 | chr:6:32505702 |
| 6 rs73729122  | 32519777 G | 12.55 | 5.29E-09 | chr:6:32505702 |
| 6 rs9270540   | 32559848 C | 18.3  | 5.30E-09 | chr:6:32505702 |
| 6 rs76662624  | 32503880 A | 8.219 | 5.31E-09 | chr:6:32505702 |
| 6 rs114034298 | 32505797 C | 5.822 | 5.33E-09 | chr:6:32505702 |
| 6 rs72851064  | 32503928 C | 11.74 | 5.37E-09 | chr:6:32505702 |
| 6 rs115217308 | 32520296 A | 15.34 | 5.39E-09 | chr:6:32505702 |
| 6 rs116173033 | 32520295 G | 15.34 | 5.39E-09 | chr:6:32505702 |
| 6 rs73729131  | 32520313 T | 15.34 | 5.39E-09 | chr:6:32505702 |
| 6 rs72853983  | 32511854 A | 12.19 | 5.52E-09 | chr:6:32505702 |
| 6 rs113085907 | 32510224 G | 10.41 | 5.56E-09 | chr:6:32505702 |
| 6 rs66497315  | 32512407 C | 12.07 | 5.57E-09 | chr:6:32505702 |
| 6 rs72492314  | 32512421 A | 12.07 | 5.57E-09 | chr:6:32505702 |
| 6 rs115664796 | 32508758 C | 14.45 | 5.60E-09 | chr:6:32505702 |
| 6 rs79364663  | 32504085 C | 5.849 | 5.63E-09 | chr:6:32505702 |
| 6 rs113434238 | 32501204 T | 9.641 | 5.66E-09 | chr:6:32505702 |
| 6 rs571341495 | 32505326 G | 4.922 | 5.71E-09 | chr:6:32505702 |
| 6 rs73401349  | 32458094 C | 10.22 | 5.72E-09 | chr:6:32505702 |
| 6 rs112004746 | 32518155 T | 10.87 | 5.74E-09 | chr:6:32505702 |
| 6 rs538718414 | 32508207 T | 4.866 | 5.75E-09 | chr:6:32505702 |
| 6 rs66532036  | 32519319 A | 13.08 | 5.75E-09 | chr:6:32505702 |
| 6 rs141020324 | 32469001 A | 5.66  | 5.75E-09 | chr:6:32505702 |
| 6 rs144975609 | 32468997 A | 5.66  | 5.75E-09 | chr:6:32505702 |
| 6 rs115726960 | 32503171 A | 13.67 | 5.77E-09 | chr:6:32505702 |
| 6 rs9270126   | 32555052 T | 14.94 | 5.78E-09 | chr:6:32505702 |
| 6 rs68175425  | 32517446 G | 13.01 | 5.79E-09 | chr:6:32505702 |
| 6 rs72492315  | 32512466 C | 9.869 | 5.85E-09 | chr:6:32505702 |
| 6 rs9270558   | 32560667 A | 17.11 | 5.87E-09 | chr:6:32505702 |
| 6 rs9271492   | 32589122 C | 12.55 | 5.93E-09 | chr:6:32505702 |

|               |            |       |          |                |
|---------------|------------|-------|----------|----------------|
| 6 rs113900769 | 32503887 T | 8.24  | 5.93E-09 | chr:6:32505702 |
| 6 rs116048339 | 32468982 T | 5.585 | 5.95E-09 | chr:6:32505702 |
| 6 rs116380301 | 32468983 T | 5.585 | 5.95E-09 | chr:6:32505702 |
| 6 rs74205903  | 32501249 C | 9.625 | 5.97E-09 | chr:6:32505702 |
| 6 rs111945767 | 32517045 C | 12    | 6.04E-09 | chr:6:32505702 |
| 6 rs66678933  | 32509320 T | 11.89 | 6.05E-09 | chr:6:32505702 |
| 6 rs67041740  | 32509273 C | 11.89 | 6.05E-09 | chr:6:32505702 |
| 6 rs72492304  | 32509311 C | 11.89 | 6.05E-09 | chr:6:32505702 |
| 6 rs112780153 | 32510301 C | 10.69 | 6.05E-09 | chr:6:32505702 |
| 6 rs555383676 | 32507771 A | 5.223 | 6.12E-09 | chr:6:32505702 |
| 6 rs116209683 | 32510508 C | 11.5  | 6.13E-09 | chr:6:32505702 |
| 6 rs184981897 | 32486966 A | 6.101 | 6.14E-09 | chr:6:32505702 |
| 6 rs149589923 | 32500818 A | 11.38 | 6.15E-09 | chr:6:32505702 |
| 6 rs552461365 | 32482115 C | 5.631 | 6.23E-09 | chr:6:32505702 |
| 6 rs115095329 | 32503497 A | 7.277 | 6.26E-09 | chr:6:32505702 |
| 6 rs116133469 | 32503492 G | 7.277 | 6.26E-09 | chr:6:32505702 |
| 6 rs76034941  | 32503498 C | 7.277 | 6.26E-09 | chr:6:32505702 |
| 6 rs72853971  | 32509938 C | 12.05 | 6.36E-09 | chr:6:32505702 |
| 6 rs72853970  | 32509919 A | 11.97 | 6.38E-09 | chr:6:32505702 |
| 6 rs9270589   | 32561390 T | 16.77 | 6.43E-09 | chr:6:32505702 |
| 6 rs9270590   | 32561392 A | 16.77 | 6.43E-09 | chr:6:32505702 |
| 6 rs9269561   | 32544405 G | 10.43 | 6.47E-09 | chr:6:32505702 |
| 6 rs72851029  | 32501639 T | 16.09 | 6.48E-09 | chr:6:32505702 |
| 6 rs9270538   | 32559758 A | 18.23 | 6.49E-09 | chr:6:32505702 |
| 6 rs113460787 | 32518089 T | 12.39 | 6.50E-09 | chr:6:32505702 |
| 6 rs75861594  | 32518103 G | 12.39 | 6.50E-09 | chr:6:32505702 |
| 6 rs184358099 | 32500832 G | 11.55 | 6.52E-09 | chr:6:32505702 |
| 6 rs74535936  | 32510547 G | 11.63 | 6.54E-09 | chr:6:32505702 |
| 6 rs116316731 | 32502097 T | 12.04 | 6.55E-09 | chr:6:32505702 |
| 6 rs9270592   | 32561429 T | 16.21 | 6.56E-09 | chr:6:32505702 |
| 6 rs72853927  | 32508474 G | 6.479 | 6.60E-09 | chr:6:32505702 |
| 6 rs9270363   | 32558137 T | 15.27 | 6.66E-09 | chr:6:32505702 |
| 6 rs114987387 | 32502131 G | 12.05 | 6.68E-09 | chr:6:32505702 |
| 6 rs72508469  | 32505309 C | 5.298 | 6.73E-09 | chr:6:32505702 |
| 6 rs76509141  | 32504529 C | 6.3   | 6.84E-09 | chr:6:32505702 |
| 6 rs534064478 | 32512189 T | 9.718 | 6.85E-09 | chr:6:32505702 |
| 6 rs546382275 | 32512190 G | 9.718 | 6.85E-09 | chr:6:32505702 |
| 6 rs112458679 | 32512167 G | 9.744 | 6.87E-09 | chr:6:32505702 |
| 6 rs72853923  | 32508222 G | 4.867 | 6.89E-09 | chr:6:32505702 |
| 6 rs115524254 | 32503565 C | 8.387 | 6.91E-09 | chr:6:32505702 |
| 6 rs72851060  | 32503560 G | 8.387 | 6.91E-09 | chr:6:32505702 |
| 6 rs534705706 | 32562023 A | 4.954 | 6.97E-09 | chr:6:32505702 |
| 6 rs76533559  | 32554897 G | 11.14 | 7.09E-09 | chr:6:32505702 |

|               |            |       |          |                |
|---------------|------------|-------|----------|----------------|
| 6 rs79740987  | 32507712 G | 6.009 | 7.12E-09 | chr:6:32505702 |
| 6 rs72853924  | 32508239 G | 4.867 | 7.41E-09 | chr:6:32505702 |
| 6 rs112111526 | 32510317 A | 10.82 | 7.44E-09 | chr:6:32505702 |
| 6 rs68009841  | 32507731 T | 6.013 | 7.48E-09 | chr:6:32505702 |
| 6 rs72851061  | 32503672 C | 9.953 | 7.52E-09 | chr:6:32505702 |
| 6 rs529580232 | 32512136 C | 9.629 | 7.69E-09 | chr:6:32505702 |
| 6 rs551034683 | 32512138 A | 9.629 | 7.69E-09 | chr:6:32505702 |
| 6 rs113220298 | 32510369 T | 10.99 | 7.81E-09 | chr:6:32505702 |
| 6 rs141005752 | 32498813 G | 16.85 | 7.90E-09 | chr:6:32505702 |
| 6 rs545949191 | 32502900 A | 5.787 | 7.98E-09 | chr:6:32505702 |
| 6 rs9270578   | 32561093 A | 19.11 | 8.00E-09 | chr:6:32505702 |
| 6 rs72849265  | 32458208 T | 12.43 | 8.01E-09 | chr:6:32505702 |
| 6 rs75820413  | 32508505 G | 5.828 | 8.06E-09 | chr:6:32505702 |
| 6 rs9270576   | 32561068 T | 19.06 | 8.08E-09 | chr:6:32505702 |
| 6 rs111890942 | 32458131 C | 12.89 | 8.18E-09 | chr:6:32505702 |
| 6 rs114758808 | 32457997 T | 7.491 | 8.25E-09 | chr:6:32505702 |
| 6 rs9270593   | 32561445 G | 16.04 | 8.38E-09 | chr:6:32505702 |
| 6 rs78942674  | 32509897 T | 11.9  | 8.49E-09 | chr:6:32505702 |
| 6 rs72508468  | 32505288 C | 5.837 | 8.55E-09 | chr:6:32505702 |
| 6 rs147266303 | 32510268 C | 9.201 | 8.70E-09 | chr:6:32505702 |
| 6 rs183777110 | 32505375 T | 4.413 | 8.75E-09 | chr:6:32505702 |
| 6 rs77413629  | 32505374 G | 4.413 | 8.75E-09 | chr:6:32505702 |
| 6 rs114171624 | 32514706 G | 11.09 | 8.80E-09 | chr:6:32505702 |
| 6 rs67860869  | 32508349 C | 9.891 | 8.82E-09 | chr:6:32505702 |
| 6 rs111896611 | 32511183 T | 5.957 | 8.94E-09 | chr:6:32505702 |
| 6 rs72851100  | 32505511 C | 8.392 | 8.95E-09 | chr:6:32505702 |
| 6 rs116675816 | 32512131 A | 9.713 | 8.96E-09 | chr:6:32505702 |
| 6 rs76483802  | 32454913 G | 10.69 | 9.04E-09 | chr:6:32505702 |
| 6 rs111626267 | 32502273 T | 8.34  | 9.10E-09 | chr:6:32505702 |
| 6 rs115573660 | 32502277 A | 8.34  | 9.10E-09 | chr:6:32505702 |
| 6 rs9269560   | 32544371 C | 11.6  | 9.26E-09 | chr:6:32505702 |
| 6 rs150117381 | 32505388 C | 4.418 | 9.38E-09 | chr:6:32505702 |
| 6 rs544548886 | 32505381 T | 4.418 | 9.38E-09 | chr:6:32505702 |
| 6 rs115084652 | 32468978 T | 5.51  | 9.40E-09 | chr:6:32505702 |
| 6 rs147023195 | 32518295 T | 9.325 | 9.42E-09 | chr:6:32505702 |
| 6 rs137863146 | 32489871 G | 7.121 | 9.49E-09 | chr:6:32505702 |
| 6 rs67515384  | 32505271 A | 5.837 | 9.56E-09 | chr:6:32505702 |
| 6 rs116085924 | 32514884 G | 7.993 | 9.79E-09 | chr:6:32505702 |
| 6 rs115137792 | 32510114 C | 11.34 | 9.88E-09 | chr:6:32505702 |
| 6 rs199616440 | 32510115 T | 11.28 | 9.90E-09 | chr:6:32505702 |
| 6 rs114198395 | 32502961 T | 5.459 | 9.98E-09 | chr:6:32505702 |
| 6 rs201439475 | 32502968 A | 5.459 | 9.98E-09 | chr:6:32505702 |
| 6 rs115627609 | 32485579 T | 5.033 | 1.01E-08 | chr:6:32505702 |

|               |            |       |          |                |
|---------------|------------|-------|----------|----------------|
| 6 rs9270541   | 32559864 T | 13.56 | 1.05E-08 | chr:6:32505702 |
| 6 rs72851052  | 32502249 T | 8.487 | 1.06E-08 | chr:6:32505702 |
| 6 rs72851053  | 32502250 G | 8.487 | 1.06E-08 | chr:6:32505702 |
| 6 rs113850533 | 32516839 T | 12.21 | 1.07E-08 | chr:6:32505702 |
| 6 rs140120971 | 32510343 C | 9.176 | 1.11E-08 | chr:6:32505702 |
| 6 rs143822887 | 32510344 A | 9.176 | 1.11E-08 | chr:6:32505702 |
| 6 rs144411837 | 32510337 C | 9.176 | 1.11E-08 | chr:6:32505702 |
| 6 rs111649944 | 32518268 T | 9.174 | 1.12E-08 | chr:6:32505702 |
| 6 rs73729140  | 32521290 C | 10.98 | 1.12E-08 | chr:6:32505702 |
| 6 rs111632178 | 32511149 C | 5.5   | 1.13E-08 | chr:6:32505702 |
| 6 rs111847217 | 32511131 G | 5.5   | 1.13E-08 | chr:6:32505702 |
| 6 rs114831840 | 32501301 C | 8.494 | 1.13E-08 | chr:6:32505702 |
| 6 rs115303308 | 32501296 A | 8.494 | 1.13E-08 | chr:6:32505702 |
| 6 rs72853928  | 32508486 T | 5.854 | 1.16E-08 | chr:6:32505702 |
| 6 rs113787446 | 32518630 C | 11.56 | 1.17E-08 | chr:6:32505702 |
| 6 rs114776163 | 32518625 G | 11.56 | 1.17E-08 | chr:6:32505702 |
| 6 rs116490940 | 32503056 T | 5.245 | 1.23E-08 | chr:6:32505702 |
| 6 rs111340421 | 32517174 G | 11.49 | 1.23E-08 | chr:6:32505702 |
| 6 rs116474488 | 32469226 T | 5.475 | 1.25E-08 | chr:6:32505702 |
| 6 rs9270485   | 32559064 C | 13.39 | 1.26E-08 | chr:6:32505702 |
| 6 rs112457394 | 32469073 C | 8.72  | 1.27E-08 | chr:6:32505702 |
| 6 rs72849267  | 32468923 T | 6.551 | 1.28E-08 | chr:6:32505702 |
| 6 rs34405098  | 32523269 T | 9.54  | 1.29E-08 | chr:6:32505702 |
| 6 rs3828832   | 32521083 C | 11.21 | 1.29E-08 | chr:6:32505702 |
| 6 rs72851077  | 32504624 C | 6.028 | 1.30E-08 | chr:6:32505702 |
| 6 rs76325796  | 32507653 A | 5.525 | 1.31E-08 | chr:6:32505702 |
| 6 rs77077499  | 32507652 T | 5.525 | 1.31E-08 | chr:6:32505702 |
| 6 rs112427949 | 32511164 T | 5.482 | 1.32E-08 | chr:6:32505702 |
| 6 rs9271539   | 32590028 A | 10.08 | 1.32E-08 | chr:6:32505702 |
| 6 rs72844152  | 32519652 A | 10.85 | 1.37E-08 | chr:6:32505702 |
| 6 rs74615215  | 32458389 G | 6.295 | 1.41E-08 | chr:6:32505702 |
| 6 rs9271522   | 32589791 C | 10.29 | 1.41E-08 | chr:6:32505702 |
| 6 rs112709345 | 32501541 T | 12.04 | 1.44E-08 | chr:6:32505702 |
| 6 rs72853926  | 32508451 G | 6.482 | 1.44E-08 | chr:6:32505702 |
| 6 rs536708130 | 32518949 G | 10.41 | 1.44E-08 | chr:6:32505702 |
| 6 rs74997284  | 32518934 G | 10.41 | 1.44E-08 | chr:6:32505702 |
| 6 rs78326230  | 32518935 A | 10.41 | 1.44E-08 | chr:6:32505702 |
| 6 rs62405642  | 32517759 G | 11.85 | 1.45E-08 | chr:6:32505702 |
| 6 rs9271489   | 32589051 A | 10.12 | 1.51E-08 | chr:6:32505702 |
| 6 rs111979375 | 32538231 T | 5.221 | 1.52E-08 | chr:6:32505702 |
| 6 rs113232784 | 32518256 A | 8.677 | 1.52E-08 | chr:6:32505702 |
| 6 rs73726814  | 32523235 C | 9.413 | 1.52E-08 | chr:6:32505702 |
| 6 rs115724613 | 32538216 C | 5.026 | 1.53E-08 | chr:6:32505702 |



|               |            |       |          |                |
|---------------|------------|-------|----------|----------------|
| 6 rs72492317  | 32512501 A | 7.745 | 1.57E-08 | chr:6:32505702 |
| 6 rs114769197 | 32538217 A | 5.029 | 1.58E-08 | chr:6:32505702 |
| 6 rs111901878 | 32516893 T | 11.01 | 1.60E-08 | chr:6:32505702 |
| 6 rs146103980 | 32493373 G | 11.79 | 1.60E-08 | chr:6:32505702 |
| 6 rs72492329  | 32521136 A | 15.21 | 1.61E-08 | chr:6:32505702 |
| 6 rs114233058 | 32517386 T | 8.775 | 1.63E-08 | chr:6:32505702 |
| 6 rs115916707 | 32517387 G | 8.775 | 1.63E-08 | chr:6:32505702 |
| 6 rs9270574   | 32561028 T | 17.01 | 1.63E-08 | chr:6:32505702 |
| 6 rs201840950 | 32487091 G | 23.25 | 1.65E-08 | chr:6:32505702 |
| 6 rs115202951 | 32501311 T | 8.519 | 1.70E-08 | chr:6:32505702 |
| 6 rs74786163  | 32507780 T | 5.428 | 1.70E-08 | chr:6:32505702 |
| 6 rs112582516 | 32481392 T | 5.363 | 1.72E-08 | chr:6:32505702 |
| 6 rs546033671 | 32498932 G | 4.612 | 1.84E-08 | chr:6:32505702 |
| 6 rs113727677 | 32517010 C | 9.429 | 1.86E-08 | chr:6:32505702 |
| 6 rs148612288 | 32498953 G | 4.61  | 1.89E-08 | chr:6:32505702 |
| 6 rs112471393 | 32538228 T | 5.153 | 1.93E-08 | chr:6:32505702 |
| 6 rs112349327 | 32502948 A | 5.341 | 1.93E-08 | chr:6:32505702 |
| 6 rs72851056  | 32502944 A | 5.341 | 1.93E-08 | chr:6:32505702 |
| 6 rs73729745  | 32469136 A | 7.961 | 1.97E-08 | chr:6:32505702 |
| 6 rs9271527   | 32589867 T | 9.459 | 1.97E-08 | chr:6:32505702 |
| 6 rs9270481   | 32559045 C | 12.53 | 1.98E-08 | chr:6:32505702 |
| 6 rs530662953 | 32504587 C | 5.997 | 2.02E-08 | chr:6:32505702 |
| 6 rs72849282  | 32469335 T | 5.793 | 2.03E-08 | chr:6:32505702 |
| 6 rs9270572   | 32561010 T | 14.65 | 2.13E-08 | chr:6:32505702 |
| 6 rs185087225 | 32480024 G | 5.926 | 2.16E-08 | chr:6:32505702 |
| 6 rs533688361 | 32480016 T | 5.926 | 2.16E-08 | chr:6:32505702 |
| 6 rs545379090 | 32469285 T | 5.954 | 2.18E-08 | chr:6:32505702 |
| 6 rs191570792 | 32486624 A | 9.805 | 2.25E-08 | chr:6:32505702 |
| 6 rs79338946  | 32502822 T | 4.625 | 2.33E-08 | chr:6:32505702 |
| 6 rs476775    | 32569722 T | 14.34 | 2.33E-08 | chr:6:32505702 |
| 6 rs143442815 | 32489863 C | 6.586 | 2.37E-08 | chr:6:32505702 |
| 6 rs78278896  | 32508647 G | 10.47 | 2.37E-08 | chr:6:32505702 |
| 6 rs476602    | 32569792 C | 14.49 | 2.37E-08 | chr:6:32505702 |
| 6 rs9270474   | 32559003 G | 13.76 | 2.38E-08 | chr:6:32505702 |
| 6 rs9270806   | 32569563 T | 14.5  | 2.39E-08 | chr:6:32505702 |
| 6 rs9270807   | 32569572 A | 14.5  | 2.39E-08 | chr:6:32505702 |
| 6 rs2516050   | 32570352 A | 14.37 | 2.40E-08 | chr:6:32505702 |
| 6 rs9270583   | 32561229 G | 13.41 | 2.48E-08 | chr:6:32505702 |
| 6 rs73726819  | 32526540 G | 11.33 | 2.50E-08 | chr:6:32505702 |
| 6 rs41287328  | 32552698 G | 7.524 | 2.53E-08 | chr:6:32505702 |
| 6 rs9270524   | 32559588 A | 11.82 | 2.54E-08 | chr:6:32505702 |
| 6 rs12665158  | 32482007 T | 8.6   | 2.67E-08 | chr:6:32505702 |
| 6 rs554443954 | 32496557 T | 6.316 | 2.74E-08 | chr:6:32505702 |

|               |            |       |          |                |
|---------------|------------|-------|----------|----------------|
| 6 rs80216275  | 32469383 A | 8.124 | 2.75E-08 | chr:6:32505702 |
| 6 rs538116343 | 32521742 T | 6.947 | 2.77E-08 | chr:6:32505702 |
| 6 rs113523485 | 32489302 C | 5.714 | 2.81E-08 | chr:6:32505702 |
| 6 rs113432958 | 32538366 A | 13.18 | 2.88E-08 | chr:6:32505702 |
| 6 rs9270487   | 32559076 G | 9.753 | 2.90E-08 | chr:6:32505702 |
| 6 rs679243    | 32570959 T | 13.78 | 2.91E-08 | chr:6:32505702 |
| 6 rs72508426  | 32485598 G | 4.766 | 2.92E-08 | chr:6:32505702 |
| 6 rs72492322  | 32519628 G | 8.319 | 2.99E-08 | chr:6:32505702 |
| 6 rs115055593 | 32468827 C | 11.11 | 3.04E-08 | chr:6:32505702 |
| 6 rs536343459 | 32468799 G | 11.35 | 3.31E-08 | chr:6:32505702 |
| 6 rs548006827 | 32468802 C | 11.35 | 3.31E-08 | chr:6:32505702 |
| 6 rs565374501 | 32468798 G | 11.35 | 3.31E-08 | chr:6:32505702 |
| 6 rs74197204  | 32507695 G | 5.885 | 3.31E-08 | chr:6:32505702 |
| 6 rs9270580   | 32561123 C | 13.44 | 3.32E-08 | chr:6:32505702 |
| 6 rs9271533   | 32589952 T | 7.969 | 3.32E-08 | chr:6:32505702 |
| 6 rs9271535   | 32589959 T | 7.969 | 3.32E-08 | chr:6:32505702 |
| 6 rs6905161   | 32505249 A | 4.755 | 3.41E-08 | chr:6:32505702 |
| 6 rs67816706  | 32517266 T | 11.86 | 3.46E-08 | chr:6:32505702 |
| 6 rs66534143  | 32512601 C | 7.435 | 3.60E-08 | chr:6:32505702 |
| 6 rs72508415  | 32459793 A | 4.753 | 3.61E-08 | chr:6:32505702 |
| 6 rs181870141 | 32507509 T | 14.46 | 3.62E-08 | chr:6:32505702 |
| 6 rs71542414  | 32560247 G | 5.399 | 3.63E-08 | chr:6:32505702 |
| 6 rs72508422  | 32481498 C | 5.323 | 3.67E-08 | chr:6:32505702 |
| 6 rs111823263 | 32482045 G | 7.561 | 3.68E-08 | chr:6:32505702 |
| 6 rs115834108 | 32459908 A | 5.445 | 3.74E-08 | chr:6:32505702 |
| 6 rs531476760 | 32490069 C | 3.918 | 3.82E-08 | chr:6:32505702 |
| 6 rs73729340  | 32560155 A | 5.4   | 3.82E-08 | chr:6:32505702 |
| 6 rs74207277  | 32560091 T | 5.456 | 3.84E-08 | chr:6:32505702 |
| 6 rs73729756  | 32482020 G | 8.854 | 3.84E-08 | chr:6:32505702 |
| 6 rs71542413  | 32560240 T | 5.408 | 3.86E-08 | chr:6:32505702 |
| 6 rs9271508   | 32589410 T | 9.106 | 3.90E-08 | chr:6:32505702 |
| 6 rs112300533 | 32517237 T | 9.771 | 3.93E-08 | chr:6:32505702 |
| 6 rs74821931  | 32517233 A | 9.771 | 3.93E-08 | chr:6:32505702 |
| 6 rs74208414  | 32501649 G | 5.643 | 3.97E-08 | chr:6:32505702 |
| 6 rs114638791 | 32538268 A | 5.39  | 3.98E-08 | chr:6:32505702 |
| 6 rs112621731 | 32501245 G | 5.126 | 3.99E-08 | chr:6:32505702 |
| 6 rs11970219  | 32500925 C | 5.651 | 3.99E-08 | chr:6:32505702 |
| 6 rs202075303 | 32496326 T | 4.983 | 4.02E-08 | chr:6:32505702 |
| 6 rs79140398  | 32527093 C | 9.006 | 4.10E-08 | chr:6:32505702 |
| 6 rs114565678 | 32469224 A | 5.311 | 4.10E-08 | chr:6:32505702 |
| 6 rs71542415  | 32560298 C | 5.351 | 4.12E-08 | chr:6:32505702 |
| 6 rs74921648  | 32560307 A | 5.351 | 4.12E-08 | chr:6:32505702 |
| 6 rs114146939 | 32459890 G | 5.502 | 4.14E-08 | chr:6:32505702 |

|               |            |         |          |                |
|---------------|------------|---------|----------|----------------|
| 6 rs116587947 | 32459889 T | 5.502   | 4.14E-08 | chr:6:32505702 |
| 6 rs545256869 | 32512858 T | 4.916   | 4.15E-08 | chr:6:32505702 |
| 6 rs75236519  | 32460670 C | 5.528   | 4.17E-08 | chr:6:32505702 |
| 6 rs34539464  | 32560339 G | 5.355   | 4.17E-08 | chr:6:32505702 |
| 6 rs36207014  | 32560332 A | 5.355   | 4.17E-08 | chr:6:32505702 |
| 6 rs200402299 | 32458349 A | 5.684   | 4.34E-08 | chr:6:32505702 |
| 6 rs76235954  | 32512815 A | 4.921   | 4.35E-08 | chr:6:32505702 |
| 6 rs113353313 | 32538242 G | 5.393   | 4.42E-08 | chr:6:32505702 |
| 6 rs73729339  | 32560017 A | 5.363   | 4.54E-08 | chr:6:32505702 |
| 6 rs628754    | 32574787 A | 12.11   | 4.54E-08 | chr:6:32505702 |
| 6 rs9270080   | 32554197 G | 10.06   | 4.66E-08 | chr:6:32505702 |
| 6 rs72508413  | 32454597 G | 7.731   | 4.70E-08 | chr:6:32505702 |
| 6 rs572581776 | 32526776 G | 7.457   | 4.98E-08 | chr:6:32505702 |
| 6 rs73726852  | 32538295 C | 6.435   | 5.05E-08 | chr:6:32505702 |
| 6 rs9270871   | 32571160 G | 10.96   | 5.10E-08 | chr:6:32505702 |
| 6 rs9270154   | 32555389 G | 7.601   | 5.70E-08 | chr:6:32505702 |
| 6 rs9270862   | 32570981 C | 10.41   | 5.73E-08 | chr:6:32505702 |
| 6 rs9270863   | 32570982 A | 10.41   | 5.73E-08 | chr:6:32505702 |
| 6 rs202231764 | 32508412 T | 6.549   | 5.74E-08 | chr:6:32505702 |
| 6 rs72508473  | 32508399 G | 6.549   | 5.74E-08 | chr:6:32505702 |
| 6 rs9270869   | 32571155 C | 11      | 5.75E-08 | chr:6:32505702 |
| 6 rs9270861   | 32570979 A | 10.5    | 5.84E-08 | chr:6:32505702 |
| 6 rs35697584  | 32522151 A | 9.394   | 5.86E-08 | chr:6:32505702 |
| 6 rs9270115   | 32554934 T | 11.24   | 5.87E-08 | chr:6:32505702 |
| 6 rs566252979 | 32496600 T | 5.804   | 5.93E-08 | chr:6:32505702 |
| 6 rs68152293  | 32561020 A | 5.151   | 6.52E-08 | chr:6:32505702 |
| 6 rs540049194 | 32503078 A | 4.345   | 6.55E-08 | chr:6:32505702 |
| 6 rs561971374 | 32503086 A | 4.345   | 6.55E-08 | chr:6:32505702 |
| 6 rs9270636   | 32565648 C | 6.475   | 6.66E-08 | chr:6:32505702 |
| 6 rs9270637   | 32565650 G | 6.475   | 6.66E-08 | chr:6:32505702 |
| 6 rs9270638   | 32565657 C | 6.475   | 6.66E-08 | chr:6:32505702 |
| 6 rs139201366 | 32513186 A | 7.231   | 6.75E-08 | chr:6:32505702 |
| 6 rs112507860 | 32496083 T | 5.347   | 6.78E-08 | chr:6:32505702 |
| 6 rs9270525   | 32559595 G | 8.082   | 7.25E-08 | chr:6:32505702 |
| 6 rs9270526   | 32559597 A | 8.082   | 7.25E-08 | chr:6:32505702 |
| 6 rs9270527   | 32559600 A | 8.082   | 7.25E-08 | chr:6:32505702 |
| 6 rs9270528   | 32559603 C | 8.082   | 7.25E-08 | chr:6:32505702 |
| 6 rs9270549   | 32560440 A | 11.17   | 7.27E-08 | chr:6:32505702 |
| 6 rs9270550   | 32560441 G | 11.17   | 7.27E-08 | chr:6:32505702 |
| 6 rs2395225   | 32590624 C | 7.391   | 7.46E-08 | chr:6:32505702 |
| 6 rs9270276   | 32557240 A | 0.07821 | 7.66E-08 | chr:6:32505702 |
| 6 rs116611418 | 32459595 G | 5.364   | 7.69E-08 | chr:6:32505702 |
| 6 rs9270562   | 32560757 T | 12.38   | 7.97E-08 | chr:6:32505702 |

|               |            |         |          |                |
|---------------|------------|---------|----------|----------------|
| 6 rs182771482 | 32500178 C | 3.416   | 8.09E-08 | chr:6:32505702 |
| 6 rs9270543   | 32559881 A | 6.737   | 8.15E-08 | chr:6:32505702 |
| 6 rs9270544   | 32559882 T | 6.737   | 8.15E-08 | chr:6:32505702 |
| 6 rs9270317   | 32557643 G | 0.1011  | 8.28E-08 | chr:6:32505702 |
| 6 rs554566424 | 32496605 A | 5.247   | 8.44E-08 | chr:6:32505702 |
| 6 rs3129967   | 32381461 T | 6.931   | 8.56E-08 | chr:6:32505702 |
| 6 rs111338793 | 32486248 G | 5.483   | 8.69E-08 | chr:6:32505702 |
| 6 rs116102092 | 32538672 A | 7.081   | 8.82E-08 | chr:6:32505702 |
| 6 rs149088066 | 32453495 T | 10.96   | 8.89E-08 | chr:6:32505702 |
| 6 rs77712892  | 32503570 T | 4.965   | 9.00E-08 | chr:6:32505702 |
| 6 rs555503640 | 32486477 T | 6       | 9.03E-08 | chr:6:32505702 |
| 6 rs9270529   | 32559658 T | 7.349   | 9.27E-08 | chr:6:32505702 |
| 6 rs9270547   | 32559951 G | 6.729   | 9.27E-08 | chr:6:32505702 |
| 6 rs9270548   | 32559960 T | 6.729   | 9.27E-08 | chr:6:32505702 |
| 6 rs3129968   | 32381472 C | 6.929   | 9.33E-08 | chr:6:32505702 |
| 6 rs189723252 | 32494948 T | 3.806   | 9.36E-08 | chr:6:32505702 |
| 6 rs9270533   | 32559709 T | 6.512   | 9.38E-08 | chr:6:32505702 |
| 6 rs9270535   | 32559714 A | 6.512   | 9.38E-08 | chr:6:32505702 |
| 6 rs141684647 | 32507289 T | 4.263   | 9.51E-08 | chr:6:32505702 |
| 6 rs138636844 | 32486961 A | 6.561   | 9.58E-08 | chr:6:32505702 |
| 6 rs7765332   | 32502374 A | 4.363   | 9.66E-08 | chr:6:32505702 |
| 6 rs115488695 | 32490036 T | 7.902   | 9.68E-08 | chr:6:32505702 |
| 6 rs9270521   | 32559529 C | 9.708   | 9.71E-08 | chr:6:32505702 |
| 6 rs561623787 | 32452602 C | 11.37   | 1.00E-07 | chr:6:32505702 |
| 6 rs35747774  | 32487050 C | 11.87   | 1.01E-07 | chr:6:32505702 |
| 6 rs17203839  | 32555926 C | 13.42   | 1.02E-07 | chr:6:32505702 |
| 6 rs3828844   | 32520755 G | 6.375   | 1.04E-07 | chr:6:32505702 |
| 6 rs9269252   | 32454293 A | 12.98   | 1.07E-07 | chr:6:32505702 |
| 6 rs201614260 | 32557436 G | 17.02   | 1.10E-07 | chr:6:32505702 |
| 6 rs9269515   | 32543469 C | 10.44   | 1.10E-07 | chr:6:32505702 |
| 6 rs7765211   | 32502346 A | 4.526   | 1.13E-07 | chr:6:32505702 |
| 6 rs62405562  | 32451834 G | 0.07116 | 1.20E-07 | chr:6:32505702 |
| 6 rs556337500 | 32503531 A | 4.685   | 1.23E-07 | chr:6:32505702 |
| 6 rs571499647 | 32503532 G | 4.685   | 1.23E-07 | chr:6:32505702 |
| 6 rs72844144  | 32519125 A | 10.76   | 1.24E-07 | chr:6:32505702 |
| 6 rs9270597   | 32561598 G | 9.652   | 1.26E-07 | chr:6:32505702 |
| 6 rs9270598   | 32561618 C | 9.652   | 1.26E-07 | chr:6:32505702 |
| 6 rs9271384   | 32587408 T | 7.843   | 1.28E-07 | chr:6:32505702 |
| 6 rs116160472 | 32485643 G | 4.771   | 1.30E-07 | chr:6:32505702 |
| 6 rs73403117  | 32468956 T | 4.245   | 1.30E-07 | chr:6:32505702 |
| 6 rs115817940 | 32489735 T | 8.158   | 1.31E-07 | chr:6:32505702 |
| 6 rs9270565   | 32560774 T | 11.06   | 1.35E-07 | chr:6:32505702 |
| 6 rs9270566   | 32560775 G | 11.06   | 1.35E-07 | chr:6:32505702 |

|               |            |         |          |                |
|---------------|------------|---------|----------|----------------|
| 6 rs9269254   | 32454327 T | 11.37   | 1.38E-07 | chr:6:32505702 |
| 6 rs9269317   | 32539767 T | 6.298   | 1.41E-07 | chr:6:32505702 |
| 6 rs374248993 | 32496534 C | 7.035   | 1.43E-07 | chr:6:32505702 |
| 6 rs72492351  | 32538451 C | 7.283   | 1.45E-07 | chr:6:32505702 |
| 6 rs9270530   | 32559686 A | 6.506   | 1.45E-07 | chr:6:32505702 |
| 6 rs149521915 | 32489639 T | 6.563   | 1.47E-07 | chr:6:32505702 |
| 6 rs73727915  | 32497046 T | 11.85   | 1.54E-07 | chr:6:32505702 |
| 6 rs9271406   | 32587588 A | 7.796   | 1.54E-07 | chr:6:32505702 |
| 6 rs9270567   | 32560801 G | 10.11   | 1.66E-07 | chr:6:32505702 |
| 6 rs73731415  | 32454428 G | 8.499   | 1.66E-07 | chr:6:32505702 |
| 6 rs680061    | 32571098 G | 8.218   | 1.69E-07 | chr:6:32505702 |
| 6 rs9270371   | 32558190 T | 8.916   | 1.69E-07 | chr:6:32505702 |
| 6 rs182890820 | 32527218 T | 4.481   | 1.70E-07 | chr:6:32505702 |
| 6 rs9270034   | 32553418 G | 9.459   | 1.72E-07 | chr:6:32505702 |
| 6 rs9270475   | 32559007 T | 4.994   | 1.75E-07 | chr:6:32505702 |
| 6 rs9270662   | 32566089 G | 5.452   | 1.75E-07 | chr:6:32505702 |
| 6 rs73729106  | 32514288 T | 8.685   | 1.75E-07 | chr:6:32505702 |
| 6 rs199973717 | 32493600 G | 13.01   | 1.75E-07 | chr:6:32505702 |
| 6 rs557048    | 32587001 T | 5.946   | 1.80E-07 | chr:6:32505702 |
| 6 rs541195    | 32567321 T | 7.235   | 1.86E-07 | chr:6:32505702 |
| 6 rs687675    | 32567316 G | 7.235   | 1.86E-07 | chr:6:32505702 |
| 6 rs116609988 | 32522988 A | 6.054   | 1.92E-07 | chr:6:32505702 |
| 6 rs112740757 | 32481965 G | 11.01   | 1.93E-07 | chr:6:32505702 |
| 6 rs148817433 | 32493266 G | 7.269   | 1.93E-07 | chr:6:32505702 |
| 6 rs116670844 | 32490925 T | 4.188   | 1.93E-07 | chr:6:32505702 |
| 6 rs148633289 | 32487229 T | 13.29   | 2.00E-07 | chr:6:32505702 |
| 6 rs531128975 | 32497352 C | 7.771   | 2.00E-07 | chr:6:32505702 |
| 6 rs78279385  | 32451758 A | 0.05531 | 2.10E-07 | chr:6:32505702 |
| 6 rs554915730 | 32487483 G | 4.265   | 2.11E-07 | chr:6:32505702 |
| 6 rs113871699 | 32509693 T | 9.062   | 2.12E-07 | chr:6:32505702 |
| 6 rs73727972  | 32509683 G | 9.062   | 2.12E-07 | chr:6:32505702 |
| 6 rs191278257 | 32500083 G | 3.207   | 2.12E-07 | chr:6:32505702 |
| 6 rs535694878 | 32512216 A | 10.54   | 2.16E-07 | chr:6:32505702 |
| 6 rs556986229 | 32512217 G | 10.54   | 2.16E-07 | chr:6:32505702 |
| 6 rs113955073 | 32522932 C | 6.17    | 2.17E-07 | chr:6:32505702 |
| 6 rs9270632   | 32565533 A | 6.733   | 2.18E-07 | chr:6:32505702 |
| 6 rs9270663   | 32566101 G | 7.061   | 2.21E-07 | chr:6:32505702 |
| 6 rs115333128 | 32485804 G | 5.276   | 2.21E-07 | chr:6:32505702 |
| 6 rs150154760 | 32479531 T | 4.297   | 2.26E-07 | chr:6:32505702 |
| 6 rs115563246 | 32489734 A | 8.438   | 2.30E-07 | chr:6:32505702 |
| 6 rs73403121  | 32469012 T | 4.935   | 2.30E-07 | chr:6:32505702 |
| 6 rs111354037 | 32579285 C | 5.623   | 2.35E-07 | chr:6:32505702 |
| 6 rs9270661   | 32566087 G | 6.735   | 2.40E-07 | chr:6:32505702 |

|                         |            |       |          |                |
|-------------------------|------------|-------|----------|----------------|
| 6 rs9270559             | 32560698 G | 10.24 | 2.40E-07 | chr:6:32505702 |
| 6 rs73407208            | 32491721 T | 4.641 | 2.41E-07 | chr:6:32505702 |
| 6 rs7768875             | 32560752 T | 7.377 | 2.47E-07 | chr:6:32505702 |
| 6 rs77149458            | 32487130 A | 14.58 | 2.47E-07 | chr:6:32505702 |
| 6 rs79966773            | 32560341 C | 5.189 | 2.48E-07 | chr:6:32505702 |
| 6 rs561942189           | 32496432 G | 5.943 | 2.48E-07 | chr:6:32505702 |
| 6 rs115978041           | 32522923 C | 6.019 | 2.50E-07 | chr:6:32505702 |
| 6 rs9270647             | 32565805 C | 7.138 | 2.53E-07 | chr:6:32505702 |
| 6 rs9270649             | 32565808 A | 7.138 | 2.53E-07 | chr:6:32505702 |
| 6 rs9270626             | 32565443 T | 6.28  | 2.54E-07 | chr:6:32505702 |
| 6 rs201574337           | 32453496 T | 8.608 | 2.61E-07 | chr:6:32505702 |
| 6 rs9269250             | 32454269 T | 10.23 | 2.64E-07 | chr:6:32505702 |
| 6 rs139726276           | 32524769 G | 4.496 | 2.72E-07 | chr:6:32505702 |
| 6 rs9270570             | 32560978 G | 8.863 | 2.76E-07 | chr:6:32505702 |
| 6 rs114020016           | 32524824 T | 4.451 | 2.76E-07 | chr:6:32505702 |
| 6 rs9269327             | 32540001 T | 5.313 | 2.83E-07 | chr:6:32505702 |
| 6 rs9269328             | 32540018 T | 5.313 | 2.83E-07 | chr:6:32505702 |
| 6 rs2858873;rs531438466 | 32566769 C | 8.243 | 2.84E-07 | chr:6:32505702 |
| 6 rs116541769           | 32524870 T | 4.843 | 2.86E-07 | chr:6:32505702 |
| 6 rs28584364            | 32512048 T | 12.19 | 2.93E-07 | chr:6:32505702 |
| 6 rs9270772             | 32568967 C | 5.755 | 2.94E-07 | chr:6:32505702 |
| 6 rs7758269             | 32598812 C | 4.716 | 2.96E-07 | chr:6:32505702 |
| 6 rs9270868             | 32571117 G | 4.895 | 2.98E-07 | chr:6:32505702 |
| 6 rs72853904            | 32505575 T | 6.884 | 3.10E-07 | chr:6:32505702 |
| 6 rs9270621             | 32565283 A | 6.777 | 3.13E-07 | chr:6:32505702 |
| 6 rs9269873             | 32550796 A | 8.398 | 3.24E-07 | chr:6:32505702 |
| 6 rs9270651             | 32565884 T | 6.838 | 3.29E-07 | chr:6:32505702 |
| 6 rs9269387             | 32541058 G | 8.855 | 3.32E-07 | chr:6:32505702 |
| 6 rs528723549           | 32490420 G | 4.812 | 3.34E-07 | chr:6:32505702 |
| 6 rs9270652             | 32565905 T | 6.82  | 3.37E-07 | chr:6:32505702 |
| 6 rs116715716           | 32506910 T | 4.777 | 3.39E-07 | chr:6:32505702 |
| 6 rs9270618             | 32565236 T | 6.606 | 3.45E-07 | chr:6:32505702 |
| 6 rs1064664             | 32552075 G | 5.029 | 3.55E-07 | chr:6:32505702 |
| 6 rs537722644           | 32525112 A | 4.398 | 3.57E-07 | chr:6:32505702 |
| 6 rs185236820           | 32488776 T | 5.738 | 3.60E-07 | chr:6:32505702 |
| 6 rs190526848           | 32488781 A | 5.738 | 3.60E-07 | chr:6:32505702 |
| 6 rs36218423            | 32524832 C | 4.549 | 3.70E-07 | chr:6:32505702 |
| 6 rs140747244           | 32488784 C | 5.786 | 3.71E-07 | chr:6:32505702 |
| 6 rs76190048            | 32566497 A | 5.372 | 3.71E-07 | chr:6:32505702 |
| 6 rs9270612             | 32565106 C | 5.838 | 3.87E-07 | chr:6:32505702 |
| 6 rs9271301             | 32581614 T | 5.573 | 3.96E-07 | chr:6:32505702 |
| 6 rs146618240           | 32482102 G | 6.045 | 3.96E-07 | chr:6:32505702 |
| 6 rs9270143             | 32555256 T | 9.213 | 4.07E-07 | chr:6:32505702 |

|               |            |         |          |                |
|---------------|------------|---------|----------|----------------|
| 6 rs9270623   | 32565331 C | 5.281   | 4.08E-07 | chr:6:32505702 |
| 6 rs9270631   | 32565505 T | 5.785   | 4.18E-07 | chr:6:32505702 |
| 6 rs553518894 | 32486504 T | 5.955   | 4.24E-07 | chr:6:32505702 |
| 6 rs9271280   | 32581047 A | 5.523   | 4.26E-07 | chr:6:32505702 |
| 6 rs75639337  | 32578656 T | 5.486   | 4.35E-07 | chr:6:32505702 |
| 6 rs77064057  | 32578653 G | 5.486   | 4.35E-07 | chr:6:32505702 |
| 6 rs9271190   | 32578369 A | 5.569   | 4.37E-07 | chr:6:32505702 |
| 6 rs9270620   | 32565272 A | 5.191   | 4.37E-07 | chr:6:32505702 |
| 6 rs502055    | 32579003 C | 5.567   | 4.42E-07 | chr:6:32505702 |
| 6 rs35179057  | 32523349 C | 6.806   | 4.47E-07 | chr:6:32505702 |
| 6 rs28895267  | 32445916 C | 9.268   | 4.49E-07 | chr:6:32505702 |
| 6 rs77568742  | 32580790 C | 5.561   | 4.50E-07 | chr:6:32505702 |
| 6 rs76259812  | 32524672 C | 4.688   | 4.51E-07 | chr:6:32505702 |
| 6 rs115005201 | 32501172 A | 10.78   | 4.53E-07 | chr:6:32505702 |
| 6 rs35121819  | 32453318 T | 8.13    | 4.54E-07 | chr:6:32505702 |
| 6 rs76946723  | 32578917 T | 5.561   | 4.55E-07 | chr:6:32505702 |
| 6 rs9270616   | 32565154 G | 6.266   | 4.56E-07 | chr:6:32505702 |
| 6 rs9270634   | 32565625 G | 6.574   | 4.56E-07 | chr:6:32505702 |
| 6 rs59447698  | 32481125 G | 3.638   | 4.58E-07 | chr:6:32505702 |
| 6 rs2858864   | 32578229 T | 5.568   | 4.58E-07 | chr:6:32505702 |
| 6 rs3104420   | 32580028 A | 5.568   | 4.58E-07 | chr:6:32505702 |
| 6 rs3104421   | 32580007 A | 5.568   | 4.58E-07 | chr:6:32505702 |
| 6 rs502771    | 32578970 C | 5.568   | 4.58E-07 | chr:6:32505702 |
| 6 rs550703793 | 32582451 T | 5.568   | 4.58E-07 | chr:6:32505702 |
| 6 rs79838044  | 32580632 C | 5.568   | 4.58E-07 | chr:6:32505702 |
| 6 rs80243928  | 32580571 T | 5.568   | 4.58E-07 | chr:6:32505702 |
| 6 rs9271262   | 32580585 G | 5.568   | 4.58E-07 | chr:6:32505702 |
| 6 rs9271330   | 32582640 A | 5.568   | 4.58E-07 | chr:6:32505702 |
| 6 rs9271333   | 32582678 T | 5.568   | 4.58E-07 | chr:6:32505702 |
| 6 rs9271334   | 32582711 C | 5.568   | 4.58E-07 | chr:6:32505702 |
| 6 rs28404276  | 32510355 A | 13.85   | 4.60E-07 | chr:6:32505702 |
| 6 rs114899212 | 32524951 G | 7.406   | 4.60E-07 | chr:6:32505702 |
| 6 rs9271541   | 32590070 C | 4.941   | 4.62E-07 | chr:6:32505702 |
| 6 rs113409465 | 32511143 T | 3.948   | 4.62E-07 | chr:6:32505702 |
| 6 rs73727927  | 32501214 G | 10.68   | 4.82E-07 | chr:6:32505702 |
| 6 rs2858875   | 32566649 C | 6.021   | 4.92E-07 | chr:6:32505702 |
| 6 rs28366320  | 32561551 A | 0.09221 | 4.93E-07 | chr:6:32505702 |
| 6 rs9270157   | 32555411 T | 9       | 5.02E-07 | chr:6:32505702 |
| 6 rs9271326   | 32582527 T | 5.531   | 5.05E-07 | chr:6:32505702 |
| 6 rs76662008  | 32580869 G | 5.323   | 5.07E-07 | chr:6:32505702 |
| 6 rs72508434  | 32487563 C | 0.09126 | 5.10E-07 | chr:6:32505702 |
| 6 rs9270600   | 32561693 T | 5.059   | 5.13E-07 | chr:6:32505702 |
| 6 rs12195582  | 32444544 C | 8.002   | 5.14E-07 | chr:6:32505702 |

|               |            |         |          |                |
|---------------|------------|---------|----------|----------------|
| 6 rs187316544 | 32500462 C | 3.062   | 5.20E-07 | chr:6:32505702 |
| 6 rs590999    | 32567508 A | 5.003   | 5.24E-07 | chr:6:32505702 |
| 6 rs9270665   | 32566232 T | 5.003   | 5.24E-07 | chr:6:32505702 |
| 6 rs115833135 | 32489672 A | 6.266   | 5.42E-07 | chr:6:32505702 |
| 6 rs79881121  | 32502324 A | 9.844   | 5.58E-07 | chr:6:32505702 |
| 6 rs566861    | 32576538 C | 5.655   | 5.60E-07 | chr:6:32505702 |
| 6 rs583177    | 32579567 A | 5.409   | 5.75E-07 | chr:6:32505702 |
| 6 rs9270493   | 32559110 C | 4.644   | 5.78E-07 | chr:6:32505702 |
| 6 rs9270658   | 32566072 C | 5.895   | 5.90E-07 | chr:6:32505702 |
| 6 rs9270659   | 32566076 T | 5.895   | 5.90E-07 | chr:6:32505702 |
| 6 rs9270660   | 32566077 G | 5.895   | 5.90E-07 | chr:6:32505702 |
| 6 rs545350177 | 32565668 G | 4.489   | 5.94E-07 | chr:6:32505702 |
| 6 rs9271237   | 32579651 G | 5.413   | 5.98E-07 | chr:6:32505702 |
| 6 rs9271238   | 32579702 T | 5.413   | 5.98E-07 | chr:6:32505702 |
| 6 rs41287329  | 32552728 G | 4.554   | 6.06E-07 | chr:6:32505702 |
| 6 rs41287330  | 32552730 A | 4.554   | 6.06E-07 | chr:6:32505702 |
| 6 rs9270614   | 32565115 A | 5.681   | 6.10E-07 | chr:6:32505702 |
| 6 rs9270642   | 32565707 T | 6.083   | 6.11E-07 | chr:6:32505702 |
| 6 rs541542451 | 32493738 T | 4.067   | 6.12E-07 | chr:6:32505702 |
| 6 rs9271524   | 32589820 C | 4.955   | 6.18E-07 | chr:6:32505702 |
| 6 rs9270667   | 32566306 C | 5.795   | 6.29E-07 | chr:6:32505702 |
| 6 rs9271528   | 32589923 T | 4.905   | 6.35E-07 | chr:6:32505702 |
| 6 rs9271187   | 32578314 C | 5.084   | 6.45E-07 | chr:6:32505702 |
| 6 rs28366259  | 32559516 C | 8.066   | 6.48E-07 | chr:6:32505702 |
| 6 rs28613510  | 32518507 A | 12.13   | 6.62E-07 | chr:6:32505702 |
| 6 rs137976440 | 32489630 T | 5.74    | 6.66E-07 | chr:6:32505702 |
| 6 rs58769847  | 32481122 T | 4.836   | 6.80E-07 | chr:6:32505702 |
| 6 rs9268951   | 32433907 A | 0.05588 | 6.82E-07 | chr:6:32505702 |
| 6 rs9270796   | 32569293 A | 5.777   | 6.87E-07 | chr:6:32505702 |
| 6 rs373964410 | 32497086 C | 0.06004 | 6.90E-07 | chr:6:32505702 |
| 6 rs139910587 | 32490483 C | 6.077   | 6.96E-07 | chr:6:32505702 |
| 6 rs67408570  | 32508874 A | 7.608   | 7.03E-07 | chr:6:32505702 |
| 6 rs9270609   | 32565051 T | 5.538   | 7.03E-07 | chr:6:32505702 |
| 6 rs9378212   | 32445691 T | 0.1154  | 7.09E-07 | chr:6:32505702 |
| 6 rs9270639   | 32565658 T | 5.009   | 7.10E-07 | chr:6:32505702 |
| 6 rs7771747   | 32498931 A | 3.679   | 7.17E-07 | chr:6:32505702 |
| 6 rs9270773   | 32568990 G | 5.665   | 7.27E-07 | chr:6:32505702 |
| 6 rs9378213   | 32448398 G | 0.1032  | 7.30E-07 | chr:6:32505702 |
| 6 rs9269301   | 32539561 T | 4.723   | 7.30E-07 | chr:6:32505702 |
| 6 rs9269998   | 32552721 G | 5.675   | 7.33E-07 | chr:6:32505702 |
| 6 rs34265294  | 32489118 A | 7.597   | 7.35E-07 | chr:6:32505702 |
| 6 rs9271558   | 32590348 G | 5.711   | 7.46E-07 | chr:6:32505702 |
| 6 rs114085331 | 32479430 A | 4.073   | 7.53E-07 | chr:6:32505702 |



|               |            |         |          |                |
|---------------|------------|---------|----------|----------------|
| 6 rs72508417  | 32459813 A | 7.846   | 7.53E-07 | chr:6:32505702 |
| 6 rs79401736  | 32503843 G | 5.188   | 7.54E-07 | chr:6:32505702 |
| 6 rs9269502   | 32543121 G | 5.361   | 7.57E-07 | chr:6:32505702 |
| 6 rs9269563   | 32544456 T | 7.379   | 7.61E-07 | chr:6:32505702 |
| 6 rs182191708 | 32490480 C | 6.004   | 7.66E-07 | chr:6:32505702 |
| 6 rs76571178  | 32525159 A | 3.974   | 7.67E-07 | chr:6:32505702 |
| 6 rs572123865 | 32497098 G | 0.06075 | 7.69E-07 | chr:6:32505702 |
| 6 rs9269302   | 32539574 T | 4.715   | 7.70E-07 | chr:6:32505702 |
| 6 rs9269388   | 32541102 T | 4.752   | 7.79E-07 | chr:6:32505702 |
| 6 rs9271738   | 32593691 G | 4.36    | 7.81E-07 | chr:6:32505702 |
| 6 rs67534237  | 32513587 C | 7.881   | 7.83E-07 | chr:6:32505702 |
| 6 rs9270877   | 32571318 G | 5.97    | 7.93E-07 | chr:6:32505702 |
| 6 rs9270878   | 32571320 A | 5.97    | 7.93E-07 | chr:6:32505702 |
| 6 rs72851018  | 32501379 A | 8.099   | 7.99E-07 | chr:6:32505702 |
| 6 rs7756647   | 32582843 G | 11.32   | 8.08E-07 | chr:6:32505702 |
| 6 rs9270894   | 32571872 G | 5.745   | 8.09E-07 | chr:6:32505702 |
| 6 rs9270876   | 32571314 A | 5.984   | 8.18E-07 | chr:6:32505702 |
| 6 rs9269555   | 32544311 A | 7.758   | 8.23E-07 | chr:6:32505702 |
| 6 rs9270573   | 32561014 G | 4.604   | 8.28E-07 | chr:6:32505702 |
| 6 rs7759742   | 32381736 T | 5.788   | 8.31E-07 | chr:6:32505702 |
| 6 rs115493349 | 32527153 G | 4.899   | 8.34E-07 | chr:6:32505702 |
| 6 rs607998    | 32587038 A | 5.01    | 8.34E-07 | chr:6:32505702 |
| 6 rs9271850   | 32595060 G | 5.007   | 8.39E-07 | chr:6:32505702 |
| 6 rs9269314   | 32539715 G | 6.048   | 8.45E-07 | chr:6:32505702 |
| 6 rs113787140 | 32502901 A | 7.847   | 8.54E-07 | chr:6:32505702 |
| 6 rs9271427   | 32587983 G | 5.011   | 8.54E-07 | chr:6:32505702 |
| 6 rs9271428   | 32587984 T | 5.011   | 8.54E-07 | chr:6:32505702 |
| 6 rs9378266   | 32448189 T | 0.1171  | 8.59E-07 | chr:6:32505702 |
| 6 rs73726176  | 32490760 G | 6.808   | 8.60E-07 | chr:6:32505702 |
| 6 rs73726177  | 32490762 G | 6.808   | 8.60E-07 | chr:6:32505702 |
| 6 rs28895242  | 32443666 C | 0.1171  | 8.67E-07 | chr:6:32505702 |
| 6 rs369376349 | 32458425 A | 7.131   | 8.70E-07 | chr:6:32505702 |
| 6 rs114715427 | 32538850 A | 6.469   | 8.70E-07 | chr:6:32505702 |
| 6 rs67672162  | 32503251 C | 7.549   | 8.71E-07 | chr:6:32505702 |
| 6 rs67870913  | 32503258 C | 7.549   | 8.71E-07 | chr:6:32505702 |
| 6 rs9269304   | 32539585 T | 4.667   | 8.80E-07 | chr:6:32505702 |
| 6 rs72508432  | 32487524 G | 0.1069  | 9.02E-07 | chr:6:32505702 |
| 6 rs147034082 | 32539600 A | 4.657   | 9.05E-07 | chr:6:32505702 |
| 6 rs9271352   | 32583938 C | 5.002   | 9.10E-07 | chr:6:32505702 |
| 6 rs17209907  | 32446261 T | 0.1095  | 9.14E-07 | chr:6:32505702 |
| 6 rs9270132   | 32555122 A | 8.593   | 9.16E-07 | chr:6:32505702 |
| 6 rs76351919  | 32588703 C | 4.84    | 9.20E-07 | chr:6:32505702 |
| 6 rs9270803   | 32569415 A | 6.086   | 9.25E-07 | chr:6:32505702 |

|               |            |         |          |                |
|---------------|------------|---------|----------|----------------|
| 6 rs148940091 | 32507101 C | 4.375   | 9.28E-07 | chr:6:32505702 |
| 6 rs9270771   | 32568964 T | 5.666   | 9.28E-07 | chr:6:32505702 |
| 6 rs117090280 | 32489265 T | 6.399   | 9.46E-07 | chr:6:32505702 |
| 6 rs6918317   | 32381210 T | 5.633   | 9.49E-07 | chr:6:32505702 |
| 6 rs186325882 | 32499990 A | 2.96    | 9.49E-07 | chr:6:32505702 |
| 6 rs5020950   | 32449965 C | 0.1067  | 9.52E-07 | chr:6:32505702 |
| 6 rs67497288  | 32503221 G | 7.54    | 9.62E-07 | chr:6:32505702 |
| 6 rs680151    | 32571166 G | 5.443   | 9.63E-07 | chr:6:32505702 |
| 6 rs68174286  | 32503204 C | 7.512   | 9.63E-07 | chr:6:32505702 |
| 6 rs9270799   | 32569318 T | 4.799   | 9.76E-07 | chr:6:32505702 |
| 6 rs543726509 | 32493208 A | 5.907   | 9.88E-07 | chr:6:32505702 |
| 6 rs9394099   | 32449160 T | 0.1182  | 9.89E-07 | chr:6:32505702 |
| 6 rs554894601 | 32497146 C | 0.06004 | 9.97E-07 | chr:6:32505702 |
| 6 rs3828826   | 32485988 A | 4.687   | 1.00E-06 | chr:6:32505702 |
| 6 rs9271526   | 32589862 A | 5.035   | 1.00E-06 | chr:6:32505702 |
| 6 rs4599680   | 32566294 C | 4.411   | 1.01E-06 | chr:6:32505702 |
| 6 rs9268839   | 32428772 G | 0.1183  | 1.01E-06 | chr:6:32505702 |
| 6 rs72492338  | 32527408 G | 7.014   | 1.01E-06 | chr:6:32505702 |
| 6 rs9270739   | 32568150 T | 5.732   | 1.02E-06 | chr:6:32505702 |
| 6 rs563226460 | 32490851 T | 3.972   | 1.02E-06 | chr:6:32505702 |
| 6 rs9270604   | 32564800 C | 5.68    | 1.02E-06 | chr:6:32505702 |
| 6 rs141404431 | 32538578 T | 4.934   | 1.02E-06 | chr:6:32505702 |
| 6 rs143027966 | 32538579 T | 4.934   | 1.02E-06 | chr:6:32505702 |
| 6 rs151286796 | 32538577 T | 4.934   | 1.02E-06 | chr:6:32505702 |
| 6 rs12195589  | 32444584 T | 0.1193  | 1.03E-06 | chr:6:32505702 |
| 6 rs12194148  | 32444198 T | 0.1188  | 1.03E-06 | chr:6:32505702 |
| 6 rs12207473  | 32444330 C | 0.1188  | 1.03E-06 | chr:6:32505702 |
| 6 rs13194665  | 32451526 G | 0.1188  | 1.03E-06 | chr:6:32505702 |
| 6 rs17203514  | 32446071 G | 0.1188  | 1.03E-06 | chr:6:32505702 |
| 6 rs17203619  | 32446922 C | 0.1188  | 1.03E-06 | chr:6:32505702 |
| 6 rs17203626  | 32446994 A | 0.1188  | 1.03E-06 | chr:6:32505702 |
| 6 rs17203636  | 32447014 A | 0.1188  | 1.03E-06 | chr:6:32505702 |
| 6 rs17209887  | 32446051 C | 0.1188  | 1.03E-06 | chr:6:32505702 |
| 6 rs28732246  | 32447219 A | 0.1188  | 1.03E-06 | chr:6:32505702 |
| 6 rs28895247  | 32443890 A | 0.1188  | 1.03E-06 | chr:6:32505702 |
| 6 rs28895259  | 32445258 G | 0.1188  | 1.03E-06 | chr:6:32505702 |
| 6 rs28895261  | 32445306 A | 0.1188  | 1.03E-06 | chr:6:32505702 |
| 6 rs29001478  | 32447162 A | 0.1188  | 1.03E-06 | chr:6:32505702 |
| 6 rs29001568  | 32447341 A | 0.1188  | 1.03E-06 | chr:6:32505702 |
| 6 rs29001620  | 32447216 T | 0.1188  | 1.03E-06 | chr:6:32505702 |
| 6 rs29001652  | 32447111 G | 0.1188  | 1.03E-06 | chr:6:32505702 |
| 6 rs554832027 | 32444708 A | 0.1188  | 1.03E-06 | chr:6:32505702 |
| 6 rs71543453  | 32452361 T | 0.1188  | 1.03E-06 | chr:6:32505702 |

|               |            |         |          |                |
|---------------|------------|---------|----------|----------------|
| 6 rs28895255  | 32445079 T | 0.1189  | 1.03E-06 | chr:6:32505702 |
| 6 rs28895257  | 32445114 G | 0.1189  | 1.03E-06 | chr:6:32505702 |
| 6 rs28895258  | 32445117 T | 0.1189  | 1.03E-06 | chr:6:32505702 |
| 6 rs4410767   | 32448129 C | 0.1176  | 1.03E-06 | chr:6:32505702 |
| 6 rs74587827  | 32567757 A | 6.105   | 1.04E-06 | chr:6:32505702 |
| 6 rs9269226   | 32450497 A | 4.525   | 1.05E-06 | chr:6:32505702 |
| 6 rs13194770  | 32451570 T | 0.1136  | 1.05E-06 | chr:6:32505702 |
| 6 rs17209866  | 32445992 A | 0.1182  | 1.06E-06 | chr:6:32505702 |
| 6 rs71543454  | 32452399 A | 0.1175  | 1.06E-06 | chr:6:32505702 |
| 6 rs71543455  | 32452409 C | 0.1175  | 1.06E-06 | chr:6:32505702 |
| 6 rs9270171   | 32555685 A | 0.1079  | 1.06E-06 | chr:6:32505702 |
| 6 rs9270172   | 32555687 G | 0.1079  | 1.06E-06 | chr:6:32505702 |
| 6 rs9271545   | 32590153 T | 4.749   | 1.06E-06 | chr:6:32505702 |
| 6 rs190623865 | 32495774 A | 4.479   | 1.07E-06 | chr:6:32505702 |
| 6 rs547797725 | 32487827 A | 6.075   | 1.09E-06 | chr:6:32505702 |
| 6 rs77469652  | 32453532 C | 0.1173  | 1.09E-06 | chr:6:32505702 |
| 6 rs28895249  | 32444021 T | 0.1195  | 1.09E-06 | chr:6:32505702 |
| 6 rs1964995   | 32449411 C | 0.118   | 1.10E-06 | chr:6:32505702 |
| 6 rs5020944   | 32450140 G | 0.116   | 1.10E-06 | chr:6:32505702 |
| 6 rs5020946   | 32450089 T | 0.1166  | 1.10E-06 | chr:6:32505702 |
| 6 rs5020947   | 32450033 T | 0.1166  | 1.10E-06 | chr:6:32505702 |
| 6 rs9391878   | 32439490 A | 0.03819 | 1.10E-06 | chr:6:32505702 |
| 6 rs9394098   | 32449138 T | 0.118   | 1.10E-06 | chr:6:32505702 |
| 6 rs115089463 | 32525092 A | 4.254   | 1.11E-06 | chr:6:32505702 |
| 6 rs618095    | 32574736 A | 5.448   | 1.11E-06 | chr:6:32505702 |
| 6 rs9391879   | 32443172 T | 0.1214  | 1.11E-06 | chr:6:32505702 |
| 6 rs75969927  | 32502416 C | 4.608   | 1.11E-06 | chr:6:32505702 |
| 6 rs28895264  | 32445792 T | 0.1184  | 1.12E-06 | chr:6:32505702 |
| 6 rs28895265  | 32445793 G | 0.1184  | 1.12E-06 | chr:6:32505702 |
| 6 rs28895266  | 32445799 G | 0.1184  | 1.12E-06 | chr:6:32505702 |
| 6 rs13211921  | 32442836 G | 0.1184  | 1.12E-06 | chr:6:32505702 |
| 6 rs9270657   | 32566021 G | 5.883   | 1.13E-06 | chr:6:32505702 |
| 6 rs4994854   | 32447900 C | 0.1198  | 1.13E-06 | chr:6:32505702 |
| 6 rs4994855   | 32447873 G | 0.1198  | 1.13E-06 | chr:6:32505702 |
| 6 rs9271703   | 32593280 T | 5.428   | 1.14E-06 | chr:6:32505702 |
| 6 rs71534519  | 32508893 G | 6.409   | 1.15E-06 | chr:6:32505702 |
| 6 rs9270728   | 32567956 C | 5.743   | 1.15E-06 | chr:6:32505702 |
| 6 rs116181884 | 32487509 T | 0.1109  | 1.15E-06 | chr:6:32505702 |
| 6 rs66466672  | 32508913 G | 6.418   | 1.15E-06 | chr:6:32505702 |
| 6 rs9271538   | 32589983 A | 4.836   | 1.15E-06 | chr:6:32505702 |
| 6 rs2647094   | 32580322 G | 4.975   | 1.18E-06 | chr:6:32505702 |
| 6 rs2858862   | 32580321 T | 4.975   | 1.18E-06 | chr:6:32505702 |
| 6 rs72492332  | 32523085 G | 6.039   | 1.18E-06 | chr:6:32505702 |

|               |            |         |          |                |
|---------------|------------|---------|----------|----------------|
| 6 rs28454881  | 32451351 G | 0.1114  | 1.19E-06 | chr:6:32505702 |
| 6 rs114293611 | 32487353 C | 6.642   | 1.19E-06 | chr:6:32505702 |
| 6 rs9271694   | 32593051 C | 5.421   | 1.20E-06 | chr:6:32505702 |
| 6 rs5018660   | 32449293 G | 0.1206  | 1.21E-06 | chr:6:32505702 |
| 6 rs4947340   | 32435338 C | 8.246   | 1.21E-06 | chr:6:32505702 |
| 6 rs28662053  | 32453107 G | 0.1194  | 1.21E-06 | chr:6:32505702 |
| 6 rs62405566  | 32453095 T | 0.1194  | 1.21E-06 | chr:6:32505702 |
| 6 rs28362368  | 32594040 G | 5.227   | 1.21E-06 | chr:6:32505702 |
| 6 rs9378264   | 32443451 A | 0.1206  | 1.23E-06 | chr:6:32505702 |
| 6 rs9391881   | 32443432 G | 0.1206  | 1.23E-06 | chr:6:32505702 |
| 6 rs115991341 | 32506545 G | 3.918   | 1.23E-06 | chr:6:32505702 |
| 6 rs9270645   | 32565773 C | 5.295   | 1.24E-06 | chr:6:32505702 |
| 6 rs78533241  | 32502317 G | 5.278   | 1.25E-06 | chr:6:32505702 |
| 6 rs9270769   | 32568907 A | 5.664   | 1.26E-06 | chr:6:32505702 |
| 6 rs9270770   | 32568910 A | 5.664   | 1.26E-06 | chr:6:32505702 |
| 6 rs74973088  | 32457874 T | 4.48    | 1.27E-06 | chr:6:32505702 |
| 6 rs9380309   | 32449820 G | 0.1152  | 1.28E-06 | chr:6:32505702 |
| 6 rs2395224   | 32590482 G | 4.344   | 1.28E-06 | chr:6:32505702 |
| 6 rs615719    | 32574204 A | 5.893   | 1.28E-06 | chr:6:32505702 |
| 6 rs79251508  | 32453632 G | 0.1186  | 1.30E-06 | chr:6:32505702 |
| 6 rs34207893  | 32447616 C | 0.122   | 1.32E-06 | chr:6:32505702 |
| 6 rs528864352 | 32452626 G | 0.1177  | 1.32E-06 | chr:6:32505702 |
| 6 rs9269299   | 32539541 C | 4.762   | 1.32E-06 | chr:6:32505702 |
| 6 rs28732244  | 32444096 T | 0.1217  | 1.33E-06 | chr:6:32505702 |
| 6 rs28895253  | 32444910 A | 0.1225  | 1.33E-06 | chr:6:32505702 |
| 6 rs9391786   | 32448561 G | 0.1094  | 1.34E-06 | chr:6:32505702 |
| 6 rs17203549  | 32446307 T | 6.711   | 1.35E-06 | chr:6:32505702 |
| 6 rs6910310   | 32604221 G | 6.225   | 1.35E-06 | chr:6:32505702 |
| 6 rs28895236  | 32437223 T | 0.04063 | 1.35E-06 | chr:6:32505702 |
| 6 rs9268949   | 32433798 T | 0.06537 | 1.36E-06 | chr:6:32505702 |
| 6 rs75259234  | 32453338 T | 0.1162  | 1.36E-06 | chr:6:32505702 |
| 6 rs9271484   | 32588905 T | 4.721   | 1.40E-06 | chr:6:32505702 |
| 6 rs28438482  | 32451243 G | 0.106   | 1.40E-06 | chr:6:32505702 |
| 6 rs28627501  | 32451242 G | 0.106   | 1.40E-06 | chr:6:32505702 |
| 6 rs116541446 | 32497494 T | 4.036   | 1.42E-06 | chr:6:32505702 |
| 6 rs73727917  | 32497510 A | 4.036   | 1.42E-06 | chr:6:32505702 |
| 6 rs116551340 | 32527461 C | 5.67    | 1.42E-06 | chr:6:32505702 |
| 6 rs62405573  | 32458239 T | 7.259   | 1.42E-06 | chr:6:32505702 |
| 6 rs3135363   | 32389648 G | 6.502   | 1.42E-06 | chr:6:32505702 |
| 6 rs673336    | 32577858 A | 5.298   | 1.42E-06 | chr:6:32505702 |
| 6 rs79346779  | 32453655 A | 0.1192  | 1.43E-06 | chr:6:32505702 |
| 6 rs9271708   | 32593386 A | 4.941   | 1.44E-06 | chr:6:32505702 |
| 6 rs9271709   | 32593392 A | 4.941   | 1.44E-06 | chr:6:32505702 |

|               |            |         |          |                |
|---------------|------------|---------|----------|----------------|
| 6 rs537678001 | 32527268 G | 4.14    | 1.45E-06 | chr:6:32505702 |
| 6 rs528638684 | 32490600 T | 7.395   | 1.46E-06 | chr:6:32505702 |
| 6 rs113749865 | 32481973 C | 8.548   | 1.47E-06 | chr:6:32505702 |
| 6 rs62405572  | 32458232 G | 7.326   | 1.48E-06 | chr:6:32505702 |
| 6 rs28732247  | 32447474 G | 0.1248  | 1.48E-06 | chr:6:32505702 |
| 6 rs17203612  | 32446853 T | 0.126   | 1.48E-06 | chr:6:32505702 |
| 6 rs9270250   | 32557001 C | 9.99    | 1.49E-06 | chr:6:32505702 |
| 6 rs9270251   | 32557003 A | 9.99    | 1.49E-06 | chr:6:32505702 |
| 6 rs28437337  | 32451484 T | 0.03933 | 1.49E-06 | chr:6:32505702 |
| 6 rs678770    | 32570817 A | 4.677   | 1.50E-06 | chr:6:32505702 |
| 6 rs75252378  | 32502610 C | 4.807   | 1.51E-06 | chr:6:32505702 |
| 6 rs4994859   | 32447715 G | 0.1234  | 1.51E-06 | chr:6:32505702 |
| 6 rs562462    | 32586437 C | 4.658   | 1.51E-06 | chr:6:32505702 |
| 6 rs9272210   | 32602017 A | 8.403   | 1.53E-06 | chr:6:32505702 |
| 6 rs9272211   | 32602029 A | 8.403   | 1.53E-06 | chr:6:32505702 |
| 6 rs72848204  | 32594073 T | 5.208   | 1.55E-06 | chr:6:32505702 |
| 6 rs28838605  | 32510279 A | 6.097   | 1.56E-06 | chr:6:32505702 |
| 6 rs143945008 | 32513183 T | 4.67    | 1.57E-06 | chr:6:32505702 |
| 6 rs9271188   | 32578320 T | 4.604   | 1.57E-06 | chr:6:32505702 |
| 6 rs646159    | 32576446 T | 5.468   | 1.57E-06 | chr:6:32505702 |
| 6 rs142795234 | 32487593 G | 7.864   | 1.58E-06 | chr:6:32505702 |
| 6 rs9270975   | 32573726 G | 5.785   | 1.58E-06 | chr:6:32505702 |
| 6 rs139029897 | 32454882 G | 4.621   | 1.60E-06 | chr:6:32505702 |
| 6 rs17209950  | 32446588 A | 0.03983 | 1.60E-06 | chr:6:32505702 |
| 6 rs35875942  | 32447563 C | 0.1245  | 1.60E-06 | chr:6:32505702 |
| 6 rs35007143  | 32447518 A | 0.1254  | 1.61E-06 | chr:6:32505702 |
| 6 rs35130701  | 32594199 G | 5.232   | 1.63E-06 | chr:6:32505702 |
| 6 rs4457186   | 32447653 G | 0.1261  | 1.64E-06 | chr:6:32505702 |
| 6 rs1281937   | 32578143 C | 4.743   | 1.64E-06 | chr:6:32505702 |
| 6 rs9270387   | 32558317 C | 6.045   | 1.65E-06 | chr:6:32505702 |
| 6 rs78987802  | 32503728 C | 4.762   | 1.66E-06 | chr:6:32505702 |
| 6 rs80048124  | 32503729 T | 4.762   | 1.66E-06 | chr:6:32505702 |
| 6 rs17203563  | 32446459 A | 0.1264  | 1.66E-06 | chr:6:32505702 |
| 6 rs79645566  | 32505836 C | 3.4     | 1.67E-06 | chr:6:32505702 |
| 6 rs9271417   | 32587818 C | 4.899   | 1.69E-06 | chr:6:32505702 |
| 6 rs28732268  | 32548352 G | 0.1335  | 1.73E-06 | chr:6:32505702 |
| 6 rs5007264   | 32378877 C | 5.182   | 1.74E-06 | chr:6:32505702 |
| 6 rs5007266   | 32378834 T | 5.182   | 1.74E-06 | chr:6:32505702 |
| 6 rs146382271 | 32511291 T | 3.37    | 1.76E-06 | chr:6:32505702 |
| 6 rs34452456  | 32450678 C | 0.1235  | 1.76E-06 | chr:6:32505702 |
| 6 rs67738935  | 32521230 C | 0.11    | 1.76E-06 | chr:6:32505702 |
| 6 rs116787876 | 32491139 G | 3.855   | 1.76E-06 | chr:6:32505702 |
| 6 rs62405643  | 32517807 C | 4.505   | 1.76E-06 | chr:6:32505702 |

|               |            |         |          |                |
|---------------|------------|---------|----------|----------------|
| 6 rs5007265   | 32378866 T | 5.188   | 1.77E-06 | chr:6:32505702 |
| 6 rs9271997   | 32597801 A | 5.064   | 1.80E-06 | chr:6:32505702 |
| 6 rs535514039 | 32490360 C | 9.004   | 1.81E-06 | chr:6:32505702 |
| 6 rs531127489 | 32453036 A | 0.1144  | 1.81E-06 | chr:6:32505702 |
| 6 rs552565118 | 32453037 T | 0.1144  | 1.81E-06 | chr:6:32505702 |
| 6 rs142886879 | 32497484 C | 3.916   | 1.85E-06 | chr:6:32505702 |
| 6 rs28895254  | 32444946 T | 0.1316  | 1.85E-06 | chr:6:32505702 |
| 6 rs9270606   | 32564869 T | 5.161   | 1.86E-06 | chr:6:32505702 |
| 6 rs114795116 | 32491112 T | 3.858   | 1.87E-06 | chr:6:32505702 |
| 6 rs9271871   | 32595383 C | 3.76    | 1.87E-06 | chr:6:32505702 |
| 6 rs536038224 | 32523371 C | 5.258   | 1.88E-06 | chr:6:32505702 |
| 6 rs9268846   | 32429245 G | 0.06173 | 1.88E-06 | chr:6:32505702 |
| 6 rs72851102  | 32505568 G | 5.972   | 1.89E-06 | chr:6:32505702 |
| 6 rs141503043 | 32485915 T | 5.196   | 1.91E-06 | chr:6:32505702 |
| 6 rs146222234 | 32485916 G | 5.196   | 1.91E-06 | chr:6:32505702 |
| 6 rs74812635  | 32573539 C | 4.487   | 1.91E-06 | chr:6:32505702 |
| 6 rs9271437   | 32588166 A | 4.888   | 1.92E-06 | chr:6:32505702 |
| 6 rs9269880   | 32550916 G | 5.382   | 1.93E-06 | chr:6:32505702 |
| 6 rs4502931   | 32380782 T | 5.168   | 1.99E-06 | chr:6:32505702 |
| 6 rs9268518   | 32380818 A | 5.168   | 1.99E-06 | chr:6:32505702 |
| 6 rs9268519   | 32380826 G | 5.168   | 1.99E-06 | chr:6:32505702 |
| 6 rs9268520   | 32380860 C | 5.168   | 1.99E-06 | chr:6:32505702 |
| 6 rs968154    | 32380785 G | 5.168   | 1.99E-06 | chr:6:32505702 |
| 6 rs9271550   | 32590274 A | 4.744   | 1.99E-06 | chr:6:32505702 |
| 6 rs9271846   | 32594980 A | 3.328   | 1.99E-06 | chr:6:32505702 |
| 6 rs592362    | 32567795 G | 4.698   | 1.99E-06 | chr:6:32505702 |
| 6 rs562057037 | 32441392 T | 0.04346 | 2.00E-06 | chr:6:32505702 |
| 6 rs3763314   | 32376618 C | 5.172   | 2.00E-06 | chr:6:32505702 |
| 6 rs5007258   | 32379239 A | 5.172   | 2.00E-06 | chr:6:32505702 |
| 6 rs5007259   | 32379101 T | 5.172   | 2.00E-06 | chr:6:32505702 |
| 6 rs5007260   | 32379047 G | 5.172   | 2.00E-06 | chr:6:32505702 |
| 6 rs5007261   | 32379031 G | 5.172   | 2.00E-06 | chr:6:32505702 |
| 6 rs5007262   | 32379011 A | 5.172   | 2.00E-06 | chr:6:32505702 |
| 6 rs5007263   | 32378982 A | 5.172   | 2.00E-06 | chr:6:32505702 |
| 6 rs6906730   | 32379445 T | 5.172   | 2.00E-06 | chr:6:32505702 |
| 6 rs6911383   | 32379682 T | 5.172   | 2.00E-06 | chr:6:32505702 |
| 6 rs6926737   | 32375745 G | 5.172   | 2.00E-06 | chr:6:32505702 |
| 6 rs6932542   | 32380262 A | 5.172   | 2.00E-06 | chr:6:32505702 |
| 6 rs6932810   | 32380190 G | 5.172   | 2.00E-06 | chr:6:32505702 |
| 6 rs6938337   | 32381041 C | 5.172   | 2.00E-06 | chr:6:32505702 |
| 6 rs9268501   | 32376882 T | 5.172   | 2.00E-06 | chr:6:32505702 |
| 6 rs9268502   | 32376932 C | 5.172   | 2.00E-06 | chr:6:32505702 |
| 6 rs9268506   | 32377470 C | 5.172   | 2.00E-06 | chr:6:32505702 |

|               |            |         |          |                |
|---------------|------------|---------|----------|----------------|
| 6 rs9268507   | 32377539 A | 5.172   | 2.00E-06 | chr:6:32505702 |
| 6 rs9268508   | 32377588 T | 5.172   | 2.00E-06 | chr:6:32505702 |
| 6 rs9268513   | 32378787 T | 5.172   | 2.00E-06 | chr:6:32505702 |
| 6 rs9270787   | 32569174 T | 4.916   | 2.01E-06 | chr:6:32505702 |
| 6 rs549879919 | 32491969 G | 4.345   | 2.06E-06 | chr:6:32505702 |
| 6 rs9269187   | 32448440 T | 8.546   | 2.07E-06 | chr:6:32505702 |
| 6 rs9271887   | 32595679 A | 5.307   | 2.07E-06 | chr:6:32505702 |
| 6 rs9268503   | 32377061 C | 5.176   | 2.08E-06 | chr:6:32505702 |
| 6 rs9268504   | 32377116 C | 5.176   | 2.08E-06 | chr:6:32505702 |
| 6 rs543993279 | 32489575 G | 9.155   | 2.08E-06 | chr:6:32505702 |
| 6 rs113091576 | 32491986 C | 4.349   | 2.09E-06 | chr:6:32505702 |
| 6 rs71549282  | 32504906 T | 3.627   | 2.09E-06 | chr:6:32505702 |
| 6 rs71565333  | 32451902 T | 0.04394 | 2.09E-06 | chr:6:32505702 |
| 6 rs9270789   | 32569208 A | 4.17    | 2.09E-06 | chr:6:32505702 |
| 6 rs9271623   | 32591914 C | 5.309   | 2.10E-06 | chr:6:32505702 |
| 6 rs9405038   | 32437614 T | 0.04378 | 2.12E-06 | chr:6:32505702 |
| 6 rs9271880   | 32595596 C | 4.981   | 2.13E-06 | chr:6:32505702 |
| 6 rs9366801   | 32440276 T | 0.04361 | 2.13E-06 | chr:6:32505702 |
| 6 rs9270752   | 32568426 T | 4.489   | 2.14E-06 | chr:6:32505702 |
| 6 rs146758209 | 32496618 C | 5.62    | 2.17E-06 | chr:6:32505702 |
| 6 rs9271410   | 32587645 G | 4.739   | 2.19E-06 | chr:6:32505702 |
| 6 rs9271412   | 32587685 T | 4.739   | 2.19E-06 | chr:6:32505702 |
| 6 rs9271654   | 32592565 A | 4.269   | 2.19E-06 | chr:6:32505702 |
| 6 rs659204    | 32577001 G | 4.585   | 2.20E-06 | chr:6:32505702 |
| 6 rs75588019  | 32568063 A | 4.455   | 2.20E-06 | chr:6:32505702 |
| 6 rs72853912  | 32506766 C | 5.667   | 2.21E-06 | chr:6:32505702 |
| 6 rs9271630   | 32591989 G | 5.134   | 2.26E-06 | chr:6:32505702 |
| 6 rs9271618   | 32591752 A | 5.302   | 2.29E-06 | chr:6:32505702 |
| 6 rs2454137   | 32570149 G | 4.62    | 2.30E-06 | chr:6:32505702 |
| 6 rs2858867   | 32575325 G | 5.462   | 2.30E-06 | chr:6:32505702 |
| 6 rs12215313  | 32441276 T | 0.04431 | 2.31E-06 | chr:6:32505702 |
| 6 rs28895235  | 32437160 A | 0.04427 | 2.33E-06 | chr:6:32505702 |
| 6 rs9268884   | 32431640 A | 0.04435 | 2.34E-06 | chr:6:32505702 |
| 6 rs9271894   | 32595874 T | 5.299   | 2.34E-06 | chr:6:32505702 |
| 6 rs9270976   | 32573728 G | 5.446   | 2.36E-06 | chr:6:32505702 |
| 6 rs12197312  | 32442180 C | 0.0444  | 2.37E-06 | chr:6:32505702 |
| 6 rs12215261  | 32441150 T | 0.0444  | 2.37E-06 | chr:6:32505702 |
| 6 rs2395185   | 32433167 T | 0.0444  | 2.37E-06 | chr:6:32505702 |
| 6 rs28895234  | 32437050 G | 0.0444  | 2.37E-06 | chr:6:32505702 |
| 6 rs62405565  | 32452281 G | 0.0444  | 2.37E-06 | chr:6:32505702 |
| 6 rs71565340  | 32452506 T | 0.0444  | 2.37E-06 | chr:6:32505702 |
| 6 rs7747529   | 32431124 A | 0.0444  | 2.37E-06 | chr:6:32505702 |
| 6 rs9268849   | 32429327 T | 0.0444  | 2.37E-06 | chr:6:32505702 |

|               |            |         |          |                |
|---------------|------------|---------|----------|----------------|
| 6 rs9268853   | 32429643 C | 0.0444  | 2.37E-06 | chr:6:32505702 |
| 6 rs9268858   | 32429758 C | 0.0444  | 2.37E-06 | chr:6:32505702 |
| 6 rs9268860   | 32429825 T | 0.0444  | 2.37E-06 | chr:6:32505702 |
| 6 rs9268905   | 32432077 C | 0.0444  | 2.37E-06 | chr:6:32505702 |
| 6 rs9268906   | 32432181 G | 0.0444  | 2.37E-06 | chr:6:32505702 |
| 6 rs9268923   | 32432835 T | 0.0444  | 2.37E-06 | chr:6:32505702 |
| 6 rs9268965   | 32434240 A | 0.0444  | 2.37E-06 | chr:6:32505702 |
| 6 rs9348886   | 32441008 T | 0.0444  | 2.37E-06 | chr:6:32505702 |
| 6 rs9368725   | 32438159 T | 0.0444  | 2.37E-06 | chr:6:32505702 |
| 6 rs9368726   | 32438542 C | 0.0444  | 2.37E-06 | chr:6:32505702 |
| 6 rs9391781   | 32434850 C | 0.0444  | 2.37E-06 | chr:6:32505702 |
| 6 rs9391877   | 32438867 T | 0.0444  | 2.37E-06 | chr:6:32505702 |
| 6 rs9405108   | 32438648 T | 0.0444  | 2.37E-06 | chr:6:32505702 |
| 6 rs9405109   | 32439029 C | 0.0444  | 2.37E-06 | chr:6:32505702 |
| 6 rs9405112   | 32445600 A | 0.0444  | 2.37E-06 | chr:6:32505702 |
| 6 rs71534530  | 32511211 A | 6.545   | 2.38E-06 | chr:6:32505702 |
| 6 rs9270746   | 32568284 T | 4.851   | 2.38E-06 | chr:6:32505702 |
| 6 rs115640078 | 32538839 T | 4.323   | 2.39E-06 | chr:6:32505702 |
| 6 rs9270653   | 32565940 A | 5.243   | 2.39E-06 | chr:6:32505702 |
| 6 rs9270654   | 32565946 G | 5.243   | 2.39E-06 | chr:6:32505702 |
| 6 rs9270655   | 32565966 T | 5.243   | 2.39E-06 | chr:6:32505702 |
| 6 rs2858866   | 32575391 C | 5.45    | 2.41E-06 | chr:6:32505702 |
| 6 rs34036879  | 32453336 T | 0.04408 | 2.42E-06 | chr:6:32505702 |
| 6 rs74894552  | 32502589 T | 4.576   | 2.42E-06 | chr:6:32505702 |
| 6 rs71565334  | 32451947 T | 0.0443  | 2.43E-06 | chr:6:32505702 |
| 6 rs71565335  | 32451954 C | 0.0443  | 2.43E-06 | chr:6:32505702 |
| 6 rs71565336  | 32451963 A | 0.0443  | 2.43E-06 | chr:6:32505702 |
| 6 rs2395186   | 32433192 G | 0.04452 | 2.43E-06 | chr:6:32505702 |
| 6 rs77777792  | 32451289 T | 0.04452 | 2.43E-06 | chr:6:32505702 |
| 6 rs79452641  | 32451288 C | 0.04452 | 2.43E-06 | chr:6:32505702 |
| 6 rs9268864   | 32430326 A | 0.04451 | 2.43E-06 | chr:6:32505702 |
| 6 rs28732275  | 32548403 A | 0.0607  | 2.45E-06 | chr:6:32505702 |
| 6 rs9380306   | 32438298 G | 0.0447  | 2.47E-06 | chr:6:32505702 |
| 6 rs76415507  | 32492589 G | 4.717   | 2.47E-06 | chr:6:32505702 |
| 6 rs3021303   | 32575746 T | 5.452   | 2.48E-06 | chr:6:32505702 |
| 6 rs36194033  | 32489959 T | 15.49   | 2.48E-06 | chr:6:32505702 |
| 6 rs9268969   | 32434349 T | 0.0447  | 2.49E-06 | chr:6:32505702 |
| 6 rs9268970   | 32434361 A | 0.0447  | 2.49E-06 | chr:6:32505702 |
| 6 rs115141943 | 32538830 C | 4.319   | 2.50E-06 | chr:6:32505702 |
| 6 rs615698    | 32574190 G | 5.449   | 2.51E-06 | chr:6:32505702 |
| 6 rs9271424   | 32587922 C | 4.722   | 2.51E-06 | chr:6:32505702 |
| 6 rs9271425   | 32587923 G | 4.722   | 2.51E-06 | chr:6:32505702 |
| 6 rs9271711   | 32593430 T | 4.063   | 2.52E-06 | chr:6:32505702 |



|               |            |         |          |                |
|---------------|------------|---------|----------|----------------|
| 6 rs9271714   | 32593434 G | 4.063   | 2.52E-06 | chr:6:32505702 |
| 6 rs9269465   | 32542247 G | 6.533   | 2.52E-06 | chr:6:32505702 |
| 6 rs481245    | 32576114 C | 5.366   | 2.53E-06 | chr:6:32505702 |
| 6 rs9286790   | 32439828 A | 0.06439 | 2.54E-06 | chr:6:32505702 |
| 6 rs187085470 | 32533998 G | 4.002   | 2.55E-06 | chr:6:32505702 |
| 6 rs112112734 | 32453853 C | 0.1245  | 2.56E-06 | chr:6:32505702 |
| 6 rs9271405   | 32587584 C | 4.596   | 2.56E-06 | chr:6:32505702 |
| 6 rs9271407   | 32587605 T | 4.596   | 2.56E-06 | chr:6:32505702 |
| 6 rs66931410  | 32518235 C | 11.23   | 2.56E-06 | chr:6:32505702 |
| 6 rs486912    | 32575493 G | 5.452   | 2.57E-06 | chr:6:32505702 |
| 6 rs614437    | 32573941 G | 5.452   | 2.57E-06 | chr:6:32505702 |
| 6 rs615672    | 32574171 C | 5.452   | 2.57E-06 | chr:6:32505702 |
| 6 rs9405040   | 32439393 C | 0.04291 | 2.57E-06 | chr:6:32505702 |
| 6 rs9405110   | 32439108 C | 0.04579 | 2.58E-06 | chr:6:32505702 |
| 6 rs73401326  | 32454783 G | 4.6     | 2.59E-06 | chr:6:32505702 |
| 6 rs9270781   | 32569111 G | 4.37    | 2.59E-06 | chr:6:32505702 |
| 6 rs35773267  | 32555944 T | 0.1115  | 2.60E-06 | chr:6:32505702 |
| 6 rs559286232 | 32527271 C | 4.023   | 2.60E-06 | chr:6:32505702 |
| 6 rs9271646   | 32592351 G | 4.881   | 2.61E-06 | chr:6:32505702 |
| 6 rs9271647   | 32592354 G | 4.881   | 2.61E-06 | chr:6:32505702 |
| 6 rs9271649   | 32592359 G | 4.881   | 2.61E-06 | chr:6:32505702 |
| 6 rs28654725  | 32435542 G | 0.04478 | 2.62E-06 | chr:6:32505702 |
| 6 rs116360287 | 32482303 T | 10.81   | 2.63E-06 | chr:6:32505702 |
| 6 rs17203542  | 32446278 A | 6.001   | 2.65E-06 | chr:6:32505702 |
| 6 rs9270611   | 32565075 T | 4.325   | 2.65E-06 | chr:6:32505702 |
| 6 rs9271715   | 32593441 T | 4.071   | 2.67E-06 | chr:6:32505702 |
| 6 rs9271716   | 32593442 G | 4.071   | 2.67E-06 | chr:6:32505702 |
| 6 rs72508418  | 32459868 T | 7.771   | 2.70E-06 | chr:6:32505702 |
| 6 rs190614023 | 32500626 G | 2.99    | 2.71E-06 | chr:6:32505702 |
| 6 rs78045276  | 32605935 T | 5.621   | 2.71E-06 | chr:6:32505702 |
| 6 rs75518178  | 32505100 C | 6.376   | 2.72E-06 | chr:6:32505702 |
| 6 rs28895224  | 32435556 G | 0.04496 | 2.73E-06 | chr:6:32505702 |
| 6 rs77236357  | 32459844 T | 7.807   | 2.75E-06 | chr:6:32505702 |
| 6 rs9269879   | 32550906 G | 5.681   | 2.75E-06 | chr:6:32505702 |
| 6 rs141961165 | 32506799 T | 5.731   | 2.76E-06 | chr:6:32505702 |
| 6 rs28895223  | 32435550 A | 0.04523 | 2.78E-06 | chr:6:32505702 |
| 6 rs115222035 | 32478706 A | 4.22    | 2.79E-06 | chr:6:32505702 |
| 6 rs139999228 | 32524711 C | 5.049   | 2.79E-06 | chr:6:32505702 |
| 6 rs67773077  | 32497528 C | 4.802   | 2.80E-06 | chr:6:32505702 |
| 6 rs9269291   | 32539445 A | 4.343   | 2.80E-06 | chr:6:32505702 |
| 6 rs113128948 | 32507129 T | 4.008   | 2.87E-06 | chr:6:32505702 |
| 6 rs6910859   | 32604552 G | 6.829   | 2.92E-06 | chr:6:32505702 |
| 6 rs3998183   | 32567946 T | 4.41    | 2.93E-06 | chr:6:32505702 |

|               |            |         |          |                |
|---------------|------------|---------|----------|----------------|
| 6 rs28895225  | 32435684 C | 0.04562 | 2.94E-06 | chr:6:32505702 |
| 6 rs547755130 | 32486547 C | 4.05    | 2.95E-06 | chr:6:32505702 |
| 6 rs565956329 | 32486548 A | 4.05    | 2.95E-06 | chr:6:32505702 |
| 6 rs9271562   | 32590411 A | 4.207   | 2.98E-06 | chr:6:32505702 |
| 6 rs9269532   | 32543825 C | 4.692   | 2.99E-06 | chr:6:32505702 |
| 6 rs9272118   | 32600448 C | 0.1292  | 3.03E-06 | chr:6:32505702 |
| 6 rs9269293   | 32539463 G | 4.456   | 3.10E-06 | chr:6:32505702 |
| 6 rs6933289   | 32604551 T | 5.618   | 3.11E-06 | chr:6:32505702 |
| 6 rs9271667   | 32592710 C | 5.019   | 3.15E-06 | chr:6:32505702 |
| 6 rs114693948 | 32485873 T | 4.192   | 3.16E-06 | chr:6:32505702 |
| 6 rs35556553  | 32495213 C | 3.293   | 3.16E-06 | chr:6:32505702 |
| 6 rs145219524 | 32533964 T | 3.774   | 3.16E-06 | chr:6:32505702 |
| 6 rs189832895 | 32533972 T | 3.774   | 3.16E-06 | chr:6:32505702 |
| 6 rs575033700 | 32533973 T | 3.774   | 3.16E-06 | chr:6:32505702 |
| 6 rs9271471   | 32588665 G | 4.493   | 3.18E-06 | chr:6:32505702 |
| 6 rs9271872   | 32595418 G | 3.925   | 3.19E-06 | chr:6:32505702 |
| 6 rs9271873   | 32595421 A | 3.925   | 3.19E-06 | chr:6:32505702 |
| 6 rs9269292   | 32539450 T | 4.47    | 3.19E-06 | chr:6:32505702 |
| 6 rs9268889   | 32431886 G | 0.04629 | 3.22E-06 | chr:6:32505702 |
| 6 rs35372060  | 32447667 T | 0.04727 | 3.23E-06 | chr:6:32505702 |
| 6 rs114015803 | 32485879 T | 4.187   | 3.28E-06 | chr:6:32505702 |
| 6 rs9271847   | 32594993 G | 3.298   | 3.28E-06 | chr:6:32505702 |
| 6 rs181939518 | 32533977 C | 3.781   | 3.31E-06 | chr:6:32505702 |
| 6 rs582591    | 32579373 A | 4.415   | 3.34E-06 | chr:6:32505702 |
| 6 rs75953322  | 32506798 C | 5.34    | 3.37E-06 | chr:6:32505702 |
| 6 rs181190479 | 32533905 G | 3.493   | 3.39E-06 | chr:6:32505702 |
| 6 rs188265524 | 32533903 G | 3.493   | 3.39E-06 | chr:6:32505702 |
| 6 rs9271717   | 32593453 G | 4.085   | 3.43E-06 | chr:6:32505702 |
| 6 rs112861810 | 32494029 G | 4.749   | 3.49E-06 | chr:6:32505702 |
| 6 rs9271379   | 32587333 T | 4.667   | 3.50E-06 | chr:6:32505702 |
| 6 rs9268963   | 32434149 T | 0.04726 | 3.53E-06 | chr:6:32505702 |
| 6 rs75499602  | 32506794 T | 5.358   | 3.54E-06 | chr:6:32505702 |
| 6 rs145092566 | 32454838 A | 4.187   | 3.55E-06 | chr:6:32505702 |
| 6 rs9268960   | 32434130 C | 0.04764 | 3.59E-06 | chr:6:32505702 |
| 6 rs9268961   | 32434135 A | 0.04764 | 3.59E-06 | chr:6:32505702 |
| 6 rs182965163 | 32454827 A | 4.162   | 3.62E-06 | chr:6:32505702 |
| 6 rs202162787 | 32454828 G | 4.162   | 3.62E-06 | chr:6:32505702 |
| 6 rs9271704   | 32593317 G | 4.433   | 3.63E-06 | chr:6:32505702 |
| 6 rs9271705   | 32593321 T | 4.433   | 3.63E-06 | chr:6:32505702 |
| 6 rs75438654  | 32459749 G | 0.04998 | 3.67E-06 | chr:6:32505702 |
| 6 rs72492356  | 32538899 C | 4.096   | 3.73E-06 | chr:6:32505702 |
| 6 rs13204736  | 32582603 G | 8.941   | 3.74E-06 | chr:6:32505702 |
| 6 rs9269787   | 32549070 G | 7.669   | 3.75E-06 | chr:6:32505702 |

|               |            |         |          |                |
|---------------|------------|---------|----------|----------------|
| 6 rs9271920   | 32596430 G | 5.062   | 3.80E-06 | chr:6:32505702 |
| 6 rs9271921   | 32596431 G | 5.062   | 3.80E-06 | chr:6:32505702 |
| 6 rs79878723  | 32505682 T | 3.39    | 3.84E-06 | chr:6:32505702 |
| 6 rs72853909  | 32505798 A | 3.88    | 3.87E-06 | chr:6:32505702 |
| 6 rs76133616  | 32506895 G | 3.337   | 3.87E-06 | chr:6:32505702 |
| 6 rs9270520   | 32559493 T | 5.838   | 3.89E-06 | chr:6:32505702 |
| 6 rs75620297  | 32457324 T | 4.251   | 3.89E-06 | chr:6:32505702 |
| 6 rs78845660  | 32457325 G | 4.251   | 3.89E-06 | chr:6:32505702 |
| 6 rs200374399 | 32482335 T | 3.429   | 3.97E-06 | chr:6:32505702 |
| 6 rs112138727 | 32497169 G | 4.862   | 3.99E-06 | chr:6:32505702 |
| 6 rs28895241  | 32443665 T | 6.343   | 4.00E-06 | chr:6:32505702 |
| 6 rs189503580 | 32488022 G | 4.488   | 4.01E-06 | chr:6:32505702 |
| 6 rs560622990 | 32526258 C | 4.354   | 4.03E-06 | chr:6:32505702 |
| 6 rs9271900   | 32596013 G | 4.777   | 4.04E-06 | chr:6:32505702 |
| 6 rs9271893   | 32595859 T | 5.73    | 4.06E-06 | chr:6:32505702 |
| 6 rs9272005   | 32597992 G | 4.603   | 4.08E-06 | chr:6:32505702 |
| 6 rs9272006   | 32597993 T | 4.603   | 4.08E-06 | chr:6:32505702 |
| 6 rs113654440 | 32596946 A | 4.512   | 4.09E-06 | chr:6:32505702 |
| 6 rs35957722  | 32450580 C | 0.0477  | 4.15E-06 | chr:6:32505702 |
| 6 rs9271954   | 32597216 C | 4.491   | 4.19E-06 | chr:6:32505702 |
| 6 rs71534527  | 32510978 G | 3.94    | 4.21E-06 | chr:6:32505702 |
| 6 rs115830407 | 32482484 G | 4.343   | 4.31E-06 | chr:6:32505702 |
| 6 rs9269965   | 32552219 G | 3.981   | 4.32E-06 | chr:6:32505702 |
| 6 rs116708952 | 32486590 A | 4.445   | 4.33E-06 | chr:6:32505702 |
| 6 rs575209356 | 32525806 A | 3.263   | 4.35E-06 | chr:6:32505702 |
| 6 rs71534526  | 32510974 C | 5.015   | 4.36E-06 | chr:6:32505702 |
| 6 rs113537193 | 32538333 T | 6.701   | 4.38E-06 | chr:6:32505702 |
| 6 rs72851098  | 32505477 C | 4.23    | 4.39E-06 | chr:6:32505702 |
| 6 rs112062732 | 32453936 C | 0.1158  | 4.39E-06 | chr:6:32505702 |
| 6 rs111293660 | 32503087 T | 3.543   | 4.41E-06 | chr:6:32505702 |
| 6 rs113045771 | 32503092 G | 3.543   | 4.41E-06 | chr:6:32505702 |
| 6 rs17203570  | 32446674 T | 0.1451  | 4.42E-06 | chr:6:32505702 |
| 6 rs9268948   | 32433746 G | 3.709   | 4.43E-06 | chr:6:32505702 |
| 6 rs9268954   | 32434011 A | 0.04842 | 4.45E-06 | chr:6:32505702 |
| 6 rs576289202 | 32452609 A | 10.64   | 4.47E-06 | chr:6:32505702 |
| 6 rs617058    | 32574479 T | 4.379   | 4.47E-06 | chr:6:32505702 |
| 6 rs371747477 | 32489266 T | 6.89    | 4.47E-06 | chr:6:32505702 |
| 6 rs577424330 | 32488029 T | 4.462   | 4.54E-06 | chr:6:32505702 |
| 6 rs574699574 | 32488987 T | 15      | 4.55E-06 | chr:6:32505702 |
| 6 rs28362367  | 32590364 T | 4.83    | 4.61E-06 | chr:6:32505702 |
| 6 rs9272117   | 32600411 T | 5.211   | 4.61E-06 | chr:6:32505702 |
| 6 rs535777    | 32577633 C | 4.757   | 4.61E-06 | chr:6:32505702 |
| 6 rs142475334 | 32533988 A | 3.799   | 4.63E-06 | chr:6:32505702 |

|               |            |       |          |                |
|---------------|------------|-------|----------|----------------|
| 6 rs4532479   | 32582194 T | 5.465 | 4.63E-06 | chr:6:32505702 |
| 6 rs9272119   | 32600470 C | 5.2   | 4.66E-06 | chr:6:32505702 |
| 6 rs66814015  | 32505258 G | 4.614 | 4.66E-06 | chr:6:32505702 |
| 6 rs9271886   | 32595633 T | 4.569 | 4.69E-06 | chr:6:32505702 |
| 6 rs113441266 | 32479312 A | 5.526 | 4.70E-06 | chr:6:32505702 |
| 6 rs148598843 | 32479311 A | 5.526 | 4.70E-06 | chr:6:32505702 |
| 6 rs28755206  | 32644010 G | 7.058 | 4.39E-22 | chr:6:32648036 |
| 6 rs28755293  | 32646010 T | 7.573 | 7.23E-22 | chr:6:32648036 |
| 6 rs28755208  | 32644036 C | 6.325 | 1.20E-21 | chr:6:32648036 |
| 6 rs28755202  | 32643894 G | 7.543 | 1.30E-21 | chr:6:32648036 |
| 6 rs9275192   | 32656305 A | 10.02 | 1.56E-21 | chr:6:32648036 |
| 6 rs9275193   | 32656306 A | 10.02 | 1.56E-21 | chr:6:32648036 |
| 6 rs140232909 | 32643883 A | 7.534 | 1.57E-21 | chr:6:32648036 |
| 6 rs28755292  | 32645974 A | 7.559 | 1.59E-21 | chr:6:32648036 |
| 6 rs28755203  | 32643947 G | 7.509 | 1.75E-21 | chr:6:32648036 |
| 6 rs28755204  | 32643953 T | 7.509 | 1.75E-21 | chr:6:32648036 |
| 6 rs28755368  | 32647280 C | 7.208 | 1.93E-21 | chr:6:32648036 |
| 6 rs114557541 | 32643844 T | 6.828 | 2.02E-21 | chr:6:32648036 |
| 6 rs116493570 | 32643860 T | 6.828 | 2.02E-21 | chr:6:32648036 |
| 6 rs28755214  | 32644111 C | 5.566 | 2.17E-21 | chr:6:32648036 |
| 6 rs28755192  | 32643687 T | 7.563 | 2.24E-21 | chr:6:32648036 |
| 6 rs28755193  | 32643704 C | 7.563 | 2.24E-21 | chr:6:32648036 |
| 6 rs28755212  | 32644094 C | 5.438 | 2.29E-21 | chr:6:32648036 |
| 6 rs28755213  | 32644099 G | 5.438 | 2.29E-21 | chr:6:32648036 |
| 6 rs28755366  | 32647187 T | 6.927 | 2.49E-21 | chr:6:32648036 |
| 6 rs28755367  | 32647215 A | 6.927 | 2.49E-21 | chr:6:32648036 |
| 6 rs2856678   | 32655830 A | 9.306 | 2.51E-21 | chr:6:32648036 |
| 6 rs28755260  | 32645073 C | 6.924 | 2.57E-21 | chr:6:32648036 |
| 6 rs28755261  | 32645075 G | 6.924 | 2.57E-21 | chr:6:32648036 |
| 6 rs28755244  | 32644631 A | 7.215 | 2.60E-21 | chr:6:32648036 |
| 6 rs28755251  | 32644775 T | 7.2   | 2.62E-21 | chr:6:32648036 |
| 6 rs28755252  | 32644806 G | 7.2   | 2.62E-21 | chr:6:32648036 |
| 6 rs28755369  | 32647313 G | 6.916 | 2.68E-21 | chr:6:32648036 |
| 6 rs113898828 | 32643755 T | 7.766 | 2.70E-21 | chr:6:32648036 |
| 6 rs114642759 | 32643766 T | 7.766 | 2.70E-21 | chr:6:32648036 |
| 6 rs28755209  | 32644049 T | 5.872 | 2.73E-21 | chr:6:32648036 |
| 6 rs28755186  | 32643479 C | 6.925 | 2.95E-21 | chr:6:32648036 |
| 6 rs28755249  | 32644701 A | 6.918 | 3.04E-21 | chr:6:32648036 |
| 6 rs28755188  | 32643548 C | 7.219 | 3.17E-21 | chr:6:32648036 |
| 6 rs28755189  | 32643552 C | 7.219 | 3.17E-21 | chr:6:32648036 |
| 6 rs28755190  | 32643583 C | 7.219 | 3.17E-21 | chr:6:32648036 |
| 6 rs28755191  | 32643584 G | 7.219 | 3.17E-21 | chr:6:32648036 |
| 6 rs554654579 | 32644070 C | 5.577 | 3.17E-21 | chr:6:32648036 |

|               |            |       |          |                |
|---------------|------------|-------|----------|----------------|
| 6 rs28755250  | 32644755 G | 7.206 | 3.24E-21 | chr:6:32648036 |
| 6 rs28755290  | 32645871 C | 7.035 | 3.25E-21 | chr:6:32648036 |
| 6 rs28755291  | 32645906 G | 7.035 | 3.25E-21 | chr:6:32648036 |
| 6 rs28755294  | 32646047 C | 5.553 | 3.27E-21 | chr:6:32648036 |
| 6 rs28755245  | 32644658 T | 6.645 | 4.20E-21 | chr:6:32648036 |
| 6 rs112838245 | 32645820 G | 6.762 | 4.46E-21 | chr:6:32648036 |
| 6 rs113838733 | 32645825 C | 6.762 | 4.46E-21 | chr:6:32648036 |
| 6 rs28755240  | 32644562 A | 6.582 | 4.72E-21 | chr:6:32648036 |
| 6 rs28755187  | 32643516 A | 6.909 | 4.75E-21 | chr:6:32648036 |
| 6 rs28371241  | 32647906 G | 6.475 | 4.79E-21 | chr:6:32648036 |
| 6 rs28371242  | 32647935 G | 6.475 | 4.79E-21 | chr:6:32648036 |
| 6 rs141967600 | 32643824 T | 6.739 | 4.88E-21 | chr:6:32648036 |
| 6 rs28755253  | 32644869 T | 6.351 | 4.93E-21 | chr:6:32648036 |
| 6 rs28755254  | 32644878 C | 6.351 | 4.93E-21 | chr:6:32648036 |
| 6 rs28371213  | 32646059 G | 5.38  | 5.10E-21 | chr:6:32648036 |
| 6 rs28371214  | 32646061 G | 5.38  | 5.10E-21 | chr:6:32648036 |
| 6 rs28755295  | 32646054 A | 5.38  | 5.10E-21 | chr:6:32648036 |
| 6 rs28755277  | 32645598 T | 6.217 | 5.22E-21 | chr:6:32648036 |
| 6 rs28755278  | 32645599 G | 6.217 | 5.22E-21 | chr:6:32648036 |
| 6 rs28755262  | 32645088 T | 6.381 | 5.27E-21 | chr:6:32648036 |
| 6 rs28755344  | 32646904 C | 5.273 | 5.30E-21 | chr:6:32648036 |
| 6 rs28755280  | 32645660 A | 6.291 | 5.31E-21 | chr:6:32648036 |
| 6 rs28371239  | 32647854 C | 5.661 | 5.39E-21 | chr:6:32648036 |
| 6 rs28755242  | 32644577 G | 6.603 | 5.55E-21 | chr:6:32648036 |
| 6 rs28755243  | 32644594 A | 6.603 | 5.55E-21 | chr:6:32648036 |
| 6 rs28755215  | 32644128 G | 5.355 | 5.57E-21 | chr:6:32648036 |
| 6 rs28755276  | 32645578 C | 6.156 | 5.72E-21 | chr:6:32648036 |
| 6 rs28755239  | 32644463 C | 6.095 | 5.91E-21 | chr:6:32648036 |
| 6 rs28755263  | 32645109 A | 6.155 | 6.24E-21 | chr:6:32648036 |
| 6 rs28755246  | 32644670 C | 6.395 | 6.30E-21 | chr:6:32648036 |
| 6 rs28755247  | 32644680 T | 6.395 | 6.30E-21 | chr:6:32648036 |
| 6 rs28755298  | 32646094 T | 5.186 | 6.52E-21 | chr:6:32648036 |
| 6 rs201805319 | 32645737 G | 6.527 | 6.83E-21 | chr:6:32648036 |
| 6 rs28371243  | 32647946 C | 6.239 | 7.13E-21 | chr:6:32648036 |
| 6 rs28755345  | 32646930 C | 4.994 | 7.54E-21 | chr:6:32648036 |
| 6 rs28755342  | 32646861 T | 5.292 | 7.74E-21 | chr:6:32648036 |
| 6 rs28755343  | 32646866 A | 5.292 | 7.74E-21 | chr:6:32648036 |
| 6 rs28755279  | 32645626 C | 6.228 | 7.78E-21 | chr:6:32648036 |
| 6 rs28755334  | 32646759 G | 6.159 | 8.10E-21 | chr:6:32648036 |
| 6 rs28755335  | 32646763 T | 6.159 | 8.10E-21 | chr:6:32648036 |
| 6 rs9275020   | 32643184 T | 5.963 | 8.27E-21 | chr:6:32648036 |
| 6 rs114954038 | 32645693 T | 6.115 | 8.53E-21 | chr:6:32648036 |
| 6 rs115932399 | 32645695 T | 6.115 | 8.53E-21 | chr:6:32648036 |

|               |            |       |          |                |
|---------------|------------|-------|----------|----------------|
| 6 rs28755296  | 32646085 G | 5.072 | 9.14E-21 | chr:6:32648036 |
| 6 rs28755297  | 32646087 G | 5.072 | 9.14E-21 | chr:6:32648036 |
| 6 rs9275031   | 32643420 A | 5.598 | 9.51E-21 | chr:6:32648036 |
| 6 rs28755299  | 32646107 A | 5.034 | 9.56E-21 | chr:6:32648036 |
| 6 rs28755264  | 32645131 G | 5.971 | 9.63E-21 | chr:6:32648036 |
| 6 rs28755265  | 32645144 A | 5.971 | 9.63E-21 | chr:6:32648036 |
| 6 rs116005148 | 32645766 A | 6.308 | 9.93E-21 | chr:6:32648036 |
| 6 rs199945715 | 32645744 T | 6.308 | 9.93E-21 | chr:6:32648036 |
| 6 rs202178406 | 32645770 G | 6.308 | 9.93E-21 | chr:6:32648036 |
| 6 rs28371222  | 32647611 T | 5.55  | 1.02E-20 | chr:6:32648036 |
| 6 rs28371223  | 32647617 G | 5.55  | 1.02E-20 | chr:6:32648036 |
| 6 rs28755353  | 32647040 A | 5.408 | 1.03E-20 | chr:6:32648036 |
| 6 rs28755324  | 32646494 T | 5.961 | 1.04E-20 | chr:6:32648036 |
| 6 rs28755333  | 32646691 G | 6.153 | 1.12E-20 | chr:6:32648036 |
| 6 rs28755365  | 32647150 C | 5.819 | 1.13E-20 | chr:6:32648036 |
| 6 rs28755216  | 32644135 A | 5.178 | 1.15E-20 | chr:6:32648036 |
| 6 rs9275021   | 32643220 A | 5.783 | 1.17E-20 | chr:6:32648036 |
| 6 rs28755364  | 32647133 T | 5.699 | 1.17E-20 | chr:6:32648036 |
| 6 rs28371218  | 32647508 C | 5.329 | 1.19E-20 | chr:6:32648036 |
| 6 rs28371219  | 32647510 A | 5.329 | 1.19E-20 | chr:6:32648036 |
| 6 rs28755325  | 32646521 A | 5.934 | 1.21E-20 | chr:6:32648036 |
| 6 rs9275019   | 32643166 T | 5.771 | 1.31E-20 | chr:6:32648036 |
| 6 rs28755346  | 32646940 T | 4.862 | 1.33E-20 | chr:6:32648036 |
| 6 rs28755341  | 32646837 C | 5.016 | 1.39E-20 | chr:6:32648036 |
| 6 rs28371238  | 32647846 C | 5.346 | 1.45E-20 | chr:6:32648036 |
| 6 rs28755326  | 32646588 A | 5.622 | 1.46E-20 | chr:6:32648036 |
| 6 rs28755360  | 32647099 C | 5.305 | 1.47E-20 | chr:6:32648036 |
| 6 rs9275015   | 32643108 A | 5.13  | 1.51E-20 | chr:6:32648036 |
| 6 rs9275016   | 32643109 G | 5.13  | 1.51E-20 | chr:6:32648036 |
| 6 rs9275017   | 32643130 T | 5.489 | 1.53E-20 | chr:6:32648036 |
| 6 rs28755351  | 32647012 G | 5.232 | 1.60E-20 | chr:6:32648036 |
| 6 rs28755327  | 32646604 A | 5.327 | 1.60E-20 | chr:6:32648036 |
| 6 rs28755352  | 32647027 T | 5.228 | 1.66E-20 | chr:6:32648036 |
| 6 rs28371220  | 32647546 A | 5.716 | 1.67E-20 | chr:6:32648036 |
| 6 rs28371221  | 32647556 C | 5.716 | 1.67E-20 | chr:6:32648036 |
| 6 rs28371226  | 32647665 T | 5.013 | 1.71E-20 | chr:6:32648036 |
| 6 rs28755361  | 32647113 G | 5.307 | 1.83E-20 | chr:6:32648036 |
| 6 rs28755255  | 32644915 G | 5.279 | 1.84E-20 | chr:6:32648036 |
| 6 rs28755256  | 32644919 G | 5.279 | 1.84E-20 | chr:6:32648036 |
| 6 rs28371224  | 32647628 A | 5.205 | 1.93E-20 | chr:6:32648036 |
| 6 rs28371225  | 32647640 A | 5.239 | 2.01E-20 | chr:6:32648036 |
| 6 rs28755362  | 32647119 C | 5.3   | 2.40E-20 | chr:6:32648036 |
| 6 rs28755363  | 32647120 T | 5.3   | 2.40E-20 | chr:6:32648036 |

|              |            |       |          |                |
|--------------|------------|-------|----------|----------------|
| 6 rs28755234 | 32644391 T | 5.119 | 2.55E-20 | chr:6:32648036 |
| 6 rs9275018  | 32643139 T | 5.301 | 2.55E-20 | chr:6:32648036 |
| 6 rs9275022  | 32643251 G | 5.029 | 2.68E-20 | chr:6:32648036 |
| 6 rs28755370 | 32647353 G | 5.431 | 2.81E-20 | chr:6:32648036 |
| 6 rs28755371 | 32647357 C | 5.431 | 2.81E-20 | chr:6:32648036 |
| 6 rs28755354 | 32647045 T | 4.976 | 2.81E-20 | chr:6:32648036 |
| 6 rs28755314 | 32646366 G | 4.526 | 2.98E-20 | chr:6:32648036 |
| 6 rs28755315 | 32646369 G | 4.526 | 2.98E-20 | chr:6:32648036 |
| 6 rs28755217 | 32644159 C | 5.14  | 3.26E-20 | chr:6:32648036 |
| 6 rs28755349 | 32646978 C | 4.831 | 3.26E-20 | chr:6:32648036 |
| 6 rs28755259 | 32644983 A | 5.234 | 3.27E-20 | chr:6:32648036 |
| 6 rs28371228 | 32647698 A | 4.669 | 3.37E-20 | chr:6:32648036 |
| 6 rs28755340 | 32646830 G | 4.692 | 3.54E-20 | chr:6:32648036 |
| 6 rs9275156  | 32652486 C | 12.35 | 3.78E-20 | chr:6:32648036 |
| 6 rs28755339 | 32646817 G | 4.731 | 3.90E-20 | chr:6:32648036 |
| 6 rs28755347 | 32646955 T | 4.494 | 4.39E-20 | chr:6:32648036 |
| 6 rs28755272 | 32645529 C | 4.942 | 4.43E-20 | chr:6:32648036 |
| 6 rs28755273 | 32645534 A | 4.942 | 4.43E-20 | chr:6:32648036 |
| 6 rs28755350 | 32646997 G | 4.877 | 4.53E-20 | chr:6:32648036 |
| 6 rs28755235 | 32644423 T | 4.963 | 4.66E-20 | chr:6:32648036 |
| 6 rs28755236 | 32644428 G | 4.963 | 4.66E-20 | chr:6:32648036 |
| 6 rs28755270 | 32645489 A | 4.934 | 5.30E-20 | chr:6:32648036 |
| 6 rs28755233 | 32644350 C | 4.657 | 5.60E-20 | chr:6:32648036 |
| 6 rs28755328 | 32646616 C | 4.944 | 5.73E-20 | chr:6:32648036 |
| 6 rs28755329 | 32646617 A | 4.944 | 5.73E-20 | chr:6:32648036 |
| 6 rs28755229 | 32644305 A | 4.502 | 5.78E-20 | chr:6:32648036 |
| 6 rs28755258 | 32644958 C | 4.836 | 6.47E-20 | chr:6:32648036 |
| 6 rs28755304 | 32646193 T | 4.708 | 6.72E-20 | chr:6:32648036 |
| 6 rs28371216 | 32647491 C | 4.697 | 6.84E-20 | chr:6:32648036 |
| 6 rs28755266 | 32645432 T | 4.601 | 8.19E-20 | chr:6:32648036 |
| 6 rs28755267 | 32645446 C | 4.601 | 8.19E-20 | chr:6:32648036 |
| 6 rs28755271 | 32645497 T | 4.806 | 8.39E-20 | chr:6:32648036 |
| 6 rs28755302 | 32646143 G | 4.465 | 8.41E-20 | chr:6:32648036 |
| 6 rs28755303 | 32646145 G | 4.465 | 8.41E-20 | chr:6:32648036 |
| 6 rs9274780  | 32638741 G | 9.067 | 8.45E-20 | chr:6:32648036 |
| 6 rs28755268 | 32645469 A | 4.799 | 8.50E-20 | chr:6:32648036 |
| 6 rs28755257 | 32644953 T | 4.83  | 8.56E-20 | chr:6:32648036 |
| 6 rs28755338 | 32646804 T | 4.589 | 8.73E-20 | chr:6:32648036 |
| 6 rs28371217 | 32647495 A | 4.675 | 9.07E-20 | chr:6:32648036 |
| 6 rs28755231 | 32644337 G | 4.547 | 9.09E-20 | chr:6:32648036 |
| 6 rs28755222 | 32644264 C | 4.562 | 1.09E-19 | chr:6:32648036 |
| 6 rs9274779  | 32638726 A | 8.925 | 1.11E-19 | chr:6:32648036 |
| 6 rs9274782  | 32638795 C | 9.076 | 1.25E-19 | chr:6:32648036 |

|               |            |       |          |                |
|---------------|------------|-------|----------|----------------|
| 6 rs28755316  | 32646395 G | 4.419 | 1.30E-19 | chr:6:32648036 |
| 6 rs28755317  | 32646396 G | 4.419 | 1.30E-19 | chr:6:32648036 |
| 6 rs9275023   | 32643276 T | 4.347 | 1.36E-19 | chr:6:32648036 |
| 6 rs9275024   | 32643281 A | 4.347 | 1.36E-19 | chr:6:32648036 |
| 6 rs28755330  | 32646637 A | 4.717 | 1.37E-19 | chr:6:32648036 |
| 6 rs28755323  | 32646469 A | 4.852 | 1.45E-19 | chr:6:32648036 |
| 6 rs28755230  | 32644328 G | 4.446 | 1.49E-19 | chr:6:32648036 |
| 6 rs28755300  | 32646132 A | 4.438 | 1.52E-19 | chr:6:32648036 |
| 6 rs28755301  | 32646134 A | 4.438 | 1.52E-19 | chr:6:32648036 |
| 6 rs28755310  | 32646304 T | 4.261 | 1.58E-19 | chr:6:32648036 |
| 6 rs28755311  | 32646309 C | 4.261 | 1.58E-19 | chr:6:32648036 |
| 6 rs9274847   | 32640143 G | 8.868 | 1.59E-19 | chr:6:32648036 |
| 6 rs9275157   | 32652552 A | 10.48 | 1.67E-19 | chr:6:32648036 |
| 6 rs28755331  | 32646647 A | 4.698 | 1.71E-19 | chr:6:32648036 |
| 6 rs28755332  | 32646648 T | 4.698 | 1.71E-19 | chr:6:32648036 |
| 6 rs28755312  | 32646342 T | 4.146 | 1.84E-19 | chr:6:32648036 |
| 6 rs28755313  | 32646343 G | 4.146 | 1.84E-19 | chr:6:32648036 |
| 6 rs28371215  | 32647476 G | 4.492 | 1.90E-19 | chr:6:32648036 |
| 6 rs9274789   | 32639143 C | 9.202 | 2.06E-19 | chr:6:32648036 |
| 6 rs28755224  | 32644285 T | 4.359 | 2.16E-19 | chr:6:32648036 |
| 6 rs9274842   | 32640095 A | 8.811 | 2.18E-19 | chr:6:32648036 |
| 6 rs28755226  | 32644297 G | 4.232 | 2.26E-19 | chr:6:32648036 |
| 6 rs28755227  | 32644299 C | 4.232 | 2.26E-19 | chr:6:32648036 |
| 6 rs28755228  | 32644300 A | 4.232 | 2.26E-19 | chr:6:32648036 |
| 6 rs28755218  | 32644190 T | 4.65  | 2.28E-19 | chr:6:32648036 |
| 6 rs9274936   | 32641625 T | 6.871 | 2.38E-19 | chr:6:32648036 |
| 6 rs28755223  | 32644276 A | 4.348 | 2.82E-19 | chr:6:32648036 |
| 6 rs9274791   | 32639163 T | 9.427 | 2.90E-19 | chr:6:32648036 |
| 6 rs28755356  | 32647059 G | 4.704 | 2.96E-19 | chr:6:32648036 |
| 6 rs28755372  | 32647383 A | 4.61  | 3.37E-19 | chr:6:32648036 |
| 6 rs28755225  | 32644290 T | 4.27  | 3.75E-19 | chr:6:32648036 |
| 6 rs28755219  | 32644226 C | 4.407 | 4.16E-19 | chr:6:32648036 |
| 6 rs28755220  | 32644238 C | 4.407 | 4.16E-19 | chr:6:32648036 |
| 6 rs28755221  | 32644239 A | 4.407 | 4.16E-19 | chr:6:32648036 |
| 6 rs28755307  | 32646241 A | 4.202 | 4.72E-19 | chr:6:32648036 |
| 6 rs9274862   | 32640595 T | 8.376 | 4.91E-19 | chr:6:32648036 |
| 6 rs28755373  | 32647388 A | 4.49  | 4.97E-19 | chr:6:32648036 |
| 6 rs139025169 | 32639390 A | 6.15  | 5.00E-19 | chr:6:32648036 |
| 6 rs141881212 | 32639387 G | 6.15  | 5.00E-19 | chr:6:32648036 |
| 6 rs9275179   | 32654275 G | 11.24 | 5.09E-19 | chr:6:32648036 |
| 6 rs9274879   | 32640918 G | 6.117 | 5.15E-19 | chr:6:32648036 |
| 6 rs28755357  | 32647061 C | 4.614 | 5.22E-19 | chr:6:32648036 |
| 6 rs9274793   | 32639247 C | 9.617 | 5.88E-19 | chr:6:32648036 |



|               |            |       |          |                |
|---------------|------------|-------|----------|----------------|
| 6 rs112819910 | 32639344 T | 6.505 | 5.94E-19 | chr:6:32648036 |
| 6 rs28755305  | 32646232 G | 4.189 | 6.00E-19 | chr:6:32648036 |
| 6 rs28755306  | 32646238 T | 4.189 | 6.00E-19 | chr:6:32648036 |
| 6 rs3129778   | 32646252 T | 4.12  | 6.51E-19 | chr:6:32648036 |
| 6 rs9275159   | 32652607 T | 10.9  | 6.63E-19 | chr:6:32648036 |
| 6 rs9274750   | 32638114 C | 10.69 | 6.73E-19 | chr:6:32648036 |
| 6 rs9274840   | 32640035 T | 8.563 | 8.04E-19 | chr:6:32648036 |
| 6 rs9274863   | 32640611 C | 8.207 | 9.45E-19 | chr:6:32648036 |
| 6 rs3021059   | 32652344 T | 10.3  | 9.77E-19 | chr:6:32648036 |
| 6 rs144949632 | 32639331 A | 6.454 | 9.82E-19 | chr:6:32648036 |
| 6 rs148651202 | 32639332 T | 6.454 | 9.82E-19 | chr:6:32648036 |
| 6 rs9274868   | 32640752 G | 7.344 | 9.86E-19 | chr:6:32648036 |
| 6 rs9275009   | 32642958 A | 13.59 | 9.91E-19 | chr:6:32648036 |
| 6 rs2935909   | 32655962 G | 15.93 | 1.01E-18 | chr:6:32648036 |
| 6 rs3021056   | 32655921 T | 15.93 | 1.01E-18 | chr:6:32648036 |
| 6 rs9274841   | 32640059 A | 8.086 | 1.12E-18 | chr:6:32648036 |
| 6 rs9274858   | 32640546 A | 7.161 | 1.13E-18 | chr:6:32648036 |
| 6 rs9274860   | 32640556 A | 7.161 | 1.13E-18 | chr:6:32648036 |
| 6 rs28755308  | 32646274 C | 3.987 | 1.17E-18 | chr:6:32648036 |
| 6 rs9274838   | 32639973 G | 10.52 | 1.17E-18 | chr:6:32648036 |
| 6 rs9274761   | 32638371 G | 11.24 | 1.20E-18 | chr:6:32648036 |
| 6 rs28371227  | 32647666 G | 4.187 | 1.27E-18 | chr:6:32648036 |
| 6 rs9275072   | 32648502 T | 10.33 | 1.32E-18 | chr:6:32648036 |
| 6 rs9274832   | 32639875 T | 9.893 | 1.36E-18 | chr:6:32648036 |
| 6 rs9274833   | 32639885 T | 9.893 | 1.36E-18 | chr:6:32648036 |
| 6 rs9274784   | 32638878 G | 9.934 | 1.37E-18 | chr:6:32648036 |
| 6 rs9274785   | 32638907 C | 9.934 | 1.37E-18 | chr:6:32648036 |
| 6 rs9274787   | 32639028 A | 9.868 | 1.44E-18 | chr:6:32648036 |
| 6 rs9274788   | 32639036 C | 9.868 | 1.44E-18 | chr:6:32648036 |
| 6 rs28755309  | 32646279 G | 3.919 | 1.47E-18 | chr:6:32648036 |
| 6 rs9275066   | 32648404 T | 8.422 | 1.52E-18 | chr:6:32648036 |
| 6 rs201341530 | 32639456 C | 6.496 | 1.58E-18 | chr:6:32648036 |
| 6 rs202086737 | 32639459 G | 6.496 | 1.58E-18 | chr:6:32648036 |
| 6 rs9275067   | 32648414 C | 8.444 | 1.59E-18 | chr:6:32648036 |
| 6 rs9274854   | 32640473 T | 10.41 | 1.60E-18 | chr:6:32648036 |
| 6 rs9274762   | 32638411 G | 11.2  | 1.64E-18 | chr:6:32648036 |
| 6 rs9274765   | 32638510 T | 9.839 | 1.68E-18 | chr:6:32648036 |
| 6 rs9274766   | 32638512 A | 9.839 | 1.68E-18 | chr:6:32648036 |
| 6 rs9274811   | 32639511 T | 7.986 | 1.70E-18 | chr:6:32648036 |
| 6 rs9274775   | 32638643 G | 10.51 | 1.72E-18 | chr:6:32648036 |
| 6 rs9274938   | 32641673 C | 8.131 | 1.77E-18 | chr:6:32648036 |
| 6 rs9274757   | 32638280 C | 8.476 | 1.79E-18 | chr:6:32648036 |
| 6 rs9274874   | 32640849 T | 5.65  | 1.79E-18 | chr:6:32648036 |

|              |            |       |          |                |
|--------------|------------|-------|----------|----------------|
| 6 rs9275147  | 32651557 T | 14.81 | 1.89E-18 | chr:6:32648036 |
| 6 rs9275164  | 32652929 C | 9.287 | 1.89E-18 | chr:6:32648036 |
| 6 rs9274856  | 32640539 T | 7.043 | 1.93E-18 | chr:6:32648036 |
| 6 rs9274767  | 32638541 G | 9.31  | 1.93E-18 | chr:6:32648036 |
| 6 rs9274768  | 32638544 C | 9.31  | 1.93E-18 | chr:6:32648036 |
| 6 rs9275025  | 32643303 T | 3.821 | 2.13E-18 | chr:6:32648036 |
| 6 rs9275064  | 32648381 T | 8.396 | 2.29E-18 | chr:6:32648036 |
| 6 rs9274876  | 32640864 G | 5.362 | 2.40E-18 | chr:6:32648036 |
| 6 rs9275165  | 32652956 G | 13.03 | 3.15E-18 | chr:6:32648036 |
| 6 rs9275166  | 32652963 C | 13.03 | 3.15E-18 | chr:6:32648036 |
| 6 rs9274742  | 32638037 C | 13.87 | 3.18E-18 | chr:6:32648036 |
| 6 rs9275079  | 32648614 C | 12.9  | 3.23E-18 | chr:6:32648036 |
| 6 rs9275080  | 32648627 T | 12.9  | 3.23E-18 | chr:6:32648036 |
| 6 rs9275075  | 32648550 A | 8.869 | 3.59E-18 | chr:6:32648036 |
| 6 rs9275140  | 32651018 A | 16.08 | 3.72E-18 | chr:6:32648036 |
| 6 rs9274812  | 32639573 T | 7.123 | 4.01E-18 | chr:6:32648036 |
| 6 rs28755375 | 32647411 C | 4.054 | 4.14E-18 | chr:6:32648036 |
| 6 rs28755376 | 32647412 A | 4.054 | 4.14E-18 | chr:6:32648036 |
| 6 rs9275175  | 32654147 A | 12.63 | 4.50E-18 | chr:6:32648036 |
| 6 rs9275176  | 32654157 G | 12.63 | 4.50E-18 | chr:6:32648036 |
| 6 rs9275077  | 32648565 C | 8.741 | 5.00E-18 | chr:6:32648036 |
| 6 rs28755322 | 32646455 A | 4.003 | 5.03E-18 | chr:6:32648036 |
| 6 rs9274852  | 32640289 A | 9.137 | 5.18E-18 | chr:6:32648036 |
| 6 rs9275083  | 32648694 C | 11.79 | 5.36E-18 | chr:6:32648036 |
| 6 rs28755374 | 32647404 T | 4.044 | 5.36E-18 | chr:6:32648036 |
| 6 rs9275002  | 32642761 A | 16.63 | 5.56E-18 | chr:6:32648036 |
| 6 rs9275003  | 32642769 C | 16.63 | 5.56E-18 | chr:6:32648036 |
| 6 rs9275149  | 32651616 T | 18.06 | 5.61E-18 | chr:6:32648036 |
| 6 rs9275150  | 32651617 G | 18.06 | 5.61E-18 | chr:6:32648036 |
| 6 rs9274972  | 32642126 T | 10.41 | 5.94E-18 | chr:6:32648036 |
| 6 rs9275181  | 32654325 G | 17.61 | 6.13E-18 | chr:6:32648036 |
| 6 rs9275171  | 32653972 G | 12.36 | 6.21E-18 | chr:6:32648036 |
| 6 rs28755318 | 32646416 T | 3.811 | 6.62E-18 | chr:6:32648036 |
| 6 rs9274992  | 32642577 G | 8.169 | 6.63E-18 | chr:6:32648036 |
| 6 rs9274993  | 32642582 A | 8.169 | 6.63E-18 | chr:6:32648036 |
| 6 rs9275076  | 32648553 G | 8.324 | 6.86E-18 | chr:6:32648036 |
| 6 rs9274976  | 32642220 A | 15.03 | 7.24E-18 | chr:6:32648036 |
| 6 rs28371229 | 32647728 C | 3.821 | 7.28E-18 | chr:6:32648036 |
| 6 rs28371230 | 32647729 C | 3.821 | 7.28E-18 | chr:6:32648036 |
| 6 rs9275000  | 32642719 T | 13.63 | 7.40E-18 | chr:6:32648036 |
| 6 rs9274981  | 32642313 G | 7.139 | 8.79E-18 | chr:6:32648036 |
| 6 rs28371231 | 32647735 A | 3.807 | 9.49E-18 | chr:6:32648036 |
| 6 rs7750477  | 32651707 G | 19.66 | 1.05E-17 | chr:6:32648036 |

|              |            |       |          |                |
|--------------|------------|-------|----------|----------------|
| 6 rs9274975  | 32642187 G | 14.64 | 1.09E-17 | chr:6:32648036 |
| 6 rs9274982  | 32642335 A | 7.026 | 1.21E-17 | chr:6:32648036 |
| 6 rs9274983  | 32642337 C | 7.026 | 1.21E-17 | chr:6:32648036 |
| 6 rs2856691  | 32653435 A | 17.52 | 1.32E-17 | chr:6:32648036 |
| 6 rs9274979  | 32642280 T | 6.73  | 1.35E-17 | chr:6:32648036 |
| 6 rs9275004  | 32642839 G | 17.4  | 1.41E-17 | chr:6:32648036 |
| 6 rs9274970  | 32642095 T | 7.425 | 1.44E-17 | chr:6:32648036 |
| 6 rs9275121  | 32650185 G | 15.72 | 1.45E-17 | chr:6:32648036 |
| 6 rs9275122  | 32650233 C | 15.72 | 1.45E-17 | chr:6:32648036 |
| 6 rs9275127  | 32650314 T | 15.72 | 1.45E-17 | chr:6:32648036 |
| 6 rs28755319 | 32646445 C | 3.797 | 1.48E-17 | chr:6:32648036 |
| 6 rs9275137  | 32650880 C | 19.7  | 1.51E-17 | chr:6:32648036 |
| 6 rs9275113  | 32649825 G | 17.73 | 1.51E-17 | chr:6:32648036 |
| 6 rs9275026  | 32643318 T | 3.575 | 1.53E-17 | chr:6:32648036 |
| 6 rs9275027  | 32643320 C | 3.575 | 1.53E-17 | chr:6:32648036 |
| 6 rs9275028  | 32643328 C | 3.575 | 1.53E-17 | chr:6:32648036 |
| 6 rs9275090  | 32648971 G | 17.23 | 1.62E-17 | chr:6:32648036 |
| 6 rs28755358 | 32647062 A | 6.131 | 1.84E-17 | chr:6:32648036 |
| 6 rs28755359 | 32647064 T | 6.131 | 1.84E-17 | chr:6:32648036 |
| 6 rs2856677  | 32656815 T | 19.5  | 2.03E-17 | chr:6:32648036 |
| 6 rs9275182  | 32654390 T | 19.55 | 2.14E-17 | chr:6:32648036 |
| 6 rs9275006  | 32642852 T | 19.42 | 2.31E-17 | chr:6:32648036 |
| 6 rs3104362  | 32656697 G | 19.26 | 2.52E-17 | chr:6:32648036 |
| 6 rs28755355 | 32647058 C | 6.051 | 2.56E-17 | chr:6:32648036 |
| 6 rs9274825  | 32639710 C | 5.333 | 2.74E-17 | chr:6:32648036 |
| 6 rs3021060  | 32651846 C | 19.41 | 2.78E-17 | chr:6:32648036 |
| 6 rs3021061  | 32651839 G | 19.41 | 2.78E-17 | chr:6:32648036 |
| 6 rs9275029  | 32643336 A | 3.54  | 2.83E-17 | chr:6:32648036 |
| 6 rs9275030  | 32643351 T | 3.54  | 2.83E-17 | chr:6:32648036 |
| 6 rs9275093  | 32649047 T | 19.12 | 2.90E-17 | chr:6:32648036 |
| 6 rs9275094  | 32649062 C | 19.12 | 2.90E-17 | chr:6:32648036 |
| 6 rs9275096  | 32649096 T | 19.12 | 2.90E-17 | chr:6:32648036 |
| 6 rs9275115  | 32649941 C | 19.23 | 2.98E-17 | chr:6:32648036 |
| 6 rs9275117  | 32649965 T | 19.23 | 2.98E-17 | chr:6:32648036 |
| 6 rs3129785  | 32656724 T | 19.22 | 3.06E-17 | chr:6:32648036 |
| 6 rs3021062  | 32651741 T | 22.01 | 3.77E-17 | chr:6:32648036 |
| 6 rs9275144  | 32651218 A | 21.64 | 4.06E-17 | chr:6:32648036 |
| 6 rs2647045  | 32668100 A | 18.74 | 4.58E-17 | chr:6:32648036 |
| 6 rs2856688  | 32654640 T | 21.89 | 4.84E-17 | chr:6:32648036 |
| 6 rs2856683  | 32655218 G | 21.95 | 5.04E-17 | chr:6:32648036 |
| 6 rs2856692  | 32653385 G | 21.78 | 5.23E-17 | chr:6:32648036 |
| 6 rs9275110  | 32649723 C | 21.99 | 5.82E-17 | chr:6:32648036 |
| 6 rs9275111  | 32649735 T | 21.99 | 5.82E-17 | chr:6:32648036 |

|              |            |       |          |                |
|--------------|------------|-------|----------|----------------|
| 6 rs9274827  | 32639726 T | 5.18  | 5.88E-17 | chr:6:32648036 |
| 6 rs9275104  | 32649388 C | 21.81 | 5.93E-17 | chr:6:32648036 |
| 6 rs9275107  | 32649508 G | 21.81 | 5.93E-17 | chr:6:32648036 |
| 6 rs9275108  | 32649609 A | 21.81 | 5.93E-17 | chr:6:32648036 |
| 6 rs9275132  | 32650500 A | 21.81 | 5.93E-17 | chr:6:32648036 |
| 6 rs9275134  | 32650612 G | 21.81 | 5.93E-17 | chr:6:32648036 |
| 6 rs28755321 | 32646451 T | 3.858 | 6.33E-17 | chr:6:32648036 |
| 6 rs28755320 | 32646449 C | 3.853 | 7.09E-17 | chr:6:32648036 |
| 6 rs9275100  | 32649308 G | 21.45 | 7.37E-17 | chr:6:32648036 |
| 6 rs28371237 | 32647816 G | 3.692 | 7.83E-17 | chr:6:32648036 |
| 6 rs9274823  | 32639695 T | 5.044 | 8.18E-17 | chr:6:32648036 |
| 6 rs9274826  | 32639725 A | 5.108 | 8.43E-17 | chr:6:32648036 |
| 6 rs28371234 | 32647779 A | 3.589 | 8.53E-17 | chr:6:32648036 |
| 6 rs28371235 | 32647786 G | 3.601 | 1.01E-16 | chr:6:32648036 |
| 6 rs4947342  | 32653070 A | 19.71 | 1.27E-16 | chr:6:32648036 |
| 6 rs28371232 | 32647761 T | 3.475 | 1.29E-16 | chr:6:32648036 |
| 6 rs28371233 | 32647762 G | 3.475 | 1.29E-16 | chr:6:32648036 |
| 6 rs9274939  | 32641751 A | 4.791 | 1.62E-16 | chr:6:32648036 |
| 6 rs9274941  | 32641755 G | 4.791 | 1.62E-16 | chr:6:32648036 |
| 6 rs9274966  | 32642019 A | 5.226 | 1.69E-16 | chr:6:32648036 |
| 6 rs9274903  | 32641221 A | 3.452 | 1.77E-16 | chr:6:32648036 |
| 6 rs9274688  | 32636900 T | 9.185 | 1.80E-16 | chr:6:32648036 |
| 6 rs28371236 | 32647803 G | 3.572 | 1.83E-16 | chr:6:32648036 |
| 6 rs9275205  | 32657560 C | 8.028 | 2.17E-16 | chr:6:32648036 |
| 6 rs9274945  | 32641796 C | 4.51  | 2.46E-16 | chr:6:32648036 |
| 6 rs9274989  | 32642424 A | 5.566 | 2.57E-16 | chr:6:32648036 |
| 6 rs9275211  | 32657844 C | 7.846 | 2.60E-16 | chr:6:32648036 |
| 6 rs9274928  | 32641484 T | 3.595 | 2.61E-16 | chr:6:32648036 |
| 6 rs9274888  | 32641142 A | 3.598 | 2.74E-16 | chr:6:32648036 |
| 6 rs9274965  | 32641984 A | 5.06  | 2.81E-16 | chr:6:32648036 |
| 6 rs9274906  | 32641252 A | 3.379 | 2.88E-16 | chr:6:32648036 |
| 6 rs9274727  | 32637696 G | 8.406 | 3.02E-16 | chr:6:32648036 |
| 6 rs1694122  | 32642845 G | 7.817 | 3.18E-16 | chr:6:32648036 |
| 6 rs9274699  | 32637096 A | 8.086 | 3.39E-16 | chr:6:32648036 |
| 6 rs9274716  | 32637404 A | 6.664 | 3.87E-16 | chr:6:32648036 |
| 6 rs28755336 | 32646798 A | 4.892 | 4.03E-16 | chr:6:32648036 |
| 6 rs28755337 | 32646799 C | 4.892 | 4.03E-16 | chr:6:32648036 |
| 6 rs9274739  | 32637940 T | 8.342 | 4.25E-16 | chr:6:32648036 |
| 6 rs9274948  | 32641847 T | 4.509 | 4.38E-16 | chr:6:32648036 |
| 6 rs9274897  | 32641195 C | 3.414 | 4.45E-16 | chr:6:32648036 |
| 6 rs9274964  | 32641972 T | 4.887 | 4.54E-16 | chr:6:32648036 |
| 6 rs9274890  | 32641148 A | 3.53  | 4.76E-16 | chr:6:32648036 |
| 6 rs2516006  | 32650268 C | 7.704 | 4.86E-16 | chr:6:32648036 |

|              |            |        |          |                |
|--------------|------------|--------|----------|----------------|
| 6 rs2647025  | 32635949 A | 8.751  | 5.01E-16 | chr:6:32648036 |
| 6 rs9274925  | 32641411 T | 3.262  | 5.44E-16 | chr:6:32648036 |
| 6 rs9274728  | 32637772 G | 8.18   | 5.46E-16 | chr:6:32648036 |
| 6 rs9274924  | 32641403 T | 3.266  | 6.60E-16 | chr:6:32648036 |
| 6 rs9274821  | 32639670 G | 4.612  | 7.41E-16 | chr:6:32648036 |
| 6 rs9274963  | 32641942 C | 4.556  | 7.52E-16 | chr:6:32648036 |
| 6 rs685810   | 32584952 G | 6.965  | 9.20E-16 | chr:6:32648036 |
| 6 rs9274950  | 32641864 T | 4.341  | 9.57E-16 | chr:6:32648036 |
| 6 rs9274947  | 32641832 A | 4.343  | 9.89E-16 | chr:6:32648036 |
| 6 rs9274984  | 32642378 C | 5.147  | 1.02E-15 | chr:6:32648036 |
| 6 rs9274985  | 32642379 A | 5.147  | 1.02E-15 | chr:6:32648036 |
| 6 rs9274958  | 32641915 G | 4.375  | 1.18E-15 | chr:6:32648036 |
| 6 rs9274959  | 32641916 C | 4.375  | 1.18E-15 | chr:6:32648036 |
| 6 rs9274960  | 32641917 A | 4.375  | 1.18E-15 | chr:6:32648036 |
| 6 rs9274704  | 32637213 G | 6.133  | 1.32E-15 | chr:6:32648036 |
| 6 rs9274700  | 32637180 G | 6.314  | 1.37E-15 | chr:6:32648036 |
| 6 rs9271930  | 32596677 G | 0.1635 | 1.54E-15 | chr:6:32648036 |
| 6 rs9271927  | 32596647 C | 0.1659 | 2.05E-15 | chr:6:32648036 |
| 6 rs9271928  | 32596648 A | 0.1659 | 2.05E-15 | chr:6:32648036 |
| 6 rs9274706  | 32637265 G | 5.228  | 2.44E-15 | chr:6:32648036 |
| 6 rs9274882  | 32641066 T | 3.564  | 2.51E-15 | chr:6:32648036 |
| 6 rs9274709  | 32637275 G | 5.098  | 2.66E-15 | chr:6:32648036 |
| 6 rs9274893  | 32641165 T | 3.303  | 2.84E-15 | chr:6:32648036 |
| 6 rs9272007  | 32598038 T | 0.172  | 3.16E-15 | chr:6:32648036 |
| 6 rs9274892  | 32641161 G | 3.3    | 3.24E-15 | chr:6:32648036 |
| 6 rs17204659 | 32557321 T | 8.819  | 3.42E-15 | chr:6:32648036 |
| 6 rs9275331  | 32666899 G | 6.71   | 3.44E-15 | chr:6:32648036 |
| 6 rs9274711  | 32637289 T | 5.064  | 3.60E-15 | chr:6:32648036 |
| 6 rs9271932  | 32596714 C | 0.1681 | 3.93E-15 | chr:6:32648036 |
| 6 rs9271933  | 32596717 A | 0.1681 | 3.93E-15 | chr:6:32648036 |
| 6 rs9274894  | 32641180 G | 3.265  | 4.12E-15 | chr:6:32648036 |
| 6 rs9274819  | 32639646 C | 4.277  | 4.15E-15 | chr:6:32648036 |
| 6 rs9272008  | 32598042 A | 0.177  | 4.52E-15 | chr:6:32648036 |
| 6 rs28371247 | 32648003 C | 4.521  | 5.21E-15 | chr:6:32648036 |
| 6 rs9274817  | 32639623 T | 4.369  | 5.24E-15 | chr:6:32648036 |
| 6 rs9275312  | 32665728 G | 6.592  | 5.27E-15 | chr:6:32648036 |
| 6 rs9275318  | 32666173 G | 6.592  | 5.27E-15 | chr:6:32648036 |
| 6 rs9275319  | 32666295 G | 6.592  | 5.27E-15 | chr:6:32648036 |
| 6 rs9275327  | 32666802 T | 6.592  | 5.27E-15 | chr:6:32648036 |
| 6 rs9275328  | 32666822 T | 6.592  | 5.27E-15 | chr:6:32648036 |
| 6 rs9275330  | 32666875 G | 6.592  | 5.27E-15 | chr:6:32648036 |
| 6 rs9275333  | 32666968 C | 6.592  | 5.27E-15 | chr:6:32648036 |
| 6 rs9275338  | 32667343 T | 6.592  | 5.27E-15 | chr:6:32648036 |

|              |            |        |          |                |
|--------------|------------|--------|----------|----------------|
| 6 rs28752526 | 32584918 G | 6.383  | 5.48E-15 | chr:6:32648036 |
| 6 rs9274818  | 32639624 G | 4.134  | 6.67E-15 | chr:6:32648036 |
| 6 rs9275347  | 32667623 A | 6.361  | 6.99E-15 | chr:6:32648036 |
| 6 rs9275348  | 32667638 A | 6.361  | 6.99E-15 | chr:6:32648036 |
| 6 rs9271888  | 32595732 C | 0.1667 | 7.06E-15 | chr:6:32648036 |
| 6 rs9274816  | 32639621 A | 4.351  | 7.41E-15 | chr:6:32648036 |
| 6 rs9275365  | 32668125 A | 6.492  | 7.47E-15 | chr:6:32648036 |
| 6 rs9275068  | 32648418 C | 7.19   | 7.64E-15 | chr:6:32648036 |
| 6 rs9274712  | 32637298 T | 4.905  | 9.20E-15 | chr:6:32648036 |
| 6 rs9272316  | 32604050 T | 5.437  | 9.82E-15 | chr:6:32648036 |
| 6 rs9272009  | 32598063 T | 0.1835 | 9.86E-15 | chr:6:32648036 |
| 6 rs9275358  | 32667895 G | 6.27   | 1.03E-14 | chr:6:32648036 |
| 6 rs9271889  | 32595747 A | 0.1709 | 1.10E-14 | chr:6:32648036 |
| 6 rs7774434  | 32657578 T | 0.1643 | 1.27E-14 | chr:6:32648036 |
| 6 rs9274884  | 32641078 C | 3.39   | 1.28E-14 | chr:6:32648036 |
| 6 rs9274885  | 32641081 T | 3.39   | 1.28E-14 | chr:6:32648036 |
| 6 rs9271909  | 32596177 T | 0.1849 | 1.49E-14 | chr:6:32648036 |
| 6 rs9271912  | 32596207 T | 0.1813 | 1.69E-14 | chr:6:32648036 |
| 6 rs9272013  | 32598224 T | 0.1741 | 1.83E-14 | chr:6:32648036 |
| 6 rs9271945  | 32597034 A | 0.181  | 1.90E-14 | chr:6:32648036 |
| 6 rs9275360  | 32667937 T | 6.051  | 1.92E-14 | chr:6:32648036 |
| 6 rs9275362  | 32667957 T | 6.051  | 1.92E-14 | chr:6:32648036 |
| 6 rs9275183  | 32654502 G | 5.876  | 1.96E-14 | chr:6:32648036 |
| 6 rs9271948  | 32597105 A | 0.1933 | 2.11E-14 | chr:6:32648036 |
| 6 rs9271917  | 32596336 G | 0.1791 | 2.12E-14 | chr:6:32648036 |
| 6 rs9271910  | 32596183 C | 0.1875 | 2.21E-14 | chr:6:32648036 |
| 6 rs9271913  | 32596222 A | 0.1849 | 2.53E-14 | chr:6:32648036 |
| 6 rs9271890  | 32595779 A | 0.1766 | 2.60E-14 | chr:6:32648036 |
| 6 rs9271891  | 32595783 T | 0.1766 | 2.60E-14 | chr:6:32648036 |
| 6 rs9271918  | 32596352 T | 0.1794 | 2.64E-14 | chr:6:32648036 |
| 6 rs55673904 | 32645076 T | 3.538  | 2.71E-14 | chr:6:32648036 |
| 6 rs9271615  | 32591686 G | 0.1812 | 2.91E-14 | chr:6:32648036 |
| 6 rs9271929  | 32596650 C | 0.1892 | 2.95E-14 | chr:6:32648036 |
| 6 rs9272061  | 32599250 A | 0.1895 | 3.55E-14 | chr:6:32648036 |
| 6 rs9271896  | 32595907 A | 0.1794 | 3.96E-14 | chr:6:32648036 |
| 6 rs9272141  | 32600797 A | 0.1962 | 4.55E-14 | chr:6:32648036 |
| 6 rs9272143  | 32600803 C | 0.1962 | 4.55E-14 | chr:6:32648036 |
| 6 rs9272156  | 32601081 C | 0.2127 | 4.90E-14 | chr:6:32648036 |
| 6 rs9271893  | 32595859 T | 0.1782 | 4.98E-14 | chr:6:32648036 |
| 6 rs9271651  | 32592385 T | 0.1702 | 4.98E-14 | chr:6:32648036 |
| 6 rs9272059  | 32599223 C | 0.1933 | 5.07E-14 | chr:6:32648036 |
| 6 rs9274737  | 32637907 C | 4.821  | 5.12E-14 | chr:6:32648036 |
| 6 rs9271915  | 32596294 C | 0.1856 | 5.24E-14 | chr:6:32648036 |

|               |            |        |          |                |
|---------------|------------|--------|----------|----------------|
| 6 rs9272016   | 32598346 T | 0.1929 | 5.52E-14 | chr:6:32648036 |
| 6 rs9271914   | 32596238 C | 0.1894 | 5.57E-14 | chr:6:32648036 |
| 6 rs9272146   | 32600914 C | 0.1922 | 5.65E-14 | chr:6:32648036 |
| 6 rs9271892   | 32595813 C | 0.182  | 6.04E-14 | chr:6:32648036 |
| 6 rs9271886   | 32595633 T | 0.2069 | 6.22E-14 | chr:6:32648036 |
| 6 rs9271897   | 32595954 A | 0.1853 | 6.23E-14 | chr:6:32648036 |
| 6 rs9271884   | 32595628 C | 0.208  | 6.37E-14 | chr:6:32648036 |
| 6 rs9271885   | 32595629 T | 0.208  | 6.37E-14 | chr:6:32648036 |
| 6 rs3129774   | 32603825 C | 0.2349 | 6.52E-14 | chr:6:32648036 |
| 6 rs9272120   | 32600501 G | 0.1894 | 6.60E-14 | chr:6:32648036 |
| 6 rs9271898   | 32595972 A | 0.1896 | 6.61E-14 | chr:6:32648036 |
| 6 rs9272108   | 32600228 C | 0.1917 | 6.64E-14 | chr:6:32648036 |
| 6 rs9271934   | 32596773 T | 0.1947 | 6.71E-14 | chr:6:32648036 |
| 6 rs9272130   | 32600638 G | 0.1917 | 6.72E-14 | chr:6:32648036 |
| 6 rs9272005   | 32597992 G | 0.203  | 6.88E-14 | chr:6:32648036 |
| 6 rs9272006   | 32597993 T | 0.203  | 6.88E-14 | chr:6:32648036 |
| 6 rs9274735   | 32637896 A | 4.822  | 6.94E-14 | chr:6:32648036 |
| 6 rs9271901   | 32596027 T | 0.1931 | 6.95E-14 | chr:6:32648036 |
| 6 rs9272015   | 32598299 A | 0.1982 | 7.24E-14 | chr:6:32648036 |
| 6 rs9271947   | 32597095 T | 0.1944 | 7.55E-14 | chr:6:32648036 |
| 6 rs9272026   | 32598618 G | 0.1961 | 7.77E-14 | chr:6:32648036 |
| 6 rs9272027   | 32598622 G | 0.1961 | 7.77E-14 | chr:6:32648036 |
| 6 rs9272119   | 32600470 C | 0.1941 | 8.17E-14 | chr:6:32648036 |
| 6 rs9272028   | 32598706 T | 0.1966 | 8.78E-14 | chr:6:32648036 |
| 6 rs9272029   | 32598707 G | 0.1966 | 8.78E-14 | chr:6:32648036 |
| 6 rs9271935   | 32596831 C | 0.2032 | 8.92E-14 | chr:6:32648036 |
| 6 rs148437409 | 32598479 C | 0.2143 | 8.95E-14 | chr:6:32648036 |
| 6 rs2647082   | 32628146 A | 4.14   | 9.09E-14 | chr:6:32648036 |
| 6 rs9271720   | 32593507 A | 0.199  | 9.32E-14 | chr:6:32648036 |
| 6 rs9271908   | 32596131 T | 0.2026 | 1.03E-13 | chr:6:32648036 |
| 6 rs9271907   | 32596123 T | 0.2035 | 1.04E-13 | chr:6:32648036 |
| 6 rs9272064   | 32599338 T | 0.1986 | 1.08E-13 | chr:6:32648036 |
| 6 rs9272137   | 32600738 C | 0.2006 | 1.09E-13 | chr:6:32648036 |
| 6 rs9271899   | 32596007 G | 0.1993 | 1.10E-13 | chr:6:32648036 |
| 6 rs9272138   | 32600757 A | 0.2024 | 1.14E-13 | chr:6:32648036 |
| 6 rs9272109   | 32600253 T | 0.1994 | 1.16E-13 | chr:6:32648036 |
| 6 rs9272117   | 32600411 T | 0.1973 | 1.24E-13 | chr:6:32648036 |
| 6 rs112313206 | 32598405 T | 0.214  | 1.54E-13 | chr:6:32648036 |
| 6 rs9271995   | 32597777 A | 0.1991 | 1.63E-13 | chr:6:32648036 |
| 6 rs9272136   | 32600730 T | 0.2073 | 1.70E-13 | chr:6:32648036 |
| 6 rs9271906   | 32596048 A | 0.2067 | 1.81E-13 | chr:6:32648036 |
| 6 rs9271954   | 32597216 C | 0.2224 | 1.85E-13 | chr:6:32648036 |
| 6 rs1049087   | 32629889 G | 0.1893 | 1.87E-13 | chr:6:32648036 |

|               |            |        |          |                |
|---------------|------------|--------|----------|----------------|
| 6 rs9271939   | 32596921 C | 0.2119 | 1.97E-13 | chr:6:32648036 |
| 6 rs9272067   | 32599401 A | 0.2067 | 2.30E-13 | chr:6:32648036 |
| 6 rs9271999   | 32597832 G | 0.2202 | 2.31E-13 | chr:6:32648036 |
| 6 rs9272000   | 32597834 T | 0.2202 | 2.31E-13 | chr:6:32648036 |
| 6 rs111477174 | 32594457 G | 0.2145 | 2.45E-13 | chr:6:32648036 |
| 6 rs111634228 | 32594452 G | 0.2145 | 2.45E-13 | chr:6:32648036 |
| 6 rs9272134   | 32600705 G | 0.2111 | 2.55E-13 | chr:6:32648036 |
| 6 rs9272135   | 32600723 A | 0.2135 | 2.71E-13 | chr:6:32648036 |
| 6 rs9271937   | 32596870 G | 0.2179 | 3.20E-13 | chr:6:32648036 |
| 6 rs9272001   | 32597901 G | 0.213  | 3.22E-13 | chr:6:32648036 |
| 6 rs9274921   | 32641341 T | 2.817  | 3.27E-13 | chr:6:32648036 |
| 6 rs659244    | 32577033 C | 3.974  | 3.56E-13 | chr:6:32648036 |
| 6 rs28383400  | 32607950 A | 3.822  | 3.67E-13 | chr:6:32648036 |
| 6 rs114309058 | 32594470 A | 0.2193 | 3.69E-13 | chr:6:32648036 |
| 6 rs9272054   | 32599164 A | 0.2206 | 3.81E-13 | chr:6:32648036 |
| 6 rs9272110   | 32600287 C | 0.2121 | 3.92E-13 | chr:6:32648036 |
| 6 rs9272113   | 32600291 C | 0.2121 | 3.92E-13 | chr:6:32648036 |
| 6 rs4947340   | 32435338 C | 0.2155 | 4.00E-13 | chr:6:32648036 |
| 6 rs9272044   | 32598971 A | 0.2096 | 4.12E-13 | chr:6:32648036 |
| 6 rs9273508   | 32628439 G | 0.1976 | 4.45E-13 | chr:6:32648036 |
| 6 rs536810    | 32577497 T | 4.454  | 4.54E-13 | chr:6:32648036 |
| 6 rs9272004   | 32597964 A | 0.2163 | 4.68E-13 | chr:6:32648036 |
| 6 rs9272148   | 32600980 C | 0.2383 | 5.02E-13 | chr:6:32648036 |
| 6 rs535852    | 32577604 T | 4.622  | 5.08E-13 | chr:6:32648036 |
| 6 rs9271699   | 32593179 G | 0.2178 | 5.14E-13 | chr:6:32648036 |
| 6 rs9272153   | 32601018 C | 0.2397 | 5.20E-13 | chr:6:32648036 |
| 6 rs9271879   | 32595489 T | 0.2269 | 5.42E-13 | chr:6:32648036 |
| 6 rs9272103   | 32599896 T | 0.225  | 5.44E-13 | chr:6:32648036 |
| 6 rs9271922   | 32596444 A | 0.2149 | 5.80E-13 | chr:6:32648036 |
| 6 rs9271955   | 32597281 A | 0.2172 | 5.85E-13 | chr:6:32648036 |
| 6 rs9274920   | 32641328 A | 2.78   | 5.95E-13 | chr:6:32648036 |
| 6 rs9271858   | 32595223 G | 0.2337 | 6.57E-13 | chr:6:32648036 |
| 6 rs9271859   | 32595231 G | 0.2337 | 6.57E-13 | chr:6:32648036 |
| 6 rs75237145  | 32594295 T | 0.2276 | 6.63E-13 | chr:6:32648036 |
| 6 rs9271791   | 32594810 A | 0.2064 | 7.12E-13 | chr:6:32648036 |
| 6 rs9271881   | 32595604 A | 0.2344 | 7.50E-13 | chr:6:32648036 |
| 6 rs9271882   | 32595605 T | 0.2344 | 7.50E-13 | chr:6:32648036 |
| 6 rs9271883   | 32595610 A | 0.2344 | 7.50E-13 | chr:6:32648036 |
| 6 rs9272049   | 32599045 G | 0.2235 | 7.51E-13 | chr:6:32648036 |
| 6 rs9271648   | 32592358 T | 0.2284 | 8.54E-13 | chr:6:32648036 |
| 6 rs9272365   | 32604621 C | 3.417  | 8.97E-13 | chr:6:32648036 |
| 6 rs9271877   | 32595469 C | 0.2221 | 9.28E-13 | chr:6:32648036 |
| 6 rs9272055   | 32599176 A | 0.2307 | 9.29E-13 | chr:6:32648036 |



|               |            |        |          |                |
|---------------|------------|--------|----------|----------------|
| 6 rs9271957   | 32597335 C | 0.2242 | 9.36E-13 | chr:6:32648036 |
| 6 rs9274777   | 32638686 T | 0.2744 | 9.56E-13 | chr:6:32648036 |
| 6 rs9272121   | 32600556 C | 0.2307 | 9.83E-13 | chr:6:32648036 |
| 6 rs9272037   | 32598844 C | 0.2285 | 1.06E-12 | chr:6:32648036 |
| 6 rs9271876   | 32595448 G | 0.2188 | 1.18E-12 | chr:6:32648036 |
| 6 rs9271931   | 32596698 G | 0.1875 | 1.21E-12 | chr:6:32648036 |
| 6 rs9271878   | 32595474 C | 0.23   | 1.26E-12 | chr:6:32648036 |
| 6 rs9271857   | 32595147 T | 0.2408 | 1.26E-12 | chr:6:32648036 |
| 6 rs9272151   | 32601005 G | 0.2521 | 1.33E-12 | chr:6:32648036 |
| 6 rs9272152   | 32601007 A | 0.2521 | 1.33E-12 | chr:6:32648036 |
| 6 rs114354029 | 32598764 G | 0.2385 | 1.35E-12 | chr:6:32648036 |
| 6 rs9272031   | 32598779 C | 0.2385 | 1.39E-12 | chr:6:32648036 |
| 6 rs17204995  | 32578328 A | 4.349  | 1.41E-12 | chr:6:32648036 |
| 6 rs17211342  | 32578323 G | 4.349  | 1.41E-12 | chr:6:32648036 |
| 6 rs9274783   | 32638816 A | 0.2797 | 1.45E-12 | chr:6:32648036 |
| 6 rs9271707   | 32593356 T | 0.2335 | 1.53E-12 | chr:6:32648036 |
| 6 rs9271951   | 32597172 A | 0.2471 | 1.58E-12 | chr:6:32648036 |
| 6 rs150165719 | 32579868 T | 4.484  | 1.59E-12 | chr:6:32648036 |
| 6 rs9271854   | 32595118 A | 0.2451 | 1.67E-12 | chr:6:32648036 |
| 6 rs9271855   | 32595119 C | 0.2451 | 1.67E-12 | chr:6:32648036 |
| 6 rs9271856   | 32595120 A | 0.2451 | 1.67E-12 | chr:6:32648036 |
| 6 rs5021727   | 32578633 G | 4.381  | 1.77E-12 | chr:6:32648036 |
| 6 rs9271653   | 32592556 C | 0.2479 | 1.80E-12 | chr:6:32648036 |
| 6 rs9272035   | 32598814 T | 0.2362 | 1.80E-12 | chr:6:32648036 |
| 6 rs9272174   | 32601307 T | 0.2494 | 1.82E-12 | chr:6:32648036 |
| 6 rs9272158   | 32601122 A | 0.2512 | 1.84E-12 | chr:6:32648036 |
| 6 rs9271663   | 32592636 A | 0.2482 | 1.87E-12 | chr:6:32648036 |
| 6 rs9272150   | 32601000 A | 0.2553 | 1.89E-12 | chr:6:32648036 |
| 6 rs1694116   | 32647839 A | 3.302  | 1.93E-12 | chr:6:32648036 |
| 6 rs9271789   | 32594768 A | 0.2262 | 1.93E-12 | chr:6:32648036 |
| 6 rs9272032   | 32598782 G | 0.2434 | 2.03E-12 | chr:6:32648036 |
| 6 rs9271919   | 32596423 G | 0.2332 | 2.13E-12 | chr:6:32648036 |
| 6 rs1048027   | 32609169 C | 3.755  | 2.15E-12 | chr:6:32648036 |
| 6 rs9272022   | 32598529 G | 0.2437 | 2.23E-12 | chr:6:32648036 |
| 6 rs9271788   | 32594734 G | 0.24   | 2.33E-12 | chr:6:32648036 |
| 6 rs34835435  | 32549966 G | 4.386  | 2.34E-12 | chr:6:32648036 |
| 6 rs9275187   | 32656038 T | 0.2709 | 2.36E-12 | chr:6:32648036 |
| 6 rs9272002   | 32597924 G | 0.2308 | 2.43E-12 | chr:6:32648036 |
| 6 rs9272128   | 32600601 A | 0.2465 | 2.50E-12 | chr:6:32648036 |
| 6 rs9272129   | 32600602 T | 0.2465 | 2.50E-12 | chr:6:32648036 |
| 6 rs9273491   | 32628221 A | 4.813  | 2.55E-12 | chr:6:32648036 |
| 6 rs9272171   | 32601249 G | 0.2546 | 2.84E-12 | chr:6:32648036 |
| 6 rs3104361   | 32652278 T | 0.2291 | 3.03E-12 | chr:6:32648036 |

|               |            |        |          |                |
|---------------|------------|--------|----------|----------------|
| 6 rs5021726   | 32578481 C | 4.328  | 3.09E-12 | chr:6:32648036 |
| 6 rs12523808  | 32579775 T | 4.423  | 3.24E-12 | chr:6:32648036 |
| 6 rs13207945  | 32579708 C | 4.423  | 3.24E-12 | chr:6:32648036 |
| 6 rs13208027  | 32579743 A | 4.423  | 3.24E-12 | chr:6:32648036 |
| 6 rs3104419   | 32580136 T | 4.423  | 3.24E-12 | chr:6:32648036 |
| 6 rs532098    | 32578052 A | 4.423  | 3.24E-12 | chr:6:32648036 |
| 6 rs9271691   | 32593006 G | 0.2466 | 3.24E-12 | chr:6:32648036 |
| 6 rs9271692   | 32593010 A | 0.2466 | 3.24E-12 | chr:6:32648036 |
| 6 rs115749644 | 32627818 A | 4.724  | 3.26E-12 | chr:6:32648036 |
| 6 rs13191862  | 32579653 G | 4.223  | 3.36E-12 | chr:6:32648036 |
| 6 rs9272165   | 32601170 C | 0.2537 | 3.46E-12 | chr:6:32648036 |
| 6 rs9271959   | 32597377 C | 0.2502 | 3.49E-12 | chr:6:32648036 |
| 6 rs9271960   | 32597385 T | 0.2502 | 3.49E-12 | chr:6:32648036 |
| 6 rs510205    | 32584693 G | 4.598  | 3.64E-12 | chr:6:32648036 |
| 6 rs521539    | 32581973 A | 4.598  | 3.64E-12 | chr:6:32648036 |
| 6 rs560530    | 32577222 A | 4.598  | 3.64E-12 | chr:6:32648036 |
| 6 rs660895    | 32577380 G | 4.598  | 3.64E-12 | chr:6:32648036 |
| 6 rs9275190   | 32656228 A | 0.2807 | 3.68E-12 | chr:6:32648036 |
| 6 rs9275191   | 32656235 T | 0.2807 | 3.68E-12 | chr:6:32648036 |
| 6 rs558095162 | 32598504 T | 0.2514 | 3.79E-12 | chr:6:32648036 |
| 6 rs9272003   | 32597940 G | 0.2375 | 3.94E-12 | chr:6:32648036 |
| 6 rs13191975  | 32579671 T | 4.312  | 3.99E-12 | chr:6:32648036 |
| 6 rs114954902 | 32517768 A | 3.648  | 4.00E-12 | chr:6:32648036 |
| 6 rs74324877  | 32517782 C | 3.648  | 4.00E-12 | chr:6:32648036 |
| 6 rs9272012   | 32598156 A | 0.2457 | 4.10E-12 | chr:6:32648036 |
| 6 rs201639066 | 32516705 T | 3.701  | 4.13E-12 | chr:6:32648036 |
| 6 rs138825368 | 32518375 A | 3.686  | 4.14E-12 | chr:6:32648036 |
| 6 rs28752509  | 32579623 T | 4.099  | 4.28E-12 | chr:6:32648036 |
| 6 rs28752510  | 32579626 A | 4.099  | 4.28E-12 | chr:6:32648036 |
| 6 rs9272166   | 32601209 C | 0.2616 | 4.30E-12 | chr:6:32648036 |
| 6 rs9272161   | 32601139 G | 0.2593 | 4.43E-12 | chr:6:32648036 |
| 6 rs9272162   | 32601140 A | 0.2593 | 4.43E-12 | chr:6:32648036 |
| 6 rs9272163   | 32601146 T | 0.2593 | 4.43E-12 | chr:6:32648036 |
| 6 rs2858327   | 32658935 G | 5.342  | 4.59E-12 | chr:6:32648036 |
| 6 rs661330    | 32577472 C | 4.486  | 4.84E-12 | chr:6:32648036 |
| 6 rs502803    | 32578958 A | 4.299  | 4.94E-12 | chr:6:32648036 |
| 6 rs3997868   | 32578590 G | 4.468  | 4.95E-12 | chr:6:32648036 |
| 6 rs199882626 | 32517752 A | 3.599  | 5.02E-12 | chr:6:32648036 |
| 6 rs9271920   | 32596430 G | 0.235  | 5.07E-12 | chr:6:32648036 |
| 6 rs9271921   | 32596431 G | 0.235  | 5.07E-12 | chr:6:32648036 |
| 6 rs9274917   | 32641317 C | 2.609  | 5.11E-12 | chr:6:32648036 |
| 6 rs9274918   | 32641318 A | 2.609  | 5.11E-12 | chr:6:32648036 |
| 6 rs9271717   | 32593453 G | 0.2639 | 5.29E-12 | chr:6:32648036 |

|               |            |        |          |                |
|---------------|------------|--------|----------|----------------|
| 6 rs9272358   | 32604538 A | 3.192  | 5.52E-12 | chr:6:32648036 |
| 6 rs9274919   | 32641320 G | 2.614  | 5.59E-12 | chr:6:32648036 |
| 6 rs3129713   | 32657255 T | 5.376  | 5.61E-12 | chr:6:32648036 |
| 6 rs3129715   | 32657281 T | 5.376  | 5.61E-12 | chr:6:32648036 |
| 6 rs7775228   | 32658079 C | 5.376  | 5.61E-12 | chr:6:32648036 |
| 6 rs3997832   | 32637497 T | 0.2781 | 5.65E-12 | chr:6:32648036 |
| 6 rs646984    | 32576592 C | 3.888  | 5.68E-12 | chr:6:32648036 |
| 6 rs9272362   | 32604564 T | 3.287  | 5.71E-12 | chr:6:32648036 |
| 6 rs9275194   | 32656334 T | 0.2826 | 5.96E-12 | chr:6:32648036 |
| 6 rs115272081 | 32519782 A | 3.768  | 6.06E-12 | chr:6:32648036 |
| 6 rs2516051   | 32570184 T | 4.459  | 6.34E-12 | chr:6:32648036 |
| 6 rs9272071   | 32599487 C | 0.244  | 6.43E-12 | chr:6:32648036 |
| 6 rs2858860   | 32580366 T | 4.233  | 6.56E-12 | chr:6:32648036 |
| 6 rs6941972   | 32583529 A | 4.455  | 6.61E-12 | chr:6:32648036 |
| 6 rs74768610  | 32509868 C | 3.559  | 6.75E-12 | chr:6:32648036 |
| 6 rs79215033  | 32509858 G | 3.559  | 6.75E-12 | chr:6:32648036 |
| 6 rs3828851   | 32520621 A | 3.635  | 7.39E-12 | chr:6:32648036 |
| 6 rs557371502 | 32520639 A | 3.635  | 7.39E-12 | chr:6:32648036 |
| 6 rs9271961   | 32597412 A | 0.2623 | 7.53E-12 | chr:6:32648036 |
| 6 rs9271554   | 32590317 G | 4.354  | 8.41E-12 | chr:6:32648036 |
| 6 rs2516052   | 32570147 G | 4.414  | 8.57E-12 | chr:6:32648036 |
| 6 rs9271786   | 32594709 T | 0.2326 | 8.64E-12 | chr:6:32648036 |
| 6 rs9272124   | 32600581 A | 0.2611 | 8.74E-12 | chr:6:32648036 |
| 6 rs9273471   | 32628030 G | 0.2397 | 8.86E-12 | chr:6:32648036 |
| 6 rs9271610   | 32591601 T | 0.232  | 9.53E-12 | chr:6:32648036 |
| 6 rs116384190 | 32520337 G | 3.563  | 1.03E-11 | chr:6:32648036 |
| 6 rs111410640 | 32521831 A | 3.648  | 1.05E-11 | chr:6:32648036 |
| 6 rs2858861   | 32580331 T | 4.086  | 1.10E-11 | chr:6:32648036 |
| 6 rs9271611   | 32591609 G | 0.232  | 1.11E-11 | chr:6:32648036 |
| 6 rs9271787   | 32594718 C | 0.2585 | 1.12E-11 | chr:6:32648036 |
| 6 rs647035    | 32576626 A | 3.757  | 1.18E-11 | chr:6:32648036 |
| 6 rs535476317 | 32570019 A | 4.362  | 1.21E-11 | chr:6:32648036 |
| 6 rs622137    | 32569852 A | 4.362  | 1.21E-11 | chr:6:32648036 |
| 6 rs116093550 | 32594395 G | 0.2551 | 1.22E-11 | chr:6:32648036 |
| 6 rs116361489 | 32594396 T | 0.2551 | 1.22E-11 | chr:6:32648036 |
| 6 rs77495163  | 32517859 G | 3.56   | 1.29E-11 | chr:6:32648036 |
| 6 rs9271962   | 32597434 C | 0.2696 | 1.30E-11 | chr:6:32648036 |
| 6 rs9274880   | 32641011 A | 0.2994 | 1.31E-11 | chr:6:32648036 |
| 6 rs62405638  | 32516715 T | 3.52   | 1.35E-11 | chr:6:32648036 |
| 6 rs62405639  | 32516724 C | 3.52   | 1.35E-11 | chr:6:32648036 |
| 6 rs6941393   | 32583200 A | 4.294  | 1.36E-11 | chr:6:32648036 |
| 6 rs9271696   | 32593085 C | 0.2403 | 1.43E-11 | chr:6:32648036 |
| 6 rs79005639  | 32510582 C | 3.473  | 1.51E-11 | chr:6:32648036 |

|               |            |        |          |                |
|---------------|------------|--------|----------|----------------|
| 6 rs113961302 | 32514219 G | 3.606  | 1.52E-11 | chr:6:32648036 |
| 6 rs9271990   | 32597735 T | 0.2243 | 1.62E-11 | chr:6:32648036 |
| 6 rs9271991   | 32597738 G | 0.2243 | 1.62E-11 | chr:6:32648036 |
| 6 rs111897614 | 32503177 T | 3.267  | 1.68E-11 | chr:6:32648036 |
| 6 rs62405598  | 32513708 C | 3.604  | 1.70E-11 | chr:6:32648036 |
| 6 rs9271784   | 32594704 A | 0.2413 | 1.78E-11 | chr:6:32648036 |
| 6 rs9271782   | 32594562 A | 0.2539 | 1.91E-11 | chr:6:32648036 |
| 6 rs522308    | 32581922 T | 4.327  | 1.94E-11 | chr:6:32648036 |
| 6 rs586610    | 32572311 C | 4.121  | 1.97E-11 | chr:6:32648036 |
| 6 rs9271780   | 32594535 C | 0.2614 | 1.98E-11 | chr:6:32648036 |
| 6 rs9271986   | 32597700 A | 0.2412 | 2.00E-11 | chr:6:32648036 |
| 6 rs9271711   | 32593430 T | 0.2804 | 2.12E-11 | chr:6:32648036 |
| 6 rs9271714   | 32593434 G | 0.2804 | 2.12E-11 | chr:6:32648036 |
| 6 rs9273495   | 32628273 A | 3.712  | 2.13E-11 | chr:6:32648036 |
| 6 rs111409670 | 32518069 C | 4.231  | 2.13E-11 | chr:6:32648036 |
| 6 rs9271989   | 32597729 T | 0.2278 | 2.14E-11 | chr:6:32648036 |
| 6 rs139940358 | 32579444 A | 3.605  | 2.17E-11 | chr:6:32648036 |
| 6 rs477515    | 32569691 A | 4.185  | 2.21E-11 | chr:6:32648036 |
| 6 rs9274907   | 32641281 A | 2.793  | 2.21E-11 | chr:6:32648036 |
| 6 rs3817966   | 32367847 C | 4.132  | 2.22E-11 | chr:6:32648036 |
| 6 rs202038991 | 32509105 C | 3.73   | 2.27E-11 | chr:6:32648036 |
| 6 rs9271715   | 32593441 T | 0.2809 | 2.36E-11 | chr:6:32648036 |
| 6 rs9271716   | 32593442 G | 0.2809 | 2.36E-11 | chr:6:32648036 |
| 6 rs202187184 | 32519848 C | 3.518  | 2.37E-11 | chr:6:32648036 |
| 6 rs530790448 | 32519846 T | 3.518  | 2.37E-11 | chr:6:32648036 |
| 6 rs9273489   | 32628189 G | 4.319  | 2.49E-11 | chr:6:32648036 |
| 6 rs111432098 | 32520940 G | 3.504  | 2.51E-11 | chr:6:32648036 |
| 6 rs113484779 | 32514162 T | 3.504  | 2.51E-11 | chr:6:32648036 |
| 6 rs62405629  | 32513885 T | 3.504  | 2.51E-11 | chr:6:32648036 |
| 6 rs75170544  | 32513285 T | 3.504  | 2.51E-11 | chr:6:32648036 |
| 6 rs77506702  | 32518704 G | 3.504  | 2.51E-11 | chr:6:32648036 |
| 6 rs28383387  | 32607575 T | 2.639  | 2.53E-11 | chr:6:32648036 |
| 6 rs79890132  | 32517668 A | 3.459  | 2.60E-11 | chr:6:32648036 |
| 6 rs9271781   | 32594547 A | 0.2628 | 2.63E-11 | chr:6:32648036 |
| 6 rs112895453 | 32510602 G | 3.394  | 2.63E-11 | chr:6:32648036 |
| 6 rs9378165   | 32510651 G | 3.394  | 2.63E-11 | chr:6:32648036 |
| 6 rs62405589  | 32508516 G | 2.975  | 2.68E-11 | chr:6:32648036 |
| 6 rs9271739   | 32593692 T | 0.2751 | 2.81E-11 | chr:6:32648036 |
| 6 rs3200830   | 32520774 T | 3.445  | 2.81E-11 | chr:6:32648036 |
| 6 rs57588792  | 32510012 A | 3.414  | 2.83E-11 | chr:6:32648036 |
| 6 rs111797109 | 32511650 T | 3.569  | 2.86E-11 | chr:6:32648036 |
| 6 rs35406650  | 32557291 G | 6.655  | 2.93E-11 | chr:6:32648036 |
| 6 rs113351668 | 32503167 A | 3.189  | 2.95E-11 | chr:6:32648036 |

|               |            |        |          |                |
|---------------|------------|--------|----------|----------------|
| 6 rs3828849   | 32520664 A | 3.459  | 3.01E-11 | chr:6:32648036 |
| 6 rs3129783   | 32655730 A | 0.2525 | 3.01E-11 | chr:6:32648036 |
| 6 rs9272744   | 32609746 T | 3.769  | 3.08E-11 | chr:6:32648036 |
| 6 rs9275188   | 32656136 C | 0.2855 | 3.09E-11 | chr:6:32648036 |
| 6 rs9275189   | 32656137 A | 0.2855 | 3.09E-11 | chr:6:32648036 |
| 6 rs3817963   | 32368087 C | 4.139  | 3.15E-11 | chr:6:32648036 |
| 6 rs113521434 | 32520460 T | 3.424  | 3.28E-11 | chr:6:32648036 |
| 6 rs370791576 | 32517082 A | 3.355  | 3.35E-11 | chr:6:32648036 |
| 6 rs17205373  | 32626210 G | 5.411  | 3.38E-11 | chr:6:32648036 |
| 6 rs78733108  | 32517511 G | 3.269  | 3.41E-11 | chr:6:32648036 |
| 6 rs147317423 | 32516905 T | 3.325  | 3.44E-11 | chr:6:32648036 |
| 6 rs189139309 | 32516915 G | 3.325  | 3.44E-11 | chr:6:32648036 |
| 6 rs62405591  | 32508704 A | 3.589  | 3.47E-11 | chr:6:32648036 |
| 6 rs111484816 | 32509034 G | 3.435  | 3.53E-11 | chr:6:32648036 |
| 6 rs34481656  | 32501664 G | 3.374  | 3.54E-11 | chr:6:32648036 |
| 6 rs585669    | 32572113 G | 0.2692 | 3.64E-11 | chr:6:32648036 |
| 6 rs77048791  | 32503986 T | 3.272  | 3.72E-11 | chr:6:32648036 |
| 6 rs113686014 | 32509551 A | 3.385  | 3.83E-11 | chr:6:32648036 |
| 6 rs28383181  | 32571669 T | 4.06   | 3.84E-11 | chr:6:32648036 |
| 6 rs78539884  | 32513224 A | 3.564  | 3.85E-11 | chr:6:32648036 |
| 6 rs9271976   | 32597617 C | 0.247  | 3.89E-11 | chr:6:32648036 |
| 6 rs9268482   | 32367777 T | 4.131  | 3.95E-11 | chr:6:32648036 |
| 6 rs9271988   | 32597725 A | 0.2354 | 3.98E-11 | chr:6:32648036 |
| 6 rs78450703  | 32513216 T | 3.41   | 4.01E-11 | chr:6:32648036 |
| 6 rs202015091 | 32520214 C | 3.351  | 4.06E-11 | chr:6:32648036 |
| 6 rs2294880   | 32367722 G | 4.156  | 4.11E-11 | chr:6:32648036 |
| 6 rs79351547  | 32610196 A | 3.786  | 4.17E-11 | chr:6:32648036 |
| 6 rs79508322  | 32512049 A | 3.467  | 4.29E-11 | chr:6:32648036 |
| 6 rs74323244  | 32503921 C | 3.225  | 4.47E-11 | chr:6:32648036 |
| 6 rs115754308 | 32518466 T | 3.291  | 4.48E-11 | chr:6:32648036 |
| 6 rs78182729  | 32502322 T | 2.894  | 4.69E-11 | chr:6:32648036 |
| 6 rs59350153  | 32509935 T | 3.277  | 4.85E-11 | chr:6:32648036 |
| 6 rs113096063 | 32503161 T | 3.111  | 4.95E-11 | chr:6:32648036 |
| 6 rs9271977   | 32597623 A | 0.2539 | 5.06E-11 | chr:6:32648036 |
| 6 rs9271983   | 32597647 T | 0.2352 | 5.15E-11 | chr:6:32648036 |
| 6 rs79207037  | 32509294 A | 3.328  | 5.20E-11 | chr:6:32648036 |
| 6 rs183870834 | 32517228 C | 3.086  | 5.24E-11 | chr:6:32648036 |
| 6 rs192002545 | 32517227 A | 3.086  | 5.24E-11 | chr:6:32648036 |
| 6 rs138222522 | 32510733 T | 2.84   | 5.48E-11 | chr:6:32648036 |
| 6 rs113586210 | 32517050 T | 3.242  | 5.58E-11 | chr:6:32648036 |
| 6 rs28746851  | 32634506 T | 3.775  | 5.91E-11 | chr:6:32648036 |
| 6 rs62405631  | 32514500 C | 3.339  | 5.92E-11 | chr:6:32648036 |
| 6 rs9271984   | 32597669 G | 0.2262 | 5.94E-11 | chr:6:32648036 |

|               |            |        |          |                |
|---------------|------------|--------|----------|----------------|
| 6 rs9271985   | 32597679 T | 0.2262 | 5.94E-11 | chr:6:32648036 |
| 6 rs62405630  | 32513942 T | 3.373  | 6.37E-11 | chr:6:32648036 |
| 6 rs28383356  | 32606646 T | 0.3556 | 6.38E-11 | chr:6:32648036 |
| 6 rs9274696   | 32637007 G | 0.2931 | 6.45E-11 | chr:6:32648036 |
| 6 rs112360905 | 32509019 G | 3.373  | 6.62E-11 | chr:6:32648036 |
| 6 rs9268477   | 32359121 A | 3.965  | 6.71E-11 | chr:6:32648036 |
| 6 rs9272092   | 32599756 C | 0.2059 | 6.77E-11 | chr:6:32648036 |
| 6 rs116022266 | 32610201 A | 3.68   | 6.93E-11 | chr:6:32648036 |
| 6 rs77789453  | 32512013 C | 4.077  | 6.99E-11 | chr:6:32648036 |
| 6 rs370787440 | 32521596 G | 3.446  | 7.24E-11 | chr:6:32648036 |
| 6 rs28383169  | 32565652 C | 0.2903 | 7.48E-11 | chr:6:32648036 |
| 6 rs9272076   | 32599624 T | 0.2598 | 7.49E-11 | chr:6:32648036 |
| 6 rs9272077   | 32599625 G | 0.2598 | 7.49E-11 | chr:6:32648036 |
| 6 rs113534515 | 32460798 C | 3.962  | 7.57E-11 | chr:6:32648036 |
| 6 rs9271987   | 32597716 G | 0.2558 | 7.63E-11 | chr:6:32648036 |
| 6 rs9274697   | 32637016 A | 0.2936 | 7.70E-11 | chr:6:32648036 |
| 6 rs9274693   | 32636972 C | 0.3153 | 7.82E-11 | chr:6:32648036 |
| 6 rs9273537   | 32628765 T | 3.258  | 7.88E-11 | chr:6:32648036 |
| 6 rs113528607 | 32500928 G | 3.279  | 7.94E-11 | chr:6:32648036 |
| 6 rs9275195   | 32656405 T | 0.2876 | 7.95E-11 | chr:6:32648036 |
| 6 rs9275196   | 32656406 G | 0.2876 | 7.95E-11 | chr:6:32648036 |
| 6 rs2076520   | 32371269 T | 3.961  | 8.05E-11 | chr:6:32648036 |
| 6 rs2076522   | 32371179 C | 3.961  | 8.05E-11 | chr:6:32648036 |
| 6 rs2076524   | 32370684 G | 3.961  | 8.05E-11 | chr:6:32648036 |
| 6 rs2076525   | 32370616 C | 3.961  | 8.05E-11 | chr:6:32648036 |
| 6 rs3763307   | 32374622 T | 3.961  | 8.05E-11 | chr:6:32648036 |
| 6 rs3763316   | 32376746 T | 3.961  | 8.05E-11 | chr:6:32648036 |
| 6 rs3793126   | 32371619 G | 3.961  | 8.05E-11 | chr:6:32648036 |
| 6 rs9268474   | 32357165 C | 3.961  | 8.05E-11 | chr:6:32648036 |
| 6 rs9268475   | 32358231 T | 3.961  | 8.05E-11 | chr:6:32648036 |
| 6 rs9268480   | 32363844 T | 3.961  | 8.05E-11 | chr:6:32648036 |
| 6 rs9268481   | 32364356 G | 3.961  | 8.05E-11 | chr:6:32648036 |
| 6 rs9268514   | 32378945 A | 3.961  | 8.05E-11 | chr:6:32648036 |
| 6 rs149690859 | 32511135 A | 2.862  | 8.10E-11 | chr:6:32648036 |
| 6 rs9272073   | 32599570 T | 0.2808 | 8.16E-11 | chr:6:32648036 |
| 6 rs9271970   | 32597550 A | 0.2819 | 8.25E-11 | chr:6:32648036 |
| 6 rs75635252  | 32509332 G | 3.239  | 8.89E-11 | chr:6:32648036 |
| 6 rs9272075   | 32599593 G | 0.279  | 9.13E-11 | chr:6:32648036 |
| 6 rs530246116 | 32517244 C | 3.02   | 9.17E-11 | chr:6:32648036 |
| 6 rs9271968   | 32597529 G | 0.2814 | 9.29E-11 | chr:6:32648036 |
| 6 rs111621461 | 32520050 T | 3.333  | 9.31E-11 | chr:6:32648036 |
| 6 rs9268499   | 32375695 A | 3.902  | 9.56E-11 | chr:6:32648036 |
| 6 rs9268491   | 32374131 G | 3.956  | 9.57E-11 | chr:6:32648036 |

|               |            |        |          |                |
|---------------|------------|--------|----------|----------------|
| 6 rs9268458   | 32350384 A | 3.878  | 9.61E-11 | chr:6:32648036 |
| 6 rs75684124  | 32503488 T | 2.84   | 9.67E-11 | chr:6:32648036 |
| 6 rs373804788 | 32521591 T | 3.428  | 9.83E-11 | chr:6:32648036 |
| 6 rs111899294 | 32517912 C | 4.105  | 9.85E-11 | chr:6:32648036 |
| 6 rs28746845  | 32634150 C | 3.539  | 1.02E-10 | chr:6:32648036 |
| 6 rs9273502   | 32628389 C | 3.834  | 1.06E-10 | chr:6:32648036 |
| 6 rs9273503   | 32628390 T | 3.834  | 1.06E-10 | chr:6:32648036 |
| 6 rs9268400   | 32340654 A | 3.944  | 1.06E-10 | chr:6:32648036 |
| 6 rs9271848   | 32595027 G | 0.2948 | 1.08E-10 | chr:6:32648036 |
| 6 rs9272072   | 32599563 G | 0.287  | 1.11E-10 | chr:6:32648036 |
| 6 rs75420369  | 32511920 A | 3.836  | 1.13E-10 | chr:6:32648036 |
| 6 rs397843773 | 32610171 T | 3.632  | 1.13E-10 | chr:6:32648036 |
| 6 rs190411898 | 32511180 T | 2.871  | 1.14E-10 | chr:6:32648036 |
| 6 rs9271972   | 32597567 T | 0.2736 | 1.15E-10 | chr:6:32648036 |
| 6 rs112654908 | 32519968 C | 3.327  | 1.16E-10 | chr:6:32648036 |
| 6 rs112956435 | 32519929 C | 3.327  | 1.16E-10 | chr:6:32648036 |
| 6 rs9271981   | 32597639 C | 0.2513 | 1.18E-10 | chr:6:32648036 |
| 6 rs9272102   | 32599830 C | 0.2806 | 1.21E-10 | chr:6:32648036 |
| 6 rs116448083 | 32486973 A | 0.3822 | 1.24E-10 | chr:6:32648036 |
| 6 rs1980494   | 32347016 G | 3.89   | 1.25E-10 | chr:6:32648036 |
| 6 rs2395155   | 32347897 T | 3.89   | 1.25E-10 | chr:6:32648036 |
| 6 rs2395157   | 32348145 G | 3.89   | 1.25E-10 | chr:6:32648036 |
| 6 rs2894252   | 32345443 T | 3.89   | 1.25E-10 | chr:6:32648036 |
| 6 rs8180664   | 32347490 T | 3.89   | 1.25E-10 | chr:6:32648036 |
| 6 rs9268405   | 32342087 T | 3.89   | 1.25E-10 | chr:6:32648036 |
| 6 rs9268406   | 32342129 T | 3.89   | 1.25E-10 | chr:6:32648036 |
| 6 rs9268407   | 32342166 C | 3.89   | 1.25E-10 | chr:6:32648036 |
| 6 rs9268409   | 32342639 C | 3.89   | 1.25E-10 | chr:6:32648036 |
| 6 rs9268412   | 32343018 A | 3.89   | 1.25E-10 | chr:6:32648036 |
| 6 rs9268413   | 32343095 C | 3.89   | 1.25E-10 | chr:6:32648036 |
| 6 rs9268414   | 32343096 A | 3.89   | 1.25E-10 | chr:6:32648036 |
| 6 rs9268415   | 32343267 C | 3.89   | 1.25E-10 | chr:6:32648036 |
| 6 rs9268416   | 32343384 G | 3.89   | 1.25E-10 | chr:6:32648036 |
| 6 rs9268426   | 32344731 G | 3.89   | 1.25E-10 | chr:6:32648036 |
| 6 rs9268427   | 32344808 T | 3.89   | 1.25E-10 | chr:6:32648036 |
| 6 rs9268428   | 32344973 T | 3.89   | 1.25E-10 | chr:6:32648036 |
| 6 rs9268431   | 32345514 G | 3.89   | 1.25E-10 | chr:6:32648036 |
| 6 rs9268432   | 32345667 G | 3.89   | 1.25E-10 | chr:6:32648036 |
| 6 rs9268446   | 32347749 G | 3.89   | 1.25E-10 | chr:6:32648036 |
| 6 rs9268450   | 32348690 A | 3.89   | 1.25E-10 | chr:6:32648036 |
| 6 rs9268461   | 32351901 A | 3.89   | 1.25E-10 | chr:6:32648036 |
| 6 rs9268462   | 32351991 A | 3.89   | 1.25E-10 | chr:6:32648036 |
| 6 rs111680800 | 32507452 A | 2.693  | 1.28E-10 | chr:6:32648036 |

|               |            |        |          |                |
|---------------|------------|--------|----------|----------------|
| 6 rs9272318   | 32604059 G | 3.367  | 1.29E-10 | chr:6:32648036 |
| 6 rs9274790   | 32639155 A | 0.2883 | 1.29E-10 | chr:6:32648036 |
| 6 rs3129766   | 32594441 G | 3.2    | 1.30E-10 | chr:6:32648036 |
| 6 rs9268484   | 32368513 T | 3.861  | 1.32E-10 | chr:6:32648036 |
| 6 rs9271966   | 32597507 T | 0.2972 | 1.32E-10 | chr:6:32648036 |
| 6 rs202207567 | 32512533 T | 3.275  | 1.33E-10 | chr:6:32648036 |
| 6 rs33927408  | 32550420 T | 4.741  | 1.33E-10 | chr:6:32648036 |
| 6 rs9274656   | 32636351 C | 3.728  | 1.36E-10 | chr:6:32648036 |
| 6 rs554943670 | 32516971 G | 3.014  | 1.39E-10 | chr:6:32648036 |
| 6 rs114680412 | 32520248 A | 3.131  | 1.42E-10 | chr:6:32648036 |
| 6 rs9268478   | 32360258 A | 3.849  | 1.42E-10 | chr:6:32648036 |
| 6 rs79957603  | 32509348 A | 3.159  | 1.43E-10 | chr:6:32648036 |
| 6 rs9268516   | 32379489 T | 3.817  | 1.44E-10 | chr:6:32648036 |
| 6 rs9268848   | 32429303 G | 0.2434 | 1.52E-10 | chr:6:32648036 |
| 6 rs9271978   | 32597632 C | 0.2683 | 1.53E-10 | chr:6:32648036 |
| 6 rs9272084   | 32599680 T | 0.2652 | 1.55E-10 | chr:6:32648036 |
| 6 rs111838566 | 32517727 G | 3.673  | 1.61E-10 | chr:6:32648036 |
| 6 rs77931438  | 32505762 A | 2.745  | 1.61E-10 | chr:6:32648036 |
| 6 rs3817962   | 32368314 A | 3.766  | 1.67E-10 | chr:6:32648036 |
| 6 rs546788946 | 32511223 A | 2.824  | 1.68E-10 | chr:6:32648036 |
| 6 rs185282713 | 32517018 C | 2.978  | 1.71E-10 | chr:6:32648036 |
| 6 rs9272099   | 32599813 G | 0.2855 | 1.72E-10 | chr:6:32648036 |
| 6 rs9268429   | 32345052 G | 3.705  | 1.75E-10 | chr:6:32648036 |
| 6 rs111403760 | 32517303 C | 3.026  | 1.76E-10 | chr:6:32648036 |
| 6 rs9271794   | 32594855 A | 0.2691 | 1.76E-10 | chr:6:32648036 |
| 6 rs9274845   | 32640134 C | 0.3213 | 1.78E-10 | chr:6:32648036 |
| 6 rs9274846   | 32640142 C | 0.3213 | 1.78E-10 | chr:6:32648036 |
| 6 rs9274848   | 32640149 C | 0.3213 | 1.78E-10 | chr:6:32648036 |
| 6 rs140590517 | 32518282 A | 3.089  | 1.79E-10 | chr:6:32648036 |
| 6 rs9271846   | 32594980 A | 0.2707 | 1.79E-10 | chr:6:32648036 |
| 6 rs2308890   | 32610008 T | 3.764  | 1.81E-10 | chr:6:32648036 |
| 6 rs9271595   | 32591235 G | 3.717  | 1.91E-10 | chr:6:32648036 |
| 6 rs9271596   | 32591237 G | 3.717  | 1.91E-10 | chr:6:32648036 |
| 6 rs9271861   | 32595287 T | 0.2996 | 1.92E-10 | chr:6:32648036 |
| 6 rs28772724  | 32509357 T | 3.135  | 1.96E-10 | chr:6:32648036 |
| 6 rs62405588  | 32508468 G | 2.866  | 1.96E-10 | chr:6:32648036 |
| 6 rs9274873   | 32640818 A | 0.3128 | 1.96E-10 | chr:6:32648036 |
| 6 rs9272086   | 32599688 T | 0.2725 | 1.97E-10 | chr:6:32648036 |
| 6 rs9274935   | 32641580 T | 0.3474 | 2.04E-10 | chr:6:32648036 |
| 6 rs375350961 | 32521793 G | 3.487  | 2.04E-10 | chr:6:32648036 |
| 6 rs113623173 | 32510438 T | 2.953  | 2.05E-10 | chr:6:32648036 |
| 6 rs3828809   | 32636172 T | 3.595  | 2.06E-10 | chr:6:32648036 |
| 6 rs2076523   | 32370835 C | 3.392  | 2.07E-10 | chr:6:32648036 |



|               |            |        |          |                |
|---------------|------------|--------|----------|----------------|
| 6 rs3806156   | 32373698 T | 3.392  | 2.07E-10 | chr:6:32648036 |
| 6 rs9271865   | 32595360 T | 0.2568 | 2.08E-10 | chr:6:32648036 |
| 6 rs112177836 | 32503658 A | 3.071  | 2.10E-10 | chr:6:32648036 |
| 6 rs115888968 | 32521309 G | 3.508  | 2.10E-10 | chr:6:32648036 |
| 6 rs551468481 | 32518258 G | 3.031  | 2.11E-10 | chr:6:32648036 |
| 6 rs281863614 | 32630788 A | 2.922  | 2.13E-10 | chr:6:32648036 |
| 6 rs9268401   | 32341318 G | 3.787  | 2.14E-10 | chr:6:32648036 |
| 6 rs58537387  | 32510176 T | 2.935  | 2.17E-10 | chr:6:32648036 |
| 6 rs71549253  | 32501882 C | 4.172  | 2.22E-10 | chr:6:32648036 |
| 6 rs71549254  | 32501887 G | 4.172  | 2.22E-10 | chr:6:32648036 |
| 6 rs112628749 | 32510769 T | 2.671  | 2.23E-10 | chr:6:32648036 |
| 6 rs113766057 | 32510772 A | 2.671  | 2.23E-10 | chr:6:32648036 |
| 6 rs113182435 | 32518236 A | 3.03   | 2.27E-10 | chr:6:32648036 |
| 6 rs9268420   | 32343796 T | 3.749  | 2.27E-10 | chr:6:32648036 |
| 6 rs9268421   | 32343869 G | 3.749  | 2.27E-10 | chr:6:32648036 |
| 6 rs9268422   | 32343873 A | 3.749  | 2.27E-10 | chr:6:32648036 |
| 6 rs9268423   | 32343882 T | 3.749  | 2.27E-10 | chr:6:32648036 |
| 6 rs9268424   | 32343985 C | 3.749  | 2.27E-10 | chr:6:32648036 |
| 6 rs9268425   | 32344376 T | 3.749  | 2.27E-10 | chr:6:32648036 |
| 6 rs9272195   | 32601830 G | 0.3075 | 2.28E-10 | chr:6:32648036 |
| 6 rs9271866   | 32595367 T | 0.2538 | 2.35E-10 | chr:6:32648036 |
| 6 rs9271867   | 32595368 G | 0.2538 | 2.35E-10 | chr:6:32648036 |
| 6 rs9274849   | 32640157 A | 0.3222 | 2.36E-10 | chr:6:32648036 |
| 6 rs28366265  | 32559708 A | 3.006  | 2.45E-10 | chr:6:32648036 |
| 6 rs79100516  | 32503452 T | 2.695  | 2.52E-10 | chr:6:32648036 |
| 6 rs3763311   | 32376176 T | 3.723  | 2.54E-10 | chr:6:32648036 |
| 6 rs1980495   | 32346794 C | 3.7    | 2.56E-10 | chr:6:32648036 |
| 6 rs2395156   | 32348098 A | 3.7    | 2.56E-10 | chr:6:32648036 |
| 6 rs533002231 | 32346663 G | 3.7    | 2.56E-10 | chr:6:32648036 |
| 6 rs564024810 | 32346662 T | 3.7    | 2.56E-10 | chr:6:32648036 |
| 6 rs8180659   | 32347280 T | 3.7    | 2.56E-10 | chr:6:32648036 |
| 6 rs8180672   | 32347533 G | 3.7    | 2.56E-10 | chr:6:32648036 |
| 6 rs8180673   | 32347532 T | 3.7    | 2.56E-10 | chr:6:32648036 |
| 6 rs9268417   | 32343616 G | 3.7    | 2.56E-10 | chr:6:32648036 |
| 6 rs9268418   | 32343686 C | 3.7    | 2.56E-10 | chr:6:32648036 |
| 6 rs9268436   | 32346637 G | 3.7    | 2.56E-10 | chr:6:32648036 |
| 6 rs9268439   | 32346701 A | 3.7    | 2.56E-10 | chr:6:32648036 |
| 6 rs9268447   | 32347831 C | 3.7    | 2.56E-10 | chr:6:32648036 |
| 6 rs9268448   | 32348463 G | 3.7    | 2.56E-10 | chr:6:32648036 |
| 6 rs9268449   | 32348467 A | 3.7    | 2.56E-10 | chr:6:32648036 |
| 6 rs9268452   | 32349494 G | 3.7    | 2.56E-10 | chr:6:32648036 |
| 6 rs9268453   | 32349571 C | 3.7    | 2.56E-10 | chr:6:32648036 |
| 6 rs9268454   | 32349711 G | 3.7    | 2.56E-10 | chr:6:32648036 |

|               |            |        |          |                |
|---------------|------------|--------|----------|----------------|
| 6 rs9268456   | 32349946 A | 3.7    | 2.56E-10 | chr:6:32648036 |
| 6 rs9268457   | 32350036 G | 3.7    | 2.56E-10 | chr:6:32648036 |
| 6 rs9268459   | 32350776 A | 3.7    | 2.56E-10 | chr:6:32648036 |
| 6 rs138087636 | 32517031 T | 2.964  | 2.61E-10 | chr:6:32648036 |
| 6 rs112158360 | 32514050 G | 3.426  | 2.61E-10 | chr:6:32648036 |
| 6 rs112587701 | 32514041 A | 3.426  | 2.61E-10 | chr:6:32648036 |
| 6 rs549070097 | 32516282 G | 3.215  | 2.66E-10 | chr:6:32648036 |
| 6 rs9274691   | 32636957 T | 0.3343 | 2.68E-10 | chr:6:32648036 |
| 6 rs9274692   | 32636958 T | 0.3343 | 2.68E-10 | chr:6:32648036 |
| 6 rs9268403   | 32341473 C | 3.749  | 2.85E-10 | chr:6:32648036 |
| 6 rs9268404   | 32341719 T | 3.749  | 2.85E-10 | chr:6:32648036 |
| 6 rs78294251  | 32503336 A | 2.714  | 2.87E-10 | chr:6:32648036 |
| 6 rs113522240 | 32512591 G | 3.018  | 2.99E-10 | chr:6:32648036 |
| 6 rs9273531   | 32628712 T | 4.78   | 3.06E-10 | chr:6:32648036 |
| 6 rs9274661   | 32636443 C | 3.722  | 3.07E-10 | chr:6:32648036 |
| 6 rs9274778   | 32638694 G | 0.2898 | 3.09E-10 | chr:6:32648036 |
| 6 rs3998159   | 32682019 C | 4.963  | 3.20E-10 | chr:6:32648036 |
| 6 rs9275293   | 32663308 C | 4.963  | 3.20E-10 | chr:6:32648036 |
| 6 rs9275296   | 32663431 C | 4.963  | 3.20E-10 | chr:6:32648036 |
| 6 rs3828796   | 32635974 G | 3.7    | 3.21E-10 | chr:6:32648036 |
| 6 rs9275422   | 32670548 A | 4.883  | 3.27E-10 | chr:6:32648036 |
| 6 rs9272366   | 32604622 A | 2.751  | 3.27E-10 | chr:6:32648036 |
| 6 rs77339454  | 32503567 A | 2.812  | 3.39E-10 | chr:6:32648036 |
| 6 rs79293578  | 32503561 T | 2.812  | 3.39E-10 | chr:6:32648036 |
| 6 rs570640158 | 32517793 C | 4.679  | 3.46E-10 | chr:6:32648036 |
| 6 rs3021057   | 32652363 C | 0.2928 | 3.48E-10 | chr:6:32648036 |
| 6 rs75438654  | 32459749 G | 3.376  | 3.50E-10 | chr:6:32648036 |
| 6 rs9274654   | 32636280 T | 3.627  | 3.58E-10 | chr:6:32648036 |
| 6 rs9274655   | 32636289 C | 3.627  | 3.58E-10 | chr:6:32648036 |
| 6 rs9274640   | 32636154 G | 3.508  | 3.64E-10 | chr:6:32648036 |
| 6 rs9274871   | 32640792 A | 0.3166 | 3.65E-10 | chr:6:32648036 |
| 6 rs9274872   | 32640793 A | 0.3166 | 3.65E-10 | chr:6:32648036 |
| 6 rs116432881 | 32514385 G | 3.473  | 3.66E-10 | chr:6:32648036 |
| 6 rs9271925   | 32596540 G | 0.2028 | 3.68E-10 | chr:6:32648036 |
| 6 rs9271926   | 32596566 T | 0.2028 | 3.68E-10 | chr:6:32648036 |
| 6 rs1770      | 32627833 G | 3.395  | 3.75E-10 | chr:6:32648036 |
| 6 rs9268495   | 32375371 T | 3.566  | 3.78E-10 | chr:6:32648036 |
| 6 rs9268496   | 32375374 A | 3.566  | 3.78E-10 | chr:6:32648036 |
| 6 rs9268497   | 32375424 A | 3.566  | 3.78E-10 | chr:6:32648036 |
| 6 rs9272335   | 32604259 T | 2.801  | 3.81E-10 | chr:6:32648036 |
| 6 rs9274843   | 32640096 A | 0.3156 | 3.87E-10 | chr:6:32648036 |
| 6 rs9275180   | 32654278 C | 0.2923 | 3.89E-10 | chr:6:32648036 |
| 6 rs3806157   | 32373801 G | 3.322  | 3.90E-10 | chr:6:32648036 |

|               |            |        |          |                |
|---------------|------------|--------|----------|----------------|
| 6 rs9275476   | 32672624 C | 4.893  | 3.92E-10 | chr:6:32648036 |
| 6 rs9275477   | 32672641 C | 4.893  | 3.92E-10 | chr:6:32648036 |
| 6 rs9271574   | 32590590 G | 3.647  | 4.00E-10 | chr:6:32648036 |
| 6 rs9271576   | 32590612 C | 3.647  | 4.00E-10 | chr:6:32648036 |
| 6 rs28746834  | 32633899 C | 3.349  | 4.07E-10 | chr:6:32648036 |
| 6 rs9273528   | 32628633 C | 3.492  | 4.18E-10 | chr:6:32648036 |
| 6 rs9268494   | 32375352 C | 3.609  | 4.26E-10 | chr:6:32648036 |
| 6 rs9274937   | 32641631 G | 0.3462 | 4.28E-10 | chr:6:32648036 |
| 6 rs201326238 | 32517754 T | 4.185  | 4.36E-10 | chr:6:32648036 |
| 6 rs115706291 | 32520256 A | 2.986  | 4.41E-10 | chr:6:32648036 |
| 6 rs3828829   | 32521233 T | 5.667  | 4.42E-10 | chr:6:32648036 |
| 6 rs9271544   | 32590120 A | 3.565  | 4.42E-10 | chr:6:32648036 |
| 6 rs9275154   | 32652435 C | 0.2976 | 4.54E-10 | chr:6:32648036 |
| 6 rs1826961   | 32603866 C | 0.2623 | 4.61E-10 | chr:6:32648036 |
| 6 rs28746843  | 32634137 C | 3.239  | 4.61E-10 | chr:6:32648036 |
| 6 rs28746844  | 32634139 T | 3.239  | 4.61E-10 | chr:6:32648036 |
| 6 rs9275349   | 32667663 C | 4.92   | 4.64E-10 | chr:6:32648036 |
| 6 rs9275429   | 32671057 A | 4.76   | 4.65E-10 | chr:6:32648036 |
| 6 rs9271823   | 32594915 G | 0.2763 | 4.68E-10 | chr:6:32648036 |
| 6 rs9271824   | 32594916 G | 0.2763 | 4.68E-10 | chr:6:32648036 |
| 6 rs1049070   | 32634425 T | 3.648  | 4.84E-10 | chr:6:32648036 |
| 6 rs28746846  | 32634261 T | 3.648  | 4.84E-10 | chr:6:32648036 |
| 6 rs28746847  | 32634262 G | 3.648  | 4.84E-10 | chr:6:32648036 |
| 6 rs9273866   | 32629639 C | 3.648  | 4.84E-10 | chr:6:32648036 |
| 6 rs76752213  | 32509416 A | 3.069  | 4.86E-10 | chr:6:32648036 |
| 6 rs9275486   | 32673099 A | 4.759  | 4.87E-10 | chr:6:32648036 |
| 6 rs9274649   | 32636217 A | 3.306  | 4.95E-10 | chr:6:32648036 |
| 6 rs9271963   | 32597453 A | 0.3145 | 4.96E-10 | chr:6:32648036 |
| 6 rs9275356   | 32667850 G | 4.757  | 5.02E-10 | chr:6:32648036 |
| 6 rs9274747   | 32638071 A | 4.893  | 5.07E-10 | chr:6:32648036 |
| 6 rs9275434   | 32671247 T | 4.756  | 5.08E-10 | chr:6:32648036 |
| 6 rs9271924   | 32596498 A | 0.2184 | 5.08E-10 | chr:6:32648036 |
| 6 rs9271607   | 32591566 G | 3.586  | 5.13E-10 | chr:6:32648036 |
| 6 rs9271609   | 32591597 C | 3.586  | 5.13E-10 | chr:6:32648036 |
| 6 rs112894757 | 32510777 T | 2.583  | 5.21E-10 | chr:6:32648036 |
| 6 rs9271842   | 32594953 A | 0.292  | 5.31E-10 | chr:6:32648036 |
| 6 rs9271843   | 32594957 T | 0.292  | 5.31E-10 | chr:6:32648036 |
| 6 rs28366325  | 32561659 C | 3.467  | 5.34E-10 | chr:6:32648036 |
| 6 rs9272093   | 32599777 T | 0.2389 | 5.39E-10 | chr:6:32648036 |
| 6 rs9272368   | 32604642 G | 2.648  | 5.47E-10 | chr:6:32648036 |
| 6 rs9272370   | 32604644 A | 2.648  | 5.47E-10 | chr:6:32648036 |
| 6 rs9275155   | 32652484 T | 0.2973 | 5.49E-10 | chr:6:32648036 |
| 6 rs115001626 | 32487462 G | 0.328  | 5.50E-10 | chr:6:32648036 |

|               |            |        |          |                |
|---------------|------------|--------|----------|----------------|
| 6 rs74587162  | 32509455 C | 3.056  | 5.51E-10 | chr:6:32648036 |
| 6 rs113453333 | 32522490 A | 3.297  | 5.51E-10 | chr:6:32648036 |
| 6 rs1766      | 32627795 A | 0.3164 | 5.56E-10 | chr:6:32648036 |
| 6 rs373544996 | 32663873 G | 4.767  | 5.64E-10 | chr:6:32648036 |
| 6 rs3957146   | 32681530 C | 4.767  | 5.64E-10 | chr:6:32648036 |
| 6 rs4273728   | 32678491 C | 4.767  | 5.64E-10 | chr:6:32648036 |
| 6 rs5002706   | 32659332 A | 4.767  | 5.64E-10 | chr:6:32648036 |
| 6 rs9275092   | 32648987 T | 4.767  | 5.64E-10 | chr:6:32648036 |
| 6 rs9275095   | 32649088 G | 4.767  | 5.64E-10 | chr:6:32648036 |
| 6 rs9275097   | 32649126 G | 4.767  | 5.64E-10 | chr:6:32648036 |
| 6 rs9275098   | 32649161 T | 4.767  | 5.64E-10 | chr:6:32648036 |
| 6 rs9275167   | 32653263 G | 4.767  | 5.64E-10 | chr:6:32648036 |
| 6 rs9275185   | 32655305 T | 4.767  | 5.64E-10 | chr:6:32648036 |
| 6 rs9275201   | 32656723 A | 4.767  | 5.64E-10 | chr:6:32648036 |
| 6 rs9275203   | 32656947 A | 4.767  | 5.64E-10 | chr:6:32648036 |
| 6 rs9275207   | 32657710 G | 4.767  | 5.64E-10 | chr:6:32648036 |
| 6 rs9275213   | 32658335 C | 4.767  | 5.64E-10 | chr:6:32648036 |
| 6 rs9275214   | 32658665 A | 4.767  | 5.64E-10 | chr:6:32648036 |
| 6 rs9275223   | 32659839 A | 4.767  | 5.64E-10 | chr:6:32648036 |
| 6 rs9275275   | 32662607 A | 4.767  | 5.64E-10 | chr:6:32648036 |
| 6 rs9275300   | 32664126 G | 4.767  | 5.64E-10 | chr:6:32648036 |
| 6 rs9275307   | 32664990 T | 4.767  | 5.64E-10 | chr:6:32648036 |
| 6 rs9275310   | 32665319 G | 4.767  | 5.64E-10 | chr:6:32648036 |
| 6 rs9275311   | 32665640 T | 4.767  | 5.64E-10 | chr:6:32648036 |
| 6 rs9275313   | 32665759 T | 4.767  | 5.64E-10 | chr:6:32648036 |
| 6 rs9275314   | 32665909 A | 4.767  | 5.64E-10 | chr:6:32648036 |
| 6 rs9275315   | 32665912 A | 4.767  | 5.64E-10 | chr:6:32648036 |
| 6 rs9275334   | 32667107 C | 4.767  | 5.64E-10 | chr:6:32648036 |
| 6 rs9275380   | 32668814 C | 4.767  | 5.64E-10 | chr:6:32648036 |
| 6 rs9275382   | 32668831 C | 4.767  | 5.64E-10 | chr:6:32648036 |
| 6 rs9275383   | 32668846 T | 4.767  | 5.64E-10 | chr:6:32648036 |
| 6 rs9275387   | 32669013 C | 4.767  | 5.64E-10 | chr:6:32648036 |
| 6 rs9275394   | 32669454 C | 4.767  | 5.64E-10 | chr:6:32648036 |
| 6 rs9275395   | 32669483 G | 4.767  | 5.64E-10 | chr:6:32648036 |
| 6 rs9275400   | 32669761 G | 4.767  | 5.64E-10 | chr:6:32648036 |
| 6 rs9275426   | 32670912 C | 4.767  | 5.64E-10 | chr:6:32648036 |
| 6 rs9275435   | 32671332 C | 4.767  | 5.64E-10 | chr:6:32648036 |
| 6 rs9275437   | 32671412 T | 4.767  | 5.64E-10 | chr:6:32648036 |
| 6 rs9275442   | 32671755 A | 4.767  | 5.64E-10 | chr:6:32648036 |
| 6 rs9275445   | 32671811 A | 4.767  | 5.64E-10 | chr:6:32648036 |
| 6 rs9275495   | 32673574 T | 4.767  | 5.64E-10 | chr:6:32648036 |
| 6 rs9275503   | 32673931 G | 4.767  | 5.64E-10 | chr:6:32648036 |
| 6 rs9275530   | 32675523 C | 4.767  | 5.64E-10 | chr:6:32648036 |

|               |            |        |          |                |
|---------------|------------|--------|----------|----------------|
| 6 rs9275532   | 32675634 G | 4.767  | 5.64E-10 | chr:6:32648036 |
| 6 rs9275541   | 32676159 G | 4.767  | 5.64E-10 | chr:6:32648036 |
| 6 rs9275583   | 32680299 A | 4.767  | 5.64E-10 | chr:6:32648036 |
| 6 rs9275592   | 32680620 T | 4.767  | 5.64E-10 | chr:6:32648036 |
| 6 rs9273526   | 32628617 C | 3.43   | 5.67E-10 | chr:6:32648036 |
| 6 rs9271979   | 32597635 C | 0.2635 | 5.70E-10 | chr:6:32648036 |
| 6 rs281863734 | 32630620 T | 3.405  | 5.73E-10 | chr:6:32648036 |
| 6 rs28723989  | 32550116 T | 3.95   | 5.75E-10 | chr:6:32648036 |
| 6 rs28383372  | 32607174 T | 2.503  | 5.90E-10 | chr:6:32648036 |
| 6 rs9275308   | 32665255 A | 4.781  | 6.00E-10 | chr:6:32648036 |
| 6 rs3129784   | 32656608 G | 0.2918 | 6.05E-10 | chr:6:32648036 |
| 6 rs9275324   | 32666635 T | 4.806  | 6.08E-10 | chr:6:32648036 |
| 6 rs9275325   | 32666651 T | 4.806  | 6.08E-10 | chr:6:32648036 |
| 6 rs9275326   | 32666660 T | 4.806  | 6.08E-10 | chr:6:32648036 |
| 6 rs9272736   | 32609671 A | 2.931  | 6.24E-10 | chr:6:32648036 |
| 6 rs9272737   | 32609673 A | 2.931  | 6.24E-10 | chr:6:32648036 |
| 6 rs9271847   | 32594993 G | 0.2997 | 6.31E-10 | chr:6:32648036 |
| 6 rs9274751   | 32638138 T | 0.2969 | 6.43E-10 | chr:6:32648036 |
| 6 rs3828801   | 32636071 T | 3.439  | 6.49E-10 | chr:6:32648036 |
| 6 rs376271339 | 32517804 C | 4.512  | 6.58E-10 | chr:6:32648036 |
| 6 rs9273821   | 32629543 C | 3.415  | 6.61E-10 | chr:6:32648036 |
| 6 rs67499532  | 32513184 G | 0.307  | 6.66E-10 | chr:6:32648036 |
| 6 rs9271486   | 32588980 T | 3.396  | 6.67E-10 | chr:6:32648036 |
| 6 rs9274730   | 32637817 G | 0.3181 | 6.68E-10 | chr:6:32648036 |
| 6 rs9274731   | 32637823 A | 0.3181 | 6.68E-10 | chr:6:32648036 |
| 6 rs9273525   | 32628605 C | 3.394  | 7.00E-10 | chr:6:32648036 |
| 6 rs9272492   | 32606052 G | 3.1    | 7.11E-10 | chr:6:32648036 |
| 6 rs9271589   | 32591128 A | 3.541  | 7.11E-10 | chr:6:32648036 |
| 6 rs9271624   | 32591921 T | 3.541  | 7.11E-10 | chr:6:32648036 |
| 6 rs534964517 | 32517795 C | 4.507  | 7.12E-10 | chr:6:32648036 |
| 6 rs9274759   | 32638315 G | 0.2921 | 7.14E-10 | chr:6:32648036 |
| 6 rs570194309 | 32590602 C | 3.565  | 7.17E-10 | chr:6:32648036 |
| 6 rs9272420   | 32605101 G | 3.555  | 7.21E-10 | chr:6:32648036 |
| 6 rs28366327  | 32561678 A | 3.425  | 7.29E-10 | chr:6:32648036 |
| 6 rs3828792   | 32635828 C | 3.532  | 7.35E-10 | chr:6:32648036 |
| 6 rs9271863   | 32595334 A | 0.2797 | 7.44E-10 | chr:6:32648036 |
| 6 rs9271582   | 32590774 C | 3.556  | 7.56E-10 | chr:6:32648036 |
| 6 rs9271583   | 32590780 C | 3.556  | 7.56E-10 | chr:6:32648036 |
| 6 rs601481    | 32573293 C | 3.356  | 7.60E-10 | chr:6:32648036 |
| 6 rs9275430   | 32671086 T | 4.59   | 7.62E-10 | chr:6:32648036 |
| 6 rs574347579 | 32514817 A | 2.784  | 7.64E-10 | chr:6:32648036 |
| 6 rs9271542   | 32590091 G | 3.463  | 7.69E-10 | chr:6:32648036 |
| 6 rs1980496   | 32340070 T | 3.646  | 7.78E-10 | chr:6:32648036 |

|               |            |        |          |                |
|---------------|------------|--------|----------|----------------|
| 6 rs9272095   | 32599782 A | 0.2283 | 7.89E-10 | chr:6:32648036 |
| 6 rs9272097   | 32599786 T | 0.2283 | 7.89E-10 | chr:6:32648036 |
| 6 rs9272098   | 32599787 G | 0.2283 | 7.89E-10 | chr:6:32648036 |
| 6 rs9274792   | 32639224 A | 0.3015 | 7.93E-10 | chr:6:32648036 |
| 6 rs72848212  | 32594898 T | 0.2914 | 7.95E-10 | chr:6:32648036 |
| 6 rs111513373 | 32520272 T | 2.918  | 8.11E-10 | chr:6:32648036 |
| 6 rs9271488   | 32589000 T | 3.507  | 8.13E-10 | chr:6:32648036 |
| 6 rs9271504   | 32589368 A | 3.419  | 8.18E-10 | chr:6:32648036 |
| 6 rs281874807 | 32631448 G | 2.802  | 8.21E-10 | chr:6:32648036 |
| 6 rs9271643   | 32592229 A | 3.469  | 8.44E-10 | chr:6:32648036 |
| 6 rs113938016 | 32517898 C | 4.491  | 8.58E-10 | chr:6:32648036 |
| 6 rs28366307  | 32560995 C | 3.424  | 8.65E-10 | chr:6:32648036 |
| 6 rs9272317   | 32604051 T | 3.394  | 8.74E-10 | chr:6:32648036 |
| 6 rs113459411 | 32521026 G | 3.483  | 8.80E-10 | chr:6:32648036 |
| 6 rs35635216  | 32501743 A | 4.893  | 8.93E-10 | chr:6:32648036 |
| 6 rs35877117  | 32501719 T | 4.893  | 8.93E-10 | chr:6:32648036 |
| 6 rs3957148   | 32682137 G | 4.63   | 8.94E-10 | chr:6:32648036 |
| 6 rs3830059   | 32634007 G | 3.497  | 9.06E-10 | chr:6:32648036 |
| 6 rs9272774   | 32610255 A | 3.408  | 9.30E-10 | chr:6:32648036 |
| 6 rs111757290 | 32517856 T | 4.597  | 9.39E-10 | chr:6:32648036 |
| 6 rs78055135  | 32517412 A | 2.856  | 9.41E-10 | chr:6:32648036 |
| 6 rs9274752   | 32638163 T | 0.2989 | 9.54E-10 | chr:6:32648036 |
| 6 rs9274753   | 32638176 C | 0.2989 | 9.54E-10 | chr:6:32648036 |
| 6 rs28746838  | 32634057 T | 3.449  | 9.61E-10 | chr:6:32648036 |
| 6 rs9274619   | 32635954 A | 4.623  | 9.63E-10 | chr:6:32648036 |
| 6 rs9274902   | 32641220 T | 0.4052 | 9.66E-10 | chr:6:32648036 |
| 6 rs9274878   | 32640889 C | 0.3839 | 9.68E-10 | chr:6:32648036 |
| 6 rs9274690   | 32636940 A | 0.3182 | 9.68E-10 | chr:6:32648036 |
| 6 rs9271862   | 32595333 C | 0.2816 | 9.71E-10 | chr:6:32648036 |
| 6 rs9272422   | 32605132 C | 3.459  | 9.74E-10 | chr:6:32648036 |
| 6 rs9275453   | 32671937 T | 4.725  | 9.81E-10 | chr:6:32648036 |
| 6 rs75076975  | 32610134 A | 3.482  | 9.88E-10 | chr:6:32648036 |
| 6 rs9274773   | 32638620 A | 0.3011 | 1.01E-09 | chr:6:32648036 |
| 6 rs9274774   | 32638630 A | 0.3011 | 1.01E-09 | chr:6:32648036 |
| 6 rs3188543   | 32610403 A | 3.518  | 1.01E-09 | chr:6:32648036 |
| 6 rs9271584   | 32590870 C | 3.518  | 1.01E-09 | chr:6:32648036 |
| 6 rs9271585   | 32590879 A | 3.518  | 1.01E-09 | chr:6:32648036 |
| 6 rs9272435   | 32605336 A | 3.518  | 1.01E-09 | chr:6:32648036 |
| 6 rs183847206 | 32490350 T | 2.537  | 1.03E-09 | chr:6:32648036 |
| 6 rs9271964   | 32597464 C | 0.3242 | 1.04E-09 | chr:6:32648036 |
| 6 rs116254278 | 32521312 A | 3.652  | 1.04E-09 | chr:6:32648036 |
| 6 rs9275206   | 32657565 G | 4.625  | 1.04E-09 | chr:6:32648036 |
| 6 rs9271628   | 32591971 G | 3.436  | 1.06E-09 | chr:6:32648036 |

|               |            |        |          |                |
|---------------|------------|--------|----------|----------------|
| 6 rs9275148   | 32651585 T | 0.2933 | 1.06E-09 | chr:6:32648036 |
| 6 rs9274875   | 32640863 A | 0.3994 | 1.06E-09 | chr:6:32648036 |
| 6 rs9274760   | 32638348 A | 0.2974 | 1.08E-09 | chr:6:32648036 |
| 6 rs79471319  | 32627777 C | 3.451  | 1.10E-09 | chr:6:32648036 |
| 6 rs28383179  | 32571116 A | 3.084  | 1.10E-09 | chr:6:32648036 |
| 6 rs28383180  | 32571118 C | 3.084  | 1.10E-09 | chr:6:32648036 |
| 6 rs9271604   | 32591430 G | 3.37   | 1.10E-09 | chr:6:32648036 |
| 6 rs9271605   | 32591448 A | 3.37   | 1.10E-09 | chr:6:32648036 |
| 6 rs112796795 | 32505471 C | 2.705  | 1.12E-09 | chr:6:32648036 |
| 6 rs74498391  | 32505267 C | 2.875  | 1.13E-09 | chr:6:32648036 |
| 6 rs9272733   | 32609652 A | 3.071  | 1.13E-09 | chr:6:32648036 |
| 6 rs9272734   | 32609654 A | 3.071  | 1.13E-09 | chr:6:32648036 |
| 6 rs9272735   | 32609655 G | 3.071  | 1.13E-09 | chr:6:32648036 |
| 6 rs9275221   | 32659099 C | 4.612  | 1.13E-09 | chr:6:32648036 |
| 6 rs9274861   | 32640592 C | 0.3347 | 1.15E-09 | chr:6:32648036 |
| 6 rs3828799   | 32636062 C | 3.364  | 1.15E-09 | chr:6:32648036 |
| 6 rs3828800   | 32636063 A | 3.364  | 1.15E-09 | chr:6:32648036 |
| 6 rs2856690   | 32654536 T | 0.2882 | 1.15E-09 | chr:6:32648036 |
| 6 rs112453089 | 32639270 T | 0.312  | 1.16E-09 | chr:6:32648036 |
| 6 rs9274794   | 32639264 T | 0.312  | 1.16E-09 | chr:6:32648036 |
| 6 rs111343881 | 32521022 C | 3.458  | 1.17E-09 | chr:6:32648036 |
| 6 rs9275158   | 32652582 G | 0.2992 | 1.17E-09 | chr:6:32648036 |
| 6 rs9271592   | 32591173 T | 3.431  | 1.21E-09 | chr:6:32648036 |
| 6 rs9275146   | 32651495 G | 0.2943 | 1.21E-09 | chr:6:32648036 |
| 6 rs9274689   | 32636930 T | 0.3192 | 1.22E-09 | chr:6:32648036 |
| 6 rs28383401  | 32607973 A | 2.852  | 1.22E-09 | chr:6:32648036 |
| 6 rs9268492   | 32375280 G | 3.42   | 1.23E-09 | chr:6:32648036 |
| 6 rs9268493   | 32375330 A | 3.42   | 1.23E-09 | chr:6:32648036 |
| 6 rs9274771   | 32638581 T | 0.3021 | 1.24E-09 | chr:6:32648036 |
| 6 rs9274772   | 32638583 A | 0.3021 | 1.24E-09 | chr:6:32648036 |
| 6 rs9274748   | 32638086 G | 0.3167 | 1.24E-09 | chr:6:32648036 |
| 6 rs9274749   | 32638094 G | 0.3167 | 1.24E-09 | chr:6:32648036 |
| 6 rs9272498   | 32606217 A | 3.059  | 1.25E-09 | chr:6:32648036 |
| 6 rs78668102  | 32507091 T | 2.394  | 1.26E-09 | chr:6:32648036 |
| 6 rs28746852  | 32634593 C | 3.376  | 1.26E-09 | chr:6:32648036 |
| 6 rs1049073   | 32632717 A | 2.873  | 1.27E-09 | chr:6:32648036 |
| 6 rs534262225 | 32646454 T | 0.319  | 1.29E-09 | chr:6:32648036 |
| 6 rs28613510  | 32518507 A | 0.3378 | 1.37E-09 | chr:6:32648036 |
| 6 rs113220099 | 32510823 T | 2.489  | 1.45E-09 | chr:6:32648036 |
| 6 rs111343297 | 32520080 G | 3.36   | 1.45E-09 | chr:6:32648036 |
| 6 rs1049072   | 32634355 A | 3.427  | 1.46E-09 | chr:6:32648036 |
| 6 rs1130373   | 32634301 C | 3.427  | 1.46E-09 | chr:6:32648036 |
| 6 rs28724252  | 32629549 A | 3.413  | 1.46E-09 | chr:6:32648036 |

|               |            |        |          |                |
|---------------|------------|--------|----------|----------------|
| 6 rs1064173   | 32627480 A | 3.128  | 1.47E-09 | chr:6:32648036 |
| 6 rs556025    | 32570880 T | 3.244  | 1.47E-09 | chr:6:32648036 |
| 6 rs9275168   | 32653676 T | 0.2893 | 1.47E-09 | chr:6:32648036 |
| 6 rs9273523   | 32628571 T | 3.381  | 1.47E-09 | chr:6:32648036 |
| 6 rs9275161   | 32652636 T | 0.2997 | 1.49E-09 | chr:6:32648036 |
| 6 rs9271521   | 32589783 T | 3.366  | 1.51E-09 | chr:6:32648036 |
| 6 rs9271523   | 32589806 G | 3.366  | 1.51E-09 | chr:6:32648036 |
| 6 rs9275013   | 32643011 T | 0.3262 | 1.52E-09 | chr:6:32648036 |
| 6 rs9275014   | 32643023 G | 0.3262 | 1.52E-09 | chr:6:32648036 |
| 6 rs77701583  | 32435699 C | 0.2826 | 1.53E-09 | chr:6:32648036 |
| 6 rs71549252  | 32501613 C | 3.733  | 1.54E-09 | chr:6:32648036 |
| 6 rs7758269   | 32598812 C | 0.2563 | 1.57E-09 | chr:6:32648036 |
| 6 rs9272463   | 32605646 G | 3.179  | 1.57E-09 | chr:6:32648036 |
| 6 rs9275177   | 32654174 C | 0.2882 | 1.57E-09 | chr:6:32648036 |
| 6 rs9275178   | 32654181 G | 0.2882 | 1.57E-09 | chr:6:32648036 |
| 6 rs9271644   | 32592337 A | 3.326  | 1.59E-09 | chr:6:32648036 |
| 6 rs9271411   | 32587661 A | 3.388  | 1.59E-09 | chr:6:32648036 |
| 6 rs116457146 | 32578632 T | 3.21   | 1.60E-09 | chr:6:32648036 |
| 6 rs28383402  | 32607985 G | 2.826  | 1.60E-09 | chr:6:32648036 |
| 6 rs9271472   | 32588700 T | 3.35   | 1.62E-09 | chr:6:32648036 |
| 6 rs9274702   | 32637184 C | 0.3051 | 1.65E-09 | chr:6:32648036 |
| 6 rs3828808   | 32636138 G | 3.433  | 1.67E-09 | chr:6:32648036 |
| 6 rs28383460  | 32609586 G | 3.422  | 1.69E-09 | chr:6:32648036 |
| 6 rs9271485   | 32588953 G | 3.284  | 1.70E-09 | chr:6:32648036 |
| 6 rs111937677 | 32639316 A | 0.3533 | 1.70E-09 | chr:6:32648036 |
| 6 rs2856689   | 32654551 A | 0.294  | 1.72E-09 | chr:6:32648036 |
| 6 rs3828787   | 32635743 C | 3.339  | 1.73E-09 | chr:6:32648036 |
| 6 rs3828788   | 32635749 G | 3.339  | 1.73E-09 | chr:6:32648036 |
| 6 rs9271344   | 32583328 C | 0.3015 | 1.74E-09 | chr:6:32648036 |
| 6 rs9271549   | 32590248 C | 3.418  | 1.74E-09 | chr:6:32648036 |
| 6 rs28366319  | 32561495 A | 3.287  | 1.76E-09 | chr:6:32648036 |
| 6 rs9271571   | 32590483 T | 3.251  | 1.77E-09 | chr:6:32648036 |
| 6 rs9274763   | 32638427 A | 0.2987 | 1.79E-09 | chr:6:32648036 |
| 6 rs11568830  | 32634556 A | 3.347  | 1.80E-09 | chr:6:32648036 |
| 6 rs11568831  | 32634545 A | 3.347  | 1.80E-09 | chr:6:32648036 |
| 6 rs9274698   | 32637095 A | 0.2942 | 1.80E-09 | chr:6:32648036 |
| 6 rs112296425 | 32521984 G | 3.909  | 1.80E-09 | chr:6:32648036 |
| 6 rs9274877   | 32640877 A | 0.3978 | 1.84E-09 | chr:6:32648036 |
| 6 rs9271971   | 32597561 A | 0.2836 | 1.86E-09 | chr:6:32648036 |
| 6 rs9272443   | 32605418 A | 3.021  | 1.87E-09 | chr:6:32648036 |
| 6 rs9272444   | 32605419 C | 3.021  | 1.87E-09 | chr:6:32648036 |
| 6 rs28746835  | 32633959 C | 3.31   | 1.87E-09 | chr:6:32648036 |
| 6 rs79136305  | 32505292 G | 2.825  | 1.89E-09 | chr:6:32648036 |



|               |            |        |          |                |
|---------------|------------|--------|----------|----------------|
| 6 rs281874979 | 32631295 A | 2.652  | 1.90E-09 | chr:6:32648036 |
| 6 rs1130399   | 32629755 A | 3.392  | 1.92E-09 | chr:6:32648036 |
| 6 rs9271520   | 32589771 G | 3.304  | 1.95E-09 | chr:6:32648036 |
| 6 rs115712530 | 32517414 A | 2.9    | 1.95E-09 | chr:6:32648036 |
| 6 rs9269076   | 32440805 C | 0.2725 | 1.96E-09 | chr:6:32648036 |
| 6 rs9269077   | 32440806 C | 0.2725 | 1.96E-09 | chr:6:32648036 |
| 6 rs75387045  | 32508213 T | 2.437  | 1.97E-09 | chr:6:32648036 |
| 6 rs9272510   | 32606367 G | 2.655  | 1.99E-09 | chr:6:32648036 |
| 6 rs34614226  | 32554963 A | 3.333  | 1.99E-09 | chr:6:32648036 |
| 6 rs9273408   | 32627221 G | 3.577  | 2.00E-09 | chr:6:32648036 |
| 6 rs75658193  | 32503375 A | 2.568  | 2.03E-09 | chr:6:32648036 |
| 6 rs78512156  | 32458168 C | 4.87   | 2.04E-09 | chr:6:32648036 |
| 6 rs78947187  | 32458169 A | 4.87   | 2.04E-09 | chr:6:32648036 |
| 6 rs2856676   | 32656833 G | 0.2966 | 2.05E-09 | chr:6:32648036 |
| 6 rs9271438   | 32588193 G | 3.329  | 2.05E-09 | chr:6:32648036 |
| 6 rs28746853  | 32634646 C | 3.275  | 2.05E-09 | chr:6:32648036 |
| 6 rs557617439 | 32523181 G | 2.952  | 2.06E-09 | chr:6:32648036 |
| 6 rs9271511   | 32589483 A | 3.342  | 2.12E-09 | chr:6:32648036 |
| 6 rs9275199   | 32656680 C | 0.2953 | 2.13E-09 | chr:6:32648036 |
| 6 rs28383182  | 32571811 A | 3.2    | 2.14E-09 | chr:6:32648036 |
| 6 rs28752490  | 32567897 A | 3.274  | 2.16E-09 | chr:6:32648036 |
| 6 rs28752494  | 32568240 A | 3.144  | 2.19E-09 | chr:6:32648036 |
| 6 rs535696666 | 32523176 A | 2.943  | 2.21E-09 | chr:6:32648036 |
| 6 rs9272025   | 32598581 A | 3.189  | 2.22E-09 | chr:6:32648036 |
| 6 rs17205907  | 32651649 G | 0.2391 | 2.23E-09 | chr:6:32648036 |
| 6 rs9271769   | 32594217 T | 3.343  | 2.25E-09 | chr:6:32648036 |
| 6 rs9271516   | 32589668 A | 3.35   | 2.25E-09 | chr:6:32648036 |
| 6 rs9275169   | 32653721 T | 0.2895 | 2.26E-09 | chr:6:32648036 |
| 6 rs9275170   | 32653726 G | 0.2895 | 2.26E-09 | chr:6:32648036 |
| 6 rs537206245 | 32514754 C | 2.669  | 2.27E-09 | chr:6:32648036 |
| 6 rs539579029 | 32514764 T | 2.669  | 2.27E-09 | chr:6:32648036 |
| 6 rs2133035   | 32596475 A | 3.316  | 2.28E-09 | chr:6:32648036 |
| 6 rs28584364  | 32512048 T | 0.334  | 2.29E-09 | chr:6:32648036 |
| 6 rs9271540   | 32590029 C | 3.337  | 2.30E-09 | chr:6:32648036 |
| 6 rs9271537   | 32589982 T | 0.3081 | 2.30E-09 | chr:6:32648036 |
| 6 rs35971290  | 32550235 G | 3.562  | 2.31E-09 | chr:6:32648036 |
| 6 rs9272514   | 32606385 T | 2.653  | 2.31E-09 | chr:6:32648036 |
| 6 rs9271474   | 32588707 A | 3.315  | 2.31E-09 | chr:6:32648036 |
| 6 rs9275151   | 32651936 T | 3.94   | 2.33E-09 | chr:6:32648036 |
| 6 rs3210176   | 32627850 C | 2.781  | 2.35E-09 | chr:6:32648036 |
| 6 rs17203846  | 32555989 A | 3.32   | 2.35E-09 | chr:6:32648036 |
| 6 rs62405594  | 32512218 T | 2.523  | 2.36E-09 | chr:6:32648036 |
| 6 rs9272775   | 32610257 C | 3.277  | 2.41E-09 | chr:6:32648036 |

|               |            |        |          |                |
|---------------|------------|--------|----------|----------------|
| 6 rs3021058   | 32652359 A | 0.2962 | 2.42E-09 | chr:6:32648036 |
| 6 rs9275143   | 32651192 A | 0.2968 | 2.42E-09 | chr:6:32648036 |
| 6 rs116213130 | 32512323 T | 4.695  | 2.45E-09 | chr:6:32648036 |
| 6 rs9274685   | 32636844 T | 0.2953 | 2.48E-09 | chr:6:32648036 |
| 6 rs9274687   | 32636882 C | 0.2953 | 2.48E-09 | chr:6:32648036 |
| 6 rs2454138   | 32570401 A | 3.169  | 2.48E-09 | chr:6:32648036 |
| 6 rs2516049   | 32570400 C | 3.169  | 2.48E-09 | chr:6:32648036 |
| 6 rs28383382  | 32607320 C | 2.744  | 2.49E-09 | chr:6:32648036 |
| 6 rs9269011   | 32436299 G | 0.3513 | 2.49E-09 | chr:6:32648036 |
| 6 rs28752501  | 32568995 A | 3.104  | 2.50E-09 | chr:6:32648036 |
| 6 rs9271408   | 32587613 T | 3.297  | 2.57E-09 | chr:6:32648036 |
| 6 rs77274878  | 32523348 A | 2.805  | 2.57E-09 | chr:6:32648036 |
| 6 rs9269968   | 32552251 A | 0.3883 | 2.60E-09 | chr:6:32648036 |
| 6 rs111690064 | 32520117 C | 4.474  | 2.63E-09 | chr:6:32648036 |
| 6 rs28383432  | 32608880 A | 2.679  | 2.64E-09 | chr:6:32648036 |
| 6 rs2858329   | 32658801 A | 0.2854 | 2.66E-09 | chr:6:32648036 |
| 6 rs34647096  | 32561681 A | 4.064  | 2.67E-09 | chr:6:32648036 |
| 6 rs185295622 | 32510840 A | 2.377  | 2.67E-09 | chr:6:32648036 |
| 6 rs9271409   | 32587628 C | 3.302  | 2.67E-09 | chr:6:32648036 |
| 6 rs9275091   | 32648972 C | 0.2963 | 2.68E-09 | chr:6:32648036 |
| 6 rs199884023 | 32639449 G | 0.374  | 2.70E-09 | chr:6:32648036 |
| 6 rs74635045  | 32502745 G | 0.4205 | 2.75E-09 | chr:6:32648036 |
| 6 rs546173503 | 32523200 C | 2.912  | 2.82E-09 | chr:6:32648036 |
| 6 rs75924712  | 32506761 A | 2.515  | 2.84E-09 | chr:6:32648036 |
| 6 rs9275162   | 32652687 T | 0.3017 | 2.86E-09 | chr:6:32648036 |
| 6 rs9275202   | 32656869 A | 0.2963 | 2.87E-09 | chr:6:32648036 |
| 6 rs9274836   | 32639956 G | 0.3144 | 2.88E-09 | chr:6:32648036 |
| 6 rs9271426   | 32587973 A | 3.27   | 2.88E-09 | chr:6:32648036 |
| 6 rs9271430   | 32588002 C | 3.27   | 2.88E-09 | chr:6:32648036 |
| 6 rs28746827  | 32633636 A | 3.077  | 2.89E-09 | chr:6:32648036 |
| 6 rs28383357  | 32606732 G | 0.4114 | 2.90E-09 | chr:6:32648036 |
| 6 rs28752495  | 32568315 T | 3.043  | 2.90E-09 | chr:6:32648036 |
| 6 rs9275139   | 32651005 C | 0.2976 | 2.92E-09 | chr:6:32648036 |
| 6 rs9272407   | 32604931 A | 2.797  | 2.95E-09 | chr:6:32648036 |
| 6 rs9275373   | 32668411 A | 4.266  | 2.96E-09 | chr:6:32648036 |
| 6 rs9274683   | 32636780 G | 0.2958 | 3.02E-09 | chr:6:32648036 |
| 6 rs9274684   | 32636785 C | 0.2958 | 3.02E-09 | chr:6:32648036 |
| 6 rs34117221  | 32568324 G | 3.97   | 3.03E-09 | chr:6:32648036 |
| 6 rs114580448 | 32507538 T | 2.458  | 3.05E-09 | chr:6:32648036 |
| 6 rs28383439  | 32609042 A | 3.251  | 3.10E-09 | chr:6:32648036 |
| 6 rs28746825  | 32633472 G | 3.214  | 3.12E-09 | chr:6:32648036 |
| 6 rs9275184   | 32654714 C | 4.201  | 3.13E-09 | chr:6:32648036 |
| 6 rs9271416   | 32587812 A | 3.252  | 3.14E-09 | chr:6:32648036 |

|               |            |        |          |                |
|---------------|------------|--------|----------|----------------|
| 6 rs9272485   | 32605972 G | 3.067  | 3.15E-09 | chr:6:32648036 |
| 6 rs9274705   | 32637245 G | 0.3456 | 3.24E-09 | chr:6:32648036 |
| 6 rs9275088   | 32648931 T | 0.297  | 3.26E-09 | chr:6:32648036 |
| 6 rs9275089   | 32648947 A | 0.297  | 3.26E-09 | chr:6:32648036 |
| 6 rs28724250  | 32629530 T | 3.107  | 3.30E-09 | chr:6:32648036 |
| 6 rs9271480   | 32588831 A | 3.177  | 3.31E-09 | chr:6:32648036 |
| 6 rs28746854  | 32634755 T | 3.051  | 3.35E-09 | chr:6:32648036 |
| 6 rs28746855  | 32634756 G | 3.051  | 3.35E-09 | chr:6:32648036 |
| 6 rs9274867   | 32640745 G | 0.3434 | 3.36E-09 | chr:6:32648036 |
| 6 rs9274869   | 32640759 C | 0.3434 | 3.36E-09 | chr:6:32648036 |
| 6 rs111693298 | 32518251 T | 2.727  | 3.41E-09 | chr:6:32648036 |
| 6 rs28366212  | 32557259 T | 3.098  | 3.41E-09 | chr:6:32648036 |
| 6 rs28366213  | 32557263 A | 3.098  | 3.41E-09 | chr:6:32648036 |
| 6 rs2856693   | 32653283 C | 0.2966 | 3.44E-09 | chr:6:32648036 |
| 6 rs111659540 | 32551520 T | 4.26   | 3.48E-09 | chr:6:32648036 |
| 6 rs9271470   | 32588662 T | 3.211  | 3.48E-09 | chr:6:32648036 |
| 6 rs28366317  | 32561411 T | 3.226  | 3.49E-09 | chr:6:32648036 |
| 6 rs2894381   | 32682228 A | 0.2774 | 3.49E-09 | chr:6:32648036 |
| 6 rs76207819  | 32507365 T | 0.4238 | 3.49E-09 | chr:6:32648036 |
| 6 rs35597441  | 32555545 T | 4.187  | 3.58E-09 | chr:6:32648036 |
| 6 rs9275112   | 32649773 G | 0.2974 | 3.60E-09 | chr:6:32648036 |
| 6 rs9272380   | 32604732 A | 2.433  | 3.61E-09 | chr:6:32648036 |
| 6 rs1129735   | 32605295 T | 3.335  | 3.63E-09 | chr:6:32648036 |
| 6 rs9272730   | 32609634 G | 3.084  | 3.63E-09 | chr:6:32648036 |
| 6 rs6914573   | 32639368 A | 0.352  | 3.64E-09 | chr:6:32648036 |
| 6 rs28366323  | 32561609 G | 3.092  | 3.65E-09 | chr:6:32648036 |
| 6 rs138574269 | 32507114 A | 2.331  | 3.68E-09 | chr:6:32648036 |
| 6 rs2856686   | 32654869 T | 0.2966 | 3.69E-09 | chr:6:32648036 |
| 6 rs28746861  | 32635120 A | 3.025  | 3.69E-09 | chr:6:32648036 |
| 6 rs79414789  | 32580591 C | 3.304  | 3.70E-09 | chr:6:32648036 |
| 6 rs28404276  | 32510355 A | 0.3643 | 3.71E-09 | chr:6:32648036 |
| 6 rs9274853   | 32640420 G | 0.3162 | 3.74E-09 | chr:6:32648036 |
| 6 rs9274855   | 32640494 G | 0.3162 | 3.74E-09 | chr:6:32648036 |
| 6 rs17212251  | 32651629 C | 0.2482 | 3.75E-09 | chr:6:32648036 |
| 6 rs9275136   | 32650757 C | 0.2974 | 3.81E-09 | chr:6:32648036 |
| 6 rs78273580  | 32506779 T | 2.46   | 3.81E-09 | chr:6:32648036 |
| 6 rs143811457 | 32507112 A | 2.297  | 3.88E-09 | chr:6:32648036 |
| 6 rs17210202  | 32555987 C | 3.403  | 3.89E-09 | chr:6:32648036 |
| 6 rs9275152   | 32652196 C | 4.373  | 3.91E-09 | chr:6:32648036 |
| 6 rs2858330   | 32658715 T | 0.2966 | 3.94E-09 | chr:6:32648036 |
| 6 rs17205914  | 32651680 G | 0.2483 | 3.96E-09 | chr:6:32648036 |
| 6 rs17205921  | 32651685 T | 0.2483 | 3.96E-09 | chr:6:32648036 |
| 6 rs17212258  | 32651690 T | 0.2483 | 3.96E-09 | chr:6:32648036 |

|               |            |        |          |                |
|---------------|------------|--------|----------|----------------|
| 6 rs17212265  | 32651694 T | 0.2483 | 3.96E-09 | chr:6:32648036 |
| 6 rs28724258  | 32630093 T | 2.607  | 4.02E-09 | chr:6:32648036 |
| 6 rs9274062   | 32630094 G | 2.607  | 4.02E-09 | chr:6:32648036 |
| 6 rs9274065   | 32630099 T | 2.607  | 4.02E-09 | chr:6:32648036 |
| 6 rs28366215  | 32557310 C | 4.147  | 4.02E-09 | chr:6:32648036 |
| 6 rs9271887   | 32595679 A | 0.2657 | 4.13E-09 | chr:6:32648036 |
| 6 rs9274726   | 32637593 C | 0.3061 | 4.13E-09 | chr:6:32648036 |
| 6 rs75876652  | 32505224 T | 2.741  | 4.14E-09 | chr:6:32648036 |
| 6 rs564551505 | 32644523 C | 0.2402 | 4.14E-09 | chr:6:32648036 |
| 6 rs9272503   | 32606286 C | 2.657  | 4.14E-09 | chr:6:32648036 |
| 6 rs9275145   | 32651363 C | 0.2976 | 4.23E-09 | chr:6:32648036 |
| 6 rs2856679   | 32655615 C | 0.2971 | 4.24E-09 | chr:6:32648036 |
| 6 rs9271503   | 32589326 A | 3.212  | 4.25E-09 | chr:6:32648036 |
| 6 rs77891198  | 32506670 C | 0.4302 | 4.27E-09 | chr:6:32648036 |
| 6 rs534490668 | 32433399 A | 0.2847 | 4.30E-09 | chr:6:32648036 |
| 6 rs9272131   | 32600671 T | 4.46   | 4.31E-09 | chr:6:32648036 |
| 6 rs9274806   | 32639441 A | 0.3822 | 4.31E-09 | chr:6:32648036 |
| 6 rs9275114   | 32649897 G | 0.2973 | 4.33E-09 | chr:6:32648036 |
| 6 rs9275116   | 32649952 T | 0.2973 | 4.33E-09 | chr:6:32648036 |
| 6 rs9271497   | 32589245 T | 3.163  | 4.36E-09 | chr:6:32648036 |
| 6 rs9275138   | 32650958 A | 0.2981 | 4.38E-09 | chr:6:32648036 |
| 6 rs553195173 | 32566329 C | 3.892  | 4.40E-09 | chr:6:32648036 |
| 6 rs28752496  | 32568321 C | 3.008  | 4.42E-09 | chr:6:32648036 |
| 6 rs77697582  | 32502517 T | 2.414  | 4.46E-09 | chr:6:32648036 |
| 6 rs9269014   | 32436529 C | 0.3892 | 4.48E-09 | chr:6:32648036 |
| 6 rs9275141   | 32651117 T | 0.2975 | 4.49E-09 | chr:6:32648036 |
| 6 rs28366298  | 32560859 C | 3.14   | 4.56E-09 | chr:6:32648036 |
| 6 rs2647000   | 32656890 T | 0.2971 | 4.56E-09 | chr:6:32648036 |
| 6 rs17205754  | 32650930 C | 0.2555 | 4.57E-09 | chr:6:32648036 |
| 6 rs28383373  | 32607193 C | 2.381  | 4.57E-09 | chr:6:32648036 |
| 6 rs9271693   | 32593033 T | 3.045  | 4.58E-09 | chr:6:32648036 |
| 6 rs151027857 | 32521366 C | 4.311  | 4.60E-09 | chr:6:32648036 |
| 6 rs34535888  | 32561527 C | 4.136  | 4.63E-09 | chr:6:32648036 |
| 6 rs9274717   | 32637454 C | 0.3403 | 4.67E-09 | chr:6:32648036 |
| 6 rs481139    | 32576145 A | 3.16   | 4.69E-09 | chr:6:32648036 |
| 6 rs28383457  | 32609456 T | 3.148  | 4.87E-09 | chr:6:32648036 |
| 6 rs9274805   | 32639429 G | 0.3885 | 4.93E-09 | chr:6:32648036 |
| 6 rs17212441  | 32652494 C | 0.2038 | 5.03E-09 | chr:6:32648036 |
| 6 rs75872455  | 32502638 C | 2.365  | 5.10E-09 | chr:6:32648036 |
| 6 rs1130161   | 32610994 A | 3.018  | 5.13E-09 | chr:6:32648036 |
| 6 rs9275007   | 32642921 T | 0.3117 | 5.15E-09 | chr:6:32648036 |
| 6 rs9271764   | 32594159 A | 3.178  | 5.15E-09 | chr:6:32648036 |
| 6 rs28772303  | 32680558 A | 0.2443 | 5.16E-09 | chr:6:32648036 |

|               |            |        |          |                |
|---------------|------------|--------|----------|----------------|
| 6 rs111848494 | 32486020 G | 4.289  | 5.17E-09 | chr:6:32648036 |
| 6 rs9275130   | 32650409 T | 0.2978 | 5.19E-09 | chr:6:32648036 |
| 6 rs75046889  | 32507835 C | 4.366  | 5.20E-09 | chr:6:32648036 |
| 6 rs9275087   | 32648893 T | 0.2977 | 5.20E-09 | chr:6:32648036 |
| 6 rs9271561   | 32590393 G | 3.107  | 5.22E-09 | chr:6:32648036 |
| 6 rs9275118   | 32649996 A | 0.2977 | 5.23E-09 | chr:6:32648036 |
| 6 rs9275119   | 32650031 G | 0.2977 | 5.23E-09 | chr:6:32648036 |
| 6 rs9275173   | 32654037 T | 0.2906 | 5.25E-09 | chr:6:32648036 |
| 6 rs76902085  | 32507945 C | 2.352  | 5.26E-09 | chr:6:32648036 |
| 6 rs78923832  | 32507947 A | 2.352  | 5.26E-09 | chr:6:32648036 |
| 6 rs79705220  | 32507930 C | 2.352  | 5.26E-09 | chr:6:32648036 |
| 6 rs9268888   | 32431867 G | 0.2856 | 5.26E-09 | chr:6:32648036 |
| 6 rs142420626 | 32630303 C | 2.977  | 5.27E-09 | chr:6:32648036 |
| 6 rs17212279  | 32651713 G | 0.2594 | 5.27E-09 | chr:6:32648036 |
| 6 rs28383410  | 32608289 A | 2.852  | 5.36E-09 | chr:6:32648036 |
| 6 rs9275135   | 32650736 T | 0.2974 | 5.41E-09 | chr:6:32648036 |
| 6 rs9271674   | 32592845 C | 3.072  | 5.45E-09 | chr:6:32648036 |
| 6 rs9271675   | 32592862 C | 3.072  | 5.45E-09 | chr:6:32648036 |
| 6 rs9271676   | 32592868 C | 3.072  | 5.45E-09 | chr:6:32648036 |
| 6 rs28732284  | 32548667 C | 3.354  | 5.52E-09 | chr:6:32648036 |
| 6 rs28732291  | 32548697 G | 3.354  | 5.52E-09 | chr:6:32648036 |
| 6 rs9271980   | 32597636 A | 0.2624 | 5.53E-09 | chr:6:32648036 |
| 6 rs9271982   | 32597640 A | 0.2624 | 5.53E-09 | chr:6:32648036 |
| 6 rs2856695   | 32651894 A | 0.2982 | 5.53E-09 | chr:6:32648036 |
| 6 rs558721    | 32570573 T | 3.839  | 5.59E-09 | chr:6:32648036 |
| 6 rs9268944   | 32433654 T | 0.3256 | 5.60E-09 | chr:6:32648036 |
| 6 rs2894379   | 32580911 C | 3.086  | 5.63E-09 | chr:6:32648036 |
| 6 rs74719989  | 32502664 G | 0.4278 | 5.67E-09 | chr:6:32648036 |
| 6 rs75016307  | 32435767 C | 0.307  | 5.74E-09 | chr:6:32648036 |
| 6 rs528153410 | 32507211 G | 2.265  | 5.77E-09 | chr:6:32648036 |
| 6 rs28732302  | 32548855 C | 3.191  | 5.79E-09 | chr:6:32648036 |
| 6 rs35653258  | 32568783 A | 3.955  | 5.90E-09 | chr:6:32648036 |
| 6 rs28366316  | 32561246 C | 3.108  | 6.00E-09 | chr:6:32648036 |
| 6 rs116333937 | 32517381 T | 2.71   | 6.01E-09 | chr:6:32648036 |
| 6 rs9275172   | 32653997 A | 0.291  | 6.03E-09 | chr:6:32648036 |
| 6 rs9274718   | 32637469 T | 0.3486 | 6.07E-09 | chr:6:32648036 |
| 6 rs9274719   | 32637470 T | 0.3486 | 6.07E-09 | chr:6:32648036 |
| 6 rs9274720   | 32637479 G | 0.3486 | 6.07E-09 | chr:6:32648036 |
| 6 rs2856667   | 32665079 T | 0.298  | 6.12E-09 | chr:6:32648036 |
| 6 rs2856684   | 32655095 T | 0.298  | 6.12E-09 | chr:6:32648036 |
| 6 rs2856685   | 32655072 A | 0.298  | 6.12E-09 | chr:6:32648036 |
| 6 rs4642516   | 32657543 G | 0.298  | 6.12E-09 | chr:6:32648036 |
| 6 rs7754464   | 32657818 A | 0.298  | 6.12E-09 | chr:6:32648036 |

|               |            |        |          |                |
|---------------|------------|--------|----------|----------------|
| 6 rs9275103   | 32649386 T | 0.298  | 6.12E-09 | chr:6:32648036 |
| 6 rs9275105   | 32649416 C | 0.298  | 6.12E-09 | chr:6:32648036 |
| 6 rs9275106   | 32649475 T | 0.298  | 6.12E-09 | chr:6:32648036 |
| 6 rs9275131   | 32650467 C | 0.298  | 6.12E-09 | chr:6:32648036 |
| 6 rs9275133   | 32650588 A | 0.298  | 6.12E-09 | chr:6:32648036 |
| 6 rs9274834   | 32639895 A | 0.3268 | 6.17E-09 | chr:6:32648036 |
| 6 rs118146750 | 32523174 A | 2.598  | 6.26E-09 | chr:6:32648036 |
| 6 rs9271563   | 32590428 C | 3.057  | 6.31E-09 | chr:6:32648036 |
| 6 rs79591888  | 32503704 A | 2.468  | 6.35E-09 | chr:6:32648036 |
| 6 rs9269042   | 32438387 C | 0.2862 | 6.43E-09 | chr:6:32648036 |
| 6 rs9274865   | 32640671 C | 0.3665 | 6.53E-09 | chr:6:32648036 |
| 6 rs113374318 | 32639415 G | 0.3965 | 6.60E-09 | chr:6:32648036 |
| 6 rs9271868   | 32595375 C | 0.1821 | 6.62E-09 | chr:6:32648036 |
| 6 rs9271869   | 32595376 A | 0.1821 | 6.62E-09 | chr:6:32648036 |
| 6 rs9271870   | 32595377 T | 0.1821 | 6.62E-09 | chr:6:32648036 |
| 6 rs28747011  | 32654554 G | 0.25   | 6.64E-09 | chr:6:32648036 |
| 6 rs28747012  | 32654558 C | 0.25   | 6.64E-09 | chr:6:32648036 |
| 6 rs561142110 | 32654552 G | 0.25   | 6.64E-09 | chr:6:32648036 |
| 6 rs9268912   | 32432509 C | 0.2867 | 6.66E-09 | chr:6:32648036 |
| 6 rs9274764   | 32638490 A | 0.3219 | 6.67E-09 | chr:6:32648036 |
| 6 rs614348    | 32573877 C | 3.114  | 6.70E-09 | chr:6:32648036 |
| 6 rs28752498  | 32568652 A | 3.027  | 6.73E-09 | chr:6:32648036 |
| 6 rs2647042   | 32667548 C | 0.2981 | 6.74E-09 | chr:6:32648036 |
| 6 rs572418566 | 32670172 C | 3.292  | 6.74E-09 | chr:6:32648036 |
| 6 rs149253766 | 32507305 T | 2.297  | 6.74E-09 | chr:6:32648036 |
| 6 rs150548684 | 32507293 T | 2.297  | 6.74E-09 | chr:6:32648036 |
| 6 rs77594561  | 32501273 G | 3.242  | 6.76E-09 | chr:6:32648036 |
| 6 rs77604461  | 32501282 C | 3.242  | 6.76E-09 | chr:6:32648036 |
| 6 rs9271517   | 32589740 G | 3.068  | 6.88E-09 | chr:6:32648036 |
| 6 rs9271519   | 32589751 C | 3.068  | 6.88E-09 | chr:6:32648036 |
| 6 rs9271681   | 32592918 T | 0.2795 | 6.92E-09 | chr:6:32648036 |
| 6 rs9271637   | 32592124 G | 3.019  | 6.94E-09 | chr:6:32648036 |
| 6 rs9271997   | 32597801 A | 0.2828 | 6.97E-09 | chr:6:32648036 |
| 6 rs28366328  | 32561766 G | 3.121  | 7.05E-09 | chr:6:32648036 |
| 6 rs2308891   | 32610009 G | 2.959  | 7.16E-09 | chr:6:32648036 |
| 6 rs9271560   | 32590381 T | 3.077  | 7.16E-09 | chr:6:32648036 |
| 6 rs72848204  | 32594073 T | 0.2743 | 7.29E-09 | chr:6:32648036 |
| 6 rs9269083   | 32441193 A | 0.287  | 7.45E-09 | chr:6:32648036 |
| 6 rs9274769   | 32638547 T | 0.3315 | 7.45E-09 | chr:6:32648036 |
| 6 rs111983899 | 32639389 C | 0.3929 | 7.51E-09 | chr:6:32648036 |
| 6 rs74768985  | 32518175 C | 2.9    | 7.53E-09 | chr:6:32648036 |
| 6 rs28746839  | 32634090 C | 2.87   | 7.57E-09 | chr:6:32648036 |
| 6 rs28746840  | 32634091 C | 2.87   | 7.57E-09 | chr:6:32648036 |

|               |            |        |          |                |
|---------------|------------|--------|----------|----------------|
| 6 rs28746841  | 32634094 C | 2.87   | 7.57E-09 | chr:6:32648036 |
| 6 rs28746842  | 32634098 G | 2.87   | 7.57E-09 | chr:6:32648036 |
| 6 rs679242    | 32570958 T | 3.57   | 7.58E-09 | chr:6:32648036 |
| 6 rs9275101   | 32649355 G | 0.299  | 7.62E-09 | chr:6:32648036 |
| 6 rs9275102   | 32649361 G | 0.299  | 7.62E-09 | chr:6:32648036 |
| 6 rs7453649   | 32440160 T | 0.2869 | 7.90E-09 | chr:6:32648036 |
| 6 rs7773030   | 32441396 G | 0.2869 | 7.90E-09 | chr:6:32648036 |
| 6 rs9268863   | 32430289 A | 0.2869 | 7.90E-09 | chr:6:32648036 |
| 6 rs9268877   | 32431147 A | 0.2869 | 7.90E-09 | chr:6:32648036 |
| 6 rs9268932   | 32433290 T | 0.2869 | 7.90E-09 | chr:6:32648036 |
| 6 rs9268979   | 32435044 T | 0.2869 | 7.90E-09 | chr:6:32648036 |
| 6 rs9269082   | 32441178 A | 0.2869 | 7.90E-09 | chr:6:32648036 |
| 6 rs9269084   | 32441199 A | 0.2869 | 7.90E-09 | chr:6:32648036 |
| 6 rs28383411  | 32608308 C | 2.8    | 7.97E-09 | chr:6:32648036 |
| 6 rs9275086   | 32648809 A | 0.3087 | 7.98E-09 | chr:6:32648036 |
| 6 rs17879995  | 32552072 G | 4.294  | 8.00E-09 | chr:6:32648036 |
| 6 rs9274835   | 32639931 T | 3.933  | 8.22E-09 | chr:6:32648036 |
| 6 rs9274837   | 32639972 T | 3.933  | 8.22E-09 | chr:6:32648036 |
| 6 rs114816840 | 32610214 C | 2.768  | 8.23E-09 | chr:6:32648036 |
| 6 rs116613962 | 32610220 G | 2.768  | 8.23E-09 | chr:6:32648036 |
| 6 rs2073045   | 32339548 A | 3.254  | 8.24E-09 | chr:6:32648036 |
| 6 rs9274740   | 32637968 A | 0.3145 | 8.25E-09 | chr:6:32648036 |
| 6 rs9274754   | 32638261 T | 0.3419 | 8.25E-09 | chr:6:32648036 |
| 6 rs9274755   | 32638262 G | 0.3419 | 8.25E-09 | chr:6:32648036 |
| 6 rs200526004 | 32486059 T | 4.13   | 8.31E-09 | chr:6:32648036 |
| 6 rs9273492   | 32628229 A | 3.01   | 8.40E-09 | chr:6:32648036 |
| 6 rs9272472   | 32605724 G | 2.747  | 8.49E-09 | chr:6:32648036 |
| 6 rs9274756   | 32638269 A | 0.3415 | 8.51E-09 | chr:6:32648036 |
| 6 rs9274864   | 32640646 A | 0.3601 | 8.54E-09 | chr:6:32648036 |
| 6 rs115466102 | 32507168 C | 2.176  | 8.54E-09 | chr:6:32648036 |
| 6 rs9274758   | 32638290 A | 0.3416 | 8.61E-09 | chr:6:32648036 |
| 6 rs17205761  | 32650934 A | 0.2674 | 8.61E-09 | chr:6:32648036 |
| 6 rs17205768  | 32650937 C | 0.2674 | 8.61E-09 | chr:6:32648036 |
| 6 rs9271765   | 32594166 G | 3.087  | 8.62E-09 | chr:6:32648036 |
| 6 rs9271767   | 32594176 T | 3.087  | 8.62E-09 | chr:6:32648036 |
| 6 rs28746860  | 32635033 G | 2.986  | 8.70E-09 | chr:6:32648036 |
| 6 rs28747008  | 32654530 T | 0.2488 | 8.71E-09 | chr:6:32648036 |
| 6 rs28747009  | 32654531 A | 0.2488 | 8.71E-09 | chr:6:32648036 |
| 6 rs1048173   | 32609855 C | 3.056  | 8.86E-09 | chr:6:32648036 |
| 6 rs570560964 | 32523134 T | 4.602  | 8.87E-09 | chr:6:32648036 |
| 6 rs553565066 | 32523149 A | 2.557  | 8.93E-09 | chr:6:32648036 |
| 6 rs9269086   | 32441268 G | 0.2873 | 8.97E-09 | chr:6:32648036 |
| 6 rs190685297 | 32458514 C | 3.233  | 8.98E-09 | chr:6:32648036 |

|               |            |        |          |                |
|---------------|------------|--------|----------|----------------|
| 6 rs28383403  | 32608035 C | 2.855  | 9.01E-09 | chr:6:32648036 |
| 6 rs79476956  | 32508173 A | 0.4335 | 9.02E-09 | chr:6:32648036 |
| 6 rs34553045  | 32561565 C | 3.872  | 9.16E-09 | chr:6:32648036 |
| 6 rs28724246  | 32629422 C | 3.078  | 9.19E-09 | chr:6:32648036 |
| 6 rs75730517  | 32503697 A | 2.446  | 9.20E-09 | chr:6:32648036 |
| 6 rs199516615 | 32493510 A | 2.587  | 9.20E-09 | chr:6:32648036 |
| 6 rs9271398   | 32587508 C | 3.002  | 9.24E-09 | chr:6:32648036 |
| 6 rs28383405  | 32608108 T | 2.969  | 9.31E-09 | chr:6:32648036 |
| 6 rs554350950 | 32522108 A | 2.611  | 9.32E-09 | chr:6:32648036 |
| 6 rs75459649  | 32505390 G | 2.392  | 9.51E-09 | chr:6:32648036 |
| 6 rs17205747  | 32650911 T | 0.2706 | 9.51E-09 | chr:6:32648036 |
| 6 rs7754885   | 32657858 G | 0.3043 | 9.65E-09 | chr:6:32648036 |
| 6 rs28746863  | 32635172 T | 2.855  | 9.78E-09 | chr:6:32648036 |
| 6 rs28891435  | 32641241 G | 0.3628 | 9.87E-09 | chr:6:32648036 |
| 6 rs9272731   | 32609645 C | 2.908  | 9.93E-09 | chr:6:32648036 |
| 6 rs9272732   | 32609647 G | 2.908  | 9.93E-09 | chr:6:32648036 |
| 6 rs76342965  | 32508008 T | 2.282  | 1.00E-08 | chr:6:32648036 |
| 6 rs77587106  | 32508001 A | 2.282  | 1.00E-08 | chr:6:32648036 |
| 6 rs35265698  | 32561334 G | 3.727  | 1.01E-08 | chr:6:32648036 |
| 6 rs17212104  | 32650883 G | 0.2733 | 1.04E-08 | chr:6:32648036 |
| 6 rs9275010   | 32642966 C | 0.3544 | 1.05E-08 | chr:6:32648036 |
| 6 rs9275011   | 32642969 C | 0.3544 | 1.05E-08 | chr:6:32648036 |
| 6 rs28746829  | 32633767 T | 2.962  | 1.05E-08 | chr:6:32648036 |
| 6 rs28746830  | 32633781 T | 2.962  | 1.05E-08 | chr:6:32648036 |
| 6 rs9268893   | 32431927 C | 0.2985 | 1.05E-08 | chr:6:32648036 |
| 6 rs34350244  | 32561465 T | 3.731  | 1.05E-08 | chr:6:32648036 |
| 6 rs35294087  | 32561466 G | 3.731  | 1.05E-08 | chr:6:32648036 |
| 6 rs9378210   | 32436518 T | 0.4009 | 1.05E-08 | chr:6:32648036 |
| 6 rs35081742  | 32553608 T | 3.454  | 1.06E-08 | chr:6:32648036 |
| 6 rs7453703   | 32440158 A | 0.2874 | 1.06E-08 | chr:6:32648036 |
| 6 rs9272154   | 32601019 A | 0.2838 | 1.07E-08 | chr:6:32648036 |
| 6 rs7739375   | 32441679 A | 0.2878 | 1.08E-08 | chr:6:32648036 |
| 6 rs9272378   | 32604718 G | 2.349  | 1.09E-08 | chr:6:32648036 |
| 6 rs9275642   | 32684935 T | 3.392  | 1.09E-08 | chr:6:32648036 |
| 6 rs9271894   | 32595874 T | 0.2804 | 1.10E-08 | chr:6:32648036 |
| 6 rs35525122  | 32561283 A | 3.776  | 1.11E-08 | chr:6:32648036 |
| 6 rs2760983   | 32565601 G | 3.77   | 1.11E-08 | chr:6:32648036 |
| 6 rs74487484  | 32455661 T | 2.3    | 1.11E-08 | chr:6:32648036 |
| 6 rs9268852   | 32429594 A | 0.2917 | 1.12E-08 | chr:6:32648036 |
| 6 rs9273496   | 32628283 A | 3.082  | 1.12E-08 | chr:6:32648036 |
| 6 rs17205928  | 32651737 G | 0.2766 | 1.13E-08 | chr:6:32648036 |
| 6 rs9274155   | 32630288 C | 2.875  | 1.13E-08 | chr:6:32648036 |
| 6 rs77794095  | 32502471 C | 0.4319 | 1.14E-08 | chr:6:32648036 |



|               |            |        |          |                |
|---------------|------------|--------|----------|----------------|
| 6 rs9271621   | 32591841 A | 3.068  | 1.14E-08 | chr:6:32648036 |
| 6 rs9391784   | 32436545 T | 0.4008 | 1.15E-08 | chr:6:32648036 |
| 6 rs673336    | 32577858 A | 0.3086 | 1.15E-08 | chr:6:32648036 |
| 6 rs34039593  | 32570311 G | 3.703  | 1.15E-08 | chr:6:32648036 |
| 6 rs9274679   | 32636653 T | 0.3416 | 1.16E-08 | chr:6:32648036 |
| 6 rs9268833   | 32428062 T | 2.993  | 1.17E-08 | chr:6:32648036 |
| 6 rs9268834   | 32428079 A | 2.993  | 1.17E-08 | chr:6:32648036 |
| 6 rs9268835   | 32428115 A | 2.993  | 1.17E-08 | chr:6:32648036 |
| 6 rs9273535   | 32628760 A | 2.934  | 1.17E-08 | chr:6:32648036 |
| 6 rs9269078   | 32440879 C | 0.2889 | 1.19E-08 | chr:6:32648036 |
| 6 rs9274707   | 32637266 A | 0.3665 | 1.21E-08 | chr:6:32648036 |
| 6 rs9274708   | 32637267 G | 0.3665 | 1.21E-08 | chr:6:32648036 |
| 6 rs17212329  | 32652005 T | 0.2738 | 1.22E-08 | chr:6:32648036 |
| 6 rs9271677   | 32592898 A | 2.886  | 1.23E-08 | chr:6:32648036 |
| 6 rs601006    | 32573173 A | 2.96   | 1.23E-08 | chr:6:32648036 |
| 6 rs74867743  | 32502819 T | 2.361  | 1.23E-08 | chr:6:32648036 |
| 6 rs9271618   | 32591752 A | 0.2814 | 1.24E-08 | chr:6:32648036 |
| 6 rs35326979  | 32653917 G | 0.237  | 1.25E-08 | chr:6:32648036 |
| 6 rs3104389   | 32595097 A | 2.757  | 1.26E-08 | chr:6:32648036 |
| 6 rs9271685   | 32592970 C | 2.849  | 1.28E-08 | chr:6:32648036 |
| 6 rs13193606  | 32575044 T | 2.898  | 1.29E-08 | chr:6:32648036 |
| 6 rs34403271  | 32550220 C | 3.348  | 1.29E-08 | chr:6:32648036 |
| 6 rs542882860 | 32670178 C | 3.16   | 1.31E-08 | chr:6:32648036 |
| 6 rs112872773 | 32487174 G | 3.632  | 1.32E-08 | chr:6:32648036 |
| 6 rs535648472 | 32487066 T | 3.577  | 1.32E-08 | chr:6:32648036 |
| 6 rs9274839   | 32640015 A | 0.3396 | 1.32E-08 | chr:6:32648036 |
| 6 rs9271532   | 32589945 C | 3.035  | 1.33E-08 | chr:6:32648036 |
| 6 rs617578    | 32574603 A | 3.689  | 1.33E-08 | chr:6:32648036 |
| 6 rs9273174   | 32613237 G | 2.795  | 1.33E-08 | chr:6:32648036 |
| 6 rs9271568   | 32590463 A | 2.956  | 1.34E-08 | chr:6:32648036 |
| 6 rs9272347   | 32604394 C | 2.487  | 1.38E-08 | chr:6:32648036 |
| 6 rs9275008   | 32642944 T | 0.3338 | 1.38E-08 | chr:6:32648036 |
| 6 rs533524385 | 32522291 G | 3.057  | 1.38E-08 | chr:6:32648036 |
| 6 rs559757855 | 32522285 C | 3.057  | 1.38E-08 | chr:6:32648036 |
| 6 rs9268881   | 32431606 T | 0.2949 | 1.39E-08 | chr:6:32648036 |
| 6 rs1130420   | 32627852 A | 2.586  | 1.40E-08 | chr:6:32648036 |
| 6 rs111517012 | 32554675 G | 3.122  | 1.42E-08 | chr:6:32648036 |
| 6 rs35675330  | 32554653 A | 3.122  | 1.42E-08 | chr:6:32648036 |
| 6 rs28362368  | 32594040 G | 0.2825 | 1.42E-08 | chr:6:32648036 |
| 6 rs9271900   | 32596013 G | 0.2816 | 1.43E-08 | chr:6:32648036 |
| 6 rs74499753  | 32455651 G | 2.28   | 1.44E-08 | chr:6:32648036 |
| 6 rs9271762   | 32594028 G | 2.837  | 1.45E-08 | chr:6:32648036 |
| 6 rs9269080   | 32440969 G | 0.2957 | 1.45E-08 | chr:6:32648036 |

|               |            |        |          |                |
|---------------|------------|--------|----------|----------------|
| 6 rs9271400   | 32587520 T | 2.959  | 1.46E-08 | chr:6:32648036 |
| 6 rs281863304 | 32631473 T | 2.744  | 1.52E-08 | chr:6:32648036 |
| 6 rs543713    | 32573934 T | 3.002  | 1.52E-08 | chr:6:32648036 |
| 6 rs111989182 | 32510924 G | 2.25   | 1.53E-08 | chr:6:32648036 |
| 6 rs28752493  | 32568165 C | 2.919  | 1.54E-08 | chr:6:32648036 |
| 6 rs3763305   | 32369488 A | 4.413  | 1.54E-08 | chr:6:32648036 |
| 6 rs3817964   | 32367997 A | 4.413  | 1.54E-08 | chr:6:32648036 |
| 6 rs9271667   | 32592710 C | 0.2875 | 1.54E-08 | chr:6:32648036 |
| 6 rs3104393   | 32594403 T | 2.55   | 1.55E-08 | chr:6:32648036 |
| 6 rs28752497  | 32568481 A | 2.966  | 1.56E-08 | chr:6:32648036 |
| 6 rs200591586 | 32485857 A | 2.45   | 1.57E-08 | chr:6:32648036 |
| 6 rs71534530  | 32511211 A | 0.399  | 1.59E-08 | chr:6:32648036 |
| 6 rs28732275  | 32548403 A | 4.659  | 1.60E-08 | chr:6:32648036 |
| 6 rs9269085   | 32441202 C | 0.2977 | 1.62E-08 | chr:6:32648036 |
| 6 rs9274715   | 32637391 G | 0.3654 | 1.62E-08 | chr:6:32648036 |
| 6 rs546722932 | 32507223 T | 2.175  | 1.63E-08 | chr:6:32648036 |
| 6 rs28746859  | 32635007 A | 2.942  | 1.64E-08 | chr:6:32648036 |
| 6 rs28752504  | 32569162 C | 2.784  | 1.64E-08 | chr:6:32648036 |
| 6 rs9271682   | 32592923 G | 2.862  | 1.65E-08 | chr:6:32648036 |
| 6 rs28747004  | 32654379 A | 0.283  | 1.66E-08 | chr:6:32648036 |
| 6 rs28747005  | 32654401 G | 0.283  | 1.66E-08 | chr:6:32648036 |
| 6 rs35239661  | 32549923 T | 3.434  | 1.67E-08 | chr:6:32648036 |
| 6 rs6928482   | 32626249 T | 0.3236 | 1.68E-08 | chr:6:32648036 |
| 6 rs9268838   | 32428715 A | 2.938  | 1.68E-08 | chr:6:32648036 |
| 6 rs35118762  | 32560631 T | 3.625  | 1.69E-08 | chr:6:32648036 |
| 6 rs687308    | 32567256 T | 3.625  | 1.69E-08 | chr:6:32648036 |
| 6 rs74729326  | 32506796 T | 2.33   | 1.70E-08 | chr:6:32648036 |
| 6 rs377552899 | 32630344 C | 2.691  | 1.70E-08 | chr:6:32648036 |
| 6 rs144949540 | 32643020 G | 5.904  | 1.71E-08 | chr:6:32648036 |
| 6 rs7745002   | 32615421 A | 0.4068 | 1.71E-08 | chr:6:32648036 |
| 6 rs28724166  | 32555858 T | 0.3959 | 1.72E-08 | chr:6:32648036 |
| 6 rs9271564   | 32590436 T | 2.916  | 1.72E-08 | chr:6:32648036 |
| 6 rs9271565   | 32590437 G | 2.916  | 1.72E-08 | chr:6:32648036 |
| 6 rs28752492  | 32568138 A | 2.904  | 1.73E-08 | chr:6:32648036 |
| 6 rs9271872   | 32595418 G | 0.217  | 1.75E-08 | chr:6:32648036 |
| 6 rs9271873   | 32595421 A | 0.217  | 1.75E-08 | chr:6:32648036 |
| 6 rs9274743   | 32638042 A | 0.3488 | 1.77E-08 | chr:6:32648036 |
| 6 rs17613542  | 32630717 A | 2.886  | 1.78E-08 | chr:6:32648036 |
| 6 rs111875855 | 32489668 T | 3.514  | 1.80E-08 | chr:6:32648036 |
| 6 rs116067927 | 32487074 G | 3.564  | 1.80E-08 | chr:6:32648036 |
| 6 rs9274744   | 32638054 G | 0.3573 | 1.82E-08 | chr:6:32648036 |
| 6 rs9274746   | 32638060 G | 0.3573 | 1.82E-08 | chr:6:32648036 |
| 6 rs75496002  | 32459855 C | 2.219  | 1.86E-08 | chr:6:32648036 |

|               |            |        |          |                |
|---------------|------------|--------|----------|----------------|
| 6 rs35130701  | 32594199 G | 0.2889 | 1.88E-08 | chr:6:32648036 |
| 6 rs79874075  | 32455649 C | 2.268  | 1.90E-08 | chr:6:32648036 |
| 6 rs281863860 | 32630427 C | 2.716  | 1.92E-08 | chr:6:32648036 |
| 6 rs377506388 | 32487038 G | 3.508  | 1.93E-08 | chr:6:32648036 |
| 6 rs17212448  | 32652519 C | 0.2333 | 1.95E-08 | chr:6:32648036 |
| 6 rs9273513   | 32628506 A | 3.004  | 1.97E-08 | chr:6:32648036 |
| 6 rs559236302 | 32486992 G | 2.599  | 1.98E-08 | chr:6:32648036 |
| 6 rs34066151  | 32559702 G | 3.05   | 2.00E-08 | chr:6:32648036 |
| 6 rs35299998  | 32559710 T | 3.05   | 2.00E-08 | chr:6:32648036 |
| 6 rs28752500  | 32568769 T | 2.849  | 2.01E-08 | chr:6:32648036 |
| 6 rs574170    | 32572904 A | 2.889  | 2.02E-08 | chr:6:32648036 |
| 6 rs28746992  | 32653919 G | 0.248  | 2.02E-08 | chr:6:32648036 |
| 6 rs2647059   | 32569362 C | 3.592  | 2.03E-08 | chr:6:32648036 |
| 6 rs79881121  | 32502324 A | 0.3947 | 2.06E-08 | chr:6:32648036 |
| 6 rs9268883   | 32431638 T | 0.3009 | 2.07E-08 | chr:6:32648036 |
| 6 rs9274741   | 32637994 T | 0.3101 | 2.08E-08 | chr:6:32648036 |
| 6 rs9273818   | 32629531 G | 2.939  | 2.09E-08 | chr:6:32648036 |
| 6 rs77572094  | 32502885 T | 2.379  | 2.10E-08 | chr:6:32648036 |
| 6 rs35371668  | 32561638 T | 3.77   | 2.11E-08 | chr:6:32648036 |
| 6 rs9274889   | 32641143 A | 0.4695 | 2.11E-08 | chr:6:32648036 |
| 6 rs372253974 | 32630329 C | 2.671  | 2.12E-08 | chr:6:32648036 |
| 6 rs28772271  | 32656901 C | 0.282  | 2.15E-08 | chr:6:32648036 |
| 6 rs35095850  | 32549935 G | 3.392  | 2.16E-08 | chr:6:32648036 |
| 6 rs9272254   | 32603098 C | 2.938  | 2.16E-08 | chr:6:32648036 |
| 6 rs74955625  | 32502871 A | 2.377  | 2.18E-08 | chr:6:32648036 |
| 6 rs12722069  | 32609231 G | 2.929  | 2.19E-08 | chr:6:32648036 |
| 6 rs3207985   | 32609227 C | 2.929  | 2.19E-08 | chr:6:32648036 |
| 6 rs9272451   | 32605501 G | 2.861  | 2.23E-08 | chr:6:32648036 |
| 6 rs28746984  | 32653819 A | 0.2696 | 2.24E-08 | chr:6:32648036 |
| 6 rs9274857   | 32640542 C | 0.3805 | 2.25E-08 | chr:6:32648036 |
| 6 rs5026743   | 32439964 G | 0.2899 | 2.26E-08 | chr:6:32648036 |
| 6 rs643889    | 32575918 T | 2.929  | 2.26E-08 | chr:6:32648036 |
| 6 rs17205942  | 32651798 T | 0.2868 | 2.29E-08 | chr:6:32648036 |
| 6 rs9271734   | 32593639 A | 3.135  | 2.29E-08 | chr:6:32648036 |
| 6 rs28383413  | 32608417 A | 2.839  | 2.30E-08 | chr:6:32648036 |
| 6 rs17205949  | 32651816 A | 0.2868 | 2.30E-08 | chr:6:32648036 |
| 6 rs17212286  | 32651819 A | 0.2868 | 2.30E-08 | chr:6:32648036 |
| 6 rs28383370  | 32607152 C | 2.276  | 2.31E-08 | chr:6:32648036 |
| 6 rs28383371  | 32607154 T | 2.276  | 2.31E-08 | chr:6:32648036 |
| 6 rs9271761   | 32594022 A | 2.988  | 2.31E-08 | chr:6:32648036 |
| 6 rs9269542   | 32544042 A | 0.4054 | 2.32E-08 | chr:6:32648036 |
| 6 rs9273040   | 32611958 G | 2.547  | 2.32E-08 | chr:6:32648036 |
| 6 rs9274713   | 32637341 C | 0.3502 | 2.34E-08 | chr:6:32648036 |

|               |            |        |          |                |
|---------------|------------|--------|----------|----------------|
| 6 rs9272229   | 32602568 C | 2.942  | 2.34E-08 | chr:6:32648036 |
| 6 rs2647066   | 32571122 T | 3.46   | 2.35E-08 | chr:6:32648036 |
| 6 rs2760990   | 32571110 A | 3.46   | 2.35E-08 | chr:6:32648036 |
| 6 rs28724244  | 32629398 C | 2.895  | 2.38E-08 | chr:6:32648036 |
| 6 rs28366268  | 32559874 G | 2.539  | 2.39E-08 | chr:6:32648036 |
| 6 rs515185    | 32574742 A | 3.632  | 2.39E-08 | chr:6:32648036 |
| 6 rs17212336  | 32652026 A | 0.2836 | 2.39E-08 | chr:6:32648036 |
| 6 rs28746815  | 32633253 G | 2.69   | 2.42E-08 | chr:6:32648036 |
| 6 rs28724008  | 32550550 G | 2.886  | 2.42E-08 | chr:6:32648036 |
| 6 rs2454139   | 32566635 C | 3.63   | 2.43E-08 | chr:6:32648036 |
| 6 rs9272716   | 32609367 G | 3.895  | 2.45E-08 | chr:6:32648036 |
| 6 rs9274710   | 32637287 C | 0.3769 | 2.47E-08 | chr:6:32648036 |
| 6 rs78510027  | 32505075 G | 2.847  | 2.47E-08 | chr:6:32648036 |
| 6 rs28366267  | 32559781 C | 2.772  | 2.48E-08 | chr:6:32648036 |
| 6 rs28747038  | 32655368 A | 0.2888 | 2.48E-08 | chr:6:32648036 |
| 6 rs1281947   | 32592009 G | 3.644  | 2.49E-08 | chr:6:32648036 |
| 6 rs28891489  | 32650362 C | 0.2942 | 2.50E-08 | chr:6:32648036 |
| 6 rs9271722   | 32593522 G | 2.596  | 2.50E-08 | chr:6:32648036 |
| 6 rs281875029 | 32631237 A | 2.782  | 2.51E-08 | chr:6:32648036 |
| 6 rs601945    | 32573415 G | 3.649  | 2.54E-08 | chr:6:32648036 |
| 6 rs28891480  | 32642843 G | 0.2905 | 2.56E-08 | chr:6:32648036 |
| 6 rs6934185   | 32673233 G | 0.2905 | 2.56E-08 | chr:6:32648036 |
| 6 rs6934347   | 32673223 G | 0.2905 | 2.56E-08 | chr:6:32648036 |
| 6 rs76924329  | 32541094 G | 2.46   | 2.59E-08 | chr:6:32648036 |
| 6 rs74728615  | 32459866 A | 2.194  | 2.59E-08 | chr:6:32648036 |
| 6 rs9275123   | 32650256 G | 0.3236 | 2.60E-08 | chr:6:32648036 |
| 6 rs9275125   | 32650293 A | 0.3236 | 2.60E-08 | chr:6:32648036 |
| 6 rs9275126   | 32650307 A | 0.3236 | 2.60E-08 | chr:6:32648036 |
| 6 rs7739203   | 32441555 A | 0.303  | 2.60E-08 | chr:6:32648036 |
| 6 rs28746810  | 32633185 T | 2.726  | 2.62E-08 | chr:6:32648036 |
| 6 rs281863219 | 32631570 A | 2.76   | 2.63E-08 | chr:6:32648036 |
| 6 rs9271608   | 32591588 G | 3.549  | 2.63E-08 | chr:6:32648036 |
| 6 rs9272412   | 32604982 G | 3.384  | 2.64E-08 | chr:6:32648036 |
| 6 rs9272319   | 32604108 C | 2.659  | 2.65E-08 | chr:6:32648036 |
| 6 rs28383406  | 32608179 C | 2.954  | 2.65E-08 | chr:6:32648036 |
| 6 rs9273149   | 32612987 A | 2.741  | 2.67E-08 | chr:6:32648036 |
| 6 rs28747006  | 32654453 T | 0.291  | 2.68E-08 | chr:6:32648036 |
| 6 rs281863638 | 32630750 A | 2.86   | 2.68E-08 | chr:6:32648036 |
| 6 rs9275078   | 32648592 A | 0.3374 | 2.69E-08 | chr:6:32648036 |
| 6 rs9269079   | 32440910 T | 0.3052 | 2.71E-08 | chr:6:32648036 |
| 6 rs9269071   | 32440467 T | 0.3044 | 2.72E-08 | chr:6:32648036 |
| 6 rs17205998  | 32652050 G | 0.2879 | 2.72E-08 | chr:6:32648036 |
| 6 rs17206005  | 32652069 G | 0.2879 | 2.72E-08 | chr:6:32648036 |

|               |            |        |          |                |
|---------------|------------|--------|----------|----------------|
| 6 rs17206012  | 32652077 C | 0.2879 | 2.72E-08 | chr:6:32648036 |
| 6 rs28366270  | 32559934 G | 2.531  | 2.72E-08 | chr:6:32648036 |
| 6 rs114746879 | 32487080 T | 3.557  | 2.74E-08 | chr:6:32648036 |
| 6 rs28747037  | 32655336 C | 0.2836 | 2.75E-08 | chr:6:32648036 |
| 6 rs9271406   | 32587588 A | 0.3404 | 2.76E-08 | chr:6:32648036 |
| 6 rs968155    | 32380715 C | 0.3411 | 2.76E-08 | chr:6:32648036 |
| 6 rs9271853   | 32595117 T | 2.576  | 2.76E-08 | chr:6:32648036 |
| 6 rs1135085   | 32522477 C | 3.732  | 2.77E-08 | chr:6:32648036 |
| 6 rs542891748 | 32526778 C | 2.694  | 2.77E-08 | chr:6:32648036 |
| 6 rs115885380 | 32502972 A | 2.327  | 2.77E-08 | chr:6:32648036 |
| 6 rs116299636 | 32502974 C | 2.327  | 2.77E-08 | chr:6:32648036 |
| 6 rs113026095 | 32460486 G | 2.891  | 2.78E-08 | chr:6:32648036 |
| 6 rs9271498   | 32589282 A | 2.932  | 2.78E-08 | chr:6:32648036 |
| 6 rs28746947  | 32652747 A | 0.2807 | 2.80E-08 | chr:6:32648036 |
| 6 rs28772272  | 32656980 T | 0.2895 | 2.80E-08 | chr:6:32648036 |
| 6 rs9378274   | 32656983 A | 0.2895 | 2.80E-08 | chr:6:32648036 |
| 6 rs9391891   | 32656975 A | 0.2895 | 2.80E-08 | chr:6:32648036 |
| 6 rs9274977   | 32642247 A | 0.3376 | 2.80E-08 | chr:6:32648036 |
| 6 rs9272193   | 32601785 G | 0.3897 | 2.83E-08 | chr:6:32648036 |
| 6 rs17205809  | 32651135 A | 0.289  | 2.83E-08 | chr:6:32648036 |
| 6 rs2395516   | 32580657 C | 2.926  | 2.84E-08 | chr:6:32648036 |
| 6 rs11963017  | 32657863 C | 0.2935 | 2.85E-08 | chr:6:32648036 |
| 6 rs11967921  | 32657855 A | 0.2935 | 2.85E-08 | chr:6:32648036 |
| 6 rs11967958  | 32657849 A | 0.2935 | 2.85E-08 | chr:6:32648036 |
| 6 rs35984981  | 32554725 T | 2.954  | 2.85E-08 | chr:6:32648036 |
| 6 rs9296035   | 32657888 G | 0.2935 | 2.85E-08 | chr:6:32648036 |
| 6 rs28747062  | 32656661 C | 0.2826 | 2.85E-08 | chr:6:32648036 |
| 6 rs28747063  | 32656668 C | 0.2826 | 2.85E-08 | chr:6:32648036 |
| 6 rs532965    | 32577973 G | 3.519  | 2.86E-08 | chr:6:32648036 |
| 6 rs9268847   | 32429277 G | 0.2849 | 2.86E-08 | chr:6:32648036 |
| 6 rs56347793  | 32646963 T | 2.896  | 2.86E-08 | chr:6:32648036 |
| 6 rs78232591  | 32458419 A | 0.4575 | 2.89E-08 | chr:6:32648036 |
| 6 rs56051108  | 32645530 A | 2.835  | 2.90E-08 | chr:6:32648036 |
| 6 rs17613340  | 32621966 G | 2.216  | 2.92E-08 | chr:6:32648036 |
| 6 rs17212371  | 32652259 A | 0.2718 | 2.92E-08 | chr:6:32648036 |
| 6 rs9269020   | 32436934 A | 0.3934 | 2.93E-08 | chr:6:32648036 |
| 6 rs17206042  | 32652244 A | 0.2752 | 2.98E-08 | chr:6:32648036 |
| 6 rs28724151  | 32555378 T | 3.325  | 3.02E-08 | chr:6:32648036 |
| 6 rs113712140 | 32485972 G | 3.959  | 3.03E-08 | chr:6:32648036 |
| 6 rs9275402   | 32669837 C | 2.845  | 3.04E-08 | chr:6:32648036 |
| 6 rs9275403   | 32669838 T | 2.845  | 3.04E-08 | chr:6:32648036 |
| 6 rs80247743  | 32527206 G | 2.423  | 3.08E-08 | chr:6:32648036 |
| 6 rs9269072   | 32440508 G | 0.2961 | 3.11E-08 | chr:6:32648036 |

|               |            |        |          |                |
|---------------|------------|--------|----------|----------------|
| 6 rs9405038   | 32437614 T | 2.915  | 3.12E-08 | chr:6:32648036 |
| 6 rs551251088 | 32507235 A | 2.144  | 3.12E-08 | chr:6:32648036 |
| 6 rs28746824  | 32633398 C | 2.645  | 3.13E-08 | chr:6:32648036 |
| 6 rs9275351   | 32667793 A | 3.988  | 3.13E-08 | chr:6:32648036 |
| 6 rs9273022   | 32611737 C | 2.376  | 3.14E-08 | chr:6:32648036 |
| 6 rs28747003  | 32654322 C | 0.2901 | 3.20E-08 | chr:6:32648036 |
| 6 rs2760985   | 32566398 A | 3.623  | 3.22E-08 | chr:6:32648036 |
| 6 rs28772273  | 32659314 T | 0.2964 | 3.27E-08 | chr:6:32648036 |
| 6 rs28747032  | 32655180 C | 0.2919 | 3.28E-08 | chr:6:32648036 |
| 6 rs28747033  | 32655213 C | 0.2919 | 3.28E-08 | chr:6:32648036 |
| 6 rs28747035  | 32655316 C | 0.2919 | 3.28E-08 | chr:6:32648036 |
| 6 rs9271623   | 32591914 C | 0.295  | 3.29E-08 | chr:6:32648036 |
| 6 rs7739357   | 32441641 A | 0.3043 | 3.30E-08 | chr:6:32648036 |
| 6 rs9274891   | 32641152 T | 0.4763 | 3.31E-08 | chr:6:32648036 |
| 6 rs34977123  | 32555736 G | 3.848  | 3.34E-08 | chr:6:32648036 |
| 6 rs9271694   | 32593051 C | 0.2943 | 3.35E-08 | chr:6:32648036 |
| 6 rs6908032   | 32643739 A | 0.2359 | 3.36E-08 | chr:6:32648036 |
| 6 rs9272417   | 32605078 G | 3.46   | 3.37E-08 | chr:6:32648036 |
| 6 rs28746816  | 32633261 A | 2.654  | 3.39E-08 | chr:6:32648036 |
| 6 rs9272323   | 32604151 T | 2.56   | 3.39E-08 | chr:6:32648036 |
| 6 rs75640879  | 32541021 T | 2.674  | 3.40E-08 | chr:6:32648036 |
| 6 rs35117964  | 32568146 G | 3.537  | 3.44E-08 | chr:6:32648036 |
| 6 rs17843717  | 32630798 A | 2.898  | 3.51E-08 | chr:6:32648036 |
| 6 rs9271660   | 32592602 G | 2.542  | 3.53E-08 | chr:6:32648036 |
| 6 rs9271661   | 32592605 A | 2.542  | 3.53E-08 | chr:6:32648036 |
| 6 rs33964890  | 32583919 C | 2.797  | 3.53E-08 | chr:6:32648036 |
| 6 rs79350467  | 32527476 T | 2.691  | 3.58E-08 | chr:6:32648036 |
| 6 rs74929336  | 32502585 A | 2.279  | 3.59E-08 | chr:6:32648036 |
| 6 rs9275163   | 32652880 C | 3.374  | 3.62E-08 | chr:6:32648036 |
| 6 rs9275084   | 32648722 A | 0.3381 | 3.72E-08 | chr:6:32648036 |
| 6 rs9275085   | 32648735 G | 0.3381 | 3.72E-08 | chr:6:32648036 |
| 6 rs28383389  | 32607596 A | 2.39   | 3.76E-08 | chr:6:32648036 |
| 6 rs28724240  | 32629328 A | 2.815  | 3.76E-08 | chr:6:32648036 |
| 6 rs28724241  | 32629330 T | 2.815  | 3.76E-08 | chr:6:32648036 |
| 6 rs28383313  | 32587117 G | 2.885  | 3.78E-08 | chr:6:32648036 |
| 6 rs585305    | 32572048 T | 2.809  | 3.79E-08 | chr:6:32648036 |
| 6 rs17212062  | 32650648 G | 0.2967 | 3.82E-08 | chr:6:32648036 |
| 6 rs17212069  | 32650667 G | 0.2967 | 3.82E-08 | chr:6:32648036 |
| 6 rs17212090  | 32650809 T | 0.2967 | 3.82E-08 | chr:6:32648036 |
| 6 rs17212643  | 32674865 T | 0.2967 | 3.82E-08 | chr:6:32648036 |
| 6 rs17212699  | 32675130 G | 0.2967 | 3.82E-08 | chr:6:32648036 |
| 6 rs28437335  | 32657644 C | 0.2967 | 3.82E-08 | chr:6:32648036 |
| 6 rs28746911  | 32649200 C | 0.2967 | 3.82E-08 | chr:6:32648036 |

|               |            |        |          |                |
|---------------|------------|--------|----------|----------------|
| 6 rs28746912  | 32649451 G | 0.2967 | 3.82E-08 | chr:6:32648036 |
| 6 rs28747029  | 32655096 A | 0.2967 | 3.82E-08 | chr:6:32648036 |
| 6 rs28747030  | 32655104 A | 0.2967 | 3.82E-08 | chr:6:32648036 |
| 6 rs28747031  | 32655125 A | 0.2967 | 3.82E-08 | chr:6:32648036 |
| 6 rs28772279  | 32673754 A | 0.2967 | 3.82E-08 | chr:6:32648036 |
| 6 rs28772280  | 32673899 T | 0.2967 | 3.82E-08 | chr:6:32648036 |
| 6 rs28772281  | 32674086 A | 0.2967 | 3.82E-08 | chr:6:32648036 |
| 6 rs28772282  | 32674136 G | 0.2967 | 3.82E-08 | chr:6:32648036 |
| 6 rs28891483  | 32649254 T | 0.2967 | 3.82E-08 | chr:6:32648036 |
| 6 rs28891484  | 32649261 A | 0.2967 | 3.82E-08 | chr:6:32648036 |
| 6 rs28891485  | 32649274 T | 0.2967 | 3.82E-08 | chr:6:32648036 |
| 6 rs28891486  | 32649408 T | 0.2967 | 3.82E-08 | chr:6:32648036 |
| 6 rs28891490  | 32660697 A | 0.2967 | 3.82E-08 | chr:6:32648036 |
| 6 rs4538747   | 32657334 A | 0.2967 | 3.82E-08 | chr:6:32648036 |
| 6 rs4570006   | 32657257 T | 0.2967 | 3.82E-08 | chr:6:32648036 |
| 6 rs5000632   | 32663688 C | 0.2967 | 3.82E-08 | chr:6:32648036 |
| 6 rs6906698   | 32673425 T | 0.2967 | 3.82E-08 | chr:6:32648036 |
| 6 rs6907114   | 32673361 A | 0.2967 | 3.82E-08 | chr:6:32648036 |
| 6 rs6935069   | 32666156 A | 0.2967 | 3.82E-08 | chr:6:32648036 |
| 6 rs9368739   | 32669945 T | 0.2967 | 3.82E-08 | chr:6:32648036 |
| 6 rs9394113   | 32665167 G | 0.2967 | 3.82E-08 | chr:6:32648036 |
| 6 rs9405042   | 32657020 G | 0.2967 | 3.82E-08 | chr:6:32648036 |
| 6 rs9405119   | 32657681 G | 0.2967 | 3.82E-08 | chr:6:32648036 |
| 6 rs28746918  | 32649769 T | 0.2976 | 3.84E-08 | chr:6:32648036 |
| 6 rs17206035  | 32652224 C | 0.2798 | 3.84E-08 | chr:6:32648036 |
| 6 rs28746808  | 32633130 A | 2.701  | 3.86E-08 | chr:6:32648036 |
| 6 rs4502931   | 32380782 T | 0.3418 | 3.91E-08 | chr:6:32648036 |
| 6 rs9268518   | 32380818 A | 0.3418 | 3.91E-08 | chr:6:32648036 |
| 6 rs9268519   | 32380826 G | 0.3418 | 3.91E-08 | chr:6:32648036 |
| 6 rs9268520   | 32380860 C | 0.3418 | 3.91E-08 | chr:6:32648036 |
| 6 rs968154    | 32380785 G | 0.3418 | 3.91E-08 | chr:6:32648036 |
| 6 rs149432428 | 32485861 G | 2.406  | 3.93E-08 | chr:6:32648036 |
| 6 rs28747061  | 32656653 T | 0.2874 | 3.93E-08 | chr:6:32648036 |
| 6 rs17205844  | 32651254 G | 0.2985 | 3.94E-08 | chr:6:32648036 |
| 6 rs17205851  | 32651265 C | 0.2985 | 3.94E-08 | chr:6:32648036 |
| 6 rs112477119 | 32489269 T | 2.264  | 3.99E-08 | chr:6:32648036 |
| 6 rs34171523  | 32655954 G | 0.2818 | 4.00E-08 | chr:6:32648036 |
| 6 rs73728637  | 32594420 C | 0.2263 | 4.01E-08 | chr:6:32648036 |
| 6 rs9271494   | 32589240 C | 3.645  | 4.02E-08 | chr:6:32648036 |
| 6 rs75288201  | 32541031 A | 2.642  | 4.04E-08 | chr:6:32648036 |
| 6 rs534819727 | 32481692 T | 3.187  | 4.06E-08 | chr:6:32648036 |
| 6 rs570919834 | 32481691 T | 3.187  | 4.06E-08 | chr:6:32648036 |
| 6 rs9269069   | 32440362 C | 0.31   | 4.13E-08 | chr:6:32648036 |

|               |            |        |          |                |
|---------------|------------|--------|----------|----------------|
| 6 rs199690134 | 32487449 T | 4.07   | 4.13E-08 | chr:6:32648036 |
| 6 rs9274351   | 32632425 A | 2.47   | 4.16E-08 | chr:6:32648036 |
| 6 rs3104413   | 32582650 G | 3.452  | 4.18E-08 | chr:6:32648036 |
| 6 rs3129753   | 32583027 C | 3.452  | 4.18E-08 | chr:6:32648036 |
| 6 rs3129769   | 32597022 A | 3.452  | 4.18E-08 | chr:6:32648036 |
| 6 rs6931277   | 32583357 T | 3.452  | 4.18E-08 | chr:6:32648036 |
| 6 rs7770010   | 32574896 A | 3.452  | 4.18E-08 | chr:6:32648036 |
| 6 rs113547679 | 32510914 T | 2.179  | 4.22E-08 | chr:6:32648036 |
| 6 rs181435903 | 32510903 A | 2.179  | 4.22E-08 | chr:6:32648036 |
| 6 rs3129751   | 32582189 C | 3.541  | 4.23E-08 | chr:6:32648036 |
| 6 rs113923037 | 32457315 A | 2.292  | 4.28E-08 | chr:6:32648036 |
| 6 rs9271394   | 32587480 T | 2.831  | 4.28E-08 | chr:6:32648036 |
| 6 rs28746973  | 32653442 A | 0.294  | 4.35E-08 | chr:6:32648036 |
| 6 rs28746974  | 32653443 A | 0.294  | 4.35E-08 | chr:6:32648036 |
| 6 rs28746930  | 32650074 A | 0.2967 | 4.36E-08 | chr:6:32648036 |
| 6 rs28746809  | 32633159 C | 2.669  | 4.37E-08 | chr:6:32648036 |
| 6 rs17205977  | 32651927 C | 0.2905 | 4.40E-08 | chr:6:32648036 |
| 6 rs9272142   | 32600800 G | 2.679  | 4.42E-08 | chr:6:32648036 |
| 6 rs28383408  | 32608251 G | 2.628  | 4.44E-08 | chr:6:32648036 |
| 6 rs17205823  | 32651168 T | 0.2937 | 4.45E-08 | chr:6:32648036 |
| 6 rs17205830  | 32651180 C | 0.2937 | 4.45E-08 | chr:6:32648036 |
| 6 rs537750078 | 32661051 A | 4.188  | 4.50E-08 | chr:6:32648036 |
| 6 rs9275401   | 32669827 G | 2.781  | 4.50E-08 | chr:6:32648036 |
| 6 rs17205717  | 32650746 C | 0.2982 | 4.50E-08 | chr:6:32648036 |
| 6 rs17212076  | 32650724 G | 0.2982 | 4.50E-08 | chr:6:32648036 |
| 6 rs7759742   | 32381736 T | 0.3331 | 4.54E-08 | chr:6:32648036 |
| 6 rs28746948  | 32652763 G | 0.2814 | 4.57E-08 | chr:6:32648036 |
| 6 rs9272214   | 32602096 G | 2.774  | 4.58E-08 | chr:6:32648036 |
| 6 rs9269070   | 32440451 G | 0.2946 | 4.58E-08 | chr:6:32648036 |
| 6 rs281863414 | 32631058 G | 2.592  | 4.64E-08 | chr:6:32648036 |
| 6 rs28746989  | 32653873 T | 0.2737 | 4.65E-08 | chr:6:32648036 |
| 6 rs28891491  | 32661080 A | 0.2981 | 4.66E-08 | chr:6:32648036 |
| 6 rs114969562 | 32594299 A | 0.2523 | 4.71E-08 | chr:6:32648036 |
| 6 rs181393156 | 32487456 A | 3.976  | 4.76E-08 | chr:6:32648036 |
| 6 rs186506234 | 32487464 C | 3.976  | 4.76E-08 | chr:6:32648036 |
| 6 rs28747034  | 32655257 T | 0.2973 | 4.77E-08 | chr:6:32648036 |
| 6 rs482162    | 32576019 C | 2.842  | 4.77E-08 | chr:6:32648036 |
| 6 rs482205    | 32576009 G | 2.842  | 4.77E-08 | chr:6:32648036 |
| 6 rs28366256  | 32559499 G | 2.639  | 4.79E-08 | chr:6:32648036 |
| 6 rs9271630   | 32591989 G | 0.3019 | 4.82E-08 | chr:6:32648036 |
| 6 rs28746802  | 32632980 T | 2.568  | 4.88E-08 | chr:6:32648036 |
| 6 rs28746803  | 32632983 T | 2.568  | 4.88E-08 | chr:6:32648036 |
| 6 rs28746804  | 32632989 G | 2.568  | 4.88E-08 | chr:6:32648036 |



|               |            |        |          |                |
|---------------|------------|--------|----------|----------------|
| 6 rs9272062   | 32599265 G | 2.757  | 4.89E-08 | chr:6:32648036 |
| 6 rs9273154   | 32613028 A | 2.635  | 4.90E-08 | chr:6:32648036 |
| 6 rs17205837  | 32651222 C | 0.3006 | 4.92E-08 | chr:6:32648036 |
| 6 rs17212188  | 32651216 A | 0.3006 | 4.92E-08 | chr:6:32648036 |
| 6 rs535671659 | 32490901 T | 2.026  | 4.95E-08 | chr:6:32648036 |
| 6 rs9272114   | 32600317 T | 2.802  | 4.96E-08 | chr:6:32648036 |
| 6 rs34784936  | 32559648 T | 3.029  | 4.99E-08 | chr:6:32648036 |
| 6 rs76270534  | 32497232 G | 2.559  | 4.99E-08 | chr:6:32648036 |
| 6 rs9273073   | 32612279 C | 2.557  | 4.99E-08 | chr:6:32648036 |
| 6 rs77311114  | 32458264 A | 2.965  | 5.00E-08 | chr:6:32648036 |
| 6 rs28746941  | 32652553 C | 0.2711 | 5.03E-08 | chr:6:32648036 |
| 6 rs28746942  | 32652556 A | 0.2711 | 5.03E-08 | chr:6:32648036 |
| 6 rs28746926  | 32650026 C | 0.3012 | 5.18E-08 | chr:6:32648036 |
| 6 rs28746927  | 32650029 T | 0.3012 | 5.18E-08 | chr:6:32648036 |
| 6 rs55722612  | 32647158 G | 2.76   | 5.18E-08 | chr:6:32648036 |
| 6 rs9271469   | 32588630 C | 2.817  | 5.23E-08 | chr:6:32648036 |
| 6 rs28747014  | 32654658 C | 0.3009 | 5.28E-08 | chr:6:32648036 |
| 6 rs9273048   | 32612008 C | 2.426  | 5.31E-08 | chr:6:32648036 |
| 6 rs9394110   | 32658471 G | 0.3009 | 5.31E-08 | chr:6:32648036 |
| 6 rs6917729   | 32579643 A | 3.448  | 5.34E-08 | chr:6:32648036 |
| 6 rs80072299  | 32459923 A | 0.4891 | 5.37E-08 | chr:6:32648036 |
| 6 rs201150249 | 32522103 C | 2.488  | 5.40E-08 | chr:6:32648036 |
| 6 rs9271773   | 32594304 C | 2.491  | 5.42E-08 | chr:6:32648036 |
| 6 rs76931568  | 32459665 G | 0.4851 | 5.43E-08 | chr:6:32648036 |
| 6 rs28772275  | 32663439 A | 0.3021 | 5.43E-08 | chr:6:32648036 |
| 6 rs28747028  | 32654989 T | 0.3015 | 5.44E-08 | chr:6:32648036 |
| 6 rs9275081   | 32648669 C | 0.3495 | 5.44E-08 | chr:6:32648036 |
| 6 rs28746906  | 32648863 A | 0.302  | 5.44E-08 | chr:6:32648036 |
| 6 rs28366309  | 32561048 T | 2.828  | 5.48E-08 | chr:6:32648036 |
| 6 rs5007264   | 32378877 C | 0.3473 | 5.49E-08 | chr:6:32648036 |
| 6 rs5007266   | 32378834 T | 0.3473 | 5.49E-08 | chr:6:32648036 |
| 6 rs28891481  | 32642899 A | 0.3026 | 5.49E-08 | chr:6:32648036 |
| 6 rs28891482  | 32642906 A | 0.3026 | 5.49E-08 | chr:6:32648036 |
| 6 rs34331363  | 32568439 T | 3.412  | 5.52E-08 | chr:6:32648036 |
| 6 rs35226637  | 32568448 A | 3.412  | 5.52E-08 | chr:6:32648036 |
| 6 rs9272068   | 32599404 T | 0.228  | 5.55E-08 | chr:6:32648036 |
| 6 rs28746910  | 32649127 G | 0.3025 | 5.55E-08 | chr:6:32648036 |
| 6 rs17212343  | 32652147 G | 0.303  | 5.59E-08 | chr:6:32648036 |
| 6 rs145260460 | 32507605 T | 3.02   | 5.64E-08 | chr:6:32648036 |
| 6 rs9273036   | 32611898 G | 2.494  | 5.65E-08 | chr:6:32648036 |
| 6 rs112031986 | 32488418 G | 2.129  | 5.68E-08 | chr:6:32648036 |
| 6 rs28746913  | 32649517 A | 0.3032 | 5.69E-08 | chr:6:32648036 |
| 6 rs28746914  | 32649536 C | 0.3032 | 5.69E-08 | chr:6:32648036 |

|               |            |        |          |                |
|---------------|------------|--------|----------|----------------|
| 6 rs28746915  | 32649543 A | 0.3032 | 5.69E-08 | chr:6:32648036 |
| 6 rs28746916  | 32649579 A | 0.3032 | 5.69E-08 | chr:6:32648036 |
| 6 rs526784    | 32572030 A | 2.764  | 5.72E-08 | chr:6:32648036 |
| 6 rs17205858  | 32651297 C | 0.3034 | 5.74E-08 | chr:6:32648036 |
| 6 rs28772285  | 32674380 T | 0.3039 | 5.77E-08 | chr:6:32648036 |
| 6 rs28772286  | 32674385 C | 0.3039 | 5.77E-08 | chr:6:32648036 |
| 6 rs9272265   | 32603412 C | 2.73   | 5.78E-08 | chr:6:32648036 |
| 6 rs9274745   | 32638058 C | 0.3593 | 5.78E-08 | chr:6:32648036 |
| 6 rs112261348 | 32537782 T | 2.523  | 5.79E-08 | chr:6:32648036 |
| 6 rs185654397 | 32490665 G | 2.097  | 5.81E-08 | chr:6:32648036 |
| 6 rs28746936  | 32651393 A | 0.3027 | 5.85E-08 | chr:6:32648036 |
| 6 rs28746937  | 32651401 T | 0.3027 | 5.85E-08 | chr:6:32648036 |
| 6 rs183972385 | 32497183 G | 2.661  | 5.85E-08 | chr:6:32648036 |
| 6 rs9273014   | 32611650 A | 2.399  | 5.90E-08 | chr:6:32648036 |
| 6 rs9274725   | 32637573 C | 0.3547 | 5.94E-08 | chr:6:32648036 |
| 6 rs727939    | 32623463 G | 2.198  | 5.97E-08 | chr:6:32648036 |
| 6 rs9272155   | 32601043 C | 0.4018 | 6.00E-08 | chr:6:32648036 |
| 6 rs3763314   | 32376618 C | 0.3479 | 6.03E-08 | chr:6:32648036 |
| 6 rs5007258   | 32379239 A | 0.3479 | 6.03E-08 | chr:6:32648036 |
| 6 rs5007259   | 32379101 T | 0.3479 | 6.03E-08 | chr:6:32648036 |
| 6 rs5007260   | 32379047 G | 0.3479 | 6.03E-08 | chr:6:32648036 |
| 6 rs5007261   | 32379031 G | 0.3479 | 6.03E-08 | chr:6:32648036 |
| 6 rs5007262   | 32379011 A | 0.3479 | 6.03E-08 | chr:6:32648036 |
| 6 rs5007263   | 32378982 A | 0.3479 | 6.03E-08 | chr:6:32648036 |
| 6 rs6906730   | 32379445 T | 0.3479 | 6.03E-08 | chr:6:32648036 |
| 6 rs6911383   | 32379682 T | 0.3479 | 6.03E-08 | chr:6:32648036 |
| 6 rs6926737   | 32375745 G | 0.3479 | 6.03E-08 | chr:6:32648036 |
| 6 rs6932542   | 32380262 A | 0.3479 | 6.03E-08 | chr:6:32648036 |
| 6 rs6932810   | 32380190 G | 0.3479 | 6.03E-08 | chr:6:32648036 |
| 6 rs6938337   | 32381041 C | 0.3479 | 6.03E-08 | chr:6:32648036 |
| 6 rs9268501   | 32376882 T | 0.3479 | 6.03E-08 | chr:6:32648036 |
| 6 rs9268502   | 32376932 C | 0.3479 | 6.03E-08 | chr:6:32648036 |
| 6 rs9268506   | 32377470 C | 0.3479 | 6.03E-08 | chr:6:32648036 |
| 6 rs9268507   | 32377539 A | 0.3479 | 6.03E-08 | chr:6:32648036 |
| 6 rs9268508   | 32377588 T | 0.3479 | 6.03E-08 | chr:6:32648036 |
| 6 rs9268513   | 32378787 T | 0.3479 | 6.03E-08 | chr:6:32648036 |
| 6 rs28366294  | 32560715 A | 2.696  | 6.06E-08 | chr:6:32648036 |
| 6 rs28366295  | 32560716 C | 2.696  | 6.06E-08 | chr:6:32648036 |
| 6 rs28366296  | 32560727 A | 2.696  | 6.06E-08 | chr:6:32648036 |
| 6 rs66931410  | 32518235 C | 0.4109 | 6.15E-08 | chr:6:32648036 |
| 6 rs7773182   | 32441422 T | 0.3188 | 6.18E-08 | chr:6:32648036 |
| 6 rs36172419  | 32507766 A | 2.263  | 6.20E-08 | chr:6:32648036 |
| 6 rs9269067   | 32440242 G | 0.2864 | 6.24E-08 | chr:6:32648036 |

|               |            |        |          |                |
|---------------|------------|--------|----------|----------------|
| 6 rs28772268  | 32656872 A | 0.2985 | 6.33E-08 | chr:6:32648036 |
| 6 rs28772269  | 32656878 C | 0.2985 | 6.33E-08 | chr:6:32648036 |
| 6 rs28772270  | 32656881 T | 0.2985 | 6.33E-08 | chr:6:32648036 |
| 6 rs28383386  | 32607567 A | 2.127  | 6.33E-08 | chr:6:32648036 |
| 6 rs9272502   | 32606244 C | 0.4088 | 6.34E-08 | chr:6:32648036 |
| 6 rs9273062   | 32612161 A | 2.533  | 6.41E-08 | chr:6:32648036 |
| 6 rs9368738   | 32658750 A | 0.3015 | 6.48E-08 | chr:6:32648036 |
| 6 rs28746928  | 32650060 G | 0.3038 | 6.50E-08 | chr:6:32648036 |
| 6 rs28746929  | 32650068 G | 0.3038 | 6.50E-08 | chr:6:32648036 |
| 6 rs9275082   | 32648684 A | 0.3506 | 6.55E-08 | chr:6:32648036 |
| 6 rs281874968 | 32631308 A | 2.693  | 6.55E-08 | chr:6:32648036 |
| 6 rs9274352   | 32632433 G | 2.432  | 6.56E-08 | chr:6:32648036 |
| 6 rs111675168 | 32487104 G | 2.99   | 6.57E-08 | chr:6:32648036 |
| 6 rs550717566 | 32609094 T | 2.673  | 6.64E-08 | chr:6:32648036 |
| 6 rs9273155   | 32613042 C | 2.577  | 6.66E-08 | chr:6:32648036 |
| 6 rs9273157   | 32613052 G | 2.577  | 6.66E-08 | chr:6:32648036 |
| 6 rs9274973   | 32642147 A | 0.3466 | 6.72E-08 | chr:6:32648036 |
| 6 rs9274974   | 32642152 A | 0.3466 | 6.72E-08 | chr:6:32648036 |
| 6 rs9348891   | 32664971 G | 0.3094 | 6.73E-08 | chr:6:32648036 |
| 6 rs9357152   | 32664960 G | 0.3094 | 6.73E-08 | chr:6:32648036 |
| 6 rs28747007  | 32654475 A | 0.3065 | 6.74E-08 | chr:6:32648036 |
| 6 rs9273541   | 32628787 T | 2.732  | 6.76E-08 | chr:6:32648036 |
| 6 rs9271594   | 32591213 G | 3.374  | 6.77E-08 | chr:6:32648036 |
| 6 rs28747064  | 32656770 G | 0.3077 | 6.79E-08 | chr:6:32648036 |
| 6 rs111917625 | 32488929 G | 2.274  | 6.89E-08 | chr:6:32648036 |
| 6 rs28746931  | 32650194 G | 0.3084 | 6.90E-08 | chr:6:32648036 |
| 6 rs28746932  | 32650217 A | 0.3084 | 6.90E-08 | chr:6:32648036 |
| 6 rs28891487  | 32650312 T | 0.3084 | 6.90E-08 | chr:6:32648036 |
| 6 rs281863827 | 32630478 G | 3.512  | 6.93E-08 | chr:6:32648036 |
| 6 rs9274828   | 32639737 A | 0.4273 | 6.93E-08 | chr:6:32648036 |
| 6 rs9275001   | 32642738 C | 0.3599 | 6.94E-08 | chr:6:32648036 |
| 6 rs28891488  | 32650345 T | 0.31   | 6.98E-08 | chr:6:32648036 |
| 6 rs9273070   | 32612241 T | 2.513  | 6.98E-08 | chr:6:32648036 |
| 6 rs28746966  | 32653145 C | 0.3077 | 6.99E-08 | chr:6:32648036 |
| 6 rs9271965   | 32597473 C | 0.3426 | 7.01E-08 | chr:6:32648036 |
| 6 rs559448699 | 32497190 T | 3.111  | 7.04E-08 | chr:6:32648036 |
| 6 rs74791653  | 32499185 C | 0.4713 | 7.06E-08 | chr:6:32648036 |
| 6 rs28383383  | 32607368 C | 2.588  | 7.09E-08 | chr:6:32648036 |
| 6 rs2647062   | 32570417 C | 3.478  | 7.18E-08 | chr:6:32648036 |
| 6 rs28383365  | 32606942 A | 2.336  | 7.24E-08 | chr:6:32648036 |
| 6 rs28357084  | 32559483 G | 2.608  | 7.30E-08 | chr:6:32648036 |
| 6 rs28366254  | 32559481 G | 2.608  | 7.30E-08 | chr:6:32648036 |
| 6 rs28366255  | 32559482 T | 2.608  | 7.30E-08 | chr:6:32648036 |

|               |            |        |          |                |
|---------------|------------|--------|----------|----------------|
| 6 rs6605556   | 32583099 G | 3.355  | 7.30E-08 | chr:6:32648036 |
| 6 rs562289    | 32577046 T | 3.327  | 7.31E-08 | chr:6:32648036 |
| 6 rs28747015  | 32654673 T | 0.3056 | 7.47E-08 | chr:6:32648036 |
| 6 rs9271718   | 32593465 T | 2.372  | 7.47E-08 | chr:6:32648036 |
| 6 rs28746865  | 32635248 T | 2.755  | 7.52E-08 | chr:6:32648036 |
| 6 rs9501648   | 32668886 G | 0.3111 | 7.56E-08 | chr:6:32648036 |
| 6 rs28747013  | 32654596 A | 0.3063 | 7.57E-08 | chr:6:32648036 |
| 6 rs552154060 | 32458032 G | 4.133  | 7.57E-08 | chr:6:32648036 |
| 6 rs75375346  | 32596908 C | 0.3063 | 7.63E-08 | chr:6:32648036 |
| 6 rs112964544 | 32488402 A | 2.115  | 7.80E-08 | chr:6:32648036 |
| 6 rs17212132  | 32651008 A | 0.3088 | 7.86E-08 | chr:6:32648036 |
| 6 rs28383397  | 32607820 T | 2.506  | 7.90E-08 | chr:6:32648036 |
| 6 rs28383398  | 32607828 T | 2.506  | 7.90E-08 | chr:6:32648036 |
| 6 rs9274663   | 32636521 A | 3.208  | 7.90E-08 | chr:6:32648036 |
| 6 rs112485576 | 32578772 A | 3.433  | 7.92E-08 | chr:6:32648036 |
| 6 rs3997872   | 32580617 A | 3.433  | 7.92E-08 | chr:6:32648036 |
| 6 rs9271880   | 32595596 C | 0.3038 | 8.07E-08 | chr:6:32648036 |
| 6 rs9272105   | 32599999 G | 2.783  | 8.09E-08 | chr:6:32648036 |
| 6 rs9273071   | 32612251 G | 2.5    | 8.10E-08 | chr:6:32648036 |
| 6 rs9275366   | 32668171 C | 2.724  | 8.11E-08 | chr:6:32648036 |
| 6 rs9275367   | 32668182 G | 2.724  | 8.11E-08 | chr:6:32648036 |
| 6 rs9275368   | 32668183 G | 2.724  | 8.11E-08 | chr:6:32648036 |
| 6 rs9378125   | 32679732 G | 0.3098 | 8.13E-08 | chr:6:32648036 |
| 6 rs28747026  | 32654860 G | 0.3045 | 8.15E-08 | chr:6:32648036 |
| 6 rs112716963 | 32485815 A | 2.306  | 8.17E-08 | chr:6:32648036 |
| 6 rs78097306  | 32499148 C | 0.4819 | 8.17E-08 | chr:6:32648036 |
| 6 rs28746818  | 32633307 C | 2.557  | 8.19E-08 | chr:6:32648036 |
| 6 rs111830089 | 32496843 A | 3.609  | 8.20E-08 | chr:6:32648036 |
| 6 rs7755212   | 32441408 C | 0.324  | 8.21E-08 | chr:6:32648036 |
| 6 rs75211336  | 32502934 G | 2.268  | 8.22E-08 | chr:6:32648036 |
| 6 rs28746951  | 32652795 A | 0.2912 | 8.24E-08 | chr:6:32648036 |
| 6 rs28746952  | 32652798 G | 0.2912 | 8.24E-08 | chr:6:32648036 |
| 6 rs17205872  | 32651558 A | 0.2965 | 8.30E-08 | chr:6:32648036 |
| 6 rs537501315 | 32516973 A | 2.386  | 8.33E-08 | chr:6:32648036 |
| 6 rs28747049  | 32655659 C | 0.3051 | 8.40E-08 | chr:6:32648036 |
| 6 rs28383407  | 32608187 T | 2.523  | 8.41E-08 | chr:6:32648036 |
| 6 rs9272218   | 32602238 C | 2.78   | 8.46E-08 | chr:6:32648036 |
| 6 rs9273045   | 32611982 C | 2.416  | 8.46E-08 | chr:6:32648036 |
| 6 rs28746949  | 32652774 A | 0.2904 | 8.46E-08 | chr:6:32648036 |
| 6 rs28772284  | 32674313 T | 0.3104 | 8.56E-08 | chr:6:32648036 |
| 6 rs113602321 | 32468804 T | 0.4581 | 8.58E-08 | chr:6:32648036 |
| 6 rs9272221   | 32602334 C | 2.7    | 8.60E-08 | chr:6:32648036 |
| 6 rs17206084  | 32652461 T | 0.2748 | 8.61E-08 | chr:6:32648036 |

|               |            |        |          |                |
|---------------|------------|--------|----------|----------------|
| 6 rs28366310  | 32561128 C | 2.754  | 8.64E-08 | chr:6:32648036 |
| 6 rs9273042   | 32611964 T | 2.42   | 8.68E-08 | chr:6:32648036 |
| 6 rs115005201 | 32501172 A | 0.4073 | 8.72E-08 | chr:6:32648036 |
| 6 rs17212350  | 32652173 G | 0.3069 | 8.81E-08 | chr:6:32648036 |
| 6 rs17212357  | 32652174 T | 0.3069 | 8.81E-08 | chr:6:32648036 |
| 6 rs17212364  | 32652176 G | 0.3069 | 8.81E-08 | chr:6:32648036 |
| 6 rs9275451   | 32671908 T | 2.721  | 8.83E-08 | chr:6:32648036 |
| 6 rs13193700  | 32575078 T | 2.704  | 8.85E-08 | chr:6:32648036 |
| 6 rs34075049  | 32554935 A | 2.726  | 8.87E-08 | chr:6:32648036 |
| 6 rs6918317   | 32381210 T | 0.3493 | 8.90E-08 | chr:6:32648036 |
| 6 rs5007265   | 32378866 T | 0.3545 | 8.93E-08 | chr:6:32648036 |
| 6 rs28746867  | 32635293 G | 2.699  | 8.95E-08 | chr:6:32648036 |
| 6 rs9271688   | 32592992 G | 0.3029 | 8.99E-08 | chr:6:32648036 |
| 6 rs9275471   | 32672491 A | 2.716  | 9.04E-08 | chr:6:32648036 |
| 6 rs9275472   | 32672494 A | 2.716  | 9.04E-08 | chr:6:32648036 |
| 6 rs28772287  | 32674400 C | 0.3128 | 9.08E-08 | chr:6:32648036 |
| 6 rs149038762 | 32475948 G | 0.4972 | 9.13E-08 | chr:6:32648036 |
| 6 rs9272185   | 32601620 G | 2.558  | 9.21E-08 | chr:6:32648036 |
| 6 rs9272186   | 32601635 C | 2.558  | 9.21E-08 | chr:6:32648036 |
| 6 rs9275062   | 32648337 T | 0.3832 | 9.22E-08 | chr:6:32648036 |
| 6 rs28746965  | 32653136 G | 0.3035 | 9.30E-08 | chr:6:32648036 |
| 6 rs28366313  | 32561186 A | 2.732  | 9.31E-08 | chr:6:32648036 |
| 6 rs28746939  | 32651416 C | 0.3114 | 9.32E-08 | chr:6:32648036 |
| 6 rs9268503   | 32377061 C | 0.3547 | 9.36E-08 | chr:6:32648036 |
| 6 rs9268504   | 32377116 C | 0.3547 | 9.36E-08 | chr:6:32648036 |
| 6 rs28366315  | 32561207 T | 2.724  | 9.38E-08 | chr:6:32648036 |
| 6 rs28891493  | 32662509 T | 0.3092 | 9.44E-08 | chr:6:32648036 |
| 6 rs28724031  | 32550819 A | 2.63   | 9.47E-08 | chr:6:32648036 |
| 6 rs35399335  | 32556338 G | 2.781  | 9.50E-08 | chr:6:32648036 |
| 6 rs9271684   | 32592953 T | 0.3072 | 9.56E-08 | chr:6:32648036 |
| 6 rs9274830   | 32639836 A | 3.406  | 9.58E-08 | chr:6:32648036 |
| 6 rs35670775  | 32544455 T | 2.615  | 9.60E-08 | chr:6:32648036 |
| 6 rs9272118   | 32600448 C | 2.741  | 9.63E-08 | chr:6:32648036 |
| 6 rs28366308  | 32561043 T | 2.756  | 9.66E-08 | chr:6:32648036 |
| 6 rs9273052   | 32612041 G | 2.39   | 9.80E-08 | chr:6:32648036 |
| 6 rs28746919  | 32649806 A | 0.3152 | 9.89E-08 | chr:6:32648036 |
| 6 rs28746920  | 32649813 A | 0.3152 | 9.89E-08 | chr:6:32648036 |
| 6 rs28746905  | 32648842 T | 0.3154 | 9.89E-08 | chr:6:32648036 |
| 6 rs9274999   | 32642709 G | 0.3614 | 9.90E-08 | chr:6:32648036 |
| 6 rs28383381  | 32607288 A | 2.271  | 9.95E-08 | chr:6:32648036 |
| 6 rs113773595 | 32488918 T | 2.251  | 9.98E-08 | chr:6:32648036 |
| 6 rs112324351 | 32457338 C | 2.225  | 1.01E-07 | chr:6:32648036 |
| 6 rs576125530 | 32522109 G | 2.722  | 1.02E-07 | chr:6:32648036 |

|               |            |        |          |                |
|---------------|------------|--------|----------|----------------|
| 6 rs28891492  | 32662451 T | 0.3074 | 1.02E-07 | chr:6:32648036 |
| 6 rs28366312  | 32561175 C | 2.731  | 1.02E-07 | chr:6:32648036 |
| 6 rs17205879  | 32651576 C | 0.2981 | 1.03E-07 | chr:6:32648036 |
| 6 rs17205886  | 32651578 A | 0.2981 | 1.03E-07 | chr:6:32648036 |
| 6 rs28746933  | 32650411 G | 0.3166 | 1.03E-07 | chr:6:32648036 |
| 6 rs28746934  | 32650436 C | 0.3166 | 1.03E-07 | chr:6:32648036 |
| 6 rs9275431   | 32671140 A | 2.703  | 1.03E-07 | chr:6:32648036 |
| 6 rs139760267 | 32486391 G | 2.293  | 1.04E-07 | chr:6:32648036 |
| 6 rs9273063   | 32612166 T | 2.487  | 1.04E-07 | chr:6:32648036 |
| 6 rs17212216  | 32651509 C | 0.3033 | 1.04E-07 | chr:6:32648036 |
| 6 rs28747050  | 32655674 C | 0.308  | 1.05E-07 | chr:6:32648036 |
| 6 rs28747051  | 32655686 T | 0.308  | 1.05E-07 | chr:6:32648036 |
| 6 rs28747052  | 32655703 T | 0.308  | 1.05E-07 | chr:6:32648036 |
| 6 rs113654440 | 32596946 A | 0.313  | 1.05E-07 | chr:6:32648036 |
| 6 rs9275428   | 32670978 G | 2.698  | 1.05E-07 | chr:6:32648036 |
| 6 rs9270161   | 32555558 A | 0.3152 | 1.06E-07 | chr:6:32648036 |
| 6 rs9268969   | 32434349 T | 2.705  | 1.07E-07 | chr:6:32648036 |
| 6 rs9268970   | 32434361 A | 2.705  | 1.07E-07 | chr:6:32648036 |
| 6 rs113481821 | 32537776 T | 2.488  | 1.07E-07 | chr:6:32648036 |
| 6 rs9275452   | 32671930 T | 2.685  | 1.07E-07 | chr:6:32648036 |
| 6 rs9275454   | 32671939 A | 2.685  | 1.07E-07 | chr:6:32648036 |
| 6 rs1056316   | 32627494 C | 2.678  | 1.07E-07 | chr:6:32648036 |
| 6 rs9275481   | 32672913 A | 2.699  | 1.08E-07 | chr:6:32648036 |
| 6 rs9275482   | 32672932 T | 2.699  | 1.08E-07 | chr:6:32648036 |
| 6 rs9275485   | 32673077 A | 2.699  | 1.08E-07 | chr:6:32648036 |
| 6 rs9275487   | 32673174 T | 2.699  | 1.08E-07 | chr:6:32648036 |
| 6 rs9275488   | 32673269 A | 2.699  | 1.08E-07 | chr:6:32648036 |
| 6 rs9275489   | 32673272 T | 2.699  | 1.08E-07 | chr:6:32648036 |
| 6 rs28746798  | 32632558 C | 2.462  | 1.08E-07 | chr:6:32648036 |
| 6 rs9394111   | 32658744 T | 0.3112 | 1.09E-07 | chr:6:32648036 |
| 6 rs28383414  | 32608467 A | 2.62   | 1.10E-07 | chr:6:32648036 |
| 6 rs28746864  | 32635230 A | 2.708  | 1.12E-07 | chr:6:32648036 |
| 6 rs73727927  | 32501214 G | 0.4126 | 1.12E-07 | chr:6:32648036 |
| 6 rs9269068   | 32440270 A | 0.2939 | 1.12E-07 | chr:6:32648036 |
| 6 rs9272184   | 32601617 C | 0.3014 | 1.12E-07 | chr:6:32648036 |
| 6 rs9272179   | 32601451 T | 2.548  | 1.13E-07 | chr:6:32648036 |
| 6 rs28366311  | 32561137 G | 2.719  | 1.13E-07 | chr:6:32648036 |
| 6 rs536496813 | 32497131 C | 3.028  | 1.13E-07 | chr:6:32648036 |
| 6 rs572081630 | 32512882 T | 2.259  | 1.13E-07 | chr:6:32648036 |
| 6 rs17205782  | 32651051 T | 0.3077 | 1.13E-07 | chr:6:32648036 |
| 6 rs17205788  | 32651056 A | 0.3077 | 1.13E-07 | chr:6:32648036 |
| 6 rs28746950  | 32652785 A | 0.296  | 1.14E-07 | chr:6:32648036 |
| 6 rs9275404   | 32669878 C | 2.692  | 1.14E-07 | chr:6:32648036 |

|               |            |        |          |                |
|---------------|------------|--------|----------|----------------|
| 6 rs9275405   | 32669883 G | 2.692  | 1.14E-07 | chr:6:32648036 |
| 6 rs28895235  | 32437160 A | 2.73   | 1.15E-07 | chr:6:32648036 |
| 6 rs9275369   | 32668255 T | 2.693  | 1.15E-07 | chr:6:32648036 |
| 6 rs9275370   | 32668258 T | 2.693  | 1.15E-07 | chr:6:32648036 |
| 6 rs9275332   | 32666943 A | 2.69   | 1.15E-07 | chr:6:32648036 |
| 6 rs17205738  | 32650762 G | 0.3162 | 1.18E-07 | chr:6:32648036 |
| 6 rs9275372   | 32668388 T | 2.691  | 1.18E-07 | chr:6:32648036 |
| 6 rs9275496   | 32673714 C | 2.689  | 1.18E-07 | chr:6:32648036 |
| 6 rs9275497   | 32673726 G | 2.689  | 1.18E-07 | chr:6:32648036 |
| 6 rs9275473   | 32672523 T | 2.688  | 1.19E-07 | chr:6:32648036 |
| 6 rs9275474   | 32672529 T | 2.688  | 1.19E-07 | chr:6:32648036 |
| 6 rs9275475   | 32672556 G | 2.688  | 1.19E-07 | chr:6:32648036 |
| 6 rs113049351 | 32511024 T | 2.107  | 1.19E-07 | chr:6:32648036 |
| 6 rs1048414   | 32610478 G | 2.731  | 1.19E-07 | chr:6:32648036 |
| 6 rs1048419   | 32610481 C | 2.731  | 1.19E-07 | chr:6:32648036 |
| 6 rs77777792  | 32451289 T | 2.693  | 1.20E-07 | chr:6:32648036 |
| 6 rs79452641  | 32451288 C | 2.693  | 1.20E-07 | chr:6:32648036 |
| 6 rs17212153  | 32651092 T | 0.3108 | 1.20E-07 | chr:6:32648036 |
| 6 rs17212160  | 32651097 G | 0.3108 | 1.20E-07 | chr:6:32648036 |
| 6 rs1065044   | 32611243 T | 2.369  | 1.20E-07 | chr:6:32648036 |
| 6 rs3104417   | 32581022 A | 2.576  | 1.21E-07 | chr:6:32648036 |
| 6 rs3104418   | 32581021 A | 2.576  | 1.21E-07 | chr:6:32648036 |
| 6 rs4587163   | 32593167 T | 2.771  | 1.22E-07 | chr:6:32648036 |
| 6 rs9274955   | 32641890 A | 0.4616 | 1.23E-07 | chr:6:32648036 |
| 6 rs12215313  | 32441276 T | 2.729  | 1.23E-07 | chr:6:32648036 |
| 6 rs9275478   | 32672654 T | 2.688  | 1.24E-07 | chr:6:32648036 |
| 6 rs9275479   | 32672659 T | 2.688  | 1.24E-07 | chr:6:32648036 |
| 6 rs9275480   | 32672668 A | 2.688  | 1.24E-07 | chr:6:32648036 |
| 6 rs113571892 | 32489037 C | 2.082  | 1.24E-07 | chr:6:32648036 |
| 6 rs1281937   | 32578143 C | 0.341  | 1.25E-07 | chr:6:32648036 |
| 6 rs141267330 | 32548054 G | 3.448  | 1.26E-07 | chr:6:32648036 |
| 6 rs9272132   | 32600677 A | 2.629  | 1.26E-07 | chr:6:32648036 |
| 6 rs114031016 | 32520035 T | 3.444  | 1.27E-07 | chr:6:32648036 |
| 6 rs28746972  | 32653406 G | 0.316  | 1.27E-07 | chr:6:32648036 |
| 6 rs28746866  | 32635266 G | 2.682  | 1.27E-07 | chr:6:32648036 |
| 6 rs9271703   | 32593280 T | 0.3157 | 1.29E-07 | chr:6:32648036 |
| 6 rs114335056 | 32559191 G | 3.679  | 1.29E-07 | chr:6:32648036 |
| 6 rs529034563 | 32559178 A | 3.679  | 1.31E-07 | chr:6:32648036 |
| 6 rs561760011 | 32559177 C | 3.679  | 1.31E-07 | chr:6:32648036 |
| 6 rs9270772   | 32568967 C | 0.3489 | 1.31E-07 | chr:6:32648036 |
| 6 rs35957722  | 32450580 C | 2.67   | 1.31E-07 | chr:6:32648036 |
| 6 rs9271776   | 32594341 C | 2.379  | 1.31E-07 | chr:6:32648036 |
| 6 rs9268505   | 32377408 A | 5.394  | 1.32E-07 | chr:6:32648036 |

|               |            |        |          |                |
|---------------|------------|--------|----------|----------------|
| 6 rs116427677 | 32493456 T | 2.34   | 1.32E-07 | chr:6:32648036 |
| 6 rs183652197 | 32558706 C | 2.133  | 1.33E-07 | chr:6:32648036 |
| 6 rs9275446   | 32671841 G | 2.635  | 1.33E-07 | chr:6:32648036 |
| 6 rs9275447   | 32671843 C | 2.635  | 1.33E-07 | chr:6:32648036 |
| 6 rs9275448   | 32671848 T | 2.635  | 1.33E-07 | chr:6:32648036 |
| 6 rs9275449   | 32671869 T | 2.635  | 1.33E-07 | chr:6:32648036 |
| 6 rs28747066  | 32656817 A | 0.3155 | 1.33E-07 | chr:6:32648036 |
| 6 rs9272178   | 32601427 G | 0.3127 | 1.34E-07 | chr:6:32648036 |
| 6 rs112103446 | 32522679 C | 0.2805 | 1.35E-07 | chr:6:32648036 |
| 6 rs56249455  | 32644378 A | 2.652  | 1.35E-07 | chr:6:32648036 |
| 6 rs281863425 | 32631044 A | 2.499  | 1.38E-07 | chr:6:32648036 |
| 6 rs281863426 | 32631043 C | 2.499  | 1.38E-07 | chr:6:32648036 |
| 6 rs112475079 | 32488437 T | 2.091  | 1.38E-07 | chr:6:32648036 |
| 6 rs115967267 | 32488427 G | 2.091  | 1.38E-07 | chr:6:32648036 |
| 6 rs35074855  | 32561140 G | 3.427  | 1.39E-07 | chr:6:32648036 |
| 6 rs6941395   | 32583206 A | 3.251  | 1.39E-07 | chr:6:32648036 |
| 6 rs34977583  | 32555377 A | 2.766  | 1.42E-07 | chr:6:32648036 |
| 6 rs200330306 | 32496048 G | 0.4962 | 1.44E-07 | chr:6:32648036 |
| 6 rs28747043  | 32655508 G | 0.3177 | 1.45E-07 | chr:6:32648036 |
| 6 rs9273025   | 32611760 T | 2.258  | 1.46E-07 | chr:6:32648036 |
| 6 rs9272232   | 32602630 C | 2.681  | 1.46E-07 | chr:6:32648036 |
| 6 rs34303755  | 32450613 C | 2.621  | 1.46E-07 | chr:6:32648036 |
| 6 rs35743245  | 32559904 T | 2.75   | 1.47E-07 | chr:6:32648036 |
| 6 rs28746903  | 32648768 T | 0.3223 | 1.47E-07 | chr:6:32648036 |
| 6 rs28746904  | 32648773 C | 0.3223 | 1.47E-07 | chr:6:32648036 |
| 6 rs17205795  | 32651066 T | 0.3117 | 1.48E-07 | chr:6:32648036 |
| 6 rs17205802  | 32651072 G | 0.3117 | 1.48E-07 | chr:6:32648036 |
| 6 rs28746805  | 32633050 G | 2.474  | 1.48E-07 | chr:6:32648036 |
| 6 rs115742569 | 32516464 C | 0.2873 | 1.49E-07 | chr:6:32648036 |
| 6 rs111890942 | 32458131 C | 0.3777 | 1.51E-07 | chr:6:32648036 |
| 6 rs369952885 | 32539033 C | 2.208  | 1.51E-07 | chr:6:32648036 |
| 6 rs4568495   | 32672246 C | 2.669  | 1.51E-07 | chr:6:32648036 |
| 6 rs9275309   | 32665258 T | 2.669  | 1.51E-07 | chr:6:32648036 |
| 6 rs9275316   | 32665916 C | 2.669  | 1.51E-07 | chr:6:32648036 |
| 6 rs9275320   | 32666469 C | 2.669  | 1.51E-07 | chr:6:32648036 |
| 6 rs9275322   | 32666560 G | 2.669  | 1.51E-07 | chr:6:32648036 |
| 6 rs9275323   | 32666609 C | 2.669  | 1.51E-07 | chr:6:32648036 |
| 6 rs9275329   | 32666831 T | 2.669  | 1.51E-07 | chr:6:32648036 |
| 6 rs9275337   | 32667318 T | 2.669  | 1.51E-07 | chr:6:32648036 |
| 6 rs9275371   | 32668296 C | 2.669  | 1.51E-07 | chr:6:32648036 |
| 6 rs9275374   | 32668526 T | 2.669  | 1.51E-07 | chr:6:32648036 |
| 6 rs9275375   | 32668632 A | 2.669  | 1.51E-07 | chr:6:32648036 |
| 6 rs9275376   | 32668633 T | 2.669  | 1.51E-07 | chr:6:32648036 |



|               |            |        |          |                |
|---------------|------------|--------|----------|----------------|
| 6 rs9275377   | 32668667 G | 2.669  | 1.51E-07 | chr:6:32648036 |
| 6 rs9275378   | 32668729 G | 2.669  | 1.51E-07 | chr:6:32648036 |
| 6 rs9275379   | 32668804 T | 2.669  | 1.51E-07 | chr:6:32648036 |
| 6 rs9275381   | 32668819 C | 2.669  | 1.51E-07 | chr:6:32648036 |
| 6 rs9275385   | 32668917 T | 2.669  | 1.51E-07 | chr:6:32648036 |
| 6 rs9275386   | 32668960 T | 2.669  | 1.51E-07 | chr:6:32648036 |
| 6 rs9275388   | 32669084 C | 2.669  | 1.51E-07 | chr:6:32648036 |
| 6 rs9275390   | 32669156 C | 2.669  | 1.51E-07 | chr:6:32648036 |
| 6 rs9275393   | 32669439 A | 2.669  | 1.51E-07 | chr:6:32648036 |
| 6 rs9275399   | 32669712 G | 2.669  | 1.51E-07 | chr:6:32648036 |
| 6 rs9275406   | 32669955 T | 2.669  | 1.51E-07 | chr:6:32648036 |
| 6 rs9275407   | 32670037 T | 2.669  | 1.51E-07 | chr:6:32648036 |
| 6 rs9275408   | 32670110 C | 2.669  | 1.51E-07 | chr:6:32648036 |
| 6 rs9275410   | 32670145 A | 2.669  | 1.51E-07 | chr:6:32648036 |
| 6 rs9275417   | 32670214 C | 2.669  | 1.51E-07 | chr:6:32648036 |
| 6 rs9275418   | 32670244 G | 2.669  | 1.51E-07 | chr:6:32648036 |
| 6 rs9275421   | 32670477 A | 2.669  | 1.51E-07 | chr:6:32648036 |
| 6 rs9275423   | 32670564 T | 2.669  | 1.51E-07 | chr:6:32648036 |
| 6 rs9275424   | 32670576 G | 2.669  | 1.51E-07 | chr:6:32648036 |
| 6 rs9275425   | 32670874 A | 2.669  | 1.51E-07 | chr:6:32648036 |
| 6 rs9275427   | 32670915 T | 2.669  | 1.51E-07 | chr:6:32648036 |
| 6 rs9275432   | 32671185 T | 2.669  | 1.51E-07 | chr:6:32648036 |
| 6 rs9275433   | 32671206 C | 2.669  | 1.51E-07 | chr:6:32648036 |
| 6 rs9275436   | 32671399 G | 2.669  | 1.51E-07 | chr:6:32648036 |
| 6 rs9275438   | 32671508 T | 2.669  | 1.51E-07 | chr:6:32648036 |
| 6 rs9275439   | 32671521 C | 2.669  | 1.51E-07 | chr:6:32648036 |
| 6 rs9275440   | 32671596 T | 2.669  | 1.51E-07 | chr:6:32648036 |
| 6 rs9275441   | 32671676 A | 2.669  | 1.51E-07 | chr:6:32648036 |
| 6 rs9275464   | 32672082 G | 2.669  | 1.51E-07 | chr:6:32648036 |
| 6 rs9275468   | 32672412 A | 2.669  | 1.51E-07 | chr:6:32648036 |
| 6 rs9275469   | 32672430 G | 2.669  | 1.51E-07 | chr:6:32648036 |
| 6 rs9275491   | 32673424 T | 2.669  | 1.51E-07 | chr:6:32648036 |
| 6 rs9275492   | 32673446 T | 2.669  | 1.51E-07 | chr:6:32648036 |
| 6 rs9275501   | 32673920 T | 2.669  | 1.51E-07 | chr:6:32648036 |
| 6 rs9275502   | 32673921 G | 2.669  | 1.51E-07 | chr:6:32648036 |
| 6 rs9275504   | 32673986 T | 2.669  | 1.51E-07 | chr:6:32648036 |
| 6 rs9275507   | 32674130 A | 2.669  | 1.51E-07 | chr:6:32648036 |
| 6 rs9275508   | 32674159 G | 2.669  | 1.51E-07 | chr:6:32648036 |
| 6 rs28747047  | 32655578 T | 0.3186 | 1.53E-07 | chr:6:32648036 |
| 6 rs28747048  | 32655584 T | 0.3186 | 1.53E-07 | chr:6:32648036 |
| 6 rs113128948 | 32507129 T | 0.4448 | 1.53E-07 | chr:6:32648036 |
| 6 rs28747056  | 32656544 G | 0.31   | 1.54E-07 | chr:6:32648036 |
| 6 rs9268954   | 32434011 A | 2.439  | 1.55E-07 | chr:6:32648036 |

|               |            |        |          |                |
|---------------|------------|--------|----------|----------------|
| 6 rs113085203 | 32512789 G | 2.239  | 1.55E-07 | chr:6:32648036 |
| 6 rs9272574   | 32607281 G | 0.4147 | 1.59E-07 | chr:6:32648036 |
| 6 rs17212230  | 32651588 A | 0.3085 | 1.61E-07 | chr:6:32648036 |
| 6 rs9275340   | 32667458 T | 2.634  | 1.61E-07 | chr:6:32648036 |
| 6 rs9274881   | 32641065 A | 0.4805 | 1.63E-07 | chr:6:32648036 |
| 6 rs9272263   | 32603295 A | 0.2969 | 1.64E-07 | chr:6:32648036 |
| 6 rs9268831   | 32427748 C | 0.3744 | 1.65E-07 | chr:6:32648036 |
| 6 rs9274899   | 32641203 T | 2.006  | 1.65E-07 | chr:6:32648036 |
| 6 rs9274900   | 32641207 A | 2.006  | 1.65E-07 | chr:6:32648036 |
| 6 rs28746983  | 32653760 T | 0.309  | 1.65E-07 | chr:6:32648036 |
| 6 rs9268960   | 32434130 C | 2.498  | 1.66E-07 | chr:6:32648036 |
| 6 rs9268961   | 32434135 A | 2.498  | 1.66E-07 | chr:6:32648036 |
| 6 rs9275498   | 32673749 T | 2.652  | 1.66E-07 | chr:6:32648036 |
| 6 rs9275483   | 32673051 C | 2.641  | 1.66E-07 | chr:6:32648036 |
| 6 rs9275484   | 32673052 T | 2.641  | 1.66E-07 | chr:6:32648036 |
| 6 rs34276369  | 32614037 T | 2.431  | 1.66E-07 | chr:6:32648036 |
| 6 rs9274922   | 32641350 G | 1.991  | 1.69E-07 | chr:6:32648036 |
| 6 rs28366314  | 32561201 G | 2.656  | 1.69E-07 | chr:6:32648036 |
| 6 rs28752516  | 32583611 A | 0.3806 | 1.69E-07 | chr:6:32648036 |
| 6 rs17210293  | 32556165 T | 2.826  | 1.71E-07 | chr:6:32648036 |
| 6 rs114281696 | 32525925 G | 3.299  | 1.73E-07 | chr:6:32648036 |
| 6 rs9272180   | 32601461 C | 2.513  | 1.73E-07 | chr:6:32648036 |
| 6 rs12197312  | 32442180 C | 2.667  | 1.74E-07 | chr:6:32648036 |
| 6 rs12215261  | 32441150 T | 2.667  | 1.74E-07 | chr:6:32648036 |
| 6 rs2395185   | 32433167 T | 2.667  | 1.74E-07 | chr:6:32648036 |
| 6 rs28895234  | 32437050 G | 2.667  | 1.74E-07 | chr:6:32648036 |
| 6 rs62405565  | 32452281 G | 2.667  | 1.74E-07 | chr:6:32648036 |
| 6 rs71565340  | 32452506 T | 2.667  | 1.74E-07 | chr:6:32648036 |
| 6 rs7747529   | 32431124 A | 2.667  | 1.74E-07 | chr:6:32648036 |
| 6 rs9268849   | 32429327 T | 2.667  | 1.74E-07 | chr:6:32648036 |
| 6 rs9268853   | 32429643 C | 2.667  | 1.74E-07 | chr:6:32648036 |
| 6 rs9268858   | 32429758 C | 2.667  | 1.74E-07 | chr:6:32648036 |
| 6 rs9268860   | 32429825 T | 2.667  | 1.74E-07 | chr:6:32648036 |
| 6 rs9268905   | 32432077 C | 2.667  | 1.74E-07 | chr:6:32648036 |
| 6 rs9268906   | 32432181 G | 2.667  | 1.74E-07 | chr:6:32648036 |
| 6 rs9268923   | 32432835 T | 2.667  | 1.74E-07 | chr:6:32648036 |
| 6 rs9268965   | 32434240 A | 2.667  | 1.74E-07 | chr:6:32648036 |
| 6 rs9348886   | 32441008 T | 2.667  | 1.74E-07 | chr:6:32648036 |
| 6 rs9368725   | 32438159 T | 2.667  | 1.74E-07 | chr:6:32648036 |
| 6 rs9368726   | 32438542 C | 2.667  | 1.74E-07 | chr:6:32648036 |
| 6 rs9391781   | 32434850 C | 2.667  | 1.74E-07 | chr:6:32648036 |
| 6 rs9391877   | 32438867 T | 2.667  | 1.74E-07 | chr:6:32648036 |
| 6 rs9405108   | 32438648 T | 2.667  | 1.74E-07 | chr:6:32648036 |

|               |            |        |          |                |
|---------------|------------|--------|----------|----------------|
| 6 rs9405109   | 32439029 C | 2.667  | 1.74E-07 | chr:6:32648036 |
| 6 rs9405112   | 32445600 A | 2.667  | 1.74E-07 | chr:6:32648036 |
| 6 rs28746963  | 32653079 T | 0.3228 | 1.75E-07 | chr:6:32648036 |
| 6 rs28746964  | 32653083 G | 0.3228 | 1.75E-07 | chr:6:32648036 |
| 6 rs9272383   | 32604749 T | 0.4554 | 1.75E-07 | chr:6:32648036 |
| 6 rs9271708   | 32593386 A | 0.3167 | 1.76E-07 | chr:6:32648036 |
| 6 rs9271709   | 32593392 A | 0.3167 | 1.76E-07 | chr:6:32648036 |
| 6 rs9272865   | 32610736 A | 2.59   | 1.76E-07 | chr:6:32648036 |
| 6 rs9275499   | 32673778 G | 2.652  | 1.77E-07 | chr:6:32648036 |
| 6 rs28746925  | 32649932 G | 0.3228 | 1.78E-07 | chr:6:32648036 |
| 6 rs77149458  | 32487130 A | 0.2622 | 1.79E-07 | chr:6:32648036 |
| 6 rs9275411   | 32670157 T | 2.627  | 1.80E-07 | chr:6:32648036 |
| 6 rs28747023  | 32654807 A | 0.3231 | 1.80E-07 | chr:6:32648036 |
| 6 rs28747044  | 32655516 C | 0.32   | 1.81E-07 | chr:6:32648036 |
| 6 rs9272116   | 32600404 T | 2.66   | 1.84E-07 | chr:6:32648036 |
| 6 rs601148    | 32573265 T | 3.04   | 1.86E-07 | chr:6:32648036 |
| 6 rs532817093 | 32522191 G | 2.589  | 1.87E-07 | chr:6:32648036 |
| 6 rs2157051   | 32658624 G | 2.826  | 1.89E-07 | chr:6:32648036 |
| 6 rs28383434  | 32608925 T | 2.549  | 1.89E-07 | chr:6:32648036 |
| 6 rs28746976  | 32653536 A | 0.3234 | 1.89E-07 | chr:6:32648036 |
| 6 rs28746977  | 32653558 T | 0.3234 | 1.89E-07 | chr:6:32648036 |
| 6 rs34282199  | 32556218 T | 2.624  | 1.90E-07 | chr:6:32648036 |
| 6 rs28383415  | 32608473 A | 2.55   | 1.91E-07 | chr:6:32648036 |
| 6 rs75262655  | 32459811 G | 2.243  | 1.92E-07 | chr:6:32648036 |
| 6 rs76867075  | 32459748 T | 2.243  | 1.92E-07 | chr:6:32648036 |
| 6 rs79420263  | 32459803 C | 2.243  | 1.92E-07 | chr:6:32648036 |
| 6 rs9272070   | 32599485 T | 2.655  | 1.92E-07 | chr:6:32648036 |
| 6 rs28746993  | 32654030 C | 0.3229 | 1.94E-07 | chr:6:32648036 |
| 6 rs41263822  | 32632447 A | 0.4343 | 1.94E-07 | chr:6:32648036 |
| 6 rs9366801   | 32440276 T | 2.694  | 1.94E-07 | chr:6:32648036 |
| 6 rs9271871   | 32595383 C | 0.1695 | 1.94E-07 | chr:6:32648036 |
| 6 rs113046257 | 32512753 T | 2.216  | 1.96E-07 | chr:6:32648036 |
| 6 rs74973088  | 32457874 T | 0.4672 | 1.96E-07 | chr:6:32648036 |
| 6 rs9272182   | 32601564 G | 2.495  | 1.96E-07 | chr:6:32648036 |
| 6 rs9380306   | 32438298 G | 2.628  | 1.97E-07 | chr:6:32648036 |
| 6 rs3104375   | 32600101 C | 3.078  | 2.00E-07 | chr:6:32648036 |
| 6 rs9274954   | 32641878 C | 0.4724 | 2.01E-07 | chr:6:32648036 |
| 6 rs9273008   | 32611572 A | 2.427  | 2.01E-07 | chr:6:32648036 |
| 6 rs9273009   | 32611579 G | 2.427  | 2.01E-07 | chr:6:32648036 |
| 6 rs184981897 | 32486966 A | 0.3318 | 2.02E-07 | chr:6:32648036 |
| 6 rs28891479  | 32642750 A | 0.3222 | 2.03E-07 | chr:6:32648036 |
| 6 rs9275071   | 32648490 G | 0.3829 | 2.03E-07 | chr:6:32648036 |
| 6 rs9272043   | 32598946 T | 2.65   | 2.04E-07 | chr:6:32648036 |

|               |            |        |          |                |
|---------------|------------|--------|----------|----------------|
| 6 rs28746819  | 32633320 C | 2.467  | 2.05E-07 | chr:6:32648036 |
| 6 rs28747065  | 32656806 C | 0.3246 | 2.06E-07 | chr:6:32648036 |
| 6 rs9271465   | 32588554 T | 2.628  | 2.08E-07 | chr:6:32648036 |
| 6 rs28746961  | 32652968 G | 0.3225 | 2.08E-07 | chr:6:32648036 |
| 6 rs28746962  | 32652979 A | 0.3225 | 2.08E-07 | chr:6:32648036 |
| 6 rs71565333  | 32451902 T | 2.649  | 2.11E-07 | chr:6:32648036 |
| 6 rs9286790   | 32439828 A | 2.648  | 2.11E-07 | chr:6:32648036 |
| 6 rs17205696  | 32650587 T | 0.3386 | 2.11E-07 | chr:6:32648036 |
| 6 rs9273044   | 32611971 C | 2.335  | 2.12E-07 | chr:6:32648036 |
| 6 rs28747045  | 32655537 C | 0.3238 | 2.13E-07 | chr:6:32648036 |
| 6 rs28747046  | 32655539 G | 0.3238 | 2.13E-07 | chr:6:32648036 |
| 6 rs9272183   | 32601604 C | 2.486  | 2.13E-07 | chr:6:32648036 |
| 6 rs7761182   | 32575099 T | 3.204  | 2.14E-07 | chr:6:32648036 |
| 6 rs2760980   | 32565201 A | 3.2    | 2.15E-07 | chr:6:32648036 |
| 6 rs1065047   | 32611260 G | 2.301  | 2.16E-07 | chr:6:32648036 |
| 6 rs1065048   | 32611265 T | 2.301  | 2.16E-07 | chr:6:32648036 |
| 6 rs111665695 | 32479429 G | 2.009  | 2.19E-07 | chr:6:32648036 |
| 6 rs28746998  | 32654246 T | 0.3076 | 2.19E-07 | chr:6:32648036 |
| 6 rs114672263 | 32540417 G | 2.376  | 2.21E-07 | chr:6:32648036 |
| 6 rs28747067  | 32656832 T | 0.3261 | 2.22E-07 | chr:6:32648036 |
| 6 rs72508417  | 32459813 A | 0.4419 | 2.22E-07 | chr:6:32648036 |
| 6 rs535694878 | 32512216 A | 0.4312 | 2.24E-07 | chr:6:32648036 |
| 6 rs556986229 | 32512217 G | 0.4312 | 2.24E-07 | chr:6:32648036 |
| 6 rs9271646   | 32592351 G | 0.3243 | 2.25E-07 | chr:6:32648036 |
| 6 rs9271647   | 32592354 G | 0.3243 | 2.25E-07 | chr:6:32648036 |
| 6 rs9271649   | 32592359 G | 0.3243 | 2.25E-07 | chr:6:32648036 |
| 6 rs28746797  | 32632544 A | 2.386  | 2.26E-07 | chr:6:32648036 |
| 6 rs28747057  | 32656553 T | 0.3167 | 2.26E-07 | chr:6:32648036 |
| 6 rs28747058  | 32656554 G | 0.3167 | 2.26E-07 | chr:6:32648036 |
| 6 rs28747059  | 32656558 G | 0.3167 | 2.26E-07 | chr:6:32648036 |
| 6 rs35464067  | 32559488 C | 3.397  | 2.26E-07 | chr:6:32648036 |
| 6 rs2395519   | 32598067 C | 2.947  | 2.28E-07 | chr:6:32648036 |
| 6 rs17209950  | 32446588 A | 2.643  | 2.29E-07 | chr:6:32648036 |
| 6 rs9271654   | 32592565 A | 0.3023 | 2.30E-07 | chr:6:32648036 |
| 6 rs372568412 | 32523041 T | 2.435  | 2.32E-07 | chr:6:32648036 |
| 6 rs9275357   | 32667891 C | 2.613  | 2.32E-07 | chr:6:32648036 |
| 6 rs9273305   | 32622927 C | 2.079  | 2.36E-07 | chr:6:32648036 |
| 6 rs9274898   | 32641199 T | 1.982  | 2.37E-07 | chr:6:32648036 |
| 6 rs2621421   | 32740671 G | 2.654  | 2.37E-07 | chr:6:32648036 |
| 6 rs115630465 | 32482032 A | 2.255  | 2.37E-07 | chr:6:32648036 |
| 6 rs9274943   | 32641784 C | 0.4803 | 2.39E-07 | chr:6:32648036 |
| 6 rs9274944   | 32641786 G | 0.4803 | 2.39E-07 | chr:6:32648036 |
| 6 rs113786400 | 32485794 T | 2.129  | 2.40E-07 | chr:6:32648036 |

|               |            |        |          |                |
|---------------|------------|--------|----------|----------------|
| 6 rs115591310 | 32511009 A | 2.066  | 2.41E-07 | chr:6:32648036 |
| 6 rs28746907  | 32648937 A | 0.3275 | 2.43E-07 | chr:6:32648036 |
| 6 rs75928817  | 32559212 G | 2.506  | 2.44E-07 | chr:6:32648036 |
| 6 rs28746995  | 32654116 A | 0.3208 | 2.44E-07 | chr:6:32648036 |
| 6 rs9268947   | 32433741 A | 2.327  | 2.47E-07 | chr:6:32648036 |
| 6 rs9271768   | 32594188 T | 2.582  | 2.49E-07 | chr:6:32648036 |
| 6 rs9274995   | 32642615 C | 0.3926 | 2.49E-07 | chr:6:32648036 |
| 6 rs35840159  | 32556332 G | 2.608  | 2.50E-07 | chr:6:32648036 |
| 6 rs28746807  | 32633085 G | 2.398  | 2.51E-07 | chr:6:32648036 |
| 6 rs9274883   | 32641072 C | 0.4874 | 2.51E-07 | chr:6:32648036 |
| 6 rs9272101   | 32599824 T | 0.2802 | 2.51E-07 | chr:6:32648036 |
| 6 rs2856698   | 32636376 G | 0.3234 | 2.51E-07 | chr:6:32648036 |
| 6 rs150332241 | 32489525 A | 2.216  | 2.53E-07 | chr:6:32648036 |
| 6 rs3104404   | 32682174 A | 0.3417 | 2.54E-07 | chr:6:32648036 |
| 6 rs9275384   | 32668898 C | 2.601  | 2.54E-07 | chr:6:32648036 |
| 6 rs2213287   | 32605508 T | 2.656  | 2.55E-07 | chr:6:32648036 |
| 6 rs74347248  | 32459878 T | 2.058  | 2.55E-07 | chr:6:32648036 |
| 6 rs77158649  | 32459875 C | 2.058  | 2.55E-07 | chr:6:32648036 |
| 6 rs78091375  | 32459877 G | 2.058  | 2.55E-07 | chr:6:32648036 |
| 6 rs9275396   | 32669528 A | 2.607  | 2.55E-07 | chr:6:32648036 |
| 6 rs9275397   | 32669552 G | 2.607  | 2.55E-07 | chr:6:32648036 |
| 6 rs9275398   | 32669568 C | 2.607  | 2.55E-07 | chr:6:32648036 |
| 6 rs3207983   | 32609213 A | 2.619  | 2.57E-07 | chr:6:32648036 |
| 6 rs28383312  | 32587090 T | 2.6    | 2.60E-07 | chr:6:32648036 |
| 6 rs28746971  | 32653272 A | 0.3286 | 2.60E-07 | chr:6:32648036 |
| 6 rs114879339 | 32587350 A | 3.184  | 2.61E-07 | chr:6:32648036 |
| 6 rs111678927 | 32488974 G | 2.166  | 2.61E-07 | chr:6:32648036 |
| 6 rs9271657   | 32592582 C | 0.3047 | 2.64E-07 | chr:6:32648036 |
| 6 rs28746994  | 32654094 A | 0.3278 | 2.64E-07 | chr:6:32648036 |
| 6 rs9275069   | 32648437 A | 0.4053 | 2.66E-07 | chr:6:32648036 |
| 6 rs28746921  | 32649831 A | 0.3364 | 2.67E-07 | chr:6:32648036 |
| 6 rs28746922  | 32649844 G | 0.3364 | 2.67E-07 | chr:6:32648036 |
| 6 rs28746923  | 32649849 G | 0.3364 | 2.67E-07 | chr:6:32648036 |
| 6 rs28746924  | 32649854 A | 0.3364 | 2.67E-07 | chr:6:32648036 |
| 6 rs9274997   | 32642673 C | 0.3762 | 2.67E-07 | chr:6:32648036 |
| 6 rs9268864   | 32430326 A | 2.601  | 2.67E-07 | chr:6:32648036 |
| 6 rs41269974  | 32620202 A | 2.692  | 2.68E-07 | chr:6:32648036 |
| 6 rs2395186   | 32433192 G | 2.6    | 2.72E-07 | chr:6:32648036 |
| 6 rs5000807   | 32496471 A | 2.073  | 2.75E-07 | chr:6:32648036 |
| 6 rs9469143   | 32454232 C | 2.631  | 2.76E-07 | chr:6:32648036 |
| 6 rs28746946  | 32652715 A | 0.3265 | 2.79E-07 | chr:6:32648036 |
| 6 rs4959029   | 32591682 G | 0.2751 | 2.80E-07 | chr:6:32648036 |
| 6 rs9272242   | 32602790 T | 2.535  | 2.81E-07 | chr:6:32648036 |

|               |            |        |          |                |
|---------------|------------|--------|----------|----------------|
| 6 rs9272181   | 32601563 A | 0.3182 | 2.82E-07 | chr:6:32648036 |
| 6 rs3129747   | 32581008 C | 2.465  | 2.84E-07 | chr:6:32648036 |
| 6 rs3129748   | 32581015 A | 2.465  | 2.84E-07 | chr:6:32648036 |
| 6 rs114758808 | 32457997 T | 0.398  | 2.86E-07 | chr:6:32648036 |
| 6 rs28895223  | 32435550 A | 2.602  | 2.86E-07 | chr:6:32648036 |
| 6 rs9275364   | 32668027 G | 2.594  | 2.87E-07 | chr:6:32648036 |
| 6 rs28747016  | 32654706 A | 0.3316 | 2.89E-07 | chr:6:32648036 |
| 6 rs77236357  | 32459844 T | 0.4585 | 2.90E-07 | chr:6:32648036 |
| 6 rs35072954  | 32559485 A | 3.391  | 2.91E-07 | chr:6:32648036 |
| 6 rs9274895   | 32641184 G | 1.97   | 2.91E-07 | chr:6:32648036 |
| 6 rs9274896   | 32641185 G | 1.97   | 2.91E-07 | chr:6:32648036 |
| 6 rs9268963   | 32434149 T | 2.453  | 2.94E-07 | chr:6:32648036 |
| 6 rs71565334  | 32451947 T | 2.599  | 2.94E-07 | chr:6:32648036 |
| 6 rs71565335  | 32451954 C | 2.599  | 2.94E-07 | chr:6:32648036 |
| 6 rs71565336  | 32451963 A | 2.599  | 2.94E-07 | chr:6:32648036 |
| 6 rs34232122  | 32556706 C | 2.843  | 2.97E-07 | chr:6:32648036 |
| 6 rs28746996  | 32654214 C | 0.318  | 2.98E-07 | chr:6:32648036 |
| 6 rs28747024  | 32654830 A | 0.33   | 3.00E-07 | chr:6:32648036 |
| 6 rs28747025  | 32654831 C | 0.33   | 3.00E-07 | chr:6:32648036 |
| 6 rs34265294  | 32489118 A | 0.4487 | 3.03E-07 | chr:6:32648036 |
| 6 rs9272201   | 32601875 G | 0.4442 | 3.03E-07 | chr:6:32648036 |
| 6 rs367983934 | 32487855 A | 1.947  | 3.04E-07 | chr:6:32648036 |
| 6 rs1065043   | 32611234 T | 2.287  | 3.05E-07 | chr:6:32648036 |
| 6 rs74345507  | 32459572 C | 2.112  | 3.06E-07 | chr:6:32648036 |
| 6 rs79893879  | 32459554 A | 2.112  | 3.06E-07 | chr:6:32648036 |
| 6 rs71565331  | 32451693 C | 2.723  | 3.07E-07 | chr:6:32648036 |
| 6 rs147842166 | 32485952 G | 3.405  | 3.07E-07 | chr:6:32648036 |
| 6 rs9272177   | 32601361 C | 0.3265 | 3.08E-07 | chr:6:32648036 |
| 6 rs9272847   | 32610695 T | 2.288  | 3.10E-07 | chr:6:32648036 |
| 6 rs34127991  | 32559131 A | 2.491  | 3.18E-07 | chr:6:32648036 |
| 6 rs34788621  | 32559124 C | 2.491  | 3.18E-07 | chr:6:32648036 |
| 6 rs2133036   | 32596203 T | 2.922  | 3.20E-07 | chr:6:32648036 |
| 6 rs28746793  | 32632528 T | 2.338  | 3.20E-07 | chr:6:32648036 |
| 6 rs140849564 | 32490607 G | 0.4765 | 3.21E-07 | chr:6:32648036 |
| 6 rs28746901  | 32648681 T | 0.3424 | 3.21E-07 | chr:6:32648036 |
| 6 rs9274949   | 32641855 A | 0.4791 | 3.21E-07 | chr:6:32648036 |
| 6 rs9275070   | 32648449 C | 0.4066 | 3.22E-07 | chr:6:32648036 |
| 6 rs28371168  | 32610751 G | 2.511  | 3.26E-07 | chr:6:32648036 |
| 6 rs9272871   | 32610747 C | 2.511  | 3.26E-07 | chr:6:32648036 |
| 6 rs9272045   | 32599006 C | 2.549  | 3.29E-07 | chr:6:32648036 |
| 6 rs9271662   | 32592628 A | 0.3124 | 3.29E-07 | chr:6:32648036 |
| 6 rs9272231   | 32602617 C | 2.604  | 3.36E-07 | chr:6:32648036 |
| 6 rs28746899  | 32648646 A | 0.3439 | 3.41E-07 | chr:6:32648036 |

|               |            |        |          |                |
|---------------|------------|--------|----------|----------------|
| 6 rs28746900  | 32648652 G | 0.3439 | 3.41E-07 | chr:6:32648036 |
| 6 rs28746908  | 32648963 A | 0.3331 | 3.43E-07 | chr:6:32648036 |
| 6 rs28746909  | 32648975 A | 0.3331 | 3.43E-07 | chr:6:32648036 |
| 6 rs9271464   | 32588544 T | 2.57   | 3.43E-07 | chr:6:32648036 |
| 6 rs9273050   | 32612035 G | 2.489  | 3.44E-07 | chr:6:32648036 |
| 6 rs7764856   | 32680640 A | 2.52   | 3.46E-07 | chr:6:32648036 |
| 6 rs9272207   | 32601966 C | 0.4447 | 3.47E-07 | chr:6:32648036 |
| 6 rs6902536   | 32667511 G | 0.2504 | 3.47E-07 | chr:6:32648036 |
| 6 rs188782605 | 32540449 A | 2.346  | 3.48E-07 | chr:6:32648036 |
| 6 rs200094698 | 32532973 A | 2.214  | 3.50E-07 | chr:6:32648036 |
| 6 rs9268949   | 32433798 T | 2.326  | 3.53E-07 | chr:6:32648036 |
| 6 rs530423766 | 32610152 T | 2.389  | 3.55E-07 | chr:6:32648036 |
| 6 rs6457681   | 32773497 T | 2.71   | 3.57E-07 | chr:6:32648036 |
| 6 rs9273488   | 32628159 G | 2.616  | 3.60E-07 | chr:6:32648036 |
| 6 rs9274926   | 32641416 T | 0.4976 | 3.61E-07 | chr:6:32648036 |
| 6 rs9274927   | 32641419 T | 0.4976 | 3.61E-07 | chr:6:32648036 |
| 6 rs28746967  | 32653231 C | 0.3334 | 3.62E-07 | chr:6:32648036 |
| 6 rs13204736  | 32582603 G | 0.3362 | 3.69E-07 | chr:6:32648036 |
| 6 rs28891409  | 32640401 G | 0.3216 | 3.72E-07 | chr:6:32648036 |
| 6 rs28891410  | 32640424 G | 0.3216 | 3.72E-07 | chr:6:32648036 |
| 6 rs2395163   | 32387809 C | 3.156  | 3.82E-07 | chr:6:32648036 |
| 6 rs72508418  | 32459868 T | 0.463  | 3.83E-07 | chr:6:32648036 |
| 6 rs76533559  | 32554897 G | 0.3413 | 3.84E-07 | chr:6:32648036 |
| 6 rs28371245  | 32647982 T | 0.4701 | 3.86E-07 | chr:6:32648036 |
| 6 rs562057037 | 32441392 T | 2.683  | 3.89E-07 | chr:6:32648036 |
| 6 rs602457    | 32573562 C | 2.993  | 3.91E-07 | chr:6:32648036 |
| 6 rs7756647   | 32582843 G | 0.3417 | 3.97E-07 | chr:6:32648036 |
| 6 rs9268889   | 32431886 G | 2.527  | 3.98E-07 | chr:6:32648036 |
| 6 rs9268884   | 32431640 A | 2.576  | 4.01E-07 | chr:6:32648036 |
| 6 rs28383395  | 32607713 T | 2.258  | 4.02E-07 | chr:6:32648036 |
| 6 rs28383396  | 32607714 G | 2.258  | 4.02E-07 | chr:6:32648036 |
| 6 rs114968045 | 32666960 C | 0.2325 | 4.04E-07 | chr:6:32648036 |
| 6 rs561942189 | 32496432 G | 0.4483 | 4.04E-07 | chr:6:32648036 |
| 6 rs9273059   | 32612111 A | 2.383  | 4.04E-07 | chr:6:32648036 |
| 6 rs28746886  | 32639083 C | 0.3133 | 4.06E-07 | chr:6:32648036 |
| 6 rs28746887  | 32639096 T | 0.3133 | 4.06E-07 | chr:6:32648036 |
| 6 rs28891379  | 32639107 C | 0.3133 | 4.06E-07 | chr:6:32648036 |
| 6 rs28746960  | 32652938 G | 0.3297 | 4.08E-07 | chr:6:32648036 |
| 6 rs28746997  | 32654225 T | 0.3231 | 4.09E-07 | chr:6:32648036 |
| 6 rs113556768 | 32496926 G | 3.331  | 4.10E-07 | chr:6:32648036 |
| 6 rs28746823  | 32633373 T | 2.38   | 4.12E-07 | chr:6:32648036 |
| 6 rs9275219   | 32659077 T | 2.537  | 4.16E-07 | chr:6:32648036 |
| 6 rs9275220   | 32659087 C | 2.537  | 4.16E-07 | chr:6:32648036 |

|               |            |        |          |                |
|---------------|------------|--------|----------|----------------|
| 6 rs9271704   | 32593317 G | 0.3318 | 4.19E-07 | chr:6:32648036 |
| 6 rs9271705   | 32593321 T | 0.3318 | 4.19E-07 | chr:6:32648036 |
| 6 rs113208447 | 32503314 A | 2.595  | 4.21E-07 | chr:6:32648036 |
| 6 rs28366302  | 32560934 C | 2.522  | 4.22E-07 | chr:6:32648036 |
| 6 rs9272188   | 32601688 G | 0.3174 | 4.23E-07 | chr:6:32648036 |
| 6 rs9271492   | 32589122 C | 0.3522 | 4.27E-07 | chr:6:32648036 |
| 6 rs34928543  | 32560695 C | 3.166  | 4.28E-07 | chr:6:32648036 |
| 6 rs9272040   | 32598903 A | 2.545  | 4.30E-07 | chr:6:32648036 |
| 6 rs9272041   | 32598906 G | 2.545  | 4.30E-07 | chr:6:32648036 |
| 6 rs9272042   | 32598917 A | 2.545  | 4.30E-07 | chr:6:32648036 |
| 6 rs9268543   | 32384801 T | 3.345  | 4.31E-07 | chr:6:32648036 |
| 6 rs28746883  | 32638392 T | 0.326  | 4.36E-07 | chr:6:32648036 |
| 6 rs28746884  | 32638395 T | 0.326  | 4.36E-07 | chr:6:32648036 |
| 6 rs41556512  | 32489708 A | 3.042  | 4.36E-07 | chr:6:32648036 |
| 6 rs41559714  | 32489707 C | 3.042  | 4.36E-07 | chr:6:32648036 |
| 6 rs35372060  | 32447667 T | 2.519  | 4.41E-07 | chr:6:32648036 |
| 6 rs9272538   | 32606809 T | 0.4573 | 4.43E-07 | chr:6:32648036 |
| 6 rs9274886   | 32641086 T | 0.4986 | 4.43E-07 | chr:6:32648036 |
| 6 rs9274887   | 32641089 A | 0.4986 | 4.43E-07 | chr:6:32648036 |
| 6 rs33932178  | 32584313 G | 2.449  | 4.45E-07 | chr:6:32648036 |
| 6 rs28746902  | 32648713 A | 0.348  | 4.46E-07 | chr:6:32648036 |
| 6 rs28747017  | 32654723 G | 0.3379 | 4.53E-07 | chr:6:32648036 |
| 6 rs28747018  | 32654739 C | 0.3379 | 4.53E-07 | chr:6:32648036 |
| 6 rs28383391  | 32607659 T | 2.217  | 4.54E-07 | chr:6:32648036 |
| 6 rs28383392  | 32607660 G | 2.217  | 4.54E-07 | chr:6:32648036 |
| 6 rs9273026   | 32611769 C | 2.163  | 4.57E-07 | chr:6:32648036 |
| 6 rs35176742  | 32535525 A | 2.137  | 4.66E-07 | chr:6:32648036 |
| 6 rs28746970  | 32653259 C | 0.3383 | 4.74E-07 | chr:6:32648036 |
| 6 rs78776954  | 32600817 G | 0.3139 | 4.78E-07 | chr:6:32648036 |
| 6 rs9275416   | 32670196 T | 2.508  | 4.80E-07 | chr:6:32648036 |
| 6 rs146702867 | 32524800 G | 2.233  | 4.81E-07 | chr:6:32648036 |
| 6 rs3104385   | 32597538 G | 2.17   | 4.92E-07 | chr:6:32648036 |
| 6 rs28891399  | 32639876 C | 0.3256 | 4.93E-07 | chr:6:32648036 |
| 6 rs34958241  | 32559575 G | 2.776  | 4.93E-07 | chr:6:32648036 |
| 6 rs28479879  | 32452517 T | 0.3112 | 5.00E-07 | chr:6:32648036 |
| 6 rs28895236  | 32437223 T | 2.781  | 5.01E-07 | chr:6:32648036 |
| 6 rs33915496  | 32583979 G | 2.481  | 5.07E-07 | chr:6:32648036 |
| 6 rs1047985   | 32605216 A | 0.3212 | 5.10E-07 | chr:6:32648036 |
| 6 rs28891403  | 32640257 C | 0.3264 | 5.13E-07 | chr:6:32648036 |
| 6 rs28891404  | 32640268 A | 0.3264 | 5.13E-07 | chr:6:32648036 |
| 6 rs28891405  | 32640288 T | 0.3264 | 5.13E-07 | chr:6:32648036 |
| 6 rs28891406  | 32640336 A | 0.3264 | 5.13E-07 | chr:6:32648036 |
| 6 rs28891407  | 32640359 T | 0.3264 | 5.13E-07 | chr:6:32648036 |



|               |            |        |          |                |
|---------------|------------|--------|----------|----------------|
| 6 rs28891408  | 32640382 A | 0.3264 | 5.13E-07 | chr:6:32648036 |
| 6 rs28366258  | 32559513 C | 2.548  | 5.17E-07 | chr:6:32648036 |
| 6 rs28371252  | 32653732 A | 4.667  | 5.24E-07 | chr:6:32648036 |
| 6 rs35858943  | 32559473 A | 3.191  | 5.26E-07 | chr:6:32648036 |
| 6 rs28891476  | 32642584 A | 0.3598 | 5.28E-07 | chr:6:32648036 |
| 6 rs115879259 | 32559213 T | 3.385  | 5.33E-07 | chr:6:32648036 |
| 6 rs28747060  | 32656614 T | 0.329  | 5.36E-07 | chr:6:32648036 |
| 6 rs539509361 | 32594399 G | 0.2826 | 5.39E-07 | chr:6:32648036 |
| 6 rs116176269 | 32490519 C | 2.38   | 5.41E-07 | chr:6:32648036 |
| 6 rs3129968   | 32381472 C | 0.3581 | 5.42E-07 | chr:6:32648036 |
| 6 rs9273031   | 32611849 C | 2.276  | 5.42E-07 | chr:6:32648036 |
| 6 rs9348889   | 32620255 C | 2.369  | 5.42E-07 | chr:6:32648036 |
| 6 rs9348890   | 32620256 C | 2.369  | 5.42E-07 | chr:6:32648036 |
| 6 rs190230688 | 32498937 T | 2.066  | 5.46E-07 | chr:6:32648036 |
| 6 rs28891375  | 32638757 A | 0.3061 | 5.60E-07 | chr:6:32648036 |
| 6 rs56151658  | 32647379 A | 2.532  | 5.61E-07 | chr:6:32648036 |
| 6 rs28891374  | 32638750 G | 0.3072 | 5.61E-07 | chr:6:32648036 |
| 6 rs28746790  | 32632459 C | 2.241  | 5.62E-07 | chr:6:32648036 |
| 6 rs9274357   | 32632457 G | 2.241  | 5.62E-07 | chr:6:32648036 |
| 6 rs10456068  | 32659419 C | 4.706  | 5.63E-07 | chr:6:32648036 |
| 6 rs10456069  | 32659520 T | 4.706  | 5.63E-07 | chr:6:32648036 |
| 6 rs10456070  | 32659527 A | 4.706  | 5.63E-07 | chr:6:32648036 |
| 6 rs17206238  | 32665761 T | 4.706  | 5.63E-07 | chr:6:32648036 |
| 6 rs1794497   | 32649180 C | 4.706  | 5.63E-07 | chr:6:32648036 |
| 6 rs2646994   | 32665813 T | 4.706  | 5.63E-07 | chr:6:32648036 |
| 6 rs2646995   | 32650492 A | 4.706  | 5.63E-07 | chr:6:32648036 |
| 6 rs2647002   | 32657082 G | 4.706  | 5.63E-07 | chr:6:32648036 |
| 6 rs2647005   | 32664760 G | 4.706  | 5.63E-07 | chr:6:32648036 |
| 6 rs2647007   | 32664677 G | 4.706  | 5.63E-07 | chr:6:32648036 |
| 6 rs2647008   | 32661515 C | 4.706  | 5.63E-07 | chr:6:32648036 |
| 6 rs2647014   | 32664279 T | 4.706  | 5.63E-07 | chr:6:32648036 |
| 6 rs2647015   | 32664093 G | 4.706  | 5.63E-07 | chr:6:32648036 |
| 6 rs2647017   | 32663772 G | 4.706  | 5.63E-07 | chr:6:32648036 |
| 6 rs28371254  | 32657452 C | 4.706  | 5.63E-07 | chr:6:32648036 |
| 6 rs28371256  | 32658366 C | 4.706  | 5.63E-07 | chr:6:32648036 |
| 6 rs28371257  | 32658375 G | 4.706  | 5.63E-07 | chr:6:32648036 |
| 6 rs28371258  | 32658513 C | 4.706  | 5.63E-07 | chr:6:32648036 |
| 6 rs28371265  | 32659263 C | 4.706  | 5.63E-07 | chr:6:32648036 |
| 6 rs28371267  | 32663578 T | 4.706  | 5.63E-07 | chr:6:32648036 |
| 6 rs2856669   | 32663360 A | 4.706  | 5.63E-07 | chr:6:32648036 |
| 6 rs2856673   | 32659822 T | 4.706  | 5.63E-07 | chr:6:32648036 |
| 6 rs2856675   | 32658768 A | 4.706  | 5.63E-07 | chr:6:32648036 |
| 6 rs2856680   | 32655606 G | 4.706  | 5.63E-07 | chr:6:32648036 |

|               |            |        |          |                |
|---------------|------------|--------|----------|----------------|
| 6 rs2856682   | 32655405 T | 4.706  | 5.63E-07 | chr:6:32648036 |
| 6 rs2858303   | 32650550 C | 4.706  | 5.63E-07 | chr:6:32648036 |
| 6 rs2858313   | 32663919 G | 4.706  | 5.63E-07 | chr:6:32648036 |
| 6 rs2858316   | 32662501 T | 4.706  | 5.63E-07 | chr:6:32648036 |
| 6 rs2858325   | 32660366 G | 4.706  | 5.63E-07 | chr:6:32648036 |
| 6 rs3021175   | 32651404 C | 4.706  | 5.63E-07 | chr:6:32648036 |
| 6 rs74379773  | 32662724 C | 4.706  | 5.63E-07 | chr:6:32648036 |
| 6 rs2621420   | 32740761 T | 2.58   | 5.63E-07 | chr:6:32648036 |
| 6 rs28746885  | 32638871 G | 0.3283 | 5.63E-07 | chr:6:32648036 |
| 6 rs28891377  | 32638888 C | 0.3283 | 5.63E-07 | chr:6:32648036 |
| 6 rs28891378  | 32638894 T | 0.3283 | 5.63E-07 | chr:6:32648036 |
| 6 rs28746880  | 32638146 A | 0.3271 | 5.76E-07 | chr:6:32648036 |
| 6 rs28746881  | 32638153 T | 0.3271 | 5.76E-07 | chr:6:32648036 |
| 6 rs9272522   | 32606490 G | 0.4308 | 5.78E-07 | chr:6:32648036 |
| 6 rs111374340 | 32509477 G | 2.773  | 5.78E-07 | chr:6:32648036 |
| 6 rs9274951   | 32641867 A | 0.4922 | 5.83E-07 | chr:6:32648036 |
| 6 rs9274952   | 32641868 T | 0.4922 | 5.83E-07 | chr:6:32648036 |
| 6 rs9272023   | 32598558 C | 2.441  | 5.83E-07 | chr:6:32648036 |
| 6 rs2856681   | 32655524 T | 4.671  | 5.84E-07 | chr:6:32648036 |
| 6 rs12722061  | 32609221 C | 2.548  | 5.91E-07 | chr:6:32648036 |
| 6 rs9271758   | 32593997 G | 0.5123 | 5.91E-07 | chr:6:32648036 |
| 6 rs9271759   | 32594006 C | 0.5123 | 5.91E-07 | chr:6:32648036 |
| 6 rs9271760   | 32594012 C | 0.5123 | 5.91E-07 | chr:6:32648036 |
| 6 rs28891373  | 32638744 A | 0.3081 | 5.92E-07 | chr:6:32648036 |
| 6 rs35380574  | 32560051 T | 2.35   | 5.92E-07 | chr:6:32648036 |
| 6 rs188803324 | 32537838 T | 2.247  | 5.94E-07 | chr:6:32648036 |
| 6 rs9272147   | 32600976 G | 0.4411 | 6.06E-07 | chr:6:32648036 |
| 6 rs9275073   | 32648513 C | 0.405  | 6.06E-07 | chr:6:32648036 |
| 6 rs3129755   | 32583057 A | 0.3984 | 6.10E-07 | chr:6:32648036 |
| 6 rs9272239   | 32602778 A | 2.435  | 6.11E-07 | chr:6:32648036 |
| 6 rs9272686   | 32609015 T | 0.3285 | 6.13E-07 | chr:6:32648036 |
| 6 rs2294878   | 32367795 G | 0.4077 | 6.16E-07 | chr:6:32648036 |
| 6 rs9274815   | 32639620 A | 0.4938 | 6.16E-07 | chr:6:32648036 |
| 6 rs3104378   | 32599163 T | 2.746  | 6.16E-07 | chr:6:32648036 |
| 6 rs9272100   | 32599814 T | 0.2916 | 6.25E-07 | chr:6:32648036 |
| 6 rs72849265  | 32458208 T | 0.4012 | 6.25E-07 | chr:6:32648036 |
| 6 rs17212427  | 32652425 C | 0.3233 | 6.25E-07 | chr:6:32648036 |
| 6 rs28383368  | 32607047 G | 2.118  | 6.25E-07 | chr:6:32648036 |
| 6 rs9272521   | 32606479 G | 0.4315 | 6.25E-07 | chr:6:32648036 |
| 6 rs28746796  | 32632536 T | 2.304  | 6.25E-07 | chr:6:32648036 |
| 6 rs28746882  | 32638175 A | 0.3322 | 6.27E-07 | chr:6:32648036 |
| 6 rs28746897  | 32648396 G | 0.369  | 6.39E-07 | chr:6:32648036 |
| 6 rs9271738   | 32593691 G | 0.2914 | 6.42E-07 | chr:6:32648036 |

|               |            |        |          |                |
|---------------|------------|--------|----------|----------------|
| 6 rs6929057   | 32597005 C | 0.3031 | 6.45E-07 | chr:6:32648036 |
| 6 rs7770905   | 32598478 C | 0.2822 | 6.46E-07 | chr:6:32648036 |
| 6 rs9272520   | 32606475 C | 0.4406 | 6.51E-07 | chr:6:32648036 |
| 6 rs28746999  | 32654258 A | 0.3339 | 6.56E-07 | chr:6:32648036 |
| 6 rs114202038 | 32493438 C | 2.33   | 6.57E-07 | chr:6:32648036 |
| 6 rs9268399   | 32340236 A | 2.634  | 6.58E-07 | chr:6:32648036 |
| 6 rs17843626  | 32621013 A | 2.022  | 6.60E-07 | chr:6:32648036 |
| 6 rs9273057   | 32612104 T | 2.338  | 6.64E-07 | chr:6:32648036 |
| 6 rs28891398  | 32639857 A | 0.3299 | 6.67E-07 | chr:6:32648036 |
| 6 rs566208536 | 32534745 A | 2.196  | 6.69E-07 | chr:6:32648036 |
| 6 rs28746968  | 32653247 T | 0.3446 | 6.69E-07 | chr:6:32648036 |
| 6 rs28746969  | 32653248 G | 0.3446 | 6.69E-07 | chr:6:32648036 |
| 6 rs78240203  | 32600881 G | 0.3261 | 6.71E-07 | chr:6:32648036 |
| 6 rs9274996   | 32642641 C | 0.3995 | 6.77E-07 | chr:6:32648036 |
| 6 rs281861609 | 32633350 A | 2.337  | 6.80E-07 | chr:6:32648036 |
| 6 rs28746821  | 32633348 G | 2.337  | 6.80E-07 | chr:6:32648036 |
| 6 rs146320947 | 32534206 A | 2.152  | 6.83E-07 | chr:6:32648036 |
| 6 rs9274946   | 32641828 A | 0.486  | 6.85E-07 | chr:6:32648036 |
| 6 rs9274824   | 32639702 C | 0.4627 | 6.85E-07 | chr:6:32648036 |
| 6 rs138925158 | 32493114 A | 2.355  | 6.85E-07 | chr:6:32648036 |
| 6 rs9272194   | 32601825 G | 0.4534 | 6.87E-07 | chr:6:32648036 |
| 6 rs9271404   | 32587553 A | 2.438  | 6.88E-07 | chr:6:32648036 |
| 6 rs9274967   | 32642030 T | 0.4501 | 6.92E-07 | chr:6:32648036 |
| 6 rs547947156 | 32373595 G | 0.4075 | 6.92E-07 | chr:6:32648036 |
| 6 rs9271215   | 32579277 C | 0.4082 | 6.96E-07 | chr:6:32648036 |
| 6 rs115787103 | 32603417 A | 0.3287 | 7.08E-07 | chr:6:32648036 |
| 6 rs707952    | 32609806 T | 0.3287 | 7.08E-07 | chr:6:32648036 |
| 6 rs9272230   | 32602602 A | 0.3287 | 7.08E-07 | chr:6:32648036 |
| 6 rs9272434   | 32605325 T | 0.3287 | 7.08E-07 | chr:6:32648036 |
| 6 rs9272728   | 32609593 G | 0.3287 | 7.08E-07 | chr:6:32648036 |
| 6 rs9405040   | 32439393 C | 2.624  | 7.15E-07 | chr:6:32648036 |
| 6 rs28891411  | 32640509 A | 0.3336 | 7.18E-07 | chr:6:32648036 |
| 6 rs1064985   | 32611034 A | 2.273  | 7.18E-07 | chr:6:32648036 |
| 6 rs13211585  | 32556129 G | 3.441  | 7.18E-07 | chr:6:32648036 |
| 6 rs114146939 | 32459890 G | 0.4511 | 7.19E-07 | chr:6:32648036 |
| 6 rs116587947 | 32459889 T | 0.4511 | 7.19E-07 | chr:6:32648036 |
| 6 rs9272122   | 32600562 C | 2.283  | 7.20E-07 | chr:6:32648036 |
| 6 rs9274929   | 32641487 T | 0.5158 | 7.21E-07 | chr:6:32648036 |
| 6 rs9274289   | 32631817 C | 2.094  | 7.24E-07 | chr:6:32648036 |
| 6 rs9271736   | 32593688 A | 2.125  | 7.25E-07 | chr:6:32648036 |
| 6 rs7382236   | 32778622 T | 2.487  | 7.27E-07 | chr:6:32648036 |
| 6 rs140185715 | 32534808 A | 2.181  | 7.33E-07 | chr:6:32648036 |
| 6 rs112736406 | 32618487 T | 2.029  | 7.39E-07 | chr:6:32648036 |

|               |            |        |          |                |
|---------------|------------|--------|----------|----------------|
| 6 rs9273487   | 32628149 G | 2.477  | 7.42E-07 | chr:6:32648036 |
| 6 rs9273748   | 32629394 A | 6.052  | 7.43E-07 | chr:6:32648036 |
| 6 rs28891371  | 32638713 T | 0.3118 | 7.45E-07 | chr:6:32648036 |
| 6 rs28891372  | 32638727 A | 0.3118 | 7.45E-07 | chr:6:32648036 |
| 6 rs9272176   | 32601333 T | 0.3385 | 7.49E-07 | chr:6:32648036 |
| 6 rs140730237 | 32534669 C | 2.181  | 7.52E-07 | chr:6:32648036 |
| 6 rs9274934   | 32641529 C | 0.5175 | 7.53E-07 | chr:6:32648036 |
| 6 rs3104381   | 32598854 A | 2.722  | 7.57E-07 | chr:6:32648036 |
| 6 rs28371253  | 32654257 T | 4.4    | 7.59E-07 | chr:6:32648036 |
| 6 rs3129967   | 32381461 T | 0.3639 | 7.67E-07 | chr:6:32648036 |
| 6 rs28747019  | 32654757 A | 0.3471 | 7.70E-07 | chr:6:32648036 |
| 6 rs28747020  | 32654760 C | 0.3471 | 7.70E-07 | chr:6:32648036 |
| 6 rs28746944  | 32652651 A | 0.3397 | 7.72E-07 | chr:6:32648036 |
| 6 rs9273079   | 32612326 T | 2.306  | 7.76E-07 | chr:6:32648036 |
| 6 rs552704888 | 32554994 T | 2.401  | 7.86E-07 | chr:6:32648036 |
| 6 rs28371261  | 32658727 A | 4.693  | 7.87E-07 | chr:6:32648036 |
| 6 rs72849274  | 32469068 C | 0.4594 | 7.94E-07 | chr:6:32648036 |
| 6 rs28891369  | 32638602 T | 0.3376 | 7.96E-07 | chr:6:32648036 |
| 6 rs9269041   | 32438243 G | 0.3221 | 7.99E-07 | chr:6:32648036 |
| 6 rs9272462   | 32605620 A | 0.329  | 8.01E-07 | chr:6:32648036 |
| 6 rs9274957   | 32641914 T | 0.4952 | 8.04E-07 | chr:6:32648036 |
| 6 rs28746953  | 32652823 G | 0.3305 | 8.05E-07 | chr:6:32648036 |
| 6 rs28746954  | 32652826 C | 0.3305 | 8.05E-07 | chr:6:32648036 |
| 6 rs28772304  | 32682114 T | 0.3518 | 8.12E-07 | chr:6:32648036 |
| 6 rs9273002   | 32611513 G | 2.08   | 8.21E-07 | chr:6:32648036 |
| 6 rs4959105   | 32583146 T | 2.422  | 8.24E-07 | chr:6:32648036 |
| 6 rs9273477   | 32628079 A | 2.493  | 8.26E-07 | chr:6:32648036 |
| 6 rs9271442   | 32588260 A | 2.41   | 8.27E-07 | chr:6:32648036 |
| 6 rs28724238  | 32629066 C | 2.462  | 8.31E-07 | chr:6:32648036 |
| 6 rs28437337  | 32451484 T | 2.51   | 8.34E-07 | chr:6:32648036 |
| 6 rs28654725  | 32435542 G | 2.445  | 8.37E-07 | chr:6:32648036 |
| 6 rs9272104   | 32599918 T | 2.355  | 8.41E-07 | chr:6:32648036 |
| 6 rs116611418 | 32459595 G | 0.4491 | 8.42E-07 | chr:6:32648036 |
| 6 rs554742089 | 32451822 T | 3.031  | 8.44E-07 | chr:6:32648036 |
| 6 rs567852525 | 32452110 T | 3.031  | 8.44E-07 | chr:6:32648036 |
| 6 rs9268926   | 32433067 G | 3.031  | 8.44E-07 | chr:6:32648036 |
| 6 rs28383221  | 32583212 A | 0.3978 | 8.49E-07 | chr:6:32648036 |
| 6 rs28383224  | 32583653 A | 0.3978 | 8.49E-07 | chr:6:32648036 |
| 6 rs28383230  | 32584088 T | 0.3978 | 8.49E-07 | chr:6:32648036 |
| 6 rs28383231  | 32584099 C | 0.3978 | 8.49E-07 | chr:6:32648036 |
| 6 rs28752527  | 32584928 C | 0.3978 | 8.49E-07 | chr:6:32648036 |
| 6 rs685244    | 32584769 A | 0.3978 | 8.49E-07 | chr:6:32648036 |
| 6 rs28383170  | 32565722 T | 2.433  | 8.50E-07 | chr:6:32648036 |

|                         |            |        |          |                |
|-------------------------|------------|--------|----------|----------------|
| 6 rs28383171            | 32565735 T | 2.433  | 8.50E-07 | chr:6:32648036 |
| 6 rs76914018            | 32436250 T | 2.25   | 8.50E-07 | chr:6:32648036 |
| 6 rs77244909            | 32436240 C | 2.25   | 8.50E-07 | chr:6:32648036 |
| 6 rs35917796            | 32560028 T | 2.314  | 8.56E-07 | chr:6:32648036 |
| 6 rs35972518            | 32560026 G | 2.314  | 8.56E-07 | chr:6:32648036 |
| 6 rs36096565            | 32560025 G | 2.314  | 8.56E-07 | chr:6:32648036 |
| 6 rs55765078            | 32647433 C | 2.477  | 8.59E-07 | chr:6:32648036 |
| 6 rs78121285            | 32502174 A | 2.631  | 8.60E-07 | chr:6:32648036 |
| 6 rs28895225            | 32435684 C | 2.393  | 8.60E-07 | chr:6:32648036 |
| 6 rs9276797             | 32778648 A | 2.44   | 8.65E-07 | chr:6:32648036 |
| 6 rs9276798             | 32778672 T | 2.44   | 8.65E-07 | chr:6:32648036 |
| 6 rs1694123             | 32642759 G | 6.155  | 8.72E-07 | chr:6:32648036 |
| 6 rs115405728           | 32481749 T | 0.5323 | 8.74E-07 | chr:6:32648036 |
| 6 rs79617990            | 32600694 A | 0.3305 | 8.79E-07 | chr:6:32648036 |
| 6 rs545350177           | 32565668 G | 0.3802 | 8.80E-07 | chr:6:32648036 |
| 6 rs370758801           | 32534736 T | 2.175  | 8.98E-07 | chr:6:32648036 |
| 6 rs9272220             | 32602306 A | 0.3282 | 9.01E-07 | chr:6:32648036 |
| 6 rs28744285            | 32773349 A | 2.464  | 9.03E-07 | chr:6:32648036 |
| 6 rs28744286            | 32773352 C | 2.464  | 9.03E-07 | chr:6:32648036 |
| 6 rs9276766             | 32773350 C | 2.464  | 9.03E-07 | chr:6:32648036 |
| 6 rs34036879            | 32453336 T | 2.488  | 9.05E-07 | chr:6:32648036 |
| 6 rs482044              | 32576064 C | 2.398  | 9.05E-07 | chr:6:32648036 |
| 6 rs3021304             | 32575658 G | 2.565  | 9.10E-07 | chr:6:32648036 |
| 6 rs9271527             | 32589867 T | 0.3521 | 9.10E-07 | chr:6:32648036 |
| 6 rs28747021            | 32654772 G | 0.3511 | 9.10E-07 | chr:6:32648036 |
| 6 rs9272393             | 32604826 T | 0.4345 | 9.12E-07 | chr:6:32648036 |
| 6 rs9271850             | 32595060 G | 0.3442 | 9.39E-07 | chr:6:32648036 |
| 6 rs3207966             | 32605197 A | 0.3321 | 9.45E-07 | chr:6:32648036 |
| 6 rs9271597             | 32591291 A | 2.491  | 9.47E-07 | chr:6:32648036 |
| 6 rs9405110             | 32439108 C | 2.487  | 9.49E-07 | chr:6:32648036 |
| 6 rs35344500            | 32609525 C | 0.3339 | 9.50E-07 | chr:6:32648036 |
| 6 rs115834108           | 32459908 A | 0.4556 | 9.63E-07 | chr:6:32648036 |
| 6 rs9391873             | 32436350 G | 2.945  | 9.65E-07 | chr:6:32648036 |
| 6 rs2935908             | 32652606 C | 4.169  | 9.68E-07 | chr:6:32648036 |
| 6 rs9406389             | 32517764 C | 3.291  | 9.74E-07 | chr:6:32648036 |
| 6 rs115833135           | 32489672 A | 0.3347 | 9.74E-07 | chr:6:32648036 |
| 6 rs2395518             | 32597812 C | 2.65   | 9.80E-07 | chr:6:32648036 |
| 6 rs1794495             | 32649347 C | 4.43   | 9.81E-07 | chr:6:32648036 |
| 6 rs9272486;rs147897616 | 32605982 T | 0.1915 | 9.81E-07 | chr:6:32648036 |
| 6 rs34902284            | 32556300 T | 2.463  | 9.87E-07 | chr:6:32648036 |
| 6 rs3763309             | 32375973 A | 2.974  | 9.93E-07 | chr:6:32648036 |
| 6 rs3763312             | 32376348 A | 2.974  | 9.93E-07 | chr:6:32648036 |
| 6 rs3793127             | 32371915 T | 2.974  | 9.93E-07 | chr:6:32648036 |

|               |            |        |          |                |
|---------------|------------|--------|----------|----------------|
| 6 rs9272262   | 32603291 T | 0.3344 | 9.96E-07 | chr:6:32648036 |
| 6 rs9272264   | 32603309 G | 0.3344 | 9.96E-07 | chr:6:32648036 |
| 6 rs28891467  | 32642307 A | 0.3749 | 9.96E-07 | chr:6:32648036 |
| 6 rs28891468  | 32642319 T | 0.3749 | 9.96E-07 | chr:6:32648036 |
| 6 rs566861    | 32576538 C | 0.3764 | 1.00E-06 | chr:6:32648036 |
| 6 rs9274962   | 32641936 G | 0.4938 | 1.01E-06 | chr:6:32648036 |
| 6 rs28383420  | 32608707 C | 2.327  | 1.02E-06 | chr:6:32648036 |
| 6 rs9271368   | 32586934 G | 0.3415 | 1.02E-06 | chr:6:32648036 |
| 6 rs74958579  | 32459971 T | 2.441  | 1.02E-06 | chr:6:32648036 |
| 6 rs28891413  | 32640548 T | 0.3419 | 1.03E-06 | chr:6:32648036 |
| 6 rs9272213   | 32602039 A | 0.3224 | 1.04E-06 | chr:6:32648036 |
| 6 rs9272215   | 32602105 T | 0.3364 | 1.04E-06 | chr:6:32648036 |
| 6 rs28366303  | 32560963 G | 2.414  | 1.04E-06 | chr:6:32648036 |
| 6 rs76946723  | 32578917 T | 0.3676 | 1.05E-06 | chr:6:32648036 |
| 6 rs28383236  | 32584188 T | 0.4074 | 1.05E-06 | chr:6:32648036 |
| 6 rs28383241  | 32584319 C | 0.4142 | 1.05E-06 | chr:6:32648036 |
| 6 rs28383242  | 32584325 A | 0.4142 | 1.05E-06 | chr:6:32648036 |
| 6 rs117055012 | 32602628 G | 6.073  | 1.05E-06 | chr:6:32648036 |
| 6 rs9271489   | 32589051 A | 0.353  | 1.06E-06 | chr:6:32648036 |
| 6 rs78279385  | 32451758 A | 2.544  | 1.06E-06 | chr:6:32648036 |
| 6 rs4532479   | 32582194 T | 0.3339 | 1.07E-06 | chr:6:32648036 |
| 6 rs9271735   | 32593649 A | 2.195  | 1.07E-06 | chr:6:32648036 |
| 6 rs9272123   | 32600573 T | 0.3331 | 1.07E-06 | chr:6:32648036 |
| 6 rs115852844 | 32603456 A | 0.3232 | 1.07E-06 | chr:6:32648036 |
| 6 rs117090280 | 32489265 T | 0.4741 | 1.08E-06 | chr:6:32648036 |
| 6 rs9269561   | 32544405 G | 0.3941 | 1.08E-06 | chr:6:32648036 |
| 6 rs9272528   | 32606617 C | 0.4634 | 1.09E-06 | chr:6:32648036 |
| 6 rs6457592   | 32425983 T | 0.3793 | 1.11E-06 | chr:6:32648036 |
| 6 rs9271326   | 32582527 T | 0.3707 | 1.11E-06 | chr:6:32648036 |
| 6 rs28383173  | 32566287 C | 2.401  | 1.12E-06 | chr:6:32648036 |
| 6 rs28383174  | 32566288 A | 2.401  | 1.12E-06 | chr:6:32648036 |
| 6 rs77122291  | 32559019 A | 2.343  | 1.13E-06 | chr:6:32648036 |
| 6 rs28895224  | 32435556 G | 2.399  | 1.14E-06 | chr:6:32648036 |
| 6 rs1600571   | 32770390 G | 2.45   | 1.14E-06 | chr:6:32648036 |
| 6 rs2187684   | 32764719 C | 2.45   | 1.14E-06 | chr:6:32648036 |
| 6 rs2199870   | 32773172 C | 2.45   | 1.14E-06 | chr:6:32648036 |
| 6 rs2199871   | 32773042 T | 2.45   | 1.14E-06 | chr:6:32648036 |
| 6 rs2257789   | 32765383 C | 2.45   | 1.14E-06 | chr:6:32648036 |
| 6 rs2621334   | 32778052 A | 2.45   | 1.14E-06 | chr:6:32648036 |
| 6 rs2621336   | 32776976 C | 2.45   | 1.14E-06 | chr:6:32648036 |
| 6 rs2621343   | 32774788 C | 2.45   | 1.14E-06 | chr:6:32648036 |
| 6 rs2621348   | 32772575 T | 2.45   | 1.14E-06 | chr:6:32648036 |
| 6 rs2621349   | 32772564 G | 2.45   | 1.14E-06 | chr:6:32648036 |

|               |            |        |          |                |
|---------------|------------|--------|----------|----------------|
| 6 rs2621351   | 32772004 G | 2.45   | 1.14E-06 | chr:6:32648036 |
| 6 rs2621352   | 32771887 C | 2.45   | 1.14E-06 | chr:6:32648036 |
| 6 rs2621353   | 32771531 G | 2.45   | 1.14E-06 | chr:6:32648036 |
| 6 rs2621354   | 32771354 T | 2.45   | 1.14E-06 | chr:6:32648036 |
| 6 rs2621371   | 32767091 G | 2.45   | 1.14E-06 | chr:6:32648036 |
| 6 rs2857113   | 32780201 C | 2.45   | 1.14E-06 | chr:6:32648036 |
| 6 rs2857116   | 32778153 A | 2.45   | 1.14E-06 | chr:6:32648036 |
| 6 rs2857121   | 32777533 T | 2.45   | 1.14E-06 | chr:6:32648036 |
| 6 rs2857122   | 32777472 G | 2.45   | 1.14E-06 | chr:6:32648036 |
| 6 rs2857124   | 32777305 T | 2.45   | 1.14E-06 | chr:6:32648036 |
| 6 rs2857126   | 32777140 C | 2.45   | 1.14E-06 | chr:6:32648036 |
| 6 rs2857127   | 32776854 A | 2.45   | 1.14E-06 | chr:6:32648036 |
| 6 rs2857128   | 32776832 A | 2.45   | 1.14E-06 | chr:6:32648036 |
| 6 rs2857129   | 32776623 A | 2.45   | 1.14E-06 | chr:6:32648036 |
| 6 rs2857130   | 32776414 T | 2.45   | 1.14E-06 | chr:6:32648036 |
| 6 rs2857133   | 32776120 A | 2.45   | 1.14E-06 | chr:6:32648036 |
| 6 rs2857135   | 32775821 A | 2.45   | 1.14E-06 | chr:6:32648036 |
| 6 rs2857136   | 32775686 A | 2.45   | 1.14E-06 | chr:6:32648036 |
| 6 rs2857137   | 32775602 A | 2.45   | 1.14E-06 | chr:6:32648036 |
| 6 rs2857139   | 32775465 C | 2.45   | 1.14E-06 | chr:6:32648036 |
| 6 rs2857141   | 32774385 A | 2.45   | 1.14E-06 | chr:6:32648036 |
| 6 rs2857143   | 32772636 A | 2.45   | 1.14E-06 | chr:6:32648036 |
| 6 rs2857144   | 32771610 A | 2.45   | 1.14E-06 | chr:6:32648036 |
| 6 rs3101941   | 32775563 A | 2.45   | 1.14E-06 | chr:6:32648036 |
| 6 rs531930837 | 32772556 C | 2.45   | 1.14E-06 | chr:6:32648036 |
| 6 rs6929856   | 32777198 C | 2.45   | 1.14E-06 | chr:6:32648036 |
| 6 rs6929867   | 32777216 C | 2.45   | 1.14E-06 | chr:6:32648036 |
| 6 rs7383433   | 32778531 A | 2.45   | 1.14E-06 | chr:6:32648036 |
| 6 rs28891390  | 32639545 T | 0.3381 | 1.15E-06 | chr:6:32648036 |
| 6 rs28383435  | 32608972 T | 2.356  | 1.15E-06 | chr:6:32648036 |
| 6 rs9268846   | 32429245 G | 2.402  | 1.15E-06 | chr:6:32648036 |
| 6 rs9274933   | 32641513 C | 1.906  | 1.15E-06 | chr:6:32648036 |
| 6 rs2647009   | 32661615 A | 4.362  | 1.16E-06 | chr:6:32648036 |
| 6 rs2647010   | 32661641 G | 4.362  | 1.16E-06 | chr:6:32648036 |
| 6 rs74750549  | 32511488 T | 1.988  | 1.16E-06 | chr:6:32648036 |
| 6 rs28366304  | 32560981 G | 2.384  | 1.17E-06 | chr:6:32648036 |
| 6 rs28746982  | 32653703 A | 0.3531 | 1.18E-06 | chr:6:32648036 |
| 6 rs9272507   | 32606324 T | 0.4552 | 1.19E-06 | chr:6:32648036 |
| 6 rs28383168  | 32565588 C | 2.322  | 1.20E-06 | chr:6:32648036 |
| 6 rs28746943  | 32652634 A | 0.3471 | 1.21E-06 | chr:6:32648036 |
| 6 rs545911074 | 32522990 C | 2.141  | 1.21E-06 | chr:6:32648036 |
| 6 rs146797212 | 32507206 G | 0.482  | 1.22E-06 | chr:6:32648036 |
| 6 rs9271508   | 32589410 T | 0.3538 | 1.24E-06 | chr:6:32648036 |

|               |            |        |          |                |
|---------------|------------|--------|----------|----------------|
| 6 rs28383416  | 32608483 C | 2.363  | 1.24E-06 | chr:6:32648036 |
| 6 rs187436363 | 32532613 G | 2.134  | 1.24E-06 | chr:6:32648036 |
| 6 rs1049086   | 32629904 A | 0.3574 | 1.25E-06 | chr:6:32648036 |
| 6 rs7771972   | 32605557 T | 0.3361 | 1.25E-06 | chr:6:32648036 |
| 6 rs28747022  | 32654785 A | 0.3571 | 1.25E-06 | chr:6:32648036 |
| 6 rs28891472  | 32642515 C | 0.3802 | 1.25E-06 | chr:6:32648036 |
| 6 rs28891473  | 32642525 T | 0.3802 | 1.25E-06 | chr:6:32648036 |
| 6 rs9271237   | 32579651 G | 0.3727 | 1.27E-06 | chr:6:32648036 |
| 6 rs9271238   | 32579702 T | 0.3727 | 1.27E-06 | chr:6:32648036 |
| 6 rs34855541  | 32559825 G | 2.647  | 1.28E-06 | chr:6:32648036 |
| 6 rs555503640 | 32486477 T | 0.4694 | 1.28E-06 | chr:6:32648036 |
| 6 rs607929    | 32586998 C | 2.462  | 1.29E-06 | chr:6:32648036 |
| 6 rs140571637 | 32516988 T | 2.149  | 1.29E-06 | chr:6:32648036 |
| 6 rs573304417 | 32488711 A | 2.014  | 1.29E-06 | chr:6:32648036 |
| 6 rs75639337  | 32578656 T | 0.3717 | 1.29E-06 | chr:6:32648036 |
| 6 rs77064057  | 32578653 G | 0.3717 | 1.29E-06 | chr:6:32648036 |
| 6 rs3205916   | 32609106 C | 2.383  | 1.30E-06 | chr:6:32648036 |
| 6 rs28383233  | 32584153 G | 0.4094 | 1.31E-06 | chr:6:32648036 |
| 6 rs28752515  | 32583603 G | 0.4126 | 1.31E-06 | chr:6:32648036 |
| 6 rs281874783 | 32632660 G | 2.575  | 1.32E-06 | chr:6:32648036 |
| 6 rs9276799   | 32778686 C | 2.386  | 1.32E-06 | chr:6:32648036 |
| 6 rs186302965 | 32498947 A | 1.999  | 1.33E-06 | chr:6:32648036 |
| 6 rs528150408 | 32489042 G | 2.117  | 1.33E-06 | chr:6:32648036 |
| 6 rs539956953 | 32489061 C | 2.117  | 1.33E-06 | chr:6:32648036 |
| 6 rs28891392  | 32639610 G | 0.3395 | 1.35E-06 | chr:6:32648036 |
| 6 rs9271757   | 32593969 G | 0.5266 | 1.35E-06 | chr:6:32648036 |
| 6 rs76585788  | 32637493 A | 6.414  | 1.36E-06 | chr:6:32648036 |
| 6 rs9276752   | 32772507 G | 2.437  | 1.37E-06 | chr:6:32648036 |
| 6 rs17212420  | 32652400 T | 0.3456 | 1.37E-06 | chr:6:32648036 |
| 6 rs9273007   | 32611537 T | 2.17   | 1.38E-06 | chr:6:32648036 |
| 6 rs34595963  | 32555222 C | 3.064  | 1.38E-06 | chr:6:32648036 |
| 6 rs35109569  | 32555218 A | 3.064  | 1.38E-06 | chr:6:32648036 |
| 6 rs72844144  | 32519125 A | 0.3344 | 1.40E-06 | chr:6:32648036 |
| 6 rs28891474  | 32642565 T | 0.3827 | 1.41E-06 | chr:6:32648036 |
| 6 rs28891475  | 32642570 C | 0.3827 | 1.41E-06 | chr:6:32648036 |
| 6 rs28891376  | 32638788 C | 0.3287 | 1.42E-06 | chr:6:32648036 |
| 6 rs707949    | 32609952 C | 0.3408 | 1.42E-06 | chr:6:32648036 |
| 6 rs73731412  | 32454215 G | 0.2967 | 1.42E-06 | chr:6:32648036 |
| 6 rs2858323   | 32660707 T | 4.261  | 1.43E-06 | chr:6:32648036 |
| 6 rs9271403   | 32587536 G | 2.354  | 1.43E-06 | chr:6:32648036 |
| 6 rs9271522   | 32589791 C | 0.3654 | 1.43E-06 | chr:6:32648036 |
| 6 rs3828786   | 32629259 C | 3.266  | 1.43E-06 | chr:6:32648036 |
| 6 rs9272626   | 32608041 C | 0.3452 | 1.43E-06 | chr:6:32648036 |



|               |            |        |          |                |
|---------------|------------|--------|----------|----------------|
| 6 rs28366306  | 32560990 A | 2.366  | 1.44E-06 | chr:6:32648036 |
| 6 rs74945612  | 32505901 C | 0.4797 | 1.45E-06 | chr:6:32648036 |
| 6 rs2621332   | 32780317 G | 2.431  | 1.45E-06 | chr:6:32648036 |
| 6 rs79996892  | 32507051 C | 0.4658 | 1.46E-06 | chr:6:32648036 |
| 6 rs9272473   | 32605738 G | 0.4077 | 1.46E-06 | chr:6:32648036 |
| 6 rs17425622  | 32571961 C | 3.152  | 1.47E-06 | chr:6:32648036 |
| 6 rs28891463  | 32642097 T | 0.3525 | 1.47E-06 | chr:6:32648036 |
| 6 rs28891464  | 32642101 A | 0.3525 | 1.47E-06 | chr:6:32648036 |
| 6 rs2395225   | 32590624 C | 0.3664 | 1.49E-06 | chr:6:32648036 |
| 6 rs74389316  | 32596869 T | 0.3539 | 1.49E-06 | chr:6:32648036 |
| 6 rs2858864   | 32578229 T | 0.3735 | 1.49E-06 | chr:6:32648036 |
| 6 rs3104420   | 32580028 A | 0.3735 | 1.49E-06 | chr:6:32648036 |
| 6 rs3104421   | 32580007 A | 0.3735 | 1.49E-06 | chr:6:32648036 |
| 6 rs502771    | 32578970 C | 0.3735 | 1.49E-06 | chr:6:32648036 |
| 6 rs550703793 | 32582451 T | 0.3735 | 1.49E-06 | chr:6:32648036 |
| 6 rs79838044  | 32580632 C | 0.3735 | 1.49E-06 | chr:6:32648036 |
| 6 rs80243928  | 32580571 T | 0.3735 | 1.49E-06 | chr:6:32648036 |
| 6 rs9271262   | 32580585 G | 0.3735 | 1.49E-06 | chr:6:32648036 |
| 6 rs9271330   | 32582640 A | 0.3735 | 1.49E-06 | chr:6:32648036 |
| 6 rs9271333   | 32582678 T | 0.3735 | 1.49E-06 | chr:6:32648036 |
| 6 rs9271334   | 32582711 C | 0.3735 | 1.49E-06 | chr:6:32648036 |
| 6 rs9272173   | 32601268 C | 0.3487 | 1.50E-06 | chr:6:32648036 |
| 6 rs77568742  | 32580790 C | 0.3754 | 1.50E-06 | chr:6:32648036 |
| 6 rs115201985 | 32526918 A | 0.4653 | 1.51E-06 | chr:6:32648036 |
| 6 rs9269560   | 32544371 C | 0.3877 | 1.51E-06 | chr:6:32648036 |
| 6 rs28366192  | 32368436 A | 0.4315 | 1.52E-06 | chr:6:32648036 |
| 6 rs9272491   | 32606046 A | 0.4155 | 1.53E-06 | chr:6:32648036 |
| 6 rs28366283  | 32560288 C | 2.2    | 1.53E-06 | chr:6:32648036 |
| 6 rs9269190   | 32448500 T | 0.3218 | 1.53E-06 | chr:6:32648036 |
| 6 rs9272057   | 32599190 A | 0.4446 | 1.53E-06 | chr:6:32648036 |
| 6 rs111289085 | 32639359 T | 0.334  | 1.55E-06 | chr:6:32648036 |
| 6 rs28366305  | 32560982 T | 2.356  | 1.56E-06 | chr:6:32648036 |
| 6 rs180852758 | 32459251 G | 2.582  | 1.57E-06 | chr:6:32648036 |
| 6 rs9268951   | 32433907 A | 2.321  | 1.58E-06 | chr:6:32648036 |
| 6 rs9271188   | 32578320 T | 0.3722 | 1.58E-06 | chr:6:32648036 |
| 6 rs9268433   | 32345891 G | 2.902  | 1.58E-06 | chr:6:32648036 |
| 6 rs9268451   | 32349086 C | 2.902  | 1.58E-06 | chr:6:32648036 |
| 6 rs9268455   | 32349772 T | 2.902  | 1.58E-06 | chr:6:32648036 |
| 6 rs28366364  | 32565532 G | 2.286  | 1.59E-06 | chr:6:32648036 |
| 6 rs28366367  | 32565571 A | 2.286  | 1.59E-06 | chr:6:32648036 |
| 6 rs9272036   | 32598841 A | 0.4443 | 1.61E-06 | chr:6:32648036 |
| 6 rs535905056 | 32511341 G | 2.139  | 1.61E-06 | chr:6:32648036 |
| 6 rs543622960 | 32511362 C | 2.139  | 1.61E-06 | chr:6:32648036 |

|               |            |        |          |                |
|---------------|------------|--------|----------|----------------|
| 6 rs552568377 | 32511319 C | 2.139  | 1.61E-06 | chr:6:32648036 |
| 6 rs553395545 | 32511337 A | 2.139  | 1.61E-06 | chr:6:32648036 |
| 6 rs558497977 | 32511365 A | 2.139  | 1.61E-06 | chr:6:32648036 |
| 6 rs571140115 | 32511322 T | 2.139  | 1.61E-06 | chr:6:32648036 |
| 6 rs574932946 | 32511340 T | 2.139  | 1.61E-06 | chr:6:32648036 |
| 6 rs9272423   | 32605164 G | 0.3507 | 1.61E-06 | chr:6:32648036 |
| 6 rs9272518   | 32606446 T | 3.354  | 1.62E-06 | chr:6:32648036 |
| 6 rs79936591  | 32503543 A | 2.377  | 1.62E-06 | chr:6:32648036 |
| 6 rs9272050   | 32599071 G | 2.258  | 1.62E-06 | chr:6:32648036 |
| 6 rs28724200  | 32556248 G | 2.38   | 1.62E-06 | chr:6:32648036 |
| 6 rs1967688   | 32340068 T | 2.476  | 1.63E-06 | chr:6:32648036 |
| 6 rs9272913   | 32610860 T | 2.27   | 1.63E-06 | chr:6:32648036 |
| 6 rs9272914   | 32610863 G | 2.27   | 1.63E-06 | chr:6:32648036 |
| 6 rs115223053 | 32602624 C | 5.588  | 1.63E-06 | chr:6:32648036 |
| 6 rs549355474 | 32486300 G | 3.579  | 1.64E-06 | chr:6:32648036 |
| 6 rs17211713  | 32626179 C | 4.842  | 1.66E-06 | chr:6:32648036 |
| 6 rs1049124   | 32627713 A | 4.885  | 1.67E-06 | chr:6:32648036 |
| 6 rs28383362  | 32606864 C | 2.023  | 1.67E-06 | chr:6:32648036 |
| 6 rs9271385   | 32587409 A | 0.389  | 1.68E-06 | chr:6:32648036 |
| 6 rs2067098   | 32762307 T | 2.403  | 1.69E-06 | chr:6:32648036 |
| 6 rs2067577   | 32762484 C | 2.403  | 1.69E-06 | chr:6:32648036 |
| 6 rs2157078   | 32762226 A | 2.403  | 1.69E-06 | chr:6:32648036 |
| 6 rs2157079   | 32762103 T | 2.403  | 1.69E-06 | chr:6:32648036 |
| 6 rs2157080   | 32761826 T | 2.403  | 1.69E-06 | chr:6:32648036 |
| 6 rs2157081   | 32761776 G | 2.403  | 1.69E-06 | chr:6:32648036 |
| 6 rs2187686   | 32761507 A | 2.403  | 1.69E-06 | chr:6:32648036 |
| 6 rs2621375   | 32763974 T | 2.403  | 1.69E-06 | chr:6:32648036 |
| 6 rs2621376   | 32763521 T | 2.403  | 1.69E-06 | chr:6:32648036 |
| 6 rs2621378   | 32763040 G | 2.403  | 1.69E-06 | chr:6:32648036 |
| 6 rs2857150   | 32763821 A | 2.403  | 1.69E-06 | chr:6:32648036 |
| 6 rs2857151   | 32763514 A | 2.403  | 1.69E-06 | chr:6:32648036 |
| 6 rs2857152   | 32762654 A | 2.403  | 1.69E-06 | chr:6:32648036 |
| 6 rs2857154   | 32762616 A | 2.403  | 1.69E-06 | chr:6:32648036 |
| 6 rs2857155   | 32761317 A | 2.403  | 1.69E-06 | chr:6:32648036 |
| 6 rs2894294   | 32760965 G | 2.403  | 1.69E-06 | chr:6:32648036 |
| 6 rs28383367  | 32607031 T | 2.047  | 1.69E-06 | chr:6:32648036 |
| 6 rs9272056   | 32599180 A | 0.4485 | 1.70E-06 | chr:6:32648036 |
| 6 rs75783927  | 32566712 C | 2.403  | 1.71E-06 | chr:6:32648036 |
| 6 rs9274930   | 32641505 C | 1.879  | 1.71E-06 | chr:6:32648036 |
| 6 rs9274931   | 32641506 A | 1.879  | 1.71E-06 | chr:6:32648036 |
| 6 rs9274932   | 32641509 G | 1.879  | 1.71E-06 | chr:6:32648036 |
| 6 rs3134993   | 32637778 G | 0.3717 | 1.74E-06 | chr:6:32648036 |
| 6 rs113141487 | 32524887 G | 2.639  | 1.75E-06 | chr:6:32648036 |

|               |            |        |          |                |
|---------------|------------|--------|----------|----------------|
| 6 rs508318    | 32584894 T | 3.149  | 1.76E-06 | chr:6:32648036 |
| 6 rs199617354 | 32644563 G | 4.366  | 1.76E-06 | chr:6:32648036 |
| 6 rs2856665   | 32665597 G | 4.996  | 1.78E-06 | chr:6:32648036 |
| 6 rs148940091 | 32507101 C | 0.4829 | 1.78E-06 | chr:6:32648036 |
| 6 rs28383223  | 32583477 C | 0.4185 | 1.78E-06 | chr:6:32648036 |
| 6 rs583177    | 32579567 A | 0.3799 | 1.80E-06 | chr:6:32648036 |
| 6 rs28891477  | 32642603 C | 0.3818 | 1.80E-06 | chr:6:32648036 |
| 6 rs28891478  | 32642605 G | 0.3818 | 1.80E-06 | chr:6:32648036 |
| 6 rs1049092   | 32629802 A | 0.3657 | 1.84E-06 | chr:6:32648036 |
| 6 rs674313    | 32578082 T | 0.3745 | 1.85E-06 | chr:6:32648036 |
| 6 rs77497538  | 32455725 G | 2.964  | 1.85E-06 | chr:6:32648036 |
| 6 rs28383418  | 32608537 C | 2.35   | 1.86E-06 | chr:6:32648036 |
| 6 rs1130156   | 32610968 G | 2.217  | 1.86E-06 | chr:6:32648036 |
| 6 rs28747000  | 32654280 A | 0.3576 | 1.87E-06 | chr:6:32648036 |
| 6 rs28747001  | 32654284 G | 0.3576 | 1.87E-06 | chr:6:32648036 |
| 6 rs9274738   | 32637909 A | 0.4406 | 1.88E-06 | chr:6:32648036 |
| 6 rs2157083   | 32760655 C | 2.39   | 1.89E-06 | chr:6:32648036 |
| 6 rs2187687   | 32760539 T | 2.39   | 1.89E-06 | chr:6:32648036 |
| 6 rs2857158   | 32760334 A | 2.39   | 1.89E-06 | chr:6:32648036 |
| 6 rs2857159   | 32760257 T | 2.39   | 1.89E-06 | chr:6:32648036 |
| 6 rs2857160   | 32760249 T | 2.39   | 1.89E-06 | chr:6:32648036 |
| 6 rs9272127   | 32600595 T | 2.243  | 1.91E-06 | chr:6:32648036 |
| 6 rs9269211   | 32450058 C | 0.3497 | 1.93E-06 | chr:6:32648036 |
| 6 rs76662008  | 32580869 G | 0.382  | 1.94E-06 | chr:6:32648036 |
| 6 rs567923948 | 32486309 C | 3.472  | 1.95E-06 | chr:6:32648036 |
| 6 rs34415150  | 32560477 G | 2.831  | 1.97E-06 | chr:6:32648036 |
| 6 rs541764084 | 32522223 G | 2.996  | 1.97E-06 | chr:6:32648036 |
| 6 rs9273133   | 32612801 C | 2.29   | 1.99E-06 | chr:6:32648036 |
| 6 rs59447698  | 32481125 G | 0.4916 | 2.01E-06 | chr:6:32648036 |
| 6 rs707962    | 32609974 G | 0.3473 | 2.02E-06 | chr:6:32648036 |
| 6 rs707963    | 32609969 G | 0.3473 | 2.02E-06 | chr:6:32648036 |
| 6 rs141961165 | 32506799 T | 0.4876 | 2.02E-06 | chr:6:32648036 |
| 6 rs9272474   | 32605754 T | 0.4181 | 2.02E-06 | chr:6:32648036 |
| 6 rs9272476   | 32605759 T | 0.4181 | 2.02E-06 | chr:6:32648036 |
| 6 rs502055    | 32579003 C | 0.3788 | 2.03E-06 | chr:6:32648036 |
| 6 rs9271602   | 32591383 G | 2.341  | 2.03E-06 | chr:6:32648036 |
| 6 rs28891465  | 32642109 C | 0.3631 | 2.03E-06 | chr:6:32648036 |
| 6 rs116661714 | 32538858 G | 0.4355 | 2.04E-06 | chr:6:32648036 |
| 6 rs113608847 | 32554284 G | 2.498  | 2.04E-06 | chr:6:32648036 |
| 6 rs9272063   | 32599303 T | 0.347  | 2.04E-06 | chr:6:32648036 |
| 6 rs9268515   | 32379295 C | 3.046  | 2.06E-06 | chr:6:32648036 |
| 6 rs72508409  | 32451073 G | 0.3058 | 2.06E-06 | chr:6:32648036 |
| 6 rs9272409   | 32604968 C | 0.3308 | 2.10E-06 | chr:6:32648036 |

|               |            |        |          |                |
|---------------|------------|--------|----------|----------------|
| 6 rs149521915 | 32489639 T | 0.3591 | 2.10E-06 | chr:6:32648036 |
| 6 rs114852415 | 32524759 A | 2.095  | 2.10E-06 | chr:6:32648036 |
| 6 rs3134988   | 32640772 G | 0.3928 | 2.11E-06 | chr:6:32648036 |
| 6 rs28383363  | 32606868 C | 2.01   | 2.11E-06 | chr:6:32648036 |
| 6 rs9272467   | 32605705 G | 0.4102 | 2.13E-06 | chr:6:32648036 |
| 6 rs9272468   | 32605708 G | 0.4102 | 2.13E-06 | chr:6:32648036 |
| 6 rs9275059   | 32648298 T | 0.4496 | 2.15E-06 | chr:6:32648036 |
| 6 rs114710684 | 32521237 G | 0.3126 | 2.15E-06 | chr:6:32648036 |
| 6 rs116783886 | 32521236 T | 0.3126 | 2.15E-06 | chr:6:32648036 |
| 6 rs9276800   | 32778709 G | 2.162  | 2.15E-06 | chr:6:32648036 |
| 6 rs6911114   | 32537753 A | 2.07   | 2.16E-06 | chr:6:32648036 |
| 6 rs9271190   | 32578369 A | 0.3811 | 2.17E-06 | chr:6:32648036 |
| 6 rs114866528 | 32599267 C | 5.206  | 2.18E-06 | chr:6:32648036 |
| 6 rs116633385 | 32599268 A | 5.206  | 2.18E-06 | chr:6:32648036 |
| 6 rs148395623 | 32524801 A | 2.21   | 2.18E-06 | chr:6:32648036 |
| 6 rs9271790   | 32594775 A | 0.2851 | 2.20E-06 | chr:6:32648036 |
| 6 rs9272256   | 32603169 C | 0.3487 | 2.23E-06 | chr:6:32648036 |
| 6 rs9272389   | 32604793 T | 0.456  | 2.23E-06 | chr:6:32648036 |
| 6 rs531329164 | 32496942 C | 3.084  | 2.26E-06 | chr:6:32648036 |
| 6 rs9274980   | 32642290 G | 0.4484 | 2.27E-06 | chr:6:32648036 |
| 6 rs9272488   | 32606005 A | 0.4111 | 2.27E-06 | chr:6:32648036 |
| 6 rs9269846   | 32550234 C | 0.3765 | 2.29E-06 | chr:6:32648036 |
| 6 rs9391785   | 32436687 C | 2.283  | 2.29E-06 | chr:6:32648036 |
| 6 rs9391874   | 32436680 G | 2.283  | 2.29E-06 | chr:6:32648036 |
| 6 rs548434177 | 32538903 C | 2.118  | 2.29E-06 | chr:6:32648036 |
| 6 rs9273144   | 32612915 C | 2.296  | 2.30E-06 | chr:6:32648036 |
| 6 rs543726509 | 32493208 A | 0.4665 | 2.30E-06 | chr:6:32648036 |
| 6 rs3134996   | 32636866 A | 0.355  | 2.31E-06 | chr:6:32648036 |
| 6 rs9274390   | 32632659 T | 2.505  | 2.31E-06 | chr:6:32648036 |
| 6 rs79579660  | 32543433 G | 2.295  | 2.32E-06 | chr:6:32648036 |
| 6 rs76870762  | 32459972 G | 2.368  | 2.32E-06 | chr:6:32648036 |
| 6 rs67774869  | 32508794 C | 0.4111 | 2.33E-06 | chr:6:32648036 |
| 6 rs9273401   | 32627129 G | 3.233  | 2.35E-06 | chr:6:32648036 |
| 6 rs187785448 | 32523396 T | 2.69   | 2.37E-06 | chr:6:32648036 |
| 6 rs536107251 | 32437166 T | 6.359  | 2.38E-06 | chr:6:32648036 |
| 6 rs9272357   | 32604522 C | 0.4475 | 2.38E-06 | chr:6:32648036 |
| 6 rs3021176   | 32652469 A | 3.815  | 2.39E-06 | chr:6:32648036 |
| 6 rs9273371   | 32626565 T | 2.656  | 2.39E-06 | chr:6:32648036 |
| 6 rs9273554   | 32628941 C | 2.4    | 2.39E-06 | chr:6:32648036 |
| 6 rs28891400  | 32640074 T | 0.3412 | 2.40E-06 | chr:6:32648036 |
| 6 rs28891401  | 32640075 G | 0.3412 | 2.40E-06 | chr:6:32648036 |
| 6 rs114895321 | 32603154 G | 5.409  | 2.40E-06 | chr:6:32648036 |
| 6 rs9256942   | 32557316 A | 0.3113 | 2.40E-06 | chr:6:32648036 |

|               |            |        |          |                |
|---------------|------------|--------|----------|----------------|
| 6 rs9270290   | 32557319 T | 0.3113 | 2.40E-06 | chr:6:32648036 |
| 6 rs9274987   | 32642405 G | 0.4777 | 2.40E-06 | chr:6:32648036 |
| 6 rs9274988   | 32642406 G | 0.4777 | 2.40E-06 | chr:6:32648036 |
| 6 rs116661539 | 32537317 C | 2.092  | 2.42E-06 | chr:6:32648036 |
| 6 rs3828832   | 32521083 C | 0.3915 | 2.43E-06 | chr:6:32648036 |
| 6 rs9271741   | 32593734 C | 0.5386 | 2.43E-06 | chr:6:32648036 |
| 6 rs9271792   | 32594843 T | 0.1985 | 2.43E-06 | chr:6:32648036 |
| 6 rs9272253   | 32603028 T | 0.3534 | 2.48E-06 | chr:6:32648036 |
| 6 rs192090456 | 32482101 C | 1.904  | 2.48E-06 | chr:6:32648036 |
| 6 rs3828811   | 32636221 T | 0.3842 | 2.49E-06 | chr:6:32648036 |
| 6 rs113648142 | 32508762 T | 0.4153 | 2.51E-06 | chr:6:32648036 |
| 6 rs28891412  | 32640538 T | 0.3564 | 2.52E-06 | chr:6:32648036 |
| 6 rs28371250  | 32648039 C | 0.5096 | 2.53E-06 | chr:6:32648036 |
| 6 rs191539752 | 32496497 A | 2.203  | 2.55E-06 | chr:6:32648036 |
| 6 rs60944058  | 32480632 T | 0.534  | 2.55E-06 | chr:6:32648036 |
| 6 rs34335637  | 32555309 G | 3.133  | 2.57E-06 | chr:6:32648036 |
| 6 rs12192514  | 32674240 T | 3.87   | 2.57E-06 | chr:6:32648036 |
| 6 rs17206287  | 32674725 G | 3.87   | 2.57E-06 | chr:6:32648036 |
| 6 rs17212616  | 32674617 A | 3.87   | 2.57E-06 | chr:6:32648036 |
| 6 rs2647049   | 32672681 A | 3.87   | 2.57E-06 | chr:6:32648036 |
| 6 rs28371270  | 32674296 G | 3.87   | 2.57E-06 | chr:6:32648036 |
| 6 rs28371272  | 32674440 C | 3.87   | 2.57E-06 | chr:6:32648036 |
| 6 rs28371273  | 32674442 C | 3.87   | 2.57E-06 | chr:6:32648036 |
| 6 rs28371274  | 32674558 C | 3.87   | 2.57E-06 | chr:6:32648036 |
| 6 rs2856705   | 32670956 T | 3.87   | 2.57E-06 | chr:6:32648036 |
| 6 rs2858308   | 32670000 T | 3.87   | 2.57E-06 | chr:6:32648036 |
| 6 rs9271600   | 32591332 G | 2.367  | 2.58E-06 | chr:6:32648036 |
| 6 rs9271601   | 32591337 T | 2.367  | 2.58E-06 | chr:6:32648036 |
| 6 rs113319840 | 32507441 T | 0.4548 | 2.58E-06 | chr:6:32648036 |
| 6 rs114278037 | 32507173 G | 0.5043 | 2.59E-06 | chr:6:32648036 |
| 6 rs115824930 | 32507172 T | 0.5043 | 2.59E-06 | chr:6:32648036 |
| 6 rs9272441   | 32605380 T | 0.3922 | 2.62E-06 | chr:6:32648036 |
| 6 rs9272442   | 32605400 C | 0.3922 | 2.62E-06 | chr:6:32648036 |
| 6 rs547755130 | 32486547 C | 0.4999 | 2.63E-06 | chr:6:32648036 |
| 6 rs565956329 | 32486548 A | 0.4999 | 2.63E-06 | chr:6:32648036 |
| 6 rs9272553   | 32607008 G | 0.4775 | 2.63E-06 | chr:6:32648036 |
| 6 rs2133037   | 32667596 A | 4.878  | 2.64E-06 | chr:6:32648036 |
| 6 rs9271187   | 32578314 C | 0.3836 | 2.65E-06 | chr:6:32648036 |
| 6 rs28752514  | 32583576 T | 0.426  | 2.66E-06 | chr:6:32648036 |
| 6 rs371747477 | 32489266 T | 0.4937 | 2.66E-06 | chr:6:32648036 |
| 6 rs35395738  | 32560209 C | 2.199  | 2.68E-06 | chr:6:32648036 |
| 6 rs17206049  | 32652336 A | 0.363  | 2.69E-06 | chr:6:32648036 |
| 6 rs9272980   | 32611357 T | 1.969  | 2.71E-06 | chr:6:32648036 |

|               |            |        |          |                |
|---------------|------------|--------|----------|----------------|
| 6 rs9271280   | 32581047 A | 0.3907 | 2.72E-06 | chr:6:32648036 |
| 6 rs28891397  | 32639777 A | 0.3577 | 2.72E-06 | chr:6:32648036 |
| 6 rs79905009  | 32479493 A | 0.5369 | 2.76E-06 | chr:6:32648036 |
| 6 rs9271742   | 32593747 A | 0.5413 | 2.78E-06 | chr:6:32648036 |
| 6 rs9271743   | 32593751 C | 0.5413 | 2.78E-06 | chr:6:32648036 |
| 6 rs113536850 | 32516432 A | 5.954  | 2.78E-06 | chr:6:32648036 |
| 6 rs9271432   | 32588056 T | 2.334  | 2.79E-06 | chr:6:32648036 |
| 6 rs9271433   | 32588057 G | 2.334  | 2.79E-06 | chr:6:32648036 |
| 6 rs560259947 | 32458033 C | 2.503  | 2.81E-06 | chr:6:32648036 |
| 6 rs28366365  | 32565560 C | 2.229  | 2.82E-06 | chr:6:32648036 |
| 6 rs28746981  | 32653677 T | 0.3695 | 2.82E-06 | chr:6:32648036 |
| 6 rs9272905   | 32610836 T | 2.21   | 2.84E-06 | chr:6:32648036 |
| 6 rs17211699  | 32626037 T | 4.669  | 2.85E-06 | chr:6:32648036 |
| 6 rs9272425   | 32605178 C | 2.366  | 2.86E-06 | chr:6:32648036 |
| 6 rs28746979  | 32653648 A | 0.3669 | 2.87E-06 | chr:6:32648036 |
| 6 rs9275641   | 32684919 T | 2.443  | 2.87E-06 | chr:6:32648036 |
| 6 rs115397315 | 32525087 C | 2.071  | 2.90E-06 | chr:6:32648036 |
| 6 rs9272355   | 32604515 G | 0.4494 | 2.90E-06 | chr:6:32648036 |
| 6 rs115064018 | 32643752 A | 3.738  | 2.92E-06 | chr:6:32648036 |
| 6 rs28891437  | 32641342 A | 0.4271 | 2.93E-06 | chr:6:32648036 |
| 6 rs28789995  | 32436733 C | 2.264  | 2.95E-06 | chr:6:32648036 |
| 6 rs1140342   | 32629141 C | 0.4616 | 2.96E-06 | chr:6:32648036 |
| 6 rs9272803   | 32610591 T | 2.231  | 2.96E-06 | chr:6:32648036 |
| 6 rs540965243 | 32511378 C | 2.091  | 2.99E-06 | chr:6:32648036 |
| 6 rs576708145 | 32511375 C | 2.091  | 2.99E-06 | chr:6:32648036 |
| 6 rs28366345  | 32564896 G | 2.168  | 2.99E-06 | chr:6:32648036 |
| 6 rs377533335 | 32525985 G | 2.055  | 3.00E-06 | chr:6:32648036 |
| 6 rs28528859  | 32451395 A | 2.931  | 3.03E-06 | chr:6:32648036 |
| 6 rs60160049  | 32510208 T | 0.4706 | 3.05E-06 | chr:6:32648036 |
| 6 rs9271724   | 32593552 C | 0.3389 | 3.06E-06 | chr:6:32648036 |
| 6 rs9272065   | 32599352 G | 0.3584 | 3.06E-06 | chr:6:32648036 |
| 6 rs9272066   | 32599374 A | 0.3584 | 3.06E-06 | chr:6:32648036 |
| 6 rs9272069   | 32599425 A | 0.3584 | 3.06E-06 | chr:6:32648036 |
| 6 rs563774374 | 32506022 A | 0.5244 | 3.06E-06 | chr:6:32648036 |
| 6 rs3819696   | 32538618 G | 0.3881 | 3.07E-06 | chr:6:32648036 |
| 6 rs375970207 | 32524649 C | 2.083  | 3.08E-06 | chr:6:32648036 |
| 6 rs9273551   | 32628913 T | 2.377  | 3.08E-06 | chr:6:32648036 |
| 6 rs9273552   | 32628916 A | 2.377  | 3.08E-06 | chr:6:32648036 |
| 6 rs3828798   | 32636038 A | 0.3942 | 3.10E-06 | chr:6:32648036 |
| 6 rs9273410   | 32627250 C | 0.4987 | 3.11E-06 | chr:6:32648036 |
| 6 rs28383417  | 32608507 C | 2.96   | 3.13E-06 | chr:6:32648036 |
| 6 rs9273524   | 32628595 T | 0.4089 | 3.13E-06 | chr:6:32648036 |
| 6 rs28366288  | 32560432 T | 2.283  | 3.13E-06 | chr:6:32648036 |

|               |            |        |          |                |
|---------------|------------|--------|----------|----------------|
| 6 rs9272160   | 32601130 A | 0.4694 | 3.14E-06 | chr:6:32648036 |
| 6 rs9272052   | 32599155 G | 0.3269 | 3.15E-06 | chr:6:32648036 |
| 6 rs9272191   | 32601769 T | 0.3513 | 3.15E-06 | chr:6:32648036 |
| 6 rs9274736   | 32637905 T | 0.4522 | 3.15E-06 | chr:6:32648036 |
| 6 rs28891391  | 32639577 T | 0.3606 | 3.17E-06 | chr:6:32648036 |
| 6 rs9273685   | 32629269 T | 2.345  | 3.18E-06 | chr:6:32648036 |
| 6 rs9273356   | 32625989 A | 0.4039 | 3.19E-06 | chr:6:32648036 |
| 6 rs35366682  | 32594354 C | 0.3327 | 3.20E-06 | chr:6:32648036 |
| 6 rs144238786 | 32601770 T | 5.105  | 3.20E-06 | chr:6:32648036 |
| 6 rs186564411 | 32601771 G | 5.105  | 3.20E-06 | chr:6:32648036 |
| 6 rs199950886 | 32603075 G | 5.105  | 3.20E-06 | chr:6:32648036 |
| 6 rs9274669   | 32636591 A | 0.4103 | 3.21E-06 | chr:6:32648036 |
| 6 rs67916930  | 32508823 G | 0.4173 | 3.22E-06 | chr:6:32648036 |
| 6 rs2647094   | 32580322 G | 0.3897 | 3.25E-06 | chr:6:32648036 |
| 6 rs2858862   | 32580321 T | 0.3897 | 3.25E-06 | chr:6:32648036 |
| 6 rs76415507  | 32492589 G | 0.5192 | 3.25E-06 | chr:6:32648036 |
| 6 rs9274734   | 32637887 T | 0.4515 | 3.26E-06 | chr:6:32648036 |
| 6 rs76164808  | 32637390 C | 5.246  | 3.28E-06 | chr:6:32648036 |
| 6 rs16898262  | 32677397 G | 3.712  | 3.28E-06 | chr:6:32648036 |
| 6 rs9272563   | 32607158 T | 0.5182 | 3.28E-06 | chr:6:32648036 |
| 6 rs1130162   | 32610997 G | 2.176  | 3.29E-06 | chr:6:32648036 |
| 6 rs9272610   | 32607767 C | 0.3824 | 3.30E-06 | chr:6:32648036 |
| 6 rs555525561 | 32523608 T | 2.14   | 3.30E-06 | chr:6:32648036 |
| 6 rs566860331 | 32523586 G | 2.14   | 3.30E-06 | chr:6:32648036 |
| 6 rs79186433  | 32479883 T | 1.852  | 3.31E-06 | chr:6:32648036 |
| 6 rs187769286 | 32541295 T | 2.276  | 3.32E-06 | chr:6:32648036 |
| 6 rs9272089   | 32599717 G | 0.2643 | 3.38E-06 | chr:6:32648036 |
| 6 rs28421666  | 32592737 G | 4.79   | 3.38E-06 | chr:6:32648036 |
| 6 rs9274978   | 32642277 T | 0.4588 | 3.40E-06 | chr:6:32648036 |
| 6 rs116334170 | 32598500 A | 4.971  | 3.40E-06 | chr:6:32648036 |
| 6 rs116573360 | 32598366 G | 4.793  | 3.41E-06 | chr:6:32648036 |
| 6 rs147493459 | 32598335 G | 4.793  | 3.41E-06 | chr:6:32648036 |
| 6 rs3998183   | 32567946 T | 0.3845 | 3.42E-06 | chr:6:32648036 |
| 6 rs553071835 | 32455724 T | 2.87   | 3.44E-06 | chr:6:32648036 |
| 6 rs75495772  | 32455718 G | 2.87   | 3.44E-06 | chr:6:32648036 |
| 6 rs9272164   | 32601154 C | 0.4709 | 3.44E-06 | chr:6:32648036 |
| 6 rs78798979  | 32593094 T | 4.797  | 3.45E-06 | chr:6:32648036 |
| 6 rs116109088 | 32599900 T | 4.799  | 3.45E-06 | chr:6:32648036 |
| 6 rs116517496 | 32595773 A | 4.799  | 3.45E-06 | chr:6:32648036 |
| 6 rs536721498 | 32522908 T | 2.434  | 3.45E-06 | chr:6:32648036 |
| 6 rs114088880 | 32600279 G | 4.848  | 3.47E-06 | chr:6:32648036 |
| 6 rs114307619 | 32596625 A | 4.848  | 3.47E-06 | chr:6:32648036 |
| 6 rs114310549 | 32600248 A | 4.848  | 3.47E-06 | chr:6:32648036 |

|               |             |        |          |                 |
|---------------|-------------|--------|----------|-----------------|
| 6 rs114762033 | 32602753 A  | 4.848  | 3.47E-06 | chr:6:32648036  |
| 6 rs114968544 | 32596711 C  | 4.848  | 3.47E-06 | chr:6:32648036  |
| 6 rs115231411 | 32600409 T  | 4.848  | 3.47E-06 | chr:6:32648036  |
| 6 rs115908946 | 32600615 C  | 4.848  | 3.47E-06 | chr:6:32648036  |
| 6 rs116485389 | 32600457 G  | 4.848  | 3.47E-06 | chr:6:32648036  |
| 6 rs536081339 | 32600597 T  | 4.848  | 3.47E-06 | chr:6:32648036  |
| 6 rs564621439 | 32598986 A  | 4.848  | 3.47E-06 | chr:6:32648036  |
| 6 rs114352945 | 32602648 T  | 5.051  | 3.47E-06 | chr:6:32648036  |
| 6 rs9268521   | 32381374 C  | 2.765  | 3.48E-06 | chr:6:32648036  |
| 6 rs9268522   | 32381443 T  | 2.765  | 3.48E-06 | chr:6:32648036  |
| 6 rs145878889 | 32609446 C  | 4.742  | 3.50E-06 | chr:6:32648036  |
| 6 rs533028614 | 32609452 C  | 4.742  | 3.50E-06 | chr:6:32648036  |
| 6 rs191277720 | 32458048 C  | 2.474  | 3.50E-06 | chr:6:32648036  |
| 6 rs9272330   | 32604213 C  | 0.4247 | 3.52E-06 | chr:6:32648036  |
| 6 rs201980192 | 32609063 T  | 4.768  | 3.52E-06 | chr:6:32648036  |
| 6 rs200289570 | 32491687 T  | 1.915  | 3.53E-06 | chr:6:32648036  |
| 6 rs28366279  | 32560222 C  | 0.4096 | 3.54E-06 | chr:6:32648036  |
| 6 rs72492351  | 32538451 C  | 0.3828 | 3.55E-06 | chr:6:32648036  |
| 6 rs555685178 | 32609581 T  | 4.896  | 3.55E-06 | chr:6:32648036  |
| 6 rs9272167   | 32601212 A  | 0.464  | 3.56E-06 | chr:6:32648036  |
| 7 rs114730739 | 158018607 C | 40.82  | 1.80E-18 | chr:7:158029482 |
| 7 rs67340855  | 158028782 C | 37.64  | 1.81E-18 | chr:7:158029482 |
| 7 rs67515424  | 158028692 T | 37.64  | 1.81E-18 | chr:7:158029482 |
| 7 rs67463190  | 158029292 T | 37.29  | 1.84E-18 | chr:7:158029482 |
| 7 rs73176116  | 158018041 T | 49.89  | 2.17E-18 | chr:7:158029482 |
| 7 rs73176117  | 158018530 A | 49.89  | 2.17E-18 | chr:7:158029482 |
| 7 rs73176123  | 158026203 G | 49.89  | 2.17E-18 | chr:7:158029482 |
| 7 rs73176112  | 158016362 G | 24.14  | 2.58E-18 | chr:7:158029482 |
| 7 rs55821220  | 158022462 G | 45.56  | 2.73E-18 | chr:7:158029482 |
| 7 rs73176110  | 158016190 T | 46.48  | 2.93E-18 | chr:7:158029482 |
| 7 rs73176115  | 158017202 C | 46.48  | 2.93E-18 | chr:7:158029482 |
| 7 rs73176118  | 158018536 A | 46.48  | 2.93E-18 | chr:7:158029482 |
| 7 rs73176107  | 158004804 G | 26.21  | 3.52E-18 | chr:7:158029482 |
| 7 rs73176114  | 158017101 G | 28.57  | 4.13E-18 | chr:7:158029482 |
| 7 rs17847433  | 157997673 A | 31.64  | 4.66E-18 | chr:7:158029482 |
| 7 rs55917540  | 157999549 C | 30.57  | 5.60E-18 | chr:7:158029482 |
| 7 rs73173694  | 157983465 A | 16.26  | 6.13E-18 | chr:7:158029482 |
| 7 rs12154635  | 158000947 G | 30.4   | 6.55E-18 | chr:7:158029482 |
| 7 rs55633973  | 158000392 A | 30.4   | 6.55E-18 | chr:7:158029482 |
| 7 rs59804289  | 158006512 G | 26.17  | 6.68E-18 | chr:7:158029482 |
| 7 rs56215385  | 158008987 A | 33.76  | 7.49E-18 | chr:7:158029482 |
| 7 rs73176108  | 158009978 A | 33.76  | 7.49E-18 | chr:7:158029482 |
| 7 rs73176109  | 158014524 G | 33.75  | 7.82E-18 | chr:7:158029482 |



|               |             |        |          |                 |
|---------------|-------------|--------|----------|-----------------|
| 7 rs73176122  | 158022065 G | 16.08  | 9.86E-18 | chr:7:158029482 |
| 7 rs12673825  | 158020274 C | 16.35  | 1.39E-17 | chr:7:158029482 |
| 7 rs73173702  | 157996475 G | 15.02  | 1.53E-17 | chr:7:158029482 |
| 7 rs56211164  | 158016764 A | 16.64  | 2.13E-17 | chr:7:158029482 |
| 7 rs73173701  | 157993472 C | 15.36  | 2.56E-17 | chr:7:158029482 |
| 7 rs73173689  | 157981830 A | 8.381  | 3.16E-15 | chr:7:158029482 |
| 7 rs67764605  | 157983029 A | 6.777  | 7.43E-14 | chr:7:158029482 |
| 7 rs10245306  | 158029340 G | 130.4  | 1.73E-13 | chr:7:158029482 |
| 7 rs10244830  | 157981865 T | 5.509  | 6.81E-13 | chr:7:158029482 |
| 7 rs10260462  | 157981747 A | 5.509  | 6.81E-13 | chr:7:158029482 |
| 7 rs73173690  | 157983241 C | 5.496  | 1.43E-12 | chr:7:158029482 |
| 7 rs56283944  | 157983840 A | 5.303  | 1.66E-12 | chr:7:158029482 |
| 7 rs6976575   | 157984182 G | 5.187  | 2.93E-12 | chr:7:158029482 |
| 7 rs7780034   | 157982161 C | 4.993  | 4.17E-12 | chr:7:158029482 |
| 7 rs4909140   | 158028901 G | 0.198  | 5.96E-12 | chr:7:158029482 |
| 7 rs528695704 | 157981197 C | 4.863  | 1.85E-10 | chr:7:158029482 |
| 7 rs548832090 | 157981198 T | 4.863  | 1.85E-10 | chr:7:158029482 |
| 7 rs1104921   | 158060317 A | 11.55  | 4.93E-09 | chr:7:158029482 |
| 7 rs7777448   | 158031749 A | 3.33   | 5.58E-08 | chr:7:158029482 |
| 7 rs117446941 | 157978483 T | 31.83  | 1.31E-07 | chr:7:158029482 |
| 7 rs58180441  | 158019047 A | 0.2645 | 2.49E-07 | chr:7:158029482 |
| 7 rs117379346 | 158107231 T | 6.52   | 2.66E-07 | chr:7:158029482 |
| 7 rs2335832   | 157992083 T | 0.2804 | 2.92E-07 | chr:7:158029482 |
| 7 rs13234832  | 158014979 T | 0.2728 | 3.21E-07 | chr:7:158029482 |
| 7 rs7803502   | 157955479 A | 3.157  | 3.82E-07 | chr:7:158029482 |
| 7 rs112608152 | 157959172 C | 0.1969 | 4.45E-07 | chr:7:158029482 |
| 7 rs113964323 | 157921852 T | 2.807  | 4.68E-07 | chr:7:158029482 |
| 7 rs62649317  | 157921924 T | 2.807  | 4.68E-07 | chr:7:158029482 |
| 7 rs12698162  | 157961637 C | 7.081  | 4.96E-07 | chr:7:158029482 |
| 7 rs1806611   | 157986440 T | 0.2505 | 5.10E-07 | chr:7:158029482 |
| 7 rs10256080  | 158019437 T | 0.266  | 5.20E-07 | chr:7:158029482 |
| 7 rs4909289   | 157954904 A | 3.094  | 6.13E-07 | chr:7:158029482 |
| 7 rs6950296   | 158020379 A | 0.2705 | 7.26E-07 | chr:7:158029482 |
| 7 rs10228083  | 157912213 T | 2.782  | 7.56E-07 | chr:7:158029482 |
| 7 rs10236157  | 157914050 T | 2.782  | 7.56E-07 | chr:7:158029482 |
| 7 rs3800860   | 157903504 T | 2.782  | 7.56E-07 | chr:7:158029482 |
| 7 rs62480206  | 157921425 A | 2.782  | 7.56E-07 | chr:7:158029482 |
| 7 rs73173650  | 157955341 A | 4.572  | 9.24E-07 | chr:7:158029482 |
| 7 rs4909265   | 157922864 G | 2.709  | 1.01E-06 | chr:7:158029482 |
| 7 rs4909270   | 157924502 A | 2.709  | 1.01E-06 | chr:7:158029482 |
| 7 rs61727967  | 157924773 C | 2.709  | 1.01E-06 | chr:7:158029482 |
| 7 rs10215745  | 158015262 C | 0.3019 | 1.06E-06 | chr:7:158029482 |
| 7 rs881468    | 158077831 A | 5.867  | 1.09E-06 | chr:7:158029482 |

|               |             |        |          |                 |
|---------------|-------------|--------|----------|-----------------|
| 7 rs11761540  | 157907394 T | 2.677  | 1.24E-06 | chr:7:158029482 |
| 7 rs12698140  | 157895564 A | 2.677  | 1.24E-06 | chr:7:158029482 |
| 7 rs13228073  | 157920698 C | 2.677  | 1.24E-06 | chr:7:158029482 |
| 7 rs10215289  | 158015301 T | 0.3075 | 1.49E-06 | chr:7:158029482 |
| 7 rs10215991  | 158015263 A | 0.3075 | 1.49E-06 | chr:7:158029482 |
| 7 rs10215992  | 158015273 A | 0.3075 | 1.49E-06 | chr:7:158029482 |
| 7 rs10278558  | 157925239 T | 2.658  | 1.74E-06 | chr:7:158029482 |
| 7 rs57309474  | 157925844 C | 2.658  | 1.74E-06 | chr:7:158029482 |
| 7 rs60270099  | 157925130 A | 2.658  | 1.74E-06 | chr:7:158029482 |
| 7 rs7783830   | 157925272 G | 2.658  | 1.74E-06 | chr:7:158029482 |
| 7 rs72505555  | 157956168 C | 3.854  | 1.79E-06 | chr:7:158029482 |
| 7 rs73173638  | 157950523 G | 4.409  | 1.90E-06 | chr:7:158029482 |
| 7 rs72505554  | 157951996 C | 4.36   | 2.05E-06 | chr:7:158029482 |
| 7 rs10282471  | 157997236 T | 0.3078 | 2.09E-06 | chr:7:158029482 |
| 7 rs1130501   | 157903538 G | 2.637  | 2.15E-06 | chr:7:158029482 |
| 7 rs10242289  | 157910620 C | 2.58   | 2.66E-06 | chr:7:158029482 |
| 7 rs4909256   | 157918314 C | 2.58   | 2.66E-06 | chr:7:158029482 |
| 7 rs4909269   | 157924037 T | 2.58   | 2.66E-06 | chr:7:158029482 |
| 7 rs62480235  | 157943806 A | 2.971  | 2.76E-06 | chr:7:158029482 |
| 7 rs10277112  | 157916913 A | 2.63   | 2.78E-06 | chr:7:158029482 |
| 7 rs35995505  | 158019225 T | 0.303  | 2.85E-06 | chr:7:158029482 |
| 7 rs2335851   | 157925600 T | 2.615  | 2.97E-06 | chr:7:158029482 |
| 7 rs13234740  | 158014940 A | 0.3079 | 3.45E-06 | chr:7:158029482 |
| 7 rs56336654  | 157974619 C | 4.527  | 3.53E-06 | chr:7:158029482 |
| 7 rs3800857   | 157929294 A | 2.601  | 3.81E-06 | chr:7:158029482 |
| 7 rs73173642  | 157952604 C | 4.123  | 3.96E-06 | chr:7:158029482 |
| 7 rs73173643  | 157952691 T | 4.123  | 3.96E-06 | chr:7:158029482 |
| 7 rs60853443  | 157944637 A | 3.909  | 4.03E-06 | chr:7:158029482 |
| 7 rs6942658   | 158001150 A | 0.3112 | 4.08E-06 | chr:7:158029482 |
| 7 rs6942903   | 158001252 A | 0.3112 | 4.08E-06 | chr:7:158029482 |
| 7 rs10256104  | 157909360 C | 2.538  | 4.37E-06 | chr:7:158029482 |
| 7 rs12698149  | 157902360 T | 2.538  | 4.37E-06 | chr:7:158029482 |
| 7 rs12698150  | 157902486 A | 2.538  | 4.37E-06 | chr:7:158029482 |
| 7 rs12698151  | 157902701 G | 2.538  | 4.37E-06 | chr:7:158029482 |
| 7 rs4075738   | 157905782 C | 2.538  | 4.37E-06 | chr:7:158029482 |
| 7 rs10247985  | 158017478 G | 2.352  | 4.38E-06 | chr:7:158029482 |
| 7 rs112417415 | 157959169 C | 3.644  | 4.50E-06 | chr:7:158029482 |
| 7 rs201346361 | 157955738 A | 3.644  | 4.50E-06 | chr:7:158029482 |
| 7 rs201627205 | 157955739 G | 3.644  | 4.50E-06 | chr:7:158029482 |
| 7 rs67158162  | 157956672 T | 3.644  | 4.50E-06 | chr:7:158029482 |
| 7 rs9691947   | 157957644 T | 3.644  | 4.50E-06 | chr:7:158029482 |
| 7 rs111073100 | 157925296 T | 2.461  | 5.28E-06 | chr:7:158029482 |
| 7 rs10248317  | 157907748 A | 2.496  | 5.68E-06 | chr:7:158029482 |

|               |             |        |          |                 |
|---------------|-------------|--------|----------|-----------------|
| 7 rs10240498  | 158003705 A | 0.3115 | 5.90E-06 | chr:7:158029482 |
| 7 rs9771103   | 157999823 T | 0.3115 | 5.90E-06 | chr:7:158029482 |
| 7 rs117486499 | 158030978 T | 10.47  | 5.99E-06 | chr:7:158029482 |
| 7 rs10949702  | 157986125 C | 0.2874 | 6.08E-06 | chr:7:158029482 |
| 7 rs10257230  | 158015030 A | 0.3431 | 6.30E-06 | chr:7:158029482 |
| 7 rs10215664  | 158015494 G | 0.3336 | 6.76E-06 | chr:7:158029482 |
| 7 rs78783432  | 157946307 G | 3.87   | 6.85E-06 | chr:7:158029482 |
| 7 rs2335848   | 158022103 G | 2.335  | 6.89E-06 | chr:7:158029482 |
| 7 rs4909266   | 157923125 C | 2.438  | 7.17E-06 | chr:7:158029482 |
| 7 rs55757155  | 157924621 C | 2.438  | 7.17E-06 | chr:7:158029482 |
| 7 rs56299768  | 157922341 G | 2.438  | 7.17E-06 | chr:7:158029482 |
| 7 rs10249710  | 158030463 A | 0.2791 | 7.35E-06 | chr:7:158029482 |
| 7 rs4506155   | 158003981 A | 2.341  | 8.38E-06 | chr:7:158029482 |
| 7 rs4595081   | 158007923 T | 2.341  | 8.38E-06 | chr:7:158029482 |
| 7 rs73173626  | 157943182 C | 3.935  | 8.83E-06 | chr:7:158029482 |
| 7 rs10246937  | 158007673 C | 0.3269 | 1.05E-05 | chr:7:158029482 |
| 7 rs10256328  | 158007074 A | 0.3269 | 1.05E-05 | chr:7:158029482 |
| 7 rs73173673  | 157967320 C | 3.939  | 1.10E-05 | chr:7:158029482 |
| 7 rs12698152  | 157902717 A | 2.419  | 1.15E-05 | chr:7:158029482 |
| 7 rs10263846  | 157990941 T | 0.2995 | 1.24E-05 | chr:7:158029482 |
| 7 rs10275911  | 157990608 G | 0.2995 | 1.24E-05 | chr:7:158029482 |
| 7 rs6459860   | 158136362 C | 2.413  | 1.30E-05 | chr:7:158029482 |
| 7 rs186905024 | 157939391 T | 3.99   | 1.32E-05 | chr:7:158029482 |
| 7 rs200584961 | 157939311 G | 3.99   | 1.32E-05 | chr:7:158029482 |
| 7 rs10258997  | 158016559 G | 0.3052 | 1.34E-05 | chr:7:158029482 |
| 7 rs67598038  | 158028778 A | 0.3055 | 1.44E-05 | chr:7:158029482 |
| 7 rs11766348  | 158135857 A | 2.759  | 1.45E-05 | chr:7:158029482 |
| 7 rs71547528  | 158135431 C | 2.759  | 1.45E-05 | chr:7:158029482 |
| 7 rs144135791 | 158048061 A | 11.18  | 1.51E-05 | chr:7:158029482 |
| 7 rs148866043 | 158039229 A | 11.18  | 1.51E-05 | chr:7:158029482 |
| 7 rs571557212 | 158042161 G | 11.18  | 1.51E-05 | chr:7:158029482 |
| 7 rs111357961 | 157939222 G | 3.711  | 1.53E-05 | chr:7:158029482 |
| 7 rs10227009  | 158027455 C | 0.3048 | 1.54E-05 | chr:7:158029482 |
| 7 rs6950346   | 158025658 T | 0.3048 | 1.54E-05 | chr:7:158029482 |
| 7 rs73173633  | 157946600 A | 3.811  | 1.54E-05 | chr:7:158029482 |
| 7 rs73173652  | 157955494 A | 3.811  | 1.54E-05 | chr:7:158029482 |
| 7 rs73173663  | 157958243 T | 3.811  | 1.54E-05 | chr:7:158029482 |
| 7 rs2878538   | 158027427 G | 2.258  | 1.56E-05 | chr:7:158029482 |
| 7 rs4909119   | 157976267 A | 2.496  | 1.58E-05 | chr:7:158029482 |
| 7 rs10268228  | 157985479 A | 0.2997 | 1.66E-05 | chr:7:158029482 |
| 7 rs10271711  | 157985854 A | 0.2997 | 1.66E-05 | chr:7:158029482 |
| 7 rs7791636   | 158032025 T | 2.332  | 1.69E-05 | chr:7:158029482 |
| 7 rs2335833   | 157966776 G | 2.462  | 1.70E-05 | chr:7:158029482 |

|               |             |        |          |                 |
|---------------|-------------|--------|----------|-----------------|
| 7 rs73173631  | 157945313 C | 3.697  | 1.74E-05 | chr:7:158029482 |
| 7 rs10237059  | 157979746 C | 2.476  | 1.83E-05 | chr:7:158029482 |
| 7 rs4476953   | 157957689 A | 2.473  | 1.84E-05 | chr:7:158029482 |
| 7 rs184314080 | 157939399 T | 3.848  | 1.88E-05 | chr:7:158029482 |
| 7 rs11773551  | 158136146 T | 2.762  | 2.04E-05 | chr:7:158029482 |
| 7 rs12698214  | 158136204 G | 2.762  | 2.04E-05 | chr:7:158029482 |
| 7 rs71547530  | 158135503 G | 2.762  | 2.04E-05 | chr:7:158029482 |
| 7 rs11769916  | 157979792 G | 2.456  | 2.15E-05 | chr:7:158029482 |
| 7 rs4909127   | 157980211 T | 2.443  | 2.25E-05 | chr:7:158029482 |
| 7 rs12698215  | 158136310 C | 2.837  | 2.26E-05 | chr:7:158029482 |
| 7 rs3800856   | 157984992 A | 0.3081 | 2.28E-05 | chr:7:158029482 |
| 7 rs10156036  | 158016777 C | 2.205  | 2.39E-05 | chr:7:158029482 |
| 7 rs10236479  | 157959506 T | 2.441  | 2.44E-05 | chr:7:158029482 |
| 7 rs12698161  | 157956141 C | 2.441  | 2.44E-05 | chr:7:158029482 |
| 7 rs4243839   | 157958591 C | 2.441  | 2.44E-05 | chr:7:158029482 |
| 7 rs4373473   | 157957688 G | 2.441  | 2.44E-05 | chr:7:158029482 |
| 7 rs4382420   | 157957463 A | 2.441  | 2.44E-05 | chr:7:158029482 |
| 7 rs7785775   | 157957900 T | 2.441  | 2.44E-05 | chr:7:158029482 |
| 7 rs7787191   | 157958783 T | 2.441  | 2.44E-05 | chr:7:158029482 |
| 7 rs7790985   | 157958919 T | 2.441  | 2.44E-05 | chr:7:158029482 |
| 7 rs7798359   | 157957947 G | 2.441  | 2.44E-05 | chr:7:158029482 |
| 7 rs7803824   | 157955671 A | 2.441  | 2.44E-05 | chr:7:158029482 |
| 7 rs7803864   | 157955743 A | 2.441  | 2.44E-05 | chr:7:158029482 |
| 7 rs7804408   | 157958922 C | 2.441  | 2.44E-05 | chr:7:158029482 |
| 7 rs7807680   | 157955925 A | 2.441  | 2.44E-05 | chr:7:158029482 |
| 7 rs7811697   | 157956030 T | 2.441  | 2.44E-05 | chr:7:158029482 |
| 7 rs7789111   | 158021519 C | 0.3301 | 2.47E-05 | chr:7:158029482 |
| 7 rs10247715  | 157978403 A | 2.431  | 2.59E-05 | chr:7:158029482 |
| 7 rs4909126   | 157980144 G | 2.431  | 2.59E-05 | chr:7:158029482 |
| 7 rs10231253  | 157983353 A | 0.3208 | 2.60E-05 | chr:7:158029482 |
| 7 rs10271837  | 157985998 C | 0.3104 | 2.64E-05 | chr:7:158029482 |
| 7 rs10262127  | 158016574 C | 2.201  | 2.67E-05 | chr:7:158029482 |
| 7 rs12698153  | 157914911 T | 2.286  | 2.68E-05 | chr:7:158029482 |
| 7 rs28536012  | 157956916 C | 2.44   | 2.69E-05 | chr:7:158029482 |
| 7 rs73173675  | 157968726 A | 3.541  | 2.81E-05 | chr:7:158029482 |
| 7 rs182179344 | 158134926 T | 2.682  | 2.89E-05 | chr:7:158029482 |
| 7 rs188495239 | 157939361 C | 3.749  | 3.10E-05 | chr:7:158029482 |
| 7 rs376173592 | 157939321 G | 3.749  | 3.10E-05 | chr:7:158029482 |
| 7 rs7799442   | 157957873 C | 2.407  | 3.13E-05 | chr:7:158029482 |
| 7 rs13310163  | 157959145 C | 2.411  | 3.14E-05 | chr:7:158029482 |
| 7 rs28408979  | 157956847 C | 2.394  | 3.22E-05 | chr:7:158029482 |
| 8 rs2129702   | 18656090 G  | 30.79  | 2.13E-23 | chr:8:18651457  |
| 8 rs28696248  | 18656314 G  | 47.07  | 1.57E-22 | chr:8:18651457  |

|               |            |        |          |                |
|---------------|------------|--------|----------|----------------|
| 8 rs13254153  | 18655330 C | 21.55  | 3.96E-20 | chr:8:18651457 |
| 8 rs13250313  | 18652812 A | 27.07  | 1.15E-19 | chr:8:18651457 |
| 8 rs10503635  | 18654329 T | 495.6  | 2.61E-19 | chr:8:18651457 |
| 8 rs11780872  | 18651376 T | 536    | 2.86E-19 | chr:8:18651457 |
| 8 rs10108047  | 18650597 T | 18.23  | 5.67E-17 | chr:8:18651457 |
| 8 rs10094591  | 18653299 T | 791    | 5.01E-15 | chr:8:18651457 |
| 8 rs10503633  | 18653742 G | 791    | 5.01E-15 | chr:8:18651457 |
| 8 rs11785249  | 18653313 G | 791    | 5.01E-15 | chr:8:18651457 |
| 8 rs35809948  | 18647701 G | 11.17  | 1.78E-14 | chr:8:18651457 |
| 8 rs11777761  | 18652934 C | 1211   | 1.98E-14 | chr:8:18651457 |
| 8 rs60508084  | 18652637 A | 1211   | 1.98E-14 | chr:8:18651457 |
| 8 rs2632852   | 18656224 T | 14.74  | 5.03E-14 | chr:8:18651457 |
| 8 rs335238    | 18642319 G | 10.77  | 1.23E-13 | chr:8:18651457 |
| 8 rs12549858  | 18654478 A | 0.2122 | 7.27E-13 | chr:8:18651457 |
| 8 rs73199983  | 18628075 C | 6.645  | 8.63E-13 | chr:8:18651457 |
| 8 rs6586762   | 18615706 T | 4.283  | 1.49E-12 | chr:8:18651457 |
| 8 rs28791302  | 18629428 T | 6.41   | 1.82E-12 | chr:8:18651457 |
| 8 rs67028998  | 18628162 A | 6.41   | 1.82E-12 | chr:8:18651457 |
| 8 rs55884038  | 18618142 C | 6.058  | 2.21E-12 | chr:8:18651457 |
| 8 rs7012188   | 18618272 T | 6.058  | 2.21E-12 | chr:8:18651457 |
| 8 rs6996801   | 18615696 G | 5.837  | 3.45E-12 | chr:8:18651457 |
| 8 rs4320588   | 18615090 A | 5.918  | 3.59E-12 | chr:8:18651457 |
| 8 rs6994455   | 18618764 G | 5.864  | 3.80E-12 | chr:8:18651457 |
| 8 rs4921956   | 18620761 A | 6.412  | 4.21E-12 | chr:8:18651457 |
| 8 rs10110943  | 18612612 A | 8.155  | 1.38E-11 | chr:8:18651457 |
| 8 rs73199966  | 18616606 A | 5.087  | 2.26E-11 | chr:8:18651457 |
| 8 rs11988686  | 18617442 G | 5.133  | 2.66E-11 | chr:8:18651457 |
| 8 rs12676642  | 18637208 C | 13.34  | 4.77E-11 | chr:8:18651457 |
| 8 rs4921958   | 18634096 A | 13.34  | 4.77E-11 | chr:8:18651457 |
| 8 rs13439022  | 18636649 C | 11.82  | 6.06E-11 | chr:8:18651457 |
| 8 rs56062960  | 18637485 C | 11.82  | 6.06E-11 | chr:8:18651457 |
| 8 rs57557661  | 18637442 C | 11.82  | 6.06E-11 | chr:8:18651457 |
| 8 rs12682382  | 18637762 G | 13     | 8.27E-11 | chr:8:18651457 |
| 8 rs111241636 | 18623207 C | 11.04  | 2.10E-10 | chr:8:18651457 |
| 8 rs7831166   | 18639675 T | 11.02  | 2.10E-10 | chr:8:18651457 |
| 8 rs17127179  | 18632112 T | 9.046  | 3.88E-10 | chr:8:18651457 |
| 8 rs9644614   | 18630435 C | 3.212  | 4.28E-10 | chr:8:18651457 |
| 8 rs335256    | 18650834 T | 0.2869 | 4.37E-10 | chr:8:18651457 |
| 8 rs73199965  | 18616604 A | 4.255  | 4.40E-10 | chr:8:18651457 |
| 8 rs9644615   | 18630532 C | 3.126  | 6.94E-10 | chr:8:18651457 |
| 8 rs6987329   | 18616376 C | 3.445  | 7.06E-10 | chr:8:18651457 |
| 8 rs7001013   | 18615974 T | 3.445  | 7.06E-10 | chr:8:18651457 |
| 8 rs4921611   | 18617581 G | 3.414  | 7.61E-10 | chr:8:18651457 |

|               |            |        |          |                |
|---------------|------------|--------|----------|----------------|
| 8 rs7012633   | 18618503 G | 3.414  | 7.61E-10 | chr:8:18651457 |
| 8 rs3988322   | 18614526 C | 3.407  | 8.04E-10 | chr:8:18651457 |
| 8 rs12155629  | 18627775 G | 3.056  | 1.07E-09 | chr:8:18651457 |
| 8 rs7841096   | 18632333 T | 0.334  | 1.31E-09 | chr:8:18651457 |
| 8 rs12335185  | 18623326 A | 3.337  | 1.71E-09 | chr:8:18651457 |
| 8 rs12544207  | 18619231 G | 3.255  | 1.85E-09 | chr:8:18651457 |
| 8 rs10111304  | 18650904 C | 0.2872 | 2.16E-09 | chr:8:18651457 |
| 8 rs6998281   | 18618557 C | 3.303  | 2.98E-09 | chr:8:18651457 |
| 8 rs7012496   | 18618427 T | 3.303  | 2.98E-09 | chr:8:18651457 |
| 8 rs7012651   | 18618539 T | 3.303  | 2.98E-09 | chr:8:18651457 |
| 8 rs10503636  | 18654794 C | 0.2696 | 3.15E-09 | chr:8:18651457 |
| 8 rs79076024  | 18614548 G | 3.39   | 4.49E-09 | chr:8:18651457 |
| 8 rs9792382   | 18620570 C | 3.195  | 4.71E-09 | chr:8:18651457 |
| 8 rs17467874  | 18652744 C | 0.2982 | 5.76E-09 | chr:8:18651457 |
| 8 rs10100475  | 18642757 G | 5.409  | 5.91E-09 | chr:8:18651457 |
| 8 rs1487745   | 18621332 T | 3.154  | 6.79E-09 | chr:8:18651457 |
| 8 rs4921961   | 18638070 T | 4.966  | 7.17E-09 | chr:8:18651457 |
| 8 rs60746929  | 18654480 T | 0.2904 | 7.46E-09 | chr:8:18651457 |
| 8 rs17383368  | 18655746 T | 0.2905 | 1.21E-08 | chr:8:18651457 |
| 8 rs74525630  | 18612870 A | 6.916  | 4.33E-08 | chr:8:18651457 |
| 8 rs335230    | 18629753 G | 13.98  | 1.15E-07 | chr:8:18651457 |
| 8 rs35884486  | 18656382 C | 0.3395 | 1.39E-07 | chr:8:18651457 |
| 8 rs111916415 | 18656221 T | 0.3451 | 2.01E-07 | chr:8:18651457 |
| 8 rs79965841  | 18656209 A | 0.353  | 2.79E-07 | chr:8:18651457 |
| 8 rs4921950   | 18535574 A | 2.656  | 3.35E-07 | chr:8:18651457 |
| 8 rs13276530  | 18658346 G | 0.3623 | 3.72E-07 | chr:8:18651457 |
| 8 rs36085278  | 18659470 G | 0.3615 | 3.90E-07 | chr:8:18651457 |
| 8 rs143459083 | 18644056 C | 16.91  | 3.93E-07 | chr:8:18651457 |
| 8 rs34650180  | 18633770 C | 2.451  | 4.19E-07 | chr:8:18651457 |
| 8 rs79441119  | 18632939 G | 3.624  | 4.67E-07 | chr:8:18651457 |
| 8 rs4921608   | 18539768 C | 2.703  | 5.33E-07 | chr:8:18651457 |
| 8 rs11786921  | 18657985 C | 0.3656 | 6.31E-07 | chr:8:18651457 |
| 8 rs11786923  | 18658007 G | 0.3656 | 6.31E-07 | chr:8:18651457 |
| 8 rs11986109  | 18657632 C | 0.3656 | 6.31E-07 | chr:8:18651457 |
| 8 rs11997879  | 18657450 A | 0.3656 | 6.31E-07 | chr:8:18651457 |
| 8 rs34059664  | 18657698 G | 0.3656 | 6.31E-07 | chr:8:18651457 |
| 8 rs11783955  | 18630683 G | 0.3951 | 8.55E-07 | chr:8:18651457 |
| 8 rs13277764  | 18630927 T | 0.3933 | 9.02E-07 | chr:8:18651457 |
| 8 rs73666715  | 18639853 C | 3.378  | 9.22E-07 | chr:8:18651457 |
| 8 rs11993467  | 18657661 T | 0.3725 | 9.59E-07 | chr:8:18651457 |
| 8 rs11993401  | 18657427 T | 0.374  | 9.69E-07 | chr:8:18651457 |
| 8 rs335235    | 18638364 C | 38.01  | 1.08E-06 | chr:8:18651457 |
| 8 rs11783494  | 18628376 G | 0.4037 | 1.42E-06 | chr:8:18651457 |

|               |            |        |          |                |
|---------------|------------|--------|----------|----------------|
| 8 rs11787013  | 18628418 T | 0.4037 | 1.42E-06 | chr:8:18651457 |
| 8 rs12155627  | 18627512 A | 0.4037 | 1.42E-06 | chr:8:18651457 |
| 8 rs13276483  | 18628009 A | 0.4037 | 1.42E-06 | chr:8:18651457 |
| 8 rs13282718  | 18625923 T | 0.4072 | 1.65E-06 | chr:8:18651457 |
| 8 rs2004292   | 18560133 T | 2.328  | 1.86E-06 | chr:8:18651457 |
| 8 rs7822288   | 18632327 A | 0.4123 | 2.05E-06 | chr:8:18651457 |
| 8 rs13264337  | 18626285 C | 0.4102 | 2.12E-06 | chr:8:18651457 |
| 8 rs13277370  | 18645191 A | 0.417  | 2.69E-06 | chr:8:18651457 |
| 8 rs11203994  | 18629018 T | 0.4209 | 3.60E-06 | chr:8:18651457 |
| 8 rs11775742  | 18665710 C | 0.3679 | 3.67E-06 | chr:8:18651457 |
| 8 rs4921951   | 18535768 C | 2.391  | 4.06E-06 | chr:8:18651457 |
| 8 rs11778698  | 18623718 T | 0.4229 | 4.26E-06 | chr:8:18651457 |
| 8 rs335228    | 18631439 G | 17.45  | 4.64E-06 | chr:8:18651457 |
| 8 rs335229    | 18629927 G | 17.45  | 4.64E-06 | chr:8:18651457 |
| 8 rs1982800   | 18624828 A | 0.4243 | 5.75E-06 | chr:8:18651457 |
| 8 rs11775676  | 18665492 C | 0.3705 | 5.78E-06 | chr:8:18651457 |
| 8 rs12680447  | 18654653 T | 2.495  | 6.61E-06 | chr:8:18651457 |
| 8 rs7844573   | 18632187 C | 0.4408 | 8.57E-06 | chr:8:18651457 |
| 8 rs13277215  | 18636688 C | 0.445  | 1.14E-05 | chr:8:18651457 |
| 8 rs11774165  | 18658950 G | 0.4087 | 1.19E-05 | chr:8:18651457 |
| 8 rs2069245   | 18657093 C | 0.4148 | 1.69E-05 | chr:8:18651457 |
| 8 rs185925003 | 18602268 T | 15.49  | 1.71E-05 | chr:8:18651457 |
| 8 rs2469946   | 18652623 G | 77.65  | 2.24E-05 | chr:8:18651457 |
| 8 rs335223    | 18634002 G | 75.68  | 2.54E-05 | chr:8:18651457 |
| 8 rs28447980  | 18606948 T | 6.403  | 2.76E-05 | chr:8:18651457 |
| 8 rs28666704  | 18607201 T | 6.403  | 2.76E-05 | chr:8:18651457 |
| 8 rs117159574 | 18563202 A | 6.47   | 3.38E-05 | chr:8:18651457 |
| 8 rs75095450  | 18522456 A | 6.215  | 3.80E-05 | chr:8:18651457 |
| 8 rs4739484   | 37082138 A | 132    | 2.66E-22 | chr:8:37050885 |
| 8 rs74571086  | 37049958 G | 75.22  | 7.71E-21 | chr:8:37050885 |
| 8 rs4739336   | 37043012 A | 44.53  | 8.72E-21 | chr:8:37050885 |
| 8 rs7841889   | 37045176 A | 44.53  | 8.72E-21 | chr:8:37050885 |
| 8 rs240524    | 37088271 T | 211.5  | 1.81E-20 | chr:8:37050885 |
| 8 rs34456013  | 37049781 A | 59.7   | 2.11E-20 | chr:8:37050885 |
| 8 rs16875909  | 37043868 T | 43.2   | 2.76E-20 | chr:8:37050885 |
| 8 rs576019    | 37044187 T | 43.2   | 2.76E-20 | chr:8:37050885 |
| 8 rs6988617   | 37042895 A | 41.57  | 2.83E-20 | chr:8:37050885 |
| 8 rs6981452   | 37046050 A | 37.93  | 3.02E-20 | chr:8:37050885 |
| 8 rs12334611  | 37045986 C | 34.72  | 7.37E-20 | chr:8:37050885 |
| 8 rs4739476   | 37046991 A | 34.72  | 7.37E-20 | chr:8:37050885 |
| 8 rs12334605  | 37045753 G | 32.65  | 9.50E-20 | chr:8:37050885 |
| 8 rs473969    | 37055831 G | 542.6  | 3.10E-18 | chr:8:37050885 |
| 8 rs491607    | 37054032 G | 542.6  | 3.10E-18 | chr:8:37050885 |

|              |            |       |          |                |
|--------------|------------|-------|----------|----------------|
| 8 rs493477   | 37053824 C | 542.6 | 3.10E-18 | chr:8:37050885 |
| 8 rs510561   | 37055719 T | 542.6 | 3.10E-18 | chr:8:37050885 |
| 8 rs562346   | 37058605 C | 542.6 | 3.10E-18 | chr:8:37050885 |
| 8 rs526765   | 37080954 A | 552.1 | 4.51E-18 | chr:8:37050885 |
| 8 rs240522   | 37087609 T | 366.3 | 1.65E-17 | chr:8:37050885 |
| 8 rs507136   | 37066554 C | 897.8 | 1.53E-15 | chr:8:37050885 |
| 8 rs514719   | 37063207 T | 897.8 | 1.53E-15 | chr:8:37050885 |
| 8 rs519407   | 37062657 T | 897.8 | 1.53E-15 | chr:8:37050885 |
| 8 rs527270   | 37059026 A | 897.8 | 1.53E-15 | chr:8:37050885 |
| 8 rs551464   | 37068041 T | 897.8 | 1.53E-15 | chr:8:37050885 |
| 8 rs56097134 | 37067371 G | 897.8 | 1.53E-15 | chr:8:37050885 |
| 8 rs574667   | 37070657 C | 897.8 | 1.53E-15 | chr:8:37050885 |
| 8 rs575360   | 37072211 T | 897.8 | 1.53E-15 | chr:8:37050885 |
| 8 rs77442378 | 37050480 A | 68.96 | 1.58E-15 | chr:8:37050885 |
| 8 rs2843836  | 37076582 T | 214.9 | 1.62E-15 | chr:8:37050885 |
| 8 rs240518   | 37085509 C | 879.8 | 1.65E-15 | chr:8:37050885 |
| 8 rs240521   | 37086908 A | 879.8 | 1.65E-15 | chr:8:37050885 |
| 8 rs2697894  | 37076650 C | 879.8 | 1.65E-15 | chr:8:37050885 |
| 8 rs2843834  | 37078884 T | 879.8 | 1.65E-15 | chr:8:37050885 |
| 8 rs2843835  | 37078820 T | 879.8 | 1.65E-15 | chr:8:37050885 |
| 8 rs473160   | 37073161 C | 879.8 | 1.65E-15 | chr:8:37050885 |
| 8 rs495428   | 37079790 A | 879.8 | 1.65E-15 | chr:8:37050885 |
| 8 rs496362   | 37073368 T | 879.8 | 1.65E-15 | chr:8:37050885 |
| 8 rs500960   | 37073841 G | 879.8 | 1.65E-15 | chr:8:37050885 |
| 8 rs501761   | 37073910 C | 879.8 | 1.65E-15 | chr:8:37050885 |
| 8 rs509011   | 37084128 C | 879.8 | 1.65E-15 | chr:8:37050885 |
| 8 rs525751   | 37080834 A | 879.8 | 1.65E-15 | chr:8:37050885 |
| 8 rs539797   | 37077235 G | 879.8 | 1.65E-15 | chr:8:37050885 |
| 8 rs547855   | 37078106 A | 879.8 | 1.65E-15 | chr:8:37050885 |
| 8 rs571788   | 37078413 T | 879.8 | 1.65E-15 | chr:8:37050885 |
| 8 rs571824   | 37077544 G | 879.8 | 1.65E-15 | chr:8:37050885 |
| 8 rs575589   | 37077120 A | 879.8 | 1.65E-15 | chr:8:37050885 |
| 8 rs577113   | 37077012 G | 879.8 | 1.65E-15 | chr:8:37050885 |
| 8 rs579858   | 37072747 C | 879.8 | 1.65E-15 | chr:8:37050885 |
| 8 rs74815246 | 37052254 A | 103.4 | 1.86E-15 | chr:8:37050885 |
| 8 rs11985899 | 37083414 C | 98.21 | 2.52E-15 | chr:8:37050885 |
| 8 rs4739338  | 37067007 T | 98.21 | 2.52E-15 | chr:8:37050885 |
| 8 rs240523   | 37087732 T | 369.5 | 2.28E-13 | chr:8:37050885 |
| 8 rs476305   | 37057139 A | 2174  | 4.21E-11 | chr:8:37050885 |
| 8 rs489405   | 37053747 A | 2174  | 4.21E-11 | chr:8:37050885 |
| 8 rs493311   | 37060431 G | 2174  | 4.21E-11 | chr:8:37050885 |
| 8 rs519676   | 37054785 T | 2174  | 4.21E-11 | chr:8:37050885 |
| 8 rs531990   | 37057541 T | 2174  | 4.21E-11 | chr:8:37050885 |



|               |            |        |          |                |
|---------------|------------|--------|----------|----------------|
| 8 rs537583    | 37058174 G | 2174   | 4.21E-11 | chr:8:37050885 |
| 8 rs542245    | 37062505 T | 2174   | 4.21E-11 | chr:8:37050885 |
| 8 rs567592    | 37052543 C | 2145   | 4.41E-11 | chr:8:37050885 |
| 8 rs493539    | 37069825 G | 2010   | 8.53E-11 | chr:8:37050885 |
| 8 rs240517    | 37085448 A | 1068   | 4.38E-10 | chr:8:37050885 |
| 8 rs240519    | 37085713 T | 1068   | 4.38E-10 | chr:8:37050885 |
| 8 rs490027    | 37079215 C | 1068   | 4.38E-10 | chr:8:37050885 |
| 8 rs511544    | 37076504 G | 1068   | 4.38E-10 | chr:8:37050885 |
| 8 rs532022    | 37074938 A | 1068   | 4.38E-10 | chr:8:37050885 |
| 8 rs557361    | 37075388 A | 1068   | 4.38E-10 | chr:8:37050885 |
| 8 rs240520    | 37086850 T | 1049   | 4.62E-10 | chr:8:37050885 |
| 8 rs2697887   | 37078928 G | 1049   | 4.62E-10 | chr:8:37050885 |
| 8 rs494545    | 37079696 C | 1049   | 4.62E-10 | chr:8:37050885 |
| 8 rs543162    | 37078419 C | 1049   | 4.62E-10 | chr:8:37050885 |
| 8 rs553163    | 37085269 A | 1049   | 4.62E-10 | chr:8:37050885 |
| 8 rs473731    | 37082568 G | 948.4  | 4.70E-10 | chr:8:37050885 |
| 8 rs4739483   | 37076718 T | 4.367  | 6.48E-10 | chr:8:37050885 |
| 8 rs990711    | 37058871 C | 3.832  | 4.52E-09 | chr:8:37050885 |
| 8 rs4237086   | 37088022 G | 0.2532 | 1.34E-08 | chr:8:37050885 |
| 8 rs16886251  | 37086493 A | 16.88  | 1.20E-07 | chr:8:37050885 |
| 8 rs12545061  | 37056695 T | 0.2805 | 1.60E-07 | chr:8:37050885 |
| 8 rs562322    | 37036994 A | 7.115  | 2.01E-07 | chr:8:37050885 |
| 8 rs13279893  | 37057678 G | 0.2904 | 2.76E-07 | chr:8:37050885 |
| 8 rs1850650   | 37065784 A | 0.2904 | 2.76E-07 | chr:8:37050885 |
| 8 rs567469    | 37064847 A | 0.3044 | 9.08E-07 | chr:8:37050885 |
| 8 rs16886326  | 37124693 G | 44.95  | 3.31E-06 | chr:8:37050885 |
| 8 rs56256845  | 37143634 T | 9.826  | 3.37E-06 | chr:8:37050885 |
| 8 rs529421    | 37038275 A | 0.3427 | 4.37E-06 | chr:8:37050885 |
| 8 rs576819    | 37039106 T | 0.3408 | 4.65E-06 | chr:8:37050885 |
| 8 rs566144555 | 37070040 C | 20.6   | 7.14E-06 | chr:8:37050885 |
| 8 rs567913    | 37042926 A | 0.3535 | 7.97E-06 | chr:8:37050885 |
| 8 rs550133    | 37008891 A | 2.828  | 9.38E-06 | chr:8:37050885 |
| 8 rs7840173   | 37049981 A | 0.3943 | 9.51E-06 | chr:8:37050885 |
| 8 rs1814907   | 37012025 C | 2.782  | 1.29E-05 | chr:8:37050885 |
| 8 rs508635    | 37011661 C | 2.782  | 1.29E-05 | chr:8:37050885 |
| 8 rs481779    | 37012275 G | 2.743  | 1.52E-05 | chr:8:37050885 |
| 8 rs1111603   | 37012084 G | 2.735  | 1.73E-05 | chr:8:37050885 |
| 8 rs482343    | 37014097 C | 2.735  | 1.73E-05 | chr:8:37050885 |
| 8 rs16886278  | 37093742 T | 2.51   | 1.74E-05 | chr:8:37050885 |
| 8 rs489583    | 37003868 C | 2.648  | 1.94E-05 | chr:8:37050885 |
| 8 rs472223    | 37073040 C | 0.3421 | 2.01E-05 | chr:8:37050885 |
| 8 rs475813    | 37065499 A | 0.3421 | 2.01E-05 | chr:8:37050885 |
| 8 rs516821    | 37070490 A | 0.3421 | 2.01E-05 | chr:8:37050885 |

|               |            |        |          |                |
|---------------|------------|--------|----------|----------------|
| 8 rs117587200 | 37079812 A | 106.2  | 2.57E-05 | chr:8:37050885 |
| 8 rs7826398   | 37048751 A | 0.4186 | 2.57E-05 | chr:8:37050885 |
| 8 rs481015    | 37075475 T | 0.3489 | 2.85E-05 | chr:8:37050885 |
| 8 rs554464    | 37047250 A | 0.386  | 2.90E-05 | chr:8:37050885 |
| 8 rs35016202  | 37092498 G | 2.433  | 2.92E-05 | chr:8:37050885 |
| 8 rs4739477   | 37047490 A | 0.4199 | 2.94E-05 | chr:8:37050885 |
| 8 rs502356    | 37049066 T | 0.3937 | 4.16E-05 | chr:8:37050885 |
| 8 rs557725    | 37048623 A | 0.3937 | 4.16E-05 | chr:8:37050885 |
| 8 rs482732    | 37012177 G | 2.637  | 4.49E-05 | chr:8:37050885 |
| 8 rs148764079 | 7370001 A  | 81.63  | 1.50E-13 | chr:8:7355397  |
| 8 rs144460864 | 7336269 C  | 271.6  | 1.07E-12 | chr:8:7355397  |
| 8 rs28548808  | 7341290 C  | 362.1  | 2.77E-12 | chr:8:7355397  |
| 8 rs62639800  | 7372247 T  | 23.24  | 3.97E-12 | chr:8:7355397  |
| 8 rs76206197  | 7371208 C  | 18.17  | 4.21E-12 | chr:8:7355397  |
| 8 rs544637792 | 7352785 C  | 34.14  | 1.06E-10 | chr:8:7355397  |
| 8 rs543368869 | 7340689 T  | 65.78  | 1.37E-10 | chr:8:7355397  |
| 8 rs79753474  | 7835900 C  | 5.033  | 2.64E-10 | chr:8:7355397  |
| 8 rs71254994  | 7225761 T  | 24.92  | 5.91E-10 | chr:8:7355397  |
| 8 rs71260573  | 7225496 A  | 23.61  | 8.91E-10 | chr:8:7355397  |
| 8 rs533497978 | 7187619 T  | 27.68  | 8.96E-10 | chr:8:7355397  |
| 8 rs118070999 | 7213936 A  | 20.65  | 1.68E-09 | chr:8:7355397  |
| 8 rs71511223  | 7218117 T  | 20.65  | 1.68E-09 | chr:8:7355397  |
| 8 rs71511225  | 7218805 G  | 20.65  | 1.68E-09 | chr:8:7355397  |
| 8 rs75437225  | 7222743 T  | 20.65  | 1.68E-09 | chr:8:7355397  |
| 8 rs190171510 | 7156751 A  | 22.19  | 1.81E-09 | chr:8:7355397  |
| 8 rs531764629 | 7172717 A  | 22.31  | 1.82E-09 | chr:8:7355397  |
| 8 rs145384272 | 7829780 A  | 4.495  | 2.29E-09 | chr:8:7355397  |
| 8 rs71509291  | 7179415 G  | 19.63  | 2.42E-09 | chr:8:7355397  |
| 8 rs567555351 | 7829112 A  | 4.343  | 2.70E-09 | chr:8:7355397  |
| 8 rs145140607 | 7831549 G  | 4.178  | 2.76E-09 | chr:8:7355397  |
| 8 rs370699871 | 7201835 T  | 18.36  | 2.87E-09 | chr:8:7355397  |
| 8 rs546834262 | 7203861 T  | 19.59  | 3.11E-09 | chr:8:7355397  |
| 8 rs180768299 | 7833447 C  | 4.163  | 3.68E-09 | chr:8:7355397  |
| 8 rs76597472  | 7206422 C  | 13.21  | 3.74E-09 | chr:8:7355397  |
| 8 rs141575646 | 7213628 T  | 16.24  | 3.86E-09 | chr:8:7355397  |
| 8 rs3989702   | 7217618 A  | 16.24  | 3.86E-09 | chr:8:7355397  |
| 8 rs71241131  | 7223188 A  | 16.24  | 3.86E-09 | chr:8:7355397  |
| 8 rs71511224  | 7218287 T  | 16.24  | 3.86E-09 | chr:8:7355397  |
| 8 rs78168349  | 7255692 A  | 21.51  | 4.14E-09 | chr:8:7355397  |
| 8 rs373838323 | 7831587 T  | 4.002  | 4.25E-09 | chr:8:7355397  |
| 8 rs537994281 | 7251907 A  | 17.66  | 4.36E-09 | chr:8:7355397  |
| 8 rs536438281 | 7829295 A  | 4.149  | 4.89E-09 | chr:8:7355397  |
| 8 rs573461318 | 7829457 A  | 3.849  | 5.15E-09 | chr:8:7355397  |

|               |           |       |          |               |
|---------------|-----------|-------|----------|---------------|
| 8 rs71509284  | 7172824 A | 13.04 | 5.17E-09 | chr:8:7355397 |
| 8 rs555846100 | 7174545 G | 16.51 | 5.43E-09 | chr:8:7355397 |
| 8 rs552674485 | 7375209 G | 9.53  | 5.79E-09 | chr:8:7355397 |
| 8 rs77333779  | 7375207 A | 9.53  | 5.79E-09 | chr:8:7355397 |
| 8 rs35292150  | 7154036 A | 15.63 | 7.46E-09 | chr:8:7355397 |
| 8 rs79407094  | 7835862 T | 4.403 | 8.90E-09 | chr:8:7355397 |
| 8 rs550449040 | 7206427 C | 12.15 | 9.24E-09 | chr:8:7355397 |
| 8 rs376067955 | 7244555 G | 15.33 | 1.27E-08 | chr:8:7355397 |
| 8 rs11786478  | 7388186 C | 4.908 | 1.53E-08 | chr:8:7355397 |
| 8 rs202154170 | 7199353 C | 10.44 | 1.78E-08 | chr:8:7355397 |
| 8 rs78947321  | 7833460 T | 4.22  | 1.89E-08 | chr:8:7355397 |
| 8 rs191010533 | 7233827 A | 13.86 | 2.14E-08 | chr:8:7355397 |
| 8 rs58448546  | 7222238 A | 13.02 | 2.29E-08 | chr:8:7355397 |
| 8 rs572881405 | 7177417 G | 18.47 | 2.53E-08 | chr:8:7355397 |
| 8 rs190107287 | 7240033 T | 13.85 | 2.68E-08 | chr:8:7355397 |
| 8 rs9720262   | 7225176 A | 11.82 | 3.90E-08 | chr:8:7355397 |
| 8 rs9720274   | 7225308 A | 11.82 | 3.90E-08 | chr:8:7355397 |
| 8 rs71511227  | 7226755 A | 12.44 | 4.61E-08 | chr:8:7355397 |
| 8 rs573869289 | 7826061 G | 9.836 | 4.92E-08 | chr:8:7355397 |
| 8 rs142491195 | 7206166 C | 7.86  | 5.52E-08 | chr:8:7355397 |
| 8 rs34542490  | 7154190 C | 7.262 | 5.85E-08 | chr:8:7355397 |
| 8 rs548024601 | 7158171 G | 19.34 | 6.09E-08 | chr:8:7355397 |
| 8 rs77864753  | 7280040 A | 12.47 | 6.89E-08 | chr:8:7355397 |
| 8 rs75263993  | 7231781 G | 11.1  | 7.79E-08 | chr:8:7355397 |
| 8 rs369451600 | 7228577 A | 12.4  | 8.64E-08 | chr:8:7355397 |
| 8 rs35340083  | 7154233 G | 6.839 | 9.51E-08 | chr:8:7355397 |
| 8 rs36116945  | 7154627 T | 9.479 | 9.55E-08 | chr:8:7355397 |
| 8 rs35348571  | 7154721 C | 9.13  | 9.61E-08 | chr:8:7355397 |
| 8 rs199686396 | 7830797 C | 14.6  | 9.68E-08 | chr:8:7355397 |
| 8 rs79674572  | 7204282 C | 7.291 | 1.06E-07 | chr:8:7355397 |
| 8 rs570398560 | 7199490 A | 7.841 | 1.61E-07 | chr:8:7355397 |
| 8 rs11985410  | 7202400 A | 7.186 | 1.82E-07 | chr:8:7355397 |
| 8 rs141402280 | 7388108 G | 4.149 | 1.92E-07 | chr:8:7355397 |
| 8 rs144469733 | 7204363 C | 6.537 | 2.57E-07 | chr:8:7355397 |
| 8 rs535677568 | 7129084 C | 10.3  | 2.82E-07 | chr:8:7355397 |
| 8 rs116727004 | 7202704 C | 6.5   | 2.88E-07 | chr:8:7355397 |
| 8 rs13257472  | 7059575 A | 12.18 | 4.17E-07 | chr:8:7355397 |
| 8 rs187151002 | 7198924 G | 7.09  | 4.89E-07 | chr:8:7355397 |
| 8 rs577501483 | 7198691 A | 7.09  | 4.89E-07 | chr:8:7355397 |
| 8 rs201877426 | 7058974 C | 11.4  | 4.93E-07 | chr:8:7355397 |
| 8 rs373416097 | 7829488 G | 3.057 | 5.47E-07 | chr:8:7355397 |
| 8 rs554462677 | 7198613 A | 6.898 | 5.68E-07 | chr:8:7355397 |
| 8 rs542348161 | 7198919 A | 6.898 | 5.87E-07 | chr:8:7355397 |

|               |           |       |          |               |
|---------------|-----------|-------|----------|---------------|
| 8 rs80002629  | 7199223 G | 5.962 | 6.12E-07 | chr:8:7355397 |
| 8 rs34616671  | 7154417 G | 5.872 | 6.29E-07 | chr:8:7355397 |
| 8 rs549409347 | 7545167 A | 8.09  | 6.40E-07 | chr:8:7355397 |
| 8 rs370324853 | 7128386 T | 8.797 | 8.66E-07 | chr:8:7355397 |
| 8 rs34002377  | 7155013 C | 5.654 | 9.01E-07 | chr:8:7355397 |
| 8 rs35855162  | 7154058 C | 5.63  | 9.11E-07 | chr:8:7355397 |
| 8 rs147886331 | 7545182 C | 8.799 | 1.06E-06 | chr:8:7355397 |
| 8 rs145885845 | 7841927 C | 4.859 | 1.36E-06 | chr:8:7355397 |
| 8 rs71509270  | 7085421 A | 22.01 | 1.63E-06 | chr:8:7355397 |
| 8 rs187300358 | 7829925 G | 2.83  | 2.48E-06 | chr:8:7355397 |
| 8 rs546887922 | 7829939 T | 2.83  | 2.48E-06 | chr:8:7355397 |
| 8 rs567019282 | 7829945 A | 2.83  | 2.48E-06 | chr:8:7355397 |
| 8 rs76725402  | 7538091 T | 7.304 | 2.94E-06 | chr:8:7355397 |
| 8 rs555905364 | 7292888 T | 22.73 | 3.35E-06 | chr:8:7355397 |
| 8 rs551253093 | 7085980 T | 17.14 | 3.93E-06 | chr:8:7355397 |
| 8 rs545793563 | 7543991 A | 9.654 | 4.18E-06 | chr:8:7355397 |
| 8 rs75561062  | 7077791 G | 6.782 | 4.79E-06 | chr:8:7355397 |
| 8 rs35158840  | 6996804 C | 9.484 | 5.99E-06 | chr:8:7355397 |
| 8 rs192094999 | 7830018 T | 3.16  | 7.39E-06 | chr:8:7355397 |
| 8 rs536482842 | 7537866 T | 5.605 | 7.53E-06 | chr:8:7355397 |
| 8 rs71509232  | 6932485 C | 7.985 | 1.53E-05 | chr:8:7355397 |
| 8 rs34501371  | 6969666 G | 8.374 | 1.99E-05 | chr:8:7355397 |
| 8 rs34067517  | 7193865 C | 6.439 | 2.19E-05 | chr:8:7355397 |
| 8 rs10089593  | 7222598 A | 11.04 | 2.29E-05 | chr:8:7355397 |
| 8 rs34693767  | 6941296 G | 5.793 | 2.35E-05 | chr:8:7355397 |
| 8 rs36160137  | 6941136 G | 5.793 | 2.35E-05 | chr:8:7355397 |
| 8 rs71509235  | 6941909 A | 5.793 | 2.35E-05 | chr:8:7355397 |
| 8 rs13263884  | 6938168 T | 6.283 | 2.53E-05 | chr:8:7355397 |
| 8 rs58346587  | 7198049 G | 5.66  | 2.71E-05 | chr:8:7355397 |
| 8 rs188014243 | 7835499 G | 6.272 | 2.80E-05 | chr:8:7355397 |
| 8 rs551102112 | 7829070 T | 4.343 | 2.95E-05 | chr:8:7355397 |
| 8 rs71509234  | 6941868 C | 5.534 | 3.21E-05 | chr:8:7355397 |
| 8 rs67189251  | 6938638 G | 5.611 | 3.51E-05 | chr:8:7355397 |
| 8 rs200962165 | 7156058 C | 5.028 | 4.05E-05 | chr:8:7355397 |
| 8 rs202233344 | 7156060 G | 5.028 | 4.05E-05 | chr:8:7355397 |
| 8 rs13268402  | 6942096 T | 5.782 | 4.13E-05 | chr:8:7355397 |
| 8 rs79934370  | 6943493 A | 5.782 | 4.13E-05 | chr:8:7355397 |
| 8 rs35819224  | 6899872 C | 10.18 | 4.50E-05 | chr:8:7355397 |
| 8 rs555988748 | 7200677 C | 8.196 | 4.95E-05 | chr:8:7355397 |
| 8 rs77372001  | 7193827 A | 5.845 | 5.57E-05 | chr:8:7355397 |
| 8 rs13261749  | 6938144 A | 5.713 | 5.75E-05 | chr:8:7355397 |
| 8 rs146193954 | 6977910 A | 6.875 | 5.90E-05 | chr:8:7355397 |
| 8 rs71509245  | 6954972 C | 6.875 | 5.90E-05 | chr:8:7355397 |

|               |           |       |          |               |
|---------------|-----------|-------|----------|---------------|
| 8 rs113931309 | 6949028 T | 5.482 | 5.90E-05 | chr:8:7355397 |
| 8 rs34284977  | 6947520 A | 5.482 | 5.90E-05 | chr:8:7355397 |
| 8 rs71509240  | 6949818 G | 5.482 | 5.90E-05 | chr:8:7355397 |
| 8 rs369528899 | 7154084 G | 26.48 | 6.15E-05 | chr:8:7355397 |
| 8 rs10090490  | 6959020 A | 5.519 | 7.21E-05 | chr:8:7355397 |

**Table S3: Associations of hiSNPs with polymorphic HERV-K insertions with East Asian super p**

| CHROM | RSID       | POS       | ALT OR | P-VAL  | HERV                      |
|-------|------------|-----------|--------|--------|---------------------------|
| 10    | rs11101890 | 135421321 | A      | 0.2651 | 4.72E-10 chr:10:135355522 |
| 10    | rs4351776  | 135415572 | T      | 0.2651 | 4.72E-10 chr:10:135355522 |
| 10    | rs4556495  | 135422209 | T      | 0.2651 | 4.72E-10 chr:10:135355522 |
| 10    | rs9630033  | 135418505 | T      | 0.2651 | 4.72E-10 chr:10:135355522 |
| 10    | rs4133041  | 135408387 | A      | 0.268  | 5.95E-10 chr:10:135355522 |
| 10    | rs4306261  | 135410989 | G      | 0.268  | 5.95E-10 chr:10:135355522 |
| 10    | rs6537613  | 135412414 | G      | 0.268  | 5.95E-10 chr:10:135355522 |
| 10    | rs7084384  | 135412322 | G      | 0.268  | 5.95E-10 chr:10:135355522 |
| 10    | rs7084391  | 135412344 | C      | 0.268  | 5.95E-10 chr:10:135355522 |
| 10    | rs7075572  | 135404358 | C      | 0.268  | 6.29E-10 chr:10:135355522 |
| 10    | rs61868695 | 135380408 | G      | 0.2735 | 6.60E-10 chr:10:135355522 |
| 10    | rs61868696 | 135380409 | C      | 0.2735 | 6.60E-10 chr:10:135355522 |
| 10    | rs61868697 | 135380410 | A      | 0.2735 | 6.60E-10 chr:10:135355522 |
| 10    | rs2515642  | 135352013 | C      | 0.2701 | 6.79E-10 chr:10:135355522 |
| 10    | rs11101867 | 135400250 | A      | 0.2704 | 6.92E-10 chr:10:135355522 |
| 10    | rs10857765 | 135394613 | C      | 0.2714 | 7.79E-10 chr:10:135355522 |
| 10    | rs10857768 | 135402703 | G      | 0.2714 | 7.79E-10 chr:10:135355522 |
| 10    | rs11101870 | 135402702 | T      | 0.2714 | 7.79E-10 chr:10:135355522 |
| 10    | rs4129223  | 135403948 | G      | 0.2714 | 7.79E-10 chr:10:135355522 |
| 10    | rs4259784  | 135399192 | A      | 0.2714 | 7.79E-10 chr:10:135355522 |
| 10    | rs4335490  | 135402350 | C      | 0.2714 | 7.79E-10 chr:10:135355522 |
| 10    | rs7093170  | 135402904 | T      | 0.2714 | 7.79E-10 chr:10:135355522 |
| 10    | rs7094588  | 135401586 | G      | 0.2714 | 7.79E-10 chr:10:135355522 |
| 10    | rs7922540  | 135395468 | T      | 0.2714 | 7.79E-10 chr:10:135355522 |
| 10    | rs9629936  | 135398783 | G      | 0.2714 | 7.79E-10 chr:10:135355522 |
| 10    | rs9630012  | 135397511 | T      | 0.2714 | 7.79E-10 chr:10:135355522 |
| 10    | rs2480258  | 135352100 | T      | 0.2722 | 7.87E-10 chr:10:135355522 |
| 10    | rs8192770  | 135342644 | A      | 0.268  | 8.06E-10 chr:10:135355522 |
| 10    | rs1854455  | 135354874 | A      | 0.2722 | 8.23E-10 chr:10:135355522 |
| 10    | rs1952467  | 135353499 | T      | 0.2722 | 8.23E-10 chr:10:135355522 |
| 10    | rs2515644  | 135353079 | A      | 0.2722 | 8.23E-10 chr:10:135355522 |
| 10    | rs4240522  | 135355557 | C      | 0.2722 | 8.23E-10 chr:10:135355522 |
| 10    | rs4363513  | 135355534 | A      | 0.2722 | 8.23E-10 chr:10:135355522 |
| 10    | rs4542321  | 135355481 | T      | 0.2722 | 8.23E-10 chr:10:135355522 |
| 10    | rs4838693  | 135354714 | G      | 0.2722 | 8.23E-10 chr:10:135355522 |
| 10    | rs4838771  | 135355007 | C      | 0.2722 | 8.23E-10 chr:10:135355522 |
| 10    | rs8192781  | 135354251 | T      | 0.2722 | 8.23E-10 chr:10:135355522 |
| 10    | rs2480254  | 135352869 | T      | 0.2721 | 8.27E-10 chr:10:135355522 |
| 10    | rs2480255  | 135352855 | T      | 0.2721 | 8.27E-10 chr:10:135355522 |
| 10    | rs1536826  | 135357239 | A      | 0.2721 | 8.58E-10 chr:10:135355522 |
| 10    | rs4512750  | 135358664 | T      | 0.2721 | 8.58E-10 chr:10:135355522 |

|                |             |        |          |                  |
|----------------|-------------|--------|----------|------------------|
| 10 rs77382433  | 135389919 C | 0.2726 | 8.66E-10 | chr:10:135355522 |
| 10 rs10857739  | 135352697 G | 0.272  | 8.68E-10 | chr:10:135355522 |
| 10 rs2987794   | 135378612 G | 0.2732 | 9.38E-10 | chr:10:135355522 |
| 10 rs11101857  | 135395359 G | 0.2741 | 9.76E-10 | chr:10:135355522 |
| 10 rs9629935   | 135398306 C | 0.2736 | 1.04E-09 | chr:10:135355522 |
| 10 rs4615946   | 135355394 G | 0.2736 | 1.05E-09 | chr:10:135355522 |
| 10 rs8192780   | 135354125 T | 0.2751 | 1.08E-09 | chr:10:135355522 |
| 10 rs2480256   | 135352514 A | 0.2774 | 1.13E-09 | chr:10:135355522 |
| 10 rs10857769  | 135405047 C | 0.2779 | 1.23E-09 | chr:10:135355522 |
| 10 rs2480257   | 135352509 T | 0.2795 | 1.34E-09 | chr:10:135355522 |
| 10 rs2987785   | 135365003 C | 0.2776 | 1.35E-09 | chr:10:135355522 |
| 10 rs2987792   | 135371466 T | 0.2776 | 1.35E-09 | chr:10:135355522 |
| 10 rs2987799   | 135380499 T | 0.2776 | 1.35E-09 | chr:10:135355522 |
| 10 rs3020513   | 135364915 T | 0.2776 | 1.35E-09 | chr:10:135355522 |
| 10 rs9418990   | 135337966 C | 0.272  | 1.42E-09 | chr:10:135355522 |
| 10 rs3020501   | 135381592 C | 0.2787 | 1.50E-09 | chr:10:135355522 |
| 10 rs12218790  | 135434551 A | 0.2841 | 1.53E-09 | chr:10:135355522 |
| 10 rs7907135   | 135410660 C | 0.2793 | 1.61E-09 | chr:10:135355522 |
| 10 rs61868336  | 135350060 C | 0.2845 | 1.65E-09 | chr:10:135355522 |
| 10 rs10857730  | 135326822 G | 0.275  | 1.75E-09 | chr:10:135355522 |
| 10 rs9418988   | 135327632 C | 0.2767 | 1.96E-09 | chr:10:135355522 |
| 10 rs10857735  | 135336230 A | 0.2755 | 2.17E-09 | chr:10:135355522 |
| 10 rs10857736  | 135336514 G | 0.2755 | 2.17E-09 | chr:10:135355522 |
| 10 rs10857737  | 135336716 A | 0.2755 | 2.17E-09 | chr:10:135355522 |
| 10 rs11101807  | 135335647 C | 0.2755 | 2.17E-09 | chr:10:135355522 |
| 10 rs11101809  | 135335746 T | 0.2755 | 2.17E-09 | chr:10:135355522 |
| 10 rs10776685  | 135327317 C | 0.2795 | 2.34E-09 | chr:10:135355522 |
| 10 rs7095379   | 135328532 A | 0.2795 | 2.34E-09 | chr:10:135355522 |
| 10 rs9419079   | 135326985 G | 0.2795 | 2.34E-09 | chr:10:135355522 |
| 10 rs1581934   | 135327410 T | 0.2794 | 2.42E-09 | chr:10:135355522 |
| 10 rs2480259   | 135352076 A | 0.2917 | 2.49E-09 | chr:10:135355522 |
| 10 rs11815623  | 135329133 G | 0.2797 | 2.55E-09 | chr:10:135355522 |
| 10 rs2026047   | 135329616 C | 0.2797 | 2.55E-09 | chr:10:135355522 |
| 10 rs7095996   | 135328948 A | 0.2797 | 2.55E-09 | chr:10:135355522 |
| 10 rs915907    | 135346927 A | 0.2896 | 2.73E-09 | chr:10:135355522 |
| 10 rs9419082   | 135333772 A | 0.2816 | 3.04E-09 | chr:10:135355522 |
| 10 rs2070675   | 135346696 T | 0.29   | 3.05E-09 | chr:10:135355522 |
| 10 rs2070673   | 135340567 A | 0.2776 | 3.25E-09 | chr:10:135355522 |
| 10 rs9418991   | 135362114 C | 0.2764 | 4.12E-09 | chr:10:135355522 |
| 10 rs8192766   | 135339385 G | 0.2843 | 4.32E-09 | chr:10:135355522 |
| 10 rs1536828   | 135342315 G | 0.2879 | 5.20E-09 | chr:10:135355522 |
| 10 rs117220052 | 135388573 A | 0.3218 | 7.75E-09 | chr:10:135355522 |
| 10 rs2249694   | 135352153 A | 0.2927 | 8.56E-09 | chr:10:135355522 |

|                |             |        |                           |
|----------------|-------------|--------|---------------------------|
| 10 rs7092584   | 135348257 T | 0.3062 | 1.00E-08 chr:10:135355522 |
| 10 rs6537609   | 135323084 G | 0.3095 | 1.02E-08 chr:10:135355522 |
| 10 rs7083073   | 135322956 A | 0.3095 | 1.02E-08 chr:10:135355522 |
| 10 rs7092634   | 135322977 A | 0.3095 | 1.02E-08 chr:10:135355522 |
| 10 rs9418982   | 135320622 C | 0.3095 | 1.02E-08 chr:10:135355522 |
| 10 rs9418984   | 135322356 G | 0.3095 | 1.02E-08 chr:10:135355522 |
| 10 rs2274665   | 135295630 T | 0.3106 | 1.02E-08 chr:10:135355522 |
| 10 rs2249695   | 135352168 T | 0.295  | 1.02E-08 chr:10:135355522 |
| 10 rs7916634   | 135435934 C | 0.3159 | 1.19E-08 chr:10:135355522 |
| 10 rs1854458   | 135313815 G | 0.314  | 1.33E-08 chr:10:135355522 |
| 10 rs7077457   | 135324370 A | 0.314  | 1.33E-08 chr:10:135355522 |
| 10 rs7096203   | 135324505 C | 0.314  | 1.33E-08 chr:10:135355522 |
| 10 rs7096321   | 135324536 G | 0.314  | 1.33E-08 chr:10:135355522 |
| 10 rs7911139   | 135323525 C | 0.314  | 1.33E-08 chr:10:135355522 |
| 10 rs9418987   | 135324409 A | 0.314  | 1.33E-08 chr:10:135355522 |
| 10 rs9419072   | 135310445 G | 0.314  | 1.33E-08 chr:10:135355522 |
| 10 rs1590820   | 135296816 A | 0.3185 | 1.67E-08 chr:10:135355522 |
| 10 rs7097581   | 135295350 A | 0.3196 | 1.91E-08 chr:10:135355522 |
| 10 rs4838687   | 135295396 C | 0.3235 | 2.75E-08 chr:10:135355522 |
| 10 rs8192776   | 135348187 T | 0.3177 | 4.22E-08 chr:10:135355522 |
| 10 rs372098690 | 135383366 C | 2.762  | 5.00E-08 chr:10:135355522 |
| 10 rs142168980 | 135389786 C | 0.3354 | 1.24E-07 chr:10:135355522 |
| 10 rs112345496 | 135382591 T | 2.724  | 2.54E-07 chr:10:135355522 |
| 10 rs3020504   | 135385782 T | 5.195  | 1.33E-06 chr:10:135355522 |
| 10 rs6537617   | 135435924 G | 0.375  | 1.44E-06 chr:10:135355522 |
| 10 rs7907225   | 135320905 G | 0.3807 | 1.84E-06 chr:10:135355522 |
| 10 rs11101794  | 135307667 C | 0.3848 | 2.26E-06 chr:10:135355522 |
| 10 rs4543900   | 135310808 G | 0.3848 | 2.26E-06 chr:10:135355522 |
| 10 rs9418986   | 135324276 T | 0.3848 | 2.26E-06 chr:10:135355522 |
| 10 rs10857775  | 135426754 G | 0.3092 | 2.79E-06 chr:10:135355522 |
| 10 rs11101895  | 135427717 G | 0.3092 | 2.79E-06 chr:10:135355522 |
| 10 rs12765125  | 135433160 G | 0.3102 | 3.13E-06 chr:10:135355522 |
| 10 rs376112539 | 135445792 G | 0.3731 | 3.35E-06 chr:10:135355522 |
| 10 rs9630023   | 135410905 C | 0.3189 | 4.81E-06 chr:10:135355522 |
| 10 rs11101881  | 135414280 C | 0.3192 | 4.86E-06 chr:10:135355522 |
| 10 rs11101884  | 135415976 G | 0.3192 | 4.86E-06 chr:10:135355522 |
| 10 rs11101886  | 135417928 G | 0.3192 | 4.86E-06 chr:10:135355522 |
| 10 rs11101888  | 135419461 A | 0.3192 | 4.86E-06 chr:10:135355522 |
| 10 rs9630029   | 135414692 A | 0.3192 | 4.86E-06 chr:10:135355522 |
| 10 rs9630031   | 135417509 G | 0.3192 | 4.86E-06 chr:10:135355522 |
| 10 rs9630032   | 135418370 C | 0.3192 | 4.86E-06 chr:10:135355522 |
| 10 rs10857764  | 135394493 C | 0.322  | 5.62E-06 chr:10:135355522 |
| 10 rs10857766  | 135395528 T | 0.322  | 5.62E-06 chr:10:135355522 |



|                |             |        |                           |
|----------------|-------------|--------|---------------------------|
| 10 rs10857767  | 135395544 C | 0.322  | 5.62E-06 chr:10:135355522 |
| 10 rs10857770  | 135405187 T | 0.322  | 5.62E-06 chr:10:135355522 |
| 10 rs11101855  | 135394798 C | 0.322  | 5.62E-06 chr:10:135355522 |
| 10 rs11101873  | 135405113 G | 0.322  | 5.62E-06 chr:10:135355522 |
| 10 rs11101876  | 135408098 T | 0.322  | 5.62E-06 chr:10:135355522 |
| 10 rs11598513  | 135409602 C | 0.322  | 5.62E-06 chr:10:135355522 |
| 10 rs142047452 | 135393459 A | 0.322  | 5.62E-06 chr:10:135355522 |
| 10 rs201011618 | 135398002 G | 0.322  | 5.62E-06 chr:10:135355522 |
| 10 rs28759996  | 135398719 A | 0.322  | 5.62E-06 chr:10:135355522 |
| 10 rs28826604  | 135398606 T | 0.322  | 5.62E-06 chr:10:135355522 |
| 10 rs4133042   | 135408428 T | 0.322  | 5.62E-06 chr:10:135355522 |
| 10 rs7083012   | 135400457 T | 0.322  | 5.62E-06 chr:10:135355522 |
| 10 rs7089803   | 135400518 G | 0.322  | 5.62E-06 chr:10:135355522 |
| 10 rs9629939   | 135406823 C | 0.322  | 5.62E-06 chr:10:135355522 |
| 10 rs9629940   | 135407330 G | 0.322  | 5.62E-06 chr:10:135355522 |
| 10 rs9629941   | 135411166 T | 0.322  | 5.62E-06 chr:10:135355522 |
| 10 rs9630017   | 135404536 T | 0.322  | 5.62E-06 chr:10:135355522 |
| 10 rs9630020   | 135407433 G | 0.322  | 5.62E-06 chr:10:135355522 |
| 10 rs9630021   | 135409607 G | 0.322  | 5.62E-06 chr:10:135355522 |
| 10 rs9633660   | 135397435 G | 0.322  | 5.62E-06 chr:10:135355522 |
| 10 rs9633661   | 135397568 A | 0.322  | 5.62E-06 chr:10:135355522 |
| 10 rs9633662   | 135397679 G | 0.322  | 5.62E-06 chr:10:135355522 |
| 10 rs9633664   | 135397745 G | 0.322  | 5.62E-06 chr:10:135355522 |
| 10 rs9702203   | 135394018 A | 0.322  | 5.62E-06 chr:10:135355522 |
| 10 rs9702433   | 135394224 T | 0.322  | 5.62E-06 chr:10:135355522 |
| 10 rs7098163   | 135404095 T | 0.3218 | 5.99E-06 chr:10:135355522 |
| 10 rs11598820  | 135395379 A | 0.3249 | 6.51E-06 chr:10:135355522 |
| 10 rs149569732 | 135395382 T | 0.3249 | 6.51E-06 chr:10:135355522 |
| 10 rs36061992  | 135364279 T | 0.3321 | 7.27E-06 chr:10:135355522 |
| 10 rs10857741  | 135358568 A | 0.338  | 8.94E-06 chr:10:135355522 |
| 10 rs11101815  | 135355927 A | 0.338  | 8.94E-06 chr:10:135355522 |
| 10 rs11527823  | 135359616 A | 0.338  | 8.94E-06 chr:10:135355522 |
| 10 rs11527824  | 135360143 T | 0.338  | 8.94E-06 chr:10:135355522 |
| 10 rs2864983   | 135362692 C | 0.338  | 8.94E-06 chr:10:135355522 |
| 10 rs2864986   | 135348673 A | 0.338  | 8.94E-06 chr:10:135355522 |
| 10 rs2864987   | 135348579 G | 0.338  | 8.94E-06 chr:10:135355522 |
| 10 rs6413432   | 135348544 A | 0.338  | 8.94E-06 chr:10:135355522 |
| 10 rs71484084  | 135355203 T | 0.338  | 8.94E-06 chr:10:135355522 |
| 10 rs743535    | 135349367 A | 0.338  | 8.94E-06 chr:10:135355522 |
| 10 rs8192779   | 135354121 T | 0.338  | 8.94E-06 chr:10:135355522 |
| 10 rs2864984   | 135348957 A | 0.3394 | 9.65E-06 chr:10:135355522 |
| 10 rs74514207  | 135386470 T | 4.05   | 1.01E-05 chr:10:135355522 |
| 10 rs77360278  | 135386471 G | 4.05   | 1.01E-05 chr:10:135355522 |

|               |             |        |                           |
|---------------|-------------|--------|---------------------------|
| 10 rs11101846 | 135381443 T | 0.3455 | 1.12E-05 chr:10:135355522 |
| 10 rs10776689 | 135366137 T | 0.3482 | 1.27E-05 chr:10:135355522 |
| 10 rs10857743 | 135365420 C | 0.3482 | 1.27E-05 chr:10:135355522 |
| 10 rs10857744 | 135365985 A | 0.3482 | 1.27E-05 chr:10:135355522 |
| 10 rs10857745 | 135365991 C | 0.3482 | 1.27E-05 chr:10:135355522 |
| 10 rs10857746 | 135366102 A | 0.3482 | 1.27E-05 chr:10:135355522 |
| 10 rs10857747 | 135366418 A | 0.3482 | 1.27E-05 chr:10:135355522 |
| 10 rs10857748 | 135372310 C | 0.3482 | 1.27E-05 chr:10:135355522 |
| 10 rs10857749 | 135372597 T | 0.3482 | 1.27E-05 chr:10:135355522 |
| 10 rs10857750 | 135372659 G | 0.3482 | 1.27E-05 chr:10:135355522 |
| 10 rs10857751 | 135373010 A | 0.3482 | 1.27E-05 chr:10:135355522 |
| 10 rs10857752 | 135373694 A | 0.3482 | 1.27E-05 chr:10:135355522 |
| 10 rs10857753 | 135373768 C | 0.3482 | 1.27E-05 chr:10:135355522 |
| 10 rs10857754 | 135373919 G | 0.3482 | 1.27E-05 chr:10:135355522 |
| 10 rs10857755 | 135374832 A | 0.3482 | 1.27E-05 chr:10:135355522 |
| 10 rs10857756 | 135374847 C | 0.3482 | 1.27E-05 chr:10:135355522 |
| 10 rs10857757 | 135374888 T | 0.3482 | 1.27E-05 chr:10:135355522 |
| 10 rs10857758 | 135374889 G | 0.3482 | 1.27E-05 chr:10:135355522 |
| 10 rs10857759 | 135375040 T | 0.3482 | 1.27E-05 chr:10:135355522 |
| 10 rs10857760 | 135375200 C | 0.3482 | 1.27E-05 chr:10:135355522 |
| 10 rs10857761 | 135376496 T | 0.3482 | 1.27E-05 chr:10:135355522 |
| 10 rs10857762 | 135377448 C | 0.3482 | 1.27E-05 chr:10:135355522 |
| 10 rs10857763 | 135378450 C | 0.3482 | 1.27E-05 chr:10:135355522 |
| 10 rs11101821 | 135367655 G | 0.3482 | 1.27E-05 chr:10:135355522 |
| 10 rs11101824 | 135371135 T | 0.3482 | 1.27E-05 chr:10:135355522 |
| 10 rs11101828 | 135374157 C | 0.3482 | 1.27E-05 chr:10:135355522 |
| 10 rs11101829 | 135374546 A | 0.3482 | 1.27E-05 chr:10:135355522 |
| 10 rs11101830 | 135375694 C | 0.3482 | 1.27E-05 chr:10:135355522 |
| 10 rs11101831 | 135376106 T | 0.3482 | 1.27E-05 chr:10:135355522 |
| 10 rs11101832 | 135376151 C | 0.3482 | 1.27E-05 chr:10:135355522 |
| 10 rs11101833 | 135376291 G | 0.3482 | 1.27E-05 chr:10:135355522 |
| 10 rs11101834 | 135376349 A | 0.3482 | 1.27E-05 chr:10:135355522 |
| 10 rs11101835 | 135376783 C | 0.3482 | 1.27E-05 chr:10:135355522 |
| 10 rs11101836 | 135376802 G | 0.3482 | 1.27E-05 chr:10:135355522 |
| 10 rs11101837 | 135376951 G | 0.3482 | 1.27E-05 chr:10:135355522 |
| 10 rs11101838 | 135377038 T | 0.3482 | 1.27E-05 chr:10:135355522 |
| 10 rs11101840 | 135377903 T | 0.3482 | 1.27E-05 chr:10:135355522 |
| 10 rs11101841 | 135377962 T | 0.3482 | 1.27E-05 chr:10:135355522 |
| 10 rs11101843 | 135379586 A | 0.3482 | 1.27E-05 chr:10:135355522 |
| 10 rs11101844 | 135381390 A | 0.3482 | 1.27E-05 chr:10:135355522 |
| 10 rs11101845 | 135381425 A | 0.3482 | 1.27E-05 chr:10:135355522 |
| 10 rs11592263 | 135365553 T | 0.3482 | 1.27E-05 chr:10:135355522 |
| 10 rs11592461 | 135368967 A | 0.3482 | 1.27E-05 chr:10:135355522 |

|                |             |        |                           |
|----------------|-------------|--------|---------------------------|
| 10 rs11593165  | 135365078 C | 0.3482 | 1.27E-05 chr:10:135355522 |
| 10 rs12764209  | 135364100 C | 0.3482 | 1.27E-05 chr:10:135355522 |
| 10 rs12766748  | 135380163 C | 0.3482 | 1.27E-05 chr:10:135355522 |
| 10 rs12767545  | 135375927 T | 0.3482 | 1.27E-05 chr:10:135355522 |
| 10 rs12767560  | 135375955 C | 0.3482 | 1.27E-05 chr:10:135355522 |
| 10 rs2149616   | 135368163 G | 0.3482 | 1.27E-05 chr:10:135355522 |
| 10 rs2149617   | 135368325 C | 0.3482 | 1.27E-05 chr:10:135355522 |
| 10 rs2183163   | 135368462 C | 0.3482 | 1.27E-05 chr:10:135355522 |
| 10 rs34433287  | 135364521 C | 0.3482 | 1.27E-05 chr:10:135355522 |
| 10 rs34776401  | 135378802 T | 0.3482 | 1.27E-05 chr:10:135355522 |
| 10 rs34890953  | 135380565 C | 0.3482 | 1.27E-05 chr:10:135355522 |
| 10 rs35616031  | 135377513 T | 0.3482 | 1.27E-05 chr:10:135355522 |
| 10 rs35620834  | 135364516 C | 0.3482 | 1.27E-05 chr:10:135355522 |
| 10 rs36158930  | 135380394 A | 0.3482 | 1.27E-05 chr:10:135355522 |
| 10 rs3737029   | 135368452 G | 0.3482 | 1.27E-05 chr:10:135355522 |
| 10 rs3737031   | 135368590 C | 0.3482 | 1.27E-05 chr:10:135355522 |
| 10 rs3737032   | 135368709 A | 0.3482 | 1.27E-05 chr:10:135355522 |
| 10 rs3737034   | 135368835 T | 0.3482 | 1.27E-05 chr:10:135355522 |
| 10 rs3747880   | 135369643 C | 0.3482 | 1.27E-05 chr:10:135355522 |
| 10 rs3747881   | 135369532 C | 0.3482 | 1.27E-05 chr:10:135355522 |
| 10 rs376008053 | 135380337 G | 0.3482 | 1.27E-05 chr:10:135355522 |
| 10 rs3813872   | 135373435 T | 0.3482 | 1.27E-05 chr:10:135355522 |
| 10 rs3813873   | 135373591 T | 0.3482 | 1.27E-05 chr:10:135355522 |
| 10 rs3827687   | 135369863 T | 0.3482 | 1.27E-05 chr:10:135355522 |
| 10 rs3827688   | 135369258 T | 0.3482 | 1.27E-05 chr:10:135355522 |
| 10 rs4144943   | 135366556 T | 0.3482 | 1.27E-05 chr:10:135355522 |
| 10 rs4144944   | 135366540 C | 0.3482 | 1.27E-05 chr:10:135355522 |
| 10 rs4144945   | 135366756 C | 0.3482 | 1.27E-05 chr:10:135355522 |
| 10 rs5029271   | 135367059 C | 0.3482 | 1.27E-05 chr:10:135355522 |
| 10 rs55801054  | 135365634 A | 0.3482 | 1.27E-05 chr:10:135355522 |
| 10 rs58187379  | 135380933 A | 0.3482 | 1.27E-05 chr:10:135355522 |
| 10 rs58687587  | 135364811 T | 0.3482 | 1.27E-05 chr:10:135355522 |
| 10 rs59526521  | 135375269 G | 0.3482 | 1.27E-05 chr:10:135355522 |
| 10 rs67106646  | 135371920 A | 0.3482 | 1.27E-05 chr:10:135355522 |
| 10 rs74162040  | 135371940 C | 0.3482 | 1.27E-05 chr:10:135355522 |
| 10 rs74162041  | 135371942 A | 0.3482 | 1.27E-05 chr:10:135355522 |
| 10 rs74753190  | 135367316 A | 0.3482 | 1.27E-05 chr:10:135355522 |
| 10 rs8181294   | 135371262 C | 0.3482 | 1.27E-05 chr:10:135355522 |
| 10 rs8181309   | 135371566 A | 0.3482 | 1.27E-05 chr:10:135355522 |
| 10 rs8181332   | 135370370 T | 0.3482 | 1.27E-05 chr:10:135355522 |
| 10 rs8181356   | 135370633 T | 0.3482 | 1.27E-05 chr:10:135355522 |
| 10 rs8181357   | 135370639 A | 0.3482 | 1.27E-05 chr:10:135355522 |
| 10 rs8181359   | 135370760 T | 0.3482 | 1.27E-05 chr:10:135355522 |

|                |             |        |                           |
|----------------|-------------|--------|---------------------------|
| 10 rs8181425   | 135370470 C | 0.3482 | 1.27E-05 chr:10:135355522 |
| 10 rs8181432   | 135370867 C | 0.3482 | 1.27E-05 chr:10:135355522 |
| 10 rs8181436   | 135371105 C | 0.3482 | 1.27E-05 chr:10:135355522 |
| 10 rs8181437   | 135371194 A | 0.3482 | 1.27E-05 chr:10:135355522 |
| 10 rs8181456   | 135371467 C | 0.3482 | 1.27E-05 chr:10:135355522 |
| 10 rs8181458   | 135371606 C | 0.3482 | 1.27E-05 chr:10:135355522 |
| 10 rs8181464   | 135370343 A | 0.3482 | 1.27E-05 chr:10:135355522 |
| 10 rs9629930   | 135365549 A | 0.3482 | 1.27E-05 chr:10:135355522 |
| 10 rs9629990   | 135364641 A | 0.3482 | 1.27E-05 chr:10:135355522 |
| 10 rs201998976 | 135389939 G | 0.3514 | 1.44E-05 chr:10:135355522 |
| 10 rs28513148  | 135388078 A | 0.3514 | 1.44E-05 chr:10:135355522 |
| 10 rs56046513  | 135389345 T | 0.3643 | 1.44E-05 chr:10:135355522 |
| 10 rs9629993   | 135364955 A | 0.3514 | 1.47E-05 chr:10:135355522 |
| 10 rs11101839  | 135377598 G | 0.354  | 1.63E-05 chr:10:135355522 |
| 10 rs11101842  | 135378517 T | 0.3548 | 1.66E-05 chr:10:135355522 |
| 10 rs9630002   | 135378544 T | 0.3548 | 1.66E-05 chr:10:135355522 |
| 10 rs11593189  | 135365145 C | 0.3548 | 1.75E-05 chr:10:135355522 |
| 10 rs12777634  | 135380323 A | 0.3552 | 1.78E-05 chr:10:135355522 |
| 10 rs751945    | 135329939 G | 0.3516 | 2.17E-05 chr:10:135355522 |
| 10 rs751946    | 135330104 G | 0.3516 | 2.17E-05 chr:10:135355522 |
| 10 rs116963301 | 135389650 A | 0.3651 | 2.19E-05 chr:10:135355522 |
| 10 rs55916570  | 135389268 T | 0.3575 | 2.41E-05 chr:10:135355522 |
| 10 rs4379786   | 135428991 C | 2.389  | 2.58E-05 chr:10:135355522 |
| 10 rs10857742  | 135365335 G | 0.3639 | 2.79E-05 chr:10:135355522 |
| 10 rs543128694 | 135380339 A | 0.3702 | 3.42E-05 chr:10:135355522 |
| 10 rs573916563 | 135380338 C | 0.3702 | 3.42E-05 chr:10:135355522 |
| 10 rs11101898  | 135430252 G | 2.345  | 3.71E-05 chr:10:135355522 |
| 10 rs11101905  | 135434303 A | 2.345  | 3.71E-05 chr:10:135355522 |
| 10 rs79743532  | 135431989 C | 2.345  | 3.71E-05 chr:10:135355522 |
| 10 rs8192775   | 135348026 A | 0.3617 | 4.80E-05 chr:10:135355522 |
| 10 rs12412900  | 135425907 A | 2.306  | 5.32E-05 chr:10:135355522 |
| 10 rs12412913  | 135426536 G | 2.306  | 5.32E-05 chr:10:135355522 |
| 10 rs4365009   | 135429295 T | 2.306  | 5.32E-05 chr:10:135355522 |
| 10 rs4528273   | 135429335 G | 2.306  | 5.32E-05 chr:10:135355522 |
| 10 rs1320466   | 135290022 G | 0.4755 | 5.64E-05 chr:10:135355522 |
| 10 rs2771208   | 135289559 G | 0.4766 | 5.69E-05 chr:10:135355522 |
| 11 rs73492994  | 60515078 T  | 112.4  | 5.79E-19 chr:11:60449890  |
| 11 rs75976166  | 60511961 T  | 109.4  | 5.89E-19 chr:11:60449890  |
| 11 rs925010    | 60512786 T  | 109.4  | 5.89E-19 chr:11:60449890  |
| 11 rs925011    | 60512497 T  | 109.4  | 5.89E-19 chr:11:60449890  |
| 11 rs569629432 | 60514937 G  | 110.8  | 9.10E-19 chr:11:60449890  |
| 11 rs1941022   | 60272887 A  | 206.6  | 1.03E-18 chr:11:60449890  |
| 11 rs61898828  | 60513780 T  | 109.6  | 1.57E-18 chr:11:60449890  |

|                |            |       |          |                 |
|----------------|------------|-------|----------|-----------------|
| 11 rs61898829  | 60514367 C | 109.6 | 1.57E-18 | chr:11:60449890 |
| 11 rs150026789 | 60240149 C | 175.2 | 1.82E-18 | chr:11:60449890 |
| 11 rs150759751 | 60243215 C | 175.2 | 1.82E-18 | chr:11:60449890 |
| 11 rs17155034  | 60237378 A | 175.2 | 1.82E-18 | chr:11:60449890 |
| 11 rs17155041  | 60237414 G | 175.2 | 1.82E-18 | chr:11:60449890 |
| 11 rs185777027 | 60252475 A | 175.2 | 1.82E-18 | chr:11:60449890 |
| 11 rs4617613   | 60250648 T | 175.2 | 1.82E-18 | chr:11:60449890 |
| 11 rs4939365   | 60238824 A | 175.2 | 1.82E-18 | chr:11:60449890 |
| 11 rs557131820 | 60243025 G | 175.2 | 1.82E-18 | chr:11:60449890 |
| 11 rs7112881   | 60235600 C | 175.2 | 1.82E-18 | chr:11:60449890 |
| 11 rs7129314   | 60235459 G | 175.2 | 1.82E-18 | chr:11:60449890 |
| 11 rs74237978  | 60254725 G | 175.2 | 1.82E-18 | chr:11:60449890 |
| 11 rs76814174  | 60256208 A | 175.2 | 1.82E-18 | chr:11:60449890 |
| 11 rs77828735  | 60251575 C | 175.2 | 1.82E-18 | chr:11:60449890 |
| 11 rs17155107  | 60275273 C | 285.5 | 2.58E-17 | chr:11:60449890 |
| 11 rs4939385   | 60275473 T | 367   | 7.66E-17 | chr:11:60449890 |
| 11 rs4939386   | 60275719 A | 367   | 7.66E-17 | chr:11:60449890 |
| 11 rs80331353  | 60276293 T | 367   | 7.66E-17 | chr:11:60449890 |
| 11 rs61898831  | 60518070 A | 22.29 | 8.05E-17 | chr:11:60449890 |
| 11 rs1443249   | 60224044 G | 41.36 | 3.73E-16 | chr:11:60449890 |
| 11 rs17155019  | 60229677 T | 41.36 | 3.73E-16 | chr:11:60449890 |
| 11 rs74478918  | 60221936 A | 41.36 | 3.73E-16 | chr:11:60449890 |
| 11 rs78619545  | 60230270 T | 41.36 | 3.73E-16 | chr:11:60449890 |
| 11 rs79350662  | 60222269 G | 41.36 | 3.73E-16 | chr:11:60449890 |
| 11 rs17154981  | 60201102 A | 23.03 | 1.96E-15 | chr:11:60449890 |
| 11 rs150289543 | 60210476 C | 21.6  | 3.22E-15 | chr:11:60449890 |
| 11 rs4534600   | 60203177 A | 21.6  | 3.22E-15 | chr:11:60449890 |
| 11 rs576832473 | 60219175 C | 20.69 | 6.07E-15 | chr:11:60449890 |
| 11 rs76274884  | 60196877 T | 22.22 | 6.35E-15 | chr:11:60449890 |
| 11 rs149904169 | 60218249 A | 20.19 | 1.02E-14 | chr:11:60449890 |
| 11 rs150164831 | 60214698 T | 20.19 | 1.02E-14 | chr:11:60449890 |
| 11 rs76907727  | 60215737 C | 20.19 | 1.02E-14 | chr:11:60449890 |
| 11 rs77182118  | 60214076 A | 20.19 | 1.02E-14 | chr:11:60449890 |
| 11 rs77831294  | 60216599 T | 20.19 | 1.02E-14 | chr:11:60449890 |
| 11 rs79685110  | 60506160 A | 498.1 | 1.13E-14 | chr:11:60449890 |
| 11 rs376103871 | 60434536 G | 703.2 | 1.55E-14 | chr:11:60449890 |
| 11 rs73492997  | 60515364 T | 27.49 | 2.37E-14 | chr:11:60449890 |
| 11 rs7119769   | 60372678 A | 12.43 | 4.34E-14 | chr:11:60449890 |
| 11 rs1588033   | 60406661 C | 14.08 | 4.57E-14 | chr:11:60449890 |
| 11 rs2087236   | 60411080 A | 14.08 | 4.57E-14 | chr:11:60449890 |
| 11 rs4939433   | 60412685 G | 14.08 | 4.57E-14 | chr:11:60449890 |
| 11 rs6591612   | 60407822 C | 14.08 | 4.57E-14 | chr:11:60449890 |
| 11 rs6591614   | 60419949 C | 14.08 | 4.57E-14 | chr:11:60449890 |

|                |            |       |          |                 |
|----------------|------------|-------|----------|-----------------|
| 11 rs7128058   | 60409995 C | 14.08 | 4.57E-14 | chr:11:60449890 |
| 11 rs7130322   | 60414821 G | 14.08 | 4.57E-14 | chr:11:60449890 |
| 11 rs72643556  | 60397090 C | 14.08 | 4.57E-14 | chr:11:60449890 |
| 11 rs79794327  | 60408059 C | 14.08 | 4.57E-14 | chr:11:60449890 |
| 11 rs1075193   | 60357882 G | 16.65 | 4.71E-14 | chr:11:60449890 |
| 11 rs10897099  | 60345446 A | 16.65 | 4.71E-14 | chr:11:60449890 |
| 11 rs112266959 | 60350831 T | 16.65 | 4.71E-14 | chr:11:60449890 |
| 11 rs11230389  | 60344066 A | 16.65 | 4.71E-14 | chr:11:60449890 |
| 11 rs11230390  | 60345907 C | 16.65 | 4.71E-14 | chr:11:60449890 |
| 11 rs11230392  | 60346342 T | 16.65 | 4.71E-14 | chr:11:60449890 |
| 11 rs11230395  | 60347928 C | 16.65 | 4.71E-14 | chr:11:60449890 |
| 11 rs11230396  | 60348289 C | 16.65 | 4.71E-14 | chr:11:60449890 |
| 11 rs11230398  | 60348665 A | 16.65 | 4.71E-14 | chr:11:60449890 |
| 11 rs11230401  | 60354064 T | 16.65 | 4.71E-14 | chr:11:60449890 |
| 11 rs11230402  | 60354355 G | 16.65 | 4.71E-14 | chr:11:60449890 |
| 11 rs11230404  | 60354440 T | 16.65 | 4.71E-14 | chr:11:60449890 |
| 11 rs11230405  | 60354446 G | 16.65 | 4.71E-14 | chr:11:60449890 |
| 11 rs11230406  | 60355032 G | 16.65 | 4.71E-14 | chr:11:60449890 |
| 11 rs11230407  | 60355215 T | 16.65 | 4.71E-14 | chr:11:60449890 |
| 11 rs11230408  | 60356188 T | 16.65 | 4.71E-14 | chr:11:60449890 |
| 11 rs11230409  | 60356955 C | 16.65 | 4.71E-14 | chr:11:60449890 |
| 11 rs11230411  | 60358502 C | 16.65 | 4.71E-14 | chr:11:60449890 |
| 11 rs11230412  | 60358517 G | 16.65 | 4.71E-14 | chr:11:60449890 |
| 11 rs11230413  | 60358600 G | 16.65 | 4.71E-14 | chr:11:60449890 |
| 11 rs11230414  | 60358669 C | 16.65 | 4.71E-14 | chr:11:60449890 |
| 11 rs11230415  | 60358744 T | 16.65 | 4.71E-14 | chr:11:60449890 |
| 11 rs11230416  | 60358917 T | 16.65 | 4.71E-14 | chr:11:60449890 |
| 11 rs11230417  | 60359982 T | 16.65 | 4.71E-14 | chr:11:60449890 |
| 11 rs112420146 | 60352340 A | 16.65 | 4.71E-14 | chr:11:60449890 |
| 11 rs113438455 | 60352321 C | 16.65 | 4.71E-14 | chr:11:60449890 |
| 11 rs12574473  | 60344427 C | 16.65 | 4.71E-14 | chr:11:60449890 |
| 11 rs12577546  | 60350014 T | 16.65 | 4.71E-14 | chr:11:60449890 |
| 11 rs192160182 | 60359598 A | 16.65 | 4.71E-14 | chr:11:60449890 |
| 11 rs4938959   | 60341383 C | 16.65 | 4.71E-14 | chr:11:60449890 |
| 11 rs4939414   | 60355673 C | 16.65 | 4.71E-14 | chr:11:60449890 |
| 11 rs75074202  | 60361575 G | 16.65 | 4.71E-14 | chr:11:60449890 |
| 11 rs75259753  | 60360747 C | 16.65 | 4.71E-14 | chr:11:60449890 |
| 11 rs75847459  | 60361128 A | 16.65 | 4.71E-14 | chr:11:60449890 |
| 11 rs76962588  | 60361563 G | 16.65 | 4.71E-14 | chr:11:60449890 |
| 11 rs77815918  | 60342648 G | 16.65 | 4.71E-14 | chr:11:60449890 |
| 11 rs80197220  | 60360315 T | 16.65 | 4.71E-14 | chr:11:60449890 |
| 11 rs59782110  | 60388974 C | 12.29 | 5.29E-14 | chr:11:60449890 |
| 11 rs79994929  | 60342896 A | 14.62 | 5.58E-14 | chr:11:60449890 |

|                |            |       |          |                 |
|----------------|------------|-------|----------|-----------------|
| 11 rs11230434  | 60379726 A | 12.3  | 5.70E-14 | chr:11:60449890 |
| 11 rs12274091  | 60375565 C | 12.3  | 5.70E-14 | chr:11:60449890 |
| 11 rs474347    | 60394379 A | 12.3  | 5.70E-14 | chr:11:60449890 |
| 11 rs533273    | 60392597 G | 12.3  | 5.70E-14 | chr:11:60449890 |
| 11 rs556374    | 60395210 G | 12.3  | 5.70E-14 | chr:11:60449890 |
| 11 rs58686875  | 60389219 G | 12.3  | 5.70E-14 | chr:11:60449890 |
| 11 rs143837385 | 60178507 T | 18.59 | 6.60E-14 | chr:11:60449890 |
| 11 rs1443243   | 60184840 C | 18.59 | 6.60E-14 | chr:11:60449890 |
| 11 rs145918292 | 60180189 A | 18.59 | 6.60E-14 | chr:11:60449890 |
| 11 rs4939355   | 60182571 G | 18.59 | 6.60E-14 | chr:11:60449890 |
| 11 rs4939356   | 60189627 C | 18.59 | 6.60E-14 | chr:11:60449890 |
| 11 rs75538311  | 60185044 C | 18.59 | 6.60E-14 | chr:11:60449890 |
| 11 rs77626314  | 60191284 G | 18.59 | 6.60E-14 | chr:11:60449890 |
| 11 rs7935330   | 60185334 C | 18.59 | 6.60E-14 | chr:11:60449890 |
| 11 rs10897100  | 60345552 A | 16.7  | 6.91E-14 | chr:11:60449890 |
| 11 rs11230386  | 60333542 C | 16.7  | 6.91E-14 | chr:11:60449890 |
| 11 rs11230393  | 60346890 A | 16.7  | 6.91E-14 | chr:11:60449890 |
| 11 rs11230410  | 60358407 T | 16.7  | 6.91E-14 | chr:11:60449890 |
| 11 rs11535815  | 60322719 C | 16.7  | 6.91E-14 | chr:11:60449890 |
| 11 rs12222676  | 60320591 T | 16.7  | 6.91E-14 | chr:11:60449890 |
| 11 rs12223063  | 60309438 T | 16.7  | 6.91E-14 | chr:11:60449890 |
| 11 rs148027662 | 60319226 C | 16.7  | 6.91E-14 | chr:11:60449890 |
| 11 rs149005040 | 60349048 T | 16.7  | 6.91E-14 | chr:11:60449890 |
| 11 rs4939401   | 60313437 T | 16.7  | 6.91E-14 | chr:11:60449890 |
| 11 rs4939409   | 60331285 A | 16.7  | 6.91E-14 | chr:11:60449890 |
| 11 rs4939419   | 60363677 A | 16.7  | 6.91E-14 | chr:11:60449890 |
| 11 rs78827449  | 60338319 G | 16.7  | 6.91E-14 | chr:11:60449890 |
| 11 rs880517    | 60327093 C | 16.7  | 6.91E-14 | chr:11:60449890 |
| 11 rs116954371 | 60484942 A | 558.9 | 7.55E-14 | chr:11:60449890 |
| 11 rs78293538  | 60313053 T | 16.66 | 7.63E-14 | chr:11:60449890 |
| 11 rs528002    | 60461496 A | 10.34 | 7.84E-14 | chr:11:60449890 |
| 11 rs4589322   | 60357024 T | 18.81 | 7.91E-14 | chr:11:60449890 |
| 11 rs484858    | 60439530 C | 10.35 | 8.41E-14 | chr:11:60449890 |
| 11 rs518778    | 60440909 C | 10.35 | 8.41E-14 | chr:11:60449890 |
| 11 rs10897102  | 60364051 G | 14.63 | 8.57E-14 | chr:11:60449890 |
| 11 rs11230420  | 60363961 A | 14.63 | 8.57E-14 | chr:11:60449890 |
| 11 rs4939411   | 60331584 C | 16.4  | 9.18E-14 | chr:11:60449890 |
| 11 rs664114    | 60470538 A | 10.3  | 9.29E-14 | chr:11:60449890 |
| 11 rs10736709  | 60455094 C | 9.485 | 1.06E-13 | chr:11:60449890 |
| 11 rs10897107  | 60438001 T | 9.485 | 1.06E-13 | chr:11:60449890 |
| 11 rs4938955   | 60298963 G | 12.19 | 1.42E-13 | chr:11:60449890 |
| 11 rs4939398   | 60298580 C | 12.19 | 1.42E-13 | chr:11:60449890 |
| 11 rs79002350  | 60285803 T | 12.19 | 1.42E-13 | chr:11:60449890 |

|                |            |       |          |                 |
|----------------|------------|-------|----------|-----------------|
| 11 rs11537201  | 60359091 T | 15.95 | 1.46E-13 | chr:11:60449890 |
| 11 rs74976810  | 60280059 T | 12.05 | 1.64E-13 | chr:11:60449890 |
| 11 rs76701960  | 60281519 C | 12.05 | 1.64E-13 | chr:11:60449890 |
| 11 rs1567083   | 60473821 T | 9.318 | 1.66E-13 | chr:11:60449890 |
| 11 rs993274    | 60427626 A | 481.3 | 3.22E-13 | chr:11:60449890 |
| 11 rs993275    | 60427570 A | 481.3 | 3.22E-13 | chr:11:60449890 |
| 11 rs117052092 | 60277975 T | 10.76 | 3.70E-13 | chr:11:60449890 |
| 11 rs1532900   | 60486121 G | 9.092 | 3.90E-13 | chr:11:60449890 |
| 11 rs2306836   | 60482329 C | 9.871 | 4.10E-13 | chr:11:60449890 |
| 11 rs7113073   | 60478793 G | 9.871 | 4.83E-13 | chr:11:60449890 |
| 11 rs60684765  | 60472310 C | 13.37 | 5.81E-13 | chr:11:60449890 |
| 11 rs372464052 | 60218891 G | 36.24 | 5.91E-13 | chr:11:60449890 |
| 11 rs113789171 | 60481588 G | 8.923 | 8.92E-13 | chr:11:60449890 |
| 11 rs76860074  | 60472292 G | 1082  | 9.02E-13 | chr:11:60449890 |
| 11 rs74973858  | 60473529 T | 627.7 | 1.90E-12 | chr:11:60449890 |
| 11 rs117262839 | 60484943 T | 1128  | 3.03E-12 | chr:11:60449890 |
| 11 rs74799034  | 60492125 A | 1128  | 3.03E-12 | chr:11:60449890 |
| 11 rs75770837  | 60490186 A | 1128  | 3.03E-12 | chr:11:60449890 |
| 11 rs76311422  | 60491217 T | 1128  | 3.03E-12 | chr:11:60449890 |
| 11 rs77579438  | 60489818 A | 1128  | 3.03E-12 | chr:11:60449890 |
| 11 rs79836451  | 60486224 A | 1128  | 3.03E-12 | chr:11:60449890 |
| 11 rs55752280  | 60239957 T | 7.828 | 3.91E-12 | chr:11:60449890 |
| 11 rs7124085   | 60239723 G | 7.828 | 3.91E-12 | chr:11:60449890 |
| 11 rs7124717   | 60243714 C | 7.828 | 3.91E-12 | chr:11:60449890 |
| 11 rs76588017  | 60499347 T | 1158  | 4.23E-12 | chr:11:60449890 |
| 11 rs79739441  | 60501355 G | 1158  | 4.23E-12 | chr:11:60449890 |
| 11 rs4939448   | 60499899 G | 1184  | 6.06E-12 | chr:11:60449890 |
| 11 rs373423561 | 60299662 G | 39.56 | 6.32E-12 | chr:11:60449890 |
| 11 rs1941026   | 60312462 A | 5.606 | 3.37E-11 | chr:11:60449890 |
| 11 rs10897089  | 60316296 A | 5.581 | 4.28E-11 | chr:11:60449890 |
| 11 rs11494164  | 60316659 C | 5.581 | 4.28E-11 | chr:11:60449890 |
| 11 rs2509514   | 60318700 C | 5.581 | 4.28E-11 | chr:11:60449890 |
| 11 rs7948426   | 60314241 G | 5.581 | 4.28E-11 | chr:11:60449890 |
| 11 rs10897101  | 60347964 C | 5.266 | 5.79E-11 | chr:11:60449890 |
| 11 rs12278643  | 60352288 C | 5.266 | 5.79E-11 | chr:11:60449890 |
| 11 rs12285680  | 60361616 A | 5.266 | 5.79E-11 | chr:11:60449890 |
| 11 rs2186916   | 60332013 C | 5.266 | 5.79E-11 | chr:11:60449890 |
| 11 rs2847210   | 60337966 C | 5.266 | 5.79E-11 | chr:11:60449890 |
| 11 rs2868222   | 60344075 T | 5.266 | 5.79E-11 | chr:11:60449890 |
| 11 rs4939412   | 60346987 T | 5.266 | 5.79E-11 | chr:11:60449890 |
| 11 rs6591606   | 60351183 T | 5.266 | 5.79E-11 | chr:11:60449890 |
| 11 rs10897086  | 60309071 G | 5.36  | 7.98E-11 | chr:11:60449890 |
| 11 rs10897109  | 60518182 T | 7.283 | 9.04E-11 | chr:11:60449890 |



|                |            |       |          |                 |
|----------------|------------|-------|----------|-----------------|
| 11 rs75655826  | 60516738 T | 6.645 | 1.05E-10 | chr:11:60449890 |
| 11 rs534362559 | 60460600 C | 33.05 | 1.26E-10 | chr:11:60449890 |
| 11 rs72643555  | 60280001 A | 4.683 | 6.18E-10 | chr:11:60449890 |
| 11 rs10897078  | 60285528 G | 4.626 | 7.26E-10 | chr:11:60449890 |
| 11 rs11230355  | 60284522 G | 4.626 | 7.26E-10 | chr:11:60449890 |
| 11 rs7934771   | 60286038 A | 4.626 | 7.26E-10 | chr:11:60449890 |
| 11 rs7110684   | 60500843 C | 6.635 | 7.61E-10 | chr:11:60449890 |
| 11 rs10750940  | 60282019 G | 4.613 | 8.63E-10 | chr:11:60449890 |
| 11 rs10897076  | 60278980 C | 4.613 | 8.63E-10 | chr:11:60449890 |
| 11 rs12277712  | 60282204 T | 4.613 | 8.63E-10 | chr:11:60449890 |
| 11 rs4939388   | 60280204 G | 4.613 | 8.63E-10 | chr:11:60449890 |
| 11 rs59358103  | 60279328 T | 4.613 | 8.63E-10 | chr:11:60449890 |
| 11 rs66506129  | 60279921 T | 4.613 | 8.63E-10 | chr:11:60449890 |
| 11 rs766111    | 60280875 A | 4.613 | 8.63E-10 | chr:11:60449890 |
| 11 rs113176669 | 60429394 A | 1126  | 1.15E-09 | chr:11:60449890 |
| 11 rs141816354 | 60429432 C | 1126  | 1.15E-09 | chr:11:60449890 |
| 11 rs2306833   | 60428082 C | 1126  | 1.15E-09 | chr:11:60449890 |
| 11 rs2306835   | 60428352 C | 1126  | 1.15E-09 | chr:11:60449890 |
| 11 rs74805892  | 60427956 A | 1126  | 1.15E-09 | chr:11:60449890 |
| 11 rs75254703  | 60429344 C | 1126  | 1.15E-09 | chr:11:60449890 |
| 11 rs76043830  | 60429187 T | 1126  | 1.15E-09 | chr:11:60449890 |
| 11 rs78425093  | 60428410 A | 1126  | 1.15E-09 | chr:11:60449890 |
| 11 rs79419574  | 60428004 T | 1126  | 1.15E-09 | chr:11:60449890 |
| 11 rs79776772  | 60429560 A | 1126  | 1.15E-09 | chr:11:60449890 |
| 11 rs80195534  | 60429104 A | 1126  | 1.15E-09 | chr:11:60449890 |
| 11 rs10897079  | 60290960 G | 4.499 | 1.17E-09 | chr:11:60449890 |
| 11 rs10897080  | 60294184 A | 4.499 | 1.17E-09 | chr:11:60449890 |
| 11 rs10897081  | 60295202 G | 4.499 | 1.17E-09 | chr:11:60449890 |
| 11 rs10897082  | 60295234 G | 4.499 | 1.17E-09 | chr:11:60449890 |
| 11 rs10897083  | 60299838 G | 4.499 | 1.17E-09 | chr:11:60449890 |
| 11 rs11230358  | 60292172 G | 4.499 | 1.17E-09 | chr:11:60449890 |
| 11 rs11230365  | 60298171 T | 4.499 | 1.17E-09 | chr:11:60449890 |
| 11 rs12282328  | 60289291 C | 4.499 | 1.17E-09 | chr:11:60449890 |
| 11 rs12284816  | 60291548 G | 4.499 | 1.17E-09 | chr:11:60449890 |
| 11 rs12286993  | 60289473 T | 4.499 | 1.17E-09 | chr:11:60449890 |
| 11 rs12578017  | 60299330 A | 4.499 | 1.17E-09 | chr:11:60449890 |
| 11 rs4938952   | 60290348 T | 4.499 | 1.17E-09 | chr:11:60449890 |
| 11 rs4938953   | 60295986 T | 4.499 | 1.17E-09 | chr:11:60449890 |
| 11 rs4938954   | 60298660 T | 4.499 | 1.17E-09 | chr:11:60449890 |
| 11 rs4938956   | 60299129 T | 4.499 | 1.17E-09 | chr:11:60449890 |
| 11 rs4939391   | 60290223 T | 4.499 | 1.17E-09 | chr:11:60449890 |
| 11 rs4939393   | 60290352 C | 4.499 | 1.17E-09 | chr:11:60449890 |
| 11 rs4939395   | 60298443 C | 4.499 | 1.17E-09 | chr:11:60449890 |

|                |            |       |          |                 |
|----------------|------------|-------|----------|-----------------|
| 11 rs4939396   | 60298541 C | 4.499 | 1.17E-09 | chr:11:60449890 |
| 11 rs4939397   | 60298564 T | 4.499 | 1.17E-09 | chr:11:60449890 |
| 11 rs4939399   | 60298745 G | 4.499 | 1.17E-09 | chr:11:60449890 |
| 11 rs6591595   | 60291413 C | 4.499 | 1.17E-09 | chr:11:60449890 |
| 11 rs11230375  | 60306767 A | 4.497 | 1.24E-09 | chr:11:60449890 |
| 11 rs11230376  | 60306877 A | 4.497 | 1.24E-09 | chr:11:60449890 |
| 11 rs2077468   | 60308202 T | 4.497 | 1.24E-09 | chr:11:60449890 |
| 11 rs4121607   | 60306301 G | 4.497 | 1.24E-09 | chr:11:60449890 |
| 11 rs750939    | 60308039 C | 4.497 | 1.24E-09 | chr:11:60449890 |
| 11 rs139686528 | 60172693 T | 9.563 | 1.37E-09 | chr:11:60449890 |
| 11 rs4938940   | 60169827 T | 9.563 | 1.37E-09 | chr:11:60449890 |
| 11 rs75332833  | 60165502 A | 9.563 | 1.37E-09 | chr:11:60449890 |
| 11 rs76943117  | 60165816 A | 9.563 | 1.37E-09 | chr:11:60449890 |
| 11 rs12222298  | 60289836 T | 4.433 | 1.94E-09 | chr:11:60449890 |
| 11 rs61898830  | 60515774 G | 6.118 | 1.99E-09 | chr:11:60449890 |
| 11 rs116841458 | 60148566 T | 9.027 | 2.26E-09 | chr:11:60449890 |
| 11 rs117655631 | 60133639 A | 9.027 | 2.26E-09 | chr:11:60449890 |
| 11 rs117961609 | 60148570 T | 9.027 | 2.26E-09 | chr:11:60449890 |
| 11 rs138775550 | 60143481 T | 9.027 | 2.26E-09 | chr:11:60449890 |
| 11 rs2233247   | 60154167 C | 9.027 | 2.26E-09 | chr:11:60449890 |
| 11 rs2233255   | 60160423 C | 9.027 | 2.26E-09 | chr:11:60449890 |
| 11 rs4939351   | 60139906 A | 9.027 | 2.26E-09 | chr:11:60449890 |
| 11 rs7112972   | 60139846 T | 9.027 | 2.26E-09 | chr:11:60449890 |
| 11 rs72472148  | 60157500 C | 9.027 | 2.26E-09 | chr:11:60449890 |
| 11 rs74603923  | 60141495 A | 9.027 | 2.26E-09 | chr:11:60449890 |
| 11 rs74693377  | 60162233 T | 9.027 | 2.26E-09 | chr:11:60449890 |
| 11 rs74836746  | 60147294 T | 9.027 | 2.26E-09 | chr:11:60449890 |
| 11 rs75301877  | 60149538 G | 9.027 | 2.26E-09 | chr:11:60449890 |
| 11 rs75408079  | 60162813 A | 9.027 | 2.26E-09 | chr:11:60449890 |
| 11 rs75443562  | 60144484 T | 9.027 | 2.26E-09 | chr:11:60449890 |
| 11 rs76402001  | 60151580 G | 9.027 | 2.26E-09 | chr:11:60449890 |
| 11 rs76757698  | 60148991 A | 9.027 | 2.26E-09 | chr:11:60449890 |
| 11 rs77256998  | 60155557 C | 9.027 | 2.26E-09 | chr:11:60449890 |
| 11 rs78824219  | 60158249 G | 9.027 | 2.26E-09 | chr:11:60449890 |
| 11 rs78843981  | 60146055 A | 9.027 | 2.26E-09 | chr:11:60449890 |
| 11 rs79926162  | 60132686 G | 9.027 | 2.26E-09 | chr:11:60449890 |
| 11 rs80196453  | 60158841 T | 9.027 | 2.26E-09 | chr:11:60449890 |
| 11 rs191364573 | 60430925 G | 23.42 | 2.56E-09 | chr:11:60449890 |
| 11 rs17155261  | 60511789 G | 6.026 | 2.74E-09 | chr:11:60449890 |
| 11 rs138525506 | 60203839 A | 6.695 | 2.99E-09 | chr:11:60449890 |
| 11 rs12269769  | 60378488 G | 2379  | 3.67E-09 | chr:11:60449890 |
| 11 rs12271356  | 60379030 T | 2060  | 4.52E-09 | chr:11:60449890 |
| 11 rs12284014  | 60391203 G | 2060  | 4.52E-09 | chr:11:60449890 |

|                |            |        |          |                 |
|----------------|------------|--------|----------|-----------------|
| 11 rs184359733 | 60389486 C | 2060   | 4.52E-09 | chr:11:60449890 |
| 11 rs111523940 | 60472332 C | 1148   | 4.77E-09 | chr:11:60449890 |
| 11 rs475320    | 60394279 C | 2138   | 5.97E-09 | chr:11:60449890 |
| 11 rs111747950 | 60495986 G | 14.02  | 9.47E-09 | chr:11:60449890 |
| 11 rs17154846  | 60126725 C | 6.026  | 2.40E-08 | chr:11:60449890 |
| 11 rs4938938   | 60119633 C | 6.026  | 2.40E-08 | chr:11:60449890 |
| 11 rs75812155  | 60126923 G | 6.026  | 2.40E-08 | chr:11:60449890 |
| 11 rs77833123  | 60128200 A | 6.026  | 2.40E-08 | chr:11:60449890 |
| 11 rs77904860  | 60115695 T | 6.026  | 2.40E-08 | chr:11:60449890 |
| 11 rs78474912  | 60127722 A | 6.026  | 2.40E-08 | chr:11:60449890 |
| 11 rs7948556   | 60517887 G | 4.877  | 3.33E-08 | chr:11:60449890 |
| 11 rs17154830  | 60122229 A | 5.833  | 3.44E-08 | chr:11:60449890 |
| 11 rs4939364   | 60232325 A | 4.16   | 4.39E-08 | chr:11:60449890 |
| 11 rs532683805 | 60241237 T | 33.39  | 1.09E-07 | chr:11:60449890 |
| 11 rs573441235 | 60515380 T | 6.561  | 1.34E-07 | chr:11:60449890 |
| 11 rs549412940 | 60303581 G | 4.347  | 1.74E-07 | chr:11:60449890 |
| 11 rs11230283  | 60112476 T | 4.609  | 6.92E-07 | chr:11:60449890 |
| 11 rs7131459   | 60278193 G | 3.326  | 1.56E-06 | chr:11:60449890 |
| 11 rs4939341   | 60111430 A | 4.243  | 1.58E-06 | chr:11:60449890 |
| 11 rs146613330 | 60277804 T | 3.324  | 1.59E-06 | chr:11:60449890 |
| 11 rs192435123 | 60277833 C | 3.324  | 1.59E-06 | chr:11:60449890 |
| 11 rs61900767  | 60278002 C | 3.324  | 1.59E-06 | chr:11:60449890 |
| 11 rs75292430  | 60277982 A | 3.324  | 1.59E-06 | chr:11:60449890 |
| 11 rs482386    | 60400154 C | 0.2881 | 2.66E-06 | chr:11:60449890 |
| 11 rs556448    | 60395181 G | 0.2881 | 2.66E-06 | chr:11:60449890 |
| 11 rs1552474   | 60388078 A | 0.2882 | 2.84E-06 | chr:11:60449890 |
| 11 rs1994457   | 60387600 G | 0.2882 | 2.84E-06 | chr:11:60449890 |
| 11 rs7479522   | 60390389 A | 0.2882 | 2.84E-06 | chr:11:60449890 |
| 11 rs78540235  | 60389656 T | 0.2882 | 2.84E-06 | chr:11:60449890 |
| 11 rs112073301 | 60371040 G | 0.2881 | 3.01E-06 | chr:11:60449890 |
| 11 rs11230424  | 60368782 C | 0.2881 | 3.01E-06 | chr:11:60449890 |
| 11 rs7933702   | 60364916 C | 0.2881 | 3.01E-06 | chr:11:60449890 |
| 11 rs79244499  | 60178119 A | 54.54  | 3.03E-06 | chr:11:60449890 |
| 11 rs1224311   | 60417361 A | 0.293  | 3.46E-06 | chr:11:60449890 |
| 11 rs2054851   | 60380272 T | 0.2906 | 3.50E-06 | chr:11:60449890 |
| 11 rs523318    | 60414669 T | 0.2931 | 3.69E-06 | chr:11:60449890 |
| 11 rs2017738   | 60110746 T | 4.039  | 3.78E-06 | chr:11:60449890 |
| 11 rs962813    | 60110542 A | 4.039  | 3.78E-06 | chr:11:60449890 |
| 11 rs1238233   | 60392174 T | 0.2955 | 4.16E-06 | chr:11:60449890 |
| 11 rs2298559   | 60274640 C | 2.973  | 5.27E-06 | chr:11:60449890 |
| 11 rs1848089   | 60429426 G | 0.301  | 5.86E-06 | chr:11:60449890 |
| 11 rs12362061  | 60446715 C | 0.3032 | 6.44E-06 | chr:11:60449890 |
| 11 rs199581697 | 60369457 G | 3.167  | 6.79E-06 | chr:11:60449890 |

|                |            |        |          |                 |
|----------------|------------|--------|----------|-----------------|
| 11 rs140837952 | 60315830 C | 21.5   | 8.39E-06 | chr:11:60449890 |
| 11 rs6591572   | 60115559 A | 3.366  | 8.58E-06 | chr:11:60449890 |
| 11 rs575559715 | 60301959 T | 2.911  | 8.87E-06 | chr:11:60449890 |
| 11 rs540348150 | 60306059 T | 4.09   | 1.00E-05 | chr:11:60449890 |
| 11 rs2298553   | 60265002 T | 0.3058 | 1.12E-05 | chr:11:60449890 |
| 11 rs190591208 | 60147512 C | 13.15  | 1.13E-05 | chr:11:60449890 |
| 11 rs1373061   | 60125647 A | 3.223  | 1.35E-05 | chr:11:60449890 |
| 11 rs1373062   | 60125591 A | 3.223  | 1.35E-05 | chr:11:60449890 |
| 11 rs1899573   | 60123837 T | 3.223  | 1.35E-05 | chr:11:60449890 |
| 11 rs2034080   | 60121869 T | 3.223  | 1.35E-05 | chr:11:60449890 |
| 11 rs75805701  | 60141605 T | 3.265  | 1.38E-05 | chr:11:60449890 |
| 11 rs11230450  | 60470119 A | 0.3229 | 1.50E-05 | chr:11:60449890 |
| 11 rs77316741  | 60426289 C | 23.65  | 1.57E-05 | chr:11:60449890 |
| 11 rs2034081   | 60121670 C | 3.168  | 1.73E-05 | chr:11:60449890 |
| 11 rs2298558   | 60274393 A | 2.742  | 2.21E-05 | chr:11:60449890 |
| 11 rs1941024   | 60275940 G | 2.869  | 2.24E-05 | chr:11:60449890 |
| 11 rs11230342  | 60261922 A | 0.325  | 2.43E-05 | chr:11:60449890 |
| 11 rs1941023   | 60275901 G | 2.835  | 2.59E-05 | chr:11:60449890 |
| 11 rs150553169 | 60205873 T | 3.334  | 4.06E-05 | chr:11:60449890 |
| 11 rs112473092 | 60259029 T | 0.3442 | 4.59E-05 | chr:11:60449890 |
| 11 rs112097939 | 71487016 A | 0.2352 | 7.62E-08 | chr:11:71478951 |
| 11 rs112117472 | 71481890 T | 0.2352 | 7.62E-08 | chr:11:71478951 |
| 11 rs112678920 | 71475227 C | 0.2352 | 7.62E-08 | chr:11:71478951 |
| 11 rs115580244 | 71476449 T | 0.2352 | 7.62E-08 | chr:11:71478951 |
| 11 rs117290341 | 71470401 T | 0.2352 | 7.62E-08 | chr:11:71478951 |
| 11 rs138406638 | 71473598 A | 0.2352 | 7.62E-08 | chr:11:71478951 |
| 11 rs28546135  | 71470971 T | 0.2352 | 7.62E-08 | chr:11:71478951 |
| 11 rs57981405  | 71474648 T | 0.2352 | 7.62E-08 | chr:11:71478951 |
| 11 rs111622192 | 71453250 A | 0.2401 | 8.25E-08 | chr:11:71478951 |
| 11 rs112047041 | 71454971 T | 0.2401 | 8.25E-08 | chr:11:71478951 |
| 11 rs112284153 | 71456083 G | 0.2401 | 8.25E-08 | chr:11:71478951 |
| 11 rs112454041 | 71453938 A | 0.2401 | 8.25E-08 | chr:11:71478951 |
| 11 rs112571415 | 71456766 G | 0.2401 | 8.25E-08 | chr:11:71478951 |
| 11 rs113205588 | 71454894 G | 0.2401 | 8.25E-08 | chr:11:71478951 |
| 11 rs117013041 | 71456433 A | 0.2401 | 8.25E-08 | chr:11:71478951 |
| 11 rs117294315 | 71453052 C | 0.2401 | 8.25E-08 | chr:11:71478951 |
| 11 rs117399152 | 71458550 A | 0.2401 | 8.25E-08 | chr:11:71478951 |
| 11 rs117422271 | 71456438 T | 0.2401 | 8.25E-08 | chr:11:71478951 |
| 11 rs117663343 | 71456234 G | 0.2401 | 8.25E-08 | chr:11:71478951 |
| 11 rs138887467 | 71456249 G | 0.2401 | 8.25E-08 | chr:11:71478951 |
| 11 rs139739533 | 71456922 A | 0.2401 | 8.25E-08 | chr:11:71478951 |
| 11 rs141862983 | 71453317 G | 0.2401 | 8.25E-08 | chr:11:71478951 |
| 11 rs143717990 | 71454652 A | 0.2401 | 8.25E-08 | chr:11:71478951 |

|                |            |        |          |                 |
|----------------|------------|--------|----------|-----------------|
| 11 rs144528456 | 71457078 C | 0.2401 | 8.25E-08 | chr:11:71478951 |
| 11 rs144533673 | 71456291 T | 0.2401 | 8.25E-08 | chr:11:71478951 |
| 11 rs145479372 | 71459318 G | 0.2401 | 8.25E-08 | chr:11:71478951 |
| 11 rs149203188 | 71457122 G | 0.2401 | 8.25E-08 | chr:11:71478951 |
| 11 rs200502800 | 71454327 G | 0.2401 | 8.25E-08 | chr:11:71478951 |
| 11 rs4508224   | 71457379 A | 0.2401 | 8.25E-08 | chr:11:71478951 |
| 11 rs57427856  | 71457356 A | 0.2401 | 8.25E-08 | chr:11:71478951 |
| 11 rs58080775  | 71457860 T | 0.2401 | 8.25E-08 | chr:11:71478951 |
| 11 rs11826419  | 71476813 T | 0.2379 | 1.40E-07 | chr:11:71478951 |
| 11 rs111685089 | 71465448 T | 0.2424 | 1.42E-07 | chr:11:71478951 |
| 11 rs112589518 | 71461024 A | 0.2424 | 1.42E-07 | chr:11:71478951 |
| 11 rs112928097 | 71465428 G | 0.2424 | 1.42E-07 | chr:11:71478951 |
| 11 rs142876574 | 71469149 G | 0.2424 | 1.42E-07 | chr:11:71478951 |
| 11 rs144191603 | 71469639 A | 0.2424 | 1.42E-07 | chr:11:71478951 |
| 11 rs147769545 | 71509320 A | 0.236  | 1.60E-07 | chr:11:71478951 |
| 11 rs117043276 | 71496288 C | 0.2381 | 1.62E-07 | chr:11:71478951 |
| 11 rs201656235 | 71455134 G | 0.2524 | 1.75E-07 | chr:11:71478951 |
| 11 rs141065030 | 71406315 T | 0.2547 | 1.99E-07 | chr:11:71478951 |
| 11 rs144299510 | 71494085 T | 0.2416 | 2.02E-07 | chr:11:71478951 |
| 11 rs112117929 | 71465240 A | 0.2429 | 2.09E-07 | chr:11:71478951 |
| 11 rs56046689  | 71391924 T | 0.2568 | 2.21E-07 | chr:11:71478951 |
| 11 rs188359817 | 71517937 T | 0.2369 | 2.26E-07 | chr:11:71478951 |
| 11 rs113601696 | 71487483 C | 0.2531 | 2.51E-07 | chr:11:71478951 |
| 11 rs111370636 | 71502886 A | 0.2467 | 2.68E-07 | chr:11:71478951 |
| 11 rs111622241 | 71501686 C | 0.2467 | 2.68E-07 | chr:11:71478951 |
| 11 rs111768712 | 71502260 A | 0.2467 | 2.68E-07 | chr:11:71478951 |
| 11 rs111834487 | 71494430 T | 0.2467 | 2.68E-07 | chr:11:71478951 |
| 11 rs111851258 | 71504211 T | 0.2467 | 2.68E-07 | chr:11:71478951 |
| 11 rs111978215 | 71503203 C | 0.2467 | 2.68E-07 | chr:11:71478951 |
| 11 rs112793304 | 71503501 G | 0.2467 | 2.68E-07 | chr:11:71478951 |
| 11 rs112959996 | 71504126 G | 0.2467 | 2.68E-07 | chr:11:71478951 |
| 11 rs113023473 | 71494961 G | 0.2467 | 2.68E-07 | chr:11:71478951 |
| 11 rs113244346 | 71493080 T | 0.2467 | 2.68E-07 | chr:11:71478951 |
| 11 rs113576471 | 71497616 T | 0.2467 | 2.68E-07 | chr:11:71478951 |
| 11 rs113835715 | 71497836 G | 0.2467 | 2.68E-07 | chr:11:71478951 |
| 11 rs117415597 | 71502424 A | 0.2467 | 2.68E-07 | chr:11:71478951 |
| 11 rs138286719 | 71494309 T | 0.2467 | 2.68E-07 | chr:11:71478951 |
| 11 rs139567594 | 71494129 T | 0.2467 | 2.68E-07 | chr:11:71478951 |
| 11 rs140832990 | 71502369 A | 0.2467 | 2.68E-07 | chr:11:71478951 |
| 11 rs144990809 | 71494133 A | 0.2467 | 2.68E-07 | chr:11:71478951 |
| 11 rs145594744 | 71503728 T | 0.2467 | 2.68E-07 | chr:11:71478951 |
| 11 rs145811849 | 71494203 T | 0.2467 | 2.68E-07 | chr:11:71478951 |
| 11 rs148906356 | 71503729 G | 0.2467 | 2.68E-07 | chr:11:71478951 |

|                |            |        |          |                 |
|----------------|------------|--------|----------|-----------------|
| 11 rs59874980  | 71491557 G | 0.2467 | 2.68E-07 | chr:11:71478951 |
| 11 rs60134124  | 71491309 A | 0.2467 | 2.68E-07 | chr:11:71478951 |
| 11 rs74808860  | 71502930 G | 0.2467 | 2.68E-07 | chr:11:71478951 |
| 11 rs9735986   | 71502009 T | 0.2467 | 2.68E-07 | chr:11:71478951 |
| 11 rs9888285   | 71492885 C | 0.2467 | 2.68E-07 | chr:11:71478951 |
| 11 rs111527020 | 71547945 A | 0.2462 | 2.68E-07 | chr:11:71478951 |
| 11 rs147784943 | 71494103 G | 0.2512 | 3.51E-07 | chr:11:71478951 |
| 11 rs3936729   | 71492015 A | 0.2567 | 3.79E-07 | chr:11:71478951 |
| 11 rs111377817 | 71511577 A | 0.2461 | 3.79E-07 | chr:11:71478951 |
| 11 rs111636055 | 71519524 G | 0.2461 | 3.79E-07 | chr:11:71478951 |
| 11 rs112017440 | 71509167 G | 0.2461 | 3.79E-07 | chr:11:71478951 |
| 11 rs112229651 | 71511029 T | 0.2461 | 3.79E-07 | chr:11:71478951 |
| 11 rs112603823 | 71515414 A | 0.2461 | 3.79E-07 | chr:11:71478951 |
| 11 rs112985036 | 71509494 A | 0.2461 | 3.79E-07 | chr:11:71478951 |
| 11 rs113589598 | 71523694 A | 0.2461 | 3.79E-07 | chr:11:71478951 |
| 11 rs113755421 | 71516891 C | 0.2461 | 3.79E-07 | chr:11:71478951 |
| 11 rs113897858 | 71522461 T | 0.2461 | 3.79E-07 | chr:11:71478951 |
| 11 rs117278305 | 71523561 A | 0.2461 | 3.79E-07 | chr:11:71478951 |
| 11 rs143627111 | 71516771 A | 0.2461 | 3.79E-07 | chr:11:71478951 |
| 11 rs147261185 | 71522726 A | 0.2461 | 3.79E-07 | chr:11:71478951 |
| 11 rs147366569 | 71511423 G | 0.2461 | 3.79E-07 | chr:11:71478951 |
| 11 rs183686301 | 71514446 A | 0.2461 | 3.79E-07 | chr:11:71478951 |
| 11 rs186932557 | 71511050 A | 0.2461 | 3.79E-07 | chr:11:71478951 |
| 11 rs57555327  | 71513070 T | 0.2461 | 3.79E-07 | chr:11:71478951 |
| 11 rs61889030  | 71514780 T | 0.2461 | 3.79E-07 | chr:11:71478951 |
| 11 rs143438086 | 71545286 T | 0.2476 | 3.98E-07 | chr:11:71478951 |
| 11 rs140664745 | 71520218 T | 0.2499 | 4.02E-07 | chr:11:71478951 |
| 11 rs117548791 | 71553354 T | 0.2504 | 4.40E-07 | chr:11:71478951 |
| 11 rs2001829   | 71505115 G | 0.2561 | 4.61E-07 | chr:11:71478951 |
| 11 rs111244511 | 71452165 T | 0.2488 | 4.90E-07 | chr:11:71478951 |
| 11 rs111977831 | 71448133 C | 0.2488 | 4.90E-07 | chr:11:71478951 |
| 11 rs112014140 | 71442059 T | 0.2488 | 4.90E-07 | chr:11:71478951 |
| 11 rs112177401 | 71451075 G | 0.2488 | 4.90E-07 | chr:11:71478951 |
| 11 rs112687323 | 71448174 A | 0.2488 | 4.90E-07 | chr:11:71478951 |
| 11 rs113198838 | 71434075 G | 0.2488 | 4.90E-07 | chr:11:71478951 |
| 11 rs142036188 | 71452214 G | 0.2488 | 4.90E-07 | chr:11:71478951 |
| 11 rs143600501 | 71430485 A | 0.2488 | 4.90E-07 | chr:11:71478951 |
| 11 rs143838207 | 71450879 A | 0.2488 | 4.90E-07 | chr:11:71478951 |
| 11 rs147535932 | 71433631 A | 0.2488 | 4.90E-07 | chr:11:71478951 |
| 11 rs149741157 | 71451886 A | 0.2488 | 4.90E-07 | chr:11:71478951 |
| 11 rs150129489 | 71447438 C | 0.2488 | 4.90E-07 | chr:11:71478951 |
| 11 rs151031340 | 71446800 C | 0.2488 | 4.90E-07 | chr:11:71478951 |
| 11 rs199503066 | 71451929 G | 0.2488 | 4.90E-07 | chr:11:71478951 |

|                |            |        |          |                 |
|----------------|------------|--------|----------|-----------------|
| 11 rs201582744 | 71458371 C | 0.2488 | 4.90E-07 | chr:11:71478951 |
| 11 rs56353834  | 71432244 A | 0.2488 | 4.90E-07 | chr:11:71478951 |
| 11 rs61006895  | 71449545 T | 0.2488 | 4.90E-07 | chr:11:71478951 |
| 11 rs142085652 | 71401598 T | 0.2681 | 4.97E-07 | chr:11:71478951 |
| 11 rs113745620 | 71552610 C | 0.2531 | 5.03E-07 | chr:11:71478951 |
| 11 rs113768098 | 71551652 T | 0.2531 | 5.03E-07 | chr:11:71478951 |
| 11 rs113861571 | 71549242 G | 0.2531 | 5.03E-07 | chr:11:71478951 |
| 11 rs139409528 | 71552092 A | 0.2531 | 5.03E-07 | chr:11:71478951 |
| 11 rs149332957 | 71507343 A | 0.2461 | 5.60E-07 | chr:11:71478951 |
| 11 rs113888897 | 71548942 C | 0.2557 | 5.73E-07 | chr:11:71478951 |
| 11 rs139287982 | 71504464 T | 0.2573 | 6.19E-07 | chr:11:71478951 |
| 11 rs147295352 | 71504455 C | 0.2573 | 6.19E-07 | chr:11:71478951 |
| 11 rs74527678  | 71448252 T | 0.2675 | 6.50E-07 | chr:11:71478951 |
| 11 rs113915307 | 71448103 G | 0.2535 | 6.61E-07 | chr:11:71478951 |
| 11 rs111563159 | 71545289 G | 0.257  | 6.62E-07 | chr:11:71478951 |
| 11 rs111619347 | 71528530 G | 0.257  | 6.62E-07 | chr:11:71478951 |
| 11 rs111703885 | 71526535 G | 0.257  | 6.62E-07 | chr:11:71478951 |
| 11 rs112242950 | 71530920 C | 0.257  | 6.62E-07 | chr:11:71478951 |
| 11 rs112263975 | 71524938 G | 0.257  | 6.62E-07 | chr:11:71478951 |
| 11 rs112960881 | 71537763 C | 0.257  | 6.62E-07 | chr:11:71478951 |
| 11 rs113103656 | 71529890 T | 0.257  | 6.62E-07 | chr:11:71478951 |
| 11 rs113140648 | 71534813 T | 0.257  | 6.62E-07 | chr:11:71478951 |
| 11 rs113146190 | 71539819 A | 0.257  | 6.62E-07 | chr:11:71478951 |
| 11 rs113454825 | 71533389 C | 0.257  | 6.62E-07 | chr:11:71478951 |
| 11 rs113569714 | 71535170 A | 0.257  | 6.62E-07 | chr:11:71478951 |
| 11 rs113691146 | 71538423 A | 0.257  | 6.62E-07 | chr:11:71478951 |
| 11 rs116993311 | 71538445 A | 0.257  | 6.62E-07 | chr:11:71478951 |
| 11 rs118180514 | 71538441 A | 0.257  | 6.62E-07 | chr:11:71478951 |
| 11 rs139581784 | 71528428 T | 0.257  | 6.62E-07 | chr:11:71478951 |
| 11 rs143630406 | 71533375 T | 0.257  | 6.62E-07 | chr:11:71478951 |
| 11 rs144867737 | 71429691 A | 0.2487 | 7.17E-07 | chr:11:71478951 |
| 11 rs369262842 | 71511206 A | 0.2452 | 7.26E-07 | chr:11:71478951 |
| 11 rs73540172  | 71553584 A | 0.2597 | 7.29E-07 | chr:11:71478951 |
| 11 rs111949989 | 71521707 A | 0.2634 | 7.52E-07 | chr:11:71478951 |
| 11 rs113174234 | 71412140 T | 0.2582 | 8.14E-07 | chr:11:71478951 |
| 11 rs143508078 | 71410883 A | 0.2582 | 8.14E-07 | chr:11:71478951 |
| 11 rs146331844 | 71409718 C | 0.2582 | 8.14E-07 | chr:11:71478951 |
| 11 rs150654533 | 71408264 A | 0.2582 | 8.14E-07 | chr:11:71478951 |
| 11 rs113071945 | 71549559 G | 0.2623 | 8.29E-07 | chr:11:71478951 |
| 11 rs112919069 | 71424283 T | 0.258  | 8.31E-07 | chr:11:71478951 |
| 11 rs113639194 | 71426449 A | 0.258  | 8.31E-07 | chr:11:71478951 |
| 11 rs149689195 | 71425783 A | 0.258  | 8.31E-07 | chr:11:71478951 |
| 11 rs112261262 | 71443430 T | 0.2539 | 8.54E-07 | chr:11:71478951 |

|                |            |        |          |                 |
|----------------|------------|--------|----------|-----------------|
| 11 rs113803309 | 71507391 A | 0.2618 | 8.63E-07 | chr:11:71478951 |
| 11 rs113922884 | 71534911 A | 0.2565 | 8.69E-07 | chr:11:71478951 |
| 11 rs111914718 | 71401796 A | 0.2749 | 8.69E-07 | chr:11:71478951 |
| 11 rs149683071 | 71397631 C | 0.2749 | 8.69E-07 | chr:11:71478951 |
| 11 rs114952659 | 71427119 T | 0.2565 | 9.90E-07 | chr:11:71478951 |
| 11 rs141653610 | 71487461 T | 0.3027 | 1.00E-06 | chr:11:71478951 |
| 11 rs113220182 | 71417617 T | 0.2645 | 1.13E-06 | chr:11:71478951 |
| 11 rs113418964 | 71388992 A | 0.2814 | 1.15E-06 | chr:11:71478951 |
| 11 rs7950844   | 71429264 A | 0.2598 | 1.22E-06 | chr:11:71478951 |
| 11 rs56721184  | 71387972 C | 0.2867 | 1.53E-06 | chr:11:71478951 |
| 11 rs60417322  | 71393469 A | 0.2867 | 1.53E-06 | chr:11:71478951 |
| 11 rs79534766  | 71388384 T | 0.2867 | 1.53E-06 | chr:11:71478951 |
| 11 rs143296416 | 71450784 C | 0.2661 | 1.59E-06 | chr:11:71478951 |
| 11 rs111777692 | 71562599 A | 0.2711 | 1.67E-06 | chr:11:71478951 |
| 11 rs112151727 | 71554372 A | 0.2711 | 1.67E-06 | chr:11:71478951 |
| 11 rs112512211 | 71563540 C | 0.2711 | 1.67E-06 | chr:11:71478951 |
| 11 rs113121781 | 71558343 T | 0.2711 | 1.67E-06 | chr:11:71478951 |
| 11 rs113443470 | 71555676 T | 0.2711 | 1.67E-06 | chr:11:71478951 |
| 11 rs111617640 | 71423732 C | 0.2721 | 2.15E-06 | chr:11:71478951 |
| 11 rs144142791 | 71421144 T | 0.2721 | 2.15E-06 | chr:11:71478951 |
| 11 rs145586905 | 71419365 T | 0.2721 | 2.15E-06 | chr:11:71478951 |
| 11 rs183118307 | 71420487 A | 0.2721 | 2.15E-06 | chr:11:71478951 |
| 11 rs186696292 | 71420526 T | 0.2721 | 2.15E-06 | chr:11:71478951 |
| 11 rs7130552   | 71420380 C | 0.2721 | 2.15E-06 | chr:11:71478951 |
| 11 rs7130731   | 71422781 A | 0.2721 | 2.15E-06 | chr:11:71478951 |
| 11 rs111245184 | 71417653 T | 0.279  | 2.24E-06 | chr:11:71478951 |
| 11 rs59845541  | 71460393 T | 0.3036 | 2.40E-06 | chr:11:71478951 |
| 11 rs112382776 | 71413587 A | 0.2753 | 2.41E-06 | chr:11:71478951 |
| 11 rs187549795 | 71413722 G | 0.2753 | 2.41E-06 | chr:11:71478951 |
| 11 rs59878609  | 71450016 C | 0.2716 | 2.47E-06 | chr:11:71478951 |
| 11 rs139450143 | 71623193 A | 0.2714 | 2.75E-06 | chr:11:71478951 |
| 11 rs118022702 | 71428085 A | 0.2831 | 2.85E-06 | chr:11:71478951 |
| 11 rs367800888 | 71399156 A | 0.2735 | 3.19E-06 | chr:11:71478951 |
| 11 rs370135898 | 71399158 T | 0.2735 | 3.19E-06 | chr:11:71478951 |
| 11 rs113964668 | 71566122 G | 0.2823 | 3.64E-06 | chr:11:71478951 |
| 11 rs188543529 | 71449398 T | 0.2808 | 3.93E-06 | chr:11:71478951 |
| 11 rs192271782 | 71449399 G | 0.2808 | 3.93E-06 | chr:11:71478951 |
| 11 rs140769814 | 71568755 A | 0.2803 | 3.97E-06 | chr:11:71478951 |
| 11 rs112175753 | 71570848 T | 0.2847 | 4.08E-06 | chr:11:71478951 |
| 11 rs113903048 | 71574166 A | 0.2847 | 4.08E-06 | chr:11:71478951 |
| 11 rs117128603 | 71581937 A | 0.2807 | 4.15E-06 | chr:11:71478951 |
| 11 rs151208436 | 71612872 C | 0.2821 | 4.25E-06 | chr:11:71478951 |
| 11 rs184448605 | 71614686 G | 0.2821 | 4.25E-06 | chr:11:71478951 |



|                |            |        |          |                 |
|----------------|------------|--------|----------|-----------------|
| 11 rs111825980 | 71624630 C | 0.2822 | 4.50E-06 | chr:11:71478951 |
| 11 rs112479397 | 71621706 A | 0.2822 | 4.50E-06 | chr:11:71478951 |
| 11 rs112694265 | 71623681 G | 0.2822 | 4.50E-06 | chr:11:71478951 |
| 11 rs145553829 | 71622847 A | 0.2822 | 4.50E-06 | chr:11:71478951 |
| 11 rs111776287 | 71388964 A | 0.2872 | 5.13E-06 | chr:11:71478951 |
| 11 rs112309108 | 71397569 A | 0.2872 | 5.13E-06 | chr:11:71478951 |
| 11 rs112645243 | 71389352 G | 0.2872 | 5.13E-06 | chr:11:71478951 |
| 11 rs112684411 | 71402939 A | 0.2872 | 5.13E-06 | chr:11:71478951 |
| 11 rs113484901 | 71403096 A | 0.2872 | 5.13E-06 | chr:11:71478951 |
| 11 rs141530510 | 71398200 T | 0.2872 | 5.13E-06 | chr:11:71478951 |
| 11 rs182427405 | 71395141 T | 0.2872 | 5.13E-06 | chr:11:71478951 |
| 11 rs199603886 | 71398683 T | 0.2872 | 5.13E-06 | chr:11:71478951 |
| 11 rs7112996   | 71397946 A | 0.2872 | 5.13E-06 | chr:11:71478951 |
| 11 rs7948115   | 71400938 A | 0.2872 | 5.13E-06 | chr:11:71478951 |
| 11 rs138777416 | 71587393 T | 0.2889 | 5.67E-06 | chr:11:71478951 |
| 11 rs181889751 | 71437507 A | 0.2824 | 5.81E-06 | chr:11:71478951 |
| 11 rs187348164 | 71611274 T | 0.2884 | 5.91E-06 | chr:11:71478951 |
| 11 rs143268066 | 71580857 C | 0.2898 | 6.06E-06 | chr:11:71478951 |
| 11 rs141269847 | 71607418 C | 0.2914 | 6.35E-06 | chr:11:71478951 |
| 11 rs112306800 | 71582457 G | 0.2914 | 6.72E-06 | chr:11:71478951 |
| 11 rs149191881 | 71580830 A | 0.2914 | 6.72E-06 | chr:11:71478951 |
| 11 rs9667883   | 71580205 A | 0.2914 | 6.72E-06 | chr:11:71478951 |
| 11 rs112314647 | 71618920 A | 0.2931 | 6.92E-06 | chr:11:71478951 |
| 11 rs112451958 | 71612183 A | 0.2931 | 6.92E-06 | chr:11:71478951 |
| 11 rs113097028 | 71619026 A | 0.2931 | 6.92E-06 | chr:11:71478951 |
| 11 rs113499491 | 71618284 T | 0.2931 | 6.92E-06 | chr:11:71478951 |
| 11 rs113647545 | 71613024 T | 0.2931 | 6.92E-06 | chr:11:71478951 |
| 11 rs111442506 | 71600022 T | 0.2977 | 8.90E-06 | chr:11:71478951 |
| 11 rs111591402 | 71587074 C | 0.2999 | 9.17E-06 | chr:11:71478951 |
| 11 rs113005728 | 71588846 C | 0.2999 | 9.17E-06 | chr:11:71478951 |
| 11 rs111433033 | 71597497 G | 0.3096 | 9.84E-06 | chr:11:71478951 |
| 11 rs111234551 | 71599638 A | 0.3024 | 1.02E-05 | chr:11:71478951 |
| 11 rs111236868 | 71600286 C | 0.3024 | 1.02E-05 | chr:11:71478951 |
| 11 rs111853509 | 71596900 A | 0.3024 | 1.02E-05 | chr:11:71478951 |
| 11 rs112075742 | 71606052 G | 0.3024 | 1.02E-05 | chr:11:71478951 |
| 11 rs112290089 | 71604800 A | 0.3024 | 1.02E-05 | chr:11:71478951 |
| 11 rs112295946 | 71596028 T | 0.3024 | 1.02E-05 | chr:11:71478951 |
| 11 rs112472411 | 71595715 C | 0.3024 | 1.02E-05 | chr:11:71478951 |
| 11 rs112474794 | 71601247 T | 0.3024 | 1.02E-05 | chr:11:71478951 |
| 11 rs112736303 | 71603265 A | 0.3024 | 1.02E-05 | chr:11:71478951 |
| 11 rs112815303 | 71583768 T | 0.3024 | 1.02E-05 | chr:11:71478951 |
| 11 rs112938275 | 71596217 C | 0.3024 | 1.02E-05 | chr:11:71478951 |
| 11 rs113607216 | 71603777 C | 0.3024 | 1.02E-05 | chr:11:71478951 |

|                |            |        |          |                 |
|----------------|------------|--------|----------|-----------------|
| 11 rs146984045 | 71610262 C | 0.3024 | 1.02E-05 | chr:11:71478951 |
| 11 rs149345036 | 71600258 A | 0.3024 | 1.02E-05 | chr:11:71478951 |
| 11 rs75672473  | 71831436 A | 0.3097 | 1.07E-05 | chr:11:71478951 |
| 11 rs76876836  | 71762950 C | 0.3097 | 1.07E-05 | chr:11:71478951 |
| 11 rs113342981 | 71615069 A | 0.2948 | 1.11E-05 | chr:11:71478951 |
| 11 rs61745941  | 71717106 A | 0.3119 | 1.21E-05 | chr:11:71478951 |
| 11 rs111859352 | 71624526 G | 0.3079 | 1.24E-05 | chr:11:71478951 |
| 11 rs112207459 | 71624013 A | 0.3079 | 1.24E-05 | chr:11:71478951 |
| 11 rs112283666 | 71622989 C | 0.3079 | 1.24E-05 | chr:11:71478951 |
| 11 rs113073866 | 71624637 G | 0.3079 | 1.24E-05 | chr:11:71478951 |
| 11 rs113132479 | 71623141 C | 0.3079 | 1.24E-05 | chr:11:71478951 |
| 11 rs113218162 | 71622030 T | 0.3079 | 1.24E-05 | chr:11:71478951 |
| 11 rs113965717 | 71622895 A | 0.3079 | 1.24E-05 | chr:11:71478951 |
| 11 rs117270990 | 71622601 C | 0.3079 | 1.24E-05 | chr:11:71478951 |
| 11 rs138762885 | 71622581 A | 0.3079 | 1.24E-05 | chr:11:71478951 |
| 11 rs187552203 | 71620334 C | 0.3079 | 1.24E-05 | chr:11:71478951 |
| 11 rs189758387 | 71620339 T | 0.3079 | 1.24E-05 | chr:11:71478951 |
| 11 rs368364715 | 71620377 C | 0.3079 | 1.24E-05 | chr:11:71478951 |
| 11 rs546265763 | 71620336 C | 0.3079 | 1.24E-05 | chr:11:71478951 |
| 11 rs73527732  | 71624763 C | 0.3079 | 1.24E-05 | chr:11:71478951 |
| 11 rs80164817  | 71627159 A | 0.3079 | 1.24E-05 | chr:11:71478951 |
| 11 rs113713599 | 71589915 A | 0.308  | 1.26E-05 | chr:11:71478951 |
| 11 rs5743661   | 71710190 T | 0.3155 | 1.37E-05 | chr:11:71478951 |
| 11 rs79511620  | 71843574 G | 0.3203 | 1.59E-05 | chr:11:71478951 |
| 11 rs57637306  | 71608335 G | 0.3198 | 1.61E-05 | chr:11:71478951 |
| 11 rs55992367  | 71713415 A | 0.3195 | 1.66E-05 | chr:11:71478951 |
| 11 rs111841654 | 71779599 A | 0.3199 | 1.68E-05 | chr:11:71478951 |
| 11 rs112528665 | 71827261 A | 0.3199 | 1.68E-05 | chr:11:71478951 |
| 11 rs112733852 | 71807134 T | 0.3199 | 1.68E-05 | chr:11:71478951 |
| 11 rs113235021 | 71736088 A | 0.3199 | 1.68E-05 | chr:11:71478951 |
| 11 rs113522868 | 71833705 A | 0.3199 | 1.68E-05 | chr:11:71478951 |
| 11 rs113691033 | 71729383 C | 0.3199 | 1.68E-05 | chr:11:71478951 |
| 11 rs145744312 | 71746546 T | 0.3199 | 1.68E-05 | chr:11:71478951 |
| 11 rs17161942  | 71798979 G | 0.3199 | 1.68E-05 | chr:11:71478951 |
| 11 rs3750913   | 71726168 C | 0.3199 | 1.68E-05 | chr:11:71478951 |
| 11 rs4556571   | 71837708 A | 0.3199 | 1.68E-05 | chr:11:71478951 |
| 11 rs74961945  | 71790020 T | 0.3199 | 1.68E-05 | chr:11:71478951 |
| 11 rs75604223  | 71733723 G | 0.3199 | 1.68E-05 | chr:11:71478951 |
| 11 rs75670662  | 71735675 G | 0.3199 | 1.68E-05 | chr:11:71478951 |
| 11 rs77315934  | 71771141 C | 0.3199 | 1.68E-05 | chr:11:71478951 |
| 11 rs77347578  | 71720946 T | 0.3199 | 1.68E-05 | chr:11:71478951 |
| 11 rs77390942  | 71824768 T | 0.3199 | 1.68E-05 | chr:11:71478951 |
| 11 rs78392235  | 71771899 A | 0.3199 | 1.68E-05 | chr:11:71478951 |

|                |            |        |          |                 |
|----------------|------------|--------|----------|-----------------|
| 11 rs78765335  | 71772955 T | 0.3199 | 1.68E-05 | chr:11:71478951 |
| 11 rs78870582  | 71774639 T | 0.3199 | 1.68E-05 | chr:11:71478951 |
| 11 rs78877838  | 71730071 G | 0.3199 | 1.68E-05 | chr:11:71478951 |
| 11 rs56388069  | 71449434 T | 0.3284 | 1.70E-05 | chr:11:71478951 |
| 11 rs187114523 | 71620250 A | 0.3168 | 1.70E-05 | chr:11:71478951 |
| 11 rs111341349 | 71619816 A | 0.3189 | 1.85E-05 | chr:11:71478951 |
| 11 rs111383075 | 71612002 A | 0.3189 | 1.85E-05 | chr:11:71478951 |
| 11 rs111777150 | 71613695 T | 0.3189 | 1.85E-05 | chr:11:71478951 |
| 11 rs111872291 | 71620731 A | 0.3189 | 1.85E-05 | chr:11:71478951 |
| 11 rs111909061 | 71613333 T | 0.3189 | 1.85E-05 | chr:11:71478951 |
| 11 rs112028406 | 71615426 A | 0.3189 | 1.85E-05 | chr:11:71478951 |
| 11 rs112111343 | 71618077 T | 0.3189 | 1.85E-05 | chr:11:71478951 |
| 11 rs112547505 | 71612612 G | 0.3189 | 1.85E-05 | chr:11:71478951 |
| 11 rs112648344 | 71619803 C | 0.3189 | 1.85E-05 | chr:11:71478951 |
| 11 rs112828649 | 71628055 A | 0.3189 | 1.85E-05 | chr:11:71478951 |
| 11 rs112935456 | 71614018 G | 0.3189 | 1.85E-05 | chr:11:71478951 |
| 11 rs112968593 | 71618090 T | 0.3189 | 1.85E-05 | chr:11:71478951 |
| 11 rs113210471 | 71613073 G | 0.3189 | 1.85E-05 | chr:11:71478951 |
| 11 rs113565216 | 71614717 G | 0.3189 | 1.85E-05 | chr:11:71478951 |
| 11 rs113643647 | 71625682 A | 0.3189 | 1.85E-05 | chr:11:71478951 |
| 11 rs113804643 | 71617480 T | 0.3189 | 1.85E-05 | chr:11:71478951 |
| 11 rs147481551 | 71616113 G | 0.3189 | 1.85E-05 | chr:11:71478951 |
| 11 rs149196799 | 71615475 G | 0.3189 | 1.85E-05 | chr:11:71478951 |
| 11 rs181200236 | 71620240 A | 0.3189 | 1.85E-05 | chr:11:71478951 |
| 11 rs183363232 | 71620319 A | 0.3189 | 1.85E-05 | chr:11:71478951 |
| 11 rs35501875  | 71618788 C | 0.3189 | 1.85E-05 | chr:11:71478951 |
| 11 rs534063245 | 71620372 T | 0.3189 | 1.85E-05 | chr:11:71478951 |
| 11 rs536398708 | 71620366 C | 0.3189 | 1.85E-05 | chr:11:71478951 |
| 11 rs554588283 | 71620368 A | 0.3189 | 1.85E-05 | chr:11:71478951 |
| 11 rs55743841  | 71620101 C | 0.3189 | 1.85E-05 | chr:11:71478951 |
| 11 rs566736461 | 71620369 A | 0.3189 | 1.85E-05 | chr:11:71478951 |
| 11 rs57119231  | 71619951 A | 0.3189 | 1.85E-05 | chr:11:71478951 |
| 11 rs7113974   | 71626089 T | 0.3189 | 1.85E-05 | chr:11:71478951 |
| 11 rs77714543  | 71626920 G | 0.3189 | 1.85E-05 | chr:11:71478951 |
| 11 rs73544108  | 71598136 C | 0.3279 | 1.97E-05 | chr:11:71478951 |
| 11 rs113129037 | 71385843 T | 0.3209 | 2.09E-05 | chr:11:71478951 |
| 11 rs78266495  | 71721757 G | 0.3269 | 2.23E-05 | chr:11:71478951 |
| 11 rs140006723 | 71597700 A | 0.2974 | 2.30E-05 | chr:11:71478951 |
| 11 rs112890198 | 71589441 T | 0.3255 | 2.40E-05 | chr:11:71478951 |
| 11 rs113377542 | 71588539 T | 0.3255 | 2.40E-05 | chr:11:71478951 |
| 11 rs115457937 | 71590682 A | 0.3255 | 2.40E-05 | chr:11:71478951 |
| 11 rs148013077 | 71587617 G | 0.3255 | 2.40E-05 | chr:11:71478951 |
| 11 rs142805197 | 71611170 T | 0.3232 | 2.45E-05 | chr:11:71478951 |

|                |            |        |          |                 |
|----------------|------------|--------|----------|-----------------|
| 11 rs78236537  | 71663905 G | 0.3256 | 2.45E-05 | chr:11:71478951 |
| 11 rs74236637  | 71629627 T | 0.3321 | 2.60E-05 | chr:11:71478951 |
| 11 rs74236638  | 71634987 T | 0.3321 | 2.60E-05 | chr:11:71478951 |
| 11 rs74452125  | 71634029 C | 0.3321 | 2.60E-05 | chr:11:71478951 |
| 11 rs75470061  | 71631293 G | 0.3321 | 2.60E-05 | chr:11:71478951 |
| 11 rs111235011 | 71593434 A | 0.328  | 2.66E-05 | chr:11:71478951 |
| 11 rs111341787 | 71610828 A | 0.328  | 2.66E-05 | chr:11:71478951 |
| 11 rs111397531 | 71603489 T | 0.328  | 2.66E-05 | chr:11:71478951 |
| 11 rs111407683 | 71610099 G | 0.328  | 2.66E-05 | chr:11:71478951 |
| 11 rs111504136 | 71609478 A | 0.328  | 2.66E-05 | chr:11:71478951 |
| 11 rs111541816 | 71610474 G | 0.328  | 2.66E-05 | chr:11:71478951 |
| 11 rs111795214 | 71607640 G | 0.328  | 2.66E-05 | chr:11:71478951 |
| 11 rs111796690 | 71602853 A | 0.328  | 2.66E-05 | chr:11:71478951 |
| 11 rs111806014 | 71603822 T | 0.328  | 2.66E-05 | chr:11:71478951 |
| 11 rs111893693 | 71596228 C | 0.328  | 2.66E-05 | chr:11:71478951 |
| 11 rs111899706 | 71600440 C | 0.328  | 2.66E-05 | chr:11:71478951 |
| 11 rs111962509 | 71608314 T | 0.328  | 2.66E-05 | chr:11:71478951 |
| 11 rs112069436 | 71602411 T | 0.328  | 2.66E-05 | chr:11:71478951 |
| 11 rs112286261 | 71600342 C | 0.328  | 2.66E-05 | chr:11:71478951 |
| 11 rs112440142 | 71595194 A | 0.328  | 2.66E-05 | chr:11:71478951 |
| 11 rs112488002 | 71608625 C | 0.328  | 2.66E-05 | chr:11:71478951 |
| 11 rs112645175 | 71600512 T | 0.328  | 2.66E-05 | chr:11:71478951 |
| 11 rs112738542 | 71609609 A | 0.328  | 2.66E-05 | chr:11:71478951 |
| 11 rs112746340 | 71601959 G | 0.328  | 2.66E-05 | chr:11:71478951 |
| 11 rs112810811 | 71596640 T | 0.328  | 2.66E-05 | chr:11:71478951 |
| 11 rs112940288 | 71605071 C | 0.328  | 2.66E-05 | chr:11:71478951 |
| 11 rs113056139 | 71607194 G | 0.328  | 2.66E-05 | chr:11:71478951 |
| 11 rs113079271 | 71594600 T | 0.328  | 2.66E-05 | chr:11:71478951 |
| 11 rs113250407 | 71603818 T | 0.328  | 2.66E-05 | chr:11:71478951 |
| 11 rs113375621 | 71608752 A | 0.328  | 2.66E-05 | chr:11:71478951 |
| 11 rs113422994 | 71593873 G | 0.328  | 2.66E-05 | chr:11:71478951 |
| 11 rs113538611 | 71601877 C | 0.328  | 2.66E-05 | chr:11:71478951 |
| 11 rs113609084 | 71610282 A | 0.328  | 2.66E-05 | chr:11:71478951 |
| 11 rs113803087 | 71607669 A | 0.328  | 2.66E-05 | chr:11:71478951 |
| 11 rs113923670 | 71602412 G | 0.328  | 2.66E-05 | chr:11:71478951 |
| 11 rs113941681 | 71606194 T | 0.328  | 2.66E-05 | chr:11:71478951 |
| 11 rs114533456 | 71599778 T | 0.328  | 2.66E-05 | chr:11:71478951 |
| 11 rs115455976 | 71599773 A | 0.328  | 2.66E-05 | chr:11:71478951 |
| 11 rs115816951 | 71601273 G | 0.328  | 2.66E-05 | chr:11:71478951 |
| 11 rs138385463 | 71598876 T | 0.328  | 2.66E-05 | chr:11:71478951 |
| 11 rs140521064 | 71601912 G | 0.328  | 2.66E-05 | chr:11:71478951 |
| 11 rs140643126 | 71599845 T | 0.328  | 2.66E-05 | chr:11:71478951 |
| 11 rs146582898 | 71606438 C | 0.328  | 2.66E-05 | chr:11:71478951 |

|                |            |        |                          |
|----------------|------------|--------|--------------------------|
| 11 rs147087227 | 71599848 G | 0.328  | 2.66E-05 chr:11:71478951 |
| 11 rs149651702 | 71596952 C | 0.328  | 2.66E-05 chr:11:71478951 |
| 11 rs151329233 | 71605906 A | 0.328  | 2.66E-05 chr:11:71478951 |
| 11 rs192193103 | 71595964 G | 0.328  | 2.66E-05 chr:11:71478951 |
| 11 rs55815017  | 71610499 T | 0.328  | 2.66E-05 chr:11:71478951 |
| 11 rs55938043  | 71596428 C | 0.328  | 2.66E-05 chr:11:71478951 |
| 11 rs57162500  | 71606955 G | 0.328  | 2.66E-05 chr:11:71478951 |
| 11 rs60057760  | 71596309 C | 0.328  | 2.66E-05 chr:11:71478951 |
| 11 rs60165720  | 71600077 C | 0.328  | 2.66E-05 chr:11:71478951 |
| 11 rs60857568  | 71608919 T | 0.328  | 2.66E-05 chr:11:71478951 |
| 11 rs7111712   | 71600249 G | 0.328  | 2.66E-05 chr:11:71478951 |
| 11 rs75986376  | 71608520 A | 0.328  | 2.66E-05 chr:11:71478951 |
| 11 rs77780241  | 71876935 C | 0.1378 | 3.83E-15 chr:11:71875416 |
| 11 rs113654469 | 71875351 A | 0.1392 | 5.56E-15 chr:11:71875416 |
| 11 rs114319082 | 71875068 T | 0.1392 | 5.56E-15 chr:11:71875416 |
| 11 rs116305805 | 71874606 T | 0.1392 | 5.56E-15 chr:11:71875416 |
| 11 rs117909722 | 71874660 C | 0.1392 | 5.56E-15 chr:11:71875416 |
| 11 rs142294082 | 71876741 G | 0.1392 | 5.56E-15 chr:11:71875416 |
| 11 rs147259385 | 71876632 T | 0.1392 | 5.56E-15 chr:11:71875416 |
| 11 rs148742728 | 71876704 G | 0.1392 | 5.56E-15 chr:11:71875416 |
| 11 rs59894793  | 71874950 G | 0.1392 | 5.56E-15 chr:11:71875416 |
| 11 rs79147044  | 71874466 A | 0.1392 | 5.56E-15 chr:11:71875416 |
| 11 rs80285294  | 71883930 T | 0.1399 | 5.96E-15 chr:11:71875416 |
| 11 rs59231055  | 71874020 A | 0.1351 | 7.41E-15 chr:11:71875416 |
| 11 rs111264786 | 71885452 A | 0.1416 | 7.45E-15 chr:11:71875416 |
| 11 rs111594394 | 71879773 T | 0.1416 | 7.45E-15 chr:11:71875416 |
| 11 rs112068862 | 71885591 T | 0.1416 | 7.45E-15 chr:11:71875416 |
| 11 rs112227293 | 71883585 G | 0.1416 | 7.45E-15 chr:11:71875416 |
| 11 rs112843408 | 71879422 T | 0.1416 | 7.45E-15 chr:11:71875416 |
| 11 rs114480679 | 71883291 G | 0.1416 | 7.45E-15 chr:11:71875416 |
| 11 rs115282592 | 71885527 G | 0.1416 | 7.45E-15 chr:11:71875416 |
| 11 rs116526259 | 71878266 T | 0.1416 | 7.45E-15 chr:11:71875416 |
| 11 rs143497983 | 71881523 T | 0.1416 | 7.45E-15 chr:11:71875416 |
| 11 rs149792914 | 71880782 G | 0.1416 | 7.45E-15 chr:11:71875416 |
| 11 rs192125273 | 71884785 T | 0.1416 | 7.45E-15 chr:11:71875416 |
| 11 rs55693133  | 71878942 T | 0.1416 | 7.45E-15 chr:11:71875416 |
| 11 rs55853463  | 71878832 T | 0.1416 | 7.45E-15 chr:11:71875416 |
| 11 rs57561154  | 71879181 T | 0.1416 | 7.45E-15 chr:11:71875416 |
| 11 rs61194383  | 71877877 T | 0.1416 | 7.45E-15 chr:11:71875416 |
| 11 rs61427200  | 71882726 T | 0.1416 | 7.45E-15 chr:11:71875416 |
| 11 rs633738    | 71883540 G | 0.1416 | 7.45E-15 chr:11:71875416 |
| 11 rs74498718  | 71886281 C | 0.1416 | 7.45E-15 chr:11:71875416 |
| 11 rs75445557  | 71885918 C | 0.1416 | 7.45E-15 chr:11:71875416 |

|                |            |        |          |                 |
|----------------|------------|--------|----------|-----------------|
| 11 rs75576834  | 71877414 A | 0.1416 | 7.45E-15 | chr:11:71875416 |
| 11 rs76789088  | 71882311 T | 0.1416 | 7.45E-15 | chr:11:71875416 |
| 11 rs77672783  | 71880076 C | 0.1416 | 7.45E-15 | chr:11:71875416 |
| 11 rs77840875  | 71885892 C | 0.1416 | 7.45E-15 | chr:11:71875416 |
| 11 rs78222092  | 71884504 A | 0.1416 | 7.45E-15 | chr:11:71875416 |
| 11 rs78244788  | 71885722 G | 0.1416 | 7.45E-15 | chr:11:71875416 |
| 11 rs78309837  | 71884566 G | 0.1416 | 7.45E-15 | chr:11:71875416 |
| 11 rs78599455  | 71884396 A | 0.1416 | 7.45E-15 | chr:11:71875416 |
| 11 rs79775960  | 71878496 G | 0.1416 | 7.45E-15 | chr:11:71875416 |
| 11 rs80101434  | 71881852 G | 0.1416 | 7.45E-15 | chr:11:71875416 |
| 11 rs80194607  | 71885949 A | 0.1416 | 7.45E-15 | chr:11:71875416 |
| 11 rs116700998 | 71874984 C | 0.1426 | 8.15E-15 | chr:11:71875416 |
| 11 rs56876078  | 71874119 T | 0.1578 | 2.98E-14 | chr:11:71875416 |
| 11 rs111540831 | 71859396 G | 0.1485 | 6.18E-14 | chr:11:71875416 |
| 11 rs146852285 | 71859549 T | 0.1512 | 8.76E-14 | chr:11:71875416 |
| 11 rs77210719  | 71865739 T | 0.1512 | 8.76E-14 | chr:11:71875416 |
| 11 rs111649414 | 71852971 C | 0.1569 | 1.98E-13 | chr:11:71875416 |
| 11 rs7950807   | 71848122 A | 0.1101 | 2.81E-13 | chr:11:71875416 |
| 11 rs114683364 | 71852019 C | 0.1637 | 4.25E-13 | chr:11:71875416 |
| 11 rs77546838  | 71852460 C | 0.1637 | 4.25E-13 | chr:11:71875416 |
| 11 rs533755950 | 71852901 C | 0.1698 | 1.80E-12 | chr:11:71875416 |
| 11 rs558716278 | 71852903 T | 0.1698 | 1.80E-12 | chr:11:71875416 |
| 11 rs576865116 | 71852904 G | 0.1698 | 1.80E-12 | chr:11:71875416 |
| 11 rs116589861 | 71852912 G | 0.1747 | 2.77E-12 | chr:11:71875416 |
| 11 rs147767496 | 71852892 G | 0.1773 | 3.47E-12 | chr:11:71875416 |
| 11 rs140631166 | 71852895 C | 0.1781 | 4.00E-12 | chr:11:71875416 |
| 11 rs536159778 | 71852888 T | 0.1896 | 1.16E-11 | chr:11:71875416 |
| 11 rs550493985 | 71852885 T | 0.1896 | 1.16E-11 | chr:11:71875416 |
| 11 rs568992955 | 71852886 C | 0.1896 | 1.16E-11 | chr:11:71875416 |
| 11 rs35340702  | 71901703 A | 0.117  | 8.51E-11 | chr:11:71875416 |
| 11 rs113107673 | 71899266 T | 0.1244 | 1.41E-10 | chr:11:71875416 |
| 11 rs113285405 | 71911758 C | 0.1383 | 3.98E-10 | chr:11:71875416 |
| 11 rs147871389 | 71910135 G | 0.1383 | 3.98E-10 | chr:11:71875416 |
| 11 rs57431438  | 71923472 G | 0.1383 | 3.98E-10 | chr:11:71875416 |
| 11 rs73545636  | 71911978 G | 0.1383 | 3.98E-10 | chr:11:71875416 |
| 11 rs73545654  | 71925659 T | 0.1383 | 3.98E-10 | chr:11:71875416 |
| 11 rs76616849  | 71921347 C | 0.1383 | 3.98E-10 | chr:11:71875416 |
| 11 rs78184297  | 71917563 T | 0.1383 | 3.98E-10 | chr:11:71875416 |
| 11 rs112180002 | 71931075 T | 0.14   | 4.66E-10 | chr:11:71875416 |
| 11 rs2508873   | 71873483 A | 0.2665 | 1.34E-09 | chr:11:71875416 |
| 11 rs57824428  | 71909314 G | 0.1609 | 1.78E-09 | chr:11:71875416 |
| 11 rs73528804  | 71938774 G | 0.176  | 2.46E-09 | chr:11:71875416 |
| 11 rs520360    | 71852973 G | 0.2776 | 4.43E-09 | chr:11:71875416 |

|                |            |         |          |                 |
|----------------|------------|---------|----------|-----------------|
| 11 rs633817    | 71852976 T | 0.2776  | 4.43E-09 | chr:11:71875416 |
| 11 rs607629    | 71872282 G | 0.2816  | 5.54E-09 | chr:11:71875416 |
| 11 rs552194372 | 71912529 C | 0.1326  | 7.82E-09 | chr:11:71875416 |
| 11 rs649089    | 71854128 T | 0.287   | 9.89E-09 | chr:11:71875416 |
| 11 rs17847215  | 71941033 C | 0.1952  | 1.21E-08 | chr:11:71875416 |
| 11 rs116990029 | 71893292 A | 0.06823 | 2.54E-08 | chr:11:71875416 |
| 11 rs117423657 | 71951312 A | 0.192   | 3.99E-08 | chr:11:71875416 |
| 11 rs75430139  | 71921583 T | 0.2356  | 7.75E-08 | chr:11:71875416 |
| 11 rs539740123 | 71912625 T | 0.1204  | 2.31E-07 | chr:11:71875416 |
| 11 rs490201    | 71859737 C | 0.3478  | 3.96E-07 | chr:11:71875416 |
| 11 rs10751197  | 71859422 C | 0.353   | 5.25E-07 | chr:11:71875416 |
| 11 rs10793020  | 71859449 T | 0.353   | 5.25E-07 | chr:11:71875416 |
| 11 rs693273    | 71867993 A | 0.3503  | 5.41E-07 | chr:11:71875416 |
| 11 rs76647350  | 71777543 T | 0.1988  | 6.40E-07 | chr:11:71875416 |
| 11 rs10751196  | 71859377 C | 0.3559  | 6.43E-07 | chr:11:71875416 |
| 11 rs2155334   | 71862576 T | 0.3559  | 6.43E-07 | chr:11:71875416 |
| 11 rs2212468   | 71860029 C | 0.3559  | 6.43E-07 | chr:11:71875416 |
| 11 rs4341566   | 71861062 C | 0.3559  | 6.43E-07 | chr:11:71875416 |
| 11 rs4430545   | 71861055 T | 0.3559  | 6.43E-07 | chr:11:71875416 |
| 11 rs4630325   | 71860709 G | 0.3559  | 6.43E-07 | chr:11:71875416 |
| 11 rs58949519  | 71861388 T | 0.3559  | 6.43E-07 | chr:11:71875416 |
| 11 rs590586    | 71867167 T | 0.3559  | 6.43E-07 | chr:11:71875416 |
| 11 rs667351    | 71869476 G | 0.3559  | 6.43E-07 | chr:11:71875416 |
| 11 rs670507    | 71868759 G | 0.3559  | 6.43E-07 | chr:11:71875416 |
| 11 rs7123197   | 71859351 G | 0.3559  | 6.43E-07 | chr:11:71875416 |
| 11 rs7949807   | 71860531 C | 0.3559  | 6.43E-07 | chr:11:71875416 |
| 11 rs619237    | 71865425 C | 0.3572  | 7.07E-07 | chr:11:71875416 |
| 11 rs550638    | 71857738 C | 0.3587  | 7.94E-07 | chr:11:71875416 |
| 11 rs575341    | 71857373 T | 0.3587  | 7.94E-07 | chr:11:71875416 |
| 11 rs575542    | 71857303 A | 0.3587  | 7.94E-07 | chr:11:71875416 |
| 11 rs682244    | 71856144 T | 0.3587  | 7.94E-07 | chr:11:71875416 |
| 11 rs28490487  | 71853686 T | 0.3601  | 8.95E-07 | chr:11:71875416 |
| 11 rs555306    | 71854493 C | 0.3601  | 8.95E-07 | chr:11:71875416 |
| 11 rs1807257   | 71854236 A | 0.361   | 9.68E-07 | chr:11:71875416 |
| 11 rs59684857  | 71861451 G | 0.365   | 1.30E-06 | chr:11:71875416 |
| 11 rs2276395   | 71824342 A | 0.2159  | 1.35E-06 | chr:11:71875416 |
| 11 rs75003513  | 71840057 G | 0.2159  | 1.35E-06 | chr:11:71875416 |
| 11 rs3750912   | 71726212 T | 0.2165  | 1.38E-06 | chr:11:71875416 |
| 11 rs11235459  | 71878943 C | 0.4124  | 1.57E-06 | chr:11:71875416 |
| 11 rs73533793  | 71750746 A | 0.2225  | 1.79E-06 | chr:11:71875416 |
| 11 rs12361490  | 71891184 G | 0.416   | 2.17E-06 | chr:11:71875416 |
| 11 rs111500908 | 72009590 A | 0.2207  | 2.39E-06 | chr:11:71875416 |
| 11 rs113221724 | 72026376 T | 0.2207  | 2.39E-06 | chr:11:71875416 |

|                |            |        |          |                 |
|----------------|------------|--------|----------|-----------------|
| 11 rs730042    | 72022400 A | 0.2207 | 2.39E-06 | chr:11:71875416 |
| 11 rs76254051  | 72001534 C | 0.2207 | 2.39E-06 | chr:11:71875416 |
| 11 rs77746673  | 72006961 T | 0.2207 | 2.39E-06 | chr:11:71875416 |
| 11 rs78019532  | 72000281 C | 0.2207 | 2.39E-06 | chr:11:71875416 |
| 11 rs2508867   | 71854961 C | 0.3102 | 2.48E-06 | chr:11:71875416 |
| 11 rs2508200   | 71989114 T | 0.222  | 2.54E-06 | chr:11:71875416 |
| 11 rs79355867  | 72080936 G | 0.2335 | 2.85E-06 | chr:11:71875416 |
| 11 rs75144282  | 71755292 T | 0.2237 | 2.94E-06 | chr:11:71875416 |
| 11 rs117306451 | 71992163 T | 0.2188 | 3.48E-06 | chr:11:71875416 |
| 11 rs148943650 | 72157689 T | 0.2467 | 3.86E-06 | chr:11:71875416 |
| 11 rs111746272 | 72154730 G | 0.2501 | 4.51E-06 | chr:11:71875416 |
| 11 rs117992720 | 72041121 T | 0.2369 | 4.71E-06 | chr:11:71875416 |
| 11 rs78020092  | 72126549 T | 0.238  | 4.85E-06 | chr:11:71875416 |
| 11 rs111411394 | 72056473 G | 0.2432 | 5.97E-06 | chr:11:71875416 |
| 11 rs112281346 | 72066195 A | 0.2432 | 5.97E-06 | chr:11:71875416 |
| 11 rs112383758 | 72062727 C | 0.2432 | 5.97E-06 | chr:11:71875416 |
| 11 rs112612875 | 72077565 A | 0.2432 | 5.97E-06 | chr:11:71875416 |
| 11 rs113220071 | 72045394 C | 0.2432 | 5.97E-06 | chr:11:71875416 |
| 11 rs113365347 | 72043454 G | 0.2432 | 5.97E-06 | chr:11:71875416 |
| 11 rs113505743 | 72052024 T | 0.2432 | 5.97E-06 | chr:11:71875416 |
| 11 rs116887615 | 72033343 T | 0.2432 | 5.97E-06 | chr:11:71875416 |
| 11 rs118064075 | 72135608 T | 0.2432 | 5.97E-06 | chr:11:71875416 |
| 11 rs138094861 | 72087873 A | 0.2432 | 5.97E-06 | chr:11:71875416 |
| 11 rs17162130  | 72074367 A | 0.2432 | 5.97E-06 | chr:11:71875416 |
| 11 rs17162141  | 72105592 A | 0.2432 | 5.97E-06 | chr:11:71875416 |
| 11 rs2886351   | 72129362 G | 0.2432 | 5.97E-06 | chr:11:71875416 |
| 11 rs4268536   | 72046557 T | 0.2432 | 5.97E-06 | chr:11:71875416 |
| 11 rs74822582  | 72088916 T | 0.2432 | 5.97E-06 | chr:11:71875416 |
| 11 rs74968219  | 72106568 G | 0.2432 | 5.97E-06 | chr:11:71875416 |
| 11 rs75283690  | 72134925 T | 0.2432 | 5.97E-06 | chr:11:71875416 |
| 11 rs75529696  | 72057560 T | 0.2432 | 5.97E-06 | chr:11:71875416 |
| 11 rs75568499  | 72097667 T | 0.2432 | 5.97E-06 | chr:11:71875416 |
| 11 rs76359286  | 72040645 T | 0.2432 | 5.97E-06 | chr:11:71875416 |
| 11 rs77908390  | 72081566 A | 0.2432 | 5.97E-06 | chr:11:71875416 |
| 11 rs77931970  | 72109920 A | 0.2432 | 5.97E-06 | chr:11:71875416 |
| 11 rs78897299  | 72133382 G | 0.3874 | 6.58E-06 | chr:11:71875416 |
| 11 rs73528860  | 71999741 C | 0.2493 | 6.58E-06 | chr:11:71875416 |
| 11 rs79915705  | 72016091 C | 0.2493 | 6.58E-06 | chr:11:71875416 |
| 11 rs184612655 | 72160500 C | 0.2594 | 6.67E-06 | chr:11:71875416 |
| 11 rs143303789 | 72153707 T | 0.2491 | 7.57E-06 | chr:11:71875416 |
| 11 rs4488227   | 72148384 A | 0.2491 | 7.57E-06 | chr:11:71875416 |
| 11 rs111799334 | 72103668 T | 0.256  | 7.70E-06 | chr:11:71875416 |
| 11 rs17162135  | 72096280 G | 0.256  | 7.70E-06 | chr:11:71875416 |



|                |             |        |          |                  |
|----------------|-------------|--------|----------|------------------|
| 11 rs77797888  | 72112980 A  | 0.256  | 7.70E-06 | chr:11:71875416  |
| 11 rs514933    | 71930207 C  | 0.4299 | 8.30E-06 | chr:11:71875416  |
| 11 rs74438810  | 71973749 T  | 0.253  | 9.10E-06 | chr:11:71875416  |
| 11 rs113153916 | 72111291 G  | 0.2667 | 1.30E-05 | chr:11:71875416  |
| 11 rs113971393 | 72076181 C  | 0.2667 | 1.30E-05 | chr:11:71875416  |
| 11 rs17160018  | 72099692 A  | 0.2667 | 1.30E-05 | chr:11:71875416  |
| 11 rs58058345  | 72095526 T  | 0.2667 | 1.30E-05 | chr:11:71875416  |
| 11 rs58515298  | 72106229 A  | 0.2667 | 1.30E-05 | chr:11:71875416  |
| 11 rs58571741  | 72065710 A  | 0.2667 | 1.30E-05 | chr:11:71875416  |
| 11 rs75696806  | 72110198 G  | 0.2667 | 1.30E-05 | chr:11:71875416  |
| 11 rs78418285  | 72105630 T  | 0.2667 | 1.30E-05 | chr:11:71875416  |
| 11 rs80338635  | 72111903 A  | 0.2667 | 1.30E-05 | chr:11:71875416  |
| 11 rs112328417 | 71886904 G  | 0.3111 | 1.43E-05 | chr:11:71875416  |
| 11 rs112841775 | 71886881 T  | 0.3111 | 1.43E-05 | chr:11:71875416  |
| 11 rs113425218 | 71886898 G  | 0.3111 | 1.43E-05 | chr:11:71875416  |
| 11 rs185908679 | 71886903 T  | 0.3111 | 1.43E-05 | chr:11:71875416  |
| 11 rs147420843 | 71898661 A  | 0.3171 | 1.59E-05 | chr:11:71875416  |
| 11 rs7109307   | 72095165 C  | 0.2797 | 1.66E-05 | chr:11:71875416  |
| 11 rs75218268  | 72113019 C  | 0.2797 | 1.66E-05 | chr:11:71875416  |
| 11 rs76625830  | 72085894 C  | 0.2797 | 1.66E-05 | chr:11:71875416  |
| 11 rs76915961  | 72092449 C  | 0.2797 | 1.66E-05 | chr:11:71875416  |
| 11 rs78990995  | 72103851 T  | 0.2797 | 1.66E-05 | chr:11:71875416  |
| 11 rs7927430   | 72093614 C  | 0.2797 | 1.66E-05 | chr:11:71875416  |
| 11 rs4475949   | 72148244 G  | 0.2686 | 1.70E-05 | chr:11:71875416  |
| 11 rs1893008   | 71894586 A  | 0.321  | 1.83E-05 | chr:11:71875416  |
| 11 rs111796003 | 71385417 C  | 0.3809 | 2.70E-05 | chr:11:71875416  |
| 11 rs1160142   | 72107188 A  | 0.2862 | 3.77E-05 | chr:11:71875416  |
| 12 rs141777284 | 124252713 T | 66.88  | 2.18E-09 | chr:12:124066477 |
| 12 rs75019514  | 124289267 A | 43.91  | 2.88E-08 | chr:12:124066477 |
| 12 rs149282672 | 124346554 G | 28.27  | 2.21E-07 | chr:12:124066477 |
| 12 rs117497930 | 123684538 G | 27.87  | 6.34E-07 | chr:12:124066477 |
| 12 rs143736845 | 123667784 T | 27.3   | 7.12E-07 | chr:12:124066477 |
| 12 rs184130394 | 123844693 A | 23.36  | 6.13E-06 | chr:12:124066477 |
| 12 rs147968480 | 124546836 T | 19.58  | 6.42E-06 | chr:12:124066477 |
| 12 rs67821327  | 124086083 A | 22.2   | 6.97E-06 | chr:12:124066477 |
| 12 rs533134640 | 124255518 T | 16.44  | 7.92E-06 | chr:12:124066477 |
| 12 rs551203459 | 124255521 T | 16.44  | 7.92E-06 | chr:12:124066477 |
| 12 rs559416991 | 124255517 C | 16.44  | 7.92E-06 | chr:12:124066477 |
| 12 rs530657685 | 124084061 G | 34     | 1.14E-05 | chr:12:124066477 |
| 12 rs142230830 | 124064849 T | 72.43  | 1.27E-05 | chr:12:124066477 |
| 12 rs117620597 | 123763176 T | 16.99  | 2.18E-05 | chr:12:124066477 |
| 12 rs201978308 | 123851667 T | 24.4   | 2.26E-05 | chr:12:124066477 |
| 12 rs182688472 | 123772354 T | 16.13  | 2.69E-05 | chr:12:124066477 |

|                |             |       |                           |
|----------------|-------------|-------|---------------------------|
| 12 rs117861889 | 124527442 T | 13.49 | 4.00E-05 chr:12:124066477 |
| 12 rs7969641   | 44310268 T  | 26.21 | 2.78E-33 chr:12:44313657  |
| 12 rs11182328  | 44311277 G  | 25.35 | 7.03E-33 chr:12:44313657  |
| 12 rs11182345  | 44347202 C  | 25.35 | 7.03E-33 chr:12:44313657  |
| 12 rs11829881  | 44322395 G  | 25.35 | 7.03E-33 chr:12:44313657  |
| 12 rs12301015  | 44321160 T  | 25.35 | 7.03E-33 chr:12:44313657  |
| 12 rs12303804  | 44340018 A  | 25.35 | 7.03E-33 chr:12:44313657  |
| 12 rs12309681  | 44343202 T  | 25.35 | 7.03E-33 chr:12:44313657  |
| 12 rs12315094  | 44345773 A  | 25.35 | 7.03E-33 chr:12:44313657  |
| 12 rs4238092   | 44315762 C  | 25.35 | 7.03E-33 chr:12:44313657  |
| 12 rs7308588   | 44356119 A  | 24.56 | 9.57E-33 chr:12:44313657  |
| 12 rs11182326  | 44310333 G  | 24.57 | 1.06E-32 chr:12:44313657  |
| 12 rs17093971  | 44359265 T  | 23.96 | 1.13E-32 chr:12:44313657  |
| 12 rs12318365  | 44352760 T  | 23.8  | 1.72E-32 chr:12:44313657  |
| 12 rs59709721  | 44362347 A  | 22.09 | 4.09E-32 chr:12:44313657  |
| 12 rs73085705  | 44345490 T  | 19.6  | 5.78E-31 chr:12:44313657  |
| 12 rs142965099 | 44339268 A  | 18.92 | 1.10E-30 chr:12:44313657  |
| 12 rs75410353  | 44336522 G  | 18.92 | 1.10E-30 chr:12:44313657  |
| 12 rs80107150  | 44318342 T  | 18.92 | 1.10E-30 chr:12:44313657  |
| 12 rs11182332  | 44317599 A  | 18.91 | 1.14E-30 chr:12:44313657  |
| 12 rs12578394  | 44361955 C  | 18.01 | 2.63E-30 chr:12:44313657  |
| 12 rs77142311  | 44362408 A  | 18.01 | 2.63E-30 chr:12:44313657  |
| 12 rs79186285  | 44361175 T  | 18.01 | 2.63E-30 chr:12:44313657  |
| 12 rs75981654  | 44310128 A  | 15.94 | 3.94E-29 chr:12:44313657  |
| 12 rs10785489  | 44364261 C  | 13.62 | 7.69E-28 chr:12:44313657  |
| 12 rs2407782   | 44278489 A  | 25.3  | 4.68E-26 chr:12:44313657  |
| 12 rs10880575  | 44241681 G  | 24.95 | 6.24E-26 chr:12:44313657  |
| 12 rs4499064   | 44315170 T  | 136.2 | 9.40E-24 chr:12:44313657  |
| 12 rs2407787   | 44300709 G  | 11.47 | 2.34E-22 chr:12:44313657  |
| 12 rs3990339   | 44300728 G  | 11.47 | 2.34E-22 chr:12:44313657  |
| 12 rs1731455   | 44260900 A  | 11.42 | 2.87E-22 chr:12:44313657  |
| 12 rs4768532   | 44279222 C  | 11.14 | 4.87E-22 chr:12:44313657  |
| 12 rs7954130   | 44301327 G  | 10.86 | 8.48E-22 chr:12:44313657  |
| 12 rs1057486   | 44260041 G  | 11.03 | 9.07E-22 chr:12:44313657  |
| 12 rs10736017  | 44300037 A  | 11.03 | 9.07E-22 chr:12:44313657  |
| 12 rs10748377  | 44308151 T  | 11.03 | 9.07E-22 chr:12:44313657  |
| 12 rs10748378  | 44308153 A  | 11.03 | 9.07E-22 chr:12:44313657  |
| 12 rs10785462  | 44299067 A  | 11.03 | 9.07E-22 chr:12:44313657  |
| 12 rs10785463  | 44299093 T  | 11.03 | 9.07E-22 chr:12:44313657  |
| 12 rs10785466  | 44308052 A  | 11.03 | 9.07E-22 chr:12:44313657  |
| 12 rs10880578  | 44291513 C  | 11.03 | 9.07E-22 chr:12:44313657  |
| 12 rs10880585  | 44307982 C  | 11.03 | 9.07E-22 chr:12:44313657  |
| 12 rs11182293  | 44231482 A  | 11.03 | 9.07E-22 chr:12:44313657  |

|               |            |       |                          |
|---------------|------------|-------|--------------------------|
| 12 rs11182324 | 44307868 C | 11.03 | 9.07E-22 chr:12:44313657 |
| 12 rs11182325 | 44307930 G | 11.03 | 9.07E-22 chr:12:44313657 |
| 12 rs11533717 | 44304261 G | 11.03 | 9.07E-22 chr:12:44313657 |
| 12 rs12302508 | 44303914 A | 11.03 | 9.07E-22 chr:12:44313657 |
| 12 rs1358705  | 44287850 C | 11.03 | 9.07E-22 chr:12:44313657 |
| 12 rs1406787  | 44274699 T | 11.03 | 9.07E-22 chr:12:44313657 |
| 12 rs1609548  | 44306947 G | 11.03 | 9.07E-22 chr:12:44313657 |
| 12 rs1609549  | 44306994 A | 11.03 | 9.07E-22 chr:12:44313657 |
| 12 rs1610291  | 44307158 A | 11.03 | 9.07E-22 chr:12:44313657 |
| 12 rs1614042  | 44290018 C | 11.03 | 9.07E-22 chr:12:44313657 |
| 12 rs1621279  | 44249011 C | 11.03 | 9.07E-22 chr:12:44313657 |
| 12 rs1622590  | 44288061 G | 11.03 | 9.07E-22 chr:12:44313657 |
| 12 rs1623667  | 44249258 T | 11.03 | 9.07E-22 chr:12:44313657 |
| 12 rs1623829  | 44262745 A | 11.03 | 9.07E-22 chr:12:44313657 |
| 12 rs1675756  | 44279540 T | 11.03 | 9.07E-22 chr:12:44313657 |
| 12 rs1675758  | 44280027 G | 11.03 | 9.07E-22 chr:12:44313657 |
| 12 rs1675764  | 44285480 T | 11.03 | 9.07E-22 chr:12:44313657 |
| 12 rs1675765  | 44244855 T | 11.03 | 9.07E-22 chr:12:44313657 |
| 12 rs1675767  | 44247135 G | 11.03 | 9.07E-22 chr:12:44313657 |
| 12 rs1675769  | 44248400 T | 11.03 | 9.07E-22 chr:12:44313657 |
| 12 rs1675781  | 44292513 A | 11.03 | 9.07E-22 chr:12:44313657 |
| 12 rs1675785  | 44292747 G | 11.03 | 9.07E-22 chr:12:44313657 |
| 12 rs1675789  | 44290545 A | 11.03 | 9.07E-22 chr:12:44313657 |
| 12 rs1675790  | 44290447 C | 11.03 | 9.07E-22 chr:12:44313657 |
| 12 rs1731421  | 44285207 A | 11.03 | 9.07E-22 chr:12:44313657 |
| 12 rs1731423  | 44278469 G | 11.03 | 9.07E-22 chr:12:44313657 |
| 12 rs1731427  | 44281449 T | 11.03 | 9.07E-22 chr:12:44313657 |
| 12 rs1731429  | 44280899 T | 11.03 | 9.07E-22 chr:12:44313657 |
| 12 rs1731430  | 44280809 A | 11.03 | 9.07E-22 chr:12:44313657 |
| 12 rs1731431  | 44279870 G | 11.03 | 9.07E-22 chr:12:44313657 |
| 12 rs1731432  | 44279783 T | 11.03 | 9.07E-22 chr:12:44313657 |
| 12 rs1731433  | 44279776 G | 11.03 | 9.07E-22 chr:12:44313657 |
| 12 rs1731434  | 44272915 A | 11.03 | 9.07E-22 chr:12:44313657 |
| 12 rs1731435  | 44292195 A | 11.03 | 9.07E-22 chr:12:44313657 |
| 12 rs1731447  | 44289250 A | 11.03 | 9.07E-22 chr:12:44313657 |
| 12 rs1731450  | 44246041 T | 11.03 | 9.07E-22 chr:12:44313657 |
| 12 rs1731452  | 44249745 C | 11.03 | 9.07E-22 chr:12:44313657 |
| 12 rs1731454  | 44251107 T | 11.03 | 9.07E-22 chr:12:44313657 |
| 12 rs1731456  | 44286932 A | 11.03 | 9.07E-22 chr:12:44313657 |
| 12 rs1731457  | 44286499 T | 11.03 | 9.07E-22 chr:12:44313657 |
| 12 rs1731458  | 44285969 T | 11.03 | 9.07E-22 chr:12:44313657 |
| 12 rs1731459  | 44285844 C | 11.03 | 9.07E-22 chr:12:44313657 |
| 12 rs2219629  | 44235406 T | 11.03 | 9.07E-22 chr:12:44313657 |

|               |            |       |                          |
|---------------|------------|-------|--------------------------|
| 12 rs2407783  | 44300247 G | 11.03 | 9.07E-22 chr:12:44313657 |
| 12 rs2407786  | 44300467 A | 11.03 | 9.07E-22 chr:12:44313657 |
| 12 rs2447113  | 44282785 G | 11.03 | 9.07E-22 chr:12:44313657 |
| 12 rs2614394  | 44282166 A | 11.03 | 9.07E-22 chr:12:44313657 |
| 12 rs2614395  | 44291851 G | 11.03 | 9.07E-22 chr:12:44313657 |
| 12 rs2951435  | 44291174 G | 11.03 | 9.07E-22 chr:12:44313657 |
| 12 rs3990338  | 44300626 T | 11.03 | 9.07E-22 chr:12:44313657 |
| 12 rs4238089  | 44299688 A | 11.03 | 9.07E-22 chr:12:44313657 |
| 12 rs4238090  | 44299833 T | 11.03 | 9.07E-22 chr:12:44313657 |
| 12 rs4238091  | 44299900 T | 11.03 | 9.07E-22 chr:12:44313657 |
| 12 rs4354753  | 44293620 G | 11.03 | 9.07E-22 chr:12:44313657 |
| 12 rs4363674  | 44307404 C | 11.03 | 9.07E-22 chr:12:44313657 |
| 12 rs4469953  | 44307349 T | 11.03 | 9.07E-22 chr:12:44313657 |
| 12 rs4537822  | 44299389 C | 11.03 | 9.07E-22 chr:12:44313657 |
| 12 rs4572198  | 44298071 G | 11.03 | 9.07E-22 chr:12:44313657 |
| 12 rs4572199  | 44298378 G | 11.03 | 9.07E-22 chr:12:44313657 |
| 12 rs4609659  | 44298550 C | 11.03 | 9.07E-22 chr:12:44313657 |
| 12 rs4768534  | 44298821 T | 11.03 | 9.07E-22 chr:12:44313657 |
| 12 rs4768535  | 44298917 C | 11.03 | 9.07E-22 chr:12:44313657 |
| 12 rs4768538  | 44300011 A | 11.03 | 9.07E-22 chr:12:44313657 |
| 12 rs5019975  | 44299370 G | 11.03 | 9.07E-22 chr:12:44313657 |
| 12 rs61930734 | 44304400 C | 11.03 | 9.07E-22 chr:12:44313657 |
| 12 rs7295151  | 44308194 G | 11.03 | 9.07E-22 chr:12:44313657 |
| 12 rs7305609  | 44240652 A | 11.03 | 9.07E-22 chr:12:44313657 |
| 12 rs73096934 | 44241279 G | 11.03 | 9.07E-22 chr:12:44313657 |
| 12 rs7954640  | 44301081 C | 11.03 | 9.07E-22 chr:12:44313657 |
| 12 rs7955615  | 44295861 C | 11.03 | 9.07E-22 chr:12:44313657 |
| 12 rs7961078  | 44306167 A | 11.03 | 9.07E-22 chr:12:44313657 |
| 12 rs7974045  | 44306266 G | 11.03 | 9.07E-22 chr:12:44313657 |
| 12 rs7979391  | 44295117 G | 11.03 | 9.07E-22 chr:12:44313657 |
| 12 rs79916589 | 44289680 T | 10.96 | 9.14E-22 chr:12:44313657 |
| 12 rs2407784  | 44300347 T | 10.94 | 1.19E-21 chr:12:44313657 |
| 12 rs2407785  | 44300358 A | 10.94 | 1.19E-21 chr:12:44313657 |
| 12 rs4768536  | 44298961 A | 9.753 | 1.32E-21 chr:12:44313657 |
| 12 rs10785468 | 44309434 G | 9.896 | 1.38E-21 chr:12:44313657 |
| 12 rs10785469 | 44309459 G | 9.896 | 1.38E-21 chr:12:44313657 |
| 12 rs7974046  | 44306269 G | 10.66 | 1.41E-21 chr:12:44313657 |
| 12 rs4768539  | 44303524 C | 10.59 | 1.53E-21 chr:12:44313657 |
| 12 rs1675787  | 44290928 T | 10.85 | 1.87E-21 chr:12:44313657 |
| 12 rs10785467 | 44309433 T | 9.756 | 2.79E-21 chr:12:44313657 |
| 12 rs4768052  | 44308910 T | 9.756 | 2.79E-21 chr:12:44313657 |
| 12 rs4768053  | 44309069 C | 9.756 | 2.79E-21 chr:12:44313657 |
| 12 rs4768543  | 44308978 A | 9.756 | 2.79E-21 chr:12:44313657 |

|                |            |       |          |                 |
|----------------|------------|-------|----------|-----------------|
| 12 rs76302415  | 44337252 G | 10.93 | 5.86E-21 | chr:12:44313657 |
| 12 rs77280204  | 44329231 G | 10.85 | 7.31E-21 | chr:12:44313657 |
| 12 rs202162002 | 44301820 A | 3.556 | 9.13E-21 | chr:12:44313657 |
| 12 rs367898590 | 44301818 C | 3.556 | 9.13E-21 | chr:12:44313657 |
| 12 rs375152458 | 44301817 T | 3.556 | 9.13E-21 | chr:12:44313657 |
| 12 rs9668647   | 44301830 A | 3.556 | 9.13E-21 | chr:12:44313657 |
| 12 rs11520309  | 44303103 A | 9.491 | 9.46E-21 | chr:12:44313657 |
| 12 rs79242691  | 44353255 T | 10.44 | 9.57E-21 | chr:12:44313657 |
| 12 rs200356917 | 44301684 A | 3.74  | 1.08E-20 | chr:12:44313657 |
| 12 rs201614323 | 44301725 T | 3.744 | 1.25E-20 | chr:12:44313657 |
| 12 rs10880579  | 44297491 A | 9.232 | 1.36E-20 | chr:12:44313657 |
| 12 rs10880580  | 44297492 G | 9.232 | 1.36E-20 | chr:12:44313657 |
| 12 rs7965240   | 44309591 A | 8.99  | 2.83E-20 | chr:12:44313657 |
| 12 rs7965330   | 44309602 A | 8.99  | 2.83E-20 | chr:12:44313657 |
| 12 rs11182358  | 44363335 T | 207.6 | 2.97E-20 | chr:12:44313657 |
| 12 rs10880606  | 44369103 A | 6.503 | 3.97E-20 | chr:12:44313657 |
| 12 rs73100933  | 44314453 T | 250.4 | 7.75E-20 | chr:12:44313657 |
| 12 rs73100935  | 44314454 G | 250.4 | 7.75E-20 | chr:12:44313657 |
| 12 rs60885283  | 44237334 G | 9.297 | 8.30E-20 | chr:12:44313657 |
| 12 rs12582087  | 44252335 T | 9.062 | 1.94E-19 | chr:12:44313657 |
| 12 rs116967754 | 44262202 T | 8.992 | 2.11E-19 | chr:12:44313657 |
| 12 rs10880573  | 44226111 G | 8.715 | 2.17E-19 | chr:12:44313657 |
| 12 rs7972025   | 44222722 T | 8.715 | 2.17E-19 | chr:12:44313657 |
| 12 rs4768544   | 44309919 C | 97.67 | 3.26E-19 | chr:12:44313657 |
| 12 rs12579894  | 44298747 A | 8.908 | 3.80E-19 | chr:12:44313657 |
| 12 rs74884917  | 44278777 A | 8.908 | 3.80E-19 | chr:12:44313657 |
| 12 rs12582940  | 44288587 A | 8.846 | 3.80E-19 | chr:12:44313657 |
| 12 rs1675755   | 44278773 G | 6.978 | 4.97E-19 | chr:12:44313657 |
| 12 rs7973886   | 44306134 G | 6.535 | 5.54E-19 | chr:12:44313657 |
| 12 rs7963981   | 44306066 T | 5.596 | 1.77E-18 | chr:12:44313657 |
| 12 rs7973769   | 44306028 G | 5.596 | 1.77E-18 | chr:12:44313657 |
| 12 rs7973774   | 44306044 G | 5.596 | 1.77E-18 | chr:12:44313657 |
| 12 rs11182290  | 44221032 A | 8.248 | 3.56E-18 | chr:12:44313657 |
| 12 rs10880599  | 44337662 T | 273.3 | 4.71E-18 | chr:12:44313657 |
| 12 rs10785472  | 44312774 T | 293.3 | 6.07E-18 | chr:12:44313657 |
| 12 rs9668752   | 44302117 T | 5.76  | 6.17E-18 | chr:12:44313657 |
| 12 rs10506232  | 44316485 A | 312.8 | 6.53E-18 | chr:12:44313657 |
| 12 rs10748379  | 44315397 T | 312.8 | 6.53E-18 | chr:12:44313657 |
| 12 rs10748380  | 44315492 G | 312.8 | 6.53E-18 | chr:12:44313657 |
| 12 rs10785470  | 44311983 A | 312.8 | 6.53E-18 | chr:12:44313657 |
| 12 rs10785471  | 44311998 A | 312.8 | 6.53E-18 | chr:12:44313657 |
| 12 rs10785473  | 44316584 G | 312.8 | 6.53E-18 | chr:12:44313657 |
| 12 rs10785474  | 44318428 G | 312.8 | 6.53E-18 | chr:12:44313657 |

|               |            |       |                          |
|---------------|------------|-------|--------------------------|
| 12 rs10785475 | 44318632 G | 312.8 | 6.53E-18 chr:12:44313657 |
| 12 rs10785476 | 44318633 A | 312.8 | 6.53E-18 chr:12:44313657 |
| 12 rs10785477 | 44318723 G | 312.8 | 6.53E-18 chr:12:44313657 |
| 12 rs10785478 | 44320156 T | 312.8 | 6.53E-18 chr:12:44313657 |
| 12 rs10785479 | 44320184 G | 312.8 | 6.53E-18 chr:12:44313657 |
| 12 rs10785481 | 44325061 G | 312.8 | 6.53E-18 chr:12:44313657 |
| 12 rs10785482 | 44342910 T | 312.8 | 6.53E-18 chr:12:44313657 |
| 12 rs10880586 | 44310604 G | 312.8 | 6.53E-18 chr:12:44313657 |
| 12 rs10880587 | 44311477 T | 312.8 | 6.53E-18 chr:12:44313657 |
| 12 rs10880588 | 44311787 T | 312.8 | 6.53E-18 chr:12:44313657 |
| 12 rs10880589 | 44313193 T | 312.8 | 6.53E-18 chr:12:44313657 |
| 12 rs10880590 | 44313636 G | 312.8 | 6.53E-18 chr:12:44313657 |
| 12 rs10880591 | 44314630 T | 312.8 | 6.53E-18 chr:12:44313657 |
| 12 rs10880592 | 44315171 A | 312.8 | 6.53E-18 chr:12:44313657 |
| 12 rs10880597 | 44336172 A | 312.8 | 6.53E-18 chr:12:44313657 |
| 12 rs10880598 | 44336375 T | 312.8 | 6.53E-18 chr:12:44313657 |
| 12 rs10880600 | 44343641 T | 312.8 | 6.53E-18 chr:12:44313657 |
| 12 rs10880601 | 44343768 A | 312.8 | 6.53E-18 chr:12:44313657 |
| 12 rs10880604 | 44349398 G | 312.8 | 6.53E-18 chr:12:44313657 |
| 12 rs10880605 | 44349669 A | 312.8 | 6.53E-18 chr:12:44313657 |
| 12 rs11182329 | 44314564 A | 312.8 | 6.53E-18 chr:12:44313657 |
| 12 rs11182337 | 44320875 A | 312.8 | 6.53E-18 chr:12:44313657 |
| 12 rs11182339 | 44331841 A | 312.8 | 6.53E-18 chr:12:44313657 |
| 12 rs11182341 | 44339216 T | 312.8 | 6.53E-18 chr:12:44313657 |
| 12 rs11182346 | 44350097 T | 312.8 | 6.53E-18 chr:12:44313657 |
| 12 rs12305959 | 44332618 G | 312.8 | 6.53E-18 chr:12:44313657 |
| 12 rs12369569 | 44313000 T | 312.8 | 6.53E-18 chr:12:44313657 |
| 12 rs1881926  | 44319047 G | 312.8 | 6.53E-18 chr:12:44313657 |
| 12 rs1881927  | 44318922 G | 312.8 | 6.53E-18 chr:12:44313657 |
| 12 rs2031056  | 44315008 A | 312.8 | 6.53E-18 chr:12:44313657 |
| 12 rs3925072  | 44327565 C | 312.8 | 6.53E-18 chr:12:44313657 |
| 12 rs3925073  | 44327736 A | 312.8 | 6.53E-18 chr:12:44313657 |
| 12 rs4238093  | 44315925 A | 312.8 | 6.53E-18 chr:12:44313657 |
| 12 rs4417371  | 44327407 A | 312.8 | 6.53E-18 chr:12:44313657 |
| 12 rs4768055  | 44317208 G | 312.8 | 6.53E-18 chr:12:44313657 |
| 12 rs4768057  | 44332707 G | 312.8 | 6.53E-18 chr:12:44313657 |
| 12 rs4768546  | 44336686 C | 312.8 | 6.53E-18 chr:12:44313657 |
| 12 rs5023324  | 44327148 C | 312.8 | 6.53E-18 chr:12:44313657 |
| 12 rs6582490  | 44329957 G | 312.8 | 6.53E-18 chr:12:44313657 |
| 12 rs73100931 | 44314388 C | 312.8 | 6.53E-18 chr:12:44313657 |
| 12 rs73100975 | 44339016 T | 312.8 | 6.53E-18 chr:12:44313657 |
| 12 rs7311847  | 44315590 A | 312.8 | 6.53E-18 chr:12:44313657 |
| 12 rs7312373  | 44332843 C | 312.8 | 6.53E-18 chr:12:44313657 |

|                |            |        |                          |
|----------------|------------|--------|--------------------------|
| 12 rs7956825   | 44313718 G | 312.8  | 6.53E-18 chr:12:44313657 |
| 12 rs7957074   | 44313906 T | 312.8  | 6.53E-18 chr:12:44313657 |
| 12 rs7971487   | 44313830 G | 312.8  | 6.53E-18 chr:12:44313657 |
| 12 rs7974214   | 44319517 T | 312.8  | 6.53E-18 chr:12:44313657 |
| 12 rs7974501   | 44313794 C | 312.8  | 6.53E-18 chr:12:44313657 |
| 12 rs4768056   | 44322826 T | 298.9  | 7.38E-18 chr:12:44313657 |
| 12 rs9668657   | 44302174 A | 5.795  | 7.74E-18 chr:12:44313657 |
| 12 rs11182327  | 44310418 A | 310    | 8.24E-18 chr:12:44313657 |
| 12 rs7965873   | 44354797 A | 310.9  | 8.31E-18 chr:12:44313657 |
| 12 rs7971628   | 44353583 G | 310.9  | 8.31E-18 chr:12:44313657 |
| 12 rs7971516   | 44353473 G | 310.5  | 8.59E-18 chr:12:44313657 |
| 12 rs9669053   | 44301883 G | 3.476  | 1.08E-17 chr:12:44313657 |
| 12 rs10736018  | 44387942 G | 7.365  | 1.33E-17 chr:12:44313657 |
| 12 rs10785492  | 44384727 C | 7.365  | 1.33E-17 chr:12:44313657 |
| 12 rs10880608  | 44371763 G | 7.365  | 1.33E-17 chr:12:44313657 |
| 12 rs2407788   | 44388354 A | 7.365  | 1.33E-17 chr:12:44313657 |
| 12 rs7312422   | 44382509 C | 7.365  | 1.33E-17 chr:12:44313657 |
| 12 rs11182274  | 44204068 A | 0.2108 | 1.58E-17 chr:12:44313657 |
| 12 rs7964465   | 44312649 G | 273.3  | 1.80E-17 chr:12:44313657 |
| 12 rs199914146 | 44303005 G | 4.778  | 1.96E-17 chr:12:44313657 |
| 12 rs201066998 | 44303041 G | 4.787  | 2.72E-17 chr:12:44313657 |
| 12 rs201261552 | 44302974 C | 4.622  | 3.20E-17 chr:12:44313657 |
| 12 rs11182280  | 44209584 C | 7.386  | 3.37E-17 chr:12:44313657 |
| 12 rs7968199   | 44212237 G | 7.386  | 3.37E-17 chr:12:44313657 |
| 12 rs17121283  | 44185593 T | 7.324  | 3.96E-17 chr:12:44313657 |
| 12 rs199957779 | 44302961 T | 4.621  | 4.14E-17 chr:12:44313657 |
| 12 rs201324668 | 44302939 C | 4.621  | 4.14E-17 chr:12:44313657 |
| 12 rs5020605   | 44216504 G | 0.2177 | 4.64E-17 chr:12:44313657 |
| 12 rs1470363   | 44093442 G | 4.307  | 4.96E-17 chr:12:44313657 |
| 12 rs10506231  | 44206027 T | 7.166  | 5.77E-17 chr:12:44313657 |
| 12 rs10880571  | 44207279 C | 7.166  | 5.77E-17 chr:12:44313657 |
| 12 rs11182273  | 44202901 C | 7.166  | 5.77E-17 chr:12:44313657 |
| 12 rs11182275  | 44206289 G | 7.166  | 5.77E-17 chr:12:44313657 |
| 12 rs3764004   | 44201451 C | 7.166  | 5.77E-17 chr:12:44313657 |
| 12 rs6582484   | 44190630 C | 7.166  | 5.77E-17 chr:12:44313657 |
| 12 rs10785460  | 44264906 T | 7.349  | 3.64E-16 chr:12:44313657 |
| 12 rs1470364   | 44093370 C | 4.012  | 3.84E-16 chr:12:44313657 |
| 12 rs7954384   | 44301587 G | 3.403  | 4.04E-16 chr:12:44313657 |
| 12 rs7969754   | 44301580 A | 3.403  | 4.04E-16 chr:12:44313657 |
| 12 rs10880551  | 44111538 C | 0.2363 | 5.85E-16 chr:12:44313657 |
| 12 rs11182226  | 44110656 G | 0.2363 | 5.85E-16 chr:12:44313657 |
| 12 rs1596508   | 44104036 T | 0.2363 | 5.85E-16 chr:12:44313657 |
| 12 rs1874298   | 44104902 T | 0.2363 | 5.85E-16 chr:12:44313657 |

|               |            |        |          |                 |
|---------------|------------|--------|----------|-----------------|
| 12 rs1874299  | 44104941 A | 0.2363 | 5.85E-16 | chr:12:44313657 |
| 12 rs4559744  | 44104561 G | 0.2363 | 5.85E-16 | chr:12:44313657 |
| 12 rs7138871  | 44105106 G | 0.2363 | 5.85E-16 | chr:12:44313657 |
| 12 rs7139024  | 44105265 G | 0.2363 | 5.85E-16 | chr:12:44313657 |
| 12 rs11182243 | 44138324 T | 0.2375 | 7.38E-16 | chr:12:44313657 |
| 12 rs1824818  | 44098609 T | 0.2413 | 7.97E-16 | chr:12:44313657 |
| 12 rs1824819  | 44098691 T | 0.2413 | 7.97E-16 | chr:12:44313657 |
| 12 rs1461567  | 44164689 A | 0.2371 | 8.06E-16 | chr:12:44313657 |
| 12 rs58197711 | 44098192 T | 0.2415 | 9.41E-16 | chr:12:44313657 |
| 12 rs1585715  | 44103294 A | 0.2428 | 9.84E-16 | chr:12:44313657 |
| 12 rs11531289 | 44102845 C | 0.2428 | 1.14E-15 | chr:12:44313657 |
| 12 rs2083955  | 44100446 C | 0.2428 | 1.14E-15 | chr:12:44313657 |
| 12 rs11561518 | 44097865 C | 0.2475 | 1.28E-15 | chr:12:44313657 |
| 12 rs12312338 | 44340209 T | 7.634  | 1.75E-15 | chr:12:44313657 |
| 12 rs75725665 | 44340195 T | 7.634  | 1.75E-15 | chr:12:44313657 |
| 12 rs1842049  | 44097068 C | 0.2516 | 1.83E-15 | chr:12:44313657 |
| 12 rs1098878  | 44423339 C | 6.046  | 3.18E-15 | chr:12:44313657 |
| 12 rs12322164 | 44413166 A | 6.046  | 3.18E-15 | chr:12:44313657 |
| 12 rs1688723  | 44418659 A | 6.046  | 3.18E-15 | chr:12:44313657 |
| 12 rs859699   | 44414828 C | 6.046  | 3.18E-15 | chr:12:44313657 |
| 12 rs863580   | 44413924 T | 6.046  | 3.18E-15 | chr:12:44313657 |
| 12 rs11182382 | 44410575 G | 5.903  | 5.04E-15 | chr:12:44313657 |
| 12 rs842199   | 44457572 T | 5.676  | 1.01E-14 | chr:12:44313657 |
| 12 rs1478614  | 44090672 A | 0.2746 | 2.85E-14 | chr:12:44313657 |
| 12 rs12230995 | 44088214 G | 0.2753 | 4.06E-14 | chr:12:44313657 |
| 12 rs7958485  | 44088856 G | 0.2753 | 4.06E-14 | chr:12:44313657 |
| 12 rs842202   | 44455107 T | 5.142  | 6.04E-14 | chr:12:44313657 |
| 12 rs7301406  | 44391937 C | 5.428  | 7.80E-14 | chr:12:44313657 |
| 12 rs10748386 | 44371118 C | 5.561  | 2.10E-13 | chr:12:44313657 |
| 12 rs4474500  | 44373565 T | 5.561  | 2.10E-13 | chr:12:44313657 |
| 12 rs6582479  | 44091149 A | 0.2928 | 2.33E-13 | chr:12:44313657 |
| 12 rs10082995 | 44232340 T | 7.329  | 2.51E-13 | chr:12:44313657 |
| 12 rs12313365 | 44433578 C | 8.64   | 4.51E-13 | chr:12:44313657 |
| 12 rs11182294 | 44231539 T | 7.149  | 5.96E-13 | chr:12:44313657 |
| 12 rs11182336 | 44320611 G | 9.866  | 6.19E-13 | chr:12:44313657 |
| 12 rs7350559  | 44362805 G | 9.806  | 6.64E-13 | chr:12:44313657 |
| 12 rs1141168  | 44182706 G | 0.295  | 9.03E-13 | chr:12:44313657 |
| 12 rs10785485 | 44355693 A | 9.602  | 1.17E-12 | chr:12:44313657 |
| 12 rs11182331 | 44317153 C | 9.602  | 1.17E-12 | chr:12:44313657 |
| 12 rs11182334 | 44318590 G | 9.602  | 1.17E-12 | chr:12:44313657 |
| 12 rs11182340 | 44335190 G | 9.602  | 1.17E-12 | chr:12:44313657 |
| 12 rs11182343 | 44344206 A | 9.602  | 1.17E-12 | chr:12:44313657 |
| 12 rs11182347 | 44353617 G | 9.602  | 1.17E-12 | chr:12:44313657 |



|                |            |       |                          |
|----------------|------------|-------|--------------------------|
| 12 rs11182349  | 44357759 G | 9.602 | 1.17E-12 chr:12:44313657 |
| 12 rs11182351  | 44358078 T | 9.602 | 1.17E-12 chr:12:44313657 |
| 12 rs11182352  | 44361158 G | 9.602 | 1.17E-12 chr:12:44313657 |
| 12 rs117528618 | 44350676 G | 9.602 | 1.17E-12 chr:12:44313657 |
| 12 rs140180348 | 44336849 T | 9.602 | 1.17E-12 chr:12:44313657 |
| 12 rs146427438 | 44339234 T | 9.602 | 1.17E-12 chr:12:44313657 |
| 12 rs150694122 | 44336742 A | 9.602 | 1.17E-12 chr:12:44313657 |
| 12 rs200338856 | 44340179 G | 9.602 | 1.17E-12 chr:12:44313657 |
| 12 rs79112229  | 44361616 G | 9.602 | 1.17E-12 chr:12:44313657 |
| 12 rs80120468  | 44344737 G | 9.602 | 1.17E-12 chr:12:44313657 |
| 12 rs80251371  | 44328497 T | 9.602 | 1.17E-12 chr:12:44313657 |
| 12 rs1701094   | 44468877 A | 5.054 | 1.24E-12 chr:12:44313657 |
| 12 rs1992604   | 44196953 T | 3.165 | 1.27E-12 chr:12:44313657 |
| 12 rs7955112   | 44197497 A | 3.165 | 1.27E-12 chr:12:44313657 |
| 12 rs2657575   | 44471709 G | 4.95  | 1.68E-12 chr:12:44313657 |
| 12 rs10880568  | 44196407 T | 3.137 | 1.91E-12 chr:12:44313657 |
| 12 rs11182298  | 44248189 A | 9.375 | 2.39E-12 chr:12:44313657 |
| 12 rs11182300  | 44249025 T | 9.375 | 2.39E-12 chr:12:44313657 |
| 12 rs11182303  | 44250800 A | 9.375 | 2.39E-12 chr:12:44313657 |
| 12 rs11182304  | 44250895 A | 9.375 | 2.39E-12 chr:12:44313657 |
| 12 rs11182305  | 44250958 G | 9.375 | 2.39E-12 chr:12:44313657 |
| 12 rs11182308  | 44252969 G | 9.375 | 2.39E-12 chr:12:44313657 |
| 12 rs11182310  | 44255992 A | 9.375 | 2.39E-12 chr:12:44313657 |
| 12 rs11182314  | 44260848 T | 9.375 | 2.39E-12 chr:12:44313657 |
| 12 rs11182323  | 44306528 G | 9.375 | 2.39E-12 chr:12:44313657 |
| 12 rs113386845 | 44239075 T | 9.375 | 2.39E-12 chr:12:44313657 |
| 12 rs113451227 | 44247014 G | 9.375 | 2.39E-12 chr:12:44313657 |
| 12 rs115482982 | 44250485 G | 9.375 | 2.39E-12 chr:12:44313657 |
| 12 rs115601996 | 44242554 T | 9.375 | 2.39E-12 chr:12:44313657 |
| 12 rs116608528 | 44239556 C | 9.375 | 2.39E-12 chr:12:44313657 |
| 12 rs116609893 | 44241652 G | 9.375 | 2.39E-12 chr:12:44313657 |
| 12 rs116930265 | 44299125 C | 9.375 | 2.39E-12 chr:12:44313657 |
| 12 rs117543763 | 44264051 A | 9.375 | 2.39E-12 chr:12:44313657 |
| 12 rs117577677 | 44246366 C | 9.375 | 2.39E-12 chr:12:44313657 |
| 12 rs118062126 | 44243952 T | 9.375 | 2.39E-12 chr:12:44313657 |
| 12 rs12227646  | 44245640 C | 9.375 | 2.39E-12 chr:12:44313657 |
| 12 rs12228658  | 44277314 C | 9.375 | 2.39E-12 chr:12:44313657 |
| 12 rs12229491  | 44255465 A | 9.375 | 2.39E-12 chr:12:44313657 |
| 12 rs12229940  | 44244636 A | 9.375 | 2.39E-12 chr:12:44313657 |
| 12 rs12230228  | 44303195 A | 9.375 | 2.39E-12 chr:12:44313657 |
| 12 rs12230284  | 44245217 G | 9.375 | 2.39E-12 chr:12:44313657 |
| 12 rs12230296  | 44245365 T | 9.375 | 2.39E-12 chr:12:44313657 |
| 12 rs12230727  | 44247063 C | 9.375 | 2.39E-12 chr:12:44313657 |

|                |            |       |                          |
|----------------|------------|-------|--------------------------|
| 12 rs12230751  | 44247312 C | 9.375 | 2.39E-12 chr:12:44313657 |
| 12 rs12231136  | 44268262 T | 9.375 | 2.39E-12 chr:12:44313657 |
| 12 rs12231953  | 44245366 G | 9.375 | 2.39E-12 chr:12:44313657 |
| 12 rs137888888 | 44246356 C | 9.375 | 2.39E-12 chr:12:44313657 |
| 12 rs138541393 | 44246210 C | 9.375 | 2.39E-12 chr:12:44313657 |
| 12 rs140628578 | 44239252 T | 9.375 | 2.39E-12 chr:12:44313657 |
| 12 rs142324451 | 44246163 C | 9.375 | 2.39E-12 chr:12:44313657 |
| 12 rs143317429 | 44239623 T | 9.375 | 2.39E-12 chr:12:44313657 |
| 12 rs144999308 | 44241733 A | 9.375 | 2.39E-12 chr:12:44313657 |
| 12 rs146784200 | 44239223 T | 9.375 | 2.39E-12 chr:12:44313657 |
| 12 rs149174850 | 44246158 T | 9.375 | 2.39E-12 chr:12:44313657 |
| 12 rs150307762 | 44246320 G | 9.375 | 2.39E-12 chr:12:44313657 |
| 12 rs151064202 | 44242351 C | 9.375 | 2.39E-12 chr:12:44313657 |
| 12 rs17093804  | 44272622 G | 9.375 | 2.39E-12 chr:12:44313657 |
| 12 rs186673154 | 44261933 T | 9.375 | 2.39E-12 chr:12:44313657 |
| 12 rs1948516   | 44238723 A | 9.375 | 2.39E-12 chr:12:44313657 |
| 12 rs202009693 | 44267522 T | 9.375 | 2.39E-12 chr:12:44313657 |
| 12 rs28758958  | 44306264 A | 9.375 | 2.39E-12 chr:12:44313657 |
| 12 rs367990382 | 44301261 T | 9.375 | 2.39E-12 chr:12:44313657 |
| 12 rs3829807   | 44255108 A | 9.375 | 2.39E-12 chr:12:44313657 |
| 12 rs61930682  | 44240177 T | 9.375 | 2.39E-12 chr:12:44313657 |
| 12 rs720944    | 44237303 C | 9.375 | 2.39E-12 chr:12:44313657 |
| 12 rs7296222   | 44238104 A | 9.375 | 2.39E-12 chr:12:44313657 |
| 12 rs74373254  | 44240769 A | 9.375 | 2.39E-12 chr:12:44313657 |
| 12 rs74775231  | 44246985 T | 9.375 | 2.39E-12 chr:12:44313657 |
| 12 rs75158834  | 44280690 T | 9.375 | 2.39E-12 chr:12:44313657 |
| 12 rs76048883  | 44250719 T | 9.375 | 2.39E-12 chr:12:44313657 |
| 12 rs76240216  | 44244168 T | 9.375 | 2.39E-12 chr:12:44313657 |
| 12 rs76350700  | 44240040 G | 9.375 | 2.39E-12 chr:12:44313657 |
| 12 rs766961    | 44236021 G | 9.375 | 2.39E-12 chr:12:44313657 |
| 12 rs76737056  | 44244225 G | 9.375 | 2.39E-12 chr:12:44313657 |
| 12 rs77161382  | 44241297 T | 9.375 | 2.39E-12 chr:12:44313657 |
| 12 rs77556291  | 44246646 C | 9.375 | 2.39E-12 chr:12:44313657 |
| 12 rs77708558  | 44240597 G | 9.375 | 2.39E-12 chr:12:44313657 |
| 12 rs77952333  | 44240015 A | 9.375 | 2.39E-12 chr:12:44313657 |
| 12 rs78170106  | 44250279 G | 9.375 | 2.39E-12 chr:12:44313657 |
| 12 rs78179678  | 44239907 C | 9.375 | 2.39E-12 chr:12:44313657 |
| 12 rs78339833  | 44236763 G | 9.375 | 2.39E-12 chr:12:44313657 |
| 12 rs78388987  | 44244204 C | 9.375 | 2.39E-12 chr:12:44313657 |
| 12 rs79074543  | 44246752 C | 9.375 | 2.39E-12 chr:12:44313657 |
| 12 rs79392152  | 44250626 C | 9.375 | 2.39E-12 chr:12:44313657 |
| 12 rs79425253  | 44241126 T | 9.375 | 2.39E-12 chr:12:44313657 |
| 12 rs79716923  | 44236764 C | 9.375 | 2.39E-12 chr:12:44313657 |

|                |            |       |          |                 |
|----------------|------------|-------|----------|-----------------|
| 12 rs79783862  | 44244432 A | 9.375 | 2.39E-12 | chr:12:44313657 |
| 12 rs79970551  | 44244859 A | 9.375 | 2.39E-12 | chr:12:44313657 |
| 12 rs80099331  | 44240349 T | 9.375 | 2.39E-12 | chr:12:44313657 |
| 12 rs11182286  | 44217342 C | 6.754 | 2.41E-12 | chr:12:44313657 |
| 12 rs11608602  | 44215732 C | 6.754 | 2.41E-12 | chr:12:44313657 |
| 12 rs12230695  | 44215935 G | 6.754 | 2.41E-12 | chr:12:44313657 |
| 12 rs11182301  | 44249779 C | 8.878 | 2.97E-12 | chr:12:44313657 |
| 12 rs112105382 | 44241680 T | 9.002 | 3.06E-12 | chr:12:44313657 |
| 12 rs74888682  | 44237950 C | 9.282 | 3.31E-12 | chr:12:44313657 |
| 12 rs28437935  | 44214821 A | 5.895 | 3.36E-12 | chr:12:44313657 |
| 12 rs6582481   | 44103477 A | 3.033 | 5.99E-12 | chr:12:44313657 |
| 12 rs11182284  | 44217312 A | 6.382 | 6.56E-12 | chr:12:44313657 |
| 12 rs1580314   | 44095531 G | 2.946 | 8.24E-12 | chr:12:44313657 |
| 12 rs1585716   | 44103302 C | 2.986 | 8.34E-12 | chr:12:44313657 |
| 12 rs11182282  | 44214899 A | 6.412 | 9.17E-12 | chr:12:44313657 |
| 12 rs11182221  | 44101967 A | 2.976 | 1.05E-11 | chr:12:44313657 |
| 12 rs1814173   | 44101092 G | 2.976 | 1.05E-11 | chr:12:44313657 |
| 12 rs1824817   | 44098594 T | 2.976 | 1.05E-11 | chr:12:44313657 |
| 12 rs10880559  | 44137338 G | 4.766 | 1.76E-11 | chr:12:44313657 |
| 12 rs10880560  | 44137382 C | 4.766 | 1.76E-11 | chr:12:44313657 |
| 12 rs10880561  | 44137426 T | 4.766 | 1.76E-11 | chr:12:44313657 |
| 12 rs4251463   | 44163295 T | 4.766 | 1.76E-11 | chr:12:44313657 |
| 12 rs4251466   | 44164441 T | 4.766 | 1.76E-11 | chr:12:44313657 |
| 12 rs4251475   | 44167093 G | 4.766 | 1.76E-11 | chr:12:44313657 |
| 12 rs4251489   | 44169945 T | 4.766 | 1.76E-11 | chr:12:44313657 |
| 12 rs4251540   | 44179579 T | 4.766 | 1.76E-11 | chr:12:44313657 |
| 12 rs4251545   | 44180295 A | 4.766 | 1.76E-11 | chr:12:44313657 |
| 12 rs4251431   | 44154690 T | 4.669 | 2.73E-11 | chr:12:44313657 |
| 12 rs10880569  | 44201636 G | 5.963 | 3.31E-11 | chr:12:44313657 |
| 12 rs10880570  | 44202465 A | 5.963 | 3.31E-11 | chr:12:44313657 |
| 12 rs11182281  | 44213461 A | 5.963 | 3.31E-11 | chr:12:44313657 |
| 12 rs12226960  | 44213124 T | 5.963 | 3.31E-11 | chr:12:44313657 |
| 12 rs1816854   | 44205018 C | 5.963 | 3.31E-11 | chr:12:44313657 |
| 12 rs7966902   | 44200485 C | 5.963 | 3.31E-11 | chr:12:44313657 |
| 12 rs6582496   | 44405125 C | 5.034 | 6.35E-11 | chr:12:44313657 |
| 12 rs842193    | 44416676 T | 5.034 | 6.35E-11 | chr:12:44313657 |
| 12 rs842194    | 44416463 G | 5.034 | 6.35E-11 | chr:12:44313657 |
| 12 rs842195    | 44415149 A | 5.034 | 6.35E-11 | chr:12:44313657 |
| 12 rs7954843   | 44113010 A | 4.445 | 7.11E-11 | chr:12:44313657 |
| 12 rs1032886   | 44529060 G | 4.236 | 1.81E-10 | chr:12:44313657 |
| 12 rs10880622  | 44547571 G | 4.236 | 1.81E-10 | chr:12:44313657 |
| 12 rs10880623  | 44548457 T | 4.236 | 1.81E-10 | chr:12:44313657 |
| 12 rs11182423  | 44521535 C | 4.236 | 1.81E-10 | chr:12:44313657 |

|                |            |       |                          |
|----------------|------------|-------|--------------------------|
| 12 rs1168078   | 44495354 C | 4.236 | 1.81E-10 chr:12:44313657 |
| 12 rs12099982  | 44495056 A | 4.236 | 1.81E-10 chr:12:44313657 |
| 12 rs12297933  | 44532691 T | 4.236 | 1.81E-10 chr:12:44313657 |
| 12 rs12319009  | 44547182 A | 4.236 | 1.81E-10 chr:12:44313657 |
| 12 rs1701088   | 44528103 C | 4.236 | 1.81E-10 chr:12:44313657 |
| 12 rs17094092  | 44508260 G | 4.236 | 1.81E-10 chr:12:44313657 |
| 12 rs17121310  | 44484813 C | 4.236 | 1.81E-10 chr:12:44313657 |
| 12 rs2062952   | 44528479 C | 4.236 | 1.81E-10 chr:12:44313657 |
| 12 rs2062954   | 44528222 G | 4.236 | 1.81E-10 chr:12:44313657 |
| 12 rs2174508   | 44528080 G | 4.236 | 1.81E-10 chr:12:44313657 |
| 12 rs2638853   | 44477099 T | 4.236 | 1.81E-10 chr:12:44313657 |
| 12 rs2638855   | 44497579 G | 4.236 | 1.81E-10 chr:12:44313657 |
| 12 rs4556611   | 44490961 C | 4.236 | 1.81E-10 chr:12:44313657 |
| 12 rs66970043  | 44543514 A | 4.236 | 1.81E-10 chr:12:44313657 |
| 12 rs67713366  | 44488039 A | 4.236 | 1.81E-10 chr:12:44313657 |
| 12 rs7977482   | 44532975 C | 4.236 | 1.81E-10 chr:12:44313657 |
| 12 rs78680549  | 44222234 T | 5.472 | 1.92E-10 chr:12:44313657 |
| 12 rs11832859  | 44524791 A | 4.234 | 2.39E-10 chr:12:44313657 |
| 12 rs11182417  | 44481551 A | 4.151 | 2.43E-10 chr:12:44313657 |
| 12 rs10880574  | 44235427 G | 6.054 | 2.53E-10 chr:12:44313657 |
| 12 rs116964327 | 44234447 A | 6.054 | 2.53E-10 chr:12:44313657 |
| 12 rs10047523  | 44628640 C | 4.242 | 2.53E-10 chr:12:44313657 |
| 12 rs10880628  | 44611099 G | 4.242 | 2.53E-10 chr:12:44313657 |
| 12 rs11182430  | 44561719 C | 4.242 | 2.53E-10 chr:12:44313657 |
| 12 rs11182431  | 44568686 C | 4.242 | 2.53E-10 chr:12:44313657 |
| 12 rs11182432  | 44568848 A | 4.242 | 2.53E-10 chr:12:44313657 |
| 12 rs11182442  | 44610079 G | 4.242 | 2.53E-10 chr:12:44313657 |
| 12 rs11182455  | 44670486 A | 4.242 | 2.53E-10 chr:12:44313657 |
| 12 rs1155808   | 44583150 G | 4.242 | 2.53E-10 chr:12:44313657 |
| 12 rs11615473  | 44616047 G | 4.242 | 2.53E-10 chr:12:44313657 |
| 12 rs11832219  | 44638210 C | 4.242 | 2.53E-10 chr:12:44313657 |
| 12 rs11835507  | 44613070 C | 4.242 | 2.53E-10 chr:12:44313657 |
| 12 rs12297689  | 44597795 C | 4.242 | 2.53E-10 chr:12:44313657 |
| 12 rs12297754  | 44597990 C | 4.242 | 2.53E-10 chr:12:44313657 |
| 12 rs12299030  | 44668797 A | 4.242 | 2.53E-10 chr:12:44313657 |
| 12 rs12299937  | 44629619 C | 4.242 | 2.53E-10 chr:12:44313657 |
| 12 rs12300793  | 44567368 C | 4.242 | 2.53E-10 chr:12:44313657 |
| 12 rs12307454  | 44555442 T | 4.242 | 2.53E-10 chr:12:44313657 |
| 12 rs12308449  | 44595759 A | 4.242 | 2.53E-10 chr:12:44313657 |
| 12 rs12308569  | 44595965 C | 4.242 | 2.53E-10 chr:12:44313657 |
| 12 rs12309639  | 44672386 A | 4.242 | 2.53E-10 chr:12:44313657 |
| 12 rs12314470  | 44648612 C | 4.242 | 2.53E-10 chr:12:44313657 |
| 12 rs1643429   | 44592861 C | 4.242 | 2.53E-10 chr:12:44313657 |

|               |            |       |          |                 |
|---------------|------------|-------|----------|-----------------|
| 12 rs1643431  | 44652897 A | 4.242 | 2.53E-10 | chr:12:44313657 |
| 12 rs17094183 | 44576678 C | 4.242 | 2.53E-10 | chr:12:44313657 |
| 12 rs17094235 | 44602588 A | 4.242 | 2.53E-10 | chr:12:44313657 |
| 12 rs2112147  | 44597242 A | 4.242 | 2.53E-10 | chr:12:44313657 |
| 12 rs2657576  | 44576071 G | 4.242 | 2.53E-10 | chr:12:44313657 |
| 12 rs2657577  | 44572960 C | 4.242 | 2.53E-10 | chr:12:44313657 |
| 12 rs57907832 | 44599898 G | 4.242 | 2.53E-10 | chr:12:44313657 |
| 12 rs59375742 | 44599305 A | 4.242 | 2.53E-10 | chr:12:44313657 |
| 12 rs61690882 | 44599441 A | 4.242 | 2.53E-10 | chr:12:44313657 |
| 12 rs67184817 | 44598586 A | 4.242 | 2.53E-10 | chr:12:44313657 |
| 12 rs7137469  | 44646701 T | 4.242 | 2.53E-10 | chr:12:44313657 |
| 12 rs7295832  | 44593960 A | 4.242 | 2.53E-10 | chr:12:44313657 |
| 12 rs7297563  | 44597047 A | 4.242 | 2.53E-10 | chr:12:44313657 |
| 12 rs7306647  | 44594091 T | 4.242 | 2.53E-10 | chr:12:44313657 |
| 12 rs7312930  | 44582694 G | 4.242 | 2.53E-10 | chr:12:44313657 |
| 12 rs7313269  | 44597005 T | 4.242 | 2.53E-10 | chr:12:44313657 |
| 12 rs7315208  | 44601318 T | 4.242 | 2.53E-10 | chr:12:44313657 |
| 12 rs7316737  | 44596536 T | 4.242 | 2.53E-10 | chr:12:44313657 |
| 12 rs7961974  | 44604028 A | 4.242 | 2.53E-10 | chr:12:44313657 |
| 12 rs7969885  | 44541019 T | 4.242 | 2.53E-10 | chr:12:44313657 |
| 12 rs7976652  | 44643042 A | 4.242 | 2.53E-10 | chr:12:44313657 |
| 12 rs17094227 | 44601036 C | 4.24  | 3.34E-10 | chr:12:44313657 |
| 12 rs11182453 | 44669863 G | 4.785 | 4.32E-10 | chr:12:44313657 |
| 12 rs56134810 | 44655618 T | 4.785 | 4.32E-10 | chr:12:44313657 |
| 12 rs7305976  | 44644078 C | 4.785 | 4.32E-10 | chr:12:44313657 |
| 12 rs73098836 | 44286253 A | 6.138 | 4.49E-10 | chr:12:44313657 |
| 12 rs61290421 | 44234529 T | 5.709 | 4.96E-10 | chr:12:44313657 |
| 12 rs7296132  | 44387379 A | 4.754 | 5.23E-10 | chr:12:44313657 |
| 12 rs11182291 | 44223083 G | 5.696 | 5.26E-10 | chr:12:44313657 |
| 12 rs12228995 | 44223752 A | 5.696 | 5.26E-10 | chr:12:44313657 |
| 12 rs11182287 | 44218539 C | 5.518 | 6.07E-10 | chr:12:44313657 |
| 12 rs55802236 | 44546248 C | 4.617 | 6.26E-10 | chr:12:44313657 |
| 12 rs11182289 | 44219670 T | 5.528 | 6.88E-10 | chr:12:44313657 |
| 12 rs4459374  | 44551067 C | 2.869 | 7.47E-10 | chr:12:44313657 |
| 12 rs2407789  | 44389644 T | 4.604 | 7.50E-10 | chr:12:44313657 |
| 12 rs10748373 | 44253386 A | 5.914 | 9.85E-10 | chr:12:44313657 |
| 12 rs12298970 | 44237256 T | 5.914 | 9.85E-10 | chr:12:44313657 |
| 12 rs12311962 | 44237272 A | 5.914 | 9.85E-10 | chr:12:44313657 |
| 12 rs12314126 | 44236455 G | 5.914 | 9.85E-10 | chr:12:44313657 |
| 12 rs1461568  | 44267583 G | 5.914 | 9.85E-10 | chr:12:44313657 |
| 12 rs1675760  | 44282981 G | 5.914 | 9.85E-10 | chr:12:44313657 |
| 12 rs1675771  | 44252960 A | 5.914 | 9.85E-10 | chr:12:44313657 |
| 12 rs1675774  | 44266575 G | 5.914 | 9.85E-10 | chr:12:44313657 |

|                |            |       |          |                 |
|----------------|------------|-------|----------|-----------------|
| 12 rs1675776   | 44265242 A | 5.914 | 9.85E-10 | chr:12:44313657 |
| 12 rs1675777   | 44264215 G | 5.914 | 9.85E-10 | chr:12:44313657 |
| 12 rs1675778   | 44263162 G | 5.914 | 9.85E-10 | chr:12:44313657 |
| 12 rs1675782   | 44258841 C | 5.914 | 9.85E-10 | chr:12:44313657 |
| 12 rs1675783   | 44257680 T | 5.914 | 9.85E-10 | chr:12:44313657 |
| 12 rs1675784   | 44257601 A | 5.914 | 9.85E-10 | chr:12:44313657 |
| 12 rs1675786   | 44292760 C | 5.914 | 9.85E-10 | chr:12:44313657 |
| 12 rs1675788   | 44273779 C | 5.914 | 9.85E-10 | chr:12:44313657 |
| 12 rs1675791   | 44290267 G | 5.914 | 9.85E-10 | chr:12:44313657 |
| 12 rs1731425   | 44282630 T | 5.914 | 9.85E-10 | chr:12:44313657 |
| 12 rs1731438   | 44267863 A | 5.914 | 9.85E-10 | chr:12:44313657 |
| 12 rs1731439   | 44266559 G | 5.914 | 9.85E-10 | chr:12:44313657 |
| 12 rs1731440   | 44265605 T | 5.914 | 9.85E-10 | chr:12:44313657 |
| 12 rs1731442   | 44262606 T | 5.914 | 9.85E-10 | chr:12:44313657 |
| 12 rs1731444   | 44262392 C | 5.914 | 9.85E-10 | chr:12:44313657 |
| 12 rs2447114   | 44252015 T | 5.914 | 9.85E-10 | chr:12:44313657 |
| 12 rs2447116   | 44262529 A | 5.914 | 9.85E-10 | chr:12:44313657 |
| 12 rs2951436   | 44261618 A | 5.914 | 9.85E-10 | chr:12:44313657 |
| 12 rs4768049   | 44256856 A | 5.914 | 9.85E-10 | chr:12:44313657 |
| 12 rs7957146   | 44306759 G | 5.914 | 9.85E-10 | chr:12:44313657 |
| 12 rs7958314   | 44302430 T | 5.914 | 9.85E-10 | chr:12:44313657 |
| 12 rs7966024   | 44297013 G | 5.914 | 9.85E-10 | chr:12:44313657 |
| 12 rs55868602  | 44546267 A | 4.513 | 1.20E-09 | chr:12:44313657 |
| 12 rs75842033  | 44228587 A | 9.874 | 1.43E-09 | chr:12:44313657 |
| 12 rs77056193  | 44225895 T | 9.874 | 1.43E-09 | chr:12:44313657 |
| 12 rs11182419  | 44500239 T | 6.491 | 2.11E-09 | chr:12:44313657 |
| 12 rs2447115   | 44254494 A | 5.704 | 2.12E-09 | chr:12:44313657 |
| 12 rs2464103   | 44279211 T | 3.395 | 2.32E-09 | chr:12:44313657 |
| 12 rs11182223  | 44105290 T | 2.507 | 2.70E-09 | chr:12:44313657 |
| 12 rs12301507  | 44394202 G | 11.41 | 3.22E-09 | chr:12:44313657 |
| 12 rs117269674 | 44197834 T | 5.002 | 3.59E-09 | chr:12:44313657 |
| 12 rs1168080   | 44466676 C | 4.584 | 5.12E-09 | chr:12:44313657 |
| 12 rs4251562   | 44183222 T | 4.852 | 5.12E-09 | chr:12:44313657 |
| 12 rs78514034  | 44281404 T | 12.36 | 6.32E-09 | chr:12:44313657 |
| 12 rs10880616  | 44419249 G | 9.785 | 6.70E-09 | chr:12:44313657 |
| 12 rs10880617  | 44423914 T | 9.785 | 6.70E-09 | chr:12:44313657 |
| 12 rs11182396  | 44431156 G | 9.785 | 6.70E-09 | chr:12:44313657 |
| 12 rs11182402  | 44444897 C | 9.785 | 6.70E-09 | chr:12:44313657 |
| 12 rs17094013  | 44421518 G | 9.785 | 6.70E-09 | chr:12:44313657 |
| 12 rs6582494   | 44401246 A | 9.785 | 6.70E-09 | chr:12:44313657 |
| 12 rs11182268  | 44194910 G | 4.856 | 7.27E-09 | chr:12:44313657 |
| 12 rs11182269  | 44194989 A | 4.856 | 7.27E-09 | chr:12:44313657 |
| 12 rs11182270  | 44195703 T | 4.856 | 7.27E-09 | chr:12:44313657 |

|                |            |       |          |                 |
|----------------|------------|-------|----------|-----------------|
| 12 rs11182279  | 44208689 G | 4.856 | 7.27E-09 | chr:12:44313657 |
| 12 rs11556066  | 44188507 G | 4.856 | 7.27E-09 | chr:12:44313657 |
| 12 rs12231553  | 44213887 C | 4.856 | 7.27E-09 | chr:12:44313657 |
| 12 rs12829856  | 44191625 A | 4.856 | 7.27E-09 | chr:12:44313657 |
| 12 rs35980560  | 44185578 T | 4.856 | 7.27E-09 | chr:12:44313657 |
| 12 rs73093785  | 44186627 C | 4.856 | 7.27E-09 | chr:12:44313657 |
| 12 rs79625327  | 44205134 T | 4.856 | 7.27E-09 | chr:12:44313657 |
| 12 rs12296857  | 44419592 A | 8.866 | 8.36E-09 | chr:12:44313657 |
| 12 rs10880618  | 44427686 A | 8.897 | 8.54E-09 | chr:12:44313657 |
| 12 rs1701083   | 44417904 A | 8.897 | 8.54E-09 | chr:12:44313657 |
| 12 rs1881928   | 44365728 C | 4.262 | 9.43E-09 | chr:12:44313657 |
| 12 rs55912858  | 44369705 C | 4.279 | 1.18E-08 | chr:12:44313657 |
| 12 rs55996795  | 44369706 A | 4.279 | 1.18E-08 | chr:12:44313657 |
| 12 rs10748388  | 44381399 G | 4.178 | 1.74E-08 | chr:12:44313657 |
| 12 rs10748389  | 44387653 C | 4.178 | 1.74E-08 | chr:12:44313657 |
| 12 rs2897765   | 44370508 T | 4.178 | 1.74E-08 | chr:12:44313657 |
| 12 rs4768058   | 44366132 G | 4.178 | 1.74E-08 | chr:12:44313657 |
| 12 rs4768060   | 44376725 A | 4.178 | 1.74E-08 | chr:12:44313657 |
| 12 rs6582493   | 44382784 A | 4.178 | 1.74E-08 | chr:12:44313657 |
| 12 rs7297277   | 44368839 T | 4.178 | 1.74E-08 | chr:12:44313657 |
| 12 rs112006889 | 44196125 C | 6.328 | 2.05E-08 | chr:12:44313657 |
| 12 rs12298711  | 44206759 T | 6.328 | 2.05E-08 | chr:12:44313657 |
| 12 rs17094231  | 44602376 C | 3.707 | 2.64E-08 | chr:12:44313657 |
| 12 rs201859105 | 44232358 C | 6.147 | 3.32E-08 | chr:12:44313657 |
| 12 rs59118688  | 44639477 G | 3.714 | 3.36E-08 | chr:12:44313657 |
| 12 rs7295281   | 44551398 A | 3.714 | 3.36E-08 | chr:12:44313657 |
| 12 rs842207    | 44465270 T | 4.761 | 3.86E-08 | chr:12:44313657 |
| 12 rs74360530  | 44466185 G | 4.577 | 5.44E-08 | chr:12:44313657 |
| 12 rs7976223   | 44096291 T | 2.337 | 5.74E-08 | chr:12:44313657 |
| 12 rs1675766   | 44244919 C | 5.015 | 7.27E-08 | chr:12:44313657 |
| 12 rs4768054   | 44309743 A | 3.305 | 7.43E-08 | chr:12:44313657 |
| 12 rs11182449  | 44661675 G | 4.124 | 7.66E-08 | chr:12:44313657 |
| 12 rs73274137  | 44651722 C | 4.124 | 7.66E-08 | chr:12:44313657 |
| 12 rs7955148   | 44301433 C | 2.565 | 7.85E-08 | chr:12:44313657 |
| 12 rs11182306  | 44251130 A | 9.301 | 9.28E-08 | chr:12:44313657 |
| 12 rs17094344  | 44641928 A | 4.162 | 9.43E-08 | chr:12:44313657 |
| 12 rs78837926  | 44642011 C | 4.162 | 9.43E-08 | chr:12:44313657 |
| 12 rs1675775   | 44265524 A | 4.833 | 9.96E-08 | chr:12:44313657 |
| 12 rs1731422   | 44276369 G | 4.833 | 9.96E-08 | chr:12:44313657 |
| 12 rs1731441   | 44265523 G | 4.833 | 9.96E-08 | chr:12:44313657 |
| 12 rs1731449   | 44244877 T | 4.833 | 9.96E-08 | chr:12:44313657 |
| 12 rs1731453   | 44250528 G | 4.833 | 9.96E-08 | chr:12:44313657 |
| 12 rs2699992   | 44278013 C | 4.833 | 9.96E-08 | chr:12:44313657 |

|                |            |        |          |                 |
|----------------|------------|--------|----------|-----------------|
| 12 rs7953229   | 44239350 T | 4.833  | 9.96E-08 | chr:12:44313657 |
| 12 rs7965635   | 44238903 A | 4.833  | 9.96E-08 | chr:12:44313657 |
| 12 rs116861561 | 44256819 T | 7.623  | 1.26E-07 | chr:12:44313657 |
| 12 rs117137831 | 44254126 G | 7.623  | 1.26E-07 | chr:12:44313657 |
| 12 rs117709201 | 44224088 T | 7.623  | 1.26E-07 | chr:12:44313657 |
| 12 rs140988631 | 44242531 C | 7.623  | 1.26E-07 | chr:12:44313657 |
| 12 rs141598641 | 44249695 T | 7.623  | 1.26E-07 | chr:12:44313657 |
| 12 rs183971901 | 44228578 A | 7.623  | 1.26E-07 | chr:12:44313657 |
| 12 rs2199390   | 44235245 C | 7.623  | 1.26E-07 | chr:12:44313657 |
| 12 rs74423632  | 44229154 T | 7.623  | 1.26E-07 | chr:12:44313657 |
| 12 rs76030944  | 44226085 A | 7.623  | 1.26E-07 | chr:12:44313657 |
| 12 rs147015726 | 44303495 G | 9.058  | 1.35E-07 | chr:12:44313657 |
| 12 rs116884551 | 44340736 C | 8.177  | 1.55E-07 | chr:12:44313657 |
| 12 rs186989426 | 44344787 C | 8.177  | 1.55E-07 | chr:12:44313657 |
| 12 rs4519146   | 44327240 A | 8.177  | 1.55E-07 | chr:12:44313657 |
| 12 rs78675197  | 44360787 A | 8.177  | 1.55E-07 | chr:12:44313657 |
| 12 rs79163779  | 44361704 T | 8.177  | 1.55E-07 | chr:12:44313657 |
| 12 rs118141340 | 44098255 A | 5.79   | 1.64E-07 | chr:12:44313657 |
| 12 rs75214296  | 44230392 G | 0.3683 | 1.74E-07 | chr:12:44313657 |
| 12 rs117894155 | 44352005 G | 6.393  | 2.23E-07 | chr:12:44313657 |
| 12 rs551442754 | 44101222 C | 0.3594 | 2.29E-07 | chr:12:44313657 |
| 12 rs149139340 | 44304397 T | 5.054  | 2.38E-07 | chr:12:44313657 |
| 12 rs75478629  | 44288040 A | 5.054  | 2.38E-07 | chr:12:44313657 |
| 12 rs118097313 | 44165186 G | 4.124  | 2.75E-07 | chr:12:44313657 |
| 12 rs12229685  | 44143189 T | 4.124  | 2.75E-07 | chr:12:44313657 |
| 12 rs139946355 | 44282948 C | 7.209  | 2.88E-07 | chr:12:44313657 |
| 12 rs528423997 | 44303078 G | 7.209  | 2.88E-07 | chr:12:44313657 |
| 12 rs542685597 | 44303937 T | 7.209  | 2.88E-07 | chr:12:44313657 |
| 12 rs566058745 | 44300960 A | 7.209  | 2.88E-07 | chr:12:44313657 |
| 12 rs79110324  | 44296458 G | 7.209  | 2.88E-07 | chr:12:44313657 |
| 12 rs7303909   | 44388400 C | 8.756  | 3.71E-07 | chr:12:44313657 |
| 12 rs12307560  | 44642789 T | 3.62   | 3.95E-07 | chr:12:44313657 |
| 12 rs2032782   | 44664789 C | 3.62   | 3.95E-07 | chr:12:44313657 |
| 12 rs117980457 | 44071406 G | 5.023  | 4.96E-07 | chr:12:44313657 |
| 12 rs564523363 | 44503765 T | 4.148  | 6.16E-07 | chr:12:44313657 |
| 12 rs77825763  | 44139217 T | 4.51   | 6.18E-07 | chr:12:44313657 |
| 12 rs1057190   | 44148259 C | 2.547  | 6.42E-07 | chr:12:44313657 |
| 12 rs10880562  | 44140311 G | 2.547  | 6.42E-07 | chr:12:44313657 |
| 12 rs10880563  | 44141593 T | 2.547  | 6.42E-07 | chr:12:44313657 |
| 12 rs10880566  | 44146392 G | 2.547  | 6.42E-07 | chr:12:44313657 |
| 12 rs11182249  | 44145654 C | 2.547  | 6.42E-07 | chr:12:44313657 |
| 12 rs11182250  | 44147174 G | 2.547  | 6.42E-07 | chr:12:44313657 |
| 12 rs3794262   | 44165430 A | 2.547  | 6.42E-07 | chr:12:44313657 |



|               |            |       |                          |
|---------------|------------|-------|--------------------------|
| 12 rs3805198  | 44175934 T | 2.547 | 6.42E-07 chr:12:44313657 |
| 12 rs4251459  | 44162566 C | 2.547 | 6.42E-07 chr:12:44313657 |
| 12 rs4251460  | 44162768 C | 2.547 | 6.42E-07 chr:12:44313657 |
| 12 rs4251465  | 44164169 T | 2.547 | 6.42E-07 chr:12:44313657 |
| 12 rs4251495  | 44171096 G | 2.547 | 6.42E-07 chr:12:44313657 |
| 12 rs4251496  | 44171097 C | 2.547 | 6.42E-07 chr:12:44313657 |
| 12 rs4251497  | 44171131 A | 2.547 | 6.42E-07 chr:12:44313657 |
| 12 rs4251532  | 44178083 T | 2.547 | 6.42E-07 chr:12:44313657 |
| 12 rs4251533  | 44178175 G | 2.547 | 6.42E-07 chr:12:44313657 |
| 12 rs4251555  | 44182312 C | 2.547 | 6.42E-07 chr:12:44313657 |
| 12 rs7311465  | 44141164 T | 2.547 | 6.42E-07 chr:12:44313657 |
| 12 rs7969729  | 44142547 A | 2.547 | 6.42E-07 chr:12:44313657 |
| 12 rs9783418  | 44144643 A | 2.547 | 6.42E-07 chr:12:44313657 |
| 12 rs9849     | 44182951 C | 2.547 | 6.42E-07 chr:12:44313657 |
| 12 rs11613902 | 44497238 A | 4.081 | 9.98E-07 chr:12:44313657 |
| 12 rs11834667 | 44515452 A | 4.081 | 9.98E-07 chr:12:44313657 |
| 12 rs12315961 | 44510369 A | 4.081 | 9.98E-07 chr:12:44313657 |
| 12 rs1352935  | 44485158 A | 4.081 | 9.98E-07 chr:12:44313657 |
| 12 rs17094063 | 44487400 G | 4.081 | 9.98E-07 chr:12:44313657 |
| 12 rs17094117 | 44511854 T | 4.081 | 9.98E-07 chr:12:44313657 |
| 12 rs28838075 | 44598154 T | 4.081 | 9.98E-07 chr:12:44313657 |
| 12 rs55950371 | 44473635 A | 4.081 | 9.98E-07 chr:12:44313657 |
| 12 rs59628873 | 44521309 G | 4.081 | 9.98E-07 chr:12:44313657 |
| 12 rs6582498  | 44495856 A | 4.081 | 9.98E-07 chr:12:44313657 |
| 12 rs6582499  | 44518071 G | 4.081 | 9.98E-07 chr:12:44313657 |
| 12 rs68049983 | 44499929 A | 4.081 | 9.98E-07 chr:12:44313657 |
| 12 rs73288050 | 44510649 A | 4.081 | 9.98E-07 chr:12:44313657 |
| 12 rs7967957  | 44488991 G | 4.081 | 9.98E-07 chr:12:44313657 |
| 12 rs7971340  | 44476017 A | 4.081 | 9.98E-07 chr:12:44313657 |
| 12 rs7979782  | 44491531 G | 4.081 | 9.98E-07 chr:12:44313657 |
| 12 rs7980383  | 44495734 C | 4.081 | 9.98E-07 chr:12:44313657 |
| 12 rs7315408  | 44308709 C | 4.173 | 1.00E-06 chr:12:44313657 |
| 12 rs10880557 | 44131697 C | 2.483 | 1.16E-06 chr:12:44313657 |
| 12 rs10880558 | 44132250 A | 2.483 | 1.16E-06 chr:12:44313657 |
| 12 rs11182240 | 44134755 C | 2.483 | 1.16E-06 chr:12:44313657 |
| 12 rs11182242 | 44135219 C | 2.483 | 1.16E-06 chr:12:44313657 |
| 12 rs12308611 | 44132831 G | 2.483 | 1.16E-06 chr:12:44313657 |
| 12 rs12310585 | 44133972 G | 2.483 | 1.16E-06 chr:12:44313657 |
| 12 rs12312327 | 44134417 C | 2.483 | 1.16E-06 chr:12:44313657 |
| 12 rs12319024 | 44135647 A | 2.483 | 1.16E-06 chr:12:44313657 |
| 12 rs1842044  | 44113667 A | 2.123 | 1.17E-06 chr:12:44313657 |
| 12 rs10506234 | 44489458 G | 4.1   | 1.28E-06 chr:12:44313657 |
| 12 rs10506238 | 44513280 T | 4.1   | 1.28E-06 chr:12:44313657 |

|                |            |       |                          |
|----------------|------------|-------|--------------------------|
| 12 rs11837611  | 44500149 T | 4.1   | 1.28E-06 chr:12:44313657 |
| 12 rs17094102  | 44510943 T | 4.1   | 1.28E-06 chr:12:44313657 |
| 12 rs17094110  | 44511522 G | 4.1   | 1.28E-06 chr:12:44313657 |
| 12 rs17094119  | 44512431 G | 4.1   | 1.28E-06 chr:12:44313657 |
| 12 rs28495612  | 44511939 A | 4.1   | 1.28E-06 chr:12:44313657 |
| 12 rs61399923  | 44637542 A | 4.1   | 1.28E-06 chr:12:44313657 |
| 12 rs7298835   | 44521851 A | 4.1   | 1.28E-06 chr:12:44313657 |
| 12 rs73288052  | 44512995 A | 4.1   | 1.28E-06 chr:12:44313657 |
| 12 rs78459717  | 44499461 G | 4.1   | 1.28E-06 chr:12:44313657 |
| 12 rs7953173   | 44488756 T | 4.1   | 1.28E-06 chr:12:44313657 |
| 12 rs11182375  | 44400890 G | 11.57 | 1.28E-06 chr:12:44313657 |
| 12 rs11182384  | 44413779 T | 11.57 | 1.28E-06 chr:12:44313657 |
| 12 rs11182385  | 44419037 G | 11.57 | 1.28E-06 chr:12:44313657 |
| 12 rs11182404  | 44446675 A | 11.57 | 1.28E-06 chr:12:44313657 |
| 12 rs11182405  | 44447849 C | 11.57 | 1.28E-06 chr:12:44313657 |
| 12 rs112625895 | 44439515 A | 11.57 | 1.28E-06 chr:12:44313657 |
| 12 rs12099769  | 44440204 C | 11.57 | 1.28E-06 chr:12:44313657 |
| 12 rs12230287  | 44451012 G | 11.57 | 1.28E-06 chr:12:44313657 |
| 12 rs1565620   | 44459583 C | 11.57 | 1.28E-06 chr:12:44313657 |
| 12 rs1976211   | 44459219 A | 11.57 | 1.28E-06 chr:12:44313657 |
| 12 rs3929354   | 44458679 A | 11.57 | 1.28E-06 chr:12:44313657 |
| 12 rs55756710  | 44458857 G | 11.57 | 1.28E-06 chr:12:44313657 |
| 12 rs56198335  | 44451559 C | 11.57 | 1.28E-06 chr:12:44313657 |
| 12 rs56227915  | 44429184 A | 11.57 | 1.28E-06 chr:12:44313657 |
| 12 rs56337317  | 44458319 T | 11.57 | 1.28E-06 chr:12:44313657 |
| 12 rs6582495   | 44401378 G | 11.57 | 1.28E-06 chr:12:44313657 |
| 12 rs73087684  | 44416728 A | 11.57 | 1.28E-06 chr:12:44313657 |
| 12 rs73087700  | 44422549 T | 11.57 | 1.28E-06 chr:12:44313657 |
| 12 rs73089723  | 44433701 T | 11.57 | 1.28E-06 chr:12:44313657 |
| 12 rs73089727  | 44435359 G | 11.57 | 1.28E-06 chr:12:44313657 |
| 12 rs73091745  | 44457857 T | 11.57 | 1.28E-06 chr:12:44313657 |
| 12 rs7959226   | 44405401 C | 11.57 | 1.28E-06 chr:12:44313657 |
| 12 rs7980005   | 44404074 G | 11.57 | 1.28E-06 chr:12:44313657 |
| 12 rs9919676   | 44426723 C | 11.57 | 1.28E-06 chr:12:44313657 |
| 12 rs9919742   | 44428853 T | 11.57 | 1.28E-06 chr:12:44313657 |
| 12 rs12301506  | 44129636 G | 2.452 | 1.58E-06 chr:12:44313657 |
| 12 rs7136217   | 44393013 G | 7.026 | 1.76E-06 chr:12:44313657 |
| 12 rs73089739  | 44439369 A | 7.026 | 1.76E-06 chr:12:44313657 |
| 12 rs2083956   | 44100278 C | 2.091 | 1.79E-06 chr:12:44313657 |
| 12 rs2407659   | 44099786 T | 2.091 | 1.79E-06 chr:12:44313657 |
| 12 rs6582480   | 44103230 G | 2.091 | 1.79E-06 chr:12:44313657 |
| 12 rs7963002   | 44098224 T | 2.091 | 1.79E-06 chr:12:44313657 |
| 12 rs142119333 | 44462402 C | 8.167 | 1.90E-06 chr:12:44313657 |

|                |            |       |          |                 |
|----------------|------------|-------|----------|-----------------|
| 12 rs4251513   | 44174204 G | 2.084 | 2.11E-06 | chr:12:44313657 |
| 12 rs17093754  | 44209423 A | 5.115 | 2.15E-06 | chr:12:44313657 |
| 12 rs10880564  | 44142064 A | 3.69  | 2.73E-06 | chr:12:44313657 |
| 12 rs11182244  | 44138539 C | 3.69  | 2.73E-06 | chr:12:44313657 |
| 12 rs11182259  | 44170718 T | 3.69  | 2.73E-06 | chr:12:44313657 |
| 12 rs11182261  | 44172123 G | 3.69  | 2.73E-06 | chr:12:44313657 |
| 12 rs11182262  | 44175858 C | 3.69  | 2.73E-06 | chr:12:44313657 |
| 12 rs11182264  | 44177894 G | 3.69  | 2.73E-06 | chr:12:44313657 |
| 12 rs12227756  | 44145669 A | 3.69  | 2.73E-06 | chr:12:44313657 |
| 12 rs12229481  | 44178254 A | 3.69  | 2.73E-06 | chr:12:44313657 |
| 12 rs1382449   | 44139025 C | 3.69  | 2.73E-06 | chr:12:44313657 |
| 12 rs1382450   | 44138859 G | 3.69  | 2.73E-06 | chr:12:44313657 |
| 12 rs147246522 | 44139458 G | 3.69  | 2.73E-06 | chr:12:44313657 |
| 12 rs77296020  | 44161675 G | 3.69  | 2.73E-06 | chr:12:44313657 |
| 12 rs199618577 | 44609512 A | 2.655 | 2.81E-06 | chr:12:44313657 |
| 12 rs145290170 | 44088512 G | 3.677 | 2.95E-06 | chr:12:44313657 |
| 12 rs10880565  | 44146248 C | 2.386 | 3.53E-06 | chr:12:44313657 |
| 12 rs7956245   | 44143520 T | 2.386 | 3.53E-06 | chr:12:44313657 |
| 12 rs111911366 | 44514800 C | 4.989 | 3.66E-06 | chr:12:44313657 |
| 12 rs369528890 | 44503920 C | 4.989 | 3.66E-06 | chr:12:44313657 |
| 12 rs73286295  | 44475530 C | 4.989 | 3.66E-06 | chr:12:44313657 |
| 12 rs73286296  | 44475937 T | 4.989 | 3.66E-06 | chr:12:44313657 |
| 12 rs73286301  | 44476878 T | 4.989 | 3.66E-06 | chr:12:44313657 |
| 12 rs118045375 | 44185257 A | 4.75  | 3.70E-06 | chr:12:44313657 |
| 12 rs141317022 | 44195765 G | 4.75  | 3.70E-06 | chr:12:44313657 |
| 12 rs147802186 | 44187010 T | 4.75  | 3.70E-06 | chr:12:44313657 |
| 12 rs150213649 | 44195782 A | 4.75  | 3.70E-06 | chr:12:44313657 |
| 12 rs17093732  | 44191475 G | 4.75  | 3.70E-06 | chr:12:44313657 |
| 12 rs17093734  | 44194265 G | 4.75  | 3.70E-06 | chr:12:44313657 |
| 12 rs17093747  | 44205459 G | 4.75  | 3.70E-06 | chr:12:44313657 |
| 12 rs1802561   | 44189129 C | 4.75  | 3.70E-06 | chr:12:44313657 |
| 12 rs2166063   | 44202450 G | 4.75  | 3.70E-06 | chr:12:44313657 |
| 12 rs79866180  | 44193532 G | 4.75  | 3.70E-06 | chr:12:44313657 |
| 12 rs11182367  | 44387655 A | 1.905 | 3.84E-06 | chr:12:44313657 |
| 12 rs7294850   | 44092547 T | 2.028 | 4.14E-06 | chr:12:44313657 |
| 12 rs544503047 | 44291853 G | 6.943 | 4.21E-06 | chr:12:44313657 |
| 12 rs184905029 | 44667015 G | 3.709 | 5.55E-06 | chr:12:44313657 |
| 12 rs11182222  | 44104379 A | 3.466 | 6.38E-06 | chr:12:44313657 |
| 12 rs11182224  | 44106602 C | 3.466 | 6.38E-06 | chr:12:44313657 |
| 12 rs11182225  | 44106701 A | 3.466 | 6.38E-06 | chr:12:44313657 |
| 12 rs11182227  | 44111030 G | 3.466 | 6.38E-06 | chr:12:44313657 |
| 12 rs11182228  | 44111235 G | 3.466 | 6.38E-06 | chr:12:44313657 |
| 12 rs11182230  | 44114277 C | 3.466 | 6.38E-06 | chr:12:44313657 |

|                |            |       |                          |
|----------------|------------|-------|--------------------------|
| 12 rs11182232  | 44115989 C | 3.466 | 6.38E-06 chr:12:44313657 |
| 12 rs11182233  | 44115990 A | 3.466 | 6.38E-06 chr:12:44313657 |
| 12 rs11182236  | 44126824 A | 3.466 | 6.38E-06 chr:12:44313657 |
| 12 rs11182237  | 44127323 G | 3.466 | 6.38E-06 chr:12:44313657 |
| 12 rs11182238  | 44131606 A | 3.466 | 6.38E-06 chr:12:44313657 |
| 12 rs117084777 | 44108213 T | 3.466 | 6.38E-06 chr:12:44313657 |
| 12 rs117215878 | 44121010 A | 3.466 | 6.38E-06 chr:12:44313657 |
| 12 rs117220364 | 44132395 C | 3.466 | 6.38E-06 chr:12:44313657 |
| 12 rs117342220 | 44103595 T | 3.466 | 6.38E-06 chr:12:44313657 |
| 12 rs117643818 | 44111400 G | 3.466 | 6.38E-06 chr:12:44313657 |
| 12 rs117644328 | 44131145 T | 3.466 | 6.38E-06 chr:12:44313657 |
| 12 rs117821691 | 44108552 G | 3.466 | 6.38E-06 chr:12:44313657 |
| 12 rs117868500 | 44134119 A | 3.466 | 6.38E-06 chr:12:44313657 |
| 12 rs118036846 | 44121422 A | 3.466 | 6.38E-06 chr:12:44313657 |
| 12 rs118169983 | 44118848 T | 3.466 | 6.38E-06 chr:12:44313657 |
| 12 rs12229228  | 44107816 G | 3.466 | 6.38E-06 chr:12:44313657 |
| 12 rs138612305 | 44114068 C | 3.466 | 6.38E-06 chr:12:44313657 |
| 12 rs140455967 | 44120361 C | 3.466 | 6.38E-06 chr:12:44313657 |
| 12 rs141503320 | 44132892 A | 3.466 | 6.38E-06 chr:12:44313657 |
| 12 rs56100821  | 44119311 T | 3.466 | 6.38E-06 chr:12:44313657 |
| 12 rs60813848  | 44120092 T | 3.466 | 6.38E-06 chr:12:44313657 |
| 12 rs7313744   | 44117161 A | 3.466 | 6.38E-06 chr:12:44313657 |
| 12 rs7314624   | 44111831 C | 3.466 | 6.38E-06 chr:12:44313657 |
| 12 rs74082229  | 44113147 G | 3.466 | 6.38E-06 chr:12:44313657 |
| 12 rs74082230  | 44113187 T | 3.466 | 6.38E-06 chr:12:44313657 |
| 12 rs74085310  | 44115324 A | 3.466 | 6.38E-06 chr:12:44313657 |
| 12 rs74085314  | 44123336 T | 3.466 | 6.38E-06 chr:12:44313657 |
| 12 rs74085316  | 44124763 A | 3.466 | 6.38E-06 chr:12:44313657 |
| 12 rs74085318  | 44135019 T | 3.466 | 6.38E-06 chr:12:44313657 |
| 12 rs74085320  | 44136744 C | 3.466 | 6.38E-06 chr:12:44313657 |
| 12 rs75464819  | 44100394 G | 3.466 | 6.38E-06 chr:12:44313657 |
| 12 rs7968653   | 44109626 T | 3.466 | 6.38E-06 chr:12:44313657 |
| 12 rs11182335  | 44320462 T | 8.403 | 6.65E-06 chr:12:44313657 |
| 12 rs11182338  | 44324397 C | 8.403 | 6.65E-06 chr:12:44313657 |
| 12 rs11182344  | 44346046 G | 8.403 | 6.65E-06 chr:12:44313657 |
| 12 rs118191803 | 44337121 A | 8.403 | 6.65E-06 chr:12:44313657 |
| 12 rs11182219  | 44099521 T | 4.346 | 7.98E-06 chr:12:44313657 |
| 12 rs7315657   | 44111950 C | 1.96  | 8.58E-06 chr:12:44313657 |
| 12 rs11182235  | 44123795 T | 3.357 | 8.98E-06 chr:12:44313657 |
| 12 rs112551250 | 44376007 G | 7.467 | 9.29E-06 chr:12:44313657 |
| 12 rs113008085 | 44371253 A | 7.467 | 9.29E-06 chr:12:44313657 |
| 12 rs113254957 | 44372738 C | 7.467 | 9.29E-06 chr:12:44313657 |
| 12 rs117920033 | 44365842 C | 7.467 | 9.29E-06 chr:12:44313657 |

|                |            |       |          |                 |
|----------------|------------|-------|----------|-----------------|
| 12 rs138620401 | 44373329 G | 7.467 | 9.29E-06 | chr:12:44313657 |
| 12 rs140281517 | 44372180 G | 7.467 | 9.29E-06 | chr:12:44313657 |
| 12 rs74448957  | 44388797 T | 7.467 | 9.29E-06 | chr:12:44313657 |
| 12 rs75662982  | 44374152 C | 7.467 | 9.29E-06 | chr:12:44313657 |
| 12 rs76048441  | 44375991 G | 7.467 | 9.29E-06 | chr:12:44313657 |
| 12 rs77015470  | 44385972 C | 7.467 | 9.29E-06 | chr:12:44313657 |
| 12 rs78067428  | 44383391 T | 7.467 | 9.29E-06 | chr:12:44313657 |
| 12 rs78214103  | 44375501 C | 7.467 | 9.29E-06 | chr:12:44313657 |
| 12 rs80192513  | 44386507 T | 7.467 | 9.29E-06 | chr:12:44313657 |
| 12 rs11182246  | 44139805 T | 2.196 | 1.05E-05 | chr:12:44313657 |
| 12 rs12306662  | 44378314 G | 3.116 | 1.16E-05 | chr:12:44313657 |
| 12 rs117940915 | 44605832 T | 5.733 | 1.18E-05 | chr:12:44313657 |
| 12 rs74622886  | 44557741 T | 5.733 | 1.18E-05 | chr:12:44313657 |
| 12 rs4251473   | 44166318 A | 4.09  | 1.27E-05 | chr:12:44313657 |
| 12 rs7137963   | 44104280 T | 1.924 | 1.39E-05 | chr:12:44313657 |
| 12 rs11182360  | 44366739 A | 11.37 | 1.46E-05 | chr:12:44313657 |
| 12 rs11182362  | 44379794 A | 11.37 | 1.46E-05 | chr:12:44313657 |
| 12 rs11182365  | 44384323 T | 11.37 | 1.46E-05 | chr:12:44313657 |
| 12 rs11182369  | 44394840 G | 11.37 | 1.46E-05 | chr:12:44313657 |
| 12 rs11182373  | 44395480 G | 11.37 | 1.46E-05 | chr:12:44313657 |
| 12 rs139064847 | 44376288 C | 11.37 | 1.46E-05 | chr:12:44313657 |
| 12 rs142060963 | 44370819 A | 11.37 | 1.46E-05 | chr:12:44313657 |
| 12 rs148303407 | 44369034 G | 11.37 | 1.46E-05 | chr:12:44313657 |
| 12 rs188416016 | 44385880 A | 11.37 | 1.46E-05 | chr:12:44313657 |
| 12 rs74405412  | 44387202 G | 11.37 | 1.46E-05 | chr:12:44313657 |
| 12 rs76785948  | 44392955 T | 11.37 | 1.46E-05 | chr:12:44313657 |
| 12 rs78178921  | 44386263 C | 11.37 | 1.46E-05 | chr:12:44313657 |
| 12 rs11182302  | 44250291 T | 9.103 | 1.62E-05 | chr:12:44313657 |
| 12 rs11182309  | 44253834 A | 9.103 | 1.62E-05 | chr:12:44313657 |
| 12 rs12231978  | 44245764 G | 9.103 | 1.62E-05 | chr:12:44313657 |
| 12 rs142661332 | 44250522 A | 9.103 | 1.62E-05 | chr:12:44313657 |
| 12 rs10880550  | 44106018 G | 1.915 | 1.64E-05 | chr:12:44313657 |
| 12 rs11182413  | 44470922 A | 5.286 | 1.82E-05 | chr:12:44313657 |
| 12 rs117419897 | 44240775 A | 3.973 | 1.86E-05 | chr:12:44313657 |
| 12 rs117657439 | 44257734 T | 3.973 | 1.86E-05 | chr:12:44313657 |
| 12 rs139428281 | 44258804 T | 3.973 | 1.86E-05 | chr:12:44313657 |
| 12 rs140201523 | 44267442 A | 3.973 | 1.86E-05 | chr:12:44313657 |
| 12 rs143382321 | 44251010 G | 3.973 | 1.86E-05 | chr:12:44313657 |
| 12 rs146156586 | 44262286 T | 3.973 | 1.86E-05 | chr:12:44313657 |
| 12 rs374326271 | 44305863 C | 3.973 | 1.86E-05 | chr:12:44313657 |
| 12 rs73096923  | 44236408 T | 3.973 | 1.86E-05 | chr:12:44313657 |
| 12 rs7979369   | 44242657 G | 3.973 | 1.86E-05 | chr:12:44313657 |
| 12 rs1505583   | 44469844 G | 4.206 | 1.90E-05 | chr:12:44313657 |

|                |            |        |          |                 |
|----------------|------------|--------|----------|-----------------|
| 12 rs117968987 | 44007162 T | 4.241  | 1.91E-05 | chr:12:44313657 |
| 12 rs12423037  | 44007502 G | 4.241  | 1.91E-05 | chr:12:44313657 |
| 12 rs12423038  | 44007535 T | 4.241  | 1.91E-05 | chr:12:44313657 |
| 12 rs143679463 | 44004246 G | 4.241  | 1.91E-05 | chr:12:44313657 |
| 12 rs145022084 | 44006315 G | 4.241  | 1.91E-05 | chr:12:44313657 |
| 12 rs145303046 | 44005226 T | 4.241  | 1.91E-05 | chr:12:44313657 |
| 12 rs150378023 | 44011962 G | 4.241  | 1.91E-05 | chr:12:44313657 |
| 12 rs166735    | 44011458 G | 4.241  | 1.91E-05 | chr:12:44313657 |
| 12 rs166736    | 44005219 T | 4.241  | 1.91E-05 | chr:12:44313657 |
| 12 rs185719    | 44005530 A | 4.241  | 1.91E-05 | chr:12:44313657 |
| 12 rs188050    | 43993214 T | 4.241  | 1.91E-05 | chr:12:44313657 |
| 12 rs202453    | 44013209 T | 4.241  | 1.91E-05 | chr:12:44313657 |
| 12 rs277196    | 44015214 C | 4.241  | 1.91E-05 | chr:12:44313657 |
| 12 rs277236    | 44003598 A | 4.241  | 1.91E-05 | chr:12:44313657 |
| 12 rs277237    | 44002806 T | 4.241  | 1.91E-05 | chr:12:44313657 |
| 12 rs277238    | 44002766 C | 4.241  | 1.91E-05 | chr:12:44313657 |
| 12 rs277239    | 44002747 C | 4.241  | 1.91E-05 | chr:12:44313657 |
| 12 rs277240    | 44002316 A | 4.241  | 1.91E-05 | chr:12:44313657 |
| 12 rs277248    | 43997826 T | 4.241  | 1.91E-05 | chr:12:44313657 |
| 12 rs74081960  | 43994195 C | 4.241  | 1.91E-05 | chr:12:44313657 |
| 12 rs74629408  | 43995252 C | 4.241  | 1.91E-05 | chr:12:44313657 |
| 12 rs75392261  | 44003152 C | 4.241  | 1.91E-05 | chr:12:44313657 |
| 12 rs77746957  | 44003197 C | 4.241  | 1.91E-05 | chr:12:44313657 |
| 12 rs78660922  | 43994976 G | 4.241  | 1.91E-05 | chr:12:44313657 |
| 12 rs79151082  | 44014926 C | 4.241  | 1.91E-05 | chr:12:44313657 |
| 12 rs75839358  | 44373492 G | 0.4692 | 1.93E-05 | chr:12:44313657 |
| 12 rs147456071 | 44296280 G | 8.683  | 2.05E-05 | chr:12:44313657 |
| 12 rs426616    | 43991836 T | 4.047  | 2.59E-05 | chr:12:44313657 |
| 12 rs9795610   | 55740956 G | 12.97  | 5.67E-27 | chr:12:55727213 |
| 12 rs10431547  | 55745950 A | 12.99  | 6.24E-27 | chr:12:55727213 |
| 12 rs10735860  | 55732664 A | 12.99  | 6.24E-27 | chr:12:55727213 |
| 12 rs10735861  | 55762857 A | 12.99  | 6.24E-27 | chr:12:55727213 |
| 12 rs10735862  | 55763034 C | 12.99  | 6.24E-27 | chr:12:55727213 |
| 12 rs10747742  | 55748509 G | 12.99  | 6.24E-27 | chr:12:55727213 |
| 12 rs10747743  | 55755226 G | 12.99  | 6.24E-27 | chr:12:55727213 |
| 12 rs10747746  | 55769082 C | 12.99  | 6.24E-27 | chr:12:55727213 |
| 12 rs10747747  | 55772188 G | 12.99  | 6.24E-27 | chr:12:55727213 |
| 12 rs10747748  | 55774581 A | 12.99  | 6.24E-27 | chr:12:55727213 |
| 12 rs10783721  | 55732060 A | 12.99  | 6.24E-27 | chr:12:55727213 |
| 12 rs10783724  | 55746910 A | 12.99  | 6.24E-27 | chr:12:55727213 |
| 12 rs10783730  | 55763463 A | 12.99  | 6.24E-27 | chr:12:55727213 |
| 12 rs10783731  | 55767702 G | 12.99  | 6.24E-27 | chr:12:55727213 |
| 12 rs10876741  | 55723575 T | 12.99  | 6.24E-27 | chr:12:55727213 |

|               |            |       |                          |
|---------------|------------|-------|--------------------------|
| 12 rs10876747 | 55745162 G | 12.99 | 6.24E-27 chr:12:55727213 |
| 12 rs10876749 | 55754085 A | 12.99 | 6.24E-27 chr:12:55727213 |
| 12 rs10876750 | 55757559 A | 12.99 | 6.24E-27 chr:12:55727213 |
| 12 rs10876751 | 55759878 G | 12.99 | 6.24E-27 chr:12:55727213 |
| 12 rs10876754 | 55767295 A | 12.99 | 6.24E-27 chr:12:55727213 |
| 12 rs11171426 | 55741827 C | 12.99 | 6.24E-27 chr:12:55727213 |
| 12 rs11171437 | 55761078 G | 12.99 | 6.24E-27 chr:12:55727213 |
| 12 rs11171444 | 55766896 T | 12.99 | 6.24E-27 chr:12:55727213 |
| 12 rs4758999  | 55756597 G | 12.99 | 6.24E-27 chr:12:55727213 |
| 12 rs7138676  | 55734240 A | 12.99 | 6.24E-27 chr:12:55727213 |
| 12 rs7486665  | 55741380 C | 12.99 | 6.24E-27 chr:12:55727213 |
| 12 rs7487069  | 55744851 C | 12.99 | 6.24E-27 chr:12:55727213 |
| 12 rs7488140  | 55770771 A | 12.99 | 6.24E-27 chr:12:55727213 |
| 12 rs7958843  | 55726716 A | 12.99 | 6.24E-27 chr:12:55727213 |
| 12 rs7488178  | 55770918 T | 12.95 | 6.27E-27 chr:12:55727213 |
| 12 rs7487315  | 55782690 T | 13.03 | 6.39E-27 chr:12:55727213 |
| 12 rs7487832  | 55782814 G | 13.03 | 6.39E-27 chr:12:55727213 |
| 12 rs7487833  | 55782819 C | 13.03 | 6.39E-27 chr:12:55727213 |
| 12 rs10876758 | 55781712 A | 12.1  | 7.14E-27 chr:12:55727213 |
| 12 rs10876759 | 55781717 G | 12.1  | 7.14E-27 chr:12:55727213 |
| 12 rs10876742 | 55737616 C | 12.97 | 8.38E-27 chr:12:55727213 |
| 12 rs10747752 | 55793235 G | 12.81 | 9.06E-27 chr:12:55727213 |
| 12 rs10783734 | 55799682 T | 12.81 | 9.06E-27 chr:12:55727213 |
| 12 rs10783737 | 55802733 A | 12.81 | 9.06E-27 chr:12:55727213 |
| 12 rs10876763 | 55788546 T | 12.81 | 9.06E-27 chr:12:55727213 |
| 12 rs10876764 | 55789304 A | 12.81 | 9.06E-27 chr:12:55727213 |
| 12 rs10876767 | 55797331 A | 12.81 | 9.06E-27 chr:12:55727213 |
| 12 rs10876768 | 55797728 G | 12.81 | 9.06E-27 chr:12:55727213 |
| 12 rs11171449 | 55789447 G | 12.81 | 9.06E-27 chr:12:55727213 |
| 12 rs7294677  | 55800713 G | 12.81 | 9.06E-27 chr:12:55727213 |
| 12 rs11171411 | 55719478 T | 12.87 | 9.14E-27 chr:12:55727213 |
| 12 rs12301041 | 55718970 T | 12.87 | 9.14E-27 chr:12:55727213 |
| 12 rs4511372  | 55722251 T | 12.87 | 9.14E-27 chr:12:55727213 |
| 12 rs10783728 | 55762519 A | 12.8  | 9.31E-27 chr:12:55727213 |
| 12 rs11171441 | 55766596 C | 12.79 | 9.77E-27 chr:12:55727213 |
| 12 rs4759140  | 55733080 T | 12.79 | 9.77E-27 chr:12:55727213 |
| 12 rs11171427 | 55742270 C | 12.23 | 1.04E-26 chr:12:55727213 |
| 12 rs10783723 | 55738137 A | 12.93 | 1.10E-26 chr:12:55727213 |
| 12 rs10747744 | 55768014 C | 12.26 | 1.15E-26 chr:12:55727213 |
| 12 rs10747745 | 55768086 G | 12.26 | 1.15E-26 chr:12:55727213 |
| 12 rs10876753 | 55767068 C | 12.26 | 1.15E-26 chr:12:55727213 |
| 12 rs4759000  | 55766037 A | 12.26 | 1.15E-26 chr:12:55727213 |
| 12 rs4759145  | 55769542 T | 12.26 | 1.15E-26 chr:12:55727213 |

|                |            |         |                          |
|----------------|------------|---------|--------------------------|
| 12 rs4759146   | 55770047 C | 12.26   | 1.15E-26 chr:12:55727213 |
| 12 rs7485722   | 55770909 C | 12.63   | 1.34E-26 chr:12:55727213 |
| 12 rs57757372  | 55718780 A | 16.36   | 1.35E-26 chr:12:55727213 |
| 12 rs58709231  | 55719090 T | 16.36   | 1.35E-26 chr:12:55727213 |
| 12 rs59097302  | 55719030 C | 16.36   | 1.35E-26 chr:12:55727213 |
| 12 rs60142559  | 55719192 A | 16.36   | 1.35E-26 chr:12:55727213 |
| 12 rs60220253  | 55717410 A | 16.36   | 1.35E-26 chr:12:55727213 |
| 12 rs61957879  | 55716971 A | 16.36   | 1.35E-26 chr:12:55727213 |
| 12 rs142753382 | 55872931 C | 9.948   | 2.95E-26 chr:12:55727213 |
| 12 rs145535298 | 55873030 G | 9.948   | 2.95E-26 chr:12:55727213 |
| 12 rs7486167   | 55783942 C | 12.25   | 4.01E-26 chr:12:55727213 |
| 12 rs143455470 | 55879325 A | 0.07018 | 6.97E-26 chr:12:55727213 |
| 12 rs10783741  | 55824985 T | 11.08   | 7.37E-26 chr:12:55727213 |
| 12 rs11171462  | 55838718 T | 11.08   | 7.37E-26 chr:12:55727213 |
| 12 rs7295548   | 55834719 C | 11.08   | 7.37E-26 chr:12:55727213 |
| 12 rs7316594   | 55887407 T | 9.775   | 1.18E-25 chr:12:55727213 |
| 12 rs11495497  | 55740640 C | 10.26   | 1.63E-25 chr:12:55727213 |
| 12 rs4309772   | 55888672 T | 9.403   | 1.74E-25 chr:12:55727213 |
| 12 rs59003108  | 55888940 C | 9.403   | 1.74E-25 chr:12:55727213 |
| 12 rs12579181  | 55887087 G | 9.588   | 1.84E-25 chr:12:55727213 |
| 12 rs7310335   | 55884439 C | 9.588   | 1.84E-25 chr:12:55727213 |
| 12 rs11831714  | 55741742 A | 29.3    | 8.51E-25 chr:12:55727213 |
| 12 rs201855666 | 55879919 A | 0.04253 | 2.20E-24 chr:12:55727213 |
| 12 rs7294659   | 55866519 C | 0.04287 | 2.44E-24 chr:12:55727213 |
| 12 rs4376077   | 55872442 G | 0.04317 | 2.72E-24 chr:12:55727213 |
| 12 rs4453888   | 55887808 C | 0.0388  | 4.87E-24 chr:12:55727213 |
| 12 rs56840674  | 55887691 T | 0.0388  | 4.87E-24 chr:12:55727213 |
| 12 rs12579005  | 55853230 A | 0.03939 | 6.00E-24 chr:12:55727213 |
| 12 rs4356858   | 55867290 T | 0.03939 | 6.00E-24 chr:12:55727213 |
| 12 rs60683621  | 55863224 G | 0.03939 | 6.00E-24 chr:12:55727213 |
| 12 rs61957763  | 55867540 A | 0.03939 | 6.00E-24 chr:12:55727213 |
| 12 rs7952853   | 55845415 T | 0.03939 | 6.00E-24 chr:12:55727213 |
| 12 rs7966770   | 55844717 C | 0.03939 | 6.00E-24 chr:12:55727213 |
| 12 rs7971742   | 55848486 G | 0.03939 | 6.00E-24 chr:12:55727213 |
| 12 rs7980098   | 55844694 G | 0.03939 | 6.00E-24 chr:12:55727213 |
| 12 rs200704134 | 55879280 T | 0.03945 | 6.06E-24 chr:12:55727213 |
| 12 rs4343668   | 55868936 T | 0.03945 | 6.06E-24 chr:12:55727213 |
| 12 rs60066834  | 55877998 T | 0.03945 | 6.06E-24 chr:12:55727213 |
| 12 rs61957764  | 55867916 A | 0.03945 | 6.06E-24 chr:12:55727213 |
| 12 rs61957765  | 55868561 C | 0.03945 | 6.06E-24 chr:12:55727213 |
| 12 rs67290413  | 55869876 C | 0.03945 | 6.06E-24 chr:12:55727213 |
| 12 rs7304753   | 55886489 A | 0.03945 | 6.06E-24 chr:12:55727213 |
| 12 rs61956358  | 55852286 T | 0.03947 | 6.57E-24 chr:12:55727213 |



|                |            |         |          |                 |
|----------------|------------|---------|----------|-----------------|
| 12 rs4130004   | 55860773 T | 0.03962 | 7.84E-24 | chr:12:55727213 |
| 12 rs60450959  | 55861373 T | 0.03962 | 7.84E-24 | chr:12:55727213 |
| 12 rs61957760  | 55859957 T | 0.03962 | 7.84E-24 | chr:12:55727213 |
| 12 rs61956303  | 55818071 A | 0.03432 | 8.19E-24 | chr:12:55727213 |
| 12 rs67246762  | 55889642 T | 0.09276 | 8.36E-24 | chr:12:55727213 |
| 12 rs7960126   | 55813605 G | 0.1018  | 1.03E-23 | chr:12:55727213 |
| 12 rs61957889  | 55724456 T | 0.09715 | 1.17E-23 | chr:12:55727213 |
| 12 rs57361193  | 55883572 A | 0.04796 | 1.30E-23 | chr:12:55727213 |
| 12 rs58780687  | 55736498 C | 0.03269 | 1.39E-23 | chr:12:55727213 |
| 12 rs58316942  | 55718919 A | 0.09726 | 1.41E-23 | chr:12:55727213 |
| 12 rs10783740  | 55824905 C | 0.03535 | 1.43E-23 | chr:12:55727213 |
| 12 rs12371318  | 55838476 C | 0.03535 | 1.43E-23 | chr:12:55727213 |
| 12 rs12582120  | 55830064 G | 0.03535 | 1.43E-23 | chr:12:55727213 |
| 12 rs12826311  | 55828310 T | 0.03535 | 1.43E-23 | chr:12:55727213 |
| 12 rs201409163 | 55827180 C | 0.03535 | 1.43E-23 | chr:12:55727213 |
| 12 rs201554506 | 55826869 A | 0.03535 | 1.43E-23 | chr:12:55727213 |
| 12 rs4318592   | 55837124 A | 0.03535 | 1.43E-23 | chr:12:55727213 |
| 12 rs4593071   | 55842842 G | 0.03535 | 1.43E-23 | chr:12:55727213 |
| 12 rs4759149   | 55827063 T | 0.03535 | 1.43E-23 | chr:12:55727213 |
| 12 rs55797706  | 55836585 A | 0.03535 | 1.43E-23 | chr:12:55727213 |
| 12 rs60643523  | 55842928 G | 0.03535 | 1.43E-23 | chr:12:55727213 |
| 12 rs61956325  | 55827707 A | 0.03535 | 1.43E-23 | chr:12:55727213 |
| 12 rs61956327  | 55828708 T | 0.03535 | 1.43E-23 | chr:12:55727213 |
| 12 rs61956331  | 55840856 A | 0.03535 | 1.43E-23 | chr:12:55727213 |
| 12 rs6581047   | 55832001 G | 0.03535 | 1.43E-23 | chr:12:55727213 |
| 12 rs7311797   | 55834721 T | 0.03535 | 1.43E-23 | chr:12:55727213 |
| 12 rs7311929   | 55834833 G | 0.03535 | 1.43E-23 | chr:12:55727213 |
| 12 rs7486280   | 55823675 C | 0.03535 | 1.43E-23 | chr:12:55727213 |
| 12 rs7957446   | 55839631 C | 0.03535 | 1.43E-23 | chr:12:55727213 |
| 12 rs7964964   | 55841398 T | 0.03535 | 1.43E-23 | chr:12:55727213 |
| 12 rs7966072   | 55829213 A | 0.03535 | 1.43E-23 | chr:12:55727213 |
| 12 rs61956326  | 55827735 A | 0.03584 | 1.61E-23 | chr:12:55727213 |
| 12 rs61957788  | 55883248 A | 0.03622 | 2.29E-23 | chr:12:55727213 |
| 12 rs112892991 | 55808749 T | 0.03331 | 2.34E-23 | chr:12:55727213 |
| 12 rs59438785  | 55811665 G | 0.03331 | 2.34E-23 | chr:12:55727213 |
| 12 rs61547125  | 55814082 G | 0.03331 | 2.34E-23 | chr:12:55727213 |
| 12 rs61956300  | 55812640 G | 0.03331 | 2.34E-23 | chr:12:55727213 |
| 12 rs201131895 | 55740725 A | 0.1306  | 2.88E-23 | chr:12:55727213 |
| 12 rs376987469 | 55740755 G | 0.1306  | 2.88E-23 | chr:12:55727213 |
| 12 rs9669227   | 55826498 C | 6.246   | 3.84E-23 | chr:12:55727213 |
| 12 rs73118998  | 55736659 C | 0.02911 | 4.17E-23 | chr:12:55727213 |
| 12 rs73119000  | 55736662 A | 0.02911 | 4.17E-23 | chr:12:55727213 |
| 12 rs61957915  | 55742266 C | 0.02947 | 4.53E-23 | chr:12:55727213 |

|                |            |         |          |                 |
|----------------|------------|---------|----------|-----------------|
| 12 rs60774348  | 55757717 G | 0.02927 | 4.68E-23 | chr:12:55727213 |
| 12 rs373941107 | 55740754 T | 0.1336  | 5.22E-23 | chr:12:55727213 |
| 12 rs115471673 | 55766516 G | 0.0293  | 5.44E-23 | chr:12:55727213 |
| 12 rs12099665  | 55731191 T | 0.0293  | 5.44E-23 | chr:12:55727213 |
| 12 rs12099808  | 55731178 A | 0.0293  | 5.44E-23 | chr:12:55727213 |
| 12 rs12579408  | 55764348 A | 0.0293  | 5.44E-23 | chr:12:55727213 |
| 12 rs12581916  | 55764409 C | 0.0293  | 5.44E-23 | chr:12:55727213 |
| 12 rs189794726 | 55743934 C | 0.0293  | 5.44E-23 | chr:12:55727213 |
| 12 rs4448777   | 55724981 C | 0.0293  | 5.44E-23 | chr:12:55727213 |
| 12 rs4590978   | 55725086 T | 0.0293  | 5.44E-23 | chr:12:55727213 |
| 12 rs4759147   | 55770418 A | 0.0293  | 5.44E-23 | chr:12:55727213 |
| 12 rs55637917  | 55747565 C | 0.0293  | 5.44E-23 | chr:12:55727213 |
| 12 rs57050414  | 55776926 A | 0.0293  | 5.44E-23 | chr:12:55727213 |
| 12 rs58254871  | 55750281 A | 0.0293  | 5.44E-23 | chr:12:55727213 |
| 12 rs59213907  | 55728911 T | 0.0293  | 5.44E-23 | chr:12:55727213 |
| 12 rs60230359  | 55736550 C | 0.0293  | 5.44E-23 | chr:12:55727213 |
| 12 rs60249205  | 55758333 G | 0.0293  | 5.44E-23 | chr:12:55727213 |
| 12 rs60586348  | 55745151 T | 0.0293  | 5.44E-23 | chr:12:55727213 |
| 12 rs61556775  | 55745640 C | 0.0293  | 5.44E-23 | chr:12:55727213 |
| 12 rs61956269  | 55768023 T | 0.0293  | 5.44E-23 | chr:12:55727213 |
| 12 rs61956272  | 55779559 T | 0.0293  | 5.44E-23 | chr:12:55727213 |
| 12 rs61957937  | 55746850 C | 0.0293  | 5.44E-23 | chr:12:55727213 |
| 12 rs61957938  | 55747266 G | 0.0293  | 5.44E-23 | chr:12:55727213 |
| 12 rs61957941  | 55748058 A | 0.0293  | 5.44E-23 | chr:12:55727213 |
| 12 rs61957946  | 55755778 C | 0.0293  | 5.44E-23 | chr:12:55727213 |
| 12 rs6581037   | 55767310 T | 0.0293  | 5.44E-23 | chr:12:55727213 |
| 12 rs66902680  | 55724080 C | 0.0293  | 5.44E-23 | chr:12:55727213 |
| 12 rs67015069  | 55759968 A | 0.0293  | 5.44E-23 | chr:12:55727213 |
| 12 rs73326725  | 55749222 C | 0.0293  | 5.44E-23 | chr:12:55727213 |
| 12 rs74844018  | 55766871 A | 0.0293  | 5.44E-23 | chr:12:55727213 |
| 12 rs7485053   | 55770126 C | 0.0293  | 5.44E-23 | chr:12:55727213 |
| 12 rs7487419   | 55769801 G | 0.0293  | 5.44E-23 | chr:12:55727213 |
| 12 rs7489047   | 55759851 G | 0.0293  | 5.44E-23 | chr:12:55727213 |
| 12 rs7959124   | 55726957 G | 0.0293  | 5.44E-23 | chr:12:55727213 |
| 12 rs7959837   | 55734511 A | 0.0293  | 5.44E-23 | chr:12:55727213 |
| 12 rs7976828   | 55726450 T | 0.0293  | 5.44E-23 | chr:12:55727213 |
| 12 rs12582005  | 55772837 A | 0.0292  | 5.80E-23 | chr:12:55727213 |
| 12 rs60991522  | 55781529 T | 0.02936 | 6.36E-23 | chr:12:55727213 |
| 12 rs12578577  | 55716443 T | 0.02933 | 6.78E-23 | chr:12:55727213 |
| 12 rs12579852  | 55716569 A | 0.02933 | 6.78E-23 | chr:12:55727213 |
| 12 rs58480409  | 55719221 T | 0.02933 | 6.78E-23 | chr:12:55727213 |
| 12 rs60873827  | 55717769 C | 0.02933 | 6.78E-23 | chr:12:55727213 |
| 12 rs61957878  | 55716754 T | 0.02933 | 6.78E-23 | chr:12:55727213 |

|                |            |         |          |                 |
|----------------|------------|---------|----------|-----------------|
| 12 rs61957884  | 55720177 G | 0.02933 | 6.78E-23 | chr:12:55727213 |
| 12 rs61957885  | 55720876 G | 0.02933 | 6.78E-23 | chr:12:55727213 |
| 12 rs12580661  | 55803129 A | 0.02948 | 7.20E-23 | chr:12:55727213 |
| 12 rs61956292  | 55803346 C | 0.02948 | 7.20E-23 | chr:12:55727213 |
| 12 rs7488940   | 55802591 T | 0.02936 | 7.25E-23 | chr:12:55727213 |
| 12 rs12578879  | 55797773 T | 0.02957 | 7.26E-23 | chr:12:55727213 |
| 12 rs12579346  | 55786856 G | 0.02957 | 7.26E-23 | chr:12:55727213 |
| 12 rs12581060  | 55797484 C | 0.02957 | 7.26E-23 | chr:12:55727213 |
| 12 rs12581959  | 55787311 A | 0.02957 | 7.26E-23 | chr:12:55727213 |
| 12 rs3935215   | 55792401 A | 0.02957 | 7.26E-23 | chr:12:55727213 |
| 12 rs61956275  | 55786423 A | 0.02957 | 7.26E-23 | chr:12:55727213 |
| 12 rs61956290  | 55793833 G | 0.02957 | 7.26E-23 | chr:12:55727213 |
| 12 rs61956291  | 55797964 C | 0.02957 | 7.26E-23 | chr:12:55727213 |
| 12 rs67934812  | 55785591 G | 0.02957 | 7.26E-23 | chr:12:55727213 |
| 12 rs7485979   | 55789043 A | 0.02957 | 7.26E-23 | chr:12:55727213 |
| 12 rs7485991   | 55789129 C | 0.02957 | 7.26E-23 | chr:12:55727213 |
| 12 rs7487895   | 55796720 C | 0.02957 | 7.26E-23 | chr:12:55727213 |
| 12 rs61957914  | 55742041 A | 0.03032 | 8.58E-23 | chr:12:55727213 |
| 12 rs112331945 | 55781657 T | 0.03251 | 1.03E-22 | chr:12:55727213 |
| 12 rs61566486  | 55781694 G | 0.03251 | 1.03E-22 | chr:12:55727213 |
| 12 rs4479639   | 55888719 A | 8.973   | 1.12E-22 | chr:12:55727213 |
| 12 rs11171432  | 55757696 C | 0.02554 | 1.70E-22 | chr:12:55727213 |
| 12 rs11171433  | 55757797 T | 0.02528 | 1.71E-22 | chr:12:55727213 |
| 12 rs66516917  | 55749131 G | 0.02555 | 1.88E-22 | chr:12:55727213 |
| 12 rs11171416  | 55731490 G | 0.02556 | 1.96E-22 | chr:12:55727213 |
| 12 rs11171430  | 55755254 G | 0.02556 | 1.96E-22 | chr:12:55727213 |
| 12 rs11171431  | 55757609 T | 0.02556 | 1.96E-22 | chr:12:55727213 |
| 12 rs11171435  | 55758053 C | 0.02556 | 1.96E-22 | chr:12:55727213 |
| 12 rs11832308  | 55755506 A | 0.02556 | 1.96E-22 | chr:12:55727213 |
| 12 rs12099811  | 55731200 A | 0.02556 | 1.96E-22 | chr:12:55727213 |
| 12 rs12296692  | 55756851 C | 0.02556 | 1.96E-22 | chr:12:55727213 |
| 12 rs12318683  | 55755024 C | 0.02556 | 1.96E-22 | chr:12:55727213 |
| 12 rs13377995  | 55757380 G | 0.02556 | 1.96E-22 | chr:12:55727213 |
| 12 rs146150551 | 55751301 C | 0.02556 | 1.96E-22 | chr:12:55727213 |
| 12 rs149898597 | 55753436 A | 0.02556 | 1.96E-22 | chr:12:55727213 |
| 12 rs55659159  | 55747754 T | 0.02556 | 1.96E-22 | chr:12:55727213 |
| 12 rs55898514  | 55736238 A | 0.02556 | 1.96E-22 | chr:12:55727213 |
| 12 rs56677471  | 55749967 A | 0.02556 | 1.96E-22 | chr:12:55727213 |
| 12 rs59136392  | 55748204 T | 0.02556 | 1.96E-22 | chr:12:55727213 |
| 12 rs59347627  | 55758129 G | 0.02556 | 1.96E-22 | chr:12:55727213 |
| 12 rs59676560  | 55745425 C | 0.02556 | 1.96E-22 | chr:12:55727213 |
| 12 rs61249728  | 55728922 G | 0.02556 | 1.96E-22 | chr:12:55727213 |
| 12 rs61957898  | 55730423 C | 0.02556 | 1.96E-22 | chr:12:55727213 |

|                |            |         |          |                 |
|----------------|------------|---------|----------|-----------------|
| 12 rs61957899  | 55731971 T | 0.02556 | 1.96E-22 | chr:12:55727213 |
| 12 rs61957924  | 55744100 C | 0.02556 | 1.96E-22 | chr:12:55727213 |
| 12 rs61957933  | 55744710 G | 0.02556 | 1.96E-22 | chr:12:55727213 |
| 12 rs61957936  | 55745719 G | 0.02556 | 1.96E-22 | chr:12:55727213 |
| 12 rs61957943  | 55749330 G | 0.02556 | 1.96E-22 | chr:12:55727213 |
| 12 rs7311751   | 55748847 G | 0.02556 | 1.96E-22 | chr:12:55727213 |
| 12 rs7313465   | 55736863 T | 0.02556 | 1.96E-22 | chr:12:55727213 |
| 12 rs7314118   | 55737403 C | 0.02556 | 1.96E-22 | chr:12:55727213 |
| 12 rs7484522   | 55738240 G | 0.02556 | 1.96E-22 | chr:12:55727213 |
| 12 rs79104523  | 55749220 C | 0.02556 | 1.96E-22 | chr:12:55727213 |
| 12 rs7955088   | 55732963 T | 0.02556 | 1.96E-22 | chr:12:55727213 |
| 12 rs7960760   | 55722311 G | 0.02556 | 1.96E-22 | chr:12:55727213 |
| 12 rs7971053   | 55729947 C | 0.02556 | 1.96E-22 | chr:12:55727213 |
| 12 rs11171434  | 55758018 T | 0.02556 | 2.03E-22 | chr:12:55727213 |
| 12 rs537017437 | 55742569 T | 0.02567 | 2.04E-22 | chr:12:55727213 |
| 12 rs61957902  | 55738064 C | 0.02557 | 2.14E-22 | chr:12:55727213 |
| 12 rs59466585  | 55722736 G | 0.02557 | 2.43E-22 | chr:12:55727213 |
| 12 rs61071395  | 55721228 C | 0.02557 | 2.43E-22 | chr:12:55727213 |
| 12 rs61957887  | 55721734 T | 0.02557 | 2.43E-22 | chr:12:55727213 |
| 12 rs7960719   | 55722035 A | 0.02551 | 2.88E-22 | chr:12:55727213 |
| 12 rs7484556   | 55738427 G | 0.02653 | 3.14E-22 | chr:12:55727213 |
| 12 rs7304684   | 55895538 T | 0.1786  | 3.69E-20 | chr:12:55727213 |
| 12 rs4336160   | 55891377 T | 0.1831  | 4.51E-20 | chr:12:55727213 |
| 12 rs61956295  | 55805499 A | 5.601   | 4.13E-19 | chr:12:55727213 |
| 12 rs7300096   | 55805787 A | 5.601   | 4.13E-19 | chr:12:55727213 |
| 12 rs184796938 | 55872907 A | 5.046   | 1.11E-18 | chr:12:55727213 |
| 12 rs10876773  | 55817115 A | 5.415   | 1.13E-18 | chr:12:55727213 |
| 12 rs7310663   | 55809747 C | 5.415   | 1.13E-18 | chr:12:55727213 |
| 12 rs10876774  | 55819933 C | 5.487   | 1.22E-18 | chr:12:55727213 |
| 12 rs7487750   | 55818508 G | 5.487   | 1.22E-18 | chr:12:55727213 |
| 12 rs7487767   | 55818496 T | 5.487   | 1.22E-18 | chr:12:55727213 |
| 12 rs11171468  | 55847999 G | 5.443   | 1.25E-18 | chr:12:55727213 |
| 12 rs11171470  | 55852060 T | 5.443   | 1.25E-18 | chr:12:55727213 |
| 12 rs11171483  | 55858919 C | 5.443   | 1.25E-18 | chr:12:55727213 |
| 12 rs4349540   | 55857469 T | 5.443   | 1.25E-18 | chr:12:55727213 |
| 12 rs79847204  | 55856831 G | 5.443   | 1.25E-18 | chr:12:55727213 |
| 12 rs7133266   | 55847268 C | 5.45    | 1.39E-18 | chr:12:55727213 |
| 12 rs10876775  | 55821535 C | 5.389   | 1.99E-18 | chr:12:55727213 |
| 12 rs10783742  | 55832499 A | 5.279   | 3.17E-18 | chr:12:55727213 |
| 12 rs10876780  | 55843263 A | 5.279   | 3.17E-18 | chr:12:55727213 |
| 12 rs3923056   | 55837986 T | 5.279   | 3.17E-18 | chr:12:55727213 |
| 12 rs4759001   | 55826648 T | 5.279   | 3.17E-18 | chr:12:55727213 |
| 12 rs6581049   | 55835376 A | 5.279   | 3.17E-18 | chr:12:55727213 |

|                |            |        |                          |
|----------------|------------|--------|--------------------------|
| 12 rs7296531   | 55835256 A | 5.279  | 3.17E-18 chr:12:55727213 |
| 12 rs73124916  | 55825800 G | 5.279  | 3.17E-18 chr:12:55727213 |
| 12 rs9971868   | 55836188 A | 5.279  | 3.17E-18 chr:12:55727213 |
| 12 rs28896912  | 55880385 C | 5.308  | 4.73E-18 chr:12:55727213 |
| 12 rs10876781  | 55843936 A | 5.08   | 8.36E-18 chr:12:55727213 |
| 12 rs7484432   | 55823725 C | 5.074  | 8.37E-18 chr:12:55727213 |
| 12 rs61957766  | 55872745 A | 4.956  | 9.14E-18 chr:12:55727213 |
| 12 rs10783749  | 55875963 A | 5.094  | 9.47E-18 chr:12:55727213 |
| 12 rs10783747  | 55868837 A | 5.099  | 9.62E-18 chr:12:55727213 |
| 12 rs10876784  | 55871441 C | 5.099  | 9.62E-18 chr:12:55727213 |
| 12 rs10876788  | 55877709 A | 5.099  | 9.62E-18 chr:12:55727213 |
| 12 rs12322589  | 55873359 T | 5.099  | 9.62E-18 chr:12:55727213 |
| 12 rs12322662  | 55873461 T | 5.099  | 9.62E-18 chr:12:55727213 |
| 12 rs4425299   | 55874323 T | 5.099  | 9.62E-18 chr:12:55727213 |
| 12 rs4759152   | 55878129 G | 5.099  | 9.62E-18 chr:12:55727213 |
| 12 rs7309879   | 55876821 T | 5.099  | 9.62E-18 chr:12:55727213 |
| 12 rs7310154   | 55877094 C | 5.099  | 9.62E-18 chr:12:55727213 |
| 12 rs7314540   | 55877913 A | 5.099  | 9.62E-18 chr:12:55727213 |
| 12 rs7965047   | 55884963 C | 5.099  | 9.62E-18 chr:12:55727213 |
| 12 rs9737652   | 55878906 A | 5.099  | 9.62E-18 chr:12:55727213 |
| 12 rs10783746  | 55861030 A | 5.108  | 9.66E-18 chr:12:55727213 |
| 12 rs4130003   | 55860906 T | 5.108  | 9.66E-18 chr:12:55727213 |
| 12 rs7977965   | 55860548 C | 5.108  | 9.66E-18 chr:12:55727213 |
| 12 rs4513499   | 55878467 A | 4.892  | 1.71E-17 chr:12:55727213 |
| 12 rs12230513  | 55916780 G | 0.2253 | 1.97E-17 chr:12:55727213 |
| 12 rs77755732  | 55924293 T | 0.2253 | 1.97E-17 chr:12:55727213 |
| 12 rs28881605  | 55914354 G | 0.1818 | 3.06E-17 chr:12:55727213 |
| 12 rs11171535  | 55914635 A | 0.2311 | 3.40E-17 chr:12:55727213 |
| 12 rs11171556  | 55949852 A | 0.2333 | 5.32E-17 chr:12:55727213 |
| 12 rs183973202 | 55935021 A | 0.2333 | 5.32E-17 chr:12:55727213 |
| 12 rs4324500   | 55935029 A | 0.2333 | 5.32E-17 chr:12:55727213 |
| 12 rs76179834  | 55936746 T | 0.2333 | 5.32E-17 chr:12:55727213 |
| 12 rs76783572  | 55936752 A | 0.2333 | 5.32E-17 chr:12:55727213 |
| 12 rs4370065   | 55864695 G | 5.057  | 5.85E-17 chr:12:55727213 |
| 12 rs4759150   | 55865320 T | 5.057  | 5.85E-17 chr:12:55727213 |
| 12 rs9737653   | 55878991 A | 4.78   | 6.19E-17 chr:12:55727213 |
| 12 rs10876790  | 55879589 T | 4.722  | 8.52E-17 chr:12:55727213 |
| 12 rs7485206   | 55739268 G | 4.185  | 1.43E-16 chr:12:55727213 |
| 12 rs7485223   | 55739267 T | 4.185  | 1.43E-16 chr:12:55727213 |
| 12 rs146073724 | 55958414 A | 0.2514 | 7.47E-16 chr:12:55727213 |
| 12 rs7960547   | 55898639 A | 3.771  | 7.79E-16 chr:12:55727213 |
| 12 rs11171521  | 55901314 T | 0.2738 | 8.71E-16 chr:12:55727213 |
| 12 rs11171522  | 55901315 G | 0.2738 | 8.71E-16 chr:12:55727213 |

|                |            |        |          |                 |
|----------------|------------|--------|----------|-----------------|
| 12 rs11532447  | 55957772 T | 0.2661 | 8.90E-16 | chr:12:55727213 |
| 12 rs11561427  | 55956274 T | 0.2661 | 8.90E-16 | chr:12:55727213 |
| 12 rs76126658  | 55942458 A | 0.2661 | 8.90E-16 | chr:12:55727213 |
| 12 rs11171523  | 55901413 A | 3.765  | 9.49E-16 | chr:12:55727213 |
| 12 rs7138601   | 55895730 T | 3.727  | 9.89E-16 | chr:12:55727213 |
| 12 rs139464426 | 55958278 C | 0.273  | 1.73E-15 | chr:12:55727213 |
| 12 rs181265801 | 55900112 G | 3.618  | 3.53E-15 | chr:12:55727213 |
| 12 rs11171448  | 55781514 A | 4.458  | 3.42E-14 | chr:12:55727213 |
| 12 rs10431546  | 55745850 C | 4.363  | 5.75E-14 | chr:12:55727213 |
| 12 rs74240661  | 55816993 G | 0.2469 | 6.31E-14 | chr:12:55727213 |
| 12 rs10876740  | 55716364 G | 4.271  | 8.08E-14 | chr:12:55727213 |
| 12 rs10783756  | 55920314 T | 3.309  | 1.23E-13 | chr:12:55727213 |
| 12 rs10876806  | 55914022 A | 3.309  | 1.23E-13 | chr:12:55727213 |
| 12 rs6581066   | 55926695 G | 3.309  | 1.23E-13 | chr:12:55727213 |
| 12 rs113584176 | 55805617 C | 4.158  | 1.99E-13 | chr:12:55727213 |
| 12 rs11171550  | 55933641 A | 3.235  | 2.88E-13 | chr:12:55727213 |
| 12 rs4302411   | 55938276 G | 3.235  | 2.88E-13 | chr:12:55727213 |
| 12 rs7297323   | 55941692 A | 3.235  | 2.88E-13 | chr:12:55727213 |
| 12 rs9669226   | 55826496 C | 4.375  | 3.08E-13 | chr:12:55727213 |
| 12 rs56112061  | 55883194 G | 4.39   | 3.64E-13 | chr:12:55727213 |
| 12 rs7963839   | 55936468 A | 3.223  | 3.74E-13 | chr:12:55727213 |
| 12 rs199557929 | 55955762 C | 0.3084 | 4.09E-13 | chr:12:55727213 |
| 12 rs12579451  | 55694116 T | 0.2901 | 6.93E-13 | chr:12:55727213 |
| 12 rs12582022  | 55694360 G | 0.2901 | 6.93E-13 | chr:12:55727213 |
| 12 rs60206376  | 55703375 A | 0.2901 | 6.93E-13 | chr:12:55727213 |
| 12 rs7489134   | 55702567 G | 0.2901 | 6.93E-13 | chr:12:55727213 |
| 12 rs7489181   | 55702575 A | 0.2901 | 6.93E-13 | chr:12:55727213 |
| 12 rs73121057  | 55764909 A | 0.2443 | 1.16E-12 | chr:12:55727213 |
| 12 rs11171595  | 55989475 C | 2.865  | 2.10E-12 | chr:12:55727213 |
| 12 rs7133826   | 55939629 A | 2.959  | 2.19E-12 | chr:12:55727213 |
| 12 rs10876778  | 55833273 C | 3.814  | 2.36E-12 | chr:12:55727213 |
| 12 rs1896044   | 55953670 T | 2.954  | 2.61E-12 | chr:12:55727213 |
| 12 rs1896045   | 55953568 A | 2.954  | 2.61E-12 | chr:12:55727213 |
| 12 rs7964180   | 55957169 A | 2.954  | 2.61E-12 | chr:12:55727213 |
| 12 rs7486279   | 55985052 T | 2.931  | 2.70E-12 | chr:12:55727213 |
| 12 rs28887802  | 55988351 G | 2.896  | 3.14E-12 | chr:12:55727213 |
| 12 rs200198953 | 55995789 C | 2.898  | 3.24E-12 | chr:12:55727213 |
| 12 rs201250931 | 55995795 C | 2.892  | 3.88E-12 | chr:12:55727213 |
| 12 rs4759167   | 55989111 G | 2.884  | 3.94E-12 | chr:12:55727213 |
| 12 rs10783760  | 55975963 G | 2.889  | 4.07E-12 | chr:12:55727213 |
| 12 rs10783761  | 55979929 T | 2.889  | 4.07E-12 | chr:12:55727213 |
| 12 rs10876814  | 55971327 C | 2.889  | 4.07E-12 | chr:12:55727213 |
| 12 rs10876815  | 55972277 C | 2.889  | 4.07E-12 | chr:12:55727213 |

|                |            |       |                          |
|----------------|------------|-------|--------------------------|
| 12 rs10876816  | 55972407 C | 2.889 | 4.07E-12 chr:12:55727213 |
| 12 rs10876818  | 55974324 C | 2.889 | 4.07E-12 chr:12:55727213 |
| 12 rs10876819  | 55976616 G | 2.889 | 4.07E-12 chr:12:55727213 |
| 12 rs10876820  | 55978465 T | 2.889 | 4.07E-12 chr:12:55727213 |
| 12 rs10876821  | 55978507 A | 2.889 | 4.07E-12 chr:12:55727213 |
| 12 rs10876822  | 55978992 C | 2.889 | 4.07E-12 chr:12:55727213 |
| 12 rs10876823  | 55980274 T | 2.889 | 4.07E-12 chr:12:55727213 |
| 12 rs10876828  | 55999228 G | 2.889 | 4.07E-12 chr:12:55727213 |
| 12 rs10876829  | 55999413 C | 2.889 | 4.07E-12 chr:12:55727213 |
| 12 rs111483828 | 55993803 C | 2.889 | 4.07E-12 chr:12:55727213 |
| 12 rs11171573  | 55970874 G | 2.889 | 4.07E-12 chr:12:55727213 |
| 12 rs11171574  | 55971794 T | 2.889 | 4.07E-12 chr:12:55727213 |
| 12 rs11171579  | 55975016 C | 2.889 | 4.07E-12 chr:12:55727213 |
| 12 rs11171581  | 55978003 A | 2.889 | 4.07E-12 chr:12:55727213 |
| 12 rs11171582  | 55978970 A | 2.889 | 4.07E-12 chr:12:55727213 |
| 12 rs11171587  | 55983634 C | 2.889 | 4.07E-12 chr:12:55727213 |
| 12 rs11171588  | 55983780 A | 2.889 | 4.07E-12 chr:12:55727213 |
| 12 rs11171589  | 55983874 A | 2.889 | 4.07E-12 chr:12:55727213 |
| 12 rs11171590  | 55984022 C | 2.889 | 4.07E-12 chr:12:55727213 |
| 12 rs11171592  | 55984163 G | 2.889 | 4.07E-12 chr:12:55727213 |
| 12 rs11171593  | 55984450 G | 2.889 | 4.07E-12 chr:12:55727213 |
| 12 rs11171598  | 55990751 C | 2.889 | 4.07E-12 chr:12:55727213 |
| 12 rs11171599  | 55991406 T | 2.889 | 4.07E-12 chr:12:55727213 |
| 12 rs11171600  | 55992412 A | 2.889 | 4.07E-12 chr:12:55727213 |
| 12 rs11171601  | 55992512 T | 2.889 | 4.07E-12 chr:12:55727213 |
| 12 rs11171602  | 55992516 A | 2.889 | 4.07E-12 chr:12:55727213 |
| 12 rs11171603  | 55994536 G | 2.889 | 4.07E-12 chr:12:55727213 |
| 12 rs113065287 | 55995355 A | 2.889 | 4.07E-12 chr:12:55727213 |
| 12 rs113074725 | 55993933 T | 2.889 | 4.07E-12 chr:12:55727213 |
| 12 rs11559929  | 55988983 G | 2.889 | 4.07E-12 chr:12:55727213 |
| 12 rs146823928 | 55995367 G | 2.889 | 4.07E-12 chr:12:55727213 |
| 12 rs146961298 | 55993853 A | 2.889 | 4.07E-12 chr:12:55727213 |
| 12 rs148698470 | 55987195 C | 2.889 | 4.07E-12 chr:12:55727213 |
| 12 rs181017073 | 55995555 A | 2.889 | 4.07E-12 chr:12:55727213 |
| 12 rs1896029   | 55980935 C | 2.889 | 4.07E-12 chr:12:55727213 |
| 12 rs1896030   | 55980692 T | 2.889 | 4.07E-12 chr:12:55727213 |
| 12 rs1896037   | 55969963 A | 2.889 | 4.07E-12 chr:12:55727213 |
| 12 rs4016597   | 55993691 T | 2.889 | 4.07E-12 chr:12:55727213 |
| 12 rs4315721   | 55985798 C | 2.889 | 4.07E-12 chr:12:55727213 |
| 12 rs4317141   | 55985852 C | 2.889 | 4.07E-12 chr:12:55727213 |
| 12 rs4501156   | 55986001 A | 2.889 | 4.07E-12 chr:12:55727213 |
| 12 rs4631921   | 55984840 C | 2.889 | 4.07E-12 chr:12:55727213 |
| 12 rs4759162   | 55971339 A | 2.889 | 4.07E-12 chr:12:55727213 |

|               |            |        |                          |
|---------------|------------|--------|--------------------------|
| 12 rs4759163  | 55971541 C | 2.889  | 4.07E-12 chr:12:55727213 |
| 12 rs4759165  | 55983070 T | 2.889  | 4.07E-12 chr:12:55727213 |
| 12 rs4759166  | 55989008 A | 2.889  | 4.07E-12 chr:12:55727213 |
| 12 rs4759169  | 55989280 C | 2.889  | 4.07E-12 chr:12:55727213 |
| 12 rs4759170  | 55989433 G | 2.889  | 4.07E-12 chr:12:55727213 |
| 12 rs4759172  | 55994387 A | 2.889  | 4.07E-12 chr:12:55727213 |
| 12 rs7134292  | 55974629 G | 2.889  | 4.07E-12 chr:12:55727213 |
| 12 rs7138577  | 55975672 G | 2.889  | 4.07E-12 chr:12:55727213 |
| 12 rs7305194  | 55974682 T | 2.889  | 4.07E-12 chr:12:55727213 |
| 12 rs7311749  | 55990312 A | 2.889  | 4.07E-12 chr:12:55727213 |
| 12 rs7315290  | 55990708 A | 2.889  | 4.07E-12 chr:12:55727213 |
| 12 rs7972344  | 55996689 A | 2.889  | 4.07E-12 chr:12:55727213 |
| 12 rs7972660  | 55996660 G | 2.889  | 4.07E-12 chr:12:55727213 |
| 12 rs9795693  | 55984519 G | 2.889  | 4.07E-12 chr:12:55727213 |
| 12 rs11171561 | 55960184 G | 2.896  | 4.54E-12 chr:12:55727213 |
| 12 rs11171562 | 55961414 T | 2.896  | 4.54E-12 chr:12:55727213 |
| 12 rs11543034 | 55959971 T | 2.896  | 4.54E-12 chr:12:55727213 |
| 12 rs4759168  | 55989225 T | 2.875  | 4.78E-12 chr:12:55727213 |
| 12 rs11171604 | 55994744 G | 2.841  | 7.19E-12 chr:12:55727213 |
| 12 rs56058167 | 55992295 T | 2.852  | 7.27E-12 chr:12:55727213 |
| 12 rs11171585 | 55982807 G | 2.811  | 7.62E-12 chr:12:55727213 |
| 12 rs11533646 | 55984265 C | 2.811  | 7.62E-12 chr:12:55727213 |
| 12 rs11536136 | 55994560 C | 2.811  | 7.62E-12 chr:12:55727213 |
| 12 rs12230307 | 55999253 C | 2.811  | 7.62E-12 chr:12:55727213 |
| 12 rs4503584  | 55984924 C | 2.811  | 7.62E-12 chr:12:55727213 |
| 12 rs7953356  | 55970039 T | 2.811  | 7.62E-12 chr:12:55727213 |
| 12 rs7397992  | 55987133 T | 0.3663 | 8.01E-12 chr:12:55727213 |
| 12 rs7399219  | 55987132 C | 0.3663 | 8.01E-12 chr:12:55727213 |
| 12 rs4759173  | 56001186 G | 2.845  | 8.25E-12 chr:12:55727213 |
| 12 rs11171591 | 55984060 T | 2.831  | 9.44E-12 chr:12:55727213 |
| 12 rs11171580 | 55975171 T | 2.777  | 1.10E-11 chr:12:55727213 |
| 12 rs7966938  | 56000284 G | 2.785  | 1.14E-11 chr:12:55727213 |
| 12 rs2162323  | 55965848 G | 2.764  | 1.23E-11 chr:12:55727213 |
| 12 rs10876771 | 55813566 T | 2.936  | 1.84E-11 chr:12:55727213 |
| 12 rs4558200  | 55987160 A | 0.3833 | 3.11E-11 chr:12:55727213 |
| 12 rs6581061  | 55885154 T | 4.151  | 8.09E-11 chr:12:55727213 |
| 12 rs7302782  | 55870007 C | 4.151  | 8.09E-11 chr:12:55727213 |
| 12 rs7310415  | 55877273 C | 4.151  | 8.09E-11 chr:12:55727213 |
| 12 rs7310693  | 55884576 G | 4.151  | 8.09E-11 chr:12:55727213 |
| 12 rs7314323  | 55877953 C | 4.151  | 8.09E-11 chr:12:55727213 |
| 12 rs7133698  | 55886294 G | 4.025  | 1.37E-10 chr:12:55727213 |
| 12 rs4130005  | 55860796 C | 4.021  | 1.39E-10 chr:12:55727213 |
| 12 rs10783745 | 55843844 A | 4.055  | 1.65E-10 chr:12:55727213 |



|                |            |        |          |                 |
|----------------|------------|--------|----------|-----------------|
| 12 rs73118926  | 55703335 G | 0.3478 | 2.38E-10 | chr:12:55727213 |
| 12 rs73118932  | 55706631 T | 0.3478 | 2.38E-10 | chr:12:55727213 |
| 12 rs11171453  | 55806437 C | 4.046  | 2.52E-10 | chr:12:55727213 |
| 12 rs10876791  | 55879633 A | 3.662  | 4.12E-10 | chr:12:55727213 |
| 12 rs4642170   | 55858613 T | 3.932  | 4.19E-10 | chr:12:55727213 |
| 12 rs7300594   | 55806238 A | 3.79   | 7.90E-10 | chr:12:55727213 |
| 12 rs145985810 | 55807356 A | 0.2374 | 1.16E-09 | chr:12:55727213 |
| 12 rs144453035 | 55750389 T | 0.2451 | 1.89E-09 | chr:12:55727213 |
| 12 rs1316898   | 55965851 C | 0.4121 | 2.24E-09 | chr:12:55727213 |
| 12 rs12579030  | 55689194 C | 0.3963 | 2.45E-09 | chr:12:55727213 |
| 12 rs12582734  | 55689572 A | 0.3963 | 2.45E-09 | chr:12:55727213 |
| 12 rs7971451   | 55699950 A | 0.3963 | 2.45E-09 | chr:12:55727213 |
| 12 rs7967746   | 55987912 G | 0.3803 | 3.10E-09 | chr:12:55727213 |
| 12 rs7954959   | 55988204 T | 2.541  | 4.34E-09 | chr:12:55727213 |
| 12 rs2169856   | 55572652 G | 0.3807 | 6.94E-09 | chr:12:55727213 |
| 12 rs7299109   | 56041749 T | 0.4319 | 9.16E-09 | chr:12:55727213 |
| 12 rs61956020  | 55618948 G | 0.3826 | 9.49E-09 | chr:12:55727213 |
| 12 rs4262806   | 55711562 A | 0.4205 | 1.01E-08 | chr:12:55727213 |
| 12 rs58332180  | 55711353 A | 0.4205 | 1.01E-08 | chr:12:55727213 |
| 12 rs7308316   | 55709162 A | 0.4205 | 1.01E-08 | chr:12:55727213 |
| 12 rs7974051   | 55713210 C | 0.4257 | 1.58E-08 | chr:12:55727213 |
| 12 rs7977724   | 56045653 T | 0.4328 | 1.93E-08 | chr:12:55727213 |
| 12 rs1478738   | 55505981 T | 0.3981 | 2.06E-08 | chr:12:55727213 |
| 12 rs7132916   | 55715119 G | 3.804  | 2.26E-08 | chr:12:55727213 |
| 12 rs6581029   | 55686521 A | 0.4371 | 2.69E-08 | chr:12:55727213 |
| 12 rs11171569  | 55967018 G | 0.4524 | 3.69E-08 | chr:12:55727213 |
| 12 rs7132431   | 55714772 G | 3.728  | 4.62E-08 | chr:12:55727213 |
| 12 rs1124741   | 55967941 T | 0.4589 | 5.14E-08 | chr:12:55727213 |
| 12 rs372553485 | 55741175 G | 0.2709 | 5.27E-08 | chr:12:55727213 |
| 12 rs7132347   | 55714876 C | 3.693  | 5.72E-08 | chr:12:55727213 |
| 12 rs11171610  | 55998903 T | 0.4604 | 6.20E-08 | chr:12:55727213 |
| 12 rs11537921  | 55985909 T | 0.4593 | 6.39E-08 | chr:12:55727213 |
| 12 rs11537924  | 55986259 C | 0.4593 | 6.39E-08 | chr:12:55727213 |
| 12 rs11171576  | 55972314 C | 0.4649 | 9.06E-08 | chr:12:55727213 |
| 12 rs11171583  | 55980116 G | 0.4649 | 9.06E-08 | chr:12:55727213 |
| 12 rs11531173  | 55987253 G | 0.4649 | 9.06E-08 | chr:12:55727213 |
| 12 rs11531175  | 55993045 T | 0.4649 | 9.06E-08 | chr:12:55727213 |
| 12 rs11532451  | 55993192 T | 0.4649 | 9.06E-08 | chr:12:55727213 |
| 12 rs11534917  | 55984049 C | 0.4649 | 9.06E-08 | chr:12:55727213 |
| 12 rs58285384  | 55981220 A | 0.4649 | 9.06E-08 | chr:12:55727213 |
| 12 rs9668674   | 55975665 C | 0.4649 | 9.06E-08 | chr:12:55727213 |
| 12 rs9669106   | 55975508 C | 0.4649 | 9.06E-08 | chr:12:55727213 |
| 12 rs61956877  | 55518238 A | 0.4192 | 1.09E-07 | chr:12:55727213 |

|                |            |        |          |                 |
|----------------|------------|--------|----------|-----------------|
| 12 rs7313943   | 55972705 T | 0.4651 | 1.09E-07 | chr:12:55727213 |
| 12 rs11536179  | 55997655 C | 0.4681 | 1.23E-07 | chr:12:55727213 |
| 12 rs7974512   | 55713606 A | 2.195  | 1.68E-07 | chr:12:55727213 |
| 12 rs1316899   | 55966101 A | 0.4777 | 1.71E-07 | chr:12:55727213 |
| 12 rs7133342   | 55879050 A | 3.613  | 2.42E-07 | chr:12:55727213 |
| 12 rs7133443   | 55878999 C | 3.626  | 2.57E-07 | chr:12:55727213 |
| 12 rs4237800   | 55864826 G | 3.776  | 2.67E-07 | chr:12:55727213 |
| 12 rs61957868  | 55695527 A | 0.4703 | 2.73E-07 | chr:12:55727213 |
| 12 rs12579915  | 55696789 C | 0.4649 | 2.77E-07 | chr:12:55727213 |
| 12 rs12580194  | 55696558 A | 0.4649 | 2.77E-07 | chr:12:55727213 |
| 12 rs4491341   | 55697838 A | 0.4649 | 2.77E-07 | chr:12:55727213 |
| 12 rs56380243  | 55690727 G | 0.4649 | 2.77E-07 | chr:12:55727213 |
| 12 rs58408480  | 55699186 T | 0.4649 | 2.77E-07 | chr:12:55727213 |
| 12 rs61539173  | 55703206 T | 0.4649 | 2.77E-07 | chr:12:55727213 |
| 12 rs7968881   | 55694434 C | 0.4649 | 2.77E-07 | chr:12:55727213 |
| 12 rs11533601  | 55994232 C | 0.4792 | 3.22E-07 | chr:12:55727213 |
| 12 rs2555033   | 56004059 C | 2.096  | 4.26E-07 | chr:12:55727213 |
| 12 rs11534920  | 55989137 T | 0.4815 | 4.78E-07 | chr:12:55727213 |
| 12 rs200792122 | 55872821 G | 3.605  | 5.08E-07 | chr:12:55727213 |
| 12 rs11534885  | 55993114 C | 0.487  | 7.45E-07 | chr:12:55727213 |
| 12 rs10876772  | 55813826 C | 3.854  | 9.76E-07 | chr:12:55727213 |
| 12 rs11171454  | 55808931 T | 3.854  | 9.76E-07 | chr:12:55727213 |
| 12 rs11171455  | 55809552 T | 3.854  | 9.76E-07 | chr:12:55727213 |
| 12 rs11171464  | 55840822 T | 3.854  | 9.76E-07 | chr:12:55727213 |
| 12 rs11614690  | 55830443 G | 3.854  | 9.76E-07 | chr:12:55727213 |
| 12 rs12824578  | 55813816 G | 3.854  | 9.76E-07 | chr:12:55727213 |
| 12 rs12825366  | 55828540 T | 3.854  | 9.76E-07 | chr:12:55727213 |
| 12 rs12833263  | 55806134 C | 3.854  | 9.76E-07 | chr:12:55727213 |
| 12 rs202057187 | 55826755 C | 3.854  | 9.76E-07 | chr:12:55727213 |
| 12 rs6581046   | 55820121 C | 3.854  | 9.76E-07 | chr:12:55727213 |
| 12 rs7300996   | 55836631 A | 3.854  | 9.76E-07 | chr:12:55727213 |
| 12 rs4641578   | 55715987 A | 3.99   | 9.93E-07 | chr:12:55727213 |
| 12 rs192768034 | 55872898 A | 3.807  | 1.06E-06 | chr:12:55727213 |
| 12 rs4470568   | 55873279 T | 3.813  | 1.13E-06 | chr:12:55727213 |
| 12 rs10876755  | 55774198 T | 3.932  | 1.28E-06 | chr:12:55727213 |
| 12 rs12371362  | 55754109 G | 3.932  | 1.28E-06 | chr:12:55727213 |
| 12 rs2371189   | 55966357 A | 2.27   | 1.38E-06 | chr:12:55727213 |
| 12 rs10783743  | 55843589 G | 3.677  | 1.40E-06 | chr:12:55727213 |
| 12 rs10783744  | 55843622 A | 3.677  | 1.40E-06 | chr:12:55727213 |
| 12 rs10876779  | 55833403 G | 3.677  | 1.40E-06 | chr:12:55727213 |
| 12 rs12369651  | 55832895 T | 3.677  | 1.40E-06 | chr:12:55727213 |
| 12 rs12370631  | 55828172 T | 3.677  | 1.40E-06 | chr:12:55727213 |
| 12 rs12825569  | 55827914 C | 3.677  | 1.40E-06 | chr:12:55727213 |

|                |            |        |          |                 |
|----------------|------------|--------|----------|-----------------|
| 12 rs12826533  | 55828401 C | 3.677  | 1.40E-06 | chr:12:55727213 |
| 12 rs4396935   | 55844172 T | 3.677  | 1.40E-06 | chr:12:55727213 |
| 12 rs4539978   | 55833949 G | 3.677  | 1.40E-06 | chr:12:55727213 |
| 12 rs200078416 | 55727892 G | 3.9    | 1.46E-06 | chr:12:55727213 |
| 12 rs4457845   | 55721819 T | 3.9    | 1.46E-06 | chr:12:55727213 |
| 12 rs146543863 | 55872964 C | 3.74   | 1.47E-06 | chr:12:55727213 |
| 12 rs4295200   | 55873266 A | 3.74   | 1.47E-06 | chr:12:55727213 |
| 12 rs10747755  | 55852950 G | 3.755  | 1.50E-06 | chr:12:55727213 |
| 12 rs10747756  | 55863381 A | 3.755  | 1.50E-06 | chr:12:55727213 |
| 12 rs10876782  | 55854669 T | 3.755  | 1.50E-06 | chr:12:55727213 |
| 12 rs4237801   | 55865961 T | 3.755  | 1.50E-06 | chr:12:55727213 |
| 12 rs6581050   | 55847402 T | 3.755  | 1.50E-06 | chr:12:55727213 |
| 12 rs6581052   | 55847742 G | 3.755  | 1.50E-06 | chr:12:55727213 |
| 12 rs7133390   | 55878800 G | 3.755  | 1.50E-06 | chr:12:55727213 |
| 12 rs7957342   | 55839553 G | 3.755  | 1.50E-06 | chr:12:55727213 |
| 12 rs117433305 | 55949122 T | 0.3976 | 1.61E-06 | chr:12:55727213 |
| 12 rs143340773 | 55958192 G | 0.3895 | 1.64E-06 | chr:12:55727213 |
| 12 rs12309178  | 55873663 A | 3.611  | 1.67E-06 | chr:12:55727213 |
| 12 rs7133588   | 55879154 C | 3.436  | 1.71E-06 | chr:12:55727213 |
| 12 rs11832252  | 55989486 C | 2.134  | 1.98E-06 | chr:12:55727213 |
| 12 rs7959457   | 55727117 C | 3.838  | 1.98E-06 | chr:12:55727213 |
| 12 rs200979636 | 55880052 G | 2.206  | 1.99E-06 | chr:12:55727213 |
| 12 rs10876786  | 55873435 T | 3.573  | 2.09E-06 | chr:12:55727213 |
| 12 rs141263973 | 55873020 T | 3.573  | 2.09E-06 | chr:12:55727213 |
| 12 rs188633040 | 55872895 T | 3.573  | 2.09E-06 | chr:12:55727213 |
| 12 rs77338658  | 55873086 T | 3.573  | 2.09E-06 | chr:12:55727213 |
| 12 rs10783748  | 55870632 T | 3.585  | 2.14E-06 | chr:12:55727213 |
| 12 rs10876787  | 55875605 C | 3.585  | 2.14E-06 | chr:12:55727213 |
| 12 rs4348037   | 55855534 G | 3.585  | 2.14E-06 | chr:12:55727213 |
| 12 rs4386542   | 55852295 A | 3.585  | 2.14E-06 | chr:12:55727213 |
| 12 rs4422358   | 55869718 T | 3.585  | 2.14E-06 | chr:12:55727213 |
| 12 rs4533700   | 55857768 T | 3.585  | 2.14E-06 | chr:12:55727213 |
| 12 rs4605592   | 55858625 C | 3.585  | 2.14E-06 | chr:12:55727213 |
| 12 rs4759153   | 55878218 T | 3.585  | 2.14E-06 | chr:12:55727213 |
| 12 rs6581051   | 55847682 A | 3.585  | 2.14E-06 | chr:12:55727213 |
| 12 rs7298422   | 55869160 A | 3.585  | 2.14E-06 | chr:12:55727213 |
| 12 rs7302568   | 55869990 A | 3.585  | 2.14E-06 | chr:12:55727213 |
| 12 rs7302745   | 55869837 G | 3.585  | 2.14E-06 | chr:12:55727213 |
| 12 rs7310158   | 55877061 C | 3.585  | 2.14E-06 | chr:12:55727213 |
| 12 rs7314214   | 55877960 A | 3.585  | 2.14E-06 | chr:12:55727213 |
| 12 rs7974966   | 55848748 C | 3.585  | 2.14E-06 | chr:12:55727213 |
| 12 rs4463014   | 55888689 A | 3.658  | 2.24E-06 | chr:12:55727213 |
| 12 rs12825123  | 55805647 G | 3.608  | 2.25E-06 | chr:12:55727213 |

|                |            |        |          |                 |
|----------------|------------|--------|----------|-----------------|
| 12 rs10876789  | 55879433 A | 3.497  | 2.28E-06 | chr:12:55727213 |
| 12 rs199991424 | 55880031 C | 2.194  | 2.32E-06 | chr:12:55727213 |
| 12 rs10783759  | 55972013 A | 2.191  | 2.42E-06 | chr:12:55727213 |
| 12 rs11171586  | 55983266 A | 2.191  | 2.42E-06 | chr:12:55727213 |
| 12 rs1896033   | 55976453 A | 2.191  | 2.42E-06 | chr:12:55727213 |
| 12 rs1896035   | 55974017 G | 2.191  | 2.42E-06 | chr:12:55727213 |
| 12 rs4572811   | 55986116 T | 2.191  | 2.42E-06 | chr:12:55727213 |
| 12 rs7137741   | 55975255 A | 2.191  | 2.42E-06 | chr:12:55727213 |
| 12 rs7299562   | 55972785 T | 2.191  | 2.42E-06 | chr:12:55727213 |
| 12 rs76124893  | 55987294 A | 2.191  | 2.42E-06 | chr:12:55727213 |
| 12 rs78726439  | 55962892 G | 0.4071 | 2.65E-06 | chr:12:55727213 |
| 12 rs11171477  | 55854899 C | 3.376  | 3.18E-06 | chr:12:55727213 |
| 12 rs11171478  | 55854906 C | 3.376  | 3.18E-06 | chr:12:55727213 |
| 12 rs11171480  | 55854932 A | 3.376  | 3.18E-06 | chr:12:55727213 |
| 12 rs11171481  | 55854938 C | 3.376  | 3.18E-06 | chr:12:55727213 |
| 12 rs9706375   | 55854925 A | 3.376  | 3.18E-06 | chr:12:55727213 |
| 12 rs7299541   | 55972724 T | 2.171  | 3.23E-06 | chr:12:55727213 |
| 12 rs10876783  | 55854845 G | 3.278  | 3.43E-06 | chr:12:55727213 |
| 12 rs11171473  | 55854852 T | 3.278  | 3.43E-06 | chr:12:55727213 |
| 12 rs11171474  | 55854863 C | 3.278  | 3.43E-06 | chr:12:55727213 |
| 12 rs11171475  | 55854878 G | 3.278  | 3.43E-06 | chr:12:55727213 |
| 12 rs11171476  | 55854880 G | 3.278  | 3.43E-06 | chr:12:55727213 |
| 12 rs183450071 | 55996263 T | 2.159  | 3.53E-06 | chr:12:55727213 |
| 12 rs2194987   | 55998704 G | 2.159  | 3.53E-06 | chr:12:55727213 |
| 12 rs62026077  | 55995088 G | 2.159  | 3.53E-06 | chr:12:55727213 |
| 12 rs10747758  | 56001327 C | 2.155  | 3.64E-06 | chr:12:55727213 |
| 12 rs142098014 | 55958852 A | 0.4298 | 3.88E-06 | chr:12:55727213 |
| 12 rs58126534  | 56033326 A | 0.4949 | 4.68E-06 | chr:12:55727213 |
| 12 rs146323897 | 55900617 G | 2.136  | 5.70E-06 | chr:12:55727213 |
| 12 rs116979156 | 55784335 C | 0.1367 | 5.86E-06 | chr:12:55727213 |
| 12 rs199896545 | 55932941 C | 0.4536 | 7.65E-06 | chr:12:55727213 |
| 12 rs10876841  | 56036131 G | 0.507  | 8.03E-06 | chr:12:55727213 |
| 12 rs11171632  | 56035456 C | 0.5106 | 9.37E-06 | chr:12:55727213 |
| 12 rs12308286  | 55707326 G | 1.912  | 1.02E-05 | chr:12:55727213 |
| 12 rs11171640  | 56045395 A | 0.5173 | 1.05E-05 | chr:12:55727213 |
| 12 rs3858536   | 56048203 C | 0.5173 | 1.05E-05 | chr:12:55727213 |
| 12 rs7952953   | 56046139 A | 0.5173 | 1.05E-05 | chr:12:55727213 |
| 12 rs4759184   | 56052541 C | 0.522  | 1.08E-05 | chr:12:55727213 |
| 12 rs79281641  | 56043311 C | 0.5172 | 1.11E-05 | chr:12:55727213 |
| 12 rs78864537  | 55814425 A | 0.2556 | 1.33E-05 | chr:12:55727213 |
| 12 rs192632634 | 55880469 C | 1.971  | 1.54E-05 | chr:12:55727213 |
| 12 rs10876837  | 56028546 A | 0.5292 | 1.55E-05 | chr:12:55727213 |
| 12 rs116931790 | 55973162 T | 2.272  | 1.99E-05 | chr:12:55727213 |

|    |            |          |   |       |          |                 |
|----|------------|----------|---|-------|----------|-----------------|
| 12 | rs76592631 | 55776153 | T | 3.388 | 2.30E-05 | chr:12:55727213 |
| 14 | rs1958722  | 20562590 | G | 18.49 | 2.28E-22 | chr:14:20552746 |
| 14 | rs12897224 | 20560235 | C | 21.02 | 2.53E-22 | chr:14:20552746 |
| 14 | rs4144240  | 20561753 | C | 19.81 | 6.35E-22 | chr:14:20552746 |
| 14 | rs4144238  | 20561971 | C | 19.89 | 7.02E-22 | chr:14:20552746 |
| 14 | rs4144239  | 20561922 | C | 19.89 | 7.02E-22 | chr:14:20552746 |
| 14 | rs4981728  | 20560512 | C | 21.87 | 1.07E-21 | chr:14:20552746 |
| 14 | rs57793822 | 20561481 | A | 22.51 | 1.34E-21 | chr:14:20552746 |
| 14 | rs969774   | 20562080 | T | 22.63 | 1.43E-21 | chr:14:20552746 |
| 14 | rs12433363 | 20561341 | A | 21.72 | 1.62E-21 | chr:14:20552746 |
| 14 | rs12586923 | 20559937 | A | 21.72 | 1.62E-21 | chr:14:20552746 |
| 14 | rs12587536 | 20559906 | T | 21.72 | 1.62E-21 | chr:14:20552746 |
| 14 | rs12881697 | 20560434 | G | 21.72 | 1.62E-21 | chr:14:20552746 |
| 14 | rs12890274 | 20560354 | T | 21.72 | 1.62E-21 | chr:14:20552746 |
| 14 | rs58368472 | 20561378 | T | 21.72 | 1.62E-21 | chr:14:20552746 |
| 14 | rs10136466 | 20550347 | C | 24.71 | 2.00E-21 | chr:14:20552746 |
| 14 | rs11158659 | 20556212 | A | 24.71 | 2.00E-21 | chr:14:20552746 |
| 14 | rs11158660 | 20556259 | C | 24.71 | 2.00E-21 | chr:14:20552746 |
| 14 | rs12434437 | 20556447 | T | 24.71 | 2.00E-21 | chr:14:20552746 |
| 14 | rs12434463 | 20556513 | T | 24.71 | 2.00E-21 | chr:14:20552746 |
| 14 | rs4297617  | 20557961 | T | 24.71 | 2.00E-21 | chr:14:20552746 |
| 14 | rs4360850  | 20558013 | A | 24.71 | 2.00E-21 | chr:14:20552746 |
| 14 | rs4438225  | 20557810 | A | 24.71 | 2.00E-21 | chr:14:20552746 |
| 14 | rs4572311  | 20557971 | C | 24.71 | 2.00E-21 | chr:14:20552746 |
| 14 | rs6573756  | 20555675 | G | 24.71 | 2.00E-21 | chr:14:20552746 |
| 14 | rs6573757  | 20555744 | A | 24.71 | 2.00E-21 | chr:14:20552746 |
| 14 | rs6573759  | 20555817 | C | 24.71 | 2.00E-21 | chr:14:20552746 |
| 14 | rs6573762  | 20555920 | A | 24.71 | 2.00E-21 | chr:14:20552746 |
| 14 | rs7151579  | 20556265 | G | 24.71 | 2.00E-21 | chr:14:20552746 |
| 14 | rs7401094  | 20555950 | C | 24.71 | 2.00E-21 | chr:14:20552746 |
| 14 | rs78783511 | 20555396 | C | 24.71 | 2.00E-21 | chr:14:20552746 |
| 14 | rs11158661 | 20556366 | T | 23.85 | 4.52E-21 | chr:14:20552746 |
| 14 | rs12588910 | 20558938 | C | 23.85 | 4.52E-21 | chr:14:20552746 |
| 14 | rs12590521 | 20558876 | T | 23.85 | 4.52E-21 | chr:14:20552746 |
| 14 | rs7148411  | 20559282 | G | 23.85 | 4.52E-21 | chr:14:20552746 |
| 14 | rs7158086  | 20559451 | T | 23.85 | 4.52E-21 | chr:14:20552746 |
| 14 | rs7153404  | 20550111 | C | 23.49 | 5.43E-21 | chr:14:20552746 |
| 14 | rs7152272  | 20559234 | A | 23.62 | 5.79E-21 | chr:14:20552746 |
| 14 | rs61993646 | 20574305 | G | 7.601 | 4.90E-20 | chr:14:20552746 |
| 14 | rs1958729  | 20591192 | C | 4.299 | 7.87E-16 | chr:14:20552746 |
| 14 | rs17242467 | 20608329 | A | 4.327 | 1.35E-15 | chr:14:20552746 |
| 14 | rs2318480  | 20591214 | A | 4.312 | 1.64E-15 | chr:14:20552746 |
| 14 | rs61993653 | 20633961 | A | 4.276 | 2.65E-15 | chr:14:20552746 |

|               |            |        |          |                 |
|---------------|------------|--------|----------|-----------------|
| 14 rs72638470 | 20636475 T | 4.206  | 3.11E-15 | chr:14:20552746 |
| 14 rs72638473 | 20650246 A | 3.844  | 8.75E-14 | chr:14:20552746 |
| 14 rs1958705  | 20653540 T | 3.272  | 4.69E-12 | chr:14:20552746 |
| 14 rs11158865 | 20589264 T | 0.3097 | 3.83E-11 | chr:14:20552746 |
| 14 rs2104803  | 20592038 C | 0.3097 | 3.83E-11 | chr:14:20552746 |
| 14 rs2094841  | 20587053 G | 0.313  | 4.64E-11 | chr:14:20552746 |
| 14 rs1958698  | 20608288 C | 0.3294 | 6.44E-11 | chr:14:20552746 |
| 14 rs1958697  | 20603359 T | 0.348  | 6.90E-11 | chr:14:20552746 |
| 14 rs67542545 | 20604949 C | 0.348  | 6.90E-11 | chr:14:20552746 |
| 14 rs10147184 | 20606164 C | 0.351  | 9.69E-11 | chr:14:20552746 |
| 14 rs10140123 | 20586650 C | 0.3408 | 2.03E-10 | chr:14:20552746 |
| 14 rs9323534  | 20586432 C | 0.3408 | 2.03E-10 | chr:14:20552746 |
| 14 rs8005245  | 20586042 G | 0.3635 | 3.74E-10 | chr:14:20552746 |
| 14 rs1888371  | 20594389 G | 0.3642 | 4.32E-10 | chr:14:20552746 |
| 14 rs2150328  | 20595252 A | 0.3642 | 4.32E-10 | chr:14:20552746 |
| 14 rs6573975  | 20590454 G | 0.3642 | 4.32E-10 | chr:14:20552746 |
| 14 rs8011934  | 20595901 G | 0.3642 | 4.32E-10 | chr:14:20552746 |
| 14 rs13379327 | 20615688 T | 0.3646 | 4.75E-10 | chr:14:20552746 |
| 14 rs2104802  | 20586859 G | 0.3673 | 5.02E-10 | chr:14:20552746 |
| 14 rs872259   | 20626291 A | 0.3394 | 5.05E-10 | chr:14:20552746 |
| 14 rs1952801  | 20611689 C | 0.3524 | 5.46E-10 | chr:14:20552746 |
| 14 rs1952802  | 20611690 T | 0.3524 | 5.46E-10 | chr:14:20552746 |
| 14 rs11847500 | 20621429 C | 0.3589 | 5.47E-10 | chr:14:20552746 |
| 14 rs10135142 | 20635506 G | 0.3725 | 1.26E-09 | chr:14:20552746 |
| 14 rs872258   | 20626203 A | 0.3479 | 1.36E-09 | chr:14:20552746 |
| 14 rs4605083  | 20615134 A | 0.3743 | 1.42E-09 | chr:14:20552746 |
| 14 rs8019785  | 20615151 G | 0.3743 | 1.42E-09 | chr:14:20552746 |
| 14 rs11850116 | 20621416 T | 0.3679 | 1.59E-09 | chr:14:20552746 |
| 14 rs10144550 | 20635795 C | 0.3551 | 2.00E-09 | chr:14:20552746 |
| 14 rs1958701  | 20644690 C | 0.3777 | 2.38E-09 | chr:14:20552746 |
| 14 rs7160752  | 20643903 T | 0.3777 | 2.38E-09 | chr:14:20552746 |
| 14 rs10151324 | 20630787 C | 0.3557 | 2.47E-09 | chr:14:20552746 |
| 14 rs7152334  | 20631384 A | 0.3557 | 2.47E-09 | chr:14:20552746 |
| 14 rs8016597  | 20632463 G | 0.3557 | 2.47E-09 | chr:14:20552746 |
| 14 rs2183532  | 20637198 G | 0.3586 | 2.62E-09 | chr:14:20552746 |
| 14 rs4981088  | 20665840 G | 2.65   | 2.66E-09 | chr:14:20552746 |
| 14 rs8020251  | 20618025 A | 0.3832 | 3.19E-09 | chr:14:20552746 |
| 14 rs4981753  | 20600523 G | 0.3667 | 3.49E-09 | chr:14:20552746 |
| 14 rs8181966  | 20625084 T | 0.3819 | 3.98E-09 | chr:14:20552746 |
| 14 rs7154081  | 20623885 C | 0.3852 | 4.29E-09 | chr:14:20552746 |
| 14 rs7150983  | 20637914 A | 0.3849 | 4.54E-09 | chr:14:20552746 |
| 14 rs1813465  | 20640534 A | 0.3873 | 7.73E-09 | chr:14:20552746 |
| 14 rs4316677  | 20640535 T | 0.3873 | 7.73E-09 | chr:14:20552746 |

|                |            |        |          |                 |
|----------------|------------|--------|----------|-----------------|
| 14 rs7157689   | 20642731 C | 0.373  | 8.42E-09 | chr:14:20552746 |
| 14 rs986365    | 20644322 A | 0.373  | 8.42E-09 | chr:14:20552746 |
| 14 rs10047837  | 20639015 C | 0.3947 | 1.21E-08 | chr:14:20552746 |
| 14 rs1813466   | 20640803 G | 0.3954 | 1.38E-08 | chr:14:20552746 |
| 14 rs1813467   | 20640990 A | 0.3954 | 1.38E-08 | chr:14:20552746 |
| 14 rs1967856   | 20640025 G | 0.3954 | 1.38E-08 | chr:14:20552746 |
| 14 rs1967857   | 20640082 G | 0.3954 | 1.38E-08 | chr:14:20552746 |
| 14 rs1988066   | 20641067 C | 0.3954 | 1.38E-08 | chr:14:20552746 |
| 14 rs7144840   | 20640422 C | 0.3954 | 1.38E-08 | chr:14:20552746 |
| 14 rs7144847   | 20640441 C | 0.3954 | 1.38E-08 | chr:14:20552746 |
| 14 rs7148965   | 20640192 G | 0.3954 | 1.38E-08 | chr:14:20552746 |
| 14 rs7152829   | 20640165 A | 0.3954 | 1.38E-08 | chr:14:20552746 |
| 14 rs7152995   | 20640199 A | 0.3954 | 1.38E-08 | chr:14:20552746 |
| 14 rs8016318   | 20639522 G | 0.3954 | 1.38E-08 | chr:14:20552746 |
| 14 rs8019990   | 20639521 A | 0.3954 | 1.38E-08 | chr:14:20552746 |
| 14 rs9285595   | 20641690 C | 0.3954 | 1.38E-08 | chr:14:20552746 |
| 14 rs9323621   | 20641707 T | 0.3954 | 1.38E-08 | chr:14:20552746 |
| 14 rs7143334   | 20642034 A | 0.4    | 1.88E-08 | chr:14:20552746 |
| 14 rs1958700   | 20644572 T | 0.3993 | 1.98E-08 | chr:14:20552746 |
| 14 rs5009637   | 20644775 T | 0.3993 | 1.98E-08 | chr:14:20552746 |
| 14 rs7142335   | 20643775 C | 0.3993 | 1.98E-08 | chr:14:20552746 |
| 14 rs7156279   | 20643847 T | 0.3993 | 1.98E-08 | chr:14:20552746 |
| 14 rs986364    | 20644026 G | 0.3993 | 1.98E-08 | chr:14:20552746 |
| 14 rs986366    | 20644436 A | 0.3993 | 1.98E-08 | chr:14:20552746 |
| 14 rs9323622   | 20641788 A | 0.4014 | 2.32E-08 | chr:14:20552746 |
| 14 rs1959650   | 20549093 C | 2.721  | 2.35E-08 | chr:14:20552746 |
| 14 rs11850259  | 20645916 T | 0.4124 | 5.14E-08 | chr:14:20552746 |
| 14 rs4981822   | 20665790 T | 2.369  | 6.92E-08 | chr:14:20552746 |
| 14 rs10484229  | 20649375 G | 0.4183 | 8.78E-08 | chr:14:20552746 |
| 14 rs7143050   | 20646485 G | 0.4223 | 1.08E-07 | chr:14:20552746 |
| 14 rs2792174   | 20505375 A | 2.848  | 1.25E-07 | chr:14:20552746 |
| 14 rs2775221   | 20512825 C | 2.757  | 1.64E-07 | chr:14:20552746 |
| 14 rs2792172   | 20512828 G | 2.757  | 1.64E-07 | chr:14:20552746 |
| 14 rs72669011  | 20518466 C | 2.706  | 1.84E-07 | chr:14:20552746 |
| 14 rs1188538   | 20646940 G | 0.3225 | 1.93E-07 | chr:14:20552746 |
| 14 rs1188541   | 20647955 G | 0.3225 | 1.93E-07 | chr:14:20552746 |
| 14 rs10484220  | 20490138 A | 2.83   | 2.08E-07 | chr:14:20552746 |
| 14 rs17242369  | 20487339 T | 2.83   | 2.08E-07 | chr:14:20552746 |
| 14 rs2185443   | 20487107 C | 2.83   | 2.08E-07 | chr:14:20552746 |
| 14 rs10130580  | 20491109 A | 2.792  | 2.12E-07 | chr:14:20552746 |
| 14 rs12888873  | 20513133 C | 2.774  | 2.34E-07 | chr:14:20552746 |
| 14 rs200268602 | 20509288 A | 2.774  | 2.34E-07 | chr:14:20552746 |
| 14 rs10136756  | 20500762 C | 2.741  | 2.36E-07 | chr:14:20552746 |

|                |            |        |          |                 |
|----------------|------------|--------|----------|-----------------|
| 14 rs1952807   | 20516422 C | 2.741  | 2.36E-07 | chr:14:20552746 |
| 14 rs2775220   | 20512772 G | 2.741  | 2.36E-07 | chr:14:20552746 |
| 14 rs2775222   | 20514864 T | 2.741  | 2.36E-07 | chr:14:20552746 |
| 14 rs2792170   | 20513775 A | 2.741  | 2.36E-07 | chr:14:20552746 |
| 14 rs8008446   | 20571795 T | 0.3814 | 2.62E-07 | chr:14:20552746 |
| 14 rs1756310   | 20645408 C | 0.3699 | 2.62E-07 | chr:14:20552746 |
| 14 rs1763740   | 20645415 G | 0.3699 | 2.62E-07 | chr:14:20552746 |
| 14 rs11849055  | 20522569 A | 2.644  | 2.80E-07 | chr:14:20552746 |
| 14 rs7144752   | 20518931 G | 2.644  | 2.80E-07 | chr:14:20552746 |
| 14 rs2792164   | 20517354 C | 2.723  | 2.80E-07 | chr:14:20552746 |
| 14 rs149657022 | 20575133 G | 0.3827 | 3.21E-07 | chr:14:20552746 |
| 14 rs201183120 | 20575571 A | 0.4295 | 3.50E-07 | chr:14:20552746 |
| 14 rs979797    | 20521465 C | 2.621  | 3.53E-07 | chr:14:20552746 |
| 14 rs7158044   | 20563508 T | 0.4219 | 3.95E-07 | chr:14:20552746 |
| 14 rs7143710   | 20577918 C | 0.4335 | 3.95E-07 | chr:14:20552746 |
| 14 rs7151455   | 20577818 C | 0.4335 | 3.95E-07 | chr:14:20552746 |
| 14 rs7159989   | 20577910 T | 0.4335 | 3.95E-07 | chr:14:20552746 |
| 14 rs7144896   | 20563540 T | 0.422  | 4.13E-07 | chr:14:20552746 |
| 14 rs12890060  | 20565461 A | 0.4254 | 5.10E-07 | chr:14:20552746 |
| 14 rs1958724   | 20565487 C | 0.4254 | 5.10E-07 | chr:14:20552746 |
| 14 rs1958725   | 20565515 T | 0.4254 | 5.10E-07 | chr:14:20552746 |
| 14 rs2225388   | 20563664 T | 0.4254 | 5.10E-07 | chr:14:20552746 |
| 14 rs4303403   | 20565381 A | 0.4254 | 5.10E-07 | chr:14:20552746 |
| 14 rs7150862   | 20564461 G | 0.4254 | 5.10E-07 | chr:14:20552746 |
| 14 rs7156270   | 20564435 C | 0.4254 | 5.10E-07 | chr:14:20552746 |
| 14 rs7156816   | 20564737 C | 0.4254 | 5.10E-07 | chr:14:20552746 |
| 14 rs1188535   | 20645608 G | 0.3801 | 5.40E-07 | chr:14:20552746 |
| 14 rs202152920 | 20575655 A | 0.4364 | 5.72E-07 | chr:14:20552746 |
| 14 rs7156327   | 20578170 C | 0.4415 | 5.98E-07 | chr:14:20552746 |
| 14 rs11844863  | 20568135 T | 0.4403 | 7.10E-07 | chr:14:20552746 |
| 14 rs3939209   | 20578244 T | 0.4424 | 7.24E-07 | chr:14:20552746 |
| 14 rs66717988  | 20523259 G | 2.509  | 7.26E-07 | chr:14:20552746 |
| 14 rs112874053 | 20572537 C | 0.4468 | 9.63E-07 | chr:14:20552746 |
| 14 rs11850994  | 20577628 T | 0.4468 | 9.63E-07 | chr:14:20552746 |
| 14 rs190993235 | 20574230 G | 0.4468 | 9.63E-07 | chr:14:20552746 |
| 14 rs36074339  | 20572229 C | 0.4468 | 9.63E-07 | chr:14:20552746 |
| 14 rs9743620   | 20573576 G | 0.4468 | 9.63E-07 | chr:14:20552746 |
| 14 rs9707258   | 20573142 T | 0.4363 | 1.09E-06 | chr:14:20552746 |
| 14 rs7140825   | 20563466 C | 0.4373 | 1.10E-06 | chr:14:20552746 |
| 14 rs7150250   | 20563495 C | 0.4373 | 1.10E-06 | chr:14:20552746 |
| 14 rs4981066   | 20570809 A | 0.4383 | 1.21E-06 | chr:14:20552746 |
| 14 rs67680230  | 20569553 A | 0.4383 | 1.21E-06 | chr:14:20552746 |
| 14 rs9743609   | 20573071 G | 0.4492 | 1.27E-06 | chr:14:20552746 |



|                |            |        |                          |
|----------------|------------|--------|--------------------------|
| 14 rs12892241  | 20563896 C | 0.4408 | 1.41E-06 chr:14:20552746 |
| 14 rs12895600  | 20566286 A | 0.4408 | 1.41E-06 chr:14:20552746 |
| 14 rs1958726   | 20565683 C | 0.4408 | 1.41E-06 chr:14:20552746 |
| 14 rs1958727   | 20565936 C | 0.4408 | 1.41E-06 chr:14:20552746 |
| 14 rs35344717  | 20568046 T | 0.4408 | 1.41E-06 chr:14:20552746 |
| 14 rs60649626  | 20568452 T | 0.4408 | 1.41E-06 chr:14:20552746 |
| 14 rs7152008   | 20566893 A | 0.4408 | 1.41E-06 chr:14:20552746 |
| 14 rs2210191   | 20563840 A | 0.454  | 1.44E-06 chr:14:20552746 |
| 14 rs28855696  | 20492574 A | 2.486  | 1.67E-06 chr:14:20552746 |
| 14 rs12886884  | 20486741 T | 2.506  | 1.72E-06 chr:14:20552746 |
| 14 rs12891014  | 20492720 G | 2.506  | 1.72E-06 chr:14:20552746 |
| 14 rs10149475  | 20565183 T | 0.456  | 1.96E-06 chr:14:20552746 |
| 14 rs11158354  | 20499170 T | 2.475  | 2.37E-06 chr:14:20552746 |
| 14 rs111429016 | 20577519 A | 0.4628 | 2.64E-06 chr:14:20552746 |
| 14 rs12887942  | 20577454 T | 0.4628 | 2.64E-06 chr:14:20552746 |
| 14 rs145789052 | 20577567 G | 0.4628 | 2.64E-06 chr:14:20552746 |
| 14 rs4981823   | 20665887 G | 2.193  | 2.66E-06 chr:14:20552746 |
| 14 rs74033842  | 20662534 G | 2.203  | 2.74E-06 chr:14:20552746 |
| 14 rs36126932  | 20576705 T | 0.4638 | 2.98E-06 chr:14:20552746 |
| 14 rs36142459  | 20576716 T | 0.4638 | 2.98E-06 chr:14:20552746 |
| 14 rs7159862   | 20569410 G | 0.4673 | 3.36E-06 chr:14:20552746 |
| 14 rs2873830   | 20661372 G | 0.4647 | 3.51E-06 chr:14:20552746 |
| 14 rs2775259   | 20501368 T | 2.302  | 3.78E-06 chr:14:20552746 |
| 14 rs12588809  | 20572684 A | 0.4508 | 4.74E-06 chr:14:20552746 |
| 14 rs111969420 | 20659102 T | 0.3406 | 6.75E-06 chr:14:20552746 |
| 14 rs1188578   | 20659151 A | 0.3406 | 6.75E-06 chr:14:20552746 |
| 14 rs17277095  | 20584114 G | 0.4327 | 6.96E-06 chr:14:20552746 |
| 14 rs1188577   | 20658847 T | 0.344  | 8.06E-06 chr:14:20552746 |
| 14 rs11159353  | 20667084 A | 2.044  | 8.47E-06 chr:14:20552746 |
| 14 rs1188545   | 20653246 G | 0.3464 | 8.49E-06 chr:14:20552746 |
| 14 rs79080197  | 20560161 G | 4.831  | 1.03E-05 chr:14:20552746 |
| 14 rs75135507  | 20494722 C | 3.015  | 1.31E-05 chr:14:20552746 |
| 14 rs28750505  | 20577068 G | 0.4969 | 1.38E-05 chr:14:20552746 |
| 14 rs28887469  | 20577050 C | 0.4969 | 1.38E-05 chr:14:20552746 |
| 14 rs76892768  | 20592172 T | 0.3033 | 1.72E-05 chr:14:20552746 |
| 14 rs17277088  | 20580112 G | 0.5041 | 2.21E-05 chr:14:20552746 |
| 14 rs1953553   | 20661105 A | 0.3833 | 2.47E-05 chr:14:20552746 |
| 14 rs1959340   | 20660992 T | 0.3833 | 2.47E-05 chr:14:20552746 |
| 14 rs2318884   | 20661292 A | 0.3833 | 2.47E-05 chr:14:20552746 |
| 14 rs2318885   | 20661943 G | 0.3833 | 2.47E-05 chr:14:20552746 |
| 14 rs2873831   | 20662152 G | 0.3833 | 2.47E-05 chr:14:20552746 |
| 14 rs8014487   | 20661380 A | 0.3833 | 2.47E-05 chr:14:20552746 |
| 14 rs74322083  | 20611385 T | 0.3236 | 3.14E-05 chr:14:20552746 |

|    |             |          |   |         |          |                 |
|----|-------------|----------|---|---------|----------|-----------------|
| 14 | rs17277081  | 20579914 | C | 0.5091  | 3.52E-05 | chr:14:20552746 |
| 14 | rs55894341  | 20579465 | G | 0.5091  | 3.52E-05 | chr:14:20552746 |
| 14 | rs76503330  | 20576401 | C | 0.4598  | 3.81E-05 | chr:14:20552746 |
| 14 | rs10141836  | 20663078 | A | 0.5264  | 5.89E-05 | chr:14:20552746 |
| 19 | rs61517956  | 21833407 | A | 18.84   | 9.36E-29 | chr:19:21841536 |
| 19 | rs7250867   | 21831884 | C | 0.02896 | 1.57E-28 | chr:19:21841536 |
| 19 | rs12461755  | 21874224 | G | 108.8   | 6.62E-28 | chr:19:21841536 |
| 19 | rs75639671  | 21875393 | C | 108.8   | 6.62E-28 | chr:19:21841536 |
| 19 | rs75322575  | 21833798 | A | 28.58   | 3.67E-27 | chr:19:21841536 |
| 19 | rs12459784  | 21941306 | C | 41.49   | 7.91E-26 | chr:19:21841536 |
| 19 | rs12461775  | 21932062 | C | 41.49   | 7.91E-26 | chr:19:21841536 |
| 19 | rs146261958 | 21911514 | A | 41.49   | 7.91E-26 | chr:19:21841536 |
| 19 | rs74814265  | 21912203 | G | 41.49   | 7.91E-26 | chr:19:21841536 |
| 19 | rs75204354  | 21913614 | A | 41.49   | 7.91E-26 | chr:19:21841536 |
| 19 | rs12459852  | 21935851 | A | 36.11   | 8.74E-26 | chr:19:21841536 |
| 19 | rs10413152  | 21937846 | A | 40.83   | 1.03E-25 | chr:19:21841536 |
| 19 | rs9304989   | 21824313 | A | 10.06   | 2.78E-25 | chr:19:21841536 |
| 19 | rs66562280  | 21833014 | T | 8.3     | 3.46E-25 | chr:19:21841536 |
| 19 | rs114434735 | 21866989 | T | 168.9   | 5.50E-25 | chr:19:21841536 |
| 19 | rs117865432 | 21866980 | G | 168.9   | 5.50E-25 | chr:19:21841536 |
| 19 | rs10403795  | 21919081 | A | 35.66   | 1.25E-24 | chr:19:21841536 |
| 19 | rs10405142  | 21918928 | T | 35.66   | 1.25E-24 | chr:19:21841536 |
| 19 | rs10422982  | 21918221 | C | 35.66   | 1.25E-24 | chr:19:21841536 |
| 19 | rs113293163 | 21914189 | A | 35.66   | 1.25E-24 | chr:19:21841536 |
| 19 | rs11879157  | 21900898 | T | 35.66   | 1.25E-24 | chr:19:21841536 |
| 19 | rs4330044   | 21905838 | T | 35.66   | 1.25E-24 | chr:19:21841536 |
| 19 | rs4352176   | 21924392 | C | 35.66   | 1.25E-24 | chr:19:21841536 |
| 19 | rs4372817   | 21922642 | A | 35.66   | 1.25E-24 | chr:19:21841536 |
| 19 | rs4569404   | 21924445 | A | 35.66   | 1.25E-24 | chr:19:21841536 |
| 19 | rs4808296   | 21931214 | A | 35.66   | 1.25E-24 | chr:19:21841536 |
| 19 | rs8101035   | 21934556 | C | 35.66   | 1.25E-24 | chr:19:21841536 |
| 19 | rs3795247   | 21906428 | C | 34.56   | 1.42E-24 | chr:19:21841536 |
| 19 | rs7252777   | 21907988 | T | 34.56   | 1.42E-24 | chr:19:21841536 |
| 19 | rs77464908  | 21898805 | A | 34.48   | 1.63E-24 | chr:19:21841536 |
| 19 | rs4808297   | 21935700 | A | 33.55   | 2.49E-24 | chr:19:21841536 |
| 19 | rs11671415  | 21944782 | A | 13.7    | 7.71E-24 | chr:19:21841536 |
| 19 | rs12463030  | 21947607 | C | 13.7    | 7.71E-24 | chr:19:21841536 |
| 19 | rs17701305  | 21948020 | G | 13.7    | 7.71E-24 | chr:19:21841536 |
| 19 | rs79961580  | 21860730 | A | 180     | 1.06E-23 | chr:19:21841536 |
| 19 | rs12461975  | 21862108 | A | 220.5   | 1.23E-23 | chr:19:21841536 |
| 19 | rs1520074   | 21833928 | G | 14.66   | 5.53E-23 | chr:19:21841536 |
| 19 | rs7258769   | 21942872 | A | 11.33   | 1.13E-22 | chr:19:21841536 |
| 19 | rs11085493  | 21948748 | T | 11.73   | 1.62E-22 | chr:19:21841536 |

|                |            |       |          |                 |
|----------------|------------|-------|----------|-----------------|
| 19 rs10405075  | 21943707 C | 39.12 | 3.39E-22 | chr:19:21841536 |
| 19 rs10412225  | 21944450 G | 39.12 | 3.39E-22 | chr:19:21841536 |
| 19 rs11085492  | 21945186 G | 39.12 | 3.39E-22 | chr:19:21841536 |
| 19 rs7258859   | 21942723 G | 39.12 | 3.39E-22 | chr:19:21841536 |
| 19 rs78077628  | 21971443 C | 11.94 | 3.76E-22 | chr:19:21841536 |
| 19 rs10421113  | 21929885 T | 38.95 | 3.78E-22 | chr:19:21841536 |
| 19 rs10421342  | 21930003 T | 38.95 | 3.78E-22 | chr:19:21841536 |
| 19 rs10423041  | 21933943 C | 38.95 | 3.78E-22 | chr:19:21841536 |
| 19 rs4547465   | 21901056 A | 38.95 | 3.78E-22 | chr:19:21841536 |
| 19 rs4613201   | 21927706 C | 38.95 | 3.78E-22 | chr:19:21841536 |
| 19 rs4808295   | 21930317 A | 38.95 | 3.78E-22 | chr:19:21841536 |
| 19 rs8105002   | 21919934 A | 38.95 | 3.78E-22 | chr:19:21841536 |
| 19 rs8111464   | 21917939 G | 38.95 | 3.78E-22 | chr:19:21841536 |
| 19 rs59958574  | 21971589 T | 11.86 | 4.07E-22 | chr:19:21841536 |
| 19 rs4809175   | 21938744 G | 38.35 | 4.57E-22 | chr:19:21841536 |
| 19 rs117182815 | 21825628 A | 28.24 | 4.76E-22 | chr:19:21841536 |
| 19 rs117740054 | 21825672 T | 28.24 | 4.76E-22 | chr:19:21841536 |
| 19 rs34891363  | 21825550 C | 28.24 | 4.76E-22 | chr:19:21841536 |
| 19 rs67673622  | 21825103 C | 28.24 | 4.76E-22 | chr:19:21841536 |
| 19 rs8113652   | 21921709 T | 38.44 | 4.90E-22 | chr:19:21841536 |
| 19 rs12460950  | 21824781 C | 28.46 | 4.95E-22 | chr:19:21841536 |
| 19 rs4436888   | 21916489 C | 38.33 | 5.04E-22 | chr:19:21841536 |
| 19 rs12973147  | 21860793 C | 11.05 | 5.14E-22 | chr:19:21841536 |
| 19 rs12975447  | 21860974 T | 11.05 | 5.14E-22 | chr:19:21841536 |
| 19 rs2139534   | 21832567 G | 29.79 | 7.94E-22 | chr:19:21841536 |
| 19 rs62109860  | 21833294 T | 14.74 | 8.03E-22 | chr:19:21841536 |
| 19 rs8108212   | 21845320 G | 12.01 | 8.46E-22 | chr:19:21841536 |
| 19 rs56742849  | 21914115 T | 36.95 | 9.10E-22 | chr:19:21841536 |
| 19 rs58748216  | 21914122 T | 36.95 | 9.10E-22 | chr:19:21841536 |
| 19 rs12984552  | 21834092 A | 16.18 | 9.24E-22 | chr:19:21841536 |
| 19 rs112439638 | 21962740 A | 11.38 | 9.54E-22 | chr:19:21841536 |
| 19 rs117301126 | 21965998 A | 11.38 | 9.54E-22 | chr:19:21841536 |
| 19 rs141892265 | 21965652 C | 11.38 | 9.54E-22 | chr:19:21841536 |
| 19 rs144038920 | 21965965 A | 11.38 | 9.54E-22 | chr:19:21841536 |
| 19 rs145830617 | 21965007 A | 11.38 | 9.54E-22 | chr:19:21841536 |
| 19 rs56904798  | 21962115 A | 11.38 | 9.54E-22 | chr:19:21841536 |
| 19 rs35188146  | 21831014 G | 29.79 | 9.61E-22 | chr:19:21841536 |
| 19 rs59571905  | 21830875 T | 29.79 | 9.61E-22 | chr:19:21841536 |
| 19 rs59724594  | 21831057 C | 29.79 | 9.61E-22 | chr:19:21841536 |
| 19 rs7258332   | 21829769 G | 29.79 | 9.61E-22 | chr:19:21841536 |
| 19 rs12232815  | 21832363 C | 29.58 | 9.71E-22 | chr:19:21841536 |
| 19 rs12232857  | 21832320 A | 29.58 | 9.71E-22 | chr:19:21841536 |
| 19 rs12232863  | 21832380 G | 29.58 | 9.71E-22 | chr:19:21841536 |

|                |            |       |          |                 |
|----------------|------------|-------|----------|-----------------|
| 19 rs2139532   | 21832597 C | 29.58 | 9.71E-22 | chr:19:21841536 |
| 19 rs7250875   | 21831905 T | 29.58 | 9.71E-22 | chr:19:21841536 |
| 19 rs7257314   | 21829542 A | 29.61 | 1.01E-21 | chr:19:21841536 |
| 19 rs7257929   | 21829488 C | 29.61 | 1.01E-21 | chr:19:21841536 |
| 19 rs2139531   | 21832736 A | 29.39 | 1.02E-21 | chr:19:21841536 |
| 19 rs4809168   | 21828794 A | 29.39 | 1.02E-21 | chr:19:21841536 |
| 19 rs7253097   | 21828936 C | 29.39 | 1.02E-21 | chr:19:21841536 |
| 19 rs7253108   | 21828955 G | 29.39 | 1.02E-21 | chr:19:21841536 |
| 19 rs7253361   | 21829123 G | 29.39 | 1.02E-21 | chr:19:21841536 |
| 19 rs7254224   | 21828967 C | 29.39 | 1.02E-21 | chr:19:21841536 |
| 19 rs111714111 | 21827774 A | 29.61 | 1.07E-21 | chr:19:21841536 |
| 19 rs112867628 | 21828269 A | 29.61 | 1.07E-21 | chr:19:21841536 |
| 19 rs113033092 | 21827530 C | 29.61 | 1.07E-21 | chr:19:21841536 |
| 19 rs113367038 | 21827121 G | 29.61 | 1.07E-21 | chr:19:21841536 |
| 19 rs35933524  | 21828299 G | 29.61 | 1.07E-21 | chr:19:21841536 |
| 19 rs58039129  | 21827133 A | 29.61 | 1.07E-21 | chr:19:21841536 |
| 19 rs77728877  | 21827833 G | 29.61 | 1.07E-21 | chr:19:21841536 |
| 19 rs10418334  | 21823931 T | 16.3  | 1.26E-21 | chr:19:21841536 |
| 19 rs58339212  | 21861075 T | 294.3 | 1.27E-21 | chr:19:21841536 |
| 19 rs58621185  | 21858531 A | 294.3 | 1.27E-21 | chr:19:21841536 |
| 19 rs73546506  | 21860575 A | 294.3 | 1.27E-21 | chr:19:21841536 |
| 19 rs10469371  | 21893614 T | 35.08 | 1.45E-21 | chr:19:21841536 |
| 19 rs75477359  | 21966566 A | 11.01 | 1.48E-21 | chr:19:21841536 |
| 19 rs115046417 | 21854616 G | 296.7 | 1.52E-21 | chr:19:21841536 |
| 19 rs12052180  | 21850463 C | 296.7 | 1.52E-21 | chr:19:21841536 |
| 19 rs12460252  | 21846543 A | 296.7 | 1.52E-21 | chr:19:21841536 |
| 19 rs12461654  | 21849302 A | 296.7 | 1.52E-21 | chr:19:21841536 |
| 19 rs12462750  | 21850703 G | 296.7 | 1.52E-21 | chr:19:21841536 |
| 19 rs138289834 | 21852693 C | 296.7 | 1.52E-21 | chr:19:21841536 |
| 19 rs144768538 | 21848501 G | 296.7 | 1.52E-21 | chr:19:21841536 |
| 19 rs146500963 | 21849138 G | 296.7 | 1.52E-21 | chr:19:21841536 |
| 19 rs1589279   | 21847351 C | 296.7 | 1.52E-21 | chr:19:21841536 |
| 19 rs1829501   | 21847506 C | 296.7 | 1.52E-21 | chr:19:21841536 |
| 19 rs59896423  | 21848375 T | 296.7 | 1.52E-21 | chr:19:21841536 |
| 19 rs59984853  | 21848526 A | 296.7 | 1.52E-21 | chr:19:21841536 |
| 19 rs8105369   | 21840734 C | 17.77 | 1.64E-21 | chr:19:21841536 |
| 19 rs8105649   | 21840765 G | 17.77 | 1.64E-21 | chr:19:21841536 |
| 19 rs111811317 | 21831260 A | 29.67 | 1.70E-21 | chr:19:21841536 |
| 19 rs35837179  | 21831140 A | 29.67 | 1.70E-21 | chr:19:21841536 |
| 19 rs57155685  | 21831116 T | 29.67 | 1.70E-21 | chr:19:21841536 |
| 19 rs57973828  | 21831115 C | 29.67 | 1.70E-21 | chr:19:21841536 |
| 19 rs115824809 | 21831481 T | 29.45 | 1.71E-21 | chr:19:21841536 |
| 19 rs116521177 | 21831596 T | 29.45 | 1.71E-21 | chr:19:21841536 |

|                |            |       |          |                 |
|----------------|------------|-------|----------|-----------------|
| 19 rs7250456   | 21831585 T | 29.45 | 1.71E-21 | chr:19:21841536 |
| 19 rs10401456  | 21834185 T | 17.61 | 2.01E-21 | chr:19:21841536 |
| 19 rs10404030  | 21839783 A | 17.61 | 2.01E-21 | chr:19:21841536 |
| 19 rs10405733  | 21834482 C | 17.61 | 2.01E-21 | chr:19:21841536 |
| 19 rs10422946  | 21838785 C | 17.61 | 2.01E-21 | chr:19:21841536 |
| 19 rs12978741  | 21843568 G | 17.61 | 2.01E-21 | chr:19:21841536 |
| 19 rs12978776  | 21843616 G | 17.61 | 2.01E-21 | chr:19:21841536 |
| 19 rs12979139  | 21843901 C | 17.61 | 2.01E-21 | chr:19:21841536 |
| 19 rs12979778  | 21843988 G | 17.61 | 2.01E-21 | chr:19:21841536 |
| 19 rs12980130  | 21843569 T | 17.61 | 2.01E-21 | chr:19:21841536 |
| 19 rs12984244  | 21833966 A | 17.61 | 2.01E-21 | chr:19:21841536 |
| 19 rs28432246  | 21842163 T | 17.61 | 2.01E-21 | chr:19:21841536 |
| 19 rs28520521  | 21842340 T | 17.61 | 2.01E-21 | chr:19:21841536 |
| 19 rs4808287   | 21835411 T | 17.61 | 2.01E-21 | chr:19:21841536 |
| 19 rs4808289   | 21836844 T | 17.61 | 2.01E-21 | chr:19:21841536 |
| 19 rs4808292   | 21841626 C | 17.61 | 2.01E-21 | chr:19:21841536 |
| 19 rs4808293   | 21841796 G | 17.61 | 2.01E-21 | chr:19:21841536 |
| 19 rs4809170   | 21836678 T | 17.61 | 2.01E-21 | chr:19:21841536 |
| 19 rs4809171   | 21841170 A | 17.61 | 2.01E-21 | chr:19:21841536 |
| 19 rs57699265  | 21844083 C | 17.61 | 2.01E-21 | chr:19:21841536 |
| 19 rs6511279   | 21838240 C | 17.61 | 2.01E-21 | chr:19:21841536 |
| 19 rs6511280   | 21838492 C | 17.61 | 2.01E-21 | chr:19:21841536 |
| 19 rs6511281   | 21838565 T | 17.61 | 2.01E-21 | chr:19:21841536 |
| 19 rs7351087   | 21838147 A | 17.61 | 2.01E-21 | chr:19:21841536 |
| 19 rs7351088   | 21838146 C | 17.61 | 2.01E-21 | chr:19:21841536 |
| 19 rs8106449   | 21835586 C | 17.61 | 2.01E-21 | chr:19:21841536 |
| 19 rs9807876   | 21837709 G | 17.61 | 2.01E-21 | chr:19:21841536 |
| 19 rs4808290   | 21837075 C | 17.59 | 2.24E-21 | chr:19:21841536 |
| 19 rs34810593  | 21825360 A | 12.15 | 2.38E-21 | chr:19:21841536 |
| 19 rs12460998  | 21973146 C | 10.98 | 2.80E-21 | chr:19:21841536 |
| 19 rs12462082  | 21974486 T | 10.98 | 2.80E-21 | chr:19:21841536 |
| 19 rs12462120  | 21974940 T | 10.98 | 2.80E-21 | chr:19:21841536 |
| 19 rs116818044 | 21857932 A | 287   | 2.88E-21 | chr:19:21841536 |
| 19 rs12971926  | 21837430 C | 17.03 | 3.55E-21 | chr:19:21841536 |
| 19 rs12972184  | 21835628 T | 17.03 | 3.55E-21 | chr:19:21841536 |
| 19 rs12975766  | 21840005 G | 17.03 | 3.55E-21 | chr:19:21841536 |
| 19 rs12979060  | 21843727 G | 17.03 | 3.55E-21 | chr:19:21841536 |
| 19 rs1850930   | 21839462 A | 17.03 | 3.55E-21 | chr:19:21841536 |
| 19 rs28711730  | 21842387 G | 17.03 | 3.55E-21 | chr:19:21841536 |
| 19 rs71333857  | 21844171 G | 17.03 | 3.55E-21 | chr:19:21841536 |
| 19 rs2139527   | 21839211 C | 17.01 | 3.90E-21 | chr:19:21841536 |
| 19 rs2139533   | 21832590 T | 29.63 | 4.48E-21 | chr:19:21841536 |
| 19 rs117329296 | 21988033 T | 11.03 | 4.57E-21 | chr:19:21841536 |

|                |            |       |          |                 |
|----------------|------------|-------|----------|-----------------|
| 19 rs117783733 | 22006570 T | 11.03 | 4.57E-21 | chr:19:21841536 |
| 19 rs118006675 | 22030918 T | 11.03 | 4.57E-21 | chr:19:21841536 |
| 19 rs118189822 | 21984558 C | 11.03 | 4.57E-21 | chr:19:21841536 |
| 19 rs12460775  | 21985091 C | 11.03 | 4.57E-21 | chr:19:21841536 |
| 19 rs12462709  | 21989391 C | 11.03 | 4.57E-21 | chr:19:21841536 |
| 19 rs141171541 | 22011873 T | 11.03 | 4.57E-21 | chr:19:21841536 |
| 19 rs142185394 | 21984590 A | 11.03 | 4.57E-21 | chr:19:21841536 |
| 19 rs147875950 | 21988064 A | 11.03 | 4.57E-21 | chr:19:21841536 |
| 19 rs17701366  | 21985740 G | 11.03 | 4.57E-21 | chr:19:21841536 |
| 19 rs3764576   | 22005000 G | 11.03 | 4.57E-21 | chr:19:21841536 |
| 19 rs58664716  | 21993467 G | 11.03 | 4.57E-21 | chr:19:21841536 |
| 19 rs60272092  | 22006953 A | 11.03 | 4.57E-21 | chr:19:21841536 |
| 19 rs74606132  | 22019517 T | 11.03 | 4.57E-21 | chr:19:21841536 |
| 19 rs74762678  | 22019157 C | 11.03 | 4.57E-21 | chr:19:21841536 |
| 19 rs75290521  | 22000435 G | 11.03 | 4.57E-21 | chr:19:21841536 |
| 19 rs75614465  | 21980134 A | 11.03 | 4.57E-21 | chr:19:21841536 |
| 19 rs76621431  | 22014914 C | 11.03 | 4.57E-21 | chr:19:21841536 |
| 19 rs77086661  | 22032924 G | 11.03 | 4.57E-21 | chr:19:21841536 |
| 19 rs77115676  | 21985611 A | 11.03 | 4.57E-21 | chr:19:21841536 |
| 19 rs77216709  | 21992940 G | 11.03 | 4.57E-21 | chr:19:21841536 |
| 19 rs77310041  | 21986116 G | 11.03 | 4.57E-21 | chr:19:21841536 |
| 19 rs77340617  | 21982326 T | 11.03 | 4.57E-21 | chr:19:21841536 |
| 19 rs77751145  | 22006138 G | 11.03 | 4.57E-21 | chr:19:21841536 |
| 19 rs78033062  | 21986636 A | 11.03 | 4.57E-21 | chr:19:21841536 |
| 19 rs78773989  | 22009807 G | 11.03 | 4.57E-21 | chr:19:21841536 |
| 19 rs79327994  | 21993765 T | 11.03 | 4.57E-21 | chr:19:21841536 |
| 19 rs8111923   | 22021828 A | 11.03 | 4.57E-21 | chr:19:21841536 |
| 19 rs7248525   | 21996571 A | 11    | 4.64E-21 | chr:19:21841536 |
| 19 rs75937847  | 22031912 A | 10.96 | 6.04E-21 | chr:19:21841536 |
| 19 rs12463064  | 21985132 G | 10.78 | 6.34E-21 | chr:19:21841536 |
| 19 rs17701347  | 21980434 T | 10.54 | 7.02E-21 | chr:19:21841536 |
| 19 rs4319879   | 21916767 G | 51.3  | 7.50E-21 | chr:19:21841536 |
| 19 rs117010520 | 22016401 A | 10.58 | 1.05E-20 | chr:19:21841536 |
| 19 rs117733188 | 22016400 A | 10.58 | 1.05E-20 | chr:19:21841536 |
| 19 rs111405107 | 21824157 A | 230   | 1.27E-20 | chr:19:21841536 |
| 19 rs111977553 | 21824165 T | 230   | 1.27E-20 | chr:19:21841536 |
| 19 rs1520075   | 21833741 C | 30.45 | 3.51E-20 | chr:19:21841536 |
| 19 rs1510964   | 21992825 C | 9.847 | 4.78E-20 | chr:19:21841536 |
| 19 rs2136890   | 22033122 T | 9.847 | 4.78E-20 | chr:19:21841536 |
| 19 rs2435003   | 22006176 T | 9.847 | 4.78E-20 | chr:19:21841536 |
| 19 rs2435006   | 21998816 T | 9.847 | 4.78E-20 | chr:19:21841536 |
| 19 rs2435041   | 22034819 G | 9.847 | 4.78E-20 | chr:19:21841536 |
| 19 rs2435044   | 22024860 C | 9.847 | 4.78E-20 | chr:19:21841536 |

|               |            |       |                          |
|---------------|------------|-------|--------------------------|
| 19 rs2457773  | 21993296 T | 9.847 | 4.78E-20 chr:19:21841536 |
| 19 rs2457785  | 22026279 A | 9.847 | 4.78E-20 chr:19:21841536 |
| 19 rs2457802  | 21997727 C | 9.847 | 4.78E-20 chr:19:21841536 |
| 19 rs12979269 | 21843781 G | 15.97 | 5.21E-20 chr:19:21841536 |
| 19 rs11085488 | 21862210 A | 9.447 | 2.26E-19 chr:19:21841536 |
| 19 rs11085489 | 21862213 A | 9.447 | 2.26E-19 chr:19:21841536 |
| 19 rs1829503  | 21869343 G | 136.6 | 4.66E-19 chr:19:21841536 |
| 19 rs11085491 | 21879352 C | 8.912 | 4.83E-19 chr:19:21841536 |
| 19 rs10414424 | 21858966 C | 27.19 | 5.43E-19 chr:19:21841536 |
| 19 rs9917005  | 21853097 G | 27.19 | 5.43E-19 chr:19:21841536 |
| 19 rs7246400  | 21909948 G | 7.979 | 1.43E-18 chr:19:21841536 |
| 19 rs4319878  | 21924452 C | 7.614 | 1.96E-18 chr:19:21841536 |
| 19 rs10412066 | 21950337 C | 7.219 | 2.12E-18 chr:19:21841536 |
| 19 rs7252798  | 21908053 T | 7.568 | 2.51E-18 chr:19:21841536 |
| 19 rs35717293 | 21912755 A | 7.338 | 3.00E-18 chr:19:21841536 |
| 19 rs61037485 | 21924189 T | 7.888 | 3.03E-18 chr:19:21841536 |
| 19 rs12972593 | 21932574 G | 7.365 | 3.05E-18 chr:19:21841536 |
| 19 rs8102320  | 21936885 A | 7.35  | 3.58E-18 chr:19:21841536 |
| 19 rs2359392  | 21854136 A | 5.774 | 5.69E-18 chr:19:21841536 |
| 19 rs2359394  | 21854169 A | 5.774 | 5.69E-18 chr:19:21841536 |
| 19 rs2359395  | 21854176 G | 5.774 | 5.69E-18 chr:19:21841536 |
| 19 rs2359396  | 21854179 G | 5.774 | 5.69E-18 chr:19:21841536 |
| 19 rs56168029 | 21942877 G | 6.929 | 6.23E-18 chr:19:21841536 |
| 19 rs4381721  | 21951581 C | 6.685 | 7.74E-18 chr:19:21841536 |
| 19 rs4522535  | 21951615 A | 6.685 | 7.74E-18 chr:19:21841536 |
| 19 rs6511291  | 21950402 T | 6.668 | 9.12E-18 chr:19:21841536 |
| 19 rs10164402 | 21856407 T | 5.712 | 9.16E-18 chr:19:21841536 |
| 19 rs10164296 | 21856328 A | 5.7   | 1.07E-17 chr:19:21841536 |
| 19 rs10164399 | 21856722 C | 5.7   | 1.07E-17 chr:19:21841536 |
| 19 rs10164404 | 21856699 T | 5.7   | 1.07E-17 chr:19:21841536 |
| 19 rs12459069 | 21852101 A | 5.7   | 1.07E-17 chr:19:21841536 |
| 19 rs12459105 | 21852322 A | 5.7   | 1.07E-17 chr:19:21841536 |
| 19 rs12459145 | 21852274 G | 5.7   | 1.07E-17 chr:19:21841536 |
| 19 rs12459146 | 21852286 G | 5.7   | 1.07E-17 chr:19:21841536 |
| 19 rs12459607 | 21852601 C | 5.7   | 1.07E-17 chr:19:21841536 |
| 19 rs12459622 | 21852799 A | 5.7   | 1.07E-17 chr:19:21841536 |
| 19 rs12459640 | 21852807 C | 5.7   | 1.07E-17 chr:19:21841536 |
| 19 rs12459653 | 21852679 G | 5.7   | 1.07E-17 chr:19:21841536 |
| 19 rs12459663 | 21852921 C | 5.7   | 1.07E-17 chr:19:21841536 |
| 19 rs12460255 | 21853648 G | 5.7   | 1.07E-17 chr:19:21841536 |
| 19 rs12460259 | 21853849 C | 5.7   | 1.07E-17 chr:19:21841536 |
| 19 rs12460275 | 21853896 C | 5.7   | 1.07E-17 chr:19:21841536 |
| 19 rs12461611 | 21856280 G | 5.7   | 1.07E-17 chr:19:21841536 |

|               |            |       |                          |
|---------------|------------|-------|--------------------------|
| 19 rs12463364 | 21851610 A | 5.7   | 1.07E-17 chr:19:21841536 |
| 19 rs12972399 | 21850149 T | 5.7   | 1.07E-17 chr:19:21841536 |
| 19 rs12982600 | 21847694 C | 5.7   | 1.07E-17 chr:19:21841536 |
| 19 rs12983456 | 21855124 G | 5.7   | 1.07E-17 chr:19:21841536 |
| 19 rs1818696  | 21850359 C | 5.7   | 1.07E-17 chr:19:21841536 |
| 19 rs1850931  | 21855226 G | 5.7   | 1.07E-17 chr:19:21841536 |
| 19 rs1850932  | 21855223 C | 5.7   | 1.07E-17 chr:19:21841536 |
| 19 rs1850935  | 21854623 T | 5.7   | 1.07E-17 chr:19:21841536 |
| 19 rs2037356  | 21849559 C | 5.7   | 1.07E-17 chr:19:21841536 |
| 19 rs2359388  | 21851081 T | 5.7   | 1.07E-17 chr:19:21841536 |
| 19 rs2359389  | 21851157 A | 5.7   | 1.07E-17 chr:19:21841536 |
| 19 rs2359390  | 21851459 G | 5.7   | 1.07E-17 chr:19:21841536 |
| 19 rs2359398  | 21854389 C | 5.7   | 1.07E-17 chr:19:21841536 |
| 19 rs2359399  | 21854394 C | 5.7   | 1.07E-17 chr:19:21841536 |
| 19 rs2359400  | 21855574 C | 5.7   | 1.07E-17 chr:19:21841536 |
| 19 rs2359401  | 21855732 G | 5.7   | 1.07E-17 chr:19:21841536 |
| 19 rs2359403  | 21855836 C | 5.7   | 1.07E-17 chr:19:21841536 |
| 19 rs2359404  | 21855839 G | 5.7   | 1.07E-17 chr:19:21841536 |
| 19 rs2359405  | 21856187 G | 5.7   | 1.07E-17 chr:19:21841536 |
| 19 rs34449776 | 21856309 A | 5.7   | 1.07E-17 chr:19:21841536 |
| 19 rs35091166 | 21856300 G | 5.7   | 1.07E-17 chr:19:21841536 |
| 19 rs3946575  | 21848698 C | 5.7   | 1.07E-17 chr:19:21841536 |
| 19 rs4026206  | 21855856 G | 5.7   | 1.07E-17 chr:19:21841536 |
| 19 rs4302166  | 21850861 C | 5.7   | 1.07E-17 chr:19:21841536 |
| 19 rs4310994  | 21850923 A | 5.7   | 1.07E-17 chr:19:21841536 |
| 19 rs4321314  | 21849668 C | 5.7   | 1.07E-17 chr:19:21841536 |
| 19 rs4490112  | 21850753 T | 5.7   | 1.07E-17 chr:19:21841536 |
| 19 rs4500887  | 21850985 G | 5.7   | 1.07E-17 chr:19:21841536 |
| 19 rs8108289  | 21846845 A | 5.7   | 1.07E-17 chr:19:21841536 |
| 19 rs1850934  | 21854928 T | 5.701 | 1.17E-17 chr:19:21841536 |
| 19 rs7259640  | 21848238 G | 5.694 | 1.26E-17 chr:19:21841536 |
| 19 rs10854059 | 21859805 G | 5.521 | 1.39E-17 chr:19:21841536 |
| 19 rs11668774 | 21859863 A | 5.521 | 1.39E-17 chr:19:21841536 |
| 19 rs12461329 | 21860597 G | 5.521 | 1.39E-17 chr:19:21841536 |
| 19 rs1818693  | 21858687 A | 5.521 | 1.39E-17 chr:19:21841536 |
| 19 rs2015476  | 21859110 A | 5.521 | 1.39E-17 chr:19:21841536 |
| 19 rs2015481  | 21858994 A | 5.521 | 1.39E-17 chr:19:21841536 |
| 19 rs2015715  | 21858115 C | 5.518 | 1.56E-17 chr:19:21841536 |
| 19 rs2015736  | 21857927 C | 5.518 | 1.56E-17 chr:19:21841536 |
| 19 rs12984472 | 21847713 T | 5.474 | 2.21E-17 chr:19:21841536 |
| 19 rs12973337 | 21860723 G | 5.356 | 2.69E-17 chr:19:21841536 |
| 19 rs10410478 | 22020018 C | 6.964 | 2.87E-17 chr:19:21841536 |
| 19 rs10413659 | 22017188 A | 6.964 | 2.87E-17 chr:19:21841536 |



|                |            |       |          |                 |
|----------------|------------|-------|----------|-----------------|
| 19 rs10418840  | 22016193 T | 6.964 | 2.87E-17 | chr:19:21841536 |
| 19 rs10420548  | 22017492 C | 6.964 | 2.87E-17 | chr:19:21841536 |
| 19 rs11672034  | 22020770 A | 6.964 | 2.87E-17 | chr:19:21841536 |
| 19 rs28480566  | 22020251 A | 6.964 | 2.87E-17 | chr:19:21841536 |
| 19 rs12459448  | 22040562 G | 6.227 | 1.20E-16 | chr:19:21841536 |
| 19 rs2435048   | 22019697 G | 6.457 | 2.00E-16 | chr:19:21841536 |
| 19 rs62112965  | 22016291 C | 6.457 | 2.00E-16 | chr:19:21841536 |
| 19 rs12232841  | 21857227 T | 5.076 | 2.53E-16 | chr:19:21841536 |
| 19 rs12984679  | 21856993 A | 5.076 | 2.53E-16 | chr:19:21841536 |
| 19 rs66697566  | 21844064 T | 6.872 | 7.00E-16 | chr:19:21841536 |
| 19 rs186336934 | 21890720 G | 12.31 | 5.95E-15 | chr:19:21841536 |
| 19 rs6511285   | 21890339 G | 4.26  | 1.07E-13 | chr:19:21841536 |
| 19 rs11670736  | 21952736 G | 3.672 | 7.07E-12 | chr:19:21841536 |
| 19 rs57706029  | 21953161 C | 3.826 | 8.15E-12 | chr:19:21841536 |
| 19 rs17769057  | 22026170 C | 10.85 | 9.59E-12 | chr:19:21841536 |
| 19 rs60200684  | 21797826 A | 3.325 | 1.67E-11 | chr:19:21841536 |
| 19 rs144847660 | 21823693 T | 1637  | 1.73E-11 | chr:19:21841536 |
| 19 rs62108422  | 21813454 G | 4.143 | 1.73E-11 | chr:19:21841536 |
| 19 rs11669298  | 21817992 T | 4.289 | 2.23E-11 | chr:19:21841536 |
| 19 rs1397579   | 21976964 C | 3.447 | 2.24E-11 | chr:19:21841536 |
| 19 rs112076231 | 21834099 G | 1386  | 2.32E-11 | chr:19:21841536 |
| 19 rs11883394  | 21789724 C | 3.293 | 2.44E-11 | chr:19:21841536 |
| 19 rs12459722  | 21794498 A | 3.273 | 3.07E-11 | chr:19:21841536 |
| 19 rs11665855  | 21784516 C | 3.23  | 3.26E-11 | chr:19:21841536 |
| 19 rs11881567  | 21785580 T | 3.23  | 3.26E-11 | chr:19:21841536 |
| 19 rs62110246  | 21787169 C | 3.23  | 3.26E-11 | chr:19:21841536 |
| 19 rs950504    | 21783995 C | 3.214 | 4.01E-11 | chr:19:21841536 |
| 19 rs11880659  | 21789930 T | 3.241 | 4.17E-11 | chr:19:21841536 |
| 19 rs11883414  | 21789801 C | 3.241 | 4.17E-11 | chr:19:21841536 |
| 19 rs2176802   | 21790419 A | 3.241 | 4.17E-11 | chr:19:21841536 |
| 19 rs57617684  | 21789421 G | 3.241 | 4.17E-11 | chr:19:21841536 |
| 19 rs58463686  | 21788992 A | 3.241 | 4.17E-11 | chr:19:21841536 |
| 19 rs61056366  | 21792791 T | 3.241 | 4.17E-11 | chr:19:21841536 |
| 19 rs12462147  | 21797161 T | 3.213 | 4.24E-11 | chr:19:21841536 |
| 19 rs60223275  | 21797400 C | 3.213 | 4.24E-11 | chr:19:21841536 |
| 19 rs11085494  | 21952631 G | 3.427 | 4.24E-11 | chr:19:21841536 |
| 19 rs58952031  | 21804541 C | 3.17  | 4.57E-11 | chr:19:21841536 |
| 19 rs11880572  | 21789735 G | 3.201 | 4.87E-11 | chr:19:21841536 |
| 19 rs62108374  | 21804661 A | 3.162 | 5.32E-11 | chr:19:21841536 |
| 19 rs142395395 | 22100706 G | 10.74 | 5.43E-11 | chr:19:21841536 |
| 19 rs11085483  | 21799990 A | 3.19  | 5.61E-11 | chr:19:21841536 |
| 19 rs62108369  | 21801450 A | 3.157 | 6.17E-11 | chr:19:21841536 |
| 19 rs6511294   | 21978569 G | 3.23  | 6.78E-11 | chr:19:21841536 |

|                |            |       |          |                 |
|----------------|------------|-------|----------|-----------------|
| 19 rs150182828 | 21856746 C | 10.47 | 7.52E-11 | chr:19:21841536 |
| 19 rs8102343   | 21810285 A | 3.328 | 1.05E-10 | chr:19:21841536 |
| 19 rs11879643  | 21816374 A | 3.715 | 1.75E-10 | chr:19:21841536 |
| 19 rs11881486  | 21813528 A | 3.715 | 1.75E-10 | chr:19:21841536 |
| 19 rs11881496  | 21813801 G | 3.715 | 1.75E-10 | chr:19:21841536 |
| 19 rs11883066  | 21816179 T | 3.715 | 1.75E-10 | chr:19:21841536 |
| 19 rs11883127  | 21816337 A | 3.715 | 1.75E-10 | chr:19:21841536 |
| 19 rs4809159   | 21815483 A | 3.715 | 1.75E-10 | chr:19:21841536 |
| 19 rs4809160   | 21815548 A | 3.715 | 1.75E-10 | chr:19:21841536 |
| 19 rs4809161   | 21815823 G | 3.715 | 1.75E-10 | chr:19:21841536 |
| 19 rs55802558  | 21814240 T | 3.715 | 1.75E-10 | chr:19:21841536 |
| 19 rs56208843  | 21814116 A | 3.715 | 1.75E-10 | chr:19:21841536 |
| 19 rs562777226 | 21812683 A | 3.715 | 1.75E-10 | chr:19:21841536 |
| 19 rs56311814  | 21814190 T | 3.715 | 1.75E-10 | chr:19:21841536 |
| 19 rs59497081  | 21819695 T | 3.715 | 1.75E-10 | chr:19:21841536 |
| 19 rs62108412  | 21812106 T | 3.715 | 1.75E-10 | chr:19:21841536 |
| 19 rs62108413  | 21812499 A | 3.715 | 1.75E-10 | chr:19:21841536 |
| 19 rs62108415  | 21812707 T | 3.715 | 1.75E-10 | chr:19:21841536 |
| 19 rs62108416  | 21812729 T | 3.715 | 1.75E-10 | chr:19:21841536 |
| 19 rs62108417  | 21813269 C | 3.715 | 1.75E-10 | chr:19:21841536 |
| 19 rs62108418  | 21813273 G | 3.715 | 1.75E-10 | chr:19:21841536 |
| 19 rs62108419  | 21813299 T | 3.715 | 1.75E-10 | chr:19:21841536 |
| 19 rs62108420  | 21813354 C | 3.715 | 1.75E-10 | chr:19:21841536 |
| 19 rs62108423  | 21813710 A | 3.715 | 1.75E-10 | chr:19:21841536 |
| 19 rs62108424  | 21814058 G | 3.715 | 1.75E-10 | chr:19:21841536 |
| 19 rs7245671   | 21812597 C | 3.715 | 1.75E-10 | chr:19:21841536 |
| 19 rs7259993   | 21812403 T | 3.715 | 1.75E-10 | chr:19:21841536 |
| 19 rs7260048   | 21812636 T | 3.715 | 1.75E-10 | chr:19:21841536 |
| 19 rs73012144  | 21812991 A | 3.715 | 1.75E-10 | chr:19:21841536 |
| 19 rs73012155  | 21813922 G | 3.715 | 1.75E-10 | chr:19:21841536 |
| 19 rs73536671  | 21813150 T | 3.715 | 1.75E-10 | chr:19:21841536 |
| 19 rs74755925  | 21813062 T | 3.715 | 1.75E-10 | chr:19:21841536 |
| 19 rs148316037 | 22257558 C | 9.75  | 3.07E-10 | chr:19:21841536 |
| 19 rs11085463  | 21751302 T | 2.994 | 3.32E-10 | chr:19:21841536 |
| 19 rs148612115 | 22272101 C | 8.952 | 3.46E-10 | chr:19:21841536 |
| 19 rs2562508   | 21726281 G | 3.031 | 4.54E-10 | chr:19:21841536 |
| 19 rs78823434  | 21982409 G | 4.512 | 5.49E-10 | chr:19:21841536 |
| 19 rs10854049  | 21751396 T | 2.917 | 6.92E-10 | chr:19:21841536 |
| 19 rs12979686  | 21975817 T | 3.108 | 8.76E-10 | chr:19:21841536 |
| 19 rs950711    | 21977453 A | 3.108 | 8.76E-10 | chr:19:21841536 |
| 19 rs2562507   | 21726337 C | 2.951 | 9.31E-10 | chr:19:21841536 |
| 19 rs10854048  | 21751314 G | 2.903 | 1.33E-09 | chr:19:21841536 |
| 19 rs10854050  | 21751448 C | 2.903 | 1.33E-09 | chr:19:21841536 |

|                |            |       |          |                 |
|----------------|------------|-------|----------|-----------------|
| 19 rs10854051  | 21751578 G | 2.903 | 1.33E-09 | chr:19:21841536 |
| 19 rs11085464  | 21751778 G | 2.903 | 1.33E-09 | chr:19:21841536 |
| 19 rs11085465  | 21751790 T | 2.903 | 1.33E-09 | chr:19:21841536 |
| 19 rs11085467  | 21751843 G | 2.903 | 1.33E-09 | chr:19:21841536 |
| 19 rs11668606  | 21737420 G | 2.903 | 1.33E-09 | chr:19:21841536 |
| 19 rs12610883  | 21750059 G | 2.903 | 1.33E-09 | chr:19:21841536 |
| 19 rs188309423 | 21734185 A | 2.903 | 1.33E-09 | chr:19:21841536 |
| 19 rs192812729 | 21734201 T | 2.903 | 1.33E-09 | chr:19:21841536 |
| 19 rs2681370   | 21736838 C | 2.903 | 1.33E-09 | chr:19:21841536 |
| 19 rs2681388   | 21732253 C | 2.903 | 1.33E-09 | chr:19:21841536 |
| 19 rs2681395   | 21738140 C | 2.903 | 1.33E-09 | chr:19:21841536 |
| 19 rs2946790   | 21731997 C | 2.903 | 1.33E-09 | chr:19:21841536 |
| 19 rs35008138  | 21731624 T | 2.903 | 1.33E-09 | chr:19:21841536 |
| 19 rs35099594  | 21734064 T | 2.903 | 1.33E-09 | chr:19:21841536 |
| 19 rs58001930  | 21742863 T | 2.903 | 1.33E-09 | chr:19:21841536 |
| 19 rs7259708   | 21750648 C | 2.903 | 1.33E-09 | chr:19:21841536 |
| 19 rs12609186  | 21984052 C | 2.951 | 1.45E-09 | chr:19:21841536 |
| 19 rs2244127   | 22016695 G | 2.951 | 1.45E-09 | chr:19:21841536 |
| 19 rs2457798   | 22002611 G | 2.951 | 1.45E-09 | chr:19:21841536 |
| 19 rs2457800   | 21999952 G | 2.951 | 1.45E-09 | chr:19:21841536 |
| 19 rs2562417   | 21711202 T | 2.908 | 1.47E-09 | chr:19:21841536 |
| 19 rs2562466   | 21714204 C | 2.908 | 1.47E-09 | chr:19:21841536 |
| 19 rs2562468   | 21714850 G | 2.908 | 1.47E-09 | chr:19:21841536 |
| 19 rs2562471   | 21715819 C | 2.908 | 1.47E-09 | chr:19:21841536 |
| 19 rs2457774   | 21993294 C | 2.946 | 1.60E-09 | chr:19:21841536 |
| 19 rs62110163  | 21728822 A | 2.896 | 1.71E-09 | chr:19:21841536 |
| 19 rs74919974  | 21806892 G | 2.958 | 1.78E-09 | chr:19:21841536 |
| 19 rs11671579  | 21737069 C | 2.842 | 2.02E-09 | chr:19:21841536 |
| 19 rs2562398   | 21722949 A | 2.842 | 2.17E-09 | chr:19:21841536 |
| 19 rs7252552   | 21968019 C | 2.909 | 2.43E-09 | chr:19:21841536 |
| 19 rs8182547   | 21967944 C | 2.909 | 2.43E-09 | chr:19:21841536 |
| 19 rs9676253   | 21969452 G | 2.909 | 2.43E-09 | chr:19:21841536 |
| 19 rs11085462  | 21750251 G | 2.848 | 2.55E-09 | chr:19:21841536 |
| 19 rs55771551  | 21746380 T | 2.848 | 2.55E-09 | chr:19:21841536 |
| 19 rs279799    | 21463797 C | 2.943 | 3.03E-09 | chr:19:21841536 |
| 19 rs2435036   | 22039105 C | 2.88  | 4.23E-09 | chr:19:21841536 |
| 19 rs10420016  | 21688602 C | 2.787 | 4.24E-09 | chr:19:21841536 |
| 19 rs147245970 | 21694206 A | 2.787 | 4.24E-09 | chr:19:21841536 |
| 19 rs1879234   | 21704479 T | 2.787 | 4.24E-09 | chr:19:21841536 |
| 19 rs2173727   | 21673957 C | 2.787 | 4.24E-09 | chr:19:21841536 |
| 19 rs2562408   | 21709881 C | 2.787 | 4.24E-09 | chr:19:21841536 |
| 19 rs2650792   | 21674334 T | 2.787 | 4.24E-09 | chr:19:21841536 |
| 19 rs2650793   | 21676115 G | 2.787 | 4.24E-09 | chr:19:21841536 |

|               |            |        |          |                 |
|---------------|------------|--------|----------|-----------------|
| 19 rs2650804  | 21680184 C | 2.787  | 4.24E-09 | chr:19:21841536 |
| 19 rs2650805  | 21687939 T | 2.787  | 4.24E-09 | chr:19:21841536 |
| 19 rs2650825  | 21699225 C | 2.787  | 4.24E-09 | chr:19:21841536 |
| 19 rs2681377  | 21716520 T | 2.787  | 4.24E-09 | chr:19:21841536 |
| 19 rs2681389  | 21692575 G | 2.787  | 4.24E-09 | chr:19:21841536 |
| 19 rs2681392  | 21695987 T | 2.787  | 4.24E-09 | chr:19:21841536 |
| 19 rs6511253  | 21678798 T | 2.787  | 4.24E-09 | chr:19:21841536 |
| 19 rs6511254  | 21680501 A | 2.787  | 4.24E-09 | chr:19:21841536 |
| 19 rs6511256  | 21693315 G | 2.787  | 4.24E-09 | chr:19:21841536 |
| 19 rs6511257  | 21693535 C | 2.787  | 4.24E-09 | chr:19:21841536 |
| 19 rs6511258  | 21694615 T | 2.787  | 4.24E-09 | chr:19:21841536 |
| 19 rs7359908  | 21694661 A | 2.787  | 4.24E-09 | chr:19:21841536 |
| 19 rs9304986  | 21682062 G | 2.787  | 4.24E-09 | chr:19:21841536 |
| 19 rs9304987  | 21682274 A | 2.787  | 4.24E-09 | chr:19:21841536 |
| 19 rs10407896 | 22019444 T | 2.845  | 4.45E-09 | chr:19:21841536 |
| 19 rs10414358 | 22011715 G | 2.845  | 4.45E-09 | chr:19:21841536 |
| 19 rs1877130  | 22030457 C | 2.845  | 4.45E-09 | chr:19:21841536 |
| 19 rs2435049  | 22016610 A | 2.845  | 4.45E-09 | chr:19:21841536 |
| 19 rs2457784  | 22026514 C | 2.845  | 4.45E-09 | chr:19:21841536 |
| 19 rs2457792  | 22030057 A | 2.845  | 4.45E-09 | chr:19:21841536 |
| 19 rs2457794  | 22031822 T | 2.845  | 4.45E-09 | chr:19:21841536 |
| 19 rs7247610  | 22006615 C | 2.845  | 4.45E-09 | chr:19:21841536 |
| 19 rs2435039  | 22036167 A | 2.89   | 4.50E-09 | chr:19:21841536 |
| 19 rs60206762 | 21782896 A | 2.778  | 5.03E-09 | chr:19:21841536 |
| 19 rs4809179  | 21955379 T | 2.821  | 5.71E-09 | chr:19:21841536 |
| 19 rs2681376  | 21715525 T | 2.794  | 5.79E-09 | chr:19:21841536 |
| 19 rs12463314 | 21973178 T | 2.916  | 6.10E-09 | chr:19:21841536 |
| 19 rs4809181  | 21974203 T | 2.916  | 6.10E-09 | chr:19:21841536 |
| 19 rs12710186 | 21958004 T | 2.804  | 7.41E-09 | chr:19:21841536 |
| 19 rs2681391  | 21695435 T | 2.736  | 8.00E-09 | chr:19:21841536 |
| 19 rs57879343 | 21782858 T | 2.749  | 8.69E-09 | chr:19:21841536 |
| 19 rs35881881 | 21942505 T | 7.826  | 9.28E-09 | chr:19:21841536 |
| 19 rs62112368 | 22306775 A | 5.274  | 9.66E-09 | chr:19:21841536 |
| 19 rs76836549 | 21860663 A | 24.7   | 1.00E-08 | chr:19:21841536 |
| 19 rs4809145  | 21780709 C | 2.73   | 1.09E-08 | chr:19:21841536 |
| 19 rs62110214 | 21775208 A | 2.73   | 1.09E-08 | chr:19:21841536 |
| 19 rs73018266 | 21865980 C | 0.3323 | 1.16E-08 | chr:19:21841536 |
| 19 rs12975399 | 21765794 C | 2.642  | 1.17E-08 | chr:19:21841536 |
| 19 rs12974842 | 21948570 C | 6.657  | 1.27E-08 | chr:19:21841536 |
| 19 rs12975387 | 21942293 T | 6.657  | 1.27E-08 | chr:19:21841536 |
| 19 rs34063259 | 21942569 G | 6.657  | 1.27E-08 | chr:19:21841536 |
| 19 rs35910168 | 21946903 T | 6.657  | 1.27E-08 | chr:19:21841536 |
| 19 rs36097084 | 21950058 A | 6.657  | 1.27E-08 | chr:19:21841536 |

|                |            |        |          |                 |
|----------------|------------|--------|----------|-----------------|
| 19 rs8107583   | 21947171 T | 6.657  | 1.27E-08 | chr:19:21841536 |
| 19 rs2359704   | 21964257 G | 2.732  | 1.35E-08 | chr:19:21841536 |
| 19 rs4075276   | 21961304 T | 2.732  | 1.35E-08 | chr:19:21841536 |
| 19 rs7252585   | 21657943 C | 2.672  | 1.43E-08 | chr:19:21841536 |
| 19 rs2562456   | 21666210 C | 2.633  | 1.58E-08 | chr:19:21841536 |
| 19 rs2650784   | 21666597 T | 2.633  | 1.58E-08 | chr:19:21841536 |
| 19 rs4524067   | 21659803 A | 2.633  | 1.58E-08 | chr:19:21841536 |
| 19 rs9277322   | 21670114 T | 2.633  | 1.58E-08 | chr:19:21841536 |
| 19 rs6511292   | 21960494 T | 2.722  | 1.61E-08 | chr:19:21841536 |
| 19 rs67428643  | 21890127 C | 0.3439 | 1.68E-08 | chr:19:21841536 |
| 19 rs34203148  | 21773545 A | 2.614  | 1.79E-08 | chr:19:21841536 |
| 19 rs614975    | 21526471 A | 3.316  | 1.81E-08 | chr:19:21841536 |
| 19 rs660147    | 21523289 A | 3.316  | 1.81E-08 | chr:19:21841536 |
| 19 rs2562474   | 21646282 A | 2.699  | 1.94E-08 | chr:19:21841536 |
| 19 rs12985995  | 21723036 C | 2.467  | 2.38E-08 | chr:19:21841536 |
| 19 rs6511250   | 21656046 C | 2.635  | 2.43E-08 | chr:19:21841536 |
| 19 rs8103668   | 21652035 A | 2.651  | 2.48E-08 | chr:19:21841536 |
| 19 rs279808    | 21467479 G | 3.32   | 2.49E-08 | chr:19:21841536 |
| 19 rs11085456  | 21725386 T | 2.458  | 2.84E-08 | chr:19:21841536 |
| 19 rs12461802  | 21725407 G | 2.458  | 2.84E-08 | chr:19:21841536 |
| 19 rs7251540   | 21727927 G | 2.458  | 2.84E-08 | chr:19:21841536 |
| 19 rs7251669   | 21728019 G | 2.458  | 2.84E-08 | chr:19:21841536 |
| 19 rs9789284   | 21727511 C | 2.458  | 2.84E-08 | chr:19:21841536 |
| 19 rs4809143   | 21772728 A | 2.611  | 2.89E-08 | chr:19:21841536 |
| 19 rs4809144   | 21772730 T | 2.611  | 2.89E-08 | chr:19:21841536 |
| 19 rs12974758  | 21667302 T | 2.613  | 3.06E-08 | chr:19:21841536 |
| 19 rs7251393   | 21669553 T | 2.613  | 3.06E-08 | chr:19:21841536 |
| 19 rs2359155   | 21671869 C | 2.611  | 3.49E-08 | chr:19:21841536 |
| 19 rs1464295   | 21757867 C | 2.552  | 3.53E-08 | chr:19:21841536 |
| 19 rs2562487   | 21651382 A | 2.591  | 4.29E-08 | chr:19:21841536 |
| 19 rs6511251   | 21656286 C | 2.595  | 4.42E-08 | chr:19:21841536 |
| 19 rs8110459   | 21732379 A | 2.416  | 4.79E-08 | chr:19:21841536 |
| 19 rs200112199 | 21725713 T | 2.493  | 4.91E-08 | chr:19:21841536 |
| 19 rs56072098  | 21651960 G | 2.581  | 4.99E-08 | chr:19:21841536 |
| 19 rs2914646   | 21637161 A | 2.537  | 5.68E-08 | chr:19:21841536 |
| 19 rs2968076   | 21637101 C | 2.537  | 5.68E-08 | chr:19:21841536 |
| 19 rs62110822  | 21936769 A | 0.3512 | 5.83E-08 | chr:19:21841536 |
| 19 rs12973084  | 21723197 T | 2.386  | 5.96E-08 | chr:19:21841536 |
| 19 rs62110249  | 21788366 C | 0.3959 | 6.10E-08 | chr:19:21841536 |
| 19 rs7260016   | 21789939 G | 0.3959 | 6.10E-08 | chr:19:21841536 |
| 19 rs62110205  | 21760071 G | 2.559  | 6.18E-08 | chr:19:21841536 |
| 19 rs62110202  | 21754601 T | 2.506  | 6.87E-08 | chr:19:21841536 |
| 19 rs138042613 | 21789656 C | 0.3983 | 7.06E-08 | chr:19:21841536 |

|                |            |        |          |                 |
|----------------|------------|--------|----------|-----------------|
| 19 rs1401926   | 21740932 T | 2.377  | 7.09E-08 | chr:19:21841536 |
| 19 rs141542153 | 21734291 C | 2.377  | 7.09E-08 | chr:19:21841536 |
| 19 rs1879237   | 21738727 G | 2.377  | 7.09E-08 | chr:19:21841536 |
| 19 rs1879238   | 21738753 C | 2.377  | 7.09E-08 | chr:19:21841536 |
| 19 rs34040704  | 21739464 C | 2.377  | 7.09E-08 | chr:19:21841536 |
| 19 rs7253559   | 21740602 A | 2.377  | 7.09E-08 | chr:19:21841536 |
| 19 rs8109536   | 21736351 C | 2.377  | 7.09E-08 | chr:19:21841536 |
| 19 rs8111885   | 21733334 G | 2.377  | 7.09E-08 | chr:19:21841536 |
| 19 rs35782355  | 21719401 T | 2.382  | 7.52E-08 | chr:19:21841536 |
| 19 rs58489424  | 21788474 A | 0.4031 | 9.30E-08 | chr:19:21841536 |
| 19 rs7248367   | 21790400 G | 0.4056 | 9.55E-08 | chr:19:21841536 |
| 19 rs34497957  | 21693426 A | 2.358  | 9.74E-08 | chr:19:21841536 |
| 19 rs2562428   | 21625454 G | 2.516  | 1.10E-07 | chr:19:21841536 |
| 19 rs2650764   | 21625859 G | 2.516  | 1.10E-07 | chr:19:21841536 |
| 19 rs2650773   | 21644088 A | 2.516  | 1.10E-07 | chr:19:21841536 |
| 19 rs2650814   | 21630798 C | 2.516  | 1.10E-07 | chr:19:21841536 |
| 19 rs2650819   | 21638873 C | 2.516  | 1.10E-07 | chr:19:21841536 |
| 19 rs2968072   | 21644599 T | 2.516  | 1.10E-07 | chr:19:21841536 |
| 19 rs2968078   | 21641744 A | 2.516  | 1.10E-07 | chr:19:21841536 |
| 19 rs8101904   | 21626377 A | 2.516  | 1.10E-07 | chr:19:21841536 |
| 19 rs8106025   | 21634724 A | 2.516  | 1.10E-07 | chr:19:21841536 |
| 19 rs11667151  | 21787932 A | 0.4083 | 1.14E-07 | chr:19:21841536 |
| 19 rs7250960   | 21787829 C | 0.4083 | 1.14E-07 | chr:19:21841536 |
| 19 rs10854053  | 21793214 G | 0.407  | 1.20E-07 | chr:19:21841536 |
| 19 rs10854054  | 21793266 G | 0.407  | 1.20E-07 | chr:19:21841536 |
| 19 rs12459715  | 21794459 G | 0.407  | 1.20E-07 | chr:19:21841536 |
| 19 rs12973209  | 21793834 T | 0.407  | 1.20E-07 | chr:19:21841536 |
| 19 rs1850937   | 21791663 G | 0.407  | 1.20E-07 | chr:19:21841536 |
| 19 rs2102922   | 21794642 C | 0.407  | 1.20E-07 | chr:19:21841536 |
| 19 rs2139530   | 21790341 G | 0.407  | 1.20E-07 | chr:19:21841536 |
| 19 rs2359157   | 21794551 G | 0.407  | 1.20E-07 | chr:19:21841536 |
| 19 rs35092215  | 21789986 A | 0.407  | 1.20E-07 | chr:19:21841536 |
| 19 rs4435389   | 21792509 G | 0.407  | 1.20E-07 | chr:19:21841536 |
| 19 rs57229007  | 21788317 G | 0.407  | 1.20E-07 | chr:19:21841536 |
| 19 rs61137407  | 21788311 G | 0.407  | 1.20E-07 | chr:19:21841536 |
| 19 rs6511273   | 21794042 G | 0.407  | 1.20E-07 | chr:19:21841536 |
| 19 rs7246154   | 21793662 A | 0.407  | 1.20E-07 | chr:19:21841536 |
| 19 rs7256982   | 21792529 C | 0.407  | 1.20E-07 | chr:19:21841536 |
| 19 rs7257246   | 21792678 C | 0.407  | 1.20E-07 | chr:19:21841536 |
| 19 rs7260391   | 21790185 A | 0.407  | 1.20E-07 | chr:19:21841536 |
| 19 rs7260514   | 21790275 A | 0.407  | 1.20E-07 | chr:19:21841536 |
| 19 rs8110320   | 21789256 A | 0.407  | 1.20E-07 | chr:19:21841536 |
| 19 rs8111076   | 21793044 A | 0.407  | 1.20E-07 | chr:19:21841536 |

|                |            |        |          |                 |
|----------------|------------|--------|----------|-----------------|
| 19 rs8112158   | 21793219 A | 0.407  | 1.20E-07 | chr:19:21841536 |
| 19 rs9749033   | 21794168 A | 0.407  | 1.20E-07 | chr:19:21841536 |
| 19 rs9749043   | 21794207 G | 0.407  | 1.20E-07 | chr:19:21841536 |
| 19 rs9749067   | 21794061 T | 0.407  | 1.20E-07 | chr:19:21841536 |
| 19 rs9749163   | 21794390 A | 0.407  | 1.20E-07 | chr:19:21841536 |
| 19 rs9749167   | 21794359 C | 0.407  | 1.20E-07 | chr:19:21841536 |
| 19 rs62107476  | 21504506 A | 2.487  | 1.23E-07 | chr:19:21841536 |
| 19 rs2650801   | 21635355 A | 2.51   | 1.54E-07 | chr:19:21841536 |
| 19 rs12981277  | 21787387 A | 0.412  | 1.55E-07 | chr:19:21841536 |
| 19 rs7250360   | 21718822 A | 2.329  | 1.56E-07 | chr:19:21841536 |
| 19 rs143750946 | 21888889 G | 28.99  | 1.59E-07 | chr:19:21841536 |
| 19 rs73017722  | 21688495 C | 2.309  | 1.63E-07 | chr:19:21841536 |
| 19 rs12978078  | 21813444 G | 13.03  | 1.67E-07 | chr:19:21841536 |
| 19 rs6511275   | 21805289 T | 0.4071 | 1.68E-07 | chr:19:21841536 |
| 19 rs28898308  | 21696860 A | 2.308  | 1.69E-07 | chr:19:21841536 |
| 19 rs11666680  | 21681788 C | 2.304  | 1.85E-07 | chr:19:21841536 |
| 19 rs12610154  | 21676357 T | 2.304  | 1.85E-07 | chr:19:21841536 |
| 19 rs12974329  | 21700400 C | 2.304  | 1.85E-07 | chr:19:21841536 |
| 19 rs147044062 | 21694415 G | 2.304  | 1.85E-07 | chr:19:21841536 |
| 19 rs2133822   | 21685102 G | 2.304  | 1.85E-07 | chr:19:21841536 |
| 19 rs4462731   | 21689603 C | 2.304  | 1.85E-07 | chr:19:21841536 |
| 19 rs6511255   | 21692027 T | 2.304  | 1.85E-07 | chr:19:21841536 |
| 19 rs7252254   | 21687561 G | 2.304  | 1.85E-07 | chr:19:21841536 |
| 19 rs7256389   | 21695797 C | 2.304  | 1.85E-07 | chr:19:21841536 |
| 19 rs7257186   | 21697444 G | 2.304  | 1.85E-07 | chr:19:21841536 |
| 19 rs8101089   | 21676173 C | 2.304  | 1.85E-07 | chr:19:21841536 |
| 19 rs8101900   | 21699047 T | 2.304  | 1.85E-07 | chr:19:21841536 |
| 19 rs12975424  | 21698865 T | 2.325  | 1.88E-07 | chr:19:21841536 |
| 19 rs73013658  | 22050293 G | 2.931  | 1.90E-07 | chr:19:21841536 |
| 19 rs34015922  | 21805280 A | 0.4102 | 2.01E-07 | chr:19:21841536 |
| 19 rs2562420   | 21631305 T | 2.471  | 2.01E-07 | chr:19:21841536 |
| 19 rs2562421   | 21631304 T | 2.471  | 2.01E-07 | chr:19:21841536 |
| 19 rs617258    | 21473476 C | 2.542  | 2.15E-07 | chr:19:21841536 |
| 19 rs11881160  | 21803122 A | 0.4117 | 2.18E-07 | chr:19:21841536 |
| 19 rs11881813  | 21803506 C | 0.4117 | 2.18E-07 | chr:19:21841536 |
| 19 rs58083971  | 21803635 T | 0.4117 | 2.18E-07 | chr:19:21841536 |
| 19 rs62108372  | 21803821 T | 0.4117 | 2.18E-07 | chr:19:21841536 |
| 19 rs8101255   | 21802697 C | 0.4117 | 2.18E-07 | chr:19:21841536 |
| 19 rs8102300   | 21802893 T | 0.4117 | 2.18E-07 | chr:19:21841536 |
| 19 rs8106840   | 21696458 G | 2.294  | 2.20E-07 | chr:19:21841536 |
| 19 rs12463354  | 21806111 T | 0.419  | 2.21E-07 | chr:19:21841536 |
| 19 rs28810709  | 21513937 C | 2.51   | 2.27E-07 | chr:19:21841536 |
| 19 rs71333824  | 21513935 A | 2.51   | 2.27E-07 | chr:19:21841536 |

|                     |            |        |          |                 |
|---------------------|------------|--------|----------|-----------------|
| 19 rs541714613      | 21514035 G | 2.487  | 2.29E-07 | chr:19:21841536 |
| 19 rs553437063      | 21514038 G | 2.487  | 2.29E-07 | chr:19:21841536 |
| 19 rs11881176       | 21803078 C | 0.4121 | 2.37E-07 | chr:19:21841536 |
| 19 rs62108370       | 21803042 C | 0.4122 | 2.37E-07 | chr:19:21841536 |
| 19 rs11673280       | 21801812 T | 0.4153 | 2.71E-07 | chr:19:21841536 |
| 19 rs12150968       | 21795169 A | 0.4153 | 2.71E-07 | chr:19:21841536 |
| 19 rs12150972       | 21795260 C | 0.4153 | 2.71E-07 | chr:19:21841536 |
| 19 rs12459011       | 21798923 A | 0.4153 | 2.71E-07 | chr:19:21841536 |
| 19 rs12463384       | 21799037 A | 0.4153 | 2.71E-07 | chr:19:21841536 |
| 19 rs4809154        | 21795663 A | 0.4153 | 2.71E-07 | chr:19:21841536 |
| 19 rs59803919       | 21801039 C | 0.4153 | 2.71E-07 | chr:19:21841536 |
| 19 rs61461318       | 21800917 A | 0.4153 | 2.71E-07 | chr:19:21841536 |
| 19 rs7249775        | 21800083 C | 0.4153 | 2.71E-07 | chr:19:21841536 |
| 19 rs7249959        | 21800061 G | 0.4153 | 2.71E-07 | chr:19:21841536 |
| 19 rs7251076        | 21796454 A | 0.4153 | 2.71E-07 | chr:19:21841536 |
| 19 rs7252706        | 21796943 T | 0.4153 | 2.71E-07 | chr:19:21841536 |
| 19 rs7255395        | 21796131 C | 0.4153 | 2.71E-07 | chr:19:21841536 |
| 19 rs7255521        | 21796278 A | 0.4153 | 2.71E-07 | chr:19:21841536 |
| 19 rs7259763        | 21798441 G | 0.4153 | 2.71E-07 | chr:19:21841536 |
| 19 rs7259888        | 21798521 G | 0.4153 | 2.71E-07 | chr:19:21841536 |
| 19 rs8100536        | 21798879 T | 0.4153 | 2.71E-07 | chr:19:21841536 |
| 19 rs627522         | 21495804 T | 2.457  | 2.73E-07 | chr:19:21841536 |
| 19 rs669560         | 21493258 T | 2.457  | 2.73E-07 | chr:19:21841536 |
| 19 rs8101857        | 21802497 T | 0.4144 | 2.91E-07 | chr:19:21841536 |
| 19 rs7249639        | 21799981 C | 0.4163 | 3.15E-07 | chr:19:21841536 |
| 19 rs57235280       | 21797672 C | 0.4186 | 3.27E-07 | chr:19:21841536 |
| 19 rs71333832       | 21797328 T | 0.4186 | 3.27E-07 | chr:19:21841536 |
| 19 rs7252080        | 21797141 C | 0.4186 | 3.27E-07 | chr:19:21841536 |
| 19 rs7252081        | 21797142 C | 0.4186 | 3.27E-07 | chr:19:21841536 |
| 19 rs7252104        | 21797251 A | 0.4186 | 3.27E-07 | chr:19:21841536 |
| 19 rs7252205        | 21797242 C | 0.4186 | 3.27E-07 | chr:19:21841536 |
| 19 rs71333821       | 21513925 T | 2.481  | 3.28E-07 | chr:19:21841536 |
| 19 rs71333822       | 21513928 C | 2.481  | 3.28E-07 | chr:19:21841536 |
| 19 rs71333823       | 21513930 G | 2.481  | 3.28E-07 | chr:19:21841536 |
| 19 rs7254059        | 21587918 G | 2.318  | 3.45E-07 | chr:19:21841536 |
| 19 rs2968086        | 21540417 A | 2.482  | 3.56E-07 | chr:19:21841536 |
| 19 rs61130683;rs602 | 22080216 A | 2.774  | 3.58E-07 | chr:19:21841536 |
| 19 rs12609768       | 21677321 G | 2.265  | 3.82E-07 | chr:19:21841536 |
| 19 rs143467934      | 21694258 C | 2.265  | 3.82E-07 | chr:19:21841536 |
| 19 rs6511259        | 21697768 T | 2.265  | 3.82E-07 | chr:19:21841536 |
| 19 rs7259317        | 21693128 G | 2.265  | 3.82E-07 | chr:19:21841536 |
| 19 rs8110814        | 21704845 G | 2.265  | 3.82E-07 | chr:19:21841536 |
| 19 rs55851748       | 21797802 C | 0.4218 | 3.90E-07 | chr:19:21841536 |



|                |            |        |          |                 |
|----------------|------------|--------|----------|-----------------|
| 19 rs149677785 | 21965457 G | 14.55  | 3.97E-07 | chr:19:21841536 |
| 19 rs2928211   | 21541297 A | 2.417  | 4.02E-07 | chr:19:21841536 |
| 19 rs35605606  | 22059609 A | 2.568  | 4.17E-07 | chr:19:21841536 |
| 19 rs12461096  | 21577157 A | 2.436  | 4.84E-07 | chr:19:21841536 |
| 19 rs1678835   | 21529361 A | 2.436  | 4.84E-07 | chr:19:21841536 |
| 19 rs1875256   | 21560141 G | 2.436  | 4.84E-07 | chr:19:21841536 |
| 19 rs2086319   | 21553567 C | 2.436  | 4.84E-07 | chr:19:21841536 |
| 19 rs2434996   | 21554868 T | 2.436  | 4.84E-07 | chr:19:21841536 |
| 19 rs2562435   | 21555874 C | 2.436  | 4.84E-07 | chr:19:21841536 |
| 19 rs2650797   | 21575024 G | 2.436  | 4.84E-07 | chr:19:21841536 |
| 19 rs2650798   | 21574453 G | 2.436  | 4.84E-07 | chr:19:21841536 |
| 19 rs2650842   | 21557311 T | 2.436  | 4.84E-07 | chr:19:21841536 |
| 19 rs2650851   | 21582163 T | 2.436  | 4.84E-07 | chr:19:21841536 |
| 19 rs2914635   | 21538297 A | 2.436  | 4.84E-07 | chr:19:21841536 |
| 19 rs2914645   | 21558311 C | 2.436  | 4.84E-07 | chr:19:21841536 |
| 19 rs2928188   | 21555850 A | 2.436  | 4.84E-07 | chr:19:21841536 |
| 19 rs2928216   | 21546880 C | 2.436  | 4.84E-07 | chr:19:21841536 |
| 19 rs2928218   | 21548381 G | 2.436  | 4.84E-07 | chr:19:21841536 |
| 19 rs2937157   | 21560805 G | 2.436  | 4.84E-07 | chr:19:21841536 |
| 19 rs2937174   | 21564001 A | 2.436  | 4.84E-07 | chr:19:21841536 |
| 19 rs2968022   | 21542935 C | 2.436  | 4.84E-07 | chr:19:21841536 |
| 19 rs2968023   | 21544805 T | 2.436  | 4.84E-07 | chr:19:21841536 |
| 19 rs2968040   | 21565070 C | 2.436  | 4.84E-07 | chr:19:21841536 |
| 19 rs2968041   | 21565398 G | 2.436  | 4.84E-07 | chr:19:21841536 |
| 19 rs2968045   | 21575253 T | 2.436  | 4.84E-07 | chr:19:21841536 |
| 19 rs475162    | 21519315 G | 2.436  | 4.84E-07 | chr:19:21841536 |
| 19 rs490479    | 21533248 G | 2.436  | 4.84E-07 | chr:19:21841536 |
| 19 rs609806    | 21512949 A | 2.436  | 4.84E-07 | chr:19:21841536 |
| 19 rs618112    | 21525802 A | 2.436  | 4.84E-07 | chr:19:21841536 |
| 19 rs647086    | 21523892 T | 2.436  | 4.84E-07 | chr:19:21841536 |
| 19 rs924485    | 21560456 G | 2.436  | 4.84E-07 | chr:19:21841536 |
| 19 rs612877    | 21518966 T | 2.432  | 4.94E-07 | chr:19:21841536 |
| 19 rs2968024   | 21546915 T | 2.432  | 5.23E-07 | chr:19:21841536 |
| 19 rs7258575   | 21344190 T | 2.467  | 5.56E-07 | chr:19:21841536 |
| 19 rs537224646 | 21513991 G | 2.423  | 5.79E-07 | chr:19:21841536 |
| 19 rs555561884 | 21513992 G | 2.423  | 5.79E-07 | chr:19:21841536 |
| 19 rs573961274 | 21513993 C | 2.423  | 5.79E-07 | chr:19:21841536 |
| 19 rs4621113   | 21606429 G | 2.227  | 5.89E-07 | chr:19:21841536 |
| 19 rs11879044  | 21785665 T | 0.4345 | 6.27E-07 | chr:19:21841536 |
| 19 rs12972148  | 21785029 G | 0.4345 | 6.27E-07 | chr:19:21841536 |
| 19 rs34835488  | 21784572 C | 0.4345 | 6.27E-07 | chr:19:21841536 |
| 19 rs540714    | 21472444 G | 2.463  | 6.77E-07 | chr:19:21841536 |
| 19 rs35465051  | 21775872 A | 0.4358 | 6.85E-07 | chr:19:21841536 |

|               |            |        |          |                 |
|---------------|------------|--------|----------|-----------------|
| 19 rs8112960  | 21775371 T | 0.4358 | 6.85E-07 | chr:19:21841536 |
| 19 rs4809151  | 21781883 A | 0.4359 | 6.92E-07 | chr:19:21841536 |
| 19 rs279810   | 21467764 A | 2.423  | 7.01E-07 | chr:19:21841536 |
| 19 rs279811   | 21467792 C | 2.423  | 7.01E-07 | chr:19:21841536 |
| 19 rs279812   | 21468281 T | 2.423  | 7.01E-07 | chr:19:21841536 |
| 19 rs279814   | 21468433 G | 2.423  | 7.01E-07 | chr:19:21841536 |
| 19 rs279815   | 21468576 A | 2.423  | 7.01E-07 | chr:19:21841536 |
| 19 rs279816   | 21468905 A | 2.423  | 7.01E-07 | chr:19:21841536 |
| 19 rs279817   | 21469261 C | 2.423  | 7.01E-07 | chr:19:21841536 |
| 19 rs279818   | 21469687 T | 2.423  | 7.01E-07 | chr:19:21841536 |
| 19 rs279819   | 21469704 C | 2.423  | 7.01E-07 | chr:19:21841536 |
| 19 rs279820   | 21469849 A | 2.423  | 7.01E-07 | chr:19:21841536 |
| 19 rs476376   | 21470068 G | 2.423  | 7.01E-07 | chr:19:21841536 |
| 19 rs478046   | 21470204 T | 2.423  | 7.01E-07 | chr:19:21841536 |
| 19 rs487991   | 21474131 C | 2.423  | 7.01E-07 | chr:19:21841536 |
| 19 rs489845   | 21474314 A | 2.423  | 7.01E-07 | chr:19:21841536 |
| 19 rs504026   | 21470726 G | 2.423  | 7.01E-07 | chr:19:21841536 |
| 19 rs508656   | 21471247 G | 2.423  | 7.01E-07 | chr:19:21841536 |
| 19 rs511469   | 21471583 G | 2.423  | 7.01E-07 | chr:19:21841536 |
| 19 rs537114   | 21472076 C | 2.423  | 7.01E-07 | chr:19:21841536 |
| 19 rs540637   | 21472420 T | 2.423  | 7.01E-07 | chr:19:21841536 |
| 19 rs541639   | 21472565 C | 2.423  | 7.01E-07 | chr:19:21841536 |
| 19 rs567148   | 21473025 C | 2.423  | 7.01E-07 | chr:19:21841536 |
| 19 rs571937   | 21473574 A | 2.423  | 7.01E-07 | chr:19:21841536 |
| 19 rs583680   | 21470033 T | 2.423  | 7.01E-07 | chr:19:21841536 |
| 19 rs661453   | 21472145 A | 2.423  | 7.01E-07 | chr:19:21841536 |
| 19 rs8112775  | 21474389 C | 2.423  | 7.01E-07 | chr:19:21841536 |
| 19 rs11669043 | 21614714 T | 2.204  | 7.23E-07 | chr:19:21841536 |
| 19 rs7248989  | 21612997 A | 2.204  | 7.23E-07 | chr:19:21841536 |
| 19 rs7253886  | 21613682 T | 2.204  | 7.23E-07 | chr:19:21841536 |
| 19 rs8111549  | 21604459 C | 2.204  | 7.23E-07 | chr:19:21841536 |
| 19 rs7254094  | 21343086 T | 2.427  | 7.26E-07 | chr:19:21841536 |
| 19 rs35998933 | 21772288 T | 0.4359 | 7.46E-07 | chr:19:21841536 |
| 19 rs2562438  | 21557461 A | 2.41   | 7.62E-07 | chr:19:21841536 |
| 19 rs2928209  | 21540698 A | 2.386  | 7.66E-07 | chr:19:21841536 |
| 19 rs11668682 | 21666161 C | 2.194  | 8.17E-07 | chr:19:21841536 |
| 19 rs56346453 | 21665484 G | 2.194  | 8.17E-07 | chr:19:21841536 |
| 19 rs7250838  | 21669642 G | 2.194  | 8.17E-07 | chr:19:21841536 |
| 19 rs7251082  | 21669802 G | 2.194  | 8.17E-07 | chr:19:21841536 |
| 19 rs7251620  | 21669681 T | 2.194  | 8.17E-07 | chr:19:21841536 |
| 19 rs11085469 | 21781232 G | 0.4397 | 8.46E-07 | chr:19:21841536 |
| 19 rs1520068  | 21779955 C | 0.4397 | 8.46E-07 | chr:19:21841536 |
| 19 rs1520070  | 21781012 A | 0.4397 | 8.46E-07 | chr:19:21841536 |

|                |            |        |          |                 |
|----------------|------------|--------|----------|-----------------|
| 19 rs1533674   | 21777466 T | 0.4397 | 8.46E-07 | chr:19:21841536 |
| 19 rs34692125  | 21778478 G | 0.4397 | 8.46E-07 | chr:19:21841536 |
| 19 rs35229762  | 21779759 G | 0.4397 | 8.46E-07 | chr:19:21841536 |
| 19 rs3817397   | 21776652 G | 0.4397 | 8.46E-07 | chr:19:21841536 |
| 19 rs4809152   | 21781974 T | 0.4397 | 8.46E-07 | chr:19:21841536 |
| 19 rs67854708  | 21778773 C | 0.4397 | 8.46E-07 | chr:19:21841536 |
| 19 rs7250457   | 21778987 G | 0.4397 | 8.46E-07 | chr:19:21841536 |
| 19 rs7250470   | 21779011 T | 0.4397 | 8.46E-07 | chr:19:21841536 |
| 19 rs7250663   | 21779246 G | 0.4397 | 8.46E-07 | chr:19:21841536 |
| 19 rs7251111   | 21779343 C | 0.4397 | 8.46E-07 | chr:19:21841536 |
| 19 rs7254018   | 21779399 T | 0.4397 | 8.46E-07 | chr:19:21841536 |
| 19 rs7255081   | 21779465 C | 0.4397 | 8.46E-07 | chr:19:21841536 |
| 19 rs73029504  | 21778138 G | 0.4397 | 8.46E-07 | chr:19:21841536 |
| 19 rs8111313   | 21776847 A | 0.4397 | 8.46E-07 | chr:19:21841536 |
| 19 rs2928205   | 21529958 A | 2.381  | 8.48E-07 | chr:19:21841536 |
| 19 rs2102920   | 21786807 G | 0.4367 | 8.49E-07 | chr:19:21841536 |
| 19 rs62110244  | 21786499 A | 0.4367 | 8.49E-07 | chr:19:21841536 |
| 19 rs11671623  | 21342816 A | 2.412  | 8.69E-07 | chr:19:21841536 |
| 19 rs59054166  | 21786908 C | 0.4371 | 9.00E-07 | chr:19:21841536 |
| 19 rs7260175   | 21805755 A | 0.4296 | 9.34E-07 | chr:19:21841536 |
| 19 rs2359385   | 21778057 G | 0.4426 | 9.40E-07 | chr:19:21841536 |
| 19 rs2884699   | 21778041 C | 0.4426 | 9.40E-07 | chr:19:21841536 |
| 19 rs73027802  | 21778049 T | 0.4426 | 9.40E-07 | chr:19:21841536 |
| 19 rs28771683  | 21513887 C | 2.373  | 9.46E-07 | chr:19:21841536 |
| 19 rs28824587  | 21513899 A | 2.373  | 9.46E-07 | chr:19:21841536 |
| 19 rs67351081  | 21833376 A | 0.227  | 9.51E-07 | chr:19:21841536 |
| 19 rs7508087   | 21543822 G | 2.186  | 9.62E-07 | chr:19:21841536 |
| 19 rs7259311   | 21598162 C | 2.212  | 9.72E-07 | chr:19:21841536 |
| 19 rs1520069   | 21780790 G | 0.4425 | 9.82E-07 | chr:19:21841536 |
| 19 rs12979255  | 21782229 C | 0.4427 | 9.95E-07 | chr:19:21841536 |
| 19 rs516519    | 21481532 C | 2.364  | 9.98E-07 | chr:19:21841536 |
| 19 rs552800    | 21484642 G | 2.364  | 9.98E-07 | chr:19:21841536 |
| 19 rs6511237   | 21581647 G | 2.208  | 1.02E-06 | chr:19:21841536 |
| 19 rs2562492   | 21568266 T | 2.218  | 1.04E-06 | chr:19:21841536 |
| 19 rs7246883   | 21646167 A | 2.202  | 1.07E-06 | chr:19:21841536 |
| 19 rs12979371  | 21547564 T | 2.223  | 1.08E-06 | chr:19:21841536 |
| 19 rs7508044   | 21543803 A | 2.179  | 1.09E-06 | chr:19:21841536 |
| 19 rs7508045   | 21543816 A | 2.179  | 1.09E-06 | chr:19:21841536 |
| 19 rs8112583   | 21553649 C | 2.19   | 1.10E-06 | chr:19:21841536 |
| 19 rs279805    | 21465588 C | 2.376  | 1.10E-06 | chr:19:21841536 |
| 19 rs10415009  | 21351758 A | 2.407  | 1.12E-06 | chr:19:21841536 |
| 19 rs55778393  | 21770143 A | 0.4438 | 1.17E-06 | chr:19:21841536 |
| 19 rs112243351 | 21508618 G | 2.387  | 1.19E-06 | chr:19:21841536 |

|                |            |        |                          |
|----------------|------------|--------|--------------------------|
| 19 rs2619823   | 21482324 A | 2.387  | 1.19E-06 chr:19:21841536 |
| 19 rs2968066   | 21479993 G | 2.387  | 1.19E-06 chr:19:21841536 |
| 19 rs472472    | 21485629 A | 2.387  | 1.19E-06 chr:19:21841536 |
| 19 rs489613    | 21506313 T | 2.387  | 1.19E-06 chr:19:21841536 |
| 19 rs492271    | 21500014 T | 2.387  | 1.19E-06 chr:19:21841536 |
| 19 rs499445    | 21503652 T | 2.387  | 1.19E-06 chr:19:21841536 |
| 19 rs501563    | 21494468 T | 2.387  | 1.19E-06 chr:19:21841536 |
| 19 rs527060    | 21510979 G | 2.387  | 1.19E-06 chr:19:21841536 |
| 19 rs547516    | 21492062 G | 2.387  | 1.19E-06 chr:19:21841536 |
| 19 rs555596    | 21502348 T | 2.387  | 1.19E-06 chr:19:21841536 |
| 19 rs555708    | 21502397 T | 2.387  | 1.19E-06 chr:19:21841536 |
| 19 rs598959    | 21475420 T | 2.387  | 1.19E-06 chr:19:21841536 |
| 19 rs600186    | 21487664 T | 2.387  | 1.19E-06 chr:19:21841536 |
| 19 rs631436    | 21503670 G | 2.387  | 1.19E-06 chr:19:21841536 |
| 19 rs632221    | 21503804 G | 2.387  | 1.19E-06 chr:19:21841536 |
| 19 rs651454    | 21497910 T | 2.387  | 1.19E-06 chr:19:21841536 |
| 19 rs11668691  | 21601254 C | 2.189  | 1.19E-06 chr:19:21841536 |
| 19 rs4525621   | 21546967 C | 2.185  | 1.19E-06 chr:19:21841536 |
| 19 rs6511245   | 21600562 C | 2.189  | 1.19E-06 chr:19:21841536 |
| 19 rs6511246   | 21600677 G | 2.189  | 1.19E-06 chr:19:21841536 |
| 19 rs12980097  | 21511106 G | 2.185  | 1.20E-06 chr:19:21841536 |
| 19 rs2358983   | 21539849 A | 2.185  | 1.20E-06 chr:19:21841536 |
| 19 rs7252261   | 21539835 A | 2.185  | 1.20E-06 chr:19:21841536 |
| 19 rs1963531   | 21541621 C | 2.186  | 1.22E-06 chr:19:21841536 |
| 19 rs2968025   | 21546971 T | 2.181  | 1.23E-06 chr:19:21841536 |
| 19 rs7508072   | 21543858 C | 2.182  | 1.24E-06 chr:19:21841536 |
| 19 rs279804    | 21465099 C | 2.366  | 1.27E-06 chr:19:21841536 |
| 19 rs34035322  | 21778084 C | 0.4478 | 1.28E-06 chr:19:21841536 |
| 19 rs117961414 | 21826889 A | 40.07  | 1.29E-06 chr:19:21841536 |
| 19 rs4809140   | 21765434 A | 0.4435 | 1.31E-06 chr:19:21841536 |
| 19 rs4809141   | 21766173 G | 0.4435 | 1.31E-06 chr:19:21841536 |
| 19 rs68172713  | 21759440 T | 0.4435 | 1.31E-06 chr:19:21841536 |
| 19 rs12973203  | 21778217 G | 0.4475 | 1.33E-06 chr:19:21841536 |
| 19 rs12973815  | 21778254 C | 0.4475 | 1.33E-06 chr:19:21841536 |
| 19 rs12975250  | 21778255 G | 0.4475 | 1.33E-06 chr:19:21841536 |
| 19 rs12974817  | 21786462 A | 0.4443 | 1.33E-06 chr:19:21841536 |
| 19 rs1055753   | 21588692 T | 2.176  | 1.38E-06 chr:19:21841536 |
| 19 rs11085447  | 21569099 C | 2.176  | 1.38E-06 chr:19:21841536 |
| 19 rs1142653   | 21544571 G | 2.176  | 1.38E-06 chr:19:21841536 |
| 19 rs11667770  | 21594558 G | 2.176  | 1.38E-06 chr:19:21841536 |
| 19 rs11669588  | 21517248 C | 2.176  | 1.38E-06 chr:19:21841536 |
| 19 rs12461384  | 21512321 G | 2.176  | 1.38E-06 chr:19:21841536 |
| 19 rs12462035  | 21530730 C | 2.176  | 1.38E-06 chr:19:21841536 |

|               |            |       |                          |
|---------------|------------|-------|--------------------------|
| 19 rs12971736 | 21548714 G | 2.176 | 1.38E-06 chr:19:21841536 |
| 19 rs12972580 | 21548525 T | 2.176 | 1.38E-06 chr:19:21841536 |
| 19 rs12974222 | 21521017 C | 2.176 | 1.38E-06 chr:19:21841536 |
| 19 rs12974735 | 21544063 C | 2.176 | 1.38E-06 chr:19:21841536 |
| 19 rs12974967 | 21521142 G | 2.176 | 1.38E-06 chr:19:21841536 |
| 19 rs12975081 | 21544242 C | 2.176 | 1.38E-06 chr:19:21841536 |
| 19 rs12975464 | 21544209 G | 2.176 | 1.38E-06 chr:19:21841536 |
| 19 rs12978116 | 21517806 A | 2.176 | 1.38E-06 chr:19:21841536 |
| 19 rs12981564 | 21544514 A | 2.176 | 1.38E-06 chr:19:21841536 |
| 19 rs12981735 | 21544466 C | 2.176 | 1.38E-06 chr:19:21841536 |
| 19 rs12981775 | 21544503 C | 2.176 | 1.38E-06 chr:19:21841536 |
| 19 rs12981777 | 21520238 G | 2.176 | 1.38E-06 chr:19:21841536 |
| 19 rs12982162 | 21544462 G | 2.176 | 1.38E-06 chr:19:21841536 |
| 19 rs12982282 | 21544714 C | 2.176 | 1.38E-06 chr:19:21841536 |
| 19 rs12983426 | 21520354 T | 2.176 | 1.38E-06 chr:19:21841536 |
| 19 rs12983787 | 21591035 C | 2.176 | 1.38E-06 chr:19:21841536 |
| 19 rs12984871 | 21554131 C | 2.176 | 1.38E-06 chr:19:21841536 |
| 19 rs1932080  | 21526102 G | 2.176 | 1.38E-06 chr:19:21841536 |
| 19 rs1932088  | 21518600 G | 2.176 | 1.38E-06 chr:19:21841536 |
| 19 rs1963532  | 21542644 A | 2.176 | 1.38E-06 chr:19:21841536 |
| 19 rs2012013  | 21541806 T | 2.176 | 1.38E-06 chr:19:21841536 |
| 19 rs2012038  | 21542212 C | 2.176 | 1.38E-06 chr:19:21841536 |
| 19 rs2061918  | 21543404 C | 2.176 | 1.38E-06 chr:19:21841536 |
| 19 rs2061919  | 21543526 A | 2.176 | 1.38E-06 chr:19:21841536 |
| 19 rs2086316  | 21523311 T | 2.176 | 1.38E-06 chr:19:21841536 |
| 19 rs2086317  | 21536294 G | 2.176 | 1.38E-06 chr:19:21841536 |
| 19 rs2086318  | 21536841 C | 2.176 | 1.38E-06 chr:19:21841536 |
| 19 rs2088762  | 21557835 C | 2.176 | 1.38E-06 chr:19:21841536 |
| 19 rs2095437  | 21526675 T | 2.176 | 1.38E-06 chr:19:21841536 |
| 19 rs2095438  | 21526517 G | 2.176 | 1.38E-06 chr:19:21841536 |
| 19 rs2095439  | 21526469 T | 2.176 | 1.38E-06 chr:19:21841536 |
| 19 rs2127404  | 21548962 A | 2.176 | 1.38E-06 chr:19:21841536 |
| 19 rs2127405  | 21549097 T | 2.176 | 1.38E-06 chr:19:21841536 |
| 19 rs2127406  | 21549102 T | 2.176 | 1.38E-06 chr:19:21841536 |
| 19 rs2127407  | 21553190 G | 2.176 | 1.38E-06 chr:19:21841536 |
| 19 rs2127408  | 21554368 C | 2.176 | 1.38E-06 chr:19:21841536 |
| 19 rs2219840  | 21546030 G | 2.176 | 1.38E-06 chr:19:21841536 |
| 19 rs2358978  | 21515962 G | 2.176 | 1.38E-06 chr:19:21841536 |
| 19 rs2358979  | 21527174 C | 2.176 | 1.38E-06 chr:19:21841536 |
| 19 rs2358980  | 21527214 G | 2.176 | 1.38E-06 chr:19:21841536 |
| 19 rs2358982  | 21539293 T | 2.176 | 1.38E-06 chr:19:21841536 |
| 19 rs2358985  | 21540184 T | 2.176 | 1.38E-06 chr:19:21841536 |
| 19 rs2358986  | 21550685 A | 2.176 | 1.38E-06 chr:19:21841536 |

|               |            |       |                          |
|---------------|------------|-------|--------------------------|
| 19 rs2358988  | 21550844 C | 2.176 | 1.38E-06 chr:19:21841536 |
| 19 rs2358990  | 21551137 A | 2.176 | 1.38E-06 chr:19:21841536 |
| 19 rs2884601  | 21538101 T | 2.176 | 1.38E-06 chr:19:21841536 |
| 19 rs35773446 | 21596327 G | 2.176 | 1.38E-06 chr:19:21841536 |
| 19 rs4438422  | 21547071 A | 2.176 | 1.38E-06 chr:19:21841536 |
| 19 rs4566304  | 21541252 C | 2.176 | 1.38E-06 chr:19:21841536 |
| 19 rs5827501  | 21553615 T | 2.176 | 1.38E-06 chr:19:21841536 |
| 19 rs6511229  | 21546551 C | 2.176 | 1.38E-06 chr:19:21841536 |
| 19 rs6511231  | 21549841 C | 2.176 | 1.38E-06 chr:19:21841536 |
| 19 rs6511232  | 21549879 A | 2.176 | 1.38E-06 chr:19:21841536 |
| 19 rs6511233  | 21552865 C | 2.176 | 1.38E-06 chr:19:21841536 |
| 19 rs6511239  | 21589126 C | 2.176 | 1.38E-06 chr:19:21841536 |
| 19 rs6511242  | 21595536 C | 2.176 | 1.38E-06 chr:19:21841536 |
| 19 rs7245447  | 21532445 T | 2.176 | 1.38E-06 chr:19:21841536 |
| 19 rs7245920  | 21550441 A | 2.176 | 1.38E-06 chr:19:21841536 |
| 19 rs7246299  | 21533019 T | 2.176 | 1.38E-06 chr:19:21841536 |
| 19 rs7246819  | 21529440 A | 2.176 | 1.38E-06 chr:19:21841536 |
| 19 rs7247411  | 21575370 G | 2.176 | 1.38E-06 chr:19:21841536 |
| 19 rs7249412  | 21586797 C | 2.176 | 1.38E-06 chr:19:21841536 |
| 19 rs7253178  | 21518588 G | 2.176 | 1.38E-06 chr:19:21841536 |
| 19 rs7256568  | 21532298 A | 2.176 | 1.38E-06 chr:19:21841536 |
| 19 rs7257326  | 21532065 T | 2.176 | 1.38E-06 chr:19:21841536 |
| 19 rs7257580  | 21565393 G | 2.176 | 1.38E-06 chr:19:21841536 |
| 19 rs7257857  | 21579538 T | 2.176 | 1.38E-06 chr:19:21841536 |
| 19 rs7258335  | 21550299 G | 2.176 | 1.38E-06 chr:19:21841536 |
| 19 rs7259051  | 21529237 G | 2.176 | 1.38E-06 chr:19:21841536 |
| 19 rs7260066  | 21532582 C | 2.176 | 1.38E-06 chr:19:21841536 |
| 19 rs7260212  | 21532700 C | 2.176 | 1.38E-06 chr:19:21841536 |
| 19 rs7508030  | 21543743 A | 2.176 | 1.38E-06 chr:19:21841536 |
| 19 rs7508092  | 21543980 C | 2.176 | 1.38E-06 chr:19:21841536 |
| 19 rs7508104  | 21543876 G | 2.176 | 1.38E-06 chr:19:21841536 |
| 19 rs7508671  | 21546862 A | 2.176 | 1.38E-06 chr:19:21841536 |
| 19 rs8099940  | 21554098 T | 2.176 | 1.38E-06 chr:19:21841536 |
| 19 rs8103325  | 21548211 A | 2.176 | 1.38E-06 chr:19:21841536 |
| 19 rs8103459  | 21548326 A | 2.176 | 1.38E-06 chr:19:21841536 |
| 19 rs8103908  | 21547904 T | 2.176 | 1.38E-06 chr:19:21841536 |
| 19 rs8104017  | 21542788 A | 2.176 | 1.38E-06 chr:19:21841536 |
| 19 rs8106936  | 21570206 G | 2.176 | 1.38E-06 chr:19:21841536 |
| 19 rs8108281  | 21527992 G | 2.176 | 1.38E-06 chr:19:21841536 |
| 19 rs8110690  | 21549668 A | 2.176 | 1.38E-06 chr:19:21841536 |
| 19 rs8110842  | 21540594 T | 2.176 | 1.38E-06 chr:19:21841536 |
| 19 rs8110967  | 21540687 T | 2.176 | 1.38E-06 chr:19:21841536 |
| 19 rs8111733  | 21528634 G | 2.176 | 1.38E-06 chr:19:21841536 |

|                |            |        |          |                 |
|----------------|------------|--------|----------|-----------------|
| 19 rs8112059   | 21514469 G | 2.176  | 1.38E-06 | chr:19:21841536 |
| 19 rs7254378   | 21779515 C | 0.4484 | 1.39E-06 | chr:19:21841536 |
| 19 rs117638181 | 22163014 G | 2.952  | 1.39E-06 | chr:19:21841536 |
| 19 rs11882553  | 21503891 A | 2.174  | 1.41E-06 | chr:19:21841536 |
| 19 rs12459702  | 21493764 A | 2.174  | 1.41E-06 | chr:19:21841536 |
| 19 rs12462022  | 21502836 G | 2.174  | 1.41E-06 | chr:19:21841536 |
| 19 rs12610331  | 21484524 G | 2.174  | 1.41E-06 | chr:19:21841536 |
| 19 rs12972339  | 21499808 C | 2.174  | 1.41E-06 | chr:19:21841536 |
| 19 rs12972601  | 21491317 G | 2.174  | 1.41E-06 | chr:19:21841536 |
| 19 rs12982346  | 21502755 A | 2.174  | 1.41E-06 | chr:19:21841536 |
| 19 rs12984300  | 21489003 A | 2.174  | 1.41E-06 | chr:19:21841536 |
| 19 rs35580411  | 21499485 G | 2.174  | 1.41E-06 | chr:19:21841536 |
| 19 rs6511222   | 21486235 A | 2.174  | 1.41E-06 | chr:19:21841536 |
| 19 rs67119504  | 21504521 G | 2.174  | 1.41E-06 | chr:19:21841536 |
| 19 rs7255549   | 21488257 A | 2.174  | 1.41E-06 | chr:19:21841536 |
| 19 rs7256361   | 21510427 C | 2.174  | 1.41E-06 | chr:19:21841536 |
| 19 rs7260369   | 21505027 G | 2.174  | 1.41E-06 | chr:19:21841536 |
| 19 rs11667349  | 22076963 G | 2.554  | 1.43E-06 | chr:19:21841536 |
| 19 rs10405716  | 21584364 G | 2.172  | 1.43E-06 | chr:19:21841536 |
| 19 rs10854043  | 21535092 T | 2.172  | 1.43E-06 | chr:19:21841536 |
| 19 rs11673304  | 21567965 A | 2.172  | 1.43E-06 | chr:19:21841536 |
| 19 rs1976384   | 21571618 G | 2.172  | 1.43E-06 | chr:19:21841536 |
| 19 rs2061917   | 21543351 T | 2.172  | 1.43E-06 | chr:19:21841536 |
| 19 rs2086320   | 21553765 A | 2.172  | 1.43E-06 | chr:19:21841536 |
| 19 rs2102072   | 21557455 A | 2.172  | 1.43E-06 | chr:19:21841536 |
| 19 rs2170024   | 21553347 T | 2.172  | 1.43E-06 | chr:19:21841536 |
| 19 rs2170025   | 21553437 T | 2.172  | 1.43E-06 | chr:19:21841536 |
| 19 rs2358989   | 21550959 G | 2.172  | 1.43E-06 | chr:19:21841536 |
| 19 rs2358991   | 21551291 C | 2.172  | 1.43E-06 | chr:19:21841536 |
| 19 rs2358992   | 21551326 T | 2.172  | 1.43E-06 | chr:19:21841536 |
| 19 rs2434997   | 21554932 T | 2.172  | 1.43E-06 | chr:19:21841536 |
| 19 rs2914638   | 21545017 A | 2.172  | 1.43E-06 | chr:19:21841536 |
| 19 rs6511238   | 21584508 A | 2.172  | 1.43E-06 | chr:19:21841536 |
| 19 rs7248601   | 21563398 A | 2.172  | 1.43E-06 | chr:19:21841536 |
| 19 rs8102342   | 21584467 G | 2.172  | 1.43E-06 | chr:19:21841536 |
| 19 rs11669130  | 21654213 C | 2.165  | 1.47E-06 | chr:19:21841536 |
| 19 rs2133819   | 21614708 G | 2.166  | 1.48E-06 | chr:19:21841536 |
| 19 rs2358984   | 21540082 T | 2.192  | 1.49E-06 | chr:19:21841536 |
| 19 rs4315457   | 21547023 G | 2.171  | 1.52E-06 | chr:19:21841536 |
| 19 rs4398213   | 21541155 T | 2.158  | 1.65E-06 | chr:19:21841536 |
| 19 rs4430876   | 21541135 C | 2.158  | 1.65E-06 | chr:19:21841536 |
| 19 rs11666867  | 21525143 T | 2.185  | 1.69E-06 | chr:19:21841536 |
| 19 rs11085443  | 21511784 G | 2.184  | 1.73E-06 | chr:19:21841536 |

|                |            |        |          |                 |
|----------------|------------|--------|----------|-----------------|
| 19 rs8108314   | 21360779 G | 2.298  | 1.73E-06 | chr:19:21841536 |
| 19 rs2650774   | 21616490 G | 2.157  | 1.74E-06 | chr:19:21841536 |
| 19 rs11667755  | 21525390 T | 2.182  | 1.74E-06 | chr:19:21841536 |
| 19 rs11670651  | 21525226 A | 2.182  | 1.74E-06 | chr:19:21841536 |
| 19 rs11670673  | 21525225 C | 2.182  | 1.74E-06 | chr:19:21841536 |
| 19 rs11670680  | 21525302 A | 2.182  | 1.74E-06 | chr:19:21841536 |
| 19 rs11670718  | 21525314 C | 2.182  | 1.74E-06 | chr:19:21841536 |
| 19 rs12974782  | 21529471 G | 2.182  | 1.74E-06 | chr:19:21841536 |
| 19 rs12980341  | 21534069 G | 2.182  | 1.74E-06 | chr:19:21841536 |
| 19 rs1813234   | 21519220 A | 2.182  | 1.74E-06 | chr:19:21841536 |
| 19 rs1932082   | 21523953 C | 2.182  | 1.74E-06 | chr:19:21841536 |
| 19 rs1932083   | 21522777 T | 2.182  | 1.74E-06 | chr:19:21841536 |
| 19 rs2358981   | 21527366 G | 2.182  | 1.74E-06 | chr:19:21841536 |
| 19 rs2903766   | 21527520 C | 2.182  | 1.74E-06 | chr:19:21841536 |
| 19 rs2928208   | 21540478 T | 2.182  | 1.74E-06 | chr:19:21841536 |
| 19 rs2968033   | 21533695 T | 2.182  | 1.74E-06 | chr:19:21841536 |
| 19 rs2992083   | 21525610 A | 2.182  | 1.74E-06 | chr:19:21841536 |
| 19 rs4381719   | 21521757 C | 2.182  | 1.74E-06 | chr:19:21841536 |
| 19 rs4494666   | 21527115 A | 2.182  | 1.74E-06 | chr:19:21841536 |
| 19 rs4574047   | 21527179 T | 2.182  | 1.74E-06 | chr:19:21841536 |
| 19 rs62109219  | 21529560 T | 2.182  | 1.74E-06 | chr:19:21841536 |
| 19 rs6511226   | 21533321 T | 2.182  | 1.74E-06 | chr:19:21841536 |
| 19 rs6511227   | 21533544 A | 2.182  | 1.74E-06 | chr:19:21841536 |
| 19 rs6511228   | 21536462 C | 2.182  | 1.74E-06 | chr:19:21841536 |
| 19 rs7249636   | 21556754 G | 2.182  | 1.74E-06 | chr:19:21841536 |
| 19 rs7252873   | 21539540 T | 2.182  | 1.74E-06 | chr:19:21841536 |
| 19 rs8102328   | 21538685 G | 2.182  | 1.74E-06 | chr:19:21841536 |
| 19 rs8109287   | 21531573 A | 2.182  | 1.74E-06 | chr:19:21841536 |
| 19 rs8109387   | 21531595 C | 2.182  | 1.74E-06 | chr:19:21841536 |
| 19 rs8110317   | 21531674 T | 2.182  | 1.74E-06 | chr:19:21841536 |
| 19 rs11085441  | 21473737 G | 2.132  | 1.76E-06 | chr:19:21841536 |
| 19 rs28688205  | 21474935 C | 2.132  | 1.76E-06 | chr:19:21841536 |
| 19 rs111526263 | 22081710 T | 2.53   | 1.83E-06 | chr:19:21841536 |
| 19 rs584725    | 21417144 G | 2.237  | 1.84E-06 | chr:19:21841536 |
| 19 rs663416    | 21419005 T | 2.237  | 1.84E-06 | chr:19:21841536 |
| 19 rs689249    | 21416583 A | 2.237  | 1.84E-06 | chr:19:21841536 |
| 19 rs12610221  | 21781616 T | 0.4531 | 1.84E-06 | chr:19:21841536 |
| 19 rs4809147   | 21781002 G | 0.4531 | 1.84E-06 | chr:19:21841536 |
| 19 rs4809148   | 21781218 G | 0.4531 | 1.84E-06 | chr:19:21841536 |
| 19 rs8109757   | 21780307 C | 0.4531 | 1.84E-06 | chr:19:21841536 |
| 19 rs28498118  | 21647585 T | 2.157  | 1.91E-06 | chr:19:21841536 |
| 19 rs12979646  | 21602657 C | 2.14   | 1.93E-06 | chr:19:21841536 |
| 19 rs7258086   | 21535707 G | 2.176  | 1.93E-06 | chr:19:21841536 |



|                |            |        |          |                 |
|----------------|------------|--------|----------|-----------------|
| 19 rs1114305   | 21584269 C | 2.294  | 1.95E-06 | chr:19:21841536 |
| 19 rs2562402   | 21593428 C | 2.294  | 1.95E-06 | chr:19:21841536 |
| 19 rs2650849   | 21585180 T | 2.294  | 1.95E-06 | chr:19:21841536 |
| 19 rs2914626   | 21593661 G | 2.294  | 1.95E-06 | chr:19:21841536 |
| 19 rs2914627   | 21594949 A | 2.294  | 1.95E-06 | chr:19:21841536 |
| 19 rs2968046   | 21587552 C | 2.294  | 1.95E-06 | chr:19:21841536 |
| 19 rs4381722   | 21591964 A | 2.294  | 1.95E-06 | chr:19:21841536 |
| 19 rs8102235   | 21584377 G | 2.294  | 1.95E-06 | chr:19:21841536 |
| 19 rs4121277   | 21394092 T | 2.244  | 2.00E-06 | chr:19:21841536 |
| 19 rs4493183   | 21393496 G | 2.244  | 2.00E-06 | chr:19:21841536 |
| 19 rs4493184   | 21393497 G | 2.244  | 2.00E-06 | chr:19:21841536 |
| 19 rs111522182 | 21835996 C | 2.947  | 2.06E-06 | chr:19:21841536 |
| 19 rs12608625  | 21781542 A | 0.4542 | 2.10E-06 | chr:19:21841536 |
| 19 rs62110983  | 22251780 A | 3.063  | 2.11E-06 | chr:19:21841536 |
| 19 rs4809146   | 21780784 A | 0.4562 | 2.14E-06 | chr:19:21841536 |
| 19 rs636752    | 21426301 C | 2.215  | 2.16E-06 | chr:19:21841536 |
| 19 rs637308    | 21426476 C | 2.215  | 2.16E-06 | chr:19:21841536 |
| 19 rs660551    | 21433092 C | 2.215  | 2.16E-06 | chr:19:21841536 |
| 19 rs665561    | 21425001 G | 2.215  | 2.16E-06 | chr:19:21841536 |
| 19 rs4809153   | 21782050 G | 0.4561 | 2.16E-06 | chr:19:21841536 |
| 19 rs279813    | 21468316 C | 2.136  | 2.19E-06 | chr:19:21841536 |
| 19 rs7245571   | 21768899 G | 2.11   | 2.22E-06 | chr:19:21841536 |
| 19 rs7257196   | 21373741 G | 2.275  | 2.24E-06 | chr:19:21841536 |
| 19 rs7259368   | 21370826 C | 2.275  | 2.24E-06 | chr:19:21841536 |
| 19 rs111454508 | 21419047 G | 2.183  | 2.32E-06 | chr:19:21841536 |
| 19 rs673889    | 21415499 G | 2.22   | 2.34E-06 | chr:19:21841536 |
| 19 rs143883891 | 22109757 C | 2.9    | 2.34E-06 | chr:19:21841536 |
| 19 rs62110861  | 22095764 T | 2.9    | 2.34E-06 | chr:19:21841536 |
| 19 rs62110863  | 22100508 C | 2.9    | 2.34E-06 | chr:19:21841536 |
| 19 rs12327638  | 21753035 G | 0.4542 | 2.37E-06 | chr:19:21841536 |
| 19 rs6511268   | 21754767 C | 0.4542 | 2.37E-06 | chr:19:21841536 |
| 19 rs67876192  | 21753089 C | 0.4542 | 2.37E-06 | chr:19:21841536 |
| 19 rs634661    | 21420882 T | 2.208  | 2.39E-06 | chr:19:21841536 |
| 19 rs2968082   | 21609743 G | 2.263  | 2.44E-06 | chr:19:21841536 |
| 19 rs2562409   | 21601110 C | 2.259  | 2.51E-06 | chr:19:21841536 |
| 19 rs1781873   | 21477431 T | 2.104  | 2.65E-06 | chr:19:21841536 |
| 19 rs2562415   | 21604904 G | 2.242  | 2.66E-06 | chr:19:21841536 |
| 19 rs29724     | 21377604 C | 6.402  | 2.83E-06 | chr:19:21841536 |
| 19 rs11878866  | 22144367 C | 2.864  | 2.90E-06 | chr:19:21841536 |
| 19 rs11881224  | 22220340 A | 2.864  | 2.90E-06 | chr:19:21841536 |
| 19 rs11881563  | 22144992 T | 2.864  | 2.90E-06 | chr:19:21841536 |
| 19 rs11882234  | 22145727 T | 2.864  | 2.90E-06 | chr:19:21841536 |
| 19 rs12150930  | 22223687 C | 2.864  | 2.90E-06 | chr:19:21841536 |

|               |            |        |                          |
|---------------|------------|--------|--------------------------|
| 19 rs17450788 | 22224755 C | 2.864  | 2.90E-06 chr:19:21841536 |
| 19 rs17701834 | 22121458 G | 2.864  | 2.90E-06 chr:19:21841536 |
| 19 rs1849004  | 22142455 C | 2.864  | 2.90E-06 chr:19:21841536 |
| 19 rs2078180  | 22209846 A | 2.864  | 2.90E-06 chr:19:21841536 |
| 19 rs2214300  | 22160537 T | 2.864  | 2.90E-06 chr:19:21841536 |
| 19 rs2359811  | 22152876 G | 2.864  | 2.90E-06 chr:19:21841536 |
| 19 rs2359820  | 22208114 T | 2.864  | 2.90E-06 chr:19:21841536 |
| 19 rs57912102 | 22136043 C | 2.864  | 2.90E-06 chr:19:21841536 |
| 19 rs60548522 | 22214874 A | 2.864  | 2.90E-06 chr:19:21841536 |
| 19 rs62112863 | 22164515 G | 2.864  | 2.90E-06 chr:19:21841536 |
| 19 rs62112864 | 22166026 T | 2.864  | 2.90E-06 chr:19:21841536 |
| 19 rs62112865 | 22172333 T | 2.864  | 2.90E-06 chr:19:21841536 |
| 19 rs62112870 | 22175976 A | 2.864  | 2.90E-06 chr:19:21841536 |
| 19 rs62112871 | 22185295 C | 2.864  | 2.90E-06 chr:19:21841536 |
| 19 rs62112872 | 22192425 C | 2.864  | 2.90E-06 chr:19:21841536 |
| 19 rs62112907 | 22209569 G | 2.864  | 2.90E-06 chr:19:21841536 |
| 19 rs62112908 | 22213956 G | 2.864  | 2.90E-06 chr:19:21841536 |
| 19 rs62112913 | 22221067 G | 2.864  | 2.90E-06 chr:19:21841536 |
| 19 rs62112914 | 22221407 A | 2.864  | 2.90E-06 chr:19:21841536 |
| 19 rs62112915 | 22223179 A | 2.864  | 2.90E-06 chr:19:21841536 |
| 19 rs75167249 | 22128655 T | 2.864  | 2.90E-06 chr:19:21841536 |
| 19 rs79846980 | 22141343 C | 2.864  | 2.90E-06 chr:19:21841536 |
| 19 rs8100042  | 22127841 A | 2.864  | 2.90E-06 chr:19:21841536 |
| 19 rs8104559  | 22205167 C | 2.864  | 2.90E-06 chr:19:21841536 |
| 19 rs8105895  | 22215457 T | 2.864  | 2.90E-06 chr:19:21841536 |
| 19 rs8105913  | 22201492 C | 2.864  | 2.90E-06 chr:19:21841536 |
| 19 rs8112751  | 22222458 T | 2.864  | 2.90E-06 chr:19:21841536 |
| 19 rs8113460  | 22128006 T | 2.864  | 2.90E-06 chr:19:21841536 |
| 19 rs8101677  | 21529954 A | 2.137  | 2.90E-06 chr:19:21841536 |
| 19 rs73027712 | 21757004 C | 0.4474 | 2.96E-06 chr:19:21841536 |
| 19 rs7247730  | 21362833 C | 2.27   | 3.00E-06 chr:19:21841536 |
| 19 rs12974292 | 21808080 A | 0.46   | 3.10E-06 chr:19:21841536 |
| 19 rs279802   | 21464257 C | 2.256  | 3.31E-06 chr:19:21841536 |
| 19 rs62110979 | 22245152 C | 2.922  | 3.39E-06 chr:19:21841536 |
| 19 rs62110980 | 22245191 A | 2.922  | 3.39E-06 chr:19:21841536 |
| 19 rs6511313  | 22215905 A | 2.834  | 3.54E-06 chr:19:21841536 |
| 19 rs1080829  | 21461135 T | 2.058  | 3.57E-06 chr:19:21841536 |
| 19 rs12976948 | 21457622 T | 2.058  | 3.57E-06 chr:19:21841536 |
| 19 rs2061915  | 21459033 C | 2.058  | 3.57E-06 chr:19:21841536 |
| 19 rs7252759  | 21451565 T | 2.058  | 3.57E-06 chr:19:21841536 |
| 19 rs7250372  | 21406019 A | 2.179  | 3.66E-06 chr:19:21841536 |
| 19 rs10407774 | 21380909 C | 2.237  | 3.74E-06 chr:19:21841536 |
| 19 rs1937811  | 21387292 G | 2.208  | 3.83E-06 chr:19:21841536 |

|                |            |        |          |                 |
|----------------|------------|--------|----------|-----------------|
| 19 rs2081187   | 21389111 G | 2.208  | 3.83E-06 | chr:19:21841536 |
| 19 rs2081188   | 21388995 A | 2.208  | 3.83E-06 | chr:19:21841536 |
| 19 rs6511209   | 21387618 A | 2.208  | 3.83E-06 | chr:19:21841536 |
| 19 rs6511210   | 21387754 C | 2.208  | 3.83E-06 | chr:19:21841536 |
| 19 rs6511211   | 21387789 C | 2.208  | 3.83E-06 | chr:19:21841536 |
| 19 rs6511212   | 21387995 A | 2.208  | 3.83E-06 | chr:19:21841536 |
| 19 rs7246432   | 21388741 T | 2.208  | 3.83E-06 | chr:19:21841536 |
| 19 rs7257208   | 21387587 T | 2.208  | 3.83E-06 | chr:19:21841536 |
| 19 rs7260451   | 21388496 C | 2.208  | 3.83E-06 | chr:19:21841536 |
| 19 rs8111169   | 21388025 T | 2.208  | 3.83E-06 | chr:19:21841536 |
| 19 rs4809156   | 21805354 A | 0.4459 | 3.87E-06 | chr:19:21841536 |
| 19 rs6511207   | 21370280 G | 2.24   | 3.94E-06 | chr:19:21841536 |
| 19 rs62112919  | 22227145 C | 2.847  | 4.00E-06 | chr:19:21841536 |
| 19 rs62112920  | 22227149 G | 2.847  | 4.00E-06 | chr:19:21841536 |
| 19 rs145389767 | 21529576 A | 6.41   | 4.19E-06 | chr:19:21841536 |
| 19 rs4306654   | 21644608 G | 2.091  | 4.20E-06 | chr:19:21841536 |
| 19 rs12461397  | 21861309 A | 0.3099 | 4.32E-06 | chr:19:21841536 |
| 19 rs12461437  | 21861314 G | 0.3099 | 4.32E-06 | chr:19:21841536 |
| 19 rs10854058  | 21858846 C | 0.3081 | 4.37E-06 | chr:19:21841536 |
| 19 rs1818694   | 21858673 C | 0.3081 | 4.37E-06 | chr:19:21841536 |
| 19 rs1983379   | 21860203 C | 0.3081 | 4.37E-06 | chr:19:21841536 |
| 19 rs2015706   | 21858208 A | 0.3081 | 4.37E-06 | chr:19:21841536 |
| 19 rs150190224 | 21395765 A | 2.164  | 4.42E-06 | chr:19:21841536 |
| 19 rs12459639  | 21852800 C | 0.3088 | 4.55E-06 | chr:19:21841536 |
| 19 rs1850933   | 21855208 G | 0.3088 | 4.55E-06 | chr:19:21841536 |
| 19 rs2359391   | 21854015 G | 0.3088 | 4.55E-06 | chr:19:21841536 |
| 19 rs2359397   | 21854270 G | 0.3088 | 4.55E-06 | chr:19:21841536 |
| 19 rs73013663  | 22075059 A | 2.392  | 4.70E-06 | chr:19:21841536 |
| 19 rs11669806  | 21396166 G | 2.167  | 4.77E-06 | chr:19:21841536 |
| 19 rs56061096  | 21713932 C | 2.336  | 4.79E-06 | chr:19:21841536 |
| 19 rs58880204  | 21394747 A | 2.175  | 4.86E-06 | chr:19:21841536 |
| 19 rs11665854  | 21395843 T | 2.168  | 5.20E-06 | chr:19:21841536 |
| 19 rs11669610  | 21395835 C | 2.168  | 5.20E-06 | chr:19:21841536 |
| 19 rs34111566  | 21395446 C | 2.171  | 5.35E-06 | chr:19:21841536 |
| 19 rs594638    | 21410623 C | 2.17   | 5.41E-06 | chr:19:21841536 |
| 19 rs11667259  | 21639989 G | 2.067  | 5.41E-06 | chr:19:21841536 |
| 19 rs11671265  | 21618629 A | 2.067  | 5.41E-06 | chr:19:21841536 |
| 19 rs12609823  | 21632719 T | 2.067  | 5.41E-06 | chr:19:21841536 |
| 19 rs34152818  | 21626405 G | 2.067  | 5.41E-06 | chr:19:21841536 |
| 19 rs35761227  | 21626540 C | 2.067  | 5.41E-06 | chr:19:21841536 |
| 19 rs3973190   | 21638322 T | 2.067  | 5.41E-06 | chr:19:21841536 |
| 19 rs7245729   | 21620962 G | 2.067  | 5.41E-06 | chr:19:21841536 |
| 19 rs7247060   | 21639017 C | 2.067  | 5.41E-06 | chr:19:21841536 |

|                |            |       |          |                 |
|----------------|------------|-------|----------|-----------------|
| 19 rs924487    | 21631409 T | 2.067 | 5.41E-06 | chr:19:21841536 |
| 19 rs951162    | 21621380 T | 2.067 | 5.41E-06 | chr:19:21841536 |
| 19 rs9973240   | 21630768 C | 2.067 | 5.41E-06 | chr:19:21841536 |
| 19 rs201684023 | 21395643 T | 2.164 | 5.42E-06 | chr:19:21841536 |
| 19 rs11085450  | 21637051 T | 2.063 | 5.60E-06 | chr:19:21841536 |
| 19 rs1846712   | 21621965 A | 2.203 | 5.65E-06 | chr:19:21841536 |
| 19 rs11665921  | 21395990 T | 2.196 | 5.82E-06 | chr:19:21841536 |
| 19 rs11666034  | 21396309 T | 2.177 | 5.89E-06 | chr:19:21841536 |
| 19 rs12611085  | 21396758 A | 2.177 | 5.89E-06 | chr:19:21841536 |
| 19 rs4280382   | 21394565 G | 2.177 | 5.89E-06 | chr:19:21841536 |
| 19 rs4305209   | 21393376 C | 2.177 | 5.89E-06 | chr:19:21841536 |
| 19 rs4411627   | 21394400 C | 2.177 | 5.89E-06 | chr:19:21841536 |
| 19 rs4482412   | 21393596 T | 2.177 | 5.89E-06 | chr:19:21841536 |
| 19 rs4493182   | 21393233 G | 2.177 | 5.89E-06 | chr:19:21841536 |
| 19 rs455492    | 21396256 G | 2.177 | 5.89E-06 | chr:19:21841536 |
| 19 rs4560042   | 21394444 C | 2.177 | 5.89E-06 | chr:19:21841536 |
| 19 rs4606860   | 21393285 C | 2.177 | 5.89E-06 | chr:19:21841536 |
| 19 rs4609982   | 21394226 C | 2.177 | 5.89E-06 | chr:19:21841536 |
| 19 rs7247871   | 21393094 A | 2.177 | 5.89E-06 | chr:19:21841536 |
| 19 rs7247882   | 21393137 A | 2.177 | 5.89E-06 | chr:19:21841536 |
| 19 rs7248088   | 21393187 C | 2.177 | 5.89E-06 | chr:19:21841536 |
| 19 rs77991815  | 21395323 T | 2.177 | 5.89E-06 | chr:19:21841536 |
| 19 rs35994743  | 21630108 C | 2.06  | 6.08E-06 | chr:19:21841536 |
| 19 rs1781863   | 21506962 T | 2.09  | 6.23E-06 | chr:19:21841536 |
| 19 rs111593785 | 21443425 T | 2.151 | 6.24E-06 | chr:19:21841536 |
| 19 rs2259655   | 21424539 A | 2.151 | 6.24E-06 | chr:19:21841536 |
| 19 rs4468754   | 21431997 G | 2.151 | 6.24E-06 | chr:19:21841536 |
| 19 rs617145    | 21448123 A | 2.151 | 6.24E-06 | chr:19:21841536 |
| 19 rs4485500   | 21394210 T | 2.173 | 6.33E-06 | chr:19:21841536 |
| 19 rs1781879   | 21406087 G | 2.143 | 6.76E-06 | chr:19:21841536 |
| 19 rs1781880   | 21406682 A | 2.143 | 6.76E-06 | chr:19:21841536 |
| 19 rs625209    | 21408467 T | 2.143 | 6.76E-06 | chr:19:21841536 |
| 19 rs661267    | 21408336 G | 2.143 | 6.76E-06 | chr:19:21841536 |
| 19 rs675130    | 21409132 G | 2.143 | 6.76E-06 | chr:19:21841536 |
| 19 rs10402151  | 21446930 C | 2.005 | 6.77E-06 | chr:19:21841536 |
| 19 rs10409412  | 21447787 C | 2.005 | 6.77E-06 | chr:19:21841536 |
| 19 rs250001    | 21408189 G | 7.157 | 6.86E-06 | chr:19:21841536 |
| 19 rs279793    | 21455774 T | 7.157 | 6.86E-06 | chr:19:21841536 |
| 19 rs279795    | 21459819 G | 7.157 | 6.86E-06 | chr:19:21841536 |
| 19 rs279796    | 21460126 G | 7.157 | 6.86E-06 | chr:19:21841536 |
| 19 rs582992    | 21449546 G | 7.157 | 6.86E-06 | chr:19:21841536 |
| 19 rs62108173  | 21427188 T | 7.157 | 6.86E-06 | chr:19:21841536 |
| 19 rs660063    | 21453905 T | 7.157 | 6.86E-06 | chr:19:21841536 |

|                |            |       |          |                 |
|----------------|------------|-------|----------|-----------------|
| 19 rs660827    | 21447450 T | 7.157 | 6.86E-06 | chr:19:21841536 |
| 19 rs10416605  | 21410033 G | 2.006 | 7.11E-06 | chr:19:21841536 |
| 19 rs11669002  | 21410825 A | 2.006 | 7.11E-06 | chr:19:21841536 |
| 19 rs2217343   | 21419141 T | 2.006 | 7.11E-06 | chr:19:21841536 |
| 19 rs78403448  | 21395221 C | 2.152 | 7.19E-06 | chr:19:21841536 |
| 19 rs79175705  | 21395284 G | 2.152 | 7.19E-06 | chr:19:21841536 |
| 19 rs12976375  | 21391221 T | 2.165 | 7.23E-06 | chr:19:21841536 |
| 19 rs1645811   | 21391206 T | 2.165 | 7.23E-06 | chr:19:21841536 |
| 19 rs1781860   | 21391358 A | 2.165 | 7.23E-06 | chr:19:21841536 |
| 19 rs138687968 | 21395576 A | 2.131 | 7.26E-06 | chr:19:21841536 |
| 19 rs145575800 | 21395526 T | 2.131 | 7.26E-06 | chr:19:21841536 |
| 19 rs148240426 | 21395572 G | 2.131 | 7.26E-06 | chr:19:21841536 |
| 19 rs111804479 | 21443607 T | 2.138 | 7.45E-06 | chr:19:21841536 |
| 19 rs10416988  | 21399563 C | 2.148 | 7.47E-06 | chr:19:21841536 |
| 19 rs10417249  | 21399721 C | 2.148 | 7.47E-06 | chr:19:21841536 |
| 19 rs10422057  | 21397107 C | 2.148 | 7.47E-06 | chr:19:21841536 |
| 19 rs12611135  | 21396943 G | 2.148 | 7.47E-06 | chr:19:21841536 |
| 19 rs1445847   | 21398233 A | 2.148 | 7.47E-06 | chr:19:21841536 |
| 19 rs1620157   | 21404350 A | 2.148 | 7.47E-06 | chr:19:21841536 |
| 19 rs1645804   | 21400095 G | 2.148 | 7.47E-06 | chr:19:21841536 |
| 19 rs2021432   | 21398488 G | 2.148 | 7.47E-06 | chr:19:21841536 |
| 19 rs2042985   | 21397607 T | 2.148 | 7.47E-06 | chr:19:21841536 |
| 19 rs2113136   | 21398102 G | 2.148 | 7.47E-06 | chr:19:21841536 |
| 19 rs6511214   | 21398839 G | 2.148 | 7.47E-06 | chr:19:21841536 |
| 19 rs6511215   | 21398889 A | 2.148 | 7.47E-06 | chr:19:21841536 |
| 19 rs7245597   | 21404615 A | 2.148 | 7.47E-06 | chr:19:21841536 |
| 19 rs7251075   | 21399204 C | 2.148 | 7.47E-06 | chr:19:21841536 |
| 19 rs634249    | 21427394 C | 2.127 | 7.62E-06 | chr:19:21841536 |
| 19 rs1645791   | 21388921 C | 2.167 | 7.69E-06 | chr:19:21841536 |
| 19 rs1781861   | 21390868 G | 2.167 | 7.69E-06 | chr:19:21841536 |
| 19 rs1781862   | 21389748 T | 2.167 | 7.69E-06 | chr:19:21841536 |
| 19 rs2081183   | 21389635 G | 2.167 | 7.69E-06 | chr:19:21841536 |
| 19 rs2081186   | 21389458 C | 2.167 | 7.69E-06 | chr:19:21841536 |
| 19 rs7254835   | 21390608 T | 2.167 | 7.69E-06 | chr:19:21841536 |
| 19 rs7254957   | 21390724 T | 2.167 | 7.69E-06 | chr:19:21841536 |
| 19 rs279801    | 21464209 G | 2.029 | 7.70E-06 | chr:19:21841536 |
| 19 rs669038    | 21422365 T | 2.137 | 7.71E-06 | chr:19:21841536 |
| 19 rs10401922  | 22253252 A | 2.796 | 7.84E-06 | chr:19:21841536 |
| 19 rs10404669  | 22241218 C | 2.796 | 7.84E-06 | chr:19:21841536 |
| 19 rs10405613  | 22244772 T | 2.796 | 7.84E-06 | chr:19:21841536 |
| 19 rs10405673  | 22244890 G | 2.796 | 7.84E-06 | chr:19:21841536 |
| 19 rs10406119  | 22245009 A | 2.796 | 7.84E-06 | chr:19:21841536 |
| 19 rs10406485  | 22245002 T | 2.796 | 7.84E-06 | chr:19:21841536 |

|                |            |       |                          |
|----------------|------------|-------|--------------------------|
| 19 rs10406551  | 22244520 A | 2.796 | 7.84E-06 chr:19:21841536 |
| 19 rs10406553  | 22237801 T | 2.796 | 7.84E-06 chr:19:21841536 |
| 19 rs10406653  | 22238023 T | 2.796 | 7.84E-06 chr:19:21841536 |
| 19 rs10407173  | 22246663 T | 2.796 | 7.84E-06 chr:19:21841536 |
| 19 rs10407250  | 22238151 A | 2.796 | 7.84E-06 chr:19:21841536 |
| 19 rs10408150  | 22245225 C | 2.796 | 7.84E-06 chr:19:21841536 |
| 19 rs10411275  | 22259469 G | 2.796 | 7.84E-06 chr:19:21841536 |
| 19 rs10411943  | 22259782 G | 2.796 | 7.84E-06 chr:19:21841536 |
| 19 rs10412953  | 22238482 G | 2.796 | 7.84E-06 chr:19:21841536 |
| 19 rs10413784  | 22246191 G | 2.796 | 7.84E-06 chr:19:21841536 |
| 19 rs10414685  | 22247749 T | 2.796 | 7.84E-06 chr:19:21841536 |
| 19 rs10414861  | 22247761 G | 2.796 | 7.84E-06 chr:19:21841536 |
| 19 rs10415794  | 22248221 T | 2.796 | 7.84E-06 chr:19:21841536 |
| 19 rs10415930  | 22248088 A | 2.796 | 7.84E-06 chr:19:21841536 |
| 19 rs10417285  | 22248184 C | 2.796 | 7.84E-06 chr:19:21841536 |
| 19 rs10419184  | 22252342 G | 2.796 | 7.84E-06 chr:19:21841536 |
| 19 rs10420019  | 22251905 A | 2.796 | 7.84E-06 chr:19:21841536 |
| 19 rs10420042  | 22251926 A | 2.796 | 7.84E-06 chr:19:21841536 |
| 19 rs10420898  | 22252331 C | 2.796 | 7.84E-06 chr:19:21841536 |
| 19 rs10422289  | 22256060 T | 2.796 | 7.84E-06 chr:19:21841536 |
| 19 rs10423114  | 22249289 G | 2.796 | 7.84E-06 chr:19:21841536 |
| 19 rs10423522  | 22243448 T | 2.796 | 7.84E-06 chr:19:21841536 |
| 19 rs10423881  | 22243422 A | 2.796 | 7.84E-06 chr:19:21841536 |
| 19 rs116220423 | 22237041 A | 2.796 | 7.84E-06 chr:19:21841536 |
| 19 rs2043315   | 22252823 C | 2.796 | 7.84E-06 chr:19:21841536 |
| 19 rs2043316   | 22251204 T | 2.796 | 7.84E-06 chr:19:21841536 |
| 19 rs2043317   | 22251096 C | 2.796 | 7.84E-06 chr:19:21841536 |
| 19 rs2163836   | 22242277 T | 2.796 | 7.84E-06 chr:19:21841536 |
| 19 rs2163837   | 22242236 A | 2.796 | 7.84E-06 chr:19:21841536 |
| 19 rs2359833   | 22242221 G | 2.796 | 7.84E-06 chr:19:21841536 |
| 19 rs28857211  | 22243104 C | 2.796 | 7.84E-06 chr:19:21841536 |
| 19 rs28894669  | 22243264 A | 2.796 | 7.84E-06 chr:19:21841536 |
| 19 rs368701052 | 22255803 A | 2.796 | 7.84E-06 chr:19:21841536 |
| 19 rs377529013 | 22242455 A | 2.796 | 7.84E-06 chr:19:21841536 |
| 19 rs4257328   | 22240090 A | 2.796 | 7.84E-06 chr:19:21841536 |
| 19 rs4510150   | 22239669 G | 2.796 | 7.84E-06 chr:19:21841536 |
| 19 rs4542784   | 22239751 A | 2.796 | 7.84E-06 chr:19:21841536 |
| 19 rs62110981  | 22246013 G | 2.796 | 7.84E-06 chr:19:21841536 |
| 19 rs62110984  | 22252332 A | 2.796 | 7.84E-06 chr:19:21841536 |
| 19 rs62110985  | 22256077 G | 2.796 | 7.84E-06 chr:19:21841536 |
| 19 rs62110986  | 22256771 A | 2.796 | 7.84E-06 chr:19:21841536 |
| 19 rs62110987  | 22257295 C | 2.796 | 7.84E-06 chr:19:21841536 |
| 19 rs62110988  | 22259956 T | 2.796 | 7.84E-06 chr:19:21841536 |

|               |            |       |                          |
|---------------|------------|-------|--------------------------|
| 19 rs62110989 | 22260299 G | 2.796 | 7.84E-06 chr:19:21841536 |
| 19 rs62110990 | 22260441 T | 2.796 | 7.84E-06 chr:19:21841536 |
| 19 rs62112917 | 22226580 T | 2.796 | 7.84E-06 chr:19:21841536 |
| 19 rs62112918 | 22227079 T | 2.796 | 7.84E-06 chr:19:21841536 |
| 19 rs62112921 | 22227577 C | 2.796 | 7.84E-06 chr:19:21841536 |
| 19 rs62112922 | 22228340 T | 2.796 | 7.84E-06 chr:19:21841536 |
| 19 rs62112955 | 22234959 T | 2.796 | 7.84E-06 chr:19:21841536 |
| 19 rs62112956 | 22235910 A | 2.796 | 7.84E-06 chr:19:21841536 |
| 19 rs62112957 | 22238259 T | 2.796 | 7.84E-06 chr:19:21841536 |
| 19 rs62112958 | 22239118 G | 2.796 | 7.84E-06 chr:19:21841536 |
| 19 rs6511314  | 22236395 A | 2.796 | 7.84E-06 chr:19:21841536 |
| 19 rs6511315  | 22236503 A | 2.796 | 7.84E-06 chr:19:21841536 |
| 19 rs6511316  | 22237629 C | 2.796 | 7.84E-06 chr:19:21841536 |
| 19 rs7246007  | 22240596 C | 2.796 | 7.84E-06 chr:19:21841536 |
| 19 rs7247041  | 22249790 A | 2.796 | 7.84E-06 chr:19:21841536 |
| 19 rs7247147  | 22249858 C | 2.796 | 7.84E-06 chr:19:21841536 |
| 19 rs7247228  | 22250136 T | 2.796 | 7.84E-06 chr:19:21841536 |
| 19 rs7248305  | 22250271 A | 2.796 | 7.84E-06 chr:19:21841536 |
| 19 rs7249591  | 22245345 C | 2.796 | 7.84E-06 chr:19:21841536 |
| 19 rs7250852  | 22250510 A | 2.796 | 7.84E-06 chr:19:21841536 |
| 19 rs7250905  | 22250743 T | 2.796 | 7.84E-06 chr:19:21841536 |
| 19 rs7251660  | 22250614 C | 2.796 | 7.84E-06 chr:19:21841536 |
| 19 rs7251884  | 22245530 T | 2.796 | 7.84E-06 chr:19:21841536 |
| 19 rs7252023  | 22245646 G | 2.796 | 7.84E-06 chr:19:21841536 |
| 19 rs7252220  | 22245564 A | 2.796 | 7.84E-06 chr:19:21841536 |
| 19 rs7252550  | 22246017 T | 2.796 | 7.84E-06 chr:19:21841536 |
| 19 rs7252772  | 22245459 A | 2.796 | 7.84E-06 chr:19:21841536 |
| 19 rs7253053  | 22245685 C | 2.796 | 7.84E-06 chr:19:21841536 |
| 19 rs7259971  | 22237319 G | 2.796 | 7.84E-06 chr:19:21841536 |
| 19 rs75025987 | 22230669 A | 2.796 | 7.84E-06 chr:19:21841536 |
| 19 rs78646027 | 22257410 T | 2.796 | 7.84E-06 chr:19:21841536 |
| 19 rs8103518  | 22246952 C | 2.796 | 7.84E-06 chr:19:21841536 |
| 19 rs8104144  | 22246913 C | 2.796 | 7.84E-06 chr:19:21841536 |
| 19 rs8104630  | 22247277 C | 2.796 | 7.84E-06 chr:19:21841536 |
| 19 rs8108651  | 22251464 G | 2.796 | 7.84E-06 chr:19:21841536 |
| 19 rs8108976  | 22251701 A | 2.796 | 7.84E-06 chr:19:21841536 |
| 19 rs8110047  | 22239502 G | 2.796 | 7.84E-06 chr:19:21841536 |
| 19 rs8110289  | 22239717 G | 2.796 | 7.84E-06 chr:19:21841536 |
| 19 rs8110841  | 22239436 C | 2.796 | 7.84E-06 chr:19:21841536 |
| 19 rs8110969  | 22240222 T | 2.796 | 7.84E-06 chr:19:21841536 |
| 19 rs8110975  | 22240233 G | 2.796 | 7.84E-06 chr:19:21841536 |
| 19 rs8111854  | 22240213 C | 2.796 | 7.84E-06 chr:19:21841536 |
| 19 rs9653142  | 22249596 G | 2.796 | 7.84E-06 chr:19:21841536 |

|                |            |        |          |                 |
|----------------|------------|--------|----------|-----------------|
| 19 rs9653157   | 22249490 C | 2.796  | 7.84E-06 | chr:19:21841536 |
| 19 rs9973249   | 22242160 A | 2.796  | 7.84E-06 | chr:19:21841536 |
| 19 rs75823203  | 21395171 A | 2.142  | 7.92E-06 | chr:19:21841536 |
| 19 rs76769697  | 21395170 C | 2.142  | 7.92E-06 | chr:19:21841536 |
| 19 rs10408971  | 21408889 G | 1.99   | 8.46E-06 | chr:19:21841536 |
| 19 rs11085438  | 21427377 A | 1.985  | 8.48E-06 | chr:19:21841536 |
| 19 rs112777606 | 21443330 C | 1.985  | 8.48E-06 | chr:19:21841536 |
| 19 rs2022513   | 21439266 A | 1.985  | 8.48E-06 | chr:19:21841536 |
| 19 rs2080068   | 21442615 G | 1.985  | 8.48E-06 | chr:19:21841536 |
| 19 rs2192082   | 21437428 G | 1.985  | 8.48E-06 | chr:19:21841536 |
| 19 rs7250918   | 21442454 C | 1.985  | 8.48E-06 | chr:19:21841536 |
| 19 rs184032321 | 21395652 A | 2.132  | 9.18E-06 | chr:19:21841536 |
| 19 rs191816269 | 21395651 C | 2.132  | 9.18E-06 | chr:19:21841536 |
| 19 rs11668443  | 21394806 A | 2.097  | 9.40E-06 | chr:19:21841536 |
| 19 rs25760     | 21394177 G | 6.569  | 9.60E-06 | chr:19:21841536 |
| 19 rs29699     | 21391605 A | 6.569  | 9.60E-06 | chr:19:21841536 |
| 19 rs10419142  | 22252262 T | 2.751  | 9.84E-06 | chr:19:21841536 |
| 19 rs35915214  | 21425375 A | 2.14   | 1.02E-05 | chr:19:21841536 |
| 19 rs4809135   | 21751988 T | 0.4713 | 1.04E-05 | chr:19:21841536 |
| 19 rs77763540  | 22015113 C | 8.293  | 1.06E-05 | chr:19:21841536 |
| 19 rs35293974  | 21426837 A | 1.963  | 1.08E-05 | chr:19:21841536 |
| 19 rs111955830 | 21395069 A | 2.1    | 1.11E-05 | chr:19:21841536 |
| 19 rs2095440   | 21442173 T | 2.11   | 1.11E-05 | chr:19:21841536 |
| 19 rs10415826  | 22248317 T | 2.732  | 1.16E-05 | chr:19:21841536 |
| 19 rs7252380   | 22245715 A | 2.723  | 1.24E-05 | chr:19:21841536 |
| 19 rs9749536   | 21391758 A | 2.126  | 1.26E-05 | chr:19:21841536 |
| 19 rs2163835   | 22242679 T | 2.695  | 1.26E-05 | chr:19:21841536 |
| 19 rs2359835   | 22242690 G | 2.695  | 1.26E-05 | chr:19:21841536 |
| 19 rs28822164  | 22245108 A | 2.719  | 1.27E-05 | chr:19:21841536 |
| 19 rs11668509  | 21394938 C | 2.041  | 1.30E-05 | chr:19:21841536 |
| 19 rs11668560  | 21394916 G | 2.041  | 1.30E-05 | chr:19:21841536 |
| 19 rs11672813  | 21394907 T | 2.041  | 1.30E-05 | chr:19:21841536 |
| 19 rs11672841  | 21394969 T | 2.041  | 1.30E-05 | chr:19:21841536 |
| 19 rs199798682 | 21546691 A | 2.007  | 1.31E-05 | chr:19:21841536 |
| 19 rs12973927  | 21383587 G | 1.981  | 1.43E-05 | chr:19:21841536 |
| 19 rs1988919   | 21381462 G | 1.981  | 1.43E-05 | chr:19:21841536 |
| 19 rs8101643   | 21384253 C | 1.981  | 1.43E-05 | chr:19:21841536 |
| 19 rs8111817   | 21383093 G | 1.981  | 1.43E-05 | chr:19:21841536 |
| 19 rs8111954   | 21383250 G | 1.981  | 1.43E-05 | chr:19:21841536 |
| 19 rs62110992  | 22261516 G | 2.702  | 1.49E-05 | chr:19:21841536 |
| 19 rs188360789 | 21649675 T | 9.21   | 1.55E-05 | chr:19:21841536 |
| 19 rs117229321 | 21875814 T | 19.75  | 1.59E-05 | chr:19:21841536 |
| 19 rs7259645   | 21842436 C | 0.3437 | 1.67E-05 | chr:19:21841536 |



|               |            |       |          |                 |
|---------------|------------|-------|----------|-----------------|
| 19 rs10424447 | 22274042 G | 2.775 | 1.68E-05 | chr:19:21841536 |
| 19 rs7247593  | 21392776 C | 1.97  | 1.78E-05 | chr:19:21841536 |
| 19 rs7247623  | 21392852 C | 1.97  | 1.78E-05 | chr:19:21841536 |
| 19 rs7248106  | 21392535 T | 1.97  | 1.78E-05 | chr:19:21841536 |
| 19 rs7259257  | 21392254 G | 1.97  | 1.78E-05 | chr:19:21841536 |
| 19 rs7259809  | 21392097 T | 1.97  | 1.78E-05 | chr:19:21841536 |
| 19 rs1987880  | 21518961 C | 0.484 | 1.86E-05 | chr:19:21841536 |
| 19 rs7259807  | 22291476 G | 2.707 | 1.87E-05 | chr:19:21841536 |
| 19 rs5827519  | 22280532 G | 2.705 | 1.92E-05 | chr:19:21841536 |
| 19 rs11672785 | 21394857 T | 2.019 | 1.93E-05 | chr:19:21841536 |
| 19 rs29701    | 21388564 A | 6.194 | 2.17E-05 | chr:19:21841536 |
| 19 rs29704    | 21386819 A | 6.194 | 2.17E-05 | chr:19:21841536 |
| 19 rs29723    | 21380717 A | 6.194 | 2.17E-05 | chr:19:21841536 |
| 19 rs17554725 | 22317759 G | 53.72 | 1.53E-40 | chr:19:22414379 |
| 19 rs12460025 | 22318230 G | 60.91 | 2.85E-40 | chr:19:22414379 |
| 19 rs7257051  | 22319292 G | 60.91 | 2.85E-40 | chr:19:22414379 |
| 19 rs8113700  | 22319421 A | 60.91 | 2.85E-40 | chr:19:22414379 |
| 19 rs1922685  | 22287970 C | 57.45 | 4.29E-40 | chr:19:22414379 |
| 19 rs7253490  | 22293706 A | 57.45 | 4.29E-40 | chr:19:22414379 |
| 19 rs7248898  | 22245354 A | 53.18 | 1.12E-39 | chr:19:22414379 |
| 19 rs8105767  | 22215441 G | 27.63 | 1.01E-36 | chr:19:22414379 |
| 19 rs808246   | 22430516 A | 210.4 | 8.18E-33 | chr:19:22414379 |
| 19 rs461804   | 22328560 C | 413.3 | 9.62E-33 | chr:19:22414379 |
| 19 rs283163   | 22455077 C | 16.53 | 1.08E-31 | chr:19:22414379 |
| 19 rs283142   | 22445651 T | 23.2  | 1.27E-31 | chr:19:22414379 |
| 19 rs283139   | 22448069 T | 23.11 | 1.31E-31 | chr:19:22414379 |
| 19 rs283140   | 22447450 G | 23.11 | 1.31E-31 | chr:19:22414379 |
| 19 rs283145   | 22438782 T | 20.87 | 4.10E-31 | chr:19:22414379 |
| 19 rs1912576  | 22121293 C | 16.88 | 1.24E-30 | chr:19:22414379 |
| 19 rs283147   | 22438069 C | 62.35 | 1.98E-30 | chr:19:22414379 |
| 19 rs1634466  | 22103726 G | 16.63 | 9.02E-30 | chr:19:22414379 |
| 19 rs1961316  | 22426154 A | 336.1 | 1.42E-29 | chr:19:22414379 |
| 19 rs1969193  | 22120269 C | 15.96 | 1.59E-29 | chr:19:22414379 |
| 19 rs61616269 | 22397866 A | 51.67 | 2.34E-29 | chr:19:22414379 |
| 19 rs1840718  | 22427586 T | 302.4 | 4.87E-29 | chr:19:22414379 |
| 19 rs57346017 | 22427336 G | 302.4 | 4.87E-29 | chr:19:22414379 |
| 19 rs62120010 | 22428480 A | 302.4 | 4.87E-29 | chr:19:22414379 |
| 19 rs11671416 | 22427254 C | 284.7 | 7.04E-29 | chr:19:22414379 |
| 19 rs34556219 | 22382294 C | 44.67 | 1.05E-28 | chr:19:22414379 |
| 19 rs283144   | 22439446 T | 16.82 | 1.27E-28 | chr:19:22414379 |
| 19 rs374309   | 22332298 G | 43.38 | 1.78E-28 | chr:19:22414379 |
| 19 rs10404322 | 22110669 G | 10.38 | 3.14E-27 | chr:19:22414379 |
| 19 rs10416248 | 22115865 A | 10.38 | 3.14E-27 | chr:19:22414379 |

|                |            |       |                          |
|----------------|------------|-------|--------------------------|
| 19 rs17769372  | 22114704 C | 10.38 | 3.14E-27 chr:19:22414379 |
| 19 rs1848994   | 22111366 A | 10.38 | 3.14E-27 chr:19:22414379 |
| 19 rs369128    | 22107866 T | 10.38 | 3.14E-27 chr:19:22414379 |
| 19 rs8108027   | 22115901 C | 10.38 | 3.14E-27 chr:19:22414379 |
| 19 rs440597    | 22096519 C | 8.881 | 7.44E-26 chr:19:22414379 |
| 19 rs385774    | 22096075 A | 8.692 | 1.15E-25 chr:19:22414379 |
| 19 rs12461491  | 22304761 G | 19.17 | 2.59E-25 chr:19:22414379 |
| 19 rs73021803  | 22286898 T | 19.1  | 3.16E-25 chr:19:22414379 |
| 19 rs111724992 | 22282718 C | 18.88 | 4.40E-25 chr:19:22414379 |
| 19 rs12459299  | 22296261 G | 18.88 | 4.40E-25 chr:19:22414379 |
| 19 rs12460028  | 22284598 C | 18.88 | 4.40E-25 chr:19:22414379 |
| 19 rs12460058  | 22284531 A | 18.88 | 4.40E-25 chr:19:22414379 |
| 19 rs12460610  | 22291277 C | 18.88 | 4.40E-25 chr:19:22414379 |
| 19 rs12461499  | 22304581 A | 18.88 | 4.40E-25 chr:19:22414379 |
| 19 rs12461719  | 22292841 T | 18.88 | 4.40E-25 chr:19:22414379 |
| 19 rs12461745  | 22262667 T | 18.88 | 4.40E-25 chr:19:22414379 |
| 19 rs190030543 | 22291079 T | 18.88 | 4.40E-25 chr:19:22414379 |
| 19 rs4436884   | 22285163 C | 18.88 | 4.40E-25 chr:19:22414379 |
| 19 rs4932955   | 22272845 A | 18.88 | 4.40E-25 chr:19:22414379 |
| 19 rs4932956   | 22273797 G | 18.88 | 4.40E-25 chr:19:22414379 |
| 19 rs55635227  | 22298116 C | 18.88 | 4.40E-25 chr:19:22414379 |
| 19 rs56138218  | 22279031 A | 18.88 | 4.40E-25 chr:19:22414379 |
| 19 rs56183023  | 22269366 C | 18.88 | 4.40E-25 chr:19:22414379 |
| 19 rs56242139  | 22295279 A | 18.88 | 4.40E-25 chr:19:22414379 |
| 19 rs56320331  | 22297657 T | 18.88 | 4.40E-25 chr:19:22414379 |
| 19 rs56359043  | 22295283 G | 18.88 | 4.40E-25 chr:19:22414379 |
| 19 rs61237480  | 22306505 T | 18.88 | 4.40E-25 chr:19:22414379 |
| 19 rs6511324   | 22283994 T | 18.88 | 4.40E-25 chr:19:22414379 |
| 19 rs7260631   | 22282906 G | 18.88 | 4.40E-25 chr:19:22414379 |
| 19 rs73019871  | 22265915 T | 18.88 | 4.40E-25 chr:19:22414379 |
| 19 rs73019874  | 22267259 G | 18.88 | 4.40E-25 chr:19:22414379 |
| 19 rs73019896  | 22286350 A | 18.88 | 4.40E-25 chr:19:22414379 |
| 19 rs73019902  | 22286707 A | 18.88 | 4.40E-25 chr:19:22414379 |
| 19 rs73021816  | 22306321 A | 18.88 | 4.40E-25 chr:19:22414379 |
| 19 rs8108310   | 22287184 T | 18.88 | 4.40E-25 chr:19:22414379 |
| 19 rs56064722  | 22312293 T | 18.04 | 4.80E-25 chr:19:22414379 |
| 19 rs73021823  | 22310164 A | 18.04 | 4.80E-25 chr:19:22414379 |
| 19 rs73021825  | 22313577 A | 17.91 | 5.93E-25 chr:19:22414379 |
| 19 rs76995772  | 22311909 A | 17.91 | 5.93E-25 chr:19:22414379 |
| 19 rs201113571 | 22290840 T | 18.29 | 1.33E-24 chr:19:22414379 |
| 19 rs12459277  | 22235908 T | 17.77 | 2.58E-24 chr:19:22414379 |
| 19 rs34878133  | 22230331 A | 17.77 | 2.58E-24 chr:19:22414379 |
| 19 rs3752168   | 22235478 C | 17.77 | 2.58E-24 chr:19:22414379 |

|                |            |        |          |                 |
|----------------|------------|--------|----------|-----------------|
| 19 rs4932951   | 22246352 C | 17.77  | 2.58E-24 | chr:19:22414379 |
| 19 rs56226428  | 22229075 C | 17.77  | 2.58E-24 | chr:19:22414379 |
| 19 rs73019807  | 22231484 G | 17.77  | 2.58E-24 | chr:19:22414379 |
| 19 rs73019812  | 22232291 T | 17.77  | 2.58E-24 | chr:19:22414379 |
| 19 rs73019829  | 22239600 A | 17.77  | 2.58E-24 | chr:19:22414379 |
| 19 rs73019831  | 22242013 T | 17.77  | 2.58E-24 | chr:19:22414379 |
| 19 rs56036277  | 22257574 A | 17.45  | 4.27E-24 | chr:19:22414379 |
| 19 rs73019862  | 22260969 T | 17.41  | 4.94E-24 | chr:19:22414379 |
| 19 rs12460852  | 22226289 T | 14.47  | 2.43E-21 | chr:19:22414379 |
| 19 rs12608810  | 22342002 A | 0.1845 | 4.30E-21 | chr:19:22414379 |
| 19 rs17470104  | 22424418 A | 0.1837 | 5.44E-21 | chr:19:22414379 |
| 19 rs4123726   | 22419677 T | 0.1837 | 5.44E-21 | chr:19:22414379 |
| 19 rs4123729   | 22418142 C | 0.1837 | 5.44E-21 | chr:19:22414379 |
| 19 rs55758909  | 22420558 A | 0.1837 | 5.44E-21 | chr:19:22414379 |
| 19 rs56144642  | 22421516 C | 0.1837 | 5.44E-21 | chr:19:22414379 |
| 19 rs4381717   | 22338981 A | 0.1806 | 5.71E-21 | chr:19:22414379 |
| 19 rs3813590   | 22321273 T | 0.1859 | 5.73E-21 | chr:19:22414379 |
| 19 rs11666326  | 22377109 A | 0.1847 | 5.81E-21 | chr:19:22414379 |
| 19 rs11667657  | 22393601 C | 0.1847 | 5.81E-21 | chr:19:22414379 |
| 19 rs11671130  | 22329455 C | 0.1847 | 5.81E-21 | chr:19:22414379 |
| 19 rs11672659  | 22394767 T | 0.1847 | 5.81E-21 | chr:19:22414379 |
| 19 rs11672740  | 22394859 A | 0.1847 | 5.81E-21 | chr:19:22414379 |
| 19 rs12609320  | 22390462 C | 0.1847 | 5.81E-21 | chr:19:22414379 |
| 19 rs149070103 | 22340413 G | 0.1847 | 5.81E-21 | chr:19:22414379 |
| 19 rs1609037   | 22380261 C | 0.1847 | 5.81E-21 | chr:19:22414379 |
| 19 rs1830174   | 22344502 A | 0.1847 | 5.81E-21 | chr:19:22414379 |
| 19 rs4372816   | 22328376 G | 0.1847 | 5.81E-21 | chr:19:22414379 |
| 19 rs4390714   | 22369043 A | 0.1847 | 5.81E-21 | chr:19:22414379 |
| 19 rs4578792   | 22368982 G | 0.1847 | 5.81E-21 | chr:19:22414379 |
| 19 rs4602157   | 22339036 C | 0.1847 | 5.81E-21 | chr:19:22414379 |
| 19 rs4616412   | 22339005 G | 0.1847 | 5.81E-21 | chr:19:22414379 |
| 19 rs4932750   | 22333226 T | 0.1847 | 5.81E-21 | chr:19:22414379 |
| 19 rs4932962   | 22372000 T | 0.1847 | 5.81E-21 | chr:19:22414379 |
| 19 rs74416263  | 22342767 T | 0.1847 | 5.81E-21 | chr:19:22414379 |
| 19 rs76490109  | 22330225 A | 0.1847 | 5.81E-21 | chr:19:22414379 |
| 19 rs12460715  | 22523304 A | 6.876  | 5.98E-21 | chr:19:22414379 |
| 19 rs12459631  | 22477395 G | 6.888  | 6.70E-21 | chr:19:22414379 |
| 19 rs12462177  | 22509486 G | 6.888  | 6.70E-21 | chr:19:22414379 |
| 19 rs4932975   | 22491072 C | 6.888  | 6.70E-21 | chr:19:22414379 |
| 19 rs4932976   | 22494878 T | 6.888  | 6.70E-21 | chr:19:22414379 |
| 19 rs56955437  | 22504518 T | 6.888  | 6.70E-21 | chr:19:22414379 |
| 19 rs7253033   | 22503203 C | 6.888  | 6.70E-21 | chr:19:22414379 |
| 19 rs8103990   | 22476027 A | 6.888  | 6.70E-21 | chr:19:22414379 |

|                |            |        |          |                 |
|----------------|------------|--------|----------|-----------------|
| 19 rs2548937   | 22413188 T | 1408   | 6.75E-21 | chr:19:22414379 |
| 19 rs4025837   | 22413189 A | 1408   | 6.75E-21 | chr:19:22414379 |
| 19 rs58164690  | 22504773 A | 6.864  | 6.87E-21 | chr:19:22414379 |
| 19 rs59870410  | 22483963 G | 6.904  | 7.32E-21 | chr:19:22414379 |
| 19 rs3813592   | 22321245 G | 0.1879 | 8.20E-21 | chr:19:22414379 |
| 19 rs1852420   | 22361902 T | 0.1866 | 8.30E-21 | chr:19:22414379 |
| 19 rs111684505 | 22401097 G | 0.1889 | 9.69E-21 | chr:19:22414379 |
| 19 rs55701013  | 22479996 G | 6.726  | 1.06E-20 | chr:19:22414379 |
| 19 rs11671580  | 22326439 A | 0.1922 | 1.47E-20 | chr:19:22414379 |
| 19 rs4932977   | 22520694 T | 6.614  | 2.09E-20 | chr:19:22414379 |
| 19 rs118032465 | 22521394 C | 6.711  | 2.32E-20 | chr:19:22414379 |
| 19 rs200200120 | 22521387 T | 6.711  | 2.32E-20 | chr:19:22414379 |
| 19 rs73021832  | 22316144 C | 0.2001 | 4.64E-20 | chr:19:22414379 |
| 19 rs112237385 | 22162147 C | 10.07  | 5.30E-20 | chr:19:22414379 |
| 19 rs2079063   | 22160674 T | 10.07  | 5.30E-20 | chr:19:22414379 |
| 19 rs4456632   | 22153634 A | 10.07  | 5.30E-20 | chr:19:22414379 |
| 19 rs56408994  | 22162618 C | 10.07  | 5.30E-20 | chr:19:22414379 |
| 19 rs7248938   | 22166196 G | 10.07  | 5.30E-20 | chr:19:22414379 |
| 19 rs7258270   | 22155520 G | 10.07  | 5.30E-20 | chr:19:22414379 |
| 19 rs7260454   | 22166739 T | 10.07  | 5.30E-20 | chr:19:22414379 |
| 19 rs73538835  | 22161066 A | 10.07  | 5.30E-20 | chr:19:22414379 |
| 19 rs8104333   | 22153801 C | 10.07  | 5.30E-20 | chr:19:22414379 |
| 19 rs111352604 | 22314567 G | 0.2001 | 5.50E-20 | chr:19:22414379 |
| 19 rs12610034  | 22314528 A | 0.2001 | 5.50E-20 | chr:19:22414379 |
| 19 rs12459526  | 22216669 T | 10.01  | 6.19E-20 | chr:19:22414379 |
| 19 rs12460903  | 22210184 C | 10.01  | 6.19E-20 | chr:19:22414379 |
| 19 rs12461536  | 22207464 G | 10.01  | 6.19E-20 | chr:19:22414379 |
| 19 rs12462824  | 22209767 G | 10.01  | 6.19E-20 | chr:19:22414379 |
| 19 rs1975167   | 22215066 T | 10.01  | 6.19E-20 | chr:19:22414379 |
| 19 rs2359827   | 22220016 C | 10.01  | 6.19E-20 | chr:19:22414379 |
| 19 rs2359828   | 22220287 G | 10.01  | 6.19E-20 | chr:19:22414379 |
| 19 rs4932932   | 22203214 T | 10.01  | 6.19E-20 | chr:19:22414379 |
| 19 rs4932940   | 22216366 G | 10.01  | 6.19E-20 | chr:19:22414379 |
| 19 rs55638635  | 22210647 A | 10.01  | 6.19E-20 | chr:19:22414379 |
| 19 rs55674738  | 22196576 T | 10.01  | 6.19E-20 | chr:19:22414379 |
| 19 rs55772746  | 22224720 G | 10.01  | 6.19E-20 | chr:19:22414379 |
| 19 rs57286877  | 22172618 G | 10.01  | 6.19E-20 | chr:19:22414379 |
| 19 rs58132720  | 22225014 A | 10.01  | 6.19E-20 | chr:19:22414379 |
| 19 rs60871663  | 22194240 T | 10.01  | 6.19E-20 | chr:19:22414379 |
| 19 rs6511310   | 22197285 A | 10.01  | 6.19E-20 | chr:19:22414379 |
| 19 rs67441682  | 22194829 C | 10.01  | 6.19E-20 | chr:19:22414379 |
| 19 rs67458228  | 22191841 T | 10.01  | 6.19E-20 | chr:19:22414379 |
| 19 rs68118096  | 22200804 T | 10.01  | 6.19E-20 | chr:19:22414379 |

|                |            |        |                          |
|----------------|------------|--------|--------------------------|
| 19 rs7246239   | 22183049 A | 10.01  | 6.19E-20 chr:19:22414379 |
| 19 rs7247687   | 22214420 T | 10.01  | 6.19E-20 chr:19:22414379 |
| 19 rs7248507   | 22214366 C | 10.01  | 6.19E-20 chr:19:22414379 |
| 19 rs7248542   | 22214447 C | 10.01  | 6.19E-20 chr:19:22414379 |
| 19 rs7251237   | 22220858 A | 10.01  | 6.19E-20 chr:19:22414379 |
| 19 rs7253170   | 22209228 G | 10.01  | 6.19E-20 chr:19:22414379 |
| 19 rs7255179   | 22213130 G | 10.01  | 6.19E-20 chr:19:22414379 |
| 19 rs7255484   | 22184978 C | 10.01  | 6.19E-20 chr:19:22414379 |
| 19 rs7258843   | 22213701 C | 10.01  | 6.19E-20 chr:19:22414379 |
| 19 rs7259460   | 22213945 A | 10.01  | 6.19E-20 chr:19:22414379 |
| 19 rs7259527   | 22214257 G | 10.01  | 6.19E-20 chr:19:22414379 |
| 19 rs73017852  | 22189239 G | 10.01  | 6.19E-20 chr:19:22414379 |
| 19 rs80117552  | 22171367 C | 10.01  | 6.19E-20 chr:19:22414379 |
| 19 rs8100117   | 22195322 C | 10.01  | 6.19E-20 chr:19:22414379 |
| 19 rs8103503   | 22216828 A | 10.01  | 6.19E-20 chr:19:22414379 |
| 19 rs8103879   | 22211437 G | 10.01  | 6.19E-20 chr:19:22414379 |
| 19 rs8106352   | 22208611 T | 10.01  | 6.19E-20 chr:19:22414379 |
| 19 rs8109237   | 22202739 G | 10.01  | 6.19E-20 chr:19:22414379 |
| 19 rs2359829   | 22222155 G | 9.954  | 6.59E-20 chr:19:22414379 |
| 19 rs11668081  | 22425615 A | 0.2061 | 7.66E-20 chr:19:22414379 |
| 19 rs12462668  | 22156943 A | 9.608  | 8.57E-20 chr:19:22414379 |
| 19 rs2359826   | 22214993 T | 9.602  | 8.82E-20 chr:19:22414379 |
| 19 rs7246992   | 22192047 A | 9.841  | 1.12E-19 chr:19:22414379 |
| 19 rs12610367  | 22320848 T | 0.2034 | 1.22E-19 chr:19:22414379 |
| 19 rs17459246  | 22278121 C | 0.2099 | 1.46E-19 chr:19:22414379 |
| 19 rs55886600  | 22276437 A | 0.2099 | 1.46E-19 chr:19:22414379 |
| 19 rs56073035  | 22276298 G | 0.2099 | 1.46E-19 chr:19:22414379 |
| 19 rs73019889  | 22277826 G | 0.2099 | 1.46E-19 chr:19:22414379 |
| 19 rs199643795 | 22291325 A | 0.2118 | 2.15E-19 chr:19:22414379 |
| 19 rs11673195  | 22313814 C | 0.2083 | 2.43E-19 chr:19:22414379 |
| 19 rs10401339  | 22210401 A | 4.913  | 2.77E-19 chr:19:22414379 |
| 19 rs1985744   | 22208601 G | 4.913  | 2.77E-19 chr:19:22414379 |
| 19 rs403997    | 22220543 T | 4.913  | 2.77E-19 chr:19:22414379 |
| 19 rs408124    | 22225337 A | 4.913  | 2.77E-19 chr:19:22414379 |
| 19 rs417947    | 22224030 G | 4.913  | 2.77E-19 chr:19:22414379 |
| 19 rs424066    | 22222884 T | 4.913  | 2.77E-19 chr:19:22414379 |
| 19 rs437192    | 22219510 C | 4.913  | 2.77E-19 chr:19:22414379 |
| 19 rs441017    | 22214122 T | 4.913  | 2.77E-19 chr:19:22414379 |
| 19 rs452459    | 22216712 T | 4.913  | 2.77E-19 chr:19:22414379 |
| 19 rs367972720 | 22291197 C | 0.2121 | 2.77E-19 chr:19:22414379 |
| 19 rs372140746 | 22291198 C | 0.2121 | 2.77E-19 chr:19:22414379 |
| 19 rs372252339 | 22291126 T | 0.2121 | 2.77E-19 chr:19:22414379 |
| 19 rs149975047 | 22287938 A | 0.2121 | 2.78E-19 chr:19:22414379 |

|                |            |        |                          |
|----------------|------------|--------|--------------------------|
| 19 rs191067451 | 22288201 A | 0.2121 | 2.78E-19 chr:19:22414379 |
| 19 rs56207853  | 22292357 T | 0.2121 | 2.78E-19 chr:19:22414379 |
| 19 rs72481609  | 22296819 C | 0.2121 | 2.78E-19 chr:19:22414379 |
| 19 rs73019900  | 22286680 A | 0.2121 | 2.78E-19 chr:19:22414379 |
| 19 rs4932957   | 22304745 T | 0.2145 | 3.31E-19 chr:19:22414379 |
| 19 rs10410114  | 22192671 C | 4.979  | 3.43E-19 chr:19:22414379 |
| 19 rs10410914  | 22192884 G | 4.979  | 3.43E-19 chr:19:22414379 |
| 19 rs10425763  | 22155918 T | 4.979  | 3.43E-19 chr:19:22414379 |
| 19 rs10426971  | 22158167 G | 4.979  | 3.43E-19 chr:19:22414379 |
| 19 rs11085508  | 22193986 A | 4.979  | 3.43E-19 chr:19:22414379 |
| 19 rs11668920  | 22182053 T | 4.979  | 3.43E-19 chr:19:22414379 |
| 19 rs12975751  | 22156482 G | 4.979  | 3.43E-19 chr:19:22414379 |
| 19 rs12979885  | 22160709 C | 4.979  | 3.43E-19 chr:19:22414379 |
| 19 rs12980606  | 22169549 A | 4.979  | 3.43E-19 chr:19:22414379 |
| 19 rs2158106   | 22186710 C | 4.979  | 3.43E-19 chr:19:22414379 |
| 19 rs2214298   | 22163606 T | 4.979  | 3.43E-19 chr:19:22414379 |
| 19 rs2359816   | 22198676 G | 4.979  | 3.43E-19 chr:19:22414379 |
| 19 rs4458136   | 22197603 C | 4.979  | 3.43E-19 chr:19:22414379 |
| 19 rs4550595   | 22153808 C | 4.979  | 3.43E-19 chr:19:22414379 |
| 19 rs74776957  | 22172805 T | 4.979  | 3.43E-19 chr:19:22414379 |
| 19 rs75181699  | 22172720 T | 4.979  | 3.43E-19 chr:19:22414379 |
| 19 rs16999012  | 22522950 G | 5.566  | 3.45E-19 chr:19:22414379 |
| 19 rs10854064  | 22206129 C | 4.889  | 3.69E-19 chr:19:22414379 |
| 19 rs1654509   | 22219163 C | 4.886  | 3.76E-19 chr:19:22414379 |
| 19 rs11669110  | 22296485 G | 0.2158 | 4.52E-19 chr:19:22414379 |
| 19 rs1526884   | 22303651 G | 0.2165 | 4.75E-19 chr:19:22414379 |
| 19 rs61268244  | 22310130 T | 0.2146 | 4.89E-19 chr:19:22414379 |
| 19 rs183691981 | 22291525 C | 0.2007 | 5.22E-19 chr:19:22414379 |
| 19 rs8105991   | 22193131 T | 4.857  | 5.52E-19 chr:19:22414379 |
| 19 rs13344143  | 22531045 T | 5.466  | 5.86E-19 chr:19:22414379 |
| 19 rs10405452  | 22529868 T | 5.438  | 6.23E-19 chr:19:22414379 |
| 19 rs4265943   | 22173740 T | 4.9    | 7.08E-19 chr:19:22414379 |
| 19 rs7247584   | 22529565 T | 5.368  | 8.98E-19 chr:19:22414379 |
| 19 rs371889380 | 22289791 T | 0.2295 | 1.49E-18 chr:19:22414379 |
| 19 rs183543741 | 22289845 T | 0.2328 | 1.86E-18 chr:19:22414379 |
| 19 rs375012052 | 22289851 A | 0.2328 | 1.86E-18 chr:19:22414379 |
| 19 rs10424932  | 22194604 G | 4.87   | 2.20E-18 chr:19:22414379 |
| 19 rs193152926 | 22289796 A | 0.2331 | 2.34E-18 chr:19:22414379 |
| 19 rs383451    | 22463231 T | 4.948  | 1.56E-17 chr:19:22414379 |
| 19 rs283158    | 22458714 A | 4.958  | 1.62E-17 chr:19:22414379 |
| 19 rs283159    | 22457776 T | 4.958  | 1.62E-17 chr:19:22414379 |
| 19 rs11085518  | 22434898 C | 0.2291 | 2.61E-17 chr:19:22414379 |
| 19 rs11085519  | 22434908 T | 0.2291 | 2.61E-17 chr:19:22414379 |

|                |            |        |                          |
|----------------|------------|--------|--------------------------|
| 19 rs11085520  | 22434988 G | 0.2291 | 2.61E-17 chr:19:22414379 |
| 19 rs11085521  | 22435049 T | 0.2291 | 2.61E-17 chr:19:22414379 |
| 19 rs57051328  | 22435951 A | 0.2291 | 2.61E-17 chr:19:22414379 |
| 19 rs57684949  | 22435886 C | 0.2291 | 2.61E-17 chr:19:22414379 |
| 19 rs61387248  | 22435806 A | 0.2291 | 2.61E-17 chr:19:22414379 |
| 19 rs8109519   | 22435128 T | 0.2291 | 2.61E-17 chr:19:22414379 |
| 19 rs8110568   | 22435291 C | 0.2291 | 2.61E-17 chr:19:22414379 |
| 19 rs11085515  | 22426520 C | 0.2311 | 2.75E-17 chr:19:22414379 |
| 19 rs720893    | 22426404 G | 0.2311 | 2.75E-17 chr:19:22414379 |
| 19 rs76969320  | 22338581 G | 0.206  | 3.51E-17 chr:19:22414379 |
| 19 rs59574273  | 22427752 T | 0.2399 | 3.76E-17 chr:19:22414379 |
| 19 rs8109649   | 22435344 G | 0.2358 | 5.48E-17 chr:19:22414379 |
| 19 rs8109766   | 22435340 T | 0.2358 | 5.48E-17 chr:19:22414379 |
| 19 rs8112637   | 22435375 T | 0.2358 | 5.48E-17 chr:19:22414379 |
| 19 rs11085517  | 22433283 T | 0.2316 | 5.52E-17 chr:19:22414379 |
| 19 rs2360006   | 22433903 T | 0.2316 | 5.52E-17 chr:19:22414379 |
| 19 rs55771377  | 22433422 G | 0.2316 | 5.52E-17 chr:19:22414379 |
| 19 rs10426665  | 22428809 G | 0.2427 | 5.75E-17 chr:19:22414379 |
| 19 rs59020942  | 22427750 T | 0.2427 | 5.75E-17 chr:19:22414379 |
| 19 rs60604817  | 22427565 G | 0.2427 | 5.75E-17 chr:19:22414379 |
| 19 rs61649777  | 22436915 G | 0.2357 | 6.78E-17 chr:19:22414379 |
| 19 rs10411905  | 22427035 G | 0.2456 | 8.86E-17 chr:19:22414379 |
| 19 rs11667886  | 22430941 T | 0.2406 | 9.22E-17 chr:19:22414379 |
| 19 rs111575233 | 22430482 A | 0.2492 | 1.12E-16 chr:19:22414379 |
| 19 rs55784860  | 22431132 C | 0.2492 | 1.12E-16 chr:19:22414379 |
| 19 rs112205850 | 22261876 A | 0.2492 | 1.42E-16 chr:19:22414379 |
| 19 rs113023530 | 22261617 A | 0.2492 | 1.42E-16 chr:19:22414379 |
| 19 rs12609368  | 22263996 C | 0.2492 | 1.42E-16 chr:19:22414379 |
| 19 rs1978719   | 22266101 A | 0.2492 | 1.42E-16 chr:19:22414379 |
| 19 rs55728714  | 22262899 G | 0.2492 | 1.42E-16 chr:19:22414379 |
| 19 rs401424    | 22232023 A | 0.2543 | 1.51E-16 chr:19:22414379 |
| 19 rs11667209  | 22259467 G | 0.2547 | 1.93E-16 chr:19:22414379 |
| 19 rs11667274  | 22259666 G | 0.2547 | 1.93E-16 chr:19:22414379 |
| 19 rs149619063 | 22248189 G | 0.2547 | 1.93E-16 chr:19:22414379 |
| 19 rs390730    | 22233509 C | 0.2547 | 1.93E-16 chr:19:22414379 |
| 19 rs409439    | 22227432 C | 0.2547 | 1.93E-16 chr:19:22414379 |
| 19 rs409835    | 22230671 T | 0.2547 | 1.93E-16 chr:19:22414379 |
| 19 rs422344    | 22230956 G | 0.2547 | 1.93E-16 chr:19:22414379 |
| 19 rs425781    | 22229306 A | 0.2547 | 1.93E-16 chr:19:22414379 |
| 19 rs436662    | 22232107 C | 0.2547 | 1.93E-16 chr:19:22414379 |
| 19 rs439574    | 22232024 A | 0.2547 | 1.93E-16 chr:19:22414379 |
| 19 rs4932949   | 22238666 A | 0.2547 | 1.93E-16 chr:19:22414379 |
| 19 rs4932950   | 22243488 G | 0.2547 | 1.93E-16 chr:19:22414379 |

|               |            |        |                          |
|---------------|------------|--------|--------------------------|
| 19 rs4932952  | 22246788 A | 0.2547 | 1.93E-16 chr:19:22414379 |
| 19 rs55735642 | 22241176 T | 0.2547 | 1.93E-16 chr:19:22414379 |
| 19 rs59448173 | 22251554 T | 0.2547 | 1.93E-16 chr:19:22414379 |
| 19 rs73019838 | 22247732 A | 0.2547 | 1.93E-16 chr:19:22414379 |
| 19 rs73019842 | 22249909 G | 0.2547 | 1.93E-16 chr:19:22414379 |
| 19 rs73019844 | 22249925 C | 0.2547 | 1.93E-16 chr:19:22414379 |
| 19 rs408687   | 22231123 T | 0.2554 | 2.60E-16 chr:19:22414379 |
| 19 rs411020   | 22231102 G | 0.2554 | 2.60E-16 chr:19:22414379 |
| 19 rs56369285 | 22267185 C | 0.2561 | 2.90E-16 chr:19:22414379 |
| 19 rs283146   | 22438180 C | 0.247  | 3.35E-16 chr:19:22414379 |
| 19 rs617609   | 22326000 A | 0.2473 | 6.06E-16 chr:19:22414379 |
| 19 rs11085514 | 22425837 A | 0.2476 | 7.31E-16 chr:19:22414379 |
| 19 rs2168491  | 22425589 G | 0.2476 | 7.31E-16 chr:19:22414379 |
| 19 rs281164   | 22419523 T | 0.2476 | 7.31E-16 chr:19:22414379 |
| 19 rs281166   | 22420798 G | 0.2476 | 7.31E-16 chr:19:22414379 |
| 19 rs281168   | 22422638 A | 0.2476 | 7.31E-16 chr:19:22414379 |
| 19 rs281169   | 22423276 T | 0.2476 | 7.31E-16 chr:19:22414379 |
| 19 rs281172   | 22424697 T | 0.2476 | 7.31E-16 chr:19:22414379 |
| 19 rs281173   | 22424997 G | 0.2476 | 7.31E-16 chr:19:22414379 |
| 19 rs11669885 | 22397422 A | 0.2501 | 7.46E-16 chr:19:22414379 |
| 19 rs1091172  | 22432373 C | 0.2593 | 8.22E-16 chr:19:22414379 |
| 19 rs12609473 | 22378606 G | 0.2503 | 9.29E-16 chr:19:22414379 |
| 19 rs12980808 | 22374080 G | 0.2503 | 9.29E-16 chr:19:22414379 |
| 19 rs172183   | 22405532 A | 0.2503 | 9.29E-16 chr:19:22414379 |
| 19 rs1830175  | 22382080 A | 0.2503 | 9.29E-16 chr:19:22414379 |
| 19 rs2522317  | 22339626 G | 0.2503 | 9.29E-16 chr:19:22414379 |
| 19 rs281196   | 22403293 G | 0.2503 | 9.29E-16 chr:19:22414379 |
| 19 rs281198   | 22405169 G | 0.2503 | 9.29E-16 chr:19:22414379 |
| 19 rs281203   | 22406377 C | 0.2503 | 9.29E-16 chr:19:22414379 |
| 19 rs34364151 | 22393367 T | 0.2503 | 9.29E-16 chr:19:22414379 |
| 19 rs368652   | 22356811 A | 0.2503 | 9.29E-16 chr:19:22414379 |
| 19 rs3951502  | 22368852 A | 0.2503 | 9.29E-16 chr:19:22414379 |
| 19 rs397538   | 22329889 A | 0.2503 | 9.29E-16 chr:19:22414379 |
| 19 rs404793   | 22329632 A | 0.2503 | 9.29E-16 chr:19:22414379 |
| 19 rs424912   | 22347371 C | 0.2503 | 9.29E-16 chr:19:22414379 |
| 19 rs431628   | 22359024 T | 0.2503 | 9.29E-16 chr:19:22414379 |
| 19 rs435638   | 22333121 A | 0.2503 | 9.29E-16 chr:19:22414379 |
| 19 rs437284   | 22354875 T | 0.2503 | 9.29E-16 chr:19:22414379 |
| 19 rs448861   | 22353606 A | 0.2503 | 9.29E-16 chr:19:22414379 |
| 19 rs458515   | 22330126 T | 0.2503 | 9.29E-16 chr:19:22414379 |
| 19 rs464038   | 22335569 G | 0.2503 | 9.29E-16 chr:19:22414379 |
| 19 rs605085   | 22355832 T | 0.2503 | 9.29E-16 chr:19:22414379 |
| 19 rs9304995  | 22366432 A | 0.2503 | 9.29E-16 chr:19:22414379 |



|               |            |        |                          |
|---------------|------------|--------|--------------------------|
| 19 rs11561612 | 22432845 A | 0.2632 | 1.02E-15 chr:19:22414379 |
| 19 rs10426106 | 22323268 T | 0.2533 | 1.40E-15 chr:19:22414379 |
| 19 rs1865067  | 22323069 T | 0.2533 | 1.40E-15 chr:19:22414379 |
| 19 rs283141   | 22445808 G | 0.2544 | 1.40E-15 chr:19:22414379 |
| 19 rs11085516 | 22431751 T | 0.2608 | 2.01E-15 chr:19:22414379 |
| 19 rs2359996  | 22285500 T | 0.2804 | 2.57E-15 chr:19:22414379 |
| 19 rs1651558  | 22089575 T | 3.982  | 3.08E-15 chr:19:22414379 |
| 19 rs34312380 | 22390071 T | 0.2511 | 3.16E-15 chr:19:22414379 |
| 19 rs34407605 | 22390084 T | 0.2511 | 3.16E-15 chr:19:22414379 |
| 19 rs10417635 | 22146123 G | 7.411  | 4.83E-15 chr:19:22414379 |
| 19 rs12461800 | 22145006 C | 7.411  | 4.83E-15 chr:19:22414379 |
| 19 rs1995934  | 22128656 T | 7.411  | 4.83E-15 chr:19:22414379 |
| 19 rs34044431 | 22128382 G | 7.411  | 4.83E-15 chr:19:22414379 |
| 19 rs4932854  | 22143597 G | 7.411  | 4.83E-15 chr:19:22414379 |
| 19 rs56058873 | 22142542 C | 7.411  | 4.83E-15 chr:19:22414379 |
| 19 rs56061708 | 22128775 T | 7.411  | 4.83E-15 chr:19:22414379 |
| 19 rs66814910 | 22148202 A | 7.411  | 4.83E-15 chr:19:22414379 |
| 19 rs68053498 | 22131813 A | 7.411  | 4.83E-15 chr:19:22414379 |
| 19 rs68061456 | 22142308 A | 7.411  | 4.83E-15 chr:19:22414379 |
| 19 rs73015567 | 22128077 A | 7.411  | 4.83E-15 chr:19:22414379 |
| 19 rs73015578 | 22132084 A | 7.411  | 4.83E-15 chr:19:22414379 |
| 19 rs10415080 | 22150937 T | 3.513  | 4.99E-15 chr:19:22414379 |
| 19 rs12985553 | 22150868 C | 3.513  | 4.99E-15 chr:19:22414379 |
| 19 rs1912574  | 22125733 C | 7.372  | 5.23E-15 chr:19:22414379 |
| 19 rs2175367  | 22125889 A | 3.46   | 6.40E-15 chr:19:22414379 |
| 19 rs2666454  | 22127730 G | 3.46   | 6.40E-15 chr:19:22414379 |
| 19 rs73930941 | 22123495 C | 7.329  | 7.16E-15 chr:19:22414379 |
| 19 rs12462173 | 22120728 T | 7.38   | 7.35E-15 chr:19:22414379 |
| 19 rs11667684 | 22129638 C | 3.437  | 8.75E-15 chr:19:22414379 |
| 19 rs12608935 | 22145147 T | 3.437  | 8.75E-15 chr:19:22414379 |
| 19 rs12971688 | 22144040 G | 3.437  | 8.75E-15 chr:19:22414379 |
| 19 rs1606063  | 22134408 T | 3.437  | 8.75E-15 chr:19:22414379 |
| 19 rs1849005  | 22142743 T | 3.437  | 8.75E-15 chr:19:22414379 |
| 19 rs1849007  | 22142930 C | 3.437  | 8.75E-15 chr:19:22414379 |
| 19 rs2136888  | 22134791 A | 3.437  | 8.75E-15 chr:19:22414379 |
| 19 rs2188972  | 22149458 A | 3.437  | 8.75E-15 chr:19:22414379 |
| 19 rs2428382  | 22137765 C | 3.437  | 8.75E-15 chr:19:22414379 |
| 19 rs2666441  | 22139230 C | 3.437  | 8.75E-15 chr:19:22414379 |
| 19 rs2666451  | 22130481 T | 3.437  | 8.75E-15 chr:19:22414379 |
| 19 rs2666455  | 22127535 T | 3.437  | 8.75E-15 chr:19:22414379 |
| 19 rs283165   | 22453422 C | 0.2778 | 1.54E-14 chr:19:22414379 |
| 19 rs1912572  | 22140878 A | 3.389  | 1.79E-14 chr:19:22414379 |
| 19 rs283164   | 22453794 A | 0.2806 | 2.24E-14 chr:19:22414379 |

|                     |            |       |          |                 |
|---------------------|------------|-------|----------|-----------------|
| 19 rs2522097        | 22123140 T | 3.334 | 2.64E-14 | chr:19:22414379 |
| 19 rs2666458        | 22123138 G | 3.334 | 2.64E-14 | chr:19:22414379 |
| 19 rs387604         | 22332265 A | 2745  | 3.58E-14 | chr:19:22414379 |
| 19 rs6511313        | 22215905 A | 18.64 | 5.98E-14 | chr:19:22414379 |
| 19 rs2168492;rs5681 | 22425645 T | 0.266 | 6.45E-14 | chr:19:22414379 |
| 19 rs281185         | 22398525 G | 2526  | 6.88E-14 | chr:19:22414379 |
| 19 rs1852417        | 22324637 A | 2512  | 7.21E-14 | chr:19:22414379 |
| 19 rs1852418        | 22324418 A | 2512  | 7.21E-14 | chr:19:22414379 |
| 19 rs2204581        | 22325017 T | 2512  | 7.21E-14 | chr:19:22414379 |
| 19 rs117638181      | 22163014 G | 18.29 | 8.56E-14 | chr:19:22414379 |
| 19 rs11878866       | 22144367 C | 18.29 | 8.56E-14 | chr:19:22414379 |
| 19 rs11881224       | 22220340 A | 18.29 | 8.56E-14 | chr:19:22414379 |
| 19 rs11881563       | 22144992 T | 18.29 | 8.56E-14 | chr:19:22414379 |
| 19 rs11882234       | 22145727 T | 18.29 | 8.56E-14 | chr:19:22414379 |
| 19 rs12150930       | 22223687 C | 18.29 | 8.56E-14 | chr:19:22414379 |
| 19 rs17450788       | 22224755 C | 18.29 | 8.56E-14 | chr:19:22414379 |
| 19 rs17701834       | 22121458 G | 18.29 | 8.56E-14 | chr:19:22414379 |
| 19 rs1849004        | 22142455 C | 18.29 | 8.56E-14 | chr:19:22414379 |
| 19 rs2078180        | 22209846 A | 18.29 | 8.56E-14 | chr:19:22414379 |
| 19 rs2214300        | 22160537 T | 18.29 | 8.56E-14 | chr:19:22414379 |
| 19 rs2359811        | 22152876 G | 18.29 | 8.56E-14 | chr:19:22414379 |
| 19 rs2359820        | 22208114 T | 18.29 | 8.56E-14 | chr:19:22414379 |
| 19 rs57912102       | 22136043 C | 18.29 | 8.56E-14 | chr:19:22414379 |
| 19 rs60548522       | 22214874 A | 18.29 | 8.56E-14 | chr:19:22414379 |
| 19 rs62112863       | 22164515 G | 18.29 | 8.56E-14 | chr:19:22414379 |
| 19 rs62112864       | 22166026 T | 18.29 | 8.56E-14 | chr:19:22414379 |
| 19 rs62112865       | 22172333 T | 18.29 | 8.56E-14 | chr:19:22414379 |
| 19 rs62112870       | 22175976 A | 18.29 | 8.56E-14 | chr:19:22414379 |
| 19 rs62112871       | 22185295 C | 18.29 | 8.56E-14 | chr:19:22414379 |
| 19 rs62112872       | 22192425 C | 18.29 | 8.56E-14 | chr:19:22414379 |
| 19 rs62112907       | 22209569 G | 18.29 | 8.56E-14 | chr:19:22414379 |
| 19 rs62112908       | 22213956 G | 18.29 | 8.56E-14 | chr:19:22414379 |
| 19 rs62112913       | 22221067 G | 18.29 | 8.56E-14 | chr:19:22414379 |
| 19 rs62112914       | 22221407 A | 18.29 | 8.56E-14 | chr:19:22414379 |
| 19 rs62112915       | 22223179 A | 18.29 | 8.56E-14 | chr:19:22414379 |
| 19 rs75167249       | 22128655 T | 18.29 | 8.56E-14 | chr:19:22414379 |
| 19 rs79846980       | 22141343 C | 18.29 | 8.56E-14 | chr:19:22414379 |
| 19 rs8100042        | 22127841 A | 18.29 | 8.56E-14 | chr:19:22414379 |
| 19 rs8104559        | 22205167 C | 18.29 | 8.56E-14 | chr:19:22414379 |
| 19 rs8105895        | 22215457 T | 18.29 | 8.56E-14 | chr:19:22414379 |
| 19 rs8105913        | 22201492 C | 18.29 | 8.56E-14 | chr:19:22414379 |
| 19 rs8112751        | 22222458 T | 18.29 | 8.56E-14 | chr:19:22414379 |
| 19 rs8113460        | 22128006 T | 18.29 | 8.56E-14 | chr:19:22414379 |

|                |            |        |          |                 |
|----------------|------------|--------|----------|-----------------|
| 19 rs62110992  | 22261516 G | 18.24  | 8.65E-14 | chr:19:22414379 |
| 19 rs7252380   | 22245715 A | 18.26  | 9.41E-14 | chr:19:22414379 |
| 19 rs12461632  | 22245089 A | 0.3145 | 1.06E-13 | chr:19:22414379 |
| 19 rs68168074  | 22120333 T | 7.481  | 1.07E-13 | chr:19:22414379 |
| 19 rs3813591   | 22321256 C | 2246   | 1.29E-13 | chr:19:22414379 |
| 19 rs28822164  | 22245108 A | 15.69  | 1.30E-13 | chr:19:22414379 |
| 19 rs143883891 | 22109757 C | 21.13  | 1.38E-13 | chr:19:22414379 |
| 19 rs62110861  | 22095764 T | 21.13  | 1.38E-13 | chr:19:22414379 |
| 19 rs62110863  | 22100508 C | 21.13  | 1.38E-13 | chr:19:22414379 |
| 19 rs10415826  | 22248317 T | 13.8   | 1.42E-13 | chr:19:22414379 |
| 19 rs10419142  | 22252262 T | 17.76  | 1.45E-13 | chr:19:22414379 |
| 19 rs62110979  | 22245152 C | 15.49  | 1.55E-13 | chr:19:22414379 |
| 19 rs62110980  | 22245191 A | 15.49  | 1.55E-13 | chr:19:22414379 |
| 19 rs72620592  | 22510560 T | 0.2784 | 1.60E-13 | chr:19:22414379 |
| 19 rs10409609  | 22439127 A | 0.2939 | 1.67E-13 | chr:19:22414379 |
| 19 rs6511327   | 22286899 A | 13.51  | 1.85E-13 | chr:19:22414379 |
| 19 rs11666460  | 22442350 C | 0.2952 | 1.85E-13 | chr:19:22414379 |
| 19 rs11879966  | 22443852 G | 0.2952 | 1.85E-13 | chr:19:22414379 |
| 19 rs77808832  | 22120260 T | 7.284  | 1.89E-13 | chr:19:22414379 |
| 19 rs10401922  | 22253252 A | 17.54  | 1.95E-13 | chr:19:22414379 |
| 19 rs10404669  | 22241218 C | 17.54  | 1.95E-13 | chr:19:22414379 |
| 19 rs10405613  | 22244772 T | 17.54  | 1.95E-13 | chr:19:22414379 |
| 19 rs10405673  | 22244890 G | 17.54  | 1.95E-13 | chr:19:22414379 |
| 19 rs10406119  | 22245009 A | 17.54  | 1.95E-13 | chr:19:22414379 |
| 19 rs10406485  | 22245002 T | 17.54  | 1.95E-13 | chr:19:22414379 |
| 19 rs10406551  | 22244520 A | 17.54  | 1.95E-13 | chr:19:22414379 |
| 19 rs10406553  | 22237801 T | 17.54  | 1.95E-13 | chr:19:22414379 |
| 19 rs10406653  | 22238023 T | 17.54  | 1.95E-13 | chr:19:22414379 |
| 19 rs10407173  | 22246663 T | 17.54  | 1.95E-13 | chr:19:22414379 |
| 19 rs10407250  | 22238151 A | 17.54  | 1.95E-13 | chr:19:22414379 |
| 19 rs10408150  | 22245225 C | 17.54  | 1.95E-13 | chr:19:22414379 |
| 19 rs10411275  | 22259469 G | 17.54  | 1.95E-13 | chr:19:22414379 |
| 19 rs10411943  | 22259782 G | 17.54  | 1.95E-13 | chr:19:22414379 |
| 19 rs10412953  | 22238482 G | 17.54  | 1.95E-13 | chr:19:22414379 |
| 19 rs10413784  | 22246191 G | 17.54  | 1.95E-13 | chr:19:22414379 |
| 19 rs10414685  | 22247749 T | 17.54  | 1.95E-13 | chr:19:22414379 |
| 19 rs10414861  | 22247761 G | 17.54  | 1.95E-13 | chr:19:22414379 |
| 19 rs10415794  | 22248221 T | 17.54  | 1.95E-13 | chr:19:22414379 |
| 19 rs10415930  | 22248088 A | 17.54  | 1.95E-13 | chr:19:22414379 |
| 19 rs10417285  | 22248184 C | 17.54  | 1.95E-13 | chr:19:22414379 |
| 19 rs10419184  | 22252342 G | 17.54  | 1.95E-13 | chr:19:22414379 |
| 19 rs10420019  | 22251905 A | 17.54  | 1.95E-13 | chr:19:22414379 |
| 19 rs10420042  | 22251926 A | 17.54  | 1.95E-13 | chr:19:22414379 |

|                |            |        |                          |
|----------------|------------|--------|--------------------------|
| 19 rs10420898  | 22252331 C | 17.54  | 1.95E-13 chr:19:22414379 |
| 19 rs10422289  | 22256060 T | 17.54  | 1.95E-13 chr:19:22414379 |
| 19 rs10423114  | 22249289 G | 17.54  | 1.95E-13 chr:19:22414379 |
| 19 rs10423522  | 22243448 T | 17.54  | 1.95E-13 chr:19:22414379 |
| 19 rs10423881  | 22243422 A | 17.54  | 1.95E-13 chr:19:22414379 |
| 19 rs116220423 | 22237041 A | 17.54  | 1.95E-13 chr:19:22414379 |
| 19 rs2043315   | 22252823 C | 17.54  | 1.95E-13 chr:19:22414379 |
| 19 rs2043316   | 22251204 T | 17.54  | 1.95E-13 chr:19:22414379 |
| 19 rs2043317   | 22251096 C | 17.54  | 1.95E-13 chr:19:22414379 |
| 19 rs2163836   | 22242277 T | 17.54  | 1.95E-13 chr:19:22414379 |
| 19 rs2163837   | 22242236 A | 17.54  | 1.95E-13 chr:19:22414379 |
| 19 rs2359833   | 22242221 G | 17.54  | 1.95E-13 chr:19:22414379 |
| 19 rs283168    | 22450922 A | 0.2966 | 1.95E-13 chr:19:22414379 |
| 19 rs28857211  | 22243104 C | 17.54  | 1.95E-13 chr:19:22414379 |
| 19 rs28894669  | 22243264 A | 17.54  | 1.95E-13 chr:19:22414379 |
| 19 rs368701052 | 22255803 A | 17.54  | 1.95E-13 chr:19:22414379 |
| 19 rs377529013 | 22242455 A | 17.54  | 1.95E-13 chr:19:22414379 |
| 19 rs4257328   | 22240090 A | 17.54  | 1.95E-13 chr:19:22414379 |
| 19 rs4510150   | 22239669 G | 17.54  | 1.95E-13 chr:19:22414379 |
| 19 rs4542784   | 22239751 A | 17.54  | 1.95E-13 chr:19:22414379 |
| 19 rs62110981  | 22246013 G | 17.54  | 1.95E-13 chr:19:22414379 |
| 19 rs62110984  | 22252332 A | 17.54  | 1.95E-13 chr:19:22414379 |
| 19 rs62110985  | 22256077 G | 17.54  | 1.95E-13 chr:19:22414379 |
| 19 rs62110986  | 22256771 A | 17.54  | 1.95E-13 chr:19:22414379 |
| 19 rs62110987  | 22257295 C | 17.54  | 1.95E-13 chr:19:22414379 |
| 19 rs62110988  | 22259956 T | 17.54  | 1.95E-13 chr:19:22414379 |
| 19 rs62110989  | 22260299 G | 17.54  | 1.95E-13 chr:19:22414379 |
| 19 rs62110990  | 22260441 T | 17.54  | 1.95E-13 chr:19:22414379 |
| 19 rs62112917  | 22226580 T | 17.54  | 1.95E-13 chr:19:22414379 |
| 19 rs62112918  | 22227079 T | 17.54  | 1.95E-13 chr:19:22414379 |
| 19 rs62112921  | 22227577 C | 17.54  | 1.95E-13 chr:19:22414379 |
| 19 rs62112922  | 22228340 T | 17.54  | 1.95E-13 chr:19:22414379 |
| 19 rs62112955  | 22234959 T | 17.54  | 1.95E-13 chr:19:22414379 |
| 19 rs62112956  | 22235910 A | 17.54  | 1.95E-13 chr:19:22414379 |
| 19 rs62112957  | 22238259 T | 17.54  | 1.95E-13 chr:19:22414379 |
| 19 rs62112958  | 22239118 G | 17.54  | 1.95E-13 chr:19:22414379 |
| 19 rs6511314   | 22236395 A | 17.54  | 1.95E-13 chr:19:22414379 |
| 19 rs6511315   | 22236503 A | 17.54  | 1.95E-13 chr:19:22414379 |
| 19 rs6511316   | 22237629 C | 17.54  | 1.95E-13 chr:19:22414379 |
| 19 rs7246007   | 22240596 C | 17.54  | 1.95E-13 chr:19:22414379 |
| 19 rs7247041   | 22249790 A | 17.54  | 1.95E-13 chr:19:22414379 |
| 19 rs7247147   | 22249858 C | 17.54  | 1.95E-13 chr:19:22414379 |
| 19 rs7247228   | 22250136 T | 17.54  | 1.95E-13 chr:19:22414379 |

|               |            |        |          |                 |
|---------------|------------|--------|----------|-----------------|
| 19 rs7248305  | 22250271 A | 17.54  | 1.95E-13 | chr:19:22414379 |
| 19 rs7249591  | 22245345 C | 17.54  | 1.95E-13 | chr:19:22414379 |
| 19 rs7250852  | 22250510 A | 17.54  | 1.95E-13 | chr:19:22414379 |
| 19 rs7250905  | 22250743 T | 17.54  | 1.95E-13 | chr:19:22414379 |
| 19 rs7251660  | 22250614 C | 17.54  | 1.95E-13 | chr:19:22414379 |
| 19 rs7251884  | 22245530 T | 17.54  | 1.95E-13 | chr:19:22414379 |
| 19 rs7252023  | 22245646 G | 17.54  | 1.95E-13 | chr:19:22414379 |
| 19 rs7252220  | 22245564 A | 17.54  | 1.95E-13 | chr:19:22414379 |
| 19 rs7252550  | 22246017 T | 17.54  | 1.95E-13 | chr:19:22414379 |
| 19 rs7252772  | 22245459 A | 17.54  | 1.95E-13 | chr:19:22414379 |
| 19 rs7253053  | 22245685 C | 17.54  | 1.95E-13 | chr:19:22414379 |
| 19 rs7259971  | 22237319 G | 17.54  | 1.95E-13 | chr:19:22414379 |
| 19 rs75025987 | 22230669 A | 17.54  | 1.95E-13 | chr:19:22414379 |
| 19 rs78646027 | 22257410 T | 17.54  | 1.95E-13 | chr:19:22414379 |
| 19 rs8103518  | 22246952 C | 17.54  | 1.95E-13 | chr:19:22414379 |
| 19 rs8104144  | 22246913 C | 17.54  | 1.95E-13 | chr:19:22414379 |
| 19 rs8104630  | 22247277 C | 17.54  | 1.95E-13 | chr:19:22414379 |
| 19 rs8108651  | 22251464 G | 17.54  | 1.95E-13 | chr:19:22414379 |
| 19 rs8108976  | 22251701 A | 17.54  | 1.95E-13 | chr:19:22414379 |
| 19 rs8110047  | 22239502 G | 17.54  | 1.95E-13 | chr:19:22414379 |
| 19 rs8110289  | 22239717 G | 17.54  | 1.95E-13 | chr:19:22414379 |
| 19 rs8110841  | 22239436 C | 17.54  | 1.95E-13 | chr:19:22414379 |
| 19 rs8110969  | 22240222 T | 17.54  | 1.95E-13 | chr:19:22414379 |
| 19 rs8110975  | 22240233 G | 17.54  | 1.95E-13 | chr:19:22414379 |
| 19 rs8111854  | 22240213 C | 17.54  | 1.95E-13 | chr:19:22414379 |
| 19 rs9653142  | 22249596 G | 17.54  | 1.95E-13 | chr:19:22414379 |
| 19 rs9653157  | 22249490 C | 17.54  | 1.95E-13 | chr:19:22414379 |
| 19 rs9973249  | 22242160 A | 17.54  | 1.95E-13 | chr:19:22414379 |
| 19 rs2163835  | 22242679 T | 17.33  | 2.28E-13 | chr:19:22414379 |
| 19 rs2359835  | 22242690 G | 17.33  | 2.28E-13 | chr:19:22414379 |
| 19 rs62112919 | 22227145 C | 17.39  | 2.29E-13 | chr:19:22414379 |
| 19 rs62112920 | 22227149 G | 17.39  | 2.29E-13 | chr:19:22414379 |
| 19 rs283166   | 22453074 G | 0.2816 | 2.41E-13 | chr:19:22414379 |
| 19 rs12982551 | 22439042 C | 0.2974 | 2.52E-13 | chr:19:22414379 |
| 19 rs10424447 | 22274042 G | 17.25  | 2.59E-13 | chr:19:22414379 |
| 19 rs12973509 | 22439581 A | 0.2979 | 2.70E-13 | chr:19:22414379 |
| 19 rs10401167 | 22291942 A | 17.14  | 2.97E-13 | chr:19:22414379 |
| 19 rs10417916 | 22272615 C | 17.14  | 2.97E-13 | chr:19:22414379 |
| 19 rs10418804 | 22273015 C | 17.14  | 2.97E-13 | chr:19:22414379 |
| 19 rs10423457 | 22279267 C | 17.14  | 2.97E-13 | chr:19:22414379 |
| 19 rs10425828 | 22283077 G | 17.14  | 2.97E-13 | chr:19:22414379 |
| 19 rs10426159 | 22267324 A | 17.14  | 2.97E-13 | chr:19:22414379 |
| 19 rs12151358 | 22282608 A | 17.14  | 2.97E-13 | chr:19:22414379 |

|                |            |        |                          |
|----------------|------------|--------|--------------------------|
| 19 rs145591522 | 22282893 G | 17.14  | 2.97E-13 chr:19:22414379 |
| 19 rs1560716   | 22305901 G | 17.14  | 2.97E-13 chr:19:22414379 |
| 19 rs1560717   | 22292247 G | 17.14  | 2.97E-13 chr:19:22414379 |
| 19 rs16998834  | 22267037 C | 17.14  | 2.97E-13 chr:19:22414379 |
| 19 rs1968446   | 22279047 C | 17.14  | 2.97E-13 chr:19:22414379 |
| 19 rs1975168   | 22305826 T | 17.14  | 2.97E-13 chr:19:22414379 |
| 19 rs1975169   | 22292098 A | 17.14  | 2.97E-13 chr:19:22414379 |
| 19 rs2043319   | 22274595 G | 17.14  | 2.97E-13 chr:19:22414379 |
| 19 rs28374572  | 22276478 C | 17.14  | 2.97E-13 chr:19:22414379 |
| 19 rs28547927  | 22277137 A | 17.14  | 2.97E-13 chr:19:22414379 |
| 19 rs28600030  | 22268443 A | 17.14  | 2.97E-13 chr:19:22414379 |
| 19 rs28635943  | 22268712 T | 17.14  | 2.97E-13 chr:19:22414379 |
| 19 rs62110993  | 22268260 A | 17.14  | 2.97E-13 chr:19:22414379 |
| 19 rs62111027  | 22269019 C | 17.14  | 2.97E-13 chr:19:22414379 |
| 19 rs62111028  | 22272397 T | 17.14  | 2.97E-13 chr:19:22414379 |
| 19 rs62111029  | 22276601 A | 17.14  | 2.97E-13 chr:19:22414379 |
| 19 rs62111030  | 22279375 A | 17.14  | 2.97E-13 chr:19:22414379 |
| 19 rs62111032  | 22281349 G | 17.14  | 2.97E-13 chr:19:22414379 |
| 19 rs62111033  | 22283395 A | 17.14  | 2.97E-13 chr:19:22414379 |
| 19 rs62111034  | 22284720 C | 17.14  | 2.97E-13 chr:19:22414379 |
| 19 rs62111037  | 22286563 T | 17.14  | 2.97E-13 chr:19:22414379 |
| 19 rs62111038  | 22286614 G | 17.14  | 2.97E-13 chr:19:22414379 |
| 19 rs62111039  | 22287336 G | 17.14  | 2.97E-13 chr:19:22414379 |
| 19 rs62111040  | 22287511 A | 17.14  | 2.97E-13 chr:19:22414379 |
| 19 rs62112362  | 22293113 G | 17.14  | 2.97E-13 chr:19:22414379 |
| 19 rs62112364  | 22294903 A | 17.14  | 2.97E-13 chr:19:22414379 |
| 19 rs62112369  | 22313901 T | 17.14  | 2.97E-13 chr:19:22414379 |
| 19 rs6511321   | 22270068 G | 17.14  | 2.97E-13 chr:19:22414379 |
| 19 rs6511328   | 22286979 A | 17.14  | 2.97E-13 chr:19:22414379 |
| 19 rs7252547   | 22305481 C | 17.14  | 2.97E-13 chr:19:22414379 |
| 19 rs7254050   | 22286741 A | 17.14  | 2.97E-13 chr:19:22414379 |
| 19 rs7256462   | 22281993 C | 17.14  | 2.97E-13 chr:19:22414379 |
| 19 rs7260331   | 22291771 T | 17.14  | 2.97E-13 chr:19:22414379 |
| 19 rs79005568  | 22288069 G | 17.14  | 2.97E-13 chr:19:22414379 |
| 19 rs8100768   | 22270468 C | 17.14  | 2.97E-13 chr:19:22414379 |
| 19 rs8103279   | 22284340 G | 17.14  | 2.97E-13 chr:19:22414379 |
| 19 rs8103374   | 22284319 T | 17.14  | 2.97E-13 chr:19:22414379 |
| 19 rs8106762   | 22284736 T | 17.14  | 2.97E-13 chr:19:22414379 |
| 19 rs959908    | 22281893 C | 17.14  | 2.97E-13 chr:19:22414379 |
| 19 rs988211    | 22302536 T | 17.14  | 2.97E-13 chr:19:22414379 |
| 19 rs7259807   | 22291476 G | 19.68  | 4.72E-13 chr:19:22414379 |
| 19 rs172216    | 22451989 A | 0.2968 | 4.77E-13 chr:19:22414379 |
| 19 rs5827519   | 22280532 G | 16.65  | 4.80E-13 chr:19:22414379 |

|                |            |        |          |                 |
|----------------|------------|--------|----------|-----------------|
| 19 rs12973144  | 22439646 A | 0.3034 | 4.87E-13 | chr:19:22414379 |
| 19 rs62111035  | 22286450 C | 0.2577 | 5.48E-13 | chr:19:22414379 |
| 19 rs62110983  | 22251780 A | 19.16  | 7.72E-13 | chr:19:22414379 |
| 19 rs17554694  | 22317148 A | 18.89  | 9.50E-13 | chr:19:22414379 |
| 19 rs62112373  | 22319825 A | 18.89  | 9.50E-13 | chr:19:22414379 |
| 19 rs2023338   | 22443261 T | 10.9   | 1.26E-12 | chr:19:22414379 |
| 19 rs58950778  | 22432275 T | 17.46  | 1.77E-12 | chr:19:22414379 |
| 19 rs699639    | 22120805 G | 3.036  | 1.84E-12 | chr:19:22414379 |
| 19 rs11881638  | 22107837 G | 3.014  | 2.22E-12 | chr:19:22414379 |
| 19 rs1848996   | 22111809 C | 3.014  | 2.22E-12 | chr:19:22414379 |
| 19 rs1965611   | 22113197 C | 3.014  | 2.22E-12 | chr:19:22414379 |
| 19 rs2078136   | 22113503 G | 3.014  | 2.22E-12 | chr:19:22414379 |
| 19 rs639356    | 22104986 C | 3.014  | 2.22E-12 | chr:19:22414379 |
| 19 rs807956    | 22117292 G | 3.014  | 2.22E-12 | chr:19:22414379 |
| 19 rs807957    | 22115990 G | 3.014  | 2.22E-12 | chr:19:22414379 |
| 19 rs807959    | 22115835 A | 3.014  | 2.22E-12 | chr:19:22414379 |
| 19 rs807965    | 22114669 C | 3.014  | 2.22E-12 | chr:19:22414379 |
| 19 rs807966    | 22113827 C | 3.014  | 2.22E-12 | chr:19:22414379 |
| 19 rs369217217 | 22289248 C | 21.67  | 3.08E-12 | chr:19:22414379 |
| 19 rs7259269   | 22441171 T | 0.318  | 3.72E-12 | chr:19:22414379 |
| 19 rs148747862 | 22177981 C | 9.765  | 3.87E-12 | chr:19:22414379 |
| 19 rs62119972  | 22425682 C | 26.25  | 4.50E-12 | chr:19:22414379 |
| 19 rs57420056  | 22094309 A | 2.908  | 4.59E-12 | chr:19:22414379 |
| 19 rs111790701 | 22438463 T | 8.815  | 4.77E-12 | chr:19:22414379 |
| 19 rs12985757  | 22444652 A | 0.3213 | 5.22E-12 | chr:19:22414379 |
| 19 rs12986108  | 22444577 T | 0.3213 | 5.22E-12 | chr:19:22414379 |
| 19 rs1229922   | 22092875 C | 2.868  | 7.05E-12 | chr:19:22414379 |
| 19 rs1229924   | 22092288 G | 2.868  | 7.05E-12 | chr:19:22414379 |
| 19 rs17769191  | 22094348 G | 2.868  | 7.05E-12 | chr:19:22414379 |
| 19 rs2188967   | 22095513 T | 2.868  | 7.05E-12 | chr:19:22414379 |
| 19 rs2435012   | 22093800 T | 2.868  | 7.05E-12 | chr:19:22414379 |
| 19 rs61590737  | 22094470 A | 2.868  | 7.05E-12 | chr:19:22414379 |
| 19 rs76446294  | 22269313 G | 12.69  | 7.65E-12 | chr:19:22414379 |
| 19 rs12972854  | 22444812 C | 0.327  | 8.56E-12 | chr:19:22414379 |
| 19 rs200235951 | 22368291 A | 0.2053 | 9.27E-12 | chr:19:22414379 |
| 19 rs1813242   | 22101473 T | 2.844  | 9.75E-12 | chr:19:22414379 |
| 19 rs1912575   | 22100319 G | 2.844  | 9.75E-12 | chr:19:22414379 |
| 19 rs2203034   | 22101710 T | 2.844  | 9.75E-12 | chr:19:22414379 |
| 19 rs413873    | 22100192 G | 2.844  | 9.75E-12 | chr:19:22414379 |
| 19 rs438100    | 22101205 T | 2.844  | 9.75E-12 | chr:19:22414379 |
| 19 rs975712    | 22098471 T | 2.844  | 9.75E-12 | chr:19:22414379 |
| 19 rs555185638 | 22290846 C | 19.35  | 1.37E-11 | chr:19:22414379 |
| 19 rs3867185   | 22413097 T | 34.34  | 1.39E-11 | chr:19:22414379 |

|                |            |        |          |                 |
|----------------|------------|--------|----------|-----------------|
| 19 rs62112374  | 22329197 T | 34.34  | 1.39E-11 | chr:19:22414379 |
| 19 rs62112416  | 22343674 C | 34.34  | 1.39E-11 | chr:19:22414379 |
| 19 rs62112420  | 22351653 G | 34.34  | 1.39E-11 | chr:19:22414379 |
| 19 rs62112447  | 22379833 G | 34.34  | 1.39E-11 | chr:19:22414379 |
| 19 rs62118346  | 22396430 A | 34.34  | 1.39E-11 | chr:19:22414379 |
| 19 rs62119969  | 22405446 C | 34.34  | 1.39E-11 | chr:19:22414379 |
| 19 rs60866819  | 22334909 C | 33.82  | 1.71E-11 | chr:19:22414379 |
| 19 rs10221484  | 22455170 G | 0.333  | 1.74E-11 | chr:19:22414379 |
| 19 rs539301358 | 22444826 A | 0.337  | 2.15E-11 | chr:19:22414379 |
| 19 rs557677690 | 22444827 A | 0.337  | 2.15E-11 | chr:19:22414379 |
| 19 rs71333870  | 22444823 G | 0.337  | 2.15E-11 | chr:19:22414379 |
| 19 rs1987409   | 22647287 T | 3.175  | 2.48E-11 | chr:19:22414379 |
| 19 rs62110991  | 22260842 T | 9.002  | 3.31E-11 | chr:19:22414379 |
| 19 rs62121863  | 22504673 A | 8.05   | 3.40E-11 | chr:19:22414379 |
| 19 rs62118563  | 22529531 A | 7.601  | 3.41E-11 | chr:19:22414379 |
| 19 rs62120019  | 22493958 T | 7.567  | 3.56E-11 | chr:19:22414379 |
| 19 rs36123644  | 22444780 C | 0.3457 | 5.41E-11 | chr:19:22414379 |
| 19 rs553185985 | 22444776 T | 0.3457 | 5.41E-11 | chr:19:22414379 |
| 19 rs570214927 | 22444775 C | 0.3457 | 5.41E-11 | chr:19:22414379 |
| 19 rs7246504   | 22532831 G | 4.429  | 5.62E-11 | chr:19:22414379 |
| 19 rs62111036  | 22286451 G | 22.51  | 5.64E-11 | chr:19:22414379 |
| 19 rs76584077  | 22286457 C | 22.51  | 5.64E-11 | chr:19:22414379 |
| 19 rs12610469  | 22454617 A | 0.3459 | 6.43E-11 | chr:19:22414379 |
| 19 rs452556    | 22469057 A | 0.3528 | 7.11E-11 | chr:19:22414379 |
| 19 rs283167    | 22452148 A | 0.3307 | 7.81E-11 | chr:19:22414379 |
| 19 rs2116895   | 22266669 T | 0.3759 | 9.52E-11 | chr:19:22414379 |
| 19 rs28456336  | 22268779 T | 0.3759 | 9.52E-11 | chr:19:22414379 |
| 19 rs6511320   | 22267122 C | 0.3759 | 9.52E-11 | chr:19:22414379 |
| 19 rs7258192   | 22264658 G | 0.3759 | 9.52E-11 | chr:19:22414379 |
| 19 rs2163846   | 22505844 C | 0.3507 | 1.04E-10 | chr:19:22414379 |
| 19 rs7259376   | 22507705 A | 0.3507 | 1.04E-10 | chr:19:22414379 |
| 19 rs808373    | 22469233 C | 0.3578 | 1.29E-10 | chr:19:22414379 |
| 19 rs11668269  | 22513960 G | 0.3546 | 1.50E-10 | chr:19:22414379 |
| 19 rs1975174   | 22515251 G | 0.3546 | 1.50E-10 | chr:19:22414379 |
| 19 rs436971    | 22461218 T | 0.3534 | 1.58E-10 | chr:19:22414379 |
| 19 rs564820548 | 22048990 T | 0.3788 | 1.85E-10 | chr:19:22414379 |
| 19 rs7252056   | 22494052 T | 0.3602 | 1.85E-10 | chr:19:22414379 |
| 19 rs8104705   | 22498943 T | 0.3602 | 1.85E-10 | chr:19:22414379 |
| 19 rs7245491   | 22532793 C | 0.3481 | 2.01E-10 | chr:19:22414379 |
| 19 rs7245492   | 22532796 C | 0.3481 | 2.01E-10 | chr:19:22414379 |
| 19 rs66562925  | 22158713 A | 3.599  | 2.79E-10 | chr:19:22414379 |
| 19 rs10403779  | 22258396 C | 0.3866 | 2.97E-10 | chr:19:22414379 |
| 19 rs2043318   | 22241615 G | 0.3866 | 2.97E-10 | chr:19:22414379 |



|                |            |        |          |                 |
|----------------|------------|--------|----------|-----------------|
| 19 rs28881618  | 22254692 G | 0.3866 | 2.97E-10 | chr:19:22414379 |
| 19 rs3752163   | 22256396 G | 0.3866 | 2.97E-10 | chr:19:22414379 |
| 19 rs403850    | 22229593 T | 0.3866 | 2.97E-10 | chr:19:22414379 |
| 19 rs417331    | 22234478 T | 0.3866 | 2.97E-10 | chr:19:22414379 |
| 19 rs4244913   | 22239919 A | 0.3866 | 2.97E-10 | chr:19:22414379 |
| 19 rs4932953   | 22249045 G | 0.3866 | 2.97E-10 | chr:19:22414379 |
| 19 rs6511318   | 22245745 A | 0.3866 | 2.97E-10 | chr:19:22414379 |
| 19 rs7251108   | 22250689 G | 0.3866 | 2.97E-10 | chr:19:22414379 |
| 19 rs7254363   | 22257048 C | 0.3866 | 2.97E-10 | chr:19:22414379 |
| 19 rs7255666   | 22257264 T | 0.3866 | 2.97E-10 | chr:19:22414379 |
| 19 rs7258080   | 22257625 A | 0.3866 | 2.97E-10 | chr:19:22414379 |
| 19 rs8107039   | 22238990 G | 0.3866 | 2.97E-10 | chr:19:22414379 |
| 19 rs11085522  | 22505167 T | 0.3622 | 3.89E-10 | chr:19:22414379 |
| 19 rs1985135   | 22523578 A | 0.3583 | 4.51E-10 | chr:19:22414379 |
| 19 rs10221483  | 22455112 G | 0.3708 | 5.29E-10 | chr:19:22414379 |
| 19 rs7260210   | 22504803 A | 0.3644 | 5.65E-10 | chr:19:22414379 |
| 19 rs808369    | 22474282 T | 0.3705 | 6.45E-10 | chr:19:22414379 |
| 19 rs366849    | 22234941 G | 0.3974 | 7.11E-10 | chr:19:22414379 |
| 19 rs632709    | 22233096 C | 0.3976 | 7.54E-10 | chr:19:22414379 |
| 19 rs4358065   | 22521132 A | 0.3665 | 7.95E-10 | chr:19:22414379 |
| 19 rs10409520  | 22512477 C | 0.3688 | 8.22E-10 | chr:19:22414379 |
| 19 rs10409947  | 22512518 G | 0.3688 | 8.22E-10 | chr:19:22414379 |
| 19 rs1975175   | 22515239 G | 0.3688 | 8.22E-10 | chr:19:22414379 |
| 19 rs1991830   | 22514730 G | 0.3688 | 8.22E-10 | chr:19:22414379 |
| 19 rs8106639   | 22509614 C | 0.3688 | 8.22E-10 | chr:19:22414379 |
| 19 rs10404225  | 22493082 G | 0.3703 | 8.42E-10 | chr:19:22414379 |
| 19 rs1091182   | 22475622 A | 0.3703 | 8.42E-10 | chr:19:22414379 |
| 19 rs2116919   | 22491706 C | 0.3703 | 8.42E-10 | chr:19:22414379 |
| 19 rs4932755   | 22494816 A | 0.3703 | 8.42E-10 | chr:19:22414379 |
| 19 rs808372    | 22470368 T | 0.3703 | 8.42E-10 | chr:19:22414379 |
| 19 rs9304996   | 22486535 A | 0.3703 | 8.42E-10 | chr:19:22414379 |
| 19 rs1808668   | 22518657 A | 0.371  | 1.16E-09 | chr:19:22414379 |
| 19 rs3862494   | 22519522 G | 0.371  | 1.16E-09 | chr:19:22414379 |
| 19 rs607075    | 22072294 T | 0.3403 | 1.19E-09 | chr:19:22414379 |
| 19 rs7254434   | 22500033 G | 0.3766 | 1.38E-09 | chr:19:22414379 |
| 19 rs117976739 | 22445319 T | 5.324  | 1.47E-09 | chr:19:22414379 |
| 19 rs62112368  | 22306775 A | 12.23  | 2.08E-09 | chr:19:22414379 |
| 19 rs28792372  | 22096971 C | 0.359  | 2.09E-09 | chr:19:22414379 |
| 19 rs7249686   | 22621434 A | 0.4189 | 2.34E-09 | chr:19:22414379 |
| 19 rs4932983   | 22533167 A | 0.3733 | 2.57E-09 | chr:19:22414379 |
| 19 rs1229936   | 22072876 G | 0.3535 | 2.80E-09 | chr:19:22414379 |
| 19 rs2457781   | 22054960 C | 0.3574 | 3.04E-09 | chr:19:22414379 |
| 19 rs2262906   | 22063808 T | 0.3541 | 3.40E-09 | chr:19:22414379 |

|                |            |        |          |                 |
|----------------|------------|--------|----------|-----------------|
| 19 rs73027904  | 22533823 T | 3.342  | 3.54E-09 | chr:19:22414379 |
| 19 rs2435026   | 22065061 C | 0.3627 | 3.96E-09 | chr:19:22414379 |
| 19 rs1229933   | 22075704 G | 0.3523 | 3.99E-09 | chr:19:22414379 |
| 19 rs1651576   | 22072917 G | 0.3579 | 4.13E-09 | chr:19:22414379 |
| 19 rs1634475   | 22097368 T | 0.3176 | 4.15E-09 | chr:19:22414379 |
| 19 rs67041396  | 22627210 T | 0.4268 | 4.65E-09 | chr:19:22414379 |
| 19 rs11673349  | 22624078 C | 0.4275 | 4.70E-09 | chr:19:22414379 |
| 19 rs2136886   | 22056159 T | 0.3636 | 5.02E-09 | chr:19:22414379 |
| 19 rs2262907   | 22065036 G | 0.3636 | 5.02E-09 | chr:19:22414379 |
| 19 rs2435027   | 22063526 C | 0.3636 | 5.02E-09 | chr:19:22414379 |
| 19 rs2435029   | 22062158 C | 0.3636 | 5.02E-09 | chr:19:22414379 |
| 19 rs2435030   | 22061789 T | 0.3636 | 5.02E-09 | chr:19:22414379 |
| 19 rs2457779   | 22064373 A | 0.3636 | 5.02E-09 | chr:19:22414379 |
| 19 rs7260580   | 22064446 A | 0.3636 | 5.02E-09 | chr:19:22414379 |
| 19 rs1651572   | 22109563 A | 0.3011 | 6.44E-09 | chr:19:22414379 |
| 19 rs17701615  | 22102137 G | 0.4361 | 6.67E-09 | chr:19:22414379 |
| 19 rs4932984   | 22533255 T | 0.387  | 1.08E-08 | chr:19:22414379 |
| 19 rs66692223  | 22634523 A | 0.4334 | 1.17E-08 | chr:19:22414379 |
| 19 rs67820891  | 22633116 A | 0.4334 | 1.17E-08 | chr:19:22414379 |
| 19 rs3914066   | 22645634 C | 4.299  | 1.40E-08 | chr:19:22414379 |
| 19 rs4462726   | 22645716 A | 4.299  | 1.40E-08 | chr:19:22414379 |
| 19 rs57019979  | 22655945 C | 4.299  | 1.40E-08 | chr:19:22414379 |
| 19 rs58928851  | 22646035 A | 4.299  | 1.40E-08 | chr:19:22414379 |
| 19 rs59779285  | 22650260 G | 4.299  | 1.40E-08 | chr:19:22414379 |
| 19 rs59898872  | 22649917 C | 4.299  | 1.40E-08 | chr:19:22414379 |
| 19 rs60073357  | 22646449 G | 4.299  | 1.40E-08 | chr:19:22414379 |
| 19 rs73924010  | 22648511 C | 4.299  | 1.40E-08 | chr:19:22414379 |
| 19 rs73924012  | 22648815 C | 4.299  | 1.40E-08 | chr:19:22414379 |
| 19 rs73924015  | 22649401 G | 4.299  | 1.40E-08 | chr:19:22414379 |
| 19 rs78732600  | 22650735 G | 4.299  | 1.40E-08 | chr:19:22414379 |
| 19 rs143971182 | 22657107 A | 4.512  | 1.57E-08 | chr:19:22414379 |
| 19 rs73924024  | 22658132 T | 4.512  | 1.57E-08 | chr:19:22414379 |
| 19 rs73924026  | 22658985 C | 4.512  | 1.57E-08 | chr:19:22414379 |
| 19 rs58361042  | 22436135 A | 0.3489 | 1.69E-08 | chr:19:22414379 |
| 19 rs1634455   | 22109050 T | 0.3168 | 1.77E-08 | chr:19:22414379 |
| 19 rs1620271   | 22104279 A | 0.3153 | 1.79E-08 | chr:19:22414379 |
| 19 rs67402748  | 22633618 C | 0.4377 | 1.82E-08 | chr:19:22414379 |
| 19 rs66507626  | 22638052 T | 0.4388 | 1.88E-08 | chr:19:22414379 |
| 19 rs72620595  | 22637631 T | 0.4388 | 1.88E-08 | chr:19:22414379 |
| 19 rs1008324   | 22103318 A | 0.3148 | 1.94E-08 | chr:19:22414379 |
| 19 rs1117304   | 22096499 A | 0.3148 | 1.94E-08 | chr:19:22414379 |
| 19 rs1117305   | 22096460 T | 0.3148 | 1.94E-08 | chr:19:22414379 |
| 19 rs1613145   | 22099638 A | 0.3148 | 1.94E-08 | chr:19:22414379 |

|               |            |        |                          |
|---------------|------------|--------|--------------------------|
| 19 rs1634454  | 22109737 G | 0.3148 | 1.94E-08 chr:19:22414379 |
| 19 rs1634456  | 22108960 G | 0.3148 | 1.94E-08 chr:19:22414379 |
| 19 rs1634457  | 22107554 T | 0.3148 | 1.94E-08 chr:19:22414379 |
| 19 rs1634458  | 22107140 G | 0.3148 | 1.94E-08 chr:19:22414379 |
| 19 rs1634459  | 22106951 A | 0.3148 | 1.94E-08 chr:19:22414379 |
| 19 rs1634460  | 22105192 A | 0.3148 | 1.94E-08 chr:19:22414379 |
| 19 rs1634461  | 22104941 T | 0.3148 | 1.94E-08 chr:19:22414379 |
| 19 rs1634462  | 22104910 A | 0.3148 | 1.94E-08 chr:19:22414379 |
| 19 rs1634463  | 22104789 T | 0.3148 | 1.94E-08 chr:19:22414379 |
| 19 rs1634464  | 22104599 A | 0.3148 | 1.94E-08 chr:19:22414379 |
| 19 rs1634465  | 22104145 A | 0.3148 | 1.94E-08 chr:19:22414379 |
| 19 rs1634467  | 22103475 C | 0.3148 | 1.94E-08 chr:19:22414379 |
| 19 rs1634468  | 22102503 T | 0.3148 | 1.94E-08 chr:19:22414379 |
| 19 rs1634469  | 22101863 T | 0.3148 | 1.94E-08 chr:19:22414379 |
| 19 rs1634470  | 22101471 T | 0.3148 | 1.94E-08 chr:19:22414379 |
| 19 rs1634471  | 22101226 C | 0.3148 | 1.94E-08 chr:19:22414379 |
| 19 rs1634472  | 22100786 A | 0.3148 | 1.94E-08 chr:19:22414379 |
| 19 rs1634473  | 22100245 T | 0.3148 | 1.94E-08 chr:19:22414379 |
| 19 rs1634474  | 22098448 A | 0.3148 | 1.94E-08 chr:19:22414379 |
| 19 rs1651560  | 22101699 G | 0.3148 | 1.94E-08 chr:19:22414379 |
| 19 rs1651561  | 22102191 G | 0.3148 | 1.94E-08 chr:19:22414379 |
| 19 rs1651562  | 22103190 C | 0.3148 | 1.94E-08 chr:19:22414379 |
| 19 rs1651563  | 22103272 G | 0.3148 | 1.94E-08 chr:19:22414379 |
| 19 rs1651564  | 22103358 C | 0.3148 | 1.94E-08 chr:19:22414379 |
| 19 rs1651565  | 22104491 A | 0.3148 | 1.94E-08 chr:19:22414379 |
| 19 rs1651566  | 22104548 G | 0.3148 | 1.94E-08 chr:19:22414379 |
| 19 rs1651567  | 22105244 C | 0.3148 | 1.94E-08 chr:19:22414379 |
| 19 rs1651568  | 22105457 C | 0.3148 | 1.94E-08 chr:19:22414379 |
| 19 rs1651569  | 22106800 G | 0.3148 | 1.94E-08 chr:19:22414379 |
| 19 rs1651570  | 22107283 G | 0.3148 | 1.94E-08 chr:19:22414379 |
| 19 rs1651571  | 22108724 A | 0.3148 | 1.94E-08 chr:19:22414379 |
| 19 rs1848995  | 22111803 A | 0.3148 | 1.94E-08 chr:19:22414379 |
| 19 rs1848997  | 22111868 T | 0.3148 | 1.94E-08 chr:19:22414379 |
| 19 rs1965612  | 22112924 T | 0.3148 | 1.94E-08 chr:19:22414379 |
| 19 rs2522098  | 22111896 G | 0.3148 | 1.94E-08 chr:19:22414379 |
| 19 rs2522099  | 22111050 A | 0.3148 | 1.94E-08 chr:19:22414379 |
| 19 rs2522100  | 22105122 A | 0.3148 | 1.94E-08 chr:19:22414379 |
| 19 rs2666459  | 22105130 C | 0.3148 | 1.94E-08 chr:19:22414379 |
| 19 rs2666460  | 22110753 A | 0.3148 | 1.94E-08 chr:19:22414379 |
| 19 rs57267325 | 22112131 C | 0.3148 | 1.94E-08 chr:19:22414379 |
| 19 rs699640   | 22114144 T | 0.3148 | 1.94E-08 chr:19:22414379 |
| 19 rs757116   | 22098282 G | 0.3148 | 1.94E-08 chr:19:22414379 |
| 19 rs807952   | 22117758 T | 0.3148 | 1.94E-08 chr:19:22414379 |

|                |            |        |                          |
|----------------|------------|--------|--------------------------|
| 19 rs807953    | 22117746 A | 0.3148 | 1.94E-08 chr:19:22414379 |
| 19 rs807954    | 22117663 T | 0.3148 | 1.94E-08 chr:19:22414379 |
| 19 rs807955    | 22117652 G | 0.3148 | 1.94E-08 chr:19:22414379 |
| 19 rs807958    | 22115982 A | 0.3148 | 1.94E-08 chr:19:22414379 |
| 19 rs807960    | 22115656 T | 0.3148 | 1.94E-08 chr:19:22414379 |
| 19 rs807962    | 22115299 A | 0.3148 | 1.94E-08 chr:19:22414379 |
| 19 rs807963    | 22115170 A | 0.3148 | 1.94E-08 chr:19:22414379 |
| 19 rs807964    | 22114802 C | 0.3148 | 1.94E-08 chr:19:22414379 |
| 19 rs988274    | 22110076 C | 0.3148 | 1.94E-08 chr:19:22414379 |
| 19 rs6511355   | 22643745 T | 4.211  | 2.18E-08 chr:19:22414379 |
| 19 rs79174442  | 22644079 G | 4.211  | 2.18E-08 chr:19:22414379 |
| 19 rs8107396   | 22643893 T | 4.211  | 2.18E-08 chr:19:22414379 |
| 19 rs73924019  | 22654910 T | 4.093  | 2.57E-08 chr:19:22414379 |
| 19 rs10407936  | 22312059 A | 0.4311 | 2.78E-08 chr:19:22414379 |
| 19 rs10411720  | 22308919 C | 0.4311 | 2.78E-08 chr:19:22414379 |
| 19 rs10411951  | 22309055 C | 0.4311 | 2.78E-08 chr:19:22414379 |
| 19 rs6511334   | 22307267 C | 0.4311 | 2.78E-08 chr:19:22414379 |
| 19 rs117922051 | 22654504 A | 4.072  | 2.80E-08 chr:19:22414379 |
| 19 rs77687506  | 22654944 T | 2.87   | 2.84E-08 chr:19:22414379 |
| 19 rs1229930   | 22076409 C | 0.3713 | 3.01E-08 chr:19:22414379 |
| 19 rs72620596  | 22656023 T | 0.4412 | 3.04E-08 chr:19:22414379 |
| 19 rs35605606  | 22059609 A | 2.869  | 3.05E-08 chr:19:22414379 |
| 19 rs55992911  | 22397853 C | 55.3   | 3.13E-08 chr:19:22414379 |
| 19 rs2666461   | 22111579 A | 0.323  | 3.21E-08 chr:19:22414379 |
| 19 rs138220002 | 22615616 T | 4.224  | 3.40E-08 chr:19:22414379 |
| 19 rs10408261  | 22298225 T | 0.437  | 3.58E-08 chr:19:22414379 |
| 19 rs452707    | 22304145 T | 0.437  | 3.58E-08 chr:19:22414379 |
| 19 rs6511333   | 22298363 T | 0.437  | 3.58E-08 chr:19:22414379 |
| 19 rs8100438   | 22301003 C | 0.437  | 3.58E-08 chr:19:22414379 |
| 19 rs8103088   | 22298322 G | 0.437  | 3.58E-08 chr:19:22414379 |
| 19 rs987711    | 22300007 T | 0.437  | 3.58E-08 chr:19:22414379 |
| 19 rs2457778   | 22065917 T | 0.381  | 3.64E-08 chr:19:22414379 |
| 19 rs118106898 | 22508607 G | 4.891  | 3.66E-08 chr:19:22414379 |
| 19 rs10405309  | 22647583 T | 2.814  | 3.73E-08 chr:19:22414379 |
| 19 rs10406090  | 22647379 C | 2.814  | 3.73E-08 chr:19:22414379 |
| 19 rs10406385  | 22648340 C | 2.814  | 3.73E-08 chr:19:22414379 |
| 19 rs10411944  | 22648417 T | 2.814  | 3.73E-08 chr:19:22414379 |
| 19 rs10412537  | 22648489 A | 2.814  | 3.73E-08 chr:19:22414379 |
| 19 rs10412735  | 22648565 A | 2.814  | 3.73E-08 chr:19:22414379 |
| 19 rs10415391  | 22652436 T | 2.814  | 3.73E-08 chr:19:22414379 |
| 19 rs10426790  | 22647350 C | 2.814  | 3.73E-08 chr:19:22414379 |
| 19 rs28493338  | 22647744 G | 2.814  | 3.73E-08 chr:19:22414379 |
| 19 rs7258464   | 22646611 G | 2.814  | 3.73E-08 chr:19:22414379 |

|                |            |        |          |                 |
|----------------|------------|--------|----------|-----------------|
| 19 rs7258729   | 22646850 G | 2.814  | 3.73E-08 | chr:19:22414379 |
| 19 rs7259503   | 22647332 T | 2.814  | 3.73E-08 | chr:19:22414379 |
| 19 rs7259890   | 22646882 C | 2.814  | 3.73E-08 | chr:19:22414379 |
| 19 rs62113000  | 22070817 T | 0.3723 | 3.81E-08 | chr:19:22414379 |
| 19 rs2435010   | 22052064 C | 0.3543 | 3.84E-08 | chr:19:22414379 |
| 19 rs10415817  | 22313214 C | 0.435  | 3.85E-08 | chr:19:22414379 |
| 19 rs10420483  | 22190378 A | 0.3484 | 3.89E-08 | chr:19:22414379 |
| 19 rs142623791 | 22173025 A | 0.3484 | 3.89E-08 | chr:19:22414379 |
| 19 rs2106869   | 22184693 C | 0.3484 | 3.89E-08 | chr:19:22414379 |
| 19 rs2188970   | 22200382 G | 0.3484 | 3.89E-08 | chr:19:22414379 |
| 19 rs6511309   | 22174292 T | 0.3484 | 3.89E-08 | chr:19:22414379 |
| 19 rs7249976   | 22183920 A | 0.3484 | 3.89E-08 | chr:19:22414379 |
| 19 rs9636187   | 22173370 T | 0.3484 | 3.89E-08 | chr:19:22414379 |
| 19 rs10419171  | 22640996 G | 4.013  | 3.91E-08 | chr:19:22414379 |
| 19 rs11523642  | 22639557 C | 4.013  | 3.91E-08 | chr:19:22414379 |
| 19 rs1605886   | 22641316 A | 4.013  | 3.91E-08 | chr:19:22414379 |
| 19 rs534533364 | 22646671 A | 2.89   | 4.01E-08 | chr:19:22414379 |
| 19 rs549033416 | 22646662 C | 2.89   | 4.01E-08 | chr:19:22414379 |
| 19 rs567523996 | 22646664 A | 2.89   | 4.01E-08 | chr:19:22414379 |
| 19 rs1229932   | 22075928 G | 0.3739 | 4.48E-08 | chr:19:22414379 |
| 19 rs1229937   | 22072814 G | 0.38   | 4.62E-08 | chr:19:22414379 |
| 19 rs200969060 | 22156855 A | 26.39  | 4.66E-08 | chr:19:22414379 |
| 19 rs1560718   | 22292212 C | 0.4391 | 4.71E-08 | chr:19:22414379 |
| 19 rs1978718   | 22293126 T | 0.4391 | 4.71E-08 | chr:19:22414379 |
| 19 rs55921217  | 22296943 C | 0.4391 | 4.71E-08 | chr:19:22414379 |
| 19 rs6511325   | 22284357 A | 0.4391 | 4.71E-08 | chr:19:22414379 |
| 19 rs6511326   | 22286679 T | 0.4391 | 4.71E-08 | chr:19:22414379 |
| 19 rs6511329   | 22287905 T | 0.4391 | 4.71E-08 | chr:19:22414379 |
| 19 rs6511332   | 22288391 A | 0.4391 | 4.71E-08 | chr:19:22414379 |
| 19 rs8111771   | 22287861 A | 0.4391 | 4.71E-08 | chr:19:22414379 |
| 19 rs2435033   | 22055853 G | 0.3868 | 4.82E-08 | chr:19:22414379 |
| 19 rs58038983  | 22544165 T | 3.424  | 5.02E-08 | chr:19:22414379 |
| 19 rs62112996  | 22064488 G | 0.3876 | 5.89E-08 | chr:19:22414379 |
| 19 rs62112998  | 22066244 T | 0.3876 | 5.89E-08 | chr:19:22414379 |
| 19 rs10401608  | 22650877 A | 2.747  | 6.13E-08 | chr:19:22414379 |
| 19 rs1018912   | 22156585 G | 0.3565 | 6.35E-08 | chr:19:22414379 |
| 19 rs4290587   | 22164646 A | 0.3565 | 6.35E-08 | chr:19:22414379 |
| 19 rs11085509  | 22204573 T | 0.3542 | 6.40E-08 | chr:19:22414379 |
| 19 rs1654508   | 22219276 A | 0.3542 | 6.40E-08 | chr:19:22414379 |
| 19 rs1988568   | 22205566 C | 0.3542 | 6.40E-08 | chr:19:22414379 |
| 19 rs1989120   | 22205528 T | 0.3542 | 6.40E-08 | chr:19:22414379 |
| 19 rs2017962   | 22208751 T | 0.3542 | 6.40E-08 | chr:19:22414379 |
| 19 rs2078089   | 22209753 A | 0.3542 | 6.40E-08 | chr:19:22414379 |

|                |            |        |          |                 |
|----------------|------------|--------|----------|-----------------|
| 19 rs2188969   | 22202783 A | 0.3542 | 6.40E-08 | chr:19:22414379 |
| 19 rs2359821   | 22208314 C | 0.3542 | 6.40E-08 | chr:19:22414379 |
| 19 rs374537    | 22222802 G | 0.3542 | 6.40E-08 | chr:19:22414379 |
| 19 rs404822    | 22215967 A | 0.3542 | 6.40E-08 | chr:19:22414379 |
| 19 rs4244912   | 22203237 T | 0.3542 | 6.40E-08 | chr:19:22414379 |
| 19 rs429184    | 22214352 A | 0.3542 | 6.40E-08 | chr:19:22414379 |
| 19 rs431328    | 22222236 A | 0.3542 | 6.40E-08 | chr:19:22414379 |
| 19 rs436039    | 22214873 T | 0.3542 | 6.40E-08 | chr:19:22414379 |
| 19 rs7255049   | 22213111 A | 0.3542 | 6.40E-08 | chr:19:22414379 |
| 19 rs1019938   | 22280954 T | 0.4431 | 6.42E-08 | chr:19:22414379 |
| 19 rs2099347   | 22282614 T | 0.4431 | 6.42E-08 | chr:19:22414379 |
| 19 rs4553749   | 22285063 C | 0.4431 | 6.42E-08 | chr:19:22414379 |
| 19 rs60200804  | 22283368 T | 0.4431 | 6.42E-08 | chr:19:22414379 |
| 19 rs7245790   | 22320009 C | 0.4418 | 6.72E-08 | chr:19:22414379 |
| 19 rs2435025   | 22065909 C | 0.3914 | 6.77E-08 | chr:19:22414379 |
| 19 rs6511323   | 22281914 T | 0.4445 | 6.90E-08 | chr:19:22414379 |
| 19 rs2158132   | 22659300 G | 0.4519 | 7.34E-08 | chr:19:22414379 |
| 19 rs62112993  | 22055989 T | 0.3886 | 7.42E-08 | chr:19:22414379 |
| 19 rs1229935   | 22073056 A | 0.3858 | 7.89E-08 | chr:19:22414379 |
| 19 rs2359708   | 22050690 G | 0.3649 | 8.87E-08 | chr:19:22414379 |
| 19 rs564862240 | 22397855 C | 48.48  | 8.95E-08 | chr:19:22414379 |
| 19 rs8102770   | 22656799 T | 2.737  | 9.54E-08 | chr:19:22414379 |
| 19 rs8110674   | 22658564 T | 2.737  | 9.54E-08 | chr:19:22414379 |
| 19 rs11667349  | 22076963 G | 2.816  | 9.73E-08 | chr:19:22414379 |
| 19 rs1036235   | 22279541 T | 0.4491 | 9.77E-08 | chr:19:22414379 |
| 19 rs2359995   | 22280060 C | 0.4491 | 9.77E-08 | chr:19:22414379 |
| 19 rs4932747   | 22279252 C | 0.4491 | 9.77E-08 | chr:19:22414379 |
| 19 rs4932748   | 22279318 T | 0.4491 | 9.77E-08 | chr:19:22414379 |
| 19 rs4932954   | 22272454 T | 0.4491 | 9.77E-08 | chr:19:22414379 |
| 19 rs9304994   | 22272743 G | 0.4491 | 9.77E-08 | chr:19:22414379 |
| 19 rs16998944  | 22487437 G | 0.3906 | 9.91E-08 | chr:19:22414379 |
| 19 rs2017521   | 22126138 T | 0.3725 | 1.01E-07 | chr:19:22414379 |
| 19 rs2175366   | 22128279 C | 0.3725 | 1.01E-07 | chr:19:22414379 |
| 19 rs2522104   | 22140849 T | 0.3725 | 1.01E-07 | chr:19:22414379 |
| 19 rs2666447   | 22132868 T | 0.3725 | 1.01E-07 | chr:19:22414379 |
| 19 rs765527    | 22129555 C | 0.3725 | 1.01E-07 | chr:19:22414379 |
| 19 rs2428381   | 22072233 C | 0.4357 | 1.02E-07 | chr:19:22414379 |
| 19 rs10404620  | 22316577 A | 0.448  | 1.03E-07 | chr:19:22414379 |
| 19 rs28420503  | 22316713 A | 0.448  | 1.03E-07 | chr:19:22414379 |
| 19 rs8103471   | 22317314 T | 0.448  | 1.03E-07 | chr:19:22414379 |
| 19 rs4244914   | 22315389 A | 0.45   | 1.11E-07 | chr:19:22414379 |
| 19 rs1229931   | 22076150 C | 0.3862 | 1.27E-07 | chr:19:22414379 |
| 19 rs1229926   | 22090871 T | 0.3382 | 1.48E-07 | chr:19:22414379 |

|                     |            |        |          |                 |
|---------------------|------------|--------|----------|-----------------|
| 19 rs77420117       | 22505345 A | 0.4006 | 1.62E-07 | chr:19:22414379 |
| 19 rs61130683;rs602 | 22080216 A | 2.797  | 1.82E-07 | chr:19:22414379 |
| 19 rs410794         | 22226159 A | 0.4315 | 1.82E-07 | chr:19:22414379 |
| 19 rs1628324        | 22074537 G | 0.4361 | 2.04E-07 | chr:19:22414379 |
| 19 rs111526263      | 22081710 T | 2.736  | 2.11E-07 | chr:19:22414379 |
| 19 rs391264         | 22083490 T | 0.4417 | 2.44E-07 | chr:19:22414379 |
| 19 rs17206          | 22092727 T | 0.3471 | 2.45E-07 | chr:19:22414379 |
| 19 rs2262909        | 22135270 A | 0.3957 | 2.47E-07 | chr:19:22414379 |
| 19 rs1828453        | 22055096 A | 0.4507 | 2.79E-07 | chr:19:22414379 |
| 19 rs2435031        | 22061608 C | 0.4507 | 2.79E-07 | chr:19:22414379 |
| 19 rs2457780        | 22062188 T | 0.4507 | 2.79E-07 | chr:19:22414379 |
| 19 rs116952936      | 22258535 C | 11.91  | 2.83E-07 | chr:19:22414379 |
| 19 rs73013663       | 22075059 A | 2.639  | 3.06E-07 | chr:19:22414379 |
| 19 rs1651559        | 22074185 A | 0.4427 | 3.17E-07 | chr:19:22414379 |
| 19 rs10405083       | 22066946 C | 0.4498 | 3.41E-07 | chr:19:22414379 |
| 19 rs1634480        | 22085885 G | 0.4473 | 3.56E-07 | chr:19:22414379 |
| 19 rs660087         | 22084180 A | 0.4473 | 3.56E-07 | chr:19:22414379 |
| 19 rs1091076        | 22087049 A | 0.4165 | 3.58E-07 | chr:19:22414379 |
| 19 rs220994         | 22084380 A | 0.4165 | 3.58E-07 | chr:19:22414379 |
| 19 rs75307507       | 22065509 A | 0.3432 | 3.67E-07 | chr:19:22414379 |
| 19 rs73013658       | 22050293 G | 2.726  | 4.63E-07 | chr:19:22414379 |
| 19 rs973016;rs20071 | 22629481 A | 3.352  | 5.03E-07 | chr:19:22414379 |
| 19 rs807948         | 22088013 T | 0.4226 | 5.32E-07 | chr:19:22414379 |
| 19 rs807949         | 22087996 C | 0.4226 | 5.32E-07 | chr:19:22414379 |
| 19 rs117760915      | 22060030 G | 0.4042 | 6.59E-07 | chr:19:22414379 |
| 19 rs56237043       | 22052929 A | 0.3593 | 6.68E-07 | chr:19:22414379 |
| 19 rs79925247       | 22415432 T | 19.84  | 7.88E-07 | chr:19:22414379 |
| 19 rs221000         | 22078992 C | 0.4263 | 8.67E-07 | chr:19:22414379 |
| 19 rs221001         | 22078255 A | 0.4263 | 8.67E-07 | chr:19:22414379 |
| 19 rs664043         | 22078486 C | 0.4263 | 8.67E-07 | chr:19:22414379 |
| 19 rs9676297        | 22079033 C | 0.4635 | 1.23E-06 | chr:19:22414379 |
| 19 rs116983655      | 22212243 A | 0.2692 | 1.75E-06 | chr:19:22414379 |
| 19 rs2435017        | 22069695 T | 0.471  | 2.48E-06 | chr:19:22414379 |
| 19 rs4433937        | 22068658 C | 0.471  | 2.48E-06 | chr:19:22414379 |
| 19 rs8105201        | 22068058 T | 0.471  | 2.48E-06 | chr:19:22414379 |
| 19 rs2435023        | 22066349 C | 0.4792 | 3.19E-06 | chr:19:22414379 |
| 19 rs2435024        | 22066306 C | 0.4792 | 3.19E-06 | chr:19:22414379 |
| 19 rs1118269        | 22086912 T | 0.4753 | 3.20E-06 | chr:19:22414379 |
| 19 rs1634478        | 22086241 G | 0.4753 | 3.20E-06 | chr:19:22414379 |
| 19 rs1634479        | 22086140 G | 0.4753 | 3.20E-06 | chr:19:22414379 |
| 19 rs391190         | 22083682 C | 0.4753 | 3.20E-06 | chr:19:22414379 |
| 19 rs2040654        | 22193451 C | 0.343  | 4.39E-06 | chr:19:22414379 |
| 19 rs145160557      | 22185110 T | 0.2832 | 4.52E-06 | chr:19:22414379 |

|                |            |         |          |                 |
|----------------|------------|---------|----------|-----------------|
| 19 rs113082133 | 22442017 T | 0.429   | 4.61E-06 | chr:19:22414379 |
| 19 rs11881250  | 22660356 C | 3.378   | 4.92E-06 | chr:19:22414379 |
| 19 rs62112972  | 22047591 G | 0.4208  | 6.69E-06 | chr:19:22414379 |
| 19 rs4025963   | 22044640 T | 0.4031  | 6.70E-06 | chr:19:22414379 |
| 19 rs58377178  | 22044631 A | 0.4031  | 6.70E-06 | chr:19:22414379 |
| 19 rs12460293  | 22543380 A | 4.407   | 7.03E-06 | chr:19:22414379 |
| 19 rs55851405  | 22541686 C | 4.407   | 7.03E-06 | chr:19:22414379 |
| 19 rs56149942  | 22541575 G | 4.407   | 7.03E-06 | chr:19:22414379 |
| 19 rs2082478   | 22539848 A | 4.442   | 7.19E-06 | chr:19:22414379 |
| 19 rs4932758   | 22540094 A | 4.442   | 7.19E-06 | chr:19:22414379 |
| 19 rs142395395 | 22100706 G | 11.07   | 7.20E-06 | chr:19:22414379 |
| 19 rs182740855 | 22298331 A | 9.113   | 7.21E-06 | chr:19:22414379 |
| 19 rs57891222  | 22449958 T | 0.4514  | 7.25E-06 | chr:19:22414379 |
| 19 rs2435043   | 22047274 A | 0.477   | 7.34E-06 | chr:19:22414379 |
| 19 rs186726610 | 22072906 A | 0.4231  | 7.77E-06 | chr:19:22414379 |
| 19 rs148612115 | 22272101 C | 8.791   | 7.97E-06 | chr:19:22414379 |
| 19 rs2457801   | 22047450 G | 0.4663  | 8.76E-06 | chr:19:22414379 |
| 19 rs11878410  | 22660286 C | 3.148   | 9.10E-06 | chr:19:22414379 |
| 19 rs10418950  | 22610740 C | 0.5438  | 9.18E-06 | chr:19:22414379 |
| 19 rs200151594 | 22047737 G | 0.459   | 9.30E-06 | chr:19:22414379 |
| 19 rs2102538   | 22045128 C | 0.4146  | 1.02E-05 | chr:19:22414379 |
| 19 rs12459747  | 22542982 G | 4.081   | 1.10E-05 | chr:19:22414379 |
| 19 rs1809825   | 22608943 A | 3.69    | 1.32E-05 | chr:19:22414379 |
| 19 rs117003659 | 22430306 T | 0.2975  | 1.34E-05 | chr:19:22414379 |
| 19 rs903937    | 22609988 G | 3.541   | 1.43E-05 | chr:19:22414379 |
| 19 rs148316037 | 22257558 C | 10.19   | 1.45E-05 | chr:19:22414379 |
| 19 rs62112969  | 22042268 C | 0.4185  | 1.61E-05 | chr:19:22414379 |
| 19 rs113242209 | 22547737 T | 3.346   | 2.04E-05 | chr:19:22414379 |
| 19 rs12462488  | 22565096 C | 3.346   | 2.04E-05 | chr:19:22414379 |
| 19 rs17461312  | 22554107 T | 3.346   | 2.04E-05 | chr:19:22414379 |
| 19 rs67769716  | 22567459 A | 3.346   | 2.04E-05 | chr:19:22414379 |
| 19 rs8107578   | 22564441 A | 3.346   | 2.04E-05 | chr:19:22414379 |
| 19 rs8112170   | 22565967 A | 3.346   | 2.04E-05 | chr:19:22414379 |
| 19 rs2935282   | 22631153 T | 1.797   | 2.14E-05 | chr:19:22414379 |
| 19 rs142716437 | 22389966 A | 0.2325  | 2.30E-05 | chr:19:22414379 |
| 19 rs200026439 | 29845668 T | 28.35   | 7.46E-29 | chr:19:29855781 |
| 19 rs201163831 | 29845670 T | 28.35   | 7.46E-29 | chr:19:29855781 |
| 19 rs62104321  | 29866339 C | 34.61   | 1.34E-28 | chr:19:29855781 |
| 19 rs200273877 | 29841554 C | 0.03816 | 4.71E-28 | chr:19:29855781 |
| 19 rs201714995 | 29841536 G | 0.03816 | 4.71E-28 | chr:19:29855781 |
| 19 rs12150940  | 29840750 A | 0.02793 | 1.08E-27 | chr:19:29855781 |
| 19 rs12151167  | 29840748 G | 0.02625 | 1.53E-27 | chr:19:29855781 |
| 19 rs62109918  | 29845664 C | 0.02364 | 6.63E-27 | chr:19:29855781 |



|                |            |         |          |                 |
|----------------|------------|---------|----------|-----------------|
| 19 rs62109919  | 29845666 C | 0.02364 | 6.63E-27 | chr:19:29855781 |
| 19 rs10405460  | 29840781 G | 0.0208  | 7.75E-27 | chr:19:29855781 |
| 19 rs10410829  | 29840787 G | 0.0208  | 7.75E-27 | chr:19:29855781 |
| 19 rs200136359 | 29843211 T | 0.01957 | 1.26E-26 | chr:19:29855781 |
| 19 rs200658849 | 29843213 C | 0.01957 | 1.26E-26 | chr:19:29855781 |
| 19 rs76108985  | 29843218 T | 0.01957 | 1.26E-26 | chr:19:29855781 |
| 19 rs79585427  | 29843225 T | 0.01957 | 1.26E-26 | chr:19:29855781 |
| 19 rs200009518 | 29841360 A | 0.05494 | 1.62E-26 | chr:19:29855781 |
| 19 rs10411884  | 29814875 T | 15.8    | 3.04E-25 | chr:19:29855781 |
| 19 rs11879307  | 29815370 A | 15.8    | 3.04E-25 | chr:19:29855781 |
| 19 rs10402522  | 29861084 A | 15.79   | 3.04E-25 | chr:19:29855781 |
| 19 rs10403684  | 29860887 T | 15.79   | 3.04E-25 | chr:19:29855781 |
| 19 rs10403689  | 29862797 A | 15.79   | 3.04E-25 | chr:19:29855781 |
| 19 rs10404170  | 29863044 C | 15.79   | 3.04E-25 | chr:19:29855781 |
| 19 rs10404520  | 29860937 G | 15.79   | 3.04E-25 | chr:19:29855781 |
| 19 rs10404941  | 29861103 C | 15.79   | 3.04E-25 | chr:19:29855781 |
| 19 rs10406127  | 29826758 T | 15.79   | 3.04E-25 | chr:19:29855781 |
| 19 rs10408748  | 29837390 T | 15.79   | 3.04E-25 | chr:19:29855781 |
| 19 rs10410330  | 29827372 C | 15.79   | 3.04E-25 | chr:19:29855781 |
| 19 rs10411489  | 29846018 C | 15.79   | 3.04E-25 | chr:19:29855781 |
| 19 rs10413814  | 29859044 A | 15.79   | 3.04E-25 | chr:19:29855781 |
| 19 rs10413925  | 29851859 T | 15.79   | 3.04E-25 | chr:19:29855781 |
| 19 rs10419817  | 29828620 T | 15.79   | 3.04E-25 | chr:19:29855781 |
| 19 rs10422443  | 29860582 A | 15.79   | 3.04E-25 | chr:19:29855781 |
| 19 rs10423850  | 29862444 A | 15.79   | 3.04E-25 | chr:19:29855781 |
| 19 rs10424375  | 29839089 A | 15.79   | 3.04E-25 | chr:19:29855781 |
| 19 rs10424790  | 29860630 G | 15.79   | 3.04E-25 | chr:19:29855781 |
| 19 rs10500239  | 29829980 C | 15.79   | 3.04E-25 | chr:19:29855781 |
| 19 rs1119169   | 29850778 T | 15.79   | 3.04E-25 | chr:19:29855781 |
| 19 rs1122022   | 29825214 A | 15.79   | 3.04E-25 | chr:19:29855781 |
| 19 rs11880983  | 29859865 C | 15.79   | 3.04E-25 | chr:19:29855781 |
| 19 rs11882773  | 29859829 A | 15.79   | 3.04E-25 | chr:19:29855781 |
| 19 rs11883246  | 29862074 G | 15.79   | 3.04E-25 | chr:19:29855781 |
| 19 rs12709912  | 29859443 C | 15.79   | 3.04E-25 | chr:19:29855781 |
| 19 rs13343404  | 29826240 A | 15.79   | 3.04E-25 | chr:19:29855781 |
| 19 rs13344917  | 29859503 C | 15.79   | 3.04E-25 | chr:19:29855781 |
| 19 rs1558362   | 29865141 T | 15.79   | 3.04E-25 | chr:19:29855781 |
| 19 rs1558364   | 29865345 A | 15.79   | 3.04E-25 | chr:19:29855781 |
| 19 rs1558365   | 29865746 C | 15.79   | 3.04E-25 | chr:19:29855781 |
| 19 rs17624933  | 29867883 T | 15.79   | 3.04E-25 | chr:19:29855781 |
| 19 rs2193500   | 29834892 G | 15.79   | 3.04E-25 | chr:19:29855781 |
| 19 rs34235250  | 29852282 C | 15.79   | 3.04E-25 | chr:19:29855781 |
| 19 rs56048673  | 29862967 A | 15.79   | 3.04E-25 | chr:19:29855781 |

|               |            |       |                          |
|---------------|------------|-------|--------------------------|
| 19 rs6509385  | 29861469 C | 15.79 | 3.04E-25 chr:19:29855781 |
| 19 rs6509386  | 29861649 T | 15.79 | 3.04E-25 chr:19:29855781 |
| 19 rs6509387  | 29861707 A | 15.79 | 3.04E-25 chr:19:29855781 |
| 19 rs6509388  | 29861882 G | 15.79 | 3.04E-25 chr:19:29855781 |
| 19 rs6509389  | 29861958 G | 15.79 | 3.04E-25 chr:19:29855781 |
| 19 rs6509390  | 29862034 T | 15.79 | 3.04E-25 chr:19:29855781 |
| 19 rs67987964 | 29845533 G | 15.79 | 3.04E-25 chr:19:29855781 |
| 19 rs7246620  | 29861360 C | 15.79 | 3.04E-25 chr:19:29855781 |
| 19 rs7248809  | 29863240 G | 15.79 | 3.04E-25 chr:19:29855781 |
| 19 rs7248884  | 29863662 T | 15.79 | 3.04E-25 chr:19:29855781 |
| 19 rs7252555  | 29863630 C | 15.79 | 3.04E-25 chr:19:29855781 |
| 19 rs7253279  | 29864696 A | 15.79 | 3.04E-25 chr:19:29855781 |
| 19 rs7258498  | 29860387 T | 15.79 | 3.04E-25 chr:19:29855781 |
| 19 rs7259512  | 29862045 G | 15.79 | 3.04E-25 chr:19:29855781 |
| 19 rs7507344  | 29863087 A | 15.79 | 3.04E-25 chr:19:29855781 |
| 19 rs7507798  | 29863083 C | 15.79 | 3.04E-25 chr:19:29855781 |
| 19 rs7508357  | 29841738 C | 15.79 | 3.04E-25 chr:19:29855781 |
| 19 rs9916951  | 29865388 G | 15.79 | 3.04E-25 chr:19:29855781 |
| 19 rs10421910 | 29868808 A | 15.74 | 3.11E-25 chr:19:29855781 |
| 19 rs10422144 | 29868886 A | 15.74 | 3.11E-25 chr:19:29855781 |
| 19 rs10422587 | 29869112 A | 15.74 | 3.11E-25 chr:19:29855781 |
| 19 rs12973626 | 29867364 C | 15.74 | 3.11E-25 chr:19:29855781 |
| 19 rs12979074 | 29867103 A | 15.74 | 3.11E-25 chr:19:29855781 |
| 19 rs12979587 | 29867327 A | 15.74 | 3.11E-25 chr:19:29855781 |
| 19 rs12980588 | 29867736 A | 15.74 | 3.11E-25 chr:19:29855781 |
| 19 rs12981862 | 29867527 G | 15.74 | 3.11E-25 chr:19:29855781 |
| 19 rs12981877 | 29867555 T | 15.74 | 3.11E-25 chr:19:29855781 |
| 19 rs1558366  | 29865847 T | 15.74 | 3.11E-25 chr:19:29855781 |
| 19 rs1981675  | 29868188 T | 15.74 | 3.11E-25 chr:19:29855781 |
| 19 rs1981677  | 29868499 A | 15.74 | 3.11E-25 chr:19:29855781 |
| 19 rs4271695  | 29866742 A | 15.74 | 3.11E-25 chr:19:29855781 |
| 19 rs4398199  | 29866833 C | 15.74 | 3.11E-25 chr:19:29855781 |
| 19 rs4558517  | 29866993 T | 15.74 | 3.11E-25 chr:19:29855781 |
| 19 rs4605284  | 29866673 T | 15.74 | 3.11E-25 chr:19:29855781 |
| 19 rs4605285  | 29866853 G | 15.74 | 3.11E-25 chr:19:29855781 |
| 19 rs8103925  | 29866287 G | 15.74 | 3.11E-25 chr:19:29855781 |
| 19 rs10408576 | 29818131 A | 15.73 | 3.28E-25 chr:19:29855781 |
| 19 rs2160717  | 29822729 T | 15.73 | 3.28E-25 chr:19:29855781 |
| 19 rs2193499  | 29821859 A | 15.73 | 3.28E-25 chr:19:29855781 |
| 19 rs10412642 | 29871720 A | 15.23 | 3.94E-25 chr:19:29855781 |
| 19 rs10405922 | 29813264 C | 14.87 | 4.02E-25 chr:19:29855781 |
| 19 rs10424492 | 29813431 A | 14.87 | 4.02E-25 chr:19:29855781 |
| 19 rs10425611 | 29813263 T | 14.87 | 4.02E-25 chr:19:29855781 |

|                |            |         |          |                 |
|----------------|------------|---------|----------|-----------------|
| 19 rs17773647  | 29813079 G | 14.87   | 4.02E-25 | chr:19:29855781 |
| 19 rs28581734  | 29813167 T | 14.87   | 4.02E-25 | chr:19:29855781 |
| 19 rs8102048   | 29814240 A | 14.87   | 4.02E-25 | chr:19:29855781 |
| 19 rs8113604   | 29813727 G | 14.87   | 4.02E-25 | chr:19:29855781 |
| 19 rs8100333   | 29866136 T | 15.15   | 4.46E-25 | chr:19:29855781 |
| 19 rs8100334   | 29866137 T | 15.15   | 4.46E-25 | chr:19:29855781 |
| 19 rs4805382   | 29873748 G | 0.02097 | 4.47E-25 | chr:19:29855781 |
| 19 rs150191335 | 29843058 T | 15.28   | 5.13E-25 | chr:19:29855781 |
| 19 rs10413763  | 29873400 A | 14.42   | 8.26E-25 | chr:19:29855781 |
| 19 rs9797726   | 29842789 C | 0.01431 | 1.09E-24 | chr:19:29855781 |
| 19 rs13345888  | 29842781 C | 13.64   | 1.34E-24 | chr:19:29855781 |
| 19 rs11883012  | 29874196 A | 0.02388 | 1.81E-24 | chr:19:29855781 |
| 19 rs6509401   | 29877643 T | 0.02388 | 1.81E-24 | chr:19:29855781 |
| 19 rs8109600   | 29877328 A | 0.02388 | 1.81E-24 | chr:19:29855781 |
| 19 rs4805383   | 29873963 A | 0.02387 | 1.85E-24 | chr:19:29855781 |
| 19 rs8108111   | 29809851 G | 12.62   | 2.53E-24 | chr:19:29855781 |
| 19 rs10418201  | 29810677 G | 12.2    | 3.59E-24 | chr:19:29855781 |
| 19 rs10419653  | 29812484 G | 12.2    | 3.59E-24 | chr:19:29855781 |
| 19 rs10423930  | 29810687 G | 12.2    | 3.59E-24 | chr:19:29855781 |
| 19 rs10425007  | 29812397 C | 12.2    | 3.59E-24 | chr:19:29855781 |
| 19 rs11880160  | 29810859 A | 12.2    | 3.59E-24 | chr:19:29855781 |
| 19 rs11880387  | 29810986 A | 12.2    | 3.59E-24 | chr:19:29855781 |
| 19 rs727798    | 29811828 C | 12.2    | 3.59E-24 | chr:19:29855781 |
| 19 rs8111179   | 29809968 C | 12.2    | 3.59E-24 | chr:19:29855781 |
| 19 rs2216341   | 29812294 T | 12.23   | 3.82E-24 | chr:19:29855781 |
| 19 rs1012613   | 29796344 G | 0.09372 | 4.13E-24 | chr:19:29855781 |
| 19 rs142004081 | 29841268 A | 9.835   | 4.96E-24 | chr:19:29855781 |
| 19 rs3960886   | 29878149 T | 0.02106 | 5.61E-24 | chr:19:29855781 |
| 19 rs10415631  | 29810562 C | 12.04   | 5.80E-24 | chr:19:29855781 |
| 19 rs34786514  | 29878333 G | 11.65   | 6.37E-24 | chr:19:29855781 |
| 19 rs12978201  | 29805534 G | 10.75   | 8.12E-24 | chr:19:29855781 |
| 19 rs12608817  | 29808821 A | 11.09   | 9.08E-24 | chr:19:29855781 |
| 19 rs12610707  | 29808907 C | 11.09   | 9.08E-24 | chr:19:29855781 |
| 19 rs12610720  | 29808999 C | 11.09   | 9.08E-24 | chr:19:29855781 |
| 19 rs10420190  | 29873997 A | 11.08   | 1.44E-23 | chr:19:29855781 |
| 19 rs8099873   | 29808683 A | 10.68   | 1.45E-23 | chr:19:29855781 |
| 19 rs12978558  | 29807938 C | 10.73   | 1.57E-23 | chr:19:29855781 |
| 19 rs78286516  | 29843274 G | 0.01077 | 1.91E-23 | chr:19:29855781 |
| 19 rs78902520  | 29843271 T | 0.01077 | 1.91E-23 | chr:19:29855781 |
| 19 rs2111519   | 29794684 C | 0.1013  | 2.15E-23 | chr:19:29855781 |
| 19 rs4591272   | 29841167 A | 8.566   | 2.41E-23 | chr:19:29855781 |
| 19 rs9789288   | 29806349 G | 0.01637 | 2.63E-23 | chr:19:29855781 |
| 19 rs28792508  | 29841216 C | 8.335   | 3.59E-23 | chr:19:29855781 |

|                |            |          |          |                 |
|----------------|------------|----------|----------|-----------------|
| 19 rs7507405   | 29841956 G | 0.01089  | 3.62E-23 | chr:19:29855781 |
| 19 rs2012095   | 29801230 A | 0.06023  | 3.90E-23 | chr:19:29855781 |
| 19 rs13344183  | 29841038 A | 0.009817 | 4.71E-23 | chr:19:29855781 |
| 19 rs12150922  | 29879068 T | 9.891    | 5.29E-23 | chr:19:29855781 |
| 19 rs200964938 | 29841291 G | 8.784    | 8.26E-23 | chr:19:29855781 |
| 19 rs150522295 | 29841311 G | 8.802    | 8.30E-23 | chr:19:29855781 |
| 19 rs17703299  | 29880277 G | 0.09123  | 9.53E-23 | chr:19:29855781 |
| 19 rs1076416   | 29879196 A | 9.414    | 1.25E-22 | chr:19:29855781 |
| 19 rs8103720   | 29800499 C | 0.1093   | 1.91E-22 | chr:19:29855781 |
| 19 rs4805366   | 29799264 A | 0.0522   | 2.12E-22 | chr:19:29855781 |
| 19 rs62108213  | 29830870 G | 0.00906  | 2.16E-22 | chr:19:29855781 |
| 19 rs62108214  | 29830872 T | 0.00906  | 2.16E-22 | chr:19:29855781 |
| 19 rs62108215  | 29830873 G | 0.00906  | 2.16E-22 | chr:19:29855781 |
| 19 rs10401191  | 29792311 C | 0.114    | 3.20E-22 | chr:19:29855781 |
| 19 rs10407706  | 29799613 T | 0.04612  | 3.41E-22 | chr:19:29855781 |
| 19 rs10407716  | 29799624 T | 0.04612  | 3.41E-22 | chr:19:29855781 |
| 19 rs10422053  | 29881070 A | 0.09685  | 3.86E-22 | chr:19:29855781 |
| 19 rs111164000 | 29881600 T | 0.09685  | 3.86E-22 | chr:19:29855781 |
| 19 rs13346371  | 29880687 A | 0.09685  | 3.86E-22 | chr:19:29855781 |
| 19 rs17703317  | 29880615 G | 0.09685  | 3.86E-22 | chr:19:29855781 |
| 19 rs56091016  | 29880529 T | 0.09685  | 3.86E-22 | chr:19:29855781 |
| 19 rs56097453  | 29881537 C | 0.09685  | 3.86E-22 | chr:19:29855781 |
| 19 rs8107864   | 29882147 C | 0.09685  | 3.86E-22 | chr:19:29855781 |
| 19 rs9748993   | 29881310 T | 0.09685  | 3.86E-22 | chr:19:29855781 |
| 19 rs10426495  | 29866098 G | 0.009108 | 4.02E-22 | chr:19:29855781 |
| 19 rs7507869   | 29841938 T | 0.00877  | 4.29E-22 | chr:19:29855781 |
| 19 rs55711025  | 29880437 T | 0.097    | 4.30E-22 | chr:19:29855781 |
| 19 rs10424195  | 29883577 T | 8.611    | 4.43E-22 | chr:19:29855781 |
| 19 rs13344861  | 29881433 C | 0.09713  | 4.94E-22 | chr:19:29855781 |
| 19 rs72623834  | 29842510 G | 0.00859  | 5.52E-22 | chr:19:29855781 |
| 19 rs74838486  | 29842509 G | 0.00859  | 5.52E-22 | chr:19:29855781 |
| 19 rs10403590  | 29844676 T | 0.007905 | 8.26E-22 | chr:19:29855781 |
| 19 rs9749537   | 29844679 C | 0.007905 | 8.26E-22 | chr:19:29855781 |
| 19 rs7249606   | 29866089 T | 0.01045  | 1.20E-21 | chr:19:29855781 |
| 19 rs957165    | 29882525 T | 0.1074   | 2.25E-21 | chr:19:29855781 |
| 19 rs4804878   | 29873579 C | 0.009529 | 3.24E-21 | chr:19:29855781 |
| 19 rs1860573   | 29879749 A | 7.814    | 4.40E-21 | chr:19:29855781 |
| 19 rs10420835  | 29856760 C | 0.007031 | 4.88E-21 | chr:19:29855781 |
| 19 rs10401757  | 29866045 C | 0.007083 | 6.09E-21 | chr:19:29855781 |
| 19 rs2159563   | 29851209 A | 0.006926 | 6.31E-21 | chr:19:29855781 |
| 19 rs2159564   | 29851751 G | 0.006926 | 6.31E-21 | chr:19:29855781 |
| 19 rs4517902   | 29851078 A | 0.006926 | 6.31E-21 | chr:19:29855781 |
| 19 rs4517903   | 29851162 A | 0.006926 | 6.31E-21 | chr:19:29855781 |

|               |            |          |          |                 |
|---------------|------------|----------|----------|-----------------|
| 19 rs10853798 | 29821124 G | 0.007372 | 6.70E-21 | chr:19:29855781 |
| 19 rs10853799 | 29821146 C | 0.007372 | 6.70E-21 | chr:19:29855781 |
| 19 rs10853800 | 29821178 G | 0.007372 | 6.70E-21 | chr:19:29855781 |
| 19 rs11083916 | 29821200 A | 0.007372 | 6.70E-21 | chr:19:29855781 |
| 19 rs4804877  | 29853608 T | 0.007382 | 6.85E-21 | chr:19:29855781 |
| 19 rs8106019  | 29846532 A | 0.007376 | 6.90E-21 | chr:19:29855781 |
| 19 rs7507511  | 29842044 C | 0.006783 | 7.20E-21 | chr:19:29855781 |
| 19 rs7507537  | 29841906 A | 0.006783 | 7.20E-21 | chr:19:29855781 |
| 19 rs2903115  | 29837927 C | 0.008272 | 1.04E-20 | chr:19:29855781 |
| 19 rs4804876  | 29853605 G | 0.008457 | 1.86E-20 | chr:19:29855781 |
| 19 rs62104320 | 29866335 A | 0.007637 | 2.00E-20 | chr:19:29855781 |
| 19 rs7257439  | 29816242 C | 0.007489 | 4.86E-20 | chr:19:29855781 |
| 19 rs979412   | 29818376 C | 0.005133 | 7.00E-20 | chr:19:29855781 |
| 19 rs8103504  | 29808196 T | 0.01282  | 9.27E-20 | chr:19:29855781 |
| 19 rs28488633 | 29823953 T | 0.005301 | 9.35E-20 | chr:19:29855781 |
| 19 rs8100899  | 29808524 A | 0.01284  | 9.36E-20 | chr:19:29855781 |
| 19 rs8113733  | 29807306 T | 0.01284  | 9.36E-20 | chr:19:29855781 |
| 19 rs10417724 | 29819252 C | 0.005453 | 9.74E-20 | chr:19:29855781 |
| 19 rs979413   | 29818635 G | 0.005471 | 1.04E-19 | chr:19:29855781 |
| 19 rs35615835 | 29827061 G | 0.005382 | 1.06E-19 | chr:19:29855781 |
| 19 rs74181477 | 29840703 T | 0.005401 | 1.07E-19 | chr:19:29855781 |
| 19 rs1981676  | 29868320 G | 0.005452 | 1.09E-19 | chr:19:29855781 |
| 19 rs35900872 | 29871153 G | 0.005452 | 1.09E-19 | chr:19:29855781 |
| 19 rs758770   | 29870136 A | 0.005452 | 1.09E-19 | chr:19:29855781 |
| 19 rs10401431 | 29829429 A | 0.00542  | 1.10E-19 | chr:19:29855781 |
| 19 rs10402726 | 29826292 G | 0.00542  | 1.10E-19 | chr:19:29855781 |
| 19 rs10403475 | 29826676 G | 0.00542  | 1.10E-19 | chr:19:29855781 |
| 19 rs10404259 | 29840188 G | 0.00542  | 1.10E-19 | chr:19:29855781 |
| 19 rs10404772 | 29821253 G | 0.00542  | 1.10E-19 | chr:19:29855781 |
| 19 rs10404828 | 29826537 C | 0.00542  | 1.10E-19 | chr:19:29855781 |
| 19 rs10405069 | 29833324 G | 0.00542  | 1.10E-19 | chr:19:29855781 |
| 19 rs10405105 | 29833373 G | 0.00542  | 1.10E-19 | chr:19:29855781 |
| 19 rs10405131 | 29845482 A | 0.00542  | 1.10E-19 | chr:19:29855781 |
| 19 rs10405159 | 29826311 A | 0.00542  | 1.10E-19 | chr:19:29855781 |
| 19 rs10405177 | 29840592 G | 0.00542  | 1.10E-19 | chr:19:29855781 |
| 19 rs10405212 | 29832150 T | 0.00542  | 1.10E-19 | chr:19:29855781 |
| 19 rs10405226 | 29840658 G | 0.00542  | 1.10E-19 | chr:19:29855781 |
| 19 rs10405550 | 29839527 T | 0.00542  | 1.10E-19 | chr:19:29855781 |
| 19 rs10406530 | 29832689 T | 0.00542  | 1.10E-19 | chr:19:29855781 |
| 19 rs10406567 | 29832755 T | 0.00542  | 1.10E-19 | chr:19:29855781 |
| 19 rs10406707 | 29840277 A | 0.00542  | 1.10E-19 | chr:19:29855781 |
| 19 rs10406756 | 29840591 C | 0.00542  | 1.10E-19 | chr:19:29855781 |
| 19 rs10406849 | 29833391 C | 0.00542  | 1.10E-19 | chr:19:29855781 |

|               |            |         |                          |
|---------------|------------|---------|--------------------------|
| 19 rs10407026 | 29848625 T | 0.00542 | 1.10E-19 chr:19:29855781 |
| 19 rs10407234 | 29833261 A | 0.00542 | 1.10E-19 chr:19:29855781 |
| 19 rs10407240 | 29829500 T | 0.00542 | 1.10E-19 chr:19:29855781 |
| 19 rs10407922 | 29833571 A | 0.00542 | 1.10E-19 chr:19:29855781 |
| 19 rs10408183 | 29823239 C | 0.00542 | 1.10E-19 chr:19:29855781 |
| 19 rs10409875 | 29827166 G | 0.00542 | 1.10E-19 chr:19:29855781 |
| 19 rs10410499 | 29827426 G | 0.00542 | 1.10E-19 chr:19:29855781 |
| 19 rs10410585 | 29837528 C | 0.00542 | 1.10E-19 chr:19:29855781 |
| 19 rs10410622 | 29826229 T | 0.00542 | 1.10E-19 chr:19:29855781 |
| 19 rs10411073 | 29826427 T | 0.00542 | 1.10E-19 chr:19:29855781 |
| 19 rs10411272 | 29826524 T | 0.00542 | 1.10E-19 chr:19:29855781 |
| 19 rs10411752 | 29826775 T | 0.00542 | 1.10E-19 chr:19:29855781 |
| 19 rs10412879 | 29848889 T | 0.00542 | 1.10E-19 chr:19:29855781 |
| 19 rs10413525 | 29833498 T | 0.00542 | 1.10E-19 chr:19:29855781 |
| 19 rs10413728 | 29833591 T | 0.00542 | 1.10E-19 chr:19:29855781 |
| 19 rs10415713 | 29831541 C | 0.00542 | 1.10E-19 chr:19:29855781 |
| 19 rs10415948 | 29824022 A | 0.00542 | 1.10E-19 chr:19:29855781 |
| 19 rs10416004 | 29831681 C | 0.00542 | 1.10E-19 chr:19:29855781 |
| 19 rs10416173 | 29824125 A | 0.00542 | 1.10E-19 chr:19:29855781 |
| 19 rs10416302 | 29851854 A | 0.00542 | 1.10E-19 chr:19:29855781 |
| 19 rs10416313 | 29831461 A | 0.00542 | 1.10E-19 chr:19:29855781 |
| 19 rs10416725 | 29831649 A | 0.00542 | 1.10E-19 chr:19:29855781 |
| 19 rs10419949 | 29828341 A | 0.00542 | 1.10E-19 chr:19:29855781 |
| 19 rs10421823 | 29835487 C | 0.00542 | 1.10E-19 chr:19:29855781 |
| 19 rs10422084 | 29835604 C | 0.00542 | 1.10E-19 chr:19:29855781 |
| 19 rs10422614 | 29835503 A | 0.00542 | 1.10E-19 chr:19:29855781 |
| 19 rs10423259 | 29820105 G | 0.00542 | 1.10E-19 chr:19:29855781 |
| 19 rs10423486 | 29839393 G | 0.00542 | 1.10E-19 chr:19:29855781 |
| 19 rs10423515 | 29853162 C | 0.00542 | 1.10E-19 chr:19:29855781 |
| 19 rs10423608 | 29852639 T | 0.00542 | 1.10E-19 chr:19:29855781 |
| 19 rs10423847 | 29852955 A | 0.00542 | 1.10E-19 chr:19:29855781 |
| 19 rs10423994 | 29839675 G | 0.00542 | 1.10E-19 chr:19:29855781 |
| 19 rs10424058 | 29853036 A | 0.00542 | 1.10E-19 chr:19:29855781 |
| 19 rs10424081 | 29832472 G | 0.00542 | 1.10E-19 chr:19:29855781 |
| 19 rs10424145 | 29839694 G | 0.00542 | 1.10E-19 chr:19:29855781 |
| 19 rs10424499 | 29848304 G | 0.00542 | 1.10E-19 chr:19:29855781 |
| 19 rs10425325 | 29839190 A | 0.00542 | 1.10E-19 chr:19:29855781 |
| 19 rs10425388 | 29848770 G | 0.00542 | 1.10E-19 chr:19:29855781 |
| 19 rs10425546 | 29832398 C | 0.00542 | 1.10E-19 chr:19:29855781 |
| 19 rs10425705 | 29839737 C | 0.00542 | 1.10E-19 chr:19:29855781 |
| 19 rs10425993 | 29832603 C | 0.00542 | 1.10E-19 chr:19:29855781 |
| 19 rs10426238 | 29848399 C | 0.00542 | 1.10E-19 chr:19:29855781 |
| 19 rs10853797 | 29821094 G | 0.00542 | 1.10E-19 chr:19:29855781 |

|                |            |         |                          |
|----------------|------------|---------|--------------------------|
| 19 rs11083917  | 29821301 T | 0.00542 | 1.10E-19 chr:19:29855781 |
| 19 rs111393122 | 29839832 A | 0.00542 | 1.10E-19 chr:19:29855781 |
| 19 rs111486428 | 29842638 C | 0.00542 | 1.10E-19 chr:19:29855781 |
| 19 rs1119168   | 29850635 G | 0.00542 | 1.10E-19 chr:19:29855781 |
| 19 rs113093811 | 29852096 T | 0.00542 | 1.10E-19 chr:19:29855781 |
| 19 rs11881314  | 29830193 G | 0.00542 | 1.10E-19 chr:19:29855781 |
| 19 rs11881407  | 29829948 C | 0.00542 | 1.10E-19 chr:19:29855781 |
| 19 rs11881459  | 29830092 C | 0.00542 | 1.10E-19 chr:19:29855781 |
| 19 rs11881508  | 29830309 C | 0.00542 | 1.10E-19 chr:19:29855781 |
| 19 rs12610959  | 29827626 T | 0.00542 | 1.10E-19 chr:19:29855781 |
| 19 rs13345551  | 29826197 A | 0.00542 | 1.10E-19 chr:19:29855781 |
| 19 rs13346790  | 29825511 G | 0.00542 | 1.10E-19 chr:19:29855781 |
| 19 rs140915866 | 29843043 T | 0.00542 | 1.10E-19 chr:19:29855781 |
| 19 rs144395360 | 29843445 C | 0.00542 | 1.10E-19 chr:19:29855781 |
| 19 rs147519792 | 29843490 T | 0.00542 | 1.10E-19 chr:19:29855781 |
| 19 rs148091885 | 29842847 G | 0.00542 | 1.10E-19 chr:19:29855781 |
| 19 rs1558363   | 29865313 T | 0.00542 | 1.10E-19 chr:19:29855781 |
| 19 rs17773922  | 29830629 T | 0.00542 | 1.10E-19 chr:19:29855781 |
| 19 rs2111496   | 29822748 G | 0.00542 | 1.10E-19 chr:19:29855781 |
| 19 rs2111497   | 29822857 T | 0.00542 | 1.10E-19 chr:19:29855781 |
| 19 rs2111498   | 29822858 G | 0.00542 | 1.10E-19 chr:19:29855781 |
| 19 rs2159565   | 29847643 G | 0.00542 | 1.10E-19 chr:19:29855781 |
| 19 rs2160716   | 29822600 A | 0.00542 | 1.10E-19 chr:19:29855781 |
| 19 rs2193501   | 29834999 G | 0.00542 | 1.10E-19 chr:19:29855781 |
| 19 rs2216339   | 29821569 A | 0.00542 | 1.10E-19 chr:19:29855781 |
| 19 rs2216340   | 29823183 T | 0.00542 | 1.10E-19 chr:19:29855781 |
| 19 rs28546871  | 29821491 T | 0.00542 | 1.10E-19 chr:19:29855781 |
| 19 rs2865869   | 29821979 G | 0.00542 | 1.10E-19 chr:19:29855781 |
| 19 rs2865870   | 29821980 T | 0.00542 | 1.10E-19 chr:19:29855781 |
| 19 rs2865871   | 29822061 C | 0.00542 | 1.10E-19 chr:19:29855781 |
| 19 rs2865872   | 29822103 T | 0.00542 | 1.10E-19 chr:19:29855781 |
| 19 rs2865874   | 29825020 G | 0.00542 | 1.10E-19 chr:19:29855781 |
| 19 rs2865875   | 29825068 G | 0.00542 | 1.10E-19 chr:19:29855781 |
| 19 rs2865876   | 29825093 G | 0.00542 | 1.10E-19 chr:19:29855781 |
| 19 rs2865877   | 29825180 T | 0.00542 | 1.10E-19 chr:19:29855781 |
| 19 rs2865878   | 29825358 T | 0.00542 | 1.10E-19 chr:19:29855781 |
| 19 rs2865883   | 29837946 C | 0.00542 | 1.10E-19 chr:19:29855781 |
| 19 rs2865884   | 29837991 T | 0.00542 | 1.10E-19 chr:19:29855781 |
| 19 rs2865888   | 29845818 T | 0.00542 | 1.10E-19 chr:19:29855781 |
| 19 rs2865889   | 29847080 G | 0.00542 | 1.10E-19 chr:19:29855781 |
| 19 rs2865890   | 29847162 C | 0.00542 | 1.10E-19 chr:19:29855781 |
| 19 rs28857523  | 29844100 C | 0.00542 | 1.10E-19 chr:19:29855781 |
| 19 rs28870995  | 29844110 A | 0.00542 | 1.10E-19 chr:19:29855781 |

|               |            |         |                          |
|---------------|------------|---------|--------------------------|
| 19 rs2903117  | 29847324 C | 0.00542 | 1.10E-19 chr:19:29855781 |
| 19 rs2903118  | 29853727 T | 0.00542 | 1.10E-19 chr:19:29855781 |
| 19 rs35349289 | 29830485 T | 0.00542 | 1.10E-19 chr:19:29855781 |
| 19 rs35754631 | 29852145 G | 0.00542 | 1.10E-19 chr:19:29855781 |
| 19 rs4517901  | 29850859 A | 0.00542 | 1.10E-19 chr:19:29855781 |
| 19 rs4805368  | 29828621 T | 0.00542 | 1.10E-19 chr:19:29855781 |
| 19 rs4805371  | 29853296 C | 0.00542 | 1.10E-19 chr:19:29855781 |
| 19 rs4805372  | 29853415 T | 0.00542 | 1.10E-19 chr:19:29855781 |
| 19 rs5007513  | 29821553 G | 0.00542 | 1.10E-19 chr:19:29855781 |
| 19 rs62108163 | 29828752 C | 0.00542 | 1.10E-19 chr:19:29855781 |
| 19 rs62108164 | 29828755 A | 0.00542 | 1.10E-19 chr:19:29855781 |
| 19 rs62109915 | 29843088 C | 0.00542 | 1.10E-19 chr:19:29855781 |
| 19 rs62109922 | 29852078 C | 0.00542 | 1.10E-19 chr:19:29855781 |
| 19 rs6417157  | 29858422 T | 0.00542 | 1.10E-19 chr:19:29855781 |
| 19 rs713444   | 29847933 T | 0.00542 | 1.10E-19 chr:19:29855781 |
| 19 rs7249621  | 29849475 A | 0.00542 | 1.10E-19 chr:19:29855781 |
| 19 rs7249732  | 29849544 A | 0.00542 | 1.10E-19 chr:19:29855781 |
| 19 rs7249741  | 29849562 A | 0.00542 | 1.10E-19 chr:19:29855781 |
| 19 rs7251831  | 29849926 G | 0.00542 | 1.10E-19 chr:19:29855781 |
| 19 rs7252072  | 29855010 A | 0.00542 | 1.10E-19 chr:19:29855781 |
| 19 rs7252876  | 29851938 G | 0.00542 | 1.10E-19 chr:19:29855781 |
| 19 rs7253264  | 29849954 A | 0.00542 | 1.10E-19 chr:19:29855781 |
| 19 rs7253600  | 29850196 A | 0.00542 | 1.10E-19 chr:19:29855781 |
| 19 rs7254854  | 29847388 G | 0.00542 | 1.10E-19 chr:19:29855781 |
| 19 rs7256256  | 29847424 A | 0.00542 | 1.10E-19 chr:19:29855781 |
| 19 rs7258038  | 29844001 A | 0.00542 | 1.10E-19 chr:19:29855781 |
| 19 rs7258057  | 29844039 A | 0.00542 | 1.10E-19 chr:19:29855781 |
| 19 rs8101272  | 29840005 G | 0.00542 | 1.10E-19 chr:19:29855781 |
| 19 rs8102393  | 29820560 T | 0.00542 | 1.10E-19 chr:19:29855781 |
| 19 rs8103034  | 29830764 G | 0.00542 | 1.10E-19 chr:19:29855781 |
| 19 rs8103862  | 29830747 C | 0.00542 | 1.10E-19 chr:19:29855781 |
| 19 rs8105295  | 29846290 C | 0.00542 | 1.10E-19 chr:19:29855781 |
| 19 rs8105692  | 29840119 T | 0.00542 | 1.10E-19 chr:19:29855781 |
| 19 rs8105878  | 29846471 A | 0.00542 | 1.10E-19 chr:19:29855781 |
| 19 rs8106354  | 29831100 G | 0.00542 | 1.10E-19 chr:19:29855781 |
| 19 rs8107378  | 29823430 T | 0.00542 | 1.10E-19 chr:19:29855781 |
| 19 rs8107784  | 29824307 C | 0.00542 | 1.10E-19 chr:19:29855781 |
| 19 rs8108489  | 29846043 T | 0.00542 | 1.10E-19 chr:19:29855781 |
| 19 rs8108803  | 29846308 T | 0.00542 | 1.10E-19 chr:19:29855781 |
| 19 rs8108995  | 29838275 A | 0.00542 | 1.10E-19 chr:19:29855781 |
| 19 rs8109140  | 29846602 T | 0.00542 | 1.10E-19 chr:19:29855781 |
| 19 rs8109315  | 29838529 A | 0.00542 | 1.10E-19 chr:19:29855781 |
| 19 rs8109855  | 29828233 A | 0.00542 | 1.10E-19 chr:19:29855781 |



|               |            |          |                          |
|---------------|------------|----------|--------------------------|
| 19 rs8111162  | 29824369 T | 0.00542  | 1.10E-19 chr:19:29855781 |
| 19 rs8112403  | 29838791 A | 0.00542  | 1.10E-19 chr:19:29855781 |
| 19 rs8112567  | 29838763 T | 0.00542  | 1.10E-19 chr:19:29855781 |
| 19 rs8113496  | 29820529 A | 0.00542  | 1.10E-19 chr:19:29855781 |
| 19 rs8113732  | 29820742 A | 0.00542  | 1.10E-19 chr:19:29855781 |
| 19 rs9748962  | 29844809 G | 0.00542  | 1.10E-19 chr:19:29855781 |
| 19 rs9749055  | 29845247 A | 0.00542  | 1.10E-19 chr:19:29855781 |
| 19 rs10409965 | 29837251 C | 0.005468 | 1.11E-19 chr:19:29855781 |
| 19 rs35270224 | 29849348 A | 0.005465 | 1.11E-19 chr:19:29855781 |
| 19 rs4804875  | 29853497 A | 0.005464 | 1.14E-19 chr:19:29855781 |
| 19 rs4805373  | 29853498 A | 0.005464 | 1.14E-19 chr:19:29855781 |
| 19 rs35379433 | 29834698 G | 0.005534 | 1.20E-19 chr:19:29855781 |
| 19 rs2193497  | 29821737 C | 0.0056   | 1.48E-19 chr:19:29855781 |
| 19 rs2193498  | 29821753 C | 0.0056   | 1.48E-19 chr:19:29855781 |
| 19 rs2903113  | 29821703 C | 0.0056   | 1.48E-19 chr:19:29855781 |
| 19 rs10409090 | 29823614 C | 0.005362 | 1.49E-19 chr:19:29855781 |
| 19 rs35184298 | 29830558 C | 0.005404 | 1.50E-19 chr:19:29855781 |
| 19 rs73028769 | 29870748 C | 0.1408   | 2.16E-19 chr:19:29855781 |
| 19 rs13344206 | 29880707 A | 6.436    | 2.35E-19 chr:19:29855781 |
| 19 rs10420966 | 29816663 G | 0.006223 | 2.47E-19 chr:19:29855781 |
| 19 rs7253662  | 29815722 C | 0.006223 | 2.47E-19 chr:19:29855781 |
| 19 rs10421211 | 29852874 G | 0.006609 | 2.52E-19 chr:19:29855781 |
| 19 rs1981678  | 29868519 A | 0.006355 | 2.58E-19 chr:19:29855781 |
| 19 rs7249123  | 29870685 A | 0.006355 | 2.58E-19 chr:19:29855781 |
| 19 rs8107989  | 29867796 C | 0.006355 | 2.58E-19 chr:19:29855781 |
| 19 rs10401849 | 29860785 G | 0.006273 | 2.59E-19 chr:19:29855781 |
| 19 rs10404303 | 29860663 T | 0.006273 | 2.59E-19 chr:19:29855781 |
| 19 rs10404884 | 29839279 T | 0.006273 | 2.59E-19 chr:19:29855781 |
| 19 rs12691091 | 29859430 T | 0.006273 | 2.59E-19 chr:19:29855781 |
| 19 rs1558864  | 29823261 T | 0.006273 | 2.59E-19 chr:19:29855781 |
| 19 rs1990391  | 29859164 C | 0.006273 | 2.59E-19 chr:19:29855781 |
| 19 rs61631634 | 29852485 A | 0.006273 | 2.59E-19 chr:19:29855781 |
| 19 rs6509383  | 29857637 T | 0.006273 | 2.59E-19 chr:19:29855781 |
| 19 rs7248644  | 29856939 T | 0.006273 | 2.59E-19 chr:19:29855781 |
| 19 rs7258342  | 29859947 A | 0.006273 | 2.59E-19 chr:19:29855781 |
| 19 rs8107741  | 29858602 T | 0.006273 | 2.59E-19 chr:19:29855781 |
| 19 rs929691   | 29818042 A | 0.006273 | 2.59E-19 chr:19:29855781 |
| 19 rs2865896  | 29872800 A | 0.006328 | 2.59E-19 chr:19:29855781 |
| 19 rs4805381  | 29872627 T | 0.006328 | 2.59E-19 chr:19:29855781 |
| 19 rs4805374  | 29862430 A | 0.006318 | 2.64E-19 chr:19:29855781 |
| 19 rs7252679  | 29863745 T | 0.006318 | 2.64E-19 chr:19:29855781 |
| 19 rs7253602  | 29864638 A | 0.006318 | 2.64E-19 chr:19:29855781 |
| 19 rs8107043  | 29864213 A | 0.006318 | 2.64E-19 chr:19:29855781 |

|               |            |          |          |                 |
|---------------|------------|----------|----------|-----------------|
| 19 rs7351109  | 29816574 A | 0.006728 | 3.15E-19 | chr:19:29855781 |
| 19 rs35308361 | 29830552 G | 0.006255 | 3.32E-19 | chr:19:29855781 |
| 19 rs55645533 | 29880453 T | 6.18     | 4.97E-19 | chr:19:29855781 |
| 19 rs11670844 | 29800673 T | 6.022    | 5.69E-19 | chr:19:29855781 |
| 19 rs2011890  | 29801011 A | 6.022    | 5.69E-19 | chr:19:29855781 |
| 19 rs7255472  | 29811968 A | 0.008542 | 8.50E-19 | chr:19:29855781 |
| 19 rs8107456  | 29810347 G | 0.008542 | 8.50E-19 | chr:19:29855781 |
| 19 rs7259050  | 29799035 G | 0.1739   | 1.55E-18 | chr:19:29855781 |
| 19 rs28573811 | 29867469 T | 146.4    | 3.59E-18 | chr:19:29855781 |
| 19 rs73024995 | 29822198 G | 0.1552   | 4.10E-18 | chr:19:29855781 |
| 19 rs957166   | 29882508 T | 5.639    | 4.15E-18 | chr:19:29855781 |
| 19 rs10425210 | 29792094 A | 5.393    | 1.29E-17 | chr:19:29855781 |
| 19 rs2111518  | 29794622 C | 5.15     | 1.42E-17 | chr:19:29855781 |
| 19 rs35980661 | 29798605 A | 0.2125   | 1.26E-16 | chr:19:29855781 |
| 19 rs62111119 | 29795071 T | 4.694    | 3.29E-16 | chr:19:29855781 |
| 19 rs11671699 | 29882003 G | 0.1785   | 5.10E-15 | chr:19:29855781 |
| 19 rs8102600  | 29793077 G | 0.2216   | 2.32E-14 | chr:19:29855781 |
| 19 rs10426484 | 29866090 A | 6.443    | 8.81E-13 | chr:19:29855781 |
| 19 rs881271   | 29927356 A | 3.754    | 9.02E-13 | chr:19:29855781 |
| 19 rs881272   | 29927265 G | 3.754    | 9.02E-13 | chr:19:29855781 |
| 19 rs8102616  | 29930766 C | 3.658    | 3.95E-12 | chr:19:29855781 |
| 19 rs4643456  | 29930485 G | 4.094    | 6.62E-12 | chr:19:29855781 |
| 19 rs12983004 | 29931341 G | 4.043    | 9.38E-12 | chr:19:29855781 |
| 19 rs12986041 | 29931394 A | 4.043    | 9.38E-12 | chr:19:29855781 |
| 19 rs8106372  | 29931143 A | 4.043    | 9.38E-12 | chr:19:29855781 |
| 19 rs17691755 | 29793376 G | 0.182    | 1.22E-11 | chr:19:29855781 |
| 19 rs12971471 | 29931658 A | 3.998    | 1.27E-11 | chr:19:29855781 |
| 19 rs4805405  | 29932099 A | 3.876    | 4.64E-11 | chr:19:29855781 |
| 19 rs57392981 | 29856276 G | 6.603    | 1.10E-10 | chr:19:29855781 |
| 19 rs10423566 | 29929061 C | 3.576    | 1.14E-10 | chr:19:29855781 |
| 19 rs8108536  | 29837645 T | 0.1769   | 2.12E-10 | chr:19:29855781 |
| 19 rs35635579 | 29877326 G | 6.306    | 2.15E-10 | chr:19:29855781 |
| 19 rs4804881  | 29931898 G | 2.947    | 2.65E-10 | chr:19:29855781 |
| 19 rs36032197 | 29813521 T | 0.2923   | 4.58E-10 | chr:19:29855781 |
| 19 rs71363971 | 29813517 C | 0.2923   | 4.58E-10 | chr:19:29855781 |
| 19 rs10410292 | 29906715 A | 0.3658   | 8.28E-10 | chr:19:29855781 |
| 19 rs7251052  | 29897537 G | 5.699    | 5.71E-09 | chr:19:29855781 |
| 19 rs79612959 | 29823787 T | 0.2042   | 8.82E-09 | chr:19:29855781 |
| 19 rs4805391  | 29885783 C | 0.3686   | 1.11E-08 | chr:19:29855781 |
| 19 rs12984061 | 29885279 A | 0.371    | 1.36E-08 | chr:19:29855781 |
| 19 rs4805387  | 29885553 C | 0.371    | 1.36E-08 | chr:19:29855781 |
| 19 rs2011889  | 29800978 T | 10.5     | 1.41E-08 | chr:19:29855781 |
| 19 rs4805389  | 29885643 C | 0.3797   | 2.19E-08 | chr:19:29855781 |

|                |            |        |          |                 |
|----------------|------------|--------|----------|-----------------|
| 19 rs4805390   | 29885676 G | 0.3797 | 2.19E-08 | chr:19:29855781 |
| 19 rs80286763  | 29834996 G | 0.2294 | 3.36E-08 | chr:19:29855781 |
| 19 rs569196726 | 29881464 A | 3.667  | 4.33E-08 | chr:19:29855781 |
| 19 rs62109920  | 29846656 G | 10.99  | 5.14E-08 | chr:19:29855781 |
| 19 rs12986207  | 29903677 A | 3.945  | 6.10E-08 | chr:19:29855781 |
| 19 rs62108165  | 29829502 T | 13.09  | 7.01E-08 | chr:19:29855781 |
| 19 rs117284068 | 29813491 A | 10.42  | 9.66E-08 | chr:19:29855781 |
| 19 rs12610896  | 29812728 A | 10.42  | 9.66E-08 | chr:19:29855781 |
| 19 rs741451    | 29805110 T | 10.07  | 1.12E-07 | chr:19:29855781 |
| 19 rs11083961  | 29919871 A | 0.4272 | 1.73E-07 | chr:19:29855781 |
| 19 rs1368453   | 29922365 T | 0.4272 | 1.73E-07 | chr:19:29855781 |
| 19 rs4805404   | 29921038 T | 0.4272 | 1.73E-07 | chr:19:29855781 |
| 19 rs11671563  | 29901465 A | 5.417  | 1.96E-07 | chr:19:29855781 |
| 19 rs964315    | 29920773 A | 0.4341 | 2.49E-07 | chr:19:29855781 |
| 19 rs11669309  | 29892297 T | 0.3591 | 2.72E-07 | chr:19:29855781 |
| 19 rs4805397   | 29906514 T | 3.099  | 3.20E-07 | chr:19:29855781 |
| 19 rs8111783   | 29890018 G | 0.4468 | 4.13E-07 | chr:19:29855781 |
| 19 rs4805400   | 29907553 A | 2.931  | 5.06E-07 | chr:19:29855781 |
| 19 rs62109953  | 29859207 T | 10.87  | 5.39E-07 | chr:19:29855781 |
| 19 rs4805414   | 29971138 A | 2.517  | 6.05E-07 | chr:19:29855781 |
| 19 rs7247663   | 29909143 G | 2.892  | 6.83E-07 | chr:19:29855781 |
| 19 rs7259598   | 29886029 C | 0.4564 | 8.06E-07 | chr:19:29855781 |
| 19 rs4805388   | 29885613 A | 0.459  | 8.73E-07 | chr:19:29855781 |
| 19 rs34649518  | 29891193 G | 0.4605 | 8.91E-07 | chr:19:29855781 |
| 19 rs4805418   | 29972566 G | 2.463  | 1.02E-06 | chr:19:29855781 |
| 19 rs6509422   | 29930889 A | 0.3966 | 1.42E-06 | chr:19:29855781 |
| 19 rs6509424   | 29931128 A | 0.3966 | 1.42E-06 | chr:19:29855781 |
| 19 rs73016599  | 29916023 A | 0.3989 | 1.56E-06 | chr:19:29855781 |
| 19 rs964313    | 29920357 C | 0.3989 | 1.56E-06 | chr:19:29855781 |
| 19 rs6509423   | 29931127 A | 0.3979 | 1.84E-06 | chr:19:29855781 |
| 19 rs73020505  | 29930394 T | 0.3979 | 1.84E-06 | chr:19:29855781 |
| 19 rs117385908 | 29748073 C | 0.2199 | 1.87E-06 | chr:19:29855781 |
| 19 rs73016590  | 29911461 T | 0.4043 | 2.23E-06 | chr:19:29855781 |
| 19 rs892073    | 29912294 T | 0.4043 | 2.23E-06 | chr:19:29855781 |
| 19 rs10409972  | 29905297 C | 0.4439 | 3.10E-06 | chr:19:29855781 |
| 19 rs10427119  | 29904972 A | 0.4461 | 3.39E-06 | chr:19:29855781 |
| 19 rs16962782  | 29864581 T | 5.748  | 4.10E-06 | chr:19:29855781 |
| 19 rs73925551  | 29864616 A | 5.748  | 4.10E-06 | chr:19:29855781 |
| 19 rs76396068  | 29864627 G | 5.748  | 4.10E-06 | chr:19:29855781 |
| 19 rs79014341  | 29864990 C | 5.748  | 4.10E-06 | chr:19:29855781 |
| 19 rs79187580  | 29864921 A | 5.748  | 4.10E-06 | chr:19:29855781 |
| 19 rs8106978   | 29864521 T | 5.748  | 4.10E-06 | chr:19:29855781 |
| 19 rs8107191   | 29864362 G | 5.748  | 4.10E-06 | chr:19:29855781 |

|                |            |        |          |                 |
|----------------|------------|--------|----------|-----------------|
| 19 rs4805376   | 29863213 C | 10.99  | 4.25E-06 | chr:19:29855781 |
| 19 rs17716836  | 29812000 C | 10.93  | 4.38E-06 | chr:19:29855781 |
| 19 rs17773551  | 29810625 C | 10.93  | 4.38E-06 | chr:19:29855781 |
| 19 rs117512512 | 29825745 A | 10.91  | 4.46E-06 | chr:19:29855781 |
| 19 rs138998402 | 29842631 C | 10.91  | 4.46E-06 | chr:19:29855781 |
| 19 rs139240069 | 29839857 A | 10.91  | 4.46E-06 | chr:19:29855781 |
| 19 rs149465522 | 29840076 T | 10.91  | 4.46E-06 | chr:19:29855781 |
| 19 rs17717108  | 29827335 T | 10.91  | 4.46E-06 | chr:19:29855781 |
| 19 rs190579845 | 29844147 A | 10.91  | 4.46E-06 | chr:19:29855781 |
| 19 rs4805375   | 29863126 T | 10.91  | 4.46E-06 | chr:19:29855781 |
| 19 rs4805378   | 29871813 T | 10.91  | 4.46E-06 | chr:19:29855781 |
| 19 rs4805380   | 29872523 A | 10.91  | 4.46E-06 | chr:19:29855781 |
| 19 rs57982463  | 29829642 G | 10.91  | 4.46E-06 | chr:19:29855781 |
| 19 rs7254145   | 29851810 G | 10.91  | 4.46E-06 | chr:19:29855781 |
| 19 rs740877    | 29869744 A | 10.91  | 4.46E-06 | chr:19:29855781 |
| 19 rs740878    | 29869768 T | 10.91  | 4.46E-06 | chr:19:29855781 |
| 19 rs740879    | 29869987 T | 10.91  | 4.46E-06 | chr:19:29855781 |
| 19 rs74453232  | 29833126 T | 10.91  | 4.46E-06 | chr:19:29855781 |
| 19 rs74578189  | 29836809 C | 10.91  | 4.46E-06 | chr:19:29855781 |
| 19 rs74647649  | 29868729 T | 10.91  | 4.46E-06 | chr:19:29855781 |
| 19 rs75224979  | 29864019 T | 10.91  | 4.46E-06 | chr:19:29855781 |
| 19 rs75530548  | 29856937 T | 10.91  | 4.46E-06 | chr:19:29855781 |
| 19 rs75553465  | 29823919 A | 10.91  | 4.46E-06 | chr:19:29855781 |
| 19 rs76278131  | 29867556 C | 10.91  | 4.46E-06 | chr:19:29855781 |
| 19 rs76807138  | 29868440 A | 10.91  | 4.46E-06 | chr:19:29855781 |
| 19 rs76963036  | 29833845 C | 10.91  | 4.46E-06 | chr:19:29855781 |
| 19 rs77238668  | 29865051 T | 10.91  | 4.46E-06 | chr:19:29855781 |
| 19 rs77337188  | 29869175 T | 10.91  | 4.46E-06 | chr:19:29855781 |
| 19 rs77430465  | 29824472 G | 10.91  | 4.46E-06 | chr:19:29855781 |
| 19 rs79470954  | 29854408 C | 10.91  | 4.46E-06 | chr:19:29855781 |
| 19 rs79857271  | 29865827 A | 10.91  | 4.46E-06 | chr:19:29855781 |
| 19 rs11083953  | 29896392 C | 0.4899 | 4.56E-06 | chr:19:29855781 |
| 19 rs4805379   | 29871922 T | 10.82  | 4.70E-06 | chr:19:29855781 |
| 19 rs11881661  | 29858638 T | 5.653  | 5.03E-06 | chr:19:29855781 |
| 19 rs7253694   | 29858529 C | 5.653  | 5.03E-06 | chr:19:29855781 |
| 19 rs79702327  | 29820070 C | 10.74  | 5.15E-06 | chr:19:29855781 |
| 19 rs79988957  | 29818879 A | 10.74  | 5.15E-06 | chr:19:29855781 |
| 19 rs17773499  | 29807131 T | 10.74  | 5.16E-06 | chr:19:29855781 |
| 19 rs4805367   | 29808147 T | 10.74  | 5.16E-06 | chr:19:29855781 |
| 19 rs75040595  | 29806368 A | 10.74  | 5.16E-06 | chr:19:29855781 |
| 19 rs7254979   | 29898187 G | 0.4916 | 5.64E-06 | chr:19:29855781 |
| 19 rs75806877  | 29797051 A | 8.383  | 6.01E-06 | chr:19:29855781 |
| 19 rs17773425  | 29793493 A | 10.52  | 6.18E-06 | chr:19:29855781 |

|                |            |        |          |                 |
|----------------|------------|--------|----------|-----------------|
| 19 rs2865901   | 29926830 A | 2.675  | 6.33E-06 | chr:19:29855781 |
| 19 rs11083910  | 29814201 T | 14.59  | 6.81E-06 | chr:19:29855781 |
| 19 rs17773524  | 29809488 G | 14.59  | 6.81E-06 | chr:19:29855781 |
| 19 rs74575010  | 29809332 A | 14.34  | 7.84E-06 | chr:19:29855781 |
| 19 rs73018522  | 29921071 A | 0.4267 | 9.79E-06 | chr:19:29855781 |
| 19 rs56269880  | 29907259 G | 0.4643 | 1.20E-05 | chr:19:29855781 |
| 19 rs4804873   | 29802033 C | 13.64  | 1.22E-05 | chr:19:29855781 |
| 19 rs4804874   | 29802246 A | 13.64  | 1.22E-05 | chr:19:29855781 |
| 19 rs116957117 | 29805109 T | 13.4   | 1.37E-05 | chr:19:29855781 |
| 19 rs151173630 | 29805108 G | 13.4   | 1.37E-05 | chr:19:29855781 |
| 19 rs62111939  | 29822553 C | 13.34  | 1.54E-05 | chr:19:29855781 |
| 19 rs4805384   | 29874653 A | 4.389  | 1.58E-05 | chr:19:29855781 |
| 19 rs60085037  | 29876248 C | 4.389  | 1.58E-05 | chr:19:29855781 |
| 19 rs6509399   | 29874546 C | 4.389  | 1.58E-05 | chr:19:29855781 |
| 19 rs74792053  | 29877463 C | 4.389  | 1.58E-05 | chr:19:29855781 |
| 19 rs75131508  | 29877447 T | 4.389  | 1.58E-05 | chr:19:29855781 |
| 19 rs78214929  | 29876346 T | 4.389  | 1.58E-05 | chr:19:29855781 |
| 19 rs78258505  | 29877345 C | 4.389  | 1.58E-05 | chr:19:29855781 |
| 19 rs4805385   | 29875032 A | 4.372  | 1.59E-05 | chr:19:29855781 |
| 19 rs144593945 | 29929491 C | 5.23   | 1.66E-05 | chr:19:29855781 |
| 19 rs192172793 | 29929894 A | 5.23   | 1.66E-05 | chr:19:29855781 |
| 19 rs8105016   | 29931120 A | 5.23   | 1.66E-05 | chr:19:29855781 |
| 19 rs78771681  | 29932268 A | 6.56   | 1.66E-05 | chr:19:29855781 |
| 19 rs8182542   | 29873087 A | 4.275  | 2.40E-05 | chr:19:29855781 |
| 19 rs8182564   | 29873348 A | 4.275  | 2.40E-05 | chr:19:29855781 |
| 19 rs111353402 | 29872155 A | 0.3244 | 2.55E-05 | chr:19:29855781 |
| 19 rs7248795   | 29893285 G | 0.5189 | 2.66E-05 | chr:19:29855781 |
| 19 rs116580970 | 29969684 C | 5.025  | 2.71E-05 | chr:19:29855781 |
| 19 rs56933718  | 29948482 G | 5.025  | 2.71E-05 | chr:19:29855781 |
| 19 rs57249767  | 29941431 G | 5.025  | 2.71E-05 | chr:19:29855781 |
| 19 rs73923825  | 29935374 C | 5.025  | 2.71E-05 | chr:19:29855781 |
| 19 rs74398783  | 29969669 A | 5.025  | 2.71E-05 | chr:19:29855781 |
| 19 rs75301265  | 29967902 T | 5.025  | 2.71E-05 | chr:19:29855781 |
| 19 rs75791040  | 29970851 A | 5.025  | 2.71E-05 | chr:19:29855781 |
| 19 rs75976529  | 29961009 G | 5.025  | 2.71E-05 | chr:19:29855781 |
| 19 rs76193759  | 29969231 G | 5.025  | 2.71E-05 | chr:19:29855781 |
| 19 rs77713166  | 29945654 C | 5.025  | 2.71E-05 | chr:19:29855781 |
| 19 rs77854197  | 29948988 A | 5.025  | 2.71E-05 | chr:19:29855781 |
| 19 rs78132823  | 29938178 A | 5.025  | 2.71E-05 | chr:19:29855781 |
| 19 rs78362269  | 29969866 C | 5.025  | 2.71E-05 | chr:19:29855781 |
| 19 rs78635090  | 29942630 T | 5.025  | 2.71E-05 | chr:19:29855781 |
| 19 rs79004461  | 29972499 T | 5.025  | 2.71E-05 | chr:19:29855781 |
| 19 rs79005430  | 29934907 A | 5.025  | 2.71E-05 | chr:19:29855781 |

|                |             |        |          |                 |
|----------------|-------------|--------|----------|-----------------|
| 19 rs80121463  | 29959148 T  | 5.025  | 2.71E-05 | chr:19:29855781 |
| 19 rs16962841  | 29939023 G  | 4.993  | 2.78E-05 | chr:19:29855781 |
| 19 rs75461522  | 29798875 A  | 12.1   | 3.15E-05 | chr:19:29855781 |
| 19 rs115051604 | 29962486 T  | 4.945  | 3.28E-05 | chr:19:29855781 |
| 19 rs75042751  | 29962182 T  | 4.945  | 3.28E-05 | chr:19:29855781 |
| 19 rs62109951  | 29854071 T  | 3.467  | 3.59E-05 | chr:19:29855781 |
| 19 rs60231848  | 29904685 T  | 0.3293 | 3.67E-05 | chr:19:29855781 |
| 19 rs79231989  | 29790947 C  | 11.73  | 3.77E-05 | chr:19:29855781 |
| 19 rs546946831 | 389293 G    | 4.945  | 7.04E-11 | chr:19:386675   |
| 19 rs571529934 | 389295 C    | 4.945  | 7.04E-11 | chr:19:386675   |
| 19 rs369380681 | 388030 C    | 4.209  | 9.49E-11 | chr:19:386675   |
| 19 rs111816487 | 385465 A    | 4.277  | 2.95E-10 | chr:19:386675   |
| 19 rs111857853 | 387614 G    | 3.633  | 5.30E-10 | chr:19:386675   |
| 19 rs73916946  | 387864 T    | 3.552  | 8.19E-10 | chr:19:386675   |
| 19 rs4897969   | 390341 G    | 3.488  | 1.54E-09 | chr:19:386675   |
| 19 rs374432840 | 387197 T    | 4.229  | 4.70E-09 | chr:19:386675   |
| 19 rs4605301   | 389302 C    | 4.356  | 1.45E-08 | chr:19:386675   |
| 19 rs111688272 | 388012 G    | 3.489  | 7.97E-08 | chr:19:386675   |
| 19 rs55749078  | 387847 C    | 2.85   | 2.65E-07 | chr:19:386675   |
| 19 rs7251812   | 405634 T    | 7.761  | 1.15E-06 | chr:19:386675   |
| 19 rs62102072  | 388053 A    | 0.3651 | 4.04E-06 | chr:19:386675   |
| 19 rs1115033   | 418786 A    | 2.495  | 5.08E-06 | chr:19:386675   |
| 19 rs188197115 | 409238 A    | 2.653  | 8.07E-06 | chr:19:386675   |
| 19 rs9710605   | 398547 T    | 3.027  | 1.48E-05 | chr:19:386675   |
| 19 rs10416684  | 392023 G    | 2.331  | 1.98E-05 | chr:19:386675   |
| 19 rs58557148  | 242063 C    | 3.239  | 3.43E-05 | chr:19:386675   |
| 19 rs79772573  | 417870 C    | 2.472  | 3.76E-05 | chr:19:386675   |
| 19 rs117685610 | 406783 A    | 4.808  | 3.94E-05 | chr:19:386675   |
| 19 rs79214389  | 428530 G    | 2.886  | 4.76E-05 | chr:19:386675   |
| 19 rs76090343  | 423933 A    | 2.278  | 6.96E-05 | chr:19:386675   |
| 1 rs1575722    | 111803894 C | 14.93  | 3.90E-28 | chr:1:111802591 |
| 1 rs2494011    | 111806553 G | 14.93  | 3.90E-28 | chr:1:111802591 |
| 1 rs2764550    | 111808478 A | 14.93  | 3.90E-28 | chr:1:111802591 |
| 1 rs2820060    | 111807851 C | 14.93  | 3.90E-28 | chr:1:111802591 |
| 1 rs2477577    | 111809238 C | 14.31  | 6.04E-28 | chr:1:111802591 |
| 1 rs3118204    | 111810952 A | 13.71  | 1.47E-27 | chr:1:111802591 |
| 1 rs17027272   | 111823851 A | 13.76  | 1.92E-27 | chr:1:111802591 |
| 1 rs1925358    | 111820367 T | 13.76  | 1.92E-27 | chr:1:111802591 |
| 1 rs4272622    | 111825435 C | 13.76  | 1.92E-27 | chr:1:111802591 |
| 1 rs4838895    | 111821459 T | 13.76  | 1.92E-27 | chr:1:111802591 |
| 1 rs61803493   | 111820997 C | 13.76  | 1.92E-27 | chr:1:111802591 |
| 1 rs9429593    | 111823315 T | 13.76  | 1.92E-27 | chr:1:111802591 |
| 1 rs12028469   | 111822648 A | 13.82  | 1.99E-27 | chr:1:111802591 |

|               |             |        |          |                 |
|---------------|-------------|--------|----------|-----------------|
| 1 rs4351635   | 111825754 T | 13.28  | 3.03E-27 | chr:1:111802591 |
| 1 rs10857872  | 111838382 A | 13.69  | 3.40E-27 | chr:1:111802591 |
| 1 rs11102240  | 111844621 G | 13.69  | 3.40E-27 | chr:1:111802591 |
| 1 rs7411387   | 111837135 C | 13.69  | 3.40E-27 | chr:1:111802591 |
| 1 rs2494014   | 111819921 G | 13.33  | 3.93E-27 | chr:1:111802591 |
| 1 rs11102233  | 111827749 T | 27.29  | 5.63E-27 | chr:1:111802591 |
| 1 rs117495492 | 111815317 A | 12.91  | 5.90E-27 | chr:1:111802591 |
| 1 rs11102238  | 111843082 G | 10.73  | 8.74E-26 | chr:1:111802591 |
| 1 rs12026810  | 111846599 G | 10.79  | 9.32E-26 | chr:1:111802591 |
| 1 rs4240528   | 111802958 C | 0.114  | 4.78E-25 | chr:1:111802591 |
| 1 rs41281400  | 111827898 A | 0.1236 | 7.60E-25 | chr:1:111802591 |
| 1 rs2820057   | 111811175 G | 51.03  | 3.77E-23 | chr:1:111802591 |
| 1 rs2820058   | 111811160 C | 51.03  | 3.77E-23 | chr:1:111802591 |
| 1 rs3118209   | 111812196 T | 51.08  | 3.89E-23 | chr:1:111802591 |
| 1 rs4259643   | 111814404 A | 50.9   | 3.93E-23 | chr:1:111802591 |
| 1 rs3118208   | 111812709 A | 47.52  | 4.77E-23 | chr:1:111802591 |
| 1 rs10776719  | 111808180 T | 64.25  | 1.96E-22 | chr:1:111802591 |
| 1 rs10776720  | 111808276 A | 64.25  | 1.96E-22 | chr:1:111802591 |
| 1 rs1590499   | 111804651 A | 64.25  | 1.96E-22 | chr:1:111802591 |
| 1 rs1853784   | 111804717 C | 64.25  | 1.96E-22 | chr:1:111802591 |
| 1 rs2494012   | 111808937 T | 64.25  | 1.96E-22 | chr:1:111802591 |
| 1 rs2764538   | 111804370 A | 64.25  | 1.96E-22 | chr:1:111802591 |
| 1 rs2764549   | 111808546 C | 64.25  | 1.96E-22 | chr:1:111802591 |
| 1 rs2820062   | 111805966 G | 64.25  | 1.96E-22 | chr:1:111802591 |
| 1 rs2104408   | 111810753 C | 74     | 2.79E-21 | chr:1:111802591 |
| 1 rs12410579  | 111835047 G | 0.1718 | 8.93E-21 | chr:1:111802591 |
| 1 rs12410848  | 111834984 C | 0.1718 | 8.93E-21 | chr:1:111802591 |
| 1 rs12752158  | 111833937 A | 0.1718 | 8.93E-21 | chr:1:111802591 |
| 1 rs12755376  | 111836023 T | 0.1718 | 8.93E-21 | chr:1:111802591 |
| 1 rs4406630   | 111834733 T | 0.1718 | 8.93E-21 | chr:1:111802591 |
| 1 rs4562620   | 111835713 A | 0.1718 | 8.93E-21 | chr:1:111802591 |
| 1 rs12401376  | 111828474 A | 0.1737 | 9.76E-21 | chr:1:111802591 |
| 1 rs11578207  | 111837366 C | 0.1723 | 1.96E-20 | chr:1:111802591 |
| 1 rs11578209  | 111837382 A | 0.1723 | 1.96E-20 | chr:1:111802591 |
| 1 rs12402658  | 111840855 G | 0.1723 | 1.96E-20 | chr:1:111802591 |
| 1 rs12562861  | 111838002 A | 0.1723 | 1.96E-20 | chr:1:111802591 |
| 1 rs12734016  | 111842985 C | 0.1723 | 1.96E-20 | chr:1:111802591 |
| 1 rs12735055  | 111842947 A | 0.1723 | 1.96E-20 | chr:1:111802591 |
| 1 rs12735944  | 111844348 T | 0.1723 | 1.96E-20 | chr:1:111802591 |
| 1 rs12736391  | 111844599 C | 0.1723 | 1.96E-20 | chr:1:111802591 |
| 1 rs12739716  | 111836168 T | 0.1723 | 1.96E-20 | chr:1:111802591 |
| 1 rs12739896  | 111844175 G | 0.1723 | 1.96E-20 | chr:1:111802591 |
| 1 rs12753801  | 111844522 C | 0.1723 | 1.96E-20 | chr:1:111802591 |

|               |             |        |                          |
|---------------|-------------|--------|--------------------------|
| 1 rs12755026  | 111844556 T | 0.1723 | 1.96E-20 chr:1:111802591 |
| 1 rs12758947  | 111842897 A | 0.1723 | 1.96E-20 chr:1:111802591 |
| 1 rs142458373 | 111842752 C | 0.1723 | 1.96E-20 chr:1:111802591 |
| 1 rs28805711  | 111844103 T | 0.1723 | 1.96E-20 chr:1:111802591 |
| 1 rs28826608  | 111843891 T | 0.1723 | 1.96E-20 chr:1:111802591 |
| 1 rs28849976  | 111844011 A | 0.1723 | 1.96E-20 chr:1:111802591 |
| 1 rs28857204  | 111844087 T | 0.1723 | 1.96E-20 chr:1:111802591 |
| 1 rs28889692  | 111844007 G | 0.1723 | 1.96E-20 chr:1:111802591 |
| 1 rs35360118  | 111839319 T | 0.1723 | 1.96E-20 chr:1:111802591 |
| 1 rs35764762  | 111843214 G | 0.1723 | 1.96E-20 chr:1:111802591 |
| 1 rs35779360  | 111839515 G | 0.1723 | 1.96E-20 chr:1:111802591 |
| 1 rs4546920   | 111836846 T | 0.1723 | 1.96E-20 chr:1:111802591 |
| 1 rs4546921   | 111836868 T | 0.1723 | 1.96E-20 chr:1:111802591 |
| 1 rs4838901   | 111838605 G | 0.1723 | 1.96E-20 chr:1:111802591 |
| 1 rs4838902   | 111838694 T | 0.1723 | 1.96E-20 chr:1:111802591 |
| 1 rs4838903   | 111838832 T | 0.1723 | 1.96E-20 chr:1:111802591 |
| 1 rs4838904   | 111838962 C | 0.1723 | 1.96E-20 chr:1:111802591 |
| 1 rs4839117   | 111839037 G | 0.1723 | 1.96E-20 chr:1:111802591 |
| 1 rs61382086  | 111842094 T | 0.1723 | 1.96E-20 chr:1:111802591 |
| 1 rs6669614   | 111840130 T | 0.1723 | 1.96E-20 chr:1:111802591 |
| 1 rs6688167   | 111841315 C | 0.1723 | 1.96E-20 chr:1:111802591 |
| 1 rs6688184   | 111841367 C | 0.1723 | 1.96E-20 chr:1:111802591 |
| 1 rs6699184   | 111841409 A | 0.1723 | 1.96E-20 chr:1:111802591 |
| 1 rs7413908   | 111842524 T | 0.1723 | 1.96E-20 chr:1:111802591 |
| 1 rs7514165   | 111836591 G | 0.1723 | 1.96E-20 chr:1:111802591 |
| 1 rs7525672   | 111836444 G | 0.1723 | 1.96E-20 chr:1:111802591 |
| 1 rs7539071   | 111841089 G | 0.1723 | 1.96E-20 chr:1:111802591 |
| 1 rs77805328  | 111842813 A | 0.1723 | 1.96E-20 chr:1:111802591 |
| 1 rs78611689  | 111840605 G | 0.1723 | 1.96E-20 chr:1:111802591 |
| 1 rs58982671  | 111826007 T | 0.1734 | 2.10E-20 chr:1:111802591 |
| 1 rs34306809  | 111845903 A | 0.1749 | 3.00E-20 chr:1:111802591 |
| 1 rs34971749  | 111845082 T | 0.1749 | 3.00E-20 chr:1:111802591 |
| 1 rs35888305  | 111845241 C | 0.1749 | 3.00E-20 chr:1:111802591 |
| 1 rs66475510  | 111845588 A | 0.1749 | 3.00E-20 chr:1:111802591 |
| 1 rs75510830  | 111842692 C | 0.176  | 3.69E-20 chr:1:111802591 |
| 1 rs76437095  | 111842681 C | 0.176  | 3.69E-20 chr:1:111802591 |
| 1 rs79096750  | 111842693 A | 0.176  | 3.69E-20 chr:1:111802591 |
| 1 rs11102232  | 111818450 C | 0.1767 | 4.40E-20 chr:1:111802591 |
| 1 rs11589353  | 111822680 G | 0.1767 | 4.40E-20 chr:1:111802591 |
| 1 rs11589375  | 111822887 G | 0.1767 | 4.40E-20 chr:1:111802591 |
| 1 rs12411206  | 111822962 C | 0.1767 | 4.40E-20 chr:1:111802591 |
| 1 rs12567865  | 111817250 A | 0.1767 | 4.40E-20 chr:1:111802591 |
| 1 rs12758301  | 111822132 C | 0.1767 | 4.40E-20 chr:1:111802591 |



|               |             |        |          |                 |
|---------------|-------------|--------|----------|-----------------|
| 1 rs35693821  | 111816294 G | 0.1767 | 4.40E-20 | chr:1:111802591 |
| 1 rs4323713   | 111823220 T | 0.1767 | 4.40E-20 | chr:1:111802591 |
| 1 rs5029527   | 111818923 T | 0.1767 | 4.40E-20 | chr:1:111802591 |
| 1 rs12562929  | 111846331 G | 0.1776 | 4.70E-20 | chr:1:111802591 |
| 1 rs12563147  | 111846300 C | 0.1776 | 4.70E-20 | chr:1:111802591 |
| 1 rs12563158  | 111846416 G | 0.1776 | 4.70E-20 | chr:1:111802591 |
| 1 rs12727314  | 111846533 T | 0.1776 | 4.70E-20 | chr:1:111802591 |
| 1 rs12751372  | 111846603 C | 0.1776 | 4.70E-20 | chr:1:111802591 |
| 1 rs11584291  | 111846803 T | 0.1777 | 5.82E-20 | chr:1:111802591 |
| 1 rs35884994  | 111816144 C | 0.1807 | 7.59E-20 | chr:1:111802591 |
| 1 rs4460637   | 111847226 T | 0.1834 | 8.98E-20 | chr:1:111802591 |
| 1 rs12724976  | 111813174 C | 0.183  | 9.26E-20 | chr:1:111802591 |
| 1 rs12738135  | 111809571 G | 0.1833 | 1.04E-19 | chr:1:111802591 |
| 1 rs11102229  | 111808446 G | 0.1857 | 1.11E-19 | chr:1:111802591 |
| 1 rs34487304  | 111804011 A | 0.1857 | 1.11E-19 | chr:1:111802591 |
| 1 rs3891601   | 111805489 G | 0.1857 | 1.11E-19 | chr:1:111802591 |
| 1 rs59772828  | 111808783 A | 0.1857 | 1.11E-19 | chr:1:111802591 |
| 1 rs12135216  | 111809857 G | 0.1836 | 1.13E-19 | chr:1:111802591 |
| 1 rs12733155  | 111812412 T | 0.185  | 1.42E-19 | chr:1:111802591 |
| 1 rs11588487  | 111812241 T | 0.1872 | 1.55E-19 | chr:1:111802591 |
| 1 rs9662740   | 111844526 C | 0.2072 | 4.05E-18 | chr:1:111802591 |
| 1 rs4418594   | 111825261 G | 0.2418 | 7.12E-17 | chr:1:111802591 |
| 1 rs10494134  | 111859912 T | 3.585  | 6.32E-14 | chr:1:111802591 |
| 1 rs11102246  | 111859419 T | 3.585  | 6.32E-14 | chr:1:111802591 |
| 1 rs2275254   | 111861974 C | 3.585  | 6.32E-14 | chr:1:111802591 |
| 1 rs7519964   | 111859286 G | 3.585  | 6.32E-14 | chr:1:111802591 |
| 1 rs7530251   | 111859300 C | 3.585  | 6.32E-14 | chr:1:111802591 |
| 1 rs147760122 | 111882509 T | 3.68   | 6.87E-14 | chr:1:111802591 |
| 1 rs10857875  | 111862502 G | 3.492  | 1.24E-13 | chr:1:111802591 |
| 1 rs11102248  | 111861508 C | 3.578  | 3.23E-13 | chr:1:111802591 |
| 1 rs12034576  | 111859838 G | 3.578  | 3.23E-13 | chr:1:111802591 |
| 1 rs11102255  | 111888656 C | 3.394  | 4.72E-13 | chr:1:111802591 |
| 1 rs12034177  | 111864527 C | 3.487  | 5.16E-13 | chr:1:111802591 |
| 1 rs12036618  | 111864330 A | 3.487  | 5.16E-13 | chr:1:111802591 |
| 1 rs6660163   | 111903821 G | 3.367  | 6.18E-13 | chr:1:111802591 |
| 1 rs2282290   | 111863451 G | 3.48   | 6.47E-13 | chr:1:111802591 |
| 1 rs2282291   | 111863565 A | 3.48   | 6.47E-13 | chr:1:111802591 |
| 1 rs9429414   | 111872423 A | 3.339  | 8.17E-13 | chr:1:111802591 |
| 1 rs7522707   | 111900659 G | 3.176  | 8.31E-13 | chr:1:111802591 |
| 1 rs10857876  | 111872774 A | 3.336  | 9.51E-13 | chr:1:111802591 |
| 1 rs12748134  | 111904901 G | 3.318  | 9.86E-13 | chr:1:111802591 |
| 1 rs4839123   | 111856496 T | 3.451  | 1.03E-12 | chr:1:111802591 |
| 1 rs11588975  | 111886304 C | 3.333  | 1.11E-12 | chr:1:111802591 |

|               |             |        |          |                 |
|---------------|-------------|--------|----------|-----------------|
| 1 rs12041092  | 111877715 C | 3.333  | 1.11E-12 | chr:1:111802591 |
| 1 rs2820065   | 111876941 G | 3.333  | 1.11E-12 | chr:1:111802591 |
| 1 rs2820068   | 111876808 A | 3.333  | 1.11E-12 | chr:1:111802591 |
| 1 rs2820074   | 111875528 G | 3.333  | 1.11E-12 | chr:1:111802591 |
| 1 rs2820075   | 111875202 G | 3.333  | 1.11E-12 | chr:1:111802591 |
| 1 rs2820083   | 111874231 G | 3.333  | 1.11E-12 | chr:1:111802591 |
| 1 rs4357523   | 111867384 C | 3.333  | 1.11E-12 | chr:1:111802591 |
| 1 rs4838907   | 111868198 T | 3.333  | 1.11E-12 | chr:1:111802591 |
| 1 rs61803549  | 111870148 C | 3.333  | 1.11E-12 | chr:1:111802591 |
| 1 rs6661476   | 111877852 A | 3.333  | 1.11E-12 | chr:1:111802591 |
| 1 rs6664423   | 111878328 T | 3.333  | 1.11E-12 | chr:1:111802591 |
| 1 rs6685197   | 111877935 A | 3.333  | 1.11E-12 | chr:1:111802591 |
| 1 rs6690266   | 111866640 A | 3.333  | 1.11E-12 | chr:1:111802591 |
| 1 rs7365414   | 111880073 G | 3.333  | 1.11E-12 | chr:1:111802591 |
| 1 rs188767109 | 111880490 C | 3.295  | 1.28E-12 | chr:1:111802591 |
| 1 rs6688274   | 111841418 G | 0.3225 | 1.38E-12 | chr:1:111802591 |
| 1 rs2786142   | 111880136 A | 3.128  | 1.78E-12 | chr:1:111802591 |
| 1 rs2786144   | 111876402 C | 3.251  | 2.09E-12 | chr:1:111802591 |
| 1 rs2786146   | 111871172 C | 3.251  | 2.09E-12 | chr:1:111802591 |
| 1 rs6683019   | 111879317 C | 3.251  | 2.09E-12 | chr:1:111802591 |
| 1 rs12407368  | 111806840 A | 0.2524 | 2.54E-12 | chr:1:111802591 |
| 1 rs6680793   | 111879586 T | 2.957  | 2.87E-12 | chr:1:111802591 |
| 1 rs3122593   | 111810965 A | 0.282  | 5.32E-12 | chr:1:111802591 |
| 1 rs3122591   | 111810174 C | 0.2825 | 6.01E-12 | chr:1:111802591 |
| 1 rs2764548   | 111808585 T | 0.2856 | 6.23E-12 | chr:1:111802591 |
| 1 rs2820059   | 111808392 G | 0.2856 | 6.23E-12 | chr:1:111802591 |
| 1 rs10776724  | 111869487 A | 2.943  | 1.20E-11 | chr:1:111802591 |
| 1 rs192870729 | 111880495 C | 2.929  | 1.23E-11 | chr:1:111802591 |
| 1 rs10776726  | 111887312 G | 2.944  | 1.27E-11 | chr:1:111802591 |
| 1 rs9429595   | 111872414 G | 2.92   | 1.28E-11 | chr:1:111802591 |
| 1 rs12029516  | 111884013 T | 2.908  | 1.83E-11 | chr:1:111802591 |
| 1 rs2786141   | 111881263 A | 2.908  | 1.83E-11 | chr:1:111802591 |
| 1 rs2786143   | 111876886 C | 2.908  | 1.83E-11 | chr:1:111802591 |
| 1 rs2786147   | 111871081 C | 2.908  | 1.83E-11 | chr:1:111802591 |
| 1 rs2820088   | 111871856 T | 2.908  | 1.83E-11 | chr:1:111802591 |
| 1 rs6673943   | 111877859 G | 2.908  | 1.83E-11 | chr:1:111802591 |
| 1 rs6676930   | 111878127 C | 2.908  | 1.83E-11 | chr:1:111802591 |
| 1 rs7550716   | 111798750 G | 2.741  | 2.86E-11 | chr:1:111802591 |
| 1 rs2820082   | 111800472 T | 0.2965 | 7.17E-11 | chr:1:111802591 |
| 1 rs3118206   | 111814461 G | 0.3196 | 1.95E-10 | chr:1:111802591 |
| 1 rs2886145   | 111898694 G | 2.811  | 2.08E-10 | chr:1:111802591 |
| 1 rs58830602  | 111898574 A | 2.811  | 2.08E-10 | chr:1:111802591 |
| 1 rs2494013   | 111813821 A | 0.3244 | 3.13E-10 | chr:1:111802591 |

|              |             |        |          |                 |
|--------------|-------------|--------|----------|-----------------|
| 1 rs3122594  | 111813735 T | 0.3244 | 3.13E-10 | chr:1:111802591 |
| 1 rs3122595  | 111813951 T | 0.3244 | 3.13E-10 | chr:1:111802591 |
| 1 rs10158004 | 111893708 A | 2.873  | 4.56E-10 | chr:1:111802591 |
| 1 rs1668     | 111893958 G | 2.873  | 4.56E-10 | chr:1:111802591 |
| 1 rs3738303  | 111894180 A | 2.873  | 4.56E-10 | chr:1:111802591 |
| 1 rs3738304  | 111890941 A | 2.873  | 4.56E-10 | chr:1:111802591 |
| 1 rs6687390  | 111825226 T | 0.3328 | 6.87E-10 | chr:1:111802591 |
| 1 rs4839119  | 111853854 T | 0.3131 | 9.83E-10 | chr:1:111802591 |
| 1 rs12033188 | 111892994 G | 2.582  | 3.19E-09 | chr:1:111802591 |
| 1 rs3820443  | 111892905 C | 2.582  | 3.19E-09 | chr:1:111802591 |
| 1 rs4839125  | 111893390 C | 2.582  | 3.19E-09 | chr:1:111802591 |
| 1 rs4839126  | 111893417 C | 2.582  | 3.19E-09 | chr:1:111802591 |
| 1 rs2786161  | 111861714 A | 2.456  | 3.52E-09 | chr:1:111802591 |
| 1 rs2275253  | 111861841 G | 2.412  | 5.07E-09 | chr:1:111802591 |
| 1 rs2786150  | 111856888 C | 2.41   | 5.61E-09 | chr:1:111802591 |
| 1 rs6676485  | 111907829 A | 2.622  | 6.80E-09 | chr:1:111802591 |
| 1 rs2256721  | 111862952 G | 2.37   | 8.14E-09 | chr:1:111802591 |
| 1 rs6673839  | 111907827 C | 2.615  | 8.33E-09 | chr:1:111802591 |
| 1 rs10857867 | 111810878 A | 10.87  | 1.08E-08 | chr:1:111802591 |
| 1 rs2786152  | 111857154 C | 2.359  | 1.19E-08 | chr:1:111802591 |
| 1 rs2820072  | 111857485 C | 2.359  | 1.19E-08 | chr:1:111802591 |
| 1 rs12139505 | 111816865 A | 10.55  | 1.81E-08 | chr:1:111802591 |
| 1 rs10857869 | 111822699 T | 10.44  | 2.21E-08 | chr:1:111802591 |
| 1 rs12048213 | 111821434 T | 10.44  | 2.21E-08 | chr:1:111802591 |
| 1 rs4240529  | 111824744 A | 10.44  | 2.21E-08 | chr:1:111802591 |
| 1 rs1856105  | 111903269 T | 0.4273 | 2.76E-08 | chr:1:111802591 |
| 1 rs2050605  | 111903304 T | 0.4216 | 2.76E-08 | chr:1:111802591 |
| 1 rs6660375  | 111904027 A | 0.4273 | 2.76E-08 | chr:1:111802591 |
| 1 rs6663292  | 111904494 A | 0.4273 | 2.76E-08 | chr:1:111802591 |
| 1 rs6674061  | 111904326 G | 0.4216 | 2.76E-08 | chr:1:111802591 |
| 1 rs12034487 | 111805474 G | 11.91  | 3.28E-08 | chr:1:111802591 |
| 1 rs6661725  | 111858499 G | 2.316  | 3.82E-08 | chr:1:111802591 |
| 1 rs2786157  | 111858589 T | 2.283  | 5.73E-08 | chr:1:111802591 |
| 1 rs2786158  | 111858603 T | 2.283  | 5.73E-08 | chr:1:111802591 |
| 1 rs10776725 | 111885460 A | 0.4642 | 7.54E-08 | chr:1:111802591 |
| 1 rs1577809  | 111872931 A | 0.4642 | 7.54E-08 | chr:1:111802591 |
| 1 rs1832286  | 111873172 T | 0.4642 | 7.54E-08 | chr:1:111802591 |
| 1 rs2820070  | 111876596 A | 0.4642 | 7.54E-08 | chr:1:111802591 |
| 1 rs6676782  | 111877999 T | 0.4642 | 7.54E-08 | chr:1:111802591 |
| 1 rs7515576  | 111882633 C | 0.4642 | 7.54E-08 | chr:1:111802591 |
| 1 rs12033510 | 111858556 C | 2.25   | 8.04E-08 | chr:1:111802591 |
| 1 rs2786148  | 111856582 G | 2.264  | 8.74E-08 | chr:1:111802591 |
| 1 rs2786149  | 111856695 A | 2.264  | 8.74E-08 | chr:1:111802591 |

|               |             |        |          |                 |
|---------------|-------------|--------|----------|-----------------|
| 1 rs2786151   | 111857087 T | 2.264  | 8.74E-08 | chr:1:111802591 |
| 1 rs2786155   | 111858291 C | 2.264  | 8.74E-08 | chr:1:111802591 |
| 1 rs2786156   | 111858444 C | 0.4424 | 1.23E-07 | chr:1:111802591 |
| 1 rs2786153   | 111857612 A | 2.221  | 1.25E-07 | chr:1:111802591 |
| 1 rs78346400  | 111844342 A | 2.288  | 1.36E-07 | chr:1:111802591 |
| 1 rs6696410   | 111840987 A | 0.3862 | 1.53E-07 | chr:1:111802591 |
| 1 rs7525014   | 111835498 A | 0.3853 | 1.79E-07 | chr:1:111802591 |
| 1 rs9725625   | 111864011 A | 0.4487 | 1.84E-07 | chr:1:111802591 |
| 1 rs4278371   | 111879541 C | 0.4582 | 4.16E-07 | chr:1:111802591 |
| 1 rs6689147   | 111886655 T | 0.4582 | 4.16E-07 | chr:1:111802591 |
| 1 rs55662441  | 111801533 C | 10.11  | 4.18E-07 | chr:1:111802591 |
| 1 rs56282594  | 111897538 A | 2.074  | 4.64E-07 | chr:1:111802591 |
| 1 rs11102231  | 111817468 A | 0.3912 | 5.35E-07 | chr:1:111802591 |
| 1 rs72981843  | 111808146 C | 9.831  | 5.54E-07 | chr:1:111802591 |
| 1 rs12027550  | 111821946 G | 9.825  | 6.21E-07 | chr:1:111802591 |
| 1 rs12047673  | 111823173 C | 9.825  | 6.21E-07 | chr:1:111802591 |
| 1 rs58013456  | 111826483 G | 9.825  | 6.21E-07 | chr:1:111802591 |
| 1 rs2820069   | 111876604 A | 0.4919 | 7.04E-07 | chr:1:111802591 |
| 1 rs2050606   | 111896856 T | 2.066  | 8.30E-07 | chr:1:111802591 |
| 1 rs57294801  | 111896531 T | 2.066  | 8.30E-07 | chr:1:111802591 |
| 1 rs72981857  | 111812089 T | 8.25   | 8.83E-07 | chr:1:111802591 |
| 1 rs139472882 | 111820464 T | 3.775  | 1.01E-06 | chr:1:111802591 |
| 1 rs4348720   | 111806066 A | 0.3214 | 1.16E-06 | chr:1:111802591 |
| 1 rs59384476  | 111830707 A | 14.25  | 1.19E-06 | chr:1:111802591 |
| 1 rs56163121  | 111830632 A | 11.09  | 1.26E-06 | chr:1:111802591 |
| 1 rs12022369  | 111837751 T | 9.211  | 1.44E-06 | chr:1:111802591 |
| 1 rs12023362  | 111838942 T | 9.211  | 1.44E-06 | chr:1:111802591 |
| 1 rs12047540  | 111834864 G | 9.211  | 1.44E-06 | chr:1:111802591 |
| 1 rs68144419  | 111836930 C | 9.211  | 1.44E-06 | chr:1:111802591 |
| 1 rs28364796  | 111743540 T | 2.112  | 1.45E-06 | chr:1:111802591 |
| 1 rs12047476  | 111750319 A | 2.108  | 1.65E-06 | chr:1:111802591 |
| 1 rs7520509   | 111927094 C | 0.5007 | 1.70E-06 | chr:1:111802591 |
| 1 rs7540753   | 111920337 G | 0.5057 | 1.81E-06 | chr:1:111802591 |
| 1 rs2820061   | 111806570 T | 0.3189 | 1.87E-06 | chr:1:111802591 |
| 1 rs12026895  | 111847080 T | 13.47  | 2.05E-06 | chr:1:111802591 |
| 1 rs10857880  | 111922011 G | 0.5061 | 2.14E-06 | chr:1:111802591 |
| 1 rs11102263  | 111916670 C | 0.5109 | 2.42E-06 | chr:1:111802591 |
| 1 rs2764541   | 111811430 C | 0.3264 | 2.45E-06 | chr:1:111802591 |
| 1 rs11102219  | 111748942 C | 2.076  | 2.61E-06 | chr:1:111802591 |
| 1 rs1575721   | 111804605 C | 0.3263 | 3.00E-06 | chr:1:111802591 |
| 1 rs1575723   | 111803817 T | 0.3263 | 3.00E-06 | chr:1:111802591 |
| 1 rs7515475   | 111801948 C | 0.3263 | 3.00E-06 | chr:1:111802591 |
| 1 rs12028656  | 111752268 G | 2.053  | 3.47E-06 | chr:1:111802591 |

|               |             |        |          |                 |
|---------------|-------------|--------|----------|-----------------|
| 1 rs12043003  | 111754524 G | 2.035  | 4.17E-06 | chr:1:111802591 |
| 1 rs569193379 | 111802590 C | 6.371  | 4.40E-06 | chr:1:111802591 |
| 1 rs2296381   | 111746355 T | 2.021  | 4.48E-06 | chr:1:111802591 |
| 1 rs12028691  | 111752444 T | 2.026  | 5.08E-06 | chr:1:111802591 |
| 1 rs12045235  | 111750993 G | 2.026  | 5.08E-06 | chr:1:111802591 |
| 1 rs12047228  | 111753024 C | 2.026  | 5.08E-06 | chr:1:111802591 |
| 1 rs4839130   | 111925349 G | 0.5253 | 5.14E-06 | chr:1:111802591 |
| 1 rs12043624  | 111754122 G | 2.018  | 5.19E-06 | chr:1:111802591 |
| 1 rs3118205   | 111814475 C | 0.3411 | 6.30E-06 | chr:1:111802591 |
| 1 rs112503681 | 111799266 A | 0.3413 | 8.22E-06 | chr:1:111802591 |
| 1 rs146047351 | 111937268 A | 0.4147 | 1.11E-05 | chr:1:111802591 |
| 1 rs1361048   | 111928394 G | 0.5383 | 1.13E-05 | chr:1:111802591 |
| 1 rs7522090   | 111929940 C | 0.5383 | 1.13E-05 | chr:1:111802591 |
| 1 rs7552795   | 111929780 A | 0.5383 | 1.13E-05 | chr:1:111802591 |
| 1 rs6537700   | 111930190 C | 0.5069 | 1.27E-05 | chr:1:111802591 |
| 1 rs7519201   | 111929584 G | 0.5069 | 1.27E-05 | chr:1:111802591 |
| 1 rs7521484   | 111929295 C | 0.5069 | 1.27E-05 | chr:1:111802591 |
| 1 rs7555330   | 111927164 G | 0.5069 | 1.27E-05 | chr:1:111802591 |
| 1 rs12133963  | 111918192 A | 0.5154 | 1.43E-05 | chr:1:111802591 |
| 1 rs6537698   | 111924519 C | 0.5114 | 1.51E-05 | chr:1:111802591 |
| 1 rs141945510 | 111842864 C | 0.3589 | 1.53E-05 | chr:1:111802591 |
| 1 rs143710780 | 111839962 T | 0.3589 | 1.53E-05 | chr:1:111802591 |
| 1 rs6662466   | 111837922 G | 0.3589 | 1.53E-05 | chr:1:111802591 |
| 1 rs74108968  | 111847695 C | 0.3796 | 1.82E-05 | chr:1:111802591 |
| 1 rs76275224  | 111823994 T | 0.3613 | 2.09E-05 | chr:1:111802591 |
| 1 rs1058530   | 111895487 C | 0.5502 | 2.13E-05 | chr:1:111802591 |
| 1 rs11102257  | 111897335 A | 0.5502 | 2.13E-05 | chr:1:111802591 |
| 1 rs6537697   | 111895781 C | 0.5502 | 2.13E-05 | chr:1:111802591 |
| 1 rs68007552  | 111898513 T | 0.5502 | 2.13E-05 | chr:1:111802591 |
| 1 rs7515840   | 111898228 A | 0.5502 | 2.13E-05 | chr:1:111802591 |
| 1 rs7516021   | 111898423 A | 0.5502 | 2.13E-05 | chr:1:111802591 |
| 1 rs7517237   | 111896079 G | 0.5502 | 2.13E-05 | chr:1:111802591 |
| 1 rs7540676   | 111896112 C | 0.5502 | 2.13E-05 | chr:1:111802591 |
| 1 rs41281398  | 111827466 T | 0.361  | 2.14E-05 | chr:1:111802591 |
| 1 rs7540576   | 111895997 C | 0.5525 | 2.56E-05 | chr:1:111802591 |
| 1 rs1264884   | 111963356 C | 0.4991 | 2.62E-05 | chr:1:111802591 |
| 1 rs12022879  | 111897232 T | 0.5537 | 2.66E-05 | chr:1:111802591 |
| 1 rs11809538  | 111801853 A | 0.4055 | 2.93E-05 | chr:1:111802591 |
| 1 rs7513936   | 111924907 A | 0.5245 | 2.97E-05 | chr:1:111802591 |
| 1 rs147541009 | 111941815 C | 0.414  | 3.21E-05 | chr:1:111802591 |
| 1 rs3806448   | 111832205 G | 0.4879 | 3.23E-05 | chr:1:111802591 |
| 1 rs1264868   | 111953735 T | 0.5015 | 3.28E-05 | chr:1:111802591 |
| 1 rs1264869   | 111953642 C | 0.5015 | 3.28E-05 | chr:1:111802591 |

|   |             |           |   |        |          |                 |
|---|-------------|-----------|---|--------|----------|-----------------|
| 1 | rs1264876   | 111949282 | T | 0.5015 | 3.28E-05 | chr:1:111802591 |
| 1 | rs1264882   | 111962944 | C | 0.502  | 3.35E-05 | chr:1:111802591 |
| 1 | rs1264883   | 111963268 | G | 0.502  | 3.35E-05 | chr:1:111802591 |
| 1 | rs1264878   | 111947430 | C | 0.5053 | 3.53E-05 | chr:1:111802591 |
| 1 | rs3927471   | 111802912 | C | 0.4126 | 3.81E-05 | chr:1:111802591 |
| 1 | rs61808280  | 111807687 | C | 0.4126 | 3.81E-05 | chr:1:111802591 |
| 1 | rs7550145   | 111804157 | T | 0.4126 | 3.81E-05 | chr:1:111802591 |
| 1 | rs9659635   | 111808642 | A | 0.4126 | 3.81E-05 | chr:1:111802591 |
| 1 | rs2485319   | 111957693 | A | 0.4972 | 3.91E-05 | chr:1:111802591 |
| 1 | rs115622479 | 111837923 | T | 0.3743 | 4.12E-05 | chr:1:111802591 |
| 1 | rs78847706  | 111838126 | T | 0.3743 | 4.12E-05 | chr:1:111802591 |
| 1 | rs55998158  | 111832722 | A | 0.3858 | 4.33E-05 | chr:1:111802591 |
| 1 | rs1264867   | 111954258 | G | 0.5075 | 4.36E-05 | chr:1:111802591 |
| 1 | rs1264874   | 111950546 | G | 0.511  | 4.63E-05 | chr:1:111802591 |
| 1 | rs1264877   | 111949063 | C | 0.511  | 4.63E-05 | chr:1:111802591 |
| 1 | rs7825      | 111957097 | C | 0.5098 | 4.89E-05 | chr:1:111802591 |
| 1 | rs41281404  | 111828148 | C | 0.3819 | 4.97E-05 | chr:1:111802591 |
| 3 | rs11711436  | 125629149 | T | 3.195  | 4.72E-08 | chr:3:125609298 |
| 3 | rs11917669  | 125599068 | T | 2.887  | 1.27E-07 | chr:3:125609298 |
| 3 | rs11925437  | 125599216 | A | 2.883  | 1.37E-07 | chr:3:125609298 |
| 3 | rs6772193   | 125597432 | A | 2.883  | 1.53E-07 | chr:3:125609298 |
| 3 | rs79780713  | 125596589 | G | 2.883  | 1.53E-07 | chr:3:125609298 |
| 3 | rs12633485  | 125605577 | T | 2.799  | 2.38E-07 | chr:3:125609298 |
| 3 | rs12637469  | 125600407 | T | 2.799  | 2.38E-07 | chr:3:125609298 |
| 3 | rs200006127 | 125610368 | G | 2.799  | 2.38E-07 | chr:3:125609298 |
| 3 | rs74470729  | 125621098 | T | 2.799  | 2.38E-07 | chr:3:125609298 |
| 3 | rs74494751  | 125615642 | G | 2.799  | 2.38E-07 | chr:3:125609298 |
| 3 | rs75313595  | 125601479 | A | 2.799  | 2.38E-07 | chr:3:125609298 |
| 3 | rs75431854  | 125601942 | A | 2.799  | 2.38E-07 | chr:3:125609298 |
| 3 | rs75687938  | 125600858 | T | 2.799  | 2.38E-07 | chr:3:125609298 |
| 3 | rs77342220  | 125608463 | T | 2.799  | 2.38E-07 | chr:3:125609298 |
| 3 | rs78438430  | 125607169 | C | 2.799  | 2.38E-07 | chr:3:125609298 |
| 3 | rs78795877  | 125617617 | T | 2.799  | 2.38E-07 | chr:3:125609298 |
| 3 | rs79584539  | 125600024 | T | 2.799  | 2.38E-07 | chr:3:125609298 |
| 3 | rs9714319   | 125612678 | T | 2.799  | 2.38E-07 | chr:3:125609298 |
| 3 | rs60487455  | 125619863 | G | 2.941  | 2.63E-07 | chr:3:125609298 |
| 3 | rs112567450 | 125592200 | T | 2.94   | 3.68E-07 | chr:3:125609298 |
| 3 | rs11922653  | 125591569 | A | 2.94   | 3.68E-07 | chr:3:125609298 |
| 3 | rs35540257  | 125590518 | A | 2.94   | 3.68E-07 | chr:3:125609298 |
| 3 | rs9859596   | 125593349 | T | 2.94   | 3.68E-07 | chr:3:125609298 |
| 3 | rs11713729  | 125631408 | A | 2.728  | 4.22E-07 | chr:3:125609298 |
| 3 | rs12634512  | 125631766 | T | 2.728  | 4.22E-07 | chr:3:125609298 |
| 3 | rs60374286  | 125630173 | T | 2.728  | 4.22E-07 | chr:3:125609298 |

|              |             |       |          |                 |
|--------------|-------------|-------|----------|-----------------|
| 3 rs6767408  | 125623666 T | 2.728 | 4.22E-07 | chr:3:125609298 |
| 3 rs6767618  | 125623941 G | 2.728 | 4.22E-07 | chr:3:125609298 |
| 3 rs75837707 | 125630833 T | 2.728 | 4.22E-07 | chr:3:125609298 |
| 3 rs79143534 | 125622688 G | 2.728 | 4.22E-07 | chr:3:125609298 |
| 3 rs79344588 | 125632117 A | 2.728 | 4.22E-07 | chr:3:125609298 |
| 3 rs79647471 | 125622158 A | 2.728 | 4.22E-07 | chr:3:125609298 |
| 3 rs10934730 | 125631706 T | 2.584 | 5.52E-07 | chr:3:125609298 |
| 3 rs11922084 | 125630876 G | 2.584 | 5.52E-07 | chr:3:125609298 |
| 3 rs72973380 | 125631030 C | 2.584 | 5.52E-07 | chr:3:125609298 |
| 3 rs59143300 | 125559619 C | 2.338 | 5.82E-07 | chr:3:125609298 |
| 3 rs72971309 | 125561013 T | 2.326 | 6.82E-07 | chr:3:125609298 |
| 3 rs34721907 | 125637285 A | 2.663 | 7.08E-07 | chr:3:125609298 |
| 3 rs58198667 | 125635719 T | 2.663 | 7.08E-07 | chr:3:125609298 |
| 3 rs80022059 | 125641856 A | 2.663 | 7.08E-07 | chr:3:125609298 |
| 3 rs2947709  | 125557545 C | 2.288 | 7.74E-07 | chr:3:125609298 |
| 3 rs2971249  | 125555546 A | 2.288 | 7.74E-07 | chr:3:125609298 |
| 3 rs2971252  | 125559915 C | 2.288 | 7.74E-07 | chr:3:125609298 |
| 3 rs2979963  | 125559115 T | 2.288 | 7.74E-07 | chr:3:125609298 |
| 3 rs7432586  | 125561246 A | 2.288 | 7.74E-07 | chr:3:125609298 |
| 3 rs75212493 | 125633523 C | 2.582 | 8.32E-07 | chr:3:125609298 |
| 3 rs71327717 | 125562103 G | 2.296 | 8.69E-07 | chr:3:125609298 |
| 3 rs11718276 | 125628689 G | 2.503 | 1.10E-06 | chr:3:125609298 |
| 3 rs2979951  | 125553430 G | 2.239 | 1.20E-06 | chr:3:125609298 |
| 3 rs2947645  | 125593271 C | 2.244 | 1.26E-06 | chr:3:125609298 |
| 3 rs2971328  | 125593443 T | 2.244 | 1.26E-06 | chr:3:125609298 |
| 3 rs76697478 | 125622811 A | 2.634 | 1.35E-06 | chr:3:125609298 |
| 3 rs2947698  | 125551761 G | 2.213 | 1.44E-06 | chr:3:125609298 |
| 3 rs2979944  | 125551355 G | 2.213 | 1.44E-06 | chr:3:125609298 |
| 3 rs74402623 | 125643173 A | 2.558 | 1.54E-06 | chr:3:125609298 |
| 3 rs11711861 | 125589450 A | 2.225 | 1.58E-06 | chr:3:125609298 |
| 3 rs11926668 | 125591488 C | 2.225 | 1.58E-06 | chr:3:125609298 |
| 3 rs2947634  | 125588652 C | 2.225 | 1.58E-06 | chr:3:125609298 |
| 3 rs2947638  | 125590155 C | 2.225 | 1.58E-06 | chr:3:125609298 |
| 3 rs2947639  | 125590505 A | 2.225 | 1.58E-06 | chr:3:125609298 |
| 3 rs2947640  | 125590570 G | 2.225 | 1.58E-06 | chr:3:125609298 |
| 3 rs2947642  | 125591302 A | 2.225 | 1.58E-06 | chr:3:125609298 |
| 3 rs2979987  | 125592580 G | 2.225 | 1.58E-06 | chr:3:125609298 |
| 3 rs2979988  | 125592307 C | 2.225 | 1.58E-06 | chr:3:125609298 |
| 3 rs2979989  | 125591425 G | 2.225 | 1.58E-06 | chr:3:125609298 |
| 3 rs2979990  | 125590914 G | 2.225 | 1.58E-06 | chr:3:125609298 |
| 3 rs2979992  | 125590630 C | 2.225 | 1.58E-06 | chr:3:125609298 |
| 3 rs2979993  | 125589673 T | 2.225 | 1.58E-06 | chr:3:125609298 |
| 3 rs10934727 | 125567894 C | 2.221 | 1.70E-06 | chr:3:125609298 |

|              |             |       |                          |
|--------------|-------------|-------|--------------------------|
| 3 rs11706723 | 125579541 A | 2.221 | 1.70E-06 chr:3:125609298 |
| 3 rs11719118 | 125567791 G | 2.221 | 1.70E-06 chr:3:125609298 |
| 3 rs11721288 | 125569614 C | 2.221 | 1.70E-06 chr:3:125609298 |
| 3 rs2947684  | 125576024 G | 2.221 | 1.70E-06 chr:3:125609298 |
| 3 rs2971257  | 125579548 G | 2.221 | 1.70E-06 chr:3:125609298 |
| 3 rs2971265  | 125571123 G | 2.221 | 1.70E-06 chr:3:125609298 |
| 3 rs2979927  | 125574869 C | 2.221 | 1.70E-06 chr:3:125609298 |
| 3 rs6770124  | 125578780 G | 2.221 | 1.70E-06 chr:3:125609298 |
| 3 rs7626162  | 125571100 A | 2.221 | 1.70E-06 chr:3:125609298 |
| 3 rs9814471  | 125566987 G | 2.221 | 1.70E-06 chr:3:125609298 |
| 3 rs9825686  | 125569330 C | 2.221 | 1.70E-06 chr:3:125609298 |
| 3 rs2979976  | 125599109 C | 2.207 | 1.92E-06 chr:3:125609298 |
| 3 rs2979981  | 125597781 G | 2.207 | 1.92E-06 chr:3:125609298 |
| 3 rs28507399 | 125565514 C | 2.215 | 1.98E-06 chr:3:125609298 |
| 3 rs2947678  | 125566556 G | 2.215 | 1.98E-06 chr:3:125609298 |
| 3 rs6767789  | 125565527 C | 2.215 | 1.98E-06 chr:3:125609298 |
| 3 rs6778145  | 125565455 T | 2.215 | 1.98E-06 chr:3:125609298 |
| 3 rs6789004  | 125564844 T | 2.215 | 1.98E-06 chr:3:125609298 |
| 3 rs9864870  | 125564317 T | 2.215 | 1.98E-06 chr:3:125609298 |
| 3 rs1109743  | 125594217 C | 2.201 | 2.01E-06 chr:3:125609298 |
| 3 rs2971329  | 125591717 T | 2.202 | 2.09E-06 chr:3:125609298 |
| 3 rs2971330  | 125591692 C | 2.202 | 2.09E-06 chr:3:125609298 |
| 3 rs2971331  | 125591447 T | 2.195 | 2.23E-06 chr:3:125609298 |
| 3 rs9833197  | 125588407 T | 2.254 | 2.33E-06 chr:3:125609298 |
| 3 rs2971332  | 125590994 A | 2.193 | 2.42E-06 chr:3:125609298 |
| 3 rs2947685  | 125575133 C | 2.208 | 2.55E-06 chr:3:125609298 |
| 3 rs2947659  | 125606698 T | 2.209 | 2.83E-06 chr:3:125609298 |
| 3 rs2947663  | 125603558 A | 2.189 | 3.06E-06 chr:3:125609298 |
| 3 rs2947664  | 125603557 A | 2.189 | 3.06E-06 chr:3:125609298 |
| 3 rs2971325  | 125597312 A | 2.166 | 3.19E-06 chr:3:125609298 |
| 3 rs4607058  | 125570585 C | 2.17  | 3.30E-06 chr:3:125609298 |
| 3 rs2979969  | 125603542 G | 2.155 | 3.40E-06 chr:3:125609298 |
| 3 rs2004228  | 125595191 T | 2.162 | 3.46E-06 chr:3:125609298 |
| 3 rs9841483  | 125595039 T | 2.469 | 3.69E-06 chr:3:125609298 |
| 3 rs2979971  | 125601981 C | 2.178 | 3.73E-06 chr:3:125609298 |
| 3 rs13433749 | 125620342 T | 2.166 | 3.89E-06 chr:3:125609298 |
| 3 rs2979967  | 125604957 A | 2.166 | 3.89E-06 chr:3:125609298 |
| 3 rs2979968  | 125604062 C | 2.166 | 3.89E-06 chr:3:125609298 |
| 3 rs6764998  | 125617734 T | 2.166 | 3.89E-06 chr:3:125609298 |
| 3 rs7615661  | 125618995 T | 2.166 | 3.89E-06 chr:3:125609298 |
| 3 rs9682882  | 125610155 A | 2.166 | 3.89E-06 chr:3:125609298 |
| 3 rs9758489  | 125616028 C | 2.166 | 3.89E-06 chr:3:125609298 |
| 3 rs9838149  | 125617135 T | 2.166 | 3.89E-06 chr:3:125609298 |



|               |             |       |                          |
|---------------|-------------|-------|--------------------------|
| 3 rs9844318   | 125618525 C | 2.166 | 3.89E-06 chr:3:125609298 |
| 3 rs11710666  | 125623167 T | 2.196 | 4.10E-06 chr:3:125609298 |
| 3 rs13433921  | 125620191 C | 2.138 | 4.20E-06 chr:3:125609298 |
| 3 rs2134522   | 125609311 A | 2.138 | 4.20E-06 chr:3:125609298 |
| 3 rs2202239   | 125603091 C | 2.138 | 4.20E-06 chr:3:125609298 |
| 3 rs2947653   | 125600011 G | 2.138 | 4.20E-06 chr:3:125609298 |
| 3 rs2947654   | 125600035 G | 2.138 | 4.20E-06 chr:3:125609298 |
| 3 rs2971295   | 125607724 C | 2.138 | 4.20E-06 chr:3:125609298 |
| 3 rs2979973   | 125600806 C | 2.138 | 4.20E-06 chr:3:125609298 |
| 3 rs6777834   | 125617760 C | 2.138 | 4.20E-06 chr:3:125609298 |
| 3 rs6777914   | 125617791 G | 2.138 | 4.20E-06 chr:3:125609298 |
| 3 rs6782187   | 125600203 C | 2.138 | 4.20E-06 chr:3:125609298 |
| 3 rs71327720  | 125616929 C | 2.138 | 4.20E-06 chr:3:125609298 |
| 3 rs9714320   | 125612679 T | 2.138 | 4.20E-06 chr:3:125609298 |
| 3 rs9754774   | 125610837 C | 2.138 | 4.20E-06 chr:3:125609298 |
| 3 rs9756867   | 125613288 G | 2.138 | 4.20E-06 chr:3:125609298 |
| 3 rs9838285   | 125617177 C | 2.138 | 4.20E-06 chr:3:125609298 |
| 3 rs73858994  | 125643933 G | 2.121 | 4.23E-06 chr:3:125609298 |
| 3 rs2971297   | 125603770 C | 2.138 | 4.33E-06 chr:3:125609298 |
| 3 rs71327725  | 125621435 C | 2.165 | 5.29E-06 chr:3:125609298 |
| 3 rs9713687   | 125612973 G | 2.136 | 5.43E-06 chr:3:125609298 |
| 3 rs2947658   | 125607010 A | 2.106 | 6.15E-06 chr:3:125609298 |
| 3 rs2979966   | 125607909 C | 2.124 | 6.32E-06 chr:3:125609298 |
| 3 rs2089012   | 125623486 A | 2.121 | 6.40E-06 chr:3:125609298 |
| 3 rs2089013   | 125623566 A | 2.121 | 6.40E-06 chr:3:125609298 |
| 3 rs6767664   | 125623771 A | 2.121 | 6.40E-06 chr:3:125609298 |
| 3 rs6773978   | 125622285 C | 2.121 | 6.40E-06 chr:3:125609298 |
| 3 rs6783770   | 125624761 A | 2.121 | 6.40E-06 chr:3:125609298 |
| 3 rs2971294   | 125607915 G | 2.096 | 6.87E-06 chr:3:125609298 |
| 3 rs1827490   | 125622815 G | 2.095 | 6.93E-06 chr:3:125609298 |
| 3 rs1827491   | 125622883 C | 2.095 | 6.93E-06 chr:3:125609298 |
| 3 rs6767589   | 125623759 A | 2.095 | 6.93E-06 chr:3:125609298 |
| 3 rs9758830   | 125624688 G | 2.095 | 6.93E-06 chr:3:125609298 |
| 3 rs9857803   | 125623973 A | 2.095 | 6.93E-06 chr:3:125609298 |
| 3 rs527790755 | 125563286 G | 2.188 | 7.42E-06 chr:3:125609298 |
| 3 rs11717929  | 125631610 C | 2.069 | 9.41E-06 chr:3:125609298 |
| 3 rs13100727  | 125627229 C | 2.069 | 9.41E-06 chr:3:125609298 |
| 3 rs34069743  | 125625537 A | 2.069 | 9.41E-06 chr:3:125609298 |
| 3 rs3929450   | 125628269 C | 2.069 | 9.41E-06 chr:3:125609298 |
| 3 rs1976463   | 125628114 A | 2.045 | 1.27E-05 chr:3:125609298 |
| 3 rs1976464   | 125628105 G | 2.045 | 1.27E-05 chr:3:125609298 |
| 3 rs9289267   | 125633335 T | 2.031 | 1.46E-05 chr:3:125609298 |
| 3 rs9289268   | 125633350 A | 2.031 | 1.46E-05 chr:3:125609298 |

|               |             |        |          |                 |
|---------------|-------------|--------|----------|-----------------|
| 3 rs9289269   | 125633524 A | 2.031  | 1.46E-05 | chr:3:125609298 |
| 3 rs9857801   | 125623965 G | 2.066  | 1.50E-05 | chr:3:125609298 |
| 3 rs116225487 | 125601562 T | 3.163  | 1.77E-05 | chr:3:125609298 |
| 3 rs2979982   | 125597165 T | 1.943  | 2.31E-05 | chr:3:125609298 |
| 3 rs2979970   | 125603345 C | 1.99   | 3.08E-05 | chr:3:125609298 |
| 3 rs7640275   | 125619483 G | 1.978  | 3.47E-05 | chr:3:125609298 |
| 3 rs2947667   | 125541174 G | 1.961  | 3.64E-05 | chr:3:125609298 |
| 3 rs2979939   | 125548998 C | 1.961  | 3.64E-05 | chr:3:125609298 |
| 3 rs4234286   | 125539838 G | 1.961  | 3.64E-05 | chr:3:125609298 |
| 3 rs11708560  | 129809131 G | 0.141  | 7.58E-19 | chr:3:129776131 |
| 3 rs13066399  | 129811073 C | 0.141  | 7.58E-19 | chr:3:129776131 |
| 3 rs6806210   | 129807027 C | 0.141  | 7.58E-19 | chr:3:129776131 |
| 3 rs7622131   | 129808869 G | 0.141  | 7.58E-19 | chr:3:129776131 |
| 3 rs12634803  | 129807284 T | 0.1451 | 2.80E-18 | chr:3:129776131 |
| 3 rs9826433   | 129757284 T | 0.1479 | 4.48E-18 | chr:3:129776131 |
| 3 rs11716622  | 129809592 A | 0.1496 | 4.76E-18 | chr:3:129776131 |
| 3 rs12495049  | 129810234 T | 0.1496 | 4.76E-18 | chr:3:129776131 |
| 3 rs11714778  | 129762082 C | 0.1532 | 8.67E-18 | chr:3:129776131 |
| 3 rs73208686  | 129762898 C | 0.1532 | 8.67E-18 | chr:3:129776131 |
| 3 rs10934906  | 129813062 C | 0.1568 | 1.12E-17 | chr:3:129776131 |
| 3 rs6799884   | 129814251 T | 0.1553 | 1.92E-17 | chr:3:129776131 |
| 3 rs11718709  | 129811323 A | 0.1591 | 2.69E-17 | chr:3:129776131 |
| 3 rs4487280   | 129813361 C | 0.1673 | 3.15E-17 | chr:3:129776131 |
| 3 rs4610271   | 129813301 A | 0.1683 | 4.74E-17 | chr:3:129776131 |
| 3 rs9864856   | 129815386 C | 0.1728 | 7.99E-17 | chr:3:129776131 |
| 3 rs9758068   | 129815212 T | 0.1769 | 9.92E-17 | chr:3:129776131 |
| 3 rs111717650 | 129814301 A | 0.1742 | 1.19E-16 | chr:3:129776131 |
| 3 rs73210759  | 129813745 T | 0.1742 | 1.19E-16 | chr:3:129776131 |
| 3 rs6766577   | 129814504 G | 0.178  | 1.45E-16 | chr:3:129776131 |
| 3 rs6802429   | 129814614 A | 0.178  | 1.45E-16 | chr:3:129776131 |
| 3 rs9812980   | 129814688 A | 0.178  | 1.45E-16 | chr:3:129776131 |
| 3 rs9758051   | 129814869 A | 0.1825 | 1.58E-16 | chr:3:129776131 |
| 3 rs9758066   | 129815151 T | 0.1787 | 1.71E-16 | chr:3:129776131 |
| 3 rs9812703   | 129814528 A | 0.1792 | 1.73E-16 | chr:3:129776131 |
| 3 rs56088005  | 129821650 A | 0.1787 | 2.34E-16 | chr:3:129776131 |
| 3 rs58302754  | 129763329 G | 0.2123 | 2.83E-16 | chr:3:129776131 |
| 3 rs12632095  | 129757870 G | 0.2052 | 3.27E-16 | chr:3:129776131 |
| 3 rs12632200  | 129816368 T | 0.1834 | 4.20E-16 | chr:3:129776131 |
| 3 rs9846907   | 129757554 G | 0.2032 | 4.67E-16 | chr:3:129776131 |
| 3 rs146549952 | 129816552 T | 0.1833 | 5.04E-16 | chr:3:129776131 |
| 3 rs9758049   | 129814863 A | 0.1858 | 5.20E-16 | chr:3:129776131 |
| 3 rs10934908  | 129840300 T | 0.1833 | 6.57E-16 | chr:3:129776131 |
| 3 rs111270043 | 129820915 T | 0.1833 | 6.57E-16 | chr:3:129776131 |

|               |             |        |                          |
|---------------|-------------|--------|--------------------------|
| 3 rs111775688 | 129826402 T | 0.1833 | 6.57E-16 chr:3:129776131 |
| 3 rs112581710 | 129820151 A | 0.1833 | 6.57E-16 chr:3:129776131 |
| 3 rs113421391 | 129830961 C | 0.1833 | 6.57E-16 chr:3:129776131 |
| 3 rs113674105 | 129830064 A | 0.1833 | 6.57E-16 chr:3:129776131 |
| 3 rs113679585 | 129819332 A | 0.1833 | 6.57E-16 chr:3:129776131 |
| 3 rs12233562  | 129845749 A | 0.1833 | 6.57E-16 chr:3:129776131 |
| 3 rs12491391  | 129843530 G | 0.1833 | 6.57E-16 chr:3:129776131 |
| 3 rs12497818  | 129843254 C | 0.1833 | 6.57E-16 chr:3:129776131 |
| 3 rs137960198 | 129828560 T | 0.1833 | 6.57E-16 chr:3:129776131 |
| 3 rs149652485 | 129830726 A | 0.1833 | 6.57E-16 chr:3:129776131 |
| 3 rs28442137  | 129840485 T | 0.1833 | 6.57E-16 chr:3:129776131 |
| 3 rs34158162  | 129828454 C | 0.1833 | 6.57E-16 chr:3:129776131 |
| 3 rs4569696   | 129834986 A | 0.1833 | 6.57E-16 chr:3:129776131 |
| 3 rs55773357  | 129849781 T | 0.1833 | 6.57E-16 chr:3:129776131 |
| 3 rs55908933  | 129835084 T | 0.1833 | 6.57E-16 chr:3:129776131 |
| 3 rs56171265  | 129833240 T | 0.1833 | 6.57E-16 chr:3:129776131 |
| 3 rs56218598  | 129823899 A | 0.1833 | 6.57E-16 chr:3:129776131 |
| 3 rs56292584  | 129833209 T | 0.1833 | 6.57E-16 chr:3:129776131 |
| 3 rs56312715  | 129849847 A | 0.1833 | 6.57E-16 chr:3:129776131 |
| 3 rs56314950  | 129833031 T | 0.1833 | 6.57E-16 chr:3:129776131 |
| 3 rs56957706  | 129845338 C | 0.1833 | 6.57E-16 chr:3:129776131 |
| 3 rs60352193  | 129830922 C | 0.1833 | 6.57E-16 chr:3:129776131 |
| 3 rs61073628  | 129817316 T | 0.1833 | 6.57E-16 chr:3:129776131 |
| 3 rs6809980   | 129847462 A | 0.1833 | 6.57E-16 chr:3:129776131 |
| 3 rs73210763  | 129827901 G | 0.1833 | 6.57E-16 chr:3:129776131 |
| 3 rs74203764  | 129817379 T | 0.1833 | 6.57E-16 chr:3:129776131 |
| 3 rs7428344   | 129826100 T | 0.1833 | 6.57E-16 chr:3:129776131 |
| 3 rs7428346   | 129826002 T | 0.1833 | 6.57E-16 chr:3:129776131 |
| 3 rs75177871  | 129821816 G | 0.1833 | 6.57E-16 chr:3:129776131 |
| 3 rs78806708  | 129822616 C | 0.1833 | 6.57E-16 chr:3:129776131 |
| 3 rs9713334   | 129822494 T | 0.1833 | 6.57E-16 chr:3:129776131 |
| 3 rs9713340   | 129822492 A | 0.1833 | 6.57E-16 chr:3:129776131 |
| 3 rs9713344   | 129822552 A | 0.1833 | 6.57E-16 chr:3:129776131 |
| 3 rs9713346   | 129822634 A | 0.1833 | 6.57E-16 chr:3:129776131 |
| 3 rs9754694   | 129844166 T | 0.1833 | 6.57E-16 chr:3:129776131 |
| 3 rs9754720   | 129844403 T | 0.1833 | 6.57E-16 chr:3:129776131 |
| 3 rs12637557  | 129815930 A | 0.1865 | 7.07E-16 chr:3:129776131 |
| 3 rs13093111  | 129754672 G | 0.1852 | 9.87E-16 chr:3:129776131 |
| 3 rs12488592  | 129752490 T | 0.1848 | 1.04E-15 chr:3:129776131 |
| 3 rs6804728   | 129820580 T | 0.1869 | 1.23E-15 chr:3:129776131 |
| 3 rs6804887   | 129820568 A | 0.1887 | 1.68E-15 chr:3:129776131 |
| 3 rs35523538  | 129832419 C | 0.1889 | 1.93E-15 chr:3:129776131 |
| 3 rs9820641   | 129755932 A | 0.2118 | 2.87E-15 chr:3:129776131 |

|               |             |        |                          |
|---------------|-------------|--------|--------------------------|
| 3 rs79351951  | 129821985 A | 0.1877 | 3.77E-15 chr:3:129776131 |
| 3 rs13085868  | 129752864 A | 0.2226 | 1.25E-14 chr:3:129776131 |
| 3 rs9754546   | 129815318 C | 0.2464 | 5.30E-14 chr:3:129776131 |
| 3 rs9815579   | 129755175 T | 0.2316 | 1.13E-13 chr:3:129776131 |
| 3 rs112405295 | 129824844 A | 0.2259 | 1.43E-13 chr:3:129776131 |
| 3 rs6439208   | 129808290 G | 0.3396 | 3.70E-12 chr:3:129776131 |
| 3 rs6779417   | 129810022 G | 0.3396 | 3.70E-12 chr:3:129776131 |
| 3 rs61532278  | 129844947 G | 0.2472 | 7.35E-12 chr:3:129776131 |
| 3 rs72990312  | 129826675 C | 0.2361 | 2.84E-11 chr:3:129776131 |
| 3 rs10934901  | 129747902 A | 0.305  | 3.29E-11 chr:3:129776131 |
| 3 rs9681064   | 129846313 C | 0.3528 | 3.31E-11 chr:3:129776131 |
| 3 rs2929778   | 129811676 C | 0.3629 | 3.65E-11 chr:3:129776131 |
| 3 rs9835275   | 129859086 T | 0.3556 | 5.39E-11 chr:3:129776131 |
| 3 rs13062365  | 129888192 A | 0.2561 | 5.79E-11 chr:3:129776131 |
| 3 rs2449399   | 129859700 G | 0.3584 | 7.41E-11 chr:3:129776131 |
| 3 rs2624624   | 129859169 C | 0.3584 | 7.41E-11 chr:3:129776131 |
| 3 rs2403477   | 129864875 T | 0.2603 | 7.62E-11 chr:3:129776131 |
| 3 rs34233228  | 129750876 G | 0.3103 | 8.05E-11 chr:3:129776131 |
| 3 rs12634323  | 129757836 T | 0.3649 | 9.65E-11 chr:3:129776131 |
| 3 rs11504995  | 129859832 A | 0.3626 | 1.11E-10 chr:3:129776131 |
| 3 rs35882657  | 129750735 T | 0.3158 | 1.27E-10 chr:3:129776131 |
| 3 rs9826246   | 129852063 A | 0.3693 | 2.34E-10 chr:3:129776131 |
| 3 rs73210760  | 129818875 A | 0.3709 | 2.89E-10 chr:3:129776131 |
| 3 rs7428327   | 129826031 T | 0.3728 | 3.17E-10 chr:3:129776131 |
| 3 rs59443817  | 129817290 G | 0.3704 | 3.17E-10 chr:3:129776131 |
| 3 rs9713134   | 129850080 A | 0.3717 | 3.22E-10 chr:3:129776131 |
| 3 rs2587972   | 129815035 G | 0.3882 | 3.70E-10 chr:3:129776131 |
| 3 rs75630148  | 129821465 T | 0.2622 | 3.80E-10 chr:3:129776131 |
| 3 rs10934907  | 129830493 C | 0.376  | 4.10E-10 chr:3:129776131 |
| 3 rs112987689 | 129824001 T | 0.376  | 4.10E-10 chr:3:129776131 |
| 3 rs113747501 | 129826513 C | 0.376  | 4.10E-10 chr:3:129776131 |
| 3 rs12487314  | 129842009 C | 0.376  | 4.10E-10 chr:3:129776131 |
| 3 rs12487371  | 129842190 G | 0.376  | 4.10E-10 chr:3:129776131 |
| 3 rs12495527  | 129822950 G | 0.376  | 4.10E-10 chr:3:129776131 |
| 3 rs12636674  | 129834567 A | 0.376  | 4.10E-10 chr:3:129776131 |
| 3 rs35543987  | 129842031 A | 0.376  | 4.10E-10 chr:3:129776131 |
| 3 rs4072146   | 129829463 A | 0.376  | 4.10E-10 chr:3:129776131 |
| 3 rs4337672   | 129839907 T | 0.376  | 4.10E-10 chr:3:129776131 |
| 3 rs55977977  | 129831316 G | 0.376  | 4.10E-10 chr:3:129776131 |
| 3 rs56086823  | 129841378 A | 0.376  | 4.10E-10 chr:3:129776131 |
| 3 rs56274321  | 129834254 A | 0.376  | 4.10E-10 chr:3:129776131 |
| 3 rs59318782  | 129842972 G | 0.376  | 4.10E-10 chr:3:129776131 |
| 3 rs61433746  | 129836538 T | 0.376  | 4.10E-10 chr:3:129776131 |

|               |             |        |                          |
|---------------|-------------|--------|--------------------------|
| 3 rs6784328   | 129822059 G | 0.376  | 4.10E-10 chr:3:129776131 |
| 3 rs6795939   | 129842885 T | 0.376  | 4.10E-10 chr:3:129776131 |
| 3 rs6796054   | 129842995 A | 0.376  | 4.10E-10 chr:3:129776131 |
| 3 rs6796132   | 129842958 A | 0.376  | 4.10E-10 chr:3:129776131 |
| 3 rs6796817   | 129837836 T | 0.376  | 4.10E-10 chr:3:129776131 |
| 3 rs6808274   | 129842797 C | 0.376  | 4.10E-10 chr:3:129776131 |
| 3 rs6808384   | 129842900 C | 0.376  | 4.10E-10 chr:3:129776131 |
| 3 rs6808888   | 129822441 A | 0.376  | 4.10E-10 chr:3:129776131 |
| 3 rs72990317  | 129830425 G | 0.376  | 4.10E-10 chr:3:129776131 |
| 3 rs73210765  | 129841875 A | 0.376  | 4.10E-10 chr:3:129776131 |
| 3 rs7432233   | 129825955 G | 0.376  | 4.10E-10 chr:3:129776131 |
| 3 rs9289355   | 129838184 G | 0.376  | 4.10E-10 chr:3:129776131 |
| 3 rs9754713   | 129837151 C | 0.376  | 4.10E-10 chr:3:129776131 |
| 3 rs6769324   | 129820903 G | 0.3859 | 5.07E-10 chr:3:129776131 |
| 3 rs10934912  | 129849479 T | 0.3843 | 6.40E-10 chr:3:129776131 |
| 3 rs9713819   | 129849956 G | 0.3855 | 7.98E-10 chr:3:129776131 |
| 3 rs12638292  | 129816961 T | 0.3858 | 8.52E-10 chr:3:129776131 |
| 3 rs113111443 | 129826394 C | 0.3866 | 8.60E-10 chr:3:129776131 |
| 3 rs28798137  | 129845247 A | 0.3867 | 8.69E-10 chr:3:129776131 |
| 3 rs112577058 | 129818750 G | 0.3867 | 9.10E-10 chr:3:129776131 |
| 3 rs113076563 | 129818689 C | 0.3867 | 9.10E-10 chr:3:129776131 |
| 3 rs118004362 | 129820231 T | 0.3867 | 9.10E-10 chr:3:129776131 |
| 3 rs13083073  | 129819247 C | 0.3867 | 9.10E-10 chr:3:129776131 |
| 3 rs56039375  | 129818509 G | 0.3867 | 9.10E-10 chr:3:129776131 |
| 3 rs56235703  | 129818389 G | 0.3867 | 9.10E-10 chr:3:129776131 |
| 3 rs6788479   | 129817708 G | 0.3867 | 9.10E-10 chr:3:129776131 |
| 3 rs73866092  | 129815599 C | 0.3888 | 1.03E-09 chr:3:129776131 |
| 3 rs2449402   | 129840060 A | 0.3869 | 1.13E-09 chr:3:129776131 |
| 3 rs2587959   | 129839820 G | 0.3869 | 1.13E-09 chr:3:129776131 |
| 3 rs2920722   | 129823310 G | 0.3869 | 1.13E-09 chr:3:129776131 |
| 3 rs147534743 | 129849886 G | 0.3909 | 1.17E-09 chr:3:129776131 |
| 3 rs2587960   | 129838501 C | 0.3891 | 1.18E-09 chr:3:129776131 |
| 3 rs2587975   | 129854978 C | 0.3875 | 1.25E-09 chr:3:129776131 |
| 3 rs2624625   | 129853425 C | 0.3875 | 1.25E-09 chr:3:129776131 |
| 3 rs12107141  | 129844617 C | 0.3922 | 1.32E-09 chr:3:129776131 |
| 3 rs12233374  | 129845660 A | 0.3922 | 1.32E-09 chr:3:129776131 |
| 3 rs12491387  | 129843518 G | 0.3922 | 1.32E-09 chr:3:129776131 |
| 3 rs12491430  | 129843630 G | 0.3922 | 1.32E-09 chr:3:129776131 |
| 3 rs12497877  | 129843458 A | 0.3922 | 1.32E-09 chr:3:129776131 |
| 3 rs12497879  | 129843468 T | 0.3922 | 1.32E-09 chr:3:129776131 |
| 3 rs17735722  | 129843196 G | 0.3922 | 1.32E-09 chr:3:129776131 |
| 3 rs28475731  | 129844692 T | 0.3922 | 1.32E-09 chr:3:129776131 |
| 3 rs28567533  | 129845174 A | 0.3922 | 1.32E-09 chr:3:129776131 |

|               |             |        |          |                 |
|---------------|-------------|--------|----------|-----------------|
| 3 rs34086701  | 129846916 C | 0.3922 | 1.32E-09 | chr:3:129776131 |
| 3 rs376047039 | 129845958 G | 0.3922 | 1.32E-09 | chr:3:129776131 |
| 3 rs57173421  | 129843153 G | 0.3922 | 1.32E-09 | chr:3:129776131 |
| 3 rs74442213  | 129846119 A | 0.3922 | 1.32E-09 | chr:3:129776131 |
| 3 rs9682942   | 129846098 T | 0.3922 | 1.32E-09 | chr:3:129776131 |
| 3 rs9682954   | 129846247 G | 0.3922 | 1.32E-09 | chr:3:129776131 |
| 3 rs9757129   | 129844461 G | 0.3922 | 1.32E-09 | chr:3:129776131 |
| 3 rs28477611  | 129844824 A | 0.3943 | 1.47E-09 | chr:3:129776131 |
| 3 rs28754684  | 129844800 C | 0.3943 | 1.47E-09 | chr:3:129776131 |
| 3 rs9713120   | 129850043 T | 0.3925 | 1.47E-09 | chr:3:129776131 |
| 3 rs10934909  | 129849297 T | 0.3972 | 1.49E-09 | chr:3:129776131 |
| 3 rs4491951   | 129850208 C | 0.3938 | 1.77E-09 | chr:3:129776131 |
| 3 rs4619822   | 129850342 A | 0.3938 | 1.77E-09 | chr:3:129776131 |
| 3 rs9713121   | 129850044 G | 0.3938 | 1.77E-09 | chr:3:129776131 |
| 3 rs11708901  | 129847846 C | 0.3976 | 1.93E-09 | chr:3:129776131 |
| 3 rs11720489  | 129848042 T | 0.3976 | 1.93E-09 | chr:3:129776131 |
| 3 rs11720599  | 129848148 A | 0.3976 | 1.93E-09 | chr:3:129776131 |
| 3 rs56279301  | 129848747 T | 0.3976 | 1.93E-09 | chr:3:129776131 |
| 3 rs59667515  | 129848796 C | 0.3976 | 1.93E-09 | chr:3:129776131 |
| 3 rs112319225 | 129826344 G | 0.3968 | 2.31E-09 | chr:3:129776131 |
| 3 rs6809088   | 129837584 C | 0.3968 | 2.31E-09 | chr:3:129776131 |
| 3 rs10934910  | 129849334 G | 0.411  | 2.46E-09 | chr:3:129776131 |
| 3 rs10934911  | 129849366 C | 0.411  | 2.46E-09 | chr:3:129776131 |
| 3 rs2587970   | 129817804 G | 0.3985 | 2.97E-09 | chr:3:129776131 |
| 3 rs6776708   | 129847555 C | 0.4055 | 3.26E-09 | chr:3:129776131 |
| 3 rs2624597   | 129825349 G | 0.3938 | 3.60E-09 | chr:3:129776131 |
| 3 rs2624631   | 129846470 A | 0.4051 | 3.62E-09 | chr:3:129776131 |
| 3 rs2587976   | 129850530 G | 0.4043 | 4.57E-09 | chr:3:129776131 |
| 3 rs34169572  | 129850179 G | 0.4043 | 4.57E-09 | chr:3:129776131 |
| 3 rs12496393  | 129853970 A | 0.4014 | 6.65E-09 | chr:3:129776131 |
| 3 rs12496397  | 129853990 A | 0.4014 | 6.65E-09 | chr:3:129776131 |
| 3 rs56110318  | 129849681 G | 0.4199 | 6.93E-09 | chr:3:129776131 |
| 3 rs12233436  | 129845766 G | 0.413  | 6.99E-09 | chr:3:129776131 |
| 3 rs6774812   | 129844022 G | 0.413  | 6.99E-09 | chr:3:129776131 |
| 3 rs28726131  | 129844802 G | 0.4156 | 7.83E-09 | chr:3:129776131 |
| 3 rs2449400   | 129849865 C | 0.4036 | 7.93E-09 | chr:3:129776131 |
| 3 rs11707425  | 129749980 T | 0.4147 | 9.57E-09 | chr:3:129776131 |
| 3 rs57573544  | 129845394 G | 0.432  | 1.20E-08 | chr:3:129776131 |
| 3 rs58593172  | 129845403 G | 0.432  | 1.20E-08 | chr:3:129776131 |
| 3 rs11712662  | 129848252 G | 0.4214 | 1.32E-08 | chr:3:129776131 |
| 3 rs187016983 | 129845427 A | 0.4418 | 2.36E-08 | chr:3:129776131 |
| 3 rs59803194  | 129845429 A | 0.4418 | 2.36E-08 | chr:3:129776131 |
| 3 rs60351474  | 129845423 G | 0.4418 | 2.36E-08 | chr:3:129776131 |

|                    |             |        |          |                 |
|--------------------|-------------|--------|----------|-----------------|
| 3 rs2624598        | 129825518 G | 0.4072 | 2.71E-08 | chr:3:129776131 |
| 3 rs11721284;rs574 | 129844950 G | 0.3727 | 5.63E-08 | chr:3:129776131 |
| 3 rs2976106        | 129758996 T | 2.269  | 8.80E-08 | chr:3:129776131 |
| 3 rs2953794        | 129734678 C | 2.575  | 9.82E-08 | chr:3:129776131 |
| 3 rs9844615        | 129748532 A | 2.209  | 1.42E-07 | chr:3:129776131 |
| 3 rs115209159      | 129763377 A | 2.241  | 1.44E-07 | chr:3:129776131 |
| 3 rs2953754        | 129749442 A | 2.189  | 1.80E-07 | chr:3:129776131 |
| 3 rs2953755        | 129749118 A | 2.189  | 1.80E-07 | chr:3:129776131 |
| 3 rs2976102        | 129762881 G | 2.208  | 2.13E-07 | chr:3:129776131 |
| 3 rs2953763        | 129760622 T | 2.207  | 2.20E-07 | chr:3:129776131 |
| 3 rs2953764        | 129760668 T | 2.207  | 2.20E-07 | chr:3:129776131 |
| 3 rs2953766        | 129761241 A | 2.207  | 2.20E-07 | chr:3:129776131 |
| 3 rs2953767        | 129761389 G | 2.207  | 2.20E-07 | chr:3:129776131 |
| 3 rs2953768        | 129761524 G | 2.207  | 2.20E-07 | chr:3:129776131 |
| 3 rs2953769        | 129761615 C | 2.207  | 2.20E-07 | chr:3:129776131 |
| 3 rs2953770        | 129761855 A | 2.207  | 2.20E-07 | chr:3:129776131 |
| 3 rs2976104        | 129760905 C | 2.207  | 2.20E-07 | chr:3:129776131 |
| 3 rs141334057      | 129757391 C | 2.176  | 2.46E-07 | chr:3:129776131 |
| 3 rs2976105        | 129759586 C | 2.203  | 2.49E-07 | chr:3:129776131 |
| 3 rs80186406       | 129759609 T | 2.203  | 2.49E-07 | chr:3:129776131 |
| 3 rs9817705        | 129750377 G | 2.156  | 2.74E-07 | chr:3:129776131 |
| 3 rs7627429        | 129758028 A | 2.15   | 5.60E-07 | chr:3:129776131 |
| 3 rs7647126        | 129809533 T | 2.123  | 6.22E-07 | chr:3:129776131 |
| 3 rs55891359       | 129760185 C | 2.049  | 7.64E-07 | chr:3:129776131 |
| 3 rs2953748        | 129755167 T | 2.235  | 1.07E-06 | chr:3:129776131 |
| 3 rs2976154        | 129740122 T | 0.2919 | 1.18E-06 | chr:3:129776131 |
| 3 rs11489082       | 129746260 T | 0.2948 | 1.40E-06 | chr:3:129776131 |
| 3 rs2953759        | 129746627 G | 0.2948 | 1.40E-06 | chr:3:129776131 |
| 3 rs2976149        | 129745832 G | 0.2948 | 1.40E-06 | chr:3:129776131 |
| 3 rs113583307      | 129722895 A | 0.2838 | 1.42E-06 | chr:3:129776131 |
| 3 rs2953753        | 129737383 A | 0.2943 | 1.48E-06 | chr:3:129776131 |
| 3 rs2953777        | 129742154 G | 0.2943 | 1.48E-06 | chr:3:129776131 |
| 3 rs2976153        | 129740831 T | 0.2943 | 1.48E-06 | chr:3:129776131 |
| 3 rs2976803        | 129757112 C | 2.103  | 1.59E-06 | chr:3:129776131 |
| 3 rs13080253       | 130019843 C | 0.3888 | 1.96E-06 | chr:3:129776131 |
| 3 rs4331705        | 129911911 C | 0.3631 | 2.02E-06 | chr:3:129776131 |
| 3 rs11713629       | 129736764 T | 0.5153 | 2.26E-06 | chr:3:129776131 |
| 3 rs1597930        | 130010817 G | 0.3979 | 2.32E-06 | chr:3:129776131 |
| 3 rs2123565        | 130003077 C | 0.3965 | 2.49E-06 | chr:3:129776131 |
| 3 rs4629378        | 129745095 A | 0.3124 | 2.65E-06 | chr:3:129776131 |
| 3 rs9863334        | 129730758 T | 0.2928 | 3.07E-06 | chr:3:129776131 |
| 3 rs9880759        | 129730719 A | 0.2928 | 3.07E-06 | chr:3:129776131 |
| 3 rs12490963       | 130006730 G | 0.4037 | 3.80E-06 | chr:3:129776131 |

|               |             |         |          |                 |
|---------------|-------------|---------|----------|-----------------|
| 3 rs35180026  | 130016615 T | 0.4037  | 3.80E-06 | chr:3:129776131 |
| 3 rs62284266  | 130017800 T | 0.4037  | 3.80E-06 | chr:3:129776131 |
| 3 rs1869316   | 130012079 T | 0.4038  | 3.98E-06 | chr:3:129776131 |
| 3 rs11719350  | 130002155 A | 0.4072  | 4.07E-06 | chr:3:129776131 |
| 3 rs1849644   | 129716331 A | 0.322   | 4.13E-06 | chr:3:129776131 |
| 3 rs9834270   | 129714660 T | 0.322   | 4.13E-06 | chr:3:129776131 |
| 3 rs9851899   | 129714702 A | 0.322   | 4.13E-06 | chr:3:129776131 |
| 3 rs34445363  | 129944852 A | 0.4053  | 4.69E-06 | chr:3:129776131 |
| 3 rs2219024   | 130021245 T | 0.4193  | 4.98E-06 | chr:3:129776131 |
| 3 rs9826716   | 129757455 T | 1.963   | 5.65E-06 | chr:3:129776131 |
| 3 rs199962650 | 129759818 T | 1.974   | 5.86E-06 | chr:3:129776131 |
| 3 rs61280544  | 129759822 C | 1.974   | 5.86E-06 | chr:3:129776131 |
| 3 rs62283513  | 129759820 C | 1.974   | 5.86E-06 | chr:3:129776131 |
| 3 rs6774398   | 129755537 G | 2.024   | 6.25E-06 | chr:3:129776131 |
| 3 rs6803518   | 129735650 C | 1.84    | 6.39E-06 | chr:3:129776131 |
| 3 rs1901786   | 130021945 A | 0.4241  | 6.64E-06 | chr:3:129776131 |
| 3 rs2953757   | 129747656 A | 2.109   | 7.14E-06 | chr:3:129776131 |
| 3 rs2976158   | 129734218 A | 0.3143  | 7.87E-06 | chr:3:129776131 |
| 3 rs1514025   | 129676582 G | 0.4681  | 9.76E-06 | chr:3:129776131 |
| 3 rs1622279   | 129678162 A | 0.4662  | 1.02E-05 | chr:3:129776131 |
| 3 rs2403539   | 129709845 C | 0.3458  | 1.23E-05 | chr:3:129776131 |
| 3 rs2670905   | 129711979 A | 0.3458  | 1.23E-05 | chr:3:129776131 |
| 3 rs4688838   | 129707351 A | 0.3458  | 1.23E-05 | chr:3:129776131 |
| 3 rs143253900 | 129742555 C | 0.3248  | 1.38E-05 | chr:3:129776131 |
| 3 rs1708227   | 129676824 C | 0.4793  | 1.52E-05 | chr:3:129776131 |
| 3 rs2670896   | 129703565 A | 0.3613  | 2.09E-05 | chr:3:129776131 |
| 3 rs112750786 | 129730542 A | 2.217   | 2.12E-05 | chr:3:129776131 |
| 3 rs2953796   | 129733968 T | 0.5358  | 2.21E-05 | chr:3:129776131 |
| 3 rs77941834  | 129956110 A | 0.2964  | 2.50E-05 | chr:3:129776131 |
| 3 rs116919780 | 129726784 T | 2.179   | 3.13E-05 | chr:3:129776131 |
| 3 rs139114107 | 129727427 T | 2.179   | 3.13E-05 | chr:3:129776131 |
| 3 rs147159868 | 129727706 G | 2.179   | 3.13E-05 | chr:3:129776131 |
| 3 rs9713331   | 129757174 A | 1.864   | 3.47E-05 | chr:3:129776131 |
| 3 rs116965417 | 129892974 T | 0.3867  | 4.42E-05 | chr:3:129776131 |
| 3 rs538034368 | 195683992 A | 0.05153 | 2.11E-10 | chr:3:195654394 |
| 3 rs575022724 | 195684009 G | 0.05153 | 2.11E-10 | chr:3:195654394 |
| 3 rs200402998 | 195676577 A | 0.05468 | 4.54E-10 | chr:3:195654394 |
| 3 rs34254399  | 195740067 T | 0.03363 | 6.30E-10 | chr:3:195654394 |
| 3 rs77192409  | 195751543 C | 0.03363 | 6.30E-10 | chr:3:195654394 |
| 3 rs78147044  | 195745484 A | 0.03363 | 6.30E-10 | chr:3:195654394 |
| 3 rs371452292 | 195710165 C | 0.05337 | 6.53E-10 | chr:3:195654394 |
| 3 rs4927856   | 195756474 T | 0.04307 | 6.63E-10 | chr:3:195654394 |
| 3 rs79238342  | 195757954 A | 0.04307 | 6.63E-10 | chr:3:195654394 |



|               |             |         |                          |
|---------------|-------------|---------|--------------------------|
| 3 rs79698107  | 195760322 A | 0.04307 | 6.63E-10 chr:3:195654394 |
| 3 rs12487635  | 195672459 T | 0.04584 | 6.69E-10 chr:3:195654394 |
| 3 rs12489913  | 195673933 G | 0.04584 | 6.69E-10 chr:3:195654394 |
| 3 rs12497996  | 195672534 C | 0.04584 | 6.69E-10 chr:3:195654394 |
| 3 rs141789999 | 195676214 G | 0.04584 | 6.69E-10 chr:3:195654394 |
| 3 rs146447703 | 195672685 A | 0.04584 | 6.69E-10 chr:3:195654394 |
| 3 rs200620860 | 195670998 T | 0.04584 | 6.69E-10 chr:3:195654394 |
| 3 rs4927799   | 195670325 T | 0.04584 | 6.69E-10 chr:3:195654394 |
| 3 rs4927800   | 195670362 A | 0.04584 | 6.69E-10 chr:3:195654394 |
| 3 rs59908382  | 195671256 A | 0.04584 | 6.69E-10 chr:3:195654394 |
| 3 rs72499663  | 195671413 G | 0.04584 | 6.69E-10 chr:3:195654394 |
| 3 rs149593867 | 195688363 C | 0.04494 | 7.77E-10 chr:3:195654394 |
| 3 rs7372023   | 195674317 T | 0.05647 | 7.92E-10 chr:3:195654394 |
| 3 rs114004364 | 195682365 G | 0.03497 | 8.16E-10 chr:3:195654394 |
| 3 rs111857020 | 195684226 A | 0.04566 | 8.38E-10 chr:3:195654394 |
| 3 rs112619958 | 195693191 G | 0.04566 | 8.38E-10 chr:3:195654394 |
| 3 rs112957249 | 195693236 T | 0.04566 | 8.38E-10 chr:3:195654394 |
| 3 rs114155151 | 195688314 G | 0.04566 | 8.38E-10 chr:3:195654394 |
| 3 rs12489547  | 195682747 C | 0.04566 | 8.38E-10 chr:3:195654394 |
| 3 rs140893852 | 195691373 T | 0.04566 | 8.38E-10 chr:3:195654394 |
| 3 rs141586514 | 195688130 C | 0.04566 | 8.38E-10 chr:3:195654394 |
| 3 rs145435068 | 195693305 T | 0.04566 | 8.38E-10 chr:3:195654394 |
| 3 rs147038037 | 195688166 C | 0.04566 | 8.38E-10 chr:3:195654394 |
| 3 rs147267489 | 195693977 G | 0.04566 | 8.38E-10 chr:3:195654394 |
| 3 rs150157283 | 195691387 C | 0.04566 | 8.38E-10 chr:3:195654394 |
| 3 rs188069625 | 195692975 A | 0.04566 | 8.38E-10 chr:3:195654394 |
| 3 rs201250247 | 195691199 G | 0.04566 | 8.38E-10 chr:3:195654394 |
| 3 rs72499666  | 195683479 G | 0.04566 | 8.38E-10 chr:3:195654394 |
| 3 rs77298109  | 195683022 G | 0.04566 | 8.38E-10 chr:3:195654394 |
| 3 rs7610260   | 195682526 A | 0.04553 | 8.41E-10 chr:3:195654394 |
| 3 rs74894130  | 195660697 T | 0.03035 | 8.53E-10 chr:3:195654394 |
| 3 rs148761326 | 195691637 A | 0.04569 | 8.76E-10 chr:3:195654394 |
| 3 rs140057626 | 195728317 A | 0.03284 | 9.11E-10 chr:3:195654394 |
| 3 rs75962942  | 195728678 G | 0.03284 | 9.11E-10 chr:3:195654394 |
| 3 rs76499913  | 195729028 T | 0.03284 | 9.11E-10 chr:3:195654394 |
| 3 rs146692935 | 195723648 C | 0.04487 | 9.33E-10 chr:3:195654394 |
| 3 rs2593984   | 195725621 A | 0.04628 | 1.00E-09 chr:3:195654394 |
| 3 rs72499672  | 195726839 G | 0.04628 | 1.00E-09 chr:3:195654394 |
| 3 rs12488793  | 195682872 G | 0.04604 | 1.02E-09 chr:3:195654394 |
| 3 rs62285304  | 195675478 T | 0.04825 | 1.03E-09 chr:3:195654394 |
| 3 rs4927855   | 195754452 T | 0.04479 | 1.07E-09 chr:3:195654394 |
| 3 rs143076671 | 195692843 A | 0.05614 | 1.08E-09 chr:3:195654394 |
| 3 rs77759126  | 195692828 C | 0.05614 | 1.08E-09 chr:3:195654394 |

|               |             |         |          |                 |
|---------------|-------------|---------|----------|-----------------|
| 3 rs112372218 | 195684599 T | 0.0556  | 1.09E-09 | chr:3:195654394 |
| 3 rs368542321 | 195677315 A | 0.06151 | 1.10E-09 | chr:3:195654394 |
| 3 rs111475386 | 195684587 T | 0.05573 | 1.17E-09 | chr:3:195654394 |
| 3 rs189722989 | 195690118 A | 0.05327 | 1.25E-09 | chr:3:195654394 |
| 3 rs78320742  | 195689817 T | 0.05327 | 1.25E-09 | chr:3:195654394 |
| 3 rs73208016  | 195650120 A | 0.02504 | 1.27E-09 | chr:3:195654394 |
| 3 rs72499671  | 195724614 C | 0.03553 | 1.43E-09 | chr:3:195654394 |
| 3 rs28660371  | 195690105 G | 0.05386 | 1.45E-09 | chr:3:195654394 |
| 3 rs72499654  | 195662770 C | 0.0258  | 1.50E-09 | chr:3:195654394 |
| 3 rs73208017  | 195650428 G | 0.0258  | 1.50E-09 | chr:3:195654394 |
| 3 rs74406097  | 195658661 C | 0.0258  | 1.50E-09 | chr:3:195654394 |
| 3 rs76268338  | 195661315 G | 0.0258  | 1.50E-09 | chr:3:195654394 |
| 3 rs76934808  | 195669480 T | 0.0258  | 1.50E-09 | chr:3:195654394 |
| 3 rs77570361  | 195659561 G | 0.0258  | 1.50E-09 | chr:3:195654394 |
| 3 rs78128847  | 195653985 T | 0.0258  | 1.50E-09 | chr:3:195654394 |
| 3 rs78809271  | 195659736 A | 0.0258  | 1.50E-09 | chr:3:195654394 |
| 3 rs79026789  | 195660712 A | 0.0258  | 1.50E-09 | chr:3:195654394 |
| 3 rs79516196  | 195658662 A | 0.0258  | 1.50E-09 | chr:3:195654394 |
| 3 rs201431379 | 195664977 C | 0.0257  | 1.51E-09 | chr:3:195654394 |
| 3 rs368599720 | 195668122 A | 0.02578 | 1.55E-09 | chr:3:195654394 |
| 3 rs72499656  | 195666233 T | 0.03178 | 1.89E-09 | chr:3:195654394 |
| 3 rs9325425   | 195662694 C | 0.04122 | 1.91E-09 | chr:3:195654394 |
| 3 rs111237905 | 195683159 A | 0.05042 | 1.92E-09 | chr:3:195654394 |
| 3 rs111452973 | 195683167 C | 0.05042 | 1.92E-09 | chr:3:195654394 |
| 3 rs111529852 | 195683186 C | 0.05042 | 1.92E-09 | chr:3:195654394 |
| 3 rs111569452 | 195683174 C | 0.05042 | 1.92E-09 | chr:3:195654394 |
| 3 rs368905451 | 195729075 T | 0.03909 | 1.95E-09 | chr:3:195654394 |
| 3 rs7619087   | 195676518 A | 0.06665 | 2.00E-09 | chr:3:195654394 |
| 3 rs113181724 | 195683118 A | 0.0317  | 2.02E-09 | chr:3:195654394 |
| 3 rs7371976   | 195684515 A | 0.06737 | 2.03E-09 | chr:3:195654394 |
| 3 rs145575126 | 195683366 T | 0.05418 | 2.06E-09 | chr:3:195654394 |
| 3 rs113310924 | 195734614 T | 0.02578 | 2.08E-09 | chr:3:195654394 |
| 3 rs4927846   | 195732325 G | 0.02578 | 2.08E-09 | chr:3:195654394 |
| 3 rs4927847   | 195736627 C | 0.02578 | 2.08E-09 | chr:3:195654394 |
| 3 rs72499680  | 195730979 A | 0.02578 | 2.08E-09 | chr:3:195654394 |
| 3 rs75342758  | 195737511 T | 0.02578 | 2.08E-09 | chr:3:195654394 |
| 3 rs76655042  | 195736059 T | 0.02578 | 2.08E-09 | chr:3:195654394 |
| 3 rs28554180  | 195674712 T | 0.06915 | 2.79E-09 | chr:3:195654394 |
| 3 rs183890720 | 195684486 G | 0.06996 | 2.87E-09 | chr:3:195654394 |
| 3 rs191821895 | 195684485 G | 0.06996 | 2.87E-09 | chr:3:195654394 |
| 3 rs138904938 | 195667637 T | 0.03148 | 2.98E-09 | chr:3:195654394 |
| 3 rs72499659  | 195667840 C | 0.03148 | 2.98E-09 | chr:3:195654394 |
| 3 rs78587262  | 195717867 G | 0.06493 | 3.02E-09 | chr:3:195654394 |

|               |             |         |          |                 |
|---------------|-------------|---------|----------|-----------------|
| 3 rs4927814   | 195684297 C | 0.07209 | 3.15E-09 | chr:3:195654394 |
| 3 rs374823901 | 195685831 A | 0.0325  | 3.52E-09 | chr:3:195654394 |
| 3 rs376696582 | 195685832 G | 0.0325  | 3.52E-09 | chr:3:195654394 |
| 3 rs200743347 | 195722294 A | 0.04603 | 3.78E-09 | chr:3:195654394 |
| 3 rs200007926 | 195682077 T | 0.07236 | 4.92E-09 | chr:3:195654394 |
| 3 rs370983839 | 195668043 C | 0.05455 | 5.59E-09 | chr:3:195654394 |
| 3 rs9325422   | 195644978 G | 0.06105 | 6.07E-09 | chr:3:195654394 |
| 3 rs113488782 | 195684121 C | 0.05284 | 6.26E-09 | chr:3:195654394 |
| 3 rs4927817   | 195693798 G | 0.03555 | 7.07E-09 | chr:3:195654394 |
| 3 rs138213397 | 195676057 A | 0.03434 | 7.08E-09 | chr:3:195654394 |
| 3 rs202025333 | 195695717 G | 0.04554 | 7.09E-09 | chr:3:195654394 |
| 3 rs112586036 | 195762470 A | 0.08336 | 7.30E-09 | chr:3:195654394 |
| 3 rs113809427 | 195762456 T | 0.08336 | 7.30E-09 | chr:3:195654394 |
| 3 rs201898153 | 195697848 C | 0.05302 | 7.31E-09 | chr:3:195654394 |
| 3 rs3107709   | 195683255 C | 0.07587 | 7.41E-09 | chr:3:195654394 |
| 3 rs11709120  | 195671861 T | 0.0802  | 1.16E-08 | chr:3:195654394 |
| 3 rs4927680   | 195659169 G | 0.08313 | 1.20E-08 | chr:3:195654394 |
| 3 rs374205056 | 195363100 G | 0.06668 | 1.33E-08 | chr:3:195654394 |
| 3 rs7372331   | 195684523 G | 0.1005  | 1.48E-08 | chr:3:195654394 |
| 3 rs113876944 | 195682180 A | 0.07154 | 1.97E-08 | chr:3:195654394 |
| 3 rs200191712 | 195682112 A | 0.09399 | 2.76E-08 | chr:3:195654394 |
| 3 rs201335223 | 195682102 T | 0.09399 | 2.76E-08 | chr:3:195654394 |
| 3 rs201963939 | 195682106 C | 0.09399 | 2.76E-08 | chr:3:195654394 |
| 3 rs557551051 | 195682108 T | 0.09399 | 2.76E-08 | chr:3:195654394 |
| 3 rs112788096 | 195682140 T | 0.09044 | 2.92E-08 | chr:3:195654394 |
| 3 rs113786804 | 195682145 G | 0.09044 | 2.92E-08 | chr:3:195654394 |
| 3 rs139965737 | 195678158 G | 0.04717 | 3.51E-08 | chr:3:195654394 |
| 3 rs12495891  | 195762306 G | 0.1084  | 3.56E-08 | chr:3:195654394 |
| 3 rs1080211   | 195764711 C | 0.1105  | 4.51E-08 | chr:3:195654394 |
| 3 rs76633380  | 195762727 A | 0.111   | 5.31E-08 | chr:3:195654394 |
| 3 rs374086116 | 195692213 C | 0.06655 | 5.38E-08 | chr:3:195654394 |
| 3 rs78758916  | 195691752 G | 0.09254 | 5.55E-08 | chr:3:195654394 |
| 3 rs62285383  | 195813923 G | 0.1545  | 6.62E-08 | chr:3:195654394 |
| 3 rs55990110  | 195768472 T | 0.1267  | 6.62E-08 | chr:3:195654394 |
| 3 rs62284005  | 195768079 T | 0.1267  | 6.62E-08 | chr:3:195654394 |
| 3 rs62284007  | 195770947 A | 0.1267  | 6.62E-08 | chr:3:195654394 |
| 3 rs62284008  | 195771155 A | 0.1267  | 6.62E-08 | chr:3:195654394 |
| 3 rs12489052  | 195673049 G | 0.1243  | 6.81E-08 | chr:3:195654394 |
| 3 rs35298165  | 195813029 G | 0.1551  | 7.51E-08 | chr:3:195654394 |
| 3 rs58758084  | 195812981 T | 0.1551  | 7.51E-08 | chr:3:195654394 |
| 3 rs6802714   | 195812220 C | 0.1551  | 7.51E-08 | chr:3:195654394 |
| 3 rs6810239   | 195812163 T | 0.1551  | 7.51E-08 | chr:3:195654394 |
| 3 rs6793116   | 195812088 G | 0.155   | 8.30E-08 | chr:3:195654394 |

|              |             |        |          |                 |
|--------------|-------------|--------|----------|-----------------|
| 3 rs9830398  | 195814634 C | 0.155  | 8.30E-08 | chr:3:195654394 |
| 3 rs2343851  | 195824225 A | 0.1556 | 8.56E-08 | chr:3:195654394 |
| 3 rs62284010 | 195773092 T | 0.1345 | 1.04E-07 | chr:3:195654394 |
| 3 rs75737544 | 195771900 G | 0.134  | 1.25E-07 | chr:3:195654394 |
| 3 rs12487702 | 195775991 A | 0.1519 | 1.28E-07 | chr:3:195654394 |
| 3 rs41299394 | 195775824 T | 0.1519 | 1.28E-07 | chr:3:195654394 |
| 3 rs570      | 195776240 T | 0.1533 | 1.61E-07 | chr:3:195654394 |
| 3 rs1004860  | 195820247 A | 0.1534 | 1.72E-07 | chr:3:195654394 |
| 3 rs12493933 | 195818769 T | 0.1534 | 1.72E-07 | chr:3:195654394 |
| 3 rs2300779  | 195790691 A | 0.1534 | 1.72E-07 | chr:3:195654394 |
| 3 rs3761716  | 195798097 G | 0.1534 | 1.72E-07 | chr:3:195654394 |
| 3 rs3804141  | 195796908 T | 0.1534 | 1.72E-07 | chr:3:195654394 |
| 3 rs3827556  | 195796574 T | 0.1534 | 1.72E-07 | chr:3:195654394 |
| 3 rs41259844 | 195781684 T | 0.1534 | 1.72E-07 | chr:3:195654394 |
| 3 rs41297523 | 195784648 C | 0.1534 | 1.72E-07 | chr:3:195654394 |
| 3 rs41300427 | 195804449 T | 0.1534 | 1.72E-07 | chr:3:195654394 |
| 3 rs41301353 | 195801426 A | 0.1534 | 1.72E-07 | chr:3:195654394 |
| 3 rs62284053 | 195783481 T | 0.1534 | 1.72E-07 | chr:3:195654394 |
| 3 rs62285382 | 195813920 T | 0.1534 | 1.72E-07 | chr:3:195654394 |
| 3 rs62285387 | 195819505 A | 0.1534 | 1.72E-07 | chr:3:195654394 |
| 3 rs7645812  | 195781325 T | 0.1534 | 1.72E-07 | chr:3:195654394 |
| 3 rs34906439 | 195779706 G | 0.1542 | 2.02E-07 | chr:3:195654394 |
| 3 rs3933     | 195784997 A | 0.1542 | 2.02E-07 | chr:3:195654394 |
| 3 rs41298087 | 195779736 T | 0.1542 | 2.02E-07 | chr:3:195654394 |
| 3 rs41298097 | 195779155 T | 0.1542 | 2.02E-07 | chr:3:195654394 |
| 3 rs492288   | 195784210 T | 0.1542 | 2.02E-07 | chr:3:195654394 |
| 3 rs492349   | 195784192 A | 0.1542 | 2.02E-07 | chr:3:195654394 |
| 3 rs539816   | 195784076 A | 0.1542 | 2.02E-07 | chr:3:195654394 |
| 3 rs557527   | 195780709 A | 0.1542 | 2.02E-07 | chr:3:195654394 |
| 3 rs12490842 | 195816783 T | 0.1542 | 2.04E-07 | chr:3:195654394 |
| 3 rs3804138  | 195807688 C | 0.1542 | 2.04E-07 | chr:3:195654394 |
| 3 rs62285381 | 195806641 T | 0.1542 | 2.04E-07 | chr:3:195654394 |
| 3 rs6763092  | 195808024 G | 0.1542 | 2.04E-07 | chr:3:195654394 |
| 3 rs79088388 | 195812194 T | 0.1542 | 2.04E-07 | chr:3:195654394 |
| 3 rs13098628 | 195772656 T | 0.1722 | 2.08E-07 | chr:3:195654394 |
| 3 rs1004992  | 195821666 A | 0.155  | 2.15E-07 | chr:3:195654394 |
| 3 rs12491771 | 195821441 G | 0.155  | 2.15E-07 | chr:3:195654394 |
| 3 rs62285392 | 195824420 C | 0.155  | 2.15E-07 | chr:3:195654394 |
| 3 rs62285393 | 195824554 T | 0.155  | 2.15E-07 | chr:3:195654394 |
| 3 rs2620600  | 195708880 C | 21.68  | 2.30E-07 | chr:3:195654394 |
| 3 rs60148746 | 195823008 T | 0.1558 | 2.53E-07 | chr:3:195654394 |
| 3 rs366268   | 195782177 G | 0.1582 | 3.00E-07 | chr:3:195654394 |
| 3 rs406271   | 195776976 C | 0.1582 | 3.00E-07 | chr:3:195654394 |

|               |             |         |          |                 |
|---------------|-------------|---------|----------|-----------------|
| 3 rs419059    | 195782184 T | 0.1582  | 3.00E-07 | chr:3:195654394 |
| 3 rs419068    | 195782176 T | 0.1582  | 3.00E-07 | chr:3:195654394 |
| 3 rs493661    | 195786489 A | 0.1582  | 3.00E-07 | chr:3:195654394 |
| 3 rs28547297  | 195770513 T | 0.1727  | 3.74E-07 | chr:3:195654394 |
| 3 rs191361199 | 195825973 G | 0.164   | 5.67E-07 | chr:3:195654394 |
| 3 rs9823320   | 195771629 G | 0.1587  | 6.41E-07 | chr:3:195654394 |
| 3 rs13093426  | 195828806 T | 0.1728  | 6.93E-07 | chr:3:195654394 |
| 3 rs58888051  | 195830295 C | 0.1977  | 8.34E-07 | chr:3:195654394 |
| 3 rs4075688   | 195848264 A | 0.1748  | 1.02E-06 | chr:3:195654394 |
| 3 rs79540055  | 195692516 T | 0.06134 | 1.27E-06 | chr:3:195654394 |
| 3 rs1688745   | 195663472 T | 0.1735  | 1.27E-06 | chr:3:195654394 |
| 3 rs6765520   | 195644332 T | 0.1813  | 1.72E-06 | chr:3:195654394 |
| 3 rs77350585  | 195830520 A | 0.2161  | 2.18E-06 | chr:3:195654394 |
| 3 rs58642435  | 195828586 G | 0.2011  | 2.32E-06 | chr:3:195654394 |
| 3 rs60891787  | 195828364 T | 0.2011  | 2.34E-06 | chr:3:195654394 |
| 3 rs6782834   | 195754164 A | 0.192   | 2.59E-06 | chr:3:195654394 |
| 3 rs544737559 | 195825972 C | 0.1627  | 2.88E-06 | chr:3:195654394 |
| 3 rs4927705   | 195751397 T | 0.1893  | 3.13E-06 | chr:3:195654394 |
| 3 rs1679296   | 195732647 A | 0.1901  | 3.54E-06 | chr:3:195654394 |
| 3 rs71321897  | 195830499 G | 0.2265  | 3.90E-06 | chr:3:195654394 |
| 3 rs2044599   | 195736740 G | 0.1928  | 4.41E-06 | chr:3:195654394 |
| 3 rs4927704   | 195738228 C | 0.1928  | 4.41E-06 | chr:3:195654394 |
| 3 rs4927848   | 195738406 A | 0.1928  | 4.41E-06 | chr:3:195654394 |
| 3 rs10881563  | 195750225 A | 0.1954  | 5.04E-06 | chr:3:195654394 |
| 3 rs2121818   | 195744988 G | 0.1954  | 5.04E-06 | chr:3:195654394 |
| 3 rs4632575   | 195744978 A | 0.1956  | 5.21E-06 | chr:3:195654394 |
| 3 rs1975582   | 195751439 G | 0.197   | 6.12E-06 | chr:3:195654394 |
| 3 rs4361313   | 195752260 A | 0.197   | 6.12E-06 | chr:3:195654394 |
| 3 rs4927850   | 195751630 T | 0.197   | 6.12E-06 | chr:3:195654394 |
| 3 rs4927851   | 195751853 A | 0.197   | 6.12E-06 | chr:3:195654394 |
| 3 rs7614767   | 195753451 G | 0.197   | 6.12E-06 | chr:3:195654394 |
| 3 rs7624638   | 195748729 C | 0.197   | 6.12E-06 | chr:3:195654394 |
| 3 rs7624831   | 195748924 C | 0.197   | 6.12E-06 | chr:3:195654394 |
| 3 rs7625570   | 195747398 A | 0.197   | 6.12E-06 | chr:3:195654394 |
| 3 rs7627706   | 195753353 A | 0.197   | 6.12E-06 | chr:3:195654394 |
| 3 rs7627868   | 195753473 A | 0.197   | 6.12E-06 | chr:3:195654394 |
| 3 rs7630489   | 195753401 T | 0.197   | 6.12E-06 | chr:3:195654394 |
| 3 rs7630875   | 195753766 T | 0.197   | 6.12E-06 | chr:3:195654394 |
| 3 rs9834211   | 195743762 A | 0.197   | 6.12E-06 | chr:3:195654394 |
| 3 rs10881564  | 195750326 C | 0.197   | 6.21E-06 | chr:3:195654394 |
| 3 rs7627407   | 195749357 C | 0.1972  | 6.40E-06 | chr:3:195654394 |
| 3 rs78219813  | 195831188 G | 0.2106  | 6.45E-06 | chr:3:195654394 |
| 3 rs6799572   | 195740408 C | 0.1981  | 6.86E-06 | chr:3:195654394 |

|               |             |        |          |                 |
|---------------|-------------|--------|----------|-----------------|
| 3 rs73072305  | 195830690 T | 0.2117 | 7.23E-06 | chr:3:195654394 |
| 3 rs79139717  | 195848753 A | 0.2149 | 8.82E-06 | chr:3:195654394 |
| 3 rs10881566  | 195425064 T | 0.141  | 9.60E-06 | chr:3:195654394 |
| 3 rs4927792   | 195652315 C | 0.2018 | 9.78E-06 | chr:3:195654394 |
| 3 rs62408947  | 195849632 A | 0.2011 | 1.16E-05 | chr:3:195654394 |
| 3 rs62408944  | 195843979 C | 0.2157 | 1.36E-05 | chr:3:195654394 |
| 3 rs11185512  | 195835304 A | 0.2477 | 1.42E-05 | chr:3:195654394 |
| 3 rs3926028   | 195733303 T | 0.2188 | 1.55E-05 | chr:3:195654394 |
| 3 rs11925423  | 195734217 G | 0.213  | 1.61E-05 | chr:3:195654394 |
| 3 rs371463960 | 195673639 G | 0.2278 | 1.67E-05 | chr:3:195654394 |
| 3 rs7618864   | 195749561 G | 0.2132 | 1.68E-05 | chr:3:195654394 |
| 3 rs7624460   | 195748530 C | 0.2132 | 1.68E-05 | chr:3:195654394 |
| 3 rs7630825   | 195753740 T | 0.2132 | 1.68E-05 | chr:3:195654394 |
| 3 rs4927798   | 195666742 C | 0.224  | 1.83E-05 | chr:3:195654394 |
| 3 rs6764284   | 195666636 C | 0.224  | 1.83E-05 | chr:3:195654394 |
| 3 rs6785037   | 195661089 A | 0.224  | 1.83E-05 | chr:3:195654394 |
| 3 rs9868045   | 195661770 C | 0.2239 | 1.85E-05 | chr:3:195654394 |
| 3 rs4927871   | 195821256 C | 0.2518 | 1.90E-05 | chr:3:195654394 |
| 3 rs115223322 | 195733933 A | 0.2285 | 1.95E-05 | chr:3:195654394 |
| 3 rs147852061 | 195733925 C | 0.2285 | 1.95E-05 | chr:3:195654394 |
| 3 rs1466085   | 195820274 G | 0.2519 | 1.96E-05 | chr:3:195654394 |
| 3 rs34307738  | 195818265 A | 0.2519 | 1.96E-05 | chr:3:195654394 |
| 3 rs4927869   | 195819446 C | 0.2519 | 1.96E-05 | chr:3:195654394 |
| 3 rs372472446 | 195404754 G | 0.1369 | 2.06E-05 | chr:3:195654394 |
| 3 rs28427561  | 195733814 G | 0.2222 | 2.07E-05 | chr:3:195654394 |
| 3 rs74289356  | 195825077 C | 0.2549 | 2.43E-05 | chr:3:195654394 |
| 3 rs13070809  | 195823440 A | 0.2549 | 2.60E-05 | chr:3:195654394 |
| 3 rs9878111   | 195671682 G | 0.2359 | 2.62E-05 | chr:3:195654394 |
| 3 rs77361883  | 195687926 G | 0.2361 | 2.88E-05 | chr:3:195654394 |
| 3 rs74203182  | 195830380 A | 0.209  | 2.94E-05 | chr:3:195654394 |
| 3 rs966199    | 195651349 C | 0.2329 | 3.08E-05 | chr:3:195654394 |
| 3 rs9861311   | 195760948 C | 0.2429 | 3.10E-05 | chr:3:195654394 |
| 3 rs374734298 | 195673642 T | 0.2438 | 3.14E-05 | chr:3:195654394 |
| 3 rs28759193  | 195673738 C | 0.2442 | 3.44E-05 | chr:3:195654394 |
| 3 rs4927873   | 195825882 T | 0.2578 | 3.49E-05 | chr:3:195654394 |
| 3 rs9834322   | 195682975 T | 0.2464 | 3.65E-05 | chr:3:195654394 |
| 3 rs4927679   | 195658360 C | 0.2385 | 3.76E-05 | chr:3:195654394 |
| 3 rs9881504   | 195656614 C | 0.2385 | 3.76E-05 | chr:3:195654394 |
| 3 rs74778113  | 195669598 T | 0.2384 | 3.79E-05 | chr:3:195654394 |
| 3 rs28594263  | 195733883 C | 0.2432 | 3.80E-05 | chr:3:195654394 |
| 3 rs60801726  | 195818697 G | 0.2722 | 3.81E-05 | chr:3:195654394 |
| 3 rs6793127   | 195812123 G | 0.2722 | 3.81E-05 | chr:3:195654394 |
| 3 rs28512347  | 195733884 C | 0.2447 | 4.09E-05 | chr:3:195654394 |

|   |             |           |   |         |          |                 |
|---|-------------|-----------|---|---------|----------|-----------------|
| 3 | rs79026838  | 195668478 | A | 0.238   | 4.10E-05 | chr:3:195654394 |
| 3 | rs78289439  | 195672200 | A | 0.2435  | 4.20E-05 | chr:3:195654394 |
| 3 | rs145114593 | 195825239 | T | 0.275   | 4.64E-05 | chr:3:195654394 |
| 3 | rs4927716   | 195817701 | T | 0.2734  | 4.79E-05 | chr:3:195654394 |
| 3 | rs61306983  | 195738447 | T | 0.2471  | 5.05E-05 | chr:3:195654394 |
| 3 | rs2620604   | 195710989 | A | 0.05314 | 5.27E-05 | chr:3:195654394 |
| 3 | rs4927692   | 195710993 | G | 0.05314 | 5.27E-05 | chr:3:195654394 |
| 3 | rs58503904  | 195672994 | C | 0.2552  | 5.98E-05 | chr:3:195654394 |
| 4 | rs77466269  | 120269755 | A | 0.1039  | 1.46E-26 | chr:4:120263688 |
| 4 | rs10017001  | 120263293 | G | 0.1089  | 1.93E-26 | chr:4:120263688 |
| 4 | rs9994691   | 120263298 | A | 0.1089  | 1.93E-26 | chr:4:120263688 |
| 4 | rs201764844 | 120269768 | C | 0.1271  | 2.95E-26 | chr:4:120263688 |
| 4 | rs190883674 | 120269780 | G | 0.1305  | 4.28E-26 | chr:4:120263688 |
| 4 | rs10006495  | 120263315 | G | 0.1195  | 3.12E-25 | chr:4:120263688 |
| 4 | rs3864143   | 120266428 | C | 0.06876 | 7.93E-25 | chr:4:120263688 |
| 4 | rs10006688  | 120263526 | C | 0.06245 | 2.33E-24 | chr:4:120263688 |
| 4 | rs143457155 | 120263622 | C | 0.06099 | 2.36E-24 | chr:4:120263688 |
| 4 | rs11735886  | 120290215 | C | 0.05228 | 2.42E-24 | chr:4:120263688 |
| 4 | rs56838032  | 120329894 | A | 0.1315  | 2.94E-24 | chr:4:120263688 |
| 4 | rs28622913  | 120261723 | A | 0.05152 | 3.41E-24 | chr:4:120263688 |
| 4 | rs28735977  | 120261738 | T | 0.05152 | 3.41E-24 | chr:4:120263688 |
| 4 | rs56155624  | 120291026 | G | 0.05978 | 4.23E-24 | chr:4:120263688 |
| 4 | rs4511986   | 120354674 | C | 0.1372  | 4.39E-24 | chr:4:120263688 |
| 4 | rs11735878  | 120290177 | C | 0.1312  | 5.57E-24 | chr:4:120263688 |
| 4 | rs13121928  | 120266518 | C | 0.05537 | 5.77E-24 | chr:4:120263688 |
| 4 | rs4563482   | 120354480 | G | 0.07723 | 8.22E-24 | chr:4:120263688 |
| 4 | rs78422072  | 120281042 | T | 0.06564 | 9.92E-24 | chr:4:120263688 |
| 4 | rs78971550  | 120281041 | T | 0.06564 | 9.92E-24 | chr:4:120263688 |
| 4 | rs60378962  | 120280991 | A | 0.06145 | 1.07E-23 | chr:4:120263688 |
| 4 | rs181331234 | 120327890 | C | 0.1288  | 1.17E-23 | chr:4:120263688 |
| 4 | rs71610285  | 120329953 | C | 0.1335  | 1.30E-23 | chr:4:120263688 |
| 4 | rs13128933  | 120246249 | A | 0.1564  | 1.42E-23 | chr:4:120263688 |
| 4 | rs7655048   | 120328284 | A | 0.1245  | 1.49E-23 | chr:4:120263688 |
| 4 | rs13139045  | 120168588 | C | 0.06618 | 1.51E-23 | chr:4:120263688 |
| 4 | rs12503360  | 120247506 | C | 0.118   | 1.74E-23 | chr:4:120263688 |
| 4 | rs12503309  | 120247397 | A | 0.1244  | 1.75E-23 | chr:4:120263688 |
| 4 | rs148893841 | 120263621 | G | 0.05013 | 1.76E-23 | chr:4:120263688 |
| 4 | rs13122153  | 120266585 | C | 0.04567 | 1.91E-23 | chr:4:120263688 |
| 4 | rs9307475   | 120368556 | A | 0.07547 | 2.04E-23 | chr:4:120263688 |
| 4 | rs368193355 | 120327846 | C | 0.122   | 2.09E-23 | chr:4:120263688 |
| 4 | rs74529999  | 120327854 | C | 0.122   | 2.09E-23 | chr:4:120263688 |
| 4 | rs7692994   | 120427489 | A | 0.0755  | 2.43E-23 | chr:4:120263688 |
| 4 | rs12510923  | 120247381 | G | 0.1251  | 2.43E-23 | chr:4:120263688 |

|               |             |         |          |                 |
|---------------|-------------|---------|----------|-----------------|
| 4 rs12498657  | 120262866 C | 0.04651 | 2.62E-23 | chr:4:120263688 |
| 4 rs4145952   | 120155806 A | 0.06338 | 2.78E-23 | chr:4:120263688 |
| 4 rs13104572  | 120285568 C | 0.04583 | 2.88E-23 | chr:4:120263688 |
| 4 rs13132082  | 120285657 A | 0.04583 | 2.88E-23 | chr:4:120263688 |
| 4 rs10518329  | 120401835 G | 0.07613 | 2.95E-23 | chr:4:120263688 |
| 4 rs6820115   | 120398182 C | 0.07613 | 2.95E-23 | chr:4:120263688 |
| 4 rs7665125   | 120402079 T | 0.07613 | 2.95E-23 | chr:4:120263688 |
| 4 rs9996940   | 120364542 T | 0.07613 | 2.95E-23 | chr:4:120263688 |
| 4 rs531826432 | 120327073 T | 0.1542  | 2.99E-23 | chr:4:120263688 |
| 4 rs10002914  | 120292081 A | 0.04567 | 3.08E-23 | chr:4:120263688 |
| 4 rs10013652  | 120292256 G | 0.04567 | 3.08E-23 | chr:4:120263688 |
| 4 rs10021601  | 120282563 A | 0.04567 | 3.08E-23 | chr:4:120263688 |
| 4 rs10029303  | 120286755 A | 0.04567 | 3.08E-23 | chr:4:120263688 |
| 4 rs10517834  | 120286783 C | 0.04567 | 3.08E-23 | chr:4:120263688 |
| 4 rs10857066  | 120286596 T | 0.04567 | 3.08E-23 | chr:4:120263688 |
| 4 rs11098505  | 120284627 T | 0.04567 | 3.08E-23 | chr:4:120263688 |
| 4 rs11098506  | 120284971 G | 0.04567 | 3.08E-23 | chr:4:120263688 |
| 4 rs11098507  | 120288286 A | 0.04567 | 3.08E-23 | chr:4:120263688 |
| 4 rs12374244  | 120281972 T | 0.04567 | 3.08E-23 | chr:4:120263688 |
| 4 rs12374245  | 120282059 T | 0.04567 | 3.08E-23 | chr:4:120263688 |
| 4 rs12374346  | 120281705 A | 0.04567 | 3.08E-23 | chr:4:120263688 |
| 4 rs12374352  | 120281977 T | 0.04567 | 3.08E-23 | chr:4:120263688 |
| 4 rs12374396  | 120281619 C | 0.04567 | 3.08E-23 | chr:4:120263688 |
| 4 rs12499602  | 120284387 A | 0.04567 | 3.08E-23 | chr:4:120263688 |
| 4 rs12503082  | 120284317 G | 0.04567 | 3.08E-23 | chr:4:120263688 |
| 4 rs12510451  | 120289143 T | 0.04567 | 3.08E-23 | chr:4:120263688 |
| 4 rs12510487  | 120289231 T | 0.04567 | 3.08E-23 | chr:4:120263688 |
| 4 rs12513310  | 120288039 A | 0.04567 | 3.08E-23 | chr:4:120263688 |
| 4 rs13105020  | 120285688 T | 0.04567 | 3.08E-23 | chr:4:120263688 |
| 4 rs28470894  | 120289405 G | 0.04567 | 3.08E-23 | chr:4:120263688 |
| 4 rs28488261  | 120289396 C | 0.04567 | 3.08E-23 | chr:4:120263688 |
| 4 rs28501434  | 120283773 T | 0.04567 | 3.08E-23 | chr:4:120263688 |
| 4 rs28581362  | 120283548 A | 0.04567 | 3.08E-23 | chr:4:120263688 |
| 4 rs28594160  | 120289456 G | 0.04567 | 3.08E-23 | chr:4:120263688 |
| 4 rs28668103  | 120291372 T | 0.04567 | 3.08E-23 | chr:4:120263688 |
| 4 rs28687057  | 120280812 G | 0.04567 | 3.08E-23 | chr:4:120263688 |
| 4 rs55845118  | 120290913 C | 0.04567 | 3.08E-23 | chr:4:120263688 |
| 4 rs67281037  | 120281157 C | 0.04567 | 3.08E-23 | chr:4:120263688 |
| 4 rs6824111   | 120285968 A | 0.04567 | 3.08E-23 | chr:4:120263688 |
| 4 rs6824169   | 120293175 C | 0.04567 | 3.08E-23 | chr:4:120263688 |
| 4 rs6846966   | 120293208 G | 0.04567 | 3.08E-23 | chr:4:120263688 |
| 4 rs6847586   | 120286069 A | 0.04567 | 3.08E-23 | chr:4:120263688 |
| 4 rs6847778   | 120293582 G | 0.04567 | 3.08E-23 | chr:4:120263688 |



|               |             |         |          |                 |
|---------------|-------------|---------|----------|-----------------|
| 4 rs6847862   | 120286371 T | 0.04567 | 3.08E-23 | chr:4:120263688 |
| 4 rs6848081   | 120286443 T | 0.04567 | 3.08E-23 | chr:4:120263688 |
| 4 rs6848380   | 120286403 A | 0.04567 | 3.08E-23 | chr:4:120263688 |
| 4 rs6857892   | 120282696 T | 0.04567 | 3.08E-23 | chr:4:120263688 |
| 4 rs71610270  | 120287436 G | 0.04567 | 3.08E-23 | chr:4:120263688 |
| 4 rs72676059  | 120290828 G | 0.04567 | 3.08E-23 | chr:4:120263688 |
| 4 rs73842616  | 120290683 A | 0.04567 | 3.08E-23 | chr:4:120263688 |
| 4 rs7677068   | 120291704 T | 0.04567 | 3.08E-23 | chr:4:120263688 |
| 4 rs9991221   | 120292107 C | 0.04567 | 3.08E-23 | chr:4:120263688 |
| 4 rs9995136   | 120286845 G | 0.04567 | 3.08E-23 | chr:4:120263688 |
| 4 rs74693727  | 120330155 T | 0.1016  | 3.67E-23 | chr:4:120263688 |
| 4 rs12503276  | 120247329 A | 0.1204  | 3.70E-23 | chr:4:120263688 |
| 4 rs4368585   | 120354482 G | 0.1179  | 4.00E-23 | chr:4:120263688 |
| 4 rs10016241  | 120268553 C | 0.04256 | 4.12E-23 | chr:4:120263688 |
| 4 rs10015579  | 120271802 C | 0.0423  | 4.20E-23 | chr:4:120263688 |
| 4 rs28546691  | 120262832 A | 0.04226 | 4.28E-23 | chr:4:120263688 |
| 4 rs201965045 | 120254952 G | 0.171   | 4.58E-23 | chr:4:120263688 |
| 4 rs13134132  | 120324615 A | 0.07887 | 4.63E-23 | chr:4:120263688 |
| 4 rs10434028  | 120294464 G | 0.05403 | 4.75E-23 | chr:4:120263688 |
| 4 rs13125526  | 120288019 A | 0.04203 | 4.87E-23 | chr:4:120263688 |
| 4 rs10000544  | 120270705 A | 0.04253 | 4.90E-23 | chr:4:120263688 |
| 4 rs10005542  | 120268302 C | 0.04253 | 4.90E-23 | chr:4:120263688 |
| 4 rs10006192  | 120263022 C | 0.04253 | 4.90E-23 | chr:4:120263688 |
| 4 rs10010355  | 120261043 G | 0.04253 | 4.90E-23 | chr:4:120263688 |
| 4 rs10012408  | 120270771 A | 0.04253 | 4.90E-23 | chr:4:120263688 |
| 4 rs10022448  | 120270421 G | 0.04253 | 4.90E-23 | chr:4:120263688 |
| 4 rs10025925  | 120271744 T | 0.04253 | 4.90E-23 | chr:4:120263688 |
| 4 rs10028773  | 120265259 G | 0.04253 | 4.90E-23 | chr:4:120263688 |
| 4 rs12502393  | 120271228 T | 0.04253 | 4.90E-23 | chr:4:120263688 |
| 4 rs12502524  | 120271414 A | 0.04253 | 4.90E-23 | chr:4:120263688 |
| 4 rs12506421  | 120271167 C | 0.04253 | 4.90E-23 | chr:4:120263688 |
| 4 rs12506445  | 120271237 C | 0.04253 | 4.90E-23 | chr:4:120263688 |
| 4 rs17009144  | 120270795 G | 0.04253 | 4.90E-23 | chr:4:120263688 |
| 4 rs17517414  | 120262101 C | 0.04253 | 4.90E-23 | chr:4:120263688 |
| 4 rs17595727  | 120262074 C | 0.04253 | 4.90E-23 | chr:4:120263688 |
| 4 rs2136911   | 120265859 A | 0.04253 | 4.90E-23 | chr:4:120263688 |
| 4 rs2175381   | 120265967 C | 0.04253 | 4.90E-23 | chr:4:120263688 |
| 4 rs28369518  | 120271630 C | 0.04253 | 4.90E-23 | chr:4:120263688 |
| 4 rs28396837  | 120271541 A | 0.04253 | 4.90E-23 | chr:4:120263688 |
| 4 rs28437684  | 120264849 A | 0.04253 | 4.90E-23 | chr:4:120263688 |
| 4 rs28551750  | 120264901 T | 0.04253 | 4.90E-23 | chr:4:120263688 |
| 4 rs28589345  | 120269080 A | 0.04253 | 4.90E-23 | chr:4:120263688 |
| 4 rs28599836  | 120268809 T | 0.04253 | 4.90E-23 | chr:4:120263688 |

|               |             |         |          |                 |
|---------------|-------------|---------|----------|-----------------|
| 4 rs28616635  | 120261861 C | 0.04253 | 4.90E-23 | chr:4:120263688 |
| 4 rs28691602  | 120264770 C | 0.04253 | 4.90E-23 | chr:4:120263688 |
| 4 rs28714087  | 120270966 G | 0.04253 | 4.90E-23 | chr:4:120263688 |
| 4 rs28726222  | 120262672 C | 0.04253 | 4.90E-23 | chr:4:120263688 |
| 4 rs3864142   | 120266191 T | 0.04253 | 4.90E-23 | chr:4:120263688 |
| 4 rs3864144   | 120272605 T | 0.04253 | 4.90E-23 | chr:4:120263688 |
| 4 rs3986377   | 120260270 A | 0.04253 | 4.90E-23 | chr:4:120263688 |
| 4 rs4001390   | 120265783 C | 0.04253 | 4.90E-23 | chr:4:120263688 |
| 4 rs4473640   | 120260437 A | 0.04253 | 4.90E-23 | chr:4:120263688 |
| 4 rs555773279 | 120269424 T | 0.04253 | 4.90E-23 | chr:4:120263688 |
| 4 rs55820750  | 120269168 C | 0.04253 | 4.90E-23 | chr:4:120263688 |
| 4 rs6815291   | 120266982 A | 0.04253 | 4.90E-23 | chr:4:120263688 |
| 4 rs6833140   | 120266822 A | 0.04253 | 4.90E-23 | chr:4:120263688 |
| 4 rs6838009   | 120267034 A | 0.04253 | 4.90E-23 | chr:4:120263688 |
| 4 rs6838457   | 120267367 G | 0.04253 | 4.90E-23 | chr:4:120263688 |
| 4 rs79606892  | 120259606 C | 0.04253 | 4.90E-23 | chr:4:120263688 |
| 4 rs9307470   | 120261214 A | 0.04253 | 4.90E-23 | chr:4:120263688 |
| 4 rs9307471   | 120261262 A | 0.04253 | 4.90E-23 | chr:4:120263688 |
| 4 rs9995716   | 120264996 C | 0.04253 | 4.90E-23 | chr:4:120263688 |
| 4 rs6815934   | 120267310 C | 0.0426  | 5.09E-23 | chr:4:120263688 |
| 4 rs13101722  | 120555975 C | 0.09259 | 5.39E-23 | chr:4:120263688 |
| 4 rs2389874   | 120554991 A | 0.09259 | 5.39E-23 | chr:4:120263688 |
| 4 rs2389879   | 120557684 G | 0.09259 | 5.39E-23 | chr:4:120263688 |
| 4 rs58583086  | 120556362 A | 0.09259 | 5.39E-23 | chr:4:120263688 |
| 4 rs59867181  | 120556467 C | 0.09259 | 5.39E-23 | chr:4:120263688 |
| 4 rs6534149   | 120559292 T | 0.09259 | 5.39E-23 | chr:4:120263688 |
| 4 rs12501602  | 120287935 T | 0.04255 | 5.67E-23 | chr:4:120263688 |
| 4 rs28572003  | 120268891 G | 0.04281 | 5.82E-23 | chr:4:120263688 |
| 4 rs114860385 | 120355584 C | 0.1164  | 6.19E-23 | chr:4:120263688 |
| 4 rs76568951  | 120355570 C | 0.1164  | 6.19E-23 | chr:4:120263688 |
| 4 rs4513552   | 120354657 T | 0.189   | 6.30E-23 | chr:4:120263688 |
| 4 rs7654611   | 120328304 G | 0.1265  | 6.32E-23 | chr:4:120263688 |
| 4 rs10003742  | 120271798 C | 0.09928 | 6.39E-23 | chr:4:120263688 |
| 4 rs12506487  | 120271361 G | 0.04281 | 6.47E-23 | chr:4:120263688 |
| 4 rs12510133  | 120271344 C | 0.04281 | 6.47E-23 | chr:4:120263688 |
| 4 rs10023641  | 120258410 G | 0.04347 | 6.79E-23 | chr:4:120263688 |
| 4 rs114866537 | 120258608 T | 0.04347 | 6.79E-23 | chr:4:120263688 |
| 4 rs1814813   | 120258207 G | 0.04347 | 6.79E-23 | chr:4:120263688 |
| 4 rs1814814   | 120258124 G | 0.04347 | 6.79E-23 | chr:4:120263688 |
| 4 rs4422403   | 120258194 T | 0.04347 | 6.79E-23 | chr:4:120263688 |
| 4 rs4001211   | 120331544 G | 0.1598  | 7.36E-23 | chr:4:120263688 |
| 4 rs71614435  | 120369711 A | 0.1213  | 7.39E-23 | chr:4:120263688 |
| 4 rs10004114  | 120259213 G | 0.09966 | 7.85E-23 | chr:4:120263688 |

|               |             |         |          |                 |
|---------------|-------------|---------|----------|-----------------|
| 4 rs10015883  | 120268146 G | 0.09966 | 7.85E-23 | chr:4:120263688 |
| 4 rs10213542  | 120260650 T | 0.09966 | 7.85E-23 | chr:4:120263688 |
| 4 rs28439855  | 120262256 A | 0.09966 | 7.85E-23 | chr:4:120263688 |
| 4 rs4643791   | 120265619 A | 0.09966 | 7.85E-23 | chr:4:120263688 |
| 4 rs9307472   | 120261415 C | 0.09966 | 7.85E-23 | chr:4:120263688 |
| 4 rs9637624   | 120274911 G | 0.09966 | 7.85E-23 | chr:4:120263688 |
| 4 rs370990577 | 120327271 C | 0.1271  | 7.94E-23 | chr:4:120263688 |
| 4 rs373735748 | 120244580 T | 0.179   | 8.30E-23 | chr:4:120263688 |
| 4 rs55884612  | 120244577 T | 0.179   | 8.30E-23 | chr:4:120263688 |
| 4 rs115227179 | 120355773 T | 0.1216  | 8.61E-23 | chr:4:120263688 |
| 4 rs11723550  | 120289961 C | 0.1038  | 8.91E-23 | chr:4:120263688 |
| 4 rs79244813  | 120354847 C | 0.1184  | 9.47E-23 | chr:4:120263688 |
| 4 rs10019309  | 120327085 T | 0.1429  | 9.48E-23 | chr:4:120263688 |
| 4 rs13104396  | 120285649 T | 0.1132  | 1.01E-22 | chr:4:120263688 |
| 4 rs13128774  | 120246282 T | 0.1666  | 1.07E-22 | chr:4:120263688 |
| 4 rs2322021   | 120295030 A | 0.1155  | 1.08E-22 | chr:4:120263688 |
| 4 rs10008386  | 120318809 A | 0.116   | 1.09E-22 | chr:4:120263688 |
| 4 rs10008392  | 120318839 A | 0.116   | 1.09E-22 | chr:4:120263688 |
| 4 rs10014719  | 120320715 A | 0.116   | 1.09E-22 | chr:4:120263688 |
| 4 rs10016944  | 120320894 A | 0.116   | 1.09E-22 | chr:4:120263688 |
| 4 rs10020141  | 120318870 C | 0.116   | 1.09E-22 | chr:4:120263688 |
| 4 rs10857068  | 120317549 G | 0.116   | 1.09E-22 | chr:4:120263688 |
| 4 rs11098514  | 120317374 C | 0.116   | 1.09E-22 | chr:4:120263688 |
| 4 rs11098516  | 120317978 C | 0.116   | 1.09E-22 | chr:4:120263688 |
| 4 rs12504149  | 120318577 A | 0.116   | 1.09E-22 | chr:4:120263688 |
| 4 rs12506148  | 120320348 T | 0.116   | 1.09E-22 | chr:4:120263688 |
| 4 rs12508173  | 120318526 C | 0.116   | 1.09E-22 | chr:4:120263688 |
| 4 rs12509234  | 120319434 C | 0.116   | 1.09E-22 | chr:4:120263688 |
| 4 rs13116768  | 120318254 C | 0.116   | 1.09E-22 | chr:4:120263688 |
| 4 rs28572238  | 120316686 G | 0.116   | 1.09E-22 | chr:4:120263688 |
| 4 rs28714195  | 120316950 T | 0.116   | 1.09E-22 | chr:4:120263688 |
| 4 rs6833815   | 120318921 A | 0.116   | 1.09E-22 | chr:4:120263688 |
| 4 rs10017189  | 120263523 C | 0.1242  | 1.10E-22 | chr:4:120263688 |
| 4 rs10015965  | 120268237 G | 0.04662 | 1.12E-22 | chr:4:120263688 |
| 4 rs10013042  | 120244482 T | 0.1377  | 1.16E-22 | chr:4:120263688 |
| 4 rs12511625  | 120318135 G | 0.1181  | 1.16E-22 | chr:4:120263688 |
| 4 rs10213221  | 120255926 A | 0.1139  | 1.18E-22 | chr:4:120263688 |
| 4 rs1814815   | 120258091 T | 0.1016  | 1.20E-22 | chr:4:120263688 |
| 4 rs2017058   | 120257739 C | 0.1016  | 1.20E-22 | chr:4:120263688 |
| 4 rs71612595  | 120331428 T | 0.1197  | 1.21E-22 | chr:4:120263688 |
| 4 rs9683604   | 120363592 T | 0.12    | 1.25E-22 | chr:4:120263688 |
| 4 rs6847075   | 120286043 T | 0.1136  | 1.26E-22 | chr:4:120263688 |
| 4 rs71614437  | 120370156 C | 0.1204  | 1.33E-22 | chr:4:120263688 |

|               |             |         |          |                 |
|---------------|-------------|---------|----------|-----------------|
| 4 rs28549914  | 120322781 A | 0.1205  | 1.34E-22 | chr:4:120263688 |
| 4 rs7695996   | 120322033 T | 0.1205  | 1.34E-22 | chr:4:120263688 |
| 4 rs7696465   | 120322114 A | 0.1205  | 1.34E-22 | chr:4:120263688 |
| 4 rs7696875   | 120322358 T | 0.1205  | 1.34E-22 | chr:4:120263688 |
| 4 rs7438634   | 120245754 C | 0.1121  | 1.36E-22 | chr:4:120263688 |
| 4 rs115044484 | 120326887 G | 0.1205  | 1.36E-22 | chr:4:120263688 |
| 4 rs10212956  | 120254343 G | 0.1145  | 1.36E-22 | chr:4:120263688 |
| 4 rs1849457   | 120254355 G | 0.1145  | 1.36E-22 | chr:4:120263688 |
| 4 rs28403131  | 120285806 T | 0.114   | 1.44E-22 | chr:4:120263688 |
| 4 rs200290730 | 120287492 A | 0.05471 | 1.45E-22 | chr:4:120263688 |
| 4 rs13101526  | 120244456 T | 0.1382  | 1.46E-22 | chr:4:120263688 |
| 4 rs11729521  | 120416788 C | 0.1181  | 1.50E-22 | chr:4:120263688 |
| 4 rs550821123 | 120327079 T | 0.1466  | 1.50E-22 | chr:4:120263688 |
| 4 rs140750089 | 120330539 A | 0.1202  | 1.52E-22 | chr:4:120263688 |
| 4 rs149826784 | 120330643 A | 0.1202  | 1.52E-22 | chr:4:120263688 |
| 4 rs187271184 | 120330448 A | 0.1202  | 1.52E-22 | chr:4:120263688 |
| 4 rs190803766 | 120330449 A | 0.1202  | 1.52E-22 | chr:4:120263688 |
| 4 rs7654984   | 120328520 G | 0.1202  | 1.52E-22 | chr:4:120263688 |
| 4 rs7655723   | 120328666 A | 0.1202  | 1.52E-22 | chr:4:120263688 |
| 4 rs6838617   | 120297423 T | 0.1154  | 1.53E-22 | chr:4:120263688 |
| 4 rs9997340   | 120364809 C | 0.1203  | 1.57E-22 | chr:4:120263688 |
| 4 rs10020256  | 120287265 T | 0.05458 | 1.57E-22 | chr:4:120263688 |
| 4 rs4001175   | 120500667 A | 0.1217  | 1.57E-22 | chr:4:120263688 |
| 4 rs35239065  | 120325130 C | 0.1207  | 1.59E-22 | chr:4:120263688 |
| 4 rs35265692  | 120325135 C | 0.1207  | 1.59E-22 | chr:4:120263688 |
| 4 rs72918577  | 120326701 A | 0.125   | 1.61E-22 | chr:4:120263688 |
| 4 rs77299866  | 120326716 T | 0.125   | 1.61E-22 | chr:4:120263688 |
| 4 rs79446934  | 120326713 C | 0.125   | 1.61E-22 | chr:4:120263688 |
| 4 rs200149630 | 120356941 C | 0.1208  | 1.63E-22 | chr:4:120263688 |
| 4 rs201742833 | 120356668 T | 0.1208  | 1.63E-22 | chr:4:120263688 |
| 4 rs9685057   | 120272333 G | 0.199   | 1.64E-22 | chr:4:120263688 |
| 4 rs9995244   | 120321858 G | 0.1211  | 1.65E-22 | chr:4:120263688 |
| 4 rs34481394  | 120248374 T | 0.1196  | 1.65E-22 | chr:4:120263688 |
| 4 rs35231872  | 120248376 T | 0.1196  | 1.65E-22 | chr:4:120263688 |
| 4 rs35653026  | 120248378 G | 0.1196  | 1.65E-22 | chr:4:120263688 |
| 4 rs12499324  | 120393786 T | 0.121   | 1.66E-22 | chr:4:120263688 |
| 4 rs7436506   | 120393769 C | 0.121   | 1.66E-22 | chr:4:120263688 |
| 4 rs4296662   | 120313440 G | 0.1169  | 1.66E-22 | chr:4:120263688 |
| 4 rs4560394   | 120313435 G | 0.1169  | 1.66E-22 | chr:4:120263688 |
| 4 rs71610279  | 120326643 C | 0.121   | 1.66E-22 | chr:4:120263688 |
| 4 rs71610280  | 120326648 G | 0.121   | 1.66E-22 | chr:4:120263688 |
| 4 rs10005973  | 120271958 T | 0.1145  | 1.71E-22 | chr:4:120263688 |
| 4 rs10213554  | 120260785 A | 0.1145  | 1.71E-22 | chr:4:120263688 |

|               |             |        |          |                 |
|---------------|-------------|--------|----------|-----------------|
| 4 rs13108589  | 120268102 C | 0.1145 | 1.71E-22 | chr:4:120263688 |
| 4 rs3864141   | 120266007 A | 0.1145 | 1.71E-22 | chr:4:120263688 |
| 4 rs9684938   | 120363595 G | 0.1208 | 1.75E-22 | chr:4:120263688 |
| 4 rs73842633  | 120375464 A | 0.1241 | 1.79E-22 | chr:4:120263688 |
| 4 rs76837541  | 120375428 G | 0.1241 | 1.79E-22 | chr:4:120263688 |
| 4 rs10012456  | 120274039 T | 0.1144 | 1.79E-22 | chr:4:120263688 |
| 4 rs10017371  | 120293776 G | 0.1144 | 1.79E-22 | chr:4:120263688 |
| 4 rs1002152   | 120273387 A | 0.1144 | 1.79E-22 | chr:4:120263688 |
| 4 rs10026436  | 120288904 A | 0.1144 | 1.79E-22 | chr:4:120263688 |
| 4 rs11722183  | 120280597 C | 0.1144 | 1.79E-22 | chr:4:120263688 |
| 4 rs11728730  | 120275003 C | 0.1144 | 1.79E-22 | chr:4:120263688 |
| 4 rs150131449 | 120288605 G | 0.1144 | 1.79E-22 | chr:4:120263688 |
| 4 rs28633994  | 120276037 G | 0.1144 | 1.79E-22 | chr:4:120263688 |
| 4 rs6838236   | 120267229 G | 0.1144 | 1.79E-22 | chr:4:120263688 |
| 4 rs6848580   | 120286492 A | 0.1144 | 1.79E-22 | chr:4:120263688 |
| 4 rs77222221  | 120329212 A | 0.1744 | 1.84E-22 | chr:4:120263688 |
| 4 rs7671759   | 120248094 C | 0.1147 | 1.85E-22 | chr:4:120263688 |
| 4 rs10026736  | 120384322 C | 0.1214 | 1.87E-22 | chr:4:120263688 |
| 4 rs145027390 | 120247827 G | 0.113  | 1.89E-22 | chr:4:120263688 |
| 4 rs2892869   | 120521297 C | 8.257  | 1.90E-22 | chr:4:120263688 |
| 4 rs56843000  | 120516597 C | 8.257  | 1.90E-22 | chr:4:120263688 |
| 4 rs9996586   | 120326942 G | 0.1162 | 1.92E-22 | chr:4:120263688 |
| 4 rs9760422   | 120354126 G | 0.1441 | 1.95E-22 | chr:4:120263688 |
| 4 rs1546503   | 120241167 C | 0.1152 | 1.95E-22 | chr:4:120263688 |
| 4 rs1546506   | 120241240 C | 0.1152 | 1.95E-22 | chr:4:120263688 |
| 4 rs28495013  | 120375831 C | 0.1214 | 1.95E-22 | chr:4:120263688 |
| 4 rs71610281  | 120328001 C | 0.1255 | 1.99E-22 | chr:4:120263688 |
| 4 rs10006525  | 120408931 G | 0.1212 | 2.00E-22 | chr:4:120263688 |
| 4 rs10006706  | 120409152 C | 0.1212 | 2.00E-22 | chr:4:120263688 |
| 4 rs10006793  | 120390791 G | 0.1212 | 2.00E-22 | chr:4:120263688 |
| 4 rs10008459  | 120394231 C | 0.1212 | 2.00E-22 | chr:4:120263688 |
| 4 rs10009450  | 120391258 G | 0.1212 | 2.00E-22 | chr:4:120263688 |
| 4 rs10017335  | 120381523 G | 0.1212 | 2.00E-22 | chr:4:120263688 |
| 4 rs10017389  | 120381412 A | 0.1212 | 2.00E-22 | chr:4:120263688 |
| 4 rs10018726  | 120394010 G | 0.1212 | 2.00E-22 | chr:4:120263688 |
| 4 rs10019406  | 120364619 G | 0.1212 | 2.00E-22 | chr:4:120263688 |
| 4 rs10020027  | 120381879 C | 0.1212 | 2.00E-22 | chr:4:120263688 |
| 4 rs10023569  | 120323316 T | 0.1212 | 2.00E-22 | chr:4:120263688 |
| 4 rs10026493  | 120384194 G | 0.1212 | 2.00E-22 | chr:4:120263688 |
| 4 rs10026516  | 120384253 A | 0.1212 | 2.00E-22 | chr:4:120263688 |
| 4 rs10026748  | 120384357 A | 0.1212 | 2.00E-22 | chr:4:120263688 |
| 4 rs10026952  | 120384564 A | 0.1212 | 2.00E-22 | chr:4:120263688 |
| 4 rs10030660  | 120436704 A | 0.1212 | 2.00E-22 | chr:4:120263688 |

|               |             |        |                          |
|---------------|-------------|--------|--------------------------|
| 4 rs10032151  | 120391628 T | 0.1212 | 2.00E-22 chr:4:120263688 |
| 4 rs10032158  | 120391632 T | 0.1212 | 2.00E-22 chr:4:120263688 |
| 4 rs10034623  | 120397829 A | 0.1212 | 2.00E-22 chr:4:120263688 |
| 4 rs10518328  | 120401779 A | 0.1212 | 2.00E-22 chr:4:120263688 |
| 4 rs10518331  | 120323595 T | 0.1212 | 2.00E-22 chr:4:120263688 |
| 4 rs11098526  | 120390359 T | 0.1212 | 2.00E-22 chr:4:120263688 |
| 4 rs11098527  | 120399906 G | 0.1212 | 2.00E-22 chr:4:120263688 |
| 4 rs11098530  | 120413154 T | 0.1212 | 2.00E-22 chr:4:120263688 |
| 4 rs11734241  | 120416872 G | 0.1212 | 2.00E-22 chr:4:120263688 |
| 4 rs11934314  | 120376540 A | 0.1212 | 2.00E-22 chr:4:120263688 |
| 4 rs11934940  | 120389369 G | 0.1212 | 2.00E-22 chr:4:120263688 |
| 4 rs11935596  | 120412457 C | 0.1212 | 2.00E-22 chr:4:120263688 |
| 4 rs11940028  | 120411907 C | 0.1212 | 2.00E-22 chr:4:120263688 |
| 4 rs11941899  | 120382758 A | 0.1212 | 2.00E-22 chr:4:120263688 |
| 4 rs11943877  | 120389047 T | 0.1212 | 2.00E-22 chr:4:120263688 |
| 4 rs12502909  | 120377529 T | 0.1212 | 2.00E-22 chr:4:120263688 |
| 4 rs12505878  | 120385485 A | 0.1212 | 2.00E-22 chr:4:120263688 |
| 4 rs12505953  | 120385681 A | 0.1212 | 2.00E-22 chr:4:120263688 |
| 4 rs12507964  | 120413061 A | 0.1212 | 2.00E-22 chr:4:120263688 |
| 4 rs12508504  | 120410607 C | 0.1212 | 2.00E-22 chr:4:120263688 |
| 4 rs13133522  | 120324424 T | 0.1212 | 2.00E-22 chr:4:120263688 |
| 4 rs13145352  | 120409963 C | 0.1212 | 2.00E-22 chr:4:120263688 |
| 4 rs13149407  | 120437825 G | 0.1212 | 2.00E-22 chr:4:120263688 |
| 4 rs139379776 | 120332234 A | 0.1212 | 2.00E-22 chr:4:120263688 |
| 4 rs142609610 | 120327032 A | 0.1212 | 2.00E-22 chr:4:120263688 |
| 4 rs1480931   | 120395809 A | 0.1212 | 2.00E-22 chr:4:120263688 |
| 4 rs148358770 | 120382262 C | 0.1212 | 2.00E-22 chr:4:120263688 |
| 4 rs149185281 | 120369277 A | 0.1212 | 2.00E-22 chr:4:120263688 |
| 4 rs150657109 | 120377707 T | 0.1212 | 2.00E-22 chr:4:120263688 |
| 4 rs17005535  | 120411562 T | 0.1212 | 2.00E-22 chr:4:120263688 |
| 4 rs17006190  | 120418838 G | 0.1212 | 2.00E-22 chr:4:120263688 |
| 4 rs17009122  | 120362403 A | 0.1212 | 2.00E-22 chr:4:120263688 |
| 4 rs17046116  | 120387259 A | 0.1212 | 2.00E-22 chr:4:120263688 |
| 4 rs17046118  | 120387496 G | 0.1212 | 2.00E-22 chr:4:120263688 |
| 4 rs1809406   | 120377122 A | 0.1212 | 2.00E-22 chr:4:120263688 |
| 4 rs185466280 | 120377740 T | 0.1212 | 2.00E-22 chr:4:120263688 |
| 4 rs200822665 | 120357250 A | 0.1212 | 2.00E-22 chr:4:120263688 |
| 4 rs2127820   | 120394534 A | 0.1212 | 2.00E-22 chr:4:120263688 |
| 4 rs2127821   | 120394535 C | 0.1212 | 2.00E-22 chr:4:120263688 |
| 4 rs2389803   | 120393511 A | 0.1212 | 2.00E-22 chr:4:120263688 |
| 4 rs2389809   | 120377399 C | 0.1212 | 2.00E-22 chr:4:120263688 |
| 4 rs28374462  | 120386597 G | 0.1212 | 2.00E-22 chr:4:120263688 |
| 4 rs28394590  | 120373738 G | 0.1212 | 2.00E-22 chr:4:120263688 |

|               |             |        |                          |
|---------------|-------------|--------|--------------------------|
| 4 rs28408407  | 120376030 G | 0.1212 | 2.00E-22 chr:4:120263688 |
| 4 rs28441656  | 120376115 G | 0.1212 | 2.00E-22 chr:4:120263688 |
| 4 rs28444327  | 120387946 G | 0.1212 | 2.00E-22 chr:4:120263688 |
| 4 rs28461559  | 120387932 A | 0.1212 | 2.00E-22 chr:4:120263688 |
| 4 rs28479042  | 120386876 C | 0.1212 | 2.00E-22 chr:4:120263688 |
| 4 rs28499576  | 120386677 A | 0.1212 | 2.00E-22 chr:4:120263688 |
| 4 rs28529639  | 120373104 T | 0.1212 | 2.00E-22 chr:4:120263688 |
| 4 rs28559989  | 120386627 T | 0.1212 | 2.00E-22 chr:4:120263688 |
| 4 rs28567426  | 120373354 G | 0.1212 | 2.00E-22 chr:4:120263688 |
| 4 rs28571712  | 120375980 A | 0.1212 | 2.00E-22 chr:4:120263688 |
| 4 rs28587142  | 120386753 C | 0.1212 | 2.00E-22 chr:4:120263688 |
| 4 rs28587175  | 120373172 C | 0.1212 | 2.00E-22 chr:4:120263688 |
| 4 rs28626372  | 120373262 T | 0.1212 | 2.00E-22 chr:4:120263688 |
| 4 rs28632018  | 120386730 C | 0.1212 | 2.00E-22 chr:4:120263688 |
| 4 rs28665282  | 120384186 T | 0.1212 | 2.00E-22 chr:4:120263688 |
| 4 rs28685688  | 120420334 C | 0.1212 | 2.00E-22 chr:4:120263688 |
| 4 rs28714318  | 120375830 T | 0.1212 | 2.00E-22 chr:4:120263688 |
| 4 rs28753180  | 120405367 T | 0.1212 | 2.00E-22 chr:4:120263688 |
| 4 rs28789446  | 120405366 C | 0.1212 | 2.00E-22 chr:4:120263688 |
| 4 rs28845498  | 120405186 A | 0.1212 | 2.00E-22 chr:4:120263688 |
| 4 rs2892848   | 120381341 T | 0.1212 | 2.00E-22 chr:4:120263688 |
| 4 rs34004415  | 120381140 A | 0.1212 | 2.00E-22 chr:4:120263688 |
| 4 rs34147052  | 120361591 C | 0.1212 | 2.00E-22 chr:4:120263688 |
| 4 rs34566984  | 120361270 A | 0.1212 | 2.00E-22 chr:4:120263688 |
| 4 rs34858317  | 120387110 C | 0.1212 | 2.00E-22 chr:4:120263688 |
| 4 rs34858405  | 120381081 A | 0.1212 | 2.00E-22 chr:4:120263688 |
| 4 rs34913743  | 120324918 G | 0.1212 | 2.00E-22 chr:4:120263688 |
| 4 rs34965784  | 120361586 C | 0.1212 | 2.00E-22 chr:4:120263688 |
| 4 rs35063680  | 120387102 C | 0.1212 | 2.00E-22 chr:4:120263688 |
| 4 rs35091806  | 120325529 A | 0.1212 | 2.00E-22 chr:4:120263688 |
| 4 rs35111011  | 120366526 T | 0.1212 | 2.00E-22 chr:4:120263688 |
| 4 rs35494005  | 120361142 C | 0.1212 | 2.00E-22 chr:4:120263688 |
| 4 rs370222454 | 120359691 G | 0.1212 | 2.00E-22 chr:4:120263688 |
| 4 rs3733525   | 120447048 G | 0.1212 | 2.00E-22 chr:4:120263688 |
| 4 rs3890049   | 120326283 A | 0.1212 | 2.00E-22 chr:4:120263688 |
| 4 rs4001185   | 120376381 C | 0.1212 | 2.00E-22 chr:4:120263688 |
| 4 rs4001190   | 120377619 A | 0.1212 | 2.00E-22 chr:4:120263688 |
| 4 rs4001207   | 120331782 C | 0.1212 | 2.00E-22 chr:4:120263688 |
| 4 rs4001305   | 120359236 T | 0.1212 | 2.00E-22 chr:4:120263688 |
| 4 rs4079144   | 120325432 T | 0.1212 | 2.00E-22 chr:4:120263688 |
| 4 rs4577559   | 120404043 G | 0.1212 | 2.00E-22 chr:4:120263688 |
| 4 rs532415426 | 120359632 A | 0.1212 | 2.00E-22 chr:4:120263688 |
| 4 rs545772518 | 120359643 G | 0.1212 | 2.00E-22 chr:4:120263688 |

|               |             |        |                          |
|---------------|-------------|--------|--------------------------|
| 4 rs559457335 | 120359644 G | 0.1212 | 2.00E-22 chr:4:120263688 |
| 4 rs56270433  | 120406030 T | 0.1212 | 2.00E-22 chr:4:120263688 |
| 4 rs563816604 | 120359627 G | 0.1212 | 2.00E-22 chr:4:120263688 |
| 4 rs58416902  | 120374639 G | 0.1212 | 2.00E-22 chr:4:120263688 |
| 4 rs59182778  | 120374798 C | 0.1212 | 2.00E-22 chr:4:120263688 |
| 4 rs66506550  | 120371445 A | 0.1212 | 2.00E-22 chr:4:120263688 |
| 4 rs67265404  | 120359270 T | 0.1212 | 2.00E-22 chr:4:120263688 |
| 4 rs6820376   | 120324476 G | 0.1212 | 2.00E-22 chr:4:120263688 |
| 4 rs6822679   | 120402702 C | 0.1212 | 2.00E-22 chr:4:120263688 |
| 4 rs6834796   | 120414693 C | 0.1212 | 2.00E-22 chr:4:120263688 |
| 4 rs6837828   | 120392084 T | 0.1212 | 2.00E-22 chr:4:120263688 |
| 4 rs6838814   | 120392443 A | 0.1212 | 2.00E-22 chr:4:120263688 |
| 4 rs6842762   | 120398236 T | 0.1212 | 2.00E-22 chr:4:120263688 |
| 4 rs6845714   | 120326138 T | 0.1212 | 2.00E-22 chr:4:120263688 |
| 4 rs6846442   | 120326323 A | 0.1212 | 2.00E-22 chr:4:120263688 |
| 4 rs6846620   | 120326404 A | 0.1212 | 2.00E-22 chr:4:120263688 |
| 4 rs6848389   | 120402622 C | 0.1212 | 2.00E-22 chr:4:120263688 |
| 4 rs6849171   | 120409549 A | 0.1212 | 2.00E-22 chr:4:120263688 |
| 4 rs6849561   | 120409694 C | 0.1212 | 2.00E-22 chr:4:120263688 |
| 4 rs71612596  | 120331743 A | 0.1212 | 2.00E-22 chr:4:120263688 |
| 4 rs71612597  | 120331845 C | 0.1212 | 2.00E-22 chr:4:120263688 |
| 4 rs71614422  | 120359340 A | 0.1212 | 2.00E-22 chr:4:120263688 |
| 4 rs71614434  | 120368975 T | 0.1212 | 2.00E-22 chr:4:120263688 |
| 4 rs71614438  | 120371252 A | 0.1212 | 2.00E-22 chr:4:120263688 |
| 4 rs71614442  | 120379346 T | 0.1212 | 2.00E-22 chr:4:120263688 |
| 4 rs71614443  | 120379388 C | 0.1212 | 2.00E-22 chr:4:120263688 |
| 4 rs71614444  | 120379436 G | 0.1212 | 2.00E-22 chr:4:120263688 |
| 4 rs71614448  | 120387026 A | 0.1212 | 2.00E-22 chr:4:120263688 |
| 4 rs71614449  | 120387055 T | 0.1212 | 2.00E-22 chr:4:120263688 |
| 4 rs71629404  | 120372724 G | 0.1212 | 2.00E-22 chr:4:120263688 |
| 4 rs72489565  | 120326819 C | 0.1212 | 2.00E-22 chr:4:120263688 |
| 4 rs72676074  | 120359841 C | 0.1212 | 2.00E-22 chr:4:120263688 |
| 4 rs72918584  | 120362445 C | 0.1212 | 2.00E-22 chr:4:120263688 |
| 4 rs7356491   | 120381974 T | 0.1212 | 2.00E-22 chr:4:120263688 |
| 4 rs74602693  | 120377647 T | 0.1212 | 2.00E-22 chr:4:120263688 |
| 4 rs74772011  | 120332334 C | 0.1212 | 2.00E-22 chr:4:120263688 |
| 4 rs75122014  | 120362426 C | 0.1212 | 2.00E-22 chr:4:120263688 |
| 4 rs75690486  | 120359788 A | 0.1212 | 2.00E-22 chr:4:120263688 |
| 4 rs76525361  | 120359608 T | 0.1212 | 2.00E-22 chr:4:120263688 |
| 4 rs7654529   | 120388230 A | 0.1212 | 2.00E-22 chr:4:120263688 |
| 4 rs7654546   | 120388255 A | 0.1212 | 2.00E-22 chr:4:120263688 |
| 4 rs7654587   | 120388406 T | 0.1212 | 2.00E-22 chr:4:120263688 |
| 4 rs7656252   | 120404268 C | 0.1212 | 2.00E-22 chr:4:120263688 |



|               |             |        |                          |
|---------------|-------------|--------|--------------------------|
| 4 rs7659336   | 120385341 C | 0.1212 | 2.00E-22 chr:4:120263688 |
| 4 rs7659501   | 120371552 T | 0.1212 | 2.00E-22 chr:4:120263688 |
| 4 rs7659551   | 120371729 T | 0.1212 | 2.00E-22 chr:4:120263688 |
| 4 rs7664458   | 120371967 G | 0.1212 | 2.00E-22 chr:4:120263688 |
| 4 rs76651228  | 120359559 G | 0.1212 | 2.00E-22 chr:4:120263688 |
| 4 rs7681214   | 120385320 A | 0.1212 | 2.00E-22 chr:4:120263688 |
| 4 rs7681544   | 120411255 C | 0.1212 | 2.00E-22 chr:4:120263688 |
| 4 rs7681978   | 120383775 C | 0.1212 | 2.00E-22 chr:4:120263688 |
| 4 rs7688613   | 120384803 C | 0.1212 | 2.00E-22 chr:4:120263688 |
| 4 rs77934861  | 120324707 C | 0.1212 | 2.00E-22 chr:4:120263688 |
| 4 rs79870274  | 120382190 T | 0.1212 | 2.00E-22 chr:4:120263688 |
| 4 rs9683609   | 120363692 G | 0.1212 | 2.00E-22 chr:4:120263688 |
| 4 rs9683709   | 120365714 A | 0.1212 | 2.00E-22 chr:4:120263688 |
| 4 rs9685777   | 120365965 A | 0.1212 | 2.00E-22 chr:4:120263688 |
| 4 rs9685784   | 120366008 T | 0.1212 | 2.00E-22 chr:4:120263688 |
| 4 rs9993199   | 120392873 A | 0.1212 | 2.00E-22 chr:4:120263688 |
| 4 rs9994730   | 120381564 C | 0.1212 | 2.00E-22 chr:4:120263688 |
| 4 rs9994810   | 120381590 G | 0.1212 | 2.00E-22 chr:4:120263688 |
| 4 rs9998174   | 120366312 G | 0.1212 | 2.00E-22 chr:4:120263688 |
| 4 rs9998585   | 120396802 A | 0.1212 | 2.00E-22 chr:4:120263688 |
| 4 rs185413498 | 120327707 T | 0.1258 | 2.03E-22 chr:4:120263688 |
| 4 rs201087782 | 120327650 G | 0.1258 | 2.03E-22 chr:4:120263688 |
| 4 rs1546504   | 120241179 T | 0.1151 | 2.03E-22 chr:4:120263688 |
| 4 rs1546505   | 120241224 G | 0.1151 | 2.03E-22 chr:4:120263688 |
| 4 rs9996494   | 120238880 A | 0.1158 | 2.06E-22 chr:4:120263688 |
| 4 rs9996644   | 120238877 T | 0.1158 | 2.06E-22 chr:4:120263688 |
| 4 rs10028423  | 120294909 T | 0.1177 | 2.07E-22 chr:4:120263688 |
| 4 rs28491261  | 120294900 A | 0.1177 | 2.07E-22 chr:4:120263688 |
| 4 rs7654762   | 120328377 C | 0.1268 | 2.07E-22 chr:4:120263688 |
| 4 rs75199754  | 120365198 A | 0.1211 | 2.09E-22 chr:4:120263688 |
| 4 rs10002083  | 120311152 T | 0.1176 | 2.11E-22 chr:4:120263688 |
| 4 rs10005644  | 120298477 C | 0.1176 | 2.11E-22 chr:4:120263688 |
| 4 rs10010801  | 120310028 C | 0.1176 | 2.11E-22 chr:4:120263688 |
| 4 rs10011097  | 120310359 G | 0.1176 | 2.11E-22 chr:4:120263688 |
| 4 rs10014748  | 120300988 G | 0.1176 | 2.11E-22 chr:4:120263688 |
| 4 rs10014845  | 120301077 G | 0.1176 | 2.11E-22 chr:4:120263688 |
| 4 rs10016060  | 120298412 G | 0.1176 | 2.11E-22 chr:4:120263688 |
| 4 rs10016448  | 120298845 G | 0.1176 | 2.11E-22 chr:4:120263688 |
| 4 rs10024844  | 120311528 G | 0.1176 | 2.11E-22 chr:4:120263688 |
| 4 rs10025054  | 120311697 C | 0.1176 | 2.11E-22 chr:4:120263688 |
| 4 rs10027498  | 120311987 C | 0.1176 | 2.11E-22 chr:4:120263688 |
| 4 rs10027856  | 120304874 A | 0.1176 | 2.11E-22 chr:4:120263688 |
| 4 rs10027976  | 120305042 T | 0.1176 | 2.11E-22 chr:4:120263688 |

|               |             |        |                          |
|---------------|-------------|--------|--------------------------|
| 4 rs10028669  | 120295197 T | 0.1176 | 2.11E-22 chr:4:120263688 |
| 4 rs10031718  | 120295892 T | 0.1176 | 2.11E-22 chr:4:120263688 |
| 4 rs10222794  | 120302351 T | 0.1176 | 2.11E-22 chr:4:120263688 |
| 4 rs10222798  | 120302419 T | 0.1176 | 2.11E-22 chr:4:120263688 |
| 4 rs10222801  | 120302350 T | 0.1176 | 2.11E-22 chr:4:120263688 |
| 4 rs10440343  | 120309787 C | 0.1176 | 2.11E-22 chr:4:120263688 |
| 4 rs10440402  | 120307813 G | 0.1176 | 2.11E-22 chr:4:120263688 |
| 4 rs10440403  | 120308047 T | 0.1176 | 2.11E-22 chr:4:120263688 |
| 4 rs11098508  | 120306607 G | 0.1176 | 2.11E-22 chr:4:120263688 |
| 4 rs11098509  | 120306670 C | 0.1176 | 2.11E-22 chr:4:120263688 |
| 4 rs11098510  | 120306793 T | 0.1176 | 2.11E-22 chr:4:120263688 |
| 4 rs11098511  | 120306879 A | 0.1176 | 2.11E-22 chr:4:120263688 |
| 4 rs11098512  | 120314161 T | 0.1176 | 2.11E-22 chr:4:120263688 |
| 4 rs11098513  | 120316075 G | 0.1176 | 2.11E-22 chr:4:120263688 |
| 4 rs1112817   | 120297800 C | 0.1176 | 2.11E-22 chr:4:120263688 |
| 4 rs114019672 | 120306475 G | 0.1176 | 2.11E-22 chr:4:120263688 |
| 4 rs11723839  | 120299673 A | 0.1176 | 2.11E-22 chr:4:120263688 |
| 4 rs11726097  | 120301499 T | 0.1176 | 2.11E-22 chr:4:120263688 |
| 4 rs11729050  | 120300066 C | 0.1176 | 2.11E-22 chr:4:120263688 |
| 4 rs12498908  | 120308261 A | 0.1176 | 2.11E-22 chr:4:120263688 |
| 4 rs12506452  | 120308083 C | 0.1176 | 2.11E-22 chr:4:120263688 |
| 4 rs12506546  | 120301618 C | 0.1176 | 2.11E-22 chr:4:120263688 |
| 4 rs13113483  | 120309039 T | 0.1176 | 2.11E-22 chr:4:120263688 |
| 4 rs13127114  | 120314664 C | 0.1176 | 2.11E-22 chr:4:120263688 |
| 4 rs13151285  | 120314741 A | 0.1176 | 2.11E-22 chr:4:120263688 |
| 4 rs13435162  | 120304634 A | 0.1176 | 2.11E-22 chr:4:120263688 |
| 4 rs138611376 | 120306434 G | 0.1176 | 2.11E-22 chr:4:120263688 |
| 4 rs140816585 | 120306228 C | 0.1176 | 2.11E-22 chr:4:120263688 |
| 4 rs146523888 | 120308804 G | 0.1176 | 2.11E-22 chr:4:120263688 |
| 4 rs150376940 | 120305404 A | 0.1176 | 2.11E-22 chr:4:120263688 |
| 4 rs28429722  | 120300093 A | 0.1176 | 2.11E-22 chr:4:120263688 |
| 4 rs28551662  | 120309556 A | 0.1176 | 2.11E-22 chr:4:120263688 |
| 4 rs28668716  | 120309875 C | 0.1176 | 2.11E-22 chr:4:120263688 |
| 4 rs28751034  | 120307097 A | 0.1176 | 2.11E-22 chr:4:120263688 |
| 4 rs28793658  | 120307214 C | 0.1176 | 2.11E-22 chr:4:120263688 |
| 4 rs28812279  | 120304152 C | 0.1176 | 2.11E-22 chr:4:120263688 |
| 4 rs28884220  | 120307211 G | 0.1176 | 2.11E-22 chr:4:120263688 |
| 4 rs4309825   | 120314881 G | 0.1176 | 2.11E-22 chr:4:120263688 |
| 4 rs4345162   | 120312959 A | 0.1176 | 2.11E-22 chr:4:120263688 |
| 4 rs4373140   | 120307698 G | 0.1176 | 2.11E-22 chr:4:120263688 |
| 4 rs4463052   | 120313258 C | 0.1176 | 2.11E-22 chr:4:120263688 |
| 4 rs4507344   | 120307485 A | 0.1176 | 2.11E-22 chr:4:120263688 |
| 4 rs4604043   | 120314921 T | 0.1176 | 2.11E-22 chr:4:120263688 |

|               |             |        |                          |
|---------------|-------------|--------|--------------------------|
| 4 rs59394118  | 120295551 G | 0.1176 | 2.11E-22 chr:4:120263688 |
| 4 rs59866101  | 120296591 G | 0.1176 | 2.11E-22 chr:4:120263688 |
| 4 rs6832410   | 120296800 G | 0.1176 | 2.11E-22 chr:4:120263688 |
| 4 rs6858383   | 120296772 C | 0.1176 | 2.11E-22 chr:4:120263688 |
| 4 rs7437420   | 120312903 G | 0.1176 | 2.11E-22 chr:4:120263688 |
| 4 rs7658181   | 120310873 G | 0.1176 | 2.11E-22 chr:4:120263688 |
| 4 rs7658368   | 120310922 T | 0.1176 | 2.11E-22 chr:4:120263688 |
| 4 rs7674500   | 120303593 T | 0.1176 | 2.11E-22 chr:4:120263688 |
| 4 rs7674544   | 120303714 G | 0.1176 | 2.11E-22 chr:4:120263688 |
| 4 rs7674556   | 120303729 G | 0.1176 | 2.11E-22 chr:4:120263688 |
| 4 rs7677836   | 120310638 A | 0.1176 | 2.11E-22 chr:4:120263688 |
| 4 rs7678238   | 120310832 C | 0.1176 | 2.11E-22 chr:4:120263688 |
| 4 rs76990001  | 120302639 T | 0.1176 | 2.11E-22 chr:4:120263688 |
| 4 rs7699346   | 120310542 T | 0.1176 | 2.11E-22 chr:4:120263688 |
| 4 rs78036070  | 120302802 A | 0.1176 | 2.11E-22 chr:4:120263688 |
| 4 rs79704848  | 120309351 A | 0.1176 | 2.11E-22 chr:4:120263688 |
| 4 rs9307473   | 120300221 T | 0.1176 | 2.11E-22 chr:4:120263688 |
| 4 rs9307474   | 120302496 A | 0.1176 | 2.11E-22 chr:4:120263688 |
| 4 rs9994889   | 120305056 G | 0.1176 | 2.11E-22 chr:4:120263688 |
| 4 rs9996417   | 120295862 C | 0.1176 | 2.11E-22 chr:4:120263688 |
| 4 rs9996569   | 120299004 C | 0.1176 | 2.11E-22 chr:4:120263688 |
| 4 rs9996677   | 120299148 A | 0.1176 | 2.11E-22 chr:4:120263688 |
| 4 rs9998953   | 120296169 C | 0.1176 | 2.11E-22 chr:4:120263688 |
| 4 rs62322293  | 120330655 G | 0.1161 | 2.12E-22 chr:4:120263688 |
| 4 rs7654700   | 120328125 A | 0.1235 | 2.15E-22 chr:4:120263688 |
| 4 rs202150896 | 120367650 T | 0.125  | 2.18E-22 chr:4:120263688 |
| 4 rs9759478   | 120367998 A | 0.125  | 2.18E-22 chr:4:120263688 |
| 4 rs9760442   | 120367951 G | 0.125  | 2.18E-22 chr:4:120263688 |
| 4 rs10019421  | 120327198 T | 0.1624 | 2.18E-22 chr:4:120263688 |
| 4 rs10031129  | 120327201 C | 0.1624 | 2.18E-22 chr:4:120263688 |
| 4 rs9995234   | 120321827 G | 0.1265 | 2.21E-22 chr:4:120263688 |
| 4 rs13104219  | 120438174 T | 0.1178 | 2.21E-22 chr:4:120263688 |
| 4 rs140982995 | 120455483 A | 8.489  | 2.21E-22 chr:4:120263688 |
| 4 rs3775842   | 120427732 A | 0.1178 | 2.21E-22 chr:4:120263688 |
| 4 rs3736115   | 120488703 A | 0.1255 | 2.25E-22 chr:4:120263688 |
| 4 rs199865201 | 120332408 A | 0.121  | 2.26E-22 chr:4:120263688 |
| 4 rs79057525  | 120375389 G | 0.125  | 2.29E-22 chr:4:120263688 |
| 4 rs34792640  | 120368627 A | 0.1214 | 2.34E-22 chr:4:120263688 |
| 4 rs9799664   | 120326678 T | 0.1164 | 2.34E-22 chr:4:120263688 |
| 4 rs28634456  | 120375778 G | 0.1256 | 2.38E-22 chr:4:120263688 |
| 4 rs10004484  | 120442428 T | 0.1216 | 2.41E-22 chr:4:120263688 |
| 4 rs34868248  | 120442430 G | 0.1216 | 2.41E-22 chr:4:120263688 |
| 4 rs3775847   | 120447642 C | 0.1216 | 2.41E-22 chr:4:120263688 |

|               |             |        |          |                 |
|---------------|-------------|--------|----------|-----------------|
| 4 rs3775848   | 120447724 T | 0.1216 | 2.41E-22 | chr:4:120263688 |
| 4 rs10003567  | 120241674 T | 0.1157 | 2.46E-22 | chr:4:120263688 |
| 4 rs10005237  | 120237897 C | 0.1157 | 2.46E-22 | chr:4:120263688 |
| 4 rs10006259  | 120242145 T | 0.1157 | 2.46E-22 | chr:4:120263688 |
| 4 rs10024933  | 120253582 A | 0.1157 | 2.46E-22 | chr:4:120263688 |
| 4 rs10212714  | 120254302 C | 0.1157 | 2.46E-22 | chr:4:120263688 |
| 4 rs10212719  | 120254437 C | 0.1157 | 2.46E-22 | chr:4:120263688 |
| 4 rs10212775  | 120239244 C | 0.1157 | 2.46E-22 | chr:4:120263688 |
| 4 rs10213158  | 120255829 T | 0.1157 | 2.46E-22 | chr:4:120263688 |
| 4 rs10213267  | 120239074 G | 0.1157 | 2.46E-22 | chr:4:120263688 |
| 4 rs10213480  | 120254561 T | 0.1157 | 2.46E-22 | chr:4:120263688 |
| 4 rs10518300  | 120249499 G | 0.1157 | 2.46E-22 | chr:4:120263688 |
| 4 rs11098501  | 120252017 G | 0.1157 | 2.46E-22 | chr:4:120263688 |
| 4 rs11098502  | 120252063 A | 0.1157 | 2.46E-22 | chr:4:120263688 |
| 4 rs11724409  | 120252361 G | 0.1157 | 2.46E-22 | chr:4:120263688 |
| 4 rs11732087  | 120239831 G | 0.1157 | 2.46E-22 | chr:4:120263688 |
| 4 rs11732686  | 120252330 A | 0.1157 | 2.46E-22 | chr:4:120263688 |
| 4 rs12498994  | 120250818 C | 0.1157 | 2.46E-22 | chr:4:120263688 |
| 4 rs12506610  | 120241659 C | 0.1157 | 2.46E-22 | chr:4:120263688 |
| 4 rs12507565  | 120251121 A | 0.1157 | 2.46E-22 | chr:4:120263688 |
| 4 rs12509621  | 120249660 C | 0.1157 | 2.46E-22 | chr:4:120263688 |
| 4 rs12510269  | 120241646 G | 0.1157 | 2.46E-22 | chr:4:120263688 |
| 4 rs12511640  | 120251248 C | 0.1157 | 2.46E-22 | chr:4:120263688 |
| 4 rs12513083  | 120249612 T | 0.1157 | 2.46E-22 | chr:4:120263688 |
| 4 rs12711071  | 120240934 C | 0.1157 | 2.46E-22 | chr:4:120263688 |
| 4 rs140387830 | 120247916 G | 0.1157 | 2.46E-22 | chr:4:120263688 |
| 4 rs1511017   | 120250805 A | 0.1157 | 2.46E-22 | chr:4:120263688 |
| 4 rs1511025   | 120240238 C | 0.1157 | 2.46E-22 | chr:4:120263688 |
| 4 rs17049949  | 120255290 G | 0.1157 | 2.46E-22 | chr:4:120263688 |
| 4 rs17595608  | 120250506 T | 0.1157 | 2.46E-22 | chr:4:120263688 |
| 4 rs1980024   | 120253047 T | 0.1157 | 2.46E-22 | chr:4:120263688 |
| 4 rs1980025   | 120252806 T | 0.1157 | 2.46E-22 | chr:4:120263688 |
| 4 rs1980026   | 120251643 A | 0.1157 | 2.46E-22 | chr:4:120263688 |
| 4 rs1980027   | 120251577 T | 0.1157 | 2.46E-22 | chr:4:120263688 |
| 4 rs2002047   | 120257228 G | 0.1157 | 2.46E-22 | chr:4:120263688 |
| 4 rs2002049   | 120257417 G | 0.1157 | 2.46E-22 | chr:4:120263688 |
| 4 rs2036856   | 120249288 A | 0.1157 | 2.46E-22 | chr:4:120263688 |
| 4 rs2036857   | 120249240 C | 0.1157 | 2.46E-22 | chr:4:120263688 |
| 4 rs2036860   | 120248934 G | 0.1157 | 2.46E-22 | chr:4:120263688 |
| 4 rs28363929  | 120257103 G | 0.1157 | 2.46E-22 | chr:4:120263688 |
| 4 rs28373117  | 120253465 T | 0.1157 | 2.46E-22 | chr:4:120263688 |
| 4 rs28502463  | 120257023 C | 0.1157 | 2.46E-22 | chr:4:120263688 |
| 4 rs28643450  | 120245242 A | 0.1157 | 2.46E-22 | chr:4:120263688 |

|              |             |        |                          |
|--------------|-------------|--------|--------------------------|
| 4 rs28652763 | 120242312 T | 0.1157 | 2.46E-22 chr:4:120263688 |
| 4 rs28713555 | 120251995 T | 0.1157 | 2.46E-22 chr:4:120263688 |
| 4 rs2964     | 120240131 C | 0.1157 | 2.46E-22 chr:4:120263688 |
| 4 rs34425882 | 120253177 A | 0.1157 | 2.46E-22 chr:4:120263688 |
| 4 rs3956464  | 120256764 C | 0.1157 | 2.46E-22 chr:4:120263688 |
| 4 rs4107728  | 120253910 A | 0.1157 | 2.46E-22 chr:4:120263688 |
| 4 rs4443261  | 120249301 C | 0.1157 | 2.46E-22 chr:4:120263688 |
| 4 rs4472123  | 120236630 A | 0.1157 | 2.46E-22 chr:4:120263688 |
| 4 rs66900435 | 120249425 A | 0.1157 | 2.46E-22 chr:4:120263688 |
| 4 rs714899   | 120243035 A | 0.1157 | 2.46E-22 chr:4:120263688 |
| 4 rs72676046 | 120254681 C | 0.1157 | 2.46E-22 chr:4:120263688 |
| 4 rs7671797  | 120248157 G | 0.1157 | 2.46E-22 chr:4:120263688 |
| 4 rs7671978  | 120248218 G | 0.1157 | 2.46E-22 chr:4:120263688 |
| 4 rs7672129  | 120248176 T | 0.1157 | 2.46E-22 chr:4:120263688 |
| 4 rs7672357  | 120248340 T | 0.1157 | 2.46E-22 chr:4:120263688 |
| 4 rs7672372  | 120248406 G | 0.1157 | 2.46E-22 chr:4:120263688 |
| 4 rs7672594  | 120248543 C | 0.1157 | 2.46E-22 chr:4:120263688 |
| 4 rs7672778  | 120248585 G | 0.1157 | 2.46E-22 chr:4:120263688 |
| 4 rs7673476  | 120248683 A | 0.1157 | 2.46E-22 chr:4:120263688 |
| 4 rs7689729  | 120256192 G | 0.1157 | 2.46E-22 chr:4:120263688 |
| 4 rs7690338  | 120256468 G | 0.1157 | 2.46E-22 chr:4:120263688 |
| 4 rs878372   | 120238780 C | 0.1157 | 2.46E-22 chr:4:120263688 |
| 4 rs878376   | 120237702 A | 0.1157 | 2.46E-22 chr:4:120263688 |
| 4 rs907204   | 120238654 A | 0.1157 | 2.46E-22 chr:4:120263688 |
| 4 rs907205   | 120238664 C | 0.1157 | 2.46E-22 chr:4:120263688 |
| 4 rs938056   | 120237453 T | 0.1157 | 2.46E-22 chr:4:120263688 |
| 4 rs9991166  | 120237851 A | 0.1157 | 2.46E-22 chr:4:120263688 |
| 4 rs9991959  | 120253773 C | 0.1157 | 2.46E-22 chr:4:120263688 |
| 4 rs9993347  | 120258955 G | 0.1157 | 2.46E-22 chr:4:120263688 |
| 4 rs9999724  | 120239944 T | 0.1157 | 2.46E-22 chr:4:120263688 |
| 4 rs10031483 | 120422636 C | 0.1212 | 2.48E-22 chr:4:120263688 |
| 4 rs10031665 | 120422852 C | 0.1212 | 2.48E-22 chr:4:120263688 |
| 4 rs10034450 | 120455649 G | 0.1212 | 2.48E-22 chr:4:120263688 |
| 4 rs12502423 | 120424172 C | 0.1212 | 2.48E-22 chr:4:120263688 |
| 4 rs12510138 | 120423935 C | 0.1212 | 2.48E-22 chr:4:120263688 |
| 4 rs1383532  | 120434404 A | 0.1212 | 2.48E-22 chr:4:120263688 |
| 4 rs1383533  | 120434576 A | 0.1212 | 2.48E-22 chr:4:120263688 |
| 4 rs2291185  | 120434833 A | 0.1212 | 2.48E-22 chr:4:120263688 |
| 4 rs2306455  | 120421969 A | 0.1212 | 2.48E-22 chr:4:120263688 |
| 4 rs3733519  | 120423448 G | 0.1212 | 2.48E-22 chr:4:120263688 |
| 4 rs3733520  | 120423480 G | 0.1212 | 2.48E-22 chr:4:120263688 |
| 4 rs3775844  | 120428033 A | 0.1212 | 2.48E-22 chr:4:120263688 |
| 4 rs3775852  | 120454556 G | 0.1212 | 2.48E-22 chr:4:120263688 |

|               |             |        |          |                 |
|---------------|-------------|--------|----------|-----------------|
| 4 rs3822190   | 120428098 A | 0.1212 | 2.48E-22 | chr:4:120263688 |
| 4 rs3822191   | 120428101 T | 0.1212 | 2.48E-22 | chr:4:120263688 |
| 4 rs6534140   | 120455311 T | 0.1212 | 2.48E-22 | chr:4:120263688 |
| 4 rs7657849   | 120455494 C | 0.1212 | 2.48E-22 | chr:4:120263688 |
| 4 rs7687843   | 120421211 T | 0.1212 | 2.48E-22 | chr:4:120263688 |
| 4 rs7688802   | 120451668 A | 0.1212 | 2.48E-22 | chr:4:120263688 |
| 4 rs7695620   | 120452776 A | 0.1212 | 2.48E-22 | chr:4:120263688 |
| 4 rs7699064   | 120428309 T | 0.1212 | 2.48E-22 | chr:4:120263688 |
| 4 rs12505876  | 120385472 G | 8.606  | 2.49E-22 | chr:4:120263688 |
| 4 rs35138262  | 120361169 G | 8.606  | 2.49E-22 | chr:4:120263688 |
| 4 rs3872807   | 120360251 T | 8.606  | 2.49E-22 | chr:4:120263688 |
| 4 rs9684327   | 120365441 A | 8.606  | 2.49E-22 | chr:4:120263688 |
| 4 rs71629403  | 120372567 T | 0.1217 | 2.50E-22 | chr:4:120263688 |
| 4 rs35165976  | 120325630 A | 0.1255 | 2.51E-22 | chr:4:120263688 |
| 4 rs10017543  | 120321420 A | 0.1234 | 2.57E-22 | chr:4:120263688 |
| 4 rs10006877  | 120242793 T | 0.1157 | 2.57E-22 | chr:4:120263688 |
| 4 rs1022145   | 120230979 G | 0.1157 | 2.57E-22 | chr:4:120263688 |
| 4 rs11722872  | 120233030 C | 0.1157 | 2.57E-22 | chr:4:120263688 |
| 4 rs12505469  | 120249585 T | 0.1157 | 2.57E-22 | chr:4:120263688 |
| 4 rs1546502   | 120235898 G | 0.1157 | 2.57E-22 | chr:4:120263688 |
| 4 rs2017057   | 120257711 G | 0.1157 | 2.57E-22 | chr:4:120263688 |
| 4 rs6847248   | 120225955 G | 0.1157 | 2.57E-22 | chr:4:120263688 |
| 4 rs72676045  | 120254663 A | 0.1157 | 2.57E-22 | chr:4:120263688 |
| 4 rs7672493   | 120248260 A | 0.1157 | 2.57E-22 | chr:4:120263688 |
| 4 rs878373    | 120237484 T | 0.1157 | 2.57E-22 | chr:4:120263688 |
| 4 rs1552095   | 120460306 C | 0.1263 | 2.58E-22 | chr:4:120263688 |
| 4 rs3775845   | 120432447 C | 0.1263 | 2.58E-22 | chr:4:120263688 |
| 4 rs34378623  | 120368744 T | 0.122  | 2.58E-22 | chr:4:120263688 |
| 4 rs2306456   | 120472422 G | 0.1258 | 2.60E-22 | chr:4:120263688 |
| 4 rs7696857   | 120322321 A | 0.1216 | 2.61E-22 | chr:4:120263688 |
| 4 rs13107475  | 120393011 T | 0.1261 | 2.64E-22 | chr:4:120263688 |
| 4 rs6857105   | 120222298 G | 0.1232 | 2.69E-22 | chr:4:120263688 |
| 4 rs116952757 | 120362969 C | 0.1248 | 2.71E-22 | chr:4:120263688 |
| 4 rs2389802   | 120325732 A | 0.1266 | 2.71E-22 | chr:4:120263688 |
| 4 rs373699192 | 120246109 A | 0.1304 | 2.73E-22 | chr:4:120263688 |
| 4 rs12648182  | 120503891 A | 8.2    | 2.75E-22 | chr:4:120263688 |
| 4 rs142970247 | 120499656 C | 8.2    | 2.75E-22 | chr:4:120263688 |
| 4 rs146743180 | 120497433 T | 8.2    | 2.75E-22 | chr:4:120263688 |
| 4 rs36173322  | 120496491 T | 8.2    | 2.75E-22 | chr:4:120263688 |
| 4 rs55661135  | 120506153 A | 8.2    | 2.75E-22 | chr:4:120263688 |
| 4 rs56173225  | 120509972 A | 8.2    | 2.75E-22 | chr:4:120263688 |
| 4 rs59516282  | 120502016 A | 8.2    | 2.75E-22 | chr:4:120263688 |
| 4 rs66887589  | 120509279 C | 8.2    | 2.75E-22 | chr:4:120263688 |

|               |             |        |          |                 |
|---------------|-------------|--------|----------|-----------------|
| 4 rs72920701  | 120513230 A | 8.2    | 2.75E-22 | chr:4:120263688 |
| 4 rs7678973   | 120511817 C | 8.2    | 2.75E-22 | chr:4:120263688 |
| 4 rs80052400  | 120498134 C | 8.2    | 2.75E-22 | chr:4:120263688 |
| 4 rs11729991  | 120292700 T | 0.117  | 2.77E-22 | chr:4:120263688 |
| 4 rs34237553  | 120325273 C | 0.1217 | 2.77E-22 | chr:4:120263688 |
| 4 rs11098525  | 120390152 A | 0.1219 | 2.77E-22 | chr:4:120263688 |
| 4 rs75396180  | 120375727 A | 0.1257 | 2.77E-22 | chr:4:120263688 |
| 4 rs80242894  | 120375752 A | 0.1257 | 2.77E-22 | chr:4:120263688 |
| 4 rs28653183  | 120372276 G | 0.1258 | 2.78E-22 | chr:4:120263688 |
| 4 rs28567749  | 120329211 C | 0.1765 | 2.83E-22 | chr:4:120263688 |
| 4 rs28369503  | 120238925 A | 0.12   | 2.86E-22 | chr:4:120263688 |
| 4 rs28458294  | 120238924 C | 0.12   | 2.86E-22 | chr:4:120263688 |
| 4 rs9996501   | 120238918 A | 0.12   | 2.86E-22 | chr:4:120263688 |
| 4 rs71612602  | 120332781 A | 0.126  | 2.86E-22 | chr:4:120263688 |
| 4 rs6534139   | 120449456 A | 0.1261 | 2.93E-22 | chr:4:120263688 |
| 4 rs78332141  | 120375782 T | 0.1256 | 2.97E-22 | chr:4:120263688 |
| 4 rs10013305  | 120450424 A | 0.1216 | 3.00E-22 | chr:4:120263688 |
| 4 rs10019674  | 120443489 C | 0.1216 | 3.00E-22 | chr:4:120263688 |
| 4 rs1155576   | 120450159 C | 0.1216 | 3.00E-22 | chr:4:120263688 |
| 4 rs12502389  | 120454191 G | 0.1216 | 3.00E-22 | chr:4:120263688 |
| 4 rs3733523   | 120423719 T | 0.1216 | 3.00E-22 | chr:4:120263688 |
| 4 rs3733524   | 120423729 C | 0.1216 | 3.00E-22 | chr:4:120263688 |
| 4 rs3775843   | 120427844 C | 0.1216 | 3.00E-22 | chr:4:120263688 |
| 4 rs3775849   | 120450908 C | 0.1216 | 3.00E-22 | chr:4:120263688 |
| 4 rs12507283  | 120247218 A | 0.1207 | 3.03E-22 | chr:4:120263688 |
| 4 rs6844263   | 120433807 A | 8.256  | 3.04E-22 | chr:4:120263688 |
| 4 rs371048191 | 120246107 C | 0.1323 | 3.04E-22 | chr:4:120263688 |
| 4 rs34954036  | 120366927 A | 0.1211 | 3.09E-22 | chr:4:120263688 |
| 4 rs3822192   | 120445720 C | 0.1266 | 3.11E-22 | chr:4:120263688 |
| 4 rs2715016   | 120452356 C | 8.197  | 3.12E-22 | chr:4:120263688 |
| 4 rs13134517  | 120405262 G | 8.582  | 3.13E-22 | chr:4:120263688 |
| 4 rs6534135   | 120406302 A | 8.582  | 3.13E-22 | chr:4:120263688 |
| 4 rs7661498   | 120408108 T | 8.582  | 3.13E-22 | chr:4:120263688 |
| 4 rs7694483   | 120405929 T | 8.582  | 3.13E-22 | chr:4:120263688 |
| 4 rs9307477   | 120421809 G | 8.582  | 3.13E-22 | chr:4:120263688 |
| 4 rs142328963 | 120498647 A | 8.199  | 3.14E-22 | chr:4:120263688 |
| 4 rs12507387  | 120247590 C | 0.1192 | 3.15E-22 | chr:4:120263688 |
| 4 rs41464847  | 120532401 G | 8.095  | 3.18E-22 | chr:4:120263688 |
| 4 rs59590064  | 120539753 C | 8.095  | 3.18E-22 | chr:4:120263688 |
| 4 rs6817317   | 120542827 G | 8.095  | 3.18E-22 | chr:4:120263688 |
| 4 rs7672519   | 120544112 T | 8.095  | 3.18E-22 | chr:4:120263688 |
| 4 rs7681980   | 120533223 A | 8.095  | 3.18E-22 | chr:4:120263688 |
| 4 rs10009626  | 120470005 C | 0.1263 | 3.23E-22 | chr:4:120263688 |

|               |             |        |                          |
|---------------|-------------|--------|--------------------------|
| 4 rs10018280  | 120478139 G | 0.1263 | 3.23E-22 chr:4:120263688 |
| 4 rs1010739   | 120463471 T | 0.1263 | 3.23E-22 chr:4:120263688 |
| 4 rs1010740   | 120463409 C | 0.1263 | 3.23E-22 chr:4:120263688 |
| 4 rs11098531  | 120465001 A | 0.1263 | 3.23E-22 chr:4:120263688 |
| 4 rs11098532  | 120490726 A | 0.1263 | 3.23E-22 chr:4:120263688 |
| 4 rs11723090  | 120490592 C | 0.1263 | 3.23E-22 chr:4:120263688 |
| 4 rs11731756  | 120478696 G | 0.1263 | 3.23E-22 chr:4:120263688 |
| 4 rs11737395  | 120520704 G | 0.1263 | 3.23E-22 chr:4:120263688 |
| 4 rs11933966  | 120476715 A | 0.1263 | 3.23E-22 chr:4:120263688 |
| 4 rs11947234  | 120474859 G | 0.1263 | 3.23E-22 chr:4:120263688 |
| 4 rs12498539  | 120468370 T | 0.1263 | 3.23E-22 chr:4:120263688 |
| 4 rs12498599  | 120468503 T | 0.1263 | 3.23E-22 chr:4:120263688 |
| 4 rs13128602  | 120459366 G | 0.1263 | 3.23E-22 chr:4:120263688 |
| 4 rs13140391  | 120503437 G | 0.1263 | 3.23E-22 chr:4:120263688 |
| 4 rs13140409  | 120503460 G | 0.1263 | 3.23E-22 chr:4:120263688 |
| 4 rs1480936   | 120462861 T | 0.1263 | 3.23E-22 chr:4:120263688 |
| 4 rs1480939   | 120456927 C | 0.1263 | 3.23E-22 chr:4:120263688 |
| 4 rs1480940   | 120457682 C | 0.1263 | 3.23E-22 chr:4:120263688 |
| 4 rs17050695  | 120489527 T | 0.1263 | 3.23E-22 chr:4:120263688 |
| 4 rs200898556 | 120500426 T | 0.1263 | 3.23E-22 chr:4:120263688 |
| 4 rs201236087 | 120474546 T | 0.1263 | 3.23E-22 chr:4:120263688 |
| 4 rs2086450   | 120496217 A | 0.1263 | 3.23E-22 chr:4:120263688 |
| 4 rs2127823   | 120485670 T | 0.1263 | 3.23E-22 chr:4:120263688 |
| 4 rs2170276   | 120485824 C | 0.1263 | 3.23E-22 chr:4:120263688 |
| 4 rs2306457   | 120472839 A | 0.1263 | 3.23E-22 chr:4:120263688 |
| 4 rs28718422  | 120466304 A | 0.1263 | 3.23E-22 chr:4:120263688 |
| 4 rs28735358  | 120482049 C | 0.1263 | 3.23E-22 chr:4:120263688 |
| 4 rs34308924  | 120481431 C | 0.1263 | 3.23E-22 chr:4:120263688 |
| 4 rs36040693  | 120477616 G | 0.1263 | 3.23E-22 chr:4:120263688 |
| 4 rs3775854   | 120471971 T | 0.1263 | 3.23E-22 chr:4:120263688 |
| 4 rs3775858   | 120486028 G | 0.1263 | 3.23E-22 chr:4:120263688 |
| 4 rs3822194   | 120471648 G | 0.1263 | 3.23E-22 chr:4:120263688 |
| 4 rs3822195   | 120471660 T | 0.1263 | 3.23E-22 chr:4:120263688 |
| 4 rs4001176   | 120500705 G | 0.1263 | 3.23E-22 chr:4:120263688 |
| 4 rs4596225   | 120496444 G | 0.1263 | 3.23E-22 chr:4:120263688 |
| 4 rs4998488   | 120500841 C | 0.1263 | 3.23E-22 chr:4:120263688 |
| 4 rs55825515  | 120486402 G | 0.1263 | 3.23E-22 chr:4:120263688 |
| 4 rs59732491  | 120489588 C | 0.1263 | 3.23E-22 chr:4:120263688 |
| 4 rs6534141   | 120485223 T | 0.1263 | 3.23E-22 chr:4:120263688 |
| 4 rs6829903   | 120506884 T | 0.1263 | 3.23E-22 chr:4:120263688 |
| 4 rs6833334   | 120504227 T | 0.1263 | 3.23E-22 chr:4:120263688 |
| 4 rs6835635   | 120458867 C | 0.1263 | 3.23E-22 chr:4:120263688 |
| 4 rs6847818   | 120469250 T | 0.1263 | 3.23E-22 chr:4:120263688 |



|               |             |        |          |                 |
|---------------|-------------|--------|----------|-----------------|
| 4 rs6853998   | 120475860 A | 0.1263 | 3.23E-22 | chr:4:120263688 |
| 4 rs6858592   | 120458692 A | 0.1263 | 3.23E-22 | chr:4:120263688 |
| 4 rs6858777   | 120475966 G | 0.1263 | 3.23E-22 | chr:4:120263688 |
| 4 rs7669520   | 120515278 C | 0.1263 | 3.23E-22 | chr:4:120263688 |
| 4 rs7678400   | 120461957 A | 0.1263 | 3.23E-22 | chr:4:120263688 |
| 4 rs7680063   | 120479889 G | 0.1263 | 3.23E-22 | chr:4:120263688 |
| 4 rs7680748   | 120479978 A | 0.1263 | 3.23E-22 | chr:4:120263688 |
| 4 rs9884402   | 120489982 G | 0.1263 | 3.23E-22 | chr:4:120263688 |
| 4 rs9995026   | 120490499 A | 0.1263 | 3.23E-22 | chr:4:120263688 |
| 4 rs9997631   | 120469995 G | 0.1263 | 3.23E-22 | chr:4:120263688 |
| 4 rs1552092   | 120488496 T | 0.1262 | 3.24E-22 | chr:4:120263688 |
| 4 rs10019522  | 120364728 G | 0.1214 | 3.25E-22 | chr:4:120263688 |
| 4 rs3956479   | 120360863 T | 0.1556 | 3.43E-22 | chr:4:120263688 |
| 4 rs3956480   | 120360861 T | 0.1556 | 3.43E-22 | chr:4:120263688 |
| 4 rs11098524  | 120390032 G | 0.1303 | 3.43E-22 | chr:4:120263688 |
| 4 rs201664317 | 120330379 C | 0.1295 | 3.43E-22 | chr:4:120263688 |
| 4 rs55777923  | 120553264 T | 0.1315 | 3.48E-22 | chr:4:120263688 |
| 4 rs9762870   | 120367769 A | 0.1527 | 3.50E-22 | chr:4:120263688 |
| 4 rs71610282  | 120329093 C | 0.1274 | 3.58E-22 | chr:4:120263688 |
| 4 rs7665192   | 120247065 A | 0.1246 | 3.59E-22 | chr:4:120263688 |
| 4 rs11728616  | 120440676 A | 0.1309 | 3.69E-22 | chr:4:120263688 |
| 4 rs35111518  | 120440682 G | 0.1309 | 3.69E-22 | chr:4:120263688 |
| 4 rs79026312  | 120440677 A | 0.1309 | 3.69E-22 | chr:4:120263688 |
| 4 rs7655177   | 120328622 G | 0.1261 | 3.70E-22 | chr:4:120263688 |
| 4 rs10027517  | 120372234 G | 0.1217 | 3.82E-22 | chr:4:120263688 |
| 4 rs10008791  | 120431469 C | 0.1267 | 3.91E-22 | chr:4:120263688 |
| 4 rs11736416  | 120431661 T | 0.1267 | 3.91E-22 | chr:4:120263688 |
| 4 rs7664986   | 120429952 C | 0.1267 | 3.91E-22 | chr:4:120263688 |
| 4 rs10020034  | 120294331 G | 0.1194 | 3.97E-22 | chr:4:120263688 |
| 4 rs13134665  | 120426430 C | 0.128  | 4.17E-22 | chr:4:120263688 |
| 4 rs12503171  | 120247196 G | 0.1254 | 4.30E-22 | chr:4:120263688 |
| 4 rs9995045   | 120321636 T | 0.1291 | 4.33E-22 | chr:4:120263688 |
| 4 rs58452170  | 120459674 T | 0.1275 | 4.42E-22 | chr:4:120263688 |
| 4 rs368648502 | 120331079 G | 0.1632 | 4.52E-22 | chr:4:120263688 |
| 4 rs76541370  | 120498280 C | 7.938  | 4.53E-22 | chr:4:120263688 |
| 4 rs368938172 | 120330272 G | 0.1462 | 4.74E-22 | chr:4:120263688 |
| 4 rs75420021  | 120246729 A | 0.1247 | 4.83E-22 | chr:4:120263688 |
| 4 rs1155577   | 120449810 T | 7.997  | 5.75E-22 | chr:4:120263688 |
| 4 rs71612601  | 120332595 T | 0.1244 | 5.96E-22 | chr:4:120263688 |
| 4 rs3775841   | 120425777 C | 0.1328 | 6.44E-22 | chr:4:120263688 |
| 4 rs1480933   | 120433248 C | 7.793  | 6.47E-22 | chr:4:120263688 |
| 4 rs200947437 | 120254755 C | 0.1775 | 7.04E-22 | chr:4:120263688 |
| 4 rs2389873   | 120554714 G | 7.534  | 7.38E-22 | chr:4:120263688 |

|               |             |        |          |                 |
|---------------|-------------|--------|----------|-----------------|
| 4 rs4834792   | 120555696 A | 7.534  | 7.38E-22 | chr:4:120263688 |
| 4 rs56372521  | 120374431 T | 0.1292 | 8.41E-22 | chr:4:120263688 |
| 4 rs1825061   | 120388902 T | 0.1734 | 8.41E-22 | chr:4:120263688 |
| 4 rs28504370  | 120388890 A | 0.1734 | 8.41E-22 | chr:4:120263688 |
| 4 rs7696649   | 120322177 A | 0.1264 | 8.54E-22 | chr:4:120263688 |
| 4 rs10050092  | 120532085 C | 0.1361 | 8.69E-22 | chr:4:120263688 |
| 4 rs6832740   | 120546136 C | 0.1361 | 8.69E-22 | chr:4:120263688 |
| 4 rs6855918   | 120546299 T | 0.1361 | 8.69E-22 | chr:4:120263688 |
| 4 rs7693919   | 120540571 A | 0.1361 | 8.69E-22 | chr:4:120263688 |
| 4 rs6843229   | 120424087 T | 7.887  | 8.93E-22 | chr:4:120263688 |
| 4 rs78709015  | 120367728 T | 0.1616 | 9.29E-22 | chr:4:120263688 |
| 4 rs13117947  | 120257060 G | 0.134  | 9.36E-22 | chr:4:120263688 |
| 4 rs10010696  | 120164303 C | 0.1383 | 9.58E-22 | chr:4:120263688 |
| 4 rs1511019   | 120166007 G | 0.1383 | 9.58E-22 | chr:4:120263688 |
| 4 rs7684942   | 120162201 T | 0.1383 | 9.58E-22 | chr:4:120263688 |
| 4 rs35280960  | 120257059 A | 0.143  | 9.72E-22 | chr:4:120263688 |
| 4 rs28450134  | 120376318 C | 0.126  | 9.93E-22 | chr:4:120263688 |
| 4 rs34818745  | 120257055 C | 0.1426 | 1.04E-21 | chr:4:120263688 |
| 4 rs12501610  | 120175763 T | 0.1411 | 1.07E-21 | chr:4:120263688 |
| 4 rs140584472 | 120246695 G | 0.1659 | 1.10E-21 | chr:4:120263688 |
| 4 rs185481756 | 120246689 C | 0.1659 | 1.10E-21 | chr:4:120263688 |
| 4 rs4001198   | 120325264 T | 0.1174 | 1.14E-21 | chr:4:120263688 |
| 4 rs7685268   | 120162188 A | 0.1406 | 1.24E-21 | chr:4:120263688 |
| 4 rs12505735  | 120532956 A | 0.1387 | 1.24E-21 | chr:4:120263688 |
| 4 rs13136462  | 120543173 T | 0.1387 | 1.24E-21 | chr:4:120263688 |
| 4 rs2389885   | 120533931 T | 0.1387 | 1.24E-21 | chr:4:120263688 |
| 4 rs28394116  | 120524283 G | 0.1387 | 1.24E-21 | chr:4:120263688 |
| 4 rs28535956  | 120536858 C | 0.1387 | 1.24E-21 | chr:4:120263688 |
| 4 rs28578366  | 120536905 T | 0.1387 | 1.24E-21 | chr:4:120263688 |
| 4 rs3756156   | 120524841 A | 0.1387 | 1.24E-21 | chr:4:120263688 |
| 4 rs11931312  | 120159023 C | 0.1395 | 1.28E-21 | chr:4:120263688 |
| 4 rs11944880  | 120159334 T | 0.1395 | 1.28E-21 | chr:4:120263688 |
| 4 rs13129661  | 120152909 G | 0.1395 | 1.28E-21 | chr:4:120263688 |
| 4 rs1397608   | 120161744 G | 0.1395 | 1.28E-21 | chr:4:120263688 |
| 4 rs1511018   | 120161580 T | 0.1395 | 1.28E-21 | chr:4:120263688 |
| 4 rs1551      | 120158500 G | 0.1395 | 1.28E-21 | chr:4:120263688 |
| 4 rs56386062  | 120155135 C | 0.1395 | 1.28E-21 | chr:4:120263688 |
| 4 rs6815725   | 120158410 A | 0.1395 | 1.28E-21 | chr:4:120263688 |
| 4 rs2389875   | 120557014 T | 7.289  | 1.29E-21 | chr:4:120263688 |
| 4 rs10009566  | 120558608 C | 0.1416 | 1.31E-21 | chr:4:120263688 |
| 4 rs10012252  | 120559139 C | 0.1416 | 1.31E-21 | chr:4:120263688 |
| 4 rs11098534  | 120556772 G | 0.1416 | 1.31E-21 | chr:4:120263688 |
| 4 rs2389880   | 120559870 A | 0.1416 | 1.31E-21 | chr:4:120263688 |

|               |             |        |                          |
|---------------|-------------|--------|--------------------------|
| 4 rs28787668  | 120554687 A | 0.1416 | 1.31E-21 chr:4:120263688 |
| 4 rs28850368  | 120554313 A | 0.1416 | 1.31E-21 chr:4:120263688 |
| 4 rs34835603  | 120553428 T | 0.1416 | 1.31E-21 chr:4:120263688 |
| 4 rs3806808   | 120551085 C | 0.1416 | 1.31E-21 chr:4:120263688 |
| 4 rs7676296   | 120555687 G | 0.1416 | 1.31E-21 chr:4:120263688 |
| 4 rs58601355  | 120186367 C | 0.143  | 1.35E-21 chr:4:120263688 |
| 4 rs10022262  | 120175152 G | 0.1418 | 1.37E-21 chr:4:120263688 |
| 4 rs10029750  | 120172543 G | 0.1418 | 1.37E-21 chr:4:120263688 |
| 4 rs10213342  | 120175237 G | 0.1418 | 1.37E-21 chr:4:120263688 |
| 4 rs11729897  | 120174453 T | 0.1418 | 1.37E-21 chr:4:120263688 |
| 4 rs12499598  | 120189303 C | 0.1418 | 1.37E-21 chr:4:120263688 |
| 4 rs12506395  | 120185094 T | 0.1418 | 1.37E-21 chr:4:120263688 |
| 4 rs12512517  | 120173245 G | 0.1418 | 1.37E-21 chr:4:120263688 |
| 4 rs13435802  | 120177960 T | 0.1418 | 1.37E-21 chr:4:120263688 |
| 4 rs146531121 | 120174794 A | 0.1418 | 1.37E-21 chr:4:120263688 |
| 4 rs28374891  | 120183550 A | 0.1418 | 1.37E-21 chr:4:120263688 |
| 4 rs34585914  | 120189194 T | 0.1418 | 1.37E-21 chr:4:120263688 |
| 4 rs34630083  | 120174569 G | 0.1418 | 1.37E-21 chr:4:120263688 |
| 4 rs35643470  | 120184948 C | 0.1418 | 1.37E-21 chr:4:120263688 |
| 4 rs6837898   | 120179154 T | 0.1418 | 1.37E-21 chr:4:120263688 |
| 4 rs11098496  | 120167466 G | 0.1422 | 1.39E-21 chr:4:120263688 |
| 4 rs28571649  | 120388867 A | 0.1555 | 1.52E-21 chr:4:120263688 |
| 4 rs4001195   | 120329676 G | 0.1506 | 1.60E-21 chr:4:120263688 |
| 4 rs11098499  | 120187611 T | 0.1422 | 1.69E-21 chr:4:120263688 |
| 4 rs12504773  | 120562149 C | 0.144  | 1.82E-21 chr:4:120263688 |
| 4 rs13122709  | 120555356 A | 0.144  | 1.82E-21 chr:4:120263688 |
| 4 rs7680914   | 120563053 G | 0.144  | 1.82E-21 chr:4:120263688 |
| 4 rs7695292   | 120558446 G | 0.144  | 1.82E-21 chr:4:120263688 |
| 4 rs13114751  | 120156617 A | 0.1431 | 1.82E-21 chr:4:120263688 |
| 4 rs35271032  | 120156659 T | 0.1431 | 1.82E-21 chr:4:120263688 |
| 4 rs11734519  | 120171071 G | 0.1456 | 2.00E-21 chr:4:120263688 |
| 4 rs1511015   | 120170473 C | 0.1456 | 2.00E-21 chr:4:120263688 |
| 4 rs34616304  | 120169435 T | 0.1456 | 2.00E-21 chr:4:120263688 |
| 4 rs35197422  | 120169314 G | 0.1456 | 2.00E-21 chr:4:120263688 |
| 4 rs35434465  | 120169378 G | 0.1456 | 2.00E-21 chr:4:120263688 |
| 4 rs6814412   | 120170851 A | 0.1456 | 2.00E-21 chr:4:120263688 |
| 4 rs6849889   | 120186348 C | 0.1443 | 2.21E-21 chr:4:120263688 |
| 4 rs1011054   | 120202387 A | 0.1435 | 2.25E-21 chr:4:120263688 |
| 4 rs11098500  | 120219239 A | 0.1435 | 2.25E-21 chr:4:120263688 |
| 4 rs11726229  | 120211580 T | 0.1435 | 2.25E-21 chr:4:120263688 |
| 4 rs13116504  | 120209412 C | 0.1435 | 2.25E-21 chr:4:120263688 |
| 4 rs13133044  | 120201252 C | 0.1435 | 2.25E-21 chr:4:120263688 |
| 4 rs28419773  | 120211061 C | 0.1435 | 2.25E-21 chr:4:120263688 |

|               |             |        |          |                 |
|---------------|-------------|--------|----------|-----------------|
| 4 rs28555550  | 120211040 G | 0.1435 | 2.25E-21 | chr:4:120263688 |
| 4 rs7659194   | 120207147 G | 0.1435 | 2.25E-21 | chr:4:120263688 |
| 4 rs199816242 | 120199351 T | 0.1425 | 2.36E-21 | chr:4:120263688 |
| 4 rs13113112  | 120156040 T | 0.1478 | 2.48E-21 | chr:4:120263688 |
| 4 rs10027431  | 120372142 G | 0.1569 | 2.51E-21 | chr:4:120263688 |
| 4 rs10027432  | 120372143 C | 0.1569 | 2.51E-21 | chr:4:120263688 |
| 4 rs35916640  | 120155852 C | 0.1452 | 2.55E-21 | chr:4:120263688 |
| 4 rs4145951   | 120155817 G | 0.1452 | 2.55E-21 | chr:4:120263688 |
| 4 rs3749591   | 120214030 G | 0.1484 | 2.56E-21 | chr:4:120263688 |
| 4 rs7679468   | 120328333 C | 0.1466 | 2.58E-21 | chr:4:120263688 |
| 4 rs9683520   | 120368199 C | 0.1976 | 2.62E-21 | chr:4:120263688 |
| 4 rs9684878   | 120368175 C | 0.1976 | 2.62E-21 | chr:4:120263688 |
| 4 rs80259299  | 120336497 G | 0.2094 | 2.78E-21 | chr:4:120263688 |
| 4 rs28655325  | 120372999 G | 0.13   | 2.94E-21 | chr:4:120263688 |
| 4 rs201085338 | 120347661 A | 0.2112 | 3.15E-21 | chr:4:120263688 |
| 4 rs55816173  | 120247014 T | 0.1756 | 3.70E-21 | chr:4:120263688 |
| 4 rs10518337  | 120574874 C | 6.908  | 4.23E-21 | chr:4:120263688 |
| 4 rs10031033  | 120151452 T | 0.1564 | 4.57E-21 | chr:4:120263688 |
| 4 rs71595380  | 120329294 T | 0.1848 | 7.41E-21 | chr:4:120263688 |
| 4 rs12186259  | 120152039 T | 0.1559 | 7.87E-21 | chr:4:120263688 |
| 4 rs4001284   | 120334957 G | 0.2677 | 8.65E-21 | chr:4:120263688 |
| 4 rs138401876 | 120370298 A | 0.1652 | 8.67E-21 | chr:4:120263688 |
| 4 rs10022185  | 120571765 G | 0.1506 | 1.08E-20 | chr:4:120263688 |
| 4 rs12642411  | 120580525 C | 0.1506 | 1.08E-20 | chr:4:120263688 |
| 4 rs17051352  | 120581427 A | 0.1506 | 1.08E-20 | chr:4:120263688 |
| 4 rs2389882   | 120566733 C | 0.1506 | 1.08E-20 | chr:4:120263688 |
| 4 rs2389886   | 120570422 A | 0.1506 | 1.08E-20 | chr:4:120263688 |
| 4 rs2389887   | 120570644 C | 0.1506 | 1.08E-20 | chr:4:120263688 |
| 4 rs34278750  | 120571136 A | 0.1506 | 1.08E-20 | chr:4:120263688 |
| 4 rs7664440   | 120578540 G | 0.1506 | 1.08E-20 | chr:4:120263688 |
| 4 rs7671096   | 120579317 A | 0.1506 | 1.08E-20 | chr:4:120263688 |
| 4 rs7674713   | 120322257 C | 0.1427 | 1.17E-20 | chr:4:120263688 |
| 4 rs200207680 | 120338383 T | 0.2073 | 1.38E-20 | chr:4:120263688 |
| 4 rs78958430  | 120338339 T | 0.2073 | 1.38E-20 | chr:4:120263688 |
| 4 rs79262354  | 120338335 T | 0.2073 | 1.38E-20 | chr:4:120263688 |
| 4 rs9684723   | 120367735 C | 0.185  | 1.51E-20 | chr:4:120263688 |
| 4 rs67073020  | 120152557 T | 0.1644 | 1.92E-20 | chr:4:120263688 |
| 4 rs192039339 | 120333191 C | 0.2002 | 2.16E-20 | chr:4:120263688 |
| 4 rs72918579  | 120333222 C | 0.2002 | 2.16E-20 | chr:4:120263688 |
| 4 rs534745130 | 120246059 C | 0.1647 | 2.23E-20 | chr:4:120263688 |
| 4 rs113263911 | 120255134 T | 0.1975 | 2.52E-20 | chr:4:120263688 |
| 4 rs199863129 | 120334013 T | 0.2005 | 2.58E-20 | chr:4:120263688 |
| 4 rs558588080 | 120348891 A | 0.2061 | 2.92E-20 | chr:4:120263688 |

|               |             |        |          |                 |
|---------------|-------------|--------|----------|-----------------|
| 4 rs3955380   | 120334410 A | 0.205  | 3.43E-20 | chr:4:120263688 |
| 4 rs569705290 | 120333521 C | 0.2402 | 4.73E-20 | chr:4:120263688 |
| 4 rs200940395 | 120333454 C | 0.243  | 8.50E-20 | chr:4:120263688 |
| 4 rs201764925 | 120334210 A | 0.2319 | 9.64E-20 | chr:4:120263688 |
| 4 rs10518336  | 120522934 A | 0.1788 | 1.13E-19 | chr:4:120263688 |
| 4 rs4834779   | 120425246 A | 0.1691 | 1.83E-19 | chr:4:120263688 |
| 4 rs186992684 | 120336473 T | 0.2683 | 3.56E-19 | chr:4:120263688 |
| 4 rs202019903 | 120344304 C | 0.1642 | 3.57E-19 | chr:4:120263688 |
| 4 rs7696877   | 120081869 T | 0.177  | 3.77E-19 | chr:4:120263688 |
| 4 rs117030010 | 120333095 C | 0.2627 | 3.92E-19 | chr:4:120263688 |
| 4 rs201495048 | 120333126 A | 0.2627 | 3.92E-19 | chr:4:120263688 |
| 4 rs11098489  | 120081606 G | 0.1772 | 4.34E-19 | chr:4:120263688 |
| 4 rs11729978  | 120079387 A | 0.1772 | 4.34E-19 | chr:4:120263688 |
| 4 rs11730138  | 120079800 A | 0.1772 | 4.34E-19 | chr:4:120263688 |
| 4 rs11731008  | 120079925 A | 0.1772 | 4.34E-19 | chr:4:120263688 |
| 4 rs12508316  | 120081291 A | 0.1772 | 4.34E-19 | chr:4:120263688 |
| 4 rs4334737   | 120080346 C | 0.1772 | 4.34E-19 | chr:4:120263688 |
| 4 rs527513020 | 120358891 C | 0.2076 | 4.58E-19 | chr:4:120263688 |
| 4 rs565835685 | 120358886 G | 0.2076 | 4.58E-19 | chr:4:120263688 |
| 4 rs11733525  | 120082417 T | 0.1772 | 4.90E-19 | chr:4:120263688 |
| 4 rs3956463   | 120245748 A | 0.183  | 7.77E-19 | chr:4:120263688 |
| 4 rs10014947  | 120280077 A | 0.185  | 8.55E-19 | chr:4:120263688 |
| 4 rs11737400  | 120279335 G | 0.185  | 8.55E-19 | chr:4:120263688 |
| 4 rs13149954  | 120279041 A | 0.185  | 8.55E-19 | chr:4:120263688 |
| 4 rs13150541  | 120279284 A | 0.185  | 8.55E-19 | chr:4:120263688 |
| 4 rs28580295  | 120278873 T | 0.185  | 8.55E-19 | chr:4:120263688 |
| 4 rs62320738  | 120279420 A | 0.185  | 8.55E-19 | chr:4:120263688 |
| 4 rs62320739  | 120279459 C | 0.185  | 8.55E-19 | chr:4:120263688 |
| 4 rs62320740  | 120279486 A | 0.185  | 8.55E-19 | chr:4:120263688 |
| 4 rs71627791  | 120278765 G | 0.185  | 8.55E-19 | chr:4:120263688 |
| 4 rs78624933  | 120338651 C | 0.2661 | 9.34E-19 | chr:4:120263688 |
| 4 rs2036858   | 120249237 C | 0.1849 | 9.97E-19 | chr:4:120263688 |
| 4 rs62319649  | 120522579 T | 0.1764 | 1.26E-18 | chr:4:120263688 |
| 4 rs11724758  | 120239878 A | 0.1866 | 1.50E-18 | chr:4:120263688 |
| 4 rs10014822  | 120280143 T | 0.1969 | 1.58E-18 | chr:4:120263688 |
| 4 rs10026625  | 120280136 C | 0.198  | 1.78E-18 | chr:4:120263688 |
| 4 rs72916543  | 120254961 T | 0.2638 | 2.80E-18 | chr:4:120263688 |
| 4 rs140305554 | 120247693 C | 0.1876 | 5.23E-18 | chr:4:120263688 |
| 4 rs71627788  | 120255728 G | 0.2335 | 6.07E-18 | chr:4:120263688 |
| 4 rs11098486  | 120066810 A | 0.2058 | 7.14E-18 | chr:4:120263688 |
| 4 rs12499377  | 120587215 A | 0.2077 | 1.01E-17 | chr:4:120263688 |
| 4 rs4504231   | 120586891 A | 0.2077 | 1.01E-17 | chr:4:120263688 |
| 4 rs11098497  | 120187068 T | 0.2177 | 2.70E-17 | chr:4:120263688 |

|               |             |        |          |                 |
|---------------|-------------|--------|----------|-----------------|
| 4 rs11098498  | 120187119 C | 0.2177 | 2.70E-17 | chr:4:120263688 |
| 4 rs73844769  | 120254829 C | 0.256  | 3.03E-17 | chr:4:120263688 |
| 4 rs370208580 | 120333619 G | 0.295  | 3.26E-17 | chr:4:120263688 |
| 4 rs376876178 | 120333615 G | 0.295  | 3.26E-17 | chr:4:120263688 |
| 4 rs11731571  | 120221185 A | 0.2189 | 3.37E-17 | chr:4:120263688 |
| 4 rs13113885  | 120221176 C | 0.2189 | 3.37E-17 | chr:4:120263688 |
| 4 rs6843509   | 120220196 A | 0.2194 | 3.46E-17 | chr:4:120263688 |
| 4 rs184174836 | 120196561 G | 0.2234 | 4.28E-17 | chr:4:120263688 |
| 4 rs10032299  | 120206419 T | 0.2199 | 4.47E-17 | chr:4:120263688 |
| 4 rs1052633   | 120215314 G | 0.2199 | 4.47E-17 | chr:4:120263688 |
| 4 rs11731675  | 120212514 C | 0.2199 | 4.47E-17 | chr:4:120263688 |
| 4 rs11732621  | 120212883 G | 0.2199 | 4.47E-17 | chr:4:120263688 |
| 4 rs2175383   | 120215836 A | 0.2199 | 4.47E-17 | chr:4:120263688 |
| 4 rs6822808   | 120217365 A | 0.2199 | 4.47E-17 | chr:4:120263688 |
| 4 rs7659403   | 120207254 A | 0.2199 | 4.47E-17 | chr:4:120263688 |
| 4 rs9994651   | 120587803 G | 4.775  | 5.19E-17 | chr:4:120263688 |
| 4 rs9994488   | 120587781 C | 4.742  | 6.68E-17 | chr:4:120263688 |
| 4 rs1459055   | 120056815 A | 0.2293 | 8.26E-17 | chr:4:120263688 |
| 4 rs552865294 | 120246034 A | 0.2397 | 1.19E-16 | chr:4:120263688 |
| 4 rs12512646  | 120585733 G | 4.213  | 3.19E-16 | chr:4:120263688 |
| 4 rs4833624   | 120585497 C | 4.213  | 3.19E-16 | chr:4:120263688 |
| 4 rs17051356  | 120585308 C | 4.11   | 5.74E-16 | chr:4:120263688 |
| 4 rs13122890  | 120601731 T | 4.862  | 7.59E-16 | chr:4:120263688 |
| 4 rs7683474   | 120612853 T | 4.456  | 7.86E-16 | chr:4:120263688 |
| 4 rs6836219   | 120597941 T | 4.864  | 8.16E-16 | chr:4:120263688 |
| 4 rs13435370  | 120334666 C | 0.2521 | 8.61E-16 | chr:4:120263688 |
| 4 rs2715026   | 120616805 C | 4.793  | 1.26E-15 | chr:4:120263688 |
| 4 rs10518301  | 120235125 C | 5.231  | 1.27E-15 | chr:4:120263688 |
| 4 rs11722847  | 120233121 T | 5.231  | 1.27E-15 | chr:4:120263688 |
| 4 rs11937425  | 120235999 C | 5.231  | 1.27E-15 | chr:4:120263688 |
| 4 rs13118936  | 120234402 A | 5.231  | 1.27E-15 | chr:4:120263688 |
| 4 rs13139118  | 120233640 C | 5.231  | 1.27E-15 | chr:4:120263688 |
| 4 rs4364243   | 120230860 T | 5.231  | 1.27E-15 | chr:4:120263688 |
| 4 rs6821717   | 120599661 C | 4.789  | 1.29E-15 | chr:4:120263688 |
| 4 rs907736    | 120289943 C | 5.172  | 1.33E-15 | chr:4:120263688 |
| 4 rs62321169  | 120591368 T | 4.644  | 1.91E-15 | chr:4:120263688 |
| 4 rs200974711 | 120468265 G | 0.2871 | 2.78E-15 | chr:4:120263688 |
| 4 rs2252708   | 120612158 C | 4.579  | 2.86E-15 | chr:4:120263688 |
| 4 rs11732403  | 120234725 G | 4.989  | 3.52E-15 | chr:4:120263688 |
| 4 rs34049297  | 120234722 C | 4.989  | 3.52E-15 | chr:4:120263688 |
| 4 rs10013032  | 120149419 T | 3.718  | 6.72E-15 | chr:4:120263688 |
| 4 rs4833612   | 120147596 C | 3.718  | 6.72E-15 | chr:4:120263688 |
| 4 rs6851130   | 120133712 A | 3.718  | 6.72E-15 | chr:4:120263688 |

|               |             |        |          |                 |
|---------------|-------------|--------|----------|-----------------|
| 4 rs7441137   | 120133221 T | 3.718  | 6.72E-15 | chr:4:120263688 |
| 4 rs951570    | 120150467 C | 3.718  | 6.72E-15 | chr:4:120263688 |
| 4 rs9996382   | 120151012 G | 3.68   | 1.04E-14 | chr:4:120263688 |
| 4 rs7655035   | 120617004 A | 4.082  | 1.30E-14 | chr:4:120263688 |
| 4 rs13126596  | 120140729 A | 3.568  | 1.72E-14 | chr:4:120263688 |
| 4 rs68128210  | 120137819 T | 3.568  | 1.72E-14 | chr:4:120263688 |
| 4 rs6534130   | 120131339 T | 3.612  | 1.84E-14 | chr:4:120263688 |
| 4 rs9884728   | 120127079 T | 3.612  | 1.84E-14 | chr:4:120263688 |
| 4 rs2203039   | 120132347 C | 3.519  | 1.91E-14 | chr:4:120263688 |
| 4 rs10006304  | 120124305 A | 3.516  | 2.75E-14 | chr:4:120263688 |
| 4 rs10022508  | 120115228 A | 3.516  | 2.75E-14 | chr:4:120263688 |
| 4 rs12502503  | 120116255 C | 3.516  | 2.75E-14 | chr:4:120263688 |
| 4 rs12509054  | 120115075 A | 3.516  | 2.75E-14 | chr:4:120263688 |
| 4 rs13123591  | 120105990 T | 3.516  | 2.75E-14 | chr:4:120263688 |
| 4 rs150408742 | 120122911 T | 3.516  | 2.75E-14 | chr:4:120263688 |
| 4 rs17839089  | 120111069 A | 3.516  | 2.75E-14 | chr:4:120263688 |
| 4 rs28452522  | 120110784 A | 3.516  | 2.75E-14 | chr:4:120263688 |
| 4 rs6822498   | 120120183 T | 3.516  | 2.75E-14 | chr:4:120263688 |
| 4 rs6826823   | 120112098 G | 3.516  | 2.75E-14 | chr:4:120263688 |
| 4 rs6832670   | 120118792 A | 3.516  | 2.75E-14 | chr:4:120263688 |
| 4 rs6838674   | 120119376 A | 3.516  | 2.75E-14 | chr:4:120263688 |
| 4 rs6845702   | 120120453 A | 3.516  | 2.75E-14 | chr:4:120263688 |
| 4 rs6851169   | 120117510 T | 3.516  | 2.75E-14 | chr:4:120263688 |
| 4 rs7661020   | 120106982 T | 3.516  | 2.75E-14 | chr:4:120263688 |
| 4 rs9995277   | 120108603 G | 3.516  | 2.75E-14 | chr:4:120263688 |
| 4 rs2245564   | 120625812 T | 4.154  | 3.78E-14 | chr:4:120263688 |
| 4 rs2583608   | 120620379 C | 4.154  | 3.78E-14 | chr:4:120263688 |
| 4 rs2583609   | 120623111 T | 4.154  | 3.78E-14 | chr:4:120263688 |
| 4 rs13138782  | 120124474 G | 3.488  | 4.02E-14 | chr:4:120263688 |
| 4 rs140263405 | 120325820 A | 0.2288 | 4.26E-14 | chr:4:120263688 |
| 4 rs56122576  | 120129336 A | 3.472  | 4.65E-14 | chr:4:120263688 |
| 4 rs7664591   | 120627116 T | 3.681  | 5.23E-14 | chr:4:120263688 |
| 4 rs13111751  | 120050762 G | 0.2819 | 5.27E-14 | chr:4:120263688 |
| 4 rs28663988  | 120620388 T | 3.791  | 8.80E-14 | chr:4:120263688 |
| 4 rs4094      | 120619421 T | 3.791  | 8.80E-14 | chr:4:120263688 |
| 4 rs4337717   | 120643040 A | 3.606  | 9.33E-14 | chr:4:120263688 |
| 4 rs2389903   | 120646281 C | 3.606  | 9.56E-14 | chr:4:120263688 |
| 4 rs1022146   | 120236103 A | 4.306  | 1.07E-13 | chr:4:120263688 |
| 4 rs2389747   | 120236102 C | 4.306  | 1.07E-13 | chr:4:120263688 |
| 4 rs199515440 | 120372424 T | 0.2053 | 1.51E-13 | chr:4:120263688 |
| 4 rs4834802   | 120614296 G | 3.44   | 2.42E-13 | chr:4:120263688 |
| 4 rs11735819  | 120290194 C | 3.443  | 2.53E-13 | chr:4:120263688 |
| 4 rs2248806   | 120621423 A | 3.789  | 4.78E-13 | chr:4:120263688 |

|              |             |        |          |                 |
|--------------|-------------|--------|----------|-----------------|
| 4 rs4355374  | 120305398 T | 3.887  | 8.89E-13 | chr:4:120263688 |
| 4 rs4833618  | 120309500 C | 3.887  | 8.89E-13 | chr:4:120263688 |
| 4 rs1511016  | 120170355 A | 4.054  | 9.34E-13 | chr:4:120263688 |
| 4 rs4496567  | 120175625 A | 4.054  | 9.34E-13 | chr:4:120263688 |
| 4 rs6534131  | 120180195 A | 4.054  | 9.34E-13 | chr:4:120263688 |
| 4 rs6823331  | 120180790 T | 4.054  | 9.34E-13 | chr:4:120263688 |
| 4 rs7676969  | 120173724 C | 4.054  | 9.34E-13 | chr:4:120263688 |
| 4 rs10001829 | 120665293 G | 3.287  | 9.84E-13 | chr:4:120263688 |
| 4 rs12512171 | 120662564 A | 3.287  | 9.84E-13 | chr:4:120263688 |
| 4 rs13103043 | 120665371 T | 3.287  | 9.84E-13 | chr:4:120263688 |
| 4 rs7693769  | 120658676 A | 3.287  | 9.84E-13 | chr:4:120263688 |
| 4 rs2252565  | 120613111 T | 3.431  | 1.17E-12 | chr:4:120263688 |
| 4 rs10518330 | 120401969 C | 0.2381 | 1.24E-12 | chr:4:120263688 |
| 4 rs2714961  | 120628627 C | 3.516  | 1.45E-12 | chr:4:120263688 |
| 4 rs2256834  | 120663939 T | 3.504  | 1.56E-12 | chr:4:120263688 |
| 4 rs2583604  | 120660715 A | 3.504  | 1.56E-12 | chr:4:120263688 |
| 4 rs2583605  | 120659992 A | 3.504  | 1.56E-12 | chr:4:120263688 |
| 4 rs2583619  | 120652805 T | 3.504  | 1.56E-12 | chr:4:120263688 |
| 4 rs2714970  | 120657355 T | 3.504  | 1.56E-12 | chr:4:120263688 |
| 4 rs2714973  | 120662172 A | 3.504  | 1.56E-12 | chr:4:120263688 |
| 4 rs2714980  | 120668765 T | 3.504  | 1.56E-12 | chr:4:120263688 |
| 4 rs2714985  | 120664142 G | 3.504  | 1.56E-12 | chr:4:120263688 |
| 4 rs725449   | 120656892 T | 3.504  | 1.56E-12 | chr:4:120263688 |
| 4 rs7437666  | 120653063 C | 3.504  | 1.56E-12 | chr:4:120263688 |
| 4 rs76798497 | 120667915 C | 4.151  | 1.73E-12 | chr:4:120263688 |
| 4 rs1033087  | 120103401 T | 3.158  | 2.02E-12 | chr:4:120263688 |
| 4 rs11098490 | 120086883 C | 3.158  | 2.02E-12 | chr:4:120263688 |
| 4 rs11098491 | 120088542 C | 3.158  | 2.02E-12 | chr:4:120263688 |
| 4 rs11098492 | 120095260 C | 3.158  | 2.02E-12 | chr:4:120263688 |
| 4 rs11098493 | 120104113 A | 3.158  | 2.02E-12 | chr:4:120263688 |
| 4 rs11733239 | 120087698 C | 3.158  | 2.02E-12 | chr:4:120263688 |
| 4 rs12513191 | 120096821 G | 3.158  | 2.02E-12 | chr:4:120263688 |
| 4 rs13136593 | 120101772 G | 3.158  | 2.02E-12 | chr:4:120263688 |
| 4 rs2036861  | 120102289 A | 3.158  | 2.02E-12 | chr:4:120263688 |
| 4 rs4355373  | 120084955 T | 3.158  | 2.02E-12 | chr:4:120263688 |
| 4 rs9993110  | 120092088 C | 3.158  | 2.02E-12 | chr:4:120263688 |
| 4 rs2714960  | 120630872 C | 3.476  | 2.13E-12 | chr:4:120263688 |
| 4 rs1986695  | 120589750 A | 3.171  | 2.38E-12 | chr:4:120263688 |
| 4 rs4834798  | 120591919 T | 3.171  | 2.38E-12 | chr:4:120263688 |
| 4 rs4834772  | 120272316 G | 2.705  | 2.67E-12 | chr:4:120263688 |
| 4 rs13120560 | 120090246 T | 3.14   | 2.72E-12 | chr:4:120263688 |
| 4 rs17005489 | 120649070 A | 3.401  | 3.34E-12 | chr:4:120263688 |
| 4 rs2583617  | 120644194 A | 3.396  | 4.02E-12 | chr:4:120263688 |



|               |             |       |          |                 |
|---------------|-------------|-------|----------|-----------------|
| 4 rs34209241  | 120634499 T | 3.136 | 4.20E-12 | chr:4:120263688 |
| 4 rs4834804   | 120633428 C | 3.136 | 4.20E-12 | chr:4:120263688 |
| 4 rs752650    | 120632387 T | 3.136 | 4.20E-12 | chr:4:120263688 |
| 4 rs2250346   | 120648078 T | 3.377 | 4.22E-12 | chr:4:120263688 |
| 4 rs12509811  | 120635685 A | 3.627 | 5.44E-12 | chr:4:120263688 |
| 4 rs12331776  | 120617412 C | 3.14  | 5.53E-12 | chr:4:120263688 |
| 4 rs11722624  | 120673096 T | 3.333 | 8.66E-12 | chr:4:120263688 |
| 4 rs11734863  | 120673259 G | 3.333 | 8.66E-12 | chr:4:120263688 |
| 4 rs2252621   | 120675026 C | 3.333 | 8.66E-12 | chr:4:120263688 |
| 4 rs2252625   | 120674899 T | 3.333 | 8.66E-12 | chr:4:120263688 |
| 4 rs2714966   | 120677425 A | 3.333 | 8.66E-12 | chr:4:120263688 |
| 4 rs2714965   | 120676814 T | 3.325 | 1.12E-11 | chr:4:120263688 |
| 4 rs2256054   | 120669517 C | 3.257 | 1.24E-11 | chr:4:120263688 |
| 4 rs2583597   | 120670150 A | 3.257 | 1.24E-11 | chr:4:120263688 |
| 4 rs2714976   | 120670555 G | 3.257 | 1.24E-11 | chr:4:120263688 |
| 4 rs2714978   | 120670213 G | 3.257 | 1.24E-11 | chr:4:120263688 |
| 4 rs55732167  | 120141507 T | 4.258 | 1.59E-11 | chr:4:120263688 |
| 4 rs35703745  | 120319797 A | 3.448 | 2.14E-11 | chr:4:120263688 |
| 4 rs10018153  | 120610535 G | 2.91  | 2.15E-11 | chr:4:120263688 |
| 4 rs13122357  | 120601758 A | 2.91  | 2.15E-11 | chr:4:120263688 |
| 4 rs10007283  | 120619656 A | 3.006 | 2.15E-11 | chr:4:120263688 |
| 4 rs10029669  | 120619666 C | 3.006 | 2.15E-11 | chr:4:120263688 |
| 4 rs2583596   | 120670120 A | 3.166 | 2.51E-11 | chr:4:120263688 |
| 4 rs62328369  | 120151494 A | 4.123 | 2.64E-11 | chr:4:120263688 |
| 4 rs12510467  | 120618359 G | 2.978 | 2.72E-11 | chr:4:120263688 |
| 4 rs28723049  | 120620507 C | 2.978 | 2.72E-11 | chr:4:120263688 |
| 4 rs28869613  | 120620588 T | 2.978 | 2.72E-11 | chr:4:120263688 |
| 4 rs5008452   | 120621752 A | 2.978 | 2.72E-11 | chr:4:120263688 |
| 4 rs9684358   | 120622560 T | 2.978 | 2.72E-11 | chr:4:120263688 |
| 4 rs4833625   | 120614593 A | 2.898 | 2.75E-11 | chr:4:120263688 |
| 4 rs4833613   | 120150156 C | 2.926 | 3.54E-11 | chr:4:120263688 |
| 4 rs12644283  | 120133549 G | 4.124 | 3.78E-11 | chr:4:120263688 |
| 4 rs3905917   | 120268435 A | 3.751 | 4.10E-11 | chr:4:120263688 |
| 4 rs62322290  | 120317904 A | 3.357 | 4.10E-11 | chr:4:120263688 |
| 4 rs10020420  | 120287431 C | 3.759 | 4.39E-11 | chr:4:120263688 |
| 4 rs12646466  | 120268321 G | 3.759 | 4.39E-11 | chr:4:120263688 |
| 4 rs4834773   | 120277395 G | 3.759 | 4.39E-11 | chr:4:120263688 |
| 4 rs6840053   | 120292233 A | 3.759 | 4.39E-11 | chr:4:120263688 |
| 4 rs7681328   | 120274496 T | 3.759 | 4.39E-11 | chr:4:120263688 |
| 4 rs12649773  | 120305262 A | 3.755 | 4.68E-11 | chr:4:120263688 |
| 4 rs142534042 | 120308936 C | 3.755 | 4.68E-11 | chr:4:120263688 |
| 4 rs4833617   | 120305176 A | 3.755 | 4.68E-11 | chr:4:120263688 |
| 4 rs55827028  | 120297059 A | 3.755 | 4.68E-11 | chr:4:120263688 |

|               |             |       |          |                 |
|---------------|-------------|-------|----------|-----------------|
| 4 rs62322279  | 120298548 T | 3.755 | 4.68E-11 | chr:4:120263688 |
| 4 rs62322286  | 120307242 G | 3.755 | 4.68E-11 | chr:4:120263688 |
| 4 rs13111773  | 120321370 A | 3.344 | 4.76E-11 | chr:4:120263688 |
| 4 rs10018308  | 120657899 A | 2.851 | 5.57E-11 | chr:4:120263688 |
| 4 rs7694773   | 120652993 G | 2.851 | 5.57E-11 | chr:4:120263688 |
| 4 rs2102541   | 120115379 G | 3.962 | 7.59E-11 | chr:4:120263688 |
| 4 rs62326344  | 120106420 G | 3.962 | 7.59E-11 | chr:4:120263688 |
| 4 rs62326345  | 120107683 A | 3.962 | 7.59E-11 | chr:4:120263688 |
| 4 rs62326346  | 120108263 A | 3.962 | 7.59E-11 | chr:4:120263688 |
| 4 rs62326347  | 120109440 T | 3.962 | 7.59E-11 | chr:4:120263688 |
| 4 rs62326348  | 120114659 G | 3.962 | 7.59E-11 | chr:4:120263688 |
| 4 rs62326349  | 120116225 T | 3.962 | 7.59E-11 | chr:4:120263688 |
| 4 rs11935130  | 120241725 A | 3.663 | 7.87E-11 | chr:4:120263688 |
| 4 rs12647635  | 120226932 T | 3.663 | 7.87E-11 | chr:4:120263688 |
| 4 rs28421394  | 120229248 A | 3.663 | 7.87E-11 | chr:4:120263688 |
| 4 rs28848291  | 120229356 G | 3.663 | 7.87E-11 | chr:4:120263688 |
| 4 rs28864107  | 120229153 G | 3.663 | 7.87E-11 | chr:4:120263688 |
| 4 rs4834768   | 120228641 G | 3.663 | 7.87E-11 | chr:4:120263688 |
| 4 rs4834769   | 120230446 G | 3.663 | 7.87E-11 | chr:4:120263688 |
| 4 rs56344202  | 120228425 T | 3.663 | 7.87E-11 | chr:4:120263688 |
| 4 rs62328426  | 120247732 C | 3.663 | 7.87E-11 | chr:4:120263688 |
| 4 rs74508090  | 120229759 C | 3.663 | 7.87E-11 | chr:4:120263688 |
| 4 rs12645079  | 120194512 C | 3.618 | 8.42E-11 | chr:4:120263688 |
| 4 rs12645965  | 120204761 A | 3.618 | 8.42E-11 | chr:4:120263688 |
| 4 rs12649811  | 120183939 T | 3.618 | 8.42E-11 | chr:4:120263688 |
| 4 rs12650267  | 120195411 A | 3.618 | 8.42E-11 | chr:4:120263688 |
| 4 rs17642800  | 120219534 C | 3.618 | 8.42E-11 | chr:4:120263688 |
| 4 rs187392552 | 120200618 C | 3.618 | 8.42E-11 | chr:4:120263688 |
| 4 rs35372126  | 120181724 G | 3.618 | 8.42E-11 | chr:4:120263688 |
| 4 rs4833614   | 120176338 T | 3.618 | 8.42E-11 | chr:4:120263688 |
| 4 rs56072232  | 120193715 T | 3.618 | 8.42E-11 | chr:4:120263688 |
| 4 rs62328371  | 120165690 G | 3.618 | 8.42E-11 | chr:4:120263688 |
| 4 rs62328372  | 120166809 G | 3.618 | 8.42E-11 | chr:4:120263688 |
| 4 rs62328377  | 120173569 A | 3.618 | 8.42E-11 | chr:4:120263688 |
| 4 rs62328379  | 120178193 C | 3.618 | 8.42E-11 | chr:4:120263688 |
| 4 rs62328398  | 120201031 A | 3.618 | 8.42E-11 | chr:4:120263688 |
| 4 rs76969560  | 120206724 T | 3.618 | 8.42E-11 | chr:4:120263688 |
| 4 rs77377547  | 120217711 G | 3.618 | 8.42E-11 | chr:4:120263688 |
| 4 rs113409736 | 120195841 T | 3.62  | 8.54E-11 | chr:4:120263688 |
| 4 rs200134651 | 120200519 A | 3.62  | 8.54E-11 | chr:4:120263688 |
| 4 rs12642042  | 120310479 T | 3.677 | 9.67E-11 | chr:4:120263688 |
| 4 rs7695983   | 120322011 T | 3.304 | 9.73E-11 | chr:4:120263688 |
| 4 rs62322287  | 120312172 A | 3.679 | 1.00E-10 | chr:4:120263688 |

|               |             |        |                          |
|---------------|-------------|--------|--------------------------|
| 4 rs1903107   | 120054782 T | 2.749  | 1.10E-10 chr:4:120263688 |
| 4 rs4833608   | 120053357 A | 2.749  | 1.10E-10 chr:4:120263688 |
| 4 rs4834752   | 120055799 T | 2.749  | 1.10E-10 chr:4:120263688 |
| 4 rs7669449   | 120054144 G | 2.753  | 1.22E-10 chr:4:120263688 |
| 4 rs1480934   | 120476006 C | 3.688  | 1.24E-10 chr:4:120263688 |
| 4 rs1858285   | 120227419 G | 3.535  | 1.25E-10 chr:4:120263688 |
| 4 rs17049968  | 120159916 A | 3.56   | 1.26E-10 chr:4:120263688 |
| 4 rs62328407  | 120221425 G | 3.531  | 1.39E-10 chr:4:120263688 |
| 4 rs62328373  | 120167453 C | 3.535  | 1.39E-10 chr:4:120263688 |
| 4 rs62328374  | 120168837 A | 3.535  | 1.39E-10 chr:4:120263688 |
| 4 rs62328376  | 120171735 G | 3.535  | 1.39E-10 chr:4:120263688 |
| 4 rs62326352  | 120127046 C | 3.847  | 1.47E-10 chr:4:120263688 |
| 4 rs2622496   | 120470255 T | 3.685  | 1.56E-10 chr:4:120263688 |
| 4 rs11946739  | 120266472 T | 3.345  | 1.59E-10 chr:4:120263688 |
| 4 rs898169    | 120051946 T | 2.709  | 1.71E-10 chr:4:120263688 |
| 4 rs574704366 | 120246403 G | 3.521  | 1.82E-10 chr:4:120263688 |
| 4 rs12642637  | 120075712 T | 3.852  | 1.82E-10 chr:4:120263688 |
| 4 rs57070054  | 120069488 T | 3.852  | 1.82E-10 chr:4:120263688 |
| 4 rs62326301  | 120065616 T | 3.852  | 1.82E-10 chr:4:120263688 |
| 4 rs62326319  | 120065643 A | 3.852  | 1.82E-10 chr:4:120263688 |
| 4 rs62326320  | 120068633 C | 3.852  | 1.82E-10 chr:4:120263688 |
| 4 rs72910519  | 120068920 G | 3.852  | 1.82E-10 chr:4:120263688 |
| 4 rs78277783  | 120070079 A | 3.852  | 1.82E-10 chr:4:120263688 |
| 4 rs2389728   | 120053113 G | 2.712  | 1.91E-10 chr:4:120263688 |
| 4 rs4001200   | 120378665 G | 0.2455 | 2.66E-10 chr:4:120263688 |
| 4 rs1459060   | 120049798 A | 2.678  | 2.68E-10 chr:4:120263688 |
| 4 rs4834762   | 120132690 T | 3.638  | 2.72E-10 chr:4:120263688 |
| 4 rs4440203   | 120265438 G | 3.009  | 2.82E-10 chr:4:120263688 |
| 4 rs12644226  | 120077329 C | 3.737  | 3.03E-10 chr:4:120263688 |
| 4 rs532905339 | 120195910 T | 3.563  | 3.18E-10 chr:4:120263688 |
| 4 rs4434234   | 120258230 T | 3.381  | 3.40E-10 chr:4:120263688 |
| 4 rs78716570  | 120281377 A | 3.414  | 4.32E-10 chr:4:120263688 |
| 4 rs10003931  | 120259052 G | 0.3084 | 4.39E-10 chr:4:120263688 |
| 4 rs10034661  | 120244085 A | 3.417  | 4.61E-10 chr:4:120263688 |
| 4 rs150043944 | 120278513 T | 3.417  | 4.61E-10 chr:4:120263688 |
| 4 rs151273612 | 120288457 T | 3.417  | 4.61E-10 chr:4:120263688 |
| 4 rs1799883   | 120241902 T | 3.417  | 4.61E-10 chr:4:120263688 |
| 4 rs56082510  | 120288041 T | 3.417  | 4.61E-10 chr:4:120263688 |
| 4 rs57842733  | 120285718 T | 3.417  | 4.61E-10 chr:4:120263688 |
| 4 rs6534133   | 120270703 C | 3.417  | 4.61E-10 chr:4:120263688 |
| 4 rs9683450   | 120232144 G | 3.417  | 4.61E-10 chr:4:120263688 |
| 4 rs9994354   | 120263158 C | 3.417  | 4.61E-10 chr:4:120263688 |
| 4 rs7679245   | 120328196 T | 3.468  | 5.11E-10 chr:4:120263688 |

|               |             |       |          |                 |
|---------------|-------------|-------|----------|-----------------|
| 4 rs113588712 | 120094880 C | 3.641 | 5.74E-10 | chr:4:120263688 |
| 4 rs4834761   | 120095288 A | 3.641 | 5.74E-10 | chr:4:120263688 |
| 4 rs55890361  | 120086656 A | 3.641 | 5.74E-10 | chr:4:120263688 |
| 4 rs56034803  | 120096381 T | 3.641 | 5.74E-10 | chr:4:120263688 |
| 4 rs56083532  | 120084950 G | 3.641 | 5.74E-10 | chr:4:120263688 |
| 4 rs62326341  | 120099617 T | 3.641 | 5.74E-10 | chr:4:120263688 |
| 4 rs62326342  | 120099793 A | 3.641 | 5.74E-10 | chr:4:120263688 |
| 4 rs10005177  | 120636476 C | 2.607 | 6.02E-10 | chr:4:120263688 |
| 4 rs10011345  | 120638169 G | 2.607 | 6.02E-10 | chr:4:120263688 |
| 4 rs10014793  | 120639522 C | 2.607 | 6.02E-10 | chr:4:120263688 |
| 4 rs12502919  | 120635917 C | 2.607 | 6.02E-10 | chr:4:120263688 |
| 4 rs2389900   | 120633111 A | 2.607 | 6.02E-10 | chr:4:120263688 |
| 4 rs2389902   | 120638756 A | 2.607 | 6.02E-10 | chr:4:120263688 |
| 4 rs28642385  | 120631599 G | 2.607 | 6.02E-10 | chr:4:120263688 |
| 4 rs28847617  | 120637508 C | 2.607 | 6.02E-10 | chr:4:120263688 |
| 4 rs34903755  | 120627444 G | 2.607 | 6.02E-10 | chr:4:120263688 |
| 4 rs4001169   | 120639506 G | 2.607 | 6.02E-10 | chr:4:120263688 |
| 4 rs4834805   | 120633506 G | 2.607 | 6.02E-10 | chr:4:120263688 |
| 4 rs7686665   | 120627203 C | 2.607 | 6.02E-10 | chr:4:120263688 |
| 4 rs7686695   | 120627289 A | 2.607 | 6.02E-10 | chr:4:120263688 |
| 4 rs7656644   | 120228035 G | 3.367 | 6.83E-10 | chr:4:120263688 |
| 4 rs60899768  | 120320771 A | 3.368 | 6.96E-10 | chr:4:120263688 |
| 4 rs13141413  | 120644071 G | 2.568 | 1.00E-09 | chr:4:120263688 |
| 4 rs13328038  | 120643320 C | 2.568 | 1.00E-09 | chr:4:120263688 |
| 4 rs2389904   | 120646406 T | 2.568 | 1.00E-09 | chr:4:120263688 |
| 4 rs7675857   | 120680581 C | 2.721 | 1.03E-09 | chr:4:120263688 |
| 4 rs2389959   | 120689407 C | 2.72  | 1.10E-09 | chr:4:120263688 |
| 4 rs2583602   | 120679347 A | 2.72  | 1.10E-09 | chr:4:120263688 |
| 4 rs6534150   | 120685502 A | 2.72  | 1.10E-09 | chr:4:120263688 |
| 4 rs9997209   | 120683244 G | 2.72  | 1.10E-09 | chr:4:120263688 |
| 4 rs80223330  | 120423094 A | 3.293 | 1.16E-09 | chr:4:120263688 |
| 4 rs3822193   | 120455191 G | 3.251 | 1.27E-09 | chr:4:120263688 |
| 4 rs11736059  | 120017786 A | 2.539 | 1.32E-09 | chr:4:120263688 |
| 4 rs11732125  | 120017681 T | 2.502 | 1.39E-09 | chr:4:120263688 |
| 4 rs55689176  | 120626603 G | 2.528 | 1.49E-09 | chr:4:120263688 |
| 4 rs35496605  | 120621914 G | 2.546 | 1.77E-09 | chr:4:120263688 |
| 4 rs4513553   | 120298549 G | 3.184 | 2.02E-09 | chr:4:120263688 |
| 4 rs4613552   | 120296250 A | 3.184 | 2.02E-09 | chr:4:120263688 |
| 4 rs57516093  | 120299780 G | 3.184 | 2.02E-09 | chr:4:120263688 |
| 4 rs74942216  | 120295084 G | 3.184 | 2.02E-09 | chr:4:120263688 |
| 4 rs1809262   | 120051382 A | 2.602 | 2.11E-09 | chr:4:120263688 |
| 4 rs898170    | 120051482 G | 2.602 | 2.11E-09 | chr:4:120263688 |
| 4 rs6822909   | 120691218 T | 2.676 | 2.17E-09 | chr:4:120263688 |

|               |             |        |                          |
|---------------|-------------|--------|--------------------------|
| 4 rs6842973   | 120694059 A | 2.665  | 2.21E-09 chr:4:120263688 |
| 4 rs28876485  | 120624447 C | 2.585  | 2.62E-09 chr:4:120263688 |
| 4 rs143726128 | 120348512 C | 0.4375 | 2.75E-09 chr:4:120263688 |
| 4 rs4452411   | 120700609 C | 2.556  | 2.75E-09 chr:4:120263688 |
| 4 rs13125695  | 120045269 A | 2.552  | 2.90E-09 chr:4:120263688 |
| 4 rs4834750   | 120048073 A | 2.562  | 3.04E-09 chr:4:120263688 |
| 4 rs17005485  | 120648487 C | 2.447  | 3.43E-09 chr:4:120263688 |
| 4 rs7669436   | 120649398 G | 2.447  | 3.43E-09 chr:4:120263688 |
| 4 rs56905341  | 120576818 C | 3.195  | 3.45E-09 chr:4:120263688 |
| 4 rs10010982  | 120048585 C | 2.557  | 3.51E-09 chr:4:120263688 |
| 4 rs10011203  | 120048855 C | 2.557  | 3.51E-09 chr:4:120263688 |
| 4 rs10022764  | 120048558 T | 2.557  | 3.51E-09 chr:4:120263688 |
| 4 rs10033187  | 120048677 A | 2.557  | 3.51E-09 chr:4:120263688 |
| 4 rs1459059   | 120049915 T | 2.557  | 3.51E-09 chr:4:120263688 |
| 4 rs1459061   | 120049762 A | 2.557  | 3.51E-09 chr:4:120263688 |
| 4 rs1459062   | 120049658 G | 2.557  | 3.51E-09 chr:4:120263688 |
| 4 rs2389727   | 120050764 C | 2.557  | 3.51E-09 chr:4:120263688 |
| 4 rs4834751   | 120048188 T | 2.557  | 3.51E-09 chr:4:120263688 |
| 4 rs6811134   | 120048323 T | 2.557  | 3.51E-09 chr:4:120263688 |
| 4 rs6817570   | 120049129 T | 2.557  | 3.51E-09 chr:4:120263688 |
| 4 rs6834139   | 120048324 G | 2.557  | 3.51E-09 chr:4:120263688 |
| 4 rs718280    | 120050573 T | 2.557  | 3.51E-09 chr:4:120263688 |
| 4 rs718281    | 120050572 A | 2.557  | 3.51E-09 chr:4:120263688 |
| 4 rs9307468   | 120048884 A | 2.557  | 3.51E-09 chr:4:120263688 |
| 4 rs13119815  | 120662321 T | 2.43   | 3.54E-09 chr:4:120263688 |
| 4 rs6534125   | 120047300 G | 2.545  | 3.55E-09 chr:4:120263688 |
| 4 rs10011928  | 120662973 C | 2.428  | 3.77E-09 chr:4:120263688 |
| 4 rs10023652  | 120662947 T | 2.428  | 3.77E-09 chr:4:120263688 |
| 4 rs4834806   | 120656656 G | 2.428  | 3.77E-09 chr:4:120263688 |
| 4 rs749526    | 120663649 G | 2.428  | 3.77E-09 chr:4:120263688 |
| 4 rs7699252   | 120659198 A | 2.428  | 3.77E-09 chr:4:120263688 |
| 4 rs874425    | 120664362 A | 2.428  | 3.77E-09 chr:4:120263688 |
| 4 rs6534126   | 120047528 A | 2.543  | 3.80E-09 chr:4:120263688 |
| 4 rs6534127   | 120047837 A | 2.543  | 3.80E-09 chr:4:120263688 |
| 4 rs6534128   | 120047858 A | 2.543  | 3.80E-09 chr:4:120263688 |
| 4 rs112778188 | 120350057 A | 0.353  | 3.90E-09 chr:4:120263688 |
| 4 rs55724227  | 120063893 A | 3.335  | 4.04E-09 chr:4:120263688 |
| 4 rs55932281  | 120063158 G | 3.335  | 4.04E-09 chr:4:120263688 |
| 4 rs7694500   | 120063715 T | 3.335  | 4.04E-09 chr:4:120263688 |
| 4 rs7694555   | 120063843 G | 3.335  | 4.04E-09 chr:4:120263688 |
| 4 rs4834765   | 120168233 C | 3.168  | 4.26E-09 chr:4:120263688 |
| 4 rs7356185   | 120167111 T | 3.168  | 4.26E-09 chr:4:120263688 |
| 4 rs995003    | 120019887 G | 2.528  | 5.07E-09 chr:4:120263688 |

|              |             |       |                          |
|--------------|-------------|-------|--------------------------|
| 4 rs11098484 | 120018082 A | 2.512 | 5.33E-09 chr:4:120263688 |
| 4 rs6841872  | 120158685 T | 3.15  | 5.71E-09 chr:4:120263688 |
| 4 rs2168987  | 120043874 C | 2.526 | 5.83E-09 chr:4:120263688 |
| 4 rs10857065 | 120183959 G | 3.092 | 5.88E-09 chr:4:120263688 |
| 4 rs62326299 | 120062451 G | 3.272 | 5.98E-09 chr:4:120263688 |
| 4 rs2389957  | 120695322 C | 2.588 | 6.26E-09 chr:4:120263688 |
| 4 rs2389958  | 120695256 C | 2.588 | 6.26E-09 chr:4:120263688 |
| 4 rs4311295  | 120695280 A | 2.588 | 6.26E-09 chr:4:120263688 |
| 4 rs10023200 | 120021881 G | 2.49  | 7.44E-09 chr:4:120263688 |
| 4 rs4834746  | 120026166 T | 2.49  | 7.44E-09 chr:4:120263688 |
| 4 rs7669518  | 120024263 C | 2.49  | 7.44E-09 chr:4:120263688 |
| 4 rs7690820  | 120020802 C | 2.49  | 7.44E-09 chr:4:120263688 |
| 4 rs2892892  | 120697553 G | 2.572 | 7.64E-09 chr:4:120263688 |
| 4 rs28763658 | 120634022 G | 2.636 | 7.92E-09 chr:4:120263688 |
| 4 rs12644843 | 120169477 T | 3.056 | 8.22E-09 chr:4:120263688 |
| 4 rs953966   | 120171342 G | 3.056 | 8.22E-09 chr:4:120263688 |
| 4 rs4447844  | 120696623 A | 2.548 | 9.73E-09 chr:4:120263688 |
| 4 rs59319494 | 120696060 A | 2.548 | 9.73E-09 chr:4:120263688 |
| 4 rs9884581  | 120699261 G | 2.402 | 1.03E-08 chr:4:120263688 |
| 4 rs4593113  | 120697811 A | 2.529 | 1.21E-08 chr:4:120263688 |
| 4 rs4637383  | 120305966 A | 2.922 | 1.21E-08 chr:4:120263688 |
| 4 rs2249165  | 120618434 G | 3.112 | 1.25E-08 chr:4:120263688 |
| 4 rs7678043  | 120698652 T | 2.524 | 1.33E-08 chr:4:120263688 |
| 4 rs10000726 | 120210764 G | 2.991 | 1.34E-08 chr:4:120263688 |
| 4 rs4834778  | 120392225 C | 3.846 | 1.39E-08 chr:4:120263688 |
| 4 rs10006850 | 120212521 G | 2.974 | 1.62E-08 chr:4:120263688 |
| 4 rs10010174 | 120206572 A | 2.974 | 1.62E-08 chr:4:120263688 |
| 4 rs1011052  | 120202199 C | 2.974 | 1.62E-08 chr:4:120263688 |
| 4 rs7681373  | 120207076 G | 2.974 | 1.62E-08 chr:4:120263688 |
| 4 rs9884655  | 120700717 C | 2.336 | 2.17E-08 chr:4:120263688 |
| 4 rs4287989  | 120700480 G | 2.457 | 2.72E-08 chr:4:120263688 |
| 4 rs878375   | 120237574 T | 2.46  | 2.99E-08 chr:4:120263688 |
| 4 rs62328425 | 120246827 A | 3.656 | 3.21E-08 chr:4:120263688 |
| 4 rs10034579 | 120244029 A | 2.457 | 3.34E-08 chr:4:120263688 |
| 4 rs1397613  | 120242929 G | 2.457 | 3.34E-08 chr:4:120263688 |
| 4 rs1973598  | 120243419 A | 2.457 | 3.34E-08 chr:4:120263688 |
| 4 rs2282688  | 120243722 T | 2.457 | 3.34E-08 chr:4:120263688 |
| 4 rs4336213  | 120236469 G | 2.457 | 3.34E-08 chr:4:120263688 |
| 4 rs4834771  | 120242772 C | 2.457 | 3.34E-08 chr:4:120263688 |
| 4 rs6823963  | 120242164 A | 2.457 | 3.34E-08 chr:4:120263688 |
| 4 rs6857641  | 120243511 T | 2.457 | 3.34E-08 chr:4:120263688 |
| 4 rs878374   | 120237564 A | 2.457 | 3.34E-08 chr:4:120263688 |
| 4 rs6833072  | 120133892 C | 3.576 | 3.60E-08 chr:4:120263688 |

|               |             |        |          |                 |
|---------------|-------------|--------|----------|-----------------|
| 4 rs4834767   | 120224565 T | 2.441  | 3.68E-08 | chr:4:120263688 |
| 4 rs62328399  | 120201360 G | 3.686  | 3.87E-08 | chr:4:120263688 |
| 4 rs1809263   | 120051273 T | 3.075  | 4.13E-08 | chr:4:120263688 |
| 4 rs1809264   | 120051252 A | 3.075  | 4.13E-08 | chr:4:120263688 |
| 4 rs28523531  | 120052696 T | 3.075  | 4.13E-08 | chr:4:120263688 |
| 4 rs28580586  | 120051988 G | 3.075  | 4.13E-08 | chr:4:120263688 |
| 4 rs11737086  | 120127117 C | 3.595  | 4.27E-08 | chr:4:120263688 |
| 4 rs1397610   | 120127761 C | 3.595  | 4.27E-08 | chr:4:120263688 |
| 4 rs4374607   | 120120930 T | 3.595  | 4.27E-08 | chr:4:120263688 |
| 4 rs7440443   | 120120607 C | 3.595  | 4.27E-08 | chr:4:120263688 |
| 4 rs4834770   | 120241849 A | 2.431  | 4.76E-08 | chr:4:120263688 |
| 4 rs2714972   | 120649156 G | 2.3    | 5.45E-08 | chr:4:120263688 |
| 4 rs79982537  | 120170904 G | 3.542  | 6.34E-08 | chr:4:120263688 |
| 4 rs10019790  | 120667078 G | 0.4544 | 8.30E-08 | chr:4:120263688 |
| 4 rs28535991  | 120662206 A | 0.4544 | 8.30E-08 | chr:4:120263688 |
| 4 rs749525    | 120663454 C | 0.4544 | 8.30E-08 | chr:4:120263688 |
| 4 rs9999212   | 120655838 C | 0.4544 | 8.30E-08 | chr:4:120263688 |
| 4 rs11098483  | 120016617 T | 0.4574 | 8.36E-08 | chr:4:120263688 |
| 4 rs10007409  | 120142306 T | 3.493  | 8.63E-08 | chr:4:120263688 |
| 4 rs11736455  | 120685312 T | 0.466  | 1.25E-07 | chr:4:120263688 |
| 4 rs4447843   | 120680950 G | 0.466  | 1.25E-07 | chr:4:120263688 |
| 4 rs7674894   | 120680189 G | 0.466  | 1.25E-07 | chr:4:120263688 |
| 4 rs7676064   | 120680560 A | 0.466  | 1.25E-07 | chr:4:120263688 |
| 4 rs12500145  | 120688312 A | 0.4675 | 1.67E-07 | chr:4:120263688 |
| 4 rs12233881  | 120318169 G | 2.37   | 2.00E-07 | chr:4:120263688 |
| 4 rs4834749   | 120042718 A | 2.822  | 2.09E-07 | chr:4:120263688 |
| 4 rs4834775   | 120301232 A | 2.55   | 2.12E-07 | chr:4:120263688 |
| 4 rs10005075  | 120673870 G | 0.4645 | 2.14E-07 | chr:4:120263688 |
| 4 rs17005677  | 120674786 C | 0.4645 | 2.14E-07 | chr:4:120263688 |
| 4 rs28706824  | 120673378 A | 0.4645 | 2.14E-07 | chr:4:120263688 |
| 4 rs4834808   | 120674512 C | 0.4645 | 2.14E-07 | chr:4:120263688 |
| 4 rs13102753  | 120672526 G | 0.4634 | 2.14E-07 | chr:4:120263688 |
| 4 rs10029388  | 120029841 A | 2.732  | 2.61E-07 | chr:4:120263688 |
| 4 rs10518310  | 120034859 T | 2.135  | 2.85E-07 | chr:4:120263688 |
| 4 rs10023655  | 120671879 C | 0.4733 | 3.42E-07 | chr:4:120263688 |
| 4 rs13112498  | 120670520 C | 0.4733 | 3.42E-07 | chr:4:120263688 |
| 4 rs13119146  | 120670994 A | 0.4733 | 3.42E-07 | chr:4:120263688 |
| 4 rs9998665   | 120671724 G | 0.4733 | 3.42E-07 | chr:4:120263688 |
| 4 rs11727740  | 120017677 C | 2.271  | 3.80E-07 | chr:4:120263688 |
| 4 rs185235331 | 120378685 T | 0.2786 | 3.80E-07 | chr:4:120263688 |
| 4 rs10031010  | 120035180 A | 2.596  | 7.12E-07 | chr:4:120263688 |
| 4 rs28690965  | 120034317 C | 2.596  | 7.12E-07 | chr:4:120263688 |
| 4 rs61391192  | 120036209 G | 2.596  | 7.12E-07 | chr:4:120263688 |

|               |             |        |          |                 |
|---------------|-------------|--------|----------|-----------------|
| 4 rs28455602  | 120034116 G | 2.585  | 8.01E-07 | chr:4:120263688 |
| 4 rs74286529  | 120346359 C | 0.106  | 9.29E-07 | chr:4:120263688 |
| 4 rs11727753  | 120017764 C | 2.235  | 1.03E-06 | chr:4:120263688 |
| 4 rs62326879  | 120029060 C | 2.469  | 1.10E-06 | chr:4:120263688 |
| 4 rs12503809  | 120472922 T | 0.316  | 1.33E-06 | chr:4:120263688 |
| 4 rs11731881  | 120017014 T | 2.004  | 1.86E-06 | chr:4:120263688 |
| 4 rs12650325  | 120024705 T | 2.388  | 2.38E-06 | chr:4:120263688 |
| 4 rs7678547   | 120314225 A | 0.2513 | 2.54E-06 | chr:4:120263688 |
| 4 rs2127826   | 120425215 G | 2.081  | 2.62E-06 | chr:4:120263688 |
| 4 rs8180225   | 120018167 A | 2.379  | 2.63E-06 | chr:4:120263688 |
| 4 rs7666824   | 120691388 A | 0.5177 | 2.79E-06 | chr:4:120263688 |
| 4 rs2583601   | 120676622 C | 2.011  | 2.85E-06 | chr:4:120263688 |
| 4 rs4834811   | 120690127 G | 0.5173 | 2.98E-06 | chr:4:120263688 |
| 4 rs12645051  | 120018064 A | 2.352  | 3.10E-06 | chr:4:120263688 |
| 4 rs12651049  | 120018055 G | 2.352  | 3.10E-06 | chr:4:120263688 |
| 4 rs11721566  | 120079159 A | 2.098  | 3.17E-06 | chr:4:120263688 |
| 4 rs12509109  | 120078375 T | 2.098  | 3.17E-06 | chr:4:120263688 |
| 4 rs12650315  | 120077684 A | 2.098  | 3.17E-06 | chr:4:120263688 |
| 4 rs7669431   | 120077220 A | 2.098  | 3.17E-06 | chr:4:120263688 |
| 4 rs79297533  | 120062418 G | 3.064  | 3.27E-06 | chr:4:120263688 |
| 4 rs62328360  | 120143858 A | 2.183  | 3.37E-06 | chr:4:120263688 |
| 4 rs1134065   | 120138824 G | 2.154  | 4.67E-06 | chr:4:120263688 |
| 4 rs11943184  | 120140582 G | 2.154  | 4.67E-06 | chr:4:120263688 |
| 4 rs11946597  | 120148368 C | 2.154  | 4.67E-06 | chr:4:120263688 |
| 4 rs12643221  | 120146640 A | 2.154  | 4.67E-06 | chr:4:120263688 |
| 4 rs35886000  | 120142802 A | 2.154  | 4.67E-06 | chr:4:120263688 |
| 4 rs4833611   | 120147460 T | 2.154  | 4.67E-06 | chr:4:120263688 |
| 4 rs56090560  | 120143139 T | 2.154  | 4.67E-06 | chr:4:120263688 |
| 4 rs61015834  | 120149662 G | 2.154  | 4.67E-06 | chr:4:120263688 |
| 4 rs62326359  | 120143266 A | 2.154  | 4.67E-06 | chr:4:120263688 |
| 4 rs74629660  | 120139183 C | 2.154  | 4.67E-06 | chr:4:120263688 |
| 4 rs76546029  | 120148510 G | 2.154  | 4.67E-06 | chr:4:120263688 |
| 4 rs77983367  | 120048657 C | 0.3014 | 5.18E-06 | chr:4:120263688 |
| 4 rs62322280  | 120301120 A | 2.053  | 6.59E-06 | chr:4:120263688 |
| 4 rs116397159 | 120307507 G | 2.019  | 9.91E-06 | chr:4:120263688 |
| 4 rs4833616   | 120304995 G | 2.019  | 9.91E-06 | chr:4:120263688 |
| 4 rs62322283  | 120302672 A | 2.019  | 9.91E-06 | chr:4:120263688 |
| 4 rs62322289  | 120314122 T | 2.019  | 9.91E-06 | chr:4:120263688 |
| 4 rs144910036 | 120498353 C | 0.4465 | 1.18E-05 | chr:4:120263688 |
| 4 rs117893766 | 120292464 C | 0.2885 | 1.23E-05 | chr:4:120263688 |
| 4 rs2014993   | 120013824 G | 2.044  | 1.29E-05 | chr:4:120263688 |
| 4 rs10033031  | 120136135 A | 2.051  | 1.61E-05 | chr:4:120263688 |
| 4 rs12648052  | 120134776 C | 2.051  | 1.61E-05 | chr:4:120263688 |



|              |             |        |          |                 |
|--------------|-------------|--------|----------|-----------------|
| 4 rs4621411  | 120135194 G | 2.051  | 1.61E-05 | chr:4:120263688 |
| 4 rs28701469 | 120697664 C | 0.5381 | 1.65E-05 | chr:4:120263688 |
| 4 rs12643853 | 120176900 A | 1.976  | 1.66E-05 | chr:4:120263688 |
| 4 rs6534132  | 120180257 A | 1.976  | 1.66E-05 | chr:4:120263688 |
| 4 rs7654590  | 120173474 A | 1.976  | 1.66E-05 | chr:4:120263688 |
| 4 rs7668372  | 120177522 T | 1.976  | 1.66E-05 | chr:4:120263688 |
| 4 rs7668423  | 120177708 T | 1.976  | 1.66E-05 | chr:4:120263688 |
| 4 rs10002119 | 120010314 C | 2.064  | 1.72E-05 | chr:4:120263688 |
| 4 rs1026501  | 120013271 G | 2.064  | 1.72E-05 | chr:4:120263688 |
| 4 rs6847629  | 120011117 T | 2.064  | 1.72E-05 | chr:4:120263688 |
| 4 rs12646887 | 120011540 C | 2.054  | 1.96E-05 | chr:4:120263688 |
| 4 rs6815602  | 9592093 T   | 13.17  | 2.63E-28 | chr:4:9603240   |
| 4 rs13105082 | 9604504 G   | 12.53  | 4.20E-28 | chr:4:9603240   |
| 4 rs11730577 | 9592342 T   | 12.92  | 4.28E-28 | chr:4:9603240   |
| 4 rs13124589 | 9590540 T   | 12.92  | 4.28E-28 | chr:4:9603240   |
| 4 rs1871719  | 9594339 T   | 12.92  | 4.28E-28 | chr:4:9603240   |
| 4 rs13134147 | 9611368 G   | 12.31  | 4.97E-28 | chr:4:9603240   |
| 4 rs11729986 | 9605023 A   | 12.82  | 4.97E-28 | chr:4:9603240   |
| 4 rs11737375 | 9607387 G   | 12.82  | 4.97E-28 | chr:4:9603240   |
| 4 rs13133557 | 9609114 A   | 12.82  | 4.97E-28 | chr:4:9603240   |
| 4 rs1812335  | 9608440 G   | 12.82  | 4.97E-28 | chr:4:9603240   |
| 4 rs12510498 | 9606546 A   | 12.79  | 5.21E-28 | chr:4:9603240   |
| 4 rs13108259 | 9603571 G   | 12.79  | 5.21E-28 | chr:4:9603240   |
| 4 rs13147553 | 9610951 A   | 12.31  | 5.39E-28 | chr:4:9603240   |
| 4 rs13123739 | 9604667 T   | 12.48  | 5.60E-28 | chr:4:9603240   |
| 4 rs11732839 | 9597885 G   | 12.78  | 6.04E-28 | chr:4:9603240   |
| 4 rs13120086 | 9599365 T   | 12.78  | 6.04E-28 | chr:4:9603240   |
| 4 rs13141297 | 9602103 T   | 12.78  | 6.04E-28 | chr:4:9603240   |
| 4 rs62409962 | 9600872 T   | 12.78  | 6.04E-28 | chr:4:9603240   |
| 4 rs62409886 | 9642713 T   | 12.08  | 1.23E-27 | chr:4:9603240   |
| 4 rs4102945  | 9581863 T   | 11.45  | 1.32E-27 | chr:4:9603240   |
| 4 rs1947868  | 9584808 C   | 10.97  | 2.11E-27 | chr:4:9603240   |
| 4 rs11736658 | 9585855 T   | 10.78  | 2.37E-27 | chr:4:9603240   |
| 4 rs13125486 | 9575367 T   | 10.83  | 2.52E-27 | chr:4:9603240   |
| 4 rs10805307 | 9580141 A   | 10.8   | 2.56E-27 | chr:4:9603240   |
| 4 rs10939373 | 9579571 T   | 10.8   | 2.56E-27 | chr:4:9603240   |
| 4 rs11722510 | 9585639 A   | 10.8   | 2.56E-27 | chr:4:9603240   |
| 4 rs13129232 | 9573407 T   | 10.8   | 2.56E-27 | chr:4:9603240   |
| 4 rs1842497  | 9579673 G   | 10.8   | 2.56E-27 | chr:4:9603240   |
| 4 rs13127386 | 9636309 T   | 10.85  | 2.91E-27 | chr:4:9603240   |
| 4 rs3864193  | 9584474 A   | 10.55  | 2.92E-27 | chr:4:9603240   |
| 4 rs6811619  | 9613669 A   | 11.24  | 3.01E-27 | chr:4:9603240   |
| 4 rs62411066 | 9638987 A   | 10.84  | 3.39E-27 | chr:4:9603240   |

|               |           |       |          |               |
|---------------|-----------|-------|----------|---------------|
| 4 rs62411067  | 9639340 T | 10.84 | 3.39E-27 | chr:4:9603240 |
| 4 rs62411071  | 9640314 A | 10.84 | 3.39E-27 | chr:4:9603240 |
| 4 rs11734592  | 9641381 T | 11.81 | 3.53E-27 | chr:4:9603240 |
| 4 rs34172197  | 9634195 A | 10.5  | 3.54E-27 | chr:4:9603240 |
| 4 rs12509448  | 9577884 T | 10.79 | 3.96E-27 | chr:4:9603240 |
| 4 rs35497679  | 9636851 T | 10.75 | 4.89E-27 | chr:4:9603240 |
| 4 rs13132135  | 9583284 T | 10.89 | 1.91E-26 | chr:4:9603240 |
| 4 rs13144634  | 9571273 G | 8.727 | 4.46E-26 | chr:4:9603240 |
| 4 rs12511479  | 9650516 A | 10.34 | 5.61E-26 | chr:4:9603240 |
| 4 rs62409888  | 9642756 A | 8.948 | 5.68E-26 | chr:4:9603240 |
| 4 rs34554083  | 9634203 T | 8.648 | 6.90E-26 | chr:4:9603240 |
| 4 rs13141772  | 9575916 T | 11.35 | 7.13E-26 | chr:4:9603240 |
| 4 rs6448969   | 9700056 A | 8.803 | 7.33E-26 | chr:4:9603240 |
| 4 rs62409885  | 9642489 T | 10.9  | 7.75E-26 | chr:4:9603240 |
| 4 rs112714712 | 9643479 G | 10.97 | 8.54E-26 | chr:4:9603240 |
| 4 rs57746863  | 9645578 A | 10.17 | 8.66E-26 | chr:4:9603240 |
| 4 rs12510096  | 9646171 G | 9.813 | 1.05E-25 | chr:4:9603240 |
| 4 rs11728002  | 9632904 A | 5.9   | 1.11E-25 | chr:4:9603240 |
| 4 rs11734220  | 9634271 C | 8.428 | 1.12E-25 | chr:4:9603240 |
| 4 rs71615596  | 9635011 C | 8.428 | 1.12E-25 | chr:4:9603240 |
| 4 rs55634110  | 9643904 T | 10.13 | 1.19E-25 | chr:4:9603240 |
| 4 rs11731299  | 9632932 G | 5.905 | 1.25E-25 | chr:4:9603240 |
| 4 rs13140984  | 9637886 A | 8.438 | 1.27E-25 | chr:4:9603240 |
| 4 rs62409901  | 9652707 C | 9.431 | 1.43E-25 | chr:4:9603240 |
| 4 rs10939455  | 9672007 T | 9.663 | 1.55E-25 | chr:4:9603240 |
| 4 rs11733344  | 9670097 T | 9.663 | 1.55E-25 | chr:4:9603240 |
| 4 rs12233698  | 9680271 C | 9.353 | 2.04E-25 | chr:4:9603240 |
| 4 rs9761193   | 9669715 C | 9.353 | 2.04E-25 | chr:4:9603240 |
| 4 rs62409900  | 9652583 A | 9.151 | 2.25E-25 | chr:4:9603240 |
| 4 rs12645053  | 9668769 A | 9.505 | 2.39E-25 | chr:4:9603240 |
| 4 rs12647495  | 9668881 A | 9.505 | 2.39E-25 | chr:4:9603240 |
| 4 rs12647777  | 9664000 T | 9.505 | 2.39E-25 | chr:4:9603240 |
| 4 rs12649399  | 9668775 A | 9.505 | 2.39E-25 | chr:4:9603240 |
| 4 rs56141152  | 9661423 A | 9.505 | 2.39E-25 | chr:4:9603240 |
| 4 rs6827470   | 9667892 C | 9.505 | 2.39E-25 | chr:4:9603240 |
| 4 rs13123294  | 9614786 C | 8.067 | 2.47E-25 | chr:4:9603240 |
| 4 rs11731648  | 9691863 T | 9.171 | 3.08E-25 | chr:4:9603240 |
| 4 rs13102980  | 9697402 T | 9.171 | 3.08E-25 | chr:4:9603240 |
| 4 rs13103452  | 9694662 C | 9.171 | 3.08E-25 | chr:4:9603240 |
| 4 rs13135989  | 9692108 A | 9.171 | 3.08E-25 | chr:4:9603240 |
| 4 rs13141594  | 9690088 T | 9.171 | 3.08E-25 | chr:4:9603240 |
| 4 rs6821253   | 9690731 G | 9.171 | 3.08E-25 | chr:4:9603240 |
| 4 rs9684596   | 9695983 G | 9.171 | 3.08E-25 | chr:4:9603240 |

|               |           |        |          |               |
|---------------|-----------|--------|----------|---------------|
| 4 rs10939461  | 9681893 G | 9.195  | 3.12E-25 | chr:4:9603240 |
| 4 rs13101545  | 9684171 C | 9.195  | 3.12E-25 | chr:4:9603240 |
| 4 rs13115277  | 9683696 A | 9.195  | 3.12E-25 | chr:4:9603240 |
| 4 rs34793939  | 9674154 A | 9.195  | 3.12E-25 | chr:4:9603240 |
| 4 rs4274844   | 9676059 T | 9.195  | 3.12E-25 | chr:4:9603240 |
| 4 rs6856685   | 9665482 G | 9.439  | 3.47E-25 | chr:4:9603240 |
| 4 rs2902921   | 9591436 C | 30.78  | 3.58E-25 | chr:4:9603240 |
| 4 rs9684683   | 9691507 T | 9.168  | 3.60E-25 | chr:4:9603240 |
| 4 rs112404663 | 9624480 T | 0.1827 | 3.87E-25 | chr:4:9603240 |
| 4 rs11724211  | 9695175 C | 9.028  | 4.17E-25 | chr:4:9603240 |
| 4 rs11723247  | 9656338 T | 9.068  | 4.18E-25 | chr:4:9603240 |
| 4 rs11726037  | 9657179 G | 9.068  | 4.18E-25 | chr:4:9603240 |
| 4 rs11726932  | 9656993 G | 9.068  | 4.18E-25 | chr:4:9603240 |
| 4 rs12502039  | 9658319 G | 9.081  | 4.53E-25 | chr:4:9603240 |
| 4 rs34113970  | 9686479 A | 9.031  | 4.78E-25 | chr:4:9603240 |
| 4 rs10212854  | 9590489 A | 30.53  | 4.89E-25 | chr:4:9603240 |
| 4 rs11728108  | 9590027 T | 30.53  | 4.89E-25 | chr:4:9603240 |
| 4 rs2865075   | 9591384 A | 30.53  | 4.89E-25 | chr:4:9603240 |
| 4 rs6837173   | 9590700 T | 30.53  | 4.89E-25 | chr:4:9603240 |
| 4 rs6856351   | 9590718 T | 30.53  | 4.89E-25 | chr:4:9603240 |
| 4 rs13147802  | 9572720 A | 8.021  | 4.99E-25 | chr:4:9603240 |
| 4 rs10939447  | 9659957 T | 8.079  | 5.63E-25 | chr:4:9603240 |
| 4 rs6448859   | 9596488 T | 30.46  | 5.86E-25 | chr:4:9603240 |
| 4 rs6811235   | 9594627 A | 30.46  | 5.86E-25 | chr:4:9603240 |
| 4 rs6855316   | 9596183 G | 30.46  | 5.86E-25 | chr:4:9603240 |
| 4 rs9714994   | 9589698 T | 30.8   | 6.24E-25 | chr:4:9603240 |
| 4 rs13103207  | 9603672 T | 30.05  | 7.02E-25 | chr:4:9603240 |
| 4 rs10019130  | 9597356 G | 30.12  | 7.21E-25 | chr:4:9603240 |
| 4 rs12645445  | 9599283 A | 30.12  | 7.21E-25 | chr:4:9603240 |
| 4 rs1842487   | 9597264 T | 30.12  | 7.21E-25 | chr:4:9603240 |
| 4 rs1842488   | 9601268 A | 30.12  | 7.21E-25 | chr:4:9603240 |
| 4 rs2865079   | 9600388 A | 30.12  | 7.21E-25 | chr:4:9603240 |
| 4 rs35735545  | 9600181 T | 30.12  | 7.21E-25 | chr:4:9603240 |
| 4 rs12512447  | 9586313 A | 7.89   | 7.60E-25 | chr:4:9603240 |
| 4 rs13115165  | 9624808 C | 5.756  | 7.77E-25 | chr:4:9603240 |
| 4 rs13136973  | 9574572 A | 7.822  | 7.87E-25 | chr:4:9603240 |
| 4 rs13138961  | 9585147 T | 7.822  | 7.87E-25 | chr:4:9603240 |
| 4 rs11733687  | 9643374 T | 10.19  | 8.74E-25 | chr:4:9603240 |
| 4 rs34968063  | 9599535 C | 29.87  | 9.29E-25 | chr:4:9603240 |
| 4 rs13123398  | 9677837 A | 7.918  | 1.09E-24 | chr:4:9603240 |
| 4 rs13134507  | 9697356 A | 7.918  | 1.09E-24 | chr:4:9603240 |
| 4 rs35737782  | 9674263 A | 7.918  | 1.09E-24 | chr:4:9603240 |
| 4 rs9714725   | 9589901 C | 28.1   | 1.09E-24 | chr:4:9603240 |

|               |           |        |          |               |
|---------------|-----------|--------|----------|---------------|
| 4 rs78121242  | 9591433 C | 35.06  | 1.49E-24 | chr:4:9603240 |
| 4 rs13141264  | 9698240 A | 8.532  | 2.11E-24 | chr:4:9603240 |
| 4 rs4077929   | 9698730 A | 7.602  | 4.81E-24 | chr:4:9603240 |
| 4 rs7434710   | 9700062 A | 7.602  | 4.81E-24 | chr:4:9603240 |
| 4 rs78943848  | 9624005 T | 0.2495 | 7.92E-23 | chr:4:9603240 |
| 4 rs150084672 | 9619998 C | 0.2519 | 1.63E-22 | chr:4:9603240 |
| 4 rs11727921  | 9632675 G | 0.258  | 2.65E-22 | chr:4:9603240 |
| 4 rs13107086  | 9628088 G | 0.258  | 2.65E-22 | chr:4:9603240 |
| 4 rs13129861  | 9626802 A | 0.258  | 2.65E-22 | chr:4:9603240 |
| 4 rs13130488  | 9627077 A | 0.258  | 2.65E-22 | chr:4:9603240 |
| 4 rs13150819  | 9626909 G | 0.258  | 2.65E-22 | chr:4:9603240 |
| 4 rs13151183  | 9627066 G | 0.258  | 2.65E-22 | chr:4:9603240 |
| 4 rs34407913  | 9627405 C | 0.258  | 2.65E-22 | chr:4:9603240 |
| 4 rs74920290  | 9631759 A | 0.258  | 2.65E-22 | chr:4:9603240 |
| 4 rs75000854  | 9631079 A | 0.258  | 2.65E-22 | chr:4:9603240 |
| 4 rs75569331  | 9631942 G | 0.258  | 2.65E-22 | chr:4:9603240 |
| 4 rs75957763  | 9631643 C | 0.258  | 2.65E-22 | chr:4:9603240 |
| 4 rs76746438  | 9631273 C | 0.258  | 2.65E-22 | chr:4:9603240 |
| 4 rs7693695   | 9629380 A | 0.258  | 2.65E-22 | chr:4:9603240 |
| 4 rs77675792  | 9632008 A | 0.258  | 2.65E-22 | chr:4:9603240 |
| 4 rs13122952  | 9707740 A | 6.229  | 1.01E-21 | chr:4:9603240 |
| 4 rs13151395  | 9709144 T | 6.229  | 1.01E-21 | chr:4:9603240 |
| 4 rs12508394  | 9702186 T | 6.085  | 1.47E-21 | chr:4:9603240 |
| 4 rs66534644  | 9711634 G | 6.131  | 1.49E-21 | chr:4:9603240 |
| 4 rs13137016  | 9715392 A | 6.096  | 3.58E-21 | chr:4:9603240 |
| 4 rs13137196  | 9715456 A | 6.096  | 3.58E-21 | chr:4:9603240 |
| 4 rs12510091  | 9708661 A | 5.864  | 6.39E-21 | chr:4:9603240 |
| 4 rs6831476   | 9708183 T | 5.864  | 6.39E-21 | chr:4:9603240 |
| 4 rs13136075  | 9714968 A | 5.959  | 7.95E-21 | chr:4:9603240 |
| 4 rs12501880  | 9717975 T | 5.833  | 1.02E-20 | chr:4:9603240 |
| 4 rs6843276   | 9714147 T | 5.784  | 1.05E-20 | chr:4:9603240 |
| 4 rs9684176   | 9716386 G | 5.784  | 1.05E-20 | chr:4:9603240 |
| 4 rs11943931  | 9706478 A | 5.739  | 1.08E-20 | chr:4:9603240 |
| 4 rs28784595  | 9646182 C | 0.1781 | 1.19E-20 | chr:4:9603240 |
| 4 rs12647772  | 9599010 C | 0.1835 | 1.96E-20 | chr:4:9603240 |
| 4 rs6825221   | 9589620 G | 0.1779 | 2.36E-20 | chr:4:9603240 |
| 4 rs2865076   | 9591550 C | 0.1942 | 2.55E-20 | chr:4:9603240 |
| 4 rs10939390  | 9590105 G | 0.1955 | 3.41E-20 | chr:4:9603240 |
| 4 rs13101251  | 9588969 T | 0.1955 | 3.41E-20 | chr:4:9603240 |
| 4 rs6448858   | 9595918 T | 0.1953 | 3.91E-20 | chr:4:9603240 |
| 4 rs6448856   | 9595797 A | 0.1957 | 4.32E-20 | chr:4:9603240 |
| 4 rs10027164  | 9574763 A | 0.2032 | 4.51E-20 | chr:4:9603240 |
| 4 rs1825043   | 9573740 G | 0.2032 | 4.51E-20 | chr:4:9603240 |

|               |           |        |          |               |
|---------------|-----------|--------|----------|---------------|
| 4 rs6448846   | 9580937 G | 0.2032 | 4.51E-20 | chr:4:9603240 |
| 4 rs6840249   | 9578971 G | 0.2032 | 4.51E-20 | chr:4:9603240 |
| 4 rs6824806   | 9589427 G | 0.1964 | 5.06E-20 | chr:4:9603240 |
| 4 rs1811570   | 9587999 A | 0.203  | 5.08E-20 | chr:4:9603240 |
| 4 rs7672211   | 9597825 A | 0.1963 | 5.61E-20 | chr:4:9603240 |
| 4 rs3864192   | 9573978 A | 0.2036 | 5.81E-20 | chr:4:9603240 |
| 4 rs13131004  | 9612911 C | 0.2034 | 6.35E-20 | chr:4:9603240 |
| 4 rs6845333   | 9614058 C | 0.2026 | 6.67E-20 | chr:4:9603240 |
| 4 rs13118242  | 9585316 A | 0.208  | 7.84E-20 | chr:4:9603240 |
| 4 rs1947866   | 9584747 G | 0.208  | 7.84E-20 | chr:4:9603240 |
| 4 rs6855045   | 9583518 T | 0.208  | 7.84E-20 | chr:4:9603240 |
| 4 rs9685853   | 9585655 G | 0.208  | 7.84E-20 | chr:4:9603240 |
| 4 rs11732596  | 9569361 T | 4.936  | 9.69E-20 | chr:4:9603240 |
| 4 rs10022843  | 9604948 C | 0.2    | 9.85E-20 | chr:4:9603240 |
| 4 rs11735679  | 9585384 G | 0.2088 | 1.13E-19 | chr:4:9603240 |
| 4 rs6820385   | 9606357 G | 0.2058 | 1.70E-19 | chr:4:9603240 |
| 4 rs9917965   | 9614520 A | 0.2057 | 2.10E-19 | chr:4:9603240 |
| 4 rs111921266 | 9591246 A | 0.1897 | 3.70E-19 | chr:4:9603240 |
| 4 rs4482762   | 9615140 A | 0.2152 | 4.42E-19 | chr:4:9603240 |
| 4 rs12501341  | 9589915 A | 0.1915 | 1.17E-18 | chr:4:9603240 |
| 4 rs143193345 | 9622281 A | 3.214  | 1.65E-18 | chr:4:9603240 |
| 4 rs13145994  | 9623518 A | 3.17   | 2.63E-18 | chr:4:9603240 |
| 4 rs112873333 | 9623915 T | 3.16   | 3.09E-18 | chr:4:9603240 |
| 4 rs7664612   | 9595727 A | 0.1988 | 3.47E-18 | chr:4:9603240 |
| 4 rs11734448  | 9563381 C | 4.214  | 6.22E-18 | chr:4:9603240 |
| 4 rs28627624  | 9637607 T | 0.2404 | 1.44E-17 | chr:4:9603240 |
| 4 rs13139079  | 9675072 T | 0.2273 | 1.52E-17 | chr:4:9603240 |
| 4 rs58724508  | 9642207 G | 0.2358 | 1.88E-17 | chr:4:9603240 |
| 4 rs1842490   | 9568457 G | 0.2425 | 1.96E-17 | chr:4:9603240 |
| 4 rs10939457  | 9677914 T | 0.229  | 2.10E-17 | chr:4:9603240 |
| 4 rs13138869  | 9674967 T | 0.229  | 2.10E-17 | chr:4:9603240 |
| 4 rs7435906   | 9673736 A | 0.229  | 2.10E-17 | chr:4:9603240 |
| 4 rs9884921   | 9676740 A | 0.229  | 2.10E-17 | chr:4:9603240 |
| 4 rs13152465  | 9556695 A | 4.066  | 2.22E-17 | chr:4:9603240 |
| 4 rs6856661   | 9689011 T | 0.2304 | 2.73E-17 | chr:4:9603240 |
| 4 rs7671092   | 9687441 C | 0.2317 | 4.01E-17 | chr:4:9603240 |
| 4 rs7686078   | 9687410 T | 0.2317 | 4.01E-17 | chr:4:9603240 |
| 4 rs6828382   | 9634594 T | 0.2493 | 4.47E-17 | chr:4:9603240 |
| 4 rs12233701  | 9552436 T | 3.979  | 5.41E-17 | chr:4:9603240 |
| 4 rs1880831   | 9568145 C | 0.2531 | 5.60E-17 | chr:4:9603240 |
| 4 rs4102942   | 9568478 C | 0.2531 | 5.60E-17 | chr:4:9603240 |
| 4 rs28765135  | 9644325 G | 0.2476 | 6.76E-17 | chr:4:9603240 |
| 4 rs28783176  | 9645220 A | 0.2476 | 6.76E-17 | chr:4:9603240 |

|               |           |        |          |               |
|---------------|-----------|--------|----------|---------------|
| 4 rs28866958  | 9644586 C | 0.2476 | 6.76E-17 | chr:4:9603240 |
| 4 rs57610759  | 9642093 A | 0.2272 | 7.64E-17 | chr:4:9603240 |
| 4 rs12233771  | 9552965 A | 3.911  | 7.77E-17 | chr:4:9603240 |
| 4 rs11723541  | 9556165 T | 3.86   | 1.01E-16 | chr:4:9603240 |
| 4 rs12233677  | 9549872 T | 3.885  | 1.02E-16 | chr:4:9603240 |
| 4 rs12233678  | 9549951 C | 3.885  | 1.02E-16 | chr:4:9603240 |
| 4 rs12233883  | 9549927 C | 3.885  | 1.02E-16 | chr:4:9603240 |
| 4 rs12233884  | 9550045 A | 3.885  | 1.02E-16 | chr:4:9603240 |
| 4 rs12505958  | 9560131 G | 3.885  | 1.02E-16 | chr:4:9603240 |
| 4 rs13132153  | 9561479 A | 3.885  | 1.02E-16 | chr:4:9603240 |
| 4 rs9715222   | 9564999 C | 3.885  | 1.02E-16 | chr:4:9603240 |
| 4 rs7442338   | 9560945 T | 3.908  | 1.16E-16 | chr:4:9603240 |
| 4 rs13138276  | 9562004 A | 3.87   | 1.33E-16 | chr:4:9603240 |
| 4 rs13107393  | 9562217 T | 3.843  | 1.45E-16 | chr:4:9603240 |
| 4 rs13116764  | 9561759 G | 3.843  | 1.45E-16 | chr:4:9603240 |
| 4 rs9684797   | 9684609 T | 0.2395 | 1.45E-16 | chr:4:9603240 |
| 4 rs4974864   | 9588259 G | 0.2368 | 1.46E-16 | chr:4:9603240 |
| 4 rs13152653  | 9556775 A | 3.814  | 1.59E-16 | chr:4:9603240 |
| 4 rs11728441  | 9558041 C | 3.794  | 1.88E-16 | chr:4:9603240 |
| 4 rs13110253  | 9558556 T | 3.726  | 2.99E-16 | chr:4:9603240 |
| 4 rs78221323  | 9622823 G | 0.2139 | 4.13E-16 | chr:4:9603240 |
| 4 rs6818180   | 9667949 T | 0.2648 | 5.39E-16 | chr:4:9603240 |
| 4 rs28728462  | 9700392 A | 0.2698 | 5.67E-16 | chr:4:9603240 |
| 4 rs111953893 | 9645341 C | 0.2696 | 1.08E-15 | chr:4:9603240 |
| 4 rs141992178 | 9645431 G | 0.2696 | 1.08E-15 | chr:4:9603240 |
| 4 rs11735687  | 9523738 T | 0.2827 | 1.16E-15 | chr:4:9603240 |
| 4 rs12641450  | 9529244 G | 0.2827 | 1.16E-15 | chr:4:9603240 |
| 4 rs13124998  | 9530491 G | 0.2827 | 1.16E-15 | chr:4:9603240 |
| 4 rs13136346  | 9528694 C | 0.2827 | 1.16E-15 | chr:4:9603240 |
| 4 rs13144880  | 9530438 C | 0.2827 | 1.16E-15 | chr:4:9603240 |
| 4 rs10939182  | 9511068 A | 0.2848 | 1.62E-15 | chr:4:9603240 |
| 4 rs2127796   | 9510832 C | 0.2848 | 1.62E-15 | chr:4:9603240 |
| 4 rs13139813  | 9547169 C | 0.2864 | 1.67E-15 | chr:4:9603240 |
| 4 rs28762742  | 9646007 A | 0.2752 | 1.72E-15 | chr:4:9603240 |
| 4 rs12649073  | 9694490 G | 0.2807 | 2.66E-15 | chr:4:9603240 |
| 4 rs6844646   | 9658265 G | 0.282  | 4.23E-15 | chr:4:9603240 |
| 4 rs13127266  | 9673542 T | 4.668  | 4.62E-15 | chr:4:9603240 |
| 4 rs13127267  | 9673543 T | 4.668  | 4.62E-15 | chr:4:9603240 |
| 4 rs6814274   | 9692502 T | 0.2881 | 6.97E-15 | chr:4:9603240 |
| 4 rs13118864  | 9521311 T | 0.3031 | 1.38E-14 | chr:4:9603240 |
| 4 rs13127154  | 9516054 A | 0.2713 | 1.77E-14 | chr:4:9603240 |
| 4 rs9790487   | 9516638 C | 3.357  | 2.74E-14 | chr:4:9603240 |
| 4 rs9684707   | 9569057 G | 0.2986 | 2.80E-14 | chr:4:9603240 |

|              |           |        |          |               |
|--------------|-----------|--------|----------|---------------|
| 4 rs4370138  | 9667026 C | 0.3052 | 8.17E-14 | chr:4:9603240 |
| 4 rs13116244 | 9678901 T | 0.3101 | 9.21E-14 | chr:4:9603240 |
| 4 rs13109135 | 9549749 T | 3.305  | 9.69E-14 | chr:4:9603240 |
| 4 rs13128352 | 9685728 T | 0.3129 | 1.40E-13 | chr:4:9603240 |
| 4 rs13136183 | 9683883 C | 0.3129 | 1.40E-13 | chr:4:9603240 |
| 4 rs13136319 | 9685017 G | 0.3129 | 1.40E-13 | chr:4:9603240 |
| 4 rs4274842  | 9676030 C | 0.3129 | 1.40E-13 | chr:4:9603240 |
| 4 rs11727040 | 9657302 T | 0.3138 | 1.57E-13 | chr:4:9603240 |
| 4 rs11724460 | 9509698 A | 0.3188 | 1.90E-13 | chr:4:9603240 |
| 4 rs9714821  | 9653526 C | 0.3155 | 2.03E-13 | chr:4:9603240 |
| 4 rs28430858 | 9626149 A | 0.2976 | 2.06E-13 | chr:4:9603240 |
| 4 rs3890174  | 9700774 G | 0.3216 | 2.06E-13 | chr:4:9603240 |
| 4 rs13136567 | 9537043 G | 0.3362 | 2.09E-13 | chr:4:9603240 |
| 4 rs13120469 | 9623671 C | 0.3051 | 2.53E-13 | chr:4:9603240 |
| 4 rs4622998  | 9621659 C | 0.3051 | 2.53E-13 | chr:4:9603240 |
| 4 rs6448855  | 9595781 G | 0.274  | 3.03E-13 | chr:4:9603240 |
| 4 rs7673959  | 9620145 G | 0.3054 | 3.28E-13 | chr:4:9603240 |
| 4 rs78469741 | 9631526 C | 0.3096 | 3.36E-13 | chr:4:9603240 |
| 4 rs4490459  | 9667257 T | 0.3179 | 3.41E-13 | chr:4:9603240 |
| 4 rs2003267  | 9534287 G | 0.3377 | 3.62E-13 | chr:4:9603240 |
| 4 rs13120201 | 9687246 C | 0.3117 | 3.76E-13 | chr:4:9603240 |
| 4 rs7657853  | 9687674 G | 0.3188 | 3.86E-13 | chr:4:9603240 |
| 4 rs12503159 | 9536716 G | 0.3407 | 4.19E-13 | chr:4:9603240 |
| 4 rs6828582  | 9536679 T | 0.3407 | 4.19E-13 | chr:4:9603240 |
| 4 rs11722359 | 9508214 A | 0.3296 | 5.20E-13 | chr:4:9603240 |
| 4 rs11733952 | 9508241 G | 0.3296 | 5.20E-13 | chr:4:9603240 |
| 4 rs11737117 | 9507890 C | 0.3296 | 5.20E-13 | chr:4:9603240 |
| 4 rs6817051  | 9536262 A | 0.3418 | 5.24E-13 | chr:4:9603240 |
| 4 rs6817702  | 9536543 A | 0.3418 | 5.24E-13 | chr:4:9603240 |
| 4 rs6837228  | 9536521 G | 0.3418 | 5.24E-13 | chr:4:9603240 |
| 4 rs6855334  | 9536037 C | 0.3418 | 5.24E-13 | chr:4:9603240 |
| 4 rs28709958 | 9686042 T | 0.3236 | 5.49E-13 | chr:4:9603240 |
| 4 rs4274843  | 9676042 C | 0.3236 | 5.49E-13 | chr:4:9603240 |
| 4 rs9884933  | 9677246 A | 0.3236 | 5.49E-13 | chr:4:9603240 |
| 4 rs9990725  | 9674055 C | 0.3236 | 5.49E-13 | chr:4:9603240 |
| 4 rs62413777 | 9583917 A | 3.217  | 5.71E-13 | chr:4:9603240 |
| 4 rs11736694 | 9607834 C | 0.2781 | 5.99E-13 | chr:4:9603240 |
| 4 rs7658414  | 9687969 G | 0.325  | 6.89E-13 | chr:4:9603240 |
| 4 rs7691759  | 9688014 T | 0.325  | 6.89E-13 | chr:4:9603240 |
| 4 rs2865009  | 9522285 A | 3.081  | 8.03E-13 | chr:4:9603240 |
| 4 rs11933525 | 9630504 G | 0.3118 | 9.39E-13 | chr:4:9603240 |
| 4 rs12505789 | 9630602 A | 0.313  | 9.82E-13 | chr:4:9603240 |
| 4 rs4352476  | 9621475 C | 0.3117 | 9.84E-13 | chr:4:9603240 |

|               |           |        |          |               |
|---------------|-----------|--------|----------|---------------|
| 4 rs4504250   | 9621700 T | 0.3117 | 9.84E-13 | chr:4:9603240 |
| 4 rs4558872   | 9621642 A | 0.3117 | 9.84E-13 | chr:4:9603240 |
| 4 rs6448878   | 9620623 G | 0.3117 | 9.84E-13 | chr:4:9603240 |
| 4 rs6448879   | 9620994 T | 0.3117 | 9.84E-13 | chr:4:9603240 |
| 4 rs6448880   | 9621023 T | 0.3117 | 9.84E-13 | chr:4:9603240 |
| 4 rs6448881   | 9621124 T | 0.3117 | 9.84E-13 | chr:4:9603240 |
| 4 rs6448882   | 9621131 A | 0.3117 | 9.84E-13 | chr:4:9603240 |
| 4 rs7661238   | 9620481 T | 0.3117 | 9.84E-13 | chr:4:9603240 |
| 4 rs7693408   | 9623110 G | 0.3117 | 9.84E-13 | chr:4:9603240 |
| 4 rs79887705  | 9622505 T | 0.3117 | 9.84E-13 | chr:4:9603240 |
| 4 rs13113655  | 9751629 T | 3.463  | 1.05E-12 | chr:4:9603240 |
| 4 rs370207286 | 9619127 T | 0.3643 | 1.05E-12 | chr:4:9603240 |
| 4 rs550435238 | 9619122 C | 0.3643 | 1.05E-12 | chr:4:9603240 |
| 4 rs570953421 | 9619123 C | 0.3643 | 1.05E-12 | chr:4:9603240 |
| 4 rs11729432  | 9539552 G | 0.3505 | 1.07E-12 | chr:4:9603240 |
| 4 rs12648085  | 9572407 G | 0.2992 | 1.09E-12 | chr:4:9603240 |
| 4 rs13118016  | 9585215 A | 0.2992 | 1.09E-12 | chr:4:9603240 |
| 4 rs13118208  | 9585272 A | 0.2992 | 1.09E-12 | chr:4:9603240 |
| 4 rs13120121  | 9577601 G | 0.2992 | 1.09E-12 | chr:4:9603240 |
| 4 rs13124988  | 9582385 C | 0.2992 | 1.09E-12 | chr:4:9603240 |
| 4 rs13135278  | 9582422 A | 0.2992 | 1.09E-12 | chr:4:9603240 |
| 4 rs13141294  | 9582314 T | 0.2992 | 1.09E-12 | chr:4:9603240 |
| 4 rs28662985  | 9544175 A | 0.3444 | 1.11E-12 | chr:4:9603240 |
| 4 rs1966999   | 9591989 G | 0.2849 | 1.13E-12 | chr:4:9603240 |
| 4 rs1967000   | 9592111 G | 0.2849 | 1.13E-12 | chr:4:9603240 |
| 4 rs3975514   | 9591609 T | 0.2849 | 1.13E-12 | chr:4:9603240 |
| 4 rs62410329  | 9504003 C | 0.3442 | 1.20E-12 | chr:4:9603240 |
| 4 rs10939482  | 9735217 T | 3.472  | 1.23E-12 | chr:4:9603240 |
| 4 rs7654517   | 9620028 A | 0.3121 | 1.27E-12 | chr:4:9603240 |
| 4 rs10007322  | 9611939 T | 0.283  | 1.28E-12 | chr:4:9603240 |
| 4 rs11939895  | 9630402 T | 0.3162 | 1.28E-12 | chr:4:9603240 |
| 4 rs142275227 | 9631513 T | 0.3162 | 1.28E-12 | chr:4:9603240 |
| 4 rs9683873   | 9585416 A | 0.2996 | 1.34E-12 | chr:4:9603240 |
| 4 rs10939395  | 9595105 T | 0.285  | 1.36E-12 | chr:4:9603240 |
| 4 rs13131693  | 9593418 T | 0.285  | 1.36E-12 | chr:4:9603240 |
| 4 rs1871717   | 9594100 G | 0.285  | 1.36E-12 | chr:4:9603240 |
| 4 rs1871718   | 9594106 A | 0.285  | 1.36E-12 | chr:4:9603240 |
| 4 rs1871720   | 9594372 A | 0.285  | 1.36E-12 | chr:4:9603240 |
| 4 rs6814674   | 9594719 T | 0.285  | 1.36E-12 | chr:4:9603240 |
| 4 rs6815282   | 9595018 T | 0.285  | 1.36E-12 | chr:4:9603240 |
| 4 rs6831341   | 9592225 T | 0.285  | 1.36E-12 | chr:4:9603240 |
| 4 rs9684206   | 9585751 T | 0.2998 | 1.41E-12 | chr:4:9603240 |
| 4 rs13152842  | 9588960 T | 0.2855 | 1.47E-12 | chr:4:9603240 |



|               |           |        |          |               |
|---------------|-----------|--------|----------|---------------|
| 4 rs6853345   | 9589192 A | 0.2855 | 1.47E-12 | chr:4:9603240 |
| 4 rs6448635   | 9523753 G | 0.3484 | 1.52E-12 | chr:4:9603240 |
| 4 rs10002614  | 9626095 T | 0.3162 | 1.55E-12 | chr:4:9603240 |
| 4 rs11729458  | 9630071 A | 0.3162 | 1.55E-12 | chr:4:9603240 |
| 4 rs28826976  | 9631246 A | 0.3162 | 1.55E-12 | chr:4:9603240 |
| 4 rs6837106   | 9626304 T | 0.3162 | 1.55E-12 | chr:4:9603240 |
| 4 rs9995183   | 9625793 C | 0.3162 | 1.55E-12 | chr:4:9603240 |
| 4 rs9999630   | 9625826 A | 0.3162 | 1.55E-12 | chr:4:9603240 |
| 4 rs143582873 | 9624071 G | 0.3165 | 1.70E-12 | chr:4:9603240 |
| 4 rs11939928  | 9630491 T | 0.3168 | 1.71E-12 | chr:4:9603240 |
| 4 rs113355114 | 9631117 A | 0.3201 | 1.74E-12 | chr:4:9603240 |
| 4 rs57504588  | 9570006 A | 0.3045 | 1.76E-12 | chr:4:9603240 |
| 4 rs11731863  | 9495756 T | 0.3466 | 1.81E-12 | chr:4:9603240 |
| 4 rs11943586  | 9746454 T | 3.383  | 1.85E-12 | chr:4:9603240 |
| 4 rs13122793  | 9748511 A | 3.383  | 1.85E-12 | chr:4:9603240 |
| 4 rs7671706   | 9749742 A | 3.383  | 1.85E-12 | chr:4:9603240 |
| 4 rs7677159   | 9745919 T | 3.383  | 1.85E-12 | chr:4:9603240 |
| 4 rs148801185 | 9567712 T | 0.2596 | 1.91E-12 | chr:4:9603240 |
| 4 rs1880830   | 9568295 A | 0.2596 | 1.91E-12 | chr:4:9603240 |
| 4 rs10032442  | 9578122 C | 0.3049 | 1.92E-12 | chr:4:9603240 |
| 4 rs13105133  | 9577464 T | 0.3049 | 1.92E-12 | chr:4:9603240 |
| 4 rs2046112   | 9584367 T | 0.3049 | 1.92E-12 | chr:4:9603240 |
| 4 rs7439868   | 9575415 A | 0.3049 | 1.92E-12 | chr:4:9603240 |
| 4 rs7439897   | 9575506 A | 0.3049 | 1.92E-12 | chr:4:9603240 |
| 4 rs7683563   | 9574835 A | 0.3049 | 1.92E-12 | chr:4:9603240 |
| 4 rs36162019  | 9625137 C | 0.3165 | 1.96E-12 | chr:4:9603240 |
| 4 rs12513044  | 9506678 A | 0.349  | 2.12E-12 | chr:4:9603240 |
| 4 rs10005684  | 9626897 T | 0.317  | 2.12E-12 | chr:4:9603240 |
| 4 rs10939423  | 9627362 A | 0.317  | 2.12E-12 | chr:4:9603240 |
| 4 rs10939424  | 9627379 G | 0.317  | 2.12E-12 | chr:4:9603240 |
| 4 rs6836718   | 9626703 A | 0.317  | 2.12E-12 | chr:4:9603240 |
| 4 rs6836875   | 9626757 A | 0.317  | 2.12E-12 | chr:4:9603240 |
| 4 rs6837700   | 9626577 T | 0.317  | 2.12E-12 | chr:4:9603240 |
| 4 rs9998663   | 9627053 C | 0.317  | 2.12E-12 | chr:4:9603240 |
| 4 rs7666466   | 9629503 G | 0.3204 | 2.14E-12 | chr:4:9603240 |
| 4 rs9291572   | 9547598 T | 0.3567 | 2.19E-12 | chr:4:9603240 |
| 4 rs10939406  | 9603769 T | 0.2896 | 2.23E-12 | chr:4:9603240 |
| 4 rs1842489   | 9601365 C | 0.2896 | 2.23E-12 | chr:4:9603240 |
| 4 rs2086430   | 9598327 C | 0.2896 | 2.23E-12 | chr:4:9603240 |
| 4 rs2101074   | 9598414 A | 0.2896 | 2.23E-12 | chr:4:9603240 |
| 4 rs7672393   | 9597912 A | 0.2896 | 2.23E-12 | chr:4:9603240 |
| 4 rs6855527   | 9596313 C | 0.2896 | 2.28E-12 | chr:4:9603240 |
| 4 rs10000206  | 9611952 C | 0.2888 | 2.33E-12 | chr:4:9603240 |

|              |           |        |          |               |
|--------------|-----------|--------|----------|---------------|
| 4 rs13143023 | 9537769 G | 0.3548 | 2.44E-12 | chr:4:9603240 |
| 4 rs13141123 | 9757904 C | 3.307  | 2.55E-12 | chr:4:9603240 |
| 4 rs10433844 | 9527567 C | 0.354  | 2.59E-12 | chr:4:9603240 |
| 4 rs13132213 | 9526790 A | 0.354  | 2.59E-12 | chr:4:9603240 |
| 4 rs6448634  | 9523588 G | 0.354  | 2.59E-12 | chr:4:9603240 |
| 4 rs6811970  | 9524003 G | 0.354  | 2.59E-12 | chr:4:9603240 |
| 4 rs9683863  | 9525076 A | 0.354  | 2.59E-12 | chr:4:9603240 |
| 4 rs9683870  | 9525148 A | 0.354  | 2.59E-12 | chr:4:9603240 |
| 4 rs10939413 | 9607827 T | 0.2893 | 2.70E-12 | chr:4:9603240 |
| 4 rs2004333  | 9609411 T | 0.2893 | 2.70E-12 | chr:4:9603240 |
| 4 rs2004334  | 9609566 A | 0.2893 | 2.70E-12 | chr:4:9603240 |
| 4 rs4974857  | 9607133 T | 0.2893 | 2.70E-12 | chr:4:9603240 |
| 4 rs4974820  | 9604794 G | 0.2917 | 2.71E-12 | chr:4:9603240 |
| 4 rs9917942  | 9612378 T | 0.2906 | 2.98E-12 | chr:4:9603240 |
| 4 rs13131893 | 9744301 A | 3.362  | 3.02E-12 | chr:4:9603240 |
| 4 rs13143804 | 9753178 C | 3.359  | 3.02E-12 | chr:4:9603240 |
| 4 rs4563493  | 9743604 A | 3.362  | 3.02E-12 | chr:4:9603240 |
| 4 rs7435681  | 9743362 C | 3.362  | 3.02E-12 | chr:4:9603240 |
| 4 rs10017411 | 9545951 G | 0.3632 | 3.28E-12 | chr:4:9603240 |
| 4 rs10023607 | 9545598 C | 0.3632 | 3.28E-12 | chr:4:9603240 |
| 4 rs10027908 | 9545523 A | 0.3632 | 3.28E-12 | chr:4:9603240 |
| 4 rs13132266 | 9546033 C | 0.3632 | 3.28E-12 | chr:4:9603240 |
| 4 rs11939706 | 9531690 C | 0.3555 | 3.36E-12 | chr:4:9603240 |
| 4 rs11941465 | 9531661 A | 0.3555 | 3.36E-12 | chr:4:9603240 |
| 4 rs2004247  | 9532659 G | 0.3555 | 3.36E-12 | chr:4:9603240 |
| 4 rs9985673  | 9552897 C | 0.2725 | 3.44E-12 | chr:4:9603240 |
| 4 rs1947867  | 9584773 A | 0.3107 | 3.46E-12 | chr:4:9603240 |
| 4 rs13128435 | 9723672 G | 3.269  | 3.52E-12 | chr:4:9603240 |
| 4 rs2086432  | 9511689 G | 0.3578 | 3.53E-12 | chr:4:9603240 |
| 4 rs3961015  | 9512110 C | 0.3578 | 3.53E-12 | chr:4:9603240 |
| 4 rs7658778  | 9512484 G | 0.3578 | 3.53E-12 | chr:4:9603240 |
| 4 rs9790388  | 9513010 G | 0.3578 | 3.53E-12 | chr:4:9603240 |
| 4 rs9684038  | 9585837 A | 0.3028 | 3.61E-12 | chr:4:9603240 |
| 4 rs9683494  | 9547264 T | 0.3633 | 3.65E-12 | chr:4:9603240 |
| 4 rs734628   | 9610085 G | 0.2934 | 3.82E-12 | chr:4:9603240 |
| 4 rs4974813  | 9614492 T | 0.2909 | 3.85E-12 | chr:4:9603240 |
| 4 rs10939407 | 9604018 G | 0.2955 | 4.03E-12 | chr:4:9603240 |
| 4 rs1809400  | 9599703 T | 0.2955 | 4.03E-12 | chr:4:9603240 |
| 4 rs1809401  | 9599790 T | 0.2955 | 4.03E-12 | chr:4:9603240 |
| 4 rs4404541  | 9600193 G | 0.2955 | 4.03E-12 | chr:4:9603240 |
| 4 rs4974821  | 9602901 A | 0.2955 | 4.03E-12 | chr:4:9603240 |
| 4 rs4974860  | 9604201 T | 0.2955 | 4.03E-12 | chr:4:9603240 |
| 4 rs9993066  | 9602631 T | 0.2955 | 4.03E-12 | chr:4:9603240 |

|               |           |        |          |               |
|---------------|-----------|--------|----------|---------------|
| 4 rs56884786  | 9736751 T | 3.338  | 4.04E-12 | chr:4:9603240 |
| 4 rs13116993  | 9516115 C | 0.3574 | 4.16E-12 | chr:4:9603240 |
| 4 rs4974817   | 9613000 A | 0.2922 | 4.17E-12 | chr:4:9603240 |
| 4 rs11930943  | 9742723 A | 3.331  | 4.21E-12 | chr:4:9603240 |
| 4 rs11942665  | 9742852 C | 3.331  | 4.21E-12 | chr:4:9603240 |
| 4 rs10025023  | 9543440 G | 0.3648 | 4.26E-12 | chr:4:9603240 |
| 4 rs13107139  | 9542907 A | 0.3648 | 4.26E-12 | chr:4:9603240 |
| 4 rs13128997  | 9543231 G | 0.3648 | 4.26E-12 | chr:4:9603240 |
| 4 rs10939410  | 9606851 T | 0.2973 | 4.27E-12 | chr:4:9603240 |
| 4 rs10939411  | 9606906 T | 0.2973 | 4.27E-12 | chr:4:9603240 |
| 4 rs6849083   | 9606355 A | 0.2973 | 4.27E-12 | chr:4:9603240 |
| 4 rs6855150   | 9606433 T | 0.2973 | 4.27E-12 | chr:4:9603240 |
| 4 rs6855313   | 9606475 T | 0.2973 | 4.27E-12 | chr:4:9603240 |
| 4 rs6855323   | 9606482 T | 0.2973 | 4.27E-12 | chr:4:9603240 |
| 4 rs9685223   | 9547260 G | 0.3651 | 4.35E-12 | chr:4:9603240 |
| 4 rs10014685  | 9545415 G | 0.3651 | 4.43E-12 | chr:4:9603240 |
| 4 rs2004246   | 9532476 T | 0.3576 | 4.50E-12 | chr:4:9603240 |
| 4 rs10939481  | 9735100 T | 3.326  | 4.53E-12 | chr:4:9603240 |
| 4 rs34441511  | 9738007 A | 3.326  | 4.53E-12 | chr:4:9603240 |
| 4 rs9291527   | 9527162 A | 0.3592 | 4.61E-12 | chr:4:9603240 |
| 4 rs12499381  | 9515174 C | 0.36   | 4.68E-12 | chr:4:9603240 |
| 4 rs13103668  | 9517095 G | 0.36   | 4.68E-12 | chr:4:9603240 |
| 4 rs13104123  | 9517330 G | 0.36   | 4.68E-12 | chr:4:9603240 |
| 4 rs13108672  | 9514668 C | 0.36   | 4.68E-12 | chr:4:9603240 |
| 4 rs13109658  | 9515121 C | 0.36   | 4.68E-12 | chr:4:9603240 |
| 4 rs13110221  | 9517737 G | 0.36   | 4.68E-12 | chr:4:9603240 |
| 4 rs13111328  | 9518187 G | 0.36   | 4.68E-12 | chr:4:9603240 |
| 4 rs13124095  | 9516987 C | 0.36   | 4.68E-12 | chr:4:9603240 |
| 4 rs13147088  | 9517687 T | 0.36   | 4.68E-12 | chr:4:9603240 |
| 4 rs28588223  | 9519105 T | 0.36   | 4.68E-12 | chr:4:9603240 |
| 4 rs13103566  | 9524305 G | 0.3578 | 4.80E-12 | chr:4:9603240 |
| 4 rs11737872  | 9608680 C | 0.2952 | 4.88E-12 | chr:4:9603240 |
| 4 rs4974855   | 9608931 T | 0.2952 | 4.88E-12 | chr:4:9603240 |
| 4 rs6825231   | 9589641 G | 0.3048 | 5.01E-12 | chr:4:9603240 |
| 4 rs13101631  | 9521113 C | 0.3612 | 5.11E-12 | chr:4:9603240 |
| 4 rs12503896  | 9513756 C | 0.3477 | 5.22E-12 | chr:4:9603240 |
| 4 rs142797284 | 9634436 T | 0.2942 | 5.56E-12 | chr:4:9603240 |
| 4 rs13147565  | 9515927 G | 0.3596 | 5.57E-12 | chr:4:9603240 |
| 4 rs11729914  | 9721691 T | 3.292  | 5.80E-12 | chr:4:9603240 |
| 4 rs13129134  | 9721358 A | 3.292  | 5.80E-12 | chr:4:9603240 |
| 4 rs13142212  | 9722814 A | 3.292  | 5.80E-12 | chr:4:9603240 |
| 4 rs10006755  | 9557642 A | 0.2773 | 6.21E-12 | chr:4:9603240 |
| 4 rs10013288  | 9559218 T | 0.2773 | 6.21E-12 | chr:4:9603240 |

|               |           |        |          |               |
|---------------|-----------|--------|----------|---------------|
| 4 rs2049542   | 9553356 C | 0.2773 | 6.21E-12 | chr:4:9603240 |
| 4 rs2141035   | 9553370 G | 0.2773 | 6.21E-12 | chr:4:9603240 |
| 4 rs2170252   | 9560062 A | 0.2773 | 6.21E-12 | chr:4:9603240 |
| 4 rs35706618  | 9561564 T | 0.2773 | 6.21E-12 | chr:4:9603240 |
| 4 rs10005112  | 9732610 A | 3.295  | 6.30E-12 | chr:4:9603240 |
| 4 rs11724159  | 9727566 T | 3.295  | 6.30E-12 | chr:4:9603240 |
| 4 rs13127001  | 9731215 A | 3.295  | 6.30E-12 | chr:4:9603240 |
| 4 rs13132835  | 9729181 G | 3.295  | 6.30E-12 | chr:4:9603240 |
| 4 rs13140838  | 9732930 A | 3.295  | 6.30E-12 | chr:4:9603240 |
| 4 rs28821561  | 9518791 G | 0.3627 | 6.57E-12 | chr:4:9603240 |
| 4 rs4974814   | 9614162 T | 0.2966 | 6.91E-12 | chr:4:9603240 |
| 4 rs10049735  | 9626409 C | 0.2259 | 6.94E-12 | chr:4:9603240 |
| 4 rs73082825  | 9627676 A | 0.2259 | 6.94E-12 | chr:4:9603240 |
| 4 rs4974822   | 9602787 A | 0.3008 | 7.18E-12 | chr:4:9603240 |
| 4 rs4974862   | 9602780 T | 0.3008 | 7.18E-12 | chr:4:9603240 |
| 4 rs12648831  | 9447802 G | 0.3671 | 7.38E-12 | chr:4:9603240 |
| 4 rs6817739   | 9442163 C | 0.3694 | 7.47E-12 | chr:4:9603240 |
| 4 rs4974852   | 9612877 C | 0.298  | 7.50E-12 | chr:4:9603240 |
| 4 rs13150238  | 9751763 A | 2.973  | 7.67E-12 | chr:4:9603240 |
| 4 rs35722426  | 9570769 C | 0.3171 | 7.82E-12 | chr:4:9603240 |
| 4 rs6810574   | 9589675 A | 0.3033 | 7.96E-12 | chr:4:9603240 |
| 4 rs13101603  | 9521074 C | 0.3661 | 8.05E-12 | chr:4:9603240 |
| 4 rs13152726  | 9520869 C | 0.3661 | 8.05E-12 | chr:4:9603240 |
| 4 rs10006201  | 9621908 G | 0.3404 | 8.09E-12 | chr:4:9603240 |
| 4 rs143992647 | 9639055 T | 0.2983 | 8.46E-12 | chr:4:9603240 |
| 4 rs12643412  | 9420974 T | 0.3709 | 8.81E-12 | chr:4:9603240 |
| 4 rs77118731  | 9633558 G | 0.2989 | 9.05E-12 | chr:4:9603240 |
| 4 rs10006208  | 9621927 G | 0.3435 | 9.36E-12 | chr:4:9603240 |
| 4 rs10019518  | 9621923 A | 0.3435 | 9.36E-12 | chr:4:9603240 |
| 4 rs10031125  | 9625879 A | 0.2304 | 1.09E-11 | chr:4:9603240 |
| 4 rs114980491 | 9623328 T | 0.2304 | 1.09E-11 | chr:4:9603240 |
| 4 rs115870066 | 9622163 A | 0.2304 | 1.09E-11 | chr:4:9603240 |
| 4 rs147074482 | 9623653 T | 0.2304 | 1.09E-11 | chr:4:9603240 |
| 4 rs150602585 | 9621799 G | 0.2304 | 1.09E-11 | chr:4:9603240 |
| 4 rs151134492 | 9623039 A | 0.2304 | 1.09E-11 | chr:4:9603240 |
| 4 rs28491253  | 9629512 T | 0.2304 | 1.09E-11 | chr:4:9603240 |
| 4 rs28648949  | 9626132 C | 0.2304 | 1.09E-11 | chr:4:9603240 |
| 4 rs6842111   | 9612572 A | 0.3025 | 1.15E-11 | chr:4:9603240 |
| 4 rs10939388  | 9589956 G | 0.3184 | 1.19E-11 | chr:4:9603240 |
| 4 rs10939389  | 9589959 T | 0.3184 | 1.19E-11 | chr:4:9603240 |
| 4 rs13119328  | 9751860 T | 2.918  | 1.26E-11 | chr:4:9603240 |
| 4 rs113133387 | 9642181 T | 0.302  | 1.26E-11 | chr:4:9603240 |
| 4 rs150196562 | 9642725 G | 0.302  | 1.26E-11 | chr:4:9603240 |

|               |           |        |          |               |
|---------------|-----------|--------|----------|---------------|
| 4 rs182962990 | 9642562 T | 0.302  | 1.26E-11 | chr:4:9603240 |
| 4 rs7692046   | 9620128 G | 0.23   | 1.33E-11 | chr:4:9603240 |
| 4 rs7690455   | 9758860 G | 2.881  | 1.41E-11 | chr:4:9603240 |
| 4 rs11734143  | 9538438 T | 0.3832 | 1.48E-11 | chr:4:9603240 |
| 4 rs199519389 | 9538430 T | 0.3832 | 1.48E-11 | chr:4:9603240 |
| 4 rs200667129 | 9538431 G | 0.3832 | 1.48E-11 | chr:4:9603240 |
| 4 rs201858621 | 9538429 G | 0.3832 | 1.48E-11 | chr:4:9603240 |
| 4 rs13120116  | 9694454 C | 0.3398 | 1.48E-11 | chr:4:9603240 |
| 4 rs13150941  | 9694401 G | 0.3398 | 1.48E-11 | chr:4:9603240 |
| 4 rs6814282   | 9692516 C | 0.3398 | 1.48E-11 | chr:4:9603240 |
| 4 rs6844565   | 9589627 C | 0.3134 | 1.56E-11 | chr:4:9603240 |
| 4 rs138499118 | 9631591 C | 0.2353 | 1.63E-11 | chr:4:9603240 |
| 4 rs28851772  | 9630974 A | 0.2353 | 1.63E-11 | chr:4:9603240 |
| 4 rs56787100  | 9631153 T | 0.2353 | 1.63E-11 | chr:4:9603240 |
| 4 rs7668654   | 9744591 C | 2.906  | 1.65E-11 | chr:4:9603240 |
| 4 rs13117391  | 9764155 T | 3.098  | 1.66E-11 | chr:4:9603240 |
| 4 rs6849466   | 9589667 C | 0.3165 | 1.71E-11 | chr:4:9603240 |
| 4 rs9685705   | 9547134 C | 0.289  | 1.72E-11 | chr:4:9603240 |
| 4 rs73097911  | 9601929 A | 0.1934 | 1.79E-11 | chr:4:9603240 |
| 4 rs74183920  | 9603786 A | 0.1934 | 1.79E-11 | chr:4:9603240 |
| 4 rs9684173   | 9691519 G | 0.3431 | 2.07E-11 | chr:4:9603240 |
| 4 rs13111135  | 9518109 G | 0.283  | 2.18E-11 | chr:4:9603240 |
| 4 rs10005582  | 9626791 A | 0.2563 | 2.31E-11 | chr:4:9603240 |
| 4 rs12509511  | 9769563 T | 3.025  | 2.64E-11 | chr:4:9603240 |
| 4 rs13110996  | 9726276 T | 2.88   | 2.77E-11 | chr:4:9603240 |
| 4 rs58786763  | 9649755 A | 0.3036 | 2.88E-11 | chr:4:9603240 |
| 4 rs10004319  | 9761940 C | 3.023  | 3.01E-11 | chr:4:9603240 |
| 4 rs10013858  | 9762461 T | 3.023  | 3.01E-11 | chr:4:9603240 |
| 4 rs13140817  | 9762975 A | 3.023  | 3.01E-11 | chr:4:9603240 |
| 4 rs13145733  | 9760645 T | 3.023  | 3.01E-11 | chr:4:9603240 |
| 4 rs560594861 | 9730070 T | 3.778  | 3.02E-11 | chr:4:9603240 |
| 4 rs111613333 | 9592284 A | 0.1982 | 3.08E-11 | chr:4:9603240 |
| 4 rs12506692  | 9596059 T | 0.1982 | 3.08E-11 | chr:4:9603240 |
| 4 rs12510176  | 9599593 G | 0.1982 | 3.08E-11 | chr:4:9603240 |
| 4 rs61485794  | 9592346 G | 0.1982 | 3.08E-11 | chr:4:9603240 |
| 4 rs6830276   | 9589678 G | 0.3228 | 3.21E-11 | chr:4:9603240 |
| 4 rs13116952  | 9516058 C | 0.3799 | 3.30E-11 | chr:4:9603240 |
| 4 rs13127159  | 9516064 A | 0.3799 | 3.30E-11 | chr:4:9603240 |
| 4 rs6448981   | 9740325 C | 2.86   | 3.30E-11 | chr:4:9603240 |
| 4 rs10003216  | 9766749 A | 3.019  | 3.55E-11 | chr:4:9603240 |
| 4 rs10015665  | 9768048 T | 3.019  | 3.55E-11 | chr:4:9603240 |
| 4 rs11726288  | 9767309 A | 3.019  | 3.55E-11 | chr:4:9603240 |
| 4 rs11731100  | 9767180 T | 3.019  | 3.55E-11 | chr:4:9603240 |

|               |           |        |          |               |
|---------------|-----------|--------|----------|---------------|
| 4 rs12507861  | 9777590 A | 3.005  | 3.78E-11 | chr:4:9603240 |
| 4 rs2127794   | 9510672 A | 2.871  | 3.87E-11 | chr:4:9603240 |
| 4 rs13129487  | 9771008 T | 2.977  | 4.70E-11 | chr:4:9603240 |
| 4 rs13145337  | 9770837 A | 2.977  | 4.70E-11 | chr:4:9603240 |
| 4 rs9997490   | 9529506 G | 0.2075 | 7.33E-11 | chr:4:9603240 |
| 4 rs10022923  | 9773438 A | 2.946  | 7.77E-11 | chr:4:9603240 |
| 4 rs13124305  | 9773273 A | 2.946  | 7.77E-11 | chr:4:9603240 |
| 4 rs111288527 | 9651346 G | 0.3149 | 8.97E-11 | chr:4:9603240 |
| 4 rs148730952 | 9647892 T | 0.3149 | 8.97E-11 | chr:4:9603240 |
| 4 rs151311132 | 9646020 C | 0.3149 | 8.97E-11 | chr:4:9603240 |
| 4 rs60568234  | 9648674 T | 0.3149 | 8.97E-11 | chr:4:9603240 |
| 4 rs61118685  | 9650877 A | 0.3149 | 8.97E-11 | chr:4:9603240 |
| 4 rs28546389  | 9703880 T | 0.3899 | 9.54E-11 | chr:4:9603240 |
| 4 rs112839156 | 9601686 A | 0.206  | 1.03E-10 | chr:4:9603240 |
| 4 rs12509677  | 9602724 A | 0.206  | 1.03E-10 | chr:4:9603240 |
| 4 rs59430272  | 9601484 C | 0.206  | 1.03E-10 | chr:4:9603240 |
| 4 rs60990443  | 9601319 T | 0.206  | 1.03E-10 | chr:4:9603240 |
| 4 rs61267391  | 9600955 G | 0.206  | 1.03E-10 | chr:4:9603240 |
| 4 rs73097914  | 9602324 T | 0.206  | 1.03E-10 | chr:4:9603240 |
| 4 rs13124141  | 9773237 A | 2.919  | 1.08E-10 | chr:4:9603240 |
| 4 rs11722202  | 9443894 T | 2.607  | 1.20E-10 | chr:4:9603240 |
| 4 rs9291586   | 9605658 A | 0.317  | 1.34E-10 | chr:4:9603240 |
| 4 rs6815039   | 9777809 C | 2.822  | 1.36E-10 | chr:4:9603240 |
| 4 rs112018355 | 9611157 A | 0.2128 | 1.55E-10 | chr:4:9603240 |
| 4 rs12512543  | 9608445 A | 0.2128 | 1.55E-10 | chr:4:9603240 |
| 4 rs59507413  | 9606018 T | 0.2128 | 1.55E-10 | chr:4:9603240 |
| 4 rs60296945  | 9604068 T | 0.2128 | 1.55E-10 | chr:4:9603240 |
| 4 rs73802916  | 9604035 C | 0.2128 | 1.55E-10 | chr:4:9603240 |
| 4 rs145014366 | 9588718 C | 0.2119 | 1.66E-10 | chr:4:9603240 |
| 4 rs56934553  | 9594735 A | 0.2112 | 1.76E-10 | chr:4:9603240 |
| 4 rs6824573   | 9589256 A | 0.2112 | 1.76E-10 | chr:4:9603240 |
| 4 rs73095794  | 9596566 A | 0.2112 | 1.76E-10 | chr:4:9603240 |
| 4 rs73805539  | 9591699 C | 0.2112 | 1.76E-10 | chr:4:9603240 |
| 4 rs7691087   | 9595443 T | 0.2112 | 1.76E-10 | chr:4:9603240 |
| 4 rs113258723 | 9643382 C | 0.316  | 1.77E-10 | chr:4:9603240 |
| 4 rs149583330 | 9662001 T | 0.3166 | 1.79E-10 | chr:4:9603240 |
| 4 rs112611007 | 9667420 A | 0.3246 | 1.81E-10 | chr:4:9603240 |
| 4 rs142877628 | 9670746 T | 0.3246 | 1.81E-10 | chr:4:9603240 |
| 4 rs145156790 | 9671365 A | 0.3246 | 1.81E-10 | chr:4:9603240 |
| 4 rs149050104 | 9661523 T | 0.3246 | 1.81E-10 | chr:4:9603240 |
| 4 rs35352906  | 9670773 T | 0.3246 | 1.81E-10 | chr:4:9603240 |
| 4 rs368426688 | 9667600 T | 0.3246 | 1.81E-10 | chr:4:9603240 |
| 4 rs4264827   | 9664677 A | 0.3246 | 1.81E-10 | chr:4:9603240 |

|               |           |        |          |               |
|---------------|-----------|--------|----------|---------------|
| 4 rs4362821   | 9668941 T | 0.3246 | 1.81E-10 | chr:4:9603240 |
| 4 rs4417968   | 9667070 T | 0.3246 | 1.81E-10 | chr:4:9603240 |
| 4 rs79367718  | 9673458 C | 0.3246 | 1.81E-10 | chr:4:9603240 |
| 4 rs79487290  | 9663694 A | 0.3246 | 1.81E-10 | chr:4:9603240 |
| 4 rs10939465  | 9702053 T | 0.3945 | 1.94E-10 | chr:4:9603240 |
| 4 rs57478100  | 9652472 A | 0.3282 | 2.07E-10 | chr:4:9603240 |
| 4 rs6858200   | 9709531 A | 0.3956 | 2.10E-10 | chr:4:9603240 |
| 4 rs6858393   | 9709577 T | 0.3956 | 2.10E-10 | chr:4:9603240 |
| 4 rs6852419   | 9711314 A | 0.3978 | 2.28E-10 | chr:4:9603240 |
| 4 rs552244216 | 9633025 T | 0.2359 | 2.34E-10 | chr:4:9603240 |
| 4 rs10005931  | 9714347 T | 0.396  | 2.38E-10 | chr:4:9603240 |
| 4 rs6836384   | 9713148 T | 0.396  | 2.38E-10 | chr:4:9603240 |
| 4 rs10020849  | 9702608 T | 0.397  | 2.62E-10 | chr:4:9603240 |
| 4 rs111322624 | 9682780 T | 0.3289 | 2.75E-10 | chr:4:9603240 |
| 4 rs146531882 | 9653818 T | 0.3289 | 2.75E-10 | chr:4:9603240 |
| 4 rs35199477  | 9674995 A | 0.3289 | 2.75E-10 | chr:4:9603240 |
| 4 rs4259062   | 9674245 T | 0.3289 | 2.75E-10 | chr:4:9603240 |
| 4 rs4260536   | 9678079 G | 0.3289 | 2.75E-10 | chr:4:9603240 |
| 4 rs4446308   | 9678379 A | 0.3289 | 2.75E-10 | chr:4:9603240 |
| 4 rs4550924   | 9674437 T | 0.3289 | 2.75E-10 | chr:4:9603240 |
| 4 rs6822851   | 9681151 A | 0.3289 | 2.75E-10 | chr:4:9603240 |
| 4 rs6822895   | 9681222 T | 0.3289 | 2.75E-10 | chr:4:9603240 |
| 4 rs6836522   | 9686823 T | 0.3289 | 2.75E-10 | chr:4:9603240 |
| 4 rs6838107   | 9679002 C | 0.3289 | 2.75E-10 | chr:4:9603240 |
| 4 rs6858190   | 9679430 G | 0.3289 | 2.75E-10 | chr:4:9603240 |
| 4 rs75729554  | 9676179 T | 0.3289 | 2.75E-10 | chr:4:9603240 |
| 4 rs7679526   | 9653286 T | 0.3289 | 2.75E-10 | chr:4:9603240 |
| 4 rs150730953 | 9697831 C | 0.3293 | 2.81E-10 | chr:4:9603240 |
| 4 rs16898588  | 9595751 T | 0.2157 | 2.86E-10 | chr:4:9603240 |
| 4 rs73802959  | 9694487 A | 0.3323 | 2.91E-10 | chr:4:9603240 |
| 4 rs57685354  | 9655782 T | 0.3307 | 3.20E-10 | chr:4:9603240 |
| 4 rs61165916  | 9655464 A | 0.3307 | 3.20E-10 | chr:4:9603240 |
| 4 rs61199897  | 9657621 T | 0.3307 | 3.20E-10 | chr:4:9603240 |
| 4 rs72491232  | 9658479 G | 0.3307 | 3.20E-10 | chr:4:9603240 |
| 4 rs74532861  | 9656067 C | 0.3307 | 3.20E-10 | chr:4:9603240 |
| 4 rs75965288  | 9656832 G | 0.3307 | 3.20E-10 | chr:4:9603240 |
| 4 rs76078762  | 9656034 A | 0.3307 | 3.20E-10 | chr:4:9603240 |
| 4 rs139901069 | 9582722 A | 0.2265 | 3.26E-10 | chr:4:9603240 |
| 4 rs77648749  | 9583407 A | 0.2265 | 3.26E-10 | chr:4:9603240 |
| 4 rs55760760  | 9503473 G | 2.541  | 3.41E-10 | chr:4:9603240 |
| 4 rs28735278  | 9614378 A | 0.2169 | 3.45E-10 | chr:4:9603240 |
| 4 rs6839392   | 9613589 T | 0.2169 | 3.45E-10 | chr:4:9603240 |
| 4 rs73082901  | 9636762 C | 0.2169 | 3.45E-10 | chr:4:9603240 |

|               |           |        |          |               |
|---------------|-----------|--------|----------|---------------|
| 4 rs13119693  | 9451151 T | 2.515  | 3.58E-10 | chr:4:9603240 |
| 4 rs57402803  | 9691353 T | 0.333  | 3.87E-10 | chr:4:9603240 |
| 4 rs57553236  | 9688140 C | 0.333  | 3.87E-10 | chr:4:9603240 |
| 4 rs57868742  | 9694076 G | 0.333  | 3.87E-10 | chr:4:9603240 |
| 4 rs58688978  | 9693903 A | 0.333  | 3.87E-10 | chr:4:9603240 |
| 4 rs6827717   | 9695525 T | 0.333  | 3.87E-10 | chr:4:9603240 |
| 4 rs74821633  | 9690069 C | 0.333  | 3.87E-10 | chr:4:9603240 |
| 4 rs7683574   | 9719148 T | 0.4015 | 4.06E-10 | chr:4:9603240 |
| 4 rs10011678  | 9688689 C | 0.2137 | 4.71E-10 | chr:4:9603240 |
| 4 rs10938806  | 9439761 C | 2.5    | 4.80E-10 | chr:4:9603240 |
| 4 rs139020598 | 9656876 T | 0.3351 | 4.84E-10 | chr:4:9603240 |
| 4 rs55912423  | 9715435 A | 0.4024 | 4.89E-10 | chr:4:9603240 |
| 4 rs13147425  | 9492966 A | 2.518  | 5.39E-10 | chr:4:9603240 |
| 4 rs28851574  | 9644580 C | 0.2213 | 5.53E-10 | chr:4:9603240 |
| 4 rs28886660  | 9644540 G | 0.2213 | 5.53E-10 | chr:4:9603240 |
| 4 rs73084810  | 9642699 G | 0.2213 | 5.53E-10 | chr:4:9603240 |
| 4 rs9995735   | 9658789 T | 0.2216 | 5.69E-10 | chr:4:9603240 |
| 4 rs73802957  | 9694235 T | 0.3418 | 5.69E-10 | chr:4:9603240 |
| 4 rs73802958  | 9694236 T | 0.3418 | 5.69E-10 | chr:4:9603240 |
| 4 rs13109001  | 9683156 G | 0.4134 | 5.78E-10 | chr:4:9603240 |
| 4 rs55700931  | 9683149 G | 0.4134 | 5.78E-10 | chr:4:9603240 |
| 4 rs10014826  | 9635408 C | 0.2224 | 5.83E-10 | chr:4:9603240 |
| 4 rs12505906  | 9636906 A | 0.2224 | 5.83E-10 | chr:4:9603240 |
| 4 rs150921853 | 9639169 T | 0.2224 | 5.83E-10 | chr:4:9603240 |
| 4 rs76266909  | 9636303 C | 0.2224 | 5.83E-10 | chr:4:9603240 |
| 4 rs13145809  | 9683143 T | 0.4099 | 5.90E-10 | chr:4:9603240 |
| 4 rs61175357  | 9434500 A | 2.48   | 5.92E-10 | chr:4:9603240 |
| 4 rs62410330  | 9505018 C | 0.4136 | 6.58E-10 | chr:4:9603240 |
| 4 rs143900004 | 9636160 T | 0.2209 | 6.72E-10 | chr:4:9603240 |
| 4 rs11723205  | 9718677 C | 0.4047 | 6.83E-10 | chr:4:9603240 |
| 4 rs13139629  | 9683171 A | 0.4149 | 7.02E-10 | chr:4:9603240 |
| 4 rs13145821  | 9683168 T | 0.4149 | 7.02E-10 | chr:4:9603240 |
| 4 rs11726471  | 9786732 C | 2.767  | 7.15E-10 | chr:4:9603240 |
| 4 rs139741229 | 9447828 T | 2.973  | 7.60E-10 | chr:4:9603240 |
| 4 rs75642648  | 9542919 T | 3.684  | 7.87E-10 | chr:4:9603240 |
| 4 rs576487641 | 9712952 T | 0.4116 | 8.94E-10 | chr:4:9603240 |
| 4 rs1967551   | 9785134 C | 2.672  | 1.04E-09 | chr:4:9603240 |
| 4 rs7692776   | 9506201 G | 2.443  | 1.26E-09 | chr:4:9603240 |
| 4 rs10939112  | 9496079 C | 0.4196 | 1.29E-09 | chr:4:9603240 |
| 4 rs12502545  | 9496170 G | 0.4196 | 1.29E-09 | chr:4:9603240 |
| 4 rs12502551  | 9496229 G | 0.4196 | 1.29E-09 | chr:4:9603240 |
| 4 rs142277140 | 9648076 C | 0.2295 | 1.62E-09 | chr:4:9603240 |
| 4 rs28577902  | 9650657 A | 0.2295 | 1.62E-09 | chr:4:9603240 |



|               |           |        |          |               |
|---------------|-----------|--------|----------|---------------|
| 4 rs73084818  | 9648875 T | 0.2295 | 1.62E-09 | chr:4:9603240 |
| 4 rs7693691   | 9652934 C | 0.2295 | 1.62E-09 | chr:4:9603240 |
| 4 rs10001941  | 9688516 A | 0.2253 | 1.66E-09 | chr:4:9603240 |
| 4 rs10024971  | 9694013 G | 0.2253 | 1.66E-09 | chr:4:9603240 |
| 4 rs12504246  | 9692932 A | 0.2253 | 1.66E-09 | chr:4:9603240 |
| 4 rs73088893  | 9695306 A | 0.2253 | 1.66E-09 | chr:4:9603240 |
| 4 rs200568963 | 9661723 A | 5.597  | 1.75E-09 | chr:4:9603240 |
| 4 rs77413886  | 9661856 T | 5.597  | 1.75E-09 | chr:4:9603240 |
| 4 rs10000759  | 9457303 C | 0.4457 | 1.92E-09 | chr:4:9603240 |
| 4 rs11725001  | 9495320 G | 0.4255 | 2.05E-09 | chr:4:9603240 |
| 4 rs11725044  | 9495402 G | 0.4255 | 2.05E-09 | chr:4:9603240 |
| 4 rs4554075   | 9497783 T | 0.4259 | 2.09E-09 | chr:4:9603240 |
| 4 rs56010928  | 9500918 G | 0.4259 | 2.09E-09 | chr:4:9603240 |
| 4 rs59501639  | 9500857 C | 0.4259 | 2.09E-09 | chr:4:9603240 |
| 4 rs12501884  | 9455690 A | 0.4213 | 2.25E-09 | chr:4:9603240 |
| 4 rs73084845  | 9671025 T | 0.2349 | 2.45E-09 | chr:4:9603240 |
| 4 rs1815183   | 9499932 T | 0.427  | 2.46E-09 | chr:4:9603240 |
| 4 rs13123640  | 9494995 G | 0.4293 | 2.49E-09 | chr:4:9603240 |
| 4 rs10012148  | 9664294 A | 0.2342 | 2.62E-09 | chr:4:9603240 |
| 4 rs10013863  | 9667436 T | 0.2342 | 2.62E-09 | chr:4:9603240 |
| 4 rs10026706  | 9674011 A | 0.2342 | 2.62E-09 | chr:4:9603240 |
| 4 rs12501304  | 9682548 T | 0.2342 | 2.62E-09 | chr:4:9603240 |
| 4 rs143079510 | 9665042 T | 0.2342 | 2.62E-09 | chr:4:9603240 |
| 4 rs143459149 | 9674515 G | 0.2342 | 2.62E-09 | chr:4:9603240 |
| 4 rs150693830 | 9665588 T | 0.2342 | 2.62E-09 | chr:4:9603240 |
| 4 rs201078836 | 9680043 T | 0.2342 | 2.62E-09 | chr:4:9603240 |
| 4 rs28575773  | 9656525 A | 0.2342 | 2.62E-09 | chr:4:9603240 |
| 4 rs28643508  | 9659221 C | 0.2342 | 2.62E-09 | chr:4:9603240 |
| 4 rs28673739  | 9677529 T | 0.2342 | 2.62E-09 | chr:4:9603240 |
| 4 rs28691200  | 9684552 A | 0.2342 | 2.62E-09 | chr:4:9603240 |
| 4 rs28718562  | 9659961 G | 0.2342 | 2.62E-09 | chr:4:9603240 |
| 4 rs28793127  | 9660482 T | 0.2342 | 2.62E-09 | chr:4:9603240 |
| 4 rs4518243   | 9664634 C | 0.2342 | 2.62E-09 | chr:4:9603240 |
| 4 rs59312718  | 9669434 T | 0.2342 | 2.62E-09 | chr:4:9603240 |
| 4 rs73084842  | 9671015 T | 0.2342 | 2.62E-09 | chr:4:9603240 |
| 4 rs73802943  | 9663020 C | 0.2342 | 2.62E-09 | chr:4:9603240 |
| 4 rs7684741   | 9661843 A | 0.2342 | 2.62E-09 | chr:4:9603240 |
| 4 rs77025480  | 9657754 A | 0.2342 | 2.62E-09 | chr:4:9603240 |
| 4 rs80077135  | 9681299 G | 0.2342 | 2.62E-09 | chr:4:9603240 |
| 4 rs9291600   | 9675669 A | 0.2342 | 2.62E-09 | chr:4:9603240 |
| 4 rs9884683   | 9677137 A | 0.2342 | 2.62E-09 | chr:4:9603240 |
| 4 rs9996676   | 9678661 C | 0.2342 | 2.62E-09 | chr:4:9603240 |
| 4 rs12171434  | 9647060 T | 0.2389 | 2.75E-09 | chr:4:9603240 |

|               |           |        |          |               |
|---------------|-----------|--------|----------|---------------|
| 4 rs59014980  | 9494946 T | 0.4287 | 2.80E-09 | chr:4:9603240 |
| 4 rs11722239  | 9482356 C | 2.391  | 2.81E-09 | chr:4:9603240 |
| 4 rs10007689  | 9487133 G | 2.432  | 2.99E-09 | chr:4:9603240 |
| 4 rs28380563  | 9658392 T | 0.2334 | 3.04E-09 | chr:4:9603240 |
| 4 rs6840936   | 9453059 C | 0.4196 | 3.21E-09 | chr:4:9603240 |
| 4 rs3961007   | 9501597 C | 0.4323 | 3.28E-09 | chr:4:9603240 |
| 4 rs13102963  | 9488726 T | 0.4322 | 3.92E-09 | chr:4:9603240 |
| 4 rs11736134  | 9447235 C | 0.4224 | 4.07E-09 | chr:4:9603240 |
| 4 rs6822257   | 9448087 T | 0.4224 | 4.07E-09 | chr:4:9603240 |
| 4 rs6835868   | 9448039 G | 0.4224 | 4.07E-09 | chr:4:9603240 |
| 4 rs6857540   | 9446874 A | 0.4224 | 4.07E-09 | chr:4:9603240 |
| 4 rs7665884   | 9448306 T | 0.4224 | 4.07E-09 | chr:4:9603240 |
| 4 rs13143798  | 9494961 C | 0.4343 | 4.20E-09 | chr:4:9603240 |
| 4 rs568086508 | 9494938 T | 0.4343 | 4.20E-09 | chr:4:9603240 |
| 4 rs28546201  | 9684768 T | 0.2438 | 4.34E-09 | chr:4:9603240 |
| 4 rs10212937  | 9485841 T | 0.4208 | 4.35E-09 | chr:4:9603240 |
| 4 rs28796640  | 9663788 T | 0.2401 | 4.35E-09 | chr:4:9603240 |
| 4 rs201440390 | 9697882 A | 0.3628 | 4.39E-09 | chr:4:9603240 |
| 4 rs11725337  | 9484986 T | 0.4346 | 4.72E-09 | chr:4:9603240 |
| 4 rs11728148  | 9718971 C | 0.3673 | 5.11E-09 | chr:4:9603240 |
| 4 rs10939280  | 9529545 T | 0.4321 | 5.13E-09 | chr:4:9603240 |
| 4 rs12645738  | 9529669 A | 0.4321 | 5.13E-09 | chr:4:9603240 |
| 4 rs6844838   | 9452616 A | 0.4258 | 5.16E-09 | chr:4:9603240 |
| 4 rs6850194   | 9452936 A | 0.4258 | 5.16E-09 | chr:4:9603240 |
| 4 rs6856153   | 9452898 T | 0.4258 | 5.16E-09 | chr:4:9603240 |
| 4 rs1852357   | 9483070 G | 0.4364 | 5.81E-09 | chr:4:9603240 |
| 4 rs13114077  | 9413105 C | 2.317  | 6.85E-09 | chr:4:9603240 |
| 4 rs13108890  | 9494959 T | 0.4378 | 7.70E-09 | chr:4:9603240 |
| 4 rs10033094  | 9456014 G | 0.4429 | 9.02E-09 | chr:4:9603240 |
| 4 rs10033095  | 9456029 G | 0.4429 | 9.02E-09 | chr:4:9603240 |
| 4 rs10470804  | 9456676 C | 0.4429 | 9.02E-09 | chr:4:9603240 |
| 4 rs12501535  | 9456977 C | 0.4429 | 9.02E-09 | chr:4:9603240 |
| 4 rs12502001  | 9456060 A | 0.4429 | 9.02E-09 | chr:4:9603240 |
| 4 rs12644512  | 9482649 A | 0.4429 | 9.02E-09 | chr:4:9603240 |
| 4 rs13142300  | 9455621 G | 0.4429 | 9.02E-09 | chr:4:9603240 |
| 4 rs1818669   | 9769995 G | 0.4323 | 9.31E-09 | chr:4:9603240 |
| 4 rs73090773  | 9765827 A | 0.4323 | 9.31E-09 | chr:4:9603240 |
| 4 rs73090775  | 9766123 T | 0.4323 | 9.31E-09 | chr:4:9603240 |
| 4 rs61166583  | 9778530 A | 0.4339 | 9.60E-09 | chr:4:9603240 |
| 4 rs7676603   | 9775710 G | 0.4339 | 9.60E-09 | chr:4:9603240 |
| 4 rs2103224   | 9453452 G | 0.4374 | 1.02E-08 | chr:4:9603240 |
| 4 rs12511327  | 9504446 G | 0.3321 | 1.16E-08 | chr:4:9603240 |
| 4 rs112123699 | 9624028 G | 0.3529 | 1.18E-08 | chr:4:9603240 |

|               |           |        |          |               |
|---------------|-----------|--------|----------|---------------|
| 4 rs1878943   | 9766888 T | 0.4354 | 1.22E-08 | chr:4:9603240 |
| 4 rs2091391   | 9454734 A | 0.4306 | 1.29E-08 | chr:4:9603240 |
| 4 rs10939515  | 9773296 A | 0.4401 | 1.73E-08 | chr:4:9603240 |
| 4 rs182659119 | 9596218 G | 4.147  | 1.96E-08 | chr:4:9603240 |
| 4 rs35599926  | 9419642 G | 2.542  | 2.04E-08 | chr:4:9603240 |
| 4 rs10938839  | 9445662 C | 0.45   | 2.09E-08 | chr:4:9603240 |
| 4 rs11722326  | 9447272 T | 0.45   | 2.09E-08 | chr:4:9603240 |
| 4 rs13104015  | 9448744 C | 0.45   | 2.09E-08 | chr:4:9603240 |
| 4 rs6815543   | 9447712 A | 0.45   | 2.09E-08 | chr:4:9603240 |
| 4 rs7437720   | 9510396 A | 0.3374 | 2.61E-08 | chr:4:9603240 |
| 4 rs2865004   | 9450173 C | 0.4544 | 2.69E-08 | chr:4:9603240 |
| 4 rs6829559   | 9449933 A | 0.4544 | 2.69E-08 | chr:4:9603240 |
| 4 rs6855905   | 9450744 G | 0.4544 | 2.69E-08 | chr:4:9603240 |
| 4 rs7680057   | 9752332 A | 0.3874 | 3.08E-08 | chr:4:9603240 |
| 4 rs189831650 | 9572732 T | 0.2437 | 4.57E-08 | chr:4:9603240 |
| 4 rs11722280  | 9444065 C | 0.4593 | 4.72E-08 | chr:4:9603240 |
| 4 rs9683488   | 9547215 G | 2.138  | 5.47E-08 | chr:4:9603240 |
| 4 rs11729203  | 9569091 T | 2.284  | 5.98E-08 | chr:4:9603240 |
| 4 rs60160622  | 9457328 C | 1.926  | 6.25E-08 | chr:4:9603240 |
| 4 rs61010333  | 9457333 A | 1.918  | 7.33E-08 | chr:4:9603240 |
| 4 rs6414750   | 9752286 A | 0.3972 | 7.66E-08 | chr:4:9603240 |
| 4 rs76799705  | 9583343 T | 0.2547 | 7.97E-08 | chr:4:9603240 |
| 4 rs10939427  | 9628538 G | 0.3676 | 8.41E-08 | chr:4:9603240 |
| 4 rs6830692   | 9589873 C | 0.3004 | 8.76E-08 | chr:4:9603240 |
| 4 rs6858082   | 9454399 A | 0.4573 | 8.93E-08 | chr:4:9603240 |
| 4 rs114809283 | 9578006 A | 0.283  | 1.08E-07 | chr:4:9603240 |
| 4 rs115723792 | 9570902 G | 0.283  | 1.08E-07 | chr:4:9603240 |
| 4 rs115847566 | 9579226 T | 0.283  | 1.08E-07 | chr:4:9603240 |
| 4 rs11729940  | 9574743 A | 0.283  | 1.08E-07 | chr:4:9603240 |
| 4 rs140355667 | 9578231 G | 0.283  | 1.08E-07 | chr:4:9603240 |
| 4 rs140501910 | 9578396 C | 0.283  | 1.08E-07 | chr:4:9603240 |
| 4 rs148852793 | 9570929 A | 0.283  | 1.08E-07 | chr:4:9603240 |
| 4 rs4974828   | 9572320 G | 0.283  | 1.08E-07 | chr:4:9603240 |
| 4 rs4974868   | 9572178 A | 0.283  | 1.08E-07 | chr:4:9603240 |
| 4 rs4974869   | 9571360 G | 0.283  | 1.08E-07 | chr:4:9603240 |
| 4 rs3975528   | 9584444 C | 0.2853 | 1.23E-07 | chr:4:9603240 |
| 4 rs28722891  | 9638572 T | 0.3591 | 1.33E-07 | chr:4:9603240 |
| 4 rs62409887  | 9642748 G | 0.3593 | 1.37E-07 | chr:4:9603240 |
| 4 rs4974863   | 9590979 T | 0.3628 | 1.40E-07 | chr:4:9603240 |
| 4 rs2091390   | 9454637 G | 0.4734 | 1.56E-07 | chr:4:9603240 |
| 4 rs188525933 | 9575159 A | 0.2904 | 1.59E-07 | chr:4:9603240 |
| 4 rs7442333   | 9476787 A | 0.5346 | 1.64E-07 | chr:4:9603240 |
| 4 rs1850734   | 9752741 G | 0.4094 | 1.69E-07 | chr:4:9603240 |

|               |           |        |          |               |
|---------------|-----------|--------|----------|---------------|
| 4 rs1850735   | 9752592 T | 0.4094 | 1.69E-07 | chr:4:9603240 |
| 4 rs4974866   | 9575646 T | 0.2919 | 1.70E-07 | chr:4:9603240 |
| 4 rs4974865   | 9587937 A | 0.2885 | 1.72E-07 | chr:4:9603240 |
| 4 rs3975529   | 9584477 T | 0.2926 | 1.76E-07 | chr:4:9603240 |
| 4 rs11726722  | 9637477 G | 0.1288 | 1.77E-07 | chr:4:9603240 |
| 4 rs6448964   | 9690292 A | 0.4395 | 1.77E-07 | chr:4:9603240 |
| 4 rs6848533   | 9690289 C | 0.4395 | 1.77E-07 | chr:4:9603240 |
| 4 rs1842494   | 9569460 A | 0.2019 | 1.79E-07 | chr:4:9603240 |
| 4 rs190948268 | 9591497 T | 0.3604 | 1.85E-07 | chr:4:9603240 |
| 4 rs58934247  | 9589730 C | 0.3722 | 1.87E-07 | chr:4:9603240 |
| 4 rs28729250  | 9584227 A | 0.2903 | 1.90E-07 | chr:4:9603240 |
| 4 rs6834697   | 9756914 A | 0.4159 | 1.93E-07 | chr:4:9603240 |
| 4 rs11723334  | 9755323 A | 0.4138 | 2.15E-07 | chr:4:9603240 |
| 4 rs10939428  | 9630041 A | 0.3621 | 2.34E-07 | chr:4:9603240 |
| 4 rs11733660  | 9608377 C | 0.3601 | 2.49E-07 | chr:4:9603240 |
| 4 rs7685974   | 9745082 T | 0.3984 | 2.55E-07 | chr:4:9603240 |
| 4 rs2127793   | 9584728 T | 0.2966 | 2.63E-07 | chr:4:9603240 |
| 4 rs4697891   | 9822319 G | 0.4642 | 2.69E-07 | chr:4:9603240 |
| 4 rs7669742   | 9822205 T | 0.4642 | 2.69E-07 | chr:4:9603240 |
| 4 rs7683059   | 9822275 G | 0.4642 | 2.69E-07 | chr:4:9603240 |
| 4 rs142642407 | 9591168 A | 0.3673 | 2.75E-07 | chr:4:9603240 |
| 4 rs147268581 | 9593254 T | 0.3673 | 2.75E-07 | chr:4:9603240 |
| 4 rs150736073 | 9590365 C | 0.3673 | 2.75E-07 | chr:4:9603240 |
| 4 rs200437010 | 9592158 G | 0.3673 | 2.75E-07 | chr:4:9603240 |
| 4 rs55988830  | 9588757 C | 0.3673 | 2.75E-07 | chr:4:9603240 |
| 4 rs76304666  | 9590479 A | 0.3673 | 2.75E-07 | chr:4:9603240 |
| 4 rs149961874 | 9763069 A | 0.4044 | 2.75E-07 | chr:4:9603240 |
| 4 rs11733921  | 9632876 T | 0.3687 | 2.75E-07 | chr:4:9603240 |
| 4 rs6834512   | 9756836 A | 0.4188 | 2.81E-07 | chr:4:9603240 |
| 4 rs56055745  | 9595453 T | 0.3665 | 2.90E-07 | chr:4:9603240 |
| 4 rs59747264  | 9595447 G | 0.3665 | 2.90E-07 | chr:4:9603240 |
| 4 rs146389512 | 9597589 A | 0.3661 | 2.91E-07 | chr:4:9603240 |
| 4 rs76469957  | 9597617 G | 0.3661 | 2.91E-07 | chr:4:9603240 |
| 4 rs4974900   | 9480349 C | 0.5492 | 2.93E-07 | chr:4:9603240 |
| 4 rs62409891  | 9643131 C | 0.3632 | 3.02E-07 | chr:4:9603240 |
| 4 rs4974829   | 9571976 T | 0.3    | 3.08E-07 | chr:4:9603240 |
| 4 rs185725801 | 9588562 C | 0.366  | 3.13E-07 | chr:4:9603240 |
| 4 rs11733905  | 9603159 A | 0.366  | 3.24E-07 | chr:4:9603240 |
| 4 rs4974823   | 9602719 A | 0.366  | 3.24E-07 | chr:4:9603240 |
| 4 rs4974824   | 9602608 C | 0.366  | 3.24E-07 | chr:4:9603240 |
| 4 rs4974859   | 9604519 T | 0.366  | 3.24E-07 | chr:4:9603240 |
| 4 rs4974861   | 9604139 T | 0.366  | 3.24E-07 | chr:4:9603240 |
| 4 rs73802915  | 9603200 A | 0.366  | 3.24E-07 | chr:4:9603240 |

|               |           |        |                        |
|---------------|-----------|--------|------------------------|
| 4 rs4974826   | 9602042 T | 0.3678 | 3.30E-07 chr:4:9603240 |
| 4 rs55916508  | 9589334 A | 0.3678 | 3.30E-07 chr:4:9603240 |
| 4 rs1401437   | 9819763 G | 0.4666 | 3.49E-07 chr:4:9603240 |
| 4 rs1519093   | 9824019 T | 0.4666 | 3.49E-07 chr:4:9603240 |
| 4 rs7656266   | 9820644 A | 0.4666 | 3.49E-07 chr:4:9603240 |
| 4 rs939131    | 9820950 A | 0.4666 | 3.49E-07 chr:4:9603240 |
| 4 rs1818670   | 9745390 G | 0.4038 | 3.50E-07 chr:4:9603240 |
| 4 rs6836184   | 9633711 A | 0.3695 | 3.52E-07 chr:4:9603240 |
| 4 rs6836196   | 9633728 A | 0.3695 | 3.52E-07 chr:4:9603240 |
| 4 rs6856161   | 9633826 G | 0.3695 | 3.52E-07 chr:4:9603240 |
| 4 rs9291589   | 9633410 C | 0.3695 | 3.52E-07 chr:4:9603240 |
| 4 rs4698055   | 9627821 A | 0.4881 | 3.57E-07 chr:4:9603240 |
| 4 rs11724183  | 9609894 G | 0.3649 | 3.62E-07 chr:4:9603240 |
| 4 rs11726515  | 9611214 C | 0.3649 | 3.62E-07 chr:4:9603240 |
| 4 rs139590336 | 9612695 A | 0.3649 | 3.62E-07 chr:4:9603240 |
| 4 rs143734288 | 9611958 C | 0.3649 | 3.62E-07 chr:4:9603240 |
| 4 rs1961552   | 9608306 C | 0.3649 | 3.62E-07 chr:4:9603240 |
| 4 rs2077679   | 9608089 A | 0.3649 | 3.62E-07 chr:4:9603240 |
| 4 rs4974818   | 9612995 T | 0.3649 | 3.62E-07 chr:4:9603240 |
| 4 rs4974853   | 9609115 C | 0.3649 | 3.62E-07 chr:4:9603240 |
| 4 rs4974854   | 9609087 G | 0.3649 | 3.62E-07 chr:4:9603240 |
| 4 rs7375281   | 9609506 T | 0.3649 | 3.62E-07 chr:4:9603240 |
| 4 rs7375292   | 9609618 T | 0.3649 | 3.62E-07 chr:4:9603240 |
| 4 rs55813730  | 9595618 A | 0.3733 | 3.71E-07 chr:4:9603240 |
| 4 rs1401442   | 9839447 C | 0.4718 | 3.86E-07 chr:4:9603240 |
| 4 rs7661082   | 9755665 C | 0.4264 | 3.89E-07 chr:4:9603240 |
| 4 rs10011580  | 9634989 A | 0.3698 | 4.15E-07 chr:4:9603240 |
| 4 rs11727601  | 9637799 G | 0.3698 | 4.15E-07 chr:4:9603240 |
| 4 rs11731624  | 9637608 A | 0.3698 | 4.15E-07 chr:4:9603240 |
| 4 rs13128072  | 9636572 G | 0.3698 | 4.15E-07 chr:4:9603240 |
| 4 rs58773742  | 9634764 A | 0.3698 | 4.15E-07 chr:4:9603240 |
| 4 rs59114318  | 9634777 A | 0.3698 | 4.15E-07 chr:4:9603240 |
| 4 rs59245820  | 9634816 G | 0.3698 | 4.15E-07 chr:4:9603240 |
| 4 rs6813740   | 9635102 T | 0.3698 | 4.15E-07 chr:4:9603240 |
| 4 rs6837618   | 9634403 A | 0.3698 | 4.15E-07 chr:4:9603240 |
| 4 rs6837988   | 9634543 A | 0.3698 | 4.15E-07 chr:4:9603240 |
| 4 rs6843869   | 9634451 T | 0.3698 | 4.15E-07 chr:4:9603240 |
| 4 rs6847293   | 9639835 T | 0.3698 | 4.15E-07 chr:4:9603240 |
| 4 rs10011621  | 9760239 C | 0.4784 | 4.34E-07 chr:4:9603240 |
| 4 rs114290083 | 9597994 T | 0.3736 | 4.35E-07 chr:4:9603240 |
| 4 rs114945335 | 9598191 T | 0.3736 | 4.35E-07 chr:4:9603240 |
| 4 rs115282360 | 9593376 T | 0.3736 | 4.35E-07 chr:4:9603240 |
| 4 rs115893429 | 9593818 A | 0.3736 | 4.35E-07 chr:4:9603240 |

|               |           |        |                        |
|---------------|-----------|--------|------------------------|
| 4 rs116079424 | 9593204 C | 0.3736 | 4.35E-07 chr:4:9603240 |
| 4 rs116509172 | 9594123 G | 0.3736 | 4.35E-07 chr:4:9603240 |
| 4 rs116614494 | 9592153 T | 0.3736 | 4.35E-07 chr:4:9603240 |
| 4 rs117496616 | 9597238 C | 0.3736 | 4.35E-07 chr:4:9603240 |
| 4 rs137855378 | 9594243 T | 0.3736 | 4.35E-07 chr:4:9603240 |
| 4 rs138143241 | 9596395 T | 0.3736 | 4.35E-07 chr:4:9603240 |
| 4 rs138542917 | 9592759 G | 0.3736 | 4.35E-07 chr:4:9603240 |
| 4 rs139555537 | 9593067 T | 0.3736 | 4.35E-07 chr:4:9603240 |
| 4 rs143023917 | 9596151 G | 0.3736 | 4.35E-07 chr:4:9603240 |
| 4 rs143167350 | 9594342 T | 0.3736 | 4.35E-07 chr:4:9603240 |
| 4 rs144619625 | 9593363 C | 0.3736 | 4.35E-07 chr:4:9603240 |
| 4 rs147777706 | 9597845 A | 0.3736 | 4.35E-07 chr:4:9603240 |
| 4 rs148075169 | 9599421 A | 0.3736 | 4.35E-07 chr:4:9603240 |
| 4 rs148536222 | 9592032 T | 0.3736 | 4.35E-07 chr:4:9603240 |
| 4 rs149064572 | 9592378 A | 0.3736 | 4.35E-07 chr:4:9603240 |
| 4 rs149095671 | 9597966 C | 0.3736 | 4.35E-07 chr:4:9603240 |
| 4 rs149737988 | 9599039 A | 0.3736 | 4.35E-07 chr:4:9603240 |
| 4 rs149930076 | 9591979 T | 0.3736 | 4.35E-07 chr:4:9603240 |
| 4 rs16898647  | 9599609 A | 0.3736 | 4.35E-07 chr:4:9603240 |
| 4 rs185210675 | 9598974 G | 0.3736 | 4.35E-07 chr:4:9603240 |
| 4 rs34495260  | 9595324 C | 0.3736 | 4.35E-07 chr:4:9603240 |
| 4 rs34587049  | 9594498 T | 0.3736 | 4.35E-07 chr:4:9603240 |
| 4 rs35023412  | 9594927 G | 0.3736 | 4.35E-07 chr:4:9603240 |
| 4 rs35228193  | 9595003 T | 0.3736 | 4.35E-07 chr:4:9603240 |
| 4 rs35332449  | 9594812 G | 0.3736 | 4.35E-07 chr:4:9603240 |
| 4 rs35509001  | 9594871 A | 0.3736 | 4.35E-07 chr:4:9603240 |
| 4 rs35583251  | 9595042 C | 0.3736 | 4.35E-07 chr:4:9603240 |
| 4 rs4547793   | 9591708 C | 0.3736 | 4.35E-07 chr:4:9603240 |
| 4 rs552645918 | 9594483 A | 0.3736 | 4.35E-07 chr:4:9603240 |
| 4 rs57171822  | 9596455 A | 0.3736 | 4.35E-07 chr:4:9603240 |
| 4 rs57472005  | 9592238 G | 0.3736 | 4.35E-07 chr:4:9603240 |
| 4 rs73802906  | 9598448 T | 0.3736 | 4.35E-07 chr:4:9603240 |
| 4 rs73805540  | 9593964 G | 0.3736 | 4.35E-07 chr:4:9603240 |
| 4 rs76738832  | 9597809 A | 0.3736 | 4.35E-07 chr:4:9603240 |
| 4 rs9683933   | 9594670 A | 0.3736 | 4.35E-07 chr:4:9603240 |
| 4 rs9799500   | 9595891 A | 0.3736 | 4.35E-07 chr:4:9603240 |
| 4 rs9799502   | 9595942 A | 0.3736 | 4.35E-07 chr:4:9603240 |
| 4 rs9799575   | 9592812 A | 0.3736 | 4.35E-07 chr:4:9603240 |
| 4 rs9799684   | 9592993 T | 0.3736 | 4.35E-07 chr:4:9603240 |
| 4 rs9799747   | 9592874 C | 0.3736 | 4.35E-07 chr:4:9603240 |
| 4 rs9799753   | 9592618 A | 0.3736 | 4.35E-07 chr:4:9603240 |
| 4 rs9799779   | 9592870 A | 0.3736 | 4.35E-07 chr:4:9603240 |
| 4 rs75043790  | 9597656 G | 0.3737 | 4.37E-07 chr:4:9603240 |

|               |           |        |          |               |
|---------------|-----------|--------|----------|---------------|
| 4 rs56411540  | 9595441 C | 0.3741 | 4.43E-07 | chr:4:9603240 |
| 4 rs113251875 | 9621763 C | 0.4826 | 4.45E-07 | chr:4:9603240 |
| 4 rs28846731  | 9623693 A | 0.4826 | 4.45E-07 | chr:4:9603240 |
| 4 rs56746271  | 9610873 T | 0.3719 | 4.56E-07 | chr:4:9603240 |
| 4 rs73805537  | 9588589 C | 0.3735 | 4.71E-07 | chr:4:9603240 |
| 4 rs74200320  | 9635275 A | 0.276  | 4.91E-07 | chr:4:9603240 |
| 4 rs149630666 | 9598726 T | 0.369  | 4.97E-07 | chr:4:9603240 |
| 4 rs62411065  | 9638952 C | 0.3703 | 4.98E-07 | chr:4:9603240 |
| 4 rs11735475  | 9614926 T | 0.3703 | 4.98E-07 | chr:4:9603240 |
| 4 rs4974812   | 9614598 C | 0.3703 | 4.98E-07 | chr:4:9603240 |
| 4 rs4974816   | 9613067 A | 0.3703 | 4.98E-07 | chr:4:9603240 |
| 4 rs55934031  | 9613756 A | 0.3703 | 4.98E-07 | chr:4:9603240 |
| 4 rs56653599  | 9642038 T | 0.3703 | 4.98E-07 | chr:4:9603240 |
| 4 rs62409890  | 9643102 T | 0.3703 | 4.98E-07 | chr:4:9603240 |
| 4 rs939132    | 9820883 T | 0.474  | 5.01E-07 | chr:4:9603240 |
| 4 rs11721978  | 9643139 G | 3.982  | 5.08E-07 | chr:4:9603240 |
| 4 rs1519092   | 9826801 T | 0.4743 | 5.13E-07 | chr:4:9603240 |
| 4 rs1878277   | 9825143 T | 0.4743 | 5.13E-07 | chr:4:9603240 |
| 4 rs1996335   | 9825814 A | 0.4743 | 5.13E-07 | chr:4:9603240 |
| 4 rs4697896   | 9828569 T | 0.4743 | 5.13E-07 | chr:4:9603240 |
| 4 rs6449028   | 9833226 C | 0.4743 | 5.13E-07 | chr:4:9603240 |
| 4 rs938557    | 9827556 T | 0.4743 | 5.13E-07 | chr:4:9603240 |
| 4 rs11730426  | 9600216 T | 0.3742 | 5.25E-07 | chr:4:9603240 |
| 4 rs11731628  | 9601348 T | 0.3742 | 5.25E-07 | chr:4:9603240 |
| 4 rs11734986  | 9601497 T | 0.3742 | 5.25E-07 | chr:4:9603240 |
| 4 rs11735905  | 9601757 G | 0.3742 | 5.25E-07 | chr:4:9603240 |
| 4 rs11737520  | 9601215 C | 0.3742 | 5.25E-07 | chr:4:9603240 |
| 4 rs35870323  | 9600326 C | 0.3742 | 5.25E-07 | chr:4:9603240 |
| 4 rs4974825   | 9602228 T | 0.3742 | 5.25E-07 | chr:4:9603240 |
| 4 rs73802912  | 9602497 A | 0.3742 | 5.25E-07 | chr:4:9603240 |
| 4 rs78422890  | 9600765 T | 0.3742 | 5.25E-07 | chr:4:9603240 |
| 4 rs73805538  | 9591438 C | 0.3726 | 5.31E-07 | chr:4:9603240 |
| 4 rs28762417  | 9481120 G | 0.5576 | 5.34E-07 | chr:4:9603240 |
| 4 rs531217356 | 9591411 A | 0.3781 | 5.44E-07 | chr:4:9603240 |
| 4 rs368238943 | 9590182 T | 0.3701 | 5.53E-07 | chr:4:9603240 |
| 4 rs6841978   | 9758140 A | 0.4303 | 5.65E-07 | chr:4:9603240 |
| 4 rs114344194 | 9606720 C | 0.3713 | 5.76E-07 | chr:4:9603240 |
| 4 rs142443233 | 9605502 T | 0.3713 | 5.76E-07 | chr:4:9603240 |
| 4 rs56873393  | 9606840 A | 0.3713 | 5.76E-07 | chr:4:9603240 |
| 4 rs4974856   | 9607691 C | 0.3722 | 5.91E-07 | chr:4:9603240 |
| 4 rs4974858   | 9607122 G | 0.3722 | 5.91E-07 | chr:4:9603240 |
| 4 rs141001435 | 9598071 C | 0.3791 | 6.48E-07 | chr:4:9603240 |
| 4 rs6847887   | 9883801 A | 0.4779 | 6.49E-07 | chr:4:9603240 |

|               |           |        |          |               |
|---------------|-----------|--------|----------|---------------|
| 4 rs6449027   | 9833140 G | 0.4777 | 6.63E-07 | chr:4:9603240 |
| 4 rs56323944  | 9642872 T | 0.372  | 6.74E-07 | chr:4:9603240 |
| 4 rs111769984 | 9643309 C | 0.4447 | 7.21E-07 | chr:4:9603240 |
| 4 rs62409884  | 9642370 T | 0.3729 | 7.32E-07 | chr:4:9603240 |
| 4 rs1401441   | 9832304 T | 0.48   | 7.34E-07 | chr:4:9603240 |
| 4 rs149362014 | 9586831 T | 0.325  | 7.45E-07 | chr:4:9603240 |
| 4 rs10014876  | 9430269 G | 0.5069 | 7.74E-07 | chr:4:9603240 |
| 4 rs28475805  | 9628806 T | 0.4942 | 7.99E-07 | chr:4:9603240 |
| 4 rs11731224  | 9640971 G | 0.3846 | 8.06E-07 | chr:4:9603240 |
| 4 rs6449053   | 9846797 A | 0.4804 | 8.23E-07 | chr:4:9603240 |
| 4 rs73100126  | 9474356 T | 0.5648 | 8.29E-07 | chr:4:9603240 |
| 4 rs149616127 | 9643049 T | 0.2873 | 9.03E-07 | chr:4:9603240 |
| 4 rs56880996  | 9761466 C | 0.4893 | 9.14E-07 | chr:4:9603240 |
| 4 rs56977009  | 9761467 T | 0.4893 | 9.14E-07 | chr:4:9603240 |
| 4 rs56293131  | 9652279 G | 0.3845 | 9.16E-07 | chr:4:9603240 |
| 4 rs532514174 | 9632907 A | 0.3131 | 9.73E-07 | chr:4:9603240 |
| 4 rs564924473 | 9632906 A | 0.3131 | 9.73E-07 | chr:4:9603240 |
| 4 rs9799674   | 9606025 C | 0.3797 | 9.79E-07 | chr:4:9603240 |
| 4 rs11939139  | 9560276 T | 0.2896 | 1.02E-06 | chr:4:9603240 |
| 4 rs1964557   | 9565668 A | 0.2896 | 1.02E-06 | chr:4:9603240 |
| 4 rs2061993   | 9561930 T | 0.2896 | 1.02E-06 | chr:4:9603240 |
| 4 rs2061994   | 9561927 C | 0.2896 | 1.02E-06 | chr:4:9603240 |
| 4 rs34433551  | 9556102 T | 0.2896 | 1.02E-06 | chr:4:9603240 |
| 4 rs34523133  | 9565010 C | 0.2896 | 1.02E-06 | chr:4:9603240 |
| 4 rs34899372  | 9561627 T | 0.2896 | 1.02E-06 | chr:4:9603240 |
| 4 rs4974815   | 9614158 T | 0.3737 | 1.02E-06 | chr:4:9603240 |
| 4 rs9996007   | 9650770 T | 0.4602 | 1.06E-06 | chr:4:9603240 |
| 4 rs35848567  | 9549756 A | 0.2864 | 1.10E-06 | chr:4:9603240 |
| 4 rs74427603  | 9461582 C | 0.5569 | 1.13E-06 | chr:4:9603240 |
| 4 rs3960679   | 9852745 T | 0.4824 | 1.13E-06 | chr:4:9603240 |
| 4 rs11734925  | 9644507 G | 0.3855 | 1.13E-06 | chr:4:9603240 |
| 4 rs4406018   | 9645618 A | 0.3855 | 1.13E-06 | chr:4:9603240 |
| 4 rs7440232   | 9651744 T | 0.3855 | 1.13E-06 | chr:4:9603240 |
| 4 rs11727873  | 9758469 C | 0.4933 | 1.19E-06 | chr:4:9603240 |
| 4 rs1519099   | 9874130 T | 0.4883 | 1.23E-06 | chr:4:9603240 |
| 4 rs10939258  | 9525869 G | 0.5041 | 1.34E-06 | chr:4:9603240 |
| 4 rs4974831   | 9525674 C | 0.5041 | 1.34E-06 | chr:4:9603240 |
| 4 rs13126697  | 9666071 T | 0.4678 | 1.45E-06 | chr:4:9603240 |
| 4 rs3961005   | 9470677 C | 0.5714 | 1.48E-06 | chr:4:9603240 |
| 4 rs4974836   | 9470880 C | 0.5714 | 1.48E-06 | chr:4:9603240 |
| 4 rs12501954  | 9515537 T | 0.5069 | 1.58E-06 | chr:4:9603240 |
| 4 rs13104525  | 9517460 G | 0.5069 | 1.58E-06 | chr:4:9603240 |
| 4 rs10012338  | 9659859 G | 0.4694 | 1.63E-06 | chr:4:9603240 |



|               |           |        |          |               |
|---------------|-----------|--------|----------|---------------|
| 4 rs28532101  | 9660902 A | 0.4694 | 1.63E-06 | chr:4:9603240 |
| 4 rs2902914   | 9552509 A | 0.2959 | 1.64E-06 | chr:4:9603240 |
| 4 rs34239995  | 9551710 C | 0.2959 | 1.64E-06 | chr:4:9603240 |
| 4 rs34580254  | 9553772 C | 0.2959 | 1.64E-06 | chr:4:9603240 |
| 4 rs34672750  | 9551410 T | 0.2959 | 1.64E-06 | chr:4:9603240 |
| 4 rs35888628  | 9551409 A | 0.2959 | 1.64E-06 | chr:4:9603240 |
| 4 rs11932164  | 9526162 C | 0.5063 | 1.69E-06 | chr:4:9603240 |
| 4 rs11935199  | 9526180 T | 0.5063 | 1.69E-06 | chr:4:9603240 |
| 4 rs13102699  | 9521611 C | 0.5063 | 1.69E-06 | chr:4:9603240 |
| 4 rs13124919  | 9521722 T | 0.5063 | 1.69E-06 | chr:4:9603240 |
| 4 rs7673463   | 9469572 C | 0.5749 | 1.72E-06 | chr:4:9603240 |
| 4 rs6815813   | 9540280 A | 0.4934 | 1.74E-06 | chr:4:9603240 |
| 4 rs10939437  | 9647252 G | 0.3937 | 1.75E-06 | chr:4:9603240 |
| 4 rs7693513   | 9469880 T | 0.5749 | 1.80E-06 | chr:4:9603240 |
| 4 rs13104927  | 9536994 C | 0.3457 | 1.81E-06 | chr:4:9603240 |
| 4 rs13105347  | 9537183 C | 0.3457 | 1.81E-06 | chr:4:9603240 |
| 4 rs13121631  | 9536993 T | 0.3457 | 1.81E-06 | chr:4:9603240 |
| 4 rs6810422   | 9535370 A | 0.3457 | 1.81E-06 | chr:4:9603240 |
| 4 rs6822409   | 9536012 T | 0.3457 | 1.81E-06 | chr:4:9603240 |
| 4 rs6822573   | 9536662 A | 0.3457 | 1.81E-06 | chr:4:9603240 |
| 4 rs6829897   | 9535245 G | 0.3457 | 1.81E-06 | chr:4:9603240 |
| 4 rs140505176 | 9610784 A | 0.1705 | 1.85E-06 | chr:4:9603240 |
| 4 rs35490012  | 9555939 A | 0.3034 | 1.95E-06 | chr:4:9603240 |
| 4 rs4974819   | 9604861 A | 0.387  | 1.95E-06 | chr:4:9603240 |
| 4 rs112423279 | 9537042 T | 0.5014 | 1.99E-06 | chr:4:9603240 |
| 4 rs6833148   | 9760753 G | 0.4527 | 1.99E-06 | chr:4:9603240 |
| 4 rs13108939  | 9514819 C | 0.5095 | 2.00E-06 | chr:4:9603240 |
| 4 rs13141402  | 9517958 A | 0.5095 | 2.00E-06 | chr:4:9603240 |
| 4 rs28624871  | 9519069 A | 0.5095 | 2.00E-06 | chr:4:9603240 |
| 4 rs9291513   | 9513570 T | 0.5095 | 2.00E-06 | chr:4:9603240 |
| 4 rs9684013   | 9516690 C | 0.5095 | 2.00E-06 | chr:4:9603240 |
| 4 rs112878601 | 9643563 G | 0.3896 | 2.07E-06 | chr:4:9603240 |
| 4 rs10939425  | 9627380 A | 0.5068 | 2.09E-06 | chr:4:9603240 |
| 4 rs10002984  | 9680733 T | 0.3957 | 2.09E-06 | chr:4:9603240 |
| 4 rs10010621  | 9668706 G | 0.3957 | 2.09E-06 | chr:4:9603240 |
| 4 rs10014408  | 9695145 T | 0.3957 | 2.09E-06 | chr:4:9603240 |
| 4 rs10939458  | 9677951 T | 0.3957 | 2.09E-06 | chr:4:9603240 |
| 4 rs11731656  | 9691910 A | 0.3957 | 2.09E-06 | chr:4:9603240 |
| 4 rs12506622  | 9690369 T | 0.3957 | 2.09E-06 | chr:4:9603240 |
| 4 rs13104360  | 9684804 C | 0.3957 | 2.09E-06 | chr:4:9603240 |
| 4 rs4260537   | 9678215 A | 0.3957 | 2.09E-06 | chr:4:9603240 |
| 4 rs4532233   | 9668924 G | 0.3957 | 2.09E-06 | chr:4:9603240 |
| 4 rs6448959   | 9683927 T | 0.3957 | 2.09E-06 | chr:4:9603240 |

|               |           |        |          |               |
|---------------|-----------|--------|----------|---------------|
| 4 rs6812811   | 9672000 T | 0.3957 | 2.09E-06 | chr:4:9603240 |
| 4 rs6823671   | 9692517 A | 0.3957 | 2.09E-06 | chr:4:9603240 |
| 4 rs6829292   | 9692892 A | 0.3957 | 2.09E-06 | chr:4:9603240 |
| 4 rs6829800   | 9685856 A | 0.3957 | 2.09E-06 | chr:4:9603240 |
| 4 rs6843809   | 9655294 G | 0.3957 | 2.09E-06 | chr:4:9603240 |
| 4 rs6844051   | 9677232 C | 0.3957 | 2.09E-06 | chr:4:9603240 |
| 4 rs6848526   | 9670487 T | 0.3957 | 2.09E-06 | chr:4:9603240 |
| 4 rs6853779   | 9684468 A | 0.3957 | 2.09E-06 | chr:4:9603240 |
| 4 rs6858093   | 9681650 G | 0.3957 | 2.09E-06 | chr:4:9603240 |
| 4 rs7654169   | 9654071 T | 0.3957 | 2.09E-06 | chr:4:9603240 |
| 4 rs7678732   | 9693253 T | 0.3957 | 2.09E-06 | chr:4:9603240 |
| 4 rs7680572   | 9687543 A | 0.3957 | 2.09E-06 | chr:4:9603240 |
| 4 rs7686230   | 9657345 T | 0.3957 | 2.09E-06 | chr:4:9603240 |
| 4 rs7691166   | 9687673 T | 0.3957 | 2.09E-06 | chr:4:9603240 |
| 4 rs9291604   | 9696677 T | 0.3957 | 2.09E-06 | chr:4:9603240 |
| 4 rs9685755   | 9670178 T | 0.3957 | 2.09E-06 | chr:4:9603240 |
| 4 rs9761757   | 9696996 T | 0.3957 | 2.09E-06 | chr:4:9603240 |
| 4 rs9685067   | 9535838 T | 0.3617 | 2.12E-06 | chr:4:9603240 |
| 4 rs4594723   | 9700910 A | 0.3956 | 2.17E-06 | chr:4:9603240 |
| 4 rs61506096  | 9465938 T | 0.5642 | 2.18E-06 | chr:4:9603240 |
| 4 rs180780886 | 9633866 A | 0.1713 | 2.33E-06 | chr:4:9603240 |
| 4 rs1464259   | 9834462 A | 0.4428 | 2.38E-06 | chr:4:9603240 |
| 4 rs9715593   | 9522682 T | 0.5109 | 2.40E-06 | chr:4:9603240 |
| 4 rs10005750  | 9653990 G | 0.4779 | 2.46E-06 | chr:4:9603240 |
| 4 rs12386406  | 9654271 C | 0.4779 | 2.46E-06 | chr:4:9603240 |
| 4 rs7693675   | 9652907 C | 0.4779 | 2.46E-06 | chr:4:9603240 |
| 4 rs60677941  | 9657737 A | 0.4771 | 2.52E-06 | chr:4:9603240 |
| 4 rs60590965  | 9672631 T | 0.3126 | 2.53E-06 | chr:4:9603240 |
| 4 rs149036428 | 9619440 A | 0.3138 | 2.53E-06 | chr:4:9603240 |
| 4 rs375351318 | 9619439 C | 0.3138 | 2.53E-06 | chr:4:9603240 |
| 4 rs9291512   | 9513465 T | 0.5129 | 2.55E-06 | chr:4:9603240 |
| 4 rs28785196  | 9623514 T | 0.5099 | 2.57E-06 | chr:4:9603240 |
| 4 rs28866204  | 9623513 T | 0.5099 | 2.57E-06 | chr:4:9603240 |
| 4 rs7434744   | 9672688 A | 0.3973 | 2.72E-06 | chr:4:9603240 |
| 4 rs2864990   | 9419428 T | 0.5248 | 2.77E-06 | chr:4:9603240 |
| 4 rs567958372 | 9765393 C | 0.4879 | 2.77E-06 | chr:4:9603240 |
| 4 rs34192965  | 9539350 A | 0.2894 | 2.82E-06 | chr:4:9603240 |
| 4 rs35776239  | 9539367 A | 0.2894 | 2.82E-06 | chr:4:9603240 |
| 4 rs78329286  | 9538878 A | 0.2894 | 2.82E-06 | chr:4:9603240 |
| 4 rs4974833   | 9517080 A | 0.3526 | 2.82E-06 | chr:4:9603240 |
| 4 rs4974882   | 9517079 C | 0.3526 | 2.82E-06 | chr:4:9603240 |
| 4 rs6838124   | 9517908 C | 0.3526 | 2.82E-06 | chr:4:9603240 |
| 4 rs7689839   | 9515288 G | 0.3526 | 2.82E-06 | chr:4:9603240 |

|               |           |        |          |               |
|---------------|-----------|--------|----------|---------------|
| 4 rs7689849   | 9515293 G | 0.3526 | 2.82E-06 | chr:4:9603240 |
| 4 rs9760961   | 9518763 A | 0.3526 | 2.82E-06 | chr:4:9603240 |
| 4 rs11944635  | 9524295 A | 0.5132 | 2.86E-06 | chr:4:9603240 |
| 4 rs117038726 | 9628361 C | 0.2038 | 2.90E-06 | chr:4:9603240 |
| 4 rs144485974 | 9626755 A | 0.2038 | 2.90E-06 | chr:4:9603240 |
| 4 rs36118407  | 9547943 A | 0.285  | 3.00E-06 | chr:4:9603240 |
| 4 rs28578840  | 9629427 T | 0.5131 | 3.06E-06 | chr:4:9603240 |
| 4 rs4440216   | 9681531 T | 0.4041 | 3.16E-06 | chr:4:9603240 |
| 4 rs6814417   | 9548214 A | 0.3586 | 3.19E-06 | chr:4:9603240 |
| 4 rs13133629  | 9521305 G | 0.5185 | 3.22E-06 | chr:4:9603240 |
| 4 rs12500350  | 9455720 C | 0.3749 | 3.25E-06 | chr:4:9603240 |
| 4 rs10014571  | 9662181 C | 0.4032 | 3.33E-06 | chr:4:9603240 |
| 4 rs13148606  | 9660864 C | 0.4032 | 3.33E-06 | chr:4:9603240 |
| 4 rs4485817   | 9674732 G | 0.4032 | 3.33E-06 | chr:4:9603240 |
| 4 rs4554077   | 9674736 G | 0.4032 | 3.33E-06 | chr:4:9603240 |
| 4 rs6856401   | 9664027 G | 0.4032 | 3.33E-06 | chr:4:9603240 |
| 4 rs148765891 | 9638642 C | 0.178  | 3.34E-06 | chr:4:9603240 |
| 4 rs9685927   | 9516151 G | 0.5164 | 3.44E-06 | chr:4:9603240 |
| 4 rs9683495   | 9547275 T | 0.526  | 3.44E-06 | chr:4:9603240 |
| 4 rs111333905 | 9647550 T | 0.4784 | 3.46E-06 | chr:4:9603240 |
| 4 rs538579393 | 9765395 C | 0.4903 | 3.55E-06 | chr:4:9603240 |
| 4 rs6448960   | 9686586 T | 0.4072 | 3.61E-06 | chr:4:9603240 |
| 4 rs6816328   | 9658460 A | 0.484  | 3.72E-06 | chr:4:9603240 |
| 4 rs9291471   | 9486645 G | 0.2921 | 3.73E-06 | chr:4:9603240 |
| 4 rs6855355   | 9672120 A | 0.4091 | 3.79E-06 | chr:4:9603240 |
| 4 rs142223268 | 9624727 C | 0.2865 | 3.88E-06 | chr:4:9603240 |
| 4 rs182012760 | 9657887 C | 0.3155 | 3.96E-06 | chr:4:9603240 |
| 4 rs185334159 | 9657890 A | 0.3155 | 3.96E-06 | chr:4:9603240 |
| 4 rs13143814  | 9494984 C | 0.5291 | 4.00E-06 | chr:4:9603240 |
| 4 rs13141834  | 9487476 T | 0.5263 | 4.09E-06 | chr:4:9603240 |
| 4 rs11722945  | 9758822 A | 0.5208 | 4.14E-06 | chr:4:9603240 |
| 4 rs114480990 | 9536102 G | 0.2993 | 4.20E-06 | chr:4:9603240 |
| 4 rs12331584  | 9535466 G | 0.2993 | 4.20E-06 | chr:4:9603240 |
| 4 rs34907188  | 9534556 T | 0.2993 | 4.20E-06 | chr:4:9603240 |
| 4 rs35570330  | 9536721 C | 0.2993 | 4.20E-06 | chr:4:9603240 |
| 4 rs111656532 | 9632606 A | 0.5188 | 4.21E-06 | chr:4:9603240 |
| 4 rs112271793 | 9631492 C | 0.5188 | 4.21E-06 | chr:4:9603240 |
| 4 rs192593373 | 9673980 T | 0.3237 | 4.21E-06 | chr:4:9603240 |
| 4 rs10005183  | 9457254 A | 0.5251 | 4.35E-06 | chr:4:9603240 |
| 4 rs114299356 | 9547325 A | 0.2958 | 4.47E-06 | chr:4:9603240 |
| 4 rs139049131 | 9543447 G | 0.2958 | 4.47E-06 | chr:4:9603240 |
| 4 rs146483162 | 9541712 G | 0.2958 | 4.47E-06 | chr:4:9603240 |
| 4 rs1813114   | 9542259 A | 0.2958 | 4.47E-06 | chr:4:9603240 |

|               |           |        |          |               |
|---------------|-----------|--------|----------|---------------|
| 4 rs191028444 | 9545080 A | 0.2958 | 4.47E-06 | chr:4:9603240 |
| 4 rs36027609  | 9541970 T | 0.2958 | 4.47E-06 | chr:4:9603240 |
| 4 rs9715299   | 9545932 A | 0.2958 | 4.47E-06 | chr:4:9603240 |
| 4 rs4974832   | 9522154 A | 0.3608 | 4.60E-06 | chr:4:9603240 |
| 4 rs4974873   | 9529080 A | 0.3608 | 4.60E-06 | chr:4:9603240 |
| 4 rs4974874   | 9529066 T | 0.3608 | 4.60E-06 | chr:4:9603240 |
| 4 rs4974878   | 9525134 A | 0.3608 | 4.60E-06 | chr:4:9603240 |
| 4 rs6448632   | 9523490 A | 0.3608 | 4.60E-06 | chr:4:9603240 |
| 4 rs6448648   | 9526038 T | 0.3608 | 4.60E-06 | chr:4:9603240 |
| 4 rs6448649   | 9526086 T | 0.3608 | 4.60E-06 | chr:4:9603240 |
| 4 rs7437687   | 9510251 A | 0.3608 | 4.60E-06 | chr:4:9603240 |
| 4 rs7442171   | 9510966 G | 0.3608 | 4.60E-06 | chr:4:9603240 |
| 4 rs1817461   | 9551986 T | 0.3671 | 4.66E-06 | chr:4:9603240 |
| 4 rs3872814   | 9498896 A | 0.5304 | 4.78E-06 | chr:4:9603240 |
| 4 rs6832404   | 9494596 C | 0.5304 | 4.78E-06 | chr:4:9603240 |
| 4 rs2865019   | 9531644 T | 0.2986 | 4.79E-06 | chr:4:9603240 |
| 4 rs13104263  | 9489249 T | 0.5296 | 4.87E-06 | chr:4:9603240 |
| 4 rs117830800 | 9747052 A | 4.325  | 4.87E-06 | chr:4:9603240 |
| 4 rs13103170  | 9488792 T | 0.5302 | 4.88E-06 | chr:4:9603240 |
| 4 rs28768980  | 9489619 G | 0.5302 | 4.88E-06 | chr:4:9603240 |
| 4 rs6834222   | 9548270 G | 0.3688 | 4.93E-06 | chr:4:9603240 |
| 4 rs28419742  | 9690215 G | 0.1683 | 5.12E-06 | chr:4:9603240 |
| 4 rs117247785 | 9613503 T | 9.093  | 5.12E-06 | chr:4:9603240 |
| 4 rs12500995  | 9543938 T | 0.3668 | 5.21E-06 | chr:4:9603240 |
| 4 rs13148830  | 9546733 A | 0.3668 | 5.21E-06 | chr:4:9603240 |
| 4 rs6852352   | 9547724 C | 0.3668 | 5.21E-06 | chr:4:9603240 |
| 4 rs9291569   | 9545554 T | 0.3668 | 5.21E-06 | chr:4:9603240 |
| 4 rs9685700   | 9547040 C | 0.3668 | 5.21E-06 | chr:4:9603240 |
| 4 rs9685984   | 9547110 A | 0.3668 | 5.21E-06 | chr:4:9603240 |
| 4 rs9998765   | 9543673 T | 0.3668 | 5.21E-06 | chr:4:9603240 |
| 4 rs4552459   | 9664933 G | 0.4877 | 5.22E-06 | chr:4:9603240 |
| 4 rs9760975   | 9518480 T | 0.3608 | 5.37E-06 | chr:4:9603240 |
| 4 rs4697904   | 9888994 C | 0.4712 | 5.39E-06 | chr:4:9603240 |
| 4 rs4697905   | 9889042 T | 0.4712 | 5.39E-06 | chr:4:9603240 |
| 4 rs4974870   | 9566083 C | 0.304  | 5.64E-06 | chr:4:9603240 |
| 4 rs7356480   | 9413501 A | 0.5387 | 5.84E-06 | chr:4:9603240 |
| 4 rs13138944  | 9546782 C | 0.3829 | 6.09E-06 | chr:4:9603240 |
| 4 rs10003673  | 9862300 G | 0.4642 | 6.14E-06 | chr:4:9603240 |
| 4 rs6825480   | 9860489 G | 0.4642 | 6.14E-06 | chr:4:9603240 |
| 4 rs13104273  | 9489263 T | 0.3687 | 6.24E-06 | chr:4:9603240 |
| 4 rs13118026  | 9488747 G | 0.3687 | 6.24E-06 | chr:4:9603240 |
| 4 rs13149072  | 9489053 A | 0.3687 | 6.24E-06 | chr:4:9603240 |
| 4 rs6825697   | 9488798 G | 0.3687 | 6.24E-06 | chr:4:9603240 |

|               |           |        |          |               |
|---------------|-----------|--------|----------|---------------|
| 4 rs7435955   | 9510072 C | 0.3694 | 6.47E-06 | chr:4:9603240 |
| 4 rs140020996 | 9547186 A | 0.3259 | 6.57E-06 | chr:4:9603240 |
| 4 rs9799622   | 9595641 G | 0.4142 | 6.63E-06 | chr:4:9603240 |
| 4 rs140416642 | 9688823 T | 0.3347 | 6.70E-06 | chr:4:9603240 |
| 4 rs2049543   | 9496515 A | 0.5347 | 6.84E-06 | chr:4:9603240 |
| 4 rs6814154   | 9666037 G | 0.4908 | 6.89E-06 | chr:4:9603240 |
| 4 rs13125980  | 9492119 T | 0.5367 | 7.04E-06 | chr:4:9603240 |
| 4 rs11931618  | 9488543 G | 0.5367 | 7.18E-06 | chr:4:9603240 |
| 4 rs2086431   | 9509791 T | 0.3683 | 7.19E-06 | chr:4:9603240 |
| 4 rs4974875   | 9528736 A | 0.3683 | 7.19E-06 | chr:4:9603240 |
| 4 rs9993054   | 9753417 G | 0.4339 | 7.20E-06 | chr:4:9603240 |
| 4 rs34580398  | 9546762 A | 0.5187 | 7.22E-06 | chr:4:9603240 |
| 4 rs9761430   | 9530816 A | 0.3689 | 7.36E-06 | chr:4:9603240 |
| 4 rs13123041  | 9537635 T | 0.3756 | 7.44E-06 | chr:4:9603240 |
| 4 rs7659768   | 9508354 A | 0.3661 | 7.49E-06 | chr:4:9603240 |
| 4 rs9291502   | 9507607 C | 0.3661 | 7.49E-06 | chr:4:9603240 |
| 4 rs12507049  | 9492364 C | 0.5388 | 7.55E-06 | chr:4:9603240 |
| 4 rs9291574   | 9550709 A | 0.3754 | 7.56E-06 | chr:4:9603240 |
| 4 rs576330935 | 9678540 G | 0.3462 | 7.61E-06 | chr:4:9603240 |
| 4 rs114501308 | 9523606 C | 0.3062 | 7.64E-06 | chr:4:9603240 |
| 4 rs144005095 | 9525521 A | 0.3062 | 7.64E-06 | chr:4:9603240 |
| 4 rs187362593 | 9522728 T | 0.3062 | 7.64E-06 | chr:4:9603240 |
| 4 rs2086434   | 9522956 T | 0.3062 | 7.64E-06 | chr:4:9603240 |
| 4 rs2865010   | 9522322 G | 0.3062 | 7.64E-06 | chr:4:9603240 |
| 4 rs2865014   | 9526839 G | 0.3062 | 7.64E-06 | chr:4:9603240 |
| 4 rs34226125  | 9524870 T | 0.3062 | 7.64E-06 | chr:4:9603240 |
| 4 rs34377969  | 9524484 T | 0.3062 | 7.64E-06 | chr:4:9603240 |
| 4 rs34973808  | 9522001 A | 0.3062 | 7.64E-06 | chr:4:9603240 |
| 4 rs35007886  | 9526152 A | 0.3062 | 7.64E-06 | chr:4:9603240 |
| 4 rs35993292  | 9528164 A | 0.3062 | 7.64E-06 | chr:4:9603240 |
| 4 rs3975573   | 9527751 C | 0.3062 | 7.64E-06 | chr:4:9603240 |
| 4 rs4974872   | 9529130 A | 0.3062 | 7.64E-06 | chr:4:9603240 |
| 4 rs4974877   | 9525399 A | 0.3062 | 7.64E-06 | chr:4:9603240 |
| 4 rs6448728   | 9541220 T | 0.3761 | 7.64E-06 | chr:4:9603240 |
| 4 rs6837003   | 9538422 T | 0.373  | 7.79E-06 | chr:4:9603240 |
| 4 rs11935740  | 9659384 T | 0.4957 | 7.97E-06 | chr:4:9603240 |
| 4 rs6815940   | 9658270 A | 0.4957 | 7.97E-06 | chr:4:9603240 |
| 4 rs146472691 | 9753129 A | 4.039  | 8.00E-06 | chr:4:9603240 |
| 4 rs3864189   | 9546431 A | 0.3771 | 8.00E-06 | chr:4:9603240 |
| 4 rs4521347   | 9701641 T | 0.4183 | 8.02E-06 | chr:4:9603240 |
| 4 rs146818253 | 9659794 T | 0.1877 | 8.06E-06 | chr:4:9603240 |
| 4 rs114031769 | 9514238 A | 0.3074 | 8.09E-06 | chr:4:9603240 |
| 4 rs150431445 | 9512554 A | 0.3074 | 8.09E-06 | chr:4:9603240 |

|               |           |        |          |               |
|---------------|-----------|--------|----------|---------------|
| 4 rs28832291  | 9513034 T | 0.3074 | 8.09E-06 | chr:4:9603240 |
| 4 rs28850870  | 9512869 G | 0.3074 | 8.09E-06 | chr:4:9603240 |
| 4 rs9760682   | 9513774 A | 0.3074 | 8.09E-06 | chr:4:9603240 |
| 4 rs12511107  | 9505163 A | 0.3747 | 8.35E-06 | chr:4:9603240 |
| 4 rs6414734   | 9506067 C | 0.3747 | 8.35E-06 | chr:4:9603240 |
| 4 rs6811895   | 9495236 A | 0.3747 | 8.35E-06 | chr:4:9603240 |
| 4 rs10805313  | 9703061 T | 0.4211 | 8.40E-06 | chr:4:9603240 |
| 4 rs10805314  | 9703181 T | 0.4211 | 8.40E-06 | chr:4:9603240 |
| 4 rs13101880  | 9707827 A | 0.4211 | 8.40E-06 | chr:4:9603240 |
| 4 rs13119702  | 9702543 G | 0.4211 | 8.40E-06 | chr:4:9603240 |
| 4 rs4536924   | 9704973 T | 0.4211 | 8.40E-06 | chr:4:9603240 |
| 4 rs4621430   | 9702695 T | 0.4211 | 8.40E-06 | chr:4:9603240 |
| 4 rs9291607   | 9708798 G | 0.4211 | 8.40E-06 | chr:4:9603240 |
| 4 rs9685887   | 9706342 T | 0.4211 | 8.40E-06 | chr:4:9603240 |
| 4 rs9992039   | 9702605 T | 0.4211 | 8.40E-06 | chr:4:9603240 |
| 4 rs9995655   | 9718931 G | 0.417  | 9.01E-06 | chr:4:9603240 |
| 4 rs6830941   | 9538436 G | 0.5288 | 9.03E-06 | chr:4:9603240 |
| 4 rs12642205  | 9504161 T | 0.5401 | 9.14E-06 | chr:4:9603240 |
| 4 rs4697901   | 9863698 G | 0.475  | 9.42E-06 | chr:4:9603240 |
| 4 rs10805342  | 9887086 T | 0.479  | 9.56E-06 | chr:4:9603240 |
| 4 rs139497414 | 9676839 A | 4.372  | 9.58E-06 | chr:4:9603240 |
| 4 rs7689419   | 9689698 T | 0.5005 | 9.70E-06 | chr:4:9603240 |
| 4 rs7680993   | 9457918 C | 0.6094 | 1.03E-05 | chr:4:9603240 |
| 4 rs141628047 | 9633784 T | 0.3838 | 1.05E-05 | chr:4:9603240 |
| 4 rs79765234  | 9965112 G | 2.388  | 1.12E-05 | chr:4:9603240 |
| 4 rs6828352   | 9566644 T | 0.3819 | 1.13E-05 | chr:4:9603240 |
| 4 rs6448742   | 9542759 C | 0.3858 | 1.13E-05 | chr:4:9603240 |
| 4 rs10010844  | 9559610 A | 0.3824 | 1.15E-05 | chr:4:9603240 |
| 4 rs12644854  | 9558686 A | 0.3824 | 1.15E-05 | chr:4:9603240 |
| 4 rs13117722  | 9561639 T | 0.3824 | 1.15E-05 | chr:4:9603240 |
| 4 rs13131681  | 9563930 A | 0.3824 | 1.15E-05 | chr:4:9603240 |
| 4 rs9291577   | 9565337 T | 0.3824 | 1.15E-05 | chr:4:9603240 |
| 4 rs9997906   | 9555408 A | 0.3824 | 1.15E-05 | chr:4:9603240 |
| 4 rs9998120   | 9555633 A | 0.3824 | 1.15E-05 | chr:4:9603240 |
| 4 rs2127797   | 9483343 A | 0.3776 | 1.19E-05 | chr:4:9603240 |
| 4 rs9714696   | 9485300 A | 0.3776 | 1.19E-05 | chr:4:9603240 |
| 4 rs10004109  | 9550663 T | 0.3834 | 1.19E-05 | chr:4:9603240 |
| 4 rs6448972   | 9709511 C | 0.4292 | 1.21E-05 | chr:4:9603240 |
| 4 rs529654115 | 9627446 T | 0.4169 | 1.25E-05 | chr:4:9603240 |
| 4 rs551252104 | 9627447 C | 0.4169 | 1.25E-05 | chr:4:9603240 |
| 4 rs2139238   | 9818655 A | 2.147  | 1.25E-05 | chr:4:9603240 |
| 4 rs6820627   | 9491205 A | 0.383  | 1.31E-05 | chr:4:9603240 |
| 4 rs13101652  | 9707682 A | 0.4308 | 1.32E-05 | chr:4:9603240 |

|   |             |            |        |          |                |
|---|-------------|------------|--------|----------|----------------|
| 4 | rs115640404 | 9514530 A  | 0.3206 | 1.32E-05 | chr:4:9603240  |
| 4 | rs115798273 | 9517159 T  | 0.3206 | 1.32E-05 | chr:4:9603240  |
| 4 | rs116631886 | 9517151 A  | 0.3206 | 1.32E-05 | chr:4:9603240  |
| 4 | rs142480715 | 9515374 C  | 0.3206 | 1.32E-05 | chr:4:9603240  |
| 4 | rs142673054 | 9517190 A  | 0.3206 | 1.32E-05 | chr:4:9603240  |
| 4 | rs143863503 | 9515918 G  | 0.3206 | 1.32E-05 | chr:4:9603240  |
| 4 | rs144017625 | 9517475 G  | 0.3206 | 1.32E-05 | chr:4:9603240  |
| 4 | rs146118254 | 9514742 T  | 0.3206 | 1.32E-05 | chr:4:9603240  |
| 4 | rs146576773 | 9515441 C  | 0.3206 | 1.32E-05 | chr:4:9603240  |
| 4 | rs148265284 | 9520483 A  | 0.3206 | 1.32E-05 | chr:4:9603240  |
| 4 | rs148935128 | 9515484 A  | 0.3206 | 1.32E-05 | chr:4:9603240  |
| 4 | rs191537310 | 9517870 T  | 0.3206 | 1.32E-05 | chr:4:9603240  |
| 4 | rs377410235 | 9515984 C  | 0.3206 | 1.32E-05 | chr:4:9603240  |
| 4 | rs58816075  | 9516725 T  | 0.3206 | 1.32E-05 | chr:4:9603240  |
| 4 | rs13138625  | 9497153 G  | 0.3834 | 1.33E-05 | chr:4:9603240  |
| 4 | rs4974886   | 9503349 T  | 0.3834 | 1.33E-05 | chr:4:9603240  |
| 4 | rs4974887   | 9496343 T  | 0.3834 | 1.33E-05 | chr:4:9603240  |
| 4 | rs4974888   | 9494435 G  | 0.3834 | 1.33E-05 | chr:4:9603240  |
| 4 | rs6852191   | 9500188 T  | 0.3834 | 1.33E-05 | chr:4:9603240  |
| 4 | rs6858402   | 9500935 T  | 0.3834 | 1.33E-05 | chr:4:9603240  |
| 4 | rs6820712   | 9548966 A  | 0.3866 | 1.34E-05 | chr:4:9603240  |
| 4 | rs9985764   | 9718719 A  | 0.425  | 1.39E-05 | chr:4:9603240  |
| 4 | rs4282175   | 9714684 A  | 0.4289 | 1.40E-05 | chr:4:9603240  |
| 4 | rs4407503   | 9714799 T  | 0.4289 | 1.40E-05 | chr:4:9603240  |
| 4 | rs4407504   | 9717360 C  | 0.4289 | 1.40E-05 | chr:4:9603240  |
| 4 | rs6448974   | 9715105 A  | 0.4289 | 1.40E-05 | chr:4:9603240  |
| 4 | rs6448996   | 9791254 G  | 0.5461 | 1.43E-05 | chr:4:9603240  |
| 6 | rs41287329  | 32552728 G | 5.263  | 8.83E-13 | chr:6:32505702 |
| 6 | rs41287330  | 32552730 A | 5.255  | 1.00E-12 | chr:6:32505702 |
| 6 | rs113085907 | 32510224 G | 4.61   | 2.12E-12 | chr:6:32505702 |
| 6 | rs556337500 | 32503531 A | 4.46   | 2.35E-12 | chr:6:32505702 |
| 6 | rs571499647 | 32503532 G | 4.46   | 2.35E-12 | chr:6:32505702 |
| 6 | rs530370261 | 32519826 T | 5.194  | 2.59E-12 | chr:6:32505702 |
| 6 | rs112515515 | 32513422 T | 5.313  | 3.37E-12 | chr:6:32505702 |
| 6 | rs147266303 | 32510268 C | 4.548  | 3.40E-12 | chr:6:32505702 |
| 6 | rs73397403  | 32519849 G | 5.109  | 3.55E-12 | chr:6:32505702 |
| 6 | rs72492329  | 32521136 A | 6.944  | 3.66E-12 | chr:6:32505702 |
| 6 | rs34405098  | 32523269 T | 5.636  | 4.38E-12 | chr:6:32505702 |
| 6 | rs115077688 | 32503287 T | 4.939  | 4.98E-12 | chr:6:32505702 |
| 6 | rs79338946  | 32502822 T | 3.85   | 5.04E-12 | chr:6:32505702 |
| 6 | rs116209683 | 32510508 C | 4.678  | 5.10E-12 | chr:6:32505702 |
| 6 | rs73726814  | 32523235 C | 5.556  | 5.50E-12 | chr:6:32505702 |
| 6 | rs74950807  | 32513375 T | 5.147  | 5.63E-12 | chr:6:32505702 |

|               |            |       |          |                |
|---------------|------------|-------|----------|----------------|
| 6 rs76818741  | 32513378 A | 5.147 | 5.63E-12 | chr:6:32505702 |
| 6 rs114653292 | 32503516 G | 4.257 | 5.70E-12 | chr:6:32505702 |
| 6 rs114821537 | 32503522 G | 4.26  | 6.05E-12 | chr:6:32505702 |
| 6 rs115726960 | 32503171 A | 4.791 | 6.14E-12 | chr:6:32505702 |
| 6 rs66924955  | 32507855 G | 4.493 | 6.83E-12 | chr:6:32505702 |
| 6 rs72853919  | 32507852 C | 4.493 | 6.83E-12 | chr:6:32505702 |
| 6 rs115296342 | 32503526 C | 4.258 | 6.87E-12 | chr:6:32505702 |
| 6 rs3828848   | 32520665 C | 5.046 | 6.93E-12 | chr:6:32505702 |
| 6 rs538116343 | 32521742 T | 4.609 | 7.17E-12 | chr:6:32505702 |
| 6 rs78622201  | 32518405 A | 4.961 | 7.23E-12 | chr:6:32505702 |
| 6 rs73397416  | 32521951 C | 5.136 | 7.39E-12 | chr:6:32505702 |
| 6 rs67774869  | 32508794 C | 5.039 | 7.40E-12 | chr:6:32505702 |
| 6 rs74535936  | 32510547 G | 4.675 | 7.58E-12 | chr:6:32505702 |
| 6 rs67916930  | 32508823 G | 5.041 | 7.91E-12 | chr:6:32505702 |
| 6 rs73727973  | 32509691 G | 4.964 | 8.29E-12 | chr:6:32505702 |
| 6 rs76571178  | 32525159 A | 3.73  | 8.32E-12 | chr:6:32505702 |
| 6 rs113209512 | 32508875 T | 4.691 | 8.91E-12 | chr:6:32505702 |
| 6 rs115806221 | 32514401 G | 4.894 | 9.22E-12 | chr:6:32505702 |
| 6 rs72492310  | 32509867 G | 4.463 | 9.29E-12 | chr:6:32505702 |
| 6 rs113225456 | 32521406 T | 5.019 | 9.49E-12 | chr:6:32505702 |
| 6 rs72844187  | 32521419 G | 5.019 | 9.49E-12 | chr:6:32505702 |
| 6 rs72844188  | 32521427 C | 5.019 | 9.49E-12 | chr:6:32505702 |
| 6 rs73729138  | 32520854 G | 5.019 | 9.49E-12 | chr:6:32505702 |
| 6 rs115123240 | 32519919 G | 4.958 | 9.51E-12 | chr:6:32505702 |
| 6 rs74485644  | 32501421 T | 4.903 | 9.79E-12 | chr:6:32505702 |
| 6 rs72851055  | 32502814 C | 3.731 | 9.86E-12 | chr:6:32505702 |
| 6 rs28819746  | 32509579 C | 4.961 | 1.03E-11 | chr:6:32505702 |
| 6 rs3828852   | 32520595 A | 4.884 | 1.04E-11 | chr:6:32505702 |
| 6 rs34615209  | 32513862 T | 4.965 | 1.05E-11 | chr:6:32505702 |
| 6 rs35687625  | 32513840 A | 4.965 | 1.05E-11 | chr:6:32505702 |
| 6 rs111289870 | 32512269 C | 4.698 | 1.07E-11 | chr:6:32505702 |
| 6 rs114987387 | 32502131 G | 4.639 | 1.07E-11 | chr:6:32505702 |
| 6 rs66738149  | 32501898 C | 4.917 | 1.08E-11 | chr:6:32505702 |
| 6 rs72851044  | 32501886 A | 4.917 | 1.08E-11 | chr:6:32505702 |
| 6 rs68126668  | 32509603 A | 4.962 | 1.08E-11 | chr:6:32505702 |
| 6 rs34369284  | 32514144 T | 4.965 | 1.09E-11 | chr:6:32505702 |
| 6 rs66796862  | 32521664 C | 4.964 | 1.10E-11 | chr:6:32505702 |
| 6 rs77783340  | 32514313 T | 4.689 | 1.12E-11 | chr:6:32505702 |
| 6 rs67529500  | 32504757 C | 4.912 | 1.13E-11 | chr:6:32505702 |
| 6 rs113220298 | 32510369 T | 4.397 | 1.15E-11 | chr:6:32505702 |
| 6 rs114353707 | 32513535 C | 4.966 | 1.15E-11 | chr:6:32505702 |
| 6 rs116817148 | 32513534 G | 4.966 | 1.15E-11 | chr:6:32505702 |
| 6 rs35301884  | 32513638 C | 4.966 | 1.15E-11 | chr:6:32505702 |



|               |            |       |          |                |
|---------------|------------|-------|----------|----------------|
| 6 rs66706092  | 32513915 T | 4.966 | 1.15E-11 | chr:6:32505702 |
| 6 rs72492319  | 32511987 T | 4.966 | 1.15E-11 | chr:6:32505702 |
| 6 rs72492327  | 32520465 G | 4.966 | 1.15E-11 | chr:6:32505702 |
| 6 rs72844111  | 32513938 C | 4.966 | 1.15E-11 | chr:6:32505702 |
| 6 rs75141783  | 32511944 A | 4.966 | 1.15E-11 | chr:6:32505702 |
| 6 rs72851025  | 32501459 C | 4.915 | 1.19E-11 | chr:6:32505702 |
| 6 rs66532036  | 32519319 A | 4.969 | 1.22E-11 | chr:6:32505702 |
| 6 rs114015220 | 32510599 T | 4.67  | 1.22E-11 | chr:6:32505702 |
| 6 rs114472333 | 32510598 T | 4.67  | 1.22E-11 | chr:6:32505702 |
| 6 rs76723065  | 32510591 G | 4.67  | 1.22E-11 | chr:6:32505702 |
| 6 rs72851060  | 32503560 G | 4.308 | 1.23E-11 | chr:6:32505702 |
| 6 rs72853940  | 32508945 T | 4.468 | 1.23E-11 | chr:6:32505702 |
| 6 rs75861594  | 32518103 G | 4.905 | 1.23E-11 | chr:6:32505702 |
| 6 rs66534143  | 32512601 C | 4.735 | 1.24E-11 | chr:6:32505702 |
| 6 rs139726276 | 32524769 G | 3.876 | 1.29E-11 | chr:6:32505702 |
| 6 rs112180912 | 32518436 A | 4.7   | 1.30E-11 | chr:6:32505702 |
| 6 rs73729106  | 32514288 T | 4.631 | 1.31E-11 | chr:6:32505702 |
| 6 rs115712701 | 32501737 C | 4.922 | 1.32E-11 | chr:6:32505702 |
| 6 rs115524254 | 32503565 C | 4.31  | 1.32E-11 | chr:6:32505702 |
| 6 rs113460787 | 32518089 T | 4.908 | 1.37E-11 | chr:6:32505702 |
| 6 rs200263528 | 32509009 C | 4.458 | 1.40E-11 | chr:6:32505702 |
| 6 rs68146539  | 32532928 C | 4.082 | 1.42E-11 | chr:6:32505702 |
| 6 rs529580232 | 32512136 C | 4.142 | 1.47E-11 | chr:6:32505702 |
| 6 rs551034683 | 32512138 A | 4.142 | 1.47E-11 | chr:6:32505702 |
| 6 rs72508474  | 32508738 C | 4.76  | 1.51E-11 | chr:6:32505702 |
| 6 rs116405199 | 32504367 T | 4.467 | 1.56E-11 | chr:6:32505702 |
| 6 rs78994392  | 32504362 T | 4.467 | 1.56E-11 | chr:6:32505702 |
| 6 rs73729745  | 32469136 A | 4.25  | 1.59E-11 | chr:6:32505702 |
| 6 rs113648142 | 32508762 T | 4.759 | 1.60E-11 | chr:6:32505702 |
| 6 rs73727961  | 32509022 A | 4.458 | 1.64E-11 | chr:6:32505702 |
| 6 rs72853968  | 32509883 C | 4.257 | 1.66E-11 | chr:6:32505702 |
| 6 rs112458679 | 32512167 G | 4.121 | 1.66E-11 | chr:6:32505702 |
| 6 rs201795916 | 32514567 C | 4.599 | 1.68E-11 | chr:6:32505702 |
| 6 rs72844118  | 32514539 T | 4.599 | 1.68E-11 | chr:6:32505702 |
| 6 rs68175425  | 32517446 G | 4.844 | 1.70E-11 | chr:6:32505702 |
| 6 rs113871699 | 32509693 T | 4.912 | 1.74E-11 | chr:6:32505702 |
| 6 rs73727972  | 32509683 G | 4.912 | 1.74E-11 | chr:6:32505702 |
| 6 rs111340421 | 32517174 G | 4.844 | 1.75E-11 | chr:6:32505702 |
| 6 rs72851065  | 32504213 T | 3.932 | 1.80E-11 | chr:6:32505702 |
| 6 rs72851066  | 32504216 T | 3.932 | 1.80E-11 | chr:6:32505702 |
| 6 rs72853950  | 32509472 T | 4.366 | 1.80E-11 | chr:6:32505702 |
| 6 rs72851061  | 32503672 C | 4.424 | 1.81E-11 | chr:6:32505702 |
| 6 rs73729140  | 32521290 C | 6.038 | 1.82E-11 | chr:6:32505702 |

|               |            |       |          |                |
|---------------|------------|-------|----------|----------------|
| 6 rs116675816 | 32512131 A | 4.118 | 1.86E-11 | chr:6:32505702 |
| 6 rs73727960  | 32508989 G | 4.462 | 2.00E-11 | chr:6:32505702 |
| 6 rs72508464  | 32504341 T | 4.459 | 2.01E-11 | chr:6:32505702 |
| 6 rs78942674  | 32509897 T | 4.253 | 2.03E-11 | chr:6:32505702 |
| 6 rs35957455  | 32521195 T | 4.728 | 2.05E-11 | chr:6:32505702 |
| 6 rs41287328  | 32552698 G | 4.85  | 2.07E-11 | chr:6:32505702 |
| 6 rs72851028  | 32501615 A | 4.651 | 2.08E-11 | chr:6:32505702 |
| 6 rs114020016 | 32524824 T | 3.637 | 2.09E-11 | chr:6:32505702 |
| 6 rs62405640  | 32516729 T | 4.737 | 2.10E-11 | chr:6:32505702 |
| 6 rs76033762  | 32516702 C | 4.737 | 2.10E-11 | chr:6:32505702 |
| 6 rs111945767 | 32517045 C | 4.778 | 2.12E-11 | chr:6:32505702 |
| 6 rs72492306  | 32509510 A | 4.646 | 2.16E-11 | chr:6:32505702 |
| 6 rs72492307  | 32509519 C | 4.646 | 2.16E-11 | chr:6:32505702 |
| 6 rs72508413  | 32454597 G | 5.486 | 2.18E-11 | chr:6:32505702 |
| 6 rs72851063  | 32503901 T | 4.413 | 2.20E-11 | chr:6:32505702 |
| 6 rs199506689 | 32504701 T | 4.244 | 2.30E-11 | chr:6:32505702 |
| 6 rs67717173  | 32520137 T | 4.698 | 2.33E-11 | chr:6:32505702 |
| 6 rs72492325  | 32520151 C | 4.698 | 2.33E-11 | chr:6:32505702 |
| 6 rs72853970  | 32509919 A | 4.449 | 2.39E-11 | chr:6:32505702 |
| 6 rs376327303 | 32520719 A | 4.584 | 2.40E-11 | chr:6:32505702 |
| 6 rs114233058 | 32517386 T | 4.689 | 2.46E-11 | chr:6:32505702 |
| 6 rs115916707 | 32517387 G | 4.689 | 2.46E-11 | chr:6:32505702 |
| 6 rs115664796 | 32508758 C | 4.743 | 2.49E-11 | chr:6:32505702 |
| 6 rs72851046  | 32501957 G | 4.656 | 2.53E-11 | chr:6:32505702 |
| 6 rs72851047  | 32501962 T | 4.656 | 2.53E-11 | chr:6:32505702 |
| 6 rs74221689  | 32501936 A | 4.656 | 2.53E-11 | chr:6:32505702 |
| 6 rs111901878 | 32516893 T | 4.695 | 2.55E-11 | chr:6:32505702 |
| 6 rs537722644 | 32525112 A | 3.336 | 2.58E-11 | chr:6:32505702 |
| 6 rs72853979  | 32511572 T | 4.691 | 2.62E-11 | chr:6:32505702 |
| 6 rs113850533 | 32516839 T | 4.697 | 2.69E-11 | chr:6:32505702 |
| 6 rs112155110 | 32501417 T | 4.897 | 2.70E-11 | chr:6:32505702 |
| 6 rs76662624  | 32503880 A | 4.207 | 2.76E-11 | chr:6:32505702 |
| 6 rs116316731 | 32502097 T | 4.41  | 2.77E-11 | chr:6:32505702 |
| 6 rs72492303  | 32509061 T | 4.46  | 2.83E-11 | chr:6:32505702 |
| 6 rs116413420 | 32509466 T | 4.356 | 2.84E-11 | chr:6:32505702 |
| 6 rs111590055 | 32510177 C | 3.921 | 2.90E-11 | chr:6:32505702 |
| 6 rs72851064  | 32503928 C | 4.416 | 2.93E-11 | chr:6:32505702 |
| 6 rs113900769 | 32503887 T | 4.206 | 2.97E-11 | chr:6:32505702 |
| 6 rs73727944  | 32504713 T | 4.248 | 2.97E-11 | chr:6:32505702 |
| 6 rs114520912 | 32517504 T | 4.623 | 2.98E-11 | chr:6:32505702 |
| 6 rs116645664 | 32517505 C | 4.623 | 2.98E-11 | chr:6:32505702 |
| 6 rs73728002  | 32513993 A | 4.978 | 2.98E-11 | chr:6:32505702 |
| 6 rs3828832   | 32521083 C | 4.795 | 2.99E-11 | chr:6:32505702 |

|               |            |       |          |                |
|---------------|------------|-------|----------|----------------|
| 6 rs112111526 | 32510317 A | 4.052 | 3.00E-11 | chr:6:32505702 |
| 6 rs73727954  | 32508902 T | 4.259 | 3.01E-11 | chr:6:32505702 |
| 6 rs545379090 | 32469285 T | 3.325 | 3.01E-11 | chr:6:32505702 |
| 6 rs112709345 | 32501541 T | 4.909 | 3.11E-11 | chr:6:32505702 |
| 6 rs546964381 | 32511275 G | 4.774 | 3.31E-11 | chr:6:32505702 |
| 6 rs558956689 | 32511276 G | 4.774 | 3.31E-11 | chr:6:32505702 |
| 6 rs76483802  | 32454913 G | 4.884 | 3.32E-11 | chr:6:32505702 |
| 6 rs72844171  | 32520749 C | 4.53  | 3.46E-11 | chr:6:32505702 |
| 6 rs5016923   | 32502028 G | 4.417 | 3.47E-11 | chr:6:32505702 |
| 6 rs74937819  | 32502037 A | 4.417 | 3.47E-11 | chr:6:32505702 |
| 6 rs115089463 | 32525092 A | 3.84  | 3.52E-11 | chr:6:32505702 |
| 6 rs202231764 | 32508412 T | 4.057 | 3.53E-11 | chr:6:32505702 |
| 6 rs67816706  | 32517266 T | 4.662 | 3.54E-11 | chr:6:32505702 |
| 6 rs72853971  | 32509938 C | 4.443 | 3.54E-11 | chr:6:32505702 |
| 6 rs72508473  | 32508399 G | 4.054 | 3.64E-11 | chr:6:32505702 |
| 6 rs77712892  | 32503570 T | 3.879 | 3.66E-11 | chr:6:32505702 |
| 6 rs114246255 | 32509461 G | 4.164 | 3.79E-11 | chr:6:32505702 |
| 6 rs115704383 | 32509460 T | 4.164 | 3.79E-11 | chr:6:32505702 |
| 6 rs66521709  | 32509829 A | 4.464 | 3.80E-11 | chr:6:32505702 |
| 6 rs545256869 | 32512858 T | 3.427 | 3.81E-11 | chr:6:32505702 |
| 6 rs66678933  | 32509320 T | 4.556 | 3.85E-11 | chr:6:32505702 |
| 6 rs370864292 | 32532975 A | 3.754 | 3.88E-11 | chr:6:32505702 |
| 6 rs111705290 | 32513412 A | 4.349 | 3.90E-11 | chr:6:32505702 |
| 6 rs73729122  | 32519777 G | 4.3   | 4.00E-11 | chr:6:32505702 |
| 6 rs9269252   | 32454293 A | 5.905 | 4.05E-11 | chr:6:32505702 |
| 6 rs67721312  | 32517556 T | 4.592 | 4.08E-11 | chr:6:32505702 |
| 6 rs74194578  | 32517590 T | 4.592 | 4.08E-11 | chr:6:32505702 |
| 6 rs75088009  | 32504884 G | 4.069 | 4.09E-11 | chr:6:32505702 |
| 6 rs72492304  | 32509311 C | 4.556 | 4.11E-11 | chr:6:32505702 |
| 6 rs560693076 | 32532972 C | 3.751 | 4.14E-11 | chr:6:32505702 |
| 6 rs112780983 | 32511348 G | 6.733 | 4.18E-11 | chr:6:32505702 |
| 6 rs72657675  | 32532955 G | 4.04  | 4.19E-11 | chr:6:32505702 |
| 6 rs112457394 | 32469073 C | 3.891 | 4.26E-11 | chr:6:32505702 |
| 6 rs374264352 | 32532969 A | 3.751 | 4.28E-11 | chr:6:32505702 |
| 6 rs67041740  | 32509273 C | 4.557 | 4.32E-11 | chr:6:32505702 |
| 6 rs67461697  | 32518767 C | 5.073 | 4.32E-11 | chr:6:32505702 |
| 6 rs73729131  | 32520313 T | 4.456 | 4.34E-11 | chr:6:32505702 |
| 6 rs74205903  | 32501249 C | 4.217 | 4.35E-11 | chr:6:32505702 |
| 6 rs76259812  | 32524672 C | 3.868 | 4.40E-11 | chr:6:32505702 |
| 6 rs116085924 | 32514884 G | 3.751 | 4.43E-11 | chr:6:32505702 |
| 6 rs116335331 | 32532577 T | 3.991 | 4.56E-11 | chr:6:32505702 |
| 6 rs73727981  | 32511791 C | 4.453 | 4.67E-11 | chr:6:32505702 |
| 6 rs189557518 | 32526205 A | 4.069 | 4.71E-11 | chr:6:32505702 |

|               |            |       |          |                |
|---------------|------------|-------|----------|----------------|
| 6 rs116190325 | 32510039 A | 4.452 | 4.75E-11 | chr:6:32505702 |
| 6 rs115217308 | 32520296 A | 4.414 | 4.78E-11 | chr:6:32505702 |
| 6 rs116173033 | 32520295 G | 4.414 | 4.78E-11 | chr:6:32505702 |
| 6 rs114171624 | 32514706 G | 3.927 | 4.80E-11 | chr:6:32505702 |
| 6 rs115380393 | 32503020 T | 3.353 | 4.80E-11 | chr:6:32505702 |
| 6 rs73727980  | 32511774 C | 4.455 | 5.04E-11 | chr:6:32505702 |
| 6 rs72492311  | 32509979 T | 4.448 | 5.09E-11 | chr:6:32505702 |
| 6 rs115077617 | 32532645 C | 3.975 | 5.13E-11 | chr:6:32505702 |
| 6 rs72853983  | 32511854 A | 4.454 | 5.17E-11 | chr:6:32505702 |
| 6 rs111896611 | 32511183 T | 3.652 | 5.20E-11 | chr:6:32505702 |
| 6 rs112427949 | 32511164 T | 3.604 | 5.22E-11 | chr:6:32505702 |
| 6 rs550643609 | 32502794 A | 3.381 | 5.26E-11 | chr:6:32505702 |
| 6 rs62405642  | 32517759 G | 4.558 | 5.55E-11 | chr:6:32505702 |
| 6 rs111626267 | 32502273 T | 3.773 | 5.65E-11 | chr:6:32505702 |
| 6 rs115573660 | 32502277 A | 3.773 | 5.65E-11 | chr:6:32505702 |
| 6 rs140120971 | 32510343 C | 3.889 | 5.66E-11 | chr:6:32505702 |
| 6 rs143822887 | 32510344 A | 3.889 | 5.66E-11 | chr:6:32505702 |
| 6 rs144411837 | 32510337 C | 3.889 | 5.66E-11 | chr:6:32505702 |
| 6 rs113955073 | 32522932 C | 4.254 | 5.70E-11 | chr:6:32505702 |
| 6 rs78278896  | 32508647 G | 4.557 | 5.73E-11 | chr:6:32505702 |
| 6 rs572581776 | 32526776 G | 4.096 | 5.78E-11 | chr:6:32505702 |
| 6 rs112300533 | 32517237 T | 4.518 | 5.83E-11 | chr:6:32505702 |
| 6 rs74821931  | 32517233 A | 4.518 | 5.83E-11 | chr:6:32505702 |
| 6 rs2157337   | 32501144 T | 4.209 | 5.95E-11 | chr:6:32505702 |
| 6 rs72508465  | 32505141 T | 3.684 | 6.08E-11 | chr:6:32505702 |
| 6 rs112780153 | 32510301 C | 3.959 | 6.25E-11 | chr:6:32505702 |
| 6 rs115303801 | 32512229 G | 3.838 | 6.27E-11 | chr:6:32505702 |
| 6 rs74375951  | 32500923 G | 4.415 | 6.33E-11 | chr:6:32505702 |
| 6 rs76235954  | 32512815 A | 3.414 | 6.37E-11 | chr:6:32505702 |
| 6 rs114435848 | 32532546 T | 3.908 | 6.81E-11 | chr:6:32505702 |
| 6 rs72508466  | 32505166 G | 3.679 | 6.85E-11 | chr:6:32505702 |
| 6 rs71534520  | 32510146 G | 3.964 | 6.96E-11 | chr:6:32505702 |
| 6 rs72492351  | 32538451 C | 4.522 | 7.41E-11 | chr:6:32505702 |
| 6 rs72492315  | 32512466 C | 3.937 | 7.51E-11 | chr:6:32505702 |
| 6 rs115978041 | 32522923 C | 4.152 | 7.87E-11 | chr:6:32505702 |
| 6 rs534064478 | 32512189 T | 3.833 | 7.88E-11 | chr:6:32505702 |
| 6 rs546382275 | 32512190 G | 3.833 | 7.88E-11 | chr:6:32505702 |
| 6 rs150423066 | 32506995 A | 3.258 | 8.02E-11 | chr:6:32505702 |
| 6 rs111649944 | 32518268 T | 4.27  | 8.20E-11 | chr:6:32505702 |
| 6 rs113232784 | 32518256 A | 4.27  | 8.20E-11 | chr:6:32505702 |
| 6 rs72849282  | 32469335 T | 3.185 | 8.29E-11 | chr:6:32505702 |
| 6 rs67011649  | 32532599 G | 4.031 | 8.32E-11 | chr:6:32505702 |
| 6 rs111938555 | 32509707 T | 4.101 | 8.34E-11 | chr:6:32505702 |

|               |            |       |          |                |
|---------------|------------|-------|----------|----------------|
| 6 rs72851052  | 32502249 T | 3.725 | 8.36E-11 | chr:6:32505702 |
| 6 rs72851053  | 32502250 G | 3.725 | 8.36E-11 | chr:6:32505702 |
| 6 rs114198395 | 32502961 T | 3.258 | 8.37E-11 | chr:6:32505702 |
| 6 rs9269560   | 32544371 C | 4.727 | 8.51E-11 | chr:6:32505702 |
| 6 rs536146370 | 32519759 A | 4.115 | 8.90E-11 | chr:6:32505702 |
| 6 rs113051760 | 32521691 G | 4.15  | 8.92E-11 | chr:6:32505702 |
| 6 rs545503784 | 32537034 A | 3.273 | 9.03E-11 | chr:6:32505702 |
| 6 rs560891265 | 32537038 C | 3.273 | 9.03E-11 | chr:6:32505702 |
| 6 rs578162447 | 32537032 G | 3.273 | 9.03E-11 | chr:6:32505702 |
| 6 rs201439475 | 32502968 A | 3.256 | 9.06E-11 | chr:6:32505702 |
| 6 rs74290599  | 32518785 T | 4.9   | 9.06E-11 | chr:6:32505702 |
| 6 rs111559749 | 32509012 T | 4.312 | 9.06E-11 | chr:6:32505702 |
| 6 rs76415310  | 32513232 T | 4.097 | 9.39E-11 | chr:6:32505702 |
| 6 rs115095329 | 32503497 A | 3.331 | 9.39E-11 | chr:6:32505702 |
| 6 rs116133469 | 32503492 G | 3.331 | 9.39E-11 | chr:6:32505702 |
| 6 rs76034941  | 32503498 C | 3.331 | 9.39E-11 | chr:6:32505702 |
| 6 rs111725169 | 32512223 C | 3.827 | 9.42E-11 | chr:6:32505702 |
| 6 rs73729111  | 32517525 T | 4.473 | 9.64E-11 | chr:6:32505702 |
| 6 rs562624040 | 32513024 C | 3.757 | 1.01E-10 | chr:6:32505702 |
| 6 rs72853989  | 32512321 T | 4.239 | 1.01E-10 | chr:6:32505702 |
| 6 rs183134414 | 32511069 T | 3.22  | 1.04E-10 | chr:6:32505702 |
| 6 rs145219524 | 32533964 T | 3.857 | 1.06E-10 | chr:6:32505702 |
| 6 rs181939518 | 32533977 C | 3.857 | 1.06E-10 | chr:6:32505702 |
| 6 rs189832895 | 32533972 T | 3.857 | 1.06E-10 | chr:6:32505702 |
| 6 rs575033700 | 32533973 T | 3.857 | 1.06E-10 | chr:6:32505702 |
| 6 rs66502326  | 32509411 T | 4.265 | 1.08E-10 | chr:6:32505702 |
| 6 rs139201366 | 32513186 A | 4.651 | 1.08E-10 | chr:6:32505702 |
| 6 rs111632178 | 32511149 C | 3.474 | 1.09E-10 | chr:6:32505702 |
| 6 rs67515384  | 32505271 A | 3.26  | 1.10E-10 | chr:6:32505702 |
| 6 rs66497315  | 32512407 C | 4.237 | 1.10E-10 | chr:6:32505702 |
| 6 rs72853911  | 32506759 G | 3.295 | 1.14E-10 | chr:6:32505702 |
| 6 rs72508468  | 32505288 C | 3.236 | 1.14E-10 | chr:6:32505702 |
| 6 rs557163190 | 32526172 G | 4.803 | 1.16E-10 | chr:6:32505702 |
| 6 rs114840252 | 32504071 T | 3.253 | 1.16E-10 | chr:6:32505702 |
| 6 rs149234868 | 32454921 G | 4.082 | 1.19E-10 | chr:6:32505702 |
| 6 rs73727940  | 32503738 T | 3.431 | 1.19E-10 | chr:6:32505702 |
| 6 rs537977627 | 32510140 A | 3.886 | 1.21E-10 | chr:6:32505702 |
| 6 rs115663137 | 32502992 C | 3.238 | 1.22E-10 | chr:6:32505702 |
| 6 rs115010442 | 32505229 C | 3.565 | 1.23E-10 | chr:6:32505702 |
| 6 rs79364663  | 32504085 C | 3.271 | 1.24E-10 | chr:6:32505702 |
| 6 rs533418679 | 32526140 A | 3.318 | 1.26E-10 | chr:6:32505702 |
| 6 rs114961271 | 32503352 T | 3.098 | 1.28E-10 | chr:6:32505702 |
| 6 rs114084676 | 32505216 C | 3.538 | 1.30E-10 | chr:6:32505702 |

|               |            |       |          |                |
|---------------|------------|-------|----------|----------------|
| 6 rs138991250 | 32534855 G | 3.957 | 1.30E-10 | chr:6:32505702 |
| 6 rs72844120  | 32514540 A | 3.931 | 1.31E-10 | chr:6:32505702 |
| 6 rs139029897 | 32454882 G | 3.678 | 1.33E-10 | chr:6:32505702 |
| 6 rs116017457 | 32521909 T | 4.067 | 1.33E-10 | chr:6:32505702 |
| 6 rs114831840 | 32501301 C | 4.013 | 1.35E-10 | chr:6:32505702 |
| 6 rs115303308 | 32501296 A | 4.013 | 1.35E-10 | chr:6:32505702 |
| 6 rs9269301   | 32539561 T | 4.362 | 1.36E-10 | chr:6:32505702 |
| 6 rs36218423  | 32524832 C | 3.376 | 1.37E-10 | chr:6:32505702 |
| 6 rs112815590 | 32504110 T | 3.26  | 1.39E-10 | chr:6:32505702 |
| 6 rs75174683  | 32504101 G | 3.26  | 1.39E-10 | chr:6:32505702 |
| 6 rs34376317  | 32536678 T | 3.555 | 1.41E-10 | chr:6:32505702 |
| 6 rs9269561   | 32544405 G | 4.5   | 1.42E-10 | chr:6:32505702 |
| 6 rs3828844   | 32520755 G | 4.058 | 1.42E-10 | chr:6:32505702 |
| 6 rs111847217 | 32511131 G | 3.465 | 1.42E-10 | chr:6:32505702 |
| 6 rs187085470 | 32533998 G | 3.923 | 1.43E-10 | chr:6:32505702 |
| 6 rs543093016 | 32532533 A | 3.717 | 1.44E-10 | chr:6:32505702 |
| 6 rs72851029  | 32501639 T | 4.643 | 1.48E-10 | chr:6:32505702 |
| 6 rs115202951 | 32501311 T | 4.011 | 1.51E-10 | chr:6:32505702 |
| 6 rs114327439 | 32505202 A | 3.532 | 1.55E-10 | chr:6:32505702 |
| 6 rs181190479 | 32533905 G | 3.165 | 1.56E-10 | chr:6:32505702 |
| 6 rs188265524 | 32533903 G | 3.165 | 1.56E-10 | chr:6:32505702 |
| 6 rs142475334 | 32533988 A | 4.095 | 1.60E-10 | chr:6:32505702 |
| 6 rs147023195 | 32518295 T | 4.112 | 1.66E-10 | chr:6:32505702 |
| 6 rs9269293   | 32539463 G | 4.196 | 1.68E-10 | chr:6:32505702 |
| 6 rs369883062 | 32519734 G | 3.956 | 1.72E-10 | chr:6:32505702 |
| 6 rs111425203 | 32534872 T | 3.977 | 1.73E-10 | chr:6:32505702 |
| 6 rs74394760  | 32513078 C | 4.043 | 1.75E-10 | chr:6:32505702 |
| 6 rs113434238 | 32501204 T | 3.848 | 1.75E-10 | chr:6:32505702 |
| 6 rs72492332  | 32523085 G | 4.843 | 1.79E-10 | chr:6:32505702 |
| 6 rs78806801  | 32503403 C | 3.143 | 1.81E-10 | chr:6:32505702 |
| 6 rs114776163 | 32518625 G | 4.186 | 1.87E-10 | chr:6:32505702 |
| 6 rs112999094 | 32511386 T | 5.938 | 1.88E-10 | chr:6:32505702 |
| 6 rs142592433 | 32511392 T | 5.938 | 1.88E-10 | chr:6:32505702 |
| 6 rs17424325  | 32521644 T | 4.002 | 2.01E-10 | chr:6:32505702 |
| 6 rs67860869  | 32508349 C | 3.703 | 2.01E-10 | chr:6:32505702 |
| 6 rs568869869 | 32502799 G | 3.233 | 2.06E-10 | chr:6:32505702 |
| 6 rs200819822 | 32505189 G | 3.526 | 2.08E-10 | chr:6:32505702 |
| 6 rs113787446 | 32518630 C | 4.183 | 2.08E-10 | chr:6:32505702 |
| 6 rs114302967 | 32503839 C | 3.309 | 2.13E-10 | chr:6:32505702 |
| 6 rs76054694  | 32503840 T | 3.309 | 2.13E-10 | chr:6:32505702 |
| 6 rs9269565   | 32544500 A | 5.224 | 2.13E-10 | chr:6:32505702 |
| 6 rs112349327 | 32502948 A | 3.148 | 2.14E-10 | chr:6:32505702 |
| 6 rs72851056  | 32502944 A | 3.148 | 2.14E-10 | chr:6:32505702 |

|               |            |       |          |                |
|---------------|------------|-------|----------|----------------|
| 6 rs116241189 | 32506751 A | 3.199 | 2.21E-10 | chr:6:32505702 |
| 6 rs9269302   | 32539574 T | 4.199 | 2.24E-10 | chr:6:32505702 |
| 6 rs9269292   | 32539450 T | 3.995 | 2.28E-10 | chr:6:32505702 |
| 6 rs113017160 | 32503834 G | 3.307 | 2.30E-10 | chr:6:32505702 |
| 6 rs9269299   | 32539541 C | 4.26  | 2.30E-10 | chr:6:32505702 |
| 6 rs67081540  | 32512359 C | 4.22  | 2.30E-10 | chr:6:32505702 |
| 6 rs9269304   | 32539585 T | 4.203 | 2.33E-10 | chr:6:32505702 |
| 6 rs185884622 | 32526169 C | 5.322 | 2.41E-10 | chr:6:32505702 |
| 6 rs73726819  | 32526540 G | 4.757 | 2.45E-10 | chr:6:32505702 |
| 6 rs112004746 | 32518155 T | 4.04  | 2.48E-10 | chr:6:32505702 |
| 6 rs556200726 | 32525900 A | 4.343 | 2.56E-10 | chr:6:32505702 |
| 6 rs72492317  | 32512501 A | 4.238 | 2.59E-10 | chr:6:32505702 |
| 6 rs74211571  | 32502566 T | 3.222 | 2.59E-10 | chr:6:32505702 |
| 6 rs116225018 | 32503380 C | 3.068 | 2.60E-10 | chr:6:32505702 |
| 6 rs72492314  | 32512421 A | 4.033 | 2.61E-10 | chr:6:32505702 |
| 6 rs542648047 | 32535499 T | 3.919 | 2.71E-10 | chr:6:32505702 |
| 6 rs545949191 | 32502900 A | 3.203 | 2.77E-10 | chr:6:32505702 |
| 6 rs11751146  | 32514899 T | 3.349 | 2.84E-10 | chr:6:32505702 |
| 6 rs9269254   | 32454327 T | 5.22  | 2.85E-10 | chr:6:32505702 |
| 6 rs73401326  | 32454783 G | 4.108 | 2.87E-10 | chr:6:32505702 |
| 6 rs9269749   | 32548136 G | 4.957 | 2.93E-10 | chr:6:32505702 |
| 6 rs116299701 | 32534068 A | 3.752 | 2.98E-10 | chr:6:32505702 |
| 6 rs539796570 | 32526182 C | 5.252 | 2.98E-10 | chr:6:32505702 |
| 6 rs74202712  | 32502546 G | 3.212 | 3.00E-10 | chr:6:32505702 |
| 6 rs182374257 | 32525306 T | 3.7   | 3.07E-10 | chr:6:32505702 |
| 6 rs147034082 | 32539600 A | 4.123 | 3.13E-10 | chr:6:32505702 |
| 6 rs74997284  | 32518934 G | 4.16  | 3.19E-10 | chr:6:32505702 |
| 6 rs78326230  | 32518935 A | 4.16  | 3.19E-10 | chr:6:32505702 |
| 6 rs72853927  | 32508474 G | 3.248 | 3.23E-10 | chr:6:32505702 |
| 6 rs72853926  | 32508451 G | 3.329 | 3.25E-10 | chr:6:32505702 |
| 6 rs35697584  | 32522151 A | 5.318 | 3.30E-10 | chr:6:32505702 |
| 6 rs76940575  | 32502590 C | 3.214 | 3.33E-10 | chr:6:32505702 |
| 6 rs79604868  | 32504073 A | 3.202 | 3.39E-10 | chr:6:32505702 |
| 6 rs72853949  | 32509435 T | 4.007 | 3.51E-10 | chr:6:32505702 |
| 6 rs116609988 | 32522988 A | 3.718 | 3.51E-10 | chr:6:32505702 |
| 6 rs536463096 | 32510951 G | 3.068 | 3.59E-10 | chr:6:32505702 |
| 6 rs547409849 | 32503365 T | 2.994 | 3.75E-10 | chr:6:32505702 |
| 6 rs565770331 | 32503366 C | 2.994 | 3.75E-10 | chr:6:32505702 |
| 6 rs527285388 | 32535496 T | 3.367 | 3.75E-10 | chr:6:32505702 |
| 6 rs537678001 | 32527268 G | 3.409 | 3.87E-10 | chr:6:32505702 |
| 6 rs113727677 | 32517010 C | 3.686 | 3.91E-10 | chr:6:32505702 |
| 6 rs79140398  | 32527093 C | 4.342 | 4.09E-10 | chr:6:32505702 |
| 6 rs146382271 | 32511291 T | 3.21  | 4.17E-10 | chr:6:32505702 |

|               |            |        |          |                |
|---------------|------------|--------|----------|----------------|
| 6 rs115141943 | 32538830 C | 3.843  | 4.20E-10 | chr:6:32505702 |
| 6 rs115640078 | 32538839 T | 3.843  | 4.20E-10 | chr:6:32505702 |
| 6 rs116541769 | 32524870 T | 3.377  | 4.22E-10 | chr:6:32505702 |
| 6 rs74197584  | 32502717 T | 2.761  | 4.44E-10 | chr:6:32505702 |
| 6 rs72853928  | 32508486 T | 3.156  | 4.51E-10 | chr:6:32505702 |
| 6 rs72853923  | 32508222 G | 2.887  | 4.76E-10 | chr:6:32505702 |
| 6 rs112944992 | 32510457 C | 3.446  | 4.85E-10 | chr:6:32505702 |
| 6 rs72492356  | 32538899 C | 4.488  | 4.86E-10 | chr:6:32505702 |
| 6 rs72492322  | 32519628 G | 4.409  | 4.87E-10 | chr:6:32505702 |
| 6 rs530662953 | 32504587 C | 3.078  | 4.91E-10 | chr:6:32505702 |
| 6 rs7765211   | 32502346 A | 3.247  | 5.11E-10 | chr:6:32505702 |
| 6 rs199616440 | 32510115 T | 3.686  | 5.19E-10 | chr:6:32505702 |
| 6 rs35179057  | 32523349 C | 4.146  | 5.20E-10 | chr:6:32505702 |
| 6 rs72853924  | 32508239 G | 2.883  | 5.21E-10 | chr:6:32505702 |
| 6 rs114715427 | 32538850 A | 3.877  | 5.33E-10 | chr:6:32505702 |
| 6 rs76317804  | 32469375 T | 2.832  | 5.34E-10 | chr:6:32505702 |
| 6 rs9269250   | 32454269 C | 0.1835 | 5.38E-10 | chr:6:32505702 |
| 6 rs112465099 | 32510430 G | 3.435  | 5.42E-10 | chr:6:32505702 |
| 6 rs80083020  | 32510439 C | 3.435  | 5.42E-10 | chr:6:32505702 |
| 6 rs114328264 | 32534675 T | 3.662  | 5.61E-10 | chr:6:32505702 |
| 6 rs138253052 | 32536103 A | 4.084  | 5.65E-10 | chr:6:32505702 |
| 6 rs111596698 | 32487123 G | 3.735  | 5.79E-10 | chr:6:32505702 |
| 6 rs541499994 | 32510983 C | 2.939  | 6.00E-10 | chr:6:32505702 |
| 6 rs115137792 | 32510114 C | 3.716  | 6.01E-10 | chr:6:32505702 |
| 6 rs74207695  | 32502631 C | 2.945  | 6.21E-10 | chr:6:32505702 |
| 6 rs114629945 | 32503717 G | 2.999  | 6.22E-10 | chr:6:32505702 |
| 6 rs116103612 | 32503716 A | 2.999  | 6.22E-10 | chr:6:32505702 |
| 6 rs142142101 | 32534657 G | 3.665  | 6.27E-10 | chr:6:32505702 |
| 6 rs66754072  | 32532402 A | 3.467  | 6.32E-10 | chr:6:32505702 |
| 6 rs182965163 | 32454827 A | 3.577  | 6.70E-10 | chr:6:32505702 |
| 6 rs202162787 | 32454828 G | 3.577  | 6.70E-10 | chr:6:32505702 |
| 6 rs34508462  | 32523476 C | 4.728  | 6.83E-10 | chr:6:32505702 |
| 6 rs559286232 | 32527271 C | 3.375  | 6.86E-10 | chr:6:32505702 |
| 6 rs532050307 | 32469431 C | 2.786  | 7.00E-10 | chr:6:32505702 |
| 6 rs571525080 | 32469429 A | 2.786  | 7.00E-10 | chr:6:32505702 |
| 6 rs76509141  | 32504529 C | 3.004  | 7.02E-10 | chr:6:32505702 |
| 6 rs141404431 | 32538578 T | 3.497  | 7.17E-10 | chr:6:32505702 |
| 6 rs143027966 | 32538579 T | 3.497  | 7.17E-10 | chr:6:32505702 |
| 6 rs151286796 | 32538577 T | 3.497  | 7.17E-10 | chr:6:32505702 |
| 6 rs73397495  | 32534640 C | 3.637  | 7.51E-10 | chr:6:32505702 |
| 6 rs74211958  | 32469040 G | 2.884  | 7.52E-10 | chr:6:32505702 |
| 6 rs554443954 | 32496557 T | 2.848  | 7.73E-10 | chr:6:32505702 |
| 6 rs11751496  | 32533549 T | 3.308  | 7.97E-10 | chr:6:32505702 |



|               |            |       |          |                |
|---------------|------------|-------|----------|----------------|
| 6 rs536708130 | 32518949 G | 3.958 | 8.05E-10 | chr:6:32505702 |
| 6 rs187395433 | 32510968 G | 2.923 | 8.09E-10 | chr:6:32505702 |
| 6 rs9269532   | 32543825 C | 4.276 | 8.10E-10 | chr:6:32505702 |
| 6 rs72492347  | 32533142 G | 3.518 | 8.23E-10 | chr:6:32505702 |
| 6 rs9269998   | 32552721 G | 4.24  | 8.34E-10 | chr:6:32505702 |
| 6 rs9269578   | 32544743 T | 4.099 | 8.38E-10 | chr:6:32505702 |
| 6 rs113908137 | 32523500 G | 4.763 | 8.46E-10 | chr:6:32505702 |
| 6 rs34166207  | 32523510 A | 4.763 | 8.46E-10 | chr:6:32505702 |
| 6 rs67704526  | 32536650 T | 3.048 | 8.67E-10 | chr:6:32505702 |
| 6 rs540049194 | 32503078 A | 2.803 | 9.32E-10 | chr:6:32505702 |
| 6 rs183667786 | 32533749 C | 4.24  | 9.50E-10 | chr:6:32505702 |
| 6 rs188327097 | 32533734 A | 4.24  | 9.50E-10 | chr:6:32505702 |
| 6 rs558887953 | 32533750 A | 4.24  | 9.50E-10 | chr:6:32505702 |
| 6 rs75519123  | 32469404 G | 2.77  | 9.63E-10 | chr:6:32505702 |
| 6 rs552961071 | 32533756 T | 3.996 | 1.03E-09 | chr:6:32505702 |
| 6 rs373289038 | 32535643 A | 3.195 | 1.04E-09 | chr:6:32505702 |
| 6 rs376459798 | 32535644 A | 3.195 | 1.04E-09 | chr:6:32505702 |
| 6 rs201947932 | 32534556 T | 4.786 | 1.04E-09 | chr:6:32505702 |
| 6 rs149589923 | 32500818 A | 3.543 | 1.05E-09 | chr:6:32505702 |
| 6 rs538718414 | 32508207 T | 2.731 | 1.05E-09 | chr:6:32505702 |
| 6 rs144578241 | 32536479 A | 3.094 | 1.06E-09 | chr:6:32505702 |
| 6 rs112280675 | 32522066 A | 4.521 | 1.10E-09 | chr:6:32505702 |
| 6 rs575449137 | 32536491 A | 3.093 | 1.11E-09 | chr:6:32505702 |
| 6 rs116180191 | 32534588 A | 4.473 | 1.12E-09 | chr:6:32505702 |
| 6 rs72508469  | 32505309 C | 2.833 | 1.13E-09 | chr:6:32505702 |
| 6 rs184358099 | 32500832 G | 3.539 | 1.15E-09 | chr:6:32505702 |
| 6 rs9269392   | 32541163 C | 3.621 | 1.16E-09 | chr:6:32505702 |
| 6 rs112013291 | 32536551 A | 3.095 | 1.17E-09 | chr:6:32505702 |
| 6 rs574369672 | 32533757 G | 3.963 | 1.18E-09 | chr:6:32505702 |
| 6 rs9269314   | 32539715 G | 3.746 | 1.19E-09 | chr:6:32505702 |
| 6 rs540304678 | 32536503 C | 3.094 | 1.23E-09 | chr:6:32505702 |
| 6 rs575744181 | 32533771 A | 4.189 | 1.24E-09 | chr:6:32505702 |
| 6 rs72844152  | 32519652 A | 3.879 | 1.24E-09 | chr:6:32505702 |
| 6 rs541874222 | 32533761 G | 4.196 | 1.27E-09 | chr:6:32505702 |
| 6 rs563246799 | 32533766 C | 4.196 | 1.27E-09 | chr:6:32505702 |
| 6 rs535694878 | 32512216 A | 3.293 | 1.28E-09 | chr:6:32505702 |
| 6 rs556986229 | 32512217 G | 3.293 | 1.28E-09 | chr:6:32505702 |
| 6 rs141124032 | 32533299 G | 4.517 | 1.29E-09 | chr:6:32505702 |
| 6 rs374248993 | 32496534 C | 3.12  | 1.30E-09 | chr:6:32505702 |
| 6 rs7743846   | 32505600 C | 3.132 | 1.33E-09 | chr:6:32505702 |
| 6 rs9269542   | 32544042 A | 4.041 | 1.36E-09 | chr:6:32505702 |
| 6 rs146280841 | 32533291 A | 4.528 | 1.36E-09 | chr:6:32505702 |
| 6 rs148731245 | 32533293 C | 4.528 | 1.36E-09 | chr:6:32505702 |

|               |            |       |          |                |
|---------------|------------|-------|----------|----------------|
| 6 rs9269296   | 32539509 G | 3.199 | 1.36E-09 | chr:6:32505702 |
| 6 rs115573308 | 32533118 T | 3.401 | 1.38E-09 | chr:6:32505702 |
| 6 rs9269373   | 32540873 G | 3.395 | 1.40E-09 | chr:6:32505702 |
| 6 rs73727946  | 32504967 C | 3.038 | 1.42E-09 | chr:6:32505702 |
| 6 rs12661707  | 32531245 T | 3.817 | 1.43E-09 | chr:6:32505702 |
| 6 rs11752506  | 32520273 A | 3.54  | 1.45E-09 | chr:6:32505702 |
| 6 rs559903629 | 32510984 A | 2.859 | 1.46E-09 | chr:6:32505702 |
| 6 rs9269237   | 32453583 T | 4.65  | 1.47E-09 | chr:6:32505702 |
| 6 rs544574563 | 32534337 G | 3.816 | 1.48E-09 | chr:6:32505702 |
| 6 rs9270570   | 32560978 G | 4.723 | 1.51E-09 | chr:6:32505702 |
| 6 rs9269393   | 32541222 A | 4.116 | 1.51E-09 | chr:6:32505702 |
| 6 rs111290332 | 32533327 A | 4.25  | 1.53E-09 | chr:6:32505702 |
| 6 rs536038224 | 32523371 C | 3.773 | 1.53E-09 | chr:6:32505702 |
| 6 rs534024500 | 32507307 G | 2.646 | 1.54E-09 | chr:6:32505702 |
| 6 rs9269317   | 32539767 T | 3.489 | 1.54E-09 | chr:6:32505702 |
| 6 rs72851077  | 32504624 C | 2.972 | 1.54E-09 | chr:6:32505702 |
| 6 rs182890820 | 32527218 T | 3.16  | 1.55E-09 | chr:6:32505702 |
| 6 rs557288207 | 32504452 T | 3.141 | 1.58E-09 | chr:6:32505702 |
| 6 rs182090170 | 32537941 G | 2.985 | 1.59E-09 | chr:6:32505702 |
| 6 rs190345143 | 32537926 G | 2.985 | 1.59E-09 | chr:6:32505702 |
| 6 rs11758321  | 32533413 G | 3.211 | 1.62E-09 | chr:6:32505702 |
| 6 rs544527733 | 32503091 T | 2.751 | 1.64E-09 | chr:6:32505702 |
| 6 rs115493349 | 32527153 G | 3.348 | 1.66E-09 | chr:6:32505702 |
| 6 rs114682516 | 32503702 C | 2.958 | 1.66E-09 | chr:6:32505702 |
| 6 rs74197151  | 32469035 T | 2.759 | 1.67E-09 | chr:6:32505702 |
| 6 rs72508430  | 32487172 T | 3.62  | 1.69E-09 | chr:6:32505702 |
| 6 rs28613510  | 32518507 A | 3.923 | 1.73E-09 | chr:6:32505702 |
| 6 rs9272408   | 32604963 G | 5.208 | 1.73E-09 | chr:6:32505702 |
| 6 rs75820413  | 32508505 G | 2.919 | 1.74E-09 | chr:6:32505702 |
| 6 rs192052326 | 32528176 T | 2.744 | 1.75E-09 | chr:6:32505702 |
| 6 rs369369329 | 32533784 C | 4.204 | 1.76E-09 | chr:6:32505702 |
| 6 rs138940568 | 32536635 T | 4.167 | 1.78E-09 | chr:6:32505702 |
| 6 rs145177101 | 32536632 G | 3.942 | 1.78E-09 | chr:6:32505702 |
| 6 rs143426018 | 32536888 G | 4.538 | 1.79E-09 | chr:6:32505702 |
| 6 rs201024350 | 32536869 C | 4.538 | 1.79E-09 | chr:6:32505702 |
| 6 rs112009323 | 32532001 C | 3.609 | 1.81E-09 | chr:6:32505702 |
| 6 rs562082330 | 32533812 G | 4.18  | 1.81E-09 | chr:6:32505702 |
| 6 rs556173675 | 32508202 G | 2.672 | 1.85E-09 | chr:6:32505702 |
| 6 rs182767311 | 32533523 C | 4.216 | 1.87E-09 | chr:6:32505702 |
| 6 rs77178107  | 32533511 C | 4.216 | 1.87E-09 | chr:6:32505702 |
| 6 rs77814554  | 32533509 C | 4.216 | 1.87E-09 | chr:6:32505702 |
| 6 rs28584364  | 32512048 T | 3.996 | 1.88E-09 | chr:6:32505702 |
| 6 rs116350000 | 32523418 G | 4.578 | 1.89E-09 | chr:6:32505702 |

|               |            |       |          |                |
|---------------|------------|-------|----------|----------------|
| 6 rs112562347 | 32532004 T | 3.611 | 1.89E-09 | chr:6:32505702 |
| 6 rs12665549  | 32517141 A | 3.419 | 1.89E-09 | chr:6:32505702 |
| 6 rs116102092 | 32538672 A | 3.442 | 1.90E-09 | chr:6:32505702 |
| 6 rs114452447 | 32532262 A | 3.965 | 1.92E-09 | chr:6:32505702 |
| 6 rs142891616 | 32534325 T | 3.93  | 1.93E-09 | chr:6:32505702 |
| 6 rs143742917 | 32533480 A | 4.222 | 1.94E-09 | chr:6:32505702 |
| 6 rs146783438 | 32533483 A | 4.222 | 1.94E-09 | chr:6:32505702 |
| 6 rs148743468 | 32533479 C | 4.222 | 1.94E-09 | chr:6:32505702 |
| 6 rs115277180 | 32533468 C | 4.221 | 1.95E-09 | chr:6:32505702 |
| 6 rs528792740 | 32533803 G | 4.44  | 1.95E-09 | chr:6:32505702 |
| 6 rs546913114 | 32533805 T | 4.44  | 1.95E-09 | chr:6:32505702 |
| 6 rs116132127 | 32503328 A | 2.789 | 1.99E-09 | chr:6:32505702 |
| 6 rs112479577 | 32533856 A | 4.188 | 2.00E-09 | chr:6:32505702 |
| 6 rs115696138 | 32504460 C | 3.127 | 2.00E-09 | chr:6:32505702 |
| 6 rs142127023 | 32532178 T | 3.272 | 2.04E-09 | chr:6:32505702 |
| 6 rs144412121 | 32532179 G | 3.272 | 2.04E-09 | chr:6:32505702 |
| 6 rs115084652 | 32468978 T | 2.741 | 2.04E-09 | chr:6:32505702 |
| 6 rs72853904  | 32505575 T | 3.259 | 2.05E-09 | chr:6:32505702 |
| 6 rs11757123  | 32520094 C | 4.152 | 2.05E-09 | chr:6:32505702 |
| 6 rs533614924 | 32532227 A | 4.156 | 2.05E-09 | chr:6:32505702 |
| 6 rs561971374 | 32503086 A | 2.745 | 2.06E-09 | chr:6:32505702 |
| 6 rs370779031 | 32535688 A | 3.074 | 2.08E-09 | chr:6:32505702 |
| 6 rs375377896 | 32535693 A | 3.074 | 2.08E-09 | chr:6:32505702 |
| 6 rs542233442 | 32535702 A | 3.074 | 2.08E-09 | chr:6:32505702 |
| 6 rs560908329 | 32535706 G | 3.074 | 2.08E-09 | chr:6:32505702 |
| 6 rs111890942 | 32458131 C | 3.346 | 2.10E-09 | chr:6:32505702 |
| 6 rs142670190 | 32532172 T | 3.272 | 2.10E-09 | chr:6:32505702 |
| 6 rs538879571 | 32503698 A | 2.948 | 2.14E-09 | chr:6:32505702 |
| 6 rs78918008  | 32532281 A | 4.205 | 2.16E-09 | chr:6:32505702 |
| 6 rs79638048  | 32519391 A | 3.584 | 2.18E-09 | chr:6:32505702 |
| 6 rs551009500 | 32533836 T | 4.202 | 2.21E-09 | chr:6:32505702 |
| 6 rs569299936 | 32533837 A | 4.202 | 2.21E-09 | chr:6:32505702 |
| 6 rs538727527 | 32505332 T | 2.7   | 2.23E-09 | chr:6:32505702 |
| 6 rs553897781 | 32505335 A | 2.7   | 2.23E-09 | chr:6:32505702 |
| 6 rs529484704 | 32507478 C | 2.847 | 2.27E-09 | chr:6:32505702 |
| 6 rs569509899 | 32507490 G | 2.847 | 2.27E-09 | chr:6:32505702 |
| 6 rs74715621  | 32508285 G | 2.848 | 2.31E-09 | chr:6:32505702 |
| 6 rs76666064  | 32530841 C | 4.178 | 2.34E-09 | chr:6:32505702 |
| 6 rs192164737 | 32508091 G | 2.627 | 2.37E-09 | chr:6:32505702 |
| 6 rs193192981 | 32533553 G | 4.172 | 2.43E-09 | chr:6:32505702 |
| 6 rs9269295   | 32539475 C | 3.113 | 2.45E-09 | chr:6:32505702 |
| 6 rs181916895 | 32525947 G | 2.99  | 2.45E-09 | chr:6:32505702 |
| 6 rs562045282 | 32502681 T | 2.597 | 2.45E-09 | chr:6:32505702 |

|               |            |        |          |                |
|---------------|------------|--------|----------|----------------|
| 6 rs367997563 | 32535716 C | 3.061  | 2.50E-09 | chr:6:32505702 |
| 6 rs111529629 | 32533843 G | 4.209  | 2.50E-09 | chr:6:32505702 |
| 6 rs9269270   | 32539081 G | 2.981  | 2.52E-09 | chr:6:32505702 |
| 6 rs115980757 | 32536914 C | 4.224  | 2.52E-09 | chr:6:32505702 |
| 6 rs72849265  | 32458208 T | 3.152  | 2.54E-09 | chr:6:32505702 |
| 6 rs570478088 | 32533448 A | 4.075  | 2.55E-09 | chr:6:32505702 |
| 6 rs113405235 | 32521796 C | 4.058  | 2.56E-09 | chr:6:32505702 |
| 6 rs114899212 | 32524951 G | 4.188  | 2.56E-09 | chr:6:32505702 |
| 6 rs35479797  | 32535900 T | 3.925  | 2.57E-09 | chr:6:32505702 |
| 6 rs115104630 | 32502387 A | 2.919  | 2.62E-09 | chr:6:32505702 |
| 6 rs575209356 | 32525806 A | 2.844  | 2.63E-09 | chr:6:32505702 |
| 6 rs571341495 | 32505326 G | 2.693  | 2.65E-09 | chr:6:32505702 |
| 6 rs139128138 | 32533420 G | 4.048  | 2.69E-09 | chr:6:32505702 |
| 6 rs149932905 | 32533421 G | 4.048  | 2.69E-09 | chr:6:32505702 |
| 6 rs541088090 | 32533411 T | 4.048  | 2.69E-09 | chr:6:32505702 |
| 6 rs542755566 | 32525942 G | 2.985  | 2.70E-09 | chr:6:32505702 |
| 6 rs115878723 | 32503335 A | 2.739  | 2.74E-09 | chr:6:32505702 |
| 6 rs531982544 | 32503334 C | 2.739  | 2.74E-09 | chr:6:32505702 |
| 6 rs115910196 | 32502304 T | 2.989  | 2.75E-09 | chr:6:32505702 |
| 6 rs201954564 | 32497824 C | 0.1827 | 2.80E-09 | chr:6:32505702 |
| 6 rs75019606  | 32531924 C | 4.454  | 2.83E-09 | chr:6:32505702 |
| 6 rs145896370 | 32533718 A | 5.475  | 2.84E-09 | chr:6:32505702 |
| 6 rs552472567 | 32533447 C | 4.085  | 2.91E-09 | chr:6:32505702 |
| 6 rs115156211 | 32533440 A | 4.054  | 2.91E-09 | chr:6:32505702 |
| 6 rs114164335 | 32532128 C | 3.279  | 2.96E-09 | chr:6:32505702 |
| 6 rs112719175 | 32533401 T | 4.056  | 3.01E-09 | chr:6:32505702 |
| 6 rs9270621   | 32565283 A | 4.322  | 3.02E-09 | chr:6:32505702 |
| 6 rs138296162 | 32536852 T | 4.535  | 3.11E-09 | chr:6:32505702 |
| 6 rs72847615  | 32536863 A | 4.535  | 3.11E-09 | chr:6:32505702 |
| 6 rs115018431 | 32534360 T | 3.161  | 3.12E-09 | chr:6:32505702 |
| 6 rs113737511 | 32533392 G | 4.061  | 3.13E-09 | chr:6:32505702 |
| 6 rs148573031 | 32530691 A | 3.727  | 3.15E-09 | chr:6:32505702 |
| 6 rs9269310   | 32539628 A | 3.716  | 3.19E-09 | chr:6:32505702 |
| 6 rs72844144  | 32519125 A | 5.494  | 3.20E-09 | chr:6:32505702 |
| 6 rs562852671 | 32512142 T | 2.669  | 3.21E-09 | chr:6:32505702 |
| 6 rs114905947 | 32533016 C | 4.767  | 3.27E-09 | chr:6:32505702 |
| 6 rs72492350  | 32538088 T | 4.432  | 3.31E-09 | chr:6:32505702 |
| 6 rs7765332   | 32502374 A | 2.901  | 3.32E-09 | chr:6:32505702 |
| 6 rs116152468 | 32536921 T | 4.249  | 3.32E-09 | chr:6:32505702 |
| 6 rs66501603  | 32538002 A | 3.82   | 3.41E-09 | chr:6:32505702 |
| 6 rs111769716 | 32530819 G | 4.484  | 3.42E-09 | chr:6:32505702 |
| 6 rs111548649 | 32533365 G | 4.073  | 3.44E-09 | chr:6:32505702 |
| 6 rs116551340 | 32527461 C | 4.147  | 3.56E-09 | chr:6:32505702 |

|               |            |       |          |                |
|---------------|------------|-------|----------|----------------|
| 6 rs6905161   | 32505249 A | 3.15  | 3.71E-09 | chr:6:32505702 |
| 6 rs140569663 | 32530944 A | 4.289 | 3.75E-09 | chr:6:32505702 |
| 6 rs149685121 | 32530946 C | 4.289 | 3.75E-09 | chr:6:32505702 |
| 6 rs558696616 | 32530898 C | 4.875 | 3.77E-09 | chr:6:32505702 |
| 6 rs577240453 | 32530899 T | 4.875 | 3.77E-09 | chr:6:32505702 |
| 6 rs151297998 | 32530904 C | 4.882 | 3.81E-09 | chr:6:32505702 |
| 6 rs9270121   | 32555009 C | 4.232 | 3.85E-09 | chr:6:32505702 |
| 6 rs73726842  | 32533029 A | 5.042 | 3.86E-09 | chr:6:32505702 |
| 6 rs532618689 | 32508064 T | 2.601 | 3.87E-09 | chr:6:32505702 |
| 6 rs549780202 | 32508055 T | 2.601 | 3.87E-09 | chr:6:32505702 |
| 6 rs564974789 | 32508061 A | 2.601 | 3.87E-09 | chr:6:32505702 |
| 6 rs116224274 | 32508583 C | 2.735 | 3.87E-09 | chr:6:32505702 |
| 6 rs373664556 | 32508561 C | 2.735 | 3.87E-09 | chr:6:32505702 |
| 6 rs76376937  | 32508568 G | 2.735 | 3.87E-09 | chr:6:32505702 |
| 6 rs77173653  | 32508587 G | 2.735 | 3.87E-09 | chr:6:32505702 |
| 6 rs75503609  | 32530929 A | 4.579 | 3.90E-09 | chr:6:32505702 |
| 6 rs9269273   | 32539129 A | 2.989 | 3.91E-09 | chr:6:32505702 |
| 6 rs9270618   | 32565236 T | 4.258 | 3.92E-09 | chr:6:32505702 |
| 6 rs147315656 | 32530869 T | 4.798 | 3.94E-09 | chr:6:32505702 |
| 6 rs9269271   | 32539107 C | 2.97  | 3.99E-09 | chr:6:32505702 |
| 6 rs538174489 | 32508201 T | 2.649 | 3.99E-09 | chr:6:32505702 |
| 6 rs146356328 | 32535965 T | 3.398 | 4.03E-09 | chr:6:32505702 |
| 6 rs115081905 | 32508276 T | 2.775 | 4.08E-09 | chr:6:32505702 |
| 6 rs9269288   | 32539408 A | 4.752 | 4.11E-09 | chr:6:32505702 |
| 6 rs534655111 | 32531220 T | 4.514 | 4.17E-09 | chr:6:32505702 |
| 6 rs537686051 | 32531213 G | 4.514 | 4.17E-09 | chr:6:32505702 |
| 6 rs552586675 | 32531215 G | 4.514 | 4.17E-09 | chr:6:32505702 |
| 6 rs571171259 | 32531218 G | 4.514 | 4.17E-09 | chr:6:32505702 |
| 6 rs72845759  | 32531182 G | 4.827 | 4.17E-09 | chr:6:32505702 |
| 6 rs9270045   | 32553662 G | 4.126 | 4.21E-09 | chr:6:32505702 |
| 6 rs114293611 | 32487353 C | 3.134 | 4.28E-09 | chr:6:32505702 |
| 6 rs72851100  | 32505511 C | 3.165 | 4.30E-09 | chr:6:32505702 |
| 6 rs553177248 | 32529916 A | 2.777 | 4.30E-09 | chr:6:32505702 |
| 6 rs73726843  | 32533042 C | 5.461 | 4.35E-09 | chr:6:32505702 |
| 6 rs9270576   | 32561068 T | 4.214 | 4.36E-09 | chr:6:32505702 |
| 6 rs34966632  | 32536306 G | 3.904 | 4.39E-09 | chr:6:32505702 |
| 6 rs72845758  | 32531178 C | 4.842 | 4.42E-09 | chr:6:32505702 |
| 6 rs576810845 | 32530891 T | 4.827 | 4.44E-09 | chr:6:32505702 |
| 6 rs9269286   | 32539396 A | 4.703 | 4.45E-09 | chr:6:32505702 |
| 6 rs145520715 | 32530952 T | 4.32  | 4.48E-09 | chr:6:32505702 |
| 6 rs111786536 | 32523589 C | 4.567 | 4.49E-09 | chr:6:32505702 |
| 6 rs145245177 | 32530955 C | 4.326 | 4.59E-09 | chr:6:32505702 |
| 6 rs148812784 | 32530954 C | 4.326 | 4.59E-09 | chr:6:32505702 |

|               |            |       |          |                |
|---------------|------------|-------|----------|----------------|
| 6 rs145092566 | 32454838 A | 2.953 | 4.61E-09 | chr:6:32505702 |
| 6 rs531336617 | 32530792 C | 4.925 | 4.62E-09 | chr:6:32505702 |
| 6 rs549516674 | 32530793 A | 4.925 | 4.62E-09 | chr:6:32505702 |
| 6 rs567265210 | 32530790 T | 4.925 | 4.62E-09 | chr:6:32505702 |
| 6 rs9270589   | 32561390 T | 4.266 | 4.62E-09 | chr:6:32505702 |
| 6 rs9270590   | 32561392 A | 4.266 | 4.62E-09 | chr:6:32505702 |
| 6 rs9270363   | 32558137 T | 4.183 | 4.65E-09 | chr:6:32505702 |
| 6 rs116520213 | 32504424 T | 3.096 | 4.75E-09 | chr:6:32505702 |
| 6 rs546636941 | 32504421 T | 3.096 | 4.75E-09 | chr:6:32505702 |
| 6 rs9270609   | 32565051 T | 3.945 | 4.75E-09 | chr:6:32505702 |
| 6 rs79749596  | 32534021 C | 3.806 | 4.76E-09 | chr:6:32505702 |
| 6 rs139868705 | 32532075 A | 3.665 | 4.85E-09 | chr:6:32505702 |
| 6 rs142162694 | 32532071 T | 3.665 | 4.85E-09 | chr:6:32505702 |
| 6 rs9269284   | 32539381 G | 4.762 | 4.91E-09 | chr:6:32505702 |
| 6 rs9269563   | 32544456 T | 4.02  | 4.93E-09 | chr:6:32505702 |
| 6 rs147819405 | 32533096 A | 4.593 | 4.95E-09 | chr:6:32505702 |
| 6 rs115742569 | 32516464 C | 5.27  | 4.97E-09 | chr:6:32505702 |
| 6 rs199893280 | 32531226 C | 4.55  | 4.99E-09 | chr:6:32505702 |
| 6 rs9270556   | 32560606 A | 4.27  | 5.06E-09 | chr:6:32505702 |
| 6 rs116048339 | 32468982 T | 2.634 | 5.09E-09 | chr:6:32505702 |
| 6 rs116380301 | 32468983 T | 2.634 | 5.09E-09 | chr:6:32505702 |
| 6 rs113409465 | 32511143 T | 3.192 | 5.21E-09 | chr:6:32505702 |
| 6 rs11970219  | 32500925 C | 3.311 | 5.22E-09 | chr:6:32505702 |
| 6 rs147611303 | 32536497 A | 4.265 | 5.27E-09 | chr:6:32505702 |
| 6 rs9270574   | 32561028 T | 4.189 | 5.40E-09 | chr:6:32505702 |
| 6 rs9270626   | 32565443 T | 3.785 | 5.48E-09 | chr:6:32505702 |
| 6 rs9270632   | 32565533 A | 4.06  | 5.48E-09 | chr:6:32505702 |
| 6 rs113474692 | 32529177 A | 2.916 | 5.53E-09 | chr:6:32505702 |
| 6 rs9270592   | 32561429 T | 4.224 | 5.53E-09 | chr:6:32505702 |
| 6 rs116609655 | 32503059 C | 2.644 | 5.60E-09 | chr:6:32505702 |
| 6 rs9270612   | 32565106 C | 4.1   | 5.60E-09 | chr:6:32505702 |
| 6 rs115774308 | 32530778 T | 5.038 | 5.65E-09 | chr:6:32505702 |
| 6 rs9269968   | 32552251 A | 3.609 | 5.69E-09 | chr:6:32505702 |
| 6 rs68009841  | 32507731 T | 2.681 | 5.76E-09 | chr:6:32505702 |
| 6 rs199973717 | 32493600 G | 3.977 | 5.78E-09 | chr:6:32505702 |
| 6 rs140527559 | 32536500 G | 4.23  | 5.89E-09 | chr:6:32505702 |
| 6 rs566710022 | 32507505 T | 2.75  | 5.92E-09 | chr:6:32505702 |
| 6 rs9270614   | 32565115 A | 4.101 | 5.92E-09 | chr:6:32505702 |
| 6 rs114451225 | 32538025 G | 3.824 | 5.97E-09 | chr:6:32505702 |
| 6 rs201648725 | 32538024 C | 3.824 | 5.97E-09 | chr:6:32505702 |
| 6 rs145319447 | 32536492 C | 4.221 | 6.01E-09 | chr:6:32505702 |
| 6 rs9269277   | 32539265 A | 5.123 | 6.04E-09 | chr:6:32505702 |
| 6 rs9269278   | 32539269 A | 5.123 | 6.04E-09 | chr:6:32505702 |

|               |            |        |          |                |
|---------------|------------|--------|----------|----------------|
| 6 rs9269279   | 32539274 G | 5.123  | 6.04E-09 | chr:6:32505702 |
| 6 rs74208414  | 32501649 G | 3.298  | 6.07E-09 | chr:6:32505702 |
| 6 rs138129967 | 32532324 C | 5.348  | 6.08E-09 | chr:6:32505702 |
| 6 rs371994404 | 32532317 A | 5.348  | 6.08E-09 | chr:6:32505702 |
| 6 rs9269280   | 32539279 C | 5.132  | 6.17E-09 | chr:6:32505702 |
| 6 rs78274956  | 32526351 A | 3.886  | 6.19E-09 | chr:6:32505702 |
| 6 rs142198554 | 32531887 T | 5.248  | 6.27E-09 | chr:6:32505702 |
| 6 rs546856170 | 32531888 G | 5.248  | 6.27E-09 | chr:6:32505702 |
| 6 rs72849267  | 32468923 T | 2.826  | 6.30E-09 | chr:6:32505702 |
| 6 rs9272214   | 32602096 A | 4.054  | 6.37E-09 | chr:6:32505702 |
| 6 rs148633289 | 32487229 T | 6.961  | 6.45E-09 | chr:6:32505702 |
| 6 rs114106672 | 32532692 A | 5.51   | 6.52E-09 | chr:6:32505702 |
| 6 rs566973051 | 32531876 C | 5.268  | 6.53E-09 | chr:6:32505702 |
| 6 rs2516050   | 32570352 G | 0.1534 | 6.54E-09 | chr:6:32505702 |
| 6 rs9270572   | 32561010 T | 4.174  | 6.64E-09 | chr:6:32505702 |
| 6 rs543107154 | 32532351 C | 5.312  | 6.68E-09 | chr:6:32505702 |
| 6 rs561232678 | 32532352 A | 5.312  | 6.68E-09 | chr:6:32505702 |
| 6 rs628754    | 32574787 G | 0.1594 | 6.72E-09 | chr:6:32505702 |
| 6 rs201917227 | 32531870 C | 5.285  | 6.98E-09 | chr:6:32505702 |
| 6 rs569119670 | 32532359 C | 5.339  | 7.09E-09 | chr:6:32505702 |
| 6 rs72492338  | 32527408 G | 4.18   | 7.16E-09 | chr:6:32505702 |
| 6 rs562335725 | 32530443 A | 4.842  | 7.17E-09 | chr:6:32505702 |
| 6 rs66931410  | 32518235 C | 3.592  | 7.17E-09 | chr:6:32505702 |
| 6 rs73401349  | 32458094 C | 2.964  | 7.21E-09 | chr:6:32505702 |
| 6 rs184981897 | 32486966 A | 2.824  | 7.25E-09 | chr:6:32505702 |
| 6 rs527678609 | 32530435 A | 4.848  | 7.32E-09 | chr:6:32505702 |
| 6 rs540951197 | 32530439 C | 4.848  | 7.32E-09 | chr:6:32505702 |
| 6 rs476602    | 32569792 T | 0.1529 | 7.32E-09 | chr:6:32505702 |
| 6 rs372618919 | 32529918 G | 4.958  | 7.35E-09 | chr:6:32505702 |
| 6 rs76325796  | 32507653 A | 2.669  | 7.36E-09 | chr:6:32505702 |
| 6 rs77077499  | 32507652 T | 2.669  | 7.36E-09 | chr:6:32505702 |
| 6 rs9270806   | 32569563 C | 0.1538 | 7.45E-09 | chr:6:32505702 |
| 6 rs9270807   | 32569572 G | 0.1538 | 7.45E-09 | chr:6:32505702 |
| 6 rs476775    | 32569722 G | 0.1543 | 7.45E-09 | chr:6:32505702 |
| 6 rs9270549   | 32560440 A | 4.113  | 7.49E-09 | chr:6:32505702 |
| 6 rs9270550   | 32560441 G | 4.113  | 7.49E-09 | chr:6:32505702 |
| 6 rs183231933 | 32524320 T | 2.709  | 7.57E-09 | chr:6:32505702 |
| 6 rs9269274   | 32539170 C | 7.674  | 7.70E-09 | chr:6:32505702 |
| 6 rs9269275   | 32539172 G | 7.674  | 7.70E-09 | chr:6:32505702 |
| 6 rs142393802 | 32508021 T | 2.569  | 7.75E-09 | chr:6:32505702 |
| 6 rs185520080 | 32505872 C | 2.459  | 7.78E-09 | chr:6:32505702 |
| 6 rs9269281   | 32539309 A | 5.154  | 7.82E-09 | chr:6:32505702 |
| 6 rs116748457 | 32514768 G | 3.228  | 7.94E-09 | chr:6:32505702 |

|               |            |       |          |                |
|---------------|------------|-------|----------|----------------|
| 6 rs148866368 | 32531582 A | 2.659 | 7.96E-09 | chr:6:32505702 |
| 6 rs9270593   | 32561445 G | 4.132 | 7.97E-09 | chr:6:32505702 |
| 6 rs74197204  | 32507695 G | 2.788 | 8.33E-09 | chr:6:32505702 |
| 6 rs545853065 | 32531737 G | 5.47  | 8.42E-09 | chr:6:32505702 |
| 6 rs199798245 | 32530708 C | 5.19  | 8.66E-09 | chr:6:32505702 |
| 6 rs200856733 | 32530709 A | 5.19  | 8.66E-09 | chr:6:32505702 |
| 6 rs543318785 | 32530714 C | 5.19  | 8.66E-09 | chr:6:32505702 |
| 6 rs572746069 | 32530713 C | 5.19  | 8.66E-09 | chr:6:32505702 |
| 6 rs185436529 | 32530740 A | 5.536 | 8.76E-09 | chr:6:32505702 |
| 6 rs9270578   | 32561093 A | 4.084 | 8.84E-09 | chr:6:32505702 |
| 6 rs373666709 | 32531748 A | 5.114 | 8.84E-09 | chr:6:32505702 |
| 6 rs563850361 | 32531744 G | 5.114 | 8.84E-09 | chr:6:32505702 |
| 6 rs556948697 | 32531729 C | 5.449 | 8.86E-09 | chr:6:32505702 |
| 6 rs79740987  | 32507712 G | 2.663 | 9.19E-09 | chr:6:32505702 |
| 6 rs532508742 | 32530749 C | 5.551 | 9.23E-09 | chr:6:32505702 |
| 6 rs545154111 | 32530754 C | 5.56  | 9.30E-09 | chr:6:32505702 |
| 6 rs73726176  | 32490760 G | 3.167 | 9.62E-09 | chr:6:32505702 |
| 6 rs73726177  | 32490762 G | 3.167 | 9.62E-09 | chr:6:32505702 |
| 6 rs115065497 | 32530466 C | 5.313 | 9.62E-09 | chr:6:32505702 |
| 6 rs111948873 | 32531081 G | 5.566 | 9.62E-09 | chr:6:32505702 |
| 6 rs537366043 | 32531076 T | 5.566 | 9.62E-09 | chr:6:32505702 |
| 6 rs570295314 | 32531074 G | 5.566 | 9.62E-09 | chr:6:32505702 |
| 6 rs141020324 | 32469001 A | 2.584 | 9.65E-09 | chr:6:32505702 |
| 6 rs144975609 | 32468997 A | 2.584 | 9.65E-09 | chr:6:32505702 |
| 6 rs112621731 | 32501245 G | 3.157 | 9.71E-09 | chr:6:32505702 |
| 6 rs9272193   | 32601785 G | 3.716 | 9.84E-09 | chr:6:32505702 |
| 6 rs9270558   | 32560667 A | 4.076 | 9.98E-09 | chr:6:32505702 |
| 6 rs111342306 | 32531091 C | 5.579 | 1.01E-08 | chr:6:32505702 |
| 6 rs113209820 | 32531088 T | 5.579 | 1.01E-08 | chr:6:32505702 |
| 6 rs151210153 | 32531734 A | 5.522 | 1.02E-08 | chr:6:32505702 |
| 6 rs77501456  | 32523627 G | 4.754 | 1.03E-08 | chr:6:32505702 |
| 6 rs9269327   | 32540001 T | 3.038 | 1.05E-08 | chr:6:32505702 |
| 6 rs9272265   | 32603412 T | 4.06  | 1.05E-08 | chr:6:32505702 |
| 6 rs28404276  | 32510355 A | 3.287 | 1.06E-08 | chr:6:32505702 |
| 6 rs12660259  | 32531709 A | 5.563 | 1.06E-08 | chr:6:32505702 |
| 6 rs184303918 | 32529976 G | 4.722 | 1.08E-08 | chr:6:32505702 |
| 6 rs143945008 | 32513183 T | 3.549 | 1.08E-08 | chr:6:32505702 |
| 6 rs9269328   | 32540018 T | 3.042 | 1.08E-08 | chr:6:32505702 |
| 6 rs9272132   | 32600677 G | 4.062 | 1.10E-08 | chr:6:32505702 |
| 6 rs148619571 | 32536155 A | 3.351 | 1.10E-08 | chr:6:32505702 |
| 6 rs376217655 | 32505666 T | 2.48  | 1.11E-08 | chr:6:32505702 |
| 6 rs9272042   | 32598917 C | 4.065 | 1.11E-08 | chr:6:32505702 |
| 6 rs9272045   | 32599006 T | 4.063 | 1.12E-08 | chr:6:32505702 |



|               |            |        |          |                |
|---------------|------------|--------|----------|----------------|
| 6 rs115946871 | 32530011 C | 5.077  | 1.12E-08 | chr:6:32505702 |
| 6 rs9270115   | 32554934 T | 4.052  | 1.14E-08 | chr:6:32505702 |
| 6 rs74615215  | 32458389 G | 2.702  | 1.15E-08 | chr:6:32505702 |
| 6 rs9272114   | 32600317 C | 4.066  | 1.15E-08 | chr:6:32505702 |
| 6 rs138912409 | 32533684 A | 6.872  | 1.15E-08 | chr:6:32505702 |
| 6 rs143506542 | 32533686 T | 6.888  | 1.16E-08 | chr:6:32505702 |
| 6 rs9269750   | 32548141 G | 5.098  | 1.16E-08 | chr:6:32505702 |
| 6 rs139796058 | 32531715 A | 5.57   | 1.17E-08 | chr:6:32505702 |
| 6 rs112720311 | 32529995 A | 5.106  | 1.19E-08 | chr:6:32505702 |
| 6 rs114418909 | 32531852 C | 5.474  | 1.21E-08 | chr:6:32505702 |
| 6 rs116479032 | 32531853 A | 5.474  | 1.21E-08 | chr:6:32505702 |
| 6 rs72492344  | 32532494 A | 5.594  | 1.21E-08 | chr:6:32505702 |
| 6 rs9269276   | 32539244 C | 5.658  | 1.21E-08 | chr:6:32505702 |
| 6 rs9272105   | 32599999 A | 4.066  | 1.21E-08 | chr:6:32505702 |
| 6 rs78085354  | 32529981 G | 5.116  | 1.22E-08 | chr:6:32505702 |
| 6 rs9272118   | 32600448 T | 4.065  | 1.23E-08 | chr:6:32505702 |
| 6 rs9272218   | 32602238 T | 4.065  | 1.23E-08 | chr:6:32505702 |
| 6 rs9272023   | 32598558 G | 3.862  | 1.24E-08 | chr:6:32505702 |
| 6 rs9272043   | 32598946 G | 4.066  | 1.25E-08 | chr:6:32505702 |
| 6 rs72508418  | 32459868 T | 2.97   | 1.26E-08 | chr:6:32505702 |
| 6 rs114633631 | 32531706 A | 5.617  | 1.26E-08 | chr:6:32505702 |
| 6 rs9271881   | 32595604 A | 3.151  | 1.27E-08 | chr:6:32505702 |
| 6 rs9271882   | 32595605 T | 3.151  | 1.27E-08 | chr:6:32505702 |
| 6 rs200402299 | 32458349 A | 2.667  | 1.30E-08 | chr:6:32505702 |
| 6 rs80216275  | 32469383 A | 2.719  | 1.31E-08 | chr:6:32505702 |
| 6 rs142795234 | 32487593 G | 3.114  | 1.31E-08 | chr:6:32505702 |
| 6 rs146621647 | 32531602 T | 4.833  | 1.31E-08 | chr:6:32505702 |
| 6 rs111338793 | 32486248 G | 2.651  | 1.32E-08 | chr:6:32505702 |
| 6 rs9269465   | 32542247 A | 0.2434 | 1.32E-08 | chr:6:32505702 |
| 6 rs9270122   | 32555031 T | 4.1    | 1.32E-08 | chr:6:32505702 |
| 6 rs72845745  | 32529961 T | 5.142  | 1.33E-08 | chr:6:32505702 |
| 6 rs542536566 | 32457959 T | 2.495  | 1.35E-08 | chr:6:32505702 |
| 6 rs141022812 | 32533567 A | 3.953  | 1.35E-08 | chr:6:32505702 |
| 6 rs9270616   | 32565154 G | 3.972  | 1.36E-08 | chr:6:32505702 |
| 6 rs137976440 | 32489630 T | 4.579  | 1.36E-08 | chr:6:32505702 |
| 6 rs113573823 | 32532719 C | 5.55   | 1.36E-08 | chr:6:32505702 |
| 6 rs116465569 | 32536986 C | 5.266  | 1.36E-08 | chr:6:32505702 |
| 6 rs71536560  | 32529163 G | 2.901  | 1.36E-08 | chr:6:32505702 |
| 6 rs115127109 | 32530038 T | 5.508  | 1.37E-08 | chr:6:32505702 |
| 6 rs376533971 | 32540407 T | 2.993  | 1.38E-08 | chr:6:32505702 |
| 6 rs35255303  | 32536356 A | 5.068  | 1.39E-08 | chr:6:32505702 |
| 6 rs191239160 | 32525992 C | 3.585  | 1.40E-08 | chr:6:32505702 |
| 6 rs112083186 | 32531320 A | 5.767  | 1.41E-08 | chr:6:32505702 |

|               |            |        |                         |
|---------------|------------|--------|-------------------------|
| 6 rs112310670 | 32531136 C | 6.067  | 1.42E-08 chr:6:32505702 |
| 6 rs112649230 | 32531140 G | 6.067  | 1.42E-08 chr:6:32505702 |
| 6 rs9270580   | 32561123 C | 3.973  | 1.43E-08 chr:6:32505702 |
| 6 rs73726810  | 32522857 A | 3.745  | 1.45E-08 chr:6:32505702 |
| 6 rs9269311   | 32539654 C | 3.476  | 1.48E-08 chr:6:32505702 |
| 6 rs9270481   | 32559045 C | 3.802  | 1.51E-08 chr:6:32505702 |
| 6 rs139188913 | 32485921 A | 3.136  | 1.52E-08 chr:6:32505702 |
| 6 rs550051341 | 32505851 C | 2.421  | 1.52E-08 chr:6:32505702 |
| 6 rs571586981 | 32505852 A | 2.421  | 1.52E-08 chr:6:32505702 |
| 6 rs72492341  | 32531636 G | 5.417  | 1.52E-08 chr:6:32505702 |
| 6 rs9270567   | 32560801 G | 3.954  | 1.59E-08 chr:6:32505702 |
| 6 rs9272201   | 32601875 G | 3.497  | 1.60E-08 chr:6:32505702 |
| 6 rs115278245 | 32531057 A | 6.113  | 1.61E-08 chr:6:32505702 |
| 6 rs115407919 | 32531056 C | 6.113  | 1.61E-08 chr:6:32505702 |
| 6 rs77236357  | 32459844 T | 2.96   | 1.63E-08 chr:6:32505702 |
| 6 rs149581890 | 32530684 A | 5.879  | 1.66E-08 chr:6:32505702 |
| 6 rs199940149 | 32536733 G | 2.914  | 1.67E-08 chr:6:32505702 |
| 6 rs9269506   | 32543187 G | 0.2418 | 1.67E-08 chr:6:32505702 |
| 6 rs186217224 | 32457967 C | 2.484  | 1.68E-08 chr:6:32505702 |
| 6 rs9272104   | 32599918 C | 3.852  | 1.70E-08 chr:6:32505702 |
| 6 rs73726834  | 32531111 C | 6.211  | 1.72E-08 chr:6:32505702 |
| 6 rs80296745  | 32478683 T | 3.04   | 1.76E-08 chr:6:32505702 |
| 6 rs112993783 | 32478652 A | 3.038  | 1.80E-08 chr:6:32505702 |
| 6 rs140036576 | 32478632 T | 3.038  | 1.80E-08 chr:6:32505702 |
| 6 rs9272062   | 32599265 A | 3.832  | 1.81E-08 chr:6:32505702 |
| 6 rs182987687 | 32506870 C | 2.418  | 1.81E-08 chr:6:32505702 |
| 6 rs188426982 | 32506878 A | 2.418  | 1.81E-08 chr:6:32505702 |
| 6 rs189968693 | 32506863 A | 2.418  | 1.81E-08 chr:6:32505702 |
| 6 rs191423596 | 32506888 C | 2.418  | 1.81E-08 chr:6:32505702 |
| 6 rs139013960 | 32531606 G | 5.268  | 1.81E-08 chr:6:32505702 |
| 6 rs75404103  | 32531348 G | 6.312  | 1.83E-08 chr:6:32505702 |
| 6 rs9270004   | 32552795 G | 0.2438 | 1.83E-08 chr:6:32505702 |
| 6 rs374099373 | 32536722 T | 2.837  | 1.84E-08 chr:6:32505702 |
| 6 rs9270638   | 32565657 C | 3.458  | 1.84E-08 chr:6:32505702 |
| 6 rs9269291   | 32539445 A | 2.795  | 1.85E-08 chr:6:32505702 |
| 6 rs75700544  | 32469300 C | 3.379  | 1.88E-08 chr:6:32505702 |
| 6 rs9270636   | 32565648 C | 3.457  | 1.91E-08 chr:6:32505702 |
| 6 rs9270637   | 32565650 G | 3.457  | 1.91E-08 chr:6:32505702 |
| 6 rs111843909 | 32531043 T | 6.127  | 1.92E-08 chr:6:32505702 |
| 6 rs72492335  | 32526460 C | 3.465  | 1.93E-08 chr:6:32505702 |
| 6 rs9270642   | 32565707 T | 3.771  | 1.95E-08 chr:6:32505702 |
| 6 rs113204386 | 32531339 G | 6.366  | 1.96E-08 chr:6:32505702 |
| 6 rs73727927  | 32501214 G | 3.166  | 1.97E-08 chr:6:32505702 |

|               |            |        |          |                |
|---------------|------------|--------|----------|----------------|
| 6 rs9270003   | 32552779 C | 0.2366 | 1.97E-08 | chr:6:32505702 |
| 6 rs9269272   | 32539114 A | 5.702  | 1.98E-08 | chr:6:32505702 |
| 6 rs9270772   | 32568967 T | 0.1996 | 1.98E-08 | chr:6:32505702 |
| 6 rs9271883   | 32595610 A | 3.12   | 1.98E-08 | chr:6:32505702 |
| 6 rs9270631   | 32565505 T | 3.591  | 1.98E-08 | chr:6:32505702 |
| 6 rs576314890 | 32523379 T | 4.02   | 2.05E-08 | chr:6:32505702 |
| 6 rs201766754 | 32531843 G | 6.116  | 2.08E-08 | chr:6:32505702 |
| 6 rs114362560 | 32504503 A | 2.661  | 2.12E-08 | chr:6:32505702 |
| 6 rs116422126 | 32504500 G | 2.661  | 2.12E-08 | chr:6:32505702 |
| 6 rs9272232   | 32602630 T | 3.876  | 2.13E-08 | chr:6:32505702 |
| 6 rs9269873   | 32550796 A | 3.984  | 2.15E-08 | chr:6:32505702 |
| 6 rs189233809 | 32530497 T | 6.248  | 2.16E-08 | chr:6:32505702 |
| 6 rs193053660 | 32530503 C | 6.248  | 2.16E-08 | chr:6:32505702 |
| 6 rs533498287 | 32530506 C | 6.248  | 2.16E-08 | chr:6:32505702 |
| 6 rs566699769 | 32530505 A | 6.248  | 2.16E-08 | chr:6:32505702 |
| 6 rs143796398 | 32536259 T | 2.744  | 2.17E-08 | chr:6:32505702 |
| 6 rs9270597   | 32561598 G | 3.91   | 2.17E-08 | chr:6:32505702 |
| 6 rs67283303  | 32531253 T | 6.135  | 2.19E-08 | chr:6:32505702 |
| 6 rs113133909 | 32457928 T | 2.471  | 2.20E-08 | chr:6:32505702 |
| 6 rs534859262 | 32457931 T | 2.471  | 2.20E-08 | chr:6:32505702 |
| 6 rs3021303   | 32575746 G | 0.183  | 2.21E-08 | chr:6:32505702 |
| 6 rs73403117  | 32468956 T | 2.701  | 2.22E-08 | chr:6:32505702 |
| 6 rs67642277  | 32538067 A | 3.995  | 2.24E-08 | chr:6:32505702 |
| 6 rs9269921   | 32551568 G | 2.698  | 2.24E-08 | chr:6:32505702 |
| 6 rs9270485   | 32559064 C | 3.678  | 2.27E-08 | chr:6:32505702 |
| 6 rs67499532  | 32513184 G | 3.507  | 2.30E-08 | chr:6:32505702 |
| 6 rs9269549   | 32544202 T | 0.1574 | 2.30E-08 | chr:6:32505702 |
| 6 rs9270894   | 32571872 A | 0.2021 | 2.30E-08 | chr:6:32505702 |
| 6 rs114034298 | 32505797 C | 2.523  | 2.30E-08 | chr:6:32505702 |
| 6 rs111383925 | 32532741 C | 6.26   | 2.34E-08 | chr:6:32505702 |
| 6 rs111566749 | 32532746 A | 6.26   | 2.34E-08 | chr:6:32505702 |
| 6 rs9269923   | 32551604 T | 3.082  | 2.34E-08 | chr:6:32505702 |
| 6 rs618095    | 32574736 G | 0.1952 | 2.37E-08 | chr:6:32505702 |
| 6 rs114710684 | 32521237 G | 7.064  | 2.38E-08 | chr:6:32505702 |
| 6 rs116783886 | 32521236 T | 7.064  | 2.38E-08 | chr:6:32505702 |
| 6 rs9269574   | 32544711 C | 2.942  | 2.39E-08 | chr:6:32505702 |
| 6 rs74786163  | 32507780 T | 2.499  | 2.39E-08 | chr:6:32505702 |
| 6 rs539226504 | 32507944 A | 2.434  | 2.40E-08 | chr:6:32505702 |
| 6 rs571430728 | 32507938 T | 2.434  | 2.40E-08 | chr:6:32505702 |
| 6 rs9269515   | 32543469 C | 3.801  | 2.41E-08 | chr:6:32505702 |
| 6 rs13211570  | 32556146 G | 4.402  | 2.41E-08 | chr:6:32505702 |
| 6 rs13211672  | 32556145 T | 4.402  | 2.41E-08 | chr:6:32505702 |
| 6 rs9270884   | 32571734 T | 0.1824 | 2.44E-08 | chr:6:32505702 |

|               |            |        |                         |
|---------------|------------|--------|-------------------------|
| 6 rs193201719 | 32505807 T | 2.492  | 2.45E-08 chr:6:32505702 |
| 6 rs9271791   | 32594810 A | 2.918  | 2.45E-08 chr:6:32505702 |
| 6 rs80011743  | 32531770 G | 6.375  | 2.46E-08 chr:6:32505702 |
| 6 rs9272405   | 32604919 C | 4.482  | 2.50E-08 chr:6:32505702 |
| 6 rs2858867   | 32575325 A | 0.1859 | 2.51E-08 chr:6:32505702 |
| 6 rs9270663   | 32566101 G | 3.709  | 2.54E-08 chr:6:32505702 |
| 6 rs555706008 | 32507953 G | 2.43   | 2.55E-08 chr:6:32505702 |
| 6 rs9269501   | 32543118 C | 0.2247 | 2.55E-08 chr:6:32505702 |
| 6 rs73726852  | 32538295 C | 2.805  | 2.58E-08 chr:6:32505702 |
| 6 rs9270877   | 32571318 A | 0.1987 | 2.58E-08 chr:6:32505702 |
| 6 rs9270878   | 32571320 G | 0.1987 | 2.58E-08 chr:6:32505702 |
| 6 rs116490940 | 32503056 T | 2.543  | 2.61E-08 chr:6:32505702 |
| 6 rs147668426 | 32507931 G | 2.43   | 2.61E-08 chr:6:32505702 |
| 6 rs9270876   | 32571314 T | 0.1983 | 2.61E-08 chr:6:32505702 |
| 6 rs111749494 | 32532432 A | 6.491  | 2.66E-08 chr:6:32505702 |
| 6 rs112501266 | 32532428 C | 6.491  | 2.66E-08 chr:6:32505702 |
| 6 rs2858875   | 32566649 C | 3.79   | 2.69E-08 chr:6:32505702 |
| 6 rs140538649 | 32507946 T | 2.427  | 2.74E-08 chr:6:32505702 |
| 6 rs76415507  | 32492589 G | 2.983  | 2.77E-08 chr:6:32505702 |
| 6 rs545350177 | 32565668 G | 3.271  | 2.78E-08 chr:6:32505702 |
| 6 rs116474488 | 32469226 T | 2.502  | 2.79E-08 chr:6:32505702 |
| 6 rs9272040   | 32598903 G | 3.831  | 2.80E-08 chr:6:32505702 |
| 6 rs9272041   | 32598906 A | 3.831  | 2.80E-08 chr:6:32505702 |
| 6 rs9269396   | 32541290 A | 3.513  | 2.84E-08 chr:6:32505702 |
| 6 rs615719    | 32574204 G | 0.1879 | 2.86E-08 chr:6:32505702 |
| 6 rs9272440   | 32605371 C | 4.569  | 2.87E-08 chr:6:32505702 |
| 6 rs9270773   | 32568990 A | 0.1977 | 2.88E-08 chr:6:32505702 |
| 6 rs9270606   | 32564869 T | 3.798  | 2.89E-08 chr:6:32505702 |
| 6 rs481245    | 32576114 A | 0.1874 | 2.90E-08 chr:6:32505702 |
| 6 rs76454806  | 32530145 C | 6.379  | 2.92E-08 chr:6:32505702 |
| 6 rs80142174  | 32530144 G | 6.379  | 2.92E-08 chr:6:32505702 |
| 6 rs9270976   | 32573728 A | 0.1867 | 2.93E-08 chr:6:32505702 |
| 6 rs9270651   | 32565884 T | 3.79   | 2.93E-08 chr:6:32505702 |
| 6 rs9270652   | 32565905 T | 3.79   | 2.93E-08 chr:6:32505702 |
| 6 rs9270653   | 32565940 A | 3.79   | 2.93E-08 chr:6:32505702 |
| 6 rs9270654   | 32565946 G | 3.79   | 2.93E-08 chr:6:32505702 |
| 6 rs9270655   | 32565966 T | 3.79   | 2.93E-08 chr:6:32505702 |
| 6 rs9270667   | 32566306 C | 3.79   | 2.93E-08 chr:6:32505702 |
| 6 rs141961165 | 32506799 T | 2.723  | 2.96E-08 chr:6:32505702 |
| 6 rs486912    | 32575493 C | 0.1855 | 2.98E-08 chr:6:32505702 |
| 6 rs615672    | 32574171 G | 0.1855 | 2.98E-08 chr:6:32505702 |
| 6 rs615698    | 32574190 A | 0.1855 | 2.98E-08 chr:6:32505702 |
| 6 rs616187    | 32574305 G | 0.1855 | 2.98E-08 chr:6:32505702 |

|               |            |        |          |                |
|---------------|------------|--------|----------|----------------|
| 6 rs9272229   | 32602568 T | 3.834  | 3.03E-08 | chr:6:32505702 |
| 6 rs180942055 | 32507976 T | 2.443  | 3.10E-08 | chr:6:32505702 |
| 6 rs186170828 | 32507977 G | 2.443  | 3.10E-08 | chr:6:32505702 |
| 6 rs573629697 | 32507971 G | 2.443  | 3.10E-08 | chr:6:32505702 |
| 6 rs9270796   | 32569293 G | 0.1918 | 3.11E-08 | chr:6:32505702 |
| 6 rs9272070   | 32599485 G | 3.789  | 3.14E-08 | chr:6:32505702 |
| 6 rs541195    | 32567321 T | 3.639  | 3.17E-08 | chr:6:32505702 |
| 6 rs687675    | 32567316 G | 3.639  | 3.17E-08 | chr:6:32505702 |
| 6 rs72845725  | 32525566 T | 0.2643 | 3.18E-08 | chr:6:32505702 |
| 6 rs112882980 | 32533222 C | 7.379  | 3.21E-08 | chr:6:32505702 |
| 6 rs9272254   | 32603098 T | 3.828  | 3.22E-08 | chr:6:32505702 |
| 6 rs72845757  | 32530563 A | 6.539  | 3.24E-08 | chr:6:32505702 |
| 6 rs9270728   | 32567956 T | 0.1909 | 3.24E-08 | chr:6:32505702 |
| 6 rs115469967 | 32530190 A | 6.539  | 3.24E-08 | chr:6:32505702 |
| 6 rs535043779 | 32497358 A | 2.491  | 3.26E-08 | chr:6:32505702 |
| 6 rs552507937 | 32497354 A | 2.491  | 3.26E-08 | chr:6:32505702 |
| 6 rs570739482 | 32497356 C | 2.491  | 3.26E-08 | chr:6:32505702 |
| 6 rs9270771   | 32568964 G | 0.1943 | 3.27E-08 | chr:6:32505702 |
| 6 rs9270143   | 32555256 T | 3.854  | 3.27E-08 | chr:6:32505702 |
| 6 rs9272116   | 32600404 C | 3.829  | 3.27E-08 | chr:6:32505702 |
| 6 rs9272413   | 32604987 C | 4.487  | 3.29E-08 | chr:6:32505702 |
| 6 rs9270657   | 32566021 G | 3.762  | 3.31E-08 | chr:6:32505702 |
| 6 rs9272713   | 32609345 A | 3.889  | 3.32E-08 | chr:6:32505702 |
| 6 rs112236587 | 32530615 C | 6.568  | 3.32E-08 | chr:6:32505702 |
| 6 rs112302151 | 32530628 T | 6.568  | 3.32E-08 | chr:6:32505702 |
| 6 rs112715773 | 32530608 C | 6.568  | 3.32E-08 | chr:6:32505702 |
| 6 rs9270803   | 32569415 G | 0.1899 | 3.33E-08 | chr:6:32505702 |
| 6 rs9272406   | 32604929 C | 3.199  | 3.34E-08 | chr:6:32505702 |
| 6 rs74587827  | 32567757 G | 0.188  | 3.35E-08 | chr:6:32505702 |
| 6 rs2858866   | 32575391 G | 0.1872 | 3.37E-08 | chr:6:32505702 |
| 6 rs9269985   | 32552532 A | 3.241  | 3.42E-08 | chr:6:32505702 |
| 6 rs9270869   | 32571155 T | 0.1948 | 3.43E-08 | chr:6:32505702 |
| 6 rs9270871   | 32571160 A | 0.1948 | 3.43E-08 | chr:6:32505702 |
| 6 rs112103446 | 32522679 C | 10.26  | 3.46E-08 | chr:6:32505702 |
| 6 rs9270647   | 32565805 C | 3.594  | 3.47E-08 | chr:6:32505702 |
| 6 rs9270649   | 32565808 A | 3.594  | 3.47E-08 | chr:6:32505702 |
| 6 rs9270583   | 32561229 G | 3.762  | 3.53E-08 | chr:6:32505702 |
| 6 rs11752277  | 32537771 G | 2.519  | 3.55E-08 | chr:6:32505702 |
| 6 rs182520386 | 32537710 C | 2.996  | 3.58E-08 | chr:6:32505702 |
| 6 rs1064664   | 32552075 G | 3.12   | 3.59E-08 | chr:6:32505702 |
| 6 rs180756398 | 32458010 A | 2.451  | 3.68E-08 | chr:6:32505702 |
| 6 rs77149458  | 32487130 A | 4.229  | 3.70E-08 | chr:6:32505702 |
| 6 rs115814063 | 32492093 C | 3.344  | 3.73E-08 | chr:6:32505702 |

|               |            |        |          |                |
|---------------|------------|--------|----------|----------------|
| 6 rs572411223 | 32454634 T | 3.684  | 3.93E-08 | chr:6:32505702 |
| 6 rs116100204 | 32531556 T | 4.081  | 3.98E-08 | chr:6:32505702 |
| 6 rs111338570 | 32533670 C | 7.288  | 4.02E-08 | chr:6:32505702 |
| 6 rs113042858 | 32533666 T | 7.288  | 4.02E-08 | chr:6:32505702 |
| 6 rs72853925  | 32508330 G | 2.972  | 4.04E-08 | chr:6:32505702 |
| 6 rs71536557  | 32528926 T | 2.529  | 4.17E-08 | chr:6:32505702 |
| 6 rs9272221   | 32602334 A | 3.628  | 4.18E-08 | chr:6:32505702 |
| 6 rs9272142   | 32600800 C | 3.62   | 4.19E-08 | chr:6:32505702 |
| 6 rs115833135 | 32489672 A | 3.903  | 4.29E-08 | chr:6:32505702 |
| 6 rs9270034   | 32553418 G | 3.642  | 4.32E-08 | chr:6:32505702 |
| 6 rs9270598   | 32561618 C | 3.734  | 4.33E-08 | chr:6:32505702 |
| 6 rs113655203 | 32533247 T | 7.061  | 4.43E-08 | chr:6:32505702 |
| 6 rs71534530  | 32511211 A | 2.853  | 4.47E-08 | chr:6:32505702 |
| 6 rs115005201 | 32501172 A | 3.037  | 4.51E-08 | chr:6:32505702 |
| 6 rs368398419 | 32510709 C | 2.438  | 4.51E-08 | chr:6:32505702 |
| 6 rs371989616 | 32510718 T | 2.438  | 4.51E-08 | chr:6:32505702 |
| 6 rs72492340  | 32531385 C | 7.263  | 4.51E-08 | chr:6:32505702 |
| 6 rs72845768  | 32531377 C | 7.263  | 4.51E-08 | chr:6:32505702 |
| 6 rs72845747  | 32530054 T | 7.045  | 4.53E-08 | chr:6:32505702 |
| 6 rs113787140 | 32502901 A | 2.728  | 4.58E-08 | chr:6:32505702 |
| 6 rs547631481 | 32507531 A | 2.481  | 4.60E-08 | chr:6:32505702 |
| 6 rs555383676 | 32507771 A | 2.402  | 4.64E-08 | chr:6:32505702 |
| 6 rs181244719 | 32498916 C | 2.426  | 4.67E-08 | chr:6:32505702 |
| 6 rs183703563 | 32498913 A | 2.426  | 4.67E-08 | chr:6:32505702 |
| 6 rs9270171   | 32555685 A | 0.1874 | 4.68E-08 | chr:6:32505702 |
| 6 rs9270172   | 32555687 G | 0.1874 | 4.68E-08 | chr:6:32505702 |
| 6 rs77340266  | 32530200 A | 7.598  | 4.69E-08 | chr:6:32505702 |
| 6 rs576289202 | 32452609 A | 6.502  | 4.77E-08 | chr:6:32505702 |
| 6 rs9270787   | 32569174 C | 0.2117 | 4.81E-08 | chr:6:32505702 |
| 6 rs143321288 | 32531487 A | 7.428  | 4.82E-08 | chr:6:32505702 |
| 6 rs72492343  | 32532385 T | 7.173  | 4.84E-08 | chr:6:32505702 |
| 6 rs9270782   | 32569119 A | 0.2111 | 4.85E-08 | chr:6:32505702 |
| 6 rs9269269   | 32539055 C | 4.556  | 4.87E-08 | chr:6:32505702 |
| 6 rs78107833  | 32531807 T | 7.265  | 4.95E-08 | chr:6:32505702 |
| 6 rs679243    | 32570959 C | 0.2103 | 4.96E-08 | chr:6:32505702 |
| 6 rs72845749  | 32530081 T | 7.215  | 4.99E-08 | chr:6:32505702 |
| 6 rs72845750  | 32530093 G | 7.215  | 4.99E-08 | chr:6:32505702 |
| 6 rs116659316 | 32527386 A | 0.1621 | 5.03E-08 | chr:6:32505702 |
| 6 rs9269381   | 32540927 T | 0.2053 | 5.07E-08 | chr:6:32505702 |
| 6 rs9271492   | 32589122 C | 3.468  | 5.12E-08 | chr:6:32505702 |
| 6 rs9271854   | 32595118 A | 2.888  | 5.17E-08 | chr:6:32505702 |
| 6 rs9271855   | 32595119 C | 2.888  | 5.17E-08 | chr:6:32505702 |
| 6 rs9271856   | 32595120 A | 2.888  | 5.17E-08 | chr:6:32505702 |

|               |            |        |          |                |
|---------------|------------|--------|----------|----------------|
| 6 rs144064415 | 32536140 T | 3.32   | 5.24E-08 | chr:6:32505702 |
| 6 rs72845756  | 32530545 C | 7.301  | 5.29E-08 | chr:6:32505702 |
| 6 rs9271789   | 32594768 A | 2.86   | 5.33E-08 | chr:6:32505702 |
| 6 rs9270661   | 32566087 G | 3.514  | 5.33E-08 | chr:6:32505702 |
| 6 rs9270474   | 32559003 G | 3.42   | 5.35E-08 | chr:6:32505702 |
| 6 rs116830840 | 32537945 T | 2.695  | 5.36E-08 | chr:6:32505702 |
| 6 rs28793944  | 32528004 T | 3.705  | 5.43E-08 | chr:6:32505702 |
| 6 rs9271790   | 32594775 A | 4.496  | 5.43E-08 | chr:6:32505702 |
| 6 rs72845755  | 32530385 G | 7.406  | 5.44E-08 | chr:6:32505702 |
| 6 rs113504992 | 32531418 T | 7.41   | 5.48E-08 | chr:6:32505702 |
| 6 rs9269705   | 32547182 T | 2.801  | 5.49E-08 | chr:6:32505702 |
| 6 rs540194362 | 32507768 G | 2.37   | 5.51E-08 | chr:6:32505702 |
| 6 rs614437    | 32573941 A | 0.2004 | 5.51E-08 | chr:6:32505702 |
| 6 rs9272182   | 32601564 A | 3.618  | 5.52E-08 | chr:6:32505702 |
| 6 rs72845752  | 32530285 T | 7.526  | 5.55E-08 | chr:6:32505702 |
| 6 rs72845754  | 32530286 G | 7.526  | 5.55E-08 | chr:6:32505702 |
| 6 rs74201443  | 32530321 G | 7.513  | 5.56E-08 | chr:6:32505702 |
| 6 rs9270861   | 32570979 G | 0.2353 | 5.78E-08 | chr:6:32505702 |
| 6 rs9270862   | 32570981 T | 0.2353 | 5.78E-08 | chr:6:32505702 |
| 6 rs9270863   | 32570982 G | 0.2353 | 5.78E-08 | chr:6:32505702 |
| 6 rs9270604   | 32564800 C | 3.641  | 5.81E-08 | chr:6:32505702 |
| 6 rs9270658   | 32566072 C | 3.51   | 5.84E-08 | chr:6:32505702 |
| 6 rs9270659   | 32566076 T | 3.51   | 5.84E-08 | chr:6:32505702 |
| 6 rs9270660   | 32566077 G | 3.51   | 5.84E-08 | chr:6:32505702 |
| 6 rs190202109 | 32525736 A | 0.2533 | 5.98E-08 | chr:6:32505702 |
| 6 rs9269212   | 32450249 A | 5.811  | 6.01E-08 | chr:6:32505702 |
| 6 rs9269213   | 32450250 A | 5.811  | 6.01E-08 | chr:6:32505702 |
| 6 rs73726198  | 32492262 C | 3.426  | 6.02E-08 | chr:6:32505702 |
| 6 rs9272436   | 32605353 G | 3.232  | 6.10E-08 | chr:6:32505702 |
| 6 rs569686853 | 32525767 G | 2.624  | 6.14E-08 | chr:6:32505702 |
| 6 rs646159    | 32576446 C | 0.2054 | 6.17E-08 | chr:6:32505702 |
| 6 rs9269326   | 32539996 G | 2.99   | 6.19E-08 | chr:6:32505702 |
| 6 rs9272242   | 32602790 C | 3.617  | 6.33E-08 | chr:6:32505702 |
| 6 rs145316959 | 32521201 T | 5.917  | 6.36E-08 | chr:6:32505702 |
| 6 rs9271788   | 32594734 G | 2.852  | 6.39E-08 | chr:6:32505702 |
| 6 rs9271880   | 32595596 C | 3.529  | 6.39E-08 | chr:6:32505702 |
| 6 rs72508441  | 32490752 A | 3.452  | 6.42E-08 | chr:6:32505702 |
| 6 rs148620529 | 32525509 C | 3.39   | 6.42E-08 | chr:6:32505702 |
| 6 rs9272179   | 32601451 C | 3.616  | 6.73E-08 | chr:6:32505702 |
| 6 rs9272180   | 32601461 T | 3.616  | 6.73E-08 | chr:6:32505702 |
| 6 rs75184770  | 32529709 A | 3.416  | 6.74E-08 | chr:6:32505702 |
| 6 rs57172910  | 32529365 T | 2.888  | 6.75E-08 | chr:6:32505702 |
| 6 rs71538515  | 32535300 G | 3.781  | 6.87E-08 | chr:6:32505702 |

|               |            |        |          |                |
|---------------|------------|--------|----------|----------------|
| 6 rs9272326   | 32604169 T | 4.302  | 6.98E-08 | chr:6:32505702 |
| 6 rs9272354   | 32604485 G | 3.078  | 7.24E-08 | chr:6:32505702 |
| 6 rs112512219 | 32532021 G | 2.529  | 7.38E-08 | chr:6:32505702 |
| 6 rs115055593 | 32468827 C | 2.458  | 7.42E-08 | chr:6:32505702 |
| 6 rs570595530 | 32525770 T | 2.604  | 7.46E-08 | chr:6:32505702 |
| 6 rs9270276   | 32557240 A | 0.2246 | 7.57E-08 | chr:6:32505702 |
| 6 rs186020633 | 32535771 A | 2.794  | 7.58E-08 | chr:6:32505702 |
| 6 rs9271857   | 32595147 T | 2.853  | 7.62E-08 | chr:6:32505702 |
| 6 rs9269555   | 32544311 A | 3.617  | 7.64E-08 | chr:6:32505702 |
| 6 rs9270465   | 32558916 C | 2.941  | 7.64E-08 | chr:6:32505702 |
| 6 rs9270388   | 32558343 T | 2.911  | 7.64E-08 | chr:6:32505702 |
| 6 rs116473597 | 32482374 T | 2.384  | 7.65E-08 | chr:6:32505702 |
| 6 rs556568526 | 32482353 T | 2.384  | 7.65E-08 | chr:6:32505702 |
| 6 rs578020847 | 32482368 C | 2.384  | 7.65E-08 | chr:6:32505702 |
| 6 rs9270769   | 32568907 T | 0.2082 | 7.73E-08 | chr:6:32505702 |
| 6 rs9270770   | 32568910 T | 0.2082 | 7.73E-08 | chr:6:32505702 |
| 6 rs28846812  | 32527845 G | 3.015  | 7.81E-08 | chr:6:32505702 |
| 6 rs116542866 | 32521907 T | 0.1167 | 7.83E-08 | chr:6:32505702 |
| 6 rs75094512  | 32529708 C | 3.778  | 7.85E-08 | chr:6:32505702 |
| 6 rs9270746   | 32568284 C | 0.2273 | 7.87E-08 | chr:6:32505702 |
| 6 rs9269629   | 32545635 G | 0.1573 | 8.03E-08 | chr:6:32505702 |
| 6 rs9269630   | 32545644 C | 0.1573 | 8.03E-08 | chr:6:32505702 |
| 6 rs536343459 | 32468799 G | 2.454  | 8.04E-08 | chr:6:32505702 |
| 6 rs548006827 | 32468802 C | 2.454  | 8.04E-08 | chr:6:32505702 |
| 6 rs565374501 | 32468798 G | 2.454  | 8.04E-08 | chr:6:32505702 |
| 6 rs9270157   | 32555411 C | 0.2463 | 8.06E-08 | chr:6:32505702 |
| 6 rs574264514 | 32547472 C | 3.601  | 8.11E-08 | chr:6:32505702 |
| 6 rs115333128 | 32485804 G | 2.61   | 8.12E-08 | chr:6:32505702 |
| 6 rs557048    | 32587001 T | 3.254  | 8.13E-08 | chr:6:32505702 |
| 6 rs9270463   | 32558913 C | 2.925  | 8.20E-08 | chr:6:32505702 |
| 6 rs9272194   | 32601825 G | 3.219  | 8.29E-08 | chr:6:32505702 |
| 6 rs9272343   | 32604326 G | 4.266  | 8.30E-08 | chr:6:32505702 |
| 6 rs180731180 | 32535770 C | 2.789  | 8.32E-08 | chr:6:32505702 |
| 6 rs34539464  | 32560339 G | 2.941  | 8.34E-08 | chr:6:32505702 |
| 6 rs71536568  | 32531151 A | 5.256  | 8.35E-08 | chr:6:32505702 |
| 6 rs9270745   | 32568264 G | 0.2261 | 8.44E-08 | chr:6:32505702 |
| 6 rs146436875 | 32498948 G | 2.383  | 8.50E-08 | chr:6:32505702 |
| 6 rs148879657 | 32498940 G | 2.383  | 8.50E-08 | chr:6:32505702 |
| 6 rs36207014  | 32560332 A | 2.939  | 8.53E-08 | chr:6:32505702 |
| 6 rs142206489 | 32536167 A | 2.774  | 8.63E-08 | chr:6:32505702 |
| 6 rs560277143 | 32547480 G | 3.371  | 8.86E-08 | chr:6:32505702 |
| 6 rs71534539  | 32512754 A | 2.695  | 8.92E-08 | chr:6:32505702 |
| 6 rs9272127   | 32600595 C | 3.287  | 9.13E-08 | chr:6:32505702 |



|               |            |        |          |                |
|---------------|------------|--------|----------|----------------|
| 6 rs9269502   | 32543121 G | 3.505  | 9.22E-08 | chr:6:32505702 |
| 6 rs199636459 | 32507758 A | 2.343  | 9.24E-08 | chr:6:32505702 |
| 6 rs71536602  | 32534455 C | 2.769  | 9.36E-08 | chr:6:32505702 |
| 6 rs9271712   | 32593432 A | 2.881  | 9.39E-08 | chr:6:32505702 |
| 6 rs9271966   | 32597507 T | 2.85   | 9.62E-08 | chr:6:32505702 |
| 6 rs9270739   | 32568150 C | 0.2054 | 9.71E-08 | chr:6:32505702 |
| 6 rs140028862 | 32496684 A | 3.22   | 9.76E-08 | chr:6:32505702 |
| 6 rs145528327 | 32496685 G | 3.22   | 9.76E-08 | chr:6:32505702 |
| 6 rs73731412  | 32454215 G | 12.91  | 9.83E-08 | chr:6:32505702 |
| 6 rs566252979 | 32496600 T | 2.407  | 9.83E-08 | chr:6:32505702 |
| 6 rs9269388   | 32541102 T | 2.96   | 9.87E-08 | chr:6:32505702 |
| 6 rs9270975   | 32573726 A | 0.2155 | 9.89E-08 | chr:6:32505702 |
| 6 rs17204294  | 32492179 T | 0.2888 | 9.92E-08 | chr:6:32505702 |
| 6 rs71536561  | 32529179 C | 2.722  | 1.00E-07 | chr:6:32505702 |
| 6 rs78953426  | 32529417 G | 3.694  | 1.00E-07 | chr:6:32505702 |
| 6 rs9270591   | 32561424 C | 0.1563 | 1.01E-07 | chr:6:32505702 |
| 6 rs9269642   | 32545877 G | 0.1582 | 1.03E-07 | chr:6:32505702 |
| 6 rs7771747   | 32498931 A | 2.332  | 1.03E-07 | chr:6:32505702 |
| 6 rs680061    | 32571098 A | 0.232  | 1.03E-07 | chr:6:32505702 |
| 6 rs9270391   | 32558361 A | 2.845  | 1.04E-07 | chr:6:32505702 |
| 6 rs530242049 | 32536125 C | 2.689  | 1.04E-07 | chr:6:32505702 |
| 6 rs559863405 | 32536118 G | 2.689  | 1.04E-07 | chr:6:32505702 |
| 6 rs2760981   | 32565465 G | 0.1649 | 1.05E-07 | chr:6:32505702 |
| 6 rs73726194  | 32492199 T | 3.429  | 1.08E-07 | chr:6:32505702 |
| 6 rs7758269   | 32598812 C | 2.806  | 1.08E-07 | chr:6:32505702 |
| 6 rs9269880   | 32550916 G | 3.252  | 1.08E-07 | chr:6:32505702 |
| 6 rs9272126   | 32600589 C | 3.279  | 1.09E-07 | chr:6:32505702 |
| 6 rs9272125   | 32600584 G | 3.278  | 1.09E-07 | chr:6:32505702 |
| 6 rs74203767  | 32491593 G | 3.78   | 1.10E-07 | chr:6:32505702 |
| 6 rs9270588   | 32561327 C | 0.1577 | 1.11E-07 | chr:6:32505702 |
| 6 rs17210637  | 32492176 G | 3.38   | 1.13E-07 | chr:6:32505702 |
| 6 rs554566424 | 32496605 A | 2.401  | 1.14E-07 | chr:6:32505702 |
| 6 rs28809558  | 32529190 A | 2.731  | 1.14E-07 | chr:6:32505702 |
| 6 rs34105415  | 32532251 A | 3.762  | 1.16E-07 | chr:6:32505702 |
| 6 rs36054655  | 32532260 G | 3.762  | 1.16E-07 | chr:6:32505702 |
| 6 rs146758209 | 32496618 C | 2.685  | 1.17E-07 | chr:6:32505702 |
| 6 rs74921648  | 32560307 A | 2.85   | 1.17E-07 | chr:6:32505702 |
| 6 rs9270585   | 32561300 C | 0.1582 | 1.18E-07 | chr:6:32505702 |
| 6 rs7756647   | 32582843 G | 3.375  | 1.18E-07 | chr:6:32505702 |
| 6 rs1048052   | 32609230 C | 2.915  | 1.20E-07 | chr:6:32505702 |
| 6 rs568465013 | 32609229 A | 2.915  | 1.20E-07 | chr:6:32505702 |
| 6 rs1065045   | 32611255 T | 2.769  | 1.21E-07 | chr:6:32505702 |
| 6 rs9272137   | 32600738 C | 3.247  | 1.22E-07 | chr:6:32505702 |

|               |            |         |          |                |
|---------------|------------|---------|----------|----------------|
| 6 rs561942189 | 32496432 G | 2.476   | 1.24E-07 | chr:6:32505702 |
| 6 rs2760982   | 32565495 C | 3.707   | 1.24E-07 | chr:6:32505702 |
| 6 rs79498062  | 32533785 G | 3.789   | 1.24E-07 | chr:6:32505702 |
| 6 rs1065049   | 32611275 A | 2.768   | 1.25E-07 | chr:6:32505702 |
| 6 rs71542415  | 32560298 C | 2.847   | 1.27E-07 | chr:6:32505702 |
| 6 rs572123865 | 32497098 G | 0.2796  | 1.27E-07 | chr:6:32505702 |
| 6 rs181549666 | 32482352 A | 2.371   | 1.28E-07 | chr:6:32505702 |
| 6 rs34698520  | 32556631 T | 3.233   | 1.28E-07 | chr:6:32505702 |
| 6 rs9269885   | 32550971 T | 3.132   | 1.28E-07 | chr:6:32505702 |
| 6 rs9269886   | 32550976 A | 3.132   | 1.28E-07 | chr:6:32505702 |
| 6 rs373964410 | 32497086 C | 0.2796  | 1.30E-07 | chr:6:32505702 |
| 6 rs9272650   | 32608586 T | 3.613   | 1.31E-07 | chr:6:32505702 |
| 6 rs76662008  | 32580869 G | 3.168   | 1.33E-07 | chr:6:32505702 |
| 6 rs75729173  | 32533813 T | 3.998   | 1.34E-07 | chr:6:32505702 |
| 6 rs533779530 | 32453612 G | 3.441   | 1.35E-07 | chr:6:32505702 |
| 6 rs9269524   | 32543671 T | 0.2201  | 1.35E-07 | chr:6:32505702 |
| 6 rs9272239   | 32602778 G | 3.427   | 1.35E-07 | chr:6:32505702 |
| 6 rs9272036   | 32598841 A | 2.952   | 1.35E-07 | chr:6:32505702 |
| 6 rs9271784   | 32594704 A | 2.64    | 1.36E-07 | chr:6:32505702 |
| 6 rs1136756   | 32552134 G | 3.681   | 1.37E-07 | chr:6:32505702 |
| 6 rs9269187   | 32448440 T | 4.999   | 1.37E-07 | chr:6:32505702 |
| 6 rs9272136   | 32600730 T | 3.241   | 1.38E-07 | chr:6:32505702 |
| 6 rs9269324   | 32539978 G | 3.089   | 1.38E-07 | chr:6:32505702 |
| 6 rs9270047   | 32553697 C | 3.307   | 1.39E-07 | chr:6:32505702 |
| 6 rs189723252 | 32494948 T | 2.461   | 1.39E-07 | chr:6:32505702 |
| 6 rs680151    | 32571166 A | 0.231   | 1.39E-07 | chr:6:32505702 |
| 6 rs9272056   | 32599180 A | 2.993   | 1.39E-07 | chr:6:32505702 |
| 6 rs9272057   | 32599190 A | 2.993   | 1.39E-07 | chr:6:32505702 |
| 6 rs77052117  | 32533886 G | 3.739   | 1.41E-07 | chr:6:32505702 |
| 6 rs9272138   | 32600757 A | 3.239   | 1.41E-07 | chr:6:32505702 |
| 6 rs138921502 | 32538132 A | 0.1513  | 1.41E-07 | chr:6:32505702 |
| 6 rs9272032   | 32598782 G | 2.818   | 1.42E-07 | chr:6:32505702 |
| 6 rs17203839  | 32555926 C | 4.158   | 1.43E-07 | chr:6:32505702 |
| 6 rs111477174 | 32594457 G | 2.913   | 1.44E-07 | chr:6:32505702 |
| 6 rs111634228 | 32594452 G | 2.913   | 1.44E-07 | chr:6:32505702 |
| 6 rs114309058 | 32594470 A | 2.913   | 1.44E-07 | chr:6:32505702 |
| 6 rs9272329   | 32604204 G | 2.921   | 1.44E-07 | chr:6:32505702 |
| 6 rs150860760 | 32486709 C | 2.551   | 1.46E-07 | chr:6:32505702 |
| 6 rs114758808 | 32457997 T | 2.341   | 1.47E-07 | chr:6:32505702 |
| 6 rs74290585  | 32491617 C | 3.1     | 1.47E-07 | chr:6:32505702 |
| 6 rs9269969   | 32552272 C | 3.149   | 1.48E-07 | chr:6:32505702 |
| 6 rs9270458   | 32558900 G | 2.986   | 1.48E-07 | chr:6:32505702 |
| 6 rs149361627 | 32486988 G | 0.09378 | 1.48E-07 | chr:6:32505702 |

|               |            |         |          |                |
|---------------|------------|---------|----------|----------------|
| 6 rs187402303 | 32486990 A | 0.09378 | 1.48E-07 | chr:6:32505702 |
| 6 rs542087123 | 32486994 A | 0.09378 | 1.48E-07 | chr:6:32505702 |
| 6 rs9271786   | 32594709 T | 2.635   | 1.49E-07 | chr:6:32505702 |
| 6 rs35772438  | 32530407 C | 0.145   | 1.50E-07 | chr:6:32505702 |
| 6 rs9271861   | 32595287 T | 2.795   | 1.56E-07 | chr:6:32505702 |
| 6 rs545728465 | 32547479 T | 3.263   | 1.57E-07 | chr:6:32505702 |
| 6 rs9272031   | 32598779 C | 2.812   | 1.57E-07 | chr:6:32505702 |
| 6 rs9270446   | 32558775 G | 3.006   | 1.57E-07 | chr:6:32505702 |
| 6 rs9272135   | 32600723 A | 3.229   | 1.57E-07 | chr:6:32505702 |
| 6 rs41287236  | 32547376 G | 2.591   | 1.59E-07 | chr:6:32505702 |
| 6 rs41287237  | 32547378 A | 2.591   | 1.59E-07 | chr:6:32505702 |
| 6 rs150117381 | 32505388 C | 2.324   | 1.59E-07 | chr:6:32505702 |
| 6 rs9271884   | 32595628 C | 2.915   | 1.60E-07 | chr:6:32505702 |
| 6 rs9271885   | 32595629 T | 2.913   | 1.61E-07 | chr:6:32505702 |
| 6 rs555503640 | 32486477 T | 2.431   | 1.64E-07 | chr:6:32505702 |
| 6 rs9270503   | 32559181 C | 0.2822  | 1.65E-07 | chr:6:32505702 |
| 6 rs9270504   | 32559184 C | 0.2822  | 1.65E-07 | chr:6:32505702 |
| 6 rs9271528   | 32589923 T | 3.876   | 1.66E-07 | chr:6:32505702 |
| 6 rs6933740   | 32537804 T | 2.46    | 1.67E-07 | chr:6:32505702 |
| 6 rs35366052  | 32531923 G | 0.2316  | 1.67E-07 | chr:6:32505702 |
| 6 rs71536552  | 32527775 C | 2.669   | 1.69E-07 | chr:6:32505702 |
| 6 rs116526477 | 32468879 T | 2.413   | 1.70E-07 | chr:6:32505702 |
| 6 rs74389316  | 32596869 T | 4.031   | 1.72E-07 | chr:6:32505702 |
| 6 rs114565678 | 32469224 A | 2.408   | 1.72E-07 | chr:6:32505702 |
| 6 rs28366259  | 32559516 C | 3.48    | 1.73E-07 | chr:6:32505702 |
| 6 rs9270159   | 32555508 C | 3.518   | 1.74E-07 | chr:6:32505702 |
| 6 rs535381236 | 32468870 G | 2.344   | 1.74E-07 | chr:6:32505702 |
| 6 rs559249402 | 32468864 C | 2.344   | 1.74E-07 | chr:6:32505702 |
| 6 rs577621741 | 32468866 A | 2.344   | 1.74E-07 | chr:6:32505702 |
| 6 rs9271886   | 32595633 T | 2.908   | 1.75E-07 | chr:6:32505702 |
| 6 rs72508434  | 32487563 T | 3.026   | 1.76E-07 | chr:6:32505702 |
| 6 rs9270448   | 32558819 T | 3.119   | 1.77E-07 | chr:6:32505702 |
| 6 rs111823263 | 32482045 G | 2.491   | 1.80E-07 | chr:6:32505702 |
| 6 rs9269508   | 32543248 C | 0.222   | 1.80E-07 | chr:6:32505702 |
| 6 rs77000541  | 32635605 A | 2.685   | 1.84E-07 | chr:6:32505702 |
| 6 rs9270462   | 32558912 G | 2.859   | 1.84E-07 | chr:6:32505702 |
| 6 rs115232480 | 32536206 G | 3.113   | 1.87E-07 | chr:6:32505702 |
| 6 rs113353313 | 32538242 G | 2.473   | 1.90E-07 | chr:6:32505702 |
| 6 rs9271947   | 32597095 T | 3.052   | 1.91E-07 | chr:6:32505702 |
| 6 rs9270521   | 32559529 C | 3.295   | 1.92E-07 | chr:6:32505702 |
| 6 rs9269879   | 32550906 G | 3.252   | 1.98E-07 | chr:6:32505702 |
| 6 rs544548886 | 32505381 T | 2.31    | 2.02E-07 | chr:6:32505702 |
| 6 rs9272195   | 32601830 G | 3.017   | 2.04E-07 | chr:6:32505702 |

|               |            |        |          |                |
|---------------|------------|--------|----------|----------------|
| 6 rs9271920   | 32596430 G | 3.164  | 2.05E-07 | chr:6:32505702 |
| 6 rs9271921   | 32596431 G | 3.164  | 2.05E-07 | chr:6:32505702 |
| 6 rs116708952 | 32486590 A | 2.35   | 2.06E-07 | chr:6:32505702 |
| 6 rs3021304   | 32575658 G | 0.2174 | 2.06E-07 | chr:6:32505702 |
| 6 rs71536584  | 32533116 C | 0.2227 | 2.08E-07 | chr:6:32505702 |
| 6 rs114638791 | 32538268 A | 2.467  | 2.09E-07 | chr:6:32505702 |
| 6 rs9272311   | 32603953 A | 3.924  | 2.11E-07 | chr:6:32505702 |
| 6 rs554894601 | 32497146 C | 0.2871 | 2.14E-07 | chr:6:32505702 |
| 6 rs9272352   | 32604454 G | 2.959  | 2.14E-07 | chr:6:32505702 |
| 6 rs115673628 | 32505419 G | 2.278  | 2.15E-07 | chr:6:32505702 |
| 6 rs9272130   | 32600638 G | 3.212  | 2.15E-07 | chr:6:32505702 |
| 6 rs9272264   | 32603309 G | 3.811  | 2.16E-07 | chr:6:32505702 |
| 6 rs72508417  | 32459813 A | 2.58   | 2.17E-07 | chr:6:32505702 |
| 6 rs9271888   | 32595732 C | 3.218  | 2.17E-07 | chr:6:32505702 |
| 6 rs9271889   | 32595747 A | 3.218  | 2.17E-07 | chr:6:32505702 |
| 6 rs647455    | 32576721 A | 3.049  | 2.18E-07 | chr:6:32505702 |
| 6 rs647467    | 32576726 T | 3.049  | 2.18E-07 | chr:6:32505702 |
| 6 rs9272245   | 32602872 C | 0.2798 | 2.19E-07 | chr:6:32505702 |
| 6 rs9270317   | 32557643 G | 0.2427 | 2.19E-07 | chr:6:32505702 |
| 6 rs9269785   | 32549053 T | 4.017  | 2.22E-07 | chr:6:32505702 |
| 6 rs9269787   | 32549070 G | 4.017  | 2.22E-07 | chr:6:32505702 |
| 6 rs544353633 | 32507596 G | 2.316  | 2.25E-07 | chr:6:32505702 |
| 6 rs9270451   | 32558838 A | 3.067  | 2.26E-07 | chr:6:32505702 |
| 6 rs145704749 | 32454744 C | 0.1357 | 2.27E-07 | chr:6:32505702 |
| 6 rs71536585  | 32533131 G | 0.2219 | 2.27E-07 | chr:6:32505702 |
| 6 rs74223623  | 32492102 T | 2.652  | 2.28E-07 | chr:6:32505702 |
| 6 rs9272059   | 32599223 C | 3.051  | 2.30E-07 | chr:6:32505702 |
| 6 rs9270538   | 32559758 A | 3.201  | 2.31E-07 | chr:6:32505702 |
| 6 rs67454457  | 32530767 G | 0.2211 | 2.32E-07 | chr:6:32505702 |
| 6 rs374408836 | 32507582 C | 2.315  | 2.33E-07 | chr:6:32505702 |
| 6 rs371747477 | 32489266 T | 2.769  | 2.33E-07 | chr:6:32505702 |
| 6 rs9269547   | 32544173 T | 0.1679 | 2.34E-07 | chr:6:32505702 |
| 6 rs35855915  | 32532691 G | 0.2036 | 2.36E-07 | chr:6:32505702 |
| 6 rs9271914   | 32596238 C | 3.208  | 2.37E-07 | chr:6:32505702 |
| 6 rs9269481   | 32542582 G | 0.1767 | 2.37E-07 | chr:6:32505702 |
| 6 rs369376349 | 32458425 A | 2.486  | 2.40E-07 | chr:6:32505702 |
| 6 rs9272100   | 32599814 T | 4.192  | 2.41E-07 | chr:6:32505702 |
| 6 rs9272663   | 32608704 G | 2.685  | 2.41E-07 | chr:6:32505702 |
| 6 rs9271919   | 32596423 G | 3.067  | 2.41E-07 | chr:6:32505702 |
| 6 rs9269906   | 32551309 G | 0.2596 | 2.41E-07 | chr:6:32505702 |
| 6 rs9271890   | 32595779 A | 3.209  | 2.44E-07 | chr:6:32505702 |
| 6 rs9271891   | 32595783 T | 3.209  | 2.44E-07 | chr:6:32505702 |
| 6 rs9271892   | 32595813 C | 3.209  | 2.44E-07 | chr:6:32505702 |

|               |            |        |          |                |
|---------------|------------|--------|----------|----------------|
| 6 rs9270055   | 32553874 C | 3.966  | 2.47E-07 | chr:6:32505702 |
| 6 rs9271922   | 32596444 A | 3.144  | 2.48E-07 | chr:6:32505702 |
| 6 rs9269651   | 32546074 C | 0.1578 | 2.49E-07 | chr:6:32505702 |
| 6 rs9272134   | 32600705 G | 3.201  | 2.51E-07 | chr:6:32505702 |
| 6 rs9272256   | 32603169 C | 3.87   | 2.51E-07 | chr:6:32505702 |
| 6 rs9272146   | 32600914 C | 3.202  | 2.52E-07 | chr:6:32505702 |
| 6 rs113523485 | 32489302 C | 2.567  | 2.52E-07 | chr:6:32505702 |
| 6 rs9270464   | 32558914 G | 3.069  | 2.53E-07 | chr:6:32505702 |
| 6 rs114354029 | 32598764 G | 2.77   | 2.53E-07 | chr:6:32505702 |
| 6 rs115724613 | 32538216 C | 2.404  | 2.54E-07 | chr:6:32505702 |
| 6 rs114269927 | 32575209 A | 3.535  | 2.56E-07 | chr:6:32505702 |
| 6 rs71536590  | 32533587 A | 0.2083 | 2.59E-07 | chr:6:32505702 |
| 6 rs116670844 | 32490925 T | 2.489  | 2.60E-07 | chr:6:32505702 |
| 6 rs77724699  | 32529470 G | 2.315  | 2.62E-07 | chr:6:32505702 |
| 6 rs9272635   | 32608193 C | 2.729  | 2.63E-07 | chr:6:32505702 |
| 6 rs183777110 | 32505375 T | 2.296  | 2.65E-07 | chr:6:32505702 |
| 6 rs77413629  | 32505374 G | 2.296  | 2.65E-07 | chr:6:32505702 |
| 6 rs67912528  | 32536466 A | 2.647  | 2.66E-07 | chr:6:32505702 |
| 6 rs67455807  | 32530881 A | 0.2093 | 2.66E-07 | chr:6:32505702 |
| 6 rs71536576  | 32532346 G | 0.2052 | 2.67E-07 | chr:6:32505702 |
| 6 rs9272183   | 32601604 T | 3.251  | 2.68E-07 | chr:6:32505702 |
| 6 rs187058069 | 32486665 A | 2.364  | 2.70E-07 | chr:6:32505702 |
| 6 rs67410451  | 32533352 A | 0.225  | 2.71E-07 | chr:6:32505702 |
| 6 rs9271948   | 32597105 A | 2.977  | 2.71E-07 | chr:6:32505702 |
| 6 rs71536577  | 32532356 T | 0.2047 | 2.74E-07 | chr:6:32505702 |
| 6 rs116585903 | 32487688 T | 3.679  | 2.74E-07 | chr:6:32505702 |
| 6 rs546033671 | 32498932 G | 2.33   | 2.76E-07 | chr:6:32505702 |
| 6 rs28832872  | 32529015 C | 2.604  | 2.78E-07 | chr:6:32505702 |
| 6 rs9270541   | 32559864 T | 2.933  | 2.78E-07 | chr:6:32505702 |
| 6 rs114769197 | 32538217 A | 2.4    | 2.79E-07 | chr:6:32505702 |
| 6 rs9270387   | 32558317 C | 3.167  | 2.80E-07 | chr:6:32505702 |
| 6 rs9272327   | 32604188 A | 2.854  | 2.80E-07 | chr:6:32505702 |
| 6 rs35603463  | 32531745 T | 0.2194 | 2.83E-07 | chr:6:32505702 |
| 6 rs73727912  | 32496944 C | 2.374  | 2.83E-07 | chr:6:32505702 |
| 6 rs67387464  | 32530892 C | 0.208  | 2.83E-07 | chr:6:32505702 |
| 6 rs17843633  | 32621058 A | 2.745  | 2.83E-07 | chr:6:32505702 |
| 6 rs9272610   | 32607767 C | 3.436  | 2.83E-07 | chr:6:32505702 |
| 6 rs148612288 | 32498953 G | 2.329  | 2.85E-07 | chr:6:32505702 |
| 6 rs36152293  | 32526410 T | 2.886  | 2.85E-07 | chr:6:32505702 |
| 6 rs9272263   | 32603295 A | 3.915  | 2.85E-07 | chr:6:32505702 |
| 6 rs143442815 | 32489863 C | 2.879  | 2.87E-07 | chr:6:32505702 |
| 6 rs9271907   | 32596123 T | 3.195  | 2.89E-07 | chr:6:32505702 |
| 6 rs9271908   | 32596131 T | 3.195  | 2.89E-07 | chr:6:32505702 |

|               |            |        |          |                |
|---------------|------------|--------|----------|----------------|
| 6 rs9270220   | 32556632 G | 4.744  | 2.91E-07 | chr:6:32505702 |
| 6 rs9269580   | 32544784 C | 0.2108 | 2.91E-07 | chr:6:32505702 |
| 6 rs9272721   | 32609401 A | 3.73   | 2.95E-07 | chr:6:32505702 |
| 6 rs67240795  | 32530458 C | 0.2127 | 2.95E-07 | chr:6:32505702 |
| 6 rs9272026   | 32598618 G | 3.198  | 2.96E-07 | chr:6:32505702 |
| 6 rs9272027   | 32598622 G | 3.198  | 2.96E-07 | chr:6:32505702 |
| 6 rs9272840   | 32610683 T | 3.045  | 3.00E-07 | chr:6:32505702 |
| 6 rs150598903 | 32489395 T | 2.379  | 3.01E-07 | chr:6:32505702 |
| 6 rs9271615   | 32591686 G | 3.191  | 3.03E-07 | chr:6:32505702 |
| 6 rs9269962   | 32552177 A | 3.809  | 3.10E-07 | chr:6:32505702 |
| 6 rs73731415  | 32454428 G | 4.437  | 3.13E-07 | chr:6:32505702 |
| 6 rs9270466   | 32558929 T | 2.784  | 3.14E-07 | chr:6:32505702 |
| 6 rs536387398 | 32507125 A | 2.323  | 3.16E-07 | chr:6:32505702 |
| 6 rs573273966 | 32507131 C | 2.323  | 3.16E-07 | chr:6:32505702 |
| 6 rs9272616   | 32607890 G | 3.307  | 3.16E-07 | chr:6:32505702 |
| 6 rs141293894 | 32536200 G | 2.656  | 3.17E-07 | chr:6:32505702 |
| 6 rs66874970  | 32530748 C | 0.2    | 3.17E-07 | chr:6:32505702 |
| 6 rs9271915   | 32596294 C | 3.189  | 3.20E-07 | chr:6:32505702 |
| 6 rs9271918   | 32596352 T | 3.189  | 3.20E-07 | chr:6:32505702 |
| 6 rs34824555  | 32525680 C | 0.1931 | 3.20E-07 | chr:6:32505702 |
| 6 rs112582516 | 32481392 T | 2.176  | 3.22E-07 | chr:6:32505702 |
| 6 rs552461365 | 32482115 C | 2.166  | 3.24E-07 | chr:6:32505702 |
| 6 rs9272049   | 32599045 G | 3.172  | 3.24E-07 | chr:6:32505702 |
| 6 rs73727915  | 32497046 T | 2.986  | 3.28E-07 | chr:6:32505702 |
| 6 rs71536582  | 32533078 G | 0.2381 | 3.31E-07 | chr:6:32505702 |
| 6 rs62405572  | 32458232 G | 2.624  | 3.32E-07 | chr:6:32505702 |
| 6 rs9271787   | 32594718 C | 2.617  | 3.33E-07 | chr:6:32505702 |
| 6 rs9271917   | 32596336 G | 3.187  | 3.37E-07 | chr:6:32505702 |
| 6 rs9272667   | 32608760 C | 2.612  | 3.37E-07 | chr:6:32505702 |
| 6 rs9269995   | 32552681 C | 2.902  | 3.40E-07 | chr:6:32505702 |
| 6 rs73729756  | 32482020 G | 2.46   | 3.41E-07 | chr:6:32505702 |
| 6 rs149521915 | 32489639 T | 3.366  | 3.42E-07 | chr:6:32505702 |
| 6 rs9270524   | 32559588 A | 2.931  | 3.42E-07 | chr:6:32505702 |
| 6 rs9271237   | 32579651 G | 3.065  | 3.45E-07 | chr:6:32505702 |
| 6 rs9271238   | 32579702 T | 3.065  | 3.45E-07 | chr:6:32505702 |
| 6 rs68152293  | 32561020 A | 2.796  | 3.46E-07 | chr:6:32505702 |
| 6 rs138636844 | 32486961 A | 2.764  | 3.60E-07 | chr:6:32505702 |
| 6 rs9271537   | 32589982 T | 3.082  | 3.61E-07 | chr:6:32505702 |
| 6 rs9270562   | 32560757 T | 3.158  | 3.62E-07 | chr:6:32505702 |
| 6 rs74750549  | 32511488 T | 0.1761 | 3.63E-07 | chr:6:32505702 |
| 6 rs140849564 | 32490607 A | 0.3302 | 3.67E-07 | chr:6:32505702 |
| 6 rs9461780   | 32599061 T | 4.411  | 3.68E-07 | chr:6:32505702 |
| 6 rs9270565   | 32560774 T | 3.135  | 3.73E-07 | chr:6:32505702 |

|               |            |        |          |                |
|---------------|------------|--------|----------|----------------|
| 6 rs9270566   | 32560775 G | 3.135  | 3.73E-07 | chr:6:32505702 |
| 6 rs9272273   | 32603583 G | 2.917  | 3.74E-07 | chr:6:32505702 |
| 6 rs9272060   | 32599237 A | 3.883  | 3.75E-07 | chr:6:32505702 |
| 6 rs540907103 | 32525757 T | 0.3155 | 3.76E-07 | chr:6:32505702 |
| 6 rs9272071   | 32599487 C | 3.017  | 3.78E-07 | chr:6:32505702 |
| 6 rs9270081   | 32554243 T | 0.2975 | 3.79E-07 | chr:6:32505702 |
| 6 rs9272147   | 32600976 G | 2.995  | 3.85E-07 | chr:6:32505702 |
| 6 rs6905975   | 32626139 G | 3.058  | 3.86E-07 | chr:6:32505702 |
| 6 rs9271999   | 32597832 G | 2.84   | 3.88E-07 | chr:6:32505702 |
| 6 rs9272000   | 32597834 T | 2.84   | 3.88E-07 | chr:6:32505702 |
| 6 rs9272067   | 32599401 A | 3.171  | 3.91E-07 | chr:6:32505702 |
| 6 rs9269813   | 32549681 G | 0.1262 | 3.91E-07 | chr:6:32505702 |
| 6 rs113749865 | 32481973 C | 2.81   | 3.94E-07 | chr:6:32505702 |
| 6 rs9272283   | 32603671 A | 4.036  | 3.95E-07 | chr:6:32505702 |
| 6 rs73727909  | 32496036 T | 2.19   | 3.96E-07 | chr:6:32505702 |
| 6 rs9272446   | 32605423 C | 3.012  | 3.98E-07 | chr:6:32505702 |
| 6 rs9271961   | 32597412 A | 2.866  | 4.01E-07 | chr:6:32505702 |
| 6 rs9272665   | 32608721 A | 3.101  | 4.02E-07 | chr:6:32505702 |
| 6 rs66491634  | 32528457 G | 0.2819 | 4.08E-07 | chr:6:32505702 |
| 6 rs9272002   | 32597924 G | 2.988  | 4.11E-07 | chr:6:32505702 |
| 6 rs9272271   | 32603526 T | 2.932  | 4.12E-07 | chr:6:32505702 |
| 6 rs9271954   | 32597216 C | 2.828  | 4.13E-07 | chr:6:32505702 |
| 6 rs9270781   | 32569111 G | 2.967  | 4.18E-07 | chr:6:32505702 |
| 6 rs9272110   | 32600287 C | 3.076  | 4.18E-07 | chr:6:32505702 |
| 6 rs9272113   | 32600291 C | 3.076  | 4.18E-07 | chr:6:32505702 |
| 6 rs9272064   | 32599338 T | 3.167  | 4.20E-07 | chr:6:32505702 |
| 6 rs9272120   | 32600501 G | 3.167  | 4.20E-07 | chr:6:32505702 |
| 6 rs9272044   | 32598971 A | 3.156  | 4.21E-07 | chr:6:32505702 |
| 6 rs9271187   | 32578314 C | 3.035  | 4.22E-07 | chr:6:32505702 |
| 6 rs9271188   | 32578320 T | 3.035  | 4.22E-07 | chr:6:32505702 |
| 6 rs9269965   | 32552219 G | 2.922  | 4.22E-07 | chr:6:32505702 |
| 6 rs9272480   | 32605800 G | 3.901  | 4.24E-07 | chr:6:32505702 |
| 6 rs9269734   | 32547433 T | 0.2842 | 4.26E-07 | chr:6:32505702 |
| 6 rs9272340   | 32604283 T | 2.78   | 4.28E-07 | chr:6:32505702 |
| 6 rs9272341   | 32604292 A | 2.78   | 4.28E-07 | chr:6:32505702 |
| 6 rs9272342   | 32604294 A | 2.78   | 4.28E-07 | chr:6:32505702 |
| 6 rs41270893  | 32629027 G | 2.872  | 4.29E-07 | chr:6:32505702 |
| 6 rs9272001   | 32597901 G | 3.087  | 4.29E-07 | chr:6:32505702 |
| 6 rs9272213   | 32602039 A | 3.736  | 4.30E-07 | chr:6:32505702 |
| 6 rs34812354  | 32530046 T | 0.2    | 4.31E-07 | chr:6:32505702 |
| 6 rs75364295  | 32529696 A | 2.368  | 4.32E-07 | chr:6:32505702 |
| 6 rs146225755 | 32491807 A | 2.387  | 4.33E-07 | chr:6:32505702 |
| 6 rs9272619   | 32607945 A | 3.56   | 4.35E-07 | chr:6:32505702 |

|               |            |        |          |                |
|---------------|------------|--------|----------|----------------|
| 6 rs9272714   | 32609348 A | 2.668  | 4.36E-07 | chr:6:32505702 |
| 6 rs185087225 | 32480024 G | 2.262  | 4.38E-07 | chr:6:32505702 |
| 6 rs566775437 | 32525993 G | 0.3183 | 4.40E-07 | chr:6:32505702 |
| 6 rs9271301   | 32581614 T | 3.03   | 4.48E-07 | chr:6:32505702 |
| 6 rs9271931   | 32596698 G | 3.206  | 4.49E-07 | chr:6:32505702 |
| 6 rs9271951   | 32597172 A | 2.821  | 4.50E-07 | chr:6:32505702 |
| 6 rs9270520   | 32559493 T | 3.146  | 4.57E-07 | chr:6:32505702 |
| 6 rs9272186   | 32601635 T | 3.1    | 4.58E-07 | chr:6:32505702 |
| 6 rs9270529   | 32559658 T | 2.9    | 4.60E-07 | chr:6:32505702 |
| 6 rs9272262   | 32603291 T | 3.741  | 4.64E-07 | chr:6:32505702 |
| 6 rs9272655   | 32608610 C | 2.625  | 4.65E-07 | chr:6:32505702 |
| 6 rs9272003   | 32597940 G | 2.975  | 4.67E-07 | chr:6:32505702 |
| 6 rs71542413  | 32560240 T | 2.689  | 4.70E-07 | chr:6:32505702 |
| 6 rs71542414  | 32560247 G | 2.689  | 4.70E-07 | chr:6:32505702 |
| 6 rs75639337  | 32578656 T | 3.028  | 4.70E-07 | chr:6:32505702 |
| 6 rs77064057  | 32578653 G | 3.028  | 4.70E-07 | chr:6:32505702 |
| 6 rs17212455  | 32652526 A | 3      | 4.71E-07 | chr:6:32505702 |
| 6 rs569962367 | 32485726 C | 2.544  | 4.75E-07 | chr:6:32505702 |
| 6 rs9269891   | 32551017 T | 2.718  | 4.77E-07 | chr:6:32505702 |
| 6 rs191570792 | 32486624 A | 3.609  | 4.77E-07 | chr:6:32505702 |
| 6 rs9272279   | 32603658 C | 3.987  | 4.78E-07 | chr:6:32505702 |
| 6 rs9272640   | 32608221 C | 3.115  | 4.78E-07 | chr:6:32505702 |
| 6 rs75732937  | 32487268 G | 2.689  | 4.85E-07 | chr:6:32505702 |
| 6 rs9269732   | 32547425 A | 0.2864 | 4.86E-07 | chr:6:32505702 |
| 6 rs66467908  | 32509787 C | 0.2056 | 4.89E-07 | chr:6:32505702 |
| 6 rs72492309  | 32509754 T | 0.2056 | 4.89E-07 | chr:6:32505702 |
| 6 rs9272185   | 32601620 A | 3.097  | 4.89E-07 | chr:6:32505702 |
| 6 rs111354037 | 32579285 C | 2.973  | 4.89E-07 | chr:6:32505702 |
| 6 rs79881121  | 32502324 A | 2.468  | 4.97E-07 | chr:6:32505702 |
| 6 rs9272306   | 32603880 T | 2.797  | 4.99E-07 | chr:6:32505702 |
| 6 rs9269736   | 32547440 C | 0.2864 | 5.00E-07 | chr:6:32505702 |
| 6 rs9269771   | 32548734 T | 0.1267 | 5.00E-07 | chr:6:32505702 |
| 6 rs533688361 | 32480016 T | 2.252  | 5.01E-07 | chr:6:32505702 |
| 6 rs3104420   | 32580028 A | 3.021  | 5.07E-07 | chr:6:32505702 |
| 6 rs79281322  | 32621047 C | 2.677  | 5.08E-07 | chr:6:32505702 |
| 6 rs9271912   | 32596207 T | 3.065  | 5.18E-07 | chr:6:32505702 |
| 6 rs9271913   | 32596222 A | 3.065  | 5.18E-07 | chr:6:32505702 |
| 6 rs9271932   | 32596714 C | 3.065  | 5.20E-07 | chr:6:32505702 |
| 6 rs9271933   | 32596717 A | 3.065  | 5.20E-07 | chr:6:32505702 |
| 6 rs9269728   | 32547385 A | 0.2666 | 5.20E-07 | chr:6:32505702 |
| 6 rs71534526  | 32510974 C | 2.359  | 5.25E-07 | chr:6:32505702 |
| 6 rs9272383   | 32604749 T | 2.645  | 5.27E-07 | chr:6:32505702 |
| 6 rs115834108 | 32459908 A | 2.208  | 5.28E-07 | chr:6:32505702 |



|               |            |        |          |                |
|---------------|------------|--------|----------|----------------|
| 6 rs9271898   | 32595972 A | 3.066  | 5.31E-07 | chr:6:32505702 |
| 6 rs9269582   | 32544787 C | 0.3279 | 5.31E-07 | chr:6:32505702 |
| 6 rs67829983  | 32531335 C | 0.1729 | 5.34E-07 | chr:6:32505702 |
| 6 rs9272094   | 32599781 C | 2.446  | 5.35E-07 | chr:6:32505702 |
| 6 rs9272096   | 32599784 C | 2.446  | 5.35E-07 | chr:6:32505702 |
| 6 rs9269727   | 32547371 C | 2.849  | 5.36E-07 | chr:6:32505702 |
| 6 rs9272101   | 32599824 T | 3.851  | 5.38E-07 | chr:6:32505702 |
| 6 rs547306579 | 32610781 T | 2.766  | 5.38E-07 | chr:6:32505702 |
| 6 rs9269783   | 32549001 A | 0.1611 | 5.46E-07 | chr:6:32505702 |
| 6 rs9272081   | 32599655 C | 2.703  | 5.49E-07 | chr:6:32505702 |
| 6 rs531950386 | 32486540 T | 2.327  | 5.50E-07 | chr:6:32505702 |
| 6 rs1281937   | 32578143 C | 3.016  | 5.55E-07 | chr:6:32505702 |
| 6 rs2647094   | 32580322 G | 3.016  | 5.55E-07 | chr:6:32505702 |
| 6 rs2858862   | 32580321 T | 3.016  | 5.55E-07 | chr:6:32505702 |
| 6 rs2858864   | 32578229 T | 3.016  | 5.55E-07 | chr:6:32505702 |
| 6 rs3104421   | 32580007 A | 3.016  | 5.55E-07 | chr:6:32505702 |
| 6 rs502055    | 32579003 C | 3.016  | 5.55E-07 | chr:6:32505702 |
| 6 rs502771    | 32578970 C | 3.016  | 5.55E-07 | chr:6:32505702 |
| 6 rs550703793 | 32582451 T | 3.016  | 5.55E-07 | chr:6:32505702 |
| 6 rs76946723  | 32578917 T | 3.016  | 5.55E-07 | chr:6:32505702 |
| 6 rs79838044  | 32580632 C | 3.016  | 5.55E-07 | chr:6:32505702 |
| 6 rs80243928  | 32580571 T | 3.016  | 5.55E-07 | chr:6:32505702 |
| 6 rs9271190   | 32578369 A | 3.016  | 5.55E-07 | chr:6:32505702 |
| 6 rs9271262   | 32580585 G | 3.016  | 5.55E-07 | chr:6:32505702 |
| 6 rs9271330   | 32582640 A | 3.016  | 5.55E-07 | chr:6:32505702 |
| 6 rs9271333   | 32582678 T | 3.016  | 5.55E-07 | chr:6:32505702 |
| 6 rs9271334   | 32582711 C | 3.016  | 5.55E-07 | chr:6:32505702 |
| 6 rs9271651   | 32592385 T | 3.277  | 5.56E-07 | chr:6:32505702 |
| 6 rs9272658   | 32608658 A | 3.297  | 5.66E-07 | chr:6:32505702 |
| 6 rs701831    | 32549401 T | 0.1107 | 5.67E-07 | chr:6:32505702 |
| 6 rs9270528   | 32559603 C | 2.757  | 5.67E-07 | chr:6:32505702 |
| 6 rs9271897   | 32595954 A | 3.061  | 5.68E-07 | chr:6:32505702 |
| 6 rs115021731 | 32489671 G | 2.878  | 5.73E-07 | chr:6:32505702 |
| 6 rs9269725   | 32547359 T | 0.2466 | 5.73E-07 | chr:6:32505702 |
| 6 rs9269726   | 32547360 G | 0.2466 | 5.73E-07 | chr:6:32505702 |
| 6 rs115852844 | 32603456 A | 3.796  | 5.76E-07 | chr:6:32505702 |
| 6 rs9272119   | 32600470 C | 3.067  | 5.76E-07 | chr:6:32505702 |
| 6 rs566861    | 32576538 C | 3.2    | 5.77E-07 | chr:6:32505702 |
| 6 rs141631850 | 32496670 C | 2.508  | 5.81E-07 | chr:6:32505702 |
| 6 rs9272307   | 32603886 T | 2.779  | 5.82E-07 | chr:6:32505702 |
| 6 rs673336    | 32577858 A | 3.234  | 5.82E-07 | chr:6:32505702 |
| 6 rs77568742  | 32580790 C | 3.001  | 5.84E-07 | chr:6:32505702 |
| 6 rs9270525   | 32559595 G | 2.741  | 5.85E-07 | chr:6:32505702 |

|               |            |        |          |                |
|---------------|------------|--------|----------|----------------|
| 6 rs9270526   | 32559597 A | 2.741  | 5.85E-07 | chr:6:32505702 |
| 6 rs9272260   | 32603236 A | 3.701  | 5.86E-07 | chr:6:32505702 |
| 6 rs72844157  | 32520071 A | 0.199  | 5.89E-07 | chr:6:32505702 |
| 6 rs2395521   | 32601700 T | 4.417  | 5.90E-07 | chr:6:32505702 |
| 6 rs66869156  | 32531295 T | 0.1705 | 5.96E-07 | chr:6:32505702 |
| 6 rs9272054   | 32599164 A | 2.843  | 5.97E-07 | chr:6:32505702 |
| 6 rs72508409  | 32451073 G | 9.257  | 6.01E-07 | chr:6:32505702 |
| 6 rs190771556 | 32485893 T | 2.765  | 6.03E-07 | chr:6:32505702 |
| 6 rs9270272   | 32557213 G | 0.1748 | 6.06E-07 | chr:6:32505702 |
| 6 rs9272141   | 32600797 A | 2.974  | 6.11E-07 | chr:6:32505702 |
| 6 rs9270527   | 32559600 A | 2.738  | 6.16E-07 | chr:6:32505702 |
| 6 rs9269595   | 32544977 T | 2.858  | 6.17E-07 | chr:6:32505702 |
| 6 rs9271930   | 32596677 G | 2.977  | 6.22E-07 | chr:6:32505702 |
| 6 rs9269717   | 32547303 G | 0.2456 | 6.26E-07 | chr:6:32505702 |
| 6 rs9272028   | 32598706 T | 3.034  | 6.27E-07 | chr:6:32505702 |
| 6 rs9272029   | 32598707 G | 3.034  | 6.27E-07 | chr:6:32505702 |
| 6 rs9271648   | 32592358 T | 2.971  | 6.30E-07 | chr:6:32505702 |
| 6 rs9272061   | 32599250 A | 2.972  | 6.34E-07 | chr:6:32505702 |
| 6 rs9270547   | 32559951 G | 2.854  | 6.36E-07 | chr:6:32505702 |
| 6 rs73729340  | 32560155 A | 2.712  | 6.38E-07 | chr:6:32505702 |
| 6 rs9272143   | 32600803 C | 2.971  | 6.40E-07 | chr:6:32505702 |
| 6 rs535866271 | 32486668 G | 2.298  | 6.44E-07 | chr:6:32505702 |
| 6 rs35115714  | 32532460 C | 0.1695 | 6.54E-07 | chr:6:32505702 |
| 6 rs707962    | 32609974 G | 3.78   | 6.54E-07 | chr:6:32505702 |
| 6 rs707963    | 32609969 G | 3.78   | 6.54E-07 | chr:6:32505702 |
| 6 rs9270540   | 32559848 C | 2.896  | 6.56E-07 | chr:6:32505702 |
| 6 rs9271326   | 32582527 T | 2.98   | 6.57E-07 | chr:6:32505702 |
| 6 rs145437633 | 32487776 G | 0.3428 | 6.61E-07 | chr:6:32505702 |
| 6 rs9271960   | 32597385 T | 2.855  | 6.66E-07 | chr:6:32505702 |
| 6 rs9272449   | 32605451 G | 2.922  | 6.67E-07 | chr:6:32505702 |
| 6 rs114146939 | 32459890 G | 2.197  | 6.74E-07 | chr:6:32505702 |
| 6 rs116587947 | 32459889 T | 2.197  | 6.74E-07 | chr:6:32505702 |
| 6 rs9272636   | 32608211 C | 2.599  | 6.76E-07 | chr:6:32505702 |
| 6 rs9272639   | 32608216 T | 2.599  | 6.76E-07 | chr:6:32505702 |
| 6 rs73729123  | 32519811 T | 0.1866 | 6.77E-07 | chr:6:32505702 |
| 6 rs9272123   | 32600573 T | 3.724  | 6.78E-07 | chr:6:32505702 |
| 6 rs9271699   | 32593179 G | 3.004  | 6.79E-07 | chr:6:32505702 |
| 6 rs9272004   | 32597964 A | 2.979  | 6.80E-07 | chr:6:32505702 |
| 6 rs583177    | 32579567 A | 2.967  | 6.90E-07 | chr:6:32505702 |
| 6 rs9270123   | 32555032 G | 0.3104 | 6.94E-07 | chr:6:32505702 |
| 6 rs9270382   | 32558285 A | 2.93   | 6.98E-07 | chr:6:32505702 |
| 6 rs9271955   | 32597281 A | 3.04   | 7.00E-07 | chr:6:32505702 |
| 6 rs9271957   | 32597335 C | 3.04   | 7.00E-07 | chr:6:32505702 |

|               |            |        |          |                |
|---------------|------------|--------|----------|----------------|
| 6 rs9269234   | 32451788 C | 3.204  | 7.04E-07 | chr:6:32505702 |
| 6 rs143742029 | 32486683 C | 2.385  | 7.05E-07 | chr:6:32505702 |
| 6 rs707949    | 32609952 C | 3.766  | 7.07E-07 | chr:6:32505702 |
| 6 rs111979375 | 32538231 T | 2.435  | 7.08E-07 | chr:6:32505702 |
| 6 rs73729339  | 32560017 A | 2.724  | 7.15E-07 | chr:6:32505702 |
| 6 rs9272668   | 32608763 A | 2.548  | 7.22E-07 | chr:6:32505702 |
| 6 rs9272493   | 32606076 C | 2.745  | 7.30E-07 | chr:6:32505702 |
| 6 rs9272085   | 32599685 C | 2.626  | 7.31E-07 | chr:6:32505702 |
| 6 rs9272272   | 32603530 A | 2.847  | 7.31E-07 | chr:6:32505702 |
| 6 rs41316211  | 32639909 C | 2.932  | 7.35E-07 | chr:6:32505702 |
| 6 rs549042477 | 32547505 A | 0.2609 | 7.44E-07 | chr:6:32505702 |
| 6 rs116011937 | 32486884 G | 2.854  | 7.45E-07 | chr:6:32505702 |
| 6 rs9272321   | 32604127 T | 3.804  | 7.47E-07 | chr:6:32505702 |
| 6 rs9272322   | 32604128 G | 3.804  | 7.47E-07 | chr:6:32505702 |
| 6 rs9272103   | 32599896 T | 2.969  | 7.51E-07 | chr:6:32505702 |
| 6 rs9271934   | 32596773 T | 2.981  | 7.61E-07 | chr:6:32505702 |
| 6 rs7758465   | 32599031 A | 3.714  | 7.68E-07 | chr:6:32505702 |
| 6 rs7758472   | 32599039 A | 3.714  | 7.68E-07 | chr:6:32505702 |
| 6 rs9269792   | 32549128 C | 0.2362 | 7.75E-07 | chr:6:32505702 |
| 6 rs112471393 | 32538228 T | 2.428  | 7.85E-07 | chr:6:32505702 |
| 6 rs72508422  | 32481498 C | 2.114  | 7.87E-07 | chr:6:32505702 |
| 6 rs659204    | 32577001 G | 3.11   | 7.88E-07 | chr:6:32505702 |
| 6 rs9272275   | 32603603 T | 3.822  | 7.89E-07 | chr:6:32505702 |
| 6 rs9272022   | 32598529 G | 2.839  | 7.93E-07 | chr:6:32505702 |
| 6 rs3998182   | 32561915 C | 3.438  | 8.02E-07 | chr:6:32505702 |
| 6 rs9271935   | 32596831 C | 2.977  | 8.03E-07 | chr:6:32505702 |
| 6 rs9270548   | 32559960 T | 2.805  | 8.07E-07 | chr:6:32505702 |
| 6 rs116088388 | 32488961 C | 2.426  | 8.15E-07 | chr:6:32505702 |
| 6 rs139007218 | 32488958 C | 2.426  | 8.15E-07 | chr:6:32505702 |
| 6 rs9272274   | 32603599 T | 2.857  | 8.18E-07 | chr:6:32505702 |
| 6 rs9270530   | 32559686 A | 2.736  | 8.22E-07 | chr:6:32505702 |
| 6 rs9269636   | 32545772 A | 0.1507 | 8.23E-07 | chr:6:32505702 |
| 6 rs9270374   | 32558216 G | 0.2127 | 8.24E-07 | chr:6:32505702 |
| 6 rs9271896   | 32595907 A | 3.03   | 8.29E-07 | chr:6:32505702 |
| 6 rs9270132   | 32555122 A | 3.576  | 8.32E-07 | chr:6:32505702 |
| 6 rs9272155   | 32601043 C | 2.955  | 8.56E-07 | chr:6:32505702 |
| 6 rs192837519 | 32547544 G | 2.985  | 8.62E-07 | chr:6:32505702 |
| 6 rs9272243   | 32602857 G | 3.696  | 8.70E-07 | chr:6:32505702 |
| 6 rs9272244   | 32602860 T | 3.696  | 8.70E-07 | chr:6:32505702 |
| 6 rs9271612   | 32591654 G | 3.693  | 8.70E-07 | chr:6:32505702 |
| 6 rs9271613   | 32591666 T | 3.693  | 8.70E-07 | chr:6:32505702 |
| 6 rs9270080   | 32554197 G | 3.112  | 8.73E-07 | chr:6:32505702 |
| 6 rs9272063   | 32599303 T | 3.702  | 8.82E-07 | chr:6:32505702 |

|               |            |        |          |                |
|---------------|------------|--------|----------|----------------|
| 6 rs113432958 | 32538366 A | 2.609  | 8.88E-07 | chr:6:32505702 |
| 6 rs9269907   | 32551324 A | 0.288  | 8.98E-07 | chr:6:32505702 |
| 6 rs41287234  | 32547338 A | 2.436  | 8.99E-07 | chr:6:32505702 |
| 6 rs41287235  | 32547344 A | 2.436  | 8.99E-07 | chr:6:32505702 |
| 6 rs78776954  | 32600817 G | 3.688  | 9.13E-07 | chr:6:32505702 |
| 6 rs9270413   | 32558495 C | 0.2169 | 9.14E-07 | chr:6:32505702 |
| 6 rs9270414   | 32558497 C | 0.2169 | 9.14E-07 | chr:6:32505702 |
| 6 rs138130801 | 32486866 T | 2.861  | 9.17E-07 | chr:6:32505702 |
| 6 rs9272657   | 32608655 A | 2.587  | 9.25E-07 | chr:6:32505702 |
| 6 rs9272659   | 32608661 C | 2.587  | 9.25E-07 | chr:6:32505702 |
| 6 rs9272176   | 32601333 T | 3.67   | 9.39E-07 | chr:6:32505702 |
| 6 rs9269338   | 32540304 G | 3.257  | 9.43E-07 | chr:6:32505702 |
| 6 rs9272188   | 32601688 G | 3.68   | 9.46E-07 | chr:6:32505702 |
| 6 rs9269715   | 32547278 T | 0.2923 | 9.55E-07 | chr:6:32505702 |
| 6 rs544698989 | 32558169 A | 3.375  | 9.56E-07 | chr:6:32505702 |
| 6 rs116544033 | 32605361 G | 2.944  | 9.59E-07 | chr:6:32505702 |
| 6 rs9272438   | 32605358 G | 2.944  | 9.59E-07 | chr:6:32505702 |
| 6 rs41316208  | 32634899 G | 2.831  | 9.59E-07 | chr:6:32505702 |
| 6 rs9272294   | 32603760 T | 3.841  | 9.59E-07 | chr:6:32505702 |
| 6 rs9272348   | 32604396 T | 2.75   | 9.65E-07 | chr:6:32505702 |
| 6 rs9272638   | 32608214 C | 3.017  | 9.69E-07 | chr:6:32505702 |
| 6 rs9272715   | 32609357 C | 2.583  | 9.70E-07 | chr:6:32505702 |
| 6 rs9271906   | 32596048 A | 2.947  | 9.73E-07 | chr:6:32505702 |
| 6 rs561017744 | 32547528 C | 0.279  | 9.73E-07 | chr:6:32505702 |
| 6 rs3188501   | 32609277 C | 3.332  | 9.74E-07 | chr:6:32505702 |
| 6 rs9272117   | 32600411 T | 3.016  | 9.78E-07 | chr:6:32505702 |
| 6 rs9271903   | 32596038 G | 3.744  | 9.81E-07 | chr:6:32505702 |
| 6 rs9271904   | 32596040 G | 3.744  | 9.81E-07 | chr:6:32505702 |
| 6 rs9271905   | 32596041 A | 3.744  | 9.81E-07 | chr:6:32505702 |
| 6 rs115254515 | 32491895 T | 2.261  | 1.00E-06 | chr:6:32505702 |
| 6 rs9271626   | 32591944 A | 3.658  | 1.01E-06 | chr:6:32505702 |
| 6 rs9271627   | 32591949 T | 3.658  | 1.01E-06 | chr:6:32505702 |
| 6 rs9271656   | 32592574 A | 3.929  | 1.01E-06 | chr:6:32505702 |
| 6 rs12665158  | 32482007 T | 2.399  | 1.02E-06 | chr:6:32505702 |
| 6 rs9271871   | 32595383 C | 3.034  | 1.02E-06 | chr:6:32505702 |
| 6 rs6929044   | 32596951 C | 3.652  | 1.02E-06 | chr:6:32505702 |
| 6 rs9271443   | 32588263 C | 3.582  | 1.02E-06 | chr:6:32505702 |
| 6 rs9272660   | 32608667 G | 2.58   | 1.02E-06 | chr:6:32505702 |
| 6 rs9271872   | 32595418 G | 3.069  | 1.02E-06 | chr:6:32505702 |
| 6 rs9271873   | 32595421 A | 3.069  | 1.02E-06 | chr:6:32505702 |
| 6 rs9272437   | 32605356 G | 2.935  | 1.04E-06 | chr:6:32505702 |
| 6 rs9272674   | 32608885 T | 2.524  | 1.04E-06 | chr:6:32505702 |
| 6 rs141114903 | 32487814 G | 2.25   | 1.04E-06 | chr:6:32505702 |

|               |            |        |          |                |
|---------------|------------|--------|----------|----------------|
| 6 rs9272489   | 32606030 T | 3.471  | 1.05E-06 | chr:6:32505702 |
| 6 rs9270634   | 32565625 G | 2.966  | 1.05E-06 | chr:6:32505702 |
| 6 rs116531157 | 32547565 A | 0.256  | 1.05E-06 | chr:6:32505702 |
| 6 rs73407208  | 32491721 T | 2.613  | 1.06E-06 | chr:6:32505702 |
| 6 rs9269635   | 32545720 A | 0.1551 | 1.06E-06 | chr:6:32505702 |
| 6 rs9271858   | 32595223 G | 2.568  | 1.06E-06 | chr:6:32505702 |
| 6 rs9271859   | 32595231 G | 2.568  | 1.06E-06 | chr:6:32505702 |
| 6 rs9272128   | 32600601 A | 2.817  | 1.07E-06 | chr:6:32505702 |
| 6 rs9272129   | 32600602 T | 2.817  | 1.07E-06 | chr:6:32505702 |
| 6 rs559294646 | 32525834 T | 0.3164 | 1.07E-06 | chr:6:32505702 |
| 6 rs9272037   | 32598844 C | 2.642  | 1.07E-06 | chr:6:32505702 |
| 6 rs1047985   | 32605216 A | 3.642  | 1.08E-06 | chr:6:32505702 |
| 6 rs201843924 | 32486878 G | 3.534  | 1.08E-06 | chr:6:32505702 |
| 6 rs9273012   | 32611641 G | 2.917  | 1.09E-06 | chr:6:32505702 |
| 6 rs59447698  | 32481125 G | 2.111  | 1.10E-06 | chr:6:32505702 |
| 6 rs74207277  | 32560091 T | 2.646  | 1.11E-06 | chr:6:32505702 |
| 6 rs9270383   | 32558298 T | 2.539  | 1.11E-06 | chr:6:32505702 |
| 6 rs556704361 | 32450273 G | 5.892  | 1.11E-06 | chr:6:32505702 |
| 6 rs368127976 | 32497090 T | 0.2134 | 1.12E-06 | chr:6:32505702 |
| 6 rs2856698   | 32636376 G | 2.957  | 1.12E-06 | chr:6:32505702 |
| 6 rs9272200   | 32601868 C | 2.78   | 1.12E-06 | chr:6:32505702 |
| 6 rs9271937   | 32596870 G | 2.953  | 1.13E-06 | chr:6:32505702 |
| 6 rs9271959   | 32597377 C | 2.808  | 1.13E-06 | chr:6:32505702 |
| 6 rs35859703  | 32535295 G | 2.342  | 1.13E-06 | chr:6:32505702 |
| 6 rs6929398   | 32596966 G | 3.633  | 1.13E-06 | chr:6:32505702 |
| 6 rs114527826 | 32594160 T | 3.63   | 1.13E-06 | chr:6:32505702 |
| 6 rs9271724   | 32593552 C | 3.023  | 1.14E-06 | chr:6:32505702 |
| 6 rs9272014   | 32598262 A | 2.855  | 1.14E-06 | chr:6:32505702 |
| 6 rs41287233  | 32547329 G | 2.42   | 1.14E-06 | chr:6:32505702 |
| 6 rs4532479   | 32582194 T | 2.917  | 1.14E-06 | chr:6:32505702 |
| 6 rs9271717   | 32593453 G | 2.573  | 1.15E-06 | chr:6:32505702 |
| 6 rs9271427   | 32587983 G | 3.575  | 1.15E-06 | chr:6:32505702 |
| 6 rs9271428   | 32587984 T | 3.575  | 1.15E-06 | chr:6:32505702 |
| 6 rs76533559  | 32554897 G | 2.96   | 1.15E-06 | chr:6:32505702 |
| 6 rs71536562  | 32529207 C | 2.268  | 1.15E-06 | chr:6:32505702 |
| 6 rs559109541 | 32493714 T | 2.807  | 1.16E-06 | chr:6:32505702 |
| 6 rs78240203  | 32600881 G | 3.641  | 1.17E-06 | chr:6:32505702 |
| 6 rs9271964   | 32597464 C | 2.557  | 1.18E-06 | chr:6:32505702 |
| 6 rs9272220   | 32602306 A | 3.626  | 1.19E-06 | chr:6:32505702 |
| 6 rs9272177   | 32601361 C | 3.623  | 1.19E-06 | chr:6:32505702 |
| 6 rs2097432   | 32590771 C | 3.623  | 1.20E-06 | chr:6:32505702 |
| 6 rs3129763   | 32590925 A | 3.623  | 1.20E-06 | chr:6:32505702 |
| 6 rs562462    | 32586437 C | 3.623  | 1.20E-06 | chr:6:32505702 |

|               |            |        |          |                |
|---------------|------------|--------|----------|----------------|
| 6 rs607998    | 32587038 A | 3.623  | 1.20E-06 | chr:6:32505702 |
| 6 rs76351919  | 32588703 C | 3.623  | 1.20E-06 | chr:6:32505702 |
| 6 rs9271352   | 32583938 C | 3.623  | 1.20E-06 | chr:6:32505702 |
| 6 rs9271541   | 32590070 C | 3.623  | 1.20E-06 | chr:6:32505702 |
| 6 rs9271545   | 32590153 T | 3.623  | 1.20E-06 | chr:6:32505702 |
| 6 rs9271610   | 32591601 T | 2.854  | 1.24E-06 | chr:6:32505702 |
| 6 rs9271611   | 32591609 G | 2.854  | 1.24E-06 | chr:6:32505702 |
| 6 rs9270335   | 32557913 A | 0.1454 | 1.24E-06 | chr:6:32505702 |
| 6 rs67927015  | 32531442 T | 0.1482 | 1.25E-06 | chr:6:32505702 |
| 6 rs140747244 | 32488784 C | 2.156  | 1.25E-06 | chr:6:32505702 |
| 6 rs9269387   | 32541058 G | 2.87   | 1.25E-06 | chr:6:32505702 |
| 6 rs1048645   | 32610786 T | 2.667  | 1.26E-06 | chr:6:32505702 |
| 6 rs67979569  | 32530540 T | 0.15   | 1.26E-06 | chr:6:32505702 |
| 6 rs9271939   | 32596921 C | 2.943  | 1.26E-06 | chr:6:32505702 |
| 6 rs9272414   | 32604994 T | 2.752  | 1.27E-06 | chr:6:32505702 |
| 6 rs79617990  | 32600694 A | 3.609  | 1.28E-06 | chr:6:32505702 |
| 6 rs9271533   | 32589952 T | 3.11   | 1.28E-06 | chr:6:32505702 |
| 6 rs9271535   | 32589959 T | 3.11   | 1.28E-06 | chr:6:32505702 |
| 6 rs187428266 | 32540161 A | 2.488  | 1.28E-06 | chr:6:32505702 |
| 6 rs9271963   | 32597453 A | 2.552  | 1.29E-06 | chr:6:32505702 |
| 6 rs9272035   | 32598814 T | 2.559  | 1.29E-06 | chr:6:32505702 |
| 6 rs9270747   | 32568292 A | 0.2231 | 1.30E-06 | chr:6:32505702 |
| 6 rs9272233   | 32602686 A | 3.606  | 1.30E-06 | chr:6:32505702 |
| 6 rs9272234   | 32602691 A | 3.606  | 1.30E-06 | chr:6:32505702 |
| 6 rs112219021 | 32518085 C | 0.1265 | 1.30E-06 | chr:6:32505702 |
| 6 rs9272462   | 32605620 A | 3.608  | 1.30E-06 | chr:6:32505702 |
| 6 rs71536570  | 32531422 C | 0.1481 | 1.31E-06 | chr:6:32505702 |
| 6 rs35464393  | 32530198 T | 0.1467 | 1.31E-06 | chr:6:32505702 |
| 6 rs113725551 | 32511420 A | 0.1588 | 1.31E-06 | chr:6:32505702 |
| 6 rs36189266  | 32526768 G | 0.2871 | 1.31E-06 | chr:6:32505702 |
| 6 rs76564265  | 32530582 G | 0.1467 | 1.31E-06 | chr:6:32505702 |
| 6 rs34265294  | 32489118 A | 2.322  | 1.31E-06 | chr:6:32505702 |
| 6 rs9271619   | 32591773 A | 3.606  | 1.32E-06 | chr:6:32505702 |
| 6 rs9270543   | 32559881 A | 2.6    | 1.32E-06 | chr:6:32505702 |
| 6 rs9270544   | 32559882 T | 2.6    | 1.32E-06 | chr:6:32505702 |
| 6 rs9270662   | 32566089 G | 3.547  | 1.35E-06 | chr:6:32505702 |
| 6 rs9272325   | 32604156 A | 2.709  | 1.35E-06 | chr:6:32505702 |
| 6 rs9269723   | 32547336 T | 0.2561 | 1.37E-06 | chr:6:32505702 |
| 6 rs1130126   | 32610795 C | 2.659  | 1.37E-06 | chr:6:32505702 |
| 6 rs9272066   | 32599374 A | 3.595  | 1.38E-06 | chr:6:32505702 |
| 6 rs9273060   | 32612114 G | 2.85   | 1.38E-06 | chr:6:32505702 |
| 6 rs9272685   | 32608991 G | 2.829  | 1.41E-06 | chr:6:32505702 |
| 6 rs9270087   | 32554294 G | 0.3163 | 1.42E-06 | chr:6:32505702 |

|               |            |        |          |                |
|---------------|------------|--------|----------|----------------|
| 6 rs9272178   | 32601427 G | 3.592  | 1.42E-06 | chr:6:32505702 |
| 6 rs9272181   | 32601563 A | 3.592  | 1.42E-06 | chr:6:32505702 |
| 6 rs77114005  | 32594342 C | 3.924  | 1.43E-06 | chr:6:32505702 |
| 6 rs9272314   | 32604037 G | 2.713  | 1.43E-06 | chr:6:32505702 |
| 6 rs9272315   | 32604039 C | 2.713  | 1.43E-06 | chr:6:32505702 |
| 6 rs72508415  | 32459793 A | 2.35   | 1.43E-06 | chr:6:32505702 |
| 6 rs112740757 | 32481965 G | 2.57   | 1.44E-06 | chr:6:32505702 |
| 6 rs9272170   | 32601243 G | 2.84   | 1.46E-06 | chr:6:32505702 |
| 6 rs9272226   | 32602396 C | 0.3151 | 1.46E-06 | chr:6:32505702 |
| 6 rs137863146 | 32489871 G | 2.586  | 1.46E-06 | chr:6:32505702 |
| 6 rs9270405   | 32558444 T | 2.589  | 1.47E-06 | chr:6:32505702 |
| 6 rs9272052   | 32599155 G | 3.616  | 1.47E-06 | chr:6:32505702 |
| 6 rs73729129  | 32520092 T | 0.2055 | 1.48E-06 | chr:6:32505702 |
| 6 rs9272124   | 32600581 A | 2.745  | 1.49E-06 | chr:6:32505702 |
| 6 rs9272676   | 32608903 C | 2.569  | 1.49E-06 | chr:6:32505702 |
| 6 rs9272677   | 32608907 A | 2.569  | 1.49E-06 | chr:6:32505702 |
| 6 rs9272409   | 32604968 C | 3.025  | 1.50E-06 | chr:6:32505702 |
| 6 rs111625346 | 32610050 C | 2.881  | 1.50E-06 | chr:6:32505702 |
| 6 rs190526848 | 32488781 A | 2.138  | 1.52E-06 | chr:6:32505702 |
| 6 rs9271958   | 32597372 A | 3.588  | 1.52E-06 | chr:6:32505702 |
| 6 rs9271715   | 32593441 T | 2.525  | 1.52E-06 | chr:6:32505702 |
| 6 rs9271716   | 32593442 G | 2.525  | 1.52E-06 | chr:6:32505702 |
| 6 rs9272253   | 32603028 T | 3.513  | 1.52E-06 | chr:6:32505702 |
| 6 rs115787103 | 32603417 A | 3.577  | 1.53E-06 | chr:6:32505702 |
| 6 rs3135003   | 32591476 T | 3.577  | 1.53E-06 | chr:6:32505702 |
| 6 rs7771972   | 32605557 T | 3.577  | 1.53E-06 | chr:6:32505702 |
| 6 rs9271668   | 32592774 T | 3.577  | 1.53E-06 | chr:6:32505702 |
| 6 rs9272065   | 32599352 G | 3.577  | 1.53E-06 | chr:6:32505702 |
| 6 rs9272230   | 32602602 A | 3.577  | 1.53E-06 | chr:6:32505702 |
| 6 rs9272434   | 32605325 T | 3.577  | 1.53E-06 | chr:6:32505702 |
| 6 rs9272686   | 32609015 T | 3.577  | 1.53E-06 | chr:6:32505702 |
| 6 rs9272728   | 32609593 G | 3.577  | 1.53E-06 | chr:6:32505702 |
| 6 rs9272069   | 32599425 A | 3.575  | 1.53E-06 | chr:6:32505702 |
| 6 rs9271850   | 32595060 G | 3.051  | 1.53E-06 | chr:6:32505702 |
| 6 rs547755130 | 32486547 C | 2.214  | 1.57E-06 | chr:6:32505702 |
| 6 rs565956329 | 32486548 A | 2.214  | 1.57E-06 | chr:6:32505702 |
| 6 rs9272257   | 32603189 T | 2.745  | 1.57E-06 | chr:6:32505702 |
| 6 rs9272258   | 32603191 T | 2.745  | 1.57E-06 | chr:6:32505702 |
| 6 rs9272259   | 32603192 G | 2.745  | 1.57E-06 | chr:6:32505702 |
| 6 rs9269722   | 32547328 A | 0.2546 | 1.57E-06 | chr:6:32505702 |
| 6 rs9272121   | 32600556 C | 2.798  | 1.57E-06 | chr:6:32505702 |
| 6 rs9270868   | 32571117 G | 3.614  | 1.59E-06 | chr:6:32505702 |
| 6 rs9271899   | 32596007 G | 2.845  | 1.59E-06 | chr:6:32505702 |

|               |            |        |          |                |
|---------------|------------|--------|----------|----------------|
| 6 rs281860696 | 32634893 A | 2.767  | 1.60E-06 | chr:6:32505702 |
| 6 rs9274574   | 32635219 A | 2.532  | 1.61E-06 | chr:6:32505702 |
| 6 rs34645444  | 32522634 T | 0.1381 | 1.61E-06 | chr:6:32505702 |
| 6 rs553033826 | 32609097 C | 2.938  | 1.61E-06 | chr:6:32505702 |
| 6 rs9269581   | 32544785 A | 0.2183 | 1.62E-06 | chr:6:32505702 |
| 6 rs9271384   | 32587408 T | 2.842  | 1.62E-06 | chr:6:32505702 |
| 6 rs73726821  | 32526767 G | 0.2853 | 1.62E-06 | chr:6:32505702 |
| 6 rs41287229  | 32547304 A | 2.389  | 1.62E-06 | chr:6:32505702 |
| 6 rs41287230  | 32547308 A | 2.389  | 1.62E-06 | chr:6:32505702 |
| 6 rs112138727 | 32497169 G | 2.902  | 1.63E-06 | chr:6:32505702 |
| 6 rs9269887   | 32550979 C | 2.639  | 1.63E-06 | chr:6:32505702 |
| 6 rs200254403 | 32487102 G | 0.366  | 1.63E-06 | chr:6:32505702 |
| 6 rs1064717   | 32546615 G | 0.1847 | 1.64E-06 | chr:6:32505702 |
| 6 rs72847623  | 32538044 G | 2.437  | 1.64E-06 | chr:6:32505702 |
| 6 rs9272219   | 32602269 T | 2.871  | 1.64E-06 | chr:6:32505702 |
| 6 rs9272236   | 32602702 C | 2.867  | 1.65E-06 | chr:6:32505702 |
| 6 rs9270600   | 32561693 T | 3.561  | 1.66E-06 | chr:6:32505702 |
| 6 rs1056315   | 32627515 A | 2.759  | 1.67E-06 | chr:6:32505702 |
| 6 rs9269653   | 32546080 A | 0.1638 | 1.68E-06 | chr:6:32505702 |
| 6 rs34644981  | 32628939 G | 2.626  | 1.68E-06 | chr:6:32505702 |
| 6 rs9272302   | 32603854 T | 2.681  | 1.69E-06 | chr:6:32505702 |
| 6 rs3207966   | 32605197 A | 3.496  | 1.69E-06 | chr:6:32505702 |
| 6 rs36203457  | 32628548 G | 2.767  | 1.69E-06 | chr:6:32505702 |
| 6 rs9269720   | 32547319 T | 0.2331 | 1.71E-06 | chr:6:32505702 |
| 6 rs41316227  | 32641821 C | 2.788  | 1.71E-06 | chr:6:32505702 |
| 6 rs9272216   | 32602131 G | 2.831  | 1.71E-06 | chr:6:32505702 |
| 6 rs9272532   | 32606643 A | 3.017  | 1.72E-06 | chr:6:32505702 |
| 6 rs71536564  | 32529818 C | 2.206  | 1.72E-06 | chr:6:32505702 |
| 6 rs201850026 | 32487100 T | 0.366  | 1.73E-06 | chr:6:32505702 |
| 6 rs9269713   | 32547252 G | 0.2318 | 1.73E-06 | chr:6:32505702 |
| 6 rs9272212   | 32602033 A | 2.553  | 1.73E-06 | chr:6:32505702 |
| 6 rs9272276   | 32603634 C | 2.767  | 1.74E-06 | chr:6:32505702 |
| 6 rs9271142   | 32577090 T | 0.1463 | 1.75E-06 | chr:6:32505702 |
| 6 rs9271043   | 32575177 A | 0.2391 | 1.77E-06 | chr:6:32505702 |
| 6 rs41287231  | 32547316 A | 2.383  | 1.77E-06 | chr:6:32505702 |
| 6 rs41287232  | 32547320 A | 2.383  | 1.77E-06 | chr:6:32505702 |
| 6 rs9272190   | 32601760 G | 3.413  | 1.78E-06 | chr:6:32505702 |
| 6 rs9272191   | 32601769 T | 3.413  | 1.78E-06 | chr:6:32505702 |
| 6 rs9272192   | 32601775 G | 3.413  | 1.78E-06 | chr:6:32505702 |
| 6 rs3207984   | 32609214 T | 2.674  | 1.78E-06 | chr:6:32505702 |
| 6 rs114020553 | 32527480 A | 0.2743 | 1.79E-06 | chr:6:32505702 |
| 6 rs9272724   | 32609506 C | 2.834  | 1.79E-06 | chr:6:32505702 |
| 6 rs4311504   | 32593349 G | 3.543  | 1.80E-06 | chr:6:32505702 |



|               |            |        |          |                |
|---------------|------------|--------|----------|----------------|
| 6 rs9272090   | 32599736 C | 2.389  | 1.80E-06 | chr:6:32505702 |
| 6 rs9272091   | 32599745 C | 2.389  | 1.80E-06 | chr:6:32505702 |
| 6 rs9271459   | 32588457 T | 0.3315 | 1.81E-06 | chr:6:32505702 |
| 6 rs707952    | 32609806 T | 3.325  | 1.82E-06 | chr:6:32505702 |
| 6 rs76045537  | 32594152 C | 2.858  | 1.83E-06 | chr:6:32505702 |
| 6 rs9272781   | 32610357 T | 2.858  | 1.83E-06 | chr:6:32505702 |
| 6 rs9272782   | 32610371 G | 2.858  | 1.83E-06 | chr:6:32505702 |
| 6 rs9272783   | 32610378 T | 2.858  | 1.83E-06 | chr:6:32505702 |
| 6 rs9272784   | 32610379 A | 2.858  | 1.83E-06 | chr:6:32505702 |
| 6 rs9270326   | 32557812 C | 0.1079 | 1.83E-06 | chr:6:32505702 |
| 6 rs9271901   | 32596027 T | 2.832  | 1.83E-06 | chr:6:32505702 |
| 6 rs9272648   | 32608524 C | 3.056  | 1.84E-06 | chr:6:32505702 |
| 6 rs9272369   | 32604643 T | 3.29   | 1.85E-06 | chr:6:32505702 |
| 6 rs199855998 | 32487096 A | 0.3629 | 1.85E-06 | chr:6:32505702 |
| 6 rs75236519  | 32460670 C | 2.14   | 1.85E-06 | chr:6:32505702 |
| 6 rs202075303 | 32496326 T | 2.448  | 1.86E-06 | chr:6:32505702 |
| 6 rs72492362  | 32543969 G | 2.702  | 1.86E-06 | chr:6:32505702 |
| 6 rs9271945   | 32597034 A | 2.891  | 1.87E-06 | chr:6:32505702 |
| 6 rs9271962   | 32597434 C | 2.55   | 1.88E-06 | chr:6:32505702 |
| 6 rs9271659   | 32592593 A | 3.828  | 1.88E-06 | chr:6:32505702 |
| 6 rs534705706 | 32562023 A | 4.535  | 1.88E-06 | chr:6:32505702 |
| 6 rs9272172   | 32601260 C | 2.826  | 1.90E-06 | chr:6:32505702 |
| 6 rs9272469   | 32605713 C | 3.678  | 1.92E-06 | chr:6:32505702 |
| 6 rs185236820 | 32488776 T | 2.124  | 1.92E-06 | chr:6:32505702 |
| 6 rs9271633   | 32592072 G | 3.532  | 1.92E-06 | chr:6:32505702 |
| 6 rs4599680   | 32566294 C | 3.534  | 1.92E-06 | chr:6:32505702 |
| 6 rs590999    | 32567508 A | 3.534  | 1.92E-06 | chr:6:32505702 |
| 6 rs76190048  | 32566497 A | 3.534  | 1.92E-06 | chr:6:32505702 |
| 6 rs9270665   | 32566232 T | 3.534  | 1.92E-06 | chr:6:32505702 |
| 6 rs148024666 | 32537516 A | 2.579  | 1.93E-06 | chr:6:32505702 |
| 6 rs9271694   | 32593051 C | 3.11   | 1.93E-06 | chr:6:32505702 |
| 6 rs9271280   | 32581047 A | 2.722  | 1.93E-06 | chr:6:32505702 |
| 6 rs9271848   | 32595027 G | 2.634  | 1.94E-06 | chr:6:32505702 |
| 6 rs67345629  | 32529268 T | 2.197  | 1.95E-06 | chr:6:32505702 |
| 6 rs530218062 | 32525091 A | 0.2986 | 1.95E-06 | chr:6:32505702 |
| 6 rs75237145  | 32594295 T | 2.494  | 1.96E-06 | chr:6:32505702 |
| 6 rs9270052   | 32553807 G | 0.1364 | 1.96E-06 | chr:6:32505702 |
| 6 rs115249219 | 32479677 G | 2.392  | 1.99E-06 | chr:6:32505702 |
| 6 rs9272215   | 32602105 T | 3.44   | 2.00E-06 | chr:6:32505702 |
| 6 rs9269708   | 32547232 C | 0.229  | 2.00E-06 | chr:6:32505702 |
| 6 rs9269709   | 32547237 G | 0.229  | 2.00E-06 | chr:6:32505702 |
| 6 rs9271714   | 32593434 G | 2.48   | 2.01E-06 | chr:6:32505702 |
| 6 rs9272207   | 32601966 C | 2.658  | 2.02E-06 | chr:6:32505702 |

|               |            |        |          |                |
|---------------|------------|--------|----------|----------------|
| 6 rs9272626   | 32608041 C | 3.46   | 2.02E-06 | chr:6:32505702 |
| 6 rs77559661  | 32599512 T | 3.549  | 2.02E-06 | chr:6:32505702 |
| 6 rs9271524   | 32589820 C | 3.434  | 2.03E-06 | chr:6:32505702 |
| 6 rs72492339  | 32527472 G | 0.2756 | 2.04E-06 | chr:6:32505702 |
| 6 rs182793436 | 32547530 T | 2.855  | 2.06E-06 | chr:6:32505702 |
| 6 rs9270560   | 32560741 T | 0.1709 | 2.08E-06 | chr:6:32505702 |
| 6 rs9272450   | 32605478 T | 2.814  | 2.08E-06 | chr:6:32505702 |
| 6 rs9270533   | 32559709 T | 2.574  | 2.08E-06 | chr:6:32505702 |
| 6 rs9270535   | 32559714 A | 2.574  | 2.08E-06 | chr:6:32505702 |
| 6 rs9270623   | 32565331 C | 3.414  | 2.11E-06 | chr:6:32505702 |
| 6 rs529763782 | 32493737 T | 2.73   | 2.12E-06 | chr:6:32505702 |
| 6 rs549643018 | 32525126 G | 0.3198 | 2.12E-06 | chr:6:32505702 |
| 6 rs35344500  | 32609525 C | 3.441  | 2.14E-06 | chr:6:32505702 |
| 6 rs201958319 | 32487094 T | 0.3662 | 2.14E-06 | chr:6:32505702 |
| 6 rs9272743   | 32609726 T | 2.683  | 2.17E-06 | chr:6:32505702 |
| 6 rs191442117 | 32525886 T | 0.3179 | 2.17E-06 | chr:6:32505702 |
| 6 rs76745381  | 32537530 T | 2.565  | 2.19E-06 | chr:6:32505702 |
| 6 rs9271711   | 32593430 T | 2.473  | 2.20E-06 | chr:6:32505702 |
| 6 rs182651216 | 32526060 G | 0.3126 | 2.21E-06 | chr:6:32505702 |
| 6 rs9272680   | 32608932 T | 2.586  | 2.23E-06 | chr:6:32505702 |
| 6 rs114969562 | 32594299 A | 2.957  | 2.23E-06 | chr:6:32505702 |
| 6 rs9272802   | 32610589 T | 2.811  | 2.23E-06 | chr:6:32505702 |
| 6 rs1142326   | 32609212 T | 2.671  | 2.23E-06 | chr:6:32505702 |
| 6 rs68148149  | 32511725 C | 0.1683 | 2.24E-06 | chr:6:32505702 |
| 6 rs9272605   | 32607728 G | 3.055  | 2.27E-06 | chr:6:32505702 |
| 6 rs9272448   | 32605439 T | 2.772  | 2.27E-06 | chr:6:32505702 |
| 6 rs140209363 | 32492971 C | 2.155  | 2.29E-06 | chr:6:32505702 |
| 6 rs9271666   | 32592693 C | 3.499  | 2.29E-06 | chr:6:32505702 |
| 6 rs9272682   | 32608953 T | 2.974  | 2.31E-06 | chr:6:32505702 |
| 6 rs9272255   | 32603133 T | 2.796  | 2.32E-06 | chr:6:32505702 |
| 6 rs9270620   | 32565272 A | 3.399  | 2.32E-06 | chr:6:32505702 |
| 6 rs9272687   | 32609057 A | 2.81   | 2.32E-06 | chr:6:32505702 |
| 6 rs1047993   | 32605271 T | 2.809  | 2.33E-06 | chr:6:32505702 |
| 6 rs560625026 | 32546591 C | 0.193  | 2.33E-06 | chr:6:32505702 |
| 6 rs9270573   | 32561014 G | 3.442  | 2.34E-06 | chr:6:32505702 |
| 6 rs540141541 | 32487480 G | 3.255  | 2.38E-06 | chr:6:32505702 |
| 6 rs9272108   | 32600228 C | 2.799  | 2.38E-06 | chr:6:32505702 |
| 6 rs9272418   | 32605091 G | 2.797  | 2.40E-06 | chr:6:32505702 |
| 6 rs9272419   | 32605097 T | 2.797  | 2.40E-06 | chr:6:32505702 |
| 6 rs9272421   | 32605118 A | 2.797  | 2.40E-06 | chr:6:32505702 |
| 6 rs9271696   | 32593085 C | 2.752  | 2.41E-06 | chr:6:32505702 |
| 6 rs17211818  | 32636963 A | 2.753  | 2.41E-06 | chr:6:32505702 |
| 6 rs9272630   | 32608150 A | 2.573  | 2.42E-06 | chr:6:32505702 |

|               |            |        |          |                |
|---------------|------------|--------|----------|----------------|
| 6 rs9272631   | 32608152 C | 2.573  | 2.42E-06 | chr:6:32505702 |
| 6 rs111358198 | 32547489 T | 0.2754 | 2.43E-06 | chr:6:32505702 |
| 6 rs9272261   | 32603242 A | 2.759  | 2.46E-06 | chr:6:32505702 |
| 6 rs9272649   | 32608550 C | 2.553  | 2.47E-06 | chr:6:32505702 |
| 6 rs9271927   | 32596647 C | 2.702  | 2.49E-06 | chr:6:32505702 |
| 6 rs9271928   | 32596648 A | 2.702  | 2.49E-06 | chr:6:32505702 |
| 6 rs9271929   | 32596650 C | 2.702  | 2.49E-06 | chr:6:32505702 |
| 6 rs9272184   | 32601617 C | 3.487  | 2.49E-06 | chr:6:32505702 |
| 6 rs558057632 | 32526072 G | 0.3274 | 2.50E-06 | chr:6:32505702 |
| 6 rs9272013   | 32598224 T | 2.81   | 2.51E-06 | chr:6:32505702 |
| 6 rs9268628   | 32405865 C | 2.873  | 2.51E-06 | chr:6:32505702 |
| 6 rs112566327 | 32537537 G | 2.55   | 2.53E-06 | chr:6:32505702 |
| 6 rs9270455   | 32558878 C | 0.2539 | 2.53E-06 | chr:6:32505702 |
| 6 rs9274600   | 32635592 G | 2.422  | 2.54E-06 | chr:6:32505702 |
| 6 rs9272016   | 32598346 T | 2.753  | 2.60E-06 | chr:6:32505702 |
| 6 rs62405573  | 32458239 T | 2.372  | 2.60E-06 | chr:6:32505702 |
| 6 rs9272015   | 32598299 A | 2.752  | 2.61E-06 | chr:6:32505702 |
| 6 rs9270965   | 32573471 A | 0.1509 | 2.61E-06 | chr:6:32505702 |
| 6 rs9270065   | 32554022 G | 3.313  | 2.62E-06 | chr:6:32505702 |
| 6 rs9272423   | 32605164 G | 3.413  | 2.63E-06 | chr:6:32505702 |
| 6 rs9270460   | 32558908 T | 2.828  | 2.66E-06 | chr:6:32505702 |
| 6 rs3763317   | 32376788 C | 2.862  | 2.67E-06 | chr:6:32505702 |
| 6 rs4713557   | 32606963 A | 3.591  | 2.71E-06 | chr:6:32505702 |
| 6 rs139547629 | 32485944 G | 2.705  | 2.71E-06 | chr:6:32505702 |
| 6 rs9272055   | 32599176 A | 2.563  | 2.74E-06 | chr:6:32505702 |
| 6 rs575576508 | 32485670 A | 2.404  | 2.75E-06 | chr:6:32505702 |
| 6 rs2002777   | 32601332 A | 3.002  | 2.77E-06 | chr:6:32505702 |
| 6 rs201211315 | 32525040 A | 0.3077 | 2.79E-06 | chr:6:32505702 |
| 6 rs9269413   | 32541458 C | 0.1422 | 2.85E-06 | chr:6:32505702 |
| 6 rs2395224   | 32590482 G | 3.28   | 2.93E-06 | chr:6:32505702 |
| 6 rs9271325   | 32582513 G | 2.808  | 2.95E-06 | chr:6:32505702 |
| 6 rs74291249  | 32594098 A | 3.45   | 2.97E-06 | chr:6:32505702 |
| 6 rs9272173   | 32601268 C | 3.445  | 2.99E-06 | chr:6:32505702 |
| 6 rs17212223  | 32651540 T | 2.775  | 2.99E-06 | chr:6:32505702 |
| 6 rs9272174   | 32601307 T | 2.722  | 3.02E-06 | chr:6:32505702 |
| 6 rs9272058   | 32599197 C | 3.608  | 3.04E-06 | chr:6:32505702 |
| 6 rs114835436 | 32524789 A | 0.3488 | 3.06E-06 | chr:6:32505702 |
| 6 rs74528572  | 32525502 G | 0.3289 | 3.11E-06 | chr:6:32505702 |
| 6 rs76087961  | 32525501 A | 0.3289 | 3.11E-06 | chr:6:32505702 |
| 6 rs9269246   | 32454098 C | 3.139  | 3.12E-06 | chr:6:32505702 |
| 6 rs112269347 | 32486197 G | 0.3276 | 3.12E-06 | chr:6:32505702 |
| 6 rs9271895   | 32595906 C | 3.437  | 3.17E-06 | chr:6:32505702 |
| 6 rs9269493   | 32542990 T | 0.1411 | 3.23E-06 | chr:6:32505702 |

|               |            |        |          |                |
|---------------|------------|--------|----------|----------------|
| 6 rs9272582   | 32607439 C | 3.28   | 3.24E-06 | chr:6:32505702 |
| 6 rs9272683   | 32608969 G | 2.469  | 3.26E-06 | chr:6:32505702 |
| 6 rs9272632   | 32608180 G | 2.867  | 3.27E-06 | chr:6:32505702 |
| 6 rs17211951  | 32637315 A | 2.748  | 3.28E-06 | chr:6:32505702 |
| 6 rs67405590  | 32525542 T | 0.2892 | 3.29E-06 | chr:6:32505702 |
| 6 rs116181884 | 32487509 C | 2.668  | 3.30E-06 | chr:6:32505702 |
| 6 rs9270126   | 32555052 T | 2.823  | 3.32E-06 | chr:6:32505702 |
| 6 rs9272755   | 32610044 C | 2.765  | 3.33E-06 | chr:6:32505702 |
| 6 rs117090280 | 32489265 T | 2.145  | 3.35E-06 | chr:6:32505702 |
| 6 rs9269484   | 32542711 C | 0.1472 | 3.37E-06 | chr:6:32505702 |
| 6 rs9271653   | 32592556 C | 2.483  | 3.40E-06 | chr:6:32505702 |
| 6 rs116360287 | 32482303 T | 2.442  | 3.40E-06 | chr:6:32505702 |
| 6 rs9271729   | 32593600 A | 2.906  | 3.42E-06 | chr:6:32505702 |
| 6 rs41270903  | 32629497 G | 2.654  | 3.45E-06 | chr:6:32505702 |
| 6 rs9270277   | 32557243 T | 3.831  | 3.48E-06 | chr:6:32505702 |
| 6 rs9272278   | 32603656 G | 2.672  | 3.55E-06 | chr:6:32505702 |
| 6 rs9272074   | 32599571 G | 2.396  | 3.56E-06 | chr:6:32505702 |
| 6 rs9272580   | 32607403 G | 3.192  | 3.57E-06 | chr:6:32505702 |
| 6 rs558095162 | 32598504 T | 2.578  | 3.59E-06 | chr:6:32505702 |
| 6 rs41270871  | 32628224 A | 2.541  | 3.63E-06 | chr:6:32505702 |
| 6 rs9271273   | 32580902 A | 2.713  | 3.66E-06 | chr:6:32505702 |
| 6 rs9272453   | 32605512 C | 2.754  | 3.66E-06 | chr:6:32505702 |
| 6 rs145340642 | 32485963 A | 2.69   | 3.81E-06 | chr:6:32505702 |
| 6 rs9271728   | 32593592 C | 2.897  | 3.84E-06 | chr:6:32505702 |
| 6 rs9269579   | 32544772 G | 0.2146 | 3.89E-06 | chr:6:32505702 |
| 6 rs116611418 | 32459595 G | 2.075  | 3.89E-06 | chr:6:32505702 |
| 6 rs9256938   | 32547194 C | 0.2283 | 3.90E-06 | chr:6:32505702 |
| 6 rs574870439 | 32547289 G | 2.305  | 3.90E-06 | chr:6:32505702 |
| 6 rs563816645 | 32485662 A | 2.366  | 3.91E-06 | chr:6:32505702 |
| 6 rs9271272   | 32580894 C | 2.702  | 3.92E-06 | chr:6:32505702 |
| 6 rs182968054 | 32536067 T | 0.3339 | 3.93E-06 | chr:6:32505702 |
| 6 rs190321460 | 32536065 G | 0.3339 | 3.93E-06 | chr:6:32505702 |
| 6 rs9272167   | 32601212 A | 2.628  | 3.96E-06 | chr:6:32505702 |
| 6 rs9272741   | 32609702 T | 2.548  | 3.97E-06 | chr:6:32505702 |
| 6 rs9272569   | 32607225 T | 3.724  | 4.03E-06 | chr:6:32505702 |
| 6 rs9269564   | 32544471 C | 0.2203 | 4.07E-06 | chr:6:32505702 |
| 6 rs9270071   | 32554097 T | 2.734  | 4.07E-06 | chr:6:32505702 |
| 6 rs7770905   | 32598478 C | 3.516  | 4.09E-06 | chr:6:32505702 |
| 6 rs9271727   | 32593585 A | 2.888  | 4.17E-06 | chr:6:32505702 |
| 6 rs9272470   | 32605714 G | 3.481  | 4.21E-06 | chr:6:32505702 |
| 6 rs542465996 | 32485661 G | 2.362  | 4.22E-06 | chr:6:32505702 |
| 6 rs41287226  | 32547279 T | 2.301  | 4.23E-06 | chr:6:32505702 |
| 6 rs41287227  | 32547280 G | 2.301  | 4.23E-06 | chr:6:32505702 |

|               |            |       |          |                |
|---------------|------------|-------|----------|----------------|
| 6 rs9272249   | 32602952 A | 2.71  | 4.24E-06 | chr:6:32505702 |
| 6 rs113321784 | 32493147 T | 0.341 | 4.27E-06 | chr:6:32505702 |
| 6 rs28371213  | 32646059 G | 7.22  | 5.88E-32 | chr:6:32648036 |
| 6 rs28371214  | 32646061 G | 7.22  | 5.88E-32 | chr:6:32648036 |
| 6 rs554654579 | 32644070 C | 8.059 | 6.05E-32 | chr:6:32648036 |
| 6 rs28755295  | 32646054 A | 7.235 | 6.07E-32 | chr:6:32648036 |
| 6 rs28755226  | 32644297 G | 7.127 | 6.35E-32 | chr:6:32648036 |
| 6 rs28755227  | 32644299 C | 7.127 | 6.35E-32 | chr:6:32648036 |
| 6 rs28755228  | 32644300 A | 7.127 | 6.35E-32 | chr:6:32648036 |
| 6 rs28755212  | 32644094 C | 8.361 | 6.92E-32 | chr:6:32648036 |
| 6 rs28755213  | 32644099 G | 8.361 | 6.92E-32 | chr:6:32648036 |
| 6 rs28755214  | 32644111 C | 8.361 | 6.92E-32 | chr:6:32648036 |
| 6 rs28755361  | 32647113 G | 6.885 | 7.21E-32 | chr:6:32648036 |
| 6 rs28755362  | 32647119 C | 6.885 | 7.21E-32 | chr:6:32648036 |
| 6 rs28755363  | 32647120 T | 6.885 | 7.21E-32 | chr:6:32648036 |
| 6 rs28755364  | 32647133 T | 7.483 | 7.27E-32 | chr:6:32648036 |
| 6 rs28755294  | 32646047 C | 7.239 | 7.89E-32 | chr:6:32648036 |
| 6 rs28755224  | 32644285 T | 7.116 | 7.93E-32 | chr:6:32648036 |
| 6 rs28755225  | 32644290 T | 7.116 | 7.93E-32 | chr:6:32648036 |
| 6 rs28755360  | 32647099 C | 6.506 | 8.07E-32 | chr:6:32648036 |
| 6 rs28755229  | 32644305 A | 7.094 | 8.27E-32 | chr:6:32648036 |
| 6 rs28755365  | 32647150 C | 7.968 | 8.43E-32 | chr:6:32648036 |
| 6 rs28755235  | 32644423 T | 8.376 | 8.46E-32 | chr:6:32648036 |
| 6 rs28755236  | 32644428 G | 8.376 | 8.46E-32 | chr:6:32648036 |
| 6 rs28371239  | 32647854 C | 6.777 | 8.51E-32 | chr:6:32648036 |
| 6 rs28371238  | 32647846 C | 6.594 | 8.86E-32 | chr:6:32648036 |
| 6 rs28755326  | 32646588 A | 7.732 | 8.93E-32 | chr:6:32648036 |
| 6 rs9275031   | 32643420 A | 7.441 | 9.04E-32 | chr:6:32648036 |
| 6 rs28755209  | 32644049 T | 7.881 | 9.44E-32 | chr:6:32648036 |
| 6 rs28371216  | 32647491 C | 6.975 | 9.54E-32 | chr:6:32648036 |
| 6 rs28371217  | 32647495 A | 6.975 | 9.54E-32 | chr:6:32648036 |
| 6 rs28371218  | 32647508 C | 7.227 | 9.99E-32 | chr:6:32648036 |
| 6 rs28371219  | 32647510 A | 7.227 | 9.99E-32 | chr:6:32648036 |
| 6 rs28371241  | 32647906 G | 8.567 | 1.02E-31 | chr:6:32648036 |
| 6 rs28371242  | 32647935 G | 8.567 | 1.02E-31 | chr:6:32648036 |
| 6 rs28755215  | 32644128 G | 8.684 | 1.03E-31 | chr:6:32648036 |
| 6 rs28755270  | 32645489 A | 7.401 | 1.04E-31 | chr:6:32648036 |
| 6 rs28755271  | 32645497 T | 7.401 | 1.04E-31 | chr:6:32648036 |
| 6 rs28755324  | 32646494 T | 7.653 | 1.07E-31 | chr:6:32648036 |
| 6 rs28755273  | 32645534 A | 6.903 | 1.10E-31 | chr:6:32648036 |
| 6 rs28755266  | 32645432 T | 7.026 | 1.11E-31 | chr:6:32648036 |
| 6 rs28755301  | 32646134 A | 7.322 | 1.12E-31 | chr:6:32648036 |
| 6 rs28755268  | 32645469 A | 7.224 | 1.12E-31 | chr:6:32648036 |

|              |            |       |          |                |
|--------------|------------|-------|----------|----------------|
| 6 rs28755327 | 32646604 A | 6.737 | 1.14E-31 | chr:6:32648036 |
| 6 rs28755341 | 32646837 C | 7.251 | 1.15E-31 | chr:6:32648036 |
| 6 rs28371220 | 32647546 A | 7.952 | 1.17E-31 | chr:6:32648036 |
| 6 rs28371243 | 32647946 C | 8.863 | 1.18E-31 | chr:6:32648036 |
| 6 rs28755340 | 32646830 G | 7.06  | 1.21E-31 | chr:6:32648036 |
| 6 rs28755302 | 32646143 G | 7.154 | 1.22E-31 | chr:6:32648036 |
| 6 rs28755370 | 32647353 G | 7.027 | 1.22E-31 | chr:6:32648036 |
| 6 rs28755371 | 32647357 C | 7.027 | 1.22E-31 | chr:6:32648036 |
| 6 rs28755222 | 32644264 C | 7.583 | 1.22E-31 | chr:6:32648036 |
| 6 rs28755272 | 32645529 C | 7.024 | 1.24E-31 | chr:6:32648036 |
| 6 rs28755303 | 32646145 G | 6.964 | 1.24E-31 | chr:6:32648036 |
| 6 rs28755234 | 32644391 T | 7.894 | 1.25E-31 | chr:6:32648036 |
| 6 rs28755296 | 32646085 G | 6.339 | 1.29E-31 | chr:6:32648036 |
| 6 rs28755297 | 32646087 G | 6.339 | 1.29E-31 | chr:6:32648036 |
| 6 rs28755223 | 32644276 A | 7.131 | 1.30E-31 | chr:6:32648036 |
| 6 rs28755267 | 32645446 C | 6.874 | 1.33E-31 | chr:6:32648036 |
| 6 rs28755299 | 32646107 A | 6.928 | 1.35E-31 | chr:6:32648036 |
| 6 rs28755325 | 32646521 A | 7.735 | 1.40E-31 | chr:6:32648036 |
| 6 rs28755300 | 32646132 A | 7.313 | 1.41E-31 | chr:6:32648036 |
| 6 rs28755230 | 32644328 G | 7.245 | 1.44E-31 | chr:6:32648036 |
| 6 rs28755231 | 32644337 G | 7.245 | 1.44E-31 | chr:6:32648036 |
| 6 rs28755233 | 32644350 C | 7.245 | 1.44E-31 | chr:6:32648036 |
| 6 rs9275023  | 32643276 T | 6.041 | 1.46E-31 | chr:6:32648036 |
| 6 rs9275024  | 32643281 A | 6.041 | 1.46E-31 | chr:6:32648036 |
| 6 rs28371228 | 32647698 A | 6.711 | 1.46E-31 | chr:6:32648036 |
| 6 rs28755323 | 32646469 A | 5.946 | 1.49E-31 | chr:6:32648036 |
| 6 rs28371215 | 32647476 G | 6.62  | 1.49E-31 | chr:6:32648036 |
| 6 rs28755259 | 32644983 A | 7.773 | 1.49E-31 | chr:6:32648036 |
| 6 rs28755276 | 32645578 C | 7.984 | 1.53E-31 | chr:6:32648036 |
| 6 rs28755277 | 32645598 T | 7.776 | 1.57E-31 | chr:6:32648036 |
| 6 rs28755278 | 32645599 G | 7.776 | 1.57E-31 | chr:6:32648036 |
| 6 rs28755366 | 32647187 T | 8.54  | 1.57E-31 | chr:6:32648036 |
| 6 rs28755216 | 32644135 A | 9.031 | 1.58E-31 | chr:6:32648036 |
| 6 rs28755208 | 32644036 C | 8.327 | 1.58E-31 | chr:6:32648036 |
| 6 rs28755304 | 32646193 T | 7.292 | 1.59E-31 | chr:6:32648036 |
| 6 rs28755258 | 32644958 C | 6.601 | 1.60E-31 | chr:6:32648036 |
| 6 rs28755312 | 32646342 T | 6.168 | 1.64E-31 | chr:6:32648036 |
| 6 rs28755313 | 32646343 G | 6.168 | 1.64E-31 | chr:6:32648036 |
| 6 rs28755255 | 32644915 G | 6.936 | 1.64E-31 | chr:6:32648036 |
| 6 rs28755256 | 32644919 G | 6.936 | 1.64E-31 | chr:6:32648036 |
| 6 rs28755369 | 32647313 G | 8.833 | 1.65E-31 | chr:6:32648036 |
| 6 rs28371225 | 32647640 A | 7.936 | 1.69E-31 | chr:6:32648036 |
| 6 rs2856678  | 32655830 A | 9.007 | 1.72E-31 | chr:6:32648036 |

|               |            |       |          |                |
|---------------|------------|-------|----------|----------------|
| 6 rs28755367  | 32647215 A | 8.81  | 1.73E-31 | chr:6:32648036 |
| 6 rs28755344  | 32646904 C | 7.659 | 1.74E-31 | chr:6:32648036 |
| 6 rs28755338  | 32646804 T | 6.338 | 1.78E-31 | chr:6:32648036 |
| 6 rs28755264  | 32645131 G | 6.875 | 1.81E-31 | chr:6:32648036 |
| 6 rs28755333  | 32646691 G | 8.406 | 1.81E-31 | chr:6:32648036 |
| 6 rs28755342  | 32646861 T | 8.083 | 1.82E-31 | chr:6:32648036 |
| 6 rs28755343  | 32646866 A | 8.083 | 1.82E-31 | chr:6:32648036 |
| 6 rs28371226  | 32647665 T | 7.377 | 1.87E-31 | chr:6:32648036 |
| 6 rs28371221  | 32647556 C | 8.413 | 1.89E-31 | chr:6:32648036 |
| 6 rs9275192   | 32656305 A | 9.324 | 1.90E-31 | chr:6:32648036 |
| 6 rs9275193   | 32656306 A | 9.324 | 1.90E-31 | chr:6:32648036 |
| 6 rs140232909 | 32643883 A | 7.894 | 1.96E-31 | chr:6:32648036 |
| 6 rs28755279  | 32645626 C | 8.32  | 1.99E-31 | chr:6:32648036 |
| 6 rs28755314  | 32646366 G | 6.275 | 1.99E-31 | chr:6:32648036 |
| 6 rs28755315  | 32646369 G | 6.275 | 1.99E-31 | chr:6:32648036 |
| 6 rs28755202  | 32643894 G | 8.121 | 2.01E-31 | chr:6:32648036 |
| 6 rs28755280  | 32645660 A | 8.852 | 2.02E-31 | chr:6:32648036 |
| 6 rs28755220  | 32644238 C | 7.144 | 2.02E-31 | chr:6:32648036 |
| 6 rs28755221  | 32644239 A | 7.144 | 2.02E-31 | chr:6:32648036 |
| 6 rs9275020   | 32643184 T | 7.427 | 2.03E-31 | chr:6:32648036 |
| 6 rs28755219  | 32644226 C | 7.39  | 2.04E-31 | chr:6:32648036 |
| 6 rs141967600 | 32643824 T | 7.889 | 2.06E-31 | chr:6:32648036 |
| 6 rs28755334  | 32646759 G | 9.066 | 2.06E-31 | chr:6:32648036 |
| 6 rs28755335  | 32646763 T | 9.066 | 2.06E-31 | chr:6:32648036 |
| 6 rs28755352  | 32647027 T | 5.977 | 2.06E-31 | chr:6:32648036 |
| 6 rs28755257  | 32644953 T | 6.602 | 2.07E-31 | chr:6:32648036 |
| 6 rs28755368  | 32647280 C | 8.831 | 2.10E-31 | chr:6:32648036 |
| 6 rs116493570 | 32643860 T | 7.172 | 2.14E-31 | chr:6:32648036 |
| 6 rs28371224  | 32647628 A | 7.925 | 2.15E-31 | chr:6:32648036 |
| 6 rs28755186  | 32643479 C | 8.711 | 2.15E-31 | chr:6:32648036 |
| 6 rs9275019   | 32643166 T | 7.184 | 2.16E-31 | chr:6:32648036 |
| 6 rs28755245  | 32644658 T | 8.186 | 2.21E-31 | chr:6:32648036 |
| 6 rs28755246  | 32644670 C | 8.186 | 2.21E-31 | chr:6:32648036 |
| 6 rs28755247  | 32644680 T | 8.186 | 2.21E-31 | chr:6:32648036 |
| 6 rs9275022   | 32643251 G | 7.264 | 2.21E-31 | chr:6:32648036 |
| 6 rs115932399 | 32645695 T | 7.988 | 2.24E-31 | chr:6:32648036 |
| 6 rs114557541 | 32643844 T | 6.977 | 2.25E-31 | chr:6:32648036 |
| 6 rs28755351  | 32647012 G | 6.151 | 2.28E-31 | chr:6:32648036 |
| 6 rs28755298  | 32646094 T | 6.522 | 2.33E-31 | chr:6:32648036 |
| 6 rs28755265  | 32645144 A | 6.862 | 2.35E-31 | chr:6:32648036 |
| 6 rs28755263  | 32645109 A | 7.055 | 2.41E-31 | chr:6:32648036 |
| 6 rs199945715 | 32645744 T | 8.503 | 2.42E-31 | chr:6:32648036 |
| 6 rs201805319 | 32645737 G | 8.503 | 2.42E-31 | chr:6:32648036 |

|               |            |       |          |                |
|---------------|------------|-------|----------|----------------|
| 6 rs28755331  | 32646647 A | 5.866 | 2.45E-31 | chr:6:32648036 |
| 6 rs28755332  | 32646648 T | 5.866 | 2.45E-31 | chr:6:32648036 |
| 6 rs9274925   | 32641411 T | 5.551 | 2.49E-31 | chr:6:32648036 |
| 6 rs28755242  | 32644577 G | 8.732 | 2.57E-31 | chr:6:32648036 |
| 6 rs28755243  | 32644594 A | 8.732 | 2.57E-31 | chr:6:32648036 |
| 6 rs28755240  | 32644562 A | 8.416 | 2.59E-31 | chr:6:32648036 |
| 6 rs28755244  | 32644631 A | 8.728 | 2.60E-31 | chr:6:32648036 |
| 6 rs28755249  | 32644701 A | 8.728 | 2.60E-31 | chr:6:32648036 |
| 6 rs28371222  | 32647611 T | 8.159 | 2.61E-31 | chr:6:32648036 |
| 6 rs28371223  | 32647617 G | 8.159 | 2.61E-31 | chr:6:32648036 |
| 6 rs28755260  | 32645073 C | 8.132 | 2.64E-31 | chr:6:32648036 |
| 6 rs28755261  | 32645075 G | 8.132 | 2.64E-31 | chr:6:32648036 |
| 6 rs28755347  | 32646955 T | 6.067 | 2.65E-31 | chr:6:32648036 |
| 6 rs28755187  | 32643516 A | 8.722 | 2.68E-31 | chr:6:32648036 |
| 6 rs28755310  | 32646304 T | 6.287 | 2.68E-31 | chr:6:32648036 |
| 6 rs28755311  | 32646309 C | 6.287 | 2.68E-31 | chr:6:32648036 |
| 6 rs9275021   | 32643220 A | 7.641 | 2.69E-31 | chr:6:32648036 |
| 6 rs114954038 | 32645693 T | 7.999 | 2.71E-31 | chr:6:32648036 |
| 6 rs28755218  | 32644190 T | 8.671 | 2.72E-31 | chr:6:32648036 |
| 6 rs28755254  | 32644878 C | 7.953 | 2.74E-31 | chr:6:32648036 |
| 6 rs28755253  | 32644869 T | 8.176 | 2.76E-31 | chr:6:32648036 |
| 6 rs28755239  | 32644463 C | 8.69  | 2.77E-31 | chr:6:32648036 |
| 6 rs28755203  | 32643947 G | 9.061 | 2.82E-31 | chr:6:32648036 |
| 6 rs28755204  | 32643953 T | 9.061 | 2.82E-31 | chr:6:32648036 |
| 6 rs28755339  | 32646817 G | 6.337 | 2.91E-31 | chr:6:32648036 |
| 6 rs113898828 | 32643755 T | 9.106 | 2.95E-31 | chr:6:32648036 |
| 6 rs114642759 | 32643766 T | 9.106 | 2.95E-31 | chr:6:32648036 |
| 6 rs28755349  | 32646978 C | 6.857 | 3.05E-31 | chr:6:32648036 |
| 6 rs28755188  | 32643548 C | 9.084 | 3.05E-31 | chr:6:32648036 |
| 6 rs28755189  | 32643552 C | 9.084 | 3.05E-31 | chr:6:32648036 |
| 6 rs28755345  | 32646930 C | 6.852 | 3.14E-31 | chr:6:32648036 |
| 6 rs116005148 | 32645766 A | 8.702 | 3.25E-31 | chr:6:32648036 |
| 6 rs202178406 | 32645770 G | 8.702 | 3.25E-31 | chr:6:32648036 |
| 6 rs28755353  | 32647040 A | 5.841 | 3.32E-31 | chr:6:32648036 |
| 6 rs28755346  | 32646940 T | 6.668 | 3.51E-31 | chr:6:32648036 |
| 6 rs28755354  | 32647045 T | 5.718 | 3.53E-31 | chr:6:32648036 |
| 6 rs28755350  | 32646997 G | 6.498 | 3.53E-31 | chr:6:32648036 |
| 6 rs28755192  | 32643687 T | 9.451 | 3.60E-31 | chr:6:32648036 |
| 6 rs28755193  | 32643704 C | 9.451 | 3.60E-31 | chr:6:32648036 |
| 6 rs28755250  | 32644755 G | 9.451 | 3.60E-31 | chr:6:32648036 |
| 6 rs28755251  | 32644775 T | 9.451 | 3.60E-31 | chr:6:32648036 |
| 6 rs28755252  | 32644806 G | 9.451 | 3.60E-31 | chr:6:32648036 |
| 6 rs28755292  | 32645974 A | 9.484 | 3.61E-31 | chr:6:32648036 |



|               |            |       |          |                |
|---------------|------------|-------|----------|----------------|
| 6 rs28755190  | 32643583 C | 9.427 | 3.76E-31 | chr:6:32648036 |
| 6 rs28755191  | 32643584 G | 9.427 | 3.76E-31 | chr:6:32648036 |
| 6 rs28755372  | 32647383 A | 5.782 | 3.81E-31 | chr:6:32648036 |
| 6 rs28371229  | 32647728 C | 5.589 | 3.85E-31 | chr:6:32648036 |
| 6 rs28371230  | 32647729 C | 5.589 | 3.85E-31 | chr:6:32648036 |
| 6 rs28371231  | 32647735 A | 5.589 | 3.85E-31 | chr:6:32648036 |
| 6 rs28755293  | 32646010 T | 9.726 | 3.92E-31 | chr:6:32648036 |
| 6 rs9275017   | 32643130 T | 5.974 | 4.09E-31 | chr:6:32648036 |
| 6 rs9275018   | 32643139 T | 5.974 | 4.09E-31 | chr:6:32648036 |
| 6 rs28755217  | 32644159 C | 9.351 | 4.18E-31 | chr:6:32648036 |
| 6 rs28371237  | 32647816 G | 5.309 | 4.23E-31 | chr:6:32648036 |
| 6 rs112838245 | 32645820 G | 8.789 | 4.28E-31 | chr:6:32648036 |
| 6 rs113838733 | 32645825 C | 8.789 | 4.28E-31 | chr:6:32648036 |
| 6 rs9275025   | 32643303 T | 5.346 | 4.33E-31 | chr:6:32648036 |
| 6 rs28755291  | 32645906 G | 9.5   | 4.34E-31 | chr:6:32648036 |
| 6 rs28755308  | 32646274 C | 5.84  | 4.48E-31 | chr:6:32648036 |
| 6 rs28755309  | 32646279 G | 5.84  | 4.48E-31 | chr:6:32648036 |
| 6 rs28755262  | 32645088 T | 8.25  | 4.59E-31 | chr:6:32648036 |
| 6 rs28755305  | 32646232 G | 5.841 | 4.61E-31 | chr:6:32648036 |
| 6 rs28755306  | 32646238 T | 5.841 | 4.61E-31 | chr:6:32648036 |
| 6 rs28755206  | 32644010 G | 9.336 | 4.75E-31 | chr:6:32648036 |
| 6 rs9274924   | 32641403 T | 5.493 | 5.02E-31 | chr:6:32648036 |
| 6 rs28755356  | 32647059 G | 5.652 | 5.26E-31 | chr:6:32648036 |
| 6 rs28755357  | 32647061 C | 5.652 | 5.26E-31 | chr:6:32648036 |
| 6 rs28755373  | 32647388 A | 5.678 | 5.27E-31 | chr:6:32648036 |
| 6 rs28755290  | 32645871 C | 9.471 | 5.41E-31 | chr:6:32648036 |
| 6 rs28755307  | 32646241 A | 5.723 | 5.69E-31 | chr:6:32648036 |
| 6 rs28755328  | 32646616 C | 5.453 | 6.32E-31 | chr:6:32648036 |
| 6 rs28755329  | 32646617 A | 5.453 | 6.32E-31 | chr:6:32648036 |
| 6 rs28371235  | 32647786 G | 5.262 | 7.04E-31 | chr:6:32648036 |
| 6 rs3129778   | 32646252 T | 5.72  | 7.52E-31 | chr:6:32648036 |
| 6 rs28755330  | 32646637 A | 5.372 | 7.56E-31 | chr:6:32648036 |
| 6 rs9275015   | 32643108 A | 5.575 | 8.31E-31 | chr:6:32648036 |
| 6 rs9275016   | 32643109 G | 5.575 | 8.31E-31 | chr:6:32648036 |
| 6 rs28371236  | 32647803 G | 5.153 | 8.36E-31 | chr:6:32648036 |
| 6 rs28371234  | 32647779 A | 5.076 | 1.01E-30 | chr:6:32648036 |
| 6 rs28755316  | 32646395 G | 5.458 | 1.40E-30 | chr:6:32648036 |
| 6 rs28755317  | 32646396 G | 5.458 | 1.40E-30 | chr:6:32648036 |
| 6 rs28371232  | 32647761 T | 4.974 | 1.99E-30 | chr:6:32648036 |
| 6 rs28371233  | 32647762 G | 4.974 | 1.99E-30 | chr:6:32648036 |
| 6 rs28755374  | 32647404 T | 5.112 | 2.00E-30 | chr:6:32648036 |
| 6 rs28755322  | 32646455 A | 4.88  | 2.47E-30 | chr:6:32648036 |
| 6 rs28755375  | 32647411 C | 5.108 | 2.60E-30 | chr:6:32648036 |

|               |            |       |                         |
|---------------|------------|-------|-------------------------|
| 6 rs28755376  | 32647412 A | 5.108 | 2.60E-30 chr:6:32648036 |
| 6 rs9275026   | 32643318 T | 4.698 | 3.35E-30 chr:6:32648036 |
| 6 rs9275027   | 32643320 C | 4.698 | 3.35E-30 chr:6:32648036 |
| 6 rs9275030   | 32643351 T | 4.644 | 3.95E-30 chr:6:32648036 |
| 6 rs28755319  | 32646445 C | 4.728 | 4.06E-30 chr:6:32648036 |
| 6 rs9275028   | 32643328 C | 4.634 | 5.26E-30 chr:6:32648036 |
| 6 rs9275029   | 32643336 A | 4.634 | 5.26E-30 chr:6:32648036 |
| 6 rs28755318  | 32646416 T | 4.72  | 6.32E-30 chr:6:32648036 |
| 6 rs9274981   | 32642313 G | 19.61 | 8.73E-30 chr:6:32648036 |
| 6 rs9274982   | 32642335 A | 18.9  | 9.45E-30 chr:6:32648036 |
| 6 rs55673904  | 32645076 T | 5.472 | 9.87E-30 chr:6:32648036 |
| 6 rs9274979   | 32642280 T | 18.27 | 1.14E-29 chr:6:32648036 |
| 6 rs9274936   | 32641625 T | 9.318 | 1.22E-29 chr:6:32648036 |
| 6 rs9274983   | 32642337 C | 18.12 | 1.25E-29 chr:6:32648036 |
| 6 rs2935909   | 32655962 G | 9.828 | 1.42E-29 chr:6:32648036 |
| 6 rs3021056   | 32655921 T | 9.388 | 1.65E-29 chr:6:32648036 |
| 6 rs9274879   | 32640918 G | 9.547 | 3.44E-29 chr:6:32648036 |
| 6 rs9274882   | 32641066 T | 5.541 | 5.88E-29 chr:6:32648036 |
| 6 rs9274858   | 32640546 A | 12.62 | 8.86E-29 chr:6:32648036 |
| 6 rs9274860   | 32640556 A | 13.29 | 9.65E-29 chr:6:32648036 |
| 6 rs9274856   | 32640539 T | 13.2  | 9.96E-29 chr:6:32648036 |
| 6 rs9274906   | 32641252 A | 4.331 | 1.06E-28 chr:6:32648036 |
| 6 rs9275156   | 32652486 C | 13.62 | 1.63E-28 chr:6:32648036 |
| 6 rs3021059   | 32652344 T | 19.05 | 2.54E-28 chr:6:32648036 |
| 6 rs144949632 | 32639331 A | 12.49 | 2.55E-28 chr:6:32648036 |
| 6 rs148651202 | 32639332 T | 12.49 | 2.55E-28 chr:6:32648036 |
| 6 rs9274984   | 32642378 C | 14.13 | 2.58E-28 chr:6:32648036 |
| 6 rs9274985   | 32642379 A | 14.13 | 2.58E-28 chr:6:32648036 |
| 6 rs9274903   | 32641221 A | 4.368 | 2.60E-28 chr:6:32648036 |
| 6 rs9274862   | 32640595 T | 17.57 | 3.12E-28 chr:6:32648036 |
| 6 rs112819910 | 32639344 T | 12.59 | 3.14E-28 chr:6:32648036 |
| 6 rs9274989   | 32642424 A | 16.25 | 3.38E-28 chr:6:32648036 |
| 6 rs9275147   | 32651557 T | 15.47 | 3.80E-28 chr:6:32648036 |
| 6 rs9274892   | 32641161 G | 4.574 | 4.55E-28 chr:6:32648036 |
| 6 rs9274893   | 32641165 T | 4.574 | 4.55E-28 chr:6:32648036 |
| 6 rs9274884   | 32641078 C | 5.017 | 4.60E-28 chr:6:32648036 |
| 6 rs9274885   | 32641081 T | 5.017 | 4.60E-28 chr:6:32648036 |
| 6 rs28755320  | 32646449 C | 4.395 | 4.66E-28 chr:6:32648036 |
| 6 rs28755321  | 32646451 T | 4.395 | 4.66E-28 chr:6:32648036 |
| 6 rs9274863   | 32640611 C | 17.21 | 4.75E-28 chr:6:32648036 |
| 6 rs9274894   | 32641180 G | 4.517 | 4.84E-28 chr:6:32648036 |
| 6 rs9274897   | 32641195 C | 4.463 | 5.07E-28 chr:6:32648036 |
| 6 rs9274874   | 32640849 T | 9.672 | 5.10E-28 chr:6:32648036 |

|               |            |       |          |                |
|---------------|------------|-------|----------|----------------|
| 6 rs9274791   | 32639163 T | 17.21 | 5.34E-28 | chr:6:32648036 |
| 6 rs9274888   | 32641142 A | 4.631 | 5.62E-28 | chr:6:32648036 |
| 6 rs9274890   | 32641148 A | 4.631 | 5.62E-28 | chr:6:32648036 |
| 6 rs9274876   | 32640864 G | 8.989 | 5.71E-28 | chr:6:32648036 |
| 6 rs9274966   | 32642019 A | 14.02 | 5.92E-28 | chr:6:32648036 |
| 6 rs139025169 | 32639390 A | 14.4  | 6.54E-28 | chr:6:32648036 |
| 6 rs141881212 | 32639387 G | 14.4  | 6.54E-28 | chr:6:32648036 |
| 6 rs9274789   | 32639143 C | 16.13 | 6.95E-28 | chr:6:32648036 |
| 6 rs9274948   | 32641847 T | 8.444 | 7.00E-28 | chr:6:32648036 |
| 6 rs9274819   | 32639646 C | 10.17 | 8.47E-28 | chr:6:32648036 |
| 6 rs9274970   | 32642095 T | 16.5  | 8.86E-28 | chr:6:32648036 |
| 6 rs9275164   | 32652929 C | 15.9  | 1.05E-27 | chr:6:32648036 |
| 6 rs9274868   | 32640752 G | 14.94 | 1.06E-27 | chr:6:32648036 |
| 6 rs201341530 | 32639456 C | 14.96 | 1.25E-27 | chr:6:32648036 |
| 6 rs202086737 | 32639459 G | 14.96 | 1.25E-27 | chr:6:32648036 |
| 6 rs9274938   | 32641673 C | 14.83 | 1.40E-27 | chr:6:32648036 |
| 6 rs9274818   | 32639624 G | 9.574 | 1.54E-27 | chr:6:32648036 |
| 6 rs9274947   | 32641832 A | 8.29  | 1.54E-27 | chr:6:32648036 |
| 6 rs9274847   | 32640143 G | 14.43 | 1.59E-27 | chr:6:32648036 |
| 6 rs9274965   | 32641984 A | 10.19 | 1.59E-27 | chr:6:32648036 |
| 6 rs9274821   | 32639670 G | 9.184 | 1.66E-27 | chr:6:32648036 |
| 6 rs9274782   | 32638795 C | 17.84 | 1.69E-27 | chr:6:32648036 |
| 6 rs3129713   | 32657255 T | 17.72 | 1.75E-27 | chr:6:32648036 |
| 6 rs3129715   | 32657281 T | 17.72 | 1.75E-27 | chr:6:32648036 |
| 6 rs7775228   | 32658079 C | 17.72 | 1.75E-27 | chr:6:32648036 |
| 6 rs9274950   | 32641864 T | 7.788 | 2.09E-27 | chr:6:32648036 |
| 6 rs9274816   | 32639621 A | 9.578 | 2.14E-27 | chr:6:32648036 |
| 6 rs9274817   | 32639623 T | 9.578 | 2.14E-27 | chr:6:32648036 |
| 6 rs9274964   | 32641972 T | 9.91  | 2.32E-27 | chr:6:32648036 |
| 6 rs9274907   | 32641281 A | 4.055 | 2.39E-27 | chr:6:32648036 |
| 6 rs9274972   | 32642126 T | 20.02 | 2.70E-27 | chr:6:32648036 |
| 6 rs9275179   | 32654275 G | 21.21 | 2.86E-27 | chr:6:32648036 |
| 6 rs9274779   | 32638726 A | 20.72 | 2.92E-27 | chr:6:32648036 |
| 6 rs9275149   | 32651616 T | 13.5  | 3.08E-27 | chr:6:32648036 |
| 6 rs9275150   | 32651617 G | 13.5  | 3.08E-27 | chr:6:32648036 |
| 6 rs9274992   | 32642577 G | 18.72 | 3.16E-27 | chr:6:32648036 |
| 6 rs9274827   | 32639726 T | 8.619 | 3.19E-27 | chr:6:32648036 |
| 6 rs9274993   | 32642582 A | 19.74 | 3.55E-27 | chr:6:32648036 |
| 6 rs9274842   | 32640095 A | 17.72 | 3.83E-27 | chr:6:32648036 |
| 6 rs1694122   | 32642845 G | 14.67 | 3.87E-27 | chr:6:32648036 |
| 6 rs9274793   | 32639247 C | 19.71 | 4.03E-27 | chr:6:32648036 |
| 6 rs9274826   | 32639725 A | 8.343 | 4.56E-27 | chr:6:32648036 |
| 6 rs9274840   | 32640035 T | 17.76 | 5.13E-27 | chr:6:32648036 |

|              |            |       |                         |
|--------------|------------|-------|-------------------------|
| 6 rs9274780  | 32638741 G | 20.55 | 5.32E-27 chr:6:32648036 |
| 6 rs9275157  | 32652552 A | 20.22 | 5.93E-27 chr:6:32648036 |
| 6 rs9274928  | 32641484 T | 4.435 | 6.08E-27 chr:6:32648036 |
| 6 rs9274854  | 32640473 T | 19.06 | 6.35E-27 chr:6:32648036 |
| 6 rs9275205  | 32657560 C | 14.32 | 6.38E-27 chr:6:32648036 |
| 6 rs9274841  | 32640059 A | 18.97 | 6.87E-27 chr:6:32648036 |
| 6 rs9274823  | 32639695 T | 7.998 | 7.32E-27 chr:6:32648036 |
| 6 rs9275003  | 32642769 C | 15.92 | 7.77E-27 chr:6:32648036 |
| 6 rs9274825  | 32639710 C | 8.05  | 7.99E-27 chr:6:32648036 |
| 6 rs9275000  | 32642719 T | 22.95 | 8.12E-27 chr:6:32648036 |
| 6 rs9274812  | 32639573 T | 21.27 | 8.74E-27 chr:6:32648036 |
| 6 rs9274939  | 32641751 A | 8.412 | 8.85E-27 chr:6:32648036 |
| 6 rs9275002  | 32642761 A | 15.11 | 9.13E-27 chr:6:32648036 |
| 6 rs9274958  | 32641915 G | 7.683 | 9.97E-27 chr:6:32648036 |
| 6 rs9274959  | 32641916 C | 7.683 | 9.97E-27 chr:6:32648036 |
| 6 rs9274960  | 32641917 A | 7.683 | 9.97E-27 chr:6:32648036 |
| 6 rs9274941  | 32641755 G | 8.482 | 1.03E-26 chr:6:32648036 |
| 6 rs9275075  | 32648550 A | 18.68 | 1.11E-26 chr:6:32648036 |
| 6 rs9275076  | 32648553 G | 18.68 | 1.11E-26 chr:6:32648036 |
| 6 rs9274963  | 32641942 C | 8.244 | 1.22E-26 chr:6:32648036 |
| 6 rs9274784  | 32638878 G | 25.53 | 1.26E-26 chr:6:32648036 |
| 6 rs2516006  | 32650268 C | 13.36 | 1.31E-26 chr:6:32648036 |
| 6 rs9274811  | 32639511 T | 22.87 | 1.44E-26 chr:6:32648036 |
| 6 rs9275077  | 32648565 C | 19.83 | 1.51E-26 chr:6:32648036 |
| 6 rs9274785  | 32638907 C | 25.23 | 1.53E-26 chr:6:32648036 |
| 6 rs28371247 | 32648003 C | 10.37 | 1.65E-26 chr:6:32648036 |
| 6 rs9275211  | 32657844 C | 12.98 | 1.81E-26 chr:6:32648036 |
| 6 rs9274838  | 32639973 G | 20.24 | 1.81E-26 chr:6:32648036 |
| 6 rs9275009  | 32642958 A | 27.78 | 1.85E-26 chr:6:32648036 |
| 6 rs9275080  | 32648627 T | 25.17 | 2.53E-26 chr:6:32648036 |
| 6 rs9274767  | 32638541 G | 24.29 | 2.61E-26 chr:6:32648036 |
| 6 rs9274768  | 32638544 C | 24.29 | 2.61E-26 chr:6:32648036 |
| 6 rs9275165  | 32652956 G | 22.29 | 2.75E-26 chr:6:32648036 |
| 6 rs9275166  | 32652963 C | 22.29 | 2.75E-26 chr:6:32648036 |
| 6 rs28755337 | 32646799 C | 4.974 | 2.90E-26 chr:6:32648036 |
| 6 rs9274945  | 32641796 C | 7.348 | 3.66E-26 chr:6:32648036 |
| 6 rs9274757  | 32638280 C | 24.16 | 3.68E-26 chr:6:32648036 |
| 6 rs9274832  | 32639875 T | 24.11 | 3.80E-26 chr:6:32648036 |
| 6 rs9274833  | 32639885 T | 24.11 | 3.80E-26 chr:6:32648036 |
| 6 rs28755336 | 32646798 A | 4.964 | 3.97E-26 chr:6:32648036 |
| 6 rs9274775  | 32638643 G | 24.14 | 4.00E-26 chr:6:32648036 |
| 6 rs9274750  | 32638114 C | 24.09 | 4.01E-26 chr:6:32648036 |
| 6 rs9274787  | 32639028 A | 24.35 | 5.24E-26 chr:6:32648036 |

|             |            |       |                         |
|-------------|------------|-------|-------------------------|
| 6 rs9274788 | 32639036 C | 24.35 | 5.24E-26 chr:6:32648036 |
| 6 rs9275181 | 32654325 G | 24.7  | 5.27E-26 chr:6:32648036 |
| 6 rs9274765 | 32638510 T | 26.67 | 6.62E-26 chr:6:32648036 |
| 6 rs9274766 | 32638512 A | 26.67 | 6.62E-26 chr:6:32648036 |
| 6 rs9275067 | 32648414 C | 36.64 | 7.23E-26 chr:6:32648036 |
| 6 rs9275079 | 32648614 C | 29.69 | 8.55E-26 chr:6:32648036 |
| 6 rs2858327 | 32658935 G | 11.89 | 9.15E-26 chr:6:32648036 |
| 6 rs9274761 | 32638371 G | 26.4  | 1.04E-25 chr:6:32648036 |
| 6 rs9274762 | 32638411 G | 26.4  | 1.04E-25 chr:6:32648036 |
| 6 rs9275083 | 32648694 C | 31.42 | 1.04E-25 chr:6:32648036 |
| 6 rs9275064 | 32648381 T | 39.88 | 1.30E-25 chr:6:32648036 |
| 6 rs9275066 | 32648404 T | 39.88 | 1.30E-25 chr:6:32648036 |
| 6 rs9274976 | 32642220 A | 36.58 | 1.51E-25 chr:6:32648036 |
| 6 rs2856691 | 32653435 A | 27.45 | 1.83E-25 chr:6:32648036 |
| 6 rs9275175 | 32654147 A | 12.76 | 2.27E-25 chr:6:32648036 |
| 6 rs9275176 | 32654157 G | 12.76 | 2.27E-25 chr:6:32648036 |
| 6 rs9274852 | 32640289 A | 13.22 | 3.20E-25 chr:6:32648036 |
| 6 rs9274975 | 32642187 G | 41.34 | 4.17E-25 chr:6:32648036 |
| 6 rs9275072 | 32648502 T | 37.94 | 4.97E-25 chr:6:32648036 |
| 6 rs9275182 | 32654390 T | 32.69 | 5.03E-25 chr:6:32648036 |
| 6 rs9275144 | 32651218 A | 31.48 | 5.91E-25 chr:6:32648036 |
| 6 rs7750477 | 32651707 G | 30.66 | 7.10E-25 chr:6:32648036 |
| 6 rs9275159 | 32652607 T | 35.14 | 8.10E-25 chr:6:32648036 |
| 6 rs9275113 | 32649825 G | 34.76 | 1.13E-24 chr:6:32648036 |
| 6 rs9275171 | 32653972 G | 14.01 | 1.17E-24 chr:6:32648036 |
| 6 rs2856688 | 32654640 T | 36.32 | 1.18E-24 chr:6:32648036 |
| 6 rs9275140 | 32651018 A | 35.53 | 1.32E-24 chr:6:32648036 |
| 6 rs3129785 | 32656724 T | 36.47 | 1.36E-24 chr:6:32648036 |
| 6 rs3104362 | 32656697 G | 35.69 | 1.45E-24 chr:6:32648036 |
| 6 rs2856677 | 32656815 T | 35.61 | 1.49E-24 chr:6:32648036 |
| 6 rs9275004 | 32642839 G | 44.45 | 2.08E-24 chr:6:32648036 |
| 6 rs2647045 | 32668100 A | 11    | 2.98E-24 chr:6:32648036 |
| 6 rs2856683 | 32655218 G | 39.55 | 3.37E-24 chr:6:32648036 |
| 6 rs2856692 | 32653385 G | 39.68 | 4.61E-24 chr:6:32648036 |
| 6 rs4947342 | 32653070 A | 39.68 | 4.61E-24 chr:6:32648036 |
| 6 rs3021062 | 32651741 T | 38.92 | 4.70E-24 chr:6:32648036 |
| 6 rs9275006 | 32642852 T | 50.27 | 7.07E-24 chr:6:32648036 |
| 6 rs9274920 | 32641328 A | 3.734 | 7.51E-24 chr:6:32648036 |
| 6 rs9275090 | 32648971 G | 47.5  | 8.54E-24 chr:6:32648036 |
| 6 rs9274921 | 32641341 T | 3.731 | 9.27E-24 chr:6:32648036 |
| 6 rs9275121 | 32650185 G | 45.55 | 9.66E-24 chr:6:32648036 |
| 6 rs9275122 | 32650233 C | 45.55 | 9.66E-24 chr:6:32648036 |
| 6 rs9275115 | 32649941 C | 46.36 | 9.73E-24 chr:6:32648036 |

|               |            |       |          |                |
|---------------|------------|-------|----------|----------------|
| 6 rs9275117   | 32649965 T | 46.36 | 9.73E-24 | chr:6:32648036 |
| 6 rs9275108   | 32649609 A | 46.12 | 9.82E-24 | chr:6:32648036 |
| 6 rs9275110   | 32649723 C | 45.58 | 1.04E-23 | chr:6:32648036 |
| 6 rs9275111   | 32649735 T | 45.58 | 1.04E-23 | chr:6:32648036 |
| 6 rs9275134   | 32650612 G | 46.47 | 2.93E-23 | chr:6:32648036 |
| 6 rs9274742   | 32638037 C | 53.69 | 3.65E-23 | chr:6:32648036 |
| 6 rs201414107 | 32647866 A | 4.244 | 4.70E-23 | chr:6:32648036 |
| 6 rs9275137   | 32650880 C | 53.7  | 4.75E-23 | chr:6:32648036 |
| 6 rs7774434   | 32657578 C | 12.18 | 5.11E-23 | chr:6:32648036 |
| 6 rs9275093   | 32649047 T | 54.41 | 5.12E-23 | chr:6:32648036 |
| 6 rs9275094   | 32649062 C | 54.41 | 5.12E-23 | chr:6:32648036 |
| 6 rs9275096   | 32649096 T | 54.41 | 5.12E-23 | chr:6:32648036 |
| 6 rs28755355  | 32647058 C | 4.648 | 5.22E-23 | chr:6:32648036 |
| 6 rs28755358  | 32647062 A | 4.648 | 5.22E-23 | chr:6:32648036 |
| 6 rs28755359  | 32647064 T | 4.648 | 5.22E-23 | chr:6:32648036 |
| 6 rs3021060   | 32651846 C | 52.41 | 5.35E-23 | chr:6:32648036 |
| 6 rs3021061   | 32651839 G | 52.41 | 5.35E-23 | chr:6:32648036 |
| 6 rs281874783 | 32632660 G | 8.3   | 6.69E-23 | chr:6:32648036 |
| 6 rs9274390   | 32632659 T | 8.3   | 6.69E-23 | chr:6:32648036 |
| 6 rs375846271 | 32640725 T | 8.605 | 8.69E-23 | chr:6:32648036 |
| 6 rs9275100   | 32649308 G | 63.85 | 1.97E-22 | chr:6:32648036 |
| 6 rs9275104   | 32649388 C | 63.85 | 1.97E-22 | chr:6:32648036 |
| 6 rs9275107   | 32649508 G | 63.85 | 1.97E-22 | chr:6:32648036 |
| 6 rs9275132   | 32650500 A | 63.85 | 1.97E-22 | chr:6:32648036 |
| 6 rs9275127   | 32650314 T | 62.5  | 2.11E-22 | chr:6:32648036 |
| 6 rs115421755 | 32647108 A | 4.016 | 2.81E-22 | chr:6:32648036 |
| 6 rs9274902   | 32641220 C | 3.367 | 3.15E-22 | chr:6:32648036 |
| 6 rs146650659 | 32646807 G | 3.917 | 7.46E-22 | chr:6:32648036 |
| 6 rs9274727   | 32637696 G | 7.824 | 8.95E-22 | chr:6:32648036 |
| 6 rs147717587 | 32623828 T | 3.69  | 1.03E-21 | chr:6:32648036 |
| 6 rs9274917   | 32641317 C | 3.132 | 4.00E-21 | chr:6:32648036 |
| 6 rs9274918   | 32641318 A | 3.132 | 4.00E-21 | chr:6:32648036 |
| 6 rs10456068  | 32659419 C | 8.333 | 4.35E-21 | chr:6:32648036 |
| 6 rs2647008   | 32661515 C | 8.372 | 5.36E-21 | chr:6:32648036 |
| 6 rs2647009   | 32661615 A | 8.372 | 5.36E-21 | chr:6:32648036 |
| 6 rs2647010   | 32661641 G | 8.372 | 5.36E-21 | chr:6:32648036 |
| 6 rs17206238  | 32665761 T | 8.414 | 5.94E-21 | chr:6:32648036 |
| 6 rs1794495   | 32649347 C | 8.414 | 5.94E-21 | chr:6:32648036 |
| 6 rs1794497   | 32649180 C | 8.414 | 5.94E-21 | chr:6:32648036 |
| 6 rs2646994   | 32665813 T | 8.414 | 5.94E-21 | chr:6:32648036 |
| 6 rs2646995   | 32650492 A | 8.414 | 5.94E-21 | chr:6:32648036 |
| 6 rs2647002   | 32657082 G | 8.414 | 5.94E-21 | chr:6:32648036 |
| 6 rs2647005   | 32664760 G | 8.414 | 5.94E-21 | chr:6:32648036 |

|               |            |        |          |                |
|---------------|------------|--------|----------|----------------|
| 6 rs2647007   | 32664677 G | 8.414  | 5.94E-21 | chr:6:32648036 |
| 6 rs2647014   | 32664279 T | 8.414  | 5.94E-21 | chr:6:32648036 |
| 6 rs2647015   | 32664093 G | 8.414  | 5.94E-21 | chr:6:32648036 |
| 6 rs2647017   | 32663772 G | 8.414  | 5.94E-21 | chr:6:32648036 |
| 6 rs2647049   | 32672681 A | 8.414  | 5.94E-21 | chr:6:32648036 |
| 6 rs28371254  | 32657452 C | 8.414  | 5.94E-21 | chr:6:32648036 |
| 6 rs28371258  | 32658513 C | 8.414  | 5.94E-21 | chr:6:32648036 |
| 6 rs28371267  | 32663578 T | 8.414  | 5.94E-21 | chr:6:32648036 |
| 6 rs2856669   | 32663360 A | 8.414  | 5.94E-21 | chr:6:32648036 |
| 6 rs2856673   | 32659822 T | 8.414  | 5.94E-21 | chr:6:32648036 |
| 6 rs2856705   | 32670956 T | 8.414  | 5.94E-21 | chr:6:32648036 |
| 6 rs2858303   | 32650550 C | 8.414  | 5.94E-21 | chr:6:32648036 |
| 6 rs2858308   | 32670000 T | 8.414  | 5.94E-21 | chr:6:32648036 |
| 6 rs2858313   | 32663919 G | 8.414  | 5.94E-21 | chr:6:32648036 |
| 6 rs2858325   | 32660366 G | 8.414  | 5.94E-21 | chr:6:32648036 |
| 6 rs74379773  | 32662724 C | 8.414  | 5.94E-21 | chr:6:32648036 |
| 6 rs2858323   | 32660707 T | 8.372  | 6.34E-21 | chr:6:32648036 |
| 6 rs2647082   | 32628146 A | 5.412  | 6.70E-21 | chr:6:32648036 |
| 6 rs9274919   | 32641320 G | 3.108  | 7.45E-21 | chr:6:32648036 |
| 6 rs10456069  | 32659520 T | 8.195  | 1.11E-20 | chr:6:32648036 |
| 6 rs10456070  | 32659527 A | 8.195  | 1.11E-20 | chr:6:32648036 |
| 6 rs3129783   | 32655730 A | 0.2043 | 1.25E-20 | chr:6:32648036 |
| 6 rs28371265  | 32659263 C | 7.811  | 2.00E-20 | chr:6:32648036 |
| 6 rs2856682   | 32655405 T | 7.918  | 2.10E-20 | chr:6:32648036 |
| 6 rs2935908   | 32652606 C | 7.31   | 4.20E-20 | chr:6:32648036 |
| 6 rs3021175   | 32651404 C | 7.535  | 4.51E-20 | chr:6:32648036 |
| 6 rs3104361   | 32652278 C | 4.982  | 5.27E-20 | chr:6:32648036 |
| 6 rs2858316   | 32662501 T | 7.117  | 6.26E-20 | chr:6:32648036 |
| 6 rs2856681   | 32655524 T | 6.397  | 7.05E-20 | chr:6:32648036 |
| 6 rs537750078 | 32661051 A | 6.654  | 1.01E-19 | chr:6:32648036 |
| 6 rs9275504   | 32673986 T | 6.302  | 1.63E-19 | chr:6:32648036 |
| 6 rs1049087   | 32629889 A | 5.71   | 2.77E-19 | chr:6:32648036 |
| 6 rs9275497   | 32673726 G | 6.124  | 2.80E-19 | chr:6:32648036 |
| 6 rs9275498   | 32673749 T | 6.124  | 2.80E-19 | chr:6:32648036 |
| 6 rs9275507   | 32674130 A | 6.01   | 2.94E-19 | chr:6:32648036 |
| 6 rs9275508   | 32674159 G | 6.01   | 2.94E-19 | chr:6:32648036 |
| 6 rs2856680   | 32655606 G | 6.025  | 3.38E-19 | chr:6:32648036 |
| 6 rs9275501   | 32673920 T | 5.876  | 3.45E-19 | chr:6:32648036 |
| 6 rs9275502   | 32673921 G | 5.876  | 3.45E-19 | chr:6:32648036 |
| 6 rs9275499   | 32673778 G | 5.979  | 4.95E-19 | chr:6:32648036 |
| 6 rs28371252  | 32653732 A | 6.929  | 5.06E-19 | chr:6:32648036 |
| 6 rs28891489  | 32650362 T | 5.623  | 5.52E-19 | chr:6:32648036 |
| 6 rs7764856   | 32680640 A | 5.861  | 5.52E-19 | chr:6:32648036 |

|               |            |        |          |                |
|---------------|------------|--------|----------|----------------|
| 6 rs114466578 | 32635501 G | 5.553  | 6.73E-19 | chr:6:32648036 |
| 6 rs9274640   | 32636154 G | 5.419  | 7.71E-19 | chr:6:32648036 |
| 6 rs3828809   | 32636172 T | 5.49   | 1.36E-18 | chr:6:32648036 |
| 6 rs28371253  | 32654257 T | 5.499  | 1.56E-18 | chr:6:32648036 |
| 6 rs28371227  | 32647666 G | 3.429  | 1.57E-18 | chr:6:32648036 |
| 6 rs9274649   | 32636217 A | 5.345  | 2.11E-18 | chr:6:32648036 |
| 6 rs9274407   | 32632832 A | 5.002  | 2.91E-18 | chr:6:32648036 |
| 6 rs28747023  | 32654807 A | 0.1978 | 3.33E-18 | chr:6:32648036 |
| 6 rs3021176   | 32652469 A | 4.735  | 4.41E-18 | chr:6:32648036 |
| 6 rs3997832   | 32637497 C | 3.794  | 8.31E-18 | chr:6:32648036 |
| 6 rs9274656   | 32636351 C | 5.141  | 1.20E-17 | chr:6:32648036 |
| 6 rs17212104  | 32650883 G | 0.1941 | 1.30E-17 | chr:6:32648036 |
| 6 rs3828799   | 32636062 C | 4.875  | 1.63E-17 | chr:6:32648036 |
| 6 rs3828800   | 32636063 A | 4.875  | 1.63E-17 | chr:6:32648036 |
| 6 rs3828801   | 32636071 T | 4.875  | 1.63E-17 | chr:6:32648036 |
| 6 rs9274306   | 32632006 G | 2.827  | 1.93E-17 | chr:6:32648036 |
| 6 rs17206005  | 32652069 G | 0.2015 | 2.13E-17 | chr:6:32648036 |
| 6 rs17206012  | 32652077 C | 0.2015 | 2.13E-17 | chr:6:32648036 |
| 6 rs149503020 | 32625802 G | 3.465  | 2.18E-17 | chr:6:32648036 |
| 6 rs17205942  | 32651798 T | 0.1979 | 2.23E-17 | chr:6:32648036 |
| 6 rs28724250  | 32629530 T | 4.221  | 2.98E-17 | chr:6:32648036 |
| 6 rs28746834  | 32633899 C | 4.303  | 3.08E-17 | chr:6:32648036 |
| 6 rs9273821   | 32629543 C | 4.658  | 3.10E-17 | chr:6:32648036 |
| 6 rs17205761  | 32650934 A | 0.2019 | 3.22E-17 | chr:6:32648036 |
| 6 rs17205768  | 32650937 C | 0.2019 | 3.22E-17 | chr:6:32648036 |
| 6 rs17205747  | 32650911 T | 0.2024 | 3.23E-17 | chr:6:32648036 |
| 6 rs28747026  | 32654860 G | 0.1992 | 4.28E-17 | chr:6:32648036 |
| 6 rs17205754  | 32650930 C | 0.2051 | 5.14E-17 | chr:6:32648036 |
| 6 rs17212062  | 32650648 G | 0.2025 | 5.57E-17 | chr:6:32648036 |
| 6 rs17212069  | 32650667 G | 0.2025 | 5.57E-17 | chr:6:32648036 |
| 6 rs17212090  | 32650809 T | 0.2025 | 5.57E-17 | chr:6:32648036 |
| 6 rs28437335  | 32657644 C | 0.2025 | 5.57E-17 | chr:6:32648036 |
| 6 rs28891488  | 32650345 T | 0.2025 | 5.57E-17 | chr:6:32648036 |
| 6 rs17212350  | 32652173 G | 0.2082 | 5.60E-17 | chr:6:32648036 |
| 6 rs17212357  | 32652174 T | 0.2082 | 5.60E-17 | chr:6:32648036 |
| 6 rs17212364  | 32652176 G | 0.2082 | 5.60E-17 | chr:6:32648036 |
| 6 rs28891487  | 32650312 T | 0.2023 | 5.86E-17 | chr:6:32648036 |
| 6 rs17205949  | 32651816 A | 0.2074 | 6.01E-17 | chr:6:32648036 |
| 6 rs17212286  | 32651819 A | 0.2074 | 6.01E-17 | chr:6:32648036 |
| 6 rs28747035  | 32655316 C | 0.2039 | 6.63E-17 | chr:6:32648036 |
| 6 rs28747031  | 32655125 A | 0.206  | 6.69E-17 | chr:6:32648036 |
| 6 rs9405119   | 32657681 G | 0.2029 | 6.71E-17 | chr:6:32648036 |
| 6 rs11963017  | 32657863 C | 0.2051 | 6.81E-17 | chr:6:32648036 |



|               |            |        |          |                |
|---------------|------------|--------|----------|----------------|
| 6 rs11967921  | 32657855 A | 0.2051 | 6.81E-17 | chr:6:32648036 |
| 6 rs11967958  | 32657849 A | 0.2051 | 6.81E-17 | chr:6:32648036 |
| 6 rs28772287  | 32674400 C | 0.2053 | 7.24E-17 | chr:6:32648036 |
| 6 rs28746963  | 32653079 T | 0.2047 | 8.05E-17 | chr:6:32648036 |
| 6 rs28746964  | 32653083 G | 0.2047 | 8.05E-17 | chr:6:32648036 |
| 6 rs28747028  | 32654989 T | 0.2047 | 8.05E-17 | chr:6:32648036 |
| 6 rs28747022  | 32654785 A | 0.2074 | 8.05E-17 | chr:6:32648036 |
| 6 rs17212343  | 32652147 G | 0.2086 | 8.14E-17 | chr:6:32648036 |
| 6 rs28746933  | 32650411 G | 0.2057 | 8.17E-17 | chr:6:32648036 |
| 6 rs28746934  | 32650436 C | 0.2057 | 8.17E-17 | chr:6:32648036 |
| 6 rs28746973  | 32653442 A | 0.2097 | 8.68E-17 | chr:6:32648036 |
| 6 rs28746974  | 32653443 A | 0.2097 | 8.68E-17 | chr:6:32648036 |
| 6 rs28891480  | 32642843 G | 0.2087 | 8.89E-17 | chr:6:32648036 |
| 6 rs28747007  | 32654475 A | 0.2072 | 9.24E-17 | chr:6:32648036 |
| 6 rs28747037  | 32655336 C | 0.2081 | 9.55E-17 | chr:6:32648036 |
| 6 rs117806464 | 32626447 A | 7.038  | 9.56E-17 | chr:6:32648036 |
| 6 rs117921525 | 32672734 A | 7.038  | 9.56E-17 | chr:6:32648036 |
| 6 rs79369121  | 32636262 A | 7.038  | 9.56E-17 | chr:6:32648036 |
| 6 rs9273861   | 32629619 A | 7.038  | 9.56E-17 | chr:6:32648036 |
| 6 rs117780937 | 32629685 A | 6.998  | 9.60E-17 | chr:6:32648036 |
| 6 rs28746972  | 32653406 G | 0.207  | 1.01E-16 | chr:6:32648036 |
| 6 rs28746903  | 32648768 T | 0.2095 | 1.02E-16 | chr:6:32648036 |
| 6 rs28746904  | 32648773 C | 0.2095 | 1.02E-16 | chr:6:32648036 |
| 6 rs28747029  | 32655096 A | 0.2106 | 1.04E-16 | chr:6:32648036 |
| 6 rs28747030  | 32655104 A | 0.2106 | 1.04E-16 | chr:6:32648036 |
| 6 rs28747032  | 32655180 C | 0.2066 | 1.06E-16 | chr:6:32648036 |
| 6 rs9405042   | 32657020 G | 0.21   | 1.06E-16 | chr:6:32648036 |
| 6 rs34983499  | 32628176 A | 6.934  | 1.10E-16 | chr:6:32648036 |
| 6 rs17204659  | 32557321 T | 6.57   | 1.10E-16 | chr:6:32648036 |
| 6 rs28746897  | 32648396 G | 0.2156 | 1.12E-16 | chr:6:32648036 |
| 6 rs9296035   | 32657888 G | 0.2095 | 1.12E-16 | chr:6:32648036 |
| 6 rs28747038  | 32655368 A | 0.2078 | 1.20E-16 | chr:6:32648036 |
| 6 rs28891493  | 32662509 T | 0.2145 | 1.37E-16 | chr:6:32648036 |
| 6 rs17205717  | 32650746 C | 0.2117 | 1.38E-16 | chr:6:32648036 |
| 6 rs28747024  | 32654830 A | 0.2122 | 1.40E-16 | chr:6:32648036 |
| 6 rs28747025  | 32654831 C | 0.2122 | 1.40E-16 | chr:6:32648036 |
| 6 rs4538747   | 32657334 A | 0.2103 | 1.41E-16 | chr:6:32648036 |
| 6 rs4570006   | 32657257 T | 0.2103 | 1.41E-16 | chr:6:32648036 |
| 6 rs34750967  | 32628487 C | 6.912  | 1.41E-16 | chr:6:32648036 |
| 6 rs28746883  | 32638392 T | 0.2166 | 1.43E-16 | chr:6:32648036 |
| 6 rs28746884  | 32638395 T | 0.2166 | 1.43E-16 | chr:6:32648036 |
| 6 rs17205928  | 32651737 G | 0.2154 | 1.46E-16 | chr:6:32648036 |
| 6 rs28746912  | 32649451 G | 0.2114 | 1.56E-16 | chr:6:32648036 |

|               |            |        |          |                |
|---------------|------------|--------|----------|----------------|
| 6 rs28891486  | 32649408 T | 0.2114 | 1.56E-16 | chr:6:32648036 |
| 6 rs28772272  | 32656980 T | 0.214  | 1.57E-16 | chr:6:32648036 |
| 6 rs9378274   | 32656983 A | 0.214  | 1.57E-16 | chr:6:32648036 |
| 6 rs9391891   | 32656975 A | 0.214  | 1.57E-16 | chr:6:32648036 |
| 6 rs28746936  | 32651393 A | 0.2155 | 1.58E-16 | chr:6:32648036 |
| 6 rs28746937  | 32651401 T | 0.2155 | 1.58E-16 | chr:6:32648036 |
| 6 rs28746905  | 32648842 T | 0.2125 | 1.58E-16 | chr:6:32648036 |
| 6 rs28746906  | 32648863 A | 0.2125 | 1.58E-16 | chr:6:32648036 |
| 6 rs28747014  | 32654658 C | 0.2101 | 1.62E-16 | chr:6:32648036 |
| 6 rs28747015  | 32654673 T | 0.2101 | 1.62E-16 | chr:6:32648036 |
| 6 rs17205858  | 32651297 C | 0.2117 | 1.64E-16 | chr:6:32648036 |
| 6 rs117407437 | 32629631 T | 6.847  | 1.64E-16 | chr:6:32648036 |
| 6 rs28772285  | 32674380 T | 0.2123 | 1.64E-16 | chr:6:32648036 |
| 6 rs28772286  | 32674385 C | 0.2123 | 1.64E-16 | chr:6:32648036 |
| 6 rs116937403 | 32628316 G | 6.945  | 1.65E-16 | chr:6:32648036 |
| 6 rs117531835 | 32628315 T | 6.945  | 1.65E-16 | chr:6:32648036 |
| 6 rs182275627 | 32628304 T | 6.945  | 1.65E-16 | chr:6:32648036 |
| 6 rs139676734 | 32629518 G | 6.935  | 1.66E-16 | chr:6:32648036 |
| 6 rs281864239 | 32629515 G | 6.935  | 1.66E-16 | chr:6:32648036 |
| 6 rs17205844  | 32651254 G | 0.2142 | 1.79E-16 | chr:6:32648036 |
| 6 rs28746910  | 32649127 G | 0.2137 | 1.86E-16 | chr:6:32648036 |
| 6 rs17212279  | 32651713 G | 0.2183 | 1.95E-16 | chr:6:32648036 |
| 6 rs17205851  | 32651265 C | 0.2141 | 1.97E-16 | chr:6:32648036 |
| 6 rs28747034  | 32655257 T | 0.2117 | 2.00E-16 | chr:6:32648036 |
| 6 rs28747006  | 32654453 T | 0.2138 | 2.07E-16 | chr:6:32648036 |
| 6 rs28746851  | 32634506 T | 3.815  | 2.10E-16 | chr:6:32648036 |
| 6 rs117488551 | 32628509 G | 6.738  | 2.12E-16 | chr:6:32648036 |
| 6 rs28891481  | 32642899 A | 0.2132 | 2.13E-16 | chr:6:32648036 |
| 6 rs28891482  | 32642906 A | 0.2132 | 2.13E-16 | chr:6:32648036 |
| 6 rs28746931  | 32650194 G | 0.2138 | 2.14E-16 | chr:6:32648036 |
| 6 rs28746932  | 32650217 A | 0.2138 | 2.14E-16 | chr:6:32648036 |
| 6 rs28746915  | 32649543 A | 0.2156 | 2.28E-16 | chr:6:32648036 |
| 6 rs28746916  | 32649579 A | 0.2156 | 2.28E-16 | chr:6:32648036 |
| 6 rs28772284  | 32674313 T | 0.2159 | 2.37E-16 | chr:6:32648036 |
| 6 rs117706971 | 32628392 A | 6.955  | 2.38E-16 | chr:6:32648036 |
| 6 rs117899140 | 32628394 G | 6.955  | 2.38E-16 | chr:6:32648036 |
| 6 rs17212076  | 32650724 G | 0.2165 | 2.38E-16 | chr:6:32648036 |
| 6 rs117867884 | 32628716 T | 6.913  | 2.46E-16 | chr:6:32648036 |
| 6 rs117988605 | 32628705 A | 6.913  | 2.46E-16 | chr:6:32648036 |
| 6 rs28772271  | 32656901 C | 0.2183 | 2.53E-16 | chr:6:32648036 |
| 6 rs117067420 | 32627654 A | 6.617  | 2.55E-16 | chr:6:32648036 |
| 6 rs28772280  | 32673899 T | 0.2165 | 2.55E-16 | chr:6:32648036 |
| 6 rs28746961  | 32652968 G | 0.2166 | 2.58E-16 | chr:6:32648036 |

|               |            |        |          |                |
|---------------|------------|--------|----------|----------------|
| 6 rs28746962  | 32652979 A | 0.2166 | 2.58E-16 | chr:6:32648036 |
| 6 rs144605209 | 32623968 G | 3.301  | 2.60E-16 | chr:6:32648036 |
| 6 rs147753413 | 32625025 T | 3.301  | 2.60E-16 | chr:6:32648036 |
| 6 rs58298103  | 32624581 T | 3.301  | 2.60E-16 | chr:6:32648036 |
| 6 rs28746914  | 32649536 C | 0.2162 | 2.77E-16 | chr:6:32648036 |
| 6 rs139172132 | 32632566 C | 4.349  | 2.77E-16 | chr:6:32648036 |
| 6 rs12722106  | 32634282 G | 6.552  | 2.82E-16 | chr:6:32648036 |
| 6 rs28746966  | 32653145 C | 0.2158 | 2.87E-16 | chr:6:32648036 |
| 6 rs28891377  | 32638888 C | 0.2192 | 2.87E-16 | chr:6:32648036 |
| 6 rs28747033  | 32655213 C | 0.2149 | 2.88E-16 | chr:6:32648036 |
| 6 rs12722107  | 32632833 G | 6.518  | 2.89E-16 | chr:6:32648036 |
| 6 rs117578558 | 32628160 T | 6.531  | 2.96E-16 | chr:6:32648036 |
| 6 rs28746911  | 32649200 C | 0.2191 | 2.96E-16 | chr:6:32648036 |
| 6 rs28891483  | 32649254 T | 0.2191 | 2.96E-16 | chr:6:32648036 |
| 6 rs28891484  | 32649261 A | 0.2191 | 2.96E-16 | chr:6:32648036 |
| 6 rs28891485  | 32649274 T | 0.2191 | 2.96E-16 | chr:6:32648036 |
| 6 rs117660270 | 32624677 A | 3.358  | 2.97E-16 | chr:6:32648036 |
| 6 rs28747045  | 32655537 C | 0.2225 | 3.05E-16 | chr:6:32648036 |
| 6 rs3210146   | 32634447 G | 6.585  | 3.12E-16 | chr:6:32648036 |
| 6 rs34236112  | 32634394 A | 6.585  | 3.12E-16 | chr:6:32648036 |
| 6 rs79692442  | 32623073 C | 3.441  | 3.13E-16 | chr:6:32648036 |
| 6 rs28747016  | 32654706 A | 0.2192 | 3.15E-16 | chr:6:32648036 |
| 6 rs28746925  | 32649932 G | 0.2173 | 3.15E-16 | chr:6:32648036 |
| 6 rs3204373   | 32632801 A | 6.561  | 3.22E-16 | chr:6:32648036 |
| 6 rs28747013  | 32654596 A | 0.2168 | 3.23E-16 | chr:6:32648036 |
| 6 rs17205998  | 32652050 G | 0.2232 | 3.24E-16 | chr:6:32648036 |
| 6 rs28891403  | 32640257 C | 0.2249 | 3.25E-16 | chr:6:32648036 |
| 6 rs28891404  | 32640268 A | 0.2249 | 3.25E-16 | chr:6:32648036 |
| 6 rs28891405  | 32640288 T | 0.2249 | 3.25E-16 | chr:6:32648036 |
| 6 rs28891406  | 32640336 A | 0.2249 | 3.25E-16 | chr:6:32648036 |
| 6 rs117118927 | 32625957 G | 6.506  | 3.29E-16 | chr:6:32648036 |
| 6 rs150008425 | 32622991 A | 3.568  | 3.43E-16 | chr:6:32648036 |
| 6 rs142144985 | 32632561 T | 4.468  | 3.71E-16 | chr:6:32648036 |
| 6 rs28746913  | 32649517 A | 0.2193 | 3.86E-16 | chr:6:32648036 |
| 6 rs150769232 | 32632563 A | 4.347  | 4.04E-16 | chr:6:32648036 |
| 6 rs281864242 | 32629508 G | 6.48   | 4.22E-16 | chr:6:32648036 |
| 6 rs9275187   | 32656038 T | 0.257  | 4.23E-16 | chr:6:32648036 |
| 6 rs140780894 | 32625384 T | 3.614  | 4.35E-16 | chr:6:32648036 |
| 6 rs28746944  | 32652651 A | 0.2221 | 4.36E-16 | chr:6:32648036 |
| 6 rs28747046  | 32655539 G | 0.2259 | 4.42E-16 | chr:6:32648036 |
| 6 rs28891378  | 32638894 T | 0.2242 | 4.53E-16 | chr:6:32648036 |
| 6 rs28891398  | 32639857 A | 0.2276 | 4.67E-16 | chr:6:32648036 |
| 6 rs28891399  | 32639876 C | 0.2276 | 4.67E-16 | chr:6:32648036 |

|               |            |        |          |                |
|---------------|------------|--------|----------|----------------|
| 6 rs118038025 | 32625692 C | 2.658  | 5.00E-16 | chr:6:32648036 |
| 6 rs28747017  | 32654723 G | 0.2244 | 5.08E-16 | chr:6:32648036 |
| 6 rs28747018  | 32654739 C | 0.2244 | 5.08E-16 | chr:6:32648036 |
| 6 rs28746939  | 32651416 C | 0.224  | 5.24E-16 | chr:6:32648036 |
| 6 rs117280913 | 32636681 T | 6.615  | 5.33E-16 | chr:6:32648036 |
| 6 rs117783863 | 32629479 T | 6.498  | 5.35E-16 | chr:6:32648036 |
| 6 rs9273492   | 32628229 A | 3.988  | 5.43E-16 | chr:6:32648036 |
| 6 rs17212132  | 32651008 A | 0.2198 | 5.47E-16 | chr:6:32648036 |
| 6 rs183607390 | 32634227 T | 6.39   | 5.80E-16 | chr:6:32648036 |
| 6 rs281862650 | 32631863 C | 3.756  | 5.86E-16 | chr:6:32648036 |
| 6 rs28747063  | 32656668 C | 0.228  | 6.22E-16 | chr:6:32648036 |
| 6 rs28746918  | 32649769 T | 0.2275 | 6.28E-16 | chr:6:32648036 |
| 6 rs28746922  | 32649844 G | 0.2263 | 6.31E-16 | chr:6:32648036 |
| 6 rs28746923  | 32649849 G | 0.2263 | 6.31E-16 | chr:6:32648036 |
| 6 rs28746924  | 32649854 A | 0.2263 | 6.31E-16 | chr:6:32648036 |
| 6 rs28747047  | 32655578 T | 0.2293 | 6.35E-16 | chr:6:32648036 |
| 6 rs28891408  | 32640382 A | 0.2298 | 6.61E-16 | chr:6:32648036 |
| 6 rs28891410  | 32640424 G | 0.2298 | 6.61E-16 | chr:6:32648036 |
| 6 rs28747005  | 32654401 G | 0.2262 | 7.14E-16 | chr:6:32648036 |
| 6 rs9274093   | 32630151 C | 6.211  | 7.27E-16 | chr:6:32648036 |
| 6 rs28747019  | 32654757 A | 0.2272 | 7.71E-16 | chr:6:32648036 |
| 6 rs28747020  | 32654760 C | 0.2272 | 7.71E-16 | chr:6:32648036 |
| 6 rs28747021  | 32654772 G | 0.2272 | 7.71E-16 | chr:6:32648036 |
| 6 rs281861725 | 32633227 T | 5.17   | 7.94E-16 | chr:6:32648036 |
| 6 rs281861730 | 32633222 A | 5.17   | 7.94E-16 | chr:6:32648036 |
| 6 rs9274193   | 32630741 T | 3.791  | 7.98E-16 | chr:6:32648036 |
| 6 rs281863289 | 32631494 C | 4.123  | 8.01E-16 | chr:6:32648036 |
| 6 rs28746885  | 32638871 G | 0.2262 | 8.04E-16 | chr:6:32648036 |
| 6 rs147719302 | 32642955 A | 6.908  | 8.07E-16 | chr:6:32648036 |
| 6 rs28891409  | 32640401 G | 0.2306 | 8.17E-16 | chr:6:32648036 |
| 6 rs28747061  | 32656653 T | 0.2297 | 8.69E-16 | chr:6:32648036 |
| 6 rs28747062  | 32656661 C | 0.2297 | 8.69E-16 | chr:6:32648036 |
| 6 rs28746919  | 32649806 A | 0.2313 | 8.88E-16 | chr:6:32648036 |
| 6 rs117199460 | 32622114 C | 3.443  | 8.95E-16 | chr:6:32648036 |
| 6 rs28746993  | 32654030 C | 0.2247 | 9.39E-16 | chr:6:32648036 |
| 6 rs28746928  | 32650060 G | 0.2337 | 1.00E-15 | chr:6:32648036 |
| 6 rs28746929  | 32650068 G | 0.2337 | 1.00E-15 | chr:6:32648036 |
| 6 rs28746930  | 32650074 A | 0.2337 | 1.00E-15 | chr:6:32648036 |
| 6 rs28747004  | 32654379 A | 0.2292 | 1.05E-15 | chr:6:32648036 |
| 6 rs281863357 | 32631142 G | 3.007  | 1.07E-15 | chr:6:32648036 |
| 6 rs28747044  | 32655516 C | 0.2317 | 1.11E-15 | chr:6:32648036 |
| 6 rs118117192 | 32633210 T | 5.23   | 1.13E-15 | chr:6:32648036 |
| 6 rs28746994  | 32654094 A | 0.2319 | 1.27E-15 | chr:6:32648036 |

|               |            |        |          |                |
|---------------|------------|--------|----------|----------------|
| 6 rs28747064  | 32656770 G | 0.2254 | 1.27E-15 | chr:6:32648036 |
| 6 rs117789582 | 32627603 A | 5.833  | 1.30E-15 | chr:6:32648036 |
| 6 rs17205837  | 32651222 C | 0.2346 | 1.38E-15 | chr:6:32648036 |
| 6 rs17212188  | 32651216 A | 0.2346 | 1.38E-15 | chr:6:32648036 |
| 6 rs28746774  | 32632173 T | 3.14   | 1.45E-15 | chr:6:32648036 |
| 6 rs28383181  | 32571669 T | 5.301  | 1.48E-15 | chr:6:32648036 |
| 6 rs3204379   | 32632642 T | 5.129  | 1.50E-15 | chr:6:32648036 |
| 6 rs28746998  | 32654246 T | 0.2365 | 1.50E-15 | chr:6:32648036 |
| 6 rs28746921  | 32649831 A | 0.2358 | 1.54E-15 | chr:6:32648036 |
| 6 rs28746926  | 32650026 C | 0.2384 | 1.57E-15 | chr:6:32648036 |
| 6 rs28746927  | 32650029 T | 0.2384 | 1.57E-15 | chr:6:32648036 |
| 6 rs28747048  | 32655584 T | 0.2455 | 1.66E-15 | chr:6:32648036 |
| 6 rs9275318   | 32666173 G | 6.227  | 1.66E-15 | chr:6:32648036 |
| 6 rs9275319   | 32666295 G | 6.227  | 1.66E-15 | chr:6:32648036 |
| 6 rs1794269   | 32673894 T | 4.192  | 1.67E-15 | chr:6:32648036 |
| 6 rs28891407  | 32640359 T | 0.2393 | 1.72E-15 | chr:6:32648036 |
| 6 rs17205782  | 32651051 T | 0.2328 | 1.77E-15 | chr:6:32648036 |
| 6 rs17205788  | 32651056 A | 0.2328 | 1.77E-15 | chr:6:32648036 |
| 6 rs34242724  | 32628363 G | 6.613  | 1.85E-15 | chr:6:32648036 |
| 6 rs34473650  | 32628362 A | 6.613  | 1.85E-15 | chr:6:32648036 |
| 6 rs35908913  | 32628358 A | 6.613  | 1.85E-15 | chr:6:32648036 |
| 6 rs150543976 | 32631713 C | 3.658  | 1.89E-15 | chr:6:32648036 |
| 6 rs281863467 | 32630995 G | 5.429  | 1.98E-15 | chr:6:32648036 |
| 6 rs281863397 | 32631080 T | 4.678  | 2.01E-15 | chr:6:32648036 |
| 6 rs28746946  | 32652715 A | 0.2328 | 2.08E-15 | chr:6:32648036 |
| 6 rs28746920  | 32649813 A | 0.2391 | 2.11E-15 | chr:6:32648036 |
| 6 rs28746995  | 32654116 A | 0.2401 | 2.16E-15 | chr:6:32648036 |
| 6 rs281862705 | 32631798 G | 3.658  | 2.18E-15 | chr:6:32648036 |
| 6 rs281874932 | 32631353 T | 5.319  | 2.29E-15 | chr:6:32648036 |
| 6 rs28747066  | 32656817 A | 0.2354 | 2.42E-15 | chr:6:32648036 |
| 6 rs201814598 | 32633493 A | 5.641  | 2.52E-15 | chr:6:32648036 |
| 6 rs28746907  | 32648937 A | 0.2402 | 2.58E-15 | chr:6:32648036 |
| 6 rs28772270  | 32656881 T | 0.2407 | 2.61E-15 | chr:6:32648036 |
| 6 rs116882546 | 32631390 C | 4.806  | 2.63E-15 | chr:6:32648036 |
| 6 rs281862676 | 32631832 T | 3.586  | 2.64E-15 | chr:6:32648036 |
| 6 rs281863585 | 32630833 G | 5.559  | 2.65E-15 | chr:6:32648036 |
| 6 rs151109211 | 32635552 T | 4.873  | 2.71E-15 | chr:6:32648036 |
| 6 rs2516052   | 32570147 G | 5.153  | 2.75E-15 | chr:6:32648036 |
| 6 rs535476317 | 32570019 A | 5.153  | 2.75E-15 | chr:6:32648036 |
| 6 rs622137    | 32569852 A | 5.153  | 2.75E-15 | chr:6:32648036 |
| 6 rs28746999  | 32654258 A | 0.2421 | 2.77E-15 | chr:6:32648036 |
| 6 rs34908677  | 32637498 A | 6.294  | 2.80E-15 | chr:6:32648036 |
| 6 rs28746960  | 32652938 G | 0.2369 | 2.99E-15 | chr:6:32648036 |

|               |            |        |          |                |
|---------------|------------|--------|----------|----------------|
| 6 rs28746996  | 32654214 C | 0.2479 | 3.23E-15 | chr:6:32648036 |
| 6 rs28891473  | 32642525 T | 0.2517 | 3.42E-15 | chr:6:32648036 |
| 6 rs17206049  | 32652336 A | 0.2374 | 3.53E-15 | chr:6:32648036 |
| 6 rs28891369  | 32638602 T | 0.2434 | 3.57E-15 | chr:6:32648036 |
| 6 rs28747065  | 32656806 C | 0.2391 | 3.68E-15 | chr:6:32648036 |
| 6 rs281861320 | 32633696 C | 4.69   | 3.82E-15 | chr:6:32648036 |
| 6 rs200177238 | 32628609 T | 6.286  | 3.84E-15 | chr:6:32648036 |
| 6 rs200955452 | 32628611 T | 6.286  | 3.84E-15 | chr:6:32648036 |
| 6 rs281874847 | 32631396 C | 5.042  | 3.84E-15 | chr:6:32648036 |
| 6 rs28772268  | 32656872 A | 0.2445 | 3.88E-15 | chr:6:32648036 |
| 6 rs28772269  | 32656878 C | 0.2445 | 3.88E-15 | chr:6:32648036 |
| 6 rs28746882  | 32638175 A | 0.2462 | 3.91E-15 | chr:6:32648036 |
| 6 rs281864445 | 32628145 C | 5.413  | 4.07E-15 | chr:6:32648036 |
| 6 rs28746887  | 32639096 T | 0.2452 | 4.08E-15 | chr:6:32648036 |
| 6 rs281862684 | 32631823 G | 3.66   | 4.10E-15 | chr:6:32648036 |
| 6 rs281863558 | 32630869 A | 5.637  | 4.28E-15 | chr:6:32648036 |
| 6 rs17212265  | 32651694 T | 0.2448 | 4.37E-15 | chr:6:32648036 |
| 6 rs28746971  | 32653272 A | 0.2439 | 4.38E-15 | chr:6:32648036 |
| 6 rs118120568 | 32634586 G | 5.834  | 4.40E-15 | chr:6:32648036 |
| 6 rs28891376  | 32638788 C | 0.2462 | 4.43E-15 | chr:6:32648036 |
| 6 rs477515    | 32569691 A | 4.907  | 4.68E-15 | chr:6:32648036 |
| 6 rs28747049  | 32655659 C | 0.2526 | 4.74E-15 | chr:6:32648036 |
| 6 rs36222416  | 32634339 G | 5.963  | 5.19E-15 | chr:6:32648036 |
| 6 rs9275347   | 32667623 A | 5.879  | 5.19E-15 | chr:6:32648036 |
| 6 rs34692792  | 32633541 G | 5.539  | 5.43E-15 | chr:6:32648036 |
| 6 rs147613458 | 32631911 G | 3.547  | 5.50E-15 | chr:6:32648036 |
| 6 rs17212336  | 32652026 A | 0.2528 | 5.52E-15 | chr:6:32648036 |
| 6 rs28747067  | 32656832 T | 0.2453 | 5.52E-15 | chr:6:32648036 |
| 6 rs28891371  | 32638713 T | 0.2448 | 5.52E-15 | chr:6:32648036 |
| 6 rs28746789  | 32632456 T | 3.47   | 5.70E-15 | chr:6:32648036 |
| 6 rs28891372  | 32638727 A | 0.2466 | 5.74E-15 | chr:6:32648036 |
| 6 rs281862190 | 32632462 C | 4.374  | 5.78E-15 | chr:6:32648036 |
| 6 rs143370221 | 32633004 T | 3.449  | 5.81E-15 | chr:6:32648036 |
| 6 rs9274783   | 32638816 A | 0.2859 | 5.87E-15 | chr:6:32648036 |
| 6 rs28746947  | 32652747 A | 0.2422 | 5.90E-15 | chr:6:32648036 |
| 6 rs28891379  | 32639107 C | 0.2476 | 5.94E-15 | chr:6:32648036 |
| 6 rs28746943  | 32652634 A | 0.2456 | 6.03E-15 | chr:6:32648036 |
| 6 rs200160235 | 32628070 C | 5.333  | 6.04E-15 | chr:6:32648036 |
| 6 rs28746880  | 32638146 A | 0.2504 | 6.12E-15 | chr:6:32648036 |
| 6 rs28746881  | 32638153 T | 0.2504 | 6.12E-15 | chr:6:32648036 |
| 6 rs28747043  | 32655508 G | 0.2451 | 6.14E-15 | chr:6:32648036 |
| 6 rs144101223 | 32633098 T | 3.691  | 6.30E-15 | chr:6:32648036 |
| 6 rs2157051   | 32658624 G | 3.534  | 6.48E-15 | chr:6:32648036 |

|               |            |        |          |                |
|---------------|------------|--------|----------|----------------|
| 6 rs28746984  | 32653819 A | 0.2453 | 6.54E-15 | chr:6:32648036 |
| 6 rs9274777   | 32638686 T | 0.2896 | 6.70E-15 | chr:6:32648036 |
| 6 rs117844647 | 32633594 C | 5.623  | 6.77E-15 | chr:6:32648036 |
| 6 rs28891472  | 32642515 C | 0.2577 | 7.08E-15 | chr:6:32648036 |
| 6 rs17205914  | 32651680 G | 0.2503 | 7.14E-15 | chr:6:32648036 |
| 6 rs17205921  | 32651685 T | 0.2503 | 7.14E-15 | chr:6:32648036 |
| 6 rs17212258  | 32651690 T | 0.2503 | 7.14E-15 | chr:6:32648036 |
| 6 rs28746958  | 32652913 C | 0.2474 | 7.33E-15 | chr:6:32648036 |
| 6 rs28746959  | 32652914 A | 0.2474 | 7.33E-15 | chr:6:32648036 |
| 6 rs17206035  | 32652224 C | 0.246  | 7.40E-15 | chr:6:32648036 |
| 6 rs281864446 | 32628141 A | 5.143  | 7.59E-15 | chr:6:32648036 |
| 6 rs118157864 | 32627197 T | 4.418  | 8.04E-15 | chr:6:32648036 |
| 6 rs117337127 | 32633654 G | 4.35   | 8.13E-15 | chr:6:32648036 |
| 6 rs510205    | 32584693 G | 5.725  | 8.14E-15 | chr:6:32648036 |
| 6 rs17205738  | 32650762 G | 0.2481 | 8.24E-15 | chr:6:32648036 |
| 6 rs28747050  | 32655674 C | 0.2571 | 8.45E-15 | chr:6:32648036 |
| 6 rs28746909  | 32648975 A | 0.2496 | 8.52E-15 | chr:6:32648036 |
| 6 rs28891411  | 32640509 A | 0.2529 | 8.88E-15 | chr:6:32648036 |
| 6 rs281863206 | 32631583 T | 4.551  | 9.42E-15 | chr:6:32648036 |
| 6 rs28746886  | 32639083 C | 0.2519 | 9.48E-15 | chr:6:32648036 |
| 6 rs9378125   | 32679732 G | 0.2262 | 9.61E-15 | chr:6:32648036 |
| 6 rs28747060  | 32656614 T | 0.2509 | 9.80E-15 | chr:6:32648036 |
| 6 rs78621519  | 32628536 C | 5.842  | 9.98E-15 | chr:6:32648036 |
| 6 rs556025    | 32570880 T | 4.844  | 9.98E-15 | chr:6:32648036 |
| 6 rs28747003  | 32654322 C | 0.2522 | 1.02E-14 | chr:6:32648036 |
| 6 rs9275183   | 32654502 G | 5.69   | 1.04E-14 | chr:6:32648036 |
| 6 rs17205977  | 32651927 C | 0.2594 | 1.07E-14 | chr:6:32648036 |
| 6 rs28746902  | 32648713 A | 0.2542 | 1.08E-14 | chr:6:32648036 |
| 6 rs144922634 | 32639093 T | 5.147  | 1.13E-14 | chr:6:32648036 |
| 6 rs28746957  | 32652893 C | 0.2494 | 1.13E-14 | chr:6:32648036 |
| 6 rs2516051   | 32570184 T | 4.924  | 1.13E-14 | chr:6:32648036 |
| 6 rs1049073   | 32632717 G | 0.2883 | 1.15E-14 | chr:6:32648036 |
| 6 rs28747011  | 32654554 G | 0.2506 | 1.22E-14 | chr:6:32648036 |
| 6 rs561142110 | 32654552 G | 0.2506 | 1.22E-14 | chr:6:32648036 |
| 6 rs2856675   | 32658768 A | 3.954  | 1.24E-14 | chr:6:32648036 |
| 6 rs281860814 | 32634572 G | 5.521  | 1.25E-14 | chr:6:32648036 |
| 6 rs116984222 | 32633648 C | 4.347  | 1.25E-14 | chr:6:32648036 |
| 6 rs28746908  | 32648963 A | 0.2541 | 1.27E-14 | chr:6:32648036 |
| 6 rs28891390  | 32639545 T | 0.2587 | 1.28E-14 | chr:6:32648036 |
| 6 rs117000147 | 32634058 T | 5.198  | 1.28E-14 | chr:6:32648036 |
| 6 rs117403290 | 32634476 A | 5.703  | 1.29E-14 | chr:6:32648036 |
| 6 rs1766      | 32627795 A | 0.281  | 1.31E-14 | chr:6:32648036 |
| 6 rs112736406 | 32618487 T | 2.837  | 1.32E-14 | chr:6:32648036 |

|               |            |        |          |                |
|---------------|------------|--------|----------|----------------|
| 6 rs17206070  | 32652361 C | 0.2473 | 1.32E-14 | chr:6:32648036 |
| 6 rs138033214 | 32632979 A | 3.585  | 1.49E-14 | chr:6:32648036 |
| 6 rs9394111   | 32658744 T | 0.2359 | 1.51E-14 | chr:6:32648036 |
| 6 rs28747012  | 32654558 C | 0.253  | 1.53E-14 | chr:6:32648036 |
| 6 rs28891471  | 32642473 G | 0.2665 | 1.54E-14 | chr:6:32648036 |
| 6 rs117069212 | 32628823 T | 5.671  | 1.59E-14 | chr:6:32648036 |
| 6 rs116850050 | 32633987 T | 5.624  | 1.62E-14 | chr:6:32648036 |
| 6 rs34029741  | 32633975 T | 5.624  | 1.62E-14 | chr:6:32648036 |
| 6 rs28747051  | 32655686 T | 0.2628 | 1.63E-14 | chr:6:32648036 |
| 6 rs28891373  | 32638744 A | 0.2586 | 1.65E-14 | chr:6:32648036 |
| 6 rs28746983  | 32653760 T | 0.2502 | 1.68E-14 | chr:6:32648036 |
| 6 rs142491022 | 32633939 C | 5.565  | 1.71E-14 | chr:6:32648036 |
| 6 rs28746992  | 32653919 G | 0.2498 | 1.71E-14 | chr:6:32648036 |
| 6 rs35326979  | 32653917 G | 0.2498 | 1.71E-14 | chr:6:32648036 |
| 6 rs281860822 | 32634503 G | 5.701  | 1.73E-14 | chr:6:32648036 |
| 6 rs17205795  | 32651066 T | 0.2551 | 1.76E-14 | chr:6:32648036 |
| 6 rs17205802  | 32651072 G | 0.2551 | 1.76E-14 | chr:6:32648036 |
| 6 rs481139    | 32576145 A | 4.666  | 1.86E-14 | chr:6:32648036 |
| 6 rs117898330 | 32632965 T | 3.586  | 1.86E-14 | chr:6:32648036 |
| 6 rs28891375  | 32638757 A | 0.2593 | 1.87E-14 | chr:6:32648036 |
| 6 rs117734503 | 32634607 T | 5.422  | 1.94E-14 | chr:6:32648036 |
| 6 rs28891381  | 32639179 A | 0.2596 | 2.12E-14 | chr:6:32648036 |
| 6 rs17205907  | 32651649 G | 0.2552 | 2.19E-14 | chr:6:32648036 |
| 6 rs28746997  | 32654225 T | 0.2651 | 2.19E-14 | chr:6:32648036 |
| 6 rs17206042  | 32652244 A | 0.256  | 2.20E-14 | chr:6:32648036 |
| 6 rs28747052  | 32655703 T | 0.2649 | 2.20E-14 | chr:6:32648036 |
| 6 rs2856695   | 32651894 A | 0.223  | 2.24E-14 | chr:6:32648036 |
| 6 rs281860823 | 32634497 A | 5.716  | 2.28E-14 | chr:6:32648036 |
| 6 rs9368738   | 32658750 A | 0.2392 | 2.34E-14 | chr:6:32648036 |
| 6 rs17212153  | 32651092 T | 0.258  | 2.40E-14 | chr:6:32648036 |
| 6 rs17212160  | 32651097 G | 0.258  | 2.40E-14 | chr:6:32648036 |
| 6 rs28891470  | 32642454 T | 0.2704 | 2.42E-14 | chr:6:32648036 |
| 6 rs28891479  | 32642750 A | 0.2622 | 2.45E-14 | chr:6:32648036 |
| 6 rs28891474  | 32642565 T | 0.2714 | 2.51E-14 | chr:6:32648036 |
| 6 rs2076523   | 32370835 C | 3.431  | 2.51E-14 | chr:6:32648036 |
| 6 rs3806156   | 32373698 T | 3.431  | 2.51E-14 | chr:6:32648036 |
| 6 rs35702610  | 32628914 G | 4.067  | 2.57E-14 | chr:6:32648036 |
| 6 rs28891400  | 32640074 T | 0.2652 | 2.59E-14 | chr:6:32648036 |
| 6 rs28891401  | 32640075 G | 0.2652 | 2.59E-14 | chr:6:32648036 |
| 6 rs28891374  | 32638750 G | 0.2628 | 2.62E-14 | chr:6:32648036 |
| 6 rs9274490   | 32633879 G | 3.723  | 2.64E-14 | chr:6:32648036 |
| 6 rs28891414  | 32640593 T | 0.2681 | 2.66E-14 | chr:6:32648036 |
| 6 rs189017474 | 32633823 G | 4.498  | 2.82E-14 | chr:6:32648036 |



|               |            |        |          |                |
|---------------|------------|--------|----------|----------------|
| 6 rs281861227 | 32633822 T | 4.498  | 2.82E-14 | chr:6:32648036 |
| 6 rs28746896  | 32648243 A | 0.2754 | 2.82E-14 | chr:6:32648036 |
| 6 rs643889    | 32575918 T | 4.594  | 2.85E-14 | chr:6:32648036 |
| 6 rs34977123  | 32555736 G | 6.652  | 2.94E-14 | chr:6:32648036 |
| 6 rs28891391  | 32639577 T | 0.2682 | 2.95E-14 | chr:6:32648036 |
| 6 rs35409710  | 32628903 A | 4.074  | 2.98E-14 | chr:6:32648036 |
| 6 rs28772273  | 32659314 T | 0.2412 | 3.13E-14 | chr:6:32648036 |
| 6 rs17212643  | 32674865 T | 0.2358 | 3.18E-14 | chr:6:32648036 |
| 6 rs28747008  | 32654530 T | 0.2597 | 3.18E-14 | chr:6:32648036 |
| 6 rs28747009  | 32654531 A | 0.2597 | 3.18E-14 | chr:6:32648036 |
| 6 rs28746967  | 32653231 C | 0.2591 | 3.23E-14 | chr:6:32648036 |
| 6 rs28746941  | 32652553 C | 0.2676 | 3.39E-14 | chr:6:32648036 |
| 6 rs28746942  | 32652556 A | 0.2676 | 3.39E-14 | chr:6:32648036 |
| 6 rs116969302 | 32633866 T | 4.489  | 3.46E-14 | chr:6:32648036 |
| 6 rs281861181 | 32633880 T | 4.489  | 3.46E-14 | chr:6:32648036 |
| 6 rs9394110   | 32658471 G | 0.2388 | 3.66E-14 | chr:6:32648036 |
| 6 rs28891475  | 32642570 C | 0.2757 | 3.68E-14 | chr:6:32648036 |
| 6 rs28747000  | 32654280 A | 0.2614 | 3.69E-14 | chr:6:32648036 |
| 6 rs28747001  | 32654284 G | 0.2614 | 3.69E-14 | chr:6:32648036 |
| 6 rs28746899  | 32648646 A | 0.2681 | 3.77E-14 | chr:6:32648036 |
| 6 rs28746900  | 32648652 G | 0.2681 | 3.77E-14 | chr:6:32648036 |
| 6 rs9273762   | 32629423 A | 5.545  | 3.81E-14 | chr:6:32648036 |
| 6 rs9273766   | 32629430 T | 5.545  | 3.81E-14 | chr:6:32648036 |
| 6 rs9273768   | 32629433 G | 5.545  | 3.81E-14 | chr:6:32648036 |
| 6 rs9275190   | 32656228 A | 0.2876 | 3.86E-14 | chr:6:32648036 |
| 6 rs9275191   | 32656235 T | 0.2876 | 3.86E-14 | chr:6:32648036 |
| 6 rs614348    | 32573877 C | 4.54   | 3.87E-14 | chr:6:32648036 |
| 6 rs28772275  | 32663439 A | 0.2388 | 3.93E-14 | chr:6:32648036 |
| 6 rs28891413  | 32640548 T | 0.3024 | 4.41E-14 | chr:6:32648036 |
| 6 rs5000632   | 32663688 C | 0.2387 | 4.45E-14 | chr:6:32648036 |
| 6 rs6935069   | 32666156 A | 0.2387 | 4.45E-14 | chr:6:32648036 |
| 6 rs9357152   | 32664960 G | 0.2387 | 4.45E-14 | chr:6:32648036 |
| 6 rs9394113   | 32665167 G | 0.2387 | 4.45E-14 | chr:6:32648036 |
| 6 rs9274880   | 32641011 A | 0.2962 | 4.50E-14 | chr:6:32648036 |
| 6 rs111289085 | 32639359 T | 0.2681 | 4.78E-14 | chr:6:32648036 |
| 6 rs17205809  | 32651135 A | 0.266  | 4.86E-14 | chr:6:32648036 |
| 6 rs28752490  | 32567897 A | 4.509  | 4.95E-14 | chr:6:32648036 |
| 6 rs28891461  | 32642018 T | 0.3028 | 5.48E-14 | chr:6:32648036 |
| 6 rs117944321 | 32633138 A | 3.896  | 5.48E-14 | chr:6:32648036 |
| 6 rs9274748   | 32638086 G | 0.2629 | 5.63E-14 | chr:6:32648036 |
| 6 rs9274749   | 32638094 G | 0.2629 | 5.63E-14 | chr:6:32648036 |
| 6 rs17212371  | 32652259 A | 0.2654 | 5.76E-14 | chr:6:32648036 |
| 6 rs281863510 | 32630936 C | 4.296  | 5.83E-14 | chr:6:32648036 |

|               |            |        |          |                |
|---------------|------------|--------|----------|----------------|
| 6 rs28891492  | 32662451 T | 0.2377 | 5.88E-14 | chr:6:32648036 |
| 6 rs28746949  | 32652774 A | 0.2657 | 6.06E-14 | chr:6:32648036 |
| 6 rs17212216  | 32651509 C | 0.2662 | 6.08E-14 | chr:6:32648036 |
| 6 rs482162    | 32576019 C | 4.48   | 6.15E-14 | chr:6:32648036 |
| 6 rs482205    | 32576009 G | 4.48   | 6.15E-14 | chr:6:32648036 |
| 6 rs28891491  | 32661080 A | 0.2416 | 6.16E-14 | chr:6:32648036 |
| 6 rs17212699  | 32675130 G | 0.2415 | 6.38E-14 | chr:6:32648036 |
| 6 rs28772279  | 32673754 A | 0.2415 | 6.38E-14 | chr:6:32648036 |
| 6 rs6906698   | 32673425 T | 0.2415 | 6.38E-14 | chr:6:32648036 |
| 6 rs6907114   | 32673361 A | 0.2415 | 6.38E-14 | chr:6:32648036 |
| 6 rs9368739   | 32669945 T | 0.2415 | 6.38E-14 | chr:6:32648036 |
| 6 rs9501648   | 32668886 G | 0.2415 | 6.38E-14 | chr:6:32648036 |
| 6 rs535728917 | 32628553 T | 5.841  | 6.38E-14 | chr:6:32648036 |
| 6 rs28746951  | 32652795 A | 0.2676 | 6.41E-14 | chr:6:32648036 |
| 6 rs28746952  | 32652798 G | 0.2676 | 6.41E-14 | chr:6:32648036 |
| 6 rs28746955  | 32652858 C | 0.2604 | 6.61E-14 | chr:6:32648036 |
| 6 rs28891392  | 32639610 G | 0.2745 | 6.64E-14 | chr:6:32648036 |
| 6 rs28746989  | 32653873 T | 0.266  | 7.03E-14 | chr:6:32648036 |
| 6 rs543713    | 32573934 T | 4.452  | 7.10E-14 | chr:6:32648036 |
| 6 rs9275194   | 32656334 T | 0.2862 | 7.21E-14 | chr:6:32648036 |
| 6 rs281875002 | 32631269 T | 3.458  | 7.32E-14 | chr:6:32648036 |
| 6 rs9274693   | 32636972 C | 0.3279 | 7.65E-14 | chr:6:32648036 |
| 6 rs7756647   | 32582843 G | 0.2641 | 8.08E-14 | chr:6:32648036 |
| 6 rs143133357 | 32625820 C | 2.708  | 8.52E-14 | chr:6:32648036 |
| 6 rs28752497  | 32568481 A | 4.44   | 8.64E-14 | chr:6:32648036 |
| 6 rs6934185   | 32673233 G | 0.2439 | 8.65E-14 | chr:6:32648036 |
| 6 rs6934347   | 32673223 G | 0.2439 | 8.65E-14 | chr:6:32648036 |
| 6 rs6916779   | 32684317 C | 4.303  | 8.82E-14 | chr:6:32648036 |
| 6 rs17212329  | 32652005 T | 0.2792 | 8.89E-14 | chr:6:32648036 |
| 6 rs28371261  | 32658727 A | 3.703  | 9.01E-14 | chr:6:32648036 |
| 6 rs62404128  | 32618728 C | 2.678  | 9.09E-14 | chr:6:32648036 |
| 6 rs3104420   | 32580028 A | 0.2673 | 9.27E-14 | chr:6:32648036 |
| 6 rs202088642 | 32634993 C | 4.761  | 9.48E-14 | chr:6:32648036 |
| 6 rs28746976  | 32653536 A | 0.243  | 9.63E-14 | chr:6:32648036 |
| 6 rs28746977  | 32653558 T | 0.243  | 9.63E-14 | chr:6:32648036 |
| 6 rs281863762 | 32630565 C | 4.901  | 9.90E-14 | chr:6:32648036 |
| 6 rs28772303  | 32680558 A | 0.2456 | 1.01E-13 | chr:6:32648036 |
| 6 rs28746901  | 32648681 T | 0.2775 | 1.07E-13 | chr:6:32648036 |
| 6 rs28746956  | 32652877 G | 0.2662 | 1.07E-13 | chr:6:32648036 |
| 6 rs144328416 | 32639464 T | 0.2805 | 1.12E-13 | chr:6:32648036 |
| 6 rs148777223 | 32639465 G | 0.2805 | 1.12E-13 | chr:6:32648036 |
| 6 rs552311831 | 32683247 G | 4.24   | 1.14E-13 | chr:6:32648036 |
| 6 rs564243097 | 32683251 G | 4.24   | 1.14E-13 | chr:6:32648036 |

|               |            |        |          |                |
|---------------|------------|--------|----------|----------------|
| 6 rs9348891   | 32664971 G | 0.2475 | 1.16E-13 | chr:6:32648036 |
| 6 rs9274498   | 32633941 G | 3.99   | 1.17E-13 | chr:6:32648036 |
| 6 rs28746950  | 32652785 A | 0.2744 | 1.18E-13 | chr:6:32648036 |
| 6 rs28746948  | 32652763 G | 0.274  | 1.25E-13 | chr:6:32648036 |
| 6 rs586610    | 32572311 C | 4.596  | 1.26E-13 | chr:6:32648036 |
| 6 rs28746982  | 32653703 A | 0.267  | 1.32E-13 | chr:6:32648036 |
| 6 rs6931277   | 32583357 T | 5.655  | 1.34E-13 | chr:6:32648036 |
| 6 rs75639337  | 32578656 T | 0.27   | 1.36E-13 | chr:6:32648036 |
| 6 rs77064057  | 32578653 G | 0.27   | 1.36E-13 | chr:6:32648036 |
| 6 rs28891490  | 32660697 A | 0.248  | 1.40E-13 | chr:6:32648036 |
| 6 rs28772282  | 32674136 G | 0.248  | 1.41E-13 | chr:6:32648036 |
| 6 rs9271280   | 32581047 A | 0.2707 | 1.41E-13 | chr:6:32648036 |
| 6 rs140768369 | 32643975 G | 3.024  | 1.41E-13 | chr:6:32648036 |
| 6 rs281863538 | 32630897 C | 4.216  | 1.42E-13 | chr:6:32648036 |
| 6 rs9271326   | 32582527 T | 0.2719 | 1.45E-13 | chr:6:32648036 |
| 6 rs28891476  | 32642584 A | 0.2852 | 1.46E-13 | chr:6:32648036 |
| 6 rs9275188   | 32656136 C | 0.288  | 1.47E-13 | chr:6:32648036 |
| 6 rs9275189   | 32656137 A | 0.288  | 1.47E-13 | chr:6:32648036 |
| 6 rs28891468  | 32642319 T | 0.296  | 1.47E-13 | chr:6:32648036 |
| 6 rs281862211 | 32632418 G | 3.722  | 1.52E-13 | chr:6:32648036 |
| 6 rs17879995  | 32552072 G | 6.008  | 1.53E-13 | chr:6:32648036 |
| 6 rs115749644 | 32627818 A | 6.121  | 1.53E-13 | chr:6:32648036 |
| 6 rs28747056  | 32656544 G | 0.2754 | 1.60E-13 | chr:6:32648036 |
| 6 rs28747057  | 32656553 T | 0.2754 | 1.60E-13 | chr:6:32648036 |
| 6 rs28747058  | 32656554 G | 0.2754 | 1.60E-13 | chr:6:32648036 |
| 6 rs28747059  | 32656558 G | 0.2754 | 1.60E-13 | chr:6:32648036 |
| 6 rs1281937   | 32578143 C | 0.2721 | 1.62E-13 | chr:6:32648036 |
| 6 rs2647094   | 32580322 G | 0.2721 | 1.62E-13 | chr:6:32648036 |
| 6 rs2858862   | 32580321 T | 0.2721 | 1.62E-13 | chr:6:32648036 |
| 6 rs2858864   | 32578229 T | 0.2721 | 1.62E-13 | chr:6:32648036 |
| 6 rs3104421   | 32580007 A | 0.2721 | 1.62E-13 | chr:6:32648036 |
| 6 rs502055    | 32579003 C | 0.2721 | 1.62E-13 | chr:6:32648036 |
| 6 rs502771    | 32578970 C | 0.2721 | 1.62E-13 | chr:6:32648036 |
| 6 rs550703793 | 32582451 T | 0.2721 | 1.62E-13 | chr:6:32648036 |
| 6 rs76946723  | 32578917 T | 0.2721 | 1.62E-13 | chr:6:32648036 |
| 6 rs79838044  | 32580632 C | 0.2721 | 1.62E-13 | chr:6:32648036 |
| 6 rs80243928  | 32580571 T | 0.2721 | 1.62E-13 | chr:6:32648036 |
| 6 rs9271190   | 32578369 A | 0.2721 | 1.62E-13 | chr:6:32648036 |
| 6 rs9271262   | 32580585 G | 0.2721 | 1.62E-13 | chr:6:32648036 |
| 6 rs9271330   | 32582640 A | 0.2721 | 1.62E-13 | chr:6:32648036 |
| 6 rs9271333   | 32582678 T | 0.2721 | 1.62E-13 | chr:6:32648036 |
| 6 rs9271334   | 32582711 C | 0.2721 | 1.62E-13 | chr:6:32648036 |
| 6 rs9274690   | 32636940 A | 0.2836 | 1.62E-13 | chr:6:32648036 |

|               |            |        |          |                |
|---------------|------------|--------|----------|----------------|
| 6 rs17205823  | 32651168 T | 0.2806 | 1.66E-13 | chr:6:32648036 |
| 6 rs574170    | 32572904 A | 4.338  | 1.78E-13 | chr:6:32648036 |
| 6 rs9273489   | 32628189 G | 6.337  | 1.82E-13 | chr:6:32648036 |
| 6 rs9271608   | 32591588 G | 5.47   | 1.84E-13 | chr:6:32648036 |
| 6 rs1130429   | 32629210 T | 6.015  | 1.89E-13 | chr:6:32648036 |
| 6 rs28746970  | 32653259 C | 0.2753 | 1.92E-13 | chr:6:32648036 |
| 6 rs117992092 | 32635098 C | 4.373  | 1.93E-13 | chr:6:32648036 |
| 6 rs9274744   | 32638054 G | 0.2663 | 1.96E-13 | chr:6:32648036 |
| 6 rs9274746   | 32638060 G | 0.2663 | 1.96E-13 | chr:6:32648036 |
| 6 rs28752500  | 32568769 T | 4.353  | 1.97E-13 | chr:6:32648036 |
| 6 rs117384891 | 32635124 G | 4.429  | 1.98E-13 | chr:6:32648036 |
| 6 rs117912793 | 32635123 G | 4.429  | 1.98E-13 | chr:6:32648036 |
| 6 rs77568742  | 32580790 C | 0.2749 | 2.09E-13 | chr:6:32648036 |
| 6 rs117016875 | 32628578 T | 5.37   | 2.09E-13 | chr:6:32648036 |
| 6 rs117509699 | 32628590 C | 5.37   | 2.09E-13 | chr:6:32648036 |
| 6 rs3104413   | 32582650 G | 5.494  | 2.12E-13 | chr:6:32648036 |
| 6 rs3129753   | 32583027 C | 5.494  | 2.12E-13 | chr:6:32648036 |
| 6 rs3129769   | 32597022 A | 5.494  | 2.12E-13 | chr:6:32648036 |
| 6 rs118164855 | 32634914 T | 4.517  | 2.15E-13 | chr:6:32648036 |
| 6 rs28891467  | 32642307 A | 0.2995 | 2.17E-13 | chr:6:32648036 |
| 6 rs9274743   | 32638042 A | 0.2664 | 2.31E-13 | chr:6:32648036 |
| 6 rs4532479   | 32582194 T | 0.2693 | 2.34E-13 | chr:6:32648036 |
| 6 rs28752501  | 32568995 A | 4.132  | 2.36E-13 | chr:6:32648036 |
| 6 rs9271187   | 32578314 C | 0.2747 | 2.42E-13 | chr:6:32648036 |
| 6 rs9271188   | 32578320 T | 0.2747 | 2.42E-13 | chr:6:32648036 |
| 6 rs9274689   | 32636930 T | 0.2839 | 2.48E-13 | chr:6:32648036 |
| 6 rs3873451   | 32683240 G | 4.155  | 2.52E-13 | chr:6:32648036 |
| 6 rs28746968  | 32653247 T | 0.2781 | 2.53E-13 | chr:6:32648036 |
| 6 rs28746969  | 32653248 G | 0.2781 | 2.53E-13 | chr:6:32648036 |
| 6 rs28724151  | 32555378 T | 4.595  | 2.57E-13 | chr:6:32648036 |
| 6 rs9275607   | 32683645 G | 4.095  | 2.59E-13 | chr:6:32648036 |
| 6 rs9274188   | 32630667 G | 4.051  | 2.64E-13 | chr:6:32648036 |
| 6 rs112616562 | 32618404 A | 2.678  | 2.67E-13 | chr:6:32648036 |
| 6 rs117158956 | 32646666 A | 2.974  | 2.74E-13 | chr:6:32648036 |
| 6 rs9271237   | 32579651 G | 0.28   | 2.79E-13 | chr:6:32648036 |
| 6 rs9271238   | 32579702 T | 0.28   | 2.79E-13 | chr:6:32648036 |
| 6 rs9274691   | 32636957 T | 0.3418 | 2.81E-13 | chr:6:32648036 |
| 6 rs9274692   | 32636958 T | 0.3418 | 2.81E-13 | chr:6:32648036 |
| 6 rs199987570 | 32629267 T | 5.017  | 2.83E-13 | chr:6:32648036 |
| 6 rs141127771 | 32632200 A | 2.65   | 2.91E-13 | chr:6:32648036 |
| 6 rs281863713 | 32630652 C | 4.065  | 2.92E-13 | chr:6:32648036 |
| 6 rs17205830  | 32651180 C | 0.2859 | 2.95E-13 | chr:6:32648036 |
| 6 rs17206084  | 32652461 T | 0.2837 | 2.96E-13 | chr:6:32648036 |

|               |            |        |          |                |
|---------------|------------|--------|----------|----------------|
| 6 rs117570697 | 32634665 A | 4.507  | 2.97E-13 | chr:6:32648036 |
| 6 rs117621674 | 32634649 T | 4.507  | 2.97E-13 | chr:6:32648036 |
| 6 rs9275608   | 32683708 G | 3.998  | 3.06E-13 | chr:6:32648036 |
| 6 rs9275609   | 32683713 G | 3.998  | 3.06E-13 | chr:6:32648036 |
| 6 rs17212251  | 32651629 C | 0.2838 | 3.21E-13 | chr:6:32648036 |
| 6 rs183801733 | 32645114 A | 3.004  | 3.22E-13 | chr:6:32648036 |
| 6 rs9272417   | 32605078 G | 5.353  | 3.25E-13 | chr:6:32648036 |
| 6 rs6917729   | 32579643 A | 5.535  | 3.38E-13 | chr:6:32648036 |
| 6 rs28891415  | 32640691 C | 0.2906 | 3.40E-13 | chr:6:32648036 |
| 6 rs28891416  | 32640692 T | 0.2906 | 3.40E-13 | chr:6:32648036 |
| 6 rs28383461  | 32609607 A | 4.634  | 3.46E-13 | chr:6:32648036 |
| 6 rs139346361 | 32622789 A | 2.528  | 3.46E-13 | chr:6:32648036 |
| 6 rs3104375   | 32600101 C | 5.116  | 3.59E-13 | chr:6:32648036 |
| 6 rs9275610   | 32683750 C | 3.962  | 3.94E-13 | chr:6:32648036 |
| 6 rs17205872  | 32651558 A | 0.2794 | 4.02E-13 | chr:6:32648036 |
| 6 rs28752498  | 32568652 A | 4.362  | 4.14E-13 | chr:6:32648036 |
| 6 rs9271594   | 32591213 G | 5.368  | 4.25E-13 | chr:6:32648036 |
| 6 rs17212448  | 32652519 C | 0.2881 | 4.25E-13 | chr:6:32648036 |
| 6 rs67336789  | 32533094 T | 2.295  | 4.37E-13 | chr:6:32648036 |
| 6 rs9271301   | 32581614 T | 0.2813 | 4.44E-13 | chr:6:32648036 |
| 6 rs583177    | 32579567 A | 0.2827 | 4.48E-13 | chr:6:32648036 |
| 6 rs2454138   | 32570401 A | 4.649  | 4.53E-13 | chr:6:32648036 |
| 6 rs2516049   | 32570400 C | 4.649  | 4.53E-13 | chr:6:32648036 |
| 6 rs34171523  | 32655954 G | 0.3219 | 4.58E-13 | chr:6:32648036 |
| 6 rs9270772   | 32568967 T | 2.875  | 4.91E-13 | chr:6:32648036 |
| 6 rs117804693 | 32622621 T | 2.563  | 5.12E-13 | chr:6:32648036 |
| 6 rs28746953  | 32652823 G | 0.2873 | 5.18E-13 | chr:6:32648036 |
| 6 rs28746954  | 32652826 C | 0.2873 | 5.18E-13 | chr:6:32648036 |
| 6 rs28383180  | 32571118 C | 3.643  | 5.43E-13 | chr:6:32648036 |
| 6 rs9274683   | 32636780 G | 0.267  | 5.47E-13 | chr:6:32648036 |
| 6 rs9274684   | 32636785 C | 0.267  | 5.47E-13 | chr:6:32648036 |
| 6 rs9274740   | 32637968 A | 0.2672 | 5.82E-13 | chr:6:32648036 |
| 6 rs28383179  | 32571116 A | 3.648  | 5.93E-13 | chr:6:32648036 |
| 6 rs368228691 | 32639312 A | 0.2918 | 6.73E-13 | chr:6:32648036 |
| 6 rs372519354 | 32639315 T | 0.2918 | 6.73E-13 | chr:6:32648036 |
| 6 rs9274687   | 32636882 C | 0.2673 | 6.88E-13 | chr:6:32648036 |
| 6 rs34350244  | 32561465 T | 5.527  | 6.92E-13 | chr:6:32648036 |
| 6 rs35294087  | 32561466 G | 5.527  | 6.92E-13 | chr:6:32648036 |
| 6 rs13193606  | 32575044 T | 4.127  | 6.93E-13 | chr:6:32648036 |
| 6 rs112248469 | 32639383 G | 0.2991 | 7.01E-13 | chr:6:32648036 |
| 6 rs28772281  | 32674086 A | 0.2662 | 7.11E-13 | chr:6:32648036 |
| 6 rs601481    | 32573293 C | 4.127  | 7.22E-13 | chr:6:32648036 |
| 6 rs28746981  | 32653677 T | 0.2853 | 7.27E-13 | chr:6:32648036 |

|               |            |        |          |                |
|---------------|------------|--------|----------|----------------|
| 6 rs9274685   | 32636844 T | 0.2672 | 7.37E-13 | chr:6:32648036 |
| 6 rs281862289 | 32632297 G | 2.916  | 7.42E-13 | chr:6:32648036 |
| 6 rs541682094 | 32632298 A | 2.916  | 7.42E-13 | chr:6:32648036 |
| 6 rs3104378   | 32599163 T | 4.569  | 7.53E-13 | chr:6:32648036 |
| 6 rs9274731   | 32637823 A | 0.3212 | 8.09E-13 | chr:6:32648036 |
| 6 rs617578    | 32574603 A | 5.275  | 8.28E-13 | chr:6:32648036 |
| 6 rs3021304   | 32575658 G | 3.067  | 8.28E-13 | chr:6:32648036 |
| 6 rs28891402  | 32640120 G | 0.3012 | 8.47E-13 | chr:6:32648036 |
| 6 rs9274726   | 32637593 C | 0.2759 | 8.57E-13 | chr:6:32648036 |
| 6 rs141507870 | 32632369 A | 3.033  | 8.70E-13 | chr:6:32648036 |
| 6 rs150457662 | 32632371 T | 3.033  | 8.70E-13 | chr:6:32648036 |
| 6 rs9274730   | 32637817 G | 0.3213 | 8.78E-13 | chr:6:32648036 |
| 6 rs372276684 | 32639148 G | 0.2905 | 8.84E-13 | chr:6:32648036 |
| 6 rs138762484 | 32639322 T | 0.2946 | 9.21E-13 | chr:6:32648036 |
| 6 rs281860801 | 32634679 G | 4.342  | 9.27E-13 | chr:6:32648036 |
| 6 rs2647059   | 32569362 C | 5.303  | 9.31E-13 | chr:6:32648036 |
| 6 rs687308    | 32567256 T | 5.303  | 9.31E-13 | chr:6:32648036 |
| 6 rs143008902 | 32639447 A | 0.3041 | 9.39E-13 | chr:6:32648036 |
| 6 rs9271554   | 32590317 G | 4.307  | 9.45E-13 | chr:6:32648036 |
| 6 rs7770010   | 32574896 A | 5.294  | 9.60E-13 | chr:6:32648036 |
| 6 rs28891477  | 32642603 C | 0.305  | 9.66E-13 | chr:6:32648036 |
| 6 rs28891478  | 32642605 G | 0.305  | 9.66E-13 | chr:6:32648036 |
| 6 rs9274171   | 32630391 C | 3.611  | 9.70E-13 | chr:6:32648036 |
| 6 rs76662008  | 32580869 G | 0.292  | 9.76E-13 | chr:6:32648036 |
| 6 rs281862269 | 32632328 A | 2.884  | 9.85E-13 | chr:6:32648036 |
| 6 rs28752494  | 32568240 A | 4.033  | 1.01E-12 | chr:6:32648036 |
| 6 rs28891397  | 32639777 A | 0.3041 | 1.01E-12 | chr:6:32648036 |
| 6 rs601006    | 32573173 A | 4.13   | 1.04E-12 | chr:6:32648036 |
| 6 rs138352855 | 32630286 A | 4.205  | 1.06E-12 | chr:6:32648036 |
| 6 rs9273491   | 32628221 A | 5.925  | 1.07E-12 | chr:6:32648036 |
| 6 rs9273588   | 32629074 A | 5.307  | 1.07E-12 | chr:6:32648036 |
| 6 rs2454139   | 32566635 C | 5.271  | 1.08E-12 | chr:6:32648036 |
| 6 rs9274698   | 32637095 A | 0.2761 | 1.10E-12 | chr:6:32648036 |
| 6 rs9274338   | 32632310 C | 2.904  | 1.11E-12 | chr:6:32648036 |
| 6 rs117626117 | 32629087 G | 5.3    | 1.12E-12 | chr:6:32648036 |
| 6 rs476602    | 32569792 T | 3.069  | 1.15E-12 | chr:6:32648036 |
| 6 rs3873446   | 32683011 G | 3.824  | 1.16E-12 | chr:6:32648036 |
| 6 rs3873447   | 32683012 A | 3.824  | 1.16E-12 | chr:6:32648036 |
| 6 rs182578413 | 32632290 C | 2.916  | 1.18E-12 | chr:6:32648036 |
| 6 rs9274922   | 32641350 A | 0.4155 | 1.31E-12 | chr:6:32648036 |
| 6 rs17212427  | 32652425 C | 0.3047 | 1.37E-12 | chr:6:32648036 |
| 6 rs9274702   | 32637184 C | 0.2995 | 1.42E-12 | chr:6:32648036 |
| 6 rs3817966   | 32367847 C | 3.507  | 1.44E-12 | chr:6:32648036 |

|               |            |        |          |                |
|---------------|------------|--------|----------|----------------|
| 6 rs112872773 | 32487174 G | 5.144  | 1.46E-12 | chr:6:32648036 |
| 6 rs17212420  | 32652400 T | 0.3046 | 1.47E-12 | chr:6:32648036 |
| 6 rs9269968   | 32552251 A | 0.3656 | 1.50E-12 | chr:6:32648036 |
| 6 rs181393156 | 32487456 A | 5.574  | 1.51E-12 | chr:6:32648036 |
| 6 rs186506234 | 32487464 C | 5.574  | 1.51E-12 | chr:6:32648036 |
| 6 rs35118762  | 32560631 T | 5.168  | 1.52E-12 | chr:6:32648036 |
| 6 rs35265698  | 32561334 G | 5.168  | 1.52E-12 | chr:6:32648036 |
| 6 rs553195173 | 32566329 C | 5.168  | 1.52E-12 | chr:6:32648036 |
| 6 rs601148    | 32573265 T | 5.168  | 1.52E-12 | chr:6:32648036 |
| 6 rs9274679   | 32636653 T | 0.2879 | 1.58E-12 | chr:6:32648036 |
| 6 rs9274696   | 32637007 G | 0.336  | 1.62E-12 | chr:6:32648036 |
| 6 rs28746891  | 32648112 G | 0.3141 | 1.70E-12 | chr:6:32648036 |
| 6 rs532965    | 32577973 G | 5.152  | 1.70E-12 | chr:6:32648036 |
| 6 rs117233242 | 32635195 C | 4.114  | 1.86E-12 | chr:6:32648036 |
| 6 rs3104381   | 32598854 A | 4.576  | 1.89E-12 | chr:6:32648036 |
| 6 rs281864287 | 32629111 C | 5.276  | 1.89E-12 | chr:6:32648036 |
| 6 rs281864289 | 32629109 T | 5.276  | 1.89E-12 | chr:6:32648036 |
| 6 rs9273609   | 32629112 A | 5.276  | 1.89E-12 | chr:6:32648036 |
| 6 rs28371256  | 32658366 C | 3.391  | 2.02E-12 | chr:6:32648036 |
| 6 rs28371257  | 32658375 G | 3.391  | 2.02E-12 | chr:6:32648036 |
| 6 rs9268458   | 32350384 A | 3.502  | 2.02E-12 | chr:6:32648036 |
| 6 rs7761182   | 32575099 T | 5.158  | 2.09E-12 | chr:6:32648036 |
| 6 rs9275195   | 32656405 T | 0.2862 | 2.10E-12 | chr:6:32648036 |
| 6 rs9275196   | 32656406 G | 0.2862 | 2.10E-12 | chr:6:32648036 |
| 6 rs679242    | 32570958 T | 4.547  | 2.14E-12 | chr:6:32648036 |
| 6 rs35653258  | 32568783 A | 5.259  | 2.19E-12 | chr:6:32648036 |
| 6 rs17212441  | 32652494 C | 0.3037 | 2.27E-12 | chr:6:32648036 |
| 6 rs9274715   | 32637391 G | 0.3337 | 2.34E-12 | chr:6:32648036 |
| 6 rs558721    | 32570573 T | 5.111  | 2.35E-12 | chr:6:32648036 |
| 6 rs6917212   | 32583005 G | 0.3092 | 2.41E-12 | chr:6:32648036 |
| 6 rs28891465  | 32642109 C | 0.3204 | 2.50E-12 | chr:6:32648036 |
| 6 rs28752504  | 32569162 C | 3.989  | 2.50E-12 | chr:6:32648036 |
| 6 rs9274935   | 32641580 T | 0.353  | 2.57E-12 | chr:6:32648036 |
| 6 rs3817963   | 32368087 C | 3.476  | 2.59E-12 | chr:6:32648036 |
| 6 rs35226637  | 32568448 A | 5.114  | 2.73E-12 | chr:6:32648036 |
| 6 rs476775    | 32569722 G | 2.945  | 2.75E-12 | chr:6:32648036 |
| 6 rs9271043   | 32575177 A | 3.259  | 2.79E-12 | chr:6:32648036 |
| 6 rs540724932 | 32644934 A | 2.791  | 2.93E-12 | chr:6:32648036 |
| 6 rs111354037 | 32579285 C | 0.2985 | 2.97E-12 | chr:6:32648036 |
| 6 rs28891435  | 32641241 G | 0.3195 | 3.01E-12 | chr:6:32648036 |
| 6 rs146003607 | 32635211 C | 4.198  | 3.15E-12 | chr:6:32648036 |
| 6 rs28891412  | 32640538 T | 0.3143 | 3.21E-12 | chr:6:32648036 |
| 6 rs2858866   | 32575391 G | 2.939  | 3.22E-12 | chr:6:32648036 |

|               |            |        |          |                |
|---------------|------------|--------|----------|----------------|
| 6 rs117360622 | 32635270 A | 4.564  | 3.44E-12 | chr:6:32648036 |
| 6 rs3998158   | 32681992 C | 3.781  | 3.50E-12 | chr:6:32648036 |
| 6 rs35525122  | 32561283 A | 5.105  | 3.56E-12 | chr:6:32648036 |
| 6 rs9274926   | 32641416 T | 0.3966 | 3.81E-12 | chr:6:32648036 |
| 6 rs9274927   | 32641419 T | 0.3966 | 3.81E-12 | chr:6:32648036 |
| 6 rs28891469  | 32642394 G | 0.3282 | 3.86E-12 | chr:6:32648036 |
| 6 rs4639377   | 32625283 C | 0.4344 | 3.95E-12 | chr:6:32648036 |
| 6 rs2395519   | 32598067 C | 4.631  | 3.96E-12 | chr:6:32648036 |
| 6 rs34415150  | 32560477 G | 5.332  | 4.14E-12 | chr:6:32648036 |
| 6 rs17205879  | 32651576 C | 0.3034 | 4.30E-12 | chr:6:32648036 |
| 6 rs17205886  | 32651578 A | 0.3034 | 4.30E-12 | chr:6:32648036 |
| 6 rs4308604   | 32624618 C | 2.297  | 4.33E-12 | chr:6:32648036 |
| 6 rs34039593  | 32570311 G | 5.022  | 4.55E-12 | chr:6:32648036 |
| 6 rs118132027 | 32635282 T | 4.386  | 4.60E-12 | chr:6:32648036 |
| 6 rs371957643 | 32635300 C | 4.386  | 4.60E-12 | chr:6:32648036 |
| 6 rs17212230  | 32651588 A | 0.3067 | 4.67E-12 | chr:6:32648036 |
| 6 rs9275155   | 32652484 T | 0.2783 | 4.76E-12 | chr:6:32648036 |
| 6 rs9273531   | 32628712 T | 4.998  | 4.79E-12 | chr:6:32648036 |
| 6 rs9273408   | 32627221 G | 5.791  | 5.17E-12 | chr:6:32648036 |
| 6 rs34331363  | 32568439 T | 5.011  | 5.32E-12 | chr:6:32648036 |
| 6 rs541430730 | 32635225 T | 4.125  | 5.41E-12 | chr:6:32648036 |
| 6 rs548946394 | 32635220 A | 4.125  | 5.41E-12 | chr:6:32648036 |
| 6 rs6941395   | 32583206 A | 4.908  | 5.52E-12 | chr:6:32648036 |
| 6 rs2858867   | 32575325 A | 2.842  | 5.56E-12 | chr:6:32648036 |
| 6 rs571314744 | 32674287 G | 3.364  | 5.63E-12 | chr:6:32648036 |
| 6 rs486912    | 32575493 C | 2.906  | 5.65E-12 | chr:6:32648036 |
| 6 rs615672    | 32574171 G | 2.906  | 5.65E-12 | chr:6:32648036 |
| 6 rs615698    | 32574190 A | 2.906  | 5.65E-12 | chr:6:32648036 |
| 6 rs616187    | 32574305 G | 2.906  | 5.65E-12 | chr:6:32648036 |
| 6 rs66502252  | 32528521 G | 2.144  | 6.05E-12 | chr:6:32648036 |
| 6 rs9275578   | 32679384 T | 3.659  | 6.24E-12 | chr:6:32648036 |
| 6 rs9270806   | 32569563 C | 2.896  | 6.38E-12 | chr:6:32648036 |
| 6 rs9270807   | 32569572 G | 2.896  | 6.38E-12 | chr:6:32648036 |
| 6 rs4637681   | 32623928 C | 0.4343 | 6.39E-12 | chr:6:32648036 |
| 6 rs9275590   | 32680480 C | 3.655  | 6.42E-12 | chr:6:32648036 |
| 6 rs9275591   | 32680562 T | 3.655  | 6.42E-12 | chr:6:32648036 |
| 6 rs9270975   | 32573726 A | 2.903  | 6.49E-12 | chr:6:32648036 |
| 6 rs114746879 | 32487080 T | 4.592  | 6.54E-12 | chr:6:32648036 |
| 6 rs116067927 | 32487074 G | 4.592  | 6.54E-12 | chr:6:32648036 |
| 6 rs28796313  | 32528538 T | 2.137  | 6.71E-12 | chr:6:32648036 |
| 6 rs614437    | 32573941 A | 2.897  | 6.73E-12 | chr:6:32648036 |
| 6 rs28746965  | 32653136 G | 0.2996 | 6.80E-12 | chr:6:32648036 |
| 6 rs281864260 | 32629365 G | 4.521  | 7.15E-12 | chr:6:32648036 |



|               |            |        |          |                |
|---------------|------------|--------|----------|----------------|
| 6 rs2647062   | 32570417 C | 5.258  | 7.17E-12 | chr:6:32648036 |
| 6 rs28752495  | 32568315 T | 3.704  | 7.21E-12 | chr:6:32648036 |
| 6 rs72508413  | 32454597 G | 0.2768 | 7.35E-12 | chr:6:32648036 |
| 6 rs9274697   | 32637016 A | 0.34   | 7.36E-12 | chr:6:32648036 |
| 6 rs3763317   | 32376788 C | 0.2924 | 7.37E-12 | chr:6:32648036 |
| 6 rs67499532  | 32513184 G | 0.3216 | 7.42E-12 | chr:6:32648036 |
| 6 rs9275547   | 32676525 G | 3.672  | 7.48E-12 | chr:6:32648036 |
| 6 rs9275512   | 32674396 G | 3.668  | 7.61E-12 | chr:6:32648036 |
| 6 rs679243    | 32570959 C | 2.716  | 7.72E-12 | chr:6:32648036 |
| 6 rs377506388 | 32487038 G | 4.813  | 7.82E-12 | chr:6:32648036 |
| 6 rs28752492  | 32568138 A | 3.784  | 8.01E-12 | chr:6:32648036 |
| 6 rs28752493  | 32568165 C | 3.784  | 8.01E-12 | chr:6:32648036 |
| 6 rs9270769   | 32568907 T | 2.79   | 8.44E-12 | chr:6:32648036 |
| 6 rs9270770   | 32568910 T | 2.79   | 8.44E-12 | chr:6:32648036 |
| 6 rs68110554  | 32528475 G | 2.135  | 8.53E-12 | chr:6:32648036 |
| 6 rs562289    | 32577046 T | 3.311  | 8.64E-12 | chr:6:32648036 |
| 6 rs545038190 | 32630327 A | 3.284  | 8.67E-12 | chr:6:32648036 |
| 6 rs481245    | 32576114 A | 2.813  | 8.80E-12 | chr:6:32648036 |
| 6 rs3021303   | 32575746 G | 2.856  | 9.00E-12 | chr:6:32648036 |
| 6 rs9270976   | 32573728 A | 2.831  | 9.37E-12 | chr:6:32648036 |
| 6 rs9269542   | 32544042 A | 0.3475 | 9.55E-12 | chr:6:32648036 |
| 6 rs4516986   | 32678323 C | 3.64   | 9.64E-12 | chr:6:32648036 |
| 6 rs9275527   | 32675378 G | 3.64   | 9.64E-12 | chr:6:32648036 |
| 6 rs9275531   | 32675592 G | 3.64   | 9.64E-12 | chr:6:32648036 |
| 6 rs9275581   | 32679914 C | 3.64   | 9.64E-12 | chr:6:32648036 |
| 6 rs9275582   | 32680070 T | 3.64   | 9.64E-12 | chr:6:32648036 |
| 6 rs9275593   | 32680843 A | 3.64   | 9.64E-12 | chr:6:32648036 |
| 6 rs9275595   | 32681355 C | 3.64   | 9.64E-12 | chr:6:32648036 |
| 6 rs76564265  | 32530582 G | 2.216  | 9.65E-12 | chr:6:32648036 |
| 6 rs17613465  | 32622359 A | 2.25   | 9.82E-12 | chr:6:32648036 |
| 6 rs34855541  | 32559825 G | 4.59   | 9.90E-12 | chr:6:32648036 |
| 6 rs3104409   | 32683121 G | 3.586  | 1.00E-11 | chr:6:32648036 |
| 6 rs28746894  | 32648173 T | 0.336  | 1.02E-11 | chr:6:32648036 |
| 6 rs9275068   | 32648418 C | 5.865  | 1.02E-11 | chr:6:32648036 |
| 6 rs117369774 | 32628991 T | 3.613  | 1.03E-11 | chr:6:32648036 |
| 6 rs117656997 | 32628992 T | 3.613  | 1.03E-11 | chr:6:32648036 |
| 6 rs534262225 | 32646454 T | 0.2422 | 1.03E-11 | chr:6:32648036 |
| 6 rs28746892  | 32648135 T | 0.3369 | 1.07E-11 | chr:6:32648036 |
| 6 rs28746893  | 32648136 G | 0.3369 | 1.07E-11 | chr:6:32648036 |
| 6 rs28383182  | 32571811 A | 4.075  | 1.21E-11 | chr:6:32648036 |
| 6 rs2516050   | 32570352 G | 2.825  | 1.22E-11 | chr:6:32648036 |
| 6 rs66931410  | 32518235 C | 0.364  | 1.30E-11 | chr:6:32648036 |
| 6 rs28891460  | 32642016 G | 0.3341 | 1.36E-11 | chr:6:32648036 |

|               |            |        |          |                |
|---------------|------------|--------|----------|----------------|
| 6 rs34496598  | 32560455 T | 5.113  | 1.40E-11 | chr:6:32648036 |
| 6 rs34924558  | 32560446 T | 5.113  | 1.40E-11 | chr:6:32648036 |
| 6 rs74750549  | 32511488 T | 2.232  | 1.44E-11 | chr:6:32648036 |
| 6 rs9274790   | 32639155 A | 0.283  | 1.46E-11 | chr:6:32648036 |
| 6 rs674313    | 32578082 T | 0.2691 | 1.46E-11 | chr:6:32648036 |
| 6 rs9275154   | 32652435 C | 0.2803 | 1.48E-11 | chr:6:32648036 |
| 6 rs117358580 | 32711787 A | 4.135  | 1.48E-11 | chr:6:32648036 |
| 6 rs117489278 | 32711433 A | 4.135  | 1.48E-11 | chr:6:32648036 |
| 6 rs117610182 | 32711984 A | 4.135  | 1.48E-11 | chr:6:32648036 |
| 6 rs117735661 | 32711822 T | 4.135  | 1.48E-11 | chr:6:32648036 |
| 6 rs141446522 | 32710933 T | 4.135  | 1.48E-11 | chr:6:32648036 |
| 6 rs16870693  | 32711691 A | 4.135  | 1.48E-11 | chr:6:32648036 |
| 6 rs28752496  | 32568321 C | 3.584  | 1.56E-11 | chr:6:32648036 |
| 6 rs515185    | 32574742 A | 4.754  | 1.58E-11 | chr:6:32648036 |
| 6 rs116923060 | 32366836 A | 5.506  | 1.62E-11 | chr:6:32648036 |
| 6 rs535648472 | 32487066 T | 4.55   | 1.62E-11 | chr:6:32648036 |
| 6 rs526784    | 32572030 A | 3.995  | 1.64E-11 | chr:6:32648036 |
| 6 rs585305    | 32572048 T | 3.995  | 1.64E-11 | chr:6:32648036 |
| 6 rs9270861   | 32570979 G | 2.528  | 1.73E-11 | chr:6:32648036 |
| 6 rs9270862   | 32570981 T | 2.528  | 1.73E-11 | chr:6:32648036 |
| 6 rs9270863   | 32570982 G | 2.528  | 1.73E-11 | chr:6:32648036 |
| 6 rs193297314 | 32646403 T | 2.683  | 1.76E-11 | chr:6:32648036 |
| 6 rs9270745   | 32568264 G | 2.618  | 1.76E-11 | chr:6:32648036 |
| 6 rs35464393  | 32530198 T | 2.191  | 1.81E-11 | chr:6:32648036 |
| 6 rs9273401   | 32627129 G | 5.462  | 1.83E-11 | chr:6:32648036 |
| 6 rs1049163   | 32629193 T | 2.601  | 1.83E-11 | chr:6:32648036 |
| 6 rs1064664   | 32552075 G | 0.2903 | 1.84E-11 | chr:6:32648036 |
| 6 rs9274717   | 32637454 C | 0.3327 | 1.90E-11 | chr:6:32648036 |
| 6 rs28746895  | 32648221 T | 0.346  | 1.94E-11 | chr:6:32648036 |
| 6 rs67240795  | 32530458 C | 2.165  | 2.05E-11 | chr:6:32648036 |
| 6 rs646159    | 32576446 C | 2.727  | 2.13E-11 | chr:6:32648036 |
| 6 rs28891462  | 32642026 A | 0.3399 | 2.14E-11 | chr:6:32648036 |
| 6 rs28891463  | 32642097 T | 0.3488 | 2.17E-11 | chr:6:32648036 |
| 6 rs28891464  | 32642101 A | 0.3488 | 2.17E-11 | chr:6:32648036 |
| 6 rs9274710   | 32637287 C | 0.3443 | 2.19E-11 | chr:6:32648036 |
| 6 rs9274937   | 32641631 G | 0.3492 | 2.19E-11 | chr:6:32648036 |
| 6 rs9274734   | 32637887 T | 0.3488 | 2.22E-11 | chr:6:32648036 |
| 6 rs28613510  | 32518507 A | 0.3583 | 2.23E-11 | chr:6:32648036 |
| 6 rs5024431   | 32684344 A | 3.222  | 2.26E-11 | chr:6:32648036 |
| 6 rs530934728 | 32684513 A | 3.222  | 2.26E-11 | chr:6:32648036 |
| 6 rs2760980   | 32565201 A | 4.917  | 2.33E-11 | chr:6:32648036 |
| 6 rs3021057   | 32652363 C | 0.2875 | 2.33E-11 | chr:6:32648036 |
| 6 rs9274707   | 32637266 A | 0.3568 | 2.43E-11 | chr:6:32648036 |

|               |            |        |          |                |
|---------------|------------|--------|----------|----------------|
| 6 rs9274708   | 32637267 G | 0.3568 | 2.43E-11 | chr:6:32648036 |
| 6 rs6935940   | 32683691 C | 3.154  | 2.53E-11 | chr:6:32648036 |
| 6 rs2647066   | 32571122 T | 4.074  | 2.57E-11 | chr:6:32648036 |
| 6 rs67979569  | 32530540 T | 2.167  | 2.60E-11 | chr:6:32648036 |
| 6 rs6605556   | 32583099 G | 4.609  | 2.65E-11 | chr:6:32648036 |
| 6 rs74587827  | 32567757 G | 2.743  | 2.78E-11 | chr:6:32648036 |
| 6 rs76483802  | 32454913 G | 0.2849 | 2.78E-11 | chr:6:32648036 |
| 6 rs9275574   | 32679183 A | 3.476  | 2.79E-11 | chr:6:32648036 |
| 6 rs9275575   | 32679185 A | 3.476  | 2.79E-11 | chr:6:32648036 |
| 6 rs68141327  | 32535354 C | 0.4586 | 2.90E-11 | chr:6:32648036 |
| 6 rs28746888  | 32648015 A | 0.353  | 3.44E-11 | chr:6:32648036 |
| 6 rs34066151  | 32559702 G | 4.083  | 3.48E-11 | chr:6:32648036 |
| 6 rs35299998  | 32559710 T | 4.083  | 3.48E-11 | chr:6:32648036 |
| 6 rs117859623 | 32402552 A | 5.022  | 3.52E-11 | chr:6:32648036 |
| 6 rs58103245  | 32395956 T | 5.022  | 3.52E-11 | chr:6:32648036 |
| 6 rs59642557  | 32400811 A | 5.022  | 3.52E-11 | chr:6:32648036 |
| 6 rs111675168 | 32487104 G | 3.877  | 3.57E-11 | chr:6:32648036 |
| 6 rs67927015  | 32531442 T | 2.15   | 3.69E-11 | chr:6:32648036 |
| 6 rs9274705   | 32637245 G | 0.3492 | 3.82E-11 | chr:6:32648036 |
| 6 rs71536582  | 32533078 G | 2.13   | 3.98E-11 | chr:6:32648036 |
| 6 rs9270771   | 32568964 G | 2.589  | 3.99E-11 | chr:6:32648036 |
| 6 rs35115714  | 32532460 C | 2.156  | 4.00E-11 | chr:6:32648036 |
| 6 rs9275180   | 32654278 C | 0.2827 | 4.13E-11 | chr:6:32648036 |
| 6 rs615719    | 32574204 G | 2.683  | 4.16E-11 | chr:6:32648036 |
| 6 rs2856690   | 32654536 T | 0.2753 | 4.28E-11 | chr:6:32648036 |
| 6 rs9275158   | 32652582 G | 0.2785 | 4.50E-11 | chr:6:32648036 |
| 6 rs9270728   | 32567956 T | 2.63   | 4.55E-11 | chr:6:32648036 |
| 6 rs6936863   | 32684029 G | 3.12   | 4.79E-11 | chr:6:32648036 |
| 6 rs34812354  | 32530046 T | 2.127  | 4.84E-11 | chr:6:32648036 |
| 6 rs9275161   | 32652636 T | 0.2773 | 4.89E-11 | chr:6:32648036 |
| 6 rs564176274 | 32642025 T | 9.893  | 4.94E-11 | chr:6:32648036 |
| 6 rs77296290  | 32635296 T | 3.178  | 5.35E-11 | chr:6:32648036 |
| 6 rs5021727   | 32578633 G | 2.694  | 5.66E-11 | chr:6:32648036 |
| 6 rs9270803   | 32569415 G | 2.64   | 5.67E-11 | chr:6:32648036 |
| 6 rs9274861   | 32640592 C | 0.2893 | 5.72E-11 | chr:6:32648036 |
| 6 rs9270869   | 32571155 T | 2.59   | 5.72E-11 | chr:6:32648036 |
| 6 rs9270871   | 32571160 A | 2.59   | 5.72E-11 | chr:6:32648036 |
| 6 rs9501400   | 32394184 A | 2.712  | 5.85E-11 | chr:6:32648036 |
| 6 rs71536570  | 32531422 C | 2.13   | 5.87E-11 | chr:6:32648036 |
| 6 rs5021726   | 32578481 C | 2.705  | 5.94E-11 | chr:6:32648036 |
| 6 rs17204995  | 32578328 A | 2.661  | 5.99E-11 | chr:6:32648036 |
| 6 rs17211342  | 32578323 G | 2.661  | 5.99E-11 | chr:6:32648036 |
| 6 rs2760990   | 32571110 A | 3.905  | 6.05E-11 | chr:6:32648036 |

|               |            |        |          |                |
|---------------|------------|--------|----------|----------------|
| 6 rs9274751   | 32638138 T | 0.2747 | 6.05E-11 | chr:6:32648036 |
| 6 rs680061    | 32571098 A | 2.515  | 6.12E-11 | chr:6:32648036 |
| 6 rs569229779 | 32634614 C | 0.3652 | 6.14E-11 | chr:6:32648036 |
| 6 rs17613347  | 32621980 T | 2.195  | 6.20E-11 | chr:6:32648036 |
| 6 rs115005201 | 32501172 A | 0.3727 | 6.23E-11 | chr:6:32648036 |
| 6 rs9275148   | 32651585 T | 0.2857 | 6.51E-11 | chr:6:32648036 |
| 6 rs28746979  | 32653648 A | 0.3011 | 6.53E-11 | chr:6:32648036 |
| 6 rs28746980  | 32653651 A | 0.3011 | 6.53E-11 | chr:6:32648036 |
| 6 rs34647096  | 32561681 A | 4.491  | 6.58E-11 | chr:6:32648036 |
| 6 rs28584364  | 32512048 T | 0.3649 | 6.75E-11 | chr:6:32648036 |
| 6 rs9274736   | 32637905 T | 0.3645 | 6.83E-11 | chr:6:32648036 |
| 6 rs9275505   | 32674058 G | 3.344  | 6.92E-11 | chr:6:32648036 |
| 6 rs9274550   | 32634795 G | 0.3788 | 6.95E-11 | chr:6:32648036 |
| 6 rs17843688  | 32622036 A | 2.182  | 7.00E-11 | chr:6:32648036 |
| 6 rs3828806   | 32636130 C | 0.3103 | 7.10E-11 | chr:6:32648036 |
| 6 rs3828807   | 32636131 G | 0.3103 | 7.10E-11 | chr:6:32648036 |
| 6 rs150165719 | 32579868 T | 2.695  | 7.16E-11 | chr:6:32648036 |
| 6 rs117841740 | 32359952 C | 4.858  | 7.52E-11 | chr:6:32648036 |
| 6 rs142491731 | 32360109 C | 4.858  | 7.52E-11 | chr:6:32648036 |
| 6 rs143363223 | 32360140 G | 4.858  | 7.52E-11 | chr:6:32648036 |
| 6 rs148169377 | 32360044 T | 4.858  | 7.52E-11 | chr:6:32648036 |
| 6 rs150724309 | 32360065 C | 4.858  | 7.52E-11 | chr:6:32648036 |
| 6 rs34784936  | 32559648 T | 3.879  | 7.54E-11 | chr:6:32648036 |
| 6 rs9276417   | 32710712 A | 4.04   | 7.58E-11 | chr:6:32648036 |
| 6 rs34117221  | 32568324 G | 4.365  | 7.62E-11 | chr:6:32648036 |
| 6 rs28891423  | 32640970 A | 0.3367 | 7.62E-11 | chr:6:32648036 |
| 6 rs9274881   | 32641065 A | 0.4378 | 7.66E-11 | chr:6:32648036 |
| 6 rs35975014  | 32610075 G | 4.891  | 7.69E-11 | chr:6:32648036 |
| 6 rs77179964  | 32610313 G | 4.891  | 7.69E-11 | chr:6:32648036 |
| 6 rs78712211  | 32610300 T | 4.891  | 7.69E-11 | chr:6:32648036 |
| 6 rs28891459  | 32642001 T | 0.357  | 7.82E-11 | chr:6:32648036 |
| 6 rs12055445  | 32626739 A | 2.708  | 8.00E-11 | chr:6:32648036 |
| 6 rs9274555   | 32634882 C | 0.4069 | 8.03E-11 | chr:6:32648036 |
| 6 rs71542460  | 32632022 G | 0.4248 | 8.19E-11 | chr:6:32648036 |
| 6 rs9274738   | 32637909 A | 0.3652 | 8.27E-11 | chr:6:32648036 |
| 6 rs9274778   | 32638694 G | 0.287  | 8.34E-11 | chr:6:32648036 |
| 6 rs9274718   | 32637469 T | 0.3541 | 8.41E-11 | chr:6:32648036 |
| 6 rs9274719   | 32637470 T | 0.3541 | 8.41E-11 | chr:6:32648036 |
| 6 rs35117964  | 32568146 G | 4.579  | 8.41E-11 | chr:6:32648036 |
| 6 rs2856689   | 32654551 A | 0.2775 | 8.47E-11 | chr:6:32648036 |
| 6 rs9270746   | 32568284 C | 2.487  | 8.87E-11 | chr:6:32648036 |
| 6 rs9275506   | 32674083 A | 3.318  | 8.91E-11 | chr:6:32648036 |
| 6 rs2856679   | 32655615 C | 0.2779 | 9.03E-11 | chr:6:32648036 |

|               |            |        |          |                |
|---------------|------------|--------|----------|----------------|
| 6 rs2858860   | 32580366 T | 2.681  | 9.15E-11 | chr:6:32648036 |
| 6 rs2858861   | 32580331 T | 2.681  | 9.15E-11 | chr:6:32648036 |
| 6 rs3104419   | 32580136 T | 2.681  | 9.15E-11 | chr:6:32648036 |
| 6 rs502803    | 32578958 A | 2.681  | 9.15E-11 | chr:6:32648036 |
| 6 rs532098    | 32578052 A | 2.681  | 9.15E-11 | chr:6:32648036 |
| 6 rs28891424  | 32640984 G | 0.339  | 1.01E-10 | chr:6:32648036 |
| 6 rs601020    | 32573179 A | 4.349  | 1.01E-10 | chr:6:32648036 |
| 6 rs117342087 | 32369871 G | 4.848  | 1.01E-10 | chr:6:32648036 |
| 6 rs117542413 | 32369877 T | 4.848  | 1.01E-10 | chr:6:32648036 |
| 6 rs9274556   | 32634883 C | 0.4083 | 1.03E-10 | chr:6:32648036 |
| 6 rs9274557   | 32634887 G | 0.4083 | 1.03E-10 | chr:6:32648036 |
| 6 rs3129784   | 32656608 G | 0.2785 | 1.03E-10 | chr:6:32648036 |
| 6 rs111830089 | 32496843 A | 4.707  | 1.04E-10 | chr:6:32648036 |
| 6 rs2213567   | 32711655 G | 3.075  | 1.05E-10 | chr:6:32648036 |
| 6 rs9276423   | 32710855 G | 3.075  | 1.05E-10 | chr:6:32648036 |
| 6 rs9276430   | 32712182 T | 3.075  | 1.05E-10 | chr:6:32648036 |
| 6 rs12192514  | 32674240 T | 7.338  | 1.06E-10 | chr:6:32648036 |
| 6 rs16898262  | 32677397 G | 7.338  | 1.06E-10 | chr:6:32648036 |
| 6 rs17212616  | 32674617 A | 7.338  | 1.06E-10 | chr:6:32648036 |
| 6 rs28371270  | 32674296 G | 7.338  | 1.06E-10 | chr:6:32648036 |
| 6 rs28371272  | 32674440 C | 7.338  | 1.06E-10 | chr:6:32648036 |
| 6 rs28371273  | 32674442 C | 7.338  | 1.06E-10 | chr:6:32648036 |
| 6 rs67829983  | 32531335 C | 2.098  | 1.07E-10 | chr:6:32648036 |
| 6 rs281861581 | 32633380 G | 0.3979 | 1.07E-10 | chr:6:32648036 |
| 6 rs117181287 | 32365467 C | 4.725  | 1.09E-10 | chr:6:32648036 |
| 6 rs117460023 | 32365431 G | 4.725  | 1.09E-10 | chr:6:32648036 |
| 6 rs118152844 | 32365446 C | 4.725  | 1.09E-10 | chr:6:32648036 |
| 6 rs56894887  | 32369994 A | 4.752  | 1.09E-10 | chr:6:32648036 |
| 6 rs71536585  | 32533131 G | 2.067  | 1.09E-10 | chr:6:32648036 |
| 6 rs66869156  | 32531295 T | 2.091  | 1.11E-10 | chr:6:32648036 |
| 6 rs9274753   | 32638176 C | 0.2756 | 1.15E-10 | chr:6:32648036 |
| 6 rs9274773   | 32638620 A | 0.283  | 1.16E-10 | chr:6:32648036 |
| 6 rs9274774   | 32638630 A | 0.283  | 1.16E-10 | chr:6:32648036 |
| 6 rs28746889  | 32648034 C | 0.3692 | 1.18E-10 | chr:6:32648036 |
| 6 rs117033414 | 32359769 C | 4.726  | 1.19E-10 | chr:6:32648036 |
| 6 rs117349956 | 32359756 A | 4.726  | 1.19E-10 | chr:6:32648036 |
| 6 rs117869812 | 32359724 A | 4.726  | 1.19E-10 | chr:6:32648036 |
| 6 rs9274752   | 32638163 T | 0.2753 | 1.19E-10 | chr:6:32648036 |
| 6 rs531642165 | 32472248 A | 4.484  | 1.20E-10 | chr:6:32648036 |
| 6 rs561310579 | 32472247 T | 4.484  | 1.20E-10 | chr:6:32648036 |
| 6 rs182395040 | 32369855 G | 4.879  | 1.23E-10 | chr:6:32648036 |
| 6 rs559971621 | 32369857 T | 4.879  | 1.23E-10 | chr:6:32648036 |
| 6 rs9275199   | 32656680 C | 0.2771 | 1.23E-10 | chr:6:32648036 |

|               |            |        |          |                |
|---------------|------------|--------|----------|----------------|
| 6 rs9275162   | 32652687 T | 0.2761 | 1.24E-10 | chr:6:32648036 |
| 6 rs13207945  | 32579708 C | 2.647  | 1.25E-10 | chr:6:32648036 |
| 6 rs9274562   | 32635000 A | 0.391  | 1.27E-10 | chr:6:32648036 |
| 6 rs9270796   | 32569293 G | 2.55   | 1.28E-10 | chr:6:32648036 |
| 6 rs9271344   | 32583328 C | 0.2918 | 1.29E-10 | chr:6:32648036 |
| 6 rs9275143   | 32651192 A | 0.281  | 1.32E-10 | chr:6:32648036 |
| 6 rs9276416   | 32710704 A | 3.026  | 1.32E-10 | chr:6:32648036 |
| 6 rs117255185 | 32369897 A | 4.959  | 1.33E-10 | chr:6:32648036 |
| 6 rs117724227 | 32369900 A | 4.959  | 1.33E-10 | chr:6:32648036 |
| 6 rs12523808  | 32579775 T | 2.642  | 1.35E-10 | chr:6:32648036 |
| 6 rs13208027  | 32579743 A | 2.642  | 1.35E-10 | chr:6:32648036 |
| 6 rs9270782   | 32569119 A | 2.489  | 1.36E-10 | chr:6:32648036 |
| 6 rs67410451  | 32533352 A | 2.059  | 1.41E-10 | chr:6:32648036 |
| 6 rs9274720   | 32637479 G | 0.3601 | 1.41E-10 | chr:6:32648036 |
| 6 rs71536584  | 32533116 C | 2.057  | 1.42E-10 | chr:6:32648036 |
| 6 rs2856676   | 32656833 G | 0.2775 | 1.43E-10 | chr:6:32648036 |
| 6 rs115276762 | 32674178 T | 7.785  | 1.43E-10 | chr:6:32648036 |
| 6 rs115911154 | 32674194 G | 7.785  | 1.43E-10 | chr:6:32648036 |
| 6 rs117296796 | 32674192 G | 7.785  | 1.43E-10 | chr:6:32648036 |
| 6 rs149005483 | 32674166 T | 7.785  | 1.43E-10 | chr:6:32648036 |
| 6 rs117759262 | 32365369 C | 4.653  | 1.45E-10 | chr:6:32648036 |
| 6 rs118039543 | 32365359 C | 4.653  | 1.45E-10 | chr:6:32648036 |
| 6 rs118128111 | 32613112 C | 4.505  | 1.45E-10 | chr:6:32648036 |
| 6 rs2213568   | 32711576 A | 3.056  | 1.47E-10 | chr:6:32648036 |
| 6 rs9275146   | 32651495 G | 0.28   | 1.48E-10 | chr:6:32648036 |
| 6 rs117347363 | 32366634 A | 4.59   | 1.52E-10 | chr:6:32648036 |
| 6 rs117809639 | 32366616 G | 4.59   | 1.52E-10 | chr:6:32648036 |
| 6 rs680151    | 32571166 A | 2.492  | 1.52E-10 | chr:6:32648036 |
| 6 rs9274848   | 32640149 C | 0.3303 | 1.63E-10 | chr:6:32648036 |
| 6 rs9274849   | 32640157 A | 0.3303 | 1.63E-10 | chr:6:32648036 |
| 6 rs60715171  | 32370112 A | 4.633  | 1.64E-10 | chr:6:32648036 |
| 6 rs116748457 | 32514768 G | 0.3797 | 1.64E-10 | chr:6:32648036 |
| 6 rs536824094 | 32370525 A | 4.734  | 1.64E-10 | chr:6:32648036 |
| 6 rs558645013 | 32370526 T | 4.734  | 1.64E-10 | chr:6:32648036 |
| 6 rs565880562 | 32370520 T | 4.734  | 1.64E-10 | chr:6:32648036 |
| 6 rs569514755 | 32370524 A | 4.734  | 1.64E-10 | chr:6:32648036 |
| 6 rs17205970  | 32651923 C | 5.636  | 1.66E-10 | chr:6:32648036 |
| 6 rs35855915  | 32532691 G | 2.056  | 1.67E-10 | chr:6:32648036 |
| 6 rs9274843   | 32640096 A | 0.2901 | 1.70E-10 | chr:6:32648036 |
| 6 rs3828811   | 32636221 T | 0.3122 | 1.70E-10 | chr:6:32648036 |
| 6 rs2856693   | 32653283 C | 0.2765 | 1.73E-10 | chr:6:32648036 |
| 6 rs117944320 | 32370489 A | 4.611  | 1.75E-10 | chr:6:32648036 |
| 6 rs113688645 | 32621088 T | 2.63   | 1.83E-10 | chr:6:32648036 |

|               |            |        |          |                |
|---------------|------------|--------|----------|----------------|
| 6 rs531329164 | 32496942 C | 4.79   | 1.83E-10 | chr:6:32648036 |
| 6 rs13191862  | 32579653 G | 2.596  | 1.84E-10 | chr:6:32648036 |
| 6 rs13191975  | 32579671 T | 2.596  | 1.84E-10 | chr:6:32648036 |
| 6 rs28752509  | 32579623 T | 2.596  | 1.84E-10 | chr:6:32648036 |
| 6 rs28752510  | 32579626 A | 2.596  | 1.84E-10 | chr:6:32648036 |
| 6 rs9274551   | 32634834 C | 0.3885 | 1.87E-10 | chr:6:32648036 |
| 6 rs117904727 | 32365406 A | 4.591  | 1.87E-10 | chr:6:32648036 |
| 6 rs2858863   | 32578278 T | 0.2798 | 1.88E-10 | chr:6:32648036 |
| 6 rs9274792   | 32639224 A | 0.2907 | 1.88E-10 | chr:6:32648036 |
| 6 rs117091492 | 32366681 T | 4.53   | 1.89E-10 | chr:6:32648036 |
| 6 rs117476307 | 32366682 G | 4.53   | 1.89E-10 | chr:6:32648036 |
| 6 rs117723432 | 32366666 G | 4.53   | 1.89E-10 | chr:6:32648036 |
| 6 rs117993693 | 32369943 G | 4.783  | 1.89E-10 | chr:6:32648036 |
| 6 rs61003922  | 32369951 T | 4.783  | 1.89E-10 | chr:6:32648036 |
| 6 rs117010275 | 32367077 T | 4.585  | 1.91E-10 | chr:6:32648036 |
| 6 rs117391429 | 32367046 A | 4.585  | 1.91E-10 | chr:6:32648036 |
| 6 rs117646657 | 32367051 G | 4.585  | 1.91E-10 | chr:6:32648036 |
| 6 rs28891458  | 32641963 T | 0.3686 | 1.95E-10 | chr:6:32648036 |
| 6 rs9275136   | 32650757 C | 0.2778 | 1.96E-10 | chr:6:32648036 |
| 6 rs9269560   | 32544371 C | 0.3532 | 1.97E-10 | chr:6:32648036 |
| 6 rs190367303 | 32368757 T | 4.58   | 1.97E-10 | chr:6:32648036 |
| 6 rs191553433 | 32368713 C | 4.58   | 1.97E-10 | chr:6:32648036 |
| 6 rs9275202   | 32656869 A | 0.2785 | 1.98E-10 | chr:6:32648036 |
| 6 rs78846394  | 32612096 G | 4.587  | 1.98E-10 | chr:6:32648036 |
| 6 rs35074855  | 32561140 G | 5.087  | 2.00E-10 | chr:6:32648036 |
| 6 rs73729452  | 32632547 C | 2.492  | 2.03E-10 | chr:6:32648036 |
| 6 rs9274834   | 32639895 A | 0.2763 | 2.04E-10 | chr:6:32648036 |
| 6 rs9275089   | 32648947 A | 0.2794 | 2.05E-10 | chr:6:32648036 |
| 6 rs9275091   | 32648972 C | 0.2795 | 2.08E-10 | chr:6:32648036 |
| 6 rs9274883   | 32641072 C | 0.4587 | 2.09E-10 | chr:6:32648036 |
| 6 rs9274561   | 32634953 A | 0.3607 | 2.15E-10 | chr:6:32648036 |
| 6 rs9274853   | 32640420 G | 0.277  | 2.15E-10 | chr:6:32648036 |
| 6 rs9274759   | 32638315 G | 0.2778 | 2.17E-10 | chr:6:32648036 |
| 6 rs111937677 | 32639316 A | 0.3237 | 2.22E-10 | chr:6:32648036 |
| 6 rs116852190 | 32354341 C | 4.57   | 2.22E-10 | chr:6:32648036 |
| 6 rs116889006 | 32361643 A | 4.57   | 2.22E-10 | chr:6:32648036 |
| 6 rs116938180 | 32359331 C | 4.57   | 2.22E-10 | chr:6:32648036 |
| 6 rs116978097 | 32341516 A | 4.57   | 2.22E-10 | chr:6:32648036 |
| 6 rs117030612 | 32358900 C | 4.57   | 2.22E-10 | chr:6:32648036 |
| 6 rs117035198 | 32354531 A | 4.57   | 2.22E-10 | chr:6:32648036 |
| 6 rs117130854 | 32358432 A | 4.57   | 2.22E-10 | chr:6:32648036 |
| 6 rs117186978 | 32360440 A | 4.57   | 2.22E-10 | chr:6:32648036 |
| 6 rs117227499 | 32360472 A | 4.57   | 2.22E-10 | chr:6:32648036 |

|               |            |        |          |                |
|---------------|------------|--------|----------|----------------|
| 6 rs117384660 | 32358202 A | 4.57   | 2.22E-10 | chr:6:32648036 |
| 6 rs117430867 | 32341576 T | 4.57   | 2.22E-10 | chr:6:32648036 |
| 6 rs117439800 | 32355803 A | 4.57   | 2.22E-10 | chr:6:32648036 |
| 6 rs117520702 | 32357411 G | 4.57   | 2.22E-10 | chr:6:32648036 |
| 6 rs117680060 | 32358956 A | 4.57   | 2.22E-10 | chr:6:32648036 |
| 6 rs117691618 | 32359300 G | 4.57   | 2.22E-10 | chr:6:32648036 |
| 6 rs117727445 | 32355745 G | 4.57   | 2.22E-10 | chr:6:32648036 |
| 6 rs117768448 | 32349113 G | 4.57   | 2.22E-10 | chr:6:32648036 |
| 6 rs117785658 | 32360363 C | 4.57   | 2.22E-10 | chr:6:32648036 |
| 6 rs117808141 | 32360464 G | 4.57   | 2.22E-10 | chr:6:32648036 |
| 6 rs117859037 | 32355536 C | 4.57   | 2.22E-10 | chr:6:32648036 |
| 6 rs117886263 | 32358666 G | 4.57   | 2.22E-10 | chr:6:32648036 |
| 6 rs117896888 | 32361799 G | 4.57   | 2.22E-10 | chr:6:32648036 |
| 6 rs117898181 | 32355792 T | 4.57   | 2.22E-10 | chr:6:32648036 |
| 6 rs118024439 | 32361865 T | 4.57   | 2.22E-10 | chr:6:32648036 |
| 6 rs118106811 | 32356721 G | 4.57   | 2.22E-10 | chr:6:32648036 |
| 6 rs118116852 | 32360877 T | 4.57   | 2.22E-10 | chr:6:32648036 |
| 6 rs142132506 | 32353945 G | 4.57   | 2.22E-10 | chr:6:32648036 |
| 6 rs144989669 | 32352251 G | 4.57   | 2.22E-10 | chr:6:32648036 |
| 6 rs145149424 | 32359459 C | 4.57   | 2.22E-10 | chr:6:32648036 |
| 6 rs147532464 | 32356648 T | 4.57   | 2.22E-10 | chr:6:32648036 |
| 6 rs373488544 | 32352172 T | 4.57   | 2.22E-10 | chr:6:32648036 |
| 6 rs3817968   | 32361450 G | 4.57   | 2.22E-10 | chr:6:32648036 |
| 6 rs3817970   | 32361239 T | 4.57   | 2.22E-10 | chr:6:32648036 |
| 6 rs3817971   | 32361133 G | 4.57   | 2.22E-10 | chr:6:32648036 |
| 6 rs3817975   | 32361030 A | 4.57   | 2.22E-10 | chr:6:32648036 |
| 6 rs3817979   | 32360983 A | 4.57   | 2.22E-10 | chr:6:32648036 |
| 6 rs532834447 | 32355682 A | 4.57   | 2.22E-10 | chr:6:32648036 |
| 6 rs56921274  | 32356265 A | 4.57   | 2.22E-10 | chr:6:32648036 |
| 6 rs57652561  | 32358162 T | 4.57   | 2.22E-10 | chr:6:32648036 |
| 6 rs57964717  | 32357782 T | 4.57   | 2.22E-10 | chr:6:32648036 |
| 6 rs58528921  | 32354240 G | 4.57   | 2.22E-10 | chr:6:32648036 |
| 6 rs58821517  | 32355908 C | 4.57   | 2.22E-10 | chr:6:32648036 |
| 6 rs58898025  | 32357493 T | 4.57   | 2.22E-10 | chr:6:32648036 |
| 6 rs59101547  | 32357974 A | 4.57   | 2.22E-10 | chr:6:32648036 |
| 6 rs60440756  | 32356019 T | 4.57   | 2.22E-10 | chr:6:32648036 |
| 6 rs116887861 | 32365688 T | 4.608  | 2.24E-10 | chr:6:32648036 |
| 6 rs71536561  | 32529179 C | 0.4836 | 2.26E-10 | chr:6:32648036 |
| 6 rs9274878   | 32640889 C | 0.3906 | 2.27E-10 | chr:6:32648036 |
| 6 rs9274764   | 32638490 A | 0.2772 | 2.28E-10 | chr:6:32648036 |
| 6 rs34105415  | 32532251 A | 0.4934 | 2.30E-10 | chr:6:32648036 |
| 6 rs36054655  | 32532260 G | 0.4934 | 2.30E-10 | chr:6:32648036 |
| 6 rs9275141   | 32651117 T | 0.2753 | 2.32E-10 | chr:6:32648036 |



|               |            |        |          |                |
|---------------|------------|--------|----------|----------------|
| 6 rs117592521 | 32365634 T | 4.579  | 2.33E-10 | chr:6:32648036 |
| 6 rs117945116 | 32365632 A | 4.579  | 2.33E-10 | chr:6:32648036 |
| 6 rs117020290 | 32364911 A | 4.439  | 2.33E-10 | chr:6:32648036 |
| 6 rs117231246 | 32365016 C | 4.439  | 2.33E-10 | chr:6:32648036 |
| 6 rs117308502 | 32364964 G | 4.439  | 2.33E-10 | chr:6:32648036 |
| 6 rs117093661 | 32369909 G | 4.79   | 2.37E-10 | chr:6:32648036 |
| 6 rs9275139   | 32651005 C | 0.275  | 2.38E-10 | chr:6:32648036 |
| 6 rs9274760   | 32638348 A | 0.2769 | 2.40E-10 | chr:6:32648036 |
| 6 rs41547417  | 32609874 G | 4.194  | 2.40E-10 | chr:6:32648036 |
| 6 rs139940358 | 32579444 A | 2.549  | 2.43E-10 | chr:6:32648036 |
| 6 rs9275123   | 32650256 G | 0.2697 | 2.43E-10 | chr:6:32648036 |
| 6 rs9275125   | 32650293 A | 0.2697 | 2.43E-10 | chr:6:32648036 |
| 6 rs9275126   | 32650307 A | 0.2697 | 2.43E-10 | chr:6:32648036 |
| 6 rs112103446 | 32522679 C | 0.2696 | 2.44E-10 | chr:6:32648036 |
| 6 rs2858329   | 32658801 A | 0.278  | 2.49E-10 | chr:6:32648036 |
| 6 rs1049086   | 32629904 A | 0.312  | 2.49E-10 | chr:6:32648036 |
| 6 rs1049092   | 32629802 A | 0.312  | 2.49E-10 | chr:6:32648036 |
| 6 rs9274763   | 32638427 A | 0.2766 | 2.50E-10 | chr:6:32648036 |
| 6 rs118150546 | 32366735 C | 4.453  | 2.52E-10 | chr:6:32648036 |
| 6 rs375838344 | 32364718 T | 4.453  | 2.52E-10 | chr:6:32648036 |
| 6 rs117252011 | 32364322 T | 4.602  | 2.54E-10 | chr:6:32648036 |
| 6 rs118128590 | 32364336 T | 4.602  | 2.54E-10 | chr:6:32648036 |
| 6 rs9274510   | 32634184 A | 0.3475 | 2.54E-10 | chr:6:32648036 |
| 6 rs67455807  | 32530881 A | 2.021  | 2.59E-10 | chr:6:32648036 |
| 6 rs9275088   | 32648931 T | 0.2795 | 2.62E-10 | chr:6:32648036 |
| 6 rs9274771   | 32638581 T | 0.2869 | 2.63E-10 | chr:6:32648036 |
| 6 rs9274772   | 32638583 A | 0.2869 | 2.63E-10 | chr:6:32648036 |
| 6 rs117238912 | 32365666 A | 4.568  | 2.64E-10 | chr:6:32648036 |
| 6 rs62404124  | 32616074 A | 2.472  | 2.66E-10 | chr:6:32648036 |
| 6 rs35371668  | 32561638 T | 4.546  | 2.67E-10 | chr:6:32648036 |
| 6 rs77052117  | 32533886 G | 0.4953 | 2.68E-10 | chr:6:32648036 |
| 6 rs111903208 | 32661432 G | 7.272  | 2.73E-10 | chr:6:32648036 |
| 6 rs112032264 | 32660115 C | 7.272  | 2.73E-10 | chr:6:32648036 |
| 6 rs112117693 | 32662754 T | 7.272  | 2.73E-10 | chr:6:32648036 |
| 6 rs112317305 | 32667199 C | 7.272  | 2.73E-10 | chr:6:32648036 |
| 6 rs112466823 | 32660104 T | 7.272  | 2.73E-10 | chr:6:32648036 |
| 6 rs112535219 | 32662613 T | 7.272  | 2.73E-10 | chr:6:32648036 |
| 6 rs112574398 | 32658610 T | 7.272  | 2.73E-10 | chr:6:32648036 |
| 6 rs112608098 | 32665270 A | 7.272  | 2.73E-10 | chr:6:32648036 |
| 6 rs112670480 | 32661440 T | 7.272  | 2.73E-10 | chr:6:32648036 |
| 6 rs113138578 | 32661335 G | 7.272  | 2.73E-10 | chr:6:32648036 |
| 6 rs113194380 | 32671391 T | 7.272  | 2.73E-10 | chr:6:32648036 |
| 6 rs113666293 | 32656477 C | 7.272  | 2.73E-10 | chr:6:32648036 |

|               |            |        |          |                |
|---------------|------------|--------|----------|----------------|
| 6 rs113773636 | 32673719 G | 7.272  | 2.73E-10 | chr:6:32648036 |
| 6 rs114218404 | 32664119 T | 7.272  | 2.73E-10 | chr:6:32648036 |
| 6 rs114325417 | 32666222 A | 7.272  | 2.73E-10 | chr:6:32648036 |
| 6 rs114744294 | 32660866 G | 7.272  | 2.73E-10 | chr:6:32648036 |
| 6 rs114801596 | 32663093 G | 7.272  | 2.73E-10 | chr:6:32648036 |
| 6 rs114996593 | 32658360 C | 7.272  | 2.73E-10 | chr:6:32648036 |
| 6 rs115262684 | 32666235 A | 7.272  | 2.73E-10 | chr:6:32648036 |
| 6 rs115577932 | 32663819 T | 7.272  | 2.73E-10 | chr:6:32648036 |
| 6 rs115777056 | 32664154 A | 7.272  | 2.73E-10 | chr:6:32648036 |
| 6 rs115842332 | 32666213 A | 7.272  | 2.73E-10 | chr:6:32648036 |
| 6 rs116147199 | 32658355 G | 7.272  | 2.73E-10 | chr:6:32648036 |
| 6 rs116459302 | 32666559 T | 7.272  | 2.73E-10 | chr:6:32648036 |
| 6 rs12525220  | 32675470 A | 7.272  | 2.73E-10 | chr:6:32648036 |
| 6 rs138256019 | 32673055 A | 7.272  | 2.73E-10 | chr:6:32648036 |
| 6 rs141345764 | 32673811 T | 7.272  | 2.73E-10 | chr:6:32648036 |
| 6 rs141748883 | 32663156 C | 7.272  | 2.73E-10 | chr:6:32648036 |
| 6 rs143607013 | 32658807 T | 7.272  | 2.73E-10 | chr:6:32648036 |
| 6 rs143895212 | 32673761 T | 7.272  | 2.73E-10 | chr:6:32648036 |
| 6 rs145250786 | 32658793 A | 7.272  | 2.73E-10 | chr:6:32648036 |
| 6 rs146797694 | 32658866 T | 7.272  | 2.73E-10 | chr:6:32648036 |
| 6 rs149999552 | 32658763 C | 7.272  | 2.73E-10 | chr:6:32648036 |
| 6 rs1694113   | 32650101 A | 7.272  | 2.73E-10 | chr:6:32648036 |
| 6 rs184950714 | 32636728 A | 7.272  | 2.73E-10 | chr:6:32648036 |
| 6 rs199923808 | 32663798 G | 7.272  | 2.73E-10 | chr:6:32648036 |
| 6 rs36030018  | 32667964 C | 7.272  | 2.73E-10 | chr:6:32648036 |
| 6 rs4713586   | 32659582 G | 7.272  | 2.73E-10 | chr:6:32648036 |
| 6 rs74756176  | 32664373 T | 7.272  | 2.73E-10 | chr:6:32648036 |
| 6 rs77329518  | 32637136 T | 7.272  | 2.73E-10 | chr:6:32648036 |
| 6 rs77537414  | 32664356 C | 7.272  | 2.73E-10 | chr:6:32648036 |
| 6 rs7754496   | 32657893 T | 7.272  | 2.73E-10 | chr:6:32648036 |
| 6 rs7775055   | 32657916 C | 7.272  | 2.73E-10 | chr:6:32648036 |
| 6 rs79951097  | 32662954 C | 7.272  | 2.73E-10 | chr:6:32648036 |
| 6 rs3828802   | 32636073 G | 0.3655 | 2.74E-10 | chr:6:32648036 |
| 6 rs28891422  | 32640936 C | 0.3526 | 2.74E-10 | chr:6:32648036 |
| 6 rs9274865   | 32640671 C | 0.3005 | 2.74E-10 | chr:6:32648036 |
| 6 rs9274769   | 32638547 T | 0.2899 | 2.75E-10 | chr:6:32648036 |
| 6 rs67387464  | 32530892 C | 2.023  | 2.76E-10 | chr:6:32648036 |
| 6 rs9274805   | 32639429 G | 0.3252 | 2.76E-10 | chr:6:32648036 |
| 6 rs116846438 | 32365658 A | 4.603  | 2.76E-10 | chr:6:32648036 |
| 6 rs182203129 | 32359699 T | 4.58   | 2.78E-10 | chr:6:32648036 |
| 6 rs187703080 | 32359700 G | 4.58   | 2.78E-10 | chr:6:32648036 |
| 6 rs9269561   | 32544405 G | 0.3606 | 2.79E-10 | chr:6:32648036 |
| 6 rs117592139 | 32357059 A | 4.572  | 2.87E-10 | chr:6:32648036 |

|               |            |        |          |                |
|---------------|------------|--------|----------|----------------|
| 6 rs71536590  | 32533587 A | 2.029  | 2.88E-10 | chr:6:32648036 |
| 6 rs112453089 | 32639270 T | 0.3003 | 2.89E-10 | chr:6:32648036 |
| 6 rs9274794   | 32639264 T | 0.3003 | 2.89E-10 | chr:6:32648036 |
| 6 rs141487324 | 32632159 A | 2.115  | 2.89E-10 | chr:6:32648036 |
| 6 rs2856684   | 32655095 T | 0.2766 | 2.97E-10 | chr:6:32648036 |
| 6 rs9274846   | 32640142 C | 0.3406 | 3.00E-10 | chr:6:32648036 |
| 6 rs9273509   | 32628473 T | 0.3487 | 3.06E-10 | chr:6:32648036 |
| 6 rs9273510   | 32628474 G | 0.3487 | 3.06E-10 | chr:6:32648036 |
| 6 rs9268489   | 32368709 T | 4.509  | 3.07E-10 | chr:6:32648036 |
| 6 rs2856685   | 32655072 A | 0.276  | 3.07E-10 | chr:6:32648036 |
| 6 rs9270739   | 32568150 C | 2.461  | 3.08E-10 | chr:6:32648036 |
| 6 rs9275103   | 32649386 T | 0.2753 | 3.09E-10 | chr:6:32648036 |
| 6 rs9275105   | 32649416 C | 0.2753 | 3.09E-10 | chr:6:32648036 |
| 6 rs9275106   | 32649475 T | 0.2753 | 3.09E-10 | chr:6:32648036 |
| 6 rs28809558  | 32529190 A | 0.4907 | 3.11E-10 | chr:6:32648036 |
| 6 rs3021058   | 32652359 A | 0.2753 | 3.20E-10 | chr:6:32648036 |
| 6 rs73731412  | 32454215 G | 0.2552 | 3.25E-10 | chr:6:32648036 |
| 6 rs115653843 | 32366132 A | 4.46   | 3.27E-10 | chr:6:32648036 |
| 6 rs116191755 | 32369554 A | 4.46   | 3.27E-10 | chr:6:32648036 |
| 6 rs116307898 | 32366097 A | 4.46   | 3.27E-10 | chr:6:32648036 |
| 6 rs116881236 | 32363084 T | 4.46   | 3.27E-10 | chr:6:32648036 |
| 6 rs116884947 | 32369238 G | 4.46   | 3.27E-10 | chr:6:32648036 |
| 6 rs116895751 | 32366039 A | 4.46   | 3.27E-10 | chr:6:32648036 |
| 6 rs116897665 | 32363493 C | 4.46   | 3.27E-10 | chr:6:32648036 |
| 6 rs116923699 | 32369293 G | 4.46   | 3.27E-10 | chr:6:32648036 |
| 6 rs116925866 | 32364305 C | 4.46   | 3.27E-10 | chr:6:32648036 |
| 6 rs116963671 | 32367971 A | 4.46   | 3.27E-10 | chr:6:32648036 |
| 6 rs117023168 | 32369381 A | 4.46   | 3.27E-10 | chr:6:32648036 |
| 6 rs117052861 | 32373903 C | 4.46   | 3.27E-10 | chr:6:32648036 |
| 6 rs117054202 | 32365748 C | 4.46   | 3.27E-10 | chr:6:32648036 |
| 6 rs117057492 | 32366556 T | 4.46   | 3.27E-10 | chr:6:32648036 |
| 6 rs117065092 | 32369454 A | 4.46   | 3.27E-10 | chr:6:32648036 |
| 6 rs117080666 | 32369596 G | 4.46   | 3.27E-10 | chr:6:32648036 |
| 6 rs117084565 | 32369517 A | 4.46   | 3.27E-10 | chr:6:32648036 |
| 6 rs117099966 | 32365791 G | 4.46   | 3.27E-10 | chr:6:32648036 |
| 6 rs117103338 | 32369034 G | 4.46   | 3.27E-10 | chr:6:32648036 |
| 6 rs117142044 | 32363351 A | 4.46   | 3.27E-10 | chr:6:32648036 |
| 6 rs117143243 | 32369096 C | 4.46   | 3.27E-10 | chr:6:32648036 |
| 6 rs117154887 | 32369249 T | 4.46   | 3.27E-10 | chr:6:32648036 |
| 6 rs117164228 | 32366070 T | 4.46   | 3.27E-10 | chr:6:32648036 |
| 6 rs117211596 | 32374185 A | 4.46   | 3.27E-10 | chr:6:32648036 |
| 6 rs117217900 | 32365532 C | 4.46   | 3.27E-10 | chr:6:32648036 |
| 6 rs117239388 | 32362967 G | 4.46   | 3.27E-10 | chr:6:32648036 |

|               |            |      |                         |
|---------------|------------|------|-------------------------|
| 6 rs117252344 | 32373866 T | 4.46 | 3.27E-10 chr:6:32648036 |
| 6 rs117252593 | 32369312 C | 4.46 | 3.27E-10 chr:6:32648036 |
| 6 rs117256614 | 32366919 T | 4.46 | 3.27E-10 chr:6:32648036 |
| 6 rs117265450 | 32368134 C | 4.46 | 3.27E-10 chr:6:32648036 |
| 6 rs117293816 | 32366342 T | 4.46 | 3.27E-10 chr:6:32648036 |
| 6 rs117298487 | 32366932 A | 4.46 | 3.27E-10 chr:6:32648036 |
| 6 rs117303587 | 32363772 T | 4.46 | 3.27E-10 chr:6:32648036 |
| 6 rs117330957 | 32366488 G | 4.46 | 3.27E-10 chr:6:32648036 |
| 6 rs117335044 | 32370559 A | 4.46 | 3.27E-10 chr:6:32648036 |
| 6 rs117335692 | 32369428 G | 4.46 | 3.27E-10 chr:6:32648036 |
| 6 rs117345995 | 32364285 G | 4.46 | 3.27E-10 chr:6:32648036 |
| 6 rs117346624 | 32373904 A | 4.46 | 3.27E-10 chr:6:32648036 |
| 6 rs117378124 | 32368355 A | 4.46 | 3.27E-10 chr:6:32648036 |
| 6 rs117381344 | 32363186 T | 4.46 | 3.27E-10 chr:6:32648036 |
| 6 rs117417231 | 32363219 G | 4.46 | 3.27E-10 chr:6:32648036 |
| 6 rs117418067 | 32367102 T | 4.46 | 3.27E-10 chr:6:32648036 |
| 6 rs117420133 | 32369037 G | 4.46 | 3.27E-10 chr:6:32648036 |
| 6 rs117439470 | 32369258 C | 4.46 | 3.27E-10 chr:6:32648036 |
| 6 rs117479358 | 32362920 T | 4.46 | 3.27E-10 chr:6:32648036 |
| 6 rs117501081 | 32369466 C | 4.46 | 3.27E-10 chr:6:32648036 |
| 6 rs117510940 | 32365491 T | 4.46 | 3.27E-10 chr:6:32648036 |
| 6 rs117524241 | 32363491 C | 4.46 | 3.27E-10 chr:6:32648036 |
| 6 rs117572918 | 32371253 C | 4.46 | 3.27E-10 chr:6:32648036 |
| 6 rs117618533 | 32373907 T | 4.46 | 3.27E-10 chr:6:32648036 |
| 6 rs117623763 | 32368016 A | 4.46 | 3.27E-10 chr:6:32648036 |
| 6 rs117624432 | 32365202 C | 4.46 | 3.27E-10 chr:6:32648036 |
| 6 rs117627382 | 32369173 A | 4.46 | 3.27E-10 chr:6:32648036 |
| 6 rs117633741 | 32363017 A | 4.46 | 3.27E-10 chr:6:32648036 |
| 6 rs117674164 | 32363147 T | 4.46 | 3.27E-10 chr:6:32648036 |
| 6 rs117674475 | 32369439 A | 4.46 | 3.27E-10 chr:6:32648036 |
| 6 rs117709429 | 32365785 T | 4.46 | 3.27E-10 chr:6:32648036 |
| 6 rs117716818 | 32366182 T | 4.46 | 3.27E-10 chr:6:32648036 |
| 6 rs117722422 | 32363212 T | 4.46 | 3.27E-10 chr:6:32648036 |
| 6 rs117726997 | 32366924 T | 4.46 | 3.27E-10 chr:6:32648036 |
| 6 rs117778565 | 32363391 A | 4.46 | 3.27E-10 chr:6:32648036 |
| 6 rs117802793 | 32365503 C | 4.46 | 3.27E-10 chr:6:32648036 |
| 6 rs117835212 | 32363256 A | 4.46 | 3.27E-10 chr:6:32648036 |
| 6 rs117870843 | 32364273 A | 4.46 | 3.27E-10 chr:6:32648036 |
| 6 rs117882890 | 32363558 T | 4.46 | 3.27E-10 chr:6:32648036 |
| 6 rs117919482 | 32368352 A | 4.46 | 3.27E-10 chr:6:32648036 |
| 6 rs117936850 | 32366925 G | 4.46 | 3.27E-10 chr:6:32648036 |
| 6 rs117956179 | 32374135 G | 4.46 | 3.27E-10 chr:6:32648036 |
| 6 rs117958394 | 32369681 A | 4.46 | 3.27E-10 chr:6:32648036 |

|               |            |        |                         |
|---------------|------------|--------|-------------------------|
| 6 rs117960900 | 32363448 C | 4.46   | 3.27E-10 chr:6:32648036 |
| 6 rs117983449 | 32366141 G | 4.46   | 3.27E-10 chr:6:32648036 |
| 6 rs117998183 | 32369336 T | 4.46   | 3.27E-10 chr:6:32648036 |
| 6 rs118010815 | 32373774 A | 4.46   | 3.27E-10 chr:6:32648036 |
| 6 rs118011756 | 32363100 G | 4.46   | 3.27E-10 chr:6:32648036 |
| 6 rs118023064 | 32365752 G | 4.46   | 3.27E-10 chr:6:32648036 |
| 6 rs118024289 | 32366569 G | 4.46   | 3.27E-10 chr:6:32648036 |
| 6 rs118046932 | 32374105 C | 4.46   | 3.27E-10 chr:6:32648036 |
| 6 rs118050003 | 32369123 T | 4.46   | 3.27E-10 chr:6:32648036 |
| 6 rs118050525 | 32363387 C | 4.46   | 3.27E-10 chr:6:32648036 |
| 6 rs118075267 | 32365564 A | 4.46   | 3.27E-10 chr:6:32648036 |
| 6 rs118085989 | 32369316 G | 4.46   | 3.27E-10 chr:6:32648036 |
| 6 rs118106395 | 32366022 T | 4.46   | 3.27E-10 chr:6:32648036 |
| 6 rs118112404 | 32370603 A | 4.46   | 3.27E-10 chr:6:32648036 |
| 6 rs118113452 | 32365720 A | 4.46   | 3.27E-10 chr:6:32648036 |
| 6 rs118131405 | 32363649 A | 4.46   | 3.27E-10 chr:6:32648036 |
| 6 rs118143002 | 32367009 A | 4.46   | 3.27E-10 chr:6:32648036 |
| 6 rs118154479 | 32365955 T | 4.46   | 3.27E-10 chr:6:32648036 |
| 6 rs184119986 | 32369139 G | 4.46   | 3.27E-10 chr:6:32648036 |
| 6 rs191295850 | 32369594 G | 4.46   | 3.27E-10 chr:6:32648036 |
| 6 rs191921237 | 32369138 A | 4.46   | 3.27E-10 chr:6:32648036 |
| 6 rs2076526   | 32364286 A | 4.46   | 3.27E-10 chr:6:32648036 |
| 6 rs2076527   | 32364214 C | 4.46   | 3.27E-10 chr:6:32648036 |
| 6 rs2076531   | 32363712 G | 4.46   | 3.27E-10 chr:6:32648036 |
| 6 rs28362675  | 32362521 A | 4.46   | 3.27E-10 chr:6:32648036 |
| 6 rs34423804  | 32364046 A | 4.46   | 3.27E-10 chr:6:32648036 |
| 6 rs41333546  | 32364057 T | 4.46   | 3.27E-10 chr:6:32648036 |
| 6 rs41343746  | 32363790 G | 4.46   | 3.27E-10 chr:6:32648036 |
| 6 rs41355746  | 32364052 T | 4.46   | 3.27E-10 chr:6:32648036 |
| 6 rs41392447  | 32363973 T | 4.46   | 3.27E-10 chr:6:32648036 |
| 6 rs41398448  | 32363786 A | 4.46   | 3.27E-10 chr:6:32648036 |
| 6 rs41417449  | 32364011 C | 4.46   | 3.27E-10 chr:6:32648036 |
| 6 rs41441651  | 32363888 T | 4.46   | 3.27E-10 chr:6:32648036 |
| 6 rs58237152  | 32370433 G | 4.46   | 3.27E-10 chr:6:32648036 |
| 6 rs59506838  | 32370318 G | 4.46   | 3.27E-10 chr:6:32648036 |
| 6 rs59526486  | 32380322 G | 4.46   | 3.27E-10 chr:6:32648036 |
| 6 rs61176680  | 32370435 C | 4.46   | 3.27E-10 chr:6:32648036 |
| 6 rs61496633  | 32370371 G | 4.46   | 3.27E-10 chr:6:32648036 |
| 6 rs75415018  | 32370860 A | 4.46   | 3.27E-10 chr:6:32648036 |
| 6 rs76868526  | 32362785 A | 4.46   | 3.27E-10 chr:6:32648036 |
| 6 rs78587369  | 32370927 A | 4.46   | 3.27E-10 chr:6:32648036 |
| 6 rs9270781   | 32569111 G | 0.3558 | 3.34E-10 chr:6:32648036 |
| 6 rs9274806   | 32639441 A | 0.3255 | 3.37E-10 chr:6:32648036 |

|               |            |        |          |                |
|---------------|------------|--------|----------|----------------|
| 6 rs199884023 | 32639449 G | 0.3253 | 3.39E-10 | chr:6:32648036 |
| 6 rs9274857   | 32640542 C | 0.3418 | 3.39E-10 | chr:6:32648036 |
| 6 rs527466850 | 32368771 G | 3.16   | 3.41E-10 | chr:6:32648036 |
| 6 rs566701406 | 32368767 T | 3.16   | 3.41E-10 | chr:6:32648036 |
| 6 rs542882860 | 32670178 C | 3.216  | 3.46E-10 | chr:6:32648036 |
| 6 rs572418566 | 32670172 C | 3.216  | 3.46E-10 | chr:6:32648036 |
| 6 rs2856686   | 32654869 T | 0.2751 | 3.47E-10 | chr:6:32648036 |
| 6 rs113374318 | 32639415 G | 0.3259 | 3.60E-10 | chr:6:32648036 |
| 6 rs9273584   | 32629064 A | 0.4605 | 3.61E-10 | chr:6:32648036 |
| 6 rs9275135   | 32650736 T | 0.2764 | 3.61E-10 | chr:6:32648036 |
| 6 rs9275145   | 32651363 C | 0.2758 | 3.64E-10 | chr:6:32648036 |
| 6 rs2647000   | 32656890 T | 0.2845 | 3.65E-10 | chr:6:32648036 |
| 6 rs9273479   | 32628093 T | 0.36   | 3.66E-10 | chr:6:32648036 |
| 6 rs79498062  | 32533785 G | 0.4982 | 3.68E-10 | chr:6:32648036 |
| 6 rs116991925 | 32364452 C | 4.508  | 3.69E-10 | chr:6:32648036 |
| 6 rs75150448  | 32620831 A | 2.686  | 3.70E-10 | chr:6:32648036 |
| 6 rs9275087   | 32648893 T | 0.2776 | 3.71E-10 | chr:6:32648036 |
| 6 rs2647092   | 32584440 T | 0.2888 | 3.71E-10 | chr:6:32648036 |
| 6 rs535773    | 32577641 T | 0.2888 | 3.71E-10 | chr:6:32648036 |
| 6 rs617058    | 32574479 T | 0.2888 | 3.71E-10 | chr:6:32648036 |
| 6 rs642093    | 32582075 A | 0.2888 | 3.71E-10 | chr:6:32648036 |
| 6 rs7760731   | 32583401 A | 0.2888 | 3.71E-10 | chr:6:32648036 |
| 6 rs9275119   | 32650031 G | 0.2826 | 3.71E-10 | chr:6:32648036 |
| 6 rs9275138   | 32650958 A | 0.2758 | 3.74E-10 | chr:6:32648036 |
| 6 rs9275101   | 32649355 G | 0.2755 | 3.75E-10 | chr:6:32648036 |
| 6 rs9275102   | 32649361 G | 0.2755 | 3.75E-10 | chr:6:32648036 |
| 6 rs9275130   | 32650409 T | 0.2755 | 3.88E-10 | chr:6:32648036 |
| 6 rs9269502   | 32543121 G | 0.3196 | 3.98E-10 | chr:6:32648036 |
| 6 rs558998942 | 32637290 G | 7.684  | 4.01E-10 | chr:6:32648036 |
| 6 rs3129860   | 32401079 A | 4.328  | 4.05E-10 | chr:6:32648036 |
| 6 rs3129865   | 32404048 G | 4.328  | 4.05E-10 | chr:6:32648036 |
| 6 rs3129868   | 32404377 A | 4.328  | 4.05E-10 | chr:6:32648036 |
| 6 rs3763323   | 32406843 C | 4.328  | 4.05E-10 | chr:6:32648036 |
| 6 rs9275086   | 32648809 A | 0.2778 | 4.06E-10 | chr:6:32648036 |
| 6 rs2856667   | 32665079 T | 0.2752 | 4.07E-10 | chr:6:32648036 |
| 6 rs4642516   | 32657543 G | 0.2752 | 4.07E-10 | chr:6:32648036 |
| 6 rs9275131   | 32650467 C | 0.2752 | 4.07E-10 | chr:6:32648036 |
| 6 rs9275133   | 32650588 A | 0.2752 | 4.07E-10 | chr:6:32648036 |
| 6 rs9270773   | 32568990 A | 2.387  | 4.10E-10 | chr:6:32648036 |
| 6 rs28371274  | 32674558 C | 6.619  | 4.20E-10 | chr:6:32648036 |
| 6 rs117632444 | 32365667 T | 4.506  | 4.21E-10 | chr:6:32648036 |
| 6 rs9275112   | 32649773 G | 0.2814 | 4.23E-10 | chr:6:32648036 |
| 6 rs10947261  | 32373232 T | 2.717  | 4.27E-10 | chr:6:32648036 |

|               |            |        |          |                |
|---------------|------------|--------|----------|----------------|
| 6 rs10947262  | 32373312 T | 2.717  | 4.27E-10 | chr:6:32648036 |
| 6 rs10947263  | 32373374 T | 2.717  | 4.27E-10 | chr:6:32648036 |
| 6 rs10947264  | 32373529 G | 2.717  | 4.27E-10 | chr:6:32648036 |
| 6 rs28362680  | 32370816 A | 2.717  | 4.27E-10 | chr:6:32648036 |
| 6 rs58110932  | 32371292 T | 2.717  | 4.27E-10 | chr:6:32648036 |
| 6 rs60234039  | 32371294 G | 2.717  | 4.27E-10 | chr:6:32648036 |
| 6 rs62404561  | 32370646 G | 2.717  | 4.27E-10 | chr:6:32648036 |
| 6 rs62404577  | 32374160 G | 2.717  | 4.27E-10 | chr:6:32648036 |
| 6 rs73400890  | 32374205 A | 2.717  | 4.27E-10 | chr:6:32648036 |
| 6 rs77331864  | 32374191 A | 2.717  | 4.27E-10 | chr:6:32648036 |
| 6 rs9275013   | 32643011 T | 0.3679 | 4.27E-10 | chr:6:32648036 |
| 6 rs535051941 | 32635364 T | 0.4397 | 4.32E-10 | chr:6:32648036 |
| 6 rs1130430   | 32629161 A | 0.4461 | 4.35E-10 | chr:6:32648036 |
| 6 rs9274758   | 32638290 A | 0.2904 | 4.35E-10 | chr:6:32648036 |
| 6 rs1694116   | 32647839 A | 2.842  | 4.42E-10 | chr:6:32648036 |
| 6 rs9274754   | 32638261 T | 0.2904 | 4.46E-10 | chr:6:32648036 |
| 6 rs9274755   | 32638262 G | 0.2904 | 4.46E-10 | chr:6:32648036 |
| 6 rs9274756   | 32638269 A | 0.2904 | 4.46E-10 | chr:6:32648036 |
| 6 rs9274845   | 32640134 C | 0.3424 | 4.49E-10 | chr:6:32648036 |
| 6 rs73727927  | 32501214 G | 0.3965 | 4.49E-10 | chr:6:32648036 |
| 6 rs2858330   | 32658715 T | 0.2802 | 4.53E-10 | chr:6:32648036 |
| 6 rs182520386 | 32537710 C | 0.4885 | 4.54E-10 | chr:6:32648036 |
| 6 rs116843571 | 32365136 G | 4.356  | 4.56E-10 | chr:6:32648036 |
| 6 rs117300548 | 32365137 C | 4.356  | 4.56E-10 | chr:6:32648036 |
| 6 rs9274864   | 32640646 A | 0.3003 | 4.66E-10 | chr:6:32648036 |
| 6 rs9274886   | 32641086 T | 0.47   | 4.69E-10 | chr:6:32648036 |
| 6 rs9274887   | 32641089 A | 0.47   | 4.69E-10 | chr:6:32648036 |
| 6 rs9271300   | 32581582 G | 0.3731 | 4.73E-10 | chr:6:32648036 |
| 6 rs35743245  | 32559904 T | 3.605  | 4.84E-10 | chr:6:32648036 |
| 6 rs582591    | 32579373 A | 0.2894 | 4.93E-10 | chr:6:32648036 |
| 6 rs117995897 | 32364365 C | 4.461  | 4.99E-10 | chr:6:32648036 |
| 6 rs141733835 | 32364378 A | 4.461  | 4.99E-10 | chr:6:32648036 |
| 6 rs148041756 | 32364377 C | 4.461  | 4.99E-10 | chr:6:32648036 |
| 6 rs150599579 | 32364381 G | 4.461  | 4.99E-10 | chr:6:32648036 |
| 6 rs78107756  | 32370791 A | 4.356  | 5.00E-10 | chr:6:32648036 |
| 6 rs9275084   | 32648722 A | 0.2883 | 5.02E-10 | chr:6:32648036 |
| 6 rs9275085   | 32648735 G | 0.2883 | 5.02E-10 | chr:6:32648036 |
| 6 rs558553724 | 32639724 T | 0.398  | 5.03E-10 | chr:6:32648036 |
| 6 rs67968776  | 32531554 C | 2.076  | 5.14E-10 | chr:6:32648036 |
| 6 rs75729173  | 32533813 T | 0.5014 | 5.15E-10 | chr:6:32648036 |
| 6 rs115341895 | 32649824 T | 7.054  | 5.29E-10 | chr:6:32648036 |
| 6 rs9275014   | 32643023 G | 0.3691 | 5.40E-10 | chr:6:32648036 |
| 6 rs67454457  | 32530767 G | 2      | 5.45E-10 | chr:6:32648036 |

|               |            |        |          |                |
|---------------|------------|--------|----------|----------------|
| 6 rs117833769 | 32361955 T | 4.342  | 5.52E-10 | chr:6:32648036 |
| 6 rs9274839   | 32640015 A | 0.2888 | 5.54E-10 | chr:6:32648036 |
| 6 rs115530896 | 32370522 G | 2.674  | 5.54E-10 | chr:6:32648036 |
| 6 rs2454137   | 32570149 G | 0.2944 | 5.57E-10 | chr:6:32648036 |
| 6 rs28404276  | 32510355 A | 0.3947 | 5.59E-10 | chr:6:32648036 |
| 6 rs9275114   | 32649897 G | 0.2811 | 5.69E-10 | chr:6:32648036 |
| 6 rs9275116   | 32649952 T | 0.2811 | 5.69E-10 | chr:6:32648036 |
| 6 rs9275118   | 32649996 A | 0.2811 | 5.69E-10 | chr:6:32648036 |
| 6 rs35603463  | 32531745 T | 2.024  | 5.75E-10 | chr:6:32648036 |
| 6 rs6921651   | 32595345 A | 0.4047 | 5.76E-10 | chr:6:32648036 |
| 6 rs9274836   | 32639956 G | 0.2884 | 5.78E-10 | chr:6:32648036 |
| 6 rs2760976   | 32560839 T | 4.658  | 5.92E-10 | chr:6:32648036 |
| 6 rs628754    | 32574787 G | 2.437  | 5.94E-10 | chr:6:32648036 |
| 6 rs142244845 | 32472941 A | 4.455  | 5.96E-10 | chr:6:32648036 |
| 6 rs78496075  | 32608967 G | 3.181  | 5.97E-10 | chr:6:32648036 |
| 6 rs9274877   | 32640877 A | 0.4062 | 6.01E-10 | chr:6:32648036 |
| 6 rs9274540   | 32634676 C | 0.4213 | 6.03E-10 | chr:6:32648036 |
| 6 rs538548316 | 32369590 G | 4.362  | 6.08E-10 | chr:6:32648036 |
| 6 rs71536568  | 32531151 A | 0.4955 | 6.10E-10 | chr:6:32648036 |
| 6 rs9275011   | 32642969 C | 0.3699 | 6.18E-10 | chr:6:32648036 |
| 6 rs3020625   | 32628835 A | 0.4462 | 6.18E-10 | chr:6:32648036 |
| 6 rs9273544   | 32628833 A | 0.4462 | 6.18E-10 | chr:6:32648036 |
| 6 rs117966543 | 32612934 C | 3.846  | 6.20E-10 | chr:6:32648036 |
| 6 rs2859122   | 32696913 A | 2.894  | 6.21E-10 | chr:6:32648036 |
| 6 rs9273556   | 32628953 C | 0.4698 | 6.23E-10 | chr:6:32648036 |
| 6 rs35366052  | 32531923 G | 1.977  | 6.36E-10 | chr:6:32648036 |
| 6 rs9270752   | 32568426 T | 0.2969 | 6.37E-10 | chr:6:32648036 |
| 6 rs9274596   | 32635467 G | 0.4392 | 6.58E-10 | chr:6:32648036 |
| 6 rs36219699  | 32609195 A | 3.335  | 6.60E-10 | chr:6:32648036 |
| 6 rs9274995   | 32642615 C | 0.3074 | 6.60E-10 | chr:6:32648036 |
| 6 rs75098126  | 32636108 G | 6.866  | 6.62E-10 | chr:6:32648036 |
| 6 rs75128960  | 32636087 A | 6.866  | 6.62E-10 | chr:6:32648036 |
| 6 rs78824971  | 32608946 A | 3.398  | 6.65E-10 | chr:6:32648036 |
| 6 rs3134993   | 32637778 G | 0.3324 | 6.68E-10 | chr:6:32648036 |
| 6 rs111983899 | 32639389 C | 0.3344 | 6.71E-10 | chr:6:32648036 |
| 6 rs35772438  | 32530407 C | 2.051  | 6.72E-10 | chr:6:32648036 |
| 6 rs9274867   | 32640745 G | 0.3253 | 6.75E-10 | chr:6:32648036 |
| 6 rs9275082   | 32648684 A | 0.2999 | 6.78E-10 | chr:6:32648036 |
| 6 rs2760995   | 32574358 A | 4.319  | 6.98E-10 | chr:6:32648036 |
| 6 rs59237763  | 32382201 G | 4.258  | 6.99E-10 | chr:6:32648036 |
| 6 rs79139281  | 32614768 C | 2.539  | 7.03E-10 | chr:6:32648036 |
| 6 rs117171028 | 32366768 G | 4.208  | 7.05E-10 | chr:6:32648036 |
| 6 rs118102698 | 32366774 T | 4.208  | 7.05E-10 | chr:6:32648036 |



|               |            |        |          |                |
|---------------|------------|--------|----------|----------------|
| 6 rs34958241  | 32559575 G | 3.615  | 7.12E-10 | chr:6:32648036 |
| 6 rs9274855   | 32640494 G | 0.3008 | 7.18E-10 | chr:6:32648036 |
| 6 rs2076528   | 32364194 C | 4.221  | 7.25E-10 | chr:6:32648036 |
| 6 rs3763315   | 32376654 T | 4.221  | 7.25E-10 | chr:6:32648036 |
| 6 rs9273547   | 32628844 T | 0.4482 | 7.31E-10 | chr:6:32648036 |
| 6 rs117191023 | 32355557 A | 4.301  | 7.39E-10 | chr:6:32648036 |
| 6 rs9274871   | 32640792 A | 0.3646 | 7.45E-10 | chr:6:32648036 |
| 6 rs9274872   | 32640793 A | 0.3646 | 7.45E-10 | chr:6:32648036 |
| 6 rs17427494  | 32665001 A | 6.914  | 7.51E-10 | chr:6:32648036 |
| 6 rs9274257   | 32631415 C | 7.777  | 7.56E-10 | chr:6:32648036 |
| 6 rs36027005  | 32610643 T | 4.011  | 7.57E-10 | chr:6:32648036 |
| 6 rs9275010   | 32642966 C | 0.3703 | 7.65E-10 | chr:6:32648036 |
| 6 rs71536576  | 32532346 G | 1.987  | 7.75E-10 | chr:6:32648036 |
| 6 rs567923497 | 32364650 G | 4.334  | 7.78E-10 | chr:6:32648036 |
| 6 rs62402757  | 32364649 T | 4.334  | 7.78E-10 | chr:6:32648036 |
| 6 rs2859124   | 32696835 A | 2.891  | 7.79E-10 | chr:6:32648036 |
| 6 rs116848553 | 32367477 C | 4.195  | 7.86E-10 | chr:6:32648036 |
| 6 rs72851046  | 32501957 G | 0.3792 | 7.95E-10 | chr:6:32648036 |
| 6 rs72851047  | 32501962 T | 0.3792 | 7.95E-10 | chr:6:32648036 |
| 6 rs74221689  | 32501936 A | 0.3792 | 7.95E-10 | chr:6:32648036 |
| 6 rs113556768 | 32496926 G | 4.338  | 8.10E-10 | chr:6:32648036 |
| 6 rs75503615  | 32608934 T | 3.399  | 8.51E-10 | chr:6:32648036 |
| 6 rs117132998 | 32365086 G | 4.238  | 8.67E-10 | chr:6:32648036 |
| 6 rs117590326 | 32365093 A | 4.238  | 8.67E-10 | chr:6:32648036 |
| 6 rs117830441 | 32365075 C | 4.238  | 8.67E-10 | chr:6:32648036 |
| 6 rs118079180 | 32365063 T | 4.238  | 8.67E-10 | chr:6:32648036 |
| 6 rs117752912 | 32364386 T | 4.323  | 8.75E-10 | chr:6:32648036 |
| 6 rs116944652 | 32721026 T | 4.907  | 8.86E-10 | chr:6:32648036 |
| 6 rs281864453 | 32628065 C | 0.3829 | 8.98E-10 | chr:6:32648036 |
| 6 rs7754464   | 32657818 A | 0.2871 | 9.07E-10 | chr:6:32648036 |
| 6 rs181156275 | 32607444 T | 3.501  | 9.12E-10 | chr:6:32648036 |
| 6 rs34928543  | 32560695 C | 4.262  | 9.19E-10 | chr:6:32648036 |
| 6 rs117131280 | 32367412 T | 4.211  | 9.34E-10 | chr:6:32648036 |
| 6 rs117543429 | 32367353 C | 4.211  | 9.34E-10 | chr:6:32648036 |
| 6 rs117802367 | 32367239 G | 4.211  | 9.34E-10 | chr:6:32648036 |
| 6 rs118178918 | 32367401 A | 4.211  | 9.34E-10 | chr:6:32648036 |
| 6 rs2760983   | 32565601 G | 3.933  | 9.58E-10 | chr:6:32648036 |
| 6 rs36214159  | 32611759 G | 3.051  | 9.74E-10 | chr:6:32648036 |
| 6 rs9492      | 32610976 C | 2.64   | 9.81E-10 | chr:6:32648036 |
| 6 rs117866892 | 32365252 A | 4.318  | 9.82E-10 | chr:6:32648036 |
| 6 rs3828786   | 32629259 C | 4.785  | 9.88E-10 | chr:6:32648036 |
| 6 rs678770    | 32570817 A | 0.2989 | 9.93E-10 | chr:6:32648036 |
| 6 rs568935162 | 32662076 G | 6.509  | 1.01E-09 | chr:6:32648036 |

|               |            |        |          |                |
|---------------|------------|--------|----------|----------------|
| 6 rs9275446   | 32671841 G | 3.147  | 1.01E-09 | chr:6:32648036 |
| 6 rs9275447   | 32671843 C | 3.147  | 1.01E-09 | chr:6:32648036 |
| 6 rs9275448   | 32671848 T | 3.147  | 1.01E-09 | chr:6:32648036 |
| 6 rs9275449   | 32671869 T | 3.147  | 1.01E-09 | chr:6:32648036 |
| 6 rs9270787   | 32569174 C | 2.346  | 1.01E-09 | chr:6:32648036 |
| 6 rs71536577  | 32532356 T | 1.978  | 1.02E-09 | chr:6:32648036 |
| 6 rs117231421 | 32359586 C | 4.39   | 1.02E-09 | chr:6:32648036 |
| 6 rs118079998 | 32359603 T | 4.39   | 1.02E-09 | chr:6:32648036 |
| 6 rs118169940 | 32359571 G | 4.39   | 1.02E-09 | chr:6:32648036 |
| 6 rs75364295  | 32529696 A | 0.4837 | 1.02E-09 | chr:6:32648036 |
| 6 rs112061353 | 32615243 C | 2.184  | 1.03E-09 | chr:6:32648036 |
| 6 rs75084410  | 32636018 A | 6.505  | 1.03E-09 | chr:6:32648036 |
| 6 rs28891446  | 32641500 G | 0.3208 | 1.03E-09 | chr:6:32648036 |
| 6 rs4568495   | 32672246 C | 3.12   | 1.05E-09 | chr:6:32648036 |
| 6 rs9275396   | 32669528 A | 3.12   | 1.05E-09 | chr:6:32648036 |
| 6 rs9275397   | 32669552 G | 3.12   | 1.05E-09 | chr:6:32648036 |
| 6 rs9275399   | 32669712 G | 3.12   | 1.05E-09 | chr:6:32648036 |
| 6 rs9275416   | 32670196 T | 3.12   | 1.05E-09 | chr:6:32648036 |
| 6 rs9275464   | 32672082 G | 3.12   | 1.05E-09 | chr:6:32648036 |
| 6 rs9275468   | 32672412 A | 3.12   | 1.05E-09 | chr:6:32648036 |
| 6 rs9275469   | 32672430 G | 3.12   | 1.05E-09 | chr:6:32648036 |
| 6 rs9275471   | 32672491 A | 3.12   | 1.05E-09 | chr:6:32648036 |
| 6 rs9275472   | 32672494 A | 3.12   | 1.05E-09 | chr:6:32648036 |
| 6 rs9275473   | 32672523 T | 3.12   | 1.05E-09 | chr:6:32648036 |
| 6 rs9275474   | 32672529 T | 3.12   | 1.05E-09 | chr:6:32648036 |
| 6 rs9275475   | 32672556 G | 3.12   | 1.05E-09 | chr:6:32648036 |
| 6 rs9275481   | 32672913 A | 3.12   | 1.05E-09 | chr:6:32648036 |
| 6 rs9275482   | 32672932 T | 3.12   | 1.05E-09 | chr:6:32648036 |
| 6 rs9275485   | 32673077 A | 3.12   | 1.05E-09 | chr:6:32648036 |
| 6 rs9275491   | 32673424 T | 3.12   | 1.05E-09 | chr:6:32648036 |
| 6 rs9275492   | 32673446 T | 3.12   | 1.05E-09 | chr:6:32648036 |
| 6 rs148633289 | 32487229 T | 0.251  | 1.05E-09 | chr:6:32648036 |
| 6 rs529802855 | 32635431 C | 4.276  | 1.06E-09 | chr:6:32648036 |
| 6 rs548017033 | 32635432 A | 4.276  | 1.06E-09 | chr:6:32648036 |
| 6 rs559060529 | 32635429 G | 4.276  | 1.06E-09 | chr:6:32648036 |
| 6 rs564551505 | 32644523 C | 0.2212 | 1.06E-09 | chr:6:32648036 |
| 6 rs62404127  | 32618229 A | 2.424  | 1.06E-09 | chr:6:32648036 |
| 6 rs1794510   | 32652171 A | 6.408  | 1.07E-09 | chr:6:32648036 |
| 6 rs592362    | 32567795 G | 0.3018 | 1.07E-09 | chr:6:32648036 |
| 6 rs66874970  | 32530748 C | 1.974  | 1.08E-09 | chr:6:32648036 |
| 6 rs9274949   | 32641855 A | 0.4331 | 1.11E-09 | chr:6:32648036 |
| 6 rs72492356  | 32538899 C | 0.4536 | 1.13E-09 | chr:6:32648036 |
| 6 rs117051525 | 32367682 T | 4.208  | 1.13E-09 | chr:6:32648036 |

|               |            |        |          |                |
|---------------|------------|--------|----------|----------------|
| 6 rs117182873 | 32367631 A | 4.208  | 1.13E-09 | chr:6:32648036 |
| 6 rs117345304 | 32367693 T | 4.208  | 1.13E-09 | chr:6:32648036 |
| 6 rs9274875   | 32640863 A | 0.4186 | 1.14E-09 | chr:6:32648036 |
| 6 rs569027473 | 32365334 A | 4.313  | 1.17E-09 | chr:6:32648036 |
| 6 rs9271281   | 32581059 T | 0.3849 | 1.17E-09 | chr:6:32648036 |
| 6 rs9271282   | 32581062 C | 0.3849 | 1.17E-09 | chr:6:32648036 |
| 6 rs71538515  | 32535300 G | 0.5122 | 1.18E-09 | chr:6:32648036 |
| 6 rs117198428 | 32359833 T | 4.249  | 1.19E-09 | chr:6:32648036 |
| 6 rs7754885   | 32657858 G | 0.2901 | 1.22E-09 | chr:6:32648036 |
| 6 rs113529604 | 32652971 A | 6.346  | 1.22E-09 | chr:6:32648036 |
| 6 rs116881495 | 32366806 T | 4.12   | 1.24E-09 | chr:6:32648036 |
| 6 rs117537769 | 32366833 A | 4.12   | 1.24E-09 | chr:6:32648036 |
| 6 rs118011907 | 32366807 T | 4.12   | 1.24E-09 | chr:6:32648036 |
| 6 rs9274564   | 32635048 G | 0.4274 | 1.25E-09 | chr:6:32648036 |
| 6 rs66738149  | 32501898 C | 0.3852 | 1.26E-09 | chr:6:32648036 |
| 6 rs72851044  | 32501886 A | 0.3852 | 1.26E-09 | chr:6:32648036 |
| 6 rs9269574   | 32544711 C | 0.4193 | 1.28E-09 | chr:6:32648036 |
| 6 rs9270799   | 32569318 T | 0.2997 | 1.28E-09 | chr:6:32648036 |
| 6 rs35957455  | 32521195 T | 0.3781 | 1.30E-09 | chr:6:32648036 |
| 6 rs376327303 | 32520719 A | 0.3748 | 1.30E-09 | chr:6:32648036 |
| 6 rs78568738  | 32614573 C | 2.519  | 1.30E-09 | chr:6:32648036 |
| 6 rs9275483   | 32673051 C | 3.114  | 1.31E-09 | chr:6:32648036 |
| 6 rs9275484   | 32673052 T | 3.114  | 1.31E-09 | chr:6:32648036 |
| 6 rs117132594 | 32367902 G | 4.224  | 1.34E-09 | chr:6:32648036 |
| 6 rs117884404 | 32367897 A | 4.224  | 1.34E-09 | chr:6:32648036 |
| 6 rs9269565   | 32544500 A | 0.4545 | 1.35E-09 | chr:6:32648036 |
| 6 rs150016754 | 32364524 A | 4.304  | 1.35E-09 | chr:6:32648036 |
| 6 rs118117353 | 32365280 G | 4.282  | 1.36E-09 | chr:6:32648036 |
| 6 rs9275081   | 32648669 C | 0.3117 | 1.37E-09 | chr:6:32648036 |
| 6 rs9275062   | 32648337 T | 0.2987 | 1.41E-09 | chr:6:32648036 |
| 6 rs2859056   | 32694420 A | 2.812  | 1.42E-09 | chr:6:32648036 |
| 6 rs28646006  | 32527793 C | 1.97   | 1.43E-09 | chr:6:32648036 |
| 6 rs72492351  | 32538451 C | 0.3922 | 1.43E-09 | chr:6:32648036 |
| 6 rs71534530  | 32511211 A | 0.4192 | 1.44E-09 | chr:6:32648036 |
| 6 rs62404092  | 32610151 A | 2.557  | 1.44E-09 | chr:6:32648036 |
| 6 rs3828832   | 32521083 C | 0.3696 | 1.44E-09 | chr:6:32648036 |
| 6 rs62404120  | 32612962 C | 3.486  | 1.44E-09 | chr:6:32648036 |
| 6 rs62404123  | 32615963 G | 2.563  | 1.44E-09 | chr:6:32648036 |
| 6 rs6926737   | 32375745 G | 0.3389 | 1.45E-09 | chr:6:32648036 |
| 6 rs5007258   | 32379239 A | 0.3412 | 1.45E-09 | chr:6:32648036 |
| 6 rs5007259   | 32379101 T | 0.3412 | 1.45E-09 | chr:6:32648036 |
| 6 rs5007262   | 32379011 A | 0.3412 | 1.45E-09 | chr:6:32648036 |
| 6 rs5007263   | 32378982 A | 0.3412 | 1.45E-09 | chr:6:32648036 |

|               |            |        |          |                |
|---------------|------------|--------|----------|----------------|
| 6 rs5007265   | 32378866 T | 0.3412 | 1.45E-09 | chr:6:32648036 |
| 6 rs5007266   | 32378834 T | 0.3412 | 1.45E-09 | chr:6:32648036 |
| 6 rs6906730   | 32379445 T | 0.3412 | 1.45E-09 | chr:6:32648036 |
| 6 rs6911383   | 32379682 T | 0.3412 | 1.45E-09 | chr:6:32648036 |
| 6 rs6932542   | 32380262 A | 0.3412 | 1.45E-09 | chr:6:32648036 |
| 6 rs6932810   | 32380190 G | 0.3412 | 1.45E-09 | chr:6:32648036 |
| 6 rs6938337   | 32381041 C | 0.3412 | 1.45E-09 | chr:6:32648036 |
| 6 rs9268501   | 32376882 T | 0.3412 | 1.45E-09 | chr:6:32648036 |
| 6 rs9268502   | 32376932 C | 0.3412 | 1.45E-09 | chr:6:32648036 |
| 6 rs9268503   | 32377061 C | 0.3412 | 1.45E-09 | chr:6:32648036 |
| 6 rs9268504   | 32377116 C | 0.3412 | 1.45E-09 | chr:6:32648036 |
| 6 rs9268506   | 32377470 C | 0.3412 | 1.45E-09 | chr:6:32648036 |
| 6 rs9268507   | 32377539 A | 0.3412 | 1.45E-09 | chr:6:32648036 |
| 6 rs9268508   | 32377588 T | 0.3412 | 1.45E-09 | chr:6:32648036 |
| 6 rs9268513   | 32378787 T | 0.3412 | 1.45E-09 | chr:6:32648036 |
| 6 rs67041740  | 32509273 C | 0.3906 | 1.46E-09 | chr:6:32648036 |
| 6 rs9274713   | 32637341 C | 0.3093 | 1.47E-09 | chr:6:32648036 |
| 6 rs114520912 | 32517504 T | 0.3876 | 1.47E-09 | chr:6:32648036 |
| 6 rs116645664 | 32517505 C | 0.3876 | 1.47E-09 | chr:6:32648036 |
| 6 rs67721312  | 32517556 T | 0.3885 | 1.48E-09 | chr:6:32648036 |
| 6 rs74194578  | 32517590 T | 0.3885 | 1.48E-09 | chr:6:32648036 |
| 6 rs9274828   | 32639737 A | 0.4152 | 1.49E-09 | chr:6:32648036 |
| 6 rs9274815   | 32639620 A | 0.3889 | 1.50E-09 | chr:6:32648036 |
| 6 rs34535888  | 32561527 C | 4.457  | 1.50E-09 | chr:6:32648036 |
| 6 rs521512    | 32581982 C | 0.3807 | 1.51E-09 | chr:6:32648036 |
| 6 rs117774706 | 32367732 C | 4.145  | 1.52E-09 | chr:6:32648036 |
| 6 rs118048736 | 32367731 C | 4.145  | 1.52E-09 | chr:6:32648036 |
| 6 rs559673115 | 32629239 A | 0.4656 | 1.53E-09 | chr:6:32648036 |
| 6 rs113843843 | 32486896 C | 3.872  | 1.54E-09 | chr:6:32648036 |
| 6 rs182976814 | 32486900 T | 3.872  | 1.54E-09 | chr:6:32648036 |
| 6 rs9271325   | 32582513 G | 0.3824 | 1.54E-09 | chr:6:32648036 |
| 6 rs9275478   | 32672654 T | 3.083  | 1.55E-09 | chr:6:32648036 |
| 6 rs9275479   | 32672659 T | 3.083  | 1.55E-09 | chr:6:32648036 |
| 6 rs9275480   | 32672668 A | 3.083  | 1.55E-09 | chr:6:32648036 |
| 6 rs28891393  | 32639683 G | 0.4055 | 1.59E-09 | chr:6:32648036 |
| 6 rs117762576 | 32635442 C | 4.277  | 1.59E-09 | chr:6:32648036 |
| 6 rs9275614   | 32684257 G | 3.213  | 1.60E-09 | chr:6:32648036 |
| 6 rs9275615   | 32684272 A | 3.213  | 1.60E-09 | chr:6:32648036 |
| 6 rs9275638   | 32684760 T | 3.213  | 1.60E-09 | chr:6:32648036 |
| 6 rs4502931   | 32380782 T | 0.3413 | 1.61E-09 | chr:6:32648036 |
| 6 rs9268518   | 32380818 A | 0.3413 | 1.61E-09 | chr:6:32648036 |
| 6 rs9268519   | 32380826 G | 0.3413 | 1.61E-09 | chr:6:32648036 |
| 6 rs9268520   | 32380860 C | 0.3413 | 1.61E-09 | chr:6:32648036 |

|               |            |        |          |                |
|---------------|------------|--------|----------|----------------|
| 6 rs968154    | 32380785 G | 0.3413 | 1.61E-09 | chr:6:32648036 |
| 6 rs28891420  | 32640866 A | 0.3847 | 1.64E-09 | chr:6:32648036 |
| 6 rs35597441  | 32555545 T | 4.056  | 1.64E-09 | chr:6:32648036 |
| 6 rs2859113   | 32697785 C | 2.798  | 1.66E-09 | chr:6:32648036 |
| 6 rs9274996   | 32642641 C | 0.3071 | 1.67E-09 | chr:6:32648036 |
| 6 rs116885919 | 32367575 G | 4.066  | 1.68E-09 | chr:6:32648036 |
| 6 rs117637259 | 32367551 A | 4.066  | 1.68E-09 | chr:6:32648036 |
| 6 rs117677057 | 32367598 G | 4.066  | 1.68E-09 | chr:6:32648036 |
| 6 rs118013350 | 32367594 G | 4.066  | 1.68E-09 | chr:6:32648036 |
| 6 rs148835240 | 32367572 C | 4.066  | 1.68E-09 | chr:6:32648036 |
| 6 rs28752516  | 32583611 G | 2.465  | 1.69E-09 | chr:6:32648036 |
| 6 rs9268628   | 32405865 C | 0.3604 | 1.70E-09 | chr:6:32648036 |
| 6 rs9275487   | 32673174 T | 3.034  | 1.71E-09 | chr:6:32648036 |
| 6 rs9275488   | 32673269 A | 3.034  | 1.71E-09 | chr:6:32648036 |
| 6 rs9275489   | 32673272 T | 3.034  | 1.71E-09 | chr:6:32648036 |
| 6 rs28383207  | 32575181 A | 3.558  | 1.73E-09 | chr:6:32648036 |
| 6 rs117338712 | 32365258 C | 4.226  | 1.74E-09 | chr:6:32648036 |
| 6 rs72508409  | 32451073 G | 0.2733 | 1.75E-09 | chr:6:32648036 |
| 6 rs3763314   | 32376618 C | 0.3432 | 1.76E-09 | chr:6:32648036 |
| 6 rs532267200 | 32364614 A | 4.654  | 1.78E-09 | chr:6:32648036 |
| 6 rs547385707 | 32364618 G | 4.654  | 1.78E-09 | chr:6:32648036 |
| 6 rs571523174 | 32364612 C | 4.654  | 1.78E-09 | chr:6:32648036 |
| 6 rs4713589   | 32659435 G | 0.316  | 1.79E-09 | chr:6:32648036 |
| 6 rs281863631 | 32630761 C | 0.455  | 1.81E-09 | chr:6:32648036 |
| 6 rs9271402   | 32587535 C | 0.3127 | 1.81E-09 | chr:6:32648036 |
| 6 rs72492329  | 32521136 A | 0.3347 | 1.82E-09 | chr:6:32648036 |
| 6 rs184243021 | 32367757 C | 4.16   | 1.82E-09 | chr:6:32648036 |
| 6 rs5007260   | 32379047 G | 0.3438 | 1.83E-09 | chr:6:32648036 |
| 6 rs5007261   | 32379031 G | 0.3438 | 1.83E-09 | chr:6:32648036 |
| 6 rs9275496   | 32673714 C | 3.056  | 1.83E-09 | chr:6:32648036 |
| 6 rs9271293   | 32581459 T | 0.3834 | 1.84E-09 | chr:6:32648036 |
| 6 rs9271294   | 32581461 G | 0.3834 | 1.84E-09 | chr:6:32648036 |
| 6 rs9271295   | 32581467 C | 0.3834 | 1.84E-09 | chr:6:32648036 |
| 6 rs9270747   | 32568292 A | 2.345  | 1.88E-09 | chr:6:32648036 |
| 6 rs9275376   | 32668633 T | 3.027  | 1.89E-09 | chr:6:32648036 |
| 6 rs9275377   | 32668667 G | 3.027  | 1.89E-09 | chr:6:32648036 |
| 6 rs9275378   | 32668729 G | 3.027  | 1.89E-09 | chr:6:32648036 |
| 6 rs9274895   | 32641184 A | 0.4961 | 1.90E-09 | chr:6:32648036 |
| 6 rs9274896   | 32641185 A | 0.4961 | 1.90E-09 | chr:6:32648036 |
| 6 rs3873452   | 32683309 C | 3.412  | 1.94E-09 | chr:6:32648036 |
| 6 rs3117116   | 32367017 G | 3.982  | 1.96E-09 | chr:6:32648036 |
| 6 rs968155    | 32380715 C | 0.3421 | 1.97E-09 | chr:6:32648036 |
| 6 rs2935907   | 32651136 A | 5.268  | 2.00E-09 | chr:6:32648036 |

|               |            |        |          |                |
|---------------|------------|--------|----------|----------------|
| 6 rs115806221 | 32514401 G | 0.3891 | 2.01E-09 | chr:6:32648036 |
| 6 rs3129755   | 32583057 G | 2.426  | 2.02E-09 | chr:6:32648036 |
| 6 rs567879431 | 32699140 C | 2.796  | 2.03E-09 | chr:6:32648036 |
| 6 rs3132948   | 32197219 T | 2.539  | 2.03E-09 | chr:6:32648036 |
| 6 rs9267857   | 32196569 A | 2.539  | 2.03E-09 | chr:6:32648036 |
| 6 rs9267861   | 32196648 G | 2.539  | 2.03E-09 | chr:6:32648036 |
| 6 rs74394760  | 32513078 C | 0.3906 | 2.03E-09 | chr:6:32648036 |
| 6 rs550551168 | 32365315 G | 4.223  | 2.05E-09 | chr:6:32648036 |
| 6 rs116999528 | 32367730 A | 4.073  | 2.05E-09 | chr:6:32648036 |
| 6 rs72492304  | 32509311 C | 0.395  | 2.06E-09 | chr:6:32648036 |
| 6 rs117579701 | 32367673 A | 4.114  | 2.07E-09 | chr:6:32648036 |
| 6 rs138855114 | 32367665 G | 4.114  | 2.07E-09 | chr:6:32648036 |
| 6 rs150110105 | 32367659 A | 4.114  | 2.07E-09 | chr:6:32648036 |
| 6 rs150919195 | 32367650 C | 4.114  | 2.07E-09 | chr:6:32648036 |
| 6 rs546545481 | 32367656 G | 4.114  | 2.07E-09 | chr:6:32648036 |
| 6 rs564613201 | 32367649 C | 4.114  | 2.07E-09 | chr:6:32648036 |
| 6 rs5007264   | 32378877 C | 0.3448 | 2.07E-09 | chr:6:32648036 |
| 6 rs618095    | 32574736 G | 2.304  | 2.09E-09 | chr:6:32648036 |
| 6 rs34369284  | 32514144 T | 0.3904 | 2.13E-09 | chr:6:32648036 |
| 6 rs9274898   | 32641199 C | 0.496  | 2.13E-09 | chr:6:32648036 |
| 6 rs9274899   | 32641203 C | 0.496  | 2.13E-09 | chr:6:32648036 |
| 6 rs9274900   | 32641207 G | 0.496  | 2.13E-09 | chr:6:32648036 |
| 6 rs28891418  | 32640859 C | 0.3883 | 2.14E-09 | chr:6:32648036 |
| 6 rs28891419  | 32640861 C | 0.3883 | 2.14E-09 | chr:6:32648036 |
| 6 rs75588019  | 32568063 A | 0.3076 | 2.14E-09 | chr:6:32648036 |
| 6 rs9274733   | 32637874 C | 0.3368 | 2.15E-09 | chr:6:32648036 |
| 6 rs9271327   | 32582533 C | 0.3855 | 2.16E-09 | chr:6:32648036 |
| 6 rs9271329   | 32582635 G | 0.3855 | 2.16E-09 | chr:6:32648036 |
| 6 rs647455    | 32576721 A | 0.4176 | 2.17E-09 | chr:6:32648036 |
| 6 rs647467    | 32576726 T | 0.4176 | 2.17E-09 | chr:6:32648036 |
| 6 rs113850533 | 32516839 T | 0.3958 | 2.24E-09 | chr:6:32648036 |
| 6 rs78953426  | 32529417 G | 0.5207 | 2.25E-09 | chr:6:32648036 |
| 6 rs9270876   | 32571314 T | 2.279  | 2.26E-09 | chr:6:32648036 |
| 6 rs73397416  | 32521951 C | 0.3885 | 2.30E-09 | chr:6:32648036 |
| 6 rs62404122  | 32614857 C | 2.433  | 2.33E-09 | chr:6:32648036 |
| 6 rs113460787 | 32518089 T | 0.3939 | 2.38E-09 | chr:6:32648036 |
| 6 rs2395223   | 32581778 T | 0.3862 | 2.46E-09 | chr:6:32648036 |
| 6 rs2858859   | 32582275 A | 0.3862 | 2.46E-09 | chr:6:32648036 |
| 6 rs2894275   | 32581754 G | 0.3862 | 2.46E-09 | chr:6:32648036 |
| 6 rs5004275   | 32582190 A | 0.3862 | 2.46E-09 | chr:6:32648036 |
| 6 rs5004276   | 32582332 A | 0.3862 | 2.46E-09 | chr:6:32648036 |
| 6 rs5004277   | 32582354 T | 0.3862 | 2.46E-09 | chr:6:32648036 |
| 6 rs641685    | 32582003 A | 0.3862 | 2.46E-09 | chr:6:32648036 |

|               |            |        |          |                |
|---------------|------------|--------|----------|----------------|
| 6 rs7451962   | 32582435 A | 0.3862 | 2.46E-09 | chr:6:32648036 |
| 6 rs9271289   | 32581305 T | 0.3862 | 2.46E-09 | chr:6:32648036 |
| 6 rs9271291   | 32581335 A | 0.3862 | 2.46E-09 | chr:6:32648036 |
| 6 rs9271292   | 32581350 C | 0.3862 | 2.46E-09 | chr:6:32648036 |
| 6 rs9271296   | 32581501 G | 0.3862 | 2.46E-09 | chr:6:32648036 |
| 6 rs9271299   | 32581537 C | 0.3862 | 2.46E-09 | chr:6:32648036 |
| 6 rs9271324   | 32582482 G | 0.3862 | 2.46E-09 | chr:6:32648036 |
| 6 rs9274889   | 32641143 A | 0.489  | 2.46E-09 | chr:6:32648036 |
| 6 rs9274891   | 32641152 T | 0.489  | 2.46E-09 | chr:6:32648036 |
| 6 rs607929    | 32586998 C | 2.581  | 2.51E-09 | chr:6:32648036 |
| 6 rs9275618   | 32684387 G | 3.15   | 2.55E-09 | chr:6:32648036 |
| 6 rs66678933  | 32509320 T | 0.3976 | 2.56E-09 | chr:6:32648036 |
| 6 rs3998183   | 32567946 T | 0.3086 | 2.58E-09 | chr:6:32648036 |
| 6 rs9270789   | 32569208 A | 0.3032 | 2.60E-09 | chr:6:32648036 |
| 6 rs28891456  | 32641919 C | 0.4092 | 2.62E-09 | chr:6:32648036 |
| 6 rs75861594  | 32518103 G | 0.3953 | 2.63E-09 | chr:6:32648036 |
| 6 rs3828848   | 32520665 C | 0.392  | 2.63E-09 | chr:6:32648036 |
| 6 rs67529500  | 32504757 C | 0.3928 | 2.68E-09 | chr:6:32648036 |
| 6 rs28752526  | 32584918 G | 2.653  | 2.71E-09 | chr:6:32648036 |
| 6 rs685810    | 32584952 G | 2.653  | 2.71E-09 | chr:6:32648036 |
| 6 rs139201366 | 32513186 A | 0.3705 | 2.71E-09 | chr:6:32648036 |
| 6 rs79140398  | 32527093 C | 0.3491 | 2.72E-09 | chr:6:32648036 |
| 6 rs74201443  | 32530321 G | 0.4991 | 2.73E-09 | chr:6:32648036 |
| 6 rs62404118  | 32612522 C | 2.645  | 2.73E-09 | chr:6:32648036 |
| 6 rs9270884   | 32571734 T | 2.208  | 2.74E-09 | chr:6:32648036 |
| 6 rs116190325 | 32510039 A | 0.395  | 2.75E-09 | chr:6:32648036 |
| 6 rs1049057   | 32634350 T | 0.3532 | 2.75E-09 | chr:6:32648036 |
| 6 rs2647042   | 32667548 C | 0.2899 | 2.76E-09 | chr:6:32648036 |
| 6 rs9274537   | 32634655 G | 0.4142 | 2.79E-09 | chr:6:32648036 |
| 6 rs35395738  | 32560209 C | 3.185  | 2.80E-09 | chr:6:32648036 |
| 6 rs111901878 | 32516893 T | 0.3987 | 2.80E-09 | chr:6:32648036 |
| 6 rs2856724   | 32585161 G | 0.3231 | 2.81E-09 | chr:6:32648036 |
| 6 rs9274943   | 32641784 C | 0.4415 | 2.81E-09 | chr:6:32648036 |
| 6 rs9274944   | 32641786 G | 0.4415 | 2.81E-09 | chr:6:32648036 |
| 6 rs9274869   | 32640759 C | 0.3362 | 2.86E-09 | chr:6:32648036 |
| 6 rs9271283   | 32581092 A | 0.3928 | 2.88E-09 | chr:6:32648036 |
| 6 rs9271268   | 32580806 A | 0.3891 | 2.88E-09 | chr:6:32648036 |
| 6 rs9271269   | 32580820 T | 0.3891 | 2.88E-09 | chr:6:32648036 |
| 6 rs9274951   | 32641867 A | 0.4483 | 2.91E-09 | chr:6:32648036 |
| 6 rs9274952   | 32641868 T | 0.4483 | 2.91E-09 | chr:6:32648036 |
| 6 rs9273560   | 32628996 C | 0.4996 | 2.97E-09 | chr:6:32648036 |
| 6 rs68175425  | 32517446 G | 0.3978 | 3.02E-09 | chr:6:32648036 |
| 6 rs67816706  | 32517266 T | 0.4253 | 3.03E-09 | chr:6:32648036 |

|               |            |        |          |                |
|---------------|------------|--------|----------|----------------|
| 6 rs115123240 | 32519919 G | 0.3959 | 3.05E-09 | chr:6:32648036 |
| 6 rs114353707 | 32513535 C | 0.3957 | 3.08E-09 | chr:6:32648036 |
| 6 rs116817148 | 32513534 G | 0.3957 | 3.08E-09 | chr:6:32648036 |
| 6 rs35301884  | 32513638 C | 0.3957 | 3.08E-09 | chr:6:32648036 |
| 6 rs66706092  | 32513915 T | 0.3957 | 3.08E-09 | chr:6:32648036 |
| 6 rs72492319  | 32511987 T | 0.3957 | 3.08E-09 | chr:6:32648036 |
| 6 rs72492327  | 32520465 G | 0.3957 | 3.08E-09 | chr:6:32648036 |
| 6 rs72844111  | 32513938 C | 0.3957 | 3.08E-09 | chr:6:32648036 |
| 6 rs75141783  | 32511944 A | 0.3957 | 3.08E-09 | chr:6:32648036 |
| 6 rs17212937  | 32681339 T | 5.583  | 3.09E-09 | chr:6:32648036 |
| 6 rs7764819   | 32680576 G | 5.583  | 3.09E-09 | chr:6:32648036 |
| 6 rs7765379   | 32680928 G | 5.583  | 3.09E-09 | chr:6:32648036 |
| 6 rs199526678 | 32653823 G | 5.629  | 3.13E-09 | chr:6:32648036 |
| 6 rs76384124  | 32653855 A | 5.629  | 3.13E-09 | chr:6:32648036 |
| 6 rs149234868 | 32454921 G | 0.469  | 3.14E-09 | chr:6:32648036 |
| 6 rs9269532   | 32543825 C | 0.467  | 3.15E-09 | chr:6:32648036 |
| 6 rs72845757  | 32530563 A | 0.5014 | 3.15E-09 | chr:6:32648036 |
| 6 rs62404121  | 32613349 A | 2.919  | 3.18E-09 | chr:6:32648036 |
| 6 rs115742569 | 32516464 C | 0.3212 | 3.19E-09 | chr:6:32648036 |
| 6 rs62405640  | 32516729 T | 0.3999 | 3.22E-09 | chr:6:32648036 |
| 6 rs76033762  | 32516702 C | 0.3999 | 3.22E-09 | chr:6:32648036 |
| 6 rs7756741   | 32583198 A | 0.3207 | 3.26E-09 | chr:6:32648036 |
| 6 rs115712701 | 32501737 C | 0.3979 | 3.26E-09 | chr:6:32648036 |
| 6 rs9274946   | 32641828 A | 0.4312 | 3.27E-09 | chr:6:32648036 |
| 6 rs140730237 | 32534669 C | 2.199  | 3.28E-09 | chr:6:32648036 |
| 6 rs116100204 | 32531556 T | 0.5096 | 3.30E-09 | chr:6:32648036 |
| 6 rs35444025  | 32610688 C | 3.619  | 3.34E-09 | chr:6:32648036 |
| 6 rs673336    | 32577858 A | 0.4043 | 3.40E-09 | chr:6:32648036 |
| 6 rs75094512  | 32529708 C | 0.5247 | 3.41E-09 | chr:6:32648036 |
| 6 rs9274967   | 32642030 T | 0.3754 | 3.46E-09 | chr:6:32648036 |
| 6 rs116080026 | 32637492 T | 6.651  | 3.46E-09 | chr:6:32648036 |
| 6 rs9270877   | 32571318 A | 2.247  | 3.47E-09 | chr:6:32648036 |
| 6 rs9270878   | 32571320 G | 2.247  | 3.47E-09 | chr:6:32648036 |
| 6 rs72853979  | 32511572 T | 0.3979 | 3.49E-09 | chr:6:32648036 |
| 6 rs9271331   | 32582672 T | 0.3912 | 3.50E-09 | chr:6:32648036 |
| 6 rs9271332   | 32582674 C | 0.3912 | 3.50E-09 | chr:6:32648036 |
| 6 rs9274873   | 32640818 A | 0.3925 | 3.54E-09 | chr:6:32648036 |
| 6 rs113225456 | 32521406 T | 0.3962 | 3.55E-09 | chr:6:32648036 |
| 6 rs72844187  | 32521419 G | 0.3962 | 3.55E-09 | chr:6:32648036 |
| 6 rs72844188  | 32521427 C | 0.3962 | 3.55E-09 | chr:6:32648036 |
| 6 rs73729138  | 32520854 G | 0.3962 | 3.55E-09 | chr:6:32648036 |
| 6 rs2858328   | 32658911 C | 0.3103 | 3.57E-09 | chr:6:32648036 |
| 6 rs9275007   | 32642921 T | 0.323  | 3.58E-09 | chr:6:32648036 |



|               |            |        |          |                |
|---------------|------------|--------|----------|----------------|
| 6 rs112004746 | 32518155 T | 0.4184 | 3.71E-09 | chr:6:32648036 |
| 6 rs111890942 | 32458131 C | 0.4053 | 3.76E-09 | chr:6:32648036 |
| 6 rs3873453   | 32683382 T | 3.096  | 3.77E-09 | chr:6:32648036 |
| 6 rs9275069   | 32648437 A | 0.3166 | 3.77E-09 | chr:6:32648036 |
| 6 rs9275070   | 32648449 C | 0.3166 | 3.77E-09 | chr:6:32648036 |
| 6 rs9275379   | 32668804 T | 2.935  | 3.81E-09 | chr:6:32648036 |
| 6 rs112300533 | 32517237 T | 0.4271 | 3.82E-09 | chr:6:32648036 |
| 6 rs74821931  | 32517233 A | 0.4271 | 3.82E-09 | chr:6:32648036 |
| 6 rs72845752  | 32530285 T | 0.503  | 3.88E-09 | chr:6:32648036 |
| 6 rs72845754  | 32530286 G | 0.503  | 3.88E-09 | chr:6:32648036 |
| 6 rs3817973   | 32361111 T | 2.557  | 3.93E-09 | chr:6:32648036 |
| 6 rs4373382   | 32350868 C | 2.557  | 3.93E-09 | chr:6:32648036 |
| 6 rs4424066   | 32354428 G | 2.557  | 3.93E-09 | chr:6:32648036 |
| 6 rs9268434   | 32346452 T | 2.557  | 3.93E-09 | chr:6:32648036 |
| 6 rs9268460   | 32351283 C | 2.557  | 3.93E-09 | chr:6:32648036 |
| 6 rs9268472   | 32355605 A | 2.557  | 3.93E-09 | chr:6:32648036 |
| 6 rs9268473   | 32355683 G | 2.557  | 3.93E-09 | chr:6:32648036 |
| 6 rs9268476   | 32358942 A | 2.557  | 3.93E-09 | chr:6:32648036 |
| 6 rs115664796 | 32508758 C | 0.3968 | 4.00E-09 | chr:6:32648036 |
| 6 rs9271307   | 32581694 A | 0.3932 | 4.01E-09 | chr:6:32648036 |
| 6 rs73727973  | 32509691 G | 0.3997 | 4.01E-09 | chr:6:32648036 |
| 6 rs68126668  | 32509603 A | 0.3997 | 4.02E-09 | chr:6:32648036 |
| 6 rs9274503   | 32634103 T | 0.4151 | 4.04E-09 | chr:6:32648036 |
| 6 rs9274997   | 32642673 C | 0.3272 | 4.04E-09 | chr:6:32648036 |
| 6 rs67916930  | 32508823 G | 0.3973 | 4.06E-09 | chr:6:32648036 |
| 6 rs60538826  | 32359465 T | 4.289  | 4.07E-09 | chr:6:32648036 |
| 6 rs114776163 | 32518625 G | 0.3856 | 4.08E-09 | chr:6:32648036 |
| 6 rs34553045  | 32561565 C | 4.18   | 4.09E-09 | chr:6:32648036 |
| 6 rs576530137 | 32629015 C | 1.945  | 4.10E-09 | chr:6:32648036 |
| 6 rs9271342   | 32583122 C | 0.3242 | 4.10E-09 | chr:6:32648036 |
| 6 rs72508418  | 32459868 T | 0.4536 | 4.11E-09 | chr:6:32648036 |
| 6 rs9275008   | 32642944 T | 0.344  | 4.12E-09 | chr:6:32648036 |
| 6 rs34615209  | 32513862 T | 0.4004 | 4.21E-09 | chr:6:32648036 |
| 6 rs35687625  | 32513840 A | 0.4004 | 4.21E-09 | chr:6:32648036 |
| 6 rs62405642  | 32517759 G | 0.4107 | 4.21E-09 | chr:6:32648036 |
| 6 rs9274954   | 32641878 C | 0.4397 | 4.24E-09 | chr:6:32648036 |
| 6 rs57172910  | 32529365 T | 0.5152 | 4.29E-09 | chr:6:32648036 |
| 6 rs66796862  | 32521664 C | 0.4001 | 4.34E-09 | chr:6:32648036 |
| 6 rs9271284   | 32581190 C | 0.3939 | 4.37E-09 | chr:6:32648036 |
| 6 rs9271285   | 32581193 G | 0.3939 | 4.37E-09 | chr:6:32648036 |
| 6 rs9271286   | 32581221 A | 0.3939 | 4.37E-09 | chr:6:32648036 |
| 6 rs9271287   | 32581253 G | 0.3939 | 4.37E-09 | chr:6:32648036 |
| 6 rs9271288   | 32581260 G | 0.3939 | 4.37E-09 | chr:6:32648036 |

|               |            |        |          |                |
|---------------|------------|--------|----------|----------------|
| 6 rs201061956 | 32487101 C | 2.535  | 4.37E-09 | chr:6:32648036 |
| 6 rs73726814  | 32523235 C | 0.4106 | 4.40E-09 | chr:6:32648036 |
| 6 rs28891451  | 32641642 T | 0.3961 | 4.48E-09 | chr:6:32648036 |
| 6 rs4959097   | 32366625 C | 2.466  | 4.48E-09 | chr:6:32648036 |
| 6 rs281863666 | 32630713 C | 2.203  | 4.48E-09 | chr:6:32648036 |
| 6 rs2157337   | 32501144 T | 0.4023 | 4.51E-09 | chr:6:32648036 |
| 6 rs115077688 | 32503287 T | 0.397  | 4.55E-09 | chr:6:32648036 |
| 6 rs2858314   | 32663448 A | 2.569  | 4.60E-09 | chr:6:32648036 |
| 6 rs549096164 | 32359479 T | 4.269  | 4.60E-09 | chr:6:32648036 |
| 6 rs561411181 | 32359483 G | 4.269  | 4.60E-09 | chr:6:32648036 |
| 6 rs113908137 | 32523500 G | 0.4865 | 4.65E-09 | chr:6:32648036 |
| 6 rs34166207  | 32523510 A | 0.4865 | 4.65E-09 | chr:6:32648036 |
| 6 rs2076529   | 32363955 C | 2.541  | 4.80E-09 | chr:6:32648036 |
| 6 rs2076533   | 32363527 T | 2.541  | 4.80E-09 | chr:6:32648036 |
| 6 rs9274536   | 32634634 C | 0.4122 | 4.80E-09 | chr:6:32648036 |
| 6 rs114795214 | 32543759 T | 3.302  | 4.90E-09 | chr:6:32648036 |
| 6 rs533460220 | 32368604 C | 3.536  | 4.97E-09 | chr:6:32648036 |
| 6 rs35380574  | 32560051 T | 3.102  | 5.00E-09 | chr:6:32648036 |
| 6 rs34405098  | 32523269 T | 0.4111 | 5.03E-09 | chr:6:32648036 |
| 6 rs111649944 | 32518268 T | 0.4093 | 5.05E-09 | chr:6:32648036 |
| 6 rs113232784 | 32518256 A | 0.4093 | 5.05E-09 | chr:6:32648036 |
| 6 rs79881121  | 32502324 A | 0.4267 | 5.06E-09 | chr:6:32648036 |
| 6 rs66532036  | 32519319 A | 0.4023 | 5.08E-09 | chr:6:32648036 |
| 6 rs34291045  | 32560385 T | 3.133  | 5.09E-09 | chr:6:32648036 |
| 6 rs34939562  | 32560388 A | 3.133  | 5.09E-09 | chr:6:32648036 |
| 6 rs35472547  | 32560370 T | 3.133  | 5.09E-09 | chr:6:32648036 |
| 6 rs113648142 | 32508762 T | 0.4009 | 5.10E-09 | chr:6:32648036 |
| 6 rs67774869  | 32508794 C | 0.4006 | 5.17E-09 | chr:6:32648036 |
| 6 rs72492311  | 32509979 T | 0.4032 | 5.19E-09 | chr:6:32648036 |
| 6 rs60986879  | 32529685 T | 1.907  | 5.24E-09 | chr:6:32648036 |
| 6 rs75174795  | 32608977 G | 2.43   | 5.29E-09 | chr:6:32648036 |
| 6 rs58069912  | 32616339 C | 2.269  | 5.33E-09 | chr:6:32648036 |
| 6 rs72853989  | 32512321 T | 0.4038 | 5.34E-09 | chr:6:32648036 |
| 6 rs139854564 | 32364496 A | 4.072  | 5.44E-09 | chr:6:32648036 |
| 6 rs28688207  | 32628660 C | 2.906  | 5.51E-09 | chr:6:32648036 |
| 6 rs74375951  | 32500923 G | 0.4048 | 5.60E-09 | chr:6:32648036 |
| 6 rs9275611   | 32683763 A | 2.976  | 5.62E-09 | chr:6:32648036 |
| 6 rs77236357  | 32459844 T | 0.4572 | 5.62E-09 | chr:6:32648036 |
| 6 rs3873445   | 32683010 T | 3.069  | 5.63E-09 | chr:6:32648036 |
| 6 rs28819746  | 32509579 C | 0.4042 | 5.66E-09 | chr:6:32648036 |
| 6 rs3020628   | 32628784 C | 0.4316 | 5.70E-09 | chr:6:32648036 |
| 6 rs114293611 | 32487353 C | 0.4012 | 5.72E-09 | chr:6:32648036 |
| 6 rs9271302   | 32581621 C | 0.3979 | 5.73E-09 | chr:6:32648036 |

|               |            |        |          |                |
|---------------|------------|--------|----------|----------------|
| 6 rs542136530 | 32486880 A | 3.511  | 5.76E-09 | chr:6:32648036 |
| 6 rs9275071   | 32648490 G | 0.3183 | 5.76E-09 | chr:6:32648036 |
| 6 rs9275073   | 32648513 C | 0.3183 | 5.76E-09 | chr:6:32648036 |
| 6 rs9274595   | 32635450 G | 0.4651 | 5.82E-09 | chr:6:32648036 |
| 6 rs9274934   | 32641529 C | 0.4994 | 5.89E-09 | chr:6:32648036 |
| 6 rs112236587 | 32530615 C | 0.5085 | 5.94E-09 | chr:6:32648036 |
| 6 rs112302151 | 32530628 T | 0.5085 | 5.94E-09 | chr:6:32648036 |
| 6 rs112715773 | 32530608 C | 0.5085 | 5.94E-09 | chr:6:32648036 |
| 6 rs73729111  | 32517525 T | 0.407  | 6.02E-09 | chr:6:32648036 |
| 6 rs67717173  | 32520137 T | 0.4051 | 6.09E-09 | chr:6:32648036 |
| 6 rs72492325  | 32520151 C | 0.4051 | 6.09E-09 | chr:6:32648036 |
| 6 rs2854273   | 32628776 C | 0.4322 | 6.17E-09 | chr:6:32648036 |
| 6 rs74950807  | 32513375 T | 0.4013 | 6.17E-09 | chr:6:32648036 |
| 6 rs76818741  | 32513378 A | 0.4013 | 6.17E-09 | chr:6:32648036 |
| 6 rs9275168   | 32653676 T | 0.2918 | 6.19E-09 | chr:6:32648036 |
| 6 rs142861613 | 32364483 C | 4.11   | 6.23E-09 | chr:6:32648036 |
| 6 rs147461309 | 32364484 A | 4.11   | 6.23E-09 | chr:6:32648036 |
| 6 rs9271274   | 32580935 C | 0.3999 | 6.39E-09 | chr:6:32648036 |
| 6 rs41287328  | 32552698 G | 0.351  | 6.39E-09 | chr:6:32648036 |
| 6 rs72508474  | 32508738 C | 0.4033 | 6.40E-09 | chr:6:32648036 |
| 6 rs9269578   | 32544743 T | 0.4851 | 6.40E-09 | chr:6:32648036 |
| 6 rs72492306  | 32509510 A | 0.4071 | 6.42E-09 | chr:6:32648036 |
| 6 rs72492307  | 32509519 C | 0.4071 | 6.42E-09 | chr:6:32648036 |
| 6 rs35858943  | 32559473 A | 4.097  | 6.43E-09 | chr:6:32648036 |
| 6 rs111340421 | 32517174 G | 0.4072 | 6.44E-09 | chr:6:32648036 |
| 6 rs556048812 | 32368631 G | 3.515  | 6.62E-09 | chr:6:32648036 |
| 6 rs567830678 | 32368633 C | 3.515  | 6.62E-09 | chr:6:32648036 |
| 6 rs72492341  | 32531636 G | 0.5096 | 6.66E-09 | chr:6:32648036 |
| 6 rs9271336   | 32582877 A | 0.4013 | 6.66E-09 | chr:6:32648036 |
| 6 rs9271337   | 32582881 T | 0.4013 | 6.66E-09 | chr:6:32648036 |
| 6 rs9271338   | 32582885 G | 0.4013 | 6.66E-09 | chr:6:32648036 |
| 6 rs9271339   | 32582891 C | 0.4013 | 6.66E-09 | chr:6:32648036 |
| 6 rs113787446 | 32518630 C | 0.392  | 6.69E-09 | chr:6:32648036 |
| 6 rs41263824  | 32632515 A | 0.4323 | 6.71E-09 | chr:6:32648036 |
| 6 rs62404094  | 32610696 A | 3.457  | 6.90E-09 | chr:6:32648036 |
| 6 rs9273534   | 32628751 C | 0.4234 | 6.90E-09 | chr:6:32648036 |
| 6 rs66497315  | 32512407 C | 0.4087 | 6.99E-09 | chr:6:32648036 |
| 6 rs9269293   | 32539463 G | 0.4718 | 7.00E-09 | chr:6:32648036 |
| 6 rs201795916 | 32514567 C | 0.4064 | 7.09E-09 | chr:6:32648036 |
| 6 rs72844118  | 32514539 T | 0.4064 | 7.09E-09 | chr:6:32648036 |
| 6 rs9271272   | 32580894 C | 0.407  | 7.21E-09 | chr:6:32648036 |
| 6 rs147023195 | 32518295 T | 0.4116 | 7.22E-09 | chr:6:32648036 |
| 6 rs3873448   | 32683055 T | 3.039  | 7.24E-09 | chr:6:32648036 |

|               |            |        |          |                |
|---------------|------------|--------|----------|----------------|
| 6 rs9269921   | 32551568 G | 0.3804 | 7.32E-09 | chr:6:32648036 |
| 6 rs35464067  | 32559488 C | 3.96   | 7.32E-09 | chr:6:32648036 |
| 6 rs72845755  | 32530385 G | 0.5109 | 7.41E-09 | chr:6:32648036 |
| 6 rs146487240 | 32359469 T | 4.198  | 7.44E-09 | chr:6:32648036 |
| 6 rs149171231 | 32359467 T | 4.198  | 7.44E-09 | chr:6:32648036 |
| 6 rs72844171  | 32520749 C | 0.4065 | 7.51E-09 | chr:6:32648036 |
| 6 rs78337030  | 32615310 G | 2.702  | 7.56E-09 | chr:6:32648036 |
| 6 rs9269292   | 32539450 T | 0.4725 | 7.68E-09 | chr:6:32648036 |
| 6 rs530246116 | 32517244 C | 2.209  | 7.70E-09 | chr:6:32648036 |
| 6 rs72851025  | 32501459 C | 0.409  | 7.79E-09 | chr:6:32648036 |
| 6 rs7759742   | 32381736 T | 0.3492 | 7.92E-09 | chr:6:32648036 |
| 6 rs369821541 | 32368934 G | 4.074  | 7.92E-09 | chr:6:32648036 |
| 6 rs536493456 | 32674838 G | 0.2814 | 7.93E-09 | chr:6:32648036 |
| 6 rs9271273   | 32580902 A | 0.4076 | 8.02E-09 | chr:6:32648036 |
| 6 rs36216571  | 32611215 T | 2.973  | 8.07E-09 | chr:6:32648036 |
| 6 rs17425622  | 32571961 C | 4.299  | 8.22E-09 | chr:6:32648036 |
| 6 rs9274594   | 32635435 C | 0.4715 | 8.33E-09 | chr:6:32648036 |
| 6 rs73727980  | 32511774 C | 0.4095 | 8.38E-09 | chr:6:32648036 |
| 6 rs73729106  | 32514288 T | 0.4089 | 8.53E-09 | chr:6:32648036 |
| 6 rs5016923   | 32502028 G | 0.4115 | 8.60E-09 | chr:6:32648036 |
| 6 rs74937819  | 32502037 A | 0.4115 | 8.60E-09 | chr:6:32648036 |
| 6 rs72508417  | 32459813 A | 0.4591 | 8.60E-09 | chr:6:32648036 |
| 6 rs9274987   | 32642405 G | 0.3685 | 8.63E-09 | chr:6:32648036 |
| 6 rs9274988   | 32642406 G | 0.3685 | 8.63E-09 | chr:6:32648036 |
| 6 rs72492314  | 32512421 A | 0.4115 | 8.69E-09 | chr:6:32648036 |
| 6 rs117203060 | 32574225 A | 6.538  | 8.69E-09 | chr:6:32648036 |
| 6 rs59110815  | 32601594 T | 6.538  | 8.69E-09 | chr:6:32648036 |
| 6 rs111945767 | 32517045 C | 0.4171 | 8.77E-09 | chr:6:32648036 |
| 6 rs2050188   | 32339897 C | 0.4029 | 8.82E-09 | chr:6:32648036 |
| 6 rs659244    | 32577033 C | 2.48   | 8.83E-09 | chr:6:32648036 |
| 6 rs2294881   | 32367604 C | 2.426  | 8.84E-09 | chr:6:32648036 |
| 6 rs2294882   | 32367515 C | 2.426  | 8.84E-09 | chr:6:32648036 |
| 6 rs4713523   | 32365971 A | 2.426  | 8.84E-09 | chr:6:32648036 |
| 6 rs4713524   | 32366331 C | 2.426  | 8.84E-09 | chr:6:32648036 |
| 6 rs62402759  | 32365707 C | 2.426  | 8.84E-09 | chr:6:32648036 |
| 6 rs62404560  | 32365896 G | 2.426  | 8.84E-09 | chr:6:32648036 |
| 6 rs71536560  | 32529163 G | 0.5212 | 9.06E-09 | chr:6:32648036 |
| 6 rs79749596  | 32534021 C | 0.5014 | 9.14E-09 | chr:6:32648036 |
| 6 rs9272071   | 32599487 C | 0.3224 | 9.22E-09 | chr:6:32648036 |
| 6 rs67912528  | 32536466 A | 0.5021 | 9.23E-09 | chr:6:32648036 |
| 6 rs72845756  | 32530545 C | 0.5149 | 9.27E-09 | chr:6:32648036 |
| 6 rs28793944  | 32528004 T | 0.5339 | 9.33E-09 | chr:6:32648036 |
| 6 rs2858317   | 32662280 C | 0.3354 | 9.37E-09 | chr:6:32648036 |

|               |            |        |          |                |
|---------------|------------|--------|----------|----------------|
| 6 rs6689      | 32627700 G | 0.3161 | 9.42E-09 | chr:6:32648036 |
| 6 rs28746784  | 32632261 T | 2.033  | 9.62E-09 | chr:6:32648036 |
| 6 rs114579035 | 32545832 C | 3.087  | 9.72E-09 | chr:6:32648036 |
| 6 rs28891455  | 32641898 C | 0.4296 | 9.73E-09 | chr:6:32648036 |
| 6 rs567852525 | 32452110 T | 4.436  | 9.75E-09 | chr:6:32648036 |
| 6 rs9274955   | 32641890 A | 0.4429 | 9.76E-09 | chr:6:32648036 |
| 6 rs115469967 | 32530190 A | 0.5151 | 9.80E-09 | chr:6:32648036 |
| 6 rs117359596 | 32718015 T | 4.912  | 9.87E-09 | chr:6:32648036 |
| 6 rs78622201  | 32518405 A | 0.4135 | 9.95E-09 | chr:6:32648036 |
| 6 rs9271303   | 32581647 G | 0.406  | 9.96E-09 | chr:6:32648036 |
| 6 rs9271304   | 32581648 A | 0.406  | 9.96E-09 | chr:6:32648036 |
| 6 rs9271305   | 32581649 T | 0.406  | 9.96E-09 | chr:6:32648036 |
| 6 rs9271306   | 32581658 G | 0.406  | 9.96E-09 | chr:6:32648036 |
| 6 rs2760975   | 32560771 A | 4.273  | 9.97E-09 | chr:6:32648036 |
| 6 rs35917796  | 32560028 T | 3.02   | 1.00E-08 | chr:6:32648036 |
| 6 rs35972518  | 32560026 G | 3.02   | 1.00E-08 | chr:6:32648036 |
| 6 rs36096565  | 32560025 G | 3.02   | 1.00E-08 | chr:6:32648036 |
| 6 rs73726893  | 32548069 T | 3.706  | 1.00E-08 | chr:6:32648036 |
| 6 rs118016683 | 32682362 C | 3.658  | 1.01E-08 | chr:6:32648036 |
| 6 rs73401349  | 32458094 C | 0.417  | 1.01E-08 | chr:6:32648036 |
| 6 rs4947340   | 32435338 T | 2.462  | 1.01E-08 | chr:6:32648036 |
| 6 rs1130381   | 32632691 A | 5.427  | 1.01E-08 | chr:6:32648036 |
| 6 rs566860331 | 32523586 G | 2.294  | 1.02E-08 | chr:6:32648036 |
| 6 rs3828852   | 32520595 A | 0.4094 | 1.03E-08 | chr:6:32648036 |
| 6 rs75351515  | 32635420 G | 0.471  | 1.03E-08 | chr:6:32648036 |
| 6 rs79957603  | 32509348 A | 2.239  | 1.04E-08 | chr:6:32648036 |
| 6 rs72508430  | 32487172 T | 0.3565 | 1.05E-08 | chr:6:32648036 |
| 6 rs36214506  | 32611709 C | 3.319  | 1.05E-08 | chr:6:32648036 |
| 6 rs281863661 | 32630720 C | 0.4873 | 1.05E-08 | chr:6:32648036 |
| 6 rs9272003   | 32597940 G | 0.3268 | 1.07E-08 | chr:6:32648036 |
| 6 rs114269927 | 32575209 A | 0.3834 | 1.09E-08 | chr:6:32648036 |
| 6 rs73727981  | 32511791 C | 0.4138 | 1.10E-08 | chr:6:32648036 |
| 6 rs77340266  | 32530200 A | 0.5161 | 1.11E-08 | chr:6:32648036 |
| 6 rs77783340  | 32514313 T | 0.4109 | 1.11E-08 | chr:6:32648036 |
| 6 rs183870834 | 32517228 C | 2.186  | 1.11E-08 | chr:6:32648036 |
| 6 rs192002545 | 32517227 A | 2.186  | 1.11E-08 | chr:6:32648036 |
| 6 rs9268926   | 32433067 G | 4.491  | 1.13E-08 | chr:6:32648036 |
| 6 rs72853983  | 32511854 A | 0.4146 | 1.15E-08 | chr:6:32648036 |
| 6 rs73729140  | 32521290 C | 0.3725 | 1.15E-08 | chr:6:32648036 |
| 6 rs28819133  | 32527988 C | 1.908  | 1.15E-08 | chr:6:32648036 |
| 6 rs75184770  | 32529709 A | 0.5377 | 1.16E-08 | chr:6:32648036 |
| 6 rs566861    | 32576538 C | 0.4239 | 1.16E-08 | chr:6:32648036 |
| 6 rs111335405 | 32655722 G | 4.618  | 1.18E-08 | chr:6:32648036 |

|               |            |        |          |                |
|---------------|------------|--------|----------|----------------|
| 6 rs9270591   | 32561424 C | 2.383  | 1.19E-08 | chr:6:32648036 |
| 6 rs3129849   | 32397309 A | 3.551  | 1.19E-08 | chr:6:32648036 |
| 6 rs3129852   | 32397784 G | 3.551  | 1.19E-08 | chr:6:32648036 |
| 6 rs3135334   | 32402686 C | 3.551  | 1.19E-08 | chr:6:32648036 |
| 6 rs3135341   | 32398748 C | 3.551  | 1.19E-08 | chr:6:32648036 |
| 6 rs3763321   | 32406704 T | 3.551  | 1.19E-08 | chr:6:32648036 |
| 6 rs4504509   | 32399159 T | 3.551  | 1.19E-08 | chr:6:32648036 |
| 6 rs9268633   | 32406473 A | 3.551  | 1.19E-08 | chr:6:32648036 |
| 6 rs66521709  | 32509829 A | 0.4135 | 1.20E-08 | chr:6:32648036 |
| 6 rs71536562  | 32529207 C | 0.5153 | 1.21E-08 | chr:6:32648036 |
| 6 rs71536564  | 32529818 C | 0.5181 | 1.23E-08 | chr:6:32648036 |
| 6 rs9270894   | 32571872 A | 2.096  | 1.23E-08 | chr:6:32648036 |
| 6 rs73728002  | 32513993 A | 0.4136 | 1.23E-08 | chr:6:32648036 |
| 6 rs9272544   | 32606878 A | 0.4698 | 1.23E-08 | chr:6:32648036 |
| 6 rs73397403  | 32519849 G | 0.4041 | 1.24E-08 | chr:6:32648036 |
| 6 rs9270588   | 32561327 C | 2.371  | 1.24E-08 | chr:6:32648036 |
| 6 rs72851028  | 32501615 A | 0.4164 | 1.24E-08 | chr:6:32648036 |
| 6 rs115065497 | 32530466 C | 0.5205 | 1.25E-08 | chr:6:32648036 |
| 6 rs13213605  | 32647764 C | 0.4667 | 1.25E-08 | chr:6:32648036 |
| 6 rs188453426 | 32560099 C | 5.657  | 1.25E-08 | chr:6:32648036 |
| 6 rs116316731 | 32502097 T | 0.416  | 1.27E-08 | chr:6:32648036 |
| 6 rs74324877  | 32517782 C | 2.197  | 1.27E-08 | chr:6:32648036 |
| 6 rs9274977   | 32642247 A | 0.35   | 1.27E-08 | chr:6:32648036 |
| 6 rs9275451   | 32671908 T | 2.864  | 1.28E-08 | chr:6:32648036 |
| 6 rs9272002   | 32597924 G | 0.3289 | 1.29E-08 | chr:6:32648036 |
| 6 rs9269274   | 32539170 C | 0.5105 | 1.31E-08 | chr:6:32648036 |
| 6 rs9269275   | 32539172 G | 0.5105 | 1.31E-08 | chr:6:32648036 |
| 6 rs1064173   | 32627480 A | 3.165  | 1.32E-08 | chr:6:32648036 |
| 6 rs28891454  | 32641894 G | 0.4342 | 1.33E-08 | chr:6:32648036 |
| 6 rs28891396  | 32639740 A | 0.4228 | 1.34E-08 | chr:6:32648036 |
| 6 rs9275177   | 32654174 C | 0.2926 | 1.35E-08 | chr:6:32648036 |
| 6 rs9275178   | 32654181 G | 0.2926 | 1.35E-08 | chr:6:32648036 |
| 6 rs2294883   | 32367451 A | 2.389  | 1.35E-08 | chr:6:32648036 |
| 6 rs28772724  | 32509357 T | 2.227  | 1.37E-08 | chr:6:32648036 |
| 6 rs75635252  | 32509332 G | 2.227  | 1.37E-08 | chr:6:32648036 |
| 6 rs112748105 | 32368483 A | 2.389  | 1.39E-08 | chr:6:32648036 |
| 6 rs45512899  | 32611299 T | 2.825  | 1.39E-08 | chr:6:32648036 |
| 6 rs140590517 | 32518282 A | 2.195  | 1.42E-08 | chr:6:32648036 |
| 6 rs117530403 | 32566482 G | 5.869  | 1.42E-08 | chr:6:32648036 |
| 6 rs72851061  | 32503672 C | 0.4191 | 1.42E-08 | chr:6:32648036 |
| 6 rs9406389   | 32517764 C | 4.653  | 1.43E-08 | chr:6:32648036 |
| 6 rs182965163 | 32454827 A | 0.4652 | 1.43E-08 | chr:6:32648036 |
| 6 rs202162787 | 32454828 G | 0.4652 | 1.43E-08 | chr:6:32648036 |

|               |            |        |          |                |
|---------------|------------|--------|----------|----------------|
| 6 rs146335245 | 32662357 C | 5.768  | 1.44E-08 | chr:6:32648036 |
| 6 rs9269387   | 32541058 G | 0.4072 | 1.45E-08 | chr:6:32648036 |
| 6 rs369883062 | 32519734 G | 0.4179 | 1.45E-08 | chr:6:32648036 |
| 6 rs9275173   | 32654037 T | 0.2913 | 1.46E-08 | chr:6:32648036 |
| 6 rs117968912 | 32681179 T | 3.651  | 1.46E-08 | chr:6:32648036 |
| 6 rs139485041 | 32674707 T | 3.651  | 1.46E-08 | chr:6:32648036 |
| 6 rs9268505   | 32377408 T | 0.3088 | 1.47E-08 | chr:6:32648036 |
| 6 rs35072954  | 32559485 A | 3.851  | 1.47E-08 | chr:6:32648036 |
| 6 rs114987387 | 32502131 G | 0.4179 | 1.48E-08 | chr:6:32648036 |
| 6 rs72851052  | 32502249 T | 0.4143 | 1.48E-08 | chr:6:32648036 |
| 6 rs72851053  | 32502250 G | 0.4143 | 1.48E-08 | chr:6:32648036 |
| 6 rs111821655 | 32616693 C | 1.968  | 1.50E-08 | chr:6:32648036 |
| 6 rs112578359 | 32534909 A | 2.131  | 1.50E-08 | chr:6:32648036 |
| 6 rs9275172   | 32653997 A | 0.2909 | 1.50E-08 | chr:6:32648036 |
| 6 rs9275169   | 32653721 T | 0.2903 | 1.51E-08 | chr:6:32648036 |
| 6 rs9275170   | 32653726 G | 0.2903 | 1.51E-08 | chr:6:32648036 |
| 6 rs34508462  | 32523476 C | 0.5019 | 1.52E-08 | chr:6:32648036 |
| 6 rs71534539  | 32512754 A | 0.4599 | 1.55E-08 | chr:6:32648036 |
| 6 rs113504992 | 32531418 T | 0.5204 | 1.57E-08 | chr:6:32648036 |
| 6 rs9274930   | 32641505 T | 0.5138 | 1.58E-08 | chr:6:32648036 |
| 6 rs9274931   | 32641506 G | 0.5138 | 1.58E-08 | chr:6:32648036 |
| 6 rs9274932   | 32641509 T | 0.5138 | 1.58E-08 | chr:6:32648036 |
| 6 rs9274933   | 32641513 T | 0.5138 | 1.58E-08 | chr:6:32648036 |
| 6 rs140185715 | 32534808 A | 2.152  | 1.63E-08 | chr:6:32648036 |
| 6 rs9275330   | 32666875 G | 2.608  | 1.65E-08 | chr:6:32648036 |
| 6 rs9275331   | 32666899 G | 2.608  | 1.65E-08 | chr:6:32648036 |
| 6 rs522308    | 32581922 T | 3.66   | 1.65E-08 | chr:6:32648036 |
| 6 rs111383925 | 32532741 C | 0.5239 | 1.66E-08 | chr:6:32648036 |
| 6 rs111566749 | 32532746 A | 0.5239 | 1.66E-08 | chr:6:32648036 |
| 6 rs72849265  | 32458208 T | 0.4246 | 1.68E-08 | chr:6:32648036 |
| 6 rs9274999   | 32642709 G | 0.3506 | 1.69E-08 | chr:6:32648036 |
| 6 rs9274969   | 32642073 G | 0.3877 | 1.69E-08 | chr:6:32648036 |
| 6 rs7751856   | 32698988 C | 2.543  | 1.70E-08 | chr:6:32648036 |
| 6 rs536038224 | 32523371 C | 0.4898 | 1.70E-08 | chr:6:32648036 |
| 6 rs9269317   | 32539767 T | 0.4772 | 1.70E-08 | chr:6:32648036 |
| 6 rs3828849   | 32520664 A | 2.24   | 1.71E-08 | chr:6:32648036 |
| 6 rs7708      | 32610749 A | 2.976  | 1.71E-08 | chr:6:32648036 |
| 6 rs143321288 | 32531487 A | 0.5207 | 1.72E-08 | chr:6:32648036 |
| 6 rs554742089 | 32451822 T | 4.333  | 1.72E-08 | chr:6:32648036 |
| 6 rs9271275   | 32580961 T | 0.4233 | 1.73E-08 | chr:6:32648036 |
| 6 rs659204    | 32577001 G | 0.4297 | 1.74E-08 | chr:6:32648036 |
| 6 rs112512531 | 32636809 T | 6.621  | 1.75E-08 | chr:6:32648036 |
| 6 rs77274878  | 32523348 A | 2.126  | 1.76E-08 | chr:6:32648036 |

|               |            |        |          |                |
|---------------|------------|--------|----------|----------------|
| 6 rs74485644  | 32501421 T | 0.4205 | 1.77E-08 | chr:6:32648036 |
| 6 rs115879259 | 32559213 T | 3.943  | 1.78E-08 | chr:6:32648036 |
| 6 rs535852    | 32577604 T | 2.449  | 1.79E-08 | chr:6:32648036 |
| 6 rs115754308 | 32518466 T | 2.225  | 1.80E-08 | chr:6:32648036 |
| 6 rs281875048 | 32631217 T | 6.59   | 1.81E-08 | chr:6:32648036 |
| 6 rs74535936  | 32510547 G | 0.4202 | 1.82E-08 | chr:6:32648036 |
| 6 rs6918317   | 32381210 T | 0.3643 | 1.82E-08 | chr:6:32648036 |
| 6 rs9274745   | 32638058 C | 0.2917 | 1.83E-08 | chr:6:32648036 |
| 6 rs72853904  | 32505575 T | 0.416  | 1.83E-08 | chr:6:32648036 |
| 6 rs62404112  | 32611122 C | 2.373  | 1.84E-08 | chr:6:32648036 |
| 6 rs73401326  | 32454783 G | 0.4683 | 1.85E-08 | chr:6:32648036 |
| 6 rs79719330  | 32637723 C | 6.376  | 1.90E-08 | chr:6:32648036 |
| 6 rs530370261 | 32519826 T | 0.409  | 1.91E-08 | chr:6:32648036 |
| 6 rs41287329  | 32552728 G | 0.3955 | 1.96E-08 | chr:6:32648036 |
| 6 rs73726810  | 32522857 A | 0.4355 | 1.96E-08 | chr:6:32648036 |
| 6 rs9275452   | 32671930 T | 2.791  | 1.97E-08 | chr:6:32648036 |
| 6 rs9275454   | 32671939 A | 2.791  | 1.97E-08 | chr:6:32648036 |
| 6 rs116830840 | 32537945 T | 0.4957 | 1.99E-08 | chr:6:32648036 |
| 6 rs176095    | 32158319 G | 2.809  | 1.99E-08 | chr:6:32648036 |
| 6 rs559448699 | 32497190 T | 3.781  | 1.99E-08 | chr:6:32648036 |
| 6 rs9271278   | 32581016 G | 0.4295 | 2.00E-08 | chr:6:32648036 |
| 6 rs9271279   | 32581018 G | 0.4295 | 2.00E-08 | chr:6:32648036 |
| 6 rs114954902 | 32517768 A | 2.168  | 2.01E-08 | chr:6:32648036 |
| 6 rs28371245  | 32647982 T | 0.4157 | 2.03E-08 | chr:6:32648036 |
| 6 rs9274639   | 32636146 T | 0.3527 | 2.04E-08 | chr:6:32648036 |
| 6 rs72844144  | 32519125 A | 0.3463 | 2.06E-08 | chr:6:32648036 |
| 6 rs12660259  | 32531709 A | 0.5268 | 2.06E-08 | chr:6:32648036 |
| 6 rs9270585   | 32561300 C | 2.329  | 2.09E-08 | chr:6:32648036 |
| 6 rs557371502 | 32520639 A | 2.222  | 2.11E-08 | chr:6:32648036 |
| 6 rs72492340  | 32531385 C | 0.5244 | 2.11E-08 | chr:6:32648036 |
| 6 rs72845768  | 32531377 C | 0.5244 | 2.11E-08 | chr:6:32648036 |
| 6 rs9275055   | 32648220 T | 0.4009 | 2.12E-08 | chr:6:32648036 |
| 6 rs6914573   | 32639368 A | 0.3195 | 2.12E-08 | chr:6:32648036 |
| 6 rs9274741   | 32637994 T | 0.29   | 2.18E-08 | chr:6:32648036 |
| 6 rs9275312   | 32665728 G | 2.583  | 2.20E-08 | chr:6:32648036 |
| 6 rs9275327   | 32666802 T | 2.583  | 2.20E-08 | chr:6:32648036 |
| 6 rs9275328   | 32666822 T | 2.583  | 2.20E-08 | chr:6:32648036 |
| 6 rs9275333   | 32666968 C | 2.583  | 2.20E-08 | chr:6:32648036 |
| 6 rs9275338   | 32667343 T | 2.583  | 2.20E-08 | chr:6:32648036 |
| 6 rs9275358   | 32667895 G | 2.583  | 2.20E-08 | chr:6:32648036 |
| 6 rs9275360   | 32667937 T | 2.583  | 2.20E-08 | chr:6:32648036 |
| 6 rs9275362   | 32667957 T | 2.583  | 2.20E-08 | chr:6:32648036 |
| 6 rs9275054   | 32648208 A | 0.4008 | 2.23E-08 | chr:6:32648036 |



|               |            |        |          |                |
|---------------|------------|--------|----------|----------------|
| 6 rs118146750 | 32523174 A | 2.088  | 2.25E-08 | chr:6:32648036 |
| 6 rs187436363 | 32532613 G | 2.097  | 2.27E-08 | chr:6:32648036 |
| 6 rs118177562 | 32702574 C | 4.565  | 2.27E-08 | chr:6:32648036 |
| 6 rs577098685 | 32440911 T | 6.023  | 2.29E-08 | chr:6:32648036 |
| 6 rs113405235 | 32521796 C | 0.359  | 2.30E-08 | chr:6:32648036 |
| 6 rs9272212   | 32602033 A | 0.4015 | 2.30E-08 | chr:6:32648036 |
| 6 rs553071835 | 32455724 T | 3.402  | 2.32E-08 | chr:6:32648036 |
| 6 rs75495772  | 32455718 G | 3.402  | 2.32E-08 | chr:6:32648036 |
| 6 rs72853971  | 32509938 C | 0.4245 | 2.32E-08 | chr:6:32648036 |
| 6 rs112280675 | 32522066 A | 0.3807 | 2.34E-08 | chr:6:32648036 |
| 6 rs9268581   | 32396930 A | 4.342  | 2.35E-08 | chr:6:32648036 |
| 6 rs9268614   | 32402778 G | 4.342  | 2.35E-08 | chr:6:32648036 |
| 6 rs9268627   | 32405821 C | 4.342  | 2.35E-08 | chr:6:32648036 |
| 6 rs1846190   | 32583813 A | 2.39   | 2.39E-08 | chr:6:32648036 |
| 6 rs549708713 | 32364587 A | 3.809  | 2.39E-08 | chr:6:32648036 |
| 6 rs66534143  | 32512601 C | 0.4362 | 2.40E-08 | chr:6:32648036 |
| 6 rs149581890 | 32530684 A | 0.527  | 2.42E-08 | chr:6:32648036 |
| 6 rs111596698 | 32487123 G | 0.3183 | 2.47E-08 | chr:6:32648036 |
| 6 rs3817965   | 32367927 G | 2.343  | 2.47E-08 | chr:6:32648036 |
| 6 rs66502326  | 32509411 T | 0.427  | 2.47E-08 | chr:6:32648036 |
| 6 rs3129967   | 32381461 T | 0.3645 | 2.47E-08 | chr:6:32648036 |
| 6 rs572411223 | 32454634 T | 0.4554 | 2.48E-08 | chr:6:32648036 |
| 6 rs72492343  | 32532385 T | 0.5272 | 2.50E-08 | chr:6:32648036 |
| 6 rs117609365 | 32678837 G | 3.58   | 2.53E-08 | chr:6:32648036 |
| 6 rs202231764 | 32508412 T | 0.4258 | 2.53E-08 | chr:6:32648036 |
| 6 rs376271339 | 32517804 C | 2.762  | 2.58E-08 | chr:6:32648036 |
| 6 rs78107833  | 32531807 T | 0.5282 | 2.58E-08 | chr:6:32648036 |
| 6 rs41263822  | 32632447 A | 0.4557 | 2.59E-08 | chr:6:32648036 |
| 6 rs114758808 | 32457997 T | 0.4134 | 2.61E-08 | chr:6:32648036 |
| 6 rs555525561 | 32523608 T | 2.247  | 2.61E-08 | chr:6:32648036 |
| 6 rs149589923 | 32500818 A | 0.4284 | 2.61E-08 | chr:6:32648036 |
| 6 rs79207037  | 32509294 A | 2.195  | 2.63E-08 | chr:6:32648036 |
| 6 rs574347579 | 32514817 A | 2.099  | 2.64E-08 | chr:6:32648036 |
| 6 rs141961165 | 32506799 T | 0.4486 | 2.65E-08 | chr:6:32648036 |
| 6 rs35859703  | 32535295 G | 0.5201 | 2.68E-08 | chr:6:32648036 |
| 6 rs114233058 | 32517386 T | 0.4484 | 2.68E-08 | chr:6:32648036 |
| 6 rs115916707 | 32517387 G | 0.4484 | 2.68E-08 | chr:6:32648036 |
| 6 rs147317423 | 32516905 T | 2.173  | 2.69E-08 | chr:6:32648036 |
| 6 rs189139309 | 32516915 G | 2.173  | 2.69E-08 | chr:6:32648036 |
| 6 rs111786536 | 32523589 C | 0.5255 | 2.72E-08 | chr:6:32648036 |
| 6 rs9274980   | 32642290 G | 0.3886 | 2.73E-08 | chr:6:32648036 |
| 6 rs41287330  | 32552730 A | 0.4003 | 2.73E-08 | chr:6:32648036 |
| 6 rs112515515 | 32513422 T | 0.414  | 2.74E-08 | chr:6:32648036 |

|               |            |        |          |                |
|---------------|------------|--------|----------|----------------|
| 6 rs1130391   | 32632624 T | 5.623  | 2.74E-08 | chr:6:32648036 |
| 6 rs66924955  | 32507855 G | 0.422  | 2.86E-08 | chr:6:32648036 |
| 6 rs72853919  | 32507852 C | 0.422  | 2.86E-08 | chr:6:32648036 |
| 6 rs28846812  | 32527845 G | 0.5411 | 2.87E-08 | chr:6:32648036 |
| 6 rs66491634  | 32528457 G | 1.809  | 2.87E-08 | chr:6:32648036 |
| 6 rs9270761   | 32568685 T | 0.3302 | 2.92E-08 | chr:6:32648036 |
| 6 rs72508464  | 32504341 T | 0.4285 | 2.93E-08 | chr:6:32648036 |
| 6 rs3129968   | 32381472 C | 0.3677 | 2.97E-08 | chr:6:32648036 |
| 6 rs189908927 | 32368842 C | 4.015  | 3.02E-08 | chr:6:32648036 |
| 6 rs9271276   | 32580971 C | 0.4313 | 3.03E-08 | chr:6:32648036 |
| 6 rs9273497   | 32628297 T | 0.4145 | 3.06E-08 | chr:6:32648036 |
| 6 rs36216730  | 32611094 T | 2.374  | 3.07E-08 | chr:6:32648036 |
| 6 rs34434863  | 32559673 G | 2.732  | 3.09E-08 | chr:6:32648036 |
| 6 rs9275043   | 32648061 T | 0.4263 | 3.12E-08 | chr:6:32648036 |
| 6 rs67345629  | 32529268 T | 0.5253 | 3.14E-08 | chr:6:32648036 |
| 6 rs72844152  | 32519652 A | 0.4164 | 3.15E-08 | chr:6:32648036 |
| 6 rs73726842  | 32533029 A | 0.5276 | 3.17E-08 | chr:6:32648036 |
| 6 rs112180912 | 32518436 A | 0.4296 | 3.24E-08 | chr:6:32648036 |
| 6 rs200254403 | 32487102 G | 1.918  | 3.24E-08 | chr:6:32648036 |
| 6 rs117726495 | 32565766 A | 5.605  | 3.24E-08 | chr:6:32648036 |
| 6 rs72853970  | 32509919 A | 0.4293 | 3.25E-08 | chr:6:32648036 |
| 6 rs73726843  | 32533042 C | 0.5279 | 3.31E-08 | chr:6:32648036 |
| 6 rs9275348   | 32667638 A | 2.53   | 3.33E-08 | chr:6:32648036 |
| 6 rs9271277   | 32580998 C | 0.4352 | 3.34E-08 | chr:6:32648036 |
| 6 rs117876414 | 32681385 A | 6.129  | 3.36E-08 | chr:6:32648036 |
| 6 rs140068907 | 32659443 C | 6.129  | 3.36E-08 | chr:6:32648036 |
| 6 rs181845116 | 32663579 G | 6.129  | 3.36E-08 | chr:6:32648036 |
| 6 rs188230545 | 32667506 T | 6.129  | 3.36E-08 | chr:6:32648036 |
| 6 rs9269386   | 32541050 A | 0.4289 | 3.40E-08 | chr:6:32648036 |
| 6 rs145586726 | 32489796 T | 3.33   | 3.40E-08 | chr:6:32648036 |
| 6 rs181578327 | 32368737 T | 3.629  | 3.42E-08 | chr:6:32648036 |
| 6 rs185455858 | 32368745 A | 3.629  | 3.42E-08 | chr:6:32648036 |
| 6 rs188757550 | 32368730 C | 3.629  | 3.42E-08 | chr:6:32648036 |
| 6 rs536810    | 32577497 T | 2.385  | 3.42E-08 | chr:6:32648036 |
| 6 rs72492315  | 32512466 C | 0.4294 | 3.44E-08 | chr:6:32648036 |
| 6 rs147210809 | 32656830 T | 6.2    | 3.45E-08 | chr:6:32648036 |
| 6 rs117250018 | 32597191 A | 5.758  | 3.50E-08 | chr:6:32648036 |
| 6 rs113490055 | 32368809 C | 2.87   | 3.53E-08 | chr:6:32648036 |
| 6 rs557445295 | 32368811 C | 2.87   | 3.53E-08 | chr:6:32648036 |
| 6 rs9274592   | 32635400 C | 0.4829 | 3.56E-08 | chr:6:32648036 |
| 6 rs184068775 | 32368715 A | 3.672  | 3.58E-08 | chr:6:32648036 |
| 6 rs79936591  | 32503543 A | 3.468  | 3.58E-08 | chr:6:32648036 |
| 6 rs9274957   | 32641914 T | 0.4639 | 3.59E-08 | chr:6:32648036 |

|               |            |        |          |                |
|---------------|------------|--------|----------|----------------|
| 6 rs115141943 | 32538830 C | 0.444  | 3.67E-08 | chr:6:32648036 |
| 6 rs115640078 | 32538839 T | 0.444  | 3.67E-08 | chr:6:32648036 |
| 6 rs113209512 | 32508875 T | 0.4311 | 3.68E-08 | chr:6:32648036 |
| 6 rs184358099 | 32500832 G | 0.4336 | 3.70E-08 | chr:6:32648036 |
| 6 rs72853949  | 32509435 T | 0.4336 | 3.71E-08 | chr:6:32648036 |
| 6 rs111365964 | 32517646 G | 2.178  | 3.73E-08 | chr:6:32648036 |
| 6 rs114905947 | 32533016 C | 0.5292 | 3.74E-08 | chr:6:32648036 |
| 6 rs527678609 | 32530435 A | 0.5347 | 3.76E-08 | chr:6:32648036 |
| 6 rs540951197 | 32530439 C | 0.5347 | 3.76E-08 | chr:6:32648036 |
| 6 rs201958319 | 32487094 T | 1.919  | 3.79E-08 | chr:6:32648036 |
| 6 rs2647011   | 32661915 C | 0.3395 | 3.79E-08 | chr:6:32648036 |
| 6 rs9274722   | 32637527 A | 2.242  | 3.79E-08 | chr:6:32648036 |
| 6 rs9274724   | 32637531 G | 2.242  | 3.79E-08 | chr:6:32648036 |
| 6 rs2395163   | 32387809 C | 4.05   | 3.81E-08 | chr:6:32648036 |
| 6 rs113011827 | 32513453 T | 2.177  | 3.82E-08 | chr:6:32648036 |
| 6 rs113208447 | 32503314 A | 3.561  | 3.83E-08 | chr:6:32648036 |
| 6 rs111374340 | 32509477 G | 3.597  | 3.84E-08 | chr:6:32648036 |
| 6 rs201850026 | 32487100 T | 1.912  | 3.86E-08 | chr:6:32648036 |
| 6 rs116209683 | 32510508 C | 0.4315 | 3.87E-08 | chr:6:32648036 |
| 6 rs111338570 | 32533670 C | 0.5328 | 3.90E-08 | chr:6:32648036 |
| 6 rs113042858 | 32533666 T | 0.5328 | 3.90E-08 | chr:6:32648036 |
| 6 rs62405629  | 32513885 T | 2.184  | 3.91E-08 | chr:6:32648036 |
| 6 rs732163    | 32394911 A | 2.338  | 3.95E-08 | chr:6:32648036 |
| 6 rs79890132  | 32517668 A | 2.175  | 3.98E-08 | chr:6:32648036 |
| 6 rs138921502 | 32538132 A | 1.871  | 3.99E-08 | chr:6:32648036 |
| 6 rs549355474 | 32486300 G | 4.18   | 3.99E-08 | chr:6:32648036 |
| 6 rs113787140 | 32502901 A | 0.4548 | 4.00E-08 | chr:6:32648036 |
| 6 rs9275001   | 32642738 C | 0.3631 | 4.00E-08 | chr:6:32648036 |
| 6 rs66754072  | 32532402 A | 0.5044 | 4.02E-08 | chr:6:32648036 |
| 6 rs115333128 | 32485804 G | 0.4442 | 4.06E-08 | chr:6:32648036 |
| 6 rs71542429  | 32630066 C | 0.3974 | 4.10E-08 | chr:6:32648036 |
| 6 rs73727944  | 32504713 T | 0.433  | 4.16E-08 | chr:6:32648036 |
| 6 rs369062139 | 32544289 T | 3.95   | 4.23E-08 | chr:6:32648036 |
| 6 rs541515279 | 32523465 T | 2.288  | 4.26E-08 | chr:6:32648036 |
| 6 rs9269311   | 32539654 C | 0.5262 | 4.27E-08 | chr:6:32648036 |
| 6 rs9273411   | 32627260 A | 0.4273 | 4.30E-08 | chr:6:32648036 |
| 6 rs9275222   | 32659516 T | 0.4374 | 4.31E-08 | chr:6:32648036 |
| 6 rs72508473  | 32508399 G | 0.4337 | 4.33E-08 | chr:6:32648036 |
| 6 rs9274986   | 32642386 G | 0.3945 | 4.46E-08 | chr:6:32648036 |
| 6 rs9275057   | 32648253 T | 0.384  | 4.47E-08 | chr:6:32648036 |
| 6 rs553565066 | 32523149 A | 2.061  | 4.47E-08 | chr:6:32648036 |
| 6 rs1130382   | 32632672 A | 5.078  | 4.50E-08 | chr:6:32648036 |
| 6 rs138825368 | 32518375 A | 2.17   | 4.53E-08 | chr:6:32648036 |

|               |            |        |          |                |
|---------------|------------|--------|----------|----------------|
| 6 rs76454806  | 32530145 C | 0.5355 | 4.57E-08 | chr:6:32648036 |
| 6 rs80142174  | 32530144 G | 0.5355 | 4.57E-08 | chr:6:32648036 |
| 6 rs532196787 | 32486819 G | 3.135  | 4.58E-08 | chr:6:32648036 |
| 6 rs113484779 | 32514162 T | 2.167  | 4.61E-08 | chr:6:32648036 |
| 6 rs67461697  | 32518767 C | 0.4063 | 4.64E-08 | chr:6:32648036 |
| 6 rs114015220 | 32510599 T | 0.4336 | 4.71E-08 | chr:6:32648036 |
| 6 rs114472333 | 32510598 T | 0.4336 | 4.71E-08 | chr:6:32648036 |
| 6 rs76723065  | 32510591 G | 0.4336 | 4.71E-08 | chr:6:32648036 |
| 6 rs9275640   | 32684890 C | 2.789  | 4.71E-08 | chr:6:32648036 |
| 6 rs62405598  | 32513708 C | 2.177  | 4.71E-08 | chr:6:32648036 |
| 6 rs9275365   | 32668125 A | 2.501  | 4.73E-08 | chr:6:32648036 |
| 6 rs78376382  | 32579305 G | 11.02  | 4.74E-08 | chr:6:32648036 |
| 6 rs201639066 | 32516705 T | 2.147  | 4.79E-08 | chr:6:32648036 |
| 6 rs62405638  | 32516715 T | 2.147  | 4.79E-08 | chr:6:32648036 |
| 6 rs62405639  | 32516724 C | 2.147  | 4.79E-08 | chr:6:32648036 |
| 6 rs113521434 | 32520460 T | 2.173  | 4.82E-08 | chr:6:32648036 |
| 6 rs77506702  | 32518704 G | 2.173  | 4.82E-08 | chr:6:32648036 |
| 6 rs9274978   | 32642277 T | 0.3992 | 4.84E-08 | chr:6:32648036 |
| 6 rs534964517 | 32517795 C | 2.702  | 4.87E-08 | chr:6:32648036 |
| 6 rs570640158 | 32517793 C | 2.702  | 4.87E-08 | chr:6:32648036 |
| 6 rs112310670 | 32531136 C | 0.5396 | 4.88E-08 | chr:6:32648036 |
| 6 rs112649230 | 32531140 G | 0.5396 | 4.88E-08 | chr:6:32648036 |
| 6 rs562335725 | 32530443 A | 0.5382 | 4.92E-08 | chr:6:32648036 |
| 6 rs575042203 | 32368704 G | 3.59   | 4.94E-08 | chr:6:32648036 |
| 6 rs67838634  | 32662128 G | 0.4365 | 4.98E-08 | chr:6:32648036 |
| 6 rs536146370 | 32519759 A | 0.4325 | 5.03E-08 | chr:6:32648036 |
| 6 rs72845747  | 32530054 T | 0.5374 | 5.05E-08 | chr:6:32648036 |
| 6 rs116405199 | 32504367 T | 0.4374 | 5.07E-08 | chr:6:32648036 |
| 6 rs78994392  | 32504362 T | 0.4374 | 5.07E-08 | chr:6:32648036 |
| 6 rs537929323 | 32545327 A | 3.183  | 5.10E-08 | chr:6:32648036 |
| 6 rs647035    | 32576626 A | 2.359  | 5.11E-08 | chr:6:32648036 |
| 6 rs113871699 | 32509693 T | 0.4372 | 5.11E-08 | chr:6:32648036 |
| 6 rs73727972  | 32509683 G | 0.4372 | 5.11E-08 | chr:6:32648036 |
| 6 rs9274929   | 32641487 T | 0.5253 | 5.13E-08 | chr:6:32648036 |
| 6 rs113474692 | 32529177 A | 0.5362 | 5.13E-08 | chr:6:32648036 |
| 6 rs199506689 | 32504701 T | 0.436  | 5.15E-08 | chr:6:32648036 |
| 6 rs115397315 | 32525087 C | 2.042  | 5.15E-08 | chr:6:32648036 |
| 6 rs9269269   | 32539055 C | 0.5512 | 5.18E-08 | chr:6:32648036 |
| 6 rs28383201  | 32574869 G | 3.149  | 5.20E-08 | chr:6:32648036 |
| 6 rs74290599  | 32518785 T | 0.4068 | 5.20E-08 | chr:6:32648036 |
| 6 rs62405631  | 32514500 C | 2.137  | 5.21E-08 | chr:6:32648036 |
| 6 rs62405630  | 32513942 T | 2.17   | 5.24E-08 | chr:6:32648036 |
| 6 rs536496813 | 32497131 C | 3.681  | 5.32E-08 | chr:6:32648036 |

|               |            |        |          |                |
|---------------|------------|--------|----------|----------------|
| 6 rs199855998 | 32487096 A | 1.908  | 5.32E-08 | chr:6:32648036 |
| 6 rs72845749  | 32530081 T | 0.5373 | 5.33E-08 | chr:6:32648036 |
| 6 rs72845750  | 32530093 G | 0.5373 | 5.33E-08 | chr:6:32648036 |
| 6 rs111749494 | 32532432 A | 0.5356 | 5.33E-08 | chr:6:32648036 |
| 6 rs112501266 | 32532428 C | 0.5356 | 5.33E-08 | chr:6:32648036 |
| 6 rs73727960  | 32508989 G | 0.4366 | 5.41E-08 | chr:6:32648036 |
| 6 rs28371250  | 32648039 C | 0.4475 | 5.56E-08 | chr:6:32648036 |
| 6 rs113655203 | 32533247 T | 0.539  | 5.61E-08 | chr:6:32648036 |
| 6 rs199705602 | 32606584 G | 1.909  | 5.67E-08 | chr:6:32648036 |
| 6 rs72853968  | 32509883 C | 0.4359 | 5.71E-08 | chr:6:32648036 |
| 6 rs56673349  | 32347637 G | 3.193  | 5.77E-08 | chr:6:32648036 |
| 6 rs62402699  | 32346388 G | 3.193  | 5.77E-08 | chr:6:32648036 |
| 6 rs62404834  | 32340596 A | 3.193  | 5.77E-08 | chr:6:32648036 |
| 6 rs7757831   | 32345183 G | 3.193  | 5.77E-08 | chr:6:32648036 |
| 6 rs113568276 | 32513127 A | 2.147  | 5.78E-08 | chr:6:32648036 |
| 6 rs2858324   | 32660375 A | 0.3019 | 5.79E-08 | chr:6:32648036 |
| 6 rs35179057  | 32523349 C | 0.4642 | 5.82E-08 | chr:6:32648036 |
| 6 rs80247743  | 32527206 G | 2.012  | 5.82E-08 | chr:6:32648036 |
| 6 rs3200830   | 32520774 T | 2.137  | 5.92E-08 | chr:6:32648036 |
| 6 rs9271610   | 32591601 T | 0.3533 | 5.99E-08 | chr:6:32648036 |
| 6 rs9271611   | 32591609 G | 0.3533 | 5.99E-08 | chr:6:32648036 |
| 6 rs113434238 | 32501204 T | 0.4398 | 6.02E-08 | chr:6:32648036 |
| 6 rs116350000 | 32523418 G | 0.5274 | 6.05E-08 | chr:6:32648036 |
| 6 rs67283303  | 32531253 T | 0.5423 | 6.07E-08 | chr:6:32648036 |
| 6 rs72492322  | 32519628 G | 0.411  | 6.11E-08 | chr:6:32648036 |
| 6 rs72492332  | 32523085 G | 0.498  | 6.16E-08 | chr:6:32648036 |
| 6 rs9269314   | 32539715 G | 0.5131 | 6.18E-08 | chr:6:32648036 |
| 6 rs34481656  | 32501664 G | 2.149  | 6.20E-08 | chr:6:32648036 |
| 6 rs72851064  | 32503928 C | 0.4403 | 6.21E-08 | chr:6:32648036 |
| 6 rs113528607 | 32500928 G | 2.131  | 6.22E-08 | chr:6:32648036 |
| 6 rs111621461 | 32520050 T | 2.153  | 6.23E-08 | chr:6:32648036 |
| 6 rs75170544  | 32513285 T | 2.153  | 6.23E-08 | chr:6:32648036 |
| 6 rs78450703  | 32513216 T | 2.153  | 6.23E-08 | chr:6:32648036 |
| 6 rs2856698   | 32636376 G | 0.3072 | 6.29E-08 | chr:6:32648036 |
| 6 rs112245362 | 32651162 A | 5.256  | 6.30E-08 | chr:6:32648036 |
| 6 rs72845758  | 32531178 C | 0.5449 | 6.32E-08 | chr:6:32648036 |
| 6 rs538116343 | 32521742 T | 0.4067 | 6.34E-08 | chr:6:32648036 |
| 6 rs9268521   | 32381374 C | 3.962  | 6.47E-08 | chr:6:32648036 |
| 6 rs9268522   | 32381443 T | 3.962  | 6.47E-08 | chr:6:32648036 |
| 6 rs182658314 | 32525847 T | 2.461  | 6.49E-08 | chr:6:32648036 |
| 6 rs3828851   | 32520621 A | 2.151  | 6.50E-08 | chr:6:32648036 |
| 6 rs9269272   | 32539114 A | 0.5401 | 6.51E-08 | chr:6:32648036 |
| 6 rs80011743  | 32531770 G | 0.54   | 6.55E-08 | chr:6:32648036 |

|               |            |        |                         |
|---------------|------------|--------|-------------------------|
| 6 rs113573823 | 32532719 C | 0.5419 | 6.56E-08 chr:6:32648036 |
| 6 rs116102092 | 32538672 A | 0.4063 | 6.58E-08 chr:6:32648036 |
| 6 rs2647046   | 32668336 A | 0.3043 | 6.59E-08 chr:6:32648036 |
| 6 rs2647048   | 32668705 A | 0.3043 | 6.59E-08 chr:6:32648036 |
| 6 rs2647051   | 32670897 T | 0.3043 | 6.59E-08 chr:6:32648036 |
| 6 rs2856687   | 32654822 T | 0.3084 | 6.59E-08 chr:6:32648036 |
| 6 rs2856699   | 32671765 A | 0.3043 | 6.59E-08 chr:6:32648036 |
| 6 rs2856717   | 32670308 A | 0.3043 | 6.59E-08 chr:6:32648036 |
| 6 rs2858305   | 32670464 G | 0.3043 | 6.59E-08 chr:6:32648036 |
| 6 rs2858309   | 32668713 C | 0.3043 | 6.59E-08 chr:6:32648036 |
| 6 rs2858310   | 32668323 G | 0.3043 | 6.59E-08 chr:6:32648036 |
| 6 rs9275389   | 32669132 C | 0.3043 | 6.59E-08 chr:6:32648036 |
| 6 rs9275521   | 32674952 T | 0.3043 | 6.59E-08 chr:6:32648036 |
| 6 rs116973790 | 32687593 T | 3.44   | 6.63E-08 chr:6:32648036 |
| 6 rs117150438 | 32687252 C | 3.44   | 6.63E-08 chr:6:32648036 |
| 6 rs117181428 | 32691780 A | 3.44   | 6.63E-08 chr:6:32648036 |
| 6 rs117402442 | 32706464 G | 3.44   | 6.63E-08 chr:6:32648036 |
| 6 rs146092969 | 32688889 T | 3.44   | 6.63E-08 chr:6:32648036 |
| 6 rs113586210 | 32517050 T | 2.11   | 6.65E-08 chr:6:32648036 |
| 6 rs118090646 | 32545605 A | 3.002  | 6.65E-08 chr:6:32648036 |
| 6 rs9275857   | 32691308 C | 2.559  | 6.65E-08 chr:6:32648036 |
| 6 rs113686014 | 32509551 A | 2.138  | 6.76E-08 chr:6:32648036 |
| 6 rs373808866 | 32526226 A | 2.333  | 6.78E-08 chr:6:32648036 |
| 6 rs189749636 | 32486834 T | 3.06   | 6.85E-08 chr:6:32648036 |
| 6 rs71542455  | 32631434 C | 0.3269 | 6.86E-08 chr:6:32648036 |
| 6 rs111410640 | 32521831 A | 2.17   | 6.90E-08 chr:6:32648036 |
| 6 rs74205903  | 32501249 C | 0.4428 | 6.93E-08 chr:6:32648036 |
| 6 rs572833716 | 32368812 T | 3.438  | 6.96E-08 chr:6:32648036 |
| 6 rs3117099   | 32358270 A | 2.195  | 6.96E-08 chr:6:32648036 |
| 6 rs554886285 | 32545962 G | 2.853  | 6.97E-08 chr:6:32648036 |
| 6 rs77501456  | 32523627 G | 0.5425 | 6.98E-08 chr:6:32648036 |
| 6 rs2858302   | 32636756 C | 0.4154 | 7.03E-08 chr:6:32648036 |
| 6 rs112882980 | 32533222 C | 0.5393 | 7.11E-08 chr:6:32648036 |
| 6 rs2858318   | 32661302 T | 0.3074 | 7.14E-08 chr:6:32648036 |
| 6 rs2858319   | 32661294 T | 0.3074 | 7.14E-08 chr:6:32648036 |
| 6 rs2760981   | 32565465 G | 2.128  | 7.15E-08 chr:6:32648036 |
| 6 rs575662827 | 32543874 C | 3.751  | 7.25E-08 chr:6:32648036 |
| 6 rs9275757   | 32689190 T | 2.565  | 7.28E-08 chr:6:32648036 |
| 6 rs182495893 | 32368789 C | 3.67   | 7.33E-08 chr:6:32648036 |
| 6 rs185890519 | 32368794 C | 3.67   | 7.33E-08 chr:6:32648036 |
| 6 rs141022812 | 32533567 A | 0.5545 | 7.34E-08 chr:6:32648036 |
| 6 rs143506542 | 32533686 T | 0.5397 | 7.39E-08 chr:6:32648036 |
| 6 rs79005639  | 32510582 C | 2.096  | 7.45E-08 chr:6:32648036 |

|               |            |        |                         |
|---------------|------------|--------|-------------------------|
| 6 rs72492310  | 32509867 G | 0.4412 | 7.49E-08 chr:6:32648036 |
| 6 rs537849709 | 32368801 T | 2.782  | 7.52E-08 chr:6:32648036 |
| 6 rs72851063  | 32503901 T | 0.4434 | 7.60E-08 chr:6:32648036 |
| 6 rs557617439 | 32523181 G | 2.114  | 7.67E-08 chr:6:32648036 |
| 6 rs78055135  | 32517412 A | 2.064  | 7.68E-08 chr:6:32648036 |
| 6 rs6902536   | 32667511 G | 0.349  | 7.76E-08 chr:6:32648036 |
| 6 rs566208536 | 32534745 A | 2.019  | 7.81E-08 chr:6:32648036 |
| 6 rs4947345   | 32678260 T | 0.3063 | 7.84E-08 chr:6:32648036 |
| 6 rs67642277  | 32538067 A | 0.5312 | 7.86E-08 chr:6:32648036 |
| 6 rs189233809 | 32530497 T | 0.5443 | 7.95E-08 chr:6:32648036 |
| 6 rs193053660 | 32530503 C | 0.5443 | 7.95E-08 chr:6:32648036 |
| 6 rs533498287 | 32530506 C | 0.5443 | 7.95E-08 chr:6:32648036 |
| 6 rs566699769 | 32530505 A | 0.5443 | 7.95E-08 chr:6:32648036 |
| 6 rs73729745  | 32469136 A | 0.4403 | 7.95E-08 chr:6:32648036 |
| 6 rs551468481 | 32518258 G | 2.094  | 7.96E-08 chr:6:32648036 |
| 6 rs146621647 | 32531602 T | 0.5429 | 7.98E-08 chr:6:32648036 |
| 6 rs72845759  | 32531182 G | 0.5485 | 8.01E-08 chr:6:32648036 |
| 6 rs73729122  | 32519777 G | 0.4398 | 8.04E-08 chr:6:32648036 |
| 6 rs9275078   | 32648592 A | 0.3636 | 8.04E-08 chr:6:32648036 |
| 6 rs35697584  | 32522151 A | 0.3827 | 8.08E-08 chr:6:32648036 |
| 6 rs113204386 | 32531339 G | 0.5431 | 8.09E-08 chr:6:32648036 |
| 6 rs72492303  | 32509061 T | 0.4418 | 8.12E-08 chr:6:32648036 |
| 6 rs114852415 | 32524759 A | 2.012  | 8.18E-08 chr:6:32648036 |
| 6 rs139029897 | 32454882 G | 0.4934 | 8.18E-08 chr:6:32648036 |
| 6 rs35479797  | 32535900 T | 0.5171 | 8.19E-08 chr:6:32648036 |
| 6 rs111290332 | 32533327 A | 0.5299 | 8.25E-08 chr:6:32648036 |
| 6 rs111289870 | 32512269 C | 0.4423 | 8.27E-08 chr:6:32648036 |
| 6 rs9274824   | 32639702 C | 0.4523 | 8.30E-08 chr:6:32648036 |
| 6 rs115124923 | 32510482 A | 3.317  | 8.31E-08 chr:6:32648036 |
| 6 rs2646998   | 32665367 T | 0.3073 | 8.36E-08 chr:6:32648036 |
| 6 rs2647001   | 32665086 C | 0.3073 | 8.36E-08 chr:6:32648036 |
| 6 rs2647003   | 32664880 T | 0.3073 | 8.36E-08 chr:6:32648036 |
| 6 rs2647012   | 32664458 T | 0.3073 | 8.36E-08 chr:6:32648036 |
| 6 rs2647013   | 32664284 C | 0.3073 | 8.36E-08 chr:6:32648036 |
| 6 rs2647016   | 32663925 C | 0.3073 | 8.36E-08 chr:6:32648036 |
| 6 rs2647018   | 32663447 T | 0.3073 | 8.36E-08 chr:6:32648036 |
| 6 rs2647020   | 32663256 T | 0.3073 | 8.36E-08 chr:6:32648036 |
| 6 rs2647021   | 32663151 T | 0.3073 | 8.36E-08 chr:6:32648036 |
| 6 rs2647022   | 32663004 A | 0.3073 | 8.36E-08 chr:6:32648036 |
| 6 rs2647040   | 32667280 A | 0.3073 | 8.36E-08 chr:6:32648036 |
| 6 rs2856666   | 32665285 G | 0.3073 | 8.36E-08 chr:6:32648036 |
| 6 rs2856668   | 32663606 G | 0.3073 | 8.36E-08 chr:6:32648036 |
| 6 rs2856670   | 32662904 G | 0.3073 | 8.36E-08 chr:6:32648036 |

|               |            |        |          |                |
|---------------|------------|--------|----------|----------------|
| 6 rs2856727   | 32666397 C | 0.3073 | 8.36E-08 | chr:6:32648036 |
| 6 rs372618919 | 32529918 G | 0.5489 | 8.40E-08 | chr:6:32648036 |
| 6 rs146702867 | 32524800 G | 1.997  | 8.41E-08 | chr:6:32648036 |
| 6 rs138912409 | 32533684 A | 0.5416 | 8.49E-08 | chr:6:32648036 |
| 6 rs35304302  | 32557196 A | 3.903  | 8.50E-08 | chr:6:32648036 |
| 6 rs111797109 | 32511650 T | 2.152  | 8.51E-08 | chr:6:32648036 |
| 6 rs78733108  | 32517511 G | 2.178  | 8.55E-08 | chr:6:32648036 |
| 6 rs9274584   | 32635365 G | 0.4961 | 8.56E-08 | chr:6:32648036 |
| 6 rs116611418 | 32459595 G | 0.4449 | 8.63E-08 | chr:6:32648036 |
| 6 rs2856725   | 32666738 C | 0.3069 | 8.69E-08 | chr:6:32648036 |
| 6 rs111626267 | 32502273 T | 0.4423 | 8.87E-08 | chr:6:32648036 |
| 6 rs115573660 | 32502277 A | 0.4423 | 8.87E-08 | chr:6:32648036 |
| 6 rs72851060  | 32503560 G | 0.4464 | 8.94E-08 | chr:6:32648036 |
| 6 rs73729131  | 32520313 T | 0.4514 | 8.96E-08 | chr:6:32648036 |
| 6 rs201766754 | 32531843 G | 0.5477 | 8.98E-08 | chr:6:32648036 |
| 6 rs72845745  | 32529961 T | 0.5456 | 9.08E-08 | chr:6:32648036 |
| 6 rs199798245 | 32530708 C | 0.5469 | 9.10E-08 | chr:6:32648036 |
| 6 rs200856733 | 32530709 A | 0.5469 | 9.10E-08 | chr:6:32648036 |
| 6 rs543318785 | 32530714 C | 0.5469 | 9.10E-08 | chr:6:32648036 |
| 6 rs572746069 | 32530713 C | 0.5469 | 9.10E-08 | chr:6:32648036 |
| 6 rs78942674  | 32509897 T | 0.4436 | 9.13E-08 | chr:6:32648036 |
| 6 rs117672655 | 32581034 A | 5.805  | 9.16E-08 | chr:6:32648036 |
| 6 rs9275046   | 32648080 T | 0.4375 | 9.16E-08 | chr:6:32648036 |
| 6 rs9275047   | 32648084 A | 0.4375 | 9.16E-08 | chr:6:32648036 |
| 6 rs13193700  | 32575078 T | 3.235  | 9.23E-08 | chr:6:32648036 |
| 6 rs188782605 | 32540449 A | 2.122  | 9.28E-08 | chr:6:32648036 |
| 6 rs57588792  | 32510012 A | 2.11   | 9.29E-08 | chr:6:32648036 |
| 6 rs2856722   | 32667958 A | 0.3091 | 9.30E-08 | chr:6:32648036 |
| 6 rs9274973   | 32642147 A | 0.3703 | 9.38E-08 | chr:6:32648036 |
| 6 rs9274974   | 32642152 A | 0.3703 | 9.38E-08 | chr:6:32648036 |
| 6 rs555098903 | 32443459 C | 5.957  | 9.38E-08 | chr:6:32648036 |
| 6 rs573655583 | 32443460 T | 5.957  | 9.38E-08 | chr:6:32648036 |
| 6 rs77495163  | 32517859 G | 2.116  | 9.41E-08 | chr:6:32648036 |
| 6 rs67860869  | 32508349 C | 0.4465 | 9.44E-08 | chr:6:32648036 |
| 6 rs114653292 | 32503516 G | 0.4449 | 9.48E-08 | chr:6:32648036 |
| 6 rs67081540  | 32512359 C | 0.4437 | 9.52E-08 | chr:6:32648036 |
| 6 rs9269281   | 32539309 A | 0.5451 | 9.72E-08 | chr:6:32648036 |
| 6 rs111432098 | 32520940 G | 2.142  | 9.73E-08 | chr:6:32648036 |
| 6 rs534655111 | 32531220 T | 0.5509 | 9.73E-08 | chr:6:32648036 |
| 6 rs537686051 | 32531213 G | 0.5509 | 9.73E-08 | chr:6:32648036 |
| 6 rs552586675 | 32531215 G | 0.5509 | 9.73E-08 | chr:6:32648036 |
| 6 rs571171259 | 32531218 G | 0.5509 | 9.73E-08 | chr:6:32648036 |
| 6 rs148781980 | 32667577 G | 4.236  | 9.82E-08 | chr:6:32648036 |



|               |            |        |          |                |
|---------------|------------|--------|----------|----------------|
| 6 rs112457394 | 32469073 C | 0.4453 | 9.83E-08 | chr:6:32648036 |
| 6 rs2647074   | 32574360 T | 3.101  | 9.87E-08 | chr:6:32648036 |
| 6 rs113140854 | 32634588 T | 5.37   | 9.88E-08 | chr:6:32648036 |
| 6 rs536708130 | 32518949 G | 0.4056 | 9.89E-08 | chr:6:32648036 |
| 6 rs370758801 | 32534736 T | 2.013  | 9.98E-08 | chr:6:32648036 |
| 6 rs9274657   | 32636364 G | 0.4177 | 1.01E-07 | chr:6:32648036 |
| 6 rs9274659   | 32636385 A | 0.4177 | 1.01E-07 | chr:6:32648036 |
| 6 rs72853950  | 32509472 T | 0.4497 | 1.04E-07 | chr:6:32648036 |
| 6 rs35122968  | 32682199 C | 3.225  | 1.04E-07 | chr:6:32648036 |
| 6 rs72492344  | 32532494 A | 0.5474 | 1.04E-07 | chr:6:32648036 |
| 6 rs200951960 | 32510600 G | 2.085  | 1.05E-07 | chr:6:32648036 |
| 6 rs9274339   | 32632319 G | 0.522  | 1.06E-07 | chr:6:32648036 |
| 6 rs9275160   | 32652620 A | 0.4527 | 1.06E-07 | chr:6:32648036 |
| 6 rs9274583   | 32635361 G | 0.4981 | 1.07E-07 | chr:6:32648036 |
| 6 rs114171624 | 32514706 G | 0.4475 | 1.07E-07 | chr:6:32648036 |
| 6 rs9274587   | 32635377 C | 0.4995 | 1.12E-07 | chr:6:32648036 |
| 6 rs541922687 | 32605561 T | 5.227  | 1.13E-07 | chr:6:32648036 |
| 6 rs115077617 | 32532645 C | 0.5088 | 1.14E-07 | chr:6:32648036 |
| 6 rs200263528 | 32509009 C | 0.4479 | 1.14E-07 | chr:6:32648036 |
| 6 rs9274573   | 32635205 C | 0.4664 | 1.14E-07 | chr:6:32648036 |
| 6 rs77497538  | 32455725 G | 3.103  | 1.15E-07 | chr:6:32648036 |
| 6 rs116661539 | 32537317 C | 1.912  | 1.16E-07 | chr:6:32648036 |
| 6 rs7739432   | 32198474 T | 2.315  | 1.16E-07 | chr:6:32648036 |
| 6 rs2856723   | 32667762 A | 0.3122 | 1.18E-07 | chr:6:32648036 |
| 6 rs281863594 | 32630820 G | 0.458  | 1.18E-07 | chr:6:32648036 |
| 6 rs75404103  | 32531348 G | 0.5486 | 1.18E-07 | chr:6:32648036 |
| 6 rs141124032 | 32533299 G | 0.5345 | 1.18E-07 | chr:6:32648036 |
| 6 rs9271854   | 32595118 A | 0.391  | 1.18E-07 | chr:6:32648036 |
| 6 rs9271855   | 32595119 C | 0.391  | 1.18E-07 | chr:6:32648036 |
| 6 rs9271856   | 32595120 A | 0.391  | 1.18E-07 | chr:6:32648036 |
| 6 rs114445199 | 32343715 A | 2.966  | 1.19E-07 | chr:6:32648036 |
| 6 rs112083186 | 32531320 A | 0.5492 | 1.21E-07 | chr:6:32648036 |
| 6 rs370791576 | 32517082 A | 2.098  | 1.21E-07 | chr:6:32648036 |
| 6 rs545853065 | 32531737 G | 0.5506 | 1.21E-07 | chr:6:32648036 |
| 6 rs546173503 | 32523200 C | 2.081  | 1.23E-07 | chr:6:32648036 |
| 6 rs9378165   | 32510651 G | 2.06   | 1.23E-07 | chr:6:32648036 |
| 6 rs3117108   | 32342822 C | 0.3738 | 1.23E-07 | chr:6:32648036 |
| 6 rs2395516   | 32580657 C | 2.218  | 1.23E-07 | chr:6:32648036 |
| 6 rs117286858 | 32798608 A | 4.323  | 1.25E-07 | chr:6:32648036 |
| 6 rs139013960 | 32531606 G | 0.5479 | 1.29E-07 | chr:6:32648036 |
| 6 rs117312811 | 32717453 A | 3.313  | 1.29E-07 | chr:6:32648036 |
| 6 rs6931740   | 32647469 G | 0.3805 | 1.30E-07 | chr:6:32648036 |
| 6 rs41541218  | 32489786 G | 0.382  | 1.30E-07 | chr:6:32648036 |

|               |            |        |          |                |
|---------------|------------|--------|----------|----------------|
| 6 rs536772126 | 32558656 A | 3.537  | 1.30E-07 | chr:6:32648036 |
| 6 rs569726716 | 32558654 A | 3.537  | 1.30E-07 | chr:6:32648036 |
| 6 rs9274962   | 32641936 G | 0.4665 | 1.31E-07 | chr:6:32648036 |
| 6 rs536343459 | 32468799 G | 0.4477 | 1.32E-07 | chr:6:32648036 |
| 6 rs548006827 | 32468802 C | 0.4477 | 1.32E-07 | chr:6:32648036 |
| 6 rs565374501 | 32468798 G | 0.4477 | 1.32E-07 | chr:6:32648036 |
| 6 rs9272036   | 32598841 A | 0.4579 | 1.33E-07 | chr:6:32648036 |
| 6 rs199616440 | 32510115 T | 0.4476 | 1.34E-07 | chr:6:32648036 |
| 6 rs9271857   | 32595147 T | 0.3941 | 1.34E-07 | chr:6:32648036 |
| 6 rs116384190 | 32520337 G | 2.108  | 1.34E-07 | chr:6:32648036 |
| 6 rs191650130 | 32525856 T | 2.387  | 1.35E-07 | chr:6:32648036 |
| 6 rs9274336   | 32632287 A | 0.5465 | 1.36E-07 | chr:6:32648036 |
| 6 rs9275212   | 32658327 G | 0.3152 | 1.36E-07 | chr:6:32648036 |
| 6 rs9275834   | 32690850 C | 3.021  | 1.36E-07 | chr:6:32648036 |
| 6 rs28724242  | 32629331 G | 1.874  | 1.37E-07 | chr:6:32648036 |
| 6 rs112895453 | 32510602 G | 2.071  | 1.38E-07 | chr:6:32648036 |
| 6 rs28891437  | 32641342 A | 0.3346 | 1.38E-07 | chr:6:32648036 |
| 6 rs115524254 | 32503565 C | 0.4534 | 1.40E-07 | chr:6:32648036 |
| 6 rs73727961  | 32509022 A | 0.4508 | 1.40E-07 | chr:6:32648036 |
| 6 rs115127109 | 32530038 T | 0.5523 | 1.40E-07 | chr:6:32648036 |
| 6 rs184303918 | 32529976 G | 0.5517 | 1.41E-07 | chr:6:32648036 |
| 6 rs185234644 | 32514792 C | 1.995  | 1.43E-07 | chr:6:32648036 |
| 6 rs9274575   | 32635226 T | 0.4677 | 1.43E-07 | chr:6:32648036 |
| 6 rs112780983 | 32511348 G | 0.5181 | 1.45E-07 | chr:6:32648036 |
| 6 rs73727954  | 32508902 T | 0.4524 | 1.46E-07 | chr:6:32648036 |
| 6 rs2076530   | 32363816 C | 2.293  | 1.46E-07 | chr:6:32648036 |
| 6 rs9269288   | 32539408 A | 0.5512 | 1.47E-07 | chr:6:32648036 |
| 6 rs117522574 | 32689886 G | 3.351  | 1.48E-07 | chr:6:32648036 |
| 6 rs115055593 | 32468827 C | 0.4492 | 1.49E-07 | chr:6:32648036 |
| 6 rs75088009  | 32504884 G | 0.453  | 1.49E-07 | chr:6:32648036 |
| 6 rs140467491 | 32606215 A | 5.14   | 1.49E-07 | chr:6:32648036 |
| 6 rs17412833  | 32632598 T | 0.4039 | 1.50E-07 | chr:6:32648036 |
| 6 rs111938555 | 32509707 T | 0.4355 | 1.50E-07 | chr:6:32648036 |
| 6 rs548434177 | 32538903 C | 1.935  | 1.50E-07 | chr:6:32648036 |
| 6 rs538468133 | 32368663 C | 2.868  | 1.51E-07 | chr:6:32648036 |
| 6 rs34335637  | 32555309 G | 3.454  | 1.51E-07 | chr:6:32648036 |
| 6 rs535696666 | 32523176 A | 2.075  | 1.51E-07 | chr:6:32648036 |
| 6 rs34698520  | 32556631 T | 0.369  | 1.52E-07 | chr:6:32648036 |
| 6 rs9275564   | 32677927 A | 2.433  | 1.54E-07 | chr:6:32648036 |
| 6 rs1130397   | 32632587 G | 0.4045 | 1.54E-07 | chr:6:32648036 |
| 6 rs115726960 | 32503171 A | 0.4538 | 1.55E-07 | chr:6:32648036 |
| 6 rs554877699 | 32487677 C | 3.566  | 1.56E-07 | chr:6:32648036 |
| 6 rs112111526 | 32510317 A | 0.4486 | 1.57E-07 | chr:6:32648036 |

|               |            |        |          |                |
|---------------|------------|--------|----------|----------------|
| 6 rs113182435 | 32518236 A | 2.052  | 1.57E-07 | chr:6:32648036 |
| 6 rs370787440 | 32521596 G | 2.122  | 1.59E-07 | chr:6:32648036 |
| 6 rs116191291 | 32469662 T | 4.898  | 1.59E-07 | chr:6:32648036 |
| 6 rs184334509 | 32469663 A | 4.898  | 1.59E-07 | chr:6:32648036 |
| 6 rs114106672 | 32532692 A | 0.5551 | 1.60E-07 | chr:6:32648036 |
| 6 rs535694878 | 32512216 A | 0.4672 | 1.60E-07 | chr:6:32648036 |
| 6 rs556986229 | 32512217 G | 0.4672 | 1.60E-07 | chr:6:32648036 |
| 6 rs72851100  | 32505511 C | 0.4509 | 1.63E-07 | chr:6:32648036 |
| 6 rs146280841 | 32533291 A | 0.5386 | 1.64E-07 | chr:6:32648036 |
| 6 rs148731245 | 32533293 C | 0.5386 | 1.64E-07 | chr:6:32648036 |
| 6 rs556317932 | 32368669 G | 2.877  | 1.64E-07 | chr:6:32648036 |
| 6 rs76934421  | 32503722 T | 2.943  | 1.66E-07 | chr:6:32648036 |
| 6 rs9269284   | 32539381 G | 0.552  | 1.66E-07 | chr:6:32648036 |
| 6 rs9275059   | 32648298 T | 0.3891 | 1.66E-07 | chr:6:32648036 |
| 6 rs145896370 | 32533718 A | 0.5529 | 1.68E-07 | chr:6:32648036 |
| 6 rs556948697 | 32531729 C | 0.5558 | 1.70E-07 | chr:6:32648036 |
| 6 rs74997284  | 32518934 G | 0.4145 | 1.70E-07 | chr:6:32648036 |
| 6 rs78326230  | 32518935 A | 0.4145 | 1.70E-07 | chr:6:32648036 |
| 6 rs9269276   | 32539244 C | 0.5553 | 1.71E-07 | chr:6:32648036 |
| 6 rs75420369  | 32511920 A | 2.165  | 1.73E-07 | chr:6:32648036 |
| 6 rs114633631 | 32531706 A | 0.5532 | 1.76E-07 | chr:6:32648036 |
| 6 rs199973717 | 32493600 G | 0.4574 | 1.76E-07 | chr:6:32648036 |
| 6 rs145316959 | 32521201 T | 0.3445 | 1.79E-07 | chr:6:32648036 |
| 6 rs111608233 | 32541061 C | 2.117  | 1.79E-07 | chr:6:32648036 |
| 6 rs111843909 | 32531043 T | 0.5564 | 1.80E-07 | chr:6:32648036 |
| 6 rs199893280 | 32531226 C | 0.5593 | 1.81E-07 | chr:6:32648036 |
| 6 rs114246255 | 32509461 G | 0.4585 | 1.82E-07 | chr:6:32648036 |
| 6 rs115202951 | 32501311 T | 0.4567 | 1.82E-07 | chr:6:32648036 |
| 6 rs115704383 | 32509460 T | 0.4585 | 1.82E-07 | chr:6:32648036 |
| 6 rs73726834  | 32531111 C | 0.5567 | 1.89E-07 | chr:6:32648036 |
| 6 rs9268644   | 32408044 A | 0.3037 | 1.90E-07 | chr:6:32648036 |
| 6 rs9276821   | 32829304 G | 2.21   | 1.92E-07 | chr:6:32648036 |
| 6 rs114146939 | 32459890 G | 0.4636 | 1.92E-07 | chr:6:32648036 |
| 6 rs116587947 | 32459889 T | 0.4636 | 1.92E-07 | chr:6:32648036 |
| 6 rs115834108 | 32459908 A | 0.462  | 1.93E-07 | chr:6:32648036 |
| 6 rs9269295   | 32539475 C | 0.4842 | 1.95E-07 | chr:6:32648036 |
| 6 rs114672263 | 32540417 G | 2.068  | 1.97E-07 | chr:6:32648036 |
| 6 rs646984    | 32576592 C | 2.257  | 1.97E-07 | chr:6:32648036 |
| 6 rs138991250 | 32534855 G | 0.5375 | 1.98E-07 | chr:6:32648036 |
| 6 rs78085354  | 32529981 G | 0.556  | 2.00E-07 | chr:6:32648036 |
| 6 rs9274582   | 32635348 T | 0.5031 | 2.01E-07 | chr:6:32648036 |
| 6 rs115217308 | 32520296 A | 0.4652 | 2.04E-07 | chr:6:32648036 |
| 6 rs116173033 | 32520295 G | 0.4652 | 2.04E-07 | chr:6:32648036 |

|               |            |        |          |                |
|---------------|------------|--------|----------|----------------|
| 6 rs3129957   | 32368593 A | 0.3991 | 2.06E-07 | chr:6:32648036 |
| 6 rs74615215  | 32458389 G | 0.4616 | 2.06E-07 | chr:6:32648036 |
| 6 rs7743846   | 32505600 C | 0.4496 | 2.12E-07 | chr:6:32648036 |
| 6 rs112177836 | 32503658 A | 2.028  | 2.13E-07 | chr:6:32648036 |
| 6 rs557048    | 32587001 T | 0.3539 | 2.13E-07 | chr:6:32648036 |
| 6 rs9269160   | 32446711 T | 0.4739 | 2.14E-07 | chr:6:32648036 |
| 6 rs373804788 | 32521591 T | 2.108  | 2.19E-07 | chr:6:32648036 |
| 6 rs74524959  | 32574739 G | 0.4514 | 2.20E-07 | chr:6:32648036 |
| 6 rs9274580   | 32635345 G | 0.5037 | 2.20E-07 | chr:6:32648036 |
| 6 rs9274581   | 32635347 A | 0.5037 | 2.20E-07 | chr:6:32648036 |
| 6 rs113961302 | 32514219 G | 2.086  | 2.20E-07 | chr:6:32648036 |
| 6 rs9275845   | 32691102 T | 2.336  | 2.21E-07 | chr:6:32648036 |
| 6 rs9275847   | 32691133 G | 2.336  | 2.21E-07 | chr:6:32648036 |
| 6 rs560693076 | 32532972 C | 0.4996 | 2.22E-07 | chr:6:32648036 |
| 6 rs537206245 | 32514754 C | 1.973  | 2.23E-07 | chr:6:32648036 |
| 6 rs539579029 | 32514764 T | 1.973  | 2.23E-07 | chr:6:32648036 |
| 6 rs9274716   | 32637404 A | 2.193  | 2.24E-07 | chr:6:32648036 |
| 6 rs114831840 | 32501301 C | 0.4605 | 2.26E-07 | chr:6:32648036 |
| 6 rs115303308 | 32501296 A | 0.4605 | 2.26E-07 | chr:6:32648036 |
| 6 rs281863504 | 32630944 A | 0.3738 | 2.26E-07 | chr:6:32648036 |
| 6 rs3117105   | 32343714 T | 0.3802 | 2.27E-07 | chr:6:32648036 |
| 6 rs113051760 | 32521691 G | 0.4398 | 2.27E-07 | chr:6:32648036 |
| 6 rs9269277   | 32539265 A | 0.5589 | 2.28E-07 | chr:6:32648036 |
| 6 rs9269278   | 32539269 A | 0.5589 | 2.28E-07 | chr:6:32648036 |
| 6 rs9269279   | 32539274 G | 0.5589 | 2.28E-07 | chr:6:32648036 |
| 6 rs115278245 | 32531057 A | 0.5598 | 2.29E-07 | chr:6:32648036 |
| 6 rs115407919 | 32531056 C | 0.5598 | 2.29E-07 | chr:6:32648036 |
| 6 rs3104404   | 32682174 A | 0.4427 | 2.30E-07 | chr:6:32648036 |
| 6 rs114418909 | 32531852 C | 0.5615 | 2.33E-07 | chr:6:32648036 |
| 6 rs116479032 | 32531853 A | 0.5615 | 2.33E-07 | chr:6:32648036 |
| 6 rs112720311 | 32529995 A | 0.5581 | 2.33E-07 | chr:6:32648036 |
| 6 rs78278896  | 32508647 G | 0.4557 | 2.34E-07 | chr:6:32648036 |
| 6 rs111425203 | 32534872 T | 0.5392 | 2.35E-07 | chr:6:32648036 |
| 6 rs9274669   | 32636591 A | 0.3598 | 2.41E-07 | chr:6:32648036 |
| 6 rs189023101 | 32539744 T | 2.453  | 2.42E-07 | chr:6:32648036 |
| 6 rs3117102   | 32350107 C | 0.385  | 2.46E-07 | chr:6:32648036 |
| 6 rs3117104   | 32348309 T | 0.385  | 2.46E-07 | chr:6:32648036 |
| 6 rs3129946   | 32346772 A | 0.385  | 2.46E-07 | chr:6:32648036 |
| 6 rs17424325  | 32521644 T | 0.4401 | 2.47E-07 | chr:6:32648036 |
| 6 rs9270081   | 32554243 T | 2.063  | 2.49E-07 | chr:6:32648036 |
| 6 rs115946871 | 32530011 C | 0.5598 | 2.51E-07 | chr:6:32648036 |
| 6 rs114821537 | 32503522 G | 0.461  | 2.52E-07 | chr:6:32648036 |
| 6 rs35139945  | 32626267 T | 2.385  | 2.54E-07 | chr:6:32648036 |

|               |            |        |          |                |
|---------------|------------|--------|----------|----------------|
| 6 rs113432958 | 32538366 A | 0.4325 | 2.55E-07 | chr:6:32648036 |
| 6 rs78806801  | 32503403 C | 0.4468 | 2.55E-07 | chr:6:32648036 |
| 6 rs111403760 | 32517303 C | 2.024  | 2.56E-07 | chr:6:32648036 |
| 6 rs68146539  | 32532928 C | 0.503  | 2.57E-07 | chr:6:32648036 |
| 6 rs202038991 | 32509105 C | 2.103  | 2.60E-07 | chr:6:32648036 |
| 6 rs281863499 | 32630949 G | 0.3747 | 2.61E-07 | chr:6:32648036 |
| 6 rs72844120  | 32514540 A | 0.4406 | 2.62E-07 | chr:6:32648036 |
| 6 rs116920857 | 32390381 C | 4.87   | 2.62E-07 | chr:6:32648036 |
| 6 rs117433623 | 32403963 G | 4.87   | 2.62E-07 | chr:6:32648036 |
| 6 rs199882626 | 32517752 A | 2.018  | 2.62E-07 | chr:6:32648036 |
| 6 rs77724699  | 32529470 G | 0.5343 | 2.65E-07 | chr:6:32648036 |
| 6 rs563837736 | 32660582 A | 0.3378 | 2.66E-07 | chr:6:32648036 |
| 6 rs68027833  | 32630028 A | 0.3909 | 2.67E-07 | chr:6:32648036 |
| 6 rs76415310  | 32513232 T | 0.445  | 2.68E-07 | chr:6:32648036 |
| 6 rs112654908 | 32519968 C | 2.099  | 2.70E-07 | chr:6:32648036 |
| 6 rs112956435 | 32519929 C | 2.099  | 2.70E-07 | chr:6:32648036 |
| 6 rs116993778 | 32359507 A | 3.596  | 2.70E-07 | chr:6:32648036 |
| 6 rs72851077  | 32504624 C | 0.4527 | 2.71E-07 | chr:6:32648036 |
| 6 rs28383236  | 32584188 G | 2.113  | 2.74E-07 | chr:6:32648036 |
| 6 rs562624040 | 32513024 C | 0.4611 | 2.75E-07 | chr:6:32648036 |
| 6 rs115010442 | 32505229 C | 0.4567 | 2.79E-07 | chr:6:32648036 |
| 6 rs72508465  | 32505141 T | 0.4597 | 2.81E-07 | chr:6:32648036 |
| 6 rs111343297 | 32520080 G | 2.099  | 2.81E-07 | chr:6:32648036 |
| 6 rs113955073 | 32522932 C | 0.4708 | 2.82E-07 | chr:6:32648036 |
| 6 rs7774573   | 32657627 C | 3.535  | 2.83E-07 | chr:6:32648036 |
| 6 rs148619571 | 32536155 A | 0.5447 | 2.86E-07 | chr:6:32648036 |
| 6 rs13211570  | 32556146 G | 0.3499 | 2.86E-07 | chr:6:32648036 |
| 6 rs13211672  | 32556145 T | 0.3499 | 2.86E-07 | chr:6:32648036 |
| 6 rs73726819  | 32526540 G | 0.467  | 2.87E-07 | chr:6:32648036 |
| 6 rs76386245  | 32541191 G | 2.168  | 2.89E-07 | chr:6:32648036 |
| 6 rs79451820  | 32541181 T | 2.168  | 2.89E-07 | chr:6:32648036 |
| 6 rs112218095 | 32490813 T | 3.809  | 2.90E-07 | chr:6:32648036 |
| 6 rs59350153  | 32509935 T | 2.026  | 2.90E-07 | chr:6:32648036 |
| 6 rs140120971 | 32510343 C | 0.4599 | 2.91E-07 | chr:6:32648036 |
| 6 rs143822887 | 32510344 A | 0.4599 | 2.91E-07 | chr:6:32648036 |
| 6 rs144411837 | 32510337 C | 0.4599 | 2.91E-07 | chr:6:32648036 |
| 6 rs191539752 | 32496497 A | 2.574  | 2.92E-07 | chr:6:32648036 |
| 6 rs139796058 | 32531715 A | 0.5607 | 2.92E-07 | chr:6:32648036 |
| 6 rs373666709 | 32531748 A | 0.5607 | 2.93E-07 | chr:6:32648036 |
| 6 rs563850361 | 32531744 G | 0.5607 | 2.93E-07 | chr:6:32648036 |
| 6 rs550717566 | 32609094 T | 2.074  | 2.94E-07 | chr:6:32648036 |
| 6 rs9269280   | 32539279 C | 0.5621 | 2.95E-07 | chr:6:32648036 |
| 6 rs112999094 | 32511386 T | 0.5372 | 2.97E-07 | chr:6:32648036 |

|               |            |        |          |                |
|---------------|------------|--------|----------|----------------|
| 6 rs142592433 | 32511392 T | 0.5372 | 2.97E-07 | chr:6:32648036 |
| 6 rs9275539   | 32676048 A | 2.401  | 2.98E-07 | chr:6:32648036 |
| 6 rs116413420 | 32509466 T | 0.4668 | 2.99E-07 | chr:6:32648036 |
| 6 rs9269310   | 32539628 A | 0.5455 | 2.99E-07 | chr:6:32648036 |
| 6 rs139726276 | 32524769 G | 0.4991 | 3.04E-07 | chr:6:32648036 |
| 6 rs72508468  | 32505288 C | 0.452  | 3.13E-07 | chr:6:32648036 |
| 6 rs2395172   | 32399842 C | 0.3041 | 3.15E-07 | chr:6:32648036 |
| 6 rs2395174   | 32404878 G | 0.3041 | 3.15E-07 | chr:6:32648036 |
| 6 rs2395176   | 32405062 T | 0.3041 | 3.15E-07 | chr:6:32648036 |
| 6 rs2395177   | 32405076 C | 0.3041 | 3.15E-07 | chr:6:32648036 |
| 6 rs3129844   | 32395835 G | 0.3041 | 3.15E-07 | chr:6:32648036 |
| 6 rs3129847   | 32396506 G | 0.3041 | 3.15E-07 | chr:6:32648036 |
| 6 rs3129848   | 32397049 A | 0.3041 | 3.15E-07 | chr:6:32648036 |
| 6 rs3129851   | 32397712 C | 0.3041 | 3.15E-07 | chr:6:32648036 |
| 6 rs3129853   | 32398648 A | 0.3041 | 3.15E-07 | chr:6:32648036 |
| 6 rs3129857   | 32399785 G | 0.3041 | 3.15E-07 | chr:6:32648036 |
| 6 rs3129864   | 32404043 G | 0.3041 | 3.15E-07 | chr:6:32648036 |
| 6 rs3129870   | 32406100 T | 0.3041 | 3.15E-07 | chr:6:32648036 |
| 6 rs3129872   | 32407153 T | 0.3041 | 3.15E-07 | chr:6:32648036 |
| 6 rs3129873   | 32407433 C | 0.3041 | 3.15E-07 | chr:6:32648036 |
| 6 rs3129874   | 32407440 C | 0.3041 | 3.15E-07 | chr:6:32648036 |
| 6 rs3129877   | 32408597 A | 0.3041 | 3.15E-07 | chr:6:32648036 |
| 6 rs3135337   | 32401534 T | 0.3041 | 3.15E-07 | chr:6:32648036 |
| 6 rs3135339   | 32399261 G | 0.3041 | 3.15E-07 | chr:6:32648036 |
| 6 rs3135340   | 32398872 G | 0.3041 | 3.15E-07 | chr:6:32648036 |
| 6 rs3135396   | 32404213 T | 0.3041 | 3.15E-07 | chr:6:32648036 |
| 6 rs3135398   | 32403934 T | 0.3041 | 3.15E-07 | chr:6:32648036 |
| 6 rs4988820   | 32399158 T | 0.3041 | 3.15E-07 | chr:6:32648036 |
| 6 rs4988821   | 32399022 G | 0.3041 | 3.15E-07 | chr:6:32648036 |
| 6 rs4988822   | 32398975 T | 0.3041 | 3.15E-07 | chr:6:32648036 |
| 6 rs5000563   | 32404135 G | 0.3041 | 3.15E-07 | chr:6:32648036 |
| 6 rs9268632   | 32406412 G | 0.3041 | 3.15E-07 | chr:6:32648036 |
| 6 rs9268641   | 32406887 T | 0.3041 | 3.15E-07 | chr:6:32648036 |
| 6 rs17205731  | 32650761 T | 0.3686 | 3.20E-07 | chr:6:32648036 |
| 6 rs72492350  | 32538088 T | 0.546  | 3.20E-07 | chr:6:32648036 |
| 6 rs138087636 | 32517031 T | 2.002  | 3.21E-07 | chr:6:32648036 |
| 6 rs28383233  | 32584153 A | 2.105  | 3.23E-07 | chr:6:32648036 |
| 6 rs9269923   | 32551604 T | 0.3732 | 3.26E-07 | chr:6:32648036 |
| 6 rs147034082 | 32539600 A | 0.5328 | 3.27E-07 | chr:6:32648036 |
| 6 rs146320947 | 32534206 A | 1.934  | 3.29E-07 | chr:6:32648036 |
| 6 rs9270559   | 32560698 T | 2.131  | 3.32E-07 | chr:6:32648036 |
| 6 rs9274211   | 32630925 T | 0.3859 | 3.34E-07 | chr:6:32648036 |
| 6 rs115774308 | 32530778 T | 0.5664 | 3.35E-07 | chr:6:32648036 |

|               |            |        |          |                |
|---------------|------------|--------|----------|----------------|
| 6 rs4406272   | 32632080 C | 1.767  | 3.36E-07 | chr:6:32648036 |
| 6 rs111769716 | 32530819 G | 0.5687 | 3.37E-07 | chr:6:32648036 |
| 6 rs374264352 | 32532969 A | 0.5065 | 3.37E-07 | chr:6:32648036 |
| 6 rs28371246  | 32647995 T | 0.4745 | 3.42E-07 | chr:6:32648036 |
| 6 rs67011649  | 32532599 G | 0.5311 | 3.43E-07 | chr:6:32648036 |
| 6 rs113192265 | 32511884 C | 2.108  | 3.45E-07 | chr:6:32648036 |
| 6 rs4713575   | 32627039 A | 0.4627 | 3.51E-07 | chr:6:32648036 |
| 6 rs114084676 | 32505216 C | 0.4626 | 3.52E-07 | chr:6:32648036 |
| 6 rs9269304   | 32539585 T | 0.5324 | 3.53E-07 | chr:6:32648036 |
| 6 rs151297998 | 32530904 C | 0.5694 | 3.54E-07 | chr:6:32648036 |
| 6 rs114327439 | 32505202 A | 0.4636 | 3.56E-07 | chr:6:32648036 |
| 6 rs77048791  | 32503986 T | 2.01   | 3.56E-07 | chr:6:32648036 |
| 6 rs200094698 | 32532973 A | 1.932  | 3.60E-07 | chr:6:32648036 |
| 6 rs28383221  | 32583212 G | 2.111  | 3.65E-07 | chr:6:32648036 |
| 6 rs28383230  | 32584088 C | 2.111  | 3.65E-07 | chr:6:32648036 |
| 6 rs28383231  | 32584099 T | 2.111  | 3.65E-07 | chr:6:32648036 |
| 6 rs28752527  | 32584928 T | 2.111  | 3.65E-07 | chr:6:32648036 |
| 6 rs115493349 | 32527153 G | 0.4265 | 3.67E-07 | chr:6:32648036 |
| 6 rs9269771   | 32548734 T | 2.388  | 3.68E-07 | chr:6:32648036 |
| 6 rs115137792 | 32510114 C | 0.4623 | 3.69E-07 | chr:6:32648036 |
| 6 rs145245177 | 32530955 C | 0.568  | 3.69E-07 | chr:6:32648036 |
| 6 rs148812784 | 32530954 C | 0.568  | 3.69E-07 | chr:6:32648036 |
| 6 rs9275503   | 32673931 G | 4.262  | 3.71E-07 | chr:6:32648036 |
| 6 rs576314890 | 32523379 T | 0.5502 | 3.72E-07 | chr:6:32648036 |
| 6 rs575209356 | 32525806 A | 0.5031 | 3.74E-07 | chr:6:32648036 |
| 6 rs545154111 | 32530754 C | 0.5674 | 3.80E-07 | chr:6:32648036 |
| 6 rs9275523   | 32674994 A | 2.359  | 3.85E-07 | chr:6:32648036 |
| 6 rs9272183   | 32601604 T | 0.4645 | 3.85E-07 | chr:6:32648036 |
| 6 rs9272070   | 32599485 G | 0.4605 | 3.87E-07 | chr:6:32648036 |
| 6 rs281863464 | 32630999 T | 0.3751 | 3.88E-07 | chr:6:32648036 |
| 6 rs67303455  | 32633153 G | 0.3967 | 3.88E-07 | chr:6:32648036 |
| 6 rs9274706   | 32637265 G | 2.188  | 3.91E-07 | chr:6:32648036 |
| 6 rs35255303  | 32536356 A | 0.5644 | 3.92E-07 | chr:6:32648036 |
| 6 rs28891453  | 32641790 A | 0.4813 | 3.93E-07 | chr:6:32648036 |
| 6 rs67110942  | 32626885 C | 2.187  | 3.93E-07 | chr:6:32648036 |
| 6 rs143742917 | 32533480 A | 0.5708 | 3.95E-07 | chr:6:32648036 |
| 6 rs146783438 | 32533483 A | 0.5708 | 3.95E-07 | chr:6:32648036 |
| 6 rs148743468 | 32533479 C | 0.5708 | 3.95E-07 | chr:6:32648036 |
| 6 rs202015091 | 32520214 C | 2.018  | 3.96E-07 | chr:6:32648036 |
| 6 rs114968045 | 32666960 C | 0.3662 | 3.97E-07 | chr:6:32648036 |
| 6 rs9269326   | 32539996 G | 0.4931 | 4.03E-07 | chr:6:32648036 |
| 6 rs3117098   | 32358513 G | 0.3947 | 4.06E-07 | chr:6:32648036 |
| 6 rs3129948   | 32354644 C | 0.3947 | 4.06E-07 | chr:6:32648036 |

|               |            |        |          |                |
|---------------|------------|--------|----------|----------------|
| 6 rs3129951   | 32358286 T | 0.3947 | 4.06E-07 | chr:6:32648036 |
| 6 rs3129952   | 32359763 G | 0.3947 | 4.06E-07 | chr:6:32648036 |
| 6 rs3129954   | 32365580 A | 0.3947 | 4.06E-07 | chr:6:32648036 |
| 6 rs3129955   | 32365840 T | 0.3947 | 4.06E-07 | chr:6:32648036 |
| 6 rs370864292 | 32532975 A | 0.5095 | 4.07E-07 | chr:6:32648036 |
| 6 rs117177076 | 32359150 A | 4.189  | 4.08E-07 | chr:6:32648036 |
| 6 rs118171271 | 32359149 T | 4.189  | 4.08E-07 | chr:6:32648036 |
| 6 rs147315656 | 32530869 T | 0.5721 | 4.09E-07 | chr:6:32648036 |
| 6 rs9274711   | 32637289 T | 2.185  | 4.09E-07 | chr:6:32648036 |
| 6 rs28832872  | 32529015 C | 0.5731 | 4.09E-07 | chr:6:32648036 |
| 6 rs75019606  | 32531924 C | 0.5732 | 4.09E-07 | chr:6:32648036 |
| 6 rs9275548   | 32676530 T | 2.37   | 4.10E-07 | chr:6:32648036 |
| 6 rs185282713 | 32517018 C | 1.988  | 4.12E-07 | chr:6:32648036 |
| 6 rs72853926  | 32508451 G | 0.4645 | 4.13E-07 | chr:6:32648036 |
| 6 rs78539884  | 32513224 A | 2.066  | 4.14E-07 | chr:6:32648036 |
| 6 rs187785448 | 32523396 T | 2.14   | 4.16E-07 | chr:6:32648036 |
| 6 rs2647043   | 32667549 A | 0.3208 | 4.16E-07 | chr:6:32648036 |
| 6 rs79508322  | 32512049 A | 2.056  | 4.18E-07 | chr:6:32648036 |
| 6 rs567470347 | 32525111 C | 2.042  | 4.20E-07 | chr:6:32648036 |
| 6 rs147819405 | 32533096 A | 0.5694 | 4.20E-07 | chr:6:32648036 |
| 6 rs9269302   | 32539574 T | 0.535  | 4.21E-07 | chr:6:32648036 |
| 6 rs111529629 | 32533843 G | 0.5721 | 4.21E-07 | chr:6:32648036 |
| 6 rs114435848 | 32532546 T | 0.5372 | 4.23E-07 | chr:6:32648036 |
| 6 rs572581776 | 32526776 G | 0.486  | 4.23E-07 | chr:6:32648036 |
| 6 rs537678001 | 32527268 G | 0.443  | 4.24E-07 | chr:6:32648036 |
| 6 rs36083025  | 32560749 T | 3.544  | 4.25E-07 | chr:6:32648036 |
| 6 rs74995702  | 32590240 G | 5.247  | 4.27E-07 | chr:6:32648036 |
| 6 rs184050448 | 32551844 T | 3.335  | 4.28E-07 | chr:6:32648036 |
| 6 rs9272182   | 32601564 A | 0.463  | 4.29E-07 | chr:6:32648036 |
| 6 rs113126350 | 32484709 T | 4.63   | 4.30E-07 | chr:6:32648036 |
| 6 rs115227911 | 32631831 C | 0.4853 | 4.32E-07 | chr:6:32648036 |
| 6 rs76259812  | 32524672 C | 0.5081 | 4.32E-07 | chr:6:32648036 |
| 6 rs9272566   | 32607175 A | 0.459  | 4.32E-07 | chr:6:32648036 |
| 6 rs71536552  | 32527775 C | 0.5725 | 4.37E-07 | chr:6:32648036 |
| 6 rs9275758   | 32689191 G | 2.335  | 4.38E-07 | chr:6:32648036 |
| 6 rs141404431 | 32538578 T | 0.4537 | 4.39E-07 | chr:6:32648036 |
| 6 rs143027966 | 32538579 T | 0.4537 | 4.39E-07 | chr:6:32648036 |
| 6 rs151286796 | 32538577 T | 0.4537 | 4.39E-07 | chr:6:32648036 |
| 6 rs200402299 | 32458349 A | 0.4819 | 4.41E-07 | chr:6:32648036 |
| 6 rs111896611 | 32511183 T | 0.4685 | 4.43E-07 | chr:6:32648036 |
| 6 rs554350950 | 32522108 A | 1.989  | 4.44E-07 | chr:6:32648036 |
| 6 rs532322163 | 32594155 T | 5.989  | 4.44E-07 | chr:6:32648036 |
| 6 rs139868705 | 32532075 A | 0.5592 | 4.45E-07 | chr:6:32648036 |



|               |            |        |          |                |
|---------------|------------|--------|----------|----------------|
| 6 rs142162694 | 32532071 T | 0.5592 | 4.45E-07 | chr:6:32648036 |
| 6 rs9275453   | 32671937 T | 4.649  | 4.45E-07 | chr:6:32648036 |
| 6 rs3763309   | 32375973 A | 3.657  | 4.46E-07 | chr:6:32648036 |
| 6 rs3763312   | 32376348 A | 3.657  | 4.46E-07 | chr:6:32648036 |
| 6 rs3793127   | 32371915 T | 3.657  | 4.46E-07 | chr:6:32648036 |
| 6 rs9268433   | 32345891 G | 3.657  | 4.46E-07 | chr:6:32648036 |
| 6 rs9268451   | 32349086 C | 3.657  | 4.46E-07 | chr:6:32648036 |
| 6 rs9268455   | 32349772 T | 3.657  | 4.46E-07 | chr:6:32648036 |
| 6 rs558696616 | 32530898 C | 0.5728 | 4.46E-07 | chr:6:32648036 |
| 6 rs577240453 | 32530899 T | 0.5728 | 4.46E-07 | chr:6:32648036 |
| 6 rs17882603  | 32552067 T | 2.046  | 4.48E-07 | chr:6:32648036 |
| 6 rs115296342 | 32503526 C | 0.4706 | 4.51E-07 | chr:6:32648036 |
| 6 rs116964260 | 32684585 T | 3.201  | 4.51E-07 | chr:6:32648036 |
| 6 rs115095329 | 32503497 A | 0.4629 | 4.55E-07 | chr:6:32648036 |
| 6 rs116133469 | 32503492 G | 0.4629 | 4.55E-07 | chr:6:32648036 |
| 6 rs76034941  | 32503498 C | 0.4629 | 4.55E-07 | chr:6:32648036 |
| 6 rs28383224  | 32583653 G | 2.087  | 4.59E-07 | chr:6:32648036 |
| 6 rs143631084 | 32632190 A | 0.5335 | 4.62E-07 | chr:6:32648036 |
| 6 rs145244319 | 32632189 A | 0.5335 | 4.62E-07 | chr:6:32648036 |
| 6 rs373544996 | 32663873 G | 4.287  | 4.63E-07 | chr:6:32648036 |
| 6 rs3957146   | 32681530 C | 4.287  | 4.63E-07 | chr:6:32648036 |
| 6 rs3998159   | 32682019 C | 4.287  | 4.63E-07 | chr:6:32648036 |
| 6 rs4273728   | 32678491 C | 4.287  | 4.63E-07 | chr:6:32648036 |
| 6 rs9274619   | 32635954 A | 4.287  | 4.63E-07 | chr:6:32648036 |
| 6 rs9275095   | 32649088 G | 4.287  | 4.63E-07 | chr:6:32648036 |
| 6 rs9275097   | 32649126 G | 4.287  | 4.63E-07 | chr:6:32648036 |
| 6 rs9275098   | 32649161 T | 4.287  | 4.63E-07 | chr:6:32648036 |
| 6 rs9275201   | 32656723 A | 4.287  | 4.63E-07 | chr:6:32648036 |
| 6 rs9275207   | 32657710 G | 4.287  | 4.63E-07 | chr:6:32648036 |
| 6 rs9275213   | 32658335 C | 4.287  | 4.63E-07 | chr:6:32648036 |
| 6 rs9275214   | 32658665 A | 4.287  | 4.63E-07 | chr:6:32648036 |
| 6 rs9275221   | 32659099 C | 4.287  | 4.63E-07 | chr:6:32648036 |
| 6 rs9275223   | 32659839 A | 4.287  | 4.63E-07 | chr:6:32648036 |
| 6 rs9275275   | 32662607 A | 4.287  | 4.63E-07 | chr:6:32648036 |
| 6 rs9275293   | 32663308 C | 4.287  | 4.63E-07 | chr:6:32648036 |
| 6 rs9275296   | 32663431 C | 4.287  | 4.63E-07 | chr:6:32648036 |
| 6 rs9275300   | 32664126 G | 4.287  | 4.63E-07 | chr:6:32648036 |
| 6 rs9275307   | 32664990 T | 4.287  | 4.63E-07 | chr:6:32648036 |
| 6 rs9275308   | 32665255 A | 4.287  | 4.63E-07 | chr:6:32648036 |
| 6 rs9275310   | 32665319 G | 4.287  | 4.63E-07 | chr:6:32648036 |
| 6 rs9275313   | 32665759 T | 4.287  | 4.63E-07 | chr:6:32648036 |
| 6 rs9275314   | 32665909 A | 4.287  | 4.63E-07 | chr:6:32648036 |
| 6 rs9275315   | 32665912 A | 4.287  | 4.63E-07 | chr:6:32648036 |

|               |            |        |          |                |
|---------------|------------|--------|----------|----------------|
| 6 rs9275324   | 32666635 T | 4.287  | 4.63E-07 | chr:6:32648036 |
| 6 rs9275325   | 32666651 T | 4.287  | 4.63E-07 | chr:6:32648036 |
| 6 rs9275326   | 32666660 T | 4.287  | 4.63E-07 | chr:6:32648036 |
| 6 rs9275334   | 32667107 C | 4.287  | 4.63E-07 | chr:6:32648036 |
| 6 rs9275387   | 32669013 C | 4.287  | 4.63E-07 | chr:6:32648036 |
| 6 rs9275394   | 32669454 C | 4.287  | 4.63E-07 | chr:6:32648036 |
| 6 rs9275395   | 32669483 G | 4.287  | 4.63E-07 | chr:6:32648036 |
| 6 rs9275400   | 32669761 G | 4.287  | 4.63E-07 | chr:6:32648036 |
| 6 rs9275422   | 32670548 A | 4.287  | 4.63E-07 | chr:6:32648036 |
| 6 rs9275426   | 32670912 C | 4.287  | 4.63E-07 | chr:6:32648036 |
| 6 rs9275429   | 32671057 A | 4.287  | 4.63E-07 | chr:6:32648036 |
| 6 rs9275430   | 32671086 T | 4.287  | 4.63E-07 | chr:6:32648036 |
| 6 rs9275434   | 32671247 T | 4.287  | 4.63E-07 | chr:6:32648036 |
| 6 rs9275435   | 32671332 C | 4.287  | 4.63E-07 | chr:6:32648036 |
| 6 rs9275437   | 32671412 T | 4.287  | 4.63E-07 | chr:6:32648036 |
| 6 rs9275442   | 32671755 A | 4.287  | 4.63E-07 | chr:6:32648036 |
| 6 rs9275445   | 32671811 A | 4.287  | 4.63E-07 | chr:6:32648036 |
| 6 rs9275486   | 32673099 A | 4.287  | 4.63E-07 | chr:6:32648036 |
| 6 rs9275495   | 32673574 T | 4.287  | 4.63E-07 | chr:6:32648036 |
| 6 rs9275530   | 32675523 C | 4.287  | 4.63E-07 | chr:6:32648036 |
| 6 rs9275532   | 32675634 G | 4.287  | 4.63E-07 | chr:6:32648036 |
| 6 rs9275541   | 32676159 G | 4.287  | 4.63E-07 | chr:6:32648036 |
| 6 rs9275583   | 32680299 A | 4.287  | 4.63E-07 | chr:6:32648036 |
| 6 rs9275592   | 32680620 T | 4.287  | 4.63E-07 | chr:6:32648036 |
| 6 rs66727344  | 32631946 A | 0.4954 | 4.68E-07 | chr:6:32648036 |
| 6 rs9271323   | 32582454 C | 0.3971 | 4.71E-07 | chr:6:32648036 |
| 6 rs71542458  | 32631984 C | 0.5107 | 4.75E-07 | chr:6:32648036 |
| 6 rs72508466  | 32505166 G | 0.4694 | 4.76E-07 | chr:6:32648036 |
| 6 rs375970207 | 32524649 C | 1.979  | 4.80E-07 | chr:6:32648036 |
| 6 rs532508742 | 32530749 C | 0.5708 | 4.80E-07 | chr:6:32648036 |
| 6 rs9275522   | 32674970 T | 2.358  | 4.81E-07 | chr:6:32648036 |
| 6 rs9275525   | 32675233 A | 2.358  | 4.81E-07 | chr:6:32648036 |
| 6 rs9275542   | 32676246 T | 2.358  | 4.81E-07 | chr:6:32648036 |
| 6 rs9275546   | 32676445 G | 2.358  | 4.81E-07 | chr:6:32648036 |
| 6 rs9275561   | 32677789 T | 2.358  | 4.81E-07 | chr:6:32648036 |
| 6 rs9275579   | 32679459 A | 2.358  | 4.81E-07 | chr:6:32648036 |
| 6 rs9275580   | 32679462 G | 2.358  | 4.81E-07 | chr:6:32648036 |
| 6 rs9275585   | 32680350 C | 2.358  | 4.81E-07 | chr:6:32648036 |
| 6 rs9275586   | 32680376 T | 2.358  | 4.81E-07 | chr:6:32648036 |
| 6 rs115277180 | 32533468 C | 0.5742 | 4.84E-07 | chr:6:32648036 |
| 6 rs67515384  | 32505271 A | 0.4595 | 4.85E-07 | chr:6:32648036 |
| 6 rs539956953 | 32489061 C | 2.183  | 4.88E-07 | chr:6:32648036 |
| 6 rs9275218   | 32658933 G | 0.4671 | 4.92E-07 | chr:6:32648036 |

|               |            |        |          |                |
|---------------|------------|--------|----------|----------------|
| 6 rs112155110 | 32501417 T | 0.468  | 4.93E-07 | chr:6:32648036 |
| 6 rs113220298 | 32510369 T | 0.471  | 4.94E-07 | chr:6:32648036 |
| 6 rs9269299   | 32539541 C | 0.5409 | 4.95E-07 | chr:6:32648036 |
| 6 rs1130456   | 32627379 T | 2.063  | 5.00E-07 | chr:6:32648036 |
| 6 rs113522240 | 32512591 G | 1.98   | 5.05E-07 | chr:6:32648036 |
| 6 rs116225018 | 32503380 C | 0.457  | 5.07E-07 | chr:6:32648036 |
| 6 rs201917227 | 32531870 C | 0.5743 | 5.09E-07 | chr:6:32648036 |
| 6 rs145520715 | 32530952 T | 0.573  | 5.11E-07 | chr:6:32648036 |
| 6 rs544337416 | 32443461 A | 5.234  | 5.12E-07 | chr:6:32648036 |
| 6 rs556752617 | 32443462 T | 5.234  | 5.12E-07 | chr:6:32648036 |
| 6 rs115978041 | 32522923 C | 0.4797 | 5.13E-07 | chr:6:32648036 |
| 6 rs182767311 | 32533523 C | 0.575  | 5.17E-07 | chr:6:32648036 |
| 6 rs77178107  | 32533511 C | 0.575  | 5.17E-07 | chr:6:32648036 |
| 6 rs77814554  | 32533509 C | 0.575  | 5.17E-07 | chr:6:32648036 |
| 6 rs149361627 | 32486988 G | 1.886  | 5.19E-07 | chr:6:32648036 |
| 6 rs187402303 | 32486990 A | 1.886  | 5.19E-07 | chr:6:32648036 |
| 6 rs542087123 | 32486994 A | 1.886  | 5.19E-07 | chr:6:32648036 |
| 6 rs551009500 | 32533836 T | 0.5752 | 5.19E-07 | chr:6:32648036 |
| 6 rs569299936 | 32533837 A | 0.5752 | 5.19E-07 | chr:6:32648036 |
| 6 rs115910196 | 32502304 T | 0.4685 | 5.27E-07 | chr:6:32648036 |
| 6 rs9275762   | 32689277 T | 2.299  | 5.30E-07 | chr:6:32648036 |
| 6 rs115712530 | 32517414 A | 2.075  | 5.41E-07 | chr:6:32648036 |
| 6 rs9271696   | 32593085 C | 0.3826 | 5.41E-07 | chr:6:32648036 |
| 6 rs28772304  | 32682114 T | 0.4528 | 5.41E-07 | chr:6:32648036 |
| 6 rs763024    | 32691944 G | 2.296  | 5.44E-07 | chr:6:32648036 |
| 6 rs200819822 | 32505189 G | 0.4712 | 5.45E-07 | chr:6:32648036 |
| 6 rs28427070  | 32687448 G | 2.318  | 5.46E-07 | chr:6:32648036 |
| 6 rs9275683   | 32687329 G | 2.318  | 5.46E-07 | chr:6:32648036 |
| 6 rs28772283  | 32674277 G | 2.194  | 5.50E-07 | chr:6:32648036 |
| 6 rs2647025   | 32635949 A | 2.223  | 5.52E-07 | chr:6:32648036 |
| 6 rs111548649 | 32533365 G | 0.5747 | 5.52E-07 | chr:6:32648036 |
| 6 rs72853940  | 32508945 T | 0.4743 | 5.56E-07 | chr:6:32648036 |
| 6 rs113900769 | 32503887 T | 0.4763 | 5.65E-07 | chr:6:32648036 |
| 6 rs185436529 | 32530740 A | 0.5733 | 5.70E-07 | chr:6:32648036 |
| 6 rs543093016 | 32532533 A | 0.5415 | 5.74E-07 | chr:6:32648036 |
| 6 rs73731415  | 32454428 G | 0.3537 | 5.75E-07 | chr:6:32648036 |
| 6 rs9275351   | 32667793 A | 4.475  | 5.78E-07 | chr:6:32648036 |
| 6 rs190685297 | 32458514 C | 2.242  | 5.81E-07 | chr:6:32648036 |
| 6 rs566973051 | 32531876 C | 0.5763 | 5.84E-07 | chr:6:32648036 |
| 6 rs537977627 | 32510140 A | 0.4757 | 5.84E-07 | chr:6:32648036 |
| 6 rs116715716 | 32506910 T | 0.4774 | 5.86E-07 | chr:6:32648036 |
| 6 rs528150408 | 32489042 G | 2.165  | 5.92E-07 | chr:6:32648036 |
| 6 rs72844386  | 32631777 T | 0.4641 | 5.93E-07 | chr:6:32648036 |

|               |            |        |          |                |
|---------------|------------|--------|----------|----------------|
| 6 rs74323244  | 32503921 C | 1.969  | 5.95E-07 | chr:6:32648036 |
| 6 rs116085924 | 32514884 G | 0.4761 | 5.96E-07 | chr:6:32648036 |
| 6 rs9272185   | 32601620 A | 0.4735 | 6.00E-07 | chr:6:32648036 |
| 6 rs182090170 | 32537941 G | 0.5329 | 6.02E-07 | chr:6:32648036 |
| 6 rs190345143 | 32537926 G | 0.5329 | 6.02E-07 | chr:6:32648036 |
| 6 rs114710684 | 32521237 G | 0.3662 | 6.06E-07 | chr:6:32648036 |
| 6 rs116783886 | 32521236 T | 0.3662 | 6.06E-07 | chr:6:32648036 |
| 6 rs115696138 | 32504460 C | 0.4734 | 6.06E-07 | chr:6:32648036 |
| 6 rs117492935 | 32767849 T | 3.509  | 6.08E-07 | chr:6:32648036 |
| 6 rs9275624   | 32684632 T | 4.09   | 6.09E-07 | chr:6:32648036 |
| 6 rs9275625   | 32684633 G | 4.09   | 6.09E-07 | chr:6:32648036 |
| 6 rs74394575  | 32541164 A | 2.118  | 6.09E-07 | chr:6:32648036 |
| 6 rs143742029 | 32486683 C | 0.5476 | 6.10E-07 | chr:6:32648036 |
| 6 rs117668050 | 32749843 T | 3.507  | 6.11E-07 | chr:6:32648036 |
| 6 rs76415507  | 32492589 G | 0.5436 | 6.11E-07 | chr:6:32648036 |
| 6 rs3129961   | 32378940 C | 0.4054 | 6.12E-07 | chr:6:32648036 |
| 6 rs9275476   | 32672624 C | 4.351  | 6.14E-07 | chr:6:32648036 |
| 6 rs9275477   | 32672641 C | 4.351  | 6.14E-07 | chr:6:32648036 |
| 6 rs181190479 | 32533905 G | 0.5319 | 6.14E-07 | chr:6:32648036 |
| 6 rs188265524 | 32533903 G | 0.5319 | 6.14E-07 | chr:6:32648036 |
| 6 rs71536602  | 32534455 C | 0.4666 | 6.25E-07 | chr:6:32648036 |
| 6 rs12722051  | 32609147 T | 2.03   | 6.31E-07 | chr:6:32648036 |
| 6 rs9275568   | 32678135 C | 2.324  | 6.32E-07 | chr:6:32648036 |
| 6 rs9269327   | 32540001 T | 0.4736 | 6.37E-07 | chr:6:32648036 |
| 6 rs3763349   | 32808232 A | 2.119  | 6.38E-07 | chr:6:32648036 |
| 6 rs9275544   | 32676353 G | 2.324  | 6.39E-07 | chr:6:32648036 |
| 6 rs9275545   | 32676355 T | 2.324  | 6.39E-07 | chr:6:32648036 |
| 6 rs202187184 | 32519848 C | 2.014  | 6.39E-07 | chr:6:32648036 |
| 6 rs530790448 | 32519846 T | 2.014  | 6.39E-07 | chr:6:32648036 |
| 6 rs115670233 | 32538001 T | 1.967  | 6.42E-07 | chr:6:32648036 |
| 6 rs112587701 | 32514041 A | 2.113  | 6.43E-07 | chr:6:32648036 |
| 6 rs111342306 | 32531091 C | 0.5738 | 6.45E-07 | chr:6:32648036 |
| 6 rs113209820 | 32531088 T | 0.5738 | 6.45E-07 | chr:6:32648036 |
| 6 rs9274688   | 32636900 T | 2.193  | 6.48E-07 | chr:6:32648036 |
| 6 rs112719175 | 32533401 T | 0.5776 | 6.52E-07 | chr:6:32648036 |
| 6 rs77149458  | 32487130 A | 0.3267 | 6.55E-07 | chr:6:32648036 |
| 6 rs180756398 | 32458010 A | 0.4577 | 6.56E-07 | chr:6:32648036 |
| 6 rs9274905   | 32641251 T | 0.5442 | 6.60E-07 | chr:6:32648036 |
| 6 rs71534520  | 32510146 G | 0.4773 | 6.67E-07 | chr:6:32648036 |
| 6 rs76666064  | 32530841 C | 0.5791 | 6.70E-07 | chr:6:32648036 |
| 6 rs9269967   | 32552239 T | 0.3972 | 6.73E-07 | chr:6:32648036 |
| 6 rs9274709   | 32637275 G | 2.152  | 6.73E-07 | chr:6:32648036 |
| 6 rs34230758  | 32633558 G | 0.3651 | 6.78E-07 | chr:6:32648036 |

|               |            |        |          |                |
|---------------|------------|--------|----------|----------------|
| 6 rs554917488 | 32677553 T | 2.444  | 6.82E-07 | chr:6:32648036 |
| 6 rs9275528   | 32675407 C | 2.316  | 6.91E-07 | chr:6:32648036 |
| 6 rs9275529   | 32675430 T | 2.316  | 6.91E-07 | chr:6:32648036 |
| 6 rs9271502   | 32589305 A | 1.976  | 6.92E-07 | chr:6:32648036 |
| 6 rs9272186   | 32601635 T | 0.4758 | 6.95E-07 | chr:6:32648036 |
| 6 rs9275555   | 32677088 T | 2.313  | 7.03E-07 | chr:6:32648036 |
| 6 rs115156211 | 32533440 A | 0.5792 | 7.03E-07 | chr:6:32648036 |
| 6 rs140977704 | 32644218 A | 3.738  | 7.12E-07 | chr:6:32648036 |
| 6 rs115663137 | 32502992 C | 0.4703 | 7.23E-07 | chr:6:32648036 |
| 6 rs9272451   | 32605501 G | 2.045  | 7.24E-07 | chr:6:32648036 |
| 6 rs76752213  | 32509416 A | 2.006  | 7.25E-07 | chr:6:32648036 |
| 6 rs71542459  | 32631994 A | 0.5187 | 7.26E-07 | chr:6:32648036 |
| 6 rs116432881 | 32514385 G | 2.085  | 7.26E-07 | chr:6:32648036 |
| 6 rs112479577 | 32533856 A | 0.5803 | 7.27E-07 | chr:6:32648036 |
| 6 rs3129867   | 32404220 G | 2.106  | 7.28E-07 | chr:6:32648036 |
| 6 rs72657675  | 32532955 G | 0.5255 | 7.29E-07 | chr:6:32648036 |
| 6 rs9271707   | 32593356 T | 0.4561 | 7.32E-07 | chr:6:32648036 |
| 6 rs112017333 | 32633501 G | 0.3664 | 7.37E-07 | chr:6:32648036 |
| 6 rs77020460  | 32633494 C | 0.3664 | 7.37E-07 | chr:6:32648036 |
| 6 rs77596642  | 32633483 T | 0.3664 | 7.37E-07 | chr:6:32648036 |
| 6 rs281874806 | 32631449 C | 0.4315 | 7.40E-07 | chr:6:32648036 |
| 6 rs9275571   | 32678847 G | 2.32   | 7.44E-07 | chr:6:32648036 |
| 6 rs144949540 | 32643020 G | 4.496  | 7.49E-07 | chr:6:32648036 |
| 6 rs9271567   | 32590456 T | 2.003  | 7.55E-07 | chr:6:32648036 |
| 6 rs114198395 | 32502961 T | 0.4704 | 7.57E-07 | chr:6:32648036 |
| 6 rs76662624  | 32503880 A | 0.4812 | 7.59E-07 | chr:6:32648036 |
| 6 rs576810845 | 32530891 T | 0.5807 | 7.61E-07 | chr:6:32648036 |
| 6 rs3129964   | 32380717 C | 0.4085 | 7.62E-07 | chr:6:32648036 |
| 6 rs9274739   | 32637940 T | 2.183  | 7.66E-07 | chr:6:32648036 |
| 6 rs116813230 | 32524784 A | 1.987  | 7.71E-07 | chr:6:32648036 |
| 6 rs72844390  | 32633436 T | 0.4142 | 7.73E-07 | chr:6:32648036 |
| 6 rs4452680   | 32710276 G | 2.863  | 7.74E-07 | chr:6:32648036 |
| 6 rs4148870   | 32806391 T | 0.479  | 7.75E-07 | chr:6:32648036 |
| 6 rs184981897 | 32486966 A | 0.4333 | 7.79E-07 | chr:6:32648036 |
| 6 rs78819516  | 32618909 A | 1.863  | 7.84E-07 | chr:6:32648036 |
| 6 rs114680412 | 32520248 A | 1.969  | 7.86E-07 | chr:6:32648036 |
| 6 rs111948873 | 32531081 G | 0.5763 | 7.91E-07 | chr:6:32648036 |
| 6 rs537366043 | 32531076 T | 0.5763 | 7.91E-07 | chr:6:32648036 |
| 6 rs570295314 | 32531074 G | 0.5763 | 7.91E-07 | chr:6:32648036 |
| 6 rs72853927  | 32508474 G | 0.4733 | 7.94E-07 | chr:6:32648036 |
| 6 rs9275151   | 32651936 T | 3.664  | 7.94E-07 | chr:6:32648036 |
| 6 rs114020016 | 32524824 T | 0.5021 | 7.96E-07 | chr:6:32648036 |
| 6 rs9272164   | 32601154 C | 0.4937 | 8.03E-07 | chr:6:32648036 |

|               |            |        |          |                |
|---------------|------------|--------|----------|----------------|
| 6 rs559286232 | 32527271 C | 0.4567 | 8.04E-07 | chr:6:32648036 |
| 6 rs4279477   | 32634901 G | 0.433  | 8.05E-07 | chr:6:32648036 |
| 6 rs112427949 | 32511164 T | 0.4761 | 8.08E-07 | chr:6:32648036 |
| 6 rs9469156   | 32545255 T | 2.761  | 8.09E-07 | chr:6:32648036 |
| 6 rs116675816 | 32512131 A | 0.4765 | 8.11E-07 | chr:6:32648036 |
| 6 rs142198554 | 32531887 T | 0.5815 | 8.18E-07 | chr:6:32648036 |
| 6 rs546856170 | 32531888 G | 0.5815 | 8.18E-07 | chr:6:32648036 |
| 6 rs9272035   | 32598814 T | 0.433  | 8.22E-07 | chr:6:32648036 |
| 6 rs9275558   | 32677427 T | 2.302  | 8.22E-07 | chr:6:32648036 |
| 6 rs36218423  | 32524832 C | 0.4898 | 8.23E-07 | chr:6:32648036 |
| 6 rs113737511 | 32533392 G | 0.5807 | 8.23E-07 | chr:6:32648036 |
| 6 rs138129967 | 32532324 C | 0.5797 | 8.24E-07 | chr:6:32648036 |
| 6 rs371994404 | 32532317 A | 0.5797 | 8.24E-07 | chr:6:32648036 |
| 6 rs116585903 | 32487688 T | 0.3247 | 8.31E-07 | chr:6:32648036 |
| 6 rs3129858   | 32400520 A | 0.3263 | 8.35E-07 | chr:6:32648036 |
| 6 rs3957148   | 32682137 G | 4.078  | 8.37E-07 | chr:6:32648036 |
| 6 rs34153824  | 32627627 T | 0.3709 | 8.38E-07 | chr:6:32648036 |
| 6 rs116520213 | 32504424 T | 0.4804 | 8.38E-07 | chr:6:32648036 |
| 6 rs546636941 | 32504421 T | 0.4804 | 8.38E-07 | chr:6:32648036 |
| 6 rs529034563 | 32559178 A | 3.513  | 8.42E-07 | chr:6:32648036 |
| 6 rs561760011 | 32559177 C | 3.513  | 8.42E-07 | chr:6:32648036 |
| 6 rs9275950   | 32693129 C | 2.271  | 8.43E-07 | chr:6:32648036 |
| 6 rs9269286   | 32539396 A | 0.5767 | 8.44E-07 | chr:6:32648036 |
| 6 rs9274295   | 32631866 A | 1.784  | 8.46E-07 | chr:6:32648036 |
| 6 rs9275203   | 32656947 A | 4.163  | 8.49E-07 | chr:6:32648036 |
| 6 rs9275696   | 32687904 G | 2.695  | 8.55E-07 | chr:6:32648036 |
| 6 rs116017457 | 32521909 T | 0.4557 | 8.59E-07 | chr:6:32648036 |
| 6 rs9275206   | 32657565 G | 4.059  | 8.64E-07 | chr:6:32648036 |
| 6 rs73726852  | 32538295 C | 0.4888 | 8.69E-07 | chr:6:32648036 |
| 6 rs535905056 | 32511341 G | 1.892  | 8.70E-07 | chr:6:32648036 |
| 6 rs552568377 | 32511319 C | 1.892  | 8.70E-07 | chr:6:32648036 |
| 6 rs553395545 | 32511337 A | 1.892  | 8.70E-07 | chr:6:32648036 |
| 6 rs571140115 | 32511322 T | 1.892  | 8.70E-07 | chr:6:32648036 |
| 6 rs574932946 | 32511340 T | 1.892  | 8.70E-07 | chr:6:32648036 |
| 6 rs2213287   | 32605508 T | 2.036  | 8.75E-07 | chr:6:32648036 |
| 6 rs281874809 | 32631446 G | 0.4346 | 8.75E-07 | chr:6:32648036 |
| 6 rs542134915 | 32541099 C | 2.016  | 8.76E-07 | chr:6:32648036 |
| 6 rs9270154   | 32555389 G | 0.4289 | 8.77E-07 | chr:6:32648036 |
| 6 rs114335056 | 32559191 G | 3.46   | 8.78E-07 | chr:6:32648036 |
| 6 rs9296027   | 32393062 G | 2.127  | 8.79E-07 | chr:6:32648036 |
| 6 rs9469109   | 32393161 T | 2.127  | 8.79E-07 | chr:6:32648036 |
| 6 rs9501622   | 32394251 A | 2.127  | 8.79E-07 | chr:6:32648036 |
| 6 rs3129944   | 32340872 G | 2.05   | 8.88E-07 | chr:6:32648036 |

|               |            |        |          |                |
|---------------|------------|--------|----------|----------------|
| 6 rs9271377   | 32587165 G | 0.3914 | 8.88E-07 | chr:6:32648036 |
| 6 rs9274045   | 32630055 C | 0.5326 | 8.88E-07 | chr:6:32648036 |
| 6 rs28383457  | 32609456 T | 2.151  | 9.01E-07 | chr:6:32648036 |
| 6 rs116335331 | 32532577 T | 0.5481 | 9.01E-07 | chr:6:32648036 |
| 6 rs541874222 | 32533761 G | 0.5811 | 9.04E-07 | chr:6:32648036 |
| 6 rs563246799 | 32533766 C | 0.5811 | 9.04E-07 | chr:6:32648036 |
| 6 rs9274728   | 32637772 G | 2.164  | 9.16E-07 | chr:6:32648036 |
| 6 rs9272142   | 32600800 C | 0.4811 | 9.17E-07 | chr:6:32648036 |
| 6 rs115018431 | 32534360 T | 0.5653 | 9.23E-07 | chr:6:32648036 |
| 6 rs115706291 | 32520256 A | 1.952  | 9.33E-07 | chr:6:32648036 |
| 6 rs151210153 | 32531734 A | 0.5777 | 9.34E-07 | chr:6:32648036 |
| 6 rs9273501   | 32628361 T | 0.4668 | 9.34E-07 | chr:6:32648036 |
| 6 rs9273704   | 32629297 T | 0.5301 | 9.43E-07 | chr:6:32648036 |
| 6 rs74587162  | 32509455 C | 1.961  | 9.46E-07 | chr:6:32648036 |
| 6 rs9275829   | 32690784 C | 2.757  | 9.46E-07 | chr:6:32648036 |
| 6 rs9275534   | 32675767 T | 2.278  | 9.47E-07 | chr:6:32648036 |
| 6 rs543622960 | 32511362 C | 1.884  | 9.48E-07 | chr:6:32648036 |
| 6 rs558497977 | 32511365 A | 1.884  | 9.48E-07 | chr:6:32648036 |
| 6 rs9272056   | 32599180 A | 0.491  | 9.50E-07 | chr:6:32648036 |
| 6 rs9272057   | 32599190 A | 0.491  | 9.50E-07 | chr:6:32648036 |
| 6 rs114715427 | 32538850 A | 0.5334 | 9.51E-07 | chr:6:32648036 |
| 6 rs2076535   | 32339511 T | 3.778  | 9.57E-07 | chr:6:32648036 |
| 6 rs9272170   | 32601243 G | 0.4877 | 9.59E-07 | chr:6:32648036 |
| 6 rs9272265   | 32603412 T | 0.4732 | 9.59E-07 | chr:6:32648036 |
| 6 rs28383241  | 32584319 A | 2.031  | 9.63E-07 | chr:6:32648036 |
| 6 rs28383242  | 32584325 G | 2.031  | 9.63E-07 | chr:6:32648036 |
| 6 rs9269705   | 32547182 T | 0.4796 | 9.70E-07 | chr:6:32648036 |
| 6 rs75503609  | 32530929 A | 0.5837 | 9.71E-07 | chr:6:32648036 |
| 6 rs9272193   | 32601785 G | 0.4854 | 9.85E-07 | chr:6:32648036 |
| 6 rs9391873   | 32436350 G | 3.806  | 9.91E-07 | chr:6:32648036 |
| 6 rs9273394   | 32627082 A | 0.4503 | 9.99E-07 | chr:6:32648036 |
| 6 rs116927204 | 32686973 A | 3.081  | 1.01E-06 | chr:6:32648036 |
| 6 rs117501180 | 32693709 C | 3.081  | 1.01E-06 | chr:6:32648036 |
| 6 rs117599332 | 32686223 A | 3.081  | 1.01E-06 | chr:6:32648036 |
| 6 rs112158360 | 32514050 G | 2.081  | 1.01E-06 | chr:6:32648036 |
| 6 rs148817433 | 32493266 G | 0.4541 | 1.01E-06 | chr:6:32648036 |
| 6 rs9272114   | 32600317 C | 0.4738 | 1.01E-06 | chr:6:32648036 |
| 6 rs2071552   | 32806461 A | 2.081  | 1.02E-06 | chr:6:32648036 |
| 6 rs557288207 | 32504452 T | 0.4829 | 1.03E-06 | chr:6:32648036 |
| 6 rs139128138 | 32533420 G | 0.5847 | 1.04E-06 | chr:6:32648036 |
| 6 rs149932905 | 32533421 G | 0.5847 | 1.04E-06 | chr:6:32648036 |
| 6 rs541088090 | 32533411 T | 0.5847 | 1.04E-06 | chr:6:32648036 |
| 6 rs114452447 | 32532262 A | 0.5855 | 1.04E-06 | chr:6:32648036 |

|                    |            |        |          |                |
|--------------------|------------|--------|----------|----------------|
| 6 rs482044         | 32576064 C | 2.08   | 1.04E-06 | chr:6:32648036 |
| 6 rs74768985       | 32518175 C | 2.008  | 1.04E-06 | chr:6:32648036 |
| 6 rs9272167        | 32601212 A | 0.4929 | 1.04E-06 | chr:6:32648036 |
| 6 rs369952885      | 32539033 C | 1.852  | 1.04E-06 | chr:6:32648036 |
| 6 rs112349327      | 32502948 A | 0.4767 | 1.06E-06 | chr:6:32648036 |
| 6 rs72851056       | 32502944 A | 0.4767 | 1.06E-06 | chr:6:32648036 |
| 6 rs547409849      | 32503365 T | 0.4679 | 1.07E-06 | chr:6:32648036 |
| 6 rs565770331      | 32503366 C | 0.4679 | 1.07E-06 | chr:6:32648036 |
| 6 rs34835435       | 32549966 G | 2.292  | 1.07E-06 | chr:6:32648036 |
| 6 rs531336617      | 32530792 C | 0.5839 | 1.08E-06 | chr:6:32648036 |
| 6 rs549516674      | 32530793 A | 0.5839 | 1.08E-06 | chr:6:32648036 |
| 6 rs567265210      | 32530790 T | 0.5839 | 1.08E-06 | chr:6:32648036 |
| 6 rs74768610       | 32509868 C | 1.917  | 1.09E-06 | chr:6:32648036 |
| 6 rs79215033       | 32509858 G | 1.917  | 1.09E-06 | chr:6:32648036 |
| 6 rs201947932      | 32534556 T | 0.5695 | 1.09E-06 | chr:6:32648036 |
| 6 rs7760841        | 32574868 T | 4.077  | 1.09E-06 | chr:6:32648036 |
| 6 rs9274700        | 32637180 G | 2.136  | 1.09E-06 | chr:6:32648036 |
| 6 rs540965243      | 32511378 C | 1.876  | 1.10E-06 | chr:6:32648036 |
| 6 rs576708145      | 32511375 C | 1.876  | 1.10E-06 | chr:6:32648036 |
| 6 rs9272023        | 32598558 G | 0.4815 | 1.10E-06 | chr:6:32648036 |
| 6 rs11346111;rs926 | 32429153 G | 3.824  | 1.11E-06 | chr:6:32648036 |
| 6 rs188734667      | 32645556 T | 2.969  | 1.11E-06 | chr:6:32648036 |
| 6 rs144064415      | 32536140 T | 0.5661 | 1.11E-06 | chr:6:32648036 |
| 6 rs74186130       | 32632859 G | 0.376  | 1.12E-06 | chr:6:32648036 |
| 6 rs72853928       | 32508486 T | 0.4795 | 1.14E-06 | chr:6:32648036 |
| 6 rs559109541      | 32493714 T | 0.5005 | 1.15E-06 | chr:6:32648036 |
| 6 rs201439475      | 32502968 A | 0.479  | 1.16E-06 | chr:6:32648036 |
| 6 rs9271823        | 32594915 G | 0.3655 | 1.16E-06 | chr:6:32648036 |
| 6 rs9271824        | 32594916 G | 0.3655 | 1.16E-06 | chr:6:32648036 |
| 6 rs9271853        | 32595117 T | 1.896  | 1.16E-06 | chr:6:32648036 |
| 6 rs1056315        | 32627515 A | 0.3442 | 1.16E-06 | chr:6:32648036 |
| 6 rs369376349      | 32458425 A | 0.5144 | 1.17E-06 | chr:6:32648036 |
| 6 rs140569663      | 32530944 A | 0.5861 | 1.17E-06 | chr:6:32648036 |
| 6 rs149685121      | 32530946 C | 0.5861 | 1.17E-06 | chr:6:32648036 |
| 6 rs28817896       | 32625368 T | 0.4166 | 1.18E-06 | chr:6:32648036 |
| 6 rs34801804       | 32555892 G | 0.3498 | 1.19E-06 | chr:6:32648036 |
| 6 rs9275051        | 32648153 T | 0.4995 | 1.19E-06 | chr:6:32648036 |
| 6 rs111705290      | 32513412 A | 0.4586 | 1.20E-06 | chr:6:32648036 |
| 6 rs529580232      | 32512136 C | 0.4842 | 1.20E-06 | chr:6:32648036 |
| 6 rs551034683      | 32512138 A | 0.4842 | 1.20E-06 | chr:6:32648036 |
| 6 rs575744181      | 32533771 A | 0.5853 | 1.21E-06 | chr:6:32648036 |
| 6 rs1130457        | 32627367 T | 2.013  | 1.21E-06 | chr:6:32648036 |
| 6 rs3828844        | 32520755 G | 0.4711 | 1.22E-06 | chr:6:32648036 |



|               |            |        |          |                |
|---------------|------------|--------|----------|----------------|
| 6 rs9272131   | 32600671 T | 4.362  | 1.22E-06 | chr:6:32648036 |
| 6 rs9275356   | 32667850 G | 3.928  | 1.23E-06 | chr:6:32648036 |
| 6 rs281874846 | 32631397 C | 0.3995 | 1.23E-06 | chr:6:32648036 |
| 6 rs72851065  | 32504213 T | 0.481  | 1.23E-06 | chr:6:32648036 |
| 6 rs72851066  | 32504216 T | 0.481  | 1.23E-06 | chr:6:32648036 |
| 6 rs34447121  | 32653156 A | 0.3615 | 1.23E-06 | chr:6:32648036 |
| 6 rs9274747   | 32638071 A | 3.931  | 1.24E-06 | chr:6:32648036 |
| 6 rs111847217 | 32511131 G | 0.4842 | 1.24E-06 | chr:6:32648036 |
| 6 rs111632178 | 32511149 C | 0.4838 | 1.25E-06 | chr:6:32648036 |
| 6 rs115115354 | 32469671 C | 3.923  | 1.25E-06 | chr:6:32648036 |
| 6 rs9271712   | 32593432 A | 0.5017 | 1.28E-06 | chr:6:32648036 |
| 6 rs9269388   | 32541102 T | 0.4619 | 1.28E-06 | chr:6:32648036 |
| 6 rs28752514  | 32583576 C | 2.003  | 1.29E-06 | chr:6:32648036 |
| 6 rs28752515  | 32583603 A | 2.003  | 1.29E-06 | chr:6:32648036 |
| 6 rs28383223  | 32583477 T | 2.014  | 1.29E-06 | chr:6:32648036 |
| 6 rs9272172   | 32601260 C | 0.4909 | 1.31E-06 | chr:6:32648036 |
| 6 rs570478088 | 32533448 A | 0.5876 | 1.31E-06 | chr:6:32648036 |
| 6 rs528413248 | 32683255 G | 2.499  | 1.31E-06 | chr:6:32648036 |
| 6 rs9272127   | 32600595 C | 0.4925 | 1.32E-06 | chr:6:32648036 |
| 6 rs28724243  | 32629347 C | 1.8    | 1.33E-06 | chr:6:32648036 |
| 6 rs7738118   | 32684957 A | 2.241  | 1.33E-06 | chr:6:32648036 |
| 6 rs9275641   | 32684919 T | 2.241  | 1.33E-06 | chr:6:32648036 |
| 6 rs9275642   | 32684935 T | 2.241  | 1.33E-06 | chr:6:32648036 |
| 6 rs117416987 | 32741458 G | 3.338  | 1.34E-06 | chr:6:32648036 |
| 6 rs117893181 | 32759845 A | 3.338  | 1.34E-06 | chr:6:32648036 |
| 6 rs117012000 | 32762862 T | 3.337  | 1.34E-06 | chr:6:32648036 |
| 6 rs117651789 | 32783244 T | 3.337  | 1.34E-06 | chr:6:32648036 |
| 6 rs117797254 | 32762023 T | 3.337  | 1.34E-06 | chr:6:32648036 |
| 6 rs9272147   | 32600976 G | 0.4972 | 1.35E-06 | chr:6:32648036 |
| 6 rs111254573 | 32537570 G | 1.885  | 1.35E-06 | chr:6:32648036 |
| 6 rs112073772 | 32534421 T | 1.909  | 1.36E-06 | chr:6:32648036 |
| 6 rs148573031 | 32530691 A | 0.5642 | 1.36E-06 | chr:6:32648036 |
| 6 rs9272254   | 32603098 T | 0.4779 | 1.36E-06 | chr:6:32648036 |
| 6 rs530662953 | 32504587 C | 0.4805 | 1.37E-06 | chr:6:32648036 |
| 6 rs552472567 | 32533447 C | 0.588  | 1.37E-06 | chr:6:32648036 |
| 6 rs9271847   | 32594993 G | 0.3929 | 1.38E-06 | chr:6:32648036 |
| 6 rs17209964  | 32534471 T | 1.908  | 1.39E-06 | chr:6:32648036 |
| 6 rs9269563   | 32544456 T | 0.5313 | 1.40E-06 | chr:6:32648036 |
| 6 rs113534515 | 32460798 C | 2.184  | 1.40E-06 | chr:6:32648036 |
| 6 rs55722612  | 32647158 G | 2.623  | 1.40E-06 | chr:6:32648036 |
| 6 rs9275185   | 32655305 T | 3.925  | 1.40E-06 | chr:6:32648036 |
| 6 rs9270220   | 32556632 G | 0.3193 | 1.41E-06 | chr:6:32648036 |
| 6 rs546964381 | 32511275 G | 0.5464 | 1.41E-06 | chr:6:32648036 |

|               |            |        |          |                |
|---------------|------------|--------|----------|----------------|
| 6 rs558956689 | 32511276 G | 0.5464 | 1.41E-06 | chr:6:32648036 |
| 6 rs56249455  | 32644378 A | 2.643  | 1.41E-06 | chr:6:32648036 |
| 6 rs1049088   | 32629868 G | 0.3716 | 1.42E-06 | chr:6:32648036 |
| 6 rs36233043  | 32629718 A | 0.3716 | 1.42E-06 | chr:6:32648036 |
| 6 rs542648047 | 32535499 T | 0.5644 | 1.42E-06 | chr:6:32648036 |
| 6 rs9273912   | 32629737 T | 0.3716 | 1.42E-06 | chr:6:32648036 |
| 6 rs9269328   | 32540018 T | 0.4892 | 1.43E-06 | chr:6:32648036 |
| 6 rs9270636   | 32565648 C | 0.4941 | 1.44E-06 | chr:6:32648036 |
| 6 rs9270637   | 32565650 G | 0.4941 | 1.44E-06 | chr:6:32648036 |
| 6 rs114961271 | 32503352 T | 0.4743 | 1.44E-06 | chr:6:32648036 |
| 6 rs9275311   | 32665640 T | 3.925  | 1.44E-06 | chr:6:32648036 |
| 6 rs147266303 | 32510268 C | 0.4857 | 1.45E-06 | chr:6:32648036 |
| 6 rs186217224 | 32457967 C | 0.4587 | 1.45E-06 | chr:6:32648036 |
| 6 rs281863130 | 32631671 G | 0.4898 | 1.45E-06 | chr:6:32648036 |
| 6 rs6908032   | 32643739 A | 0.2491 | 1.45E-06 | chr:6:32648036 |
| 6 rs58095553  | 32457733 A | 0.5298 | 1.46E-06 | chr:6:32648036 |
| 6 rs58937009  | 32457727 T | 0.5298 | 1.46E-06 | chr:6:32648036 |
| 6 rs79293578  | 32503561 T | 1.876  | 1.46E-06 | chr:6:32648036 |
| 6 rs556704361 | 32450273 G | 0.3678 | 1.46E-06 | chr:6:32648036 |
| 6 rs9275092   | 32648987 T | 3.93   | 1.47E-06 | chr:6:32648036 |
| 6 rs3130302   | 32204642 C | 0.4162 | 1.48E-06 | chr:6:32648036 |
| 6 rs693432    | 32204680 C | 0.4162 | 1.48E-06 | chr:6:32648036 |
| 6 rs13211607  | 32688990 G | 2.205  | 1.48E-06 | chr:6:32648036 |
| 6 rs9272105   | 32599999 A | 0.4793 | 1.48E-06 | chr:6:32648036 |
| 6 rs116609988 | 32522988 A | 0.5098 | 1.49E-06 | chr:6:32648036 |
| 6 rs34966632  | 32536306 G | 0.5742 | 1.49E-06 | chr:6:32648036 |
| 6 rs138253052 | 32536103 A | 0.5772 | 1.51E-06 | chr:6:32648036 |
| 6 rs185779937 | 32551693 A | 3.063  | 1.52E-06 | chr:6:32648036 |
| 6 rs77789453  | 32512013 C | 2.077  | 1.52E-06 | chr:6:32648036 |
| 6 rs9274323   | 32632205 T | 0.5424 | 1.52E-06 | chr:6:32648036 |
| 6 rs116854236 | 32359186 A | 3.788  | 1.54E-06 | chr:6:32648036 |
| 6 rs118094977 | 32359185 C | 3.788  | 1.54E-06 | chr:6:32648036 |
| 6 rs9269301   | 32539561 T | 0.5577 | 1.55E-06 | chr:6:32648036 |
| 6 rs9275780   | 32689786 C | 2.687  | 1.55E-06 | chr:6:32648036 |
| 6 rs34376317  | 32536678 T | 0.544  | 1.55E-06 | chr:6:32648036 |
| 6 rs41270871  | 32628224 A | 0.4094 | 1.56E-06 | chr:6:32648036 |
| 6 rs9271597   | 32591291 A | 1.99   | 1.57E-06 | chr:6:32648036 |
| 6 rs183667786 | 32533749 C | 0.5883 | 1.57E-06 | chr:6:32648036 |
| 6 rs188327097 | 32533734 A | 0.5883 | 1.57E-06 | chr:6:32648036 |
| 6 rs558887953 | 32533750 A | 0.5883 | 1.57E-06 | chr:6:32648036 |
| 6 rs9275216   | 32658748 T | 0.4762 | 1.57E-06 | chr:6:32648036 |
| 6 rs9274830   | 32639836 A | 3.736  | 1.58E-06 | chr:6:32648036 |
| 6 rs9274835   | 32639931 T | 3.736  | 1.58E-06 | chr:6:32648036 |

|               |            |        |                         |
|---------------|------------|--------|-------------------------|
| 6 rs574369672 | 32533757 G | 0.5897 | 1.59E-06 chr:6:32648036 |
| 6 rs566710022 | 32507505 T | 0.4784 | 1.59E-06 chr:6:32648036 |
| 6 rs9275957   | 32693294 A | 2.682  | 1.59E-06 chr:6:32648036 |
| 6 rs114164335 | 32532128 C | 0.5634 | 1.59E-06 chr:6:32648036 |
| 6 rs9272116   | 32600404 C | 0.4812 | 1.62E-06 chr:6:32648036 |
| 6 rs149352897 | 32646898 A | 2.826  | 1.62E-06 chr:6:32648036 |
| 6 rs9275869   | 32691540 G | 2.162  | 1.62E-06 chr:6:32648036 |
| 6 rs9275639   | 32684831 T | 2.226  | 1.63E-06 chr:6:32648036 |
| 6 rs528792740 | 32533803 G | 0.5922 | 1.65E-06 chr:6:32648036 |
| 6 rs546913114 | 32533805 T | 0.5922 | 1.65E-06 chr:6:32648036 |
| 6 rs3135342   | 32396615 T | 0.2999 | 1.65E-06 chr:6:32648036 |
| 6 rs685244    | 32584769 G | 2.002  | 1.65E-06 chr:6:32648036 |
| 6 rs75876652  | 32505224 T | 1.884  | 1.65E-06 chr:6:32648036 |
| 6 rs78918008  | 32532281 A | 0.5921 | 1.67E-06 chr:6:32648036 |
| 6 rs77247372  | 32633415 T | 0.4428 | 1.68E-06 chr:6:32648036 |
| 6 rs7744001   | 32626086 A | 1.999  | 1.69E-06 chr:6:32648036 |
| 6 rs556337500 | 32503531 A | 0.4822 | 1.71E-06 chr:6:32648036 |
| 6 rs571499647 | 32503532 G | 0.4822 | 1.71E-06 chr:6:32648036 |
| 6 rs9270638   | 32565657 C | 0.4969 | 1.73E-06 chr:6:32648036 |
| 6 rs71542437  | 32630223 T | 0.4188 | 1.73E-06 chr:6:32648036 |
| 6 rs71534526  | 32510974 C | 0.5238 | 1.75E-06 chr:6:32648036 |
| 6 rs9269291   | 32539445 A | 0.4992 | 1.75E-06 chr:6:32648036 |
| 6 rs67955939  | 32634188 C | 0.4095 | 1.75E-06 chr:6:32648036 |
| 6 rs17203839  | 32555926 C | 0.3814 | 1.75E-06 chr:6:32648036 |
| 6 rs116180191 | 32534588 A | 0.5779 | 1.76E-06 chr:6:32648036 |
| 6 rs568102960 | 32683287 G | 2.509  | 1.76E-06 chr:6:32648036 |
| 6 rs112402647 | 32490838 G | 5.493  | 1.77E-06 chr:6:32648036 |
| 6 rs115944000 | 32201708 C | 0.4177 | 1.78E-06 chr:6:32648036 |
| 6 rs12178917  | 32201440 A | 0.4177 | 1.78E-06 chr:6:32648036 |
| 6 rs2395109   | 32203652 C | 0.4177 | 1.78E-06 chr:6:32648036 |
| 6 rs3130298   | 32200359 A | 0.4177 | 1.78E-06 chr:6:32648036 |
| 6 rs3130299   | 32203537 G | 0.4177 | 1.78E-06 chr:6:32648036 |
| 6 rs389703    | 32199239 T | 0.4177 | 1.78E-06 chr:6:32648036 |
| 6 rs389713    | 32199224 T | 0.4177 | 1.78E-06 chr:6:32648036 |
| 6 rs504993    | 32202607 A | 0.4177 | 1.78E-06 chr:6:32648036 |
| 6 rs505731    | 32203041 A | 0.4177 | 1.78E-06 chr:6:32648036 |
| 6 rs6457503   | 32202256 A | 0.4177 | 1.78E-06 chr:6:32648036 |
| 6 rs6457504   | 32202303 T | 0.4177 | 1.78E-06 chr:6:32648036 |
| 6 rs6914482   | 32201175 G | 0.4177 | 1.78E-06 chr:6:32648036 |
| 6 rs6918601   | 32201284 C | 0.4177 | 1.78E-06 chr:6:32648036 |
| 6 rs7738491   | 32202019 T | 0.4177 | 1.78E-06 chr:6:32648036 |
| 6 rs3129754   | 32583046 G | 2.019  | 1.79E-06 chr:6:32648036 |
| 6 rs3129756   | 32583063 G | 2.019  | 1.79E-06 chr:6:32648036 |

|               |            |        |          |                |
|---------------|------------|--------|----------|----------------|
| 6 rs35484705  | 32583051 T | 2.019  | 1.79E-06 | chr:6:32648036 |
| 6 rs35558953  | 32583056 T | 2.019  | 1.79E-06 | chr:6:32648036 |
| 6 rs369369329 | 32533784 C | 0.5939 | 1.80E-06 | chr:6:32648036 |
| 6 rs9274699   | 32637096 A | 2.11   | 1.81E-06 | chr:6:32648036 |
| 6 rs9272043   | 32598946 G | 0.4817 | 1.81E-06 | chr:6:32648036 |
| 6 rs9271566   | 32590443 G | 1.947  | 1.81E-06 | chr:6:32648036 |
| 6 rs113133909 | 32457928 T | 0.4656 | 1.81E-06 | chr:6:32648036 |
| 6 rs534859262 | 32457931 T | 0.4656 | 1.81E-06 | chr:6:32648036 |
| 6 rs68081734  | 32628828 C | 0.4919 | 1.84E-06 | chr:6:32648036 |
| 6 rs543726509 | 32493208 A | 0.5085 | 1.85E-06 | chr:6:32648036 |
| 6 rs56347793  | 32646963 T | 2.602  | 1.85E-06 | chr:6:32648036 |
| 6 rs72492338  | 32527408 G | 0.4232 | 1.86E-06 | chr:6:32648036 |
| 6 rs9269918   | 32551502 A | 1.833  | 1.86E-06 | chr:6:32648036 |
| 6 rs149567738 | 32699764 C | 2.969  | 1.87E-06 | chr:6:32648036 |
| 6 rs529763782 | 32493737 T | 0.5076 | 1.87E-06 | chr:6:32648036 |
| 6 rs59447698  | 32481125 G | 0.4831 | 1.87E-06 | chr:6:32648036 |
| 6 rs543107154 | 32532351 C | 0.5921 | 1.87E-06 | chr:6:32648036 |
| 6 rs561232678 | 32532352 A | 0.5921 | 1.87E-06 | chr:6:32648036 |
| 6 rs552961071 | 32533756 T | 0.5915 | 1.88E-06 | chr:6:32648036 |
| 6 rs72849267  | 32468923 T | 0.4849 | 1.89E-06 | chr:6:32648036 |
| 6 rs4587163   | 32593167 T | 1.975  | 1.89E-06 | chr:6:32648036 |
| 6 rs193192981 | 32533553 G | 0.5946 | 1.91E-06 | chr:6:32648036 |
| 6 rs73397495  | 32534640 C | 0.5762 | 1.91E-06 | chr:6:32648036 |
| 6 rs9272037   | 32598844 C | 0.4511 | 1.92E-06 | chr:6:32648036 |
| 6 rs17205640  | 32637413 T | 0.5174 | 1.94E-06 | chr:6:32648036 |
| 6 rs74202712  | 32502546 G | 0.4935 | 1.95E-06 | chr:6:32648036 |
| 6 rs141267330 | 32548054 G | 3.338  | 1.97E-06 | chr:6:32648036 |
| 6 rs569119670 | 32532359 C | 0.5922 | 1.98E-06 | chr:6:32648036 |
| 6 rs562082330 | 32533812 G | 0.5952 | 1.98E-06 | chr:6:32648036 |
| 6 rs9272132   | 32600677 G | 0.4862 | 1.99E-06 | chr:6:32648036 |
| 6 rs4496841   | 32389997 C | 2.021  | 1.99E-06 | chr:6:32648036 |
| 6 rs440261    | 32198056 G | 0.4192 | 2.00E-06 | chr:6:32648036 |
| 6 rs9273258   | 32614268 G | 1.7    | 2.01E-06 | chr:6:32648036 |
| 6 rs112261348 | 32537782 T | 2.044  | 2.01E-06 | chr:6:32648036 |
| 6 rs9269501   | 32543118 C | 1.829  | 2.02E-06 | chr:6:32648036 |
| 6 rs142127023 | 32532178 T | 0.5686 | 2.10E-06 | chr:6:32648036 |
| 6 rs144412121 | 32532179 G | 0.5686 | 2.10E-06 | chr:6:32648036 |
| 6 rs79485014  | 32541147 G | 1.922  | 2.11E-06 | chr:6:32648036 |
| 6 rs77339454  | 32503567 A | 1.861  | 2.12E-06 | chr:6:32648036 |
| 6 rs66481651  | 32633630 T | 0.4665 | 2.12E-06 | chr:6:32648036 |
| 6 rs9272045   | 32599006 T | 0.4863 | 2.12E-06 | chr:6:32648036 |
| 6 rs73727940  | 32503738 T | 0.4961 | 2.13E-06 | chr:6:32648036 |
| 6 rs9269296   | 32539509 G | 0.5215 | 2.13E-06 | chr:6:32648036 |

|               |            |        |          |                |
|---------------|------------|--------|----------|----------------|
| 6 rs56051108  | 32645530 A | 2.568  | 2.15E-06 | chr:6:32648036 |
| 6 rs117526708 | 32704363 A | 2.971  | 2.15E-06 | chr:6:32648036 |
| 6 rs117952809 | 32704029 T | 2.971  | 2.15E-06 | chr:6:32648036 |
| 6 rs9269969   | 32552272 C | 0.3925 | 2.15E-06 | chr:6:32648036 |
| 6 rs9274837   | 32639972 T | 3.606  | 2.16E-06 | chr:6:32648036 |
| 6 rs76509141  | 32504529 C | 0.4872 | 2.18E-06 | chr:6:32648036 |
| 6 rs9271863   | 32595334 A | 0.4245 | 2.18E-06 | chr:6:32648036 |
| 6 rs113727677 | 32517010 C | 0.4738 | 2.19E-06 | chr:6:32648036 |
| 6 rs17212637  | 32674841 A | 2.061  | 2.19E-06 | chr:6:32648036 |
| 6 rs17212650  | 32674869 C | 2.061  | 2.19E-06 | chr:6:32648036 |
| 6 rs4713576   | 32627130 C | 0.4608 | 2.21E-06 | chr:6:32648036 |
| 6 rs9271499   | 32589291 T | 1.929  | 2.21E-06 | chr:6:32648036 |
| 6 rs533614924 | 32532227 A | 0.5974 | 2.22E-06 | chr:6:32648036 |
| 6 rs545911074 | 32522990 C | 1.856  | 2.23E-06 | chr:6:32648036 |
| 6 rs113128948 | 32507129 T | 0.5065 | 2.26E-06 | chr:6:32648036 |
| 6 rs9272040   | 32598903 G | 0.4871 | 2.26E-06 | chr:6:32648036 |
| 6 rs9272041   | 32598906 A | 0.4871 | 2.26E-06 | chr:6:32648036 |
| 6 rs9270157   | 32555411 C | 1.879  | 2.26E-06 | chr:6:32648036 |
| 6 rs763025    | 32691937 G | 2.635  | 2.29E-06 | chr:6:32648036 |
| 6 rs763026    | 32691745 T | 2.635  | 2.29E-06 | chr:6:32648036 |
| 6 rs9275680   | 32687218 T | 2.635  | 2.29E-06 | chr:6:32648036 |
| 6 rs9275682   | 32687297 G | 2.635  | 2.29E-06 | chr:6:32648036 |
| 6 rs9275686   | 32687570 A | 2.635  | 2.29E-06 | chr:6:32648036 |
| 6 rs9275690   | 32687720 A | 2.635  | 2.29E-06 | chr:6:32648036 |
| 6 rs9275699   | 32688021 G | 2.635  | 2.29E-06 | chr:6:32648036 |
| 6 rs9275702   | 32688100 T | 2.635  | 2.29E-06 | chr:6:32648036 |
| 6 rs9275723   | 32688483 A | 2.635  | 2.29E-06 | chr:6:32648036 |
| 6 rs9275728   | 32688638 C | 2.635  | 2.29E-06 | chr:6:32648036 |
| 6 rs9275731   | 32688752 T | 2.635  | 2.29E-06 | chr:6:32648036 |
| 6 rs9275735   | 32688787 A | 2.635  | 2.29E-06 | chr:6:32648036 |
| 6 rs9275738   | 32688839 T | 2.635  | 2.29E-06 | chr:6:32648036 |
| 6 rs9275740   | 32688859 C | 2.635  | 2.29E-06 | chr:6:32648036 |
| 6 rs9275741   | 32688872 A | 2.635  | 2.29E-06 | chr:6:32648036 |
| 6 rs9275764   | 32689289 T | 2.635  | 2.29E-06 | chr:6:32648036 |
| 6 rs9275769   | 32689431 C | 2.635  | 2.29E-06 | chr:6:32648036 |
| 6 rs9275796   | 32690078 C | 2.635  | 2.29E-06 | chr:6:32648036 |
| 6 rs9275848   | 32691173 T | 2.635  | 2.29E-06 | chr:6:32648036 |
| 6 rs9275858   | 32691345 G | 2.635  | 2.29E-06 | chr:6:32648036 |
| 6 rs9275899   | 32692094 A | 2.635  | 2.29E-06 | chr:6:32648036 |
| 6 rs9275911   | 32692391 G | 2.635  | 2.29E-06 | chr:6:32648036 |
| 6 rs9275936   | 32692933 A | 2.635  | 2.29E-06 | chr:6:32648036 |
| 6 rs9275945   | 32693085 G | 2.635  | 2.29E-06 | chr:6:32648036 |
| 6 rs9272242   | 32602790 C | 0.4886 | 2.29E-06 | chr:6:32648036 |

|               |            |        |          |                |
|---------------|------------|--------|----------|----------------|
| 6 rs6924352   | 32206199 T | 0.4585 | 2.29E-06 | chr:6:32648036 |
| 6 rs9272126   | 32600589 C | 0.5002 | 2.29E-06 | chr:6:32648036 |
| 6 rs542536566 | 32457959 T | 0.4682 | 2.30E-06 | chr:6:32648036 |
| 6 rs9274704   | 32637213 G | 2.083  | 2.32E-06 | chr:6:32648036 |
| 6 rs116904036 | 32792318 T | 3.259  | 2.33E-06 | chr:6:32648036 |
| 6 rs116981592 | 32796992 C | 3.259  | 2.33E-06 | chr:6:32648036 |
| 6 rs9275184   | 32654714 C | 3.757  | 2.34E-06 | chr:6:32648036 |
| 6 rs2856432   | 32198526 T | 0.4216 | 2.36E-06 | chr:6:32648036 |
| 6 rs518102    | 32198366 C | 0.4216 | 2.36E-06 | chr:6:32648036 |
| 6 rs1049100   | 32629963 T | 0.3959 | 2.37E-06 | chr:6:32648036 |
| 6 rs115303801 | 32512229 G | 0.4972 | 2.38E-06 | chr:6:32648036 |
| 6 rs79136305  | 32505292 G | 1.802  | 2.38E-06 | chr:6:32648036 |
| 6 rs9272179   | 32601451 C | 0.4897 | 2.38E-06 | chr:6:32648036 |
| 6 rs9272180   | 32601461 T | 0.4897 | 2.38E-06 | chr:6:32648036 |
| 6 rs111484816 | 32509034 G | 1.976  | 2.41E-06 | chr:6:32648036 |
| 6 rs112360905 | 32509019 G | 1.976  | 2.41E-06 | chr:6:32648036 |
| 6 rs17880292  | 32552000 T | 2.943  | 2.41E-06 | chr:6:32648036 |
| 6 rs41540813  | 32632790 A | 5.375  | 2.41E-06 | chr:6:32648036 |
| 6 rs145092566 | 32454838 A | 0.5042 | 2.43E-06 | chr:6:32648036 |
| 6 rs1130451   | 32627527 A | 0.4667 | 2.44E-06 | chr:6:32648036 |
| 6 rs142142101 | 32534657 G | 0.5793 | 2.45E-06 | chr:6:32648036 |
| 6 rs576289202 | 32452609 A | 0.381  | 2.50E-06 | chr:6:32648036 |
| 6 rs547947156 | 32373595 T | 2.043  | 2.53E-06 | chr:6:32648036 |
| 6 rs9272218   | 32602238 T | 0.4881 | 2.54E-06 | chr:6:32648036 |
| 6 rs204995    | 32154285 G | 2.234  | 2.54E-06 | chr:6:32648036 |
| 6 rs9274735   | 32637896 A | 2.055  | 2.54E-06 | chr:6:32648036 |
| 6 rs3135359   | 32390578 T | 2.038  | 2.55E-06 | chr:6:32648036 |
| 6 rs9272229   | 32602568 T | 0.4888 | 2.56E-06 | chr:6:32648036 |
| 6 rs7738119   | 32684959 A | 2.189  | 2.58E-06 | chr:6:32648036 |
| 6 rs542730850 | 32646829 T | 2.794  | 2.59E-06 | chr:6:32648036 |
| 6 rs541637298 | 32548034 G | 3.295  | 2.60E-06 | chr:6:32648036 |
| 6 rs493406    | 32198769 T | 0.4248 | 2.61E-06 | chr:6:32648036 |
| 6 rs113481821 | 32537776 T | 2.025  | 2.62E-06 | chr:6:32648036 |
| 6 rs9271862   | 32595333 C | 0.4279 | 2.63E-06 | chr:6:32648036 |
| 6 rs28746832  | 32633816 C | 0.4819 | 2.63E-06 | chr:6:32648036 |
| 6 rs9274297   | 32631878 G | 0.5397 | 2.64E-06 | chr:6:32648036 |
| 6 rs9272155   | 32601043 C | 0.5004 | 2.65E-06 | chr:6:32648036 |
| 6 rs9272239   | 32602778 G | 0.493  | 2.67E-06 | chr:6:32648036 |
| 6 rs74199853  | 32632542 C | 0.4509 | 2.67E-06 | chr:6:32648036 |
| 6 rs9272232   | 32602630 T | 0.4901 | 2.71E-06 | chr:6:32648036 |
| 6 rs9272125   | 32600584 G | 0.5038 | 2.71E-06 | chr:6:32648036 |
| 6 rs535730306 | 32541206 G | 2.005  | 2.71E-06 | chr:6:32648036 |
| 6 rs75380949  | 32541219 T | 2.005  | 2.71E-06 | chr:6:32648036 |

|               |            |        |          |                |
|---------------|------------|--------|----------|----------------|
| 6 rs9275109   | 32649676 G | 0.3091 | 2.71E-06 | chr:6:32648036 |
| 6 rs137863146 | 32489871 G | 0.444  | 2.72E-06 | chr:6:32648036 |
| 6 rs112709345 | 32501541 T | 0.4979 | 2.73E-06 | chr:6:32648036 |
| 6 rs544574563 | 32534337 G | 0.5989 | 2.73E-06 | chr:6:32648036 |
| 6 rs112128028 | 32633870 C | 0.4239 | 2.80E-06 | chr:6:32648036 |
| 6 rs544068844 | 32486543 T | 3.94   | 2.80E-06 | chr:6:32648036 |
| 6 rs1049177   | 32627991 T | 0.4309 | 2.83E-06 | chr:6:32648036 |
| 6 rs1049178   | 32627988 G | 0.4309 | 2.83E-06 | chr:6:32648036 |
| 6 rs61433897  | 32498787 T | 1.943  | 2.83E-06 | chr:6:32648036 |
| 6 rs9272449   | 32605451 G | 0.3817 | 2.84E-06 | chr:6:32648036 |
| 6 rs1612904   | 32669018 C | 0.3084 | 2.85E-06 | chr:6:32648036 |
| 6 rs3129721   | 32676251 C | 0.3084 | 2.85E-06 | chr:6:32648036 |
| 6 rs9269250   | 32454269 C | 1.91   | 2.85E-06 | chr:6:32648036 |
| 6 rs9275596   | 32681631 C | 0.3084 | 2.85E-06 | chr:6:32648036 |
| 6 rs1056318   | 32627450 A | 0.4962 | 2.85E-06 | chr:6:32648036 |
| 6 rs72848212  | 32594898 T | 0.4017 | 2.86E-06 | chr:6:32648036 |
| 6 rs114868939 | 32633270 T | 0.4437 | 2.86E-06 | chr:6:32648036 |
| 6 rs3129748   | 32581015 A | 1.913  | 2.87E-06 | chr:6:32648036 |
| 6 rs3997868   | 32578590 G | 2.161  | 2.89E-06 | chr:6:32648036 |
| 6 rs9272118   | 32600448 T | 0.4911 | 2.92E-06 | chr:6:32648036 |
| 6 rs138940568 | 32536635 T | 0.6014 | 2.92E-06 | chr:6:32648036 |
| 6 rs9274131   | 32630236 A | 0.4316 | 2.92E-06 | chr:6:32648036 |
| 6 rs9269998   | 32552721 G | 0.5501 | 2.94E-06 | chr:6:32648036 |
| 6 rs76940575  | 32502590 C | 0.5024 | 2.96E-06 | chr:6:32648036 |
| 6 rs74498391  | 32505267 C | 1.79   | 2.97E-06 | chr:6:32648036 |
| 6 rs113537193 | 32538333 C | 1.868  | 2.98E-06 | chr:6:32648036 |
| 6 rs2228391   | 32797773 C | 3.209  | 2.99E-06 | chr:6:32648036 |
| 6 rs375350961 | 32521793 G | 1.981  | 2.99E-06 | chr:6:32648036 |
| 6 rs76571178  | 32525159 A | 0.5324 | 3.00E-06 | chr:6:32648036 |
| 6 rs9274737   | 32637907 C | 2.042  | 3.04E-06 | chr:6:32648036 |
| 6 rs142670190 | 32532172 T | 0.5748 | 3.05E-06 | chr:6:32648036 |
| 6 rs1049175   | 32628001 C | 0.4314 | 3.06E-06 | chr:6:32648036 |
| 6 rs142795234 | 32487593 G | 0.5223 | 3.07E-06 | chr:6:32648036 |
| 6 rs3104417   | 32581022 A | 1.917  | 3.09E-06 | chr:6:32648036 |
| 6 rs3104418   | 32581021 A | 1.917  | 3.09E-06 | chr:6:32648036 |
| 6 rs9273058   | 32612110 T | 0.5467 | 3.09E-06 | chr:6:32648036 |
| 6 rs538879571 | 32503698 A | 0.5009 | 3.09E-06 | chr:6:32648036 |
| 6 rs545379090 | 32469285 T | 0.4966 | 3.10E-06 | chr:6:32648036 |
| 6 rs9273375   | 32626786 G | 2.134  | 3.11E-06 | chr:6:32648036 |
| 6 rs144631592 | 32537513 A | 2.029  | 3.11E-06 | chr:6:32648036 |
| 6 rs116485144 | 32633249 C | 0.4444 | 3.11E-06 | chr:6:32648036 |
| 6 rs281874911 | 32631375 C | 0.4156 | 3.12E-06 | chr:6:32648036 |
| 6 rs78017592  | 32508455 C | 1.79   | 3.15E-06 | chr:6:32648036 |

|               |             |        |          |                 |
|---------------|-------------|--------|----------|-----------------|
| 6 rs1049056   | 32634369 A  | 0.401  | 3.16E-06 | chr:6:32648036  |
| 6 rs115272081 | 32519782 A  | 1.962  | 3.16E-06 | chr:6:32648036  |
| 6 rs77514798  | 32611788 A  | 2.936  | 3.16E-06 | chr:6:32648036  |
| 6 rs9270087   | 32554294 G  | 1.948  | 3.21E-06 | chr:6:32648036  |
| 6 rs540368661 | 32538886 A  | 1.806  | 3.23E-06 | chr:6:32648036  |
| 6 rs281863398 | 32631079 A  | 0.4524 | 3.24E-06 | chr:6:32648036  |
| 6 rs145177101 | 32536632 G  | 0.6031 | 3.26E-06 | chr:6:32648036  |
| 6 rs9270123   | 32555032 G  | 1.886  | 3.28E-06 | chr:6:32648036  |
| 6 rs4286817   | 32608821 A  | 1.852  | 3.28E-06 | chr:6:32648036  |
| 6 rs436845    | 32197736 G  | 0.4286 | 3.28E-06 | chr:6:32648036  |
| 6 rs9274662   | 32636494 T  | 0.3445 | 3.29E-06 | chr:6:32648036  |
| 6 rs529484704 | 32507478 C  | 0.493  | 3.33E-06 | chr:6:32648036  |
| 6 rs569509899 | 32507490 G  | 0.493  | 3.33E-06 | chr:6:32648036  |
| 6 rs9271600   | 32591332 G  | 1.936  | 3.33E-06 | chr:6:32648036  |
| 6 rs9271601   | 32591337 T  | 1.936  | 3.33E-06 | chr:6:32648036  |
| 6 rs114769197 | 32538217 A  | 0.5036 | 3.35E-06 | chr:6:32648036  |
| 6 rs9273286   | 32614494 A  | 1.685  | 3.35E-06 | chr:6:32648036  |
| 6 rs9268499   | 32375695 A  | 1.943  | 3.35E-06 | chr:6:32648036  |
| 6 rs3817967   | 32361469 T  | 2.459  | 3.36E-06 | chr:6:32648036  |
| 6 rs113353313 | 32538242 G  | 0.5099 | 3.38E-06 | chr:6:32648036  |
| 6 rs9275167   | 32653263 G  | 3.618  | 3.38E-06 | chr:6:32648036  |
| 6 rs537501315 | 32516973 A  | 1.854  | 3.39E-06 | chr:6:32648036  |
| 6 rs139455771 | 32631775 T  | 4.319  | 3.39E-06 | chr:6:32648036  |
| 6 rs9271472   | 32588700 T  | 2.065  | 3.39E-06 | chr:6:32648036  |
| 6 rs9270868   | 32571117 G  | 0.1825 | 3.39E-06 | chr:6:32648036  |
| 6 rs9272718   | 32609379 C  | 0.5784 | 3.40E-06 | chr:6:32648036  |
| 6 rs114328264 | 32534675 T  | 0.5845 | 3.40E-06 | chr:6:32648036  |
| 7 rs10245306  | 158029340 G | 5.473  | 1.50E-19 | chr:7:158029482 |
| 7 rs12670590  | 157939058 A | 8.149  | 6.26E-17 | chr:7:158029482 |
| 7 rs10215745  | 158015262 C | 0.2536 | 2.32E-16 | chr:7:158029482 |
| 7 rs10256080  | 158019437 T | 0.2536 | 2.32E-16 | chr:7:158029482 |
| 7 rs67463190  | 158029292 T | 14.15  | 1.21E-12 | chr:7:158029482 |
| 7 rs67340855  | 158028782 C | 11.08  | 1.27E-12 | chr:7:158029482 |
| 7 rs67515424  | 158028692 T | 11.08  | 1.27E-12 | chr:7:158029482 |
| 7 rs114730739 | 158018607 C | 12.76  | 1.47E-12 | chr:7:158029482 |
| 7 rs12154635  | 158000947 G | 12.76  | 1.47E-12 | chr:7:158029482 |
| 7 rs17847433  | 157997673 A | 12.76  | 1.47E-12 | chr:7:158029482 |
| 7 rs55633973  | 158000392 A | 12.76  | 1.47E-12 | chr:7:158029482 |
| 7 rs55821220  | 158022462 G | 12.76  | 1.47E-12 | chr:7:158029482 |
| 7 rs55917540  | 157999549 C | 12.76  | 1.47E-12 | chr:7:158029482 |
| 7 rs56215385  | 158008987 A | 12.76  | 1.47E-12 | chr:7:158029482 |
| 7 rs73176107  | 158004804 G | 12.76  | 1.47E-12 | chr:7:158029482 |
| 7 rs73176108  | 158009978 A | 12.76  | 1.47E-12 | chr:7:158029482 |



|               |             |        |          |                 |
|---------------|-------------|--------|----------|-----------------|
| 7 rs73176109  | 158014524 G | 12.76  | 1.47E-12 | chr:7:158029482 |
| 7 rs73176110  | 158016190 T | 12.76  | 1.47E-12 | chr:7:158029482 |
| 7 rs73176112  | 158016362 G | 12.76  | 1.47E-12 | chr:7:158029482 |
| 7 rs73176114  | 158017101 G | 12.76  | 1.47E-12 | chr:7:158029482 |
| 7 rs73176115  | 158017202 C | 12.76  | 1.47E-12 | chr:7:158029482 |
| 7 rs73176117  | 158018530 A | 12.76  | 1.47E-12 | chr:7:158029482 |
| 7 rs73176118  | 158018536 A | 12.76  | 1.47E-12 | chr:7:158029482 |
| 7 rs73176123  | 158026203 G | 12.76  | 1.47E-12 | chr:7:158029482 |
| 7 rs73176116  | 158018041 T | 11.72  | 1.63E-12 | chr:7:158029482 |
| 7 rs73176124  | 158026709 A | 11.51  | 2.06E-12 | chr:7:158029482 |
| 7 rs11971401  | 157932023 T | 3.247  | 2.97E-12 | chr:7:158029482 |
| 7 rs73173628  | 157944923 A | 7.639  | 7.00E-11 | chr:7:158029482 |
| 7 rs117432206 | 157962519 A | 7.567  | 7.93E-11 | chr:7:158029482 |
| 7 rs4416779   | 157987251 T | 2.457  | 3.09E-09 | chr:7:158029482 |
| 7 rs6459852   | 157987496 T | 2.447  | 3.77E-09 | chr:7:158029482 |
| 7 rs139728816 | 157937535 T | 9.979  | 4.32E-09 | chr:7:158029482 |
| 7 rs4604380   | 157996809 T | 2.421  | 5.34E-09 | chr:7:158029482 |
| 7 rs10240498  | 158003705 A | 0.3708 | 1.21E-08 | chr:7:158029482 |
| 7 rs10256328  | 158007074 A | 0.3708 | 1.21E-08 | chr:7:158029482 |
| 7 rs6942658   | 158001150 A | 0.3708 | 1.21E-08 | chr:7:158029482 |
| 7 rs6942903   | 158001252 A | 0.3708 | 1.21E-08 | chr:7:158029482 |
| 7 rs9771103   | 157999823 T | 0.3708 | 1.21E-08 | chr:7:158029482 |
| 7 rs11763127  | 157931893 C | 4.449  | 1.39E-08 | chr:7:158029482 |
| 7 rs13234832  | 158014979 T | 0.3766 | 1.65E-08 | chr:7:158029482 |
| 7 rs10246937  | 158007673 C | 0.3773 | 1.81E-08 | chr:7:158029482 |
| 7 rs6950296   | 158020379 A | 0.3773 | 1.81E-08 | chr:7:158029482 |
| 7 rs10215289  | 158015301 T | 0.3775 | 2.02E-08 | chr:7:158029482 |
| 7 rs10215664  | 158015494 G | 0.3775 | 2.02E-08 | chr:7:158029482 |
| 7 rs10215991  | 158015263 A | 0.3775 | 2.02E-08 | chr:7:158029482 |
| 7 rs10215992  | 158015273 A | 0.3775 | 2.02E-08 | chr:7:158029482 |
| 7 rs10257230  | 158015030 A | 0.3775 | 2.02E-08 | chr:7:158029482 |
| 7 rs13234740  | 158014940 A | 0.3775 | 2.02E-08 | chr:7:158029482 |
| 7 rs35995505  | 158019225 T | 0.3775 | 2.02E-08 | chr:7:158029482 |
| 7 rs58180441  | 158019047 A | 0.3775 | 2.02E-08 | chr:7:158029482 |
| 7 rs75199490  | 157997325 T | 6.048  | 2.48E-08 | chr:7:158029482 |
| 7 rs1806611   | 157986440 T | 0.3819 | 2.74E-08 | chr:7:158029482 |
| 7 rs76250128  | 157992897 T | 5.803  | 5.57E-08 | chr:7:158029482 |
| 7 rs3800857   | 157929294 A | 4.205  | 5.86E-08 | chr:7:158029482 |
| 7 rs10282471  | 157997236 T | 0.3881 | 5.95E-08 | chr:7:158029482 |
| 7 rs4909140   | 158028901 G | 0.3797 | 7.16E-08 | chr:7:158029482 |
| 7 rs10271711  | 157985854 A | 0.358  | 9.45E-08 | chr:7:158029482 |
| 7 rs10271837  | 157985998 C | 0.358  | 9.45E-08 | chr:7:158029482 |
| 7 rs62480212  | 157937613 T | 0.3574 | 9.99E-08 | chr:7:158029482 |

|               |             |        |          |                 |
|---------------|-------------|--------|----------|-----------------|
| 7 rs10268228  | 157985479 A | 0.3715 | 2.01E-07 | chr:7:158029482 |
| 7 rs73173701  | 157993472 C | 3.101  | 3.01E-07 | chr:7:158029482 |
| 7 rs10249710  | 158030463 A | 0.3659 | 3.06E-07 | chr:7:158029482 |
| 7 rs3800856   | 157984992 A | 0.3787 | 3.73E-07 | chr:7:158029482 |
| 7 rs3829727   | 157889500 T | 10.82  | 4.13E-07 | chr:7:158029482 |
| 7 rs73173702  | 157996475 G | 3.009  | 6.07E-07 | chr:7:158029482 |
| 7 rs4506155   | 158003981 G | 2.015  | 9.12E-07 | chr:7:158029482 |
| 7 rs10227009  | 158027455 C | 0.4127 | 1.13E-06 | chr:7:158029482 |
| 7 rs6950346   | 158025658 T | 0.4127 | 1.13E-06 | chr:7:158029482 |
| 7 rs9769342   | 157999891 G | 2.019  | 1.18E-06 | chr:7:158029482 |
| 7 rs117762153 | 157996630 C | 0.3376 | 1.33E-06 | chr:7:158029482 |
| 7 rs12671841  | 157984567 A | 0.3419 | 1.44E-06 | chr:7:158029482 |
| 7 rs61519514  | 157990691 C | 0.3419 | 1.44E-06 | chr:7:158029482 |
| 7 rs74379630  | 157989997 C | 0.3419 | 1.44E-06 | chr:7:158029482 |
| 7 rs74990416  | 157990978 G | 0.3419 | 1.44E-06 | chr:7:158029482 |
| 7 rs80277851  | 157989073 T | 0.3419 | 1.44E-06 | chr:7:158029482 |
| 7 rs76840048  | 157996453 G | 0.3389 | 1.51E-06 | chr:7:158029482 |
| 7 rs4595081   | 158007923 G | 1.98   | 1.63E-06 | chr:7:158029482 |
| 7 rs3965316   | 158023815 C | 1.985  | 1.70E-06 | chr:7:158029482 |
| 7 rs7789111   | 158021519 C | 0.4217 | 1.73E-06 | chr:7:158029482 |
| 7 rs10258997  | 158016559 G | 0.4221 | 1.91E-06 | chr:7:158029482 |
| 7 rs10273930  | 158025121 A | 1.966  | 2.17E-06 | chr:7:158029482 |
| 7 rs10276960  | 158025026 T | 1.966  | 2.17E-06 | chr:7:158029482 |
| 7 rs2335848   | 158022103 A | 1.966  | 2.17E-06 | chr:7:158029482 |
| 7 rs2878538   | 158027427 A | 1.966  | 2.17E-06 | chr:7:158029482 |
| 7 rs6963124   | 158023589 T | 1.966  | 2.17E-06 | chr:7:158029482 |
| 7 rs6970487   | 158020147 A | 1.966  | 2.17E-06 | chr:7:158029482 |
| 7 rs6951312   | 158020287 C | 1.964  | 2.20E-06 | chr:7:158029482 |
| 7 rs6974918   | 158020284 T | 1.964  | 2.20E-06 | chr:7:158029482 |
| 7 rs6974924   | 158020293 T | 1.964  | 2.20E-06 | chr:7:158029482 |
| 7 rs144609400 | 157966546 A | 6.289  | 2.39E-06 | chr:7:158029482 |
| 7 rs10156036  | 158016777 A | 1.958  | 2.57E-06 | chr:7:158029482 |
| 7 rs6948273   | 158015457 T | 1.958  | 2.57E-06 | chr:7:158029482 |
| 7 rs10263846  | 157990941 T | 0.4299 | 3.13E-06 | chr:7:158029482 |
| 7 rs10275911  | 157990608 G | 0.4299 | 3.13E-06 | chr:7:158029482 |
| 7 rs10949702  | 157986125 C | 0.4299 | 3.13E-06 | chr:7:158029482 |
| 7 rs10248317  | 157907748 A | 2.171  | 3.16E-06 | chr:7:158029482 |
| 7 rs6949642   | 158025328 C | 1.94   | 3.35E-06 | chr:7:158029482 |
| 7 rs67598038  | 158028778 A | 0.43   | 3.52E-06 | chr:7:158029482 |
| 7 rs10231253  | 157983353 A | 0.4338 | 3.88E-06 | chr:7:158029482 |
| 7 rs73746436  | 158028699 A | 0.3244 | 4.99E-06 | chr:7:158029482 |
| 7 rs73173694  | 157983465 A | 2.593  | 5.48E-06 | chr:7:158029482 |
| 7 rs77563115  | 158018947 T | 0.3594 | 5.73E-06 | chr:7:158029482 |

|               |             |        |          |                 |
|---------------|-------------|--------|----------|-----------------|
| 7 rs78978471  | 158018950 G | 0.3594 | 5.73E-06 | chr:7:158029482 |
| 7 rs117944741 | 157997391 G | 0.3689 | 7.64E-06 | chr:7:158029482 |
| 7 rs75722811  | 158002177 C | 0.3689 | 7.64E-06 | chr:7:158029482 |
| 7 rs77172137  | 158002312 A | 0.3689 | 7.64E-06 | chr:7:158029482 |
| 7 rs78025349  | 157997235 A | 0.3689 | 7.64E-06 | chr:7:158029482 |
| 7 rs3800855   | 157985149 G | 0.3939 | 8.41E-06 | chr:7:158029482 |
| 7 rs113207019 | 158009900 C | 0.373  | 9.48E-06 | chr:7:158029482 |
| 7 rs116937137 | 158019256 G | 0.373  | 9.48E-06 | chr:7:158029482 |
| 7 rs117359298 | 158019112 C | 0.373  | 9.48E-06 | chr:7:158029482 |
| 7 rs117359788 | 158010684 T | 0.373  | 9.48E-06 | chr:7:158029482 |
| 7 rs12671669  | 158017440 C | 0.373  | 9.48E-06 | chr:7:158029482 |
| 7 rs73746433  | 158019018 T | 0.373  | 9.48E-06 | chr:7:158029482 |
| 7 rs75164236  | 158015964 C | 0.373  | 9.48E-06 | chr:7:158029482 |
| 7 rs75813490  | 158020768 G | 0.373  | 9.48E-06 | chr:7:158029482 |
| 7 rs76279791  | 158017906 C | 0.373  | 9.48E-06 | chr:7:158029482 |
| 7 rs77080725  | 158008536 C | 0.373  | 9.48E-06 | chr:7:158029482 |
| 7 rs77458014  | 158018702 A | 0.373  | 9.48E-06 | chr:7:158029482 |
| 7 rs7793689   | 158018620 G | 0.373  | 9.48E-06 | chr:7:158029482 |
| 7 rs79218449  | 158017038 A | 0.373  | 9.48E-06 | chr:7:158029482 |
| 7 rs79702184  | 158018093 A | 0.373  | 9.48E-06 | chr:7:158029482 |
| 7 rs117130220 | 158030705 A | 0.322  | 1.09E-05 | chr:7:158029482 |
| 7 rs11767654  | 157941943 G | 2.467  | 1.26E-05 | chr:7:158029482 |
| 7 rs6947802   | 157942350 C | 2.467  | 1.26E-05 | chr:7:158029482 |
| 7 rs11763130  | 157931928 A | 2.646  | 1.46E-05 | chr:7:158029482 |
| 7 rs141020723 | 158025936 C | 0.3856 | 1.48E-05 | chr:7:158029482 |
| 7 rs186119367 | 158028616 A | 0.3856 | 1.48E-05 | chr:7:158029482 |
| 7 rs6950107   | 157945632 T | 2.421  | 1.79E-05 | chr:7:158029482 |
| 7 rs2335832   | 157992083 T | 0.4244 | 3.07E-05 | chr:7:158029482 |
| 7 rs10240553  | 157971377 A | 2.332  | 3.40E-05 | chr:7:158029482 |
| 7 rs10243412  | 157977302 A | 2.332  | 3.40E-05 | chr:7:158029482 |
| 7 rs10244260  | 157971813 T | 2.332  | 3.40E-05 | chr:7:158029482 |
| 7 rs10266358  | 157972401 C | 2.332  | 3.40E-05 | chr:7:158029482 |
| 7 rs10280226  | 157950935 A | 2.332  | 3.40E-05 | chr:7:158029482 |
| 7 rs1130495   | 157959911 A | 2.332  | 3.40E-05 | chr:7:158029482 |
| 7 rs12532664  | 157958954 T | 2.332  | 3.40E-05 | chr:7:158029482 |
| 7 rs2335835   | 157969663 T | 2.332  | 3.40E-05 | chr:7:158029482 |
| 7 rs2335840   | 157958514 T | 2.332  | 3.40E-05 | chr:7:158029482 |
| 7 rs4618642   | 157951850 T | 2.332  | 3.40E-05 | chr:7:158029482 |
| 7 rs4909112   | 157962887 T | 2.332  | 3.40E-05 | chr:7:158029482 |
| 7 rs4909290   | 157954961 T | 2.332  | 3.40E-05 | chr:7:158029482 |
| 7 rs62477449  | 157963529 A | 2.332  | 3.40E-05 | chr:7:158029482 |
| 7 rs6947178   | 157967843 T | 2.332  | 3.40E-05 | chr:7:158029482 |
| 7 rs7785917   | 157957996 T | 2.332  | 3.40E-05 | chr:7:158029482 |

|               |             |        |                          |
|---------------|-------------|--------|--------------------------|
| 7 rs7787039   | 157958910 A | 2.332  | 3.40E-05 chr:7:158029482 |
| 7 rs75464412  | 16226799 T  | 0.1055 | 6.62E-24 chr:7:16237347  |
| 7 rs13438329  | 16249102 A  | 0.1154 | 3.33E-23 chr:7:16237347  |
| 7 rs80148995  | 16240992 A  | 0.1138 | 3.47E-23 chr:7:16237347  |
| 7 rs150801290 | 16230303 T  | 0.1145 | 5.83E-23 chr:7:16237347  |
| 7 rs17169327  | 16231028 C  | 0.1145 | 5.83E-23 chr:7:16237347  |
| 7 rs10274855  | 16248664 C  | 0.1217 | 7.21E-23 chr:7:16237347  |
| 7 rs17169340  | 16244970 G  | 0.1217 | 7.21E-23 chr:7:16237347  |
| 7 rs17169343  | 16245214 T  | 0.1217 | 7.21E-23 chr:7:16237347  |
| 7 rs17169349  | 16247721 C  | 0.1217 | 7.21E-23 chr:7:16237347  |
| 7 rs28470194  | 16247703 C  | 0.1217 | 7.21E-23 chr:7:16237347  |
| 7 rs28640135  | 16248131 G  | 0.1217 | 7.21E-23 chr:7:16237347  |
| 7 rs7777414   | 16246548 C  | 0.1217 | 7.21E-23 chr:7:16237347  |
| 7 rs17169337  | 16243641 A  | 0.1216 | 8.85E-23 chr:7:16237347  |
| 7 rs17169341  | 16245009 G  | 0.1216 | 8.85E-23 chr:7:16237347  |
| 7 rs61172485  | 16248570 A  | 0.1216 | 8.85E-23 chr:7:16237347  |
| 7 rs17169339  | 16244782 G  | 0.122  | 8.90E-23 chr:7:16237347  |
| 7 rs28446402  | 16245037 C  | 0.122  | 8.90E-23 chr:7:16237347  |
| 7 rs7794053   | 16246456 G  | 0.1226 | 9.50E-23 chr:7:16237347  |
| 7 rs17169347  | 16247621 C  | 0.1219 | 1.09E-22 chr:7:16237347  |
| 7 rs17169295  | 16206239 A  | 0.1224 | 1.32E-22 chr:7:16237347  |
| 7 rs10237535  | 16250375 G  | 0.1259 | 1.37E-22 chr:7:16237347  |
| 7 rs76635530  | 16220088 A  | 0.1195 | 1.42E-22 chr:7:16237347  |
| 7 rs78569357  | 16241435 C  | 0.1259 | 1.44E-22 chr:7:16237347  |
| 7 rs75798894  | 16204714 A  | 0.1234 | 1.77E-22 chr:7:16237347  |
| 7 rs114237814 | 16203354 A  | 0.1209 | 1.99E-22 chr:7:16237347  |
| 7 rs149192706 | 16200558 C  | 0.1209 | 1.99E-22 chr:7:16237347  |
| 7 rs59951504  | 16201410 A  | 0.1209 | 1.99E-22 chr:7:16237347  |
| 7 rs75093879  | 16200177 A  | 0.1209 | 1.99E-22 chr:7:16237347  |
| 7 rs17169336  | 16242870 C  | 0.1323 | 2.00E-22 chr:7:16237347  |
| 7 rs139906888 | 16202233 G  | 0.1252 | 2.55E-22 chr:7:16237347  |
| 7 rs17169288  | 16193288 A  | 0.1256 | 2.89E-22 chr:7:16237347  |
| 7 rs17169290  | 16194207 G  | 0.1298 | 3.73E-22 chr:7:16237347  |
| 7 rs59124001  | 16191337 C  | 0.1298 | 3.73E-22 chr:7:16237347  |
| 7 rs7787953   | 16160986 C  | 0.1294 | 5.30E-22 chr:7:16237347  |
| 7 rs75844841  | 16184554 C  | 0.1316 | 5.55E-22 chr:7:16237347  |
| 7 rs74297952  | 16147975 A  | 0.1329 | 6.82E-22 chr:7:16237347  |
| 7 rs60082144  | 16184639 G  | 0.1358 | 7.17E-22 chr:7:16237347  |
| 7 rs60412407  | 16189893 G  | 0.1358 | 7.17E-22 chr:7:16237347  |
| 7 rs74666326  | 16188224 G  | 0.1363 | 9.95E-22 chr:7:16237347  |
| 7 rs76015838  | 16128754 C  | 0.1353 | 1.24E-21 chr:7:16237347  |
| 7 rs57213749  | 16147064 C  | 0.1348 | 2.00E-21 chr:7:16237347  |
| 7 rs61059482  | 16147246 C  | 0.1348 | 2.00E-21 chr:7:16237347  |

|               |            |        |                         |
|---------------|------------|--------|-------------------------|
| 7 rs143528089 | 16142507 A | 0.1396 | 3.30E-21 chr:7:16237347 |
| 7 rs59529774  | 16141140 G | 0.1396 | 3.30E-21 chr:7:16237347 |
| 7 rs59510115  | 16150162 A | 0.1432 | 4.31E-21 chr:7:16237347 |
| 7 rs60525181  | 16148477 A | 0.1432 | 4.31E-21 chr:7:16237347 |
| 7 rs75872145  | 16169991 A | 0.1413 | 4.63E-21 chr:7:16237347 |
| 7 rs79608769  | 16159898 A | 0.1413 | 4.63E-21 chr:7:16237347 |
| 7 rs17169255  | 16124839 G | 0.1481 | 5.67E-21 chr:7:16237347 |
| 7 rs78099222  | 16121031 C | 0.1481 | 5.67E-21 chr:7:16237347 |
| 7 rs59618653  | 16186627 T | 0.1439 | 6.11E-21 chr:7:16237347 |
| 7 rs77332294  | 16145345 A | 0.1464 | 1.29E-20 chr:7:16237347 |
| 7 rs79400093  | 16242670 G | 0.15   | 1.83E-20 chr:7:16237347 |
| 7 rs79391915  | 16138889 A | 0.1531 | 3.39E-20 chr:7:16237347 |
| 7 rs79430054  | 16137524 A | 0.1531 | 3.39E-20 chr:7:16237347 |
| 7 rs1034960   | 16212032 T | 0.1647 | 5.51E-20 chr:7:16237347 |
| 7 rs1527219   | 16245752 C | 0.1723 | 6.05E-20 chr:7:16237347 |
| 7 rs73304822  | 16216110 T | 0.1657 | 7.22E-20 chr:7:16237347 |
| 7 rs758703    | 16118422 G | 0.1641 | 7.65E-20 chr:7:16237347 |
| 7 rs76029789  | 16096270 T | 0.1635 | 7.88E-20 chr:7:16237347 |
| 7 rs78309898  | 16098726 C | 0.1635 | 7.88E-20 chr:7:16237347 |
| 7 rs17169227  | 16104327 A | 0.1641 | 9.91E-20 chr:7:16237347 |
| 7 rs201756228 | 16128987 G | 0.1747 | 2.05E-19 chr:7:16237347 |
| 7 rs73680572  | 16099186 T | 0.2083 | 1.59E-17 chr:7:16237347 |
| 7 rs6979583   | 16110544 C | 0.2142 | 3.02E-17 chr:7:16237347 |
| 7 rs17458603  | 16279593 G | 0.2196 | 3.49E-17 chr:7:16237347 |
| 7 rs17169240  | 16111116 A | 0.2156 | 4.53E-17 chr:7:16237347 |
| 7 rs13237999  | 16126709 T | 0.2352 | 5.73E-17 chr:7:16237347 |
| 7 rs12668400  | 16233634 G | 4.272  | 6.38E-17 chr:7:16237347 |
| 7 rs1527207   | 16231182 G | 4.272  | 6.38E-17 chr:7:16237347 |
| 7 rs35978678  | 16232776 C | 4.312  | 6.39E-17 chr:7:16237347 |
| 7 rs6963052   | 16211529 T | 0.2158 | 6.60E-17 chr:7:16237347 |
| 7 rs4721480   | 16244425 A | 4.143  | 7.49E-17 chr:7:16237347 |
| 7 rs17169323  | 16228909 G | 4.236  | 7.95E-17 chr:7:16237347 |
| 7 rs10232023  | 16237180 G | 4.166  | 9.62E-17 chr:7:16237347 |
| 7 rs12670694  | 16233741 T | 4.219  | 1.02E-16 chr:7:16237347 |
| 7 rs12699772  | 16226615 G | 4.219  | 1.02E-16 chr:7:16237347 |
| 7 rs4721478   | 16227094 G | 4.219  | 1.02E-16 chr:7:16237347 |
| 7 rs6976322   | 16231830 G | 4.219  | 1.02E-16 chr:7:16237347 |
| 7 rs7809306   | 16225174 G | 4.223  | 1.06E-16 chr:7:16237347 |
| 7 rs11761915  | 16243928 A | 4.064  | 1.13E-16 chr:7:16237347 |
| 7 rs6461229   | 16238691 T | 4.082  | 1.26E-16 chr:7:16237347 |
| 7 rs6461230   | 16242151 C | 4.124  | 1.29E-16 chr:7:16237347 |
| 7 rs28483341  | 16099361 A | 0.237  | 2.34E-16 chr:7:16237347 |
| 7 rs7801673   | 16243069 C | 4.017  | 2.49E-16 chr:7:16237347 |

|               |            |        |                         |
|---------------|------------|--------|-------------------------|
| 7 rs10487907  | 16105145 C | 0.2405 | 2.99E-16 chr:7:16237347 |
| 7 rs58553783  | 16403683 G | 0.2426 | 8.13E-16 chr:7:16237347 |
| 7 rs17169353  | 16252416 A | 0.2008 | 8.23E-16 chr:7:16237347 |
| 7 rs61282805  | 16276606 C | 0.258  | 9.34E-16 chr:7:16237347 |
| 7 rs12112931  | 16269214 G | 0.2051 | 9.90E-16 chr:7:16237347 |
| 7 rs77029597  | 16263225 C | 0.201  | 1.07E-15 chr:7:16237347 |
| 7 rs59096069  | 16293060 A | 0.2003 | 1.13E-15 chr:7:16237347 |
| 7 rs78208790  | 16331139 G | 0.2461 | 1.17E-15 chr:7:16237347 |
| 7 rs73681799  | 16285485 C | 0.2103 | 1.36E-15 chr:7:16237347 |
| 7 rs199541295 | 16128992 T | 0.191  | 1.39E-15 chr:7:16237347 |
| 7 rs200989147 | 16128994 C | 0.191  | 1.39E-15 chr:7:16237347 |
| 7 rs201774908 | 16128995 A | 0.191  | 1.39E-15 chr:7:16237347 |
| 7 rs11509157  | 16393482 T | 0.2487 | 1.40E-15 chr:7:16237347 |
| 7 rs4463323   | 16394509 A | 0.2487 | 1.40E-15 chr:7:16237347 |
| 7 rs17169351  | 16252167 G | 0.2034 | 1.53E-15 chr:7:16237347 |
| 7 rs73060585  | 16304454 G | 0.2514 | 1.64E-15 chr:7:16237347 |
| 7 rs73060586  | 16304503 C | 0.2514 | 1.64E-15 chr:7:16237347 |
| 7 rs17169354  | 16254553 A | 0.2034 | 1.74E-15 chr:7:16237347 |
| 7 rs59670548  | 16271157 A | 0.2034 | 1.74E-15 chr:7:16237347 |
| 7 rs61017342  | 16271147 G | 0.2034 | 1.74E-15 chr:7:16237347 |
| 7 rs74956820  | 16271950 T | 0.2034 | 1.74E-15 chr:7:16237347 |
| 7 rs55966090  | 16391588 T | 0.2506 | 1.90E-15 chr:7:16237347 |
| 7 rs56926429  | 16288772 G | 0.2098 | 1.95E-15 chr:7:16237347 |
| 7 rs75307962  | 16286597 C | 0.2098 | 1.95E-15 chr:7:16237347 |
| 7 rs80280843  | 16289437 G | 0.2098 | 1.95E-15 chr:7:16237347 |
| 7 rs147195562 | 16295043 T | 0.2053 | 2.22E-15 chr:7:16237347 |
| 7 rs12666868  | 16388295 C | 0.2508 | 2.31E-15 chr:7:16237347 |
| 7 rs4615457   | 16388624 G | 0.2508 | 2.31E-15 chr:7:16237347 |
| 7 rs74297954  | 16278437 G | 0.2092 | 2.62E-15 chr:7:16237347 |
| 7 rs10950614  | 16395531 G | 0.2557 | 2.81E-15 chr:7:16237347 |
| 7 rs73306417  | 16395978 C | 0.2558 | 3.43E-15 chr:7:16237347 |
| 7 rs4001474   | 16389089 G | 0.2576 | 3.79E-15 chr:7:16237347 |
| 7 rs4001545   | 16228893 T | 3.881  | 3.80E-15 chr:7:16237347 |
| 7 rs61227640  | 16397327 C | 0.2602 | 3.97E-15 chr:7:16237347 |
| 7 rs12531451  | 16319042 C | 0.259  | 4.79E-15 chr:7:16237347 |
| 7 rs10950613  | 16395343 A | 0.2614 | 4.92E-15 chr:7:16237347 |
| 7 rs11508469  | 16395072 A | 0.2614 | 4.92E-15 chr:7:16237347 |
| 7 rs12533801  | 16399727 A | 0.2614 | 4.92E-15 chr:7:16237347 |
| 7 rs1921839   | 16398598 A | 0.2614 | 4.92E-15 chr:7:16237347 |
| 7 rs61391935  | 16397809 A | 0.2614 | 4.92E-15 chr:7:16237347 |
| 7 rs79828425  | 16281396 A | 0.2162 | 5.82E-15 chr:7:16237347 |
| 7 rs12531973  | 16385256 G | 0.2633 | 6.65E-15 chr:7:16237347 |
| 7 rs56327615  | 16386826 G | 0.2633 | 6.65E-15 chr:7:16237347 |

|               |            |        |          |                |
|---------------|------------|--------|----------|----------------|
| 7 rs6975387   | 16228254 T | 3.84   | 6.72E-15 | chr:7:16237347 |
| 7 rs13240803  | 16227939 A | 3.829  | 6.85E-15 | chr:7:16237347 |
| 7 rs73304492  | 16386034 T | 0.2636 | 8.15E-15 | chr:7:16237347 |
| 7 rs11983498  | 16316422 C | 0.2273 | 1.04E-14 | chr:7:16237347 |
| 7 rs10950616  | 16399822 C | 0.2685 | 1.11E-14 | chr:7:16237347 |
| 7 rs12666346  | 16351558 C | 0.2658 | 1.41E-14 | chr:7:16237347 |
| 7 rs6974125   | 16391779 G | 0.2765 | 2.99E-14 | chr:7:16237347 |
| 7 rs199579699 | 16281598 T | 0.262  | 3.24E-14 | chr:7:16237347 |
| 7 rs4568517   | 16391210 C | 0.2776 | 3.69E-14 | chr:7:16237347 |
| 7 rs28703222  | 16174921 G | 0.2905 | 5.85E-14 | chr:7:16237347 |
| 7 rs58327496  | 16351899 G | 0.283  | 7.13E-14 | chr:7:16237347 |
| 7 rs10244600  | 16240154 G | 3.559  | 8.12E-14 | chr:7:16237347 |
| 7 rs11766565  | 16312057 C | 3.454  | 1.20E-13 | chr:7:16237347 |
| 7 rs28422957  | 16099520 G | 0.2957 | 1.72E-13 | chr:7:16237347 |
| 7 rs1527224   | 16242168 G | 3.346  | 5.44E-13 | chr:7:16237347 |
| 7 rs60943478  | 16271535 A | 0.2764 | 9.31E-13 | chr:7:16237347 |
| 7 rs17169388  | 16310373 G | 3.259  | 1.02E-12 | chr:7:16237347 |
| 7 rs56005627  | 16293690 A | 0.2841 | 1.97E-12 | chr:7:16237347 |
| 7 rs113407083 | 16199382 A | 3.346  | 2.69E-12 | chr:7:16237347 |
| 7 rs11760717  | 16159827 G | 3.281  | 9.31E-12 | chr:7:16237347 |
| 7 rs10487914  | 16219670 A | 3.198  | 1.17E-11 | chr:7:16237347 |
| 7 rs11760631  | 16159780 C | 3.247  | 1.26E-11 | chr:7:16237347 |
| 7 rs1527205   | 16160617 T | 3.247  | 1.26E-11 | chr:7:16237347 |
| 7 rs4721485   | 16282473 A | 0.3027 | 1.26E-11 | chr:7:16237347 |
| 7 rs537249407 | 16171775 A | 3.16   | 2.71E-11 | chr:7:16237347 |
| 7 rs558512300 | 16171776 A | 3.16   | 2.71E-11 | chr:7:16237347 |
| 7 rs569856115 | 16171774 A | 3.16   | 2.71E-11 | chr:7:16237347 |
| 7 rs10255266  | 16394079 C | 0.3424 | 3.00E-11 | chr:7:16237347 |
| 7 rs59806774  | 16400685 A | 0.3474 | 5.44E-11 | chr:7:16237347 |
| 7 rs1295170   | 16278622 T | 2.965  | 6.00E-11 | chr:7:16237347 |
| 7 rs12539945  | 16122473 G | 3.065  | 6.08E-11 | chr:7:16237347 |
| 7 rs1295173   | 16274499 G | 2.926  | 6.74E-11 | chr:7:16237347 |
| 7 rs56406025  | 16401195 A | 0.3526 | 7.34E-11 | chr:7:16237347 |
| 7 rs10225225  | 16395385 G | 0.3542 | 9.09E-11 | chr:7:16237347 |
| 7 rs10950615  | 16399679 C | 0.3542 | 9.09E-11 | chr:7:16237347 |
| 7 rs10950617  | 16399990 T | 0.3542 | 9.09E-11 | chr:7:16237347 |
| 7 rs55698830  | 16400602 G | 0.3542 | 9.09E-11 | chr:7:16237347 |
| 7 rs58665173  | 16397773 T | 0.3542 | 9.09E-11 | chr:7:16237347 |
| 7 rs2178598   | 16397352 A | 0.3562 | 1.23E-10 | chr:7:16237347 |
| 7 rs4721484   | 16282403 A | 2.813  | 1.57E-10 | chr:7:16237347 |
| 7 rs10237469  | 16256305 A | 2.855  | 1.76E-10 | chr:7:16237347 |
| 7 rs4236286   | 16393365 C | 0.3647 | 2.56E-10 | chr:7:16237347 |
| 7 rs4721493   | 16393152 T | 0.3647 | 2.56E-10 | chr:7:16237347 |

|               |            |        |          |                |
|---------------|------------|--------|----------|----------------|
| 7 rs12699785  | 16403855 G | 0.3611 | 2.81E-10 | chr:7:16237347 |
| 7 rs13240683  | 16257898 C | 2.969  | 3.45E-10 | chr:7:16237347 |
| 7 rs10252227  | 16167652 A | 2.87   | 3.91E-10 | chr:7:16237347 |
| 7 rs62440394  | 16254633 C | 0.3518 | 3.92E-10 | chr:7:16237347 |
| 7 rs1527208   | 16280843 A | 0.3529 | 4.16E-10 | chr:7:16237347 |
| 7 rs7810150   | 16388904 T | 0.3687 | 4.43E-10 | chr:7:16237347 |
| 7 rs6978854   | 16392578 A | 0.3734 | 4.86E-10 | chr:7:16237347 |
| 7 rs4559135   | 16389532 A | 0.3752 | 6.16E-10 | chr:7:16237347 |
| 7 rs4721491   | 16390226 C | 0.3752 | 6.16E-10 | chr:7:16237347 |
| 7 rs59866961  | 16372756 C | 0.3724 | 6.87E-10 | chr:7:16237347 |
| 7 rs12667418  | 16122923 T | 2.892  | 6.91E-10 | chr:7:16237347 |
| 7 rs12537658  | 16119502 C | 2.866  | 7.90E-10 | chr:7:16237347 |
| 7 rs62441885  | 16348059 C | 0.3712 | 7.97E-10 | chr:7:16237347 |
| 7 rs17286602  | 16152174 T | 2.89   | 1.05E-09 | chr:7:16237347 |
| 7 rs10950612  | 16387297 C | 0.3838 | 1.17E-09 | chr:7:16237347 |
| 7 rs7808683   | 16401133 T | 0.3839 | 1.23E-09 | chr:7:16237347 |
| 7 rs2214623   | 16350846 C | 2.598  | 1.34E-09 | chr:7:16237347 |
| 7 rs2214624   | 16350845 G | 2.598  | 1.34E-09 | chr:7:16237347 |
| 7 rs4146016   | 16386494 T | 0.3862 | 1.59E-09 | chr:7:16237347 |
| 7 rs11773181  | 16124957 T | 2.916  | 4.69E-09 | chr:7:16237347 |
| 7 rs10247036  | 16392048 A | 2.601  | 5.21E-09 | chr:7:16237347 |
| 7 rs11766323  | 16308138 G | 0.3934 | 5.48E-09 | chr:7:16237347 |
| 7 rs12666960  | 16322506 C | 0.3693 | 6.99E-09 | chr:7:16237347 |
| 7 rs34077328  | 16216370 A | 2.6    | 7.01E-09 | chr:7:16237347 |
| 7 rs34947249  | 16216375 T | 2.6    | 7.01E-09 | chr:7:16237347 |
| 7 rs10950602  | 16136846 T | 2.838  | 7.36E-09 | chr:7:16237347 |
| 7 rs191030074 | 16370782 A | 0.3728 | 7.38E-09 | chr:7:16237347 |
| 7 rs58877550  | 16368771 T | 0.3728 | 7.38E-09 | chr:7:16237347 |
| 7 rs1295158   | 16294041 T | 2.549  | 8.76E-09 | chr:7:16237347 |
| 7 rs1918261   | 16245134 A | 2.934  | 9.96E-09 | chr:7:16237347 |
| 7 rs10807781  | 16244143 C | 2.892  | 1.10E-08 | chr:7:16237347 |
| 7 rs78966320  | 16366306 C | 0.2297 | 1.11E-08 | chr:7:16237347 |
| 7 rs78898296  | 16328729 A | 0.2307 | 1.24E-08 | chr:7:16237347 |
| 7 rs1589988   | 16266711 T | 2.92   | 1.25E-08 | chr:7:16237347 |
| 7 rs1527226   | 16242073 C | 2.872  | 1.27E-08 | chr:7:16237347 |
| 7 rs6461231   | 16246374 C | 2.882  | 1.45E-08 | chr:7:16237347 |
| 7 rs6945862   | 16124226 T | 2.865  | 1.53E-08 | chr:7:16237347 |
| 7 rs7793068   | 16045794 A | 0.3916 | 1.53E-08 | chr:7:16237347 |
| 7 rs72506102  | 16337556 G | 0.3947 | 1.67E-08 | chr:7:16237347 |
| 7 rs79345791  | 16032440 T | 0.3787 | 1.71E-08 | chr:7:16237347 |
| 7 rs3801431   | 16317667 C | 0.3799 | 1.73E-08 | chr:7:16237347 |
| 7 rs17169202  | 16040251 T | 0.3945 | 1.85E-08 | chr:7:16237347 |
| 7 rs1527223   | 16242223 G | 2.824  | 2.00E-08 | chr:7:16237347 |



|               |            |        |          |                |
|---------------|------------|--------|----------|----------------|
| 7 rs1527225   | 16242141 A | 2.824  | 2.00E-08 | chr:7:16237347 |
| 7 rs74347979  | 16339423 G | 0.2351 | 2.11E-08 | chr:7:16237347 |
| 7 rs10259283  | 16239695 T | 2.804  | 2.19E-08 | chr:7:16237347 |
| 7 rs6949481   | 16234156 G | 2.799  | 2.21E-08 | chr:7:16237347 |
| 7 rs2389573   | 16031404 G | 0.386  | 2.53E-08 | chr:7:16237347 |
| 7 rs1528135   | 16120873 G | 2.817  | 2.67E-08 | chr:7:16237347 |
| 7 rs6946639   | 16120675 A | 2.84   | 2.72E-08 | chr:7:16237347 |
| 7 rs11561808  | 16314944 C | 0.4182 | 2.86E-08 | chr:7:16237347 |
| 7 rs12540311  | 16323837 T | 0.4016 | 2.91E-08 | chr:7:16237347 |
| 7 rs11761666  | 16314090 G | 0.4193 | 2.97E-08 | chr:7:16237347 |
| 7 rs2389591   | 16229442 A | 2.783  | 3.24E-08 | chr:7:16237347 |
| 7 rs12539671  | 16323312 A | 0.3999 | 3.31E-08 | chr:7:16237347 |
| 7 rs12668858  | 16033566 T | 0.3884 | 3.79E-08 | chr:7:16237347 |
| 7 rs78582491  | 16018794 A | 0.3826 | 3.95E-08 | chr:7:16237347 |
| 7 rs10277151  | 16115413 G | 2.434  | 4.02E-08 | chr:7:16237347 |
| 7 rs199940319 | 15996192 G | 0.3289 | 4.38E-08 | chr:7:16237347 |
| 7 rs7792559   | 16045657 G | 0.407  | 4.43E-08 | chr:7:16237347 |
| 7 rs12673932  | 16023083 G | 0.3897 | 4.54E-08 | chr:7:16237347 |
| 7 rs138631537 | 16019211 A | 0.3897 | 4.54E-08 | chr:7:16237347 |
| 7 rs1528166   | 16026367 G | 0.3897 | 4.54E-08 | chr:7:16237347 |
| 7 rs74329914  | 16023805 T | 0.3897 | 4.54E-08 | chr:7:16237347 |
| 7 rs75970757  | 16024245 G | 0.3897 | 4.54E-08 | chr:7:16237347 |
| 7 rs1859418   | 16348763 C | 2.501  | 4.76E-08 | chr:7:16237347 |
| 7 rs12155021  | 16337176 T | 0.4065 | 4.87E-08 | chr:7:16237347 |
| 7 rs57026722  | 16338614 G | 0.4065 | 4.87E-08 | chr:7:16237347 |
| 7 rs1155436   | 16221063 G | 2.784  | 5.02E-08 | chr:7:16237347 |
| 7 rs3919476   | 16327408 A | 0.4095 | 6.10E-08 | chr:7:16237347 |
| 7 rs12669828  | 16061462 A | 0.408  | 6.33E-08 | chr:7:16237347 |
| 7 rs9648214   | 16380806 T | 0.4178 | 7.78E-08 | chr:7:16237347 |
| 7 rs10263175  | 16043897 T | 0.416  | 8.05E-08 | chr:7:16237347 |
| 7 rs78450848  | 16049348 G | 0.4136 | 8.16E-08 | chr:7:16237347 |
| 7 rs11769952  | 16100672 T | 2.734  | 8.61E-08 | chr:7:16237347 |
| 7 rs17169417  | 16348830 C | 0.4165 | 8.85E-08 | chr:7:16237347 |
| 7 rs12537888  | 16167498 A | 2.786  | 8.98E-08 | chr:7:16237347 |
| 7 rs1990364   | 16168925 G | 2.786  | 8.98E-08 | chr:7:16237347 |
| 7 rs6943936   | 16168273 A | 2.786  | 8.98E-08 | chr:7:16237347 |
| 7 rs6968537   | 16168708 T | 2.786  | 8.98E-08 | chr:7:16237347 |
| 7 rs17169207  | 16057110 A | 0.4107 | 9.33E-08 | chr:7:16237347 |
| 7 rs7805187   | 16314184 A | 2.481  | 1.03E-07 | chr:7:16237347 |
| 7 rs1527199   | 16213150 A | 2.423  | 1.07E-07 | chr:7:16237347 |
| 7 rs6945278   | 16098081 C | 2.648  | 1.09E-07 | chr:7:16237347 |
| 7 rs6965576   | 16098155 T | 2.648  | 1.09E-07 | chr:7:16237347 |
| 7 rs10258882  | 16033593 C | 0.4137 | 1.14E-07 | chr:7:16237347 |

|               |            |        |          |                |
|---------------|------------|--------|----------|----------------|
| 7 rs10950610  | 16370043 G | 0.4231 | 1.15E-07 | chr:7:16237347 |
| 7 rs17169426  | 16368668 G | 0.4231 | 1.15E-07 | chr:7:16237347 |
| 7 rs57381059  | 16377308 A | 0.4231 | 1.15E-07 | chr:7:16237347 |
| 7 rs55750250  | 16359060 G | 0.4278 | 1.39E-07 | chr:7:16237347 |
| 7 rs73684129  | 16359028 A | 0.4278 | 1.39E-07 | chr:7:16237347 |
| 7 rs1881241   | 16100729 T | 2.671  | 1.43E-07 | chr:7:16237347 |
| 7 rs1918269   | 16263849 A | 2.781  | 1.57E-07 | chr:7:16237347 |
| 7 rs75270864  | 15957639 A | 0.3454 | 1.78E-07 | chr:7:16237347 |
| 7 rs73684130  | 16360809 A | 0.4337 | 1.84E-07 | chr:7:16237347 |
| 7 rs1918264   | 16272661 A | 2.762  | 1.95E-07 | chr:7:16237347 |
| 7 rs111348358 | 16367021 C | 0.4331 | 2.03E-07 | chr:7:16237347 |
| 7 rs7777150   | 16197861 A | 2.699  | 2.10E-07 | chr:7:16237347 |
| 7 rs1295165   | 16283065 C | 2.725  | 2.18E-07 | chr:7:16237347 |
| 7 rs74639410  | 16359083 T | 0.3523 | 2.35E-07 | chr:7:16237347 |
| 7 rs75830904  | 15993509 G | 0.378  | 2.41E-07 | chr:7:16237347 |
| 7 rs10950605  | 16262235 T | 0.4701 | 2.57E-07 | chr:7:16237347 |
| 7 rs1609082   | 16269409 G | 2.653  | 2.70E-07 | chr:7:16237347 |
| 7 rs75741236  | 15994284 G | 0.3796 | 2.75E-07 | chr:7:16237347 |
| 7 rs10807780  | 16219368 A | 2.68   | 2.81E-07 | chr:7:16237347 |
| 7 rs78735052  | 16054144 C | 0.4297 | 2.90E-07 | chr:7:16237347 |
| 7 rs13437646  | 16348091 C | 0.4364 | 3.03E-07 | chr:7:16237347 |
| 7 rs1527206   | 16209427 C | 2.614  | 3.16E-07 | chr:7:16237347 |
| 7 rs6948977   | 16198968 G | 2.614  | 3.16E-07 | chr:7:16237347 |
| 7 rs7786921   | 16199594 C | 2.614  | 3.16E-07 | chr:7:16237347 |
| 7 rs1295175   | 16272850 A | 2.691  | 3.16E-07 | chr:7:16237347 |
| 7 rs78909341  | 16003518 T | 0.3851 | 3.30E-07 | chr:7:16237347 |
| 7 rs7804654   | 16357529 C | 0.4429 | 3.44E-07 | chr:7:16237347 |
| 7 rs10257485  | 16038502 G | 0.4289 | 3.69E-07 | chr:7:16237347 |
| 7 rs1918265   | 16271635 C | 0.4737 | 3.85E-07 | chr:7:16237347 |
| 7 rs79445933  | 15923396 A | 0.3962 | 4.01E-07 | chr:7:16237347 |
| 7 rs56815850  | 16365655 G | 0.452  | 4.24E-07 | chr:7:16237347 |
| 7 rs1295171   | 16278158 T | 2.642  | 4.44E-07 | chr:7:16237347 |
| 7 rs1295167   | 16282162 C | 2.652  | 4.44E-07 | chr:7:16237347 |
| 7 rs12669371  | 15990343 C | 0.3897 | 4.51E-07 | chr:7:16237347 |
| 7 rs10227232  | 16178100 A | 2.619  | 4.78E-07 | chr:7:16237347 |
| 7 rs17169428  | 16369115 T | 0.446  | 5.43E-07 | chr:7:16237347 |
| 7 rs76405124  | 15921297 T | 0.4016 | 5.86E-07 | chr:7:16237347 |
| 7 rs7785481   | 16357439 A | 0.4527 | 6.13E-07 | chr:7:16237347 |
| 7 rs11983791  | 15922392 A | 0.4031 | 6.32E-07 | chr:7:16237347 |
| 7 rs74912883  | 15970033 A | 0.3922 | 6.37E-07 | chr:7:16237347 |
| 7 rs11973822  | 15922577 C | 0.4059 | 6.38E-07 | chr:7:16237347 |
| 7 rs11983826  | 15922499 C | 0.4059 | 6.38E-07 | chr:7:16237347 |
| 7 rs2189734   | 16351568 C | 2.136  | 6.39E-07 | chr:7:16237347 |

|               |            |        |                         |
|---------------|------------|--------|-------------------------|
| 7 rs7795348   | 16150272 T | 2.578  | 6.40E-07 chr:7:16237347 |
| 7 rs12666423  | 15995040 A | 0.3932 | 6.70E-07 chr:7:16237347 |
| 7 rs10950587  | 15926592 G | 0.4047 | 7.19E-07 chr:7:16237347 |
| 7 rs7459380   | 16201138 T | 2.866  | 8.40E-07 chr:7:16237347 |
| 7 rs13438718  | 16354230 A | 0.458  | 8.75E-07 chr:7:16237347 |
| 7 rs1304877   | 16352390 A | 2.11   | 9.50E-07 chr:7:16237347 |
| 7 rs111518632 | 15922157 T | 0.4129 | 9.96E-07 chr:7:16237347 |
| 7 rs11979210  | 15918248 A | 0.4129 | 9.96E-07 chr:7:16237347 |
| 7 rs11983018  | 15922212 C | 0.4129 | 9.96E-07 chr:7:16237347 |
| 7 rs12699771  | 16196880 G | 2.662  | 9.98E-07 chr:7:16237347 |
| 7 rs78123584  | 15961519 G | 0.4025 | 1.03E-06 chr:7:16237347 |
| 7 rs111691564 | 16030808 C | 0.4516 | 1.29E-06 chr:7:16237347 |
| 7 rs10486791  | 16284326 T | 2.462  | 1.52E-06 chr:7:16237347 |
| 7 rs77310392  | 15934247 T | 0.3809 | 1.66E-06 chr:7:16237347 |
| 7 rs2428687   | 16382798 G | 2.487  | 1.79E-06 chr:7:16237347 |
| 7 rs2526601   | 16383078 G | 2.487  | 1.79E-06 chr:7:16237347 |
| 7 rs2526602   | 16382991 A | 2.487  | 1.79E-06 chr:7:16237347 |
| 7 rs1852476   | 16164763 C | 2.523  | 2.04E-06 chr:7:16237347 |
| 7 rs4721475   | 16163218 G | 2.523  | 2.04E-06 chr:7:16237347 |
| 7 rs76832525  | 16021233 A | 0.451  | 2.16E-06 chr:7:16237347 |
| 7 rs1295133   | 16312781 G | 3.343  | 2.18E-06 chr:7:16237347 |
| 7 rs1295134   | 16312272 A | 3.431  | 2.20E-06 chr:7:16237347 |
| 7 rs10950594  | 16022092 C | 0.457  | 2.30E-06 chr:7:16237347 |
| 7 rs11984407  | 16023553 T | 0.457  | 2.30E-06 chr:7:16237347 |
| 7 rs60399447  | 16028028 G | 0.457  | 2.30E-06 chr:7:16237347 |
| 7 rs75246066  | 16024091 T | 0.457  | 2.30E-06 chr:7:16237347 |
| 7 rs77094939  | 16025868 T | 0.457  | 2.30E-06 chr:7:16237347 |
| 7 rs79544132  | 16024393 A | 0.457  | 2.30E-06 chr:7:16237347 |
| 7 rs17169111  | 15891270 C | 0.453  | 2.45E-06 chr:7:16237347 |
| 7 rs11765428  | 16296385 C | 2.367  | 2.53E-06 chr:7:16237347 |
| 7 rs2526600   | 16383169 C | 2.446  | 2.55E-06 chr:7:16237347 |
| 7 rs1527215   | 16166809 T | 2.52   | 3.17E-06 chr:7:16237347 |
| 7 rs1295150   | 16300368 A | 3.072  | 3.19E-06 chr:7:16237347 |
| 7 rs1295161   | 16290208 A | 3.072  | 3.19E-06 chr:7:16237347 |
| 7 rs1295138   | 16307185 G | 3.092  | 3.41E-06 chr:7:16237347 |
| 7 rs1075267   | 16216494 C | 2.472  | 3.59E-06 chr:7:16237347 |
| 7 rs1157494   | 16215613 C | 2.472  | 3.59E-06 chr:7:16237347 |
| 7 rs17150163  | 16301259 T | 3.072  | 3.82E-06 chr:7:16237347 |
| 7 rs13231100  | 15913441 C | 0.4407 | 3.84E-06 chr:7:16237347 |
| 7 rs1295143   | 16304817 G | 2.977  | 3.93E-06 chr:7:16237347 |
| 7 rs1295135   | 16309693 C | 2.966  | 4.54E-06 chr:7:16237347 |
| 7 rs12672042  | 15903782 A | 0.399  | 4.60E-06 chr:7:16237347 |
| 7 rs1295152   | 16299294 G | 2.924  | 4.76E-06 chr:7:16237347 |

|               |            |        |          |                |
|---------------|------------|--------|----------|----------------|
| 7 rs17169117  | 15899201 A | 0.4448 | 4.87E-06 | chr:7:16237347 |
| 7 rs1295131   | 16313584 A | 3.277  | 5.30E-06 | chr:7:16237347 |
| 7 rs73680224  | 15891687 T | 0.4571 | 5.55E-06 | chr:7:16237347 |
| 7 rs7797334   | 15891740 C | 0.4571 | 5.55E-06 | chr:7:16237347 |
| 7 rs10252017  | 16292641 C | 2.894  | 5.84E-06 | chr:7:16237347 |
| 7 rs1295149   | 16301306 G | 2.894  | 5.84E-06 | chr:7:16237347 |
| 7 rs1295162   | 16288849 G | 2.894  | 5.84E-06 | chr:7:16237347 |
| 7 rs1295163   | 16288344 C | 2.894  | 5.84E-06 | chr:7:16237347 |
| 7 rs28837728  | 16292603 G | 2.894  | 5.84E-06 | chr:7:16237347 |
| 7 rs77161903  | 15900456 A | 0.4463 | 5.84E-06 | chr:7:16237347 |
| 7 rs1295139   | 16306492 C | 2.908  | 6.17E-06 | chr:7:16237347 |
| 7 rs111529765 | 15898188 T | 0.4532 | 6.63E-06 | chr:7:16237347 |
| 7 rs13245773  | 16179881 C | 2.096  | 7.17E-06 | chr:7:16237347 |
| 7 rs11978849  | 16012391 T | 0.4738 | 7.42E-06 | chr:7:16237347 |
| 7 rs7787337   | 16014540 G | 0.4738 | 7.42E-06 | chr:7:16237347 |
| 7 rs1295142   | 16305255 T | 2.905  | 7.48E-06 | chr:7:16237347 |
| 7 rs10272175  | 16252115 G | 0.5347 | 7.48E-06 | chr:7:16237347 |
| 7 rs1295136   | 16308583 C | 2.88   | 8.11E-06 | chr:7:16237347 |
| 7 rs79493573  | 15900446 A | 0.4546 | 9.11E-06 | chr:7:16237347 |
| 7 rs1034959   | 16134245 T | 2.037  | 9.62E-06 | chr:7:16237347 |
| 7 rs6960138   | 16132020 A | 2.037  | 9.62E-06 | chr:7:16237347 |
| 7 rs76604057  | 16325075 A | 3.205  | 1.11E-05 | chr:7:16237347 |
| 7 rs11975989  | 16315932 A | 3.092  | 1.11E-05 | chr:7:16237347 |
| 7 rs6461221   | 16108697 C | 2.558  | 1.16E-05 | chr:7:16237347 |
| 7 rs7808453   | 16224829 A | 2.423  | 1.39E-05 | chr:7:16237347 |
| 7 rs9690682   | 15985328 A | 1.843  | 1.43E-05 | chr:7:16237347 |
| 7 rs28379235  | 16129153 T | 2.01   | 1.65E-05 | chr:7:16237347 |
| 7 rs13230369  | 16210683 T | 2.631  | 1.95E-05 | chr:7:16237347 |
| 7 rs2109368   | 16204680 C | 2.631  | 1.95E-05 | chr:7:16237347 |
| 7 rs4721477   | 16204185 A | 2.631  | 1.95E-05 | chr:7:16237347 |
| 7 rs34612021  | 16155673 A | 2.057  | 1.97E-05 | chr:7:16237347 |
| 7 rs62439069  | 15882345 G | 0.4367 | 2.00E-05 | chr:7:16237347 |
| 7 rs61121193  | 15988477 G | 0.4672 | 2.20E-05 | chr:7:16237347 |
| 7 rs1012401   | 16211553 A | 2.615  | 2.22E-05 | chr:7:16237347 |
| 7 rs1012402   | 16211816 A | 2.615  | 2.22E-05 | chr:7:16237347 |
| 7 rs1527204   | 16190428 G | 2.615  | 2.22E-05 | chr:7:16237347 |
| 7 rs79030553  | 16122125 G | 0.1955 | 2.36E-05 | chr:7:16237347 |
| 7 rs1881242   | 16113447 A | 2.26   | 2.45E-05 | chr:7:16237347 |
| 7 rs4382357   | 15996016 G | 0.47   | 2.54E-05 | chr:7:16237347 |
| 7 rs6461236   | 16369586 C | 1.948  | 2.69E-05 | chr:7:16237347 |
| 7 rs6461237   | 16369951 G | 1.948  | 2.69E-05 | chr:7:16237347 |
| 7 rs7784596   | 16370188 G | 1.948  | 2.69E-05 | chr:7:16237347 |
| 7 rs57548226  | 16392103 G | 0.4369 | 2.76E-05 | chr:7:16237347 |

|   |            |          |   |         |          |                |
|---|------------|----------|---|---------|----------|----------------|
| 7 | rs7798339  | 16142246 | A | 2.358   | 2.79E-05 | chr:7:16237347 |
| 8 | rs2172289  | 18663483 | G | 0.08789 | 5.47E-23 | chr:8:18651457 |
| 8 | rs2632849  | 18658425 | G | 0.07246 | 1.28E-22 | chr:8:18651457 |
| 8 | rs2632846  | 18660016 | C | 0.08513 | 4.79E-22 | chr:8:18651457 |
| 8 | rs2638652  | 18665045 | T | 0.08396 | 9.98E-22 | chr:8:18651457 |
| 8 | rs335256   | 18650834 | T | 0.05373 | 1.09E-21 | chr:8:18651457 |
| 8 | rs1487753  | 18665523 | T | 0.08441 | 1.47E-21 | chr:8:18651457 |
| 8 | rs12549858 | 18654478 | A | 0.05529 | 1.91E-21 | chr:8:18651457 |
| 8 | rs13250313 | 18652812 | A | 10.34   | 7.64E-19 | chr:8:18651457 |
| 8 | rs6586762  | 18615706 | C | 0.1336  | 9.68E-19 | chr:8:18651457 |
| 8 | rs2632851  | 18657428 | A | 0.1416  | 1.51E-18 | chr:8:18651457 |
| 8 | rs28696248 | 18656314 | C | 0.01033 | 3.69E-18 | chr:8:18651457 |
| 8 | rs13254153 | 18655330 | C | 8.825   | 3.87E-18 | chr:8:18651457 |
| 8 | rs10111304 | 18650904 | C | 0.136   | 5.69E-18 | chr:8:18651457 |
| 8 | rs77501580 | 18661520 | A | 0.1557  | 5.99E-18 | chr:8:18651457 |
| 8 | rs2632852  | 18656224 | T | 9.699   | 6.44E-18 | chr:8:18651457 |
| 8 | rs78113778 | 18660607 | T | 0.1648  | 1.20E-17 | chr:8:18651457 |
| 8 | rs2129702  | 18656090 | G | 8.296   | 1.25E-17 | chr:8:18651457 |
| 8 | rs60746929 | 18654480 | T | 0.143   | 1.25E-17 | chr:8:18651457 |
| 8 | rs10108047 | 18650597 | T | 8.949   | 1.47E-17 | chr:8:18651457 |
| 8 | rs34650180 | 18633770 | A | 0.1548  | 1.77E-17 | chr:8:18651457 |
| 8 | rs17467874 | 18652744 | C | 0.1462  | 2.61E-17 | chr:8:18651457 |
| 8 | rs11996790 | 18656238 | C | 0.1428  | 2.87E-17 | chr:8:18651457 |
| 8 | rs7841096  | 18632333 | T | 0.1623  | 9.89E-17 | chr:8:18651457 |
| 8 | rs335232   | 18636126 | A | 0.1567  | 1.23E-16 | chr:8:18651457 |
| 8 | rs9644615  | 18630532 | A | 0.1637  | 1.32E-16 | chr:8:18651457 |
| 8 | rs12155629 | 18627775 | A | 0.1659  | 1.46E-16 | chr:8:18651457 |
| 8 | rs2638654  | 18666503 | G | 0.1865  | 4.35E-16 | chr:8:18651457 |
| 8 | rs35809948 | 18647701 | G | 7.079   | 5.57E-16 | chr:8:18651457 |
| 8 | rs73199983 | 18628075 | C | 7.171   | 8.23E-16 | chr:8:18651457 |
| 8 | rs335238   | 18642319 | G | 7.298   | 8.34E-16 | chr:8:18651457 |
| 8 | rs6586764  | 18632093 | T | 0.1691  | 9.92E-16 | chr:8:18651457 |
| 8 | rs28791302 | 18629428 | T | 7.026   | 1.42E-15 | chr:8:18651457 |
| 8 | rs67028998 | 18628162 | A | 7.026   | 1.42E-15 | chr:8:18651457 |
| 8 | rs10100475 | 18642757 | G | 6.951   | 1.42E-15 | chr:8:18651457 |
| 8 | rs6586763  | 18632062 | T | 0.1695  | 1.50E-15 | chr:8:18651457 |
| 8 | rs7831166  | 18639675 | T | 7.408   | 2.04E-15 | chr:8:18651457 |
| 8 | rs13439022 | 18636649 | C | 7.107   | 2.16E-15 | chr:8:18651457 |
| 8 | rs12682382 | 18637762 | G | 7.18    | 2.28E-15 | chr:8:18651457 |
| 8 | rs79054350 | 18657189 | G | 0.1673  | 2.60E-15 | chr:8:18651457 |
| 8 | rs2638656  | 18666839 | G | 0.2023  | 2.76E-15 | chr:8:18651457 |
| 8 | rs56062960 | 18637485 | C | 7.067   | 2.82E-15 | chr:8:18651457 |
| 8 | rs12676642 | 18637208 | C | 7.045   | 2.84E-15 | chr:8:18651457 |

|              |            |          |          |                |
|--------------|------------|----------|----------|----------------|
| 8 rs57557661 | 18637442 C | 7.045    | 2.84E-15 | chr:8:18651457 |
| 8 rs10094591 | 18653299 C | 0.00567  | 2.93E-15 | chr:8:18651457 |
| 8 rs4921958  | 18634096 A | 7.054    | 3.43E-15 | chr:8:18651457 |
| 8 rs11785249 | 18653313 A | 0.007028 | 5.90E-15 | chr:8:18651457 |
| 8 rs2306825  | 18656805 A | 7.774    | 6.44E-15 | chr:8:18651457 |
| 8 rs9644614  | 18630435 T | 0.1892   | 8.40E-15 | chr:8:18651457 |
| 8 rs2638653  | 18666210 A | 0.2292   | 8.72E-15 | chr:8:18651457 |
| 8 rs79655476 | 18630599 A | 0.1777   | 1.11E-14 | chr:8:18651457 |
| 8 rs17127179 | 18632112 T | 6.766    | 1.25E-14 | chr:8:18651457 |
| 8 rs7837572  | 18665140 T | 6.361    | 5.13E-14 | chr:8:18651457 |
| 8 rs12544173 | 18649150 T | 0.176    | 5.51E-14 | chr:8:18651457 |
| 8 rs74515745 | 18651239 C | 0.176    | 5.51E-14 | chr:8:18651457 |
| 8 rs76250284 | 18650036 T | 0.176    | 5.51E-14 | chr:8:18651457 |
| 8 rs77385050 | 18651205 C | 0.176    | 5.51E-14 | chr:8:18651457 |
| 8 rs77898773 | 18650433 A | 0.176    | 5.51E-14 | chr:8:18651457 |
| 8 rs78761786 | 18651135 G | 0.176    | 5.51E-14 | chr:8:18651457 |
| 8 rs1386688  | 18664294 G | 5.952    | 8.40E-14 | chr:8:18651457 |
| 8 rs335234   | 18637444 T | 0.2173   | 1.08E-13 | chr:8:18651457 |
| 8 rs77012668 | 18652911 G | 0.1843   | 1.55E-13 | chr:8:18651457 |
| 8 rs79681521 | 18653369 C | 0.1843   | 1.55E-13 | chr:8:18651457 |
| 8 rs335248   | 18646733 C | 0.2206   | 1.71E-13 | chr:8:18651457 |
| 8 rs75721331 | 18635294 A | 0.187    | 1.90E-13 | chr:8:18651457 |
| 8 rs79574844 | 18635441 G | 0.187    | 1.90E-13 | chr:8:18651457 |
| 8 rs78910759 | 18646968 T | 0.1884   | 2.92E-13 | chr:8:18651457 |
| 8 rs12544519 | 18644914 C | 0.1887   | 3.01E-13 | chr:8:18651457 |
| 8 rs12544522 | 18644951 G | 0.1887   | 3.01E-13 | chr:8:18651457 |
| 8 rs12546737 | 18645009 A | 0.1887   | 3.01E-13 | chr:8:18651457 |
| 8 rs74634795 | 18641819 T | 0.1887   | 3.01E-13 | chr:8:18651457 |
| 8 rs75399248 | 18645940 A | 0.1887   | 3.01E-13 | chr:8:18651457 |
| 8 rs76512351 | 18642252 T | 0.1887   | 3.01E-13 | chr:8:18651457 |
| 8 rs76662971 | 18642879 C | 0.1887   | 3.01E-13 | chr:8:18651457 |
| 8 rs78700717 | 18642861 T | 0.1887   | 3.01E-13 | chr:8:18651457 |
| 8 rs12550694 | 18633172 C | 0.1911   | 3.26E-13 | chr:8:18651457 |
| 8 rs76101588 | 18640126 A | 0.1911   | 3.26E-13 | chr:8:18651457 |
| 8 rs76704985 | 18639176 A | 0.1911   | 3.26E-13 | chr:8:18651457 |
| 8 rs76783307 | 18636930 T | 0.1911   | 3.26E-13 | chr:8:18651457 |
| 8 rs79224377 | 18640335 T | 0.1911   | 3.26E-13 | chr:8:18651457 |
| 8 rs79834494 | 18637190 C | 0.1911   | 3.26E-13 | chr:8:18651457 |
| 8 rs12547605 | 18654292 G | 0.1894   | 3.59E-13 | chr:8:18651457 |
| 8 rs12549839 | 18654362 A | 0.1894   | 3.59E-13 | chr:8:18651457 |
| 8 rs75549661 | 18653689 C | 0.1894   | 3.59E-13 | chr:8:18651457 |
| 8 rs78263509 | 18655506 C | 0.1894   | 3.59E-13 | chr:8:18651457 |
| 8 rs79768913 | 18655545 T | 0.1894   | 3.59E-13 | chr:8:18651457 |

|              |            |          |          |                |
|--------------|------------|----------|----------|----------------|
| 8 rs79441119 | 18632939 G | 4.95     | 5.48E-13 | chr:8:18651457 |
| 8 rs13261634 | 18653020 C | 0.003528 | 6.77E-13 | chr:8:18651457 |
| 8 rs57290482 | 18652460 C | 0.003528 | 6.77E-13 | chr:8:18651457 |
| 8 rs57931874 | 18652499 G | 0.003528 | 6.77E-13 | chr:8:18651457 |
| 8 rs60508084 | 18652637 T | 0.003528 | 6.77E-13 | chr:8:18651457 |
| 8 rs335244   | 18645147 A | 0.2369   | 9.77E-13 | chr:8:18651457 |
| 8 rs11777761 | 18652934 T | 0.004481 | 1.40E-12 | chr:8:18651457 |
| 8 rs17127180 | 18632276 G | 0.2028   | 1.50E-12 | chr:8:18651457 |
| 8 rs10503634 | 18654293 T | 0.004435 | 1.55E-12 | chr:8:18651457 |
| 8 rs10503635 | 18654329 C | 0.004435 | 1.55E-12 | chr:8:18651457 |
| 8 rs11203998 | 18654206 G | 0.004435 | 1.55E-12 | chr:8:18651457 |
| 8 rs10503633 | 18653742 A | 0.004745 | 1.75E-12 | chr:8:18651457 |
| 8 rs79966403 | 18627984 C | 0.2044   | 2.02E-12 | chr:8:18651457 |
| 8 rs7812892  | 18660674 A | 4.898    | 2.56E-12 | chr:8:18651457 |
| 8 rs2172290  | 18668608 G | 0.2679   | 2.69E-12 | chr:8:18651457 |
| 8 rs76591911 | 18630664 C | 0.2066   | 3.11E-12 | chr:8:18651457 |
| 8 rs77944826 | 18629223 C | 0.2066   | 3.11E-12 | chr:8:18651457 |
| 8 rs9644613  | 18628398 G | 0.2085   | 3.17E-12 | chr:8:18651457 |
| 8 rs2638657  | 18669006 A | 0.2532   | 6.66E-12 | chr:8:18651457 |
| 8 rs35764685 | 18661342 A | 5.321    | 8.25E-12 | chr:8:18651457 |
| 8 rs17467958 | 18670645 A | 0.2759   | 8.34E-12 | chr:8:18651457 |
| 8 rs335237   | 18641291 C | 0.2772   | 2.75E-11 | chr:8:18651457 |
| 8 rs2638658  | 18669340 T | 0.2971   | 5.05E-11 | chr:8:18651457 |
| 8 rs10086769 | 18664962 C | 4.638    | 6.47E-11 | chr:8:18651457 |
| 8 rs13256470 | 18626578 G | 3.438    | 7.39E-11 | chr:8:18651457 |
| 8 rs10102692 | 18665202 C | 4.9      | 7.67E-11 | chr:8:18651457 |
| 8 rs73666715 | 18639853 C | 3.778    | 8.90E-11 | chr:8:18651457 |
| 8 rs73666724 | 18662204 A | 4.807    | 1.26E-10 | chr:8:18651457 |
| 8 rs11988686 | 18617442 G | 4.337    | 1.91E-10 | chr:8:18651457 |
| 8 rs13255143 | 18661844 G | 4.224    | 2.02E-10 | chr:8:18651457 |
| 8 rs7014135  | 18623860 G | 4.527    | 3.38E-10 | chr:8:18651457 |
| 8 rs7012188  | 18618272 T | 4.829    | 7.28E-10 | chr:8:18651457 |
| 8 rs4921956  | 18620761 A | 4.798    | 9.10E-10 | chr:8:18651457 |
| 8 rs4921961  | 18638070 T | 3.039    | 1.25E-09 | chr:8:18651457 |
| 8 rs2410595  | 18620703 A | 0.2365   | 1.66E-09 | chr:8:18651457 |
| 8 rs3988321  | 18614241 A | 4.101    | 1.87E-09 | chr:8:18651457 |
| 8 rs11780872 | 18651376 C | 0.001598 | 2.02E-09 | chr:8:18651457 |
| 8 rs11780185 | 18651428 G | 0.001614 | 2.08E-09 | chr:8:18651457 |
| 8 rs1038610  | 18624424 T | 0.3333   | 2.34E-09 | chr:8:18651457 |
| 8 rs1038611  | 18624327 T | 0.3333   | 2.34E-09 | chr:8:18651457 |
| 8 rs11778064 | 18665597 T | 3.267    | 2.69E-09 | chr:8:18651457 |
| 8 rs4320588  | 18615090 A | 4.001    | 3.22E-09 | chr:8:18651457 |
| 8 rs2248631  | 18656601 G | 3.73     | 3.47E-09 | chr:8:18651457 |

|               |            |        |          |                |
|---------------|------------|--------|----------|----------------|
| 8 rs6996801   | 18615696 G | 3.981  | 3.72E-09 | chr:8:18651457 |
| 8 rs55884038  | 18618142 C | 3.951  | 4.49E-09 | chr:8:18651457 |
| 8 rs6994455   | 18618764 G | 3.951  | 4.49E-09 | chr:8:18651457 |
| 8 rs77655497  | 18655199 G | 0.2428 | 4.64E-09 | chr:8:18651457 |
| 8 rs17383361  | 18653137 A | 0.2237 | 4.95E-09 | chr:8:18651457 |
| 8 rs2469946   | 18652623 G | 4.407  | 5.55E-09 | chr:8:18651457 |
| 8 rs78758645  | 18635514 G | 0.2473 | 6.57E-09 | chr:8:18651457 |
| 8 rs140775288 | 18650627 A | 0.2312 | 8.58E-09 | chr:8:18651457 |
| 8 rs76308784  | 18637361 G | 0.2536 | 1.10E-08 | chr:8:18651457 |
| 8 rs76580499  | 18637360 A | 0.2536 | 1.10E-08 | chr:8:18651457 |
| 8 rs111241636 | 18623207 C | 3.718  | 1.16E-08 | chr:8:18651457 |
| 8 rs335223    | 18634002 G | 4.224  | 1.52E-08 | chr:8:18651457 |
| 8 rs335220    | 18634828 A | 4.2    | 1.73E-08 | chr:8:18651457 |
| 8 rs77266718  | 18602547 G | 0.2142 | 2.02E-08 | chr:8:18651457 |
| 8 rs9644567   | 18630471 G | 0.2583 | 2.09E-08 | chr:8:18651457 |
| 8 rs335227    | 18632901 G | 4.035  | 2.38E-08 | chr:8:18651457 |
| 8 rs74538096  | 18643698 G | 0.261  | 2.41E-08 | chr:8:18651457 |
| 8 rs10099535  | 18604754 C | 3.968  | 2.69E-08 | chr:8:18651457 |
| 8 rs335241    | 18642689 G | 4.234  | 3.26E-08 | chr:8:18651457 |
| 8 rs17127243  | 18668828 T | 0.2653 | 3.53E-08 | chr:8:18651457 |
| 8 rs335217    | 18627058 T | 0.3703 | 4.37E-08 | chr:8:18651457 |
| 8 rs10110943  | 18612612 A | 3.249  | 4.47E-08 | chr:8:18651457 |
| 8 rs28447980  | 18606948 T | 3.68   | 6.38E-08 | chr:8:18651457 |
| 8 rs335233    | 18636629 A | 3.995  | 6.86E-08 | chr:8:18651457 |
| 8 rs335239    | 18642504 A | 4.04   | 7.65E-08 | chr:8:18651457 |
| 8 rs17383284  | 18644651 A | 0.252  | 8.31E-08 | chr:8:18651457 |
| 8 rs10107780  | 18606236 T | 3.63   | 8.49E-08 | chr:8:18651457 |
| 8 rs56155524  | 18623489 A | 0.3841 | 1.38E-07 | chr:8:18651457 |
| 8 rs2004292   | 18560133 C | 0.3954 | 1.83E-07 | chr:8:18651457 |
| 8 rs62498293  | 18665861 G | 0.3056 | 2.31E-07 | chr:8:18651457 |
| 8 rs28666704  | 18607201 T | 3.477  | 2.49E-07 | chr:8:18651457 |
| 8 rs335246    | 18645679 C | 3.866  | 2.50E-07 | chr:8:18651457 |
| 8 rs2200620   | 18666972 G | 0.3077 | 2.76E-07 | chr:8:18651457 |
| 8 rs1386689   | 18664022 A | 3.536  | 2.81E-07 | chr:8:18651457 |
| 8 rs335257    | 18650893 A | 0.3005 | 2.85E-07 | chr:8:18651457 |
| 8 rs12547198  | 18657577 G | 3.348  | 3.51E-07 | chr:8:18651457 |
| 8 rs1386693   | 18657328 C | 3.348  | 3.51E-07 | chr:8:18651457 |
| 8 rs2632850   | 18657953 C | 3.348  | 3.51E-07 | chr:8:18651457 |
| 8 rs10111500  | 18607860 T | 3.401  | 3.67E-07 | chr:8:18651457 |
| 8 rs2638655   | 18666674 G | 3.36   | 3.67E-07 | chr:8:18651457 |
| 8 rs1386690   | 18659019 C | 3.3    | 3.83E-07 | chr:8:18651457 |
| 8 rs17383193  | 18618718 G | 0.2271 | 4.13E-07 | chr:8:18651457 |
| 8 rs2632843   | 18661305 G | 3.339  | 4.95E-07 | chr:8:18651457 |



|               |            |        |          |                |
|---------------|------------|--------|----------|----------------|
| 8 rs2632847   | 18659928 A | 3.339  | 4.95E-07 | chr:8:18651457 |
| 8 rs2638646   | 18659765 A | 3.339  | 4.95E-07 | chr:8:18651457 |
| 8 rs2638647   | 18660007 A | 3.339  | 4.95E-07 | chr:8:18651457 |
| 8 rs11994526  | 18659422 C | 0.3197 | 6.05E-07 | chr:8:18651457 |
| 8 rs2638648   | 18660386 T | 3.283  | 6.66E-07 | chr:8:18651457 |
| 8 rs73199966  | 18616606 A | 2.661  | 6.68E-07 | chr:8:18651457 |
| 8 rs2638624   | 18657753 T | 3.224  | 6.78E-07 | chr:8:18651457 |
| 8 rs74525630  | 18612870 A | 2.849  | 6.91E-07 | chr:8:18651457 |
| 8 rs1386691   | 18658929 C | 3.132  | 7.00E-07 | chr:8:18651457 |
| 8 rs75995453  | 18615149 G | 0.3767 | 7.28E-07 | chr:8:18651457 |
| 8 rs76840220  | 18615127 T | 0.3767 | 7.28E-07 | chr:8:18651457 |
| 8 rs77464163  | 18615772 G | 0.3767 | 7.28E-07 | chr:8:18651457 |
| 8 rs77540108  | 18615564 T | 0.3767 | 7.28E-07 | chr:8:18651457 |
| 8 rs78356585  | 18614945 T | 0.3767 | 7.28E-07 | chr:8:18651457 |
| 8 rs79991640  | 18616227 G | 0.3767 | 7.28E-07 | chr:8:18651457 |
| 8 rs11203999  | 18665836 G | 0.3273 | 8.03E-07 | chr:8:18651457 |
| 8 rs2632842   | 18661610 G | 3.19   | 8.83E-07 | chr:8:18651457 |
| 8 rs73199994  | 18646365 T | 0.3339 | 9.27E-07 | chr:8:18651457 |
| 8 rs2468000   | 18659605 G | 3.134  | 9.37E-07 | chr:8:18651457 |
| 8 rs2469947   | 18659475 T | 3.134  | 9.37E-07 | chr:8:18651457 |
| 8 rs2638626   | 18659324 T | 3.134  | 9.37E-07 | chr:8:18651457 |
| 8 rs10102455  | 18668748 G | 0.3295 | 9.49E-07 | chr:8:18651457 |
| 8 rs1386692   | 18658750 A | 2.664  | 9.54E-07 | chr:8:18651457 |
| 8 rs17127165  | 18618715 C | 0.3895 | 1.00E-06 | chr:8:18651457 |
| 8 rs10503636  | 18654794 C | 0.2319 | 1.25E-06 | chr:8:18651457 |
| 8 rs17383368  | 18655746 T | 0.2319 | 1.25E-06 | chr:8:18651457 |
| 8 rs80217485  | 18615389 T | 0.386  | 1.32E-06 | chr:8:18651457 |
| 8 rs2131183   | 18664444 C | 0.397  | 1.39E-06 | chr:8:18651457 |
| 8 rs35884486  | 18656382 C | 0.2421 | 1.49E-06 | chr:8:18651457 |
| 8 rs335229    | 18629927 G | 3.153  | 1.59E-06 | chr:8:18651457 |
| 8 rs73199965  | 18616604 A | 2.522  | 1.84E-06 | chr:8:18651457 |
| 8 rs2410584   | 18602354 C | 0.3467 | 1.89E-06 | chr:8:18651457 |
| 8 rs335230    | 18629753 G | 3.057  | 2.02E-06 | chr:8:18651457 |
| 8 rs111916415 | 18656221 T | 0.2433 | 2.26E-06 | chr:8:18651457 |
| 8 rs1565139   | 18601772 T | 0.352  | 2.50E-06 | chr:8:18651457 |
| 8 rs335228    | 18631439 G | 3.029  | 2.63E-06 | chr:8:18651457 |
| 8 rs2632848   | 18659780 T | 2.523  | 2.79E-06 | chr:8:18651457 |
| 8 rs2632845   | 18660720 C | 2.52   | 2.96E-06 | chr:8:18651457 |
| 8 rs78156521  | 18526487 C | 0.1899 | 3.95E-06 | chr:8:18651457 |
| 8 rs2638625   | 18659269 C | 2.445  | 4.88E-06 | chr:8:18651457 |
| 8 rs79965841  | 18656209 A | 0.2576 | 6.08E-06 | chr:8:18651457 |
| 8 rs1487752   | 18670235 G | 2.673  | 6.38E-06 | chr:8:18651457 |
| 8 rs76959140  | 18620045 G | 0.4151 | 7.16E-06 | chr:8:18651457 |

|               |            |        |          |                |
|---------------|------------|--------|----------|----------------|
| 8 rs2638650   | 18661521 T | 2.663  | 7.43E-06 | chr:8:18651457 |
| 8 rs139041077 | 18649503 T | 0.1938 | 9.10E-06 | chr:8:18651457 |
| 8 rs7822288   | 18632327 A | 0.2792 | 1.11E-05 | chr:8:18651457 |
| 8 rs11203994  | 18629018 T | 0.2876 | 1.47E-05 | chr:8:18651457 |
| 8 rs11783494  | 18628376 G | 0.2876 | 1.47E-05 | chr:8:18651457 |
| 8 rs11787013  | 18628418 T | 0.2876 | 1.47E-05 | chr:8:18651457 |
| 8 rs12155627  | 18627512 A | 0.2876 | 1.47E-05 | chr:8:18651457 |
| 8 rs13276483  | 18628009 A | 0.2876 | 1.47E-05 | chr:8:18651457 |
| 8 rs13277764  | 18630927 T | 0.2876 | 1.47E-05 | chr:8:18651457 |
| 8 rs13282718  | 18625923 T | 0.2876 | 1.47E-05 | chr:8:18651457 |
| 8 rs1982800   | 18624828 A | 0.2876 | 1.47E-05 | chr:8:18651457 |
| 8 rs7844573   | 18632187 C | 0.2876 | 1.47E-05 | chr:8:18651457 |
| 8 rs7845297   | 18632736 T | 2.146  | 1.66E-05 | chr:8:18651457 |
| 8 rs13277215  | 18636688 C | 0.2927 | 1.72E-05 | chr:8:18651457 |
| 8 rs12541534  | 18619195 T | 0.4414 | 1.77E-05 | chr:8:18651457 |
| 8 rs59340787  | 18619917 C | 0.4414 | 1.77E-05 | chr:8:18651457 |
| 8 rs80086996  | 18618523 C | 0.4414 | 1.77E-05 | chr:8:18651457 |
| 8 rs9792200   | 18620279 T | 0.4414 | 1.77E-05 | chr:8:18651457 |
| 8 rs9792380   | 18620234 A | 0.4414 | 1.77E-05 | chr:8:18651457 |
| 8 rs11778698  | 18623718 T | 0.3031 | 2.60E-05 | chr:8:18651457 |
| 8 rs13277370  | 18645191 A | 0.3074 | 2.83E-05 | chr:8:18651457 |
| 8 rs7833606   | 18612464 T | 0.395  | 2.91E-05 | chr:8:18651457 |
| 8 rs13264337  | 18626285 C | 0.3105 | 3.17E-05 | chr:8:18651457 |
| 8 rs7821713   | 18592175 T | 0.4093 | 3.37E-05 | chr:8:18651457 |
| 8 rs77071638  | 18668093 C | 0.26   | 3.71E-05 | chr:8:18651457 |
| 8 rs73199963  | 18616523 A | 0.4499 | 3.73E-05 | chr:8:18651457 |
| 8 rs73199967  | 18616764 T | 0.4499 | 3.73E-05 | chr:8:18651457 |
| 8 rs13258866  | 18614112 T | 0.3131 | 3.76E-05 | chr:8:18651457 |
| 8 rs11783955  | 18630683 G | 0.3109 | 3.79E-05 | chr:8:18651457 |
| 8 rs13251176  | 18543584 G | 0.3829 | 3.84E-05 | chr:8:18651457 |
| 8 rs148494577 | 18608202 T | 0.4554 | 3.90E-05 | chr:8:18651457 |
| 8 rs57199617  | 18606940 T | 0.4554 | 3.90E-05 | chr:8:18651457 |
| 8 rs58121066  | 18606637 T | 0.4554 | 3.90E-05 | chr:8:18651457 |
| 8 rs77481477  | 18612578 C | 0.4554 | 3.90E-05 | chr:8:18651457 |
| 8 rs79216619  | 18606217 C | 0.4554 | 3.90E-05 | chr:8:18651457 |
| 8 rs75313540  | 18634176 A | 0.1814 | 3.94E-05 | chr:8:18651457 |
| 8 rs10503632  | 18625362 G | 0.453  | 4.24E-05 | chr:8:18651457 |
| 8 rs12550683  | 18625902 A | 0.453  | 4.24E-05 | chr:8:18651457 |
| 8 rs73666713  | 18626679 C | 0.453  | 4.24E-05 | chr:8:18651457 |
| 8 rs9792305   | 18623705 A | 0.453  | 4.24E-05 | chr:8:18651457 |
| 8 rs56910862  | 18617156 C | 0.4607 | 4.47E-05 | chr:8:18651457 |
| 8 rs57338100  | 18617010 C | 0.4607 | 4.47E-05 | chr:8:18651457 |
| 8 rs60112605  | 18617110 C | 0.4607 | 4.47E-05 | chr:8:18651457 |

|               |            |        |          |                |
|---------------|------------|--------|----------|----------------|
| 8 rs73199968  | 18617309 T | 0.4607 | 4.47E-05 | chr:8:18651457 |
| 8 rs73199969  | 18617426 C | 0.4607 | 4.47E-05 | chr:8:18651457 |
| 8 rs118055033 | 18637345 C | 0.1451 | 4.57E-05 | chr:8:18651457 |
| 8 rs74937867  | 18639290 A | 0.1451 | 4.57E-05 | chr:8:18651457 |
| 8 rs75500121  | 18634512 T | 0.1451 | 4.57E-05 | chr:8:18651457 |
| 8 rs76776839  | 18642336 T | 0.1451 | 4.57E-05 | chr:8:18651457 |
| 8 rs34456013  | 37049781 A | 84.84  | 5.89E-34 | chr:8:37050885 |
| 8 rs74571086  | 37049958 G | 84.84  | 5.89E-34 | chr:8:37050885 |
| 8 rs4739476   | 37046991 A | 83.66  | 1.08E-33 | chr:8:37050885 |
| 8 rs16875909  | 37043868 T | 96.01  | 2.14E-33 | chr:8:37050885 |
| 8 rs576019    | 37044187 T | 96.01  | 2.14E-33 | chr:8:37050885 |
| 8 rs6988617   | 37042895 A | 96.01  | 2.14E-33 | chr:8:37050885 |
| 8 rs12334605  | 37045753 G | 95.13  | 4.00E-33 | chr:8:37050885 |
| 8 rs12334611  | 37045986 C | 95.13  | 4.00E-33 | chr:8:37050885 |
| 8 rs4739336   | 37043012 A | 120.3  | 2.94E-32 | chr:8:37050885 |
| 8 rs7841889   | 37045176 A | 120.3  | 2.94E-32 | chr:8:37050885 |
| 8 rs6981452   | 37046050 A | 119.8  | 5.34E-32 | chr:8:37050885 |
| 8 rs11985899  | 37083414 C | 190.5  | 6.17E-32 | chr:8:37050885 |
| 8 rs4739484   | 37082138 A | 291.7  | 3.36E-29 | chr:8:37050885 |
| 8 rs2843835   | 37078820 T | 394.9  | 8.16E-27 | chr:8:37050885 |
| 8 rs2843834   | 37078884 T | 452.8  | 2.54E-25 | chr:8:37050885 |
| 8 rs495428    | 37079790 A | 452.8  | 2.54E-25 | chr:8:37050885 |
| 8 rs509011    | 37084128 C | 452.8  | 2.54E-25 | chr:8:37050885 |
| 8 rs525751    | 37080834 A | 452.8  | 2.54E-25 | chr:8:37050885 |
| 8 rs526765    | 37080954 A | 452.8  | 2.54E-25 | chr:8:37050885 |
| 8 rs571788    | 37078413 T | 452.8  | 2.54E-25 | chr:8:37050885 |
| 8 rs575589    | 37077120 A | 455.1  | 2.73E-25 | chr:8:37050885 |
| 8 rs2697894   | 37076650 C | 499    | 2.79E-25 | chr:8:37050885 |
| 8 rs539797    | 37077235 G | 499    | 2.79E-25 | chr:8:37050885 |
| 8 rs571824    | 37077544 G | 499    | 2.79E-25 | chr:8:37050885 |
| 8 rs577113    | 37077012 G | 499    | 2.79E-25 | chr:8:37050885 |
| 8 rs2697887   | 37078928 G | 451.5  | 3.21E-25 | chr:8:37050885 |
| 8 rs473731    | 37082568 G | 451.5  | 3.21E-25 | chr:8:37050885 |
| 8 rs490027    | 37079215 C | 451.5  | 3.21E-25 | chr:8:37050885 |
| 8 rs494545    | 37079696 C | 451.5  | 3.21E-25 | chr:8:37050885 |
| 8 rs543162    | 37078419 C | 451.5  | 3.21E-25 | chr:8:37050885 |
| 8 rs553163    | 37085269 A | 451.5  | 3.21E-25 | chr:8:37050885 |
| 8 rs2843836   | 37076582 T | 498.8  | 3.45E-25 | chr:8:37050885 |
| 8 rs511544    | 37076504 G | 498.8  | 3.45E-25 | chr:8:37050885 |
| 8 rs547855    | 37078106 A | 460.7  | 3.73E-25 | chr:8:37050885 |
| 8 rs4739338   | 37067007 T | 523.7  | 5.13E-25 | chr:8:37050885 |
| 8 rs240522    | 37087609 T | 403.4  | 6.63E-25 | chr:8:37050885 |
| 8 rs240518    | 37085509 C | 386    | 7.61E-25 | chr:8:37050885 |

|               |            |        |          |                |
|---------------|------------|--------|----------|----------------|
| 8 rs240521    | 37086908 A | 386    | 7.61E-25 | chr:8:37050885 |
| 8 rs240523    | 37087732 T | 403.6  | 8.14E-25 | chr:8:37050885 |
| 8 rs240524    | 37088271 T | 409.3  | 9.22E-25 | chr:8:37050885 |
| 8 rs240517    | 37085448 A | 386.2  | 9.44E-25 | chr:8:37050885 |
| 8 rs240519    | 37085713 T | 386.2  | 9.44E-25 | chr:8:37050885 |
| 8 rs240520    | 37086850 T | 386.2  | 9.44E-25 | chr:8:37050885 |
| 8 rs77442378  | 37050480 A | 430.8  | 1.79E-24 | chr:8:37050885 |
| 8 rs117587200 | 37079812 A | 22.51  | 2.40E-22 | chr:8:37050885 |
| 8 rs990711    | 37058871 C | 5.524  | 3.21E-19 | chr:8:37050885 |
| 8 rs4739483   | 37076718 T | 5.278  | 1.64E-18 | chr:8:37050885 |
| 8 rs13279893  | 37057678 C | 4.599  | 1.68E-17 | chr:8:37050885 |
| 8 rs12545061  | 37056695 C | 4.592  | 1.96E-17 | chr:8:37050885 |
| 8 rs4237086   | 37088022 A | 4.567  | 2.21E-17 | chr:8:37050885 |
| 8 rs1850650   | 37065784 G | 4.585  | 2.57E-17 | chr:8:37050885 |
| 8 rs4739477   | 37047490 G | 4.398  | 1.14E-16 | chr:8:37050885 |
| 8 rs7826398   | 37048751 G | 4.398  | 1.14E-16 | chr:8:37050885 |
| 8 rs9642768   | 37046812 C | 4.398  | 1.14E-16 | chr:8:37050885 |
| 8 rs9642765   | 37046467 C | 4.311  | 1.96E-16 | chr:8:37050885 |
| 8 rs9642766   | 37046589 G | 4.311  | 1.96E-16 | chr:8:37050885 |
| 8 rs7840173   | 37049981 G | 4.318  | 3.21E-16 | chr:8:37050885 |
| 8 rs9642715   | 37038245 C | 3.414  | 1.42E-13 | chr:8:37050885 |
| 8 rs567469    | 37064847 A | 0.2799 | 1.59E-10 | chr:8:37050885 |
| 8 rs472223    | 37073040 C | 0.2756 | 1.26E-09 | chr:8:37050885 |
| 8 rs475813    | 37065499 A | 0.2776 | 1.55E-09 | chr:8:37050885 |
| 8 rs516821    | 37070490 A | 0.2776 | 1.55E-09 | chr:8:37050885 |
| 8 rs481015    | 37075475 T | 0.2802 | 1.99E-09 | chr:8:37050885 |
| 8 rs576819    | 37039106 T | 0.2873 | 5.58E-09 | chr:8:37050885 |
| 8 rs567913    | 37042926 A | 0.3041 | 1.32E-08 | chr:8:37050885 |
| 8 rs502356    | 37049066 T | 0.3005 | 1.33E-08 | chr:8:37050885 |
| 8 rs554464    | 37047250 A | 0.3005 | 1.33E-08 | chr:8:37050885 |
| 8 rs557725    | 37048623 A | 0.3005 | 1.33E-08 | chr:8:37050885 |
| 8 rs484465    | 37045840 A | 0.3074 | 1.76E-08 | chr:8:37050885 |
| 8 rs9642767   | 37046802 G | 0.3196 | 3.82E-08 | chr:8:37050885 |
| 8 rs9642769   | 37048234 G | 0.3196 | 3.82E-08 | chr:8:37050885 |
| 8 rs2843837   | 37050143 A | 0.281  | 4.40E-08 | chr:8:37050885 |
| 8 rs529421    | 37038275 A | 0.3198 | 4.41E-08 | chr:8:37050885 |
| 8 rs16886118  | 37032724 A | 2.367  | 9.57E-08 | chr:8:37050885 |
| 8 rs7005136   | 37030919 T | 2.367  | 9.57E-08 | chr:8:37050885 |
| 8 rs11987372  | 37023909 T | 2.324  | 1.44E-07 | chr:8:37050885 |
| 8 rs1475832   | 37018665 C | 2.322  | 1.44E-07 | chr:8:37050885 |
| 8 rs7844049   | 37017773 A | 2.322  | 1.44E-07 | chr:8:37050885 |
| 8 rs12550015  | 37034824 T | 2.162  | 1.54E-07 | chr:8:37050885 |
| 8 rs11987291  | 37023612 G | 2.314  | 1.63E-07 | chr:8:37050885 |

|              |            |        |           |                |
|--------------|------------|--------|-----------|----------------|
| 8 rs7841774  | 37020255 G | 2.314  | 1.63E-07  | chr:8:37050885 |
| 8 rs55673185 | 37008076 C | 2.229  | 5.01E-07  | chr:8:37050885 |
| 8 rs16886043 | 37006731 G | 2.211  | 8.86E-07  | chr:8:37050885 |
| 8 rs55703107 | 37006932 T | 2.211  | 8.86E-07  | chr:8:37050885 |
| 8 rs16886031 | 37005865 C | 2.197  | 1.07E-06  | chr:8:37050885 |
| 8 rs481779   | 37012275 G | 2.087  | 1.26E-06  | chr:8:37050885 |
| 8 rs482732   | 37012177 G | 2.087  | 1.26E-06  | chr:8:37050885 |
| 8 rs508295   | 37013573 A | 0.5228 | 8.49E-06  | chr:8:37050885 |
| 8 rs10504003 | 37128540 G | 0.52   | 1.43E-05  | chr:8:37050885 |
| 8 rs12547095 | 37131170 T | 0.52   | 1.43E-05  | chr:8:37050885 |
| 8 rs1518502  | 37129796 G | 0.52   | 1.43E-05  | chr:8:37050885 |
| 8 rs12549360 | 37135272 A | 0.533  | 3.08E-05  | chr:8:37050885 |
| 8 rs34561112 | 37138328 T | 0.533  | 3.08E-05  | chr:8:37050885 |
| 8 rs7846582  | 37146426 C | 0.5408 | 3.75E-05  | chr:8:37050885 |
| 8 rs11780232 | 37089066 A | 1.899  | 3.80E-05  | chr:8:37050885 |
| 8 rs12155571 | 37147061 C | 0.5441 | 4.37E-05  | chr:8:37050885 |
| 8 rs13254078 | 37146989 G | 0.5441 | 4.37E-05  | chr:8:37050885 |
| 8 rs13272382 | 37132714 G | 0.5398 | 4.45E-05  | chr:8:37050885 |
| 8 rs874270   | 37132184 G | 0.5398 | 4.45E-05  | chr:8:37050885 |
| 8 rs72612125 | 37012403 T | 1.978  | 4.62E-05  | chr:8:37050885 |
| 8 rs7833873  | 37126142 G | 0.5435 | 4.98E-05  | chr:8:37050885 |
| 8 rs482343   | 37014097 C | 1.765  | 6.31E-05  | chr:8:37050885 |
| 8 rs368641   | 37181510 T | 0.4319 | 6.90E-05  | chr:8:37050885 |
| 8 rs1111603  | 37012084 G | 1.747  | 7.94E-05  | chr:8:37050885 |
| 8 rs508635   | 37011661 C | 1.747  | 7.94E-05  | chr:8:37050885 |
| 8 rs517254   | 37007897 A | 1.747  | 7.94E-05  | chr:8:37050885 |
| 8 rs1814907  | 37012025 C | 1.741  | 8.98E-05  | chr:8:37050885 |
| 8 rs367168   | 37181125 T | 0.4426 | 0.0001093 | chr:8:37050885 |
| 8 rs418565   | 37180975 A | 0.4426 | 0.0001093 | chr:8:37050885 |
| 8 rs7846250  | 37181738 T | 0.4426 | 0.0001093 | chr:8:37050885 |

**Table S3: Associations of hiSNPs with polymorphic HERV-K insertions with European super p**

| CHROM | RSID        | POS       | ALT OR | P-VAL  | HERV                      |
|-------|-------------|-----------|--------|--------|---------------------------|
| 10    | rs9418991   | 135362114 | C      | 0.2233 | 3.17E-08 chr:10:135355522 |
| 10    | rs8192780   | 135354125 | T      | 0.2328 | 3.49E-08 chr:10:135355522 |
| 10    | rs1536826   | 135357239 | A      | 0.2205 | 4.00E-08 chr:10:135355522 |
| 10    | rs8192776   | 135348187 | T      | 0.2339 | 4.17E-08 chr:10:135355522 |
| 10    | rs4838771   | 135355007 | C      | 0.2356 | 4.42E-08 chr:10:135355522 |
| 10    | rs915906    | 135343738 | C      | 0.1664 | 6.08E-08 chr:10:135355522 |
| 10    | rs2249694   | 135352153 | A      | 0.2447 | 6.09E-08 chr:10:135355522 |
| 10    | rs2480258   | 135352100 | T      | 0.2453 | 6.29E-08 chr:10:135355522 |
| 10    | rs1854455   | 135354874 | A      | 0.2472 | 7.12E-08 chr:10:135355522 |
| 10    | rs2515642   | 135352013 | C      | 0.2473 | 7.14E-08 chr:10:135355522 |
| 10    | rs10857739  | 135352697 | G      | 0.2488 | 7.48E-08 chr:10:135355522 |
| 10    | rs61868336  | 135350060 | C      | 0.2486 | 7.82E-08 chr:10:135355522 |
| 10    | rs1952467   | 135353499 | T      | 0.2482 | 7.87E-08 chr:10:135355522 |
| 10    | rs2249695   | 135352168 | T      | 0.2482 | 7.87E-08 chr:10:135355522 |
| 10    | rs2480254   | 135352869 | T      | 0.2482 | 7.87E-08 chr:10:135355522 |
| 10    | rs2480259   | 135352076 | A      | 0.2482 | 7.87E-08 chr:10:135355522 |
| 10    | rs2515644   | 135353079 | A      | 0.2482 | 7.87E-08 chr:10:135355522 |
| 10    | rs4240522   | 135355557 | C      | 0.2482 | 7.87E-08 chr:10:135355522 |
| 10    | rs4363513   | 135355534 | A      | 0.2482 | 7.87E-08 chr:10:135355522 |
| 10    | rs4542321   | 135355481 | T      | 0.2482 | 7.87E-08 chr:10:135355522 |
| 10    | rs4615946   | 135355394 | G      | 0.2482 | 7.87E-08 chr:10:135355522 |
| 10    | rs8192781   | 135354251 | T      | 0.2482 | 7.87E-08 chr:10:135355522 |
| 10    | rs4838693   | 135354714 | G      | 0.2491 | 8.61E-08 chr:10:135355522 |
| 10    | rs4512750   | 135358664 | T      | 0.2515 | 1.00E-07 chr:10:135355522 |
| 10    | rs2480256   | 135352514 | A      | 0.2578 | 1.07E-07 chr:10:135355522 |
| 10    | rs2480257   | 135352509 | T      | 0.2578 | 1.07E-07 chr:10:135355522 |
| 10    | rs2987785   | 135365003 | C      | 0.2711 | 1.08E-07 chr:10:135355522 |
| 10    | rs2480255   | 135352855 | T      | 0.2533 | 1.09E-07 chr:10:135355522 |
| 10    | rs1536828   | 135342315 | G      | 0.2561 | 1.20E-07 chr:10:135355522 |
| 10    | rs3020513   | 135364915 | T      | 0.2565 | 1.26E-07 chr:10:135355522 |
| 10    | rs117220052 | 135388573 | A      | 0.2866 | 2.96E-07 chr:10:135355522 |
| 10    | rs2987799   | 135380499 | T      | 0.2713 | 3.03E-07 chr:10:135355522 |
| 10    | rs77382433  | 135389919 | C      | 0.2858 | 3.59E-07 chr:10:135355522 |
| 10    | rs3020501   | 135381592 | C      | 0.2845 | 3.83E-07 chr:10:135355522 |
| 10    | rs2987792   | 135371466 | T      | 0.284  | 4.20E-07 chr:10:135355522 |
| 10    | rs7094588   | 135401586 | G      | 0.3107 | 5.19E-07 chr:10:135355522 |
| 10    | rs7922540   | 135395468 | T      | 0.2875 | 5.22E-07 chr:10:135355522 |
| 10    | rs10857765  | 135394613 | C      | 0.2872 | 5.56E-07 chr:10:135355522 |
| 10    | rs10857768  | 135402703 | G      | 0.2872 | 5.56E-07 chr:10:135355522 |
| 10    | rs10857769  | 135405047 | C      | 0.2872 | 5.56E-07 chr:10:135355522 |
| 10    | rs4335490   | 135402350 | C      | 0.2872 | 5.56E-07 chr:10:135355522 |

|                |             |        |          |                  |
|----------------|-------------|--------|----------|------------------|
| 10 rs6537613   | 135412414 G | 0.2872 | 5.56E-07 | chr:10:135355522 |
| 10 rs7075572   | 135404358 C | 0.2872 | 5.56E-07 | chr:10:135355522 |
| 10 rs9629936   | 135398783 G | 0.2872 | 5.56E-07 | chr:10:135355522 |
| 10 rs9630012   | 135397511 T | 0.2872 | 5.56E-07 | chr:10:135355522 |
| 10 rs9630033   | 135418505 T | 0.2872 | 5.56E-07 | chr:10:135355522 |
| 10 rs61868695  | 135380408 G | 0.2903 | 5.87E-07 | chr:10:135355522 |
| 10 rs61868696  | 135380409 C | 0.2903 | 5.87E-07 | chr:10:135355522 |
| 10 rs61868697  | 135380410 A | 0.2903 | 5.87E-07 | chr:10:135355522 |
| 10 rs11101867  | 135400250 A | 0.2985 | 6.42E-07 | chr:10:135355522 |
| 10 rs11101890  | 135421321 A | 0.2985 | 6.42E-07 | chr:10:135355522 |
| 10 rs4129223   | 135403948 G | 0.2985 | 6.42E-07 | chr:10:135355522 |
| 10 rs4133041   | 135408387 A | 0.2985 | 6.42E-07 | chr:10:135355522 |
| 10 rs4259784   | 135399192 A | 0.2985 | 6.42E-07 | chr:10:135355522 |
| 10 rs4306261   | 135410989 G | 0.2985 | 6.42E-07 | chr:10:135355522 |
| 10 rs4351776   | 135415572 T | 0.2985 | 6.42E-07 | chr:10:135355522 |
| 10 rs4556495   | 135422209 T | 0.2985 | 6.42E-07 | chr:10:135355522 |
| 10 rs7084384   | 135412322 G | 0.2985 | 6.42E-07 | chr:10:135355522 |
| 10 rs7084391   | 135412344 C | 0.2985 | 6.42E-07 | chr:10:135355522 |
| 10 rs7907135   | 135410660 C | 0.2985 | 6.42E-07 | chr:10:135355522 |
| 10 rs7093170   | 135402904 T | 0.2982 | 6.45E-07 | chr:10:135355522 |
| 10 rs11101857  | 135395359 G | 0.315  | 6.64E-07 | chr:10:135355522 |
| 10 rs9629935   | 135398306 C | 0.2979 | 6.85E-07 | chr:10:135355522 |
| 10 rs2987794   | 135378612 G | 0.2999 | 7.33E-07 | chr:10:135355522 |
| 10 rs6537618   | 135435995 A | 0.4374 | 3.65E-06 | chr:10:135355522 |
| 10 rs71484094  | 135432056 G | 0.3954 | 3.89E-06 | chr:10:135355522 |
| 10 rs67322600  | 135432073 C | 0.4217 | 4.29E-06 | chr:10:135355522 |
| 10 rs142168980 | 135389786 C | 0.359  | 4.50E-06 | chr:10:135355522 |
| 10 rs4454678   | 135431118 G | 0.4278 | 4.99E-06 | chr:10:135355522 |
| 10 rs10745303  | 135432865 T | 0.4257 | 5.35E-06 | chr:10:135355522 |
| 10 rs10857779  | 135432982 T | 0.4257 | 5.35E-06 | chr:10:135355522 |
| 10 rs10857780  | 135432988 T | 0.4257 | 5.35E-06 | chr:10:135355522 |
| 10 rs11101900  | 135432003 T | 0.4257 | 5.35E-06 | chr:10:135355522 |
| 10 rs12261676  | 135433091 G | 0.4257 | 5.35E-06 | chr:10:135355522 |
| 10 rs7087703   | 135434565 C | 0.4257 | 5.35E-06 | chr:10:135355522 |
| 10 rs7090051   | 135430810 G | 0.4257 | 5.35E-06 | chr:10:135355522 |
| 10 rs9629943   | 135433387 A | 0.4257 | 5.35E-06 | chr:10:135355522 |
| 10 rs10745304  | 135434988 A | 0.4298 | 5.52E-06 | chr:10:135355522 |
| 10 rs9418996   | 135423910 C | 0.4238 | 5.56E-06 | chr:10:135355522 |
| 10 rs9630042   | 135433765 T | 0.4263 | 5.86E-06 | chr:10:135355522 |
| 10 rs7077457   | 135324370 A | 0.2582 | 5.88E-06 | chr:10:135355522 |
| 10 rs7096203   | 135324505 C | 0.2582 | 5.88E-06 | chr:10:135355522 |
| 10 rs7096321   | 135324536 G | 0.2582 | 5.88E-06 | chr:10:135355522 |
| 10 rs10857778  | 135432974 C | 0.438  | 8.20E-06 | chr:10:135355522 |

|               |             |        |          |                  |
|---------------|-------------|--------|----------|------------------|
| 10 rs8192770  | 135342644 A | 0.2934 | 8.27E-06 | chr:10:135355522 |
| 10 rs10857730 | 135326822 G | 0.2644 | 8.36E-06 | chr:10:135355522 |
| 10 rs9419079  | 135326985 G | 0.2811 | 8.36E-06 | chr:10:135355522 |
| 10 rs4075721  | 135429761 C | 0.4393 | 8.70E-06 | chr:10:135355522 |
| 10 rs4379787  | 135429181 C | 0.4393 | 8.70E-06 | chr:10:135355522 |
| 10 rs7080705  | 135426384 C | 0.4393 | 8.70E-06 | chr:10:135355522 |
| 10 rs10159607 | 135424298 T | 0.438  | 8.98E-06 | chr:10:135355522 |
| 10 rs6537609  | 135323084 G | 0.2683 | 9.34E-06 | chr:10:135355522 |
| 10 rs7083073  | 135322956 A | 0.2683 | 9.34E-06 | chr:10:135355522 |
| 10 rs7092634  | 135322977 A | 0.2683 | 9.34E-06 | chr:10:135355522 |
| 10 rs7911139  | 135323525 C | 0.2683 | 9.34E-06 | chr:10:135355522 |
| 10 rs10857776 | 135428908 G | 0.4374 | 9.35E-06 | chr:10:135355522 |
| 10 rs4450132  | 135427295 T | 0.4374 | 9.35E-06 | chr:10:135355522 |
| 10 rs4463807  | 135425572 G | 0.4374 | 9.35E-06 | chr:10:135355522 |
| 10 rs4589248  | 135429336 T | 0.4374 | 9.35E-06 | chr:10:135355522 |
| 10 rs4628635  | 135430043 T | 0.4374 | 9.35E-06 | chr:10:135355522 |
| 10 rs9630038  | 135429348 G | 0.4374 | 9.35E-06 | chr:10:135355522 |
| 10 rs9418982  | 135320622 C | 0.2955 | 9.74E-06 | chr:10:135355522 |
| 10 rs9418984  | 135322356 G | 0.2955 | 9.74E-06 | chr:10:135355522 |
| 10 rs9419072  | 135310445 G | 0.2976 | 1.06E-05 | chr:10:135355522 |
| 10 rs4528274  | 135429564 G | 0.4399 | 1.07E-05 | chr:10:135355522 |
| 10 rs1854458  | 135313815 G | 0.2972 | 1.08E-05 | chr:10:135355522 |
| 10 rs9418987  | 135324409 A | 0.2981 | 1.09E-05 | chr:10:135355522 |
| 10 rs71484093 | 135432053 C | 0.4185 | 1.10E-05 | chr:10:135355522 |
| 10 rs9629942  | 135430091 C | 0.4407 | 1.10E-05 | chr:10:135355522 |
| 10 rs2026047  | 135329616 C | 0.3017 | 1.18E-05 | chr:10:135355522 |
| 10 rs10776685 | 135327317 C | 0.2748 | 1.32E-05 | chr:10:135355522 |
| 10 rs11815623 | 135329133 G | 0.2748 | 1.32E-05 | chr:10:135355522 |
| 10 rs1581934  | 135327410 T | 0.2748 | 1.32E-05 | chr:10:135355522 |
| 10 rs7095379  | 135328532 A | 0.2748 | 1.32E-05 | chr:10:135355522 |
| 10 rs7095996  | 135328948 A | 0.2748 | 1.32E-05 | chr:10:135355522 |
| 10 rs11101870 | 135402702 T | 0.3205 | 2.33E-05 | chr:10:135355522 |
| 10 rs7916634  | 135435934 C | 0.4122 | 2.86E-05 | chr:10:135355522 |
| 10 rs2070673  | 135340567 A | 0.3284 | 3.12E-05 | chr:10:135355522 |
| 10 rs9418988  | 135327632 C | 0.351  | 3.38E-05 | chr:10:135355522 |
| 10 rs9418990  | 135337966 C | 0.3579 | 4.13E-05 | chr:10:135355522 |
| 10 rs12761234 | 135349914 C | 0.2528 | 4.73E-05 | chr:10:135355522 |
| 10 rs12762259 | 135350365 C | 0.2528 | 4.73E-05 | chr:10:135355522 |
| 10 rs1329149  | 135349801 T | 0.2528 | 4.73E-05 | chr:10:135355522 |
| 10 rs1410897  | 135349537 G | 0.2528 | 4.73E-05 | chr:10:135355522 |
| 10 rs2070676  | 135351137 G | 0.2528 | 4.73E-05 | chr:10:135355522 |
| 10 rs2070677  | 135351174 T | 0.2528 | 4.73E-05 | chr:10:135355522 |
| 10 rs2515641  | 135351362 T | 0.2528 | 4.73E-05 | chr:10:135355522 |



|                |             |        |          |                  |
|----------------|-------------|--------|----------|------------------|
| 10 rs71505853  | 135350332 G | 0.2528 | 4.73E-05 | chr:10:135355522 |
| 10 rs8192777   | 135350871 G | 0.2528 | 4.73E-05 | chr:10:135355522 |
| 10 rs4838687   | 135295396 C | 0.3489 | 5.11E-05 | chr:10:135355522 |
| 10 rs2864985   | 135348757 C | 0.2549 | 5.34E-05 | chr:10:135355522 |
| 10 rs751946    | 135330104 G | 0.2844 | 5.63E-05 | chr:10:135355522 |
| 12 rs6488879   | 124027372 T | 43.25  | 1.07E-22 | chr:12:124066477 |
| 12 rs78072538  | 124074848 T | 46.17  | 1.14E-22 | chr:12:124066477 |
| 12 rs10082874  | 124051951 A | 46.55  | 1.22E-22 | chr:12:124066477 |
| 12 rs111516966 | 124035781 A | 46.55  | 1.22E-22 | chr:12:124066477 |
| 12 rs143130669 | 124046424 T | 46.55  | 1.22E-22 | chr:12:124066477 |
| 12 rs146502362 | 124041729 C | 46.55  | 1.22E-22 | chr:12:124066477 |
| 12 rs188848881 | 124042516 A | 46.55  | 1.22E-22 | chr:12:124066477 |
| 12 rs2458449   | 124053767 C | 46.55  | 1.22E-22 | chr:12:124066477 |
| 12 rs786455    | 124054766 T | 46.55  | 1.22E-22 | chr:12:124066477 |
| 12 rs111790379 | 124022967 T | 42.41  | 1.56E-22 | chr:12:124066477 |
| 12 rs145594864 | 124024519 A | 42.41  | 1.56E-22 | chr:12:124066477 |
| 12 rs28691687  | 124023020 T | 42.41  | 1.56E-22 | chr:12:124066477 |
| 12 rs117887064 | 124074320 T | 45.1   | 1.86E-22 | chr:12:124066477 |
| 12 rs137909390 | 124078791 A | 45.1   | 1.86E-22 | chr:12:124066477 |
| 12 rs141542281 | 124075268 A | 45.1   | 1.86E-22 | chr:12:124066477 |
| 12 rs34099549  | 124085062 A | 45.1   | 1.86E-22 | chr:12:124066477 |
| 12 rs77699179  | 124092437 A | 45.1   | 1.86E-22 | chr:12:124066477 |
| 12 rs74844896  | 124068924 C | 48.29  | 3.93E-22 | chr:12:124066477 |
| 12 rs76100851  | 124067280 T | 48.29  | 3.93E-22 | chr:12:124066477 |
| 12 rs78067009  | 124019231 T | 36.96  | 4.09E-22 | chr:12:124066477 |
| 12 rs11615043  | 124056715 C | 45.66  | 4.76E-22 | chr:12:124066477 |
| 12 rs2048614   | 124011429 T | 28.32  | 1.19E-20 | chr:12:124066477 |
| 12 rs28361405  | 124012714 A | 27.89  | 1.54E-20 | chr:12:124066477 |
| 12 rs79370578  | 124007431 T | 25.33  | 3.63E-20 | chr:12:124066477 |
| 12 rs71458805  | 124017254 G | 20.83  | 6.37E-20 | chr:12:124066477 |
| 12 rs786426    | 124086086 C | 22.99  | 8.59E-20 | chr:12:124066477 |
| 12 rs883503    | 124008897 C | 23.12  | 1.40E-19 | chr:12:124066477 |
| 12 rs10846527  | 124043296 C | 23.01  | 2.31E-19 | chr:12:124066477 |
| 12 rs11572966  | 124134802 T | 22.91  | 3.89E-19 | chr:12:124066477 |
| 12 rs147460725 | 124038535 T | 21.4   | 1.08E-18 | chr:12:124066477 |
| 12 rs28880346  | 124038995 C | 21.4   | 1.08E-18 | chr:12:124066477 |
| 12 rs7314792   | 124036984 G | 137.3  | 4.79E-18 | chr:12:124066477 |
| 12 rs7965466   | 124036188 C | 137.3  | 4.79E-18 | chr:12:124066477 |
| 12 rs11057311  | 124121429 T | 19.14  | 5.49E-18 | chr:12:124066477 |
| 12 rs9697379   | 124005129 A | 17.62  | 8.41E-18 | chr:12:124066477 |
| 12 rs28711456  | 124012763 T | 21.82  | 2.17E-17 | chr:12:124066477 |
| 12 rs4930716   | 124013306 A | 21.82  | 2.17E-17 | chr:12:124066477 |
| 12 rs7313179   | 124009190 T | 19.62  | 2.79E-17 | chr:12:124066477 |

|                |             |       |          |                  |
|----------------|-------------|-------|----------|------------------|
| 12 rs7307227   | 124020098 T | 15.57 | 3.27E-17 | chr:12:124066477 |
| 12 rs884892    | 124097528 G | 32.1  | 8.40E-17 | chr:12:124066477 |
| 12 rs10846531  | 124098612 G | 13.54 | 8.50E-17 | chr:12:124066477 |
| 12 rs2048802   | 124098780 T | 13.54 | 8.50E-17 | chr:12:124066477 |
| 12 rs28454032  | 124034703 G | 44.12 | 9.74E-17 | chr:12:124066477 |
| 12 rs5027860   | 124032819 G | 44.12 | 9.74E-17 | chr:12:124066477 |
| 12 rs3748268   | 124097824 G | 31.25 | 1.10E-16 | chr:12:124066477 |
| 12 rs7965334   | 124036026 C | 42.92 | 1.28E-16 | chr:12:124066477 |
| 12 rs117209788 | 124014251 T | 15.62 | 1.77E-16 | chr:12:124066477 |
| 12 rs143928387 | 124013220 T | 15.62 | 1.77E-16 | chr:12:124066477 |
| 12 rs74996347  | 124086528 G | 196.7 | 1.86E-16 | chr:12:124066477 |
| 12 rs28673982  | 124016464 C | 12.65 | 1.96E-16 | chr:12:124066477 |
| 12 rs112455213 | 124055507 A | 209.8 | 2.10E-16 | chr:12:124066477 |
| 12 rs116716383 | 124055605 G | 209.8 | 2.10E-16 | chr:12:124066477 |
| 12 rs6488881   | 124056441 G | 209.8 | 2.10E-16 | chr:12:124066477 |
| 12 rs11057302  | 124070013 A | 193.8 | 2.34E-16 | chr:12:124066477 |
| 12 rs111507681 | 124088418 T | 193.8 | 2.34E-16 | chr:12:124066477 |
| 12 rs118111778 | 124083600 T | 193.8 | 2.34E-16 | chr:12:124066477 |
| 12 rs143269373 | 124071864 A | 193.8 | 2.34E-16 | chr:12:124066477 |
| 12 rs146539578 | 124071144 T | 193.8 | 2.34E-16 | chr:12:124066477 |
| 12 rs146936648 | 124074744 G | 193.8 | 2.34E-16 | chr:12:124066477 |
| 12 rs61678733  | 124094174 C | 193.8 | 2.34E-16 | chr:12:124066477 |
| 12 rs7301377   | 124076254 T | 193.8 | 2.34E-16 | chr:12:124066477 |
| 12 rs7303554   | 124079920 G | 193.8 | 2.34E-16 | chr:12:124066477 |
| 12 rs73414262  | 124093859 G | 193.8 | 2.34E-16 | chr:12:124066477 |
| 12 rs74643748  | 124075915 T | 193.8 | 2.34E-16 | chr:12:124066477 |
| 12 rs77592647  | 124084160 G | 193.8 | 2.34E-16 | chr:12:124066477 |
| 12 rs77895354  | 124075111 G | 193.8 | 2.34E-16 | chr:12:124066477 |
| 12 rs786428    | 124086998 C | 193.8 | 2.34E-16 | chr:12:124066477 |
| 12 rs786429    | 124087394 T | 193.8 | 2.34E-16 | chr:12:124066477 |
| 12 rs786430    | 124087988 G | 193.8 | 2.34E-16 | chr:12:124066477 |
| 12 rs786431    | 124088366 T | 193.8 | 2.34E-16 | chr:12:124066477 |
| 12 rs786432    | 124088532 T | 193.8 | 2.34E-16 | chr:12:124066477 |
| 12 rs786433    | 124089582 A | 193.8 | 2.34E-16 | chr:12:124066477 |
| 12 rs786434    | 124089793 T | 193.8 | 2.34E-16 | chr:12:124066477 |
| 12 rs786435    | 124090208 G | 193.8 | 2.34E-16 | chr:12:124066477 |
| 12 rs786437    | 124090814 G | 193.8 | 2.34E-16 | chr:12:124066477 |
| 12 rs786438    | 124091218 A | 193.8 | 2.34E-16 | chr:12:124066477 |
| 12 rs786439    | 124091460 G | 193.8 | 2.34E-16 | chr:12:124066477 |
| 12 rs786450    | 124071765 C | 193.8 | 2.34E-16 | chr:12:124066477 |
| 12 rs7970545   | 124085080 G | 193.8 | 2.34E-16 | chr:12:124066477 |
| 12 rs79933835  | 124073911 T | 193.8 | 2.34E-16 | chr:12:124066477 |
| 12 rs952360    | 124076806 C | 193.8 | 2.34E-16 | chr:12:124066477 |

|                |             |       |          |                  |
|----------------|-------------|-------|----------|------------------|
| 12 rs4930715   | 124042949 C | 193.2 | 2.58E-16 | chr:12:124066477 |
| 12 rs7316613   | 124045580 T | 193.2 | 2.58E-16 | chr:12:124066477 |
| 12 rs11057306  | 124097766 G | 180.2 | 3.11E-16 | chr:12:124066477 |
| 12 rs7952920   | 124085011 T | 190.2 | 3.15E-16 | chr:12:124066477 |
| 12 rs61953538  | 124005708 T | 10.78 | 8.86E-16 | chr:12:124066477 |
| 12 rs2063629   | 124006842 C | 10.51 | 1.59E-15 | chr:12:124066477 |
| 12 rs2292500   | 124008073 A | 10.51 | 1.59E-15 | chr:12:124066477 |
| 12 rs9723048   | 124006318 G | 10.51 | 1.59E-15 | chr:12:124066477 |
| 12 rs112002563 | 124077902 T | 22.49 | 4.20E-15 | chr:12:124066477 |
| 12 rs11611540  | 124187606 T | 15.26 | 4.67E-15 | chr:12:124066477 |
| 12 rs147639128 | 124176516 G | 15.26 | 4.67E-15 | chr:12:124066477 |
| 12 rs74936044  | 124177506 C | 15.26 | 4.67E-15 | chr:12:124066477 |
| 12 rs73420364  | 124251160 C | 13.66 | 3.18E-14 | chr:12:124066477 |
| 12 rs7296437   | 124254812 T | 14    | 3.72E-14 | chr:12:124066477 |
| 12 rs7302406   | 124252688 T | 13.23 | 4.35E-14 | chr:12:124066477 |
| 12 rs12817861  | 124046540 T | 6.657 | 4.93E-14 | chr:12:124066477 |
| 12 rs10846528  | 124052985 A | 6.66  | 5.38E-14 | chr:12:124066477 |
| 12 rs2048616   | 124049966 G | 6.66  | 5.38E-14 | chr:12:124066477 |
| 12 rs2458115   | 124053902 T | 6.66  | 5.38E-14 | chr:12:124066477 |
| 12 rs4310694   | 124050760 A | 6.66  | 5.38E-14 | chr:12:124066477 |
| 12 rs786454    | 124055358 C | 6.66  | 5.38E-14 | chr:12:124066477 |
| 12 rs150972482 | 124251463 C | 12.91 | 5.60E-14 | chr:12:124066477 |
| 12 rs76455766  | 124250506 G | 15.42 | 8.19E-14 | chr:12:124066477 |
| 12 rs542038648 | 124086080 A | 11.37 | 8.52E-14 | chr:12:124066477 |
| 12 rs28834793  | 124040064 G | 6.374 | 9.71E-14 | chr:12:124066477 |
| 12 rs7315326   | 124033885 G | 6.363 | 9.88E-14 | chr:12:124066477 |
| 12 rs74322376  | 124251830 A | 14.78 | 1.13E-13 | chr:12:124066477 |
| 12 rs78441107  | 124251942 C | 14.78 | 1.13E-13 | chr:12:124066477 |
| 12 rs111625397 | 124058009 A | 282.7 | 1.17E-13 | chr:12:124066477 |
| 12 rs11610013  | 124069614 A | 282.7 | 1.17E-13 | chr:12:124066477 |
| 12 rs11834369  | 124059546 T | 282.7 | 1.17E-13 | chr:12:124066477 |
| 12 rs11837236  | 124065116 G | 282.7 | 1.17E-13 | chr:12:124066477 |
| 12 rs12099981  | 124065428 C | 282.7 | 1.17E-13 | chr:12:124066477 |
| 12 rs12099986  | 124065978 G | 282.7 | 1.17E-13 | chr:12:124066477 |
| 12 rs138708987 | 124058169 C | 282.7 | 1.17E-13 | chr:12:124066477 |
| 12 rs1877365   | 124061397 T | 282.7 | 1.17E-13 | chr:12:124066477 |
| 12 rs2340691   | 124061421 T | 282.7 | 1.17E-13 | chr:12:124066477 |
| 12 rs78955489  | 124068910 A | 282.7 | 1.17E-13 | chr:12:124066477 |
| 12 rs7954782   | 124064537 G | 282.7 | 1.17E-13 | chr:12:124066477 |
| 12 rs7958153   | 124064998 G | 282.7 | 1.17E-13 | chr:12:124066477 |
| 12 rs7960812   | 124062742 T | 282.7 | 1.17E-13 | chr:12:124066477 |
| 12 rs7968040   | 124058937 A | 282.7 | 1.17E-13 | chr:12:124066477 |
| 12 rs7971779   | 124064918 T | 282.7 | 1.17E-13 | chr:12:124066477 |

|               |             |       |          |                  |
|---------------|-------------|-------|----------|------------------|
| 12 rs7136101  | 124056685 A | 265.5 | 1.55E-13 | chr:12:124066477 |
| 12 rs7301897  | 124250710 G | 12.64 | 1.61E-13 | chr:12:124066477 |
| 12 rs7316847  | 124250893 T | 12.64 | 1.61E-13 | chr:12:124066477 |
| 12 rs76728475 | 124250473 T | 12.64 | 1.61E-13 | chr:12:124066477 |
| 12 rs28752288 | 124020681 A | 7.535 | 3.85E-13 | chr:12:124066477 |
| 12 rs28894691 | 123993839 A | 7.079 | 6.21E-13 | chr:12:124066477 |
| 12 rs11615300 | 124100423 G | 5.532 | 6.99E-13 | chr:12:124066477 |
| 12 rs7959727  | 124022758 G | 5.587 | 8.91E-13 | chr:12:124066477 |
| 12 rs28478308 | 124017569 A | 5.541 | 1.32E-12 | chr:12:124066477 |
| 12 rs28662057 | 124017568 A | 5.425 | 1.70E-12 | chr:12:124066477 |
| 12 rs34996665 | 124134656 T | 5.383 | 1.95E-12 | chr:12:124066477 |
| 12 rs11057298 | 124057112 A | 188.8 | 2.26E-12 | chr:12:124066477 |
| 12 rs11609591 | 124174065 A | 5.155 | 3.26E-12 | chr:12:124066477 |
| 12 rs11614659 | 124167956 T | 5.155 | 3.26E-12 | chr:12:124066477 |
| 12 rs11829958 | 124173005 G | 5.155 | 3.26E-12 | chr:12:124066477 |
| 12 rs12819746 | 124193574 G | 5.155 | 3.26E-12 | chr:12:124066477 |
| 12 rs12825800 | 124193666 C | 5.155 | 3.26E-12 | chr:12:124066477 |
| 12 rs12828633 | 124179620 A | 5.155 | 3.26E-12 | chr:12:124066477 |
| 12 rs35114195 | 124176013 C | 5.155 | 3.26E-12 | chr:12:124066477 |
| 12 rs6488897  | 124195483 C | 5.155 | 3.26E-12 | chr:12:124066477 |
| 12 rs7133199  | 124159185 C | 5.155 | 3.26E-12 | chr:12:124066477 |
| 12 rs7297576  | 124171323 C | 5.155 | 3.26E-12 | chr:12:124066477 |
| 12 rs7298831  | 124172555 T | 5.155 | 3.26E-12 | chr:12:124066477 |
| 12 rs7308862  | 124171151 T | 5.155 | 3.26E-12 | chr:12:124066477 |
| 12 rs7313032  | 124172731 A | 5.155 | 3.26E-12 | chr:12:124066477 |
| 12 rs7313261  | 124166937 A | 5.155 | 3.26E-12 | chr:12:124066477 |
| 12 rs7958693  | 124162750 A | 5.155 | 3.26E-12 | chr:12:124066477 |
| 12 rs7960951  | 124165829 A | 5.155 | 3.26E-12 | chr:12:124066477 |
| 12 rs7964443  | 124166500 C | 5.155 | 3.26E-12 | chr:12:124066477 |
| 12 rs7974279  | 124166411 T | 5.155 | 3.26E-12 | chr:12:124066477 |
| 12 rs7138503  | 124183827 G | 5.155 | 3.58E-12 | chr:12:124066477 |
| 12 rs35158437 | 124160764 T | 5.047 | 3.97E-12 | chr:12:124066477 |
| 12 rs7134074  | 124159885 T | 5.047 | 3.97E-12 | chr:12:124066477 |
| 12 rs7301065  | 124154838 A | 5.047 | 3.97E-12 | chr:12:124066477 |
| 12 rs7306549  | 124156897 G | 5.047 | 3.97E-12 | chr:12:124066477 |
| 12 rs7313140  | 124157188 G | 5.047 | 3.97E-12 | chr:12:124066477 |
| 12 rs11497310 | 123976928 A | 6.283 | 3.98E-12 | chr:12:124066477 |
| 12 rs11522341 | 123988872 T | 6.283 | 3.98E-12 | chr:12:124066477 |
| 12 rs11522342 | 123987503 T | 6.283 | 3.98E-12 | chr:12:124066477 |
| 12 rs28493578 | 123978292 T | 6.283 | 3.98E-12 | chr:12:124066477 |
| 12 rs28703907 | 123975260 T | 6.283 | 3.98E-12 | chr:12:124066477 |
| 12 rs78623288 | 123986771 C | 6.283 | 3.98E-12 | chr:12:124066477 |
| 12 rs9697415  | 123983542 G | 6.283 | 3.98E-12 | chr:12:124066477 |

|                |             |       |          |                  |
|----------------|-------------|-------|----------|------------------|
| 12 rs9697423   | 123988504 A | 6.283 | 3.98E-12 | chr:12:124066477 |
| 12 rs66647364  | 124197280 C | 5.116 | 4.09E-12 | chr:12:124066477 |
| 12 rs7970602   | 124165056 T | 5.158 | 4.17E-12 | chr:12:124066477 |
| 12 rs1057879   | 124013406 A | 5.189 | 5.02E-12 | chr:12:124066477 |
| 12 rs2333831   | 124012316 G | 5.189 | 5.02E-12 | chr:12:124066477 |
| 12 rs28371124  | 124012558 T | 5.189 | 5.02E-12 | chr:12:124066477 |
| 12 rs28430750  | 124012197 G | 5.189 | 5.02E-12 | chr:12:124066477 |
| 12 rs28450070  | 124013120 G | 5.189 | 5.02E-12 | chr:12:124066477 |
| 12 rs28478446  | 124014177 T | 5.189 | 5.02E-12 | chr:12:124066477 |
| 12 rs28497190  | 124012223 T | 5.189 | 5.02E-12 | chr:12:124066477 |
| 12 rs28535055  | 124014073 C | 5.189 | 5.02E-12 | chr:12:124066477 |
| 12 rs28580741  | 124013216 C | 5.189 | 5.02E-12 | chr:12:124066477 |
| 12 rs28605072  | 124011804 G | 5.189 | 5.02E-12 | chr:12:124066477 |
| 12 rs28701527  | 124011923 C | 5.189 | 5.02E-12 | chr:12:124066477 |
| 12 rs28741988  | 124013264 C | 5.189 | 5.02E-12 | chr:12:124066477 |
| 12 rs528420077 | 124190390 G | 19.86 | 6.56E-12 | chr:12:124066477 |
| 12 rs530657685 | 124084061 G | 12.19 | 6.76E-12 | chr:12:124066477 |
| 12 rs10846537  | 124138346 T | 5.014 | 7.04E-12 | chr:12:124066477 |
| 12 rs35649708  | 124151439 G | 4.907 | 8.52E-12 | chr:12:124066477 |
| 12 rs4930708   | 124145697 C | 4.907 | 8.52E-12 | chr:12:124066477 |
| 12 rs1051793   | 124144395 G | 4.904 | 9.08E-12 | chr:12:124066477 |
| 12 rs11507743  | 123941864 T | 5.903 | 9.46E-12 | chr:12:124066477 |
| 12 rs28781570  | 123948106 A | 5.903 | 9.46E-12 | chr:12:124066477 |
| 12 rs61953496  | 123937785 G | 5.903 | 9.46E-12 | chr:12:124066477 |
| 12 rs74838047  | 123938411 G | 5.903 | 9.46E-12 | chr:12:124066477 |
| 12 rs77594973  | 123938416 G | 5.903 | 9.46E-12 | chr:12:124066477 |
| 12 rs7957839   | 123941055 T | 5.903 | 9.46E-12 | chr:12:124066477 |
| 12 rs9330647   | 123945620 T | 5.903 | 9.46E-12 | chr:12:124066477 |
| 12 rs9777715   | 123939131 G | 5.903 | 9.46E-12 | chr:12:124066477 |
| 12 rs9777830   | 123946812 C | 5.903 | 9.46E-12 | chr:12:124066477 |
| 12 rs9803125   | 123942940 G | 5.903 | 9.46E-12 | chr:12:124066477 |
| 12 rs11523309  | 123990909 A | 5.863 | 9.47E-12 | chr:12:124066477 |
| 12 rs9697330   | 123965901 C | 5.884 | 9.74E-12 | chr:12:124066477 |
| 12 rs9723026   | 123987680 A | 5.973 | 1.05E-11 | chr:12:124066477 |
| 12 rs2048615   | 124011285 C | 4.89  | 1.07E-11 | chr:12:124066477 |
| 12 rs9723244   | 123939394 T | 5.857 | 1.16E-11 | chr:12:124066477 |
| 12 rs11516175  | 123934296 C | 5.844 | 1.24E-11 | chr:12:124066477 |
| 12 rs11535679  | 123957640 A | 5.844 | 1.24E-11 | chr:12:124066477 |
| 12 rs908373    | 124113319 G | 5.002 | 1.24E-11 | chr:12:124066477 |
| 12 rs11522343  | 123969828 G | 5.814 | 1.32E-11 | chr:12:124066477 |
| 12 rs67516712  | 124201524 A | 4.879 | 1.54E-11 | chr:12:124066477 |
| 12 rs786441    | 124062743 G | 4.879 | 1.87E-11 | chr:12:124066477 |
| 12 rs28722199  | 123989436 G | 13.42 | 2.04E-11 | chr:12:124066477 |

|                |             |       |          |                  |
|----------------|-------------|-------|----------|------------------|
| 12 rs786443    | 124063891 T | 4.872 | 2.10E-11 | chr:12:124066477 |
| 12 rs786444    | 124065416 T | 4.872 | 2.10E-11 | chr:12:124066477 |
| 12 rs786445    | 124068361 C | 4.872 | 2.10E-11 | chr:12:124066477 |
| 12 rs786447    | 124069667 A | 4.872 | 2.10E-11 | chr:12:124066477 |
| 12 rs4456350   | 124058489 A | 4.871 | 2.26E-11 | chr:12:124066477 |
| 12 rs11516174  | 123934200 C | 5.551 | 2.82E-11 | chr:12:124066477 |
| 12 rs13303358  | 123983753 T | 5.201 | 3.01E-11 | chr:12:124066477 |
| 12 rs28728075  | 123974521 T | 5.201 | 3.01E-11 | chr:12:124066477 |
| 12 rs11522338  | 124004918 C | 4.626 | 4.72E-11 | chr:12:124066477 |
| 12 rs11522339  | 124004948 A | 4.626 | 4.72E-11 | chr:12:124066477 |
| 12 rs28496079  | 124006841 C | 4.626 | 4.72E-11 | chr:12:124066477 |
| 12 rs28707421  | 124010185 T | 4.626 | 4.72E-11 | chr:12:124066477 |
| 12 rs28712858  | 124007762 C | 4.626 | 4.72E-11 | chr:12:124066477 |
| 12 rs7305701   | 124150013 C | 4.538 | 6.29E-11 | chr:12:124066477 |
| 12 rs11516178  | 123969457 T | 4.888 | 8.02E-11 | chr:12:124066477 |
| 12 rs1543075   | 124086448 G | 4.53  | 8.08E-11 | chr:12:124066477 |
| 12 rs1543076   | 124086449 C | 4.53  | 8.08E-11 | chr:12:124066477 |
| 12 rs6551      | 124082240 C | 4.53  | 8.08E-11 | chr:12:124066477 |
| 12 rs786422    | 124083562 G | 4.53  | 8.08E-11 | chr:12:124066477 |
| 12 rs786423    | 124083898 G | 4.53  | 8.08E-11 | chr:12:124066477 |
| 12 rs786448    | 124070214 A | 4.53  | 8.08E-11 | chr:12:124066477 |
| 12 rs4040225   | 124096673 A | 4.533 | 8.20E-11 | chr:12:124066477 |
| 12 rs786425    | 124085502 G | 4.533 | 8.61E-11 | chr:12:124066477 |
| 12 rs11057307  | 124098213 C | 4.53  | 8.63E-11 | chr:12:124066477 |
| 12 rs3748269   | 124099925 C | 4.53  | 8.63E-11 | chr:12:124066477 |
| 12 rs6488883   | 124101347 C | 4.53  | 8.63E-11 | chr:12:124066477 |
| 12 rs7134896   | 124101858 A | 4.53  | 8.63E-11 | chr:12:124066477 |
| 12 rs7302183   | 124104460 G | 4.53  | 8.63E-11 | chr:12:124066477 |
| 12 rs786449    | 124071728 C | 4.529 | 8.72E-11 | chr:12:124066477 |
| 12 rs2017181   | 124117257 G | 4.469 | 1.18E-10 | chr:12:124066477 |
| 12 rs7300147   | 124116833 A | 4.468 | 1.33E-10 | chr:12:124066477 |
| 12 rs2250026   | 124198405 C | 4.353 | 1.68E-10 | chr:12:124066477 |
| 12 rs1515814   | 124108699 A | 4.293 | 2.71E-10 | chr:12:124066477 |
| 12 rs7313628   | 124107015 A | 4.304 | 3.08E-10 | chr:12:124066477 |
| 12 rs11522337  | 124004843 C | 4.163 | 3.65E-10 | chr:12:124066477 |
| 12 rs187708927 | 123937099 G | 16.43 | 3.92E-10 | chr:12:124066477 |
| 12 rs7972413   | 124108296 C | 4.229 | 4.31E-10 | chr:12:124066477 |
| 12 rs7971452   | 124126821 G | 4.186 | 4.48E-10 | chr:12:124066477 |
| 12 rs11057326  | 124148478 T | 4.068 | 4.73E-10 | chr:12:124066477 |
| 12 rs10846540  | 124169093 G | 4.145 | 5.72E-10 | chr:12:124066477 |
| 12 rs10846541  | 124176286 T | 4.145 | 5.72E-10 | chr:12:124066477 |
| 12 rs12813346  | 124201114 G | 4.145 | 5.72E-10 | chr:12:124066477 |
| 12 rs1969272   | 124170293 G | 4.145 | 5.72E-10 | chr:12:124066477 |

|                |             |       |          |                  |
|----------------|-------------|-------|----------|------------------|
| 12 rs2222061   | 124194929 T | 4.145 | 5.72E-10 | chr:12:124066477 |
| 12 rs56176939  | 124184829 G | 4.145 | 5.72E-10 | chr:12:124066477 |
| 12 rs7137946   | 124177289 C | 4.145 | 5.72E-10 | chr:12:124066477 |
| 12 rs7139193   | 124171176 G | 4.145 | 5.72E-10 | chr:12:124066477 |
| 12 rs7301907   | 124172342 C | 4.145 | 5.72E-10 | chr:12:124066477 |
| 12 rs7302449   | 124172746 C | 4.145 | 5.72E-10 | chr:12:124066477 |
| 12 rs7316011   | 124185212 T | 4.145 | 5.72E-10 | chr:12:124066477 |
| 12 rs10846546  | 124187886 G | 4.146 | 5.87E-10 | chr:12:124066477 |
| 12 rs7966867   | 124179417 C | 4.146 | 5.87E-10 | chr:12:124066477 |
| 12 rs7966882   | 124128965 A | 4.124 | 6.02E-10 | chr:12:124066477 |
| 12 rs10846535  | 124130388 G | 4.06  | 7.85E-10 | chr:12:124066477 |
| 12 rs12821219  | 124178290 C | 4.222 | 8.24E-10 | chr:12:124066477 |
| 12 rs786452    | 124057169 C | 4.106 | 1.12E-09 | chr:12:124066477 |
| 12 rs11057320  | 124141362 G | 4.011 | 1.26E-09 | chr:12:124066477 |
| 12 rs11610664  | 124043486 A | 17.85 | 1.44E-09 | chr:12:124066477 |
| 12 rs7135624   | 124147831 G | 3.948 | 1.62E-09 | chr:12:124066477 |
| 12 rs35911711  | 124201087 T | 3.693 | 1.93E-09 | chr:12:124066477 |
| 12 rs12815746  | 124126086 T | 4.007 | 2.42E-09 | chr:12:124066477 |
| 12 rs36018806  | 124114552 A | 3.625 | 3.10E-09 | chr:12:124066477 |
| 12 rs66690784  | 124165677 G | 3.615 | 3.35E-09 | chr:12:124066477 |
| 12 rs1515815   | 124111999 C | 3.619 | 3.46E-09 | chr:12:124066477 |
| 12 rs2222060   | 124194438 G | 3.5   | 3.74E-09 | chr:12:124066477 |
| 12 rs1060637   | 124110122 T | 3.575 | 3.90E-09 | chr:12:124066477 |
| 12 rs1060639   | 124109988 A | 3.575 | 3.90E-09 | chr:12:124066477 |
| 12 rs79739600  | 123949627 G | 4.795 | 4.68E-09 | chr:12:124066477 |
| 12 rs12813758  | 124201294 T | 3.527 | 4.78E-09 | chr:12:124066477 |
| 12 rs137861315 | 124077886 C | 13.05 | 4.86E-09 | chr:12:124066477 |
| 12 rs116907308 | 124094412 C | 12    | 6.65E-09 | chr:12:124066477 |
| 12 rs118095783 | 124105296 A | 12    | 6.65E-09 | chr:12:124066477 |
| 12 rs139817539 | 124095705 G | 12    | 6.65E-09 | chr:12:124066477 |
| 12 rs146415513 | 124023859 A | 12    | 6.65E-09 | chr:12:124066477 |
| 12 rs11572920  | 124119983 A | 3.474 | 6.77E-09 | chr:12:124066477 |
| 12 rs12830927  | 124120991 T | 3.474 | 6.77E-09 | chr:12:124066477 |
| 12 rs114208992 | 124169242 C | 3.455 | 7.97E-09 | chr:12:124066477 |
| 12 rs11612030  | 124188064 T | 3.455 | 7.97E-09 | chr:12:124066477 |
| 12 rs11613632  | 124184065 A | 3.455 | 7.97E-09 | chr:12:124066477 |
| 12 rs11614468  | 124187924 C | 3.455 | 7.97E-09 | chr:12:124066477 |
| 12 rs118004082 | 124169240 T | 3.455 | 7.97E-09 | chr:12:124066477 |
| 12 rs11830462  | 124178665 T | 3.455 | 7.97E-09 | chr:12:124066477 |
| 12 rs11831536  | 124176748 G | 3.455 | 7.97E-09 | chr:12:124066477 |
| 12 rs11833604  | 124176472 A | 3.455 | 7.97E-09 | chr:12:124066477 |
| 12 rs11834492  | 124180011 C | 3.455 | 7.97E-09 | chr:12:124066477 |
| 12 rs11834808  | 124190582 T | 3.455 | 7.97E-09 | chr:12:124066477 |

|               |             |       |          |                  |
|---------------|-------------|-------|----------|------------------|
| 12 rs11837256 | 124190393 T | 3.455 | 7.97E-09 | chr:12:124066477 |
| 12 rs12817757 | 124156487 T | 3.455 | 7.97E-09 | chr:12:124066477 |
| 12 rs12818596 | 124180474 C | 3.455 | 7.97E-09 | chr:12:124066477 |
| 12 rs12821242 | 124178329 A | 3.455 | 7.97E-09 | chr:12:124066477 |
| 12 rs12822546 | 124157247 A | 3.455 | 7.97E-09 | chr:12:124066477 |
| 12 rs12823866 | 124165111 C | 3.455 | 7.97E-09 | chr:12:124066477 |
| 12 rs12824075 | 124157335 T | 3.455 | 7.97E-09 | chr:12:124066477 |
| 12 rs12827074 | 124190836 C | 3.455 | 7.97E-09 | chr:12:124066477 |
| 12 rs12828408 | 124198718 C | 3.455 | 7.97E-09 | chr:12:124066477 |
| 12 rs12829984 | 124172307 T | 3.455 | 7.97E-09 | chr:12:124066477 |
| 12 rs12831081 | 124179739 G | 3.455 | 7.97E-09 | chr:12:124066477 |
| 12 rs2203500  | 124194710 G | 3.455 | 7.97E-09 | chr:12:124066477 |
| 12 rs34586028 | 124187082 C | 3.455 | 7.97E-09 | chr:12:124066477 |
| 12 rs35416308 | 124169461 G | 3.455 | 7.97E-09 | chr:12:124066477 |
| 12 rs35946281 | 124177016 A | 3.455 | 7.97E-09 | chr:12:124066477 |
| 12 rs3817309  | 124198721 T | 3.455 | 7.97E-09 | chr:12:124066477 |
| 12 rs6488890  | 124158971 T | 3.455 | 7.97E-09 | chr:12:124066477 |
| 12 rs6488891  | 124163512 T | 3.455 | 7.97E-09 | chr:12:124066477 |
| 12 rs6488892  | 124171826 C | 3.455 | 7.97E-09 | chr:12:124066477 |
| 12 rs6488893  | 124171903 G | 3.455 | 7.97E-09 | chr:12:124066477 |
| 12 rs6488894  | 124185124 T | 3.455 | 7.97E-09 | chr:12:124066477 |
| 12 rs66471742 | 124199006 A | 3.455 | 7.97E-09 | chr:12:124066477 |
| 12 rs67178535 | 124196299 A | 3.455 | 7.97E-09 | chr:12:124066477 |
| 12 rs7133543  | 124159411 G | 3.455 | 7.97E-09 | chr:12:124066477 |
| 12 rs7135267  | 124199120 C | 3.455 | 7.97E-09 | chr:12:124066477 |
| 12 rs7135660  | 124174234 A | 3.455 | 7.97E-09 | chr:12:124066477 |
| 12 rs71458814 | 124196891 G | 3.455 | 7.97E-09 | chr:12:124066477 |
| 12 rs7298440  | 124181049 T | 3.455 | 7.97E-09 | chr:12:124066477 |
| 12 rs7302649  | 124159766 A | 3.455 | 7.97E-09 | chr:12:124066477 |
| 12 rs7304052  | 124177643 A | 3.455 | 7.97E-09 | chr:12:124066477 |
| 12 rs7304837  | 124177538 T | 3.455 | 7.97E-09 | chr:12:124066477 |
| 12 rs7305838  | 124193471 A | 3.455 | 7.97E-09 | chr:12:124066477 |
| 12 rs7307343  | 124174365 G | 3.455 | 7.97E-09 | chr:12:124066477 |
| 12 rs7309528  | 124171658 T | 3.455 | 7.97E-09 | chr:12:124066477 |
| 12 rs73219037 | 124184482 C | 3.455 | 7.97E-09 | chr:12:124066477 |
| 12 rs7397160  | 124196219 A | 3.455 | 7.97E-09 | chr:12:124066477 |
| 12 rs7397230  | 124182659 G | 3.455 | 7.97E-09 | chr:12:124066477 |
| 12 rs7397930  | 124188581 A | 3.455 | 7.97E-09 | chr:12:124066477 |
| 12 rs7398152  | 124184639 G | 3.455 | 7.97E-09 | chr:12:124066477 |
| 12 rs7398298  | 124192728 T | 3.455 | 7.97E-09 | chr:12:124066477 |
| 12 rs7399224  | 124195856 T | 3.455 | 7.97E-09 | chr:12:124066477 |
| 12 rs7959553  | 124162705 T | 3.455 | 7.97E-09 | chr:12:124066477 |
| 12 rs7963968  | 124166041 C | 3.455 | 7.97E-09 | chr:12:124066477 |



|                |             |       |          |                  |
|----------------|-------------|-------|----------|------------------|
| 12 rs7968029   | 124182120 T | 3.455 | 7.97E-09 | chr:12:124066477 |
| 12 rs7969964   | 124165213 A | 3.455 | 7.97E-09 | chr:12:124066477 |
| 12 rs7973155   | 124185948 G | 3.455 | 7.97E-09 | chr:12:124066477 |
| 12 rs7975119   | 124157674 T | 3.455 | 7.97E-09 | chr:12:124066477 |
| 12 rs7975233   | 124157745 G | 3.455 | 7.97E-09 | chr:12:124066477 |
| 12 rs7978447   | 124158080 G | 3.455 | 7.97E-09 | chr:12:124066477 |
| 12 rs7979528   | 124181820 G | 3.455 | 7.97E-09 | chr:12:124066477 |
| 12 rs113088709 | 124095455 G | 29.23 | 8.41E-09 | chr:12:124066477 |
| 12 rs28769008  | 123948148 T | 4.65  | 8.44E-09 | chr:12:124066477 |
| 12 rs7302788   | 124167021 C | 3.451 | 8.65E-09 | chr:12:124066477 |
| 12 rs142623670 | 124251303 G | 10.21 | 9.20E-09 | chr:12:124066477 |
| 12 rs7308234   | 124183804 T | 3.446 | 9.57E-09 | chr:12:124066477 |
| 12 rs1139320   | 124197099 T | 3.443 | 9.62E-09 | chr:12:124066477 |
| 12 rs113310757 | 124161494 G | 3.396 | 9.74E-09 | chr:12:124066477 |
| 12 rs11611354  | 124153639 T | 3.396 | 9.74E-09 | chr:12:124066477 |
| 12 rs12820195  | 124162047 C | 3.396 | 9.74E-09 | chr:12:124066477 |
| 12 rs34534928  | 124160834 C | 3.396 | 9.74E-09 | chr:12:124066477 |
| 12 rs7138209   | 124157052 A | 3.396 | 9.74E-09 | chr:12:124066477 |
| 12 rs7307008   | 124160021 G | 3.396 | 9.74E-09 | chr:12:124066477 |
| 12 rs7953596   | 124158450 C | 3.396 | 9.74E-09 | chr:12:124066477 |
| 12 rs7953599   | 124158455 C | 3.396 | 9.74E-09 | chr:12:124066477 |
| 12 rs7963498   | 124158502 A | 3.396 | 9.74E-09 | chr:12:124066477 |
| 12 rs7969130   | 124161056 G | 3.396 | 9.74E-09 | chr:12:124066477 |
| 12 rs7969234   | 124161110 G | 3.396 | 9.74E-09 | chr:12:124066477 |
| 12 rs7973695   | 124162477 G | 3.396 | 9.74E-09 | chr:12:124066477 |
| 12 rs7960017   | 124165059 C | 3.455 | 1.01E-08 | chr:12:124066477 |
| 12 rs7310918   | 124174656 C | 3.387 | 1.07E-08 | chr:12:124066477 |
| 12 rs11612479  | 124155526 G | 3.386 | 1.12E-08 | chr:12:124066477 |
| 12 rs12817576  | 124126339 T | 3.404 | 1.25E-08 | chr:12:124066477 |
| 12 rs534202576 | 124190469 T | 17.34 | 1.42E-08 | chr:12:124066477 |
| 12 rs573165835 | 124190464 C | 17.34 | 1.42E-08 | chr:12:124066477 |
| 12 rs11572952  | 124129809 A | 3.354 | 1.65E-08 | chr:12:124066477 |
| 12 rs11612927  | 124131727 C | 3.354 | 1.65E-08 | chr:12:124066477 |
| 12 rs11615162  | 124131929 A | 3.354 | 1.65E-08 | chr:12:124066477 |
| 12 rs111707562 | 124164355 C | 3.333 | 1.72E-08 | chr:12:124066477 |
| 12 rs11614155  | 124167175 T | 3.333 | 1.72E-08 | chr:12:124066477 |
| 12 rs12811354  | 124192415 A | 3.333 | 1.72E-08 | chr:12:124066477 |
| 12 rs12829893  | 124166978 T | 3.333 | 1.72E-08 | chr:12:124066477 |
| 12 rs7133734   | 124196735 C | 3.333 | 1.72E-08 | chr:12:124066477 |
| 12 rs7136939   | 124189657 C | 3.333 | 1.72E-08 | chr:12:124066477 |
| 12 rs143343937 | 124254323 C | 9.144 | 1.89E-08 | chr:12:124066477 |
| 12 rs11834141  | 124150696 C | 3.301 | 2.01E-08 | chr:12:124066477 |
| 12 rs7296804   | 124153863 C | 3.301 | 2.01E-08 | chr:12:124066477 |

|                |             |       |          |                  |
|----------------|-------------|-------|----------|------------------|
| 12 rs35804181  | 124162344 C | 3.279 | 2.10E-08 | chr:12:124066477 |
| 12 rs2333839   | 124216852 T | 3.19  | 3.16E-08 | chr:12:124066477 |
| 12 rs1962020   | 124137485 T | 3.238 | 3.57E-08 | chr:12:124066477 |
| 12 rs6488888   | 124142591 G | 3.238 | 3.57E-08 | chr:12:124066477 |
| 12 rs7294984   | 124141749 G | 3.238 | 3.57E-08 | chr:12:124066477 |
| 12 rs137963709 | 124020685 A | 13.28 | 4.26E-08 | chr:12:124066477 |
| 12 rs11611450  | 124148207 G | 3.185 | 4.33E-08 | chr:12:124066477 |
| 12 rs35900897  | 124148892 G | 3.185 | 4.33E-08 | chr:12:124066477 |
| 12 rs10846549  | 124222687 C | 3.129 | 4.69E-08 | chr:12:124066477 |
| 12 rs2333838   | 124220354 A | 3.118 | 5.64E-08 | chr:12:124066477 |
| 12 rs7398082   | 124225073 A | 3.118 | 5.64E-08 | chr:12:124066477 |
| 12 rs2333834   | 124246004 G | 3.122 | 5.79E-08 | chr:12:124066477 |
| 12 rs2271660   | 124220055 T | 3.105 | 6.54E-08 | chr:12:124066477 |
| 12 rs13303364  | 124006100 G | 3.264 | 6.76E-08 | chr:12:124066477 |
| 12 rs10744162  | 124243707 T | 3.094 | 6.79E-08 | chr:12:124066477 |
| 12 rs111482432 | 124078585 G | 29.9  | 7.25E-08 | chr:12:124066477 |
| 12 rs111601834 | 124116169 G | 29.9  | 7.25E-08 | chr:12:124066477 |
| 12 rs113620982 | 124086656 T | 29.9  | 7.25E-08 | chr:12:124066477 |
| 12 rs114613914 | 124089740 G | 29.9  | 7.25E-08 | chr:12:124066477 |
| 12 rs12099985  | 124065667 C | 29.9  | 7.25E-08 | chr:12:124066477 |
| 12 rs34827093  | 124118248 G | 29.9  | 7.25E-08 | chr:12:124066477 |
| 12 rs3850953   | 124091412 T | 29.9  | 7.25E-08 | chr:12:124066477 |
| 12 rs6488882   | 124056572 T | 29.9  | 7.25E-08 | chr:12:124066477 |
| 12 rs6488886   | 124120205 A | 29.9  | 7.25E-08 | chr:12:124066477 |
| 12 rs7301031   | 124116808 G | 29.9  | 7.25E-08 | chr:12:124066477 |
| 12 rs7306906   | 124100486 A | 29.9  | 7.25E-08 | chr:12:124066477 |
| 12 rs75700739  | 124084424 A | 29.9  | 7.25E-08 | chr:12:124066477 |
| 12 rs78068178  | 124059962 T | 29.9  | 7.25E-08 | chr:12:124066477 |
| 12 rs79606093  | 124111062 A | 29.9  | 7.25E-08 | chr:12:124066477 |
| 12 rs7964934   | 124058639 A | 29.9  | 7.25E-08 | chr:12:124066477 |
| 12 rs7965292   | 124081779 T | 29.9  | 7.25E-08 | chr:12:124066477 |
| 12 rs7973187   | 124068015 C | 29.9  | 7.25E-08 | chr:12:124066477 |
| 12 rs7973689   | 124090655 T | 29.9  | 7.25E-08 | chr:12:124066477 |
| 12 rs79847496  | 124089348 G | 29.9  | 7.25E-08 | chr:12:124066477 |
| 12 rs10744160  | 124225542 A | 3.089 | 7.30E-08 | chr:12:124066477 |
| 12 rs10773033  | 124231368 T | 3.089 | 7.30E-08 | chr:12:124066477 |
| 12 rs10773034  | 124234253 A | 3.089 | 7.30E-08 | chr:12:124066477 |
| 12 rs10846550  | 124222695 T | 3.041 | 9.40E-08 | chr:12:124066477 |
| 12 rs7398372   | 124217688 C | 3.019 | 1.09E-07 | chr:12:124066477 |
| 12 rs7398373   | 124217689 C | 3.019 | 1.09E-07 | chr:12:124066477 |
| 12 rs111687827 | 124051096 C | 22.3  | 1.10E-07 | chr:12:124066477 |
| 12 rs111853781 | 124051065 G | 22.3  | 1.10E-07 | chr:12:124066477 |
| 12 rs112931584 | 124044574 A | 22.3  | 1.10E-07 | chr:12:124066477 |

|                |             |       |          |                  |
|----------------|-------------|-------|----------|------------------|
| 12 rs113254073 | 124052945 A | 22.3  | 1.10E-07 | chr:12:124066477 |
| 12 rs113381757 | 124052913 C | 22.3  | 1.10E-07 | chr:12:124066477 |
| 12 rs11831129  | 124110675 G | 22.3  | 1.10E-07 | chr:12:124066477 |
| 12 rs11832820  | 124047285 C | 22.3  | 1.10E-07 | chr:12:124066477 |
| 12 rs138318001 | 124054104 C | 22.3  | 1.10E-07 | chr:12:124066477 |
| 12 rs145600453 | 124049196 G | 22.3  | 1.10E-07 | chr:12:124066477 |
| 12 rs1983274   | 124049736 A | 22.3  | 1.10E-07 | chr:12:124066477 |
| 12 rs1983275   | 124049759 A | 22.3  | 1.10E-07 | chr:12:124066477 |
| 12 rs6488885   | 124119155 G | 22.3  | 1.10E-07 | chr:12:124066477 |
| 12 rs6488889   | 124144793 C | 22.3  | 1.10E-07 | chr:12:124066477 |
| 12 rs7134190   | 124116483 C | 22.3  | 1.10E-07 | chr:12:124066477 |
| 12 rs7294379   | 124053430 G | 22.3  | 1.10E-07 | chr:12:124066477 |
| 12 rs7297951   | 124053711 C | 22.3  | 1.10E-07 | chr:12:124066477 |
| 12 rs7308408   | 124053542 A | 22.3  | 1.10E-07 | chr:12:124066477 |
| 12 rs73416283  | 124149382 A | 22.3  | 1.10E-07 | chr:12:124066477 |
| 12 rs75468015  | 124054109 C | 22.3  | 1.10E-07 | chr:12:124066477 |
| 12 rs78702455  | 124054015 G | 22.3  | 1.10E-07 | chr:12:124066477 |
| 12 rs7953401   | 124050042 A | 22.3  | 1.10E-07 | chr:12:124066477 |
| 12 rs7968699   | 124052243 A | 22.3  | 1.10E-07 | chr:12:124066477 |
| 12 rs80260318  | 124048074 G | 22.3  | 1.10E-07 | chr:12:124066477 |
| 12 rs1040156   | 124223364 A | 3.03  | 1.13E-07 | chr:12:124066477 |
| 12 rs10732574  | 124219121 A | 3.03  | 1.13E-07 | chr:12:124066477 |
| 12 rs10773031  | 124222909 G | 3.03  | 1.13E-07 | chr:12:124066477 |
| 12 rs10846551  | 124222811 G | 3.03  | 1.13E-07 | chr:12:124066477 |
| 12 rs12580486  | 124224335 T | 3.03  | 1.13E-07 | chr:12:124066477 |
| 12 rs2271661   | 124219910 T | 3.03  | 1.13E-07 | chr:12:124066477 |
| 12 rs2333835   | 124220879 T | 3.03  | 1.13E-07 | chr:12:124066477 |
| 12 rs7295552   | 124223844 T | 3.03  | 1.13E-07 | chr:12:124066477 |
| 12 rs7300721   | 124219595 T | 3.03  | 1.13E-07 | chr:12:124066477 |
| 12 rs7308398   | 124226800 T | 3.03  | 1.13E-07 | chr:12:124066477 |
| 12 rs7399128   | 124225211 G | 3.03  | 1.13E-07 | chr:12:124066477 |
| 12 rs10744161  | 124231355 A | 3.013 | 1.21E-07 | chr:12:124066477 |
| 12 rs10082815  | 124249319 C | 2.992 | 1.26E-07 | chr:12:124066477 |
| 12 rs7397240   | 124217627 A | 3.011 | 1.28E-07 | chr:12:124066477 |
| 12 rs7397745   | 124218026 T | 3.011 | 1.28E-07 | chr:12:124066477 |
| 12 rs7397746   | 124218044 T | 3.011 | 1.28E-07 | chr:12:124066477 |
| 12 rs7398384   | 124217840 C | 3.011 | 1.28E-07 | chr:12:124066477 |
| 12 rs7398641   | 124218102 C | 3.011 | 1.28E-07 | chr:12:124066477 |
| 12 rs2333836   | 124220543 C | 3.022 | 1.28E-07 | chr:12:124066477 |
| 12 rs11573002  | 124144150 T | 27.3  | 1.29E-07 | chr:12:124066477 |
| 12 rs9697536   | 123995023 T | 3.071 | 1.39E-07 | chr:12:124066477 |
| 12 rs7974462   | 124214694 T | 3.003 | 1.41E-07 | chr:12:124066477 |
| 12 rs10734904  | 124204158 T | 3.002 | 1.45E-07 | chr:12:124066477 |

|                |             |       |          |                  |
|----------------|-------------|-------|----------|------------------|
| 12 rs10734908  | 124219036 C | 3.002 | 1.45E-07 | chr:12:124066477 |
| 12 rs10773032  | 124226063 A | 3.002 | 1.45E-07 | chr:12:124066477 |
| 12 rs2333837   | 124220522 C | 3.002 | 1.45E-07 | chr:12:124066477 |
| 12 rs34247974  | 124224211 A | 3.002 | 1.45E-07 | chr:12:124066477 |
| 12 rs7398851   | 124215004 A | 3.002 | 1.45E-07 | chr:12:124066477 |
| 12 rs882563    | 124210549 C | 3.002 | 1.45E-07 | chr:12:124066477 |
| 12 rs9788204   | 124207209 C | 3.002 | 1.45E-07 | chr:12:124066477 |
| 12 rs11610473  | 124149975 G | 3.055 | 1.46E-07 | chr:12:124066477 |
| 12 rs2333828   | 124049030 T | 16.46 | 1.83E-07 | chr:12:124066477 |
| 12 rs7309150   | 124053413 T | 17.65 | 1.91E-07 | chr:12:124066477 |
| 12 rs73420345  | 124234445 C | 22.22 | 2.56E-07 | chr:12:124066477 |
| 12 rs7956769   | 124235890 G | 22.22 | 2.56E-07 | chr:12:124066477 |
| 12 rs111806547 | 124246603 C | 19.12 | 2.87E-07 | chr:12:124066477 |
| 12 rs73420351  | 124246132 A | 19.12 | 2.87E-07 | chr:12:124066477 |
| 12 rs73420355  | 124247212 T | 19.12 | 2.87E-07 | chr:12:124066477 |
| 12 rs79730733  | 124247209 C | 19.12 | 2.87E-07 | chr:12:124066477 |
| 12 rs75169199  | 124217938 T | 21.49 | 2.89E-07 | chr:12:124066477 |
| 12 rs111795621 | 124012981 C | 20.59 | 3.15E-07 | chr:12:124066477 |
| 12 rs113246895 | 124013942 A | 20.59 | 3.15E-07 | chr:12:124066477 |
| 12 rs28711796  | 124008074 C | 20.59 | 3.15E-07 | chr:12:124066477 |
| 12 rs78878823  | 124016535 A | 20.59 | 3.15E-07 | chr:12:124066477 |
| 12 rs7974138   | 124011075 A | 20.59 | 3.15E-07 | chr:12:124066477 |
| 12 rs111260541 | 124226670 A | 25.75 | 3.19E-07 | chr:12:124066477 |
| 12 rs111291425 | 124204277 G | 25.75 | 3.19E-07 | chr:12:124066477 |
| 12 rs111553286 | 124163200 G | 25.75 | 3.19E-07 | chr:12:124066477 |
| 12 rs111768713 | 124234188 G | 25.75 | 3.19E-07 | chr:12:124066477 |
| 12 rs111776710 | 124172499 C | 25.75 | 3.19E-07 | chr:12:124066477 |
| 12 rs111795191 | 124151267 T | 25.75 | 3.19E-07 | chr:12:124066477 |
| 12 rs111858039 | 124164575 T | 25.75 | 3.19E-07 | chr:12:124066477 |
| 12 rs111865336 | 124210872 T | 25.75 | 3.19E-07 | chr:12:124066477 |
| 12 rs111888114 | 124199424 T | 25.75 | 3.19E-07 | chr:12:124066477 |
| 12 rs111942715 | 124180507 T | 25.75 | 3.19E-07 | chr:12:124066477 |
| 12 rs111963801 | 124041781 A | 25.75 | 3.19E-07 | chr:12:124066477 |
| 12 rs112019281 | 124145916 C | 25.75 | 3.19E-07 | chr:12:124066477 |
| 12 rs112095096 | 124215340 G | 25.75 | 3.19E-07 | chr:12:124066477 |
| 12 rs112101306 | 124165079 C | 25.75 | 3.19E-07 | chr:12:124066477 |
| 12 rs112158562 | 124192207 C | 25.75 | 3.19E-07 | chr:12:124066477 |
| 12 rs112237685 | 124137928 T | 25.75 | 3.19E-07 | chr:12:124066477 |
| 12 rs112325438 | 124202498 A | 25.75 | 3.19E-07 | chr:12:124066477 |
| 12 rs112358013 | 124125805 A | 25.75 | 3.19E-07 | chr:12:124066477 |
| 12 rs112482747 | 124196163 C | 25.75 | 3.19E-07 | chr:12:124066477 |
| 12 rs112522115 | 124185161 G | 25.75 | 3.19E-07 | chr:12:124066477 |
| 12 rs112704788 | 124042091 G | 25.75 | 3.19E-07 | chr:12:124066477 |

|                |             |       |          |                  |
|----------------|-------------|-------|----------|------------------|
| 12 rs112713519 | 124208643 C | 25.75 | 3.19E-07 | chr:12:124066477 |
| 12 rs112788090 | 124077754 T | 25.75 | 3.19E-07 | chr:12:124066477 |
| 12 rs112940220 | 124176510 T | 25.75 | 3.19E-07 | chr:12:124066477 |
| 12 rs113038752 | 124220799 A | 25.75 | 3.19E-07 | chr:12:124066477 |
| 12 rs113129322 | 124027872 A | 25.75 | 3.19E-07 | chr:12:124066477 |
| 12 rs113132248 | 124052510 G | 25.75 | 3.19E-07 | chr:12:124066477 |
| 12 rs113146172 | 124196338 A | 25.75 | 3.19E-07 | chr:12:124066477 |
| 12 rs113207719 | 124189779 A | 25.75 | 3.19E-07 | chr:12:124066477 |
| 12 rs113212386 | 124109615 T | 25.75 | 3.19E-07 | chr:12:124066477 |
| 12 rs113349008 | 124175803 T | 25.75 | 3.19E-07 | chr:12:124066477 |
| 12 rs113350030 | 124178820 A | 25.75 | 3.19E-07 | chr:12:124066477 |
| 12 rs113386205 | 124125875 T | 25.75 | 3.19E-07 | chr:12:124066477 |
| 12 rs113421547 | 124234305 A | 25.75 | 3.19E-07 | chr:12:124066477 |
| 12 rs113425875 | 124217119 T | 25.75 | 3.19E-07 | chr:12:124066477 |
| 12 rs113727412 | 124131642 A | 25.75 | 3.19E-07 | chr:12:124066477 |
| 12 rs11572938  | 124125725 C | 25.75 | 3.19E-07 | chr:12:124066477 |
| 12 rs11572956  | 124130802 A | 25.75 | 3.19E-07 | chr:12:124066477 |
| 12 rs11572962  | 124132856 A | 25.75 | 3.19E-07 | chr:12:124066477 |
| 12 rs11573006  | 124144359 C | 25.75 | 3.19E-07 | chr:12:124066477 |
| 12 rs116985162 | 124211857 A | 25.75 | 3.19E-07 | chr:12:124066477 |
| 12 rs117035856 | 124183249 C | 25.75 | 3.19E-07 | chr:12:124066477 |
| 12 rs117647122 | 124051724 T | 25.75 | 3.19E-07 | chr:12:124066477 |
| 12 rs141344174 | 124061093 A | 25.75 | 3.19E-07 | chr:12:124066477 |
| 12 rs146908377 | 124077861 A | 25.75 | 3.19E-07 | chr:12:124066477 |
| 12 rs151281380 | 124222810 A | 25.75 | 3.19E-07 | chr:12:124066477 |
| 12 rs17881657  | 124092033 C | 25.75 | 3.19E-07 | chr:12:124066477 |
| 12 rs28743126  | 124028131 A | 25.75 | 3.19E-07 | chr:12:124066477 |
| 12 rs4534668   | 124029746 C | 25.75 | 3.19E-07 | chr:12:124066477 |
| 12 rs60577371  | 124158076 A | 25.75 | 3.19E-07 | chr:12:124066477 |
| 12 rs7310965   | 124245814 G | 25.75 | 3.19E-07 | chr:12:124066477 |
| 12 rs73416265  | 124138060 A | 25.75 | 3.19E-07 | chr:12:124066477 |
| 12 rs73416269  | 124142705 G | 25.75 | 3.19E-07 | chr:12:124066477 |
| 12 rs73416277  | 124145822 G | 25.75 | 3.19E-07 | chr:12:124066477 |
| 12 rs73418103  | 124156838 A | 25.75 | 3.19E-07 | chr:12:124066477 |
| 12 rs73418107  | 124157091 C | 25.75 | 3.19E-07 | chr:12:124066477 |
| 12 rs73418114  | 124159484 T | 25.75 | 3.19E-07 | chr:12:124066477 |
| 12 rs73418167  | 124179928 A | 25.75 | 3.19E-07 | chr:12:124066477 |
| 12 rs73418179  | 124188103 T | 25.75 | 3.19E-07 | chr:12:124066477 |
| 12 rs74691387  | 124224357 C | 25.75 | 3.19E-07 | chr:12:124066477 |
| 12 rs77114115  | 124096588 G | 25.75 | 3.19E-07 | chr:12:124066477 |
| 12 rs77765053  | 124245456 A | 25.75 | 3.19E-07 | chr:12:124066477 |
| 12 rs77804131  | 124175086 T | 25.75 | 3.19E-07 | chr:12:124066477 |
| 12 rs77988284  | 124225324 T | 25.75 | 3.19E-07 | chr:12:124066477 |

|                |             |       |          |                  |
|----------------|-------------|-------|----------|------------------|
| 12 rs78856277  | 124208524 A | 25.75 | 3.19E-07 | chr:12:124066477 |
| 12 rs79138426  | 124204768 G | 25.75 | 3.19E-07 | chr:12:124066477 |
| 12 rs79296492  | 124083306 G | 25.75 | 3.19E-07 | chr:12:124066477 |
| 12 rs76791219  | 124281322 C | 4.208 | 3.28E-07 | chr:12:124066477 |
| 12 rs7980049   | 124291534 C | 4.208 | 3.28E-07 | chr:12:124066477 |
| 12 rs115704331 | 124272935 G | 15.83 | 4.24E-07 | chr:12:124066477 |
| 12 rs140413050 | 124272116 G | 15.83 | 4.24E-07 | chr:12:124066477 |
| 12 rs149109213 | 124267109 T | 15.83 | 4.24E-07 | chr:12:124066477 |
| 12 rs78301653  | 124293413 A | 15.83 | 4.24E-07 | chr:12:124066477 |
| 12 rs11837257  | 124190394 C | 2.968 | 5.05E-07 | chr:12:124066477 |
| 12 rs111421584 | 124147473 G | 19.38 | 5.33E-07 | chr:12:124066477 |
| 12 rs112183155 | 124123436 A | 19.38 | 5.33E-07 | chr:12:124066477 |
| 12 rs112298489 | 124042646 C | 19.38 | 5.33E-07 | chr:12:124066477 |
| 12 rs112368000 | 124126470 A | 19.38 | 5.33E-07 | chr:12:124066477 |
| 12 rs112525270 | 124192672 C | 19.38 | 5.33E-07 | chr:12:124066477 |
| 12 rs112581027 | 124151981 G | 19.38 | 5.33E-07 | chr:12:124066477 |
| 12 rs112955959 | 124185126 T | 19.38 | 5.33E-07 | chr:12:124066477 |
| 12 rs113035936 | 124153130 T | 19.38 | 5.33E-07 | chr:12:124066477 |
| 12 rs113175793 | 124123477 A | 19.38 | 5.33E-07 | chr:12:124066477 |
| 12 rs113292231 | 124192347 T | 19.38 | 5.33E-07 | chr:12:124066477 |
| 12 rs113613042 | 124163027 A | 19.38 | 5.33E-07 | chr:12:124066477 |
| 12 rs113638879 | 124164895 A | 19.38 | 5.33E-07 | chr:12:124066477 |
| 12 rs11572928  | 124122663 G | 19.38 | 5.33E-07 | chr:12:124066477 |
| 12 rs11572929  | 124122937 C | 19.38 | 5.33E-07 | chr:12:124066477 |
| 12 rs11572931  | 124123070 A | 19.38 | 5.33E-07 | chr:12:124066477 |
| 12 rs11572992  | 124141383 T | 19.38 | 5.33E-07 | chr:12:124066477 |
| 12 rs11573005  | 124144279 C | 19.38 | 5.33E-07 | chr:12:124066477 |
| 12 rs142599916 | 124214892 G | 19.38 | 5.33E-07 | chr:12:124066477 |
| 12 rs1568031   | 124136607 T | 19.38 | 5.33E-07 | chr:12:124066477 |
| 12 rs1913847   | 124151770 T | 19.38 | 5.33E-07 | chr:12:124066477 |
| 12 rs28627432  | 124029137 C | 19.38 | 5.33E-07 | chr:12:124066477 |
| 12 rs35917561  | 124041472 T | 19.38 | 5.33E-07 | chr:12:124066477 |
| 12 rs56816130  | 124183058 T | 19.38 | 5.33E-07 | chr:12:124066477 |
| 12 rs58680194  | 124190648 A | 19.38 | 5.33E-07 | chr:12:124066477 |
| 12 rs59279556  | 124128077 G | 19.38 | 5.33E-07 | chr:12:124066477 |
| 12 rs60422010  | 124169010 T | 19.38 | 5.33E-07 | chr:12:124066477 |
| 12 rs61082817  | 124185855 A | 19.38 | 5.33E-07 | chr:12:124066477 |
| 12 rs73416299  | 124156050 T | 19.38 | 5.33E-07 | chr:12:124066477 |
| 12 rs73416301  | 124156637 T | 19.38 | 5.33E-07 | chr:12:124066477 |
| 12 rs73418104  | 124156914 A | 19.38 | 5.33E-07 | chr:12:124066477 |
| 12 rs73418125  | 124162960 C | 19.38 | 5.33E-07 | chr:12:124066477 |
| 12 rs73418139  | 124168543 C | 19.38 | 5.33E-07 | chr:12:124066477 |
| 12 rs73418153  | 124172706 G | 19.38 | 5.33E-07 | chr:12:124066477 |

|                |             |       |          |                  |
|----------------|-------------|-------|----------|------------------|
| 12 rs117988962 | 124156809 A | 13.57 | 5.59E-07 | chr:12:124066477 |
| 12 rs57623425  | 124209770 T | 16.82 | 6.04E-07 | chr:12:124066477 |
| 12 rs58507743  | 124208285 T | 16.82 | 6.04E-07 | chr:12:124066477 |
| 12 rs59827616  | 124209778 T | 16.82 | 6.04E-07 | chr:12:124066477 |
| 12 rs74713228  | 124207471 T | 16.82 | 6.04E-07 | chr:12:124066477 |
| 12 rs73416298  | 124154446 C | 16.02 | 6.71E-07 | chr:12:124066477 |
| 12 rs56862679  | 124241591 C | 15.3  | 6.80E-07 | chr:12:124066477 |
| 12 rs11497308  | 123990848 T | 2.829 | 7.76E-07 | chr:12:124066477 |
| 12 rs146184147 | 124196604 A | 3.021 | 8.58E-07 | chr:12:124066477 |
| 12 rs117336016 | 124196606 A | 3.015 | 9.23E-07 | chr:12:124066477 |
| 12 rs116950396 | 124210007 C | 5.827 | 1.06E-06 | chr:12:124066477 |
| 12 rs116957652 | 124216482 A | 5.827 | 1.06E-06 | chr:12:124066477 |
| 12 rs144866718 | 124202041 A | 5.827 | 1.06E-06 | chr:12:124066477 |
| 12 rs17883456  | 124241506 T | 5.827 | 1.06E-06 | chr:12:124066477 |
| 12 rs112751206 | 124231327 G | 23.1  | 1.09E-06 | chr:12:124066477 |
| 12 rs4078291   | 123975585 C | 2.798 | 1.12E-06 | chr:12:124066477 |
| 12 rs9697616   | 123976861 C | 2.798 | 1.12E-06 | chr:12:124066477 |
| 12 rs11560820  | 123966973 A | 2.788 | 1.15E-06 | chr:12:124066477 |
| 12 rs9697264   | 123983941 A | 2.794 | 1.19E-06 | chr:12:124066477 |
| 12 rs12827680  | 124240645 A | 2.937 | 1.35E-06 | chr:12:124066477 |
| 12 rs9777754   | 123960474 A | 2.804 | 1.42E-06 | chr:12:124066477 |
| 12 rs34031619  | 123965988 C | 2.714 | 1.72E-06 | chr:12:124066477 |
| 12 rs75844860  | 124295677 A | 3.723 | 1.81E-06 | chr:12:124066477 |
| 12 rs78883615  | 124296519 A | 3.723 | 1.81E-06 | chr:12:124066477 |
| 12 rs6488901   | 124205009 C | 2.686 | 1.81E-06 | chr:12:124066477 |
| 12 rs11572968  | 124135800 T | 19.95 | 2.08E-06 | chr:12:124066477 |
| 12 rs74437961  | 124215126 T | 19.95 | 2.08E-06 | chr:12:124066477 |
| 12 rs77365219  | 124358816 G | 12.61 | 2.10E-06 | chr:12:124066477 |
| 12 rs9777813   | 123962482 C | 2.685 | 2.25E-06 | chr:12:124066477 |
| 12 rs11497313  | 123962437 A | 2.663 | 2.84E-06 | chr:12:124066477 |
| 12 rs141885705 | 124040561 C | 11.88 | 3.23E-06 | chr:12:124066477 |
| 12 rs11516176  | 123936016 C | 2.639 | 3.49E-06 | chr:12:124066477 |
| 12 rs28829651  | 123936900 G | 2.639 | 3.49E-06 | chr:12:124066477 |
| 12 rs35322317  | 123937147 C | 2.639 | 3.49E-06 | chr:12:124066477 |
| 12 rs9778112   | 123951474 C | 2.649 | 3.56E-06 | chr:12:124066477 |
| 12 rs11534428  | 123938488 A | 2.636 | 3.70E-06 | chr:12:124066477 |
| 12 rs11559494  | 123938353 T | 2.636 | 3.70E-06 | chr:12:124066477 |
| 12 rs4479070   | 123938954 T | 2.636 | 3.70E-06 | chr:12:124066477 |
| 12 rs7975636   | 123943673 C | 2.636 | 3.70E-06 | chr:12:124066477 |
| 12 rs6606747   | 123949588 C | 2.643 | 3.89E-06 | chr:12:124066477 |
| 12 rs78405445  | 124253095 C | 20.74 | 3.97E-06 | chr:12:124066477 |
| 12 rs7976110   | 124249818 A | 2.634 | 4.67E-06 | chr:12:124066477 |
| 12 rs3087496   | 123956749 A | 2.589 | 5.32E-06 | chr:12:124066477 |

|                |             |       |          |                  |
|----------------|-------------|-------|----------|------------------|
| 12 rs11522340  | 123958937 C | 2.576 | 5.59E-06 | chr:12:124066477 |
| 12 rs9723046   | 123959092 G | 2.576 | 5.59E-06 | chr:12:124066477 |
| 12 rs117478677 | 124326587 C | 14.47 | 6.08E-06 | chr:12:124066477 |
| 12 rs11507744  | 123955845 C | 2.564 | 6.71E-06 | chr:12:124066477 |
| 12 rs11497312  | 123962721 T | 2.606 | 6.87E-06 | chr:12:124066477 |
| 12 rs117222175 | 124244936 T | 11.86 | 7.06E-06 | chr:12:124066477 |
| 12 rs112823641 | 124292928 G | 5.662 | 7.17E-06 | chr:12:124066477 |
| 12 rs11834698  | 124261929 G | 5.449 | 9.92E-06 | chr:12:124066477 |
| 12 rs12099921  | 124289144 A | 5.449 | 9.92E-06 | chr:12:124066477 |
| 12 rs36085880  | 124263740 A | 5.449 | 9.92E-06 | chr:12:124066477 |
| 12 rs80041527  | 124288212 T | 5.449 | 9.92E-06 | chr:12:124066477 |
| 12 rs10773029  | 124219000 G | 2.437 | 1.29E-05 | chr:12:124066477 |
| 12 rs73418174  | 124186925 C | 7.481 | 1.42E-05 | chr:12:124066477 |
| 12 rs59224630  | 124003622 G | 2.443 | 1.49E-05 | chr:12:124066477 |
| 12 rs11057352  | 124262249 G | 2.508 | 1.50E-05 | chr:12:124066477 |
| 12 rs11526043  | 123971491 G | 2.49  | 1.52E-05 | chr:12:124066477 |
| 12 rs118025830 | 124439296 C | 14.66 | 2.10E-05 | chr:12:124066477 |
| 12 rs117388497 | 123801305 G | 4.876 | 2.35E-05 | chr:12:124066477 |
| 12 rs10846557  | 124265053 T | 2.444 | 2.48E-05 | chr:12:124066477 |
| 12 rs539447252 | 124216137 T | 16.86 | 2.57E-05 | chr:12:124066477 |
| 12 rs558454491 | 124216138 G | 16.86 | 2.57E-05 | chr:12:124066477 |
| 12 rs75889421  | 124298787 G | 3.214 | 2.65E-05 | chr:12:124066477 |
| 12 rs78440621  | 124302210 C | 3.214 | 2.65E-05 | chr:12:124066477 |
| 12 rs10846558  | 124269573 T | 2.408 | 2.91E-05 | chr:12:124066477 |
| 12 rs11057357  | 124270939 A | 2.408 | 2.91E-05 | chr:12:124066477 |
| 12 rs11182294  | 44231539 T  | 80.57 | 2.87E-23 | chr:12:44313657  |
| 12 rs1675760   | 44282981 G  | 93.38 | 3.29E-23 | chr:12:44313657  |
| 12 rs1675786   | 44292760 C  | 93.38 | 3.29E-23 | chr:12:44313657  |
| 12 rs1675791   | 44290267 G  | 93.38 | 3.29E-23 | chr:12:44313657  |
| 12 rs1731422   | 44276369 G  | 93.38 | 3.29E-23 | chr:12:44313657  |
| 12 rs1731425   | 44282630 T  | 93.38 | 3.29E-23 | chr:12:44313657  |
| 12 rs73098836  | 44286253 A  | 93.38 | 3.29E-23 | chr:12:44313657  |
| 12 rs7957146   | 44306759 G  | 93.38 | 3.29E-23 | chr:12:44313657  |
| 12 rs7958314   | 44302430 T  | 93.38 | 3.29E-23 | chr:12:44313657  |
| 12 rs7966024   | 44297013 G  | 93.38 | 3.29E-23 | chr:12:44313657  |
| 12 rs4238092   | 44315762 C  | 237.5 | 7.22E-23 | chr:12:44313657  |
| 12 rs11182326  | 44310333 G  | 268.1 | 1.63E-22 | chr:12:44313657  |
| 12 rs11182328  | 44311277 G  | 268.1 | 1.63E-22 | chr:12:44313657  |
| 12 rs11182345  | 44347202 C  | 268.1 | 1.63E-22 | chr:12:44313657  |
| 12 rs11829881  | 44322395 G  | 268.1 | 1.63E-22 | chr:12:44313657  |
| 12 rs12301015  | 44321160 T  | 268.1 | 1.63E-22 | chr:12:44313657  |
| 12 rs12303804  | 44340018 A  | 268.1 | 1.63E-22 | chr:12:44313657  |
| 12 rs12309681  | 44343202 T  | 268.1 | 1.63E-22 | chr:12:44313657  |



|                |            |       |          |                 |
|----------------|------------|-------|----------|-----------------|
| 12 rs12315094  | 44345773 A | 268.1 | 1.63E-22 | chr:12:44313657 |
| 12 rs7969641   | 44310268 T | 268.1 | 1.63E-22 | chr:12:44313657 |
| 12 rs10736017  | 44300037 A | 43.88 | 7.60E-22 | chr:12:44313657 |
| 12 rs1731421   | 44285207 A | 43.88 | 7.60E-22 | chr:12:44313657 |
| 12 rs1731427   | 44281449 T | 43.88 | 7.60E-22 | chr:12:44313657 |
| 12 rs1731429   | 44280899 T | 43.88 | 7.60E-22 | chr:12:44313657 |
| 12 rs1731447   | 44289250 A | 43.88 | 7.60E-22 | chr:12:44313657 |
| 12 rs2614394   | 44282166 A | 43.88 | 7.60E-22 | chr:12:44313657 |
| 12 rs4238090   | 44299833 T | 43.88 | 7.60E-22 | chr:12:44313657 |
| 12 rs4354753   | 44293620 G | 43.88 | 7.60E-22 | chr:12:44313657 |
| 12 rs4768052   | 44308910 T | 43.88 | 7.60E-22 | chr:12:44313657 |
| 12 rs4768534   | 44298821 T | 43.88 | 7.60E-22 | chr:12:44313657 |
| 12 rs7979391   | 44295117 G | 43.88 | 7.60E-22 | chr:12:44313657 |
| 12 rs7961078   | 44306167 A | 42.19 | 1.15E-21 | chr:12:44313657 |
| 12 rs11182332  | 44317599 A | 63.64 | 2.23E-21 | chr:12:44313657 |
| 12 rs73085705  | 44345490 T | 63.64 | 2.23E-21 | chr:12:44313657 |
| 12 rs7315408   | 44308709 C | 62.39 | 5.35E-21 | chr:12:44313657 |
| 12 rs7979369   | 44242657 G | 62.39 | 5.35E-21 | chr:12:44313657 |
| 12 rs10880574  | 44235427 G | 53.21 | 5.56E-21 | chr:12:44313657 |
| 12 rs61290421  | 44234529 T | 53.21 | 5.56E-21 | chr:12:44313657 |
| 12 rs73096923  | 44236408 T | 53.21 | 5.56E-21 | chr:12:44313657 |
| 12 rs10785467  | 44309433 T | 97.32 | 7.11E-21 | chr:12:44313657 |
| 12 rs11182287  | 44218539 C | 41.54 | 8.87E-21 | chr:12:44313657 |
| 12 rs1675775   | 44265524 A | 28.27 | 1.29E-20 | chr:12:44313657 |
| 12 rs1731441   | 44265523 G | 28.27 | 1.29E-20 | chr:12:44313657 |
| 12 rs1731449   | 44244877 T | 28.27 | 1.29E-20 | chr:12:44313657 |
| 12 rs1731453   | 44250528 G | 28.27 | 1.29E-20 | chr:12:44313657 |
| 12 rs7965635   | 44238903 A | 28.27 | 1.29E-20 | chr:12:44313657 |
| 12 rs10082995  | 44232340 T | 28.02 | 2.11E-20 | chr:12:44313657 |
| 12 rs2699992   | 44278013 C | 27.58 | 2.19E-20 | chr:12:44313657 |
| 12 rs10880580  | 44297492 G | 35.23 | 2.20E-20 | chr:12:44313657 |
| 12 rs149139340 | 44304397 T | 50.41 | 2.85E-20 | chr:12:44313657 |
| 12 rs7953229   | 44239350 T | 27.24 | 2.97E-20 | chr:12:44313657 |
| 12 rs12318365  | 44352760 T | 118.2 | 3.44E-20 | chr:12:44313657 |
| 12 rs17093971  | 44359265 T | 118.2 | 3.44E-20 | chr:12:44313657 |
| 12 rs7308588   | 44356119 A | 118.2 | 3.44E-20 | chr:12:44313657 |
| 12 rs201614323 | 44301725 T | 8.882 | 4.47E-20 | chr:12:44313657 |
| 12 rs1675766   | 44244919 C | 32.17 | 9.93E-20 | chr:12:44313657 |
| 12 rs9668752   | 44302117 T | 10.92 | 1.03E-19 | chr:12:44313657 |
| 12 rs200356917 | 44301684 A | 8.933 | 1.35E-19 | chr:12:44313657 |
| 12 rs11830410  | 44322978 C | 37.45 | 1.96E-17 | chr:12:44313657 |
| 12 rs12371940  | 44319060 C | 37.45 | 1.96E-17 | chr:12:44313657 |
| 12 rs73100979  | 44345424 T | 37.45 | 1.96E-17 | chr:12:44313657 |

|                |            |       |          |                 |
|----------------|------------|-------|----------|-----------------|
| 12 rs7976722   | 44312149 T | 37.45 | 1.96E-17 | chr:12:44313657 |
| 12 rs7350559   | 44362805 G | 17.52 | 2.17E-17 | chr:12:44313657 |
| 12 rs10785489  | 44364261 C | 23.83 | 2.48E-17 | chr:12:44313657 |
| 12 rs544503047 | 44291853 G | 20.69 | 1.27E-16 | chr:12:44313657 |
| 12 rs10880587  | 44311477 T | 20.56 | 3.96E-16 | chr:12:44313657 |
| 12 rs1881926   | 44319047 G | 20.56 | 3.96E-16 | chr:12:44313657 |
| 12 rs1881927   | 44318922 G | 20.56 | 3.96E-16 | chr:12:44313657 |
| 12 rs4768055   | 44317208 G | 20.56 | 3.96E-16 | chr:12:44313657 |
| 12 rs4768057   | 44332707 G | 20.56 | 3.96E-16 | chr:12:44313657 |
| 12 rs4768546   | 44336686 C | 20.56 | 3.96E-16 | chr:12:44313657 |
| 12 rs5023324   | 44327148 C | 20.56 | 3.96E-16 | chr:12:44313657 |
| 12 rs6582490   | 44329957 G | 20.56 | 3.96E-16 | chr:12:44313657 |
| 12 rs7311847   | 44315590 A | 20.56 | 3.96E-16 | chr:12:44313657 |
| 12 rs7974214   | 44319517 T | 20.56 | 3.96E-16 | chr:12:44313657 |
| 12 rs10785481  | 44325061 G | 20.48 | 4.53E-16 | chr:12:44313657 |
| 12 rs9668657   | 44302174 A | 5.69  | 6.41E-16 | chr:12:44313657 |
| 12 rs4768056   | 44322826 T | 19.96 | 6.68E-16 | chr:12:44313657 |
| 12 rs11533717  | 44304261 G | 13.89 | 6.79E-16 | chr:12:44313657 |
| 12 rs12302508  | 44303914 A | 13.89 | 6.79E-16 | chr:12:44313657 |
| 12 rs10785468  | 44309434 G | 15.36 | 9.24E-16 | chr:12:44313657 |
| 12 rs10785469  | 44309459 G | 15.71 | 9.87E-16 | chr:12:44313657 |
| 12 rs7965240   | 44309591 A | 17.13 | 1.22E-15 | chr:12:44313657 |
| 12 rs7965330   | 44309602 A | 19.76 | 1.23E-15 | chr:12:44313657 |
| 12 rs11182327  | 44310418 A | 995.9 | 1.41E-15 | chr:12:44313657 |
| 12 rs9669060   | 44301944 G | 6.605 | 1.82E-15 | chr:12:44313657 |
| 12 rs111789075 | 44352673 C | 14.65 | 2.17E-15 | chr:12:44313657 |
| 12 rs7965873   | 44354797 A | 18.95 | 2.18E-15 | chr:12:44313657 |
| 12 rs7971628   | 44353583 G | 16.56 | 2.34E-15 | chr:12:44313657 |
| 12 rs201324668 | 44302939 C | 4.874 | 2.37E-15 | chr:12:44313657 |
| 12 rs11182348  | 44354835 C | 14.05 | 3.63E-15 | chr:12:44313657 |
| 12 rs11182353  | 44361688 T | 14.05 | 3.63E-15 | chr:12:44313657 |
| 12 rs11182354  | 44361712 G | 14.05 | 3.63E-15 | chr:12:44313657 |
| 12 rs11182355  | 44362091 G | 14.05 | 3.63E-15 | chr:12:44313657 |
| 12 rs199914146 | 44303005 G | 4.688 | 3.69E-15 | chr:12:44313657 |
| 12 rs201066998 | 44303041 G | 4.688 | 3.69E-15 | chr:12:44313657 |
| 12 rs9669053   | 44301883 G | 4.457 | 3.82E-15 | chr:12:44313657 |
| 12 rs199957779 | 44302961 T | 4.633 | 4.97E-15 | chr:12:44313657 |
| 12 rs201261552 | 44302974 C | 4.633 | 4.97E-15 | chr:12:44313657 |
| 12 rs11182359  | 44363956 T | 13.7  | 5.03E-15 | chr:12:44313657 |
| 12 rs1675755   | 44278773 G | 10.42 | 1.02E-14 | chr:12:44313657 |
| 12 rs10880573  | 44226111 G | 11.82 | 1.10E-14 | chr:12:44313657 |
| 12 rs7973886   | 44306134 G | 5.166 | 1.63E-14 | chr:12:44313657 |
| 12 rs9668647   | 44301830 A | 4.199 | 2.05E-14 | chr:12:44313657 |

|                |            |       |          |                 |
|----------------|------------|-------|----------|-----------------|
| 12 rs7963981   | 44306066 T | 4.781 | 2.40E-14 | chr:12:44313657 |
| 12 rs7973769   | 44306028 G | 4.781 | 2.40E-14 | chr:12:44313657 |
| 12 rs7973774   | 44306044 G | 4.781 | 2.40E-14 | chr:12:44313657 |
| 12 rs202162002 | 44301820 A | 4.172 | 2.45E-14 | chr:12:44313657 |
| 12 rs367898590 | 44301818 C | 4.172 | 2.45E-14 | chr:12:44313657 |
| 12 rs375152458 | 44301817 T | 4.172 | 2.45E-14 | chr:12:44313657 |
| 12 rs59709721  | 44362347 A | 80.5  | 4.46E-14 | chr:12:44313657 |
| 12 rs7972025   | 44222722 T | 10.25 | 7.67E-14 | chr:12:44313657 |
| 12 rs7954130   | 44301327 G | 7.034 | 8.57E-14 | chr:12:44313657 |
| 12 rs10748377  | 44308151 T | 8.262 | 9.12E-14 | chr:12:44313657 |
| 12 rs10748378  | 44308153 A | 8.262 | 9.12E-14 | chr:12:44313657 |
| 12 rs10785462  | 44299067 A | 8.262 | 9.12E-14 | chr:12:44313657 |
| 12 rs10785463  | 44299093 T | 8.262 | 9.12E-14 | chr:12:44313657 |
| 12 rs10785466  | 44308052 A | 8.262 | 9.12E-14 | chr:12:44313657 |
| 12 rs10880585  | 44307982 C | 8.262 | 9.12E-14 | chr:12:44313657 |
| 12 rs11182324  | 44307868 C | 8.262 | 9.12E-14 | chr:12:44313657 |
| 12 rs11182325  | 44307930 G | 8.262 | 9.12E-14 | chr:12:44313657 |
| 12 rs1358705   | 44287850 C | 8.262 | 9.12E-14 | chr:12:44313657 |
| 12 rs1609549   | 44306994 A | 8.262 | 9.12E-14 | chr:12:44313657 |
| 12 rs1610291   | 44307158 A | 8.262 | 9.12E-14 | chr:12:44313657 |
| 12 rs1614042   | 44290018 C | 8.262 | 9.12E-14 | chr:12:44313657 |
| 12 rs1675764   | 44285480 T | 8.262 | 9.12E-14 | chr:12:44313657 |
| 12 rs1675781   | 44292513 A | 8.262 | 9.12E-14 | chr:12:44313657 |
| 12 rs1675789   | 44290545 A | 8.262 | 9.12E-14 | chr:12:44313657 |
| 12 rs1675790   | 44290447 C | 8.262 | 9.12E-14 | chr:12:44313657 |
| 12 rs1731456   | 44286932 A | 8.262 | 9.12E-14 | chr:12:44313657 |
| 12 rs1731457   | 44286499 T | 8.262 | 9.12E-14 | chr:12:44313657 |
| 12 rs1731458   | 44285969 T | 8.262 | 9.12E-14 | chr:12:44313657 |
| 12 rs1731459   | 44285844 C | 8.262 | 9.12E-14 | chr:12:44313657 |
| 12 rs2407783   | 44300247 G | 8.262 | 9.12E-14 | chr:12:44313657 |
| 12 rs2407785   | 44300358 A | 8.262 | 9.12E-14 | chr:12:44313657 |
| 12 rs2407786   | 44300467 A | 8.262 | 9.12E-14 | chr:12:44313657 |
| 12 rs3990338   | 44300626 T | 8.262 | 9.12E-14 | chr:12:44313657 |
| 12 rs4238089   | 44299688 A | 8.262 | 9.12E-14 | chr:12:44313657 |
| 12 rs4238091   | 44299900 T | 8.262 | 9.12E-14 | chr:12:44313657 |
| 12 rs4363674   | 44307404 C | 8.262 | 9.12E-14 | chr:12:44313657 |
| 12 rs4469953   | 44307349 T | 8.262 | 9.12E-14 | chr:12:44313657 |
| 12 rs4537822   | 44299389 C | 8.262 | 9.12E-14 | chr:12:44313657 |
| 12 rs4572198   | 44298071 G | 8.262 | 9.12E-14 | chr:12:44313657 |
| 12 rs4572199   | 44298378 G | 8.262 | 9.12E-14 | chr:12:44313657 |
| 12 rs4609659   | 44298550 C | 8.262 | 9.12E-14 | chr:12:44313657 |
| 12 rs4768535   | 44298917 C | 8.262 | 9.12E-14 | chr:12:44313657 |
| 12 rs4768538   | 44300011 A | 8.262 | 9.12E-14 | chr:12:44313657 |

|               |            |       |          |                 |
|---------------|------------|-------|----------|-----------------|
| 12 rs4768539  | 44303524 C | 8.262 | 9.12E-14 | chr:12:44313657 |
| 12 rs4768543  | 44308978 A | 8.262 | 9.12E-14 | chr:12:44313657 |
| 12 rs5019975  | 44299370 G | 8.262 | 9.12E-14 | chr:12:44313657 |
| 12 rs7295151  | 44308194 G | 8.262 | 9.12E-14 | chr:12:44313657 |
| 12 rs7974045  | 44306266 G | 8.262 | 9.12E-14 | chr:12:44313657 |
| 12 rs7974046  | 44306269 G | 8.262 | 9.12E-14 | chr:12:44313657 |
| 12 rs7954384  | 44301587 G | 5.167 | 9.58E-14 | chr:12:44313657 |
| 12 rs7969754  | 44301580 A | 5.159 | 1.10E-13 | chr:12:44313657 |
| 12 rs1406787  | 44274699 T | 7.767 | 1.10E-13 | chr:12:44313657 |
| 12 rs1675756  | 44279540 T | 7.767 | 1.10E-13 | chr:12:44313657 |
| 12 rs1731423  | 44278469 G | 7.767 | 1.10E-13 | chr:12:44313657 |
| 12 rs1731430  | 44280809 A | 7.767 | 1.10E-13 | chr:12:44313657 |
| 12 rs1731433  | 44279776 G | 7.767 | 1.10E-13 | chr:12:44313657 |
| 12 rs4768532  | 44279222 C | 7.767 | 1.10E-13 | chr:12:44313657 |
| 12 rs10880578 | 44291513 C | 8.199 | 1.11E-13 | chr:12:44313657 |
| 12 rs1609548  | 44306947 G | 8.199 | 1.11E-13 | chr:12:44313657 |
| 12 rs1675785  | 44292747 G | 8.199 | 1.11E-13 | chr:12:44313657 |
| 12 rs1675787  | 44290928 T | 8.199 | 1.11E-13 | chr:12:44313657 |
| 12 rs1731435  | 44292195 A | 8.199 | 1.11E-13 | chr:12:44313657 |
| 12 rs2447113  | 44282785 G | 8.199 | 1.11E-13 | chr:12:44313657 |
| 12 rs2951435  | 44291174 G | 8.199 | 1.11E-13 | chr:12:44313657 |
| 12 rs7955615  | 44295861 C | 8.199 | 1.11E-13 | chr:12:44313657 |
| 12 rs11520309 | 44303103 A | 8.2   | 1.11E-13 | chr:12:44313657 |
| 12 rs1731432  | 44279783 T | 7.735 | 1.15E-13 | chr:12:44313657 |
| 12 rs2219629  | 44235406 T | 7.763 | 1.23E-13 | chr:12:44313657 |
| 12 rs1622590  | 44288061 G | 8.144 | 1.33E-13 | chr:12:44313657 |
| 12 rs1057486  | 44260041 G | 7.711 | 1.33E-13 | chr:12:44313657 |
| 12 rs1621279  | 44249011 C | 7.711 | 1.33E-13 | chr:12:44313657 |
| 12 rs1623667  | 44249258 T | 7.711 | 1.33E-13 | chr:12:44313657 |
| 12 rs1623829  | 44262745 A | 7.711 | 1.33E-13 | chr:12:44313657 |
| 12 rs1675758  | 44280027 G | 7.711 | 1.33E-13 | chr:12:44313657 |
| 12 rs1675765  | 44244855 T | 7.711 | 1.33E-13 | chr:12:44313657 |
| 12 rs1675769  | 44248400 T | 7.711 | 1.33E-13 | chr:12:44313657 |
| 12 rs1731431  | 44279870 G | 7.711 | 1.33E-13 | chr:12:44313657 |
| 12 rs1731434  | 44272915 A | 7.711 | 1.33E-13 | chr:12:44313657 |
| 12 rs1731450  | 44246041 T | 7.711 | 1.33E-13 | chr:12:44313657 |
| 12 rs1731452  | 44249745 C | 7.711 | 1.33E-13 | chr:12:44313657 |
| 12 rs1731454  | 44251107 T | 7.711 | 1.33E-13 | chr:12:44313657 |
| 12 rs7305609  | 44240652 A | 7.711 | 1.33E-13 | chr:12:44313657 |
| 12 rs73096934 | 44241279 G | 7.711 | 1.33E-13 | chr:12:44313657 |
| 12 rs61930734 | 44304400 C | 7.745 | 1.37E-13 | chr:12:44313657 |
| 12 rs7954640  | 44301081 C | 7.694 | 1.39E-13 | chr:12:44313657 |
| 12 rs10785460 | 44264906 T | 7.712 | 1.47E-13 | chr:12:44313657 |

|                |            |       |          |                 |
|----------------|------------|-------|----------|-----------------|
| 12 rs2614395   | 44291851 G | 7.966 | 1.54E-13 | chr:12:44313657 |
| 12 rs2407787   | 44300709 G | 7.977 | 1.67E-13 | chr:12:44313657 |
| 12 rs11182293  | 44231482 A | 7.632 | 1.77E-13 | chr:12:44313657 |
| 12 rs1675767   | 44247135 G | 7.612 | 1.82E-13 | chr:12:44313657 |
| 12 rs4768053   | 44309069 C | 7.73  | 2.14E-13 | chr:12:44313657 |
| 12 rs79916589  | 44289680 T | 7.264 | 2.16E-13 | chr:12:44313657 |
| 12 rs1731455   | 44260900 A | 7.527 | 2.30E-13 | chr:12:44313657 |
| 12 rs3990339   | 44300728 G | 7.449 | 2.51E-13 | chr:12:44313657 |
| 12 rs10880579  | 44297491 A | 7.795 | 3.51E-13 | chr:12:44313657 |
| 12 rs2407784   | 44300347 T | 7.643 | 4.22E-13 | chr:12:44313657 |
| 12 rs73093779  | 44184287 G | 27.4  | 4.51E-13 | chr:12:44313657 |
| 12 rs111537988 | 44206802 A | 24.24 | 6.50E-13 | chr:12:44313657 |
| 12 rs113256006 | 44187061 A | 24.24 | 6.50E-13 | chr:12:44313657 |
| 12 rs115243912 | 44191795 G | 24.24 | 6.50E-13 | chr:12:44313657 |
| 12 rs11836775  | 44205419 T | 24.24 | 6.50E-13 | chr:12:44313657 |
| 12 rs140904391 | 44188758 G | 24.24 | 6.50E-13 | chr:12:44313657 |
| 12 rs548923462 | 44191793 G | 24.24 | 6.50E-13 | chr:12:44313657 |
| 12 rs73093798  | 44197267 C | 24.24 | 6.50E-13 | chr:12:44313657 |
| 12 rs73095671  | 44203886 C | 24.24 | 6.50E-13 | chr:12:44313657 |
| 12 rs73095672  | 44204919 A | 24.24 | 6.50E-13 | chr:12:44313657 |
| 12 rs7972804   | 44198528 T | 24.24 | 6.50E-13 | chr:12:44313657 |
| 12 rs111561083 | 44230097 G | 24.61 | 7.81E-13 | chr:12:44313657 |
| 12 rs55935254  | 44300440 T | 24.61 | 7.81E-13 | chr:12:44313657 |
| 12 rs56116013  | 44296263 A | 24.61 | 7.81E-13 | chr:12:44313657 |
| 12 rs7307521   | 44307239 G | 24.61 | 7.81E-13 | chr:12:44313657 |
| 12 rs73096918  | 44236051 A | 24.61 | 7.81E-13 | chr:12:44313657 |
| 12 rs73096965  | 44253252 A | 24.61 | 7.81E-13 | chr:12:44313657 |
| 12 rs73096996  | 44266628 G | 24.61 | 7.81E-13 | chr:12:44313657 |
| 12 rs73096997  | 44267498 G | 24.61 | 7.81E-13 | chr:12:44313657 |
| 12 rs73096907  | 44230758 G | 24.49 | 8.43E-13 | chr:12:44313657 |
| 12 rs10506233  | 44376031 C | 31.87 | 8.92E-13 | chr:12:44313657 |
| 12 rs56249323  | 44221370 T | 21.81 | 9.89E-13 | chr:12:44313657 |
| 12 rs73095688  | 44216325 T | 21.81 | 9.89E-13 | chr:12:44313657 |
| 12 rs73095695  | 44220911 T | 21.81 | 9.89E-13 | chr:12:44313657 |
| 12 rs77613343  | 44220690 A | 21.81 | 9.89E-13 | chr:12:44313657 |
| 12 rs11182363  | 44381348 C | 37.93 | 1.04E-12 | chr:12:44313657 |
| 12 rs11182371  | 44394939 C | 37.93 | 1.04E-12 | chr:12:44313657 |
| 12 rs12320155  | 44394433 T | 37.93 | 1.04E-12 | chr:12:44313657 |
| 12 rs4768536   | 44298961 A | 7.756 | 1.16E-12 | chr:12:44313657 |
| 12 rs11182286  | 44217342 C | 7.226 | 2.30E-12 | chr:12:44313657 |
| 12 rs11182284  | 44217312 A | 7.17  | 2.83E-12 | chr:12:44313657 |
| 12 rs11608602  | 44215732 C | 7.17  | 2.83E-12 | chr:12:44313657 |
| 12 rs12230695  | 44215935 G | 7.17  | 2.83E-12 | chr:12:44313657 |

|               |            |       |          |                 |
|---------------|------------|-------|----------|-----------------|
| 12 rs1731444  | 44262392 C | 6.374 | 3.07E-12 | chr:12:44313657 |
| 12 rs10748373 | 44253386 A | 6.025 | 4.84E-12 | chr:12:44313657 |
| 12 rs12298970 | 44237256 T | 6.025 | 4.84E-12 | chr:12:44313657 |
| 12 rs1461568  | 44267583 G | 6.025 | 4.84E-12 | chr:12:44313657 |
| 12 rs1675771  | 44252960 A | 6.025 | 4.84E-12 | chr:12:44313657 |
| 12 rs1675774  | 44266575 G | 6.025 | 4.84E-12 | chr:12:44313657 |
| 12 rs1675776  | 44265242 A | 6.025 | 4.84E-12 | chr:12:44313657 |
| 12 rs1675777  | 44264215 G | 6.025 | 4.84E-12 | chr:12:44313657 |
| 12 rs1675778  | 44263162 G | 6.025 | 4.84E-12 | chr:12:44313657 |
| 12 rs1675783  | 44257680 T | 6.025 | 4.84E-12 | chr:12:44313657 |
| 12 rs1675784  | 44257601 A | 6.025 | 4.84E-12 | chr:12:44313657 |
| 12 rs1675788  | 44273779 C | 6.025 | 4.84E-12 | chr:12:44313657 |
| 12 rs1731438  | 44267863 A | 6.025 | 4.84E-12 | chr:12:44313657 |
| 12 rs1731439  | 44266559 G | 6.025 | 4.84E-12 | chr:12:44313657 |
| 12 rs1731440  | 44265605 T | 6.025 | 4.84E-12 | chr:12:44313657 |
| 12 rs1731442  | 44262606 T | 6.025 | 4.84E-12 | chr:12:44313657 |
| 12 rs2447114  | 44252015 T | 6.025 | 4.84E-12 | chr:12:44313657 |
| 12 rs2447115  | 44254494 A | 6.025 | 4.84E-12 | chr:12:44313657 |
| 12 rs2447116  | 44262529 A | 6.025 | 4.84E-12 | chr:12:44313657 |
| 12 rs2951436  | 44261618 A | 6.025 | 4.84E-12 | chr:12:44313657 |
| 12 rs4768049  | 44256856 A | 6.025 | 4.84E-12 | chr:12:44313657 |
| 12 rs1675782  | 44258841 C | 5.985 | 5.85E-12 | chr:12:44313657 |
| 12 rs12311962 | 44237272 A | 5.982 | 5.86E-12 | chr:12:44313657 |
| 12 rs1731448  | 44244270 G | 5.947 | 6.65E-12 | chr:12:44313657 |
| 12 rs12314126 | 44236455 G | 5.904 | 8.04E-12 | chr:12:44313657 |
| 12 rs10785482 | 44342910 T | 2226  | 9.98E-12 | chr:12:44313657 |
| 12 rs73089764 | 44450085 C | 8.381 | 1.22E-11 | chr:12:44313657 |
| 12 rs10785475 | 44318632 G | 1804  | 1.57E-11 | chr:12:44313657 |
| 12 rs10785476 | 44318633 A | 1804  | 1.57E-11 | chr:12:44313657 |
| 12 rs10506232 | 44316485 A | 2306  | 1.72E-11 | chr:12:44313657 |
| 12 rs10748379 | 44315397 T | 2306  | 1.72E-11 | chr:12:44313657 |
| 12 rs10748380 | 44315492 G | 2306  | 1.72E-11 | chr:12:44313657 |
| 12 rs10785470 | 44311983 A | 2306  | 1.72E-11 | chr:12:44313657 |
| 12 rs10785471 | 44311998 A | 2306  | 1.72E-11 | chr:12:44313657 |
| 12 rs10785472 | 44312774 T | 2306  | 1.72E-11 | chr:12:44313657 |
| 12 rs10785473 | 44316584 G | 2306  | 1.72E-11 | chr:12:44313657 |
| 12 rs10785474 | 44318428 G | 2306  | 1.72E-11 | chr:12:44313657 |
| 12 rs10785477 | 44318723 G | 2306  | 1.72E-11 | chr:12:44313657 |
| 12 rs10785478 | 44320156 T | 2306  | 1.72E-11 | chr:12:44313657 |
| 12 rs10785479 | 44320184 G | 2306  | 1.72E-11 | chr:12:44313657 |
| 12 rs10880586 | 44310604 G | 2306  | 1.72E-11 | chr:12:44313657 |
| 12 rs10880588 | 44311787 T | 2306  | 1.72E-11 | chr:12:44313657 |
| 12 rs10880589 | 44313193 T | 2306  | 1.72E-11 | chr:12:44313657 |

|                |            |       |          |                 |
|----------------|------------|-------|----------|-----------------|
| 12 rs10880590  | 44313636 G | 2306  | 1.72E-11 | chr:12:44313657 |
| 12 rs10880591  | 44314630 T | 2306  | 1.72E-11 | chr:12:44313657 |
| 12 rs10880592  | 44315171 A | 2306  | 1.72E-11 | chr:12:44313657 |
| 12 rs10880597  | 44336172 A | 2306  | 1.72E-11 | chr:12:44313657 |
| 12 rs10880598  | 44336375 T | 2306  | 1.72E-11 | chr:12:44313657 |
| 12 rs10880600  | 44343641 T | 2306  | 1.72E-11 | chr:12:44313657 |
| 12 rs10880601  | 44343768 A | 2306  | 1.72E-11 | chr:12:44313657 |
| 12 rs10880604  | 44349398 G | 2306  | 1.72E-11 | chr:12:44313657 |
| 12 rs10880605  | 44349669 A | 2306  | 1.72E-11 | chr:12:44313657 |
| 12 rs11182329  | 44314564 A | 2306  | 1.72E-11 | chr:12:44313657 |
| 12 rs11182337  | 44320875 A | 2306  | 1.72E-11 | chr:12:44313657 |
| 12 rs11182341  | 44339216 T | 2306  | 1.72E-11 | chr:12:44313657 |
| 12 rs11182346  | 44350097 T | 2306  | 1.72E-11 | chr:12:44313657 |
| 12 rs12305959  | 44332618 G | 2306  | 1.72E-11 | chr:12:44313657 |
| 12 rs12369569  | 44313000 T | 2306  | 1.72E-11 | chr:12:44313657 |
| 12 rs2031056   | 44315008 A | 2306  | 1.72E-11 | chr:12:44313657 |
| 12 rs3925072   | 44327565 C | 2306  | 1.72E-11 | chr:12:44313657 |
| 12 rs3925073   | 44327736 A | 2306  | 1.72E-11 | chr:12:44313657 |
| 12 rs4238093   | 44315925 A | 2306  | 1.72E-11 | chr:12:44313657 |
| 12 rs4417371   | 44327407 A | 2306  | 1.72E-11 | chr:12:44313657 |
| 12 rs4499064   | 44315170 T | 2306  | 1.72E-11 | chr:12:44313657 |
| 12 rs73100931  | 44314388 C | 2306  | 1.72E-11 | chr:12:44313657 |
| 12 rs73100933  | 44314453 T | 2306  | 1.72E-11 | chr:12:44313657 |
| 12 rs73100935  | 44314454 G | 2306  | 1.72E-11 | chr:12:44313657 |
| 12 rs73100975  | 44339016 T | 2306  | 1.72E-11 | chr:12:44313657 |
| 12 rs7312373   | 44332843 C | 2306  | 1.72E-11 | chr:12:44313657 |
| 12 rs7956825   | 44313718 G | 2306  | 1.72E-11 | chr:12:44313657 |
| 12 rs7957074   | 44313906 T | 2306  | 1.72E-11 | chr:12:44313657 |
| 12 rs7964465   | 44312649 G | 2306  | 1.72E-11 | chr:12:44313657 |
| 12 rs7971487   | 44313830 G | 2306  | 1.72E-11 | chr:12:44313657 |
| 12 rs7974501   | 44313794 C | 2306  | 1.72E-11 | chr:12:44313657 |
| 12 rs10880599  | 44337662 T | 1678  | 1.78E-11 | chr:12:44313657 |
| 12 rs4768544   | 44309919 C | 1781  | 1.92E-11 | chr:12:44313657 |
| 12 rs11182339  | 44331841 A | 1805  | 1.99E-11 | chr:12:44313657 |
| 12 rs17121283  | 44185593 T | 5.81  | 1.44E-10 | chr:12:44313657 |
| 12 rs7968199   | 44212237 G | 5.265 | 2.09E-10 | chr:12:44313657 |
| 12 rs6582484   | 44190630 C | 5.686 | 2.26E-10 | chr:12:44313657 |
| 12 rs11182291  | 44223083 G | 45.17 | 3.40E-10 | chr:12:44313657 |
| 12 rs147350332 | 44811690 A | 29.6  | 3.52E-10 | chr:12:44313657 |
| 12 rs28437935  | 44214821 A | 5.607 | 3.67E-10 | chr:12:44313657 |
| 12 rs150957679 | 44301666 T | 11.21 | 3.89E-10 | chr:12:44313657 |
| 12 rs11182281  | 44213461 A | 5.531 | 4.47E-10 | chr:12:44313657 |
| 12 rs11182282  | 44214899 A | 5.531 | 4.47E-10 | chr:12:44313657 |

|                |            |       |          |                 |
|----------------|------------|-------|----------|-----------------|
| 12 rs12226960  | 44213124 T | 5.531 | 4.47E-10 | chr:12:44313657 |
| 12 rs2699993   | 44398254 T | 18.94 | 5.42E-10 | chr:12:44313657 |
| 12 rs7971516   | 44353473 G | 627.3 | 5.78E-10 | chr:12:44313657 |
| 12 rs145822768 | 44350947 T | 60.44 | 6.46E-10 | chr:12:44313657 |
| 12 rs116612625 | 44470326 C | 59.24 | 1.19E-09 | chr:12:44313657 |
| 12 rs11182358  | 44363335 T | 536.2 | 1.42E-09 | chr:12:44313657 |
| 12 rs139428281 | 44258804 T | 58.48 | 1.43E-09 | chr:12:44313657 |
| 12 rs7956245   | 44143520 T | 9.206 | 1.46E-09 | chr:12:44313657 |
| 12 rs11182410  | 44456249 A | 56.22 | 1.66E-09 | chr:12:44313657 |
| 12 rs35980560  | 44185578 T | 4.959 | 2.92E-09 | chr:12:44313657 |
| 12 rs11182269  | 44194989 A | 4.917 | 3.62E-09 | chr:12:44313657 |
| 12 rs11556066  | 44188507 G | 4.917 | 3.62E-09 | chr:12:44313657 |
| 12 rs73093785  | 44186627 C | 4.917 | 3.62E-09 | chr:12:44313657 |
| 12 rs4251565   | 44183367 G | 9.716 | 4.73E-09 | chr:12:44313657 |
| 12 rs4251566   | 44151022 A | 9.716 | 4.73E-09 | chr:12:44313657 |
| 12 rs115692896 | 44349790 C | 91.97 | 6.98E-09 | chr:12:44313657 |
| 12 rs12297529  | 44319602 A | 91.97 | 6.98E-09 | chr:12:44313657 |
| 12 rs12297544  | 44319679 A | 91.97 | 6.98E-09 | chr:12:44313657 |
| 12 rs12301421  | 44346015 A | 91.97 | 6.98E-09 | chr:12:44313657 |
| 12 rs12302401  | 44333816 T | 91.97 | 6.98E-09 | chr:12:44313657 |
| 12 rs74364320  | 44361242 T | 91.97 | 6.98E-09 | chr:12:44313657 |
| 12 rs76876041  | 44355481 T | 91.97 | 6.98E-09 | chr:12:44313657 |
| 12 rs117657439 | 44257734 T | 91.04 | 1.12E-08 | chr:12:44313657 |
| 12 rs140201523 | 44267442 A | 91.04 | 1.12E-08 | chr:12:44313657 |
| 12 rs146156586 | 44262286 T | 91.04 | 1.12E-08 | chr:12:44313657 |
| 12 rs12306662  | 44378314 G | 7.24  | 1.20E-08 | chr:12:44313657 |
| 12 rs10161163  | 44433103 C | 86.38 | 1.40E-08 | chr:12:44313657 |
| 12 rs10161301  | 44432919 A | 86.38 | 1.40E-08 | chr:12:44313657 |
| 12 rs11182376  | 44402498 G | 86.38 | 1.40E-08 | chr:12:44313657 |
| 12 rs11182389  | 44424153 A | 86.38 | 1.40E-08 | chr:12:44313657 |
| 12 rs11182401  | 44442917 T | 86.38 | 1.40E-08 | chr:12:44313657 |
| 12 rs114289528 | 44425403 C | 86.38 | 1.40E-08 | chr:12:44313657 |
| 12 rs114457407 | 44426674 T | 86.38 | 1.40E-08 | chr:12:44313657 |
| 12 rs114631781 | 44397804 A | 86.38 | 1.40E-08 | chr:12:44313657 |
| 12 rs114890225 | 44431883 A | 86.38 | 1.40E-08 | chr:12:44313657 |
| 12 rs115287223 | 44439789 G | 86.38 | 1.40E-08 | chr:12:44313657 |
| 12 rs116190624 | 44401433 A | 86.38 | 1.40E-08 | chr:12:44313657 |
| 12 rs116788397 | 44431142 T | 86.38 | 1.40E-08 | chr:12:44313657 |
| 12 rs12296939  | 44426290 T | 86.38 | 1.40E-08 | chr:12:44313657 |
| 12 rs12303163  | 44409858 T | 86.38 | 1.40E-08 | chr:12:44313657 |
| 12 rs12303870  | 44405114 G | 86.38 | 1.40E-08 | chr:12:44313657 |
| 12 rs12310801  | 44407385 A | 86.38 | 1.40E-08 | chr:12:44313657 |
| 12 rs12319385  | 44446809 C | 86.38 | 1.40E-08 | chr:12:44313657 |



|                |            |        |          |                 |
|----------------|------------|--------|----------|-----------------|
| 12 rs12319439  | 44450614 G | 86.38  | 1.40E-08 | chr:12:44313657 |
| 12 rs12319776  | 44454041 G | 86.38  | 1.40E-08 | chr:12:44313657 |
| 12 rs12321149  | 44399814 G | 86.38  | 1.40E-08 | chr:12:44313657 |
| 12 rs12321287  | 44458521 A | 86.38  | 1.40E-08 | chr:12:44313657 |
| 12 rs13378086  | 44445795 G | 86.38  | 1.40E-08 | chr:12:44313657 |
| 12 rs17094016  | 44443417 T | 86.38  | 1.40E-08 | chr:12:44313657 |
| 12 rs74389423  | 44418402 A | 86.38  | 1.40E-08 | chr:12:44313657 |
| 12 rs76842947  | 44435161 T | 86.38  | 1.40E-08 | chr:12:44313657 |
| 12 rs12312338  | 44340209 T | 5.69   | 1.82E-08 | chr:12:44313657 |
| 12 rs75725665  | 44340195 T | 5.69   | 1.82E-08 | chr:12:44313657 |
| 12 rs79768723  | 44433061 A | 10.03  | 2.59E-08 | chr:12:44313657 |
| 12 rs4251475   | 44167093 G | 15.4   | 3.48E-08 | chr:12:44313657 |
| 12 rs11182290  | 44221032 A | 3.444  | 5.25E-08 | chr:12:44313657 |
| 12 rs547527570 | 44301398 C | 0.2356 | 5.63E-08 | chr:12:44313657 |
| 12 rs35126165  | 44028955 A | 4.286  | 9.76E-08 | chr:12:44313657 |
| 12 rs28408299  | 44090479 A | 9.868  | 1.13E-07 | chr:12:44313657 |
| 12 rs12297079  | 44018079 A | 4.225  | 1.16E-07 | chr:12:44313657 |
| 12 rs12301506  | 44129636 G | 3.759  | 1.24E-07 | chr:12:44313657 |
| 12 rs55924723  | 44062960 A | 4.202  | 1.55E-07 | chr:12:44313657 |
| 12 rs11182273  | 44202901 C | 3.352  | 3.10E-07 | chr:12:44313657 |
| 12 rs10506231  | 44206027 T | 3.328  | 3.50E-07 | chr:12:44313657 |
| 12 rs10880571  | 44207279 C | 3.328  | 3.50E-07 | chr:12:44313657 |
| 12 rs11182275  | 44206289 G | 3.328  | 3.50E-07 | chr:12:44313657 |
| 12 rs11182280  | 44209584 C | 3.328  | 3.50E-07 | chr:12:44313657 |
| 12 rs3764004   | 44201451 C | 3.328  | 3.50E-07 | chr:12:44313657 |
| 12 rs376925605 | 44301553 A | 0.2857 | 5.42E-07 | chr:12:44313657 |
| 12 rs10880569  | 44201636 G | 3.24   | 6.19E-07 | chr:12:44313657 |
| 12 rs181074684 | 44471287 G | 58.49  | 6.36E-07 | chr:12:44313657 |
| 12 rs181345838 | 44547013 T | 58.49  | 6.36E-07 | chr:12:44313657 |
| 12 rs181787289 | 44677690 T | 32.45  | 1.33E-06 | chr:12:44313657 |
| 12 rs10880570  | 44202465 A | 3.144  | 1.33E-06 | chr:12:44313657 |
| 12 rs1816854   | 44205018 C | 3.144  | 1.33E-06 | chr:12:44313657 |
| 12 rs7966902   | 44200485 C | 3.144  | 1.33E-06 | chr:12:44313657 |
| 12 rs4768537   | 44299704 G | 0.3125 | 1.69E-06 | chr:12:44313657 |
| 12 rs7962590   | 44294199 G | 0.3125 | 1.69E-06 | chr:12:44313657 |
| 12 rs55946332  | 44091046 G | 3.407  | 1.92E-06 | chr:12:44313657 |
| 12 rs2464103   | 44279211 T | 4.705  | 2.44E-06 | chr:12:44313657 |
| 12 rs191547348 | 44741424 T | 28.27  | 2.52E-06 | chr:12:44313657 |
| 12 rs35321432  | 44629968 G | 8.582  | 3.10E-06 | chr:12:44313657 |
| 12 rs4768054   | 44309743 A | 4.203  | 3.28E-06 | chr:12:44313657 |
| 12 rs7969372   | 44309996 T | 0.3354 | 3.33E-06 | chr:12:44313657 |
| 12 rs11829716  | 44344461 C | 0.301  | 3.40E-06 | chr:12:44313657 |
| 12 rs7488456   | 44347675 A | 0.301  | 3.40E-06 | chr:12:44313657 |

|                |            |        |          |                 |
|----------------|------------|--------|----------|-----------------|
| 12 rs186567154 | 44724857 C | 47.12  | 3.57E-06 | chr:12:44313657 |
| 12 rs12298711  | 44206759 T | 3.299  | 3.58E-06 | chr:12:44313657 |
| 12 rs4768048   | 44228872 T | 0.3172 | 4.08E-06 | chr:12:44313657 |
| 12 rs10880583  | 44305868 T | 0.336  | 4.90E-06 | chr:12:44313657 |
| 12 rs842209    | 44583825 T | 0.3405 | 8.93E-06 | chr:12:44313657 |
| 12 rs10880627  | 44599081 T | 0.3405 | 9.10E-06 | chr:12:44313657 |
| 12 rs117471702 | 44095854 C | 39.8   | 1.07E-05 | chr:12:44313657 |
| 12 rs55690512  | 44001017 A | 3.272  | 1.13E-05 | chr:12:44313657 |
| 12 rs1492310   | 44549435 G | 0.3433 | 1.16E-05 | chr:12:44313657 |
| 12 rs1907688   | 44527496 G | 0.3433 | 1.16E-05 | chr:12:44313657 |
| 12 rs7954843   | 44113010 A | 2.927  | 1.16E-05 | chr:12:44313657 |
| 12 rs113536633 | 44269705 C | 25.26  | 1.28E-05 | chr:12:44313657 |
| 12 rs184244630 | 44622335 C | 109.9  | 1.33E-05 | chr:12:44313657 |
| 12 rs11182279  | 44208689 G | 112.3  | 1.38E-05 | chr:12:44313657 |
| 12 rs117269674 | 44197834 T | 112.3  | 1.38E-05 | chr:12:44313657 |
| 12 rs12231553  | 44213887 C | 112.3  | 1.38E-05 | chr:12:44313657 |
| 12 rs79625327  | 44205134 T | 112.3  | 1.38E-05 | chr:12:44313657 |
| 12 rs17535213  | 44128391 A | 3.269  | 1.39E-05 | chr:12:44313657 |
| 12 rs57939394  | 44123883 C | 3.269  | 1.39E-05 | chr:12:44313657 |
| 12 rs12321590  | 44006596 A | 3.143  | 1.50E-05 | chr:12:44313657 |
| 12 rs7960654   | 44007168 A | 3.143  | 1.50E-05 | chr:12:44313657 |
| 12 rs117631626 | 44668645 T | 23.09  | 1.66E-05 | chr:12:44313657 |
| 12 rs149241486 | 44589735 C | 17.48  | 1.69E-05 | chr:12:44313657 |
| 12 rs116536283 | 44145191 T | 3.221  | 1.74E-05 | chr:12:44313657 |
| 12 rs4251520   | 44175338 C | 3.221  | 1.74E-05 | chr:12:44313657 |
| 12 rs117180073 | 44620708 C | 10.81  | 1.77E-05 | chr:12:44313657 |
| 12 rs117665579 | 44583699 C | 10.81  | 1.77E-05 | chr:12:44313657 |
| 12 rs145876671 | 44669200 T | 16.85  | 2.17E-05 | chr:12:44313657 |
| 12 rs150853331 | 43975558 T | 38.69  | 2.17E-05 | chr:12:44313657 |
| 12 rs551405916 | 44301953 C | 34.67  | 2.27E-05 | chr:12:44313657 |
| 12 rs2407790   | 44431493 G | 0.3662 | 2.61E-05 | chr:12:44313657 |
| 12 rs190265803 | 43864810 A | 22.54  | 2.74E-05 | chr:12:44313657 |
| 12 rs571492907 | 43928047 C | 22.54  | 2.74E-05 | chr:12:44313657 |
| 12 rs142567092 | 44331004 G | 98.2   | 2.81E-05 | chr:12:44313657 |
| 12 rs146670186 | 44283197 C | 98.2   | 2.81E-05 | chr:12:44313657 |
| 12 rs182518986 | 44281673 C | 98.2   | 2.81E-05 | chr:12:44313657 |
| 12 rs183955880 | 44308195 A | 98.2   | 2.81E-05 | chr:12:44313657 |
| 12 rs185737279 | 44422887 C | 98.2   | 2.81E-05 | chr:12:44313657 |
| 12 rs187279138 | 44251202 T | 98.2   | 2.81E-05 | chr:12:44313657 |
| 12 rs188949963 | 44262448 G | 98.2   | 2.81E-05 | chr:12:44313657 |
| 12 rs189447410 | 44285596 C | 98.2   | 2.81E-05 | chr:12:44313657 |
| 12 rs191943516 | 44247101 G | 98.2   | 2.81E-05 | chr:12:44313657 |
| 12 rs540391974 | 44285215 T | 98.2   | 2.81E-05 | chr:12:44313657 |

|                |            |        |          |                 |
|----------------|------------|--------|----------|-----------------|
| 12 rs866839    | 44446985 A | 0.3681 | 2.92E-05 | chr:12:44313657 |
| 12 rs10748390  | 44406723 C | 0.3717 | 3.23E-05 | chr:12:44313657 |
| 12 rs116964327 | 44234447 A | 22.2   | 3.46E-05 | chr:12:44313657 |
| 12 rs200704134 | 55879280 T | 0.1154 | 3.91E-17 | chr:12:55727213 |
| 12 rs4130004   | 55860773 T | 0.1154 | 3.91E-17 | chr:12:55727213 |
| 12 rs4343668   | 55868936 T | 0.1154 | 3.91E-17 | chr:12:55727213 |
| 12 rs4356858   | 55867290 T | 0.1154 | 3.91E-17 | chr:12:55727213 |
| 12 rs4376077   | 55872442 G | 0.1154 | 3.91E-17 | chr:12:55727213 |
| 12 rs4453888   | 55887808 C | 0.1154 | 3.91E-17 | chr:12:55727213 |
| 12 rs56840674  | 55887691 T | 0.1154 | 3.91E-17 | chr:12:55727213 |
| 12 rs60066834  | 55877998 T | 0.1154 | 3.91E-17 | chr:12:55727213 |
| 12 rs60450959  | 55861373 T | 0.1154 | 3.91E-17 | chr:12:55727213 |
| 12 rs60683621  | 55863224 G | 0.1154 | 3.91E-17 | chr:12:55727213 |
| 12 rs61957763  | 55867540 A | 0.1154 | 3.91E-17 | chr:12:55727213 |
| 12 rs61957764  | 55867916 A | 0.1154 | 3.91E-17 | chr:12:55727213 |
| 12 rs61957765  | 55868561 C | 0.1154 | 3.91E-17 | chr:12:55727213 |
| 12 rs67290413  | 55869876 C | 0.1154 | 3.91E-17 | chr:12:55727213 |
| 12 rs7294659   | 55866519 C | 0.1154 | 3.91E-17 | chr:12:55727213 |
| 12 rs7304753   | 55886489 A | 0.1154 | 3.91E-17 | chr:12:55727213 |
| 12 rs12579005  | 55853230 A | 0.1156 | 4.43E-17 | chr:12:55727213 |
| 12 rs60643523  | 55842928 G | 0.1156 | 4.43E-17 | chr:12:55727213 |
| 12 rs61956331  | 55840856 A | 0.1156 | 4.43E-17 | chr:12:55727213 |
| 12 rs61956358  | 55852286 T | 0.1156 | 4.43E-17 | chr:12:55727213 |
| 12 rs61957760  | 55859957 T | 0.1156 | 4.43E-17 | chr:12:55727213 |
| 12 rs7966770   | 55844717 C | 0.1156 | 4.43E-17 | chr:12:55727213 |
| 12 rs7971742   | 55848486 G | 0.1156 | 4.43E-17 | chr:12:55727213 |
| 12 rs7980098   | 55844694 G | 0.1156 | 4.43E-17 | chr:12:55727213 |
| 12 rs61956269  | 55768023 T | 0.1159 | 4.57E-17 | chr:12:55727213 |
| 12 rs57361193  | 55883572 A | 0.1149 | 4.75E-17 | chr:12:55727213 |
| 12 rs61957788  | 55883248 A | 0.1149 | 4.75E-17 | chr:12:55727213 |
| 12 rs142753382 | 55872931 T | 0.118  | 4.83E-17 | chr:12:55727213 |
| 12 rs145535298 | 55873030 C | 0.118  | 4.83E-17 | chr:12:55727213 |
| 12 rs61957915  | 55742266 C | 0.1179 | 4.84E-17 | chr:12:55727213 |
| 12 rs112892991 | 55808749 T | 0.1161 | 5.27E-17 | chr:12:55727213 |
| 12 rs12582120  | 55830064 G | 0.1161 | 5.27E-17 | chr:12:55727213 |
| 12 rs201409163 | 55827180 C | 0.1161 | 5.27E-17 | chr:12:55727213 |
| 12 rs201554506 | 55826869 A | 0.1161 | 5.27E-17 | chr:12:55727213 |
| 12 rs4318592   | 55837124 A | 0.1161 | 5.27E-17 | chr:12:55727213 |
| 12 rs55797706  | 55836585 A | 0.1161 | 5.27E-17 | chr:12:55727213 |
| 12 rs59438785  | 55811665 G | 0.1161 | 5.27E-17 | chr:12:55727213 |
| 12 rs61547125  | 55814082 G | 0.1161 | 5.27E-17 | chr:12:55727213 |
| 12 rs61956300  | 55812640 G | 0.1161 | 5.27E-17 | chr:12:55727213 |
| 12 rs61956303  | 55818071 A | 0.1161 | 5.27E-17 | chr:12:55727213 |

|                |            |        |          |                 |
|----------------|------------|--------|----------|-----------------|
| 12 rs61956325  | 55827707 A | 0.1161 | 5.27E-17 | chr:12:55727213 |
| 12 rs61956326  | 55827735 A | 0.1161 | 5.27E-17 | chr:12:55727213 |
| 12 rs61956327  | 55828708 T | 0.1161 | 5.27E-17 | chr:12:55727213 |
| 12 rs6581047   | 55832001 G | 0.1161 | 5.27E-17 | chr:12:55727213 |
| 12 rs7311929   | 55834833 G | 0.1161 | 5.27E-17 | chr:12:55727213 |
| 12 rs7957446   | 55839631 C | 0.1161 | 5.27E-17 | chr:12:55727213 |
| 12 rs11171416  | 55731490 G | 0.1184 | 5.62E-17 | chr:12:55727213 |
| 12 rs11171430  | 55755254 G | 0.1184 | 5.62E-17 | chr:12:55727213 |
| 12 rs11171431  | 55757609 T | 0.1184 | 5.62E-17 | chr:12:55727213 |
| 12 rs11171432  | 55757696 C | 0.1184 | 5.62E-17 | chr:12:55727213 |
| 12 rs11171434  | 55758018 T | 0.1184 | 5.62E-17 | chr:12:55727213 |
| 12 rs115471673 | 55766516 G | 0.1184 | 5.62E-17 | chr:12:55727213 |
| 12 rs11831714  | 55741742 G | 0.1184 | 5.62E-17 | chr:12:55727213 |
| 12 rs11832308  | 55755506 A | 0.1184 | 5.62E-17 | chr:12:55727213 |
| 12 rs12296692  | 55756851 C | 0.1184 | 5.62E-17 | chr:12:55727213 |
| 12 rs12318683  | 55755024 C | 0.1184 | 5.62E-17 | chr:12:55727213 |
| 12 rs12578879  | 55797773 T | 0.1184 | 5.62E-17 | chr:12:55727213 |
| 12 rs12579346  | 55786856 G | 0.1184 | 5.62E-17 | chr:12:55727213 |
| 12 rs12579408  | 55764348 A | 0.1184 | 5.62E-17 | chr:12:55727213 |
| 12 rs12580661  | 55803129 A | 0.1184 | 5.62E-17 | chr:12:55727213 |
| 12 rs12581060  | 55797484 C | 0.1184 | 5.62E-17 | chr:12:55727213 |
| 12 rs12581916  | 55764409 C | 0.1184 | 5.62E-17 | chr:12:55727213 |
| 12 rs12582005  | 55772837 A | 0.1184 | 5.62E-17 | chr:12:55727213 |
| 12 rs13377995  | 55757380 G | 0.1184 | 5.62E-17 | chr:12:55727213 |
| 12 rs146150551 | 55751301 C | 0.1184 | 5.62E-17 | chr:12:55727213 |
| 12 rs149898597 | 55753436 A | 0.1184 | 5.62E-17 | chr:12:55727213 |
| 12 rs189794726 | 55743934 C | 0.1184 | 5.62E-17 | chr:12:55727213 |
| 12 rs3935215   | 55792401 A | 0.1184 | 5.62E-17 | chr:12:55727213 |
| 12 rs537017437 | 55742569 T | 0.1184 | 5.62E-17 | chr:12:55727213 |
| 12 rs55637917  | 55747565 C | 0.1184 | 5.62E-17 | chr:12:55727213 |
| 12 rs55659159  | 55747754 T | 0.1184 | 5.62E-17 | chr:12:55727213 |
| 12 rs55898514  | 55736238 A | 0.1184 | 5.62E-17 | chr:12:55727213 |
| 12 rs56677471  | 55749967 A | 0.1184 | 5.62E-17 | chr:12:55727213 |
| 12 rs57050414  | 55776926 A | 0.1184 | 5.62E-17 | chr:12:55727213 |
| 12 rs58254871  | 55750281 A | 0.1184 | 5.62E-17 | chr:12:55727213 |
| 12 rs58780687  | 55736498 C | 0.1184 | 5.62E-17 | chr:12:55727213 |
| 12 rs59136392  | 55748204 T | 0.1184 | 5.62E-17 | chr:12:55727213 |
| 12 rs59213907  | 55728911 T | 0.1184 | 5.62E-17 | chr:12:55727213 |
| 12 rs59347627  | 55758129 G | 0.1184 | 5.62E-17 | chr:12:55727213 |
| 12 rs59676560  | 55745425 C | 0.1184 | 5.62E-17 | chr:12:55727213 |
| 12 rs60230359  | 55736550 C | 0.1184 | 5.62E-17 | chr:12:55727213 |
| 12 rs60249205  | 55758333 G | 0.1184 | 5.62E-17 | chr:12:55727213 |
| 12 rs60586348  | 55745151 T | 0.1184 | 5.62E-17 | chr:12:55727213 |

|               |            |        |          |                 |
|---------------|------------|--------|----------|-----------------|
| 12 rs60774348 | 55757717 G | 0.1184 | 5.62E-17 | chr:12:55727213 |
| 12 rs61249728 | 55728922 G | 0.1184 | 5.62E-17 | chr:12:55727213 |
| 12 rs61556775 | 55745640 C | 0.1184 | 5.62E-17 | chr:12:55727213 |
| 12 rs61956272 | 55779559 T | 0.1184 | 5.62E-17 | chr:12:55727213 |
| 12 rs61956275 | 55786423 A | 0.1184 | 5.62E-17 | chr:12:55727213 |
| 12 rs61956290 | 55793833 G | 0.1184 | 5.62E-17 | chr:12:55727213 |
| 12 rs61956291 | 55797964 C | 0.1184 | 5.62E-17 | chr:12:55727213 |
| 12 rs61956292 | 55803346 C | 0.1184 | 5.62E-17 | chr:12:55727213 |
| 12 rs61957898 | 55730423 C | 0.1184 | 5.62E-17 | chr:12:55727213 |
| 12 rs61957899 | 55731971 T | 0.1184 | 5.62E-17 | chr:12:55727213 |
| 12 rs61957924 | 55744100 C | 0.1184 | 5.62E-17 | chr:12:55727213 |
| 12 rs61957933 | 55744710 G | 0.1184 | 5.62E-17 | chr:12:55727213 |
| 12 rs61957936 | 55745719 G | 0.1184 | 5.62E-17 | chr:12:55727213 |
| 12 rs61957937 | 55746850 C | 0.1184 | 5.62E-17 | chr:12:55727213 |
| 12 rs61957938 | 55747266 G | 0.1184 | 5.62E-17 | chr:12:55727213 |
| 12 rs61957941 | 55748058 A | 0.1184 | 5.62E-17 | chr:12:55727213 |
| 12 rs61957943 | 55749330 G | 0.1184 | 5.62E-17 | chr:12:55727213 |
| 12 rs61957946 | 55755778 C | 0.1184 | 5.62E-17 | chr:12:55727213 |
| 12 rs6581037  | 55767310 T | 0.1184 | 5.62E-17 | chr:12:55727213 |
| 12 rs66516917 | 55749131 G | 0.1184 | 5.62E-17 | chr:12:55727213 |
| 12 rs67015069 | 55759968 A | 0.1184 | 5.62E-17 | chr:12:55727213 |
| 12 rs67934812 | 55785591 G | 0.1184 | 5.62E-17 | chr:12:55727213 |
| 12 rs7311751  | 55748847 G | 0.1184 | 5.62E-17 | chr:12:55727213 |
| 12 rs73118998 | 55736659 C | 0.1184 | 5.62E-17 | chr:12:55727213 |
| 12 rs73119000 | 55736662 A | 0.1184 | 5.62E-17 | chr:12:55727213 |
| 12 rs7313465  | 55736863 T | 0.1184 | 5.62E-17 | chr:12:55727213 |
| 12 rs7314118  | 55737403 C | 0.1184 | 5.62E-17 | chr:12:55727213 |
| 12 rs73326725 | 55749222 C | 0.1184 | 5.62E-17 | chr:12:55727213 |
| 12 rs74844018 | 55766871 A | 0.1184 | 5.62E-17 | chr:12:55727213 |
| 12 rs7484522  | 55738240 G | 0.1184 | 5.62E-17 | chr:12:55727213 |
| 12 rs7484556  | 55738427 G | 0.1184 | 5.62E-17 | chr:12:55727213 |
| 12 rs7485053  | 55770126 C | 0.1184 | 5.62E-17 | chr:12:55727213 |
| 12 rs7485979  | 55789043 A | 0.1184 | 5.62E-17 | chr:12:55727213 |
| 12 rs7485991  | 55789129 C | 0.1184 | 5.62E-17 | chr:12:55727213 |
| 12 rs7487419  | 55769801 G | 0.1184 | 5.62E-17 | chr:12:55727213 |
| 12 rs7487895  | 55796720 C | 0.1184 | 5.62E-17 | chr:12:55727213 |
| 12 rs7488940  | 55802591 T | 0.1184 | 5.62E-17 | chr:12:55727213 |
| 12 rs7489047  | 55759851 G | 0.1184 | 5.62E-17 | chr:12:55727213 |
| 12 rs79104523 | 55749220 C | 0.1184 | 5.62E-17 | chr:12:55727213 |
| 12 rs7955088  | 55732963 T | 0.1184 | 5.62E-17 | chr:12:55727213 |
| 12 rs7959124  | 55726957 G | 0.1184 | 5.62E-17 | chr:12:55727213 |
| 12 rs7959837  | 55734511 A | 0.1184 | 5.62E-17 | chr:12:55727213 |
| 12 rs7971053  | 55729947 C | 0.1184 | 5.62E-17 | chr:12:55727213 |

|                |            |        |          |                 |
|----------------|------------|--------|----------|-----------------|
| 12 rs7976828   | 55726450 T | 0.1184 | 5.62E-17 | chr:12:55727213 |
| 12 rs12579181  | 55887087 T | 0.1195 | 5.86E-17 | chr:12:55727213 |
| 12 rs4309772   | 55888672 C | 0.1195 | 5.86E-17 | chr:12:55727213 |
| 12 rs59003108  | 55888940 T | 0.1195 | 5.86E-17 | chr:12:55727213 |
| 12 rs7310335   | 55884439 T | 0.1195 | 5.86E-17 | chr:12:55727213 |
| 12 rs7316594   | 55887407 A | 0.1195 | 5.86E-17 | chr:12:55727213 |
| 12 rs11171435  | 55758053 C | 0.1186 | 6.25E-17 | chr:12:55727213 |
| 12 rs201855666 | 55879919 A | 0.1211 | 6.33E-17 | chr:12:55727213 |
| 12 rs61957902  | 55738064 C | 0.1188 | 6.85E-17 | chr:12:55727213 |
| 12 rs61957914  | 55742041 A | 0.1232 | 9.71E-17 | chr:12:55727213 |
| 12 rs112331945 | 55781657 T | 0.1192 | 9.92E-17 | chr:12:55727213 |
| 12 rs60991522  | 55781529 T | 0.1192 | 9.92E-17 | chr:12:55727213 |
| 12 rs12578577  | 55716443 T | 0.1261 | 1.05E-16 | chr:12:55727213 |
| 12 rs12579852  | 55716569 A | 0.1261 | 1.05E-16 | chr:12:55727213 |
| 12 rs4448777   | 55724981 C | 0.1261 | 1.05E-16 | chr:12:55727213 |
| 12 rs4590978   | 55725086 T | 0.1261 | 1.05E-16 | chr:12:55727213 |
| 12 rs58480409  | 55719221 T | 0.1261 | 1.05E-16 | chr:12:55727213 |
| 12 rs59466585  | 55722736 G | 0.1261 | 1.05E-16 | chr:12:55727213 |
| 12 rs60873827  | 55717769 C | 0.1261 | 1.05E-16 | chr:12:55727213 |
| 12 rs61071395  | 55721228 C | 0.1261 | 1.05E-16 | chr:12:55727213 |
| 12 rs61957878  | 55716754 T | 0.1261 | 1.05E-16 | chr:12:55727213 |
| 12 rs61957884  | 55720177 G | 0.1261 | 1.05E-16 | chr:12:55727213 |
| 12 rs61957885  | 55720876 G | 0.1261 | 1.05E-16 | chr:12:55727213 |
| 12 rs66902680  | 55724080 C | 0.1261 | 1.05E-16 | chr:12:55727213 |
| 12 rs7960760   | 55722311 G | 0.1261 | 1.05E-16 | chr:12:55727213 |
| 12 rs12099665  | 55731191 T | 0.1249 | 1.10E-16 | chr:12:55727213 |
| 12 rs12099808  | 55731178 A | 0.1249 | 1.10E-16 | chr:12:55727213 |
| 12 rs12099811  | 55731200 A | 0.1249 | 1.10E-16 | chr:12:55727213 |
| 12 rs61957887  | 55721734 T | 0.1268 | 1.24E-16 | chr:12:55727213 |
| 12 rs57757372  | 55718780 G | 0.1278 | 1.26E-16 | chr:12:55727213 |
| 12 rs58709231  | 55719090 C | 0.1278 | 1.26E-16 | chr:12:55727213 |
| 12 rs59097302  | 55719030 T | 0.1278 | 1.26E-16 | chr:12:55727213 |
| 12 rs60142559  | 55719192 G | 0.1278 | 1.26E-16 | chr:12:55727213 |
| 12 rs60220253  | 55717410 G | 0.1278 | 1.26E-16 | chr:12:55727213 |
| 12 rs61957879  | 55716971 C | 0.1278 | 1.26E-16 | chr:12:55727213 |
| 12 rs7960719   | 55722035 A | 0.1272 | 1.42E-16 | chr:12:55727213 |
| 12 rs61566486  | 55781694 G | 0.1242 | 1.74E-16 | chr:12:55727213 |
| 12 rs12581959  | 55787311 A | 0.1348 | 2.39E-16 | chr:12:55727213 |
| 12 rs7960126   | 55813605 G | 0.1321 | 3.41E-16 | chr:12:55727213 |
| 12 rs67246762  | 55889642 T | 0.1448 | 5.11E-16 | chr:12:55727213 |
| 12 rs143455470 | 55879325 A | 0.1431 | 5.49E-16 | chr:12:55727213 |
| 12 rs58316942  | 55718919 A | 0.1421 | 7.11E-16 | chr:12:55727213 |
| 12 rs61957889  | 55724456 T | 0.1435 | 8.65E-16 | chr:12:55727213 |

|                |            |        |          |                 |
|----------------|------------|--------|----------|-----------------|
| 12 rs4336160   | 55891377 T | 0.2076 | 2.94E-12 | chr:12:55727213 |
| 12 rs7304684   | 55895538 T | 0.2076 | 2.94E-12 | chr:12:55727213 |
| 12 rs11171535  | 55914635 A | 0.2106 | 3.47E-12 | chr:12:55727213 |
| 12 rs76179834  | 55936746 T | 0.2106 | 3.47E-12 | chr:12:55727213 |
| 12 rs76783572  | 55936752 A | 0.2106 | 3.47E-12 | chr:12:55727213 |
| 12 rs12579451  | 55694116 T | 0.2173 | 3.62E-12 | chr:12:55727213 |
| 12 rs12582022  | 55694360 G | 0.2173 | 3.62E-12 | chr:12:55727213 |
| 12 rs60206376  | 55703375 A | 0.2173 | 3.62E-12 | chr:12:55727213 |
| 12 rs7489134   | 55702567 G | 0.2173 | 3.62E-12 | chr:12:55727213 |
| 12 rs7489181   | 55702575 A | 0.2173 | 3.62E-12 | chr:12:55727213 |
| 12 rs12230513  | 55916780 G | 0.2117 | 5.87E-12 | chr:12:55727213 |
| 12 rs183973202 | 55935021 A | 0.2117 | 5.87E-12 | chr:12:55727213 |
| 12 rs76126658  | 55942458 A | 0.2117 | 5.87E-12 | chr:12:55727213 |
| 12 rs4324500   | 55935029 A | 0.2123 | 6.79E-12 | chr:12:55727213 |
| 12 rs77755732  | 55924293 T | 0.2123 | 6.79E-12 | chr:12:55727213 |
| 12 rs11532447  | 55957772 T | 0.2131 | 6.91E-12 | chr:12:55727213 |
| 12 rs139464426 | 55958278 C | 0.2131 | 6.91E-12 | chr:12:55727213 |
| 12 rs146073724 | 55958414 A | 0.2131 | 6.91E-12 | chr:12:55727213 |
| 12 rs11171556  | 55949852 A | 0.2138 | 8.00E-12 | chr:12:55727213 |
| 12 rs11561427  | 55956274 T | 0.2138 | 8.00E-12 | chr:12:55727213 |
| 12 rs12579030  | 55689194 C | 0.2367 | 1.12E-11 | chr:12:55727213 |
| 12 rs12579915  | 55696789 C | 0.2367 | 1.12E-11 | chr:12:55727213 |
| 12 rs12580194  | 55696558 A | 0.2367 | 1.12E-11 | chr:12:55727213 |
| 12 rs12582734  | 55689572 A | 0.2367 | 1.12E-11 | chr:12:55727213 |
| 12 rs4491341   | 55697838 A | 0.2367 | 1.12E-11 | chr:12:55727213 |
| 12 rs58408480  | 55699186 T | 0.2367 | 1.12E-11 | chr:12:55727213 |
| 12 rs61539173  | 55703206 T | 0.2367 | 1.12E-11 | chr:12:55727213 |
| 12 rs61957868  | 55695527 A | 0.2367 | 1.12E-11 | chr:12:55727213 |
| 12 rs7968881   | 55694434 C | 0.2367 | 1.12E-11 | chr:12:55727213 |
| 12 rs7971451   | 55699950 A | 0.2367 | 1.12E-11 | chr:12:55727213 |
| 12 rs73118926  | 55703335 G | 0.2333 | 1.35E-11 | chr:12:55727213 |
| 12 rs56380243  | 55690727 G | 0.2381 | 1.39E-11 | chr:12:55727213 |
| 12 rs7976741   | 55696028 A | 0.2428 | 2.31E-11 | chr:12:55727213 |
| 12 rs4262806   | 55711562 A | 0.2471 | 2.43E-11 | chr:12:55727213 |
| 12 rs58332180  | 55711353 A | 0.2471 | 2.43E-11 | chr:12:55727213 |
| 12 rs7308316   | 55709162 A | 0.2471 | 2.43E-11 | chr:12:55727213 |
| 12 rs7974051   | 55713210 C | 0.2471 | 2.43E-11 | chr:12:55727213 |
| 12 rs73118932  | 55706631 T | 0.2445 | 3.25E-11 | chr:12:55727213 |
| 12 rs7952853   | 55845415 T | 0.2386 | 3.70E-11 | chr:12:55727213 |
| 12 rs12308286  | 55707326 A | 0.2533 | 4.97E-11 | chr:12:55727213 |
| 12 rs4593071   | 55842842 G | 0.2486 | 8.38E-11 | chr:12:55727213 |
| 12 rs7964964   | 55841398 T | 0.2486 | 8.38E-11 | chr:12:55727213 |
| 12 rs4759147   | 55770418 A | 0.2592 | 1.09E-10 | chr:12:55727213 |

|               |            |        |          |                 |
|---------------|------------|--------|----------|-----------------|
| 12 rs1478738  | 55505981 T | 0.2484 | 1.10E-10 | chr:12:55727213 |
| 12 rs2169856  | 55572652 G | 0.2484 | 1.10E-10 | chr:12:55727213 |
| 12 rs61956877 | 55518238 A | 0.2484 | 1.10E-10 | chr:12:55727213 |
| 12 rs10783740 | 55824905 C | 0.2531 | 1.11E-10 | chr:12:55727213 |
| 12 rs12371318 | 55838476 C | 0.2531 | 1.11E-10 | chr:12:55727213 |
| 12 rs12826311 | 55828310 T | 0.2531 | 1.11E-10 | chr:12:55727213 |
| 12 rs7486280  | 55823675 C | 0.2531 | 1.11E-10 | chr:12:55727213 |
| 12 rs7966072  | 55829213 A | 0.2531 | 1.11E-10 | chr:12:55727213 |
| 12 rs7311797  | 55834721 T | 0.2531 | 1.19E-10 | chr:12:55727213 |
| 12 rs10747744 | 55768014 T | 0.2611 | 1.34E-10 | chr:12:55727213 |
| 12 rs11171427 | 55742270 T | 0.2622 | 1.51E-10 | chr:12:55727213 |
| 12 rs12231054 | 55594459 G | 0.2526 | 1.51E-10 | chr:12:55727213 |
| 12 rs61956020 | 55618948 G | 0.2526 | 1.51E-10 | chr:12:55727213 |
| 12 rs10431547 | 55745950 G | 0.2625 | 1.63E-10 | chr:12:55727213 |
| 12 rs10735860 | 55732664 C | 0.2625 | 1.63E-10 | chr:12:55727213 |
| 12 rs10735861 | 55762857 G | 0.2625 | 1.63E-10 | chr:12:55727213 |
| 12 rs10735862 | 55763034 T | 0.2625 | 1.63E-10 | chr:12:55727213 |
| 12 rs10747742 | 55748509 A | 0.2625 | 1.63E-10 | chr:12:55727213 |
| 12 rs10747743 | 55755226 A | 0.2625 | 1.63E-10 | chr:12:55727213 |
| 12 rs10747745 | 55768086 A | 0.2625 | 1.63E-10 | chr:12:55727213 |
| 12 rs10747746 | 55769082 T | 0.2625 | 1.63E-10 | chr:12:55727213 |
| 12 rs10747747 | 55772188 T | 0.2625 | 1.63E-10 | chr:12:55727213 |
| 12 rs10747748 | 55774581 G | 0.2625 | 1.63E-10 | chr:12:55727213 |
| 12 rs10747752 | 55793235 A | 0.2625 | 1.63E-10 | chr:12:55727213 |
| 12 rs10783721 | 55732060 G | 0.2625 | 1.63E-10 | chr:12:55727213 |
| 12 rs10783724 | 55746910 G | 0.2625 | 1.63E-10 | chr:12:55727213 |
| 12 rs10783728 | 55762519 G | 0.2625 | 1.63E-10 | chr:12:55727213 |
| 12 rs10783730 | 55763463 G | 0.2625 | 1.63E-10 | chr:12:55727213 |
| 12 rs10783731 | 55767702 T | 0.2625 | 1.63E-10 | chr:12:55727213 |
| 12 rs10783734 | 55799682 G | 0.2625 | 1.63E-10 | chr:12:55727213 |
| 12 rs10783737 | 55802733 G | 0.2625 | 1.63E-10 | chr:12:55727213 |
| 12 rs10876742 | 55737616 T | 0.2625 | 1.63E-10 | chr:12:55727213 |
| 12 rs10876747 | 55745162 A | 0.2625 | 1.63E-10 | chr:12:55727213 |
| 12 rs10876749 | 55754085 G | 0.2625 | 1.63E-10 | chr:12:55727213 |
| 12 rs10876750 | 55757559 C | 0.2625 | 1.63E-10 | chr:12:55727213 |
| 12 rs10876751 | 55759878 A | 0.2625 | 1.63E-10 | chr:12:55727213 |
| 12 rs10876753 | 55767068 T | 0.2625 | 1.63E-10 | chr:12:55727213 |
| 12 rs10876754 | 55767295 G | 0.2625 | 1.63E-10 | chr:12:55727213 |
| 12 rs10876763 | 55788546 C | 0.2625 | 1.63E-10 | chr:12:55727213 |
| 12 rs10876764 | 55789304 G | 0.2625 | 1.63E-10 | chr:12:55727213 |
| 12 rs10876767 | 55797331 C | 0.2625 | 1.63E-10 | chr:12:55727213 |
| 12 rs10876768 | 55797728 A | 0.2625 | 1.63E-10 | chr:12:55727213 |
| 12 rs11171437 | 55761078 A | 0.2625 | 1.63E-10 | chr:12:55727213 |



|                |            |        |          |                 |
|----------------|------------|--------|----------|-----------------|
| 12 rs11171441  | 55766596 T | 0.2625 | 1.63E-10 | chr:12:55727213 |
| 12 rs11171444  | 55766896 C | 0.2625 | 1.63E-10 | chr:12:55727213 |
| 12 rs11171449  | 55789447 A | 0.2625 | 1.63E-10 | chr:12:55727213 |
| 12 rs4759000   | 55766037 C | 0.2625 | 1.63E-10 | chr:12:55727213 |
| 12 rs4759140   | 55733080 A | 0.2625 | 1.63E-10 | chr:12:55727213 |
| 12 rs4759145   | 55769542 A | 0.2625 | 1.63E-10 | chr:12:55727213 |
| 12 rs4759146   | 55770047 T | 0.2625 | 1.63E-10 | chr:12:55727213 |
| 12 rs7138676   | 55734240 G | 0.2625 | 1.63E-10 | chr:12:55727213 |
| 12 rs7294677   | 55800713 T | 0.2625 | 1.63E-10 | chr:12:55727213 |
| 12 rs7485722   | 55770909 T | 0.2625 | 1.63E-10 | chr:12:55727213 |
| 12 rs7487069   | 55744851 T | 0.2625 | 1.63E-10 | chr:12:55727213 |
| 12 rs7488140   | 55770771 G | 0.2625 | 1.63E-10 | chr:12:55727213 |
| 12 rs7488178   | 55770918 G | 0.2625 | 1.63E-10 | chr:12:55727213 |
| 12 rs10783741  | 55824985 C | 0.2566 | 1.67E-10 | chr:12:55727213 |
| 12 rs11171462  | 55838718 G | 0.2566 | 1.67E-10 | chr:12:55727213 |
| 12 rs7295548   | 55834719 A | 0.2566 | 1.67E-10 | chr:12:55727213 |
| 12 rs7974512   | 55713606 G | 0.2685 | 1.72E-10 | chr:12:55727213 |
| 12 rs9795610   | 55740956 A | 0.263  | 1.83E-10 | chr:12:55727213 |
| 12 rs7486665   | 55741380 A | 0.2629 | 1.84E-10 | chr:12:55727213 |
| 12 rs11171426  | 55741827 T | 0.2647 | 1.92E-10 | chr:12:55727213 |
| 12 rs7958843   | 55726716 T | 0.2646 | 2.11E-10 | chr:12:55727213 |
| 12 rs10876741  | 55723575 C | 0.2706 | 2.79E-10 | chr:12:55727213 |
| 12 rs4511372   | 55722251 C | 0.2706 | 2.79E-10 | chr:12:55727213 |
| 12 rs4758999   | 55756597 T | 0.2662 | 2.86E-10 | chr:12:55727213 |
| 12 rs199557929 | 55955762 C | 0.2391 | 2.87E-10 | chr:12:55727213 |
| 12 rs11171411  | 55719478 C | 0.271  | 3.03E-10 | chr:12:55727213 |
| 12 rs12301041  | 55718970 C | 0.271  | 3.03E-10 | chr:12:55727213 |
| 12 rs11171372  | 55608138 G | 0.2564 | 3.17E-10 | chr:12:55727213 |
| 12 rs7486167   | 55783942 T | 0.2628 | 3.83E-10 | chr:12:55727213 |
| 12 rs10783723  | 55738137 G | 0.2718 | 4.17E-10 | chr:12:55727213 |
| 12 rs201131895 | 55740725 A | 0.1821 | 6.53E-10 | chr:12:55727213 |
| 12 rs373941107 | 55740754 T | 0.1821 | 6.53E-10 | chr:12:55727213 |
| 12 rs376987469 | 55740755 G | 0.1821 | 6.53E-10 | chr:12:55727213 |
| 12 rs4759149   | 55827063 T | 0.2752 | 6.57E-10 | chr:12:55727213 |
| 12 rs10876758  | 55781712 G | 0.2706 | 7.78E-10 | chr:12:55727213 |
| 12 rs10876759  | 55781717 A | 0.2706 | 7.78E-10 | chr:12:55727213 |
| 12 rs9669227   | 55826498 T | 0.3123 | 1.01E-09 | chr:12:55727213 |
| 12 rs11171399  | 55679567 A | 0.2829 | 1.53E-09 | chr:12:55727213 |
| 12 rs4302411   | 55938276 T | 0.2928 | 1.62E-09 | chr:12:55727213 |
| 12 rs28881605  | 55914354 G | 0.2866 | 1.65E-09 | chr:12:55727213 |
| 12 rs6581016   | 55458430 A | 0.2817 | 1.70E-09 | chr:12:55727213 |
| 12 rs10783756  | 55920314 C | 0.2932 | 1.73E-09 | chr:12:55727213 |
| 12 rs10876806  | 55914022 G | 0.2932 | 1.73E-09 | chr:12:55727213 |

|                |            |        |          |                 |
|----------------|------------|--------|----------|-----------------|
| 12 rs7297323   | 55941692 C | 0.2932 | 1.73E-09 | chr:12:55727213 |
| 12 rs7963839   | 55936468 G | 0.2932 | 1.73E-09 | chr:12:55727213 |
| 12 rs1896044   | 55953670 A | 0.2939 | 1.83E-09 | chr:12:55727213 |
| 12 rs1896045   | 55953568 G | 0.2939 | 1.83E-09 | chr:12:55727213 |
| 12 rs7960547   | 55898639 C | 0.2962 | 2.06E-09 | chr:12:55727213 |
| 12 rs7138601   | 55895730 A | 0.3001 | 2.23E-09 | chr:12:55727213 |
| 12 rs11171523  | 55901413 T | 0.2971 | 2.32E-09 | chr:12:55727213 |
| 12 rs7133826   | 55939629 G | 0.3014 | 2.64E-09 | chr:12:55727213 |
| 12 rs11171550  | 55933641 C | 0.2967 | 2.96E-09 | chr:12:55727213 |
| 12 rs199896545 | 55932941 C | 0.2217 | 3.09E-09 | chr:12:55727213 |
| 12 rs6581066   | 55926695 A | 0.2971 | 3.14E-09 | chr:12:55727213 |
| 12 rs11171561  | 55960184 T | 0.2978 | 3.33E-09 | chr:12:55727213 |
| 12 rs11171562  | 55961414 C | 0.2978 | 3.33E-09 | chr:12:55727213 |
| 12 rs11543034  | 55959971 C | 0.2978 | 3.33E-09 | chr:12:55727213 |
| 12 rs7964180   | 55957169 G | 0.2978 | 3.33E-09 | chr:12:55727213 |
| 12 rs10876739  | 55682869 C | 0.2938 | 3.67E-09 | chr:12:55727213 |
| 12 rs10876738  | 55677395 A | 0.2949 | 4.45E-09 | chr:12:55727213 |
| 12 rs7978555   | 55656617 A | 0.2949 | 4.45E-09 | chr:12:55727213 |
| 12 rs7972171   | 55444946 C | 0.2941 | 4.53E-09 | chr:12:55727213 |
| 12 rs7487315   | 55782690 C | 0.2732 | 4.72E-09 | chr:12:55727213 |
| 12 rs7487832   | 55782814 A | 0.2732 | 4.72E-09 | chr:12:55727213 |
| 12 rs7487833   | 55782819 A | 0.2732 | 4.72E-09 | chr:12:55727213 |
| 12 rs11171521  | 55901314 T | 0.3078 | 5.34E-09 | chr:12:55727213 |
| 12 rs11495497  | 55740640 G | 0.2963 | 6.44E-09 | chr:12:55727213 |
| 12 rs73121057  | 55764909 A | 0.2084 | 6.48E-09 | chr:12:55727213 |
| 12 rs181265801 | 55900112 C | 0.3165 | 9.76E-09 | chr:12:55727213 |
| 12 rs11171522  | 55901315 G | 0.3462 | 2.21E-08 | chr:12:55727213 |
| 12 rs73108851  | 55417452 T | 0.3248 | 3.51E-08 | chr:12:55727213 |
| 12 rs10876719  | 55561012 G | 0.3421 | 1.36E-07 | chr:12:55727213 |
| 12 rs10876720  | 55561174 T | 0.3421 | 1.36E-07 | chr:12:55727213 |
| 12 rs7312500   | 55513552 G | 0.3421 | 1.36E-07 | chr:12:55727213 |
| 12 rs7133588   | 55879154 C | 2.962  | 5.63E-07 | chr:12:55727213 |
| 12 rs7133698   | 55886294 G | 2.932  | 7.30E-07 | chr:12:55727213 |
| 12 rs6581061   | 55885154 T | 2.932  | 7.63E-07 | chr:12:55727213 |
| 12 rs7302782   | 55870007 C | 2.932  | 7.63E-07 | chr:12:55727213 |
| 12 rs7310415   | 55877273 C | 2.932  | 7.63E-07 | chr:12:55727213 |
| 12 rs7310693   | 55884576 G | 2.932  | 7.63E-07 | chr:12:55727213 |
| 12 rs7314323   | 55877953 C | 2.932  | 7.63E-07 | chr:12:55727213 |
| 12 rs4130005   | 55860796 C | 2.899  | 8.49E-07 | chr:12:55727213 |
| 12 rs4642170   | 55858613 T | 2.902  | 9.26E-07 | chr:12:55727213 |
| 12 rs7300594   | 55806238 A | 2.902  | 9.26E-07 | chr:12:55727213 |
| 12 rs10783748  | 55870632 T | 2.85   | 1.22E-06 | chr:12:55727213 |
| 12 rs10876787  | 55875605 C | 2.85   | 1.22E-06 | chr:12:55727213 |

|                |            |        |          |                 |
|----------------|------------|--------|----------|-----------------|
| 12 rs12309178  | 55873663 A | 2.85   | 1.22E-06 | chr:12:55727213 |
| 12 rs141263973 | 55873020 T | 2.85   | 1.22E-06 | chr:12:55727213 |
| 12 rs188633040 | 55872895 T | 2.85   | 1.22E-06 | chr:12:55727213 |
| 12 rs4422358   | 55869718 T | 2.85   | 1.22E-06 | chr:12:55727213 |
| 12 rs7302745   | 55869837 G | 2.85   | 1.22E-06 | chr:12:55727213 |
| 12 rs7310158   | 55877061 C | 2.85   | 1.22E-06 | chr:12:55727213 |
| 12 rs7314214   | 55877960 A | 2.85   | 1.22E-06 | chr:12:55727213 |
| 12 rs77338658  | 55873086 T | 2.85   | 1.22E-06 | chr:12:55727213 |
| 12 rs6581046   | 55820121 C | 2.841  | 1.28E-06 | chr:12:55727213 |
| 12 rs10876772  | 55813826 C | 2.822  | 1.47E-06 | chr:12:55727213 |
| 12 rs7133443   | 55878999 C | 2.742  | 1.65E-06 | chr:12:55727213 |
| 12 rs10876791  | 55879633 A | 2.625  | 1.88E-06 | chr:12:55727213 |
| 12 rs113153049 | 55473494 T | 0.3016 | 2.10E-06 | chr:12:55727213 |
| 12 rs74478806  | 55482043 C | 0.3016 | 2.10E-06 | chr:12:55727213 |
| 12 rs7133342   | 55879050 A | 2.656  | 2.41E-06 | chr:12:55727213 |
| 12 rs200792122 | 55872821 G | 2.736  | 2.48E-06 | chr:12:55727213 |
| 12 rs7958414   | 55438675 T | 0.4055 | 2.69E-06 | chr:12:55727213 |
| 12 rs2162323   | 55965848 C | 0.3388 | 6.33E-06 | chr:12:55727213 |
| 12 rs61958463  | 55455167 A | 0.1915 | 1.38E-05 | chr:12:55727213 |
| 12 rs12369766  | 55256390 G | 0.3011 | 1.39E-05 | chr:12:55727213 |
| 12 rs17116558  | 55276250 C | 0.3011 | 1.39E-05 | chr:12:55727213 |
| 12 rs1316898   | 55965851 C | 0.328  | 1.91E-05 | chr:12:55727213 |
| 12 rs145091110 | 55281593 T | 0.2617 | 2.11E-05 | chr:12:55727213 |
| 12 rs61956302  | 55814747 G | 0.1599 | 2.21E-05 | chr:12:55727213 |
| 13 rs2805699   | 90723189 A | 76.89  | 1.65E-24 | chr:13:90743183 |
| 13 rs112632269 | 90731067 G | 68.65  | 3.55E-24 | chr:13:90743183 |
| 13 rs16943826  | 90710255 C | 68.65  | 3.55E-24 | chr:13:90743183 |
| 13 rs77191234  | 90719556 G | 68.65  | 3.55E-24 | chr:13:90743183 |
| 13 rs78721625  | 90744516 T | 68.65  | 3.55E-24 | chr:13:90743183 |
| 13 rs2805748   | 90747577 A | 73.14  | 5.80E-24 | chr:13:90743183 |
| 13 rs116763682 | 90743619 A | 65.29  | 1.29E-23 | chr:13:90743183 |
| 13 rs74507286  | 90738994 T | 65.29  | 1.29E-23 | chr:13:90743183 |
| 13 rs75805202  | 90735664 G | 65.29  | 1.29E-23 | chr:13:90743183 |
| 13 rs76202013  | 90714744 C | 65.29  | 1.29E-23 | chr:13:90743183 |
| 13 rs78645261  | 90754325 G | 65.29  | 1.29E-23 | chr:13:90743183 |
| 13 rs78975634  | 90720218 G | 65.29  | 1.29E-23 | chr:13:90743183 |
| 13 rs79110442  | 90748308 G | 65.29  | 1.29E-23 | chr:13:90743183 |
| 13 rs79785623  | 90752549 T | 65.29  | 1.29E-23 | chr:13:90743183 |
| 13 rs80233688  | 90723496 G | 65.29  | 1.29E-23 | chr:13:90743183 |
| 13 rs1341654   | 90661565 A | 72.68  | 1.72E-23 | chr:13:90743183 |
| 13 rs16943737  | 90663135 G | 64.51  | 3.55E-23 | chr:13:90743183 |
| 13 rs16943738  | 90664242 G | 64.51  | 3.55E-23 | chr:13:90743183 |
| 13 rs41322051  | 90646840 G | 64.51  | 3.55E-23 | chr:13:90743183 |

|                |            |       |          |                 |
|----------------|------------|-------|----------|-----------------|
| 13 rs74387961  | 90647017 A | 64.51 | 3.55E-23 | chr:13:90743183 |
| 13 rs74422803  | 90653835 T | 64.51 | 3.55E-23 | chr:13:90743183 |
| 13 rs74568779  | 90660687 A | 64.51 | 3.55E-23 | chr:13:90743183 |
| 13 rs76111549  | 90651195 A | 64.51 | 3.55E-23 | chr:13:90743183 |
| 13 rs76925939  | 90646777 T | 64.51 | 3.55E-23 | chr:13:90743183 |
| 13 rs77555222  | 90662826 C | 64.51 | 3.55E-23 | chr:13:90743183 |
| 13 rs78076983  | 90651105 G | 64.51 | 3.55E-23 | chr:13:90743183 |
| 13 rs78078484  | 90646090 A | 64.51 | 3.55E-23 | chr:13:90743183 |
| 13 rs78172895  | 90663325 A | 64.51 | 3.55E-23 | chr:13:90743183 |
| 13 rs78641456  | 90653738 G | 64.51 | 3.55E-23 | chr:13:90743183 |
| 13 rs78680587  | 90654218 A | 64.51 | 3.55E-23 | chr:13:90743183 |
| 13 rs78905293  | 90647677 T | 64.51 | 3.55E-23 | chr:13:90743183 |
| 13 rs78992908  | 90651318 A | 64.51 | 3.55E-23 | chr:13:90743183 |
| 13 rs79494540  | 90648492 C | 64.51 | 3.55E-23 | chr:13:90743183 |
| 13 rs79603316  | 90660753 A | 64.51 | 3.55E-23 | chr:13:90743183 |
| 13 rs80350675  | 90647983 G | 64.51 | 3.55E-23 | chr:13:90743183 |
| 13 rs41361347  | 90652322 G | 61.2  | 4.60E-23 | chr:13:90743183 |
| 13 rs112945355 | 90680625 T | 55.83 | 4.97E-23 | chr:13:90743183 |
| 13 rs113169741 | 90685650 A | 55.83 | 4.97E-23 | chr:13:90743183 |
| 13 rs114498245 | 90667379 A | 55.83 | 4.97E-23 | chr:13:90743183 |
| 13 rs115029999 | 90669505 G | 55.83 | 4.97E-23 | chr:13:90743183 |
| 13 rs137989181 | 90676229 T | 55.83 | 4.97E-23 | chr:13:90743183 |
| 13 rs1987095   | 90681873 C | 55.83 | 4.97E-23 | chr:13:90743183 |
| 13 rs1987156   | 90681662 A | 55.83 | 4.97E-23 | chr:13:90743183 |
| 13 rs57346044  | 90704533 C | 55.83 | 4.97E-23 | chr:13:90743183 |
| 13 rs74565296  | 90691322 T | 55.83 | 4.97E-23 | chr:13:90743183 |
| 13 rs75410608  | 90693188 A | 55.83 | 4.97E-23 | chr:13:90743183 |
| 13 rs75635330  | 90668043 C | 55.83 | 4.97E-23 | chr:13:90743183 |
| 13 rs76901628  | 90699709 C | 55.83 | 4.97E-23 | chr:13:90743183 |
| 13 rs78545676  | 90677712 G | 55.83 | 4.97E-23 | chr:13:90743183 |
| 13 rs78585383  | 90673119 T | 55.83 | 4.97E-23 | chr:13:90743183 |
| 13 rs78693129  | 90673027 T | 55.83 | 4.97E-23 | chr:13:90743183 |
| 13 rs79671279  | 90682347 T | 55.83 | 4.97E-23 | chr:13:90743183 |
| 13 rs7985369   | 90671522 A | 55.83 | 4.97E-23 | chr:13:90743183 |
| 13 rs80014975  | 90678526 G | 55.83 | 4.97E-23 | chr:13:90743183 |
| 13 rs76821422  | 90696710 T | 51.63 | 5.62E-22 | chr:13:90743183 |
| 13 rs117605767 | 90638149 G | 56.01 | 5.68E-22 | chr:13:90743183 |
| 13 rs74593387  | 90592567 A | 50.57 | 4.14E-21 | chr:13:90743183 |
| 13 rs76200599  | 90606676 T | 43.89 | 6.61E-20 | chr:13:90743183 |
| 13 rs76245692  | 90623318 T | 43.89 | 6.61E-20 | chr:13:90743183 |
| 13 rs6492468   | 90650308 T | 98.94 | 2.57E-19 | chr:13:90743183 |
| 13 rs6492469   | 90650326 A | 98.94 | 2.57E-19 | chr:13:90743183 |
| 13 rs186610268 | 90795129 A | 23.17 | 2.78E-19 | chr:13:90743183 |

|                |            |       |          |                 |
|----------------|------------|-------|----------|-----------------|
| 13 rs76649938  | 90799618 T | 23.17 | 2.78E-19 | chr:13:90743183 |
| 13 rs77533677  | 90798005 T | 23.17 | 2.78E-19 | chr:13:90743183 |
| 13 rs113355173 | 90805755 A | 22.58 | 4.86E-19 | chr:13:90743183 |
| 13 rs74734778  | 90805574 G | 22.58 | 4.86E-19 | chr:13:90743183 |
| 13 rs1341647   | 90653212 G | 128.5 | 4.19E-18 | chr:13:90743183 |
| 13 rs1361601   | 90651537 T | 128.5 | 4.19E-18 | chr:13:90743183 |
| 13 rs1417931   | 90652059 C | 128.5 | 4.19E-18 | chr:13:90743183 |
| 13 rs1417932   | 90651802 C | 128.5 | 4.19E-18 | chr:13:90743183 |
| 13 rs1578539   | 90647385 A | 128.5 | 4.19E-18 | chr:13:90743183 |
| 13 rs1857016   | 90653003 C | 128.5 | 4.19E-18 | chr:13:90743183 |
| 13 rs1935181   | 90649956 C | 128.5 | 4.19E-18 | chr:13:90743183 |
| 13 rs1935182   | 90649766 T | 128.5 | 4.19E-18 | chr:13:90743183 |
| 13 rs2805658   | 90652699 A | 128.5 | 4.19E-18 | chr:13:90743183 |
| 13 rs2805659   | 90652722 A | 128.5 | 4.19E-18 | chr:13:90743183 |
| 13 rs4773545   | 90650689 T | 128.5 | 4.19E-18 | chr:13:90743183 |
| 13 rs6492467   | 90646581 T | 128.5 | 4.19E-18 | chr:13:90743183 |
| 13 rs7321841   | 90645244 A | 128.5 | 4.19E-18 | chr:13:90743183 |
| 13 rs7326085   | 90645471 C | 128.5 | 4.19E-18 | chr:13:90743183 |
| 13 rs7987787   | 90648902 A | 128.5 | 4.19E-18 | chr:13:90743183 |
| 13 rs7987946   | 90648926 A | 128.5 | 4.19E-18 | chr:13:90743183 |
| 13 rs9522811   | 90647140 C | 128.5 | 4.19E-18 | chr:13:90743183 |
| 13 rs7987947   | 90648931 A | 123.6 | 5.93E-18 | chr:13:90743183 |
| 13 rs80247605  | 90664690 G | 102.4 | 7.48E-17 | chr:13:90743183 |
| 13 rs1491024   | 90715598 G | 14.62 | 8.20E-16 | chr:13:90743183 |
| 13 rs9588850   | 90717634 A | 14.62 | 8.20E-16 | chr:13:90743183 |
| 13 rs9588852   | 90719948 G | 16.25 | 1.18E-15 | chr:13:90743183 |
| 13 rs149865385 | 90872475 T | 12.16 | 1.76E-15 | chr:13:90743183 |
| 13 rs2637400   | 90723289 T | 20.42 | 5.97E-15 | chr:13:90743183 |
| 13 rs2805701   | 90723284 A | 20.42 | 5.97E-15 | chr:13:90743183 |
| 13 rs11841913  | 90637307 T | 8.149 | 3.46E-13 | chr:13:90743183 |
| 13 rs11842101  | 90633545 G | 7.663 | 4.32E-13 | chr:13:90743183 |
| 13 rs11842540  | 90634897 G | 7.663 | 4.32E-13 | chr:13:90743183 |
| 13 rs35159467  | 90631767 A | 7.663 | 4.32E-13 | chr:13:90743183 |
| 13 rs2805689   | 90715153 G | 7.074 | 4.66E-13 | chr:13:90743183 |
| 13 rs11620232  | 90642326 G | 7.597 | 5.09E-13 | chr:13:90743183 |
| 13 rs12855674  | 90638634 G | 7.597 | 5.09E-13 | chr:13:90743183 |
| 13 rs12857525  | 90638814 G | 7.597 | 5.09E-13 | chr:13:90743183 |
| 13 rs34788777  | 90640624 G | 7.597 | 5.09E-13 | chr:13:90743183 |
| 13 rs7322351   | 90639552 T | 7.597 | 5.09E-13 | chr:13:90743183 |
| 13 rs12858780  | 90735185 T | 6.169 | 1.35E-12 | chr:13:90743183 |
| 13 rs1586740   | 90747887 C | 6.169 | 1.35E-12 | chr:13:90743183 |
| 13 rs2350300   | 90733811 G | 6.169 | 1.35E-12 | chr:13:90743183 |
| 13 rs35414148  | 90749088 A | 6.169 | 1.35E-12 | chr:13:90743183 |

|                |            |       |          |                 |
|----------------|------------|-------|----------|-----------------|
| 13 rs3864991   | 90752677 G | 6.169 | 1.35E-12 | chr:13:90743183 |
| 13 rs4093505   | 90755052 G | 6.169 | 1.35E-12 | chr:13:90743183 |
| 13 rs4142563   | 90722674 G | 6.169 | 1.35E-12 | chr:13:90743183 |
| 13 rs4357809   | 90752644 C | 6.169 | 1.35E-12 | chr:13:90743183 |
| 13 rs4771804   | 90756276 G | 6.169 | 1.35E-12 | chr:13:90743183 |
| 13 rs4773550   | 90754699 T | 6.169 | 1.35E-12 | chr:13:90743183 |
| 13 rs7330958   | 90724514 T | 6.169 | 1.35E-12 | chr:13:90743183 |
| 13 rs7992099   | 90737810 G | 6.169 | 1.35E-12 | chr:13:90743183 |
| 13 rs7994352   | 90737852 A | 6.169 | 1.35E-12 | chr:13:90743183 |
| 13 rs9515679   | 90723917 T | 6.169 | 1.35E-12 | chr:13:90743183 |
| 13 rs9515680   | 90726064 G | 6.169 | 1.35E-12 | chr:13:90743183 |
| 13 rs9515684   | 90735792 A | 6.169 | 1.35E-12 | chr:13:90743183 |
| 13 rs9522843   | 90735691 A | 6.169 | 1.35E-12 | chr:13:90743183 |
| 13 rs9522844   | 90738863 T | 6.169 | 1.35E-12 | chr:13:90743183 |
| 13 rs9560547   | 90725963 T | 6.169 | 1.35E-12 | chr:13:90743183 |
| 13 rs1491012   | 90738253 C | 5.671 | 6.76E-12 | chr:13:90743183 |
| 13 rs72641548  | 90818172 T | 5.284 | 2.40E-11 | chr:13:90743183 |
| 13 rs7139586   | 90853329 T | 5.159 | 6.42E-11 | chr:13:90743183 |
| 13 rs1388186   | 90720423 A | 5.081 | 7.47E-11 | chr:13:90743183 |
| 13 rs17730970  | 90862534 G | 5.095 | 8.05E-11 | chr:13:90743183 |
| 13 rs7322297   | 90720522 A | 897.1 | 8.66E-11 | chr:13:90743183 |
| 13 rs75921720  | 90708825 C | 897.1 | 8.66E-11 | chr:13:90743183 |
| 13 rs75863885  | 90740389 C | 861.4 | 8.95E-11 | chr:13:90743183 |
| 13 rs2637401   | 90723306 T | 854.6 | 9.42E-11 | chr:13:90743183 |
| 13 rs2805700   | 90723275 A | 854.6 | 9.42E-11 | chr:13:90743183 |
| 13 rs8001217   | 90717865 C | 4.999 | 1.04E-10 | chr:13:90743183 |
| 13 rs9515678   | 90718301 A | 4.999 | 1.04E-10 | chr:13:90743183 |
| 13 rs9522836   | 90718114 T | 4.999 | 1.04E-10 | chr:13:90743183 |
| 13 rs2637414   | 90736401 A | 813.3 | 1.32E-10 | chr:13:90743183 |
| 13 rs2637459   | 90729037 A | 809.3 | 1.35E-10 | chr:13:90743183 |
| 13 rs11619601  | 90630160 G | 4.705 | 1.44E-10 | chr:13:90743183 |
| 13 rs148883547 | 90682831 G | 30.97 | 2.85E-10 | chr:13:90743183 |
| 13 rs12872730  | 90628330 T | 4.389 | 7.37E-10 | chr:13:90743183 |
| 13 rs34721005  | 90628659 C | 4.389 | 7.37E-10 | chr:13:90743183 |
| 13 rs34072176  | 90595015 G | 4.372 | 8.21E-10 | chr:13:90743183 |
| 13 rs67181673  | 90624858 G | 4.372 | 8.21E-10 | chr:13:90743183 |
| 13 rs116849433 | 90751369 G | 21.12 | 8.26E-10 | chr:13:90743183 |
| 13 rs143286281 | 90733243 T | 21.12 | 8.26E-10 | chr:13:90743183 |
| 13 rs35152474  | 90623202 T | 4.362 | 8.73E-10 | chr:13:90743183 |
| 13 rs35019682  | 90600049 G | 4.352 | 9.64E-10 | chr:13:90743183 |
| 13 rs12854096  | 90614128 G | 4.343 | 1.02E-09 | chr:13:90743183 |
| 13 rs8001179   | 90613977 G | 4.343 | 1.02E-09 | chr:13:90743183 |
| 13 rs12870592  | 90616121 T | 4.326 | 1.14E-09 | chr:13:90743183 |

|                |            |       |          |                 |
|----------------|------------|-------|----------|-----------------|
| 13 rs17633242  | 90603523 A | 4.326 | 1.14E-09 | chr:13:90743183 |
| 13 rs36012183  | 90604597 C | 4.326 | 1.14E-09 | chr:13:90743183 |
| 13 rs114291545 | 90749422 A | 16.04 | 1.91E-09 | chr:13:90743183 |
| 13 rs115351275 | 90709635 T | 16.04 | 1.91E-09 | chr:13:90743183 |
| 13 rs116060467 | 90710375 G | 16.04 | 1.91E-09 | chr:13:90743183 |
| 13 rs116973354 | 90722526 C | 16.04 | 1.91E-09 | chr:13:90743183 |
| 13 rs117473905 | 90716349 C | 16.04 | 1.91E-09 | chr:13:90743183 |
| 13 rs118067867 | 90739018 G | 16.04 | 1.91E-09 | chr:13:90743183 |
| 13 rs141011955 | 90729982 T | 16.04 | 1.91E-09 | chr:13:90743183 |
| 13 rs77168701  | 90718549 C | 16.04 | 1.91E-09 | chr:13:90743183 |
| 13 rs79900586  | 90756056 T | 16.04 | 1.91E-09 | chr:13:90743183 |
| 13 rs11839415  | 90579846 T | 4.17  | 1.94E-09 | chr:13:90743183 |
| 13 rs67842803  | 90583574 G | 4.17  | 1.94E-09 | chr:13:90743183 |
| 13 rs950956    | 90581710 C | 4.17  | 1.94E-09 | chr:13:90743183 |
| 13 rs67813670  | 90635824 T | 4.858 | 2.22E-09 | chr:13:90743183 |
| 13 rs11617103  | 90631248 T | 4.684 | 2.96E-09 | chr:13:90743183 |
| 13 rs11840615  | 90633462 T | 4.684 | 2.96E-09 | chr:13:90743183 |
| 13 rs11842409  | 90633533 C | 4.684 | 2.96E-09 | chr:13:90743183 |
| 13 rs11842551  | 90635001 G | 4.684 | 2.96E-09 | chr:13:90743183 |
| 13 rs11842578  | 90635214 G | 4.684 | 2.96E-09 | chr:13:90743183 |
| 13 rs33978002  | 90631956 C | 4.684 | 2.96E-09 | chr:13:90743183 |
| 13 rs34913089  | 90631879 A | 4.684 | 2.96E-09 | chr:13:90743183 |
| 13 rs35140659  | 90635765 G | 4.684 | 2.96E-09 | chr:13:90743183 |
| 13 rs35478160  | 90631588 A | 4.684 | 2.96E-09 | chr:13:90743183 |
| 13 rs35544140  | 90632802 C | 4.684 | 2.96E-09 | chr:13:90743183 |
| 13 rs36035336  | 90632808 G | 4.684 | 2.96E-09 | chr:13:90743183 |
| 13 rs36088073  | 90632180 G | 4.684 | 2.96E-09 | chr:13:90743183 |
| 13 rs36107022  | 90633068 G | 4.684 | 2.96E-09 | chr:13:90743183 |
| 13 rs4483712   | 90631681 T | 4.684 | 2.96E-09 | chr:13:90743183 |
| 13 rs67925817  | 90634231 C | 4.684 | 2.96E-09 | chr:13:90743183 |
| 13 rs71444053  | 90634418 T | 4.684 | 2.96E-09 | chr:13:90743183 |
| 13 rs75355243  | 90632450 C | 4.684 | 2.96E-09 | chr:13:90743183 |
| 13 rs6492463   | 90630714 A | 4.678 | 2.98E-09 | chr:13:90743183 |
| 13 rs6492464   | 90630756 A | 4.678 | 2.98E-09 | chr:13:90743183 |
| 13 rs6492465   | 90630793 T | 4.678 | 2.98E-09 | chr:13:90743183 |
| 13 rs11069955  | 90636907 C | 4.659 | 3.34E-09 | chr:13:90743183 |
| 13 rs11839010  | 90637082 T | 4.659 | 3.34E-09 | chr:13:90743183 |
| 13 rs7318758   | 90636318 A | 4.659 | 3.34E-09 | chr:13:90743183 |
| 13 rs7323349   | 90636352 A | 4.659 | 3.34E-09 | chr:13:90743183 |
| 13 rs7323973   | 90636677 A | 4.659 | 3.34E-09 | chr:13:90743183 |
| 13 rs35389000  | 90631733 A | 4.662 | 3.37E-09 | chr:13:90743183 |
| 13 rs1602410   | 90699029 A | 4.505 | 3.73E-09 | chr:13:90743183 |
| 13 rs9588859   | 90725395 A | 411.3 | 4.02E-09 | chr:13:90743183 |

|                |            |        |          |                 |
|----------------|------------|--------|----------|-----------------|
| 13 rs1987096   | 90681823 T | 4.44   | 4.53E-09 | chr:13:90743183 |
| 13 rs117983080 | 90804883 T | 33.92  | 4.81E-09 | chr:13:90743183 |
| 13 rs9522806   | 90635841 C | 4.522  | 5.39E-09 | chr:13:90743183 |
| 13 rs2805728   | 90742666 A | 3.836  | 7.70E-09 | chr:13:90743183 |
| 13 rs2637398   | 90722150 T | 3.837  | 7.92E-09 | chr:13:90743183 |
| 13 rs2637421   | 90740082 T | 3.837  | 7.92E-09 | chr:13:90743183 |
| 13 rs2637426   | 90741000 A | 3.837  | 7.92E-09 | chr:13:90743183 |
| 13 rs2637439   | 90732217 G | 3.837  | 7.92E-09 | chr:13:90743183 |
| 13 rs2805704   | 90727635 A | 3.837  | 7.92E-09 | chr:13:90743183 |
| 13 rs118021824 | 90816034 A | 13.57  | 1.15E-08 | chr:13:90743183 |
| 13 rs67849531  | 90635826 C | 4.77   | 1.78E-08 | chr:13:90743183 |
| 13 rs7991374   | 90713284 G | 3.771  | 4.76E-08 | chr:13:90743183 |
| 13 rs11841910  | 90637232 T | 4.03   | 4.89E-08 | chr:13:90743183 |
| 13 rs150706648 | 90738184 G | 27.2   | 7.69E-08 | chr:13:90743183 |
| 13 rs6492462   | 90630593 G | 3.54   | 1.05E-07 | chr:13:90743183 |
| 13 rs185458160 | 90699652 G | 55.54  | 1.31E-07 | chr:13:90743183 |
| 13 rs9555956   | 90559501 C | 3.868  | 1.72E-07 | chr:13:90743183 |
| 13 rs7318897   | 90541300 T | 3.849  | 1.91E-07 | chr:13:90743183 |
| 13 rs7491812   | 90752437 G | 0.2602 | 2.35E-07 | chr:13:90743183 |
| 13 rs9515674   | 90711524 G | 0.2634 | 2.82E-07 | chr:13:90743183 |
| 13 rs9515676   | 90716425 C | 0.2662 | 3.33E-07 | chr:13:90743183 |
| 13 rs9522832   | 90709541 C | 0.2662 | 3.33E-07 | chr:13:90743183 |
| 13 rs9522833   | 90709723 G | 0.2662 | 3.33E-07 | chr:13:90743183 |
| 13 rs4326917   | 90679195 G | 0.2927 | 4.00E-07 | chr:13:90743183 |
| 13 rs1935180   | 90596974 C | 3.183  | 5.84E-07 | chr:13:90743183 |
| 13 rs181802528 | 90736981 G | 42.95  | 6.14E-07 | chr:13:90743183 |
| 13 rs1935184   | 90607762 G | 3.182  | 6.17E-07 | chr:13:90743183 |
| 13 rs7992508   | 90605747 G | 3.182  | 6.17E-07 | chr:13:90743183 |
| 13 rs117984132 | 90853139 T | 7.419  | 6.74E-07 | chr:13:90743183 |
| 13 rs140725342 | 90709607 G | 72.06  | 9.20E-07 | chr:13:90743183 |
| 13 rs1491030   | 90702879 G | 0.31   | 9.35E-07 | chr:13:90743183 |
| 13 rs9588818   | 90627467 G | 3.075  | 1.06E-06 | chr:13:90743183 |
| 13 rs7986744   | 90693163 T | 3.064  | 1.29E-06 | chr:13:90743183 |
| 13 rs112440273 | 90618024 A | 3.02   | 1.64E-06 | chr:13:90743183 |
| 13 rs7996618   | 90616720 T | 3.02   | 1.64E-06 | chr:13:90743183 |
| 13 rs10047731  | 90875075 A | 2.956  | 2.08E-06 | chr:13:90743183 |
| 13 rs1592088   | 90655104 A | 0.2887 | 2.13E-06 | chr:13:90743183 |
| 13 rs2882283   | 90653844 A | 0.2887 | 2.13E-06 | chr:13:90743183 |
| 13 rs9522816   | 90661816 A | 0.2887 | 2.13E-06 | chr:13:90743183 |
| 13 rs1341649   | 90648220 T | 5.825  | 3.29E-06 | chr:13:90743183 |
| 13 rs191507114 | 90637807 A | 53.78  | 3.51E-06 | chr:13:90743183 |
| 13 rs1341661   | 90657913 G | 0.3051 | 4.52E-06 | chr:13:90743183 |
| 13 rs4773544   | 90650610 G | 0.3051 | 4.52E-06 | chr:13:90743183 |



|                |            |        |          |                 |
|----------------|------------|--------|----------|-----------------|
| 13 rs2794492   | 90663132 G | 0.306  | 4.65E-06 | chr:13:90743183 |
| 13 rs9301634   | 90574498 G | 2.985  | 4.95E-06 | chr:13:90743183 |
| 13 rs9560498   | 90572159 G | 2.985  | 4.95E-06 | chr:13:90743183 |
| 13 rs2805675   | 90707678 G | 0.3407 | 5.38E-06 | chr:13:90743183 |
| 13 rs72632618  | 90866328 A | 2.655  | 7.21E-06 | chr:13:90743183 |
| 13 rs1931137   | 90867672 C | 2.651  | 8.30E-06 | chr:13:90743183 |
| 13 rs9560577   | 90859851 C | 2.629  | 8.31E-06 | chr:13:90743183 |
| 13 rs9560582   | 90869873 A | 2.648  | 8.75E-06 | chr:13:90743183 |
| 13 rs4553466   | 90872224 G | 2.627  | 9.94E-06 | chr:13:90743183 |
| 13 rs7984375   | 90871986 C | 2.627  | 9.94E-06 | chr:13:90743183 |
| 13 rs117793157 | 90694205 C | 5.484  | 1.14E-05 | chr:13:90743183 |
| 13 rs139307145 | 90675441 C | 5.484  | 1.14E-05 | chr:13:90743183 |
| 13 rs548746627 | 90675256 C | 5.484  | 1.14E-05 | chr:13:90743183 |
| 13 rs55994643  | 90704398 A | 5.484  | 1.14E-05 | chr:13:90743183 |
| 13 rs565882327 | 90675264 C | 5.484  | 1.14E-05 | chr:13:90743183 |
| 13 rs74520633  | 90693303 T | 5.484  | 1.14E-05 | chr:13:90743183 |
| 13 rs76582632  | 90671100 T | 5.484  | 1.14E-05 | chr:13:90743183 |
| 13 rs77156828  | 90694151 C | 5.484  | 1.14E-05 | chr:13:90743183 |
| 13 rs77511551  | 90670611 T | 5.484  | 1.14E-05 | chr:13:90743183 |
| 13 rs77822207  | 90701077 G | 5.484  | 1.14E-05 | chr:13:90743183 |
| 13 rs78192708  | 90699764 C | 5.484  | 1.14E-05 | chr:13:90743183 |
| 13 rs78931332  | 90668211 T | 5.484  | 1.14E-05 | chr:13:90743183 |
| 13 rs9301656   | 90821987 A | 2.649  | 1.31E-05 | chr:13:90743183 |
| 13 rs117426292 | 90555243 T | 7.85   | 1.57E-05 | chr:13:90743183 |
| 13 rs1341650   | 90648217 C | 5.262  | 1.62E-05 | chr:13:90743183 |
| 13 rs1857017   | 90652869 T | 5.262  | 1.62E-05 | chr:13:90743183 |
| 13 rs2185648   | 90648598 G | 5.262  | 1.62E-05 | chr:13:90743183 |
| 13 rs7317856   | 90647978 A | 5.262  | 1.62E-05 | chr:13:90743183 |
| 13 rs7982868   | 90644770 G | 5.262  | 1.62E-05 | chr:13:90743183 |
| 13 rs7989743   | 90644957 T | 5.262  | 1.62E-05 | chr:13:90743183 |
| 13 rs7992539   | 90650150 G | 5.262  | 1.62E-05 | chr:13:90743183 |
| 13 rs79388488  | 90700311 T | 5.237  | 1.71E-05 | chr:13:90743183 |
| 13 rs534909547 | 90675272 A | 5.222  | 1.78E-05 | chr:13:90743183 |
| 13 rs529712683 | 90634896 A | 17.34  | 1.81E-05 | chr:13:90743183 |
| 13 rs142095130 | 90731169 G | 13.2   | 2.18E-05 | chr:13:90743183 |
| 13 rs147230913 | 90747803 G | 13.2   | 2.18E-05 | chr:13:90743183 |
| 13 rs2882441   | 90873539 A | 2.547  | 2.21E-05 | chr:13:90743183 |
| 13 rs9301660   | 90872807 A | 2.502  | 2.79E-05 | chr:13:90743183 |
| 13 rs9588804   | 90595948 G | 2.527  | 2.88E-05 | chr:13:90743183 |
| 13 rs12428825  | 90908442 C | 2.592  | 3.00E-05 | chr:13:90743183 |
| 13 rs12853685  | 90904839 A | 2.592  | 3.00E-05 | chr:13:90743183 |
| 13 rs12866812  | 90920757 C | 2.592  | 3.00E-05 | chr:13:90743183 |
| 13 rs12870077  | 90913388 A | 2.592  | 3.00E-05 | chr:13:90743183 |

|                |            |       |          |                 |
|----------------|------------|-------|----------|-----------------|
| 13 rs35757821  | 90916581 G | 2.592 | 3.00E-05 | chr:13:90743183 |
| 13 rs113859462 | 90866313 C | 2.484 | 3.05E-05 | chr:13:90743183 |
| 13 rs2882281   | 90622455 G | 2.531 | 3.29E-05 | chr:13:90743183 |
| 13 rs7324134   | 90620379 T | 2.531 | 3.29E-05 | chr:13:90743183 |
| 13 rs7987877   | 90621106 A | 2.531 | 3.29E-05 | chr:13:90743183 |
| 13 rs9583756   | 90622073 A | 2.531 | 3.29E-05 | chr:13:90743183 |
| 13 rs113805970 | 90860307 A | 2.461 | 3.48E-05 | chr:13:90743183 |
| 13 rs113843515 | 90860351 C | 2.461 | 3.48E-05 | chr:13:90743183 |
| 13 rs17669330  | 90862819 C | 2.461 | 3.48E-05 | chr:13:90743183 |
| 13 rs17730988  | 90862687 C | 2.461 | 3.48E-05 | chr:13:90743183 |
| 13 rs9555987   | 90861182 T | 2.461 | 3.48E-05 | chr:13:90743183 |
| 13 rs9560575   | 90859463 A | 2.461 | 3.48E-05 | chr:13:90743183 |
| 13 rs9560578   | 90861108 G | 2.461 | 3.48E-05 | chr:13:90743183 |
| 13 rs9560579   | 90861688 G | 2.461 | 3.48E-05 | chr:13:90743183 |
| 13 rs112892478 | 90523407 A | 10.43 | 3.53E-05 | chr:13:90743183 |
| 13 rs11069954  | 90617118 C | 2.526 | 3.56E-05 | chr:13:90743183 |
| 13 rs12184685  | 90619018 G | 2.526 | 3.56E-05 | chr:13:90743183 |
| 13 rs2027467   | 90618584 A | 2.526 | 3.56E-05 | chr:13:90743183 |
| 13 rs2185650   | 90618955 T | 2.526 | 3.56E-05 | chr:13:90743183 |
| 13 rs7995245   | 90616709 A | 2.526 | 3.56E-05 | chr:13:90743183 |
| 13 rs9583754   | 90616363 T | 2.526 | 3.56E-05 | chr:13:90743183 |
| 13 rs9588812   | 90617329 T | 2.526 | 3.56E-05 | chr:13:90743183 |
| 13 rs9588814   | 90623011 C | 2.526 | 3.56E-05 | chr:13:90743183 |
| 13 rs9588815   | 90623215 C | 2.526 | 3.56E-05 | chr:13:90743183 |
| 14 rs12586923  | 20559937 A | 25.83 | 3.84E-19 | chr:14:20552746 |
| 14 rs12587536  | 20559906 T | 25.83 | 3.84E-19 | chr:14:20552746 |
| 14 rs12588910  | 20558938 C | 25.83 | 3.84E-19 | chr:14:20552746 |
| 14 rs7152272   | 20559234 A | 25.83 | 3.84E-19 | chr:14:20552746 |
| 14 rs7158086   | 20559451 T | 25.83 | 3.84E-19 | chr:14:20552746 |
| 14 rs12590521  | 20558876 T | 25.67 | 4.38E-19 | chr:14:20552746 |
| 14 rs7148411   | 20559282 G | 18.7  | 6.68E-19 | chr:14:20552746 |
| 14 rs11158661  | 20556366 T | 29.29 | 1.07E-18 | chr:14:20552746 |
| 14 rs4144239   | 20561922 C | 29.29 | 1.07E-18 | chr:14:20552746 |
| 14 rs4144240   | 20561753 C | 29.29 | 1.07E-18 | chr:14:20552746 |
| 14 rs57793822  | 20561481 A | 29.29 | 1.07E-18 | chr:14:20552746 |
| 14 rs58368472  | 20561378 T | 29.29 | 1.07E-18 | chr:14:20552746 |
| 14 rs969774    | 20562080 T | 29.29 | 1.07E-18 | chr:14:20552746 |
| 14 rs12433363  | 20561341 A | 20.69 | 1.14E-18 | chr:14:20552746 |
| 14 rs12881697  | 20560434 G | 20.69 | 1.14E-18 | chr:14:20552746 |
| 14 rs7153404   | 20550111 C | 29.11 | 1.22E-18 | chr:14:20552746 |
| 14 rs12890274  | 20560354 T | 20.61 | 1.28E-18 | chr:14:20552746 |
| 14 rs4144238   | 20561971 C | 28.85 | 1.44E-18 | chr:14:20552746 |
| 14 rs12897224  | 20560235 C | 9.426 | 8.22E-18 | chr:14:20552746 |

|                |            |       |          |                 |
|----------------|------------|-------|----------|-----------------|
| 14 rs1958722   | 20562590 G | 42.28 | 1.58E-17 | chr:14:20552746 |
| 14 rs4297617   | 20557961 T | 50.41 | 1.74E-16 | chr:14:20552746 |
| 14 rs4360850   | 20558013 A | 50.41 | 1.74E-16 | chr:14:20552746 |
| 14 rs4438225   | 20557810 A | 50.41 | 1.74E-16 | chr:14:20552746 |
| 14 rs4572311   | 20557971 C | 50.41 | 1.74E-16 | chr:14:20552746 |
| 14 rs4981728   | 20560512 C | 50.41 | 1.74E-16 | chr:14:20552746 |
| 14 rs78783511  | 20555396 C | 81.47 | 1.85E-16 | chr:14:20552746 |
| 14 rs10136466  | 20550347 C | 76.81 | 3.22E-16 | chr:14:20552746 |
| 14 rs11158659  | 20556212 A | 76.81 | 3.22E-16 | chr:14:20552746 |
| 14 rs11158660  | 20556259 C | 76.81 | 3.22E-16 | chr:14:20552746 |
| 14 rs12434437  | 20556447 T | 76.81 | 3.22E-16 | chr:14:20552746 |
| 14 rs12434463  | 20556513 T | 76.81 | 3.22E-16 | chr:14:20552746 |
| 14 rs6573757   | 20555744 A | 76.81 | 3.22E-16 | chr:14:20552746 |
| 14 rs6573759   | 20555817 C | 76.81 | 3.22E-16 | chr:14:20552746 |
| 14 rs6573762   | 20555920 A | 76.45 | 3.33E-16 | chr:14:20552746 |
| 14 rs7401094   | 20555950 C | 76.45 | 3.33E-16 | chr:14:20552746 |
| 14 rs7151579   | 20556265 G | 75.7  | 3.82E-16 | chr:14:20552746 |
| 14 rs6573756   | 20555675 G | 75.39 | 3.94E-16 | chr:14:20552746 |
| 14 rs7144896   | 20563540 A | 5.382 | 5.73E-15 | chr:14:20552746 |
| 14 rs7158044   | 20563508 C | 5.382 | 5.73E-15 | chr:14:20552746 |
| 14 rs7150862   | 20564461 A | 5.315 | 1.07E-14 | chr:14:20552746 |
| 14 rs2225388   | 20563664 C | 5.259 | 1.09E-14 | chr:14:20552746 |
| 14 rs12890060  | 20565461 G | 5.26  | 1.14E-14 | chr:14:20552746 |
| 14 rs1958724   | 20565487 T | 5.26  | 1.14E-14 | chr:14:20552746 |
| 14 rs1958725   | 20565515 G | 5.26  | 1.14E-14 | chr:14:20552746 |
| 14 rs2210191   | 20563840 G | 5.26  | 1.14E-14 | chr:14:20552746 |
| 14 rs4303403   | 20565381 C | 5.26  | 1.14E-14 | chr:14:20552746 |
| 14 rs7156270   | 20564435 T | 5.26  | 1.14E-14 | chr:14:20552746 |
| 14 rs7156816   | 20564737 T | 5.26  | 1.14E-14 | chr:14:20552746 |
| 14 rs12895600  | 20566286 G | 4.741 | 3.04E-14 | chr:14:20552746 |
| 14 rs1958727   | 20565936 T | 4.741 | 3.04E-14 | chr:14:20552746 |
| 14 rs7140825   | 20563466 G | 4.664 | 3.41E-14 | chr:14:20552746 |
| 14 rs7150250   | 20563495 T | 4.664 | 3.41E-14 | chr:14:20552746 |
| 14 rs28750505  | 20577068 A | 4.803 | 3.41E-14 | chr:14:20552746 |
| 14 rs28887469  | 20577050 T | 4.803 | 3.41E-14 | chr:14:20552746 |
| 14 rs3939209   | 20578244 G | 5.007 | 3.78E-14 | chr:14:20552746 |
| 14 rs201183120 | 20575571 G | 4.882 | 3.88E-14 | chr:14:20552746 |
| 14 rs7156327   | 20578170 G | 5.006 | 4.01E-14 | chr:14:20552746 |
| 14 rs112874053 | 20572537 A | 4.978 | 4.35E-14 | chr:14:20552746 |
| 14 rs11844863  | 20568135 C | 4.978 | 4.35E-14 | chr:14:20552746 |
| 14 rs11850994  | 20577628 A | 4.978 | 4.35E-14 | chr:14:20552746 |
| 14 rs7151455   | 20577818 G | 4.978 | 4.35E-14 | chr:14:20552746 |
| 14 rs9743609   | 20573071 A | 4.978 | 4.35E-14 | chr:14:20552746 |

|                |            |        |          |                 |
|----------------|------------|--------|----------|-----------------|
| 14 rs7143710   | 20577918 T | 4.979  | 4.55E-14 | chr:14:20552746 |
| 14 rs7159989   | 20577910 A | 4.979  | 4.55E-14 | chr:14:20552746 |
| 14 rs190993235 | 20574230 A | 4.917  | 5.67E-14 | chr:14:20552746 |
| 14 rs9707258   | 20573142 C | 4.654  | 6.80E-14 | chr:14:20552746 |
| 14 rs10149475  | 20565183 A | 4.559  | 6.83E-14 | chr:14:20552746 |
| 14 rs12892241  | 20563896 T | 4.559  | 6.83E-14 | chr:14:20552746 |
| 14 rs1958726   | 20565683 A | 4.559  | 6.83E-14 | chr:14:20552746 |
| 14 rs9743620   | 20573576 A | 4.815  | 7.78E-14 | chr:14:20552746 |
| 14 rs202152920 | 20575655 G | 4.815  | 8.25E-14 | chr:14:20552746 |
| 14 rs36074339  | 20572229 T | 4.724  | 9.06E-14 | chr:14:20552746 |
| 14 rs4981066   | 20570809 C | 4.553  | 1.10E-13 | chr:14:20552746 |
| 14 rs67680230  | 20569553 G | 4.553  | 1.10E-13 | chr:14:20552746 |
| 14 rs36126932  | 20576705 G | 4.511  | 1.48E-13 | chr:14:20552746 |
| 14 rs36142459  | 20576716 C | 4.511  | 1.48E-13 | chr:14:20552746 |
| 14 rs111429016 | 20577519 G | 4.421  | 1.93E-13 | chr:14:20552746 |
| 14 rs12887942  | 20577454 G | 4.421  | 1.93E-13 | chr:14:20552746 |
| 14 rs145789052 | 20577567 A | 4.421  | 1.93E-13 | chr:14:20552746 |
| 14 rs7152008   | 20566893 T | 4.38   | 2.27E-13 | chr:14:20552746 |
| 14 rs35344717  | 20568046 C | 4.38   | 2.44E-13 | chr:14:20552746 |
| 14 rs60649626  | 20568452 A | 4.38   | 2.44E-13 | chr:14:20552746 |
| 14 rs7159862   | 20569410 A | 4.38   | 2.44E-13 | chr:14:20552746 |
| 14 rs61993646  | 20574305 G | 5.838  | 1.76E-11 | chr:14:20552746 |
| 14 rs375935149 | 20576375 T | 0.2726 | 9.94E-10 | chr:14:20552746 |
| 14 rs573217071 | 20576361 G | 0.2726 | 9.94E-10 | chr:14:20552746 |
| 14 rs76503330  | 20576401 C | 0.2896 | 1.90E-09 | chr:14:20552746 |
| 14 rs369097102 | 20621303 G | 5.925  | 2.67E-09 | chr:14:20552746 |
| 14 rs144272469 | 20571849 T | 18.73  | 2.89E-09 | chr:14:20552746 |
| 14 rs12588809  | 20572684 A | 0.3215 | 9.17E-09 | chr:14:20552746 |
| 14 rs1188535   | 20645608 G | 0.2696 | 9.48E-09 | chr:14:20552746 |
| 14 rs72669071  | 20568482 C | 5.322  | 1.42E-08 | chr:14:20552746 |
| 14 rs1953554   | 20664258 A | 2.67   | 6.75E-08 | chr:14:20552746 |
| 14 rs17097317  | 20606144 C | 0.233  | 9.05E-08 | chr:14:20552746 |
| 14 rs10149500  | 20599515 C | 0.2345 | 1.04E-07 | chr:14:20552746 |
| 14 rs1958730   | 20600154 C | 0.2345 | 1.04E-07 | chr:14:20552746 |
| 14 rs4514585   | 20597055 C | 0.2345 | 1.04E-07 | chr:14:20552746 |
| 14 rs914073    | 20599640 T | 0.2345 | 1.04E-07 | chr:14:20552746 |
| 14 rs58495941  | 20605051 C | 0.2358 | 1.15E-07 | chr:14:20552746 |
| 14 rs2318480   | 20591214 A | 3.498  | 1.16E-07 | chr:14:20552746 |
| 14 rs17242467  | 20608329 A | 3.417  | 1.30E-07 | chr:14:20552746 |
| 14 rs17097307  | 20606091 G | 0.2237 | 1.64E-07 | chr:14:20552746 |
| 14 rs2039235   | 20605595 G | 0.2237 | 1.64E-07 | chr:14:20552746 |
| 14 rs34835847  | 20605266 T | 0.2237 | 1.64E-07 | chr:14:20552746 |
| 14 rs117593036 | 20601736 C | 0.2252 | 1.86E-07 | chr:14:20552746 |

|                |            |        |          |                 |
|----------------|------------|--------|----------|-----------------|
| 14 rs12434752  | 20602228 C | 0.2252 | 1.86E-07 | chr:14:20552746 |
| 14 rs138091604 | 20597454 T | 0.2252 | 1.86E-07 | chr:14:20552746 |
| 14 rs187200042 | 20597311 G | 0.2252 | 1.86E-07 | chr:14:20552746 |
| 14 rs1888370   | 20588893 T | 0.2252 | 1.86E-07 | chr:14:20552746 |
| 14 rs914074    | 20600017 G | 0.2252 | 1.86E-07 | chr:14:20552746 |
| 14 rs9796435   | 20601311 C | 0.2252 | 1.86E-07 | chr:14:20552746 |
| 14 rs12893678  | 20597588 A | 0.2264 | 2.05E-07 | chr:14:20552746 |
| 14 rs34659767  | 20605251 C | 0.2264 | 2.05E-07 | chr:14:20552746 |
| 14 rs8015300   | 20601713 T | 0.2264 | 2.05E-07 | chr:14:20552746 |
| 14 rs11158828  | 20584582 G | 0.2367 | 2.24E-07 | chr:14:20552746 |
| 14 rs1952824   | 20585203 G | 0.2367 | 2.24E-07 | chr:14:20552746 |
| 14 rs1959339   | 20610349 G | 0.2284 | 2.24E-07 | chr:14:20552746 |
| 14 rs12590518  | 20593122 G | 0.2382 | 2.54E-07 | chr:14:20552746 |
| 14 rs12432461  | 20584199 T | 0.2388 | 2.87E-07 | chr:14:20552746 |
| 14 rs11158821  | 20582608 A | 0.2399 | 3.08E-07 | chr:14:20552746 |
| 14 rs12433977  | 20602267 C | 0.2404 | 3.16E-07 | chr:14:20552746 |
| 14 rs113231632 | 20551103 A | 2.492  | 3.41E-07 | chr:14:20552746 |
| 14 rs58438833  | 20552415 C | 2.274  | 4.29E-07 | chr:14:20552746 |
| 14 rs56163433  | 20579247 T | 0.2531 | 4.80E-07 | chr:14:20552746 |
| 14 rs61993653  | 20633961 A | 3.198  | 5.19E-07 | chr:14:20552746 |
| 14 rs72638470  | 20636475 T | 3.198  | 5.19E-07 | chr:14:20552746 |
| 14 rs10150358  | 20552946 G | 2.258  | 5.48E-07 | chr:14:20552746 |
| 14 rs12434086  | 20591724 T | 0.2447 | 9.27E-07 | chr:14:20552746 |
| 14 rs2318883   | 20601049 A | 0.25   | 1.28E-06 | chr:14:20552746 |
| 14 rs58793756  | 20639063 A | 0.4316 | 1.36E-06 | chr:14:20552746 |
| 14 rs36153650  | 20576301 A | 0.2108 | 1.64E-06 | chr:14:20552746 |
| 14 rs77773790  | 20576294 A | 0.2108 | 1.64E-06 | chr:14:20552746 |
| 14 rs1959651   | 20548729 C | 3.454  | 2.64E-06 | chr:14:20552746 |
| 14 rs2150324   | 20525833 A | 2.338  | 3.95E-06 | chr:14:20552746 |
| 14 rs2183533   | 20527602 C | 2.332  | 4.29E-06 | chr:14:20552746 |
| 14 rs1958715   | 20528207 A | 2.331  | 4.44E-06 | chr:14:20552746 |
| 14 rs1958716   | 20528321 G | 2.331  | 4.44E-06 | chr:14:20552746 |
| 14 rs1958717   | 20528362 G | 2.331  | 4.44E-06 | chr:14:20552746 |
| 14 rs2150325   | 20527290 A | 2.331  | 4.44E-06 | chr:14:20552746 |
| 14 rs2150326   | 20527359 T | 2.331  | 4.44E-06 | chr:14:20552746 |
| 14 rs2150327   | 20527470 G | 2.331  | 4.44E-06 | chr:14:20552746 |
| 14 rs2775245   | 20526511 T | 2.331  | 4.44E-06 | chr:14:20552746 |
| 14 rs2775246   | 20526535 A | 2.331  | 4.44E-06 | chr:14:20552746 |
| 14 rs7152940   | 20527044 T | 2.331  | 4.44E-06 | chr:14:20552746 |
| 14 rs944398    | 20532379 C | 2.331  | 4.44E-06 | chr:14:20552746 |
| 14 rs1958712   | 20525385 G | 2.32   | 4.50E-06 | chr:14:20552746 |
| 14 rs1958713   | 20525461 T | 2.32   | 4.50E-06 | chr:14:20552746 |
| 14 rs1959632   | 20525445 A | 2.32   | 4.50E-06 | chr:14:20552746 |

|                |            |        |          |                 |
|----------------|------------|--------|----------|-----------------|
| 14 rs1188548   | 20653932 T | 2.281  | 5.17E-06 | chr:14:20552746 |
| 14 rs1188576   | 20658375 T | 2.281  | 5.17E-06 | chr:14:20552746 |
| 14 rs1958710   | 20525182 T | 2.298  | 5.32E-06 | chr:14:20552746 |
| 14 rs1958711   | 20525320 T | 2.298  | 5.32E-06 | chr:14:20552746 |
| 14 rs1959634   | 20524608 T | 2.298  | 5.32E-06 | chr:14:20552746 |
| 14 rs7157543   | 20527034 A | 2.316  | 5.33E-06 | chr:14:20552746 |
| 14 rs72669017  | 20523568 G | 3.734  | 5.57E-06 | chr:14:20552746 |
| 14 rs72669018  | 20523598 T | 3.734  | 5.57E-06 | chr:14:20552746 |
| 14 rs2792158   | 20526904 C | 2.295  | 6.01E-06 | chr:14:20552746 |
| 14 rs55888788  | 20526854 A | 2.295  | 6.01E-06 | chr:14:20552746 |
| 14 rs7145013   | 20526912 C | 2.295  | 6.01E-06 | chr:14:20552746 |
| 14 rs61996981  | 20662198 A | 2.248  | 6.76E-06 | chr:14:20552746 |
| 14 rs183972550 | 20509518 C | 3.655  | 6.92E-06 | chr:14:20552746 |
| 14 rs1952815   | 20519713 A | 3.651  | 7.16E-06 | chr:14:20552746 |
| 14 rs1952818   | 20519905 A | 3.651  | 7.16E-06 | chr:14:20552746 |
| 14 rs147248666 | 20508670 C | 3.634  | 7.57E-06 | chr:14:20552746 |
| 14 rs1188568   | 20656645 G | 2.236  | 7.63E-06 | chr:14:20552746 |
| 14 rs995726    | 20529652 G | 2.269  | 8.44E-06 | chr:14:20552746 |
| 14 rs2318476   | 20522392 T | 3.584  | 8.85E-06 | chr:14:20552746 |
| 14 rs72669013  | 20518709 C | 3.584  | 8.85E-06 | chr:14:20552746 |
| 14 rs72669014  | 20518781 C | 3.584  | 8.85E-06 | chr:14:20552746 |
| 14 rs10484224  | 20504435 T | 3.541  | 1.02E-05 | chr:14:20552746 |
| 14 rs10484226  | 20511107 C | 3.541  | 1.02E-05 | chr:14:20552746 |
| 14 rs138516517 | 20510655 G | 3.541  | 1.02E-05 | chr:14:20552746 |
| 14 rs148313578 | 20508671 C | 3.541  | 1.02E-05 | chr:14:20552746 |
| 14 rs17211104  | 20504874 T | 3.541  | 1.02E-05 | chr:14:20552746 |
| 14 rs17277060  | 20514180 T | 3.541  | 1.02E-05 | chr:14:20552746 |
| 14 rs372920758 | 20506314 T | 3.541  | 1.02E-05 | chr:14:20552746 |
| 14 rs55927734  | 20506265 C | 3.541  | 1.02E-05 | chr:14:20552746 |
| 14 rs569454096 | 20507515 G | 3.541  | 1.02E-05 | chr:14:20552746 |
| 14 rs138267523 | 20657684 T | 7.552  | 1.17E-05 | chr:14:20552746 |
| 14 rs374481570 | 20550995 A | 0.2066 | 1.19E-05 | chr:14:20552746 |
| 14 rs17122640  | 20503541 A | 3.478  | 1.26E-05 | chr:14:20552746 |
| 14 rs143867877 | 20505450 A | 3.435  | 1.46E-05 | chr:14:20552746 |
| 14 rs45584133  | 20528250 T | 3.506  | 2.30E-05 | chr:14:20552746 |
| 14 rs45585336  | 20528682 C | 3.506  | 2.30E-05 | chr:14:20552746 |
| 14 rs55893849  | 20524035 C | 3.506  | 2.30E-05 | chr:14:20552746 |
| 14 rs56327453  | 20529148 C | 3.506  | 2.30E-05 | chr:14:20552746 |
| 14 rs7152931   | 20527032 T | 3.506  | 2.30E-05 | chr:14:20552746 |
| 14 rs7161355   | 20526287 C | 3.506  | 2.30E-05 | chr:14:20552746 |
| 14 rs72669019  | 20524309 C | 3.506  | 2.30E-05 | chr:14:20552746 |
| 14 rs72669021  | 20524956 A | 3.506  | 2.30E-05 | chr:14:20552746 |
| 14 rs72669022  | 20525093 G | 3.506  | 2.30E-05 | chr:14:20552746 |

|    |            |          |   |         |          |                 |
|----|------------|----------|---|---------|----------|-----------------|
| 14 | rs72669025 | 20526239 | C | 3.506   | 2.30E-05 | chr:14:20552746 |
| 14 | rs72669031 | 20527127 | C | 3.506   | 2.30E-05 | chr:14:20552746 |
| 14 | rs72669032 | 20527202 | C | 3.506   | 2.30E-05 | chr:14:20552746 |
| 14 | rs72669033 | 20527443 | C | 3.506   | 2.30E-05 | chr:14:20552746 |
| 14 | rs72669037 | 20529550 | A | 3.506   | 2.30E-05 | chr:14:20552746 |
| 14 | rs78059363 | 20529431 | T | 3.506   | 2.30E-05 | chr:14:20552746 |
| 14 | rs1188543  | 20651901 | C | 2.186   | 2.57E-05 | chr:14:20552746 |
| 14 | rs17277025 | 20502044 | T | 3.263   | 2.88E-05 | chr:14:20552746 |
| 14 | rs45553840 | 20501842 | C | 3.263   | 2.88E-05 | chr:14:20552746 |
| 14 | rs1756310  | 20645408 | C | 0.3587  | 2.97E-05 | chr:14:20552746 |
| 14 | rs1763740  | 20645415 | G | 0.3587  | 2.97E-05 | chr:14:20552746 |
| 14 | rs2104803  | 20592038 | C | 2.093   | 3.62E-05 | chr:14:20552746 |
| 14 | rs11158865 | 20589264 | T | 2.083   | 4.06E-05 | chr:14:20552746 |
| 14 | rs2094841  | 20587053 | G | 2.083   | 4.06E-05 | chr:14:20552746 |
| 15 | rs2729806  | 63373329 | T | 0.07968 | 7.99E-27 | chr:15:63374594 |
| 15 | rs2729805  | 63374289 | A | 0.07929 | 8.84E-27 | chr:15:63374594 |
| 15 | rs2652804  | 63374256 | T | 0.07535 | 9.27E-27 | chr:15:63374594 |
| 15 | rs2652805  | 63374129 | A | 0.07535 | 9.27E-27 | chr:15:63374594 |
| 15 | rs2652806  | 63374127 | C | 0.07535 | 9.27E-27 | chr:15:63374594 |
| 15 | rs2937855  | 63374677 | G | 0.07535 | 9.27E-27 | chr:15:63374594 |
| 15 | rs1135403  | 63344958 | G | 0.1141  | 6.57E-25 | chr:15:63374594 |
| 15 | rs1574311  | 63346320 | G | 0.1143  | 7.81E-25 | chr:15:63374594 |
| 15 | rs16953467 | 63347997 | A | 0.1143  | 7.81E-25 | chr:15:63374594 |
| 15 | rs7166724  | 63348395 | G | 0.1143  | 7.81E-25 | chr:15:63374594 |
| 15 | rs2937857  | 63369571 | A | 0.1154  | 9.79E-25 | chr:15:63374594 |
| 15 | rs11071722 | 63350422 | A | 0.1144  | 1.05E-24 | chr:15:63374594 |
| 15 | rs7173072  | 63349564 | C | 0.1144  | 1.05E-24 | chr:15:63374594 |
| 15 | rs4238371  | 63347403 | G | 0.1149  | 1.11E-24 | chr:15:63374594 |
| 15 | rs6494387  | 63345526 | A | 0.1214  | 1.93E-24 | chr:15:63374594 |
| 15 | rs1966032  | 63365471 | C | 0.1226  | 2.15E-24 | chr:15:63374594 |
| 15 | rs1966033  | 63365444 | T | 0.1226  | 2.15E-24 | chr:15:63374594 |
| 15 | rs6738     | 63363901 | C | 0.1226  | 2.15E-24 | chr:15:63374594 |
| 15 | rs8519     | 63363654 | A | 0.1226  | 2.15E-24 | chr:15:63374594 |
| 15 | rs1071646  | 63351840 | C | 0.1203  | 2.81E-24 | chr:15:63374594 |
| 15 | rs2729811  | 63364783 | T | 0.123   | 3.04E-24 | chr:15:63374594 |
| 15 | rs16946372 | 63347876 | G | 0.1212  | 3.28E-24 | chr:15:63374594 |
| 15 | rs4450350  | 63349952 | A | 0.1212  | 4.40E-24 | chr:15:63374594 |
| 15 | rs11071726 | 63390622 | T | 0.1601  | 2.35E-22 | chr:15:63374594 |
| 15 | rs2729803  | 63376661 | C | 0.1698  | 1.14E-21 | chr:15:63374594 |
| 15 | rs2729804  | 63376659 | C | 0.1698  | 1.14E-21 | chr:15:63374594 |
| 15 | rs8038648  | 63379643 | G | 0.1733  | 2.48E-20 | chr:15:63374594 |
| 15 | rs11071721 | 63350218 | T | 0.1792  | 5.08E-19 | chr:15:63374594 |
| 15 | rs11071723 | 63355275 | A | 0.1792  | 5.08E-19 | chr:15:63374594 |

|               |            |        |          |                 |
|---------------|------------|--------|----------|-----------------|
| 15 rs4238370  | 63347363 T | 0.1792 | 5.08E-19 | chr:15:63374594 |
| 15 rs4238372  | 63351488 G | 0.1792 | 5.08E-19 | chr:15:63374594 |
| 15 rs4775614  | 63351687 A | 0.1792 | 5.08E-19 | chr:15:63374594 |
| 15 rs7166624  | 63348594 A | 0.1792 | 5.08E-19 | chr:15:63374594 |
| 15 rs7170462  | 63345622 A | 0.1792 | 5.08E-19 | chr:15:63374594 |
| 15 rs8032506  | 63371644 A | 0.1781 | 5.49E-19 | chr:15:63374594 |
| 15 rs4468558  | 63346681 T | 0.1812 | 7.11E-19 | chr:15:63374594 |
| 15 rs28583444 | 63357852 T | 0.1826 | 7.82E-19 | chr:15:63374594 |
| 15 rs16946416 | 63356721 T | 0.1822 | 8.92E-19 | chr:15:63374594 |
| 15 rs2729826  | 63360446 G | 0.1822 | 8.92E-19 | chr:15:63374594 |
| 15 rs2729801  | 63381095 A | 0.1902 | 1.50E-18 | chr:15:63374594 |
| 15 rs2729827  | 63360564 G | 0.1894 | 1.90E-18 | chr:15:63374594 |
| 15 rs4774472  | 63353760 C | 0.1894 | 1.90E-18 | chr:15:63374594 |
| 15 rs12148828 | 63355339 C | 0.2286 | 1.94E-18 | chr:15:63374594 |
| 15 rs3803501  | 63352092 G | 0.2286 | 1.94E-18 | chr:15:63374594 |
| 15 rs4775613  | 63349096 G | 0.2286 | 1.94E-18 | chr:15:63374594 |
| 15 rs2134263  | 63365394 C | 0.23   | 2.05E-18 | chr:15:63374594 |
| 15 rs10162675 | 63370358 C | 0.189  | 2.39E-18 | chr:15:63374594 |
| 15 rs2937859  | 63366282 G | 0.1928 | 3.31E-18 | chr:15:63374594 |
| 15 rs7175602  | 63367032 C | 0.1928 | 3.31E-18 | chr:15:63374594 |
| 15 rs2729828  | 63361307 A | 0.1924 | 3.98E-18 | chr:15:63374594 |
| 15 rs2652842  | 63391939 C | 0.193  | 4.43E-18 | chr:15:63374594 |
| 15 rs76127683 | 63391362 G | 0.193  | 4.43E-18 | chr:15:63374594 |
| 15 rs78015421 | 63391406 A | 0.193  | 4.43E-18 | chr:15:63374594 |
| 15 rs2652843  | 63391648 T | 0.1956 | 6.56E-18 | chr:15:63374594 |
| 15 rs2652844  | 63391647 T | 0.1956 | 6.56E-18 | chr:15:63374594 |
| 15 rs4619348  | 63359564 A | 0.2383 | 7.47E-18 | chr:15:63374594 |
| 15 rs16953475 | 63348087 A | 0.2492 | 1.17E-17 | chr:15:63374594 |
| 15 rs2134265  | 63398196 G | 0.1994 | 1.54E-17 | chr:15:63374594 |
| 15 rs2652785  | 63397890 T | 0.1994 | 1.54E-17 | chr:15:63374594 |
| 15 rs2652832  | 63396928 T | 0.1994 | 1.54E-17 | chr:15:63374594 |
| 15 rs2652833  | 63396885 C | 0.1994 | 1.54E-17 | chr:15:63374594 |
| 15 rs2652835  | 63396408 T | 0.1994 | 1.54E-17 | chr:15:63374594 |
| 15 rs2652838  | 63396088 A | 0.1994 | 1.54E-17 | chr:15:63374594 |
| 15 rs2652840  | 63393220 T | 0.1994 | 1.54E-17 | chr:15:63374594 |
| 15 rs2729788  | 63400378 G | 0.1994 | 1.54E-17 | chr:15:63374594 |
| 15 rs2729789  | 63400345 G | 0.1994 | 1.54E-17 | chr:15:63374594 |
| 15 rs2729830  | 63395812 G | 0.1994 | 1.54E-17 | chr:15:63374594 |
| 15 rs28768697 | 63394095 A | 0.1994 | 1.54E-17 | chr:15:63374594 |
| 15 rs28849975 | 63393922 T | 0.1994 | 1.54E-17 | chr:15:63374594 |
| 15 rs28860327 | 63393824 A | 0.1994 | 1.54E-17 | chr:15:63374594 |
| 15 rs34575783 | 63397686 G | 0.1994 | 1.54E-17 | chr:15:63374594 |
| 15 rs34786874 | 63397504 A | 0.1994 | 1.54E-17 | chr:15:63374594 |



|               |            |        |          |                 |
|---------------|------------|--------|----------|-----------------|
| 15 rs36116701 | 63397494 T | 0.1994 | 1.54E-17 | chr:15:63374594 |
| 15 rs4344684  | 63397318 C | 0.1994 | 1.54E-17 | chr:15:63374594 |
| 15 rs68088462 | 63397617 T | 0.1994 | 1.54E-17 | chr:15:63374594 |
| 15 rs7181141  | 63398552 A | 0.1994 | 1.54E-17 | chr:15:63374594 |
| 15 rs7182618  | 63398622 T | 0.1994 | 1.54E-17 | chr:15:63374594 |
| 15 rs8032104  | 63400584 A | 0.1994 | 1.54E-17 | chr:15:63374594 |
| 15 rs2729781  | 63404265 T | 0.2063 | 2.49E-17 | chr:15:63374594 |
| 15 rs2729783  | 63403316 G | 0.2063 | 2.49E-17 | chr:15:63374594 |
| 15 rs2729784  | 63402735 T | 0.2063 | 2.49E-17 | chr:15:63374594 |
| 15 rs2729785  | 63402574 G | 0.2063 | 2.49E-17 | chr:15:63374594 |
| 15 rs11637852 | 63397151 G | 0.2027 | 2.78E-17 | chr:15:63374594 |
| 15 rs2652815  | 63401345 T | 0.2063 | 4.00E-17 | chr:15:63374594 |
| 15 rs2652816  | 63403368 C | 0.2097 | 4.48E-17 | chr:15:63374594 |
| 15 rs2729782  | 63403354 G | 0.2097 | 4.48E-17 | chr:15:63374594 |
| 15 rs11857703 | 63379592 A | 4.059  | 4.67E-17 | chr:15:63374594 |
| 15 rs2729780  | 63404639 C | 0.2113 | 5.09E-17 | chr:15:63374594 |
| 15 rs2729833  | 63397044 G | 0.206  | 6.07E-17 | chr:15:63374594 |
| 15 rs2729787  | 63401493 G | 0.2118 | 7.09E-17 | chr:15:63374594 |
| 15 rs11071725 | 63390608 C | 0.2508 | 8.24E-16 | chr:15:63374594 |
| 15 rs11071727 | 63390808 T | 0.2508 | 8.24E-16 | chr:15:63374594 |
| 15 rs9646207  | 63391235 C | 0.2508 | 8.24E-16 | chr:15:63374594 |
| 15 rs11558748 | 63363402 A | 6.044  | 9.83E-16 | chr:15:63374594 |
| 15 rs12904537 | 63379726 T | 3.684  | 1.33E-15 | chr:15:63374594 |
| 15 rs7177692  | 63379733 T | 3.684  | 1.33E-15 | chr:15:63374594 |
| 15 rs7177694  | 63379737 T | 3.684  | 1.33E-15 | chr:15:63374594 |
| 15 rs11637947 | 63397538 C | 0.2616 | 4.78E-15 | chr:15:63374594 |
| 15 rs12912721 | 63397385 T | 0.2616 | 4.78E-15 | chr:15:63374594 |
| 15 rs12917357 | 63399793 C | 0.2616 | 4.78E-15 | chr:15:63374594 |
| 15 rs2414811  | 63397725 C | 0.2616 | 4.78E-15 | chr:15:63374594 |
| 15 rs2652836  | 63396301 C | 0.2616 | 4.78E-15 | chr:15:63374594 |
| 15 rs2652839  | 63395158 C | 0.2616 | 4.78E-15 | chr:15:63374594 |
| 15 rs2729776  | 63392222 T | 0.2616 | 4.78E-15 | chr:15:63374594 |
| 15 rs2729829  | 63395484 C | 0.2616 | 4.78E-15 | chr:15:63374594 |
| 15 rs2729831  | 63396039 A | 0.2616 | 4.78E-15 | chr:15:63374594 |
| 15 rs2729832  | 63396401 A | 0.2616 | 4.78E-15 | chr:15:63374594 |
| 15 rs28872293 | 63394148 G | 0.2616 | 4.78E-15 | chr:15:63374594 |
| 15 rs35963767 | 63397601 G | 0.2616 | 4.78E-15 | chr:15:63374594 |
| 15 rs4775621  | 63395062 G | 0.2616 | 4.78E-15 | chr:15:63374594 |
| 15 rs1027647  | 63374825 A | 3.571  | 5.83E-15 | chr:15:63374594 |
| 15 rs4775620  | 63395043 C | 0.2636 | 6.48E-15 | chr:15:63374594 |
| 15 rs4774478  | 63434763 A | 0.2709 | 6.74E-15 | chr:15:63374594 |
| 15 rs8034945  | 63397207 G | 0.2625 | 6.79E-15 | chr:15:63374594 |
| 15 rs6494394  | 63440938 A | 0.2709 | 7.28E-15 | chr:15:63374594 |

|                |            |        |          |                 |
|----------------|------------|--------|----------|-----------------|
| 15 rs8034620   | 63397155 C | 0.2655 | 8.17E-15 | chr:15:63374594 |
| 15 rs4774474   | 63405580 G | 0.2532 | 1.03E-14 | chr:15:63374594 |
| 15 rs2729834   | 63397047 G | 0.2708 | 1.92E-14 | chr:15:63374594 |
| 15 rs2652813   | 63405366 G | 0.2784 | 2.48E-14 | chr:15:63374594 |
| 15 rs66793829  | 63341238 C | 0.2379 | 2.51E-14 | chr:15:63374594 |
| 15 rs2729835   | 63433766 G | 0.2894 | 4.95E-14 | chr:15:63374594 |
| 15 rs8468      | 63434110 C | 0.2894 | 4.95E-14 | chr:15:63374594 |
| 15 rs6494396   | 63441248 C | 0.2891 | 5.26E-14 | chr:15:63374594 |
| 15 rs7163254   | 63439403 C | 0.2907 | 6.86E-14 | chr:15:63374594 |
| 15 rs78356111  | 63436955 C | 0.2916 | 9.23E-14 | chr:15:63374594 |
| 15 rs35829897  | 63334688 C | 0.2694 | 1.07E-13 | chr:15:63374594 |
| 15 rs7174174   | 63372327 C | 0.2834 | 1.18E-13 | chr:15:63374594 |
| 15 rs7165016   | 63439590 T | 0.3025 | 1.26E-13 | chr:15:63374594 |
| 15 rs55703462  | 63395428 A | 0.3164 | 2.25E-13 | chr:15:63374594 |
| 15 rs34830703  | 63388274 G | 0.1814 | 3.84E-13 | chr:15:63374594 |
| 15 rs36155821  | 63393917 T | 0.1807 | 4.75E-13 | chr:15:63374594 |
| 15 rs28565028  | 63397038 C | 0.3246 | 4.84E-13 | chr:15:63374594 |
| 15 rs36185677  | 63379754 T | 0.1958 | 5.19E-13 | chr:15:63374594 |
| 15 rs4075584   | 63340292 C | 0.2671 | 5.68E-13 | chr:15:63374594 |
| 15 rs59768255  | 63436960 A | 0.3362 | 5.72E-13 | chr:15:63374594 |
| 15 rs61187203  | 63436958 C | 0.3362 | 5.72E-13 | chr:15:63374594 |
| 15 rs12899230  | 63369788 C | 0.1878 | 6.10E-13 | chr:15:63374594 |
| 15 rs575644748 | 63569717 T | 0.1752 | 1.75E-12 | chr:15:63374594 |
| 15 rs71393143  | 63569080 T | 0.1752 | 1.75E-12 | chr:15:63374594 |
| 15 rs36038234  | 63551808 C | 0.1793 | 2.42E-12 | chr:15:63374594 |
| 15 rs75561597  | 63553423 C | 0.1793 | 2.42E-12 | chr:15:63374594 |
| 15 rs17829047  | 63525952 C | 0.1812 | 2.67E-12 | chr:15:63374594 |
| 15 rs34742909  | 63529980 T | 0.1812 | 2.67E-12 | chr:15:63374594 |
| 15 rs35446744  | 63509930 C | 0.1812 | 2.67E-12 | chr:15:63374594 |
| 15 rs71393137  | 63505505 T | 0.1812 | 2.67E-12 | chr:15:63374594 |
| 15 rs71393141  | 63534181 C | 0.1812 | 2.67E-12 | chr:15:63374594 |
| 15 rs71394504  | 63585707 G | 0.1802 | 3.01E-12 | chr:15:63374594 |
| 15 rs12595312  | 63494159 T | 0.3288 | 3.32E-12 | chr:15:63374594 |
| 15 rs12912328  | 63494235 A | 0.3288 | 3.32E-12 | chr:15:63374594 |
| 15 rs7176597   | 63494482 G | 0.3288 | 3.32E-12 | chr:15:63374594 |
| 15 rs17829848  | 63585128 T | 0.1793 | 3.40E-12 | chr:15:63374594 |
| 15 rs34195340  | 63577624 C | 0.1793 | 3.40E-12 | chr:15:63374594 |
| 15 rs36011035  | 63579780 C | 0.1793 | 3.40E-12 | chr:15:63374594 |
| 15 rs71393144  | 63577949 T | 0.1793 | 3.40E-12 | chr:15:63374594 |
| 15 rs62012880  | 63527162 A | 0.3284 | 3.45E-12 | chr:15:63374594 |
| 15 rs1017545   | 63553994 T | 0.3333 | 4.00E-12 | chr:15:63374594 |
| 15 rs71393134  | 63466745 A | 0.1915 | 4.11E-12 | chr:15:63374594 |
| 15 rs12901035  | 63541446 C | 0.1862 | 4.16E-12 | chr:15:63374594 |

|                |            |        |          |                 |
|----------------|------------|--------|----------|-----------------|
| 15 rs34256929  | 63534850 T | 0.1862 | 4.16E-12 | chr:15:63374594 |
| 15 rs8043419   | 63539622 T | 0.1862 | 4.16E-12 | chr:15:63374594 |
| 15 rs35884071  | 63477314 A | 0.1886 | 4.70E-12 | chr:15:63374594 |
| 15 rs28895995  | 63604087 T | 0.1925 | 4.95E-12 | chr:15:63374594 |
| 15 rs12913281  | 63590993 T | 0.1878 | 5.15E-12 | chr:15:63374594 |
| 15 rs34728797  | 63592472 T | 0.1878 | 5.15E-12 | chr:15:63374594 |
| 15 rs71393133  | 63459591 T | 0.1935 | 5.19E-12 | chr:15:63374594 |
| 15 rs17828224  | 63456749 C | 0.1924 | 5.92E-12 | chr:15:63374594 |
| 15 rs35893526  | 63455686 T | 0.1924 | 5.92E-12 | chr:15:63374594 |
| 15 rs35612331  | 63494964 C | 0.188  | 6.27E-12 | chr:15:63374594 |
| 15 rs71393136  | 63492776 G | 0.188  | 6.27E-12 | chr:15:63374594 |
| 15 rs17828380  | 63467887 C | 0.1999 | 8.15E-12 | chr:15:63374594 |
| 15 rs55719615  | 63344167 G | 0.3336 | 8.43E-12 | chr:15:63374594 |
| 15 rs12908992  | 63428427 G | 0.2041 | 9.96E-12 | chr:15:63374594 |
| 15 rs12899855  | 63608031 T | 0.1855 | 1.07E-11 | chr:15:63374594 |
| 15 rs12900085  | 63607986 C | 0.1855 | 1.07E-11 | chr:15:63374594 |
| 15 rs12902541  | 63615016 C | 0.1855 | 1.07E-11 | chr:15:63374594 |
| 15 rs12903186  | 63605364 T | 0.1855 | 1.07E-11 | chr:15:63374594 |
| 15 rs17762822  | 63601379 A | 0.1855 | 1.07E-11 | chr:15:63374594 |
| 15 rs188757860 | 63604107 G | 0.1855 | 1.07E-11 | chr:15:63374594 |
| 15 rs35902265  | 63600524 T | 0.1855 | 1.07E-11 | chr:15:63374594 |
| 15 rs71394506  | 63601026 T | 0.1855 | 1.07E-11 | chr:15:63374594 |
| 15 rs71394509  | 63605923 A | 0.1855 | 1.07E-11 | chr:15:63374594 |
| 15 rs71394511  | 63611828 A | 0.1855 | 1.07E-11 | chr:15:63374594 |
| 15 rs34367270  | 63410912 G | 0.3588 | 1.10E-11 | chr:15:63374594 |
| 15 rs4774476   | 63407390 C | 0.3588 | 1.10E-11 | chr:15:63374594 |
| 15 rs2652787   | 63415843 G | 0.3143 | 1.12E-11 | chr:15:63374594 |
| 15 rs2729819   | 63415849 C | 0.3143 | 1.12E-11 | chr:15:63374594 |
| 15 rs3803499   | 63343318 C | 0.3141 | 1.20E-11 | chr:15:63374594 |
| 15 rs62011182  | 63413115 A | 0.321  | 1.43E-11 | chr:15:63374594 |
| 15 rs2729815   | 63412843 A | 0.3207 | 1.44E-11 | chr:15:63374594 |
| 15 rs34119905  | 63490547 T | 0.195  | 1.45E-11 | chr:15:63374594 |
| 15 rs12913346  | 63530965 A | 0.235  | 1.49E-11 | chr:15:63374594 |
| 15 rs71394508  | 63603615 T | 0.1896 | 1.54E-11 | chr:15:63374594 |
| 15 rs34568831  | 63444365 T | 0.2054 | 1.58E-11 | chr:15:63374594 |
| 15 rs7177131   | 63443189 T | 0.2054 | 1.58E-11 | chr:15:63374594 |
| 15 rs8025816   | 63448554 G | 0.2054 | 1.58E-11 | chr:15:63374594 |
| 15 rs2729793   | 63483977 T | 0.3374 | 1.59E-11 | chr:15:63374594 |
| 15 rs11071733  | 63416481 A | 0.3613 | 1.67E-11 | chr:15:63374594 |
| 15 rs10851724  | 63416702 T | 0.3228 | 2.18E-11 | chr:15:63374594 |
| 15 rs2652789   | 63415223 A | 0.3228 | 2.18E-11 | chr:15:63374594 |
| 15 rs2652792   | 63411492 G | 0.3228 | 2.18E-11 | chr:15:63374594 |
| 15 rs2652794   | 63410872 C | 0.3228 | 2.18E-11 | chr:15:63374594 |

|                |            |        |          |                 |
|----------------|------------|--------|----------|-----------------|
| 15 rs2652795   | 63409265 T | 0.3228 | 2.18E-11 | chr:15:63374594 |
| 15 rs2652796   | 63408042 T | 0.3228 | 2.18E-11 | chr:15:63374594 |
| 15 rs2652797   | 63407578 C | 0.3228 | 2.18E-11 | chr:15:63374594 |
| 15 rs2652819   | 63431175 A | 0.3228 | 2.18E-11 | chr:15:63374594 |
| 15 rs2652820   | 63430901 T | 0.3228 | 2.18E-11 | chr:15:63374594 |
| 15 rs2652824   | 63420001 C | 0.3228 | 2.18E-11 | chr:15:63374594 |
| 15 rs2729778   | 63407332 T | 0.3228 | 2.18E-11 | chr:15:63374594 |
| 15 rs2729779   | 63407173 T | 0.3228 | 2.18E-11 | chr:15:63374594 |
| 15 rs2729813   | 63412154 A | 0.3228 | 2.18E-11 | chr:15:63374594 |
| 15 rs2729820   | 63416193 A | 0.3228 | 2.18E-11 | chr:15:63374594 |
| 15 rs2729823   | 63420660 A | 0.3228 | 2.18E-11 | chr:15:63374594 |
| 15 rs2729837   | 63430330 C | 0.3228 | 2.18E-11 | chr:15:63374594 |
| 15 rs4551986   | 63424400 T | 0.3228 | 2.18E-11 | chr:15:63374594 |
| 15 rs4775624   | 63408548 T | 0.3228 | 2.18E-11 | chr:15:63374594 |
| 15 rs7174466   | 63425019 A | 0.3228 | 2.18E-11 | chr:15:63374594 |
| 15 rs7175973   | 63425027 T | 0.3228 | 2.18E-11 | chr:15:63374594 |
| 15 rs9888638   | 63410349 T | 0.3228 | 2.18E-11 | chr:15:63374594 |
| 15 rs9888735   | 63410141 G | 0.3228 | 2.18E-11 | chr:15:63374594 |
| 15 rs71394505  | 63597072 G | 0.1855 | 2.63E-11 | chr:15:63374594 |
| 15 rs34317102  | 63414083 A | 0.3243 | 2.66E-11 | chr:15:63374594 |
| 15 rs2652798   | 63407446 C | 0.3265 | 3.21E-11 | chr:15:63374594 |
| 15 rs6494392   | 63406863 G | 0.3265 | 3.21E-11 | chr:15:63374594 |
| 15 rs1007075   | 63413501 A | 0.3296 | 3.45E-11 | chr:15:63374594 |
| 15 rs1007076   | 63413371 T | 0.3296 | 3.45E-11 | chr:15:63374594 |
| 15 rs10851723  | 63416335 G | 0.3296 | 3.45E-11 | chr:15:63374594 |
| 15 rs1126312   | 63427638 A | 0.3296 | 3.45E-11 | chr:15:63374594 |
| 15 rs12902237  | 63418188 C | 0.3296 | 3.45E-11 | chr:15:63374594 |
| 15 rs1566660   | 63429258 C | 0.3296 | 3.45E-11 | chr:15:63374594 |
| 15 rs1976433   | 63426912 T | 0.3296 | 3.45E-11 | chr:15:63374594 |
| 15 rs4633662   | 63424286 G | 0.3296 | 3.45E-11 | chr:15:63374594 |
| 15 rs4774475   | 63407357 T | 0.3296 | 3.45E-11 | chr:15:63374594 |
| 15 rs4775625   | 63410577 G | 0.3296 | 3.45E-11 | chr:15:63374594 |
| 15 rs4775628   | 63426463 A | 0.3296 | 3.45E-11 | chr:15:63374594 |
| 15 rs6494393   | 63426435 A | 0.3296 | 3.45E-11 | chr:15:63374594 |
| 15 rs7175185   | 63425337 A | 0.3296 | 3.45E-11 | chr:15:63374594 |
| 15 rs9302231   | 63427394 G | 0.3296 | 3.45E-11 | chr:15:63374594 |
| 15 rs966331    | 63411927 T | 0.3296 | 3.45E-11 | chr:15:63374594 |
| 15 rs6494391   | 63406785 T | 0.3334 | 5.08E-11 | chr:15:63374594 |
| 15 rs4775605   | 63324048 C | 0.3991 | 6.53E-11 | chr:15:63374594 |
| 15 rs151295599 | 63391721 A | 0.1724 | 6.65E-11 | chr:15:63374594 |
| 15 rs1126310   | 63428765 G | 0.337  | 6.76E-11 | chr:15:63374594 |
| 15 rs11071719  | 63329875 C | 0.3953 | 7.96E-11 | chr:15:63374594 |
| 15 rs62013179  | 63329601 T | 0.3953 | 7.96E-11 | chr:15:63374594 |

|                |            |        |          |                 |
|----------------|------------|--------|----------|-----------------|
| 15 rs11858666  | 63526239 G | 0.3696 | 1.57E-10 | chr:15:63374594 |
| 15 rs11853804  | 63528256 C | 0.3711 | 1.60E-10 | chr:15:63374594 |
| 15 rs12593078  | 63517347 A | 0.3711 | 1.60E-10 | chr:15:63374594 |
| 15 rs146054382 | 63508433 A | 0.3667 | 1.70E-10 | chr:15:63374594 |
| 15 rs72747098  | 63525249 G | 0.3723 | 1.92E-10 | chr:15:63374594 |
| 15 rs4514628   | 63321439 C | 0.3742 | 2.14E-10 | chr:15:63374594 |
| 15 rs17826683  | 63365911 A | 0.1577 | 2.28E-10 | chr:15:63374594 |
| 15 rs16946330  | 63324501 C | 0.415  | 3.07E-10 | chr:15:63374594 |
| 15 rs9806533   | 63328298 A | 0.4117 | 3.40E-10 | chr:15:63374594 |
| 15 rs9806544   | 63328360 G | 0.4117 | 3.40E-10 | chr:15:63374594 |
| 15 rs9806545   | 63328490 C | 0.4117 | 3.40E-10 | chr:15:63374594 |
| 15 rs4984257   | 63561160 C | 0.3816 | 3.62E-10 | chr:15:63374594 |
| 15 rs17826629  | 63365680 G | 0.1647 | 3.78E-10 | chr:15:63374594 |
| 15 rs11852512  | 63326399 A | 0.4175 | 4.43E-10 | chr:15:63374594 |
| 15 rs11852516  | 63326407 A | 0.4175 | 4.43E-10 | chr:15:63374594 |
| 15 rs4775606   | 63327605 T | 0.4175 | 4.43E-10 | chr:15:63374594 |
| 15 rs4775607   | 63328007 C | 0.4152 | 4.43E-10 | chr:15:63374594 |
| 15 rs6494384   | 63325607 C | 0.42   | 4.90E-10 | chr:15:63374594 |
| 15 rs2173982   | 63361262 G | 0.3846 | 4.93E-10 | chr:15:63374594 |
| 15 rs72743203  | 63320885 C | 0.3376 | 4.97E-10 | chr:15:63374594 |
| 15 rs72743204  | 63321345 A | 0.3376 | 4.97E-10 | chr:15:63374594 |
| 15 rs4775604   | 63323880 T | 0.4215 | 5.28E-10 | chr:15:63374594 |
| 15 rs72741202  | 63319539 T | 0.3434 | 8.54E-10 | chr:15:63374594 |
| 15 rs200962701 | 63417378 A | 0.3922 | 8.56E-10 | chr:15:63374594 |
| 15 rs1972041   | 63360847 T | 0.396  | 1.23E-09 | chr:15:63374594 |
| 15 rs16946801  | 63605080 C | 0.3869 | 1.25E-09 | chr:15:63374594 |
| 15 rs56208666  | 63451858 T | 0.4168 | 2.63E-09 | chr:15:63374594 |
| 15 rs12324180  | 63323779 T | 0.4446 | 2.82E-09 | chr:15:63374594 |
| 15 rs55862039  | 63451563 C | 0.4178 | 3.09E-09 | chr:15:63374594 |
| 15 rs2652812   | 63406170 C | 0.3951 | 3.23E-09 | chr:15:63374594 |
| 15 rs55962736  | 63333892 T | 2.281  | 3.61E-09 | chr:15:63374594 |
| 15 rs6494386   | 63337532 A | 0.4444 | 6.01E-09 | chr:15:63374594 |
| 15 rs4775609   | 63332009 G | 2.244  | 6.40E-09 | chr:15:63374594 |
| 15 rs4984255   | 63538725 G | 0.3151 | 8.78E-09 | chr:15:63374594 |
| 15 rs7162890   | 63492027 G | 0.427  | 9.42E-09 | chr:15:63374594 |
| 15 rs8041454   | 63485976 T | 0.427  | 9.42E-09 | chr:15:63374594 |
| 15 rs3809566   | 63333724 A | 0.4276 | 1.04E-08 | chr:15:63374594 |
| 15 rs35703701  | 63536275 A | 0.316  | 1.07E-08 | chr:15:63374594 |
| 15 rs3809565   | 63333619 A | 0.4257 | 1.12E-08 | chr:15:63374594 |
| 15 rs10851721  | 63332383 T | 0.43   | 1.28E-08 | chr:15:63374594 |
| 15 rs12148057  | 63331509 A | 0.43   | 1.28E-08 | chr:15:63374594 |
| 15 rs4774471   | 63332645 A | 0.43   | 1.28E-08 | chr:15:63374594 |
| 15 rs4775608   | 63331940 A | 0.43   | 1.28E-08 | chr:15:63374594 |

|                |            |        |          |                 |
|----------------|------------|--------|----------|-----------------|
| 15 rs4775610   | 63332057 A | 0.43   | 1.28E-08 | chr:15:63374594 |
| 15 rs4775612   | 63332157 T | 0.43   | 1.28E-08 | chr:15:63374594 |
| 15 rs2291881   | 63597639 T | 0.3335 | 1.40E-08 | chr:15:63374594 |
| 15 rs2729807   | 63370329 A | 0.2449 | 1.49E-08 | chr:15:63374594 |
| 15 rs2937856   | 63369742 G | 0.2449 | 1.49E-08 | chr:15:63374594 |
| 15 rs3784671   | 63569184 A | 2.341  | 1.56E-08 | chr:15:63374594 |
| 15 rs7162825   | 63439186 T | 2.311  | 1.62E-08 | chr:15:63374594 |
| 15 rs4774465   | 63311196 T | 0.3767 | 1.65E-08 | chr:15:63374594 |
| 15 rs2062726   | 63472745 A | 0.4348 | 1.74E-08 | chr:15:63374594 |
| 15 rs2652822   | 63422772 C | 2.311  | 1.77E-08 | chr:15:63374594 |
| 15 rs2652823   | 63421110 A | 2.306  | 1.83E-08 | chr:15:63374594 |
| 15 rs1126308   | 63429086 C | 2.297  | 1.92E-08 | chr:15:63374594 |
| 15 rs7170846   | 63449543 C | 2.288  | 1.94E-08 | chr:15:63374594 |
| 15 rs1472631   | 63423739 G | 2.295  | 1.97E-08 | chr:15:63374594 |
| 15 rs4775623   | 63408320 A | 2.28   | 2.04E-08 | chr:15:63374594 |
| 15 rs4775633   | 63437746 A | 2.282  | 2.12E-08 | chr:15:63374594 |
| 15 rs76119457  | 63376829 A | 0.2629 | 2.19E-08 | chr:15:63374594 |
| 15 rs11071738  | 63580155 C | 2.32   | 2.27E-08 | chr:15:63374594 |
| 15 rs7176591   | 63580596 C | 2.32   | 2.27E-08 | chr:15:63374594 |
| 15 rs920864    | 63474391 G | 0.4395 | 2.31E-08 | chr:15:63374594 |
| 15 rs12594313  | 63436662 G | 2.272  | 2.42E-08 | chr:15:63374594 |
| 15 rs4775622   | 63408179 C | 2.272  | 2.46E-08 | chr:15:63374594 |
| 15 rs12148069  | 63443792 T | 2.262  | 2.95E-08 | chr:15:63374594 |
| 15 rs12909910  | 63606341 C | 0.3399 | 3.03E-08 | chr:15:63374594 |
| 15 rs4775598   | 63300480 G | 0.447  | 3.26E-08 | chr:15:63374594 |
| 15 rs1126309   | 63429062 G | 2.256  | 3.53E-08 | chr:15:63374594 |
| 15 rs17826341  | 63359302 A | 0.2662 | 3.95E-08 | chr:15:63374594 |
| 15 rs8040219   | 63360814 G | 0.2662 | 3.95E-08 | chr:15:63374594 |
| 15 rs2292038   | 63449680 G | 2.24   | 4.09E-08 | chr:15:63374594 |
| 15 rs7163519   | 63595981 C | 0.3694 | 4.90E-08 | chr:15:63374594 |
| 15 rs1050255   | 63363631 T | 0.2723 | 5.81E-08 | chr:15:63374594 |
| 15 rs11636549  | 63357288 G | 0.2723 | 5.81E-08 | chr:15:63374594 |
| 15 rs28512289  | 63359185 A | 0.2723 | 5.81E-08 | chr:15:63374594 |
| 15 rs28735896  | 63359199 A | 0.2723 | 5.81E-08 | chr:15:63374594 |
| 15 rs7178040   | 63364098 T | 0.2723 | 5.81E-08 | chr:15:63374594 |
| 15 rs9920576   | 63363013 C | 0.2723 | 5.81E-08 | chr:15:63374594 |
| 15 rs8042050   | 63355871 G | 0.2711 | 6.61E-08 | chr:15:63374594 |
| 15 rs183109285 | 63414724 T | 2.177  | 6.90E-08 | chr:15:63374594 |
| 15 rs189796619 | 63414723 C | 2.177  | 6.90E-08 | chr:15:63374594 |
| 15 rs17753220  | 63349726 A | 0.274  | 7.83E-08 | chr:15:63374594 |
| 15 rs28645615  | 63348601 T | 0.274  | 7.83E-08 | chr:15:63374594 |
| 15 rs28660606  | 63356181 A | 0.274  | 7.83E-08 | chr:15:63374594 |
| 15 rs28430785  | 63300255 A | 0.4656 | 8.35E-08 | chr:15:63374594 |

|                |            |        |          |                 |
|----------------|------------|--------|----------|-----------------|
| 15 rs78729321  | 63366160 G | 0.275  | 8.48E-08 | chr:15:63374594 |
| 15 rs2588859   | 63469846 A | 0.4605 | 8.79E-08 | chr:15:63374594 |
| 15 rs145418989 | 63414725 C | 2.161  | 9.59E-08 | chr:15:63374594 |
| 15 rs11635698  | 63478573 A | 2.177  | 9.64E-08 | chr:15:63374594 |
| 15 rs4984273   | 63472714 T | 2.173  | 1.10E-07 | chr:15:63374594 |
| 15 rs4984274   | 63472715 T | 2.173  | 1.10E-07 | chr:15:63374594 |
| 15 rs28485524  | 63349132 A | 0.2803 | 1.15E-07 | chr:15:63374594 |
| 15 rs3803502   | 63352140 T | 0.2803 | 1.15E-07 | chr:15:63374594 |
| 15 rs80220017  | 63366161 T | 0.2814 | 1.24E-07 | chr:15:63374594 |
| 15 rs1017547   | 63563303 A | 2.196  | 1.31E-07 | chr:15:63374594 |
| 15 rs59906576  | 63501183 T | 2.159  | 1.32E-07 | chr:15:63374594 |
| 15 rs62011237  | 63501720 T | 2.159  | 1.32E-07 | chr:15:63374594 |
| 15 rs34964685  | 63638637 T | 0.2076 | 1.40E-07 | chr:15:63374594 |
| 15 rs376848493 | 63365312 G | 0.2744 | 1.44E-07 | chr:15:63374594 |
| 15 rs77372534  | 63360126 T | 0.2744 | 1.44E-07 | chr:15:63374594 |
| 15 rs1017546   | 63566702 C | 2.166  | 1.65E-07 | chr:15:63374594 |
| 15 rs17752921  | 63343631 C | 0.3033 | 1.68E-07 | chr:15:63374594 |
| 15 rs8040632   | 63631824 G | 0.2479 | 1.81E-07 | chr:15:63374594 |
| 15 rs1910094   | 63485527 C | 2.128  | 1.94E-07 | chr:15:63374594 |
| 15 rs58789072  | 63497553 A | 2.128  | 1.94E-07 | chr:15:63374594 |
| 15 rs8032253   | 63488248 A | 2.128  | 1.94E-07 | chr:15:63374594 |
| 15 rs117932747 | 63399767 A | 0.2698 | 1.94E-07 | chr:15:63374594 |
| 15 rs34607951  | 63397625 A | 0.2698 | 1.94E-07 | chr:15:63374594 |
| 15 rs35580861  | 63639324 A | 0.21   | 1.96E-07 | chr:15:63374594 |
| 15 rs707602    | 63363737 C | 0.2813 | 2.17E-07 | chr:15:63374594 |
| 15 rs11634159  | 63507422 T | 2.118  | 2.28E-07 | chr:15:63374594 |
| 15 rs16946249  | 63302130 G | 0.4716 | 2.28E-07 | chr:15:63374594 |
| 15 rs2053633   | 63505649 A | 2.118  | 2.28E-07 | chr:15:63374594 |
| 15 rs58314914  | 63508168 C | 2.118  | 2.28E-07 | chr:15:63374594 |
| 15 rs56218146  | 63312079 C | 0.3381 | 2.41E-07 | chr:15:63374594 |
| 15 rs34573088  | 63638478 A | 0.2354 | 2.58E-07 | chr:15:63374594 |
| 15 rs112244929 | 63550357 G | 2.099  | 2.64E-07 | chr:15:63374594 |
| 15 rs28531385  | 63350604 C | 0.2829 | 2.83E-07 | chr:15:63374594 |
| 15 rs75449003  | 63355797 T | 0.2829 | 2.83E-07 | chr:15:63374594 |
| 15 rs80349772  | 63350471 A | 0.2829 | 2.83E-07 | chr:15:63374594 |
| 15 rs8039583   | 63319972 T | 0.4915 | 2.93E-07 | chr:15:63374594 |
| 15 rs11630639  | 63399250 T | 0.2775 | 2.94E-07 | chr:15:63374594 |
| 15 rs11630737  | 63399556 G | 0.2775 | 2.94E-07 | chr:15:63374594 |
| 15 rs146600192 | 63385070 A | 0.2779 | 3.03E-07 | chr:15:63374594 |
| 15 rs2652841   | 63392707 C | 0.2779 | 3.03E-07 | chr:15:63374594 |
| 15 rs28862017  | 63393846 G | 0.2779 | 3.03E-07 | chr:15:63374594 |
| 15 rs77273812  | 63391248 A | 0.2779 | 3.03E-07 | chr:15:63374594 |
| 15 rs9888699   | 63387709 T | 0.2779 | 3.03E-07 | chr:15:63374594 |

|                |            |        |          |                 |
|----------------|------------|--------|----------|-----------------|
| 15 rs4984256   | 63552102 T | 2.09   | 3.22E-07 | chr:15:63374594 |
| 15 rs11632192  | 63515946 G | 2.088  | 3.30E-07 | chr:15:63374594 |
| 15 rs12148434  | 63510114 G | 2.088  | 3.30E-07 | chr:15:63374594 |
| 15 rs17828874  | 63516266 C | 2.088  | 3.30E-07 | chr:15:63374594 |
| 15 rs56068040  | 63515503 T | 2.088  | 3.30E-07 | chr:15:63374594 |
| 15 rs62012877  | 63518262 T | 2.088  | 3.30E-07 | chr:15:63374594 |
| 15 rs8037296   | 63516759 G | 2.088  | 3.30E-07 | chr:15:63374594 |
| 15 rs1502071   | 63480488 G | 0.4801 | 3.44E-07 | chr:15:63374594 |
| 15 rs17829340  | 63546414 C | 2.073  | 3.51E-07 | chr:15:63374594 |
| 15 rs57672995  | 63313588 C | 0.3459 | 3.60E-07 | chr:15:63374594 |
| 15 rs77171305  | 63536230 A | 2.092  | 3.90E-07 | chr:15:63374594 |
| 15 rs8039821   | 63477290 C | 0.4812 | 3.91E-07 | chr:15:63374594 |
| 15 rs12594552  | 63542284 A | 2.081  | 3.92E-07 | chr:15:63374594 |
| 15 rs35594365  | 63520154 C | 2.081  | 3.92E-07 | chr:15:63374594 |
| 15 rs56260487  | 63312130 A | 0.3451 | 4.12E-07 | chr:15:63374594 |
| 15 rs11556745  | 63618032 A | 0.2235 | 4.19E-07 | chr:15:63374594 |
| 15 rs11556746  | 63618250 A | 0.2235 | 4.19E-07 | chr:15:63374594 |
| 15 rs34704344  | 63615671 C | 0.2235 | 4.19E-07 | chr:15:63374594 |
| 15 rs34919165  | 63620705 C | 0.2235 | 4.19E-07 | chr:15:63374594 |
| 15 rs61732378  | 63616561 T | 0.2235 | 4.19E-07 | chr:15:63374594 |
| 15 rs2729840   | 63391744 G | 0.2856 | 4.55E-07 | chr:15:63374594 |
| 15 rs76960849  | 63389834 G | 0.2856 | 4.55E-07 | chr:15:63374594 |
| 15 rs1992620   | 63541408 T | 2.062  | 4.64E-07 | chr:15:63374594 |
| 15 rs71394514  | 63650944 T | 0.211  | 4.83E-07 | chr:15:63374594 |
| 15 rs79664659  | 63645643 T | 0.211  | 4.83E-07 | chr:15:63374594 |
| 15 rs12904064  | 63633488 G | 0.2313 | 8.15E-07 | chr:15:63374594 |
| 15 rs12908050  | 63625091 T | 0.2313 | 8.15E-07 | chr:15:63374594 |
| 15 rs12911704  | 63630891 T | 0.2313 | 8.15E-07 | chr:15:63374594 |
| 15 rs2306719   | 63633238 C | 0.2313 | 8.15E-07 | chr:15:63374594 |
| 15 rs34511446  | 63637528 T | 0.2313 | 8.15E-07 | chr:15:63374594 |
| 15 rs34652065  | 63624144 C | 0.2313 | 8.15E-07 | chr:15:63374594 |
| 15 rs35171697  | 63631505 C | 0.2313 | 8.15E-07 | chr:15:63374594 |
| 15 rs35243299  | 63627576 A | 0.2313 | 8.15E-07 | chr:15:63374594 |
| 15 rs12164904  | 63320534 C | 0.5034 | 8.50E-07 | chr:15:63374594 |
| 15 rs8039242   | 63320508 C | 0.5034 | 8.50E-07 | chr:15:63374594 |
| 15 rs34026505  | 63640496 G | 0.2228 | 8.58E-07 | chr:15:63374594 |
| 15 rs34955448  | 63643541 T | 0.2228 | 8.58E-07 | chr:15:63374594 |
| 15 rs56239097  | 63661970 G | 0.5072 | 9.34E-07 | chr:15:63374594 |
| 15 rs117618017 | 63569902 T | 3.317  | 9.76E-07 | chr:15:63374594 |
| 15 rs17762576  | 63589972 C | 2.032  | 9.89E-07 | chr:15:63374594 |
| 15 rs8037564   | 63379822 A | 0.28   | 1.06E-06 | chr:15:63374594 |
| 15 rs2899691   | 63519088 A | 2.037  | 1.09E-06 | chr:15:63374594 |
| 15 rs71394515  | 63652976 G | 0.2214 | 1.11E-06 | chr:15:63374594 |



|                |            |        |          |                 |
|----------------|------------|--------|----------|-----------------|
| 15 rs75763893  | 63571820 T | 3.348  | 1.16E-06 | chr:15:63374594 |
| 15 rs72748944  | 63660537 G | 0.5121 | 1.21E-06 | chr:15:63374594 |
| 15 rs72741187  | 63307318 A | 0.3647 | 1.28E-06 | chr:15:63374594 |
| 15 rs11071720  | 63341996 T | 0.4882 | 1.30E-06 | chr:15:63374594 |
| 15 rs71394512  | 63634428 T | 0.2441 | 1.47E-06 | chr:15:63374594 |
| 15 rs71394513  | 63634487 C | 0.2441 | 1.47E-06 | chr:15:63374594 |
| 15 rs35639434  | 63628289 G | 0.2459 | 1.56E-06 | chr:15:63374594 |
| 15 rs12908499  | 63655327 C | 0.2257 | 1.65E-06 | chr:15:63374594 |
| 15 rs34598221  | 63655120 A | 0.2257 | 1.65E-06 | chr:15:63374594 |
| 15 rs71394516  | 63653886 T | 0.2257 | 1.65E-06 | chr:15:63374594 |
| 15 rs76862276  | 63380427 A | 0.3116 | 1.65E-06 | chr:15:63374594 |
| 15 rs34381378  | 63628152 C | 0.2466 | 1.69E-06 | chr:15:63374594 |
| 15 rs34683907  | 63628120 G | 0.2466 | 1.69E-06 | chr:15:63374594 |
| 15 rs6494383   | 63316212 G | 0.5138 | 1.72E-06 | chr:15:63374594 |
| 15 rs12904952  | 63628048 G | 0.2473 | 1.75E-06 | chr:15:63374594 |
| 15 rs1867479   | 63465759 A | 0.5106 | 2.42E-06 | chr:15:63374594 |
| 15 rs16946959  | 63663833 A | 0.2206 | 2.44E-06 | chr:15:63374594 |
| 15 rs71394517  | 63663751 A | 0.2206 | 2.44E-06 | chr:15:63374594 |
| 15 rs56153363  | 63469616 G | 0.5153 | 2.74E-06 | chr:15:63374594 |
| 15 rs4775592   | 63289869 G | 0.4721 | 3.07E-06 | chr:15:63374594 |
| 15 rs72748939  | 63648678 C | 0.5193 | 3.27E-06 | chr:15:63374594 |
| 15 rs55656642  | 63649198 G | 0.5012 | 3.56E-06 | chr:15:63374594 |
| 15 rs111564920 | 63441242 A | 3.188  | 3.62E-06 | chr:15:63374594 |
| 15 rs1826040   | 63321899 G | 0.5233 | 3.98E-06 | chr:15:63374594 |
| 15 rs72741178  | 63299656 T | 0.516  | 3.99E-06 | chr:15:63374594 |
| 15 rs16946956  | 63663147 A | 0.2326 | 5.55E-06 | chr:15:63374594 |
| 15 rs78802628  | 63301079 C | 0.3928 | 6.48E-06 | chr:15:63374594 |
| 15 rs77350051  | 63247965 G | 0.3661 | 7.07E-06 | chr:15:63374594 |
| 15 rs79324313  | 63252649 A | 0.364  | 7.09E-06 | chr:15:63374594 |
| 15 rs79443421  | 63260065 C | 0.3654 | 7.41E-06 | chr:15:63374594 |
| 15 rs2018400   | 63626540 T | 0.5028 | 7.67E-06 | chr:15:63374594 |
| 15 rs78998900  | 63248907 A | 0.3662 | 8.01E-06 | chr:15:63374594 |
| 15 rs4075583   | 63340227 G | 0.5382 | 8.54E-06 | chr:15:63374594 |
| 15 rs16946182  | 63259797 G | 0.3784 | 9.83E-06 | chr:15:63374594 |
| 15 rs34199355  | 63398870 T | 3.047  | 1.11E-05 | chr:15:63374594 |
| 15 rs112069214 | 63252926 A | 0.3747 | 1.14E-05 | chr:15:63374594 |
| 15 rs112976065 | 63252610 A | 0.3747 | 1.14E-05 | chr:15:63374594 |
| 15 rs78067912  | 63253895 G | 0.3747 | 1.14E-05 | chr:15:63374594 |
| 15 rs79809571  | 63252578 G | 0.3747 | 1.14E-05 | chr:15:63374594 |
| 15 rs77347325  | 63259867 G | 0.3749 | 1.15E-05 | chr:15:63374594 |
| 15 rs12898755  | 63574641 A | 0.4953 | 1.26E-05 | chr:15:63374594 |
| 15 rs12899503  | 63574572 C | 0.4953 | 1.26E-05 | chr:15:63374594 |
| 15 rs12437471  | 63288730 C | 0.4961 | 1.39E-05 | chr:15:63374594 |

|                |            |        |          |                 |
|----------------|------------|--------|----------|-----------------|
| 15 rs12440391  | 63288874 A | 0.4961 | 1.39E-05 | chr:15:63374594 |
| 15 rs72757522  | 63288013 A | 0.4961 | 1.39E-05 | chr:15:63374594 |
| 15 rs8026047   | 63323347 C | 0.5105 | 1.41E-05 | chr:15:63374594 |
| 15 rs34320008  | 63398633 C | 3.01   | 1.43E-05 | chr:15:63374594 |
| 15 rs7184038   | 63395257 G | 3.01   | 1.43E-05 | chr:15:63374594 |
| 15 rs9646186   | 63393210 G | 3.01   | 1.43E-05 | chr:15:63374594 |
| 15 rs72743297  | 63368115 C | 0.3689 | 1.53E-05 | chr:15:63374594 |
| 15 rs73434140  | 63255694 A | 0.3814 | 1.55E-05 | chr:15:63374594 |
| 15 rs76694642  | 63256784 A | 0.3814 | 1.55E-05 | chr:15:63374594 |
| 15 rs80262408  | 63256358 T | 0.3814 | 1.55E-05 | chr:15:63374594 |
| 15 rs113519012 | 63362525 A | 2.268  | 1.63E-05 | chr:15:63374594 |
| 15 rs7162310   | 63571234 T | 0.5014 | 1.72E-05 | chr:15:63374594 |
| 15 rs7163368   | 63571121 C | 0.5014 | 1.72E-05 | chr:15:63374594 |
| 15 rs35763222  | 63641361 G | 0.496  | 1.76E-05 | chr:15:63374594 |
| 15 rs16946166  | 63254687 A | 0.403  | 1.80E-05 | chr:15:63374594 |
| 15 rs12910186  | 63613273 C | 0.414  | 1.83E-05 | chr:15:63374594 |
| 15 rs78469752  | 63613274 A | 0.414  | 1.83E-05 | chr:15:63374594 |
| 15 rs76855300  | 63595878 C | 2.747  | 2.14E-05 | chr:15:63374594 |
| 15 rs79177175  | 63288209 G | 0.5    | 2.15E-05 | chr:15:63374594 |
| 15 rs73434137  | 63253314 G | 0.4023 | 2.84E-05 | chr:15:63374594 |
| 15 rs2729786   | 63401605 A | 0.3365 | 2.90E-05 | chr:15:63374594 |
| 15 rs79591982  | 63256441 A | 0.3992 | 2.91E-05 | chr:15:63374594 |
| 17 rs140288713 | 44690708 A | 3.41   | 4.30E-10 | chr:17:44361947 |
| 17 rs532600730 | 44283479 C | 3.371  | 5.92E-10 | chr:17:44361947 |
| 17 rs2532417   | 44289220 T | 3.26   | 1.09E-09 | chr:17:44361947 |
| 17 rs2732630   | 44289150 C | 3.26   | 1.15E-09 | chr:17:44361947 |
| 17 rs566209918 | 44283761 T | 3.26   | 1.27E-09 | chr:17:44361947 |
| 17 rs2668668   | 44284641 G | 3.264  | 1.31E-09 | chr:17:44361947 |
| 17 rs141783865 | 44755729 C | 3.435  | 1.41E-09 | chr:17:44361947 |
| 17 rs528334214 | 44762252 G | 3.435  | 1.41E-09 | chr:17:44361947 |
| 17 rs116956554 | 44699851 A | 3.396  | 1.42E-09 | chr:17:44361947 |
| 17 rs547112461 | 44213934 A | 3.283  | 1.45E-09 | chr:17:44361947 |
| 17 rs538569832 | 44227510 T | 3.292  | 1.48E-09 | chr:17:44361947 |
| 17 rs553616014 | 44227531 C | 3.292  | 1.48E-09 | chr:17:44361947 |
| 17 rs62056850  | 43992581 T | 3.337  | 1.62E-09 | chr:17:44361947 |
| 17 rs2732631   | 44289232 T | 3.181  | 1.69E-09 | chr:17:44361947 |
| 17 rs112166495 | 44005361 A | 3.296  | 1.70E-09 | chr:17:44361947 |
| 17 rs112439933 | 44005226 C | 3.296  | 1.70E-09 | chr:17:44361947 |
| 17 rs112454267 | 44005329 A | 3.296  | 1.70E-09 | chr:17:44361947 |
| 17 rs113313477 | 44005186 A | 3.296  | 1.70E-09 | chr:17:44361947 |
| 17 rs113796169 | 44005254 A | 3.296  | 1.70E-09 | chr:17:44361947 |
| 17 rs17564780  | 44005413 G | 3.296  | 1.70E-09 | chr:17:44361947 |
| 17 rs565244003 | 44304884 T | 3.166  | 1.73E-09 | chr:17:44361947 |

|                |            |       |          |                 |
|----------------|------------|-------|----------|-----------------|
| 17 rs199443    | 44819565 T | 3.422 | 1.92E-09 | chr:17:44361947 |
| 17 rs199445    | 44817408 T | 3.422 | 1.92E-09 | chr:17:44361947 |
| 17 rs199448    | 44809001 G | 3.422 | 1.92E-09 | chr:17:44361947 |
| 17 rs199533    | 44828931 A | 3.422 | 1.92E-09 | chr:17:44361947 |
| 17 rs199534    | 44824213 G | 3.422 | 1.92E-09 | chr:17:44361947 |
| 17 rs199535    | 44822662 G | 3.422 | 1.92E-09 | chr:17:44361947 |
| 17 rs17649700  | 43997901 C | 3.283 | 1.95E-09 | chr:17:44361947 |
| 17 rs199447    | 44812188 T | 3.42  | 1.97E-09 | chr:17:44361947 |
| 17 rs8712      | 44101871 G | 3.306 | 1.99E-09 | chr:17:44361947 |
| 17 rs9468      | 44101563 C | 3.306 | 1.99E-09 | chr:17:44361947 |
| 17 rs2732629   | 44289101 G | 3.226 | 2.03E-09 | chr:17:44361947 |
| 17 rs2316772   | 43946423 C | 3.309 | 2.08E-09 | chr:17:44361947 |
| 17 rs2668670   | 44289628 C | 3.279 | 2.18E-09 | chr:17:44361947 |
| 17 rs17763199  | 43910183 A | 3.317 | 2.18E-09 | chr:17:44361947 |
| 17 rs75743061  | 44068112 G | 3.254 | 2.30E-09 | chr:17:44361947 |
| 17 rs11079733  | 44269964 A | 3.256 | 2.39E-09 | chr:17:44361947 |
| 17 rs2696633   | 44270059 T | 3.256 | 2.39E-09 | chr:17:44361947 |
| 17 rs1991556   | 44083402 A | 3.29  | 2.39E-09 | chr:17:44361947 |
| 17 rs542442671 | 44283139 A | 3.201 | 2.45E-09 | chr:17:44361947 |
| 17 rs545914867 | 44273264 A | 3.252 | 2.49E-09 | chr:17:44361947 |
| 17 rs111520035 | 44039410 G | 3.252 | 2.50E-09 | chr:17:44361947 |
| 17 rs528392906 | 44217293 A | 3.255 | 2.51E-09 | chr:17:44361947 |
| 17 rs560926498 | 44228824 G | 3.255 | 2.51E-09 | chr:17:44361947 |
| 17 rs563621837 | 44253364 A | 3.258 | 2.52E-09 | chr:17:44361947 |
| 17 rs34739559  | 43949342 A | 3.307 | 2.57E-09 | chr:17:44361947 |
| 17 rs62061723  | 44014981 T | 3.268 | 2.59E-09 | chr:17:44361947 |
| 17 rs62061724  | 44014982 T | 3.268 | 2.59E-09 | chr:17:44361947 |
| 17 rs546672662 | 44274766 C | 3.242 | 2.60E-09 | chr:17:44361947 |
| 17 rs10445368  | 43933171 T | 3.259 | 2.61E-09 | chr:17:44361947 |
| 17 rs4627402   | 43932741 T | 3.259 | 2.61E-09 | chr:17:44361947 |
| 17 rs534560878 | 44235893 T | 3.244 | 2.64E-09 | chr:17:44361947 |
| 17 rs537399285 | 44231326 A | 3.244 | 2.64E-09 | chr:17:44361947 |
| 17 rs569963579 | 44231295 A | 3.244 | 2.64E-09 | chr:17:44361947 |
| 17 rs17425752  | 43906726 C | 3.259 | 2.65E-09 | chr:17:44361947 |
| 17 rs17689882  | 43906828 A | 3.259 | 2.65E-09 | chr:17:44361947 |
| 17 rs2316766   | 43919068 T | 3.268 | 2.68E-09 | chr:17:44361947 |
| 17 rs2316767   | 43919070 C | 3.268 | 2.68E-09 | chr:17:44361947 |
| 17 rs2316768   | 43919073 T | 3.268 | 2.68E-09 | chr:17:44361947 |
| 17 rs149586816 | 44494110 G | 2.966 | 2.71E-09 | chr:17:44361947 |
| 17 rs62061859  | 44201109 G | 3.243 | 2.72E-09 | chr:17:44361947 |
| 17 rs557034628 | 44353262 C | 3.389 | 2.76E-09 | chr:17:44361947 |
| 17 rs561678956 | 44259261 G | 3.389 | 2.76E-09 | chr:17:44361947 |
| 17 rs532044959 | 44213921 C | 3.235 | 2.79E-09 | chr:17:44361947 |

|                |            |       |          |                 |
|----------------|------------|-------|----------|-----------------|
| 17 rs3110331   | 44318575 G | 3.136 | 2.80E-09 | chr:17:44361947 |
| 17 rs2253488   | 44304910 C | 3.242 | 2.81E-09 | chr:17:44361947 |
| 17 rs16940676  | 43911036 A | 3.253 | 2.83E-09 | chr:17:44361947 |
| 17 rs552475563 | 44234526 T | 3.235 | 2.83E-09 | chr:17:44361947 |
| 17 rs2458193   | 44285467 G | 3.129 | 2.84E-09 | chr:17:44361947 |
| 17 rs2106785   | 43919105 T | 3.262 | 2.88E-09 | chr:17:44361947 |
| 17 rs2106786   | 43919096 G | 3.262 | 2.88E-09 | chr:17:44361947 |
| 17 rs547806751 | 44269546 T | 3.286 | 2.89E-09 | chr:17:44361947 |
| 17 rs540664392 | 44237068 T | 3.234 | 2.89E-09 | chr:17:44361947 |
| 17 rs2532340   | 44345653 G | 3.317 | 2.95E-09 | chr:17:44361947 |
| 17 rs2532416   | 44289291 C | 3.144 | 2.98E-09 | chr:17:44361947 |
| 17 rs537757858 | 44284420 T | 3.147 | 2.98E-09 | chr:17:44361947 |
| 17 rs76723223  | 44089108 C | 3.223 | 3.11E-09 | chr:17:44361947 |
| 17 rs560050580 | 44297148 A | 3.177 | 3.15E-09 | chr:17:44361947 |
| 17 rs545835713 | 44318663 A | 3.171 | 3.16E-09 | chr:17:44361947 |
| 17 rs540260849 | 44277923 A | 3.193 | 3.21E-09 | chr:17:44361947 |
| 17 rs538694593 | 44243863 T | 3.239 | 3.24E-09 | chr:17:44361947 |
| 17 rs554127484 | 44243868 T | 3.239 | 3.24E-09 | chr:17:44361947 |
| 17 rs572482907 | 44243870 C | 3.239 | 3.24E-09 | chr:17:44361947 |
| 17 rs2696559   | 44346674 C | 3.316 | 3.25E-09 | chr:17:44361947 |
| 17 rs371996525 | 44183317 A | 3.219 | 3.28E-09 | chr:17:44361947 |
| 17 rs17652520  | 44098967 A | 3.25  | 3.31E-09 | chr:17:44361947 |
| 17 rs545648705 | 44276330 C | 3.183 | 3.31E-09 | chr:17:44361947 |
| 17 rs533125554 | 44222460 G | 3.197 | 3.31E-09 | chr:17:44361947 |
| 17 rs544990728 | 43991515 G | 3.295 | 3.38E-09 | chr:17:44361947 |
| 17 rs111751251 | 44042951 T | 3.233 | 3.38E-09 | chr:17:44361947 |
| 17 rs112003311 | 44042939 A | 3.233 | 3.38E-09 | chr:17:44361947 |
| 17 rs10445333  | 43916509 G | 3.236 | 3.43E-09 | chr:17:44361947 |
| 17 rs10445334  | 43934826 G | 3.236 | 3.43E-09 | chr:17:44361947 |
| 17 rs10445335  | 43934896 A | 3.236 | 3.43E-09 | chr:17:44361947 |
| 17 rs10445336  | 43934948 G | 3.236 | 3.43E-09 | chr:17:44361947 |
| 17 rs10445362  | 43914554 A | 3.236 | 3.43E-09 | chr:17:44361947 |
| 17 rs10445363  | 43914558 A | 3.236 | 3.43E-09 | chr:17:44361947 |
| 17 rs10445364  | 43916356 A | 3.236 | 3.43E-09 | chr:17:44361947 |
| 17 rs10445369  | 43934776 G | 3.236 | 3.43E-09 | chr:17:44361947 |
| 17 rs10445370  | 43935118 A | 3.236 | 3.43E-09 | chr:17:44361947 |
| 17 rs1078830   | 43946112 C | 3.236 | 3.43E-09 | chr:17:44361947 |
| 17 rs11079725  | 43923934 C | 3.236 | 3.43E-09 | chr:17:44361947 |
| 17 rs111321973 | 43953170 T | 3.236 | 3.43E-09 | chr:17:44361947 |
| 17 rs111447859 | 43987184 C | 3.236 | 3.43E-09 | chr:17:44361947 |
| 17 rs111541901 | 43994358 T | 3.236 | 3.43E-09 | chr:17:44361947 |
| 17 rs111689007 | 43981103 A | 3.236 | 3.43E-09 | chr:17:44361947 |
| 17 rs111739681 | 43898459 T | 3.236 | 3.43E-09 | chr:17:44361947 |

|    |             |          |   |       |          |                 |
|----|-------------|----------|---|-------|----------|-----------------|
| 17 | rs111941646 | 43966608 | T | 3.236 | 3.43E-09 | chr:17:44361947 |
| 17 | rs111962225 | 43934016 | C | 3.236 | 3.43E-09 | chr:17:44361947 |
| 17 | rs111972148 | 43973121 | C | 3.236 | 3.43E-09 | chr:17:44361947 |
| 17 | rs112003140 | 43980998 | A | 3.236 | 3.43E-09 | chr:17:44361947 |
| 17 | rs112116311 | 43989898 | G | 3.236 | 3.43E-09 | chr:17:44361947 |
| 17 | rs112137135 | 43900817 | G | 3.236 | 3.43E-09 | chr:17:44361947 |
| 17 | rs112275277 | 43981958 | T | 3.236 | 3.43E-09 | chr:17:44361947 |
| 17 | rs112425426 | 43963416 | G | 3.236 | 3.43E-09 | chr:17:44361947 |
| 17 | rs112583797 | 43918418 | G | 3.236 | 3.43E-09 | chr:17:44361947 |
| 17 | rs112647192 | 43994623 | A | 3.236 | 3.43E-09 | chr:17:44361947 |
| 17 | rs112915466 | 43958744 | G | 3.236 | 3.43E-09 | chr:17:44361947 |
| 17 | rs112950348 | 44033188 | A | 3.236 | 3.43E-09 | chr:17:44361947 |
| 17 | rs113029914 | 43981831 | T | 3.236 | 3.43E-09 | chr:17:44361947 |
| 17 | rs113093579 | 43934116 | G | 3.236 | 3.43E-09 | chr:17:44361947 |
| 17 | rs113161176 | 43974354 | A | 3.236 | 3.43E-09 | chr:17:44361947 |
| 17 | rs113277432 | 44033169 | C | 3.236 | 3.43E-09 | chr:17:44361947 |
| 17 | rs113327263 | 43965063 | C | 3.236 | 3.43E-09 | chr:17:44361947 |
| 17 | rs113347741 | 43973408 | T | 3.236 | 3.43E-09 | chr:17:44361947 |
| 17 | rs113395365 | 44025650 | C | 3.236 | 3.43E-09 | chr:17:44361947 |
| 17 | rs113414067 | 43955093 | C | 3.236 | 3.43E-09 | chr:17:44361947 |
| 17 | rs113520245 | 44033132 | T | 3.236 | 3.43E-09 | chr:17:44361947 |
| 17 | rs113537106 | 44016462 | G | 3.236 | 3.43E-09 | chr:17:44361947 |
| 17 | rs113589236 | 43981795 | A | 3.236 | 3.43E-09 | chr:17:44361947 |
| 17 | rs113756354 | 44013483 | G | 3.236 | 3.43E-09 | chr:17:44361947 |
| 17 | rs113793114 | 44037079 | A | 3.236 | 3.43E-09 | chr:17:44361947 |
| 17 | rs113834264 | 43979622 | A | 3.236 | 3.43E-09 | chr:17:44361947 |
| 17 | rs113856644 | 43932277 | A | 3.236 | 3.43E-09 | chr:17:44361947 |
| 17 | rs113952577 | 44010661 | G | 3.236 | 3.43E-09 | chr:17:44361947 |
| 17 | rs11575895  | 43971785 | G | 3.236 | 3.43E-09 | chr:17:44361947 |
| 17 | rs11575896  | 43972142 | A | 3.236 | 3.43E-09 | chr:17:44361947 |
| 17 | rs117365970 | 43893259 | A | 3.236 | 3.43E-09 | chr:17:44361947 |
| 17 | rs117646503 | 43893260 | C | 3.236 | 3.43E-09 | chr:17:44361947 |
| 17 | rs12150104  | 44015929 | A | 3.236 | 3.43E-09 | chr:17:44361947 |
| 17 | rs12150111  | 44013938 | G | 3.236 | 3.43E-09 | chr:17:44361947 |
| 17 | rs12150125  | 43986432 | A | 3.236 | 3.43E-09 | chr:17:44361947 |
| 17 | rs12150195  | 44014263 | C | 3.236 | 3.43E-09 | chr:17:44361947 |
| 17 | rs12150223  | 43944204 | C | 3.236 | 3.43E-09 | chr:17:44361947 |
| 17 | rs12150229  | 44015446 | G | 3.236 | 3.43E-09 | chr:17:44361947 |
| 17 | rs12150230  | 44015464 | G | 3.236 | 3.43E-09 | chr:17:44361947 |
| 17 | rs12150235  | 44015745 | G | 3.236 | 3.43E-09 | chr:17:44361947 |
| 17 | rs12150242  | 44015816 | G | 3.236 | 3.43E-09 | chr:17:44361947 |
| 17 | rs12150390  | 43896228 | C | 3.236 | 3.43E-09 | chr:17:44361947 |
| 17 | rs12150460  | 44014137 | T | 3.236 | 3.43E-09 | chr:17:44361947 |

|               |            |       |          |                 |
|---------------|------------|-------|----------|-----------------|
| 17 rs12150516 | 43944519 T | 3.236 | 3.43E-09 | chr:17:44361947 |
| 17 rs12150527 | 43986462 G | 3.236 | 3.43E-09 | chr:17:44361947 |
| 17 rs12150576 | 44015624 A | 3.236 | 3.43E-09 | chr:17:44361947 |
| 17 rs12185235 | 43923703 T | 3.236 | 3.43E-09 | chr:17:44361947 |
| 17 rs12185268 | 43923683 G | 3.236 | 3.43E-09 | chr:17:44361947 |
| 17 rs12373123 | 43924073 C | 3.236 | 3.43E-09 | chr:17:44361947 |
| 17 rs12373124 | 43924219 C | 3.236 | 3.43E-09 | chr:17:44361947 |
| 17 rs12373139 | 43924130 A | 3.236 | 3.43E-09 | chr:17:44361947 |
| 17 rs12373140 | 43924231 A | 3.236 | 3.43E-09 | chr:17:44361947 |
| 17 rs12373142 | 43924200 G | 3.236 | 3.43E-09 | chr:17:44361947 |
| 17 rs1396862  | 43902997 A | 3.236 | 3.43E-09 | chr:17:44361947 |
| 17 rs1467962  | 43978604 G | 3.236 | 3.43E-09 | chr:17:44361947 |
| 17 rs1467963  | 43978934 G | 3.236 | 3.43E-09 | chr:17:44361947 |
| 17 rs1467966  | 43984399 T | 3.236 | 3.43E-09 | chr:17:44361947 |
| 17 rs1467968  | 43986396 T | 3.236 | 3.43E-09 | chr:17:44361947 |
| 17 rs1467969  | 43998328 T | 3.236 | 3.43E-09 | chr:17:44361947 |
| 17 rs1467970  | 43998574 G | 3.236 | 3.43E-09 | chr:17:44361947 |
| 17 rs1476127  | 43999793 A | 3.236 | 3.43E-09 | chr:17:44361947 |
| 17 rs1560310  | 43978534 A | 3.236 | 3.43E-09 | chr:17:44361947 |
| 17 rs1560311  | 43978625 C | 3.236 | 3.43E-09 | chr:17:44361947 |
| 17 rs16940665 | 43907896 C | 3.236 | 3.43E-09 | chr:17:44361947 |
| 17 rs16940668 | 43907966 A | 3.236 | 3.43E-09 | chr:17:44361947 |
| 17 rs16940671 | 43908151 T | 3.236 | 3.43E-09 | chr:17:44361947 |
| 17 rs16940672 | 43908152 T | 3.236 | 3.43E-09 | chr:17:44361947 |
| 17 rs16940674 | 43910507 T | 3.236 | 3.43E-09 | chr:17:44361947 |
| 17 rs16940677 | 43911898 T | 3.236 | 3.43E-09 | chr:17:44361947 |
| 17 rs16940681 | 43912159 C | 3.236 | 3.43E-09 | chr:17:44361947 |
| 17 rs17563965 | 43990919 G | 3.236 | 3.43E-09 | chr:17:44361947 |
| 17 rs17563986 | 43991272 G | 3.236 | 3.43E-09 | chr:17:44361947 |
| 17 rs17564020 | 43991781 T | 3.236 | 3.43E-09 | chr:17:44361947 |
| 17 rs17564153 | 43995098 A | 3.236 | 3.43E-09 | chr:17:44361947 |
| 17 rs17564493 | 44001379 T | 3.236 | 3.43E-09 | chr:17:44361947 |
| 17 rs17564591 | 44002062 C | 3.236 | 3.43E-09 | chr:17:44361947 |
| 17 rs17564619 | 44002138 G | 3.236 | 3.43E-09 | chr:17:44361947 |
| 17 rs17564703 | 44002595 T | 3.236 | 3.43E-09 | chr:17:44361947 |
| 17 rs17564829 | 44006601 C | 3.236 | 3.43E-09 | chr:17:44361947 |
| 17 rs17564871 | 44011018 G | 3.236 | 3.43E-09 | chr:17:44361947 |
| 17 rs17564948 | 44011749 G | 3.236 | 3.43E-09 | chr:17:44361947 |
| 17 rs17564983 | 44011825 C | 3.236 | 3.43E-09 | chr:17:44361947 |
| 17 rs17571718 | 44032768 C | 3.236 | 3.43E-09 | chr:17:44361947 |
| 17 rs17571739 | 44032915 C | 3.236 | 3.43E-09 | chr:17:44361947 |
| 17 rs17571781 | 44033802 C | 3.236 | 3.43E-09 | chr:17:44361947 |
| 17 rs17571809 | 44034859 G | 3.236 | 3.43E-09 | chr:17:44361947 |

|               |            |       |          |                 |
|---------------|------------|-------|----------|-----------------|
| 17 rs17571857 | 44035706 G | 3.236 | 3.43E-09 | chr:17:44361947 |
| 17 rs17649518 | 43994386 A | 3.236 | 3.43E-09 | chr:17:44361947 |
| 17 rs17649571 | 43994952 G | 3.236 | 3.43E-09 | chr:17:44361947 |
| 17 rs17649635 | 43995990 G | 3.236 | 3.43E-09 | chr:17:44361947 |
| 17 rs17649641 | 43997372 C | 3.236 | 3.43E-09 | chr:17:44361947 |
| 17 rs17649866 | 44000914 C | 3.236 | 3.43E-09 | chr:17:44361947 |
| 17 rs17649918 | 44001621 G | 3.236 | 3.43E-09 | chr:17:44361947 |
| 17 rs17649954 | 44001661 G | 3.236 | 3.43E-09 | chr:17:44361947 |
| 17 rs17650063 | 44002555 G | 3.236 | 3.43E-09 | chr:17:44361947 |
| 17 rs17650258 | 44011073 A | 3.236 | 3.43E-09 | chr:17:44361947 |
| 17 rs17650335 | 44012343 A | 3.236 | 3.43E-09 | chr:17:44361947 |
| 17 rs17650381 | 44013024 C | 3.236 | 3.43E-09 | chr:17:44361947 |
| 17 rs17650417 | 44013103 T | 3.236 | 3.43E-09 | chr:17:44361947 |
| 17 rs17650579 | 44030115 T | 3.236 | 3.43E-09 | chr:17:44361947 |
| 17 rs17650597 | 44030195 T | 3.236 | 3.43E-09 | chr:17:44361947 |
| 17 rs17650633 | 44030231 C | 3.236 | 3.43E-09 | chr:17:44361947 |
| 17 rs17650651 | 44030311 G | 3.236 | 3.43E-09 | chr:17:44361947 |
| 17 rs17650771 | 44035367 G | 3.236 | 3.43E-09 | chr:17:44361947 |
| 17 rs17650818 | 44036787 C | 3.236 | 3.43E-09 | chr:17:44361947 |
| 17 rs17650842 | 44037491 G | 3.236 | 3.43E-09 | chr:17:44361947 |
| 17 rs17689471 | 43892973 C | 3.236 | 3.43E-09 | chr:17:44361947 |
| 17 rs17689608 | 43896528 G | 3.236 | 3.43E-09 | chr:17:44361947 |
| 17 rs17689653 | 43898963 T | 3.236 | 3.43E-09 | chr:17:44361947 |
| 17 rs17689824 | 43904397 T | 3.236 | 3.43E-09 | chr:17:44361947 |
| 17 rs17689918 | 43910088 A | 3.236 | 3.43E-09 | chr:17:44361947 |
| 17 rs17690314 | 43919884 G | 3.236 | 3.43E-09 | chr:17:44361947 |
| 17 rs17690326 | 43920974 C | 3.236 | 3.43E-09 | chr:17:44361947 |
| 17 rs17690661 | 43924521 A | 3.236 | 3.43E-09 | chr:17:44361947 |
| 17 rs17690679 | 43924803 G | 3.236 | 3.43E-09 | chr:17:44361947 |
| 17 rs17690987 | 43931626 C | 3.236 | 3.43E-09 | chr:17:44361947 |
| 17 rs17691449 | 43964283 C | 3.236 | 3.43E-09 | chr:17:44361947 |
| 17 rs17691466 | 43968219 G | 3.236 | 3.43E-09 | chr:17:44361947 |
| 17 rs17691508 | 43968463 G | 3.236 | 3.43E-09 | chr:17:44361947 |
| 17 rs17691556 | 43969168 A | 3.236 | 3.43E-09 | chr:17:44361947 |
| 17 rs17691610 | 43970662 T | 3.236 | 3.43E-09 | chr:17:44361947 |
| 17 rs17762769 | 43893403 A | 3.236 | 3.43E-09 | chr:17:44361947 |
| 17 rs17762882 | 43898887 C | 3.236 | 3.43E-09 | chr:17:44361947 |
| 17 rs17762912 | 43899161 C | 3.236 | 3.43E-09 | chr:17:44361947 |
| 17 rs17762954 | 43899786 T | 3.236 | 3.43E-09 | chr:17:44361947 |
| 17 rs17763050 | 43903336 A | 3.236 | 3.43E-09 | chr:17:44361947 |
| 17 rs17763086 | 43905481 G | 3.236 | 3.43E-09 | chr:17:44361947 |
| 17 rs17763515 | 43917818 A | 3.236 | 3.43E-09 | chr:17:44361947 |
| 17 rs17763533 | 43918190 C | 3.236 | 3.43E-09 | chr:17:44361947 |

|               |            |       |          |                 |
|---------------|------------|-------|----------|-----------------|
| 17 rs17763596 | 43921210 T | 3.236 | 3.43E-09 | chr:17:44361947 |
| 17 rs17763634 | 43921754 C | 3.236 | 3.43E-09 | chr:17:44361947 |
| 17 rs17770108 | 43961292 T | 3.236 | 3.43E-09 | chr:17:44361947 |
| 17 rs17770120 | 43963943 A | 3.236 | 3.43E-09 | chr:17:44361947 |
| 17 rs17770150 | 43964163 A | 3.236 | 3.43E-09 | chr:17:44361947 |
| 17 rs17770186 | 43964191 A | 3.236 | 3.43E-09 | chr:17:44361947 |
| 17 rs17770296 | 43969136 T | 3.236 | 3.43E-09 | chr:17:44361947 |
| 17 rs17770337 | 43969779 T | 3.236 | 3.43E-09 | chr:17:44361947 |
| 17 rs17770343 | 43970154 C | 3.236 | 3.43E-09 | chr:17:44361947 |
| 17 rs1864324  | 43977702 T | 3.236 | 3.43E-09 | chr:17:44361947 |
| 17 rs1864325  | 43977827 T | 3.236 | 3.43E-09 | chr:17:44361947 |
| 17 rs1876827  | 43911832 C | 3.236 | 3.43E-09 | chr:17:44361947 |
| 17 rs1876828  | 43911525 T | 3.236 | 3.43E-09 | chr:17:44361947 |
| 17 rs1876829  | 43911443 C | 3.236 | 3.43E-09 | chr:17:44361947 |
| 17 rs1876830  | 43911352 T | 3.236 | 3.43E-09 | chr:17:44361947 |
| 17 rs1876831  | 43907745 T | 3.236 | 3.43E-09 | chr:17:44361947 |
| 17 rs1912151  | 43902944 T | 3.236 | 3.43E-09 | chr:17:44361947 |
| 17 rs1967981  | 43999785 G | 3.236 | 3.43E-09 | chr:17:44361947 |
| 17 rs1984937  | 43980530 C | 3.236 | 3.43E-09 | chr:17:44361947 |
| 17 rs2006305  | 43959752 T | 3.236 | 3.43E-09 | chr:17:44361947 |
| 17 rs2019816  | 43959661 A | 3.236 | 3.43E-09 | chr:17:44361947 |
| 17 rs2019822  | 43959918 A | 3.236 | 3.43E-09 | chr:17:44361947 |
| 17 rs2055794  | 43951717 A | 3.236 | 3.43E-09 | chr:17:44361947 |
| 17 rs2055795  | 43951995 T | 3.236 | 3.43E-09 | chr:17:44361947 |
| 17 rs2055796  | 43952191 T | 3.236 | 3.43E-09 | chr:17:44361947 |
| 17 rs2082068  | 43979971 T | 3.236 | 3.43E-09 | chr:17:44361947 |
| 17 rs2099151  | 43979822 T | 3.236 | 3.43E-09 | chr:17:44361947 |
| 17 rs2106784  | 43949892 T | 3.236 | 3.43E-09 | chr:17:44361947 |
| 17 rs2158072  | 43950195 C | 3.236 | 3.43E-09 | chr:17:44361947 |
| 17 rs2188888  | 43953695 C | 3.236 | 3.43E-09 | chr:17:44361947 |
| 17 rs2214258  | 43953719 C | 3.236 | 3.43E-09 | chr:17:44361947 |
| 17 rs2316763  | 43895530 T | 3.236 | 3.43E-09 | chr:17:44361947 |
| 17 rs2316764  | 43895602 G | 3.236 | 3.43E-09 | chr:17:44361947 |
| 17 rs2316765  | 43912454 C | 3.236 | 3.43E-09 | chr:17:44361947 |
| 17 rs2316769  | 43930798 G | 3.236 | 3.43E-09 | chr:17:44361947 |
| 17 rs2316771  | 43945931 C | 3.236 | 3.43E-09 | chr:17:44361947 |
| 17 rs2316773  | 43946536 T | 3.236 | 3.43E-09 | chr:17:44361947 |
| 17 rs2316774  | 43946642 C | 3.236 | 3.43E-09 | chr:17:44361947 |
| 17 rs2316782  | 44010040 G | 3.236 | 3.43E-09 | chr:17:44361947 |
| 17 rs2316783  | 44010118 C | 3.236 | 3.43E-09 | chr:17:44361947 |
| 17 rs2316784  | 44021699 T | 3.236 | 3.43E-09 | chr:17:44361947 |
| 17 rs242561   | 44026548 T | 3.236 | 3.43E-09 | chr:17:44361947 |
| 17 rs28364021 | 43912282 T | 3.236 | 3.43E-09 | chr:17:44361947 |



|                |            |       |          |                 |
|----------------|------------|-------|----------|-----------------|
| 17 rs28364023  | 43894159 T | 3.236 | 3.43E-09 | chr:17:44361947 |
| 17 rs28364025  | 43894102 C | 3.236 | 3.43E-09 | chr:17:44361947 |
| 17 rs28439143  | 43987723 A | 3.236 | 3.43E-09 | chr:17:44361947 |
| 17 rs2873268   | 43930955 A | 3.236 | 3.43E-09 | chr:17:44361947 |
| 17 rs2873269   | 43931122 T | 3.236 | 3.43E-09 | chr:17:44361947 |
| 17 rs34097347  | 43949448 A | 3.236 | 3.43E-09 | chr:17:44361947 |
| 17 rs34283254  | 43902861 A | 3.236 | 3.43E-09 | chr:17:44361947 |
| 17 rs34416056  | 43951220 G | 3.236 | 3.43E-09 | chr:17:44361947 |
| 17 rs35163442  | 44023842 A | 3.236 | 3.43E-09 | chr:17:44361947 |
| 17 rs367820416 | 43982069 G | 3.236 | 3.43E-09 | chr:17:44361947 |
| 17 rs3885074   | 43902738 A | 3.236 | 3.43E-09 | chr:17:44361947 |
| 17 rs3885075   | 43902799 G | 3.236 | 3.43E-09 | chr:17:44361947 |
| 17 rs3919455   | 43953707 T | 3.236 | 3.43E-09 | chr:17:44361947 |
| 17 rs41280116  | 43902842 T | 3.236 | 3.43E-09 | chr:17:44361947 |
| 17 rs41280118  | 43903089 T | 3.236 | 3.43E-09 | chr:17:44361947 |
| 17 rs4255816   | 44010364 G | 3.236 | 3.43E-09 | chr:17:44361947 |
| 17 rs4277389   | 43895653 G | 3.236 | 3.43E-09 | chr:17:44361947 |
| 17 rs4309444   | 43895797 C | 3.236 | 3.43E-09 | chr:17:44361947 |
| 17 rs4327091   | 44021717 A | 3.236 | 3.43E-09 | chr:17:44361947 |
| 17 rs4335809   | 43902216 T | 3.236 | 3.43E-09 | chr:17:44361947 |
| 17 rs4340365   | 43930980 T | 3.236 | 3.43E-09 | chr:17:44361947 |
| 17 rs4371195   | 43986420 G | 3.236 | 3.43E-09 | chr:17:44361947 |
| 17 rs4441322   | 43955030 G | 3.236 | 3.43E-09 | chr:17:44361947 |
| 17 rs4479290   | 44021744 C | 3.236 | 3.43E-09 | chr:17:44361947 |
| 17 rs4482334   | 43912830 C | 3.236 | 3.43E-09 | chr:17:44361947 |
| 17 rs4523962   | 43902522 A | 3.236 | 3.43E-09 | chr:17:44361947 |
| 17 rs4525537   | 43912723 C | 3.236 | 3.43E-09 | chr:17:44361947 |
| 17 rs4564621   | 43895501 C | 3.236 | 3.43E-09 | chr:17:44361947 |
| 17 rs4566211   | 43895696 A | 3.236 | 3.43E-09 | chr:17:44361947 |
| 17 rs4566212   | 43895751 A | 3.236 | 3.43E-09 | chr:17:44361947 |
| 17 rs4640231   | 43912786 C | 3.236 | 3.43E-09 | chr:17:44361947 |
| 17 rs527658313 | 43945495 G | 3.236 | 3.43E-09 | chr:17:44361947 |
| 17 rs528939982 | 44034486 G | 3.236 | 3.43E-09 | chr:17:44361947 |
| 17 rs55638417  | 43900434 G | 3.236 | 3.43E-09 | chr:17:44361947 |
| 17 rs55646970  | 43938796 G | 3.236 | 3.43E-09 | chr:17:44361947 |
| 17 rs55653657  | 43956778 G | 3.236 | 3.43E-09 | chr:17:44361947 |
| 17 rs55673092  | 43938882 A | 3.236 | 3.43E-09 | chr:17:44361947 |
| 17 rs55673340  | 43948733 T | 3.236 | 3.43E-09 | chr:17:44361947 |
| 17 rs55682376  | 43991888 A | 3.236 | 3.43E-09 | chr:17:44361947 |
| 17 rs55685451  | 44001957 G | 3.236 | 3.43E-09 | chr:17:44361947 |
| 17 rs55691306  | 43978295 C | 3.236 | 3.43E-09 | chr:17:44361947 |
| 17 rs55711631  | 43958431 C | 3.236 | 3.43E-09 | chr:17:44361947 |
| 17 rs55718212  | 43920411 C | 3.236 | 3.43E-09 | chr:17:44361947 |

|               |            |       |          |                 |
|---------------|------------|-------|----------|-----------------|
| 17 rs55719714 | 43939638 A | 3.236 | 3.43E-09 | chr:17:44361947 |
| 17 rs55721252 | 43958099 C | 3.236 | 3.43E-09 | chr:17:44361947 |
| 17 rs55746658 | 44034575 C | 3.236 | 3.43E-09 | chr:17:44361947 |
| 17 rs55751924 | 43932155 G | 3.236 | 3.43E-09 | chr:17:44361947 |
| 17 rs55760800 | 43996908 G | 3.236 | 3.43E-09 | chr:17:44361947 |
| 17 rs55763795 | 43908773 C | 3.236 | 3.43E-09 | chr:17:44361947 |
| 17 rs55767267 | 43960325 C | 3.236 | 3.43E-09 | chr:17:44361947 |
| 17 rs55768605 | 43956734 A | 3.236 | 3.43E-09 | chr:17:44361947 |
| 17 rs55779147 | 43894510 A | 3.236 | 3.43E-09 | chr:17:44361947 |
| 17 rs55781174 | 43944158 T | 3.236 | 3.43E-09 | chr:17:44361947 |
| 17 rs55788597 | 44003397 A | 3.236 | 3.43E-09 | chr:17:44361947 |
| 17 rs55788678 | 43992233 T | 3.236 | 3.43E-09 | chr:17:44361947 |
| 17 rs55810795 | 43992283 G | 3.236 | 3.43E-09 | chr:17:44361947 |
| 17 rs55821155 | 44032470 G | 3.236 | 3.43E-09 | chr:17:44361947 |
| 17 rs55823844 | 43978320 A | 3.236 | 3.43E-09 | chr:17:44361947 |
| 17 rs55841786 | 43978308 C | 3.236 | 3.43E-09 | chr:17:44361947 |
| 17 rs55865707 | 43908826 G | 3.236 | 3.43E-09 | chr:17:44361947 |
| 17 rs55874169 | 44014384 A | 3.236 | 3.43E-09 | chr:17:44361947 |
| 17 rs55876817 | 43958139 C | 3.236 | 3.43E-09 | chr:17:44361947 |
| 17 rs55877243 | 43969019 C | 3.236 | 3.43E-09 | chr:17:44361947 |
| 17 rs55886302 | 43936011 G | 3.236 | 3.43E-09 | chr:17:44361947 |
| 17 rs55888391 | 43938107 G | 3.236 | 3.43E-09 | chr:17:44361947 |
| 17 rs55894109 | 43957221 T | 3.236 | 3.43E-09 | chr:17:44361947 |
| 17 rs55895732 | 43968937 C | 3.236 | 3.43E-09 | chr:17:44361947 |
| 17 rs55905252 | 43955365 A | 3.236 | 3.43E-09 | chr:17:44361947 |
| 17 rs55929431 | 44000202 A | 3.236 | 3.43E-09 | chr:17:44361947 |
| 17 rs55933304 | 43992305 A | 3.236 | 3.43E-09 | chr:17:44361947 |
| 17 rs55937610 | 43960283 G | 3.236 | 3.43E-09 | chr:17:44361947 |
| 17 rs55942528 | 43932028 G | 3.236 | 3.43E-09 | chr:17:44361947 |
| 17 rs55943044 | 43872228 A | 3.236 | 3.43E-09 | chr:17:44361947 |
| 17 rs55943606 | 43968874 G | 3.236 | 3.43E-09 | chr:17:44361947 |
| 17 rs55943825 | 43924776 T | 3.236 | 3.43E-09 | chr:17:44361947 |
| 17 rs55944735 | 43958172 G | 3.236 | 3.43E-09 | chr:17:44361947 |
| 17 rs55960528 | 43968994 C | 3.236 | 3.43E-09 | chr:17:44361947 |
| 17 rs55967721 | 43948977 A | 3.236 | 3.43E-09 | chr:17:44361947 |
| 17 rs55975673 | 43959113 G | 3.236 | 3.43E-09 | chr:17:44361947 |
| 17 rs55978005 | 44031540 T | 3.236 | 3.43E-09 | chr:17:44361947 |
| 17 rs55979424 | 43900081 T | 3.236 | 3.43E-09 | chr:17:44361947 |
| 17 rs55996632 | 43935888 T | 3.236 | 3.43E-09 | chr:17:44361947 |
| 17 rs56002706 | 44000505 T | 3.236 | 3.43E-09 | chr:17:44361947 |
| 17 rs56023973 | 43917776 T | 3.236 | 3.43E-09 | chr:17:44361947 |
| 17 rs56026128 | 43931244 C | 3.236 | 3.43E-09 | chr:17:44361947 |
| 17 rs56026232 | 43939399 C | 3.236 | 3.43E-09 | chr:17:44361947 |

|                |            |       |          |                 |
|----------------|------------|-------|----------|-----------------|
| 17 rs56026524  | 43939389 T | 3.236 | 3.43E-09 | chr:17:44361947 |
| 17 rs56036719  | 43943974 T | 3.236 | 3.43E-09 | chr:17:44361947 |
| 17 rs56042957  | 43992244 A | 3.236 | 3.43E-09 | chr:17:44361947 |
| 17 rs56080482  | 44032597 A | 3.236 | 3.43E-09 | chr:17:44361947 |
| 17 rs56099546  | 43894609 G | 3.236 | 3.43E-09 | chr:17:44361947 |
| 17 rs56100710  | 43939395 T | 3.236 | 3.43E-09 | chr:17:44361947 |
| 17 rs56101773  | 43957269 C | 3.236 | 3.43E-09 | chr:17:44361947 |
| 17 rs56127111  | 43913315 T | 3.236 | 3.43E-09 | chr:17:44361947 |
| 17 rs56136075  | 43936298 A | 3.236 | 3.43E-09 | chr:17:44361947 |
| 17 rs56146262  | 43931907 A | 3.236 | 3.43E-09 | chr:17:44361947 |
| 17 rs56150806  | 43919301 C | 3.236 | 3.43E-09 | chr:17:44361947 |
| 17 rs56194412  | 43960600 C | 3.236 | 3.43E-09 | chr:17:44361947 |
| 17 rs56197117  | 44003446 G | 3.236 | 3.43E-09 | chr:17:44361947 |
| 17 rs56201245  | 44034340 T | 3.236 | 3.43E-09 | chr:17:44361947 |
| 17 rs56227067  | 43939609 T | 3.236 | 3.43E-09 | chr:17:44361947 |
| 17 rs56233672  | 43920300 C | 3.236 | 3.43E-09 | chr:17:44361947 |
| 17 rs56249080  | 43939432 T | 3.236 | 3.43E-09 | chr:17:44361947 |
| 17 rs56249311  | 44003599 T | 3.236 | 3.43E-09 | chr:17:44361947 |
| 17 rs56249780  | 43957328 T | 3.236 | 3.43E-09 | chr:17:44361947 |
| 17 rs56254732  | 43932049 T | 3.236 | 3.43E-09 | chr:17:44361947 |
| 17 rs56288604  | 43931380 G | 3.236 | 3.43E-09 | chr:17:44361947 |
| 17 rs56289364  | 43947928 G | 3.236 | 3.43E-09 | chr:17:44361947 |
| 17 rs56299858  | 43939659 A | 3.236 | 3.43E-09 | chr:17:44361947 |
| 17 rs56301449  | 43960918 C | 3.236 | 3.43E-09 | chr:17:44361947 |
| 17 rs56303672  | 43996960 G | 3.236 | 3.43E-09 | chr:17:44361947 |
| 17 rs56306380  | 43978306 A | 3.236 | 3.43E-09 | chr:17:44361947 |
| 17 rs56317731  | 44032073 G | 3.236 | 3.43E-09 | chr:17:44361947 |
| 17 rs56319902  | 43871982 T | 3.236 | 3.43E-09 | chr:17:44361947 |
| 17 rs56327054  | 43943957 C | 3.236 | 3.43E-09 | chr:17:44361947 |
| 17 rs56329743  | 43931245 A | 3.236 | 3.43E-09 | chr:17:44361947 |
| 17 rs56338487  | 43960812 T | 3.236 | 3.43E-09 | chr:17:44361947 |
| 17 rs56343551  | 43959092 T | 3.236 | 3.43E-09 | chr:17:44361947 |
| 17 rs56347602  | 43939255 C | 3.236 | 3.43E-09 | chr:17:44361947 |
| 17 rs56354807  | 43920378 T | 3.236 | 3.43E-09 | chr:17:44361947 |
| 17 rs56357543  | 43894547 T | 3.236 | 3.43E-09 | chr:17:44361947 |
| 17 rs56364632  | 43956642 C | 3.236 | 3.43E-09 | chr:17:44361947 |
| 17 rs56365901  | 43960323 G | 3.236 | 3.43E-09 | chr:17:44361947 |
| 17 rs56367860  | 44034673 G | 3.236 | 3.43E-09 | chr:17:44361947 |
| 17 rs56387391  | 43959261 A | 3.236 | 3.43E-09 | chr:17:44361947 |
| 17 rs56398500  | 43947488 G | 3.236 | 3.43E-09 | chr:17:44361947 |
| 17 rs56971664  | 43918613 C | 3.236 | 3.43E-09 | chr:17:44361947 |
| 17 rs572616442 | 44036129 T | 3.236 | 3.43E-09 | chr:17:44361947 |
| 17 rs62054763  | 43910262 G | 3.236 | 3.43E-09 | chr:17:44361947 |

|               |            |       |          |                 |
|---------------|------------|-------|----------|-----------------|
| 17 rs62054802 | 43914598 C | 3.236 | 3.43E-09 | chr:17:44361947 |
| 17 rs62054803 | 43914728 T | 3.236 | 3.43E-09 | chr:17:44361947 |
| 17 rs62054804 | 43914809 T | 3.236 | 3.43E-09 | chr:17:44361947 |
| 17 rs62054805 | 43915054 G | 3.236 | 3.43E-09 | chr:17:44361947 |
| 17 rs62054806 | 43915312 T | 3.236 | 3.43E-09 | chr:17:44361947 |
| 17 rs62054809 | 43918239 T | 3.236 | 3.43E-09 | chr:17:44361947 |
| 17 rs62054811 | 43918651 G | 3.236 | 3.43E-09 | chr:17:44361947 |
| 17 rs62054814 | 43921572 A | 3.236 | 3.43E-09 | chr:17:44361947 |
| 17 rs62054815 | 43923266 A | 3.236 | 3.43E-09 | chr:17:44361947 |
| 17 rs62054824 | 43929992 T | 3.236 | 3.43E-09 | chr:17:44361947 |
| 17 rs62054831 | 43932381 T | 3.236 | 3.43E-09 | chr:17:44361947 |
| 17 rs62054834 | 43934314 C | 3.236 | 3.43E-09 | chr:17:44361947 |
| 17 rs62054835 | 43934672 C | 3.236 | 3.43E-09 | chr:17:44361947 |
| 17 rs62054839 | 43936804 G | 3.236 | 3.43E-09 | chr:17:44361947 |
| 17 rs62054840 | 43936812 A | 3.236 | 3.43E-09 | chr:17:44361947 |
| 17 rs62054841 | 43937104 A | 3.236 | 3.43E-09 | chr:17:44361947 |
| 17 rs62054842 | 43937162 T | 3.236 | 3.43E-09 | chr:17:44361947 |
| 17 rs62054843 | 43937184 C | 3.236 | 3.43E-09 | chr:17:44361947 |
| 17 rs62054844 | 43937333 G | 3.236 | 3.43E-09 | chr:17:44361947 |
| 17 rs62054846 | 43938634 G | 3.236 | 3.43E-09 | chr:17:44361947 |
| 17 rs62054857 | 43939936 A | 3.236 | 3.43E-09 | chr:17:44361947 |
| 17 rs62054858 | 43940188 C | 3.236 | 3.43E-09 | chr:17:44361947 |
| 17 rs62054859 | 43940685 A | 3.236 | 3.43E-09 | chr:17:44361947 |
| 17 rs62055460 | 43940825 C | 3.236 | 3.43E-09 | chr:17:44361947 |
| 17 rs62055461 | 43941350 T | 3.236 | 3.43E-09 | chr:17:44361947 |
| 17 rs62055462 | 43941476 C | 3.236 | 3.43E-09 | chr:17:44361947 |
| 17 rs62055463 | 43941491 G | 3.236 | 3.43E-09 | chr:17:44361947 |
| 17 rs62055464 | 43941858 G | 3.236 | 3.43E-09 | chr:17:44361947 |
| 17 rs62055465 | 43942046 A | 3.236 | 3.43E-09 | chr:17:44361947 |
| 17 rs62055466 | 43942656 A | 3.236 | 3.43E-09 | chr:17:44361947 |
| 17 rs62055467 | 43942820 C | 3.236 | 3.43E-09 | chr:17:44361947 |
| 17 rs62055468 | 43943000 C | 3.236 | 3.43E-09 | chr:17:44361947 |
| 17 rs62055469 | 43943655 C | 3.236 | 3.43E-09 | chr:17:44361947 |
| 17 rs62055470 | 43943657 G | 3.236 | 3.43E-09 | chr:17:44361947 |
| 17 rs62055471 | 43943755 C | 3.236 | 3.43E-09 | chr:17:44361947 |
| 17 rs62055475 | 43945106 C | 3.236 | 3.43E-09 | chr:17:44361947 |
| 17 rs62055478 | 43945938 T | 3.236 | 3.43E-09 | chr:17:44361947 |
| 17 rs62055483 | 43948040 T | 3.236 | 3.43E-09 | chr:17:44361947 |
| 17 rs62055486 | 43949092 G | 3.236 | 3.43E-09 | chr:17:44361947 |
| 17 rs62055488 | 43950394 T | 3.236 | 3.43E-09 | chr:17:44361947 |
| 17 rs62055489 | 43950441 A | 3.236 | 3.43E-09 | chr:17:44361947 |
| 17 rs62055490 | 43950533 G | 3.236 | 3.43E-09 | chr:17:44361947 |
| 17 rs62055491 | 43951120 C | 3.236 | 3.43E-09 | chr:17:44361947 |

|               |            |       |          |                 |
|---------------|------------|-------|----------|-----------------|
| 17 rs62055492 | 43951345 A | 3.236 | 3.43E-09 | chr:17:44361947 |
| 17 rs62055496 | 43953307 T | 3.236 | 3.43E-09 | chr:17:44361947 |
| 17 rs62055497 | 43953529 G | 3.236 | 3.43E-09 | chr:17:44361947 |
| 17 rs62055498 | 43953814 A | 3.236 | 3.43E-09 | chr:17:44361947 |
| 17 rs62055499 | 43953991 G | 3.236 | 3.43E-09 | chr:17:44361947 |
| 17 rs62055500 | 43954134 A | 3.236 | 3.43E-09 | chr:17:44361947 |
| 17 rs62055501 | 43954227 A | 3.236 | 3.43E-09 | chr:17:44361947 |
| 17 rs62055502 | 43954284 A | 3.236 | 3.43E-09 | chr:17:44361947 |
| 17 rs62055515 | 43956370 T | 3.236 | 3.43E-09 | chr:17:44361947 |
| 17 rs62055516 | 43956390 C | 3.236 | 3.43E-09 | chr:17:44361947 |
| 17 rs62055517 | 43956425 T | 3.236 | 3.43E-09 | chr:17:44361947 |
| 17 rs62055518 | 43956505 C | 3.236 | 3.43E-09 | chr:17:44361947 |
| 17 rs62055525 | 43958736 A | 3.236 | 3.43E-09 | chr:17:44361947 |
| 17 rs62055529 | 43960020 G | 3.236 | 3.43E-09 | chr:17:44361947 |
| 17 rs62055538 | 43960997 C | 3.236 | 3.43E-09 | chr:17:44361947 |
| 17 rs62055539 | 43961044 G | 3.236 | 3.43E-09 | chr:17:44361947 |
| 17 rs62055540 | 43961142 C | 3.236 | 3.43E-09 | chr:17:44361947 |
| 17 rs62055541 | 43962017 C | 3.236 | 3.43E-09 | chr:17:44361947 |
| 17 rs62055542 | 43963844 T | 3.236 | 3.43E-09 | chr:17:44361947 |
| 17 rs62055545 | 43964561 T | 3.236 | 3.43E-09 | chr:17:44361947 |
| 17 rs62055546 | 43964567 C | 3.236 | 3.43E-09 | chr:17:44361947 |
| 17 rs62055547 | 43964755 T | 3.236 | 3.43E-09 | chr:17:44361947 |
| 17 rs62055548 | 43964899 G | 3.236 | 3.43E-09 | chr:17:44361947 |
| 17 rs62055549 | 43965595 C | 3.236 | 3.43E-09 | chr:17:44361947 |
| 17 rs62055550 | 43965680 A | 3.236 | 3.43E-09 | chr:17:44361947 |
| 17 rs62055551 | 43965687 G | 3.236 | 3.43E-09 | chr:17:44361947 |
| 17 rs62055552 | 43965955 G | 3.236 | 3.43E-09 | chr:17:44361947 |
| 17 rs62055553 | 43966178 A | 3.236 | 3.43E-09 | chr:17:44361947 |
| 17 rs62055554 | 43966260 G | 3.236 | 3.43E-09 | chr:17:44361947 |
| 17 rs62055555 | 43966282 T | 3.236 | 3.43E-09 | chr:17:44361947 |
| 17 rs62055556 | 43966749 C | 3.236 | 3.43E-09 | chr:17:44361947 |
| 17 rs62055557 | 43966795 A | 3.236 | 3.43E-09 | chr:17:44361947 |
| 17 rs62055558 | 43966955 G | 3.236 | 3.43E-09 | chr:17:44361947 |
| 17 rs62055559 | 43967138 G | 3.236 | 3.43E-09 | chr:17:44361947 |
| 17 rs62056760 | 43968572 A | 3.236 | 3.43E-09 | chr:17:44361947 |
| 17 rs62056761 | 43969686 A | 3.236 | 3.43E-09 | chr:17:44361947 |
| 17 rs62056773 | 43969833 G | 3.236 | 3.43E-09 | chr:17:44361947 |
| 17 rs62056774 | 43969901 A | 3.236 | 3.43E-09 | chr:17:44361947 |
| 17 rs62056775 | 43969952 C | 3.236 | 3.43E-09 | chr:17:44361947 |
| 17 rs62056776 | 43969995 T | 3.236 | 3.43E-09 | chr:17:44361947 |
| 17 rs62056777 | 43970303 A | 3.236 | 3.43E-09 | chr:17:44361947 |
| 17 rs62056778 | 43971604 G | 3.236 | 3.43E-09 | chr:17:44361947 |
| 17 rs62056779 | 43971937 A | 3.236 | 3.43E-09 | chr:17:44361947 |

|               |            |       |          |                 |
|---------------|------------|-------|----------|-----------------|
| 17 rs62056780 | 43973652 T | 3.236 | 3.43E-09 | chr:17:44361947 |
| 17 rs62056781 | 43973899 C | 3.236 | 3.43E-09 | chr:17:44361947 |
| 17 rs62056782 | 43974230 T | 3.236 | 3.43E-09 | chr:17:44361947 |
| 17 rs62056783 | 43974549 C | 3.236 | 3.43E-09 | chr:17:44361947 |
| 17 rs62056784 | 43974889 G | 3.236 | 3.43E-09 | chr:17:44361947 |
| 17 rs62056785 | 43975263 C | 3.236 | 3.43E-09 | chr:17:44361947 |
| 17 rs62056786 | 43975285 C | 3.236 | 3.43E-09 | chr:17:44361947 |
| 17 rs62056789 | 43975415 C | 3.236 | 3.43E-09 | chr:17:44361947 |
| 17 rs62056790 | 43975417 A | 3.236 | 3.43E-09 | chr:17:44361947 |
| 17 rs62056791 | 43976064 C | 3.236 | 3.43E-09 | chr:17:44361947 |
| 17 rs62056792 | 43976644 A | 3.236 | 3.43E-09 | chr:17:44361947 |
| 17 rs62056793 | 43977018 G | 3.236 | 3.43E-09 | chr:17:44361947 |
| 17 rs62056794 | 43977049 G | 3.236 | 3.43E-09 | chr:17:44361947 |
| 17 rs62056795 | 43978041 T | 3.236 | 3.43E-09 | chr:17:44361947 |
| 17 rs62056796 | 43978120 G | 3.236 | 3.43E-09 | chr:17:44361947 |
| 17 rs62056800 | 43979468 A | 3.236 | 3.43E-09 | chr:17:44361947 |
| 17 rs62056801 | 43979504 A | 3.236 | 3.43E-09 | chr:17:44361947 |
| 17 rs62056802 | 43980762 G | 3.236 | 3.43E-09 | chr:17:44361947 |
| 17 rs62056803 | 43982159 G | 3.236 | 3.43E-09 | chr:17:44361947 |
| 17 rs62056804 | 43982286 T | 3.236 | 3.43E-09 | chr:17:44361947 |
| 17 rs62056805 | 43983363 A | 3.236 | 3.43E-09 | chr:17:44361947 |
| 17 rs62056806 | 43983801 G | 3.236 | 3.43E-09 | chr:17:44361947 |
| 17 rs62056807 | 43984253 C | 3.236 | 3.43E-09 | chr:17:44361947 |
| 17 rs62056808 | 43984646 C | 3.236 | 3.43E-09 | chr:17:44361947 |
| 17 rs62056809 | 43984669 G | 3.236 | 3.43E-09 | chr:17:44361947 |
| 17 rs62056810 | 43984672 C | 3.236 | 3.43E-09 | chr:17:44361947 |
| 17 rs62056812 | 43987154 A | 3.236 | 3.43E-09 | chr:17:44361947 |
| 17 rs62056837 | 43988884 C | 3.236 | 3.43E-09 | chr:17:44361947 |
| 17 rs62056838 | 43989087 G | 3.236 | 3.43E-09 | chr:17:44361947 |
| 17 rs62056839 | 43989221 C | 3.236 | 3.43E-09 | chr:17:44361947 |
| 17 rs62056840 | 43989689 C | 3.236 | 3.43E-09 | chr:17:44361947 |
| 17 rs62056841 | 43990041 C | 3.236 | 3.43E-09 | chr:17:44361947 |
| 17 rs62056848 | 43992456 A | 3.236 | 3.43E-09 | chr:17:44361947 |
| 17 rs62056849 | 43992463 C | 3.236 | 3.43E-09 | chr:17:44361947 |
| 17 rs62056851 | 43992806 G | 3.236 | 3.43E-09 | chr:17:44361947 |
| 17 rs62056856 | 43992939 C | 3.236 | 3.43E-09 | chr:17:44361947 |
| 17 rs62056859 | 43994435 G | 3.236 | 3.43E-09 | chr:17:44361947 |
| 17 rs62057101 | 43885291 A | 3.236 | 3.43E-09 | chr:17:44361947 |
| 17 rs62057103 | 43887480 C | 3.236 | 3.43E-09 | chr:17:44361947 |
| 17 rs62057107 | 43896032 T | 3.236 | 3.43E-09 | chr:17:44361947 |
| 17 rs62057108 | 43896616 C | 3.236 | 3.43E-09 | chr:17:44361947 |
| 17 rs62057109 | 43896637 C | 3.236 | 3.43E-09 | chr:17:44361947 |
| 17 rs62057110 | 43896734 C | 3.236 | 3.43E-09 | chr:17:44361947 |

|               |            |       |          |                 |
|---------------|------------|-------|----------|-----------------|
| 17 rs62057111 | 43897130 G | 3.236 | 3.43E-09 | chr:17:44361947 |
| 17 rs62057112 | 43897202 A | 3.236 | 3.43E-09 | chr:17:44361947 |
| 17 rs62057113 | 43897449 T | 3.236 | 3.43E-09 | chr:17:44361947 |
| 17 rs62057114 | 43899401 T | 3.236 | 3.43E-09 | chr:17:44361947 |
| 17 rs62057115 | 43899417 C | 3.236 | 3.43E-09 | chr:17:44361947 |
| 17 rs62057116 | 43899655 C | 3.236 | 3.43E-09 | chr:17:44361947 |
| 17 rs62057117 | 43899657 G | 3.236 | 3.43E-09 | chr:17:44361947 |
| 17 rs62057118 | 43899727 G | 3.236 | 3.43E-09 | chr:17:44361947 |
| 17 rs62057119 | 43899736 A | 3.236 | 3.43E-09 | chr:17:44361947 |
| 17 rs62057121 | 43900760 A | 3.236 | 3.43E-09 | chr:17:44361947 |
| 17 rs62057122 | 43901001 T | 3.236 | 3.43E-09 | chr:17:44361947 |
| 17 rs62057123 | 43901238 G | 3.236 | 3.43E-09 | chr:17:44361947 |
| 17 rs62057143 | 43901528 C | 3.236 | 3.43E-09 | chr:17:44361947 |
| 17 rs62057144 | 43901558 G | 3.236 | 3.43E-09 | chr:17:44361947 |
| 17 rs62057146 | 43903106 G | 3.236 | 3.43E-09 | chr:17:44361947 |
| 17 rs62057147 | 43903298 A | 3.236 | 3.43E-09 | chr:17:44361947 |
| 17 rs62057149 | 43903546 G | 3.236 | 3.43E-09 | chr:17:44361947 |
| 17 rs62057150 | 43903548 T | 3.236 | 3.43E-09 | chr:17:44361947 |
| 17 rs62057152 | 43904110 C | 3.236 | 3.43E-09 | chr:17:44361947 |
| 17 rs62057153 | 43904528 C | 3.236 | 3.43E-09 | chr:17:44361947 |
| 17 rs62057154 | 43904610 T | 3.236 | 3.43E-09 | chr:17:44361947 |
| 17 rs62057155 | 43904673 T | 3.236 | 3.43E-09 | chr:17:44361947 |
| 17 rs62057156 | 43904948 C | 3.236 | 3.43E-09 | chr:17:44361947 |
| 17 rs62057157 | 43905313 C | 3.236 | 3.43E-09 | chr:17:44361947 |
| 17 rs62057158 | 43907143 A | 3.236 | 3.43E-09 | chr:17:44361947 |
| 17 rs62058962 | 43998151 T | 3.236 | 3.43E-09 | chr:17:44361947 |
| 17 rs62058965 | 43999529 C | 3.236 | 3.43E-09 | chr:17:44361947 |
| 17 rs62058968 | 44001228 A | 3.236 | 3.43E-09 | chr:17:44361947 |
| 17 rs62059003 | 44002431 T | 3.236 | 3.43E-09 | chr:17:44361947 |
| 17 rs62059004 | 44003893 G | 3.236 | 3.43E-09 | chr:17:44361947 |
| 17 rs62059005 | 44004472 G | 3.236 | 3.43E-09 | chr:17:44361947 |
| 17 rs62059007 | 44005615 G | 3.236 | 3.43E-09 | chr:17:44361947 |
| 17 rs62059008 | 44006085 G | 3.236 | 3.43E-09 | chr:17:44361947 |
| 17 rs62059009 | 44006130 C | 3.236 | 3.43E-09 | chr:17:44361947 |
| 17 rs62061705 | 44006252 C | 3.236 | 3.43E-09 | chr:17:44361947 |
| 17 rs62061706 | 44006896 C | 3.236 | 3.43E-09 | chr:17:44361947 |
| 17 rs62061707 | 44006954 C | 3.236 | 3.43E-09 | chr:17:44361947 |
| 17 rs62061708 | 44006956 G | 3.236 | 3.43E-09 | chr:17:44361947 |
| 17 rs62061709 | 44007493 T | 3.236 | 3.43E-09 | chr:17:44361947 |
| 17 rs62061710 | 44007727 T | 3.236 | 3.43E-09 | chr:17:44361947 |
| 17 rs62061711 | 44007764 C | 3.236 | 3.43E-09 | chr:17:44361947 |
| 17 rs62061712 | 44009876 A | 3.236 | 3.43E-09 | chr:17:44361947 |
| 17 rs62061713 | 44010405 G | 3.236 | 3.43E-09 | chr:17:44361947 |

|               |            |       |          |                 |
|---------------|------------|-------|----------|-----------------|
| 17 rs62061714 | 44010452 A | 3.236 | 3.43E-09 | chr:17:44361947 |
| 17 rs62061715 | 44011526 G | 3.236 | 3.43E-09 | chr:17:44361947 |
| 17 rs62061716 | 44012096 G | 3.236 | 3.43E-09 | chr:17:44361947 |
| 17 rs62061717 | 44012248 A | 3.236 | 3.43E-09 | chr:17:44361947 |
| 17 rs62061718 | 44012260 C | 3.236 | 3.43E-09 | chr:17:44361947 |
| 17 rs62061719 | 44012989 T | 3.236 | 3.43E-09 | chr:17:44361947 |
| 17 rs62061720 | 44013189 T | 3.236 | 3.43E-09 | chr:17:44361947 |
| 17 rs62061721 | 44013346 C | 3.236 | 3.43E-09 | chr:17:44361947 |
| 17 rs62061725 | 44016157 C | 3.236 | 3.43E-09 | chr:17:44361947 |
| 17 rs62061726 | 44016341 A | 3.236 | 3.43E-09 | chr:17:44361947 |
| 17 rs62061727 | 44017124 T | 3.236 | 3.43E-09 | chr:17:44361947 |
| 17 rs62061728 | 44017180 G | 3.236 | 3.43E-09 | chr:17:44361947 |
| 17 rs62061729 | 44017283 G | 3.236 | 3.43E-09 | chr:17:44361947 |
| 17 rs62061730 | 44017342 G | 3.236 | 3.43E-09 | chr:17:44361947 |
| 17 rs62061731 | 44017666 A | 3.236 | 3.43E-09 | chr:17:44361947 |
| 17 rs62061732 | 44017941 T | 3.236 | 3.43E-09 | chr:17:44361947 |
| 17 rs62062768 | 44019479 G | 3.236 | 3.43E-09 | chr:17:44361947 |
| 17 rs62062769 | 44019643 A | 3.236 | 3.43E-09 | chr:17:44361947 |
| 17 rs62062770 | 44019680 C | 3.236 | 3.43E-09 | chr:17:44361947 |
| 17 rs62062771 | 44020282 A | 3.236 | 3.43E-09 | chr:17:44361947 |
| 17 rs62062772 | 44020314 T | 3.236 | 3.43E-09 | chr:17:44361947 |
| 17 rs62062773 | 44020545 G | 3.236 | 3.43E-09 | chr:17:44361947 |
| 17 rs62062774 | 44021463 C | 3.236 | 3.43E-09 | chr:17:44361947 |
| 17 rs62062776 | 44022043 C | 3.236 | 3.43E-09 | chr:17:44361947 |
| 17 rs62062777 | 44022068 A | 3.236 | 3.43E-09 | chr:17:44361947 |
| 17 rs62062778 | 44022528 G | 3.236 | 3.43E-09 | chr:17:44361947 |
| 17 rs62062779 | 44022577 C | 3.236 | 3.43E-09 | chr:17:44361947 |
| 17 rs62062780 | 44022593 T | 3.236 | 3.43E-09 | chr:17:44361947 |
| 17 rs62062781 | 44022632 A | 3.236 | 3.43E-09 | chr:17:44361947 |
| 17 rs62062782 | 44023087 A | 3.236 | 3.43E-09 | chr:17:44361947 |
| 17 rs62062783 | 44023520 G | 3.236 | 3.43E-09 | chr:17:44361947 |
| 17 rs62062784 | 44024552 G | 3.236 | 3.43E-09 | chr:17:44361947 |
| 17 rs62062785 | 44024562 T | 3.236 | 3.43E-09 | chr:17:44361947 |
| 17 rs62062787 | 44024865 C | 3.236 | 3.43E-09 | chr:17:44361947 |
| 17 rs62062788 | 44024906 G | 3.236 | 3.43E-09 | chr:17:44361947 |
| 17 rs62062789 | 44025033 C | 3.236 | 3.43E-09 | chr:17:44361947 |
| 17 rs62062790 | 44025045 T | 3.236 | 3.43E-09 | chr:17:44361947 |
| 17 rs62062791 | 44025273 A | 3.236 | 3.43E-09 | chr:17:44361947 |
| 17 rs62062792 | 44025347 C | 3.236 | 3.43E-09 | chr:17:44361947 |
| 17 rs62062793 | 44026321 C | 3.236 | 3.43E-09 | chr:17:44361947 |
| 17 rs62062794 | 44026394 G | 3.236 | 3.43E-09 | chr:17:44361947 |
| 17 rs62062795 | 44027090 T | 3.236 | 3.43E-09 | chr:17:44361947 |
| 17 rs62062796 | 44027316 A | 3.236 | 3.43E-09 | chr:17:44361947 |



|               |            |       |          |                 |
|---------------|------------|-------|----------|-----------------|
| 17 rs62062797 | 44027366 G | 3.236 | 3.43E-09 | chr:17:44361947 |
| 17 rs62062798 | 44027383 G | 3.236 | 3.43E-09 | chr:17:44361947 |
| 17 rs62062799 | 44027521 T | 3.236 | 3.43E-09 | chr:17:44361947 |
| 17 rs62062800 | 44027753 G | 3.236 | 3.43E-09 | chr:17:44361947 |
| 17 rs62062801 | 44028011 G | 3.236 | 3.43E-09 | chr:17:44361947 |
| 17 rs62062802 | 44028045 T | 3.236 | 3.43E-09 | chr:17:44361947 |
| 17 rs62062803 | 44028183 C | 3.236 | 3.43E-09 | chr:17:44361947 |
| 17 rs62062805 | 44030773 G | 3.236 | 3.43E-09 | chr:17:44361947 |
| 17 rs62062806 | 44031420 A | 3.236 | 3.43E-09 | chr:17:44361947 |
| 17 rs62062813 | 44032956 A | 3.236 | 3.43E-09 | chr:17:44361947 |
| 17 rs62063262 | 44033002 C | 3.236 | 3.43E-09 | chr:17:44361947 |
| 17 rs62063263 | 44033394 C | 3.236 | 3.43E-09 | chr:17:44361947 |
| 17 rs62063264 | 44033401 T | 3.236 | 3.43E-09 | chr:17:44361947 |
| 17 rs62063265 | 44033468 A | 3.236 | 3.43E-09 | chr:17:44361947 |
| 17 rs62063266 | 44033488 T | 3.236 | 3.43E-09 | chr:17:44361947 |
| 17 rs62063269 | 44034833 A | 3.236 | 3.43E-09 | chr:17:44361947 |
| 17 rs62063271 | 44036047 A | 3.236 | 3.43E-09 | chr:17:44361947 |
| 17 rs62063275 | 44036287 G | 3.236 | 3.43E-09 | chr:17:44361947 |
| 17 rs62063277 | 44036462 A | 3.236 | 3.43E-09 | chr:17:44361947 |
| 17 rs62063278 | 44036914 T | 3.236 | 3.43E-09 | chr:17:44361947 |
| 17 rs62063279 | 44036936 A | 3.236 | 3.43E-09 | chr:17:44361947 |
| 17 rs62063280 | 44037299 C | 3.236 | 3.43E-09 | chr:17:44361947 |
| 17 rs62621252 | 43922942 C | 3.236 | 3.43E-09 | chr:17:44361947 |
| 17 rs739642   | 43946838 A | 3.236 | 3.43E-09 | chr:17:44361947 |
| 17 rs739643   | 43946707 C | 3.236 | 3.43E-09 | chr:17:44361947 |
| 17 rs739644   | 43895008 G | 3.236 | 3.43E-09 | chr:17:44361947 |
| 17 rs739645   | 43894990 G | 3.236 | 3.43E-09 | chr:17:44361947 |
| 17 rs74457229 | 43972581 T | 3.236 | 3.43E-09 | chr:17:44361947 |
| 17 rs74496580 | 43974065 A | 3.236 | 3.43E-09 | chr:17:44361947 |
| 17 rs74509629 | 43985597 T | 3.236 | 3.43E-09 | chr:17:44361947 |
| 17 rs74548327 | 43973080 G | 3.236 | 3.43E-09 | chr:17:44361947 |
| 17 rs74573628 | 43982961 C | 3.236 | 3.43E-09 | chr:17:44361947 |
| 17 rs74863825 | 43963120 T | 3.236 | 3.43E-09 | chr:17:44361947 |
| 17 rs74872829 | 43938394 G | 3.236 | 3.43E-09 | chr:17:44361947 |
| 17 rs74903707 | 44028707 A | 3.236 | 3.43E-09 | chr:17:44361947 |
| 17 rs74922289 | 43918524 G | 3.236 | 3.43E-09 | chr:17:44361947 |
| 17 rs74944644 | 43940020 C | 3.236 | 3.43E-09 | chr:17:44361947 |
| 17 rs7501759  | 44009921 G | 3.236 | 3.43E-09 | chr:17:44361947 |
| 17 rs7502888  | 43986992 C | 3.236 | 3.43E-09 | chr:17:44361947 |
| 17 rs75046472 | 43997499 T | 3.236 | 3.43E-09 | chr:17:44361947 |
| 17 rs75210307 | 43940012 C | 3.236 | 3.43E-09 | chr:17:44361947 |
| 17 rs75617973 | 43983159 C | 3.236 | 3.43E-09 | chr:17:44361947 |
| 17 rs75676226 | 43947171 A | 3.236 | 3.43E-09 | chr:17:44361947 |

|               |            |       |          |                 |
|---------------|------------|-------|----------|-----------------|
| 17 rs75686108 | 44022376 T | 3.236 | 3.43E-09 | chr:17:44361947 |
| 17 rs75690239 | 43941710 T | 3.236 | 3.43E-09 | chr:17:44361947 |
| 17 rs757055   | 43946875 T | 3.236 | 3.43E-09 | chr:17:44361947 |
| 17 rs75839508 | 44022319 A | 3.236 | 3.43E-09 | chr:17:44361947 |
| 17 rs75945623 | 43937505 T | 3.236 | 3.43E-09 | chr:17:44361947 |
| 17 rs76090253 | 44002969 C | 3.236 | 3.43E-09 | chr:17:44361947 |
| 17 rs76324150 | 43973233 T | 3.236 | 3.43E-09 | chr:17:44361947 |
| 17 rs76329216 | 43938499 A | 3.236 | 3.43E-09 | chr:17:44361947 |
| 17 rs76500077 | 44004076 C | 3.236 | 3.43E-09 | chr:17:44361947 |
| 17 rs76563578 | 43933879 G | 3.236 | 3.43E-09 | chr:17:44361947 |
| 17 rs76594404 | 43971457 C | 3.236 | 3.43E-09 | chr:17:44361947 |
| 17 rs76627340 | 43937460 A | 3.236 | 3.43E-09 | chr:17:44361947 |
| 17 rs767056   | 43998910 T | 3.236 | 3.43E-09 | chr:17:44361947 |
| 17 rs767057   | 43998822 G | 3.236 | 3.43E-09 | chr:17:44361947 |
| 17 rs767058   | 43998767 C | 3.236 | 3.43E-09 | chr:17:44361947 |
| 17 rs76839282 | 44029178 C | 3.236 | 3.43E-09 | chr:17:44361947 |
| 17 rs77017444 | 44028796 C | 3.236 | 3.43E-09 | chr:17:44361947 |
| 17 rs77084869 | 43982903 G | 3.236 | 3.43E-09 | chr:17:44361947 |
| 17 rs77092481 | 43949008 T | 3.236 | 3.43E-09 | chr:17:44361947 |
| 17 rs77129180 | 43963046 A | 3.236 | 3.43E-09 | chr:17:44361947 |
| 17 rs77426526 | 43962982 A | 3.236 | 3.43E-09 | chr:17:44361947 |
| 17 rs77489223 | 43937736 T | 3.236 | 3.43E-09 | chr:17:44361947 |
| 17 rs77555455 | 44035516 A | 3.236 | 3.43E-09 | chr:17:44361947 |
| 17 rs77561671 | 43976627 T | 3.236 | 3.43E-09 | chr:17:44361947 |
| 17 rs77625338 | 43937671 T | 3.236 | 3.43E-09 | chr:17:44361947 |
| 17 rs77652965 | 43941608 G | 3.236 | 3.43E-09 | chr:17:44361947 |
| 17 rs77692262 | 43917086 G | 3.236 | 3.43E-09 | chr:17:44361947 |
| 17 rs77924424 | 44012915 C | 3.236 | 3.43E-09 | chr:17:44361947 |
| 17 rs78026984 | 44025592 C | 3.236 | 3.43E-09 | chr:17:44361947 |
| 17 rs78074121 | 43896690 C | 3.236 | 3.43E-09 | chr:17:44361947 |
| 17 rs78077519 | 44010984 A | 3.236 | 3.43E-09 | chr:17:44361947 |
| 17 rs78209533 | 43989909 G | 3.236 | 3.43E-09 | chr:17:44361947 |
| 17 rs78238042 | 43948159 A | 3.236 | 3.43E-09 | chr:17:44361947 |
| 17 rs78328427 | 43916932 A | 3.236 | 3.43E-09 | chr:17:44361947 |
| 17 rs78506181 | 43897480 G | 3.236 | 3.43E-09 | chr:17:44361947 |
| 17 rs78555354 | 44032879 G | 3.236 | 3.43E-09 | chr:17:44361947 |
| 17 rs78587102 | 43897246 G | 3.236 | 3.43E-09 | chr:17:44361947 |
| 17 rs78637438 | 43945855 A | 3.236 | 3.43E-09 | chr:17:44361947 |
| 17 rs78720789 | 43973413 G | 3.236 | 3.43E-09 | chr:17:44361947 |
| 17 rs78729125 | 43970108 A | 3.236 | 3.43E-09 | chr:17:44361947 |
| 17 rs78834738 | 44022434 A | 3.236 | 3.43E-09 | chr:17:44361947 |
| 17 rs78872653 | 43905134 A | 3.236 | 3.43E-09 | chr:17:44361947 |
| 17 rs78917479 | 43899611 T | 3.236 | 3.43E-09 | chr:17:44361947 |

|                |            |       |          |                 |
|----------------|------------|-------|----------|-----------------|
| 17 rs79115768  | 44021061 T | 3.236 | 3.43E-09 | chr:17:44361947 |
| 17 rs79193046  | 43967562 C | 3.236 | 3.43E-09 | chr:17:44361947 |
| 17 rs79290980  | 43985662 C | 3.236 | 3.43E-09 | chr:17:44361947 |
| 17 rs79406732  | 43940497 T | 3.236 | 3.43E-09 | chr:17:44361947 |
| 17 rs79412431  | 43940021 A | 3.236 | 3.43E-09 | chr:17:44361947 |
| 17 rs79492906  | 43984864 T | 3.236 | 3.43E-09 | chr:17:44361947 |
| 17 rs79501144  | 43900697 T | 3.236 | 3.43E-09 | chr:17:44361947 |
| 17 rs79580365  | 43960172 T | 3.236 | 3.43E-09 | chr:17:44361947 |
| 17 rs79589869  | 43930238 A | 3.236 | 3.43E-09 | chr:17:44361947 |
| 17 rs79600142  | 43897722 C | 3.236 | 3.43E-09 | chr:17:44361947 |
| 17 rs79765413  | 44022433 C | 3.236 | 3.43E-09 | chr:17:44361947 |
| 17 rs79857651  | 44013475 A | 3.236 | 3.43E-09 | chr:17:44361947 |
| 17 rs79860128  | 43990072 G | 3.236 | 3.43E-09 | chr:17:44361947 |
| 17 rs79889833  | 43937633 G | 3.236 | 3.43E-09 | chr:17:44361947 |
| 17 rs80184151  | 43879308 G | 3.236 | 3.43E-09 | chr:17:44361947 |
| 17 rs80190331  | 44035233 T | 3.236 | 3.43E-09 | chr:17:44361947 |
| 17 rs80233201  | 43971481 C | 3.236 | 3.43E-09 | chr:17:44361947 |
| 17 rs80254317  | 43963282 G | 3.236 | 3.43E-09 | chr:17:44361947 |
| 17 rs80348388  | 43952634 T | 3.236 | 3.43E-09 | chr:17:44361947 |
| 17 rs8072451   | 43893716 T | 3.236 | 3.43E-09 | chr:17:44361947 |
| 17 rs8073146   | 43893751 G | 3.236 | 3.43E-09 | chr:17:44361947 |
| 17 rs8078495   | 44000610 A | 3.236 | 3.43E-09 | chr:17:44361947 |
| 17 rs8079501   | 44000234 T | 3.236 | 3.43E-09 | chr:17:44361947 |
| 17 rs878886    | 43912490 G | 3.236 | 3.43E-09 | chr:17:44361947 |
| 17 rs878887    | 43912582 T | 3.236 | 3.43E-09 | chr:17:44361947 |
| 17 rs878888    | 43912635 G | 3.236 | 3.43E-09 | chr:17:44361947 |
| 17 rs916793    | 43954686 A | 3.236 | 3.43E-09 | chr:17:44361947 |
| 17 rs9944484   | 43990662 A | 3.236 | 3.43E-09 | chr:17:44361947 |
| 17 rs12185233  | 43923654 C | 3.237 | 3.47E-09 | chr:17:44361947 |
| 17 rs41457044  | 43911424 T | 3.237 | 3.47E-09 | chr:17:44361947 |
| 17 rs62057148  | 43903485 C | 3.237 | 3.47E-09 | chr:17:44361947 |
| 17 rs55653937  | 44316076 T | 3.216 | 3.49E-09 | chr:17:44361947 |
| 17 rs2532233   | 44273218 T | 3.174 | 3.50E-09 | chr:17:44361947 |
| 17 rs570285046 | 44305199 C | 3.229 | 3.58E-09 | chr:17:44361947 |
| 17 rs62054832  | 43933579 A | 3.213 | 3.60E-09 | chr:17:44361947 |
| 17 rs56119705  | 44209985 C | 3.232 | 3.64E-09 | chr:17:44361947 |
| 17 rs1468240   | 44196447 A | 3.226 | 3.65E-09 | chr:17:44361947 |
| 17 rs17577975  | 44210442 T | 3.222 | 3.67E-09 | chr:17:44361947 |
| 17 rs62060842  | 44153607 A | 3.222 | 3.67E-09 | chr:17:44361947 |
| 17 rs546821167 | 44271152 A | 3.18  | 3.67E-09 | chr:17:44361947 |
| 17 rs17576954  | 44181933 C | 3.224 | 3.76E-09 | chr:17:44361947 |
| 17 rs549814054 | 44149348 C | 3.272 | 3.82E-09 | chr:17:44361947 |
| 17 rs17573607  | 44083081 A | 3.22  | 3.84E-09 | chr:17:44361947 |

|                |            |       |          |                 |
|----------------|------------|-------|----------|-----------------|
| 17 rs62061803  | 44174513 A | 3.217 | 3.92E-09 | chr:17:44361947 |
| 17 rs55735563  | 44165596 T | 3.218 | 3.92E-09 | chr:17:44361947 |
| 17 rs55955207  | 44165594 A | 3.218 | 3.92E-09 | chr:17:44361947 |
| 17 rs62062786  | 44024660 C | 3.224 | 3.92E-09 | chr:17:44361947 |
| 17 rs2532276   | 44246624 A | 3.157 | 3.92E-09 | chr:17:44361947 |
| 17 rs17691328  | 43955487 T | 3.213 | 3.99E-09 | chr:17:44361947 |
| 17 rs541891089 | 44364481 G | 4.496 | 3.99E-09 | chr:17:44361947 |
| 17 rs573045769 | 44220785 A | 3.176 | 4.02E-09 | chr:17:44361947 |
| 17 rs62056835  | 43988623 A | 3.223 | 4.02E-09 | chr:17:44361947 |
| 17 rs62061798  | 44173812 A | 3.215 | 4.05E-09 | chr:17:44361947 |
| 17 rs77926909  | 43994252 C | 3.216 | 4.07E-09 | chr:17:44361947 |
| 17 rs111905143 | 44184808 G | 3.213 | 4.07E-09 | chr:17:44361947 |
| 17 rs113138968 | 44314261 T | 3.213 | 4.07E-09 | chr:17:44361947 |
| 17 rs113343439 | 44314217 G | 3.213 | 4.07E-09 | chr:17:44361947 |
| 17 rs573428524 | 44314342 C | 3.213 | 4.07E-09 | chr:17:44361947 |
| 17 rs62061858  | 44200033 C | 3.213 | 4.07E-09 | chr:17:44361947 |
| 17 rs62057151  | 43903842 T | 3.186 | 4.07E-09 | chr:17:44361947 |
| 17 rs78929339  | 44189910 G | 3.213 | 4.08E-09 | chr:17:44361947 |
| 17 rs2696494   | 44365000 G | 3.289 | 4.09E-09 | chr:17:44361947 |
| 17 rs62054833  | 43933673 C | 3.216 | 4.10E-09 | chr:17:44361947 |
| 17 rs531647912 | 44298279 T | 3.175 | 4.11E-09 | chr:17:44361947 |
| 17 rs2668645   | 44288640 G | 3.166 | 4.12E-09 | chr:17:44361947 |
| 17 rs2696444   | 44288672 A | 3.166 | 4.12E-09 | chr:17:44361947 |
| 17 rs529897519 | 44358561 A | 3.304 | 4.13E-09 | chr:17:44361947 |
| 17 rs548216148 | 44358562 T | 3.304 | 4.13E-09 | chr:17:44361947 |
| 17 rs566979023 | 44318184 G | 3.167 | 4.16E-09 | chr:17:44361947 |
| 17 rs17649553  | 43994648 T | 3.217 | 4.19E-09 | chr:17:44361947 |
| 17 rs17565025  | 44012463 C | 3.22  | 4.20E-09 | chr:17:44361947 |
| 17 rs62054825  | 43930033 A | 3.218 | 4.21E-09 | chr:17:44361947 |
| 17 rs36050210  | 44353414 G | 3.198 | 4.23E-09 | chr:17:44361947 |
| 17 rs569635106 | 44272000 A | 3.206 | 4.25E-09 | chr:17:44361947 |
| 17 rs62055544  | 43964539 G | 3.213 | 4.31E-09 | chr:17:44361947 |
| 17 rs534959541 | 44286089 A | 3.012 | 4.32E-09 | chr:17:44361947 |
| 17 rs17564223  | 43997520 T | 3.205 | 4.33E-09 | chr:17:44361947 |
| 17 rs1378358   | 44787312 T | 3.285 | 4.33E-09 | chr:17:44361947 |
| 17 rs169201    | 44790203 G | 3.285 | 4.33E-09 | chr:17:44361947 |
| 17 rs199439    | 44793503 G | 3.285 | 4.33E-09 | chr:17:44361947 |
| 17 rs199456    | 44797919 T | 3.285 | 4.33E-09 | chr:17:44361947 |
| 17 rs199457    | 44795469 T | 3.285 | 4.33E-09 | chr:17:44361947 |
| 17 rs538628    | 44787313 C | 3.285 | 4.33E-09 | chr:17:44361947 |
| 17 rs4341787   | 43902505 T | 3.211 | 4.33E-09 | chr:17:44361947 |
| 17 rs62056811  | 43985247 T | 3.211 | 4.33E-09 | chr:17:44361947 |
| 17 rs62063281  | 44038785 G | 3.246 | 4.40E-09 | chr:17:44361947 |

|                |            |       |          |                 |
|----------------|------------|-------|----------|-----------------|
| 17 rs62058964  | 43999406 G | 3.208 | 4.40E-09 | chr:17:44361947 |
| 17 rs56323304  | 43932129 T | 3.157 | 4.49E-09 | chr:17:44361947 |
| 17 rs140713557 | 43953179 G | 3.206 | 4.51E-09 | chr:17:44361947 |
| 17 rs10445337  | 44067400 C | 3.205 | 4.55E-09 | chr:17:44361947 |
| 17 rs10445338  | 44067682 A | 3.205 | 4.55E-09 | chr:17:44361947 |
| 17 rs10445371  | 44065410 A | 3.205 | 4.55E-09 | chr:17:44361947 |
| 17 rs10514897  | 44117397 G | 3.205 | 4.55E-09 | chr:17:44361947 |
| 17 rs10514898  | 44119636 C | 3.205 | 4.55E-09 | chr:17:44361947 |
| 17 rs10514901  | 44194735 T | 3.205 | 4.55E-09 | chr:17:44361947 |
| 17 rs10514903  | 44206646 G | 3.205 | 4.55E-09 | chr:17:44361947 |
| 17 rs10514904  | 44207887 T | 3.205 | 4.55E-09 | chr:17:44361947 |
| 17 rs1052551   | 44068924 A | 3.205 | 4.55E-09 | chr:17:44361947 |
| 17 rs1052587   | 44102604 C | 3.205 | 4.55E-09 | chr:17:44361947 |
| 17 rs1052590   | 44102638 G | 3.205 | 4.55E-09 | chr:17:44361947 |
| 17 rs1076222   | 44109769 G | 3.205 | 4.55E-09 | chr:17:44361947 |
| 17 rs1078268   | 44075901 G | 3.205 | 4.55E-09 | chr:17:44361947 |
| 17 rs1078269   | 44075837 C | 3.205 | 4.55E-09 | chr:17:44361947 |
| 17 rs1107820   | 44135359 C | 3.205 | 4.55E-09 | chr:17:44361947 |
| 17 rs11079729  | 44115569 A | 3.205 | 4.55E-09 | chr:17:44361947 |
| 17 rs111164082 | 44047037 A | 3.205 | 4.55E-09 | chr:17:44361947 |
| 17 rs111240522 | 44066874 A | 3.205 | 4.55E-09 | chr:17:44361947 |
| 17 rs111259120 | 44133534 T | 3.205 | 4.55E-09 | chr:17:44361947 |
| 17 rs111295615 | 44184428 C | 3.205 | 4.55E-09 | chr:17:44361947 |
| 17 rs111314258 | 44296522 C | 3.205 | 4.55E-09 | chr:17:44361947 |
| 17 rs111324579 | 44082181 G | 3.205 | 4.55E-09 | chr:17:44361947 |
| 17 rs111327992 | 44126691 A | 3.205 | 4.55E-09 | chr:17:44361947 |
| 17 rs111364350 | 44168508 T | 3.205 | 4.55E-09 | chr:17:44361947 |
| 17 rs111372048 | 44136577 C | 3.205 | 4.55E-09 | chr:17:44361947 |
| 17 rs111424940 | 44211502 A | 3.205 | 4.55E-09 | chr:17:44361947 |
| 17 rs111519055 | 44159672 G | 3.205 | 4.55E-09 | chr:17:44361947 |
| 17 rs111652694 | 44067831 C | 3.205 | 4.55E-09 | chr:17:44361947 |
| 17 rs111676341 | 44183403 G | 3.205 | 4.55E-09 | chr:17:44361947 |
| 17 rs111678697 | 44197032 C | 3.205 | 4.55E-09 | chr:17:44361947 |
| 17 rs111724389 | 44209364 A | 3.205 | 4.55E-09 | chr:17:44361947 |
| 17 rs1117253   | 44149297 C | 3.205 | 4.55E-09 | chr:17:44361947 |
| 17 rs111853996 | 44130878 G | 3.205 | 4.55E-09 | chr:17:44361947 |
| 17 rs111880194 | 44194621 G | 3.205 | 4.55E-09 | chr:17:44361947 |
| 17 rs111913701 | 44159631 G | 3.205 | 4.55E-09 | chr:17:44361947 |
| 17 rs111952388 | 44181454 T | 3.205 | 4.55E-09 | chr:17:44361947 |
| 17 rs111957446 | 44179723 C | 3.205 | 4.55E-09 | chr:17:44361947 |
| 17 rs111970616 | 44169581 C | 3.205 | 4.55E-09 | chr:17:44361947 |
| 17 rs111976319 | 44095335 A | 3.205 | 4.55E-09 | chr:17:44361947 |
| 17 rs112058117 | 44041562 T | 3.205 | 4.55E-09 | chr:17:44361947 |

|    |             |          |   |       |          |                 |
|----|-------------|----------|---|-------|----------|-----------------|
| 17 | rs112073200 | 44201791 | C | 3.205 | 4.55E-09 | chr:17:44361947 |
| 17 | rs112074397 | 44131022 | C | 3.205 | 4.55E-09 | chr:17:44361947 |
| 17 | rs112102887 | 44179749 | A | 3.205 | 4.55E-09 | chr:17:44361947 |
| 17 | rs112197756 | 44154105 | G | 3.205 | 4.55E-09 | chr:17:44361947 |
| 17 | rs112206871 | 44041817 | G | 3.205 | 4.55E-09 | chr:17:44361947 |
| 17 | rs1122380   | 44206079 | T | 3.205 | 4.55E-09 | chr:17:44361947 |
| 17 | rs1122381   | 44205839 | G | 3.205 | 4.55E-09 | chr:17:44361947 |
| 17 | rs112310745 | 44082432 | A | 3.205 | 4.55E-09 | chr:17:44361947 |
| 17 | rs112333322 | 44126673 | G | 3.205 | 4.55E-09 | chr:17:44361947 |
| 17 | rs112385572 | 44066172 | G | 3.205 | 4.55E-09 | chr:17:44361947 |
| 17 | rs112401617 | 44209474 | T | 3.205 | 4.55E-09 | chr:17:44361947 |
| 17 | rs112411928 | 44139762 | G | 3.205 | 4.55E-09 | chr:17:44361947 |
| 17 | rs112415880 | 44042868 | A | 3.205 | 4.55E-09 | chr:17:44361947 |
| 17 | rs112560196 | 44200078 | T | 3.205 | 4.55E-09 | chr:17:44361947 |
| 17 | rs112572874 | 44072984 | G | 3.205 | 4.55E-09 | chr:17:44361947 |
| 17 | rs112578465 | 44125066 | T | 3.205 | 4.55E-09 | chr:17:44361947 |
| 17 | rs112596352 | 44170238 | A | 3.205 | 4.55E-09 | chr:17:44361947 |
| 17 | rs112674766 | 44130924 | T | 3.205 | 4.55E-09 | chr:17:44361947 |
| 17 | rs112746008 | 44126650 | T | 3.205 | 4.55E-09 | chr:17:44361947 |
| 17 | rs112813897 | 44196799 | A | 3.205 | 4.55E-09 | chr:17:44361947 |
| 17 | rs112893440 | 44179969 | A | 3.205 | 4.55E-09 | chr:17:44361947 |
| 17 | rs113120855 | 44203520 | T | 3.205 | 4.55E-09 | chr:17:44361947 |
| 17 | rs113134013 | 44066995 | T | 3.205 | 4.55E-09 | chr:17:44361947 |
| 17 | rs113201171 | 44082249 | T | 3.205 | 4.55E-09 | chr:17:44361947 |
| 17 | rs113316734 | 44084157 | C | 3.205 | 4.55E-09 | chr:17:44361947 |
| 17 | rs113417378 | 44270809 | G | 3.205 | 4.55E-09 | chr:17:44361947 |
| 17 | rs113638513 | 44204749 | G | 3.205 | 4.55E-09 | chr:17:44361947 |
| 17 | rs113758975 | 44207523 | A | 3.205 | 4.55E-09 | chr:17:44361947 |
| 17 | rs113788190 | 44161302 | G | 3.205 | 4.55E-09 | chr:17:44361947 |
| 17 | rs113857334 | 44044940 | C | 3.205 | 4.55E-09 | chr:17:44361947 |
| 17 | rs113909426 | 44196822 | A | 3.205 | 4.55E-09 | chr:17:44361947 |
| 17 | rs113955100 | 44161522 | C | 3.205 | 4.55E-09 | chr:17:44361947 |
| 17 | rs117124984 | 44051588 | G | 3.205 | 4.55E-09 | chr:17:44361947 |
| 17 | rs118087478 | 44051589 | G | 3.205 | 4.55E-09 | chr:17:44361947 |
| 17 | rs12149995  | 44092801 | A | 3.205 | 4.55E-09 | chr:17:44361947 |
| 17 | rs12150064  | 44128407 | A | 3.205 | 4.55E-09 | chr:17:44361947 |
| 17 | rs12150087  | 44210988 | G | 3.205 | 4.55E-09 | chr:17:44361947 |
| 17 | rs12150090  | 44115886 | T | 3.205 | 4.55E-09 | chr:17:44361947 |
| 17 | rs12150127  | 44141732 | A | 3.205 | 4.55E-09 | chr:17:44361947 |
| 17 | rs12150162  | 44114218 | C | 3.205 | 4.55E-09 | chr:17:44361947 |
| 17 | rs12150170  | 44090646 | G | 3.205 | 4.55E-09 | chr:17:44361947 |
| 17 | rs12150254  | 44090455 | C | 3.205 | 4.55E-09 | chr:17:44361947 |
| 17 | rs12150336  | 44125704 | T | 3.205 | 4.55E-09 | chr:17:44361947 |

|    |             |          |   |       |          |                 |
|----|-------------|----------|---|-------|----------|-----------------|
| 17 | rs12150344  | 44143484 | A | 3.205 | 4.55E-09 | chr:17:44361947 |
| 17 | rs12150438  | 44113963 | T | 3.205 | 4.55E-09 | chr:17:44361947 |
| 17 | rs12150447  | 44128125 | C | 3.205 | 4.55E-09 | chr:17:44361947 |
| 17 | rs12150469  | 44092497 | C | 3.205 | 4.55E-09 | chr:17:44361947 |
| 17 | rs12150515  | 44090685 | T | 3.205 | 4.55E-09 | chr:17:44361947 |
| 17 | rs12150542  | 44115730 | A | 3.205 | 4.55E-09 | chr:17:44361947 |
| 17 | rs12150551  | 44150920 | C | 3.205 | 4.55E-09 | chr:17:44361947 |
| 17 | rs12150558  | 44151156 | C | 3.205 | 4.55E-09 | chr:17:44361947 |
| 17 | rs12150570  | 44126218 | A | 3.205 | 4.55E-09 | chr:17:44361947 |
| 17 | rs12150611  | 44149741 | A | 3.205 | 4.55E-09 | chr:17:44361947 |
| 17 | rs12150625  | 44149448 | G | 3.205 | 4.55E-09 | chr:17:44361947 |
| 17 | rs12150627  | 44149537 | G | 3.205 | 4.55E-09 | chr:17:44361947 |
| 17 | rs12150628  | 44149581 | T | 3.205 | 4.55E-09 | chr:17:44361947 |
| 17 | rs12185225  | 44113491 | C | 3.205 | 4.55E-09 | chr:17:44361947 |
| 17 | rs12185243  | 44115351 | C | 3.205 | 4.55E-09 | chr:17:44361947 |
| 17 | rs144416125 | 44296523 | A | 3.205 | 4.55E-09 | chr:17:44361947 |
| 17 | rs145848989 | 44301546 | C | 3.205 | 4.55E-09 | chr:17:44361947 |
| 17 | rs1468241   | 44196153 | G | 3.205 | 4.55E-09 | chr:17:44361947 |
| 17 | rs1476554   | 44159102 | T | 3.205 | 4.55E-09 | chr:17:44361947 |
| 17 | rs16940799  | 44102933 | C | 3.205 | 4.55E-09 | chr:17:44361947 |
| 17 | rs16940806  | 44103826 | A | 3.205 | 4.55E-09 | chr:17:44361947 |
| 17 | rs17572147  | 44044985 | G | 3.205 | 4.55E-09 | chr:17:44361947 |
| 17 | rs17572169  | 44045974 | T | 3.205 | 4.55E-09 | chr:17:44361947 |
| 17 | rs17572248  | 44049867 | G | 3.205 | 4.55E-09 | chr:17:44361947 |
| 17 | rs17572361  | 44052009 | C | 3.205 | 4.55E-09 | chr:17:44361947 |
| 17 | rs17572467  | 44054388 | C | 3.205 | 4.55E-09 | chr:17:44361947 |
| 17 | rs17572495  | 44054596 | G | 3.205 | 4.55E-09 | chr:17:44361947 |
| 17 | rs17572613  | 44058004 | G | 3.205 | 4.55E-09 | chr:17:44361947 |
| 17 | rs17573175  | 44071089 | G | 3.205 | 4.55E-09 | chr:17:44361947 |
| 17 | rs17573266  | 44072881 | G | 3.205 | 4.55E-09 | chr:17:44361947 |
| 17 | rs17573509  | 44081224 | A | 3.205 | 4.55E-09 | chr:17:44361947 |
| 17 | rs17573593  | 44082603 | C | 3.205 | 4.55E-09 | chr:17:44361947 |
| 17 | rs17573858  | 44090796 | C | 3.205 | 4.55E-09 | chr:17:44361947 |
| 17 | rs17573907  | 44099082 | T | 3.205 | 4.55E-09 | chr:17:44361947 |
| 17 | rs17574040  | 44102865 | C | 3.205 | 4.55E-09 | chr:17:44361947 |
| 17 | rs17574228  | 44104509 | C | 3.205 | 4.55E-09 | chr:17:44361947 |
| 17 | rs17574361  | 44108202 | G | 3.205 | 4.55E-09 | chr:17:44361947 |
| 17 | rs17574425  | 44109188 | G | 3.205 | 4.55E-09 | chr:17:44361947 |
| 17 | rs17574604  | 44111613 | G | 3.205 | 4.55E-09 | chr:17:44361947 |
| 17 | rs17574796  | 44115074 | C | 3.205 | 4.55E-09 | chr:17:44361947 |
| 17 | rs17574824  | 44115107 | T | 3.205 | 4.55E-09 | chr:17:44361947 |
| 17 | rs17575423  | 44129253 | C | 3.205 | 4.55E-09 | chr:17:44361947 |
| 17 | rs17575437  | 44133031 | A | 3.205 | 4.55E-09 | chr:17:44361947 |

|               |            |       |          |                 |
|---------------|------------|-------|----------|-----------------|
| 17 rs17575507 | 44134095 G | 3.205 | 4.55E-09 | chr:17:44361947 |
| 17 rs17575683 | 44139662 T | 3.205 | 4.55E-09 | chr:17:44361947 |
| 17 rs17575773 | 44142879 T | 3.205 | 4.55E-09 | chr:17:44361947 |
| 17 rs17575822 | 44144345 G | 3.205 | 4.55E-09 | chr:17:44361947 |
| 17 rs17575850 | 44144387 A | 3.205 | 4.55E-09 | chr:17:44361947 |
| 17 rs17576165 | 44159849 C | 3.205 | 4.55E-09 | chr:17:44361947 |
| 17 rs17576200 | 44159988 A | 3.205 | 4.55E-09 | chr:17:44361947 |
| 17 rs17576631 | 44170018 C | 3.205 | 4.55E-09 | chr:17:44361947 |
| 17 rs17576695 | 44172327 A | 3.205 | 4.55E-09 | chr:17:44361947 |
| 17 rs17576709 | 44173356 G | 3.205 | 4.55E-09 | chr:17:44361947 |
| 17 rs17576779 | 44178272 T | 3.205 | 4.55E-09 | chr:17:44361947 |
| 17 rs17576842 | 44179992 G | 3.205 | 4.55E-09 | chr:17:44361947 |
| 17 rs17576870 | 44180442 G | 3.205 | 4.55E-09 | chr:17:44361947 |
| 17 rs17576989 | 44183616 A | 3.205 | 4.55E-09 | chr:17:44361947 |
| 17 rs17577024 | 44186252 A | 3.205 | 4.55E-09 | chr:17:44361947 |
| 17 rs17577052 | 44186301 C | 3.205 | 4.55E-09 | chr:17:44361947 |
| 17 rs17577094 | 44187492 G | 3.205 | 4.55E-09 | chr:17:44361947 |
| 17 rs17577159 | 44188477 G | 3.205 | 4.55E-09 | chr:17:44361947 |
| 17 rs17577313 | 44191835 G | 3.205 | 4.55E-09 | chr:17:44361947 |
| 17 rs17577369 | 44192923 G | 3.205 | 4.55E-09 | chr:17:44361947 |
| 17 rs17577447 | 44194381 A | 3.205 | 4.55E-09 | chr:17:44361947 |
| 17 rs17577496 | 44194835 C | 3.205 | 4.55E-09 | chr:17:44361947 |
| 17 rs17577650 | 44205500 G | 3.205 | 4.55E-09 | chr:17:44361947 |
| 17 rs17577954 | 44209628 C | 3.205 | 4.55E-09 | chr:17:44361947 |
| 17 rs17650860 | 44039008 A | 3.205 | 4.55E-09 | chr:17:44361947 |
| 17 rs17650872 | 44039516 T | 3.205 | 4.55E-09 | chr:17:44361947 |
| 17 rs17650901 | 44039691 G | 3.205 | 4.55E-09 | chr:17:44361947 |
| 17 rs17650973 | 44044220 T | 3.205 | 4.55E-09 | chr:17:44361947 |
| 17 rs17650991 | 44044508 C | 3.205 | 4.55E-09 | chr:17:44361947 |
| 17 rs17651093 | 44049550 A | 3.205 | 4.55E-09 | chr:17:44361947 |
| 17 rs17651134 | 44050340 A | 3.205 | 4.55E-09 | chr:17:44361947 |
| 17 rs17651213 | 44051924 A | 3.205 | 4.55E-09 | chr:17:44361947 |
| 17 rs17651243 | 44052284 A | 3.205 | 4.55E-09 | chr:17:44361947 |
| 17 rs17651285 | 44054237 A | 3.205 | 4.55E-09 | chr:17:44361947 |
| 17 rs17651483 | 44058861 A | 3.205 | 4.55E-09 | chr:17:44361947 |
| 17 rs17651549 | 44061278 T | 3.205 | 4.55E-09 | chr:17:44361947 |
| 17 rs17651700 | 44066634 G | 3.205 | 4.55E-09 | chr:17:44361947 |
| 17 rs17651754 | 44067546 C | 3.205 | 4.55E-09 | chr:17:44361947 |
| 17 rs17651857 | 44069687 G | 3.205 | 4.55E-09 | chr:17:44361947 |
| 17 rs17651887 | 44069840 A | 3.205 | 4.55E-09 | chr:17:44361947 |
| 17 rs17652036 | 44073027 A | 3.205 | 4.55E-09 | chr:17:44361947 |
| 17 rs17652066 | 44073145 C | 3.205 | 4.55E-09 | chr:17:44361947 |
| 17 rs17652121 | 44073973 C | 3.205 | 4.55E-09 | chr:17:44361947 |



|               |            |       |          |                 |
|---------------|------------|-------|----------|-----------------|
| 17 rs17652449 | 44088937 C | 3.205 | 4.55E-09 | chr:17:44361947 |
| 17 rs17652748 | 44103616 T | 3.205 | 4.55E-09 | chr:17:44361947 |
| 17 rs17652961 | 44108355 A | 3.205 | 4.55E-09 | chr:17:44361947 |
| 17 rs17653162 | 44111827 A | 3.205 | 4.55E-09 | chr:17:44361947 |
| 17 rs17653193 | 44112441 A | 3.205 | 4.55E-09 | chr:17:44361947 |
| 17 rs17653211 | 44112638 C | 3.205 | 4.55E-09 | chr:17:44361947 |
| 17 rs17653255 | 44112743 A | 3.205 | 4.55E-09 | chr:17:44361947 |
| 17 rs17653836 | 44128876 A | 3.205 | 4.55E-09 | chr:17:44361947 |
| 17 rs17653889 | 44133070 T | 3.205 | 4.55E-09 | chr:17:44361947 |
| 17 rs17653906 | 44133142 A | 3.205 | 4.55E-09 | chr:17:44361947 |
| 17 rs17653998 | 44135985 G | 3.205 | 4.55E-09 | chr:17:44361947 |
| 17 rs17654016 | 44137925 C | 3.205 | 4.55E-09 | chr:17:44361947 |
| 17 rs17659731 | 44144634 A | 3.205 | 4.55E-09 | chr:17:44361947 |
| 17 rs17659743 | 44146165 G | 3.205 | 4.55E-09 | chr:17:44361947 |
| 17 rs17659881 | 44157597 G | 3.205 | 4.55E-09 | chr:17:44361947 |
| 17 rs17659953 | 44159725 T | 3.205 | 4.55E-09 | chr:17:44361947 |
| 17 rs17660017 | 44160674 C | 3.205 | 4.55E-09 | chr:17:44361947 |
| 17 rs17660065 | 44162284 C | 3.205 | 4.55E-09 | chr:17:44361947 |
| 17 rs17660132 | 44165803 C | 3.205 | 4.55E-09 | chr:17:44361947 |
| 17 rs17660167 | 44166311 T | 3.205 | 4.55E-09 | chr:17:44361947 |
| 17 rs17660228 | 44166500 A | 3.205 | 4.55E-09 | chr:17:44361947 |
| 17 rs17660251 | 44166646 T | 3.205 | 4.55E-09 | chr:17:44361947 |
| 17 rs17660294 | 44167101 C | 3.205 | 4.55E-09 | chr:17:44361947 |
| 17 rs17660337 | 44169605 C | 3.205 | 4.55E-09 | chr:17:44361947 |
| 17 rs17660398 | 44170612 T | 3.205 | 4.55E-09 | chr:17:44361947 |
| 17 rs17660464 | 44177993 A | 3.205 | 4.55E-09 | chr:17:44361947 |
| 17 rs17660488 | 44178337 C | 3.205 | 4.55E-09 | chr:17:44361947 |
| 17 rs17660595 | 44180954 G | 3.205 | 4.55E-09 | chr:17:44361947 |
| 17 rs17660847 | 44189373 T | 3.205 | 4.55E-09 | chr:17:44361947 |
| 17 rs17660865 | 44189408 C | 3.205 | 4.55E-09 | chr:17:44361947 |
| 17 rs17660907 | 44191085 A | 3.205 | 4.55E-09 | chr:17:44361947 |
| 17 rs17660936 | 44191159 T | 3.205 | 4.55E-09 | chr:17:44361947 |
| 17 rs17661015 | 44192957 C | 3.205 | 4.55E-09 | chr:17:44361947 |
| 17 rs17661027 | 44193097 A | 3.205 | 4.55E-09 | chr:17:44361947 |
| 17 rs17661045 | 44194152 A | 3.205 | 4.55E-09 | chr:17:44361947 |
| 17 rs17661348 | 44207066 G | 3.205 | 4.55E-09 | chr:17:44361947 |
| 17 rs17661385 | 44207778 G | 3.205 | 4.55E-09 | chr:17:44361947 |
| 17 rs17664048 | 44278742 G | 3.205 | 4.55E-09 | chr:17:44361947 |
| 17 rs1800547  | 44051846 G | 3.205 | 4.55E-09 | chr:17:44361947 |
| 17 rs1918786  | 44279101 G | 3.205 | 4.55E-09 | chr:17:44361947 |
| 17 rs1918787  | 44279252 G | 3.205 | 4.55E-09 | chr:17:44361947 |
| 17 rs1966345  | 44197806 C | 3.205 | 4.55E-09 | chr:17:44361947 |
| 17 rs1981997  | 44056767 A | 3.205 | 4.55E-09 | chr:17:44361947 |

|                |            |       |          |                 |
|----------------|------------|-------|----------|-----------------|
| 17 rs1981998   | 44056833 A | 3.205 | 4.55E-09 | chr:17:44361947 |
| 17 rs2004673   | 44075099 C | 3.205 | 4.55E-09 | chr:17:44361947 |
| 17 rs2004674   | 44075110 T | 3.205 | 4.55E-09 | chr:17:44361947 |
| 17 rs2158257   | 44104343 C | 3.205 | 4.55E-09 | chr:17:44361947 |
| 17 rs2163129   | 44056433 C | 3.205 | 4.55E-09 | chr:17:44361947 |
| 17 rs2163130   | 44056434 A | 3.205 | 4.55E-09 | chr:17:44361947 |
| 17 rs2217394   | 44053448 G | 3.205 | 4.55E-09 | chr:17:44361947 |
| 17 rs2266497   | 44294786 G | 3.205 | 4.55E-09 | chr:17:44361947 |
| 17 rs2316948   | 44094667 G | 3.205 | 4.55E-09 | chr:17:44361947 |
| 17 rs2316952   | 44139190 C | 3.205 | 4.55E-09 | chr:17:44361947 |
| 17 rs2316953   | 44140341 A | 3.205 | 4.55E-09 | chr:17:44361947 |
| 17 rs2316954   | 44156167 A | 3.205 | 4.55E-09 | chr:17:44361947 |
| 17 rs2316955   | 44161985 G | 3.205 | 4.55E-09 | chr:17:44361947 |
| 17 rs2458204   | 44293963 A | 3.205 | 4.55E-09 | chr:17:44361947 |
| 17 rs2532239   | 44266227 C | 3.205 | 4.55E-09 | chr:17:44361947 |
| 17 rs2532307   | 44221350 A | 3.205 | 4.55E-09 | chr:17:44361947 |
| 17 rs2532413   | 44294983 A | 3.205 | 4.55E-09 | chr:17:44361947 |
| 17 rs2668662   | 44290759 C | 3.205 | 4.55E-09 | chr:17:44361947 |
| 17 rs2668695   | 44292126 C | 3.205 | 4.55E-09 | chr:17:44361947 |
| 17 rs2696566   | 44266531 A | 3.205 | 4.55E-09 | chr:17:44361947 |
| 17 rs2696568   | 44266342 C | 3.205 | 4.55E-09 | chr:17:44361947 |
| 17 rs2696610   | 44291820 G | 3.205 | 4.55E-09 | chr:17:44361947 |
| 17 rs2732601   | 44291479 A | 3.205 | 4.55E-09 | chr:17:44361947 |
| 17 rs2732606   | 44291365 T | 3.205 | 4.55E-09 | chr:17:44361947 |
| 17 rs2838      | 44141347 G | 3.205 | 4.55E-09 | chr:17:44361947 |
| 17 rs3087534   | 44198806 C | 3.205 | 4.55E-09 | chr:17:44361947 |
| 17 rs3089      | 44209919 G | 3.205 | 4.55E-09 | chr:17:44361947 |
| 17 rs34043286  | 44117119 G | 3.205 | 4.55E-09 | chr:17:44361947 |
| 17 rs34579536  | 44108906 G | 3.205 | 4.55E-09 | chr:17:44361947 |
| 17 rs35833914  | 44110541 A | 3.205 | 4.55E-09 | chr:17:44361947 |
| 17 rs36076725  | 44110532 A | 3.205 | 4.55E-09 | chr:17:44361947 |
| 17 rs368557302 | 44303525 A | 3.205 | 4.55E-09 | chr:17:44361947 |
| 17 rs370558872 | 44086726 C | 3.205 | 4.55E-09 | chr:17:44361947 |
| 17 rs372810927 | 44066868 A | 3.205 | 4.55E-09 | chr:17:44361947 |
| 17 rs372980169 | 44212527 G | 3.205 | 4.55E-09 | chr:17:44361947 |
| 17 rs386558525 | 44240986 A | 3.205 | 4.55E-09 | chr:17:44361947 |
| 17 rs3912061   | 44165098 T | 3.205 | 4.55E-09 | chr:17:44361947 |
| 17 rs3912062   | 44165069 G | 3.205 | 4.55E-09 | chr:17:44361947 |
| 17 rs3912063   | 44165049 G | 3.205 | 4.55E-09 | chr:17:44361947 |
| 17 rs41374248  | 44120442 G | 3.205 | 4.55E-09 | chr:17:44361947 |
| 17 rs41382552  | 44118999 G | 3.205 | 4.55E-09 | chr:17:44361947 |
| 17 rs41384744  | 44137070 G | 3.205 | 4.55E-09 | chr:17:44361947 |
| 17 rs41437445  | 44116238 A | 3.205 | 4.55E-09 | chr:17:44361947 |

|                |            |       |          |                 |
|----------------|------------|-------|----------|-----------------|
| 17 rs4306559   | 44090236 C | 3.205 | 4.55E-09 | chr:17:44361947 |
| 17 rs430789    | 44295157 G | 3.205 | 4.55E-09 | chr:17:44361947 |
| 17 rs4383188   | 44197603 C | 3.205 | 4.55E-09 | chr:17:44361947 |
| 17 rs4548919   | 44192395 T | 3.205 | 4.55E-09 | chr:17:44361947 |
| 17 rs4581739   | 44204739 C | 3.205 | 4.55E-09 | chr:17:44361947 |
| 17 rs4608377   | 44113359 C | 3.205 | 4.55E-09 | chr:17:44361947 |
| 17 rs527778993 | 44223060 A | 3.205 | 4.55E-09 | chr:17:44361947 |
| 17 rs528564917 | 44251907 T | 3.205 | 4.55E-09 | chr:17:44361947 |
| 17 rs529556708 | 44271430 G | 3.205 | 4.55E-09 | chr:17:44361947 |
| 17 rs529844822 | 44122484 T | 3.205 | 4.55E-09 | chr:17:44361947 |
| 17 rs529970690 | 44231117 C | 3.205 | 4.55E-09 | chr:17:44361947 |
| 17 rs530157802 | 44062993 G | 3.205 | 4.55E-09 | chr:17:44361947 |
| 17 rs530783064 | 44122626 A | 3.205 | 4.55E-09 | chr:17:44361947 |
| 17 rs530881963 | 44251582 C | 3.205 | 4.55E-09 | chr:17:44361947 |
| 17 rs531013081 | 44287310 G | 3.205 | 4.55E-09 | chr:17:44361947 |
| 17 rs531217003 | 44063393 A | 3.205 | 4.55E-09 | chr:17:44361947 |
| 17 rs531360085 | 44244926 G | 3.205 | 4.55E-09 | chr:17:44361947 |
| 17 rs532035713 | 44260967 A | 3.205 | 4.55E-09 | chr:17:44361947 |
| 17 rs532291518 | 44249800 A | 3.205 | 4.55E-09 | chr:17:44361947 |
| 17 rs532327698 | 44156180 G | 3.205 | 4.55E-09 | chr:17:44361947 |
| 17 rs532849973 | 44225234 C | 3.205 | 4.55E-09 | chr:17:44361947 |
| 17 rs532888975 | 44226561 G | 3.205 | 4.55E-09 | chr:17:44361947 |
| 17 rs532904601 | 44261137 T | 3.205 | 4.55E-09 | chr:17:44361947 |
| 17 rs533307115 | 44237372 C | 3.205 | 4.55E-09 | chr:17:44361947 |
| 17 rs533467502 | 44255532 C | 3.205 | 4.55E-09 | chr:17:44361947 |
| 17 rs534210380 | 44218242 T | 3.205 | 4.55E-09 | chr:17:44361947 |
| 17 rs534369494 | 44255777 A | 3.205 | 4.55E-09 | chr:17:44361947 |
| 17 rs535019273 | 44248814 A | 3.205 | 4.55E-09 | chr:17:44361947 |
| 17 rs535725934 | 44250616 A | 3.205 | 4.55E-09 | chr:17:44361947 |
| 17 rs536077496 | 44214094 G | 3.205 | 4.55E-09 | chr:17:44361947 |
| 17 rs536694159 | 44252416 C | 3.205 | 4.55E-09 | chr:17:44361947 |
| 17 rs537321556 | 44305252 A | 3.205 | 4.55E-09 | chr:17:44361947 |
| 17 rs537342897 | 44064208 A | 3.205 | 4.55E-09 | chr:17:44361947 |
| 17 rs537938065 | 44227186 A | 3.205 | 4.55E-09 | chr:17:44361947 |
| 17 rs538726790 | 44061696 T | 3.205 | 4.55E-09 | chr:17:44361947 |
| 17 rs539073154 | 44264717 C | 3.205 | 4.55E-09 | chr:17:44361947 |
| 17 rs539179202 | 44264045 C | 3.205 | 4.55E-09 | chr:17:44361947 |
| 17 rs539303688 | 44258231 G | 3.205 | 4.55E-09 | chr:17:44361947 |
| 17 rs539559479 | 44241304 G | 3.205 | 4.55E-09 | chr:17:44361947 |
| 17 rs540745552 | 44252510 C | 3.205 | 4.55E-09 | chr:17:44361947 |
| 17 rs540782647 | 44233811 T | 3.205 | 4.55E-09 | chr:17:44361947 |
| 17 rs541260793 | 44251230 C | 3.205 | 4.55E-09 | chr:17:44361947 |
| 17 rs541759959 | 44228609 G | 3.205 | 4.55E-09 | chr:17:44361947 |

|                |            |       |          |                 |
|----------------|------------|-------|----------|-----------------|
| 17 rs541986174 | 44063140 G | 3.205 | 4.55E-09 | chr:17:44361947 |
| 17 rs542050069 | 44234060 G | 3.205 | 4.55E-09 | chr:17:44361947 |
| 17 rs542300723 | 44228770 G | 3.205 | 4.55E-09 | chr:17:44361947 |
| 17 rs542364049 | 44246997 A | 3.205 | 4.55E-09 | chr:17:44361947 |
| 17 rs542509380 | 44298209 C | 3.205 | 4.55E-09 | chr:17:44361947 |
| 17 rs542524111 | 44213204 T | 3.205 | 4.55E-09 | chr:17:44361947 |
| 17 rs543087623 | 44243979 T | 3.205 | 4.55E-09 | chr:17:44361947 |
| 17 rs543124303 | 44226126 C | 3.205 | 4.55E-09 | chr:17:44361947 |
| 17 rs543869616 | 44142332 G | 3.205 | 4.55E-09 | chr:17:44361947 |
| 17 rs544098746 | 44263479 C | 3.205 | 4.55E-09 | chr:17:44361947 |
| 17 rs544227999 | 44281588 C | 3.205 | 4.55E-09 | chr:17:44361947 |
| 17 rs544380840 | 44137676 T | 3.205 | 4.55E-09 | chr:17:44361947 |
| 17 rs544405672 | 44092744 G | 3.205 | 4.55E-09 | chr:17:44361947 |
| 17 rs544669576 | 44281722 C | 3.205 | 4.55E-09 | chr:17:44361947 |
| 17 rs544717127 | 44244581 C | 3.205 | 4.55E-09 | chr:17:44361947 |
| 17 rs545434959 | 44132379 G | 3.205 | 4.55E-09 | chr:17:44361947 |
| 17 rs546325422 | 44181118 A | 3.205 | 4.55E-09 | chr:17:44361947 |
| 17 rs546433642 | 44250108 C | 3.205 | 4.55E-09 | chr:17:44361947 |
| 17 rs547200563 | 44251972 A | 3.205 | 4.55E-09 | chr:17:44361947 |
| 17 rs547435395 | 44063766 G | 3.205 | 4.55E-09 | chr:17:44361947 |
| 17 rs549229394 | 44153909 G | 3.205 | 4.55E-09 | chr:17:44361947 |
| 17 rs549601771 | 44227196 C | 3.205 | 4.55E-09 | chr:17:44361947 |
| 17 rs549710507 | 44266022 G | 3.205 | 4.55E-09 | chr:17:44361947 |
| 17 rs549786165 | 44262403 T | 3.205 | 4.55E-09 | chr:17:44361947 |
| 17 rs550757212 | 44254379 T | 3.205 | 4.55E-09 | chr:17:44361947 |
| 17 rs550997647 | 44220942 A | 3.205 | 4.55E-09 | chr:17:44361947 |
| 17 rs551188913 | 44280188 A | 3.205 | 4.55E-09 | chr:17:44361947 |
| 17 rs551853349 | 44090536 A | 3.205 | 4.55E-09 | chr:17:44361947 |
| 17 rs552053109 | 44257788 C | 3.205 | 4.55E-09 | chr:17:44361947 |
| 17 rs552177258 | 44217226 G | 3.205 | 4.55E-09 | chr:17:44361947 |
| 17 rs552438695 | 44156181 A | 3.205 | 4.55E-09 | chr:17:44361947 |
| 17 rs552604120 | 44251698 A | 3.205 | 4.55E-09 | chr:17:44361947 |
| 17 rs552965964 | 44064759 C | 3.205 | 4.55E-09 | chr:17:44361947 |
| 17 rs553321776 | 44231617 T | 3.205 | 4.55E-09 | chr:17:44361947 |
| 17 rs553368530 | 44266972 G | 3.205 | 4.55E-09 | chr:17:44361947 |
| 17 rs553779720 | 44226030 A | 3.205 | 4.55E-09 | chr:17:44361947 |
| 17 rs553907178 | 44245766 A | 3.205 | 4.55E-09 | chr:17:44361947 |
| 17 rs554424146 | 44280902 C | 3.205 | 4.55E-09 | chr:17:44361947 |
| 17 rs554819069 | 44061898 C | 3.205 | 4.55E-09 | chr:17:44361947 |
| 17 rs555006557 | 44246211 G | 3.205 | 4.55E-09 | chr:17:44361947 |
| 17 rs556496186 | 44277691 C | 3.205 | 4.55E-09 | chr:17:44361947 |
| 17 rs55662347  | 44070545 A | 3.205 | 4.55E-09 | chr:17:44361947 |
| 17 rs55669501  | 44202564 A | 3.205 | 4.55E-09 | chr:17:44361947 |

|                |            |       |          |                 |
|----------------|------------|-------|----------|-----------------|
| 17 rs55672516  | 44201680 C | 3.205 | 4.55E-09 | chr:17:44361947 |
| 17 rs55686102  | 44202608 T | 3.205 | 4.55E-09 | chr:17:44361947 |
| 17 rs55690782  | 44137311 A | 3.205 | 4.55E-09 | chr:17:44361947 |
| 17 rs556917425 | 44090538 G | 3.205 | 4.55E-09 | chr:17:44361947 |
| 17 rs55692232  | 44164323 A | 3.205 | 4.55E-09 | chr:17:44361947 |
| 17 rs557054045 | 44237790 A | 3.205 | 4.55E-09 | chr:17:44361947 |
| 17 rs55709241  | 44041101 C | 3.205 | 4.55E-09 | chr:17:44361947 |
| 17 rs557104793 | 44274985 A | 3.205 | 4.55E-09 | chr:17:44361947 |
| 17 rs55711941  | 44040823 T | 3.205 | 4.55E-09 | chr:17:44361947 |
| 17 rs55714296  | 44137189 T | 3.205 | 4.55E-09 | chr:17:44361947 |
| 17 rs557239232 | 44216158 C | 3.205 | 4.55E-09 | chr:17:44361947 |
| 17 rs55726761  | 44099669 A | 3.205 | 4.55E-09 | chr:17:44361947 |
| 17 rs55736025  | 44072017 A | 3.205 | 4.55E-09 | chr:17:44361947 |
| 17 rs55780786  | 44209875 C | 3.205 | 4.55E-09 | chr:17:44361947 |
| 17 rs55780945  | 44040120 T | 3.205 | 4.55E-09 | chr:17:44361947 |
| 17 rs557923371 | 44258354 C | 3.205 | 4.55E-09 | chr:17:44361947 |
| 17 rs55794067  | 44188764 C | 3.205 | 4.55E-09 | chr:17:44361947 |
| 17 rs55802590  | 44201344 C | 3.205 | 4.55E-09 | chr:17:44361947 |
| 17 rs55825513  | 44176215 A | 3.205 | 4.55E-09 | chr:17:44361947 |
| 17 rs55864131  | 44163411 C | 3.205 | 4.55E-09 | chr:17:44361947 |
| 17 rs558642106 | 44214814 A | 3.205 | 4.55E-09 | chr:17:44361947 |
| 17 rs55881134  | 44109248 A | 3.205 | 4.55E-09 | chr:17:44361947 |
| 17 rs55885063  | 44202952 G | 3.205 | 4.55E-09 | chr:17:44361947 |
| 17 rs55886080  | 44072041 A | 3.205 | 4.55E-09 | chr:17:44361947 |
| 17 rs55893711  | 44119320 T | 3.205 | 4.55E-09 | chr:17:44361947 |
| 17 rs55900347  | 44176092 A | 3.205 | 4.55E-09 | chr:17:44361947 |
| 17 rs55907036  | 44042366 A | 3.205 | 4.55E-09 | chr:17:44361947 |
| 17 rs55909047  | 44209957 G | 3.205 | 4.55E-09 | chr:17:44361947 |
| 17 rs55913645  | 44070956 A | 3.205 | 4.55E-09 | chr:17:44361947 |
| 17 rs55929190  | 44147599 C | 3.205 | 4.55E-09 | chr:17:44361947 |
| 17 rs559376136 | 44062915 T | 3.205 | 4.55E-09 | chr:17:44361947 |
| 17 rs55947022  | 44147574 A | 3.205 | 4.55E-09 | chr:17:44361947 |
| 17 rs55972730  | 44155707 T | 3.205 | 4.55E-09 | chr:17:44361947 |
| 17 rs559754274 | 44285531 A | 3.205 | 4.55E-09 | chr:17:44361947 |
| 17 rs55987700  | 44161146 G | 3.205 | 4.55E-09 | chr:17:44361947 |
| 17 rs559886250 | 44280523 G | 3.205 | 4.55E-09 | chr:17:44361947 |
| 17 rs559888218 | 44298102 A | 3.205 | 4.55E-09 | chr:17:44361947 |
| 17 rs56041778  | 44147511 C | 3.205 | 4.55E-09 | chr:17:44361947 |
| 17 rs560714845 | 44259040 C | 3.205 | 4.55E-09 | chr:17:44361947 |
| 17 rs56100031  | 44155157 T | 3.205 | 4.55E-09 | chr:17:44361947 |
| 17 rs561060735 | 44304490 C | 3.205 | 4.55E-09 | chr:17:44361947 |
| 17 rs56108300  | 44077851 A | 3.205 | 4.55E-09 | chr:17:44361947 |
| 17 rs561270316 | 44282007 C | 3.205 | 4.55E-09 | chr:17:44361947 |

|                |            |       |          |                 |
|----------------|------------|-------|----------|-----------------|
| 17 rs56166491  | 44042221 G | 3.205 | 4.55E-09 | chr:17:44361947 |
| 17 rs56226437  | 44042361 C | 3.205 | 4.55E-09 | chr:17:44361947 |
| 17 rs56234850  | 44060248 A | 3.205 | 4.55E-09 | chr:17:44361947 |
| 17 rs562357125 | 44263729 G | 3.205 | 4.55E-09 | chr:17:44361947 |
| 17 rs56240678  | 44176170 G | 3.205 | 4.55E-09 | chr:17:44361947 |
| 17 rs562481792 | 44242788 T | 3.205 | 4.55E-09 | chr:17:44361947 |
| 17 rs562531663 | 44240107 C | 3.205 | 4.55E-09 | chr:17:44361947 |
| 17 rs56257094  | 44201667 A | 3.205 | 4.55E-09 | chr:17:44361947 |
| 17 rs56273589  | 44203131 G | 3.205 | 4.55E-09 | chr:17:44361947 |
| 17 rs56280951  | 44041107 A | 3.205 | 4.55E-09 | chr:17:44361947 |
| 17 rs56294117  | 44042783 A | 3.205 | 4.55E-09 | chr:17:44361947 |
| 17 rs56301633  | 44077850 A | 3.205 | 4.55E-09 | chr:17:44361947 |
| 17 rs563074118 | 44276013 A | 3.205 | 4.55E-09 | chr:17:44361947 |
| 17 rs56318865  | 44147411 A | 3.205 | 4.55E-09 | chr:17:44361947 |
| 17 rs56323408  | 44147721 T | 3.205 | 4.55E-09 | chr:17:44361947 |
| 17 rs563314190 | 44217112 T | 3.205 | 4.55E-09 | chr:17:44361947 |
| 17 rs563686637 | 44251548 A | 3.205 | 4.55E-09 | chr:17:44361947 |
| 17 rs563748134 | 44142334 T | 3.205 | 4.55E-09 | chr:17:44361947 |
| 17 rs563972143 | 44265702 T | 3.205 | 4.55E-09 | chr:17:44361947 |
| 17 rs564325593 | 44236725 A | 3.205 | 4.55E-09 | chr:17:44361947 |
| 17 rs564388623 | 44137678 A | 3.205 | 4.55E-09 | chr:17:44361947 |
| 17 rs564591344 | 44230647 T | 3.205 | 4.55E-09 | chr:17:44361947 |
| 17 rs564683968 | 44045585 A | 3.205 | 4.55E-09 | chr:17:44361947 |
| 17 rs564717292 | 44247314 T | 3.205 | 4.55E-09 | chr:17:44361947 |
| 17 rs564755460 | 44249621 G | 3.205 | 4.55E-09 | chr:17:44361947 |
| 17 rs564905548 | 44213712 A | 3.205 | 4.55E-09 | chr:17:44361947 |
| 17 rs565744479 | 44063787 G | 3.205 | 4.55E-09 | chr:17:44361947 |
| 17 rs565948451 | 44247673 A | 3.205 | 4.55E-09 | chr:17:44361947 |
| 17 rs566037900 | 44245876 G | 3.205 | 4.55E-09 | chr:17:44361947 |
| 17 rs566214080 | 44264943 C | 3.205 | 4.55E-09 | chr:17:44361947 |
| 17 rs566458560 | 44225485 C | 3.205 | 4.55E-09 | chr:17:44361947 |
| 17 rs566672630 | 44248769 C | 3.205 | 4.55E-09 | chr:17:44361947 |
| 17 rs567428298 | 44243179 G | 3.205 | 4.55E-09 | chr:17:44361947 |
| 17 rs567744882 | 44223243 A | 3.205 | 4.55E-09 | chr:17:44361947 |
| 17 rs568534287 | 44252098 T | 3.205 | 4.55E-09 | chr:17:44361947 |
| 17 rs568850733 | 44223387 C | 3.205 | 4.55E-09 | chr:17:44361947 |
| 17 rs569087361 | 44275035 G | 3.205 | 4.55E-09 | chr:17:44361947 |
| 17 rs569311806 | 44252197 T | 3.205 | 4.55E-09 | chr:17:44361947 |
| 17 rs569670697 | 44121469 T | 3.205 | 4.55E-09 | chr:17:44361947 |
| 17 rs570200944 | 44248042 A | 3.205 | 4.55E-09 | chr:17:44361947 |
| 17 rs570877560 | 44214815 G | 3.205 | 4.55E-09 | chr:17:44361947 |
| 17 rs570968715 | 44251769 G | 3.205 | 4.55E-09 | chr:17:44361947 |
| 17 rs571131167 | 44063563 C | 3.205 | 4.55E-09 | chr:17:44361947 |

|                |            |       |          |                 |
|----------------|------------|-------|----------|-----------------|
| 17 rs571583943 | 44262418 A | 3.205 | 4.55E-09 | chr:17:44361947 |
| 17 rs572193192 | 44304203 C | 3.205 | 4.55E-09 | chr:17:44361947 |
| 17 rs572320710 | 44298178 G | 3.205 | 4.55E-09 | chr:17:44361947 |
| 17 rs572760195 | 44296251 C | 3.205 | 4.55E-09 | chr:17:44361947 |
| 17 rs573082572 | 44222067 G | 3.205 | 4.55E-09 | chr:17:44361947 |
| 17 rs573536609 | 44279760 A | 3.205 | 4.55E-09 | chr:17:44361947 |
| 17 rs573840384 | 44282744 C | 3.205 | 4.55E-09 | chr:17:44361947 |
| 17 rs574648692 | 44253203 C | 3.205 | 4.55E-09 | chr:17:44361947 |
| 17 rs575200428 | 44121917 T | 3.205 | 4.55E-09 | chr:17:44361947 |
| 17 rs575572584 | 44233589 C | 3.205 | 4.55E-09 | chr:17:44361947 |
| 17 rs575657041 | 44183232 G | 3.205 | 4.55E-09 | chr:17:44361947 |
| 17 rs576159528 | 44048937 C | 3.205 | 4.55E-09 | chr:17:44361947 |
| 17 rs576263378 | 44304740 T | 3.205 | 4.55E-09 | chr:17:44361947 |
| 17 rs576389326 | 44062337 A | 3.205 | 4.55E-09 | chr:17:44361947 |
| 17 rs576400151 | 44233776 C | 3.205 | 4.55E-09 | chr:17:44361947 |
| 17 rs576672302 | 44265328 G | 3.205 | 4.55E-09 | chr:17:44361947 |
| 17 rs577071575 | 44064334 C | 3.205 | 4.55E-09 | chr:17:44361947 |
| 17 rs577520390 | 44229986 C | 3.205 | 4.55E-09 | chr:17:44361947 |
| 17 rs578046020 | 44258954 C | 3.205 | 4.55E-09 | chr:17:44361947 |
| 17 rs578055951 | 44260416 C | 3.205 | 4.55E-09 | chr:17:44361947 |
| 17 rs62060760  | 44132887 T | 3.205 | 4.55E-09 | chr:17:44361947 |
| 17 rs62060761  | 44133162 C | 3.205 | 4.55E-09 | chr:17:44361947 |
| 17 rs62060762  | 44133396 A | 3.205 | 4.55E-09 | chr:17:44361947 |
| 17 rs62060763  | 44133403 C | 3.205 | 4.55E-09 | chr:17:44361947 |
| 17 rs62060764  | 44133633 G | 3.205 | 4.55E-09 | chr:17:44361947 |
| 17 rs62060765  | 44133648 C | 3.205 | 4.55E-09 | chr:17:44361947 |
| 17 rs62060767  | 44134910 A | 3.205 | 4.55E-09 | chr:17:44361947 |
| 17 rs62060768  | 44134984 A | 3.205 | 4.55E-09 | chr:17:44361947 |
| 17 rs62060769  | 44135026 C | 3.205 | 4.55E-09 | chr:17:44361947 |
| 17 rs62060785  | 44136634 A | 3.205 | 4.55E-09 | chr:17:44361947 |
| 17 rs62060786  | 44136763 T | 3.205 | 4.55E-09 | chr:17:44361947 |
| 17 rs62060787  | 44136803 T | 3.205 | 4.55E-09 | chr:17:44361947 |
| 17 rs62060792  | 44141955 A | 3.205 | 4.55E-09 | chr:17:44361947 |
| 17 rs62060793  | 44142427 G | 3.205 | 4.55E-09 | chr:17:44361947 |
| 17 rs62060794  | 44142566 T | 3.205 | 4.55E-09 | chr:17:44361947 |
| 17 rs62060795  | 44142663 T | 3.205 | 4.55E-09 | chr:17:44361947 |
| 17 rs62060797  | 44143344 A | 3.205 | 4.55E-09 | chr:17:44361947 |
| 17 rs62060800  | 44145592 G | 3.205 | 4.55E-09 | chr:17:44361947 |
| 17 rs62060801  | 44145860 G | 3.205 | 4.55E-09 | chr:17:44361947 |
| 17 rs62060802  | 44146336 C | 3.205 | 4.55E-09 | chr:17:44361947 |
| 17 rs62060812  | 44151667 G | 3.205 | 4.55E-09 | chr:17:44361947 |
| 17 rs62060834  | 44151697 T | 3.205 | 4.55E-09 | chr:17:44361947 |
| 17 rs62060835  | 44152390 T | 3.205 | 4.55E-09 | chr:17:44361947 |

|               |            |       |          |                 |
|---------------|------------|-------|----------|-----------------|
| 17 rs62060836 | 44152447 A | 3.205 | 4.55E-09 | chr:17:44361947 |
| 17 rs62060837 | 44152760 G | 3.205 | 4.55E-09 | chr:17:44361947 |
| 17 rs62060838 | 44153144 G | 3.205 | 4.55E-09 | chr:17:44361947 |
| 17 rs62060839 | 44153227 G | 3.205 | 4.55E-09 | chr:17:44361947 |
| 17 rs62060840 | 44153258 G | 3.205 | 4.55E-09 | chr:17:44361947 |
| 17 rs62060841 | 44153386 T | 3.205 | 4.55E-09 | chr:17:44361947 |
| 17 rs62060843 | 44153626 T | 3.205 | 4.55E-09 | chr:17:44361947 |
| 17 rs62060845 | 44154393 G | 3.205 | 4.55E-09 | chr:17:44361947 |
| 17 rs62060846 | 44154461 C | 3.205 | 4.55E-09 | chr:17:44361947 |
| 17 rs62060847 | 44154946 T | 3.205 | 4.55E-09 | chr:17:44361947 |
| 17 rs62060850 | 44157982 T | 3.205 | 4.55E-09 | chr:17:44361947 |
| 17 rs62060851 | 44157992 C | 3.205 | 4.55E-09 | chr:17:44361947 |
| 17 rs62060852 | 44160050 A | 3.205 | 4.55E-09 | chr:17:44361947 |
| 17 rs62060853 | 44160592 A | 3.205 | 4.55E-09 | chr:17:44361947 |
| 17 rs62060855 | 44161860 T | 3.205 | 4.55E-09 | chr:17:44361947 |
| 17 rs62060856 | 44161875 C | 3.205 | 4.55E-09 | chr:17:44361947 |
| 17 rs62060858 | 44164090 C | 3.205 | 4.55E-09 | chr:17:44361947 |
| 17 rs62060859 | 44164133 A | 3.205 | 4.55E-09 | chr:17:44361947 |
| 17 rs62061764 | 44166197 G | 3.205 | 4.55E-09 | chr:17:44361947 |
| 17 rs62061766 | 44167464 A | 3.205 | 4.55E-09 | chr:17:44361947 |
| 17 rs62061767 | 44167729 G | 3.205 | 4.55E-09 | chr:17:44361947 |
| 17 rs62061770 | 44169377 C | 3.205 | 4.55E-09 | chr:17:44361947 |
| 17 rs62061771 | 44169406 A | 3.205 | 4.55E-09 | chr:17:44361947 |
| 17 rs62061772 | 44169437 C | 3.205 | 4.55E-09 | chr:17:44361947 |
| 17 rs62061788 | 44169759 A | 3.205 | 4.55E-09 | chr:17:44361947 |
| 17 rs62061789 | 44169769 T | 3.205 | 4.55E-09 | chr:17:44361947 |
| 17 rs62061790 | 44170414 A | 3.205 | 4.55E-09 | chr:17:44361947 |
| 17 rs62061791 | 44171024 C | 3.205 | 4.55E-09 | chr:17:44361947 |
| 17 rs62061792 | 44171554 A | 3.205 | 4.55E-09 | chr:17:44361947 |
| 17 rs62061793 | 44171565 A | 3.205 | 4.55E-09 | chr:17:44361947 |
| 17 rs62061795 | 44173179 A | 3.205 | 4.55E-09 | chr:17:44361947 |
| 17 rs62061796 | 44173408 A | 3.205 | 4.55E-09 | chr:17:44361947 |
| 17 rs62061800 | 44174109 C | 3.205 | 4.55E-09 | chr:17:44361947 |
| 17 rs62061801 | 44174235 G | 3.205 | 4.55E-09 | chr:17:44361947 |
| 17 rs62061802 | 44174351 A | 3.205 | 4.55E-09 | chr:17:44361947 |
| 17 rs62061807 | 44177097 T | 3.205 | 4.55E-09 | chr:17:44361947 |
| 17 rs62061808 | 44177337 T | 3.205 | 4.55E-09 | chr:17:44361947 |
| 17 rs62061809 | 44178839 C | 3.205 | 4.55E-09 | chr:17:44361947 |
| 17 rs62061810 | 44178884 A | 3.205 | 4.55E-09 | chr:17:44361947 |
| 17 rs62061811 | 44180173 G | 3.205 | 4.55E-09 | chr:17:44361947 |
| 17 rs62061812 | 44180997 T | 3.205 | 4.55E-09 | chr:17:44361947 |
| 17 rs62061814 | 44181508 G | 3.205 | 4.55E-09 | chr:17:44361947 |
| 17 rs62061815 | 44181681 G | 3.205 | 4.55E-09 | chr:17:44361947 |



|               |            |       |          |                 |
|---------------|------------|-------|----------|-----------------|
| 17 rs62061816 | 44182336 A | 3.205 | 4.55E-09 | chr:17:44361947 |
| 17 rs62061817 | 44182706 G | 3.205 | 4.55E-09 | chr:17:44361947 |
| 17 rs62061821 | 44186055 A | 3.205 | 4.55E-09 | chr:17:44361947 |
| 17 rs62061823 | 44188645 T | 3.205 | 4.55E-09 | chr:17:44361947 |
| 17 rs62061824 | 44188755 C | 3.205 | 4.55E-09 | chr:17:44361947 |
| 17 rs62061847 | 44191682 A | 3.205 | 4.55E-09 | chr:17:44361947 |
| 17 rs62061848 | 44192946 T | 3.205 | 4.55E-09 | chr:17:44361947 |
| 17 rs62061849 | 44193882 T | 3.205 | 4.55E-09 | chr:17:44361947 |
| 17 rs62061850 | 44194519 C | 3.205 | 4.55E-09 | chr:17:44361947 |
| 17 rs62061851 | 44194891 T | 3.205 | 4.55E-09 | chr:17:44361947 |
| 17 rs62061852 | 44195424 C | 3.205 | 4.55E-09 | chr:17:44361947 |
| 17 rs62061853 | 44196125 C | 3.205 | 4.55E-09 | chr:17:44361947 |
| 17 rs62061854 | 44198080 T | 3.205 | 4.55E-09 | chr:17:44361947 |
| 17 rs62061855 | 44199670 A | 3.205 | 4.55E-09 | chr:17:44361947 |
| 17 rs62061856 | 44200015 C | 3.205 | 4.55E-09 | chr:17:44361947 |
| 17 rs62062133 | 44114372 C | 3.205 | 4.55E-09 | chr:17:44361947 |
| 17 rs62062134 | 44114432 C | 3.205 | 4.55E-09 | chr:17:44361947 |
| 17 rs62062136 | 44116312 C | 3.205 | 4.55E-09 | chr:17:44361947 |
| 17 rs62062137 | 44118848 A | 3.205 | 4.55E-09 | chr:17:44361947 |
| 17 rs62062265 | 44090035 G | 3.205 | 4.55E-09 | chr:17:44361947 |
| 17 rs62062266 | 44090704 G | 3.205 | 4.55E-09 | chr:17:44361947 |
| 17 rs62062267 | 44090854 T | 3.205 | 4.55E-09 | chr:17:44361947 |
| 17 rs62062268 | 44090858 T | 3.205 | 4.55E-09 | chr:17:44361947 |
| 17 rs62062269 | 44091092 C | 3.205 | 4.55E-09 | chr:17:44361947 |
| 17 rs62062270 | 44091195 C | 3.205 | 4.55E-09 | chr:17:44361947 |
| 17 rs62062272 | 44092108 C | 3.205 | 4.55E-09 | chr:17:44361947 |
| 17 rs62062273 | 44092243 T | 3.205 | 4.55E-09 | chr:17:44361947 |
| 17 rs62062274 | 44093319 A | 3.205 | 4.55E-09 | chr:17:44361947 |
| 17 rs62062275 | 44093496 G | 3.205 | 4.55E-09 | chr:17:44361947 |
| 17 rs62062276 | 44093627 G | 3.205 | 4.55E-09 | chr:17:44361947 |
| 17 rs62062277 | 44093753 G | 3.205 | 4.55E-09 | chr:17:44361947 |
| 17 rs62062278 | 44093860 G | 3.205 | 4.55E-09 | chr:17:44361947 |
| 17 rs62062279 | 44093964 C | 3.205 | 4.55E-09 | chr:17:44361947 |
| 17 rs62062280 | 44093993 T | 3.205 | 4.55E-09 | chr:17:44361947 |
| 17 rs62062281 | 44094112 G | 3.205 | 4.55E-09 | chr:17:44361947 |
| 17 rs62062282 | 44094374 G | 3.205 | 4.55E-09 | chr:17:44361947 |
| 17 rs62062283 | 44095055 A | 3.205 | 4.55E-09 | chr:17:44361947 |
| 17 rs62062284 | 44095570 A | 3.205 | 4.55E-09 | chr:17:44361947 |
| 17 rs62062286 | 44096486 T | 3.205 | 4.55E-09 | chr:17:44361947 |
| 17 rs62062289 | 44097235 C | 3.205 | 4.55E-09 | chr:17:44361947 |
| 17 rs62062292 | 44099809 C | 3.205 | 4.55E-09 | chr:17:44361947 |
| 17 rs62062293 | 44100553 A | 3.205 | 4.55E-09 | chr:17:44361947 |
| 17 rs62062295 | 44100906 G | 3.205 | 4.55E-09 | chr:17:44361947 |

|               |            |       |          |                 |
|---------------|------------|-------|----------|-----------------|
| 17 rs62062296 | 44100916 T | 3.205 | 4.55E-09 | chr:17:44361947 |
| 17 rs62062297 | 44101004 G | 3.205 | 4.55E-09 | chr:17:44361947 |
| 17 rs62062321 | 44111109 G | 3.205 | 4.55E-09 | chr:17:44361947 |
| 17 rs62062322 | 44112385 G | 3.205 | 4.55E-09 | chr:17:44361947 |
| 17 rs62062323 | 44113224 T | 3.205 | 4.55E-09 | chr:17:44361947 |
| 17 rs62062324 | 44114362 T | 3.205 | 4.55E-09 | chr:17:44361947 |
| 17 rs62062325 | 44114364 A | 3.205 | 4.55E-09 | chr:17:44361947 |
| 17 rs62063165 | 44202147 G | 3.205 | 4.55E-09 | chr:17:44361947 |
| 17 rs62063166 | 44202231 G | 3.205 | 4.55E-09 | chr:17:44361947 |
| 17 rs62063171 | 44203311 T | 3.205 | 4.55E-09 | chr:17:44361947 |
| 17 rs62063172 | 44203366 C | 3.205 | 4.55E-09 | chr:17:44361947 |
| 17 rs62063174 | 44205122 G | 3.205 | 4.55E-09 | chr:17:44361947 |
| 17 rs62063200 | 44206482 T | 3.205 | 4.55E-09 | chr:17:44361947 |
| 17 rs62063201 | 44207360 T | 3.205 | 4.55E-09 | chr:17:44361947 |
| 17 rs62063202 | 44208945 T | 3.205 | 4.55E-09 | chr:17:44361947 |
| 17 rs62063203 | 44209313 C | 3.205 | 4.55E-09 | chr:17:44361947 |
| 17 rs62063207 | 44211902 G | 3.205 | 4.55E-09 | chr:17:44361947 |
| 17 rs62063208 | 44212032 A | 3.205 | 4.55E-09 | chr:17:44361947 |
| 17 rs62063212 | 44221042 T | 3.205 | 4.55E-09 | chr:17:44361947 |
| 17 rs62063282 | 44039043 A | 3.205 | 4.55E-09 | chr:17:44361947 |
| 17 rs62063291 | 44043378 C | 3.205 | 4.55E-09 | chr:17:44361947 |
| 17 rs62063292 | 44043636 T | 3.205 | 4.55E-09 | chr:17:44361947 |
| 17 rs62063293 | 44043819 A | 3.205 | 4.55E-09 | chr:17:44361947 |
| 17 rs62063295 | 44044431 T | 3.205 | 4.55E-09 | chr:17:44361947 |
| 17 rs62063296 | 44046202 T | 3.205 | 4.55E-09 | chr:17:44361947 |
| 17 rs62063297 | 44047802 T | 3.205 | 4.55E-09 | chr:17:44361947 |
| 17 rs62063298 | 44048323 T | 3.205 | 4.55E-09 | chr:17:44361947 |
| 17 rs62063299 | 44048336 C | 3.205 | 4.55E-09 | chr:17:44361947 |
| 17 rs62063300 | 44048350 C | 3.205 | 4.55E-09 | chr:17:44361947 |
| 17 rs62063301 | 44048941 C | 3.205 | 4.55E-09 | chr:17:44361947 |
| 17 rs62063302 | 44048943 A | 3.205 | 4.55E-09 | chr:17:44361947 |
| 17 rs62063303 | 44049133 C | 3.205 | 4.55E-09 | chr:17:44361947 |
| 17 rs62063304 | 44049900 G | 3.205 | 4.55E-09 | chr:17:44361947 |
| 17 rs62063305 | 44050282 A | 3.205 | 4.55E-09 | chr:17:44361947 |
| 17 rs62063306 | 44050395 A | 3.205 | 4.55E-09 | chr:17:44361947 |
| 17 rs62063670 | 44123248 C | 3.205 | 4.55E-09 | chr:17:44361947 |
| 17 rs62063671 | 44124837 G | 3.205 | 4.55E-09 | chr:17:44361947 |
| 17 rs62063672 | 44125288 G | 3.205 | 4.55E-09 | chr:17:44361947 |
| 17 rs62063673 | 44125484 G | 3.205 | 4.55E-09 | chr:17:44361947 |
| 17 rs62063676 | 44129800 A | 3.205 | 4.55E-09 | chr:17:44361947 |
| 17 rs62063677 | 44129885 T | 3.205 | 4.55E-09 | chr:17:44361947 |
| 17 rs62063678 | 44129949 G | 3.205 | 4.55E-09 | chr:17:44361947 |
| 17 rs62063680 | 44131559 A | 3.205 | 4.55E-09 | chr:17:44361947 |

|               |            |       |          |                 |
|---------------|------------|-------|----------|-----------------|
| 17 rs62063681 | 44131592 G | 3.205 | 4.55E-09 | chr:17:44361947 |
| 17 rs62063682 | 44131622 A | 3.205 | 4.55E-09 | chr:17:44361947 |
| 17 rs62063683 | 44131717 A | 3.205 | 4.55E-09 | chr:17:44361947 |
| 17 rs62063684 | 44132269 C | 3.205 | 4.55E-09 | chr:17:44361947 |
| 17 rs62063686 | 44132458 A | 3.205 | 4.55E-09 | chr:17:44361947 |
| 17 rs62063687 | 44132592 G | 3.205 | 4.55E-09 | chr:17:44361947 |
| 17 rs62063774 | 44050463 C | 3.205 | 4.55E-09 | chr:17:44361947 |
| 17 rs62063775 | 44050823 T | 3.205 | 4.55E-09 | chr:17:44361947 |
| 17 rs62063776 | 44050850 G | 3.205 | 4.55E-09 | chr:17:44361947 |
| 17 rs62063777 | 44053171 G | 3.205 | 4.55E-09 | chr:17:44361947 |
| 17 rs62063778 | 44053989 A | 3.205 | 4.55E-09 | chr:17:44361947 |
| 17 rs62063779 | 44054671 T | 3.205 | 4.55E-09 | chr:17:44361947 |
| 17 rs62063780 | 44056238 G | 3.205 | 4.55E-09 | chr:17:44361947 |
| 17 rs62063781 | 44058691 T | 3.205 | 4.55E-09 | chr:17:44361947 |
| 17 rs62063782 | 44058716 T | 3.205 | 4.55E-09 | chr:17:44361947 |
| 17 rs62063783 | 44059215 T | 3.205 | 4.55E-09 | chr:17:44361947 |
| 17 rs62063784 | 44059775 G | 3.205 | 4.55E-09 | chr:17:44361947 |
| 17 rs62063786 | 44061023 A | 3.205 | 4.55E-09 | chr:17:44361947 |
| 17 rs62063787 | 44061036 C | 3.205 | 4.55E-09 | chr:17:44361947 |
| 17 rs62063794 | 44066088 A | 3.205 | 4.55E-09 | chr:17:44361947 |
| 17 rs62063798 | 44068543 A | 3.205 | 4.55E-09 | chr:17:44361947 |
| 17 rs62063799 | 44069180 G | 3.205 | 4.55E-09 | chr:17:44361947 |
| 17 rs62063800 | 44069198 T | 3.205 | 4.55E-09 | chr:17:44361947 |
| 17 rs62063801 | 44069376 T | 3.205 | 4.55E-09 | chr:17:44361947 |
| 17 rs62063842 | 44070111 C | 3.205 | 4.55E-09 | chr:17:44361947 |
| 17 rs62063845 | 44071294 C | 3.205 | 4.55E-09 | chr:17:44361947 |
| 17 rs62063846 | 44071674 G | 3.205 | 4.55E-09 | chr:17:44361947 |
| 17 rs62063849 | 44073062 G | 3.205 | 4.55E-09 | chr:17:44361947 |
| 17 rs62063851 | 44074435 G | 3.205 | 4.55E-09 | chr:17:44361947 |
| 17 rs62063852 | 44074581 G | 3.205 | 4.55E-09 | chr:17:44361947 |
| 17 rs62063853 | 44074613 G | 3.205 | 4.55E-09 | chr:17:44361947 |
| 17 rs62063854 | 44074619 A | 3.205 | 4.55E-09 | chr:17:44361947 |
| 17 rs62063855 | 44075535 C | 3.205 | 4.55E-09 | chr:17:44361947 |
| 17 rs62063856 | 44076466 G | 3.205 | 4.55E-09 | chr:17:44361947 |
| 17 rs62063857 | 44076665 G | 3.205 | 4.55E-09 | chr:17:44361947 |
| 17 rs62063859 | 44078616 A | 3.205 | 4.55E-09 | chr:17:44361947 |
| 17 rs62064661 | 44078892 A | 3.205 | 4.55E-09 | chr:17:44361947 |
| 17 rs62064662 | 44079721 G | 3.205 | 4.55E-09 | chr:17:44361947 |
| 17 rs62064663 | 44080039 G | 3.205 | 4.55E-09 | chr:17:44361947 |
| 17 rs62064664 | 44081462 C | 3.205 | 4.55E-09 | chr:17:44361947 |
| 17 rs62064665 | 44081527 C | 3.205 | 4.55E-09 | chr:17:44361947 |
| 17 rs62064666 | 44082514 C | 3.205 | 4.55E-09 | chr:17:44361947 |
| 17 rs62064667 | 44082528 T | 3.205 | 4.55E-09 | chr:17:44361947 |

|               |            |       |          |                 |
|---------------|------------|-------|----------|-----------------|
| 17 rs62064668 | 44082981 A | 3.205 | 4.55E-09 | chr:17:44361947 |
| 17 rs62064669 | 44084676 T | 3.205 | 4.55E-09 | chr:17:44361947 |
| 17 rs62064670 | 44085852 A | 3.205 | 4.55E-09 | chr:17:44361947 |
| 17 rs62064671 | 44086100 C | 3.205 | 4.55E-09 | chr:17:44361947 |
| 17 rs62064672 | 44086521 A | 3.205 | 4.55E-09 | chr:17:44361947 |
| 17 rs62064674 | 44088772 A | 3.205 | 4.55E-09 | chr:17:44361947 |
| 17 rs62064675 | 44088926 T | 3.205 | 4.55E-09 | chr:17:44361947 |
| 17 rs62070944 | 44304298 A | 3.205 | 4.55E-09 | chr:17:44361947 |
| 17 rs62641967 | 44047216 G | 3.205 | 4.55E-09 | chr:17:44361947 |
| 17 rs63750417 | 44060775 T | 3.205 | 4.55E-09 | chr:17:44361947 |
| 17 rs727425   | 44195495 A | 3.205 | 4.55E-09 | chr:17:44361947 |
| 17 rs733966   | 44089563 T | 3.205 | 4.55E-09 | chr:17:44361947 |
| 17 rs733967   | 44089690 C | 3.205 | 4.55E-09 | chr:17:44361947 |
| 17 rs733968   | 44089715 T | 3.205 | 4.55E-09 | chr:17:44361947 |
| 17 rs733969   | 44089727 A | 3.205 | 4.55E-09 | chr:17:44361947 |
| 17 rs7350928  | 44108100 T | 3.205 | 4.55E-09 | chr:17:44361947 |
| 17 rs73984689 | 44184404 A | 3.205 | 4.55E-09 | chr:17:44361947 |
| 17 rs74348235 | 44165852 G | 3.205 | 4.55E-09 | chr:17:44361947 |
| 17 rs74373419 | 44047609 T | 3.205 | 4.55E-09 | chr:17:44361947 |
| 17 rs74450848 | 44082441 C | 3.205 | 4.55E-09 | chr:17:44361947 |
| 17 rs74481389 | 44154607 C | 3.205 | 4.55E-09 | chr:17:44361947 |
| 17 rs74571696 | 44123685 A | 3.205 | 4.55E-09 | chr:17:44361947 |
| 17 rs747152   | 44090339 C | 3.205 | 4.55E-09 | chr:17:44361947 |
| 17 rs74759276 | 44069768 G | 3.205 | 4.55E-09 | chr:17:44361947 |
| 17 rs74829364 | 44084533 C | 3.205 | 4.55E-09 | chr:17:44361947 |
| 17 rs74846646 | 44082446 A | 3.205 | 4.55E-09 | chr:17:44361947 |
| 17 rs74850776 | 44150042 C | 3.205 | 4.55E-09 | chr:17:44361947 |
| 17 rs74977736 | 44126977 C | 3.205 | 4.55E-09 | chr:17:44361947 |
| 17 rs75010486 | 44103825 C | 3.205 | 4.55E-09 | chr:17:44361947 |
| 17 rs75145092 | 44044823 A | 3.205 | 4.55E-09 | chr:17:44361947 |
| 17 rs75229280 | 44196653 A | 3.205 | 4.55E-09 | chr:17:44361947 |
| 17 rs75242405 | 44049329 T | 3.205 | 4.55E-09 | chr:17:44361947 |
| 17 rs75412750 | 44172773 T | 3.205 | 4.55E-09 | chr:17:44361947 |
| 17 rs754512   | 44055647 T | 3.205 | 4.55E-09 | chr:17:44361947 |
| 17 rs754513   | 44055638 A | 3.205 | 4.55E-09 | chr:17:44361947 |
| 17 rs75530705 | 44154048 T | 3.205 | 4.55E-09 | chr:17:44361947 |
| 17 rs75534191 | 44091724 A | 3.205 | 4.55E-09 | chr:17:44361947 |
| 17 rs75546272 | 44130668 A | 3.205 | 4.55E-09 | chr:17:44361947 |
| 17 rs75641221 | 44145373 C | 3.205 | 4.55E-09 | chr:17:44361947 |
| 17 rs75652502 | 44200510 A | 3.205 | 4.55E-09 | chr:17:44361947 |
| 17 rs75666751 | 44090148 C | 3.205 | 4.55E-09 | chr:17:44361947 |
| 17 rs75911589 | 44183002 A | 3.205 | 4.55E-09 | chr:17:44361947 |
| 17 rs75944932 | 44072423 C | 3.205 | 4.55E-09 | chr:17:44361947 |

|               |            |       |          |                 |
|---------------|------------|-------|----------|-----------------|
| 17 rs75975083 | 44146357 C | 3.205 | 4.55E-09 | chr:17:44361947 |
| 17 rs76154201 | 44154033 C | 3.205 | 4.55E-09 | chr:17:44361947 |
| 17 rs76307183 | 44142121 A | 3.205 | 4.55E-09 | chr:17:44361947 |
| 17 rs76357066 | 44067046 A | 3.205 | 4.55E-09 | chr:17:44361947 |
| 17 rs76380490 | 44203413 T | 3.205 | 4.55E-09 | chr:17:44361947 |
| 17 rs76475191 | 44290849 A | 3.205 | 4.55E-09 | chr:17:44361947 |
| 17 rs76618565 | 44068481 A | 3.205 | 4.55E-09 | chr:17:44361947 |
| 17 rs76761511 | 44185245 A | 3.205 | 4.55E-09 | chr:17:44361947 |
| 17 rs7687     | 44103296 C | 3.205 | 4.55E-09 | chr:17:44361947 |
| 17 rs77009866 | 44110888 T | 3.205 | 4.55E-09 | chr:17:44361947 |
| 17 rs77044307 | 44172408 G | 3.205 | 4.55E-09 | chr:17:44361947 |
| 17 rs77095128 | 44204304 G | 3.205 | 4.55E-09 | chr:17:44361947 |
| 17 rs77105679 | 44122896 A | 3.205 | 4.55E-09 | chr:17:44361947 |
| 17 rs77138434 | 44159555 A | 3.205 | 4.55E-09 | chr:17:44361947 |
| 17 rs77290642 | 44068480 C | 3.205 | 4.55E-09 | chr:17:44361947 |
| 17 rs77513497 | 44045474 G | 3.205 | 4.55E-09 | chr:17:44361947 |
| 17 rs77566074 | 44048936 A | 3.205 | 4.55E-09 | chr:17:44361947 |
| 17 rs77604208 | 44177669 T | 3.205 | 4.55E-09 | chr:17:44361947 |
| 17 rs77635460 | 44186593 C | 3.205 | 4.55E-09 | chr:17:44361947 |
| 17 rs77747656 | 44099827 G | 3.205 | 4.55E-09 | chr:17:44361947 |
| 17 rs77875796 | 44051612 G | 3.205 | 4.55E-09 | chr:17:44361947 |
| 17 rs77924366 | 44182181 C | 3.205 | 4.55E-09 | chr:17:44361947 |
| 17 rs77925835 | 44159695 T | 3.205 | 4.55E-09 | chr:17:44361947 |
| 17 rs77950913 | 44146451 C | 3.205 | 4.55E-09 | chr:17:44361947 |
| 17 rs78104015 | 44052733 G | 3.205 | 4.55E-09 | chr:17:44361947 |
| 17 rs78229689 | 44106806 A | 3.205 | 4.55E-09 | chr:17:44361947 |
| 17 rs78599197 | 44069970 G | 3.205 | 4.55E-09 | chr:17:44361947 |
| 17 rs78681971 | 44106219 T | 3.205 | 4.55E-09 | chr:17:44361947 |
| 17 rs78938131 | 44157622 G | 3.205 | 4.55E-09 | chr:17:44361947 |
| 17 rs78962882 | 44084844 C | 3.205 | 4.55E-09 | chr:17:44361947 |
| 17 rs79065019 | 44124535 C | 3.205 | 4.55E-09 | chr:17:44361947 |
| 17 rs79180862 | 44131798 T | 3.205 | 4.55E-09 | chr:17:44361947 |
| 17 rs79252344 | 44120608 G | 3.205 | 4.55E-09 | chr:17:44361947 |
| 17 rs79301522 | 44207932 G | 3.205 | 4.55E-09 | chr:17:44361947 |
| 17 rs79346219 | 44184375 G | 3.205 | 4.55E-09 | chr:17:44361947 |
| 17 rs79348289 | 44172698 C | 3.205 | 4.55E-09 | chr:17:44361947 |
| 17 rs79447161 | 44067508 G | 3.205 | 4.55E-09 | chr:17:44361947 |
| 17 rs79649865 | 44130587 G | 3.205 | 4.55E-09 | chr:17:44361947 |
| 17 rs79698033 | 44123717 T | 3.205 | 4.55E-09 | chr:17:44361947 |
| 17 rs79782347 | 44146567 C | 3.205 | 4.55E-09 | chr:17:44361947 |
| 17 rs79861768 | 44290910 G | 3.205 | 4.55E-09 | chr:17:44361947 |
| 17 rs79923630 | 44167661 T | 3.205 | 4.55E-09 | chr:17:44361947 |
| 17 rs79923708 | 44183790 A | 3.205 | 4.55E-09 | chr:17:44361947 |

|                |            |       |          |                 |
|----------------|------------|-------|----------|-----------------|
| 17 rs79959255  | 44077708 T | 3.205 | 4.55E-09 | chr:17:44361947 |
| 17 rs80020809  | 44172391 T | 3.205 | 4.55E-09 | chr:17:44361947 |
| 17 rs80028338  | 44161470 C | 3.205 | 4.55E-09 | chr:17:44361947 |
| 17 rs80120913  | 44177755 G | 3.205 | 4.55E-09 | chr:17:44361947 |
| 17 rs8070723   | 44081064 G | 3.205 | 4.55E-09 | chr:17:44361947 |
| 17 rs876944    | 44134391 T | 3.205 | 4.55E-09 | chr:17:44361947 |
| 17 rs919461    | 44065669 T | 3.205 | 4.55E-09 | chr:17:44361947 |
| 17 rs919462    | 44065740 T | 3.205 | 4.55E-09 | chr:17:44361947 |
| 17 rs919464    | 44065901 T | 3.205 | 4.55E-09 | chr:17:44361947 |
| 17 rs9709338   | 44094871 G | 3.205 | 4.55E-09 | chr:17:44361947 |
| 17 rs974291    | 44150480 T | 3.205 | 4.55E-09 | chr:17:44361947 |
| 17 rs974292    | 44150464 C | 3.205 | 4.55E-09 | chr:17:44361947 |
| 17 rs974293    | 44150233 A | 3.205 | 4.55E-09 | chr:17:44361947 |
| 17 rs974294    | 44150163 G | 3.205 | 4.55E-09 | chr:17:44361947 |
| 17 rs974295    | 44150152 T | 3.205 | 4.55E-09 | chr:17:44361947 |
| 17 rs557492346 | 44367453 C | 3.284 | 4.60E-09 | chr:17:44361947 |
| 17 rs2732605   | 44291381 G | 3.206 | 4.61E-09 | chr:17:44361947 |
| 17 rs62060798  | 44144152 C | 3.206 | 4.61E-09 | chr:17:44361947 |
| 17 rs62060799  | 44144251 T | 3.206 | 4.61E-09 | chr:17:44361947 |
| 17 rs62062285  | 44095661 G | 3.206 | 4.61E-09 | chr:17:44361947 |
| 17 rs2532392   | 44309856 A | 3.203 | 4.70E-09 | chr:17:44361947 |
| 17 rs558936396 | 44310164 C | 3.203 | 4.70E-09 | chr:17:44361947 |
| 17 rs577197474 | 44310234 C | 3.203 | 4.70E-09 | chr:17:44361947 |
| 17 rs74531363  | 44026495 G | 3.216 | 4.72E-09 | chr:17:44361947 |
| 17 rs77266933  | 44026490 C | 3.216 | 4.72E-09 | chr:17:44361947 |
| 17 rs78556223  | 44026478 G | 3.216 | 4.72E-09 | chr:17:44361947 |
| 17 rs28416808  | 44021218 T | 3.174 | 4.74E-09 | chr:17:44361947 |
| 17 rs62063276  | 44036408 G | 3.174 | 4.74E-09 | chr:17:44361947 |
| 17 rs2532423   | 44285952 C | 3.017 | 4.76E-09 | chr:17:44361947 |
| 17 rs17769490  | 43925605 A | 3.167 | 4.78E-09 | chr:17:44361947 |
| 17 rs56113217  | 43926948 G | 3.167 | 4.78E-09 | chr:17:44361947 |
| 17 rs56269136  | 43926992 T | 3.167 | 4.78E-09 | chr:17:44361947 |
| 17 rs56385754  | 43927255 T | 3.167 | 4.78E-09 | chr:17:44361947 |
| 17 rs62054817  | 43925966 A | 3.167 | 4.78E-09 | chr:17:44361947 |
| 17 rs62054818  | 43926056 C | 3.167 | 4.78E-09 | chr:17:44361947 |
| 17 rs62054819  | 43926149 G | 3.167 | 4.78E-09 | chr:17:44361947 |
| 17 rs62054820  | 43926755 G | 3.167 | 4.78E-09 | chr:17:44361947 |
| 17 rs62054822  | 43927708 G | 3.167 | 4.78E-09 | chr:17:44361947 |
| 17 rs77063768  | 43925729 G | 3.167 | 4.78E-09 | chr:17:44361947 |
| 17 rs885639    | 43928614 G | 3.167 | 4.78E-09 | chr:17:44361947 |
| 17 rs550683961 | 44367288 C | 3.325 | 4.82E-09 | chr:17:44361947 |
| 17 rs572762545 | 44277867 A | 3.106 | 4.89E-09 | chr:17:44361947 |
| 17 rs2668685   | 44340151 C | 3.024 | 4.98E-09 | chr:17:44361947 |

|                |            |       |          |                 |
|----------------|------------|-------|----------|-----------------|
| 17 rs199514    | 44856881 G | 3.276 | 5.01E-09 | chr:17:44361947 |
| 17 rs1052594   | 44102689 C | 3.19  | 5.07E-09 | chr:17:44361947 |
| 17 rs62060844  | 44153836 T | 3.189 | 5.07E-09 | chr:17:44361947 |
| 17 rs55831516  | 44148267 T | 3.162 | 5.07E-09 | chr:17:44361947 |
| 17 rs62060809  | 44148613 A | 3.162 | 5.07E-09 | chr:17:44361947 |
| 17 rs62060810  | 44148674 G | 3.162 | 5.07E-09 | chr:17:44361947 |
| 17 rs62061733  | 44018399 G | 3.201 | 5.08E-09 | chr:17:44361947 |
| 17 rs76924476  | 44199029 C | 3.182 | 5.21E-09 | chr:17:44361947 |
| 17 rs1052553   | 44073889 G | 3.186 | 5.24E-09 | chr:17:44361947 |
| 17 rs559790424 | 44267617 G | 3.083 | 5.24E-09 | chr:17:44361947 |
| 17 rs572543580 | 43914981 G | 3.153 | 5.29E-09 | chr:17:44361947 |
| 17 rs2316951   | 44139083 C | 3.189 | 5.30E-09 | chr:17:44361947 |
| 17 rs530819145 | 44232959 A | 3.189 | 5.30E-09 | chr:17:44361947 |
| 17 rs62063795  | 44068238 T | 3.183 | 5.35E-09 | chr:17:44361947 |
| 17 rs544076796 | 44246405 A | 3.143 | 5.40E-09 | chr:17:44361947 |
| 17 rs62054760  | 43908989 T | 3.172 | 5.40E-09 | chr:17:44361947 |
| 17 rs62054761  | 43909008 T | 3.172 | 5.40E-09 | chr:17:44361947 |
| 17 rs62054762  | 43909022 T | 3.172 | 5.40E-09 | chr:17:44361947 |
| 17 rs62061822  | 44186894 C | 3.191 | 5.40E-09 | chr:17:44361947 |
| 17 rs62064660  | 44078832 A | 3.186 | 5.44E-09 | chr:17:44361947 |
| 17 rs544243747 | 44239958 T | 3.174 | 5.44E-09 | chr:17:44361947 |
| 17 rs79772576  | 44106220 G | 3.19  | 5.44E-09 | chr:17:44361947 |
| 17 rs62063850  | 44073739 A | 3.187 | 5.46E-09 | chr:17:44361947 |
| 17 rs112493812 | 44314179 A | 3.187 | 5.49E-09 | chr:17:44361947 |
| 17 rs2696607   | 44319167 A | 3.187 | 5.49E-09 | chr:17:44361947 |
| 17 rs2732715   | 44321527 T | 3.187 | 5.49E-09 | chr:17:44361947 |
| 17 rs534615982 | 44314066 G | 3.187 | 5.49E-09 | chr:17:44361947 |
| 17 rs546360771 | 44313950 A | 3.187 | 5.49E-09 | chr:17:44361947 |
| 17 rs550505763 | 44317210 A | 3.187 | 5.49E-09 | chr:17:44361947 |
| 17 rs552419936 | 44313757 A | 3.187 | 5.49E-09 | chr:17:44361947 |
| 17 rs55744103  | 44316280 C | 3.187 | 5.49E-09 | chr:17:44361947 |
| 17 rs561690667 | 44317103 C | 3.187 | 5.49E-09 | chr:17:44361947 |
| 17 rs564242533 | 44316888 G | 3.187 | 5.49E-09 | chr:17:44361947 |
| 17 rs566835244 | 44316389 A | 3.187 | 5.49E-09 | chr:17:44361947 |
| 17 rs62073098  | 44316449 C | 3.187 | 5.49E-09 | chr:17:44361947 |
| 17 rs62063796  | 44068289 A | 3.185 | 5.50E-09 | chr:17:44361947 |
| 17 rs62063797  | 44068294 C | 3.185 | 5.50E-09 | chr:17:44361947 |
| 17 rs62073257  | 44412076 G | 3.261 | 5.50E-09 | chr:17:44361947 |
| 17 rs62063675  | 44126575 T | 3.187 | 5.52E-09 | chr:17:44361947 |
| 17 rs17573245  | 44072854 C | 3.187 | 5.55E-09 | chr:17:44361947 |
| 17 rs565531740 | 44244397 A | 3.187 | 5.55E-09 | chr:17:44361947 |
| 17 rs76632685  | 43974477 T | 3.15  | 5.56E-09 | chr:17:44361947 |
| 17 rs80346216  | 43974476 T | 3.15  | 5.56E-09 | chr:17:44361947 |

|                |            |       |          |                 |
|----------------|------------|-------|----------|-----------------|
| 17 rs553226241 | 44272552 T | 3.096 | 5.57E-09 | chr:17:44361947 |
| 17 rs56127309  | 43960341 A | 3.146 | 5.60E-09 | chr:17:44361947 |
| 17 rs62055493  | 43952944 C | 3.146 | 5.60E-09 | chr:17:44361947 |
| 17 rs62055494  | 43953016 T | 3.146 | 5.60E-09 | chr:17:44361947 |
| 17 rs62055495  | 43953043 C | 3.146 | 5.60E-09 | chr:17:44361947 |
| 17 rs17575556  | 44135827 A | 3.184 | 5.62E-09 | chr:17:44361947 |
| 17 rs17652502  | 44094471 A | 3.184 | 5.62E-09 | chr:17:44361947 |
| 17 rs2532330   | 44349867 A | 3.182 | 5.63E-09 | chr:17:44361947 |
| 17 rs539364020 | 44276821 A | 3.13  | 5.70E-09 | chr:17:44361947 |
| 17 rs568226663 | 44362355 G | 3.21  | 5.74E-09 | chr:17:44361947 |
| 17 rs556323004 | 44225802 T | 3.181 | 5.75E-09 | chr:17:44361947 |
| 17 rs17572627  | 44058629 A | 3.18  | 5.76E-09 | chr:17:44361947 |
| 17 rs77527347  | 44058017 T | 3.18  | 5.76E-09 | chr:17:44361947 |
| 17 rs570486150 | 44272266 G | 3.145 | 5.76E-09 | chr:17:44361947 |
| 17 rs199451    | 44801784 A | 3.271 | 5.85E-09 | chr:17:44361947 |
| 17 rs62063294  | 44044157 A | 3.173 | 5.92E-09 | chr:17:44361947 |
| 17 rs567324860 | 44259792 A | 3.172 | 5.95E-09 | chr:17:44361947 |
| 17 rs1819040   | 44219831 A | 3.127 | 5.96E-09 | chr:17:44361947 |
| 17 rs564301026 | 44220454 G | 3.138 | 5.99E-09 | chr:17:44361947 |
| 17 rs55946323  | 44031946 G | 3.158 | 6.06E-09 | chr:17:44361947 |
| 17 rs56189701  | 43987801 C | 3.158 | 6.06E-09 | chr:17:44361947 |
| 17 rs2435204   | 43988205 G | 3.178 | 6.08E-09 | chr:17:44361947 |
| 17 rs2532229   | 44277265 C | 3.145 | 6.09E-09 | chr:17:44361947 |
| 17 rs62061799  | 44174068 C | 3.138 | 6.11E-09 | chr:17:44361947 |
| 17 rs142955985 | 43933790 T | 3.15  | 6.12E-09 | chr:17:44361947 |
| 17 rs2696495   | 44364864 T | 3.173 | 6.12E-09 | chr:17:44361947 |
| 17 rs62061818  | 44182917 G | 3.189 | 6.15E-09 | chr:17:44361947 |
| 17 rs75183956  | 44182956 G | 3.189 | 6.15E-09 | chr:17:44361947 |
| 17 rs75330746  | 44182955 T | 3.189 | 6.15E-09 | chr:17:44361947 |
| 17 rs56040418  | 43958079 T | 3.139 | 6.17E-09 | chr:17:44361947 |
| 17 rs56180212  | 43960911 G | 3.139 | 6.17E-09 | chr:17:44361947 |
| 17 rs62062294  | 44100666 C | 3.145 | 6.19E-09 | chr:17:44361947 |
| 17 rs78358711  | 44296230 A | 3.14  | 6.23E-09 | chr:17:44361947 |
| 17 rs2141298   | 44268488 T | 3.135 | 6.28E-09 | chr:17:44361947 |
| 17 rs575816835 | 44216226 G | 3.135 | 6.28E-09 | chr:17:44361947 |
| 17 rs570324382 | 44254494 C | 3.061 | 6.28E-09 | chr:17:44361947 |
| 17 rs4283261   | 44089921 T | 3.137 | 6.34E-09 | chr:17:44361947 |
| 17 rs534205707 | 44296846 A | 3.137 | 6.34E-09 | chr:17:44361947 |
| 17 rs577973995 | 44296845 C | 3.137 | 6.34E-09 | chr:17:44361947 |
| 17 rs74998289  | 43913558 G | 3.124 | 6.36E-09 | chr:17:44361947 |
| 17 rs75104593  | 43913557 G | 3.124 | 6.36E-09 | chr:17:44361947 |
| 17 rs535998558 | 44233433 C | 3.139 | 6.38E-09 | chr:17:44361947 |
| 17 rs562593126 | 44238424 A | 3.139 | 6.38E-09 | chr:17:44361947 |



|                |            |       |          |                 |
|----------------|------------|-------|----------|-----------------|
| 17 rs564614982 | 44334288 G | 3.177 | 6.39E-09 | chr:17:44361947 |
| 17 rs62061845  | 44190156 C | 3.176 | 6.39E-09 | chr:17:44361947 |
| 17 rs535751452 | 44272928 A | 3.128 | 6.39E-09 | chr:17:44361947 |
| 17 rs574644730 | 44272679 C | 3.128 | 6.39E-09 | chr:17:44361947 |
| 17 rs2532418   | 44288579 C | 3.137 | 6.48E-09 | chr:17:44361947 |
| 17 rs573087816 | 44258422 T | 3.137 | 6.48E-09 | chr:17:44361947 |
| 17 rs371411506 | 44303668 T | 3.138 | 6.50E-09 | chr:17:44361947 |
| 17 rs540548105 | 44220790 G | 3.138 | 6.50E-09 | chr:17:44361947 |
| 17 rs577620178 | 44224686 T | 3.138 | 6.50E-09 | chr:17:44361947 |
| 17 rs17690176  | 43916773 C | 3.129 | 6.56E-09 | chr:17:44361947 |
| 17 rs113271363 | 43996721 G | 3.175 | 6.58E-09 | chr:17:44361947 |
| 17 rs2668665   | 44290047 A | 3.121 | 6.60E-09 | chr:17:44361947 |
| 17 rs570399582 | 44274560 C | 3.133 | 6.61E-09 | chr:17:44361947 |
| 17 rs199507    | 44858855 A | 3.247 | 6.63E-09 | chr:17:44361947 |
| 17 rs199509    | 44858728 G | 3.247 | 6.63E-09 | chr:17:44361947 |
| 17 rs199510    | 44857929 A | 3.247 | 6.63E-09 | chr:17:44361947 |
| 17 rs199512    | 44857352 T | 3.247 | 6.63E-09 | chr:17:44361947 |
| 17 rs538148047 | 44221602 C | 3.129 | 6.68E-09 | chr:17:44361947 |
| 17 rs547862429 | 44305026 A | 3.121 | 6.74E-09 | chr:17:44361947 |
| 17 rs575638762 | 44255017 C | 3.129 | 6.78E-09 | chr:17:44361947 |
| 17 rs886249    | 43946291 G | 3.225 | 6.79E-09 | chr:17:44361947 |
| 17 rs551124966 | 44487793 C | 3.118 | 6.82E-09 | chr:17:44361947 |
| 17 rs571470536 | 44487794 T | 3.118 | 6.82E-09 | chr:17:44361947 |
| 17 rs111825734 | 44019107 G | 3.106 | 6.87E-09 | chr:17:44361947 |
| 17 rs532193457 | 44368404 T | 3.211 | 6.89E-09 | chr:17:44361947 |
| 17 rs527375859 | 44263965 C | 3.117 | 6.92E-09 | chr:17:44361947 |
| 17 rs544272461 | 44257473 C | 3.12  | 7.03E-09 | chr:17:44361947 |
| 17 rs535910576 | 44284734 C | 3.05  | 7.11E-09 | chr:17:44361947 |
| 17 rs113912415 | 44007785 G | 3.232 | 7.12E-09 | chr:17:44361947 |
| 17 rs577482939 | 44228529 A | 3.125 | 7.12E-09 | chr:17:44361947 |
| 17 rs555346866 | 44281452 G | 3.166 | 7.14E-09 | chr:17:44361947 |
| 17 rs62073110  | 44324048 G | 3.86  | 7.14E-09 | chr:17:44361947 |
| 17 rs544161107 | 44222335 A | 3.12  | 7.26E-09 | chr:17:44361947 |
| 17 rs566177628 | 44343121 G | 3.152 | 7.28E-09 | chr:17:44361947 |
| 17 rs62062287  | 44096541 G | 3.113 | 7.29E-09 | chr:17:44361947 |
| 17 rs2696542   | 44351533 G | 3.087 | 7.32E-09 | chr:17:44361947 |
| 17 rs9896243   | 44826056 G | 3.173 | 7.33E-09 | chr:17:44361947 |
| 17 rs62062290  | 44099129 A | 3.175 | 7.35E-09 | chr:17:44361947 |
| 17 rs2668694   | 44292319 C | 3.116 | 7.43E-09 | chr:17:44361947 |
| 17 rs557534113 | 44215045 C | 3.116 | 7.43E-09 | chr:17:44361947 |
| 17 rs55649944  | 44119463 T | 3.131 | 7.44E-09 | chr:17:44361947 |
| 17 rs56406462  | 44119474 C | 3.131 | 7.44E-09 | chr:17:44361947 |
| 17 rs62063163  | 44201865 T | 3.124 | 7.48E-09 | chr:17:44361947 |

|                |            |       |          |                 |
|----------------|------------|-------|----------|-----------------|
| 17 rs62063164  | 44201887 T | 3.124 | 7.48E-09 | chr:17:44361947 |
| 17 rs569247938 | 44254413 G | 3.111 | 7.51E-09 | chr:17:44361947 |
| 17 rs548762783 | 44261753 C | 3.115 | 7.54E-09 | chr:17:44361947 |
| 17 rs552471054 | 44215823 G | 3.115 | 7.54E-09 | chr:17:44361947 |
| 17 rs562593824 | 44322922 G | 3.127 | 7.56E-09 | chr:17:44361947 |
| 17 rs533699804 | 44241664 C | 3.117 | 7.64E-09 | chr:17:44361947 |
| 17 rs554416680 | 44286198 A | 2.917 | 7.64E-09 | chr:17:44361947 |
| 17 rs373695612 | 44360349 G | 3.178 | 7.67E-09 | chr:17:44361947 |
| 17 rs2732613   | 44364829 C | 3.109 | 7.71E-09 | chr:17:44361947 |
| 17 rs112364920 | 44161360 T | 3.16  | 7.75E-09 | chr:17:44361947 |
| 17 rs566489145 | 44242969 C | 3.11  | 7.91E-09 | chr:17:44361947 |
| 17 rs2668692   | 44293020 A | 3.095 | 7.96E-09 | chr:17:44361947 |
| 17 rs555485669 | 44275619 G | 3.058 | 7.97E-09 | chr:17:44361947 |
| 17 rs570807150 | 44284542 A | 3.047 | 8.01E-09 | chr:17:44361947 |
| 17 rs12373168  | 43924337 C | 3.067 | 8.14E-09 | chr:17:44361947 |
| 17 rs2696530   | 44355714 G | 3.235 | 8.25E-09 | chr:17:44361947 |
| 17 rs542241702 | 44098862 G | 3.12  | 8.34E-09 | chr:17:44361947 |
| 17 rs542802424 | 44098861 T | 3.12  | 8.34E-09 | chr:17:44361947 |
| 17 rs576111957 | 44285142 C | 2.994 | 8.40E-09 | chr:17:44361947 |
| 17 rs184837332 | 44359783 T | 3.19  | 8.49E-09 | chr:17:44361947 |
| 17 rs538174453 | 44781030 C | 4.033 | 8.53E-09 | chr:17:44361947 |
| 17 rs2732650   | 44344988 G | 3.18  | 8.56E-09 | chr:17:44361947 |
| 17 rs2316956   | 44162056 A | 3.621 | 8.59E-09 | chr:17:44361947 |
| 17 rs546081116 | 44368055 C | 3.23  | 8.61E-09 | chr:17:44361947 |
| 17 rs199516    | 44856485 C | 3.215 | 8.67E-09 | chr:17:44361947 |
| 17 rs199525    | 44847834 G | 3.215 | 8.67E-09 | chr:17:44361947 |
| 17 rs199528    | 44843136 T | 3.215 | 8.67E-09 | chr:17:44361947 |
| 17 rs150592114 | 44333331 G | 3.144 | 8.73E-09 | chr:17:44361947 |
| 17 rs199504    | 44861003 C | 3.163 | 8.78E-09 | chr:17:44361947 |
| 17 rs561504284 | 44340253 G | 3.013 | 8.81E-09 | chr:17:44361947 |
| 17 rs112480703 | 44189799 C | 3.11  | 8.91E-09 | chr:17:44361947 |
| 17 rs753235    | 43946223 A | 3.092 | 8.97E-09 | chr:17:44361947 |
| 17 rs568873066 | 44352872 G | 3.173 | 9.08E-09 | chr:17:44361947 |
| 17 rs199513    | 44856932 A | 3.185 | 9.11E-09 | chr:17:44361947 |
| 17 rs17573447  | 44079567 T | 3.096 | 9.23E-09 | chr:17:44361947 |
| 17 rs535060999 | 44238966 C | 3.014 | 9.27E-09 | chr:17:44361947 |
| 17 rs568059837 | 44238938 C | 3.014 | 9.27E-09 | chr:17:44361947 |
| 17 rs547005230 | 44286128 G | 2.937 | 9.45E-09 | chr:17:44361947 |
| 17 rs570203120 | 44267863 A | 3.052 | 9.59E-09 | chr:17:44361947 |
| 17 rs543821315 | 44331297 T | 3.142 | 9.67E-09 | chr:17:44361947 |
| 17 rs2950015   | 44332351 G | 3.123 | 9.69E-09 | chr:17:44361947 |
| 17 rs74807476  | 44355726 A | 3.167 | 9.76E-09 | chr:17:44361947 |
| 17 rs17577877  | 44208218 G | 3.104 | 9.92E-09 | chr:17:44361947 |

|                |            |       |          |                 |
|----------------|------------|-------|----------|-----------------|
| 17 rs17661428  | 44208144 G | 3.104 | 9.92E-09 | chr:17:44361947 |
| 17 rs4606752   | 44192618 G | 3.104 | 9.92E-09 | chr:17:44361947 |
| 17 rs112082260 | 44355303 C | 3.216 | 9.96E-09 | chr:17:44361947 |
| 17 rs17665188  | 44357351 C | 3.216 | 9.96E-09 | chr:17:44361947 |
| 17 rs2696522   | 44356890 C | 3.216 | 9.96E-09 | chr:17:44361947 |
| 17 rs2696524   | 44356793 G | 3.216 | 9.96E-09 | chr:17:44361947 |
| 17 rs529898785 | 44357777 T | 3.216 | 9.96E-09 | chr:17:44361947 |
| 17 rs530676870 | 44347218 A | 3.216 | 9.96E-09 | chr:17:44361947 |
| 17 rs570136507 | 44357297 T | 3.216 | 9.96E-09 | chr:17:44361947 |
| 17 rs571516577 | 44356949 C | 3.216 | 9.96E-09 | chr:17:44361947 |
| 17 rs74839514  | 44357453 T | 3.216 | 9.96E-09 | chr:17:44361947 |
| 17 rs79523636  | 44359499 T | 3.216 | 9.96E-09 | chr:17:44361947 |
| 17 rs548785130 | 44284057 T | 2.992 | 9.97E-09 | chr:17:44361947 |
| 17 rs17661141  | 44196015 G | 3.101 | 1.00E-08 | chr:17:44361947 |
| 17 rs17689378  | 43881790 T | 3.097 | 1.00E-08 | chr:17:44361947 |
| 17 rs112836774 | 44084002 C | 3.194 | 1.00E-08 | chr:17:44361947 |
| 17 rs2668653   | 44288156 C | 3.063 | 1.01E-08 | chr:17:44361947 |
| 17 rs544309319 | 44258914 G | 3.056 | 1.02E-08 | chr:17:44361947 |
| 17 rs55795042  | 44325635 C | 3.096 | 1.02E-08 | chr:17:44361947 |
| 17 rs2532389   | 44311107 C | 3.065 | 1.03E-08 | chr:17:44361947 |
| 17 rs568589031 | 44311099 A | 3.065 | 1.03E-08 | chr:17:44361947 |
| 17 rs58879558  | 44095467 C | 3.043 | 1.03E-08 | chr:17:44361947 |
| 17 rs528977056 | 44276618 G | 3.012 | 1.04E-08 | chr:17:44361947 |
| 17 rs568196639 | 44276578 C | 3.012 | 1.04E-08 | chr:17:44361947 |
| 17 rs77015737  | 44224939 T | 3.137 | 1.04E-08 | chr:17:44361947 |
| 17 rs80103986  | 44224940 T | 3.137 | 1.04E-08 | chr:17:44361947 |
| 17 rs2243967   | 44329636 C | 3.096 | 1.06E-08 | chr:17:44361947 |
| 17 rs572695193 | 44350919 C | 3.087 | 1.06E-08 | chr:17:44361947 |
| 17 rs113913001 | 44282892 C | 3.05  | 1.06E-08 | chr:17:44361947 |
| 17 rs199913382 | 44625866 C | 3.076 | 1.07E-08 | chr:17:44361947 |
| 17 rs6503457   | 44208312 T | 3.152 | 1.08E-08 | chr:17:44361947 |
| 17 rs17652337  | 44083323 T | 3.131 | 1.09E-08 | chr:17:44361947 |
| 17 rs3912060   | 44165435 T | 3.09  | 1.10E-08 | chr:17:44361947 |
| 17 rs2696569   | 44266290 C | 3.033 | 1.14E-08 | chr:17:44361947 |
| 17 rs753236    | 43946318 C | 3.083 | 1.15E-08 | chr:17:44361947 |
| 17 rs545270044 | 44277818 G | 3.032 | 1.16E-08 | chr:17:44361947 |
| 17 rs62056788  | 43975382 A | 2.982 | 1.16E-08 | chr:17:44361947 |
| 17 rs541425496 | 44062689 C | 3.051 | 1.17E-08 | chr:17:44361947 |
| 17 rs571792649 | 44283022 G | 3.031 | 1.19E-08 | chr:17:44361947 |
| 17 rs559536284 | 44369214 C | 3.124 | 1.19E-08 | chr:17:44361947 |
| 17 rs568624216 | 44369224 G | 3.124 | 1.19E-08 | chr:17:44361947 |
| 17 rs7210219   | 44018519 C | 3.033 | 1.20E-08 | chr:17:44361947 |
| 17 rs199505    | 44859410 A | 3.157 | 1.20E-08 | chr:17:44361947 |

|                |            |       |          |                 |
|----------------|------------|-------|----------|-----------------|
| 17 rs199515    | 44856641 G | 3.157 | 1.20E-08 | chr:17:44361947 |
| 17 rs70600     | 44860021 T | 3.157 | 1.20E-08 | chr:17:44361947 |
| 17 rs70602     | 44859715 T | 3.157 | 1.20E-08 | chr:17:44361947 |
| 17 rs62054823  | 43929029 G | 3.055 | 1.21E-08 | chr:17:44361947 |
| 17 rs547988515 | 44365369 C | 3.141 | 1.21E-08 | chr:17:44361947 |
| 17 rs557642992 | 44365374 T | 3.141 | 1.21E-08 | chr:17:44361947 |
| 17 rs2732708   | 44351387 T | 3.083 | 1.22E-08 | chr:17:44361947 |
| 17 rs553560640 | 44304130 G | 3.075 | 1.22E-08 | chr:17:44361947 |
| 17 rs190796367 | 44333293 G | 3.115 | 1.23E-08 | chr:17:44361947 |
| 17 rs2532364   | 44332970 G | 3.115 | 1.23E-08 | chr:17:44361947 |
| 17 rs62073155  | 44333121 A | 3.115 | 1.23E-08 | chr:17:44361947 |
| 17 rs62073157  | 44334052 A | 3.115 | 1.23E-08 | chr:17:44361947 |
| 17 rs79173919  | 44262582 A | 4.176 | 1.25E-08 | chr:17:44361947 |
| 17 rs79974469  | 44262581 C | 4.176 | 1.25E-08 | chr:17:44361947 |
| 17 rs2732649   | 44344810 G | 3.153 | 1.26E-08 | chr:17:44361947 |
| 17 rs557874689 | 44365050 A | 3.081 | 1.27E-08 | chr:17:44361947 |
| 17 rs527420934 | 44337429 C | 3.062 | 1.28E-08 | chr:17:44361947 |
| 17 rs2732611   | 44365487 C | 4.17  | 1.29E-08 | chr:17:44361947 |
| 17 rs35524223  | 44192590 A | 3.079 | 1.29E-08 | chr:17:44361947 |
| 17 rs1706725   | 44324185 G | 2.858 | 1.30E-08 | chr:17:44361947 |
| 17 rs2732713   | 44348593 G | 3.094 | 1.31E-08 | chr:17:44361947 |
| 17 rs545178846 | 44327712 T | 2.96  | 1.31E-08 | chr:17:44361947 |
| 17 rs62062271  | 44091988 C | 3.033 | 1.32E-08 | chr:17:44361947 |
| 17 rs2696609   | 44293205 G | 3.038 | 1.32E-08 | chr:17:44361947 |
| 17 rs555719522 | 44302881 T | 3.023 | 1.33E-08 | chr:17:44361947 |
| 17 rs78993847  | 43933834 T | 3.049 | 1.34E-08 | chr:17:44361947 |
| 17 rs80209523  | 43933830 T | 3.049 | 1.34E-08 | chr:17:44361947 |
| 17 rs569817232 | 44310101 G | 3.014 | 1.34E-08 | chr:17:44361947 |
| 17 rs534145818 | 44367939 A | 3.153 | 1.35E-08 | chr:17:44361947 |
| 17 rs2668632   | 44319366 T | 3.045 | 1.37E-08 | chr:17:44361947 |
| 17 rs578109777 | 44319369 C | 3.045 | 1.37E-08 | chr:17:44361947 |
| 17 rs191247549 | 44326105 C | 3.094 | 1.38E-08 | chr:17:44361947 |
| 17 rs531804214 | 44343930 G | 3.003 | 1.40E-08 | chr:17:44361947 |
| 17 rs556215035 | 44342327 G | 2.944 | 1.41E-08 | chr:17:44361947 |
| 17 rs543638572 | 44267170 T | 2.975 | 1.43E-08 | chr:17:44361947 |
| 17 rs564912328 | 44267227 G | 2.975 | 1.43E-08 | chr:17:44361947 |
| 17 rs575726704 | 44267164 T | 2.975 | 1.43E-08 | chr:17:44361947 |
| 17 rs566760142 | 44408004 C | 2.97  | 1.44E-08 | chr:17:44361947 |
| 17 rs78826239  | 44290850 A | 3.379 | 1.46E-08 | chr:17:44361947 |
| 17 rs530892614 | 44267904 C | 2.983 | 1.48E-08 | chr:17:44361947 |
| 17 rs10221243  | 44212310 A | 3.067 | 1.51E-08 | chr:17:44361947 |
| 17 rs1029463   | 44150161 G | 3.067 | 1.51E-08 | chr:17:44361947 |
| 17 rs16940904  | 44186063 T | 3.067 | 1.51E-08 | chr:17:44361947 |

|                      |            |       |          |                 |
|----------------------|------------|-------|----------|-----------------|
| 17 rs2066899         | 44155732 T | 3.067 | 1.51E-08 | chr:17:44361947 |
| 17 rs2097760         | 44168677 G | 3.067 | 1.51E-08 | chr:17:44361947 |
| 17 rs3865315         | 44165169 T | 3.067 | 1.51E-08 | chr:17:44361947 |
| 17 rs4597358         | 44110670 G | 3.067 | 1.51E-08 | chr:17:44361947 |
| 17 rs533322597       | 44257783 G | 3.067 | 1.51E-08 | chr:17:44361947 |
| 17 rs549599956       | 44247164 G | 3.067 | 1.51E-08 | chr:17:44361947 |
| 17 rs566704864       | 44238571 G | 3.067 | 1.51E-08 | chr:17:44361947 |
| 17 rs62061820        | 44185431 C | 3.067 | 1.51E-08 | chr:17:44361947 |
| 17 rs7207582         | 44210933 G | 3.067 | 1.51E-08 | chr:17:44361947 |
| 17 rs7218319         | 44126365 T | 3.067 | 1.51E-08 | chr:17:44361947 |
| 17 rs7220752         | 44138201 C | 3.067 | 1.51E-08 | chr:17:44361947 |
| 17 rs7221390         | 44116950 G | 3.067 | 1.51E-08 | chr:17:44361947 |
| 17 rs7350980         | 44110271 A | 3.067 | 1.51E-08 | chr:17:44361947 |
| 17 rs76402917        | 44126477 A | 3.067 | 1.51E-08 | chr:17:44361947 |
| 17 rs78773690        | 44126478 C | 3.067 | 1.51E-08 | chr:17:44361947 |
| 17 rs8070942         | 44208674 T | 3.067 | 1.51E-08 | chr:17:44361947 |
| 17 rs8077487         | 44115440 C | 3.067 | 1.51E-08 | chr:17:44361947 |
| 17 rs8080583         | 44162597 A | 3.067 | 1.51E-08 | chr:17:44361947 |
| 17 rs9303525         | 44187257 G | 3.067 | 1.51E-08 | chr:17:44361947 |
| 17 rs9891103         | 44091886 T | 3.067 | 1.51E-08 | chr:17:44361947 |
| 17 rs9907738         | 44151546 G | 3.067 | 1.51E-08 | chr:17:44361947 |
| 17 rs2696533         | 44355343 C | 3.074 | 1.53E-08 | chr:17:44361947 |
| 17 rs2532387         | 44313522 T | 3.034 | 1.54E-08 | chr:17:44361947 |
| 17 rs2696673         | 44315803 C | 3.521 | 1.54E-08 | chr:17:44361947 |
| 17 rs2732685         | 44339408 T | 2.92  | 1.54E-08 | chr:17:44361947 |
| 17 rs2732712         | 44348932 G | 2.908 | 1.57E-08 | chr:17:44361947 |
| 17 rs111198951       | 44353885 A | 2.99  | 1.58E-08 | chr:17:44361947 |
| 17 rs2957321         | 44336594 G | 3.083 | 1.60E-08 | chr:17:44361947 |
| 17 rs541994922       | 44335818 G | 3.083 | 1.60E-08 | chr:17:44361947 |
| 17 rs559420324       | 44334419 T | 3.083 | 1.60E-08 | chr:17:44361947 |
| 17 rs62074562        | 44334768 G | 3.083 | 1.60E-08 | chr:17:44361947 |
| 17 rs76155390        | 44335752 C | 3.083 | 1.60E-08 | chr:17:44361947 |
| 17 rs540298066       | 44273448 A | 3.054 | 1.62E-08 | chr:17:44361947 |
| 17 rs2532322         | 44358428 A | 3.13  | 1.62E-08 | chr:17:44361947 |
| 17 rs556115834       | 44113392 A | 3.17  | 1.63E-08 | chr:17:44361947 |
| 17 rs530407589;rs201 | 44166080 A | 3.022 | 1.64E-08 | chr:17:44361947 |
| 17 rs4471723         | 44205690 T | 3.043 | 1.65E-08 | chr:17:44361947 |
| 17 rs199506          | 44859031 A | 3.115 | 1.67E-08 | chr:17:44361947 |
| 17 rs2696515         | 44358109 T | 3.082 | 1.69E-08 | chr:17:44361947 |
| 17 rs2696516         | 44358107 T | 3.082 | 1.69E-08 | chr:17:44361947 |
| 17 rs112347948       | 44263725 T | 4.285 | 1.70E-08 | chr:17:44361947 |
| 17 rs147431626       | 44335635 A | 3.022 | 1.75E-08 | chr:17:44361947 |
| 17 rs543465293       | 44122348 T | 3.017 | 1.77E-08 | chr:17:44361947 |

|                |            |       |          |                 |
|----------------|------------|-------|----------|-----------------|
| 17 rs564973192 | 44122354 G | 3.017 | 1.77E-08 | chr:17:44361947 |
| 17 rs576066466 | 44122345 G | 3.017 | 1.77E-08 | chr:17:44361947 |
| 17 rs2696555   | 44348370 G | 3.036 | 1.78E-08 | chr:17:44361947 |
| 17 rs56356641  | 43958362 G | 3.084 | 1.78E-08 | chr:17:44361947 |
| 17 rs532784638 | 44354231 G | 3.066 | 1.80E-08 | chr:17:44361947 |
| 17 rs551976521 | 44366665 T | 3.071 | 1.80E-08 | chr:17:44361947 |
| 17 rs533596122 | 44354587 G | 4.107 | 1.81E-08 | chr:17:44361947 |
| 17 rs9915547   | 44212782 C | 3.05  | 1.84E-08 | chr:17:44361947 |
| 17 rs529106335 | 44364699 T | 3.031 | 1.87E-08 | chr:17:44361947 |
| 17 rs62073178  | 44368431 T | 3.139 | 1.89E-08 | chr:17:44361947 |
| 17 rs561183899 | 44226325 T | 4.27  | 1.90E-08 | chr:17:44361947 |
| 17 rs576581426 | 44226331 G | 4.27  | 1.90E-08 | chr:17:44361947 |
| 17 rs544255850 | 44260933 G | 3.095 | 1.93E-08 | chr:17:44361947 |
| 17 rs2732625   | 44332429 T | 3.065 | 2.02E-08 | chr:17:44361947 |
| 17 rs112305366 | 44337903 G | 2.996 | 2.03E-08 | chr:17:44361947 |
| 17 rs562855425 | 44351285 G | 3.068 | 2.04E-08 | chr:17:44361947 |
| 17 rs536361473 | 44246143 A | 4.186 | 2.05E-08 | chr:17:44361947 |
| 17 rs534585219 | 44361861 G | 4.14  | 2.07E-08 | chr:17:44361947 |
| 17 rs552808944 | 44361869 C | 4.14  | 2.07E-08 | chr:17:44361947 |
| 17 rs562955593 | 44366315 C | 3.071 | 2.07E-08 | chr:17:44361947 |
| 17 rs2532424   | 44368926 A | 3.048 | 2.07E-08 | chr:17:44361947 |
| 17 rs2429449   | 44296224 T | 4.166 | 2.10E-08 | chr:17:44361947 |
| 17 rs62070952  | 44309255 A | 4.16  | 2.13E-08 | chr:17:44361947 |
| 17 rs564706435 | 44269493 C | 4.23  | 2.14E-08 | chr:17:44361947 |
| 17 rs76640332  | 44189858 A | 2.999 | 2.14E-08 | chr:17:44361947 |
| 17 rs79772780  | 44189855 A | 2.999 | 2.14E-08 | chr:17:44361947 |
| 17 rs572794734 | 44324257 T | 2.863 | 2.14E-08 | chr:17:44361947 |
| 17 rs113677423 | 44355750 T | 3.108 | 2.15E-08 | chr:17:44361947 |
| 17 rs2732705   | 44351929 G | 3.001 | 2.15E-08 | chr:17:44361947 |
| 17 rs62073156  | 44333568 C | 3.031 | 2.19E-08 | chr:17:44361947 |
| 17 rs563076603 | 44273919 G | 4.167 | 2.23E-08 | chr:17:44361947 |
| 17 rs566238830 | 44354549 G | 2.79  | 2.31E-08 | chr:17:44361947 |
| 17 rs550530305 | 44338694 A | 2.677 | 2.34E-08 | chr:17:44361947 |
| 17 rs546564131 | 44348753 C | 4.104 | 2.35E-08 | chr:17:44361947 |
| 17 rs372745970 | 44322577 C | 3.07  | 2.41E-08 | chr:17:44361947 |
| 17 rs571822645 | 44326619 G | 2.662 | 2.42E-08 | chr:17:44361947 |
| 17 rs565415067 | 44354103 G | 2.975 | 2.50E-08 | chr:17:44361947 |
| 17 rs532035561 | 44240797 C | 4.157 | 2.50E-08 | chr:17:44361947 |
| 17 rs1724404   | 44323425 T | 2.96  | 2.55E-08 | chr:17:44361947 |
| 17 rs2532349   | 44339473 G | 2.935 | 2.56E-08 | chr:17:44361947 |
| 17 rs415430    | 44859144 C | 3.056 | 2.57E-08 | chr:17:44361947 |
| 17 rs430685    | 44859148 T | 3.056 | 2.57E-08 | chr:17:44361947 |
| 17 rs112243618 | 44355284 A | 4.143 | 2.59E-08 | chr:17:44361947 |

|                |            |       |          |                 |
|----------------|------------|-------|----------|-----------------|
| 17 rs3785884   | 44057595 A | 2.942 | 2.62E-08 | chr:17:44361947 |
| 17 rs113343751 | 44333532 G | 3.013 | 2.62E-08 | chr:17:44361947 |
| 17 rs546983754 | 44336237 T | 2.918 | 2.66E-08 | chr:17:44361947 |
| 17 rs10445365  | 43932789 T | 2.926 | 2.70E-08 | chr:17:44361947 |
| 17 rs10445366  | 43932797 C | 2.926 | 2.70E-08 | chr:17:44361947 |
| 17 rs10445367  | 43932798 T | 2.926 | 2.70E-08 | chr:17:44361947 |
| 17 rs2696430   | 44338279 C | 2.694 | 2.76E-08 | chr:17:44361947 |
| 17 rs2532363   | 44333423 T | 3.006 | 2.81E-08 | chr:17:44361947 |
| 17 rs242559    | 44025888 C | 2.921 | 2.83E-08 | chr:17:44361947 |
| 17 rs562047763 | 44362865 C | 3.005 | 2.86E-08 | chr:17:44361947 |
| 17 rs576500756 | 44228169 T | 2.97  | 2.87E-08 | chr:17:44361947 |
| 17 rs117629202 | 44344596 A | 4.067 | 2.88E-08 | chr:17:44361947 |
| 17 rs117995241 | 44344595 T | 4.067 | 2.88E-08 | chr:17:44361947 |
| 17 rs559107881 | 44363632 C | 4.073 | 2.89E-08 | chr:17:44361947 |
| 17 rs192856660 | 44359779 T | 3.052 | 2.90E-08 | chr:17:44361947 |
| 17 rs576947229 | 44348221 G | 2.955 | 2.90E-08 | chr:17:44361947 |
| 17 rs2696532   | 44355602 G | 3.118 | 2.93E-08 | chr:17:44361947 |
| 17 rs531995170 | 44352639 A | 2.999 | 2.99E-08 | chr:17:44361947 |
| 17 rs546129596 | 44236209 A | 4.111 | 3.01E-08 | chr:17:44361947 |
| 17 rs2732706   | 44351686 T | 2.93  | 3.03E-08 | chr:17:44361947 |
| 17 rs199441    | 44773783 A | 2.974 | 3.08E-08 | chr:17:44361947 |
| 17 rs544780187 | 44263923 C | 4.162 | 3.09E-08 | chr:17:44361947 |
| 17 rs560239021 | 44263955 G | 4.162 | 3.09E-08 | chr:17:44361947 |
| 17 rs527437752 | 44281821 C | 4.1   | 3.10E-08 | chr:17:44361947 |
| 17 rs535689567 | 44274933 G | 4.1   | 3.10E-08 | chr:17:44361947 |
| 17 rs542404072 | 44281964 C | 4.1   | 3.10E-08 | chr:17:44361947 |
| 17 rs544396824 | 44273889 T | 4.1   | 3.10E-08 | chr:17:44361947 |
| 17 rs578092205 | 44277707 G | 4.1   | 3.10E-08 | chr:17:44361947 |
| 17 rs62060952  | 44273398 T | 4.1   | 3.10E-08 | chr:17:44361947 |
| 17 rs533534846 | 44343125 T | 2.865 | 3.22E-08 | chr:17:44361947 |
| 17 rs548461223 | 44357796 T | 4.093 | 3.24E-08 | chr:17:44361947 |
| 17 rs535576035 | 44364649 T | 2.915 | 3.27E-08 | chr:17:44361947 |
| 17 rs556191214 | 44258938 A | 4.089 | 3.27E-08 | chr:17:44361947 |
| 17 rs567135833 | 44363929 T | 2.967 | 3.34E-08 | chr:17:44361947 |
| 17 rs532625333 | 44355532 A | 4.081 | 3.35E-08 | chr:17:44361947 |
| 17 rs565586009 | 44355516 C | 4.081 | 3.35E-08 | chr:17:44361947 |
| 17 rs534069237 | 44258446 G | 4.082 | 3.35E-08 | chr:17:44361947 |
| 17 rs112665297 | 44348634 C | 4.091 | 3.51E-08 | chr:17:44361947 |
| 17 rs112784142 | 44327958 G | 4.132 | 3.52E-08 | chr:17:44361947 |
| 17 rs531845455 | 44328668 G | 4.132 | 3.52E-08 | chr:17:44361947 |
| 17 rs55660209  | 43932173 G | 3.352 | 3.52E-08 | chr:17:44361947 |
| 17 rs534691244 | 44347638 T | 2.893 | 3.54E-08 | chr:17:44361947 |
| 17 rs1358439   | 44219905 A | 4.132 | 3.57E-08 | chr:17:44361947 |

|                |            |       |          |                 |
|----------------|------------|-------|----------|-----------------|
| 17 rs545111519 | 44242574 A | 4.142 | 3.62E-08 | chr:17:44361947 |
| 17 rs577583257 | 44242536 T | 4.142 | 3.62E-08 | chr:17:44361947 |
| 17 rs572514738 | 44343719 T | 2.894 | 3.66E-08 | chr:17:44361947 |
| 17 rs541694781 | 44230097 T | 4.119 | 3.73E-08 | chr:17:44361947 |
| 17 rs2463514   | 44338869 T | 4.086 | 3.75E-08 | chr:17:44361947 |
| 17 rs549572472 | 44352621 G | 2.944 | 3.77E-08 | chr:17:44361947 |
| 17 rs2696432   | 44338285 T | 4.103 | 3.81E-08 | chr:17:44361947 |
| 17 rs547291419 | 44229364 C | 4.117 | 3.84E-08 | chr:17:44361947 |
| 17 rs569025098 | 44338735 T | 2.599 | 3.84E-08 | chr:17:44361947 |
| 17 rs2732714   | 44321478 G | 2.852 | 3.85E-08 | chr:17:44361947 |
| 17 rs533246868 | 44238490 A | 4.116 | 3.86E-08 | chr:17:44361947 |
| 17 rs2668627   | 44353693 C | 2.843 | 3.87E-08 | chr:17:44361947 |
| 17 rs17769552  | 43927290 A | 2.939 | 3.89E-08 | chr:17:44361947 |
| 17 rs374242426 | 44358812 A | 4.011 | 3.95E-08 | chr:17:44361947 |
| 17 rs567642046 | 44358811 A | 4.011 | 3.95E-08 | chr:17:44361947 |
| 17 rs529396612 | 44273664 G | 4.012 | 3.97E-08 | chr:17:44361947 |
| 17 rs561951897 | 44273653 G | 4.012 | 3.97E-08 | chr:17:44361947 |
| 17 rs111535660 | 44314148 A | 4.055 | 3.98E-08 | chr:17:44361947 |
| 17 rs111912558 | 44356694 C | 4.055 | 3.98E-08 | chr:17:44361947 |
| 17 rs112750270 | 44357562 T | 4.055 | 3.98E-08 | chr:17:44361947 |
| 17 rs113130019 | 44357172 T | 4.055 | 3.98E-08 | chr:17:44361947 |
| 17 rs113896715 | 44356746 C | 4.055 | 3.98E-08 | chr:17:44361947 |
| 17 rs2668691   | 44293546 T | 4.055 | 3.98E-08 | chr:17:44361947 |
| 17 rs2957296   | 44291734 A | 4.055 | 3.98E-08 | chr:17:44361947 |
| 17 rs528727097 | 44269510 G | 4.055 | 3.98E-08 | chr:17:44361947 |
| 17 rs529862341 | 44232721 A | 4.055 | 3.98E-08 | chr:17:44361947 |
| 17 rs530231140 | 44285683 C | 4.055 | 3.98E-08 | chr:17:44361947 |
| 17 rs530421535 | 44228621 A | 4.055 | 3.98E-08 | chr:17:44361947 |
| 17 rs534108118 | 44239556 C | 4.055 | 3.98E-08 | chr:17:44361947 |
| 17 rs539399180 | 44223491 G | 4.055 | 3.98E-08 | chr:17:44361947 |
| 17 rs539726587 | 44233699 T | 4.055 | 3.98E-08 | chr:17:44361947 |
| 17 rs540306918 | 44256710 C | 4.055 | 3.98E-08 | chr:17:44361947 |
| 17 rs540381781 | 44222080 C | 4.055 | 3.98E-08 | chr:17:44361947 |
| 17 rs543087095 | 44249199 G | 4.055 | 3.98E-08 | chr:17:44361947 |
| 17 rs543622396 | 44355376 A | 4.055 | 3.98E-08 | chr:17:44361947 |
| 17 rs546567549 | 44255784 G | 4.055 | 3.98E-08 | chr:17:44361947 |
| 17 rs548457389 | 44214386 G | 4.055 | 3.98E-08 | chr:17:44361947 |
| 17 rs549067929 | 44226817 A | 4.055 | 3.98E-08 | chr:17:44361947 |
| 17 rs550466211 | 44242759 T | 4.055 | 3.98E-08 | chr:17:44361947 |
| 17 rs550631839 | 44240850 C | 4.055 | 3.98E-08 | chr:17:44361947 |
| 17 rs550818680 | 44271512 C | 4.055 | 3.98E-08 | chr:17:44361947 |
| 17 rs551434843 | 44225440 C | 4.055 | 3.98E-08 | chr:17:44361947 |
| 17 rs553497360 | 44282979 A | 4.055 | 3.98E-08 | chr:17:44361947 |



|                |            |       |          |                 |
|----------------|------------|-------|----------|-----------------|
| 17 rs553586616 | 44248837 C | 4.055 | 3.98E-08 | chr:17:44361947 |
| 17 rs555329451 | 44239639 A | 4.055 | 3.98E-08 | chr:17:44361947 |
| 17 rs557177636 | 44255002 A | 4.055 | 3.98E-08 | chr:17:44361947 |
| 17 rs558011060 | 44239225 A | 4.055 | 3.98E-08 | chr:17:44361947 |
| 17 rs558551156 | 44254467 G | 4.055 | 3.98E-08 | chr:17:44361947 |
| 17 rs558928409 | 44216817 T | 4.055 | 3.98E-08 | chr:17:44361947 |
| 17 rs560756822 | 44240497 C | 4.055 | 3.98E-08 | chr:17:44361947 |
| 17 rs564528960 | 44232169 G | 4.055 | 3.98E-08 | chr:17:44361947 |
| 17 rs566617135 | 44223593 C | 4.055 | 3.98E-08 | chr:17:44361947 |
| 17 rs569900381 | 44214518 T | 4.055 | 3.98E-08 | chr:17:44361947 |
| 17 rs570962190 | 44250236 G | 4.055 | 3.98E-08 | chr:17:44361947 |
| 17 rs571156765 | 44266692 A | 4.055 | 3.98E-08 | chr:17:44361947 |
| 17 rs571568457 | 44249096 C | 4.055 | 3.98E-08 | chr:17:44361947 |
| 17 rs573890487 | 44241797 C | 4.055 | 3.98E-08 | chr:17:44361947 |
| 17 rs575067355 | 44230166 A | 4.055 | 3.98E-08 | chr:17:44361947 |
| 17 rs576712993 | 44246330 C | 4.055 | 3.98E-08 | chr:17:44361947 |
| 17 rs576920154 | 44268697 C | 4.055 | 3.98E-08 | chr:17:44361947 |
| 17 rs577191345 | 44285436 T | 4.055 | 3.98E-08 | chr:17:44361947 |
| 17 rs62060947  | 44269922 C | 4.055 | 3.98E-08 | chr:17:44361947 |
| 17 rs75033119  | 44357360 A | 4.055 | 3.98E-08 | chr:17:44361947 |
| 17 rs80296410  | 44357198 A | 4.055 | 3.98E-08 | chr:17:44361947 |
| 17 rs2732654   | 44346405 T | 4.069 | 4.00E-08 | chr:17:44361947 |
| 17 rs2732655   | 44346407 C | 4.069 | 4.00E-08 | chr:17:44361947 |
| 17 rs533583428 | 44366410 C | 2.925 | 4.03E-08 | chr:17:44361947 |
| 17 rs2668639   | 44324539 T | 2.923 | 4.12E-08 | chr:17:44361947 |
| 17 rs374470873 | 44328919 C | 2.833 | 4.24E-08 | chr:17:44361947 |
| 17 rs377762376 | 44328921 G | 2.833 | 4.24E-08 | chr:17:44361947 |
| 17 rs561816303 | 44318863 C | 2.855 | 4.25E-08 | chr:17:44361947 |
| 17 rs551691455 | 44574285 G | 3.684 | 4.29E-08 | chr:17:44361947 |
| 17 rs4327090   | 43902541 G | 3.009 | 4.39E-08 | chr:17:44361947 |
| 17 rs2532329   | 44350090 A | 2.741 | 4.42E-08 | chr:17:44361947 |
| 17 rs2532277   | 44246527 C | 4.092 | 4.48E-08 | chr:17:44361947 |
| 17 rs2696635   | 44269726 A | 4.092 | 4.48E-08 | chr:17:44361947 |
| 17 rs2732628   | 44288284 A | 4.092 | 4.48E-08 | chr:17:44361947 |
| 17 rs386477048 | 44245171 T | 4.092 | 4.48E-08 | chr:17:44361947 |
| 17 rs386477606 | 44222019 T | 4.092 | 4.48E-08 | chr:17:44361947 |
| 17 rs527841438 | 44221476 T | 4.092 | 4.48E-08 | chr:17:44361947 |
| 17 rs528770545 | 44287390 G | 4.092 | 4.48E-08 | chr:17:44361947 |
| 17 rs533659895 | 44274451 C | 4.092 | 4.48E-08 | chr:17:44361947 |
| 17 rs538910132 | 44245359 A | 4.092 | 4.48E-08 | chr:17:44361947 |
| 17 rs542893855 | 44242637 T | 4.092 | 4.48E-08 | chr:17:44361947 |
| 17 rs549030526 | 44244896 G | 4.092 | 4.48E-08 | chr:17:44361947 |
| 17 rs554944034 | 44227882 G | 4.092 | 4.48E-08 | chr:17:44361947 |

|                      |            |       |          |                 |
|----------------------|------------|-------|----------|-----------------|
| 17 rs556952432       | 44221836 T | 4.092 | 4.48E-08 | chr:17:44361947 |
| 17 rs557885236       | 44275230 T | 4.092 | 4.48E-08 | chr:17:44361947 |
| 17 rs558031693       | 44218044 T | 4.092 | 4.48E-08 | chr:17:44361947 |
| 17 rs559157320       | 44265477 C | 4.092 | 4.48E-08 | chr:17:44361947 |
| 17 rs560044525       | 44228619 T | 4.092 | 4.48E-08 | chr:17:44361947 |
| 17 rs563326240       | 44234064 A | 4.092 | 4.48E-08 | chr:17:44361947 |
| 17 rs567299266       | 44226980 G | 4.092 | 4.48E-08 | chr:17:44361947 |
| 17 rs568158082       | 44274838 A | 4.092 | 4.48E-08 | chr:17:44361947 |
| 17 rs568519571       | 44215896 T | 4.092 | 4.48E-08 | chr:17:44361947 |
| 17 rs570806151       | 44217267 T | 4.092 | 4.48E-08 | chr:17:44361947 |
| 17 rs571667294       | 44266975 A | 4.092 | 4.48E-08 | chr:17:44361947 |
| 17 rs574949827       | 44231827 C | 4.092 | 4.48E-08 | chr:17:44361947 |
| 17 rs575952052       | 44231932 A | 3.998 | 4.53E-08 | chr:17:44361947 |
| 17 rs111920741       | 44333412 A | 2.974 | 4.56E-08 | chr:17:44361947 |
| 17 rs528731539       | 44311529 C | 3.996 | 4.62E-08 | chr:17:44361947 |
| 17 rs539081995       | 44341627 T | 4.115 | 4.62E-08 | chr:17:44361947 |
| 17 rs571886519       | 44341609 C | 4.115 | 4.62E-08 | chr:17:44361947 |
| 17 rs572116262;rs373 | 44227623 C | 2.96  | 4.63E-08 | chr:17:44361947 |
| 17 rs2532395         | 44307193 T | 2.882 | 4.64E-08 | chr:17:44361947 |
| 17 rs528330857       | 44315987 A | 3.995 | 4.68E-08 | chr:17:44361947 |
| 17 rs111854089       | 44344541 A | 4.029 | 4.71E-08 | chr:17:44361947 |
| 17 rs113056783       | 44348616 T | 4.029 | 4.71E-08 | chr:17:44361947 |
| 17 rs2261016         | 44349899 A | 4.029 | 4.71E-08 | chr:17:44361947 |
| 17 rs2262140         | 44349736 T | 4.029 | 4.71E-08 | chr:17:44361947 |
| 17 rs2262144         | 44350511 G | 4.029 | 4.71E-08 | chr:17:44361947 |
| 17 rs2458216         | 44346962 T | 4.029 | 4.71E-08 | chr:17:44361947 |
| 17 rs2458217         | 44353206 C | 4.029 | 4.71E-08 | chr:17:44361947 |
| 17 rs2469939         | 44351739 A | 4.029 | 4.71E-08 | chr:17:44361947 |
| 17 rs2469940         | 44351731 G | 4.029 | 4.71E-08 | chr:17:44361947 |
| 17 rs2469941         | 44349744 G | 4.029 | 4.71E-08 | chr:17:44361947 |
| 17 rs2469943         | 44349347 G | 4.029 | 4.71E-08 | chr:17:44361947 |
| 17 rs2469944         | 44349283 C | 4.029 | 4.71E-08 | chr:17:44361947 |
| 17 rs2668611         | 44350125 T | 4.029 | 4.71E-08 | chr:17:44361947 |
| 17 rs2668614         | 44350310 A | 4.029 | 4.71E-08 | chr:17:44361947 |
| 17 rs2668626         | 44353175 C | 4.029 | 4.71E-08 | chr:17:44361947 |
| 17 rs2668719         | 44345090 A | 4.029 | 4.71E-08 | chr:17:44361947 |
| 17 rs2732615         | 44364056 C | 4.029 | 4.71E-08 | chr:17:44361947 |
| 17 rs2732651         | 44345063 T | 4.029 | 4.71E-08 | chr:17:44361947 |
| 17 rs2732652         | 44345114 T | 4.029 | 4.71E-08 | chr:17:44361947 |
| 17 rs2732704         | 44353114 C | 4.029 | 4.71E-08 | chr:17:44361947 |
| 17 rs2732710         | 44350527 A | 4.029 | 4.71E-08 | chr:17:44361947 |
| 17 rs2942175         | 44348825 G | 4.029 | 4.71E-08 | chr:17:44361947 |
| 17 rs2942176         | 44348848 A | 4.029 | 4.71E-08 | chr:17:44361947 |

|                |            |       |          |                 |
|----------------|------------|-------|----------|-----------------|
| 17 rs2942177   | 44348987 A | 4.029 | 4.71E-08 | chr:17:44361947 |
| 17 rs2950691   | 44348768 G | 4.029 | 4.71E-08 | chr:17:44361947 |
| 17 rs2950692   | 44348387 G | 4.029 | 4.71E-08 | chr:17:44361947 |
| 17 rs2950693   | 44348356 A | 4.029 | 4.71E-08 | chr:17:44361947 |
| 17 rs2950694   | 44348298 G | 4.029 | 4.71E-08 | chr:17:44361947 |
| 17 rs2957297   | 44368212 A | 4.029 | 4.71E-08 | chr:17:44361947 |
| 17 rs529941744 | 44347097 G | 4.029 | 4.71E-08 | chr:17:44361947 |
| 17 rs535416854 | 44350460 G | 4.029 | 4.71E-08 | chr:17:44361947 |
| 17 rs538317039 | 44361147 G | 4.029 | 4.71E-08 | chr:17:44361947 |
| 17 rs539045125 | 44352970 A | 4.029 | 4.71E-08 | chr:17:44361947 |
| 17 rs539665598 | 44350203 G | 4.029 | 4.71E-08 | chr:17:44361947 |
| 17 rs541175865 | 44360168 G | 4.029 | 4.71E-08 | chr:17:44361947 |
| 17 rs544269730 | 44364538 C | 4.029 | 4.71E-08 | chr:17:44361947 |
| 17 rs544541884 | 44353320 A | 4.029 | 4.71E-08 | chr:17:44361947 |
| 17 rs544566362 | 44351249 A | 4.029 | 4.71E-08 | chr:17:44361947 |
| 17 rs546223853 | 44348013 G | 4.029 | 4.71E-08 | chr:17:44361947 |
| 17 rs548376955 | 44347109 G | 4.029 | 4.71E-08 | chr:17:44361947 |
| 17 rs551916351 | 44350217 G | 4.029 | 4.71E-08 | chr:17:44361947 |
| 17 rs552545212 | 44347557 A | 4.029 | 4.71E-08 | chr:17:44361947 |
| 17 rs553047624 | 44346610 G | 4.029 | 4.71E-08 | chr:17:44361947 |
| 17 rs556176202 | 44353343 A | 4.029 | 4.71E-08 | chr:17:44361947 |
| 17 rs558083621 | 44364298 C | 4.029 | 4.71E-08 | chr:17:44361947 |
| 17 rs561631796 | 44351007 C | 4.029 | 4.71E-08 | chr:17:44361947 |
| 17 rs563901070 | 44350662 C | 4.029 | 4.71E-08 | chr:17:44361947 |
| 17 rs564676144 | 44346751 G | 4.029 | 4.71E-08 | chr:17:44361947 |
| 17 rs567938785 | 44351578 C | 4.029 | 4.71E-08 | chr:17:44361947 |
| 17 rs568197156 | 44347727 T | 4.029 | 4.71E-08 | chr:17:44361947 |
| 17 rs569012614 | 44364209 T | 4.029 | 4.71E-08 | chr:17:44361947 |
| 17 rs569417763 | 44361129 A | 4.029 | 4.71E-08 | chr:17:44361947 |
| 17 rs569601491 | 44354530 A | 4.029 | 4.71E-08 | chr:17:44361947 |
| 17 rs570804960 | 44347561 C | 4.029 | 4.71E-08 | chr:17:44361947 |
| 17 rs572539273 | 44353505 T | 4.029 | 4.71E-08 | chr:17:44361947 |
| 17 rs572733824 | 44351858 G | 4.029 | 4.71E-08 | chr:17:44361947 |
| 17 rs573855916 | 44353318 A | 4.029 | 4.71E-08 | chr:17:44361947 |
| 17 rs574735237 | 44346666 A | 4.029 | 4.71E-08 | chr:17:44361947 |
| 17 rs575122613 | 44364958 A | 4.029 | 4.71E-08 | chr:17:44361947 |
| 17 rs575384767 | 44349380 G | 4.029 | 4.71E-08 | chr:17:44361947 |
| 17 rs575822367 | 44346690 G | 4.029 | 4.71E-08 | chr:17:44361947 |
| 17 rs576899681 | 44360071 C | 4.029 | 4.71E-08 | chr:17:44361947 |
| 17 rs577997128 | 44353344 A | 4.029 | 4.71E-08 | chr:17:44361947 |
| 17 rs62071576  | 44346829 T | 4.029 | 4.71E-08 | chr:17:44361947 |
| 17 rs62071595  | 44349167 A | 4.029 | 4.71E-08 | chr:17:44361947 |
| 17 rs62071596  | 44349169 C | 4.029 | 4.71E-08 | chr:17:44361947 |

|                |            |       |          |                 |
|----------------|------------|-------|----------|-----------------|
| 17 rs74358353  | 44344858 G | 4.029 | 4.71E-08 | chr:17:44361947 |
| 17 rs74652075  | 44344926 G | 4.029 | 4.71E-08 | chr:17:44361947 |
| 17 rs75257416  | 44349079 A | 4.029 | 4.71E-08 | chr:17:44361947 |
| 17 rs76934998  | 44344822 A | 4.029 | 4.71E-08 | chr:17:44361947 |
| 17 rs77488920  | 44346589 A | 4.029 | 4.71E-08 | chr:17:44361947 |
| 17 rs77568881  | 44344970 C | 4.029 | 4.71E-08 | chr:17:44361947 |
| 17 rs78570732  | 44349080 G | 4.029 | 4.71E-08 | chr:17:44361947 |
| 17 rs2429438   | 44348265 C | 2.924 | 4.73E-08 | chr:17:44361947 |
| 17 rs533207022 | 44340506 G | 2.822 | 4.85E-08 | chr:17:44361947 |
| 17 rs113925422 | 44046934 A | 2.884 | 4.87E-08 | chr:17:44361947 |
| 17 rs551059895 | 44369320 T | 3.003 | 4.93E-08 | chr:17:44361947 |
| 17 rs561488872 | 44353728 G | 2.827 | 4.95E-08 | chr:17:44361947 |
| 17 rs560168478 | 44223034 C | 3.989 | 5.19E-08 | chr:17:44361947 |
| 17 rs575478100 | 44236108 C | 4.041 | 5.20E-08 | chr:17:44361947 |
| 17 rs545737636 | 44362552 T | 2.899 | 5.41E-08 | chr:17:44361947 |
| 17 rs147642589 | 44300067 G | 4.099 | 5.42E-08 | chr:17:44361947 |
| 17 rs537485102 | 44302752 A | 4.099 | 5.42E-08 | chr:17:44361947 |
| 17 rs577342440 | 44302904 C | 4.099 | 5.42E-08 | chr:17:44361947 |
| 17 rs62073146  | 44328871 G | 2.81  | 5.46E-08 | chr:17:44361947 |
| 17 rs544146004 | 44340328 C | 2.873 | 5.53E-08 | chr:17:44361947 |
| 17 rs533579396 | 44327070 A | 2.588 | 5.66E-08 | chr:17:44361947 |
| 17 rs36123991  | 44359663 T | 3.886 | 5.73E-08 | chr:17:44361947 |
| 17 rs12150319  | 44213164 A | 3.942 | 5.79E-08 | chr:17:44361947 |
| 17 rs575112434 | 44213187 T | 3.942 | 5.79E-08 | chr:17:44361947 |
| 17 rs113178301 | 44339354 C | 4.065 | 5.95E-08 | chr:17:44361947 |
| 17 rs2429440   | 44342563 G | 4.065 | 5.95E-08 | chr:17:44361947 |
| 17 rs2668687   | 44339712 G | 4.065 | 5.95E-08 | chr:17:44361947 |
| 17 rs2668713   | 44342513 C | 4.065 | 5.95E-08 | chr:17:44361947 |
| 17 rs2696431   | 44338280 A | 4.065 | 5.95E-08 | chr:17:44361947 |
| 17 rs2942185   | 44338422 A | 4.065 | 5.95E-08 | chr:17:44361947 |
| 17 rs2950656   | 44338433 A | 4.065 | 5.95E-08 | chr:17:44361947 |
| 17 rs34046424  | 44339513 C | 4.065 | 5.95E-08 | chr:17:44361947 |
| 17 rs528392237 | 44338404 A | 4.065 | 5.95E-08 | chr:17:44361947 |
| 17 rs551092140 | 44343084 G | 4.065 | 5.95E-08 | chr:17:44361947 |
| 17 rs553781537 | 44343392 A | 4.065 | 5.95E-08 | chr:17:44361947 |
| 17 rs572865475 | 44340021 T | 4.065 | 5.95E-08 | chr:17:44361947 |
| 17 rs80290584  | 44339375 G | 4.065 | 5.95E-08 | chr:17:44361947 |
| 17 rs2469937   | 44336976 C | 4.017 | 6.05E-08 | chr:17:44361947 |
| 17 rs552350876 | 44269442 C | 3.987 | 6.12E-08 | chr:17:44361947 |
| 17 rs555203107 | 44324572 G | 2.786 | 6.27E-08 | chr:17:44361947 |
| 17 rs2668622   | 44352131 T | 2.769 | 6.48E-08 | chr:17:44361947 |
| 17 rs113830390 | 44344552 T | 3.965 | 6.49E-08 | chr:17:44361947 |
| 17 rs536275664 | 44355138 A | 3.912 | 6.51E-08 | chr:17:44361947 |

|                |            |       |          |                 |
|----------------|------------|-------|----------|-----------------|
| 17 rs527879650 | 44351452 C | 3.965 | 6.58E-08 | chr:17:44361947 |
| 17 rs2532419   | 44288281 T | 3.931 | 6.63E-08 | chr:17:44361947 |
| 17 rs148033495 | 44313224 G | 3.912 | 6.74E-08 | chr:17:44361947 |
| 17 rs543784320 | 44244639 G | 3.924 | 6.87E-08 | chr:17:44361947 |
| 17 rs560744251 | 44230269 C | 3.914 | 6.88E-08 | chr:17:44361947 |
| 17 rs4630591   | 44192568 T | 2.91  | 7.04E-08 | chr:17:44361947 |
| 17 rs530576715 | 44363885 T | 4.016 | 7.10E-08 | chr:17:44361947 |
| 17 rs564014870 | 44362633 T | 3.311 | 7.15E-08 | chr:17:44361947 |
| 17 rs561617862 | 44260845 A | 3.915 | 7.29E-08 | chr:17:44361947 |
| 17 rs199529    | 44837217 C | 2.856 | 7.41E-08 | chr:17:44361947 |
| 17 rs569366247 | 44217791 C | 3.859 | 7.42E-08 | chr:17:44361947 |
| 17 rs528895211 | 44368946 C | 4.11  | 7.44E-08 | chr:17:44361947 |
| 17 rs62054807  | 43915497 T | 2.644 | 7.47E-08 | chr:17:44361947 |
| 17 rs2532401   | 44305817 C | 2.813 | 7.54E-08 | chr:17:44361947 |
| 17 rs528139864 | 44276479 G | 3.902 | 7.57E-08 | chr:17:44361947 |
| 17 rs564007266 | 44364584 T | 4.084 | 7.60E-08 | chr:17:44361947 |
| 17 rs541927337 | 44217020 C | 3.896 | 7.69E-08 | chr:17:44361947 |
| 17 rs545089385 | 44342404 C | 4.01  | 7.92E-08 | chr:17:44361947 |
| 17 rs76167437  | 44356436 C | 3.873 | 8.01E-08 | chr:17:44361947 |
| 17 rs199926341 | 44326245 G | 4.012 | 8.04E-08 | chr:17:44361947 |
| 17 rs2257575   | 44326063 G | 4.012 | 8.04E-08 | chr:17:44361947 |
| 17 rs531804347 | 44326396 C | 4.012 | 8.04E-08 | chr:17:44361947 |
| 17 rs555608763 | 44219888 T | 3.902 | 8.04E-08 | chr:17:44361947 |
| 17 rs2696534   | 44355162 G | 3.107 | 8.18E-08 | chr:17:44361947 |
| 17 rs562641029 | 44279803 G | 3.923 | 8.24E-08 | chr:17:44361947 |
| 17 rs2532339   | 44345668 G | 4.022 | 8.36E-08 | chr:17:44361947 |
| 17 rs199526    | 44847707 C | 2.862 | 8.40E-08 | chr:17:44361947 |
| 17 rs547813077 | 44326845 G | 2.513 | 8.40E-08 | chr:17:44361947 |
| 17 rs2532343   | 44344097 C | 2.703 | 8.43E-08 | chr:17:44361947 |
| 17 rs557129713 | 44351087 C | 4.028 | 8.49E-08 | chr:17:44361947 |
| 17 rs2696608   | 44293671 G | 3.897 | 8.50E-08 | chr:17:44361947 |
| 17 rs538530693 | 44225886 A | 3.886 | 8.58E-08 | chr:17:44361947 |
| 17 rs540702737 | 44232408 A | 3.886 | 8.58E-08 | chr:17:44361947 |
| 17 rs575074983 | 44214888 C | 3.886 | 8.58E-08 | chr:17:44361947 |
| 17 rs62073099  | 44316491 C | 3.88  | 8.63E-08 | chr:17:44361947 |
| 17 rs559264754 | 44251243 T | 3.883 | 8.69E-08 | chr:17:44361947 |
| 17 rs371894855 | 44355304 T | 4.03  | 8.77E-08 | chr:17:44361947 |
| 17 rs113146341 | 44296097 T | 3.913 | 8.80E-08 | chr:17:44361947 |
| 17 rs2532412   | 44295695 G | 3.913 | 8.80E-08 | chr:17:44361947 |
| 17 rs2942186   | 44295795 A | 3.913 | 8.80E-08 | chr:17:44361947 |
| 17 rs77294312  | 44296179 C | 3.913 | 8.80E-08 | chr:17:44361947 |
| 17 rs532764039 | 44305689 G | 2.797 | 8.81E-08 | chr:17:44361947 |
| 17 rs78098830  | 44361337 T | 2.818 | 8.85E-08 | chr:17:44361947 |

|                |            |       |          |                 |
|----------------|------------|-------|----------|-----------------|
| 17 rs545244112 | 44343371 A | 2.76  | 8.88E-08 | chr:17:44361947 |
| 17 rs572446729 | 44262758 T | 3.839 | 8.90E-08 | chr:17:44361947 |
| 17 rs565882203 | 44229415 C | 3.912 | 8.92E-08 | chr:17:44361947 |
| 17 rs2696541   | 44351743 A | 4.03  | 8.94E-08 | chr:17:44361947 |
| 17 rs2668658   | 44282472 C | 3.909 | 8.97E-08 | chr:17:44361947 |
| 17 rs564178382 | 44360760 T | 3.865 | 9.33E-08 | chr:17:44361947 |
| 17 rs557594331 | 44339966 A | 4.01  | 9.42E-08 | chr:17:44361947 |
| 17 rs2696528   | 44356320 T | 4.007 | 9.69E-08 | chr:17:44361947 |
| 17 rs533899562 | 44225607 T | 3.859 | 9.70E-08 | chr:17:44361947 |
| 17 rs113434679 | 44126765 A | 2.962 | 9.76E-08 | chr:17:44361947 |
| 17 rs149753849 | 44316509 C | 3.993 | 9.78E-08 | chr:17:44361947 |
| 17 rs557433399 | 44318665 C | 3.993 | 9.78E-08 | chr:17:44361947 |
| 17 rs74390346  | 44356410 C | 3.831 | 9.86E-08 | chr:17:44361947 |
| 17 rs75342548  | 44356394 G | 3.831 | 9.86E-08 | chr:17:44361947 |
| 17 rs2696422   | 44333889 C | 2.8   | 9.89E-08 | chr:17:44361947 |
| 17 rs2696423   | 44333890 A | 2.8   | 9.89E-08 | chr:17:44361947 |
| 17 rs539980845 | 44218017 G | 3.854 | 9.91E-08 | chr:17:44361947 |
| 17 rs542276730 | 44269217 C | 3.854 | 9.91E-08 | chr:17:44361947 |
| 17 rs563671821 | 44287006 G | 3.851 | 9.95E-08 | chr:17:44361947 |
| 17 rs556965428 | 44339153 G | 3.87  | 1.00E-07 | chr:17:44361947 |
| 17 rs575310615 | 44339174 T | 3.87  | 1.00E-07 | chr:17:44361947 |
| 17 rs564307311 | 44287373 C | 3.85  | 1.01E-07 | chr:17:44361947 |
| 17 rs570839197 | 44232990 C | 3.85  | 1.01E-07 | chr:17:44361947 |
| 17 rs571125231 | 44229073 A | 3.845 | 1.03E-07 | chr:17:44361947 |
| 17 rs62071573  | 44342994 T | 2.745 | 1.04E-07 | chr:17:44361947 |
| 17 rs2696445   | 44288702 T | 3.889 | 1.04E-07 | chr:17:44361947 |
| 17 rs2732699   | 44354904 T | 3.76  | 1.04E-07 | chr:17:44361947 |
| 17 rs533813183 | 44278661 A | 3.889 | 1.04E-07 | chr:17:44361947 |
| 17 rs536950796 | 44281308 A | 3.889 | 1.04E-07 | chr:17:44361947 |
| 17 rs547806241 | 44283571 T | 3.889 | 1.04E-07 | chr:17:44361947 |
| 17 rs560806845 | 44277825 T | 3.889 | 1.04E-07 | chr:17:44361947 |
| 17 rs577688575 | 44281633 A | 3.889 | 1.04E-07 | chr:17:44361947 |
| 17 rs537672653 | 44343291 G | 2.577 | 1.05E-07 | chr:17:44361947 |
| 17 rs556290186 | 44343304 A | 2.577 | 1.05E-07 | chr:17:44361947 |
| 17 rs567001845 | 44343282 A | 2.577 | 1.05E-07 | chr:17:44361947 |
| 17 rs532593319 | 44344219 T | 3.691 | 1.06E-07 | chr:17:44361947 |
| 17 rs548109274 | 44344222 G | 3.691 | 1.06E-07 | chr:17:44361947 |
| 17 rs537893623 | 44259919 G | 3.892 | 1.10E-07 | chr:17:44361947 |
| 17 rs546307573 | 44257923 A | 3.892 | 1.10E-07 | chr:17:44361947 |
| 17 rs551312659 | 44259519 G | 3.892 | 1.10E-07 | chr:17:44361947 |
| 17 rs566628150 | 44259539 C | 3.892 | 1.10E-07 | chr:17:44361947 |
| 17 rs1918794   | 44224782 T | 3.882 | 1.11E-07 | chr:17:44361947 |
| 17 rs369268849 | 44708736 T | 2.796 | 1.12E-07 | chr:17:44361947 |

|                |            |       |          |                 |
|----------------|------------|-------|----------|-----------------|
| 17 rs543121955 | 44250883 A | 3.881 | 1.12E-07 | chr:17:44361947 |
| 17 rs553285076 | 44250473 C | 3.881 | 1.12E-07 | chr:17:44361947 |
| 17 rs551731610 | 44340525 C | 2.718 | 1.18E-07 | chr:17:44361947 |
| 17 rs2696429   | 44335274 A | 3.415 | 1.20E-07 | chr:17:44361947 |
| 17 rs529815603 | 44335806 C | 3.415 | 1.20E-07 | chr:17:44361947 |
| 17 rs112254607 | 44357392 A | 3.963 | 1.21E-07 | chr:17:44361947 |
| 17 rs2696525   | 44356637 T | 3.963 | 1.21E-07 | chr:17:44361947 |
| 17 rs2696527   | 44356433 T | 3.963 | 1.21E-07 | chr:17:44361947 |
| 17 rs2696535   | 44355130 G | 3.963 | 1.21E-07 | chr:17:44361947 |
| 17 rs2696547   | 44350395 C | 3.963 | 1.21E-07 | chr:17:44361947 |
| 17 rs2696550   | 44349290 G | 3.963 | 1.21E-07 | chr:17:44361947 |
| 17 rs2696551   | 44349234 T | 3.963 | 1.21E-07 | chr:17:44361947 |
| 17 rs2696561   | 44346393 G | 3.963 | 1.21E-07 | chr:17:44361947 |
| 17 rs2732707   | 44351600 T | 3.963 | 1.21E-07 | chr:17:44361947 |
| 17 rs527318161 | 44356770 A | 3.963 | 1.21E-07 | chr:17:44361947 |
| 17 rs568575845 | 44367296 A | 3.963 | 1.21E-07 | chr:17:44361947 |
| 17 rs571576894 | 44356098 C | 3.963 | 1.21E-07 | chr:17:44361947 |
| 17 rs577019110 | 44356682 A | 3.963 | 1.21E-07 | chr:17:44361947 |
| 17 rs2532414   | 44294105 T | 3.851 | 1.22E-07 | chr:17:44361947 |
| 17 rs572858137 | 44341870 C | 3.932 | 1.28E-07 | chr:17:44361947 |
| 17 rs568071087 | 44364519 G | 2.641 | 1.30E-07 | chr:17:44361947 |
| 17 rs550405754 | 44326509 A | 3.835 | 1.31E-07 | chr:17:44361947 |
| 17 rs573087564 | 44256655 A | 3.816 | 1.31E-07 | chr:17:44361947 |
| 17 rs542150384 | 44253275 C | 3.842 | 1.35E-07 | chr:17:44361947 |
| 17 rs562155591 | 44365981 T | 2.608 | 1.36E-07 | chr:17:44361947 |
| 17 rs569948327 | 44347165 C | 3.924 | 1.36E-07 | chr:17:44361947 |
| 17 rs2732682   | 44339675 C | 3.805 | 1.39E-07 | chr:17:44361947 |
| 17 rs2732683   | 44339665 G | 3.805 | 1.39E-07 | chr:17:44361947 |
| 17 rs36036607  | 44339651 C | 3.805 | 1.39E-07 | chr:17:44361947 |
| 17 rs79947689  | 44339608 G | 3.805 | 1.39E-07 | chr:17:44361947 |
| 17 rs55668363  | 43892788 A | 3.037 | 1.39E-07 | chr:17:44361947 |
| 17 rs535521250 | 44256053 A | 3.808 | 1.39E-07 | chr:17:44361947 |
| 17 rs77917260  | 44339607 T | 3.628 | 1.44E-07 | chr:17:44361947 |
| 17 rs555313689 | 44327082 T | 3.808 | 1.54E-07 | chr:17:44361947 |
| 17 rs111413387 | 44344409 C | 2.562 | 1.55E-07 | chr:17:44361947 |
| 17 rs113313727 | 44338594 A | 2.544 | 1.55E-07 | chr:17:44361947 |
| 17 rs2667932   | 44582284 G | 2.157 | 1.55E-07 | chr:17:44361947 |
| 17 rs573419147 | 44327370 A | 3.691 | 1.55E-07 | chr:17:44361947 |
| 17 rs530785468 | 44360580 G | 3.91  | 1.56E-07 | chr:17:44361947 |
| 17 rs75543806  | 44297459 A | 3.689 | 1.57E-07 | chr:17:44361947 |
| 17 rs575478168 | 44256296 A | 3.789 | 1.58E-07 | chr:17:44361947 |
| 17 rs55915917  | 43892784 G | 3.019 | 1.62E-07 | chr:17:44361947 |
| 17 rs571742017 | 44280697 C | 3.724 | 1.63E-07 | chr:17:44361947 |

|                |            |       |          |                 |
|----------------|------------|-------|----------|-----------------|
| 17 rs2693333   | 44311200 C | 2.743 | 1.63E-07 | chr:17:44361947 |
| 17 rs554959222 | 44344456 C | 2.553 | 1.64E-07 | chr:17:44361947 |
| 17 rs62073222  | 44374710 A | 2.213 | 1.66E-07 | chr:17:44361947 |
| 17 rs534396161 | 44339003 T | 2.552 | 1.69E-07 | chr:17:44361947 |
| 17 rs537509137 | 44327438 G | 2.445 | 1.79E-07 | chr:17:44361947 |
| 17 rs573336988 | 44326864 G | 2.478 | 1.81E-07 | chr:17:44361947 |
| 17 rs533425051 | 44351298 A | 3.846 | 1.81E-07 | chr:17:44361947 |
| 17 rs369234167 | 44611782 C | 2.81  | 1.82E-07 | chr:17:44361947 |
| 17 rs374569899 | 44494339 T | 2.202 | 1.84E-07 | chr:17:44361947 |
| 17 rs577465540 | 44327482 A | 2.448 | 1.89E-07 | chr:17:44361947 |
| 17 rs558980400 | 44360941 C | 3.825 | 1.92E-07 | chr:17:44361947 |
| 17 rs112534607 | 44344376 A | 2.526 | 1.93E-07 | chr:17:44361947 |
| 17 rs2258587   | 44303564 T | 2.753 | 2.01E-07 | chr:17:44361947 |
| 17 rs2732711   | 44350293 G | 3.82  | 2.13E-07 | chr:17:44361947 |
| 17 rs2696549   | 44349372 A | 3.807 | 2.20E-07 | chr:17:44361947 |
| 17 rs533170687 | 44352361 T | 2.642 | 2.23E-07 | chr:17:44361947 |
| 17 rs17690703  | 43925297 T | 2.701 | 2.26E-07 | chr:17:44361947 |
| 17 rs554899842 | 44331214 C | 2.969 | 2.37E-07 | chr:17:44361947 |
| 17 rs573245541 | 44218138 T | 3.712 | 2.38E-07 | chr:17:44361947 |
| 17 rs527751731 | 44340942 C | 2.633 | 2.39E-07 | chr:17:44361947 |
| 17 rs574836840 | 44286972 C | 3.698 | 2.41E-07 | chr:17:44361947 |
| 17 rs76147580  | 44330106 C | 2.683 | 2.41E-07 | chr:17:44361947 |
| 17 rs79641193  | 44330105 G | 2.683 | 2.41E-07 | chr:17:44361947 |
| 17 rs552290972 | 43947883 G | 2.799 | 2.55E-07 | chr:17:44361947 |
| 17 rs546745122 | 44253951 A | 3.651 | 2.57E-07 | chr:17:44361947 |
| 17 rs563583864 | 44358721 T | 2.662 | 2.66E-07 | chr:17:44361947 |
| 17 rs531050317 | 44269421 T | 3.645 | 2.67E-07 | chr:17:44361947 |
| 17 rs113475307 | 44330398 G | 2.625 | 2.69E-07 | chr:17:44361947 |
| 17 rs575972824 | 44358146 A | 3.569 | 2.69E-07 | chr:17:44361947 |
| 17 rs563364166 | 44335865 G | 3.271 | 2.71E-07 | chr:17:44361947 |
| 17 rs2696518   | 44357885 G | 3.746 | 2.77E-07 | chr:17:44361947 |
| 17 rs540279850 | 44365897 T | 3.615 | 2.77E-07 | chr:17:44361947 |
| 17 rs2458218   | 44361383 C | 3.053 | 2.81E-07 | chr:17:44361947 |
| 17 rs578102530 | 44364335 A | 3.535 | 2.82E-07 | chr:17:44361947 |
| 17 rs78903072  | 44338966 C | 2.478 | 2.85E-07 | chr:17:44361947 |
| 17 rs79928920  | 44338967 C | 2.478 | 2.85E-07 | chr:17:44361947 |
| 17 rs528462017 | 44361007 G | 3.313 | 2.90E-07 | chr:17:44361947 |
| 17 rs555075975 | 44343192 A | 3.735 | 2.93E-07 | chr:17:44361947 |
| 17 rs529398497 | 44254291 T | 3.605 | 2.96E-07 | chr:17:44361947 |
| 17 rs144848361 | 44515566 T | 2.024 | 3.13E-07 | chr:17:44361947 |
| 17 rs539219056 | 44326712 C | 3.596 | 3.13E-07 | chr:17:44361947 |
| 17 rs570571928 | 44346039 G | 3.736 | 3.19E-07 | chr:17:44361947 |
| 17 rs546715241 | 44361075 G | 2.606 | 3.31E-07 | chr:17:44361947 |



|                |            |       |          |                 |
|----------------|------------|-------|----------|-----------------|
| 17 rs574730796 | 44312911 T | 3.645 | 3.37E-07 | chr:17:44361947 |
| 17 rs199442    | 44820122 A | 2.607 | 3.48E-07 | chr:17:44361947 |
| 17 rs199444    | 44818276 C | 2.607 | 3.48E-07 | chr:17:44361947 |
| 17 rs199449    | 44808902 A | 2.607 | 3.48E-07 | chr:17:44361947 |
| 17 rs565427790 | 44344178 G | 2.508 | 3.48E-07 | chr:17:44361947 |
| 17 rs548542325 | 44344300 T | 2.45  | 3.55E-07 | chr:17:44361947 |
| 17 rs2532407   | 44301840 C | 2.599 | 3.69E-07 | chr:17:44361947 |
| 17 rs111446248 | 44355173 C | 3.547 | 3.70E-07 | chr:17:44361947 |
| 17 rs2942187   | 44296355 A | 3.549 | 3.71E-07 | chr:17:44361947 |
| 17 rs145487105 | 44499795 C | 2.009 | 3.78E-07 | chr:17:44361947 |
| 17 rs149197001 | 44500095 G | 2.009 | 3.78E-07 | chr:17:44361947 |
| 17 rs199461    | 44762589 A | 2.594 | 3.87E-07 | chr:17:44361947 |
| 17 rs56072903  | 44013966 C | 3.21  | 3.88E-07 | chr:17:44361947 |
| 17 rs151172887 | 44515243 T | 2.017 | 3.92E-07 | chr:17:44361947 |
| 17 rs142045106 | 44514788 T | 2.143 | 3.96E-07 | chr:17:44361947 |
| 17 rs546616364 | 44338503 A | 2.348 | 4.10E-07 | chr:17:44361947 |
| 17 rs199531    | 44830414 C | 2.591 | 4.18E-07 | chr:17:44361947 |
| 17 rs549057705 | 44236321 G | 3.49  | 4.35E-07 | chr:17:44361947 |
| 17 rs138033946 | 44527102 C | 1.992 | 4.40E-07 | chr:17:44361947 |
| 17 rs558257469 | 44252461 G | 3.519 | 4.58E-07 | chr:17:44361947 |
| 17 rs576904891 | 44252468 A | 3.519 | 4.58E-07 | chr:17:44361947 |
| 17 rs62062288  | 44096553 A | 2.697 | 4.74E-07 | chr:17:44361947 |
| 17 rs12453264  | 44330438 G | 2.561 | 5.02E-07 | chr:17:44361947 |
| 17 rs182821552 | 44330410 A | 2.561 | 5.02E-07 | chr:17:44361947 |
| 17 rs199446    | 44813169 G | 2.576 | 5.21E-07 | chr:17:44361947 |
| 17 rs199536    | 44820425 T | 2.576 | 5.21E-07 | chr:17:44361947 |
| 17 rs199452    | 44801340 T | 2.544 | 5.57E-07 | chr:17:44361947 |
| 17 rs155771    | 44531724 T | 1.979 | 6.15E-07 | chr:17:44361947 |
| 17 rs567996834 | 44338534 T | 2.326 | 6.35E-07 | chr:17:44361947 |
| 17 rs376334563 | 44537611 T | 1.979 | 6.42E-07 | chr:17:44361947 |
| 17 rs142167    | 44795234 G | 2.529 | 6.64E-07 | chr:17:44361947 |
| 17 rs199436    | 44789285 G | 2.529 | 6.64E-07 | chr:17:44361947 |
| 17 rs199437    | 44786336 A | 2.529 | 6.64E-07 | chr:17:44361947 |
| 17 rs199438    | 44791643 A | 2.529 | 6.64E-07 | chr:17:44361947 |
| 17 rs62072124  | 44544470 T | 1.977 | 6.65E-07 | chr:17:44361947 |
| 17 rs62072129  | 44554156 A | 1.976 | 6.66E-07 | chr:17:44361947 |
| 17 rs62072137  | 44563656 A | 1.976 | 6.66E-07 | chr:17:44361947 |
| 17 rs2732608   | 44365980 T | 2.309 | 6.88E-07 | chr:17:44361947 |
| 17 rs529274065 | 44338536 C | 2.32  | 7.03E-07 | chr:17:44361947 |
| 17 rs146761208 | 44495308 G | 1.963 | 7.26E-07 | chr:17:44361947 |
| 17 rs199464    | 44538038 C | 1.974 | 7.27E-07 | chr:17:44361947 |
| 17 rs374090709 | 44538511 C | 1.974 | 7.27E-07 | chr:17:44361947 |
| 17 rs62072119  | 44537776 C | 1.974 | 7.27E-07 | chr:17:44361947 |

|                |            |       |          |                 |
|----------------|------------|-------|----------|-----------------|
| 17 rs199453    | 44800946 T | 2.511 | 8.22E-07 | chr:17:44361947 |
| 17 rs183211    | 44788310 A | 2.509 | 8.29E-07 | chr:17:44361947 |
| 17 rs62073233  | 44388912 C | 2.209 | 8.43E-07 | chr:17:44361947 |
| 17 rs554338050 | 44357654 T | 3.381 | 8.66E-07 | chr:17:44361947 |
| 17 rs574251995 | 44357655 C | 3.381 | 8.66E-07 | chr:17:44361947 |
| 17 rs559816018 | 44283858 A | 3.369 | 9.52E-07 | chr:17:44361947 |
| 17 rs199454    | 44800110 G | 2.499 | 9.85E-07 | chr:17:44361947 |
| 17 rs139077859 | 44335579 A | 3.431 | 1.17E-06 | chr:17:44361947 |
| 17 rs572665454 | 44019103 G | 2.58  | 1.28E-06 | chr:17:44361947 |
| 17 rs554105021 | 44482352 G | 1.926 | 1.30E-06 | chr:17:44361947 |
| 17 rs199530    | 44836653 G | 2.448 | 1.41E-06 | chr:17:44361947 |
| 17 rs200403    | 44781143 C | 2.44  | 1.51E-06 | chr:17:44361947 |
| 17 rs117300236 | 44753350 A | 2.536 | 1.60E-06 | chr:17:44361947 |
| 17 rs551752654 | 44255550 G | 3.293 | 1.62E-06 | chr:17:44361947 |
| 17 rs557236423 | 44517766 A | 2.062 | 1.66E-06 | chr:17:44361947 |
| 17 rs1560312   | 43978988 G | 2.354 | 1.68E-06 | chr:17:44361947 |
| 17 rs28646281  | 43977846 G | 2.354 | 1.68E-06 | chr:17:44361947 |
| 17 rs4792891   | 43973498 G | 2.354 | 1.68E-06 | chr:17:44361947 |
| 17 rs7210728   | 43968415 A | 2.354 | 1.68E-06 | chr:17:44361947 |
| 17 rs9303523   | 43976684 C | 2.354 | 1.68E-06 | chr:17:44361947 |
| 17 rs2950706   | 44343004 T | 3.377 | 1.69E-06 | chr:17:44361947 |
| 17 rs369332489 | 44753645 C | 2.457 | 1.98E-06 | chr:17:44361947 |
| 17 rs374952396 | 44753643 G | 2.457 | 1.98E-06 | chr:17:44361947 |
| 17 rs199455    | 44799216 C | 2.394 | 2.17E-06 | chr:17:44361947 |
| 17 rs371886929 | 44481020 C | 1.939 | 2.26E-06 | chr:17:44361947 |
| 17 rs144129607 | 44344377 T | 2.924 | 2.37E-06 | chr:17:44361947 |
| 17 rs199521    | 44853456 G | 2.361 | 3.33E-06 | chr:17:44361947 |
| 17 rs199508    | 44858838 C | 2.357 | 3.44E-06 | chr:17:44361947 |
| 17 rs9912530   | 44836302 T | 2.352 | 3.57E-06 | chr:17:44361947 |
| 17 rs564310304 | 43991553 G | 2.266 | 3.62E-06 | chr:17:44361947 |
| 17 rs9899833   | 43992943 A | 2.266 | 3.62E-06 | chr:17:44361947 |
| 17 rs199460    | 44764775 C | 2.926 | 3.86E-06 | chr:17:44361947 |
| 17 rs530766798 | 44369585 A | 2.062 | 3.92E-06 | chr:17:44361947 |
| 17 rs533038339 | 44369595 G | 2.062 | 3.92E-06 | chr:17:44361947 |
| 17 rs544075301 | 44369590 C | 2.062 | 3.92E-06 | chr:17:44361947 |
| 17 rs546608798 | 44369596 G | 2.062 | 3.92E-06 | chr:17:44361947 |
| 17 rs564410162 | 44369591 A | 2.062 | 3.92E-06 | chr:17:44361947 |
| 17 rs566503719 | 44369605 G | 2.062 | 3.92E-06 | chr:17:44361947 |
| 17 rs199517    | 44854587 A | 2.339 | 4.25E-06 | chr:17:44361947 |
| 17 rs199518    | 44854580 A | 2.339 | 4.25E-06 | chr:17:44361947 |
| 17 rs199519    | 44853924 G | 2.339 | 4.25E-06 | chr:17:44361947 |
| 17 rs199520    | 44853872 G | 2.339 | 4.25E-06 | chr:17:44361947 |
| 17 rs199523    | 44848517 C | 2.339 | 4.25E-06 | chr:17:44361947 |

|                |            |       |          |                 |
|----------------|------------|-------|----------|-----------------|
| 17 rs199524    | 44848438 G | 2.339 | 4.25E-06 | chr:17:44361947 |
| 17 rs199527    | 44843667 G | 2.339 | 4.25E-06 | chr:17:44361947 |
| 17 rs553682853 | 44759766 A | 2.418 | 4.94E-06 | chr:17:44361947 |
| 17 rs571088452 | 44227393 A | 2.526 | 4.96E-06 | chr:17:44361947 |
| 17 rs530674879 | 44408485 C | 3.133 | 5.02E-06 | chr:17:44361947 |
| 17 rs7224296   | 44800046 G | 2.283 | 5.89E-06 | chr:17:44361947 |
| 17 rs2532362   | 44333499 T | 2.708 | 6.18E-06 | chr:17:44361947 |
| 17 rs2696558   | 44346951 A | 2.277 | 6.78E-06 | chr:17:44361947 |
| 17 rs140997625 | 44412252 C | 1.938 | 7.67E-06 | chr:17:44361947 |
| 17 rs7221167   | 43933307 C | 2.128 | 8.92E-06 | chr:17:44361947 |
| 17 rs62071371  | 44446162 C | 2.274 | 1.12E-05 | chr:17:44361947 |
| 17 rs62070949  | 44308053 G | 2.232 | 1.32E-05 | chr:17:44361947 |
| 17 rs6503451   | 43948347 C | 2.12  | 1.35E-05 | chr:17:44361947 |
| 17 rs2458203   | 44336651 C | 2.216 | 1.71E-05 | chr:17:44361947 |
| 17 rs528330857 | 44315987 A | 3.677 | 5.14E-08 | chr:17:44361948 |
| 17 rs538174453 | 44781030 C | 3.385 | 1.01E-07 | chr:17:44361948 |
| 17 rs2463514   | 44338869 T | 3.563 | 1.15E-07 | chr:17:44361948 |
| 17 rs572446729 | 44262758 T | 3.516 | 1.22E-07 | chr:17:44361948 |
| 17 rs533596122 | 44354587 G | 3.444 | 1.25E-07 | chr:17:44361948 |
| 17 rs573336988 | 44326864 G | 2.45  | 1.68E-07 | chr:17:44361948 |
| 17 rs547813077 | 44326845 G | 2.4   | 2.07E-07 | chr:17:44361948 |
| 17 rs117629202 | 44344596 A | 3.392 | 2.28E-07 | chr:17:44361948 |
| 17 rs117995241 | 44344595 T | 3.392 | 2.28E-07 | chr:17:44361948 |
| 17 rs112665297 | 44348634 C | 3.398 | 2.85E-07 | chr:17:44361948 |
| 17 rs532784638 | 44354231 G | 2.661 | 2.99E-07 | chr:17:44361948 |
| 17 rs2696673   | 44315803 C | 2.936 | 3.01E-07 | chr:17:44361948 |
| 17 rs2732654   | 44346405 T | 3.388 | 3.09E-07 | chr:17:44361948 |
| 17 rs2732655   | 44346407 C | 3.388 | 3.09E-07 | chr:17:44361948 |
| 17 rs541927337 | 44217020 C | 3.372 | 3.12E-07 | chr:17:44361948 |
| 17 rs147642589 | 44300067 G | 3.425 | 3.29E-07 | chr:17:44361948 |
| 17 rs537485102 | 44302752 A | 3.425 | 3.29E-07 | chr:17:44361948 |
| 17 rs577342440 | 44302904 C | 3.425 | 3.29E-07 | chr:17:44361948 |
| 17 rs572858137 | 44341870 C | 3.442 | 3.30E-07 | chr:17:44361948 |
| 17 rs12150319  | 44213164 A | 3.335 | 3.43E-07 | chr:17:44361948 |
| 17 rs575112434 | 44213187 T | 3.335 | 3.43E-07 | chr:17:44361948 |
| 17 rs543784320 | 44244639 G | 3.356 | 3.46E-07 | chr:17:44361948 |
| 17 rs528139864 | 44276479 G | 3.353 | 3.51E-07 | chr:17:44361948 |
| 17 rs36123991  | 44359663 T | 3.283 | 3.55E-07 | chr:17:44361948 |
| 17 rs111854089 | 44344541 A | 3.361 | 3.55E-07 | chr:17:44361948 |
| 17 rs113056783 | 44348616 T | 3.361 | 3.55E-07 | chr:17:44361948 |
| 17 rs2261016   | 44349899 A | 3.361 | 3.55E-07 | chr:17:44361948 |
| 17 rs2262140   | 44349736 T | 3.361 | 3.55E-07 | chr:17:44361948 |
| 17 rs2262144   | 44350511 G | 3.361 | 3.55E-07 | chr:17:44361948 |

|                |            |       |          |                 |
|----------------|------------|-------|----------|-----------------|
| 17 rs2458216   | 44346962 T | 3.361 | 3.55E-07 | chr:17:44361948 |
| 17 rs2458217   | 44353206 C | 3.361 | 3.55E-07 | chr:17:44361948 |
| 17 rs2469939   | 44351739 A | 3.361 | 3.55E-07 | chr:17:44361948 |
| 17 rs2469940   | 44351731 G | 3.361 | 3.55E-07 | chr:17:44361948 |
| 17 rs2469941   | 44349744 G | 3.361 | 3.55E-07 | chr:17:44361948 |
| 17 rs2469943   | 44349347 G | 3.361 | 3.55E-07 | chr:17:44361948 |
| 17 rs2469944   | 44349283 C | 3.361 | 3.55E-07 | chr:17:44361948 |
| 17 rs2668611   | 44350125 T | 3.361 | 3.55E-07 | chr:17:44361948 |
| 17 rs2668614   | 44350310 A | 3.361 | 3.55E-07 | chr:17:44361948 |
| 17 rs2668626   | 44353175 C | 3.361 | 3.55E-07 | chr:17:44361948 |
| 17 rs2668719   | 44345090 A | 3.361 | 3.55E-07 | chr:17:44361948 |
| 17 rs2732615   | 44364056 C | 3.361 | 3.55E-07 | chr:17:44361948 |
| 17 rs2732651   | 44345063 T | 3.361 | 3.55E-07 | chr:17:44361948 |
| 17 rs2732652   | 44345114 T | 3.361 | 3.55E-07 | chr:17:44361948 |
| 17 rs2732704   | 44353114 C | 3.361 | 3.55E-07 | chr:17:44361948 |
| 17 rs2732710   | 44350527 A | 3.361 | 3.55E-07 | chr:17:44361948 |
| 17 rs2942175   | 44348825 G | 3.361 | 3.55E-07 | chr:17:44361948 |
| 17 rs2942176   | 44348848 A | 3.361 | 3.55E-07 | chr:17:44361948 |
| 17 rs2942177   | 44348987 A | 3.361 | 3.55E-07 | chr:17:44361948 |
| 17 rs2950691   | 44348768 G | 3.361 | 3.55E-07 | chr:17:44361948 |
| 17 rs2950692   | 44348387 G | 3.361 | 3.55E-07 | chr:17:44361948 |
| 17 rs2950693   | 44348356 A | 3.361 | 3.55E-07 | chr:17:44361948 |
| 17 rs2950694   | 44348298 G | 3.361 | 3.55E-07 | chr:17:44361948 |
| 17 rs2957297   | 44368212 A | 3.361 | 3.55E-07 | chr:17:44361948 |
| 17 rs529941744 | 44347097 G | 3.361 | 3.55E-07 | chr:17:44361948 |
| 17 rs535416854 | 44350460 G | 3.361 | 3.55E-07 | chr:17:44361948 |
| 17 rs538317039 | 44361147 G | 3.361 | 3.55E-07 | chr:17:44361948 |
| 17 rs539045125 | 44352970 A | 3.361 | 3.55E-07 | chr:17:44361948 |
| 17 rs539665598 | 44350203 G | 3.361 | 3.55E-07 | chr:17:44361948 |
| 17 rs541175865 | 44360168 G | 3.361 | 3.55E-07 | chr:17:44361948 |
| 17 rs544269730 | 44364538 C | 3.361 | 3.55E-07 | chr:17:44361948 |
| 17 rs544541884 | 44353320 A | 3.361 | 3.55E-07 | chr:17:44361948 |
| 17 rs544566362 | 44351249 A | 3.361 | 3.55E-07 | chr:17:44361948 |
| 17 rs546223853 | 44348013 G | 3.361 | 3.55E-07 | chr:17:44361948 |
| 17 rs548376955 | 44347109 G | 3.361 | 3.55E-07 | chr:17:44361948 |
| 17 rs551916351 | 44350217 G | 3.361 | 3.55E-07 | chr:17:44361948 |
| 17 rs552545212 | 44347557 A | 3.361 | 3.55E-07 | chr:17:44361948 |
| 17 rs553047624 | 44346610 G | 3.361 | 3.55E-07 | chr:17:44361948 |
| 17 rs556176202 | 44353343 A | 3.361 | 3.55E-07 | chr:17:44361948 |
| 17 rs558083621 | 44364298 C | 3.361 | 3.55E-07 | chr:17:44361948 |
| 17 rs561631796 | 44351007 C | 3.361 | 3.55E-07 | chr:17:44361948 |
| 17 rs563901070 | 44350662 C | 3.361 | 3.55E-07 | chr:17:44361948 |
| 17 rs564676144 | 44346751 G | 3.361 | 3.55E-07 | chr:17:44361948 |

|                |            |       |          |                 |
|----------------|------------|-------|----------|-----------------|
| 17 rs567938785 | 44351578 C | 3.361 | 3.55E-07 | chr:17:44361948 |
| 17 rs568197156 | 44347727 T | 3.361 | 3.55E-07 | chr:17:44361948 |
| 17 rs569012614 | 44364209 T | 3.361 | 3.55E-07 | chr:17:44361948 |
| 17 rs569417763 | 44361129 A | 3.361 | 3.55E-07 | chr:17:44361948 |
| 17 rs569601491 | 44354530 A | 3.361 | 3.55E-07 | chr:17:44361948 |
| 17 rs570804960 | 44347561 C | 3.361 | 3.55E-07 | chr:17:44361948 |
| 17 rs572539273 | 44353505 T | 3.361 | 3.55E-07 | chr:17:44361948 |
| 17 rs572733824 | 44351858 G | 3.361 | 3.55E-07 | chr:17:44361948 |
| 17 rs573855916 | 44353318 A | 3.361 | 3.55E-07 | chr:17:44361948 |
| 17 rs574735237 | 44346666 A | 3.361 | 3.55E-07 | chr:17:44361948 |
| 17 rs575122613 | 44364958 A | 3.361 | 3.55E-07 | chr:17:44361948 |
| 17 rs575384767 | 44349380 G | 3.361 | 3.55E-07 | chr:17:44361948 |
| 17 rs575822367 | 44346690 G | 3.361 | 3.55E-07 | chr:17:44361948 |
| 17 rs576899681 | 44360071 C | 3.361 | 3.55E-07 | chr:17:44361948 |
| 17 rs577997128 | 44353344 A | 3.361 | 3.55E-07 | chr:17:44361948 |
| 17 rs62071576  | 44346829 T | 3.361 | 3.55E-07 | chr:17:44361948 |
| 17 rs62071595  | 44349167 A | 3.361 | 3.55E-07 | chr:17:44361948 |
| 17 rs62071596  | 44349169 C | 3.361 | 3.55E-07 | chr:17:44361948 |
| 17 rs74358353  | 44344858 G | 3.361 | 3.55E-07 | chr:17:44361948 |
| 17 rs74652075  | 44344926 G | 3.361 | 3.55E-07 | chr:17:44361948 |
| 17 rs75257416  | 44349079 A | 3.361 | 3.55E-07 | chr:17:44361948 |
| 17 rs76934998  | 44344822 A | 3.361 | 3.55E-07 | chr:17:44361948 |
| 17 rs77488920  | 44346589 A | 3.361 | 3.55E-07 | chr:17:44361948 |
| 17 rs77568881  | 44344970 C | 3.361 | 3.55E-07 | chr:17:44361948 |
| 17 rs78570732  | 44349080 G | 3.361 | 3.55E-07 | chr:17:44361948 |
| 17 rs561617862 | 44260845 A | 3.348 | 3.69E-07 | chr:17:44361948 |
| 17 rs530785468 | 44360580 G | 3.435 | 3.73E-07 | chr:17:44361948 |
| 17 rs536361473 | 44246143 A | 3.339 | 3.84E-07 | chr:17:44361948 |
| 17 rs562855425 | 44351285 G | 2.644 | 4.02E-07 | chr:17:44361948 |
| 17 rs558257469 | 44252461 G | 3.295 | 4.24E-07 | chr:17:44361948 |
| 17 rs576904891 | 44252468 A | 3.295 | 4.24E-07 | chr:17:44361948 |
| 17 rs547988515 | 44365369 C | 2.646 | 4.29E-07 | chr:17:44361948 |
| 17 rs557642992 | 44365374 T | 2.646 | 4.29E-07 | chr:17:44361948 |
| 17 rs527879650 | 44351452 C | 3.333 | 4.31E-07 | chr:17:44361948 |
| 17 rs2696555   | 44348370 G | 2.597 | 4.35E-07 | chr:17:44361948 |
| 17 rs564706435 | 44269493 C | 3.327 | 4.45E-07 | chr:17:44361948 |
| 17 rs556191214 | 44258938 A | 3.316 | 4.45E-07 | chr:17:44361948 |
| 17 rs534069237 | 44258446 G | 3.307 | 4.66E-07 | chr:17:44361948 |
| 17 rs565415067 | 44354103 G | 2.579 | 4.67E-07 | chr:17:44361948 |
| 17 rs532035561 | 44240797 C | 3.311 | 4.67E-07 | chr:17:44361948 |
| 17 rs564178382 | 44360760 T | 3.303 | 4.77E-07 | chr:17:44361948 |
| 17 rs113830390 | 44344552 T | 3.313 | 4.78E-07 | chr:17:44361948 |
| 17 rs533899562 | 44225607 T | 3.304 | 4.80E-07 | chr:17:44361948 |

|                |            |       |          |                 |
|----------------|------------|-------|----------|-----------------|
| 17 rs112243618 | 44355284 A | 3.303 | 4.86E-07 | chr:17:44361948 |
| 17 rs2696430   | 44338279 C | 2.384 | 4.97E-07 | chr:17:44361948 |
| 17 rs555608763 | 44219888 T | 3.295 | 5.10E-07 | chr:17:44361948 |
| 17 rs527437752 | 44281821 C | 3.291 | 5.15E-07 | chr:17:44361948 |
| 17 rs535689567 | 44274933 G | 3.291 | 5.15E-07 | chr:17:44361948 |
| 17 rs542404072 | 44281964 C | 3.291 | 5.15E-07 | chr:17:44361948 |
| 17 rs544396824 | 44273889 T | 3.291 | 5.15E-07 | chr:17:44361948 |
| 17 rs578092205 | 44277707 G | 3.291 | 5.15E-07 | chr:17:44361948 |
| 17 rs62060952  | 44273398 T | 3.291 | 5.15E-07 | chr:17:44361948 |
| 17 rs555075975 | 44343192 A | 3.354 | 5.17E-07 | chr:17:44361948 |
| 17 rs62073257  | 44412076 G | 2.639 | 5.20E-07 | chr:17:44361948 |
| 17 rs563671821 | 44287006 G | 3.287 | 5.27E-07 | chr:17:44361948 |
| 17 rs546129596 | 44236209 A | 3.285 | 5.39E-07 | chr:17:44361948 |
| 17 rs530576715 | 44363885 T | 3.319 | 5.45E-07 | chr:17:44361948 |
| 17 rs9896243   | 44826056 G | 2.604 | 5.50E-07 | chr:17:44361948 |
| 17 rs2732650   | 44344988 G | 2.607 | 5.52E-07 | chr:17:44361948 |
| 17 rs532625333 | 44355532 A | 3.273 | 5.65E-07 | chr:17:44361948 |
| 17 rs565586009 | 44355516 C | 3.273 | 5.65E-07 | chr:17:44361948 |
| 17 rs529396612 | 44273664 G | 3.253 | 5.88E-07 | chr:17:44361948 |
| 17 rs561951897 | 44273653 G | 3.253 | 5.88E-07 | chr:17:44361948 |
| 17 rs535521250 | 44256053 A | 3.272 | 6.05E-07 | chr:17:44361948 |
| 17 rs550405754 | 44326509 A | 3.272 | 6.13E-07 | chr:17:44361948 |
| 17 rs149753849 | 44316509 C | 3.328 | 6.16E-07 | chr:17:44361948 |
| 17 rs557433399 | 44318665 C | 3.328 | 6.16E-07 | chr:17:44361948 |
| 17 rs2732649   | 44344810 G | 2.614 | 6.20E-07 | chr:17:44361948 |
| 17 rs559107881 | 44363632 C | 3.222 | 6.32E-07 | chr:17:44361948 |
| 17 rs576947229 | 44348221 G | 2.542 | 6.37E-07 | chr:17:44361948 |
| 17 rs2696541   | 44351743 A | 3.33  | 6.39E-07 | chr:17:44361948 |
| 17 rs557594331 | 44339966 A | 3.329 | 6.46E-07 | chr:17:44361948 |
| 17 rs371894855 | 44355304 T | 3.32  | 6.86E-07 | chr:17:44361948 |
| 17 rs2696528   | 44356320 T | 3.32  | 6.89E-07 | chr:17:44361948 |
| 17 rs546564131 | 44348753 C | 3.209 | 6.92E-07 | chr:17:44361948 |
| 17 rs111535660 | 44314148 A | 3.244 | 6.98E-07 | chr:17:44361948 |
| 17 rs111912558 | 44356694 C | 3.244 | 6.98E-07 | chr:17:44361948 |
| 17 rs112750270 | 44357562 T | 3.244 | 6.98E-07 | chr:17:44361948 |
| 17 rs113130019 | 44357172 T | 3.244 | 6.98E-07 | chr:17:44361948 |
| 17 rs113896715 | 44356746 C | 3.244 | 6.98E-07 | chr:17:44361948 |
| 17 rs2668691   | 44293546 T | 3.244 | 6.98E-07 | chr:17:44361948 |
| 17 rs2957296   | 44291734 A | 3.244 | 6.98E-07 | chr:17:44361948 |
| 17 rs528727097 | 44269510 G | 3.244 | 6.98E-07 | chr:17:44361948 |
| 17 rs529862341 | 44232721 A | 3.244 | 6.98E-07 | chr:17:44361948 |
| 17 rs530231140 | 44285683 C | 3.244 | 6.98E-07 | chr:17:44361948 |
| 17 rs530421535 | 44228621 A | 3.244 | 6.98E-07 | chr:17:44361948 |

|                |            |       |          |                 |
|----------------|------------|-------|----------|-----------------|
| 17 rs534108118 | 44239556 C | 3.244 | 6.98E-07 | chr:17:44361948 |
| 17 rs539399180 | 44223491 G | 3.244 | 6.98E-07 | chr:17:44361948 |
| 17 rs539726587 | 44233699 T | 3.244 | 6.98E-07 | chr:17:44361948 |
| 17 rs540306918 | 44256710 C | 3.244 | 6.98E-07 | chr:17:44361948 |
| 17 rs540381781 | 44222080 C | 3.244 | 6.98E-07 | chr:17:44361948 |
| 17 rs543087095 | 44249199 G | 3.244 | 6.98E-07 | chr:17:44361948 |
| 17 rs543622396 | 44355376 A | 3.244 | 6.98E-07 | chr:17:44361948 |
| 17 rs546567549 | 44255784 G | 3.244 | 6.98E-07 | chr:17:44361948 |
| 17 rs548457389 | 44214386 G | 3.244 | 6.98E-07 | chr:17:44361948 |
| 17 rs549067929 | 44226817 A | 3.244 | 6.98E-07 | chr:17:44361948 |
| 17 rs550466211 | 44242759 T | 3.244 | 6.98E-07 | chr:17:44361948 |
| 17 rs550631839 | 44240850 C | 3.244 | 6.98E-07 | chr:17:44361948 |
| 17 rs550818680 | 44271512 C | 3.244 | 6.98E-07 | chr:17:44361948 |
| 17 rs551434843 | 44225440 C | 3.244 | 6.98E-07 | chr:17:44361948 |
| 17 rs553497360 | 44282979 A | 3.244 | 6.98E-07 | chr:17:44361948 |
| 17 rs553586616 | 44248837 C | 3.244 | 6.98E-07 | chr:17:44361948 |
| 17 rs555329451 | 44239639 A | 3.244 | 6.98E-07 | chr:17:44361948 |
| 17 rs557177636 | 44255002 A | 3.244 | 6.98E-07 | chr:17:44361948 |
| 17 rs558011060 | 44239225 A | 3.244 | 6.98E-07 | chr:17:44361948 |
| 17 rs558551156 | 44254467 G | 3.244 | 6.98E-07 | chr:17:44361948 |
| 17 rs558928409 | 44216817 T | 3.244 | 6.98E-07 | chr:17:44361948 |
| 17 rs560756822 | 44240497 C | 3.244 | 6.98E-07 | chr:17:44361948 |
| 17 rs564528960 | 44232169 G | 3.244 | 6.98E-07 | chr:17:44361948 |
| 17 rs566617135 | 44223593 C | 3.244 | 6.98E-07 | chr:17:44361948 |
| 17 rs569900381 | 44214518 T | 3.244 | 6.98E-07 | chr:17:44361948 |
| 17 rs570962190 | 44250236 G | 3.244 | 6.98E-07 | chr:17:44361948 |
| 17 rs571156765 | 44266692 A | 3.244 | 6.98E-07 | chr:17:44361948 |
| 17 rs571568457 | 44249096 C | 3.244 | 6.98E-07 | chr:17:44361948 |
| 17 rs573890487 | 44241797 C | 3.244 | 6.98E-07 | chr:17:44361948 |
| 17 rs575067355 | 44230166 A | 3.244 | 6.98E-07 | chr:17:44361948 |
| 17 rs576712993 | 44246330 C | 3.244 | 6.98E-07 | chr:17:44361948 |
| 17 rs576920154 | 44268697 C | 3.244 | 6.98E-07 | chr:17:44361948 |
| 17 rs577191345 | 44285436 T | 3.244 | 6.98E-07 | chr:17:44361948 |
| 17 rs62060947  | 44269922 C | 3.244 | 6.98E-07 | chr:17:44361948 |
| 17 rs75033119  | 44357360 A | 3.244 | 6.98E-07 | chr:17:44361948 |
| 17 rs80296410  | 44357198 A | 3.244 | 6.98E-07 | chr:17:44361948 |
| 17 rs574730796 | 44312911 T | 3.254 | 7.26E-07 | chr:17:44361948 |
| 17 rs568226663 | 44362355 G | 2.574 | 7.39E-07 | chr:17:44361948 |
| 17 rs1358439   | 44219905 A | 3.247 | 7.44E-07 | chr:17:44361948 |
| 17 rs547291419 | 44229364 C | 3.243 | 7.67E-07 | chr:17:44361948 |
| 17 rs2696542   | 44351533 G | 2.51  | 7.77E-07 | chr:17:44361948 |
| 17 rs2942187   | 44296355 A | 3.189 | 7.87E-07 | chr:17:44361948 |
| 17 rs543121955 | 44250883 A | 3.237 | 8.09E-07 | chr:17:44361948 |

|                |            |       |          |                 |
|----------------|------------|-------|----------|-----------------|
| 17 rs553285076 | 44250473 C | 3.237 | 8.09E-07 | chr:17:44361948 |
| 17 rs542150384 | 44253275 C | 3.232 | 8.17E-07 | chr:17:44361948 |
| 17 rs2732708   | 44351387 T | 2.531 | 8.32E-07 | chr:17:44361948 |
| 17 rs2732699   | 44354904 T | 3.211 | 8.51E-07 | chr:17:44361948 |
| 17 rs76167437  | 44356436 C | 3.2   | 8.57E-07 | chr:17:44361948 |
| 17 rs575478168 | 44256296 A | 3.217 | 8.65E-07 | chr:17:44361948 |
| 17 rs112254607 | 44357392 A | 3.276 | 8.94E-07 | chr:17:44361948 |
| 17 rs2696525   | 44356637 T | 3.276 | 8.94E-07 | chr:17:44361948 |
| 17 rs2696527   | 44356433 T | 3.276 | 8.94E-07 | chr:17:44361948 |
| 17 rs2696535   | 44355130 G | 3.276 | 8.94E-07 | chr:17:44361948 |
| 17 rs2696547   | 44350395 C | 3.276 | 8.94E-07 | chr:17:44361948 |
| 17 rs2696550   | 44349290 G | 3.276 | 8.94E-07 | chr:17:44361948 |
| 17 rs2696551   | 44349234 T | 3.276 | 8.94E-07 | chr:17:44361948 |
| 17 rs2696561   | 44346393 G | 3.276 | 8.94E-07 | chr:17:44361948 |
| 17 rs2732707   | 44351600 T | 3.276 | 8.94E-07 | chr:17:44361948 |
| 17 rs527318161 | 44356770 A | 3.276 | 8.94E-07 | chr:17:44361948 |
| 17 rs568575845 | 44367296 A | 3.276 | 8.94E-07 | chr:17:44361948 |
| 17 rs571576894 | 44356098 C | 3.276 | 8.94E-07 | chr:17:44361948 |
| 17 rs577019110 | 44356682 A | 3.276 | 8.94E-07 | chr:17:44361948 |
| 17 rs373695612 | 44360349 G | 2.554 | 9.09E-07 | chr:17:44361948 |
| 17 rs536275664 | 44355138 A | 3.19  | 9.12E-07 | chr:17:44361948 |
| 17 rs532193457 | 44368404 T | 2.556 | 9.36E-07 | chr:17:44361948 |
| 17 rs552350876 | 44269442 C | 3.198 | 9.61E-07 | chr:17:44361948 |
| 17 rs557034628 | 44353262 C | 2.589 | 9.68E-07 | chr:17:44361948 |
| 17 rs561678956 | 44259261 G | 2.589 | 9.68E-07 | chr:17:44361948 |
| 17 rs533583428 | 44366410 C | 2.505 | 9.69E-07 | chr:17:44361948 |
| 17 rs113677423 | 44355750 T | 2.579 | 9.73E-07 | chr:17:44361948 |
| 17 rs533425051 | 44351298 A | 3.246 | 9.78E-07 | chr:17:44361948 |
| 17 rs374569899 | 44494339 T | 2.021 | 9.79E-07 | chr:17:44361948 |
| 17 rs2532277   | 44246527 C | 3.205 | 9.87E-07 | chr:17:44361948 |
| 17 rs2696635   | 44269726 A | 3.205 | 9.87E-07 | chr:17:44361948 |
| 17 rs2732628   | 44288284 A | 3.205 | 9.87E-07 | chr:17:44361948 |
| 17 rs386477048 | 44245171 T | 3.205 | 9.87E-07 | chr:17:44361948 |
| 17 rs386477606 | 44222019 T | 3.205 | 9.87E-07 | chr:17:44361948 |
| 17 rs527841438 | 44221476 T | 3.205 | 9.87E-07 | chr:17:44361948 |
| 17 rs528770545 | 44287390 G | 3.205 | 9.87E-07 | chr:17:44361948 |
| 17 rs533659895 | 44274451 C | 3.205 | 9.87E-07 | chr:17:44361948 |
| 17 rs538910132 | 44245359 A | 3.205 | 9.87E-07 | chr:17:44361948 |
| 17 rs542893855 | 44242637 T | 3.205 | 9.87E-07 | chr:17:44361948 |
| 17 rs549030526 | 44244896 G | 3.205 | 9.87E-07 | chr:17:44361948 |
| 17 rs554944034 | 44227882 G | 3.205 | 9.87E-07 | chr:17:44361948 |
| 17 rs556952432 | 44221836 T | 3.205 | 9.87E-07 | chr:17:44361948 |
| 17 rs557885236 | 44275230 T | 3.205 | 9.87E-07 | chr:17:44361948 |



|                |            |       |          |                 |
|----------------|------------|-------|----------|-----------------|
| 17 rs558031693 | 44218044 T | 3.205 | 9.87E-07 | chr:17:44361948 |
| 17 rs559157320 | 44265477 C | 3.205 | 9.87E-07 | chr:17:44361948 |
| 17 rs560044525 | 44228619 T | 3.205 | 9.87E-07 | chr:17:44361948 |
| 17 rs563326240 | 44234064 A | 3.205 | 9.87E-07 | chr:17:44361948 |
| 17 rs567299266 | 44226980 G | 3.205 | 9.87E-07 | chr:17:44361948 |
| 17 rs568158082 | 44274838 A | 3.205 | 9.87E-07 | chr:17:44361948 |
| 17 rs568519571 | 44215896 T | 3.205 | 9.87E-07 | chr:17:44361948 |
| 17 rs570806151 | 44217267 T | 3.205 | 9.87E-07 | chr:17:44361948 |
| 17 rs571667294 | 44266975 A | 3.205 | 9.87E-07 | chr:17:44361948 |
| 17 rs574949827 | 44231827 C | 3.205 | 9.87E-07 | chr:17:44361948 |
| 17 rs2532329   | 44350090 A | 2.381 | 9.93E-07 | chr:17:44361948 |
| 17 rs1378358   | 44787312 T | 2.564 | 9.99E-07 | chr:17:44361948 |
| 17 rs169201    | 44790203 G | 2.564 | 9.99E-07 | chr:17:44361948 |
| 17 rs199439    | 44793503 G | 2.564 | 9.99E-07 | chr:17:44361948 |
| 17 rs199456    | 44797919 T | 2.564 | 9.99E-07 | chr:17:44361948 |
| 17 rs199457    | 44795469 T | 2.564 | 9.99E-07 | chr:17:44361948 |
| 17 rs538628    | 44787313 C | 2.564 | 9.99E-07 | chr:17:44361948 |
| 17 rs74390346  | 44356410 C | 3.169 | 1.02E-06 | chr:17:44361948 |
| 17 rs75342548  | 44356394 G | 3.169 | 1.02E-06 | chr:17:44361948 |
| 17 rs374242426 | 44358812 A | 3.169 | 1.02E-06 | chr:17:44361948 |
| 17 rs567642046 | 44358811 A | 3.169 | 1.02E-06 | chr:17:44361948 |
| 17 rs2532330   | 44349867 A | 2.512 | 1.03E-06 | chr:17:44361948 |
| 17 rs2696530   | 44355714 G | 2.571 | 1.05E-06 | chr:17:44361948 |
| 17 rs2532419   | 44288281 T | 3.171 | 1.06E-06 | chr:17:44361948 |
| 17 rs535576035 | 44364649 T | 2.47  | 1.08E-06 | chr:17:44361948 |
| 17 rs551059895 | 44369320 T | 2.567 | 1.09E-06 | chr:17:44361948 |
| 17 rs199926341 | 44326245 G | 3.219 | 1.09E-06 | chr:17:44361948 |
| 17 rs2257575   | 44326063 G | 3.219 | 1.09E-06 | chr:17:44361948 |
| 17 rs531804347 | 44326396 C | 3.219 | 1.09E-06 | chr:17:44361948 |
| 17 rs2732706   | 44351686 T | 2.471 | 1.10E-06 | chr:17:44361948 |
| 17 rs2696532   | 44355602 G | 2.597 | 1.11E-06 | chr:17:44361948 |
| 17 rs2696559   | 44346674 C | 2.548 | 1.13E-06 | chr:17:44361948 |
| 17 rs199443    | 44819565 T | 2.566 | 1.14E-06 | chr:17:44361948 |
| 17 rs199445    | 44817408 T | 2.566 | 1.14E-06 | chr:17:44361948 |
| 17 rs199448    | 44809001 G | 2.566 | 1.14E-06 | chr:17:44361948 |
| 17 rs199533    | 44828931 A | 2.566 | 1.14E-06 | chr:17:44361948 |
| 17 rs199534    | 44824213 G | 2.566 | 1.14E-06 | chr:17:44361948 |
| 17 rs199535    | 44822662 G | 2.566 | 1.14E-06 | chr:17:44361948 |
| 17 rs563076603 | 44273919 G | 3.156 | 1.16E-06 | chr:17:44361948 |
| 17 rs74807476  | 44355726 A | 2.547 | 1.18E-06 | chr:17:44361948 |
| 17 rs561488872 | 44353728 G | 2.437 | 1.18E-06 | chr:17:44361948 |
| 17 rs199447    | 44812188 T | 2.56  | 1.21E-06 | chr:17:44361948 |
| 17 rs62073099  | 44316491 C | 3.155 | 1.21E-06 | chr:17:44361948 |

|                |            |       |          |                 |
|----------------|------------|-------|----------|-----------------|
| 17 rs562955593 | 44366315 C | 2.524 | 1.22E-06 | chr:17:44361948 |
| 17 rs558980400 | 44360941 C | 3.196 | 1.25E-06 | chr:17:44361948 |
| 17 rs2732682   | 44339675 C | 3.145 | 1.26E-06 | chr:17:44361948 |
| 17 rs2732683   | 44339665 G | 3.145 | 1.26E-06 | chr:17:44361948 |
| 17 rs36036607  | 44339651 C | 3.145 | 1.26E-06 | chr:17:44361948 |
| 17 rs79947689  | 44339608 G | 3.145 | 1.26E-06 | chr:17:44361948 |
| 17 rs112347948 | 44263725 T | 3.152 | 1.26E-06 | chr:17:44361948 |
| 17 rs112082260 | 44355303 C | 2.553 | 1.27E-06 | chr:17:44361948 |
| 17 rs17665188  | 44357351 C | 2.553 | 1.27E-06 | chr:17:44361948 |
| 17 rs2696522   | 44356890 C | 2.553 | 1.27E-06 | chr:17:44361948 |
| 17 rs2696524   | 44356793 G | 2.553 | 1.27E-06 | chr:17:44361948 |
| 17 rs529898785 | 44357777 T | 2.553 | 1.27E-06 | chr:17:44361948 |
| 17 rs530676870 | 44347218 A | 2.553 | 1.27E-06 | chr:17:44361948 |
| 17 rs570136507 | 44357297 T | 2.553 | 1.27E-06 | chr:17:44361948 |
| 17 rs571516577 | 44356949 C | 2.553 | 1.27E-06 | chr:17:44361948 |
| 17 rs74839514  | 44357453 T | 2.553 | 1.27E-06 | chr:17:44361948 |
| 17 rs79523636  | 44359499 T | 2.553 | 1.27E-06 | chr:17:44361948 |
| 17 rs2532322   | 44358428 A | 2.54  | 1.28E-06 | chr:17:44361948 |
| 17 rs199441    | 44773783 A | 2.494 | 1.29E-06 | chr:17:44361948 |
| 17 rs2732611   | 44365487 C | 3.067 | 1.31E-06 | chr:17:44361948 |
| 17 rs534585219 | 44361861 G | 3.11  | 1.32E-06 | chr:17:44361948 |
| 17 rs552808944 | 44361869 C | 3.11  | 1.32E-06 | chr:17:44361948 |
| 17 rs2696494   | 44365000 G | 2.523 | 1.33E-06 | chr:17:44361948 |
| 17 rs199451    | 44801784 A | 2.549 | 1.33E-06 | chr:17:44361948 |
| 17 rs559264754 | 44251243 T | 3.132 | 1.35E-06 | chr:17:44361948 |
| 17 rs2696534   | 44355162 G | 2.664 | 1.36E-06 | chr:17:44361948 |
| 17 rs2696549   | 44349372 A | 3.192 | 1.36E-06 | chr:17:44361948 |
| 17 rs562155591 | 44365981 T | 2.34  | 1.39E-06 | chr:17:44361948 |
| 17 rs1991556   | 44083402 A | 2.476 | 1.40E-06 | chr:17:44361948 |
| 17 rs534691244 | 44347638 T | 2.445 | 1.41E-06 | chr:17:44361948 |
| 17 rs569366247 | 44217791 C | 3.095 | 1.41E-06 | chr:17:44361948 |
| 17 rs2732711   | 44350293 G | 3.186 | 1.44E-06 | chr:17:44361948 |
| 17 rs575478100 | 44236108 C | 3.135 | 1.44E-06 | chr:17:44361948 |
| 17 rs564307311 | 44287373 C | 3.113 | 1.53E-06 | chr:17:44361948 |
| 17 rs570839197 | 44232990 C | 3.113 | 1.53E-06 | chr:17:44361948 |
| 17 rs531995170 | 44352639 A | 2.484 | 1.55E-06 | chr:17:44361948 |
| 17 rs572695193 | 44350919 C | 2.459 | 1.55E-06 | chr:17:44361948 |
| 17 rs539980845 | 44218017 G | 3.108 | 1.58E-06 | chr:17:44361948 |
| 17 rs542276730 | 44269217 C | 3.108 | 1.58E-06 | chr:17:44361948 |
| 17 rs574836840 | 44286972 C | 3.112 | 1.59E-06 | chr:17:44361948 |
| 17 rs571125231 | 44229073 A | 3.104 | 1.61E-06 | chr:17:44361948 |
| 17 rs565882203 | 44229415 C | 3.109 | 1.63E-06 | chr:17:44361948 |
| 17 rs111198951 | 44353885 A | 2.426 | 1.63E-06 | chr:17:44361948 |

|                |            |       |          |                 |
|----------------|------------|-------|----------|-----------------|
| 17 rs557492346 | 44367453 C | 2.505 | 1.64E-06 | chr:17:44361948 |
| 17 rs36050210  | 44353414 G | 2.445 | 1.70E-06 | chr:17:44361948 |
| 17 rs2732713   | 44348593 G | 2.471 | 1.71E-06 | chr:17:44361948 |
| 17 rs113146341 | 44296097 T | 3.1   | 1.71E-06 | chr:17:44361948 |
| 17 rs2532412   | 44295695 G | 3.1   | 1.71E-06 | chr:17:44361948 |
| 17 rs2942186   | 44295795 A | 3.1   | 1.71E-06 | chr:17:44361948 |
| 17 rs77294312  | 44296179 C | 3.1   | 1.71E-06 | chr:17:44361948 |
| 17 rs559536284 | 44369214 C | 2.478 | 1.72E-06 | chr:17:44361948 |
| 17 rs568624216 | 44369224 G | 2.478 | 1.72E-06 | chr:17:44361948 |
| 17 rs548461223 | 44357796 T | 3.094 | 1.72E-06 | chr:17:44361948 |
| 17 rs570571928 | 44346039 G | 3.158 | 1.72E-06 | chr:17:44361948 |
| 17 rs2696533   | 44355343 C | 2.471 | 1.74E-06 | chr:17:44361948 |
| 17 rs537893623 | 44259919 G | 3.111 | 1.74E-06 | chr:17:44361948 |
| 17 rs546307573 | 44257923 A | 3.111 | 1.74E-06 | chr:17:44361948 |
| 17 rs551312659 | 44259519 G | 3.111 | 1.74E-06 | chr:17:44361948 |
| 17 rs566628150 | 44259539 C | 3.111 | 1.74E-06 | chr:17:44361948 |
| 17 rs62062288  | 44096553 A | 2.486 | 1.77E-06 | chr:17:44361948 |
| 17 rs540279850 | 44365897 T | 3.062 | 1.78E-06 | chr:17:44361948 |
| 17 rs547112461 | 44213934 A | 2.419 | 1.78E-06 | chr:17:44361948 |
| 17 rs528895211 | 44368946 C | 3.171 | 1.79E-06 | chr:17:44361948 |
| 17 rs557129713 | 44351087 C | 3.15  | 1.79E-06 | chr:17:44361948 |
| 17 rs573087564 | 44256655 A | 3.087 | 1.81E-06 | chr:17:44361948 |
| 17 rs573419147 | 44327370 A | 3.037 | 1.82E-06 | chr:17:44361948 |
| 17 rs139077859 | 44335579 A | 3.124 | 1.83E-06 | chr:17:44361948 |
| 17 rs546745122 | 44253951 A | 3.067 | 1.86E-06 | chr:17:44361948 |
| 17 rs570203120 | 44267863 A | 2.411 | 1.89E-06 | chr:17:44361948 |
| 17 rs549572472 | 44352621 G | 2.446 | 1.90E-06 | chr:17:44361948 |
| 17 rs544780187 | 44263923 C | 3.089 | 1.91E-06 | chr:17:44361948 |
| 17 rs560239021 | 44263955 G | 3.089 | 1.91E-06 | chr:17:44361948 |
| 17 rs2429449   | 44296224 T | 3.074 | 1.92E-06 | chr:17:44361948 |
| 17 rs575952052 | 44231932 A | 3.072 | 1.93E-06 | chr:17:44361948 |
| 17 rs533246868 | 44238490 A | 3.089 | 1.94E-06 | chr:17:44361948 |
| 17 rs2732705   | 44351929 G | 2.433 | 1.94E-06 | chr:17:44361948 |
| 17 rs148033495 | 44313224 G | 3.067 | 1.94E-06 | chr:17:44361948 |
| 17 rs529398497 | 44254291 T | 3.055 | 1.96E-06 | chr:17:44361948 |
| 17 rs17573447  | 44079567 T | 2.429 | 1.97E-06 | chr:17:44361948 |
| 17 rs116956554 | 44699851 A | 2.476 | 2.01E-06 | chr:17:44361948 |
| 17 rs184837332 | 44359783 T | 2.481 | 2.02E-06 | chr:17:44361948 |
| 17 rs2532414   | 44294105 T | 3.074 | 2.05E-06 | chr:17:44361948 |
| 17 rs141783865 | 44755729 C | 2.486 | 2.06E-06 | chr:17:44361948 |
| 17 rs528334214 | 44762252 G | 2.486 | 2.06E-06 | chr:17:44361948 |
| 17 rs541694781 | 44230097 T | 3.073 | 2.06E-06 | chr:17:44361948 |
| 17 rs2668627   | 44353693 C | 2.383 | 2.08E-06 | chr:17:44361948 |

|                |            |       |          |                 |
|----------------|------------|-------|----------|-----------------|
| 17 rs1918794   | 44224782 T | 3.079 | 2.08E-06 | chr:17:44361948 |
| 17 rs2696445   | 44288702 T | 3.073 | 2.08E-06 | chr:17:44361948 |
| 17 rs533813183 | 44278661 A | 3.073 | 2.08E-06 | chr:17:44361948 |
| 17 rs536950796 | 44281308 A | 3.073 | 2.08E-06 | chr:17:44361948 |
| 17 rs547806241 | 44283571 T | 3.073 | 2.08E-06 | chr:17:44361948 |
| 17 rs560806845 | 44277825 T | 3.073 | 2.08E-06 | chr:17:44361948 |
| 17 rs577688575 | 44281633 A | 3.073 | 2.08E-06 | chr:17:44361948 |
| 17 rs551976521 | 44366665 T | 2.46  | 2.09E-06 | chr:17:44361948 |
| 17 rs550683961 | 44367288 C | 2.502 | 2.13E-06 | chr:17:44361948 |
| 17 rs6503457   | 44208312 T | 2.455 | 2.14E-06 | chr:17:44361948 |
| 17 rs557874689 | 44365050 A | 2.434 | 2.14E-06 | chr:17:44361948 |
| 17 rs2458193   | 44285467 G | 2.36  | 2.16E-06 | chr:17:44361948 |
| 17 rs569635106 | 44272000 A | 2.428 | 2.17E-06 | chr:17:44361948 |
| 17 rs553435810 | 43933802 T | 2.664 | 2.17E-06 | chr:17:44361948 |
| 17 rs555313689 | 44327082 T | 3.069 | 2.18E-06 | chr:17:44361948 |
| 17 rs538530693 | 44225886 A | 3.045 | 2.19E-06 | chr:17:44361948 |
| 17 rs540702737 | 44232408 A | 3.045 | 2.19E-06 | chr:17:44361948 |
| 17 rs575074983 | 44214888 C | 3.045 | 2.19E-06 | chr:17:44361948 |
| 17 rs577465540 | 44327482 A | 2.206 | 2.24E-06 | chr:17:44361948 |
| 17 rs560168478 | 44223034 C | 3.045 | 2.31E-06 | chr:17:44361948 |
| 17 rs529897519 | 44358561 A | 2.473 | 2.32E-06 | chr:17:44361948 |
| 17 rs548216148 | 44358562 T | 2.473 | 2.32E-06 | chr:17:44361948 |
| 17 rs546081116 | 44368055 C | 2.485 | 2.34E-06 | chr:17:44361948 |
| 17 rs113178301 | 44339354 C | 3.082 | 2.36E-06 | chr:17:44361948 |
| 17 rs2429440   | 44342563 G | 3.082 | 2.36E-06 | chr:17:44361948 |
| 17 rs2668687   | 44339712 G | 3.082 | 2.36E-06 | chr:17:44361948 |
| 17 rs2668713   | 44342513 C | 3.082 | 2.36E-06 | chr:17:44361948 |
| 17 rs2696431   | 44338280 A | 3.082 | 2.36E-06 | chr:17:44361948 |
| 17 rs2942185   | 44338422 A | 3.082 | 2.36E-06 | chr:17:44361948 |
| 17 rs2950656   | 44338433 A | 3.082 | 2.36E-06 | chr:17:44361948 |
| 17 rs34046424  | 44339513 C | 3.082 | 2.36E-06 | chr:17:44361948 |
| 17 rs528392237 | 44338404 A | 3.082 | 2.36E-06 | chr:17:44361948 |
| 17 rs551092140 | 44343084 G | 3.082 | 2.36E-06 | chr:17:44361948 |
| 17 rs553781537 | 44343392 A | 3.082 | 2.36E-06 | chr:17:44361948 |
| 17 rs572865475 | 44340021 T | 3.082 | 2.36E-06 | chr:17:44361948 |
| 17 rs80290584  | 44339375 G | 3.082 | 2.36E-06 | chr:17:44361948 |
| 17 rs549814054 | 44149348 C | 2.438 | 2.39E-06 | chr:17:44361948 |
| 17 rs10221243  | 44212310 A | 2.424 | 2.41E-06 | chr:17:44361948 |
| 17 rs1029463   | 44150161 G | 2.424 | 2.41E-06 | chr:17:44361948 |
| 17 rs16940904  | 44186063 T | 2.424 | 2.41E-06 | chr:17:44361948 |
| 17 rs2066899   | 44155732 T | 2.424 | 2.41E-06 | chr:17:44361948 |
| 17 rs2097760   | 44168677 G | 2.424 | 2.41E-06 | chr:17:44361948 |
| 17 rs3865315   | 44165169 T | 2.424 | 2.41E-06 | chr:17:44361948 |

|                |            |       |          |                 |
|----------------|------------|-------|----------|-----------------|
| 17 rs4597358   | 44110670 G | 2.424 | 2.41E-06 | chr:17:44361948 |
| 17 rs533322597 | 44257783 G | 2.424 | 2.41E-06 | chr:17:44361948 |
| 17 rs549599956 | 44247164 G | 2.424 | 2.41E-06 | chr:17:44361948 |
| 17 rs566704864 | 44238571 G | 2.424 | 2.41E-06 | chr:17:44361948 |
| 17 rs62061820  | 44185431 C | 2.424 | 2.41E-06 | chr:17:44361948 |
| 17 rs7207582   | 44210933 G | 2.424 | 2.41E-06 | chr:17:44361948 |
| 17 rs7218319   | 44126365 T | 2.424 | 2.41E-06 | chr:17:44361948 |
| 17 rs7220752   | 44138201 C | 2.424 | 2.41E-06 | chr:17:44361948 |
| 17 rs7221390   | 44116950 G | 2.424 | 2.41E-06 | chr:17:44361948 |
| 17 rs7350980   | 44110271 A | 2.424 | 2.41E-06 | chr:17:44361948 |
| 17 rs76402917  | 44126477 A | 2.424 | 2.41E-06 | chr:17:44361948 |
| 17 rs78773690  | 44126478 C | 2.424 | 2.41E-06 | chr:17:44361948 |
| 17 rs8070942   | 44208674 T | 2.424 | 2.41E-06 | chr:17:44361948 |
| 17 rs8077487   | 44115440 C | 2.424 | 2.41E-06 | chr:17:44361948 |
| 17 rs8080583   | 44162597 A | 2.424 | 2.41E-06 | chr:17:44361948 |
| 17 rs9303525   | 44187257 G | 2.424 | 2.41E-06 | chr:17:44361948 |
| 17 rs9891103   | 44091886 T | 2.424 | 2.41E-06 | chr:17:44361948 |
| 17 rs9907738   | 44151546 G | 2.424 | 2.41E-06 | chr:17:44361948 |
| 17 rs569948327 | 44347165 C | 3.102 | 2.42E-06 | chr:17:44361948 |
| 17 rs564007266 | 44364584 T | 3.11  | 2.44E-06 | chr:17:44361948 |
| 17 rs567135833 | 44363929 T | 2.435 | 2.46E-06 | chr:17:44361948 |
| 17 rs561816303 | 44318863 C | 2.368 | 2.46E-06 | chr:17:44361948 |
| 17 rs529106335 | 44364699 T | 2.418 | 2.47E-06 | chr:17:44361948 |
| 17 rs539219056 | 44326712 C | 3.031 | 2.48E-06 | chr:17:44361948 |
| 17 rs2429438   | 44348265 C | 2.417 | 2.51E-06 | chr:17:44361948 |
| 17 rs2732608   | 44365980 T | 2.157 | 2.51E-06 | chr:17:44361948 |
| 17 rs62073178  | 44368431 T | 2.487 | 2.53E-06 | chr:17:44361948 |
| 17 rs534145818 | 44367939 A | 2.464 | 2.64E-06 | chr:17:44361948 |
| 17 rs573045769 | 44220785 A | 2.379 | 2.77E-06 | chr:17:44361948 |
| 17 rs545111519 | 44242574 A | 3.029 | 2.79E-06 | chr:17:44361948 |
| 17 rs577583257 | 44242536 T | 3.029 | 2.79E-06 | chr:17:44361948 |
| 17 rs2532340   | 44345653 G | 2.433 | 2.82E-06 | chr:17:44361948 |
| 17 rs528462017 | 44361007 G | 2.817 | 2.84E-06 | chr:17:44361948 |
| 17 rs2950706   | 44343004 T | 3.064 | 2.85E-06 | chr:17:44361948 |
| 17 rs561183899 | 44226325 T | 3.015 | 2.87E-06 | chr:17:44361948 |
| 17 rs576581426 | 44226331 G | 3.015 | 2.87E-06 | chr:17:44361948 |
| 17 rs149586816 | 44494110 G | 2.252 | 2.91E-06 | chr:17:44361948 |
| 17 rs544309319 | 44258914 G | 2.373 | 2.92E-06 | chr:17:44361948 |
| 17 rs560744251 | 44230269 C | 3.004 | 2.92E-06 | chr:17:44361948 |
| 17 rs568873066 | 44352872 G | 2.432 | 2.95E-06 | chr:17:44361948 |
| 17 rs570486150 | 44272266 G | 2.385 | 2.99E-06 | chr:17:44361948 |
| 17 rs55660209  | 43932173 G | 2.614 | 3.01E-06 | chr:17:44361948 |
| 17 rs541425496 | 44062689 C | 2.373 | 3.04E-06 | chr:17:44361948 |

|                |            |       |          |                 |
|----------------|------------|-------|----------|-----------------|
| 17 rs2668665   | 44290047 A | 2.382 | 3.04E-06 | chr:17:44361948 |
| 17 rs562047763 | 44362865 C | 2.415 | 3.09E-06 | chr:17:44361948 |
| 17 rs9915547   | 44212782 C | 2.402 | 3.09E-06 | chr:17:44361948 |
| 17 rs545089385 | 44342404 C | 3.038 | 3.16E-06 | chr:17:44361948 |
| 17 rs559816018 | 44283858 A | 2.972 | 3.17E-06 | chr:17:44361948 |
| 17 rs556965428 | 44339153 G | 2.991 | 3.17E-06 | chr:17:44361948 |
| 17 rs575310615 | 44339174 T | 2.991 | 3.17E-06 | chr:17:44361948 |
| 17 rs62061818  | 44182917 G | 2.404 | 3.23E-06 | chr:17:44361948 |
| 17 rs75183956  | 44182956 G | 2.404 | 3.23E-06 | chr:17:44361948 |
| 17 rs75330746  | 44182955 T | 2.404 | 3.23E-06 | chr:17:44361948 |
| 17 rs565427790 | 44344178 G | 2.259 | 3.25E-06 | chr:17:44361948 |
| 17 rs530892614 | 44267904 C | 2.346 | 3.25E-06 | chr:17:44361948 |
| 17 rs2667932   | 44582284 G | 1.928 | 3.26E-06 | chr:17:44361948 |
| 17 rs575972824 | 44358146 A | 2.929 | 3.27E-06 | chr:17:44361948 |
| 17 rs75743061  | 44068112 G | 2.372 | 3.28E-06 | chr:17:44361948 |
| 17 rs192856660 | 44359779 T | 2.439 | 3.29E-06 | chr:17:44361948 |
| 17 rs540298066 | 44273448 A | 2.406 | 3.30E-06 | chr:17:44361948 |
| 17 rs532044959 | 44213921 C | 2.37  | 3.39E-06 | chr:17:44361948 |
| 17 rs547806751 | 44269546 T | 2.397 | 3.40E-06 | chr:17:44361948 |
| 17 rs111413387 | 44344409 C | 2.224 | 3.47E-06 | chr:17:44361948 |
| 17 rs4283261   | 44089921 T | 2.366 | 3.52E-06 | chr:17:44361948 |
| 17 rs534205707 | 44296846 A | 2.366 | 3.52E-06 | chr:17:44361948 |
| 17 rs577973995 | 44296845 C | 2.366 | 3.52E-06 | chr:17:44361948 |
| 17 rs533170687 | 44352361 T | 2.32  | 3.57E-06 | chr:17:44361948 |
| 17 rs2668632   | 44319366 T | 2.363 | 3.58E-06 | chr:17:44361948 |
| 17 rs578109777 | 44319369 C | 2.363 | 3.58E-06 | chr:17:44361948 |
| 17 rs575638762 | 44255017 C | 2.364 | 3.64E-06 | chr:17:44361948 |
| 17 rs533579396 | 44327070 A | 2.187 | 3.65E-06 | chr:17:44361948 |
| 17 rs55649944  | 44119463 T | 2.374 | 3.65E-06 | chr:17:44361948 |
| 17 rs56406462  | 44119474 C | 2.374 | 3.65E-06 | chr:17:44361948 |
| 17 rs2696608   | 44293671 G | 2.97  | 3.68E-06 | chr:17:44361948 |
| 17 rs2696422   | 44333889 C | 2.367 | 3.69E-06 | chr:17:44361948 |
| 17 rs2696423   | 44333890 A | 2.367 | 3.69E-06 | chr:17:44361948 |
| 17 rs541891089 | 44364481 G | 2.963 | 3.70E-06 | chr:17:44361948 |
| 17 rs569247938 | 44254413 G | 2.36  | 3.70E-06 | chr:17:44361948 |
| 17 rs554959222 | 44344456 C | 2.217 | 3.70E-06 | chr:17:44361948 |
| 17 rs2668694   | 44292319 C | 2.362 | 3.71E-06 | chr:17:44361948 |
| 17 rs557534113 | 44215045 C | 2.362 | 3.71E-06 | chr:17:44361948 |
| 17 rs555203107 | 44324572 G | 2.315 | 3.73E-06 | chr:17:44361948 |
| 17 rs111520035 | 44039410 G | 2.359 | 3.74E-06 | chr:17:44361948 |
| 17 rs552475563 | 44234526 T | 2.36  | 3.75E-06 | chr:17:44361948 |
| 17 rs538148047 | 44221602 C | 2.36  | 3.76E-06 | chr:17:44361948 |
| 17 rs112784142 | 44327958 G | 2.977 | 3.78E-06 | chr:17:44361948 |

|                |            |       |          |                 |
|----------------|------------|-------|----------|-----------------|
| 17 rs531845455 | 44328668 G | 2.977 | 3.78E-06 | chr:17:44361948 |
| 17 rs17652520  | 44098967 A | 2.377 | 3.78E-06 | chr:17:44361948 |
| 17 rs534959541 | 44286089 A | 2.281 | 3.79E-06 | chr:17:44361948 |
| 17 rs531050317 | 44269421 T | 2.964 | 3.81E-06 | chr:17:44361948 |
| 17 rs2668622   | 44352131 T | 2.306 | 3.82E-06 | chr:17:44361948 |
| 17 rs112364920 | 44161360 T | 2.386 | 3.83E-06 | chr:17:44361948 |
| 17 rs150592114 | 44333331 G | 2.386 | 3.83E-06 | chr:17:44361948 |
| 17 rs55668363  | 43892788 A | 2.543 | 3.85E-06 | chr:17:44361948 |
| 17 rs2435204   | 43988205 G | 2.374 | 3.88E-06 | chr:17:44361948 |
| 17 rs544161107 | 44222335 A | 2.357 | 3.90E-06 | chr:17:44361948 |
| 17 rs62073156  | 44333568 C | 2.386 | 3.91E-06 | chr:17:44361948 |
| 17 rs562641029 | 44279803 G | 2.962 | 3.92E-06 | chr:17:44361948 |
| 17 rs77917260  | 44339607 T | 2.881 | 3.92E-06 | chr:17:44361948 |
| 17 rs2532339   | 44345668 G | 3.01  | 3.93E-06 | chr:17:44361948 |
| 17 rs2668658   | 44282472 C | 2.963 | 3.94E-06 | chr:17:44361948 |
| 17 rs2668639   | 44324539 T | 2.36  | 3.95E-06 | chr:17:44361948 |
| 17 rs2732625   | 44332429 T | 2.396 | 3.96E-06 | chr:17:44361948 |
| 17 rs535910576 | 44284734 C | 2.316 | 3.98E-06 | chr:17:44361948 |
| 17 rs2316956   | 44162056 A | 2.599 | 3.98E-06 | chr:17:44361948 |
| 17 rs2696515   | 44358109 T | 2.397 | 3.98E-06 | chr:17:44361948 |
| 17 rs2696516   | 44358107 T | 2.397 | 3.98E-06 | chr:17:44361948 |
| 17 rs2668670   | 44289628 C | 2.354 | 4.01E-06 | chr:17:44361948 |
| 17 rs2253488   | 44304910 C | 2.355 | 4.02E-06 | chr:17:44361948 |
| 17 rs371411506 | 44303668 T | 2.355 | 4.04E-06 | chr:17:44361948 |
| 17 rs537509137 | 44327438 G | 2.147 | 4.04E-06 | chr:17:44361948 |
| 17 rs540548105 | 44220790 G | 2.355 | 4.04E-06 | chr:17:44361948 |
| 17 rs577620178 | 44224686 T | 2.355 | 4.04E-06 | chr:17:44361948 |
| 17 rs111446248 | 44355173 C | 2.943 | 4.05E-06 | chr:17:44361948 |
| 17 rs533699804 | 44241664 C | 2.354 | 4.05E-06 | chr:17:44361948 |
| 17 rs78903072  | 44338966 C | 2.208 | 4.06E-06 | chr:17:44361948 |
| 17 rs79928920  | 44338967 C | 2.208 | 4.06E-06 | chr:17:44361948 |
| 17 rs140288713 | 44690708 A | 2.349 | 4.08E-06 | chr:17:44361948 |
| 17 rs573245541 | 44218138 T | 2.961 | 4.14E-06 | chr:17:44361948 |
| 17 rs2696432   | 44338285 T | 2.95  | 4.18E-06 | chr:17:44361948 |
| 17 rs563364166 | 44335865 G | 2.729 | 4.18E-06 | chr:17:44361948 |
| 17 rs538694593 | 44243863 T | 2.359 | 4.26E-06 | chr:17:44361948 |
| 17 rs554127484 | 44243868 T | 2.359 | 4.26E-06 | chr:17:44361948 |
| 17 rs572482907 | 44243870 C | 2.359 | 4.26E-06 | chr:17:44361948 |
| 17 rs372745970 | 44322577 C | 2.408 | 4.34E-06 | chr:17:44361948 |
| 17 rs528977056 | 44276618 G | 2.321 | 4.35E-06 | chr:17:44361948 |
| 17 rs568196639 | 44276578 C | 2.321 | 4.35E-06 | chr:17:44361948 |
| 17 rs2469937   | 44336976 C | 2.968 | 4.39E-06 | chr:17:44361948 |
| 17 rs2532418   | 44288579 C | 2.347 | 4.39E-06 | chr:17:44361948 |

|                      |            |       |          |                 |
|----------------------|------------|-------|----------|-----------------|
| 17 rs573087816       | 44258422 T | 2.347 | 4.39E-06 | chr:17:44361948 |
| 17 rs2950015         | 44332351 G | 2.366 | 4.43E-06 | chr:17:44361948 |
| 17 rs62061803        | 44174513 A | 2.354 | 4.52E-06 | chr:17:44361948 |
| 17 rs113912415       | 44007785 G | 2.398 | 4.55E-06 | chr:17:44361948 |
| 17 rs1468240         | 44196447 A | 2.353 | 4.55E-06 | chr:17:44361948 |
| 17 rs576500756       | 44228169 T | 2.348 | 4.56E-06 | chr:17:44361948 |
| 17 rs554899842       | 44331214 C | 2.524 | 4.63E-06 | chr:17:44361948 |
| 17 rs570285046       | 44305199 C | 2.352 | 4.64E-06 | chr:17:44361948 |
| 17 rs113343751       | 44333532 G | 2.37  | 4.65E-06 | chr:17:44361948 |
| 17 rs142045106       | 44514788 T | 1.927 | 4.66E-06 | chr:17:44361948 |
| 17 rs2532349         | 44339473 G | 2.321 | 4.74E-06 | chr:17:44361948 |
| 17 rs576111957       | 44285142 C | 2.283 | 4.75E-06 | chr:17:44361948 |
| 17 rs555346866       | 44281452 G | 2.358 | 4.76E-06 | chr:17:44361948 |
| 17 rs572116262;rs373 | 44227623 C | 2.378 | 4.77E-06 | chr:17:44361948 |
| 17 rs371996525       | 44183317 A | 2.341 | 4.77E-06 | chr:17:44361948 |
| 17 rs2696609         | 44293205 G | 2.327 | 4.80E-06 | chr:17:44361948 |
| 17 rs55735563        | 44165596 T | 2.348 | 4.81E-06 | chr:17:44361948 |
| 17 rs55955207        | 44165594 A | 2.348 | 4.81E-06 | chr:17:44361948 |
| 17 rs2732712         | 44348932 G | 2.276 | 4.84E-06 | chr:17:44361948 |
| 17 rs62061798        | 44173812 A | 2.347 | 4.86E-06 | chr:17:44361948 |
| 17 rs112534607       | 44344376 A | 2.184 | 4.87E-06 | chr:17:44361948 |
| 17 rs545648705       | 44276330 C | 2.318 | 4.89E-06 | chr:17:44361948 |
| 17 rs2732685         | 44339408 T | 2.27  | 4.90E-06 | chr:17:44361948 |
| 17 rs539081995       | 44341627 T | 2.961 | 4.92E-06 | chr:17:44361948 |
| 17 rs571886519       | 44341609 C | 2.961 | 4.92E-06 | chr:17:44361948 |
| 17 rs55915917        | 43892784 G | 2.515 | 4.94E-06 | chr:17:44361948 |
| 17 rs545737636       | 44362552 T | 2.349 | 4.96E-06 | chr:17:44361948 |
| 17 rs534396161       | 44339003 T | 2.211 | 5.02E-06 | chr:17:44361948 |
| 17 rs56119705        | 44209985 C | 2.345 | 5.04E-06 | chr:17:44361948 |
| 17 rs17577877        | 44208218 G | 2.344 | 5.05E-06 | chr:17:44361948 |
| 17 rs17661428        | 44208144 G | 2.344 | 5.05E-06 | chr:17:44361948 |
| 17 rs4606752         | 44192618 G | 2.344 | 5.05E-06 | chr:17:44361948 |
| 17 rs555719522       | 44302881 T | 2.319 | 5.06E-06 | chr:17:44361948 |
| 17 rs191247549       | 44326105 C | 2.36  | 5.09E-06 | chr:17:44361948 |
| 17 rs531804214       | 44343930 G | 2.321 | 5.10E-06 | chr:17:44361948 |
| 17 rs533125554       | 44222460 G | 2.319 | 5.12E-06 | chr:17:44361948 |
| 17 rs17691328        | 43955487 T | 2.339 | 5.21E-06 | chr:17:44361948 |
| 17 rs569817232       | 44310101 G | 2.314 | 5.28E-06 | chr:17:44361948 |
| 17 rs559790424       | 44267617 G | 2.291 | 5.50E-06 | chr:17:44361948 |
| 17 rs568071087       | 44364519 G | 2.234 | 5.50E-06 | chr:17:44361948 |
| 17 rs571792649       | 44283022 G | 2.307 | 5.61E-06 | chr:17:44361948 |
| 17 rs2696429         | 44335274 A | 2.692 | 5.61E-06 | chr:17:44361948 |
| 17 rs529815603       | 44335806 C | 2.692 | 5.61E-06 | chr:17:44361948 |



|                |            |       |          |                 |
|----------------|------------|-------|----------|-----------------|
| 17 rs532600730 | 44283479 C | 2.289 | 5.79E-06 | chr:17:44361948 |
| 17 rs10445337  | 44067400 C | 2.331 | 5.85E-06 | chr:17:44361948 |
| 17 rs10445338  | 44067682 A | 2.331 | 5.85E-06 | chr:17:44361948 |
| 17 rs10445371  | 44065410 A | 2.331 | 5.85E-06 | chr:17:44361948 |
| 17 rs10514897  | 44117397 G | 2.331 | 5.85E-06 | chr:17:44361948 |
| 17 rs10514898  | 44119636 C | 2.331 | 5.85E-06 | chr:17:44361948 |
| 17 rs10514901  | 44194735 T | 2.331 | 5.85E-06 | chr:17:44361948 |
| 17 rs10514903  | 44206646 G | 2.331 | 5.85E-06 | chr:17:44361948 |
| 17 rs10514904  | 44207887 T | 2.331 | 5.85E-06 | chr:17:44361948 |
| 17 rs1052551   | 44068924 A | 2.331 | 5.85E-06 | chr:17:44361948 |
| 17 rs1052587   | 44102604 C | 2.331 | 5.85E-06 | chr:17:44361948 |
| 17 rs1052590   | 44102638 G | 2.331 | 5.85E-06 | chr:17:44361948 |
| 17 rs1076222   | 44109769 G | 2.331 | 5.85E-06 | chr:17:44361948 |
| 17 rs1078268   | 44075901 G | 2.331 | 5.85E-06 | chr:17:44361948 |
| 17 rs1078269   | 44075837 C | 2.331 | 5.85E-06 | chr:17:44361948 |
| 17 rs1107820   | 44135359 C | 2.331 | 5.85E-06 | chr:17:44361948 |
| 17 rs11079729  | 44115569 A | 2.331 | 5.85E-06 | chr:17:44361948 |
| 17 rs111164082 | 44047037 A | 2.331 | 5.85E-06 | chr:17:44361948 |
| 17 rs111240522 | 44066874 A | 2.331 | 5.85E-06 | chr:17:44361948 |
| 17 rs111259120 | 44133534 T | 2.331 | 5.85E-06 | chr:17:44361948 |
| 17 rs111295615 | 44184428 C | 2.331 | 5.85E-06 | chr:17:44361948 |
| 17 rs111314258 | 44296522 C | 2.331 | 5.85E-06 | chr:17:44361948 |
| 17 rs111324579 | 44082181 G | 2.331 | 5.85E-06 | chr:17:44361948 |
| 17 rs111327992 | 44126691 A | 2.331 | 5.85E-06 | chr:17:44361948 |
| 17 rs111364350 | 44168508 T | 2.331 | 5.85E-06 | chr:17:44361948 |
| 17 rs111372048 | 44136577 C | 2.331 | 5.85E-06 | chr:17:44361948 |
| 17 rs111424940 | 44211502 A | 2.331 | 5.85E-06 | chr:17:44361948 |
| 17 rs111519055 | 44159672 G | 2.331 | 5.85E-06 | chr:17:44361948 |
| 17 rs111652694 | 44067831 C | 2.331 | 5.85E-06 | chr:17:44361948 |
| 17 rs111676341 | 44183403 G | 2.331 | 5.85E-06 | chr:17:44361948 |
| 17 rs111678697 | 44197032 C | 2.331 | 5.85E-06 | chr:17:44361948 |
| 17 rs111724389 | 44209364 A | 2.331 | 5.85E-06 | chr:17:44361948 |
| 17 rs1117253   | 44149297 C | 2.331 | 5.85E-06 | chr:17:44361948 |
| 17 rs111853996 | 44130878 G | 2.331 | 5.85E-06 | chr:17:44361948 |
| 17 rs111880194 | 44194621 G | 2.331 | 5.85E-06 | chr:17:44361948 |
| 17 rs111913701 | 44159631 G | 2.331 | 5.85E-06 | chr:17:44361948 |
| 17 rs111952388 | 44181454 T | 2.331 | 5.85E-06 | chr:17:44361948 |
| 17 rs111957446 | 44179723 C | 2.331 | 5.85E-06 | chr:17:44361948 |
| 17 rs111970616 | 44169581 C | 2.331 | 5.85E-06 | chr:17:44361948 |
| 17 rs111976319 | 44095335 A | 2.331 | 5.85E-06 | chr:17:44361948 |
| 17 rs112058117 | 44041562 T | 2.331 | 5.85E-06 | chr:17:44361948 |
| 17 rs112073200 | 44201791 C | 2.331 | 5.85E-06 | chr:17:44361948 |
| 17 rs112074397 | 44131022 C | 2.331 | 5.85E-06 | chr:17:44361948 |

|    |             |          |   |       |          |                 |
|----|-------------|----------|---|-------|----------|-----------------|
| 17 | rs112102887 | 44179749 | A | 2.331 | 5.85E-06 | chr:17:44361948 |
| 17 | rs112197756 | 44154105 | G | 2.331 | 5.85E-06 | chr:17:44361948 |
| 17 | rs112206871 | 44041817 | G | 2.331 | 5.85E-06 | chr:17:44361948 |
| 17 | rs1122380   | 44206079 | T | 2.331 | 5.85E-06 | chr:17:44361948 |
| 17 | rs1122381   | 44205839 | G | 2.331 | 5.85E-06 | chr:17:44361948 |
| 17 | rs112310745 | 44082432 | A | 2.331 | 5.85E-06 | chr:17:44361948 |
| 17 | rs112333322 | 44126673 | G | 2.331 | 5.85E-06 | chr:17:44361948 |
| 17 | rs112385572 | 44066172 | G | 2.331 | 5.85E-06 | chr:17:44361948 |
| 17 | rs112401617 | 44209474 | T | 2.331 | 5.85E-06 | chr:17:44361948 |
| 17 | rs112411928 | 44139762 | G | 2.331 | 5.85E-06 | chr:17:44361948 |
| 17 | rs112415880 | 44042868 | A | 2.331 | 5.85E-06 | chr:17:44361948 |
| 17 | rs112560196 | 44200078 | T | 2.331 | 5.85E-06 | chr:17:44361948 |
| 17 | rs112572874 | 44072984 | G | 2.331 | 5.85E-06 | chr:17:44361948 |
| 17 | rs112578465 | 44125066 | T | 2.331 | 5.85E-06 | chr:17:44361948 |
| 17 | rs112596352 | 44170238 | A | 2.331 | 5.85E-06 | chr:17:44361948 |
| 17 | rs112674766 | 44130924 | T | 2.331 | 5.85E-06 | chr:17:44361948 |
| 17 | rs112746008 | 44126650 | T | 2.331 | 5.85E-06 | chr:17:44361948 |
| 17 | rs112813897 | 44196799 | A | 2.331 | 5.85E-06 | chr:17:44361948 |
| 17 | rs112893440 | 44179969 | A | 2.331 | 5.85E-06 | chr:17:44361948 |
| 17 | rs113120855 | 44203520 | T | 2.331 | 5.85E-06 | chr:17:44361948 |
| 17 | rs113134013 | 44066995 | T | 2.331 | 5.85E-06 | chr:17:44361948 |
| 17 | rs113201171 | 44082249 | T | 2.331 | 5.85E-06 | chr:17:44361948 |
| 17 | rs113316734 | 44084157 | C | 2.331 | 5.85E-06 | chr:17:44361948 |
| 17 | rs113417378 | 44270809 | G | 2.331 | 5.85E-06 | chr:17:44361948 |
| 17 | rs113638513 | 44204749 | G | 2.331 | 5.85E-06 | chr:17:44361948 |
| 17 | rs113758975 | 44207523 | A | 2.331 | 5.85E-06 | chr:17:44361948 |
| 17 | rs113788190 | 44161302 | G | 2.331 | 5.85E-06 | chr:17:44361948 |
| 17 | rs113857334 | 44044940 | C | 2.331 | 5.85E-06 | chr:17:44361948 |
| 17 | rs113909426 | 44196822 | A | 2.331 | 5.85E-06 | chr:17:44361948 |
| 17 | rs113955100 | 44161522 | C | 2.331 | 5.85E-06 | chr:17:44361948 |
| 17 | rs117124984 | 44051588 | G | 2.331 | 5.85E-06 | chr:17:44361948 |
| 17 | rs118087478 | 44051589 | G | 2.331 | 5.85E-06 | chr:17:44361948 |
| 17 | rs12149995  | 44092801 | A | 2.331 | 5.85E-06 | chr:17:44361948 |
| 17 | rs12150064  | 44128407 | A | 2.331 | 5.85E-06 | chr:17:44361948 |
| 17 | rs12150087  | 44210988 | G | 2.331 | 5.85E-06 | chr:17:44361948 |
| 17 | rs12150090  | 44115886 | T | 2.331 | 5.85E-06 | chr:17:44361948 |
| 17 | rs12150127  | 44141732 | A | 2.331 | 5.85E-06 | chr:17:44361948 |
| 17 | rs12150162  | 44114218 | C | 2.331 | 5.85E-06 | chr:17:44361948 |
| 17 | rs12150170  | 44090646 | G | 2.331 | 5.85E-06 | chr:17:44361948 |
| 17 | rs12150254  | 44090455 | C | 2.331 | 5.85E-06 | chr:17:44361948 |
| 17 | rs12150336  | 44125704 | T | 2.331 | 5.85E-06 | chr:17:44361948 |
| 17 | rs12150344  | 44143484 | A | 2.331 | 5.85E-06 | chr:17:44361948 |
| 17 | rs12150438  | 44113963 | T | 2.331 | 5.85E-06 | chr:17:44361948 |

|                |            |       |          |                 |
|----------------|------------|-------|----------|-----------------|
| 17 rs12150447  | 44128125 C | 2.331 | 5.85E-06 | chr:17:44361948 |
| 17 rs12150469  | 44092497 C | 2.331 | 5.85E-06 | chr:17:44361948 |
| 17 rs12150515  | 44090685 T | 2.331 | 5.85E-06 | chr:17:44361948 |
| 17 rs12150542  | 44115730 A | 2.331 | 5.85E-06 | chr:17:44361948 |
| 17 rs12150551  | 44150920 C | 2.331 | 5.85E-06 | chr:17:44361948 |
| 17 rs12150558  | 44151156 C | 2.331 | 5.85E-06 | chr:17:44361948 |
| 17 rs12150570  | 44126218 A | 2.331 | 5.85E-06 | chr:17:44361948 |
| 17 rs12150611  | 44149741 A | 2.331 | 5.85E-06 | chr:17:44361948 |
| 17 rs12150625  | 44149448 G | 2.331 | 5.85E-06 | chr:17:44361948 |
| 17 rs12150627  | 44149537 G | 2.331 | 5.85E-06 | chr:17:44361948 |
| 17 rs12150628  | 44149581 T | 2.331 | 5.85E-06 | chr:17:44361948 |
| 17 rs12185225  | 44113491 C | 2.331 | 5.85E-06 | chr:17:44361948 |
| 17 rs12185243  | 44115351 C | 2.331 | 5.85E-06 | chr:17:44361948 |
| 17 rs144416125 | 44296523 A | 2.331 | 5.85E-06 | chr:17:44361948 |
| 17 rs145848989 | 44301546 C | 2.331 | 5.85E-06 | chr:17:44361948 |
| 17 rs1468241   | 44196153 G | 2.331 | 5.85E-06 | chr:17:44361948 |
| 17 rs1476554   | 44159102 T | 2.331 | 5.85E-06 | chr:17:44361948 |
| 17 rs16940799  | 44102933 C | 2.331 | 5.85E-06 | chr:17:44361948 |
| 17 rs16940806  | 44103826 A | 2.331 | 5.85E-06 | chr:17:44361948 |
| 17 rs17572147  | 44044985 G | 2.331 | 5.85E-06 | chr:17:44361948 |
| 17 rs17572169  | 44045974 T | 2.331 | 5.85E-06 | chr:17:44361948 |
| 17 rs17572248  | 44049867 G | 2.331 | 5.85E-06 | chr:17:44361948 |
| 17 rs17572361  | 44052009 C | 2.331 | 5.85E-06 | chr:17:44361948 |
| 17 rs17572467  | 44054388 C | 2.331 | 5.85E-06 | chr:17:44361948 |
| 17 rs17572495  | 44054596 G | 2.331 | 5.85E-06 | chr:17:44361948 |
| 17 rs17572613  | 44058004 G | 2.331 | 5.85E-06 | chr:17:44361948 |
| 17 rs17573175  | 44071089 G | 2.331 | 5.85E-06 | chr:17:44361948 |
| 17 rs17573266  | 44072881 G | 2.331 | 5.85E-06 | chr:17:44361948 |
| 17 rs17573509  | 44081224 A | 2.331 | 5.85E-06 | chr:17:44361948 |
| 17 rs17573593  | 44082603 C | 2.331 | 5.85E-06 | chr:17:44361948 |
| 17 rs17573858  | 44090796 C | 2.331 | 5.85E-06 | chr:17:44361948 |
| 17 rs17573907  | 44099082 T | 2.331 | 5.85E-06 | chr:17:44361948 |
| 17 rs17574040  | 44102865 C | 2.331 | 5.85E-06 | chr:17:44361948 |
| 17 rs17574228  | 44104509 C | 2.331 | 5.85E-06 | chr:17:44361948 |
| 17 rs17574361  | 44108202 G | 2.331 | 5.85E-06 | chr:17:44361948 |
| 17 rs17574425  | 44109188 G | 2.331 | 5.85E-06 | chr:17:44361948 |
| 17 rs17574604  | 44111613 G | 2.331 | 5.85E-06 | chr:17:44361948 |
| 17 rs17574796  | 44115074 C | 2.331 | 5.85E-06 | chr:17:44361948 |
| 17 rs17574824  | 44115107 T | 2.331 | 5.85E-06 | chr:17:44361948 |
| 17 rs17575423  | 44129253 C | 2.331 | 5.85E-06 | chr:17:44361948 |
| 17 rs17575437  | 44133031 A | 2.331 | 5.85E-06 | chr:17:44361948 |
| 17 rs17575507  | 44134095 G | 2.331 | 5.85E-06 | chr:17:44361948 |
| 17 rs17575683  | 44139662 T | 2.331 | 5.85E-06 | chr:17:44361948 |

|               |            |       |          |                 |
|---------------|------------|-------|----------|-----------------|
| 17 rs17575773 | 44142879 T | 2.331 | 5.85E-06 | chr:17:44361948 |
| 17 rs17575822 | 44144345 G | 2.331 | 5.85E-06 | chr:17:44361948 |
| 17 rs17575850 | 44144387 A | 2.331 | 5.85E-06 | chr:17:44361948 |
| 17 rs17576165 | 44159849 C | 2.331 | 5.85E-06 | chr:17:44361948 |
| 17 rs17576200 | 44159988 A | 2.331 | 5.85E-06 | chr:17:44361948 |
| 17 rs17576631 | 44170018 C | 2.331 | 5.85E-06 | chr:17:44361948 |
| 17 rs17576695 | 44172327 A | 2.331 | 5.85E-06 | chr:17:44361948 |
| 17 rs17576709 | 44173356 G | 2.331 | 5.85E-06 | chr:17:44361948 |
| 17 rs17576779 | 44178272 T | 2.331 | 5.85E-06 | chr:17:44361948 |
| 17 rs17576842 | 44179992 G | 2.331 | 5.85E-06 | chr:17:44361948 |
| 17 rs17576870 | 44180442 G | 2.331 | 5.85E-06 | chr:17:44361948 |
| 17 rs17576989 | 44183616 A | 2.331 | 5.85E-06 | chr:17:44361948 |
| 17 rs17577024 | 44186252 A | 2.331 | 5.85E-06 | chr:17:44361948 |
| 17 rs17577052 | 44186301 C | 2.331 | 5.85E-06 | chr:17:44361948 |
| 17 rs17577094 | 44187492 G | 2.331 | 5.85E-06 | chr:17:44361948 |
| 17 rs17577159 | 44188477 G | 2.331 | 5.85E-06 | chr:17:44361948 |
| 17 rs17577313 | 44191835 G | 2.331 | 5.85E-06 | chr:17:44361948 |
| 17 rs17577369 | 44192923 G | 2.331 | 5.85E-06 | chr:17:44361948 |
| 17 rs17577447 | 44194381 A | 2.331 | 5.85E-06 | chr:17:44361948 |
| 17 rs17577496 | 44194835 C | 2.331 | 5.85E-06 | chr:17:44361948 |
| 17 rs17577650 | 44205500 G | 2.331 | 5.85E-06 | chr:17:44361948 |
| 17 rs17577954 | 44209628 C | 2.331 | 5.85E-06 | chr:17:44361948 |
| 17 rs17650860 | 44039008 A | 2.331 | 5.85E-06 | chr:17:44361948 |
| 17 rs17650872 | 44039516 T | 2.331 | 5.85E-06 | chr:17:44361948 |
| 17 rs17650901 | 44039691 G | 2.331 | 5.85E-06 | chr:17:44361948 |
| 17 rs17650973 | 44044220 T | 2.331 | 5.85E-06 | chr:17:44361948 |
| 17 rs17650991 | 44044508 C | 2.331 | 5.85E-06 | chr:17:44361948 |
| 17 rs17651093 | 44049550 A | 2.331 | 5.85E-06 | chr:17:44361948 |
| 17 rs17651134 | 44050340 A | 2.331 | 5.85E-06 | chr:17:44361948 |
| 17 rs17651213 | 44051924 A | 2.331 | 5.85E-06 | chr:17:44361948 |
| 17 rs17651243 | 44052284 A | 2.331 | 5.85E-06 | chr:17:44361948 |
| 17 rs17651285 | 44054237 A | 2.331 | 5.85E-06 | chr:17:44361948 |
| 17 rs17651483 | 44058861 A | 2.331 | 5.85E-06 | chr:17:44361948 |
| 17 rs17651549 | 44061278 T | 2.331 | 5.85E-06 | chr:17:44361948 |
| 17 rs17651700 | 44066634 G | 2.331 | 5.85E-06 | chr:17:44361948 |
| 17 rs17651754 | 44067546 C | 2.331 | 5.85E-06 | chr:17:44361948 |
| 17 rs17651857 | 44069687 G | 2.331 | 5.85E-06 | chr:17:44361948 |
| 17 rs17651887 | 44069840 A | 2.331 | 5.85E-06 | chr:17:44361948 |
| 17 rs17652036 | 44073027 A | 2.331 | 5.85E-06 | chr:17:44361948 |
| 17 rs17652066 | 44073145 C | 2.331 | 5.85E-06 | chr:17:44361948 |
| 17 rs17652121 | 44073973 C | 2.331 | 5.85E-06 | chr:17:44361948 |
| 17 rs17652449 | 44088937 C | 2.331 | 5.85E-06 | chr:17:44361948 |
| 17 rs17652748 | 44103616 T | 2.331 | 5.85E-06 | chr:17:44361948 |

|               |            |       |          |                 |
|---------------|------------|-------|----------|-----------------|
| 17 rs17652961 | 44108355 A | 2.331 | 5.85E-06 | chr:17:44361948 |
| 17 rs17653162 | 44111827 A | 2.331 | 5.85E-06 | chr:17:44361948 |
| 17 rs17653193 | 44112441 A | 2.331 | 5.85E-06 | chr:17:44361948 |
| 17 rs17653211 | 44112638 C | 2.331 | 5.85E-06 | chr:17:44361948 |
| 17 rs17653255 | 44112743 A | 2.331 | 5.85E-06 | chr:17:44361948 |
| 17 rs17653836 | 44128876 A | 2.331 | 5.85E-06 | chr:17:44361948 |
| 17 rs17653889 | 44133070 T | 2.331 | 5.85E-06 | chr:17:44361948 |
| 17 rs17653906 | 44133142 A | 2.331 | 5.85E-06 | chr:17:44361948 |
| 17 rs17653998 | 44135985 G | 2.331 | 5.85E-06 | chr:17:44361948 |
| 17 rs17654016 | 44137925 C | 2.331 | 5.85E-06 | chr:17:44361948 |
| 17 rs17659731 | 44144634 A | 2.331 | 5.85E-06 | chr:17:44361948 |
| 17 rs17659743 | 44146165 G | 2.331 | 5.85E-06 | chr:17:44361948 |
| 17 rs17659881 | 44157597 G | 2.331 | 5.85E-06 | chr:17:44361948 |
| 17 rs17659953 | 44159725 T | 2.331 | 5.85E-06 | chr:17:44361948 |
| 17 rs17660017 | 44160674 C | 2.331 | 5.85E-06 | chr:17:44361948 |
| 17 rs17660065 | 44162284 C | 2.331 | 5.85E-06 | chr:17:44361948 |
| 17 rs17660132 | 44165803 C | 2.331 | 5.85E-06 | chr:17:44361948 |
| 17 rs17660167 | 44166311 T | 2.331 | 5.85E-06 | chr:17:44361948 |
| 17 rs17660228 | 44166500 A | 2.331 | 5.85E-06 | chr:17:44361948 |
| 17 rs17660251 | 44166646 T | 2.331 | 5.85E-06 | chr:17:44361948 |
| 17 rs17660294 | 44167101 C | 2.331 | 5.85E-06 | chr:17:44361948 |
| 17 rs17660337 | 44169605 C | 2.331 | 5.85E-06 | chr:17:44361948 |
| 17 rs17660398 | 44170612 T | 2.331 | 5.85E-06 | chr:17:44361948 |
| 17 rs17660464 | 44177993 A | 2.331 | 5.85E-06 | chr:17:44361948 |
| 17 rs17660488 | 44178337 C | 2.331 | 5.85E-06 | chr:17:44361948 |
| 17 rs17660595 | 44180954 G | 2.331 | 5.85E-06 | chr:17:44361948 |
| 17 rs17660847 | 44189373 T | 2.331 | 5.85E-06 | chr:17:44361948 |
| 17 rs17660865 | 44189408 C | 2.331 | 5.85E-06 | chr:17:44361948 |
| 17 rs17660907 | 44191085 A | 2.331 | 5.85E-06 | chr:17:44361948 |
| 17 rs17660936 | 44191159 T | 2.331 | 5.85E-06 | chr:17:44361948 |
| 17 rs17661015 | 44192957 C | 2.331 | 5.85E-06 | chr:17:44361948 |
| 17 rs17661027 | 44193097 A | 2.331 | 5.85E-06 | chr:17:44361948 |
| 17 rs17661045 | 44194152 A | 2.331 | 5.85E-06 | chr:17:44361948 |
| 17 rs17661348 | 44207066 G | 2.331 | 5.85E-06 | chr:17:44361948 |
| 17 rs17661385 | 44207778 G | 2.331 | 5.85E-06 | chr:17:44361948 |
| 17 rs17664048 | 44278742 G | 2.331 | 5.85E-06 | chr:17:44361948 |
| 17 rs1800547  | 44051846 G | 2.331 | 5.85E-06 | chr:17:44361948 |
| 17 rs1918786  | 44279101 G | 2.331 | 5.85E-06 | chr:17:44361948 |
| 17 rs1918787  | 44279252 G | 2.331 | 5.85E-06 | chr:17:44361948 |
| 17 rs1966345  | 44197806 C | 2.331 | 5.85E-06 | chr:17:44361948 |
| 17 rs1981997  | 44056767 A | 2.331 | 5.85E-06 | chr:17:44361948 |
| 17 rs1981998  | 44056833 A | 2.331 | 5.85E-06 | chr:17:44361948 |
| 17 rs2004673  | 44075099 C | 2.331 | 5.85E-06 | chr:17:44361948 |

|                |            |       |          |                 |
|----------------|------------|-------|----------|-----------------|
| 17 rs2004674   | 44075110 T | 2.331 | 5.85E-06 | chr:17:44361948 |
| 17 rs2158257   | 44104343 C | 2.331 | 5.85E-06 | chr:17:44361948 |
| 17 rs2163129   | 44056433 C | 2.331 | 5.85E-06 | chr:17:44361948 |
| 17 rs2163130   | 44056434 A | 2.331 | 5.85E-06 | chr:17:44361948 |
| 17 rs2217394   | 44053448 G | 2.331 | 5.85E-06 | chr:17:44361948 |
| 17 rs2266497   | 44294786 G | 2.331 | 5.85E-06 | chr:17:44361948 |
| 17 rs2316948   | 44094667 G | 2.331 | 5.85E-06 | chr:17:44361948 |
| 17 rs2316952   | 44139190 C | 2.331 | 5.85E-06 | chr:17:44361948 |
| 17 rs2316953   | 44140341 A | 2.331 | 5.85E-06 | chr:17:44361948 |
| 17 rs2316954   | 44156167 A | 2.331 | 5.85E-06 | chr:17:44361948 |
| 17 rs2316955   | 44161985 G | 2.331 | 5.85E-06 | chr:17:44361948 |
| 17 rs2458204   | 44293963 A | 2.331 | 5.85E-06 | chr:17:44361948 |
| 17 rs2532239   | 44266227 C | 2.331 | 5.85E-06 | chr:17:44361948 |
| 17 rs2532307   | 44221350 A | 2.331 | 5.85E-06 | chr:17:44361948 |
| 17 rs2532413   | 44294983 A | 2.331 | 5.85E-06 | chr:17:44361948 |
| 17 rs2668662   | 44290759 C | 2.331 | 5.85E-06 | chr:17:44361948 |
| 17 rs2668695   | 44292126 C | 2.331 | 5.85E-06 | chr:17:44361948 |
| 17 rs2696566   | 44266531 A | 2.331 | 5.85E-06 | chr:17:44361948 |
| 17 rs2696568   | 44266342 C | 2.331 | 5.85E-06 | chr:17:44361948 |
| 17 rs2696610   | 44291820 G | 2.331 | 5.85E-06 | chr:17:44361948 |
| 17 rs2732601   | 44291479 A | 2.331 | 5.85E-06 | chr:17:44361948 |
| 17 rs2732606   | 44291365 T | 2.331 | 5.85E-06 | chr:17:44361948 |
| 17 rs2838      | 44141347 G | 2.331 | 5.85E-06 | chr:17:44361948 |
| 17 rs3087534   | 44198806 C | 2.331 | 5.85E-06 | chr:17:44361948 |
| 17 rs3089      | 44209919 G | 2.331 | 5.85E-06 | chr:17:44361948 |
| 17 rs34043286  | 44117119 G | 2.331 | 5.85E-06 | chr:17:44361948 |
| 17 rs34579536  | 44108906 G | 2.331 | 5.85E-06 | chr:17:44361948 |
| 17 rs35833914  | 44110541 A | 2.331 | 5.85E-06 | chr:17:44361948 |
| 17 rs36076725  | 44110532 A | 2.331 | 5.85E-06 | chr:17:44361948 |
| 17 rs368557302 | 44303525 A | 2.331 | 5.85E-06 | chr:17:44361948 |
| 17 rs370558872 | 44086726 C | 2.331 | 5.85E-06 | chr:17:44361948 |
| 17 rs372810927 | 44066868 A | 2.331 | 5.85E-06 | chr:17:44361948 |
| 17 rs372980169 | 44212527 G | 2.331 | 5.85E-06 | chr:17:44361948 |
| 17 rs386558525 | 44240986 A | 2.331 | 5.85E-06 | chr:17:44361948 |
| 17 rs3912061   | 44165098 T | 2.331 | 5.85E-06 | chr:17:44361948 |
| 17 rs3912062   | 44165069 G | 2.331 | 5.85E-06 | chr:17:44361948 |
| 17 rs3912063   | 44165049 G | 2.331 | 5.85E-06 | chr:17:44361948 |
| 17 rs41374248  | 44120442 G | 2.331 | 5.85E-06 | chr:17:44361948 |
| 17 rs41382552  | 44118999 G | 2.331 | 5.85E-06 | chr:17:44361948 |
| 17 rs41384744  | 44137070 G | 2.331 | 5.85E-06 | chr:17:44361948 |
| 17 rs41437445  | 44116238 A | 2.331 | 5.85E-06 | chr:17:44361948 |
| 17 rs4306559   | 44090236 C | 2.331 | 5.85E-06 | chr:17:44361948 |
| 17 rs430789    | 44295157 G | 2.331 | 5.85E-06 | chr:17:44361948 |

|                |            |       |          |                 |
|----------------|------------|-------|----------|-----------------|
| 17 rs4383188   | 44197603 C | 2.331 | 5.85E-06 | chr:17:44361948 |
| 17 rs4548919   | 44192395 T | 2.331 | 5.85E-06 | chr:17:44361948 |
| 17 rs4581739   | 44204739 C | 2.331 | 5.85E-06 | chr:17:44361948 |
| 17 rs4608377   | 44113359 C | 2.331 | 5.85E-06 | chr:17:44361948 |
| 17 rs527778993 | 44223060 A | 2.331 | 5.85E-06 | chr:17:44361948 |
| 17 rs528564917 | 44251907 T | 2.331 | 5.85E-06 | chr:17:44361948 |
| 17 rs529556708 | 44271430 G | 2.331 | 5.85E-06 | chr:17:44361948 |
| 17 rs529844822 | 44122484 T | 2.331 | 5.85E-06 | chr:17:44361948 |
| 17 rs529970690 | 44231117 C | 2.331 | 5.85E-06 | chr:17:44361948 |
| 17 rs530157802 | 44062993 G | 2.331 | 5.85E-06 | chr:17:44361948 |
| 17 rs530783064 | 44122626 A | 2.331 | 5.85E-06 | chr:17:44361948 |
| 17 rs530881963 | 44251582 C | 2.331 | 5.85E-06 | chr:17:44361948 |
| 17 rs531013081 | 44287310 G | 2.331 | 5.85E-06 | chr:17:44361948 |
| 17 rs531217003 | 44063393 A | 2.331 | 5.85E-06 | chr:17:44361948 |
| 17 rs531360085 | 44244926 G | 2.331 | 5.85E-06 | chr:17:44361948 |
| 17 rs532035713 | 44260967 A | 2.331 | 5.85E-06 | chr:17:44361948 |
| 17 rs532291518 | 44249800 A | 2.331 | 5.85E-06 | chr:17:44361948 |
| 17 rs532327698 | 44156180 G | 2.331 | 5.85E-06 | chr:17:44361948 |
| 17 rs532849973 | 44225234 C | 2.331 | 5.85E-06 | chr:17:44361948 |
| 17 rs532888975 | 44226561 G | 2.331 | 5.85E-06 | chr:17:44361948 |
| 17 rs532904601 | 44261137 T | 2.331 | 5.85E-06 | chr:17:44361948 |
| 17 rs533307115 | 44237372 C | 2.331 | 5.85E-06 | chr:17:44361948 |
| 17 rs533467502 | 44255532 C | 2.331 | 5.85E-06 | chr:17:44361948 |
| 17 rs534210380 | 44218242 T | 2.331 | 5.85E-06 | chr:17:44361948 |
| 17 rs534369494 | 44255777 A | 2.331 | 5.85E-06 | chr:17:44361948 |
| 17 rs535019273 | 44248814 A | 2.331 | 5.85E-06 | chr:17:44361948 |
| 17 rs535725934 | 44250616 A | 2.331 | 5.85E-06 | chr:17:44361948 |
| 17 rs536077496 | 44214094 G | 2.331 | 5.85E-06 | chr:17:44361948 |
| 17 rs536694159 | 44252416 C | 2.331 | 5.85E-06 | chr:17:44361948 |
| 17 rs537321556 | 44305252 A | 2.331 | 5.85E-06 | chr:17:44361948 |
| 17 rs537342897 | 44064208 A | 2.331 | 5.85E-06 | chr:17:44361948 |
| 17 rs537938065 | 44227186 A | 2.331 | 5.85E-06 | chr:17:44361948 |
| 17 rs538726790 | 44061696 T | 2.331 | 5.85E-06 | chr:17:44361948 |
| 17 rs539073154 | 44264717 C | 2.331 | 5.85E-06 | chr:17:44361948 |
| 17 rs539179202 | 44264045 C | 2.331 | 5.85E-06 | chr:17:44361948 |
| 17 rs539303688 | 44258231 G | 2.331 | 5.85E-06 | chr:17:44361948 |
| 17 rs539559479 | 44241304 G | 2.331 | 5.85E-06 | chr:17:44361948 |
| 17 rs540745552 | 44252510 C | 2.331 | 5.85E-06 | chr:17:44361948 |
| 17 rs540782647 | 44233811 T | 2.331 | 5.85E-06 | chr:17:44361948 |
| 17 rs541260793 | 44251230 C | 2.331 | 5.85E-06 | chr:17:44361948 |
| 17 rs541759959 | 44228609 G | 2.331 | 5.85E-06 | chr:17:44361948 |
| 17 rs541986174 | 44063140 G | 2.331 | 5.85E-06 | chr:17:44361948 |
| 17 rs542050069 | 44234060 G | 2.331 | 5.85E-06 | chr:17:44361948 |

|                |            |       |          |                 |
|----------------|------------|-------|----------|-----------------|
| 17 rs542300723 | 44228770 G | 2.331 | 5.85E-06 | chr:17:44361948 |
| 17 rs542364049 | 44246997 A | 2.331 | 5.85E-06 | chr:17:44361948 |
| 17 rs542509380 | 44298209 C | 2.331 | 5.85E-06 | chr:17:44361948 |
| 17 rs542524111 | 44213204 T | 2.331 | 5.85E-06 | chr:17:44361948 |
| 17 rs543087623 | 44243979 T | 2.331 | 5.85E-06 | chr:17:44361948 |
| 17 rs543124303 | 44226126 C | 2.331 | 5.85E-06 | chr:17:44361948 |
| 17 rs543869616 | 44142332 G | 2.331 | 5.85E-06 | chr:17:44361948 |
| 17 rs544098746 | 44263479 C | 2.331 | 5.85E-06 | chr:17:44361948 |
| 17 rs544227999 | 44281588 C | 2.331 | 5.85E-06 | chr:17:44361948 |
| 17 rs544380840 | 44137676 T | 2.331 | 5.85E-06 | chr:17:44361948 |
| 17 rs544405672 | 44092744 G | 2.331 | 5.85E-06 | chr:17:44361948 |
| 17 rs544669576 | 44281722 C | 2.331 | 5.85E-06 | chr:17:44361948 |
| 17 rs544717127 | 44244581 C | 2.331 | 5.85E-06 | chr:17:44361948 |
| 17 rs545434959 | 44132379 G | 2.331 | 5.85E-06 | chr:17:44361948 |
| 17 rs546325422 | 44181118 A | 2.331 | 5.85E-06 | chr:17:44361948 |
| 17 rs546433642 | 44250108 C | 2.331 | 5.85E-06 | chr:17:44361948 |
| 17 rs547200563 | 44251972 A | 2.331 | 5.85E-06 | chr:17:44361948 |
| 17 rs547435395 | 44063766 G | 2.331 | 5.85E-06 | chr:17:44361948 |
| 17 rs549229394 | 44153909 G | 2.331 | 5.85E-06 | chr:17:44361948 |
| 17 rs549601771 | 44227196 C | 2.331 | 5.85E-06 | chr:17:44361948 |
| 17 rs549710507 | 44266022 G | 2.331 | 5.85E-06 | chr:17:44361948 |
| 17 rs549786165 | 44262403 T | 2.331 | 5.85E-06 | chr:17:44361948 |
| 17 rs550757212 | 44254379 T | 2.331 | 5.85E-06 | chr:17:44361948 |
| 17 rs550997647 | 44220942 A | 2.331 | 5.85E-06 | chr:17:44361948 |
| 17 rs551188913 | 44280188 A | 2.331 | 5.85E-06 | chr:17:44361948 |
| 17 rs551853349 | 44090536 A | 2.331 | 5.85E-06 | chr:17:44361948 |
| 17 rs552053109 | 44257788 C | 2.331 | 5.85E-06 | chr:17:44361948 |
| 17 rs552177258 | 44217226 G | 2.331 | 5.85E-06 | chr:17:44361948 |
| 17 rs552438695 | 44156181 A | 2.331 | 5.85E-06 | chr:17:44361948 |
| 17 rs552604120 | 44251698 A | 2.331 | 5.85E-06 | chr:17:44361948 |
| 17 rs552965964 | 44064759 C | 2.331 | 5.85E-06 | chr:17:44361948 |
| 17 rs553321776 | 44231617 T | 2.331 | 5.85E-06 | chr:17:44361948 |
| 17 rs553368530 | 44266972 G | 2.331 | 5.85E-06 | chr:17:44361948 |
| 17 rs553779720 | 44226030 A | 2.331 | 5.85E-06 | chr:17:44361948 |
| 17 rs553907178 | 44245766 A | 2.331 | 5.85E-06 | chr:17:44361948 |
| 17 rs554424146 | 44280902 C | 2.331 | 5.85E-06 | chr:17:44361948 |
| 17 rs554819069 | 44061898 C | 2.331 | 5.85E-06 | chr:17:44361948 |
| 17 rs555006557 | 44246211 G | 2.331 | 5.85E-06 | chr:17:44361948 |
| 17 rs556496186 | 44277691 C | 2.331 | 5.85E-06 | chr:17:44361948 |
| 17 rs55662347  | 44070545 A | 2.331 | 5.85E-06 | chr:17:44361948 |
| 17 rs55669501  | 44202564 A | 2.331 | 5.85E-06 | chr:17:44361948 |
| 17 rs55672516  | 44201680 C | 2.331 | 5.85E-06 | chr:17:44361948 |
| 17 rs55686102  | 44202608 T | 2.331 | 5.85E-06 | chr:17:44361948 |



|                |            |       |          |                 |
|----------------|------------|-------|----------|-----------------|
| 17 rs55690782  | 44137311 A | 2.331 | 5.85E-06 | chr:17:44361948 |
| 17 rs556917425 | 44090538 G | 2.331 | 5.85E-06 | chr:17:44361948 |
| 17 rs55692232  | 44164323 A | 2.331 | 5.85E-06 | chr:17:44361948 |
| 17 rs557054045 | 44237790 A | 2.331 | 5.85E-06 | chr:17:44361948 |
| 17 rs55709241  | 44041101 C | 2.331 | 5.85E-06 | chr:17:44361948 |
| 17 rs557104793 | 44274985 A | 2.331 | 5.85E-06 | chr:17:44361948 |
| 17 rs55711941  | 44040823 T | 2.331 | 5.85E-06 | chr:17:44361948 |
| 17 rs55714296  | 44137189 T | 2.331 | 5.85E-06 | chr:17:44361948 |
| 17 rs557239232 | 44216158 C | 2.331 | 5.85E-06 | chr:17:44361948 |
| 17 rs55726761  | 44099669 A | 2.331 | 5.85E-06 | chr:17:44361948 |
| 17 rs55736025  | 44072017 A | 2.331 | 5.85E-06 | chr:17:44361948 |
| 17 rs55780786  | 44209875 C | 2.331 | 5.85E-06 | chr:17:44361948 |
| 17 rs55780945  | 44040120 T | 2.331 | 5.85E-06 | chr:17:44361948 |
| 17 rs557923371 | 44258354 C | 2.331 | 5.85E-06 | chr:17:44361948 |
| 17 rs55794067  | 44188764 C | 2.331 | 5.85E-06 | chr:17:44361948 |
| 17 rs55802590  | 44201344 C | 2.331 | 5.85E-06 | chr:17:44361948 |
| 17 rs55825513  | 44176215 A | 2.331 | 5.85E-06 | chr:17:44361948 |
| 17 rs55864131  | 44163411 C | 2.331 | 5.85E-06 | chr:17:44361948 |
| 17 rs558642106 | 44214814 A | 2.331 | 5.85E-06 | chr:17:44361948 |
| 17 rs55881134  | 44109248 A | 2.331 | 5.85E-06 | chr:17:44361948 |
| 17 rs55885063  | 44202952 G | 2.331 | 5.85E-06 | chr:17:44361948 |
| 17 rs55886080  | 44072041 A | 2.331 | 5.85E-06 | chr:17:44361948 |
| 17 rs55893711  | 44119320 T | 2.331 | 5.85E-06 | chr:17:44361948 |
| 17 rs55900347  | 44176092 A | 2.331 | 5.85E-06 | chr:17:44361948 |
| 17 rs55907036  | 44042366 A | 2.331 | 5.85E-06 | chr:17:44361948 |
| 17 rs55909047  | 44209957 G | 2.331 | 5.85E-06 | chr:17:44361948 |
| 17 rs55913645  | 44070956 A | 2.331 | 5.85E-06 | chr:17:44361948 |
| 17 rs55929190  | 44147599 C | 2.331 | 5.85E-06 | chr:17:44361948 |
| 17 rs559376136 | 44062915 T | 2.331 | 5.85E-06 | chr:17:44361948 |
| 17 rs55947022  | 44147574 A | 2.331 | 5.85E-06 | chr:17:44361948 |
| 17 rs55972730  | 44155707 T | 2.331 | 5.85E-06 | chr:17:44361948 |
| 17 rs559754274 | 44285531 A | 2.331 | 5.85E-06 | chr:17:44361948 |
| 17 rs55987700  | 44161146 G | 2.331 | 5.85E-06 | chr:17:44361948 |
| 17 rs559886250 | 44280523 G | 2.331 | 5.85E-06 | chr:17:44361948 |
| 17 rs559888218 | 44298102 A | 2.331 | 5.85E-06 | chr:17:44361948 |
| 17 rs56041778  | 44147511 C | 2.331 | 5.85E-06 | chr:17:44361948 |
| 17 rs560714845 | 44259040 C | 2.331 | 5.85E-06 | chr:17:44361948 |
| 17 rs56100031  | 44155157 T | 2.331 | 5.85E-06 | chr:17:44361948 |
| 17 rs561060735 | 44304490 C | 2.331 | 5.85E-06 | chr:17:44361948 |
| 17 rs56108300  | 44077851 A | 2.331 | 5.85E-06 | chr:17:44361948 |
| 17 rs561270316 | 44282007 C | 2.331 | 5.85E-06 | chr:17:44361948 |
| 17 rs56166491  | 44042221 G | 2.331 | 5.85E-06 | chr:17:44361948 |
| 17 rs56226437  | 44042361 C | 2.331 | 5.85E-06 | chr:17:44361948 |

|                |            |       |          |                 |
|----------------|------------|-------|----------|-----------------|
| 17 rs56234850  | 44060248 A | 2.331 | 5.85E-06 | chr:17:44361948 |
| 17 rs562357125 | 44263729 G | 2.331 | 5.85E-06 | chr:17:44361948 |
| 17 rs56240678  | 44176170 G | 2.331 | 5.85E-06 | chr:17:44361948 |
| 17 rs562481792 | 44242788 T | 2.331 | 5.85E-06 | chr:17:44361948 |
| 17 rs562531663 | 44240107 C | 2.331 | 5.85E-06 | chr:17:44361948 |
| 17 rs56257094  | 44201667 A | 2.331 | 5.85E-06 | chr:17:44361948 |
| 17 rs56273589  | 44203131 G | 2.331 | 5.85E-06 | chr:17:44361948 |
| 17 rs56280951  | 44041107 A | 2.331 | 5.85E-06 | chr:17:44361948 |
| 17 rs56294117  | 44042783 A | 2.331 | 5.85E-06 | chr:17:44361948 |
| 17 rs56301633  | 44077850 A | 2.331 | 5.85E-06 | chr:17:44361948 |
| 17 rs563074118 | 44276013 A | 2.331 | 5.85E-06 | chr:17:44361948 |
| 17 rs56318865  | 44147411 A | 2.331 | 5.85E-06 | chr:17:44361948 |
| 17 rs56323408  | 44147721 T | 2.331 | 5.85E-06 | chr:17:44361948 |
| 17 rs563314190 | 44217112 T | 2.331 | 5.85E-06 | chr:17:44361948 |
| 17 rs563686637 | 44251548 A | 2.331 | 5.85E-06 | chr:17:44361948 |
| 17 rs563748134 | 44142334 T | 2.331 | 5.85E-06 | chr:17:44361948 |
| 17 rs563972143 | 44265702 T | 2.331 | 5.85E-06 | chr:17:44361948 |
| 17 rs564325593 | 44236725 A | 2.331 | 5.85E-06 | chr:17:44361948 |
| 17 rs564388623 | 44137678 A | 2.331 | 5.85E-06 | chr:17:44361948 |
| 17 rs564591344 | 44230647 T | 2.331 | 5.85E-06 | chr:17:44361948 |
| 17 rs564683968 | 44045585 A | 2.331 | 5.85E-06 | chr:17:44361948 |
| 17 rs564717292 | 44247314 T | 2.331 | 5.85E-06 | chr:17:44361948 |
| 17 rs564755460 | 44249621 G | 2.331 | 5.85E-06 | chr:17:44361948 |
| 17 rs564905548 | 44213712 A | 2.331 | 5.85E-06 | chr:17:44361948 |
| 17 rs565744479 | 44063787 G | 2.331 | 5.85E-06 | chr:17:44361948 |
| 17 rs565948451 | 44247673 A | 2.331 | 5.85E-06 | chr:17:44361948 |
| 17 rs566037900 | 44245876 G | 2.331 | 5.85E-06 | chr:17:44361948 |
| 17 rs566214080 | 44264943 C | 2.331 | 5.85E-06 | chr:17:44361948 |
| 17 rs566458560 | 44225485 C | 2.331 | 5.85E-06 | chr:17:44361948 |
| 17 rs566672630 | 44248769 C | 2.331 | 5.85E-06 | chr:17:44361948 |
| 17 rs567428298 | 44243179 G | 2.331 | 5.85E-06 | chr:17:44361948 |
| 17 rs567744882 | 44223243 A | 2.331 | 5.85E-06 | chr:17:44361948 |
| 17 rs568534287 | 44252098 T | 2.331 | 5.85E-06 | chr:17:44361948 |
| 17 rs568850733 | 44223387 C | 2.331 | 5.85E-06 | chr:17:44361948 |
| 17 rs569087361 | 44275035 G | 2.331 | 5.85E-06 | chr:17:44361948 |
| 17 rs569311806 | 44252197 T | 2.331 | 5.85E-06 | chr:17:44361948 |
| 17 rs569670697 | 44121469 T | 2.331 | 5.85E-06 | chr:17:44361948 |
| 17 rs570200944 | 44248042 A | 2.331 | 5.85E-06 | chr:17:44361948 |
| 17 rs570877560 | 44214815 G | 2.331 | 5.85E-06 | chr:17:44361948 |
| 17 rs570968715 | 44251769 G | 2.331 | 5.85E-06 | chr:17:44361948 |
| 17 rs571131167 | 44063563 C | 2.331 | 5.85E-06 | chr:17:44361948 |
| 17 rs571583943 | 44262418 A | 2.331 | 5.85E-06 | chr:17:44361948 |
| 17 rs572193192 | 44304203 C | 2.331 | 5.85E-06 | chr:17:44361948 |

|                |            |       |          |                 |
|----------------|------------|-------|----------|-----------------|
| 17 rs572320710 | 44298178 G | 2.331 | 5.85E-06 | chr:17:44361948 |
| 17 rs572760195 | 44296251 C | 2.331 | 5.85E-06 | chr:17:44361948 |
| 17 rs573082572 | 44222067 G | 2.331 | 5.85E-06 | chr:17:44361948 |
| 17 rs573536609 | 44279760 A | 2.331 | 5.85E-06 | chr:17:44361948 |
| 17 rs573840384 | 44282744 C | 2.331 | 5.85E-06 | chr:17:44361948 |
| 17 rs574648692 | 44253203 C | 2.331 | 5.85E-06 | chr:17:44361948 |
| 17 rs575200428 | 44121917 T | 2.331 | 5.85E-06 | chr:17:44361948 |
| 17 rs575572584 | 44233589 C | 2.331 | 5.85E-06 | chr:17:44361948 |
| 17 rs575657041 | 44183232 G | 2.331 | 5.85E-06 | chr:17:44361948 |
| 17 rs576159528 | 44048937 C | 2.331 | 5.85E-06 | chr:17:44361948 |
| 17 rs576263378 | 44304740 T | 2.331 | 5.85E-06 | chr:17:44361948 |
| 17 rs576389326 | 44062337 A | 2.331 | 5.85E-06 | chr:17:44361948 |
| 17 rs576400151 | 44233776 C | 2.331 | 5.85E-06 | chr:17:44361948 |
| 17 rs576672302 | 44265328 G | 2.331 | 5.85E-06 | chr:17:44361948 |
| 17 rs577071575 | 44064334 C | 2.331 | 5.85E-06 | chr:17:44361948 |
| 17 rs577520390 | 44229986 C | 2.331 | 5.85E-06 | chr:17:44361948 |
| 17 rs578046020 | 44258954 C | 2.331 | 5.85E-06 | chr:17:44361948 |
| 17 rs578055951 | 44260416 C | 2.331 | 5.85E-06 | chr:17:44361948 |
| 17 rs62060760  | 44132887 T | 2.331 | 5.85E-06 | chr:17:44361948 |
| 17 rs62060761  | 44133162 C | 2.331 | 5.85E-06 | chr:17:44361948 |
| 17 rs62060762  | 44133396 A | 2.331 | 5.85E-06 | chr:17:44361948 |
| 17 rs62060763  | 44133403 C | 2.331 | 5.85E-06 | chr:17:44361948 |
| 17 rs62060764  | 44133633 G | 2.331 | 5.85E-06 | chr:17:44361948 |
| 17 rs62060765  | 44133648 C | 2.331 | 5.85E-06 | chr:17:44361948 |
| 17 rs62060767  | 44134910 A | 2.331 | 5.85E-06 | chr:17:44361948 |
| 17 rs62060768  | 44134984 A | 2.331 | 5.85E-06 | chr:17:44361948 |
| 17 rs62060769  | 44135026 C | 2.331 | 5.85E-06 | chr:17:44361948 |
| 17 rs62060785  | 44136634 A | 2.331 | 5.85E-06 | chr:17:44361948 |
| 17 rs62060786  | 44136763 T | 2.331 | 5.85E-06 | chr:17:44361948 |
| 17 rs62060787  | 44136803 T | 2.331 | 5.85E-06 | chr:17:44361948 |
| 17 rs62060792  | 44141955 A | 2.331 | 5.85E-06 | chr:17:44361948 |
| 17 rs62060793  | 44142427 G | 2.331 | 5.85E-06 | chr:17:44361948 |
| 17 rs62060794  | 44142566 T | 2.331 | 5.85E-06 | chr:17:44361948 |
| 17 rs62060795  | 44142663 T | 2.331 | 5.85E-06 | chr:17:44361948 |
| 17 rs62060797  | 44143344 A | 2.331 | 5.85E-06 | chr:17:44361948 |
| 17 rs62060800  | 44145592 G | 2.331 | 5.85E-06 | chr:17:44361948 |
| 17 rs62060801  | 44145860 G | 2.331 | 5.85E-06 | chr:17:44361948 |
| 17 rs62060802  | 44146336 C | 2.331 | 5.85E-06 | chr:17:44361948 |
| 17 rs62060812  | 44151667 G | 2.331 | 5.85E-06 | chr:17:44361948 |
| 17 rs62060834  | 44151697 T | 2.331 | 5.85E-06 | chr:17:44361948 |
| 17 rs62060835  | 44152390 T | 2.331 | 5.85E-06 | chr:17:44361948 |
| 17 rs62060836  | 44152447 A | 2.331 | 5.85E-06 | chr:17:44361948 |
| 17 rs62060837  | 44152760 G | 2.331 | 5.85E-06 | chr:17:44361948 |

|               |            |       |          |                 |
|---------------|------------|-------|----------|-----------------|
| 17 rs62060838 | 44153144 G | 2.331 | 5.85E-06 | chr:17:44361948 |
| 17 rs62060839 | 44153227 G | 2.331 | 5.85E-06 | chr:17:44361948 |
| 17 rs62060840 | 44153258 G | 2.331 | 5.85E-06 | chr:17:44361948 |
| 17 rs62060841 | 44153386 T | 2.331 | 5.85E-06 | chr:17:44361948 |
| 17 rs62060843 | 44153626 T | 2.331 | 5.85E-06 | chr:17:44361948 |
| 17 rs62060845 | 44154393 G | 2.331 | 5.85E-06 | chr:17:44361948 |
| 17 rs62060846 | 44154461 C | 2.331 | 5.85E-06 | chr:17:44361948 |
| 17 rs62060847 | 44154946 T | 2.331 | 5.85E-06 | chr:17:44361948 |
| 17 rs62060850 | 44157982 T | 2.331 | 5.85E-06 | chr:17:44361948 |
| 17 rs62060851 | 44157992 C | 2.331 | 5.85E-06 | chr:17:44361948 |
| 17 rs62060852 | 44160050 A | 2.331 | 5.85E-06 | chr:17:44361948 |
| 17 rs62060853 | 44160592 A | 2.331 | 5.85E-06 | chr:17:44361948 |
| 17 rs62060855 | 44161860 T | 2.331 | 5.85E-06 | chr:17:44361948 |
| 17 rs62060856 | 44161875 C | 2.331 | 5.85E-06 | chr:17:44361948 |
| 17 rs62060858 | 44164090 C | 2.331 | 5.85E-06 | chr:17:44361948 |
| 17 rs62060859 | 44164133 A | 2.331 | 5.85E-06 | chr:17:44361948 |
| 17 rs62061764 | 44166197 G | 2.331 | 5.85E-06 | chr:17:44361948 |
| 17 rs62061766 | 44167464 A | 2.331 | 5.85E-06 | chr:17:44361948 |
| 17 rs62061767 | 44167729 G | 2.331 | 5.85E-06 | chr:17:44361948 |
| 17 rs62061770 | 44169377 C | 2.331 | 5.85E-06 | chr:17:44361948 |
| 17 rs62061771 | 44169406 A | 2.331 | 5.85E-06 | chr:17:44361948 |
| 17 rs62061772 | 44169437 C | 2.331 | 5.85E-06 | chr:17:44361948 |
| 17 rs62061788 | 44169759 A | 2.331 | 5.85E-06 | chr:17:44361948 |
| 17 rs62061789 | 44169769 T | 2.331 | 5.85E-06 | chr:17:44361948 |
| 17 rs62061790 | 44170414 A | 2.331 | 5.85E-06 | chr:17:44361948 |
| 17 rs62061791 | 44171024 C | 2.331 | 5.85E-06 | chr:17:44361948 |
| 17 rs62061792 | 44171554 A | 2.331 | 5.85E-06 | chr:17:44361948 |
| 17 rs62061793 | 44171565 A | 2.331 | 5.85E-06 | chr:17:44361948 |
| 17 rs62061795 | 44173179 A | 2.331 | 5.85E-06 | chr:17:44361948 |
| 17 rs62061796 | 44173408 A | 2.331 | 5.85E-06 | chr:17:44361948 |
| 17 rs62061800 | 44174109 C | 2.331 | 5.85E-06 | chr:17:44361948 |
| 17 rs62061801 | 44174235 G | 2.331 | 5.85E-06 | chr:17:44361948 |
| 17 rs62061802 | 44174351 A | 2.331 | 5.85E-06 | chr:17:44361948 |
| 17 rs62061807 | 44177097 T | 2.331 | 5.85E-06 | chr:17:44361948 |
| 17 rs62061808 | 44177337 T | 2.331 | 5.85E-06 | chr:17:44361948 |
| 17 rs62061809 | 44178839 C | 2.331 | 5.85E-06 | chr:17:44361948 |
| 17 rs62061810 | 44178884 A | 2.331 | 5.85E-06 | chr:17:44361948 |
| 17 rs62061811 | 44180173 G | 2.331 | 5.85E-06 | chr:17:44361948 |
| 17 rs62061812 | 44180997 T | 2.331 | 5.85E-06 | chr:17:44361948 |
| 17 rs62061814 | 44181508 G | 2.331 | 5.85E-06 | chr:17:44361948 |
| 17 rs62061815 | 44181681 G | 2.331 | 5.85E-06 | chr:17:44361948 |
| 17 rs62061816 | 44182336 A | 2.331 | 5.85E-06 | chr:17:44361948 |
| 17 rs62061817 | 44182706 G | 2.331 | 5.85E-06 | chr:17:44361948 |

|               |            |       |          |                 |
|---------------|------------|-------|----------|-----------------|
| 17 rs62061821 | 44186055 A | 2.331 | 5.85E-06 | chr:17:44361948 |
| 17 rs62061823 | 44188645 T | 2.331 | 5.85E-06 | chr:17:44361948 |
| 17 rs62061824 | 44188755 C | 2.331 | 5.85E-06 | chr:17:44361948 |
| 17 rs62061847 | 44191682 A | 2.331 | 5.85E-06 | chr:17:44361948 |
| 17 rs62061848 | 44192946 T | 2.331 | 5.85E-06 | chr:17:44361948 |
| 17 rs62061849 | 44193882 T | 2.331 | 5.85E-06 | chr:17:44361948 |
| 17 rs62061850 | 44194519 C | 2.331 | 5.85E-06 | chr:17:44361948 |
| 17 rs62061851 | 44194891 T | 2.331 | 5.85E-06 | chr:17:44361948 |
| 17 rs62061852 | 44195424 C | 2.331 | 5.85E-06 | chr:17:44361948 |
| 17 rs62061853 | 44196125 C | 2.331 | 5.85E-06 | chr:17:44361948 |
| 17 rs62061854 | 44198080 T | 2.331 | 5.85E-06 | chr:17:44361948 |
| 17 rs62061855 | 44199670 A | 2.331 | 5.85E-06 | chr:17:44361948 |
| 17 rs62061856 | 44200015 C | 2.331 | 5.85E-06 | chr:17:44361948 |
| 17 rs62062133 | 44114372 C | 2.331 | 5.85E-06 | chr:17:44361948 |
| 17 rs62062134 | 44114432 C | 2.331 | 5.85E-06 | chr:17:44361948 |
| 17 rs62062136 | 44116312 C | 2.331 | 5.85E-06 | chr:17:44361948 |
| 17 rs62062137 | 44118848 A | 2.331 | 5.85E-06 | chr:17:44361948 |
| 17 rs62062265 | 44090035 G | 2.331 | 5.85E-06 | chr:17:44361948 |
| 17 rs62062266 | 44090704 G | 2.331 | 5.85E-06 | chr:17:44361948 |
| 17 rs62062267 | 44090854 T | 2.331 | 5.85E-06 | chr:17:44361948 |
| 17 rs62062268 | 44090858 T | 2.331 | 5.85E-06 | chr:17:44361948 |
| 17 rs62062269 | 44091092 C | 2.331 | 5.85E-06 | chr:17:44361948 |
| 17 rs62062270 | 44091195 C | 2.331 | 5.85E-06 | chr:17:44361948 |
| 17 rs62062272 | 44092108 C | 2.331 | 5.85E-06 | chr:17:44361948 |
| 17 rs62062273 | 44092243 T | 2.331 | 5.85E-06 | chr:17:44361948 |
| 17 rs62062274 | 44093319 A | 2.331 | 5.85E-06 | chr:17:44361948 |
| 17 rs62062275 | 44093496 G | 2.331 | 5.85E-06 | chr:17:44361948 |
| 17 rs62062276 | 44093627 G | 2.331 | 5.85E-06 | chr:17:44361948 |
| 17 rs62062277 | 44093753 G | 2.331 | 5.85E-06 | chr:17:44361948 |
| 17 rs62062278 | 44093860 G | 2.331 | 5.85E-06 | chr:17:44361948 |
| 17 rs62062279 | 44093964 C | 2.331 | 5.85E-06 | chr:17:44361948 |
| 17 rs62062280 | 44093993 T | 2.331 | 5.85E-06 | chr:17:44361948 |
| 17 rs62062281 | 44094112 G | 2.331 | 5.85E-06 | chr:17:44361948 |
| 17 rs62062282 | 44094374 G | 2.331 | 5.85E-06 | chr:17:44361948 |
| 17 rs62062283 | 44095055 A | 2.331 | 5.85E-06 | chr:17:44361948 |
| 17 rs62062284 | 44095570 A | 2.331 | 5.85E-06 | chr:17:44361948 |
| 17 rs62062286 | 44096486 T | 2.331 | 5.85E-06 | chr:17:44361948 |
| 17 rs62062289 | 44097235 C | 2.331 | 5.85E-06 | chr:17:44361948 |
| 17 rs62062292 | 44099809 C | 2.331 | 5.85E-06 | chr:17:44361948 |
| 17 rs62062293 | 44100553 A | 2.331 | 5.85E-06 | chr:17:44361948 |
| 17 rs62062295 | 44100906 G | 2.331 | 5.85E-06 | chr:17:44361948 |
| 17 rs62062296 | 44100916 T | 2.331 | 5.85E-06 | chr:17:44361948 |
| 17 rs62062297 | 44101004 G | 2.331 | 5.85E-06 | chr:17:44361948 |

|               |            |       |          |                 |
|---------------|------------|-------|----------|-----------------|
| 17 rs62062321 | 44111109 G | 2.331 | 5.85E-06 | chr:17:44361948 |
| 17 rs62062322 | 44112385 G | 2.331 | 5.85E-06 | chr:17:44361948 |
| 17 rs62062323 | 44113224 T | 2.331 | 5.85E-06 | chr:17:44361948 |
| 17 rs62062324 | 44114362 T | 2.331 | 5.85E-06 | chr:17:44361948 |
| 17 rs62062325 | 44114364 A | 2.331 | 5.85E-06 | chr:17:44361948 |
| 17 rs62063165 | 44202147 G | 2.331 | 5.85E-06 | chr:17:44361948 |
| 17 rs62063166 | 44202231 G | 2.331 | 5.85E-06 | chr:17:44361948 |
| 17 rs62063171 | 44203311 T | 2.331 | 5.85E-06 | chr:17:44361948 |
| 17 rs62063172 | 44203366 C | 2.331 | 5.85E-06 | chr:17:44361948 |
| 17 rs62063174 | 44205122 G | 2.331 | 5.85E-06 | chr:17:44361948 |
| 17 rs62063200 | 44206482 T | 2.331 | 5.85E-06 | chr:17:44361948 |
| 17 rs62063201 | 44207360 T | 2.331 | 5.85E-06 | chr:17:44361948 |
| 17 rs62063202 | 44208945 T | 2.331 | 5.85E-06 | chr:17:44361948 |
| 17 rs62063203 | 44209313 C | 2.331 | 5.85E-06 | chr:17:44361948 |
| 17 rs62063207 | 44211902 G | 2.331 | 5.85E-06 | chr:17:44361948 |
| 17 rs62063208 | 44212032 A | 2.331 | 5.85E-06 | chr:17:44361948 |
| 17 rs62063212 | 44221042 T | 2.331 | 5.85E-06 | chr:17:44361948 |
| 17 rs62063282 | 44039043 A | 2.331 | 5.85E-06 | chr:17:44361948 |
| 17 rs62063291 | 44043378 C | 2.331 | 5.85E-06 | chr:17:44361948 |
| 17 rs62063292 | 44043636 T | 2.331 | 5.85E-06 | chr:17:44361948 |
| 17 rs62063293 | 44043819 A | 2.331 | 5.85E-06 | chr:17:44361948 |
| 17 rs62063295 | 44044431 T | 2.331 | 5.85E-06 | chr:17:44361948 |
| 17 rs62063296 | 44046202 T | 2.331 | 5.85E-06 | chr:17:44361948 |
| 17 rs62063297 | 44047802 T | 2.331 | 5.85E-06 | chr:17:44361948 |
| 17 rs62063298 | 44048323 T | 2.331 | 5.85E-06 | chr:17:44361948 |
| 17 rs62063299 | 44048336 C | 2.331 | 5.85E-06 | chr:17:44361948 |
| 17 rs62063300 | 44048350 C | 2.331 | 5.85E-06 | chr:17:44361948 |
| 17 rs62063301 | 44048941 C | 2.331 | 5.85E-06 | chr:17:44361948 |
| 17 rs62063302 | 44048943 A | 2.331 | 5.85E-06 | chr:17:44361948 |
| 17 rs62063303 | 44049133 C | 2.331 | 5.85E-06 | chr:17:44361948 |
| 17 rs62063304 | 44049900 G | 2.331 | 5.85E-06 | chr:17:44361948 |
| 17 rs62063305 | 44050282 A | 2.331 | 5.85E-06 | chr:17:44361948 |
| 17 rs62063306 | 44050395 A | 2.331 | 5.85E-06 | chr:17:44361948 |
| 17 rs62063670 | 44123248 C | 2.331 | 5.85E-06 | chr:17:44361948 |
| 17 rs62063671 | 44124837 G | 2.331 | 5.85E-06 | chr:17:44361948 |
| 17 rs62063672 | 44125288 G | 2.331 | 5.85E-06 | chr:17:44361948 |
| 17 rs62063673 | 44125484 G | 2.331 | 5.85E-06 | chr:17:44361948 |
| 17 rs62063676 | 44129800 A | 2.331 | 5.85E-06 | chr:17:44361948 |
| 17 rs62063677 | 44129885 T | 2.331 | 5.85E-06 | chr:17:44361948 |
| 17 rs62063678 | 44129949 G | 2.331 | 5.85E-06 | chr:17:44361948 |
| 17 rs62063680 | 44131559 A | 2.331 | 5.85E-06 | chr:17:44361948 |
| 17 rs62063681 | 44131592 G | 2.331 | 5.85E-06 | chr:17:44361948 |
| 17 rs62063682 | 44131622 A | 2.331 | 5.85E-06 | chr:17:44361948 |

|               |            |       |          |                 |
|---------------|------------|-------|----------|-----------------|
| 17 rs62063683 | 44131717 A | 2.331 | 5.85E-06 | chr:17:44361948 |
| 17 rs62063684 | 44132269 C | 2.331 | 5.85E-06 | chr:17:44361948 |
| 17 rs62063686 | 44132458 A | 2.331 | 5.85E-06 | chr:17:44361948 |
| 17 rs62063687 | 44132592 G | 2.331 | 5.85E-06 | chr:17:44361948 |
| 17 rs62063774 | 44050463 C | 2.331 | 5.85E-06 | chr:17:44361948 |
| 17 rs62063775 | 44050823 T | 2.331 | 5.85E-06 | chr:17:44361948 |
| 17 rs62063776 | 44050850 G | 2.331 | 5.85E-06 | chr:17:44361948 |
| 17 rs62063777 | 44053171 G | 2.331 | 5.85E-06 | chr:17:44361948 |
| 17 rs62063778 | 44053989 A | 2.331 | 5.85E-06 | chr:17:44361948 |
| 17 rs62063779 | 44054671 T | 2.331 | 5.85E-06 | chr:17:44361948 |
| 17 rs62063780 | 44056238 G | 2.331 | 5.85E-06 | chr:17:44361948 |
| 17 rs62063781 | 44058691 T | 2.331 | 5.85E-06 | chr:17:44361948 |
| 17 rs62063782 | 44058716 T | 2.331 | 5.85E-06 | chr:17:44361948 |
| 17 rs62063783 | 44059215 T | 2.331 | 5.85E-06 | chr:17:44361948 |
| 17 rs62063784 | 44059775 G | 2.331 | 5.85E-06 | chr:17:44361948 |
| 17 rs62063786 | 44061023 A | 2.331 | 5.85E-06 | chr:17:44361948 |
| 17 rs62063787 | 44061036 C | 2.331 | 5.85E-06 | chr:17:44361948 |
| 17 rs62063794 | 44066088 A | 2.331 | 5.85E-06 | chr:17:44361948 |
| 17 rs62063798 | 44068543 A | 2.331 | 5.85E-06 | chr:17:44361948 |
| 17 rs62063799 | 44069180 G | 2.331 | 5.85E-06 | chr:17:44361948 |
| 17 rs62063800 | 44069198 T | 2.331 | 5.85E-06 | chr:17:44361948 |
| 17 rs62063801 | 44069376 T | 2.331 | 5.85E-06 | chr:17:44361948 |
| 17 rs62063842 | 44070111 C | 2.331 | 5.85E-06 | chr:17:44361948 |
| 17 rs62063845 | 44071294 C | 2.331 | 5.85E-06 | chr:17:44361948 |
| 17 rs62063846 | 44071674 G | 2.331 | 5.85E-06 | chr:17:44361948 |
| 17 rs62063849 | 44073062 G | 2.331 | 5.85E-06 | chr:17:44361948 |
| 17 rs62063851 | 44074435 G | 2.331 | 5.85E-06 | chr:17:44361948 |
| 17 rs62063852 | 44074581 G | 2.331 | 5.85E-06 | chr:17:44361948 |
| 17 rs62063853 | 44074613 G | 2.331 | 5.85E-06 | chr:17:44361948 |
| 17 rs62063854 | 44074619 A | 2.331 | 5.85E-06 | chr:17:44361948 |
| 17 rs62063855 | 44075535 C | 2.331 | 5.85E-06 | chr:17:44361948 |
| 17 rs62063856 | 44076466 G | 2.331 | 5.85E-06 | chr:17:44361948 |
| 17 rs62063857 | 44076665 G | 2.331 | 5.85E-06 | chr:17:44361948 |
| 17 rs62063859 | 44078616 A | 2.331 | 5.85E-06 | chr:17:44361948 |
| 17 rs62064661 | 44078892 A | 2.331 | 5.85E-06 | chr:17:44361948 |
| 17 rs62064662 | 44079721 G | 2.331 | 5.85E-06 | chr:17:44361948 |
| 17 rs62064663 | 44080039 G | 2.331 | 5.85E-06 | chr:17:44361948 |
| 17 rs62064664 | 44081462 C | 2.331 | 5.85E-06 | chr:17:44361948 |
| 17 rs62064665 | 44081527 C | 2.331 | 5.85E-06 | chr:17:44361948 |
| 17 rs62064666 | 44082514 C | 2.331 | 5.85E-06 | chr:17:44361948 |
| 17 rs62064667 | 44082528 T | 2.331 | 5.85E-06 | chr:17:44361948 |
| 17 rs62064668 | 44082981 A | 2.331 | 5.85E-06 | chr:17:44361948 |
| 17 rs62064669 | 44084676 T | 2.331 | 5.85E-06 | chr:17:44361948 |

|               |            |       |          |                 |
|---------------|------------|-------|----------|-----------------|
| 17 rs62064670 | 44085852 A | 2.331 | 5.85E-06 | chr:17:44361948 |
| 17 rs62064671 | 44086100 C | 2.331 | 5.85E-06 | chr:17:44361948 |
| 17 rs62064672 | 44086521 A | 2.331 | 5.85E-06 | chr:17:44361948 |
| 17 rs62064674 | 44088772 A | 2.331 | 5.85E-06 | chr:17:44361948 |
| 17 rs62064675 | 44088926 T | 2.331 | 5.85E-06 | chr:17:44361948 |
| 17 rs62070944 | 44304298 A | 2.331 | 5.85E-06 | chr:17:44361948 |
| 17 rs62641967 | 44047216 G | 2.331 | 5.85E-06 | chr:17:44361948 |
| 17 rs63750417 | 44060775 T | 2.331 | 5.85E-06 | chr:17:44361948 |
| 17 rs727425   | 44195495 A | 2.331 | 5.85E-06 | chr:17:44361948 |
| 17 rs733966   | 44089563 T | 2.331 | 5.85E-06 | chr:17:44361948 |
| 17 rs733967   | 44089690 C | 2.331 | 5.85E-06 | chr:17:44361948 |
| 17 rs733968   | 44089715 T | 2.331 | 5.85E-06 | chr:17:44361948 |
| 17 rs733969   | 44089727 A | 2.331 | 5.85E-06 | chr:17:44361948 |
| 17 rs7350928  | 44108100 T | 2.331 | 5.85E-06 | chr:17:44361948 |
| 17 rs73984689 | 44184404 A | 2.331 | 5.85E-06 | chr:17:44361948 |
| 17 rs74348235 | 44165852 G | 2.331 | 5.85E-06 | chr:17:44361948 |
| 17 rs74373419 | 44047609 T | 2.331 | 5.85E-06 | chr:17:44361948 |
| 17 rs74450848 | 44082441 C | 2.331 | 5.85E-06 | chr:17:44361948 |
| 17 rs74481389 | 44154607 C | 2.331 | 5.85E-06 | chr:17:44361948 |
| 17 rs74571696 | 44123685 A | 2.331 | 5.85E-06 | chr:17:44361948 |
| 17 rs747152   | 44090339 C | 2.331 | 5.85E-06 | chr:17:44361948 |
| 17 rs74759276 | 44069768 G | 2.331 | 5.85E-06 | chr:17:44361948 |
| 17 rs74829364 | 44084533 C | 2.331 | 5.85E-06 | chr:17:44361948 |
| 17 rs74846646 | 44082446 A | 2.331 | 5.85E-06 | chr:17:44361948 |
| 17 rs74850776 | 44150042 C | 2.331 | 5.85E-06 | chr:17:44361948 |
| 17 rs74977736 | 44126977 C | 2.331 | 5.85E-06 | chr:17:44361948 |
| 17 rs75010486 | 44103825 C | 2.331 | 5.85E-06 | chr:17:44361948 |
| 17 rs75145092 | 44044823 A | 2.331 | 5.85E-06 | chr:17:44361948 |
| 17 rs75229280 | 44196653 A | 2.331 | 5.85E-06 | chr:17:44361948 |
| 17 rs75242405 | 44049329 T | 2.331 | 5.85E-06 | chr:17:44361948 |
| 17 rs75412750 | 44172773 T | 2.331 | 5.85E-06 | chr:17:44361948 |
| 17 rs754512   | 44055647 T | 2.331 | 5.85E-06 | chr:17:44361948 |
| 17 rs754513   | 44055638 A | 2.331 | 5.85E-06 | chr:17:44361948 |
| 17 rs75530705 | 44154048 T | 2.331 | 5.85E-06 | chr:17:44361948 |
| 17 rs75534191 | 44091724 A | 2.331 | 5.85E-06 | chr:17:44361948 |
| 17 rs75546272 | 44130668 A | 2.331 | 5.85E-06 | chr:17:44361948 |
| 17 rs75641221 | 44145373 C | 2.331 | 5.85E-06 | chr:17:44361948 |
| 17 rs75652502 | 44200510 A | 2.331 | 5.85E-06 | chr:17:44361948 |
| 17 rs75666751 | 44090148 C | 2.331 | 5.85E-06 | chr:17:44361948 |
| 17 rs75911589 | 44183002 A | 2.331 | 5.85E-06 | chr:17:44361948 |
| 17 rs75944932 | 44072423 C | 2.331 | 5.85E-06 | chr:17:44361948 |
| 17 rs75975083 | 44146357 C | 2.331 | 5.85E-06 | chr:17:44361948 |
| 17 rs76154201 | 44154033 C | 2.331 | 5.85E-06 | chr:17:44361948 |



|               |            |       |          |                 |
|---------------|------------|-------|----------|-----------------|
| 17 rs76307183 | 44142121 A | 2.331 | 5.85E-06 | chr:17:44361948 |
| 17 rs76357066 | 44067046 A | 2.331 | 5.85E-06 | chr:17:44361948 |
| 17 rs76380490 | 44203413 T | 2.331 | 5.85E-06 | chr:17:44361948 |
| 17 rs76475191 | 44290849 A | 2.331 | 5.85E-06 | chr:17:44361948 |
| 17 rs76618565 | 44068481 A | 2.331 | 5.85E-06 | chr:17:44361948 |
| 17 rs76761511 | 44185245 A | 2.331 | 5.85E-06 | chr:17:44361948 |
| 17 rs7687     | 44103296 C | 2.331 | 5.85E-06 | chr:17:44361948 |
| 17 rs77009866 | 44110888 T | 2.331 | 5.85E-06 | chr:17:44361948 |
| 17 rs77044307 | 44172408 G | 2.331 | 5.85E-06 | chr:17:44361948 |
| 17 rs77095128 | 44204304 G | 2.331 | 5.85E-06 | chr:17:44361948 |
| 17 rs77105679 | 44122896 A | 2.331 | 5.85E-06 | chr:17:44361948 |
| 17 rs77138434 | 44159555 A | 2.331 | 5.85E-06 | chr:17:44361948 |
| 17 rs77290642 | 44068480 C | 2.331 | 5.85E-06 | chr:17:44361948 |
| 17 rs77513497 | 44045474 G | 2.331 | 5.85E-06 | chr:17:44361948 |
| 17 rs77566074 | 44048936 A | 2.331 | 5.85E-06 | chr:17:44361948 |
| 17 rs77604208 | 44177669 T | 2.331 | 5.85E-06 | chr:17:44361948 |
| 17 rs77635460 | 44186593 C | 2.331 | 5.85E-06 | chr:17:44361948 |
| 17 rs77747656 | 44099827 G | 2.331 | 5.85E-06 | chr:17:44361948 |
| 17 rs77875796 | 44051612 G | 2.331 | 5.85E-06 | chr:17:44361948 |
| 17 rs77924366 | 44182181 C | 2.331 | 5.85E-06 | chr:17:44361948 |
| 17 rs77925835 | 44159695 T | 2.331 | 5.85E-06 | chr:17:44361948 |
| 17 rs77950913 | 44146451 C | 2.331 | 5.85E-06 | chr:17:44361948 |
| 17 rs78104015 | 44052733 G | 2.331 | 5.85E-06 | chr:17:44361948 |
| 17 rs78229689 | 44106806 A | 2.331 | 5.85E-06 | chr:17:44361948 |
| 17 rs78599197 | 44069970 G | 2.331 | 5.85E-06 | chr:17:44361948 |
| 17 rs78681971 | 44106219 T | 2.331 | 5.85E-06 | chr:17:44361948 |
| 17 rs78938131 | 44157622 G | 2.331 | 5.85E-06 | chr:17:44361948 |
| 17 rs78962882 | 44084844 C | 2.331 | 5.85E-06 | chr:17:44361948 |
| 17 rs79065019 | 44124535 C | 2.331 | 5.85E-06 | chr:17:44361948 |
| 17 rs79180862 | 44131798 T | 2.331 | 5.85E-06 | chr:17:44361948 |
| 17 rs79252344 | 44120608 G | 2.331 | 5.85E-06 | chr:17:44361948 |
| 17 rs79301522 | 44207932 G | 2.331 | 5.85E-06 | chr:17:44361948 |
| 17 rs79346219 | 44184375 G | 2.331 | 5.85E-06 | chr:17:44361948 |
| 17 rs79348289 | 44172698 C | 2.331 | 5.85E-06 | chr:17:44361948 |
| 17 rs79447161 | 44067508 G | 2.331 | 5.85E-06 | chr:17:44361948 |
| 17 rs79649865 | 44130587 G | 2.331 | 5.85E-06 | chr:17:44361948 |
| 17 rs79698033 | 44123717 T | 2.331 | 5.85E-06 | chr:17:44361948 |
| 17 rs79782347 | 44146567 C | 2.331 | 5.85E-06 | chr:17:44361948 |
| 17 rs79861768 | 44290910 G | 2.331 | 5.85E-06 | chr:17:44361948 |
| 17 rs79923630 | 44167661 T | 2.331 | 5.85E-06 | chr:17:44361948 |
| 17 rs79923708 | 44183790 A | 2.331 | 5.85E-06 | chr:17:44361948 |
| 17 rs79959255 | 44077708 T | 2.331 | 5.85E-06 | chr:17:44361948 |
| 17 rs80020809 | 44172391 T | 2.331 | 5.85E-06 | chr:17:44361948 |

|                |            |       |          |                 |
|----------------|------------|-------|----------|-----------------|
| 17 rs80028338  | 44161470 C | 2.331 | 5.85E-06 | chr:17:44361948 |
| 17 rs80120913  | 44177755 G | 2.331 | 5.85E-06 | chr:17:44361948 |
| 17 rs8070723   | 44081064 G | 2.331 | 5.85E-06 | chr:17:44361948 |
| 17 rs876944    | 44134391 T | 2.331 | 5.85E-06 | chr:17:44361948 |
| 17 rs919461    | 44065669 T | 2.331 | 5.85E-06 | chr:17:44361948 |
| 17 rs919462    | 44065740 T | 2.331 | 5.85E-06 | chr:17:44361948 |
| 17 rs919464    | 44065901 T | 2.331 | 5.85E-06 | chr:17:44361948 |
| 17 rs9709338   | 44094871 G | 2.331 | 5.85E-06 | chr:17:44361948 |
| 17 rs974291    | 44150480 T | 2.331 | 5.85E-06 | chr:17:44361948 |
| 17 rs974292    | 44150464 C | 2.331 | 5.85E-06 | chr:17:44361948 |
| 17 rs974293    | 44150233 A | 2.331 | 5.85E-06 | chr:17:44361948 |
| 17 rs974294    | 44150163 G | 2.331 | 5.85E-06 | chr:17:44361948 |
| 17 rs974295    | 44150152 T | 2.331 | 5.85E-06 | chr:17:44361948 |
| 17 rs78993847  | 43933834 T | 2.321 | 5.94E-06 | chr:17:44361948 |
| 17 rs80209523  | 43933830 T | 2.321 | 5.94E-06 | chr:17:44361948 |
| 17 rs190796367 | 44333293 G | 2.348 | 5.94E-06 | chr:17:44361948 |
| 17 rs2532364   | 44332970 G | 2.348 | 5.94E-06 | chr:17:44361948 |
| 17 rs62073155  | 44333121 A | 2.348 | 5.94E-06 | chr:17:44361948 |
| 17 rs62073157  | 44334052 A | 2.348 | 5.94E-06 | chr:17:44361948 |
| 17 rs531647912 | 44298279 T | 2.305 | 5.98E-06 | chr:17:44361948 |
| 17 rs543638572 | 44267170 T | 2.284 | 5.99E-06 | chr:17:44361948 |
| 17 rs564912328 | 44267227 G | 2.284 | 5.99E-06 | chr:17:44361948 |
| 17 rs575726704 | 44267164 T | 2.284 | 5.99E-06 | chr:17:44361948 |
| 17 rs62063281  | 44038785 G | 2.347 | 6.00E-06 | chr:17:44361948 |
| 17 rs551752654 | 44255550 G | 2.887 | 6.04E-06 | chr:17:44361948 |
| 17 rs528731539 | 44311529 C | 2.889 | 6.08E-06 | chr:17:44361948 |
| 17 rs2732605   | 44291381 G | 2.327 | 6.15E-06 | chr:17:44361948 |
| 17 rs62060798  | 44144152 C | 2.327 | 6.15E-06 | chr:17:44361948 |
| 17 rs62060799  | 44144251 T | 2.327 | 6.15E-06 | chr:17:44361948 |
| 17 rs62062285  | 44095661 G | 2.327 | 6.15E-06 | chr:17:44361948 |
| 17 rs1052594   | 44102689 C | 2.325 | 6.15E-06 | chr:17:44361948 |
| 17 rs544243747 | 44239958 T | 2.325 | 6.16E-06 | chr:17:44361948 |
| 17 rs76924476  | 44199029 C | 2.325 | 6.17E-06 | chr:17:44361948 |
| 17 rs62060844  | 44153836 T | 2.325 | 6.20E-06 | chr:17:44361948 |
| 17 rs8712      | 44101871 G | 2.324 | 6.20E-06 | chr:17:44361948 |
| 17 rs9468      | 44101563 C | 2.324 | 6.20E-06 | chr:17:44361948 |
| 17 rs532764039 | 44305689 G | 2.299 | 6.23E-06 | chr:17:44361948 |
| 17 rs62063795  | 44068238 T | 2.324 | 6.24E-06 | chr:17:44361948 |
| 17 rs2668645   | 44288640 G | 2.297 | 6.26E-06 | chr:17:44361948 |
| 17 rs2696444   | 44288672 A | 2.297 | 6.26E-06 | chr:17:44361948 |
| 17 rs62056850  | 43992581 T | 2.322 | 6.30E-06 | chr:17:44361948 |
| 17 rs199507    | 44858855 A | 2.382 | 6.33E-06 | chr:17:44361948 |
| 17 rs199509    | 44858728 G | 2.382 | 6.33E-06 | chr:17:44361948 |

|                |            |       |          |                 |
|----------------|------------|-------|----------|-----------------|
| 17 rs199510    | 44857929 A | 2.382 | 6.33E-06 | chr:17:44361948 |
| 17 rs199512    | 44857352 T | 2.382 | 6.33E-06 | chr:17:44361948 |
| 17 rs539364020 | 44276821 A | 2.307 | 6.42E-06 | chr:17:44361948 |
| 17 rs1052553   | 44073889 G | 2.321 | 6.44E-06 | chr:17:44361948 |
| 17 rs369234167 | 44611782 C | 2.362 | 6.45E-06 | chr:17:44361948 |
| 17 rs564014870 | 44362633 T | 2.568 | 6.46E-06 | chr:17:44361948 |
| 17 rs35524223  | 44192590 A | 2.322 | 6.52E-06 | chr:17:44361948 |
| 17 rs55831516  | 44148267 T | 2.305 | 6.60E-06 | chr:17:44361948 |
| 17 rs62060809  | 44148613 A | 2.305 | 6.60E-06 | chr:17:44361948 |
| 17 rs62060810  | 44148674 G | 2.305 | 6.60E-06 | chr:17:44361948 |
| 17 rs2957321   | 44336594 G | 2.338 | 6.62E-06 | chr:17:44361948 |
| 17 rs541994922 | 44335818 G | 2.338 | 6.62E-06 | chr:17:44361948 |
| 17 rs559420324 | 44334419 T | 2.338 | 6.62E-06 | chr:17:44361948 |
| 17 rs62074562  | 44334768 G | 2.338 | 6.62E-06 | chr:17:44361948 |
| 17 rs76155390  | 44335752 C | 2.338 | 6.62E-06 | chr:17:44361948 |
| 17 rs566238830 | 44354549 G | 2.205 | 6.62E-06 | chr:17:44361948 |
| 17 rs112166495 | 44005361 A | 2.303 | 6.65E-06 | chr:17:44361948 |
| 17 rs112439933 | 44005226 C | 2.303 | 6.65E-06 | chr:17:44361948 |
| 17 rs112454267 | 44005329 A | 2.303 | 6.65E-06 | chr:17:44361948 |
| 17 rs113313477 | 44005186 A | 2.303 | 6.65E-06 | chr:17:44361948 |
| 17 rs113796169 | 44005254 A | 2.303 | 6.65E-06 | chr:17:44361948 |
| 17 rs17564780  | 44005413 G | 2.303 | 6.65E-06 | chr:17:44361948 |
| 17 rs566979023 | 44318184 G | 2.292 | 6.67E-06 | chr:17:44361948 |
| 17 rs1819040   | 44219831 A | 2.302 | 6.67E-06 | chr:17:44361948 |
| 17 rs2696495   | 44364864 T | 2.321 | 6.68E-06 | chr:17:44361948 |
| 17 rs2696518   | 44357885 G | 2.922 | 6.71E-06 | chr:17:44361948 |
| 17 rs62054825  | 43930033 A | 2.318 | 6.72E-06 | chr:17:44361948 |
| 17 rs62064660  | 44078832 A | 2.318 | 6.74E-06 | chr:17:44361948 |
| 17 rs2316951   | 44139083 C | 2.317 | 6.75E-06 | chr:17:44361948 |
| 17 rs530819145 | 44232959 A | 2.317 | 6.75E-06 | chr:17:44361948 |
| 17 rs544076796 | 44246405 A | 2.303 | 6.75E-06 | chr:17:44361948 |
| 17 rs113925422 | 44046934 A | 2.302 | 6.77E-06 | chr:17:44361948 |
| 17 rs556323004 | 44225802 T | 2.318 | 6.78E-06 | chr:17:44361948 |
| 17 rs548785130 | 44284057 T | 2.249 | 6.84E-06 | chr:17:44361948 |
| 17 rs17573245  | 44072854 C | 2.318 | 6.85E-06 | chr:17:44361948 |
| 17 rs565531740 | 44244397 A | 2.318 | 6.85E-06 | chr:17:44361948 |
| 17 rs1724404   | 44323425 T | 2.294 | 6.89E-06 | chr:17:44361948 |
| 17 rs62070952  | 44309255 A | 2.845 | 6.94E-06 | chr:17:44361948 |
| 17 rs112493812 | 44314179 A | 2.315 | 6.95E-06 | chr:17:44361948 |
| 17 rs2696607   | 44319167 A | 2.315 | 6.95E-06 | chr:17:44361948 |
| 17 rs2732715   | 44321527 T | 2.315 | 6.95E-06 | chr:17:44361948 |
| 17 rs534615982 | 44314066 G | 2.315 | 6.95E-06 | chr:17:44361948 |
| 17 rs546360771 | 44313950 A | 2.315 | 6.95E-06 | chr:17:44361948 |

|                |            |       |          |                 |
|----------------|------------|-------|----------|-----------------|
| 17 rs550505763 | 44317210 A | 2.315 | 6.95E-06 | chr:17:44361948 |
| 17 rs552419936 | 44313757 A | 2.315 | 6.95E-06 | chr:17:44361948 |
| 17 rs55744103  | 44316280 C | 2.315 | 6.95E-06 | chr:17:44361948 |
| 17 rs561690667 | 44317103 C | 2.315 | 6.95E-06 | chr:17:44361948 |
| 17 rs564242533 | 44316888 G | 2.315 | 6.95E-06 | chr:17:44361948 |
| 17 rs566835244 | 44316389 A | 2.315 | 6.95E-06 | chr:17:44361948 |
| 17 rs62073098  | 44316449 C | 2.315 | 6.95E-06 | chr:17:44361948 |
| 17 rs2668653   | 44288156 C | 2.29  | 6.95E-06 | chr:17:44361948 |
| 17 rs551124966 | 44487793 C | 2.296 | 6.97E-06 | chr:17:44361948 |
| 17 rs571470536 | 44487794 T | 2.296 | 6.97E-06 | chr:17:44361948 |
| 17 rs62063294  | 44044157 A | 2.314 | 6.99E-06 | chr:17:44361948 |
| 17 rs546616364 | 44338503 A | 2.058 | 6.99E-06 | chr:17:44361948 |
| 17 rs556215035 | 44342327 G | 2.25  | 7.01E-06 | chr:17:44361948 |
| 17 rs17763199  | 43910183 A | 2.321 | 7.03E-06 | chr:17:44361948 |
| 17 rs543465293 | 44122348 T | 2.303 | 7.04E-06 | chr:17:44361948 |
| 17 rs564973192 | 44122354 G | 2.303 | 7.04E-06 | chr:17:44361948 |
| 17 rs576066466 | 44122345 G | 2.303 | 7.04E-06 | chr:17:44361948 |
| 17 rs62063796  | 44068289 A | 2.313 | 7.04E-06 | chr:17:44361948 |
| 17 rs62063797  | 44068294 C | 2.313 | 7.04E-06 | chr:17:44361948 |
| 17 rs17572627  | 44058629 A | 2.313 | 7.13E-06 | chr:17:44361948 |
| 17 rs77527347  | 44058017 T | 2.313 | 7.13E-06 | chr:17:44361948 |
| 17 rs78098830  | 44361337 T | 2.3   | 7.19E-06 | chr:17:44361948 |
| 17 rs17769490  | 43925605 A | 2.294 | 7.21E-06 | chr:17:44361948 |
| 17 rs56113217  | 43926948 G | 2.294 | 7.21E-06 | chr:17:44361948 |
| 17 rs56269136  | 43926992 T | 2.294 | 7.21E-06 | chr:17:44361948 |
| 17 rs56385754  | 43927255 T | 2.294 | 7.21E-06 | chr:17:44361948 |
| 17 rs62054817  | 43925966 A | 2.294 | 7.21E-06 | chr:17:44361948 |
| 17 rs62054818  | 43926056 C | 2.294 | 7.21E-06 | chr:17:44361948 |
| 17 rs62054819  | 43926149 G | 2.294 | 7.21E-06 | chr:17:44361948 |
| 17 rs62054820  | 43926755 G | 2.294 | 7.21E-06 | chr:17:44361948 |
| 17 rs62054822  | 43927708 G | 2.294 | 7.21E-06 | chr:17:44361948 |
| 17 rs77063768  | 43925729 G | 2.294 | 7.21E-06 | chr:17:44361948 |
| 17 rs885639    | 43928614 G | 2.294 | 7.21E-06 | chr:17:44361948 |
| 17 rs17575556  | 44135827 A | 2.312 | 7.21E-06 | chr:17:44361948 |
| 17 rs17652502  | 44094471 A | 2.312 | 7.21E-06 | chr:17:44361948 |
| 17 rs567324860 | 44259792 A | 2.309 | 7.25E-06 | chr:17:44361948 |
| 17 rs199504    | 44861003 C | 2.35  | 7.25E-06 | chr:17:44361948 |
| 17 rs142955985 | 43933790 T | 2.302 | 7.31E-06 | chr:17:44361948 |
| 17 rs79772576  | 44106220 G | 2.311 | 7.32E-06 | chr:17:44361948 |
| 17 rs62063850  | 44073739 A | 2.31  | 7.34E-06 | chr:17:44361948 |
| 17 rs545178846 | 44327712 T | 2.253 | 7.34E-06 | chr:17:44361948 |
| 17 rs2532229   | 44277265 C | 2.296 | 7.41E-06 | chr:17:44361948 |
| 17 rs553560640 | 44304130 G | 2.309 | 7.43E-06 | chr:17:44361948 |

|                |            |       |          |                 |
|----------------|------------|-------|----------|-----------------|
| 17 rs535751452 | 44272928 A | 2.291 | 7.46E-06 | chr:17:44361948 |
| 17 rs574644730 | 44272679 C | 2.291 | 7.46E-06 | chr:17:44361948 |
| 17 rs564301026 | 44220454 G | 2.293 | 7.47E-06 | chr:17:44361948 |
| 17 rs527375859 | 44263965 C | 2.29  | 7.48E-06 | chr:17:44361948 |
| 17 rs74998289  | 43913558 G | 2.29  | 7.50E-06 | chr:17:44361948 |
| 17 rs75104593  | 43913557 G | 2.29  | 7.50E-06 | chr:17:44361948 |
| 17 rs547862429 | 44305026 A | 2.29  | 7.55E-06 | chr:17:44361948 |
| 17 rs78358711  | 44296230 A | 2.293 | 7.60E-06 | chr:17:44361948 |
| 17 rs2141298   | 44268488 T | 2.29  | 7.63E-06 | chr:17:44361948 |
| 17 rs2458218   | 44361383 C | 2.52  | 7.63E-06 | chr:17:44361948 |
| 17 rs575816835 | 44216226 G | 2.29  | 7.63E-06 | chr:17:44361948 |
| 17 rs554416680 | 44286198 A | 2.2   | 7.64E-06 | chr:17:44361948 |
| 17 rs553226241 | 44272552 T | 2.262 | 7.65E-06 | chr:17:44361948 |
| 17 rs545914867 | 44273264 A | 2.291 | 7.67E-06 | chr:17:44361948 |
| 17 rs62063675  | 44126575 T | 2.306 | 7.69E-06 | chr:17:44361948 |
| 17 rs544272461 | 44257473 C | 2.289 | 7.79E-06 | chr:17:44361948 |
| 17 rs62061822  | 44186894 C | 2.305 | 7.81E-06 | chr:17:44361948 |
| 17 rs415430    | 44859144 C | 2.353 | 7.82E-06 | chr:17:44361948 |
| 17 rs430685    | 44859148 T | 2.353 | 7.82E-06 | chr:17:44361948 |
| 17 rs17690176  | 43916773 C | 2.286 | 7.82E-06 | chr:17:44361948 |
| 17 rs76632685  | 43974477 T | 2.286 | 7.87E-06 | chr:17:44361948 |
| 17 rs80346216  | 43974476 T | 2.286 | 7.87E-06 | chr:17:44361948 |
| 17 rs113313727 | 44338594 A | 2.131 | 7.88E-06 | chr:17:44361948 |
| 17 rs113271363 | 43996721 G | 2.311 | 7.89E-06 | chr:17:44361948 |
| 17 rs570324382 | 44254494 C | 2.252 | 7.93E-06 | chr:17:44361948 |
| 17 rs199516    | 44856485 C | 2.359 | 7.96E-06 | chr:17:44361948 |
| 17 rs199525    | 44847834 G | 2.359 | 7.96E-06 | chr:17:44361948 |
| 17 rs199528    | 44843136 T | 2.359 | 7.96E-06 | chr:17:44361948 |
| 17 rs546672662 | 44274766 C | 2.284 | 7.96E-06 | chr:17:44361948 |
| 17 rs542442671 | 44283139 A | 2.26  | 8.03E-06 | chr:17:44361948 |
| 17 rs62061799  | 44174068 C | 2.284 | 8.03E-06 | chr:17:44361948 |
| 17 rs2668668   | 44284641 G | 2.258 | 8.11E-06 | chr:17:44361948 |
| 17 rs62061859  | 44201109 G | 2.285 | 8.11E-06 | chr:17:44361948 |
| 17 rs535998558 | 44233433 C | 2.286 | 8.11E-06 | chr:17:44361948 |
| 17 rs562593126 | 44238424 A | 2.286 | 8.11E-06 | chr:17:44361948 |
| 17 rs577482939 | 44228529 A | 2.286 | 8.13E-06 | chr:17:44361948 |
| 17 rs555485669 | 44275619 G | 2.27  | 8.17E-06 | chr:17:44361948 |
| 17 rs548762783 | 44261753 C | 2.283 | 8.27E-06 | chr:17:44361948 |
| 17 rs552471054 | 44215823 G | 2.283 | 8.27E-06 | chr:17:44361948 |
| 17 rs11079733  | 44269964 A | 2.281 | 8.30E-06 | chr:17:44361948 |
| 17 rs2696633   | 44270059 T | 2.281 | 8.30E-06 | chr:17:44361948 |
| 17 rs563621837 | 44253364 A | 2.285 | 8.30E-06 | chr:17:44361948 |
| 17 rs540664392 | 44237068 T | 2.281 | 8.32E-06 | chr:17:44361948 |

|                |            |       |          |                 |
|----------------|------------|-------|----------|-----------------|
| 17 rs111825734 | 44019107 G | 2.275 | 8.35E-06 | chr:17:44361948 |
| 17 rs534560878 | 44235893 T | 2.28  | 8.43E-06 | chr:17:44361948 |
| 17 rs537399285 | 44231326 A | 2.28  | 8.43E-06 | chr:17:44361948 |
| 17 rs569963579 | 44231295 A | 2.28  | 8.43E-06 | chr:17:44361948 |
| 17 rs560050580 | 44297148 A | 2.271 | 8.50E-06 | chr:17:44361948 |
| 17 rs62062287  | 44096541 G | 2.282 | 8.54E-06 | chr:17:44361948 |
| 17 rs2732629   | 44289101 G | 2.255 | 8.56E-06 | chr:17:44361948 |
| 17 rs566489145 | 44242969 C | 2.279 | 8.58E-06 | chr:17:44361948 |
| 17 rs76723223  | 44089108 C | 2.279 | 8.58E-06 | chr:17:44361948 |
| 17 rs537757858 | 44284420 T | 2.244 | 8.61E-06 | chr:17:44361948 |
| 17 rs2532407   | 44301840 C | 2.241 | 8.62E-06 | chr:17:44361948 |
| 17 rs570399582 | 44274560 C | 2.278 | 8.65E-06 | chr:17:44361948 |
| 17 rs2532395   | 44307193 T | 2.274 | 8.68E-06 | chr:17:44361948 |
| 17 rs78826239  | 44290850 A | 2.442 | 8.69E-06 | chr:17:44361948 |
| 17 rs548542325 | 44344300 T | 2.127 | 8.69E-06 | chr:17:44361948 |
| 17 rs532593319 | 44344219 T | 2.76  | 8.70E-06 | chr:17:44361948 |
| 17 rs548109274 | 44344222 G | 2.76  | 8.70E-06 | chr:17:44361948 |
| 17 rs2532423   | 44285952 C | 2.215 | 8.76E-06 | chr:17:44361948 |
| 17 rs62062294  | 44100666 C | 2.278 | 8.77E-06 | chr:17:44361948 |
| 17 rs56040418  | 43958079 T | 2.276 | 8.78E-06 | chr:17:44361948 |
| 17 rs56180212  | 43960911 G | 2.276 | 8.78E-06 | chr:17:44361948 |
| 17 rs146761208 | 44495308 G | 1.767 | 8.90E-06 | chr:17:44361948 |
| 17 rs571742017 | 44280697 C | 2.807 | 8.97E-06 | chr:17:44361948 |
| 17 rs564614982 | 44334288 G | 2.294 | 8.98E-06 | chr:17:44361948 |
| 17 rs542241702 | 44098862 G | 2.285 | 8.99E-06 | chr:17:44361948 |
| 17 rs542802424 | 44098861 T | 2.285 | 8.99E-06 | chr:17:44361948 |
| 17 rs77015737  | 44224939 T | 2.307 | 9.07E-06 | chr:17:44361948 |
| 17 rs80103986  | 44224940 T | 2.307 | 9.07E-06 | chr:17:44361948 |
| 17 rs55795042  | 44325635 C | 2.283 | 9.13E-06 | chr:17:44361948 |
| 17 rs571822645 | 44326619 G | 2.109 | 9.15E-06 | chr:17:44361948 |
| 17 rs533534846 | 44343125 T | 2.242 | 9.19E-06 | chr:17:44361948 |
| 17 rs528392906 | 44217293 A | 2.273 | 9.21E-06 | chr:17:44361948 |
| 17 rs560926498 | 44228824 G | 2.273 | 9.21E-06 | chr:17:44361948 |
| 17 rs570807150 | 44284542 A | 2.24  | 9.21E-06 | chr:17:44361948 |
| 17 rs569025098 | 44338735 T | 2.102 | 9.23E-06 | chr:17:44361948 |
| 17 rs2316766   | 43919068 T | 2.282 | 9.32E-06 | chr:17:44361948 |
| 17 rs2316767   | 43919070 C | 2.282 | 9.32E-06 | chr:17:44361948 |
| 17 rs2316768   | 43919073 T | 2.282 | 9.32E-06 | chr:17:44361948 |
| 17 rs55946323  | 44031946 G | 2.28  | 9.35E-06 | chr:17:44361948 |
| 17 rs56189701  | 43987801 C | 2.28  | 9.35E-06 | chr:17:44361948 |
| 17 rs111751251 | 44042951 T | 2.281 | 9.36E-06 | chr:17:44361948 |
| 17 rs112003311 | 44042939 A | 2.281 | 9.36E-06 | chr:17:44361948 |
| 17 rs2696569   | 44266290 C | 2.258 | 9.45E-06 | chr:17:44361948 |

|                |            |       |          |                 |
|----------------|------------|-------|----------|-----------------|
| 17 rs2732613   | 44364829 C | 2.268 | 9.52E-06 | chr:17:44361948 |
| 17 rs2532233   | 44273218 T | 2.253 | 9.71E-06 | chr:17:44361948 |
| 17 rs17577975  | 44210442 T | 2.276 | 9.74E-06 | chr:17:44361948 |
| 17 rs62060842  | 44153607 A | 2.276 | 9.74E-06 | chr:17:44361948 |
| 17 rs62062290  | 44099129 A | 2.295 | 9.77E-06 | chr:17:44361948 |
| 17 rs3912060   | 44165435 T | 2.278 | 9.79E-06 | chr:17:44361948 |
| 17 rs111905143 | 44184808 G | 2.277 | 9.80E-06 | chr:17:44361948 |
| 17 rs113138968 | 44314261 T | 2.277 | 9.80E-06 | chr:17:44361948 |
| 17 rs113343439 | 44314217 G | 2.277 | 9.80E-06 | chr:17:44361948 |
| 17 rs573428524 | 44314342 C | 2.277 | 9.80E-06 | chr:17:44361948 |
| 17 rs62061858  | 44200033 C | 2.277 | 9.80E-06 | chr:17:44361948 |
| 17 rs16940676  | 43911036 A | 2.275 | 9.81E-06 | chr:17:44361948 |
| 17 rs567996834 | 44338534 T | 2.045 | 9.81E-06 | chr:17:44361948 |
| 17 rs55653937  | 44316076 T | 2.266 | 9.83E-06 | chr:17:44361948 |
| 17 rs199505    | 44859410 A | 2.331 | 9.84E-06 | chr:17:44361948 |
| 17 rs199515    | 44856641 G | 2.331 | 9.84E-06 | chr:17:44361948 |
| 17 rs70600     | 44860021 T | 2.331 | 9.84E-06 | chr:17:44361948 |
| 17 rs70602     | 44859715 T | 2.331 | 9.84E-06 | chr:17:44361948 |
| 17 rs2532363   | 44333423 T | 2.295 | 9.88E-06 | chr:17:44361948 |
| 17 rs78929339  | 44189910 G | 2.276 | 9.92E-06 | chr:17:44361948 |
| 17 rs62073146  | 44328871 G | 2.252 | 1.00E-05 | chr:17:44361948 |
| 17 rs544146004 | 44340328 C | 2.26  | 1.01E-05 | chr:17:44361948 |
| 17 rs62061723  | 44014981 T | 2.272 | 1.01E-05 | chr:17:44361948 |
| 17 rs62061724  | 44014982 T | 2.272 | 1.01E-05 | chr:17:44361948 |
| 17 rs2532276   | 44246624 A | 2.254 | 1.01E-05 | chr:17:44361948 |
| 17 rs546983754 | 44336237 T | 2.24  | 1.02E-05 | chr:17:44361948 |
| 17 rs540260849 | 44277923 A | 2.25  | 1.02E-05 | chr:17:44361948 |
| 17 rs62073110  | 44324048 G | 2.546 | 1.02E-05 | chr:17:44361948 |
| 17 rs17576954  | 44181933 C | 2.272 | 1.05E-05 | chr:17:44361948 |
| 17 rs2693333   | 44311200 C | 2.255 | 1.06E-05 | chr:17:44361948 |
| 17 rs562593824 | 44322922 G | 2.263 | 1.06E-05 | chr:17:44361948 |
| 17 rs145487105 | 44499795 C | 1.769 | 1.06E-05 | chr:17:44361948 |
| 17 rs149197001 | 44500095 G | 1.769 | 1.06E-05 | chr:17:44361948 |
| 17 rs529274065 | 44338536 C | 2.041 | 1.06E-05 | chr:17:44361948 |
| 17 rs566209918 | 44283761 T | 2.221 | 1.08E-05 | chr:17:44361948 |
| 17 rs2532424   | 44368926 A | 2.289 | 1.08E-05 | chr:17:44361948 |
| 17 rs112836774 | 44084002 C | 2.31  | 1.09E-05 | chr:17:44361948 |
| 17 rs17573607  | 44083081 A | 2.267 | 1.09E-05 | chr:17:44361948 |
| 17 rs2106785   | 43919105 T | 2.267 | 1.09E-05 | chr:17:44361948 |
| 17 rs2106786   | 43919096 G | 2.267 | 1.09E-05 | chr:17:44361948 |
| 17 rs17661141  | 44196015 G | 2.267 | 1.09E-05 | chr:17:44361948 |
| 17 rs199514    | 44856881 G | 2.322 | 1.10E-05 | chr:17:44361948 |
| 17 rs543821315 | 44331297 T | 2.285 | 1.10E-05 | chr:17:44361948 |

|                |            |       |          |                 |
|----------------|------------|-------|----------|-----------------|
| 17 rs545270044 | 44277818 G | 2.24  | 1.11E-05 | chr:17:44361948 |
| 17 rs17689378  | 43881790 T | 2.262 | 1.12E-05 | chr:17:44361948 |
| 17 rs535060999 | 44238966 C | 2.214 | 1.13E-05 | chr:17:44361948 |
| 17 rs568059837 | 44238938 C | 2.214 | 1.13E-05 | chr:17:44361948 |
| 17 rs113913001 | 44282892 C | 2.24  | 1.14E-05 | chr:17:44361948 |
| 17 rs538569832 | 44227510 T | 2.237 | 1.15E-05 | chr:17:44361948 |
| 17 rs553616014 | 44227531 C | 2.237 | 1.15E-05 | chr:17:44361948 |
| 17 rs561504284 | 44340253 G | 2.208 | 1.15E-05 | chr:17:44361948 |
| 17 rs2668692   | 44293020 A | 2.239 | 1.15E-05 | chr:17:44361948 |
| 17 rs2668685   | 44340151 C | 2.184 | 1.16E-05 | chr:17:44361948 |
| 17 rs546821167 | 44271152 A | 2.239 | 1.16E-05 | chr:17:44361948 |
| 17 rs151172887 | 44515243 T | 1.769 | 1.18E-05 | chr:17:44361948 |
| 17 rs10445333  | 43916509 G | 2.258 | 1.19E-05 | chr:17:44361948 |
| 17 rs10445334  | 43934826 G | 2.258 | 1.19E-05 | chr:17:44361948 |
| 17 rs10445335  | 43934896 A | 2.258 | 1.19E-05 | chr:17:44361948 |
| 17 rs10445336  | 43934948 G | 2.258 | 1.19E-05 | chr:17:44361948 |
| 17 rs10445362  | 43914554 A | 2.258 | 1.19E-05 | chr:17:44361948 |
| 17 rs10445363  | 43914558 A | 2.258 | 1.19E-05 | chr:17:44361948 |
| 17 rs10445364  | 43916356 A | 2.258 | 1.19E-05 | chr:17:44361948 |
| 17 rs10445369  | 43934776 G | 2.258 | 1.19E-05 | chr:17:44361948 |
| 17 rs10445370  | 43935118 A | 2.258 | 1.19E-05 | chr:17:44361948 |
| 17 rs1078830   | 43946112 C | 2.258 | 1.19E-05 | chr:17:44361948 |
| 17 rs11079725  | 43923934 C | 2.258 | 1.19E-05 | chr:17:44361948 |
| 17 rs111321973 | 43953170 T | 2.258 | 1.19E-05 | chr:17:44361948 |
| 17 rs111447859 | 43987184 C | 2.258 | 1.19E-05 | chr:17:44361948 |
| 17 rs111541901 | 43994358 T | 2.258 | 1.19E-05 | chr:17:44361948 |
| 17 rs111689007 | 43981103 A | 2.258 | 1.19E-05 | chr:17:44361948 |
| 17 rs111739681 | 43898459 T | 2.258 | 1.19E-05 | chr:17:44361948 |
| 17 rs111941646 | 43966608 T | 2.258 | 1.19E-05 | chr:17:44361948 |
| 17 rs111962225 | 43934016 C | 2.258 | 1.19E-05 | chr:17:44361948 |
| 17 rs111972148 | 43973121 C | 2.258 | 1.19E-05 | chr:17:44361948 |
| 17 rs112003140 | 43980998 A | 2.258 | 1.19E-05 | chr:17:44361948 |
| 17 rs112116311 | 43989898 G | 2.258 | 1.19E-05 | chr:17:44361948 |
| 17 rs112137135 | 43900817 G | 2.258 | 1.19E-05 | chr:17:44361948 |
| 17 rs112275277 | 43981958 T | 2.258 | 1.19E-05 | chr:17:44361948 |
| 17 rs112425426 | 43963416 G | 2.258 | 1.19E-05 | chr:17:44361948 |
| 17 rs112583797 | 43918418 G | 2.258 | 1.19E-05 | chr:17:44361948 |
| 17 rs112647192 | 43994623 A | 2.258 | 1.19E-05 | chr:17:44361948 |
| 17 rs112915466 | 43958744 G | 2.258 | 1.19E-05 | chr:17:44361948 |
| 17 rs112950348 | 44033188 A | 2.258 | 1.19E-05 | chr:17:44361948 |
| 17 rs113029914 | 43981831 T | 2.258 | 1.19E-05 | chr:17:44361948 |
| 17 rs113093579 | 43934116 G | 2.258 | 1.19E-05 | chr:17:44361948 |
| 17 rs113161176 | 43974354 A | 2.258 | 1.19E-05 | chr:17:44361948 |



|                |            |       |          |                 |
|----------------|------------|-------|----------|-----------------|
| 17 rs113277432 | 44033169 C | 2.258 | 1.19E-05 | chr:17:44361948 |
| 17 rs113327263 | 43965063 C | 2.258 | 1.19E-05 | chr:17:44361948 |
| 17 rs113347741 | 43973408 T | 2.258 | 1.19E-05 | chr:17:44361948 |
| 17 rs113395365 | 44025650 C | 2.258 | 1.19E-05 | chr:17:44361948 |
| 17 rs113414067 | 43955093 C | 2.258 | 1.19E-05 | chr:17:44361948 |
| 17 rs113520245 | 44033132 T | 2.258 | 1.19E-05 | chr:17:44361948 |
| 17 rs113537106 | 44016462 G | 2.258 | 1.19E-05 | chr:17:44361948 |
| 17 rs113589236 | 43981795 A | 2.258 | 1.19E-05 | chr:17:44361948 |
| 17 rs113756354 | 44013483 G | 2.258 | 1.19E-05 | chr:17:44361948 |
| 17 rs113793114 | 44037079 A | 2.258 | 1.19E-05 | chr:17:44361948 |
| 17 rs113834264 | 43979622 A | 2.258 | 1.19E-05 | chr:17:44361948 |
| 17 rs113856644 | 43932277 A | 2.258 | 1.19E-05 | chr:17:44361948 |
| 17 rs113952577 | 44010661 G | 2.258 | 1.19E-05 | chr:17:44361948 |
| 17 rs11575895  | 43971785 G | 2.258 | 1.19E-05 | chr:17:44361948 |
| 17 rs11575896  | 43972142 A | 2.258 | 1.19E-05 | chr:17:44361948 |
| 17 rs117365970 | 43893259 A | 2.258 | 1.19E-05 | chr:17:44361948 |
| 17 rs117646503 | 43893260 C | 2.258 | 1.19E-05 | chr:17:44361948 |
| 17 rs12150104  | 44015929 A | 2.258 | 1.19E-05 | chr:17:44361948 |
| 17 rs12150111  | 44013938 G | 2.258 | 1.19E-05 | chr:17:44361948 |
| 17 rs12150125  | 43986432 A | 2.258 | 1.19E-05 | chr:17:44361948 |
| 17 rs12150195  | 44014263 C | 2.258 | 1.19E-05 | chr:17:44361948 |
| 17 rs12150223  | 43944204 C | 2.258 | 1.19E-05 | chr:17:44361948 |
| 17 rs12150229  | 44015446 G | 2.258 | 1.19E-05 | chr:17:44361948 |
| 17 rs12150230  | 44015464 G | 2.258 | 1.19E-05 | chr:17:44361948 |
| 17 rs12150235  | 44015745 G | 2.258 | 1.19E-05 | chr:17:44361948 |
| 17 rs12150242  | 44015816 G | 2.258 | 1.19E-05 | chr:17:44361948 |
| 17 rs12150390  | 43896228 C | 2.258 | 1.19E-05 | chr:17:44361948 |
| 17 rs12150460  | 44014137 T | 2.258 | 1.19E-05 | chr:17:44361948 |
| 17 rs12150516  | 43944519 T | 2.258 | 1.19E-05 | chr:17:44361948 |
| 17 rs12150527  | 43986462 G | 2.258 | 1.19E-05 | chr:17:44361948 |
| 17 rs12150576  | 44015624 A | 2.258 | 1.19E-05 | chr:17:44361948 |
| 17 rs12185235  | 43923703 T | 2.258 | 1.19E-05 | chr:17:44361948 |
| 17 rs12185268  | 43923683 G | 2.258 | 1.19E-05 | chr:17:44361948 |
| 17 rs12373123  | 43924073 C | 2.258 | 1.19E-05 | chr:17:44361948 |
| 17 rs12373124  | 43924219 C | 2.258 | 1.19E-05 | chr:17:44361948 |
| 17 rs12373139  | 43924130 A | 2.258 | 1.19E-05 | chr:17:44361948 |
| 17 rs12373140  | 43924231 A | 2.258 | 1.19E-05 | chr:17:44361948 |
| 17 rs12373142  | 43924200 G | 2.258 | 1.19E-05 | chr:17:44361948 |
| 17 rs1396862   | 43902997 A | 2.258 | 1.19E-05 | chr:17:44361948 |
| 17 rs1467962   | 43978604 G | 2.258 | 1.19E-05 | chr:17:44361948 |
| 17 rs1467963   | 43978934 G | 2.258 | 1.19E-05 | chr:17:44361948 |
| 17 rs1467966   | 43984399 T | 2.258 | 1.19E-05 | chr:17:44361948 |
| 17 rs1467968   | 43986396 T | 2.258 | 1.19E-05 | chr:17:44361948 |

|               |            |       |          |                 |
|---------------|------------|-------|----------|-----------------|
| 17 rs1467969  | 43998328 T | 2.258 | 1.19E-05 | chr:17:44361948 |
| 17 rs1467970  | 43998574 G | 2.258 | 1.19E-05 | chr:17:44361948 |
| 17 rs1476127  | 43999793 A | 2.258 | 1.19E-05 | chr:17:44361948 |
| 17 rs1560310  | 43978534 A | 2.258 | 1.19E-05 | chr:17:44361948 |
| 17 rs1560311  | 43978625 C | 2.258 | 1.19E-05 | chr:17:44361948 |
| 17 rs16940665 | 43907896 C | 2.258 | 1.19E-05 | chr:17:44361948 |
| 17 rs16940668 | 43907966 A | 2.258 | 1.19E-05 | chr:17:44361948 |
| 17 rs16940671 | 43908151 T | 2.258 | 1.19E-05 | chr:17:44361948 |
| 17 rs16940672 | 43908152 T | 2.258 | 1.19E-05 | chr:17:44361948 |
| 17 rs16940674 | 43910507 T | 2.258 | 1.19E-05 | chr:17:44361948 |
| 17 rs16940677 | 43911898 T | 2.258 | 1.19E-05 | chr:17:44361948 |
| 17 rs16940681 | 43912159 C | 2.258 | 1.19E-05 | chr:17:44361948 |
| 17 rs17563965 | 43990919 G | 2.258 | 1.19E-05 | chr:17:44361948 |
| 17 rs17563986 | 43991272 G | 2.258 | 1.19E-05 | chr:17:44361948 |
| 17 rs17564020 | 43991781 T | 2.258 | 1.19E-05 | chr:17:44361948 |
| 17 rs17564153 | 43995098 A | 2.258 | 1.19E-05 | chr:17:44361948 |
| 17 rs17564493 | 44001379 T | 2.258 | 1.19E-05 | chr:17:44361948 |
| 17 rs17564591 | 44002062 C | 2.258 | 1.19E-05 | chr:17:44361948 |
| 17 rs17564619 | 44002138 G | 2.258 | 1.19E-05 | chr:17:44361948 |
| 17 rs17564703 | 44002595 T | 2.258 | 1.19E-05 | chr:17:44361948 |
| 17 rs17564829 | 44006601 C | 2.258 | 1.19E-05 | chr:17:44361948 |
| 17 rs17564871 | 44011018 G | 2.258 | 1.19E-05 | chr:17:44361948 |
| 17 rs17564948 | 44011749 G | 2.258 | 1.19E-05 | chr:17:44361948 |
| 17 rs17564983 | 44011825 C | 2.258 | 1.19E-05 | chr:17:44361948 |
| 17 rs17571718 | 44032768 C | 2.258 | 1.19E-05 | chr:17:44361948 |
| 17 rs17571739 | 44032915 C | 2.258 | 1.19E-05 | chr:17:44361948 |
| 17 rs17571781 | 44033802 C | 2.258 | 1.19E-05 | chr:17:44361948 |
| 17 rs17571809 | 44034859 G | 2.258 | 1.19E-05 | chr:17:44361948 |
| 17 rs17571857 | 44035706 G | 2.258 | 1.19E-05 | chr:17:44361948 |
| 17 rs17649518 | 43994386 A | 2.258 | 1.19E-05 | chr:17:44361948 |
| 17 rs17649571 | 43994952 G | 2.258 | 1.19E-05 | chr:17:44361948 |
| 17 rs17649635 | 43995990 G | 2.258 | 1.19E-05 | chr:17:44361948 |
| 17 rs17649641 | 43997372 C | 2.258 | 1.19E-05 | chr:17:44361948 |
| 17 rs17649866 | 44000914 C | 2.258 | 1.19E-05 | chr:17:44361948 |
| 17 rs17649918 | 44001621 G | 2.258 | 1.19E-05 | chr:17:44361948 |
| 17 rs17649954 | 44001661 G | 2.258 | 1.19E-05 | chr:17:44361948 |
| 17 rs17650063 | 44002555 G | 2.258 | 1.19E-05 | chr:17:44361948 |
| 17 rs17650258 | 44011073 A | 2.258 | 1.19E-05 | chr:17:44361948 |
| 17 rs17650335 | 44012343 A | 2.258 | 1.19E-05 | chr:17:44361948 |
| 17 rs17650381 | 44013024 C | 2.258 | 1.19E-05 | chr:17:44361948 |
| 17 rs17650417 | 44013103 T | 2.258 | 1.19E-05 | chr:17:44361948 |
| 17 rs17650579 | 44030115 T | 2.258 | 1.19E-05 | chr:17:44361948 |
| 17 rs17650597 | 44030195 T | 2.258 | 1.19E-05 | chr:17:44361948 |

|               |            |       |          |                 |
|---------------|------------|-------|----------|-----------------|
| 17 rs17650633 | 44030231 C | 2.258 | 1.19E-05 | chr:17:44361948 |
| 17 rs17650651 | 44030311 G | 2.258 | 1.19E-05 | chr:17:44361948 |
| 17 rs17650771 | 44035367 G | 2.258 | 1.19E-05 | chr:17:44361948 |
| 17 rs17650818 | 44036787 C | 2.258 | 1.19E-05 | chr:17:44361948 |
| 17 rs17650842 | 44037491 G | 2.258 | 1.19E-05 | chr:17:44361948 |
| 17 rs17689471 | 43892973 C | 2.258 | 1.19E-05 | chr:17:44361948 |
| 17 rs17689608 | 43896528 G | 2.258 | 1.19E-05 | chr:17:44361948 |
| 17 rs17689653 | 43898963 T | 2.258 | 1.19E-05 | chr:17:44361948 |
| 17 rs17689824 | 43904397 T | 2.258 | 1.19E-05 | chr:17:44361948 |
| 17 rs17689918 | 43910088 A | 2.258 | 1.19E-05 | chr:17:44361948 |
| 17 rs17690314 | 43919884 G | 2.258 | 1.19E-05 | chr:17:44361948 |
| 17 rs17690326 | 43920974 C | 2.258 | 1.19E-05 | chr:17:44361948 |
| 17 rs17690661 | 43924521 A | 2.258 | 1.19E-05 | chr:17:44361948 |
| 17 rs17690679 | 43924803 G | 2.258 | 1.19E-05 | chr:17:44361948 |
| 17 rs17690987 | 43931626 C | 2.258 | 1.19E-05 | chr:17:44361948 |
| 17 rs17691449 | 43964283 C | 2.258 | 1.19E-05 | chr:17:44361948 |
| 17 rs17691466 | 43968219 G | 2.258 | 1.19E-05 | chr:17:44361948 |
| 17 rs17691508 | 43968463 G | 2.258 | 1.19E-05 | chr:17:44361948 |
| 17 rs17691556 | 43969168 A | 2.258 | 1.19E-05 | chr:17:44361948 |
| 17 rs17691610 | 43970662 T | 2.258 | 1.19E-05 | chr:17:44361948 |
| 17 rs17762769 | 43893403 A | 2.258 | 1.19E-05 | chr:17:44361948 |
| 17 rs17762882 | 43898887 C | 2.258 | 1.19E-05 | chr:17:44361948 |
| 17 rs17762912 | 43899161 C | 2.258 | 1.19E-05 | chr:17:44361948 |
| 17 rs17762954 | 43899786 T | 2.258 | 1.19E-05 | chr:17:44361948 |
| 17 rs17763050 | 43903336 A | 2.258 | 1.19E-05 | chr:17:44361948 |
| 17 rs17763086 | 43905481 G | 2.258 | 1.19E-05 | chr:17:44361948 |
| 17 rs17763515 | 43917818 A | 2.258 | 1.19E-05 | chr:17:44361948 |
| 17 rs17763533 | 43918190 C | 2.258 | 1.19E-05 | chr:17:44361948 |
| 17 rs17763596 | 43921210 T | 2.258 | 1.19E-05 | chr:17:44361948 |
| 17 rs17763634 | 43921754 C | 2.258 | 1.19E-05 | chr:17:44361948 |
| 17 rs17770108 | 43961292 T | 2.258 | 1.19E-05 | chr:17:44361948 |
| 17 rs17770120 | 43963943 A | 2.258 | 1.19E-05 | chr:17:44361948 |
| 17 rs17770150 | 43964163 A | 2.258 | 1.19E-05 | chr:17:44361948 |
| 17 rs17770186 | 43964191 A | 2.258 | 1.19E-05 | chr:17:44361948 |
| 17 rs17770296 | 43969136 T | 2.258 | 1.19E-05 | chr:17:44361948 |
| 17 rs17770337 | 43969779 T | 2.258 | 1.19E-05 | chr:17:44361948 |
| 17 rs17770343 | 43970154 C | 2.258 | 1.19E-05 | chr:17:44361948 |
| 17 rs1864324  | 43977702 T | 2.258 | 1.19E-05 | chr:17:44361948 |
| 17 rs1864325  | 43977827 T | 2.258 | 1.19E-05 | chr:17:44361948 |
| 17 rs1876827  | 43911832 C | 2.258 | 1.19E-05 | chr:17:44361948 |
| 17 rs1876828  | 43911525 T | 2.258 | 1.19E-05 | chr:17:44361948 |
| 17 rs1876829  | 43911443 C | 2.258 | 1.19E-05 | chr:17:44361948 |
| 17 rs1876830  | 43911352 T | 2.258 | 1.19E-05 | chr:17:44361948 |

|                |            |       |          |                 |
|----------------|------------|-------|----------|-----------------|
| 17 rs1876831   | 43907745 T | 2.258 | 1.19E-05 | chr:17:44361948 |
| 17 rs1912151   | 43902944 T | 2.258 | 1.19E-05 | chr:17:44361948 |
| 17 rs1967981   | 43999785 G | 2.258 | 1.19E-05 | chr:17:44361948 |
| 17 rs1984937   | 43980530 C | 2.258 | 1.19E-05 | chr:17:44361948 |
| 17 rs2006305   | 43959752 T | 2.258 | 1.19E-05 | chr:17:44361948 |
| 17 rs2019816   | 43959661 A | 2.258 | 1.19E-05 | chr:17:44361948 |
| 17 rs2019822   | 43959918 A | 2.258 | 1.19E-05 | chr:17:44361948 |
| 17 rs2055794   | 43951717 A | 2.258 | 1.19E-05 | chr:17:44361948 |
| 17 rs2055795   | 43951995 T | 2.258 | 1.19E-05 | chr:17:44361948 |
| 17 rs2055796   | 43952191 T | 2.258 | 1.19E-05 | chr:17:44361948 |
| 17 rs2082068   | 43979971 T | 2.258 | 1.19E-05 | chr:17:44361948 |
| 17 rs2099151   | 43979822 T | 2.258 | 1.19E-05 | chr:17:44361948 |
| 17 rs2106784   | 43949892 T | 2.258 | 1.19E-05 | chr:17:44361948 |
| 17 rs2158072   | 43950195 C | 2.258 | 1.19E-05 | chr:17:44361948 |
| 17 rs2188888   | 43953695 C | 2.258 | 1.19E-05 | chr:17:44361948 |
| 17 rs2214258   | 43953719 C | 2.258 | 1.19E-05 | chr:17:44361948 |
| 17 rs2316763   | 43895530 T | 2.258 | 1.19E-05 | chr:17:44361948 |
| 17 rs2316764   | 43895602 G | 2.258 | 1.19E-05 | chr:17:44361948 |
| 17 rs2316765   | 43912454 C | 2.258 | 1.19E-05 | chr:17:44361948 |
| 17 rs2316769   | 43930798 G | 2.258 | 1.19E-05 | chr:17:44361948 |
| 17 rs2316771   | 43945931 C | 2.258 | 1.19E-05 | chr:17:44361948 |
| 17 rs2316773   | 43946536 T | 2.258 | 1.19E-05 | chr:17:44361948 |
| 17 rs2316774   | 43946642 C | 2.258 | 1.19E-05 | chr:17:44361948 |
| 17 rs2316782   | 44010040 G | 2.258 | 1.19E-05 | chr:17:44361948 |
| 17 rs2316783   | 44010118 C | 2.258 | 1.19E-05 | chr:17:44361948 |
| 17 rs2316784   | 44021699 T | 2.258 | 1.19E-05 | chr:17:44361948 |
| 17 rs242561    | 44026548 T | 2.258 | 1.19E-05 | chr:17:44361948 |
| 17 rs28364021  | 43912282 T | 2.258 | 1.19E-05 | chr:17:44361948 |
| 17 rs28364023  | 43894159 T | 2.258 | 1.19E-05 | chr:17:44361948 |
| 17 rs28364025  | 43894102 C | 2.258 | 1.19E-05 | chr:17:44361948 |
| 17 rs28439143  | 43987723 A | 2.258 | 1.19E-05 | chr:17:44361948 |
| 17 rs2873268   | 43930955 A | 2.258 | 1.19E-05 | chr:17:44361948 |
| 17 rs2873269   | 43931122 T | 2.258 | 1.19E-05 | chr:17:44361948 |
| 17 rs34097347  | 43949448 A | 2.258 | 1.19E-05 | chr:17:44361948 |
| 17 rs34283254  | 43902861 A | 2.258 | 1.19E-05 | chr:17:44361948 |
| 17 rs34416056  | 43951220 G | 2.258 | 1.19E-05 | chr:17:44361948 |
| 17 rs35163442  | 44023842 A | 2.258 | 1.19E-05 | chr:17:44361948 |
| 17 rs367820416 | 43982069 G | 2.258 | 1.19E-05 | chr:17:44361948 |
| 17 rs3885074   | 43902738 A | 2.258 | 1.19E-05 | chr:17:44361948 |
| 17 rs3885075   | 43902799 G | 2.258 | 1.19E-05 | chr:17:44361948 |
| 17 rs3919455   | 43953707 T | 2.258 | 1.19E-05 | chr:17:44361948 |
| 17 rs41280116  | 43902842 T | 2.258 | 1.19E-05 | chr:17:44361948 |
| 17 rs41280118  | 43903089 T | 2.258 | 1.19E-05 | chr:17:44361948 |

|                |            |       |          |                 |
|----------------|------------|-------|----------|-----------------|
| 17 rs4255816   | 44010364 G | 2.258 | 1.19E-05 | chr:17:44361948 |
| 17 rs4277389   | 43895653 G | 2.258 | 1.19E-05 | chr:17:44361948 |
| 17 rs4309444   | 43895797 C | 2.258 | 1.19E-05 | chr:17:44361948 |
| 17 rs4327091   | 44021717 A | 2.258 | 1.19E-05 | chr:17:44361948 |
| 17 rs4335809   | 43902216 T | 2.258 | 1.19E-05 | chr:17:44361948 |
| 17 rs4340365   | 43930980 T | 2.258 | 1.19E-05 | chr:17:44361948 |
| 17 rs4371195   | 43986420 G | 2.258 | 1.19E-05 | chr:17:44361948 |
| 17 rs4441322   | 43955030 G | 2.258 | 1.19E-05 | chr:17:44361948 |
| 17 rs4479290   | 44021744 C | 2.258 | 1.19E-05 | chr:17:44361948 |
| 17 rs4482334   | 43912830 C | 2.258 | 1.19E-05 | chr:17:44361948 |
| 17 rs4523962   | 43902522 A | 2.258 | 1.19E-05 | chr:17:44361948 |
| 17 rs4525537   | 43912723 C | 2.258 | 1.19E-05 | chr:17:44361948 |
| 17 rs4564621   | 43895501 C | 2.258 | 1.19E-05 | chr:17:44361948 |
| 17 rs4566211   | 43895696 A | 2.258 | 1.19E-05 | chr:17:44361948 |
| 17 rs4566212   | 43895751 A | 2.258 | 1.19E-05 | chr:17:44361948 |
| 17 rs4640231   | 43912786 C | 2.258 | 1.19E-05 | chr:17:44361948 |
| 17 rs527658313 | 43945495 G | 2.258 | 1.19E-05 | chr:17:44361948 |
| 17 rs528939982 | 44034486 G | 2.258 | 1.19E-05 | chr:17:44361948 |
| 17 rs55638417  | 43900434 G | 2.258 | 1.19E-05 | chr:17:44361948 |
| 17 rs55646970  | 43938796 G | 2.258 | 1.19E-05 | chr:17:44361948 |
| 17 rs55653657  | 43956778 G | 2.258 | 1.19E-05 | chr:17:44361948 |
| 17 rs55673092  | 43938882 A | 2.258 | 1.19E-05 | chr:17:44361948 |
| 17 rs55673340  | 43948733 T | 2.258 | 1.19E-05 | chr:17:44361948 |
| 17 rs55682376  | 43991888 A | 2.258 | 1.19E-05 | chr:17:44361948 |
| 17 rs55685451  | 44001957 G | 2.258 | 1.19E-05 | chr:17:44361948 |
| 17 rs55691306  | 43978295 C | 2.258 | 1.19E-05 | chr:17:44361948 |
| 17 rs55711631  | 43958431 C | 2.258 | 1.19E-05 | chr:17:44361948 |
| 17 rs55718212  | 43920411 C | 2.258 | 1.19E-05 | chr:17:44361948 |
| 17 rs55719714  | 43939638 A | 2.258 | 1.19E-05 | chr:17:44361948 |
| 17 rs55721252  | 43958099 C | 2.258 | 1.19E-05 | chr:17:44361948 |
| 17 rs55746658  | 44034575 C | 2.258 | 1.19E-05 | chr:17:44361948 |
| 17 rs55751924  | 43932155 G | 2.258 | 1.19E-05 | chr:17:44361948 |
| 17 rs55760800  | 43996908 G | 2.258 | 1.19E-05 | chr:17:44361948 |
| 17 rs55763795  | 43908773 C | 2.258 | 1.19E-05 | chr:17:44361948 |
| 17 rs55767267  | 43960325 C | 2.258 | 1.19E-05 | chr:17:44361948 |
| 17 rs55768605  | 43956734 A | 2.258 | 1.19E-05 | chr:17:44361948 |
| 17 rs55779147  | 43894510 A | 2.258 | 1.19E-05 | chr:17:44361948 |
| 17 rs55781174  | 43944158 T | 2.258 | 1.19E-05 | chr:17:44361948 |
| 17 rs55788597  | 44003397 A | 2.258 | 1.19E-05 | chr:17:44361948 |
| 17 rs55788678  | 43992233 T | 2.258 | 1.19E-05 | chr:17:44361948 |
| 17 rs55810795  | 43992283 G | 2.258 | 1.19E-05 | chr:17:44361948 |
| 17 rs55821155  | 44032470 G | 2.258 | 1.19E-05 | chr:17:44361948 |
| 17 rs55823844  | 43978320 A | 2.258 | 1.19E-05 | chr:17:44361948 |

|               |            |       |          |                 |
|---------------|------------|-------|----------|-----------------|
| 17 rs55841786 | 43978308 C | 2.258 | 1.19E-05 | chr:17:44361948 |
| 17 rs55865707 | 43908826 G | 2.258 | 1.19E-05 | chr:17:44361948 |
| 17 rs55874169 | 44014384 A | 2.258 | 1.19E-05 | chr:17:44361948 |
| 17 rs55876817 | 43958139 C | 2.258 | 1.19E-05 | chr:17:44361948 |
| 17 rs55877243 | 43969019 C | 2.258 | 1.19E-05 | chr:17:44361948 |
| 17 rs55886302 | 43936011 G | 2.258 | 1.19E-05 | chr:17:44361948 |
| 17 rs55888391 | 43938107 G | 2.258 | 1.19E-05 | chr:17:44361948 |
| 17 rs55894109 | 43957221 T | 2.258 | 1.19E-05 | chr:17:44361948 |
| 17 rs55895732 | 43968937 C | 2.258 | 1.19E-05 | chr:17:44361948 |
| 17 rs55905252 | 43955365 A | 2.258 | 1.19E-05 | chr:17:44361948 |
| 17 rs55929431 | 44000202 A | 2.258 | 1.19E-05 | chr:17:44361948 |
| 17 rs55933304 | 43992305 A | 2.258 | 1.19E-05 | chr:17:44361948 |
| 17 rs55937610 | 43960283 G | 2.258 | 1.19E-05 | chr:17:44361948 |
| 17 rs55942528 | 43932028 G | 2.258 | 1.19E-05 | chr:17:44361948 |
| 17 rs55943044 | 43872228 A | 2.258 | 1.19E-05 | chr:17:44361948 |
| 17 rs55943606 | 43968874 G | 2.258 | 1.19E-05 | chr:17:44361948 |
| 17 rs55943825 | 43924776 T | 2.258 | 1.19E-05 | chr:17:44361948 |
| 17 rs55944735 | 43958172 G | 2.258 | 1.19E-05 | chr:17:44361948 |
| 17 rs55960528 | 43968994 C | 2.258 | 1.19E-05 | chr:17:44361948 |
| 17 rs55967721 | 43948977 A | 2.258 | 1.19E-05 | chr:17:44361948 |
| 17 rs55975673 | 43959113 G | 2.258 | 1.19E-05 | chr:17:44361948 |
| 17 rs55978005 | 44031540 T | 2.258 | 1.19E-05 | chr:17:44361948 |
| 17 rs55979424 | 43900081 T | 2.258 | 1.19E-05 | chr:17:44361948 |
| 17 rs55996632 | 43935888 T | 2.258 | 1.19E-05 | chr:17:44361948 |
| 17 rs56002706 | 44000505 T | 2.258 | 1.19E-05 | chr:17:44361948 |
| 17 rs56023973 | 43917776 T | 2.258 | 1.19E-05 | chr:17:44361948 |
| 17 rs56026128 | 43931244 C | 2.258 | 1.19E-05 | chr:17:44361948 |
| 17 rs56026232 | 43939399 C | 2.258 | 1.19E-05 | chr:17:44361948 |
| 17 rs56026524 | 43939389 T | 2.258 | 1.19E-05 | chr:17:44361948 |
| 17 rs56036719 | 43943974 T | 2.258 | 1.19E-05 | chr:17:44361948 |
| 17 rs56042957 | 43992244 A | 2.258 | 1.19E-05 | chr:17:44361948 |
| 17 rs56080482 | 44032597 A | 2.258 | 1.19E-05 | chr:17:44361948 |
| 17 rs56099546 | 43894609 G | 2.258 | 1.19E-05 | chr:17:44361948 |
| 17 rs56100710 | 43939395 T | 2.258 | 1.19E-05 | chr:17:44361948 |
| 17 rs56101773 | 43957269 C | 2.258 | 1.19E-05 | chr:17:44361948 |
| 17 rs56127111 | 43913315 T | 2.258 | 1.19E-05 | chr:17:44361948 |
| 17 rs56136075 | 43936298 A | 2.258 | 1.19E-05 | chr:17:44361948 |
| 17 rs56146262 | 43931907 A | 2.258 | 1.19E-05 | chr:17:44361948 |
| 17 rs56150806 | 43919301 C | 2.258 | 1.19E-05 | chr:17:44361948 |
| 17 rs56194412 | 43960600 C | 2.258 | 1.19E-05 | chr:17:44361948 |
| 17 rs56197117 | 44003446 G | 2.258 | 1.19E-05 | chr:17:44361948 |
| 17 rs56201245 | 44034340 T | 2.258 | 1.19E-05 | chr:17:44361948 |
| 17 rs56227067 | 43939609 T | 2.258 | 1.19E-05 | chr:17:44361948 |

|                |            |       |          |                 |
|----------------|------------|-------|----------|-----------------|
| 17 rs56233672  | 43920300 C | 2.258 | 1.19E-05 | chr:17:44361948 |
| 17 rs56249080  | 43939432 T | 2.258 | 1.19E-05 | chr:17:44361948 |
| 17 rs56249311  | 44003599 T | 2.258 | 1.19E-05 | chr:17:44361948 |
| 17 rs56249780  | 43957328 T | 2.258 | 1.19E-05 | chr:17:44361948 |
| 17 rs56254732  | 43932049 T | 2.258 | 1.19E-05 | chr:17:44361948 |
| 17 rs56288604  | 43931380 G | 2.258 | 1.19E-05 | chr:17:44361948 |
| 17 rs56289364  | 43947928 G | 2.258 | 1.19E-05 | chr:17:44361948 |
| 17 rs56299858  | 43939659 A | 2.258 | 1.19E-05 | chr:17:44361948 |
| 17 rs56301449  | 43960918 C | 2.258 | 1.19E-05 | chr:17:44361948 |
| 17 rs56303672  | 43996960 G | 2.258 | 1.19E-05 | chr:17:44361948 |
| 17 rs56306380  | 43978306 A | 2.258 | 1.19E-05 | chr:17:44361948 |
| 17 rs56317731  | 44032073 G | 2.258 | 1.19E-05 | chr:17:44361948 |
| 17 rs56319902  | 43871982 T | 2.258 | 1.19E-05 | chr:17:44361948 |
| 17 rs56327054  | 43943957 C | 2.258 | 1.19E-05 | chr:17:44361948 |
| 17 rs56329743  | 43931245 A | 2.258 | 1.19E-05 | chr:17:44361948 |
| 17 rs56338487  | 43960812 T | 2.258 | 1.19E-05 | chr:17:44361948 |
| 17 rs56343551  | 43959092 T | 2.258 | 1.19E-05 | chr:17:44361948 |
| 17 rs56347602  | 43939255 C | 2.258 | 1.19E-05 | chr:17:44361948 |
| 17 rs56354807  | 43920378 T | 2.258 | 1.19E-05 | chr:17:44361948 |
| 17 rs56357543  | 43894547 T | 2.258 | 1.19E-05 | chr:17:44361948 |
| 17 rs56364632  | 43956642 C | 2.258 | 1.19E-05 | chr:17:44361948 |
| 17 rs56365901  | 43960323 G | 2.258 | 1.19E-05 | chr:17:44361948 |
| 17 rs56367860  | 44034673 G | 2.258 | 1.19E-05 | chr:17:44361948 |
| 17 rs56387391  | 43959261 A | 2.258 | 1.19E-05 | chr:17:44361948 |
| 17 rs56398500  | 43947488 G | 2.258 | 1.19E-05 | chr:17:44361948 |
| 17 rs56971664  | 43918613 C | 2.258 | 1.19E-05 | chr:17:44361948 |
| 17 rs572616442 | 44036129 T | 2.258 | 1.19E-05 | chr:17:44361948 |
| 17 rs62054763  | 43910262 G | 2.258 | 1.19E-05 | chr:17:44361948 |
| 17 rs62054802  | 43914598 C | 2.258 | 1.19E-05 | chr:17:44361948 |
| 17 rs62054803  | 43914728 T | 2.258 | 1.19E-05 | chr:17:44361948 |
| 17 rs62054804  | 43914809 T | 2.258 | 1.19E-05 | chr:17:44361948 |
| 17 rs62054805  | 43915054 G | 2.258 | 1.19E-05 | chr:17:44361948 |
| 17 rs62054806  | 43915312 T | 2.258 | 1.19E-05 | chr:17:44361948 |
| 17 rs62054809  | 43918239 T | 2.258 | 1.19E-05 | chr:17:44361948 |
| 17 rs62054811  | 43918651 G | 2.258 | 1.19E-05 | chr:17:44361948 |
| 17 rs62054814  | 43921572 A | 2.258 | 1.19E-05 | chr:17:44361948 |
| 17 rs62054815  | 43923266 A | 2.258 | 1.19E-05 | chr:17:44361948 |
| 17 rs62054824  | 43929992 T | 2.258 | 1.19E-05 | chr:17:44361948 |
| 17 rs62054831  | 43932381 T | 2.258 | 1.19E-05 | chr:17:44361948 |
| 17 rs62054834  | 43934314 C | 2.258 | 1.19E-05 | chr:17:44361948 |
| 17 rs62054835  | 43934672 C | 2.258 | 1.19E-05 | chr:17:44361948 |
| 17 rs62054839  | 43936804 G | 2.258 | 1.19E-05 | chr:17:44361948 |
| 17 rs62054840  | 43936812 A | 2.258 | 1.19E-05 | chr:17:44361948 |

|               |            |       |          |                 |
|---------------|------------|-------|----------|-----------------|
| 17 rs62054841 | 43937104 A | 2.258 | 1.19E-05 | chr:17:44361948 |
| 17 rs62054842 | 43937162 T | 2.258 | 1.19E-05 | chr:17:44361948 |
| 17 rs62054843 | 43937184 C | 2.258 | 1.19E-05 | chr:17:44361948 |
| 17 rs62054844 | 43937333 G | 2.258 | 1.19E-05 | chr:17:44361948 |
| 17 rs62054846 | 43938634 G | 2.258 | 1.19E-05 | chr:17:44361948 |
| 17 rs62054857 | 43939936 A | 2.258 | 1.19E-05 | chr:17:44361948 |
| 17 rs62054858 | 43940188 C | 2.258 | 1.19E-05 | chr:17:44361948 |
| 17 rs62054859 | 43940685 A | 2.258 | 1.19E-05 | chr:17:44361948 |
| 17 rs62055460 | 43940825 C | 2.258 | 1.19E-05 | chr:17:44361948 |
| 17 rs62055461 | 43941350 T | 2.258 | 1.19E-05 | chr:17:44361948 |
| 17 rs62055462 | 43941476 C | 2.258 | 1.19E-05 | chr:17:44361948 |
| 17 rs62055463 | 43941491 G | 2.258 | 1.19E-05 | chr:17:44361948 |
| 17 rs62055464 | 43941858 G | 2.258 | 1.19E-05 | chr:17:44361948 |
| 17 rs62055465 | 43942046 A | 2.258 | 1.19E-05 | chr:17:44361948 |
| 17 rs62055466 | 43942656 A | 2.258 | 1.19E-05 | chr:17:44361948 |
| 17 rs62055467 | 43942820 C | 2.258 | 1.19E-05 | chr:17:44361948 |
| 17 rs62055468 | 43943000 C | 2.258 | 1.19E-05 | chr:17:44361948 |
| 17 rs62055469 | 43943655 C | 2.258 | 1.19E-05 | chr:17:44361948 |
| 17 rs62055470 | 43943657 G | 2.258 | 1.19E-05 | chr:17:44361948 |
| 17 rs62055471 | 43943755 C | 2.258 | 1.19E-05 | chr:17:44361948 |
| 17 rs62055475 | 43945106 C | 2.258 | 1.19E-05 | chr:17:44361948 |
| 17 rs62055478 | 43945938 T | 2.258 | 1.19E-05 | chr:17:44361948 |
| 17 rs62055483 | 43948040 T | 2.258 | 1.19E-05 | chr:17:44361948 |
| 17 rs62055486 | 43949092 G | 2.258 | 1.19E-05 | chr:17:44361948 |
| 17 rs62055488 | 43950394 T | 2.258 | 1.19E-05 | chr:17:44361948 |
| 17 rs62055489 | 43950441 A | 2.258 | 1.19E-05 | chr:17:44361948 |
| 17 rs62055490 | 43950533 G | 2.258 | 1.19E-05 | chr:17:44361948 |
| 17 rs62055491 | 43951120 C | 2.258 | 1.19E-05 | chr:17:44361948 |
| 17 rs62055492 | 43951345 A | 2.258 | 1.19E-05 | chr:17:44361948 |
| 17 rs62055496 | 43953307 T | 2.258 | 1.19E-05 | chr:17:44361948 |
| 17 rs62055497 | 43953529 G | 2.258 | 1.19E-05 | chr:17:44361948 |
| 17 rs62055498 | 43953814 A | 2.258 | 1.19E-05 | chr:17:44361948 |
| 17 rs62055499 | 43953991 G | 2.258 | 1.19E-05 | chr:17:44361948 |
| 17 rs62055500 | 43954134 A | 2.258 | 1.19E-05 | chr:17:44361948 |
| 17 rs62055501 | 43954227 A | 2.258 | 1.19E-05 | chr:17:44361948 |
| 17 rs62055502 | 43954284 A | 2.258 | 1.19E-05 | chr:17:44361948 |
| 17 rs62055515 | 43956370 T | 2.258 | 1.19E-05 | chr:17:44361948 |
| 17 rs62055516 | 43956390 C | 2.258 | 1.19E-05 | chr:17:44361948 |
| 17 rs62055517 | 43956425 T | 2.258 | 1.19E-05 | chr:17:44361948 |
| 17 rs62055518 | 43956505 C | 2.258 | 1.19E-05 | chr:17:44361948 |
| 17 rs62055525 | 43958736 A | 2.258 | 1.19E-05 | chr:17:44361948 |
| 17 rs62055529 | 43960020 G | 2.258 | 1.19E-05 | chr:17:44361948 |
| 17 rs62055538 | 43960997 C | 2.258 | 1.19E-05 | chr:17:44361948 |



|               |            |       |          |                 |
|---------------|------------|-------|----------|-----------------|
| 17 rs62055539 | 43961044 G | 2.258 | 1.19E-05 | chr:17:44361948 |
| 17 rs62055540 | 43961142 C | 2.258 | 1.19E-05 | chr:17:44361948 |
| 17 rs62055541 | 43962017 C | 2.258 | 1.19E-05 | chr:17:44361948 |
| 17 rs62055542 | 43963844 T | 2.258 | 1.19E-05 | chr:17:44361948 |
| 17 rs62055545 | 43964561 T | 2.258 | 1.19E-05 | chr:17:44361948 |
| 17 rs62055546 | 43964567 C | 2.258 | 1.19E-05 | chr:17:44361948 |
| 17 rs62055547 | 43964755 T | 2.258 | 1.19E-05 | chr:17:44361948 |
| 17 rs62055548 | 43964899 G | 2.258 | 1.19E-05 | chr:17:44361948 |
| 17 rs62055549 | 43965595 C | 2.258 | 1.19E-05 | chr:17:44361948 |
| 17 rs62055550 | 43965680 A | 2.258 | 1.19E-05 | chr:17:44361948 |
| 17 rs62055551 | 43965687 G | 2.258 | 1.19E-05 | chr:17:44361948 |
| 17 rs62055552 | 43965955 G | 2.258 | 1.19E-05 | chr:17:44361948 |
| 17 rs62055553 | 43966178 A | 2.258 | 1.19E-05 | chr:17:44361948 |
| 17 rs62055554 | 43966260 G | 2.258 | 1.19E-05 | chr:17:44361948 |
| 17 rs62055555 | 43966282 T | 2.258 | 1.19E-05 | chr:17:44361948 |
| 17 rs62055556 | 43966749 C | 2.258 | 1.19E-05 | chr:17:44361948 |
| 17 rs62055557 | 43966795 A | 2.258 | 1.19E-05 | chr:17:44361948 |
| 17 rs62055558 | 43966955 G | 2.258 | 1.19E-05 | chr:17:44361948 |
| 17 rs62055559 | 43967138 G | 2.258 | 1.19E-05 | chr:17:44361948 |
| 17 rs62056760 | 43968572 A | 2.258 | 1.19E-05 | chr:17:44361948 |
| 17 rs62056761 | 43969686 A | 2.258 | 1.19E-05 | chr:17:44361948 |
| 17 rs62056773 | 43969833 G | 2.258 | 1.19E-05 | chr:17:44361948 |
| 17 rs62056774 | 43969901 A | 2.258 | 1.19E-05 | chr:17:44361948 |
| 17 rs62056775 | 43969952 C | 2.258 | 1.19E-05 | chr:17:44361948 |
| 17 rs62056776 | 43969995 T | 2.258 | 1.19E-05 | chr:17:44361948 |
| 17 rs62056777 | 43970303 A | 2.258 | 1.19E-05 | chr:17:44361948 |
| 17 rs62056778 | 43971604 G | 2.258 | 1.19E-05 | chr:17:44361948 |
| 17 rs62056779 | 43971937 A | 2.258 | 1.19E-05 | chr:17:44361948 |
| 17 rs62056780 | 43973652 T | 2.258 | 1.19E-05 | chr:17:44361948 |
| 17 rs62056781 | 43973899 C | 2.258 | 1.19E-05 | chr:17:44361948 |
| 17 rs62056782 | 43974230 T | 2.258 | 1.19E-05 | chr:17:44361948 |
| 17 rs62056783 | 43974549 C | 2.258 | 1.19E-05 | chr:17:44361948 |
| 17 rs62056784 | 43974889 G | 2.258 | 1.19E-05 | chr:17:44361948 |
| 17 rs62056785 | 43975263 C | 2.258 | 1.19E-05 | chr:17:44361948 |
| 17 rs62056786 | 43975285 C | 2.258 | 1.19E-05 | chr:17:44361948 |
| 17 rs62056789 | 43975415 C | 2.258 | 1.19E-05 | chr:17:44361948 |
| 17 rs62056790 | 43975417 A | 2.258 | 1.19E-05 | chr:17:44361948 |
| 17 rs62056791 | 43976064 C | 2.258 | 1.19E-05 | chr:17:44361948 |
| 17 rs62056792 | 43976644 A | 2.258 | 1.19E-05 | chr:17:44361948 |
| 17 rs62056793 | 43977018 G | 2.258 | 1.19E-05 | chr:17:44361948 |
| 17 rs62056794 | 43977049 G | 2.258 | 1.19E-05 | chr:17:44361948 |
| 17 rs62056795 | 43978041 T | 2.258 | 1.19E-05 | chr:17:44361948 |
| 17 rs62056796 | 43978120 G | 2.258 | 1.19E-05 | chr:17:44361948 |

|               |            |       |          |                 |
|---------------|------------|-------|----------|-----------------|
| 17 rs62056800 | 43979468 A | 2.258 | 1.19E-05 | chr:17:44361948 |
| 17 rs62056801 | 43979504 A | 2.258 | 1.19E-05 | chr:17:44361948 |
| 17 rs62056802 | 43980762 G | 2.258 | 1.19E-05 | chr:17:44361948 |
| 17 rs62056803 | 43982159 G | 2.258 | 1.19E-05 | chr:17:44361948 |
| 17 rs62056804 | 43982286 T | 2.258 | 1.19E-05 | chr:17:44361948 |
| 17 rs62056805 | 43983363 A | 2.258 | 1.19E-05 | chr:17:44361948 |
| 17 rs62056806 | 43983801 G | 2.258 | 1.19E-05 | chr:17:44361948 |
| 17 rs62056807 | 43984253 C | 2.258 | 1.19E-05 | chr:17:44361948 |
| 17 rs62056808 | 43984646 C | 2.258 | 1.19E-05 | chr:17:44361948 |
| 17 rs62056809 | 43984669 G | 2.258 | 1.19E-05 | chr:17:44361948 |
| 17 rs62056810 | 43984672 C | 2.258 | 1.19E-05 | chr:17:44361948 |
| 17 rs62056812 | 43987154 A | 2.258 | 1.19E-05 | chr:17:44361948 |
| 17 rs62056837 | 43988884 C | 2.258 | 1.19E-05 | chr:17:44361948 |
| 17 rs62056838 | 43989087 G | 2.258 | 1.19E-05 | chr:17:44361948 |
| 17 rs62056839 | 43989221 C | 2.258 | 1.19E-05 | chr:17:44361948 |
| 17 rs62056840 | 43989689 C | 2.258 | 1.19E-05 | chr:17:44361948 |
| 17 rs62056841 | 43990041 C | 2.258 | 1.19E-05 | chr:17:44361948 |
| 17 rs62056848 | 43992456 A | 2.258 | 1.19E-05 | chr:17:44361948 |
| 17 rs62056849 | 43992463 C | 2.258 | 1.19E-05 | chr:17:44361948 |
| 17 rs62056851 | 43992806 G | 2.258 | 1.19E-05 | chr:17:44361948 |
| 17 rs62056856 | 43992939 C | 2.258 | 1.19E-05 | chr:17:44361948 |
| 17 rs62056859 | 43994435 G | 2.258 | 1.19E-05 | chr:17:44361948 |
| 17 rs62057101 | 43885291 A | 2.258 | 1.19E-05 | chr:17:44361948 |
| 17 rs62057103 | 43887480 C | 2.258 | 1.19E-05 | chr:17:44361948 |
| 17 rs62057107 | 43896032 T | 2.258 | 1.19E-05 | chr:17:44361948 |
| 17 rs62057108 | 43896616 C | 2.258 | 1.19E-05 | chr:17:44361948 |
| 17 rs62057109 | 43896637 C | 2.258 | 1.19E-05 | chr:17:44361948 |
| 17 rs62057110 | 43896734 C | 2.258 | 1.19E-05 | chr:17:44361948 |
| 17 rs62057111 | 43897130 G | 2.258 | 1.19E-05 | chr:17:44361948 |
| 17 rs62057112 | 43897202 A | 2.258 | 1.19E-05 | chr:17:44361948 |
| 17 rs62057113 | 43897449 T | 2.258 | 1.19E-05 | chr:17:44361948 |
| 17 rs62057114 | 43899401 T | 2.258 | 1.19E-05 | chr:17:44361948 |
| 17 rs62057115 | 43899417 C | 2.258 | 1.19E-05 | chr:17:44361948 |
| 17 rs62057116 | 43899655 C | 2.258 | 1.19E-05 | chr:17:44361948 |
| 17 rs62057117 | 43899657 G | 2.258 | 1.19E-05 | chr:17:44361948 |
| 17 rs62057118 | 43899727 G | 2.258 | 1.19E-05 | chr:17:44361948 |
| 17 rs62057119 | 43899736 A | 2.258 | 1.19E-05 | chr:17:44361948 |
| 17 rs62057121 | 43900760 A | 2.258 | 1.19E-05 | chr:17:44361948 |
| 17 rs62057122 | 43901001 T | 2.258 | 1.19E-05 | chr:17:44361948 |
| 17 rs62057123 | 43901238 G | 2.258 | 1.19E-05 | chr:17:44361948 |
| 17 rs62057143 | 43901528 C | 2.258 | 1.19E-05 | chr:17:44361948 |
| 17 rs62057144 | 43901558 G | 2.258 | 1.19E-05 | chr:17:44361948 |
| 17 rs62057146 | 43903106 G | 2.258 | 1.19E-05 | chr:17:44361948 |

|               |            |       |          |                 |
|---------------|------------|-------|----------|-----------------|
| 17 rs62057147 | 43903298 A | 2.258 | 1.19E-05 | chr:17:44361948 |
| 17 rs62057149 | 43903546 G | 2.258 | 1.19E-05 | chr:17:44361948 |
| 17 rs62057150 | 43903548 T | 2.258 | 1.19E-05 | chr:17:44361948 |
| 17 rs62057152 | 43904110 C | 2.258 | 1.19E-05 | chr:17:44361948 |
| 17 rs62057153 | 43904528 C | 2.258 | 1.19E-05 | chr:17:44361948 |
| 17 rs62057154 | 43904610 T | 2.258 | 1.19E-05 | chr:17:44361948 |
| 17 rs62057155 | 43904673 T | 2.258 | 1.19E-05 | chr:17:44361948 |
| 17 rs62057156 | 43904948 C | 2.258 | 1.19E-05 | chr:17:44361948 |
| 17 rs62057157 | 43905313 C | 2.258 | 1.19E-05 | chr:17:44361948 |
| 17 rs62057158 | 43907143 A | 2.258 | 1.19E-05 | chr:17:44361948 |
| 17 rs62058962 | 43998151 T | 2.258 | 1.19E-05 | chr:17:44361948 |
| 17 rs62058965 | 43999529 C | 2.258 | 1.19E-05 | chr:17:44361948 |
| 17 rs62058968 | 44001228 A | 2.258 | 1.19E-05 | chr:17:44361948 |
| 17 rs62059003 | 44002431 T | 2.258 | 1.19E-05 | chr:17:44361948 |
| 17 rs62059004 | 44003893 G | 2.258 | 1.19E-05 | chr:17:44361948 |
| 17 rs62059005 | 44004472 G | 2.258 | 1.19E-05 | chr:17:44361948 |
| 17 rs62059007 | 44005615 G | 2.258 | 1.19E-05 | chr:17:44361948 |
| 17 rs62059008 | 44006085 G | 2.258 | 1.19E-05 | chr:17:44361948 |
| 17 rs62059009 | 44006130 C | 2.258 | 1.19E-05 | chr:17:44361948 |
| 17 rs62061705 | 44006252 C | 2.258 | 1.19E-05 | chr:17:44361948 |
| 17 rs62061706 | 44006896 C | 2.258 | 1.19E-05 | chr:17:44361948 |
| 17 rs62061707 | 44006954 C | 2.258 | 1.19E-05 | chr:17:44361948 |
| 17 rs62061708 | 44006956 G | 2.258 | 1.19E-05 | chr:17:44361948 |
| 17 rs62061709 | 44007493 T | 2.258 | 1.19E-05 | chr:17:44361948 |
| 17 rs62061710 | 44007727 T | 2.258 | 1.19E-05 | chr:17:44361948 |
| 17 rs62061711 | 44007764 C | 2.258 | 1.19E-05 | chr:17:44361948 |
| 17 rs62061712 | 44009876 A | 2.258 | 1.19E-05 | chr:17:44361948 |
| 17 rs62061713 | 44010405 G | 2.258 | 1.19E-05 | chr:17:44361948 |
| 17 rs62061714 | 44010452 A | 2.258 | 1.19E-05 | chr:17:44361948 |
| 17 rs62061715 | 44011526 G | 2.258 | 1.19E-05 | chr:17:44361948 |
| 17 rs62061716 | 44012096 G | 2.258 | 1.19E-05 | chr:17:44361948 |
| 17 rs62061717 | 44012248 A | 2.258 | 1.19E-05 | chr:17:44361948 |
| 17 rs62061718 | 44012260 C | 2.258 | 1.19E-05 | chr:17:44361948 |
| 17 rs62061719 | 44012989 T | 2.258 | 1.19E-05 | chr:17:44361948 |
| 17 rs62061720 | 44013189 T | 2.258 | 1.19E-05 | chr:17:44361948 |
| 17 rs62061721 | 44013346 C | 2.258 | 1.19E-05 | chr:17:44361948 |
| 17 rs62061725 | 44016157 C | 2.258 | 1.19E-05 | chr:17:44361948 |
| 17 rs62061726 | 44016341 A | 2.258 | 1.19E-05 | chr:17:44361948 |
| 17 rs62061727 | 44017124 T | 2.258 | 1.19E-05 | chr:17:44361948 |
| 17 rs62061728 | 44017180 G | 2.258 | 1.19E-05 | chr:17:44361948 |
| 17 rs62061729 | 44017283 G | 2.258 | 1.19E-05 | chr:17:44361948 |
| 17 rs62061730 | 44017342 G | 2.258 | 1.19E-05 | chr:17:44361948 |
| 17 rs62061731 | 44017666 A | 2.258 | 1.19E-05 | chr:17:44361948 |

|               |            |       |          |                 |
|---------------|------------|-------|----------|-----------------|
| 17 rs62061732 | 44017941 T | 2.258 | 1.19E-05 | chr:17:44361948 |
| 17 rs62062768 | 44019479 G | 2.258 | 1.19E-05 | chr:17:44361948 |
| 17 rs62062769 | 44019643 A | 2.258 | 1.19E-05 | chr:17:44361948 |
| 17 rs62062770 | 44019680 C | 2.258 | 1.19E-05 | chr:17:44361948 |
| 17 rs62062771 | 44020282 A | 2.258 | 1.19E-05 | chr:17:44361948 |
| 17 rs62062772 | 44020314 T | 2.258 | 1.19E-05 | chr:17:44361948 |
| 17 rs62062773 | 44020545 G | 2.258 | 1.19E-05 | chr:17:44361948 |
| 17 rs62062774 | 44021463 C | 2.258 | 1.19E-05 | chr:17:44361948 |
| 17 rs62062776 | 44022043 C | 2.258 | 1.19E-05 | chr:17:44361948 |
| 17 rs62062777 | 44022068 A | 2.258 | 1.19E-05 | chr:17:44361948 |
| 17 rs62062778 | 44022528 G | 2.258 | 1.19E-05 | chr:17:44361948 |
| 17 rs62062779 | 44022577 C | 2.258 | 1.19E-05 | chr:17:44361948 |
| 17 rs62062780 | 44022593 T | 2.258 | 1.19E-05 | chr:17:44361948 |
| 17 rs62062781 | 44022632 A | 2.258 | 1.19E-05 | chr:17:44361948 |
| 17 rs62062782 | 44023087 A | 2.258 | 1.19E-05 | chr:17:44361948 |
| 17 rs62062783 | 44023520 G | 2.258 | 1.19E-05 | chr:17:44361948 |
| 17 rs62062784 | 44024552 G | 2.258 | 1.19E-05 | chr:17:44361948 |
| 17 rs62062785 | 44024562 T | 2.258 | 1.19E-05 | chr:17:44361948 |
| 17 rs62062787 | 44024865 C | 2.258 | 1.19E-05 | chr:17:44361948 |
| 17 rs62062788 | 44024906 G | 2.258 | 1.19E-05 | chr:17:44361948 |
| 17 rs62062789 | 44025033 C | 2.258 | 1.19E-05 | chr:17:44361948 |
| 17 rs62062790 | 44025045 T | 2.258 | 1.19E-05 | chr:17:44361948 |
| 17 rs62062791 | 44025273 A | 2.258 | 1.19E-05 | chr:17:44361948 |
| 17 rs62062792 | 44025347 C | 2.258 | 1.19E-05 | chr:17:44361948 |
| 17 rs62062793 | 44026321 C | 2.258 | 1.19E-05 | chr:17:44361948 |
| 17 rs62062794 | 44026394 G | 2.258 | 1.19E-05 | chr:17:44361948 |
| 17 rs62062795 | 44027090 T | 2.258 | 1.19E-05 | chr:17:44361948 |
| 17 rs62062796 | 44027316 A | 2.258 | 1.19E-05 | chr:17:44361948 |
| 17 rs62062797 | 44027366 G | 2.258 | 1.19E-05 | chr:17:44361948 |
| 17 rs62062798 | 44027383 G | 2.258 | 1.19E-05 | chr:17:44361948 |
| 17 rs62062799 | 44027521 T | 2.258 | 1.19E-05 | chr:17:44361948 |
| 17 rs62062800 | 44027753 G | 2.258 | 1.19E-05 | chr:17:44361948 |
| 17 rs62062801 | 44028011 G | 2.258 | 1.19E-05 | chr:17:44361948 |
| 17 rs62062802 | 44028045 T | 2.258 | 1.19E-05 | chr:17:44361948 |
| 17 rs62062803 | 44028183 C | 2.258 | 1.19E-05 | chr:17:44361948 |
| 17 rs62062805 | 44030773 G | 2.258 | 1.19E-05 | chr:17:44361948 |
| 17 rs62062806 | 44031420 A | 2.258 | 1.19E-05 | chr:17:44361948 |
| 17 rs62062813 | 44032956 A | 2.258 | 1.19E-05 | chr:17:44361948 |
| 17 rs62063262 | 44033002 C | 2.258 | 1.19E-05 | chr:17:44361948 |
| 17 rs62063263 | 44033394 C | 2.258 | 1.19E-05 | chr:17:44361948 |
| 17 rs62063264 | 44033401 T | 2.258 | 1.19E-05 | chr:17:44361948 |
| 17 rs62063265 | 44033468 A | 2.258 | 1.19E-05 | chr:17:44361948 |
| 17 rs62063266 | 44033488 T | 2.258 | 1.19E-05 | chr:17:44361948 |

|               |            |       |          |                 |
|---------------|------------|-------|----------|-----------------|
| 17 rs62063269 | 44034833 A | 2.258 | 1.19E-05 | chr:17:44361948 |
| 17 rs62063271 | 44036047 A | 2.258 | 1.19E-05 | chr:17:44361948 |
| 17 rs62063275 | 44036287 G | 2.258 | 1.19E-05 | chr:17:44361948 |
| 17 rs62063277 | 44036462 A | 2.258 | 1.19E-05 | chr:17:44361948 |
| 17 rs62063278 | 44036914 T | 2.258 | 1.19E-05 | chr:17:44361948 |
| 17 rs62063279 | 44036936 A | 2.258 | 1.19E-05 | chr:17:44361948 |
| 17 rs62063280 | 44037299 C | 2.258 | 1.19E-05 | chr:17:44361948 |
| 17 rs62621252 | 43922942 C | 2.258 | 1.19E-05 | chr:17:44361948 |
| 17 rs739642   | 43946838 A | 2.258 | 1.19E-05 | chr:17:44361948 |
| 17 rs739643   | 43946707 C | 2.258 | 1.19E-05 | chr:17:44361948 |
| 17 rs739644   | 43895008 G | 2.258 | 1.19E-05 | chr:17:44361948 |
| 17 rs739645   | 43894990 G | 2.258 | 1.19E-05 | chr:17:44361948 |
| 17 rs74457229 | 43972581 T | 2.258 | 1.19E-05 | chr:17:44361948 |
| 17 rs74496580 | 43974065 A | 2.258 | 1.19E-05 | chr:17:44361948 |
| 17 rs74509629 | 43985597 T | 2.258 | 1.19E-05 | chr:17:44361948 |
| 17 rs74548327 | 43973080 G | 2.258 | 1.19E-05 | chr:17:44361948 |
| 17 rs74573628 | 43982961 C | 2.258 | 1.19E-05 | chr:17:44361948 |
| 17 rs74863825 | 43963120 T | 2.258 | 1.19E-05 | chr:17:44361948 |
| 17 rs74872829 | 43938394 G | 2.258 | 1.19E-05 | chr:17:44361948 |
| 17 rs74903707 | 44028707 A | 2.258 | 1.19E-05 | chr:17:44361948 |
| 17 rs74922289 | 43918524 G | 2.258 | 1.19E-05 | chr:17:44361948 |
| 17 rs74944644 | 43940020 C | 2.258 | 1.19E-05 | chr:17:44361948 |
| 17 rs7501759  | 44009921 G | 2.258 | 1.19E-05 | chr:17:44361948 |
| 17 rs7502888  | 43986992 C | 2.258 | 1.19E-05 | chr:17:44361948 |
| 17 rs75046472 | 43997499 T | 2.258 | 1.19E-05 | chr:17:44361948 |
| 17 rs75210307 | 43940012 C | 2.258 | 1.19E-05 | chr:17:44361948 |
| 17 rs75617973 | 43983159 C | 2.258 | 1.19E-05 | chr:17:44361948 |
| 17 rs75676226 | 43947171 A | 2.258 | 1.19E-05 | chr:17:44361948 |
| 17 rs75686108 | 44022376 T | 2.258 | 1.19E-05 | chr:17:44361948 |
| 17 rs75690239 | 43941710 T | 2.258 | 1.19E-05 | chr:17:44361948 |
| 17 rs757055   | 43946875 T | 2.258 | 1.19E-05 | chr:17:44361948 |
| 17 rs75839508 | 44022319 A | 2.258 | 1.19E-05 | chr:17:44361948 |
| 17 rs75945623 | 43937505 T | 2.258 | 1.19E-05 | chr:17:44361948 |
| 17 rs76090253 | 44002969 C | 2.258 | 1.19E-05 | chr:17:44361948 |
| 17 rs76324150 | 43973233 T | 2.258 | 1.19E-05 | chr:17:44361948 |
| 17 rs76329216 | 43938499 A | 2.258 | 1.19E-05 | chr:17:44361948 |
| 17 rs76500077 | 44004076 C | 2.258 | 1.19E-05 | chr:17:44361948 |
| 17 rs76563578 | 43933879 G | 2.258 | 1.19E-05 | chr:17:44361948 |
| 17 rs76594404 | 43971457 C | 2.258 | 1.19E-05 | chr:17:44361948 |
| 17 rs76627340 | 43937460 A | 2.258 | 1.19E-05 | chr:17:44361948 |
| 17 rs767056   | 43998910 T | 2.258 | 1.19E-05 | chr:17:44361948 |
| 17 rs767057   | 43998822 G | 2.258 | 1.19E-05 | chr:17:44361948 |
| 17 rs767058   | 43998767 C | 2.258 | 1.19E-05 | chr:17:44361948 |

|               |            |       |          |                 |
|---------------|------------|-------|----------|-----------------|
| 17 rs76839282 | 44029178 C | 2.258 | 1.19E-05 | chr:17:44361948 |
| 17 rs77017444 | 44028796 C | 2.258 | 1.19E-05 | chr:17:44361948 |
| 17 rs77084869 | 43982903 G | 2.258 | 1.19E-05 | chr:17:44361948 |
| 17 rs77092481 | 43949008 T | 2.258 | 1.19E-05 | chr:17:44361948 |
| 17 rs77129180 | 43963046 A | 2.258 | 1.19E-05 | chr:17:44361948 |
| 17 rs77426526 | 43962982 A | 2.258 | 1.19E-05 | chr:17:44361948 |
| 17 rs77489223 | 43937736 T | 2.258 | 1.19E-05 | chr:17:44361948 |
| 17 rs77555455 | 44035516 A | 2.258 | 1.19E-05 | chr:17:44361948 |
| 17 rs77561671 | 43976627 T | 2.258 | 1.19E-05 | chr:17:44361948 |
| 17 rs77625338 | 43937671 T | 2.258 | 1.19E-05 | chr:17:44361948 |
| 17 rs77652965 | 43941608 G | 2.258 | 1.19E-05 | chr:17:44361948 |
| 17 rs77692262 | 43917086 G | 2.258 | 1.19E-05 | chr:17:44361948 |
| 17 rs77924424 | 44012915 C | 2.258 | 1.19E-05 | chr:17:44361948 |
| 17 rs78026984 | 44025592 C | 2.258 | 1.19E-05 | chr:17:44361948 |
| 17 rs78074121 | 43896690 C | 2.258 | 1.19E-05 | chr:17:44361948 |
| 17 rs78077519 | 44010984 A | 2.258 | 1.19E-05 | chr:17:44361948 |
| 17 rs78209533 | 43989909 G | 2.258 | 1.19E-05 | chr:17:44361948 |
| 17 rs78238042 | 43948159 A | 2.258 | 1.19E-05 | chr:17:44361948 |
| 17 rs78328427 | 43916932 A | 2.258 | 1.19E-05 | chr:17:44361948 |
| 17 rs78506181 | 43897480 G | 2.258 | 1.19E-05 | chr:17:44361948 |
| 17 rs78555354 | 44032879 G | 2.258 | 1.19E-05 | chr:17:44361948 |
| 17 rs78587102 | 43897246 G | 2.258 | 1.19E-05 | chr:17:44361948 |
| 17 rs78637438 | 43945855 A | 2.258 | 1.19E-05 | chr:17:44361948 |
| 17 rs78720789 | 43973413 G | 2.258 | 1.19E-05 | chr:17:44361948 |
| 17 rs78729125 | 43970108 A | 2.258 | 1.19E-05 | chr:17:44361948 |
| 17 rs78834738 | 44022434 A | 2.258 | 1.19E-05 | chr:17:44361948 |
| 17 rs78872653 | 43905134 A | 2.258 | 1.19E-05 | chr:17:44361948 |
| 17 rs78917479 | 43899611 T | 2.258 | 1.19E-05 | chr:17:44361948 |
| 17 rs79115768 | 44021061 T | 2.258 | 1.19E-05 | chr:17:44361948 |
| 17 rs79193046 | 43967562 C | 2.258 | 1.19E-05 | chr:17:44361948 |
| 17 rs79290980 | 43985662 C | 2.258 | 1.19E-05 | chr:17:44361948 |
| 17 rs79406732 | 43940497 T | 2.258 | 1.19E-05 | chr:17:44361948 |
| 17 rs79412431 | 43940021 A | 2.258 | 1.19E-05 | chr:17:44361948 |
| 17 rs79492906 | 43984864 T | 2.258 | 1.19E-05 | chr:17:44361948 |
| 17 rs79501144 | 43900697 T | 2.258 | 1.19E-05 | chr:17:44361948 |
| 17 rs79580365 | 43960172 T | 2.258 | 1.19E-05 | chr:17:44361948 |
| 17 rs79589869 | 43930238 A | 2.258 | 1.19E-05 | chr:17:44361948 |
| 17 rs79600142 | 43897722 C | 2.258 | 1.19E-05 | chr:17:44361948 |
| 17 rs79765413 | 44022433 C | 2.258 | 1.19E-05 | chr:17:44361948 |
| 17 rs79857651 | 44013475 A | 2.258 | 1.19E-05 | chr:17:44361948 |
| 17 rs79860128 | 43990072 G | 2.258 | 1.19E-05 | chr:17:44361948 |
| 17 rs79889833 | 43937633 G | 2.258 | 1.19E-05 | chr:17:44361948 |
| 17 rs80184151 | 43879308 G | 2.258 | 1.19E-05 | chr:17:44361948 |

|                |            |       |          |                 |
|----------------|------------|-------|----------|-----------------|
| 17 rs80190331  | 44035233 T | 2.258 | 1.19E-05 | chr:17:44361948 |
| 17 rs80233201  | 43971481 C | 2.258 | 1.19E-05 | chr:17:44361948 |
| 17 rs80254317  | 43963282 G | 2.258 | 1.19E-05 | chr:17:44361948 |
| 17 rs80348388  | 43952634 T | 2.258 | 1.19E-05 | chr:17:44361948 |
| 17 rs8072451   | 43893716 T | 2.258 | 1.19E-05 | chr:17:44361948 |
| 17 rs8073146   | 43893751 G | 2.258 | 1.19E-05 | chr:17:44361948 |
| 17 rs8078495   | 44000610 A | 2.258 | 1.19E-05 | chr:17:44361948 |
| 17 rs8079501   | 44000234 T | 2.258 | 1.19E-05 | chr:17:44361948 |
| 17 rs878886    | 43912490 G | 2.258 | 1.19E-05 | chr:17:44361948 |
| 17 rs878887    | 43912582 T | 2.258 | 1.19E-05 | chr:17:44361948 |
| 17 rs878888    | 43912635 G | 2.258 | 1.19E-05 | chr:17:44361948 |
| 17 rs916793    | 43954686 A | 2.258 | 1.19E-05 | chr:17:44361948 |
| 17 rs9944484   | 43990662 A | 2.258 | 1.19E-05 | chr:17:44361948 |
| 17 rs3785884   | 44057595 A | 2.235 | 1.21E-05 | chr:17:44361948 |
| 17 rs2532401   | 44305817 C | 2.235 | 1.21E-05 | chr:17:44361948 |
| 17 rs527420934 | 44337429 C | 2.251 | 1.23E-05 | chr:17:44361948 |
| 17 rs546715241 | 44361075 G | 2.201 | 1.24E-05 | chr:17:44361948 |
| 17 rs12185233  | 43923654 C | 2.255 | 1.25E-05 | chr:17:44361948 |
| 17 rs41457044  | 43911424 T | 2.255 | 1.25E-05 | chr:17:44361948 |
| 17 rs62057148  | 43903485 C | 2.255 | 1.25E-05 | chr:17:44361948 |
| 17 rs147431626 | 44335635 A | 2.249 | 1.26E-05 | chr:17:44361948 |
| 17 rs572762545 | 44277867 A | 2.213 | 1.29E-05 | chr:17:44361948 |
| 17 rs566177628 | 44343121 G | 2.259 | 1.29E-05 | chr:17:44361948 |
| 17 rs17564223  | 43997520 T | 2.247 | 1.32E-05 | chr:17:44361948 |
| 17 rs62061845  | 44190156 C | 2.258 | 1.32E-05 | chr:17:44361948 |
| 17 rs77926909  | 43994252 C | 2.248 | 1.32E-05 | chr:17:44361948 |
| 17 rs572514738 | 44343719 T | 2.225 | 1.33E-05 | chr:17:44361948 |
| 17 rs56323304  | 43932129 T | 2.232 | 1.35E-05 | chr:17:44361948 |
| 17 rs2243967   | 44329636 C | 2.251 | 1.35E-05 | chr:17:44361948 |
| 17 rs2532392   | 44309856 A | 2.248 | 1.36E-05 | chr:17:44361948 |
| 17 rs558936396 | 44310164 C | 2.248 | 1.36E-05 | chr:17:44361948 |
| 17 rs577197474 | 44310234 C | 2.248 | 1.36E-05 | chr:17:44361948 |
| 17 rs552290972 | 43947883 G | 2.312 | 1.36E-05 | chr:17:44361948 |
| 17 rs56356641  | 43958362 G | 2.269 | 1.37E-05 | chr:17:44361948 |
| 17 rs140713557 | 43953179 G | 2.246 | 1.37E-05 | chr:17:44361948 |
| 17 rs62054832  | 43933579 A | 2.238 | 1.38E-05 | chr:17:44361948 |
| 17 rs199506    | 44859031 A | 2.297 | 1.39E-05 | chr:17:44361948 |
| 17 rs62054833  | 43933673 C | 2.244 | 1.39E-05 | chr:17:44361948 |
| 17 rs62058964  | 43999406 G | 2.244 | 1.39E-05 | chr:17:44361948 |
| 17 rs62055544  | 43964539 G | 2.244 | 1.40E-05 | chr:17:44361948 |
| 17 rs62062786  | 44024660 C | 2.243 | 1.40E-05 | chr:17:44361948 |
| 17 rs17652337  | 44083323 T | 2.26  | 1.41E-05 | chr:17:44361948 |
| 17 rs62056835  | 43988623 A | 2.243 | 1.43E-05 | chr:17:44361948 |

|                |            |       |          |                 |
|----------------|------------|-------|----------|-----------------|
| 17 rs527751731 | 44340942 C | 2.18  | 1.44E-05 | chr:17:44361948 |
| 17 rs4341787   | 43902505 T | 2.241 | 1.44E-05 | chr:17:44361948 |
| 17 rs62056811  | 43985247 T | 2.241 | 1.44E-05 | chr:17:44361948 |
| 17 rs374470873 | 44328919 C | 2.215 | 1.47E-05 | chr:17:44361948 |
| 17 rs377762376 | 44328921 G | 2.215 | 1.47E-05 | chr:17:44361948 |
| 17 rs567454978 | 44337512 A | 1.856 | 1.48E-05 | chr:17:44361948 |
| 17 rs550530305 | 44338694 A | 2.075 | 1.49E-05 | chr:17:44361948 |
| 17 rs17649553  | 43994648 T | 2.235 | 1.54E-05 | chr:17:44361948 |
| 17 rs155771    | 44531724 T | 1.746 | 1.57E-05 | chr:17:44361948 |
| 17 rs2258587   | 44303564 T | 2.24  | 1.59E-05 | chr:17:44361948 |
| 17 rs17565025  | 44012463 C | 2.232 | 1.60E-05 | chr:17:44361948 |
| 17 rs62054760  | 43908989 T | 2.226 | 1.62E-05 | chr:17:44361948 |
| 17 rs62054761  | 43909008 T | 2.226 | 1.62E-05 | chr:17:44361948 |
| 17 rs62054762  | 43909022 T | 2.226 | 1.62E-05 | chr:17:44361948 |
| 17 rs62054823  | 43929029 G | 2.215 | 1.63E-05 | chr:17:44361948 |
| 17 rs572543580 | 43914981 G | 2.213 | 1.64E-05 | chr:17:44361948 |
| 17 rs111920741 | 44333412 A | 2.258 | 1.65E-05 | chr:17:44361948 |
| 17 rs56127309  | 43960341 A | 2.213 | 1.66E-05 | chr:17:44361948 |
| 17 rs62055493  | 43952944 C | 2.213 | 1.66E-05 | chr:17:44361948 |
| 17 rs62055494  | 43953016 T | 2.213 | 1.66E-05 | chr:17:44361948 |
| 17 rs62055495  | 43953043 C | 2.213 | 1.66E-05 | chr:17:44361948 |
| 17 rs4471723   | 44205690 T | 2.223 | 1.68E-05 | chr:17:44361948 |
| 17 rs2532343   | 44344097 C | 2.154 | 1.69E-05 | chr:17:44361948 |
| 17 rs547005230 | 44286128 G | 2.153 | 1.69E-05 | chr:17:44361948 |
| 17 rs199513    | 44856932 A | 2.273 | 1.69E-05 | chr:17:44361948 |
| 17 rs62072129  | 44554156 A | 1.742 | 1.69E-05 | chr:17:44361948 |
| 17 rs62072137  | 44563656 A | 1.742 | 1.69E-05 | chr:17:44361948 |
| 17 rs62072124  | 44544470 T | 1.743 | 1.69E-05 | chr:17:44361948 |
| 17 rs144848361 | 44515566 T | 1.746 | 1.70E-05 | chr:17:44361948 |
| 17 rs2316772   | 43946423 C | 2.225 | 1.72E-05 | chr:17:44361948 |
| 17 rs17649700  | 43997901 C | 2.21  | 1.73E-05 | chr:17:44361948 |
| 17 rs112480703 | 44189799 C | 2.219 | 1.76E-05 | chr:17:44361948 |
| 17 rs28416808  | 44021218 T | 2.208 | 1.79E-05 | chr:17:44361948 |
| 17 rs62063276  | 44036408 G | 2.208 | 1.79E-05 | chr:17:44361948 |
| 17 rs376334563 | 44537611 T | 1.74  | 1.82E-05 | chr:17:44361948 |
| 19 rs12461975  | 21862108 A | 167.3 | 4.47E-22 | chr:19:21841536 |
| 19 rs58339212  | 21861075 T | 193.7 | 5.82E-22 | chr:19:21841536 |
| 19 rs114434735 | 21866989 T | 197.9 | 4.61E-21 | chr:19:21841536 |
| 19 rs12461755  | 21874224 G | 137   | 5.29E-21 | chr:19:21841536 |
| 19 rs117865432 | 21866980 G | 169.1 | 6.94E-21 | chr:19:21841536 |
| 19 rs75639671  | 21875393 C | 169.1 | 6.94E-21 | chr:19:21841536 |
| 19 rs11085493  | 21948748 T | 62.49 | 6.28E-19 | chr:19:21841536 |
| 19 rs186336934 | 21890720 G | 106.5 | 7.08E-19 | chr:19:21841536 |



|                |            |       |          |                 |
|----------------|------------|-------|----------|-----------------|
| 19 rs11671415  | 21944782 A | 69.52 | 3.47E-18 | chr:19:21841536 |
| 19 rs12463030  | 21947607 C | 69.52 | 3.47E-18 | chr:19:21841536 |
| 19 rs17701305  | 21948020 G | 69.52 | 3.47E-18 | chr:19:21841536 |
| 19 rs7258769   | 21942872 A | 69.52 | 3.47E-18 | chr:19:21841536 |
| 19 rs149586901 | 21901959 A | 75.7  | 3.93E-18 | chr:19:21841536 |
| 19 rs10413152  | 21937846 A | 80.57 | 7.30E-18 | chr:19:21841536 |
| 19 rs12459784  | 21941306 C | 80.57 | 7.30E-18 | chr:19:21841536 |
| 19 rs12459852  | 21935851 A | 80.57 | 7.30E-18 | chr:19:21841536 |
| 19 rs12461775  | 21932062 C | 80.57 | 7.30E-18 | chr:19:21841536 |
| 19 rs146261958 | 21911514 A | 80.57 | 7.30E-18 | chr:19:21841536 |
| 19 rs74814265  | 21912203 G | 80.57 | 7.30E-18 | chr:19:21841536 |
| 19 rs75204354  | 21913614 A | 80.57 | 7.30E-18 | chr:19:21841536 |
| 19 rs1520075   | 21833741 C | 34.38 | 6.62E-16 | chr:19:21841536 |
| 19 rs4569404   | 21924445 A | 20.94 | 4.84E-15 | chr:19:21841536 |
| 19 rs10403795  | 21919081 A | 20.69 | 6.25E-15 | chr:19:21841536 |
| 19 rs10405142  | 21918928 T | 20.69 | 6.25E-15 | chr:19:21841536 |
| 19 rs10422982  | 21918221 C | 20.69 | 6.25E-15 | chr:19:21841536 |
| 19 rs113293163 | 21914189 A | 20.69 | 6.25E-15 | chr:19:21841536 |
| 19 rs11879157  | 21900898 T | 20.69 | 6.25E-15 | chr:19:21841536 |
| 19 rs3795247   | 21906428 C | 20.69 | 6.25E-15 | chr:19:21841536 |
| 19 rs4330044   | 21905838 T | 20.69 | 6.25E-15 | chr:19:21841536 |
| 19 rs4352176   | 21924392 C | 20.69 | 6.25E-15 | chr:19:21841536 |
| 19 rs4372817   | 21922642 A | 20.69 | 6.25E-15 | chr:19:21841536 |
| 19 rs4808296   | 21931214 A | 20.69 | 6.25E-15 | chr:19:21841536 |
| 19 rs4808297   | 21935700 A | 20.69 | 6.25E-15 | chr:19:21841536 |
| 19 rs7252777   | 21907988 T | 20.69 | 6.25E-15 | chr:19:21841536 |
| 19 rs77464908  | 21898805 A | 20.69 | 6.25E-15 | chr:19:21841536 |
| 19 rs8101035   | 21934556 C | 20.69 | 6.25E-15 | chr:19:21841536 |
| 19 rs10414424  | 21858966 C | 18.66 | 6.29E-15 | chr:19:21841536 |
| 19 rs7250867   | 21831884 T | 39.1  | 2.10E-14 | chr:19:21841536 |
| 19 rs150839878 | 22023299 A | 37.07 | 6.47E-14 | chr:19:21841536 |
| 19 rs181060267 | 22027447 T | 37.07 | 6.47E-14 | chr:19:21841536 |
| 19 rs9304989   | 21824313 A | 11.82 | 1.49E-13 | chr:19:21841536 |
| 19 rs9917005   | 21853097 G | 9.929 | 2.14E-13 | chr:19:21841536 |
| 19 rs12975447  | 21860974 T | 11.1  | 1.15E-12 | chr:19:21841536 |
| 19 rs12973147  | 21860793 C | 11.22 | 1.32E-12 | chr:19:21841536 |
| 19 rs1520074   | 21833928 G | 9.046 | 2.21E-12 | chr:19:21841536 |
| 19 rs12984552  | 21834092 A | 8.524 | 4.93E-12 | chr:19:21841536 |
| 19 rs34810593  | 21825360 A | 8.213 | 6.37E-12 | chr:19:21841536 |
| 19 rs62109860  | 21833294 T | 8.213 | 6.37E-12 | chr:19:21841536 |
| 19 rs6511279   | 21838240 C | 8.089 | 6.38E-12 | chr:19:21841536 |
| 19 rs10418334  | 21823931 T | 8.163 | 6.72E-12 | chr:19:21841536 |
| 19 rs8108212   | 21845320 G | 8.521 | 9.29E-12 | chr:19:21841536 |

|               |            |       |          |                 |
|---------------|------------|-------|----------|-----------------|
| 19 rs4319879  | 21916767 G | 11.78 | 1.02E-11 | chr:19:21841536 |
| 19 rs10401456 | 21834185 T | 8.084 | 1.11E-11 | chr:19:21841536 |
| 19 rs10404030 | 21839783 A | 8.084 | 1.11E-11 | chr:19:21841536 |
| 19 rs10405733 | 21834482 C | 8.084 | 1.11E-11 | chr:19:21841536 |
| 19 rs10422946 | 21838785 C | 8.084 | 1.11E-11 | chr:19:21841536 |
| 19 rs12978741 | 21843568 G | 8.084 | 1.11E-11 | chr:19:21841536 |
| 19 rs12978776 | 21843616 G | 8.084 | 1.11E-11 | chr:19:21841536 |
| 19 rs12979139 | 21843901 C | 8.084 | 1.11E-11 | chr:19:21841536 |
| 19 rs12979778 | 21843988 G | 8.084 | 1.11E-11 | chr:19:21841536 |
| 19 rs12980130 | 21843569 T | 8.084 | 1.11E-11 | chr:19:21841536 |
| 19 rs12984244 | 21833966 A | 8.084 | 1.11E-11 | chr:19:21841536 |
| 19 rs28432246 | 21842163 T | 8.084 | 1.11E-11 | chr:19:21841536 |
| 19 rs28520521 | 21842340 T | 8.084 | 1.11E-11 | chr:19:21841536 |
| 19 rs4808287  | 21835411 T | 8.084 | 1.11E-11 | chr:19:21841536 |
| 19 rs4808289  | 21836844 T | 8.084 | 1.11E-11 | chr:19:21841536 |
| 19 rs4808292  | 21841626 C | 8.084 | 1.11E-11 | chr:19:21841536 |
| 19 rs4808293  | 21841796 G | 8.084 | 1.11E-11 | chr:19:21841536 |
| 19 rs4809170  | 21836678 T | 8.084 | 1.11E-11 | chr:19:21841536 |
| 19 rs4809171  | 21841170 A | 8.084 | 1.11E-11 | chr:19:21841536 |
| 19 rs6511280  | 21838492 C | 8.084 | 1.11E-11 | chr:19:21841536 |
| 19 rs6511281  | 21838565 T | 8.084 | 1.11E-11 | chr:19:21841536 |
| 19 rs7351087  | 21838147 A | 8.084 | 1.11E-11 | chr:19:21841536 |
| 19 rs7351088  | 21838146 C | 8.084 | 1.11E-11 | chr:19:21841536 |
| 19 rs8105369  | 21840734 C | 8.084 | 1.11E-11 | chr:19:21841536 |
| 19 rs8105649  | 21840765 G | 8.084 | 1.11E-11 | chr:19:21841536 |
| 19 rs8106449  | 21835586 C | 8.084 | 1.11E-11 | chr:19:21841536 |
| 19 rs9807876  | 21837709 G | 8.084 | 1.11E-11 | chr:19:21841536 |
| 19 rs4808290  | 21837075 C | 8.085 | 1.17E-11 | chr:19:21841536 |
| 19 rs57699265 | 21844083 C | 8.088 | 1.19E-11 | chr:19:21841536 |
| 19 rs12459622 | 21852799 A | 6.886 | 1.77E-11 | chr:19:21841536 |
| 19 rs12459640 | 21852807 C | 6.886 | 1.77E-11 | chr:19:21841536 |
| 19 rs10854059 | 21859805 G | 6.851 | 2.01E-11 | chr:19:21841536 |
| 19 rs11668774 | 21859863 A | 6.851 | 2.01E-11 | chr:19:21841536 |
| 19 rs1818693  | 21858687 A | 6.851 | 2.01E-11 | chr:19:21841536 |
| 19 rs2015476  | 21859110 A | 6.851 | 2.01E-11 | chr:19:21841536 |
| 19 rs2015481  | 21858994 A | 6.851 | 2.01E-11 | chr:19:21841536 |
| 19 rs2015715  | 21858115 C | 6.851 | 2.01E-11 | chr:19:21841536 |
| 19 rs2015736  | 21857927 C | 6.851 | 2.01E-11 | chr:19:21841536 |
| 19 rs2359390  | 21851459 G | 6.839 | 2.04E-11 | chr:19:21841536 |
| 19 rs2359394  | 21854169 A | 6.445 | 2.11E-11 | chr:19:21841536 |
| 19 rs2359395  | 21854176 G | 6.445 | 2.11E-11 | chr:19:21841536 |
| 19 rs2359396  | 21854179 G | 6.445 | 2.11E-11 | chr:19:21841536 |
| 19 rs10164296 | 21856328 A | 6.846 | 2.16E-11 | chr:19:21841536 |

|               |            |       |          |                 |
|---------------|------------|-------|----------|-----------------|
| 19 rs10164399 | 21856722 C | 6.846 | 2.16E-11 | chr:19:21841536 |
| 19 rs10164402 | 21856407 T | 6.846 | 2.16E-11 | chr:19:21841536 |
| 19 rs10164404 | 21856699 T | 6.846 | 2.16E-11 | chr:19:21841536 |
| 19 rs12459069 | 21852101 A | 6.846 | 2.16E-11 | chr:19:21841536 |
| 19 rs12459105 | 21852322 A | 6.846 | 2.16E-11 | chr:19:21841536 |
| 19 rs12459145 | 21852274 G | 6.846 | 2.16E-11 | chr:19:21841536 |
| 19 rs12459146 | 21852286 G | 6.846 | 2.16E-11 | chr:19:21841536 |
| 19 rs12459607 | 21852601 C | 6.846 | 2.16E-11 | chr:19:21841536 |
| 19 rs12459653 | 21852679 G | 6.846 | 2.16E-11 | chr:19:21841536 |
| 19 rs12459663 | 21852921 C | 6.846 | 2.16E-11 | chr:19:21841536 |
| 19 rs12460255 | 21853648 G | 6.846 | 2.16E-11 | chr:19:21841536 |
| 19 rs12460259 | 21853849 C | 6.846 | 2.16E-11 | chr:19:21841536 |
| 19 rs12460275 | 21853896 C | 6.846 | 2.16E-11 | chr:19:21841536 |
| 19 rs12461611 | 21856280 G | 6.846 | 2.16E-11 | chr:19:21841536 |
| 19 rs12463364 | 21851610 A | 6.846 | 2.16E-11 | chr:19:21841536 |
| 19 rs12972399 | 21850149 T | 6.846 | 2.16E-11 | chr:19:21841536 |
| 19 rs12982600 | 21847694 C | 6.846 | 2.16E-11 | chr:19:21841536 |
| 19 rs12983456 | 21855124 G | 6.846 | 2.16E-11 | chr:19:21841536 |
| 19 rs12984472 | 21847713 T | 6.846 | 2.16E-11 | chr:19:21841536 |
| 19 rs1818696  | 21850359 C | 6.846 | 2.16E-11 | chr:19:21841536 |
| 19 rs1850931  | 21855226 G | 6.846 | 2.16E-11 | chr:19:21841536 |
| 19 rs1850932  | 21855223 C | 6.846 | 2.16E-11 | chr:19:21841536 |
| 19 rs1850934  | 21854928 T | 6.846 | 2.16E-11 | chr:19:21841536 |
| 19 rs1850935  | 21854623 T | 6.846 | 2.16E-11 | chr:19:21841536 |
| 19 rs2037356  | 21849559 C | 6.846 | 2.16E-11 | chr:19:21841536 |
| 19 rs2359388  | 21851081 T | 6.846 | 2.16E-11 | chr:19:21841536 |
| 19 rs2359389  | 21851157 A | 6.846 | 2.16E-11 | chr:19:21841536 |
| 19 rs2359398  | 21854389 C | 6.846 | 2.16E-11 | chr:19:21841536 |
| 19 rs2359399  | 21854394 C | 6.846 | 2.16E-11 | chr:19:21841536 |
| 19 rs2359400  | 21855574 C | 6.846 | 2.16E-11 | chr:19:21841536 |
| 19 rs2359401  | 21855732 G | 6.846 | 2.16E-11 | chr:19:21841536 |
| 19 rs2359403  | 21855836 C | 6.846 | 2.16E-11 | chr:19:21841536 |
| 19 rs2359404  | 21855839 G | 6.846 | 2.16E-11 | chr:19:21841536 |
| 19 rs2359405  | 21856187 G | 6.846 | 2.16E-11 | chr:19:21841536 |
| 19 rs34449776 | 21856309 A | 6.846 | 2.16E-11 | chr:19:21841536 |
| 19 rs35091166 | 21856300 G | 6.846 | 2.16E-11 | chr:19:21841536 |
| 19 rs3946575  | 21848698 C | 6.846 | 2.16E-11 | chr:19:21841536 |
| 19 rs4026206  | 21855856 G | 6.846 | 2.16E-11 | chr:19:21841536 |
| 19 rs4302166  | 21850861 C | 6.846 | 2.16E-11 | chr:19:21841536 |
| 19 rs4310994  | 21850923 A | 6.846 | 2.16E-11 | chr:19:21841536 |
| 19 rs4321314  | 21849668 C | 6.846 | 2.16E-11 | chr:19:21841536 |
| 19 rs4490112  | 21850753 T | 6.846 | 2.16E-11 | chr:19:21841536 |
| 19 rs4500887  | 21850985 G | 6.846 | 2.16E-11 | chr:19:21841536 |

|                |            |       |          |                 |
|----------------|------------|-------|----------|-----------------|
| 19 rs7259640   | 21848238 G | 6.846 | 2.16E-11 | chr:19:21841536 |
| 19 rs8108289   | 21846845 A | 6.846 | 2.16E-11 | chr:19:21841536 |
| 19 rs12461329  | 21860597 G | 6.675 | 2.57E-11 | chr:19:21841536 |
| 19 rs12973337  | 21860723 G | 6.675 | 2.57E-11 | chr:19:21841536 |
| 19 rs2359392   | 21854136 A | 6.235 | 3.33E-11 | chr:19:21841536 |
| 19 rs12979269  | 21843781 G | 7.975 | 3.41E-11 | chr:19:21841536 |
| 19 rs1850930   | 21839462 A | 6.465 | 4.22E-11 | chr:19:21841536 |
| 19 rs12971926  | 21837430 C | 6.463 | 4.71E-11 | chr:19:21841536 |
| 19 rs12972184  | 21835628 T | 6.463 | 4.71E-11 | chr:19:21841536 |
| 19 rs12975766  | 21840005 G | 6.463 | 4.71E-11 | chr:19:21841536 |
| 19 rs12979060  | 21843727 G | 6.463 | 4.71E-11 | chr:19:21841536 |
| 19 rs2139527   | 21839211 C | 6.463 | 4.71E-11 | chr:19:21841536 |
| 19 rs28711730  | 21842387 G | 6.463 | 4.71E-11 | chr:19:21841536 |
| 19 rs71333857  | 21844171 G | 6.465 | 4.95E-11 | chr:19:21841536 |
| 19 rs10405075  | 21943707 C | 7.712 | 2.18E-10 | chr:19:21841536 |
| 19 rs11085492  | 21945186 G | 7.712 | 2.18E-10 | chr:19:21841536 |
| 19 rs7258859   | 21942723 G | 7.712 | 2.18E-10 | chr:19:21841536 |
| 19 rs10469371  | 21893614 T | 7.664 | 2.53E-10 | chr:19:21841536 |
| 19 rs56742849  | 21914115 T | 8.044 | 2.55E-10 | chr:19:21841536 |
| 19 rs10421113  | 21929885 T | 7.631 | 2.82E-10 | chr:19:21841536 |
| 19 rs10421342  | 21930003 T | 7.631 | 2.82E-10 | chr:19:21841536 |
| 19 rs10423041  | 21933943 C | 7.631 | 2.82E-10 | chr:19:21841536 |
| 19 rs4436888   | 21916489 C | 7.631 | 2.82E-10 | chr:19:21841536 |
| 19 rs4613201   | 21927706 C | 7.631 | 2.82E-10 | chr:19:21841536 |
| 19 rs4808295   | 21930317 A | 7.631 | 2.82E-10 | chr:19:21841536 |
| 19 rs4809175   | 21938744 G | 7.631 | 2.82E-10 | chr:19:21841536 |
| 19 rs8105002   | 21919934 A | 7.631 | 2.82E-10 | chr:19:21841536 |
| 19 rs8111464   | 21917939 G | 7.631 | 2.82E-10 | chr:19:21841536 |
| 19 rs10412225  | 21944450 G | 7     | 3.18E-10 | chr:19:21841536 |
| 19 rs4547465   | 21901056 A | 7.596 | 3.24E-10 | chr:19:21841536 |
| 19 rs58748216  | 21914122 T | 7.342 | 5.68E-10 | chr:19:21841536 |
| 19 rs57489232  | 22078207 T | 33.73 | 1.04E-09 | chr:19:21841536 |
| 19 rs533292204 | 22047662 T | 13.16 | 6.59E-09 | chr:19:21841536 |
| 19 rs143817923 | 22138849 T | 10.42 | 4.46E-08 | chr:19:21841536 |
| 19 rs117527435 | 22223356 A | 9.932 | 6.17E-08 | chr:19:21841536 |
| 19 rs140214047 | 21735691 T | 31.26 | 1.72E-07 | chr:19:21841536 |
| 19 rs140410963 | 21786476 T | 31.26 | 1.72E-07 | chr:19:21841536 |
| 19 rs148962396 | 21645233 C | 31.26 | 1.72E-07 | chr:19:21841536 |
| 19 rs7259645   | 21842436 T | 3.931 | 2.03E-07 | chr:19:21841536 |
| 19 rs12232841  | 21857227 T | 4.07  | 2.54E-07 | chr:19:21841536 |
| 19 rs12984679  | 21856993 A | 4.07  | 2.54E-07 | chr:19:21841536 |
| 19 rs151018420 | 22050727 T | 9.442 | 2.60E-07 | chr:19:21841536 |
| 19 rs142224548 | 22020029 T | 63.68 | 3.49E-07 | chr:19:21841536 |

|                |            |       |          |                 |
|----------------|------------|-------|----------|-----------------|
| 19 rs8113652   | 21921709 T | 3.62  | 6.95E-07 | chr:19:21841536 |
| 19 rs117359089 | 21791908 T | 60.71 | 8.07E-07 | chr:19:21841536 |
| 19 rs1510964   | 21992825 C | 6.09  | 8.28E-07 | chr:19:21841536 |
| 19 rs2136890   | 22033122 T | 6.09  | 8.28E-07 | chr:19:21841536 |
| 19 rs2435003   | 22006176 T | 6.09  | 8.28E-07 | chr:19:21841536 |
| 19 rs2435041   | 22034819 G | 6.09  | 8.28E-07 | chr:19:21841536 |
| 19 rs2435044   | 22024860 C | 6.09  | 8.28E-07 | chr:19:21841536 |
| 19 rs2457773   | 21993296 T | 6.09  | 8.28E-07 | chr:19:21841536 |
| 19 rs2457785   | 22026279 A | 6.09  | 8.28E-07 | chr:19:21841536 |
| 19 rs2457802   | 21997727 C | 6.09  | 8.28E-07 | chr:19:21841536 |
| 19 rs2435006   | 21998816 T | 5.869 | 1.12E-06 | chr:19:21841536 |
| 19 rs138802937 | 21608302 C | 25.53 | 1.40E-06 | chr:19:21841536 |
| 19 rs147052447 | 21394079 A | 20.4  | 1.66E-06 | chr:19:21841536 |
| 19 rs12460998  | 21973146 C | 7.252 | 4.27E-06 | chr:19:21841536 |
| 19 rs59958574  | 21971589 T | 7.252 | 4.27E-06 | chr:19:21841536 |
| 19 rs78077628  | 21971443 C | 7.252 | 4.27E-06 | chr:19:21841536 |
| 19 rs192906111 | 21838869 T | 29.98 | 4.88E-06 | chr:19:21841536 |
| 19 rs66562280  | 21833014 T | 12.01 | 4.93E-06 | chr:19:21841536 |
| 19 rs150998731 | 22318965 A | 48.02 | 5.22E-06 | chr:19:21841536 |
| 19 rs117010520 | 22016401 A | 6.814 | 7.29E-06 | chr:19:21841536 |
| 19 rs117329296 | 21988033 T | 6.814 | 7.29E-06 | chr:19:21841536 |
| 19 rs117733188 | 22016400 A | 6.814 | 7.29E-06 | chr:19:21841536 |
| 19 rs117783733 | 22006570 T | 6.814 | 7.29E-06 | chr:19:21841536 |
| 19 rs118006675 | 22030918 T | 6.814 | 7.29E-06 | chr:19:21841536 |
| 19 rs118189822 | 21984558 C | 6.814 | 7.29E-06 | chr:19:21841536 |
| 19 rs12460775  | 21985091 C | 6.814 | 7.29E-06 | chr:19:21841536 |
| 19 rs12462120  | 21974940 T | 6.814 | 7.29E-06 | chr:19:21841536 |
| 19 rs12462709  | 21989391 C | 6.814 | 7.29E-06 | chr:19:21841536 |
| 19 rs12463064  | 21985132 G | 6.814 | 7.29E-06 | chr:19:21841536 |
| 19 rs141171541 | 22011873 T | 6.814 | 7.29E-06 | chr:19:21841536 |
| 19 rs142185394 | 21984590 A | 6.814 | 7.29E-06 | chr:19:21841536 |
| 19 rs147875950 | 21988064 A | 6.814 | 7.29E-06 | chr:19:21841536 |
| 19 rs17701347  | 21980434 T | 6.814 | 7.29E-06 | chr:19:21841536 |
| 19 rs17701366  | 21985740 G | 6.814 | 7.29E-06 | chr:19:21841536 |
| 19 rs3764576   | 22005000 G | 6.814 | 7.29E-06 | chr:19:21841536 |
| 19 rs58664716  | 21993467 G | 6.814 | 7.29E-06 | chr:19:21841536 |
| 19 rs60272092  | 22006953 A | 6.814 | 7.29E-06 | chr:19:21841536 |
| 19 rs74606132  | 22019517 T | 6.814 | 7.29E-06 | chr:19:21841536 |
| 19 rs74762678  | 22019157 C | 6.814 | 7.29E-06 | chr:19:21841536 |
| 19 rs75290521  | 22000435 G | 6.814 | 7.29E-06 | chr:19:21841536 |
| 19 rs75614465  | 21980134 A | 6.814 | 7.29E-06 | chr:19:21841536 |
| 19 rs75937847  | 22031912 A | 6.814 | 7.29E-06 | chr:19:21841536 |
| 19 rs76621431  | 22014914 C | 6.814 | 7.29E-06 | chr:19:21841536 |

|                |            |       |          |                 |
|----------------|------------|-------|----------|-----------------|
| 19 rs77086661  | 22032924 G | 6.814 | 7.29E-06 | chr:19:21841536 |
| 19 rs77115676  | 21985611 A | 6.814 | 7.29E-06 | chr:19:21841536 |
| 19 rs77216709  | 21992940 G | 6.814 | 7.29E-06 | chr:19:21841536 |
| 19 rs77310041  | 21986116 G | 6.814 | 7.29E-06 | chr:19:21841536 |
| 19 rs77340617  | 21982326 T | 6.814 | 7.29E-06 | chr:19:21841536 |
| 19 rs77751145  | 22006138 G | 6.814 | 7.29E-06 | chr:19:21841536 |
| 19 rs78033062  | 21986636 A | 6.814 | 7.29E-06 | chr:19:21841536 |
| 19 rs78773989  | 22009807 G | 6.814 | 7.29E-06 | chr:19:21841536 |
| 19 rs78823434  | 21982409 G | 6.814 | 7.29E-06 | chr:19:21841536 |
| 19 rs79327994  | 21993765 T | 6.814 | 7.29E-06 | chr:19:21841536 |
| 19 rs8111923   | 22021828 A | 6.814 | 7.29E-06 | chr:19:21841536 |
| 19 rs138663259 | 22043115 T | 20.93 | 8.27E-06 | chr:19:21841536 |
| 19 rs12462082  | 21974486 T | 6.624 | 9.34E-06 | chr:19:21841536 |
| 19 rs138827513 | 21387134 G | 21.25 | 1.01E-05 | chr:19:21841536 |
| 19 rs146931253 | 22101776 C | 16.44 | 1.63E-05 | chr:19:21841536 |
| 19 rs112439638 | 21962740 A | 6.737 | 1.73E-05 | chr:19:21841536 |
| 19 rs117301126 | 21965998 A | 6.737 | 1.73E-05 | chr:19:21841536 |
| 19 rs145830617 | 21965007 A | 6.737 | 1.73E-05 | chr:19:21841536 |
| 19 rs192160581 | 21861695 C | 25.91 | 2.01E-05 | chr:19:21841536 |
| 19 rs141892265 | 21965652 C | 6.522 | 2.23E-05 | chr:19:21841536 |
| 19 rs144038920 | 21965965 A | 6.522 | 2.23E-05 | chr:19:21841536 |
| 19 rs56904798  | 21962115 A | 6.522 | 2.23E-05 | chr:19:21841536 |
| 19 rs75477359  | 21966566 A | 6.522 | 2.23E-05 | chr:19:21841536 |
| 19 rs113163368 | 21795534 A | 23.59 | 2.29E-05 | chr:19:21841536 |
| 19 rs1829503   | 21869343 G | 3.068 | 2.31E-05 | chr:19:21841536 |
| 19 rs17554725  | 22317759 G | 67.53 | 9.64E-41 | chr:19:22414379 |
| 19 rs12460025  | 22318230 G | 67.5  | 9.74E-41 | chr:19:22414379 |
| 19 rs8113700   | 22319421 A | 67.18 | 1.17E-40 | chr:19:22414379 |
| 19 rs7257051   | 22319292 G | 65.72 | 2.74E-40 | chr:19:22414379 |
| 19 rs3813591   | 22321256 C | 118.8 | 2.85E-40 | chr:19:22414379 |
| 19 rs283163    | 22455077 C | 23.45 | 7.35E-36 | chr:19:22414379 |
| 19 rs283145    | 22438782 T | 33.93 | 2.63E-32 | chr:19:22414379 |
| 19 rs283144    | 22439446 T | 34.51 | 2.68E-32 | chr:19:22414379 |
| 19 rs283140    | 22447450 G | 28.83 | 2.85E-32 | chr:19:22414379 |
| 19 rs283142    | 22445651 T | 28.83 | 2.85E-32 | chr:19:22414379 |
| 19 rs7248898   | 22245354 A | 17.91 | 6.42E-32 | chr:19:22414379 |
| 19 rs283139    | 22448069 T | 27.6  | 7.05E-32 | chr:19:22414379 |
| 19 rs1922685   | 22287970 C | 15.8  | 1.91E-31 | chr:19:22414379 |
| 19 rs7253490   | 22293706 A | 15.8  | 1.91E-31 | chr:19:22414379 |
| 19 rs58950778  | 22432275 T | 62.15 | 1.08E-30 | chr:19:22414379 |
| 19 rs2023338   | 22443261 T | 31.83 | 2.62E-30 | chr:19:22414379 |
| 19 rs283147    | 22438069 C | 33.29 | 4.31E-30 | chr:19:22414379 |
| 19 rs8105767   | 22215441 G | 13.91 | 7.16E-30 | chr:19:22414379 |

|                |            |       |          |                 |
|----------------|------------|-------|----------|-----------------|
| 19 rs111790701 | 22438463 T | 21.43 | 3.76E-29 | chr:19:22414379 |
| 19 rs1912576   | 22121293 C | 13.02 | 3.76E-28 | chr:19:22414379 |
| 19 rs3867185   | 22413097 T | 113.2 | 6.02E-28 | chr:19:22414379 |
| 19 rs62119969  | 22405446 C | 113.2 | 6.02E-28 | chr:19:22414379 |
| 19 rs113493783 | 22333975 G | 551   | 6.69E-28 | chr:19:22414379 |
| 19 rs142745046 | 22334261 C | 551   | 6.69E-28 | chr:19:22414379 |
| 19 rs1852418   | 22324418 A | 551   | 6.69E-28 | chr:19:22414379 |
| 19 rs379619    | 22341905 C | 551   | 6.69E-28 | chr:19:22414379 |
| 19 rs387604    | 22332265 A | 551   | 6.69E-28 | chr:19:22414379 |
| 19 rs411557    | 22333324 C | 551   | 6.69E-28 | chr:19:22414379 |
| 19 rs459017    | 22330531 C | 551   | 6.69E-28 | chr:19:22414379 |
| 19 rs459539    | 22330699 T | 551   | 6.69E-28 | chr:19:22414379 |
| 19 rs462577    | 22335500 A | 551   | 6.69E-28 | chr:19:22414379 |
| 19 rs462671    | 22328850 T | 551   | 6.69E-28 | chr:19:22414379 |
| 19 rs465978    | 22342421 A | 551   | 6.69E-28 | chr:19:22414379 |
| 19 rs408240    | 22346403 G | 549.7 | 6.75E-28 | chr:19:22414379 |
| 19 rs112297561 | 22341110 C | 547.5 | 7.26E-28 | chr:19:22414379 |
| 19 rs112826254 | 22334192 A | 547.5 | 7.26E-28 | chr:19:22414379 |
| 19 rs395410    | 22336307 T | 547.5 | 7.26E-28 | chr:19:22414379 |
| 19 rs400419    | 22345405 T | 547.5 | 7.26E-28 | chr:19:22414379 |
| 19 rs400661    | 22345337 T | 547.5 | 7.26E-28 | chr:19:22414379 |
| 19 rs416928    | 22345369 C | 547.5 | 7.26E-28 | chr:19:22414379 |
| 19 rs420977    | 22335762 T | 547.5 | 7.26E-28 | chr:19:22414379 |
| 19 rs421180    | 22335719 C | 547.5 | 7.26E-28 | chr:19:22414379 |
| 19 rs427343    | 22346138 T | 547.5 | 7.26E-28 | chr:19:22414379 |
| 19 rs447533    | 22345393 A | 547.5 | 7.26E-28 | chr:19:22414379 |
| 19 rs451905    | 22345649 T | 547.5 | 7.26E-28 | chr:19:22414379 |
| 19 rs457504    | 22331109 A | 547.5 | 7.26E-28 | chr:19:22414379 |
| 19 rs458172    | 22329400 G | 547.5 | 7.26E-28 | chr:19:22414379 |
| 19 rs461312    | 22333288 A | 547.5 | 7.26E-28 | chr:19:22414379 |
| 19 rs461661    | 22327559 T | 547.5 | 7.26E-28 | chr:19:22414379 |
| 19 rs461804    | 22328560 C | 547.5 | 7.26E-28 | chr:19:22414379 |
| 19 rs465150    | 22342486 G | 547.5 | 7.26E-28 | chr:19:22414379 |
| 19 rs465380    | 22335068 C | 547.5 | 7.26E-28 | chr:19:22414379 |
| 19 rs56256419  | 22345457 A | 547.5 | 7.26E-28 | chr:19:22414379 |
| 19 rs56284384  | 22345461 T | 547.5 | 7.26E-28 | chr:19:22414379 |
| 19 rs76608558  | 22334370 A | 547.5 | 7.26E-28 | chr:19:22414379 |
| 19 rs78408635  | 22339824 G | 547.5 | 7.34E-28 | chr:19:22414379 |
| 19 rs371540    | 22344391 G | 544.9 | 7.95E-28 | chr:19:22414379 |
| 19 rs399307    | 22345794 T | 518.3 | 9.95E-28 | chr:19:22414379 |
| 19 rs62112447  | 22379833 G | 110.7 | 1.02E-27 | chr:19:22414379 |
| 19 rs62118346  | 22396430 A | 110.7 | 1.02E-27 | chr:19:22414379 |
| 19 rs60866819  | 22334909 C | 104.7 | 1.60E-27 | chr:19:22414379 |

|               |            |       |          |                 |
|---------------|------------|-------|----------|-----------------|
| 19 rs62112374 | 22329197 T | 104.7 | 1.60E-27 | chr:19:22414379 |
| 19 rs62112416 | 22343674 C | 104.7 | 1.60E-27 | chr:19:22414379 |
| 19 rs62112420 | 22351653 G | 106.6 | 1.77E-27 | chr:19:22414379 |
| 19 rs1634466  | 22103726 G | 12.82 | 7.12E-27 | chr:19:22414379 |
| 19 rs1852417  | 22324637 A | 393.9 | 7.39E-27 | chr:19:22414379 |
| 19 rs2204581  | 22325017 T | 393.9 | 7.39E-27 | chr:19:22414379 |
| 19 rs382357   | 22343507 G | 393.9 | 7.39E-27 | chr:19:22414379 |
| 19 rs386720   | 22342796 T | 393.9 | 7.39E-27 | chr:19:22414379 |
| 19 rs414385   | 22338577 T | 393.9 | 7.39E-27 | chr:19:22414379 |
| 19 rs421261   | 22334418 C | 393.9 | 7.39E-27 | chr:19:22414379 |
| 19 rs456246   | 22327192 A | 393.9 | 7.39E-27 | chr:19:22414379 |
| 19 rs78957365 | 22341032 C | 393.9 | 7.39E-27 | chr:19:22414379 |
| 19 rs10421426 | 22366423 T | 403.7 | 7.44E-27 | chr:19:22414379 |
| 19 rs546256   | 22339777 T | 391.4 | 8.13E-27 | chr:19:22414379 |
| 19 rs62120010 | 22428480 A | 1250  | 9.27E-27 | chr:19:22414379 |
| 19 rs808246   | 22430516 A | 1250  | 9.27E-27 | chr:19:22414379 |
| 19 rs79196382 | 22339817 A | 409.4 | 1.24E-26 | chr:19:22414379 |
| 19 rs1969193  | 22120269 C | 11.03 | 2.08E-26 | chr:19:22414379 |
| 19 rs11671416 | 22427254 C | 1153  | 2.11E-26 | chr:19:22414379 |
| 19 rs1840718  | 22427586 T | 1153  | 2.11E-26 | chr:19:22414379 |
| 19 rs57346017 | 22427336 G | 1153  | 2.11E-26 | chr:19:22414379 |
| 19 rs17554694 | 22317148 A | 68.88 | 6.14E-26 | chr:19:22414379 |
| 19 rs62112373 | 22319825 A | 66.96 | 6.44E-26 | chr:19:22414379 |
| 19 rs1961316  | 22426154 A | 1689  | 1.08E-25 | chr:19:22414379 |
| 19 rs62112369 | 22313901 T | 56.23 | 8.10E-25 | chr:19:22414379 |
| 19 rs62119972 | 22425682 C | 26.49 | 9.75E-25 | chr:19:22414379 |
| 19 rs10419384 | 22391239 G | 761.1 | 1.73E-24 | chr:19:22414379 |
| 19 rs10425845 | 22370672 A | 761.1 | 1.73E-24 | chr:19:22414379 |
| 19 rs1830173  | 22388037 T | 761.1 | 1.73E-24 | chr:19:22414379 |
| 19 rs1918161  | 22374023 T | 761.1 | 1.73E-24 | chr:19:22414379 |
| 19 rs2360002  | 22383362 A | 761.1 | 1.73E-24 | chr:19:22414379 |
| 19 rs281177   | 22394727 T | 761.1 | 1.73E-24 | chr:19:22414379 |
| 19 rs281181   | 22396809 T | 761.1 | 1.73E-24 | chr:19:22414379 |
| 19 rs3934143  | 22392238 G | 761.1 | 1.73E-24 | chr:19:22414379 |
| 19 rs420218   | 22353589 T | 761.1 | 1.73E-24 | chr:19:22414379 |
| 19 rs436431   | 22360919 T | 761.1 | 1.73E-24 | chr:19:22414379 |
| 19 rs451793   | 22361286 G | 761.1 | 1.73E-24 | chr:19:22414379 |
| 19 rs62112446 | 22368828 A | 761.1 | 1.73E-24 | chr:19:22414379 |
| 19 rs7253425  | 22381476 G | 761.1 | 1.73E-24 | chr:19:22414379 |
| 19 rs7343144  | 22369824 T | 761.1 | 1.73E-24 | chr:19:22414379 |
| 19 rs10403375 | 22389248 T | 756.2 | 1.85E-24 | chr:19:22414379 |
| 19 rs10411854 | 22377604 T | 756.2 | 1.85E-24 | chr:19:22414379 |
| 19 rs10412921 | 22386545 T | 756.2 | 1.85E-24 | chr:19:22414379 |



|                |            |       |          |                 |
|----------------|------------|-------|----------|-----------------|
| 19 rs10418058  | 22391275 A | 756.2 | 1.85E-24 | chr:19:22414379 |
| 19 rs10419666  | 22364492 T | 756.2 | 1.85E-24 | chr:19:22414379 |
| 19 rs10419926  | 22364620 G | 756.2 | 1.85E-24 | chr:19:22414379 |
| 19 rs111581976 | 22370897 T | 756.2 | 1.85E-24 | chr:19:22414379 |
| 19 rs121382    | 22348657 T | 756.2 | 1.85E-24 | chr:19:22414379 |
| 19 rs12459032  | 22365552 A | 756.2 | 1.85E-24 | chr:19:22414379 |
| 19 rs1378915   | 22362527 A | 756.2 | 1.85E-24 | chr:19:22414379 |
| 19 rs1526883   | 22366973 T | 756.2 | 1.85E-24 | chr:19:22414379 |
| 19 rs1830172   | 22388211 T | 756.2 | 1.85E-24 | chr:19:22414379 |
| 19 rs1852426   | 22385097 T | 756.2 | 1.85E-24 | chr:19:22414379 |
| 19 rs1852427   | 22375002 G | 756.2 | 1.85E-24 | chr:19:22414379 |
| 19 rs1852428   | 22380017 A | 756.2 | 1.85E-24 | chr:19:22414379 |
| 19 rs1918162   | 22373949 C | 756.2 | 1.85E-24 | chr:19:22414379 |
| 19 rs1988038   | 22356993 C | 756.2 | 1.85E-24 | chr:19:22414379 |
| 19 rs2214352   | 22350938 C | 756.2 | 1.85E-24 | chr:19:22414379 |
| 19 rs2522318   | 22350385 T | 756.2 | 1.85E-24 | chr:19:22414379 |
| 19 rs2522319   | 22356056 C | 756.2 | 1.85E-24 | chr:19:22414379 |
| 19 rs2522322   | 22358015 A | 756.2 | 1.85E-24 | chr:19:22414379 |
| 19 rs281176    | 22394319 T | 756.2 | 1.85E-24 | chr:19:22414379 |
| 19 rs281178    | 22395581 A | 756.2 | 1.85E-24 | chr:19:22414379 |
| 19 rs281179    | 22396158 T | 756.2 | 1.85E-24 | chr:19:22414379 |
| 19 rs281180    | 22396190 G | 756.2 | 1.85E-24 | chr:19:22414379 |
| 19 rs281182    | 22396907 T | 756.2 | 1.85E-24 | chr:19:22414379 |
| 19 rs281183    | 22397080 T | 756.2 | 1.85E-24 | chr:19:22414379 |
| 19 rs28760999  | 22365862 T | 756.2 | 1.85E-24 | chr:19:22414379 |
| 19 rs28790613  | 22378639 T | 756.2 | 1.85E-24 | chr:19:22414379 |
| 19 rs2884867   | 22380662 A | 756.2 | 1.85E-24 | chr:19:22414379 |
| 19 rs366501    | 22352375 C | 756.2 | 1.85E-24 | chr:19:22414379 |
| 19 rs381995    | 22361666 C | 756.2 | 1.85E-24 | chr:19:22414379 |
| 19 rs3855858   | 22385901 A | 756.2 | 1.85E-24 | chr:19:22414379 |
| 19 rs409627    | 22357936 C | 756.2 | 1.85E-24 | chr:19:22414379 |
| 19 rs412658    | 22359440 T | 756.2 | 1.85E-24 | chr:19:22414379 |
| 19 rs414983    | 22357747 C | 756.2 | 1.85E-24 | chr:19:22414379 |
| 19 rs427500    | 22356757 T | 756.2 | 1.85E-24 | chr:19:22414379 |
| 19 rs427945    | 22356325 G | 756.2 | 1.85E-24 | chr:19:22414379 |
| 19 rs428455    | 22357247 A | 756.2 | 1.85E-24 | chr:19:22414379 |
| 19 rs4371283   | 22373810 T | 756.2 | 1.85E-24 | chr:19:22414379 |
| 19 rs440539    | 22359330 A | 756.2 | 1.85E-24 | chr:19:22414379 |
| 19 rs445788    | 22354323 A | 756.2 | 1.85E-24 | chr:19:22414379 |
| 19 rs446754    | 22361761 G | 756.2 | 1.85E-24 | chr:19:22414379 |
| 19 rs453104    | 22354405 A | 756.2 | 1.85E-24 | chr:19:22414379 |
| 19 rs4584959   | 22368977 C | 756.2 | 1.85E-24 | chr:19:22414379 |
| 19 rs557388    | 22353206 G | 756.2 | 1.85E-24 | chr:19:22414379 |

|                |            |        |          |                 |
|----------------|------------|--------|----------|-----------------|
| 19 rs682866    | 22360309 T | 756.2  | 1.85E-24 | chr:19:22414379 |
| 19 rs7343146   | 22369930 A | 756.2  | 1.85E-24 | chr:19:22414379 |
| 19 rs8104929   | 22375868 T | 756.2  | 1.85E-24 | chr:19:22414379 |
| 19 rs8105545   | 22376246 T | 756.2  | 1.85E-24 | chr:19:22414379 |
| 19 rs8106346   | 22376315 C | 756.2  | 1.85E-24 | chr:19:22414379 |
| 19 rs7343077   | 22367925 T | 757.2  | 1.88E-24 | chr:19:22414379 |
| 19 rs2522321   | 22358014 A | 751.8  | 1.99E-24 | chr:19:22414379 |
| 19 rs7343076   | 22367903 C | 752.2  | 2.01E-24 | chr:19:22414379 |
| 19 rs17769372  | 22114704 C | 8.571  | 4.54E-24 | chr:19:22414379 |
| 19 rs1848994   | 22111366 A | 8.571  | 4.54E-24 | chr:19:22414379 |
| 19 rs369128    | 22107866 T | 8.571  | 4.54E-24 | chr:19:22414379 |
| 19 rs385774    | 22096075 A | 8.571  | 4.54E-24 | chr:19:22414379 |
| 19 rs440597    | 22096519 C | 8.571  | 4.54E-24 | chr:19:22414379 |
| 19 rs11879966  | 22443852 G | 0.135  | 5.14E-24 | chr:19:22414379 |
| 19 rs12973144  | 22439646 A | 0.136  | 7.11E-24 | chr:19:22414379 |
| 19 rs10409609  | 22439127 A | 0.1364 | 7.86E-24 | chr:19:22414379 |
| 19 rs11666460  | 22442350 C | 0.1364 | 7.86E-24 | chr:19:22414379 |
| 19 rs12973509  | 22439581 A | 0.1364 | 7.86E-24 | chr:19:22414379 |
| 19 rs12982551  | 22439042 C | 0.1364 | 7.86E-24 | chr:19:22414379 |
| 19 rs7259269   | 22441171 T | 0.1364 | 7.86E-24 | chr:19:22414379 |
| 19 rs539301358 | 22444826 A | 0.142  | 8.55E-24 | chr:19:22414379 |
| 19 rs557677690 | 22444827 A | 0.142  | 8.55E-24 | chr:19:22414379 |
| 19 rs71333870  | 22444823 G | 0.142  | 8.55E-24 | chr:19:22414379 |
| 19 rs452556    | 22469057 A | 0.1098 | 1.04E-23 | chr:19:22414379 |
| 19 rs808373    | 22469233 C | 0.1098 | 1.04E-23 | chr:19:22414379 |
| 19 rs1651558   | 22089575 T | 8.632  | 1.28E-23 | chr:19:22414379 |
| 19 rs2021560   | 22373470 C | 539.5  | 1.40E-23 | chr:19:22414379 |
| 19 rs10417143  | 22373303 A | 530.9  | 1.74E-23 | chr:19:22414379 |
| 19 rs2360001   | 22379587 T | 530.9  | 1.74E-23 | chr:19:22414379 |
| 19 rs281174    | 22392420 C | 530.9  | 1.74E-23 | chr:19:22414379 |
| 19 rs281184    | 22397099 C | 530.9  | 1.74E-23 | chr:19:22414379 |
| 19 rs383678    | 22361741 C | 530.9  | 1.74E-23 | chr:19:22414379 |
| 19 rs430560    | 22353560 C | 530.9  | 1.74E-23 | chr:19:22414379 |
| 19 rs436744    | 22355575 A | 530.9  | 1.74E-23 | chr:19:22414379 |
| 19 rs449891    | 22352161 A | 530.9  | 1.74E-23 | chr:19:22414379 |
| 19 rs4614861   | 22373841 C | 530.9  | 1.74E-23 | chr:19:22414379 |
| 19 rs4932963   | 22388931 T | 530.9  | 1.74E-23 | chr:19:22414379 |
| 19 rs12986108  | 22444577 T | 0.1424 | 2.44E-23 | chr:19:22414379 |
| 19 rs12985757  | 22444652 A | 0.1433 | 3.30E-23 | chr:19:22414379 |
| 19 rs12972854  | 22444812 C | 0.1576 | 9.53E-23 | chr:19:22414379 |
| 19 rs12610469  | 22454617 A | 0.15   | 1.14E-22 | chr:19:22414379 |
| 19 rs8108027   | 22115901 C | 7.45   | 1.61E-22 | chr:19:22414379 |
| 19 rs10415826  | 22248317 T | 11.68  | 2.65E-22 | chr:19:22414379 |

|                      |            |        |          |                 |
|----------------------|------------|--------|----------|-----------------|
| 19 rs463200          | 22327489 C | 415.5  | 2.88E-22 | chr:19:22414379 |
| 19 rs10404322        | 22110669 G | 7.275  | 2.92E-22 | chr:19:22414379 |
| 19 rs62118563        | 22529531 A | 13.99  | 7.00E-22 | chr:19:22414379 |
| 19 rs62120019        | 22493958 T | 13.88  | 8.47E-22 | chr:19:22414379 |
| 19 rs10416248        | 22115865 A | 6.923  | 1.01E-21 | chr:19:22414379 |
| 19 rs36123644        | 22444780 C | 0.1832 | 1.16E-21 | chr:19:22414379 |
| 19 rs553185985       | 22444776 T | 0.1832 | 1.16E-21 | chr:19:22414379 |
| 19 rs570214927       | 22444775 C | 0.1832 | 1.16E-21 | chr:19:22414379 |
| 19 rs11667886        | 22430941 T | 0.1624 | 1.39E-21 | chr:19:22414379 |
| 19 rs2168491         | 22425589 G | 0.1665 | 1.80E-21 | chr:19:22414379 |
| 19 rs281172          | 22424697 T | 0.1683 | 2.02E-21 | chr:19:22414379 |
| 19 rs11085514        | 22425837 A | 0.168  | 2.08E-21 | chr:19:22414379 |
| 19 rs2168492;rs56814 | 22425645 T | 0.1722 | 2.40E-21 | chr:19:22414379 |
| 19 rs11085515        | 22426520 C | 0.1685 | 2.76E-21 | chr:19:22414379 |
| 19 rs720893          | 22426404 G | 0.1685 | 2.76E-21 | chr:19:22414379 |
| 19 rs10221484        | 22455170 G | 0.1778 | 2.94E-21 | chr:19:22414379 |
| 19 rs281173          | 22424997 G | 0.17   | 2.98E-21 | chr:19:22414379 |
| 19 rs62121863        | 22504673 A | 13.82  | 3.46E-21 | chr:19:22414379 |
| 19 rs10221483        | 22455112 G | 0.1792 | 4.14E-21 | chr:19:22414379 |
| 19 rs605085          | 22355832 T | 0.1877 | 6.06E-21 | chr:19:22414379 |
| 19 rs1975174         | 22515251 G | 0.1745 | 6.16E-21 | chr:19:22414379 |
| 19 rs11668269        | 22513960 G | 0.1755 | 8.24E-21 | chr:19:22414379 |
| 19 rs2163846         | 22505844 C | 0.1755 | 8.24E-21 | chr:19:22414379 |
| 19 rs7252056         | 22494052 T | 0.1755 | 8.24E-21 | chr:19:22414379 |
| 19 rs7259376         | 22507705 A | 0.1755 | 8.24E-21 | chr:19:22414379 |
| 19 rs8104705         | 22498943 T | 0.1755 | 8.24E-21 | chr:19:22414379 |
| 19 rs436971          | 22461218 T | 0.1881 | 8.51E-21 | chr:19:22414379 |
| 19 rs808369          | 22474282 T | 0.1752 | 8.63E-21 | chr:19:22414379 |
| 19 rs281164          | 22419523 T | 0.1806 | 9.67E-21 | chr:19:22414379 |
| 19 rs281169          | 22423276 T | 0.1806 | 9.67E-21 | chr:19:22414379 |
| 19 rs172183          | 22405532 A | 0.1822 | 9.97E-21 | chr:19:22414379 |
| 19 rs281166          | 22420798 G | 0.1822 | 9.97E-21 | chr:19:22414379 |
| 19 rs281168          | 22422638 A | 0.1822 | 9.97E-21 | chr:19:22414379 |
| 19 rs281196          | 22403293 G | 0.1822 | 9.97E-21 | chr:19:22414379 |
| 19 rs281198          | 22405169 G | 0.1822 | 9.97E-21 | chr:19:22414379 |
| 19 rs281203          | 22406377 C | 0.1822 | 9.97E-21 | chr:19:22414379 |
| 19 rs808372          | 22470368 T | 0.1925 | 1.33E-20 | chr:19:22414379 |
| 19 rs11669885        | 22397422 A | 0.1836 | 1.38E-20 | chr:19:22414379 |
| 19 rs437284          | 22354875 T | 0.1836 | 1.38E-20 | chr:19:22414379 |
| 19 rs12609473        | 22378606 G | 0.1893 | 2.43E-20 | chr:19:22414379 |
| 19 rs12980808        | 22374080 G | 0.1893 | 2.43E-20 | chr:19:22414379 |
| 19 rs1830175         | 22382080 A | 0.1893 | 2.43E-20 | chr:19:22414379 |
| 19 rs34364151        | 22393367 T | 0.1893 | 2.43E-20 | chr:19:22414379 |

|               |            |        |          |                 |
|---------------|------------|--------|----------|-----------------|
| 19 rs368652   | 22356811 A | 0.1893 | 2.43E-20 | chr:19:22414379 |
| 19 rs3951502  | 22368852 A | 0.1893 | 2.43E-20 | chr:19:22414379 |
| 19 rs424912   | 22347371 C | 0.1893 | 2.43E-20 | chr:19:22414379 |
| 19 rs431628   | 22359024 T | 0.1893 | 2.43E-20 | chr:19:22414379 |
| 19 rs448861   | 22353606 A | 0.1893 | 2.43E-20 | chr:19:22414379 |
| 19 rs9304995  | 22366432 A | 0.1893 | 2.43E-20 | chr:19:22414379 |
| 19 rs10426106 | 22323268 T | 0.1907 | 2.50E-20 | chr:19:22414379 |
| 19 rs1865067  | 22323069 T | 0.1909 | 2.58E-20 | chr:19:22414379 |
| 19 rs2522317  | 22339626 G | 0.1952 | 4.43E-20 | chr:19:22414379 |
| 19 rs397538   | 22329889 A | 0.1952 | 4.43E-20 | chr:19:22414379 |
| 19 rs404793   | 22329632 A | 0.1952 | 4.43E-20 | chr:19:22414379 |
| 19 rs435638   | 22333121 A | 0.1952 | 4.43E-20 | chr:19:22414379 |
| 19 rs458515   | 22330126 T | 0.1952 | 4.43E-20 | chr:19:22414379 |
| 19 rs464038   | 22335569 G | 0.1952 | 4.43E-20 | chr:19:22414379 |
| 19 rs617609   | 22326000 A | 0.1957 | 5.74E-20 | chr:19:22414379 |
| 19 rs28420503 | 22316713 A | 0.208  | 6.28E-20 | chr:19:22414379 |
| 19 rs281185   | 22398525 G | 1038   | 7.31E-20 | chr:19:22414379 |
| 19 rs281199   | 22405501 T | 1343   | 7.90E-20 | chr:19:22414379 |
| 19 rs34312380 | 22390071 T | 0.1949 | 8.21E-20 | chr:19:22414379 |
| 19 rs34407605 | 22390084 T | 0.1949 | 8.21E-20 | chr:19:22414379 |
| 19 rs1975175  | 22515239 G | 0.2104 | 1.14E-19 | chr:19:22414379 |
| 19 rs9304996  | 22486535 A | 0.2105 | 1.17E-19 | chr:19:22414379 |
| 19 rs1808668  | 22518657 A | 0.2114 | 1.19E-19 | chr:19:22414379 |
| 19 rs3862494  | 22519522 G | 0.2114 | 1.19E-19 | chr:19:22414379 |
| 19 rs59598661 | 22537029 T | 0.1999 | 1.22E-19 | chr:19:22414379 |
| 19 rs1091182  | 22475622 A | 0.2121 | 1.28E-19 | chr:19:22414379 |
| 19 rs1985135  | 22523578 A | 0.213  | 1.31E-19 | chr:19:22414379 |
| 19 rs4358065  | 22521132 A | 0.213  | 1.31E-19 | chr:19:22414379 |
| 19 rs2217666  | 22565048 A | 0.2018 | 1.33E-19 | chr:19:22414379 |
| 19 rs62110991 | 22260842 T | 23.75  | 1.39E-19 | chr:19:22414379 |
| 19 rs1975173  | 22534538 C | 0.2038 | 1.47E-19 | chr:19:22414379 |
| 19 rs12459636 | 22542439 A | 0.2046 | 1.48E-19 | chr:19:22414379 |
| 19 rs12608536 | 22542058 A | 0.2046 | 1.48E-19 | chr:19:22414379 |
| 19 rs10404225 | 22493082 G | 0.2119 | 1.57E-19 | chr:19:22414379 |
| 19 rs10409520 | 22512477 C | 0.2119 | 1.57E-19 | chr:19:22414379 |
| 19 rs10409947 | 22512518 G | 0.2119 | 1.57E-19 | chr:19:22414379 |
| 19 rs11085522 | 22505167 T | 0.2119 | 1.57E-19 | chr:19:22414379 |
| 19 rs1991830  | 22514730 G | 0.2119 | 1.57E-19 | chr:19:22414379 |
| 19 rs2116919  | 22491706 C | 0.2119 | 1.57E-19 | chr:19:22414379 |
| 19 rs4932755  | 22494816 A | 0.2119 | 1.57E-19 | chr:19:22414379 |
| 19 rs7254434  | 22500033 G | 0.2119 | 1.57E-19 | chr:19:22414379 |
| 19 rs8106639  | 22509614 C | 0.2119 | 1.57E-19 | chr:19:22414379 |
| 19 rs12610462 | 22551462 C | 0.2057 | 1.60E-19 | chr:19:22414379 |

|               |            |        |          |                 |
|---------------|------------|--------|----------|-----------------|
| 19 rs16999064 | 22552602 A | 0.2057 | 1.60E-19 | chr:19:22414379 |
| 19 rs8106611  | 22569618 G | 0.203  | 1.60E-19 | chr:19:22414379 |
| 19 rs1865073  | 22554980 T | 0.206  | 1.61E-19 | chr:19:22414379 |
| 19 rs7260210  | 22504803 A | 0.2135 | 1.71E-19 | chr:19:22414379 |
| 19 rs12608491 | 22541627 A | 0.2052 | 1.73E-19 | chr:19:22414379 |
| 19 rs2082479  | 22539847 T | 0.2052 | 1.73E-19 | chr:19:22414379 |
| 19 rs2082480  | 22538650 G | 0.2052 | 1.73E-19 | chr:19:22414379 |
| 19 rs2099354  | 22539532 C | 0.2052 | 1.73E-19 | chr:19:22414379 |
| 19 rs2195964  | 22538338 C | 0.2052 | 1.73E-19 | chr:19:22414379 |
| 19 rs2195965  | 22538111 C | 0.2052 | 1.73E-19 | chr:19:22414379 |
| 19 rs57501688 | 22540597 G | 0.2052 | 1.73E-19 | chr:19:22414379 |
| 19 rs58170323 | 22539115 T | 0.2052 | 1.73E-19 | chr:19:22414379 |
| 19 rs7255829  | 22537311 C | 0.202  | 1.81E-19 | chr:19:22414379 |
| 19 rs12608842 | 22548013 G | 0.2063 | 1.86E-19 | chr:19:22414379 |
| 19 rs2885035  | 22549124 T | 0.2063 | 1.86E-19 | chr:19:22414379 |
| 19 rs61657442 | 22552178 A | 0.2063 | 1.86E-19 | chr:19:22414379 |
| 19 rs7258446  | 22550341 A | 0.2063 | 1.86E-19 | chr:19:22414379 |
| 19 rs11085526 | 22563880 C | 0.2039 | 2.03E-19 | chr:19:22414379 |
| 19 rs11085524 | 22536422 G | 0.2051 | 2.03E-19 | chr:19:22414379 |
| 19 rs11673212 | 22536050 C | 0.2051 | 2.03E-19 | chr:19:22414379 |
| 19 rs11879791 | 22536939 A | 0.2051 | 2.03E-19 | chr:19:22414379 |
| 19 rs56227660 | 22533543 A | 0.2051 | 2.03E-19 | chr:19:22414379 |
| 19 rs6511344  | 22535673 C | 0.2051 | 2.03E-19 | chr:19:22414379 |
| 19 rs7249374  | 22533465 C | 0.2051 | 2.03E-19 | chr:19:22414379 |
| 19 rs7251413  | 22609759 T | 0.2038 | 2.12E-19 | chr:19:22414379 |
| 19 rs10411720 | 22308919 C | 0.2107 | 2.16E-19 | chr:19:22414379 |
| 19 rs10411951 | 22309055 C | 0.2107 | 2.16E-19 | chr:19:22414379 |
| 19 rs10409819 | 22602919 T | 0.2073 | 2.20E-19 | chr:19:22414379 |
| 19 rs10418203 | 22567144 A | 0.2073 | 2.20E-19 | chr:19:22414379 |
| 19 rs10419506 | 22561519 G | 0.2073 | 2.20E-19 | chr:19:22414379 |
| 19 rs11671470 | 22599468 T | 0.2073 | 2.20E-19 | chr:19:22414379 |
| 19 rs11673228 | 22596084 A | 0.2073 | 2.20E-19 | chr:19:22414379 |
| 19 rs11881957 | 22573251 T | 0.2073 | 2.20E-19 | chr:19:22414379 |
| 19 rs12978477 | 22577709 G | 0.2073 | 2.20E-19 | chr:19:22414379 |
| 19 rs34643838 | 22608433 T | 0.2073 | 2.20E-19 | chr:19:22414379 |
| 19 rs7256749  | 22592289 G | 0.2073 | 2.20E-19 | chr:19:22414379 |
| 19 rs62118584 | 22541142 G | 0.2066 | 2.43E-19 | chr:19:22414379 |
| 19 rs7259586  | 22537862 C | 0.2066 | 2.43E-19 | chr:19:22414379 |
| 19 rs10402396 | 22601809 C | 0.2078 | 2.55E-19 | chr:19:22414379 |
| 19 rs10414591 | 22600122 A | 0.2078 | 2.55E-19 | chr:19:22414379 |
| 19 rs10420380 | 22600624 T | 0.2078 | 2.55E-19 | chr:19:22414379 |
| 19 rs11669179 | 22604729 G | 0.2078 | 2.55E-19 | chr:19:22414379 |
| 19 rs11669270 | 22604816 A | 0.2078 | 2.55E-19 | chr:19:22414379 |

|               |            |        |          |                 |
|---------------|------------|--------|----------|-----------------|
| 19 rs11669353 | 22605103 C | 0.2078 | 2.55E-19 | chr:19:22414379 |
| 19 rs11669356 | 22605120 T | 0.2078 | 2.55E-19 | chr:19:22414379 |
| 19 rs11879678 | 22607312 A | 0.2078 | 2.55E-19 | chr:19:22414379 |
| 19 rs11879697 | 22607206 A | 0.2078 | 2.55E-19 | chr:19:22414379 |
| 19 rs34187872 | 22607883 A | 0.2078 | 2.55E-19 | chr:19:22414379 |
| 19 rs34787405 | 22608148 A | 0.2078 | 2.55E-19 | chr:19:22414379 |
| 19 rs4932763  | 22603922 A | 0.2078 | 2.55E-19 | chr:19:22414379 |
| 19 rs8101947  | 22605640 T | 0.2078 | 2.55E-19 | chr:19:22414379 |
| 19 rs8112041  | 22604565 T | 0.2078 | 2.55E-19 | chr:19:22414379 |
| 19 rs55983151 | 22552936 T | 0.2077 | 2.60E-19 | chr:19:22414379 |
| 19 rs8110854  | 22549453 C | 0.2077 | 2.60E-19 | chr:19:22414379 |
| 19 rs17391718 | 22554154 A | 0.208  | 2.60E-19 | chr:19:22414379 |
| 19 rs1865075  | 22554854 T | 0.208  | 2.60E-19 | chr:19:22414379 |
| 19 rs56027264 | 22554354 T | 0.208  | 2.60E-19 | chr:19:22414379 |
| 19 rs7250541  | 22557093 G | 0.208  | 2.60E-19 | chr:19:22414379 |
| 19 rs7250710  | 22557231 G | 0.208  | 2.60E-19 | chr:19:22414379 |
| 19 rs7508099  | 22556203 T | 0.208  | 2.60E-19 | chr:19:22414379 |
| 19 rs13382114 | 22545739 G | 0.2075 | 2.66E-19 | chr:19:22414379 |
| 19 rs1865074  | 22554949 G | 0.2116 | 2.74E-19 | chr:19:22414379 |
| 19 rs8111537  | 22535545 C | 0.2066 | 2.85E-19 | chr:19:22414379 |
| 19 rs10404620 | 22316577 A | 0.2111 | 2.85E-19 | chr:19:22414379 |
| 19 rs10415817 | 22313214 C | 0.2111 | 2.85E-19 | chr:19:22414379 |
| 19 rs7245790  | 22320009 C | 0.2111 | 2.85E-19 | chr:19:22414379 |
| 19 rs8103471  | 22317314 T | 0.2111 | 2.85E-19 | chr:19:22414379 |
| 19 rs4932759  | 22540105 C | 0.2107 | 2.94E-19 | chr:19:22414379 |
| 19 rs4932760  | 22540455 T | 0.2107 | 2.94E-19 | chr:19:22414379 |
| 19 rs4932986  | 22540437 A | 0.2107 | 2.94E-19 | chr:19:22414379 |
| 19 rs12984257 | 22590664 A | 0.2087 | 3.05E-19 | chr:19:22414379 |
| 19 rs7248242  | 22575994 G | 0.2087 | 3.05E-19 | chr:19:22414379 |
| 19 rs6511345  | 22537436 T | 0.2067 | 3.11E-19 | chr:19:22414379 |
| 19 rs7256745  | 22537287 T | 0.2256 | 3.30E-19 | chr:19:22414379 |
| 19 rs1897613  | 22573575 G | 0.2088 | 3.30E-19 | chr:19:22414379 |
| 19 rs10404998 | 22608374 C | 0.2092 | 3.54E-19 | chr:19:22414379 |
| 19 rs10405295 | 22608556 C | 0.2092 | 3.54E-19 | chr:19:22414379 |
| 19 rs10406199 | 22584530 G | 0.2092 | 3.54E-19 | chr:19:22414379 |
| 19 rs10407050 | 22584914 G | 0.2092 | 3.54E-19 | chr:19:22414379 |
| 19 rs10407485 | 22585087 T | 0.2092 | 3.54E-19 | chr:19:22414379 |
| 19 rs10408428 | 22578023 T | 0.2092 | 3.54E-19 | chr:19:22414379 |
| 19 rs10413240 | 22591317 C | 0.2092 | 3.54E-19 | chr:19:22414379 |
| 19 rs10416278 | 22607031 T | 0.2092 | 3.54E-19 | chr:19:22414379 |
| 19 rs10417380 | 22596625 T | 0.2092 | 3.54E-19 | chr:19:22414379 |
| 19 rs10423736 | 22596132 T | 0.2092 | 3.54E-19 | chr:19:22414379 |
| 19 rs10425699 | 22576384 T | 0.2092 | 3.54E-19 | chr:19:22414379 |

|                |            |        |          |                 |
|----------------|------------|--------|----------|-----------------|
| 19 rs10454118  | 22559605 G | 0.2092 | 3.54E-19 | chr:19:22414379 |
| 19 rs12151261  | 22587929 T | 0.2092 | 3.54E-19 | chr:19:22414379 |
| 19 rs12461060  | 22566085 T | 0.2092 | 3.54E-19 | chr:19:22414379 |
| 19 rs12977605  | 22566997 T | 0.2092 | 3.54E-19 | chr:19:22414379 |
| 19 rs12983542  | 22590585 G | 0.2092 | 3.54E-19 | chr:19:22414379 |
| 19 rs16999542  | 22573092 A | 0.2092 | 3.54E-19 | chr:19:22414379 |
| 19 rs2195967   | 22564922 T | 0.2092 | 3.54E-19 | chr:19:22414379 |
| 19 rs2360622   | 22570622 T | 0.2092 | 3.54E-19 | chr:19:22414379 |
| 19 rs2360625   | 22592860 G | 0.2092 | 3.54E-19 | chr:19:22414379 |
| 19 rs4024623   | 22568065 A | 0.2092 | 3.54E-19 | chr:19:22414379 |
| 19 rs4024624   | 22568264 C | 0.2092 | 3.54E-19 | chr:19:22414379 |
| 19 rs5014503   | 22568340 A | 0.2092 | 3.54E-19 | chr:19:22414379 |
| 19 rs56376504  | 22562520 C | 0.2092 | 3.54E-19 | chr:19:22414379 |
| 19 rs58374468  | 22562522 C | 0.2092 | 3.54E-19 | chr:19:22414379 |
| 19 rs6511350   | 22594697 G | 0.2092 | 3.54E-19 | chr:19:22414379 |
| 19 rs7247085   | 22589367 G | 0.2092 | 3.54E-19 | chr:19:22414379 |
| 19 rs7247220   | 22589489 G | 0.2092 | 3.54E-19 | chr:19:22414379 |
| 19 rs7247735   | 22575488 T | 0.2092 | 3.54E-19 | chr:19:22414379 |
| 19 rs7253315   | 22594439 T | 0.2092 | 3.54E-19 | chr:19:22414379 |
| 19 rs7255934   | 22596865 C | 0.2092 | 3.54E-19 | chr:19:22414379 |
| 19 rs7256861   | 22561484 T | 0.2092 | 3.54E-19 | chr:19:22414379 |
| 19 rs75653200  | 22579503 T | 0.2092 | 3.54E-19 | chr:19:22414379 |
| 19 rs8100077   | 22593112 T | 0.2092 | 3.54E-19 | chr:19:22414379 |
| 19 rs8101997   | 22568432 A | 0.2092 | 3.54E-19 | chr:19:22414379 |
| 19 rs8103765   | 22569105 T | 0.2092 | 3.54E-19 | chr:19:22414379 |
| 19 rs8107513   | 22564534 C | 0.2092 | 3.54E-19 | chr:19:22414379 |
| 19 rs8107704   | 22564531 G | 0.2092 | 3.54E-19 | chr:19:22414379 |
| 19 rs8111665   | 22588559 T | 0.2092 | 3.54E-19 | chr:19:22414379 |
| 19 rs8112246   | 22567447 C | 0.2092 | 3.54E-19 | chr:19:22414379 |
| 19 rs8100087   | 22601359 C | 0.2093 | 3.57E-19 | chr:19:22414379 |
| 19 rs8110636   | 22600827 A | 0.2093 | 3.57E-19 | chr:19:22414379 |
| 19 rs4244914   | 22315389 A | 0.2115 | 3.65E-19 | chr:19:22414379 |
| 19 rs6511334   | 22307267 C | 0.2157 | 3.65E-19 | chr:19:22414379 |
| 19 rs10407936  | 22312059 A | 0.212  | 3.89E-19 | chr:19:22414379 |
| 19 rs12971375  | 22599963 A | 0.2142 | 4.93E-19 | chr:19:22414379 |
| 19 rs61216675  | 22561510 C | 0.2106 | 4.95E-19 | chr:19:22414379 |
| 19 rs71333873  | 22581471 T | 0.2106 | 4.95E-19 | chr:19:22414379 |
| 19 rs2664067   | 22638066 C | 0.2103 | 5.24E-19 | chr:19:22414379 |
| 19 rs139019650 | 22566671 T | 0.2109 | 5.36E-19 | chr:19:22414379 |
| 19 rs2957848   | 22583747 G | 0.2142 | 5.80E-19 | chr:19:22414379 |
| 19 rs1976314   | 22608853 T | 0.213  | 6.19E-19 | chr:19:22414379 |
| 19 rs4024619   | 22586839 G | 0.2113 | 6.44E-19 | chr:19:22414379 |
| 19 rs1230295   | 22621678 C | 0.2138 | 6.48E-19 | chr:19:22414379 |

|                |            |        |          |                 |
|----------------|------------|--------|----------|-----------------|
| 19 rs12983035  | 22590392 T | 0.2117 | 6.62E-19 | chr:19:22414379 |
| 19 rs4932990   | 22583691 A | 0.2113 | 6.71E-19 | chr:19:22414379 |
| 19 rs1368476   | 22586192 G | 0.218  | 6.78E-19 | chr:19:22414379 |
| 19 rs10420149  | 22582925 G | 0.2118 | 6.91E-19 | chr:19:22414379 |
| 19 rs8108630   | 22535177 G | 0.2095 | 7.54E-19 | chr:19:22414379 |
| 19 rs2645164   | 22638080 T | 0.2119 | 8.63E-19 | chr:19:22414379 |
| 19 rs2957814   | 22637580 T | 0.2119 | 8.63E-19 | chr:19:22414379 |
| 19 rs1118049   | 22642131 T | 0.2132 | 1.19E-18 | chr:19:22414379 |
| 19 rs1230304   | 22641598 C | 0.2132 | 1.19E-18 | chr:19:22414379 |
| 19 rs1230307   | 22642684 T | 0.2132 | 1.19E-18 | chr:19:22414379 |
| 19 rs1230308   | 22642916 C | 0.2132 | 1.19E-18 | chr:19:22414379 |
| 19 rs6511327   | 22286899 A | 14.44  | 1.38E-18 | chr:19:22414379 |
| 19 rs62112863  | 22164515 G | 14.51  | 2.95E-18 | chr:19:22414379 |
| 19 rs62112914  | 22221407 A | 14.51  | 2.95E-18 | chr:19:22414379 |
| 19 rs7247228   | 22250136 T | 16.53  | 3.80E-18 | chr:19:22414379 |
| 19 rs7245491   | 22532793 C | 0.2438 | 4.02E-18 | chr:19:22414379 |
| 19 rs7245492   | 22532796 C | 0.2438 | 4.02E-18 | chr:19:22414379 |
| 19 rs113181884 | 22586084 C | 0.2452 | 4.02E-18 | chr:19:22414379 |
| 19 rs56768795  | 22586073 A | 0.2452 | 4.02E-18 | chr:19:22414379 |
| 19 rs7257134   | 22540857 A | 0.2364 | 4.09E-18 | chr:19:22414379 |
| 19 rs117638181 | 22163014 G | 13.32  | 4.12E-18 | chr:19:22414379 |
| 19 rs11881224  | 22220340 A | 13.32  | 4.12E-18 | chr:19:22414379 |
| 19 rs12150930  | 22223687 C | 13.32  | 4.12E-18 | chr:19:22414379 |
| 19 rs17450788  | 22224755 C | 13.32  | 4.12E-18 | chr:19:22414379 |
| 19 rs2078180   | 22209846 A | 13.32  | 4.12E-18 | chr:19:22414379 |
| 19 rs2359820   | 22208114 T | 13.32  | 4.12E-18 | chr:19:22414379 |
| 19 rs60548522  | 22214874 A | 13.32  | 4.12E-18 | chr:19:22414379 |
| 19 rs62112865  | 22172333 T | 13.32  | 4.12E-18 | chr:19:22414379 |
| 19 rs62112870  | 22175976 A | 13.32  | 4.12E-18 | chr:19:22414379 |
| 19 rs62112871  | 22185295 C | 13.32  | 4.12E-18 | chr:19:22414379 |
| 19 rs62112872  | 22192425 C | 13.32  | 4.12E-18 | chr:19:22414379 |
| 19 rs62112907  | 22209569 G | 13.32  | 4.12E-18 | chr:19:22414379 |
| 19 rs62112908  | 22213956 G | 13.32  | 4.12E-18 | chr:19:22414379 |
| 19 rs62112913  | 22221067 G | 13.32  | 4.12E-18 | chr:19:22414379 |
| 19 rs62112915  | 22223179 A | 13.32  | 4.12E-18 | chr:19:22414379 |
| 19 rs6511313   | 22215905 A | 13.32  | 4.12E-18 | chr:19:22414379 |
| 19 rs8104559   | 22205167 C | 13.32  | 4.12E-18 | chr:19:22414379 |
| 19 rs8105895   | 22215457 T | 13.32  | 4.12E-18 | chr:19:22414379 |
| 19 rs8112751   | 22222458 T | 13.32  | 4.12E-18 | chr:19:22414379 |
| 19 rs10423522  | 22243448 T | 18.37  | 4.18E-18 | chr:19:22414379 |
| 19 rs2214300   | 22160537 T | 17     | 4.37E-18 | chr:19:22414379 |
| 19 rs62112864  | 22166026 T | 17     | 4.37E-18 | chr:19:22414379 |
| 19 rs8105913   | 22201492 C | 17     | 4.37E-18 | chr:19:22414379 |



|                |            |        |          |                 |
|----------------|------------|--------|----------|-----------------|
| 19 rs4932984   | 22533255 T | 0.238  | 4.55E-18 | chr:19:22414379 |
| 19 rs1975172   | 22534603 A | 0.2388 | 4.66E-18 | chr:19:22414379 |
| 19 rs8110969   | 22240222 T | 16.48  | 5.11E-18 | chr:19:22414379 |
| 19 rs8110975   | 22240233 G | 16.48  | 5.11E-18 | chr:19:22414379 |
| 19 rs8111854   | 22240213 C | 16.48  | 5.11E-18 | chr:19:22414379 |
| 19 rs79846980  | 22141343 C | 13.14  | 5.79E-18 | chr:19:22414379 |
| 19 rs201005223 | 22574818 C | 0.2192 | 6.16E-18 | chr:19:22414379 |
| 19 rs2359811   | 22152876 G | 16.8   | 6.50E-18 | chr:19:22414379 |
| 19 rs4932983   | 22533167 A | 0.24   | 6.52E-18 | chr:19:22414379 |
| 19 rs10401922  | 22253252 A | 20.25  | 6.74E-18 | chr:19:22414379 |
| 19 rs10404669  | 22241218 C | 20.25  | 6.74E-18 | chr:19:22414379 |
| 19 rs10405613  | 22244772 T | 20.25  | 6.74E-18 | chr:19:22414379 |
| 19 rs10405673  | 22244890 G | 20.25  | 6.74E-18 | chr:19:22414379 |
| 19 rs10406119  | 22245009 A | 20.25  | 6.74E-18 | chr:19:22414379 |
| 19 rs10406485  | 22245002 T | 20.25  | 6.74E-18 | chr:19:22414379 |
| 19 rs10406551  | 22244520 A | 20.25  | 6.74E-18 | chr:19:22414379 |
| 19 rs10406553  | 22237801 T | 20.25  | 6.74E-18 | chr:19:22414379 |
| 19 rs10406653  | 22238023 T | 20.25  | 6.74E-18 | chr:19:22414379 |
| 19 rs10407173  | 22246663 T | 20.25  | 6.74E-18 | chr:19:22414379 |
| 19 rs10407250  | 22238151 A | 20.25  | 6.74E-18 | chr:19:22414379 |
| 19 rs10408150  | 22245225 C | 20.25  | 6.74E-18 | chr:19:22414379 |
| 19 rs10411275  | 22259469 G | 20.25  | 6.74E-18 | chr:19:22414379 |
| 19 rs10411943  | 22259782 G | 20.25  | 6.74E-18 | chr:19:22414379 |
| 19 rs10412953  | 22238482 G | 20.25  | 6.74E-18 | chr:19:22414379 |
| 19 rs10413784  | 22246191 G | 20.25  | 6.74E-18 | chr:19:22414379 |
| 19 rs10414685  | 22247749 T | 20.25  | 6.74E-18 | chr:19:22414379 |
| 19 rs10414861  | 22247761 G | 20.25  | 6.74E-18 | chr:19:22414379 |
| 19 rs10415794  | 22248221 T | 20.25  | 6.74E-18 | chr:19:22414379 |
| 19 rs10415930  | 22248088 A | 20.25  | 6.74E-18 | chr:19:22414379 |
| 19 rs10417285  | 22248184 C | 20.25  | 6.74E-18 | chr:19:22414379 |
| 19 rs10419142  | 22252262 T | 20.25  | 6.74E-18 | chr:19:22414379 |
| 19 rs10420019  | 22251905 A | 20.25  | 6.74E-18 | chr:19:22414379 |
| 19 rs10420042  | 22251926 A | 20.25  | 6.74E-18 | chr:19:22414379 |
| 19 rs10422289  | 22256060 T | 20.25  | 6.74E-18 | chr:19:22414379 |
| 19 rs10423114  | 22249289 G | 20.25  | 6.74E-18 | chr:19:22414379 |
| 19 rs10423881  | 22243422 A | 20.25  | 6.74E-18 | chr:19:22414379 |
| 19 rs116220423 | 22237041 A | 20.25  | 6.74E-18 | chr:19:22414379 |
| 19 rs2043315   | 22252823 C | 20.25  | 6.74E-18 | chr:19:22414379 |
| 19 rs2043316   | 22251204 T | 20.25  | 6.74E-18 | chr:19:22414379 |
| 19 rs2043317   | 22251096 C | 20.25  | 6.74E-18 | chr:19:22414379 |
| 19 rs2163835   | 22242679 T | 20.25  | 6.74E-18 | chr:19:22414379 |
| 19 rs2163836   | 22242277 T | 20.25  | 6.74E-18 | chr:19:22414379 |
| 19 rs2163837   | 22242236 A | 20.25  | 6.74E-18 | chr:19:22414379 |

|                |            |       |          |                 |
|----------------|------------|-------|----------|-----------------|
| 19 rs2359833   | 22242221 G | 20.25 | 6.74E-18 | chr:19:22414379 |
| 19 rs2359835   | 22242690 G | 20.25 | 6.74E-18 | chr:19:22414379 |
| 19 rs28822164  | 22245108 A | 20.25 | 6.74E-18 | chr:19:22414379 |
| 19 rs28857211  | 22243104 C | 20.25 | 6.74E-18 | chr:19:22414379 |
| 19 rs28894669  | 22243264 A | 20.25 | 6.74E-18 | chr:19:22414379 |
| 19 rs368701052 | 22255803 A | 20.25 | 6.74E-18 | chr:19:22414379 |
| 19 rs377529013 | 22242455 A | 20.25 | 6.74E-18 | chr:19:22414379 |
| 19 rs4257328   | 22240090 A | 20.25 | 6.74E-18 | chr:19:22414379 |
| 19 rs4510150   | 22239669 G | 20.25 | 6.74E-18 | chr:19:22414379 |
| 19 rs4542784   | 22239751 A | 20.25 | 6.74E-18 | chr:19:22414379 |
| 19 rs62110979  | 22245152 C | 20.25 | 6.74E-18 | chr:19:22414379 |
| 19 rs62110980  | 22245191 A | 20.25 | 6.74E-18 | chr:19:22414379 |
| 19 rs62110981  | 22246013 G | 20.25 | 6.74E-18 | chr:19:22414379 |
| 19 rs62110984  | 22252332 A | 20.25 | 6.74E-18 | chr:19:22414379 |
| 19 rs62110985  | 22256077 G | 20.25 | 6.74E-18 | chr:19:22414379 |
| 19 rs62110986  | 22256771 A | 20.25 | 6.74E-18 | chr:19:22414379 |
| 19 rs62110987  | 22257295 C | 20.25 | 6.74E-18 | chr:19:22414379 |
| 19 rs62110988  | 22259956 T | 20.25 | 6.74E-18 | chr:19:22414379 |
| 19 rs62110989  | 22260299 G | 20.25 | 6.74E-18 | chr:19:22414379 |
| 19 rs62110990  | 22260441 T | 20.25 | 6.74E-18 | chr:19:22414379 |
| 19 rs62112956  | 22235910 A | 20.25 | 6.74E-18 | chr:19:22414379 |
| 19 rs62112957  | 22238259 T | 20.25 | 6.74E-18 | chr:19:22414379 |
| 19 rs62112958  | 22239118 G | 20.25 | 6.74E-18 | chr:19:22414379 |
| 19 rs6511314   | 22236395 A | 20.25 | 6.74E-18 | chr:19:22414379 |
| 19 rs6511315   | 22236503 A | 20.25 | 6.74E-18 | chr:19:22414379 |
| 19 rs6511316   | 22237629 C | 20.25 | 6.74E-18 | chr:19:22414379 |
| 19 rs7246007   | 22240596 C | 20.25 | 6.74E-18 | chr:19:22414379 |
| 19 rs7247041   | 22249790 A | 20.25 | 6.74E-18 | chr:19:22414379 |
| 19 rs7247147   | 22249858 C | 20.25 | 6.74E-18 | chr:19:22414379 |
| 19 rs7249591   | 22245345 C | 20.25 | 6.74E-18 | chr:19:22414379 |
| 19 rs7250852   | 22250510 A | 20.25 | 6.74E-18 | chr:19:22414379 |
| 19 rs7250905   | 22250743 T | 20.25 | 6.74E-18 | chr:19:22414379 |
| 19 rs7251660   | 22250614 C | 20.25 | 6.74E-18 | chr:19:22414379 |
| 19 rs7251884   | 22245530 T | 20.25 | 6.74E-18 | chr:19:22414379 |
| 19 rs7252023   | 22245646 G | 20.25 | 6.74E-18 | chr:19:22414379 |
| 19 rs7252220   | 22245564 A | 20.25 | 6.74E-18 | chr:19:22414379 |
| 19 rs7252380   | 22245715 A | 20.25 | 6.74E-18 | chr:19:22414379 |
| 19 rs7252550   | 22246017 T | 20.25 | 6.74E-18 | chr:19:22414379 |
| 19 rs7252772   | 22245459 A | 20.25 | 6.74E-18 | chr:19:22414379 |
| 19 rs7253053   | 22245685 C | 20.25 | 6.74E-18 | chr:19:22414379 |
| 19 rs7259971   | 22237319 G | 20.25 | 6.74E-18 | chr:19:22414379 |
| 19 rs78646027  | 22257410 T | 20.25 | 6.74E-18 | chr:19:22414379 |
| 19 rs8103518   | 22246952 C | 20.25 | 6.74E-18 | chr:19:22414379 |

|                |            |        |          |                 |
|----------------|------------|--------|----------|-----------------|
| 19 rs8104144   | 22246913 C | 20.25  | 6.74E-18 | chr:19:22414379 |
| 19 rs8104630   | 22247277 C | 20.25  | 6.74E-18 | chr:19:22414379 |
| 19 rs8108651   | 22251464 G | 20.25  | 6.74E-18 | chr:19:22414379 |
| 19 rs8108976   | 22251701 A | 20.25  | 6.74E-18 | chr:19:22414379 |
| 19 rs8110047   | 22239502 G | 20.25  | 6.74E-18 | chr:19:22414379 |
| 19 rs8110289   | 22239717 G | 20.25  | 6.74E-18 | chr:19:22414379 |
| 19 rs8110841   | 22239436 C | 20.25  | 6.74E-18 | chr:19:22414379 |
| 19 rs9653142   | 22249596 G | 20.25  | 6.74E-18 | chr:19:22414379 |
| 19 rs9653157   | 22249490 C | 20.25  | 6.74E-18 | chr:19:22414379 |
| 19 rs9973249   | 22242160 A | 20.25  | 6.74E-18 | chr:19:22414379 |
| 19 rs10419184  | 22252342 G | 20.08  | 7.81E-18 | chr:19:22414379 |
| 19 rs10420898  | 22252331 C | 20.08  | 7.81E-18 | chr:19:22414379 |
| 19 rs7259807   | 22291476 G | 20.01  | 7.84E-18 | chr:19:22414379 |
| 19 rs11878866  | 22144367 C | 12.13  | 8.67E-18 | chr:19:22414379 |
| 19 rs11881563  | 22144992 T | 12.13  | 8.67E-18 | chr:19:22414379 |
| 19 rs11882234  | 22145727 T | 12.13  | 8.67E-18 | chr:19:22414379 |
| 19 rs1849004   | 22142455 C | 12.13  | 8.67E-18 | chr:19:22414379 |
| 19 rs57912102  | 22136043 C | 12.13  | 8.67E-18 | chr:19:22414379 |
| 19 rs75167249  | 22128655 T | 12.13  | 8.67E-18 | chr:19:22414379 |
| 19 rs8100042   | 22127841 A | 12.13  | 8.67E-18 | chr:19:22414379 |
| 19 rs8113460   | 22128006 T | 12.13  | 8.67E-18 | chr:19:22414379 |
| 19 rs7248305   | 22250271 A | 20.07  | 9.10E-18 | chr:19:22414379 |
| 19 rs10418804  | 22273015 C | 22.77  | 9.75E-18 | chr:19:22414379 |
| 19 rs62111039  | 22287336 G | 22.75  | 9.75E-18 | chr:19:22414379 |
| 19 rs1230305   | 22641917 C | 0.2352 | 1.14E-17 | chr:19:22414379 |
| 19 rs10401167  | 22291942 A | 22.43  | 1.40E-17 | chr:19:22414379 |
| 19 rs10423457  | 22279267 C | 22.43  | 1.40E-17 | chr:19:22414379 |
| 19 rs10424447  | 22274042 G | 22.43  | 1.40E-17 | chr:19:22414379 |
| 19 rs10425828  | 22283077 G | 22.43  | 1.40E-17 | chr:19:22414379 |
| 19 rs10426159  | 22267324 A | 22.43  | 1.40E-17 | chr:19:22414379 |
| 19 rs12151358  | 22282608 A | 22.43  | 1.40E-17 | chr:19:22414379 |
| 19 rs145591522 | 22282893 G | 22.43  | 1.40E-17 | chr:19:22414379 |
| 19 rs1560717   | 22292247 G | 22.43  | 1.40E-17 | chr:19:22414379 |
| 19 rs16998834  | 22267037 C | 22.43  | 1.40E-17 | chr:19:22414379 |
| 19 rs1968446   | 22279047 C | 22.43  | 1.40E-17 | chr:19:22414379 |
| 19 rs1975169   | 22292098 A | 22.43  | 1.40E-17 | chr:19:22414379 |
| 19 rs2043319   | 22274595 G | 22.43  | 1.40E-17 | chr:19:22414379 |
| 19 rs28374572  | 22276478 C | 22.43  | 1.40E-17 | chr:19:22414379 |
| 19 rs28547927  | 22277137 A | 22.43  | 1.40E-17 | chr:19:22414379 |
| 19 rs28600030  | 22268443 A | 22.43  | 1.40E-17 | chr:19:22414379 |
| 19 rs28635943  | 22268712 T | 22.43  | 1.40E-17 | chr:19:22414379 |
| 19 rs5827519   | 22280532 G | 22.43  | 1.40E-17 | chr:19:22414379 |
| 19 rs62110992  | 22261516 G | 22.43  | 1.40E-17 | chr:19:22414379 |

|                |            |        |          |                 |
|----------------|------------|--------|----------|-----------------|
| 19 rs62110993  | 22268260 A | 22.43  | 1.40E-17 | chr:19:22414379 |
| 19 rs62111027  | 22269019 C | 22.43  | 1.40E-17 | chr:19:22414379 |
| 19 rs62111028  | 22272397 T | 22.43  | 1.40E-17 | chr:19:22414379 |
| 19 rs62111029  | 22276601 A | 22.43  | 1.40E-17 | chr:19:22414379 |
| 19 rs62111030  | 22279375 A | 22.43  | 1.40E-17 | chr:19:22414379 |
| 19 rs62111032  | 22281349 G | 22.43  | 1.40E-17 | chr:19:22414379 |
| 19 rs62111033  | 22283395 A | 22.43  | 1.40E-17 | chr:19:22414379 |
| 19 rs62111034  | 22284720 C | 22.43  | 1.40E-17 | chr:19:22414379 |
| 19 rs62111037  | 22286563 T | 22.43  | 1.40E-17 | chr:19:22414379 |
| 19 rs62111038  | 22286614 G | 22.43  | 1.40E-17 | chr:19:22414379 |
| 19 rs62111040  | 22287511 A | 22.43  | 1.40E-17 | chr:19:22414379 |
| 19 rs62112362  | 22293113 G | 22.43  | 1.40E-17 | chr:19:22414379 |
| 19 rs62112364  | 22294903 A | 22.43  | 1.40E-17 | chr:19:22414379 |
| 19 rs6511321   | 22270068 G | 22.43  | 1.40E-17 | chr:19:22414379 |
| 19 rs6511328   | 22286979 A | 22.43  | 1.40E-17 | chr:19:22414379 |
| 19 rs7254050   | 22286741 A | 22.43  | 1.40E-17 | chr:19:22414379 |
| 19 rs7256462   | 22281993 C | 22.43  | 1.40E-17 | chr:19:22414379 |
| 19 rs7260331   | 22291771 T | 22.43  | 1.40E-17 | chr:19:22414379 |
| 19 rs79005568  | 22288069 G | 22.43  | 1.40E-17 | chr:19:22414379 |
| 19 rs8100768   | 22270468 C | 22.43  | 1.40E-17 | chr:19:22414379 |
| 19 rs8103279   | 22284340 G | 22.43  | 1.40E-17 | chr:19:22414379 |
| 19 rs8103374   | 22284319 T | 22.43  | 1.40E-17 | chr:19:22414379 |
| 19 rs8106762   | 22284736 T | 22.43  | 1.40E-17 | chr:19:22414379 |
| 19 rs959908    | 22281893 C | 22.43  | 1.40E-17 | chr:19:22414379 |
| 19 rs2360621   | 22548669 C | 0.2507 | 1.43E-17 | chr:19:22414379 |
| 19 rs17701834  | 22121458 G | 14.77  | 1.61E-17 | chr:19:22414379 |
| 19 rs10417916  | 22272615 C | 22.3   | 1.62E-17 | chr:19:22414379 |
| 19 rs11669254  | 22544805 A | 0.2474 | 1.65E-17 | chr:19:22414379 |
| 19 rs6511346   | 22537574 T | 0.2443 | 1.78E-17 | chr:19:22414379 |
| 19 rs6511348   | 22557374 G | 0.253  | 2.05E-17 | chr:19:22414379 |
| 19 rs8113208   | 22553888 A | 0.253  | 2.05E-17 | chr:19:22414379 |
| 19 rs62112917  | 22226580 T | 19.4   | 2.08E-17 | chr:19:22414379 |
| 19 rs111498572 | 22583766 A | 0.2447 | 2.50E-17 | chr:19:22414379 |
| 19 rs62112918  | 22227079 T | 19.28  | 2.56E-17 | chr:19:22414379 |
| 19 rs62112919  | 22227145 C | 19.28  | 2.56E-17 | chr:19:22414379 |
| 19 rs62112920  | 22227149 G | 19.28  | 2.56E-17 | chr:19:22414379 |
| 19 rs62112921  | 22227577 C | 19.28  | 2.56E-17 | chr:19:22414379 |
| 19 rs62112922  | 22228340 T | 19.28  | 2.56E-17 | chr:19:22414379 |
| 19 rs75025987  | 22230669 A | 19.28  | 2.56E-17 | chr:19:22414379 |
| 19 rs143883891 | 22109757 C | 12.42  | 2.68E-17 | chr:19:22414379 |
| 19 rs62110861  | 22095764 T | 12.42  | 2.68E-17 | chr:19:22414379 |
| 19 rs62110863  | 22100508 C | 12.42  | 2.68E-17 | chr:19:22414379 |
| 19 rs11671804  | 22591216 C | 0.2548 | 2.87E-17 | chr:19:22414379 |

|                |            |        |          |                 |
|----------------|------------|--------|----------|-----------------|
| 19 rs12973769  | 22593223 C | 0.2548 | 2.87E-17 | chr:19:22414379 |
| 19 rs2885036   | 22560484 T | 0.2548 | 2.87E-17 | chr:19:22414379 |
| 19 rs2885037   | 22606672 A | 0.2548 | 2.87E-17 | chr:19:22414379 |
| 19 rs3867187   | 22570220 C | 0.2548 | 2.87E-17 | chr:19:22414379 |
| 19 rs4932988   | 22560235 A | 0.2548 | 2.87E-17 | chr:19:22414379 |
| 19 rs7252785   | 22561287 G | 0.2548 | 2.87E-17 | chr:19:22414379 |
| 19 rs62112955  | 22234959 T | 19.13  | 3.01E-17 | chr:19:22414379 |
| 19 rs17470104  | 22424418 A | 0.2305 | 4.95E-17 | chr:19:22414379 |
| 19 rs4123726   | 22419677 T | 0.2305 | 4.95E-17 | chr:19:22414379 |
| 19 rs4123729   | 22418142 C | 0.2305 | 4.95E-17 | chr:19:22414379 |
| 19 rs55758909  | 22420558 A | 0.2305 | 4.95E-17 | chr:19:22414379 |
| 19 rs56144642  | 22421516 C | 0.2305 | 4.95E-17 | chr:19:22414379 |
| 19 rs12977311  | 22606001 A | 0.2604 | 6.37E-17 | chr:19:22414379 |
| 19 rs1987409   | 22647287 T | 4.645  | 7.81E-17 | chr:19:22414379 |
| 19 rs1560716   | 22305901 G | 29.02  | 1.07E-16 | chr:19:22414379 |
| 19 rs1975168   | 22305826 T | 29.02  | 1.07E-16 | chr:19:22414379 |
| 19 rs988211    | 22302536 T | 29.02  | 1.07E-16 | chr:19:22414379 |
| 19 rs7252547   | 22305481 C | 28.77  | 1.28E-16 | chr:19:22414379 |
| 19 rs62110983  | 22251780 A | 19.7   | 2.94E-16 | chr:19:22414379 |
| 19 rs10411905  | 22427035 G | 0.2445 | 3.33E-16 | chr:19:22414379 |
| 19 rs369217217 | 22289248 C | 27.22  | 4.38E-16 | chr:19:22414379 |
| 19 rs59020942  | 22427750 T | 0.2466 | 4.81E-16 | chr:19:22414379 |
| 19 rs59574273  | 22427752 T | 0.2466 | 4.81E-16 | chr:19:22414379 |
| 19 rs60604817  | 22427565 G | 0.2466 | 4.81E-16 | chr:19:22414379 |
| 19 rs11668081  | 22425615 A | 0.2467 | 5.11E-16 | chr:19:22414379 |
| 19 rs12609595  | 22614478 T | 0.2742 | 6.52E-16 | chr:19:22414379 |
| 19 rs62112368  | 22306775 A | 32.45  | 9.60E-16 | chr:19:22414379 |
| 19 rs555185638 | 22290846 C | 9.512  | 1.07E-15 | chr:19:22414379 |
| 19 rs111575233 | 22430482 A | 0.2497 | 1.11E-15 | chr:19:22414379 |
| 19 rs55784860  | 22431132 C | 0.2497 | 1.11E-15 | chr:19:22414379 |
| 19 rs10426665  | 22428809 G | 0.2515 | 1.26E-15 | chr:19:22414379 |
| 19 rs1091172   | 22432373 C | 0.2515 | 1.26E-15 | chr:19:22414379 |
| 19 rs4932979   | 22532857 A | 0.2865 | 1.79E-15 | chr:19:22414379 |
| 19 rs11085516  | 22431751 T | 0.2538 | 2.37E-15 | chr:19:22414379 |
| 19 rs111684505 | 22401097 G | 0.2527 | 3.87E-15 | chr:19:22414379 |
| 19 rs62111036  | 22286451 G | 19.72  | 5.19E-15 | chr:19:22414379 |
| 19 rs76584077  | 22286457 C | 19.72  | 5.19E-15 | chr:19:22414379 |
| 19 rs11561612  | 22432845 A | 0.2544 | 6.27E-15 | chr:19:22414379 |
| 19 rs12104137  | 22659822 G | 0.2996 | 1.93E-14 | chr:19:22414379 |
| 19 rs11671130  | 22329455 C | 0.2719 | 4.36E-14 | chr:19:22414379 |
| 19 rs11666326  | 22377109 A | 0.2751 | 6.76E-14 | chr:19:22414379 |
| 19 rs11667657  | 22393601 C | 0.2751 | 6.76E-14 | chr:19:22414379 |
| 19 rs11671580  | 22326439 A | 0.2751 | 6.76E-14 | chr:19:22414379 |

|                |            |        |          |                 |
|----------------|------------|--------|----------|-----------------|
| 19 rs11672659  | 22394767 T | 0.2751 | 6.76E-14 | chr:19:22414379 |
| 19 rs12609320  | 22390462 C | 0.2751 | 6.76E-14 | chr:19:22414379 |
| 19 rs149070103 | 22340413 G | 0.2751 | 6.76E-14 | chr:19:22414379 |
| 19 rs1609037   | 22380261 C | 0.2751 | 6.76E-14 | chr:19:22414379 |
| 19 rs1830174   | 22344502 A | 0.2751 | 6.76E-14 | chr:19:22414379 |
| 19 rs1852420   | 22361902 T | 0.2751 | 6.76E-14 | chr:19:22414379 |
| 19 rs4372816   | 22328376 G | 0.2751 | 6.76E-14 | chr:19:22414379 |
| 19 rs4390714   | 22369043 A | 0.2751 | 6.76E-14 | chr:19:22414379 |
| 19 rs4578792   | 22368982 G | 0.2751 | 6.76E-14 | chr:19:22414379 |
| 19 rs4602157   | 22339036 C | 0.2751 | 6.76E-14 | chr:19:22414379 |
| 19 rs4616412   | 22339005 G | 0.2751 | 6.76E-14 | chr:19:22414379 |
| 19 rs4932750   | 22333226 T | 0.2751 | 6.76E-14 | chr:19:22414379 |
| 19 rs4932962   | 22372000 T | 0.2751 | 6.76E-14 | chr:19:22414379 |
| 19 rs74416263  | 22342767 T | 0.2751 | 6.76E-14 | chr:19:22414379 |
| 19 rs76490109  | 22330225 A | 0.2751 | 6.76E-14 | chr:19:22414379 |
| 19 rs283161    | 22456131 A | 3.328  | 9.64E-14 | chr:19:22414379 |
| 19 rs4381717   | 22338981 A | 0.2782 | 9.98E-14 | chr:19:22414379 |
| 19 rs11672740  | 22394859 A | 0.2792 | 1.11E-13 | chr:19:22414379 |
| 19 rs2694449   | 22404047 A | 2632   | 1.12E-13 | chr:19:22414379 |
| 19 rs281193    | 22400609 A | 2632   | 1.12E-13 | chr:19:22414379 |
| 19 rs281194    | 22400802 A | 2632   | 1.12E-13 | chr:19:22414379 |
| 19 rs281195    | 22402480 T | 2632   | 1.12E-13 | chr:19:22414379 |
| 19 rs281186    | 22398960 A | 2612   | 1.16E-13 | chr:19:22414379 |
| 19 rs281187    | 22399362 T | 2612   | 1.16E-13 | chr:19:22414379 |
| 19 rs281188    | 22399389 A | 2612   | 1.16E-13 | chr:19:22414379 |
| 19 rs281191    | 22400166 C | 2612   | 1.16E-13 | chr:19:22414379 |
| 19 rs281197    | 22404604 C | 2612   | 1.16E-13 | chr:19:22414379 |
| 19 rs281200    | 22405888 G | 2612   | 1.16E-13 | chr:19:22414379 |
| 19 rs283137    | 22464916 G | 3.296  | 1.18E-13 | chr:19:22414379 |
| 19 rs2360006   | 22433903 T | 0.2514 | 1.25E-13 | chr:19:22414379 |
| 19 rs11085517  | 22433283 T | 0.2491 | 1.26E-13 | chr:19:22414379 |
| 19 rs55771377  | 22433422 G | 0.2491 | 1.26E-13 | chr:19:22414379 |
| 19 rs283136    | 22466736 A | 3.289  | 1.47E-13 | chr:19:22414379 |
| 19 rs281189    | 22399448 T | 2190   | 1.86E-13 | chr:19:22414379 |
| 19 rs808371    | 22471055 T | 3.215  | 2.67E-13 | chr:19:22414379 |
| 19 rs11878178  | 22577079 A | 0.3544 | 2.83E-13 | chr:19:22414379 |
| 19 rs11883405  | 22577080 T | 0.3544 | 2.83E-13 | chr:19:22414379 |
| 19 rs1230299   | 22624040 C | 4.73   | 4.08E-13 | chr:19:22414379 |
| 19 rs55992911  | 22397853 C | 75.25  | 4.37E-13 | chr:19:22414379 |
| 19 rs808370    | 22472263 A | 3.136  | 4.99E-13 | chr:19:22414379 |
| 19 rs281190    | 22399788 G | 1718   | 6.40E-13 | chr:19:22414379 |
| 19 rs1692590   | 22629695 T | 4.586  | 7.27E-13 | chr:19:22414379 |
| 19 rs1704017   | 22629868 C | 4.586  | 7.27E-13 | chr:19:22414379 |

|                |            |        |          |                 |
|----------------|------------|--------|----------|-----------------|
| 19 rs2957817   | 22637364 A | 4.586  | 7.27E-13 | chr:19:22414379 |
| 19 rs281192    | 22400404 T | 1992   | 1.24E-12 | chr:19:22414379 |
| 19 rs2935279   | 22626467 C | 4.405  | 1.27E-12 | chr:19:22414379 |
| 19 rs1692595   | 22634726 T | 4.449  | 1.28E-12 | chr:19:22414379 |
| 19 rs1603765   | 22635852 T | 4.353  | 1.39E-12 | chr:19:22414379 |
| 19 rs1692598   | 22635052 A | 4.353  | 1.39E-12 | chr:19:22414379 |
| 19 rs1704015   | 22636585 G | 4.353  | 1.39E-12 | chr:19:22414379 |
| 19 rs1230296   | 22622638 G | 6.43   | 1.81E-12 | chr:19:22414379 |
| 19 rs1230298   | 22622846 C | 6.43   | 1.81E-12 | chr:19:22414379 |
| 19 rs1230294   | 22620820 T | 6.395  | 1.94E-12 | chr:19:22414379 |
| 19 rs73029815  | 22623948 T | 7.407  | 3.51E-12 | chr:19:22414379 |
| 19 rs4932747   | 22279252 C | 0.3543 | 3.64E-12 | chr:19:22414379 |
| 19 rs639356    | 22104986 C | 2.864  | 3.91E-12 | chr:19:22414379 |
| 19 rs807966    | 22113827 C | 2.864  | 3.91E-12 | chr:19:22414379 |
| 19 rs11085518  | 22434898 C | 0.2825 | 4.02E-12 | chr:19:22414379 |
| 19 rs11085519  | 22434908 T | 0.2825 | 4.02E-12 | chr:19:22414379 |
| 19 rs11085520  | 22434988 G | 0.2825 | 4.02E-12 | chr:19:22414379 |
| 19 rs11085521  | 22435049 T | 0.2825 | 4.02E-12 | chr:19:22414379 |
| 19 rs57051328  | 22435951 A | 0.2825 | 4.02E-12 | chr:19:22414379 |
| 19 rs57684949  | 22435886 C | 0.2825 | 4.02E-12 | chr:19:22414379 |
| 19 rs61387248  | 22435806 A | 0.2825 | 4.02E-12 | chr:19:22414379 |
| 19 rs8109519   | 22435128 T | 0.2825 | 4.02E-12 | chr:19:22414379 |
| 19 rs2188967   | 22095513 T | 2.802  | 7.65E-12 | chr:19:22414379 |
| 19 rs1704019   | 22633165 T | 4.242  | 7.98E-12 | chr:19:22414379 |
| 19 rs8109649   | 22435344 G | 0.2916 | 8.38E-12 | chr:19:22414379 |
| 19 rs8109766   | 22435340 T | 0.2916 | 8.38E-12 | chr:19:22414379 |
| 19 rs8110568   | 22435291 C | 0.2916 | 8.38E-12 | chr:19:22414379 |
| 19 rs8112637   | 22435375 T | 0.2916 | 8.38E-12 | chr:19:22414379 |
| 19 rs1230297   | 22622753 G | 6.473  | 1.05E-11 | chr:19:22414379 |
| 19 rs58038983  | 22544165 T | 3.137  | 1.28E-11 | chr:19:22414379 |
| 19 rs2453888   | 22632145 G | 4.075  | 1.39E-11 | chr:19:22414379 |
| 19 rs2935280   | 22628754 C | 4.075  | 1.39E-11 | chr:19:22414379 |
| 19 rs2935281   | 22630650 A | 4.075  | 1.39E-11 | chr:19:22414379 |
| 19 rs138220002 | 22615616 T | 6.982  | 1.53E-11 | chr:19:22414379 |
| 19 rs1692591   | 22632743 G | 4.026  | 1.53E-11 | chr:19:22414379 |
| 19 rs1692592   | 22632854 G | 4.026  | 1.53E-11 | chr:19:22414379 |
| 19 rs1692593   | 22633259 T | 4.026  | 1.53E-11 | chr:19:22414379 |
| 19 rs61649777  | 22436915 G | 0.2966 | 1.65E-11 | chr:19:22414379 |
| 19 rs903937    | 22609988 G | 6.655  | 1.85E-11 | chr:19:22414379 |
| 19 rs59870410  | 22483963 G | 7.019  | 2.22E-11 | chr:19:22414379 |
| 19 rs10408585  | 22613247 A | 7.23   | 2.55E-11 | chr:19:22414379 |
| 19 rs11085533  | 22612880 T | 7.23   | 2.55E-11 | chr:19:22414379 |
| 19 rs11085534  | 22613229 T | 7.23   | 2.55E-11 | chr:19:22414379 |

|               |            |        |          |                 |
|---------------|------------|--------|----------|-----------------|
| 19 rs931608   | 22614122 A | 7.23   | 2.55E-11 | chr:19:22414379 |
| 19 rs4932992  | 22628842 T | 4.072  | 3.20E-11 | chr:19:22414379 |
| 19 rs1912572  | 22140878 C | 0.371  | 3.38E-11 | chr:19:22414379 |
| 19 rs12459631 | 22477395 G | 6.882  | 3.46E-11 | chr:19:22414379 |
| 19 rs55701013 | 22479996 G | 6.533  | 3.98E-11 | chr:19:22414379 |
| 19 rs8103990  | 22476027 A | 6.533  | 3.98E-11 | chr:19:22414379 |
| 19 rs57420056 | 22094309 A | 2.702  | 4.19E-11 | chr:19:22414379 |
| 19 rs1560718  | 22292212 C | 0.3764 | 4.24E-11 | chr:19:22414379 |
| 19 rs10410114 | 22192671 T | 0.3786 | 4.64E-11 | chr:19:22414379 |
| 19 rs10426971 | 22158167 A | 0.3786 | 4.64E-11 | chr:19:22414379 |
| 19 rs11668920 | 22182053 C | 0.3786 | 4.64E-11 | chr:19:22414379 |
| 19 rs2214298  | 22163606 C | 0.3786 | 4.64E-11 | chr:19:22414379 |
| 19 rs74776957 | 22172805 G | 0.3786 | 4.64E-11 | chr:19:22414379 |
| 19 rs8105991  | 22193131 C | 0.3786 | 4.64E-11 | chr:19:22414379 |
| 19 rs12462177 | 22509486 G | 6.805  | 4.68E-11 | chr:19:22414379 |
| 19 rs4932975  | 22491072 C | 6.805  | 4.68E-11 | chr:19:22414379 |
| 19 rs4932976  | 22494878 T | 6.805  | 4.68E-11 | chr:19:22414379 |
| 19 rs56955437 | 22504518 T | 6.805  | 4.68E-11 | chr:19:22414379 |
| 19 rs7253033  | 22503203 C | 6.805  | 4.68E-11 | chr:19:22414379 |
| 19 rs283158   | 22458714 A | 6.764  | 5.16E-11 | chr:19:22414379 |
| 19 rs283159   | 22457776 T | 6.764  | 5.16E-11 | chr:19:22414379 |
| 19 rs383451   | 22463231 T | 6.764  | 5.16E-11 | chr:19:22414379 |
| 19 rs2099347  | 22282614 T | 0.3753 | 5.36E-11 | chr:19:22414379 |
| 19 rs58164690 | 22504773 A | 6.461  | 5.40E-11 | chr:19:22414379 |
| 19 rs1019938  | 22280954 T | 0.3783 | 5.87E-11 | chr:19:22414379 |
| 19 rs10408261 | 22298225 T | 0.3783 | 5.87E-11 | chr:19:22414379 |
| 19 rs1978718  | 22293126 T | 0.3783 | 5.87E-11 | chr:19:22414379 |
| 19 rs2359995  | 22280060 C | 0.3783 | 5.87E-11 | chr:19:22414379 |
| 19 rs452707   | 22304145 T | 0.3783 | 5.87E-11 | chr:19:22414379 |
| 19 rs55921217 | 22296943 C | 0.3783 | 5.87E-11 | chr:19:22414379 |
| 19 rs6511323  | 22281914 T | 0.3783 | 5.87E-11 | chr:19:22414379 |
| 19 rs6511325  | 22284357 A | 0.3783 | 5.87E-11 | chr:19:22414379 |
| 19 rs6511326  | 22286679 T | 0.3783 | 5.87E-11 | chr:19:22414379 |
| 19 rs6511329  | 22287905 T | 0.3783 | 5.87E-11 | chr:19:22414379 |
| 19 rs6511332  | 22288391 A | 0.3783 | 5.87E-11 | chr:19:22414379 |
| 19 rs6511333  | 22298363 T | 0.3783 | 5.87E-11 | chr:19:22414379 |
| 19 rs8100438  | 22301003 C | 0.3783 | 5.87E-11 | chr:19:22414379 |
| 19 rs8103088  | 22298322 G | 0.3783 | 5.87E-11 | chr:19:22414379 |
| 19 rs8111771  | 22287861 A | 0.3783 | 5.87E-11 | chr:19:22414379 |
| 19 rs987711   | 22300007 T | 0.3783 | 5.87E-11 | chr:19:22414379 |
| 19 rs75181699 | 22172720 G | 0.3802 | 6.14E-11 | chr:19:22414379 |
| 19 rs2175367  | 22125889 G | 0.3809 | 6.37E-11 | chr:19:22414379 |
| 19 rs10410914 | 22192884 A | 0.3818 | 6.76E-11 | chr:19:22414379 |



|                |            |        |          |                 |
|----------------|------------|--------|----------|-----------------|
| 19 rs1229924   | 22092288 G | 2.666  | 6.99E-11 | chr:19:22414379 |
| 19 rs62120014  | 22454523 C | 8.309  | 7.28E-11 | chr:19:22414379 |
| 19 rs10854064  | 22206129 T | 0.3843 | 7.45E-11 | chr:19:22414379 |
| 19 rs1654509   | 22219163 T | 0.3843 | 7.45E-11 | chr:19:22414379 |
| 19 rs408124    | 22225337 G | 0.3843 | 7.45E-11 | chr:19:22414379 |
| 19 rs441017    | 22214122 C | 0.3843 | 7.45E-11 | chr:19:22414379 |
| 19 rs10425763  | 22155918 C | 0.3839 | 7.53E-11 | chr:19:22414379 |
| 19 rs118032465 | 22521394 C | 6.655  | 7.77E-11 | chr:19:22414379 |
| 19 rs200200120 | 22521387 T | 6.655  | 7.77E-11 | chr:19:22414379 |
| 19 rs10415080  | 22150937 C | 0.3853 | 7.95E-11 | chr:19:22414379 |
| 19 rs11881638  | 22107837 G | 2.647  | 7.99E-11 | chr:19:22414379 |
| 19 rs17769191  | 22094348 G | 2.647  | 7.99E-11 | chr:19:22414379 |
| 19 rs1813242   | 22101473 T | 2.647  | 7.99E-11 | chr:19:22414379 |
| 19 rs1848996   | 22111809 C | 2.647  | 7.99E-11 | chr:19:22414379 |
| 19 rs1965611   | 22113197 C | 2.647  | 7.99E-11 | chr:19:22414379 |
| 19 rs2435012   | 22093800 T | 2.647  | 7.99E-11 | chr:19:22414379 |
| 19 rs413873    | 22100192 G | 2.647  | 7.99E-11 | chr:19:22414379 |
| 19 rs438100    | 22101205 T | 2.647  | 7.99E-11 | chr:19:22414379 |
| 19 rs807956    | 22117292 G | 2.647  | 7.99E-11 | chr:19:22414379 |
| 19 rs807957    | 22115990 G | 2.647  | 7.99E-11 | chr:19:22414379 |
| 19 rs807965    | 22114669 C | 2.647  | 7.99E-11 | chr:19:22414379 |
| 19 rs975712    | 22098471 T | 2.647  | 7.99E-11 | chr:19:22414379 |
| 19 rs12460715  | 22523304 A | 6.124  | 8.07E-11 | chr:19:22414379 |
| 19 rs1036235   | 22279541 T | 0.381  | 8.22E-11 | chr:19:22414379 |
| 19 rs28456336  | 22268779 T | 0.381  | 8.22E-11 | chr:19:22414379 |
| 19 rs4553749   | 22285063 C | 0.381  | 8.22E-11 | chr:19:22414379 |
| 19 rs4932748   | 22279318 T | 0.381  | 8.22E-11 | chr:19:22414379 |
| 19 rs4932954   | 22272454 T | 0.381  | 8.22E-11 | chr:19:22414379 |
| 19 rs60200804  | 22283368 T | 0.381  | 8.22E-11 | chr:19:22414379 |
| 19 rs9304994   | 22272743 G | 0.381  | 8.22E-11 | chr:19:22414379 |
| 19 rs10424932  | 22194604 T | 0.3831 | 8.34E-11 | chr:19:22414379 |
| 19 rs2078136   | 22113503 G | 2.644  | 8.45E-11 | chr:19:22414379 |
| 19 rs2203034   | 22101710 T | 2.644  | 8.45E-11 | chr:19:22414379 |
| 19 rs4932977   | 22520694 T | 5.882  | 9.20E-11 | chr:19:22414379 |
| 19 rs61590737  | 22094470 A | 2.633  | 1.05E-10 | chr:19:22414379 |
| 19 rs807959    | 22115835 A | 2.616  | 1.05E-10 | chr:19:22414379 |
| 19 rs1849007   | 22142930 T | 0.3875 | 1.07E-10 | chr:19:22414379 |
| 19 rs2136888   | 22134791 G | 0.3875 | 1.07E-10 | chr:19:22414379 |
| 19 rs1229922   | 22092875 C | 2.628  | 1.10E-10 | chr:19:22414379 |
| 19 rs366849    | 22234941 G | 0.3868 | 1.13E-10 | chr:19:22414379 |
| 19 rs55851405  | 22541686 C | 6.859  | 1.15E-10 | chr:19:22414379 |
| 19 rs1912575   | 22100319 G | 2.626  | 1.18E-10 | chr:19:22414379 |
| 19 rs2116895   | 22266669 T | 0.3872 | 1.32E-10 | chr:19:22414379 |

|               |            |        |          |                 |
|---------------|------------|--------|----------|-----------------|
| 19 rs6511320  | 22267122 C | 0.3872 | 1.32E-10 | chr:19:22414379 |
| 19 rs34556219 | 22382294 C | 7.21   | 1.35E-10 | chr:19:22414379 |
| 19 rs2666451  | 22130481 C | 0.3903 | 1.49E-10 | chr:19:22414379 |
| 19 rs7246504  | 22532831 G | 5.975  | 1.52E-10 | chr:19:22414379 |
| 19 rs7258192  | 22264658 G | 0.3894 | 1.77E-10 | chr:19:22414379 |
| 19 rs374309   | 22332298 G | 7.109  | 1.90E-10 | chr:19:22414379 |
| 19 rs56149942 | 22541575 G | 6.126  | 1.94E-10 | chr:19:22414379 |
| 19 rs73027904 | 22533823 T | 6.126  | 1.94E-10 | chr:19:22414379 |
| 19 rs417947   | 22224030 A | 0.3902 | 2.38E-10 | chr:19:22414379 |
| 19 rs1849005  | 22142743 C | 0.3905 | 2.39E-10 | chr:19:22414379 |
| 19 rs12975751 | 22156482 T | 0.3911 | 2.51E-10 | chr:19:22414379 |
| 19 rs410794   | 22226159 A | 0.3633 | 2.61E-10 | chr:19:22414379 |
| 19 rs12979885 | 22160709 T | 0.3936 | 2.70E-10 | chr:19:22414379 |
| 19 rs2082478  | 22539848 A | 6.567  | 2.79E-10 | chr:19:22414379 |
| 19 rs4932758  | 22540094 A | 6.567  | 2.79E-10 | chr:19:22414379 |
| 19 rs4265943  | 22173740 A | 0.3921 | 2.80E-10 | chr:19:22414379 |
| 19 rs2158106  | 22186710 T | 0.3946 | 2.88E-10 | chr:19:22414379 |
| 19 rs6511351  | 22595741 C | 6.527  | 3.05E-10 | chr:19:22414379 |
| 19 rs67769716 | 22567459 A | 6.527  | 3.05E-10 | chr:19:22414379 |
| 19 rs7249109  | 22577764 C | 6.527  | 3.05E-10 | chr:19:22414379 |
| 19 rs10403779 | 22258396 C | 0.3959 | 3.21E-10 | chr:19:22414379 |
| 19 rs2043318  | 22241615 G | 0.3959 | 3.21E-10 | chr:19:22414379 |
| 19 rs28881618 | 22254692 G | 0.3959 | 3.21E-10 | chr:19:22414379 |
| 19 rs3752163  | 22256396 G | 0.3959 | 3.21E-10 | chr:19:22414379 |
| 19 rs403850   | 22229593 T | 0.3959 | 3.21E-10 | chr:19:22414379 |
| 19 rs417331   | 22234478 T | 0.3959 | 3.21E-10 | chr:19:22414379 |
| 19 rs4244913  | 22239919 A | 0.3959 | 3.21E-10 | chr:19:22414379 |
| 19 rs4932953  | 22249045 G | 0.3959 | 3.21E-10 | chr:19:22414379 |
| 19 rs632709   | 22233096 C | 0.3959 | 3.21E-10 | chr:19:22414379 |
| 19 rs6511318  | 22245745 A | 0.3959 | 3.21E-10 | chr:19:22414379 |
| 19 rs7251108  | 22250689 G | 0.3959 | 3.21E-10 | chr:19:22414379 |
| 19 rs7254363  | 22257048 C | 0.3959 | 3.21E-10 | chr:19:22414379 |
| 19 rs7255666  | 22257264 T | 0.3959 | 3.21E-10 | chr:19:22414379 |
| 19 rs7258080  | 22257625 A | 0.3959 | 3.21E-10 | chr:19:22414379 |
| 19 rs8107039  | 22238990 G | 0.3959 | 3.21E-10 | chr:19:22414379 |
| 19 rs10401339 | 22210401 T | 0.397  | 4.00E-10 | chr:19:22414379 |
| 19 rs11085508 | 22193986 C | 0.397  | 4.00E-10 | chr:19:22414379 |
| 19 rs12980606 | 22169549 G | 0.397  | 4.00E-10 | chr:19:22414379 |
| 19 rs1985744  | 22208601 T | 0.397  | 4.00E-10 | chr:19:22414379 |
| 19 rs2359816  | 22198676 A | 0.397  | 4.00E-10 | chr:19:22414379 |
| 19 rs424066   | 22222884 C | 0.397  | 4.00E-10 | chr:19:22414379 |
| 19 rs437192   | 22219510 G | 0.397  | 4.00E-10 | chr:19:22414379 |
| 19 rs4458136  | 22197603 T | 0.397  | 4.00E-10 | chr:19:22414379 |

|                |            |        |          |                 |
|----------------|------------|--------|----------|-----------------|
| 19 rs4550595   | 22153808 T | 0.397  | 4.00E-10 | chr:19:22414379 |
| 19 rs12976630  | 22590340 A | 6.154  | 4.34E-10 | chr:19:22414379 |
| 19 rs12460293  | 22543380 A | 5.872  | 4.75E-10 | chr:19:22414379 |
| 19 rs3813590   | 22321273 T | 0.3684 | 4.79E-10 | chr:19:22414379 |
| 19 rs3813592   | 22321245 G | 0.3684 | 4.79E-10 | chr:19:22414379 |
| 19 rs17461312  | 22554107 T | 5.838  | 5.15E-10 | chr:19:22414379 |
| 19 rs2957824   | 22579316 T | 5.838  | 5.15E-10 | chr:19:22414379 |
| 19 rs3867189   | 22581121 C | 5.838  | 5.15E-10 | chr:19:22414379 |
| 19 rs6511352   | 22599758 A | 5.838  | 5.15E-10 | chr:19:22414379 |
| 19 rs8107578   | 22564441 A | 5.838  | 5.15E-10 | chr:19:22414379 |
| 19 rs8108891   | 22595082 T | 5.838  | 5.15E-10 | chr:19:22414379 |
| 19 rs8112170   | 22565967 A | 5.838  | 5.15E-10 | chr:19:22414379 |
| 19 rs452459    | 22216712 G | 0.4003 | 5.66E-10 | chr:19:22414379 |
| 19 rs2188972   | 22149458 G | 0.4002 | 5.69E-10 | chr:19:22414379 |
| 19 rs2428382   | 22137765 G | 0.4002 | 5.69E-10 | chr:19:22414379 |
| 19 rs2666455   | 22127535 G | 0.4002 | 5.69E-10 | chr:19:22414379 |
| 19 rs113242209 | 22547737 T | 5.766  | 7.35E-10 | chr:19:22414379 |
| 19 rs12982366  | 22449420 G | 0.3134 | 7.36E-10 | chr:19:22414379 |
| 19 rs12459747  | 22542982 G | 5.533  | 7.96E-10 | chr:19:22414379 |
| 19 rs403997    | 22220543 C | 0.4056 | 8.12E-10 | chr:19:22414379 |
| 19 rs28792372  | 22096971 C | 0.4117 | 8.71E-10 | chr:19:22414379 |
| 19 rs12610367  | 22320848 T | 0.3787 | 8.77E-10 | chr:19:22414379 |
| 19 rs11667684  | 22129638 T | 0.4063 | 9.02E-10 | chr:19:22414379 |
| 19 rs12608935  | 22145147 C | 0.4063 | 9.02E-10 | chr:19:22414379 |
| 19 rs12971688  | 22144040 A | 0.4063 | 9.02E-10 | chr:19:22414379 |
| 19 rs12985553  | 22150868 T | 0.4063 | 9.02E-10 | chr:19:22414379 |
| 19 rs1606063   | 22134408 A | 0.4063 | 9.02E-10 | chr:19:22414379 |
| 19 rs2666441   | 22139230 A | 0.4063 | 9.02E-10 | chr:19:22414379 |
| 19 rs2666454   | 22127730 A | 0.4063 | 9.02E-10 | chr:19:22414379 |
| 19 rs111724992 | 22282718 C | 4.946  | 1.03E-09 | chr:19:22414379 |
| 19 rs12459299  | 22296261 G | 4.946  | 1.03E-09 | chr:19:22414379 |
| 19 rs12460028  | 22284598 C | 4.946  | 1.03E-09 | chr:19:22414379 |
| 19 rs12460058  | 22284531 A | 4.946  | 1.03E-09 | chr:19:22414379 |
| 19 rs12460610  | 22291277 C | 4.946  | 1.03E-09 | chr:19:22414379 |
| 19 rs12461491  | 22304761 G | 4.946  | 1.03E-09 | chr:19:22414379 |
| 19 rs12461499  | 22304581 A | 4.946  | 1.03E-09 | chr:19:22414379 |
| 19 rs12461745  | 22262667 T | 4.946  | 1.03E-09 | chr:19:22414379 |
| 19 rs56138218  | 22279031 A | 4.946  | 1.03E-09 | chr:19:22414379 |
| 19 rs56183023  | 22269366 C | 4.946  | 1.03E-09 | chr:19:22414379 |
| 19 rs56320331  | 22297657 T | 4.946  | 1.03E-09 | chr:19:22414379 |
| 19 rs56359043  | 22295283 G | 4.946  | 1.03E-09 | chr:19:22414379 |
| 19 rs61237480  | 22306505 T | 4.946  | 1.03E-09 | chr:19:22414379 |
| 19 rs6511324   | 22283994 T | 4.946  | 1.03E-09 | chr:19:22414379 |

|                |            |        |          |                 |
|----------------|------------|--------|----------|-----------------|
| 19 rs7260631   | 22282906 G | 4.946  | 1.03E-09 | chr:19:22414379 |
| 19 rs73019896  | 22286350 A | 4.946  | 1.03E-09 | chr:19:22414379 |
| 19 rs73019902  | 22286707 A | 4.946  | 1.03E-09 | chr:19:22414379 |
| 19 rs73021816  | 22306321 A | 4.946  | 1.03E-09 | chr:19:22414379 |
| 19 rs73021823  | 22310164 A | 4.946  | 1.03E-09 | chr:19:22414379 |
| 19 rs73021825  | 22313577 A | 4.946  | 1.03E-09 | chr:19:22414379 |
| 19 rs76995772  | 22311909 A | 4.946  | 1.03E-09 | chr:19:22414379 |
| 19 rs8108310   | 22287184 T | 4.946  | 1.03E-09 | chr:19:22414379 |
| 19 rs1809825   | 22608943 A | 5.606  | 1.28E-09 | chr:19:22414379 |
| 19 rs12462488  | 22565096 C | 5.359  | 1.37E-09 | chr:19:22414379 |
| 19 rs56064722  | 22312293 T | 4.885  | 1.39E-09 | chr:19:22414379 |
| 19 rs73019871  | 22265915 T | 4.853  | 1.63E-09 | chr:19:22414379 |
| 19 rs73019874  | 22267259 G | 4.853  | 1.63E-09 | chr:19:22414379 |
| 19 rs73019862  | 22260969 T | 5.122  | 1.86E-09 | chr:19:22414379 |
| 19 rs283146    | 22438180 C | 0.3595 | 1.93E-09 | chr:19:22414379 |
| 19 rs12459277  | 22235908 T | 4.936  | 2.17E-09 | chr:19:22414379 |
| 19 rs34878133  | 22230331 A | 4.936  | 2.17E-09 | chr:19:22414379 |
| 19 rs3752168   | 22235478 C | 4.936  | 2.17E-09 | chr:19:22414379 |
| 19 rs4932951   | 22246352 C | 4.936  | 2.17E-09 | chr:19:22414379 |
| 19 rs73019812  | 22232291 T | 4.936  | 2.17E-09 | chr:19:22414379 |
| 19 rs73019829  | 22239600 A | 4.936  | 2.17E-09 | chr:19:22414379 |
| 19 rs73019831  | 22242013 T | 4.936  | 2.17E-09 | chr:19:22414379 |
| 19 rs201113571 | 22290840 T | 4.78   | 2.35E-09 | chr:19:22414379 |
| 19 rs374195570 | 22598418 T | 4.462  | 2.58E-09 | chr:19:22414379 |
| 19 rs377199228 | 22598420 C | 4.462  | 2.58E-09 | chr:19:22414379 |
| 19 rs56226428  | 22229075 C | 4.876  | 2.90E-09 | chr:19:22414379 |
| 19 rs73019807  | 22231484 G | 4.876  | 2.90E-09 | chr:19:22414379 |
| 19 rs112237385 | 22162147 C | 4.877  | 2.90E-09 | chr:19:22414379 |
| 19 rs12462668  | 22156943 A | 4.877  | 2.90E-09 | chr:19:22414379 |
| 19 rs2079063   | 22160674 T | 4.877  | 2.90E-09 | chr:19:22414379 |
| 19 rs2359826   | 22214993 T | 4.877  | 2.90E-09 | chr:19:22414379 |
| 19 rs2359829   | 22222155 G | 4.877  | 2.90E-09 | chr:19:22414379 |
| 19 rs4456632   | 22153634 A | 4.877  | 2.90E-09 | chr:19:22414379 |
| 19 rs55674738  | 22196576 T | 4.877  | 2.90E-09 | chr:19:22414379 |
| 19 rs56408994  | 22162618 C | 4.877  | 2.90E-09 | chr:19:22414379 |
| 19 rs57286877  | 22172618 G | 4.877  | 2.90E-09 | chr:19:22414379 |
| 19 rs60871663  | 22194240 T | 4.877  | 2.90E-09 | chr:19:22414379 |
| 19 rs6511310   | 22197285 A | 4.877  | 2.90E-09 | chr:19:22414379 |
| 19 rs67441682  | 22194829 C | 4.877  | 2.90E-09 | chr:19:22414379 |
| 19 rs67458228  | 22191841 T | 4.877  | 2.90E-09 | chr:19:22414379 |
| 19 rs68118096  | 22200804 T | 4.877  | 2.90E-09 | chr:19:22414379 |
| 19 rs7246239   | 22183049 A | 4.877  | 2.90E-09 | chr:19:22414379 |
| 19 rs7246992   | 22192047 A | 4.877  | 2.90E-09 | chr:19:22414379 |

|                |            |        |          |                 |
|----------------|------------|--------|----------|-----------------|
| 19 rs7248938   | 22166196 G | 4.877  | 2.90E-09 | chr:19:22414379 |
| 19 rs7251237   | 22220858 A | 4.877  | 2.90E-09 | chr:19:22414379 |
| 19 rs7255484   | 22184978 C | 4.877  | 2.90E-09 | chr:19:22414379 |
| 19 rs7258270   | 22155520 G | 4.877  | 2.90E-09 | chr:19:22414379 |
| 19 rs7259460   | 22213945 A | 4.877  | 2.90E-09 | chr:19:22414379 |
| 19 rs7260454   | 22166739 T | 4.877  | 2.90E-09 | chr:19:22414379 |
| 19 rs73017852  | 22189239 G | 4.877  | 2.90E-09 | chr:19:22414379 |
| 19 rs73538835  | 22161066 A | 4.877  | 2.90E-09 | chr:19:22414379 |
| 19 rs80117552  | 22171367 C | 4.877  | 2.90E-09 | chr:19:22414379 |
| 19 rs8104333   | 22153801 C | 4.877  | 2.90E-09 | chr:19:22414379 |
| 19 rs12976555  | 22434811 T | 0.3139 | 3.08E-09 | chr:19:22414379 |
| 19 rs12986319  | 22364233 T | 0.3159 | 3.19E-09 | chr:19:22414379 |
| 19 rs12460852  | 22226289 T | 4.732  | 3.28E-09 | chr:19:22414379 |
| 19 rs2522097   | 22123140 C | 0.422  | 3.42E-09 | chr:19:22414379 |
| 19 rs2666458   | 22123138 A | 0.422  | 3.42E-09 | chr:19:22414379 |
| 19 rs113023530 | 22261617 A | 0.3888 | 3.66E-09 | chr:19:22414379 |
| 19 rs2359828   | 22220287 G | 4.687  | 3.71E-09 | chr:19:22414379 |
| 19 rs35433471  | 22524989 G | 2.401  | 3.83E-09 | chr:19:22414379 |
| 19 rs190030543 | 22291079 T | 4.401  | 4.55E-09 | chr:19:22414379 |
| 19 rs1230293   | 22620302 T | 3.449  | 4.57E-09 | chr:19:22414379 |
| 19 rs12459526  | 22216669 T | 4.633  | 5.05E-09 | chr:19:22414379 |
| 19 rs12460903  | 22210184 C | 4.633  | 5.05E-09 | chr:19:22414379 |
| 19 rs12461536  | 22207464 G | 4.633  | 5.05E-09 | chr:19:22414379 |
| 19 rs12462824  | 22209767 G | 4.633  | 5.05E-09 | chr:19:22414379 |
| 19 rs1975167   | 22215066 T | 4.633  | 5.05E-09 | chr:19:22414379 |
| 19 rs2359827   | 22220016 C | 4.633  | 5.05E-09 | chr:19:22414379 |
| 19 rs4932940   | 22216366 G | 4.633  | 5.05E-09 | chr:19:22414379 |
| 19 rs55638635  | 22210647 A | 4.633  | 5.05E-09 | chr:19:22414379 |
| 19 rs55772746  | 22224720 G | 4.633  | 5.05E-09 | chr:19:22414379 |
| 19 rs58132720  | 22225014 A | 4.633  | 5.05E-09 | chr:19:22414379 |
| 19 rs7247687   | 22214420 T | 4.633  | 5.05E-09 | chr:19:22414379 |
| 19 rs7248507   | 22214366 C | 4.633  | 5.05E-09 | chr:19:22414379 |
| 19 rs7248542   | 22214447 C | 4.633  | 5.05E-09 | chr:19:22414379 |
| 19 rs7255179   | 22213130 G | 4.633  | 5.05E-09 | chr:19:22414379 |
| 19 rs7258843   | 22213701 C | 4.633  | 5.05E-09 | chr:19:22414379 |
| 19 rs7259527   | 22214257 G | 4.633  | 5.05E-09 | chr:19:22414379 |
| 19 rs8103503   | 22216828 A | 4.633  | 5.05E-09 | chr:19:22414379 |
| 19 rs8103879   | 22211437 G | 4.633  | 5.05E-09 | chr:19:22414379 |
| 19 rs8106352   | 22208611 T | 4.633  | 5.05E-09 | chr:19:22414379 |
| 19 rs56036277  | 22257574 A | 4.367  | 5.08E-09 | chr:19:22414379 |
| 19 rs2905575   | 22656127 A | 3.512  | 5.45E-09 | chr:19:22414379 |
| 19 rs58636168  | 22530129 A | 2.367  | 5.64E-09 | chr:19:22414379 |
| 19 rs59533346  | 22484182 T | 2.357  | 6.48E-09 | chr:19:22414379 |

|                |            |        |          |                 |
|----------------|------------|--------|----------|-----------------|
| 19 rs10401608  | 22650877 A | 4.645  | 6.55E-09 | chr:19:22414379 |
| 19 rs10405309  | 22647583 T | 4.645  | 6.55E-09 | chr:19:22414379 |
| 19 rs10406090  | 22647379 C | 4.645  | 6.55E-09 | chr:19:22414379 |
| 19 rs10406385  | 22648340 C | 4.645  | 6.55E-09 | chr:19:22414379 |
| 19 rs10411944  | 22648417 T | 4.645  | 6.55E-09 | chr:19:22414379 |
| 19 rs10412537  | 22648489 A | 4.645  | 6.55E-09 | chr:19:22414379 |
| 19 rs10415391  | 22652436 T | 4.645  | 6.55E-09 | chr:19:22414379 |
| 19 rs10426790  | 22647350 C | 4.645  | 6.55E-09 | chr:19:22414379 |
| 19 rs28493338  | 22647744 G | 4.645  | 6.55E-09 | chr:19:22414379 |
| 19 rs7258464   | 22646611 G | 4.645  | 6.55E-09 | chr:19:22414379 |
| 19 rs7258729   | 22646850 G | 4.645  | 6.55E-09 | chr:19:22414379 |
| 19 rs7259503   | 22647332 T | 4.645  | 6.55E-09 | chr:19:22414379 |
| 19 rs7259890   | 22646882 C | 4.645  | 6.55E-09 | chr:19:22414379 |
| 19 rs77687506  | 22654944 T | 4.645  | 6.55E-09 | chr:19:22414379 |
| 19 rs8102770   | 22656799 T | 4.645  | 6.55E-09 | chr:19:22414379 |
| 19 rs8110674   | 22658564 T | 4.645  | 6.55E-09 | chr:19:22414379 |
| 19 rs12610063  | 22493057 T | 2.356  | 6.92E-09 | chr:19:22414379 |
| 19 rs7245650   | 22483695 G | 2.356  | 6.92E-09 | chr:19:22414379 |
| 19 rs199643795 | 22291325 A | 0.3961 | 7.49E-09 | chr:19:22414379 |
| 19 rs2905574   | 22655531 G | 3.394  | 7.69E-09 | chr:19:22414379 |
| 19 rs73021803  | 22286898 T | 4.13   | 8.04E-09 | chr:19:22414379 |
| 19 rs1091180   | 22476882 G | 2.348  | 8.07E-09 | chr:19:22414379 |
| 19 rs11668921  | 22492030 T | 2.348  | 8.07E-09 | chr:19:22414379 |
| 19 rs11673221  | 22492035 C | 2.348  | 8.07E-09 | chr:19:22414379 |
| 19 rs1962867   | 22495600 T | 2.348  | 8.07E-09 | chr:19:22414379 |
| 19 rs3926992   | 22505876 G | 2.348  | 8.07E-09 | chr:19:22414379 |
| 19 rs7251483   | 22494136 A | 2.348  | 8.07E-09 | chr:19:22414379 |
| 19 rs7252078   | 22503015 A | 2.348  | 8.07E-09 | chr:19:22414379 |
| 19 rs7253170   | 22209228 G | 4.412  | 8.72E-09 | chr:19:22414379 |
| 19 rs2957849   | 22583761 A | 0.3954 | 9.99E-09 | chr:19:22414379 |
| 19 rs283162    | 22455775 A | 2.249  | 1.06E-08 | chr:19:22414379 |
| 19 rs10419171  | 22640996 G | 4.776  | 1.25E-08 | chr:19:22414379 |
| 19 rs3914066   | 22645634 C | 4.776  | 1.25E-08 | chr:19:22414379 |
| 19 rs4462726   | 22645716 A | 4.776  | 1.25E-08 | chr:19:22414379 |
| 19 rs6511355   | 22643745 T | 4.776  | 1.25E-08 | chr:19:22414379 |
| 19 rs8107396   | 22643893 T | 4.776  | 1.25E-08 | chr:19:22414379 |
| 19 rs111352604 | 22314567 G | 0.4054 | 1.41E-08 | chr:19:22414379 |
| 19 rs11673195  | 22313814 C | 0.4054 | 1.41E-08 | chr:19:22414379 |
| 19 rs73021832  | 22316144 C | 0.4054 | 1.41E-08 | chr:19:22414379 |
| 19 rs10412735  | 22648565 A | 4.318  | 1.50E-08 | chr:19:22414379 |
| 19 rs10417635  | 22146123 G | 4.53   | 1.51E-08 | chr:19:22414379 |
| 19 rs12461800  | 22145006 C | 4.53   | 1.51E-08 | chr:19:22414379 |
| 19 rs1912574   | 22125733 C | 4.53   | 1.51E-08 | chr:19:22414379 |

|                |            |        |          |                 |
|----------------|------------|--------|----------|-----------------|
| 19 rs1995934   | 22128656 T | 4.53   | 1.51E-08 | chr:19:22414379 |
| 19 rs34044431  | 22128382 G | 4.53   | 1.51E-08 | chr:19:22414379 |
| 19 rs4932854   | 22143597 G | 4.53   | 1.51E-08 | chr:19:22414379 |
| 19 rs56058873  | 22142542 C | 4.53   | 1.51E-08 | chr:19:22414379 |
| 19 rs56061708  | 22128775 T | 4.53   | 1.51E-08 | chr:19:22414379 |
| 19 rs66814910  | 22148202 A | 4.53   | 1.51E-08 | chr:19:22414379 |
| 19 rs68053498  | 22131813 A | 4.53   | 1.51E-08 | chr:19:22414379 |
| 19 rs68061456  | 22142308 A | 4.53   | 1.51E-08 | chr:19:22414379 |
| 19 rs73015567  | 22128077 A | 4.53   | 1.51E-08 | chr:19:22414379 |
| 19 rs73015578  | 22132084 A | 4.53   | 1.51E-08 | chr:19:22414379 |
| 19 rs11523642  | 22639557 C | 4.827  | 1.79E-08 | chr:19:22414379 |
| 19 rs16999012  | 22522950 G | 3.469  | 1.80E-08 | chr:19:22414379 |
| 19 rs12608810  | 22342002 A | 0.3476 | 1.81E-08 | chr:19:22414379 |
| 19 rs117922051 | 22654504 A | 4.686  | 1.89E-08 | chr:19:22414379 |
| 19 rs1605886   | 22641316 A | 4.686  | 1.89E-08 | chr:19:22414379 |
| 19 rs57019979  | 22655945 C | 4.686  | 1.89E-08 | chr:19:22414379 |
| 19 rs58928851  | 22646035 A | 4.686  | 1.89E-08 | chr:19:22414379 |
| 19 rs59779285  | 22650260 G | 4.686  | 1.89E-08 | chr:19:22414379 |
| 19 rs59898872  | 22649917 C | 4.686  | 1.89E-08 | chr:19:22414379 |
| 19 rs60073357  | 22646449 G | 4.686  | 1.89E-08 | chr:19:22414379 |
| 19 rs73924010  | 22648511 C | 4.686  | 1.89E-08 | chr:19:22414379 |
| 19 rs73924012  | 22648815 C | 4.686  | 1.89E-08 | chr:19:22414379 |
| 19 rs73924015  | 22649401 G | 4.686  | 1.89E-08 | chr:19:22414379 |
| 19 rs73924024  | 22658132 T | 4.686  | 1.89E-08 | chr:19:22414379 |
| 19 rs73924026  | 22658985 C | 4.686  | 1.89E-08 | chr:19:22414379 |
| 19 rs78732600  | 22650735 G | 4.686  | 1.89E-08 | chr:19:22414379 |
| 19 rs79174442  | 22644079 G | 4.686  | 1.89E-08 | chr:19:22414379 |
| 19 rs12461719  | 22292841 T | 3.921  | 1.96E-08 | chr:19:22414379 |
| 19 rs4436884   | 22285163 C | 3.921  | 1.96E-08 | chr:19:22414379 |
| 19 rs4932955   | 22272845 A | 3.921  | 1.96E-08 | chr:19:22414379 |
| 19 rs4932956   | 22273797 G | 3.921  | 1.96E-08 | chr:19:22414379 |
| 19 rs55635227  | 22298116 C | 3.921  | 1.96E-08 | chr:19:22414379 |
| 19 rs56242139  | 22295279 A | 3.921  | 1.96E-08 | chr:19:22414379 |
| 19 rs73021851  | 22320597 A | 14.45  | 1.98E-08 | chr:19:22414379 |
| 19 rs1692599   | 22635548 T | 2.261  | 2.03E-08 | chr:19:22414379 |
| 19 rs73924019  | 22654910 T | 4.794  | 2.04E-08 | chr:19:22414379 |
| 19 rs1692603   | 22638306 G | 2.26   | 2.08E-08 | chr:19:22414379 |
| 19 rs1704013   | 22638386 A | 2.26   | 2.08E-08 | chr:19:22414379 |
| 19 rs2957815   | 22637516 A | 2.26   | 2.08E-08 | chr:19:22414379 |
| 19 rs2957816   | 22637439 G | 2.26   | 2.08E-08 | chr:19:22414379 |
| 19 rs8108229   | 22637156 T | 2.26   | 2.08E-08 | chr:19:22414379 |
| 19 rs11667209  | 22259467 G | 0.4102 | 2.17E-08 | chr:19:22414379 |
| 19 rs11667274  | 22259666 G | 0.4102 | 2.17E-08 | chr:19:22414379 |

|                |            |        |          |                 |
|----------------|------------|--------|----------|-----------------|
| 19 rs12461632  | 22245089 A | 0.4102 | 2.17E-08 | chr:19:22414379 |
| 19 rs149619063 | 22248189 G | 0.4102 | 2.17E-08 | chr:19:22414379 |
| 19 rs4932949   | 22238666 A | 0.4102 | 2.17E-08 | chr:19:22414379 |
| 19 rs4932950   | 22243488 G | 0.4102 | 2.17E-08 | chr:19:22414379 |
| 19 rs4932952   | 22246788 A | 0.4102 | 2.17E-08 | chr:19:22414379 |
| 19 rs55735642  | 22241176 T | 0.4102 | 2.17E-08 | chr:19:22414379 |
| 19 rs73019838  | 22247732 A | 0.4102 | 2.17E-08 | chr:19:22414379 |
| 19 rs73019842  | 22249909 G | 0.4102 | 2.17E-08 | chr:19:22414379 |
| 19 rs73019844  | 22249925 C | 0.4102 | 2.17E-08 | chr:19:22414379 |
| 19 rs1692596   | 22634729 C | 2.253  | 2.20E-08 | chr:19:22414379 |
| 19 rs1526884   | 22303651 G | 0.4122 | 2.30E-08 | chr:19:22414379 |
| 19 rs4932957   | 22304745 T | 0.4122 | 2.30E-08 | chr:19:22414379 |
| 19 rs61268244  | 22310130 T | 0.4122 | 2.30E-08 | chr:19:22414379 |
| 19 rs13344143  | 22531045 T | 3.48   | 2.50E-08 | chr:19:22414379 |
| 19 rs55750203  | 22549476 C | 2.234  | 2.67E-08 | chr:19:22414379 |
| 19 rs114713026 | 22078702 A | 0.3403 | 2.71E-08 | chr:19:22414379 |
| 19 rs4932761   | 22546375 A | 0.3507 | 2.75E-08 | chr:19:22414379 |
| 19 rs10405452  | 22529868 T | 3.416  | 2.77E-08 | chr:19:22414379 |
| 19 rs7247584   | 22529565 T | 3.416  | 2.77E-08 | chr:19:22414379 |
| 19 rs1692594   | 22634598 C | 2.241  | 2.87E-08 | chr:19:22414379 |
| 19 rs1692597   | 22634929 G | 2.241  | 2.87E-08 | chr:19:22414379 |
| 19 rs1692601   | 22636135 G | 2.241  | 2.87E-08 | chr:19:22414379 |
| 19 rs1692602   | 22636287 C | 2.241  | 2.87E-08 | chr:19:22414379 |
| 19 rs1704014   | 22636903 G | 2.241  | 2.87E-08 | chr:19:22414379 |
| 19 rs1704016   | 22635383 A | 2.241  | 2.87E-08 | chr:19:22414379 |
| 19 rs7248454   | 22633935 C | 2.241  | 2.87E-08 | chr:19:22414379 |
| 19 rs112205850 | 22261876 A | 0.4138 | 2.93E-08 | chr:19:22414379 |
| 19 rs12609368  | 22263996 C | 0.4138 | 2.93E-08 | chr:19:22414379 |
| 19 rs17459246  | 22278121 C | 0.4138 | 2.93E-08 | chr:19:22414379 |
| 19 rs1978719   | 22266101 A | 0.4138 | 2.93E-08 | chr:19:22414379 |
| 19 rs55728714  | 22262899 G | 0.4138 | 2.93E-08 | chr:19:22414379 |
| 19 rs55886600  | 22276437 A | 0.4138 | 2.93E-08 | chr:19:22414379 |
| 19 rs56073035  | 22276298 G | 0.4138 | 2.93E-08 | chr:19:22414379 |
| 19 rs56369285  | 22267185 C | 0.4138 | 2.93E-08 | chr:19:22414379 |
| 19 rs73019889  | 22277826 G | 0.4138 | 2.93E-08 | chr:19:22414379 |
| 19 rs12610034  | 22314528 A | 0.4142 | 3.02E-08 | chr:19:22414379 |
| 19 rs143971182 | 22657107 A | 4.401  | 3.27E-08 | chr:19:22414379 |
| 19 rs2935282   | 22631153 C | 2.21   | 3.59E-08 | chr:19:22414379 |
| 19 rs1624967   | 22634476 T | 3.101  | 3.89E-08 | chr:19:22414379 |
| 19 rs2905572   | 22651073 T | 3.251  | 4.19E-08 | chr:19:22414379 |
| 19 rs2957811   | 22658228 T | 3.251  | 4.19E-08 | chr:19:22414379 |
| 19 rs431328    | 22222236 A | 0.4197 | 4.22E-08 | chr:19:22414379 |
| 19 rs7255049   | 22213111 A | 0.4197 | 4.22E-08 | chr:19:22414379 |



|                      |            |        |          |                 |
|----------------------|------------|--------|----------|-----------------|
| 19 rs11669110        | 22296485 G | 0.4196 | 4.43E-08 | chr:19:22414379 |
| 19 rs149975047       | 22287938 A | 0.4196 | 4.43E-08 | chr:19:22414379 |
| 19 rs367972720       | 22291197 C | 0.4196 | 4.43E-08 | chr:19:22414379 |
| 19 rs372140746       | 22291198 C | 0.4196 | 4.43E-08 | chr:19:22414379 |
| 19 rs56207853        | 22292357 T | 0.4196 | 4.43E-08 | chr:19:22414379 |
| 19 rs72481609        | 22296819 C | 0.4196 | 4.43E-08 | chr:19:22414379 |
| 19 rs73019900        | 22286680 A | 0.4196 | 4.43E-08 | chr:19:22414379 |
| 19 rs973016;rs200712 | 22629481 A | 4.341  | 4.44E-08 | chr:19:22414379 |
| 19 rs61616269        | 22397866 A | 3.736  | 4.45E-08 | chr:19:22414379 |
| 19 rs183691981       | 22291525 C | 0.4141 | 4.47E-08 | chr:19:22414379 |
| 19 rs2116948         | 22608156 A | 2.2    | 4.60E-08 | chr:19:22414379 |
| 19 rs2116949         | 22608036 G | 2.2    | 4.60E-08 | chr:19:22414379 |
| 19 rs200235951       | 22368291 A | 0.2755 | 5.15E-08 | chr:19:22414379 |
| 19 rs62118583        | 22541062 A | 2.215  | 5.19E-08 | chr:19:22414379 |
| 19 rs60830072        | 22551832 T | 2.185  | 5.27E-08 | chr:19:22414379 |
| 19 rs2435042         | 22046814 C | 0.3455 | 5.31E-08 | chr:19:22414379 |
| 19 rs699639          | 22120805 C | 0.4524 | 6.51E-08 | chr:19:22414379 |
| 19 rs62118649        | 22606157 T | 2.169  | 7.03E-08 | chr:19:22414379 |
| 19 rs11672223        | 22075780 T | 0.3437 | 7.42E-08 | chr:19:22414379 |
| 19 rs35164852        | 22072465 G | 0.3489 | 7.42E-08 | chr:19:22414379 |
| 19 rs12981008        | 22072655 C | 0.3464 | 7.47E-08 | chr:19:22414379 |
| 19 rs191067451       | 22288201 A | 0.4286 | 7.47E-08 | chr:19:22414379 |
| 19 rs372252339       | 22291126 T | 0.4286 | 7.47E-08 | chr:19:22414379 |
| 19 rs62118582        | 22540837 G | 2.183  | 7.96E-08 | chr:19:22414379 |
| 19 rs16999061        | 22550020 A | 2.155  | 8.05E-08 | chr:19:22414379 |
| 19 rs4629098         | 22565607 T | 2.172  | 8.71E-08 | chr:19:22414379 |
| 19 rs2033494         | 22600546 G | 2.161  | 8.86E-08 | chr:19:22414379 |
| 19 rs57590977        | 22594646 A | 2.161  | 8.86E-08 | chr:19:22414379 |
| 19 rs11085528        | 22571966 A | 2.16   | 9.06E-08 | chr:19:22414379 |
| 19 rs4932932         | 22203214 T | 3.674  | 9.31E-08 | chr:19:22414379 |
| 19 rs8100117         | 22195322 C | 3.674  | 9.31E-08 | chr:19:22414379 |
| 19 rs8109237         | 22202739 G | 3.674  | 9.31E-08 | chr:19:22414379 |
| 19 rs7247112         | 22589435 T | 2.15   | 9.73E-08 | chr:19:22414379 |
| 19 rs11881250        | 22660356 C | 4.671  | 1.02E-07 | chr:19:22414379 |
| 19 rs1230301         | 22640390 A | 2.139  | 1.04E-07 | chr:19:22414379 |
| 19 rs10454117        | 22557634 G | 2.141  | 1.06E-07 | chr:19:22414379 |
| 19 rs807946          | 22089322 T | 0.3506 | 1.19E-07 | chr:19:22414379 |
| 19 rs10419798        | 22068858 C | 0.3553 | 1.20E-07 | chr:19:22414379 |
| 19 rs10424971        | 22069675 G | 0.3553 | 1.20E-07 | chr:19:22414379 |
| 19 rs10426702        | 22069687 C | 0.3553 | 1.20E-07 | chr:19:22414379 |
| 19 rs1828455         | 22056752 A | 0.3558 | 1.24E-07 | chr:19:22414379 |
| 19 rs11673476        | 22576534 G | 2.131  | 1.35E-07 | chr:19:22414379 |
| 19 rs1230300         | 22639349 A | 2.128  | 1.35E-07 | chr:19:22414379 |

|                |            |        |          |                 |
|----------------|------------|--------|----------|-----------------|
| 19 rs1230302   | 22640737 T | 2.128  | 1.35E-07 | chr:19:22414379 |
| 19 rs1235534   | 22640026 T | 2.128  | 1.35E-07 | chr:19:22414379 |
| 19 rs4630690   | 22565040 A | 2.131  | 1.35E-07 | chr:19:22414379 |
| 19 rs56862063  | 22578169 C | 2.131  | 1.35E-07 | chr:19:22414379 |
| 19 rs62118627  | 22594123 A | 2.131  | 1.35E-07 | chr:19:22414379 |
| 19 rs191716270 | 22047973 T | 0.3548 | 1.36E-07 | chr:19:22414379 |
| 19 rs10406876  | 22070737 A | 0.3554 | 1.40E-07 | chr:19:22414379 |
| 19 rs73013658  | 22050293 G | 2.799  | 1.41E-07 | chr:19:22414379 |
| 19 rs35144209  | 22605999 T | 2.121  | 1.46E-07 | chr:19:22414379 |
| 19 rs422344    | 22230956 G | 0.4376 | 1.47E-07 | chr:19:22414379 |
| 19 rs390730    | 22233509 C | 0.4399 | 1.53E-07 | chr:19:22414379 |
| 19 rs401424    | 22232023 A | 0.4412 | 1.67E-07 | chr:19:22414379 |
| 19 rs1230303   | 22640958 T | 2.118  | 1.71E-07 | chr:19:22414379 |
| 19 rs549033416 | 22646662 C | 3.981  | 1.78E-07 | chr:19:22414379 |
| 19 rs567523996 | 22646664 A | 3.981  | 1.78E-07 | chr:19:22414379 |
| 19 rs74167888  | 22072484 G | 0.3607 | 1.83E-07 | chr:19:22414379 |
| 19 rs73013663  | 22075059 A | 2.675  | 1.84E-07 | chr:19:22414379 |
| 19 rs10416011  | 22050790 A | 0.3613 | 1.87E-07 | chr:19:22414379 |
| 19 rs7258344   | 22051776 A | 0.3613 | 1.87E-07 | chr:19:22414379 |
| 19 rs68168074  | 22120333 T | 4.742  | 1.91E-07 | chr:19:22414379 |
| 19 rs62118626  | 22584389 T | 2.105  | 1.94E-07 | chr:19:22414379 |
| 19 rs408687    | 22231123 T | 0.4424 | 2.04E-07 | chr:19:22414379 |
| 19 rs409439    | 22227432 C | 0.4424 | 2.04E-07 | chr:19:22414379 |
| 19 rs409835    | 22230671 T | 0.4424 | 2.04E-07 | chr:19:22414379 |
| 19 rs411020    | 22231102 G | 0.4424 | 2.04E-07 | chr:19:22414379 |
| 19 rs425781    | 22229306 A | 0.4424 | 2.04E-07 | chr:19:22414379 |
| 19 rs436662    | 22232107 C | 0.4424 | 2.04E-07 | chr:19:22414379 |
| 19 rs439574    | 22232024 A | 0.4424 | 2.04E-07 | chr:19:22414379 |
| 19 rs10404399  | 22066632 C | 0.3618 | 2.21E-07 | chr:19:22414379 |
| 19 rs10417634  | 22060007 A | 0.3617 | 2.21E-07 | chr:19:22414379 |
| 19 rs200969060 | 22156855 A | 11.97  | 2.26E-07 | chr:19:22414379 |
| 19 rs2435022   | 22066760 A | 0.3624 | 2.31E-07 | chr:19:22414379 |
| 19 rs12462173  | 22120728 T | 4.354  | 2.49E-07 | chr:19:22414379 |
| 19 rs6511309   | 22174292 T | 0.4456 | 2.55E-07 | chr:19:22414379 |
| 19 rs1989120   | 22205528 T | 0.4478 | 2.65E-07 | chr:19:22414379 |
| 19 rs10409887  | 22067439 G | 0.3661 | 2.74E-07 | chr:19:22414379 |
| 19 rs10410326  | 22067674 G | 0.3661 | 2.74E-07 | chr:19:22414379 |
| 19 rs11672236  | 22068431 A | 0.3661 | 2.74E-07 | chr:19:22414379 |
| 19 rs12985835  | 22070216 A | 0.3661 | 2.74E-07 | chr:19:22414379 |
| 19 rs28771224  | 22068105 C | 0.3661 | 2.74E-07 | chr:19:22414379 |
| 19 rs283165    | 22453422 C | 0.4135 | 3.11E-07 | chr:19:22414379 |
| 19 rs2435021   | 22066783 C | 0.3698 | 3.45E-07 | chr:19:22414379 |
| 19 rs2457775   | 22066809 A | 0.3698 | 3.45E-07 | chr:19:22414379 |

|                |            |        |          |                 |
|----------------|------------|--------|----------|-----------------|
| 19 rs534533364 | 22646671 A | 3.863  | 3.46E-07 | chr:19:22414379 |
| 19 rs35605606  | 22059609 A | 2.676  | 3.50E-07 | chr:19:22414379 |
| 19 rs1018912   | 22156585 G | 0.4504 | 3.53E-07 | chr:19:22414379 |
| 19 rs10420483  | 22190378 A | 0.4504 | 3.53E-07 | chr:19:22414379 |
| 19 rs11085509  | 22204573 T | 0.4504 | 3.53E-07 | chr:19:22414379 |
| 19 rs142623791 | 22173025 A | 0.4504 | 3.53E-07 | chr:19:22414379 |
| 19 rs1654508   | 22219276 A | 0.4504 | 3.53E-07 | chr:19:22414379 |
| 19 rs1988568   | 22205566 C | 0.4504 | 3.53E-07 | chr:19:22414379 |
| 19 rs2017962   | 22208751 T | 0.4504 | 3.53E-07 | chr:19:22414379 |
| 19 rs2078089   | 22209753 A | 0.4504 | 3.53E-07 | chr:19:22414379 |
| 19 rs2106869   | 22184693 C | 0.4504 | 3.53E-07 | chr:19:22414379 |
| 19 rs2188969   | 22202783 A | 0.4504 | 3.53E-07 | chr:19:22414379 |
| 19 rs2188970   | 22200382 G | 0.4504 | 3.53E-07 | chr:19:22414379 |
| 19 rs2359821   | 22208314 C | 0.4504 | 3.53E-07 | chr:19:22414379 |
| 19 rs374537    | 22222802 G | 0.4504 | 3.53E-07 | chr:19:22414379 |
| 19 rs404822    | 22215967 A | 0.4504 | 3.53E-07 | chr:19:22414379 |
| 19 rs4244912   | 22203237 T | 0.4504 | 3.53E-07 | chr:19:22414379 |
| 19 rs4290587   | 22164646 A | 0.4504 | 3.53E-07 | chr:19:22414379 |
| 19 rs429184    | 22214352 A | 0.4504 | 3.53E-07 | chr:19:22414379 |
| 19 rs436039    | 22214873 T | 0.4504 | 3.53E-07 | chr:19:22414379 |
| 19 rs7249976   | 22183920 A | 0.4504 | 3.53E-07 | chr:19:22414379 |
| 19 rs9636187   | 22173370 T | 0.4504 | 3.53E-07 | chr:19:22414379 |
| 19 rs74804285  | 22072824 T | 0.3742 | 3.94E-07 | chr:19:22414379 |
| 19 rs36052723  | 22532783 C | 2.066  | 4.09E-07 | chr:19:22414379 |
| 19 rs73930941  | 22123495 C | 3.892  | 4.12E-07 | chr:19:22414379 |
| 19 rs111526263 | 22081710 T | 2.552  | 4.32E-07 | chr:19:22414379 |
| 19 rs10404329  | 22067155 C | 0.3707 | 4.40E-07 | chr:19:22414379 |
| 19 rs11667349  | 22076963 G | 2.549  | 4.47E-07 | chr:19:22414379 |
| 19 rs172216    | 22451989 A | 0.4187 | 4.50E-07 | chr:19:22414379 |
| 19 rs283164    | 22453794 A | 0.4187 | 4.50E-07 | chr:19:22414379 |
| 19 rs77808832  | 22120260 T | 3.904  | 4.95E-07 | chr:19:22414379 |
| 19 rs2457776   | 22066705 G | 0.3729 | 5.00E-07 | chr:19:22414379 |
| 19 rs2457777   | 22066702 A | 0.3729 | 5.00E-07 | chr:19:22414379 |
| 19 rs283168    | 22450922 A | 0.4237 | 6.20E-07 | chr:19:22414379 |
| 19 rs2359996   | 22285500 T | 0.4617 | 6.43E-07 | chr:19:22414379 |
| 19 rs10419257  | 22045797 G | 0.3769 | 6.48E-07 | chr:19:22414379 |
| 19 rs220995    | 22084265 G | 0.3823 | 6.49E-07 | chr:19:22414379 |
| 19 rs79718037  | 22086812 C | 0.3823 | 6.49E-07 | chr:19:22414379 |
| 19 rs11878410  | 22660286 C | 3.886  | 7.21E-07 | chr:19:22414379 |
| 19 rs8107022   | 22618698 T | 2.879  | 7.52E-07 | chr:19:22414379 |
| 19 rs2435019   | 22067097 G | 0.3812 | 7.72E-07 | chr:19:22414379 |
| 19 rs2435020   | 22066983 G | 0.3812 | 7.72E-07 | chr:19:22414379 |
| 19 rs2361014   | 22654426 G | 0.3967 | 8.64E-07 | chr:19:22414379 |

|                |            |        |          |                 |
|----------------|------------|--------|----------|-----------------|
| 19 rs2017521   | 22126138 T | 0.4715 | 1.35E-06 | chr:19:22414379 |
| 19 rs2175366   | 22128279 C | 0.4715 | 1.35E-06 | chr:19:22414379 |
| 19 rs2522104   | 22140849 T | 0.4715 | 1.35E-06 | chr:19:22414379 |
| 19 rs2666447   | 22132868 T | 0.4715 | 1.35E-06 | chr:19:22414379 |
| 19 rs765527    | 22129555 C | 0.4715 | 1.35E-06 | chr:19:22414379 |
| 19 rs10417727  | 22045793 T | 0.3889 | 1.45E-06 | chr:19:22414379 |
| 19 rs391264    | 22083490 T | 0.513  | 1.98E-06 | chr:19:22414379 |
| 19 rs2262909   | 22135270 A | 0.4785 | 2.16E-06 | chr:19:22414379 |
| 19 rs113082133 | 22442017 T | 0.4241 | 2.62E-06 | chr:19:22414379 |
| 19 rs2435031   | 22061608 C | 0.522  | 3.49E-06 | chr:19:22414379 |
| 19 rs2457780   | 22062188 T | 0.522  | 3.49E-06 | chr:19:22414379 |
| 19 rs1828453   | 22055096 A | 0.5233 | 3.63E-06 | chr:19:22414379 |
| 19 rs1634475   | 22097368 T | 0.5041 | 4.43E-06 | chr:19:22414379 |
| 19 rs193152926 | 22289796 A | 0.5064 | 4.48E-06 | chr:19:22414379 |
| 19 rs2435043   | 22047274 A | 0.5252 | 4.52E-06 | chr:19:22414379 |
| 19 rs150615222 | 22079917 T | 6.749  | 4.66E-06 | chr:19:22414379 |
| 19 rs73025933  | 22452515 G | 0.204  | 4.85E-06 | chr:19:22414379 |
| 19 rs2457801   | 22047450 G | 0.5292 | 5.20E-06 | chr:19:22414379 |
| 19 rs12459448  | 22040562 G | 6.035  | 5.36E-06 | chr:19:22414379 |
| 19 rs183543741 | 22289845 T | 0.5142 | 6.41E-06 | chr:19:22414379 |
| 19 rs375012052 | 22289851 A | 0.5142 | 6.41E-06 | chr:19:22414379 |
| 19 rs66562925  | 22158713 A | 2.454  | 6.49E-06 | chr:19:22414379 |
| 19 rs283141    | 22445808 G | 0.4182 | 6.59E-06 | chr:19:22414379 |
| 19 rs1634480   | 22085885 G | 0.5242 | 6.89E-06 | chr:19:22414379 |
| 19 rs10418950  | 22610740 C | 1.883  | 7.32E-06 | chr:19:22414379 |
| 19 rs4433937   | 22068658 C | 0.5368 | 7.45E-06 | chr:19:22414379 |
| 19 rs9676297   | 22079033 C | 0.5284 | 7.71E-06 | chr:19:22414379 |
| 19 rs2435023   | 22066349 C | 0.538  | 9.29E-06 | chr:19:22414379 |
| 19 rs2435024   | 22066306 C | 0.538  | 9.29E-06 | chr:19:22414379 |
| 19 rs537201554 | 22607421 C | 0.3414 | 1.00E-05 | chr:19:22414379 |
| 19 rs2428381   | 22072233 C | 0.538  | 1.02E-05 | chr:19:22414379 |
| 19 rs2435017   | 22069695 T | 0.5472 | 1.27E-05 | chr:19:22414379 |
| 19 rs8105201   | 22068058 T | 0.5457 | 1.29E-05 | chr:19:22414379 |
| 19 rs1651559   | 22074185 A | 0.5336 | 1.32E-05 | chr:19:22414379 |
| 19 rs660087    | 22084180 A | 0.5381 | 1.39E-05 | chr:19:22414379 |
| 19 rs283167    | 22452148 A | 0.432  | 1.42E-05 | chr:19:22414379 |
| 19 rs2457796   | 22046079 A | 0.5456 | 1.98E-05 | chr:19:22414379 |
| 19 rs283166    | 22453074 G | 0.4379 | 2.00E-05 | chr:19:22414379 |
| 19 rs10405083  | 22066946 C | 0.5518 | 2.05E-05 | chr:19:22414379 |
| 19 rs113141632 | 22848875 G | 2.971  | 2.17E-05 | chr:19:22414379 |
| 19 rs1628324   | 22074537 G | 0.5467 | 2.17E-05 | chr:19:22414379 |
| 19 rs200026439 | 29845668 T | 41.66  | 4.19E-38 | chr:19:29855781 |
| 19 rs201163831 | 29845670 T | 41.66  | 4.19E-38 | chr:19:29855781 |

|                |            |       |          |                 |
|----------------|------------|-------|----------|-----------------|
| 19 rs62104321  | 29866339 C | 31.35 | 2.51E-37 | chr:19:29855781 |
| 19 rs200273877 | 29841554 A | 41.02 | 2.14E-36 | chr:19:29855781 |
| 19 rs201714995 | 29841536 A | 41.02 | 2.14E-36 | chr:19:29855781 |
| 19 rs79585427  | 29843225 C | 46.4  | 3.94E-35 | chr:19:29855781 |
| 19 rs200136359 | 29843211 G | 44.31 | 4.15E-35 | chr:19:29855781 |
| 19 rs200658849 | 29843213 T | 44.31 | 4.15E-35 | chr:19:29855781 |
| 19 rs76108985  | 29843218 C | 44.31 | 4.15E-35 | chr:19:29855781 |
| 19 rs62109918  | 29845664 T | 21.8  | 8.69E-35 | chr:19:29855781 |
| 19 rs62109919  | 29845666 T | 21.8  | 8.69E-35 | chr:19:29855781 |
| 19 rs10426484  | 29866090 A | 37.51 | 2.48E-34 | chr:19:29855781 |
| 19 rs4591272   | 29841167 A | 17.25 | 3.54E-33 | chr:19:29855781 |
| 19 rs621111119 | 29795071 T | 20.63 | 6.92E-33 | chr:19:29855781 |
| 19 rs10425210  | 29792094 A | 20.22 | 1.09E-32 | chr:19:29855781 |
| 19 rs1012613   | 29796344 A | 24.84 | 1.61E-32 | chr:19:29855781 |
| 19 rs12150940  | 29840750 C | 61.54 | 2.06E-32 | chr:19:29855781 |
| 19 rs12151167  | 29840748 T | 61.54 | 2.06E-32 | chr:19:29855781 |
| 19 rs13345888  | 29842781 C | 64.34 | 2.75E-32 | chr:19:29855781 |
| 19 rs200009518 | 29841360 G | 15.58 | 4.04E-31 | chr:19:29855781 |
| 19 rs957166    | 29882508 T | 26.75 | 5.09E-31 | chr:19:29855781 |
| 19 rs28792508  | 29841216 C | 14.07 | 1.22E-30 | chr:19:29855781 |
| 19 rs10424195  | 29883577 T | 13.44 | 2.72E-30 | chr:19:29855781 |
| 19 rs10405460  | 29840781 A | 88.58 | 9.06E-30 | chr:19:29855781 |
| 19 rs10410829  | 29840787 T | 88.58 | 9.06E-30 | chr:19:29855781 |
| 19 rs2011890   | 29801011 A | 76.94 | 9.51E-30 | chr:19:29855781 |
| 19 rs11670844  | 29800673 T | 73.51 | 1.11E-29 | chr:19:29855781 |
| 19 rs9797726   | 29842789 T | 92.65 | 2.59E-29 | chr:19:29855781 |
| 19 rs34786514  | 29878333 G | 52.88 | 4.54E-29 | chr:19:29855781 |
| 19 rs10413763  | 29873400 A | 67.66 | 4.83E-29 | chr:19:29855781 |
| 19 rs8100333   | 29866136 T | 65.87 | 1.11E-28 | chr:19:29855781 |
| 19 rs8100334   | 29866137 T | 65.87 | 1.11E-28 | chr:19:29855781 |
| 19 rs12978558  | 29807938 C | 92.19 | 1.34E-28 | chr:19:29855781 |
| 19 rs12610720  | 29808999 C | 93.2  | 1.42E-28 | chr:19:29855781 |
| 19 rs12150922  | 29879068 T | 60.1  | 1.55E-28 | chr:19:29855781 |
| 19 rs4805366   | 29799264 G | 59.08 | 2.10E-28 | chr:19:29855781 |
| 19 rs10412642  | 29871720 A | 80.78 | 2.58E-28 | chr:19:29855781 |
| 19 rs8108111   | 29809851 G | 92.16 | 2.63E-28 | chr:19:29855781 |
| 19 rs2111518   | 29794622 C | 37.31 | 5.27E-28 | chr:19:29855781 |
| 19 rs1558365   | 29865746 C | 76.96 | 6.26E-28 | chr:19:29855781 |
| 19 rs1558366   | 29865847 T | 76.96 | 6.26E-28 | chr:19:29855781 |
| 19 rs11883246  | 29862074 G | 77.33 | 6.84E-28 | chr:19:29855781 |
| 19 rs6509390   | 29862034 T | 77.33 | 6.84E-28 | chr:19:29855781 |
| 19 rs7259512   | 29862045 G | 77.33 | 6.84E-28 | chr:19:29855781 |
| 19 rs8099873   | 29808683 A | 112.3 | 1.13E-27 | chr:19:29855781 |

|               |            |       |          |                 |
|---------------|------------|-------|----------|-----------------|
| 19 rs10408576 | 29818131 A | 110.6 | 1.41E-27 | chr:19:29855781 |
| 19 rs10405922 | 29813264 C | 110.6 | 1.43E-27 | chr:19:29855781 |
| 19 rs10419653 | 29812484 G | 110.6 | 1.43E-27 | chr:19:29855781 |
| 19 rs10424492 | 29813431 A | 110.6 | 1.43E-27 | chr:19:29855781 |
| 19 rs10425007 | 29812397 C | 110.6 | 1.43E-27 | chr:19:29855781 |
| 19 rs10425611 | 29813263 T | 110.6 | 1.43E-27 | chr:19:29855781 |
| 19 rs11880387 | 29810986 A | 110.6 | 1.43E-27 | chr:19:29855781 |
| 19 rs12608817 | 29808821 A | 110.6 | 1.43E-27 | chr:19:29855781 |
| 19 rs12610707 | 29808907 C | 110.6 | 1.43E-27 | chr:19:29855781 |
| 19 rs12978201 | 29805534 G | 110.6 | 1.43E-27 | chr:19:29855781 |
| 19 rs17773647 | 29813079 G | 110.6 | 1.43E-27 | chr:19:29855781 |
| 19 rs2216341  | 29812294 T | 110.6 | 1.43E-27 | chr:19:29855781 |
| 19 rs28581734 | 29813167 T | 110.6 | 1.43E-27 | chr:19:29855781 |
| 19 rs727798   | 29811828 C | 110.6 | 1.43E-27 | chr:19:29855781 |
| 19 rs8111179  | 29809968 C | 110.6 | 1.43E-27 | chr:19:29855781 |
| 19 rs8113604  | 29813727 G | 110.6 | 1.43E-27 | chr:19:29855781 |
| 19 rs1860573  | 29879749 A | 44.49 | 1.55E-27 | chr:19:29855781 |
| 19 rs10415631 | 29810562 C | 109.9 | 1.58E-27 | chr:19:29855781 |
| 19 rs10411884 | 29814875 T | 109.7 | 1.59E-27 | chr:19:29855781 |
| 19 rs11879307 | 29815370 A | 109.7 | 1.59E-27 | chr:19:29855781 |
| 19 rs8102048  | 29814240 A | 109.7 | 1.59E-27 | chr:19:29855781 |
| 19 rs10418201 | 29810677 G | 109.7 | 1.64E-27 | chr:19:29855781 |
| 19 rs10423930 | 29810687 G | 109.7 | 1.64E-27 | chr:19:29855781 |
| 19 rs10413814 | 29859044 A | 111.1 | 1.65E-27 | chr:19:29855781 |
| 19 rs10402522 | 29861084 A | 110.9 | 1.82E-27 | chr:19:29855781 |
| 19 rs10403684 | 29860887 T | 110.9 | 1.82E-27 | chr:19:29855781 |
| 19 rs10404520 | 29860937 G | 110.9 | 1.82E-27 | chr:19:29855781 |
| 19 rs10404941 | 29861103 C | 110.9 | 1.82E-27 | chr:19:29855781 |
| 19 rs10422443 | 29860582 A | 110.9 | 1.82E-27 | chr:19:29855781 |
| 19 rs10424790 | 29860630 G | 110.9 | 1.82E-27 | chr:19:29855781 |
| 19 rs11880983 | 29859865 C | 110.9 | 1.82E-27 | chr:19:29855781 |
| 19 rs12709912 | 29859443 C | 110.9 | 1.82E-27 | chr:19:29855781 |
| 19 rs13344917 | 29859503 C | 110.9 | 1.82E-27 | chr:19:29855781 |
| 19 rs6509385  | 29861469 C | 110.9 | 1.82E-27 | chr:19:29855781 |
| 19 rs6509386  | 29861649 T | 110.9 | 1.82E-27 | chr:19:29855781 |
| 19 rs6509387  | 29861707 A | 110.9 | 1.82E-27 | chr:19:29855781 |
| 19 rs7246620  | 29861360 C | 110.9 | 1.82E-27 | chr:19:29855781 |
| 19 rs7258498  | 29860387 T | 110.9 | 1.82E-27 | chr:19:29855781 |
| 19 rs7259050  | 29799035 A | 72.25 | 1.89E-27 | chr:19:29855781 |
| 19 rs11882773 | 29859829 A | 105.9 | 2.13E-27 | chr:19:29855781 |
| 19 rs11880160 | 29810859 A | 110.7 | 2.36E-27 | chr:19:29855781 |
| 19 rs35980661 | 29798605 G | 51.68 | 2.38E-27 | chr:19:29855781 |
| 19 rs10422053 | 29881070 T | 11.61 | 2.60E-27 | chr:19:29855781 |

|                |            |       |          |                 |
|----------------|------------|-------|----------|-----------------|
| 19 rs111164000 | 29881600 C | 11.61 | 2.60E-27 | chr:19:29855781 |
| 19 rs13346371  | 29880687 G | 11.61 | 2.60E-27 | chr:19:29855781 |
| 19 rs17703299  | 29880277 A | 11.61 | 2.60E-27 | chr:19:29855781 |
| 19 rs17703317  | 29880615 A | 11.61 | 2.60E-27 | chr:19:29855781 |
| 19 rs55711025  | 29880437 G | 11.61 | 2.60E-27 | chr:19:29855781 |
| 19 rs56091016  | 29880529 C | 11.61 | 2.60E-27 | chr:19:29855781 |
| 19 rs9748993   | 29881310 C | 11.61 | 2.60E-27 | chr:19:29855781 |
| 19 rs56097453  | 29881537 A | 11.51 | 3.35E-27 | chr:19:29855781 |
| 19 rs10420190  | 29873997 A | 16.85 | 3.47E-27 | chr:19:29855781 |
| 19 rs13344206  | 29880707 A | 10.36 | 3.66E-27 | chr:19:29855781 |
| 19 rs55645533  | 29880453 T | 10.36 | 3.66E-27 | chr:19:29855781 |
| 19 rs13344861  | 29881433 A | 10.39 | 3.84E-27 | chr:19:29855781 |
| 19 rs8107864   | 29882147 T | 10.97 | 3.85E-27 | chr:19:29855781 |
| 19 rs957165    | 29882525 G | 10.36 | 4.08E-27 | chr:19:29855781 |
| 19 rs8113733   | 29807306 C | 22.13 | 4.55E-27 | chr:19:29855781 |
| 19 rs1558362   | 29865141 T | 91.77 | 6.13E-27 | chr:19:29855781 |
| 19 rs10421910  | 29868808 A | 91.34 | 6.73E-27 | chr:19:29855781 |
| 19 rs10422144  | 29868886 A | 91.34 | 6.73E-27 | chr:19:29855781 |
| 19 rs10422587  | 29869112 A | 91.34 | 6.73E-27 | chr:19:29855781 |
| 19 rs12973626  | 29867364 C | 91.34 | 6.73E-27 | chr:19:29855781 |
| 19 rs12979074  | 29867103 A | 91.34 | 6.73E-27 | chr:19:29855781 |
| 19 rs12979587  | 29867327 A | 91.34 | 6.73E-27 | chr:19:29855781 |
| 19 rs12980588  | 29867736 A | 91.34 | 6.73E-27 | chr:19:29855781 |
| 19 rs12981862  | 29867527 G | 91.34 | 6.73E-27 | chr:19:29855781 |
| 19 rs12981877  | 29867555 T | 91.34 | 6.73E-27 | chr:19:29855781 |
| 19 rs1558364   | 29865345 A | 91.34 | 6.73E-27 | chr:19:29855781 |
| 19 rs17624933  | 29867883 T | 91.34 | 6.73E-27 | chr:19:29855781 |
| 19 rs1981675   | 29868188 T | 91.34 | 6.73E-27 | chr:19:29855781 |
| 19 rs1981677   | 29868499 A | 91.34 | 6.73E-27 | chr:19:29855781 |
| 19 rs4271695   | 29866742 A | 91.34 | 6.73E-27 | chr:19:29855781 |
| 19 rs4398199   | 29866833 C | 91.34 | 6.73E-27 | chr:19:29855781 |
| 19 rs4558517   | 29866993 T | 91.34 | 6.73E-27 | chr:19:29855781 |
| 19 rs4605284   | 29866673 T | 91.34 | 6.73E-27 | chr:19:29855781 |
| 19 rs4605285   | 29866853 G | 91.34 | 6.73E-27 | chr:19:29855781 |
| 19 rs7253279   | 29864696 A | 91.34 | 6.73E-27 | chr:19:29855781 |
| 19 rs8103925   | 29866287 G | 91.34 | 6.73E-27 | chr:19:29855781 |
| 19 rs9916951   | 29865388 G | 91.34 | 6.73E-27 | chr:19:29855781 |
| 19 rs10403689  | 29862797 A | 91.2  | 7.29E-27 | chr:19:29855781 |
| 19 rs10404170  | 29863044 C | 91.2  | 7.29E-27 | chr:19:29855781 |
| 19 rs10423850  | 29862444 A | 91.2  | 7.29E-27 | chr:19:29855781 |
| 19 rs56048673  | 29862967 A | 91.2  | 7.29E-27 | chr:19:29855781 |
| 19 rs6509388   | 29861882 G | 91.2  | 7.29E-27 | chr:19:29855781 |
| 19 rs6509389   | 29861958 G | 91.2  | 7.29E-27 | chr:19:29855781 |

|                |            |       |          |                 |
|----------------|------------|-------|----------|-----------------|
| 19 rs7248809   | 29863240 G | 91.2  | 7.29E-27 | chr:19:29855781 |
| 19 rs7248884   | 29863662 T | 91.2  | 7.29E-27 | chr:19:29855781 |
| 19 rs7252555   | 29863630 C | 91.2  | 7.29E-27 | chr:19:29855781 |
| 19 rs7507344   | 29863087 A | 87.77 | 9.56E-27 | chr:19:29855781 |
| 19 rs7507798   | 29863083 C | 87.77 | 9.56E-27 | chr:19:29855781 |
| 19 rs142004081 | 29841268 A | 10.54 | 1.93E-26 | chr:19:29855781 |
| 19 rs1076416   | 29879196 A | 16.8  | 1.98E-26 | chr:19:29855781 |
| 19 rs10426495  | 29866098 C | 86.99 | 2.05E-26 | chr:19:29855781 |
| 19 rs4805382   | 29873748 A | 20.11 | 3.50E-26 | chr:19:29855781 |
| 19 rs10403590  | 29844676 C | 132.1 | 3.73E-26 | chr:19:29855781 |
| 19 rs9749537   | 29844679 A | 131.6 | 4.12E-26 | chr:19:29855781 |
| 19 rs10406127  | 29826758 T | 129.3 | 4.56E-26 | chr:19:29855781 |
| 19 rs10408748  | 29837390 T | 129.3 | 4.56E-26 | chr:19:29855781 |
| 19 rs10411489  | 29846018 C | 129.3 | 4.56E-26 | chr:19:29855781 |
| 19 rs10413925  | 29851859 T | 129.3 | 4.56E-26 | chr:19:29855781 |
| 19 rs10419817  | 29828620 T | 129.3 | 4.56E-26 | chr:19:29855781 |
| 19 rs10424375  | 29839089 A | 129.3 | 4.56E-26 | chr:19:29855781 |
| 19 rs10500239  | 29829980 C | 129.3 | 4.56E-26 | chr:19:29855781 |
| 19 rs1119169   | 29850778 T | 129.3 | 4.56E-26 | chr:19:29855781 |
| 19 rs1122022   | 29825214 A | 129.3 | 4.56E-26 | chr:19:29855781 |
| 19 rs13343404  | 29826240 A | 129.3 | 4.56E-26 | chr:19:29855781 |
| 19 rs150191335 | 29843058 T | 129.3 | 4.56E-26 | chr:19:29855781 |
| 19 rs2193499   | 29821859 A | 129.3 | 4.56E-26 | chr:19:29855781 |
| 19 rs2193500   | 29834892 G | 129.3 | 4.56E-26 | chr:19:29855781 |
| 19 rs34235250  | 29852282 C | 129.3 | 4.56E-26 | chr:19:29855781 |
| 19 rs67987964  | 29845533 G | 129.3 | 4.56E-26 | chr:19:29855781 |
| 19 rs7508357   | 29841738 C | 129.3 | 4.56E-26 | chr:19:29855781 |
| 19 rs2160717   | 29822729 T | 129   | 4.96E-26 | chr:19:29855781 |
| 19 rs4804878   | 29873579 A | 19.68 | 5.13E-26 | chr:19:29855781 |
| 19 rs10410330  | 29827372 C | 129.5 | 7.01E-26 | chr:19:29855781 |
| 19 rs6509401   | 29877643 C | 21.38 | 9.09E-26 | chr:19:29855781 |
| 19 rs10404884  | 29839279 A | 24.19 | 1.30E-25 | chr:19:29855781 |
| 19 rs3960886   | 29878149 C | 21.08 | 1.40E-25 | chr:19:29855781 |
| 19 rs8109600   | 29877328 G | 21.08 | 1.40E-25 | chr:19:29855781 |
| 19 rs4805383   | 29873963 G | 21.09 | 1.50E-25 | chr:19:29855781 |
| 19 rs7249606   | 29866089 C | 70.67 | 2.41E-25 | chr:19:29855781 |
| 19 rs10401757  | 29866045 T | 103.8 | 5.56E-25 | chr:19:29855781 |
| 19 rs10407706  | 29799613 C | 96.87 | 7.12E-25 | chr:19:29855781 |
| 19 rs2012095   | 29801230 G | 96.87 | 7.12E-25 | chr:19:29855781 |
| 19 rs10407716  | 29799624 G | 91.87 | 1.41E-24 | chr:19:29855781 |
| 19 rs150522295 | 29841311 G | 9.278 | 1.52E-24 | chr:19:29855781 |
| 19 rs200964938 | 29841291 G | 9.313 | 1.56E-24 | chr:19:29855781 |
| 19 rs10416313  | 29831461 G | 169.4 | 1.58E-24 | chr:19:29855781 |



|                |            |        |          |                 |
|----------------|------------|--------|----------|-----------------|
| 19 rs74181477  | 29840703 A | 168.1  | 2.22E-24 | chr:19:29855781 |
| 19 rs144395360 | 29843445 T | 169.7  | 3.56E-24 | chr:19:29855781 |
| 19 rs10407922  | 29833571 C | 173.7  | 4.35E-24 | chr:19:29855781 |
| 19 rs979413    | 29818635 A | 150.7  | 4.74E-24 | chr:19:29855781 |
| 19 rs35900872  | 29871153 A | 136.9  | 8.40E-24 | chr:19:29855781 |
| 19 rs8103504   | 29808196 C | 121.5  | 3.31E-23 | chr:19:29855781 |
| 19 rs2111519   | 29794684 T | 72.81  | 3.60E-23 | chr:19:29855781 |
| 19 rs62104320  | 29866335 T | 105.6  | 1.48E-22 | chr:19:29855781 |
| 19 rs11883012  | 29874196 G | 103.6  | 1.94E-22 | chr:19:29855781 |
| 19 rs10404772  | 29821253 A | 213.3  | 3.14E-22 | chr:19:29855781 |
| 19 rs10417724  | 29819252 A | 213.3  | 3.14E-22 | chr:19:29855781 |
| 19 rs10423259  | 29820105 A | 213.3  | 3.14E-22 | chr:19:29855781 |
| 19 rs10853797  | 29821094 C | 213.3  | 3.14E-22 | chr:19:29855781 |
| 19 rs10853798  | 29821124 A | 213.3  | 3.14E-22 | chr:19:29855781 |
| 19 rs11083917  | 29821301 C | 213.3  | 3.14E-22 | chr:19:29855781 |
| 19 rs8102393   | 29820560 C | 213.3  | 3.14E-22 | chr:19:29855781 |
| 19 rs8113732   | 29820742 G | 213.3  | 3.14E-22 | chr:19:29855781 |
| 19 rs979412    | 29818376 A | 213.3  | 3.14E-22 | chr:19:29855781 |
| 19 rs9789288   | 29806349 T | 213.4  | 3.15E-22 | chr:19:29855781 |
| 19 rs10853799  | 29821146 A | 212.7  | 3.38E-22 | chr:19:29855781 |
| 19 rs8113496   | 29820529 G | 212.7  | 3.38E-22 | chr:19:29855781 |
| 19 rs10405226  | 29840658 A | 209.2  | 3.39E-22 | chr:19:29855781 |
| 19 rs62108213  | 29830870 A | 206.4  | 3.49E-22 | chr:19:29855781 |
| 19 rs62108214  | 29830872 C | 206.4  | 3.49E-22 | chr:19:29855781 |
| 19 rs62108215  | 29830873 T | 206.4  | 3.49E-22 | chr:19:29855781 |
| 19 rs10853800  | 29821178 C | 211.4  | 3.51E-22 | chr:19:29855781 |
| 19 rs11083916  | 29821200 C | 211.4  | 3.51E-22 | chr:19:29855781 |
| 19 rs8105295   | 29846290 G | 210    | 3.57E-22 | chr:19:29855781 |
| 19 rs8108803   | 29846308 G | 210    | 3.57E-22 | chr:19:29855781 |
| 19 rs13344183  | 29841038 T | 208.8  | 3.67E-22 | chr:19:29855781 |
| 19 rs6417157   | 29858422 C | 214.1  | 3.82E-22 | chr:19:29855781 |
| 19 rs11881459  | 29830092 T | 218.7  | 3.90E-22 | chr:19:29855781 |
| 19 rs72623834  | 29842510 A | 203.4  | 4.18E-22 | chr:19:29855781 |
| 19 rs74838486  | 29842509 A | 203.4  | 4.18E-22 | chr:19:29855781 |
| 19 rs10405177  | 29840592 C | 207    | 4.30E-22 | chr:19:29855781 |
| 19 rs10406756  | 29840591 T | 207    | 4.30E-22 | chr:19:29855781 |
| 19 rs28857523  | 29844100 G | 209.4  | 5.30E-22 | chr:19:29855781 |
| 19 rs28870995  | 29844110 C | 209.4  | 5.30E-22 | chr:19:29855781 |
| 19 rs1558363   | 29865313 C | 169.6  | 1.56E-21 | chr:19:29855781 |
| 19 rs1981676   | 29868320 A | 169.6  | 1.56E-21 | chr:19:29855781 |
| 19 rs758770    | 29870136 G | 169.6  | 1.56E-21 | chr:19:29855781 |
| 19 rs8103720   | 29800499 C | 0.1816 | 1.63E-21 | chr:19:29855781 |
| 19 rs28573811  | 29867469 T | 168.2  | 2.02E-21 | chr:19:29855781 |

|               |            |        |          |                 |
|---------------|------------|--------|----------|-----------------|
| 19 rs7255472  | 29811968 C | 158    | 2.96E-21 | chr:19:29855781 |
| 19 rs8100899  | 29808524 G | 158    | 2.96E-21 | chr:19:29855781 |
| 19 rs8107456  | 29810347 C | 158    | 2.96E-21 | chr:19:29855781 |
| 19 rs12691091 | 29859430 C | 157    | 3.30E-21 | chr:19:29855781 |
| 19 rs10420966 | 29816663 T | 156.6  | 3.30E-21 | chr:19:29855781 |
| 19 rs929691   | 29818042 C | 156.6  | 3.30E-21 | chr:19:29855781 |
| 19 rs10401849 | 29860785 T | 156.8  | 3.52E-21 | chr:19:29855781 |
| 19 rs10404303 | 29860663 C | 156.8  | 3.52E-21 | chr:19:29855781 |
| 19 rs1990391  | 29859164 T | 156.8  | 3.52E-21 | chr:19:29855781 |
| 19 rs7258342  | 29859947 C | 156.8  | 3.52E-21 | chr:19:29855781 |
| 19 rs8107741  | 29858602 G | 156.8  | 3.52E-21 | chr:19:29855781 |
| 19 rs7253662  | 29815722 T | 155.5  | 3.63E-21 | chr:19:29855781 |
| 19 rs7257439  | 29816242 A | 155.5  | 3.63E-21 | chr:19:29855781 |
| 19 rs7351109  | 29816574 C | 155.5  | 3.63E-21 | chr:19:29855781 |
| 19 rs7253602  | 29864638 G | 134.2  | 1.67E-20 | chr:19:29855781 |
| 19 rs8107043  | 29864213 G | 134.2  | 1.67E-20 | chr:19:29855781 |
| 19 rs1981678  | 29868519 G | 134    | 1.76E-20 | chr:19:29855781 |
| 19 rs4805374  | 29862430 G | 134    | 1.76E-20 | chr:19:29855781 |
| 19 rs7252679  | 29863745 C | 134    | 1.76E-20 | chr:19:29855781 |
| 19 rs8107989  | 29867796 G | 134    | 1.76E-20 | chr:19:29855781 |
| 19 rs7249123  | 29870685 G | 133.1  | 2.26E-20 | chr:19:29855781 |
| 19 rs2865896  | 29872800 T | 130.6  | 2.30E-20 | chr:19:29855781 |
| 19 rs4805381  | 29872627 C | 130.6  | 2.30E-20 | chr:19:29855781 |
| 19 rs11671699 | 29882003 G | 0.1099 | 4.49E-20 | chr:19:29855781 |
| 19 rs7507405  | 29841956 C | 292.9  | 1.26E-19 | chr:19:29855781 |
| 19 rs78286516 | 29843274 C | 305    | 1.26E-19 | chr:19:29855781 |
| 19 rs78902520 | 29843271 A | 305    | 1.26E-19 | chr:19:29855781 |
| 19 rs2865870  | 29821980 C | 288.1  | 1.49E-19 | chr:19:29855781 |
| 19 rs8103862  | 29830747 A | 284.5  | 1.54E-19 | chr:19:29855781 |
| 19 rs10401431 | 29829429 G | 285.6  | 1.61E-19 | chr:19:29855781 |
| 19 rs10402726 | 29826292 T | 285.6  | 1.61E-19 | chr:19:29855781 |
| 19 rs10403475 | 29826676 C | 285.6  | 1.61E-19 | chr:19:29855781 |
| 19 rs10404259 | 29840188 C | 285.6  | 1.61E-19 | chr:19:29855781 |
| 19 rs10405105 | 29833373 T | 285.6  | 1.61E-19 | chr:19:29855781 |
| 19 rs10405159 | 29826311 G | 285.6  | 1.61E-19 | chr:19:29855781 |
| 19 rs10405212 | 29832150 G | 285.6  | 1.61E-19 | chr:19:29855781 |
| 19 rs10405550 | 29839527 C | 285.6  | 1.61E-19 | chr:19:29855781 |
| 19 rs10406707 | 29840277 C | 285.6  | 1.61E-19 | chr:19:29855781 |
| 19 rs10406849 | 29833391 A | 285.6  | 1.61E-19 | chr:19:29855781 |
| 19 rs10407234 | 29833261 C | 285.6  | 1.61E-19 | chr:19:29855781 |
| 19 rs10407240 | 29829500 C | 285.6  | 1.61E-19 | chr:19:29855781 |
| 19 rs10408183 | 29823239 T | 285.6  | 1.61E-19 | chr:19:29855781 |
| 19 rs10409090 | 29823614 G | 285.6  | 1.61E-19 | chr:19:29855781 |

|                |            |       |          |                 |
|----------------|------------|-------|----------|-----------------|
| 19 rs10409875  | 29827166 A | 285.6 | 1.61E-19 | chr:19:29855781 |
| 19 rs10409965  | 29837251 T | 285.6 | 1.61E-19 | chr:19:29855781 |
| 19 rs10410499  | 29827426 T | 285.6 | 1.61E-19 | chr:19:29855781 |
| 19 rs10410585  | 29837528 A | 285.6 | 1.61E-19 | chr:19:29855781 |
| 19 rs10410622  | 29826229 G | 285.6 | 1.61E-19 | chr:19:29855781 |
| 19 rs10411073  | 29826427 C | 285.6 | 1.61E-19 | chr:19:29855781 |
| 19 rs10412879  | 29848889 A | 285.6 | 1.61E-19 | chr:19:29855781 |
| 19 rs10413525  | 29833498 C | 285.6 | 1.61E-19 | chr:19:29855781 |
| 19 rs10413728  | 29833591 C | 285.6 | 1.61E-19 | chr:19:29855781 |
| 19 rs10415713  | 29831541 T | 285.6 | 1.61E-19 | chr:19:29855781 |
| 19 rs10415948  | 29824022 G | 285.6 | 1.61E-19 | chr:19:29855781 |
| 19 rs10416004  | 29831681 T | 285.6 | 1.61E-19 | chr:19:29855781 |
| 19 rs10416173  | 29824125 T | 285.6 | 1.61E-19 | chr:19:29855781 |
| 19 rs10416302  | 29851854 C | 285.6 | 1.61E-19 | chr:19:29855781 |
| 19 rs10416725  | 29831649 C | 285.6 | 1.61E-19 | chr:19:29855781 |
| 19 rs10419949  | 29828341 G | 285.6 | 1.61E-19 | chr:19:29855781 |
| 19 rs10422084  | 29835604 G | 285.6 | 1.61E-19 | chr:19:29855781 |
| 19 rs10422614  | 29835503 G | 285.6 | 1.61E-19 | chr:19:29855781 |
| 19 rs10423486  | 29839393 A | 285.6 | 1.61E-19 | chr:19:29855781 |
| 19 rs10423515  | 29853162 T | 285.6 | 1.61E-19 | chr:19:29855781 |
| 19 rs10423608  | 29852639 G | 285.6 | 1.61E-19 | chr:19:29855781 |
| 19 rs10423847  | 29852955 T | 285.6 | 1.61E-19 | chr:19:29855781 |
| 19 rs10423994  | 29839675 A | 285.6 | 1.61E-19 | chr:19:29855781 |
| 19 rs10424058  | 29853036 G | 285.6 | 1.61E-19 | chr:19:29855781 |
| 19 rs10424081  | 29832472 A | 285.6 | 1.61E-19 | chr:19:29855781 |
| 19 rs10424145  | 29839694 T | 285.6 | 1.61E-19 | chr:19:29855781 |
| 19 rs10424499  | 29848304 T | 285.6 | 1.61E-19 | chr:19:29855781 |
| 19 rs10425325  | 29839190 C | 285.6 | 1.61E-19 | chr:19:29855781 |
| 19 rs10425388  | 29848770 T | 285.6 | 1.61E-19 | chr:19:29855781 |
| 19 rs10425546  | 29832398 T | 285.6 | 1.61E-19 | chr:19:29855781 |
| 19 rs10425993  | 29832603 G | 285.6 | 1.61E-19 | chr:19:29855781 |
| 19 rs10426238  | 29848399 A | 285.6 | 1.61E-19 | chr:19:29855781 |
| 19 rs111393122 | 29839832 C | 285.6 | 1.61E-19 | chr:19:29855781 |
| 19 rs111486428 | 29842638 T | 285.6 | 1.61E-19 | chr:19:29855781 |
| 19 rs1119168   | 29850635 C | 285.6 | 1.61E-19 | chr:19:29855781 |
| 19 rs113093811 | 29852096 A | 285.6 | 1.61E-19 | chr:19:29855781 |
| 19 rs11881314  | 29830193 A | 285.6 | 1.61E-19 | chr:19:29855781 |
| 19 rs11881407  | 29829948 T | 285.6 | 1.61E-19 | chr:19:29855781 |
| 19 rs11881508  | 29830309 G | 285.6 | 1.61E-19 | chr:19:29855781 |
| 19 rs12610959  | 29827626 C | 285.6 | 1.61E-19 | chr:19:29855781 |
| 19 rs13345551  | 29826197 G | 285.6 | 1.61E-19 | chr:19:29855781 |
| 19 rs13346790  | 29825511 A | 285.6 | 1.61E-19 | chr:19:29855781 |
| 19 rs140915866 | 29843043 G | 285.6 | 1.61E-19 | chr:19:29855781 |

|                |            |       |          |                 |
|----------------|------------|-------|----------|-----------------|
| 19 rs147519792 | 29843490 G | 285.6 | 1.61E-19 | chr:19:29855781 |
| 19 rs148091885 | 29842847 A | 285.6 | 1.61E-19 | chr:19:29855781 |
| 19 rs17773922  | 29830629 C | 285.6 | 1.61E-19 | chr:19:29855781 |
| 19 rs2111496   | 29822748 A | 285.6 | 1.61E-19 | chr:19:29855781 |
| 19 rs2111498   | 29822858 A | 285.6 | 1.61E-19 | chr:19:29855781 |
| 19 rs2159563   | 29851209 C | 285.6 | 1.61E-19 | chr:19:29855781 |
| 19 rs2160716   | 29822600 C | 285.6 | 1.61E-19 | chr:19:29855781 |
| 19 rs2193501   | 29834999 A | 285.6 | 1.61E-19 | chr:19:29855781 |
| 19 rs2216340   | 29823183 G | 285.6 | 1.61E-19 | chr:19:29855781 |
| 19 rs28488633  | 29823953 C | 285.6 | 1.61E-19 | chr:19:29855781 |
| 19 rs28546871  | 29821491 C | 285.6 | 1.61E-19 | chr:19:29855781 |
| 19 rs2865869   | 29821979 T | 285.6 | 1.61E-19 | chr:19:29855781 |
| 19 rs2865871   | 29822061 T | 285.6 | 1.61E-19 | chr:19:29855781 |
| 19 rs2865874   | 29825020 A | 285.6 | 1.61E-19 | chr:19:29855781 |
| 19 rs2865875   | 29825068 A | 285.6 | 1.61E-19 | chr:19:29855781 |
| 19 rs2865876   | 29825093 A | 285.6 | 1.61E-19 | chr:19:29855781 |
| 19 rs2865877   | 29825180 C | 285.6 | 1.61E-19 | chr:19:29855781 |
| 19 rs2865884   | 29837991 C | 285.6 | 1.61E-19 | chr:19:29855781 |
| 19 rs2865888   | 29845818 C | 285.6 | 1.61E-19 | chr:19:29855781 |
| 19 rs2865889   | 29847080 A | 285.6 | 1.61E-19 | chr:19:29855781 |
| 19 rs2865890   | 29847162 T | 285.6 | 1.61E-19 | chr:19:29855781 |
| 19 rs2903117   | 29847324 T | 285.6 | 1.61E-19 | chr:19:29855781 |
| 19 rs2903118   | 29853727 C | 285.6 | 1.61E-19 | chr:19:29855781 |
| 19 rs35349289  | 29830485 G | 285.6 | 1.61E-19 | chr:19:29855781 |
| 19 rs35615835  | 29827061 A | 285.6 | 1.61E-19 | chr:19:29855781 |
| 19 rs35754631  | 29852145 C | 285.6 | 1.61E-19 | chr:19:29855781 |
| 19 rs4517901   | 29850859 G | 285.6 | 1.61E-19 | chr:19:29855781 |
| 19 rs4517902   | 29851078 C | 285.6 | 1.61E-19 | chr:19:29855781 |
| 19 rs4517903   | 29851162 C | 285.6 | 1.61E-19 | chr:19:29855781 |
| 19 rs4804877   | 29853608 A | 285.6 | 1.61E-19 | chr:19:29855781 |
| 19 rs4805368   | 29828621 G | 285.6 | 1.61E-19 | chr:19:29855781 |
| 19 rs4805371   | 29853296 T | 285.6 | 1.61E-19 | chr:19:29855781 |
| 19 rs4805372   | 29853415 C | 285.6 | 1.61E-19 | chr:19:29855781 |
| 19 rs5007513   | 29821553 A | 285.6 | 1.61E-19 | chr:19:29855781 |
| 19 rs62108164  | 29828755 C | 285.6 | 1.61E-19 | chr:19:29855781 |
| 19 rs62109915  | 29843088 T | 285.6 | 1.61E-19 | chr:19:29855781 |
| 19 rs62109922  | 29852078 T | 285.6 | 1.61E-19 | chr:19:29855781 |
| 19 rs713444    | 29847933 C | 285.6 | 1.61E-19 | chr:19:29855781 |
| 19 rs7249621   | 29849475 G | 285.6 | 1.61E-19 | chr:19:29855781 |
| 19 rs7249732   | 29849544 G | 285.6 | 1.61E-19 | chr:19:29855781 |
| 19 rs7252876   | 29851938 A | 285.6 | 1.61E-19 | chr:19:29855781 |
| 19 rs7253264   | 29849954 G | 285.6 | 1.61E-19 | chr:19:29855781 |
| 19 rs7253600   | 29850196 C | 285.6 | 1.61E-19 | chr:19:29855781 |

|               |            |       |          |                 |
|---------------|------------|-------|----------|-----------------|
| 19 rs7254854  | 29847388 A | 285.6 | 1.61E-19 | chr:19:29855781 |
| 19 rs7256256  | 29847424 G | 285.6 | 1.61E-19 | chr:19:29855781 |
| 19 rs7258057  | 29844039 G | 285.6 | 1.61E-19 | chr:19:29855781 |
| 19 rs7507511  | 29842044 T | 285.6 | 1.61E-19 | chr:19:29855781 |
| 19 rs7507537  | 29841906 G | 285.6 | 1.61E-19 | chr:19:29855781 |
| 19 rs7507869  | 29841938 C | 285.6 | 1.61E-19 | chr:19:29855781 |
| 19 rs8103034  | 29830764 A | 285.6 | 1.61E-19 | chr:19:29855781 |
| 19 rs8105878  | 29846471 G | 285.6 | 1.61E-19 | chr:19:29855781 |
| 19 rs8106354  | 29831100 A | 285.6 | 1.61E-19 | chr:19:29855781 |
| 19 rs8107378  | 29823430 C | 285.6 | 1.61E-19 | chr:19:29855781 |
| 19 rs8107784  | 29824307 T | 285.6 | 1.61E-19 | chr:19:29855781 |
| 19 rs8108489  | 29846043 C | 285.6 | 1.61E-19 | chr:19:29855781 |
| 19 rs8108995  | 29838275 G | 285.6 | 1.61E-19 | chr:19:29855781 |
| 19 rs8109140  | 29846602 C | 285.6 | 1.61E-19 | chr:19:29855781 |
| 19 rs8109315  | 29838529 C | 285.6 | 1.61E-19 | chr:19:29855781 |
| 19 rs8112403  | 29838791 G | 285.6 | 1.61E-19 | chr:19:29855781 |
| 19 rs9748962  | 29844809 A | 285.6 | 1.61E-19 | chr:19:29855781 |
| 19 rs8107249  | 29834648 G | 285.5 | 1.64E-19 | chr:19:29855781 |
| 19 rs10404828 | 29826537 T | 285.1 | 1.71E-19 | chr:19:29855781 |
| 19 rs10407026 | 29848625 C | 285.1 | 1.71E-19 | chr:19:29855781 |
| 19 rs10411272 | 29826524 A | 285.1 | 1.71E-19 | chr:19:29855781 |
| 19 rs10411752 | 29826775 C | 285.1 | 1.71E-19 | chr:19:29855781 |
| 19 rs10420835 | 29856760 T | 285.1 | 1.71E-19 | chr:19:29855781 |
| 19 rs10421823 | 29835487 A | 285.1 | 1.71E-19 | chr:19:29855781 |
| 19 rs2111497  | 29822857 C | 285.1 | 1.71E-19 | chr:19:29855781 |
| 19 rs2159564  | 29851751 A | 285.1 | 1.71E-19 | chr:19:29855781 |
| 19 rs2159565  | 29847643 A | 285.1 | 1.71E-19 | chr:19:29855781 |
| 19 rs2865872  | 29822103 C | 285.1 | 1.71E-19 | chr:19:29855781 |
| 19 rs2865878  | 29825358 C | 285.1 | 1.71E-19 | chr:19:29855781 |
| 19 rs2865883  | 29837946 T | 285.1 | 1.71E-19 | chr:19:29855781 |
| 19 rs7251831  | 29849926 A | 285.1 | 1.71E-19 | chr:19:29855781 |
| 19 rs7252072  | 29855010 G | 285.1 | 1.71E-19 | chr:19:29855781 |
| 19 rs7258038  | 29844001 G | 285.1 | 1.71E-19 | chr:19:29855781 |
| 19 rs8101272  | 29840005 C | 285.1 | 1.71E-19 | chr:19:29855781 |
| 19 rs8105692  | 29840119 C | 285.1 | 1.71E-19 | chr:19:29855781 |
| 19 rs8109855  | 29828233 T | 285.1 | 1.71E-19 | chr:19:29855781 |
| 19 rs8111162  | 29824369 C | 285.1 | 1.71E-19 | chr:19:29855781 |
| 19 rs8112567  | 29838763 G | 285.1 | 1.71E-19 | chr:19:29855781 |
| 19 rs9749055  | 29845247 G | 285.1 | 1.71E-19 | chr:19:29855781 |
| 19 rs4804875  | 29853497 G | 285.9 | 1.73E-19 | chr:19:29855781 |
| 19 rs4805373  | 29853498 C | 285.9 | 1.73E-19 | chr:19:29855781 |
| 19 rs2193497  | 29821737 A | 283   | 1.77E-19 | chr:19:29855781 |
| 19 rs10406530 | 29832689 C | 283   | 1.79E-19 | chr:19:29855781 |

|                      |            |        |          |                 |
|----------------------|------------|--------|----------|-----------------|
| 19 rs10406567        | 29832755 C | 283    | 1.79E-19 | chr:19:29855781 |
| 19 rs8106019         | 29846532 T | 283    | 1.79E-19 | chr:19:29855781 |
| 19 rs35379433        | 29834698 A | 282.7  | 1.84E-19 | chr:19:29855781 |
| 19 rs2193498         | 29821753 G | 282.5  | 1.88E-19 | chr:19:29855781 |
| 19 rs2903113         | 29821703 T | 282.5  | 1.88E-19 | chr:19:29855781 |
| 19 rs7249741         | 29849562 G | 284.3  | 1.92E-19 | chr:19:29855781 |
| 19 rs2216339         | 29821569 G | 277    | 2.08E-19 | chr:19:29855781 |
| 19 rs35270224        | 29849348 G | 285.8  | 2.08E-19 | chr:19:29855781 |
| 19 rs10405069        | 29833324 A | 279.5  | 2.12E-19 | chr:19:29855781 |
| 19 rs35184298        | 29830558 A | 277.6  | 2.13E-19 | chr:19:29855781 |
| 19 rs10405131        | 29845482 G | 265.6  | 2.19E-19 | chr:19:29855781 |
| 19 rs62109951        | 29854071 T | 8.342  | 2.19E-19 | chr:19:29855781 |
| 19 rs10425705        | 29839737 T | 275.2  | 2.21E-19 | chr:19:29855781 |
| 19 rs62108163        | 29828752 T | 267.5  | 2.25E-19 | chr:19:29855781 |
| 19 rs76154346        | 29894876 A | 7.032  | 4.86E-19 | chr:19:29855781 |
| 19 rs10421211        | 29852874 A | 208.5  | 1.65E-18 | chr:19:29855781 |
| 19 rs1558864         | 29823261 A | 208.5  | 1.65E-18 | chr:19:29855781 |
| 19 rs2903115         | 29837927 T | 208.5  | 1.65E-18 | chr:19:29855781 |
| 19 rs4804876         | 29853605 A | 208.5  | 1.65E-18 | chr:19:29855781 |
| 19 rs61631634        | 29852485 C | 208.5  | 1.65E-18 | chr:19:29855781 |
| 19 rs6509383         | 29857637 C | 208.5  | 1.65E-18 | chr:19:29855781 |
| 19 rs7248644         | 29856939 C | 208.5  | 1.65E-18 | chr:19:29855781 |
| 19 rs35308361        | 29830552 T | 201.8  | 2.62E-18 | chr:19:29855781 |
| 19 rs36032197        | 29813521 T | 0.2189 | 2.02E-17 | chr:19:29855781 |
| 19 rs71363971        | 29813517 C | 0.2189 | 2.02E-17 | chr:19:29855781 |
| 19 rs10401191        | 29792311 C | 0.293  | 2.66E-15 | chr:19:29855781 |
| 19 rs10417711        | 29928712 T | 2.911  | 1.45E-13 | chr:19:29855781 |
| 19 rs10423905        | 29928853 C | 2.911  | 1.45E-13 | chr:19:29855781 |
| 19 rs112026496       | 29929595 C | 2.901  | 1.89E-13 | chr:19:29855781 |
| 19 rs8108536         | 29837645 T | 0.2787 | 1.55E-12 | chr:19:29855781 |
| 19 rs17691755        | 29793376 G | 0.2953 | 4.97E-12 | chr:19:29855781 |
| 19 rs73027078;rs531C | 29845662 C | 0.2865 | 1.62E-10 | chr:19:29855781 |
| 19 rs73027098        | 29850863 C | 0.2765 | 2.14E-10 | chr:19:29855781 |
| 19 rs73024933        | 29806342 T | 0.282  | 3.73E-10 | chr:19:29855781 |
| 19 rs73024931        | 29805085 A | 0.2847 | 3.91E-10 | chr:19:29855781 |
| 19 rs741450          | 29805084 A | 0.2847 | 3.91E-10 | chr:19:29855781 |
| 19 rs111353402       | 29872155 A | 0.2907 | 5.95E-10 | chr:19:29855781 |
| 19 rs73028737        | 29864112 T | 0.2907 | 5.95E-10 | chr:19:29855781 |
| 19 rs2865500         | 29724465 G | 2.403  | 6.27E-10 | chr:19:29855781 |
| 19 rs34451031        | 29724209 G | 2.403  | 6.27E-10 | chr:19:29855781 |
| 19 rs12610669        | 29859234 C | 0.2904 | 6.74E-10 | chr:19:29855781 |
| 19 rs62109337        | 29719609 C | 2.391  | 8.44E-10 | chr:19:29855781 |
| 19 rs147208655       | 29717557 G | 2.385  | 8.74E-10 | chr:19:29855781 |

|                |            |        |          |                 |
|----------------|------------|--------|----------|-----------------|
| 19 rs62109281  | 29689377 T | 2.385  | 8.74E-10 | chr:19:29855781 |
| 19 rs62109284  | 29691443 A | 2.385  | 8.74E-10 | chr:19:29855781 |
| 19 rs35368619  | 29697134 T | 2.384  | 8.76E-10 | chr:19:29855781 |
| 19 rs759628    | 29709012 A | 2.384  | 8.76E-10 | chr:19:29855781 |
| 19 rs1013424   | 29693318 G | 2.349  | 1.36E-09 | chr:19:29855781 |
| 19 rs8106472   | 29708731 C | 2.349  | 1.36E-09 | chr:19:29855781 |
| 19 rs13382050  | 29685293 A | 2.371  | 1.81E-09 | chr:19:29855781 |
| 19 rs10413487  | 29911836 A | 2.618  | 3.05E-09 | chr:19:29855781 |
| 19 rs149790791 | 29720058 G | 0.4532 | 6.45E-09 | chr:19:29855781 |
| 19 rs144973495 | 29881947 A | 8.944  | 2.56E-08 | chr:19:29855781 |
| 19 rs73028769  | 29870748 C | 0.2957 | 2.56E-08 | chr:19:29855781 |
| 19 rs8102600   | 29793077 G | 0.3173 | 6.39E-08 | chr:19:29855781 |
| 19 rs73024995  | 29822198 G | 0.3183 | 6.41E-08 | chr:19:29855781 |
| 19 rs2082454   | 29904906 G | 4.083  | 7.78E-08 | chr:19:29855781 |
| 19 rs11666114  | 29690571 T | 2.19   | 8.04E-08 | chr:19:29855781 |
| 19 rs148037882 | 29717889 T | 2.176  | 9.14E-08 | chr:19:29855781 |
| 19 rs76738117  | 29717976 T | 2.176  | 9.14E-08 | chr:19:29855781 |
| 19 rs59817498  | 29720661 T | 2.168  | 1.12E-07 | chr:19:29855781 |
| 19 rs79476955  | 29830830 T | 5.239  | 1.79E-07 | chr:19:29855781 |
| 19 rs79517164  | 29929531 A | 2.147  | 2.09E-07 | chr:19:29855781 |
| 19 rs741451    | 29805110 T | 11.97  | 2.24E-07 | chr:19:29855781 |
| 19 rs62109920  | 29846656 G | 41.4   | 3.19E-07 | chr:19:29855781 |
| 19 rs4805387   | 29885553 C | 0.4467 | 3.43E-07 | chr:19:29855781 |
| 19 rs4805389   | 29885643 C | 0.4467 | 3.43E-07 | chr:19:29855781 |
| 19 rs4805390   | 29885676 G | 0.4467 | 3.45E-07 | chr:19:29855781 |
| 19 rs9304679   | 29917132 A | 2.303  | 3.62E-07 | chr:19:29855781 |
| 19 rs113291742 | 29722180 C | 0.5005 | 4.21E-07 | chr:19:29855781 |
| 19 rs12984061  | 29885279 A | 0.4485 | 4.33E-07 | chr:19:29855781 |
| 19 rs4805391   | 29885783 C | 0.4485 | 4.33E-07 | chr:19:29855781 |
| 19 rs8102616   | 29930766 T | 0.4943 | 4.56E-07 | chr:19:29855781 |
| 19 rs10408364  | 29927536 A | 2.049  | 7.32E-07 | chr:19:29855781 |
| 19 rs10409760  | 29927476 T | 2.049  | 7.32E-07 | chr:19:29855781 |
| 19 rs12608692  | 29744597 C | 0.5188 | 9.79E-07 | chr:19:29855781 |
| 19 rs11668013  | 29898144 T | 3.143  | 1.04E-06 | chr:19:29855781 |
| 19 rs17703419  | 29898487 G | 3.143  | 1.04E-06 | chr:19:29855781 |
| 19 rs12460620  | 29724086 C | 0.5204 | 1.68E-06 | chr:19:29855781 |
| 19 rs11668806  | 29911302 T | 2.998  | 1.84E-06 | chr:19:29855781 |
| 19 rs4805353   | 29715336 A | 0.5247 | 1.93E-06 | chr:19:29855781 |
| 19 rs13344510  | 29943934 C | 2.432  | 1.93E-06 | chr:19:29855781 |
| 19 rs8111783   | 29890018 G | 0.4947 | 2.05E-06 | chr:19:29855781 |
| 19 rs28520801  | 29940864 T | 2.463  | 2.16E-06 | chr:19:29855781 |
| 19 rs34390849  | 29683699 C | 0.4829 | 2.27E-06 | chr:19:29855781 |
| 19 rs10418830  | 29724513 A | 0.5266 | 2.40E-06 | chr:19:29855781 |

|                |            |        |          |                 |
|----------------|------------|--------|----------|-----------------|
| 19 rs4602149   | 29724111 G | 0.5266 | 2.40E-06 | chr:19:29855781 |
| 19 rs1861793   | 29724904 C | 0.5273 | 2.43E-06 | chr:19:29855781 |
| 19 rs4805388   | 29885613 A | 0.5016 | 2.48E-06 | chr:19:29855781 |
| 19 rs62108165  | 29829502 T | 30.92  | 2.62E-06 | chr:19:29855781 |
| 19 rs62109953  | 29859207 T | 30.92  | 2.62E-06 | chr:19:29855781 |
| 19 rs74323598  | 29882007 A | 3.43   | 3.09E-06 | chr:19:29855781 |
| 19 rs7259598   | 29886029 C | 0.484  | 3.10E-06 | chr:19:29855781 |
| 19 rs10405611  | 29722506 T | 0.5308 | 3.19E-06 | chr:19:29855781 |
| 19 rs2080622   | 29716759 A | 0.5308 | 3.19E-06 | chr:19:29855781 |
| 19 rs10405653  | 29722551 G | 0.531  | 3.20E-06 | chr:19:29855781 |
| 19 rs10412630  | 29714573 G | 0.531  | 3.20E-06 | chr:19:29855781 |
| 19 rs10412657  | 29716831 C | 0.531  | 3.20E-06 | chr:19:29855781 |
| 19 rs10418421  | 29714673 C | 0.531  | 3.20E-06 | chr:19:29855781 |
| 19 rs1125039   | 29710720 T | 0.531  | 3.20E-06 | chr:19:29855781 |
| 19 rs2011073   | 29713043 T | 0.531  | 3.20E-06 | chr:19:29855781 |
| 19 rs2160736   | 29715594 C | 0.531  | 3.20E-06 | chr:19:29855781 |
| 19 rs4805348   | 29711778 C | 0.531  | 3.20E-06 | chr:19:29855781 |
| 19 rs4805349   | 29714261 T | 0.531  | 3.20E-06 | chr:19:29855781 |
| 19 rs4805350   | 29714355 A | 0.531  | 3.20E-06 | chr:19:29855781 |
| 19 rs4805351   | 29715110 T | 0.531  | 3.20E-06 | chr:19:29855781 |
| 19 rs8103416   | 29711054 C | 0.531  | 3.20E-06 | chr:19:29855781 |
| 19 rs11083863  | 29725786 A | 0.5331 | 3.39E-06 | chr:19:29855781 |
| 19 rs10853807  | 29919983 G | 0.4336 | 4.02E-06 | chr:19:29855781 |
| 19 rs117284068 | 29813491 A | 28.84  | 4.13E-06 | chr:19:29855781 |
| 19 rs12610896  | 29812728 A | 28.84  | 4.13E-06 | chr:19:29855781 |
| 19 rs2011889   | 29800978 T | 28.77  | 4.20E-06 | chr:19:29855781 |
| 19 rs10420904  | 29703089 T | 0.537  | 4.39E-06 | chr:19:29855781 |
| 19 rs2865499   | 29707275 G | 0.537  | 4.39E-06 | chr:19:29855781 |
| 19 rs3760840   | 29706112 T | 0.537  | 4.39E-06 | chr:19:29855781 |
| 19 rs4239556   | 29708394 A | 0.537  | 4.39E-06 | chr:19:29855781 |
| 19 rs4805346   | 29708650 A | 0.537  | 4.39E-06 | chr:19:29855781 |
| 19 rs4805347   | 29710233 C | 0.537  | 4.39E-06 | chr:19:29855781 |
| 19 rs6509306   | 29710038 T | 0.537  | 4.39E-06 | chr:19:29855781 |
| 19 rs724320    | 29695371 T | 0.537  | 4.39E-06 | chr:19:29855781 |
| 19 rs73526479  | 29691589 T | 0.537  | 4.39E-06 | chr:19:29855781 |
| 19 rs9304664   | 29697907 A | 0.537  | 4.39E-06 | chr:19:29855781 |
| 19 rs10423879  | 29948025 T | 2.319  | 4.76E-06 | chr:19:29855781 |
| 19 rs34649518  | 29891193 G | 0.51   | 5.13E-06 | chr:19:29855781 |
| 19 rs10413623  | 29938355 A | 2.337  | 5.59E-06 | chr:19:29855781 |
| 19 rs8111626   | 29939575 A | 2.337  | 5.59E-06 | chr:19:29855781 |
| 19 rs8111712   | 29939615 T | 2.337  | 5.59E-06 | chr:19:29855781 |
| 19 rs12971585  | 29720102 A | 0.5445 | 5.66E-06 | chr:19:29855781 |
| 19 rs73539073  | 29941575 C | 2.33   | 6.71E-06 | chr:19:29855781 |



|                |             |        |          |                 |
|----------------|-------------|--------|----------|-----------------|
| 19 rs8106792   | 29946968 T  | 2.33   | 6.71E-06 | chr:19:29855781 |
| 19 rs79165424  | 29916920 C  | 4.019  | 7.22E-06 | chr:19:29855781 |
| 19 rs569196726 | 29881464 A  | 2.909  | 7.89E-06 | chr:19:29855781 |
| 19 rs76688046  | 29938464 C  | 2.441  | 8.68E-06 | chr:19:29855781 |
| 19 rs10853806  | 29919866 T  | 0.4483 | 8.83E-06 | chr:19:29855781 |
| 19 rs73027005  | 29824834 C  | 0.3626 | 9.42E-06 | chr:19:29855781 |
| 19 rs12459178  | 29683731 A  | 0.5484 | 9.95E-06 | chr:19:29855781 |
| 19 rs150832031 | 29720064 C  | 0.5541 | 1.03E-05 | chr:19:29855781 |
| 19 rs7256832   | 29894805 G  | 0.5026 | 1.07E-05 | chr:19:29855781 |
| 19 rs3045478   | 29868529 G  | 6.5    | 1.08E-05 | chr:19:29855781 |
| 19 rs73923824  | 29933396 A  | 2.359  | 1.22E-05 | chr:19:29855781 |
| 19 rs7248795   | 29893285 G  | 0.5304 | 1.28E-05 | chr:19:29855781 |
| 19 rs12972635  | 29897019 C  | 0.4701 | 1.34E-05 | chr:19:29855781 |
| 19 rs11666495  | 29923273 G  | 2.629  | 1.36E-05 | chr:19:29855781 |
| 19 rs61156061  | 29914752 A  | 2.629  | 1.36E-05 | chr:19:29855781 |
| 19 rs138782371 | 29718666 C  | 0.5045 | 1.38E-05 | chr:19:29855781 |
| 19 rs7251918   | 29722890 G  | 0.5045 | 1.38E-05 | chr:19:29855781 |
| 19 rs8112681   | 29707071 G  | 0.5045 | 1.38E-05 | chr:19:29855781 |
| 19 rs4804867   | 29682383 A  | 0.5598 | 1.76E-05 | chr:19:29855781 |
| 19 rs73028729  | 29862990 A  | 0.2636 | 1.80E-05 | chr:19:29855781 |
| 19 rs11672945  | 29968998 G  | 1.922  | 1.82E-05 | chr:19:29855781 |
| 19 rs7246647   | 29978054 C  | 1.89   | 2.13E-05 | chr:19:29855781 |
| 19 rs572557241 | 29725952 C  | 2.323  | 2.54E-05 | chr:19:29855781 |
| 19 rs36060857  | 29898561 A  | 0.4776 | 2.59E-05 | chr:19:29855781 |
| 19 rs73014561  | 29899008 A  | 0.4776 | 2.59E-05 | chr:19:29855781 |
| 19 rs34894094  | 29894875 T  | 0.4857 | 2.99E-05 | chr:19:29855781 |
| 19 rs11669309  | 29892297 T  | 0.4864 | 3.02E-05 | chr:19:29855781 |
| 19 rs17717398  | 29902465 A  | 0.4832 | 3.06E-05 | chr:19:29855781 |
| 19 rs4805395   | 29900360 T  | 0.3593 | 3.10E-05 | chr:19:29855781 |
| 1 rs12034487   | 111805474 G | 14.5   | 1.61E-27 | chr:1:111802591 |
| 1 rs10857867   | 111810878 A | 14.29  | 2.87E-27 | chr:1:111802591 |
| 1 rs4259643    | 111814404 A | 31.8   | 2.17E-26 | chr:1:111802591 |
| 1 rs2104408    | 111810753 C | 96.24  | 5.01E-25 | chr:1:111802591 |
| 1 rs10776719   | 111808180 T | 96.13  | 5.51E-25 | chr:1:111802591 |
| 1 rs10776720   | 111808276 A | 96.13  | 5.51E-25 | chr:1:111802591 |
| 1 rs1590499    | 111804651 A | 96.13  | 5.51E-25 | chr:1:111802591 |
| 1 rs1853784    | 111804717 C | 96.13  | 5.51E-25 | chr:1:111802591 |
| 1 rs2494012    | 111808937 T | 96.13  | 5.51E-25 | chr:1:111802591 |
| 1 rs2764549    | 111808546 C | 96.13  | 5.51E-25 | chr:1:111802591 |
| 1 rs2820062    | 111805966 G | 96.13  | 5.51E-25 | chr:1:111802591 |
| 1 rs2764538    | 111804370 A | 95.72  | 6.08E-25 | chr:1:111802591 |
| 1 rs2820057    | 111811175 G | 92.3   | 7.34E-25 | chr:1:111802591 |
| 1 rs2820058    | 111811160 C | 92.3   | 7.34E-25 | chr:1:111802591 |

|              |             |        |          |                 |
|--------------|-------------|--------|----------|-----------------|
| 1 rs3118209  | 111812196 T | 92.3   | 7.34E-25 | chr:1:111802591 |
| 1 rs3118208  | 111812709 A | 92.85  | 7.64E-25 | chr:1:111802591 |
| 1 rs4240528  | 111802958 C | 0.1455 | 2.21E-23 | chr:1:111802591 |
| 1 rs12048213 | 111821434 T | 7.364  | 7.45E-23 | chr:1:111802591 |
| 1 rs12139505 | 111816865 A | 7.364  | 7.45E-23 | chr:1:111802591 |
| 1 rs10857869 | 111822699 T | 7.242  | 1.41E-22 | chr:1:111802591 |
| 1 rs10857872 | 111838382 A | 6.418  | 1.49E-22 | chr:1:111802591 |
| 1 rs11102240 | 111844621 G | 6.418  | 1.49E-22 | chr:1:111802591 |
| 1 rs7411387  | 111837135 C | 6.418  | 1.49E-22 | chr:1:111802591 |
| 1 rs11102229 | 111808446 G | 0.1575 | 2.79E-22 | chr:1:111802591 |
| 1 rs34487304 | 111804011 A | 0.1575 | 2.79E-22 | chr:1:111802591 |
| 1 rs3891601  | 111805489 G | 0.1575 | 2.79E-22 | chr:1:111802591 |
| 1 rs59772828 | 111808783 A | 0.1575 | 2.79E-22 | chr:1:111802591 |
| 1 rs4240529  | 111824744 A | 6.951  | 2.98E-22 | chr:1:111802591 |
| 1 rs11588487 | 111812241 T | 0.1587 | 3.74E-22 | chr:1:111802591 |
| 1 rs12733155 | 111812412 T | 0.1587 | 3.74E-22 | chr:1:111802591 |
| 1 rs12724976 | 111813174 C | 0.1647 | 1.08E-21 | chr:1:111802591 |
| 1 rs41281400 | 111827898 A | 0.192  | 2.91E-19 | chr:1:111802591 |
| 1 rs12140893 | 111812832 A | 9.548  | 5.19E-19 | chr:1:111802591 |
| 1 rs11102233 | 111827749 T | 6.017  | 1.02E-18 | chr:1:111802591 |
| 1 rs11102232 | 111818450 C | 0.1979 | 1.17E-18 | chr:1:111802591 |
| 1 rs11589353 | 111822680 G | 0.1979 | 1.17E-18 | chr:1:111802591 |
| 1 rs11589375 | 111822887 G | 0.1979 | 1.17E-18 | chr:1:111802591 |
| 1 rs12411206 | 111822962 C | 0.1979 | 1.17E-18 | chr:1:111802591 |
| 1 rs12567865 | 111817250 A | 0.1979 | 1.17E-18 | chr:1:111802591 |
| 1 rs12758301 | 111822132 C | 0.1979 | 1.17E-18 | chr:1:111802591 |
| 1 rs35693821 | 111816294 G | 0.1979 | 1.17E-18 | chr:1:111802591 |
| 1 rs35884994 | 111816144 C | 0.1979 | 1.17E-18 | chr:1:111802591 |
| 1 rs4323713  | 111823220 T | 0.1979 | 1.17E-18 | chr:1:111802591 |
| 1 rs5029527  | 111818923 T | 0.1979 | 1.17E-18 | chr:1:111802591 |
| 1 rs12401376 | 111828474 A | 0.1954 | 2.73E-18 | chr:1:111802591 |
| 1 rs58982671 | 111826007 T | 0.1954 | 2.73E-18 | chr:1:111802591 |
| 1 rs12738135 | 111809571 G | 0.2436 | 8.36E-17 | chr:1:111802591 |
| 1 rs12135216 | 111809857 G | 0.2479 | 1.20E-16 | chr:1:111802591 |
| 1 rs10857866 | 111810876 A | 7.032  | 6.62E-14 | chr:1:111802591 |
| 1 rs12139408 | 111816538 A | 4.543  | 8.05E-14 | chr:1:111802591 |
| 1 rs12728726 | 111819239 C | 4.543  | 8.05E-14 | chr:1:111802591 |
| 1 rs10776722 | 111828464 C | 4.372  | 2.17E-13 | chr:1:111802591 |
| 1 rs7517252  | 111828817 A | 4.372  | 2.17E-13 | chr:1:111802591 |
| 1 rs12140873 | 111826055 G | 4.38   | 2.47E-13 | chr:1:111802591 |
| 1 rs6694890  | 111827901 T | 4.38   | 2.47E-13 | chr:1:111802591 |
| 1 rs12023459 | 111832973 T | 3.783  | 3.37E-13 | chr:1:111802591 |
| 1 rs34828808 | 111836752 A | 3.783  | 3.37E-13 | chr:1:111802591 |

|              |             |        |          |                 |
|--------------|-------------|--------|----------|-----------------|
| 1 rs4838897  | 111833661 T | 3.783  | 3.37E-13 | chr:1:111802591 |
| 1 rs4838899  | 111834050 G | 3.783  | 3.37E-13 | chr:1:111802591 |
| 1 rs61803522 | 111838731 G | 3.783  | 3.37E-13 | chr:1:111802591 |
| 1 rs61803519 | 111832469 T | 4.573  | 4.17E-13 | chr:1:111802591 |
| 1 rs4376736  | 111841944 T | 3.718  | 5.31E-13 | chr:1:111802591 |
| 1 rs4838905  | 111840470 T | 3.718  | 5.31E-13 | chr:1:111802591 |
| 1 rs72981843 | 111808146 C | 12.9   | 1.05E-12 | chr:1:111802591 |
| 1 rs10857871 | 111829633 C | 4.013  | 2.92E-12 | chr:1:111802591 |
| 1 rs2764548  | 111808585 T | 0.3027 | 3.15E-12 | chr:1:111802591 |
| 1 rs2820059  | 111808392 G | 0.3027 | 3.15E-12 | chr:1:111802591 |
| 1 rs3122593  | 111810965 A | 0.3034 | 4.24E-12 | chr:1:111802591 |
| 1 rs11102231 | 111817468 A | 0.3016 | 4.62E-12 | chr:1:111802591 |
| 1 rs2494013  | 111813821 A | 0.3044 | 5.85E-12 | chr:1:111802591 |
| 1 rs3118206  | 111814461 G | 0.3044 | 5.85E-12 | chr:1:111802591 |
| 1 rs3122594  | 111813735 T | 0.3044 | 5.85E-12 | chr:1:111802591 |
| 1 rs3122595  | 111813951 T | 0.3044 | 5.85E-12 | chr:1:111802591 |
| 1 rs1575722  | 111803894 C | 4.444  | 6.64E-12 | chr:1:111802591 |
| 1 rs2494011  | 111806553 G | 4.444  | 6.64E-12 | chr:1:111802591 |
| 1 rs6687390  | 111825226 T | 0.3034 | 7.87E-12 | chr:1:111802591 |
| 1 rs12028469 | 111822648 A | 4.487  | 8.47E-12 | chr:1:111802591 |
| 1 rs2764550  | 111808478 A | 4.354  | 1.12E-11 | chr:1:111802591 |
| 1 rs2820060  | 111807851 C | 4.354  | 1.12E-11 | chr:1:111802591 |
| 1 rs3118204  | 111810952 A | 4.311  | 1.29E-11 | chr:1:111802591 |
| 1 rs2477577  | 111809238 C | 4.299  | 1.91E-11 | chr:1:111802591 |
| 1 rs12127313 | 111854120 A | 5.078  | 2.10E-11 | chr:1:111802591 |
| 1 rs12125435 | 111850588 C | 5.046  | 2.45E-11 | chr:1:111802591 |
| 1 rs12128793 | 111850511 A | 5.046  | 2.45E-11 | chr:1:111802591 |
| 1 rs12130874 | 111852353 T | 5.046  | 2.45E-11 | chr:1:111802591 |
| 1 rs41282500 | 111858200 A | 5.046  | 2.45E-11 | chr:1:111802591 |
| 1 rs56292601 | 111851233 T | 5.046  | 2.45E-11 | chr:1:111802591 |
| 1 rs56387509 | 111853174 T | 5.046  | 2.45E-11 | chr:1:111802591 |
| 1 rs61756687 | 111857951 G | 5.046  | 2.45E-11 | chr:1:111802591 |
| 1 rs72693265 | 111859301 T | 5.046  | 2.45E-11 | chr:1:111802591 |
| 1 rs12402658 | 111840855 G | 0.3657 | 3.49E-11 | chr:1:111802591 |
| 1 rs2494014  | 111819921 G | 4.037  | 3.61E-11 | chr:1:111802591 |
| 1 rs11578207 | 111837366 C | 0.3678 | 4.94E-11 | chr:1:111802591 |
| 1 rs11578209 | 111837382 A | 0.3678 | 4.94E-11 | chr:1:111802591 |
| 1 rs12410579 | 111835047 G | 0.3678 | 4.94E-11 | chr:1:111802591 |
| 1 rs12410848 | 111834984 C | 0.3678 | 4.94E-11 | chr:1:111802591 |
| 1 rs12562861 | 111838002 A | 0.3678 | 4.94E-11 | chr:1:111802591 |
| 1 rs12739716 | 111836168 T | 0.3678 | 4.94E-11 | chr:1:111802591 |
| 1 rs12752158 | 111833937 A | 0.3678 | 4.94E-11 | chr:1:111802591 |
| 1 rs12755376 | 111836023 T | 0.3678 | 4.94E-11 | chr:1:111802591 |

|               |             |        |          |                 |
|---------------|-------------|--------|----------|-----------------|
| 1 rs35360118  | 111839319 T | 0.3678 | 4.94E-11 | chr:1:111802591 |
| 1 rs35779360  | 111839515 G | 0.3678 | 4.94E-11 | chr:1:111802591 |
| 1 rs4406630   | 111834733 T | 0.3678 | 4.94E-11 | chr:1:111802591 |
| 1 rs4546920   | 111836846 T | 0.3678 | 4.94E-11 | chr:1:111802591 |
| 1 rs4546921   | 111836868 T | 0.3678 | 4.94E-11 | chr:1:111802591 |
| 1 rs4562620   | 111835713 A | 0.3678 | 4.94E-11 | chr:1:111802591 |
| 1 rs4838901   | 111838605 G | 0.3678 | 4.94E-11 | chr:1:111802591 |
| 1 rs4838902   | 111838694 T | 0.3678 | 4.94E-11 | chr:1:111802591 |
| 1 rs4838903   | 111838832 T | 0.3678 | 4.94E-11 | chr:1:111802591 |
| 1 rs4838904   | 111838962 C | 0.3678 | 4.94E-11 | chr:1:111802591 |
| 1 rs4839117   | 111839037 G | 0.3678 | 4.94E-11 | chr:1:111802591 |
| 1 rs6669614   | 111840130 T | 0.3678 | 4.94E-11 | chr:1:111802591 |
| 1 rs7514165   | 111836591 G | 0.3678 | 4.94E-11 | chr:1:111802591 |
| 1 rs7525672   | 111836444 G | 0.3678 | 4.94E-11 | chr:1:111802591 |
| 1 rs7539071   | 111841089 G | 0.3678 | 4.94E-11 | chr:1:111802591 |
| 1 rs78611689  | 111840605 G | 0.3678 | 4.94E-11 | chr:1:111802591 |
| 1 rs117495492 | 111815317 A | 3.959  | 6.03E-11 | chr:1:111802591 |
| 1 rs17027272  | 111823851 A | 3.959  | 6.03E-11 | chr:1:111802591 |
| 1 rs1925358   | 111820367 T | 3.959  | 6.03E-11 | chr:1:111802591 |
| 1 rs4838895   | 111821459 T | 3.959  | 6.03E-11 | chr:1:111802591 |
| 1 rs61803493  | 111820997 C | 3.959  | 6.03E-11 | chr:1:111802591 |
| 1 rs9429593   | 111823315 T | 3.959  | 6.03E-11 | chr:1:111802591 |
| 1 rs11584291  | 111846803 T | 0.3749 | 8.25E-11 | chr:1:111802591 |
| 1 rs12562929  | 111846331 G | 0.3749 | 8.25E-11 | chr:1:111802591 |
| 1 rs12563147  | 111846300 C | 0.3749 | 8.25E-11 | chr:1:111802591 |
| 1 rs12563158  | 111846416 G | 0.3749 | 8.25E-11 | chr:1:111802591 |
| 1 rs12727314  | 111846533 T | 0.3749 | 8.25E-11 | chr:1:111802591 |
| 1 rs12734016  | 111842985 C | 0.3749 | 8.25E-11 | chr:1:111802591 |
| 1 rs12735055  | 111842947 A | 0.3749 | 8.25E-11 | chr:1:111802591 |
| 1 rs12735944  | 111844348 T | 0.3749 | 8.25E-11 | chr:1:111802591 |
| 1 rs12736391  | 111844599 C | 0.3749 | 8.25E-11 | chr:1:111802591 |
| 1 rs12739896  | 111844175 G | 0.3749 | 8.25E-11 | chr:1:111802591 |
| 1 rs12751372  | 111846603 C | 0.3749 | 8.25E-11 | chr:1:111802591 |
| 1 rs12753801  | 111844522 C | 0.3749 | 8.25E-11 | chr:1:111802591 |
| 1 rs12755026  | 111844556 T | 0.3749 | 8.25E-11 | chr:1:111802591 |
| 1 rs12758947  | 111842897 A | 0.3749 | 8.25E-11 | chr:1:111802591 |
| 1 rs142458373 | 111842752 C | 0.3749 | 8.25E-11 | chr:1:111802591 |
| 1 rs28826608  | 111843891 T | 0.3749 | 8.25E-11 | chr:1:111802591 |
| 1 rs28849976  | 111844011 A | 0.3749 | 8.25E-11 | chr:1:111802591 |
| 1 rs28857204  | 111844087 T | 0.3749 | 8.25E-11 | chr:1:111802591 |
| 1 rs28889692  | 111844007 G | 0.3749 | 8.25E-11 | chr:1:111802591 |
| 1 rs34306809  | 111845903 A | 0.3749 | 8.25E-11 | chr:1:111802591 |
| 1 rs34971749  | 111845082 T | 0.3749 | 8.25E-11 | chr:1:111802591 |

|              |             |        |          |                 |
|--------------|-------------|--------|----------|-----------------|
| 1 rs35764762 | 111843214 G | 0.3749 | 8.25E-11 | chr:1:111802591 |
| 1 rs35888305 | 111845241 C | 0.3749 | 8.25E-11 | chr:1:111802591 |
| 1 rs61382086 | 111842094 T | 0.3749 | 8.25E-11 | chr:1:111802591 |
| 1 rs66475510 | 111845588 A | 0.3749 | 8.25E-11 | chr:1:111802591 |
| 1 rs6688167  | 111841315 C | 0.3749 | 8.25E-11 | chr:1:111802591 |
| 1 rs6688184  | 111841367 C | 0.3749 | 8.25E-11 | chr:1:111802591 |
| 1 rs6699184  | 111841409 A | 0.3749 | 8.25E-11 | chr:1:111802591 |
| 1 rs7413908  | 111842524 T | 0.3749 | 8.25E-11 | chr:1:111802591 |
| 1 rs77805328 | 111842813 A | 0.3749 | 8.25E-11 | chr:1:111802591 |
| 1 rs75510830 | 111842692 C | 0.3742 | 8.29E-11 | chr:1:111802591 |
| 1 rs76437095 | 111842681 C | 0.3742 | 8.29E-11 | chr:1:111802591 |
| 1 rs79096750 | 111842693 A | 0.3742 | 8.29E-11 | chr:1:111802591 |
| 1 rs4460637  | 111847226 T | 0.3775 | 1.09E-10 | chr:1:111802591 |
| 1 rs28805711 | 111844103 T | 0.3783 | 1.16E-10 | chr:1:111802591 |
| 1 rs11809538 | 111801853 A | 0.328  | 1.29E-10 | chr:1:111802591 |
| 1 rs3927471  | 111802912 C | 0.328  | 1.29E-10 | chr:1:111802591 |
| 1 rs61808280 | 111807687 C | 0.328  | 1.29E-10 | chr:1:111802591 |
| 1 rs7550145  | 111804157 T | 0.328  | 1.29E-10 | chr:1:111802591 |
| 1 rs9660405  | 111808946 C | 0.328  | 1.29E-10 | chr:1:111802591 |
| 1 rs75179058 | 111812021 T | 0.2337 | 1.31E-10 | chr:1:111802591 |
| 1 rs4575084  | 111826609 A | 3.147  | 1.31E-10 | chr:1:111802591 |
| 1 rs12137755 | 111877332 A | 4.884  | 1.57E-10 | chr:1:111802591 |
| 1 rs72693268 | 111868761 A | 4.884  | 1.57E-10 | chr:1:111802591 |
| 1 rs6537690  | 111824209 A | 0.3242 | 1.73E-10 | chr:1:111802591 |
| 1 rs6655936  | 111821516 G | 0.3242 | 1.73E-10 | chr:1:111802591 |
| 1 rs6698373  | 111816497 A | 0.3242 | 1.73E-10 | chr:1:111802591 |
| 1 rs6702380  | 111818052 A | 0.3242 | 1.73E-10 | chr:1:111802591 |
| 1 rs7512322  | 111818550 A | 0.3242 | 1.73E-10 | chr:1:111802591 |
| 1 rs9659635  | 111808642 A | 0.3325 | 2.00E-10 | chr:1:111802591 |
| 1 rs10857870 | 111829220 C | 0.3226 | 2.22E-10 | chr:1:111802591 |
| 1 rs10494131 | 111824711 C | 0.3253 | 2.36E-10 | chr:1:111802591 |
| 1 rs6671713  | 111815790 T | 0.33   | 2.38E-10 | chr:1:111802591 |
| 1 rs10494134 | 111859912 T | 2.643  | 2.40E-10 | chr:1:111802591 |
| 1 rs10857875 | 111862502 G | 2.643  | 2.40E-10 | chr:1:111802591 |
| 1 rs12137697 | 111869948 T | 4.66   | 2.63E-10 | chr:1:111802591 |
| 1 rs12140599 | 111872120 A | 4.66   | 2.63E-10 | chr:1:111802591 |
| 1 rs56063302 | 111874822 A | 4.66   | 2.63E-10 | chr:1:111802591 |
| 1 rs6657334  | 111876213 T | 4.66   | 2.63E-10 | chr:1:111802591 |
| 1 rs6703883  | 111820644 G | 0.3288 | 2.67E-10 | chr:1:111802591 |
| 1 rs41282488 | 111828423 T | 0.3264 | 3.26E-10 | chr:1:111802591 |
| 1 rs6688201  | 111826023 G | 0.3264 | 3.26E-10 | chr:1:111802591 |
| 1 rs6688325  | 111826175 T | 0.3264 | 3.26E-10 | chr:1:111802591 |
| 1 rs6537691  | 111824255 T | 0.3294 | 3.35E-10 | chr:1:111802591 |

|               |             |        |          |                 |
|---------------|-------------|--------|----------|-----------------|
| 1 rs4272622   | 111825435 C | 3.561  | 3.66E-10 | chr:1:111802591 |
| 1 rs4351635   | 111825754 T | 3.561  | 3.66E-10 | chr:1:111802591 |
| 1 rs11800770  | 111813650 T | 0.3347 | 3.67E-10 | chr:1:111802591 |
| 1 rs56282594  | 111897538 A | 2.682  | 3.76E-10 | chr:1:111802591 |
| 1 rs2886145   | 111898694 G | 2.689  | 5.75E-10 | chr:1:111802591 |
| 1 rs6696410   | 111840987 A | 0.3459 | 6.00E-10 | chr:1:111802591 |
| 1 rs7525014   | 111835498 A | 0.3459 | 6.00E-10 | chr:1:111802591 |
| 1 rs12119577  | 111878969 T | 4.332  | 8.10E-10 | chr:1:111802591 |
| 1 rs145619795 | 111883203 C | 4.332  | 8.10E-10 | chr:1:111802591 |
| 1 rs146591607 | 111826106 T | 0.2572 | 8.80E-10 | chr:1:111802591 |
| 1 rs58830602  | 111898574 A | 2.639  | 8.99E-10 | chr:1:111802591 |
| 1 rs375681065 | 111882052 T | 4.792  | 1.03E-09 | chr:1:111802591 |
| 1 rs12064178  | 111841263 G | 0.3518 | 4.95E-09 | chr:1:111802591 |
| 1 rs12127136  | 111843916 A | 2.537  | 5.26E-09 | chr:1:111802591 |
| 1 rs113703527 | 111840317 A | 0.353  | 5.33E-09 | chr:1:111802591 |
| 1 rs6537695   | 111854223 C | 0.4242 | 7.42E-09 | chr:1:111802591 |
| 1 rs12027550  | 111821946 G | 10.07  | 9.66E-09 | chr:1:111802591 |
| 1 rs12047673  | 111823173 C | 10.07  | 9.66E-09 | chr:1:111802591 |
| 1 rs72981857  | 111812089 T | 9.81   | 1.45E-08 | chr:1:111802591 |
| 1 rs12144594  | 111834306 A | 0.3763 | 1.48E-08 | chr:1:111802591 |
| 1 rs58013456  | 111826483 G | 7.86   | 1.96E-08 | chr:1:111802591 |
| 1 rs10494132  | 111832223 C | 0.3825 | 2.29E-08 | chr:1:111802591 |
| 1 rs111379430 | 111902566 T | 3.141  | 2.30E-08 | chr:1:111802591 |
| 1 rs11102238  | 111843082 G | 3.56   | 2.37E-08 | chr:1:111802591 |
| 1 rs12026810  | 111846599 G | 3.56   | 2.37E-08 | chr:1:111802591 |
| 1 rs11102258  | 111900279 T | 3.143  | 2.50E-08 | chr:1:111802591 |
| 1 rs11102262  | 111904746 C | 3.143  | 2.50E-08 | chr:1:111802591 |
| 1 rs12117253  | 111904619 A | 3.143  | 2.50E-08 | chr:1:111802591 |
| 1 rs12124835  | 111904361 T | 3.143  | 2.50E-08 | chr:1:111802591 |
| 1 rs1317560   | 111899710 T | 3.143  | 2.50E-08 | chr:1:111802591 |
| 1 rs1415387   | 111902104 A | 3.143  | 2.50E-08 | chr:1:111802591 |
| 1 rs1582119   | 111898977 C | 3.143  | 2.50E-08 | chr:1:111802591 |
| 1 rs2225855   | 111898562 T | 3.143  | 2.50E-08 | chr:1:111802591 |
| 1 rs4486449   | 111899271 G | 3.143  | 2.50E-08 | chr:1:111802591 |
| 1 rs7540576   | 111895997 G | 2.27   | 2.83E-08 | chr:1:111802591 |
| 1 rs6537697   | 111895781 T | 2.24   | 4.19E-08 | chr:1:111802591 |
| 1 rs7516021   | 111898423 G | 2.24   | 4.19E-08 | chr:1:111802591 |
| 1 rs7517237   | 111896079 T | 2.24   | 4.19E-08 | chr:1:111802591 |
| 1 rs7540676   | 111896112 T | 2.24   | 4.19E-08 | chr:1:111802591 |
| 1 rs1058530   | 111895487 T | 2.215  | 5.72E-08 | chr:1:111802591 |
| 1 rs68007552  | 111898513 C | 2.21   | 5.95E-08 | chr:1:111802591 |
| 1 rs11102257  | 111897335 G | 2.214  | 6.81E-08 | chr:1:111802591 |
| 1 rs12022879  | 111897232 C | 2.214  | 6.81E-08 | chr:1:111802591 |

|    |             |           |   |        |          |                 |
|----|-------------|-----------|---|--------|----------|-----------------|
| 1  | rs7515840   | 111898228 | T | 2.214  | 6.81E-08 | chr:1:111802591 |
| 1  | rs3122591   | 111810174 | C | 0.4476 | 1.83E-07 | chr:1:111802591 |
| 1  | rs2820082   | 111800472 | T | 0.3554 | 2.35E-07 | chr:1:111802591 |
| 1  | rs111424951 | 111840315 | C | 0.329  | 3.51E-07 | chr:1:111802591 |
| 1  | rs72693247  | 111820852 | T | 9.172  | 5.17E-07 | chr:1:111802591 |
| 1  | rs78346400  | 111844342 | G | 0.509  | 6.86E-07 | chr:1:111802591 |
| 1  | rs6688274   | 111841418 | G | 0.4938 | 6.95E-07 | chr:1:111802591 |
| 1  | rs75478608  | 111792100 | A | 3.706  | 8.29E-07 | chr:1:111802591 |
| 1  | rs78134644  | 111791777 | C | 3.706  | 8.29E-07 | chr:1:111802591 |
| 1  | rs76082189  | 111797767 | G | 3.62   | 9.15E-07 | chr:1:111802591 |
| 1  | rs76474119  | 111797926 | C | 3.62   | 9.15E-07 | chr:1:111802591 |
| 1  | rs78424795  | 111797873 | A | 3.62   | 9.15E-07 | chr:1:111802591 |
| 1  | rs78619070  | 111797874 | C | 3.62   | 9.15E-07 | chr:1:111802591 |
| 1  | rs2820073   | 111857685 | C | 0.4074 | 9.30E-07 | chr:1:111802591 |
| 1  | rs1361049   | 111908713 | C | 0.4916 | 1.26E-06 | chr:1:111802591 |
| 1  | rs569193379 | 111802590 | C | 9.572  | 2.25E-06 | chr:1:111802591 |
| 1  | rs2820072   | 111857485 | A | 0.52   | 4.88E-06 | chr:1:111802591 |
| 1  | rs1106189   | 111899929 | A | 2.135  | 7.96E-06 | chr:1:111802591 |
| 1  | rs11102261  | 111904161 | G | 2.135  | 7.96E-06 | chr:1:111802591 |
| 1  | rs1591638   | 111899108 | G | 2.135  | 7.96E-06 | chr:1:111802591 |
| 1  | rs2364678   | 111899235 | T | 2.135  | 7.96E-06 | chr:1:111802591 |
| 1  | rs2364679   | 111899301 | C | 2.135  | 7.96E-06 | chr:1:111802591 |
| 1  | rs2364680   | 111899463 | T | 2.135  | 7.96E-06 | chr:1:111802591 |
| 1  | rs67205435  | 111900008 | T | 2.135  | 7.96E-06 | chr:1:111802591 |
| 1  | rs7545946   | 111933151 | C | 1.94   | 8.98E-06 | chr:1:111802591 |
| 1  | rs7519964   | 111859286 | A | 0.5336 | 1.03E-05 | chr:1:111802591 |
| 1  | rs7530251   | 111859300 | G | 0.5336 | 1.03E-05 | chr:1:111802591 |
| 1  | rs11102246  | 111859419 | C | 0.5378 | 1.32E-05 | chr:1:111802591 |
| 1  | rs2275254   | 111861974 | T | 0.5378 | 1.32E-05 | chr:1:111802591 |
| 1  | rs7518913   | 111905110 | C | 2.092  | 1.33E-05 | chr:1:111802591 |
| 1  | rs12058156  | 111896992 | C | 2.158  | 1.42E-05 | chr:1:111802591 |
| 1  | rs112597784 | 111776685 | T | 2.682  | 1.50E-05 | chr:1:111802591 |
| 1  | rs11556868  | 111778325 | T | 2.682  | 1.50E-05 | chr:1:111802591 |
| 1  | rs2182115   | 111774137 | G | 2.682  | 1.50E-05 | chr:1:111802591 |
| 1  | rs80286857  | 111820618 | A | 8.536  | 1.86E-05 | chr:1:111802591 |
| 1  | rs7545853   | 111933032 | C | 1.878  | 1.98E-05 | chr:1:111802591 |
| 1  | rs15396     | 111891170 | C | 3.954  | 2.27E-05 | chr:1:111802591 |
| 1  | rs80014867  | 111888684 | T | 3.954  | 2.27E-05 | chr:1:111802591 |
| 1  | rs12082033  | 111798711 | C | 0.4103 | 2.91E-05 | chr:1:111802591 |
| 21 | rs73162408  | 15626882  | T | 0.4253 | 1.57E-08 | chr:21:15654234 |
| 21 | rs2822506   | 15618300  | A | 2.132  | 1.51E-07 | chr:21:15654234 |
| 21 | rs11087987  | 15640160  | T | 2.068  | 5.99E-07 | chr:21:15654234 |
| 21 | rs7283703   | 15640426  | C | 2.053  | 6.64E-07 | chr:21:15654234 |

|               |             |        |          |                 |
|---------------|-------------|--------|----------|-----------------|
| 21 rs4588273  | 15638745 A  | 2.039  | 7.51E-07 | chr:21:15654234 |
| 21 rs7277033  | 15644339 C  | 2.045  | 7.93E-07 | chr:21:15654234 |
| 21 rs11701684 | 15654199 C  | 2.164  | 1.11E-06 | chr:21:15654234 |
| 21 rs2013669  | 15642676 T  | 1.984  | 2.31E-06 | chr:21:15654234 |
| 21 rs2822548  | 15656052 A  | 2.185  | 4.63E-06 | chr:21:15654234 |
| 21 rs2822519  | 15645581 C  | 0.5215 | 5.22E-06 | chr:21:15654234 |
| 21 rs2064539  | 15639859 T  | 0.5239 | 5.99E-06 | chr:21:15654234 |
| 21 rs11087989 | 15641468 A  | 0.5254 | 6.77E-06 | chr:21:15654234 |
| 21 rs2064536  | 15639212 G  | 0.5282 | 7.29E-06 | chr:21:15654234 |
| 21 rs13048205 | 15656435 A  | 2.122  | 7.68E-06 | chr:21:15654234 |
| 21 rs11087992 | 15654009 C  | 2.087  | 1.57E-05 | chr:21:15654234 |
| 21 rs9305276  | 15640881 A  | 2.028  | 2.14E-05 | chr:21:15654234 |
| 21 rs9808686  | 15640520 C  | 2.028  | 2.14E-05 | chr:21:15654234 |
| 21 rs9975020  | 15640329 T  | 2.028  | 2.14E-05 | chr:21:15654234 |
| 21 rs62230076 | 15643700 C  | 2.002  | 2.63E-05 | chr:21:15654234 |
| 3 rs60487455  | 125619863 G | 4.072  | 2.50E-11 | chr:3:125609298 |
| 3 rs112567450 | 125592200 T | 4.009  | 3.01E-11 | chr:3:125609298 |
| 3 rs11922653  | 125591569 A | 4.009  | 3.01E-11 | chr:3:125609298 |
| 3 rs35540257  | 125590518 A | 4.009  | 3.01E-11 | chr:3:125609298 |
| 3 rs9859596   | 125593349 T | 4.009  | 3.01E-11 | chr:3:125609298 |
| 3 rs76697478  | 125622811 A | 3.998  | 3.19E-11 | chr:3:125609298 |
| 3 rs12634512  | 125631766 T | 3.995  | 3.26E-11 | chr:3:125609298 |
| 3 rs60374286  | 125630173 T | 3.995  | 3.26E-11 | chr:3:125609298 |
| 3 rs75837707  | 125630833 T | 3.995  | 3.26E-11 | chr:3:125609298 |
| 3 rs79344588  | 125632117 A | 3.995  | 3.26E-11 | chr:3:125609298 |
| 3 rs11713729  | 125631408 A | 3.932  | 4.61E-11 | chr:3:125609298 |
| 3 rs74402623  | 125643173 A | 3.937  | 5.19E-11 | chr:3:125609298 |
| 3 rs80022059  | 125641856 A | 3.937  | 5.19E-11 | chr:3:125609298 |
| 3 rs11917669  | 125599068 T | 3.888  | 5.62E-11 | chr:3:125609298 |
| 3 rs11925437  | 125599216 A | 3.888  | 5.62E-11 | chr:3:125609298 |
| 3 rs12633485  | 125605577 T | 3.888  | 5.62E-11 | chr:3:125609298 |
| 3 rs12637469  | 125600407 T | 3.888  | 5.62E-11 | chr:3:125609298 |
| 3 rs200006127 | 125610368 G | 3.888  | 5.62E-11 | chr:3:125609298 |
| 3 rs6767408   | 125623666 T | 3.888  | 5.62E-11 | chr:3:125609298 |
| 3 rs6767618   | 125623941 G | 3.888  | 5.62E-11 | chr:3:125609298 |
| 3 rs6772193   | 125597432 A | 3.888  | 5.62E-11 | chr:3:125609298 |
| 3 rs74470729  | 125621098 T | 3.888  | 5.62E-11 | chr:3:125609298 |
| 3 rs74494751  | 125615642 G | 3.888  | 5.62E-11 | chr:3:125609298 |
| 3 rs75313595  | 125601479 A | 3.888  | 5.62E-11 | chr:3:125609298 |
| 3 rs75431854  | 125601942 A | 3.888  | 5.62E-11 | chr:3:125609298 |
| 3 rs75687938  | 125600858 T | 3.888  | 5.62E-11 | chr:3:125609298 |
| 3 rs78438430  | 125607169 C | 3.888  | 5.62E-11 | chr:3:125609298 |
| 3 rs78795877  | 125617617 T | 3.888  | 5.62E-11 | chr:3:125609298 |



|               |             |       |          |                 |
|---------------|-------------|-------|----------|-----------------|
| 3 rs79143534  | 125622688 G | 3.888 | 5.62E-11 | chr:3:125609298 |
| 3 rs79584539  | 125600024 T | 3.888 | 5.62E-11 | chr:3:125609298 |
| 3 rs79647471  | 125622158 A | 3.888 | 5.62E-11 | chr:3:125609298 |
| 3 rs79780713  | 125596589 G | 3.888 | 5.62E-11 | chr:3:125609298 |
| 3 rs9714319   | 125612678 T | 3.888 | 5.62E-11 | chr:3:125609298 |
| 3 rs34721907  | 125637285 A | 3.925 | 6.02E-11 | chr:3:125609298 |
| 3 rs58198667  | 125635719 T | 3.925 | 6.02E-11 | chr:3:125609298 |
| 3 rs77342220  | 125608463 T | 3.839 | 7.54E-11 | chr:3:125609298 |
| 3 rs11711436  | 125629149 T | 3.79  | 1.55E-10 | chr:3:125609298 |
| 3 rs36074052  | 125554457 A | 3.939 | 6.06E-10 | chr:3:125609298 |
| 3 rs36052298  | 125554425 A | 3.948 | 6.58E-10 | chr:3:125609298 |
| 3 rs2979955   | 125554233 C | 3.792 | 9.68E-10 | chr:3:125609298 |
| 3 rs78718797  | 125556575 C | 3.812 | 9.95E-10 | chr:3:125609298 |
| 3 rs2979953   | 125554002 G | 3.669 | 1.23E-09 | chr:3:125609298 |
| 3 rs2947701   | 125553160 A | 3.745 | 1.56E-09 | chr:3:125609298 |
| 3 rs2971247   | 125553347 C | 3.745 | 1.56E-09 | chr:3:125609298 |
| 3 rs2979952   | 125553514 T | 3.745 | 1.56E-09 | chr:3:125609298 |
| 3 rs76765944  | 125554804 A | 3.745 | 1.56E-09 | chr:3:125609298 |
| 3 rs77524584  | 125558110 C | 3.745 | 1.56E-09 | chr:3:125609298 |
| 3 rs80067333  | 125559464 T | 3.745 | 1.56E-09 | chr:3:125609298 |
| 3 rs9848299   | 125557678 C | 3.745 | 1.56E-09 | chr:3:125609298 |
| 3 rs113525069 | 125573023 G | 3.697 | 1.98E-09 | chr:3:125609298 |
| 3 rs11706818  | 125579822 A | 3.697 | 1.98E-09 | chr:3:125609298 |
| 3 rs11708613  | 125577595 C | 3.697 | 1.98E-09 | chr:3:125609298 |
| 3 rs11713267  | 125578350 T | 3.697 | 1.98E-09 | chr:3:125609298 |
| 3 rs11720087  | 125577524 T | 3.697 | 1.98E-09 | chr:3:125609298 |
| 3 rs142956830 | 125574053 G | 3.697 | 1.98E-09 | chr:3:125609298 |
| 3 rs143489229 | 125573812 G | 3.697 | 1.98E-09 | chr:3:125609298 |
| 3 rs28603219  | 125581860 C | 3.697 | 1.98E-09 | chr:3:125609298 |
| 3 rs2877920   | 125578987 A | 3.697 | 1.98E-09 | chr:3:125609298 |
| 3 rs4465900   | 125580464 T | 3.697 | 1.98E-09 | chr:3:125609298 |
| 3 rs57482370  | 125577906 A | 3.697 | 1.98E-09 | chr:3:125609298 |
| 3 rs6764584   | 125564726 A | 3.697 | 1.98E-09 | chr:3:125609298 |
| 3 rs75945393  | 125566855 T | 3.697 | 1.98E-09 | chr:3:125609298 |
| 3 rs7614815   | 125571436 T | 3.697 | 1.98E-09 | chr:3:125609298 |
| 3 rs77521522  | 125566651 A | 3.697 | 1.98E-09 | chr:3:125609298 |
| 3 rs79330036  | 125586222 A | 3.697 | 1.98E-09 | chr:3:125609298 |
| 3 rs79951679  | 125575493 T | 3.697 | 1.98E-09 | chr:3:125609298 |
| 3 rs9832909   | 125588352 T | 3.697 | 1.98E-09 | chr:3:125609298 |
| 3 rs9847495   | 125566153 A | 3.697 | 1.98E-09 | chr:3:125609298 |
| 3 rs9872316   | 125576232 T | 3.697 | 1.98E-09 | chr:3:125609298 |
| 3 rs9883344   | 125569292 A | 3.697 | 1.98E-09 | chr:3:125609298 |
| 3 rs143065094 | 125643940 G | 3.09  | 2.07E-09 | chr:3:125609298 |

|               |             |       |          |                 |
|---------------|-------------|-------|----------|-----------------|
| 3 rs2947699   | 125552053 G | 3.71  | 2.09E-09 | chr:3:125609298 |
| 3 rs2971246   | 125552502 C | 3.71  | 2.09E-09 | chr:3:125609298 |
| 3 rs2947703   | 125554238 A | 3.672 | 2.23E-09 | chr:3:125609298 |
| 3 rs2947704   | 125555291 T | 3.672 | 2.23E-09 | chr:3:125609298 |
| 3 rs2947706   | 125556079 T | 3.672 | 2.23E-09 | chr:3:125609298 |
| 3 rs2947707   | 125556638 A | 3.672 | 2.23E-09 | chr:3:125609298 |
| 3 rs2947708   | 125556785 T | 3.672 | 2.23E-09 | chr:3:125609298 |
| 3 rs2971248   | 125553488 C | 3.672 | 2.23E-09 | chr:3:125609298 |
| 3 rs2971250   | 125555596 A | 3.672 | 2.23E-09 | chr:3:125609298 |
| 3 rs2971251   | 125556882 A | 3.672 | 2.23E-09 | chr:3:125609298 |
| 3 rs2979949   | 125553091 G | 3.672 | 2.23E-09 | chr:3:125609298 |
| 3 rs2979950   | 125553321 C | 3.672 | 2.23E-09 | chr:3:125609298 |
| 3 rs2979956   | 125555547 C | 3.672 | 2.23E-09 | chr:3:125609298 |
| 3 rs2979958   | 125556251 T | 3.672 | 2.23E-09 | chr:3:125609298 |
| 3 rs2979960   | 125556689 T | 3.672 | 2.23E-09 | chr:3:125609298 |
| 3 rs9798949   | 125557038 G | 3.672 | 2.23E-09 | chr:3:125609298 |
| 3 rs2979957   | 125556150 G | 3.679 | 2.29E-09 | chr:3:125609298 |
| 3 rs2971245   | 125550615 A | 3.639 | 2.51E-09 | chr:3:125609298 |
| 3 rs11720091  | 125577538 T | 3.627 | 2.81E-09 | chr:3:125609298 |
| 3 rs4502540   | 125580618 G | 3.627 | 2.81E-09 | chr:3:125609298 |
| 3 rs2947702   | 125554069 A | 3.563 | 2.85E-09 | chr:3:125609298 |
| 3 rs2947697   | 125551385 C | 3.638 | 2.98E-09 | chr:3:125609298 |
| 3 rs2947700   | 125552789 T | 3.638 | 2.98E-09 | chr:3:125609298 |
| 3 rs2979942   | 125550810 C | 3.638 | 2.98E-09 | chr:3:125609298 |
| 3 rs2979943   | 125551290 G | 3.638 | 2.98E-09 | chr:3:125609298 |
| 3 rs2979945   | 125551772 G | 3.638 | 2.98E-09 | chr:3:125609298 |
| 3 rs2979948   | 125552742 C | 3.638 | 2.98E-09 | chr:3:125609298 |
| 3 rs140061761 | 125573221 A | 3.64  | 2.98E-09 | chr:3:125609298 |
| 3 rs11721242  | 125578642 T | 3.636 | 3.01E-09 | chr:3:125609298 |
| 3 rs141959419 | 125572267 G | 3.636 | 3.01E-09 | chr:3:125609298 |
| 3 rs2947695   | 125551048 A | 3.648 | 3.18E-09 | chr:3:125609298 |
| 3 rs2947696   | 125551372 A | 3.648 | 3.18E-09 | chr:3:125609298 |
| 3 rs2979947   | 125552507 T | 3.648 | 3.18E-09 | chr:3:125609298 |
| 3 rs2947694   | 125549914 C | 3.615 | 3.29E-09 | chr:3:125609298 |
| 3 rs59014841  | 125584640 A | 3.594 | 3.36E-09 | chr:3:125609298 |
| 3 rs3112275   | 125554339 G | 3.364 | 3.63E-09 | chr:3:125609298 |
| 3 rs75212493  | 125633523 C | 3.08  | 3.96E-09 | chr:3:125609298 |
| 3 rs2947688   | 125545658 C | 3.565 | 4.36E-09 | chr:3:125609298 |
| 3 rs2947689   | 125546187 G | 3.565 | 4.36E-09 | chr:3:125609298 |
| 3 rs2979941   | 125550456 A | 3.578 | 4.52E-09 | chr:3:125609298 |
| 3 rs2979940   | 125549777 C | 3.546 | 4.67E-09 | chr:3:125609298 |
| 3 rs1815022   | 125549169 T | 3.499 | 6.19E-09 | chr:3:125609298 |
| 3 rs2947692   | 125548569 A | 3.499 | 6.19E-09 | chr:3:125609298 |

|               |             |       |          |                 |
|---------------|-------------|-------|----------|-----------------|
| 3 rs2971243   | 125548950 T | 3.499 | 6.19E-09 | chr:3:125609298 |
| 3 rs2971244   | 125548955 C | 3.499 | 6.19E-09 | chr:3:125609298 |
| 3 rs2979936   | 125547834 G | 3.499 | 6.19E-09 | chr:3:125609298 |
| 3 rs2979938   | 125548601 G | 3.499 | 6.19E-09 | chr:3:125609298 |
| 3 rs2979954   | 125554203 A | 3.43  | 6.30E-09 | chr:3:125609298 |
| 3 rs4426635   | 125539913 T | 3.475 | 6.93E-09 | chr:3:125609298 |
| 3 rs72973380  | 125631030 C | 2.931 | 8.48E-09 | chr:3:125609298 |
| 3 rs10934730  | 125631706 T | 2.922 | 1.11E-08 | chr:3:125609298 |
| 3 rs11922084  | 125630876 G | 2.922 | 1.11E-08 | chr:3:125609298 |
| 3 rs9841483   | 125595039 T | 2.9   | 1.38E-08 | chr:3:125609298 |
| 3 rs2979934   | 125546915 T | 5.187 | 7.18E-08 | chr:3:125609298 |
| 3 rs1879627   | 125548193 G | 5.557 | 9.13E-08 | chr:3:125609298 |
| 3 rs2971290   | 125547698 G | 5.557 | 9.13E-08 | chr:3:125609298 |
| 3 rs2947690   | 125547912 A | 5.813 | 9.37E-08 | chr:3:125609298 |
| 3 rs2971291   | 125546503 T | 5.813 | 9.37E-08 | chr:3:125609298 |
| 3 rs2947659   | 125606698 T | 2.303 | 1.15E-07 | chr:3:125609298 |
| 3 rs2979937   | 125548116 C | 5.06  | 1.34E-07 | chr:3:125609298 |
| 3 rs2979930   | 125542667 T | 5.443 | 1.34E-07 | chr:3:125609298 |
| 3 rs2979931   | 125542972 T | 5.443 | 1.34E-07 | chr:3:125609298 |
| 3 rs2979935   | 125547824 A | 5.443 | 1.34E-07 | chr:3:125609298 |
| 3 rs4510340   | 125541767 C | 5.443 | 1.34E-07 | chr:3:125609298 |
| 3 rs72971309  | 125561013 T | 2.263 | 1.41E-07 | chr:3:125609298 |
| 3 rs2020198   | 125543796 G | 5.156 | 1.55E-07 | chr:3:125609298 |
| 3 rs59143300  | 125559619 C | 2.245 | 1.61E-07 | chr:3:125609298 |
| 3 rs73858994  | 125643933 G | 2.452 | 1.86E-07 | chr:3:125609298 |
| 3 rs34601658  | 125542554 A | 5.101 | 2.11E-07 | chr:3:125609298 |
| 3 rs6783770   | 125624761 A | 2.21  | 2.46E-07 | chr:3:125609298 |
| 3 rs9844318   | 125618525 C | 2.205 | 2.49E-07 | chr:3:125609298 |
| 3 rs2979929   | 125541332 T | 5.149 | 2.74E-07 | chr:3:125609298 |
| 3 rs13433749  | 125620342 T | 2.196 | 3.07E-07 | chr:3:125609298 |
| 3 rs2089012   | 125623486 A | 2.196 | 3.07E-07 | chr:3:125609298 |
| 3 rs2089013   | 125623566 A | 2.196 | 3.07E-07 | chr:3:125609298 |
| 3 rs2979967   | 125604957 A | 2.196 | 3.07E-07 | chr:3:125609298 |
| 3 rs2979968   | 125604062 C | 2.196 | 3.07E-07 | chr:3:125609298 |
| 3 rs6764998   | 125617734 T | 2.196 | 3.07E-07 | chr:3:125609298 |
| 3 rs6767664   | 125623771 A | 2.196 | 3.07E-07 | chr:3:125609298 |
| 3 rs7615661   | 125618995 T | 2.196 | 3.07E-07 | chr:3:125609298 |
| 3 rs9713687   | 125612973 G | 2.196 | 3.07E-07 | chr:3:125609298 |
| 3 rs9758489   | 125616028 C | 2.196 | 3.07E-07 | chr:3:125609298 |
| 3 rs9838149   | 125617135 T | 2.196 | 3.07E-07 | chr:3:125609298 |
| 3 rs11710666  | 125623167 T | 2.199 | 3.11E-07 | chr:3:125609298 |
| 3 rs11718276  | 125628689 G | 2.489 | 3.17E-07 | chr:3:125609298 |
| 3 rs112649976 | 125641926 T | 5.68  | 3.18E-07 | chr:3:125609298 |

|               |             |       |          |                 |
|---------------|-------------|-------|----------|-----------------|
| 3 rs11711481  | 125629151 A | 6.012 | 3.52E-07 | chr:3:125609298 |
| 3 rs59319586  | 125637753 A | 5.648 | 3.60E-07 | chr:3:125609298 |
| 3 rs9682882   | 125610155 A | 2.189 | 3.71E-07 | chr:3:125609298 |
| 3 rs2947663   | 125603558 A | 2.167 | 4.50E-07 | chr:3:125609298 |
| 3 rs2947664   | 125603557 A | 2.167 | 4.50E-07 | chr:3:125609298 |
| 3 rs6773978   | 125622285 C | 2.159 | 5.02E-07 | chr:3:125609298 |
| 3 rs2979966   | 125607909 C | 2.159 | 5.11E-07 | chr:3:125609298 |
| 3 rs4607058   | 125570585 C | 2.035 | 2.16E-06 | chr:3:125609298 |
| 3 rs9833197   | 125588407 T | 2.023 | 2.25E-06 | chr:3:125609298 |
| 3 rs11707308  | 125680151 T | 6.547 | 2.92E-06 | chr:3:125609298 |
| 3 rs7612255   | 125677775 T | 6.547 | 2.92E-06 | chr:3:125609298 |
| 3 rs2947685   | 125575133 C | 1.998 | 3.30E-06 | chr:3:125609298 |
| 3 rs11711861  | 125589450 A | 1.995 | 3.67E-06 | chr:3:125609298 |
| 3 rs2979970   | 125603345 C | 1.984 | 3.88E-06 | chr:3:125609298 |
| 3 rs1815014   | 125512783 C | 3.075 | 4.21E-06 | chr:3:125609298 |
| 3 rs4081043   | 125512992 G | 3.075 | 4.21E-06 | chr:3:125609298 |
| 3 rs141570567 | 125664523 C | 6.341 | 4.48E-06 | chr:3:125609298 |
| 3 rs150116448 | 125671861 A | 6.341 | 4.48E-06 | chr:3:125609298 |
| 3 rs7432586   | 125561246 A | 1.982 | 4.74E-06 | chr:3:125609298 |
| 3 rs10934727  | 125567894 C | 1.969 | 4.89E-06 | chr:3:125609298 |
| 3 rs1109743   | 125594217 C | 1.969 | 4.89E-06 | chr:3:125609298 |
| 3 rs11706723  | 125579541 A | 1.969 | 4.89E-06 | chr:3:125609298 |
| 3 rs11719118  | 125567791 G | 1.969 | 4.89E-06 | chr:3:125609298 |
| 3 rs11721288  | 125569614 C | 1.969 | 4.89E-06 | chr:3:125609298 |
| 3 rs28507399  | 125565514 C | 1.969 | 4.89E-06 | chr:3:125609298 |
| 3 rs2947634   | 125588652 C | 1.969 | 4.89E-06 | chr:3:125609298 |
| 3 rs2947638   | 125590155 C | 1.969 | 4.89E-06 | chr:3:125609298 |
| 3 rs2947639   | 125590505 A | 1.969 | 4.89E-06 | chr:3:125609298 |
| 3 rs2947640   | 125590570 G | 1.969 | 4.89E-06 | chr:3:125609298 |
| 3 rs2947642   | 125591302 A | 1.969 | 4.89E-06 | chr:3:125609298 |
| 3 rs2947645   | 125593271 C | 1.969 | 4.89E-06 | chr:3:125609298 |
| 3 rs2947678   | 125566556 G | 1.969 | 4.89E-06 | chr:3:125609298 |
| 3 rs2971257   | 125579548 G | 1.969 | 4.89E-06 | chr:3:125609298 |
| 3 rs2971265   | 125571123 G | 1.969 | 4.89E-06 | chr:3:125609298 |
| 3 rs2971328   | 125593443 T | 1.969 | 4.89E-06 | chr:3:125609298 |
| 3 rs2971329   | 125591717 T | 1.969 | 4.89E-06 | chr:3:125609298 |
| 3 rs2971330   | 125591692 C | 1.969 | 4.89E-06 | chr:3:125609298 |
| 3 rs2971331   | 125591447 T | 1.969 | 4.89E-06 | chr:3:125609298 |
| 3 rs2971332   | 125590994 A | 1.969 | 4.89E-06 | chr:3:125609298 |
| 3 rs2979927   | 125574869 C | 1.969 | 4.89E-06 | chr:3:125609298 |
| 3 rs2979987   | 125592580 G | 1.969 | 4.89E-06 | chr:3:125609298 |
| 3 rs2979988   | 125592307 C | 1.969 | 4.89E-06 | chr:3:125609298 |
| 3 rs2979989   | 125591425 G | 1.969 | 4.89E-06 | chr:3:125609298 |

|              |             |       |          |                 |
|--------------|-------------|-------|----------|-----------------|
| 3 rs2979990  | 125590914 G | 1.969 | 4.89E-06 | chr:3:125609298 |
| 3 rs2979992  | 125590630 C | 1.969 | 4.89E-06 | chr:3:125609298 |
| 3 rs2979993  | 125589673 T | 1.969 | 4.89E-06 | chr:3:125609298 |
| 3 rs6767789  | 125565527 C | 1.969 | 4.89E-06 | chr:3:125609298 |
| 3 rs6770124  | 125578780 G | 1.969 | 4.89E-06 | chr:3:125609298 |
| 3 rs6778145  | 125565455 T | 1.969 | 4.89E-06 | chr:3:125609298 |
| 3 rs6789004  | 125564844 T | 1.969 | 4.89E-06 | chr:3:125609298 |
| 3 rs7626162  | 125571100 A | 1.969 | 4.89E-06 | chr:3:125609298 |
| 3 rs9814471  | 125566987 G | 1.969 | 4.89E-06 | chr:3:125609298 |
| 3 rs9825686  | 125569330 C | 1.969 | 4.89E-06 | chr:3:125609298 |
| 3 rs9864870  | 125564317 T | 1.969 | 4.89E-06 | chr:3:125609298 |
| 3 rs2947684  | 125576024 G | 1.96  | 5.57E-06 | chr:3:125609298 |
| 3 rs13433921 | 125620191 C | 1.955 | 5.96E-06 | chr:3:125609298 |
| 3 rs1827490  | 125622815 G | 1.955 | 5.96E-06 | chr:3:125609298 |
| 3 rs1827491  | 125622883 C | 1.955 | 5.96E-06 | chr:3:125609298 |
| 3 rs2134522  | 125609311 A | 1.955 | 5.96E-06 | chr:3:125609298 |
| 3 rs2947653  | 125600011 G | 1.955 | 5.96E-06 | chr:3:125609298 |
| 3 rs2947654  | 125600035 G | 1.955 | 5.96E-06 | chr:3:125609298 |
| 3 rs2947658  | 125607010 A | 1.955 | 5.96E-06 | chr:3:125609298 |
| 3 rs2971295  | 125607724 C | 1.955 | 5.96E-06 | chr:3:125609298 |
| 3 rs2971297  | 125603770 C | 1.955 | 5.96E-06 | chr:3:125609298 |
| 3 rs2971325  | 125597312 A | 1.955 | 5.96E-06 | chr:3:125609298 |
| 3 rs2979973  | 125600806 C | 1.955 | 5.96E-06 | chr:3:125609298 |
| 3 rs2979976  | 125599109 C | 1.955 | 5.96E-06 | chr:3:125609298 |
| 3 rs34069743 | 125625537 A | 1.955 | 5.96E-06 | chr:3:125609298 |
| 3 rs6767589  | 125623759 A | 1.955 | 5.96E-06 | chr:3:125609298 |
| 3 rs6777834  | 125617760 C | 1.955 | 5.96E-06 | chr:3:125609298 |
| 3 rs6777914  | 125617791 G | 1.955 | 5.96E-06 | chr:3:125609298 |
| 3 rs6782187  | 125600203 C | 1.955 | 5.96E-06 | chr:3:125609298 |
| 3 rs71327720 | 125616929 C | 1.955 | 5.96E-06 | chr:3:125609298 |
| 3 rs7640275  | 125619483 G | 1.955 | 5.96E-06 | chr:3:125609298 |
| 3 rs9714320  | 125612679 T | 1.955 | 5.96E-06 | chr:3:125609298 |
| 3 rs9754774  | 125610837 C | 1.955 | 5.96E-06 | chr:3:125609298 |
| 3 rs9756867  | 125613288 G | 1.955 | 5.96E-06 | chr:3:125609298 |
| 3 rs9758830  | 125624688 G | 1.955 | 5.96E-06 | chr:3:125609298 |
| 3 rs9838285  | 125617177 C | 1.955 | 5.96E-06 | chr:3:125609298 |
| 3 rs9857803  | 125623973 A | 1.955 | 5.96E-06 | chr:3:125609298 |
| 3 rs2947709  | 125557545 C | 1.957 | 6.31E-06 | chr:3:125609298 |
| 3 rs2971249  | 125555546 A | 1.957 | 6.31E-06 | chr:3:125609298 |
| 3 rs2971252  | 125559915 C | 1.957 | 6.31E-06 | chr:3:125609298 |
| 3 rs2979963  | 125559115 T | 1.957 | 6.31E-06 | chr:3:125609298 |
| 3 rs11926668 | 125591488 C | 1.964 | 6.43E-06 | chr:3:125609298 |
| 3 rs71327725 | 125621435 C | 1.945 | 6.66E-06 | chr:3:125609298 |

|               |             |        |          |                 |
|---------------|-------------|--------|----------|-----------------|
| 3 rs115478265 | 125684743 C | 5.687  | 7.02E-06 | chr:3:125609298 |
| 3 rs11711908  | 125684744 A | 5.687  | 7.02E-06 | chr:3:125609298 |
| 3 rs71327717  | 125562103 G | 1.951  | 7.10E-06 | chr:3:125609298 |
| 3 rs2004228   | 125595191 T | 1.924  | 8.32E-06 | chr:3:125609298 |
| 3 rs7612555   | 125678096 T | 5.558  | 8.40E-06 | chr:3:125609298 |
| 3 rs2979969   | 125603542 G | 1.93   | 8.43E-06 | chr:3:125609298 |
| 3 rs11717929  | 125631610 C | 1.93   | 8.65E-06 | chr:3:125609298 |
| 3 rs9289267   | 125633335 T | 1.93   | 9.17E-06 | chr:3:125609298 |
| 3 rs2979981   | 125597781 G | 1.927  | 9.34E-06 | chr:3:125609298 |
| 3 rs2971294   | 125607915 G | 1.922  | 9.41E-06 | chr:3:125609298 |
| 3 rs9857801   | 125623965 G | 1.917  | 1.03E-05 | chr:3:125609298 |
| 3 rs2947698   | 125551761 G | 1.901  | 1.12E-05 | chr:3:125609298 |
| 3 rs2979944   | 125551355 G | 1.901  | 1.12E-05 | chr:3:125609298 |
| 3 rs2979951   | 125553430 G | 1.901  | 1.12E-05 | chr:3:125609298 |
| 3 rs9289268   | 125633350 A | 1.906  | 1.21E-05 | chr:3:125609298 |
| 3 rs9289269   | 125633524 A | 1.906  | 1.21E-05 | chr:3:125609298 |
| 3 rs2979971   | 125601981 C | 1.897  | 1.31E-05 | chr:3:125609298 |
| 3 rs2947669   | 125538361 C | 1.888  | 1.42E-05 | chr:3:125609298 |
| 3 rs2979998   | 125539094 A | 1.865  | 2.14E-05 | chr:3:125609298 |
| 3 rs4234286   | 125539838 G | 1.859  | 2.18E-05 | chr:3:125609298 |
| 3 rs41265737  | 125694875 A | 5.191  | 2.35E-05 | chr:3:125609298 |
| 3 rs2947667   | 125541174 G | 1.843  | 2.74E-05 | chr:3:125609298 |
| 3 rs2979939   | 125548998 C | 1.843  | 2.74E-05 | chr:3:125609298 |
| 3 rs2947668   | 125538929 G | 1.838  | 2.88E-05 | chr:3:125609298 |
| 3 rs4276142   | 125539819 A | 1.838  | 2.88E-05 | chr:3:125609298 |
| 3 rs11714778  | 129762082 C | 0.1264 | 6.76E-23 | chr:3:129776131 |
| 3 rs73208686  | 129762898 C | 0.1264 | 6.76E-23 | chr:3:129776131 |
| 3 rs11716622  | 129809592 A | 0.1288 | 1.04E-22 | chr:3:129776131 |
| 3 rs12495049  | 129810234 T | 0.1288 | 1.04E-22 | chr:3:129776131 |
| 3 rs12634803  | 129807284 T | 0.1321 | 1.45E-22 | chr:3:129776131 |
| 3 rs11718709  | 129811323 A | 0.1299 | 1.57E-22 | chr:3:129776131 |
| 3 rs9758049   | 129814863 A | 0.1332 | 2.02E-22 | chr:3:129776131 |
| 3 rs73210759  | 129813745 T | 0.1329 | 2.21E-22 | chr:3:129776131 |
| 3 rs111717650 | 129814301 A | 0.133  | 2.53E-22 | chr:3:129776131 |
| 3 rs34831897  | 129759914 T | 0.2089 | 1.71E-16 | chr:3:129776131 |
| 3 rs9815579   | 129755175 T | 0.236  | 2.33E-16 | chr:3:129776131 |
| 3 rs73866092  | 129815599 C | 0.2972 | 4.78E-14 | chr:3:129776131 |
| 3 rs78806708  | 129822616 C | 0.3033 | 3.22E-13 | chr:3:129776131 |
| 3 rs9713346   | 129822634 A | 0.3033 | 3.22E-13 | chr:3:129776131 |
| 3 rs12637557  | 129815930 A | 0.3036 | 3.31E-13 | chr:3:129776131 |
| 3 rs146549952 | 129816552 T | 0.3036 | 3.31E-13 | chr:3:129776131 |
| 3 rs12632200  | 129816368 T | 0.3065 | 3.81E-13 | chr:3:129776131 |
| 3 rs111270043 | 129820915 T | 0.3053 | 3.82E-13 | chr:3:129776131 |

|               |             |        |          |                 |
|---------------|-------------|--------|----------|-----------------|
| 3 rs75630148  | 129821465 T | 0.3034 | 4.08E-13 | chr:3:129776131 |
| 3 rs6784328   | 129822059 G | 0.3199 | 4.12E-13 | chr:3:129776131 |
| 3 rs75177871  | 129821816 G | 0.3048 | 4.20E-13 | chr:3:129776131 |
| 3 rs112581710 | 129820151 A | 0.3059 | 4.26E-13 | chr:3:129776131 |
| 3 rs113679585 | 129819332 A | 0.3059 | 4.26E-13 | chr:3:129776131 |
| 3 rs56218598  | 129823899 A | 0.3059 | 4.26E-13 | chr:3:129776131 |
| 3 rs61073628  | 129817316 T | 0.3059 | 4.26E-13 | chr:3:129776131 |
| 3 rs74203764  | 129817379 T | 0.3059 | 4.26E-13 | chr:3:129776131 |
| 3 rs9713340   | 129822492 A | 0.3059 | 4.26E-13 | chr:3:129776131 |
| 3 rs9713344   | 129822552 A | 0.3059 | 4.26E-13 | chr:3:129776131 |
| 3 rs112577058 | 129818750 G | 0.3219 | 4.28E-13 | chr:3:129776131 |
| 3 rs112987689 | 129824001 T | 0.3219 | 4.28E-13 | chr:3:129776131 |
| 3 rs118004362 | 129820231 T | 0.3219 | 4.28E-13 | chr:3:129776131 |
| 3 rs12495527  | 129822950 G | 0.3219 | 4.28E-13 | chr:3:129776131 |
| 3 rs12638292  | 129816961 T | 0.3219 | 4.28E-13 | chr:3:129776131 |
| 3 rs13083073  | 129819247 C | 0.3219 | 4.28E-13 | chr:3:129776131 |
| 3 rs56039375  | 129818509 G | 0.3219 | 4.28E-13 | chr:3:129776131 |
| 3 rs56235703  | 129818389 G | 0.3219 | 4.28E-13 | chr:3:129776131 |
| 3 rs59443817  | 129817290 G | 0.3219 | 4.28E-13 | chr:3:129776131 |
| 3 rs6769324   | 129820903 G | 0.3219 | 4.28E-13 | chr:3:129776131 |
| 3 rs6788479   | 129817708 G | 0.3219 | 4.28E-13 | chr:3:129776131 |
| 3 rs6808888   | 129822441 A | 0.3219 | 4.28E-13 | chr:3:129776131 |
| 3 rs111775688 | 129826402 T | 0.3061 | 4.82E-13 | chr:3:129776131 |
| 3 rs112405295 | 129824844 A | 0.3061 | 4.82E-13 | chr:3:129776131 |
| 3 rs113674105 | 129830064 A | 0.3061 | 4.82E-13 | chr:3:129776131 |
| 3 rs137960198 | 129828560 T | 0.3061 | 4.82E-13 | chr:3:129776131 |
| 3 rs34158162  | 129828454 C | 0.3061 | 4.82E-13 | chr:3:129776131 |
| 3 rs60352193  | 129830922 C | 0.3061 | 4.82E-13 | chr:3:129776131 |
| 3 rs7428344   | 129826100 T | 0.3061 | 4.82E-13 | chr:3:129776131 |
| 3 rs7428346   | 129826002 T | 0.3061 | 4.82E-13 | chr:3:129776131 |
| 3 rs10934907  | 129830493 C | 0.3224 | 5.01E-13 | chr:3:129776131 |
| 3 rs113747501 | 129826513 C | 0.3224 | 5.01E-13 | chr:3:129776131 |
| 3 rs4072146   | 129829463 A | 0.3224 | 5.01E-13 | chr:3:129776131 |
| 3 rs55977977  | 129831316 G | 0.3224 | 5.01E-13 | chr:3:129776131 |
| 3 rs72990317  | 129830425 G | 0.3224 | 5.01E-13 | chr:3:129776131 |
| 3 rs7432233   | 129825955 G | 0.3224 | 5.01E-13 | chr:3:129776131 |
| 3 rs113076563 | 129818689 C | 0.3229 | 5.41E-13 | chr:3:129776131 |
| 3 rs56171265  | 129833240 T | 0.3077 | 5.43E-13 | chr:3:129776131 |
| 3 rs12233562  | 129845749 A | 0.3061 | 5.56E-13 | chr:3:129776131 |
| 3 rs113421391 | 129830961 C | 0.3066 | 5.68E-13 | chr:3:129776131 |
| 3 rs12497879  | 129843468 T | 0.3235 | 6.05E-13 | chr:3:129776131 |
| 3 rs56274321  | 129834254 A | 0.3244 | 6.26E-13 | chr:3:129776131 |
| 3 rs9713334   | 129822494 T | 0.3099 | 6.26E-13 | chr:3:129776131 |

|               |             |        |          |                 |
|---------------|-------------|--------|----------|-----------------|
| 3 rs6804728   | 129820580 T | 0.3107 | 6.27E-13 | chr:3:129776131 |
| 3 rs6804887   | 129820568 A | 0.3107 | 6.27E-13 | chr:3:129776131 |
| 3 rs10934912  | 129849479 T | 0.3204 | 6.52E-13 | chr:3:129776131 |
| 3 rs9681064   | 129846313 C | 0.3268 | 6.75E-13 | chr:3:129776131 |
| 3 rs73210763  | 129827901 G | 0.3101 | 7.07E-13 | chr:3:129776131 |
| 3 rs10934908  | 129840300 T | 0.3092 | 7.21E-13 | chr:3:129776131 |
| 3 rs12497818  | 129843254 C | 0.3092 | 7.21E-13 | chr:3:129776131 |
| 3 rs28442137  | 129840485 T | 0.3092 | 7.21E-13 | chr:3:129776131 |
| 3 rs55908933  | 129835084 T | 0.3092 | 7.21E-13 | chr:3:129776131 |
| 3 rs56292584  | 129833209 T | 0.3092 | 7.21E-13 | chr:3:129776131 |
| 3 rs56314950  | 129833031 T | 0.3092 | 7.21E-13 | chr:3:129776131 |
| 3 rs56957706  | 129845338 C | 0.3092 | 7.21E-13 | chr:3:129776131 |
| 3 rs9754694   | 129844166 T | 0.3092 | 7.21E-13 | chr:3:129776131 |
| 3 rs9754720   | 129844403 T | 0.3092 | 7.21E-13 | chr:3:129776131 |
| 3 rs12636674  | 129834567 A | 0.3248 | 7.28E-13 | chr:3:129776131 |
| 3 rs61433746  | 129836538 T | 0.3248 | 7.28E-13 | chr:3:129776131 |
| 3 rs9754713   | 129837151 C | 0.3248 | 7.28E-13 | chr:3:129776131 |
| 3 rs149652485 | 129830726 A | 0.3093 | 7.86E-13 | chr:3:129776131 |
| 3 rs28477611  | 129844824 A | 0.3271 | 8.16E-13 | chr:3:129776131 |
| 3 rs28754684  | 129844800 C | 0.3271 | 8.16E-13 | chr:3:129776131 |
| 3 rs112319225 | 129826344 G | 0.329  | 8.88E-13 | chr:3:129776131 |
| 3 rs113111443 | 129826394 C | 0.329  | 8.88E-13 | chr:3:129776131 |
| 3 rs6809980   | 129847462 A | 0.3098 | 9.22E-13 | chr:3:129776131 |
| 3 rs6795939   | 129842885 T | 0.3261 | 9.35E-13 | chr:3:129776131 |
| 3 rs6808384   | 129842900 C | 0.3261 | 9.35E-13 | chr:3:129776131 |
| 3 rs55773357  | 129849781 T | 0.3102 | 1.02E-12 | chr:3:129776131 |
| 3 rs56312715  | 129849847 A | 0.3102 | 1.02E-12 | chr:3:129776131 |
| 3 rs4569696   | 129834986 A | 0.3104 | 1.04E-12 | chr:3:129776131 |
| 3 rs12491391  | 129843530 G | 0.3133 | 1.06E-12 | chr:3:129776131 |
| 3 rs11720599  | 129848148 A | 0.3294 | 1.07E-12 | chr:3:129776131 |
| 3 rs11708901  | 129847846 C | 0.3299 | 1.25E-12 | chr:3:129776131 |
| 3 rs11720489  | 129848042 T | 0.3299 | 1.25E-12 | chr:3:129776131 |
| 3 rs12107141  | 129844617 C | 0.3299 | 1.25E-12 | chr:3:129776131 |
| 3 rs12233374  | 129845660 A | 0.3299 | 1.25E-12 | chr:3:129776131 |
| 3 rs12487314  | 129842009 C | 0.3299 | 1.25E-12 | chr:3:129776131 |
| 3 rs12487371  | 129842190 G | 0.3299 | 1.25E-12 | chr:3:129776131 |
| 3 rs12491387  | 129843518 G | 0.3299 | 1.25E-12 | chr:3:129776131 |
| 3 rs12491430  | 129843630 G | 0.3299 | 1.25E-12 | chr:3:129776131 |
| 3 rs17735722  | 129843196 G | 0.3299 | 1.25E-12 | chr:3:129776131 |
| 3 rs28475731  | 129844692 T | 0.3299 | 1.25E-12 | chr:3:129776131 |
| 3 rs28567533  | 129845174 A | 0.3299 | 1.25E-12 | chr:3:129776131 |
| 3 rs28798137  | 129845247 A | 0.3299 | 1.25E-12 | chr:3:129776131 |
| 3 rs34086701  | 129846916 C | 0.3299 | 1.25E-12 | chr:3:129776131 |



|               |             |        |          |                 |
|---------------|-------------|--------|----------|-----------------|
| 3 rs35543987  | 129842031 A | 0.3299 | 1.25E-12 | chr:3:129776131 |
| 3 rs376047039 | 129845958 G | 0.3299 | 1.25E-12 | chr:3:129776131 |
| 3 rs4337672   | 129839907 T | 0.3299 | 1.25E-12 | chr:3:129776131 |
| 3 rs56086823  | 129841378 A | 0.3299 | 1.25E-12 | chr:3:129776131 |
| 3 rs56279301  | 129848747 T | 0.3299 | 1.25E-12 | chr:3:129776131 |
| 3 rs57173421  | 129843153 G | 0.3299 | 1.25E-12 | chr:3:129776131 |
| 3 rs59318782  | 129842972 G | 0.3299 | 1.25E-12 | chr:3:129776131 |
| 3 rs59667515  | 129848796 C | 0.3299 | 1.25E-12 | chr:3:129776131 |
| 3 rs6796132   | 129842958 A | 0.3299 | 1.25E-12 | chr:3:129776131 |
| 3 rs6796817   | 129837836 T | 0.3299 | 1.25E-12 | chr:3:129776131 |
| 3 rs6808274   | 129842797 C | 0.3299 | 1.25E-12 | chr:3:129776131 |
| 3 rs73210765  | 129841875 A | 0.3299 | 1.25E-12 | chr:3:129776131 |
| 3 rs74442213  | 129846119 A | 0.3299 | 1.25E-12 | chr:3:129776131 |
| 3 rs9289355   | 129838184 G | 0.3299 | 1.25E-12 | chr:3:129776131 |
| 3 rs9682942   | 129846098 T | 0.3299 | 1.25E-12 | chr:3:129776131 |
| 3 rs9757129   | 129844461 G | 0.3299 | 1.25E-12 | chr:3:129776131 |
| 3 rs9713120   | 129850043 T | 0.3284 | 1.28E-12 | chr:3:129776131 |
| 3 rs6776708   | 129847555 C | 0.3301 | 1.28E-12 | chr:3:129776131 |
| 3 rs6809088   | 129837584 C | 0.3315 | 1.29E-12 | chr:3:129776131 |
| 3 rs28726131  | 129844802 G | 0.3338 | 1.45E-12 | chr:3:129776131 |
| 3 rs9682954   | 129846247 G | 0.3308 | 1.53E-12 | chr:3:129776131 |
| 3 rs12233436  | 129845766 G | 0.3322 | 1.64E-12 | chr:3:129776131 |
| 3 rs6796054   | 129842995 A | 0.3348 | 1.72E-12 | chr:3:129776131 |
| 3 rs73210760  | 129818875 A | 0.3294 | 1.73E-12 | chr:3:129776131 |
| 3 rs147534743 | 129849886 G | 0.3325 | 1.77E-12 | chr:3:129776131 |
| 3 rs4619822   | 129850342 A | 0.3325 | 1.77E-12 | chr:3:129776131 |
| 3 rs9713121   | 129850044 G | 0.3325 | 1.77E-12 | chr:3:129776131 |
| 3 rs9713819   | 129849956 G | 0.3325 | 1.77E-12 | chr:3:129776131 |
| 3 rs11712662  | 129848252 G | 0.3366 | 2.21E-12 | chr:3:129776131 |
| 3 rs6774812   | 129844022 G | 0.3366 | 2.21E-12 | chr:3:129776131 |
| 3 rs4491951   | 129850208 C | 0.335  | 2.50E-12 | chr:3:129776131 |
| 3 rs7428327   | 129826031 T | 0.3436 | 3.13E-12 | chr:3:129776131 |
| 3 rs61532278  | 129844947 G | 0.2486 | 5.57E-12 | chr:3:129776131 |
| 3 rs10934910  | 129849334 G | 0.3544 | 7.33E-12 | chr:3:129776131 |
| 3 rs10934911  | 129849366 C | 0.3544 | 7.33E-12 | chr:3:129776131 |
| 3 rs72990312  | 129826675 C | 0.3295 | 1.29E-11 | chr:3:129776131 |
| 3 rs6799884   | 129814251 G | 7.972  | 1.36E-11 | chr:3:129776131 |
| 3 rs10934909  | 129849297 T | 0.3584 | 1.48E-11 | chr:3:129776131 |
| 3 rs9758051   | 129814869 G | 2.875  | 3.08E-11 | chr:3:129776131 |
| 3 rs9812980   | 129814688 G | 2.875  | 3.08E-11 | chr:3:129776131 |
| 3 rs10934906  | 129813062 T | 2.873  | 3.12E-11 | chr:3:129776131 |
| 3 rs4610271   | 129813301 G | 2.861  | 3.13E-11 | chr:3:129776131 |
| 3 rs9812703   | 129814528 G | 2.872  | 3.23E-11 | chr:3:129776131 |

|                     |             |        |          |                 |
|---------------------|-------------|--------|----------|-----------------|
| 3 rs56088005        | 129821650 A | 0.3587 | 3.25E-11 | chr:3:129776131 |
| 3 rs12497877        | 129843458 G | 2.754  | 4.11E-11 | chr:3:129776131 |
| 3 rs57573544        | 129845394 G | 0.3741 | 4.77E-11 | chr:3:129776131 |
| 3 rs58593172        | 129845403 G | 0.3741 | 4.77E-11 | chr:3:129776131 |
| 3 rs6766577         | 129814504 T | 2.825  | 5.47E-11 | chr:3:129776131 |
| 3 rs6802429         | 129814614 C | 2.825  | 5.47E-11 | chr:3:129776131 |
| 3 rs35523538        | 129832419 C | 0.3434 | 6.25E-11 | chr:3:129776131 |
| 3 rs11708560        | 129809131 A | 2.822  | 8.87E-11 | chr:3:129776131 |
| 3 rs6806210         | 129807027 T | 2.822  | 8.87E-11 | chr:3:129776131 |
| 3 rs7622131         | 129808869 A | 2.822  | 8.87E-11 | chr:3:129776131 |
| 3 rs187016983       | 129845427 A | 0.3891 | 1.21E-10 | chr:3:129776131 |
| 3 rs59803194        | 129845429 A | 0.3891 | 1.21E-10 | chr:3:129776131 |
| 3 rs60351474        | 129845423 G | 0.3891 | 1.21E-10 | chr:3:129776131 |
| 3 rs4487280         | 129813361 G | 2.722  | 1.90E-10 | chr:3:129776131 |
| 3 rs56110318        | 129849681 G | 0.3947 | 2.13E-10 | chr:3:129776131 |
| 3 rs35695300        | 129760923 T | 2.708  | 2.71E-10 | chr:3:129776131 |
| 3 rs9863859         | 129814862 T | 2.64   | 3.73E-10 | chr:3:129776131 |
| 3 rs13066399        | 129811073 T | 2.72   | 5.19E-10 | chr:3:129776131 |
| 3 rs9713134         | 129850080 A | 0.3997 | 6.13E-10 | chr:3:129776131 |
| 3 rs9879964         | 129760340 T | 2.617  | 7.69E-10 | chr:3:129776131 |
| 3 rs9832290         | 129758522 C | 2.607  | 9.07E-10 | chr:3:129776131 |
| 3 rs55891359        | 129760185 C | 2.602  | 9.97E-10 | chr:3:129776131 |
| 3 rs2403477         | 129864875 T | 0.377  | 1.44E-09 | chr:3:129776131 |
| 3 rs12186005        | 129760328 T | 2.642  | 8.05E-09 | chr:3:129776131 |
| 3 rs11721284;rs5742 | 129844950 G | 0.4085 | 1.06E-08 | chr:3:129776131 |
| 3 rs58302754        | 129763329 A | 2.538  | 1.81E-08 | chr:3:129776131 |
| 3 rs9681294         | 129717018 G | 0.4631 | 1.12E-07 | chr:3:129776131 |
| 3 rs12632095        | 129757870 C | 2.385  | 1.23E-07 | chr:3:129776131 |
| 3 rs9864424         | 129815139 A | 2.202  | 1.35E-07 | chr:3:129776131 |
| 3 rs12495240        | 129715796 G | 0.4682 | 1.38E-07 | chr:3:129776131 |
| 3 rs7641918         | 129707759 T | 0.4673 | 1.45E-07 | chr:3:129776131 |
| 3 rs2929778         | 129811676 T | 2.37   | 1.49E-07 | chr:3:129776131 |
| 3 rs7645772         | 129695373 C | 0.4678 | 1.50E-07 | chr:3:129776131 |
| 3 rs6439208         | 129808290 C | 2.382  | 1.75E-07 | chr:3:129776131 |
| 3 rs35882657        | 129750735 C | 2.304  | 1.87E-07 | chr:3:129776131 |
| 3 rs55935386        | 129707561 A | 0.4701 | 1.89E-07 | chr:3:129776131 |
| 3 rs9846907         | 129757554 T | 2.305  | 1.96E-07 | chr:3:129776131 |
| 3 rs925613          | 129709647 T | 0.4742 | 2.17E-07 | chr:3:129776131 |
| 3 rs13097861        | 129818593 T | 2.158  | 2.18E-07 | chr:3:129776131 |
| 3 rs34233228        | 129750876 A | 2.291  | 2.21E-07 | chr:3:129776131 |
| 3 rs9289349         | 129714372 T | 0.4749 | 2.25E-07 | chr:3:129776131 |
| 3 rs6779417         | 129810022 A | 2.359  | 2.36E-07 | chr:3:129776131 |
| 3 rs2718839         | 129820775 A | 2.147  | 2.66E-07 | chr:3:129776131 |

|               |             |        |          |                 |
|---------------|-------------|--------|----------|-----------------|
| 3 rs2920723   | 129823614 A | 2.147  | 2.66E-07 | chr:3:129776131 |
| 3 rs10804593  | 129707167 T | 0.4772 | 2.80E-07 | chr:3:129776131 |
| 3 rs9840458   | 129830086 T | 2.137  | 3.22E-07 | chr:3:129776131 |
| 3 rs9856004   | 129829611 C | 2.137  | 3.22E-07 | chr:3:129776131 |
| 3 rs9681741   | 129841652 C | 2.135  | 3.35E-07 | chr:3:129776131 |
| 3 rs9849970   | 129807203 T | 2.22   | 3.73E-07 | chr:3:129776131 |
| 3 rs2587978   | 129846893 A | 2.125  | 4.26E-07 | chr:3:129776131 |
| 3 rs2624600   | 129833250 G | 2.125  | 4.26E-07 | chr:3:129776131 |
| 3 rs2624643   | 129839629 C | 2.125  | 4.26E-07 | chr:3:129776131 |
| 3 rs2976111   | 129833542 A | 2.125  | 4.26E-07 | chr:3:129776131 |
| 3 rs9289354   | 129832263 A | 2.125  | 4.26E-07 | chr:3:129776131 |
| 3 rs9809135   | 129845316 C | 2.125  | 4.26E-07 | chr:3:129776131 |
| 3 rs9813000   | 129844814 T | 2.125  | 4.26E-07 | chr:3:129776131 |
| 3 rs9850354   | 129837353 A | 2.125  | 4.26E-07 | chr:3:129776131 |
| 3 rs9862965   | 129834631 T | 2.125  | 4.26E-07 | chr:3:129776131 |
| 3 rs11914710  | 129810346 C | 2.189  | 5.68E-07 | chr:3:129776131 |
| 3 rs13061782  | 129810800 A | 2.189  | 5.68E-07 | chr:3:129776131 |
| 3 rs13081624  | 129810799 G | 2.189  | 5.68E-07 | chr:3:129776131 |
| 3 rs6767964   | 129809899 A | 2.189  | 5.68E-07 | chr:3:129776131 |
| 3 rs6803922   | 129810158 T | 2.189  | 5.68E-07 | chr:3:129776131 |
| 3 rs6804080   | 129810128 A | 2.189  | 5.68E-07 | chr:3:129776131 |
| 3 rs7644173   | 129808755 T | 2.189  | 5.68E-07 | chr:3:129776131 |
| 3 rs10934901  | 129747902 T | 2.209  | 6.96E-07 | chr:3:129776131 |
| 3 rs9870162   | 129816352 A | 2.07   | 7.92E-07 | chr:3:129776131 |
| 3 rs7616082   | 129820737 C | 2.046  | 1.01E-06 | chr:3:129776131 |
| 3 rs9799292   | 129824168 A | 2.046  | 1.01E-06 | chr:3:129776131 |
| 3 rs10433409  | 129687780 T | 1.972  | 1.14E-06 | chr:3:129776131 |
| 3 rs9826433   | 129757284 C | 2.123  | 1.19E-06 | chr:3:129776131 |
| 3 rs9758068   | 129815212 C | 2.134  | 1.51E-06 | chr:3:129776131 |
| 3 rs2587972   | 129815035 T | 2.18   | 2.19E-06 | chr:3:129776131 |
| 3 rs9835466   | 129977373 G | 2.528  | 2.21E-06 | chr:3:129776131 |
| 3 rs9812409   | 129814502 T | 2.09   | 2.42E-06 | chr:3:129776131 |
| 3 rs13062365  | 129888192 T | 1.996  | 2.48E-06 | chr:3:129776131 |
| 3 rs11707425  | 129749980 G | 2.073  | 2.80E-06 | chr:3:129776131 |
| 3 rs9754546   | 129815318 T | 2.102  | 4.33E-06 | chr:3:129776131 |
| 3 rs13093111  | 129754672 A | 1.978  | 4.76E-06 | chr:3:129776131 |
| 3 rs112301199 | 129786534 G | 2.261  | 5.24E-06 | chr:3:129776131 |
| 3 rs6803518   | 129735650 C | 2.097  | 5.39E-06 | chr:3:129776131 |
| 3 rs9820641   | 129755932 G | 2.004  | 5.96E-06 | chr:3:129776131 |
| 3 rs13316898  | 129651554 A | 2.157  | 7.46E-06 | chr:3:129776131 |
| 3 rs2175732   | 129649569 A | 2.157  | 7.46E-06 | chr:3:129776131 |
| 3 rs62265609  | 129649214 T | 2.157  | 7.46E-06 | chr:3:129776131 |
| 3 rs9824076   | 129651072 G | 2.157  | 7.46E-06 | chr:3:129776131 |

|               |             |         |          |                 |
|---------------|-------------|---------|----------|-----------------|
| 3 rs9828783   | 129648591 C | 2.157   | 7.46E-06 | chr:3:129776131 |
| 3 rs4688873   | 130010060 C | 2.356   | 7.57E-06 | chr:3:129776131 |
| 3 rs62284263  | 130004924 A | 2.356   | 7.57E-06 | chr:3:129776131 |
| 3 rs9829426   | 130016770 G | 2.356   | 7.57E-06 | chr:3:129776131 |
| 3 rs138180770 | 129918873 A | 3.272   | 7.76E-06 | chr:3:129776131 |
| 3 rs62265649  | 129687355 A | 1.88    | 7.83E-06 | chr:3:129776131 |
| 3 rs62265650  | 129687427 A | 1.88    | 7.83E-06 | chr:3:129776131 |
| 3 rs784716    | 129687988 A | 1.88    | 7.83E-06 | chr:3:129776131 |
| 3 rs784717    | 129687948 A | 1.88    | 7.83E-06 | chr:3:129776131 |
| 3 rs10934929  | 129944074 A | 2.349   | 8.03E-06 | chr:3:129776131 |
| 3 rs16824839  | 129939729 T | 2.349   | 8.03E-06 | chr:3:129776131 |
| 3 rs9880811   | 129943514 A | 2.349   | 8.03E-06 | chr:3:129776131 |
| 3 rs12488592  | 129752490 C | 1.942   | 8.18E-06 | chr:3:129776131 |
| 3 rs35116196  | 129876516 A | 1.893   | 8.68E-06 | chr:3:129776131 |
| 3 rs2137575   | 129649763 G | 2.139   | 8.86E-06 | chr:3:129776131 |
| 3 rs545632099 | 129814937 G | 0.3273  | 9.51E-06 | chr:3:129776131 |
| 3 rs578194713 | 129814936 T | 0.3273  | 9.51E-06 | chr:3:129776131 |
| 3 rs11719041  | 130012212 T | 2.282   | 1.01E-05 | chr:3:129776131 |
| 3 rs13085868  | 129752864 G | 1.959   | 1.09E-05 | chr:3:129776131 |
| 3 rs9855392   | 129933246 A | 2.271   | 1.32E-05 | chr:3:129776131 |
| 3 rs4432694   | 129868311 T | 1.878   | 1.70E-05 | chr:3:129776131 |
| 3 rs12695517  | 129690192 G | 1.815   | 1.85E-05 | chr:3:129776131 |
| 3 rs7643221   | 129689066 T | 1.798   | 2.32E-05 | chr:3:129776131 |
| 3 rs9758066   | 129815151 C | 1.885   | 2.48E-05 | chr:3:129776131 |
| 3 rs143471490 | 129879887 C | 1.83    | 2.52E-05 | chr:3:129776131 |
| 3 rs7643327   | 129689177 T | 1.798   | 2.54E-05 | chr:3:129776131 |
| 3 rs2953796   | 129733968 G | 1.889   | 2.60E-05 | chr:3:129776131 |
| 3 rs12635811  | 129981377 A | 2.067   | 2.63E-05 | chr:3:129776131 |
| 3 rs1708884   | 129672976 T | 2.01    | 2.67E-05 | chr:3:129776131 |
| 3 rs111956860 | 129723999 C | 0.3492  | 2.76E-05 | chr:3:129776131 |
| 3 rs142279767 | 129882877 T | 1.826   | 2.79E-05 | chr:3:129776131 |
| 3 rs6791923   | 129706392 G | 1.798   | 3.02E-05 | chr:3:129776131 |
| 3 rs13091203  | 129692674 T | 1.782   | 3.17E-05 | chr:3:129776131 |
| 3 rs11921216  | 129973416 G | 2.259   | 3.26E-05 | chr:3:129776131 |
| 3 rs9827848   | 129687128 G | 1.772   | 3.46E-05 | chr:3:129776131 |
| 3 rs9832570   | 129687847 C | 1.772   | 3.46E-05 | chr:3:129776131 |
| 3 rs9833637   | 129688384 G | 1.772   | 3.46E-05 | chr:3:129776131 |
| 3 rs9865790   | 129687520 A | 1.772   | 3.46E-05 | chr:3:129776131 |
| 3 rs9866299   | 129687815 A | 1.772   | 3.46E-05 | chr:3:129776131 |
| 3 rs9870300   | 129688039 A | 1.772   | 3.46E-05 | chr:3:129776131 |
| 3 rs138904938 | 195667637 T | 0.05366 | 1.98E-08 | chr:3:195654394 |
| 3 rs200620860 | 195670998 T | 0.05366 | 1.98E-08 | chr:3:195654394 |
| 3 rs201431379 | 195664977 C | 0.05366 | 1.98E-08 | chr:3:195654394 |

|               |             |         |          |                 |
|---------------|-------------|---------|----------|-----------------|
| 3 rs368599720 | 195668122 A | 0.05366 | 1.98E-08 | chr:3:195654394 |
| 3 rs4927799   | 195670325 T | 0.05366 | 1.98E-08 | chr:3:195654394 |
| 3 rs4927800   | 195670362 A | 0.05366 | 1.98E-08 | chr:3:195654394 |
| 3 rs72499654  | 195662770 C | 0.05366 | 1.98E-08 | chr:3:195654394 |
| 3 rs72499656  | 195666233 T | 0.05366 | 1.98E-08 | chr:3:195654394 |
| 3 rs72499659  | 195667840 C | 0.05366 | 1.98E-08 | chr:3:195654394 |
| 3 rs72499663  | 195671413 G | 0.05366 | 1.98E-08 | chr:3:195654394 |
| 3 rs74406097  | 195658661 C | 0.05366 | 1.98E-08 | chr:3:195654394 |
| 3 rs74894130  | 195660697 T | 0.05366 | 1.98E-08 | chr:3:195654394 |
| 3 rs76268338  | 195661315 G | 0.05366 | 1.98E-08 | chr:3:195654394 |
| 3 rs76934808  | 195669480 T | 0.05366 | 1.98E-08 | chr:3:195654394 |
| 3 rs77570361  | 195659561 G | 0.05366 | 1.98E-08 | chr:3:195654394 |
| 3 rs78128847  | 195653985 T | 0.05366 | 1.98E-08 | chr:3:195654394 |
| 3 rs78809271  | 195659736 A | 0.05366 | 1.98E-08 | chr:3:195654394 |
| 3 rs79026789  | 195660712 A | 0.05366 | 1.98E-08 | chr:3:195654394 |
| 3 rs79516196  | 195658662 A | 0.05366 | 1.98E-08 | chr:3:195654394 |
| 3 rs59908382  | 195671256 A | 0.05646 | 2.90E-08 | chr:3:195654394 |
| 3 rs7371976   | 195684515 A | 0.06463 | 3.84E-07 | chr:3:195654394 |
| 3 rs111237905 | 195683159 A | 0.06868 | 5.06E-07 | chr:3:195654394 |
| 3 rs111452973 | 195683167 C | 0.06868 | 5.06E-07 | chr:3:195654394 |
| 3 rs111529852 | 195683186 C | 0.06868 | 5.06E-07 | chr:3:195654394 |
| 3 rs111569452 | 195683174 C | 0.06868 | 5.06E-07 | chr:3:195654394 |
| 3 rs113181724 | 195683118 A | 0.06868 | 5.06E-07 | chr:3:195654394 |
| 3 rs147267489 | 195693977 G | 0.06551 | 5.24E-07 | chr:3:195654394 |
| 3 rs112372218 | 195684599 T | 0.06967 | 5.68E-07 | chr:3:195654394 |
| 3 rs112619958 | 195693191 G | 0.06823 | 5.73E-07 | chr:3:195654394 |
| 3 rs112957249 | 195693236 T | 0.06823 | 5.73E-07 | chr:3:195654394 |
| 3 rs200402998 | 195676577 A | 0.0706  | 6.29E-07 | chr:3:195654394 |
| 3 rs111857020 | 195684226 A | 0.07107 | 6.83E-07 | chr:3:195654394 |
| 3 rs114004364 | 195682365 G | 0.07107 | 6.83E-07 | chr:3:195654394 |
| 3 rs114155151 | 195688314 G | 0.07107 | 6.83E-07 | chr:3:195654394 |
| 3 rs12489547  | 195682747 C | 0.07107 | 6.83E-07 | chr:3:195654394 |
| 3 rs140893852 | 195691373 T | 0.07107 | 6.83E-07 | chr:3:195654394 |
| 3 rs141586514 | 195688130 C | 0.07107 | 6.83E-07 | chr:3:195654394 |
| 3 rs143076671 | 195692843 A | 0.07107 | 6.83E-07 | chr:3:195654394 |
| 3 rs145435068 | 195693305 T | 0.07107 | 6.83E-07 | chr:3:195654394 |
| 3 rs145575126 | 195683366 T | 0.07107 | 6.83E-07 | chr:3:195654394 |
| 3 rs147038037 | 195688166 C | 0.07107 | 6.83E-07 | chr:3:195654394 |
| 3 rs148761326 | 195691637 A | 0.07107 | 6.83E-07 | chr:3:195654394 |
| 3 rs149593867 | 195688363 C | 0.07107 | 6.83E-07 | chr:3:195654394 |
| 3 rs150157283 | 195691387 C | 0.07107 | 6.83E-07 | chr:3:195654394 |
| 3 rs188069625 | 195692975 A | 0.07107 | 6.83E-07 | chr:3:195654394 |
| 3 rs189722989 | 195690118 A | 0.07107 | 6.83E-07 | chr:3:195654394 |

|               |             |         |          |                 |
|---------------|-------------|---------|----------|-----------------|
| 3 rs201250247 | 195691199 G | 0.07107 | 6.83E-07 | chr:3:195654394 |
| 3 rs201898153 | 195697848 C | 0.07107 | 6.83E-07 | chr:3:195654394 |
| 3 rs202025333 | 195695717 G | 0.07107 | 6.83E-07 | chr:3:195654394 |
| 3 rs28660371  | 195690105 G | 0.07107 | 6.83E-07 | chr:3:195654394 |
| 3 rs4927817   | 195693798 G | 0.07107 | 6.83E-07 | chr:3:195654394 |
| 3 rs72499666  | 195683479 G | 0.07107 | 6.83E-07 | chr:3:195654394 |
| 3 rs77298109  | 195683022 G | 0.07107 | 6.83E-07 | chr:3:195654394 |
| 3 rs77759126  | 195692828 C | 0.07107 | 6.83E-07 | chr:3:195654394 |
| 3 rs78320742  | 195689817 T | 0.07107 | 6.83E-07 | chr:3:195654394 |
| 3 rs12487635  | 195672459 T | 0.07519 | 8.77E-07 | chr:3:195654394 |
| 3 rs12489913  | 195673933 G | 0.07519 | 8.77E-07 | chr:3:195654394 |
| 3 rs12497996  | 195672534 C | 0.07519 | 8.77E-07 | chr:3:195654394 |
| 3 rs138213397 | 195676057 A | 0.07519 | 8.77E-07 | chr:3:195654394 |
| 3 rs141789999 | 195676214 G | 0.07519 | 8.77E-07 | chr:3:195654394 |
| 3 rs146447703 | 195672685 A | 0.07519 | 8.77E-07 | chr:3:195654394 |
| 3 rs7372023   | 195674317 T | 0.07519 | 8.77E-07 | chr:3:195654394 |
| 3 rs7619087   | 195676518 A | 0.07519 | 8.77E-07 | chr:3:195654394 |
| 3 rs12488793  | 195682872 G | 0.07434 | 9.11E-07 | chr:3:195654394 |
| 3 rs200007926 | 195682077 T | 0.07168 | 1.49E-06 | chr:3:195654394 |
| 3 rs200191712 | 195682112 A | 0.07168 | 1.49E-06 | chr:3:195654394 |
| 3 rs201335223 | 195682102 T | 0.07168 | 1.49E-06 | chr:3:195654394 |
| 3 rs201963939 | 195682106 C | 0.07168 | 1.49E-06 | chr:3:195654394 |
| 3 rs557551051 | 195682108 T | 0.07168 | 1.49E-06 | chr:3:195654394 |
| 3 rs111475386 | 195684587 T | 0.08423 | 1.75E-06 | chr:3:195654394 |
| 3 rs34254399  | 195740067 T | 0.07363 | 1.77E-06 | chr:3:195654394 |
| 3 rs371452292 | 195710165 C | 0.07539 | 1.82E-06 | chr:3:195654394 |
| 3 rs112788096 | 195682140 T | 0.07349 | 1.89E-06 | chr:3:195654394 |
| 3 rs113786804 | 195682145 G | 0.07349 | 1.89E-06 | chr:3:195654394 |
| 3 rs113876944 | 195682180 A | 0.07349 | 1.89E-06 | chr:3:195654394 |
| 3 rs78587262  | 195717867 G | 0.07614 | 2.05E-06 | chr:3:195654394 |
| 3 rs4927814   | 195684297 C | 0.08407 | 2.09E-06 | chr:3:195654394 |
| 3 rs28554180  | 195674712 T | 0.07559 | 2.28E-06 | chr:3:195654394 |
| 3 rs146692935 | 195723648 C | 0.08367 | 4.04E-06 | chr:3:195654394 |
| 3 rs374823901 | 195685831 A | 0.08419 | 4.23E-06 | chr:3:195654394 |
| 3 rs376696582 | 195685832 G | 0.08419 | 4.23E-06 | chr:3:195654394 |
| 3 rs113310924 | 195734614 T | 0.08471 | 4.55E-06 | chr:3:195654394 |
| 3 rs140057626 | 195728317 A | 0.08471 | 4.55E-06 | chr:3:195654394 |
| 3 rs200743347 | 195722294 A | 0.08471 | 4.55E-06 | chr:3:195654394 |
| 3 rs2593984   | 195725621 A | 0.08471 | 4.55E-06 | chr:3:195654394 |
| 3 rs4927846   | 195732325 G | 0.08471 | 4.55E-06 | chr:3:195654394 |
| 3 rs4927847   | 195736627 C | 0.08471 | 4.55E-06 | chr:3:195654394 |
| 3 rs72499671  | 195724614 C | 0.08471 | 4.55E-06 | chr:3:195654394 |
| 3 rs72499672  | 195726839 G | 0.08471 | 4.55E-06 | chr:3:195654394 |

|   |             |           |   |         |          |                 |
|---|-------------|-----------|---|---------|----------|-----------------|
| 3 | rs72499680  | 195730979 | A | 0.08471 | 4.55E-06 | chr:3:195654394 |
| 3 | rs75342758  | 195737511 | T | 0.08471 | 4.55E-06 | chr:3:195654394 |
| 3 | rs75962942  | 195728678 | G | 0.08471 | 4.55E-06 | chr:3:195654394 |
| 3 | rs76499913  | 195729028 | T | 0.08471 | 4.55E-06 | chr:3:195654394 |
| 3 | rs76655042  | 195736059 | T | 0.08471 | 4.55E-06 | chr:3:195654394 |
| 3 | rs4927856   | 195756474 | T | 0.09222 | 6.75E-06 | chr:3:195654394 |
| 3 | rs77192409  | 195751543 | C | 0.09222 | 6.75E-06 | chr:3:195654394 |
| 3 | rs78147044  | 195745484 | A | 0.09222 | 6.75E-06 | chr:3:195654394 |
| 3 | rs79238342  | 195757954 | A | 0.09222 | 6.75E-06 | chr:3:195654394 |
| 3 | rs79698107  | 195760322 | A | 0.09222 | 6.75E-06 | chr:3:195654394 |
| 3 | rs113488782 | 195684121 | C | 0.09889 | 6.86E-06 | chr:3:195654394 |
| 3 | rs62285304  | 195675478 | T | 0.1075  | 1.36E-05 | chr:3:195654394 |
| 3 | rs4927855   | 195754452 | T | 0.1189  | 3.29E-05 | chr:3:195654394 |
| 3 | rs368927131 | 195367547 | G | 0.203   | 3.65E-05 | chr:3:195654394 |
| 3 | rs538034368 | 195683992 | A | 0.09631 | 4.37E-05 | chr:3:195654394 |
| 3 | rs575022724 | 195684009 | G | 0.09631 | 4.37E-05 | chr:3:195654394 |
| 4 | rs190883674 | 120269780 | G | 0.1333  | 2.78E-24 | chr:4:120263688 |
| 4 | rs201764844 | 120269768 | C | 0.1333  | 2.78E-24 | chr:4:120263688 |
| 4 | rs12503360  | 120247506 | C | 0.1099  | 6.92E-24 | chr:4:120263688 |
| 4 | rs10013042  | 120244482 | T | 0.1244  | 8.21E-24 | chr:4:120263688 |
| 4 | rs13101526  | 120244456 | T | 0.1244  | 8.21E-24 | chr:4:120263688 |
| 4 | rs12503309  | 120247397 | A | 0.1236  | 8.79E-24 | chr:4:120263688 |
| 4 | rs12510923  | 120247381 | G | 0.1236  | 8.79E-24 | chr:4:120263688 |
| 4 | rs534745130 | 120246059 | C | 0.1245  | 1.02E-23 | chr:4:120263688 |
| 4 | rs143457155 | 120263622 | C | 0.08649 | 1.22E-23 | chr:4:120263688 |
| 4 | rs10006688  | 120263526 | C | 0.09048 | 1.38E-23 | chr:4:120263688 |
| 4 | rs10006495  | 120263315 | G | 0.133   | 1.61E-23 | chr:4:120263688 |
| 4 | rs77466269  | 120269755 | A | 0.1382  | 2.11E-23 | chr:4:120263688 |
| 4 | rs7671759   | 120248094 | C | 0.1136  | 2.24E-23 | chr:4:120263688 |
| 4 | rs3864143   | 120266428 | C | 0.1035  | 2.61E-23 | chr:4:120263688 |
| 4 | rs201965045 | 120254952 | G | 0.1365  | 3.13E-23 | chr:4:120263688 |
| 4 | rs35280960  | 120257059 | A | 0.1184  | 3.36E-23 | chr:4:120263688 |
| 4 | rs12503171  | 120247196 | G | 0.117   | 3.42E-23 | chr:4:120263688 |
| 4 | rs12507283  | 120247218 | A | 0.117   | 3.42E-23 | chr:4:120263688 |
| 4 | rs10003567  | 120241674 | T | 0.1138  | 3.47E-23 | chr:4:120263688 |
| 4 | rs10005237  | 120237897 | C | 0.1138  | 3.47E-23 | chr:4:120263688 |
| 4 | rs10005973  | 120271958 | T | 0.1138  | 3.47E-23 | chr:4:120263688 |
| 4 | rs10006259  | 120242145 | T | 0.1138  | 3.47E-23 | chr:4:120263688 |
| 4 | rs10024933  | 120253582 | A | 0.1138  | 3.47E-23 | chr:4:120263688 |
| 4 | rs10212719  | 120254437 | C | 0.1138  | 3.47E-23 | chr:4:120263688 |
| 4 | rs10212775  | 120239244 | C | 0.1138  | 3.47E-23 | chr:4:120263688 |
| 4 | rs10213221  | 120255926 | A | 0.1138  | 3.47E-23 | chr:4:120263688 |
| 4 | rs10213267  | 120239074 | G | 0.1138  | 3.47E-23 | chr:4:120263688 |

|               |             |        |          |                 |
|---------------|-------------|--------|----------|-----------------|
| 4 rs10213554  | 120260785 A | 0.1138 | 3.47E-23 | chr:4:120263688 |
| 4 rs10518300  | 120249499 G | 0.1138 | 3.47E-23 | chr:4:120263688 |
| 4 rs11098501  | 120252017 G | 0.1138 | 3.47E-23 | chr:4:120263688 |
| 4 rs11098502  | 120252063 A | 0.1138 | 3.47E-23 | chr:4:120263688 |
| 4 rs11724409  | 120252361 G | 0.1138 | 3.47E-23 | chr:4:120263688 |
| 4 rs11732087  | 120239831 G | 0.1138 | 3.47E-23 | chr:4:120263688 |
| 4 rs11732686  | 120252330 A | 0.1138 | 3.47E-23 | chr:4:120263688 |
| 4 rs12498994  | 120250818 C | 0.1138 | 3.47E-23 | chr:4:120263688 |
| 4 rs12506610  | 120241659 C | 0.1138 | 3.47E-23 | chr:4:120263688 |
| 4 rs12507387  | 120247590 C | 0.1138 | 3.47E-23 | chr:4:120263688 |
| 4 rs12507565  | 120251121 A | 0.1138 | 3.47E-23 | chr:4:120263688 |
| 4 rs12509621  | 120249660 C | 0.1138 | 3.47E-23 | chr:4:120263688 |
| 4 rs12510269  | 120241646 G | 0.1138 | 3.47E-23 | chr:4:120263688 |
| 4 rs12511640  | 120251248 C | 0.1138 | 3.47E-23 | chr:4:120263688 |
| 4 rs12513083  | 120249612 T | 0.1138 | 3.47E-23 | chr:4:120263688 |
| 4 rs12711071  | 120240934 C | 0.1138 | 3.47E-23 | chr:4:120263688 |
| 4 rs13108589  | 120268102 C | 0.1138 | 3.47E-23 | chr:4:120263688 |
| 4 rs140387830 | 120247916 G | 0.1138 | 3.47E-23 | chr:4:120263688 |
| 4 rs145027390 | 120247827 G | 0.1138 | 3.47E-23 | chr:4:120263688 |
| 4 rs1511017   | 120250805 A | 0.1138 | 3.47E-23 | chr:4:120263688 |
| 4 rs1511025   | 120240238 C | 0.1138 | 3.47E-23 | chr:4:120263688 |
| 4 rs1546503   | 120241167 C | 0.1138 | 3.47E-23 | chr:4:120263688 |
| 4 rs17049949  | 120255290 G | 0.1138 | 3.47E-23 | chr:4:120263688 |
| 4 rs17595608  | 120250506 T | 0.1138 | 3.47E-23 | chr:4:120263688 |
| 4 rs1980024   | 120253047 T | 0.1138 | 3.47E-23 | chr:4:120263688 |
| 4 rs1980025   | 120252806 T | 0.1138 | 3.47E-23 | chr:4:120263688 |
| 4 rs1980026   | 120251643 A | 0.1138 | 3.47E-23 | chr:4:120263688 |
| 4 rs1980027   | 120251577 T | 0.1138 | 3.47E-23 | chr:4:120263688 |
| 4 rs2002047   | 120257228 G | 0.1138 | 3.47E-23 | chr:4:120263688 |
| 4 rs2002049   | 120257417 G | 0.1138 | 3.47E-23 | chr:4:120263688 |
| 4 rs2036856   | 120249288 A | 0.1138 | 3.47E-23 | chr:4:120263688 |
| 4 rs2036857   | 120249240 C | 0.1138 | 3.47E-23 | chr:4:120263688 |
| 4 rs2036860   | 120248934 G | 0.1138 | 3.47E-23 | chr:4:120263688 |
| 4 rs28363929  | 120257103 G | 0.1138 | 3.47E-23 | chr:4:120263688 |
| 4 rs28373117  | 120253465 T | 0.1138 | 3.47E-23 | chr:4:120263688 |
| 4 rs28502463  | 120257023 C | 0.1138 | 3.47E-23 | chr:4:120263688 |
| 4 rs28643450  | 120245242 A | 0.1138 | 3.47E-23 | chr:4:120263688 |
| 4 rs28652763  | 120242312 T | 0.1138 | 3.47E-23 | chr:4:120263688 |
| 4 rs28713555  | 120251995 T | 0.1138 | 3.47E-23 | chr:4:120263688 |
| 4 rs2964      | 120240131 C | 0.1138 | 3.47E-23 | chr:4:120263688 |
| 4 rs34425882  | 120253177 A | 0.1138 | 3.47E-23 | chr:4:120263688 |
| 4 rs3864141   | 120266007 A | 0.1138 | 3.47E-23 | chr:4:120263688 |
| 4 rs3956464   | 120256764 C | 0.1138 | 3.47E-23 | chr:4:120263688 |



|               |             |         |          |                 |
|---------------|-------------|---------|----------|-----------------|
| 4 rs4107728   | 120253910 A | 0.1138  | 3.47E-23 | chr:4:120263688 |
| 4 rs4443261   | 120249301 C | 0.1138  | 3.47E-23 | chr:4:120263688 |
| 4 rs66900435  | 120249425 A | 0.1138  | 3.47E-23 | chr:4:120263688 |
| 4 rs714899    | 120243035 A | 0.1138  | 3.47E-23 | chr:4:120263688 |
| 4 rs7671797   | 120248157 G | 0.1138  | 3.47E-23 | chr:4:120263688 |
| 4 rs7671978   | 120248218 G | 0.1138  | 3.47E-23 | chr:4:120263688 |
| 4 rs7672129   | 120248176 T | 0.1138  | 3.47E-23 | chr:4:120263688 |
| 4 rs7672357   | 120248340 T | 0.1138  | 3.47E-23 | chr:4:120263688 |
| 4 rs7672372   | 120248406 G | 0.1138  | 3.47E-23 | chr:4:120263688 |
| 4 rs7672594   | 120248543 C | 0.1138  | 3.47E-23 | chr:4:120263688 |
| 4 rs7672778   | 120248585 G | 0.1138  | 3.47E-23 | chr:4:120263688 |
| 4 rs7689729   | 120256192 G | 0.1138  | 3.47E-23 | chr:4:120263688 |
| 4 rs878372    | 120238780 C | 0.1138  | 3.47E-23 | chr:4:120263688 |
| 4 rs907204    | 120238654 A | 0.1138  | 3.47E-23 | chr:4:120263688 |
| 4 rs907205    | 120238664 C | 0.1138  | 3.47E-23 | chr:4:120263688 |
| 4 rs9991166   | 120237851 A | 0.1138  | 3.47E-23 | chr:4:120263688 |
| 4 rs9991959   | 120253773 C | 0.1138  | 3.47E-23 | chr:4:120263688 |
| 4 rs9993347   | 120258955 G | 0.1138  | 3.47E-23 | chr:4:120263688 |
| 4 rs9999724   | 120239944 T | 0.1138  | 3.47E-23 | chr:4:120263688 |
| 4 rs13121928  | 120266518 C | 0.1047  | 3.53E-23 | chr:4:120263688 |
| 4 rs140584472 | 120246695 G | 0.1369  | 3.65E-23 | chr:4:120263688 |
| 4 rs185481756 | 120246689 C | 0.1369  | 3.65E-23 | chr:4:120263688 |
| 4 rs75420021  | 120246729 A | 0.1195  | 3.93E-23 | chr:4:120263688 |
| 4 rs7690338   | 120256468 G | 0.1138  | 4.02E-23 | chr:4:120263688 |
| 4 rs28622913  | 120261723 A | 0.1002  | 4.35E-23 | chr:4:120263688 |
| 4 rs28735977  | 120261738 T | 0.1002  | 4.35E-23 | chr:4:120263688 |
| 4 rs10213158  | 120255829 T | 0.1148  | 4.65E-23 | chr:4:120263688 |
| 4 rs148893841 | 120263621 G | 0.08912 | 5.26E-23 | chr:4:120263688 |
| 4 rs7438634   | 120245754 C | 0.118   | 5.28E-23 | chr:4:120263688 |
| 4 rs10213480  | 120254561 T | 0.118   | 5.36E-23 | chr:4:120263688 |
| 4 rs72676046  | 120254681 C | 0.118   | 5.36E-23 | chr:4:120263688 |
| 4 rs1546506   | 120241240 C | 0.1185  | 5.61E-23 | chr:4:120263688 |
| 4 rs4472123   | 120236630 A | 0.1191  | 5.96E-23 | chr:4:120263688 |
| 4 rs878376    | 120237702 A | 0.1191  | 5.96E-23 | chr:4:120263688 |
| 4 rs10017001  | 120263293 G | 0.1429  | 6.06E-23 | chr:4:120263688 |
| 4 rs9994691   | 120263298 A | 0.1429  | 6.06E-23 | chr:4:120263688 |
| 4 rs34481394  | 120248374 T | 0.1226  | 6.12E-23 | chr:4:120263688 |
| 4 rs35231872  | 120248376 T | 0.1226  | 6.12E-23 | chr:4:120263688 |
| 4 rs35653026  | 120248378 G | 0.1226  | 6.12E-23 | chr:4:120263688 |
| 4 rs28369503  | 120238925 A | 0.1245  | 6.31E-23 | chr:4:120263688 |
| 4 rs28458294  | 120238924 C | 0.1245  | 6.31E-23 | chr:4:120263688 |
| 4 rs9996501   | 120238918 A | 0.1245  | 6.31E-23 | chr:4:120263688 |
| 4 rs10000544  | 120270705 A | 0.08936 | 6.40E-23 | chr:4:120263688 |

|               |             |         |          |                 |
|---------------|-------------|---------|----------|-----------------|
| 4 rs10005542  | 120268302 C | 0.08936 | 6.40E-23 | chr:4:120263688 |
| 4 rs10006192  | 120263022 C | 0.08936 | 6.40E-23 | chr:4:120263688 |
| 4 rs10010355  | 120261043 G | 0.08936 | 6.40E-23 | chr:4:120263688 |
| 4 rs10012408  | 120270771 A | 0.08936 | 6.40E-23 | chr:4:120263688 |
| 4 rs10015579  | 120271802 C | 0.08936 | 6.40E-23 | chr:4:120263688 |
| 4 rs10015965  | 120268237 G | 0.08936 | 6.40E-23 | chr:4:120263688 |
| 4 rs10022448  | 120270421 G | 0.08936 | 6.40E-23 | chr:4:120263688 |
| 4 rs10023641  | 120258410 G | 0.08936 | 6.40E-23 | chr:4:120263688 |
| 4 rs10025925  | 120271744 T | 0.08936 | 6.40E-23 | chr:4:120263688 |
| 4 rs10028773  | 120265259 G | 0.08936 | 6.40E-23 | chr:4:120263688 |
| 4 rs114866537 | 120258608 T | 0.08936 | 6.40E-23 | chr:4:120263688 |
| 4 rs12498657  | 120262866 C | 0.08936 | 6.40E-23 | chr:4:120263688 |
| 4 rs12502393  | 120271228 T | 0.08936 | 6.40E-23 | chr:4:120263688 |
| 4 rs12502524  | 120271414 A | 0.08936 | 6.40E-23 | chr:4:120263688 |
| 4 rs12506421  | 120271167 C | 0.08936 | 6.40E-23 | chr:4:120263688 |
| 4 rs12506445  | 120271237 C | 0.08936 | 6.40E-23 | chr:4:120263688 |
| 4 rs12506487  | 120271361 G | 0.08936 | 6.40E-23 | chr:4:120263688 |
| 4 rs12510133  | 120271344 C | 0.08936 | 6.40E-23 | chr:4:120263688 |
| 4 rs13122153  | 120266585 C | 0.08936 | 6.40E-23 | chr:4:120263688 |
| 4 rs17009144  | 120270795 G | 0.08936 | 6.40E-23 | chr:4:120263688 |
| 4 rs17517414  | 120262101 C | 0.08936 | 6.40E-23 | chr:4:120263688 |
| 4 rs17595727  | 120262074 C | 0.08936 | 6.40E-23 | chr:4:120263688 |
| 4 rs1814814   | 120258124 G | 0.08936 | 6.40E-23 | chr:4:120263688 |
| 4 rs2136911   | 120265859 A | 0.08936 | 6.40E-23 | chr:4:120263688 |
| 4 rs2175381   | 120265967 C | 0.08936 | 6.40E-23 | chr:4:120263688 |
| 4 rs28369518  | 120271630 C | 0.08936 | 6.40E-23 | chr:4:120263688 |
| 4 rs28396837  | 120271541 A | 0.08936 | 6.40E-23 | chr:4:120263688 |
| 4 rs28437684  | 120264849 A | 0.08936 | 6.40E-23 | chr:4:120263688 |
| 4 rs28546691  | 120262832 A | 0.08936 | 6.40E-23 | chr:4:120263688 |
| 4 rs28551750  | 120264901 T | 0.08936 | 6.40E-23 | chr:4:120263688 |
| 4 rs28572003  | 120268891 G | 0.08936 | 6.40E-23 | chr:4:120263688 |
| 4 rs28589345  | 120269080 A | 0.08936 | 6.40E-23 | chr:4:120263688 |
| 4 rs28599836  | 120268809 T | 0.08936 | 6.40E-23 | chr:4:120263688 |
| 4 rs28616635  | 120261861 C | 0.08936 | 6.40E-23 | chr:4:120263688 |
| 4 rs28691602  | 120264770 C | 0.08936 | 6.40E-23 | chr:4:120263688 |
| 4 rs28714087  | 120270966 G | 0.08936 | 6.40E-23 | chr:4:120263688 |
| 4 rs28726222  | 120262672 C | 0.08936 | 6.40E-23 | chr:4:120263688 |
| 4 rs3864142   | 120266191 T | 0.08936 | 6.40E-23 | chr:4:120263688 |
| 4 rs3864144   | 120272605 T | 0.08936 | 6.40E-23 | chr:4:120263688 |
| 4 rs3986377   | 120260270 A | 0.08936 | 6.40E-23 | chr:4:120263688 |
| 4 rs4001390   | 120265783 C | 0.08936 | 6.40E-23 | chr:4:120263688 |
| 4 rs4422403   | 120258194 T | 0.08936 | 6.40E-23 | chr:4:120263688 |
| 4 rs4473640   | 120260437 A | 0.08936 | 6.40E-23 | chr:4:120263688 |

|               |             |         |          |                 |
|---------------|-------------|---------|----------|-----------------|
| 4 rs555773279 | 120269424 T | 0.08936 | 6.40E-23 | chr:4:120263688 |
| 4 rs6815291   | 120266982 A | 0.08936 | 6.40E-23 | chr:4:120263688 |
| 4 rs6815934   | 120267310 C | 0.08936 | 6.40E-23 | chr:4:120263688 |
| 4 rs6833140   | 120266822 A | 0.08936 | 6.40E-23 | chr:4:120263688 |
| 4 rs6838009   | 120267034 A | 0.08936 | 6.40E-23 | chr:4:120263688 |
| 4 rs6838457   | 120267367 G | 0.08936 | 6.40E-23 | chr:4:120263688 |
| 4 rs79606892  | 120259606 C | 0.08936 | 6.40E-23 | chr:4:120263688 |
| 4 rs9307470   | 120261214 A | 0.08936 | 6.40E-23 | chr:4:120263688 |
| 4 rs9307471   | 120261262 A | 0.08936 | 6.40E-23 | chr:4:120263688 |
| 4 rs9995716   | 120264996 C | 0.08936 | 6.40E-23 | chr:4:120263688 |
| 4 rs10212956  | 120254343 G | 0.1235  | 6.83E-23 | chr:4:120263688 |
| 4 rs1849457   | 120254355 G | 0.1235  | 6.83E-23 | chr:4:120263688 |
| 4 rs9996494   | 120238880 A | 0.1218  | 7.55E-23 | chr:4:120263688 |
| 4 rs9996644   | 120238877 T | 0.1218  | 7.55E-23 | chr:4:120263688 |
| 4 rs938056    | 120237453 T | 0.1211  | 7.64E-23 | chr:4:120263688 |
| 4 rs10016241  | 120268553 C | 0.08955 | 7.71E-23 | chr:4:120263688 |
| 4 rs55820750  | 120269168 C | 0.08953 | 8.00E-23 | chr:4:120263688 |
| 4 rs200947437 | 120254755 C | 0.1398  | 8.14E-23 | chr:4:120263688 |
| 4 rs10212714  | 120254302 C | 0.1246  | 9.32E-23 | chr:4:120263688 |
| 4 rs12503276  | 120247329 A | 0.1329  | 9.56E-23 | chr:4:120263688 |
| 4 rs1814813   | 120258207 G | 0.09202 | 9.59E-23 | chr:4:120263688 |
| 4 rs28584388  | 120261788 C | 0.09501 | 1.04E-22 | chr:4:120263688 |
| 4 rs11735886  | 120290215 C | 0.1116  | 1.06E-22 | chr:4:120263688 |
| 4 rs7673476   | 120248683 A | 0.1247  | 1.79E-22 | chr:4:120263688 |
| 4 rs4145952   | 120155806 A | 0.1016  | 2.41E-22 | chr:4:120263688 |
| 4 rs113263911 | 120255134 T | 0.1494  | 4.41E-22 | chr:4:120263688 |
| 4 rs71610270  | 120287436 G | 0.1096  | 5.98E-22 | chr:4:120263688 |
| 4 rs12374244  | 120281972 T | 0.1102  | 6.07E-22 | chr:4:120263688 |
| 4 rs12374352  | 120281977 T | 0.1102  | 6.07E-22 | chr:4:120263688 |
| 4 rs6847862   | 120286371 T | 0.1102  | 6.10E-22 | chr:4:120263688 |
| 4 rs6848380   | 120286403 A | 0.1102  | 6.10E-22 | chr:4:120263688 |
| 4 rs10002914  | 120292081 A | 0.1105  | 7.45E-22 | chr:4:120263688 |
| 4 rs10021601  | 120282563 A | 0.1105  | 7.45E-22 | chr:4:120263688 |
| 4 rs10029303  | 120286755 A | 0.1105  | 7.45E-22 | chr:4:120263688 |
| 4 rs10517834  | 120286783 C | 0.1105  | 7.45E-22 | chr:4:120263688 |
| 4 rs11098505  | 120284627 T | 0.1105  | 7.45E-22 | chr:4:120263688 |
| 4 rs11098506  | 120284971 G | 0.1105  | 7.45E-22 | chr:4:120263688 |
| 4 rs11098507  | 120288286 A | 0.1105  | 7.45E-22 | chr:4:120263688 |
| 4 rs12374245  | 120282059 T | 0.1105  | 7.45E-22 | chr:4:120263688 |
| 4 rs12374346  | 120281705 A | 0.1105  | 7.45E-22 | chr:4:120263688 |
| 4 rs12374396  | 120281619 C | 0.1105  | 7.45E-22 | chr:4:120263688 |
| 4 rs12499602  | 120284387 A | 0.1105  | 7.45E-22 | chr:4:120263688 |
| 4 rs12501602  | 120287935 T | 0.1105  | 7.45E-22 | chr:4:120263688 |

|               |             |        |          |                 |
|---------------|-------------|--------|----------|-----------------|
| 4 rs12503082  | 120284317 G | 0.1105 | 7.45E-22 | chr:4:120263688 |
| 4 rs12510451  | 120289143 T | 0.1105 | 7.45E-22 | chr:4:120263688 |
| 4 rs12510487  | 120289231 T | 0.1105 | 7.45E-22 | chr:4:120263688 |
| 4 rs12513310  | 120288039 A | 0.1105 | 7.45E-22 | chr:4:120263688 |
| 4 rs13104572  | 120285568 C | 0.1105 | 7.45E-22 | chr:4:120263688 |
| 4 rs13105020  | 120285688 T | 0.1105 | 7.45E-22 | chr:4:120263688 |
| 4 rs13125526  | 120288019 A | 0.1105 | 7.45E-22 | chr:4:120263688 |
| 4 rs13132082  | 120285657 A | 0.1105 | 7.45E-22 | chr:4:120263688 |
| 4 rs28470894  | 120289405 G | 0.1105 | 7.45E-22 | chr:4:120263688 |
| 4 rs28488261  | 120289396 C | 0.1105 | 7.45E-22 | chr:4:120263688 |
| 4 rs28501434  | 120283773 T | 0.1105 | 7.45E-22 | chr:4:120263688 |
| 4 rs28581362  | 120283548 A | 0.1105 | 7.45E-22 | chr:4:120263688 |
| 4 rs28594160  | 120289456 G | 0.1105 | 7.45E-22 | chr:4:120263688 |
| 4 rs28668103  | 120291372 T | 0.1105 | 7.45E-22 | chr:4:120263688 |
| 4 rs28687057  | 120280812 G | 0.1105 | 7.45E-22 | chr:4:120263688 |
| 4 rs55845118  | 120290913 C | 0.1105 | 7.45E-22 | chr:4:120263688 |
| 4 rs60378962  | 120280991 A | 0.1105 | 7.45E-22 | chr:4:120263688 |
| 4 rs67281037  | 120281157 C | 0.1105 | 7.45E-22 | chr:4:120263688 |
| 4 rs6824111   | 120285968 A | 0.1105 | 7.45E-22 | chr:4:120263688 |
| 4 rs6824169   | 120293175 C | 0.1105 | 7.45E-22 | chr:4:120263688 |
| 4 rs6846966   | 120293208 G | 0.1105 | 7.45E-22 | chr:4:120263688 |
| 4 rs6847586   | 120286069 A | 0.1105 | 7.45E-22 | chr:4:120263688 |
| 4 rs6847778   | 120293582 G | 0.1105 | 7.45E-22 | chr:4:120263688 |
| 4 rs6848081   | 120286443 T | 0.1105 | 7.45E-22 | chr:4:120263688 |
| 4 rs6857892   | 120282696 T | 0.1105 | 7.45E-22 | chr:4:120263688 |
| 4 rs72676059  | 120290828 G | 0.1105 | 7.45E-22 | chr:4:120263688 |
| 4 rs73842616  | 120290683 A | 0.1105 | 7.45E-22 | chr:4:120263688 |
| 4 rs7677068   | 120291704 T | 0.1105 | 7.45E-22 | chr:4:120263688 |
| 4 rs9991221   | 120292107 C | 0.1105 | 7.45E-22 | chr:4:120263688 |
| 4 rs9995136   | 120286845 G | 0.1105 | 7.45E-22 | chr:4:120263688 |
| 4 rs56155624  | 120291026 G | 0.1257 | 9.17E-22 | chr:4:120263688 |
| 4 rs10857066  | 120286596 T | 0.1116 | 9.79E-22 | chr:4:120263688 |
| 4 rs6857105   | 120222298 G | 0.1368 | 1.08E-21 | chr:4:120263688 |
| 4 rs7665192   | 120247065 A | 0.139  | 1.12E-21 | chr:4:120263688 |
| 4 rs55816173  | 120247014 T | 0.1546 | 1.13E-21 | chr:4:120263688 |
| 4 rs78422072  | 120281042 T | 0.1199 | 1.32E-21 | chr:4:120263688 |
| 4 rs78971550  | 120281041 T | 0.1199 | 1.32E-21 | chr:4:120263688 |
| 4 rs58583086  | 120556362 A | 0.1261 | 1.34E-21 | chr:4:120263688 |
| 4 rs10013652  | 120292256 G | 0.1117 | 1.39E-21 | chr:4:120263688 |
| 4 rs13128933  | 120246249 A | 0.1694 | 1.54E-21 | chr:4:120263688 |
| 4 rs10026436  | 120288904 A | 0.1349 | 1.59E-21 | chr:4:120263688 |
| 4 rs11722183  | 120280597 C | 0.1349 | 1.59E-21 | chr:4:120263688 |
| 4 rs150131449 | 120288605 G | 0.1349 | 1.59E-21 | chr:4:120263688 |

|               |             |        |          |                 |
|---------------|-------------|--------|----------|-----------------|
| 4 rs6848580   | 120286492 A | 0.1349 | 1.59E-21 | chr:4:120263688 |
| 4 rs34818745  | 120257055 C | 0.1389 | 1.81E-21 | chr:4:120263688 |
| 4 rs10028423  | 120294909 T | 0.1385 | 2.00E-21 | chr:4:120263688 |
| 4 rs28491261  | 120294900 A | 0.1385 | 2.00E-21 | chr:4:120263688 |
| 4 rs13101722  | 120555975 C | 0.132  | 2.18E-21 | chr:4:120263688 |
| 4 rs2389874   | 120554991 A | 0.132  | 2.18E-21 | chr:4:120263688 |
| 4 rs2389879   | 120557684 G | 0.132  | 2.18E-21 | chr:4:120263688 |
| 4 rs59867181  | 120556467 C | 0.132  | 2.18E-21 | chr:4:120263688 |
| 4 rs6534149   | 120559292 T | 0.132  | 2.18E-21 | chr:4:120263688 |
| 4 rs13128774  | 120246282 T | 0.17   | 2.82E-21 | chr:4:120263688 |
| 4 rs10034623  | 120397829 A | 0.139  | 3.03E-21 | chr:4:120263688 |
| 4 rs10006877  | 120242793 T | 0.1405 | 3.11E-21 | chr:4:120263688 |
| 4 rs10012456  | 120274039 T | 0.1405 | 3.11E-21 | chr:4:120263688 |
| 4 rs10017371  | 120293776 G | 0.1405 | 3.11E-21 | chr:4:120263688 |
| 4 rs1002152   | 120273387 A | 0.1405 | 3.11E-21 | chr:4:120263688 |
| 4 rs1022145   | 120230979 G | 0.1405 | 3.11E-21 | chr:4:120263688 |
| 4 rs11722872  | 120233030 C | 0.1405 | 3.11E-21 | chr:4:120263688 |
| 4 rs11729991  | 120292700 T | 0.1405 | 3.11E-21 | chr:4:120263688 |
| 4 rs12505469  | 120249585 T | 0.1405 | 3.11E-21 | chr:4:120263688 |
| 4 rs13104396  | 120285649 T | 0.1405 | 3.11E-21 | chr:4:120263688 |
| 4 rs1546502   | 120235898 G | 0.1405 | 3.11E-21 | chr:4:120263688 |
| 4 rs28403131  | 120285806 T | 0.1405 | 3.11E-21 | chr:4:120263688 |
| 4 rs28633994  | 120276037 G | 0.1405 | 3.11E-21 | chr:4:120263688 |
| 4 rs6838236   | 120267229 G | 0.1405 | 3.11E-21 | chr:4:120263688 |
| 4 rs6847075   | 120286043 T | 0.1405 | 3.11E-21 | chr:4:120263688 |
| 4 rs7672493   | 120248260 A | 0.1405 | 3.11E-21 | chr:4:120263688 |
| 4 rs878373    | 120237484 T | 0.1405 | 3.11E-21 | chr:4:120263688 |
| 4 rs10020034  | 120294331 G | 0.1418 | 3.22E-21 | chr:4:120263688 |
| 4 rs10009566  | 120558608 C | 0.1481 | 3.35E-21 | chr:4:120263688 |
| 4 rs10012252  | 120559139 C | 0.1481 | 3.35E-21 | chr:4:120263688 |
| 4 rs11098534  | 120556772 G | 0.1481 | 3.35E-21 | chr:4:120263688 |
| 4 rs2389880   | 120559870 A | 0.1481 | 3.35E-21 | chr:4:120263688 |
| 4 rs28787668  | 120554687 A | 0.1481 | 3.35E-21 | chr:4:120263688 |
| 4 rs28850368  | 120554313 A | 0.1481 | 3.35E-21 | chr:4:120263688 |
| 4 rs34835603  | 120553428 T | 0.1481 | 3.35E-21 | chr:4:120263688 |
| 4 rs3806808   | 120551085 C | 0.1481 | 3.35E-21 | chr:4:120263688 |
| 4 rs7676296   | 120555687 G | 0.1481 | 3.35E-21 | chr:4:120263688 |
| 4 rs72918584  | 120362445 C | 0.1404 | 3.37E-21 | chr:4:120263688 |
| 4 rs140305554 | 120247693 C | 0.1519 | 3.49E-21 | chr:4:120263688 |
| 4 rs2017057   | 120257711 G | 0.1406 | 3.58E-21 | chr:4:120263688 |
| 4 rs10434028  | 120294464 G | 0.1225 | 3.64E-21 | chr:4:120263688 |
| 4 rs35239065  | 120325130 C | 0.1412 | 3.64E-21 | chr:4:120263688 |
| 4 rs35265692  | 120325135 C | 0.1412 | 3.64E-21 | chr:4:120263688 |

|               |             |        |          |                 |
|---------------|-------------|--------|----------|-----------------|
| 4 rs10031033  | 120151452 T | 0.1467 | 3.81E-21 | chr:4:120263688 |
| 4 rs9996382   | 120151012 A | 0.1467 | 3.81E-21 | chr:4:120263688 |
| 4 rs72918577  | 120326701 A | 0.1418 | 3.98E-21 | chr:4:120263688 |
| 4 rs10518329  | 120401835 G | 0.1313 | 4.12E-21 | chr:4:120263688 |
| 4 rs13134132  | 120324615 A | 0.1313 | 4.12E-21 | chr:4:120263688 |
| 4 rs6820115   | 120398182 C | 0.1313 | 4.12E-21 | chr:4:120263688 |
| 4 rs7665125   | 120402079 T | 0.1313 | 4.12E-21 | chr:4:120263688 |
| 4 rs9996940   | 120364542 T | 0.1313 | 4.12E-21 | chr:4:120263688 |
| 4 rs10013032  | 120149419 C | 0.1466 | 4.18E-21 | chr:4:120263688 |
| 4 rs2203039   | 120132347 T | 0.1466 | 4.18E-21 | chr:4:120263688 |
| 4 rs4833612   | 120147596 A | 0.1466 | 4.18E-21 | chr:4:120263688 |
| 4 rs6851130   | 120133712 G | 0.1466 | 4.18E-21 | chr:4:120263688 |
| 4 rs7441137   | 120133221 G | 0.1466 | 4.18E-21 | chr:4:120263688 |
| 4 rs951570    | 120150467 T | 0.1466 | 4.18E-21 | chr:4:120263688 |
| 4 rs9884728   | 120127079 C | 0.1466 | 4.18E-21 | chr:4:120263688 |
| 4 rs3733520   | 120423480 G | 0.1425 | 4.32E-21 | chr:4:120263688 |
| 4 rs10002083  | 120311152 T | 0.1414 | 4.52E-21 | chr:4:120263688 |
| 4 rs10005644  | 120298477 C | 0.1414 | 4.52E-21 | chr:4:120263688 |
| 4 rs10010801  | 120310028 C | 0.1414 | 4.52E-21 | chr:4:120263688 |
| 4 rs10011097  | 120310359 G | 0.1414 | 4.52E-21 | chr:4:120263688 |
| 4 rs10014748  | 120300988 G | 0.1414 | 4.52E-21 | chr:4:120263688 |
| 4 rs10014845  | 120301077 G | 0.1414 | 4.52E-21 | chr:4:120263688 |
| 4 rs10016060  | 120298412 G | 0.1414 | 4.52E-21 | chr:4:120263688 |
| 4 rs10016448  | 120298845 G | 0.1414 | 4.52E-21 | chr:4:120263688 |
| 4 rs10024844  | 120311528 G | 0.1414 | 4.52E-21 | chr:4:120263688 |
| 4 rs10025054  | 120311697 C | 0.1414 | 4.52E-21 | chr:4:120263688 |
| 4 rs10027498  | 120311987 C | 0.1414 | 4.52E-21 | chr:4:120263688 |
| 4 rs10027856  | 120304874 A | 0.1414 | 4.52E-21 | chr:4:120263688 |
| 4 rs10027976  | 120305042 T | 0.1414 | 4.52E-21 | chr:4:120263688 |
| 4 rs10031718  | 120295892 T | 0.1414 | 4.52E-21 | chr:4:120263688 |
| 4 rs10222794  | 120302351 T | 0.1414 | 4.52E-21 | chr:4:120263688 |
| 4 rs10222798  | 120302419 T | 0.1414 | 4.52E-21 | chr:4:120263688 |
| 4 rs10222801  | 120302350 T | 0.1414 | 4.52E-21 | chr:4:120263688 |
| 4 rs10440343  | 120309787 C | 0.1414 | 4.52E-21 | chr:4:120263688 |
| 4 rs10440402  | 120307813 G | 0.1414 | 4.52E-21 | chr:4:120263688 |
| 4 rs10440403  | 120308047 T | 0.1414 | 4.52E-21 | chr:4:120263688 |
| 4 rs11098508  | 120306607 G | 0.1414 | 4.52E-21 | chr:4:120263688 |
| 4 rs11098509  | 120306670 C | 0.1414 | 4.52E-21 | chr:4:120263688 |
| 4 rs11098510  | 120306793 T | 0.1414 | 4.52E-21 | chr:4:120263688 |
| 4 rs1112817   | 120297800 C | 0.1414 | 4.52E-21 | chr:4:120263688 |
| 4 rs114019672 | 120306475 G | 0.1414 | 4.52E-21 | chr:4:120263688 |
| 4 rs11726097  | 120301499 T | 0.1414 | 4.52E-21 | chr:4:120263688 |
| 4 rs11729050  | 120300066 C | 0.1414 | 4.52E-21 | chr:4:120263688 |

|               |             |        |          |                 |
|---------------|-------------|--------|----------|-----------------|
| 4 rs12498908  | 120308261 A | 0.1414 | 4.52E-21 | chr:4:120263688 |
| 4 rs12506452  | 120308083 C | 0.1414 | 4.52E-21 | chr:4:120263688 |
| 4 rs13113483  | 120309039 T | 0.1414 | 4.52E-21 | chr:4:120263688 |
| 4 rs13127114  | 120314664 C | 0.1414 | 4.52E-21 | chr:4:120263688 |
| 4 rs13151285  | 120314741 A | 0.1414 | 4.52E-21 | chr:4:120263688 |
| 4 rs138611376 | 120306434 G | 0.1414 | 4.52E-21 | chr:4:120263688 |
| 4 rs140816585 | 120306228 C | 0.1414 | 4.52E-21 | chr:4:120263688 |
| 4 rs146523888 | 120308804 G | 0.1414 | 4.52E-21 | chr:4:120263688 |
| 4 rs150376940 | 120305404 A | 0.1414 | 4.52E-21 | chr:4:120263688 |
| 4 rs28429722  | 120300093 A | 0.1414 | 4.52E-21 | chr:4:120263688 |
| 4 rs28668716  | 120309875 C | 0.1414 | 4.52E-21 | chr:4:120263688 |
| 4 rs28751034  | 120307097 A | 0.1414 | 4.52E-21 | chr:4:120263688 |
| 4 rs28793658  | 120307214 C | 0.1414 | 4.52E-21 | chr:4:120263688 |
| 4 rs28812279  | 120304152 C | 0.1414 | 4.52E-21 | chr:4:120263688 |
| 4 rs28884220  | 120307211 G | 0.1414 | 4.52E-21 | chr:4:120263688 |
| 4 rs4309825   | 120314881 G | 0.1414 | 4.52E-21 | chr:4:120263688 |
| 4 rs4345162   | 120312959 A | 0.1414 | 4.52E-21 | chr:4:120263688 |
| 4 rs4373140   | 120307698 G | 0.1414 | 4.52E-21 | chr:4:120263688 |
| 4 rs4463052   | 120313258 C | 0.1414 | 4.52E-21 | chr:4:120263688 |
| 4 rs4604043   | 120314921 T | 0.1414 | 4.52E-21 | chr:4:120263688 |
| 4 rs59394118  | 120295551 G | 0.1414 | 4.52E-21 | chr:4:120263688 |
| 4 rs59866101  | 120296591 G | 0.1414 | 4.52E-21 | chr:4:120263688 |
| 4 rs6832410   | 120296800 G | 0.1414 | 4.52E-21 | chr:4:120263688 |
| 4 rs6838617   | 120297423 T | 0.1414 | 4.52E-21 | chr:4:120263688 |
| 4 rs6858383   | 120296772 C | 0.1414 | 4.52E-21 | chr:4:120263688 |
| 4 rs7674500   | 120303593 T | 0.1414 | 4.52E-21 | chr:4:120263688 |
| 4 rs7674544   | 120303714 G | 0.1414 | 4.52E-21 | chr:4:120263688 |
| 4 rs7677836   | 120310638 A | 0.1414 | 4.52E-21 | chr:4:120263688 |
| 4 rs76990001  | 120302639 T | 0.1414 | 4.52E-21 | chr:4:120263688 |
| 4 rs78036070  | 120302802 A | 0.1414 | 4.52E-21 | chr:4:120263688 |
| 4 rs79704848  | 120309351 A | 0.1414 | 4.52E-21 | chr:4:120263688 |
| 4 rs9307473   | 120300221 T | 0.1414 | 4.52E-21 | chr:4:120263688 |
| 4 rs9307474   | 120302496 A | 0.1414 | 4.52E-21 | chr:4:120263688 |
| 4 rs9994889   | 120305056 G | 0.1414 | 4.52E-21 | chr:4:120263688 |
| 4 rs9996417   | 120295862 C | 0.1414 | 4.52E-21 | chr:4:120263688 |
| 4 rs9996569   | 120299004 C | 0.1414 | 4.52E-21 | chr:4:120263688 |
| 4 rs9996677   | 120299148 A | 0.1414 | 4.52E-21 | chr:4:120263688 |
| 4 rs9998953   | 120296169 C | 0.1414 | 4.52E-21 | chr:4:120263688 |
| 4 rs10020256  | 120287265 T | 0.1142 | 4.61E-21 | chr:4:120263688 |
| 4 rs200290730 | 120287492 A | 0.1142 | 4.61E-21 | chr:4:120263688 |
| 4 rs10018726  | 120394010 G | 0.1421 | 4.75E-21 | chr:4:120263688 |
| 4 rs10020027  | 120381879 C | 0.1421 | 4.75E-21 | chr:4:120263688 |
| 4 rs13107475  | 120393011 T | 0.1421 | 4.75E-21 | chr:4:120263688 |

|                     |             |        |          |                 |
|---------------------|-------------|--------|----------|-----------------|
| 4 rs1809406         | 120377122 A | 0.1421 | 4.75E-21 | chr:4:120263688 |
| 4 rs2389803         | 120393511 A | 0.1421 | 4.75E-21 | chr:4:120263688 |
| 4 rs2389809         | 120377399 C | 0.1421 | 4.75E-21 | chr:4:120263688 |
| 4 rs28408407        | 120376030 G | 0.1421 | 4.75E-21 | chr:4:120263688 |
| 4 rs28499576        | 120386677 A | 0.1421 | 4.75E-21 | chr:4:120263688 |
| 4 rs28587175        | 120373172 C | 0.1421 | 4.75E-21 | chr:4:120263688 |
| 4 rs34237553        | 120325273 C | 0.1421 | 4.75E-21 | chr:4:120263688 |
| 4 rs4001207         | 120331782 C | 0.1421 | 4.75E-21 | chr:4:120263688 |
| 4 rs6849171         | 120409549 A | 0.1421 | 4.75E-21 | chr:4:120263688 |
| 4 rs7356491         | 120381974 T | 0.1421 | 4.75E-21 | chr:4:120263688 |
| 4 rs9994810         | 120381590 G | 0.1421 | 4.75E-21 | chr:4:120263688 |
| 4 rs9998174         | 120366312 G | 0.1421 | 4.75E-21 | chr:4:120263688 |
| 4 rs6534130         | 120131339 A | 0.1465 | 4.92E-21 | chr:4:120263688 |
| 4 rs9997340         | 120364809 C | 0.1418 | 5.17E-21 | chr:4:120263688 |
| 4 rs10050092        | 120532085 C | 0.1519 | 5.34E-21 | chr:4:120263688 |
| 4 rs6832740         | 120546136 C | 0.1519 | 5.34E-21 | chr:4:120263688 |
| 4 rs6855918         | 120546299 T | 0.1519 | 5.34E-21 | chr:4:120263688 |
| 4 rs7693919         | 120540571 A | 0.1519 | 5.34E-21 | chr:4:120263688 |
| 4 rs72676045        | 120254663 A | 0.1448 | 5.52E-21 | chr:4:120263688 |
| 4 rs11728730        | 120275003 C | 0.1446 | 5.67E-21 | chr:4:120263688 |
| 4 rs6847248         | 120225955 G | 0.1446 | 5.67E-21 | chr:4:120263688 |
| 4 rs550069983;rs776 | 120359650 G | 0.1424 | 6.01E-21 | chr:4:120263688 |
| 4 rs10028669        | 120295197 T | 0.1463 | 6.04E-21 | chr:4:120263688 |
| 4 rs1546504         | 120241179 T | 0.1464 | 6.06E-21 | chr:4:120263688 |
| 4 rs1546505         | 120241224 G | 0.1464 | 6.06E-21 | chr:4:120263688 |
| 4 rs73842633        | 120375464 A | 0.1462 | 6.47E-21 | chr:4:120263688 |
| 4 rs76837541        | 120375428 G | 0.1462 | 6.47E-21 | chr:4:120263688 |
| 4 rs9307475         | 120368556 A | 0.1362 | 6.53E-21 | chr:4:120263688 |
| 4 rs11098513        | 120316075 G | 0.1436 | 6.58E-21 | chr:4:120263688 |
| 4 rs3890049         | 120326283 A | 0.1472 | 6.58E-21 | chr:4:120263688 |
| 4 rs4296662         | 120313440 G | 0.1457 | 6.60E-21 | chr:4:120263688 |
| 4 rs4560394         | 120313435 G | 0.1457 | 6.60E-21 | chr:4:120263688 |
| 4 rs7678238         | 120310832 C | 0.1434 | 6.61E-21 | chr:4:120263688 |
| 4 rs75122014        | 120362426 C | 0.1461 | 6.75E-21 | chr:4:120263688 |
| 4 rs13116768        | 120318254 C | 0.1462 | 6.98E-21 | chr:4:120263688 |
| 4 rs28714318        | 120375830 T | 0.1463 | 7.17E-21 | chr:4:120263688 |
| 4 rs12512646        | 120585733 A | 0.1532 | 7.29E-21 | chr:4:120263688 |
| 4 rs4833624         | 120585497 T | 0.1532 | 7.29E-21 | chr:4:120263688 |
| 4 rs80242894        | 120375752 A | 0.1478 | 7.50E-21 | chr:4:120263688 |
| 4 rs368938172       | 120330272 G | 0.1523 | 7.59E-21 | chr:4:120263688 |
| 4 rs71612601        | 120332595 T | 0.1478 | 7.77E-21 | chr:4:120263688 |
| 4 rs77299866        | 120326716 T | 0.1474 | 7.97E-21 | chr:4:120263688 |
| 4 rs79446934        | 120326713 C | 0.1474 | 7.97E-21 | chr:4:120263688 |



|              |             |        |          |                 |
|--------------|-------------|--------|----------|-----------------|
| 4 rs7654611  | 120328304 G | 0.1463 | 8.03E-21 | chr:4:120263688 |
| 4 rs4507344  | 120307485 A | 0.1465 | 8.39E-21 | chr:4:120263688 |
| 4 rs9683604  | 120363592 T | 0.1477 | 8.48E-21 | chr:4:120263688 |
| 4 rs9684938  | 120363595 G | 0.1477 | 8.48E-21 | chr:4:120263688 |
| 4 rs4001305  | 120359236 T | 0.147  | 8.89E-21 | chr:4:120263688 |
| 4 rs79057525 | 120375389 G | 0.1478 | 9.02E-21 | chr:4:120263688 |
| 4 rs11098511 | 120306879 A | 0.147  | 9.09E-21 | chr:4:120263688 |
| 4 rs11098512 | 120314161 T | 0.147  | 9.09E-21 | chr:4:120263688 |
| 4 rs11723839 | 120299673 A | 0.147  | 9.09E-21 | chr:4:120263688 |
| 4 rs12506546 | 120301618 C | 0.147  | 9.09E-21 | chr:4:120263688 |
| 4 rs13435162 | 120304634 A | 0.147  | 9.09E-21 | chr:4:120263688 |
| 4 rs28551662 | 120309556 A | 0.147  | 9.09E-21 | chr:4:120263688 |
| 4 rs7674556  | 120303729 G | 0.147  | 9.09E-21 | chr:4:120263688 |
| 4 rs7699346  | 120310542 T | 0.147  | 9.09E-21 | chr:4:120263688 |
| 4 rs13139045 | 120168588 C | 0.1344 | 9.09E-21 | chr:4:120263688 |
| 4 rs10857068 | 120317549 G | 0.1477 | 9.28E-21 | chr:4:120263688 |
| 4 rs11098514 | 120317374 C | 0.1477 | 9.28E-21 | chr:4:120263688 |
| 4 rs11098516 | 120317978 C | 0.1477 | 9.28E-21 | chr:4:120263688 |
| 4 rs12511625 | 120318135 G | 0.1477 | 9.28E-21 | chr:4:120263688 |
| 4 rs28572238 | 120316686 G | 0.1477 | 9.28E-21 | chr:4:120263688 |
| 4 rs28714195 | 120316950 T | 0.1477 | 9.28E-21 | chr:4:120263688 |
| 4 rs7437420  | 120312903 G | 0.1477 | 9.28E-21 | chr:4:120263688 |
| 4 rs10006525 | 120408931 G | 0.1477 | 9.53E-21 | chr:4:120263688 |
| 4 rs10006706 | 120409152 C | 0.1477 | 9.53E-21 | chr:4:120263688 |
| 4 rs10006793 | 120390791 G | 0.1477 | 9.53E-21 | chr:4:120263688 |
| 4 rs10008459 | 120394231 C | 0.1477 | 9.53E-21 | chr:4:120263688 |
| 4 rs10009450 | 120391258 G | 0.1477 | 9.53E-21 | chr:4:120263688 |
| 4 rs10017335 | 120381523 G | 0.1477 | 9.53E-21 | chr:4:120263688 |
| 4 rs10017389 | 120381412 A | 0.1477 | 9.53E-21 | chr:4:120263688 |
| 4 rs10019406 | 120364619 G | 0.1477 | 9.53E-21 | chr:4:120263688 |
| 4 rs10019522 | 120364728 G | 0.1477 | 9.53E-21 | chr:4:120263688 |
| 4 rs10023569 | 120323316 T | 0.1477 | 9.53E-21 | chr:4:120263688 |
| 4 rs10026493 | 120384194 G | 0.1477 | 9.53E-21 | chr:4:120263688 |
| 4 rs10026516 | 120384253 A | 0.1477 | 9.53E-21 | chr:4:120263688 |
| 4 rs10026736 | 120384322 C | 0.1477 | 9.53E-21 | chr:4:120263688 |
| 4 rs10026748 | 120384357 A | 0.1477 | 9.53E-21 | chr:4:120263688 |
| 4 rs10026952 | 120384564 A | 0.1477 | 9.53E-21 | chr:4:120263688 |
| 4 rs10031483 | 120422636 C | 0.1477 | 9.53E-21 | chr:4:120263688 |
| 4 rs10031665 | 120422852 C | 0.1477 | 9.53E-21 | chr:4:120263688 |
| 4 rs10518328 | 120401779 A | 0.1477 | 9.53E-21 | chr:4:120263688 |
| 4 rs10518331 | 120323595 T | 0.1477 | 9.53E-21 | chr:4:120263688 |
| 4 rs11098524 | 120390032 G | 0.1477 | 9.53E-21 | chr:4:120263688 |
| 4 rs11098525 | 120390152 A | 0.1477 | 9.53E-21 | chr:4:120263688 |

|               |             |        |          |                 |
|---------------|-------------|--------|----------|-----------------|
| 4 rs11098526  | 120390359 T | 0.1477 | 9.53E-21 | chr:4:120263688 |
| 4 rs11098527  | 120399906 G | 0.1477 | 9.53E-21 | chr:4:120263688 |
| 4 rs11098530  | 120413154 T | 0.1477 | 9.53E-21 | chr:4:120263688 |
| 4 rs115044484 | 120326887 G | 0.1477 | 9.53E-21 | chr:4:120263688 |
| 4 rs116952757 | 120362969 C | 0.1477 | 9.53E-21 | chr:4:120263688 |
| 4 rs11729521  | 120416788 C | 0.1477 | 9.53E-21 | chr:4:120263688 |
| 4 rs11734241  | 120416872 G | 0.1477 | 9.53E-21 | chr:4:120263688 |
| 4 rs11934314  | 120376540 A | 0.1477 | 9.53E-21 | chr:4:120263688 |
| 4 rs11934940  | 120389369 G | 0.1477 | 9.53E-21 | chr:4:120263688 |
| 4 rs11935596  | 120412457 C | 0.1477 | 9.53E-21 | chr:4:120263688 |
| 4 rs11940028  | 120411907 C | 0.1477 | 9.53E-21 | chr:4:120263688 |
| 4 rs11941899  | 120382758 A | 0.1477 | 9.53E-21 | chr:4:120263688 |
| 4 rs11943877  | 120389047 T | 0.1477 | 9.53E-21 | chr:4:120263688 |
| 4 rs12499324  | 120393786 T | 0.1477 | 9.53E-21 | chr:4:120263688 |
| 4 rs12502909  | 120377529 T | 0.1477 | 9.53E-21 | chr:4:120263688 |
| 4 rs12507964  | 120413061 A | 0.1477 | 9.53E-21 | chr:4:120263688 |
| 4 rs12508504  | 120410607 C | 0.1477 | 9.53E-21 | chr:4:120263688 |
| 4 rs12510138  | 120423935 C | 0.1477 | 9.53E-21 | chr:4:120263688 |
| 4 rs13133522  | 120324424 T | 0.1477 | 9.53E-21 | chr:4:120263688 |
| 4 rs13145352  | 120409963 C | 0.1477 | 9.53E-21 | chr:4:120263688 |
| 4 rs139379776 | 120332234 A | 0.1477 | 9.53E-21 | chr:4:120263688 |
| 4 rs140750089 | 120330539 A | 0.1477 | 9.53E-21 | chr:4:120263688 |
| 4 rs1480931   | 120395809 A | 0.1477 | 9.53E-21 | chr:4:120263688 |
| 4 rs149185281 | 120369277 A | 0.1477 | 9.53E-21 | chr:4:120263688 |
| 4 rs150657109 | 120377707 T | 0.1477 | 9.53E-21 | chr:4:120263688 |
| 4 rs17005535  | 120411562 T | 0.1477 | 9.53E-21 | chr:4:120263688 |
| 4 rs17006190  | 120418838 G | 0.1477 | 9.53E-21 | chr:4:120263688 |
| 4 rs17009122  | 120362403 A | 0.1477 | 9.53E-21 | chr:4:120263688 |
| 4 rs17046116  | 120387259 A | 0.1477 | 9.53E-21 | chr:4:120263688 |
| 4 rs17046118  | 120387496 G | 0.1477 | 9.53E-21 | chr:4:120263688 |
| 4 rs185466280 | 120377740 T | 0.1477 | 9.53E-21 | chr:4:120263688 |
| 4 rs2127820   | 120394534 A | 0.1477 | 9.53E-21 | chr:4:120263688 |
| 4 rs2127821   | 120394535 C | 0.1477 | 9.53E-21 | chr:4:120263688 |
| 4 rs2306455   | 120421969 A | 0.1477 | 9.53E-21 | chr:4:120263688 |
| 4 rs28374462  | 120386597 G | 0.1477 | 9.53E-21 | chr:4:120263688 |
| 4 rs28394590  | 120373738 G | 0.1477 | 9.53E-21 | chr:4:120263688 |
| 4 rs28441656  | 120376115 G | 0.1477 | 9.53E-21 | chr:4:120263688 |
| 4 rs28444327  | 120387946 G | 0.1477 | 9.53E-21 | chr:4:120263688 |
| 4 rs28461559  | 120387932 A | 0.1477 | 9.53E-21 | chr:4:120263688 |
| 4 rs28479042  | 120386876 C | 0.1477 | 9.53E-21 | chr:4:120263688 |
| 4 rs28495013  | 120375831 C | 0.1477 | 9.53E-21 | chr:4:120263688 |
| 4 rs28529639  | 120373104 T | 0.1477 | 9.53E-21 | chr:4:120263688 |
| 4 rs28549914  | 120322781 A | 0.1477 | 9.53E-21 | chr:4:120263688 |

|               |             |        |          |                 |
|---------------|-------------|--------|----------|-----------------|
| 4 rs28559989  | 120386627 T | 0.1477 | 9.53E-21 | chr:4:120263688 |
| 4 rs28567426  | 120373354 G | 0.1477 | 9.53E-21 | chr:4:120263688 |
| 4 rs28587142  | 120386753 C | 0.1477 | 9.53E-21 | chr:4:120263688 |
| 4 rs28626372  | 120373262 T | 0.1477 | 9.53E-21 | chr:4:120263688 |
| 4 rs28632018  | 120386730 C | 0.1477 | 9.53E-21 | chr:4:120263688 |
| 4 rs28653183  | 120372276 G | 0.1477 | 9.53E-21 | chr:4:120263688 |
| 4 rs28665282  | 120384186 T | 0.1477 | 9.53E-21 | chr:4:120263688 |
| 4 rs28685688  | 120420334 C | 0.1477 | 9.53E-21 | chr:4:120263688 |
| 4 rs28753180  | 120405367 T | 0.1477 | 9.53E-21 | chr:4:120263688 |
| 4 rs28789446  | 120405366 C | 0.1477 | 9.53E-21 | chr:4:120263688 |
| 4 rs28845498  | 120405186 A | 0.1477 | 9.53E-21 | chr:4:120263688 |
| 4 rs2892848   | 120381341 T | 0.1477 | 9.53E-21 | chr:4:120263688 |
| 4 rs34004415  | 120381140 A | 0.1477 | 9.53E-21 | chr:4:120263688 |
| 4 rs34147052  | 120361591 C | 0.1477 | 9.53E-21 | chr:4:120263688 |
| 4 rs34378623  | 120368744 T | 0.1477 | 9.53E-21 | chr:4:120263688 |
| 4 rs34566984  | 120361270 A | 0.1477 | 9.53E-21 | chr:4:120263688 |
| 4 rs34792640  | 120368627 A | 0.1477 | 9.53E-21 | chr:4:120263688 |
| 4 rs34858317  | 120387110 C | 0.1477 | 9.53E-21 | chr:4:120263688 |
| 4 rs34858405  | 120381081 A | 0.1477 | 9.53E-21 | chr:4:120263688 |
| 4 rs34913743  | 120324918 G | 0.1477 | 9.53E-21 | chr:4:120263688 |
| 4 rs34965784  | 120361586 C | 0.1477 | 9.53E-21 | chr:4:120263688 |
| 4 rs35063680  | 120387102 C | 0.1477 | 9.53E-21 | chr:4:120263688 |
| 4 rs35091806  | 120325529 A | 0.1477 | 9.53E-21 | chr:4:120263688 |
| 4 rs35111011  | 120366526 T | 0.1477 | 9.53E-21 | chr:4:120263688 |
| 4 rs35165976  | 120325630 A | 0.1477 | 9.53E-21 | chr:4:120263688 |
| 4 rs35494005  | 120361142 C | 0.1477 | 9.53E-21 | chr:4:120263688 |
| 4 rs370222454 | 120359691 G | 0.1477 | 9.53E-21 | chr:4:120263688 |
| 4 rs3733519   | 120423448 G | 0.1477 | 9.53E-21 | chr:4:120263688 |
| 4 rs3733523   | 120423719 T | 0.1477 | 9.53E-21 | chr:4:120263688 |
| 4 rs3733524   | 120423729 C | 0.1477 | 9.53E-21 | chr:4:120263688 |
| 4 rs3955380   | 120334410 A | 0.1477 | 9.53E-21 | chr:4:120263688 |
| 4 rs4001185   | 120376381 C | 0.1477 | 9.53E-21 | chr:4:120263688 |
| 4 rs4001190   | 120377619 A | 0.1477 | 9.53E-21 | chr:4:120263688 |
| 4 rs4079144   | 120325432 T | 0.1477 | 9.53E-21 | chr:4:120263688 |
| 4 rs4577559   | 120404043 G | 0.1477 | 9.53E-21 | chr:4:120263688 |
| 4 rs532415426 | 120359632 A | 0.1477 | 9.53E-21 | chr:4:120263688 |
| 4 rs545772518 | 120359643 G | 0.1477 | 9.53E-21 | chr:4:120263688 |
| 4 rs559457335 | 120359644 G | 0.1477 | 9.53E-21 | chr:4:120263688 |
| 4 rs56270433  | 120406030 T | 0.1477 | 9.53E-21 | chr:4:120263688 |
| 4 rs563816604 | 120359627 G | 0.1477 | 9.53E-21 | chr:4:120263688 |
| 4 rs66506550  | 120371445 A | 0.1477 | 9.53E-21 | chr:4:120263688 |
| 4 rs6820376   | 120324476 G | 0.1477 | 9.53E-21 | chr:4:120263688 |
| 4 rs6822679   | 120402702 C | 0.1477 | 9.53E-21 | chr:4:120263688 |

|              |             |        |          |                 |
|--------------|-------------|--------|----------|-----------------|
| 4 rs6834796  | 120414693 C | 0.1477 | 9.53E-21 | chr:4:120263688 |
| 4 rs6837828  | 120392084 T | 0.1477 | 9.53E-21 | chr:4:120263688 |
| 4 rs6838814  | 120392443 A | 0.1477 | 9.53E-21 | chr:4:120263688 |
| 4 rs6842762  | 120398236 T | 0.1477 | 9.53E-21 | chr:4:120263688 |
| 4 rs6845714  | 120326138 T | 0.1477 | 9.53E-21 | chr:4:120263688 |
| 4 rs6846442  | 120326323 A | 0.1477 | 9.53E-21 | chr:4:120263688 |
| 4 rs6846620  | 120326404 A | 0.1477 | 9.53E-21 | chr:4:120263688 |
| 4 rs6848389  | 120402622 C | 0.1477 | 9.53E-21 | chr:4:120263688 |
| 4 rs6849561  | 120409694 C | 0.1477 | 9.53E-21 | chr:4:120263688 |
| 4 rs71610279 | 120326643 C | 0.1477 | 9.53E-21 | chr:4:120263688 |
| 4 rs71610280 | 120326648 G | 0.1477 | 9.53E-21 | chr:4:120263688 |
| 4 rs71612595 | 120331428 T | 0.1477 | 9.53E-21 | chr:4:120263688 |
| 4 rs71612596 | 120331743 A | 0.1477 | 9.53E-21 | chr:4:120263688 |
| 4 rs71612597 | 120331845 C | 0.1477 | 9.53E-21 | chr:4:120263688 |
| 4 rs71612602 | 120332781 A | 0.1477 | 9.53E-21 | chr:4:120263688 |
| 4 rs71614422 | 120359340 A | 0.1477 | 9.53E-21 | chr:4:120263688 |
| 4 rs71614434 | 120368975 T | 0.1477 | 9.53E-21 | chr:4:120263688 |
| 4 rs71614437 | 120370156 C | 0.1477 | 9.53E-21 | chr:4:120263688 |
| 4 rs71614438 | 120371252 A | 0.1477 | 9.53E-21 | chr:4:120263688 |
| 4 rs71614442 | 120379346 T | 0.1477 | 9.53E-21 | chr:4:120263688 |
| 4 rs71614443 | 120379388 C | 0.1477 | 9.53E-21 | chr:4:120263688 |
| 4 rs71614444 | 120379436 G | 0.1477 | 9.53E-21 | chr:4:120263688 |
| 4 rs71614448 | 120387026 A | 0.1477 | 9.53E-21 | chr:4:120263688 |
| 4 rs71614449 | 120387055 T | 0.1477 | 9.53E-21 | chr:4:120263688 |
| 4 rs71629403 | 120372567 T | 0.1477 | 9.53E-21 | chr:4:120263688 |
| 4 rs71629404 | 120372724 G | 0.1477 | 9.53E-21 | chr:4:120263688 |
| 4 rs72489565 | 120326819 C | 0.1477 | 9.53E-21 | chr:4:120263688 |
| 4 rs7436506  | 120393769 C | 0.1477 | 9.53E-21 | chr:4:120263688 |
| 4 rs74602693 | 120377647 T | 0.1477 | 9.53E-21 | chr:4:120263688 |
| 4 rs74772011 | 120332334 C | 0.1477 | 9.53E-21 | chr:4:120263688 |
| 4 rs75396180 | 120375727 A | 0.1477 | 9.53E-21 | chr:4:120263688 |
| 4 rs75690486 | 120359788 A | 0.1477 | 9.53E-21 | chr:4:120263688 |
| 4 rs76525361 | 120359608 T | 0.1477 | 9.53E-21 | chr:4:120263688 |
| 4 rs7654529  | 120388230 A | 0.1477 | 9.53E-21 | chr:4:120263688 |
| 4 rs7654546  | 120388255 A | 0.1477 | 9.53E-21 | chr:4:120263688 |
| 4 rs7654587  | 120388406 T | 0.1477 | 9.53E-21 | chr:4:120263688 |
| 4 rs7654700  | 120328125 A | 0.1477 | 9.53E-21 | chr:4:120263688 |
| 4 rs7656252  | 120404268 C | 0.1477 | 9.53E-21 | chr:4:120263688 |
| 4 rs7659336  | 120385341 C | 0.1477 | 9.53E-21 | chr:4:120263688 |
| 4 rs7659501  | 120371552 T | 0.1477 | 9.53E-21 | chr:4:120263688 |
| 4 rs7659551  | 120371729 T | 0.1477 | 9.53E-21 | chr:4:120263688 |
| 4 rs7664458  | 120371967 G | 0.1477 | 9.53E-21 | chr:4:120263688 |
| 4 rs76651228 | 120359559 G | 0.1477 | 9.53E-21 | chr:4:120263688 |

|               |             |        |          |                 |
|---------------|-------------|--------|----------|-----------------|
| 4 rs7681214   | 120385320 A | 0.1477 | 9.53E-21 | chr:4:120263688 |
| 4 rs7681544   | 120411255 C | 0.1477 | 9.53E-21 | chr:4:120263688 |
| 4 rs7687843   | 120421211 T | 0.1477 | 9.53E-21 | chr:4:120263688 |
| 4 rs7688613   | 120384803 C | 0.1477 | 9.53E-21 | chr:4:120263688 |
| 4 rs7695996   | 120322033 T | 0.1477 | 9.53E-21 | chr:4:120263688 |
| 4 rs7696465   | 120322114 A | 0.1477 | 9.53E-21 | chr:4:120263688 |
| 4 rs7696649   | 120322177 A | 0.1477 | 9.53E-21 | chr:4:120263688 |
| 4 rs77934861  | 120324707 C | 0.1477 | 9.53E-21 | chr:4:120263688 |
| 4 rs79870274  | 120382190 T | 0.1477 | 9.53E-21 | chr:4:120263688 |
| 4 rs9683609   | 120363692 G | 0.1477 | 9.53E-21 | chr:4:120263688 |
| 4 rs9685777   | 120365965 A | 0.1477 | 9.53E-21 | chr:4:120263688 |
| 4 rs9685784   | 120366008 T | 0.1477 | 9.53E-21 | chr:4:120263688 |
| 4 rs9993199   | 120392873 A | 0.1477 | 9.53E-21 | chr:4:120263688 |
| 4 rs9994730   | 120381564 C | 0.1477 | 9.53E-21 | chr:4:120263688 |
| 4 rs9998585   | 120396802 A | 0.1477 | 9.53E-21 | chr:4:120263688 |
| 4 rs28634456  | 120375778 G | 0.151  | 9.55E-21 | chr:4:120263688 |
| 4 rs78332141  | 120375782 T | 0.151  | 9.55E-21 | chr:4:120263688 |
| 4 rs71614435  | 120369711 A | 0.1509 | 9.60E-21 | chr:4:120263688 |
| 4 rs55777923  | 120553264 T | 0.1542 | 9.73E-21 | chr:4:120263688 |
| 4 rs75199754  | 120365198 A | 0.1449 | 1.01E-20 | chr:4:120263688 |
| 4 rs2322021   | 120295030 A | 0.149  | 1.01E-20 | chr:4:120263688 |
| 4 rs371048191 | 120246107 C | 0.1466 | 1.04E-20 | chr:4:120263688 |
| 4 rs7692994   | 120427489 A | 0.14   | 1.10E-20 | chr:4:120263688 |
| 4 rs148358770 | 120382262 C | 0.1476 | 1.14E-20 | chr:4:120263688 |
| 4 rs9683709   | 120365714 A | 0.1481 | 1.15E-20 | chr:4:120263688 |
| 4 rs34954036  | 120366927 A | 0.1482 | 1.15E-20 | chr:4:120263688 |
| 4 rs12505878  | 120385485 A | 0.1483 | 1.18E-20 | chr:4:120263688 |
| 4 rs58416902  | 120374639 G | 0.1483 | 1.18E-20 | chr:4:120263688 |
| 4 rs115227179 | 120355773 T | 0.1504 | 1.23E-20 | chr:4:120263688 |
| 4 rs2389802   | 120325732 A | 0.1478 | 1.25E-20 | chr:4:120263688 |
| 4 rs71610281  | 120328001 C | 0.1491 | 1.30E-20 | chr:4:120263688 |
| 4 rs185413498 | 120327707 T | 0.151  | 1.30E-20 | chr:4:120263688 |
| 4 rs201087782 | 120327650 G | 0.151  | 1.30E-20 | chr:4:120263688 |
| 4 rs7658181   | 120310873 G | 0.149  | 1.30E-20 | chr:4:120263688 |
| 4 rs10008386  | 120318809 A | 0.1511 | 1.31E-20 | chr:4:120263688 |
| 4 rs10008392  | 120318839 A | 0.1511 | 1.31E-20 | chr:4:120263688 |
| 4 rs10020141  | 120318870 C | 0.1511 | 1.31E-20 | chr:4:120263688 |
| 4 rs6833815   | 120318921 A | 0.1511 | 1.31E-20 | chr:4:120263688 |
| 4 rs9762870   | 120367769 A | 0.1594 | 1.32E-20 | chr:4:120263688 |
| 4 rs12505953  | 120385681 A | 0.1498 | 1.33E-20 | chr:4:120263688 |
| 4 rs12502423  | 120424172 C | 0.1504 | 1.37E-20 | chr:4:120263688 |
| 4 rs28571712  | 120375980 A | 0.1498 | 1.39E-20 | chr:4:120263688 |
| 4 rs7655048   | 120328284 A | 0.1513 | 1.42E-20 | chr:4:120263688 |

|               |             |        |          |                 |
|---------------|-------------|--------|----------|-----------------|
| 4 rs7679468   | 120328333 C | 0.1458 | 1.45E-20 | chr:4:120263688 |
| 4 rs7696875   | 120322358 T | 0.1489 | 1.45E-20 | chr:4:120263688 |
| 4 rs373735748 | 120244580 T | 0.1877 | 1.45E-20 | chr:4:120263688 |
| 4 rs55884612  | 120244577 T | 0.1877 | 1.45E-20 | chr:4:120263688 |
| 4 rs7655723   | 120328666 A | 0.1517 | 1.51E-20 | chr:4:120263688 |
| 4 rs28655325  | 120372999 G | 0.1492 | 1.52E-20 | chr:4:120263688 |
| 4 rs72676074  | 120359841 C | 0.1474 | 1.54E-20 | chr:4:120263688 |
| 4 rs9760442   | 120367951 G | 0.1524 | 1.56E-20 | chr:4:120263688 |
| 4 rs12499377  | 120587215 A | 0.1588 | 1.60E-20 | chr:4:120263688 |
| 4 rs4504231   | 120586891 A | 0.1588 | 1.60E-20 | chr:4:120263688 |
| 4 rs7681978   | 120383775 C | 0.1535 | 1.61E-20 | chr:4:120263688 |
| 4 rs7696857   | 120322321 A | 0.1491 | 1.62E-20 | chr:4:120263688 |
| 4 rs199863129 | 120334013 T | 0.1518 | 1.66E-20 | chr:4:120263688 |
| 4 rs7654762   | 120328377 C | 0.1522 | 1.66E-20 | chr:4:120263688 |
| 4 rs7654984   | 120328520 G | 0.1522 | 1.66E-20 | chr:4:120263688 |
| 4 rs201664317 | 120330379 C | 0.1498 | 1.69E-20 | chr:4:120263688 |
| 4 rs78709015  | 120367728 T | 0.1618 | 1.77E-20 | chr:4:120263688 |
| 4 rs142609610 | 120327032 A | 0.153  | 1.77E-20 | chr:4:120263688 |
| 4 rs202150896 | 120367650 T | 0.1528 | 1.80E-20 | chr:4:120263688 |
| 4 rs67265404  | 120359270 T | 0.1528 | 1.80E-20 | chr:4:120263688 |
| 4 rs9759478   | 120367998 A | 0.1528 | 1.80E-20 | chr:4:120263688 |
| 4 rs10032151  | 120391628 T | 0.1539 | 1.85E-20 | chr:4:120263688 |
| 4 rs10032158  | 120391632 T | 0.1539 | 1.85E-20 | chr:4:120263688 |
| 4 rs10014719  | 120320715 A | 0.1534 | 1.88E-20 | chr:4:120263688 |
| 4 rs10016944  | 120320894 A | 0.1534 | 1.88E-20 | chr:4:120263688 |
| 4 rs10017543  | 120321420 A | 0.1534 | 1.88E-20 | chr:4:120263688 |
| 4 rs12504149  | 120318577 A | 0.1534 | 1.88E-20 | chr:4:120263688 |
| 4 rs12508173  | 120318526 C | 0.1534 | 1.88E-20 | chr:4:120263688 |
| 4 rs12509234  | 120319434 C | 0.1534 | 1.88E-20 | chr:4:120263688 |
| 4 rs9995234   | 120321827 G | 0.1534 | 1.88E-20 | chr:4:120263688 |
| 4 rs10003931  | 120259052 G | 0.1517 | 1.88E-20 | chr:4:120263688 |
| 4 rs71610282  | 120329093 C | 0.1553 | 1.90E-20 | chr:4:120263688 |
| 4 rs10004484  | 120442428 T | 0.1535 | 1.99E-20 | chr:4:120263688 |
| 4 rs10018280  | 120478139 G | 0.1535 | 1.99E-20 | chr:4:120263688 |
| 4 rs1155576   | 120450159 C | 0.1535 | 1.99E-20 | chr:4:120263688 |
| 4 rs17050695  | 120489527 T | 0.1535 | 1.99E-20 | chr:4:120263688 |
| 4 rs2127823   | 120485670 T | 0.1535 | 1.99E-20 | chr:4:120263688 |
| 4 rs28735358  | 120482049 C | 0.1535 | 1.99E-20 | chr:4:120263688 |
| 4 rs3775858   | 120486028 G | 0.1535 | 1.99E-20 | chr:4:120263688 |
| 4 rs6534141   | 120485223 T | 0.1535 | 1.99E-20 | chr:4:120263688 |
| 4 rs6858592   | 120458692 A | 0.1535 | 1.99E-20 | chr:4:120263688 |
| 4 rs7680063   | 120479889 G | 0.1535 | 1.99E-20 | chr:4:120263688 |
| 4 rs9997631   | 120469995 G | 0.1535 | 1.99E-20 | chr:4:120263688 |

|               |             |        |          |                 |
|---------------|-------------|--------|----------|-----------------|
| 4 rs59182778  | 120374798 C | 0.1503 | 2.03E-20 | chr:4:120263688 |
| 4 rs28571649  | 120388867 A | 0.1582 | 2.06E-20 | chr:4:120263688 |
| 4 rs11737395  | 120520704 G | 0.1564 | 2.07E-20 | chr:4:120263688 |
| 4 rs56372521  | 120374431 T | 0.1492 | 2.09E-20 | chr:4:120263688 |
| 4 rs4001175   | 120500667 A | 0.1577 | 2.43E-20 | chr:4:120263688 |
| 4 rs4001176   | 120500705 G | 0.1577 | 2.43E-20 | chr:4:120263688 |
| 4 rs12506148  | 120320348 T | 0.1535 | 2.49E-20 | chr:4:120263688 |
| 4 rs187271184 | 120330448 A | 0.1519 | 2.52E-20 | chr:4:120263688 |
| 4 rs190803766 | 120330449 A | 0.1519 | 2.52E-20 | chr:4:120263688 |
| 4 rs4001198   | 120325264 T | 0.1496 | 2.59E-20 | chr:4:120263688 |
| 4 rs7655177   | 120328622 G | 0.1518 | 2.60E-20 | chr:4:120263688 |
| 4 rs200149630 | 120356941 C | 0.154  | 2.61E-20 | chr:4:120263688 |
| 4 rs200822665 | 120357250 A | 0.154  | 2.61E-20 | chr:4:120263688 |
| 4 rs201742833 | 120356668 T | 0.154  | 2.61E-20 | chr:4:120263688 |
| 4 rs114860385 | 120355584 C | 0.1554 | 2.81E-20 | chr:4:120263688 |
| 4 rs28450134  | 120376318 C | 0.1511 | 3.01E-20 | chr:4:120263688 |
| 4 rs149826784 | 120330643 A | 0.1546 | 3.10E-20 | chr:4:120263688 |
| 4 rs373699192 | 120246109 A | 0.1357 | 3.17E-20 | chr:4:120263688 |
| 4 rs3822190   | 120428098 A | 0.159  | 3.46E-20 | chr:4:120263688 |
| 4 rs3822191   | 120428101 T | 0.159  | 3.46E-20 | chr:4:120263688 |
| 4 rs74693727  | 120330155 T | 0.1556 | 3.78E-20 | chr:4:120263688 |
| 4 rs10008791  | 120431469 C | 0.1593 | 4.04E-20 | chr:4:120263688 |
| 4 rs10009626  | 120470005 C | 0.1593 | 4.04E-20 | chr:4:120263688 |
| 4 rs10013305  | 120450424 A | 0.1593 | 4.04E-20 | chr:4:120263688 |
| 4 rs10019674  | 120443489 C | 0.1593 | 4.04E-20 | chr:4:120263688 |
| 4 rs10030660  | 120436704 A | 0.1593 | 4.04E-20 | chr:4:120263688 |
| 4 rs10034450  | 120455649 G | 0.1593 | 4.04E-20 | chr:4:120263688 |
| 4 rs1010739   | 120463471 T | 0.1593 | 4.04E-20 | chr:4:120263688 |
| 4 rs1010740   | 120463409 C | 0.1593 | 4.04E-20 | chr:4:120263688 |
| 4 rs11098531  | 120465001 A | 0.1593 | 4.04E-20 | chr:4:120263688 |
| 4 rs11098532  | 120490726 A | 0.1593 | 4.04E-20 | chr:4:120263688 |
| 4 rs11723090  | 120490592 C | 0.1593 | 4.04E-20 | chr:4:120263688 |
| 4 rs11731756  | 120478696 G | 0.1593 | 4.04E-20 | chr:4:120263688 |
| 4 rs11736416  | 120431661 T | 0.1593 | 4.04E-20 | chr:4:120263688 |
| 4 rs11933966  | 120476715 A | 0.1593 | 4.04E-20 | chr:4:120263688 |
| 4 rs11947234  | 120474859 G | 0.1593 | 4.04E-20 | chr:4:120263688 |
| 4 rs12498539  | 120468370 T | 0.1593 | 4.04E-20 | chr:4:120263688 |
| 4 rs12498599  | 120468503 T | 0.1593 | 4.04E-20 | chr:4:120263688 |
| 4 rs12502389  | 120454191 G | 0.1593 | 4.04E-20 | chr:4:120263688 |
| 4 rs13128602  | 120459366 G | 0.1593 | 4.04E-20 | chr:4:120263688 |
| 4 rs13140391  | 120503437 G | 0.1593 | 4.04E-20 | chr:4:120263688 |
| 4 rs13140409  | 120503460 G | 0.1593 | 4.04E-20 | chr:4:120263688 |
| 4 rs13149407  | 120437825 G | 0.1593 | 4.04E-20 | chr:4:120263688 |

|               |             |        |                          |
|---------------|-------------|--------|--------------------------|
| 4 rs1383532   | 120434404 A | 0.1593 | 4.04E-20 chr:4:120263688 |
| 4 rs1383533   | 120434576 A | 0.1593 | 4.04E-20 chr:4:120263688 |
| 4 rs1480936   | 120462861 T | 0.1593 | 4.04E-20 chr:4:120263688 |
| 4 rs1480939   | 120456927 C | 0.1593 | 4.04E-20 chr:4:120263688 |
| 4 rs1480940   | 120457682 C | 0.1593 | 4.04E-20 chr:4:120263688 |
| 4 rs1552092   | 120488496 T | 0.1593 | 4.04E-20 chr:4:120263688 |
| 4 rs1552095   | 120460306 C | 0.1593 | 4.04E-20 chr:4:120263688 |
| 4 rs200898556 | 120500426 T | 0.1593 | 4.04E-20 chr:4:120263688 |
| 4 rs201236087 | 120474546 T | 0.1593 | 4.04E-20 chr:4:120263688 |
| 4 rs2086450   | 120496217 A | 0.1593 | 4.04E-20 chr:4:120263688 |
| 4 rs2170276   | 120485824 C | 0.1593 | 4.04E-20 chr:4:120263688 |
| 4 rs2291185   | 120434833 A | 0.1593 | 4.04E-20 chr:4:120263688 |
| 4 rs2306456   | 120472422 G | 0.1593 | 4.04E-20 chr:4:120263688 |
| 4 rs2306457   | 120472839 A | 0.1593 | 4.04E-20 chr:4:120263688 |
| 4 rs28718422  | 120466304 A | 0.1593 | 4.04E-20 chr:4:120263688 |
| 4 rs34308924  | 120481431 C | 0.1593 | 4.04E-20 chr:4:120263688 |
| 4 rs34868248  | 120442430 G | 0.1593 | 4.04E-20 chr:4:120263688 |
| 4 rs36040693  | 120477616 G | 0.1593 | 4.04E-20 chr:4:120263688 |
| 4 rs3733525   | 120447048 G | 0.1593 | 4.04E-20 chr:4:120263688 |
| 4 rs3736115   | 120488703 A | 0.1593 | 4.04E-20 chr:4:120263688 |
| 4 rs3775843   | 120427844 C | 0.1593 | 4.04E-20 chr:4:120263688 |
| 4 rs3775844   | 120428033 A | 0.1593 | 4.04E-20 chr:4:120263688 |
| 4 rs3775845   | 120432447 C | 0.1593 | 4.04E-20 chr:4:120263688 |
| 4 rs3775847   | 120447642 C | 0.1593 | 4.04E-20 chr:4:120263688 |
| 4 rs3775848   | 120447724 T | 0.1593 | 4.04E-20 chr:4:120263688 |
| 4 rs3775849   | 120450908 C | 0.1593 | 4.04E-20 chr:4:120263688 |
| 4 rs3775852   | 120454556 G | 0.1593 | 4.04E-20 chr:4:120263688 |
| 4 rs3775854   | 120471971 T | 0.1593 | 4.04E-20 chr:4:120263688 |
| 4 rs3822192   | 120445720 C | 0.1593 | 4.04E-20 chr:4:120263688 |
| 4 rs3822194   | 120471648 G | 0.1593 | 4.04E-20 chr:4:120263688 |
| 4 rs3822195   | 120471660 T | 0.1593 | 4.04E-20 chr:4:120263688 |
| 4 rs4596225   | 120496444 G | 0.1593 | 4.04E-20 chr:4:120263688 |
| 4 rs4998488   | 120500841 C | 0.1593 | 4.04E-20 chr:4:120263688 |
| 4 rs58452170  | 120459674 T | 0.1593 | 4.04E-20 chr:4:120263688 |
| 4 rs59732491  | 120489588 C | 0.1593 | 4.04E-20 chr:4:120263688 |
| 4 rs6534139   | 120449456 A | 0.1593 | 4.04E-20 chr:4:120263688 |
| 4 rs6534140   | 120455311 T | 0.1593 | 4.04E-20 chr:4:120263688 |
| 4 rs6829903   | 120506884 T | 0.1593 | 4.04E-20 chr:4:120263688 |
| 4 rs6833334   | 120504227 T | 0.1593 | 4.04E-20 chr:4:120263688 |
| 4 rs6835635   | 120458867 C | 0.1593 | 4.04E-20 chr:4:120263688 |
| 4 rs6847818   | 120469250 T | 0.1593 | 4.04E-20 chr:4:120263688 |
| 4 rs6853998   | 120475860 A | 0.1593 | 4.04E-20 chr:4:120263688 |
| 4 rs6858777   | 120475966 G | 0.1593 | 4.04E-20 chr:4:120263688 |



|               |             |        |          |                 |
|---------------|-------------|--------|----------|-----------------|
| 4 rs7657849   | 120455494 C | 0.1593 | 4.04E-20 | chr:4:120263688 |
| 4 rs7664986   | 120429952 C | 0.1593 | 4.04E-20 | chr:4:120263688 |
| 4 rs7669520   | 120515278 C | 0.1593 | 4.04E-20 | chr:4:120263688 |
| 4 rs7678400   | 120461957 A | 0.1593 | 4.04E-20 | chr:4:120263688 |
| 4 rs7680748   | 120479978 A | 0.1593 | 4.04E-20 | chr:4:120263688 |
| 4 rs7688802   | 120451668 A | 0.1593 | 4.04E-20 | chr:4:120263688 |
| 4 rs7695620   | 120452776 A | 0.1593 | 4.04E-20 | chr:4:120263688 |
| 4 rs7699064   | 120428309 T | 0.1593 | 4.04E-20 | chr:4:120263688 |
| 4 rs9884402   | 120489982 G | 0.1593 | 4.04E-20 | chr:4:120263688 |
| 4 rs9995026   | 120490499 A | 0.1593 | 4.04E-20 | chr:4:120263688 |
| 4 rs79244813  | 120354847 C | 0.1578 | 4.33E-20 | chr:4:120263688 |
| 4 rs11735878  | 120290177 C | 0.168  | 4.52E-20 | chr:4:120263688 |
| 4 rs9995045   | 120321636 T | 0.1576 | 4.89E-20 | chr:4:120263688 |
| 4 rs1011054   | 120202387 A | 0.1603 | 4.91E-20 | chr:4:120263688 |
| 4 rs7658561   | 120479985 C | 0.1601 | 5.20E-20 | chr:4:120263688 |
| 4 rs3775841   | 120425777 C | 0.1601 | 5.23E-20 | chr:4:120263688 |
| 4 rs72918579  | 120333222 C | 0.1608 | 5.31E-20 | chr:4:120263688 |
| 4 rs10010696  | 120164303 C | 0.1619 | 5.67E-20 | chr:4:120263688 |
| 4 rs11098496  | 120167466 G | 0.1619 | 5.67E-20 | chr:4:120263688 |
| 4 rs11734519  | 120171071 G | 0.1619 | 5.67E-20 | chr:4:120263688 |
| 4 rs1511015   | 120170473 C | 0.1619 | 5.67E-20 | chr:4:120263688 |
| 4 rs1511019   | 120166007 G | 0.1619 | 5.67E-20 | chr:4:120263688 |
| 4 rs34616304  | 120169435 T | 0.1619 | 5.67E-20 | chr:4:120263688 |
| 4 rs35197422  | 120169314 G | 0.1619 | 5.67E-20 | chr:4:120263688 |
| 4 rs35434465  | 120169378 G | 0.1619 | 5.67E-20 | chr:4:120263688 |
| 4 rs6814412   | 120170851 A | 0.1619 | 5.67E-20 | chr:4:120263688 |
| 4 rs76568951  | 120355570 C | 0.1612 | 5.79E-20 | chr:4:120263688 |
| 4 rs13134665  | 120426430 C | 0.1614 | 5.96E-20 | chr:4:120263688 |
| 4 rs4563482   | 120354480 G | 0.1672 | 6.49E-20 | chr:4:120263688 |
| 4 rs12501610  | 120175763 T | 0.1648 | 6.99E-20 | chr:4:120263688 |
| 4 rs10022262  | 120175152 G | 0.1649 | 8.85E-20 | chr:4:120263688 |
| 4 rs10029750  | 120172543 G | 0.1649 | 8.85E-20 | chr:4:120263688 |
| 4 rs10213342  | 120175237 G | 0.1649 | 8.85E-20 | chr:4:120263688 |
| 4 rs11098500  | 120219239 A | 0.1649 | 8.85E-20 | chr:4:120263688 |
| 4 rs11726229  | 120211580 T | 0.1649 | 8.85E-20 | chr:4:120263688 |
| 4 rs11729897  | 120174453 T | 0.1649 | 8.85E-20 | chr:4:120263688 |
| 4 rs12499598  | 120189303 C | 0.1649 | 8.85E-20 | chr:4:120263688 |
| 4 rs12506395  | 120185094 T | 0.1649 | 8.85E-20 | chr:4:120263688 |
| 4 rs12512517  | 120173245 G | 0.1649 | 8.85E-20 | chr:4:120263688 |
| 4 rs13116504  | 120209412 C | 0.1649 | 8.85E-20 | chr:4:120263688 |
| 4 rs13133044  | 120201252 C | 0.1649 | 8.85E-20 | chr:4:120263688 |
| 4 rs13435802  | 120177960 T | 0.1649 | 8.85E-20 | chr:4:120263688 |
| 4 rs146531121 | 120174794 A | 0.1649 | 8.85E-20 | chr:4:120263688 |

|               |             |        |          |                 |
|---------------|-------------|--------|----------|-----------------|
| 4 rs28374891  | 120183550 A | 0.1649 | 8.85E-20 | chr:4:120263688 |
| 4 rs28419773  | 120211061 C | 0.1649 | 8.85E-20 | chr:4:120263688 |
| 4 rs28555550  | 120211040 G | 0.1649 | 8.85E-20 | chr:4:120263688 |
| 4 rs34585914  | 120189194 T | 0.1649 | 8.85E-20 | chr:4:120263688 |
| 4 rs34630083  | 120174569 G | 0.1649 | 8.85E-20 | chr:4:120263688 |
| 4 rs35643470  | 120184948 C | 0.1649 | 8.85E-20 | chr:4:120263688 |
| 4 rs3749591   | 120214030 G | 0.1649 | 8.85E-20 | chr:4:120263688 |
| 4 rs6837898   | 120179154 T | 0.1649 | 8.85E-20 | chr:4:120263688 |
| 4 rs7659194   | 120207147 G | 0.1649 | 8.85E-20 | chr:4:120263688 |
| 4 rs11931312  | 120159023 C | 0.1628 | 9.03E-20 | chr:4:120263688 |
| 4 rs11944880  | 120159334 T | 0.1628 | 9.03E-20 | chr:4:120263688 |
| 4 rs13114751  | 120156617 A | 0.1628 | 9.03E-20 | chr:4:120263688 |
| 4 rs1397608   | 120161744 G | 0.1628 | 9.03E-20 | chr:4:120263688 |
| 4 rs1511018   | 120161580 T | 0.1628 | 9.03E-20 | chr:4:120263688 |
| 4 rs1551      | 120158500 G | 0.1628 | 9.03E-20 | chr:4:120263688 |
| 4 rs35271032  | 120156659 T | 0.1628 | 9.03E-20 | chr:4:120263688 |
| 4 rs35916640  | 120155852 C | 0.1628 | 9.03E-20 | chr:4:120263688 |
| 4 rs4145951   | 120155817 G | 0.1628 | 9.03E-20 | chr:4:120263688 |
| 4 rs56386062  | 120155135 C | 0.1628 | 9.03E-20 | chr:4:120263688 |
| 4 rs6815725   | 120158410 A | 0.1628 | 9.03E-20 | chr:4:120263688 |
| 4 rs7684942   | 120162201 T | 0.1628 | 9.03E-20 | chr:4:120263688 |
| 4 rs7685268   | 120162188 A | 0.1628 | 9.03E-20 | chr:4:120263688 |
| 4 rs55825515  | 120486402 G | 0.1606 | 9.50E-20 | chr:4:120263688 |
| 4 rs58601355  | 120186367 C | 0.169  | 1.04E-19 | chr:4:120263688 |
| 4 rs6849889   | 120186348 C | 0.169  | 1.04E-19 | chr:4:120263688 |
| 4 rs1825061   | 120388902 T | 0.1736 | 1.09E-19 | chr:4:120263688 |
| 4 rs28504370  | 120388890 A | 0.1736 | 1.09E-19 | chr:4:120263688 |
| 4 rs192039339 | 120333191 C | 0.1667 | 1.11E-19 | chr:4:120263688 |
| 4 rs4001195   | 120329676 G | 0.1695 | 1.13E-19 | chr:4:120263688 |
| 4 rs13113112  | 120156040 T | 0.1643 | 1.23E-19 | chr:4:120263688 |
| 4 rs11728616  | 120440676 A | 0.1705 | 1.30E-19 | chr:4:120263688 |
| 4 rs35111518  | 120440682 G | 0.1705 | 1.30E-19 | chr:4:120263688 |
| 4 rs79026312  | 120440677 A | 0.1705 | 1.30E-19 | chr:4:120263688 |
| 4 rs10019309  | 120327085 T | 0.1742 | 1.31E-19 | chr:4:120263688 |
| 4 rs199816242 | 120199351 T | 0.1655 | 1.40E-19 | chr:4:120263688 |
| 4 rs11098499  | 120187611 T | 0.1678 | 1.58E-19 | chr:4:120263688 |
| 4 rs9994651   | 120587803 A | 0.1703 | 1.62E-19 | chr:4:120263688 |
| 4 rs56838032  | 120329894 A | 0.1916 | 1.72E-19 | chr:4:120263688 |
| 4 rs531826432 | 120327073 T | 0.1805 | 1.77E-19 | chr:4:120263688 |
| 4 rs13129661  | 120152909 G | 0.1628 | 2.03E-19 | chr:4:120263688 |
| 4 rs12504773  | 120562149 C | 0.1705 | 2.32E-19 | chr:4:120263688 |
| 4 rs9994488   | 120587781 T | 0.1714 | 2.55E-19 | chr:4:120263688 |
| 4 rs550821123 | 120327079 T | 0.1799 | 2.78E-19 | chr:4:120263688 |

|               |             |        |          |                 |
|---------------|-------------|--------|----------|-----------------|
| 4 rs4368585   | 120354482 G | 0.1796 | 3.00E-19 | chr:4:120263688 |
| 4 rs13122709  | 120555356 A | 0.1716 | 3.01E-19 | chr:4:120263688 |
| 4 rs7680914   | 120563053 G | 0.1716 | 3.01E-19 | chr:4:120263688 |
| 4 rs7695292   | 120558446 G | 0.1716 | 3.01E-19 | chr:4:120263688 |
| 4 rs200207680 | 120338383 T | 0.1769 | 3.21E-19 | chr:4:120263688 |
| 4 rs78958430  | 120338339 T | 0.1769 | 3.21E-19 | chr:4:120263688 |
| 4 rs79262354  | 120338335 T | 0.1769 | 3.21E-19 | chr:4:120263688 |
| 4 rs9995244   | 120321858 G | 0.168  | 3.58E-19 | chr:4:120263688 |
| 4 rs12505735  | 120532956 A | 0.1757 | 4.86E-19 | chr:4:120263688 |
| 4 rs13136462  | 120543173 T | 0.1755 | 5.05E-19 | chr:4:120263688 |
| 4 rs28394116  | 120524283 G | 0.1755 | 5.05E-19 | chr:4:120263688 |
| 4 rs28535956  | 120536858 C | 0.1755 | 5.05E-19 | chr:4:120263688 |
| 4 rs28578366  | 120536905 T | 0.1755 | 5.05E-19 | chr:4:120263688 |
| 4 rs3756156   | 120524841 A | 0.1755 | 5.05E-19 | chr:4:120263688 |
| 4 rs7674713   | 120322257 C | 0.1811 | 6.87E-19 | chr:4:120263688 |
| 4 rs12186259  | 120152039 T | 0.1723 | 7.88E-19 | chr:4:120263688 |
| 4 rs368648502 | 120331079 G | 0.1895 | 8.00E-19 | chr:4:120263688 |
| 4 rs13126596  | 120140729 G | 0.1766 | 8.00E-19 | chr:4:120263688 |
| 4 rs2389885   | 120533931 T | 0.1801 | 9.38E-19 | chr:4:120263688 |
| 4 rs370990577 | 120327271 C | 0.1767 | 1.00E-18 | chr:4:120263688 |
| 4 rs10017189  | 120263523 C | 0.1798 | 1.08E-18 | chr:4:120263688 |
| 4 rs4511986   | 120354674 C | 0.1886 | 1.16E-18 | chr:4:120263688 |
| 4 rs17051356  | 120585308 T | 0.1878 | 1.27E-18 | chr:4:120263688 |
| 4 rs10006304  | 120124305 G | 0.1776 | 1.29E-18 | chr:4:120263688 |
| 4 rs56122576  | 120129336 G | 0.1776 | 1.29E-18 | chr:4:120263688 |
| 4 rs68128210  | 120137819 G | 0.1776 | 1.29E-18 | chr:4:120263688 |
| 4 rs201085338 | 120347661 A | 0.1924 | 1.32E-18 | chr:4:120263688 |
| 4 rs13138782  | 120124474 A | 0.1746 | 1.37E-18 | chr:4:120263688 |
| 4 rs10022185  | 120571765 G | 0.1905 | 1.65E-18 | chr:4:120263688 |
| 4 rs2389882   | 120566733 C | 0.1905 | 1.65E-18 | chr:4:120263688 |
| 4 rs2389886   | 120570422 A | 0.1905 | 1.65E-18 | chr:4:120263688 |
| 4 rs2389887   | 120570644 C | 0.1905 | 1.65E-18 | chr:4:120263688 |
| 4 rs34278750  | 120571136 A | 0.1905 | 1.65E-18 | chr:4:120263688 |
| 4 rs7671096   | 120579317 A | 0.1905 | 1.65E-18 | chr:4:120263688 |
| 4 rs10003742  | 120271798 C | 0.1729 | 1.87E-18 | chr:4:120263688 |
| 4 rs10004114  | 120259213 G | 0.1729 | 1.87E-18 | chr:4:120263688 |
| 4 rs10015883  | 120268146 G | 0.1729 | 1.87E-18 | chr:4:120263688 |
| 4 rs10213542  | 120260650 T | 0.1729 | 1.87E-18 | chr:4:120263688 |
| 4 rs1814815   | 120258091 T | 0.1729 | 1.87E-18 | chr:4:120263688 |
| 4 rs2017058   | 120257739 C | 0.1729 | 1.87E-18 | chr:4:120263688 |
| 4 rs28439855  | 120262256 A | 0.1729 | 1.87E-18 | chr:4:120263688 |
| 4 rs4643791   | 120265619 A | 0.1729 | 1.87E-18 | chr:4:120263688 |
| 4 rs9307472   | 120261415 C | 0.1729 | 1.87E-18 | chr:4:120263688 |

|               |             |        |          |                 |
|---------------|-------------|--------|----------|-----------------|
| 4 rs12642411  | 120580525 C | 0.1917 | 2.18E-18 | chr:4:120263688 |
| 4 rs17051352  | 120581427 A | 0.1917 | 2.18E-18 | chr:4:120263688 |
| 4 rs9637624   | 120274911 G | 0.1731 | 2.31E-18 | chr:4:120263688 |
| 4 rs7664440   | 120578540 G | 0.1926 | 2.72E-18 | chr:4:120263688 |
| 4 rs67073020  | 120152557 T | 0.1887 | 3.05E-18 | chr:4:120263688 |
| 4 rs138401876 | 120370298 A | 0.1944 | 3.38E-18 | chr:4:120263688 |
| 4 rs181331234 | 120327890 C | 0.1909 | 3.64E-18 | chr:4:120263688 |
| 4 rs13117947  | 120257060 G | 0.1848 | 3.73E-18 | chr:4:120263688 |
| 4 rs6843229   | 120424087 C | 0.1936 | 8.64E-18 | chr:4:120263688 |
| 4 rs9307477   | 120421809 A | 0.1935 | 9.32E-18 | chr:4:120263688 |
| 4 rs10014822  | 120280143 T | 0.1983 | 9.70E-18 | chr:4:120263688 |
| 4 rs10022508  | 120115228 G | 0.1972 | 9.79E-18 | chr:4:120263688 |
| 4 rs12502503  | 120116255 T | 0.1972 | 9.79E-18 | chr:4:120263688 |
| 4 rs12509054  | 120115075 C | 0.1972 | 9.79E-18 | chr:4:120263688 |
| 4 rs150408742 | 120122911 A | 0.1972 | 9.79E-18 | chr:4:120263688 |
| 4 rs6822498   | 120120183 C | 0.1972 | 9.79E-18 | chr:4:120263688 |
| 4 rs6832670   | 120118792 G | 0.1972 | 9.79E-18 | chr:4:120263688 |
| 4 rs6838674   | 120119376 G | 0.1972 | 9.79E-18 | chr:4:120263688 |
| 4 rs6845702   | 120120453 G | 0.1972 | 9.79E-18 | chr:4:120263688 |
| 4 rs6851169   | 120117510 C | 0.1972 | 9.79E-18 | chr:4:120263688 |
| 4 rs10027517  | 120372234 G | 0.1939 | 1.14E-17 | chr:4:120263688 |
| 4 rs13134517  | 120405262 A | 0.1939 | 1.14E-17 | chr:4:120263688 |
| 4 rs35138262  | 120361169 T | 0.1939 | 1.14E-17 | chr:4:120263688 |
| 4 rs3872807   | 120360251 A | 0.1939 | 1.14E-17 | chr:4:120263688 |
| 4 rs6534135   | 120406302 G | 0.1939 | 1.14E-17 | chr:4:120263688 |
| 4 rs7661498   | 120408108 C | 0.1939 | 1.14E-17 | chr:4:120263688 |
| 4 rs9684327   | 120365441 G | 0.1939 | 1.14E-17 | chr:4:120263688 |
| 4 rs9799664   | 120326678 T | 0.1939 | 1.14E-17 | chr:4:120263688 |
| 4 rs9996586   | 120326942 G | 0.1939 | 1.14E-17 | chr:4:120263688 |
| 4 rs78624933  | 120338651 C | 0.1901 | 1.21E-17 | chr:4:120263688 |
| 4 rs12505876  | 120385472 A | 0.1937 | 1.22E-17 | chr:4:120263688 |
| 4 rs13123591  | 120105990 G | 0.202  | 1.35E-17 | chr:4:120263688 |
| 4 rs17839089  | 120111069 G | 0.202  | 1.35E-17 | chr:4:120263688 |
| 4 rs6826823   | 120112098 C | 0.202  | 1.35E-17 | chr:4:120263688 |
| 4 rs7661020   | 120106982 C | 0.202  | 1.35E-17 | chr:4:120263688 |
| 4 rs4001211   | 120331544 G | 0.1817 | 1.70E-17 | chr:4:120263688 |
| 4 rs552865294 | 120246034 A | 0.229  | 1.80E-17 | chr:4:120263688 |
| 4 rs13435370  | 120334666 C | 0.1836 | 1.86E-17 | chr:4:120263688 |
| 4 rs12648182  | 120503891 T | 0.1963 | 1.87E-17 | chr:4:120263688 |
| 4 rs142328963 | 120498647 T | 0.1963 | 1.87E-17 | chr:4:120263688 |
| 4 rs142970247 | 120499656 T | 0.1963 | 1.87E-17 | chr:4:120263688 |
| 4 rs146743180 | 120497433 C | 0.1963 | 1.87E-17 | chr:4:120263688 |
| 4 rs2892869   | 120521297 T | 0.1963 | 1.87E-17 | chr:4:120263688 |

|               |             |        |          |                 |
|---------------|-------------|--------|----------|-----------------|
| 4 rs36173322  | 120496491 C | 0.1963 | 1.87E-17 | chr:4:120263688 |
| 4 rs55661135  | 120506153 G | 0.1963 | 1.87E-17 | chr:4:120263688 |
| 4 rs56173225  | 120509972 G | 0.1963 | 1.87E-17 | chr:4:120263688 |
| 4 rs59516282  | 120502016 G | 0.1963 | 1.87E-17 | chr:4:120263688 |
| 4 rs72920701  | 120513230 G | 0.1963 | 1.87E-17 | chr:4:120263688 |
| 4 rs76541370  | 120498280 A | 0.1963 | 1.87E-17 | chr:4:120263688 |
| 4 rs7678973   | 120511817 T | 0.1963 | 1.87E-17 | chr:4:120263688 |
| 4 rs80052400  | 120498134 G | 0.1963 | 1.87E-17 | chr:4:120263688 |
| 4 rs199865201 | 120332408 A | 0.2003 | 2.17E-17 | chr:4:120263688 |
| 4 rs1155577   | 120449810 T | 5.083  | 2.31E-17 | chr:4:120263688 |
| 4 rs13104219  | 120438174 T | 0.1967 | 2.31E-17 | chr:4:120263688 |
| 4 rs140982995 | 120455483 A | 5.083  | 2.31E-17 | chr:4:120263688 |
| 4 rs1480933   | 120433248 T | 0.1967 | 2.31E-17 | chr:4:120263688 |
| 4 rs3775842   | 120427732 A | 0.1967 | 2.31E-17 | chr:4:120263688 |
| 4 rs6844263   | 120433807 G | 0.1967 | 2.31E-17 | chr:4:120263688 |
| 4 rs7694483   | 120405929 A | 0.2011 | 2.51E-17 | chr:4:120263688 |
| 4 rs9995277   | 120108603 A | 0.209  | 2.77E-17 | chr:4:120263688 |
| 4 rs56843000  | 120516597 C | 4.963  | 2.85E-17 | chr:4:120263688 |
| 4 rs2389873   | 120554714 G | 5.025  | 2.98E-17 | chr:4:120263688 |
| 4 rs4834792   | 120555696 A | 5.025  | 2.98E-17 | chr:4:120263688 |
| 4 rs11724758  | 120239878 A | 0.1992 | 3.20E-17 | chr:4:120263688 |
| 4 rs2036858   | 120249237 C | 0.1992 | 3.20E-17 | chr:4:120263688 |
| 4 rs62322293  | 120330655 G | 0.2057 | 4.55E-17 | chr:4:120263688 |
| 4 rs3956463   | 120245748 A | 0.2057 | 6.00E-17 | chr:4:120263688 |
| 4 rs62321169  | 120591368 C | 0.2188 | 6.13E-17 | chr:4:120263688 |
| 4 rs3956479   | 120360863 T | 0.2431 | 6.74E-17 | chr:4:120263688 |
| 4 rs3956480   | 120360861 T | 0.2431 | 6.74E-17 | chr:4:120263688 |
| 4 rs71595380  | 120329294 T | 0.2293 | 8.44E-17 | chr:4:120263688 |
| 4 rs41464847  | 120532401 G | 4.818  | 9.12E-17 | chr:4:120263688 |
| 4 rs59590064  | 120539753 C | 4.818  | 9.12E-17 | chr:4:120263688 |
| 4 rs6817317   | 120542827 G | 4.818  | 9.12E-17 | chr:4:120263688 |
| 4 rs7672519   | 120544112 T | 4.818  | 9.12E-17 | chr:4:120263688 |
| 4 rs7681980   | 120533223 A | 4.818  | 9.12E-17 | chr:4:120263688 |
| 4 rs71610285  | 120329953 C | 0.2025 | 1.07E-16 | chr:4:120263688 |
| 4 rs10027431  | 120372142 G | 0.236  | 1.08E-16 | chr:4:120263688 |
| 4 rs10027432  | 120372143 C | 0.236  | 1.08E-16 | chr:4:120263688 |
| 4 rs28567749  | 120329211 C | 0.2125 | 1.39E-16 | chr:4:120263688 |
| 4 rs73844769  | 120254829 C | 0.2658 | 1.48E-16 | chr:4:120263688 |
| 4 rs2389875   | 120557014 T | 4.595  | 1.74E-16 | chr:4:120263688 |
| 4 rs184174836 | 120196561 G | 0.2486 | 1.75E-16 | chr:4:120263688 |
| 4 rs201495048 | 120333126 A | 0.2107 | 1.84E-16 | chr:4:120263688 |
| 4 rs2715016   | 120452356 C | 4.824  | 1.95E-16 | chr:4:120263688 |
| 4 rs28452522  | 120110784 G | 0.2236 | 2.17E-16 | chr:4:120263688 |

|               |             |        |          |                 |
|---------------|-------------|--------|----------|-----------------|
| 4 rs9684723   | 120367735 C | 0.2485 | 2.31E-16 | chr:4:120263688 |
| 4 rs9684878   | 120368175 C | 0.2449 | 2.40E-16 | chr:4:120263688 |
| 4 rs117030010 | 120333095 C | 0.2145 | 2.58E-16 | chr:4:120263688 |
| 4 rs77222221  | 120329212 A | 0.2186 | 2.72E-16 | chr:4:120263688 |
| 4 rs2252708   | 120612158 A | 0.232  | 3.14E-16 | chr:4:120263688 |
| 4 rs6821717   | 120599661 T | 0.232  | 3.14E-16 | chr:4:120263688 |
| 4 rs10518337  | 120574874 C | 4.572  | 3.19E-16 | chr:4:120263688 |
| 4 rs9683520   | 120368199 C | 0.2466 | 3.36E-16 | chr:4:120263688 |
| 4 rs7683474   | 120612853 C | 0.2363 | 4.23E-16 | chr:4:120263688 |
| 4 rs13122890  | 120601731 G | 0.2375 | 4.78E-16 | chr:4:120263688 |
| 4 rs10518336  | 120522934 A | 0.2242 | 6.82E-16 | chr:4:120263688 |
| 4 rs10019421  | 120327198 T | 0.2646 | 7.42E-16 | chr:4:120263688 |
| 4 rs10031129  | 120327201 C | 0.2646 | 7.42E-16 | chr:4:120263688 |
| 4 rs9760422   | 120354126 G | 0.2494 | 7.72E-16 | chr:4:120263688 |
| 4 rs66887589  | 120509279 C | 4.406  | 7.73E-16 | chr:4:120263688 |
| 4 rs201764925 | 120334210 A | 0.1687 | 9.09E-16 | chr:4:120263688 |
| 4 rs72916543  | 120254961 T | 0.2782 | 9.92E-16 | chr:4:120263688 |
| 4 rs4834802   | 120614296 C | 0.2404 | 1.50E-15 | chr:4:120263688 |
| 4 rs11723550  | 120289961 C | 0.2356 | 1.68E-15 | chr:4:120263688 |
| 4 rs71627788  | 120255728 G | 0.2668 | 2.12E-15 | chr:4:120263688 |
| 4 rs200940395 | 120333454 C | 0.1878 | 2.27E-15 | chr:4:120263688 |
| 4 rs4833613   | 120150156 A | 0.2365 | 2.29E-15 | chr:4:120263688 |
| 4 rs370208580 | 120333619 G | 0.22   | 2.79E-15 | chr:4:120263688 |
| 4 rs376876178 | 120333615 G | 0.22   | 2.79E-15 | chr:4:120263688 |
| 4 rs4513552   | 120354657 T | 0.2894 | 4.55E-15 | chr:4:120263688 |
| 4 rs10026625  | 120280136 C | 0.2559 | 4.67E-15 | chr:4:120263688 |
| 4 rs569705290 | 120333521 C | 0.2023 | 4.70E-15 | chr:4:120263688 |
| 4 rs28869613  | 120620588 A | 0.2587 | 7.32E-15 | chr:4:120263688 |
| 4 rs10029669  | 120619666 T | 0.2602 | 1.12E-14 | chr:4:120263688 |
| 4 rs12331776  | 120617412 A | 0.2602 | 1.12E-14 | chr:4:120263688 |
| 4 rs12510467  | 120618359 A | 0.2602 | 1.12E-14 | chr:4:120263688 |
| 4 rs28723049  | 120620507 A | 0.2602 | 1.12E-14 | chr:4:120263688 |
| 4 rs5008452   | 120621752 T | 0.2602 | 1.12E-14 | chr:4:120263688 |
| 4 rs9684358   | 120622560 C | 0.2602 | 1.12E-14 | chr:4:120263688 |
| 4 rs10007283  | 120619656 G | 0.2605 | 1.22E-14 | chr:4:120263688 |
| 4 rs10011928  | 120662973 G | 0.2628 | 1.66E-14 | chr:4:120263688 |
| 4 rs10023652  | 120662947 C | 0.2628 | 1.66E-14 | chr:4:120263688 |
| 4 rs749526    | 120663649 T | 0.2628 | 1.66E-14 | chr:4:120263688 |
| 4 rs7699252   | 120659198 G | 0.2628 | 1.66E-14 | chr:4:120263688 |
| 4 rs874425    | 120664362 C | 0.2628 | 1.66E-14 | chr:4:120263688 |
| 4 rs7658368   | 120310922 T | 0.2576 | 1.66E-14 | chr:4:120263688 |
| 4 rs10014947  | 120280077 A | 0.2599 | 1.82E-14 | chr:4:120263688 |
| 4 rs11737400  | 120279335 G | 0.2599 | 1.82E-14 | chr:4:120263688 |

|               |             |        |          |                 |
|---------------|-------------|--------|----------|-----------------|
| 4 rs13149954  | 120279041 A | 0.2599 | 1.82E-14 | chr:4:120263688 |
| 4 rs13150541  | 120279284 A | 0.2599 | 1.82E-14 | chr:4:120263688 |
| 4 rs28580295  | 120278873 T | 0.2599 | 1.82E-14 | chr:4:120263688 |
| 4 rs62320738  | 120279420 A | 0.2599 | 1.82E-14 | chr:4:120263688 |
| 4 rs62320739  | 120279459 C | 0.2599 | 1.82E-14 | chr:4:120263688 |
| 4 rs62320740  | 120279486 A | 0.2599 | 1.82E-14 | chr:4:120263688 |
| 4 rs71627791  | 120278765 G | 0.2599 | 1.82E-14 | chr:4:120263688 |
| 4 rs9685057   | 120272333 G | 0.3008 | 1.90E-14 | chr:4:120263688 |
| 4 rs13119815  | 120662321 A | 0.2625 | 1.92E-14 | chr:4:120263688 |
| 4 rs74529999  | 120327854 C | 0.2633 | 2.63E-14 | chr:4:120263688 |
| 4 rs34941495  | 120137489 C | 0.2493 | 3.24E-14 | chr:4:120263688 |
| 4 rs2389903   | 120646281 G | 0.273  | 3.27E-14 | chr:4:120263688 |
| 4 rs4337717   | 120643040 C | 0.273  | 3.27E-14 | chr:4:120263688 |
| 4 rs368193355 | 120327846 C | 0.2667 | 3.48E-14 | chr:4:120263688 |
| 4 rs1986695   | 120589750 C | 0.2651 | 3.70E-14 | chr:4:120263688 |
| 4 rs4834798   | 120591919 G | 0.2651 | 3.70E-14 | chr:4:120263688 |
| 4 rs28663988  | 120620388 C | 0.2771 | 4.42E-14 | chr:4:120263688 |
| 4 rs7655035   | 120617004 T | 0.2771 | 4.42E-14 | chr:4:120263688 |
| 4 rs7664591   | 120627116 C | 0.2771 | 4.42E-14 | chr:4:120263688 |
| 4 rs527513020 | 120358891 C | 0.2213 | 5.70E-14 | chr:4:120263688 |
| 4 rs4094      | 120619421 G | 0.279  | 6.12E-14 | chr:4:120263688 |
| 4 rs80259299  | 120336497 G | 0.2186 | 6.84E-14 | chr:4:120263688 |
| 4 rs199515440 | 120372424 T | 0.2164 | 7.61E-14 | chr:4:120263688 |
| 4 rs2256834   | 120663939 C | 0.2795 | 8.75E-14 | chr:4:120263688 |
| 4 rs2714985   | 120664142 A | 0.2795 | 8.75E-14 | chr:4:120263688 |
| 4 rs10001829  | 120665293 C | 0.284  | 1.18E-13 | chr:4:120263688 |
| 4 rs12512171  | 120662564 T | 0.284  | 1.18E-13 | chr:4:120263688 |
| 4 rs13103043  | 120665371 C | 0.284  | 1.18E-13 | chr:4:120263688 |
| 4 rs7693769   | 120658676 C | 0.284  | 1.18E-13 | chr:4:120263688 |
| 4 rs565835685 | 120358886 G | 0.2288 | 1.23E-13 | chr:4:120263688 |
| 4 rs11731571  | 120221185 A | 0.2958 | 6.21E-13 | chr:4:120263688 |
| 4 rs13113885  | 120221176 C | 0.3014 | 1.07E-12 | chr:4:120263688 |
| 4 rs10032299  | 120206419 T | 0.3066 | 1.60E-12 | chr:4:120263688 |
| 4 rs1052633   | 120215314 G | 0.3066 | 1.60E-12 | chr:4:120263688 |
| 4 rs11098497  | 120187068 T | 0.3066 | 1.60E-12 | chr:4:120263688 |
| 4 rs11098498  | 120187119 C | 0.3066 | 1.60E-12 | chr:4:120263688 |
| 4 rs2175383   | 120215836 A | 0.3066 | 1.60E-12 | chr:4:120263688 |
| 4 rs6822808   | 120217365 A | 0.3066 | 1.60E-12 | chr:4:120263688 |
| 4 rs6843509   | 120220196 A | 0.3066 | 1.60E-12 | chr:4:120263688 |
| 4 rs7659403   | 120207254 A | 0.3066 | 1.60E-12 | chr:4:120263688 |
| 4 rs1511016   | 120170355 A | 3.708  | 1.64E-12 | chr:4:120263688 |
| 4 rs4496567   | 120175625 A | 3.67   | 2.29E-12 | chr:4:120263688 |
| 4 rs6534131   | 120180195 A | 3.67   | 2.29E-12 | chr:4:120263688 |

|               |             |        |          |                 |
|---------------|-------------|--------|----------|-----------------|
| 4 rs6823331   | 120180790 T | 3.67   | 2.29E-12 | chr:4:120263688 |
| 4 rs7676969   | 120173724 C | 3.67   | 2.29E-12 | chr:4:120263688 |
| 4 rs11731675  | 120212514 C | 0.3132 | 2.66E-12 | chr:4:120263688 |
| 4 rs11732621  | 120212883 G | 0.3132 | 2.66E-12 | chr:4:120263688 |
| 4 rs558588080 | 120348891 A | 0.2675 | 7.02E-12 | chr:4:120263688 |
| 4 rs12509811  | 120635685 T | 0.2576 | 7.35E-12 | chr:4:120263688 |
| 4 rs10018153  | 120610535 A | 0.3    | 7.39E-12 | chr:4:120263688 |
| 4 rs4833625   | 120614593 G | 0.3    | 7.39E-12 | chr:4:120263688 |
| 4 rs10034579  | 120244029 A | 3.246  | 9.88E-12 | chr:4:120263688 |
| 4 rs1397613   | 120242929 G | 3.246  | 9.88E-12 | chr:4:120263688 |
| 4 rs1973598   | 120243419 A | 3.246  | 9.88E-12 | chr:4:120263688 |
| 4 rs2282688   | 120243722 T | 3.246  | 9.88E-12 | chr:4:120263688 |
| 4 rs4834770   | 120241849 A | 3.246  | 9.88E-12 | chr:4:120263688 |
| 4 rs4834771   | 120242772 C | 3.246  | 9.88E-12 | chr:4:120263688 |
| 4 rs6823963   | 120242164 A | 3.246  | 9.88E-12 | chr:4:120263688 |
| 4 rs6857641   | 120243511 T | 3.246  | 9.88E-12 | chr:4:120263688 |
| 4 rs13122357  | 120601758 G | 0.307  | 1.20E-11 | chr:4:120263688 |
| 4 rs2714972   | 120649156 C | 0.306  | 1.26E-11 | chr:4:120263688 |
| 4 rs17005485  | 120648487 T | 0.3097 | 1.66E-11 | chr:4:120263688 |
| 4 rs28706824  | 120673378 A | 0.3097 | 1.66E-11 | chr:4:120263688 |
| 4 rs7669436   | 120649398 A | 0.3097 | 1.66E-11 | chr:4:120263688 |
| 4 rs11737086  | 120127117 C | 3.54   | 1.86E-11 | chr:4:120263688 |
| 4 rs878374    | 120237564 A | 3.178  | 1.89E-11 | chr:4:120263688 |
| 4 rs878375    | 120237574 T | 3.178  | 1.89E-11 | chr:4:120263688 |
| 4 rs4452411   | 120700609 A | 0.3363 | 2.21E-11 | chr:4:120263688 |
| 4 rs1397610   | 120127761 C | 3.506  | 2.42E-11 | chr:4:120263688 |
| 4 rs4336213   | 120236469 G | 3.14   | 2.69E-11 | chr:4:120263688 |
| 4 rs10005075  | 120673870 G | 0.3168 | 2.70E-11 | chr:4:120263688 |
| 4 rs10023655  | 120671879 C | 0.3168 | 2.70E-11 | chr:4:120263688 |
| 4 rs13112498  | 120670520 C | 0.3168 | 2.70E-11 | chr:4:120263688 |
| 4 rs13119146  | 120670994 A | 0.3168 | 2.70E-11 | chr:4:120263688 |
| 4 rs17005677  | 120674786 C | 0.3168 | 2.70E-11 | chr:4:120263688 |
| 4 rs28535991  | 120662206 A | 0.3168 | 2.70E-11 | chr:4:120263688 |
| 4 rs4834808   | 120674512 C | 0.3168 | 2.70E-11 | chr:4:120263688 |
| 4 rs749525    | 120663454 C | 0.3168 | 2.70E-11 | chr:4:120263688 |
| 4 rs9998665   | 120671724 G | 0.3168 | 2.70E-11 | chr:4:120263688 |
| 4 rs9999212   | 120655838 C | 0.3168 | 2.70E-11 | chr:4:120263688 |
| 4 rs4001284   | 120334957 G | 0.3948 | 2.93E-11 | chr:4:120263688 |
| 4 rs10005177  | 120636476 T | 0.318  | 3.12E-11 | chr:4:120263688 |
| 4 rs10011345  | 120638169 C | 0.318  | 3.12E-11 | chr:4:120263688 |
| 4 rs10014793  | 120639522 T | 0.318  | 3.12E-11 | chr:4:120263688 |
| 4 rs12502919  | 120635917 T | 0.318  | 3.12E-11 | chr:4:120263688 |
| 4 rs13141413  | 120644071 A | 0.318  | 3.12E-11 | chr:4:120263688 |



|               |             |        |          |                 |
|---------------|-------------|--------|----------|-----------------|
| 4 rs13328038  | 120643320 T | 0.318  | 3.12E-11 | chr:4:120263688 |
| 4 rs2389900   | 120633111 G | 0.318  | 3.12E-11 | chr:4:120263688 |
| 4 rs2389902   | 120638756 G | 0.318  | 3.12E-11 | chr:4:120263688 |
| 4 rs2389904   | 120646406 A | 0.318  | 3.12E-11 | chr:4:120263688 |
| 4 rs28642385  | 120631599 A | 0.318  | 3.12E-11 | chr:4:120263688 |
| 4 rs28847617  | 120637508 T | 0.318  | 3.12E-11 | chr:4:120263688 |
| 4 rs4001169   | 120639506 T | 0.318  | 3.12E-11 | chr:4:120263688 |
| 4 rs4834805   | 120633506 T | 0.318  | 3.12E-11 | chr:4:120263688 |
| 4 rs28876485  | 120624447 T | 0.323  | 4.68E-11 | chr:4:120263688 |
| 4 rs34903755  | 120627444 C | 0.3268 | 6.15E-11 | chr:4:120263688 |
| 4 rs35496605  | 120621914 C | 0.3268 | 6.15E-11 | chr:4:120263688 |
| 4 rs55689176  | 120626603 A | 0.3268 | 6.15E-11 | chr:4:120263688 |
| 4 rs7686665   | 120627203 T | 0.3268 | 6.15E-11 | chr:4:120263688 |
| 4 rs7686695   | 120627289 T | 0.3268 | 6.15E-11 | chr:4:120263688 |
| 4 rs200974711 | 120468265 G | 0.3832 | 7.50E-11 | chr:4:120263688 |
| 4 rs10007409  | 120142306 T | 3.306  | 8.14E-11 | chr:4:120263688 |
| 4 rs6833072   | 120133892 C | 3.306  | 8.14E-11 | chr:4:120263688 |
| 4 rs13136593  | 120101772 A | 0.3435 | 8.27E-11 | chr:4:120263688 |
| 4 rs7694773   | 120652993 A | 0.3343 | 9.50E-11 | chr:4:120263688 |
| 4 rs2252565   | 120613111 T | 2.946  | 1.02E-10 | chr:4:120263688 |
| 4 rs4374607   | 120120930 T | 3.3    | 1.27E-10 | chr:4:120263688 |
| 4 rs7440443   | 120120607 C | 3.3    | 1.27E-10 | chr:4:120263688 |
| 4 rs13102753  | 120672526 G | 0.332  | 1.48E-10 | chr:4:120263688 |
| 4 rs11098493  | 120104113 G | 0.3583 | 1.50E-10 | chr:4:120263688 |
| 4 rs34209241  | 120634499 C | 0.3423 | 1.67E-10 | chr:4:120263688 |
| 4 rs4834804   | 120633428 T | 0.3423 | 1.67E-10 | chr:4:120263688 |
| 4 rs4355374   | 120305398 T | 2.917  | 1.76E-10 | chr:4:120263688 |
| 4 rs4833618   | 120309500 C | 2.917  | 1.76E-10 | chr:4:120263688 |
| 4 rs10018308  | 120657899 G | 0.3439 | 1.98E-10 | chr:4:120263688 |
| 4 rs202019903 | 120344304 C | 0.2605 | 2.11E-10 | chr:4:120263688 |
| 4 rs62322290  | 120317904 A | 2.88   | 2.19E-10 | chr:4:120263688 |
| 4 rs6836219   | 120597941 T | 2.844  | 2.23E-10 | chr:4:120263688 |
| 4 rs752650    | 120632387 C | 0.3453 | 2.30E-10 | chr:4:120263688 |
| 4 rs4834775   | 120301232 A | 3.109  | 2.32E-10 | chr:4:120263688 |
| 4 rs11736455  | 120685312 T | 0.3576 | 2.67E-10 | chr:4:120263688 |
| 4 rs12500145  | 120688312 A | 0.3576 | 2.67E-10 | chr:4:120263688 |
| 4 rs1033087   | 120103401 C | 0.3621 | 2.70E-10 | chr:4:120263688 |
| 4 rs2036861   | 120102289 G | 0.3621 | 2.70E-10 | chr:4:120263688 |
| 4 rs1022146   | 120236103 A | 2.937  | 2.75E-10 | chr:4:120263688 |
| 4 rs2389747   | 120236102 C | 2.937  | 2.75E-10 | chr:4:120263688 |
| 4 rs11098490  | 120086883 A | 0.3662 | 3.61E-10 | chr:4:120263688 |
| 4 rs11098491  | 120088542 T | 0.3662 | 3.61E-10 | chr:4:120263688 |
| 4 rs11098492  | 120095260 A | 0.3662 | 3.61E-10 | chr:4:120263688 |

|               |             |        |          |                 |
|---------------|-------------|--------|----------|-----------------|
| 4 rs11733239  | 120087698 T | 0.3662 | 3.61E-10 | chr:4:120263688 |
| 4 rs12513191  | 120096821 C | 0.3662 | 3.61E-10 | chr:4:120263688 |
| 4 rs13120560  | 120090246 C | 0.3662 | 3.61E-10 | chr:4:120263688 |
| 4 rs4355373   | 120084955 C | 0.3662 | 3.61E-10 | chr:4:120263688 |
| 4 rs9993110   | 120092088 T | 0.3662 | 3.61E-10 | chr:4:120263688 |
| 4 rs62319649  | 120522579 C | 2.969  | 3.84E-10 | chr:4:120263688 |
| 4 rs2389957   | 120695322 T | 0.3684 | 3.92E-10 | chr:4:120263688 |
| 4 rs4447843   | 120680950 G | 0.3639 | 3.96E-10 | chr:4:120263688 |
| 4 rs7674894   | 120680189 G | 0.3639 | 3.96E-10 | chr:4:120263688 |
| 4 rs7676064   | 120680560 A | 0.3639 | 3.96E-10 | chr:4:120263688 |
| 4 rs4434234   | 120258230 T | 3.451  | 5.77E-10 | chr:4:120263688 |
| 4 rs11098486  | 120066810 A | 0.3731 | 6.14E-10 | chr:4:120263688 |
| 4 rs11098489  | 120081606 G | 0.3731 | 6.14E-10 | chr:4:120263688 |
| 4 rs11729978  | 120079387 A | 0.3731 | 6.14E-10 | chr:4:120263688 |
| 4 rs11730138  | 120079800 A | 0.3731 | 6.14E-10 | chr:4:120263688 |
| 4 rs11731008  | 120079925 A | 0.3731 | 6.14E-10 | chr:4:120263688 |
| 4 rs11733525  | 120082417 T | 0.3731 | 6.14E-10 | chr:4:120263688 |
| 4 rs12508316  | 120081291 A | 0.3731 | 6.14E-10 | chr:4:120263688 |
| 4 rs4334737   | 120080346 C | 0.3731 | 6.14E-10 | chr:4:120263688 |
| 4 rs7696877   | 120081869 T | 0.3731 | 6.14E-10 | chr:4:120263688 |
| 4 rs186992684 | 120336473 T | 0.3903 | 6.82E-10 | chr:4:120263688 |
| 4 rs1459055   | 120056815 A | 0.3686 | 6.87E-10 | chr:4:120263688 |
| 4 rs2389958   | 120695256 T | 0.3742 | 7.32E-10 | chr:4:120263688 |
| 4 rs4311295   | 120695280 G | 0.3742 | 7.32E-10 | chr:4:120263688 |
| 4 rs10034661  | 120244085 A | 3.464  | 7.79E-10 | chr:4:120263688 |
| 4 rs150043944 | 120278513 T | 3.464  | 7.79E-10 | chr:4:120263688 |
| 4 rs151273612 | 120288457 T | 3.464  | 7.79E-10 | chr:4:120263688 |
| 4 rs1799883   | 120241902 T | 3.464  | 7.79E-10 | chr:4:120263688 |
| 4 rs56082510  | 120288041 T | 3.464  | 7.79E-10 | chr:4:120263688 |
| 4 rs57842733  | 120285718 T | 3.464  | 7.79E-10 | chr:4:120263688 |
| 4 rs6534133   | 120270703 C | 3.464  | 7.79E-10 | chr:4:120263688 |
| 4 rs78716570  | 120281377 A | 3.464  | 7.79E-10 | chr:4:120263688 |
| 4 rs9994354   | 120263158 C | 3.464  | 7.79E-10 | chr:4:120263688 |
| 4 rs4513553   | 120298549 G | 3.446  | 9.78E-10 | chr:4:120263688 |
| 4 rs57516093  | 120299780 G | 3.446  | 9.78E-10 | chr:4:120263688 |
| 4 rs74942216  | 120295084 G | 3.446  | 9.78E-10 | chr:4:120263688 |
| 4 rs4613552   | 120296250 A | 3.449  | 1.01E-09 | chr:4:120263688 |
| 4 rs11937425  | 120235999 C | 2.854  | 1.17E-09 | chr:4:120263688 |
| 4 rs7656644   | 120228035 G | 3.411  | 1.20E-09 | chr:4:120263688 |
| 4 rs9683450   | 120232144 G | 3.411  | 1.20E-09 | chr:4:120263688 |
| 4 rs2892892   | 120697553 A | 0.3817 | 1.22E-09 | chr:4:120263688 |
| 4 rs4447844   | 120696623 G | 0.3817 | 1.22E-09 | chr:4:120263688 |
| 4 rs2256054   | 120669517 C | 2.721  | 1.49E-09 | chr:4:120263688 |

|              |             |        |          |                 |
|--------------|-------------|--------|----------|-----------------|
| 4 rs2583596  | 120670120 A | 2.721  | 1.49E-09 | chr:4:120263688 |
| 4 rs2583597  | 120670150 A | 2.721  | 1.49E-09 | chr:4:120263688 |
| 4 rs2714976  | 120670555 G | 2.721  | 1.49E-09 | chr:4:120263688 |
| 4 rs2714978  | 120670213 G | 2.721  | 1.49E-09 | chr:4:120263688 |
| 4 rs2714980  | 120668765 T | 2.721  | 1.49E-09 | chr:4:120263688 |
| 4 rs7437666  | 120653063 C | 2.714  | 1.67E-09 | chr:4:120263688 |
| 4 rs4637383  | 120305966 A | 3.358  | 1.68E-09 | chr:4:120263688 |
| 4 rs4287989  | 120700480 A | 0.3905 | 1.81E-09 | chr:4:120263688 |
| 4 rs4834806  | 120656656 G | 2.647  | 1.85E-09 | chr:4:120263688 |
| 4 rs2583604  | 120660715 A | 2.704  | 1.92E-09 | chr:4:120263688 |
| 4 rs2583605  | 120659992 A | 2.704  | 1.92E-09 | chr:4:120263688 |
| 4 rs2714970  | 120657355 T | 2.704  | 1.92E-09 | chr:4:120263688 |
| 4 rs2714973  | 120662172 A | 2.704  | 1.92E-09 | chr:4:120263688 |
| 4 rs725449   | 120656892 T | 2.704  | 1.92E-09 | chr:4:120263688 |
| 4 rs17005489 | 120649070 A | 2.701  | 2.18E-09 | chr:4:120263688 |
| 4 rs2250346  | 120648078 T | 2.701  | 2.18E-09 | chr:4:120263688 |
| 4 rs2583619  | 120652805 T | 2.701  | 2.18E-09 | chr:4:120263688 |
| 4 rs62319692 | 120763615 T | 0.3685 | 2.37E-09 | chr:4:120263688 |
| 4 rs67101952 | 120763539 T | 0.3685 | 2.37E-09 | chr:4:120263688 |
| 4 rs6856904  | 120759579 A | 0.3685 | 2.37E-09 | chr:4:120263688 |
| 4 rs10518301 | 120235125 C | 2.772  | 2.49E-09 | chr:4:120263688 |
| 4 rs11722847 | 120233121 T | 2.772  | 2.49E-09 | chr:4:120263688 |
| 4 rs13118936 | 120234402 A | 2.772  | 2.49E-09 | chr:4:120263688 |
| 4 rs13139118 | 120233640 C | 2.772  | 2.49E-09 | chr:4:120263688 |
| 4 rs4364243  | 120230860 T | 2.772  | 2.49E-09 | chr:4:120263688 |
| 4 rs11722624 | 120673096 T | 2.668  | 2.56E-09 | chr:4:120263688 |
| 4 rs11734863 | 120673259 G | 2.668  | 2.56E-09 | chr:4:120263688 |
| 4 rs2252621  | 120675026 C | 2.668  | 2.56E-09 | chr:4:120263688 |
| 4 rs2252625  | 120674899 T | 2.668  | 2.56E-09 | chr:4:120263688 |
| 4 rs2714966  | 120677425 A | 2.668  | 2.56E-09 | chr:4:120263688 |
| 4 rs6822164  | 120761806 G | 0.3703 | 2.84E-09 | chr:4:120263688 |
| 4 rs4001200  | 120378665 G | 0.1473 | 2.94E-09 | chr:4:120263688 |
| 4 rs12509043 | 120747574 T | 0.3715 | 3.21E-09 | chr:4:120263688 |
| 4 rs34269004 | 120747293 C | 0.3715 | 3.21E-09 | chr:4:120263688 |
| 4 rs35367572 | 120747061 A | 0.3715 | 3.21E-09 | chr:4:120263688 |
| 4 rs2583617  | 120644194 A | 2.658  | 3.26E-09 | chr:4:120263688 |
| 4 rs2714960  | 120630872 C | 2.658  | 3.26E-09 | chr:4:120263688 |
| 4 rs11732403 | 120234725 G | 2.716  | 3.45E-09 | chr:4:120263688 |
| 4 rs34049297 | 120234722 C | 2.716  | 3.45E-09 | chr:4:120263688 |
| 4 rs4834767  | 120224565 T | 2.634  | 3.46E-09 | chr:4:120263688 |
| 4 rs2245564  | 120625812 T | 2.641  | 3.95E-09 | chr:4:120263688 |
| 4 rs2248806  | 120621423 A | 2.641  | 3.95E-09 | chr:4:120263688 |
| 4 rs2583608  | 120620379 C | 2.641  | 3.95E-09 | chr:4:120263688 |

|               |             |        |          |                 |
|---------------|-------------|--------|----------|-----------------|
| 4 rs2583609   | 120623111 T | 2.641  | 3.95E-09 | chr:4:120263688 |
| 4 rs2715026   | 120616805 C | 2.641  | 3.95E-09 | chr:4:120263688 |
| 4 rs28701469  | 120697664 C | 0.366  | 3.99E-09 | chr:4:120263688 |
| 4 rs6842973   | 120694059 G | 0.3945 | 4.43E-09 | chr:4:120263688 |
| 4 rs4593113   | 120697811 C | 0.401  | 4.62E-09 | chr:4:120263688 |
| 4 rs4834811   | 120690127 G | 0.369  | 4.78E-09 | chr:4:120263688 |
| 4 rs12644843  | 120169477 T | 3.497  | 4.84E-09 | chr:4:120263688 |
| 4 rs6822154   | 120761791 A | 0.3788 | 4.86E-09 | chr:4:120263688 |
| 4 rs7678043   | 120698652 C | 0.4022 | 5.53E-09 | chr:4:120263688 |
| 4 rs2714961   | 120628627 C | 2.604  | 5.97E-09 | chr:4:120263688 |
| 4 rs113409736 | 120195841 T | 2.971  | 7.77E-09 | chr:4:120263688 |
| 4 rs11098539  | 120712592 A | 0.3884 | 1.60E-08 | chr:4:120263688 |
| 4 rs11098541  | 120733893 T | 0.3884 | 1.60E-08 | chr:4:120263688 |
| 4 rs11098542  | 120738603 C | 0.3884 | 1.60E-08 | chr:4:120263688 |
| 4 rs12503086  | 120731489 A | 0.3884 | 1.60E-08 | chr:4:120263688 |
| 4 rs12507755  | 120736980 A | 0.3884 | 1.60E-08 | chr:4:120263688 |
| 4 rs12509179  | 120732886 A | 0.3884 | 1.60E-08 | chr:4:120263688 |
| 4 rs12509484  | 120712678 A | 0.3884 | 1.60E-08 | chr:4:120263688 |
| 4 rs13119094  | 120725734 C | 0.3884 | 1.60E-08 | chr:4:120263688 |
| 4 rs13130176  | 120718398 G | 0.3884 | 1.60E-08 | chr:4:120263688 |
| 4 rs13130468  | 120718279 A | 0.3884 | 1.60E-08 | chr:4:120263688 |
| 4 rs35579162  | 120710492 A | 0.3884 | 1.60E-08 | chr:4:120263688 |
| 4 rs3816243   | 120722060 C | 0.3884 | 1.60E-08 | chr:4:120263688 |
| 4 rs4261973   | 120727943 A | 0.3884 | 1.60E-08 | chr:4:120263688 |
| 4 rs4496568   | 120728007 G | 0.3884 | 1.60E-08 | chr:4:120263688 |
| 4 rs4834813   | 120719990 C | 0.3884 | 1.60E-08 | chr:4:120263688 |
| 4 rs4834814   | 120734488 C | 0.3884 | 1.60E-08 | chr:4:120263688 |
| 4 rs60993901  | 120733348 G | 0.3884 | 1.60E-08 | chr:4:120263688 |
| 4 rs72682853  | 120728533 A | 0.3884 | 1.60E-08 | chr:4:120263688 |
| 4 rs7657393   | 120730146 G | 0.3884 | 1.60E-08 | chr:4:120263688 |
| 4 rs11098543  | 120748542 G | 0.394  | 1.63E-08 | chr:4:120263688 |
| 4 rs11737790  | 120751664 T | 0.394  | 1.63E-08 | chr:4:120263688 |
| 4 rs2389919   | 120756095 G | 0.394  | 1.63E-08 | chr:4:120263688 |
| 4 rs4834817   | 120752566 C | 0.394  | 1.63E-08 | chr:4:120263688 |
| 4 rs6534157   | 120753056 G | 0.394  | 1.63E-08 | chr:4:120263688 |
| 4 rs6858155   | 120754216 T | 0.394  | 1.63E-08 | chr:4:120263688 |
| 4 rs72682879  | 120754392 G | 0.394  | 1.63E-08 | chr:4:120263688 |
| 4 rs6828788   | 120725228 A | 0.3897 | 1.81E-08 | chr:4:120263688 |
| 4 rs35674683  | 120734911 A | 0.3923 | 2.21E-08 | chr:4:120263688 |
| 4 rs4834765   | 120168233 C | 3.189  | 2.62E-08 | chr:4:120263688 |
| 4 rs953966    | 120171342 G | 3.189  | 2.62E-08 | chr:4:120263688 |
| 4 rs7356185   | 120167111 T | 3.191  | 2.68E-08 | chr:4:120263688 |
| 4 rs2714965   | 120676814 T | 2.579  | 2.94E-08 | chr:4:120263688 |

|               |             |        |          |                 |
|---------------|-------------|--------|----------|-----------------|
| 4 rs35703745  | 120319797 A | 2.477  | 2.96E-08 | chr:4:120263688 |
| 4 rs17363983  | 120756608 G | 0.4038 | 3.05E-08 | chr:4:120263688 |
| 4 rs10000726  | 120210764 G | 3.13   | 3.73E-08 | chr:4:120263688 |
| 4 rs10010174  | 120206572 A | 3.13   | 3.73E-08 | chr:4:120263688 |
| 4 rs10857065  | 120183959 G | 3.13   | 3.73E-08 | chr:4:120263688 |
| 4 rs7681373   | 120207076 G | 3.13   | 3.73E-08 | chr:4:120263688 |
| 4 rs6841872   | 120158685 T | 3.142  | 3.90E-08 | chr:4:120263688 |
| 4 rs7695983   | 120322011 T | 2.441  | 4.36E-08 | chr:4:120263688 |
| 4 rs7666824   | 120691388 A | 0.4041 | 4.43E-08 | chr:4:120263688 |
| 4 rs13111773  | 120321370 A | 2.425  | 5.21E-08 | chr:4:120263688 |
| 4 rs10006850  | 120212521 G | 3.083  | 5.45E-08 | chr:4:120263688 |
| 4 rs7695544   | 120741242 A | 0.4108 | 6.82E-08 | chr:4:120263688 |
| 4 rs28763658  | 120634022 A | 0.3579 | 8.86E-08 | chr:4:120263688 |
| 4 rs2622496   | 120470255 T | 2.601  | 1.16E-07 | chr:4:120263688 |
| 4 rs55732167  | 120141507 T | 2.718  | 1.23E-07 | chr:4:120263688 |
| 4 rs60899768  | 120320771 A | 3.353  | 1.37E-07 | chr:4:120263688 |
| 4 rs1011052   | 120202199 C | 2.919  | 1.40E-07 | chr:4:120263688 |
| 4 rs56153161  | 120149836 G | 3.068  | 1.40E-07 | chr:4:120263688 |
| 4 rs11731992  | 120716861 T | 0.4257 | 1.41E-07 | chr:4:120263688 |
| 4 rs12510985  | 120718900 A | 0.4257 | 1.41E-07 | chr:4:120263688 |
| 4 rs2389954   | 120721063 C | 0.4257 | 1.41E-07 | chr:4:120263688 |
| 4 rs61485416  | 120708284 G | 0.4257 | 1.41E-07 | chr:4:120263688 |
| 4 rs1480934   | 120476006 C | 2.565  | 1.68E-07 | chr:4:120263688 |
| 4 rs4834762   | 120132690 T | 2.657  | 1.75E-07 | chr:4:120263688 |
| 4 rs62326352  | 120127046 C | 2.657  | 1.75E-07 | chr:4:120263688 |
| 4 rs62328369  | 120151494 A | 2.647  | 2.15E-07 | chr:4:120263688 |
| 4 rs12644283  | 120133549 G | 2.647  | 2.24E-07 | chr:4:120263688 |
| 4 rs7679245   | 120328196 T | 2.541  | 2.29E-07 | chr:4:120263688 |
| 4 rs2036862   | 120135531 G | 2.975  | 2.39E-07 | chr:4:120263688 |
| 4 rs56894567  | 120142001 T | 2.975  | 2.39E-07 | chr:4:120263688 |
| 4 rs67110248  | 120139522 C | 2.975  | 2.39E-07 | chr:4:120263688 |
| 4 rs72673792  | 120141616 A | 2.975  | 2.39E-07 | chr:4:120263688 |
| 4 rs11735819  | 120290194 C | 2.205  | 2.47E-07 | chr:4:120263688 |
| 4 rs9884581   | 120699261 A | 0.4357 | 2.59E-07 | chr:4:120263688 |
| 4 rs4834779   | 120425246 A | 0.3929 | 2.72E-07 | chr:4:120263688 |
| 4 rs112769034 | 120124496 C | 2.965  | 3.10E-07 | chr:4:120263688 |
| 4 rs2102541   | 120115379 G | 2.609  | 3.11E-07 | chr:4:120263688 |
| 4 rs62326348  | 120114659 G | 2.609  | 3.11E-07 | chr:4:120263688 |
| 4 rs62326349  | 120116225 T | 2.609  | 3.11E-07 | chr:4:120263688 |
| 4 rs56905341  | 120576818 C | 3.286  | 3.46E-07 | chr:4:120263688 |
| 4 rs1980029   | 120092338 G | 2.682  | 3.59E-07 | chr:4:120263688 |
| 4 rs62326337  | 120087450 A | 2.682  | 3.59E-07 | chr:4:120263688 |
| 4 rs62326339  | 120090766 C | 2.682  | 3.59E-07 | chr:4:120263688 |

|                     |             |       |          |                 |
|---------------------|-------------|-------|----------|-----------------|
| 4 rs62326344        | 120106420 G | 2.593 | 3.63E-07 | chr:4:120263688 |
| 4 rs62326345        | 120107683 A | 2.593 | 3.63E-07 | chr:4:120263688 |
| 4 rs62326346        | 120108263 A | 2.593 | 3.63E-07 | chr:4:120263688 |
| 4 rs62326347        | 120109440 T | 2.593 | 3.63E-07 | chr:4:120263688 |
| 4 rs17642800        | 120219534 C | 2.646 | 3.68E-07 | chr:4:120263688 |
| 4 rs77377547        | 120217711 G | 2.646 | 3.68E-07 | chr:4:120263688 |
| 4 rs111663206       | 120122939 C | 2.947 | 3.89E-07 | chr:4:120263688 |
| 4 rs17049975        | 120115461 C | 2.947 | 3.89E-07 | chr:4:120263688 |
| 4 rs17049978        | 120112049 G | 2.947 | 3.89E-07 | chr:4:120263688 |
| 4 rs66792078        | 120112924 C | 2.947 | 3.89E-07 | chr:4:120263688 |
| 4 rs7436509         | 120120569 C | 2.947 | 3.89E-07 | chr:4:120263688 |
| 4 rs925387          | 120111190 G | 2.947 | 3.89E-07 | chr:4:120263688 |
| 4 rs72910582        | 120094758 G | 2.678 | 4.00E-07 | chr:4:120263688 |
| 4 rs4834778         | 120392225 C | 2.688 | 4.15E-07 | chr:4:120263688 |
| 4 rs539206049;rs126 | 120187868 T | 2.636 | 4.25E-07 | chr:4:120263688 |
| 4 rs907736          | 120289943 C | 2.286 | 4.47E-07 | chr:4:120263688 |
| 4 rs4834754         | 120062978 A | 2.564 | 4.58E-07 | chr:4:120263688 |
| 4 rs58422197        | 120062383 A | 2.564 | 4.58E-07 | chr:4:120263688 |
| 4 rs6829757         | 120065656 T | 2.564 | 4.58E-07 | chr:4:120263688 |
| 4 rs72910585        | 120104082 A | 3.031 | 4.85E-07 | chr:4:120263688 |
| 4 rs187392552       | 120200618 C | 2.602 | 5.31E-07 | chr:4:120263688 |
| 4 rs200134651       | 120200519 A | 2.602 | 5.31E-07 | chr:4:120263688 |
| 4 rs35372126        | 120181724 G | 2.602 | 5.31E-07 | chr:4:120263688 |
| 4 rs62328372        | 120166809 G | 2.602 | 5.31E-07 | chr:4:120263688 |
| 4 rs62328398        | 120201031 A | 2.602 | 5.31E-07 | chr:4:120263688 |
| 4 rs6843571         | 120067410 A | 2.547 | 5.41E-07 | chr:4:120263688 |
| 4 rs6843643         | 120067589 T | 2.547 | 5.41E-07 | chr:4:120263688 |
| 4 rs6844238         | 120067703 A | 2.547 | 5.41E-07 | chr:4:120263688 |
| 4 rs6847481         | 120071267 C | 2.547 | 5.41E-07 | chr:4:120263688 |
| 4 rs4264818         | 120075223 A | 2.621 | 5.58E-07 | chr:4:120263688 |
| 4 rs12645079        | 120194512 C | 2.587 | 6.19E-07 | chr:4:120263688 |
| 4 rs12645965        | 120204761 A | 2.587 | 6.19E-07 | chr:4:120263688 |
| 4 rs12649811        | 120183939 T | 2.587 | 6.19E-07 | chr:4:120263688 |
| 4 rs12650267        | 120195411 A | 2.587 | 6.19E-07 | chr:4:120263688 |
| 4 rs4833614         | 120176338 T | 2.587 | 6.19E-07 | chr:4:120263688 |
| 4 rs56072232        | 120193715 T | 2.587 | 6.19E-07 | chr:4:120263688 |
| 4 rs62328371        | 120165690 G | 2.587 | 6.19E-07 | chr:4:120263688 |
| 4 rs62328374        | 120168837 A | 2.587 | 6.19E-07 | chr:4:120263688 |
| 4 rs62328376        | 120171735 G | 2.587 | 6.19E-07 | chr:4:120263688 |
| 4 rs62328377        | 120173569 A | 2.587 | 6.19E-07 | chr:4:120263688 |
| 4 rs62328379        | 120178193 C | 2.587 | 6.19E-07 | chr:4:120263688 |
| 4 rs76969560        | 120206724 T | 2.587 | 6.19E-07 | chr:4:120263688 |
| 4 rs59319494        | 120696060 A | 2.181 | 6.51E-07 | chr:4:120263688 |

|               |             |        |          |                 |
|---------------|-------------|--------|----------|-----------------|
| 4 rs2583601   | 120676622 A | 0.4628 | 7.70E-07 | chr:4:120263688 |
| 4 rs62328373  | 120167453 C | 2.532  | 9.54E-07 | chr:4:120263688 |
| 4 rs62328407  | 120221425 G | 2.544  | 9.54E-07 | chr:4:120263688 |
| 4 rs62328399  | 120201360 G | 2.866  | 9.56E-07 | chr:4:120263688 |
| 4 rs76798497  | 120667915 C | 2.659  | 9.60E-07 | chr:4:120263688 |
| 4 rs13114198  | 120719868 C | 0.4173 | 9.62E-07 | chr:4:120263688 |
| 4 rs2389959   | 120689407 C | 2.141  | 9.82E-07 | chr:4:120263688 |
| 4 rs6534150   | 120685502 A | 2.141  | 9.82E-07 | chr:4:120263688 |
| 4 rs7675857   | 120680581 C | 2.141  | 9.82E-07 | chr:4:120263688 |
| 4 rs2583602   | 120679347 A | 2.132  | 1.03E-06 | chr:4:120263688 |
| 4 rs17049968  | 120159916 A | 2.517  | 1.11E-06 | chr:4:120263688 |
| 4 rs79982537  | 120170904 G | 2.848  | 1.12E-06 | chr:4:120263688 |
| 4 rs9997209   | 120683244 G | 2.126  | 1.19E-06 | chr:4:120263688 |
| 4 rs6822909   | 120691218 T | 2.126  | 1.37E-06 | chr:4:120263688 |
| 4 rs57970878  | 120058168 G | 2.488  | 1.38E-06 | chr:4:120263688 |
| 4 rs80223330  | 120423094 A | 3.233  | 1.39E-06 | chr:4:120263688 |
| 4 rs2389918   | 120759073 A | 0.4646 | 1.82E-06 | chr:4:120263688 |
| 4 rs6847508   | 120761613 T | 0.4646 | 1.82E-06 | chr:4:120263688 |
| 4 rs6856110   | 120759381 C | 0.4646 | 1.82E-06 | chr:4:120263688 |
| 4 rs74508090  | 120229759 C | 2.475  | 2.17E-06 | chr:4:120263688 |
| 4 rs4834769   | 120230446 G | 2.474  | 2.34E-06 | chr:4:120263688 |
| 4 rs10019790  | 120667078 G | 0.4868 | 2.75E-06 | chr:4:120263688 |
| 4 rs10020420  | 120287431 C | 2.459  | 2.88E-06 | chr:4:120263688 |
| 4 rs11935130  | 120241725 A | 2.459  | 2.88E-06 | chr:4:120263688 |
| 4 rs12646466  | 120268321 G | 2.459  | 2.88E-06 | chr:4:120263688 |
| 4 rs3905917   | 120268435 A | 2.459  | 2.88E-06 | chr:4:120263688 |
| 4 rs4834773   | 120277395 G | 2.459  | 2.88E-06 | chr:4:120263688 |
| 4 rs62328426  | 120247732 C | 2.459  | 2.88E-06 | chr:4:120263688 |
| 4 rs7681328   | 120274496 T | 2.459  | 2.88E-06 | chr:4:120263688 |
| 4 rs112778188 | 120350057 A | 0.4093 | 2.92E-06 | chr:4:120263688 |
| 4 rs55826301  | 120455648 C | 2.611  | 3.16E-06 | chr:4:120263688 |
| 4 rs7690791   | 120758258 A | 0.4757 | 3.54E-06 | chr:4:120263688 |
| 4 rs7688177   | 120760872 C | 0.4492 | 3.68E-06 | chr:4:120263688 |
| 4 rs62328425  | 120246827 A | 2.662  | 4.00E-06 | chr:4:120263688 |
| 4 rs574704366 | 120246403 G | 2.381  | 4.61E-06 | chr:4:120263688 |
| 4 rs6840053   | 120292233 A | 2.413  | 4.67E-06 | chr:4:120263688 |
| 4 rs532905339 | 120195910 T | 2.418  | 4.82E-06 | chr:4:120263688 |
| 4 rs143726128 | 120348512 C | 0.5493 | 5.35E-06 | chr:4:120263688 |
| 4 rs968757    | 120757454 G | 0.4887 | 6.34E-06 | chr:4:120263688 |
| 4 rs76352192  | 120132520 G | 0.3902 | 6.71E-06 | chr:4:120263688 |
| 4 rs12649773  | 120305262 A | 2.371  | 7.73E-06 | chr:4:120263688 |
| 4 rs142534042 | 120308936 C | 2.371  | 7.73E-06 | chr:4:120263688 |
| 4 rs4833617   | 120305176 A | 2.371  | 7.73E-06 | chr:4:120263688 |

|               |             |         |          |                 |
|---------------|-------------|---------|----------|-----------------|
| 4 rs55827028  | 120297059 A | 2.371   | 7.73E-06 | chr:4:120263688 |
| 4 rs62322279  | 120298548 T | 2.371   | 7.73E-06 | chr:4:120263688 |
| 4 rs62322286  | 120307242 G | 2.371   | 7.73E-06 | chr:4:120263688 |
| 4 rs12647635  | 120226932 T | 2.323   | 8.05E-06 | chr:4:120263688 |
| 4 rs28421394  | 120229248 A | 2.323   | 8.05E-06 | chr:4:120263688 |
| 4 rs28848291  | 120229356 G | 2.323   | 8.05E-06 | chr:4:120263688 |
| 4 rs28864107  | 120229153 G | 2.323   | 8.05E-06 | chr:4:120263688 |
| 4 rs4834768   | 120228641 G | 2.323   | 8.05E-06 | chr:4:120263688 |
| 4 rs56344202  | 120228425 T | 2.323   | 8.05E-06 | chr:4:120263688 |
| 4 rs77224774  | 120165752 G | 0.2035  | 8.69E-06 | chr:4:120263688 |
| 4 rs12642042  | 120310479 T | 2.368   | 9.15E-06 | chr:4:120263688 |
| 4 rs115471236 | 120122947 C | 0.396   | 9.72E-06 | chr:4:120263688 |
| 4 rs62322287  | 120312172 A | 2.342   | 1.16E-05 | chr:4:120263688 |
| 4 rs72678532  | 120510840 A | 0.1803  | 1.26E-05 | chr:4:120263688 |
| 4 rs4834772   | 120272316 G | 1.746   | 1.64E-05 | chr:4:120263688 |
| 4 rs11946739  | 120266472 T | 2.15    | 1.66E-05 | chr:4:120263688 |
| 4 rs17009129  | 120280617 T | 2.084   | 1.66E-05 | chr:4:120263688 |
| 4 rs72676012  | 120208480 C | 0.2133  | 1.70E-05 | chr:4:120263688 |
| 4 rs11943184  | 120140582 G | 2.067   | 1.74E-05 | chr:4:120263688 |
| 4 rs12643221  | 120146640 A | 2.067   | 1.74E-05 | chr:4:120263688 |
| 4 rs35886000  | 120142802 A | 2.067   | 1.74E-05 | chr:4:120263688 |
| 4 rs4833611   | 120147460 T | 2.067   | 1.74E-05 | chr:4:120263688 |
| 4 rs56090560  | 120143139 T | 2.067   | 1.74E-05 | chr:4:120263688 |
| 4 rs62326359  | 120143266 A | 2.067   | 1.74E-05 | chr:4:120263688 |
| 4 rs62328360  | 120143858 A | 2.067   | 1.74E-05 | chr:4:120263688 |
| 4 rs74629660  | 120139183 C | 2.067   | 1.74E-05 | chr:4:120263688 |
| 4 rs137984938 | 120377685 C | 0.1725  | 1.94E-05 | chr:4:120263688 |
| 4 rs4834749   | 120042718 A | 2.404   | 1.99E-05 | chr:4:120263688 |
| 4 rs111921266 | 9591246 A   | 0.09908 | 4.51E-16 | chr:4:9603240   |
| 4 rs2902921   | 9591436 A   | 0.1082  | 7.28E-16 | chr:4:9603240   |
| 4 rs10212854  | 9590489 G   | 0.1067  | 9.07E-16 | chr:4:9603240   |
| 4 rs11728108  | 9590027 C   | 0.1067  | 9.07E-16 | chr:4:9603240   |
| 4 rs2865075   | 9591384 C   | 0.1067  | 9.07E-16 | chr:4:9603240   |
| 4 rs6837173   | 9590700 G   | 0.1067  | 9.07E-16 | chr:4:9603240   |
| 4 rs6856351   | 9590718 C   | 0.1067  | 9.07E-16 | chr:4:9603240   |
| 4 rs34968063  | 9599535 T   | 0.1055  | 9.80E-16 | chr:4:9603240   |
| 4 rs7664612   | 9595727 A   | 0.1016  | 1.00E-15 | chr:4:9603240   |
| 4 rs1842487   | 9597264 C   | 0.1055  | 1.02E-15 | chr:4:9603240   |
| 4 rs12645445  | 9599283 G   | 0.107   | 1.26E-15 | chr:4:9603240   |
| 4 rs13103207  | 9603672 C   | 0.1063  | 1.32E-15 | chr:4:9603240   |
| 4 rs1842488   | 9601268 G   | 0.1063  | 1.32E-15 | chr:4:9603240   |
| 4 rs2865079   | 9600388 G   | 0.1063  | 1.32E-15 | chr:4:9603240   |
| 4 rs6855316   | 9596183 C   | 0.1063  | 1.32E-15 | chr:4:9603240   |



|               |           |        |          |               |
|---------------|-----------|--------|----------|---------------|
| 4 rs6448859   | 9596488 C | 0.1089 | 1.45E-15 | chr:4:9603240 |
| 4 rs6811235   | 9594627 G | 0.1089 | 1.45E-15 | chr:4:9603240 |
| 4 rs35735545  | 9600181 A | 0.1096 | 1.65E-15 | chr:4:9603240 |
| 4 rs12501341  | 9589915 A | 0.102  | 2.42E-15 | chr:4:9603240 |
| 4 rs10019130  | 9597356 A | 0.1085 | 2.46E-15 | chr:4:9603240 |
| 4 rs78121242  | 9591433 A | 0.1076 | 6.89E-15 | chr:4:9603240 |
| 4 rs9714725   | 9589901 G | 0.1131 | 7.04E-15 | chr:4:9603240 |
| 4 rs34027818  | 9605709 G | 0.1099 | 9.70E-15 | chr:4:9603240 |
| 4 rs9714994   | 9589698 C | 0.131  | 1.01E-14 | chr:4:9603240 |
| 4 rs12512543  | 9608445 A | 0.1128 | 1.34E-14 | chr:4:9603240 |
| 4 rs61485794  | 9592346 G | 0.1164 | 1.38E-14 | chr:4:9603240 |
| 4 rs28735278  | 9614378 A | 0.1172 | 1.48E-14 | chr:4:9603240 |
| 4 rs6839392   | 9613589 T | 0.1172 | 1.48E-14 | chr:4:9603240 |
| 4 rs10031125  | 9625879 A | 0.1248 | 1.89E-14 | chr:4:9603240 |
| 4 rs114980491 | 9623328 T | 0.1248 | 1.89E-14 | chr:4:9603240 |
| 4 rs115870066 | 9622163 A | 0.1248 | 1.89E-14 | chr:4:9603240 |
| 4 rs138499118 | 9631591 C | 0.1248 | 1.89E-14 | chr:4:9603240 |
| 4 rs147074482 | 9623653 T | 0.1248 | 1.89E-14 | chr:4:9603240 |
| 4 rs150602585 | 9621799 G | 0.1248 | 1.89E-14 | chr:4:9603240 |
| 4 rs151134492 | 9623039 A | 0.1248 | 1.89E-14 | chr:4:9603240 |
| 4 rs28491253  | 9629512 T | 0.1248 | 1.89E-14 | chr:4:9603240 |
| 4 rs28648949  | 9626132 C | 0.1248 | 1.89E-14 | chr:4:9603240 |
| 4 rs28851772  | 9630974 A | 0.1248 | 1.89E-14 | chr:4:9603240 |
| 4 rs56787100  | 9631153 T | 0.1248 | 1.89E-14 | chr:4:9603240 |
| 4 rs73082825  | 9627676 A | 0.1248 | 1.89E-14 | chr:4:9603240 |
| 4 rs7692046   | 9620128 G | 0.1248 | 1.89E-14 | chr:4:9603240 |
| 4 rs142223268 | 9624727 C | 0.1237 | 2.03E-14 | chr:4:9603240 |
| 4 rs111613333 | 9592284 A | 0.12   | 2.04E-14 | chr:4:9603240 |
| 4 rs73805539  | 9591699 C | 0.12   | 2.04E-14 | chr:4:9603240 |
| 4 rs10049735  | 9626409 C | 0.1252 | 2.14E-14 | chr:4:9603240 |
| 4 rs6824573   | 9589256 A | 0.1202 | 2.26E-14 | chr:4:9603240 |
| 4 rs143900004 | 9636160 T | 0.1223 | 2.40E-14 | chr:4:9603240 |
| 4 rs76266909  | 9636303 C | 0.1223 | 2.40E-14 | chr:4:9603240 |
| 4 rs112018355 | 9611157 A | 0.1183 | 2.88E-14 | chr:4:9603240 |
| 4 rs10014826  | 9635408 C | 0.1232 | 2.89E-14 | chr:4:9603240 |
| 4 rs12505906  | 9636906 A | 0.1232 | 2.89E-14 | chr:4:9603240 |
| 4 rs150921853 | 9639169 T | 0.1232 | 2.89E-14 | chr:4:9603240 |
| 4 rs73082901  | 9636762 C | 0.1232 | 2.89E-14 | chr:4:9603240 |
| 4 rs112839156 | 9601686 A | 0.1195 | 3.17E-14 | chr:4:9603240 |
| 4 rs12510176  | 9599593 G | 0.1195 | 3.17E-14 | chr:4:9603240 |
| 4 rs59430272  | 9601484 C | 0.1195 | 3.17E-14 | chr:4:9603240 |
| 4 rs59507413  | 9606018 T | 0.1195 | 3.17E-14 | chr:4:9603240 |
| 4 rs60296945  | 9604068 T | 0.1195 | 3.17E-14 | chr:4:9603240 |

|               |           |        |          |               |
|---------------|-----------|--------|----------|---------------|
| 4 rs60990443  | 9601319 T | 0.1195 | 3.17E-14 | chr:4:9603240 |
| 4 rs61267391  | 9600955 G | 0.1195 | 3.17E-14 | chr:4:9603240 |
| 4 rs73097911  | 9601929 A | 0.1195 | 3.17E-14 | chr:4:9603240 |
| 4 rs73097914  | 9602324 T | 0.1195 | 3.17E-14 | chr:4:9603240 |
| 4 rs73802916  | 9604035 C | 0.1195 | 3.17E-14 | chr:4:9603240 |
| 4 rs74183920  | 9603786 A | 0.1195 | 3.17E-14 | chr:4:9603240 |
| 4 rs7691087   | 9595443 T | 0.1236 | 3.17E-14 | chr:4:9603240 |
| 4 rs10005582  | 9626791 A | 0.1329 | 4.80E-14 | chr:4:9603240 |
| 4 rs16898588  | 9595751 T | 0.1242 | 5.06E-14 | chr:4:9603240 |
| 4 rs12506692  | 9596059 T | 0.1245 | 5.58E-14 | chr:4:9603240 |
| 4 rs56934553  | 9594735 A | 0.1245 | 5.58E-14 | chr:4:9603240 |
| 4 rs28784595  | 9646182 C | 0.1355 | 7.35E-14 | chr:4:9603240 |
| 4 rs73084810  | 9642699 G | 0.1303 | 7.81E-14 | chr:4:9603240 |
| 4 rs73095794  | 9596566 A | 0.1315 | 7.84E-14 | chr:4:9603240 |
| 4 rs6830692   | 9589873 T | 0.1064 | 1.08E-13 | chr:4:9603240 |
| 4 rs145014366 | 9588718 C | 0.1326 | 1.09E-13 | chr:4:9603240 |
| 4 rs9995735   | 9658789 T | 0.1394 | 1.62E-13 | chr:4:9603240 |
| 4 rs12171434  | 9647060 T | 0.1329 | 2.20E-13 | chr:4:9603240 |
| 4 rs142277140 | 9648076 C | 0.1329 | 2.20E-13 | chr:4:9603240 |
| 4 rs28577902  | 9650657 A | 0.1329 | 2.20E-13 | chr:4:9603240 |
| 4 rs28851574  | 9644580 C | 0.1329 | 2.20E-13 | chr:4:9603240 |
| 4 rs28886660  | 9644540 G | 0.1329 | 2.20E-13 | chr:4:9603240 |
| 4 rs73084818  | 9648875 T | 0.1329 | 2.20E-13 | chr:4:9603240 |
| 4 rs12509677  | 9602724 A | 0.1258 | 2.59E-13 | chr:4:9603240 |
| 4 rs139901069 | 9582722 A | 0.1335 | 3.14E-13 | chr:4:9603240 |
| 4 rs77648749  | 9583407 A | 0.1335 | 3.14E-13 | chr:4:9603240 |
| 4 rs7693691   | 9652934 C | 0.1494 | 1.10E-12 | chr:4:9603240 |
| 4 rs138384987 | 9547049 A | 0.1277 | 1.40E-12 | chr:4:9603240 |
| 4 rs73802943  | 9663020 C | 0.1509 | 1.63E-12 | chr:4:9603240 |
| 4 rs75856105  | 9666491 T | 0.1488 | 1.70E-12 | chr:4:9603240 |
| 4 rs73084845  | 9671025 T | 0.1503 | 1.83E-12 | chr:4:9603240 |
| 4 rs10012148  | 9664294 A | 0.1557 | 1.87E-12 | chr:4:9603240 |
| 4 rs143079510 | 9665042 T | 0.1557 | 1.87E-12 | chr:4:9603240 |
| 4 rs150693830 | 9665588 T | 0.1557 | 1.87E-12 | chr:4:9603240 |
| 4 rs28380563  | 9658392 T | 0.1557 | 1.87E-12 | chr:4:9603240 |
| 4 rs28575773  | 9656525 A | 0.1557 | 1.87E-12 | chr:4:9603240 |
| 4 rs28643508  | 9659221 C | 0.1557 | 1.87E-12 | chr:4:9603240 |
| 4 rs28718562  | 9659961 G | 0.1557 | 1.87E-12 | chr:4:9603240 |
| 4 rs28796640  | 9663788 T | 0.1557 | 1.87E-12 | chr:4:9603240 |
| 4 rs4518243   | 9664634 C | 0.1557 | 1.87E-12 | chr:4:9603240 |
| 4 rs7684741   | 9661843 A | 0.1557 | 1.87E-12 | chr:4:9603240 |
| 4 rs77025480  | 9657754 A | 0.1557 | 1.87E-12 | chr:4:9603240 |
| 4 rs28793127  | 9660482 T | 0.1563 | 2.15E-12 | chr:4:9603240 |

|               |           |        |          |               |
|---------------|-----------|--------|----------|---------------|
| 4 rs10001941  | 9688516 A | 0.154  | 2.17E-12 | chr:4:9603240 |
| 4 rs10011678  | 9688689 C | 0.154  | 2.17E-12 | chr:4:9603240 |
| 4 rs12504246  | 9692932 A | 0.154  | 2.17E-12 | chr:4:9603240 |
| 4 rs112219402 | 9562271 G | 0.1318 | 2.65E-12 | chr:4:9603240 |
| 4 rs114237113 | 9547812 A | 0.1318 | 2.65E-12 | chr:4:9603240 |
| 4 rs12500632  | 9554039 A | 0.1318 | 2.65E-12 | chr:4:9603240 |
| 4 rs35454046  | 9545545 A | 0.1318 | 2.65E-12 | chr:4:9603240 |
| 4 rs10024971  | 9694013 G | 0.1555 | 2.76E-12 | chr:4:9603240 |
| 4 rs73088893  | 9695306 A | 0.1555 | 2.76E-12 | chr:4:9603240 |
| 4 rs10007500  | 9551938 A | 0.137  | 2.85E-12 | chr:4:9603240 |
| 4 rs11938000  | 9553730 G | 0.137  | 2.85E-12 | chr:4:9603240 |
| 4 rs12500696  | 9554200 A | 0.137  | 2.85E-12 | chr:4:9603240 |
| 4 rs10013863  | 9667436 T | 0.1556 | 3.01E-12 | chr:4:9603240 |
| 4 rs10026706  | 9674011 A | 0.1556 | 3.01E-12 | chr:4:9603240 |
| 4 rs143459149 | 9674515 G | 0.1556 | 3.01E-12 | chr:4:9603240 |
| 4 rs59312718  | 9669434 T | 0.1556 | 3.01E-12 | chr:4:9603240 |
| 4 rs73084842  | 9671015 T | 0.1556 | 3.01E-12 | chr:4:9603240 |
| 4 rs9291600   | 9675669 A | 0.1522 | 3.24E-12 | chr:4:9603240 |
| 4 rs61213314  | 9541933 G | 0.1414 | 6.29E-12 | chr:4:9603240 |
| 4 rs10012224  | 9569324 A | 0.1516 | 8.48E-12 | chr:4:9603240 |
| 4 rs80077135  | 9681299 G | 0.1599 | 2.47E-11 | chr:4:9603240 |
| 4 rs28546201  | 9684768 T | 0.1644 | 2.60E-11 | chr:4:9603240 |
| 4 rs28691200  | 9684552 A | 0.1644 | 2.60E-11 | chr:4:9603240 |
| 4 rs12501304  | 9682548 T | 0.1651 | 2.96E-11 | chr:4:9603240 |
| 4 rs201078836 | 9680043 T | 0.1651 | 2.96E-11 | chr:4:9603240 |
| 4 rs28673739  | 9677529 T | 0.1618 | 3.16E-11 | chr:4:9603240 |
| 4 rs10939362  | 9553684 T | 0.1571 | 3.23E-11 | chr:4:9603240 |
| 4 rs9884683   | 9677137 A | 0.1669 | 3.78E-11 | chr:4:9603240 |
| 4 rs9996676   | 9678661 C | 0.1669 | 3.78E-11 | chr:4:9603240 |
| 4 rs11728148  | 9718971 C | 0.1769 | 5.85E-11 | chr:4:9603240 |
| 4 rs58522119  | 9525010 T | 0.1566 | 6.75E-11 | chr:4:9603240 |
| 4 rs58667761  | 9524632 C | 0.1566 | 6.75E-11 | chr:4:9603240 |
| 4 rs2001392   | 9533092 C | 0.1611 | 8.74E-11 | chr:4:9603240 |
| 4 rs9761072   | 9530984 T | 0.1611 | 8.74E-11 | chr:4:9603240 |
| 4 rs6448969   | 9700056 G | 0.2368 | 2.26E-10 | chr:4:9603240 |
| 4 rs13115165  | 9624808 A | 0.2638 | 3.12E-10 | chr:4:9603240 |
| 4 rs13127386  | 9636309 G | 0.2785 | 7.12E-10 | chr:4:9603240 |
| 4 rs35497679  | 9636851 C | 0.2786 | 7.52E-10 | chr:4:9603240 |
| 4 rs62411066  | 9638987 C | 0.2786 | 7.52E-10 | chr:4:9603240 |
| 4 rs62411071  | 9640314 C | 0.2786 | 7.52E-10 | chr:4:9603240 |
| 4 rs62411067  | 9639340 C | 0.2787 | 7.76E-10 | chr:4:9603240 |
| 4 rs11728002  | 9632904 G | 0.2856 | 7.99E-10 | chr:4:9603240 |
| 4 rs11731299  | 9632932 C | 0.2856 | 7.99E-10 | chr:4:9603240 |

|               |           |        |          |               |
|---------------|-----------|--------|----------|---------------|
| 4 rs34172197  | 9634195 C | 0.2808 | 9.56E-10 | chr:4:9603240 |
| 4 rs11727921  | 9632675 G | 0.2945 | 1.27E-09 | chr:4:9603240 |
| 4 rs13107086  | 9628088 G | 0.2945 | 1.27E-09 | chr:4:9603240 |
| 4 rs34407913  | 9627405 C | 0.2945 | 1.27E-09 | chr:4:9603240 |
| 4 rs74920290  | 9631759 A | 0.2945 | 1.27E-09 | chr:4:9603240 |
| 4 rs75000854  | 9631079 A | 0.2945 | 1.27E-09 | chr:4:9603240 |
| 4 rs75569331  | 9631942 G | 0.2945 | 1.27E-09 | chr:4:9603240 |
| 4 rs76746438  | 9631273 C | 0.2945 | 1.27E-09 | chr:4:9603240 |
| 4 rs77675792  | 9632008 A | 0.2945 | 1.27E-09 | chr:4:9603240 |
| 4 rs7693695   | 9629380 A | 0.2947 | 1.33E-09 | chr:4:9603240 |
| 4 rs150084672 | 9619998 C | 0.2954 | 1.37E-09 | chr:4:9603240 |
| 4 rs11734592  | 9641381 C | 0.284  | 1.45E-09 | chr:4:9603240 |
| 4 rs13129861  | 9626802 A | 0.2957 | 1.48E-09 | chr:4:9603240 |
| 4 rs13130488  | 9627077 A | 0.2957 | 1.48E-09 | chr:4:9603240 |
| 4 rs13150819  | 9626909 G | 0.2957 | 1.48E-09 | chr:4:9603240 |
| 4 rs13151183  | 9627066 G | 0.2957 | 1.48E-09 | chr:4:9603240 |
| 4 rs78943848  | 9624005 T | 0.2957 | 1.48E-09 | chr:4:9603240 |
| 4 rs75957763  | 9631643 C | 0.2961 | 1.59E-09 | chr:4:9603240 |
| 4 rs6811619   | 9613669 T | 0.2898 | 1.85E-09 | chr:4:9603240 |
| 4 rs12510096  | 9646171 C | 0.2896 | 2.04E-09 | chr:4:9603240 |
| 4 rs57746863  | 9645578 T | 0.2896 | 2.04E-09 | chr:4:9603240 |
| 4 rs11730577  | 9592342 C | 0.2947 | 2.50E-09 | chr:4:9603240 |
| 4 rs13124589  | 9590540 G | 0.2968 | 3.16E-09 | chr:4:9603240 |
| 4 rs6815602   | 9592093 C | 0.2968 | 3.16E-09 | chr:4:9603240 |
| 4 rs9997490   | 9529506 G | 0.1558 | 3.30E-09 | chr:4:9603240 |
| 4 rs11732839  | 9597885 A | 0.2975 | 3.65E-09 | chr:4:9603240 |
| 4 rs13108259  | 9603571 A | 0.2975 | 3.65E-09 | chr:4:9603240 |
| 4 rs13120086  | 9599365 C | 0.2975 | 3.65E-09 | chr:4:9603240 |
| 4 rs13141297  | 9602103 C | 0.2975 | 3.65E-09 | chr:4:9603240 |
| 4 rs62409962  | 9600872 C | 0.2975 | 3.65E-09 | chr:4:9603240 |
| 4 rs13147553  | 9610951 G | 0.3018 | 4.12E-09 | chr:4:9603240 |
| 4 rs62409886  | 9642713 C | 0.2975 | 4.13E-09 | chr:4:9603240 |
| 4 rs1871719   | 9594339 C | 0.301  | 5.36E-09 | chr:4:9603240 |
| 4 rs112404663 | 9624480 T | 0.3125 | 5.71E-09 | chr:4:9603240 |
| 4 rs1812335   | 9608440 C | 0.3053 | 6.04E-09 | chr:4:9603240 |
| 4 rs11737375  | 9607387 A | 0.3052 | 6.16E-09 | chr:4:9603240 |
| 4 rs13133557  | 9609114 G | 0.3052 | 6.16E-09 | chr:4:9603240 |
| 4 rs12511479  | 9650516 G | 0.3054 | 7.10E-09 | chr:4:9603240 |
| 4 rs11729986  | 9605023 G | 0.3085 | 7.28E-09 | chr:4:9603240 |
| 4 rs11724606  | 9720444 A | 0.2183 | 7.78E-09 | chr:4:9603240 |
| 4 rs73802973  | 9722401 A | 0.2183 | 7.78E-09 | chr:4:9603240 |
| 4 rs62409900  | 9652583 T | 0.3072 | 8.52E-09 | chr:4:9603240 |
| 4 rs62409901  | 9652707 G | 0.3072 | 8.52E-09 | chr:4:9603240 |

|               |           |        |          |               |
|---------------|-----------|--------|----------|---------------|
| 4 rs12510498  | 9606546 C | 0.3097 | 8.88E-09 | chr:4:9603240 |
| 4 rs13105082  | 9604504 C | 0.3097 | 8.88E-09 | chr:4:9603240 |
| 4 rs13123739  | 9604667 C | 0.3097 | 8.88E-09 | chr:4:9603240 |
| 4 rs13134147  | 9611368 T | 0.3092 | 9.70E-09 | chr:4:9603240 |
| 4 rs11734804  | 9734103 C | 0.2216 | 1.06E-08 | chr:4:9603240 |
| 4 rs2139239   | 9752609 A | 0.2216 | 1.06E-08 | chr:4:9603240 |
| 4 rs7437720   | 9510396 A | 0.2494 | 1.21E-08 | chr:4:9603240 |
| 4 rs11733687  | 9643374 G | 0.308  | 1.63E-08 | chr:4:9603240 |
| 4 rs55634110  | 9643904 C | 0.3142 | 1.72E-08 | chr:4:9603240 |
| 4 rs9761193   | 9669715 G | 0.3191 | 2.16E-08 | chr:4:9603240 |
| 4 rs11723247  | 9656338 C | 0.3213 | 2.24E-08 | chr:4:9603240 |
| 4 rs11726037  | 9657179 A | 0.3213 | 2.24E-08 | chr:4:9603240 |
| 4 rs11726932  | 9656993 T | 0.3213 | 2.24E-08 | chr:4:9603240 |
| 4 rs12647777  | 9664000 C | 0.3213 | 2.24E-08 | chr:4:9603240 |
| 4 rs56141152  | 9661423 G | 0.3213 | 2.24E-08 | chr:4:9603240 |
| 4 rs6856685   | 9665482 A | 0.3213 | 2.24E-08 | chr:4:9603240 |
| 4 rs12502039  | 9658319 C | 0.3214 | 2.32E-08 | chr:4:9603240 |
| 4 rs11722510  | 9585639 C | 0.3143 | 2.54E-08 | chr:4:9603240 |
| 4 rs112714712 | 9643479 C | 0.3186 | 2.90E-08 | chr:4:9603240 |
| 4 rs13123294  | 9614786 T | 0.3444 | 2.99E-08 | chr:4:9603240 |
| 4 rs3864193   | 9584474 G | 0.3163 | 3.09E-08 | chr:4:9603240 |
| 4 rs6821253   | 9690731 T | 0.3267 | 3.19E-08 | chr:4:9603240 |
| 4 rs140729951 | 9521179 A | 0.2281 | 3.72E-08 | chr:4:9603240 |
| 4 rs35732176  | 9514457 A | 0.2376 | 3.80E-08 | chr:4:9603240 |
| 4 rs13141594  | 9690088 C | 0.3283 | 3.91E-08 | chr:4:9603240 |
| 4 rs10939455  | 9672007 A | 0.3295 | 4.44E-08 | chr:4:9603240 |
| 4 rs11733344  | 9670097 C | 0.3295 | 4.44E-08 | chr:4:9603240 |
| 4 rs12645053  | 9668769 G | 0.3295 | 4.44E-08 | chr:4:9603240 |
| 4 rs12647495  | 9668881 C | 0.3295 | 4.44E-08 | chr:4:9603240 |
| 4 rs12649399  | 9668775 T | 0.3295 | 4.44E-08 | chr:4:9603240 |
| 4 rs34793939  | 9674154 T | 0.3295 | 4.44E-08 | chr:4:9603240 |
| 4 rs6827470   | 9667892 A | 0.3295 | 4.44E-08 | chr:4:9603240 |
| 4 rs4274844   | 9676059 C | 0.3299 | 4.80E-08 | chr:4:9603240 |
| 4 rs1842497   | 9579673 A | 0.3258 | 5.09E-08 | chr:4:9603240 |
| 4 rs10805307  | 9580141 G | 0.327  | 5.81E-08 | chr:4:9603240 |
| 4 rs10939373  | 9579571 G | 0.327  | 5.81E-08 | chr:4:9603240 |
| 4 rs13129232  | 9573407 G | 0.327  | 5.81E-08 | chr:4:9603240 |
| 4 rs1947868   | 9584808 G | 0.327  | 5.81E-08 | chr:4:9603240 |
| 4 rs12498563  | 9509030 T | 0.2458 | 6.76E-08 | chr:4:9603240 |
| 4 rs13103452  | 9694662 T | 0.3391 | 7.27E-08 | chr:4:9603240 |
| 4 rs12509448  | 9577884 G | 0.326  | 7.56E-08 | chr:4:9603240 |
| 4 rs11734220  | 9634271 A | 0.3568 | 7.67E-08 | chr:4:9603240 |
| 4 rs13140984  | 9637886 G | 0.3568 | 7.67E-08 | chr:4:9603240 |

|               |           |        |          |               |
|---------------|-----------|--------|----------|---------------|
| 4 rs34554083  | 9634203 G | 0.3568 | 7.67E-08 | chr:4:9603240 |
| 4 rs71615596  | 9635011 T | 0.3568 | 7.67E-08 | chr:4:9603240 |
| 4 rs28728462  | 9700392 A | 0.3106 | 7.87E-08 | chr:4:9603240 |
| 4 rs114264816 | 9500293 A | 0.2476 | 8.06E-08 | chr:4:9603240 |
| 4 rs34056993  | 9514776 T | 0.2534 | 8.37E-08 | chr:4:9603240 |
| 4 rs56306649  | 9510873 C | 0.2534 | 8.37E-08 | chr:4:9603240 |
| 4 rs56340722  | 9510913 G | 0.2534 | 8.37E-08 | chr:4:9603240 |
| 4 rs57995767  | 9510711 A | 0.2534 | 8.37E-08 | chr:4:9603240 |
| 4 rs58768205  | 9511390 A | 0.2534 | 8.37E-08 | chr:4:9603240 |
| 4 rs6833119   | 9520138 C | 0.2534 | 8.37E-08 | chr:4:9603240 |
| 4 rs7658772   | 9512477 A | 0.2534 | 8.37E-08 | chr:4:9603240 |
| 4 rs11731648  | 9691863 A | 0.343  | 8.95E-08 | chr:4:9603240 |
| 4 rs13135989  | 9692108 G | 0.343  | 8.95E-08 | chr:4:9603240 |
| 4 rs9684683   | 9691507 C | 0.343  | 8.95E-08 | chr:4:9603240 |
| 4 rs13145994  | 9623518 G | 0.3706 | 9.17E-08 | chr:4:9603240 |
| 4 rs11736658  | 9585855 G | 0.3264 | 9.20E-08 | chr:4:9603240 |
| 4 rs13144634  | 9571273 A | 0.3363 | 9.30E-08 | chr:4:9603240 |
| 4 rs141703666 | 9510151 G | 0.2555 | 9.77E-08 | chr:4:9603240 |
| 4 rs142510631 | 9456118 A | 0.2513 | 1.00E-07 | chr:4:9603240 |
| 4 rs13125486  | 9575367 C | 0.3332 | 1.05E-07 | chr:4:9603240 |
| 4 rs11724211  | 9695175 G | 0.3422 | 1.06E-07 | chr:4:9603240 |
| 4 rs4102945   | 9581863 G | 0.3383 | 1.16E-07 | chr:4:9603240 |
| 4 rs4698055   | 9627821 A | 0.3604 | 1.16E-07 | chr:4:9603240 |
| 4 rs116441071 | 9482896 A | 0.2529 | 1.16E-07 | chr:4:9603240 |
| 4 rs149153755 | 9482613 C | 0.2529 | 1.16E-07 | chr:4:9603240 |
| 4 rs1871723   | 9481671 T | 0.2529 | 1.16E-07 | chr:4:9603240 |
| 4 rs11732596  | 9569361 C | 0.363  | 1.26E-07 | chr:4:9603240 |
| 4 rs112873333 | 9623915 C | 0.3734 | 1.28E-07 | chr:4:9603240 |
| 4 rs34113970  | 9686479 G | 0.3428 | 1.32E-07 | chr:4:9603240 |
| 4 rs9684173   | 9691519 G | 0.3462 | 1.37E-07 | chr:4:9603240 |
| 4 rs143193345 | 9622281 G | 0.3742 | 1.41E-07 | chr:4:9603240 |
| 4 rs12510906  | 9509153 T | 0.2617 | 1.45E-07 | chr:4:9603240 |
| 4 rs147845837 | 9430737 T | 0.2551 | 1.50E-07 | chr:4:9603240 |
| 4 rs57610759  | 9642093 A | 0.3544 | 1.56E-07 | chr:4:9603240 |
| 4 rs28627624  | 9637607 T | 0.3555 | 1.66E-07 | chr:4:9603240 |
| 4 rs6828382   | 9634594 T | 0.3555 | 1.66E-07 | chr:4:9603240 |
| 4 rs55901556  | 9492888 A | 0.2635 | 1.72E-07 | chr:4:9603240 |
| 4 rs58434858  | 9501245 A | 0.2635 | 1.72E-07 | chr:4:9603240 |
| 4 rs28785196  | 9623514 T | 0.3654 | 1.74E-07 | chr:4:9603240 |
| 4 rs28866204  | 9623513 T | 0.3654 | 1.74E-07 | chr:4:9603240 |
| 4 rs13102980  | 9697402 C | 0.3559 | 1.86E-07 | chr:4:9603240 |
| 4 rs187748995 | 9490915 T | 0.2654 | 1.97E-07 | chr:4:9603240 |
| 4 rs10939425  | 9627380 A | 0.3677 | 2.21E-07 | chr:4:9603240 |

|               |           |        |          |               |
|---------------|-----------|--------|----------|---------------|
| 4 rs112271793 | 9631492 C | 0.3677 | 2.21E-07 | chr:4:9603240 |
| 4 rs28475805  | 9628806 T | 0.3677 | 2.21E-07 | chr:4:9603240 |
| 4 rs28578840  | 9629427 T | 0.3677 | 2.21E-07 | chr:4:9603240 |
| 4 rs9684596   | 9695983 C | 0.3579 | 2.27E-07 | chr:4:9603240 |
| 4 rs114281488 | 9486098 G | 0.2688 | 2.43E-07 | chr:4:9603240 |
| 4 rs116340496 | 9490093 T | 0.2688 | 2.43E-07 | chr:4:9603240 |
| 4 rs11936920  | 9488135 T | 0.2688 | 2.43E-07 | chr:4:9603240 |
| 4 rs113251875 | 9621763 C | 0.3694 | 2.57E-07 | chr:4:9603240 |
| 4 rs28846731  | 9623693 A | 0.3694 | 2.57E-07 | chr:4:9603240 |
| 4 rs13101545  | 9684171 T | 0.3515 | 2.58E-07 | chr:4:9603240 |
| 4 rs13115277  | 9683696 G | 0.3515 | 2.58E-07 | chr:4:9603240 |
| 4 rs10939461  | 9681893 A | 0.3518 | 2.71E-07 | chr:4:9603240 |
| 4 rs12233698  | 9680271 T | 0.3518 | 2.71E-07 | chr:4:9603240 |
| 4 rs58724508  | 9642207 G | 0.3639 | 3.00E-07 | chr:4:9603240 |
| 4 rs62409885  | 9642489 C | 0.3161 | 3.14E-07 | chr:4:9603240 |
| 4 rs12506669  | 9437122 T | 0.2713 | 3.14E-07 | chr:4:9603240 |
| 4 rs62409888  | 9642756 G | 0.3763 | 3.25E-07 | chr:4:9603240 |
| 4 rs148449111 | 9444136 A | 0.2719 | 3.36E-07 | chr:4:9603240 |
| 4 rs6834815   | 9445203 T | 0.2719 | 3.36E-07 | chr:4:9603240 |
| 4 rs111953893 | 9645341 C | 0.3646 | 3.47E-07 | chr:4:9603240 |
| 4 rs141992178 | 9645431 G | 0.3646 | 3.47E-07 | chr:4:9603240 |
| 4 rs28762742  | 9646007 A | 0.3646 | 3.47E-07 | chr:4:9603240 |
| 4 rs13136973  | 9574572 G | 0.3716 | 3.52E-07 | chr:4:9603240 |
| 4 rs13120116  | 9694454 C | 0.3605 | 3.60E-07 | chr:4:9603240 |
| 4 rs6814282   | 9692516 C | 0.3654 | 3.62E-07 | chr:4:9603240 |
| 4 rs36055615  | 9489223 C | 0.2754 | 3.66E-07 | chr:4:9603240 |
| 4 rs13147802  | 9572720 C | 0.3721 | 3.76E-07 | chr:4:9603240 |
| 4 rs7674841   | 9414657 T | 0.2627 | 3.80E-07 | chr:4:9603240 |
| 4 rs6811069   | 9415008 T | 0.2634 | 4.08E-07 | chr:4:9603240 |
| 4 rs7658142   | 9411831 C | 0.2634 | 4.08E-07 | chr:4:9603240 |
| 4 rs7661060   | 9416002 G | 0.2634 | 4.08E-07 | chr:4:9603240 |
| 4 rs13138961  | 9585147 G | 0.3719 | 4.62E-07 | chr:4:9603240 |
| 4 rs111656532 | 9632606 A | 0.378  | 4.63E-07 | chr:4:9603240 |
| 4 rs111964883 | 9426264 C | 0.2714 | 4.91E-07 | chr:4:9603240 |
| 4 rs112213976 | 9445551 T | 0.2714 | 4.91E-07 | chr:4:9603240 |
| 4 rs13150941  | 9694401 G | 0.3651 | 4.97E-07 | chr:4:9603240 |
| 4 rs12512447  | 9586313 G | 0.3755 | 5.20E-07 | chr:4:9603240 |
| 4 rs7667132   | 9416679 G | 0.267  | 5.24E-07 | chr:4:9603240 |
| 4 rs28406240  | 9638555 A | 0.3709 | 6.00E-07 | chr:4:9603240 |
| 4 rs6841835   | 9639540 A | 0.3709 | 6.00E-07 | chr:4:9603240 |
| 4 rs115753392 | 9448159 A | 0.2749 | 6.06E-07 | chr:4:9603240 |
| 4 rs116798697 | 9447428 A | 0.2749 | 6.06E-07 | chr:4:9603240 |
| 4 rs145680794 | 9448253 T | 0.2749 | 6.06E-07 | chr:4:9603240 |

|               |           |        |          |               |
|---------------|-----------|--------|----------|---------------|
| 4 rs143150298 | 9424474 A | 0.2696 | 6.19E-07 | chr:4:9603240 |
| 4 rs13141264  | 9698240 G | 0.3807 | 7.03E-07 | chr:4:9603240 |
| 4 rs114466306 | 9427938 C | 0.2794 | 8.01E-07 | chr:4:9603240 |
| 4 rs1949921   | 9419322 A | 0.2807 | 8.13E-07 | chr:4:9603240 |
| 4 rs10939447  | 9659957 C | 0.4015 | 8.97E-07 | chr:4:9603240 |
| 4 rs28765135  | 9644325 G | 0.3831 | 9.73E-07 | chr:4:9603240 |
| 4 rs28783176  | 9645220 A | 0.3831 | 9.73E-07 | chr:4:9603240 |
| 4 rs28866958  | 9644586 C | 0.3831 | 9.73E-07 | chr:4:9603240 |
| 4 rs2902903   | 9419450 G | 0.2833 | 1.02E-06 | chr:4:9603240 |
| 4 rs9991809   | 9607279 G | 0.38   | 1.03E-06 | chr:4:9603240 |
| 4 rs13132135  | 9583284 C | 0.3571 | 1.07E-06 | chr:4:9603240 |
| 4 rs138431574 | 9643091 A | 0.3842 | 1.35E-06 | chr:4:9603240 |
| 4 rs11944560  | 9604670 G | 0.3854 | 1.44E-06 | chr:4:9603240 |
| 4 rs6838885   | 9606104 T | 0.3854 | 1.44E-06 | chr:4:9603240 |
| 4 rs6839486   | 9606411 A | 0.3854 | 1.44E-06 | chr:4:9603240 |
| 4 rs6842850   | 9788598 A | 0.3532 | 1.55E-06 | chr:4:9603240 |
| 4 rs113906552 | 9635435 T | 0.2968 | 1.70E-06 | chr:4:9603240 |
| 4 rs145217742 | 9420544 C | 0.2941 | 1.76E-06 | chr:4:9603240 |
| 4 rs11727477  | 9768621 A | 0.3083 | 1.80E-06 | chr:4:9603240 |
| 4 rs11730777  | 9768556 T | 0.3084 | 2.03E-06 | chr:4:9603240 |
| 4 rs11732272  | 9768258 G | 0.3084 | 2.03E-06 | chr:4:9603240 |
| 4 rs148211737 | 9547689 T | 0.1949 | 2.20E-06 | chr:4:9603240 |
| 4 rs9684707   | 9569057 G | 0.3914 | 2.28E-06 | chr:4:9603240 |
| 4 rs1880831   | 9568145 C | 0.3856 | 2.62E-06 | chr:4:9603240 |
| 4 rs10049659  | 9586764 T | 0.3873 | 2.65E-06 | chr:4:9603240 |
| 4 rs28680396  | 9646707 A | 0.4007 | 2.81E-06 | chr:4:9603240 |
| 4 rs12233678  | 9549951 A | 0.3882 | 3.32E-06 | chr:4:9603240 |
| 4 rs6831476   | 9708183 G | 0.4246 | 3.49E-06 | chr:4:9603240 |
| 4 rs1976792   | 9846309 A | 0.3358 | 3.73E-06 | chr:4:9603240 |
| 4 rs57235613  | 9867708 T | 0.3358 | 3.73E-06 | chr:4:9603240 |
| 4 rs10939515  | 9773296 A | 0.333  | 3.74E-06 | chr:4:9603240 |
| 4 rs11943931  | 9706478 C | 0.4256 | 3.83E-06 | chr:4:9603240 |
| 4 rs13150882  | 9621101 C | 0.427  | 3.99E-06 | chr:4:9603240 |
| 4 rs188796369 | 9854038 A | 0.3376 | 4.15E-06 | chr:4:9603240 |
| 4 rs13107393  | 9562217 C | 0.3961 | 4.23E-06 | chr:4:9603240 |
| 4 rs11723541  | 9556165 C | 0.3968 | 4.51E-06 | chr:4:9603240 |
| 4 rs11728441  | 9558041 T | 0.3968 | 4.51E-06 | chr:4:9603240 |
| 4 rs12233677  | 9549872 A | 0.3968 | 4.51E-06 | chr:4:9603240 |
| 4 rs12233771  | 9552965 T | 0.3968 | 4.51E-06 | chr:4:9603240 |
| 4 rs12233883  | 9549927 G | 0.3968 | 4.51E-06 | chr:4:9603240 |
| 4 rs12505958  | 9560131 A | 0.3968 | 4.51E-06 | chr:4:9603240 |
| 4 rs13110253  | 9558556 G | 0.3968 | 4.51E-06 | chr:4:9603240 |
| 4 rs13116764  | 9561759 A | 0.3968 | 4.51E-06 | chr:4:9603240 |



|               |           |        |          |               |
|---------------|-----------|--------|----------|---------------|
| 4 rs13132153  | 9561479 G | 0.3968 | 4.51E-06 | chr:4:9603240 |
| 4 rs13138276  | 9562004 G | 0.3968 | 4.51E-06 | chr:4:9603240 |
| 4 rs13152653  | 9556775 G | 0.3968 | 4.51E-06 | chr:4:9603240 |
| 4 rs1842490   | 9568457 G | 0.3968 | 4.51E-06 | chr:4:9603240 |
| 4 rs7442338   | 9560945 C | 0.3968 | 4.51E-06 | chr:4:9603240 |
| 4 rs9715222   | 9564999 T | 0.3968 | 4.51E-06 | chr:4:9603240 |
| 4 rs12508394  | 9702186 G | 0.4316 | 4.65E-06 | chr:4:9603240 |
| 4 rs6844646   | 9658265 G | 0.4128 | 4.79E-06 | chr:4:9603240 |
| 4 rs553557418 | 9457341 T | 0.289  | 4.94E-06 | chr:4:9603240 |
| 4 rs10004517  | 9581761 T | 0.3987 | 5.19E-06 | chr:4:9603240 |
| 4 rs35737782  | 9674263 G | 0.4316 | 5.26E-06 | chr:4:9603240 |
| 4 rs12233884  | 9550045 G | 0.3986 | 5.26E-06 | chr:4:9603240 |
| 4 rs4102942   | 9568478 C | 0.3996 | 5.39E-06 | chr:4:9603240 |
| 4 rs11734448  | 9563381 T | 0.3991 | 5.47E-06 | chr:4:9603240 |
| 4 rs13123398  | 9677837 G | 0.4322 | 5.62E-06 | chr:4:9603240 |
| 4 rs28440975  | 9585358 T | 0.402  | 5.87E-06 | chr:4:9603240 |
| 4 rs28672255  | 9583711 A | 0.402  | 5.87E-06 | chr:4:9603240 |
| 4 rs6820570   | 9579020 G | 0.402  | 5.87E-06 | chr:4:9603240 |
| 4 rs6840511   | 9579114 A | 0.402  | 5.87E-06 | chr:4:9603240 |
| 4 rs7669441   | 9576926 A | 0.402  | 5.87E-06 | chr:4:9603240 |
| 4 rs9683876   | 9584058 A | 0.402  | 5.87E-06 | chr:4:9603240 |
| 4 rs13124998  | 9530491 G | 0.4129 | 5.91E-06 | chr:4:9603240 |
| 4 rs13144880  | 9530438 C | 0.4129 | 5.91E-06 | chr:4:9603240 |
| 4 rs9685049   | 9570932 A | 0.4033 | 6.41E-06 | chr:4:9603240 |
| 4 rs13134507  | 9697356 G | 0.4376 | 6.49E-06 | chr:4:9603240 |
| 4 rs12510091  | 9708661 G | 0.4369 | 6.61E-06 | chr:4:9603240 |
| 4 rs1048252   | 9870535 T | 0.3513 | 7.16E-06 | chr:4:9603240 |
| 4 rs884573    | 9869734 C | 0.3513 | 7.16E-06 | chr:4:9603240 |
| 4 rs13151395  | 9709144 C | 0.4379 | 7.22E-06 | chr:4:9603240 |
| 4 rs6448964   | 9690292 A | 0.3765 | 7.64E-06 | chr:4:9603240 |
| 4 rs12233701  | 9552436 C | 0.4039 | 7.65E-06 | chr:4:9603240 |
| 4 rs61166583  | 9778530 A | 0.3668 | 8.38E-06 | chr:4:9603240 |
| 4 rs3872817   | 9571272 A | 0.4109 | 8.71E-06 | chr:4:9603240 |
| 4 rs3975532   | 9571302 T | 0.4109 | 8.71E-06 | chr:4:9603240 |
| 4 rs6818180   | 9667949 T | 0.4227 | 8.89E-06 | chr:4:9603240 |
| 4 rs7676603   | 9775710 G | 0.37   | 9.10E-06 | chr:4:9603240 |
| 4 rs11735687  | 9523738 T | 0.4122 | 9.28E-06 | chr:4:9603240 |
| 4 rs12641450  | 9529244 G | 0.4122 | 9.28E-06 | chr:4:9603240 |
| 4 rs13136346  | 9528694 C | 0.4122 | 9.28E-06 | chr:4:9603240 |
| 4 rs6848533   | 9690289 C | 0.3839 | 1.03E-05 | chr:4:9603240 |
| 4 rs4077929   | 9698730 C | 0.4456 | 1.07E-05 | chr:4:9603240 |
| 4 rs7434710   | 9700062 G | 0.4456 | 1.07E-05 | chr:4:9603240 |
| 4 rs13122952  | 9707740 G | 0.4503 | 1.16E-05 | chr:4:9603240 |

|   |             |          |   |        |          |                |
|---|-------------|----------|---|--------|----------|----------------|
| 4 | rs13139813  | 9547169  | C | 0.417  | 1.23E-05 | chr:4:9603240  |
| 4 | rs12645738  | 9529669  | A | 0.4219 | 1.29E-05 | chr:4:9603240  |
| 4 | rs13152465  | 9556695  | G | 0.4165 | 1.36E-05 | chr:4:9603240  |
| 4 | rs12649073  | 9694490  | G | 0.4328 | 1.42E-05 | chr:4:9603240  |
| 4 | rs16889260  | 9834896  | T | 0.3892 | 1.49E-05 | chr:4:9603240  |
| 4 | rs11729203  | 9569091  | G | 0.4262 | 1.51E-05 | chr:4:9603240  |
| 4 | rs3890174   | 9700774  | G | 0.3846 | 1.51E-05 | chr:4:9603240  |
| 4 | rs6814274   | 9692502  | T | 0.4383 | 1.53E-05 | chr:4:9603240  |
| 4 | rs10939280  | 9529545  | T | 0.4209 | 1.53E-05 | chr:4:9603240  |
| 4 | rs113957727 | 9840568  | G | 0.3904 | 1.81E-05 | chr:4:9603240  |
| 4 | rs950310    | 9842850  | A | 0.3904 | 1.81E-05 | chr:4:9603240  |
| 4 | rs12644047  | 9893403  | A | 0.3914 | 1.87E-05 | chr:4:9603240  |
| 4 | rs2867394   | 9872475  | A | 0.3914 | 1.87E-05 | chr:4:9603240  |
| 4 | rs6840999   | 9880169  | A | 0.3914 | 1.87E-05 | chr:4:9603240  |
| 4 | rs190804173 | 9675208  | C | 0.1741 | 2.01E-05 | chr:4:9603240  |
| 4 | rs11727873  | 9758469  | C | 0.3904 | 2.11E-05 | chr:4:9603240  |
| 4 | rs1818669   | 9769995  | G | 0.3899 | 2.16E-05 | chr:4:9603240  |
| 4 | rs1878943   | 9766888  | T | 0.3899 | 2.16E-05 | chr:4:9603240  |
| 4 | rs73090773  | 9765827  | A | 0.3899 | 2.16E-05 | chr:4:9603240  |
| 4 | rs6842656   | 9692050  | C | 0.4373 | 2.17E-05 | chr:4:9603240  |
| 5 | rs139126213 | 64355569 | T | 58.42  | 3.89E-15 | chr:5:64388440 |
| 5 | rs75261655  | 64354080 | G | 58.42  | 3.89E-15 | chr:5:64388440 |
| 5 | rs115153571 | 64501108 | T | 336.9  | 1.71E-14 | chr:5:64388440 |
| 5 | rs147069896 | 64474153 | T | 641.5  | 7.09E-14 | chr:5:64388440 |
| 5 | rs76603114  | 64451012 | C | 641.5  | 7.09E-14 | chr:5:64388440 |
| 5 | rs11742881  | 64373645 | A | 20.85  | 5.76E-13 | chr:5:64388440 |
| 5 | rs115434958 | 64475274 | A | 22.98  | 6.33E-12 | chr:5:64388440 |
| 5 | rs112408822 | 64469647 | G | 15.21  | 1.16E-10 | chr:5:64388440 |
| 5 | rs17206232  | 64433400 | A | 15.21  | 1.16E-10 | chr:5:64388440 |
| 5 | rs4700668   | 64435732 | A | 15.21  | 1.16E-10 | chr:5:64388440 |
| 5 | rs55762587  | 64436355 | C | 15.21  | 1.16E-10 | chr:5:64388440 |
| 5 | rs55853058  | 64436298 | T | 15.21  | 1.16E-10 | chr:5:64388440 |
| 5 | rs56246735  | 64434968 | A | 15.21  | 1.16E-10 | chr:5:64388440 |
| 5 | rs56375618  | 64471186 | G | 15.21  | 1.16E-10 | chr:5:64388440 |
| 5 | rs57027704  | 64470833 | C | 15.21  | 1.16E-10 | chr:5:64388440 |
| 5 | rs72758879  | 64437191 | G | 15.21  | 1.16E-10 | chr:5:64388440 |
| 5 | rs72758880  | 64440519 | A | 15.21  | 1.16E-10 | chr:5:64388440 |
| 5 | rs79124463  | 64437182 | T | 15.21  | 1.16E-10 | chr:5:64388440 |
| 5 | rs67024543  | 64439173 | C | 14.91  | 1.43E-10 | chr:5:64388440 |
| 5 | rs72758884  | 64452214 | G | 14.91  | 1.43E-10 | chr:5:64388440 |
| 5 | rs112170622 | 64456245 | T | 14.77  | 1.65E-10 | chr:5:64388440 |
| 5 | rs72758876  | 64434562 | T | 14.81  | 1.71E-10 | chr:5:64388440 |
| 5 | rs1862570   | 64480933 | T | 13.18  | 3.28E-10 | chr:5:64388440 |

|               |            |       |          |                |
|---------------|------------|-------|----------|----------------|
| 5 rs1363921   | 64496183 T | 12.62 | 5.10E-10 | chr:5:64388440 |
| 5 rs16893495  | 64494702 G | 12.62 | 5.10E-10 | chr:5:64388440 |
| 5 rs4700670   | 64505218 C | 12.62 | 5.10E-10 | chr:5:64388440 |
| 5 rs58335637  | 64506243 T | 12.62 | 5.10E-10 | chr:5:64388440 |
| 5 rs67872027  | 64517189 C | 12.62 | 5.10E-10 | chr:5:64388440 |
| 5 rs6867844   | 64503815 C | 12.62 | 5.10E-10 | chr:5:64388440 |
| 5 rs59128191  | 64519335 C | 12.8  | 7.91E-10 | chr:5:64388440 |
| 5 rs17812505  | 64454782 A | 183.5 | 2.93E-09 | chr:5:64388440 |
| 5 rs11739329  | 64429954 A | 5.759 | 9.95E-09 | chr:5:64388440 |
| 5 rs6861157   | 64428747 T | 5.759 | 9.95E-09 | chr:5:64388440 |
| 5 rs560140895 | 63996509 T | 25.57 | 8.72E-08 | chr:5:64388440 |
| 5 rs146133707 | 63915910 C | 63.11 | 1.46E-07 | chr:5:64388440 |
| 5 rs185239295 | 63931359 C | 35.68 | 1.61E-07 | chr:5:64388440 |
| 5 rs190672357 | 63999405 G | 43.54 | 1.85E-07 | chr:5:64388440 |
| 5 rs61492617  | 64519091 A | 7.176 | 2.55E-07 | chr:5:64388440 |
| 5 rs426628    | 64351318 T | 4.43  | 3.74E-07 | chr:5:64388440 |
| 5 rs264733    | 64359607 G | 4.428 | 3.91E-07 | chr:5:64388440 |
| 5 rs264737    | 64363583 A | 4.428 | 3.91E-07 | chr:5:64388440 |
| 5 rs264741    | 64367179 T | 4.428 | 3.91E-07 | chr:5:64388440 |
| 5 rs264742    | 64368149 T | 4.428 | 3.91E-07 | chr:5:64388440 |
| 5 rs266591    | 64347543 G | 4.428 | 3.91E-07 | chr:5:64388440 |
| 5 rs381652    | 64352334 C | 4.428 | 3.91E-07 | chr:5:64388440 |
| 5 rs264770    | 64391134 T | 4.482 | 6.14E-07 | chr:5:64388440 |
| 5 rs75652947  | 64757788 T | 80.81 | 6.40E-07 | chr:5:64388440 |
| 5 rs264752    | 64375502 T | 4.407 | 6.72E-07 | chr:5:64388440 |
| 5 rs75623669  | 64581577 T | 293.8 | 7.39E-07 | chr:5:64388440 |
| 5 rs155337    | 64375371 A | 4.357 | 7.68E-07 | chr:5:64388440 |
| 5 rs190543    | 64391933 G | 4.357 | 7.68E-07 | chr:5:64388440 |
| 5 rs197138    | 64376615 G | 4.357 | 7.68E-07 | chr:5:64388440 |
| 5 rs264753    | 64375657 T | 4.357 | 7.68E-07 | chr:5:64388440 |
| 5 rs264754    | 64377290 A | 4.357 | 7.68E-07 | chr:5:64388440 |
| 5 rs264756    | 64380395 G | 4.357 | 7.68E-07 | chr:5:64388440 |
| 5 rs264762    | 64384386 A | 4.357 | 7.68E-07 | chr:5:64388440 |
| 5 rs264763    | 64384431 C | 4.357 | 7.68E-07 | chr:5:64388440 |
| 5 rs264766    | 64388979 T | 4.357 | 7.68E-07 | chr:5:64388440 |
| 5 rs264775    | 64395359 G | 4.357 | 7.68E-07 | chr:5:64388440 |
| 5 rs521074    | 64392198 C | 4.357 | 7.68E-07 | chr:5:64388440 |
| 5 rs65407     | 64375128 C | 4.357 | 7.68E-07 | chr:5:64388440 |
| 5 rs4700662   | 64392906 C | 4.355 | 7.99E-07 | chr:5:64388440 |
| 5 rs146117686 | 64347580 A | 28.98 | 9.59E-07 | chr:5:64388440 |
| 5 rs535303836 | 64762835 T | 73.53 | 9.87E-07 | chr:5:64388440 |
| 5 rs73762006  | 64755100 C | 75.07 | 9.98E-07 | chr:5:64388440 |
| 5 rs434882    | 64353312 A | 4.275 | 1.01E-06 | chr:5:64388440 |

|               |            |       |          |                |
|---------------|------------|-------|----------|----------------|
| 5 rs16893539  | 64506320 G | 5.536 | 1.55E-06 | chr:5:64388440 |
| 5 rs16893492  | 64494637 C | 5.52  | 1.65E-06 | chr:5:64388440 |
| 5 rs16893504  | 64495736 G | 5.52  | 1.65E-06 | chr:5:64388440 |
| 5 rs2161559   | 64493852 C | 5.52  | 1.65E-06 | chr:5:64388440 |
| 5 rs67057805  | 64497594 G | 5.52  | 1.65E-06 | chr:5:64388440 |
| 5 rs264758    | 64381433 A | 4.066 | 2.04E-06 | chr:5:64388440 |
| 5 rs264765    | 64388548 C | 4.066 | 2.04E-06 | chr:5:64388440 |
| 5 rs397044    | 64391972 C | 4.066 | 2.04E-06 | chr:5:64388440 |
| 5 rs74770633  | 64629562 T | 221.4 | 2.17E-06 | chr:5:64388440 |
| 5 rs266594    | 64346189 C | 4.339 | 5.81E-06 | chr:5:64388440 |
| 5 rs183488197 | 64271585 T | 35.82 | 5.86E-06 | chr:5:64388440 |
| 5 rs111403991 | 64653472 G | 178.5 | 6.19E-06 | chr:5:64388440 |
| 5 rs116627357 | 64630794 T | 178.5 | 6.19E-06 | chr:5:64388440 |
| 5 rs139312895 | 64621250 C | 178.5 | 6.19E-06 | chr:5:64388440 |
| 5 rs143472363 | 64732617 A | 178.5 | 6.19E-06 | chr:5:64388440 |
| 5 rs150346987 | 64671387 A | 178.5 | 6.19E-06 | chr:5:64388440 |
| 5 rs16875177  | 64641688 C | 178.5 | 6.19E-06 | chr:5:64388440 |
| 5 rs16893695  | 64627780 C | 178.5 | 6.19E-06 | chr:5:64388440 |
| 5 rs16893696  | 64628544 C | 178.5 | 6.19E-06 | chr:5:64388440 |
| 5 rs16893704  | 64634361 A | 178.5 | 6.19E-06 | chr:5:64388440 |
| 5 rs16893719  | 64647811 G | 178.5 | 6.19E-06 | chr:5:64388440 |
| 5 rs16893792  | 64691256 G | 178.5 | 6.19E-06 | chr:5:64388440 |
| 5 rs181814301 | 64667535 C | 178.5 | 6.19E-06 | chr:5:64388440 |
| 5 rs182676027 | 64672011 T | 178.5 | 6.19E-06 | chr:5:64388440 |
| 5 rs186263710 | 64671758 A | 178.5 | 6.19E-06 | chr:5:64388440 |
| 5 rs186486385 | 64671870 C | 178.5 | 6.19E-06 | chr:5:64388440 |
| 5 rs188499509 | 64666700 C | 178.5 | 6.19E-06 | chr:5:64388440 |
| 5 rs190917348 | 64671873 A | 178.5 | 6.19E-06 | chr:5:64388440 |
| 5 rs193064121 | 64670050 G | 178.5 | 6.19E-06 | chr:5:64388440 |
| 5 rs200690639 | 64667389 C | 178.5 | 6.19E-06 | chr:5:64388440 |
| 5 rs373045591 | 64669733 C | 178.5 | 6.19E-06 | chr:5:64388440 |
| 5 rs4260623   | 64635243 G | 178.5 | 6.19E-06 | chr:5:64388440 |
| 5 rs544590677 | 64669667 G | 178.5 | 6.19E-06 | chr:5:64388440 |
| 5 rs59514176  | 64694098 A | 178.5 | 6.19E-06 | chr:5:64388440 |
| 5 rs6875208   | 64714718 A | 178.5 | 6.19E-06 | chr:5:64388440 |
| 5 rs74334295  | 64627084 G | 178.5 | 6.19E-06 | chr:5:64388440 |
| 5 rs74484470  | 64685150 C | 178.5 | 6.19E-06 | chr:5:64388440 |
| 5 rs74488865  | 64640973 G | 178.5 | 6.19E-06 | chr:5:64388440 |
| 5 rs74619653  | 64660935 T | 178.5 | 6.19E-06 | chr:5:64388440 |
| 5 rs74726061  | 64654399 A | 178.5 | 6.19E-06 | chr:5:64388440 |
| 5 rs74868989  | 64626555 T | 178.5 | 6.19E-06 | chr:5:64388440 |
| 5 rs74929530  | 64734246 C | 178.5 | 6.19E-06 | chr:5:64388440 |
| 5 rs75024492  | 64622647 T | 178.5 | 6.19E-06 | chr:5:64388440 |

|              |            |       |          |                |
|--------------|------------|-------|----------|----------------|
| 5 rs75054447 | 64650877 C | 178.5 | 6.19E-06 | chr:5:64388440 |
| 5 rs75166706 | 64658423 C | 178.5 | 6.19E-06 | chr:5:64388440 |
| 5 rs75238724 | 64725093 G | 178.5 | 6.19E-06 | chr:5:64388440 |
| 5 rs75428651 | 64630328 G | 178.5 | 6.19E-06 | chr:5:64388440 |
| 5 rs75472193 | 64656153 T | 178.5 | 6.19E-06 | chr:5:64388440 |
| 5 rs75553188 | 64625166 G | 178.5 | 6.19E-06 | chr:5:64388440 |
| 5 rs75692340 | 64659887 C | 178.5 | 6.19E-06 | chr:5:64388440 |
| 5 rs75696004 | 64659292 A | 178.5 | 6.19E-06 | chr:5:64388440 |
| 5 rs75905344 | 64666009 C | 178.5 | 6.19E-06 | chr:5:64388440 |
| 5 rs75945381 | 64676960 T | 178.5 | 6.19E-06 | chr:5:64388440 |
| 5 rs75956499 | 64655771 T | 178.5 | 6.19E-06 | chr:5:64388440 |
| 5 rs76001857 | 64641863 G | 178.5 | 6.19E-06 | chr:5:64388440 |
| 5 rs76268663 | 64746373 C | 178.5 | 6.19E-06 | chr:5:64388440 |
| 5 rs76293569 | 64640536 T | 178.5 | 6.19E-06 | chr:5:64388440 |
| 5 rs76368874 | 64647919 T | 178.5 | 6.19E-06 | chr:5:64388440 |
| 5 rs76392027 | 64626995 A | 178.5 | 6.19E-06 | chr:5:64388440 |
| 5 rs76472131 | 64695955 T | 178.5 | 6.19E-06 | chr:5:64388440 |
| 5 rs76485756 | 64676619 G | 178.5 | 6.19E-06 | chr:5:64388440 |
| 5 rs76782560 | 64679920 G | 178.5 | 6.19E-06 | chr:5:64388440 |
| 5 rs76794337 | 64655475 G | 178.5 | 6.19E-06 | chr:5:64388440 |
| 5 rs76969182 | 64681639 C | 178.5 | 6.19E-06 | chr:5:64388440 |
| 5 rs77028893 | 64631244 A | 178.5 | 6.19E-06 | chr:5:64388440 |
| 5 rs77052091 | 64639062 T | 178.5 | 6.19E-06 | chr:5:64388440 |
| 5 rs7717781  | 64663777 C | 178.5 | 6.19E-06 | chr:5:64388440 |
| 5 rs77387343 | 64657821 C | 178.5 | 6.19E-06 | chr:5:64388440 |
| 5 rs77659707 | 64641634 A | 178.5 | 6.19E-06 | chr:5:64388440 |
| 5 rs77744644 | 64654797 C | 178.5 | 6.19E-06 | chr:5:64388440 |
| 5 rs77970699 | 64640296 T | 178.5 | 6.19E-06 | chr:5:64388440 |
| 5 rs78096530 | 64625939 A | 178.5 | 6.19E-06 | chr:5:64388440 |
| 5 rs78128870 | 64622942 A | 178.5 | 6.19E-06 | chr:5:64388440 |
| 5 rs78442417 | 64695786 T | 178.5 | 6.19E-06 | chr:5:64388440 |
| 5 rs78483037 | 64640850 T | 178.5 | 6.19E-06 | chr:5:64388440 |
| 5 rs78700208 | 64639111 C | 178.5 | 6.19E-06 | chr:5:64388440 |
| 5 rs78738829 | 64654247 C | 178.5 | 6.19E-06 | chr:5:64388440 |
| 5 rs78887494 | 64629698 G | 178.5 | 6.19E-06 | chr:5:64388440 |
| 5 rs79143098 | 64650114 G | 178.5 | 6.19E-06 | chr:5:64388440 |
| 5 rs79245146 | 64650124 G | 178.5 | 6.19E-06 | chr:5:64388440 |
| 5 rs79403368 | 64636674 T | 178.5 | 6.19E-06 | chr:5:64388440 |
| 5 rs79768434 | 64641045 C | 178.5 | 6.19E-06 | chr:5:64388440 |
| 5 rs79914687 | 64636738 C | 178.5 | 6.19E-06 | chr:5:64388440 |
| 5 rs79918297 | 64664562 T | 178.5 | 6.19E-06 | chr:5:64388440 |
| 5 rs80348054 | 64653899 T | 178.5 | 6.19E-06 | chr:5:64388440 |
| 5 rs264740   | 64366306 A | 4.278 | 6.40E-06 | chr:5:64388440 |

|               |            |       |          |                |
|---------------|------------|-------|----------|----------------|
| 5 rs141991210 | 64196427 C | 525.6 | 7.05E-06 | chr:5:64388440 |
| 5 rs77967071  | 63932163 T | 4.843 | 7.20E-06 | chr:5:64388440 |
| 5 rs35841260  | 64360517 T | 4.113 | 1.01E-05 | chr:5:64388440 |
| 5 rs79033050  | 64684040 C | 13.44 | 1.07E-05 | chr:5:64388440 |
| 5 rs13155773  | 64773576 G | 7.829 | 1.09E-05 | chr:5:64388440 |
| 5 rs6881609   | 64764658 A | 7.829 | 1.09E-05 | chr:5:64388440 |
| 5 rs264734    | 64361949 G | 4.081 | 1.11E-05 | chr:5:64388440 |
| 5 rs266568    | 64358639 G | 4.081 | 1.11E-05 | chr:5:64388440 |
| 5 rs266569    | 64358540 A | 4.081 | 1.11E-05 | chr:5:64388440 |
| 5 rs403958    | 64357631 C | 4.081 | 1.11E-05 | chr:5:64388440 |
| 5 rs438698    | 64358052 A | 4.081 | 1.11E-05 | chr:5:64388440 |
| 5 rs439327    | 64356942 T | 4.081 | 1.11E-05 | chr:5:64388440 |
| 5 rs395850    | 64356894 G | 4.085 | 1.13E-05 | chr:5:64388440 |
| 5 rs398407    | 64357523 T | 4.085 | 1.13E-05 | chr:5:64388440 |
| 5 rs400088    | 64355340 G | 4.085 | 1.13E-05 | chr:5:64388440 |
| 5 rs423139    | 64355873 A | 4.085 | 1.13E-05 | chr:5:64388440 |
| 5 rs6891430   | 64479934 A | 4.077 | 1.15E-05 | chr:5:64388440 |
| 5 rs266571    | 64358152 A | 4.084 | 1.15E-05 | chr:5:64388440 |
| 5 rs140150422 | 64347629 C | 156   | 1.42E-05 | chr:5:64388440 |
| 5 rs16893475  | 64483759 C | 4.017 | 1.60E-05 | chr:5:64388440 |
| 5 rs68189167  | 64481943 T | 4.017 | 1.60E-05 | chr:5:64388440 |
| 5 rs7735218   | 64480562 T | 4.017 | 1.60E-05 | chr:5:64388440 |
| 5 rs55757359  | 64490196 T | 4.002 | 1.72E-05 | chr:5:64388440 |
| 5 rs4700077   | 64486973 C | 3.971 | 1.97E-05 | chr:5:64388440 |
| 5 rs67054803  | 64488152 T | 3.971 | 1.97E-05 | chr:5:64388440 |
| 5 rs67475355  | 64489407 C | 3.971 | 1.97E-05 | chr:5:64388440 |
| 5 rs264778    | 64395979 A | 3.316 | 2.41E-05 | chr:5:64388440 |
| 5 rs16893543  | 64512773 T | 3.27  | 2.72E-05 | chr:5:64388440 |
| 5 rs264779    | 64398181 C | 3.247 | 2.92E-05 | chr:5:64388440 |
| 5 rs541931593 | 64624362 T | 10.92 | 3.09E-05 | chr:5:64388440 |
| 5 rs75925757  | 64803090 A | 29.42 | 4.17E-05 | chr:5:64388440 |
| 5 rs13163495  | 64772052 T | 7.172 | 5.00E-05 | chr:5:64388440 |
| 5 rs6863422   | 80474998 G | 37.69 | 6.09E-14 | chr:5:80442266 |
| 5 rs73130821  | 80474424 C | 37.69 | 6.09E-14 | chr:5:80442266 |
| 5 rs73130824  | 80475341 C | 37.69 | 6.09E-14 | chr:5:80442266 |
| 5 rs79215865  | 80476220 A | 33.19 | 8.47E-14 | chr:5:80442266 |
| 5 rs6878238   | 80474599 T | 35.33 | 8.90E-14 | chr:5:80442266 |
| 5 rs26897     | 80416882 C | 14.29 | 4.88E-13 | chr:5:80442266 |
| 5 rs7707396   | 80433658 G | 41.45 | 1.08E-12 | chr:5:80442266 |
| 5 rs80015185  | 80435871 A | 37.85 | 1.27E-12 | chr:5:80442266 |
| 5 rs12697915  | 80458973 G | 11.43 | 1.69E-12 | chr:5:80442266 |
| 5 rs6881941   | 80467902 G | 10.64 | 7.27E-12 | chr:5:80442266 |
| 5 rs13159681  | 80467140 G | 10.58 | 1.20E-11 | chr:5:80442266 |

|               |            |       |          |                |
|---------------|------------|-------|----------|----------------|
| 5 rs62364962  | 80465734 G | 10.58 | 1.20E-11 | chr:5:80442266 |
| 5 rs6890433   | 80463887 C | 10.58 | 1.20E-11 | chr:5:80442266 |
| 5 rs4144527   | 80467798 C | 9.54  | 1.58E-11 | chr:5:80442266 |
| 5 rs4704705   | 80463635 G | 10.56 | 1.66E-11 | chr:5:80442266 |
| 5 rs10474654  | 80464099 T | 10.65 | 1.69E-11 | chr:5:80442266 |
| 5 rs6872444   | 80464801 A | 10.65 | 1.69E-11 | chr:5:80442266 |
| 5 rs4703824   | 80466298 T | 10.61 | 1.93E-11 | chr:5:80442266 |
| 5 rs145198622 | 80414774 T | 42.13 | 3.07E-11 | chr:5:80442266 |
| 5 rs76834320  | 80416108 G | 31.99 | 3.14E-11 | chr:5:80442266 |
| 5 rs115017698 | 80424934 A | 40.4  | 3.26E-11 | chr:5:80442266 |
| 5 rs143086439 | 80424848 T | 40.4  | 3.26E-11 | chr:5:80442266 |
| 5 rs115568758 | 80416113 C | 31.01 | 3.32E-11 | chr:5:80442266 |
| 5 rs6880350   | 80470499 T | 9.348 | 3.34E-11 | chr:5:80442266 |
| 5 rs6895645   | 80470495 C | 9.348 | 3.34E-11 | chr:5:80442266 |
| 5 rs13159648  | 80467069 G | 7.306 | 3.36E-11 | chr:5:80442266 |
| 5 rs116503403 | 80427691 A | 24.33 | 6.41E-11 | chr:5:80442266 |
| 5 rs153239    | 80425860 A | 6.256 | 6.49E-10 | chr:5:80442266 |
| 5 rs153241    | 80424303 T | 6.135 | 7.05E-10 | chr:5:80442266 |
| 5 rs153240    | 80425505 G | 6.076 | 7.85E-10 | chr:5:80442266 |
| 5 rs2454870   | 80422415 G | 5.685 | 8.65E-10 | chr:5:80442266 |
| 5 rs153242    | 80423966 T | 5.691 | 8.74E-10 | chr:5:80442266 |
| 5 rs466044    | 80413713 A | 5.588 | 9.37E-10 | chr:5:80442266 |
| 5 rs26890     | 80420831 T | 5.578 | 9.43E-10 | chr:5:80442266 |
| 5 rs153231    | 80413979 A | 5.523 | 9.49E-10 | chr:5:80442266 |
| 5 rs26898     | 80416697 T | 5.523 | 9.49E-10 | chr:5:80442266 |
| 5 rs248982    | 80433511 G | 6.163 | 9.72E-10 | chr:5:80442266 |
| 5 rs459021    | 80413712 C | 5.521 | 1.01E-09 | chr:5:80442266 |
| 5 rs153244    | 80423109 A | 5.571 | 1.05E-09 | chr:5:80442266 |
| 5 rs190339    | 80431615 C | 5.991 | 1.08E-09 | chr:5:80442266 |
| 5 rs26889     | 80421700 C | 5.523 | 1.10E-09 | chr:5:80442266 |
| 5 rs27558     | 80419939 A | 5.523 | 1.10E-09 | chr:5:80442266 |
| 5 rs27781     | 80421043 G | 5.523 | 1.10E-09 | chr:5:80442266 |
| 5 rs173596    | 80431783 C | 5.936 | 1.34E-09 | chr:5:80442266 |
| 5 rs248984    | 80435007 T | 5.936 | 1.34E-09 | chr:5:80442266 |
| 5 rs248985    | 80435071 A | 5.936 | 1.34E-09 | chr:5:80442266 |
| 5 rs248986    | 80435429 C | 5.936 | 1.34E-09 | chr:5:80442266 |
| 5 rs153234    | 80427980 A | 6.025 | 1.43E-09 | chr:5:80442266 |
| 5 rs153236    | 80427640 T | 6.025 | 1.43E-09 | chr:5:80442266 |
| 5 rs153237    | 80427576 A | 6.025 | 1.43E-09 | chr:5:80442266 |
| 5 rs153238    | 80427376 A | 6.025 | 1.43E-09 | chr:5:80442266 |
| 5 rs382926    | 80430212 A | 6.022 | 1.45E-09 | chr:5:80442266 |
| 5 rs248979    | 80429930 A | 6.026 | 1.48E-09 | chr:5:80442266 |
| 5 rs153235    | 80427922 G | 5.962 | 1.75E-09 | chr:5:80442266 |

|               |            |         |          |                |
|---------------|------------|---------|----------|----------------|
| 5 rs12188759  | 80462147 C | 4.868   | 2.14E-09 | chr:5:80442266 |
| 5 rs62367373  | 80305176 C | 10.39   | 2.33E-09 | chr:5:80442266 |
| 5 rs73766157  | 80305159 C | 10.39   | 2.33E-09 | chr:5:80442266 |
| 5 rs12186554  | 80462184 T | 4.865   | 2.49E-09 | chr:5:80442266 |
| 5 rs12697916  | 80462439 G | 4.865   | 2.49E-09 | chr:5:80442266 |
| 5 rs13353953  | 80462407 A | 4.865   | 2.49E-09 | chr:5:80442266 |
| 5 rs10942943  | 80462935 G | 4.864   | 2.67E-09 | chr:5:80442266 |
| 5 rs10942944  | 80462963 G | 4.864   | 2.67E-09 | chr:5:80442266 |
| 5 rs1379270   | 80468463 C | 4.646   | 6.71E-09 | chr:5:80442266 |
| 5 rs147665836 | 80382832 C | 17.29   | 6.77E-09 | chr:5:80442266 |
| 5 rs115860918 | 80393475 T | 17.92   | 8.90E-09 | chr:5:80442266 |
| 5 rs6882101   | 80458283 T | 4.295   | 1.42E-08 | chr:5:80442266 |
| 5 rs193786    | 80441637 T | 4.569   | 1.77E-08 | chr:5:80442266 |
| 5 rs34116     | 80441999 C | 4.569   | 1.77E-08 | chr:5:80442266 |
| 5 rs34120     | 80440146 G | 4.569   | 1.77E-08 | chr:5:80442266 |
| 5 rs34121     | 80438915 G | 4.569   | 1.77E-08 | chr:5:80442266 |
| 5 rs147162679 | 80199208 A | 18.56   | 3.11E-08 | chr:5:80442266 |
| 5 rs11952133  | 80471121 T | 3.994   | 4.62E-08 | chr:5:80442266 |
| 5 rs111531198 | 80550110 T | 9.154   | 6.90E-08 | chr:5:80442266 |
| 5 rs113613260 | 80202171 T | 16.44   | 2.10E-07 | chr:5:80442266 |
| 5 rs114819297 | 80165443 G | 14.36   | 4.01E-07 | chr:5:80442266 |
| 5 rs6876160   | 80500674 G | 3.847   | 1.00E-06 | chr:5:80442266 |
| 5 rs369175    | 80447380 G | 3.527   | 2.85E-06 | chr:5:80442266 |
| 5 rs11949363  | 80509137 G | 4.844   | 2.90E-06 | chr:5:80442266 |
| 5 rs838845    | 80447823 T | 3.446   | 3.17E-06 | chr:5:80442266 |
| 5 rs113138533 | 80516504 A | 5.121   | 4.05E-06 | chr:5:80442266 |
| 5 rs79837333  | 80512632 C | 5.121   | 4.05E-06 | chr:5:80442266 |
| 5 rs112680973 | 80546851 G | 4.907   | 6.27E-06 | chr:5:80442266 |
| 5 rs190585232 | 80356070 T | 7.214   | 7.18E-06 | chr:5:80442266 |
| 5 rs111372294 | 80550608 A | 9.236   | 9.77E-06 | chr:5:80442266 |
| 5 rs111809751 | 80316223 G | 6.571   | 1.12E-05 | chr:5:80442266 |
| 5 rs62364964  | 80465787 C | 0.1937  | 1.33E-05 | chr:5:80442266 |
| 5 rs1020720   | 80472768 T | 3.06    | 1.38E-05 | chr:5:80442266 |
| 5 rs6151703   | 80004688 A | 17.08   | 1.54E-05 | chr:5:80442266 |
| 5 rs13168801  | 8943312 A  | 0.09686 | 1.16E-20 | chr:5:8937853  |
| 5 rs13189384  | 8943321 G  | 0.09686 | 1.16E-20 | chr:5:8937853  |
| 5 rs34626780  | 8943339 T  | 0.09686 | 1.16E-20 | chr:5:8937853  |
| 5 rs35951584  | 8943375 A  | 0.09686 | 1.16E-20 | chr:5:8937853  |
| 5 rs34251442  | 8942645 C  | 0.1005  | 1.75E-20 | chr:5:8937853  |
| 5 rs35495516  | 8942635 C  | 0.1005  | 1.75E-20 | chr:5:8937853  |
| 5 rs71611354  | 8942703 T  | 0.1005  | 1.75E-20 | chr:5:8937853  |
| 5 rs11949503  | 8937804 C  | 0.1003  | 2.05E-20 | chr:5:8937853  |
| 5 rs11955429  | 8941715 A  | 0.1003  | 2.05E-20 | chr:5:8937853  |



|              |           |        |          |               |
|--------------|-----------|--------|----------|---------------|
| 5 rs12186849 | 8933088 C | 0.1003 | 2.05E-20 | chr:5:8937853 |
| 5 rs13157678 | 8931378 C | 0.1003 | 2.05E-20 | chr:5:8937853 |
| 5 rs13160595 | 8929697 C | 0.1003 | 2.05E-20 | chr:5:8937853 |
| 5 rs13165792 | 8943070 T | 0.1003 | 2.05E-20 | chr:5:8937853 |
| 5 rs13166892 | 8931212 C | 0.1003 | 2.05E-20 | chr:5:8937853 |
| 5 rs13169109 | 8943532 C | 0.1003 | 2.05E-20 | chr:5:8937853 |
| 5 rs13170524 | 8934862 G | 0.1003 | 2.05E-20 | chr:5:8937853 |
| 5 rs13180198 | 8936074 C | 0.1003 | 2.05E-20 | chr:5:8937853 |
| 5 rs13181039 | 8936810 C | 0.1003 | 2.05E-20 | chr:5:8937853 |
| 5 rs13181188 | 8936871 G | 0.1003 | 2.05E-20 | chr:5:8937853 |
| 5 rs13185206 | 8943046 G | 0.1003 | 2.05E-20 | chr:5:8937853 |
| 5 rs13186994 | 8930953 C | 0.1003 | 2.05E-20 | chr:5:8937853 |
| 5 rs2962735  | 8942095 G | 0.1003 | 2.05E-20 | chr:5:8937853 |
| 5 rs34108904 | 8943745 T | 0.1003 | 2.05E-20 | chr:5:8937853 |
| 5 rs35376107 | 8942188 G | 0.1003 | 2.05E-20 | chr:5:8937853 |
| 5 rs36075104 | 8937389 A | 0.1003 | 2.05E-20 | chr:5:8937853 |
| 5 rs4495147  | 8933733 T | 0.1003 | 2.05E-20 | chr:5:8937853 |
| 5 rs4505924  | 8936629 A | 0.1003 | 2.05E-20 | chr:5:8937853 |
| 5 rs4526080  | 8941529 G | 0.1003 | 2.05E-20 | chr:5:8937853 |
| 5 rs4563593  | 8933794 G | 0.1003 | 2.05E-20 | chr:5:8937853 |
| 5 rs4585412  | 8941705 G | 0.1003 | 2.05E-20 | chr:5:8937853 |
| 5 rs6555580  | 8932263 C | 0.1003 | 2.05E-20 | chr:5:8937853 |
| 5 rs6555585  | 8935651 G | 0.1003 | 2.05E-20 | chr:5:8937853 |
| 5 rs6555586  | 8935800 A | 0.1003 | 2.05E-20 | chr:5:8937853 |
| 5 rs6862593  | 8928550 T | 0.1003 | 2.05E-20 | chr:5:8937853 |
| 5 rs6866047  | 8932660 T | 0.1003 | 2.05E-20 | chr:5:8937853 |
| 5 rs6870451  | 8938885 G | 0.1003 | 2.05E-20 | chr:5:8937853 |
| 5 rs6870477  | 8938935 G | 0.1003 | 2.05E-20 | chr:5:8937853 |
| 5 rs6884096  | 8932523 A | 0.1003 | 2.05E-20 | chr:5:8937853 |
| 5 rs6885789  | 8932782 T | 0.1003 | 2.05E-20 | chr:5:8937853 |
| 5 rs6888819  | 8929239 C | 0.1003 | 2.05E-20 | chr:5:8937853 |
| 5 rs6894834  | 8930468 G | 0.1003 | 2.05E-20 | chr:5:8937853 |
| 5 rs76109783 | 8939954 A | 0.1003 | 2.05E-20 | chr:5:8937853 |
| 5 rs7735641  | 8935206 A | 0.1003 | 2.05E-20 | chr:5:8937853 |
| 5 rs13160367 | 8936774 A | 0.1061 | 2.97E-20 | chr:5:8937853 |
| 5 rs36068583 | 8942585 A | 0.12   | 8.68E-20 | chr:5:8937853 |
| 5 rs6555581  | 8932337 T | 0.1198 | 1.00E-19 | chr:5:8937853 |
| 5 rs80193320 | 8941404 C | 0.1333 | 1.05E-19 | chr:5:8937853 |
| 5 rs2963363  | 8928893 A | 0.1183 | 2.71E-19 | chr:5:8937853 |
| 5 rs6861103  | 8928381 A | 0.1183 | 2.71E-19 | chr:5:8937853 |
| 5 rs2962650  | 8937165 G | 0.1248 | 4.70E-19 | chr:5:8937853 |
| 5 rs2963376  | 8942864 T | 0.1248 | 4.70E-19 | chr:5:8937853 |
| 5 rs2963325  | 8933269 T | 0.1436 | 8.54E-19 | chr:5:8937853 |

|              |           |        |          |               |
|--------------|-----------|--------|----------|---------------|
| 5 rs12513755 | 8958879 A | 0.1507 | 9.58E-19 | chr:5:8937853 |
| 5 rs13155565 | 8965540 T | 0.1507 | 9.58E-19 | chr:5:8937853 |
| 5 rs1947583  | 8980189 C | 0.1507 | 9.58E-19 | chr:5:8937853 |
| 5 rs34814654 | 8958042 A | 0.1507 | 9.58E-19 | chr:5:8937853 |
| 5 rs6869307  | 8968310 G | 0.1507 | 9.58E-19 | chr:5:8937853 |
| 5 rs6876180  | 8977231 T | 0.1507 | 9.58E-19 | chr:5:8937853 |
| 5 rs6883368  | 8968144 C | 0.1507 | 9.58E-19 | chr:5:8937853 |
| 5 rs7730808  | 8977997 T | 0.1507 | 9.58E-19 | chr:5:8937853 |
| 5 rs7730809  | 8977998 C | 0.1507 | 9.58E-19 | chr:5:8937853 |
| 5 rs10040864 | 8965550 A | 0.151  | 1.10E-18 | chr:5:8937853 |
| 5 rs13355363 | 8960849 A | 0.151  | 1.10E-18 | chr:5:8937853 |
| 5 rs34352770 | 8970561 A | 0.151  | 1.10E-18 | chr:5:8937853 |
| 5 rs59676981 | 8968807 T | 0.151  | 1.10E-18 | chr:5:8937853 |
| 5 rs6861946  | 8966209 T | 0.151  | 1.10E-18 | chr:5:8937853 |
| 5 rs6863109  | 8966159 T | 0.151  | 1.10E-18 | chr:5:8937853 |
| 5 rs6869638  | 8968467 G | 0.151  | 1.10E-18 | chr:5:8937853 |
| 5 rs6872524  | 8972999 T | 0.151  | 1.10E-18 | chr:5:8937853 |
| 5 rs7723950  | 8959250 C | 0.151  | 1.10E-18 | chr:5:8937853 |
| 5 rs7726068  | 8971413 G | 0.151  | 1.10E-18 | chr:5:8937853 |
| 5 rs7728475  | 8969172 A | 0.151  | 1.10E-18 | chr:5:8937853 |
| 5 rs2963382  | 8948523 C | 0.1611 | 1.17E-18 | chr:5:8937853 |
| 5 rs2963375  | 8942567 T | 0.1501 | 1.22E-18 | chr:5:8937853 |
| 5 rs2963337  | 8935632 G | 0.15   | 1.49E-18 | chr:5:8937853 |
| 5 rs2963326  | 8933452 A | 0.1503 | 1.52E-18 | chr:5:8937853 |
| 5 rs2962654  | 8931393 A | 0.1504 | 1.70E-18 | chr:5:8937853 |
| 5 rs2962724  | 8952042 T | 0.1505 | 1.80E-18 | chr:5:8937853 |
| 5 rs2963324  | 8933130 C | 0.1567 | 2.68E-18 | chr:5:8937853 |
| 5 rs2963327  | 8934159 G | 0.1567 | 2.68E-18 | chr:5:8937853 |
| 5 rs2963380  | 8945194 A | 0.1567 | 2.68E-18 | chr:5:8937853 |
| 5 rs2962651  | 8935871 A | 0.1569 | 3.00E-18 | chr:5:8937853 |
| 5 rs2962733  | 8945736 C | 0.1569 | 3.00E-18 | chr:5:8937853 |
| 5 rs2963370  | 8940538 C | 0.1569 | 3.00E-18 | chr:5:8937853 |
| 5 rs2963371  | 8940701 G | 0.1569 | 3.00E-18 | chr:5:8937853 |
| 5 rs2963384  | 8950534 T | 0.1572 | 3.24E-18 | chr:5:8937853 |
| 5 rs13163334 | 8962662 C | 0.1696 | 1.73E-17 | chr:5:8937853 |
| 5 rs4452535  | 8958034 C | 0.1696 | 1.73E-17 | chr:5:8937853 |
| 5 rs1585204  | 8974023 A | 0.1764 | 3.19E-17 | chr:5:8937853 |
| 5 rs10038936 | 8965436 A | 0.1768 | 3.64E-17 | chr:5:8937853 |
| 5 rs10056871 | 8964318 C | 0.1768 | 3.64E-17 | chr:5:8937853 |
| 5 rs10058520 | 8964357 C | 0.1768 | 3.64E-17 | chr:5:8937853 |
| 5 rs10062754 | 8972259 C | 0.1768 | 3.64E-17 | chr:5:8937853 |
| 5 rs10512999 | 8963885 C | 0.1768 | 3.64E-17 | chr:5:8937853 |
| 5 rs12521690 | 8967716 A | 0.1768 | 3.64E-17 | chr:5:8937853 |

|               |           |        |          |               |
|---------------|-----------|--------|----------|---------------|
| 5 rs13164654  | 8972492 T | 0.1768 | 3.64E-17 | chr:5:8937853 |
| 5 rs13175700  | 8967537 T | 0.1768 | 3.64E-17 | chr:5:8937853 |
| 5 rs13185652  | 8967225 C | 0.1768 | 3.64E-17 | chr:5:8937853 |
| 5 rs13188103  | 8964519 T | 0.1768 | 3.64E-17 | chr:5:8937853 |
| 5 rs16881756  | 8976859 G | 0.1768 | 3.64E-17 | chr:5:8937853 |
| 5 rs1902806   | 8965016 C | 0.1768 | 3.64E-17 | chr:5:8937853 |
| 5 rs1902807   | 8964963 A | 0.1768 | 3.64E-17 | chr:5:8937853 |
| 5 rs1902808   | 8964937 T | 0.1768 | 3.64E-17 | chr:5:8937853 |
| 5 rs1947586   | 8974532 C | 0.1768 | 3.64E-17 | chr:5:8937853 |
| 5 rs1947587   | 8974402 A | 0.1768 | 3.64E-17 | chr:5:8937853 |
| 5 rs2219397   | 8971713 T | 0.1768 | 3.64E-17 | chr:5:8937853 |
| 5 rs2219398   | 8971683 C | 0.1768 | 3.64E-17 | chr:5:8937853 |
| 5 rs2388006   | 8968700 C | 0.1768 | 3.64E-17 | chr:5:8937853 |
| 5 rs2388007   | 8968699 C | 0.1768 | 3.64E-17 | chr:5:8937853 |
| 5 rs2388008   | 8968479 C | 0.1768 | 3.64E-17 | chr:5:8937853 |
| 5 rs34958715  | 8970889 G | 0.1768 | 3.64E-17 | chr:5:8937853 |
| 5 rs3921964   | 8972146 G | 0.1768 | 3.64E-17 | chr:5:8937853 |
| 5 rs4431316   | 8964778 T | 0.1768 | 3.64E-17 | chr:5:8937853 |
| 5 rs4432854   | 8966865 C | 0.1768 | 3.64E-17 | chr:5:8937853 |
| 5 rs4624764   | 8958031 T | 0.1768 | 3.64E-17 | chr:5:8937853 |
| 5 rs4627964   | 8968639 C | 0.1768 | 3.64E-17 | chr:5:8937853 |
| 5 rs58854317  | 8968867 C | 0.1768 | 3.64E-17 | chr:5:8937853 |
| 5 rs6555587   | 8969296 G | 0.1768 | 3.64E-17 | chr:5:8937853 |
| 5 rs6555588   | 8977866 G | 0.1768 | 3.64E-17 | chr:5:8937853 |
| 5 rs6862506   | 8965836 T | 0.1768 | 3.64E-17 | chr:5:8937853 |
| 5 rs6863266   | 8966162 T | 0.1768 | 3.64E-17 | chr:5:8937853 |
| 5 rs6866139   | 8966309 C | 0.1768 | 3.64E-17 | chr:5:8937853 |
| 5 rs6870017   | 8977512 A | 0.1768 | 3.64E-17 | chr:5:8937853 |
| 5 rs6871960   | 8963871 C | 0.1768 | 3.64E-17 | chr:5:8937853 |
| 5 rs6875463   | 8963376 C | 0.1768 | 3.64E-17 | chr:5:8937853 |
| 5 rs6877048   | 8973265 T | 0.1768 | 3.64E-17 | chr:5:8937853 |
| 5 rs6880066   | 8969679 C | 0.1768 | 3.64E-17 | chr:5:8937853 |
| 5 rs6880494   | 8977180 G | 0.1768 | 3.64E-17 | chr:5:8937853 |
| 5 rs6880574   | 8969997 G | 0.1768 | 3.64E-17 | chr:5:8937853 |
| 5 rs6884293   | 8968011 T | 0.1768 | 3.64E-17 | chr:5:8937853 |
| 5 rs6884680   | 8968261 T | 0.1768 | 3.64E-17 | chr:5:8937853 |
| 5 rs9313264   | 8961561 T | 0.1768 | 3.64E-17 | chr:5:8937853 |
| 5 rs9313265   | 8964069 G | 0.1768 | 3.64E-17 | chr:5:8937853 |
| 5 rs6883897   | 8966181 G | 0.1797 | 5.09E-17 | chr:5:8937853 |
| 5 rs115606914 | 8942429 T | 0.1491 | 5.24E-17 | chr:5:8937853 |
| 5 rs140461872 | 8942428 C | 0.1491 | 5.24E-17 | chr:5:8937853 |
| 5 rs2962717   | 8978826 G | 0.179  | 5.31E-17 | chr:5:8937853 |
| 5 rs12518501  | 8982887 T | 0.1674 | 6.90E-17 | chr:5:8937853 |

|               |           |        |          |               |
|---------------|-----------|--------|----------|---------------|
| 5 rs12521160  | 8982888 G | 0.174  | 1.58E-16 | chr:5:8937853 |
| 5 rs16881803  | 8983995 C | 0.1762 | 2.03E-16 | chr:5:8937853 |
| 5 rs75435196  | 8987064 G | 0.1762 | 2.03E-16 | chr:5:8937853 |
| 5 rs74370667  | 8988253 C | 0.1765 | 2.30E-16 | chr:5:8937853 |
| 5 rs111387677 | 9004023 A | 0.177  | 2.39E-16 | chr:5:8937853 |
| 5 rs11738920  | 8991968 C | 0.177  | 2.39E-16 | chr:5:8937853 |
| 5 rs11750315  | 8999860 A | 0.177  | 2.39E-16 | chr:5:8937853 |
| 5 rs12517703  | 9011519 T | 0.177  | 2.39E-16 | chr:5:8937853 |
| 5 rs16881838  | 9012115 T | 0.177  | 2.39E-16 | chr:5:8937853 |
| 5 rs6897203   | 9002771 C | 0.177  | 2.39E-16 | chr:5:8937853 |
| 5 rs75432582  | 9010227 T | 0.177  | 2.39E-16 | chr:5:8937853 |
| 5 rs77037743  | 8991632 T | 0.177  | 2.39E-16 | chr:5:8937853 |
| 5 rs7720782   | 8994422 C | 0.177  | 2.39E-16 | chr:5:8937853 |
| 5 rs376060904 | 9001673 A | 0.1808 | 2.93E-16 | chr:5:8937853 |
| 5 rs112854697 | 9006793 C | 0.1818 | 3.87E-16 | chr:5:8937853 |
| 5 rs143252128 | 9006280 T | 0.1823 | 4.47E-16 | chr:5:8937853 |
| 5 rs61036506  | 8981340 G | 0.2122 | 6.53E-15 | chr:5:8937853 |
| 5 rs11134338  | 8983721 A | 0.2073 | 9.31E-15 | chr:5:8937853 |
| 5 rs11134340  | 8987726 T | 0.2073 | 9.31E-15 | chr:5:8937853 |
| 5 rs11134341  | 8989290 C | 0.2073 | 9.31E-15 | chr:5:8937853 |
| 5 rs1124255   | 8984662 G | 0.2073 | 9.31E-15 | chr:5:8937853 |
| 5 rs1124256   | 8984616 T | 0.2073 | 9.31E-15 | chr:5:8937853 |
| 5 rs11738634  | 8983818 C | 0.2073 | 9.31E-15 | chr:5:8937853 |
| 5 rs12187003  | 8986008 A | 0.2073 | 9.31E-15 | chr:5:8937853 |
| 5 rs12187849  | 8987501 A | 0.2073 | 9.31E-15 | chr:5:8937853 |
| 5 rs12188659  | 8987572 G | 0.2073 | 9.31E-15 | chr:5:8937853 |
| 5 rs12189462  | 8986146 G | 0.2073 | 9.31E-15 | chr:5:8937853 |
| 5 rs12523277  | 8987940 T | 0.2073 | 9.31E-15 | chr:5:8937853 |
| 5 rs1457772   | 8985553 A | 0.2073 | 9.31E-15 | chr:5:8937853 |
| 5 rs16881805  | 8984147 A | 0.2073 | 9.31E-15 | chr:5:8937853 |
| 5 rs4472235   | 8984391 G | 0.2073 | 9.31E-15 | chr:5:8937853 |
| 5 rs4612031   | 8984728 G | 0.2073 | 9.31E-15 | chr:5:8937853 |
| 5 rs74774935  | 8985010 C | 0.2073 | 9.31E-15 | chr:5:8937853 |
| 5 rs75926318  | 8986713 T | 0.2073 | 9.31E-15 | chr:5:8937853 |
| 5 rs76025485  | 8986886 C | 0.2073 | 9.31E-15 | chr:5:8937853 |
| 5 rs76811960  | 8987051 A | 0.2073 | 9.31E-15 | chr:5:8937853 |
| 5 rs7703582   | 8988714 T | 0.2073 | 9.31E-15 | chr:5:8937853 |
| 5 rs7723456   | 8989021 G | 0.2073 | 9.31E-15 | chr:5:8937853 |
| 5 rs7727402   | 8988961 G | 0.2073 | 9.31E-15 | chr:5:8937853 |
| 5 rs77557093  | 8987082 T | 0.2073 | 9.31E-15 | chr:5:8937853 |
| 5 rs77709148  | 8988682 G | 0.2073 | 9.31E-15 | chr:5:8937853 |
| 5 rs78982025  | 8984905 T | 0.2073 | 9.31E-15 | chr:5:8937853 |
| 5 rs79028086  | 8984958 G | 0.2073 | 9.31E-15 | chr:5:8937853 |

|               |           |        |          |               |
|---------------|-----------|--------|----------|---------------|
| 5 rs80323589  | 8986254 A | 0.2073 | 9.31E-15 | chr:5:8937853 |
| 5 rs11134342  | 8991036 A | 0.2081 | 1.08E-14 | chr:5:8937853 |
| 5 rs11134343  | 8999304 C | 0.2081 | 1.08E-14 | chr:5:8937853 |
| 5 rs11134347  | 9029842 C | 0.2081 | 1.08E-14 | chr:5:8937853 |
| 5 rs11743644  | 9000098 A | 0.2081 | 1.08E-14 | chr:5:8937853 |
| 5 rs11750358  | 8999971 T | 0.2081 | 1.08E-14 | chr:5:8937853 |
| 5 rs11750361  | 9000007 G | 0.2081 | 1.08E-14 | chr:5:8937853 |
| 5 rs11951651  | 8995163 C | 0.2081 | 1.08E-14 | chr:5:8937853 |
| 5 rs11952933  | 8993747 T | 0.2081 | 1.08E-14 | chr:5:8937853 |
| 5 rs12186781  | 8998527 G | 0.2081 | 1.08E-14 | chr:5:8937853 |
| 5 rs12189149  | 8998699 G | 0.2081 | 1.08E-14 | chr:5:8937853 |
| 5 rs1379574   | 8991576 A | 0.2081 | 1.08E-14 | chr:5:8937853 |
| 5 rs146404047 | 8998963 T | 0.2081 | 1.08E-14 | chr:5:8937853 |
| 5 rs6870588   | 8993002 C | 0.2081 | 1.08E-14 | chr:5:8937853 |
| 5 rs74864061  | 8993179 G | 0.2081 | 1.08E-14 | chr:5:8937853 |
| 5 rs7712850   | 8990532 A | 0.2081 | 1.08E-14 | chr:5:8937853 |
| 5 rs7733108   | 8990306 G | 0.2081 | 1.08E-14 | chr:5:8937853 |
| 5 rs77430208  | 8997524 G | 0.2081 | 1.08E-14 | chr:5:8937853 |
| 5 rs79649573  | 8997977 T | 0.2081 | 1.08E-14 | chr:5:8937853 |
| 5 rs148681757 | 9001509 C | 0.2099 | 1.59E-14 | chr:5:8937853 |
| 5 rs11134339  | 8987697 A | 0.2154 | 1.93E-14 | chr:5:8937853 |
| 5 rs146470969 | 9001510 C | 0.209  | 2.44E-14 | chr:5:8937853 |
| 5 rs2963349   | 8915030 C | 0.1968 | 2.57E-14 | chr:5:8937853 |
| 5 rs3111057   | 8915303 C | 0.1968 | 2.57E-14 | chr:5:8937853 |
| 5 rs2962685   | 8901696 T | 0.1979 | 3.11E-14 | chr:5:8937853 |
| 5 rs2963329   | 8892991 C | 0.1979 | 3.11E-14 | chr:5:8937853 |
| 5 rs2963335   | 8901944 G | 0.1979 | 3.11E-14 | chr:5:8937853 |
| 5 rs6868644   | 8981136 C | 0.2276 | 3.31E-14 | chr:5:8937853 |
| 5 rs2962675   | 8913429 C | 0.1992 | 3.86E-14 | chr:5:8937853 |
| 5 rs16881671  | 8917970 G | 0.2045 | 5.79E-14 | chr:5:8937853 |
| 5 rs9313260   | 8919349 G | 0.2045 | 5.79E-14 | chr:5:8937853 |
| 5 rs2963351   | 8915179 T | 0.2023 | 5.81E-14 | chr:5:8937853 |
| 5 rs10512996  | 8916550 A | 0.2041 | 6.59E-14 | chr:5:8937853 |
| 5 rs16881678  | 8920805 T | 0.2059 | 7.18E-14 | chr:5:8937853 |
| 5 rs16881672  | 8918651 G | 0.2066 | 7.79E-14 | chr:5:8937853 |
| 5 rs71611351  | 8896933 T | 0.2053 | 7.96E-14 | chr:5:8937853 |
| 5 rs12652085  | 8927217 A | 0.2061 | 8.42E-14 | chr:5:8937853 |
| 5 rs12188723  | 8952085 C | 0.2167 | 2.39E-13 | chr:5:8937853 |
| 5 rs34968754  | 8959664 G | 0.2167 | 2.39E-13 | chr:5:8937853 |
| 5 rs35592900  | 8942245 T | 0.2167 | 2.39E-13 | chr:5:8937853 |
| 5 rs35817870  | 8939620 G | 0.2167 | 2.39E-13 | chr:5:8937853 |
| 5 rs4583857   | 8941558 G | 0.2167 | 2.39E-13 | chr:5:8937853 |
| 5 rs75949059  | 8948201 T | 0.2167 | 2.39E-13 | chr:5:8937853 |

|               |           |        |          |               |
|---------------|-----------|--------|----------|---------------|
| 5 rs77781846  | 8941171 G | 0.2167 | 2.39E-13 | chr:5:8937853 |
| 5 rs16881715  | 8960556 G | 0.2179 | 2.87E-13 | chr:5:8937853 |
| 5 rs2962694   | 8889910 T | 0.2644 | 7.42E-13 | chr:5:8937853 |
| 5 rs2963341   | 8908533 G | 0.2173 | 1.21E-12 | chr:5:8937853 |
| 5 rs2963344   | 8909428 G | 0.2173 | 1.21E-12 | chr:5:8937853 |
| 5 rs2963345   | 8909508 T | 0.2173 | 1.21E-12 | chr:5:8937853 |
| 5 rs2963347   | 8910873 C | 0.2173 | 1.21E-12 | chr:5:8937853 |
| 5 rs6555577   | 8924770 A | 0.2242 | 2.27E-12 | chr:5:8937853 |
| 5 rs2962692   | 8892465 T | 0.2231 | 2.70E-12 | chr:5:8937853 |
| 5 rs35191363  | 8912793 T | 0.2253 | 3.15E-12 | chr:5:8937853 |
| 5 rs114656264 | 8942423 T | 0.2089 | 5.52E-12 | chr:5:8937853 |
| 5 rs115883187 | 8942422 C | 0.2089 | 5.52E-12 | chr:5:8937853 |
| 5 rs12658301  | 8927212 T | 3.599  | 7.73E-12 | chr:5:8937853 |
| 5 rs71611355  | 8950617 A | 0.2354 | 8.03E-12 | chr:5:8937853 |
| 5 rs2963360   | 8927205 G | 0.2615 | 9.66E-12 | chr:5:8937853 |
| 5 rs1457773   | 8978530 A | 0.2389 | 1.15E-11 | chr:5:8937853 |
| 5 rs6883135   | 8944432 T | 0.241  | 1.53E-11 | chr:5:8937853 |
| 5 rs12516982  | 9038951 T | 0.1957 | 1.09E-10 | chr:5:8937853 |
| 5 rs6874770   | 8955823 T | 3.428  | 1.91E-10 | chr:5:8937853 |
| 5 rs6873594   | 8930306 A | 0.1844 | 2.02E-10 | chr:5:8937853 |
| 5 rs11954862  | 8949344 C | 0.1897 | 3.11E-10 | chr:5:8937853 |
| 5 rs140571419 | 9003153 T | 0.2059 | 3.24E-10 | chr:5:8937853 |
| 5 rs147259526 | 9005371 T | 0.2059 | 3.24E-10 | chr:5:8937853 |
| 5 rs16881875  | 9038043 A | 0.2059 | 3.24E-10 | chr:5:8937853 |
| 5 rs1902809   | 9021827 A | 0.2059 | 3.24E-10 | chr:5:8937853 |
| 5 rs2388004   | 8996618 C | 0.2059 | 3.24E-10 | chr:5:8937853 |
| 5 rs2388005   | 8996523 T | 0.2059 | 3.24E-10 | chr:5:8937853 |
| 5 rs6871654   | 9002625 T | 0.2059 | 3.24E-10 | chr:5:8937853 |
| 5 rs7727526   | 9041573 C | 0.2059 | 3.24E-10 | chr:5:8937853 |
| 5 rs78251142  | 9013906 C | 0.2059 | 3.24E-10 | chr:5:8937853 |
| 5 rs11134348  | 9073742 A | 0.2154 | 8.71E-10 | chr:5:8937853 |
| 5 rs11739474  | 9073231 A | 0.2154 | 8.71E-10 | chr:5:8937853 |
| 5 rs11742324  | 9059996 G | 0.2154 | 8.71E-10 | chr:5:8937853 |
| 5 rs12520615  | 9074053 A | 0.2154 | 8.71E-10 | chr:5:8937853 |
| 5 rs12521925  | 9068974 T | 0.2154 | 8.71E-10 | chr:5:8937853 |
| 5 rs1354570   | 9059223 G | 0.2154 | 8.71E-10 | chr:5:8937853 |
| 5 rs16881898  | 9058104 G | 0.2154 | 8.71E-10 | chr:5:8937853 |
| 5 rs16881912  | 9071551 G | 0.2154 | 8.71E-10 | chr:5:8937853 |
| 5 rs16881913  | 9072053 G | 0.2154 | 8.71E-10 | chr:5:8937853 |
| 5 rs16881943  | 9082436 A | 0.2154 | 8.71E-10 | chr:5:8937853 |
| 5 rs2388001   | 9077099 G | 0.2154 | 8.71E-10 | chr:5:8937853 |
| 5 rs75330064  | 9068818 A | 0.2154 | 8.71E-10 | chr:5:8937853 |
| 5 rs76397895  | 9058287 A | 0.2154 | 8.71E-10 | chr:5:8937853 |

|               |           |        |          |               |
|---------------|-----------|--------|----------|---------------|
| 5 rs76643870  | 9072905 G | 0.2154 | 8.71E-10 | chr:5:8937853 |
| 5 rs79769433  | 9058460 T | 0.2154 | 8.71E-10 | chr:5:8937853 |
| 5 rs11745238  | 9059696 C | 0.2256 | 2.38E-09 | chr:5:8937853 |
| 5 rs144966221 | 9076273 T | 0.2256 | 2.38E-09 | chr:5:8937853 |
| 5 rs16881901  | 9062943 A | 0.2256 | 2.38E-09 | chr:5:8937853 |
| 5 rs562119632 | 9078710 G | 0.2256 | 2.38E-09 | chr:5:8937853 |
| 5 rs78271112  | 9075331 G | 0.2256 | 2.38E-09 | chr:5:8937853 |
| 5 rs2962686   | 8899363 T | 2.892  | 3.29E-09 | chr:5:8937853 |
| 5 rs2963331   | 8893953 A | 2.892  | 3.29E-09 | chr:5:8937853 |
| 5 rs2962683   | 8903736 T | 2.892  | 3.45E-09 | chr:5:8937853 |
| 5 rs2100641   | 9014968 A | 0.3692 | 4.30E-09 | chr:5:8937853 |
| 5 rs2963348   | 8912286 T | 2.85   | 4.36E-09 | chr:5:8937853 |
| 5 rs16881928  | 9078372 A | 0.2337 | 5.44E-09 | chr:5:8937853 |
| 5 rs1505067   | 9036790 C | 0.3753 | 5.47E-09 | chr:5:8937853 |
| 5 rs2963339   | 8906295 A | 2.826  | 5.97E-09 | chr:5:8937853 |
| 5 rs2963340   | 8907028 T | 2.826  | 5.97E-09 | chr:5:8937853 |
| 5 rs114496602 | 9079303 T | 0.242  | 6.37E-09 | chr:5:8937853 |
| 5 rs142852646 | 9076188 A | 0.2391 | 6.60E-09 | chr:5:8937853 |
| 5 rs2962662   | 8923967 C | 2.882  | 7.81E-09 | chr:5:8937853 |
| 5 rs2962664   | 8922521 T | 2.882  | 7.81E-09 | chr:5:8937853 |
| 5 rs2962666   | 8922072 G | 2.882  | 7.81E-09 | chr:5:8937853 |
| 5 rs2962669   | 8919975 G | 2.882  | 7.81E-09 | chr:5:8937853 |
| 5 rs2962670   | 8918843 A | 2.882  | 7.81E-09 | chr:5:8937853 |
| 5 rs2963354   | 8918219 C | 2.882  | 7.81E-09 | chr:5:8937853 |
| 5 rs74482613  | 8927592 C | 0.201  | 8.08E-09 | chr:5:8937853 |
| 5 rs76169939  | 8934848 T | 0.201  | 8.08E-09 | chr:5:8937853 |
| 5 rs2962674   | 8915589 A | 2.872  | 8.64E-09 | chr:5:8937853 |
| 5 rs2290735   | 9044411 G | 0.2176 | 8.90E-09 | chr:5:8937853 |
| 5 rs2925923   | 9012388 T | 0.3779 | 1.01E-08 | chr:5:8937853 |
| 5 rs2962676   | 8912731 A | 2.839  | 1.02E-08 | chr:5:8937853 |
| 5 rs2963343   | 8908896 G | 2.839  | 1.02E-08 | chr:5:8937853 |
| 5 rs1947584   | 8980099 C | 0.2526 | 1.03E-08 | chr:5:8937853 |
| 5 rs75014751  | 8965335 C | 0.2526 | 1.03E-08 | chr:5:8937853 |
| 5 rs79740539  | 8969856 C | 0.2526 | 1.03E-08 | chr:5:8937853 |
| 5 rs2962684   | 8902520 C | 2.834  | 1.17E-08 | chr:5:8937853 |
| 5 rs2962689   | 8898259 G | 2.834  | 1.17E-08 | chr:5:8937853 |
| 5 rs2963330   | 8893478 G | 2.834  | 1.17E-08 | chr:5:8937853 |
| 5 rs2963332   | 8899356 C | 2.834  | 1.17E-08 | chr:5:8937853 |
| 5 rs2963333   | 8899812 C | 2.834  | 1.17E-08 | chr:5:8937853 |
| 5 rs2963334   | 8901400 G | 2.834  | 1.17E-08 | chr:5:8937853 |
| 5 rs2963336   | 8902604 A | 2.834  | 1.17E-08 | chr:5:8937853 |
| 5 rs2963352   | 8915809 C | 2.833  | 1.19E-08 | chr:5:8937853 |
| 5 rs2963353   | 8916950 A | 2.833  | 1.19E-08 | chr:5:8937853 |

|               |           |        |          |               |
|---------------|-----------|--------|----------|---------------|
| 5 rs2962681   | 8904650 T | 2.833  | 1.23E-08 | chr:5:8937853 |
| 5 rs2962682   | 8904189 T | 2.833  | 1.23E-08 | chr:5:8937853 |
| 5 rs2962688   | 8898369 C | 2.833  | 1.23E-08 | chr:5:8937853 |
| 5 rs2962691   | 8892647 T | 2.833  | 1.23E-08 | chr:5:8937853 |
| 5 rs577492066 | 8948517 T | 0.2065 | 1.43E-08 | chr:5:8937853 |
| 5 rs75975896  | 9042458 T | 0.2288 | 2.51E-08 | chr:5:8937853 |
| 5 rs2925903   | 8983680 C | 0.3924 | 2.65E-08 | chr:5:8937853 |
| 5 rs116545555 | 8975424 C | 0.2148 | 2.86E-08 | chr:5:8937853 |
| 5 rs2925902   | 8982517 T | 0.3899 | 3.04E-08 | chr:5:8937853 |
| 5 rs2925905   | 8985794 T | 0.3959 | 3.21E-08 | chr:5:8937853 |
| 5 rs72739858  | 8983300 A | 0.3959 | 3.21E-08 | chr:5:8937853 |
| 5 rs10037735  | 9004192 C | 0.3967 | 3.52E-08 | chr:5:8937853 |
| 5 rs10041221  | 9004208 T | 0.3967 | 3.52E-08 | chr:5:8937853 |
| 5 rs1379566   | 9019532 A | 0.3967 | 3.52E-08 | chr:5:8937853 |
| 5 rs1379572   | 9014114 G | 0.3967 | 3.52E-08 | chr:5:8937853 |
| 5 rs1598826   | 9021310 T | 0.3967 | 3.52E-08 | chr:5:8937853 |
| 5 rs2100642   | 9014917 C | 0.3967 | 3.52E-08 | chr:5:8937853 |
| 5 rs2198981   | 9028370 C | 0.3967 | 3.52E-08 | chr:5:8937853 |
| 5 rs2925908   | 8991487 T | 0.3967 | 3.52E-08 | chr:5:8937853 |
| 5 rs2925909   | 8992098 C | 0.3967 | 3.52E-08 | chr:5:8937853 |
| 5 rs2925910   | 8992745 A | 0.3967 | 3.52E-08 | chr:5:8937853 |
| 5 rs2925927   | 9031436 T | 0.3967 | 3.52E-08 | chr:5:8937853 |
| 5 rs2962701   | 9025032 T | 0.3967 | 3.52E-08 | chr:5:8937853 |
| 5 rs2962702   | 9025608 A | 0.3967 | 3.52E-08 | chr:5:8937853 |
| 5 rs2962705   | 8997304 C | 0.3967 | 3.52E-08 | chr:5:8937853 |
| 5 rs2962707   | 8990084 G | 0.3967 | 3.52E-08 | chr:5:8937853 |
| 5 rs7712539   | 8990300 A | 0.3967 | 3.52E-08 | chr:5:8937853 |
| 5 rs112110914 | 9006527 C | 0.4042 | 6.33E-08 | chr:5:8937853 |
| 5 rs12517597  | 9002094 C | 0.4042 | 6.33E-08 | chr:5:8937853 |
| 5 rs1379567   | 9016944 C | 0.4042 | 6.33E-08 | chr:5:8937853 |
| 5 rs1379568   | 9016763 G | 0.4042 | 6.33E-08 | chr:5:8937853 |
| 5 rs1379569   | 9016719 C | 0.4042 | 6.33E-08 | chr:5:8937853 |
| 5 rs1379570   | 9016694 C | 0.4042 | 6.33E-08 | chr:5:8937853 |
| 5 rs1379573   | 9013983 T | 0.4042 | 6.33E-08 | chr:5:8937853 |
| 5 rs1598825   | 9021566 C | 0.4042 | 6.33E-08 | chr:5:8937853 |
| 5 rs2085512   | 9014812 C | 0.4042 | 6.33E-08 | chr:5:8937853 |
| 5 rs2085514   | 9001414 A | 0.4042 | 6.33E-08 | chr:5:8937853 |
| 5 rs2925919   | 9001913 G | 0.4042 | 6.33E-08 | chr:5:8937853 |
| 5 rs2925920   | 9004597 T | 0.4042 | 6.33E-08 | chr:5:8937853 |
| 5 rs2925921   | 9005353 T | 0.4042 | 6.33E-08 | chr:5:8937853 |
| 5 rs2925922   | 9010282 T | 0.4042 | 6.33E-08 | chr:5:8937853 |
| 5 rs2925924   | 9019816 C | 0.4042 | 6.33E-08 | chr:5:8937853 |
| 5 rs2925928   | 9032400 G | 0.4042 | 6.33E-08 | chr:5:8937853 |



|               |             |        |          |                 |
|---------------|-------------|--------|----------|-----------------|
| 5 rs2962718   | 9008955 G   | 0.4042 | 6.33E-08 | chr:5:8937853   |
| 5 rs2962719   | 9009465 G   | 0.4042 | 6.33E-08 | chr:5:8937853   |
| 5 rs2962720   | 9009675 C   | 0.4042 | 6.33E-08 | chr:5:8937853   |
| 5 rs2962721   | 9010331 A   | 0.4042 | 6.33E-08 | chr:5:8937853   |
| 5 rs4702602   | 9014396 G   | 0.4042 | 6.33E-08 | chr:5:8937853   |
| 5 rs79211599  | 9003402 A   | 0.4042 | 6.33E-08 | chr:5:8937853   |
| 5 rs79198156  | 9060021 T   | 0.2401 | 6.72E-08 | chr:5:8937853   |
| 5 rs112032434 | 9014459 T   | 0.2996 | 7.72E-08 | chr:5:8937853   |
| 5 rs113605265 | 9002446 A   | 0.2996 | 7.72E-08 | chr:5:8937853   |
| 5 rs114501856 | 8991577 A   | 0.2996 | 7.72E-08 | chr:5:8937853   |
| 5 rs12189367  | 8987361 A   | 0.2996 | 7.72E-08 | chr:5:8937853   |
| 5 rs143959340 | 9002474 A   | 0.2996 | 7.72E-08 | chr:5:8937853   |
| 5 rs1457768   | 9034674 G   | 0.2996 | 7.72E-08 | chr:5:8937853   |
| 5 rs17235037  | 9013608 T   | 0.2996 | 7.72E-08 | chr:5:8937853   |
| 5 rs74984858  | 8986951 C   | 0.2996 | 7.72E-08 | chr:5:8937853   |
| 5 rs7709752   | 8990196 G   | 0.2996 | 7.72E-08 | chr:5:8937853   |
| 5 rs77207173  | 8984484 A   | 0.2996 | 7.72E-08 | chr:5:8937853   |
| 5 rs77213924  | 8984873 G   | 0.2996 | 7.72E-08 | chr:5:8937853   |
| 5 rs77865922  | 9034181 C   | 0.2996 | 7.72E-08 | chr:5:8937853   |
| 5 rs79101386  | 8996698 T   | 0.2996 | 7.72E-08 | chr:5:8937853   |
| 5 rs74980194  | 9003526 T   | 0.4082 | 7.89E-08 | chr:5:8937853   |
| 5 rs78490007  | 9003525 G   | 0.4082 | 7.89E-08 | chr:5:8937853   |
| 5 rs2962677   | 8910822 T   | 2.448  | 1.81E-07 | chr:5:8937853   |
| 5 rs2963342   | 8908886 T   | 2.448  | 1.81E-07 | chr:5:8937853   |
| 5 rs2962679   | 8907810 T   | 2.439  | 2.23E-07 | chr:5:8937853   |
| 5 rs116066804 | 8918507 G   | 0.2382 | 3.07E-07 | chr:5:8937853   |
| 5 rs6889183   | 8968532 A   | 0.2836 | 4.23E-07 | chr:5:8937853   |
| 5 rs75281373  | 8964076 A   | 0.2836 | 4.23E-07 | chr:5:8937853   |
| 5 rs77025081  | 8892865 A   | 0.2918 | 7.72E-07 | chr:5:8937853   |
| 5 rs76897293  | 8923448 A   | 0.2935 | 1.02E-06 | chr:5:8937853   |
| 5 rs78188883  | 9016919 G   | 0.2226 | 1.08E-06 | chr:5:8937853   |
| 5 rs80123099  | 9052965 T   | 0.2724 | 1.44E-06 | chr:5:8937853   |
| 5 rs113479415 | 9007713 C   | 2.474  | 3.41E-06 | chr:5:8937853   |
| 5 rs79119740  | 9078918 C   | 0.2877 | 4.00E-06 | chr:5:8937853   |
| 5 rs4571438   | 9001202 C   | 2.504  | 1.01E-05 | chr:5:8937853   |
| 5 rs62358460  | 9008833 A   | 2.504  | 1.01E-05 | chr:5:8937853   |
| 6 rs73603096  | 161272870 C | 23.32  | 1.09E-32 | chr:6:161270898 |
| 6 rs6908103   | 161274560 T | 17.55  | 6.05E-31 | chr:6:161270898 |
| 6 rs9456600   | 161272696 C | 74     | 4.89E-30 | chr:6:161270898 |
| 6 rs144320744 | 161265076 T | 17.63  | 1.01E-29 | chr:6:161270898 |
| 6 rs75664940  | 161265073 C | 17.63  | 1.01E-29 | chr:6:161270898 |
| 6 rs76731838  | 161265072 T | 17.63  | 1.01E-29 | chr:6:161270898 |
| 6 rs115067610 | 161274512 T | 18.15  | 4.17E-29 | chr:6:161270898 |

|               |             |         |          |                 |
|---------------|-------------|---------|----------|-----------------|
| 6 rs74200112  | 161274513 C | 18.15   | 4.17E-29 | chr:6:161270898 |
| 6 rs13208565  | 161268025 A | 0.08008 | 1.11E-28 | chr:6:161270898 |
| 6 rs13208570  | 161268029 A | 0.08008 | 1.11E-28 | chr:6:161270898 |
| 6 rs13208572  | 161268036 A | 0.08008 | 1.11E-28 | chr:6:161270898 |
| 6 rs783156    | 161231177 T | 0.04413 | 3.03E-28 | chr:6:161270898 |
| 6 rs1740448   | 161230370 T | 0.04526 | 4.27E-28 | chr:6:161270898 |
| 6 rs2565721   | 161235098 A | 0.04088 | 6.42E-28 | chr:6:161270898 |
| 6 rs783154    | 161229780 G | 0.04514 | 6.63E-28 | chr:6:161270898 |
| 6 rs783153    | 161229578 T | 0.0453  | 6.80E-28 | chr:6:161270898 |
| 6 rs812482    | 161227652 G | 0.04182 | 7.80E-28 | chr:6:161270898 |
| 6 rs1782618   | 161230368 A | 0.04197 | 8.08E-28 | chr:6:161270898 |
| 6 rs146201099 | 161274582 T | 0.02583 | 1.96E-27 | chr:6:161270898 |
| 6 rs373446157 | 161274587 A | 0.02583 | 1.96E-27 | chr:6:161270898 |
| 6 rs62435319  | 161274589 A | 0.02583 | 1.96E-27 | chr:6:161270898 |
| 6 rs1652455   | 161210349 C | 0.05212 | 1.98E-27 | chr:6:161270898 |
| 6 rs783177    | 161169815 C | 0.05463 | 2.17E-27 | chr:6:161270898 |
| 6 rs783178    | 161169739 C | 0.05463 | 2.17E-27 | chr:6:161270898 |
| 6 rs783180    | 161168961 G | 0.05463 | 2.17E-27 | chr:6:161270898 |
| 6 rs783182    | 161168548 G | 0.05463 | 2.17E-27 | chr:6:161270898 |
| 6 rs1084654   | 161182100 G | 0.05507 | 2.34E-27 | chr:6:161270898 |
| 6 rs1084655   | 161181923 C | 0.05507 | 2.34E-27 | chr:6:161270898 |
| 6 rs11902     | 161174871 C | 0.05507 | 2.34E-27 | chr:6:161270898 |
| 6 rs1247551   | 161187517 T | 0.05507 | 2.34E-27 | chr:6:161270898 |
| 6 rs6690      | 161174138 A | 0.05507 | 2.34E-27 | chr:6:161270898 |
| 6 rs783159    | 161185325 G | 0.05507 | 2.34E-27 | chr:6:161270898 |
| 6 rs783162    | 161182954 A | 0.05507 | 2.34E-27 | chr:6:161270898 |
| 6 rs783168    | 161174594 A | 0.05507 | 2.34E-27 | chr:6:161270898 |
| 6 rs783169    | 161174579 T | 0.05507 | 2.34E-27 | chr:6:161270898 |
| 6 rs783171    | 161173610 A | 0.05507 | 2.34E-27 | chr:6:161270898 |
| 6 rs783173    | 161172942 C | 0.05507 | 2.34E-27 | chr:6:161270898 |
| 6 rs783174    | 161171919 C | 0.05507 | 2.34E-27 | chr:6:161270898 |
| 6 rs783165    | 161177842 A | 0.05524 | 2.36E-27 | chr:6:161270898 |
| 6 rs1084658   | 161180477 G | 0.05526 | 2.39E-27 | chr:6:161270898 |
| 6 rs62436729  | 161210806 T | 0.05092 | 2.40E-27 | chr:6:161270898 |
| 6 rs1247555   | 161189018 A | 0.05481 | 2.56E-27 | chr:6:161270898 |
| 6 rs1247556   | 161189595 G | 0.05481 | 2.56E-27 | chr:6:161270898 |
| 6 rs1247557   | 161189670 A | 0.05481 | 2.56E-27 | chr:6:161270898 |
| 6 rs1247558   | 161190199 A | 0.05481 | 2.56E-27 | chr:6:161270898 |
| 6 rs1652502   | 161194542 C | 0.05481 | 2.56E-27 | chr:6:161270898 |
| 6 rs1652482   | 161197885 G | 0.05498 | 2.58E-27 | chr:6:161270898 |
| 6 rs1615527   | 161211095 G | 0.05082 | 2.63E-27 | chr:6:161270898 |
| 6 rs1247552   | 161187744 G | 0.05719 | 2.64E-27 | chr:6:161270898 |
| 6 rs1652454   | 161210256 G | 0.05558 | 3.30E-27 | chr:6:161270898 |

|               |             |         |          |                 |
|---------------|-------------|---------|----------|-----------------|
| 6 rs1247553   | 161188103 A | 0.05119 | 3.46E-27 | chr:6:161270898 |
| 6 rs1740432   | 161210470 A | 0.05189 | 3.50E-27 | chr:6:161270898 |
| 6 rs1247570   | 161208957 T | 0.05136 | 3.50E-27 | chr:6:161270898 |
| 6 rs1740446   | 161194278 C | 0.05125 | 3.72E-27 | chr:6:161270898 |
| 6 rs1406890   | 161187335 C | 0.05313 | 3.83E-27 | chr:6:161270898 |
| 6 rs1406891   | 161187080 T | 0.05313 | 3.83E-27 | chr:6:161270898 |
| 6 rs1614840   | 161197845 A | 0.05126 | 3.85E-27 | chr:6:161270898 |
| 6 rs1620921   | 161197087 A | 0.05126 | 3.85E-27 | chr:6:161270898 |
| 6 rs1621801   | 161196966 A | 0.05126 | 3.85E-27 | chr:6:161270898 |
| 6 rs1740442   | 161197558 T | 0.05126 | 3.85E-27 | chr:6:161270898 |
| 6 rs1740443   | 161197042 T | 0.05126 | 3.85E-27 | chr:6:161270898 |
| 6 rs59754710  | 161187850 C | 0.05335 | 3.87E-27 | chr:6:161270898 |
| 6 rs75211522  | 161266022 G | 11.98   | 5.44E-27 | chr:6:161270898 |
| 6 rs28515783  | 161268702 T | 12.6    | 7.29E-27 | chr:6:161270898 |
| 6 rs11060     | 161173946 T | 0.06564 | 7.67E-27 | chr:6:161270898 |
| 6 rs376433866 | 161274602 G | 0.02456 | 1.06E-26 | chr:6:161270898 |
| 6 rs112898058 | 161274433 A | 14.97   | 1.25E-26 | chr:6:161270898 |
| 6 rs139452685 | 161263330 C | 0.02249 | 2.22E-26 | chr:6:161270898 |
| 6 rs147841394 | 161263331 A | 0.02249 | 2.22E-26 | chr:6:161270898 |
| 6 rs76259860  | 161263334 G | 0.02249 | 2.22E-26 | chr:6:161270898 |
| 6 rs9347445   | 161257418 G | 12.44   | 2.66E-26 | chr:6:161270898 |
| 6 rs10945698  | 161237551 C | 12.88   | 3.43E-26 | chr:6:161270898 |
| 6 rs1835345   | 161240330 T | 12.88   | 3.43E-26 | chr:6:161270898 |
| 6 rs4708894   | 161243370 C | 12.88   | 3.43E-26 | chr:6:161270898 |
| 6 rs12190057  | 161264201 G | 12.46   | 4.61E-26 | chr:6:161270898 |
| 6 rs12195948  | 161263790 A | 12.46   | 4.61E-26 | chr:6:161270898 |
| 6 rs13218423  | 161267283 T | 12.46   | 4.61E-26 | chr:6:161270898 |
| 6 rs13219777  | 161275735 G | 12.46   | 4.61E-26 | chr:6:161270898 |
| 6 rs36162229  | 161265356 A | 12.46   | 4.61E-26 | chr:6:161270898 |
| 6 rs56055227  | 161264940 G | 12.46   | 4.61E-26 | chr:6:161270898 |
| 6 rs66507368  | 161271537 T | 12.46   | 4.61E-26 | chr:6:161270898 |
| 6 rs66514671  | 161268507 T | 12.46   | 4.61E-26 | chr:6:161270898 |
| 6 rs66746245  | 161270505 G | 12.46   | 4.61E-26 | chr:6:161270898 |
| 6 rs71551165  | 161263039 G | 12.46   | 4.61E-26 | chr:6:161270898 |
| 6 rs9365214   | 161267556 C | 12.46   | 4.61E-26 | chr:6:161270898 |
| 6 rs9365222   | 161276870 T | 12.46   | 4.61E-26 | chr:6:161270898 |
| 6 rs9346838   | 161247649 C | 11.32   | 4.91E-26 | chr:6:161270898 |
| 6 rs9355840   | 161251350 C | 12.19   | 4.92E-26 | chr:6:161270898 |
| 6 rs6925542   | 161241864 A | 12.35   | 5.12E-26 | chr:6:161270898 |
| 6 rs765351    | 161252685 A | 11.29   | 5.20E-26 | chr:6:161270898 |
| 6 rs5013438   | 161283051 A | 0.01976 | 5.57E-26 | chr:6:161270898 |
| 6 rs5013439   | 161283060 G | 0.01976 | 5.57E-26 | chr:6:161270898 |
| 6 rs5013440   | 161283064 A | 0.01976 | 5.57E-26 | chr:6:161270898 |

|               |             |         |          |                 |
|---------------|-------------|---------|----------|-----------------|
| 6 rs5013441   | 161283071 A | 0.01976 | 5.57E-26 | chr:6:161270898 |
| 6 rs783145    | 161152449 G | 0.09259 | 6.43E-26 | chr:6:161270898 |
| 6 rs2997093   | 161283133 T | 0.01935 | 9.95E-26 | chr:6:161270898 |
| 6 rs2997094   | 161283135 T | 0.01935 | 9.95E-26 | chr:6:161270898 |
| 6 rs1806449   | 161280932 G | 0.01948 | 1.38E-25 | chr:6:161270898 |
| 6 rs1892347   | 161281358 A | 0.01948 | 1.38E-25 | chr:6:161270898 |
| 6 rs1892348   | 161281390 T | 0.01948 | 1.38E-25 | chr:6:161270898 |
| 6 rs2243944   | 161280766 C | 0.01948 | 1.38E-25 | chr:6:161270898 |
| 6 rs2465850   | 161281175 T | 0.01948 | 1.38E-25 | chr:6:161270898 |
| 6 rs2489936   | 161280325 G | 0.01948 | 1.38E-25 | chr:6:161270898 |
| 6 rs2465857   | 161282500 C | 0.01957 | 1.39E-25 | chr:6:161270898 |
| 6 rs2465859   | 161282713 C | 0.01957 | 1.39E-25 | chr:6:161270898 |
| 6 rs2953495   | 161283183 C | 0.01957 | 1.39E-25 | chr:6:161270898 |
| 6 rs62435345  | 161283600 T | 0.01957 | 1.39E-25 | chr:6:161270898 |
| 6 rs2953494   | 161283178 G | 0.01966 | 1.41E-25 | chr:6:161270898 |
| 6 rs2997095   | 161283204 A | 0.01966 | 1.41E-25 | chr:6:161270898 |
| 6 rs58508475  | 161279395 A | 0.01938 | 1.96E-25 | chr:6:161270898 |
| 6 rs9355847   | 161276847 G | 11.78   | 2.52E-25 | chr:6:161270898 |
| 6 rs9346839   | 161255046 C | 0.01791 | 5.30E-25 | chr:6:161270898 |
| 6 rs2802356   | 161238215 G | 0.0181  | 5.81E-25 | chr:6:161270898 |
| 6 rs1652465   | 161248552 T | 0.01895 | 6.48E-25 | chr:6:161270898 |
| 6 rs1652466   | 161249569 T | 0.01895 | 6.48E-25 | chr:6:161270898 |
| 6 rs1782632   | 161249412 A | 0.01895 | 6.48E-25 | chr:6:161270898 |
| 6 rs2565725   | 161244359 A | 0.01895 | 6.48E-25 | chr:6:161270898 |
| 6 rs1084659   | 161163777 G | 9.861   | 1.49E-24 | chr:6:161270898 |
| 6 rs73604919  | 161277020 A | 0.01595 | 2.63E-24 | chr:6:161270898 |
| 6 rs144015366 | 161274617 A | 0.01599 | 2.72E-24 | chr:6:161270898 |
| 6 rs370624331 | 161274612 T | 0.01599 | 2.72E-24 | chr:6:161270898 |
| 6 rs538674856 | 161274614 T | 0.01599 | 2.72E-24 | chr:6:161270898 |
| 6 rs558873783 | 161274615 A | 0.01599 | 2.72E-24 | chr:6:161270898 |
| 6 rs573457182 | 161274613 G | 0.01599 | 2.72E-24 | chr:6:161270898 |
| 6 rs2489938   | 161282377 G | 0.01504 | 2.77E-24 | chr:6:161270898 |
| 6 rs9355841   | 161267335 A | 0.01541 | 2.83E-24 | chr:6:161270898 |
| 6 rs2465848   | 161280023 C | 0.01389 | 3.29E-24 | chr:6:161270898 |
| 6 rs2465849   | 161280167 C | 0.01389 | 3.29E-24 | chr:6:161270898 |
| 6 rs59536962  | 161264131 A | 0.01557 | 3.41E-24 | chr:6:161270898 |
| 6 rs67368974  | 161264124 A | 0.01557 | 3.41E-24 | chr:6:161270898 |
| 6 rs9765937   | 161268118 C | 0.0149  | 4.28E-24 | chr:6:161270898 |
| 6 rs9766526   | 161268119 T | 0.0149  | 4.28E-24 | chr:6:161270898 |
| 6 rs13201433  | 161269959 C | 0.01588 | 4.37E-24 | chr:6:161270898 |
| 6 rs13217026  | 161269951 A | 0.01588 | 4.37E-24 | chr:6:161270898 |
| 6 rs13220254  | 161269958 T | 0.01588 | 4.37E-24 | chr:6:161270898 |
| 6 rs55900705  | 161264920 G | 0.01338 | 1.12E-23 | chr:6:161270898 |

|              |             |         |          |                 |
|--------------|-------------|---------|----------|-----------------|
| 6 rs55968870 | 161264803 A | 0.01338 | 1.12E-23 | chr:6:161270898 |
| 6 rs56238146 | 161264866 G | 0.01338 | 1.12E-23 | chr:6:161270898 |
| 6 rs10945701 | 161266812 C | 0.01374 | 1.53E-23 | chr:6:161270898 |
| 6 rs9347453  | 161270866 C | 0.01319 | 1.61E-23 | chr:6:161270898 |
| 6 rs9347454  | 161270870 C | 0.01319 | 1.61E-23 | chr:6:161270898 |
| 6 rs2489949  | 161259718 T | 0.01338 | 1.67E-23 | chr:6:161270898 |
| 6 rs2489951  | 161259799 T | 0.01338 | 1.67E-23 | chr:6:161270898 |
| 6 rs12153973 | 161273891 T | 0.01346 | 1.74E-23 | chr:6:161270898 |
| 6 rs10945699 | 161266748 G | 0.01354 | 1.78E-23 | chr:6:161270898 |
| 6 rs10945700 | 161266764 T | 0.01354 | 1.78E-23 | chr:6:161270898 |
| 6 rs10945702 | 161267174 A | 0.01354 | 1.78E-23 | chr:6:161270898 |
| 6 rs11753103 | 161267086 A | 0.01354 | 1.78E-23 | chr:6:161270898 |
| 6 rs11753537 | 161267022 T | 0.01354 | 1.78E-23 | chr:6:161270898 |
| 6 rs11753560 | 161267122 T | 0.01354 | 1.78E-23 | chr:6:161270898 |
| 6 rs11753819 | 161264775 G | 0.01354 | 1.78E-23 | chr:6:161270898 |
| 6 rs12153845 | 161273987 C | 0.01354 | 1.78E-23 | chr:6:161270898 |
| 6 rs12173853 | 161266428 A | 0.01354 | 1.78E-23 | chr:6:161270898 |
| 6 rs12173859 | 161266513 A | 0.01354 | 1.78E-23 | chr:6:161270898 |
| 6 rs12176296 | 161266407 C | 0.01354 | 1.78E-23 | chr:6:161270898 |
| 6 rs12189741 | 161263528 T | 0.01354 | 1.78E-23 | chr:6:161270898 |
| 6 rs12191314 | 161263721 T | 0.01354 | 1.78E-23 | chr:6:161270898 |
| 6 rs12194479 | 161263485 G | 0.01354 | 1.78E-23 | chr:6:161270898 |
| 6 rs12196112 | 161264064 G | 0.01354 | 1.78E-23 | chr:6:161270898 |
| 6 rs12209829 | 161263938 C | 0.01354 | 1.78E-23 | chr:6:161270898 |
| 6 rs12215233 | 161263453 A | 0.01354 | 1.78E-23 | chr:6:161270898 |
| 6 rs13192981 | 161275824 T | 0.01354 | 1.78E-23 | chr:6:161270898 |
| 6 rs13200798 | 161275510 C | 0.01354 | 1.78E-23 | chr:6:161270898 |
| 6 rs13203412 | 161275871 G | 0.01354 | 1.78E-23 | chr:6:161270898 |
| 6 rs13203427 | 161275892 G | 0.01354 | 1.78E-23 | chr:6:161270898 |
| 6 rs13216274 | 161275309 A | 0.01354 | 1.78E-23 | chr:6:161270898 |
| 6 rs13219765 | 161275516 T | 0.01354 | 1.78E-23 | chr:6:161270898 |
| 6 rs2465855  | 161270619 G | 0.01354 | 1.78E-23 | chr:6:161270898 |
| 6 rs2465856  | 161271369 C | 0.01354 | 1.78E-23 | chr:6:161270898 |
| 6 rs2465861  | 161261486 T | 0.01354 | 1.78E-23 | chr:6:161270898 |
| 6 rs2465862  | 161261198 G | 0.01354 | 1.78E-23 | chr:6:161270898 |
| 6 rs2465863  | 161260969 A | 0.01354 | 1.78E-23 | chr:6:161270898 |
| 6 rs2465864  | 161273785 G | 0.01354 | 1.78E-23 | chr:6:161270898 |
| 6 rs2465865  | 161273576 G | 0.01354 | 1.78E-23 | chr:6:161270898 |
| 6 rs2489930  | 161271311 G | 0.01354 | 1.78E-23 | chr:6:161270898 |
| 6 rs2489931  | 161273628 A | 0.01354 | 1.78E-23 | chr:6:161270898 |
| 6 rs2489932  | 161273637 C | 0.01354 | 1.78E-23 | chr:6:161270898 |
| 6 rs2489948  | 161259549 G | 0.01348 | 1.78E-23 | chr:6:161270898 |
| 6 rs2489958  | 161261109 T | 0.01354 | 1.78E-23 | chr:6:161270898 |

|              |             |         |          |                 |
|--------------|-------------|---------|----------|-----------------|
| 6 rs2489960  | 161261315 C | 0.01354 | 1.78E-23 | chr:6:161270898 |
| 6 rs2489961  | 161261383 T | 0.01354 | 1.78E-23 | chr:6:161270898 |
| 6 rs2489965  | 161262607 C | 0.01354 | 1.78E-23 | chr:6:161270898 |
| 6 rs2489966  | 161262874 T | 0.01354 | 1.78E-23 | chr:6:161270898 |
| 6 rs2489968  | 161264408 G | 0.01354 | 1.78E-23 | chr:6:161270898 |
| 6 rs2489969  | 161264604 T | 0.01354 | 1.78E-23 | chr:6:161270898 |
| 6 rs28446193 | 161272078 A | 0.01354 | 1.78E-23 | chr:6:161270898 |
| 6 rs28448569 | 161271706 T | 0.01354 | 1.78E-23 | chr:6:161270898 |
| 6 rs28488549 | 161266035 A | 0.01354 | 1.78E-23 | chr:6:161270898 |
| 6 rs28533078 | 161268730 G | 0.01354 | 1.78E-23 | chr:6:161270898 |
| 6 rs28544460 | 161271777 T | 0.01354 | 1.78E-23 | chr:6:161270898 |
| 6 rs28594774 | 161271666 T | 0.01354 | 1.78E-23 | chr:6:161270898 |
| 6 rs28597670 | 161271643 C | 0.01354 | 1.78E-23 | chr:6:161270898 |
| 6 rs28655734 | 161271783 T | 0.01354 | 1.78E-23 | chr:6:161270898 |
| 6 rs28670241 | 161268736 C | 0.01354 | 1.78E-23 | chr:6:161270898 |
| 6 rs28698869 | 161265892 C | 0.01354 | 1.78E-23 | chr:6:161270898 |
| 6 rs28711930 | 161272157 A | 0.01354 | 1.78E-23 | chr:6:161270898 |
| 6 rs28715036 | 161266045 G | 0.01354 | 1.78E-23 | chr:6:161270898 |
| 6 rs2953496  | 161263032 A | 0.01354 | 1.78E-23 | chr:6:161270898 |
| 6 rs2997097  | 161263200 G | 0.01354 | 1.78E-23 | chr:6:161270898 |
| 6 rs3949208  | 161269749 T | 0.01354 | 1.78E-23 | chr:6:161270898 |
| 6 rs57127570 | 161272996 C | 0.01354 | 1.78E-23 | chr:6:161270898 |
| 6 rs59942091 | 161263402 A | 0.01354 | 1.78E-23 | chr:6:161270898 |
| 6 rs62435277 | 161265332 C | 0.01354 | 1.78E-23 | chr:6:161270898 |
| 6 rs62435278 | 161265459 C | 0.01354 | 1.78E-23 | chr:6:161270898 |
| 6 rs62435280 | 161265620 C | 0.01354 | 1.78E-23 | chr:6:161270898 |
| 6 rs62435284 | 161268570 A | 0.01354 | 1.78E-23 | chr:6:161270898 |
| 6 rs66533808 | 161273302 C | 0.01354 | 1.78E-23 | chr:6:161270898 |
| 6 rs67136969 | 161273433 T | 0.01354 | 1.78E-23 | chr:6:161270898 |
| 6 rs67591610 | 161268474 C | 0.01354 | 1.78E-23 | chr:6:161270898 |
| 6 rs67721200 | 161265209 C | 0.01354 | 1.78E-23 | chr:6:161270898 |
| 6 rs67876803 | 161268321 G | 0.01354 | 1.78E-23 | chr:6:161270898 |
| 6 rs68027339 | 161272813 G | 0.01354 | 1.78E-23 | chr:6:161270898 |
| 6 rs68142848 | 161273257 T | 0.01354 | 1.78E-23 | chr:6:161270898 |
| 6 rs73029748 | 161268408 C | 0.01354 | 1.78E-23 | chr:6:161270898 |
| 6 rs7381442  | 161276215 T | 0.01354 | 1.78E-23 | chr:6:161270898 |
| 6 rs7381975  | 161275254 G | 0.01354 | 1.78E-23 | chr:6:161270898 |
| 6 rs7382318  | 161276128 G | 0.01354 | 1.78E-23 | chr:6:161270898 |
| 6 rs7382435  | 161276434 C | 0.01354 | 1.78E-23 | chr:6:161270898 |
| 6 rs7382456  | 161276583 C | 0.01354 | 1.78E-23 | chr:6:161270898 |
| 6 rs7383738  | 161276047 A | 0.01354 | 1.78E-23 | chr:6:161270898 |
| 6 rs74199274 | 161274567 G | 0.01354 | 1.78E-23 | chr:6:161270898 |
| 6 rs76926711 | 161270283 C | 0.01354 | 1.78E-23 | chr:6:161270898 |

|              |             |         |          |                 |
|--------------|-------------|---------|----------|-----------------|
| 6 rs9295132  | 161267909 G | 0.01354 | 1.78E-23 | chr:6:161270898 |
| 6 rs9347447  | 161269371 G | 0.01354 | 1.78E-23 | chr:6:161270898 |
| 6 rs9347450  | 161269890 A | 0.01354 | 1.78E-23 | chr:6:161270898 |
| 6 rs9347451  | 161270100 T | 0.01354 | 1.78E-23 | chr:6:161270898 |
| 6 rs9347452  | 161270827 C | 0.01354 | 1.78E-23 | chr:6:161270898 |
| 6 rs9347455  | 161276752 C | 0.01354 | 1.78E-23 | chr:6:161270898 |
| 6 rs9347456  | 161276965 C | 0.01354 | 1.78E-23 | chr:6:161270898 |
| 6 rs9347458  | 161277046 C | 0.01354 | 1.78E-23 | chr:6:161270898 |
| 6 rs9355320  | 161269256 A | 0.01354 | 1.78E-23 | chr:6:161270898 |
| 6 rs9355842  | 161267442 C | 0.01354 | 1.78E-23 | chr:6:161270898 |
| 6 rs9355843  | 161268805 G | 0.01354 | 1.78E-23 | chr:6:161270898 |
| 6 rs9355844  | 161268967 T | 0.01354 | 1.78E-23 | chr:6:161270898 |
| 6 rs9355845  | 161269097 A | 0.01354 | 1.78E-23 | chr:6:161270898 |
| 6 rs9355846  | 161269204 C | 0.01354 | 1.78E-23 | chr:6:161270898 |
| 6 rs9365215  | 161268788 A | 0.01354 | 1.78E-23 | chr:6:161270898 |
| 6 rs9365216  | 161268818 G | 0.01354 | 1.78E-23 | chr:6:161270898 |
| 6 rs9365217  | 161269849 T | 0.01354 | 1.78E-23 | chr:6:161270898 |
| 6 rs9365218  | 161269903 A | 0.01354 | 1.78E-23 | chr:6:161270898 |
| 6 rs9365219  | 161270070 A | 0.01354 | 1.78E-23 | chr:6:161270898 |
| 6 rs9365221  | 161276676 G | 0.01354 | 1.78E-23 | chr:6:161270898 |
| 6 rs9456598  | 161272283 A | 0.01354 | 1.78E-23 | chr:6:161270898 |
| 6 rs9456599  | 161272401 A | 0.01354 | 1.78E-23 | chr:6:161270898 |
| 6 rs9458045  | 161262083 A | 0.01354 | 1.78E-23 | chr:6:161270898 |
| 6 rs9458046  | 161262133 G | 0.01354 | 1.78E-23 | chr:6:161270898 |
| 6 rs9458047  | 161262336 A | 0.01354 | 1.78E-23 | chr:6:161270898 |
| 6 rs9458048  | 161272317 A | 0.01354 | 1.78E-23 | chr:6:161270898 |
| 6 rs9765938  | 161268135 C | 0.01354 | 1.78E-23 | chr:6:161270898 |
| 6 rs9766397  | 161267843 A | 0.01354 | 1.78E-23 | chr:6:161270898 |
| 6 rs9766412  | 161268255 A | 0.01354 | 1.78E-23 | chr:6:161270898 |
| 6 rs9766533  | 161268200 T | 0.01354 | 1.78E-23 | chr:6:161270898 |
| 6 rs2465866  | 161273489 G | 0.01358 | 1.80E-23 | chr:6:161270898 |
| 6 rs2186128  | 161269751 T | 0.01359 | 1.81E-23 | chr:6:161270898 |
| 6 rs9347448  | 161269737 C | 0.01359 | 1.81E-23 | chr:6:161270898 |
| 6 rs60507137 | 161273066 A | 0.01363 | 1.90E-23 | chr:6:161270898 |
| 6 rs66542006 | 161273252 C | 0.01363 | 1.90E-23 | chr:6:161270898 |
| 6 rs1652471  | 161254403 T | 0.01436 | 2.01E-23 | chr:6:161270898 |
| 6 rs1937479  | 161255544 C | 0.01436 | 2.01E-23 | chr:6:161270898 |
| 6 rs2465846  | 161258027 C | 0.01436 | 2.01E-23 | chr:6:161270898 |
| 6 rs2489942  | 161257961 G | 0.01436 | 2.01E-23 | chr:6:161270898 |
| 6 rs12196838 | 161272765 A | 0.01386 | 2.12E-23 | chr:6:161270898 |
| 6 rs1629794  | 161246303 G | 0.01503 | 2.30E-23 | chr:6:161270898 |
| 6 rs1652463  | 161237204 C | 0.01503 | 2.30E-23 | chr:6:161270898 |
| 6 rs2802358  | 161243584 C | 0.01503 | 2.30E-23 | chr:6:161270898 |

|              |             |         |          |                 |
|--------------|-------------|---------|----------|-----------------|
| 6 rs12176297 | 161266417 C | 0.01384 | 2.37E-23 | chr:6:161270898 |
| 6 rs2565724  | 161241889 A | 0.0151  | 2.38E-23 | chr:6:161270898 |
| 6 rs2802357  | 161242350 T | 0.0151  | 2.38E-23 | chr:6:161270898 |
| 6 rs67998011 | 161273327 G | 0.01395 | 2.46E-23 | chr:6:161270898 |
| 6 rs1247541  | 161253485 T | 0.01579 | 2.65E-23 | chr:6:161270898 |
| 6 rs9456590  | 161215252 G | 9.057   | 4.29E-23 | chr:6:161270898 |
| 6 rs783163   | 161182401 T | 27.42   | 5.76E-23 | chr:6:161270898 |
| 6 rs1590185  | 161225303 C | 9.105   | 8.98E-23 | chr:6:161270898 |
| 6 rs1835344  | 161223773 G | 9.105   | 8.98E-23 | chr:6:161270898 |
| 6 rs62435318 | 161274301 C | 0.01105 | 9.09E-23 | chr:6:161270898 |
| 6 rs9456592  | 161231592 T | 9.282   | 9.19E-23 | chr:6:161270898 |
| 6 rs1358755  | 161213427 C | 8.888   | 9.20E-23 | chr:6:161270898 |
| 6 rs1853022  | 161213636 C | 8.888   | 9.20E-23 | chr:6:161270898 |
| 6 rs4709470  | 161216023 A | 8.888   | 9.20E-23 | chr:6:161270898 |
| 6 rs9456589  | 161212704 A | 8.888   | 9.20E-23 | chr:6:161270898 |
| 6 rs9458036  | 161213047 C | 8.888   | 9.20E-23 | chr:6:161270898 |
| 6 rs7383363  | 161274962 A | 0.01094 | 1.03E-22 | chr:6:161270898 |
| 6 rs66561051 | 161265144 C | 0.01093 | 1.15E-22 | chr:6:161270898 |
| 6 rs66940842 | 161265190 C | 0.01093 | 1.15E-22 | chr:6:161270898 |
| 6 rs67613705 | 161265155 T | 0.01093 | 1.15E-22 | chr:6:161270898 |
| 6 rs9347449  | 161269740 C | 0.0111  | 1.21E-22 | chr:6:161270898 |
| 6 rs1853020  | 161221417 G | 9.025   | 1.36E-22 | chr:6:161270898 |
| 6 rs9458039  | 161225730 T | 9.025   | 1.36E-22 | chr:6:161270898 |
| 6 rs9458041  | 161235710 T | 8.849   | 1.51E-22 | chr:6:161270898 |
| 6 rs9456588  | 161212564 G | 8.609   | 1.54E-22 | chr:6:161270898 |
| 6 rs9885597  | 161227692 A | 8.902   | 2.03E-22 | chr:6:161270898 |
| 6 rs4708882  | 161203182 T | 8.632   | 2.16E-22 | chr:6:161270898 |
| 6 rs1937485  | 161284895 A | 0.1327  | 2.18E-22 | chr:6:161270898 |
| 6 rs12191929 | 161234926 G | 8.778   | 2.28E-22 | chr:6:161270898 |
| 6 rs13202192 | 161233181 T | 8.778   | 2.28E-22 | chr:6:161270898 |
| 6 rs2024839  | 161233418 C | 8.778   | 2.28E-22 | chr:6:161270898 |
| 6 rs9458040  | 161232224 C | 8.778   | 2.28E-22 | chr:6:161270898 |
| 6 rs4708880  | 161203148 C | 8.599   | 2.30E-22 | chr:6:161270898 |
| 6 rs4708881  | 161203159 T | 8.599   | 2.30E-22 | chr:6:161270898 |
| 6 rs4709468  | 161203142 C | 8.599   | 2.30E-22 | chr:6:161270898 |
| 6 rs56376510 | 161203138 A | 8.599   | 2.30E-22 | chr:6:161270898 |
| 6 rs9458032  | 161210205 T | 8.446   | 2.39E-22 | chr:6:161270898 |
| 6 rs35332231 | 161210871 G | 8.447   | 2.39E-22 | chr:6:161270898 |
| 6 rs11756055 | 161210622 T | 8.424   | 2.52E-22 | chr:6:161270898 |
| 6 rs11758404 | 161210455 G | 8.424   | 2.52E-22 | chr:6:161270898 |
| 6 rs28408689 | 161210522 A | 8.424   | 2.52E-22 | chr:6:161270898 |
| 6 rs66496533 | 161210741 C | 8.424   | 2.52E-22 | chr:6:161270898 |
| 6 rs9456587  | 161211226 G | 8.424   | 2.52E-22 | chr:6:161270898 |



|              |             |       |          |                 |
|--------------|-------------|-------|----------|-----------------|
| 6 rs9458035  | 161211234 C | 8.424 | 2.52E-22 | chr:6:161270898 |
| 6 rs4440440  | 161183424 C | 8.738 | 3.40E-22 | chr:6:161270898 |
| 6 rs7450979  | 161186889 T | 8.738 | 3.40E-22 | chr:6:161270898 |
| 6 rs9458023  | 161176256 A | 8.738 | 3.40E-22 | chr:6:161270898 |
| 6 rs9458031  | 161210119 A | 8.377 | 3.44E-22 | chr:6:161270898 |
| 6 rs10455783 | 161208580 A | 8.373 | 3.51E-22 | chr:6:161270898 |
| 6 rs10455784 | 161208584 T | 8.373 | 3.51E-22 | chr:6:161270898 |
| 6 rs11756434 | 161201356 C | 8.373 | 3.51E-22 | chr:6:161270898 |
| 6 rs11758027 | 161201112 A | 8.373 | 3.51E-22 | chr:6:161270898 |
| 6 rs12206847 | 161207395 C | 8.373 | 3.51E-22 | chr:6:161270898 |
| 6 rs12526591 | 161204311 A | 8.373 | 3.51E-22 | chr:6:161270898 |
| 6 rs13196302 | 161201783 G | 8.373 | 3.51E-22 | chr:6:161270898 |
| 6 rs13196324 | 161201842 T | 8.373 | 3.51E-22 | chr:6:161270898 |
| 6 rs13199812 | 161201960 C | 8.373 | 3.51E-22 | chr:6:161270898 |
| 6 rs13203571 | 161208765 G | 8.373 | 3.51E-22 | chr:6:161270898 |
| 6 rs13206887 | 161201651 A | 8.373 | 3.51E-22 | chr:6:161270898 |
| 6 rs1344729  | 161204841 T | 8.373 | 3.51E-22 | chr:6:161270898 |
| 6 rs1344731  | 161205037 A | 8.373 | 3.51E-22 | chr:6:161270898 |
| 6 rs1549741  | 161204783 T | 8.373 | 3.51E-22 | chr:6:161270898 |
| 6 rs1965092  | 161204889 T | 8.373 | 3.51E-22 | chr:6:161270898 |
| 6 rs1991598  | 161204488 A | 8.373 | 3.51E-22 | chr:6:161270898 |
| 6 rs1991599  | 161204643 T | 8.373 | 3.51E-22 | chr:6:161270898 |
| 6 rs2115869  | 161207892 A | 8.373 | 3.51E-22 | chr:6:161270898 |
| 6 rs2115870  | 161207992 G | 8.373 | 3.51E-22 | chr:6:161270898 |
| 6 rs2115871  | 161208007 T | 8.373 | 3.51E-22 | chr:6:161270898 |
| 6 rs34797199 | 161203769 T | 8.373 | 3.51E-22 | chr:6:161270898 |
| 6 rs4708878  | 161203026 G | 8.373 | 3.51E-22 | chr:6:161270898 |
| 6 rs4708884  | 161206213 T | 8.373 | 3.51E-22 | chr:6:161270898 |
| 6 rs4708885  | 161206349 G | 8.373 | 3.51E-22 | chr:6:161270898 |
| 6 rs4708887  | 161206387 G | 8.373 | 3.51E-22 | chr:6:161270898 |
| 6 rs4708888  | 161206490 C | 8.373 | 3.51E-22 | chr:6:161270898 |
| 6 rs4708889  | 161208868 G | 8.373 | 3.51E-22 | chr:6:161270898 |
| 6 rs4708891  | 161209020 G | 8.373 | 3.51E-22 | chr:6:161270898 |
| 6 rs4708892  | 161209101 C | 8.373 | 3.51E-22 | chr:6:161270898 |
| 6 rs4708893  | 161209245 C | 8.373 | 3.51E-22 | chr:6:161270898 |
| 6 rs4709466  | 161202419 G | 8.373 | 3.51E-22 | chr:6:161270898 |
| 6 rs4709467  | 161203079 A | 8.373 | 3.51E-22 | chr:6:161270898 |
| 6 rs4709469  | 161206484 T | 8.373 | 3.51E-22 | chr:6:161270898 |
| 6 rs9456585  | 161207448 A | 8.373 | 3.51E-22 | chr:6:161270898 |
| 6 rs9456586  | 161207643 A | 8.373 | 3.51E-22 | chr:6:161270898 |
| 6 rs9458025  | 161203435 C | 8.373 | 3.51E-22 | chr:6:161270898 |
| 6 rs9458026  | 161203466 A | 8.373 | 3.51E-22 | chr:6:161270898 |
| 6 rs9458028  | 161209716 T | 8.373 | 3.51E-22 | chr:6:161270898 |

|               |             |        |          |                 |
|---------------|-------------|--------|----------|-----------------|
| 6 rs9458029   | 161209717 G | 8.373  | 3.51E-22 | chr:6:161270898 |
| 6 rs9458030   | 161209985 A | 8.373  | 3.51E-22 | chr:6:161270898 |
| 6 rs34145009  | 161208656 T | 8.394  | 3.84E-22 | chr:6:161270898 |
| 6 rs114581531 | 161237090 T | 9.404  | 3.96E-22 | chr:6:161270898 |
| 6 rs115032617 | 161237091 G | 9.404  | 3.96E-22 | chr:6:161270898 |
| 6 rs143687018 | 161237088 C | 9.404  | 3.96E-22 | chr:6:161270898 |
| 6 rs370751318 | 161237096 G | 9.404  | 3.96E-22 | chr:6:161270898 |
| 6 rs373974575 | 161237097 A | 9.404  | 3.96E-22 | chr:6:161270898 |
| 6 rs376125603 | 161237094 C | 9.404  | 3.96E-22 | chr:6:161270898 |
| 6 rs4708886   | 161206350 T | 8.56   | 4.85E-22 | chr:6:161270898 |
| 6 rs12194271  | 161195895 G | 8.553  | 5.45E-22 | chr:6:161270898 |
| 6 rs12214168  | 161195801 T | 8.553  | 5.45E-22 | chr:6:161270898 |
| 6 rs12214254  | 161195932 A | 8.553  | 5.45E-22 | chr:6:161270898 |
| 6 rs13216458  | 161204262 C | 8.053  | 6.43E-22 | chr:6:161270898 |
| 6 rs13192114  | 161210258 A | 7.544  | 7.51E-22 | chr:6:161270898 |
| 6 rs13192211  | 161210266 A | 7.544  | 7.51E-22 | chr:6:161270898 |
| 6 rs1344730   | 161204995 A | 8.389  | 7.73E-22 | chr:6:161270898 |
| 6 rs1937486   | 161284845 G | 0.1448 | 8.45E-22 | chr:6:161270898 |
| 6 rs1937487   | 161284779 T | 0.1448 | 8.45E-22 | chr:6:161270898 |
| 6 rs7454268   | 161166502 T | 8.676  | 9.55E-22 | chr:6:161270898 |
| 6 rs2144727   | 161194814 C | 8.198  | 1.03E-21 | chr:6:161270898 |
| 6 rs2255792   | 161284473 C | 0.1457 | 1.28E-21 | chr:6:161270898 |
| 6 rs114592559 | 161259990 C | 10.05  | 1.69E-21 | chr:6:161270898 |
| 6 rs2465868   | 161287333 C | 0.1549 | 2.23E-21 | chr:6:161270898 |
| 6 rs13206066  | 161167452 G | 8.223  | 2.25E-21 | chr:6:161270898 |
| 6 rs377289957 | 161277231 C | 12.78  | 2.37E-21 | chr:6:161270898 |
| 6 rs1613037   | 161210911 G | 8.564  | 3.26E-21 | chr:6:161270898 |
| 6 rs1782624   | 161290595 G | 0.1559 | 3.40E-21 | chr:6:161270898 |
| 6 rs1782625   | 161290812 T | 0.1559 | 3.40E-21 | chr:6:161270898 |
| 6 rs1937484   | 161286950 T | 0.1559 | 3.40E-21 | chr:6:161270898 |
| 6 rs2489943   | 161288640 C | 0.1559 | 3.40E-21 | chr:6:161270898 |
| 6 rs2953493   | 161291617 C | 0.1559 | 3.40E-21 | chr:6:161270898 |
| 6 rs2953492   | 161289895 G | 0.1565 | 4.99E-21 | chr:6:161270898 |
| 6 rs45485198  | 161237998 C | 0.1813 | 2.13E-19 | chr:6:161270898 |
| 6 rs6926947   | 161272676 T | 0.1823 | 2.73E-19 | chr:6:161270898 |
| 6 rs73029749  | 161268411 T | 0.1823 | 2.73E-19 | chr:6:161270898 |
| 6 rs45475797  | 161237891 A | 0.1854 | 3.23E-19 | chr:6:161270898 |
| 6 rs62436736  | 161244838 C | 0.1854 | 3.23E-19 | chr:6:161270898 |
| 6 rs3757019   | 161135111 T | 5.383  | 3.28E-19 | chr:6:161270898 |
| 6 rs3798903   | 161133335 C | 5.383  | 3.28E-19 | chr:6:161270898 |
| 6 rs4252092   | 161133651 A | 5.383  | 3.28E-19 | chr:6:161270898 |
| 6 rs14224     | 161137779 C | 5.255  | 4.09E-19 | chr:6:161270898 |
| 6 rs3778217   | 161139058 T | 5.255  | 4.09E-19 | chr:6:161270898 |

|               |             |        |          |                 |
|---------------|-------------|--------|----------|-----------------|
| 6 rs1130656   | 161139480 T | 5.283  | 5.24E-19 | chr:6:161270898 |
| 6 rs1321201   | 161138181 C | 5.283  | 5.24E-19 | chr:6:161270898 |
| 6 rs2295368   | 161139502 A | 5.283  | 5.24E-19 | chr:6:161270898 |
| 6 rs4709458   | 161141158 C | 5.283  | 5.24E-19 | chr:6:161270898 |
| 6 rs1247514   | 161283586 C | 0.1911 | 1.04E-18 | chr:6:161270898 |
| 6 rs4252105   | 161136058 A | 5.303  | 1.04E-18 | chr:6:161270898 |
| 6 rs2465860   | 161261813 T | 4.89   | 6.94E-18 | chr:6:161270898 |
| 6 rs202074609 | 161261844 C | 4.737  | 3.36E-17 | chr:6:161270898 |
| 6 rs9456593   | 161261833 T | 4.737  | 3.36E-17 | chr:6:161270898 |
| 6 rs9456594   | 161261839 A | 4.737  | 3.36E-17 | chr:6:161270898 |
| 6 rs9456595   | 161261845 T | 4.737  | 3.36E-17 | chr:6:161270898 |
| 6 rs62436701  | 161194298 T | 0.2133 | 4.87E-17 | chr:6:161270898 |
| 6 rs62436702  | 161196562 C | 0.2137 | 4.95E-17 | chr:6:161270898 |
| 6 rs62436703  | 161198379 T | 0.2137 | 4.95E-17 | chr:6:161270898 |
| 6 rs62436704  | 161199736 T | 0.2137 | 4.95E-17 | chr:6:161270898 |
| 6 rs62436705  | 161200486 T | 0.2137 | 4.95E-17 | chr:6:161270898 |
| 6 rs9365226   | 161279734 G | 4.842  | 5.97E-17 | chr:6:161270898 |
| 6 rs200406291 | 161261860 G | 4.891  | 6.64E-17 | chr:6:161270898 |
| 6 rs9456596   | 161261870 A | 4.891  | 6.64E-17 | chr:6:161270898 |
| 6 rs9347463   | 161279690 T | 4.801  | 7.44E-17 | chr:6:161270898 |
| 6 rs56262039  | 161183455 A | 0.2263 | 1.30E-16 | chr:6:161270898 |
| 6 rs9456580   | 161185380 T | 0.2263 | 1.30E-16 | chr:6:161270898 |
| 6 rs9458044   | 161259988 C | 8.814  | 1.37E-16 | chr:6:161270898 |
| 6 rs201418433 | 161261865 A | 4.864  | 1.38E-16 | chr:6:161270898 |
| 6 rs9347462   | 161279599 A | 4.765  | 1.44E-16 | chr:6:161270898 |
| 6 rs34620274  | 161266021 T | 11.37  | 1.65E-16 | chr:6:161270898 |
| 6 rs4252181   | 161175004 T | 0.2274 | 1.67E-16 | chr:6:161270898 |
| 6 rs60198722  | 161181980 A | 0.2274 | 1.67E-16 | chr:6:161270898 |
| 6 rs9458022   | 161171682 A | 0.2274 | 1.67E-16 | chr:6:161270898 |
| 6 rs1247513   | 161280379 T | 0.2043 | 1.68E-16 | chr:6:161270898 |
| 6 rs28402939  | 161168949 T | 0.2423 | 8.88E-16 | chr:6:161270898 |
| 6 rs2997096   | 161298263 T | 0.2566 | 1.77E-15 | chr:6:161270898 |
| 6 rs10945703  | 161279258 C | 4.419  | 1.80E-15 | chr:6:161270898 |
| 6 rs59450759  | 161279302 G | 4.419  | 1.80E-15 | chr:6:161270898 |
| 6 rs1247571   | 161218651 A | 0.2215 | 1.96E-15 | chr:6:161270898 |
| 6 rs783155    | 161229797 G | 0.2328 | 4.31E-15 | chr:6:161270898 |
| 6 rs3846778   | 161230801 C | 0.2677 | 5.10E-15 | chr:6:161270898 |
| 6 rs1247569   | 161208655 C | 0.2365 | 5.40E-15 | chr:6:161270898 |
| 6 rs1261931   | 161311849 T | 0.2658 | 1.32E-14 | chr:6:161270898 |
| 6 rs9365224   | 161279539 A | 4.261  | 1.86E-14 | chr:6:161270898 |
| 6 rs1247519   | 161303720 A | 0.2713 | 2.10E-14 | chr:6:161270898 |
| 6 rs1247520   | 161312344 T | 0.2724 | 2.60E-14 | chr:6:161270898 |
| 6 rs13206496  | 161279478 C | 4.105  | 5.52E-14 | chr:6:161270898 |

|                     |             |        |          |                 |
|---------------------|-------------|--------|----------|-----------------|
| 6 rs783166          | 161177237 A | 0.1732 | 6.77E-14 | chr:6:161270898 |
| 6 rs4709473         | 161278938 C | 3.888  | 9.35E-14 | chr:6:161270898 |
| 6 rs4252134         | 161153527 C | 0.2901 | 1.29E-13 | chr:6:161270898 |
| 6 rs4252135         | 161154232 T | 0.2901 | 1.29E-13 | chr:6:161270898 |
| 6 rs56093624        | 161156667 A | 0.2901 | 1.29E-13 | chr:6:161270898 |
| 6 rs9458019         | 161153561 C | 0.2901 | 1.29E-13 | chr:6:161270898 |
| 6 rs9458020         | 161156296 T | 0.2901 | 1.29E-13 | chr:6:161270898 |
| 6 rs1084657         | 161181271 A | 0.1774 | 1.30E-13 | chr:6:161270898 |
| 6 rs9689453         | 161278910 G | 3.835  | 1.38E-13 | chr:6:161270898 |
| 6 rs56387679        | 161154878 A | 0.29   | 1.66E-13 | chr:6:161270898 |
| 6 rs4252165         | 161161559 A | 0.2916 | 1.67E-13 | chr:6:161270898 |
| 6 rs1247539         | 161252795 T | 0.1969 | 1.67E-13 | chr:6:161270898 |
| 6 rs783150          | 161226939 T | 0.1953 | 1.75E-13 | chr:6:161270898 |
| 6 rs9689560         | 161279081 C | 3.948  | 2.34E-13 | chr:6:161270898 |
| 6 rs4252117         | 161143376 G | 0.296  | 2.36E-13 | chr:6:161270898 |
| 6 rs4252120         | 161143608 C | 0.296  | 2.36E-13 | chr:6:161270898 |
| 6 rs4252125         | 161152240 A | 0.296  | 2.36E-13 | chr:6:161270898 |
| 6 rs4252126         | 161152294 G | 0.296  | 2.36E-13 | chr:6:161270898 |
| 6 rs4252130         | 161153080 C | 0.296  | 2.36E-13 | chr:6:161270898 |
| 6 rs9456578         | 161147368 T | 0.296  | 2.36E-13 | chr:6:161270898 |
| 6 rs9458016         | 161144800 G | 0.296  | 2.36E-13 | chr:6:161270898 |
| 6 rs9458017         | 161150251 T | 0.296  | 2.36E-13 | chr:6:161270898 |
| 6 rs1247565         | 161206910 A | 3.817  | 2.40E-13 | chr:6:161270898 |
| 6 rs71551166;rs1494 | 161266025 A | 686.4  | 2.60E-13 | chr:6:161270898 |
| 6 rs1830524         | 161186641 A | 0.2639 | 2.63E-13 | chr:6:161270898 |
| 6 rs1972748         | 161154717 C | 0.3004 | 3.23E-13 | chr:6:161270898 |
| 6 rs783160          | 161183722 C | 0.2666 | 3.56E-13 | chr:6:161270898 |
| 6 rs783164          | 161182327 T | 0.2666 | 3.56E-13 | chr:6:161270898 |
| 6 rs783167          | 161174658 G | 0.2666 | 3.56E-13 | chr:6:161270898 |
| 6 rs4252150         | 161159006 C | 0.3015 | 3.96E-13 | chr:6:161270898 |
| 6 rs4252151         | 161159016 G | 0.3015 | 3.96E-13 | chr:6:161270898 |
| 6 rs1321197         | 161145176 T | 0.305  | 4.62E-13 | chr:6:161270898 |
| 6 rs1897108         | 161146704 G | 0.305  | 4.62E-13 | chr:6:161270898 |
| 6 rs4252114         | 161143190 C | 0.305  | 4.62E-13 | chr:6:161270898 |
| 6 rs4252090         | 161133544 T | 0.3024 | 4.72E-13 | chr:6:161270898 |
| 6 rs4252093         | 161133685 G | 0.3024 | 4.72E-13 | chr:6:161270898 |
| 6 rs783175          | 161171664 C | 0.2729 | 4.94E-13 | chr:6:161270898 |
| 6 rs13231           | 161139857 G | 0.3058 | 5.64E-13 | chr:6:161270898 |
| 6 rs783181          | 161168759 T | 0.2707 | 6.02E-13 | chr:6:161270898 |
| 6 rs4252075         | 161128617 A | 3.635  | 6.07E-13 | chr:6:161270898 |
| 6 rs4252072         | 161128264 T | 0.304  | 6.10E-13 | chr:6:161270898 |
| 6 rs4252076         | 161128922 G | 0.304  | 6.10E-13 | chr:6:161270898 |
| 6 rs57539649        | 161131516 A | 0.304  | 6.10E-13 | chr:6:161270898 |

|               |             |        |          |                 |
|---------------|-------------|--------|----------|-----------------|
| 6 rs59614420  | 161129013 A | 0.304  | 6.10E-13 | chr:6:161270898 |
| 6 rs783161    | 161183665 A | 0.2719 | 6.73E-13 | chr:6:161270898 |
| 6 rs1740436   | 161203136 C | 0.2765 | 6.89E-13 | chr:6:161270898 |
| 6 rs4252066   | 161127125 A | 0.3075 | 7.10E-13 | chr:6:161270898 |
| 6 rs4252096   | 161134273 G | 0.3075 | 7.10E-13 | chr:6:161270898 |
| 6 rs4252107   | 161137518 C | 0.3075 | 7.10E-13 | chr:6:161270898 |
| 6 rs4252109   | 161137663 G | 0.3075 | 7.10E-13 | chr:6:161270898 |
| 6 rs62439804  | 161134805 C | 0.3075 | 7.10E-13 | chr:6:161270898 |
| 6 rs1247554   | 161188613 T | 0.2796 | 1.03E-12 | chr:6:161270898 |
| 6 rs1620875   | 161201175 A | 0.2796 | 1.03E-12 | chr:6:161270898 |
| 6 rs1652485   | 161198390 C | 0.2796 | 1.03E-12 | chr:6:161270898 |
| 6 rs1652490   | 161200632 G | 0.2796 | 1.03E-12 | chr:6:161270898 |
| 6 rs1652499   | 161191694 T | 0.2796 | 1.03E-12 | chr:6:161270898 |
| 6 rs1652500   | 161192189 C | 0.2796 | 1.03E-12 | chr:6:161270898 |
| 6 rs1740444   | 161196476 G | 0.2796 | 1.03E-12 | chr:6:161270898 |
| 6 rs1782600   | 161199014 T | 0.2774 | 1.05E-12 | chr:6:161270898 |
| 6 rs34126283  | 161130002 A | 0.3054 | 1.08E-12 | chr:6:161270898 |
| 6 rs1853017   | 161133046 T | 0.3153 | 1.12E-12 | chr:6:161270898 |
| 6 rs1247561   | 161204856 C | 0.2816 | 1.36E-12 | chr:6:161270898 |
| 6 rs1247562   | 161205456 C | 0.2816 | 1.36E-12 | chr:6:161270898 |
| 6 rs1247563   | 161205949 G | 0.2816 | 1.36E-12 | chr:6:161270898 |
| 6 rs1853016   | 161133125 C | 0.3168 | 1.38E-12 | chr:6:161270898 |
| 6 rs35513104  | 161134732 G | 0.3168 | 1.38E-12 | chr:6:161270898 |
| 6 rs4252078   | 161131818 T | 0.3168 | 1.38E-12 | chr:6:161270898 |
| 6 rs4252082   | 161132417 G | 0.3168 | 1.38E-12 | chr:6:161270898 |
| 6 rs4252086   | 161132725 C | 0.3168 | 1.38E-12 | chr:6:161270898 |
| 6 rs4252087   | 161133244 A | 0.3168 | 1.38E-12 | chr:6:161270898 |
| 6 rs4757      | 161132146 T | 0.3168 | 1.38E-12 | chr:6:161270898 |
| 6 rs62439805  | 161134940 A | 0.3168 | 1.38E-12 | chr:6:161270898 |
| 6 rs1853018   | 161132804 C | 0.3199 | 2.26E-12 | chr:6:161270898 |
| 6 rs1247568   | 161208386 C | 0.2891 | 2.39E-12 | chr:6:161270898 |
| 6 rs2465833   | 161302883 G | 0.3197 | 2.52E-12 | chr:6:161270898 |
| 6 rs4708895   | 161309155 T | 0.3207 | 3.04E-12 | chr:6:161270898 |
| 6 rs112324442 | 161200873 T | 0.168  | 3.45E-12 | chr:6:161270898 |
| 6 rs1247515   | 161302267 A | 0.3222 | 3.48E-12 | chr:6:161270898 |
| 6 rs9458012   | 161130930 C | 0.3346 | 9.03E-12 | chr:6:161270898 |
| 6 rs77894138  | 161149322 T | 0.1776 | 1.95E-11 | chr:6:161270898 |
| 6 rs12211977  | 161252770 A | 0.1891 | 2.09E-11 | chr:6:161270898 |
| 6 rs9458010   | 161125419 C | 0.3577 | 4.76E-11 | chr:6:161270898 |
| 6 rs12191307  | 161256529 A | 0.1968 | 7.46E-11 | chr:6:161270898 |
| 6 rs1596406   | 161360548 A | 3.189  | 1.43E-10 | chr:6:161270898 |
| 6 rs56348450  | 161320210 A | 3.056  | 3.55E-10 | chr:6:161270898 |
| 6 rs1596405   | 161360697 A | 3.059  | 4.16E-10 | chr:6:161270898 |

|               |             |        |          |                 |
|---------------|-------------|--------|----------|-----------------|
| 6 rs76031264  | 161312655 C | 0.147  | 6.36E-10 | chr:6:161270898 |
| 6 rs1247295   | 161349728 G | 2.565  | 1.27E-09 | chr:6:161270898 |
| 6 rs9365225   | 161279685 G | 3.869  | 1.62E-09 | chr:6:161270898 |
| 6 rs4252049   | 161121715 A | 2.558  | 2.15E-09 | chr:6:161270898 |
| 6 rs1830521   | 161123158 G | 2.552  | 2.60E-09 | chr:6:161270898 |
| 6 rs1864449   | 161122763 T | 2.552  | 2.60E-09 | chr:6:161270898 |
| 6 rs1864450   | 161122707 G | 2.552  | 2.60E-09 | chr:6:161270898 |
| 6 rs4063598   | 161122931 G | 2.552  | 2.60E-09 | chr:6:161270898 |
| 6 rs4252065   | 161123771 T | 2.552  | 2.60E-09 | chr:6:161270898 |
| 6 rs2163235   | 161121303 C | 2.546  | 3.04E-09 | chr:6:161270898 |
| 6 rs62435349  | 161304242 T | 0.2636 | 3.16E-09 | chr:6:161270898 |
| 6 rs1950562   | 161123185 T | 2.496  | 4.68E-09 | chr:6:161270898 |
| 6 rs1781518   | 161293151 A | 0.4051 | 6.87E-09 | chr:6:161270898 |
| 6 rs2186129   | 161286450 G | 0.4057 | 7.91E-09 | chr:6:161270898 |
| 6 rs9347465   | 161289932 T | 0.4057 | 7.91E-09 | chr:6:161270898 |
| 6 rs4709474   | 161285760 A | 0.4061 | 8.14E-09 | chr:6:161270898 |
| 6 rs113525646 | 161119901 A | 0.4215 | 9.72E-09 | chr:6:161270898 |
| 6 rs4252045   | 161121210 A | 0.4215 | 9.72E-09 | chr:6:161270898 |
| 6 rs2064712   | 161216608 A | 5.243  | 1.09E-08 | chr:6:161270898 |
| 6 rs2144723   | 161121390 T | 0.4229 | 1.20E-08 | chr:6:161270898 |
| 6 rs2314851   | 161123413 T | 0.4229 | 1.20E-08 | chr:6:161270898 |
| 6 rs1965091   | 161120648 A | 0.4241 | 1.42E-08 | chr:6:161270898 |
| 6 rs7452732   | 161120058 G | 0.4241 | 1.42E-08 | chr:6:161270898 |
| 6 rs7772437   | 161115245 T | 0.4241 | 1.42E-08 | chr:6:161270898 |
| 6 rs598306    | 161357756 A | 0.3924 | 1.47E-08 | chr:6:161270898 |
| 6 rs10945684  | 161110273 T | 0.4268 | 1.49E-08 | chr:6:161270898 |
| 6 rs62436890  | 161317745 G | 0.3797 | 1.71E-08 | chr:6:161270898 |
| 6 rs73017771  | 161319223 T | 0.3797 | 1.71E-08 | chr:6:161270898 |
| 6 rs622215    | 161363231 T | 0.3953 | 1.85E-08 | chr:6:161270898 |
| 6 rs1009124   | 161117913 A | 0.4285 | 1.87E-08 | chr:6:161270898 |
| 6 rs1937470   | 161318009 G | 0.3833 | 2.26E-08 | chr:6:161270898 |
| 6 rs1937471   | 161317961 T | 0.3833 | 2.26E-08 | chr:6:161270898 |
| 6 rs1937473   | 161317305 T | 0.3833 | 2.26E-08 | chr:6:161270898 |
| 6 rs57154076  | 161317615 A | 0.3833 | 2.26E-08 | chr:6:161270898 |
| 6 rs60897688  | 161316063 A | 0.3833 | 2.26E-08 | chr:6:161270898 |
| 6 rs62436886  | 161315795 A | 0.3833 | 2.26E-08 | chr:6:161270898 |
| 6 rs62436888  | 161316375 C | 0.3833 | 2.26E-08 | chr:6:161270898 |
| 6 rs62436891  | 161318736 A | 0.3833 | 2.26E-08 | chr:6:161270898 |
| 6 rs62436892  | 161318811 T | 0.3833 | 2.26E-08 | chr:6:161270898 |
| 6 rs62436893  | 161319046 A | 0.3833 | 2.26E-08 | chr:6:161270898 |
| 6 rs6902594   | 161316919 G | 0.3833 | 2.26E-08 | chr:6:161270898 |
| 6 rs6917099   | 161316478 A | 0.3833 | 2.26E-08 | chr:6:161270898 |
| 6 rs6923460   | 161316970 T | 0.3833 | 2.26E-08 | chr:6:161270898 |

|               |             |        |          |                 |
|---------------|-------------|--------|----------|-----------------|
| 6 rs73017757  | 161315757 A | 0.3833 | 2.26E-08 | chr:6:161270898 |
| 6 rs73017769  | 161319183 T | 0.3833 | 2.26E-08 | chr:6:161270898 |
| 6 rs73017775  | 161319251 T | 0.3833 | 2.26E-08 | chr:6:161270898 |
| 6 rs7451401   | 161101996 T | 2.351  | 2.33E-08 | chr:6:161270898 |
| 6 rs11966600  | 161321552 A | 0.3861 | 2.43E-08 | chr:6:161270898 |
| 6 rs673319    | 161360378 C | 0.4061 | 2.64E-08 | chr:6:161270898 |
| 6 rs61179056  | 161100557 G | 2.347  | 3.02E-08 | chr:6:161270898 |
| 6 rs62436895  | 161324382 C | 0.3881 | 3.20E-08 | chr:6:161270898 |
| 6 rs62436896  | 161325096 T | 0.3881 | 3.20E-08 | chr:6:161270898 |
| 6 rs62436894  | 161319573 A | 0.3795 | 3.34E-08 | chr:6:161270898 |
| 6 rs77819438  | 161319569 A | 0.3795 | 3.34E-08 | chr:6:161270898 |
| 6 rs75879205  | 161200868 G | 3.226  | 3.80E-08 | chr:6:161270898 |
| 6 rs62439764  | 161100512 C | 2.321  | 4.08E-08 | chr:6:161270898 |
| 6 rs60171130  | 161100558 C | 2.313  | 5.00E-08 | chr:6:161270898 |
| 6 rs60553356  | 161100338 C | 2.313  | 5.00E-08 | chr:6:161270898 |
| 6 rs12204899  | 161342481 G | 0.2451 | 5.05E-08 | chr:6:161270898 |
| 6 rs9347440   | 161106121 C | 2.311  | 5.13E-08 | chr:6:161270898 |
| 6 rs11961006  | 161334562 G | 0.3945 | 5.22E-08 | chr:6:161270898 |
| 6 rs4345373   | 161346676 A | 0.3945 | 5.22E-08 | chr:6:161270898 |
| 6 rs62436899  | 161333399 A | 0.3945 | 5.22E-08 | chr:6:161270898 |
| 6 rs1590183   | 161096758 T | 2.322  | 5.26E-08 | chr:6:161270898 |
| 6 rs1897106   | 161096483 C | 2.322  | 5.26E-08 | chr:6:161270898 |
| 6 rs79551445  | 161319570 A | 0.395  | 5.33E-08 | chr:6:161270898 |
| 6 rs62436933  | 161346830 A | 0.3959 | 5.67E-08 | chr:6:161270898 |
| 6 rs10455873  | 161105654 C | 2.291  | 6.54E-08 | chr:6:161270898 |
| 6 rs7453324   | 161102022 G | 2.291  | 6.54E-08 | chr:6:161270898 |
| 6 rs9347439   | 161102413 G | 2.291  | 6.54E-08 | chr:6:161270898 |
| 6 rs62436931  | 161334507 C | 0.417  | 6.64E-08 | chr:6:161270898 |
| 6 rs111793381 | 161338203 A | 0.3979 | 6.75E-08 | chr:6:161270898 |
| 6 rs73019785  | 161337875 G | 0.3979 | 6.75E-08 | chr:6:161270898 |
| 6 rs6905422   | 161068064 C | 2.311  | 9.19E-08 | chr:6:161270898 |
| 6 rs1740428   | 161081331 A | 2.305  | 9.82E-08 | chr:6:161270898 |
| 6 rs62441718  | 161036382 A | 2.261  | 1.06E-07 | chr:6:161270898 |
| 6 rs138400966 | 161032923 C | 2.285  | 1.14E-07 | chr:6:161270898 |
| 6 rs1584059   | 161350782 C | 0.4083 | 1.20E-07 | chr:6:161270898 |
| 6 rs56009524  | 161350292 T | 0.4083 | 1.20E-07 | chr:6:161270898 |
| 6 rs56219422  | 161350176 T | 0.4083 | 1.20E-07 | chr:6:161270898 |
| 6 rs60343440  | 161349841 A | 0.4083 | 1.20E-07 | chr:6:161270898 |
| 6 rs61070418  | 161350274 G | 0.4083 | 1.20E-07 | chr:6:161270898 |
| 6 rs62436938  | 161349554 C | 0.4083 | 1.20E-07 | chr:6:161270898 |
| 6 rs113727842 | 161032668 G | 2.295  | 1.23E-07 | chr:6:161270898 |
| 6 rs2144726   | 161076247 A | 2.29   | 1.25E-07 | chr:6:161270898 |
| 6 rs12195619  | 161362042 G | 0.2584 | 1.26E-07 | chr:6:161270898 |

|               |             |        |          |                 |
|---------------|-------------|--------|----------|-----------------|
| 6 rs1321196   | 161081842 C | 2.28   | 1.31E-07 | chr:6:161270898 |
| 6 rs10945683  | 161069952 C | 2.279  | 1.33E-07 | chr:6:161270898 |
| 6 rs2983236   | 161072331 G | 2.279  | 1.33E-07 | chr:6:161270898 |
| 6 rs6455691   | 161023209 A | 2.279  | 1.33E-07 | chr:6:161270898 |
| 6 rs6455692   | 161023402 A | 2.279  | 1.33E-07 | chr:6:161270898 |
| 6 rs6455693   | 161026455 T | 2.279  | 1.33E-07 | chr:6:161270898 |
| 6 rs6455695   | 161030469 C | 2.279  | 1.33E-07 | chr:6:161270898 |
| 6 rs6902102   | 161025288 A | 2.279  | 1.33E-07 | chr:6:161270898 |
| 6 rs6919497   | 161031638 G | 2.279  | 1.33E-07 | chr:6:161270898 |
| 6 rs6923917   | 161031718 T | 2.279  | 1.33E-07 | chr:6:161270898 |
| 6 rs6929299   | 161032089 C | 2.279  | 1.33E-07 | chr:6:161270898 |
| 6 rs6930342   | 161025442 G | 2.279  | 1.33E-07 | chr:6:161270898 |
| 6 rs6932014   | 161026515 G | 2.279  | 1.33E-07 | chr:6:161270898 |
| 6 rs6933576   | 161068176 G | 2.279  | 1.33E-07 | chr:6:161270898 |
| 6 rs6937879   | 161030880 A | 2.279  | 1.33E-07 | chr:6:161270898 |
| 6 rs7752408   | 161021873 C | 2.279  | 1.33E-07 | chr:6:161270898 |
| 6 rs7760585   | 161070870 G | 2.279  | 1.33E-07 | chr:6:161270898 |
| 6 rs7769720   | 161023620 T | 2.279  | 1.33E-07 | chr:6:161270898 |
| 6 rs7771129   | 161018464 G | 2.279  | 1.33E-07 | chr:6:161270898 |
| 6 rs9295130   | 161068891 A | 2.279  | 1.33E-07 | chr:6:161270898 |
| 6 rs9355813   | 161031172 C | 2.279  | 1.33E-07 | chr:6:161270898 |
| 6 rs9365179   | 161024848 T | 2.279  | 1.33E-07 | chr:6:161270898 |
| 6 rs9456552   | 161017120 T | 2.279  | 1.33E-07 | chr:6:161270898 |
| 6 rs2489952   | 161260530 G | 3.768  | 1.52E-07 | chr:6:161270898 |
| 6 rs62435300  | 161269523 T | 3.768  | 1.52E-07 | chr:6:161270898 |
| 6 rs62435324  | 161276911 T | 3.768  | 1.52E-07 | chr:6:161270898 |
| 6 rs72501802  | 161263496 C | 3.768  | 1.52E-07 | chr:6:161270898 |
| 6 rs76838390  | 161272755 G | 3.768  | 1.52E-07 | chr:6:161270898 |
| 6 rs6913833   | 161017451 C | 2.264  | 1.53E-07 | chr:6:161270898 |
| 6 rs2092931   | 161077342 G | 2.272  | 1.60E-07 | chr:6:161270898 |
| 6 rs2872764   | 161078021 G | 2.272  | 1.60E-07 | chr:6:161270898 |
| 6 rs111437733 | 161352256 G | 0.414  | 1.60E-07 | chr:6:161270898 |
| 6 rs62436934  | 161348267 A | 0.4125 | 1.60E-07 | chr:6:161270898 |
| 6 rs62436936  | 161348391 T | 0.4125 | 1.60E-07 | chr:6:161270898 |
| 6 rs62436937  | 161348393 G | 0.4125 | 1.60E-07 | chr:6:161270898 |
| 6 rs73021716  | 161348131 T | 0.4125 | 1.60E-07 | chr:6:161270898 |
| 6 rs73021719  | 161348134 A | 0.4125 | 1.60E-07 | chr:6:161270898 |
| 6 rs935178    | 161348194 C | 0.4125 | 1.60E-07 | chr:6:161270898 |
| 6 rs935179    | 161348174 C | 0.4125 | 1.60E-07 | chr:6:161270898 |
| 6 rs935181    | 161348069 C | 0.4125 | 1.60E-07 | chr:6:161270898 |
| 6 rs10945682  | 161069941 A | 2.268  | 1.62E-07 | chr:6:161270898 |
| 6 rs13192132  | 161022423 C | 2.271  | 1.62E-07 | chr:6:161270898 |
| 6 rs36115561  | 161067693 T | 2.271  | 1.62E-07 | chr:6:161270898 |



|               |             |        |          |                 |
|---------------|-------------|--------|----------|-----------------|
| 6 rs9355814   | 161031253 T | 2.271  | 1.62E-07 | chr:6:161270898 |
| 6 rs9355815   | 161031894 G | 2.271  | 1.62E-07 | chr:6:161270898 |
| 6 rs1569933   | 161071212 T | 2.271  | 1.62E-07 | chr:6:161270898 |
| 6 rs62439772  | 161103568 G | 2.228  | 1.64E-07 | chr:6:161270898 |
| 6 rs6906446   | 161067949 A | 2.265  | 1.77E-07 | chr:6:161270898 |
| 6 rs783158    | 161234178 C | 3.661  | 1.83E-07 | chr:6:161270898 |
| 6 rs59962866  | 161351208 C | 0.4147 | 1.91E-07 | chr:6:161270898 |
| 6 rs1950564   | 161076516 T | 2.26   | 1.94E-07 | chr:6:161270898 |
| 6 rs62436935  | 161348273 C | 0.4152 | 1.98E-07 | chr:6:161270898 |
| 6 rs873039    | 161347469 G | 0.4137 | 2.04E-07 | chr:6:161270898 |
| 6 rs6415085   | 161023460 G | 2.23   | 2.13E-07 | chr:6:161270898 |
| 6 rs2565722   | 161235142 T | 3.705  | 2.21E-07 | chr:6:161270898 |
| 6 rs783157    | 161232771 C | 3.715  | 2.28E-07 | chr:6:161270898 |
| 6 rs10945704  | 161290926 T | 3.957  | 2.37E-07 | chr:6:161270898 |
| 6 rs2489944   | 161292913 T | 3.957  | 2.37E-07 | chr:6:161270898 |
| 6 rs2465867   | 161285463 A | 3.953  | 2.42E-07 | chr:6:161270898 |
| 6 rs2489941   | 161285517 T | 3.953  | 2.42E-07 | chr:6:161270898 |
| 6 rs1652462   | 161235660 C | 3.78   | 2.49E-07 | chr:6:161270898 |
| 6 rs1950563   | 161076527 C | 2.223  | 2.55E-07 | chr:6:161270898 |
| 6 rs7746273   | 161055827 G | 2.201  | 2.72E-07 | chr:6:161270898 |
| 6 rs813021    | 161234047 T | 3.677  | 2.81E-07 | chr:6:161270898 |
| 6 rs7761377   | 161032481 G | 2.192  | 3.23E-07 | chr:6:161270898 |
| 6 rs62435283  | 161267489 T | 3.622  | 3.29E-07 | chr:6:161270898 |
| 6 rs143943337 | 161033124 G | 2.322  | 3.46E-07 | chr:6:161270898 |
| 6 rs78851647  | 161276950 T | 4.049  | 3.55E-07 | chr:6:161270898 |
| 6 rs1652461   | 161235530 T | 3.625  | 3.69E-07 | chr:6:161270898 |
| 6 rs1406888   | 161091593 C | 2.158  | 3.93E-07 | chr:6:161270898 |
| 6 rs201364232 | 161103405 G | 2.152  | 4.15E-07 | chr:6:161270898 |
| 6 rs1937480   | 161304323 T | 3.821  | 4.50E-07 | chr:6:161270898 |
| 6 rs2465834   | 161301868 C | 3.821  | 4.50E-07 | chr:6:161270898 |
| 6 rs2465844   | 161297372 C | 3.821  | 4.50E-07 | chr:6:161270898 |
| 6 rs2465854   | 161310910 A | 3.821  | 4.50E-07 | chr:6:161270898 |
| 6 rs2465873   | 161299972 G | 3.821  | 4.50E-07 | chr:6:161270898 |
| 6 rs2489946   | 161301034 T | 3.821  | 4.50E-07 | chr:6:161270898 |
| 6 rs2489947   | 161301113 G | 3.821  | 4.50E-07 | chr:6:161270898 |
| 6 rs57300662  | 161301965 G | 3.821  | 4.50E-07 | chr:6:161270898 |
| 6 rs9347466   | 161297926 T | 3.821  | 4.50E-07 | chr:6:161270898 |
| 6 rs9365227   | 161297925 T | 3.821  | 4.50E-07 | chr:6:161270898 |
| 6 rs2489929   | 161270781 T | 4.005  | 4.56E-07 | chr:6:161270898 |
| 6 rs62435317  | 161274298 T | 4.005  | 4.56E-07 | chr:6:161270898 |
| 6 rs62435323  | 161276568 A | 4.005  | 4.56E-07 | chr:6:161270898 |
| 6 rs9365196   | 161056112 T | 2.16   | 4.58E-07 | chr:6:161270898 |
| 6 rs373160343 | 161339315 A | 0.4143 | 4.67E-07 | chr:6:161270898 |

|               |             |         |          |                 |
|---------------|-------------|---------|----------|-----------------|
| 6 rs62441743  | 161036480 A | 2.173   | 4.98E-07 | chr:6:161270898 |
| 6 rs73027814  | 161235533 C | 4.758   | 5.76E-07 | chr:6:161270898 |
| 6 rs7746421   | 161055924 G | 2.143   | 5.80E-07 | chr:6:161270898 |
| 6 rs113061358 | 161331854 T | 0.3016  | 5.81E-07 | chr:6:161270898 |
| 6 rs143671905 | 161055315 G | 2.177   | 6.07E-07 | chr:6:161270898 |
| 6 rs112215831 | 161182037 A | 4.947   | 6.20E-07 | chr:6:161270898 |
| 6 rs35527267  | 161181927 A | 4.947   | 6.20E-07 | chr:6:161270898 |
| 6 rs73019984  | 161183526 A | 4.947   | 6.20E-07 | chr:6:161270898 |
| 6 rs2802353   | 161244566 A | 3.894   | 6.64E-07 | chr:6:161270898 |
| 6 rs1782633   | 161249326 A | 3.911   | 6.68E-07 | chr:6:161270898 |
| 6 rs1782634   | 161248137 C | 3.895   | 6.73E-07 | chr:6:161270898 |
| 6 rs57196352  | 161302311 A | 4.885   | 6.78E-07 | chr:6:161270898 |
| 6 rs1624660   | 161246896 T | 3.907   | 6.78E-07 | chr:6:161270898 |
| 6 rs1782631   | 161249499 A | 3.907   | 6.78E-07 | chr:6:161270898 |
| 6 rs1972747   | 161241523 C | 3.907   | 6.78E-07 | chr:6:161270898 |
| 6 rs2565723   | 161239033 T | 3.907   | 6.78E-07 | chr:6:161270898 |
| 6 rs9365171   | 160981736 A | 2.162   | 7.16E-07 | chr:6:161270898 |
| 6 rs7765684   | 161055671 G | 2.125   | 7.24E-07 | chr:6:161270898 |
| 6 rs2997092   | 161282909 C | 4.026   | 7.61E-07 | chr:6:161270898 |
| 6 rs11753588  | 161189071 A | 4.882   | 7.72E-07 | chr:6:161270898 |
| 6 rs7746435   | 161055947 A | 2.117   | 8.05E-07 | chr:6:161270898 |
| 6 rs11963698  | 161347138 G | 0.4372  | 8.27E-07 | chr:6:161270898 |
| 6 rs1652464   | 161247894 C | 3.843   | 8.53E-07 | chr:6:161270898 |
| 6 rs1782635   | 161247896 T | 3.843   | 8.53E-07 | chr:6:161270898 |
| 6 rs12195630  | 161195800 A | 4.626   | 9.89E-07 | chr:6:161270898 |
| 6 rs1317216   | 161282102 C | 3.958   | 1.02E-06 | chr:6:161270898 |
| 6 rs2489935   | 161280245 C | 3.958   | 1.02E-06 | chr:6:161270898 |
| 6 rs2489939   | 161283829 C | 3.958   | 1.02E-06 | chr:6:161270898 |
| 6 rs1247537   | 161251788 C | 3.813   | 1.05E-06 | chr:6:161270898 |
| 6 rs1247538   | 161252452 A | 3.813   | 1.05E-06 | chr:6:161270898 |
| 6 rs1247540   | 161253016 A | 3.813   | 1.05E-06 | chr:6:161270898 |
| 6 rs2489928   | 161256391 G | 3.813   | 1.05E-06 | chr:6:161270898 |
| 6 rs73019765  | 161329691 C | 3.113   | 1.09E-06 | chr:6:161270898 |
| 6 rs73021703  | 161345204 G | 3.113   | 1.09E-06 | chr:6:161270898 |
| 6 rs111363879 | 161341729 C | 0.311   | 1.12E-06 | chr:6:161270898 |
| 6 rs4252192   | 161154745 A | 0.08429 | 1.27E-06 | chr:6:161270898 |
| 6 rs76411064  | 161380842 T | 0.3016  | 1.30E-06 | chr:6:161270898 |
| 6 rs1367209   | 161082847 G | 2.251   | 1.33E-06 | chr:6:161270898 |
| 6 rs1740431   | 161210798 C | 3.085   | 1.39E-06 | chr:6:161270898 |
| 6 rs74196484  | 161268783 A | 3.545   | 1.47E-06 | chr:6:161270898 |
| 6 rs113389682 | 161215570 T | 0.1309  | 1.54E-06 | chr:6:161270898 |
| 6 rs1247311   | 161336460 T | 2.332   | 1.63E-06 | chr:6:161270898 |
| 6 rs1367211   | 161082695 T | 2.228   | 1.69E-06 | chr:6:161270898 |

|              |             |        |          |                 |
|--------------|-------------|--------|----------|-----------------|
| 6 rs3902910  | 161009684 C | 2.086  | 1.73E-06 | chr:6:161270898 |
| 6 rs4073498  | 161008645 T | 2.086  | 1.73E-06 | chr:6:161270898 |
| 6 rs6455688  | 160996327 G | 2.086  | 1.73E-06 | chr:6:161270898 |
| 6 rs6455689  | 161006988 C | 2.086  | 1.73E-06 | chr:6:161270898 |
| 6 rs6903340  | 161005468 C | 2.086  | 1.73E-06 | chr:6:161270898 |
| 6 rs6906412  | 160994143 G | 2.086  | 1.73E-06 | chr:6:161270898 |
| 6 rs6910635  | 161001207 C | 2.086  | 1.73E-06 | chr:6:161270898 |
| 6 rs6923877  | 160996797 G | 2.086  | 1.73E-06 | chr:6:161270898 |
| 6 rs6927129  | 161013019 G | 2.086  | 1.73E-06 | chr:6:161270898 |
| 6 rs6939089  | 161003836 C | 2.086  | 1.73E-06 | chr:6:161270898 |
| 6 rs7450279  | 161010554 C | 2.086  | 1.73E-06 | chr:6:161270898 |
| 6 rs7453899  | 161010766 T | 2.086  | 1.73E-06 | chr:6:161270898 |
| 6 rs7765781  | 161007496 C | 2.086  | 1.73E-06 | chr:6:161270898 |
| 6 rs7765803  | 161007538 C | 2.086  | 1.73E-06 | chr:6:161270898 |
| 6 rs7771801  | 161008115 G | 2.086  | 1.73E-06 | chr:6:161270898 |
| 6 rs7775704  | 160999191 C | 2.086  | 1.73E-06 | chr:6:161270898 |
| 6 rs9346824  | 161002817 G | 2.086  | 1.73E-06 | chr:6:161270898 |
| 6 rs9355295  | 161003265 G | 2.086  | 1.73E-06 | chr:6:161270898 |
| 6 rs9456551  | 161012805 C | 2.086  | 1.73E-06 | chr:6:161270898 |
| 6 rs9457946  | 161012749 T | 2.086  | 1.73E-06 | chr:6:161270898 |
| 6 rs6905073  | 161067892 T | 2.08   | 1.88E-06 | chr:6:161270898 |
| 6 rs783176   | 161170835 G | 2.923  | 1.91E-06 | chr:6:161270898 |
| 6 rs9346820  | 160983209 C | 2.079  | 2.01E-06 | chr:6:161270898 |
| 6 rs34600300 | 161013322 A | 2.078  | 2.08E-06 | chr:6:161270898 |
| 6 rs7739883  | 160987728 C | 2.078  | 2.08E-06 | chr:6:161270898 |
| 6 rs9346821  | 160986787 T | 2.078  | 2.08E-06 | chr:6:161270898 |
| 6 rs9365174  | 160988957 A | 2.078  | 2.08E-06 | chr:6:161270898 |
| 6 rs9457943  | 160995199 A | 2.078  | 2.08E-06 | chr:6:161270898 |
| 6 rs4708876  | 161068320 C | 0.4977 | 2.12E-06 | chr:6:161270898 |
| 6 rs7770628  | 161018174 C | 0.4977 | 2.12E-06 | chr:6:161270898 |
| 6 rs1247572  | 161222490 G | 2.937  | 2.25E-06 | chr:6:161270898 |
| 6 rs1740466  | 161225836 T | 2.937  | 2.25E-06 | chr:6:161270898 |
| 6 rs1615455  | 161198488 T | 2.959  | 2.29E-06 | chr:6:161270898 |
| 6 rs1620969  | 161197068 G | 2.959  | 2.29E-06 | chr:6:161270898 |
| 6 rs1652481  | 161197882 A | 2.959  | 2.29E-06 | chr:6:161270898 |
| 6 rs1652483  | 161198083 T | 2.959  | 2.29E-06 | chr:6:161270898 |
| 6 rs1652484  | 161198290 C | 2.959  | 2.29E-06 | chr:6:161270898 |
| 6 rs1652486  | 161199200 A | 2.959  | 2.29E-06 | chr:6:161270898 |
| 6 rs1652487  | 161199394 A | 2.959  | 2.29E-06 | chr:6:161270898 |
| 6 rs1652489  | 161200191 A | 2.959  | 2.29E-06 | chr:6:161270898 |
| 6 rs1740437  | 161200058 C | 2.959  | 2.29E-06 | chr:6:161270898 |
| 6 rs1740440  | 161198468 T | 2.959  | 2.29E-06 | chr:6:161270898 |
| 6 rs1740441  | 161198305 T | 2.959  | 2.29E-06 | chr:6:161270898 |

|              |             |        |          |                 |
|--------------|-------------|--------|----------|-----------------|
| 6 rs1782599  | 161198776 C | 2.959  | 2.29E-06 | chr:6:161270898 |
| 6 rs1782601  | 161199213 T | 2.959  | 2.29E-06 | chr:6:161270898 |
| 6 rs9347418  | 160997603 G | 2.052  | 2.32E-06 | chr:6:161270898 |
| 6 rs1084653  | 161182115 A | 2.954  | 2.35E-06 | chr:6:161270898 |
| 6 rs2465835  | 161186537 G | 2.954  | 2.35E-06 | chr:6:161270898 |
| 6 rs2465836  | 161187044 A | 2.954  | 2.35E-06 | chr:6:161270898 |
| 6 rs4709450  | 161054859 G | 2.011  | 2.41E-06 | chr:6:161270898 |
| 6 rs1247559  | 161203756 T | 2.944  | 2.54E-06 | chr:6:161270898 |
| 6 rs1247560  | 161204820 C | 2.944  | 2.54E-06 | chr:6:161270898 |
| 6 rs1247564  | 161206650 A | 2.944  | 2.54E-06 | chr:6:161270898 |
| 6 rs1247566  | 161207315 A | 2.944  | 2.54E-06 | chr:6:161270898 |
| 6 rs1247567  | 161208297 C | 2.944  | 2.54E-06 | chr:6:161270898 |
| 6 rs1367216  | 161203454 C | 2.944  | 2.54E-06 | chr:6:161270898 |
| 6 rs2749127  | 161201658 A | 2.944  | 2.54E-06 | chr:6:161270898 |
| 6 rs3120137  | 160771192 A | 0.3949 | 2.66E-06 | chr:6:161270898 |
| 6 rs6905723  | 161351524 T | 2.929  | 2.69E-06 | chr:6:161270898 |
| 6 rs6415084  | 160980330 T | 0.4998 | 2.74E-06 | chr:6:161270898 |
| 6 rs34026567 | 161225901 G | 2.909  | 2.75E-06 | chr:6:161270898 |
| 6 rs1740438  | 161199900 C | 2.931  | 2.78E-06 | chr:6:161270898 |
| 6 rs1782602  | 161199887 A | 2.931  | 2.78E-06 | chr:6:161270898 |
| 6 rs1271391  | 161190851 G | 2.93   | 2.79E-06 | chr:6:161270898 |
| 6 rs1652498  | 161191645 G | 2.93   | 2.79E-06 | chr:6:161270898 |
| 6 rs1652501  | 161193959 G | 2.93   | 2.79E-06 | chr:6:161270898 |
| 6 rs1740447  | 161193779 A | 2.93   | 2.79E-06 | chr:6:161270898 |
| 6 rs11970528 | 161319672 A | 0.5097 | 2.85E-06 | chr:6:161270898 |
| 6 rs2465869  | 161319904 C | 0.5097 | 2.85E-06 | chr:6:161270898 |
| 6 rs9355839  | 161250259 A | 4.756  | 2.97E-06 | chr:6:161270898 |
| 6 rs1652492  | 161201024 A | 2.91   | 3.19E-06 | chr:6:161270898 |
| 6 rs7750229  | 160989198 G | 2.046  | 3.23E-06 | chr:6:161270898 |
| 6 rs2016359  | 161347179 C | 2.873  | 3.27E-06 | chr:6:161270898 |
| 6 rs2465870  | 161320060 T | 0.512  | 3.40E-06 | chr:6:161270898 |
| 6 rs4252200  | 161175721 G | 0.1635 | 3.48E-06 | chr:6:161270898 |
| 6 rs1937476  | 161315677 A | 0.5143 | 3.56E-06 | chr:6:161270898 |
| 6 rs1652456  | 161215051 T | 2.886  | 3.80E-06 | chr:6:161270898 |
| 6 rs1740430  | 161211997 A | 2.886  | 3.80E-06 | chr:6:161270898 |
| 6 rs62441715 | 161036201 C | 2.014  | 3.82E-06 | chr:6:161270898 |
| 6 rs62441716 | 161036202 C | 2.014  | 3.82E-06 | chr:6:161270898 |
| 6 rs62656960 | 161315678 G | 0.5188 | 4.44E-06 | chr:6:161270898 |
| 6 rs79570361 | 161170855 G | 7.33   | 5.09E-06 | chr:6:161270898 |
| 6 rs2489956  | 161315347 T | 0.523  | 5.42E-06 | chr:6:161270898 |
| 6 rs9364561  | 160988675 T | 1.942  | 6.15E-06 | chr:6:161270898 |
| 6 rs4709487  | 161487794 T | 2.689  | 7.47E-06 | chr:6:161270898 |
| 6 rs7454595  | 160995956 C | 0.521  | 7.83E-06 | chr:6:161270898 |

|               |             |        |          |                 |
|---------------|-------------|--------|----------|-----------------|
| 6 rs1247299   | 161347496 T | 0.5283 | 8.16E-06 | chr:6:161270898 |
| 6 rs147829643 | 161588372 T | 0.1334 | 8.76E-06 | chr:6:161270898 |
| 6 rs6921516   | 161015762 A | 1.972  | 8.97E-06 | chr:6:161270898 |
| 6 rs1247516   | 161301103 G | 1.965  | 9.85E-06 | chr:6:161270898 |
| 6 rs9347476   | 161396687 C | 0.3638 | 1.08E-05 | chr:6:161270898 |
| 6 rs4252166   | 161161904 C | 0.4527 | 1.20E-05 | chr:6:161270898 |
| 6 rs606817    | 161424682 A | 2.699  | 1.23E-05 | chr:6:161270898 |
| 6 rs625977    | 161418642 T | 2.699  | 1.23E-05 | chr:6:161270898 |
| 6 rs644486    | 161430522 G | 2.699  | 1.23E-05 | chr:6:161270898 |
| 6 rs705826    | 161415759 G | 2.699  | 1.23E-05 | chr:6:161270898 |
| 6 rs705828    | 161426545 T | 2.699  | 1.23E-05 | chr:6:161270898 |
| 6 rs9355324   | 161399193 A | 0.3642 | 1.32E-05 | chr:6:161270898 |
| 6 rs11751714  | 161329829 T | 4.009  | 1.41E-05 | chr:6:161270898 |
| 6 rs11751813  | 161339018 T | 4.009  | 1.41E-05 | chr:6:161270898 |
| 6 rs11754459  | 161330721 C | 4.009  | 1.41E-05 | chr:6:161270898 |
| 6 rs11758427  | 161334763 T | 4.009  | 1.41E-05 | chr:6:161270898 |
| 6 rs2275926   | 161347456 C | 4.009  | 1.41E-05 | chr:6:161270898 |
| 6 rs56160793  | 161339651 G | 4.009  | 1.41E-05 | chr:6:161270898 |
| 6 rs6914092   | 161348708 G | 4.009  | 1.41E-05 | chr:6:161270898 |
| 6 rs73017797  | 161324576 A | 4.009  | 1.41E-05 | chr:6:161270898 |
| 6 rs73019757  | 161327295 T | 4.009  | 1.41E-05 | chr:6:161270898 |
| 6 rs73019758  | 161327976 G | 4.009  | 1.41E-05 | chr:6:161270898 |
| 6 rs73019760  | 161328023 A | 4.009  | 1.41E-05 | chr:6:161270898 |
| 6 rs73019762  | 161328299 C | 4.009  | 1.41E-05 | chr:6:161270898 |
| 6 rs73019772  | 161333620 A | 4.009  | 1.41E-05 | chr:6:161270898 |
| 6 rs73019780  | 161336770 A | 4.009  | 1.41E-05 | chr:6:161270898 |
| 6 rs73019797  | 161339947 A | 4.009  | 1.41E-05 | chr:6:161270898 |
| 6 rs76832359  | 161351932 T | 3.991  | 1.41E-05 | chr:6:161270898 |
| 6 rs62436699  | 161190945 C | 3.241  | 1.68E-05 | chr:6:161270898 |
| 6 rs9457950   | 161024293 T | 2.384  | 1.76E-05 | chr:6:161270898 |
| 6 rs11752957  | 161363705 T | 3.924  | 1.78E-05 | chr:6:161270898 |
| 6 rs11755099  | 161361675 A | 3.924  | 1.78E-05 | chr:6:161270898 |
| 6 rs11759366  | 161361339 T | 3.924  | 1.78E-05 | chr:6:161270898 |
| 6 rs73021743  | 161356292 C | 3.924  | 1.78E-05 | chr:6:161270898 |
| 6 rs675457    | 161431040 C | 2.605  | 1.80E-05 | chr:6:161270898 |
| 6 rs1800589   | 161086160 T | 1.881  | 1.87E-05 | chr:6:161270898 |
| 6 rs1740445   | 161196162 G | 0.5392 | 1.94E-05 | chr:6:161270898 |
| 6 rs1782627   | 161196800 G | 0.5392 | 1.94E-05 | chr:6:161270898 |
| 6 rs1782629   | 161195866 A | 0.5392 | 1.94E-05 | chr:6:161270898 |
| 6 rs6938647   | 160986915 A | 0.4874 | 1.94E-05 | chr:6:161270898 |
| 6 rs117729404 | 161528577 G | 0.3608 | 2.25E-05 | chr:6:161270898 |
| 6 rs9365200   | 161083272 T | 1.866  | 2.36E-05 | chr:6:161270898 |
| 6 rs9365201   | 161083481 T | 1.866  | 2.36E-05 | chr:6:161270898 |

|               |             |        |          |                 |
|---------------|-------------|--------|----------|-----------------|
| 6 rs1530395   | 161362678 A | 2.325  | 2.42E-05 | chr:6:161270898 |
| 6 rs73021756  | 161362769 G | 2.325  | 2.42E-05 | chr:6:161270898 |
| 6 rs783147    | 161137990 A | 0.5549 | 2.44E-05 | chr:6:161270898 |
| 6 rs9346841   | 161315130 C | 2.884  | 2.61E-05 | chr:6:161270898 |
| 6 rs12207195  | 160974578 A | 2.909  | 2.68E-05 | chr:6:161270898 |
| 6 rs9346833   | 161084642 C | 1.852  | 2.78E-05 | chr:6:161270898 |
| 6 rs374071816 | 161103805 A | 0.378  | 2.85E-05 | chr:6:161270898 |
| 6 rs112280675 | 32522066 A  | 6.017  | 2.23E-11 | chr:6:32505702  |
| 6 rs35957455  | 32521195 T  | 5.728  | 2.60E-11 | chr:6:32505702  |
| 6 rs3828832   | 32521083 C  | 5.579  | 2.93E-11 | chr:6:32505702  |
| 6 rs74211958  | 32469040 G  | 3.992  | 3.04E-11 | chr:6:32505702  |
| 6 rs115303801 | 32512229 G  | 4.792  | 3.10E-11 | chr:6:32505702  |
| 6 rs114987387 | 32502131 G  | 5.18   | 3.12E-11 | chr:6:32505702  |
| 6 rs116316731 | 32502097 T  | 5.18   | 3.12E-11 | chr:6:32505702  |
| 6 rs114302967 | 32503839 C  | 3.887  | 3.17E-11 | chr:6:32505702  |
| 6 rs76054694  | 32503840 T  | 3.887  | 3.17E-11 | chr:6:32505702  |
| 6 rs116405199 | 32504367 T  | 4.932  | 3.26E-11 | chr:6:32505702  |
| 6 rs78994392  | 32504362 T  | 4.932  | 3.26E-11 | chr:6:32505702  |
| 6 rs113017160 | 32503834 G  | 3.853  | 4.16E-11 | chr:6:32505702  |
| 6 rs111725169 | 32512223 C  | 4.8    | 4.18E-11 | chr:6:32505702  |
| 6 rs116017457 | 32521909 T  | 4.854  | 4.23E-11 | chr:6:32505702  |
| 6 rs5016923   | 32502028 G  | 5.194  | 4.96E-11 | chr:6:32505702  |
| 6 rs74937819  | 32502037 A  | 5.194  | 4.96E-11 | chr:6:32505702  |
| 6 rs72844111  | 32513938 C  | 5.226  | 4.99E-11 | chr:6:32505702  |
| 6 rs72851064  | 32503928 C  | 4.883  | 5.03E-11 | chr:6:32505702  |
| 6 rs66706092  | 32513915 T  | 5.229  | 5.10E-11 | chr:6:32505702  |
| 6 rs72508464  | 32504341 T  | 4.891  | 5.40E-11 | chr:6:32505702  |
| 6 rs72844171  | 32520749 C  | 5.354  | 5.43E-11 | chr:6:32505702  |
| 6 rs35697584  | 32522151 A  | 6.93   | 5.45E-11 | chr:6:32505702  |
| 6 rs72844118  | 32514539 T  | 5.153  | 5.52E-11 | chr:6:32505702  |
| 6 rs74485644  | 32501421 T  | 5.172  | 5.58E-11 | chr:6:32505702  |
| 6 rs201795916 | 32514567 C  | 5.154  | 5.59E-11 | chr:6:32505702  |
| 6 rs66521709  | 32509829 A  | 5.184  | 5.66E-11 | chr:6:32505702  |
| 6 rs113787446 | 32518630 C  | 5.179  | 5.86E-11 | chr:6:32505702  |
| 6 rs114776163 | 32518625 G  | 5.179  | 5.86E-11 | chr:6:32505702  |
| 6 rs72492311  | 32509979 T  | 5.183  | 5.89E-11 | chr:6:32505702  |
| 6 rs72844120  | 32514540 A  | 4.686  | 6.35E-11 | chr:6:32505702  |
| 6 rs74197151  | 32469035 T  | 3.717  | 6.53E-11 | chr:6:32505702  |
| 6 rs113225456 | 32521406 T  | 5.235  | 6.56E-11 | chr:6:32505702  |
| 6 rs73729138  | 32520854 G  | 5.209  | 6.67E-11 | chr:6:32505702  |
| 6 rs72851025  | 32501459 C  | 5.183  | 6.72E-11 | chr:6:32505702  |
| 6 rs72492327  | 32520465 G  | 5.208  | 6.77E-11 | chr:6:32505702  |
| 6 rs77783340  | 32514313 T  | 5.171  | 6.84E-11 | chr:6:32505702  |

|               |            |       |          |                |
|---------------|------------|-------|----------|----------------|
| 6 rs66532036  | 32519319 A | 5.306 | 6.85E-11 | chr:6:32505702 |
| 6 rs72844187  | 32521419 G | 5.229 | 6.93E-11 | chr:6:32505702 |
| 6 rs116190325 | 32510039 A | 5.163 | 6.99E-11 | chr:6:32505702 |
| 6 rs376327303 | 32520719 A | 5.289 | 7.01E-11 | chr:6:32505702 |
| 6 rs73397416  | 32521951 C | 5.24  | 7.03E-11 | chr:6:32505702 |
| 6 rs75861594  | 32518103 G | 5.065 | 7.15E-11 | chr:6:32505702 |
| 6 rs72508413  | 32454597 G | 5.267 | 7.25E-11 | chr:6:32505702 |
| 6 rs72492319  | 32511987 T | 5.189 | 7.36E-11 | chr:6:32505702 |
| 6 rs75141783  | 32511944 A | 5.189 | 7.36E-11 | chr:6:32505702 |
| 6 rs3828848   | 32520665 C | 5.193 | 7.49E-11 | chr:6:32505702 |
| 6 rs113460787 | 32518089 T | 5.063 | 7.53E-11 | chr:6:32505702 |
| 6 rs572581776 | 32526776 G | 4.173 | 7.70E-11 | chr:6:32505702 |
| 6 rs113727677 | 32517010 C | 4.901 | 7.96E-11 | chr:6:32505702 |
| 6 rs66738149  | 32501898 C | 5.165 | 8.00E-11 | chr:6:32505702 |
| 6 rs72851044  | 32501886 A | 5.165 | 8.00E-11 | chr:6:32505702 |
| 6 rs72851046  | 32501957 G | 5.173 | 8.10E-11 | chr:6:32505702 |
| 6 rs72851047  | 32501962 T | 5.173 | 8.10E-11 | chr:6:32505702 |
| 6 rs72844188  | 32521427 C | 5.176 | 8.14E-11 | chr:6:32505702 |
| 6 rs114353707 | 32513535 C | 5.174 | 8.36E-11 | chr:6:32505702 |
| 6 rs116817148 | 32513534 G | 5.174 | 8.36E-11 | chr:6:32505702 |
| 6 rs66796862  | 32521664 C | 5.179 | 8.47E-11 | chr:6:32505702 |
| 6 rs115712701 | 32501737 C | 5.181 | 8.50E-11 | chr:6:32505702 |
| 6 rs35301884  | 32513638 C | 5.181 | 8.54E-11 | chr:6:32505702 |
| 6 rs74221689  | 32501936 A | 5.179 | 8.58E-11 | chr:6:32505702 |
| 6 rs68175425  | 32517446 G | 5.13  | 8.64E-11 | chr:6:32505702 |
| 6 rs111945767 | 32517045 C | 4.939 | 8.65E-11 | chr:6:32505702 |
| 6 rs115806221 | 32514401 G | 5.182 | 8.90E-11 | chr:6:32505702 |
| 6 rs34369284  | 32514144 T | 5.182 | 8.90E-11 | chr:6:32505702 |
| 6 rs114233058 | 32517386 T | 4.997 | 9.41E-11 | chr:6:32505702 |
| 6 rs115916707 | 32517387 G | 4.997 | 9.41E-11 | chr:6:32505702 |
| 6 rs113051760 | 32521691 G | 4.684 | 9.50E-11 | chr:6:32505702 |
| 6 rs17424325  | 32521644 T | 4.684 | 9.50E-11 | chr:6:32505702 |
| 6 rs114015220 | 32510599 T | 4.877 | 9.81E-11 | chr:6:32505702 |
| 6 rs114472333 | 32510598 T | 4.877 | 9.81E-11 | chr:6:32505702 |
| 6 rs534064478 | 32512189 T | 4.386 | 9.81E-11 | chr:6:32505702 |
| 6 rs546382275 | 32512190 G | 4.386 | 9.81E-11 | chr:6:32505702 |
| 6 rs113850533 | 32516839 T | 5.03  | 1.04E-10 | chr:6:32505702 |
| 6 rs66502326  | 32509411 T | 5.156 | 1.07E-10 | chr:6:32505702 |
| 6 rs72853950  | 32509472 T | 4.855 | 1.08E-10 | chr:6:32505702 |
| 6 rs114246255 | 32509461 G | 4.858 | 1.10E-10 | chr:6:32505702 |
| 6 rs115704383 | 32509460 T | 4.858 | 1.10E-10 | chr:6:32505702 |
| 6 rs115664796 | 32508758 C | 4.834 | 1.10E-10 | chr:6:32505702 |
| 6 rs79638048  | 32519391 A | 4.69  | 1.11E-10 | chr:6:32505702 |

|               |            |       |          |                |
|---------------|------------|-------|----------|----------------|
| 6 rs72844152  | 32519652 A | 4.983 | 1.12E-10 | chr:6:32505702 |
| 6 rs34615209  | 32513862 T | 5.062 | 1.15E-10 | chr:6:32505702 |
| 6 rs35687625  | 32513840 A | 5.062 | 1.15E-10 | chr:6:32505702 |
| 6 rs113648142 | 32508762 T | 4.822 | 1.15E-10 | chr:6:32505702 |
| 6 rs76723065  | 32510591 G | 4.88  | 1.16E-10 | chr:6:32505702 |
| 6 rs111938555 | 32509707 T | 4.537 | 1.17E-10 | chr:6:32505702 |
| 6 rs67529500  | 32504757 C | 4.857 | 1.19E-10 | chr:6:32505702 |
| 6 rs111289870 | 32512269 C | 4.868 | 1.20E-10 | chr:6:32505702 |
| 6 rs113900769 | 32503887 T | 4.075 | 1.22E-10 | chr:6:32505702 |
| 6 rs112458679 | 32512167 G | 4.262 | 1.26E-10 | chr:6:32505702 |
| 6 rs72508474  | 32508738 C | 4.819 | 1.28E-10 | chr:6:32505702 |
| 6 rs9269254   | 32454327 T | 5.736 | 1.33E-10 | chr:6:32505702 |
| 6 rs3828852   | 32520595 A | 4.885 | 1.36E-10 | chr:6:32505702 |
| 6 rs62405640  | 32516729 T | 4.973 | 1.37E-10 | chr:6:32505702 |
| 6 rs76033762  | 32516702 C | 4.973 | 1.37E-10 | chr:6:32505702 |
| 6 rs114520912 | 32517504 T | 4.873 | 1.39E-10 | chr:6:32505702 |
| 6 rs111901878 | 32516893 T | 4.876 | 1.41E-10 | chr:6:32505702 |
| 6 rs72492307  | 32509519 C | 4.88  | 1.41E-10 | chr:6:32505702 |
| 6 rs73728002  | 32513993 A | 5.075 | 1.42E-10 | chr:6:32505702 |
| 6 rs148633289 | 32487229 T | 7.664 | 1.42E-10 | chr:6:32505702 |
| 6 rs73727973  | 32509691 G | 4.876 | 1.46E-10 | chr:6:32505702 |
| 6 rs72492303  | 32509061 T | 4.774 | 1.48E-10 | chr:6:32505702 |
| 6 rs73727980  | 32511774 C | 4.885 | 1.48E-10 | chr:6:32505702 |
| 6 rs73727981  | 32511791 C | 4.885 | 1.48E-10 | chr:6:32505702 |
| 6 rs115696138 | 32504460 C | 3.965 | 1.50E-10 | chr:6:32505702 |
| 6 rs111705290 | 32513412 A | 4.449 | 1.51E-10 | chr:6:32505702 |
| 6 rs72851028  | 32501615 A | 4.874 | 1.57E-10 | chr:6:32505702 |
| 6 rs72492306  | 32509510 A | 4.879 | 1.59E-10 | chr:6:32505702 |
| 6 rs76415310  | 32513232 T | 4.508 | 1.64E-10 | chr:6:32505702 |
| 6 rs67721312  | 32517556 T | 4.936 | 1.71E-10 | chr:6:32505702 |
| 6 rs74194578  | 32517590 T | 4.936 | 1.71E-10 | chr:6:32505702 |
| 6 rs72853949  | 32509435 T | 5.149 | 1.74E-10 | chr:6:32505702 |
| 6 rs66497315  | 32512407 C | 4.867 | 1.77E-10 | chr:6:32505702 |
| 6 rs72492314  | 32512421 A | 4.867 | 1.77E-10 | chr:6:32505702 |
| 6 rs114831840 | 32501301 C | 4.588 | 1.78E-10 | chr:6:32505702 |
| 6 rs115303308 | 32501296 A | 4.588 | 1.78E-10 | chr:6:32505702 |
| 6 rs116474488 | 32469226 T | 3.37  | 1.86E-10 | chr:6:32505702 |
| 6 rs2157337   | 32501144 T | 4.609 | 1.86E-10 | chr:6:32505702 |
| 6 rs72853989  | 32512321 T | 4.864 | 1.87E-10 | chr:6:32505702 |
| 6 rs112515515 | 32513422 T | 4.744 | 1.89E-10 | chr:6:32505702 |
| 6 rs28819746  | 32509579 C | 4.863 | 1.93E-10 | chr:6:32505702 |
| 6 rs76662624  | 32503880 A | 3.905 | 1.93E-10 | chr:6:32505702 |
| 6 rs112457394 | 32469073 C | 4.265 | 1.96E-10 | chr:6:32505702 |



|               |            |       |          |                |
|---------------|------------|-------|----------|----------------|
| 6 rs562624040 | 32513024 C | 4.051 | 2.03E-10 | chr:6:32505702 |
| 6 rs68126668  | 32509603 A | 4.863 | 2.08E-10 | chr:6:32505702 |
| 6 rs115833135 | 32489672 A | 4.261 | 2.10E-10 | chr:6:32505702 |
| 6 rs34508462  | 32523476 C | 4.899 | 2.12E-10 | chr:6:32505702 |
| 6 rs72492325  | 32520151 C | 4.838 | 2.19E-10 | chr:6:32505702 |
| 6 rs72849265  | 32458208 T | 3.808 | 2.19E-10 | chr:6:32505702 |
| 6 rs116413420 | 32509466 T | 4.852 | 2.20E-10 | chr:6:32505702 |
| 6 rs115202951 | 32501311 T | 4.57  | 2.25E-10 | chr:6:32505702 |
| 6 rs74950807  | 32513375 T | 4.645 | 2.42E-10 | chr:6:32505702 |
| 6 rs76818741  | 32513378 A | 4.645 | 2.42E-10 | chr:6:32505702 |
| 6 rs149521915 | 32489639 T | 4.199 | 2.47E-10 | chr:6:32505702 |
| 6 rs115217308 | 32520296 A | 4.738 | 2.47E-10 | chr:6:32505702 |
| 6 rs116173033 | 32520295 G | 4.738 | 2.47E-10 | chr:6:32505702 |
| 6 rs114171624 | 32514706 G | 4.266 | 2.52E-10 | chr:6:32505702 |
| 6 rs72853983  | 32511854 A | 4.611 | 2.60E-10 | chr:6:32505702 |
| 6 rs73729745  | 32469136 A | 4.373 | 2.60E-10 | chr:6:32505702 |
| 6 rs73729131  | 32520313 T | 4.745 | 2.60E-10 | chr:6:32505702 |
| 6 rs529580232 | 32512136 C | 4.23  | 2.64E-10 | chr:6:32505702 |
| 6 rs551034683 | 32512138 A | 4.23  | 2.64E-10 | chr:6:32505702 |
| 6 rs9269252   | 32454293 A | 5.353 | 2.65E-10 | chr:6:32505702 |
| 6 rs113908137 | 32523500 G | 4.843 | 2.71E-10 | chr:6:32505702 |
| 6 rs34166207  | 32523510 A | 4.843 | 2.71E-10 | chr:6:32505702 |
| 6 rs67717173  | 32520137 T | 4.832 | 2.74E-10 | chr:6:32505702 |
| 6 rs62405642  | 32517759 G | 4.727 | 2.76E-10 | chr:6:32505702 |
| 6 rs116645664 | 32517505 C | 4.656 | 2.84E-10 | chr:6:32505702 |
| 6 rs9271649   | 32592359 G | 4.355 | 2.86E-10 | chr:6:32505702 |
| 6 rs73727961  | 32509022 A | 4.502 | 2.87E-10 | chr:6:32505702 |
| 6 rs67041740  | 32509273 C | 4.773 | 2.91E-10 | chr:6:32505702 |
| 6 rs113434238 | 32501204 T | 4.362 | 2.93E-10 | chr:6:32505702 |
| 6 rs142127023 | 32532178 T | 3.523 | 2.95E-10 | chr:6:32505702 |
| 6 rs142670190 | 32532172 T | 3.523 | 2.95E-10 | chr:6:32505702 |
| 6 rs144412121 | 32532179 G | 3.523 | 2.95E-10 | chr:6:32505702 |
| 6 rs74394760  | 32513078 C | 4.594 | 2.95E-10 | chr:6:32505702 |
| 6 rs116675816 | 32512131 A | 4.226 | 2.98E-10 | chr:6:32505702 |
| 6 rs111340421 | 32517174 G | 4.627 | 2.99E-10 | chr:6:32505702 |
| 6 rs113405235 | 32521796 C | 4.529 | 3.00E-10 | chr:6:32505702 |
| 6 rs74205903  | 32501249 C | 4.348 | 3.01E-10 | chr:6:32505702 |
| 6 rs9271646   | 32592351 G | 4.356 | 3.03E-10 | chr:6:32505702 |
| 6 rs9271647   | 32592354 G | 4.356 | 3.03E-10 | chr:6:32505702 |
| 6 rs9272100   | 32599814 T | 3.958 | 3.09E-10 | chr:6:32505702 |
| 6 rs73401349  | 32458094 C | 3.645 | 3.10E-10 | chr:6:32505702 |
| 6 rs115123240 | 32519919 G | 4.65  | 3.11E-10 | chr:6:32505702 |
| 6 rs187085470 | 32533998 G | 3.617 | 3.11E-10 | chr:6:32505702 |

|               |            |       |          |                |
|---------------|------------|-------|----------|----------------|
| 6 rs72492332  | 32523085 G | 4.739 | 3.11E-10 | chr:6:32505702 |
| 6 rs111890942 | 32458131 C | 3.925 | 3.19E-10 | chr:6:32505702 |
| 6 rs9271703   | 32593280 T | 4.486 | 3.21E-10 | chr:6:32505702 |
| 6 rs78622201  | 32518405 A | 4.6   | 3.28E-10 | chr:6:32505702 |
| 6 rs147023195 | 32518295 T | 4.417 | 3.30E-10 | chr:6:32505702 |
| 6 rs67461697  | 32518767 C | 4.577 | 3.31E-10 | chr:6:32505702 |
| 6 rs73729111  | 32517525 T | 4.856 | 3.31E-10 | chr:6:32505702 |
| 6 rs74290599  | 32518785 T | 4.577 | 3.31E-10 | chr:6:32505702 |
| 6 rs557288207 | 32504452 T | 3.794 | 3.34E-10 | chr:6:32505702 |
| 6 rs76533559  | 32554897 G | 4.742 | 3.41E-10 | chr:6:32505702 |
| 6 rs34405098  | 32523269 T | 4.331 | 3.47E-10 | chr:6:32505702 |
| 6 rs112155110 | 32501417 T | 5.141 | 3.50E-10 | chr:6:32505702 |
| 6 rs12665549  | 32517141 A | 4.274 | 3.59E-10 | chr:6:32505702 |
| 6 rs72853979  | 32511572 T | 4.6   | 3.65E-10 | chr:6:32505702 |
| 6 rs67774869  | 32508794 C | 4.533 | 3.79E-10 | chr:6:32505702 |
| 6 rs72851063  | 32503901 T | 4.145 | 3.81E-10 | chr:6:32505702 |
| 6 rs73727944  | 32504713 T | 4.168 | 3.84E-10 | chr:6:32505702 |
| 6 rs142475334 | 32533988 A | 3.704 | 4.02E-10 | chr:6:32505702 |
| 6 rs9269560   | 32544371 C | 4.605 | 4.04E-10 | chr:6:32505702 |
| 6 rs9269317   | 32539767 T | 3.689 | 4.07E-10 | chr:6:32505702 |
| 6 rs141020324 | 32469001 A | 3.152 | 4.09E-10 | chr:6:32505702 |
| 6 rs144975609 | 32468997 A | 3.152 | 4.09E-10 | chr:6:32505702 |
| 6 rs76483802  | 32454913 G | 4.763 | 4.11E-10 | chr:6:32505702 |
| 6 rs72492322  | 32519628 G | 4.625 | 4.16E-10 | chr:6:32505702 |
| 6 rs9269299   | 32539541 C | 4.006 | 4.16E-10 | chr:6:32505702 |
| 6 rs67916930  | 32508823 G | 4.53  | 4.19E-10 | chr:6:32505702 |
| 6 rs115077688 | 32503287 T | 4.354 | 4.22E-10 | chr:6:32505702 |
| 6 rs114840252 | 32504071 T | 3.337 | 4.28E-10 | chr:6:32505702 |
| 6 rs66678933  | 32509320 T | 4.643 | 4.41E-10 | chr:6:32505702 |
| 6 rs72492304  | 32509311 C | 4.643 | 4.41E-10 | chr:6:32505702 |
| 6 rs72492315  | 32512466 C | 3.865 | 4.54E-10 | chr:6:32505702 |
| 6 rs75375346  | 32596908 C | 4.457 | 4.66E-10 | chr:6:32505702 |
| 6 rs67011649  | 32532599 G | 3.39  | 4.67E-10 | chr:6:32505702 |
| 6 rs9271527   | 32589867 T | 4.458 | 4.80E-10 | chr:6:32505702 |
| 6 rs72508430  | 32487172 T | 4.286 | 4.87E-10 | chr:6:32505702 |
| 6 rs9271618   | 32591752 A | 4.446 | 4.88E-10 | chr:6:32505702 |
| 6 rs199506689 | 32504701 T | 3.995 | 4.99E-10 | chr:6:32505702 |
| 6 rs9269749   | 32548136 G | 5.218 | 5.09E-10 | chr:6:32505702 |
| 6 rs9271492   | 32589122 C | 4.641 | 5.13E-10 | chr:6:32505702 |
| 6 rs73726814  | 32523235 C | 4.247 | 5.14E-10 | chr:6:32505702 |
| 6 rs9271894   | 32595874 T | 4.441 | 5.16E-10 | chr:6:32505702 |
| 6 rs532050307 | 32469431 C | 3.194 | 5.17E-10 | chr:6:32505702 |
| 6 rs571525080 | 32469429 A | 3.194 | 5.17E-10 | chr:6:32505702 |

|               |            |       |          |                |
|---------------|------------|-------|----------|----------------|
| 6 rs67081540  | 32512359 C | 4.811 | 5.22E-10 | chr:6:32505702 |
| 6 rs536038224 | 32523371 C | 4.359 | 5.30E-10 | chr:6:32505702 |
| 6 rs114565678 | 32469224 A | 3.358 | 5.36E-10 | chr:6:32505702 |
| 6 rs9269561   | 32544405 G | 4.477 | 5.44E-10 | chr:6:32505702 |
| 6 rs114164335 | 32532128 C | 3.498 | 5.54E-10 | chr:6:32505702 |
| 6 rs66534143  | 32512601 C | 4.383 | 5.59E-10 | chr:6:32505702 |
| 6 rs536708130 | 32518949 G | 4.645 | 5.66E-10 | chr:6:32505702 |
| 6 rs72853968  | 32509883 C | 4.153 | 5.79E-10 | chr:6:32505702 |
| 6 rs75519123  | 32469404 G | 3.185 | 5.98E-10 | chr:6:32505702 |
| 6 rs200263528 | 32509009 C | 4.264 | 6.00E-10 | chr:6:32505702 |
| 6 rs111626267 | 32502273 T | 3.847 | 6.12E-10 | chr:6:32505702 |
| 6 rs115573660 | 32502277 A | 3.847 | 6.12E-10 | chr:6:32505702 |
| 6 rs74997284  | 32518934 G | 4.634 | 6.25E-10 | chr:6:32505702 |
| 6 rs78326230  | 32518935 A | 4.634 | 6.25E-10 | chr:6:32505702 |
| 6 rs116350000 | 32523418 G | 4.876 | 6.34E-10 | chr:6:32505702 |
| 6 rs9271694   | 32593051 C | 4.382 | 6.38E-10 | chr:6:32505702 |
| 6 rs9271533   | 32589952 T | 4.217 | 6.45E-10 | chr:6:32505702 |
| 6 rs9271535   | 32589959 T | 4.217 | 6.45E-10 | chr:6:32505702 |
| 6 rs73727940  | 32503738 T | 3.471 | 6.50E-10 | chr:6:32505702 |
| 6 rs79604868  | 32504073 A | 3.316 | 6.66E-10 | chr:6:32505702 |
| 6 rs72844144  | 32519125 A | 5.541 | 6.69E-10 | chr:6:32505702 |
| 6 rs9269965   | 32552219 G | 3.634 | 6.70E-10 | chr:6:32505702 |
| 6 rs9269270   | 32539081 G | 3.085 | 6.74E-10 | chr:6:32505702 |
| 6 rs9271900   | 32596013 G | 4.26  | 6.81E-10 | chr:6:32505702 |
| 6 rs137976440 | 32489630 T | 4.15  | 7.06E-10 | chr:6:32505702 |
| 6 rs9271997   | 32597801 A | 4.314 | 7.08E-10 | chr:6:32505702 |
| 6 rs112180912 | 32518436 A | 4.323 | 7.09E-10 | chr:6:32505702 |
| 6 rs72492310  | 32509867 G | 4.147 | 7.10E-10 | chr:6:32505702 |
| 6 rs9271688   | 32592992 G | 3.959 | 7.16E-10 | chr:6:32505702 |
| 6 rs2395225   | 32590624 C | 4.302 | 7.26E-10 | chr:6:32505702 |
| 6 rs78942674  | 32509897 T | 4.141 | 7.30E-10 | chr:6:32505702 |
| 6 rs9269532   | 32543825 C | 4.148 | 7.69E-10 | chr:6:32505702 |
| 6 rs547409849 | 32503365 T | 3.278 | 7.77E-10 | chr:6:32505702 |
| 6 rs565770331 | 32503366 C | 3.278 | 7.77E-10 | chr:6:32505702 |
| 6 rs538116343 | 32521742 T | 3.9   | 7.83E-10 | chr:6:32505702 |
| 6 rs112709345 | 32501541 T | 4.967 | 7.84E-10 | chr:6:32505702 |
| 6 rs73397403  | 32519849 G | 4.188 | 7.87E-10 | chr:6:32505702 |
| 6 rs9271508   | 32589410 T | 4.342 | 7.88E-10 | chr:6:32505702 |
| 6 rs145219524 | 32533964 T | 3.369 | 7.90E-10 | chr:6:32505702 |
| 6 rs189832895 | 32533972 T | 3.369 | 7.90E-10 | chr:6:32505702 |
| 6 rs575033700 | 32533973 T | 3.369 | 7.90E-10 | chr:6:32505702 |
| 6 rs9269304   | 32539585 T | 3.672 | 7.91E-10 | chr:6:32505702 |
| 6 rs9271539   | 32590028 A | 4.301 | 7.92E-10 | chr:6:32505702 |

|               |            |       |          |                |
|---------------|------------|-------|----------|----------------|
| 6 rs181939518 | 32533977 C | 3.369 | 8.46E-10 | chr:6:32505702 |
| 6 rs73727960  | 32508989 G | 4.254 | 8.70E-10 | chr:6:32505702 |
| 6 rs115524254 | 32503565 C | 3.928 | 8.81E-10 | chr:6:32505702 |
| 6 rs9271850   | 32595060 G | 3.843 | 8.87E-10 | chr:6:32505702 |
| 6 rs79364663  | 32504085 C | 3.227 | 8.95E-10 | chr:6:32505702 |
| 6 rs71534520  | 32510146 G | 3.836 | 9.24E-10 | chr:6:32505702 |
| 6 rs11752506  | 32520273 A | 4.03  | 9.30E-10 | chr:6:32505702 |
| 6 rs116335331 | 32532577 T | 3.177 | 9.37E-10 | chr:6:32505702 |
| 6 rs72508473  | 32508399 G | 3.896 | 9.49E-10 | chr:6:32505702 |
| 6 rs9271667   | 32592710 C | 4.232 | 9.59E-10 | chr:6:32505702 |
| 6 rs76509141  | 32504529 C | 3.441 | 9.92E-10 | chr:6:32505702 |
| 6 rs9271489   | 32589051 A | 4.268 | 9.98E-10 | chr:6:32505702 |
| 6 rs72851061  | 32503672 C | 3.936 | 1.02E-09 | chr:6:32505702 |
| 6 rs9270121   | 32555009 C | 4.97  | 1.04E-09 | chr:6:32505702 |
| 6 rs116048339 | 32468982 T | 3.047 | 1.05E-09 | chr:6:32505702 |
| 6 rs116380301 | 32468983 T | 3.047 | 1.05E-09 | chr:6:32505702 |
| 6 rs73726819  | 32526540 G | 4.295 | 1.07E-09 | chr:6:32505702 |
| 6 rs74375951  | 32500923 G | 4.31  | 1.08E-09 | chr:6:32505702 |
| 6 rs114362560 | 32504503 A | 3.341 | 1.13E-09 | chr:6:32505702 |
| 6 rs116422126 | 32504500 G | 3.341 | 1.13E-09 | chr:6:32505702 |
| 6 rs181190479 | 32533905 G | 3.176 | 1.13E-09 | chr:6:32505702 |
| 6 rs188265524 | 32533903 G | 3.176 | 1.13E-09 | chr:6:32505702 |
| 6 rs9271887   | 32595679 A | 4.207 | 1.13E-09 | chr:6:32505702 |
| 6 rs72853970  | 32509919 A | 4.118 | 1.15E-09 | chr:6:32505702 |
| 6 rs9272635   | 32608193 C | 3.859 | 1.18E-09 | chr:6:32505702 |
| 6 rs530662953 | 32504587 C | 3.445 | 1.19E-09 | chr:6:32505702 |
| 6 rs74389316  | 32596869 T | 4.005 | 1.22E-09 | chr:6:32505702 |
| 6 rs9271522   | 32589791 C | 4.147 | 1.22E-09 | chr:6:32505702 |
| 6 rs72851052  | 32502249 T | 3.814 | 1.23E-09 | chr:6:32505702 |
| 6 rs72851053  | 32502250 G | 3.814 | 1.23E-09 | chr:6:32505702 |
| 6 rs72492317  | 32512501 A | 4.084 | 1.26E-09 | chr:6:32505702 |
| 6 rs115077617 | 32532645 C | 3.613 | 1.27E-09 | chr:6:32505702 |
| 6 rs113654440 | 32596946 A | 4.208 | 1.30E-09 | chr:6:32505702 |
| 6 rs9270583   | 32561229 G | 4.77  | 1.31E-09 | chr:6:32505702 |
| 6 rs9270592   | 32561429 T | 4.884 | 1.31E-09 | chr:6:32505702 |
| 6 rs9270593   | 32561445 G | 4.884 | 1.31E-09 | chr:6:32505702 |
| 6 rs72853971  | 32509938 C | 4.121 | 1.34E-09 | chr:6:32505702 |
| 6 rs72851077  | 32504624 C | 3.443 | 1.34E-09 | chr:6:32505702 |
| 6 rs75174683  | 32504101 G | 3.264 | 1.35E-09 | chr:6:32505702 |
| 6 rs116299701 | 32534068 A | 3.054 | 1.35E-09 | chr:6:32505702 |
| 6 rs115910196 | 32502304 T | 3.493 | 1.36E-09 | chr:6:32505702 |
| 6 rs41287328  | 32552698 G | 4.051 | 1.41E-09 | chr:6:32505702 |
| 6 rs139029897 | 32454882 G | 3.604 | 1.43E-09 | chr:6:32505702 |

|               |            |       |          |                |
|---------------|------------|-------|----------|----------------|
| 6 rs9269293   | 32539463 G | 3.528 | 1.44E-09 | chr:6:32505702 |
| 6 rs114327439 | 32505202 A | 3.391 | 1.45E-09 | chr:6:32505702 |
| 6 rs182965163 | 32454827 A | 3.68  | 1.47E-09 | chr:6:32505702 |
| 6 rs202162787 | 32454828 G | 3.68  | 1.47E-09 | chr:6:32505702 |
| 6 rs9271623   | 32591914 C | 4.196 | 1.48E-09 | chr:6:32505702 |
| 6 rs9271880   | 32595596 C | 3.915 | 1.48E-09 | chr:6:32505702 |
| 6 rs543093016 | 32532533 A | 3.131 | 1.50E-09 | chr:6:32505702 |
| 6 rs9269302   | 32539574 T | 3.561 | 1.53E-09 | chr:6:32505702 |
| 6 rs116520213 | 32504424 T | 3.575 | 1.55E-09 | chr:6:32505702 |
| 6 rs546636941 | 32504421 T | 3.575 | 1.55E-09 | chr:6:32505702 |
| 6 rs9270080   | 32554197 G | 4.6   | 1.55E-09 | chr:6:32505702 |
| 6 rs73727954  | 32508902 T | 3.834 | 1.56E-09 | chr:6:32505702 |
| 6 rs114435848 | 32532546 T | 3.07  | 1.59E-09 | chr:6:32505702 |
| 6 rs72851100  | 32505511 C | 3.788 | 1.60E-09 | chr:6:32505702 |
| 6 rs78806801  | 32503403 C | 3.221 | 1.67E-09 | chr:6:32505702 |
| 6 rs202231764 | 32508412 T | 3.742 | 1.68E-09 | chr:6:32505702 |
| 6 rs111649944 | 32518268 T | 4.051 | 1.68E-09 | chr:6:32505702 |
| 6 rs9271681   | 32592918 T | 3.978 | 1.70E-09 | chr:6:32505702 |
| 6 rs530370261 | 32519826 T | 3.982 | 1.70E-09 | chr:6:32505702 |
| 6 rs545379090 | 32469285 T | 3.305 | 1.72E-09 | chr:6:32505702 |
| 6 rs113209512 | 32508875 T | 3.915 | 1.74E-09 | chr:6:32505702 |
| 6 rs9269301   | 32539561 T | 3.557 | 1.76E-09 | chr:6:32505702 |
| 6 rs147034082 | 32539600 A | 3.5   | 1.79E-09 | chr:6:32505702 |
| 6 rs116225018 | 32503380 C | 3.156 | 1.82E-09 | chr:6:32505702 |
| 6 rs115726960 | 32503171 A | 3.93  | 1.85E-09 | chr:6:32505702 |
| 6 rs72508466  | 32505166 G | 3.447 | 1.87E-09 | chr:6:32505702 |
| 6 rs9270578   | 32561093 A | 4.728 | 1.90E-09 | chr:6:32505702 |
| 6 rs144411837 | 32510337 C | 3.652 | 1.92E-09 | chr:6:32505702 |
| 6 rs200819822 | 32505189 G | 3.386 | 1.94E-09 | chr:6:32505702 |
| 6 rs140120971 | 32510343 C | 3.652 | 1.95E-09 | chr:6:32505702 |
| 6 rs143822887 | 32510344 A | 3.652 | 1.95E-09 | chr:6:32505702 |
| 6 rs72851060  | 32503560 G | 3.751 | 1.95E-09 | chr:6:32505702 |
| 6 rs9269271   | 32539107 C | 3.038 | 2.06E-09 | chr:6:32505702 |
| 6 rs9271630   | 32591989 G | 4.086 | 2.08E-09 | chr:6:32505702 |
| 6 rs112111526 | 32510317 A | 3.654 | 2.09E-09 | chr:6:32505702 |
| 6 rs147266303 | 32510268 C | 3.635 | 2.11E-09 | chr:6:32505702 |
| 6 rs116209683 | 32510508 C | 3.927 | 2.12E-09 | chr:6:32505702 |
| 6 rs545256869 | 32512858 T | 2.994 | 2.16E-09 | chr:6:32505702 |
| 6 rs9269273   | 32539129 A | 3.102 | 2.19E-09 | chr:6:32505702 |
| 6 rs112780153 | 32510301 C | 3.641 | 2.20E-09 | chr:6:32505702 |
| 6 rs76259812  | 32524672 C | 3.327 | 2.22E-09 | chr:6:32505702 |
| 6 rs35130701  | 32594199 G | 4     | 2.22E-09 | chr:6:32505702 |
| 6 rs111590055 | 32510177 C | 3.518 | 2.23E-09 | chr:6:32505702 |

|               |            |       |          |                |
|---------------|------------|-------|----------|----------------|
| 6 rs148619571 | 32536155 A | 3.721 | 2.23E-09 | chr:6:32505702 |
| 6 rs111632178 | 32511149 C | 3.329 | 2.27E-09 | chr:6:32505702 |
| 6 rs111847217 | 32511131 G | 3.329 | 2.27E-09 | chr:6:32505702 |
| 6 rs9269274   | 32539170 C | 4.355 | 2.32E-09 | chr:6:32505702 |
| 6 rs9269275   | 32539172 G | 4.355 | 2.32E-09 | chr:6:32505702 |
| 6 rs72853940  | 32508945 T | 3.925 | 2.36E-09 | chr:6:32505702 |
| 6 rs9270538   | 32559758 A | 4.432 | 2.37E-09 | chr:6:32505702 |
| 6 rs9269314   | 32539715 G | 3.483 | 2.41E-09 | chr:6:32505702 |
| 6 rs373664556 | 32508561 C | 3.234 | 2.43E-09 | chr:6:32505702 |
| 6 rs76376937  | 32508568 G | 3.234 | 2.43E-09 | chr:6:32505702 |
| 6 rs73401326  | 32454783 G | 3.685 | 2.44E-09 | chr:6:32505702 |
| 6 rs112004746 | 32518155 T | 3.924 | 2.45E-09 | chr:6:32505702 |
| 6 rs111596698 | 32487123 G | 4.104 | 2.49E-09 | chr:6:32505702 |
| 6 rs148573031 | 32530691 A | 3.571 | 2.50E-09 | chr:6:32505702 |
| 6 rs35179057  | 32523349 C | 4.286 | 2.50E-09 | chr:6:32505702 |
| 6 rs9269292   | 32539450 T | 3.381 | 2.54E-09 | chr:6:32505702 |
| 6 rs9270576   | 32561068 T | 4.483 | 2.56E-09 | chr:6:32505702 |
| 6 rs9271871   | 32595383 C | 3.259 | 2.59E-09 | chr:6:32505702 |
| 6 rs113232784 | 32518256 A | 3.95  | 2.61E-09 | chr:6:32505702 |
| 6 rs116180191 | 32534588 A | 3.443 | 2.66E-09 | chr:6:32505702 |
| 6 rs74535936  | 32510547 G | 3.916 | 2.69E-09 | chr:6:32505702 |
| 6 rs116224274 | 32508583 C | 3.231 | 2.69E-09 | chr:6:32505702 |
| 6 rs77173653  | 32508587 G | 3.231 | 2.69E-09 | chr:6:32505702 |
| 6 rs536146370 | 32519759 A | 3.977 | 2.71E-09 | chr:6:32505702 |
| 6 rs9270589   | 32561390 T | 4.64  | 2.72E-09 | chr:6:32505702 |
| 6 rs9270590   | 32561392 A | 4.64  | 2.72E-09 | chr:6:32505702 |
| 6 rs201947932 | 32534556 T | 3.443 | 2.73E-09 | chr:6:32505702 |
| 6 rs9271558   | 32590348 G | 3.958 | 2.75E-09 | chr:6:32505702 |
| 6 rs67860869  | 32508349 C | 3.691 | 2.75E-09 | chr:6:32505702 |
| 6 rs115084652 | 32468978 T | 3.007 | 2.76E-09 | chr:6:32505702 |
| 6 rs111559749 | 32509012 T | 4.166 | 2.77E-09 | chr:6:32505702 |
| 6 rs73729122  | 32519777 G | 3.97  | 2.84E-09 | chr:6:32505702 |
| 6 rs115010442 | 32505229 C | 3.321 | 2.86E-09 | chr:6:32505702 |
| 6 rs112427949 | 32511164 T | 3.317 | 2.86E-09 | chr:6:32505702 |
| 6 rs115573308 | 32533118 T | 3.131 | 2.92E-09 | chr:6:32505702 |
| 6 rs76317804  | 32469375 T | 2.982 | 2.95E-09 | chr:6:32505702 |
| 6 rs72492347  | 32533142 G | 3.131 | 3.01E-09 | chr:6:32505702 |
| 6 rs9271872   | 32595418 G | 3.461 | 3.16E-09 | chr:6:32505702 |
| 6 rs9271873   | 32595421 A | 3.461 | 3.16E-09 | chr:6:32505702 |
| 6 rs112815590 | 32504110 T | 3.149 | 3.28E-09 | chr:6:32505702 |
| 6 rs72508465  | 32505141 T | 3.42  | 3.36E-09 | chr:6:32505702 |
| 6 rs113573823 | 32532719 C | 4.299 | 3.46E-09 | chr:6:32505702 |
| 6 rs72848204  | 32594073 T | 3.85  | 3.48E-09 | chr:6:32505702 |

|               |            |       |          |                |
|---------------|------------|-------|----------|----------------|
| 6 rs112300533 | 32517237 T | 3.93  | 3.55E-09 | chr:6:32505702 |
| 6 rs145896370 | 32533718 A | 3.524 | 3.59E-09 | chr:6:32505702 |
| 6 rs9269272   | 32539114 A | 4.05  | 3.61E-09 | chr:6:32505702 |
| 6 rs9269296   | 32539509 G | 3.2   | 3.72E-09 | chr:6:32505702 |
| 6 rs9270570   | 32560978 G | 4.322 | 3.80E-09 | chr:6:32505702 |
| 6 rs111342306 | 32531091 C | 3.817 | 3.83E-09 | chr:6:32505702 |
| 6 rs113209820 | 32531088 T | 3.817 | 3.83E-09 | chr:6:32505702 |
| 6 rs9269281   | 32539309 A | 3.654 | 3.86E-09 | chr:6:32505702 |
| 6 rs531476760 | 32490069 C | 2.83  | 3.88E-09 | chr:6:32505702 |
| 6 rs72851029  | 32501639 T | 4.757 | 3.90E-09 | chr:6:32505702 |
| 6 rs111566749 | 32532746 A | 4.316 | 3.93E-09 | chr:6:32505702 |
| 6 rs9270572   | 32561010 T | 4.319 | 3.94E-09 | chr:6:32505702 |
| 6 rs72492341  | 32531636 G | 4.363 | 3.97E-09 | chr:6:32505702 |
| 6 rs111383925 | 32532741 C | 4.318 | 3.97E-09 | chr:6:32505702 |
| 6 rs74821931  | 32517233 A | 3.922 | 4.00E-09 | chr:6:32505702 |
| 6 rs72492344  | 32532494 A | 3.823 | 4.02E-09 | chr:6:32505702 |
| 6 rs527678609 | 32530435 A | 4.297 | 4.08E-09 | chr:6:32505702 |
| 6 rs540951197 | 32530439 C | 4.297 | 4.08E-09 | chr:6:32505702 |
| 6 rs562335725 | 32530443 A | 4.297 | 4.08E-09 | chr:6:32505702 |
| 6 rs184358099 | 32500832 G | 3.88  | 4.10E-09 | chr:6:32505702 |
| 6 rs112999094 | 32511386 T | 3.953 | 4.12E-09 | chr:6:32505702 |
| 6 rs9269328   | 32540018 T | 3.417 | 4.15E-09 | chr:6:32505702 |
| 6 rs9269288   | 32539408 A | 3.4   | 4.16E-09 | chr:6:32505702 |
| 6 rs535694878 | 32512216 A | 3.853 | 4.18E-09 | chr:6:32505702 |
| 6 rs556986229 | 32512217 G | 3.853 | 4.18E-09 | chr:6:32505702 |
| 6 rs9271704   | 32593317 G | 3.734 | 4.20E-09 | chr:6:32505702 |
| 6 rs9271705   | 32593321 T | 3.734 | 4.20E-09 | chr:6:32505702 |
| 6 rs9270549   | 32560440 A | 4.376 | 4.21E-09 | chr:6:32505702 |
| 6 rs9270550   | 32560441 G | 4.376 | 4.21E-09 | chr:6:32505702 |
| 6 rs142592433 | 32511392 T | 3.955 | 4.23E-09 | chr:6:32505702 |
| 6 rs199616440 | 32510115 T | 3.667 | 4.26E-09 | chr:6:32505702 |
| 6 rs9269276   | 32539244 C | 3.814 | 4.28E-09 | chr:6:32505702 |
| 6 rs114961271 | 32503352 T | 2.992 | 4.35E-09 | chr:6:32505702 |
| 6 rs114106672 | 32532692 A | 4.037 | 4.35E-09 | chr:6:32505702 |
| 6 rs72851065  | 32504213 T | 3.27  | 4.39E-09 | chr:6:32505702 |
| 6 rs72851066  | 32504216 T | 3.27  | 4.39E-09 | chr:6:32505702 |
| 6 rs182890820 | 32527218 T | 3.019 | 4.41E-09 | chr:6:32505702 |
| 6 rs9270556   | 32560606 A | 4.525 | 4.41E-09 | chr:6:32505702 |
| 6 rs9272263   | 32603295 A | 5.218 | 4.43E-09 | chr:6:32505702 |
| 6 rs9270071   | 32554097 T | 4.271 | 4.44E-09 | chr:6:32505702 |
| 6 rs146356328 | 32535965 T | 3.217 | 4.46E-09 | chr:6:32505702 |
| 6 rs138912409 | 32533684 A | 3.956 | 4.46E-09 | chr:6:32505702 |
| 6 rs143506542 | 32533686 T | 3.956 | 4.46E-09 | chr:6:32505702 |

|               |            |       |          |                |
|---------------|------------|-------|----------|----------------|
| 6 rs9269284   | 32539381 G | 3.529 | 4.49E-09 | chr:6:32505702 |
| 6 rs75820413  | 32508505 G | 3.25  | 4.54E-09 | chr:6:32505702 |
| 6 rs9270574   | 32561028 T | 4.28  | 4.54E-09 | chr:6:32505702 |
| 6 rs145092566 | 32454838 A | 3.386 | 4.61E-09 | chr:6:32505702 |
| 6 rs143321288 | 32531487 A | 4.417 | 4.62E-09 | chr:6:32505702 |
| 6 rs116609988 | 32522988 A | 3.364 | 4.67E-09 | chr:6:32505702 |
| 6 rs9269280   | 32539279 C | 3.472 | 4.69E-09 | chr:6:32505702 |
| 6 rs9271684   | 32592953 T | 3.72  | 4.74E-09 | chr:6:32505702 |
| 6 rs79140398  | 32527093 C | 4.028 | 4.75E-09 | chr:6:32505702 |
| 6 rs115065497 | 32530466 C | 4.311 | 4.75E-09 | chr:6:32505702 |
| 6 rs139201366 | 32513186 A | 3.984 | 4.77E-09 | chr:6:32505702 |
| 6 rs9269250   | 32454269 T | 4.447 | 4.77E-09 | chr:6:32505702 |
| 6 rs112236587 | 32530615 C | 4.675 | 4.81E-09 | chr:6:32505702 |
| 6 rs112302151 | 32530628 T | 4.675 | 4.81E-09 | chr:6:32505702 |
| 6 rs112715773 | 32530608 C | 4.675 | 4.81E-09 | chr:6:32505702 |
| 6 rs113955073 | 32522932 C | 3.512 | 4.86E-09 | chr:6:32505702 |
| 6 rs115978041 | 32522923 C | 3.512 | 4.86E-09 | chr:6:32505702 |
| 6 rs115137792 | 32510114 C | 3.664 | 4.89E-09 | chr:6:32505702 |
| 6 rs9269291   | 32539445 A | 3.205 | 4.92E-09 | chr:6:32505702 |
| 6 rs114682516 | 32503702 C | 3.128 | 4.93E-09 | chr:6:32505702 |
| 6 rs76235954  | 32512815 A | 2.928 | 4.98E-09 | chr:6:32505702 |
| 6 rs628754    | 32574787 A | 4.178 | 4.99E-09 | chr:6:32505702 |
| 6 rs373666709 | 32531748 A | 3.782 | 5.01E-09 | chr:6:32505702 |
| 6 rs563850361 | 32531744 G | 3.782 | 5.01E-09 | chr:6:32505702 |
| 6 rs149581890 | 32530684 A | 4.328 | 5.06E-09 | chr:6:32505702 |
| 6 rs72849282  | 32469335 T | 3.116 | 5.08E-09 | chr:6:32505702 |
| 6 rs146621647 | 32531602 T | 4.031 | 5.09E-09 | chr:6:32505702 |
| 6 rs537366043 | 32531076 T | 3.623 | 5.17E-09 | chr:6:32505702 |
| 6 rs570295314 | 32531074 G | 3.623 | 5.17E-09 | chr:6:32505702 |
| 6 rs538879571 | 32503698 A | 3.126 | 5.19E-09 | chr:6:32505702 |
| 6 rs80011743  | 32531770 G | 4.045 | 5.21E-09 | chr:6:32505702 |
| 6 rs111843909 | 32531043 T | 3.798 | 5.30E-09 | chr:6:32505702 |
| 6 rs112780983 | 32511348 G | 3.82  | 5.34E-09 | chr:6:32505702 |
| 6 rs9269277   | 32539265 A | 3.46  | 5.37E-09 | chr:6:32505702 |
| 6 rs9269278   | 32539269 A | 3.46  | 5.37E-09 | chr:6:32505702 |
| 6 rs9269279   | 32539274 G | 3.46  | 5.37E-09 | chr:6:32505702 |
| 6 rs9269465   | 32542247 G | 4.117 | 5.48E-09 | chr:6:32505702 |
| 6 rs369883062 | 32519734 G | 3.797 | 5.49E-09 | chr:6:32505702 |
| 6 rs111948873 | 32531081 G | 3.626 | 5.52E-09 | chr:6:32505702 |
| 6 rs113655203 | 32533247 T | 4.055 | 5.53E-09 | chr:6:32505702 |
| 6 rs72492340  | 32531385 C | 4.342 | 5.54E-09 | chr:6:32505702 |
| 6 rs72845768  | 32531377 C | 4.342 | 5.54E-09 | chr:6:32505702 |
| 6 rs9270481   | 32559045 C | 4.012 | 5.55E-09 | chr:6:32505702 |



|               |            |       |          |                |
|---------------|------------|-------|----------|----------------|
| 6 rs114084676 | 32505216 C | 3.196 | 5.58E-09 | chr:6:32505702 |
| 6 rs537977627 | 32510140 A | 3.459 | 5.62E-09 | chr:6:32505702 |
| 6 rs112009323 | 32532001 C | 3.078 | 5.65E-09 | chr:6:32505702 |
| 6 rs112562347 | 32532004 T | 3.078 | 5.65E-09 | chr:6:32505702 |
| 6 rs115493349 | 32527153 G | 3.337 | 5.68E-09 | chr:6:32505702 |
| 6 rs146280841 | 32533291 A | 3.291 | 5.75E-09 | chr:6:32505702 |
| 6 rs148731245 | 32533293 C | 3.291 | 5.75E-09 | chr:6:32505702 |
| 6 rs116085924 | 32514884 G | 3.237 | 5.80E-09 | chr:6:32505702 |
| 6 rs72508418  | 32459868 T | 3.663 | 5.80E-09 | chr:6:32505702 |
| 6 rs116670844 | 32490925 T | 2.929 | 5.85E-09 | chr:6:32505702 |
| 6 rs113085907 | 32510224 G | 3.43  | 5.87E-09 | chr:6:32505702 |
| 6 rs7758269   | 32598812 C | 3.626 | 5.87E-09 | chr:6:32505702 |
| 6 rs9270126   | 32555052 T | 4.263 | 5.95E-09 | chr:6:32505702 |
| 6 rs112882980 | 32533222 C | 4.106 | 5.99E-09 | chr:6:32505702 |
| 6 rs11751496  | 32533549 T | 2.774 | 6.03E-09 | chr:6:32505702 |
| 6 rs67816706  | 32517266 T | 3.877 | 6.04E-09 | chr:6:32505702 |
| 6 rs141124032 | 32533299 G | 3.291 | 6.06E-09 | chr:6:32505702 |
| 6 rs11758321  | 32533413 G | 2.856 | 6.10E-09 | chr:6:32505702 |
| 6 rs147819405 | 32533096 A | 3.276 | 6.11E-09 | chr:6:32505702 |
| 6 rs113220298 | 32510369 T | 3.593 | 6.22E-09 | chr:6:32505702 |
| 6 rs78107833  | 32531807 T | 3.865 | 6.24E-09 | chr:6:32505702 |
| 6 rs111749494 | 32532432 A | 4.035 | 6.24E-09 | chr:6:32505702 |
| 6 rs112501266 | 32532428 C | 4.035 | 6.24E-09 | chr:6:32505702 |
| 6 rs139726276 | 32524769 G | 2.882 | 6.25E-09 | chr:6:32505702 |
| 6 rs9269327   | 32540001 T | 3.3   | 6.27E-09 | chr:6:32505702 |
| 6 rs111896611 | 32511183 T | 3.215 | 6.30E-09 | chr:6:32505702 |
| 6 rs9270580   | 32561123 C | 4.251 | 6.30E-09 | chr:6:32505702 |
| 6 rs66924955  | 32507855 G | 3.567 | 6.34E-09 | chr:6:32505702 |
| 6 rs72853919  | 32507852 C | 3.567 | 6.34E-09 | chr:6:32505702 |
| 6 rs9269565   | 32544500 A | 3.902 | 6.34E-09 | chr:6:32505702 |
| 6 rs9270045   | 32553662 G | 4.29  | 6.41E-09 | chr:6:32505702 |
| 6 rs7770905   | 32598478 C | 3.744 | 6.42E-09 | chr:6:32505702 |
| 6 rs9269237   | 32453583 T | 4.448 | 6.42E-09 | chr:6:32505702 |
| 6 rs189233809 | 32530497 T | 4.055 | 6.50E-09 | chr:6:32505702 |
| 6 rs9269295   | 32539475 C | 3.067 | 6.51E-09 | chr:6:32505702 |
| 6 rs28362368  | 32594040 G | 3.68  | 6.54E-09 | chr:6:32505702 |
| 6 rs72845755  | 32530385 G | 4.374 | 6.62E-09 | chr:6:32505702 |
| 6 rs543107154 | 32532351 C | 3.081 | 6.63E-09 | chr:6:32505702 |
| 6 rs561232678 | 32532352 A | 3.081 | 6.63E-09 | chr:6:32505702 |
| 6 rs113504992 | 32531418 T | 4.374 | 6.65E-09 | chr:6:32505702 |
| 6 rs9269308   | 32539620 A | 2.894 | 6.65E-09 | chr:6:32505702 |
| 6 rs76454806  | 32530145 C | 4.062 | 6.71E-09 | chr:6:32505702 |
| 6 rs80142174  | 32530144 G | 4.062 | 6.71E-09 | chr:6:32505702 |

|               |            |       |          |                |
|---------------|------------|-------|----------|----------------|
| 6 rs111290332 | 32533327 A | 3.291 | 6.71E-09 | chr:6:32505702 |
| 6 rs148866368 | 32531582 A | 2.936 | 6.79E-09 | chr:6:32505702 |
| 6 rs111338570 | 32533670 C | 4.062 | 6.84E-09 | chr:6:32505702 |
| 6 rs113042858 | 32533666 T | 4.062 | 6.84E-09 | chr:6:32505702 |
| 6 rs9271727   | 32593585 A | 3.478 | 6.85E-09 | chr:6:32505702 |
| 6 rs9272204   | 32601915 A | 3.509 | 6.86E-09 | chr:6:32505702 |
| 6 rs113204386 | 32531339 G | 3.801 | 6.87E-09 | chr:6:32505702 |
| 6 rs75404103  | 32531348 G | 3.801 | 6.87E-09 | chr:6:32505702 |
| 6 rs142162694 | 32532071 T | 3.085 | 6.95E-09 | chr:6:32505702 |
| 6 rs9269286   | 32539396 A | 3.366 | 6.95E-09 | chr:6:32505702 |
| 6 rs72508417  | 32459813 A | 3.471 | 6.96E-09 | chr:6:32505702 |
| 6 rs112944992 | 32510457 C | 3.395 | 6.97E-09 | chr:6:32505702 |
| 6 rs72845752  | 32530285 T | 4.382 | 7.06E-09 | chr:6:32505702 |
| 6 rs72845754  | 32530286 G | 4.382 | 7.06E-09 | chr:6:32505702 |
| 6 rs74201443  | 32530321 G | 4.382 | 7.06E-09 | chr:6:32505702 |
| 6 rs3129968   | 32381472 C | 3.802 | 7.07E-09 | chr:6:32505702 |
| 6 rs72492343  | 32532385 T | 3.835 | 7.23E-09 | chr:6:32505702 |
| 6 rs9271733   | 32593633 A | 3.466 | 7.29E-09 | chr:6:32505702 |
| 6 rs566973051 | 32531876 C | 3.17  | 7.32E-09 | chr:6:32505702 |
| 6 rs66754072  | 32532402 A | 3.861 | 7.48E-09 | chr:6:32505702 |
| 6 rs77236357  | 32459844 T | 3.669 | 7.49E-09 | chr:6:32505702 |
| 6 rs9270363   | 32558137 T | 4.29  | 7.69E-09 | chr:6:32505702 |
| 6 rs9270558   | 32560667 A | 4.203 | 7.72E-09 | chr:6:32505702 |
| 6 rs72845756  | 32530545 C | 4.078 | 7.79E-09 | chr:6:32505702 |
| 6 rs112083186 | 32531320 A | 3.826 | 7.80E-09 | chr:6:32505702 |
| 6 rs569119670 | 32532359 C | 3.079 | 7.83E-09 | chr:6:32505702 |
| 6 rs115278245 | 32531057 A | 3.486 | 7.87E-09 | chr:6:32505702 |
| 6 rs115407919 | 32531056 C | 3.486 | 7.87E-09 | chr:6:32505702 |
| 6 rs149932905 | 32533421 G | 2.951 | 7.92E-09 | chr:6:32505702 |
| 6 rs6920012   | 32556186 G | 4.293 | 7.94E-09 | chr:6:32505702 |
| 6 rs72845749  | 32530081 T | 4.081 | 7.97E-09 | chr:6:32505702 |
| 6 rs72845750  | 32530093 G | 4.081 | 7.97E-09 | chr:6:32505702 |
| 6 rs139013960 | 32531606 G | 4.092 | 7.98E-09 | chr:6:32505702 |
| 6 rs112465099 | 32510430 G | 3.397 | 7.99E-09 | chr:6:32505702 |
| 6 rs80083020  | 32510439 C | 3.397 | 7.99E-09 | chr:6:32505702 |
| 6 rs112512219 | 32532021 G | 2.904 | 8.01E-09 | chr:6:32505702 |
| 6 rs111786536 | 32523589 C | 3.511 | 8.05E-09 | chr:6:32505702 |
| 6 rs3129967   | 32381461 T | 3.763 | 8.10E-09 | chr:6:32505702 |
| 6 rs199798245 | 32530708 C | 3.432 | 8.20E-09 | chr:6:32505702 |
| 6 rs200856733 | 32530709 A | 3.432 | 8.20E-09 | chr:6:32505702 |
| 6 rs543318785 | 32530714 C | 3.432 | 8.20E-09 | chr:6:32505702 |
| 6 rs572746069 | 32530713 C | 3.432 | 8.20E-09 | chr:6:32505702 |
| 6 rs9269563   | 32544456 T | 3.951 | 8.22E-09 | chr:6:32505702 |

|               |            |       |          |                |
|---------------|------------|-------|----------|----------------|
| 6 rs150423066 | 32506995 A | 2.965 | 8.23E-09 | chr:6:32505702 |
| 6 rs142206489 | 32536167 A | 3.306 | 8.26E-09 | chr:6:32505702 |
| 6 rs35255303  | 32536356 A | 3.809 | 8.35E-09 | chr:6:32505702 |
| 6 rs72845757  | 32530563 A | 4.086 | 8.36E-09 | chr:6:32505702 |
| 6 rs72853927  | 32508474 G | 3.227 | 8.40E-09 | chr:6:32505702 |
| 6 rs149589923 | 32500818 A | 3.69  | 8.44E-09 | chr:6:32505702 |
| 6 rs201917227 | 32531870 C | 3.172 | 8.45E-09 | chr:6:32505702 |
| 6 rs4959029   | 32591682 G | 4.154 | 8.46E-09 | chr:6:32505702 |
| 6 rs115469967 | 32530190 A | 4.092 | 8.48E-09 | chr:6:32505702 |
| 6 rs9272197   | 32601840 T | 3.377 | 8.76E-09 | chr:6:32505702 |
| 6 rs9272198   | 32601842 T | 3.377 | 8.76E-09 | chr:6:32505702 |
| 6 rs77340266  | 32530200 A | 4.097 | 8.92E-09 | chr:6:32505702 |
| 6 rs139796058 | 32531715 A | 3.6   | 8.99E-09 | chr:6:32505702 |
| 6 rs7743846   | 32505600 C | 3.233 | 9.02E-09 | chr:6:32505702 |
| 6 rs9270474   | 32559003 G | 3.847 | 9.09E-09 | chr:6:32505702 |
| 6 rs112719175 | 32533401 T | 3.024 | 9.20E-09 | chr:6:32505702 |
| 6 rs9269923   | 32551604 T | 3.207 | 9.25E-09 | chr:6:32505702 |
| 6 rs142198554 | 32531887 T | 3.054 | 9.28E-09 | chr:6:32505702 |
| 6 rs546856170 | 32531888 G | 3.054 | 9.28E-09 | chr:6:32505702 |
| 6 rs193053660 | 32530503 C | 3.827 | 9.29E-09 | chr:6:32505702 |
| 6 rs533498287 | 32530506 C | 3.827 | 9.29E-09 | chr:6:32505702 |
| 6 rs566699769 | 32530505 A | 3.827 | 9.29E-09 | chr:6:32505702 |
| 6 rs545853065 | 32531737 G | 3.421 | 9.32E-09 | chr:6:32505702 |
| 6 rs556948697 | 32531729 C | 3.421 | 9.32E-09 | chr:6:32505702 |
| 6 rs182374257 | 32525306 T | 3.036 | 9.36E-09 | chr:6:32505702 |
| 6 rs72853926  | 32508451 G | 3.318 | 9.41E-09 | chr:6:32505702 |
| 6 rs114633631 | 32531706 A | 3.604 | 9.44E-09 | chr:6:32505702 |
| 6 rs371994404 | 32532317 A | 2.972 | 9.49E-09 | chr:6:32505702 |
| 6 rs114418909 | 32531852 C | 3.469 | 9.51E-09 | chr:6:32505702 |
| 6 rs116479032 | 32531853 A | 3.469 | 9.51E-09 | chr:6:32505702 |
| 6 rs138129967 | 32532324 C | 2.972 | 9.59E-09 | chr:6:32505702 |
| 6 rs111425203 | 32534872 T | 2.973 | 9.63E-09 | chr:6:32505702 |
| 6 rs139128138 | 32533420 G | 2.925 | 9.66E-09 | chr:6:32505702 |
| 6 rs9271708   | 32593386 A | 3.567 | 9.82E-09 | chr:6:32505702 |
| 6 rs9271709   | 32593392 A | 3.567 | 9.82E-09 | chr:6:32505702 |
| 6 rs116132127 | 32503328 A | 2.906 | 9.95E-09 | chr:6:32505702 |
| 6 rs72853928  | 32508486 T | 3.216 | 9.98E-09 | chr:6:32505702 |
| 6 rs11751146  | 32514899 T | 3.104 | 9.99E-09 | chr:6:32505702 |
| 6 rs78278896  | 32508647 G | 3.883 | 9.99E-09 | chr:6:32505702 |
| 6 rs9270521   | 32559529 C | 4.04  | 1.02E-08 | chr:6:32505702 |
| 6 rs113737511 | 32533392 G | 3.024 | 1.02E-08 | chr:6:32505702 |
| 6 rs143742917 | 32533480 A | 2.908 | 1.03E-08 | chr:6:32505702 |
| 6 rs146783438 | 32533483 A | 2.908 | 1.03E-08 | chr:6:32505702 |

|               |            |       |          |                |
|---------------|------------|-------|----------|----------------|
| 6 rs148743468 | 32533479 C | 2.908 | 1.03E-08 | chr:6:32505702 |
| 6 rs114034298 | 32505797 C | 2.847 | 1.07E-08 | chr:6:32505702 |
| 6 rs116103612 | 32503716 A | 2.947 | 1.08E-08 | chr:6:32505702 |
| 6 rs78918008  | 32532281 A | 2.855 | 1.08E-08 | chr:6:32505702 |
| 6 rs116133469 | 32503492 G | 3.069 | 1.08E-08 | chr:6:32505702 |
| 6 rs144064415 | 32536140 T | 3.851 | 1.08E-08 | chr:6:32505702 |
| 6 rs541088090 | 32533411 T | 2.923 | 1.10E-08 | chr:6:32505702 |
| 6 rs72492350  | 32538088 T | 3.806 | 1.10E-08 | chr:6:32505702 |
| 6 rs193192981 | 32533553 G | 2.824 | 1.13E-08 | chr:6:32505702 |
| 6 rs553177248 | 32529916 A | 2.931 | 1.13E-08 | chr:6:32505702 |
| 6 rs115277180 | 32533468 C | 2.907 | 1.16E-08 | chr:6:32505702 |
| 6 rs201766754 | 32531843 G | 3.475 | 1.16E-08 | chr:6:32505702 |
| 6 rs72845747  | 32530054 T | 3.845 | 1.16E-08 | chr:6:32505702 |
| 6 rs186217224 | 32457967 C | 2.662 | 1.16E-08 | chr:6:32505702 |
| 6 rs542536566 | 32457959 T | 2.662 | 1.16E-08 | chr:6:32505702 |
| 6 rs576314890 | 32523379 T | 4.56  | 1.19E-08 | chr:6:32505702 |
| 6 rs116241189 | 32506751 A | 3.103 | 1.20E-08 | chr:6:32505702 |
| 6 rs72853911  | 32506759 G | 3.103 | 1.20E-08 | chr:6:32505702 |
| 6 rs111548649 | 32533365 G | 3.023 | 1.20E-08 | chr:6:32505702 |
| 6 rs115232480 | 32536206 G | 3.602 | 1.21E-08 | chr:6:32505702 |
| 6 rs574901905 | 32452501 C | 6.07  | 1.21E-08 | chr:6:32505702 |
| 6 rs151210153 | 32531734 A | 3.425 | 1.21E-08 | chr:6:32505702 |
| 6 rs73726810  | 32522857 A | 3.876 | 1.22E-08 | chr:6:32505702 |
| 6 rs114629945 | 32503717 G | 2.939 | 1.23E-08 | chr:6:32505702 |
| 6 rs72508468  | 32505288 C | 2.928 | 1.24E-08 | chr:6:32505702 |
| 6 rs9272123   | 32600573 T | 3.626 | 1.24E-08 | chr:6:32505702 |
| 6 rs74615215  | 32458389 G | 2.817 | 1.24E-08 | chr:6:32505702 |
| 6 rs74715621  | 32508285 G | 2.968 | 1.25E-08 | chr:6:32505702 |
| 6 rs115742569 | 32516464 C | 4.813 | 1.26E-08 | chr:6:32505702 |
| 6 rs3135363   | 32389648 G | 3.736 | 1.27E-08 | chr:6:32505702 |
| 6 rs9269750   | 32548141 G | 4.84  | 1.27E-08 | chr:6:32505702 |
| 6 rs9270806   | 32569563 T | 4.101 | 1.29E-08 | chr:6:32505702 |
| 6 rs9270807   | 32569572 A | 4.101 | 1.29E-08 | chr:6:32505702 |
| 6 rs9269310   | 32539628 A | 3.144 | 1.30E-08 | chr:6:32505702 |
| 6 rs28366259  | 32559516 C | 4.146 | 1.33E-08 | chr:6:32505702 |
| 6 rs114715427 | 32538850 A | 3.478 | 1.34E-08 | chr:6:32505702 |
| 6 rs372618919 | 32529918 G | 3.133 | 1.35E-08 | chr:6:32505702 |
| 6 rs138991250 | 32534855 G | 2.875 | 1.35E-08 | chr:6:32505702 |
| 6 rs9271738   | 32593691 G | 3.285 | 1.35E-08 | chr:6:32505702 |
| 6 rs9270387   | 32558317 C | 3.923 | 1.35E-08 | chr:6:32505702 |
| 6 rs9271729   | 32593600 A | 3.347 | 1.35E-08 | chr:6:32505702 |
| 6 rs476775    | 32569722 T | 4.107 | 1.37E-08 | chr:6:32505702 |
| 6 rs9271724   | 32593552 C | 3.418 | 1.38E-08 | chr:6:32505702 |

|               |            |       |          |                |
|---------------|------------|-------|----------|----------------|
| 6 rs185436529 | 32530740 A | 3.142 | 1.40E-08 | chr:6:32505702 |
| 6 rs532508742 | 32530749 C | 3.142 | 1.40E-08 | chr:6:32505702 |
| 6 rs182767311 | 32533523 C | 2.815 | 1.41E-08 | chr:6:32505702 |
| 6 rs77178107  | 32533511 C | 2.815 | 1.41E-08 | chr:6:32505702 |
| 6 rs77814554  | 32533509 C | 2.815 | 1.41E-08 | chr:6:32505702 |
| 6 rs72845745  | 32529961 T | 3.435 | 1.41E-08 | chr:6:32505702 |
| 6 rs550286428 | 32452407 T | 6.019 | 1.42E-08 | chr:6:32505702 |
| 6 rs201024350 | 32536869 C | 3.102 | 1.44E-08 | chr:6:32505702 |
| 6 rs9270115   | 32554934 T | 4.031 | 1.45E-08 | chr:6:32505702 |
| 6 rs184303918 | 32529976 G | 3.436 | 1.46E-08 | chr:6:32505702 |
| 6 rs114020016 | 32524824 T | 2.852 | 1.47E-08 | chr:6:32505702 |
| 6 rs9269311   | 32539654 C | 3.198 | 1.48E-08 | chr:6:32505702 |
| 6 rs9269269   | 32539055 C | 3.03  | 1.49E-08 | chr:6:32505702 |
| 6 rs9270876   | 32571314 A | 3.65  | 1.50E-08 | chr:6:32505702 |
| 6 rs138253052 | 32536103 A | 3.014 | 1.51E-08 | chr:6:32505702 |
| 6 rs9270533   | 32559709 T | 3.346 | 1.51E-08 | chr:6:32505702 |
| 6 rs9270535   | 32559714 A | 3.346 | 1.51E-08 | chr:6:32505702 |
| 6 rs139868705 | 32532075 A | 2.94  | 1.51E-08 | chr:6:32505702 |
| 6 rs9269515   | 32543469 C | 3.845 | 1.54E-08 | chr:6:32505702 |
| 6 rs143426018 | 32536888 G | 3.103 | 1.54E-08 | chr:6:32505702 |
| 6 rs9270529   | 32559658 T | 3.555 | 1.56E-08 | chr:6:32505702 |
| 6 rs78085354  | 32529981 G | 3.438 | 1.56E-08 | chr:6:32505702 |
| 6 rs112720311 | 32529995 A | 3.437 | 1.56E-08 | chr:6:32505702 |
| 6 rs114452447 | 32532262 A | 2.768 | 1.57E-08 | chr:6:32505702 |
| 6 rs145316959 | 32521201 T | 9.615 | 1.59E-08 | chr:6:32505702 |
| 6 rs533614924 | 32532227 A | 2.778 | 1.60E-08 | chr:6:32505702 |
| 6 rs9271728   | 32593592 C | 3.332 | 1.60E-08 | chr:6:32505702 |
| 6 rs112310670 | 32531136 C | 3.296 | 1.62E-08 | chr:6:32505702 |
| 6 rs9270562   | 32560757 T | 3.866 | 1.62E-08 | chr:6:32505702 |
| 6 rs476602    | 32569792 C | 4.096 | 1.63E-08 | chr:6:32505702 |
| 6 rs115834108 | 32459908 A | 2.656 | 1.64E-08 | chr:6:32505702 |
| 6 rs7756647   | 32582843 G | 4.514 | 1.64E-08 | chr:6:32505702 |
| 6 rs72849267  | 32468923 T | 2.898 | 1.65E-08 | chr:6:32505702 |
| 6 rs545154111 | 32530754 C | 3.141 | 1.66E-08 | chr:6:32505702 |
| 6 rs150598903 | 32489395 T | 3.408 | 1.67E-08 | chr:6:32505702 |
| 6 rs528792740 | 32533803 G | 2.748 | 1.68E-08 | chr:6:32505702 |
| 6 rs546913114 | 32533805 T | 2.748 | 1.68E-08 | chr:6:32505702 |
| 6 rs114653292 | 32503516 G | 3.123 | 1.69E-08 | chr:6:32505702 |
| 6 rs112479577 | 32533856 A | 2.813 | 1.70E-08 | chr:6:32505702 |
| 6 rs73726834  | 32531111 C | 3.301 | 1.70E-08 | chr:6:32505702 |
| 6 rs541874222 | 32533761 G | 2.746 | 1.74E-08 | chr:6:32505702 |
| 6 rs76571178  | 32525159 A | 2.825 | 1.81E-08 | chr:6:32505702 |
| 6 rs68146539  | 32532928 C | 2.938 | 1.82E-08 | chr:6:32505702 |

|               |            |       |          |                |
|---------------|------------|-------|----------|----------------|
| 6 rs9270520   | 32559493 T | 3.815 | 1.82E-08 | chr:6:32505702 |
| 6 rs9272199   | 32601852 G | 3.293 | 1.82E-08 | chr:6:32505702 |
| 6 rs140569663 | 32530944 A | 2.91  | 1.84E-08 | chr:6:32505702 |
| 6 rs149685121 | 32530946 C | 2.91  | 1.84E-08 | chr:6:32505702 |
| 6 rs9270524   | 32559588 A | 3.469 | 1.85E-08 | chr:6:32505702 |
| 6 rs41287329  | 32552728 G | 3.111 | 1.86E-08 | chr:6:32505702 |
| 6 rs41287330  | 32552730 A | 3.111 | 1.86E-08 | chr:6:32505702 |
| 6 rs114821537 | 32503522 G | 3.128 | 1.87E-08 | chr:6:32505702 |
| 6 rs552961071 | 32533756 T | 2.709 | 1.87E-08 | chr:6:32505702 |
| 6 rs574369672 | 32533757 G | 2.709 | 1.87E-08 | chr:6:32505702 |
| 6 rs562852671 | 32512142 T | 2.79  | 1.92E-08 | chr:6:32505702 |
| 6 rs535195653 | 32453064 G | 5.72  | 1.92E-08 | chr:6:32505702 |
| 6 rs183667786 | 32533749 C | 2.709 | 1.94E-08 | chr:6:32505702 |
| 6 rs558887953 | 32533750 A | 2.709 | 1.94E-08 | chr:6:32505702 |
| 6 rs562082330 | 32533812 G | 2.732 | 1.94E-08 | chr:6:32505702 |
| 6 rs9270436   | 32558693 T | 2.89  | 1.95E-08 | chr:6:32505702 |
| 6 rs72657675  | 32532955 G | 2.936 | 1.95E-08 | chr:6:32505702 |
| 6 rs151297998 | 32530904 C | 2.905 | 1.97E-08 | chr:6:32505702 |
| 6 rs114146939 | 32459890 G | 2.65  | 2.02E-08 | chr:6:32505702 |
| 6 rs116587947 | 32459889 T | 2.65  | 2.02E-08 | chr:6:32505702 |
| 6 rs116609655 | 32503059 C | 2.743 | 2.03E-08 | chr:6:32505702 |
| 6 rs75019606  | 32531924 C | 2.756 | 2.03E-08 | chr:6:32505702 |
| 6 rs187058069 | 32486665 A | 3.21  | 2.04E-08 | chr:6:32505702 |
| 6 rs115095329 | 32503497 A | 2.968 | 2.05E-08 | chr:6:32505702 |
| 6 rs76034941  | 32503498 C | 2.968 | 2.05E-08 | chr:6:32505702 |
| 6 rs536463096 | 32510951 G | 2.906 | 2.05E-08 | chr:6:32505702 |
| 6 rs9270464   | 32558914 G | 2.731 | 2.06E-08 | chr:6:32505702 |
| 6 rs138296162 | 32536852 T | 3.086 | 2.08E-08 | chr:6:32505702 |
| 6 rs115563246 | 32489734 A | 3.435 | 2.09E-08 | chr:6:32505702 |
| 6 rs115817940 | 32489735 T | 3.435 | 2.09E-08 | chr:6:32505702 |
| 6 rs115127109 | 32530038 T | 3.445 | 2.13E-08 | chr:6:32505702 |
| 6 rs563246799 | 32533766 C | 2.741 | 2.13E-08 | chr:6:32505702 |
| 6 rs575744181 | 32533771 A | 2.741 | 2.13E-08 | chr:6:32505702 |
| 6 rs559863405 | 32536118 G | 3.012 | 2.15E-08 | chr:6:32505702 |
| 6 rs9270598   | 32561618 C | 3.835 | 2.15E-08 | chr:6:32505702 |
| 6 rs115878723 | 32503335 A | 2.78  | 2.17E-08 | chr:6:32505702 |
| 6 rs531982544 | 32503334 C | 2.78  | 2.17E-08 | chr:6:32505702 |
| 6 rs114905947 | 32533016 C | 3.103 | 2.17E-08 | chr:6:32505702 |
| 6 rs189557518 | 32526205 A | 2.776 | 2.18E-08 | chr:6:32505702 |
| 6 rs116526477 | 32468879 T | 2.749 | 2.18E-08 | chr:6:32505702 |
| 6 rs112649230 | 32531140 G | 3.156 | 2.24E-08 | chr:6:32505702 |
| 6 rs188327097 | 32533734 A | 2.706 | 2.24E-08 | chr:6:32505702 |
| 6 rs530242049 | 32536125 C | 3.011 | 2.25E-08 | chr:6:32505702 |

|               |            |       |          |                |
|---------------|------------|-------|----------|----------------|
| 6 rs9270567   | 32560801 G | 3.896 | 2.25E-08 | chr:6:32505702 |
| 6 rs142891616 | 32534325 T | 2.69  | 2.28E-08 | chr:6:32505702 |
| 6 rs544574563 | 32534337 G | 2.69  | 2.28E-08 | chr:6:32505702 |
| 6 rs115946871 | 32530011 C | 3.28  | 2.28E-08 | chr:6:32505702 |
| 6 rs549879919 | 32491969 G | 3.154 | 2.33E-08 | chr:6:32505702 |
| 6 rs12660259  | 32531709 A | 3.058 | 2.34E-08 | chr:6:32505702 |
| 6 rs115296342 | 32503526 C | 3.122 | 2.35E-08 | chr:6:32505702 |
| 6 rs73729140  | 32521290 C | 4.202 | 2.35E-08 | chr:6:32505702 |
| 6 rs77501456  | 32523627 G | 3.028 | 2.35E-08 | chr:6:32505702 |
| 6 rs9272181   | 32601563 A | 3.315 | 2.35E-08 | chr:6:32505702 |
| 6 rs539509361 | 32594399 G | 3.013 | 2.38E-08 | chr:6:32505702 |
| 6 rs75503609  | 32530929 A | 2.906 | 2.38E-08 | chr:6:32505702 |
| 6 rs369369329 | 32533784 C | 2.741 | 2.38E-08 | chr:6:32505702 |
| 6 rs113091576 | 32491986 C | 3.147 | 2.41E-08 | chr:6:32505702 |
| 6 rs72847615  | 32536863 A | 3.088 | 2.46E-08 | chr:6:32505702 |
| 6 rs73726842  | 32533029 A | 3.075 | 2.50E-08 | chr:6:32505702 |
| 6 rs374264352 | 32532969 A | 2.85  | 2.52E-08 | chr:6:32505702 |
| 6 rs560693076 | 32532972 C | 2.85  | 2.52E-08 | chr:6:32505702 |
| 6 rs540304678 | 32536503 C | 2.671 | 2.55E-08 | chr:6:32505702 |
| 6 rs73726843  | 32533042 C | 3.075 | 2.55E-08 | chr:6:32505702 |
| 6 rs115663137 | 32502992 C | 2.89  | 2.56E-08 | chr:6:32505702 |
| 6 rs116541769 | 32524870 T | 2.849 | 2.58E-08 | chr:6:32505702 |
| 6 rs72492329  | 32521136 A | 4.328 | 2.61E-08 | chr:6:32505702 |
| 6 rs73726176  | 32490760 G | 3.453 | 2.64E-08 | chr:6:32505702 |
| 6 rs73726177  | 32490762 G | 3.453 | 2.64E-08 | chr:6:32505702 |
| 6 rs76325796  | 32507653 A | 2.775 | 2.66E-08 | chr:6:32505702 |
| 6 rs77077499  | 32507652 T | 2.775 | 2.66E-08 | chr:6:32505702 |
| 6 rs111529629 | 32533843 G | 2.724 | 2.68E-08 | chr:6:32505702 |
| 6 rs115980757 | 32536914 C | 2.728 | 2.70E-08 | chr:6:32505702 |
| 6 rs149234868 | 32454921 G | 3.362 | 2.78E-08 | chr:6:32505702 |
| 6 rs11757123  | 32520094 C | 4.045 | 2.79E-08 | chr:6:32505702 |
| 6 rs72851055  | 32502814 C | 2.862 | 2.79E-08 | chr:6:32505702 |
| 6 rs9269921   | 32551568 G | 2.97  | 2.79E-08 | chr:6:32505702 |
| 6 rs115081905 | 32508276 T | 2.867 | 2.82E-08 | chr:6:32505702 |
| 6 rs9270597   | 32561598 G | 3.752 | 2.83E-08 | chr:6:32505702 |
| 6 rs553518894 | 32486504 T | 3.924 | 2.83E-08 | chr:6:32505702 |
| 6 rs9270485   | 32559064 C | 3.679 | 2.85E-08 | chr:6:32505702 |
| 6 rs67642277  | 32538067 A | 3.611 | 2.87E-08 | chr:6:32505702 |
| 6 rs9269969   | 32552272 C | 3.904 | 2.93E-08 | chr:6:32505702 |
| 6 rs533418679 | 32526140 A | 2.626 | 2.96E-08 | chr:6:32505702 |
| 6 rs9269508   | 32543248 T | 4.051 | 2.96E-08 | chr:6:32505702 |
| 6 rs9269506   | 32543187 A | 3.6   | 2.97E-08 | chr:6:32505702 |
| 6 rs9271690   | 32593003 C | 3.484 | 2.97E-08 | chr:6:32505702 |

|               |            |        |          |                |
|---------------|------------|--------|----------|----------------|
| 6 rs552472567 | 32533447 C | 2.723  | 3.03E-08 | chr:6:32505702 |
| 6 rs570478088 | 32533448 A | 2.723  | 3.03E-08 | chr:6:32505702 |
| 6 rs9272192   | 32601775 G | 3.454  | 3.03E-08 | chr:6:32505702 |
| 6 rs558696616 | 32530898 C | 2.806  | 3.04E-08 | chr:6:32505702 |
| 6 rs576810845 | 32530891 T | 2.806  | 3.04E-08 | chr:6:32505702 |
| 6 rs577240453 | 32530899 T | 2.806  | 3.04E-08 | chr:6:32505702 |
| 6 rs183134414 | 32511069 T | 2.837  | 3.06E-08 | chr:6:32505702 |
| 6 rs9272173   | 32601268 C | 3.188  | 3.09E-08 | chr:6:32505702 |
| 6 rs9269880   | 32550916 G | 3.427  | 3.13E-08 | chr:6:32505702 |
| 6 rs116152468 | 32536921 T | 2.725  | 3.17E-08 | chr:6:32505702 |
| 6 rs193201719 | 32505807 T | 2.702  | 3.18E-08 | chr:6:32505702 |
| 6 rs72845759  | 32531182 G | 2.911  | 3.19E-08 | chr:6:32505702 |
| 6 rs138940568 | 32536635 T | 2.726  | 3.20E-08 | chr:6:32505702 |
| 6 rs576289202 | 32452609 A | 7.619  | 3.20E-08 | chr:6:32505702 |
| 6 rs9270565   | 32560774 T | 3.687  | 3.20E-08 | chr:6:32505702 |
| 6 rs9270566   | 32560775 G | 3.687  | 3.20E-08 | chr:6:32505702 |
| 6 rs140527559 | 32536500 G | 2.781  | 3.22E-08 | chr:6:32505702 |
| 6 rs147611303 | 32536497 A | 2.781  | 3.22E-08 | chr:6:32505702 |
| 6 rs115156211 | 32533440 A | 2.722  | 3.23E-08 | chr:6:32505702 |
| 6 rs527285388 | 32535496 T | 2.633  | 3.24E-08 | chr:6:32505702 |
| 6 rs141293894 | 32536200 G | 3.077  | 3.25E-08 | chr:6:32505702 |
| 6 rs116787876 | 32491139 G | 2.849  | 3.26E-08 | chr:6:32505702 |
| 6 rs114375471 | 32493854 G | 3.696  | 3.29E-08 | chr:6:32505702 |
| 6 rs9270884   | 32571734 G | 3.268  | 3.30E-08 | chr:6:32505702 |
| 6 rs36218423  | 32524832 C | 2.79   | 3.31E-08 | chr:6:32505702 |
| 6 rs145340642 | 32485963 A | 3.389  | 3.31E-08 | chr:6:32505702 |
| 6 rs572411223 | 32454634 G | 0.1778 | 3.34E-08 | chr:6:32505702 |
| 6 rs147315656 | 32530869 T | 2.803  | 3.35E-08 | chr:6:32505702 |
| 6 rs9270530   | 32559686 A | 3.312  | 3.36E-08 | chr:6:32505702 |
| 6 rs551009500 | 32533836 T | 2.646  | 3.37E-08 | chr:6:32505702 |
| 6 rs569299936 | 32533837 A | 2.646  | 3.37E-08 | chr:6:32505702 |
| 6 rs72845758  | 32531178 C | 2.91   | 3.37E-08 | chr:6:32505702 |
| 6 rs145319447 | 32536492 C | 2.779  | 3.40E-08 | chr:6:32505702 |
| 6 rs542648047 | 32535499 T | 2.674  | 3.44E-08 | chr:6:32505702 |
| 6 rs563226460 | 32490851 T | 2.792  | 3.45E-08 | chr:6:32505702 |
| 6 rs9272191   | 32601769 T | 3.442  | 3.45E-08 | chr:6:32505702 |
| 6 rs75088009  | 32504884 G | 3.096  | 3.46E-08 | chr:6:32505702 |
| 6 rs9270423   | 32558580 A | 3.218  | 3.47E-08 | chr:6:32505702 |
| 6 rs9270503   | 32559181 G | 3.659  | 3.47E-08 | chr:6:32505702 |
| 6 rs9270504   | 32559184 A | 3.659  | 3.47E-08 | chr:6:32505702 |
| 6 rs116684175 | 32493853 T | 3.695  | 3.48E-08 | chr:6:32505702 |
| 6 rs9272658   | 32608658 A | 3.159  | 3.48E-08 | chr:6:32505702 |
| 6 rs541499994 | 32510983 C | 2.815  | 3.49E-08 | chr:6:32505702 |



|               |            |        |          |                |
|---------------|------------|--------|----------|----------------|
| 6 rs376217655 | 32505666 T | 2.539  | 3.53E-08 | chr:6:32505702 |
| 6 rs114795116 | 32491112 T | 2.847  | 3.54E-08 | chr:6:32505702 |
| 6 rs138921502 | 32538132 C | 3.774  | 3.60E-08 | chr:6:32505702 |
| 6 rs537686051 | 32531213 G | 2.817  | 3.61E-08 | chr:6:32505702 |
| 6 rs552586675 | 32531215 G | 2.817  | 3.61E-08 | chr:6:32505702 |
| 6 rs9269502   | 32543121 G | 3.672  | 3.61E-08 | chr:6:32505702 |
| 6 rs9269373   | 32540873 G | 2.673  | 3.62E-08 | chr:6:32505702 |
| 6 rs200402299 | 32458349 A | 2.672  | 3.72E-08 | chr:6:32505702 |
| 6 rs9272190   | 32601760 G | 3.433  | 3.77E-08 | chr:6:32505702 |
| 6 rs139547629 | 32485944 G | 3.375  | 3.83E-08 | chr:6:32505702 |
| 6 rs9271784   | 32594704 A | 2.921  | 3.83E-08 | chr:6:32505702 |
| 6 rs571171259 | 32531218 G | 2.817  | 3.86E-08 | chr:6:32505702 |
| 6 rs575449137 | 32536491 A | 2.63   | 3.90E-08 | chr:6:32505702 |
| 6 rs9272086   | 32599688 T | 3.123  | 3.90E-08 | chr:6:32505702 |
| 6 rs9271786   | 32594709 T | 2.921  | 3.91E-08 | chr:6:32505702 |
| 6 rs9272206   | 32601933 T | 3.266  | 3.92E-08 | chr:6:32505702 |
| 6 rs9271612   | 32591654 G | 3.519  | 3.93E-08 | chr:6:32505702 |
| 6 rs9271613   | 32591666 T | 3.519  | 3.93E-08 | chr:6:32505702 |
| 6 rs9272184   | 32601617 C | 3.158  | 3.94E-08 | chr:6:32505702 |
| 6 rs9269985   | 32552532 A | 3.624  | 3.95E-08 | chr:6:32505702 |
| 6 rs9271384   | 32587408 T | 3.467  | 3.99E-08 | chr:6:32505702 |
| 6 rs534655111 | 32531220 T | 2.816  | 4.01E-08 | chr:6:32505702 |
| 6 rs531336617 | 32530792 C | 2.721  | 4.01E-08 | chr:6:32505702 |
| 6 rs549516674 | 32530793 A | 2.721  | 4.01E-08 | chr:6:32505702 |
| 6 rs567265210 | 32530790 T | 2.721  | 4.01E-08 | chr:6:32505702 |
| 6 rs144578241 | 32536479 A | 2.63   | 4.01E-08 | chr:6:32505702 |
| 6 rs9269501   | 32543118 T | 3.707  | 4.08E-08 | chr:6:32505702 |
| 6 rs115852844 | 32603456 A | 3.5    | 4.09E-08 | chr:6:32505702 |
| 6 rs142142101 | 32534657 G | 2.646  | 4.14E-08 | chr:6:32505702 |
| 6 rs72851056  | 32502944 A | 2.865  | 4.17E-08 | chr:6:32505702 |
| 6 rs73731415  | 32454428 G | 4.268  | 4.19E-08 | chr:6:32505702 |
| 6 rs9270559   | 32560698 G | 3.794  | 4.38E-08 | chr:6:32505702 |
| 6 rs9269481   | 32542582 G | 0.2276 | 4.39E-08 | chr:6:32505702 |
| 6 rs115380393 | 32503020 T | 2.832  | 4.42E-08 | chr:6:32505702 |
| 6 rs114328264 | 32534675 T | 2.646  | 4.42E-08 | chr:6:32505702 |
| 6 rs191570792 | 32486624 A | 4.254  | 4.43E-08 | chr:6:32505702 |
| 6 rs71536568  | 32531151 A | 3.14   | 4.45E-08 | chr:6:32505702 |
| 6 rs145245177 | 32530955 C | 2.803  | 4.46E-08 | chr:6:32505702 |
| 6 rs145520715 | 32530952 T | 2.803  | 4.46E-08 | chr:6:32505702 |
| 6 rs148812784 | 32530954 C | 2.803  | 4.46E-08 | chr:6:32505702 |
| 6 rs544353633 | 32507596 G | 2.69   | 4.46E-08 | chr:6:32505702 |
| 6 rs9270877   | 32571318 G | 3.336  | 4.48E-08 | chr:6:32505702 |
| 6 rs9270878   | 32571320 A | 3.336  | 4.48E-08 | chr:6:32505702 |

|               |            |       |          |                |
|---------------|------------|-------|----------|----------------|
| 6 rs114198395 | 32502961 T | 2.857 | 4.49E-08 | chr:6:32505702 |
| 6 rs9270433   | 32558670 A | 2.842 | 4.51E-08 | chr:6:32505702 |
| 6 rs9271654   | 32592565 A | 3.121 | 4.54E-08 | chr:6:32505702 |
| 6 rs9271657   | 32592582 C | 3.121 | 4.54E-08 | chr:6:32505702 |
| 6 rs115774308 | 32530778 T | 2.8   | 4.55E-08 | chr:6:32505702 |
| 6 rs116465569 | 32536986 C | 2.884 | 4.57E-08 | chr:6:32505702 |
| 6 rs556173675 | 32508202 G | 2.644 | 4.58E-08 | chr:6:32505702 |
| 6 rs9270463   | 32558913 C | 2.639 | 4.60E-08 | chr:6:32505702 |
| 6 rs112013291 | 32536551 A | 2.612 | 4.61E-08 | chr:6:32505702 |
| 6 rs112349327 | 32502948 A | 2.856 | 4.69E-08 | chr:6:32505702 |
| 6 rs9270465   | 32558916 C | 2.644 | 4.71E-08 | chr:6:32505702 |
| 6 rs34265294  | 32489118 A | 3.177 | 4.73E-08 | chr:6:32505702 |
| 6 rs76666064  | 32530841 C | 2.64  | 4.77E-08 | chr:6:32505702 |
| 6 rs9272005   | 32597992 G | 3.762 | 4.83E-08 | chr:6:32505702 |
| 6 rs9272006   | 32597993 T | 3.762 | 4.83E-08 | chr:6:32505702 |
| 6 rs9272178   | 32601427 G | 3.174 | 4.86E-08 | chr:6:32505702 |
| 6 rs79740987  | 32507712 G | 2.721 | 4.88E-08 | chr:6:32505702 |
| 6 rs7768875   | 32560752 T | 3.416 | 4.93E-08 | chr:6:32505702 |
| 6 rs73397495  | 32534640 C | 2.641 | 4.93E-08 | chr:6:32505702 |
| 6 rs73407208  | 32491721 T | 3.102 | 4.96E-08 | chr:6:32505702 |
| 6 rs66501603  | 32538002 A | 3.029 | 4.97E-08 | chr:6:32505702 |
| 6 rs370864292 | 32532975 A | 2.755 | 5.00E-08 | chr:6:32505702 |
| 6 rs9272007   | 32598038 T | 3.764 | 5.01E-08 | chr:6:32505702 |
| 6 rs374408836 | 32507582 C | 2.683 | 5.03E-08 | chr:6:32505702 |
| 6 rs201439475 | 32502968 A | 2.849 | 5.05E-08 | chr:6:32505702 |
| 6 rs9272176   | 32601333 T | 3.155 | 5.09E-08 | chr:6:32505702 |
| 6 rs9270047   | 32553697 C | 3.505 | 5.12E-08 | chr:6:32505702 |
| 6 rs187395433 | 32510968 G | 2.792 | 5.16E-08 | chr:6:32505702 |
| 6 rs536343459 | 32468799 G | 2.743 | 5.24E-08 | chr:6:32505702 |
| 6 rs548006827 | 32468802 C | 2.743 | 5.24E-08 | chr:6:32505702 |
| 6 rs565374501 | 32468798 G | 2.743 | 5.24E-08 | chr:6:32505702 |
| 6 rs9270525   | 32559595 G | 3.196 | 5.27E-08 | chr:6:32505702 |
| 6 rs9270526   | 32559597 A | 3.196 | 5.27E-08 | chr:6:32505702 |
| 6 rs9270527   | 32559600 A | 3.196 | 5.27E-08 | chr:6:32505702 |
| 6 rs180756398 | 32458010 A | 2.56  | 5.28E-08 | chr:6:32505702 |
| 6 rs556200726 | 32525900 A | 2.586 | 5.31E-08 | chr:6:32505702 |
| 6 rs545949191 | 32502900 A | 2.847 | 5.34E-08 | chr:6:32505702 |
| 6 rs145177101 | 32536632 G | 2.641 | 5.39E-08 | chr:6:32505702 |
| 6 rs9272495   | 32606133 A | 3.513 | 5.42E-08 | chr:6:32505702 |
| 6 rs9270157   | 32555411 T | 3.79  | 5.44E-08 | chr:6:32505702 |
| 6 rs559903629 | 32510984 A | 2.777 | 5.61E-08 | chr:6:32505702 |
| 6 rs9272138   | 32600757 A | 3.767 | 5.67E-08 | chr:6:32505702 |
| 6 rs9272008   | 32598042 A | 3.766 | 5.68E-08 | chr:6:32505702 |

|               |            |        |          |                |
|---------------|------------|--------|----------|----------------|
| 6 rs9272247   | 32602924 A | 3.432  | 5.70E-08 | chr:6:32505702 |
| 6 rs9270528   | 32559603 C | 3.191  | 5.71E-08 | chr:6:32505702 |
| 6 rs9269885   | 32550971 T | 3.126  | 5.72E-08 | chr:6:32505702 |
| 6 rs535866271 | 32486668 G | 3.063  | 5.76E-08 | chr:6:32505702 |
| 6 rs538718414 | 32508207 T | 2.628  | 5.78E-08 | chr:6:32505702 |
| 6 rs77559661  | 32599512 T | 3.5    | 5.91E-08 | chr:6:32505702 |
| 6 rs545350177 | 32565668 G | 3.149  | 5.95E-08 | chr:6:32505702 |
| 6 rs73726852  | 32538295 C | 2.952  | 5.95E-08 | chr:6:32505702 |
| 6 rs550643609 | 32502794 A | 2.694  | 6.04E-08 | chr:6:32505702 |
| 6 rs9272248   | 32602941 A | 3.423  | 6.12E-08 | chr:6:32505702 |
| 6 rs113725551 | 32511420 G | 3.803  | 6.13E-08 | chr:6:32505702 |
| 6 rs538727527 | 32505332 T | 2.623  | 6.18E-08 | chr:6:32505702 |
| 6 rs9271662   | 32592628 A | 3.109  | 6.19E-08 | chr:6:32505702 |
| 6 rs707952    | 32609806 T | 3.506  | 6.23E-08 | chr:6:32505702 |
| 6 rs141005752 | 32498813 G | 7.076  | 6.23E-08 | chr:6:32505702 |
| 6 rs9269629   | 32545635 A | 3.685  | 6.31E-08 | chr:6:32505702 |
| 6 rs9269630   | 32545644 T | 3.685  | 6.31E-08 | chr:6:32505702 |
| 6 rs114710684 | 32521237 G | 8.726  | 6.38E-08 | chr:6:32505702 |
| 6 rs116783886 | 32521236 T | 8.726  | 6.38E-08 | chr:6:32505702 |
| 6 rs553897781 | 32505335 A | 2.621  | 6.40E-08 | chr:6:32505702 |
| 6 rs9272136   | 32600730 T | 3.771  | 6.46E-08 | chr:6:32505702 |
| 6 rs9272137   | 32600738 C | 3.771  | 6.46E-08 | chr:6:32505702 |
| 6 rs9272135   | 32600723 A | 3.772  | 6.63E-08 | chr:6:32505702 |
| 6 rs74197204  | 32507695 G | 2.747  | 6.73E-08 | chr:6:32505702 |
| 6 rs181916895 | 32525947 G | 2.594  | 6.82E-08 | chr:6:32505702 |
| 6 rs9269642   | 32545877 G | 0.2343 | 6.84E-08 | chr:6:32505702 |
| 6 rs9269651   | 32546074 C | 0.2563 | 6.86E-08 | chr:6:32505702 |
| 6 rs115254515 | 32491895 T | 3.267  | 6.94E-08 | chr:6:32505702 |
| 6 rs9272084   | 32599680 T | 3.001  | 7.00E-08 | chr:6:32505702 |
| 6 rs537722644 | 32525112 A | 2.649  | 7.04E-08 | chr:6:32505702 |
| 6 rs9272015   | 32598299 A | 3.761  | 7.08E-08 | chr:6:32505702 |
| 6 rs9272009   | 32598063 T | 3.768  | 7.10E-08 | chr:6:32505702 |
| 6 rs9269785   | 32549053 T | 4.955  | 7.10E-08 | chr:6:32505702 |
| 6 rs9269787   | 32549070 G | 4.955  | 7.10E-08 | chr:6:32505702 |
| 6 rs199893280 | 32531226 C | 2.807  | 7.11E-08 | chr:6:32505702 |
| 6 rs532618689 | 32508064 T | 2.534  | 7.17E-08 | chr:6:32505702 |
| 6 rs549780202 | 32508055 T | 2.534  | 7.17E-08 | chr:6:32505702 |
| 6 rs564974789 | 32508061 A | 2.534  | 7.17E-08 | chr:6:32505702 |
| 6 rs544527733 | 32503091 T | 2.613  | 7.21E-08 | chr:6:32505702 |
| 6 rs72508469  | 32505309 C | 2.648  | 7.25E-08 | chr:6:32505702 |
| 6 rs12661707  | 32531245 T | 2.812  | 7.30E-08 | chr:6:32505702 |
| 6 rs74211571  | 32502566 T | 2.849  | 7.33E-08 | chr:6:32505702 |
| 6 rs68009841  | 32507731 T | 2.654  | 7.40E-08 | chr:6:32505702 |

|               |            |        |          |                |
|---------------|------------|--------|----------|----------------|
| 6 rs9271787   | 32594718 C | 2.996  | 7.42E-08 | chr:6:32505702 |
| 6 rs143796398 | 32536259 T | 2.626  | 7.48E-08 | chr:6:32505702 |
| 6 rs111769716 | 32530819 G | 2.565  | 7.50E-08 | chr:6:32505702 |
| 6 rs74223623  | 32492102 C | 0.2526 | 7.51E-08 | chr:6:32505702 |
| 6 rs535381236 | 32468870 G | 2.57   | 7.53E-08 | chr:6:32505702 |
| 6 rs559249402 | 32468864 C | 2.57   | 7.53E-08 | chr:6:32505702 |
| 6 rs577621741 | 32468866 A | 2.57   | 7.53E-08 | chr:6:32505702 |
| 6 rs9271794   | 32594855 A | 2.81   | 7.54E-08 | chr:6:32505702 |
| 6 rs9272196   | 32601834 G | 2.999  | 7.55E-08 | chr:6:32505702 |
| 6 rs17203839  | 32555926 C | 5.734  | 7.56E-08 | chr:6:32505702 |
| 6 rs67283303  | 32531253 T | 3.023  | 7.63E-08 | chr:6:32505702 |
| 6 rs9271699   | 32593179 G | 3.783  | 7.64E-08 | chr:6:32505702 |
| 6 rs9269879   | 32550906 G | 3.321  | 7.68E-08 | chr:6:32505702 |
| 6 rs9271981   | 32597639 C | 2.718  | 7.71E-08 | chr:6:32505702 |
| 6 rs2516050   | 32570352 A | 3.625  | 7.74E-08 | chr:6:32505702 |
| 6 rs9270540   | 32559848 C | 3.346  | 7.75E-08 | chr:6:32505702 |
| 6 rs9272134   | 32600705 G | 3.784  | 7.76E-08 | chr:6:32505702 |
| 6 rs116473597 | 32482374 T | 2.487  | 7.84E-08 | chr:6:32505702 |
| 6 rs556568526 | 32482353 T | 2.487  | 7.84E-08 | chr:6:32505702 |
| 6 rs578020847 | 32482368 C | 2.487  | 7.84E-08 | chr:6:32505702 |
| 6 rs113133909 | 32457928 T | 2.496  | 7.95E-08 | chr:6:32505702 |
| 6 rs534859262 | 32457931 T | 2.496  | 7.95E-08 | chr:6:32505702 |
| 6 rs571341495 | 32505326 G | 2.607  | 7.98E-08 | chr:6:32505702 |
| 6 rs9271958   | 32597372 A | 3.369  | 7.99E-08 | chr:6:32505702 |
| 6 rs76940575  | 32502590 C | 2.844  | 8.00E-08 | chr:6:32505702 |
| 6 rs9271788   | 32594734 G | 3.101  | 8.01E-08 | chr:6:32505702 |
| 6 rs114451225 | 32538025 G | 2.948  | 8.01E-08 | chr:6:32505702 |
| 6 rs201648725 | 32538024 C | 2.948  | 8.01E-08 | chr:6:32505702 |
| 6 rs9272001   | 32597901 G | 3.773  | 8.04E-08 | chr:6:32505702 |
| 6 rs115104630 | 32502387 A | 2.77   | 8.05E-08 | chr:6:32505702 |
| 6 rs146436875 | 32498948 G | 2.588  | 8.08E-08 | chr:6:32505702 |
| 6 rs148879657 | 32498940 G | 2.588  | 8.08E-08 | chr:6:32505702 |
| 6 rs34966632  | 32536306 G | 2.808  | 8.09E-08 | chr:6:32505702 |
| 6 rs67515384  | 32505271 A | 2.738  | 8.15E-08 | chr:6:32505702 |
| 6 rs679243    | 32570959 T | 3.429  | 8.21E-08 | chr:6:32505702 |
| 6 rs542755566 | 32525942 G | 2.584  | 8.22E-08 | chr:6:32505702 |
| 6 rs115055593 | 32468827 C | 2.662  | 8.35E-08 | chr:6:32505702 |
| 6 rs540141541 | 32487480 G | 3.129  | 8.37E-08 | chr:6:32505702 |
| 6 rs117090280 | 32489265 T | 2.907  | 8.44E-08 | chr:6:32505702 |
| 6 rs9272121   | 32600556 C | 3.553  | 8.46E-08 | chr:6:32505702 |
| 6 rs9269549   | 32544202 T | 0.2225 | 8.49E-08 | chr:6:32505702 |
| 6 rs9272260   | 32603236 A | 3.333  | 8.49E-08 | chr:6:32505702 |
| 6 rs148437409 | 32598479 C | 3.373  | 8.55E-08 | chr:6:32505702 |

|               |            |        |          |                |
|---------------|------------|--------|----------|----------------|
| 6 rs9272004   | 32597964 A | 3.778  | 8.58E-08 | chr:6:32505702 |
| 6 rs80216275  | 32469383 A | 2.896  | 8.61E-08 | chr:6:32505702 |
| 6 rs115018431 | 32534360 T | 2.59   | 8.62E-08 | chr:6:32505702 |
| 6 rs9272110   | 32600287 C | 3.781  | 8.66E-08 | chr:6:32505702 |
| 6 rs9272113   | 32600291 C | 3.781  | 8.66E-08 | chr:6:32505702 |
| 6 rs9269574   | 32544711 C | 2.821  | 8.68E-08 | chr:6:32505702 |
| 6 rs114969562 | 32594299 A | 2.867  | 8.70E-08 | chr:6:32505702 |
| 6 rs3207966   | 32605197 A | 3.451  | 8.77E-08 | chr:6:32505702 |
| 6 rs1047985   | 32605216 A | 3.448  | 8.78E-08 | chr:6:32505702 |
| 6 rs35479797  | 32535900 T | 3.024  | 8.86E-08 | chr:6:32505702 |
| 6 rs1064717   | 32546615 G | 0.2397 | 8.89E-08 | chr:6:32505702 |
| 6 rs9272130   | 32600638 G | 3.782  | 9.00E-08 | chr:6:32505702 |
| 6 rs9272141   | 32600797 A | 3.554  | 9.07E-08 | chr:6:32505702 |
| 6 rs9272195   | 32601830 G | 3.415  | 9.15E-08 | chr:6:32505702 |
| 6 rs201954564 | 32497824 C | 0.1841 | 9.18E-08 | chr:6:32505702 |
| 6 rs116708952 | 32486590 A | 2.868  | 9.19E-08 | chr:6:32505702 |
| 6 rs9269636   | 32545772 A | 0.2403 | 9.20E-08 | chr:6:32505702 |
| 6 rs9272177   | 32601361 C | 3.07   | 9.20E-08 | chr:6:32505702 |
| 6 rs146225755 | 32491807 A | 3.183  | 9.25E-08 | chr:6:32505702 |
| 6 rs9272026   | 32598618 G | 3.784  | 9.40E-08 | chr:6:32505702 |
| 6 rs9272027   | 32598622 G | 3.784  | 9.40E-08 | chr:6:32505702 |
| 6 rs113432958 | 32538366 A | 3.35   | 9.42E-08 | chr:6:32505702 |
| 6 rs137863146 | 32489871 G | 2.917  | 9.51E-08 | chr:6:32505702 |
| 6 rs9272143   | 32600803 C | 3.551  | 9.52E-08 | chr:6:32505702 |
| 6 rs77114005  | 32594342 C | 2.85   | 9.53E-08 | chr:6:32505702 |
| 6 rs6940063   | 32428862 C | 4.17   | 9.57E-08 | chr:6:32505702 |
| 6 rs9271615   | 32591686 G | 3.784  | 9.62E-08 | chr:6:32505702 |
| 6 rs9269413   | 32541458 C | 0.2417 | 9.63E-08 | chr:6:32505702 |
| 6 rs9272061   | 32599250 A | 3.76   | 9.65E-08 | chr:6:32505702 |
| 6 rs9269873   | 32550796 A | 3.546  | 9.83E-08 | chr:6:32505702 |
| 6 rs537453284 | 32596036 A | 3.407  | 9.85E-08 | chr:6:32505702 |
| 6 rs73403117  | 32468956 T | 2.781  | 9.92E-08 | chr:6:32505702 |
| 6 rs9271939   | 32596921 C | 3.784  | 9.97E-08 | chr:6:32505702 |
| 6 rs9272013   | 32598224 T | 3.781  | 9.97E-08 | chr:6:32505702 |
| 6 rs9270034   | 32553418 G | 3.545  | 9.99E-08 | chr:6:32505702 |
| 6 rs116531157 | 32547565 G | 3.381  | 1.00E-07 | chr:6:32505702 |
| 6 rs79617990  | 32600694 A | 3.4    | 1.00E-07 | chr:6:32505702 |
| 6 rs9272233   | 32602686 A | 3.435  | 1.01E-07 | chr:6:32505702 |
| 6 rs9272234   | 32602691 A | 3.435  | 1.01E-07 | chr:6:32505702 |
| 6 rs143442815 | 32489863 C | 3.056  | 1.01E-07 | chr:6:32505702 |
| 6 rs72848212  | 32594898 T | 2.601  | 1.02E-07 | chr:6:32505702 |
| 6 rs9271890   | 32595779 A | 3.783  | 1.02E-07 | chr:6:32505702 |
| 6 rs9271891   | 32595783 T | 3.783  | 1.02E-07 | chr:6:32505702 |

|               |            |        |          |                |
|---------------|------------|--------|----------|----------------|
| 6 rs2395184   | 32432646 A | 4.228  | 1.02E-07 | chr:6:32505702 |
| 6 rs528827703 | 32452406 G | 4.228  | 1.02E-07 | chr:6:32505702 |
| 6 rs7749057   | 32448904 G | 4.228  | 1.02E-07 | chr:6:32505702 |
| 6 rs9272480   | 32605800 G | 3.432  | 1.02E-07 | chr:6:32505702 |
| 6 rs9270861   | 32570979 A | 3.077  | 1.02E-07 | chr:6:32505702 |
| 6 rs9270862   | 32570981 C | 3.077  | 1.02E-07 | chr:6:32505702 |
| 6 rs9270863   | 32570982 A | 3.077  | 1.02E-07 | chr:6:32505702 |
| 6 rs9271889   | 32595747 A | 3.782  | 1.03E-07 | chr:6:32505702 |
| 6 rs9269653   | 32546080 A | 0.2494 | 1.04E-07 | chr:6:32505702 |
| 6 rs182987687 | 32506870 C | 2.446  | 1.04E-07 | chr:6:32505702 |
| 6 rs189968693 | 32506863 A | 2.446  | 1.04E-07 | chr:6:32505702 |
| 6 rs9269074   | 32440792 A | 4.418  | 1.05E-07 | chr:6:32505702 |
| 6 rs9269705   | 32547182 T | 2.921  | 1.05E-07 | chr:6:32505702 |
| 6 rs9272063   | 32599303 T | 3.405  | 1.05E-07 | chr:6:32505702 |
| 6 rs150860760 | 32486709 C | 3.281  | 1.05E-07 | chr:6:32505702 |
| 6 rs72853923  | 32508222 G | 2.628  | 1.06E-07 | chr:6:32505702 |
| 6 rs9272044   | 32598971 A | 3.784  | 1.07E-07 | chr:6:32505702 |
| 6 rs9272665   | 32608721 A | 3.072  | 1.07E-07 | chr:6:32505702 |
| 6 rs112313206 | 32598405 T | 3.551  | 1.08E-07 | chr:6:32505702 |
| 6 rs9270487   | 32559076 G | 3.208  | 1.08E-07 | chr:6:32505702 |
| 6 rs9271619   | 32591773 A | 3.385  | 1.10E-07 | chr:6:32505702 |
| 6 rs188426982 | 32506878 A | 2.444  | 1.10E-07 | chr:6:32505702 |
| 6 rs191423596 | 32506888 C | 2.444  | 1.10E-07 | chr:6:32505702 |
| 6 rs9271897   | 32595954 A | 3.785  | 1.10E-07 | chr:6:32505702 |
| 6 rs9271898   | 32595972 A | 3.785  | 1.10E-07 | chr:6:32505702 |
| 6 rs9272215   | 32602105 T | 3.369  | 1.10E-07 | chr:6:32505702 |
| 6 rs9271648   | 32592358 T | 3.562  | 1.12E-07 | chr:6:32505702 |
| 6 rs9272117   | 32600411 T | 3.789  | 1.12E-07 | chr:6:32505702 |
| 6 rs150117381 | 32505388 C | 2.502  | 1.12E-07 | chr:6:32505702 |
| 6 rs9271945   | 32597034 A | 3.786  | 1.13E-07 | chr:6:32505702 |
| 6 rs9271896   | 32595907 A | 3.785  | 1.15E-07 | chr:6:32505702 |
| 6 rs9271892   | 32595813 C | 3.785  | 1.15E-07 | chr:6:32505702 |
| 6 rs9269578   | 32544743 T | 2.844  | 1.18E-07 | chr:6:32505702 |
| 6 rs9270475   | 32559007 T | 3.146  | 1.18E-07 | chr:6:32505702 |
| 6 rs112103446 | 32522679 C | 7.176  | 1.19E-07 | chr:6:32505702 |
| 6 rs9272064   | 32599338 T | 3.767  | 1.19E-07 | chr:6:32505702 |
| 6 rs114527826 | 32594160 T | 3.37   | 1.20E-07 | chr:6:32505702 |
| 6 rs9272065   | 32599352 G | 3.396  | 1.20E-07 | chr:6:32505702 |
| 6 rs9272066   | 32599374 A | 3.396  | 1.20E-07 | chr:6:32505702 |
| 6 rs9272120   | 32600501 G | 3.786  | 1.20E-07 | chr:6:32505702 |
| 6 rs192164737 | 32508091 G | 2.483  | 1.20E-07 | chr:6:32505702 |
| 6 rs9269635   | 32545720 A | 0.2451 | 1.20E-07 | chr:6:32505702 |
| 6 rs73729106  | 32514288 T | 3.447  | 1.21E-07 | chr:6:32505702 |

|               |            |        |          |                |
|---------------|------------|--------|----------|----------------|
| 6 rs9272067   | 32599401 A | 3.767  | 1.22E-07 | chr:6:32505702 |
| 6 rs9269524   | 32543671 C | 3.277  | 1.22E-07 | chr:6:32505702 |
| 6 rs9272071   | 32599487 C | 3.401  | 1.23E-07 | chr:6:32505702 |
| 6 rs538174489 | 32508201 T | 2.577  | 1.25E-07 | chr:6:32505702 |
| 6 rs113523485 | 32489302 C | 2.718  | 1.26E-07 | chr:6:32505702 |
| 6 rs9272012   | 32598156 A | 2.817  | 1.27E-07 | chr:6:32505702 |
| 6 rs77149458  | 32487130 A | 4.089  | 1.27E-07 | chr:6:32505702 |
| 6 rs9271903   | 32596038 G | 3.374  | 1.27E-07 | chr:6:32505702 |
| 6 rs9271904   | 32596040 G | 3.374  | 1.27E-07 | chr:6:32505702 |
| 6 rs9271905   | 32596041 A | 3.374  | 1.27E-07 | chr:6:32505702 |
| 6 rs560625026 | 32546591 C | 0.2468 | 1.28E-07 | chr:6:32505702 |
| 6 rs574714830 | 32494119 A | 3.135  | 1.31E-07 | chr:6:32505702 |
| 6 rs78776954  | 32600817 G | 3.298  | 1.31E-07 | chr:6:32505702 |
| 6 rs115141943 | 32538830 C | 3.092  | 1.31E-07 | chr:6:32505702 |
| 6 rs115640078 | 32538839 T | 3.092  | 1.31E-07 | chr:6:32505702 |
| 6 rs9272262   | 32603291 T | 3.405  | 1.32E-07 | chr:6:32505702 |
| 6 rs9272264   | 32603309 G | 3.405  | 1.32E-07 | chr:6:32505702 |
| 6 rs9272728   | 32609593 G | 3.405  | 1.32E-07 | chr:6:32505702 |
| 6 rs9272028   | 32598706 T | 3.556  | 1.33E-07 | chr:6:32505702 |
| 6 rs9272029   | 32598707 G | 3.556  | 1.33E-07 | chr:6:32505702 |
| 6 rs529484704 | 32507478 C | 2.618  | 1.34E-07 | chr:6:32505702 |
| 6 rs9272253   | 32603028 T | 3.388  | 1.34E-07 | chr:6:32505702 |
| 6 rs181549666 | 32482352 A | 2.455  | 1.35E-07 | chr:6:32505702 |
| 6 rs9271789   | 32594768 A | 3.081  | 1.36E-07 | chr:6:32505702 |
| 6 rs1064664   | 32552075 G | 3.237  | 1.38E-07 | chr:6:32505702 |
| 6 rs527371188 | 32453819 T | 4.345  | 1.38E-07 | chr:6:32505702 |
| 6 rs115787103 | 32603417 A | 3.401  | 1.40E-07 | chr:6:32505702 |
| 6 rs35344500  | 32609525 C | 3.401  | 1.40E-07 | chr:6:32505702 |
| 6 rs9272230   | 32602602 A | 3.401  | 1.40E-07 | chr:6:32505702 |
| 6 rs9272434   | 32605325 T | 3.401  | 1.40E-07 | chr:6:32505702 |
| 6 rs9272626   | 32608041 C | 3.401  | 1.40E-07 | chr:6:32505702 |
| 6 rs9272686   | 32609015 T | 3.401  | 1.40E-07 | chr:6:32505702 |
| 6 rs562462    | 32586437 C | 3.299  | 1.40E-07 | chr:6:32505702 |
| 6 rs9272069   | 32599425 A | 3.377  | 1.40E-07 | chr:6:32505702 |
| 6 rs558095162 | 32598504 T | 3.369  | 1.43E-07 | chr:6:32505702 |
| 6 rs554443954 | 32496557 T | 2.664  | 1.44E-07 | chr:6:32505702 |
| 6 rs74786163  | 32507780 T | 2.554  | 1.46E-07 | chr:6:32505702 |
| 6 rs9271895   | 32595906 C | 3.356  | 1.46E-07 | chr:6:32505702 |
| 6 rs190526848 | 32488781 A | 2.609  | 1.47E-07 | chr:6:32505702 |
| 6 rs78240203  | 32600881 G | 3.359  | 1.47E-07 | chr:6:32505702 |
| 6 rs114638791 | 32538268 A | 2.703  | 1.50E-07 | chr:6:32505702 |
| 6 rs9272124   | 32600581 A | 3.189  | 1.50E-07 | chr:6:32505702 |
| 6 rs9271918   | 32596352 T | 3.689  | 1.50E-07 | chr:6:32505702 |

|               |            |        |          |                |
|---------------|------------|--------|----------|----------------|
| 6 rs9272022   | 32598529 G | 3.369  | 1.51E-07 | chr:6:32505702 |
| 6 rs74202712  | 32502546 G | 2.746  | 1.52E-07 | chr:6:32505702 |
| 6 rs192052326 | 32528176 T | 2.297  | 1.52E-07 | chr:6:32505702 |
| 6 rs9269393   | 32541222 A | 2.61   | 1.53E-07 | chr:6:32505702 |
| 6 rs9269968   | 32552251 G | 0.2184 | 1.53E-07 | chr:6:32505702 |
| 6 rs9269484   | 32542711 C | 0.247  | 1.55E-07 | chr:6:32505702 |
| 6 rs9272241   | 32602787 A | 3.332  | 1.55E-07 | chr:6:32505702 |
| 6 rs35366682  | 32594354 C | 2.724  | 1.57E-07 | chr:6:32505702 |
| 6 rs9271978   | 32597632 C | 2.687  | 1.59E-07 | chr:6:32505702 |
| 6 rs9272128   | 32600601 A | 3.186  | 1.59E-07 | chr:6:32505702 |
| 6 rs9272129   | 32600602 T | 3.186  | 1.59E-07 | chr:6:32505702 |
| 6 rs192837519 | 32547544 G | 3.05   | 1.60E-07 | chr:6:32505702 |
| 6 rs569509899 | 32507490 G | 2.606  | 1.62E-07 | chr:6:32505702 |
| 6 rs9272002   | 32597924 G | 3.391  | 1.63E-07 | chr:6:32505702 |
| 6 rs183777110 | 32505375 T | 2.482  | 1.66E-07 | chr:6:32505702 |
| 6 rs77413629  | 32505374 G | 2.482  | 1.66E-07 | chr:6:32505702 |
| 6 rs9272108   | 32600228 C | 3.544  | 1.66E-07 | chr:6:32505702 |
| 6 rs3135003   | 32591476 T | 3.296  | 1.68E-07 | chr:6:32505702 |
| 6 rs9272003   | 32597940 G | 3.39   | 1.68E-07 | chr:6:32505702 |
| 6 rs185236820 | 32488776 T | 2.594  | 1.69E-07 | chr:6:32505702 |
| 6 rs544548886 | 32505381 T | 2.476  | 1.69E-07 | chr:6:32505702 |
| 6 rs9271915   | 32596294 C | 3.69   | 1.71E-07 | chr:6:32505702 |
| 6 rs3129763   | 32590925 A | 3.334  | 1.73E-07 | chr:6:32505702 |
| 6 rs9271999   | 32597832 G | 3.366  | 1.74E-07 | chr:6:32505702 |
| 6 rs568869869 | 32502799 G | 2.629  | 1.77E-07 | chr:6:32505702 |
| 6 rs9271917   | 32596336 G | 3.645  | 1.78E-07 | chr:6:32505702 |
| 6 rs181244719 | 32498916 C | 2.517  | 1.78E-07 | chr:6:32505702 |
| 6 rs9272109   | 32600253 T | 3.549  | 1.79E-07 | chr:6:32505702 |
| 6 rs9271979   | 32597635 C | 2.583  | 1.79E-07 | chr:6:32505702 |
| 6 rs9271791   | 32594810 A | 2.958  | 1.80E-07 | chr:6:32505702 |
| 6 rs9270894   | 32571872 G | 2.969  | 1.82E-07 | chr:6:32505702 |
| 6 rs74291249  | 32594098 A | 3.275  | 1.83E-07 | chr:6:32505702 |
| 6 rs9271715   | 32593441 T | 2.984  | 1.84E-07 | chr:6:32505702 |
| 6 rs9271716   | 32593442 G | 2.984  | 1.84E-07 | chr:6:32505702 |
| 6 rs9272632   | 32608180 G | 3.127  | 1.85E-07 | chr:6:32505702 |
| 6 rs9271906   | 32596048 A | 3.557  | 1.85E-07 | chr:6:32505702 |
| 6 rs9271957   | 32597335 C | 3.555  | 1.86E-07 | chr:6:32505702 |
| 6 rs9271927   | 32596647 C | 3.545  | 1.87E-07 | chr:6:32505702 |
| 6 rs9271928   | 32596648 A | 3.545  | 1.87E-07 | chr:6:32505702 |
| 6 rs9272000   | 32597834 T | 3.365  | 1.90E-07 | chr:6:32505702 |
| 6 rs113353313 | 32538242 G | 2.694  | 1.90E-07 | chr:6:32505702 |
| 6 rs9271955   | 32597281 A | 3.554  | 1.90E-07 | chr:6:32505702 |
| 6 rs9271720   | 32593507 A | 3.211  | 1.91E-07 | chr:6:32505702 |



|                     |            |        |          |                |
|---------------------|------------|--------|----------|----------------|
| 6 rs116611418       | 32459595 G | 2.445  | 1.92E-07 | chr:6:32505702 |
| 6 rs112861810       | 32494029 G | 2.896  | 1.92E-07 | chr:6:32505702 |
| 6 rs183231933       | 32524320 T | 2.525  | 1.92E-07 | chr:6:32505702 |
| 6 rs9271901         | 32596027 T | 3.56   | 1.93E-07 | chr:6:32505702 |
| 6 rs112200867       | 32485949 G | 3.211  | 1.94E-07 | chr:6:32505702 |
| 6 rs115814063       | 32492093 T | 0.2659 | 1.94E-07 | chr:6:32505702 |
| 6 rs9269493         | 32542990 T | 0.2485 | 1.95E-07 | chr:6:32505702 |
| 6 rs9269886         | 32550976 A | 2.878  | 1.95E-07 | chr:6:32505702 |
| 6 rs528638684       | 32490600 T | 2.826  | 1.96E-07 | chr:6:32505702 |
| 6 rs7758472         | 32599039 A | 3.311  | 1.96E-07 | chr:6:32505702 |
| 6 rs9271934         | 32596773 T | 3.559  | 1.98E-07 | chr:6:32505702 |
| 6 rs9269967         | 32552239 T | 3.559  | 1.98E-07 | chr:6:32505702 |
| 6 rs9271739         | 32593692 T | 2.88   | 1.99E-07 | chr:6:32505702 |
| 6 rs4713552         | 32560984 T | 3.183  | 2.00E-07 | chr:6:32505702 |
| 6 rs72492362        | 32543969 G | 3.16   | 2.01E-07 | chr:6:32505702 |
| 6 rs73727946        | 32504967 C | 2.55   | 2.03E-07 | chr:6:32505702 |
| 6 rs9272016         | 32598346 T | 3.553  | 2.03E-07 | chr:6:32505702 |
| 6 rs9271977         | 32597623 A | 2.752  | 2.04E-07 | chr:6:32505702 |
| 6 rs9272682         | 32608953 T | 3.113  | 2.04E-07 | chr:6:32505702 |
| 6 rs9269720         | 32547319 C | 2.922  | 2.07E-07 | chr:6:32505702 |
| 6 rs111979375       | 32538231 T | 2.629  | 2.08E-07 | chr:6:32505702 |
| 6 rs79749596        | 32534021 T | 0.2078 | 2.08E-07 | chr:6:32505702 |
| 6 rs202042857       | 32540564 G | 2.794  | 2.08E-07 | chr:6:32505702 |
| 6 rs9271899         | 32596007 G | 3.558  | 2.11E-07 | chr:6:32505702 |
| 6 rs41287236        | 32547376 G | 2.569  | 2.14E-07 | chr:6:32505702 |
| 6 rs41287237        | 32547378 A | 2.569  | 2.14E-07 | chr:6:32505702 |
| 6 rs9272146         | 32600914 C | 3.558  | 2.15E-07 | chr:6:32505702 |
| 6 rs192232151;rs928 | 32390414 A | 4.022  | 2.17E-07 | chr:6:32505702 |
| 6 rs140747244       | 32488784 C | 2.595  | 2.17E-07 | chr:6:32505702 |
| 6 rs561942189       | 32496432 G | 2.634  | 2.19E-07 | chr:6:32505702 |
| 6 rs540194362       | 32507768 G | 2.435  | 2.20E-07 | chr:6:32505702 |
| 6 rs9269906         | 32551309 A | 2.673  | 2.20E-07 | chr:6:32505702 |
| 6 rs9272049         | 32599045 G | 3.556  | 2.20E-07 | chr:6:32505702 |
| 6 rs9269580         | 32544784 A | 2.962  | 2.22E-07 | chr:6:32505702 |
| 6 rs9271405         | 32587584 C | 3.157  | 2.24E-07 | chr:6:32505702 |
| 6 rs9272610         | 32607767 C | 3.126  | 2.25E-07 | chr:6:32505702 |
| 6 rs112471393       | 32538228 T | 2.623  | 2.26E-07 | chr:6:32505702 |
| 6 rs115333128       | 32485804 G | 2.674  | 2.29E-07 | chr:6:32505702 |
| 6 rs566710022       | 32507505 T | 2.588  | 2.30E-07 | chr:6:32505702 |
| 6 rs9272060         | 32599237 A | 3.223  | 2.30E-07 | chr:6:32505702 |
| 6 rs11966146        | 32487739 A | 3.984  | 2.31E-07 | chr:6:32505702 |
| 6 rs707949          | 32609952 C | 3.303  | 2.32E-07 | chr:6:32505702 |
| 6 rs9271861         | 32595287 T | 2.812  | 2.34E-07 | chr:6:32505702 |

|               |            |        |          |                |
|---------------|------------|--------|----------|----------------|
| 6 rs9271888   | 32595732 C | 3.556  | 2.36E-07 | chr:6:32505702 |
| 6 rs9271907   | 32596123 T | 3.557  | 2.36E-07 | chr:6:32505702 |
| 6 rs9271908   | 32596131 T | 3.557  | 2.36E-07 | chr:6:32505702 |
| 6 rs9272423   | 32605164 G | 3.281  | 2.36E-07 | chr:6:32505702 |
| 6 rs114085331 | 32479430 A | 2.899  | 2.37E-07 | chr:6:32505702 |
| 6 rs533688361 | 32480016 T | 2.412  | 2.40E-07 | chr:6:32505702 |
| 6 rs199636459 | 32507758 A | 2.427  | 2.41E-07 | chr:6:32505702 |
| 6 rs9271910   | 32596183 C | 3.557  | 2.41E-07 | chr:6:32505702 |
| 6 rs9271862   | 32595333 C | 2.638  | 2.41E-07 | chr:6:32505702 |
| 6 rs9270573   | 32561014 G | 3.184  | 2.41E-07 | chr:6:32505702 |
| 6 rs2097432   | 32590771 C | 3.251  | 2.43E-07 | chr:6:32505702 |
| 6 rs590999    | 32567508 A | 3.251  | 2.43E-07 | chr:6:32505702 |
| 6 rs607998    | 32587038 A | 3.212  | 2.43E-07 | chr:6:32505702 |
| 6 rs76190048  | 32566497 A | 3.251  | 2.43E-07 | chr:6:32505702 |
| 6 rs9270665   | 32566232 T | 3.251  | 2.43E-07 | chr:6:32505702 |
| 6 rs9271352   | 32583938 C | 3.251  | 2.43E-07 | chr:6:32505702 |
| 6 rs9271541   | 32590070 C | 3.251  | 2.43E-07 | chr:6:32505702 |
| 6 rs9271868   | 32595375 C | 2.441  | 2.44E-07 | chr:6:32505702 |
| 6 rs9271869   | 32595376 A | 2.441  | 2.44E-07 | chr:6:32505702 |
| 6 rs9271870   | 32595377 T | 2.441  | 2.44E-07 | chr:6:32505702 |
| 6 rs9271931   | 32596698 G | 4.527  | 2.46E-07 | chr:6:32505702 |
| 6 rs9271691   | 32593006 G | 3.203  | 2.46E-07 | chr:6:32505702 |
| 6 rs9271692   | 32593010 A | 3.203  | 2.46E-07 | chr:6:32505702 |
| 6 rs111634228 | 32594452 G | 3.068  | 2.47E-07 | chr:6:32505702 |
| 6 rs9272075   | 32599593 G | 2.767  | 2.49E-07 | chr:6:32505702 |
| 6 rs7758465   | 32599031 A | 3.251  | 2.49E-07 | chr:6:32505702 |
| 6 rs9271912   | 32596207 T | 3.556  | 2.49E-07 | chr:6:32505702 |
| 6 rs9271913   | 32596222 A | 3.556  | 2.49E-07 | chr:6:32505702 |
| 6 rs9272193   | 32601785 T | 0.2803 | 2.50E-07 | chr:6:32505702 |
| 6 rs9271914   | 32596238 C | 3.557  | 2.52E-07 | chr:6:32505702 |
| 6 rs9269723   | 32547336 C | 2.808  | 2.57E-07 | chr:6:32505702 |
| 6 rs114769197 | 32538217 A | 2.567  | 2.57E-07 | chr:6:32505702 |
| 6 rs185087225 | 32480024 G | 2.408  | 2.57E-07 | chr:6:32505702 |
| 6 rs537678001 | 32527268 G | 2.637  | 2.59E-07 | chr:6:32505702 |
| 6 rs9271848   | 32595027 G | 3.071  | 2.60E-07 | chr:6:32505702 |
| 6 rs9271528   | 32589923 T | 3.169  | 2.60E-07 | chr:6:32505702 |
| 6 rs9271937   | 32596870 G | 3.483  | 2.61E-07 | chr:6:32505702 |
| 6 rs111477174 | 32594457 G | 3.066  | 2.64E-07 | chr:6:32505702 |
| 6 rs9272119   | 32600470 C | 3.514  | 2.68E-07 | chr:6:32505702 |
| 6 rs9272168   | 32601222 C | 2.954  | 2.71E-07 | chr:6:32505702 |
| 6 rs9272246   | 32602903 C | 3.207  | 2.72E-07 | chr:6:32505702 |
| 6 rs9271930   | 32596677 G | 3.462  | 2.72E-07 | chr:6:32505702 |
| 6 rs9271843   | 32594957 T | 2.425  | 2.72E-07 | chr:6:32505702 |

|               |            |        |          |                |
|---------------|------------|--------|----------|----------------|
| 6 rs9270600   | 32561693 T | 3.243  | 2.73E-07 | chr:6:32505702 |
| 6 rs114309058 | 32594470 A | 3.064  | 2.74E-07 | chr:6:32505702 |
| 6 rs28613510  | 32518507 G | 0.2665 | 2.75E-07 | chr:6:32505702 |
| 6 rs9271983   | 32597647 T | 2.544  | 2.76E-07 | chr:6:32505702 |
| 6 rs72853924  | 32508239 G | 2.57   | 2.79E-07 | chr:6:32505702 |
| 6 rs187653175 | 32490127 A | 2.824  | 2.79E-07 | chr:6:32505702 |
| 6 rs9272103   | 32599896 T | 3.365  | 2.79E-07 | chr:6:32505702 |
| 6 rs575209356 | 32525806 A | 2.419  | 2.81E-07 | chr:6:32505702 |
| 6 rs9271842   | 32594953 A | 2.423  | 2.82E-07 | chr:6:32505702 |
| 6 rs9271863   | 32595334 A | 2.625  | 2.82E-07 | chr:6:32505702 |
| 6 rs9271881   | 32595604 A | 3.178  | 2.83E-07 | chr:6:32505702 |
| 6 rs9271882   | 32595605 T | 3.178  | 2.83E-07 | chr:6:32505702 |
| 6 rs28584364  | 32512048 C | 0.2649 | 2.84E-07 | chr:6:32505702 |
| 6 rs9271379   | 32587333 T | 3.231  | 2.85E-07 | chr:6:32505702 |
| 6 rs74812635  | 32573539 C | 3.232  | 2.87E-07 | chr:6:32505702 |
| 6 rs41287232  | 32547320 A | 2.601  | 2.89E-07 | chr:6:32505702 |
| 6 rs9270541   | 32559864 T | 3.06   | 2.90E-07 | chr:6:32505702 |
| 6 rs2395168   | 32390196 C | 3.918  | 2.90E-07 | chr:6:32505702 |
| 6 rs3129841   | 32393959 C | 3.918  | 2.90E-07 | chr:6:32505702 |
| 6 rs3135345   | 32394585 T | 3.918  | 2.90E-07 | chr:6:32505702 |
| 6 rs3135351   | 32392945 A | 3.918  | 2.90E-07 | chr:6:32505702 |
| 6 rs3135356   | 32391516 A | 3.918  | 2.90E-07 | chr:6:32505702 |
| 6 rs3135358   | 32390748 T | 3.918  | 2.90E-07 | chr:6:32505702 |
| 6 rs9271717   | 32593453 G | 2.973  | 2.92E-07 | chr:6:32505702 |
| 6 rs9271883   | 32595610 A | 3.177  | 2.94E-07 | chr:6:32505702 |
| 6 rs9272462   | 32605620 A | 3.266  | 2.94E-07 | chr:6:32505702 |
| 6 rs9270623   | 32565331 C | 3.188  | 2.95E-07 | chr:6:32505702 |
| 6 rs9271866   | 32595367 T | 2.617  | 2.95E-07 | chr:6:32505702 |
| 6 rs9271867   | 32595368 G | 2.617  | 2.95E-07 | chr:6:32505702 |
| 6 rs2395224   | 32590482 G | 3.193  | 2.96E-07 | chr:6:32505702 |
| 6 rs9271932   | 32596714 C | 3.464  | 2.96E-07 | chr:6:32505702 |
| 6 rs9271933   | 32596717 A | 3.464  | 2.96E-07 | chr:6:32505702 |
| 6 rs9269722   | 32547328 G | 2.804  | 2.97E-07 | chr:6:32505702 |
| 6 rs9272238   | 32602777 T | 3.208  | 3.00E-07 | chr:6:32505702 |
| 6 rs9272240   | 32602779 A | 3.208  | 3.00E-07 | chr:6:32505702 |
| 6 rs115673628 | 32505419 G | 2.396  | 3.01E-07 | chr:6:32505702 |
| 6 rs111823263 | 32482045 G | 2.486  | 3.06E-07 | chr:6:32505702 |
| 6 rs140209363 | 32492971 C | 2.55   | 3.08E-07 | chr:6:32505702 |
| 6 rs9272076   | 32599624 T | 2.62   | 3.09E-07 | chr:6:32505702 |
| 6 rs9272077   | 32599625 G | 2.62   | 3.09E-07 | chr:6:32505702 |
| 6 rs115724613 | 32538216 C | 2.544  | 3.13E-07 | chr:6:32505702 |
| 6 rs116711613 | 32492041 A | 3.233  | 3.13E-07 | chr:6:32505702 |
| 6 rs9272099   | 32599813 G | 2.945  | 3.15E-07 | chr:6:32505702 |

|               |            |        |          |                |
|---------------|------------|--------|----------|----------------|
| 6 rs9271538   | 32589983 A | 3.119  | 3.16E-07 | chr:6:32505702 |
| 6 rs3135362   | 32389747 G | 3.917  | 3.19E-07 | chr:6:32505702 |
| 6 rs9271865   | 32595360 T | 2.615  | 3.19E-07 | chr:6:32505702 |
| 6 rs9272220   | 32602306 A | 3.248  | 3.21E-07 | chr:6:32505702 |
| 6 rs9272101   | 32599824 T | 3.182  | 3.23E-07 | chr:6:32505702 |
| 6 rs3135348   | 32394098 A | 0.2676 | 3.31E-07 | chr:6:32505702 |
| 6 rs9269582   | 32544787 T | 2.753  | 3.32E-07 | chr:6:32505702 |
| 6 rs9271929   | 32596650 C | 3.302  | 3.32E-07 | chr:6:32505702 |
| 6 rs557163190 | 32526172 G | 2.441  | 3.38E-07 | chr:6:32505702 |
| 6 rs9272188   | 32601688 G | 3.239  | 3.39E-07 | chr:6:32505702 |
| 6 rs9269555   | 32544311 A | 3.301  | 3.40E-07 | chr:6:32505702 |
| 6 rs11752277  | 32537771 G | 2.388  | 3.43E-07 | chr:6:32505702 |
| 6 rs9272194   | 32601825 G | 3.349  | 3.44E-07 | chr:6:32505702 |
| 6 rs72853925  | 32508330 G | 3.175  | 3.45E-07 | chr:6:32505702 |
| 6 rs9272638   | 32608214 C | 3.011  | 3.49E-07 | chr:6:32505702 |
| 6 rs73729756  | 32482020 G | 2.527  | 3.49E-07 | chr:6:32505702 |
| 6 rs9271858   | 32595223 G | 2.785  | 3.55E-07 | chr:6:32505702 |
| 6 rs9271884   | 32595628 C | 3.164  | 3.55E-07 | chr:6:32505702 |
| 6 rs9271885   | 32595629 T | 3.164  | 3.55E-07 | chr:6:32505702 |
| 6 rs763035    | 32394845 A | 3.876  | 3.55E-07 | chr:6:32505702 |
| 6 rs553033826 | 32609097 C | 2.996  | 3.56E-07 | chr:6:32505702 |
| 6 rs9271550   | 32590274 A | 3.157  | 3.57E-07 | chr:6:32505702 |
| 6 rs4599680   | 32566294 C | 3.147  | 3.58E-07 | chr:6:32505702 |
| 6 rs9272243   | 32602857 G | 3.172  | 3.63E-07 | chr:6:32505702 |
| 6 rs9272244   | 32602860 T | 3.172  | 3.63E-07 | chr:6:32505702 |
| 6 rs6929044   | 32596951 C | 3.204  | 3.63E-07 | chr:6:32505702 |
| 6 rs6929398   | 32596966 G | 3.204  | 3.63E-07 | chr:6:32505702 |
| 6 rs41287231  | 32547316 A | 2.587  | 3.72E-07 | chr:6:32505702 |
| 6 rs185520080 | 32505872 C | 2.352  | 3.73E-07 | chr:6:32505702 |
| 6 rs550051341 | 32505851 C | 2.352  | 3.73E-07 | chr:6:32505702 |
| 6 rs571586981 | 32505852 A | 2.352  | 3.73E-07 | chr:6:32505702 |
| 6 rs9271859   | 32595231 G | 2.783  | 3.74E-07 | chr:6:32505702 |
| 6 rs9271668   | 32592774 T | 3.192  | 3.76E-07 | chr:6:32505702 |
| 6 rs9271846   | 32594980 A | 2.411  | 3.77E-07 | chr:6:32505702 |
| 6 rs9271326   | 32582527 T | 3.06   | 3.83E-07 | chr:6:32505702 |
| 6 rs4311504   | 32593349 G | 3.154  | 3.85E-07 | chr:6:32505702 |
| 6 rs9269717   | 32547303 T | 2.716  | 3.85E-07 | chr:6:32505702 |
| 6 rs9271392   | 32587456 G | 3.112  | 3.85E-07 | chr:6:32505702 |
| 6 rs9271976   | 32597617 C | 2.656  | 3.88E-07 | chr:6:32505702 |
| 6 rs559286232 | 32527271 C | 2.604  | 3.94E-07 | chr:6:32505702 |
| 6 rs71536560  | 32529163 G | 2.329  | 3.94E-07 | chr:6:32505702 |
| 6 rs9272640   | 32608221 C | 2.999  | 3.95E-07 | chr:6:32505702 |
| 6 rs9272059   | 32599223 C | 3.341  | 3.95E-07 | chr:6:32505702 |

|               |            |        |          |                |
|---------------|------------|--------|----------|----------------|
| 6 rs62405572  | 32458232 G | 2.921  | 3.96E-07 | chr:6:32505702 |
| 6 rs2006174   | 32382749 G | 3.955  | 3.98E-07 | chr:6:32505702 |
| 6 rs3129969   | 32382609 G | 3.955  | 3.98E-07 | chr:6:32505702 |
| 6 rs3129970   | 32382638 C | 3.955  | 3.98E-07 | chr:6:32505702 |
| 6 rs7771972   | 32605557 T | 3.193  | 3.98E-07 | chr:6:32505702 |
| 6 rs9271886   | 32595633 T | 3.161  | 4.00E-07 | chr:6:32505702 |
| 6 rs139188913 | 32485921 A | 2.64   | 4.01E-07 | chr:6:32505702 |
| 6 rs557048    | 32587001 T | 3.073  | 4.02E-07 | chr:6:32505702 |
| 6 rs9269736   | 32547440 T | 2.627  | 4.05E-07 | chr:6:32505702 |
| 6 rs9270620   | 32565272 A | 3.129  | 4.05E-07 | chr:6:32505702 |
| 6 rs547631481 | 32507531 A | 2.509  | 4.07E-07 | chr:6:32505702 |
| 6 rs547797725 | 32487827 A | 2.513  | 4.07E-07 | chr:6:32505702 |
| 6 rs9271526   | 32589862 A | 3.155  | 4.12E-07 | chr:6:32505702 |
| 6 rs9271854   | 32595118 A | 2.947  | 4.14E-07 | chr:6:32505702 |
| 6 rs9271855   | 32595119 C | 2.947  | 4.14E-07 | chr:6:32505702 |
| 6 rs9271856   | 32595120 A | 2.947  | 4.14E-07 | chr:6:32505702 |
| 6 rs549042477 | 32547505 G | 2.713  | 4.17E-07 | chr:6:32505702 |
| 6 rs707962    | 32609974 G | 3.181  | 4.19E-07 | chr:6:32505702 |
| 6 rs707963    | 32609969 G | 3.181  | 4.19E-07 | chr:6:32505702 |
| 6 rs376533971 | 32540407 T | 2.661  | 4.23E-07 | chr:6:32505702 |
| 6 rs73727912  | 32496944 C | 2.612  | 4.24E-07 | chr:6:32505702 |
| 6 rs555383676 | 32507771 A | 2.39   | 4.26E-07 | chr:6:32505702 |
| 6 rs201840950 | 32487091 G | 4.862  | 4.26E-07 | chr:6:32505702 |
| 6 rs9271626   | 32591944 A | 3.181  | 4.29E-07 | chr:6:32505702 |
| 6 rs9271627   | 32591949 T | 3.181  | 4.29E-07 | chr:6:32505702 |
| 6 rs9271666   | 32592693 C | 3.181  | 4.29E-07 | chr:6:32505702 |
| 6 rs9269388   | 32541102 T | 2.723  | 4.32E-07 | chr:6:32505702 |
| 6 rs75236519  | 32460670 C | 2.33   | 4.32E-07 | chr:6:32505702 |
| 6 rs9270543   | 32559881 A | 2.865  | 4.39E-07 | chr:6:32505702 |
| 6 rs9270544   | 32559882 T | 2.865  | 4.39E-07 | chr:6:32505702 |
| 6 rs9272132   | 32600677 A | 0.2611 | 4.40E-07 | chr:6:32505702 |
| 6 rs9271410   | 32587645 G | 3.104  | 4.40E-07 | chr:6:32505702 |
| 6 rs9272070   | 32599485 T | 0.2615 | 4.47E-07 | chr:6:32505702 |
| 6 rs9272214   | 32602096 G | 0.2613 | 4.48E-07 | chr:6:32505702 |
| 6 rs9269734   | 32547433 G | 2.604  | 4.49E-07 | chr:6:32505702 |
| 6 rs680061    | 32571098 G | 2.927  | 4.50E-07 | chr:6:32505702 |
| 6 rs9269732   | 32547425 C | 2.626  | 4.50E-07 | chr:6:32505702 |
| 6 rs73726198  | 32492262 T | 0.2584 | 4.51E-07 | chr:6:32505702 |
| 6 rs9271857   | 32595147 T | 2.944  | 4.52E-07 | chr:6:32505702 |
| 6 rs9272213   | 32602039 A | 3.068  | 4.53E-07 | chr:6:32505702 |
| 6 rs9271524   | 32589820 C | 3.123  | 4.55E-07 | chr:6:32505702 |
| 6 rs77568742  | 32580790 C | 3.004  | 4.60E-07 | chr:6:32505702 |
| 6 rs9271424   | 32587922 C | 3.089  | 4.61E-07 | chr:6:32505702 |

|               |            |        |          |                |
|---------------|------------|--------|----------|----------------|
| 6 rs9271425   | 32587923 G | 3.089  | 4.61E-07 | chr:6:32505702 |
| 6 rs9271964   | 32597464 C | 2.633  | 4.62E-07 | chr:6:32505702 |
| 6 rs62405573  | 32458239 T | 2.813  | 4.69E-07 | chr:6:32505702 |
| 6 rs73731412  | 32454215 G | 11.4   | 4.70E-07 | chr:6:32505702 |
| 6 rs9270493   | 32559110 C | 3.029  | 4.71E-07 | chr:6:32505702 |
| 6 rs9272265   | 32603412 C | 0.2611 | 4.72E-07 | chr:6:32505702 |
| 6 rs9270086   | 32554283 A | 3.71   | 4.75E-07 | chr:6:32505702 |
| 6 rs9271407   | 32587605 T | 3.071  | 4.77E-07 | chr:6:32505702 |
| 6 rs9270272   | 32557213 G | 0.2177 | 4.79E-07 | chr:6:32505702 |
| 6 rs9271823   | 32594915 G | 2.397  | 4.80E-07 | chr:6:32505702 |
| 6 rs9271824   | 32594916 G | 2.397  | 4.80E-07 | chr:6:32505702 |
| 6 rs114899212 | 32524951 G | 3.4    | 4.87E-07 | chr:6:32505702 |
| 6 rs9272085   | 32599685 C | 3.03   | 4.87E-07 | chr:6:32505702 |
| 6 rs145606733 | 32491959 G | 2.87   | 4.88E-07 | chr:6:32505702 |
| 6 rs9271412   | 32587685 T | 3.079  | 4.91E-07 | chr:6:32505702 |
| 6 rs76351919  | 32588703 C | 2.963  | 4.92E-07 | chr:6:32505702 |
| 6 rs9272232   | 32602630 C | 0.2614 | 4.93E-07 | chr:6:32505702 |
| 6 rs114758808 | 32457997 T | 2.378  | 4.93E-07 | chr:6:32505702 |
| 6 rs9272254   | 32603098 C | 0.2609 | 4.95E-07 | chr:6:32505702 |
| 6 rs9269998   | 32552721 G | 2.677  | 4.98E-07 | chr:6:32505702 |
| 6 rs9271484   | 32588905 T | 3.073  | 4.99E-07 | chr:6:32505702 |
| 6 rs9272489   | 32606030 T | 2.948  | 5.01E-07 | chr:6:32505702 |
| 6 rs116585903 | 32487688 T | 3.413  | 5.02E-07 | chr:6:32505702 |
| 6 rs9272045   | 32599006 C | 0.261  | 5.03E-07 | chr:6:32505702 |
| 6 rs9269725   | 32547359 C | 2.712  | 5.07E-07 | chr:6:32505702 |
| 6 rs9269726   | 32547360 T | 2.712  | 5.07E-07 | chr:6:32505702 |
| 6 rs9272062   | 32599265 G | 0.2629 | 5.07E-07 | chr:6:32505702 |
| 6 rs9271330   | 32582640 A | 2.991  | 5.08E-07 | chr:6:32505702 |
| 6 rs9272040   | 32598903 A | 0.2614 | 5.12E-07 | chr:6:32505702 |
| 6 rs9272041   | 32598906 G | 0.2614 | 5.12E-07 | chr:6:32505702 |
| 6 rs41287230  | 32547308 A | 2.531  | 5.14E-07 | chr:6:32505702 |
| 6 rs371747477 | 32489266 T | 2.901  | 5.15E-07 | chr:6:32505702 |
| 6 rs561971374 | 32503086 A | 2.663  | 5.18E-07 | chr:6:32505702 |
| 6 rs9272229   | 32602568 C | 0.2609 | 5.20E-07 | chr:6:32505702 |
| 6 rs9270662   | 32566089 G | 3.112  | 5.22E-07 | chr:6:32505702 |
| 6 rs9271909   | 32596177 T | 3.356  | 5.22E-07 | chr:6:32505702 |
| 6 rs9271948   | 32597105 A | 3.178  | 5.23E-07 | chr:6:32505702 |
| 6 rs112993783 | 32478652 A | 2.735  | 5.28E-07 | chr:6:32505702 |
| 6 rs140036576 | 32478632 T | 2.735  | 5.28E-07 | chr:6:32505702 |
| 6 rs80296745  | 32478683 T | 2.735  | 5.28E-07 | chr:6:32505702 |
| 6 rs9272218   | 32602238 C | 0.2608 | 5.32E-07 | chr:6:32505702 |
| 6 rs9272116   | 32600404 T | 0.2605 | 5.33E-07 | chr:6:32505702 |
| 6 rs9269581   | 32544785 G | 2.859  | 5.35E-07 | chr:6:32505702 |

|               |            |        |          |                |
|---------------|------------|--------|----------|----------------|
| 6 rs9271935   | 32596831 C | 3.29   | 5.36E-07 | chr:6:32505702 |
| 6 rs9272089   | 32599717 G | 2.911  | 5.36E-07 | chr:6:32505702 |
| 6 rs9272042   | 32598917 A | 0.261  | 5.38E-07 | chr:6:32505702 |
| 6 rs9272256   | 32603169 C | 3.087  | 5.39E-07 | chr:6:32505702 |
| 6 rs9272043   | 32598946 T | 0.2609 | 5.41E-07 | chr:6:32505702 |
| 6 rs9272114   | 32600317 T | 0.2608 | 5.42E-07 | chr:6:32505702 |
| 6 rs552461365 | 32482115 C | 2.271  | 5.43E-07 | chr:6:32505702 |
| 6 rs111779823 | 32491965 A | 2.873  | 5.43E-07 | chr:6:32505702 |
| 6 rs9272102   | 32599830 C | 2.925  | 5.44E-07 | chr:6:32505702 |
| 6 rs673336    | 32577858 A | 3.127  | 5.45E-07 | chr:6:32505702 |
| 6 rs4713534   | 32445926 T | 3.819  | 5.46E-07 | chr:6:32505702 |
| 6 rs9272142   | 32600800 G | 0.2812 | 5.50E-07 | chr:6:32505702 |
| 6 rs9271562   | 32590411 A | 3.038  | 5.53E-07 | chr:6:32505702 |
| 6 rs41287233  | 32547329 G | 2.517  | 5.53E-07 | chr:6:32505702 |
| 6 rs9271187   | 32578314 C | 2.987  | 5.58E-07 | chr:6:32505702 |
| 6 rs115021731 | 32489671 A | 0.2506 | 5.62E-07 | chr:6:32505702 |
| 6 rs9272105   | 32599999 G | 0.2606 | 5.63E-07 | chr:6:32505702 |
| 6 rs75639337  | 32578656 T | 3.002  | 5.64E-07 | chr:6:32505702 |
| 6 rs77064057  | 32578653 G | 3.002  | 5.64E-07 | chr:6:32505702 |
| 6 rs115089463 | 32525092 A | 2.481  | 5.66E-07 | chr:6:32505702 |
| 6 rs566861    | 32576538 C | 3.032  | 5.73E-07 | chr:6:32505702 |
| 6 rs572264676 | 32490134 C | 2.701  | 5.76E-07 | chr:6:32505702 |
| 6 rs9271545   | 32590153 T | 3.102  | 5.78E-07 | chr:6:32505702 |
| 6 rs9269708   | 32547232 T | 2.816  | 5.78E-07 | chr:6:32505702 |
| 6 rs9269709   | 32547237 C | 2.816  | 5.78E-07 | chr:6:32505702 |
| 6 rs41287234  | 32547338 A | 2.514  | 5.81E-07 | chr:6:32505702 |
| 6 rs9272127   | 32600595 T | 0.3027 | 5.82E-07 | chr:6:32505702 |
| 6 rs9271471   | 32588665 G | 2.962  | 5.83E-07 | chr:6:32505702 |
| 6 rs185884622 | 32526169 C | 2.42   | 5.91E-07 | chr:6:32505702 |
| 6 rs9269396   | 32541290 A | 2.552  | 5.93E-07 | chr:6:32505702 |
| 6 rs6457602   | 32542298 C | 3.024  | 5.94E-07 | chr:6:32505702 |
| 6 rs74197584  | 32502717 T | 2.36   | 5.94E-07 | chr:6:32505702 |
| 6 rs502055    | 32579003 C | 2.982  | 5.95E-07 | chr:6:32505702 |
| 6 rs9271954   | 32597216 C | 2.924  | 5.96E-07 | chr:6:32505702 |
| 6 rs9272037   | 32598844 C | 3.039  | 5.98E-07 | chr:6:32505702 |
| 6 rs9272126   | 32600589 G | 0.3026 | 6.02E-07 | chr:6:32505702 |
| 6 rs9271925   | 32596540 G | 4.303  | 6.08E-07 | chr:6:32505702 |
| 6 rs9271926   | 32596566 T | 4.303  | 6.08E-07 | chr:6:32505702 |
| 6 rs9272054   | 32599164 A | 3.151  | 6.08E-07 | chr:6:32505702 |
| 6 rs9272125   | 32600584 T | 0.3025 | 6.08E-07 | chr:6:32505702 |
| 6 rs9270448   | 32558819 T | 2.644  | 6.17E-07 | chr:6:32505702 |
| 6 rs41287235  | 32547344 A | 2.509  | 6.18E-07 | chr:6:32505702 |
| 6 rs9271633   | 32592072 G | 3.086  | 6.19E-07 | chr:6:32505702 |

|               |            |        |          |                |
|---------------|------------|--------|----------|----------------|
| 6 rs2001099   | 32383633 C | 3.719  | 6.21E-07 | chr:6:32505702 |
| 6 rs9270374   | 32558216 G | 0.2619 | 6.32E-07 | chr:6:32505702 |
| 6 rs9272231   | 32602617 C | 0.2639 | 6.33E-07 | chr:6:32505702 |
| 6 rs9270761   | 32568685 T | 2.98   | 6.35E-07 | chr:6:32505702 |
| 6 rs9271280   | 32581047 A | 2.93   | 6.43E-07 | chr:6:32505702 |
| 6 rs9270093   | 32554435 T | 4.527  | 6.45E-07 | chr:6:32505702 |
| 6 rs556704361 | 32450273 G | 4.241  | 6.50E-07 | chr:6:32505702 |
| 6 rs9270772   | 32568967 C | 3.021  | 6.51E-07 | chr:6:32505702 |
| 6 rs143972840 | 32491242 T | 0.3304 | 6.55E-07 | chr:6:32505702 |
| 6 rs9270462   | 32558912 G | 2.448  | 6.56E-07 | chr:6:32505702 |
| 6 rs9271188   | 32578320 T | 2.973  | 6.57E-07 | chr:6:32505702 |
| 6 rs115249219 | 32479677 G | 2.686  | 6.66E-07 | chr:6:32505702 |
| 6 rs113871699 | 32509693 T | 3.15   | 6.71E-07 | chr:6:32505702 |
| 6 rs9272055   | 32599176 A | 3.016  | 6.72E-07 | chr:6:32505702 |
| 6 rs2395521   | 32601700 T | 3.271  | 6.73E-07 | chr:6:32505702 |
| 6 rs547755130 | 32486547 C | 2.536  | 6.79E-07 | chr:6:32505702 |
| 6 rs565956329 | 32486548 A | 2.536  | 6.79E-07 | chr:6:32505702 |
| 6 rs9271782   | 32594562 A | 2.577  | 6.83E-07 | chr:6:32505702 |
| 6 rs75588019  | 32568063 A | 3.06   | 6.97E-07 | chr:6:32505702 |
| 6 rs560622990 | 32526258 C | 3.505  | 6.98E-07 | chr:6:32505702 |
| 6 rs9272052   | 32599155 G | 3      | 6.99E-07 | chr:6:32505702 |
| 6 rs73726194  | 32492199 G | 0.2348 | 7.01E-07 | chr:6:32505702 |
| 6 rs502771    | 32578970 C | 2.968  | 7.04E-07 | chr:6:32505702 |
| 6 rs72847623  | 32538044 G | 2.679  | 7.06E-07 | chr:6:32505702 |
| 6 rs9272648   | 32608524 C | 2.93   | 7.08E-07 | chr:6:32505702 |
| 6 rs2001097   | 32383858 T | 3.743  | 7.09E-07 | chr:6:32505702 |
| 6 rs2001098   | 32383837 A | 3.743  | 7.09E-07 | chr:6:32505702 |
| 6 rs2001100   | 32383488 A | 3.743  | 7.09E-07 | chr:6:32505702 |
| 6 rs2157336   | 32386061 T | 3.743  | 7.09E-07 | chr:6:32505702 |
| 6 rs2187819   | 32386383 G | 3.743  | 7.09E-07 | chr:6:32505702 |
| 6 rs2187820   | 32385873 T | 3.743  | 7.09E-07 | chr:6:32505702 |
| 6 rs2213580   | 32388574 C | 3.743  | 7.09E-07 | chr:6:32505702 |
| 6 rs2395159   | 32384077 T | 3.743  | 7.09E-07 | chr:6:32505702 |
| 6 rs2395161   | 32387752 C | 3.743  | 7.09E-07 | chr:6:32505702 |
| 6 rs2395162   | 32387780 T | 3.743  | 7.09E-07 | chr:6:32505702 |
| 6 rs2395167   | 32388308 T | 3.743  | 7.09E-07 | chr:6:32505702 |
| 6 rs3135366   | 32388709 C | 3.743  | 7.09E-07 | chr:6:32505702 |
| 6 rs3135368   | 32387278 A | 3.743  | 7.09E-07 | chr:6:32505702 |
| 6 rs3135370   | 32386707 C | 3.743  | 7.09E-07 | chr:6:32505702 |
| 6 rs3135372   | 32385782 A | 3.743  | 7.09E-07 | chr:6:32505702 |
| 6 rs3135373   | 32385653 G | 3.743  | 7.09E-07 | chr:6:32505702 |
| 6 rs3135374   | 32385605 A | 3.743  | 7.09E-07 | chr:6:32505702 |
| 6 rs3135375   | 32385573 A | 3.743  | 7.09E-07 | chr:6:32505702 |



|               |            |       |          |                |
|---------------|------------|-------|----------|----------------|
| 6 rs3135376   | 32385470 G | 3.743 | 7.09E-07 | chr:6:32505702 |
| 6 rs3135378   | 32385099 A | 3.743 | 7.09E-07 | chr:6:32505702 |
| 6 rs3135379   | 32384900 C | 3.743 | 7.09E-07 | chr:6:32505702 |
| 6 rs3135381   | 32384343 A | 3.743 | 7.09E-07 | chr:6:32505702 |
| 6 rs3135382   | 32383441 G | 3.743 | 7.09E-07 | chr:6:32505702 |
| 6 rs6457570   | 32386495 C | 3.743 | 7.09E-07 | chr:6:32505702 |
| 6 rs6457571   | 32386506 C | 3.743 | 7.09E-07 | chr:6:32505702 |
| 6 rs6457573   | 32386643 A | 3.743 | 7.09E-07 | chr:6:32505702 |
| 6 rs6908056   | 32383360 A | 3.743 | 7.09E-07 | chr:6:32505702 |
| 6 rs6908065   | 32383341 C | 3.743 | 7.09E-07 | chr:6:32505702 |
| 6 rs6930571   | 32383208 T | 3.743 | 7.09E-07 | chr:6:32505702 |
| 6 rs6930933   | 32383410 T | 3.743 | 7.09E-07 | chr:6:32505702 |
| 6 rs9268531   | 32383246 G | 3.743 | 7.09E-07 | chr:6:32505702 |
| 6 rs9268532   | 32383249 C | 3.743 | 7.09E-07 | chr:6:32505702 |
| 6 rs9268534   | 32383307 G | 3.743 | 7.09E-07 | chr:6:32505702 |
| 6 rs9270220   | 32556632 G | 5.997 | 7.10E-07 | chr:6:32505702 |
| 6 rs73727972  | 32509683 G | 3.149 | 7.12E-07 | chr:6:32505702 |
| 6 rs9269324   | 32539978 G | 2.937 | 7.14E-07 | chr:6:32505702 |
| 6 rs139910587 | 32490483 C | 2.598 | 7.18E-07 | chr:6:32505702 |
| 6 rs9268530   | 32383223 C | 3.726 | 7.23E-07 | chr:6:32505702 |
| 6 rs9271190   | 32578369 A | 2.964 | 7.26E-07 | chr:6:32505702 |
| 6 rs9271325   | 32582513 G | 3.329 | 7.26E-07 | chr:6:32505702 |
| 6 rs182191708 | 32490480 C | 2.575 | 7.34E-07 | chr:6:32505702 |
| 6 rs9272743   | 32609726 T | 2.958 | 7.43E-07 | chr:6:32505702 |
| 6 rs9272097   | 32599786 T | 2.376 | 7.43E-07 | chr:6:32505702 |
| 6 rs9272098   | 32599787 G | 2.376 | 7.43E-07 | chr:6:32505702 |
| 6 rs9272072   | 32599563 G | 2.64  | 7.46E-07 | chr:6:32505702 |
| 6 rs561017744 | 32547528 T | 2.612 | 7.49E-07 | chr:6:32505702 |
| 6 rs9271847   | 32594993 G | 2.378 | 7.55E-07 | chr:6:32505702 |
| 6 rs9270250   | 32557001 C | 4.061 | 7.57E-07 | chr:6:32505702 |
| 6 rs9270251   | 32557003 A | 4.061 | 7.57E-07 | chr:6:32505702 |
| 6 rs368398419 | 32510709 C | 2.391 | 7.68E-07 | chr:6:32505702 |
| 6 rs371989616 | 32510718 T | 2.391 | 7.68E-07 | chr:6:32505702 |
| 6 rs9271960   | 32597385 T | 3.04  | 7.72E-07 | chr:6:32505702 |
| 6 rs9272073   | 32599570 T | 2.638 | 7.76E-07 | chr:6:32505702 |
| 6 rs9269728   | 32547385 T | 2.626 | 7.87E-07 | chr:6:32505702 |
| 6 rs9271972   | 32597567 T | 2.621 | 7.88E-07 | chr:6:32505702 |
| 6 rs3135380   | 32384677 C | 3.726 | 7.88E-07 | chr:6:32505702 |
| 6 rs2157334   | 32392543 C | 3.704 | 7.92E-07 | chr:6:32505702 |
| 6 rs2395171   | 32394537 T | 3.704 | 7.92E-07 | chr:6:32505702 |
| 6 rs3129842   | 32394060 C | 3.704 | 7.92E-07 | chr:6:32505702 |
| 6 rs3135349   | 32394027 G | 3.704 | 7.92E-07 | chr:6:32505702 |
| 6 rs541986750 | 32391192 C | 3.704 | 7.92E-07 | chr:6:32505702 |

|               |            |        |          |                |
|---------------|------------|--------|----------|----------------|
| 6 rs9271959   | 32597377 C | 3.04   | 7.97E-07 | chr:6:32505702 |
| 6 rs9269713   | 32547252 A | 2.703  | 8.07E-07 | chr:6:32505702 |
| 6 rs9270752   | 32568426 T | 3.035  | 8.19E-07 | chr:6:32505702 |
| 6 rs73727927  | 32501214 G | 3.181  | 8.22E-07 | chr:6:32505702 |
| 6 rs2858863   | 32578278 T | 3.039  | 8.23E-07 | chr:6:32505702 |
| 6 rs17209280  | 32440269 G | 4.45   | 8.26E-07 | chr:6:32505702 |
| 6 rs9272095   | 32599782 A | 2.372  | 8.37E-07 | chr:6:32505702 |
| 6 rs9271985   | 32597679 T | 2.362  | 8.38E-07 | chr:6:32505702 |
| 6 rs17204294  | 32492179 T | 0.2524 | 8.46E-07 | chr:6:32505702 |
| 6 rs72492356  | 32538899 C | 2.727  | 8.55E-07 | chr:6:32505702 |
| 6 rs9271417   | 32587818 C | 3.017  | 8.59E-07 | chr:6:32505702 |
| 6 rs9272311   | 32603953 A | 2.917  | 8.61E-07 | chr:6:32505702 |
| 6 rs9270868   | 32571117 G | 2.885  | 8.61E-07 | chr:6:32505702 |
| 6 rs9272496   | 32606144 G | 2.989  | 8.63E-07 | chr:6:32505702 |
| 6 rs115005201 | 32501172 A | 3.177  | 8.66E-07 | chr:6:32505702 |
| 6 rs9270458   | 32558900 G | 2.444  | 8.69E-07 | chr:6:32505702 |
| 6 rs2647094   | 32580322 G | 2.953  | 8.71E-07 | chr:6:32505702 |
| 6 rs2858862   | 32580321 T | 2.953  | 8.71E-07 | chr:6:32505702 |
| 6 rs2858864   | 32578229 T | 2.953  | 8.71E-07 | chr:6:32505702 |
| 6 rs3104420   | 32580028 A | 2.953  | 8.71E-07 | chr:6:32505702 |
| 6 rs3104421   | 32580007 A | 2.953  | 8.71E-07 | chr:6:32505702 |
| 6 rs550703793 | 32582451 T | 2.953  | 8.71E-07 | chr:6:32505702 |
| 6 rs76946723  | 32578917 T | 2.953  | 8.71E-07 | chr:6:32505702 |
| 6 rs79838044  | 32580632 C | 2.953  | 8.71E-07 | chr:6:32505702 |
| 6 rs80243928  | 32580571 T | 2.953  | 8.71E-07 | chr:6:32505702 |
| 6 rs9271262   | 32580585 G | 2.953  | 8.71E-07 | chr:6:32505702 |
| 6 rs9271301   | 32581614 T | 2.953  | 8.71E-07 | chr:6:32505702 |
| 6 rs9271334   | 32582711 C | 2.953  | 8.71E-07 | chr:6:32505702 |
| 6 rs9270466   | 32558929 T | 2.437  | 8.75E-07 | chr:6:32505702 |
| 6 rs9272092   | 32599756 C | 2.464  | 8.77E-07 | chr:6:32505702 |
| 6 rs17203769  | 32555721 C | 4.235  | 8.90E-07 | chr:6:32505702 |
| 6 rs17203776  | 32555722 A | 4.235  | 8.90E-07 | chr:6:32505702 |
| 6 rs535043779 | 32497358 A | 2.36   | 8.92E-07 | chr:6:32505702 |
| 6 rs552507937 | 32497354 A | 2.36   | 8.92E-07 | chr:6:32505702 |
| 6 rs570739482 | 32497356 C | 2.36   | 8.92E-07 | chr:6:32505702 |
| 6 rs2395170   | 32394313 C | 3.671  | 8.94E-07 | chr:6:32505702 |
| 6 rs592362    | 32567795 G | 3.031  | 8.95E-07 | chr:6:32505702 |
| 6 rs543726509 | 32493208 A | 2.677  | 8.95E-07 | chr:6:32505702 |
| 6 rs34645444  | 32522634 T | 0.2226 | 9.00E-07 | chr:6:32505702 |
| 6 rs9272285   | 32603688 G | 2.922  | 9.03E-07 | chr:6:32505702 |
| 6 rs189723252 | 32494948 T | 2.467  | 9.09E-07 | chr:6:32505702 |
| 6 rs562045282 | 32502681 T | 2.313  | 9.09E-07 | chr:6:32505702 |
| 6 rs9272058   | 32599197 C | 2.95   | 9.12E-07 | chr:6:32505702 |

|               |            |        |          |                |
|---------------|------------|--------|----------|----------------|
| 6 rs560277143 | 32547480 G | 2.393  | 9.19E-07 | chr:6:32505702 |
| 6 rs9271922   | 32596444 A | 3.155  | 9.27E-07 | chr:6:32505702 |
| 6 rs9272669   | 32608816 G | 2.746  | 9.32E-07 | chr:6:32505702 |
| 6 rs9272616   | 32607890 G | 2.921  | 9.35E-07 | chr:6:32505702 |
| 6 rs9270799   | 32569318 T | 2.979  | 9.55E-07 | chr:6:32505702 |
| 6 rs75324027  | 32573629 G | 3.022  | 9.60E-07 | chr:6:32505702 |
| 6 rs9272261   | 32603242 A | 2.922  | 9.62E-07 | chr:6:32505702 |
| 6 rs1003879   | 32299592 A | 3.051  | 9.71E-07 | chr:6:32505702 |
| 6 rs9271790   | 32594775 A | 2.887  | 9.78E-07 | chr:6:32505702 |
| 6 rs140849564 | 32490607 G | 2.682  | 9.81E-07 | chr:6:32505702 |
| 6 rs142393802 | 32508021 T | 2.34   | 9.90E-07 | chr:6:32505702 |
| 6 rs2647092   | 32584440 T | 3.019  | 9.91E-07 | chr:6:32505702 |
| 6 rs617058    | 32574479 T | 3.019  | 9.91E-07 | chr:6:32505702 |
| 6 rs642093    | 32582075 A | 3.019  | 9.91E-07 | chr:6:32505702 |
| 6 rs583177    | 32579567 A | 2.901  | 9.95E-07 | chr:6:32505702 |
| 6 rs9271238   | 32579702 T | 2.901  | 9.95E-07 | chr:6:32505702 |
| 6 rs9270451   | 32558838 A | 2.565  | 1.01E-06 | chr:6:32505702 |
| 6 rs659204    | 32577001 G | 2.92   | 1.02E-06 | chr:6:32505702 |
| 6 rs2395164   | 32387860 T | 3.589  | 1.03E-06 | chr:6:32505702 |
| 6 rs9271711   | 32593430 T | 2.731  | 1.04E-06 | chr:6:32505702 |
| 6 rs9271714   | 32593434 G | 2.731  | 1.04E-06 | chr:6:32505702 |
| 6 rs531950386 | 32486540 T | 2.42   | 1.04E-06 | chr:6:32505702 |
| 6 rs111338793 | 32486248 G | 2.484  | 1.05E-06 | chr:6:32505702 |
| 6 rs9272469   | 32605713 C | 2.89   | 1.05E-06 | chr:6:32505702 |
| 6 rs72508441  | 32490752 G | 0.2882 | 1.07E-06 | chr:6:32505702 |
| 6 rs9272351   | 32604423 A | 2.856  | 1.08E-06 | chr:6:32505702 |
| 6 rs370779031 | 32535688 A | 2.36   | 1.08E-06 | chr:6:32505702 |
| 6 rs375377896 | 32535693 A | 2.36   | 1.08E-06 | chr:6:32505702 |
| 6 rs542233442 | 32535702 A | 2.36   | 1.08E-06 | chr:6:32505702 |
| 6 rs545728465 | 32547479 T | 2.382  | 1.09E-06 | chr:6:32505702 |
| 6 rs7760731   | 32583401 A | 2.98   | 1.10E-06 | chr:6:32505702 |
| 6 rs9272242   | 32602790 T | 0.2801 | 1.10E-06 | chr:6:32505702 |
| 6 rs34801804  | 32555892 G | 4.587  | 1.11E-06 | chr:6:32505702 |
| 6 rs9271781   | 32594547 A | 2.559  | 1.11E-06 | chr:6:32505702 |
| 6 rs9270118   | 32554983 C | 0.1219 | 1.11E-06 | chr:6:32505702 |
| 6 rs9270119   | 32554987 A | 0.1219 | 1.11E-06 | chr:6:32505702 |
| 6 rs9270120   | 32554990 C | 0.1219 | 1.11E-06 | chr:6:32505702 |
| 6 rs3828844   | 32520755 G | 3.087  | 1.11E-06 | chr:6:32505702 |
| 6 rs554566424 | 32496605 A | 2.393  | 1.12E-06 | chr:6:32505702 |
| 6 rs566252979 | 32496600 T | 2.393  | 1.12E-06 | chr:6:32505702 |
| 6 rs72508445  | 32491851 T | 2.43   | 1.12E-06 | chr:6:32505702 |
| 6 rs9271963   | 32597453 A | 2.53   | 1.13E-06 | chr:6:32505702 |
| 6 rs9272275   | 32603603 T | 2.949  | 1.13E-06 | chr:6:32505702 |

|               |            |        |          |                |
|---------------|------------|--------|----------|----------------|
| 6 rs9270276   | 32557240 A | 0.2637 | 1.15E-06 | chr:6:32505702 |
| 6 rs9270626   | 32565443 T | 2.866  | 1.16E-06 | chr:6:32505702 |
| 6 rs9272221   | 32602334 C | 0.2804 | 1.16E-06 | chr:6:32505702 |
| 6 rs9271966   | 32597507 T | 2.639  | 1.18E-06 | chr:6:32505702 |
| 6 rs9271780   | 32594535 C | 2.556  | 1.19E-06 | chr:6:32505702 |
| 6 rs535773    | 32577641 T | 2.973  | 1.19E-06 | chr:6:32505702 |
| 6 rs17210637  | 32492176 A | 0.2962 | 1.20E-06 | chr:6:32505702 |
| 6 rs9271333   | 32582678 T | 2.881  | 1.21E-06 | chr:6:32505702 |
| 6 rs9269907   | 32551324 C | 2.67   | 1.21E-06 | chr:6:32505702 |
| 6 rs540049194 | 32503078 A | 2.568  | 1.22E-06 | chr:6:32505702 |
| 6 rs9270210   | 32556475 T | 2.694  | 1.22E-06 | chr:6:32505702 |
| 6 rs112582516 | 32481392 T | 2.179  | 1.25E-06 | chr:6:32505702 |
| 6 rs148817433 | 32493266 G | 2.932  | 1.26E-06 | chr:6:32505702 |
| 6 rs9271402   | 32587535 C | 2.855  | 1.27E-06 | chr:6:32505702 |
| 6 rs9270004   | 32552795 T | 2.877  | 1.28E-06 | chr:6:32505702 |
| 6 rs9271920   | 32596430 G | 3.046  | 1.30E-06 | chr:6:32505702 |
| 6 rs9271921   | 32596431 G | 3.046  | 1.30E-06 | chr:6:32505702 |
| 6 rs76662008  | 32580869 G | 2.882  | 1.30E-06 | chr:6:32505702 |
| 6 rs12665158  | 32482007 T | 2.381  | 1.31E-06 | chr:6:32505702 |
| 6 rs9271792   | 32594843 T | 2.801  | 1.32E-06 | chr:6:32505702 |
| 6 rs79338946  | 32502822 T | 2.665  | 1.32E-06 | chr:6:32505702 |
| 6 rs9271986   | 32597700 A | 2.343  | 1.35E-06 | chr:6:32505702 |
| 6 rs71536557  | 32528926 T | 2.145  | 1.35E-06 | chr:6:32505702 |
| 6 rs534024500 | 32507307 G | 2.279  | 1.36E-06 | chr:6:32505702 |
| 6 rs9272023   | 32598558 C | 0.2999 | 1.39E-06 | chr:6:32505702 |
| 6 rs9272580   | 32607403 G | 2.831  | 1.40E-06 | chr:6:32505702 |
| 6 rs139195061 | 32491813 A | 2.467  | 1.40E-06 | chr:6:32505702 |
| 6 rs141142229 | 32491805 C | 2.467  | 1.40E-06 | chr:6:32505702 |
| 6 rs202075303 | 32496326 T | 2.486  | 1.41E-06 | chr:6:32505702 |
| 6 rs9272118   | 32600448 C | 0.2835 | 1.42E-06 | chr:6:32505702 |
| 6 rs145704749 | 32454744 C | 0.1453 | 1.42E-06 | chr:6:32505702 |
| 6 rs199973717 | 32493600 A | 0.3193 | 1.44E-06 | chr:6:32505702 |
| 6 rs9272093   | 32599777 T | 2.313  | 1.44E-06 | chr:6:32505702 |
| 6 rs72492335  | 32526460 C | 2.512  | 1.45E-06 | chr:6:32505702 |
| 6 rs187428266 | 32540161 A | 2.445  | 1.45E-06 | chr:6:32505702 |
| 6 rs9269338   | 32540304 G | 3.107  | 1.45E-06 | chr:6:32505702 |
| 6 rs2856724   | 32585161 G | 2.551  | 1.46E-06 | chr:6:32505702 |
| 6 rs3129963   | 32380208 G | 3.558  | 1.47E-06 | chr:6:32505702 |
| 6 rs3129965   | 32380830 C | 3.558  | 1.47E-06 | chr:6:32505702 |
| 6 rs560908329 | 32535706 G | 2.344  | 1.48E-06 | chr:6:32505702 |
| 6 rs9272104   | 32599918 T | 0.2988 | 1.48E-06 | chr:6:32505702 |
| 6 rs9270377   | 32558260 T | 2.775  | 1.50E-06 | chr:6:32505702 |
| 6 rs72508422  | 32481498 C | 2.177  | 1.50E-06 | chr:6:32505702 |

|               |            |        |          |                |
|---------------|------------|--------|----------|----------------|
| 6 rs9271984   | 32597669 G | 2.297  | 1.51E-06 | chr:6:32505702 |
| 6 rs9271427   | 32587983 G | 2.878  | 1.51E-06 | chr:6:32505702 |
| 6 rs9271428   | 32587984 T | 2.878  | 1.51E-06 | chr:6:32505702 |
| 6 rs9271237   | 32579651 G | 2.819  | 1.54E-06 | chr:6:32505702 |
| 6 rs367997563 | 32535716 C | 2.342  | 1.55E-06 | chr:6:32505702 |
| 6 rs9272259   | 32603192 G | 2.735  | 1.56E-06 | chr:6:32505702 |
| 6 rs9270003   | 32552779 T | 2.825  | 1.58E-06 | chr:6:32505702 |
| 6 rs9270591   | 32561424 C | 0.2774 | 1.60E-06 | chr:6:32505702 |
| 6 rs9272383   | 32604749 T | 2.859  | 1.60E-06 | chr:6:32505702 |
| 6 rs9270413   | 32558495 T | 2.457  | 1.61E-06 | chr:6:32505702 |
| 6 rs9270414   | 32558497 T | 2.457  | 1.61E-06 | chr:6:32505702 |
| 6 rs528723549 | 32490420 G | 2.381  | 1.61E-06 | chr:6:32505702 |
| 6 rs373289038 | 32535643 A | 2.351  | 1.62E-06 | chr:6:32505702 |
| 6 rs376459798 | 32535644 A | 2.351  | 1.62E-06 | chr:6:32505702 |
| 6 rs9271437   | 32588166 A | 2.875  | 1.62E-06 | chr:6:32505702 |
| 6 rs142795234 | 32487593 G | 2.955  | 1.63E-06 | chr:6:32505702 |
| 6 rs57172910  | 32529365 T | 2.208  | 1.64E-06 | chr:6:32505702 |
| 6 rs9271947   | 32597095 T | 2.944  | 1.65E-06 | chr:6:32505702 |
| 6 rs9271401   | 32587525 G | 2.868  | 1.66E-06 | chr:6:32505702 |
| 6 rs9270369   | 32558183 T | 0.3063 | 1.67E-06 | chr:6:32505702 |
| 6 rs9269075   | 32440795 G | 4.782  | 1.68E-06 | chr:6:32505702 |
| 6 rs140538649 | 32507946 T | 2.263  | 1.71E-06 | chr:6:32505702 |
| 6 rs539226504 | 32507944 A | 2.263  | 1.71E-06 | chr:6:32505702 |
| 6 rs183703563 | 32498913 A | 2.364  | 1.77E-06 | chr:6:32505702 |
| 6 rs1281937   | 32578143 C | 2.899  | 1.77E-06 | chr:6:32505702 |
| 6 rs9272250   | 32602958 T | 2.907  | 1.77E-06 | chr:6:32505702 |
| 6 rs9272251   | 32602966 G | 2.907  | 1.77E-06 | chr:6:32505702 |
| 6 rs2760981   | 32565465 G | 0.2972 | 1.78E-06 | chr:6:32505702 |
| 6 rs3129887   | 32410691 A | 3.332  | 1.78E-06 | chr:6:32505702 |
| 6 rs9270513   | 32559400 T | 0.2701 | 1.78E-06 | chr:6:32505702 |
| 6 rs9272081   | 32599655 C | 2.763  | 1.78E-06 | chr:6:32505702 |
| 6 rs9270514   | 32559418 G | 0.2699 | 1.80E-06 | chr:6:32505702 |
| 6 rs9269381   | 32540927 C | 2.811  | 1.81E-06 | chr:6:32505702 |
| 6 rs77724699  | 32529470 G | 2.121  | 1.82E-06 | chr:6:32505702 |
| 6 rs141114903 | 32487814 G | 2.508  | 1.83E-06 | chr:6:32505702 |
| 6 rs138535752 | 32489520 G | 2.57   | 1.84E-06 | chr:6:32505702 |
| 6 rs72853904  | 32505575 T | 2.741  | 1.85E-06 | chr:6:32505702 |
| 6 rs72844157  | 32520071 A | 0.2527 | 1.88E-06 | chr:6:32505702 |
| 6 rs116490940 | 32503056 T | 2.627  | 1.89E-06 | chr:6:32505702 |
| 6 rs76415507  | 32492589 G | 2.354  | 1.89E-06 | chr:6:32505702 |
| 6 rs150154760 | 32479531 T | 2.667  | 1.90E-06 | chr:6:32505702 |
| 6 rs9272249   | 32602952 A | 2.899  | 1.92E-06 | chr:6:32505702 |
| 6 rs539796570 | 32526182 C | 2.393  | 1.93E-06 | chr:6:32505702 |

|               |            |        |          |                |
|---------------|------------|--------|----------|----------------|
| 6 rs9272255   | 32603133 T | 2.91   | 1.94E-06 | chr:6:32505702 |
| 6 rs147668426 | 32507931 G | 2.253  | 1.95E-06 | chr:6:32505702 |
| 6 rs571430728 | 32507938 T | 2.253  | 1.95E-06 | chr:6:32505702 |
| 6 rs41287229  | 32547304 A | 2.381  | 1.95E-06 | chr:6:32505702 |
| 6 rs190771556 | 32485893 T | 2.594  | 1.95E-06 | chr:6:32505702 |
| 6 rs182090170 | 32537941 G | 2.23   | 1.95E-06 | chr:6:32505702 |
| 6 rs190345143 | 32537926 G | 2.23   | 1.95E-06 | chr:6:32505702 |
| 6 rs9271877   | 32595469 C | 2.767  | 1.96E-06 | chr:6:32505702 |
| 6 rs9271878   | 32595474 C | 2.767  | 1.96E-06 | chr:6:32505702 |
| 6 rs116542866 | 32521907 T | 0.2284 | 1.97E-06 | chr:6:32505702 |
| 6 rs115170333 | 32552322 C | 4.325  | 1.99E-06 | chr:6:32505702 |
| 6 rs566656642 | 32552339 A | 4.325  | 1.99E-06 | chr:6:32505702 |
| 6 rs112240819 | 32555962 C | 4.372  | 2.03E-06 | chr:6:32505702 |
| 6 rs9270599   | 32561656 G | 0.2866 | 2.04E-06 | chr:6:32505702 |
| 6 rs9272619   | 32607945 A | 2.781  | 2.04E-06 | chr:6:32505702 |
| 6 rs3998183   | 32567946 T | 2.897  | 2.05E-06 | chr:6:32505702 |
| 6 rs9270631   | 32565505 T | 2.826  | 2.08E-06 | chr:6:32505702 |
| 6 rs555706008 | 32507953 G | 2.252  | 2.08E-06 | chr:6:32505702 |
| 6 rs9270511   | 32559371 T | 0.2927 | 2.09E-06 | chr:6:32505702 |
| 6 rs582591    | 32579373 A | 2.869  | 2.10E-06 | chr:6:32505702 |
| 6 rs9270505   | 32559216 A | 0.3002 | 2.12E-06 | chr:6:32505702 |
| 6 rs2454137   | 32570149 G | 2.892  | 2.13E-06 | chr:6:32505702 |
| 6 rs9269962   | 32552177 A | 3.635  | 2.14E-06 | chr:6:32505702 |
| 6 rs678770    | 32570817 A | 2.855  | 2.14E-06 | chr:6:32505702 |
| 6 rs9270512   | 32559380 G | 0.2923 | 2.17E-06 | chr:6:32505702 |
| 6 rs34376317  | 32536678 T | 2.328  | 2.19E-06 | chr:6:32505702 |
| 6 rs182336149 | 32494269 C | 0.3581 | 2.19E-06 | chr:6:32505702 |
| 6 rs9256942   | 32557316 A | 12.57  | 2.19E-06 | chr:6:32505702 |
| 6 rs9270290   | 32557319 T | 12.57  | 2.19E-06 | chr:6:32505702 |
| 6 rs1894552   | 32395465 G | 3.288  | 2.20E-06 | chr:6:32505702 |
| 6 rs2105903   | 32395656 T | 3.288  | 2.20E-06 | chr:6:32505702 |
| 6 rs2239805   | 32411376 G | 3.288  | 2.20E-06 | chr:6:32505702 |
| 6 rs3135393   | 32408842 G | 3.288  | 2.20E-06 | chr:6:32505702 |
| 6 rs6925852   | 32409060 A | 3.288  | 2.20E-06 | chr:6:32505702 |
| 6 rs9268636   | 32406611 A | 3.288  | 2.20E-06 | chr:6:32505702 |
| 6 rs9271951   | 32597172 A | 2.68   | 2.21E-06 | chr:6:32505702 |
| 6 rs9271659   | 32592593 A | 2.801  | 2.22E-06 | chr:6:32505702 |
| 6 rs138130801 | 32486866 T | 2.504  | 2.26E-06 | chr:6:32505702 |
| 6 rs9272239   | 32602778 A | 0.2994 | 2.27E-06 | chr:6:32505702 |
| 6 rs186995982 | 32494270 A | 2.354  | 2.30E-06 | chr:6:32505702 |
| 6 rs9271707   | 32593356 T | 3.07   | 2.32E-06 | chr:6:32505702 |
| 6 rs9270555   | 32560584 C | 0.2867 | 2.32E-06 | chr:6:32505702 |
| 6 rs9272200   | 32601868 C | 2.612  | 2.33E-06 | chr:6:32505702 |

|               |            |        |          |                |
|---------------|------------|--------|----------|----------------|
| 6 rs9270657   | 32566021 G | 2.956  | 2.34E-06 | chr:6:32505702 |
| 6 rs555503640 | 32486477 T | 2.322  | 2.35E-06 | chr:6:32505702 |
| 6 rs9271342   | 32583122 C | 2.851  | 2.36E-06 | chr:6:32505702 |
| 6 rs546033671 | 32498932 G | 2.307  | 2.37E-06 | chr:6:32505702 |
| 6 rs9270391   | 32558361 A | 2.363  | 2.38E-06 | chr:6:32505702 |
| 6 rs572123865 | 32497098 G | 0.288  | 2.39E-06 | chr:6:32505702 |
| 6 rs9271879   | 32595489 T | 2.756  | 2.43E-06 | chr:6:32505702 |
| 6 rs9272032   | 32598782 G | 2.675  | 2.44E-06 | chr:6:32505702 |
| 6 rs9270616   | 32565154 G | 2.771  | 2.44E-06 | chr:6:32505702 |
| 6 rs373964410 | 32497086 C | 0.288  | 2.46E-06 | chr:6:32505702 |
| 6 rs9272840   | 32610683 T | 2.837  | 2.52E-06 | chr:6:32505702 |
| 6 rs9270446   | 32558775 G | 2.363  | 2.52E-06 | chr:6:32505702 |
| 6 rs9271375   | 32587067 A | 2.948  | 2.52E-06 | chr:6:32505702 |
| 6 rs369376349 | 32458425 A | 2.542  | 2.54E-06 | chr:6:32505702 |
| 6 rs546964381 | 32511275 G | 2.481  | 2.58E-06 | chr:6:32505702 |
| 6 rs558956689 | 32511276 G | 2.481  | 2.58E-06 | chr:6:32505702 |
| 6 rs182793436 | 32547530 T | 2.682  | 2.59E-06 | chr:6:32505702 |
| 6 rs7756741   | 32583198 A | 2.817  | 2.60E-06 | chr:6:32505702 |
| 6 rs9272161   | 32601139 G | 2.677  | 2.60E-06 | chr:6:32505702 |
| 6 rs9272162   | 32601140 A | 2.677  | 2.60E-06 | chr:6:32505702 |
| 6 rs9271962   | 32597434 C | 2.549  | 2.63E-06 | chr:6:32505702 |
| 6 rs71534530  | 32511211 A | 2.784  | 2.63E-06 | chr:6:32505702 |
| 6 rs9272163   | 32601146 T | 2.675  | 2.68E-06 | chr:6:32505702 |
| 6 rs2858875   | 32566649 C | 2.875  | 2.71E-06 | chr:6:32505702 |
| 6 rs9268845   | 32429204 T | 3.179  | 2.71E-06 | chr:6:32505702 |
| 6 rs111354037 | 32579285 C | 2.729  | 2.74E-06 | chr:6:32505702 |
| 6 rs148612288 | 32498953 G | 2.298  | 2.75E-06 | chr:6:32505702 |
| 6 rs180942055 | 32507976 T | 2.232  | 2.77E-06 | chr:6:32505702 |
| 6 rs186170828 | 32507977 G | 2.232  | 2.77E-06 | chr:6:32505702 |
| 6 rs573629697 | 32507971 G | 2.232  | 2.77E-06 | chr:6:32505702 |
| 6 rs9272257   | 32603189 T | 2.646  | 2.78E-06 | chr:6:32505702 |
| 6 rs73728637  | 32594420 C | 2.647  | 2.81E-06 | chr:6:32505702 |
| 6 rs16822820  | 32552060 T | 3.673  | 2.83E-06 | chr:6:32505702 |
| 6 rs9272201   | 32601875 G | 2.845  | 2.89E-06 | chr:6:32505702 |
| 6 rs9272031   | 32598779 C | 2.667  | 2.89E-06 | chr:6:32505702 |
| 6 rs9271970   | 32597550 A | 2.474  | 2.89E-06 | chr:6:32505702 |
| 6 rs184981897 | 32486966 A | 2.318  | 2.92E-06 | chr:6:32505702 |
| 6 rs9270081   | 32554243 T | 0.2772 | 2.94E-06 | chr:6:32505702 |
| 6 rs9272448   | 32605439 T | 2.711  | 2.98E-06 | chr:6:32505702 |
| 6 rs79788626  | 32490246 C | 2.367  | 3.01E-06 | chr:6:32505702 |
| 6 rs9272165   | 32601170 C | 2.671  | 3.01E-06 | chr:6:32505702 |
| 6 rs72508409  | 32451073 G | 30.59  | 3.01E-06 | chr:6:32505702 |
| 6 rs114895810 | 32473514 C | 4.576  | 3.02E-06 | chr:6:32505702 |

|               |            |        |          |                |
|---------------|------------|--------|----------|----------------|
| 6 rs9272493   | 32606076 C | 2.638  | 3.02E-06 | chr:6:32505702 |
| 6 rs9272657   | 32608655 A | 2.504  | 3.03E-06 | chr:6:32505702 |
| 6 rs146382271 | 32511291 T | 2.431  | 3.06E-06 | chr:6:32505702 |
| 6 rs9270388   | 32558343 T | 2.352  | 3.10E-06 | chr:6:32505702 |
| 6 rs67704526  | 32536650 T | 2.185  | 3.15E-06 | chr:6:32505702 |
| 6 rs9271656   | 32592574 A | 2.76   | 3.15E-06 | chr:6:32505702 |
| 6 rs114354029 | 32598764 G | 2.662  | 3.21E-06 | chr:6:32505702 |
| 6 rs9272314   | 32604037 G | 2.723  | 3.24E-06 | chr:6:32505702 |
| 6 rs9272315   | 32604039 C | 2.723  | 3.24E-06 | chr:6:32505702 |
| 6 rs6933740   | 32537804 T | 2.239  | 3.25E-06 | chr:6:32505702 |
| 6 rs9270548   | 32559960 T | 2.601  | 3.25E-06 | chr:6:32505702 |
| 6 rs573273966 | 32507131 C | 2.249  | 3.27E-06 | chr:6:32505702 |
| 6 rs9272605   | 32607728 G | 2.653  | 3.27E-06 | chr:6:32505702 |
| 6 rs9269007   | 32436214 A | 3.076  | 3.28E-06 | chr:6:32505702 |
| 6 rs9270547   | 32559951 G | 2.601  | 3.31E-06 | chr:6:32505702 |
| 6 rs9272224   | 32602352 T | 2.851  | 3.31E-06 | chr:6:32505702 |
| 6 rs9272258   | 32603191 T | 2.651  | 3.32E-06 | chr:6:32505702 |
| 6 rs9272660   | 32608667 G | 2.494  | 3.34E-06 | chr:6:32505702 |
| 6 rs141404431 | 32538578 T | 2.851  | 3.36E-06 | chr:6:32505702 |
| 6 rs143027966 | 32538579 T | 2.851  | 3.36E-06 | chr:6:32505702 |
| 6 rs151286796 | 32538577 T | 2.851  | 3.36E-06 | chr:6:32505702 |
| 6 rs9272166   | 32601209 C | 2.67   | 3.36E-06 | chr:6:32505702 |
| 6 rs190202109 | 32525736 G | 2.41   | 3.43E-06 | chr:6:32505702 |
| 6 rs536387398 | 32507125 A | 2.245  | 3.45E-06 | chr:6:32505702 |
| 6 rs112507860 | 32496083 T | 2.187  | 3.46E-06 | chr:6:32505702 |
| 6 rs9270588   | 32561327 C | 0.2961 | 3.47E-06 | chr:6:32505702 |
| 6 rs28404276  | 32510355 A | 2.865  | 3.47E-06 | chr:6:32505702 |
| 6 rs115711695 | 32495994 A | 2.169  | 3.48E-06 | chr:6:32505702 |
| 6 rs9272659   | 32608661 C | 2.492  | 3.48E-06 | chr:6:32505702 |
| 6 rs376549    | 32208697 C | 2.93   | 3.51E-06 | chr:6:32505702 |
| 6 rs9272271   | 32603526 T | 2.678  | 3.53E-06 | chr:6:32505702 |
| 6 rs9272272   | 32603530 A | 2.678  | 3.53E-06 | chr:6:32505702 |
| 6 rs9268251   | 32295878 A | 3.125  | 3.53E-06 | chr:6:32505702 |
| 6 rs116011937 | 32486884 G | 2.43   | 3.53E-06 | chr:6:32505702 |
| 6 rs9272225   | 32602372 T | 2.843  | 3.54E-06 | chr:6:32505702 |
| 6 rs9272464   | 32605648 G | 2.81   | 3.55E-06 | chr:6:32505702 |
| 6 rs9270508   | 32559347 G | 0.3334 | 3.62E-06 | chr:6:32505702 |
| 6 rs116312062 | 32527045 G | 4.308  | 3.63E-06 | chr:6:32505702 |
| 6 rs9271439   | 32588234 G | 2.693  | 3.64E-06 | chr:6:32505702 |
| 6 rs9270585   | 32561300 C | 0.2996 | 3.65E-06 | chr:6:32505702 |
| 6 rs9271130   | 32576894 A | 0.3229 | 3.67E-06 | chr:6:32505702 |
| 6 rs9270507   | 32559326 T | 0.3333 | 3.69E-06 | chr:6:32505702 |
| 6 rs9272035   | 32598814 T | 2.66   | 3.69E-06 | chr:6:32505702 |



|               |            |        |          |                |
|---------------|------------|--------|----------|----------------|
| 6 rs9268124   | 32252507 G | 3.292  | 3.71E-06 | chr:6:32505702 |
| 6 rs9272158   | 32601122 A | 2.661  | 3.71E-06 | chr:6:32505702 |
| 6 rs1136756   | 32552134 G | 3.403  | 3.75E-06 | chr:6:32505702 |
| 6 rs9271460   | 32588463 A | 2.535  | 3.75E-06 | chr:6:32505702 |
| 6 rs9270317   | 32557643 G | 0.272  | 3.76E-06 | chr:6:32505702 |
| 6 rs9270614   | 32565115 A | 2.718  | 3.83E-06 | chr:6:32505702 |
| 6 rs9272446   | 32605423 C | 2.712  | 3.85E-06 | chr:6:32505702 |
| 6 rs9270509   | 32559355 A | 0.3331 | 3.86E-06 | chr:6:32505702 |
| 6 rs9272685   | 32608991 G | 2.799  | 3.87E-06 | chr:6:32505702 |
| 6 rs9272465   | 32605655 A | 2.797  | 3.90E-06 | chr:6:32505702 |
| 6 rs114293611 | 32487353 C | 2.579  | 3.92E-06 | chr:6:32505702 |
| 6 rs9271443   | 32588263 C | 2.663  | 3.99E-06 | chr:6:32505702 |
| 6 rs9270653   | 32565940 A | 2.82   | 4.00E-06 | chr:6:32505702 |
| 6 rs9270654   | 32565946 G | 2.82   | 4.00E-06 | chr:6:32505702 |
| 6 rs9270655   | 32565966 T | 2.82   | 4.00E-06 | chr:6:32505702 |
| 6 rs9272450   | 32605478 T | 2.757  | 4.02E-06 | chr:6:32505702 |
| 6 rs9272203   | 32601886 G | 2.541  | 4.04E-06 | chr:6:32505702 |
| 6 rs9271462   | 32588501 C | 2.639  | 4.06E-06 | chr:6:32505702 |
| 6 rs9271968   | 32597529 G | 2.405  | 4.06E-06 | chr:6:32505702 |
| 6 rs9272582   | 32607439 C | 2.665  | 4.08E-06 | chr:6:32505702 |
| 6 rs28755203  | 32643947 G | 8.144  | 4.03E-30 | chr:6:32648036 |
| 6 rs28755204  | 32643953 T | 8.144  | 4.03E-30 | chr:6:32648036 |
| 6 rs28755192  | 32643687 T | 8.427  | 4.33E-30 | chr:6:32648036 |
| 6 rs28755193  | 32643704 C | 8.427  | 4.33E-30 | chr:6:32648036 |
| 6 rs28755325  | 32646521 A | 7.508  | 4.57E-30 | chr:6:32648036 |
| 6 rs28755367  | 32647215 A | 8.136  | 4.85E-30 | chr:6:32648036 |
| 6 rs28755250  | 32644755 G | 8.426  | 5.30E-30 | chr:6:32648036 |
| 6 rs28755251  | 32644775 T | 8.426  | 5.30E-30 | chr:6:32648036 |
| 6 rs28755252  | 32644806 G | 8.426  | 5.30E-30 | chr:6:32648036 |
| 6 rs28755218  | 32644190 T | 6.689  | 5.55E-30 | chr:6:32648036 |
| 6 rs28755333  | 32646691 G | 7.471  | 5.97E-30 | chr:6:32648036 |
| 6 rs28755242  | 32644577 G | 7.656  | 6.14E-30 | chr:6:32648036 |
| 6 rs28755243  | 32644594 A | 7.656  | 6.14E-30 | chr:6:32648036 |
| 6 rs28755292  | 32645974 A | 8.413  | 6.25E-30 | chr:6:32648036 |
| 6 rs28755253  | 32644869 T | 8.081  | 6.33E-30 | chr:6:32648036 |
| 6 rs28755335  | 32646763 T | 7.279  | 6.41E-30 | chr:6:32648036 |
| 6 rs28755206  | 32644010 G | 6.961  | 6.54E-30 | chr:6:32648036 |
| 6 rs28371220  | 32647546 A | 7.597  | 6.57E-30 | chr:6:32648036 |
| 6 rs28755254  | 32644878 C | 7.829  | 7.04E-30 | chr:6:32648036 |
| 6 rs140232909 | 32643883 A | 7.659  | 7.11E-30 | chr:6:32648036 |
| 6 rs28755202  | 32643894 G | 7.659  | 7.11E-30 | chr:6:32648036 |
| 6 rs28755368  | 32647280 C | 7.922  | 7.48E-30 | chr:6:32648036 |
| 6 rs28755369  | 32647313 G | 7.922  | 7.48E-30 | chr:6:32648036 |

|               |            |       |          |                |
|---------------|------------|-------|----------|----------------|
| 6 rs28755265  | 32645144 A | 6.514 | 7.58E-30 | chr:6:32648036 |
| 6 rs28755343  | 32646866 A | 7.275 | 7.73E-30 | chr:6:32648036 |
| 6 rs28755280  | 32645660 A | 7.62  | 7.75E-30 | chr:6:32648036 |
| 6 rs28755334  | 32646759 G | 7.278 | 7.75E-30 | chr:6:32648036 |
| 6 rs28755244  | 32644631 A | 7.555 | 7.81E-30 | chr:6:32648036 |
| 6 rs28755293  | 32646010 T | 7.649 | 7.99E-30 | chr:6:32648036 |
| 6 rs28755290  | 32645871 C | 8.144 | 8.08E-30 | chr:6:32648036 |
| 6 rs28755208  | 32644036 C | 6.656 | 8.09E-30 | chr:6:32648036 |
| 6 rs28755209  | 32644049 T | 6.656 | 8.09E-30 | chr:6:32648036 |
| 6 rs114557541 | 32643844 T | 7.024 | 8.51E-30 | chr:6:32648036 |
| 6 rs116493570 | 32643860 T | 7.024 | 8.51E-30 | chr:6:32648036 |
| 6 rs28755188  | 32643548 C | 7.888 | 8.63E-30 | chr:6:32648036 |
| 6 rs28755189  | 32643552 C | 7.888 | 8.63E-30 | chr:6:32648036 |
| 6 rs28755366  | 32647187 T | 7.66  | 8.73E-30 | chr:6:32648036 |
| 6 rs28755344  | 32646904 C | 7.356 | 8.78E-30 | chr:6:32648036 |
| 6 rs28755190  | 32643583 C | 7.917 | 8.80E-30 | chr:6:32648036 |
| 6 rs28755191  | 32643584 G | 7.917 | 8.80E-30 | chr:6:32648036 |
| 6 rs28755217  | 32644159 C | 6.664 | 8.80E-30 | chr:6:32648036 |
| 6 rs28755239  | 32644463 C | 7.661 | 8.84E-30 | chr:6:32648036 |
| 6 rs28755264  | 32645131 G | 6.499 | 9.40E-30 | chr:6:32648036 |
| 6 rs28755324  | 32646494 T | 7.122 | 9.57E-30 | chr:6:32648036 |
| 6 rs28755291  | 32645906 G | 7.964 | 9.65E-30 | chr:6:32648036 |
| 6 rs28755187  | 32643516 A | 7.622 | 1.01E-29 | chr:6:32648036 |
| 6 rs28755245  | 32644658 T | 7.349 | 1.02E-29 | chr:6:32648036 |
| 6 rs28371221  | 32647556 C | 7.366 | 1.12E-29 | chr:6:32648036 |
| 6 rs9275019   | 32643166 T | 7.006 | 1.14E-29 | chr:6:32648036 |
| 6 rs28755276  | 32645578 C | 7.6   | 1.16E-29 | chr:6:32648036 |
| 6 rs28755277  | 32645598 T | 7.6   | 1.16E-29 | chr:6:32648036 |
| 6 rs28755278  | 32645599 G | 7.6   | 1.16E-29 | chr:6:32648036 |
| 6 rs28755279  | 32645626 C | 7.6   | 1.16E-29 | chr:6:32648036 |
| 6 rs113898828 | 32643755 T | 7.631 | 1.17E-29 | chr:6:32648036 |
| 6 rs114642759 | 32643766 T | 7.631 | 1.17E-29 | chr:6:32648036 |
| 6 rs28371219  | 32647510 A | 6.729 | 1.18E-29 | chr:6:32648036 |
| 6 rs2856678   | 32655830 A | 8.605 | 1.19E-29 | chr:6:32648036 |
| 6 rs28755215  | 32644128 G | 6.203 | 1.23E-29 | chr:6:32648036 |
| 6 rs112838245 | 32645820 G | 7.626 | 1.28E-29 | chr:6:32648036 |
| 6 rs113838733 | 32645825 C | 7.626 | 1.28E-29 | chr:6:32648036 |
| 6 rs28755342  | 32646861 T | 6.907 | 1.34E-29 | chr:6:32648036 |
| 6 rs9275020   | 32643184 T | 6.999 | 1.39E-29 | chr:6:32648036 |
| 6 rs28371218  | 32647508 C | 6.728 | 1.41E-29 | chr:6:32648036 |
| 6 rs28755249  | 32644701 A | 7.51  | 1.41E-29 | chr:6:32648036 |
| 6 rs28755216  | 32644135 A | 6.207 | 1.42E-29 | chr:6:32648036 |
| 6 rs9275021   | 32643220 A | 7.02  | 1.48E-29 | chr:6:32648036 |

|               |            |       |          |                |
|---------------|------------|-------|----------|----------------|
| 6 rs141967600 | 32643824 T | 7.027 | 1.49E-29 | chr:6:32648036 |
| 6 rs28755240  | 32644562 A | 7.449 | 1.56E-29 | chr:6:32648036 |
| 6 rs114954038 | 32645693 T | 7.003 | 1.78E-29 | chr:6:32648036 |
| 6 rs115932399 | 32645695 T | 7.003 | 1.78E-29 | chr:6:32648036 |
| 6 rs199945715 | 32645744 T | 6.996 | 1.79E-29 | chr:6:32648036 |
| 6 rs28755263  | 32645109 A | 6.734 | 1.85E-29 | chr:6:32648036 |
| 6 rs28755246  | 32644670 C | 7.122 | 1.97E-29 | chr:6:32648036 |
| 6 rs28755247  | 32644680 T | 7.122 | 1.97E-29 | chr:6:32648036 |
| 6 rs28755365  | 32647150 C | 6.788 | 1.98E-29 | chr:6:32648036 |
| 6 rs28755340  | 32646830 G | 6.407 | 2.04E-29 | chr:6:32648036 |
| 6 rs116005148 | 32645766 A | 7     | 2.11E-29 | chr:6:32648036 |
| 6 rs202178406 | 32645770 G | 7     | 2.11E-29 | chr:6:32648036 |
| 6 rs28755230  | 32644328 G | 6.642 | 2.34E-29 | chr:6:32648036 |
| 6 rs28755262  | 32645088 T | 6.938 | 2.44E-29 | chr:6:32648036 |
| 6 rs28755231  | 32644337 G | 6.626 | 2.85E-29 | chr:6:32648036 |
| 6 rs28755235  | 32644423 T | 6.937 | 2.92E-29 | chr:6:32648036 |
| 6 rs28755341  | 32646837 C | 6.395 | 2.97E-29 | chr:6:32648036 |
| 6 rs28755186  | 32643479 C | 6.818 | 3.03E-29 | chr:6:32648036 |
| 6 rs28755339  | 32646817 G | 6.254 | 3.10E-29 | chr:6:32648036 |
| 6 rs28755212  | 32644094 C | 5.936 | 3.14E-29 | chr:6:32648036 |
| 6 rs28755213  | 32644099 G | 5.936 | 3.14E-29 | chr:6:32648036 |
| 6 rs28755214  | 32644111 C | 5.936 | 3.14E-29 | chr:6:32648036 |
| 6 rs201805319 | 32645737 G | 6.782 | 3.31E-29 | chr:6:32648036 |
| 6 rs28755259  | 32644983 A | 6.688 | 3.59E-29 | chr:6:32648036 |
| 6 rs28755326  | 32646588 A | 6.381 | 3.64E-29 | chr:6:32648036 |
| 6 rs28371241  | 32647906 G | 6.597 | 3.73E-29 | chr:6:32648036 |
| 6 rs9275017   | 32643130 T | 6.165 | 3.83E-29 | chr:6:32648036 |
| 6 rs28755370  | 32647353 G | 6.529 | 3.86E-29 | chr:6:32648036 |
| 6 rs28755371  | 32647357 C | 6.529 | 3.86E-29 | chr:6:32648036 |
| 6 rs9275192   | 32656305 A | 8.061 | 4.23E-29 | chr:6:32648036 |
| 6 rs9275193   | 32656306 A | 8.061 | 4.23E-29 | chr:6:32648036 |
| 6 rs28755260  | 32645073 C | 6.915 | 4.26E-29 | chr:6:32648036 |
| 6 rs28755261  | 32645075 G | 6.915 | 4.26E-29 | chr:6:32648036 |
| 6 rs28755236  | 32644428 G | 6.899 | 4.35E-29 | chr:6:32648036 |
| 6 rs9275018   | 32643139 T | 6.168 | 4.48E-29 | chr:6:32648036 |
| 6 rs28755233  | 32644350 C | 6.429 | 4.51E-29 | chr:6:32648036 |
| 6 rs28755234  | 32644391 T | 6.613 | 4.73E-29 | chr:6:32648036 |
| 6 rs28371242  | 32647935 G | 6.433 | 4.76E-29 | chr:6:32648036 |
| 6 rs28371243  | 32647946 C | 6.433 | 4.76E-29 | chr:6:32648036 |
| 6 rs28371222  | 32647611 T | 6.546 | 4.94E-29 | chr:6:32648036 |
| 6 rs28755273  | 32645534 A | 6.333 | 5.02E-29 | chr:6:32648036 |
| 6 rs28755266  | 32645432 T | 6.054 | 5.22E-29 | chr:6:32648036 |
| 6 rs554654579 | 32644070 C | 5.905 | 5.29E-29 | chr:6:32648036 |

|              |            |       |          |                |
|--------------|------------|-------|----------|----------------|
| 6 rs28755219 | 32644226 C | 5.917 | 5.73E-29 | chr:6:32648036 |
| 6 rs28755220 | 32644238 C | 5.917 | 5.73E-29 | chr:6:32648036 |
| 6 rs28755221 | 32644239 A | 5.917 | 5.73E-29 | chr:6:32648036 |
| 6 rs28371223 | 32647617 G | 6.423 | 6.30E-29 | chr:6:32648036 |
| 6 rs28755345 | 32646930 C | 6.441 | 6.55E-29 | chr:6:32648036 |
| 6 rs28755364 | 32647133 T | 6.204 | 7.45E-29 | chr:6:32648036 |
| 6 rs28755222 | 32644264 C | 5.908 | 7.57E-29 | chr:6:32648036 |
| 6 rs28755267 | 32645446 C | 6.047 | 7.63E-29 | chr:6:32648036 |
| 6 rs28755338 | 32646804 T | 5.732 | 7.94E-29 | chr:6:32648036 |
| 6 rs28755272 | 32645529 C | 6.169 | 8.03E-29 | chr:6:32648036 |
| 6 rs28755271 | 32645497 T | 6.062 | 9.35E-29 | chr:6:32648036 |
| 6 rs28755268 | 32645469 A | 6.057 | 9.42E-29 | chr:6:32648036 |
| 6 rs28755346 | 32646940 T | 6.236 | 9.61E-29 | chr:6:32648036 |
| 6 rs28371213 | 32646059 G | 5.729 | 9.77E-29 | chr:6:32648036 |
| 6 rs28371214 | 32646061 G | 5.729 | 9.77E-29 | chr:6:32648036 |
| 6 rs9274879  | 32640918 G | 9.309 | 1.02E-28 | chr:6:32648036 |
| 6 rs28755295 | 32646054 A | 5.761 | 1.05E-28 | chr:6:32648036 |
| 6 rs28755255 | 32644915 G | 6.227 | 1.11E-28 | chr:6:32648036 |
| 6 rs28755256 | 32644919 G | 6.227 | 1.11E-28 | chr:6:32648036 |
| 6 rs28755270 | 32645489 A | 6.056 | 1.12E-28 | chr:6:32648036 |
| 6 rs28755294 | 32646047 C | 5.757 | 1.26E-28 | chr:6:32648036 |
| 6 rs28755257 | 32644953 T | 6.05  | 1.51E-28 | chr:6:32648036 |
| 6 rs28755258 | 32644958 C | 6.05  | 1.51E-28 | chr:6:32648036 |
| 6 rs28371215 | 32647476 G | 5.703 | 1.62E-28 | chr:6:32648036 |
| 6 rs28755226 | 32644297 G | 5.454 | 1.63E-28 | chr:6:32648036 |
| 6 rs28755227 | 32644299 C | 5.454 | 1.63E-28 | chr:6:32648036 |
| 6 rs28755228 | 32644300 A | 5.454 | 1.63E-28 | chr:6:32648036 |
| 6 rs28755224 | 32644285 T | 5.643 | 1.75E-28 | chr:6:32648036 |
| 6 rs28755225 | 32644290 T | 5.643 | 1.75E-28 | chr:6:32648036 |
| 6 rs28755223 | 32644276 A | 5.627 | 2.20E-28 | chr:6:32648036 |
| 6 rs28371216 | 32647491 C | 5.603 | 2.30E-28 | chr:6:32648036 |
| 6 rs28371217 | 32647495 A | 5.603 | 2.30E-28 | chr:6:32648036 |
| 6 rs28755361 | 32647113 G | 5.726 | 2.43E-28 | chr:6:32648036 |
| 6 rs28755229 | 32644305 A | 5.442 | 2.45E-28 | chr:6:32648036 |
| 6 rs9274936  | 32641625 T | 12.61 | 2.90E-28 | chr:6:32648036 |
| 6 rs28755305 | 32646232 G | 5.729 | 2.93E-28 | chr:6:32648036 |
| 6 rs28755306 | 32646238 T | 5.729 | 2.93E-28 | chr:6:32648036 |
| 6 rs28755307 | 32646241 A | 5.729 | 2.93E-28 | chr:6:32648036 |
| 6 rs28371225 | 32647640 A | 5.85  | 3.05E-28 | chr:6:32648036 |
| 6 rs9275031  | 32643420 A | 5.884 | 3.13E-28 | chr:6:32648036 |
| 6 rs28755362 | 32647119 C | 5.719 | 3.58E-28 | chr:6:32648036 |
| 6 rs28755363 | 32647120 T | 5.719 | 3.58E-28 | chr:6:32648036 |
| 6 rs28371224 | 32647628 A | 5.814 | 3.61E-28 | chr:6:32648036 |

|              |            |       |          |                |
|--------------|------------|-------|----------|----------------|
| 6 rs9275022  | 32643251 G | 5.61  | 4.04E-28 | chr:6:32648036 |
| 6 rs3129778  | 32646252 T | 5.51  | 4.54E-28 | chr:6:32648036 |
| 6 rs28755304 | 32646193 T | 5.815 | 5.32E-28 | chr:6:32648036 |
| 6 rs28755349 | 32646978 C | 5.474 | 5.76E-28 | chr:6:32648036 |
| 6 rs28755296 | 32646085 G | 5.208 | 6.14E-28 | chr:6:32648036 |
| 6 rs28755297 | 32646087 G | 5.208 | 6.14E-28 | chr:6:32648036 |
| 6 rs28755331 | 32646647 A | 5.152 | 6.92E-28 | chr:6:32648036 |
| 6 rs28755332 | 32646648 T | 5.152 | 6.92E-28 | chr:6:32648036 |
| 6 rs28755351 | 32647012 G | 5.39  | 8.00E-28 | chr:6:32648036 |
| 6 rs28755350 | 32646997 G | 5.34  | 9.66E-28 | chr:6:32648036 |
| 6 rs28755298 | 32646094 T | 5.191 | 1.12E-27 | chr:6:32648036 |
| 6 rs28755299 | 32646107 A | 5.178 | 1.38E-27 | chr:6:32648036 |
| 6 rs28755308 | 32646274 C | 5.128 | 1.39E-27 | chr:6:32648036 |
| 6 rs28755309 | 32646279 G | 5.128 | 1.39E-27 | chr:6:32648036 |
| 6 rs9274856  | 32640539 T | 12.02 | 1.54E-27 | chr:6:32648036 |
| 6 rs9274858  | 32640546 A | 12.02 | 1.54E-27 | chr:6:32648036 |
| 6 rs9274860  | 32640556 A | 12.02 | 1.54E-27 | chr:6:32648036 |
| 6 rs28755327 | 32646604 A | 5.357 | 1.56E-27 | chr:6:32648036 |
| 6 rs28755353 | 32647040 A | 5.175 | 1.60E-27 | chr:6:32648036 |
| 6 rs9274847  | 32640143 G | 10.67 | 1.83E-27 | chr:6:32648036 |
| 6 rs28755300 | 32646132 A | 5.351 | 1.89E-27 | chr:6:32648036 |
| 6 rs28755301 | 32646134 A | 5.351 | 1.89E-27 | chr:6:32648036 |
| 6 rs9274779  | 32638726 A | 12.43 | 2.37E-27 | chr:6:32648036 |
| 6 rs9274780  | 32638741 G | 12.43 | 2.37E-27 | chr:6:32648036 |
| 6 rs28755347 | 32646955 T | 5.092 | 2.42E-27 | chr:6:32648036 |
| 6 rs28755352 | 32647027 T | 5.158 | 2.47E-27 | chr:6:32648036 |
| 6 rs28755323 | 32646469 A | 5.151 | 2.55E-27 | chr:6:32648036 |
| 6 rs28371226 | 32647665 T | 5.127 | 2.81E-27 | chr:6:32648036 |
| 6 rs28755360 | 32647099 C | 5.201 | 3.25E-27 | chr:6:32648036 |
| 6 rs28755373 | 32647388 A | 4.937 | 3.27E-27 | chr:6:32648036 |
| 6 rs28755330 | 32646637 A | 4.882 | 3.29E-27 | chr:6:32648036 |
| 6 rs9274782  | 32638795 C | 11.81 | 3.30E-27 | chr:6:32648036 |
| 6 rs28755302 | 32646143 G | 5.23  | 3.42E-27 | chr:6:32648036 |
| 6 rs28755303 | 32646145 G | 5.23  | 3.42E-27 | chr:6:32648036 |
| 6 rs28755314 | 32646366 G | 5.121 | 4.32E-27 | chr:6:32648036 |
| 6 rs28755315 | 32646369 G | 5.121 | 4.32E-27 | chr:6:32648036 |
| 6 rs2935909  | 32655962 G | 16.23 | 4.34E-27 | chr:6:32648036 |
| 6 rs3021056  | 32655921 T | 16.23 | 4.34E-27 | chr:6:32648036 |
| 6 rs9274868  | 32640752 G | 10.51 | 4.43E-27 | chr:6:32648036 |
| 6 rs28755354 | 32647045 T | 4.944 | 4.60E-27 | chr:6:32648036 |
| 6 rs9275067  | 32648414 C | 16.81 | 4.63E-27 | chr:6:32648036 |
| 6 rs9274842  | 32640095 A | 11.16 | 4.77E-27 | chr:6:32648036 |
| 6 rs28755372 | 32647383 A | 4.923 | 5.06E-27 | chr:6:32648036 |

|               |            |       |          |                |
|---------------|------------|-------|----------|----------------|
| 6 rs139025169 | 32639390 A | 9.013 | 5.85E-27 | chr:6:32648036 |
| 6 rs141881212 | 32639387 G | 9.013 | 5.85E-27 | chr:6:32648036 |
| 6 rs28755310  | 32646304 T | 4.921 | 6.35E-27 | chr:6:32648036 |
| 6 rs28755311  | 32646309 C | 4.921 | 6.35E-27 | chr:6:32648036 |
| 6 rs9274789   | 32639143 C | 10.99 | 6.41E-27 | chr:6:32648036 |
| 6 rs9275064   | 32648381 T | 18.59 | 7.02E-27 | chr:6:32648036 |
| 6 rs9274840   | 32640035 T | 12.86 | 7.07E-27 | chr:6:32648036 |
| 6 rs9274791   | 32639163 T | 10.93 | 7.38E-27 | chr:6:32648036 |
| 6 rs9274862   | 32640595 T | 15.22 | 7.75E-27 | chr:6:32648036 |
| 6 rs9275066   | 32648404 T | 16.42 | 8.15E-27 | chr:6:32648036 |
| 6 rs9274841   | 32640059 A | 12.83 | 8.48E-27 | chr:6:32648036 |
| 6 rs9274863   | 32640611 C | 15.73 | 9.15E-27 | chr:6:32648036 |
| 6 rs201341530 | 32639456 C | 13.85 | 9.23E-27 | chr:6:32648036 |
| 6 rs202086737 | 32639459 G | 13.85 | 9.23E-27 | chr:6:32648036 |
| 6 rs9274793   | 32639247 C | 12.12 | 9.23E-27 | chr:6:32648036 |
| 6 rs28371228  | 32647698 A | 4.811 | 1.06E-26 | chr:6:32648036 |
| 6 rs9275023   | 32643276 T | 4.766 | 1.20E-26 | chr:6:32648036 |
| 6 rs3021059   | 32652344 T | 15.63 | 1.27E-26 | chr:6:32648036 |
| 6 rs9274784   | 32638878 G | 13.55 | 1.29E-26 | chr:6:32648036 |
| 6 rs9274785   | 32638907 C | 13.55 | 1.29E-26 | chr:6:32648036 |
| 6 rs28755312  | 32646342 T | 4.923 | 1.32E-26 | chr:6:32648036 |
| 6 rs28755313  | 32646343 G | 4.923 | 1.32E-26 | chr:6:32648036 |
| 6 rs28371227  | 32647666 G | 5.051 | 1.51E-26 | chr:6:32648036 |
| 6 rs9274767   | 32638541 G | 14.1  | 1.63E-26 | chr:6:32648036 |
| 6 rs9274768   | 32638544 C | 14.1  | 1.63E-26 | chr:6:32648036 |
| 6 rs9274812   | 32639573 T | 14.97 | 1.65E-26 | chr:6:32648036 |
| 6 rs9275156   | 32652486 C | 17.51 | 1.75E-26 | chr:6:32648036 |
| 6 rs9274819   | 32639646 C | 8.254 | 1.76E-26 | chr:6:32648036 |
| 6 rs28755328  | 32646616 C | 4.741 | 1.80E-26 | chr:6:32648036 |
| 6 rs28755329  | 32646617 A | 4.741 | 1.80E-26 | chr:6:32648036 |
| 6 rs28755316  | 32646395 G | 4.804 | 1.99E-26 | chr:6:32648036 |
| 6 rs28755317  | 32646396 G | 4.804 | 1.99E-26 | chr:6:32648036 |
| 6 rs9274757   | 32638280 C | 13.55 | 2.23E-26 | chr:6:32648036 |
| 6 rs9275024   | 32643281 A | 4.684 | 2.27E-26 | chr:6:32648036 |
| 6 rs9274938   | 32641673 C | 20.99 | 2.74E-26 | chr:6:32648036 |
| 6 rs9274838   | 32639973 G | 15.46 | 2.94E-26 | chr:6:32648036 |
| 6 rs9275015   | 32643108 A | 4.705 | 3.41E-26 | chr:6:32648036 |
| 6 rs9275016   | 32643109 G | 4.705 | 3.41E-26 | chr:6:32648036 |
| 6 rs9274750   | 32638114 C | 15.94 | 3.46E-26 | chr:6:32648036 |
| 6 rs28755356  | 32647059 G | 4.651 | 3.60E-26 | chr:6:32648036 |
| 6 rs28755357  | 32647061 C | 4.651 | 3.60E-26 | chr:6:32648036 |
| 6 rs9274832   | 32639875 T | 14.94 | 3.70E-26 | chr:6:32648036 |
| 6 rs9274833   | 32639885 T | 14.94 | 3.70E-26 | chr:6:32648036 |

|               |            |       |          |                |
|---------------|------------|-------|----------|----------------|
| 6 rs9275072   | 32648502 T | 16.4  | 3.72E-26 | chr:6:32648036 |
| 6 rs9274765   | 32638510 T | 15.77 | 3.77E-26 | chr:6:32648036 |
| 6 rs9274766   | 32638512 A | 15.77 | 3.77E-26 | chr:6:32648036 |
| 6 rs28371239  | 32647854 C | 4.682 | 4.37E-26 | chr:6:32648036 |
| 6 rs9274811   | 32639511 T | 15.86 | 4.39E-26 | chr:6:32648036 |
| 6 rs9275157   | 32652552 A | 19.28 | 4.83E-26 | chr:6:32648036 |
| 6 rs144949632 | 32639331 A | 8.094 | 5.03E-26 | chr:6:32648036 |
| 6 rs148651202 | 32639332 T | 8.094 | 5.03E-26 | chr:6:32648036 |
| 6 rs9274787   | 32639028 A | 15.79 | 5.32E-26 | chr:6:32648036 |
| 6 rs9274788   | 32639036 C | 15.79 | 5.32E-26 | chr:6:32648036 |
| 6 rs9274970   | 32642095 T | 13.65 | 5.49E-26 | chr:6:32648036 |
| 6 rs9274775   | 32638643 G | 16.9  | 5.72E-26 | chr:6:32648036 |
| 6 rs9274972   | 32642126 T | 21.37 | 5.87E-26 | chr:6:32648036 |
| 6 rs112819910 | 32639344 T | 7.823 | 6.14E-26 | chr:6:32648036 |
| 6 rs9274854   | 32640473 T | 17.27 | 6.19E-26 | chr:6:32648036 |
| 6 rs9275009   | 32642958 A | 15.6  | 6.38E-26 | chr:6:32648036 |
| 6 rs28755374  | 32647404 T | 4.539 | 6.45E-26 | chr:6:32648036 |
| 6 rs28755375  | 32647411 C | 4.539 | 6.45E-26 | chr:6:32648036 |
| 6 rs28755376  | 32647412 A | 4.539 | 6.45E-26 | chr:6:32648036 |
| 6 rs9275002   | 32642761 A | 20.42 | 6.51E-26 | chr:6:32648036 |
| 6 rs9274761   | 32638371 G | 15.74 | 6.54E-26 | chr:6:32648036 |
| 6 rs9274992   | 32642577 G | 17.98 | 7.06E-26 | chr:6:32648036 |
| 6 rs9274993   | 32642582 A | 17.98 | 7.06E-26 | chr:6:32648036 |
| 6 rs9274874   | 32640849 T | 6.547 | 7.12E-26 | chr:6:32648036 |
| 6 rs9275075   | 32648550 A | 22.13 | 7.82E-26 | chr:6:32648036 |
| 6 rs9275076   | 32648553 G | 22.13 | 7.82E-26 | chr:6:32648036 |
| 6 rs9274966   | 32642019 A | 10.48 | 8.06E-26 | chr:6:32648036 |
| 6 rs9274964   | 32641972 T | 9.676 | 8.09E-26 | chr:6:32648036 |
| 6 rs9275003   | 32642769 C | 22.09 | 8.15E-26 | chr:6:32648036 |
| 6 rs9275147   | 32651557 T | 19.05 | 8.64E-26 | chr:6:32648036 |
| 6 rs28371229  | 32647728 C | 4.505 | 8.72E-26 | chr:6:32648036 |
| 6 rs28371230  | 32647729 C | 4.505 | 8.72E-26 | chr:6:32648036 |
| 6 rs28371231  | 32647735 A | 4.505 | 8.72E-26 | chr:6:32648036 |
| 6 rs9274852   | 32640289 A | 10.31 | 9.86E-26 | chr:6:32648036 |
| 6 rs9274939   | 32641751 A | 9.316 | 9.99E-26 | chr:6:32648036 |
| 6 rs9274941   | 32641755 G | 9.073 | 1.37E-25 | chr:6:32648036 |
| 6 rs9275164   | 32652929 C | 16.89 | 1.37E-25 | chr:6:32648036 |
| 6 rs9275000   | 32642719 T | 25.18 | 1.41E-25 | chr:6:32648036 |
| 6 rs9274762   | 32638411 G | 17.96 | 1.47E-25 | chr:6:32648036 |
| 6 rs9274965   | 32641984 A | 9.337 | 1.59E-25 | chr:6:32648036 |
| 6 rs9274976   | 32642220 A | 24.48 | 1.61E-25 | chr:6:32648036 |
| 6 rs28371238  | 32647846 C | 4.511 | 1.85E-25 | chr:6:32648036 |
| 6 rs2858327   | 32658935 G | 12.56 | 1.85E-25 | chr:6:32648036 |

|              |            |       |          |                |
|--------------|------------|-------|----------|----------------|
| 6 rs3129713  | 32657255 T | 12.64 | 1.91E-25 | chr:6:32648036 |
| 6 rs3129715  | 32657281 T | 12.64 | 1.91E-25 | chr:6:32648036 |
| 6 rs7775228  | 32658079 C | 12.64 | 1.91E-25 | chr:6:32648036 |
| 6 rs9274948  | 32641847 T | 8.448 | 2.06E-25 | chr:6:32648036 |
| 6 rs9274876  | 32640864 G | 6.005 | 2.14E-25 | chr:6:32648036 |
| 6 rs9274981  | 32642313 G | 10.5  | 2.17E-25 | chr:6:32648036 |
| 6 rs9275030  | 32643351 T | 4.194 | 2.40E-25 | chr:6:32648036 |
| 6 rs9274818  | 32639624 G | 6.96  | 2.57E-25 | chr:6:32648036 |
| 6 rs9275205  | 32657560 C | 13.83 | 2.91E-25 | chr:6:32648036 |
| 6 rs9275077  | 32648565 C | 28.24 | 3.49E-25 | chr:6:32648036 |
| 6 rs9275179  | 32654275 G | 22.57 | 3.96E-25 | chr:6:32648036 |
| 6 rs9274821  | 32639670 G | 6.834 | 4.03E-25 | chr:6:32648036 |
| 6 rs9275166  | 32652963 C | 20.05 | 4.19E-25 | chr:6:32648036 |
| 6 rs9275025  | 32643303 T | 4.175 | 4.26E-25 | chr:6:32648036 |
| 6 rs9275079  | 32648614 C | 24.81 | 4.36E-25 | chr:6:32648036 |
| 6 rs9275080  | 32648627 T | 24.81 | 4.36E-25 | chr:6:32648036 |
| 6 rs9274816  | 32639621 A | 7.224 | 4.47E-25 | chr:6:32648036 |
| 6 rs9274817  | 32639623 T | 7.224 | 4.47E-25 | chr:6:32648036 |
| 6 rs9274826  | 32639725 A | 6.808 | 4.67E-25 | chr:6:32648036 |
| 6 rs9274827  | 32639726 T | 6.808 | 4.67E-25 | chr:6:32648036 |
| 6 rs9275083  | 32648694 C | 24.18 | 6.00E-25 | chr:6:32648036 |
| 6 rs9275165  | 32652956 G | 22.02 | 6.31E-25 | chr:6:32648036 |
| 6 rs9275159  | 32652607 T | 24.41 | 6.36E-25 | chr:6:32648036 |
| 6 rs9275028  | 32643328 C | 4.097 | 7.00E-25 | chr:6:32648036 |
| 6 rs2516006  | 32650268 C | 12.78 | 8.66E-25 | chr:6:32648036 |
| 6 rs9274979  | 32642280 T | 9.246 | 9.03E-25 | chr:6:32648036 |
| 6 rs9275029  | 32643336 A | 4.043 | 1.07E-24 | chr:6:32648036 |
| 6 rs9274716  | 32637404 A | 9.103 | 1.11E-24 | chr:6:32648036 |
| 6 rs9274989  | 32642424 A | 8.965 | 1.23E-24 | chr:6:32648036 |
| 6 rs9274823  | 32639695 T | 6.661 | 1.26E-24 | chr:6:32648036 |
| 6 rs9274728  | 32637772 G | 11.84 | 1.32E-24 | chr:6:32648036 |
| 6 rs9274982  | 32642335 A | 9.13  | 1.32E-24 | chr:6:32648036 |
| 6 rs9274983  | 32642337 C | 9.13  | 1.32E-24 | chr:6:32648036 |
| 6 rs9275026  | 32643318 T | 4.032 | 1.34E-24 | chr:6:32648036 |
| 6 rs9275027  | 32643320 C | 4.032 | 1.34E-24 | chr:6:32648036 |
| 6 rs9274688  | 32636900 T | 10.64 | 1.46E-24 | chr:6:32648036 |
| 6 rs9274825  | 32639710 C | 6.592 | 1.49E-24 | chr:6:32648036 |
| 6 rs1694122  | 32642845 G | 12.38 | 1.51E-24 | chr:6:32648036 |
| 6 rs9274975  | 32642187 G | 32.58 | 1.55E-24 | chr:6:32648036 |
| 6 rs9275144  | 32651218 A | 24.34 | 1.59E-24 | chr:6:32648036 |
| 6 rs28755322 | 32646455 A | 4.05  | 1.69E-24 | chr:6:32648036 |
| 6 rs9274727  | 32637696 G | 12.95 | 1.73E-24 | chr:6:32648036 |
| 6 rs9274699  | 32637096 A | 10.74 | 1.77E-24 | chr:6:32648036 |



|              |            |       |          |                |
|--------------|------------|-------|----------|----------------|
| 6 rs2647025  | 32635949 A | 11.79 | 1.81E-24 | chr:6:32648036 |
| 6 rs28755336 | 32646798 A | 5.914 | 1.84E-24 | chr:6:32648036 |
| 6 rs28755337 | 32646799 C | 5.914 | 1.84E-24 | chr:6:32648036 |
| 6 rs9274739  | 32637940 T | 11.1  | 2.17E-24 | chr:6:32648036 |
| 6 rs9275211  | 32657844 C | 11.87 | 2.26E-24 | chr:6:32648036 |
| 6 rs9274984  | 32642378 C | 8.532 | 2.45E-24 | chr:6:32648036 |
| 6 rs9274985  | 32642379 A | 8.532 | 2.45E-24 | chr:6:32648036 |
| 6 rs2856677  | 32656815 T | 27.65 | 2.50E-24 | chr:6:32648036 |
| 6 rs9275175  | 32654147 A | 13.47 | 2.88E-24 | chr:6:32648036 |
| 6 rs9275176  | 32654157 G | 13.47 | 2.88E-24 | chr:6:32648036 |
| 6 rs9274711  | 32637289 T | 7.627 | 3.32E-24 | chr:6:32648036 |
| 6 rs2856691  | 32653435 A | 26.32 | 3.48E-24 | chr:6:32648036 |
| 6 rs28371232 | 32647761 T | 3.979 | 4.08E-24 | chr:6:32648036 |
| 6 rs28371233 | 32647762 G | 3.979 | 4.08E-24 | chr:6:32648036 |
| 6 rs9275004  | 32642839 G | 30.86 | 4.28E-24 | chr:6:32648036 |
| 6 rs9275006  | 32642852 T | 30.86 | 4.28E-24 | chr:6:32648036 |
| 6 rs9274700  | 32637180 G | 8.604 | 4.31E-24 | chr:6:32648036 |
| 6 rs9274735  | 32637896 A | 7.991 | 4.31E-24 | chr:6:32648036 |
| 6 rs9274947  | 32641832 A | 7.338 | 4.34E-24 | chr:6:32648036 |
| 6 rs9275149  | 32651616 T | 30.69 | 4.48E-24 | chr:6:32648036 |
| 6 rs9275150  | 32651617 G | 30.69 | 4.48E-24 | chr:6:32648036 |
| 6 rs9275171  | 32653972 G | 14.26 | 6.42E-24 | chr:6:32648036 |
| 6 rs17205373 | 32626210 G | 10.61 | 6.62E-24 | chr:6:32648036 |
| 6 rs685810   | 32584952 G | 8.519 | 8.08E-24 | chr:6:32648036 |
| 6 rs28755321 | 32646451 T | 4.106 | 8.20E-24 | chr:6:32648036 |
| 6 rs28371234 | 32647779 A | 3.909 | 8.96E-24 | chr:6:32648036 |
| 6 rs28371235 | 32647786 G | 3.909 | 8.96E-24 | chr:6:32648036 |
| 6 rs9274709  | 32637275 G | 7.063 | 9.15E-24 | chr:6:32648036 |
| 6 rs9274742  | 32638037 C | 35.26 | 9.50E-24 | chr:6:32648036 |
| 6 rs9274704  | 32637213 G | 7.757 | 9.54E-24 | chr:6:32648036 |
| 6 rs9274925  | 32641411 T | 4.099 | 1.04E-23 | chr:6:32648036 |
| 6 rs2647082  | 32628146 A | 6.832 | 1.15E-23 | chr:6:32648036 |
| 6 rs3021062  | 32651741 T | 34.57 | 1.17E-23 | chr:6:32648036 |
| 6 rs7750477  | 32651707 G | 34.57 | 1.17E-23 | chr:6:32648036 |
| 6 rs9274945  | 32641796 C | 6.804 | 1.33E-23 | chr:6:32648036 |
| 6 rs28755320 | 32646449 C | 4.045 | 1.53E-23 | chr:6:32648036 |
| 6 rs2647045  | 32668100 A | 27.98 | 1.59E-23 | chr:6:32648036 |
| 6 rs9274737  | 32637907 C | 7.217 | 1.62E-23 | chr:6:32648036 |
| 6 rs9274924  | 32641403 T | 4.17  | 1.67E-23 | chr:6:32648036 |
| 6 rs9274706  | 32637265 G | 6.583 | 1.71E-23 | chr:6:32648036 |
| 6 rs9275140  | 32651018 A | 34.09 | 1.84E-23 | chr:6:32648036 |
| 6 rs2856683  | 32655218 G | 33.63 | 1.88E-23 | chr:6:32648036 |
| 6 rs9274882  | 32641066 T | 4.573 | 1.88E-23 | chr:6:32648036 |

|              |            |       |          |                |
|--------------|------------|-------|----------|----------------|
| 6 rs9275115  | 32649941 C | 33.76 | 2.12E-23 | chr:6:32648036 |
| 6 rs3104362  | 32656697 G | 33.13 | 2.34E-23 | chr:6:32648036 |
| 6 rs28755355 | 32647058 C | 5.145 | 2.65E-23 | chr:6:32648036 |
| 6 rs28755358 | 32647062 A | 5.145 | 2.65E-23 | chr:6:32648036 |
| 6 rs28755359 | 32647064 T | 5.145 | 2.65E-23 | chr:6:32648036 |
| 6 rs28755319 | 32646445 C | 3.852 | 2.74E-23 | chr:6:32648036 |
| 6 rs9275068  | 32648418 C | 10.4  | 3.19E-23 | chr:6:32648036 |
| 6 rs28371236 | 32647803 G | 3.817 | 3.44E-23 | chr:6:32648036 |
| 6 rs9274963  | 32641942 C | 6.616 | 4.01E-23 | chr:6:32648036 |
| 6 rs28371237 | 32647816 G | 3.81  | 4.18E-23 | chr:6:32648036 |
| 6 rs28752526 | 32584918 G | 7.731 | 4.27E-23 | chr:6:32648036 |
| 6 rs9274958  | 32641915 G | 6.17  | 4.99E-23 | chr:6:32648036 |
| 6 rs9274959  | 32641916 C | 6.17  | 4.99E-23 | chr:6:32648036 |
| 6 rs9274960  | 32641917 A | 6.17  | 4.99E-23 | chr:6:32648036 |
| 6 rs9275127  | 32650314 T | 38.29 | 5.83E-23 | chr:6:32648036 |
| 6 rs9275181  | 32654325 G | 39    | 6.08E-23 | chr:6:32648036 |
| 6 rs28755318 | 32646416 T | 3.825 | 6.35E-23 | chr:6:32648036 |
| 6 rs9275121  | 32650185 G | 38.33 | 6.51E-23 | chr:6:32648036 |
| 6 rs9275122  | 32650233 C | 38.33 | 6.51E-23 | chr:6:32648036 |
| 6 rs9275110  | 32649723 C | 38.51 | 6.58E-23 | chr:6:32648036 |
| 6 rs9275111  | 32649735 T | 38.51 | 6.58E-23 | chr:6:32648036 |
| 6 rs9275113  | 32649825 G | 38.51 | 6.58E-23 | chr:6:32648036 |
| 6 rs9275117  | 32649965 T | 38.43 | 6.90E-23 | chr:6:32648036 |
| 6 rs9275182  | 32654390 T | 38.29 | 7.14E-23 | chr:6:32648036 |
| 6 rs9274950  | 32641864 T | 6.152 | 8.48E-23 | chr:6:32648036 |
| 6 rs9274712  | 32637298 T | 6.111 | 1.12E-22 | chr:6:32648036 |
| 6 rs9275100  | 32649308 G | 44.97 | 1.90E-22 | chr:6:32648036 |
| 6 rs4947340  | 32435338 T | 7.568 | 2.04E-22 | chr:6:32648036 |
| 6 rs9275093  | 32649047 T | 44.54 | 2.20E-22 | chr:6:32648036 |
| 6 rs9275094  | 32649062 C | 44.54 | 2.20E-22 | chr:6:32648036 |
| 6 rs9275096  | 32649096 T | 44.54 | 2.20E-22 | chr:6:32648036 |
| 6 rs3021060  | 32651846 C | 45    | 2.21E-22 | chr:6:32648036 |
| 6 rs3021061  | 32651839 G | 45    | 2.21E-22 | chr:6:32648036 |
| 6 rs9275104  | 32649388 C | 44.84 | 2.22E-22 | chr:6:32648036 |
| 6 rs9275107  | 32649508 G | 44.84 | 2.22E-22 | chr:6:32648036 |
| 6 rs9275108  | 32649609 A | 44.84 | 2.22E-22 | chr:6:32648036 |
| 6 rs2856688  | 32654640 T | 45.29 | 2.38E-22 | chr:6:32648036 |
| 6 rs3129785  | 32656724 T | 44.45 | 2.43E-22 | chr:6:32648036 |
| 6 rs9275090  | 32648971 G | 44.05 | 2.48E-22 | chr:6:32648036 |
| 6 rs2856692  | 32653385 G | 44.47 | 2.73E-22 | chr:6:32648036 |
| 6 rs4947342  | 32653070 A | 44.47 | 2.73E-22 | chr:6:32648036 |
| 6 rs9275132  | 32650500 A | 44.47 | 2.73E-22 | chr:6:32648036 |
| 6 rs9275134  | 32650612 G | 44.47 | 2.73E-22 | chr:6:32648036 |

|               |            |       |          |                |
|---------------|------------|-------|----------|----------------|
| 6 rs9275137   | 32650880 C | 43.95 | 2.80E-22 | chr:6:32648036 |
| 6 rs9272316   | 32604050 T | 5.837 | 3.76E-22 | chr:6:32648036 |
| 6 rs9274884   | 32641078 C | 4.17  | 3.81E-22 | chr:6:32648036 |
| 6 rs9274885   | 32641081 T | 4.17  | 3.81E-22 | chr:6:32648036 |
| 6 rs1048027   | 32609169 C | 5.21  | 3.92E-22 | chr:6:32648036 |
| 6 rs9275187   | 32656038 C | 4.459 | 4.70E-22 | chr:6:32648036 |
| 6 rs9274777   | 32638686 G | 4.173 | 4.87E-22 | chr:6:32648036 |
| 6 rs9274783   | 32638816 G | 4.171 | 5.70E-22 | chr:6:32648036 |
| 6 rs9274893   | 32641165 T | 3.846 | 8.41E-22 | chr:6:32648036 |
| 6 rs9274888   | 32641142 A | 3.885 | 9.42E-22 | chr:6:32648036 |
| 6 rs9274890   | 32641148 A | 3.875 | 1.00E-21 | chr:6:32648036 |
| 6 rs9274892   | 32641161 G | 3.785 | 1.63E-21 | chr:6:32648036 |
| 6 rs9274880   | 32641011 G | 4.06  | 3.59E-21 | chr:6:32648036 |
| 6 rs28371247  | 32648003 C | 5.886 | 4.32E-21 | chr:6:32648036 |
| 6 rs9274894   | 32641180 G | 3.661 | 4.39E-21 | chr:6:32648036 |
| 6 rs7774434   | 32657578 C | 6.321 | 1.06E-20 | chr:6:32648036 |
| 6 rs9275190   | 32656228 G | 4.036 | 1.20E-20 | chr:6:32648036 |
| 6 rs9275191   | 32656235 C | 4.036 | 1.20E-20 | chr:6:32648036 |
| 6 rs9275194   | 32656334 C | 4.027 | 1.31E-20 | chr:6:32648036 |
| 6 rs9274935   | 32641580 C | 3.714 | 1.34E-20 | chr:6:32648036 |
| 6 rs9274748   | 32638086 A | 4.701 | 1.57E-20 | chr:6:32648036 |
| 6 rs9274749   | 32638094 A | 4.703 | 1.73E-20 | chr:6:32648036 |
| 6 rs28383432  | 32608880 A | 4.172 | 1.74E-20 | chr:6:32648036 |
| 6 rs9274897   | 32641195 C | 3.457 | 1.74E-20 | chr:6:32648036 |
| 6 rs28383400  | 32607950 A | 4.147 | 3.63E-20 | chr:6:32648036 |
| 6 rs570919834 | 32481691 T | 7.865 | 4.89E-20 | chr:6:32648036 |
| 6 rs113534515 | 32460798 C | 6.249 | 7.09E-20 | chr:6:32648036 |
| 6 rs370787440 | 32521596 G | 4.737 | 7.24E-20 | chr:6:32648036 |
| 6 rs373804788 | 32521591 T | 4.737 | 7.24E-20 | chr:6:32648036 |
| 6 rs534819727 | 32481692 T | 7.695 | 7.66E-20 | chr:6:32648036 |
| 6 rs1049087   | 32629889 A | 5.671 | 8.61E-20 | chr:6:32648036 |
| 6 rs535852    | 32577604 T | 5.397 | 1.09E-19 | chr:6:32648036 |
| 6 rs9274937   | 32641631 A | 3.724 | 1.11E-19 | chr:6:32648036 |
| 6 rs546788946 | 32511223 A | 3.897 | 1.18E-19 | chr:6:32648036 |
| 6 rs3129774   | 32603825 T | 4.49  | 1.23E-19 | chr:6:32648036 |
| 6 rs116448083 | 32486973 G | 3.533 | 1.37E-19 | chr:6:32648036 |
| 6 rs9272358   | 32604538 A | 4.086 | 1.41E-19 | chr:6:32648036 |
| 6 rs62405588  | 32508468 G | 3.947 | 1.42E-19 | chr:6:32648036 |
| 6 rs9274730   | 32637817 A | 4.463 | 1.45E-19 | chr:6:32648036 |
| 6 rs9274731   | 32637823 G | 4.463 | 1.45E-19 | chr:6:32648036 |
| 6 rs9272492   | 32606052 G | 4.448 | 1.52E-19 | chr:6:32648036 |
| 6 rs180852758 | 32459251 G | 6.049 | 1.53E-19 | chr:6:32648036 |
| 6 rs9274928   | 32641484 T | 3.538 | 1.54E-19 | chr:6:32648036 |

|               |            |       |          |                |
|---------------|------------|-------|----------|----------------|
| 6 rs112956435 | 32519929 C | 4.496 | 1.99E-19 | chr:6:32648036 |
| 6 rs9275188   | 32656136 T | 4.064 | 2.03E-19 | chr:6:32648036 |
| 6 rs9275189   | 32656137 G | 4.064 | 2.03E-19 | chr:6:32648036 |
| 6 rs111621461 | 32520050 T | 4.461 | 2.04E-19 | chr:6:32648036 |
| 6 rs77495163  | 32517859 G | 4.457 | 2.36E-19 | chr:6:32648036 |
| 6 rs79890132  | 32517668 A | 4.497 | 2.38E-19 | chr:6:32648036 |
| 6 rs112654908 | 32519968 C | 4.465 | 2.43E-19 | chr:6:32648036 |
| 6 rs111410640 | 32521831 A | 4.476 | 2.45E-19 | chr:6:32648036 |
| 6 rs9273508   | 32628439 A | 5.09  | 2.56E-19 | chr:6:32648036 |
| 6 rs190411898 | 32511180 T | 3.841 | 2.62E-19 | chr:6:32648036 |
| 6 rs116384190 | 32520337 G | 4.464 | 2.63E-19 | chr:6:32648036 |
| 6 rs1770      | 32627833 G | 5.32  | 2.72E-19 | chr:6:32648036 |
| 6 rs62405589  | 32508516 G | 3.744 | 3.00E-19 | chr:6:32648036 |
| 6 rs111432098 | 32520940 G | 4.48  | 3.04E-19 | chr:6:32648036 |
| 6 rs113484779 | 32514162 T | 4.48  | 3.04E-19 | chr:6:32648036 |
| 6 rs3828849   | 32520664 A | 4.48  | 3.04E-19 | chr:6:32648036 |
| 6 rs77506702  | 32518704 G | 4.48  | 3.04E-19 | chr:6:32648036 |
| 6 rs9391784   | 32436545 C | 4.212 | 3.25E-19 | chr:6:32648036 |
| 6 rs113182435 | 32518236 A | 4.157 | 3.68E-19 | chr:6:32648036 |
| 6 rs113686014 | 32509551 A | 4.42  | 4.04E-19 | chr:6:32648036 |
| 6 rs3200830   | 32520774 T | 4.44  | 4.09E-19 | chr:6:32648036 |
| 6 rs62405631  | 32514500 C | 4.399 | 4.14E-19 | chr:6:32648036 |
| 6 rs75170544  | 32513285 T | 4.413 | 4.34E-19 | chr:6:32648036 |
| 6 rs201639066 | 32516705 T | 4.358 | 4.41E-19 | chr:6:32648036 |
| 6 rs62405638  | 32516715 T | 4.358 | 4.41E-19 | chr:6:32648036 |
| 6 rs62405639  | 32516724 C | 4.358 | 4.41E-19 | chr:6:32648036 |
| 6 rs9268833   | 32428062 T | 5.59  | 4.42E-19 | chr:6:32648036 |
| 6 rs9268838   | 32428715 A | 5.59  | 4.42E-19 | chr:6:32648036 |
| 6 rs9378210   | 32436518 G | 4.163 | 4.63E-19 | chr:6:32648036 |
| 6 rs149690859 | 32511135 A | 3.764 | 4.77E-19 | chr:6:32648036 |
| 6 rs2647002   | 32657082 G | 11.84 | 4.78E-19 | chr:6:32648036 |
| 6 rs113096063 | 32503161 T | 4.113 | 4.81E-19 | chr:6:32648036 |
| 6 rs113528607 | 32500928 G | 4.27  | 4.85E-19 | chr:6:32648036 |
| 6 rs113521434 | 32520460 T | 4.371 | 5.02E-19 | chr:6:32648036 |
| 6 rs3828851   | 32520621 A | 4.31  | 5.28E-19 | chr:6:32648036 |
| 6 rs557371502 | 32520639 A | 4.306 | 5.29E-19 | chr:6:32648036 |
| 6 rs113351668 | 32503167 A | 4.112 | 5.42E-19 | chr:6:32648036 |
| 6 rs9273471   | 32628030 A | 5.146 | 5.47E-19 | chr:6:32648036 |
| 6 rs9269014   | 32436529 A | 4.149 | 5.60E-19 | chr:6:32648036 |
| 6 rs113961302 | 32514219 G | 4.445 | 5.69E-19 | chr:6:32648036 |
| 6 rs9268834   | 32428079 A | 5.535 | 5.76E-19 | chr:6:32648036 |
| 6 rs9268835   | 32428115 A | 5.535 | 5.76E-19 | chr:6:32648036 |
| 6 rs78733108  | 32517511 G | 4.578 | 5.85E-19 | chr:6:32648036 |

|               |            |       |          |                |
|---------------|------------|-------|----------|----------------|
| 6 rs34481656  | 32501664 G | 4.334 | 5.92E-19 | chr:6:32648036 |
| 6 rs57588792  | 32510012 A | 4.352 | 5.93E-19 | chr:6:32648036 |
| 6 rs12192514  | 32674240 T | 10.96 | 6.00E-19 | chr:6:32648036 |
| 6 rs16898262  | 32677397 G | 10.96 | 6.00E-19 | chr:6:32648036 |
| 6 rs17212616  | 32674617 A | 10.96 | 6.00E-19 | chr:6:32648036 |
| 6 rs2647049   | 32672681 A | 10.96 | 6.00E-19 | chr:6:32648036 |
| 6 rs28371270  | 32674296 G | 10.96 | 6.00E-19 | chr:6:32648036 |
| 6 rs28371272  | 32674440 C | 10.96 | 6.00E-19 | chr:6:32648036 |
| 6 rs28371273  | 32674442 C | 10.96 | 6.00E-19 | chr:6:32648036 |
| 6 rs28371274  | 32674558 C | 10.96 | 6.00E-19 | chr:6:32648036 |
| 6 rs2856705   | 32670956 T | 10.96 | 6.00E-19 | chr:6:32648036 |
| 6 rs2858308   | 32670000 T | 10.96 | 6.00E-19 | chr:6:32648036 |
| 6 rs199882626 | 32517752 A | 4.33  | 6.26E-19 | chr:6:32648036 |
| 6 rs536810    | 32577497 T | 4.908 | 6.38E-19 | chr:6:32648036 |
| 6 rs28371265  | 32659263 C | 11.28 | 6.41E-19 | chr:6:32648036 |
| 6 rs10456068  | 32659419 C | 11.39 | 6.63E-19 | chr:6:32648036 |
| 6 rs17206238  | 32665761 T | 11.39 | 6.63E-19 | chr:6:32648036 |
| 6 rs1794495   | 32649347 C | 11.39 | 6.63E-19 | chr:6:32648036 |
| 6 rs1794497   | 32649180 C | 11.39 | 6.63E-19 | chr:6:32648036 |
| 6 rs2646994   | 32665813 T | 11.39 | 6.63E-19 | chr:6:32648036 |
| 6 rs2646995   | 32650492 A | 11.39 | 6.63E-19 | chr:6:32648036 |
| 6 rs2647005   | 32664760 G | 11.39 | 6.63E-19 | chr:6:32648036 |
| 6 rs2647007   | 32664677 G | 11.39 | 6.63E-19 | chr:6:32648036 |
| 6 rs2647008   | 32661515 C | 11.39 | 6.63E-19 | chr:6:32648036 |
| 6 rs2647009   | 32661615 A | 11.39 | 6.63E-19 | chr:6:32648036 |
| 6 rs2647010   | 32661641 G | 11.39 | 6.63E-19 | chr:6:32648036 |
| 6 rs2647014   | 32664279 T | 11.39 | 6.63E-19 | chr:6:32648036 |
| 6 rs2647015   | 32664093 G | 11.39 | 6.63E-19 | chr:6:32648036 |
| 6 rs2647017   | 32663772 G | 11.39 | 6.63E-19 | chr:6:32648036 |
| 6 rs28371252  | 32653732 A | 11.39 | 6.63E-19 | chr:6:32648036 |
| 6 rs28371254  | 32657452 C | 11.39 | 6.63E-19 | chr:6:32648036 |
| 6 rs28371258  | 32658513 C | 11.39 | 6.63E-19 | chr:6:32648036 |
| 6 rs28371267  | 32663578 T | 11.39 | 6.63E-19 | chr:6:32648036 |
| 6 rs2856669   | 32663360 A | 11.39 | 6.63E-19 | chr:6:32648036 |
| 6 rs2856673   | 32659822 T | 11.39 | 6.63E-19 | chr:6:32648036 |
| 6 rs2856682   | 32655405 T | 11.39 | 6.63E-19 | chr:6:32648036 |
| 6 rs2858303   | 32650550 C | 11.39 | 6.63E-19 | chr:6:32648036 |
| 6 rs2858313   | 32663919 G | 11.39 | 6.63E-19 | chr:6:32648036 |
| 6 rs3021175   | 32651404 C | 11.39 | 6.63E-19 | chr:6:32648036 |
| 6 rs74379773  | 32662724 C | 11.39 | 6.63E-19 | chr:6:32648036 |
| 6 rs9274693   | 32636972 T | 3.714 | 6.66E-19 | chr:6:32648036 |
| 6 rs78450703  | 32513216 T | 4.307 | 6.87E-19 | chr:6:32648036 |
| 6 rs9272362   | 32604564 T | 3.92  | 7.09E-19 | chr:6:32648036 |

|               |            |       |          |                |
|---------------|------------|-------|----------|----------------|
| 6 rs9274778   | 32638694 A | 4.052 | 7.16E-19 | chr:6:32648036 |
| 6 rs111484816 | 32509034 G | 4.521 | 7.19E-19 | chr:6:32648036 |
| 6 rs75635252  | 32509332 G | 4.28  | 7.33E-19 | chr:6:32648036 |
| 6 rs9274903   | 32641221 A | 3.169 | 8.02E-19 | chr:6:32648036 |
| 6 rs59350153  | 32509935 T | 4.236 | 8.27E-19 | chr:6:32648036 |
| 6 rs9274864   | 32640646 G | 4.057 | 8.44E-19 | chr:6:32648036 |
| 6 rs114954902 | 32517768 A | 4.238 | 8.49E-19 | chr:6:32648036 |
| 6 rs111897614 | 32503177 T | 4.048 | 9.14E-19 | chr:6:32648036 |
| 6 rs9272380   | 32604732 A | 3.582 | 9.17E-19 | chr:6:32648036 |
| 6 rs79005639  | 32510582 C | 4.142 | 9.56E-19 | chr:6:32648036 |
| 6 rs111899294 | 32517912 C | 5.165 | 9.83E-19 | chr:6:32648036 |
| 6 rs112895453 | 32510602 G | 4.069 | 9.84E-19 | chr:6:32648036 |
| 6 rs77048791  | 32503986 T | 4.099 | 1.03E-18 | chr:6:32648036 |
| 6 rs115754308 | 32518466 T | 4.216 | 1.04E-18 | chr:6:32648036 |
| 6 rs189139309 | 32516915 G | 4.109 | 1.06E-18 | chr:6:32648036 |
| 6 rs113586210 | 32517050 T | 4.044 | 1.11E-18 | chr:6:32648036 |
| 6 rs2856680   | 32655606 G | 11.05 | 1.11E-18 | chr:6:32648036 |
| 6 rs62405630  | 32513942 T | 4.356 | 1.11E-18 | chr:6:32648036 |
| 6 rs78055135  | 32517412 A | 4.069 | 1.11E-18 | chr:6:32648036 |
| 6 rs62405629  | 32513885 T | 4.364 | 1.14E-18 | chr:6:32648036 |
| 6 rs138825368 | 32518375 A | 4.248 | 1.16E-18 | chr:6:32648036 |
| 6 rs200330306 | 32496048 A | 3.026 | 1.23E-18 | chr:6:32648036 |
| 6 rs2858325   | 32660366 G | 11.01 | 1.23E-18 | chr:6:32648036 |
| 6 rs549070097 | 32516282 G | 4.214 | 1.24E-18 | chr:6:32648036 |
| 6 rs28772724  | 32509357 T | 4.242 | 1.27E-18 | chr:6:32648036 |
| 6 rs79957603  | 32509348 A | 4.242 | 1.27E-18 | chr:6:32648036 |
| 6 rs9274691   | 32636957 C | 3.586 | 1.29E-18 | chr:6:32648036 |
| 6 rs9274692   | 32636958 A | 3.586 | 1.29E-18 | chr:6:32648036 |
| 6 rs9274773   | 32638620 G | 4.047 | 1.31E-18 | chr:6:32648036 |
| 6 rs9274774   | 32638630 G | 4.047 | 1.31E-18 | chr:6:32648036 |
| 6 rs3210176   | 32627850 C | 3.984 | 1.34E-18 | chr:6:32648036 |
| 6 rs202038991 | 32509105 C | 4.552 | 1.36E-18 | chr:6:32648036 |
| 6 rs9274697   | 32637016 G | 4.256 | 1.37E-18 | chr:6:32648036 |
| 6 rs62405594  | 32512218 T | 3.62  | 1.40E-18 | chr:6:32648036 |
| 6 rs9275195   | 32656405 C | 3.949 | 1.40E-18 | chr:6:32648036 |
| 6 rs9275196   | 32656406 A | 3.949 | 1.40E-18 | chr:6:32648036 |
| 6 rs9274855   | 32640494 A | 4.048 | 1.46E-18 | chr:6:32648036 |
| 6 rs62405598  | 32513708 C | 4.337 | 1.46E-18 | chr:6:32648036 |
| 6 rs9378165   | 32510651 G | 4.01  | 1.48E-18 | chr:6:32648036 |
| 6 rs9272744   | 32609746 T | 4.4   | 1.49E-18 | chr:6:32648036 |
| 6 rs111343881 | 32521022 C | 4.844 | 1.56E-18 | chr:6:32648036 |
| 6 rs79508322  | 32512049 A | 4.28  | 1.58E-18 | chr:6:32648036 |
| 6 rs9274865   | 32640671 T | 3.956 | 1.59E-18 | chr:6:32648036 |

|               |            |        |          |                |
|---------------|------------|--------|----------|----------------|
| 6 rs28383169  | 32565652 G | 4.536  | 1.64E-18 | chr:6:32648036 |
| 6 rs28366212  | 32557259 T | 4.499  | 1.80E-18 | chr:6:32648036 |
| 6 rs28366213  | 32557263 A | 4.499  | 1.80E-18 | chr:6:32648036 |
| 6 rs9272365   | 32604621 C | 3.701  | 1.83E-18 | chr:6:32648036 |
| 6 rs78539884  | 32513224 A | 4.313  | 1.87E-18 | chr:6:32648036 |
| 6 rs540527828 | 32459250 T | 5.394  | 1.88E-18 | chr:6:32648036 |
| 6 rs9272733   | 32609652 A | 4.338  | 1.92E-18 | chr:6:32648036 |
| 6 rs9272734   | 32609654 A | 4.338  | 1.92E-18 | chr:6:32648036 |
| 6 rs9272735   | 32609655 G | 4.338  | 1.92E-18 | chr:6:32648036 |
| 6 rs79207037  | 32509294 A | 4.135  | 1.93E-18 | chr:6:32648036 |
| 6 rs9274861   | 32640592 G | 3.807  | 1.95E-18 | chr:6:32648036 |
| 6 rs112360905 | 32509019 G | 4.422  | 2.02E-18 | chr:6:32648036 |
| 6 rs9274906   | 32641252 A | 3.06   | 2.04E-18 | chr:6:32648036 |
| 6 rs74768610  | 32509868 C | 4.056  | 2.05E-18 | chr:6:32648036 |
| 6 rs79215033  | 32509858 G | 4.056  | 2.05E-18 | chr:6:32648036 |
| 6 rs74324877  | 32517782 C | 4.13   | 2.06E-18 | chr:6:32648036 |
| 6 rs79293578  | 32503561 T | 3.763  | 2.16E-18 | chr:6:32648036 |
| 6 rs111797109 | 32511650 T | 4.159  | 2.18E-18 | chr:6:32648036 |
| 6 rs62405591  | 32508704 A | 4.378  | 2.20E-18 | chr:6:32648036 |
| 6 rs200289570 | 32491687 T | 3.098  | 2.22E-18 | chr:6:32648036 |
| 6 rs113459411 | 32521026 G | 4.749  | 2.25E-18 | chr:6:32648036 |
| 6 rs147317423 | 32516905 T | 4.009  | 2.26E-18 | chr:6:32648036 |
| 6 rs3997832   | 32637497 C | 4.396  | 2.31E-18 | chr:6:32648036 |
| 6 rs9271406   | 32587588 A | 0.2011 | 2.31E-18 | chr:6:32648036 |
| 6 rs202187184 | 32519848 C | 4.239  | 2.34E-18 | chr:6:32648036 |
| 6 rs530790448 | 32519846 T | 4.239  | 2.34E-18 | chr:6:32648036 |
| 6 rs551468481 | 32518258 G | 3.932  | 2.40E-18 | chr:6:32648036 |
| 6 rs370791576 | 32517082 A | 4.045  | 2.41E-18 | chr:6:32648036 |
| 6 rs140590517 | 32518282 A | 3.93   | 2.42E-18 | chr:6:32648036 |
| 6 rs112177836 | 32503658 A | 3.829  | 2.52E-18 | chr:6:32648036 |
| 6 rs9274790   | 32639155 G | 3.791  | 2.55E-18 | chr:6:32648036 |
| 6 rs375350961 | 32521793 G | 4.496  | 2.59E-18 | chr:6:32648036 |
| 6 rs183652197 | 32558706 C | 3.252  | 2.61E-18 | chr:6:32648036 |
| 6 rs9274717   | 32637454 A | 4.224  | 2.67E-18 | chr:6:32648036 |
| 6 rs28383356  | 32606646 C | 3.39   | 2.79E-18 | chr:6:32648036 |
| 6 rs9275318   | 32666173 G | 7.759  | 2.84E-18 | chr:6:32648036 |
| 6 rs9275319   | 32666295 G | 7.759  | 2.84E-18 | chr:6:32648036 |
| 6 rs9275183   | 32654502 G | 7.698  | 2.86E-18 | chr:6:32648036 |
| 6 rs2856697   | 32673230 T | 10.56  | 3.00E-18 | chr:6:32648036 |
| 6 rs28755392  | 32678021 C | 10.56  | 3.00E-18 | chr:6:32648036 |
| 6 rs2858323   | 32660707 T | 10.49  | 3.06E-18 | chr:6:32648036 |
| 6 rs58537387  | 32510176 T | 3.754  | 3.08E-18 | chr:6:32648036 |
| 6 rs111403760 | 32517303 C | 4.057  | 3.10E-18 | chr:6:32648036 |

|               |            |       |          |                |
|---------------|------------|-------|----------|----------------|
| 6 rs17212846  | 32675581 T | 10.45 | 3.23E-18 | chr:6:32648036 |
| 6 rs9274853   | 32640420 A | 4.037 | 3.23E-18 | chr:6:32648036 |
| 6 rs116254278 | 32521312 A | 4.687 | 3.28E-18 | chr:6:32648036 |
| 6 rs17211713  | 32626179 C | 11    | 3.30E-18 | chr:6:32648036 |
| 6 rs2133037   | 32667596 A | 11    | 3.30E-18 | chr:6:32648036 |
| 6 rs9272463   | 32605646 G | 4.47  | 3.39E-18 | chr:6:32648036 |
| 6 rs9272485   | 32605972 G | 4.264 | 3.45E-18 | chr:6:32648036 |
| 6 rs2858316   | 32662501 T | 10.45 | 3.50E-18 | chr:6:32648036 |
| 6 rs77339454  | 32503567 A | 3.749 | 3.56E-18 | chr:6:32648036 |
| 6 rs111838566 | 32517727 G | 4.492 | 3.73E-18 | chr:6:32648036 |
| 6 rs9274836   | 32639956 A | 4.034 | 3.79E-18 | chr:6:32648036 |
| 6 rs646984    | 32576592 C | 4.438 | 3.86E-18 | chr:6:32648036 |
| 6 rs9274696   | 32637007 C | 3.962 | 3.96E-18 | chr:6:32648036 |
| 6 rs76752213  | 32509416 A | 4.246 | 4.01E-18 | chr:6:32648036 |
| 6 rs150165719 | 32579868 T | 4.973 | 4.02E-18 | chr:6:32648036 |
| 6 rs113623173 | 32510438 T | 3.793 | 4.05E-18 | chr:6:32648036 |
| 6 rs111343297 | 32520080 G | 4.611 | 4.06E-18 | chr:6:32648036 |
| 6 rs113453333 | 32522490 A | 4.48  | 4.34E-18 | chr:6:32648036 |
| 6 rs111409670 | 32518069 C | 4.848 | 4.39E-18 | chr:6:32648036 |
| 6 rs2856696   | 32651868 T | 10.88 | 4.45E-18 | chr:6:32648036 |
| 6 rs9274751   | 32638138 C | 3.856 | 4.51E-18 | chr:6:32648036 |
| 6 rs74323244  | 32503921 C | 3.87  | 4.52E-18 | chr:6:32648036 |
| 6 rs502803    | 32578958 A | 4.981 | 4.52E-18 | chr:6:32648036 |
| 6 rs9274743   | 32638042 G | 4.525 | 4.62E-18 | chr:6:32648036 |
| 6 rs1049124   | 32627713 A | 10.85 | 4.66E-18 | chr:6:32648036 |
| 6 rs9274740   | 32637968 T | 4.8   | 4.96E-18 | chr:6:32648036 |
| 6 rs9274763   | 32638427 T | 4.029 | 5.03E-18 | chr:6:32648036 |
| 6 rs9274746   | 32638060 A | 4.402 | 5.14E-18 | chr:6:32648036 |
| 6 rs659244    | 32577033 C | 4.201 | 5.15E-18 | chr:6:32648036 |
| 6 rs3104419   | 32580136 T | 4.979 | 5.15E-18 | chr:6:32648036 |
| 6 rs78232591  | 32458419 T | 3.11  | 5.20E-18 | chr:6:32648036 |
| 6 rs9272731   | 32609645 C | 4.438 | 5.25E-18 | chr:6:32648036 |
| 6 rs9272732   | 32609647 G | 4.438 | 5.25E-18 | chr:6:32648036 |
| 6 rs9469143   | 32454232 C | 5.03  | 5.34E-18 | chr:6:32648036 |
| 6 rs9274921   | 32641341 T | 2.964 | 5.47E-18 | chr:6:32648036 |
| 6 rs9274752   | 32638163 A | 3.855 | 5.51E-18 | chr:6:32648036 |
| 6 rs12523808  | 32579775 T | 4.971 | 5.51E-18 | chr:6:32648036 |
| 6 rs13208027  | 32579743 A | 4.971 | 5.51E-18 | chr:6:32648036 |
| 6 rs9274753   | 32638176 T | 3.854 | 5.55E-18 | chr:6:32648036 |
| 6 rs113422598 | 32626508 T | 10.58 | 5.55E-18 | chr:6:32648036 |
| 6 rs17211741  | 32626346 A | 10.58 | 5.55E-18 | chr:6:32648036 |
| 6 rs2647032   | 32629905 C | 10.58 | 5.55E-18 | chr:6:32648036 |
| 6 rs79638487  | 32626664 A | 10.58 | 5.55E-18 | chr:6:32648036 |



|               |            |        |          |                |
|---------------|------------|--------|----------|----------------|
| 6 rs28366268  | 32559874 G | 4.127  | 5.56E-18 | chr:6:32648036 |
| 6 rs9274771   | 32638581 C | 3.939  | 5.78E-18 | chr:6:32648036 |
| 6 rs9274772   | 32638583 C | 3.939  | 5.78E-18 | chr:6:32648036 |
| 6 rs9274744   | 32638054 A | 4.401  | 5.80E-18 | chr:6:32648036 |
| 6 rs9272736   | 32609671 A | 3.832  | 5.89E-18 | chr:6:32648036 |
| 6 rs9272737   | 32609673 A | 3.832  | 5.89E-18 | chr:6:32648036 |
| 6 rs115888968 | 32521309 G | 4.496  | 5.92E-18 | chr:6:32648036 |
| 6 rs647035    | 32576626 A | 4.41   | 6.06E-18 | chr:6:32648036 |
| 6 rs5021726   | 32578481 C | 4.973  | 6.08E-18 | chr:6:32648036 |
| 6 rs532098    | 32578052 A | 4.973  | 6.08E-18 | chr:6:32648036 |
| 6 rs199884023 | 32639449 A | 3.706  | 6.28E-18 | chr:6:32648036 |
| 6 rs2076523   | 32370835 C | 4.825  | 6.45E-18 | chr:6:32648036 |
| 6 rs3806156   | 32373698 T | 4.825  | 6.45E-18 | chr:6:32648036 |
| 6 rs2856665   | 32665597 G | 10.74  | 6.48E-18 | chr:6:32648036 |
| 6 rs9274846   | 32640142 T | 3.45   | 6.50E-18 | chr:6:32648036 |
| 6 rs28371253  | 32654257 T | 9.825  | 6.59E-18 | chr:6:32648036 |
| 6 rs75658193  | 32503375 A | 3.354  | 6.64E-18 | chr:6:32648036 |
| 6 rs115272081 | 32519782 A | 4.581  | 6.94E-18 | chr:6:32648036 |
| 6 rs9275347   | 32667623 A | 7.445  | 7.06E-18 | chr:6:32648036 |
| 6 rs17211699  | 32626037 T | 10.78  | 7.09E-18 | chr:6:32648036 |
| 6 rs9275155   | 32652484 A | 3.999  | 7.49E-18 | chr:6:32648036 |
| 6 rs9274764   | 32638490 G | 3.94   | 7.69E-18 | chr:6:32648036 |
| 6 rs28752509  | 32579623 T | 4.806  | 7.91E-18 | chr:6:32648036 |
| 6 rs28752510  | 32579626 A | 4.806  | 7.91E-18 | chr:6:32648036 |
| 6 rs9274679   | 32636653 C | 4.639  | 7.97E-18 | chr:6:32648036 |
| 6 rs9272730   | 32609634 G | 4.413  | 8.11E-18 | chr:6:32648036 |
| 6 rs3129730   | 32681839 G | 10.21  | 8.12E-18 | chr:6:32648036 |
| 6 rs111517012 | 32554675 G | 4.892  | 8.56E-18 | chr:6:32648036 |
| 6 rs9272378   | 32604718 G | 3.383  | 8.69E-18 | chr:6:32648036 |
| 6 rs10456069  | 32659520 T | 10.02  | 8.74E-18 | chr:6:32648036 |
| 6 rs10456070  | 32659527 A | 10.02  | 8.74E-18 | chr:6:32648036 |
| 6 rs116333937 | 32517381 T | 4.099  | 8.80E-18 | chr:6:32648036 |
| 6 rs9268848   | 32429303 G | 0.1867 | 9.08E-18 | chr:6:32648036 |
| 6 rs9274848   | 32640149 G | 3.441  | 9.11E-18 | chr:6:32648036 |
| 6 rs9274849   | 32640157 T | 3.441  | 9.11E-18 | chr:6:32648036 |
| 6 rs114816840 | 32610214 C | 4.144  | 9.18E-18 | chr:6:32648036 |
| 6 rs116613962 | 32610220 G | 4.144  | 9.18E-18 | chr:6:32648036 |
| 6 rs554943670 | 32516971 G | 3.637  | 9.40E-18 | chr:6:32648036 |
| 6 rs28383397  | 32607820 T | 4.097  | 9.43E-18 | chr:6:32648036 |
| 6 rs1694111   | 32648753 T | 10.65  | 9.64E-18 | chr:6:32648036 |
| 6 rs13191862  | 32579653 G | 4.806  | 9.71E-18 | chr:6:32648036 |
| 6 rs13191975  | 32579671 T | 4.806  | 9.71E-18 | chr:6:32648036 |
| 6 rs9274845   | 32640134 T | 3.437  | 9.77E-18 | chr:6:32648036 |

|               |            |       |          |                |
|---------------|------------|-------|----------|----------------|
| 6 rs9274685   | 32636844 C | 4.786 | 9.84E-18 | chr:6:32648036 |
| 6 rs9274683   | 32636780 A | 4.784 | 1.01E-17 | chr:6:32648036 |
| 6 rs9274684   | 32636785 T | 4.784 | 1.01E-17 | chr:6:32648036 |
| 6 rs71549253  | 32501882 C | 4.728 | 1.02E-17 | chr:6:32648036 |
| 6 rs71549254  | 32501887 G | 4.728 | 1.02E-17 | chr:6:32648036 |
| 6 rs576125530 | 32522109 G | 4.183 | 1.02E-17 | chr:6:32648036 |
| 6 rs1694129   | 32637743 T | 11.04 | 1.05E-17 | chr:6:32648036 |
| 6 rs78512156  | 32458168 C | 8.488 | 1.15E-17 | chr:6:32648036 |
| 6 rs78947187  | 32458169 A | 8.488 | 1.15E-17 | chr:6:32648036 |
| 6 rs2858860   | 32580366 T | 4.812 | 1.16E-17 | chr:6:32648036 |
| 6 rs2858861   | 32580331 T | 4.812 | 1.16E-17 | chr:6:32648036 |
| 6 rs79591888  | 32503704 A | 3.356 | 1.22E-17 | chr:6:32648036 |
| 6 rs112296425 | 32521984 G | 6.346 | 1.25E-17 | chr:6:32648036 |
| 6 rs115712530 | 32517414 A | 4.034 | 1.28E-17 | chr:6:32648036 |
| 6 rs17204995  | 32578328 A | 4.795 | 1.28E-17 | chr:6:32648036 |
| 6 rs17211342  | 32578323 G | 4.795 | 1.28E-17 | chr:6:32648036 |
| 6 rs9273495   | 32628273 A | 3.982 | 1.30E-17 | chr:6:32648036 |
| 6 rs13207945  | 32579708 C | 4.774 | 1.31E-17 | chr:6:32648036 |
| 6 rs530246116 | 32517244 C | 3.725 | 1.31E-17 | chr:6:32648036 |
| 6 rs183870834 | 32517228 C | 3.724 | 1.32E-17 | chr:6:32648036 |
| 6 rs192002545 | 32517227 A | 3.724 | 1.32E-17 | chr:6:32648036 |
| 6 rs75684124  | 32503488 T | 3.366 | 1.33E-17 | chr:6:32648036 |
| 6 rs74587162  | 32509455 C | 4.095 | 1.42E-17 | chr:6:32648036 |
| 6 rs74498391  | 32505267 C | 3.56  | 1.42E-17 | chr:6:32648036 |
| 6 rs9274857   | 32640542 G | 3.451 | 1.46E-17 | chr:6:32648036 |
| 6 rs554350950 | 32522108 A | 3.524 | 1.47E-17 | chr:6:32648036 |
| 6 rs138087636 | 32517031 T | 3.707 | 1.49E-17 | chr:6:32648036 |
| 6 rs2856675   | 32658768 A | 9.033 | 1.50E-17 | chr:6:32648036 |
| 6 rs9274769   | 32638547 C | 3.759 | 1.50E-17 | chr:6:32648036 |
| 6 rs9274689   | 32636930 C | 4.081 | 1.51E-17 | chr:6:32648036 |
| 6 rs77931438  | 32505762 A | 3.334 | 1.53E-17 | chr:6:32648036 |
| 6 rs551251088 | 32507235 A | 3.077 | 1.56E-17 | chr:6:32648036 |
| 6 rs9274715   | 32637391 A | 4.074 | 1.57E-17 | chr:6:32648036 |
| 6 rs9274834   | 32639895 G | 3.836 | 1.57E-17 | chr:6:32648036 |
| 6 rs112796795 | 32505471 C | 3.466 | 1.61E-17 | chr:6:32648036 |
| 6 rs202015091 | 32520214 C | 3.863 | 1.61E-17 | chr:6:32648036 |
| 6 rs114202038 | 32493438 C | 3.492 | 1.62E-17 | chr:6:32648036 |
| 6 rs74958579  | 32459971 T | 4.462 | 1.63E-17 | chr:6:32648036 |
| 6 rs9275154   | 32652435 T | 3.99  | 1.65E-17 | chr:6:32648036 |
| 6 rs35675330  | 32554653 A | 4.765 | 1.66E-17 | chr:6:32648036 |
| 6 rs75730517  | 32503697 A | 3.328 | 1.68E-17 | chr:6:32648036 |
| 6 rs115885380 | 32502972 A | 3.388 | 1.69E-17 | chr:6:32648036 |
| 6 rs116299636 | 32502974 C | 3.388 | 1.69E-17 | chr:6:32648036 |

|               |            |        |          |                |
|---------------|------------|--------|----------|----------------|
| 6 rs17206287  | 32674725 G | 8.324  | 1.69E-17 | chr:6:32648036 |
| 6 rs9274839   | 32640015 G | 3.837  | 1.70E-17 | chr:6:32648036 |
| 6 rs5021727   | 32578633 G | 4.733  | 1.72E-17 | chr:6:32648036 |
| 6 rs3021057   | 32652363 T | 3.995  | 1.93E-17 | chr:6:32648036 |
| 6 rs75438654  | 32459749 G | 4.115  | 1.94E-17 | chr:6:32648036 |
| 6 rs114680412 | 32520248 A | 3.874  | 1.95E-17 | chr:6:32648036 |
| 6 rs115706291 | 32520256 A | 3.874  | 1.95E-17 | chr:6:32648036 |
| 6 rs28366267  | 32559781 C | 4.3    | 1.95E-17 | chr:6:32648036 |
| 6 rs3806157   | 32373801 G | 4.576  | 2.00E-17 | chr:6:32648036 |
| 6 rs76870762  | 32459972 G | 4.449  | 2.01E-17 | chr:6:32648036 |
| 6 rs112158360 | 32514050 G | 4.513  | 2.02E-17 | chr:6:32648036 |
| 6 rs112587701 | 32514041 A | 4.513  | 2.02E-17 | chr:6:32648036 |
| 6 rs74929336  | 32502585 A | 3.423  | 2.09E-17 | chr:6:32648036 |
| 6 rs9275331   | 32666899 G | 6.901  | 2.11E-17 | chr:6:32648036 |
| 6 rs77594561  | 32501273 G | 4.866  | 2.12E-17 | chr:6:32648036 |
| 6 rs77604461  | 32501282 C | 4.866  | 2.12E-17 | chr:6:32648036 |
| 6 rs28383398  | 32607828 T | 4.018  | 2.13E-17 | chr:6:32648036 |
| 6 rs9272498   | 32606217 A | 4.038  | 2.15E-17 | chr:6:32648036 |
| 6 rs75876652  | 32505224 T | 3.666  | 2.17E-17 | chr:6:32648036 |
| 6 rs9271568   | 32590463 A | 4.376  | 2.18E-17 | chr:6:32648036 |
| 6 rs28371256  | 32658366 C | 8.523  | 2.19E-17 | chr:6:32648036 |
| 6 rs28371257  | 32658375 G | 8.523  | 2.19E-17 | chr:6:32648036 |
| 6 rs537750078 | 32661051 A | 6.966  | 2.21E-17 | chr:6:32648036 |
| 6 rs9275312   | 32665728 G | 6.954  | 2.23E-17 | chr:6:32648036 |
| 6 rs9275327   | 32666802 T | 6.954  | 2.23E-17 | chr:6:32648036 |
| 6 rs9275330   | 32666875 G | 6.954  | 2.23E-17 | chr:6:32648036 |
| 6 rs9275333   | 32666968 C | 6.954  | 2.23E-17 | chr:6:32648036 |
| 6 rs9275338   | 32667343 T | 6.954  | 2.23E-17 | chr:6:32648036 |
| 6 rs9275365   | 32668125 A | 6.954  | 2.23E-17 | chr:6:32648036 |
| 6 rs9271516   | 32589668 A | 4.52   | 2.38E-17 | chr:6:32648036 |
| 6 rs9271607   | 32591566 G | 4.391  | 2.40E-17 | chr:6:32648036 |
| 6 rs9271609   | 32591597 C | 4.391  | 2.40E-17 | chr:6:32648036 |
| 6 rs9272064   | 32599338 T | 0.2132 | 2.41E-17 | chr:6:32648036 |
| 6 rs112530924 | 32552590 C | 5.993  | 2.47E-17 | chr:6:32648036 |
| 6 rs75420369  | 32511920 A | 4.167  | 2.47E-17 | chr:6:32648036 |
| 6 rs9271914   | 32596238 C | 0.2107 | 2.53E-17 | chr:6:32648036 |
| 6 rs9271540   | 32590029 C | 4.486  | 2.54E-17 | chr:6:32648036 |
| 6 rs9274920   | 32641328 A | 2.862  | 2.64E-17 | chr:6:32648036 |
| 6 rs535871572 | 32493946 A | 3.643  | 2.67E-17 | chr:6:32648036 |
| 6 rs551092761 | 32493947 T | 3.643  | 2.67E-17 | chr:6:32648036 |
| 6 rs9271589   | 32591128 A | 4.381  | 2.68E-17 | chr:6:32648036 |
| 6 rs185282713 | 32517018 C | 3.593  | 2.70E-17 | chr:6:32648036 |
| 6 rs113522240 | 32512591 G | 3.712  | 2.74E-17 | chr:6:32648036 |

|               |            |        |          |                |
|---------------|------------|--------|----------|----------------|
| 6 rs9272472   | 32605724 G | 3.804  | 2.76E-17 | chr:6:32648036 |
| 6 rs546722932 | 32507223 T | 3.017  | 2.77E-17 | chr:6:32648036 |
| 6 rs9271955   | 32597281 A | 0.2158 | 2.83E-17 | chr:6:32648036 |
| 6 rs28383439  | 32609042 A | 4.411  | 2.85E-17 | chr:6:32648036 |
| 6 rs9275358   | 32667895 G | 6.912  | 2.96E-17 | chr:6:32648036 |
| 6 rs9272514   | 32606385 T | 3.469  | 2.97E-17 | chr:6:32648036 |
| 6 rs139940358 | 32579444 A | 4.321  | 2.97E-17 | chr:6:32648036 |
| 6 rs199516615 | 32493510 A | 3.509  | 3.00E-17 | chr:6:32648036 |
| 6 rs9271504   | 32589368 A | 4.433  | 3.03E-17 | chr:6:32648036 |
| 6 rs574347579 | 32514817 A | 3.597  | 3.07E-17 | chr:6:32648036 |
| 6 rs9272774   | 32610255 A | 4.485  | 3.08E-17 | chr:6:32648036 |
| 6 rs1130161   | 32610994 A | 4.495  | 3.09E-17 | chr:6:32648036 |
| 6 rs9271563   | 32590428 C | 4.353  | 3.11E-17 | chr:6:32648036 |
| 6 rs201150249 | 32522103 C | 3.526  | 3.14E-17 | chr:6:32648036 |
| 6 rs9275328   | 32666822 T | 6.852  | 3.14E-17 | chr:6:32648036 |
| 6 rs9272146   | 32600914 C | 0.2135 | 3.15E-17 | chr:6:32648036 |
| 6 rs9271561   | 32590393 G | 4.394  | 3.21E-17 | chr:6:32648036 |
| 6 rs9271912   | 32596207 T | 0.2118 | 3.29E-17 | chr:6:32648036 |
| 6 rs9271913   | 32596222 A | 0.2118 | 3.29E-17 | chr:6:32648036 |
| 6 rs9272016   | 32598346 T | 0.2135 | 3.32E-17 | chr:6:32648036 |
| 6 rs9272117   | 32600411 T | 0.2144 | 3.34E-17 | chr:6:32648036 |
| 6 rs28383460  | 32609586 G | 4.464  | 3.36E-17 | chr:6:32648036 |
| 6 rs9271592   | 32591173 T | 4.479  | 3.40E-17 | chr:6:32648036 |
| 6 rs9272317   | 32604051 T | 4.45   | 3.43E-17 | chr:6:32648036 |
| 6 rs9275158   | 32652582 A | 3.974  | 3.45E-17 | chr:6:32648036 |
| 6 rs9274843   | 32640096 G | 3.513  | 3.52E-17 | chr:6:32648036 |
| 6 rs142244845 | 32472941 A | 6.455  | 3.55E-17 | chr:6:32648036 |
| 6 rs17212014  | 32637472 T | 5.131  | 3.58E-17 | chr:6:32648036 |
| 6 rs112453089 | 32639270 G | 3.592  | 3.61E-17 | chr:6:32648036 |
| 6 rs9274759   | 32638315 A | 3.741  | 3.65E-17 | chr:6:32648036 |
| 6 rs9271469   | 32588630 C | 4.306  | 3.65E-17 | chr:6:32648036 |
| 6 rs79100516  | 32503452 T | 3.216  | 3.67E-17 | chr:6:32648036 |
| 6 rs9271957   | 32597335 C | 0.2171 | 3.69E-17 | chr:6:32648036 |
| 6 rs9271576   | 32590612 C | 4.396  | 3.69E-17 | chr:6:32648036 |
| 6 rs9271560   | 32590381 T | 4.386  | 3.72E-17 | chr:6:32648036 |
| 6 rs9275161   | 32652636 C | 3.969  | 3.77E-17 | chr:6:32648036 |
| 6 rs9271939   | 32596921 C | 0.2175 | 3.85E-17 | chr:6:32648036 |
| 6 rs6928482   | 32626249 C | 4.557  | 3.86E-17 | chr:6:32648036 |
| 6 rs9272119   | 32600470 C | 0.2166 | 3.89E-17 | chr:6:32648036 |
| 6 rs9271584   | 32590870 C | 4.432  | 4.01E-17 | chr:6:32648036 |
| 6 rs9271585   | 32590879 A | 4.432  | 4.01E-17 | chr:6:32648036 |
| 6 rs9274760   | 32638348 G | 3.741  | 4.04E-17 | chr:6:32648036 |
| 6 rs78294251  | 32503336 A | 3.14   | 4.05E-17 | chr:6:32648036 |

|               |            |        |          |                |
|---------------|------------|--------|----------|----------------|
| 6 rs9274718   | 32637469 C | 3.754  | 4.05E-17 | chr:6:32648036 |
| 6 rs9274719   | 32637470 C | 3.754  | 4.05E-17 | chr:6:32648036 |
| 6 rs9271896   | 32595907 A | 0.2156 | 4.10E-17 | chr:6:32648036 |
| 6 rs9274754   | 32638261 C | 3.664  | 4.10E-17 | chr:6:32648036 |
| 6 rs9274755   | 32638262 A | 3.664  | 4.10E-17 | chr:6:32648036 |
| 6 rs9274756   | 32638269 T | 3.664  | 4.10E-17 | chr:6:32648036 |
| 6 rs9274687   | 32636882 T | 4.49   | 4.13E-17 | chr:6:32648036 |
| 6 rs3188543   | 32610403 A | 4.443  | 4.15E-17 | chr:6:32648036 |
| 6 rs570194309 | 32590602 C | 4.443  | 4.15E-17 | chr:6:32648036 |
| 6 rs9271488   | 32589000 T | 4.443  | 4.15E-17 | chr:6:32648036 |
| 6 rs9271624   | 32591921 T | 4.443  | 4.15E-17 | chr:6:32648036 |
| 6 rs9271628   | 32591971 G | 4.443  | 4.15E-17 | chr:6:32648036 |
| 6 rs9272420   | 32605101 G | 4.443  | 4.15E-17 | chr:6:32648036 |
| 6 rs9272067   | 32599401 A | 0.2177 | 4.21E-17 | chr:6:32648036 |
| 6 rs9271544   | 32590120 A | 4.384  | 4.21E-17 | chr:6:32648036 |
| 6 rs9271595   | 32591235 G | 4.406  | 4.25E-17 | chr:6:32648036 |
| 6 rs9271596   | 32591237 G | 4.406  | 4.25E-17 | chr:6:32648036 |
| 6 rs9271892   | 32595813 C | 0.2161 | 4.25E-17 | chr:6:32648036 |
| 6 rs76867075  | 32459748 T | 3.315  | 4.26E-17 | chr:6:32648036 |
| 6 rs9271564   | 32590436 T | 4.275  | 4.27E-17 | chr:6:32648036 |
| 6 rs9271565   | 32590437 G | 4.275  | 4.27E-17 | chr:6:32648036 |
| 6 rs9271945   | 32597034 A | 0.216  | 4.29E-17 | chr:6:32648036 |
| 6 rs559236302 | 32486992 G | 3.812  | 4.32E-17 | chr:6:32648036 |
| 6 rs28366307  | 32560995 C | 4.382  | 4.33E-17 | chr:6:32648036 |
| 6 rs3129784   | 32656608 T | 3.896  | 4.34E-17 | chr:6:32648036 |
| 6 rs9271571   | 32590483 T | 4.306  | 4.34E-17 | chr:6:32648036 |
| 6 rs9271959   | 32597377 C | 0.2209 | 4.35E-17 | chr:6:32648036 |
| 6 rs9272407   | 32604931 A | 3.7    | 4.36E-17 | chr:6:32648036 |
| 6 rs116427677 | 32493456 T | 3.327  | 4.44E-17 | chr:6:32648036 |
| 6 rs9274806   | 32639441 G | 3.474  | 4.52E-17 | chr:6:32648036 |
| 6 rs9271574   | 32590590 G | 4.377  | 4.53E-17 | chr:6:32648036 |
| 6 rs9274698   | 32637095 C | 4.486  | 4.53E-17 | chr:6:32648036 |
| 6 rs9271910   | 32596183 C | 0.2137 | 4.54E-17 | chr:6:32648036 |
| 6 rs75211336  | 32502934 G | 3.319  | 4.56E-17 | chr:6:32648036 |
| 6 rs9271485   | 32588953 G | 4.28   | 4.65E-17 | chr:6:32648036 |
| 6 rs116022266 | 32610201 A | 4.213  | 4.66E-17 | chr:6:32648036 |
| 6 rs79351547  | 32610196 A | 4.213  | 4.66E-17 | chr:6:32648036 |
| 6 rs9271604   | 32591430 G | 4.257  | 4.67E-17 | chr:6:32648036 |
| 6 rs9271605   | 32591448 A | 4.257  | 4.67E-17 | chr:6:32648036 |
| 6 rs9274869   | 32640759 T | 3.415  | 4.74E-17 | chr:6:32648036 |
| 6 rs9271472   | 32588700 T | 4.312  | 4.81E-17 | chr:6:32648036 |
| 6 rs9271474   | 32588707 A | 4.312  | 4.81E-17 | chr:6:32648036 |
| 6 rs1694116   | 32647839 A | 3.289  | 4.82E-17 | chr:6:32648036 |

|               |            |        |          |                |
|---------------|------------|--------|----------|----------------|
| 6 rs528153410 | 32507211 G | 2.992  | 5.14E-17 | chr:6:32648036 |
| 6 rs9271426   | 32587973 A | 4.321  | 5.28E-17 | chr:6:32648036 |
| 6 rs9275360   | 32667937 T | 6.731  | 5.29E-17 | chr:6:32648036 |
| 6 rs9275362   | 32667957 T | 6.731  | 5.29E-17 | chr:6:32648036 |
| 6 rs79136305  | 32505292 G | 3.498  | 5.33E-17 | chr:6:32648036 |
| 6 rs9275348   | 32667638 A | 6.682  | 5.43E-17 | chr:6:32648036 |
| 6 rs28383403  | 32608035 C | 3.833  | 5.65E-17 | chr:6:32648036 |
| 6 rs9272120   | 32600501 G | 0.219  | 5.67E-17 | chr:6:32648036 |
| 6 rs113296631 | 32478885 T | 2.759  | 5.69E-17 | chr:6:32648036 |
| 6 rs111757290 | 32517856 T | 6.036  | 5.72E-17 | chr:6:32648036 |
| 6 rs9271960   | 32597385 T | 0.2233 | 5.73E-17 | chr:6:32648036 |
| 6 rs9272435   | 32605336 A | 4.378  | 5.78E-17 | chr:6:32648036 |
| 6 rs28371261  | 32658727 A | 8.442  | 5.79E-17 | chr:6:32648036 |
| 6 rs9271897   | 32595954 A | 0.2181 | 5.82E-17 | chr:6:32648036 |
| 6 rs9271898   | 32595972 A | 0.2181 | 5.82E-17 | chr:6:32648036 |
| 6 rs9271438   | 32588193 G | 4.218  | 5.82E-17 | chr:6:32648036 |
| 6 rs9274805   | 32639429 T | 3.413  | 5.91E-17 | chr:6:32648036 |
| 6 rs9271470   | 32588662 T | 4.255  | 6.29E-17 | chr:6:32648036 |
| 6 rs9271542   | 32590091 G | 4.35   | 6.30E-17 | chr:6:32648036 |
| 6 rs9271699   | 32593179 G | 0.2191 | 6.42E-17 | chr:6:32648036 |
| 6 rs75928817  | 32559212 G | 3.942  | 6.57E-17 | chr:6:32648036 |
| 6 rs9272130   | 32600638 G | 0.2194 | 6.66E-17 | chr:6:32648036 |
| 6 rs28383457  | 32609456 T | 4.302  | 6.77E-17 | chr:6:32648036 |
| 6 rs9271906   | 32596048 A | 0.2217 | 6.85E-17 | chr:6:32648036 |
| 6 rs9271643   | 32592229 A | 4.284  | 6.86E-17 | chr:6:32648036 |
| 6 rs367983934 | 32487855 A | 2.782  | 6.87E-17 | chr:6:32648036 |
| 6 rs111480903 | 32478848 A | 2.754  | 6.96E-17 | chr:6:32648036 |
| 6 rs2647026   | 32635705 T | 9.86   | 6.97E-17 | chr:6:32648036 |
| 6 rs9271909   | 32596177 T | 0.2179 | 6.97E-17 | chr:6:32648036 |
| 6 rs9271615   | 32591686 G | 0.2236 | 7.08E-17 | chr:6:32648036 |
| 6 rs9272025   | 32598581 A | 4.131  | 7.09E-17 | chr:6:32648036 |
| 6 rs9272318   | 32604059 G | 3.979  | 7.12E-17 | chr:6:32648036 |
| 6 rs76914018  | 32436250 T | 3.772  | 7.28E-17 | chr:6:32648036 |
| 6 rs77244909  | 32436240 C | 3.772  | 7.28E-17 | chr:6:32648036 |
| 6 rs2856681   | 32655524 T | 8.486  | 7.40E-17 | chr:6:32648036 |
| 6 rs281874807 | 32631448 G | 3.38   | 7.45E-17 | chr:6:32648036 |
| 6 rs76164808  | 32637390 C | 10.31  | 7.54E-17 | chr:6:32648036 |
| 6 rs2935908   | 32652606 C | 8.517  | 7.60E-17 | chr:6:32648036 |
| 6 rs75262655  | 32459811 G | 3.251  | 7.61E-17 | chr:6:32648036 |
| 6 rs79420263  | 32459803 C | 3.251  | 7.61E-17 | chr:6:32648036 |
| 6 rs111989182 | 32510924 G | 3.113  | 7.62E-17 | chr:6:32648036 |
| 6 rs113547679 | 32510914 T | 3.113  | 7.62E-17 | chr:6:32648036 |
| 6 rs9274720   | 32637479 A | 3.736  | 7.70E-17 | chr:6:32648036 |

|              |            |        |          |                |
|--------------|------------|--------|----------|----------------|
| 6 rs9272510  | 32606367 G | 3.348  | 7.72E-17 | chr:6:32648036 |
| 6 rs9272044  | 32598971 A | 0.2215 | 7.79E-17 | chr:6:32648036 |
| 6 rs9274726  | 32637593 G | 4.359  | 7.81E-17 | chr:6:32648036 |
| 6 rs9272443  | 32605418 A | 3.856  | 7.85E-17 | chr:6:32648036 |
| 6 rs9272444  | 32605419 C | 3.856  | 7.85E-17 | chr:6:32648036 |
| 6 rs9274794  | 32639264 G | 3.512  | 7.89E-17 | chr:6:32648036 |
| 6 rs9271511  | 32589483 A | 4.326  | 8.10E-17 | chr:6:32648036 |
| 6 rs9271937  | 32596870 G | 0.2262 | 8.10E-17 | chr:6:32648036 |
| 6 rs9271915  | 32596294 C | 0.2233 | 8.14E-17 | chr:6:32648036 |
| 6 rs33927408 | 32550420 T | 6.431  | 8.31E-17 | chr:6:32648036 |
| 6 rs75076975 | 32610134 A | 4.325  | 8.32E-17 | chr:6:32648036 |
| 6 rs35984981 | 32554725 T | 4.191  | 8.69E-17 | chr:6:32648036 |
| 6 rs1794489  | 32641718 C | 11.37  | 8.82E-17 | chr:6:32648036 |
| 6 rs9271497  | 32589245 T | 4.155  | 8.95E-17 | chr:6:32648036 |
| 6 rs2308890  | 32610008 T | 3.968  | 9.02E-17 | chr:6:32648036 |
| 6 rs9271890  | 32595779 A | 0.2236 | 9.09E-17 | chr:6:32648036 |
| 6 rs9271891  | 32595783 T | 0.2236 | 9.09E-17 | chr:6:32648036 |
| 6 rs9271430  | 32588002 C | 4.218  | 9.11E-17 | chr:6:32648036 |
| 6 rs5000807  | 32496471 A | 3.11   | 9.35E-17 | chr:6:32648036 |
| 6 rs9271889  | 32595747 A | 0.2242 | 9.52E-17 | chr:6:32648036 |
| 6 rs9271907  | 32596123 T | 0.2225 | 9.64E-17 | chr:6:32648036 |
| 6 rs9271908  | 32596131 T | 0.2225 | 9.64E-17 | chr:6:32648036 |
| 6 rs9271707  | 32593356 T | 0.2236 | 9.71E-17 | chr:6:32648036 |
| 6 rs75872455 | 32502638 C | 3.115  | 9.73E-17 | chr:6:32648036 |
| 6 rs9271416  | 32587812 A | 4.278  | 9.76E-17 | chr:6:32648036 |
| 6 rs9272026  | 32598618 G | 0.2239 | 9.82E-17 | chr:6:32648036 |
| 6 rs9272027  | 32598622 G | 0.2239 | 9.82E-17 | chr:6:32648036 |
| 6 rs78182729 | 32502322 T | 3.284  | 9.83E-17 | chr:6:32648036 |
| 6 rs1048414  | 32610478 G | 4.12   | 1.02E-16 | chr:6:32648036 |
| 6 rs1048419  | 32610481 C | 4.12   | 1.02E-16 | chr:6:32648036 |
| 6 rs9275180  | 32654278 T | 3.955  | 1.02E-16 | chr:6:32648036 |
| 6 rs9272009  | 32598063 T | 0.2214 | 1.02E-16 | chr:6:32648036 |
| 6 rs35399335 | 32556338 G | 4.552  | 1.03E-16 | chr:6:32648036 |
| 6 rs34614226 | 32554963 A | 4.303  | 1.04E-16 | chr:6:32648036 |
| 6 rs9272335  | 32604259 T | 3.357  | 1.06E-16 | chr:6:32648036 |
| 6 rs9271899  | 32596007 G | 0.2225 | 1.07E-16 | chr:6:32648036 |
| 6 rs74867743 | 32502819 T | 3.214  | 1.08E-16 | chr:6:32648036 |
| 6 rs9274758  | 32638290 G | 3.576  | 1.08E-16 | chr:6:32648036 |
| 6 rs9274867  | 32640745 A | 3.343  | 1.09E-16 | chr:6:32648036 |
| 6 rs9272005  | 32597992 G | 0.2237 | 1.11E-16 | chr:6:32648036 |
| 6 rs9272006  | 32597993 T | 0.2237 | 1.11E-16 | chr:6:32648036 |
| 6 rs28366319 | 32561495 A | 4.21   | 1.12E-16 | chr:6:32648036 |
| 6 rs9271400  | 32587520 T | 4.109  | 1.13E-16 | chr:6:32648036 |

|               |            |        |          |                |
|---------------|------------|--------|----------|----------------|
| 6 rs9274734   | 32637887 C | 3.81   | 1.15E-16 | chr:6:32648036 |
| 6 rs9271901   | 32596027 T | 0.225  | 1.15E-16 | chr:6:32648036 |
| 6 rs9272004   | 32597964 A | 0.2249 | 1.16E-16 | chr:6:32648036 |
| 6 rs537206245 | 32514754 C | 3.429  | 1.17E-16 | chr:6:32648036 |
| 6 rs539579029 | 32514764 T | 3.429  | 1.17E-16 | chr:6:32648036 |
| 6 rs2308891   | 32610009 G | 3.947  | 1.26E-16 | chr:6:32648036 |
| 6 rs28366298  | 32560859 C | 4.29   | 1.26E-16 | chr:6:32648036 |
| 6 rs2133035   | 32596475 A | 4.193  | 1.28E-16 | chr:6:32648036 |
| 6 rs9272013   | 32598224 T | 0.2274 | 1.28E-16 | chr:6:32648036 |
| 6 rs542891748 | 32526778 C | 3.562  | 1.28E-16 | chr:6:32648036 |
| 6 rs113049351 | 32511024 T | 3.117  | 1.29E-16 | chr:6:32648036 |
| 6 rs9271888   | 32595732 C | 0.2273 | 1.29E-16 | chr:6:32648036 |
| 6 rs76585788  | 32637493 A | 9.791  | 1.30E-16 | chr:6:32648036 |
| 6 rs201326238 | 32517754 T | 5.756  | 1.31E-16 | chr:6:32648036 |
| 6 rs9271408   | 32587613 T | 4.181  | 1.33E-16 | chr:6:32648036 |
| 6 rs113374318 | 32639415 A | 3.296  | 1.35E-16 | chr:6:32648036 |
| 6 rs397843773 | 32610171 T | 4.094  | 1.35E-16 | chr:6:32648036 |
| 6 rs2856690   | 32654536 A | 4.033  | 1.37E-16 | chr:6:32648036 |
| 6 rs9271718   | 32593465 T | 3.464  | 1.38E-16 | chr:6:32648036 |
| 6 rs9272001   | 32597901 G | 0.2268 | 1.38E-16 | chr:6:32648036 |
| 6 rs28732302  | 32548855 C | 4.278  | 1.38E-16 | chr:6:32648036 |
| 6 rs113938016 | 32517898 C | 5.779  | 1.40E-16 | chr:6:32648036 |
| 6 rs28383357  | 32606732 A | 3.061  | 1.40E-16 | chr:6:32648036 |
| 6 rs9271621   | 32591841 A | 4.217  | 1.42E-16 | chr:6:32648036 |
| 6 rs9272015   | 32598299 A | 0.2299 | 1.43E-16 | chr:6:32648036 |
| 6 rs28366256  | 32559499 G | 3.712  | 1.48E-16 | chr:6:32648036 |
| 6 rs9271693   | 32593033 T | 3.9    | 1.48E-16 | chr:6:32648036 |
| 6 rs9274878   | 32640889 G | 2.967  | 1.48E-16 | chr:6:32648036 |
| 6 rs181435903 | 32510903 A | 3.052  | 1.53E-16 | chr:6:32648036 |
| 6 rs80072299  | 32459923 G | 2.856  | 1.54E-16 | chr:6:32648036 |
| 6 rs9272108   | 32600228 C | 0.2266 | 1.55E-16 | chr:6:32648036 |
| 6 rs28383405  | 32608108 T | 3.943  | 1.60E-16 | chr:6:32648036 |
| 6 rs28383406  | 32608179 C | 4.242  | 1.60E-16 | chr:6:32648036 |
| 6 rs9272049   | 32599045 G | 0.227  | 1.65E-16 | chr:6:32648036 |
| 6 rs113602321 | 32468804 A | 3.009  | 1.66E-16 | chr:6:32648036 |
| 6 rs9274710   | 32637287 G | 3.716  | 1.69E-16 | chr:6:32648036 |
| 6 rs74347248  | 32459878 T | 2.897  | 1.70E-16 | chr:6:32648036 |
| 6 rs77158649  | 32459875 C | 2.897  | 1.70E-16 | chr:6:32648036 |
| 6 rs78091375  | 32459877 G | 2.897  | 1.70E-16 | chr:6:32648036 |
| 6 rs28383372  | 32607174 T | 2.834  | 1.72E-16 | chr:6:32648036 |
| 6 rs9272347   | 32604394 C | 3.467  | 1.75E-16 | chr:6:32648036 |
| 6 rs77789453  | 32512013 C | 4.026  | 1.81E-16 | chr:6:32648036 |
| 6 rs28383179  | 32571116 A | 3.74   | 1.83E-16 | chr:6:32648036 |



|               |            |        |          |                |
|---------------|------------|--------|----------|----------------|
| 6 rs28383180  | 32571118 C | 3.74   | 1.83E-16 | chr:6:32648036 |
| 6 rs9271917   | 32596336 G | 0.2316 | 1.87E-16 | chr:6:32648036 |
| 6 rs28357084  | 32559483 G | 3.676  | 1.89E-16 | chr:6:32648036 |
| 6 rs28366254  | 32559481 G | 3.676  | 1.89E-16 | chr:6:32648036 |
| 6 rs28366255  | 32559482 T | 3.676  | 1.89E-16 | chr:6:32648036 |
| 6 rs9275148   | 32651585 C | 3.949  | 1.89E-16 | chr:6:32648036 |
| 6 rs535671659 | 32490901 T | 2.776  | 1.90E-16 | chr:6:32648036 |
| 6 rs28366258  | 32559513 C | 4.106  | 1.92E-16 | chr:6:32648036 |
| 6 rs3104385   | 32597538 G | 3.309  | 1.92E-16 | chr:6:32648036 |
| 6 rs9272366   | 32604622 A | 3.288  | 1.94E-16 | chr:6:32648036 |
| 6 rs28732291  | 32548697 G | 4.611  | 1.95E-16 | chr:6:32648036 |
| 6 rs78273580  | 32506779 T | 3.116  | 1.98E-16 | chr:6:32648036 |
| 6 rs2856689   | 32654551 A | 0.2518 | 1.98E-16 | chr:6:32648036 |
| 6 rs9272054   | 32599164 A | 0.237  | 2.05E-16 | chr:6:32648036 |
| 6 rs9271685   | 32592970 C | 3.681  | 2.07E-16 | chr:6:32648036 |
| 6 rs28732284  | 32548667 C | 4.593  | 2.14E-16 | chr:6:32648036 |
| 6 rs78097306  | 32499148 T | 2.783  | 2.17E-16 | chr:6:32648036 |
| 6 rs34075049  | 32554935 A | 3.99   | 2.18E-16 | chr:6:32648036 |
| 6 rs9271918   | 32596352 T | 0.2318 | 2.18E-16 | chr:6:32648036 |
| 6 rs9274702   | 32637184 A | 3.857  | 2.19E-16 | chr:6:32648036 |
| 6 rs9272061   | 32599250 A | 0.232  | 2.21E-16 | chr:6:32648036 |
| 6 rs9274792   | 32639224 C | 3.437  | 2.22E-16 | chr:6:32648036 |
| 6 rs28366317  | 32561411 T | 4.155  | 2.24E-16 | chr:6:32648036 |
| 6 rs9271480   | 32588831 A | 4.062  | 2.29E-16 | chr:6:32648036 |
| 6 rs35840159  | 32556332 G | 3.853  | 2.37E-16 | chr:6:32648036 |
| 6 rs115466102 | 32507168 C | 2.858  | 2.38E-16 | chr:6:32648036 |
| 6 rs9272135   | 32600723 A | 0.229  | 2.42E-16 | chr:6:32648036 |
| 6 rs9272110   | 32600287 C | 0.2309 | 2.44E-16 | chr:6:32648036 |
| 6 rs9272113   | 32600291 C | 0.2309 | 2.44E-16 | chr:6:32648036 |
| 6 rs9272134   | 32600705 G | 0.2282 | 2.50E-16 | chr:6:32648036 |
| 6 rs9274725   | 32637573 T | 4.168  | 2.55E-16 | chr:6:32648036 |
| 6 rs9272000   | 32597834 T | 0.2333 | 2.57E-16 | chr:6:32648036 |
| 6 rs9269011   | 32436299 C | 3.775  | 2.59E-16 | chr:6:32648036 |
| 6 rs28383411  | 32608308 C | 3.583  | 2.65E-16 | chr:6:32648036 |
| 6 rs9271503   | 32589326 A | 4.032  | 2.67E-16 | chr:6:32648036 |
| 6 rs28366308  | 32561043 T | 4.018  | 2.68E-16 | chr:6:32648036 |
| 6 rs28366309  | 32561048 T | 4.018  | 2.68E-16 | chr:6:32648036 |
| 6 rs552547617 | 32479301 A | 2.67   | 2.69E-16 | chr:6:32648036 |
| 6 rs75496002  | 32459855 C | 2.848  | 2.71E-16 | chr:6:32648036 |
| 6 rs28383408  | 32608251 G | 3.668  | 2.71E-16 | chr:6:32648036 |
| 6 rs9271674   | 32592845 C | 3.896  | 2.74E-16 | chr:6:32648036 |
| 6 rs9271675   | 32592862 C | 3.896  | 2.74E-16 | chr:6:32648036 |
| 6 rs9271676   | 32592868 C | 3.896  | 2.74E-16 | chr:6:32648036 |

|               |            |        |          |                |
|---------------|------------|--------|----------|----------------|
| 6 rs9274065   | 32630099 T | 3.516  | 2.75E-16 | chr:6:32648036 |
| 6 rs1048173   | 32609855 C | 4.047  | 2.81E-16 | chr:6:32648036 |
| 6 rs9275143   | 32651192 A | 0.2536 | 2.82E-16 | chr:6:32648036 |
| 6 rs9272008   | 32598042 A | 0.2293 | 2.86E-16 | chr:6:32648036 |
| 6 rs9271411   | 32587661 A | 4.12   | 2.87E-16 | chr:6:32648036 |
| 6 rs9271966   | 32597507 T | 0.2138 | 2.90E-16 | chr:6:32648036 |
| 6 rs9273537   | 32628765 T | 3.523  | 2.93E-16 | chr:6:32648036 |
| 6 rs9271764   | 32594159 A | 3.932  | 2.95E-16 | chr:6:32648036 |
| 6 rs9271765   | 32594166 G | 3.932  | 2.95E-16 | chr:6:32648036 |
| 6 rs9271767   | 32594176 T | 3.932  | 2.95E-16 | chr:6:32648036 |
| 6 rs74955625  | 32502871 A | 3.206  | 2.97E-16 | chr:6:32648036 |
| 6 rs77572094  | 32502885 T | 3.206  | 2.97E-16 | chr:6:32648036 |
| 6 rs9271549   | 32590248 C | 4.124  | 2.97E-16 | chr:6:32648036 |
| 6 rs9271637   | 32592124 G | 3.996  | 2.98E-16 | chr:6:32648036 |
| 6 rs112337463 | 32479229 G | 2.661  | 2.98E-16 | chr:6:32648036 |
| 6 rs9272319   | 32604108 C | 3.755  | 3.05E-16 | chr:6:32648036 |
| 6 rs9272109   | 32600253 T | 0.2338 | 3.12E-16 | chr:6:32648036 |
| 6 rs9271886   | 32595633 T | 0.2325 | 3.20E-16 | chr:6:32648036 |
| 6 rs9271398   | 32587508 C | 3.972  | 3.23E-16 | chr:6:32648036 |
| 6 rs9271486   | 32588980 T | 3.952  | 3.26E-16 | chr:6:32648036 |
| 6 rs9272136   | 32600730 T | 0.2313 | 3.27E-16 | chr:6:32648036 |
| 6 rs9272137   | 32600738 C | 0.2313 | 3.27E-16 | chr:6:32648036 |
| 6 rs9272166   | 32601209 C | 0.2303 | 3.28E-16 | chr:6:32648036 |
| 6 rs9271717   | 32593453 G | 0.219  | 3.30E-16 | chr:6:32648036 |
| 6 rs3021176   | 32652469 A | 7.745  | 3.32E-16 | chr:6:32648036 |
| 6 rs9271394   | 32587480 T | 3.99   | 3.37E-16 | chr:6:32648036 |
| 6 rs202207567 | 32512533 T | 3.836  | 3.38E-16 | chr:6:32648036 |
| 6 rs28724008  | 32550550 G | 4.175  | 3.39E-16 | chr:6:32648036 |
| 6 rs9275162   | 32652687 T | 0.254  | 3.40E-16 | chr:6:32648036 |
| 6 rs1826961   | 32603866 T | 4.432  | 3.52E-16 | chr:6:32648036 |
| 6 rs9271409   | 32587628 C | 4.055  | 3.54E-16 | chr:6:32648036 |
| 6 rs113026095 | 32460486 G | 4.168  | 3.55E-16 | chr:6:32648036 |
| 6 rs9275146   | 32651495 G | 0.2535 | 3.58E-16 | chr:6:32648036 |
| 6 rs74728615  | 32459866 A | 2.828  | 3.65E-16 | chr:6:32648036 |
| 6 rs74791653  | 32499185 T | 2.828  | 3.66E-16 | chr:6:32648036 |
| 6 rs9274690   | 32636940 C | 3.615  | 3.69E-16 | chr:6:32648036 |
| 6 rs9271999   | 32597832 G | 0.2374 | 3.71E-16 | chr:6:32648036 |
| 6 rs281874979 | 32631295 A | 3.137  | 3.77E-16 | chr:6:32648036 |
| 6 rs9272028   | 32598706 T | 0.2415 | 3.79E-16 | chr:6:32648036 |
| 6 rs9272029   | 32598707 G | 0.2415 | 3.79E-16 | chr:6:32648036 |
| 6 rs2647000   | 32656890 T | 0.2539 | 3.91E-16 | chr:6:32648036 |
| 6 rs9275202   | 32656869 A | 0.2539 | 3.91E-16 | chr:6:32648036 |
| 6 rs9272007   | 32598038 T | 0.2329 | 3.99E-16 | chr:6:32648036 |

|               |            |        |          |                |
|---------------|------------|--------|----------|----------------|
| 6 rs28383313  | 32587117 G | 4.115  | 4.08E-16 | chr:6:32648036 |
| 6 rs9271919   | 32596423 G | 0.2374 | 4.11E-16 | chr:6:32648036 |
| 6 rs111693298 | 32518251 T | 3.336  | 4.17E-16 | chr:6:32648036 |
| 6 rs28724258  | 32630093 T | 3.455  | 4.17E-16 | chr:6:32648036 |
| 6 rs9274062   | 32630094 G | 3.455  | 4.17E-16 | chr:6:32648036 |
| 6 rs28723989  | 32550116 T | 4.595  | 4.21E-16 | chr:6:32648036 |
| 6 rs141506183 | 32485776 A | 4.109  | 4.29E-16 | chr:6:32648036 |
| 6 rs9275091   | 32648972 C | 0.2505 | 4.35E-16 | chr:6:32648036 |
| 6 rs74635045  | 32502745 C | 2.991  | 4.36E-16 | chr:6:32648036 |
| 6 rs9271582   | 32590774 C | 4.095  | 4.42E-16 | chr:6:32648036 |
| 6 rs9271583   | 32590780 C | 4.095  | 4.42E-16 | chr:6:32648036 |
| 6 rs9275088   | 32648931 T | 0.2506 | 4.51E-16 | chr:6:32648036 |
| 6 rs9275089   | 32648947 A | 0.2506 | 4.51E-16 | chr:6:32648036 |
| 6 rs76931568  | 32459665 A | 2.773  | 4.56E-16 | chr:6:32648036 |
| 6 rs9405110   | 32439108 C | 4.169  | 4.57E-16 | chr:6:32648036 |
| 6 rs9275199   | 32656680 T | 3.838  | 4.62E-16 | chr:6:32648036 |
| 6 rs111917625 | 32488929 G | 3.294  | 4.71E-16 | chr:6:32648036 |
| 6 rs113773595 | 32488918 T | 3.294  | 4.71E-16 | chr:6:32648036 |
| 6 rs28383383  | 32607368 C | 3.661  | 4.78E-16 | chr:6:32648036 |
| 6 rs9271734   | 32593639 A | 4.379  | 4.79E-16 | chr:6:32648036 |
| 6 rs9271648   | 32592358 T | 0.2384 | 4.84E-16 | chr:6:32648036 |
| 6 rs2395186   | 32433192 G | 4.055  | 4.91E-16 | chr:6:32648036 |
| 6 rs9380306   | 32438298 G | 4.039  | 4.91E-16 | chr:6:32648036 |
| 6 rs17203846  | 32555989 A | 4.093  | 5.00E-16 | chr:6:32648036 |
| 6 rs9271935   | 32596831 C | 0.2407 | 5.01E-16 | chr:6:32648036 |
| 6 rs9271722   | 32593522 G | 3.504  | 5.05E-16 | chr:6:32648036 |
| 6 rs190685297 | 32458514 C | 4.099  | 5.12E-16 | chr:6:32648036 |
| 6 rs9268849   | 32429327 T | 3.963  | 5.27E-16 | chr:6:32648036 |
| 6 rs112477119 | 32489269 T | 3.069  | 5.32E-16 | chr:6:32648036 |
| 6 rs114031016 | 32520035 T | 5.326  | 5.35E-16 | chr:6:32648036 |
| 6 rs74768985  | 32518175 C | 3.775  | 5.37E-16 | chr:6:32648036 |
| 6 rs9271881   | 32595604 A | 0.2326 | 5.47E-16 | chr:6:32648036 |
| 6 rs9271882   | 32595605 T | 0.2326 | 5.47E-16 | chr:6:32648036 |
| 6 rs9274705   | 32637245 A | 3.497  | 5.55E-16 | chr:6:32648036 |
| 6 rs9405108   | 32438648 T | 4.079  | 5.57E-16 | chr:6:32648036 |
| 6 rs74719989  | 32502664 A | 2.947  | 5.60E-16 | chr:6:32648036 |
| 6 rs9275087   | 32648893 T | 0.2507 | 5.65E-16 | chr:6:32648036 |
| 6 rs116432881 | 32514385 G | 4.089  | 5.71E-16 | chr:6:32648036 |
| 6 rs9273748   | 32629394 A | 9.167  | 5.73E-16 | chr:6:32648036 |
| 6 rs9272055   | 32599176 A | 0.2499 | 5.76E-16 | chr:6:32648036 |
| 6 rs522308    | 32581922 T | 4.189  | 5.80E-16 | chr:6:32648036 |
| 6 rs28383373  | 32607193 C | 2.755  | 5.91E-16 | chr:6:32648036 |
| 6 rs111513373 | 32520272 T | 3.537  | 5.93E-16 | chr:6:32648036 |

|               |            |        |          |                |
|---------------|------------|--------|----------|----------------|
| 6 rs9271644   | 32592337 A | 3.779  | 6.06E-16 | chr:6:32648036 |
| 6 rs35372060  | 32447667 T | 4.034  | 6.14E-16 | chr:6:32648036 |
| 6 rs9271884   | 32595628 C | 0.2391 | 6.14E-16 | chr:6:32648036 |
| 6 rs9271885   | 32595629 T | 0.2391 | 6.14E-16 | chr:6:32648036 |
| 6 rs111983899 | 32639389 T | 3.12   | 6.22E-16 | chr:6:32648036 |
| 6 rs2856676   | 32656833 G | 0.2545 | 6.29E-16 | chr:6:32648036 |
| 6 rs34036879  | 32453336 T | 4.031  | 6.31E-16 | chr:6:32648036 |
| 6 rs77794095  | 32502471 T | 2.915  | 6.33E-16 | chr:6:32648036 |
| 6 rs111678927 | 32488974 G | 3.212  | 6.50E-16 | chr:6:32648036 |
| 6 rs28366265  | 32559708 A | 3.423  | 6.53E-16 | chr:6:32648036 |
| 6 rs9272503   | 32606286 C | 3.407  | 6.56E-16 | chr:6:32648036 |
| 6 rs9273491   | 32628221 A | 6.363  | 6.69E-16 | chr:6:32648036 |
| 6 rs35971290  | 32550235 G | 4.504  | 6.70E-16 | chr:6:32648036 |
| 6 rs9275138   | 32650958 A | 0.2544 | 6.75E-16 | chr:6:32648036 |
| 6 rs9275086   | 32648809 A | 0.2508 | 6.77E-16 | chr:6:32648036 |
| 6 rs535667342 | 32485778 T | 4.091  | 6.87E-16 | chr:6:32648036 |
| 6 rs552798572 | 32485775 C | 4.091  | 6.87E-16 | chr:6:32648036 |
| 6 rs9273489   | 32628189 G | 6.511  | 6.92E-16 | chr:6:32648036 |
| 6 rs9272368   | 32604642 G | 3.141  | 6.95E-16 | chr:6:32648036 |
| 6 rs9272370   | 32604644 A | 3.141  | 6.95E-16 | chr:6:32648036 |
| 6 rs75924712  | 32506761 A | 3.061  | 7.00E-16 | chr:6:32648036 |
| 6 rs199690134 | 32487449 T | 6.61   | 7.17E-16 | chr:6:32648036 |
| 6 rs111680800 | 32507452 A | 3.023  | 7.21E-16 | chr:6:32648036 |
| 6 rs9271769   | 32594217 T | 3.939  | 7.27E-16 | chr:6:32648036 |
| 6 rs28366302  | 32560934 C | 3.895  | 7.34E-16 | chr:6:32648036 |
| 6 rs78510027  | 32505075 G | 4.481  | 7.51E-16 | chr:6:32648036 |
| 6 rs34835435  | 32549966 G | 4.523  | 7.53E-16 | chr:6:32648036 |
| 6 rs35081742  | 32553608 T | 4.799  | 7.58E-16 | chr:6:32648036 |
| 6 rs9271922   | 32596444 A | 0.2411 | 7.65E-16 | chr:6:32648036 |
| 6 rs28895225  | 32435684 C | 3.838  | 7.81E-16 | chr:6:32648036 |
| 6 rs12197312  | 32442180 C | 4.017  | 7.84E-16 | chr:6:32648036 |
| 6 rs12215313  | 32441276 T | 4.017  | 7.84E-16 | chr:6:32648036 |
| 6 rs2395185   | 32433167 T | 4.017  | 7.84E-16 | chr:6:32648036 |
| 6 rs28895223  | 32435550 A | 4.017  | 7.84E-16 | chr:6:32648036 |
| 6 rs28895234  | 32437050 G | 4.017  | 7.84E-16 | chr:6:32648036 |
| 6 rs28895235  | 32437160 A | 4.017  | 7.84E-16 | chr:6:32648036 |
| 6 rs62405565  | 32452281 G | 4.017  | 7.84E-16 | chr:6:32648036 |
| 6 rs7747529   | 32431124 A | 4.017  | 7.84E-16 | chr:6:32648036 |
| 6 rs77777792  | 32451289 T | 4.017  | 7.84E-16 | chr:6:32648036 |
| 6 rs79452641  | 32451288 C | 4.017  | 7.84E-16 | chr:6:32648036 |
| 6 rs9268853   | 32429643 C | 4.017  | 7.84E-16 | chr:6:32648036 |
| 6 rs9268858   | 32429758 C | 4.017  | 7.84E-16 | chr:6:32648036 |
| 6 rs9268860   | 32429825 T | 4.017  | 7.84E-16 | chr:6:32648036 |

|               |            |        |          |                |
|---------------|------------|--------|----------|----------------|
| 6 rs9268864   | 32430326 A | 4.017  | 7.84E-16 | chr:6:32648036 |
| 6 rs9268884   | 32431640 A | 4.017  | 7.84E-16 | chr:6:32648036 |
| 6 rs9268905   | 32432077 C | 4.017  | 7.84E-16 | chr:6:32648036 |
| 6 rs9268906   | 32432181 G | 4.017  | 7.84E-16 | chr:6:32648036 |
| 6 rs9268923   | 32432835 T | 4.017  | 7.84E-16 | chr:6:32648036 |
| 6 rs9268965   | 32434240 A | 4.017  | 7.84E-16 | chr:6:32648036 |
| 6 rs9268969   | 32434349 T | 4.017  | 7.84E-16 | chr:6:32648036 |
| 6 rs9268970   | 32434361 A | 4.017  | 7.84E-16 | chr:6:32648036 |
| 6 rs9348886   | 32441008 T | 4.017  | 7.84E-16 | chr:6:32648036 |
| 6 rs9368725   | 32438159 T | 4.017  | 7.84E-16 | chr:6:32648036 |
| 6 rs9368726   | 32438542 C | 4.017  | 7.84E-16 | chr:6:32648036 |
| 6 rs9391781   | 32434850 C | 4.017  | 7.84E-16 | chr:6:32648036 |
| 6 rs9391877   | 32438867 T | 4.017  | 7.84E-16 | chr:6:32648036 |
| 6 rs9405109   | 32439029 C | 4.017  | 7.84E-16 | chr:6:32648036 |
| 6 rs9271682   | 32592923 G | 3.584  | 7.91E-16 | chr:6:32648036 |
| 6 rs2856684   | 32655095 T | 0.2561 | 7.97E-16 | chr:6:32648036 |
| 6 rs2856685   | 32655072 A | 0.2561 | 7.97E-16 | chr:6:32648036 |
| 6 rs9271432   | 32588056 T | 3.838  | 8.00E-16 | chr:6:32648036 |
| 6 rs9271433   | 32588057 G | 3.838  | 8.00E-16 | chr:6:32648036 |
| 6 rs9275139   | 32651005 C | 0.2544 | 8.02E-16 | chr:6:32648036 |
| 6 rs115749644 | 32627818 A | 6.303  | 8.10E-16 | chr:6:32648036 |
| 6 rs9271523   | 32589806 G | 3.883  | 8.27E-16 | chr:6:32648036 |
| 6 rs9271711   | 32593430 T | 0.2288 | 8.32E-16 | chr:6:32648036 |
| 6 rs9271714   | 32593434 G | 0.2288 | 8.32E-16 | chr:6:32648036 |
| 6 rs9274736   | 32637905 C | 3.576  | 8.36E-16 | chr:6:32648036 |
| 6 rs9274738   | 32637909 C | 3.576  | 8.36E-16 | chr:6:32648036 |
| 6 rs9274707   | 32637266 G | 3.381  | 8.37E-16 | chr:6:32648036 |
| 6 rs9274708   | 32637267 A | 3.381  | 8.37E-16 | chr:6:32648036 |
| 6 rs28366325  | 32561659 C | 3.914  | 8.45E-16 | chr:6:32648036 |
| 6 rs75387045  | 32508213 T | 2.996  | 8.79E-16 | chr:6:32648036 |
| 6 rs9275116   | 32649952 T | 0.2545 | 8.87E-16 | chr:6:32648036 |
| 6 rs78668102  | 32507091 T | 2.899  | 8.99E-16 | chr:6:32648036 |
| 6 rs9405112   | 32445600 A | 3.97   | 9.10E-16 | chr:6:32648036 |
| 6 rs9272059   | 32599223 C | 0.2467 | 9.12E-16 | chr:6:32648036 |
| 6 rs115591310 | 32511009 A | 2.964  | 9.20E-16 | chr:6:32648036 |
| 6 rs9366801   | 32440276 T | 4.032  | 9.31E-16 | chr:6:32648036 |
| 6 rs9271883   | 32595610 A | 0.2383 | 9.31E-16 | chr:6:32648036 |
| 6 rs28366328  | 32561766 G | 3.924  | 9.50E-16 | chr:6:32648036 |
| 6 rs9274919   | 32641320 G | 2.7    | 9.54E-16 | chr:6:32648036 |
| 6 rs9275123   | 32650256 G | 0.2511 | 9.64E-16 | chr:6:32648036 |
| 6 rs9275125   | 32650293 A | 0.2511 | 9.64E-16 | chr:6:32648036 |
| 6 rs9275126   | 32650307 A | 0.2511 | 9.64E-16 | chr:6:32648036 |
| 6 rs622137    | 32569852 A | 4.127  | 9.66E-16 | chr:6:32648036 |

|               |            |        |          |                |
|---------------|------------|--------|----------|----------------|
| 6 rs185654397 | 32490665 G | 2.724  | 9.73E-16 | chr:6:32648036 |
| 6 rs9272002   | 32597924 G | 0.2275 | 9.81E-16 | chr:6:32648036 |
| 6 rs9275119   | 32650031 G | 0.2546 | 9.86E-16 | chr:6:32648036 |
| 6 rs2516052   | 32570147 G | 4.124  | 9.86E-16 | chr:6:32648036 |
| 6 rs113571892 | 32489037 C | 2.838  | 9.93E-16 | chr:6:32648036 |
| 6 rs112313206 | 32598405 T | 0.2371 | 9.95E-16 | chr:6:32648036 |
| 6 rs9275114   | 32649897 G | 0.2546 | 9.97E-16 | chr:6:32648036 |
| 6 rs9271762   | 32594028 G | 3.608  | 1.00E-15 | chr:6:32648036 |
| 6 rs77274878  | 32523348 A | 3.195  | 1.04E-15 | chr:6:32648036 |
| 6 rs9271532   | 32589945 C | 3.898  | 1.04E-15 | chr:6:32648036 |
| 6 rs9271761   | 32594022 A | 3.82   | 1.05E-15 | chr:6:32648036 |
| 6 rs9271995   | 32597777 A | 0.1883 | 1.08E-15 | chr:6:32648036 |
| 6 rs9271927   | 32596647 C | 0.2423 | 1.08E-15 | chr:6:32648036 |
| 6 rs9271928   | 32596648 A | 0.2423 | 1.08E-15 | chr:6:32648036 |
| 6 rs2856686   | 32654869 T | 0.2563 | 1.09E-15 | chr:6:32648036 |
| 6 rs1130420   | 32627852 A | 3.226  | 1.09E-15 | chr:6:32648036 |
| 6 rs9268889   | 32431886 G | 3.95   | 1.09E-15 | chr:6:32648036 |
| 6 rs28383402  | 32607985 G | 3.372  | 1.10E-15 | chr:6:32648036 |
| 6 rs9272171   | 32601249 G | 0.246  | 1.10E-15 | chr:6:32648036 |
| 6 rs1136633   | 32487170 A | 4.324  | 1.10E-15 | chr:6:32648036 |
| 6 rs34902284  | 32556300 T | 3.828  | 1.10E-15 | chr:6:32648036 |
| 6 rs9275118   | 32649996 A | 0.2547 | 1.11E-15 | chr:6:32648036 |
| 6 rs9272138   | 32600757 A | 0.2411 | 1.11E-15 | chr:6:32648036 |
| 6 rs113786400 | 32485794 T | 2.943  | 1.11E-15 | chr:6:32648036 |
| 6 rs74345507  | 32459572 C | 2.959  | 1.12E-15 | chr:6:32648036 |
| 6 rs79893879  | 32459554 A | 2.959  | 1.12E-15 | chr:6:32648036 |
| 6 rs2858329   | 32658801 A | 0.2547 | 1.13E-15 | chr:6:32648036 |
| 6 rs9275145   | 32651363 C | 0.2546 | 1.14E-15 | chr:6:32648036 |
| 6 rs9286790   | 32439828 A | 3.993  | 1.14E-15 | chr:6:32648036 |
| 6 rs1794491   | 32640041 A | 7.977  | 1.14E-15 | chr:6:32648036 |
| 6 rs6938008   | 32604743 C | 3.193  | 1.16E-15 | chr:6:32648036 |
| 6 rs143811457 | 32507112 A | 2.884  | 1.18E-15 | chr:6:32648036 |
| 6 rs9271879   | 32595489 T | 0.2353 | 1.19E-15 | chr:6:32648036 |
| 6 rs9273009   | 32611579 G | 3.372  | 1.19E-15 | chr:6:32648036 |
| 6 rs3021058   | 32652359 A | 0.2546 | 1.19E-15 | chr:6:32648036 |
| 6 rs71565340  | 32452506 T | 4.002  | 1.20E-15 | chr:6:32648036 |
| 6 rs2856693   | 32653283 C | 0.2549 | 1.20E-15 | chr:6:32648036 |
| 6 rs9275014   | 32643023 A | 3.379  | 1.21E-15 | chr:6:32648036 |
| 6 rs79186433  | 32479883 T | 2.65   | 1.22E-15 | chr:6:32648036 |
| 6 rs2516051   | 32570184 T | 4.106  | 1.25E-15 | chr:6:32648036 |
| 6 rs477515    | 32569691 A | 4.028  | 1.26E-15 | chr:6:32648036 |
| 6 rs28654725  | 32435542 G | 3.827  | 1.29E-15 | chr:6:32648036 |
| 6 rs28895224  | 32435556 G | 3.827  | 1.29E-15 | chr:6:32648036 |

|               |            |        |          |                |
|---------------|------------|--------|----------|----------------|
| 6 rs585669    | 32572113 G | 0.2329 | 1.29E-15 | chr:6:32648036 |
| 6 rs9275112   | 32649773 G | 0.255  | 1.30E-15 | chr:6:32648036 |
| 6 rs9275135   | 32650736 T | 0.2549 | 1.31E-15 | chr:6:32648036 |
| 6 rs9275136   | 32650757 C | 0.2549 | 1.31E-15 | chr:6:32648036 |
| 6 rs9275130   | 32650409 T | 0.2549 | 1.32E-15 | chr:6:32648036 |
| 6 rs17209950  | 32446588 A | 3.97   | 1.33E-15 | chr:6:32648036 |
| 6 rs7754464   | 32657818 A | 0.255  | 1.33E-15 | chr:6:32648036 |
| 6 rs9272163   | 32601146 T | 0.246  | 1.34E-15 | chr:6:32648036 |
| 6 rs138748427 | 32484520 A | 2.586  | 1.34E-15 | chr:6:32648036 |
| 6 rs9271920   | 32596430 G | 0.2401 | 1.34E-15 | chr:6:32648036 |
| 6 rs9271921   | 32596431 G | 0.2401 | 1.34E-15 | chr:6:32648036 |
| 6 rs182778252 | 32495761 G | 2.703  | 1.35E-15 | chr:6:32648036 |
| 6 rs529088135 | 32495760 T | 2.703  | 1.35E-15 | chr:6:32648036 |
| 6 rs36172419  | 32507766 A | 2.861  | 1.36E-15 | chr:6:32648036 |
| 6 rs185295622 | 32510840 A | 2.908  | 1.38E-15 | chr:6:32648036 |
| 6 rs28366327  | 32561678 A | 3.863  | 1.38E-15 | chr:6:32648036 |
| 6 rs9272161   | 32601139 G | 0.2462 | 1.39E-15 | chr:6:32648036 |
| 6 rs9272162   | 32601140 A | 0.2462 | 1.39E-15 | chr:6:32648036 |
| 6 rs2647042   | 32667548 C | 0.2524 | 1.39E-15 | chr:6:32648036 |
| 6 rs2856667   | 32665079 T | 0.2548 | 1.40E-15 | chr:6:32648036 |
| 6 rs9272323   | 32604151 T | 3.425  | 1.41E-15 | chr:6:32648036 |
| 6 rs2856679   | 32655615 C | 0.2567 | 1.41E-15 | chr:6:32648036 |
| 6 rs9274871   | 32640792 G | 2.994  | 1.43E-15 | chr:6:32648036 |
| 6 rs9274872   | 32640793 G | 2.994  | 1.43E-15 | chr:6:32648036 |
| 6 rs28383401  | 32607973 A | 3.351  | 1.44E-15 | chr:6:32648036 |
| 6 rs7754885   | 32657858 G | 0.2563 | 1.47E-15 | chr:6:32648036 |
| 6 rs28366314  | 32561201 G | 3.822  | 1.49E-15 | chr:6:32648036 |
| 6 rs28366315  | 32561207 T | 3.822  | 1.49E-15 | chr:6:32648036 |
| 6 rs78923832  | 32507947 A | 2.801  | 1.49E-15 | chr:6:32648036 |
| 6 rs9275133   | 32650588 A | 0.255  | 1.50E-15 | chr:6:32648036 |
| 6 rs79705220  | 32507930 C | 2.792  | 1.53E-15 | chr:6:32648036 |
| 6 rs535476317 | 32570019 A | 4.092  | 1.54E-15 | chr:6:32648036 |
| 6 rs552189104 | 32485744 T | 3.908  | 1.58E-15 | chr:6:32648036 |
| 6 rs9271715   | 32593441 T | 0.2354 | 1.59E-15 | chr:6:32648036 |
| 6 rs9271716   | 32593442 G | 0.2354 | 1.59E-15 | chr:6:32648036 |
| 6 rs9405040   | 32439393 C | 4.047  | 1.60E-15 | chr:6:32648036 |
| 6 rs2856695   | 32651894 A | 0.255  | 1.62E-15 | chr:6:32648036 |
| 6 rs4642516   | 32657543 G | 0.255  | 1.62E-15 | chr:6:32648036 |
| 6 rs9275101   | 32649355 G | 0.255  | 1.62E-15 | chr:6:32648036 |
| 6 rs9275102   | 32649361 G | 0.255  | 1.62E-15 | chr:6:32648036 |
| 6 rs9275103   | 32649386 T | 0.255  | 1.62E-15 | chr:6:32648036 |
| 6 rs9275105   | 32649416 C | 0.255  | 1.62E-15 | chr:6:32648036 |
| 6 rs9275106   | 32649475 T | 0.255  | 1.62E-15 | chr:6:32648036 |

|               |            |        |          |                |
|---------------|------------|--------|----------|----------------|
| 6 rs9275131   | 32650467 C | 0.255  | 1.62E-15 | chr:6:32648036 |
| 6 rs9275141   | 32651117 T | 0.255  | 1.62E-15 | chr:6:32648036 |
| 6 rs3864306   | 32635012 A | 9.208  | 1.66E-15 | chr:6:32648036 |
| 6 rs9271934   | 32596773 T | 0.2458 | 1.67E-15 | chr:6:32648036 |
| 6 rs9272103   | 32599896 T | 0.2507 | 1.69E-15 | chr:6:32648036 |
| 6 rs732163    | 32394911 A | 5.595  | 1.69E-15 | chr:6:32648036 |
| 6 rs9272165   | 32601170 C | 0.2482 | 1.70E-15 | chr:6:32648036 |
| 6 rs9274917   | 32641317 C | 2.661  | 1.71E-15 | chr:6:32648036 |
| 6 rs9274918   | 32641318 A | 2.661  | 1.71E-15 | chr:6:32648036 |
| 6 rs113929181 | 32495492 G | 2.711  | 1.72E-15 | chr:6:32648036 |
| 6 rs28371211  | 32637528 A | 4.457  | 1.72E-15 | chr:6:32648036 |
| 6 rs9271521   | 32589783 T | 3.786  | 1.72E-15 | chr:6:32648036 |
| 6 rs9272003   | 32597940 G | 0.2333 | 1.73E-15 | chr:6:32648036 |
| 6 rs74729326  | 32506796 T | 2.92   | 1.81E-15 | chr:6:32648036 |
| 6 rs9272775   | 32610257 C | 3.809  | 1.81E-15 | chr:6:32648036 |
| 6 rs77697582  | 32502517 T | 2.896  | 1.83E-15 | chr:6:32648036 |
| 6 rs28383410  | 32608289 A | 3.362  | 1.84E-15 | chr:6:32648036 |
| 6 rs28366316  | 32561246 C | 3.844  | 1.85E-15 | chr:6:32648036 |
| 6 rs71565334  | 32451947 T | 3.927  | 1.96E-15 | chr:6:32648036 |
| 6 rs71565335  | 32451954 C | 3.927  | 1.96E-15 | chr:6:32648036 |
| 6 rs71565336  | 32451963 A | 3.927  | 1.96E-15 | chr:6:32648036 |
| 6 rs17613340  | 32621966 G | 2.762  | 2.00E-15 | chr:6:32648036 |
| 6 rs9271663   | 32592636 A | 0.2566 | 2.01E-15 | chr:6:32648036 |
| 6 rs77891198  | 32506670 A | 2.791  | 2.03E-15 | chr:6:32648036 |
| 6 rs9275084   | 32648722 A | 0.265  | 2.04E-15 | chr:6:32648036 |
| 6 rs9275085   | 32648735 G | 0.265  | 2.04E-15 | chr:6:32648036 |
| 6 rs151027857 | 32521366 C | 5.393  | 2.07E-15 | chr:6:32648036 |
| 6 rs9405038   | 32437614 T | 4.002  | 2.08E-15 | chr:6:32648036 |
| 6 rs76902085  | 32507945 C | 2.774  | 2.09E-15 | chr:6:32648036 |
| 6 rs149253766 | 32507305 T | 2.768  | 2.13E-15 | chr:6:32648036 |
| 6 rs150548684 | 32507293 T | 2.768  | 2.13E-15 | chr:6:32648036 |
| 6 rs76207819  | 32507365 G | 2.796  | 2.15E-15 | chr:6:32648036 |
| 6 rs9273014   | 32611650 A | 3.081  | 2.21E-15 | chr:6:32648036 |
| 6 rs71565333  | 32451902 T | 3.848  | 2.22E-15 | chr:6:32648036 |
| 6 rs113712140 | 32485972 G | 6.366  | 2.23E-15 | chr:6:32648036 |
| 6 rs111937677 | 32639316 G | 3.12   | 2.27E-15 | chr:6:32648036 |
| 6 rs9271877   | 32595469 C | 0.2391 | 2.27E-15 | chr:6:32648036 |
| 6 rs9271878   | 32595474 C | 0.2391 | 2.27E-15 | chr:6:32648036 |
| 6 rs28366270  | 32559934 G | 3.386  | 2.27E-15 | chr:6:32648036 |
| 6 rs9272158   | 32601122 A | 0.2532 | 2.31E-15 | chr:6:32648036 |
| 6 rs12215261  | 32441150 T | 3.905  | 2.40E-15 | chr:6:32648036 |
| 6 rs9268963   | 32434149 T | 3.65   | 2.42E-15 | chr:6:32648036 |
| 6 rs9271498   | 32589282 A | 3.77   | 2.43E-15 | chr:6:32648036 |



|               |            |        |          |                |
|---------------|------------|--------|----------|----------------|
| 6 rs9272174   | 32601307 T | 0.2531 | 2.45E-15 | chr:6:32648036 |
| 6 rs9273050   | 32612035 G | 3.714  | 2.46E-15 | chr:6:32648036 |
| 6 rs9268954   | 32434011 A | 3.506  | 2.47E-15 | chr:6:32648036 |
| 6 rs9274873   | 32640818 C | 2.896  | 2.48E-15 | chr:6:32648036 |
| 6 rs28383407  | 32608187 T | 3.465  | 2.54E-15 | chr:6:32648036 |
| 6 rs28383181  | 32571669 T | 3.992  | 2.54E-15 | chr:6:32648036 |
| 6 rs9271677   | 32592898 A | 3.507  | 2.56E-15 | chr:6:32648036 |
| 6 rs28724031  | 32550819 A | 3.709  | 2.58E-15 | chr:6:32648036 |
| 6 rs2858330   | 32658715 T | 0.2621 | 2.61E-15 | chr:6:32648036 |
| 6 rs76342965  | 32508008 T | 2.761  | 2.62E-15 | chr:6:32648036 |
| 6 rs77587106  | 32508001 A | 2.761  | 2.62E-15 | chr:6:32648036 |
| 6 rs9268947   | 32433741 A | 3.483  | 2.64E-15 | chr:6:32648036 |
| 6 rs9275013   | 32643011 C | 3.303  | 2.67E-15 | chr:6:32648036 |
| 6 rs9271773   | 32594304 C | 3.166  | 2.69E-15 | chr:6:32648036 |
| 6 rs28437337  | 32451484 T | 3.938  | 2.78E-15 | chr:6:32648036 |
| 6 rs28366306  | 32560990 A | 3.669  | 2.80E-15 | chr:6:32648036 |
| 6 rs3205916   | 32609106 C | 3.627  | 2.82E-15 | chr:6:32648036 |
| 6 rs28366303  | 32560963 G | 3.696  | 2.84E-15 | chr:6:32648036 |
| 6 rs9274815   | 32639620 G | 2.708  | 2.89E-15 | chr:6:32648036 |
| 6 rs9274875   | 32640863 G | 2.708  | 3.06E-15 | chr:6:32648036 |
| 6 rs35957722  | 32450580 C | 3.77   | 3.07E-15 | chr:6:32648036 |
| 6 rs9272451   | 32605501 G | 3.646  | 3.09E-15 | chr:6:32648036 |
| 6 rs111848494 | 32486020 G | 6.817  | 3.11E-15 | chr:6:32648036 |
| 6 rs77122291  | 32559019 A | 3.605  | 3.14E-15 | chr:6:32648036 |
| 6 rs2213287   | 32605508 T | 3.594  | 3.15E-15 | chr:6:32648036 |
| 6 rs34303755  | 32450613 C | 3.627  | 3.16E-15 | chr:6:32648036 |
| 6 rs114580448 | 32507538 T | 2.887  | 3.36E-15 | chr:6:32648036 |
| 6 rs9391785   | 32436687 C | 3.491  | 3.36E-15 | chr:6:32648036 |
| 6 rs9391874   | 32436680 G | 3.491  | 3.36E-15 | chr:6:32648036 |
| 6 rs9273008   | 32611572 A | 3.263  | 3.41E-15 | chr:6:32648036 |
| 6 rs9271932   | 32596714 C | 0.2547 | 3.77E-15 | chr:6:32648036 |
| 6 rs9271933   | 32596717 A | 0.2547 | 3.77E-15 | chr:6:32648036 |
| 6 rs183847206 | 32490350 T | 2.741  | 3.79E-15 | chr:6:32648036 |
| 6 rs9274713   | 32637341 T | 3.476  | 3.79E-15 | chr:6:32648036 |
| 6 rs55673904  | 32645076 T | 3.513  | 3.89E-15 | chr:6:32648036 |
| 6 rs75237145  | 32594295 T | 0.258  | 3.91E-15 | chr:6:32648036 |
| 6 rs9274828   | 32639737 G | 2.835  | 3.92E-15 | chr:6:32648036 |
| 6 rs9271780   | 32594535 C | 0.2301 | 4.03E-15 | chr:6:32648036 |
| 6 rs138574269 | 32507114 A | 2.847  | 4.07E-15 | chr:6:32648036 |
| 6 rs28366310  | 32561128 C | 3.606  | 4.08E-15 | chr:6:32648036 |
| 6 rs28366312  | 32561175 C | 3.632  | 4.23E-15 | chr:6:32648036 |
| 6 rs28366313  | 32561186 A | 3.632  | 4.23E-15 | chr:6:32648036 |
| 6 rs112382456 | 32554296 C | 4.31   | 4.24E-15 | chr:6:32648036 |

|               |            |        |          |                |
|---------------|------------|--------|----------|----------------|
| 6 rs9271520   | 32589771 G | 3.691  | 4.29E-15 | chr:6:32648036 |
| 6 rs9271930   | 32596677 G | 0.2559 | 4.34E-15 | chr:6:32648036 |
| 6 rs28789995  | 32436733 C | 3.476  | 4.34E-15 | chr:6:32648036 |
| 6 rs9272156   | 32601081 C | 0.2599 | 4.37E-15 | chr:6:32648036 |
| 6 rs28366304  | 32560981 G | 3.6    | 4.38E-15 | chr:6:32648036 |
| 6 rs9271948   | 32597105 A | 0.2565 | 4.50E-15 | chr:6:32648036 |
| 6 rs28366288  | 32560432 T | 3.629  | 4.52E-15 | chr:6:32648036 |
| 6 rs562057037 | 32441392 T | 3.983  | 4.54E-15 | chr:6:32648036 |
| 6 rs1694123   | 32642759 G | 9.289  | 4.55E-15 | chr:6:32648036 |
| 6 rs9268960   | 32434130 C | 3.563  | 4.59E-15 | chr:6:32648036 |
| 6 rs9268961   | 32434135 A | 3.563  | 4.59E-15 | chr:6:32648036 |
| 6 rs9271660   | 32592602 G | 3.423  | 4.66E-15 | chr:6:32648036 |
| 6 rs9271661   | 32592605 A | 3.423  | 4.66E-15 | chr:6:32648036 |
| 6 rs71549252  | 32501613 C | 4.268  | 4.78E-15 | chr:6:32648036 |
| 6 rs9273174   | 32613237 G | 3.516  | 4.90E-15 | chr:6:32648036 |
| 6 rs9275081   | 32648669 C | 0.2754 | 4.91E-15 | chr:6:32648036 |
| 6 rs9271720   | 32593507 A | 0.2548 | 5.10E-15 | chr:6:32648036 |
| 6 rs28383367  | 32607031 T | 2.886  | 5.13E-15 | chr:6:32648036 |
| 6 rs9271781   | 32594547 A | 0.2321 | 5.13E-15 | chr:6:32648036 |
| 6 rs9271464   | 32588544 T | 3.594  | 5.26E-15 | chr:6:32648036 |
| 6 rs147842166 | 32485952 G | 6.012  | 5.29E-15 | chr:6:32648036 |
| 6 rs1766      | 32627795 G | 3.474  | 5.38E-15 | chr:6:32648036 |
| 6 rs9271776   | 32594341 C | 3.029  | 5.47E-15 | chr:6:32648036 |
| 6 rs113277625 | 32474340 C | 2.62   | 5.47E-15 | chr:6:32648036 |
| 6 rs552704888 | 32554994 T | 3.559  | 5.53E-15 | chr:6:32648036 |
| 6 rs28366305  | 32560982 T | 3.581  | 5.77E-15 | chr:6:32648036 |
| 6 rs9271736   | 32593688 A | 3.058  | 5.79E-15 | chr:6:32648036 |
| 6 rs9272143   | 32600803 C | 0.2601 | 6.06E-15 | chr:6:32648036 |
| 6 rs9275082   | 32648684 A | 0.2759 | 6.09E-15 | chr:6:32648036 |
| 6 rs148437409 | 32598479 C | 0.253  | 6.14E-15 | chr:6:32648036 |
| 6 rs9271653   | 32592556 C | 0.2624 | 6.15E-15 | chr:6:32648036 |
| 6 rs149038762 | 32475948 A | 2.488  | 6.19E-15 | chr:6:32648036 |
| 6 rs9274733   | 32637874 T | 3.363  | 6.24E-15 | chr:6:32648036 |
| 6 rs9274877   | 32640877 G | 2.712  | 6.36E-15 | chr:6:32648036 |
| 6 rs9274995   | 32642615 T | 3.473  | 6.36E-15 | chr:6:32648036 |
| 6 rs28383415  | 32608473 A | 3.484  | 6.37E-15 | chr:6:32648036 |
| 6 rs28383413  | 32608417 A | 3.603  | 6.40E-15 | chr:6:32648036 |
| 6 rs7453649   | 32440160 T | 0.23   | 6.58E-15 | chr:6:32648036 |
| 6 rs80247743  | 32527206 G | 2.9    | 6.66E-15 | chr:6:32648036 |
| 6 rs114354029 | 32598764 G | 0.2676 | 6.78E-15 | chr:6:32648036 |
| 6 rs3104389   | 32595097 A | 3.207  | 6.81E-15 | chr:6:32648036 |
| 6 rs9271758   | 32593997 A | 2.634  | 7.06E-15 | chr:6:32648036 |
| 6 rs9271759   | 32594006 A | 2.634  | 7.06E-15 | chr:6:32648036 |

|               |            |        |          |                |
|---------------|------------|--------|----------|----------------|
| 6 rs9271760   | 32594012 T | 2.634  | 7.06E-15 | chr:6:32648036 |
| 6 rs371203121 | 32455743 C | 6.273  | 7.08E-15 | chr:6:32648036 |
| 6 rs9272022   | 32598529 G | 0.2583 | 7.16E-15 | chr:6:32648036 |
| 6 rs200526004 | 32486059 T | 5.483  | 7.16E-15 | chr:6:32648036 |
| 6 rs2027856   | 32402705 A | 5.361  | 7.19E-15 | chr:6:32648036 |
| 6 rs4959100   | 32397813 T | 5.361  | 7.19E-15 | chr:6:32648036 |
| 6 rs9469110   | 32398525 T | 5.361  | 7.19E-15 | chr:6:32648036 |
| 6 rs9501626   | 32400344 A | 5.361  | 7.19E-15 | chr:6:32648036 |
| 6 rs115405728 | 32481749 C | 2.523  | 7.20E-15 | chr:6:32648036 |
| 6 rs9271791   | 32594810 A | 0.2505 | 7.27E-15 | chr:6:32648036 |
| 6 rs9271691   | 32593006 G | 0.2681 | 7.38E-15 | chr:6:32648036 |
| 6 rs9271692   | 32593010 A | 0.2681 | 7.38E-15 | chr:6:32648036 |
| 6 rs9275078   | 32648592 A | 0.2761 | 7.39E-15 | chr:6:32648036 |
| 6 rs9273408   | 32627221 G | 6.035  | 7.63E-15 | chr:6:32648036 |
| 6 rs9271848   | 32595027 G | 0.2561 | 7.69E-15 | chr:6:32648036 |
| 6 rs9275169   | 32653721 T | 0.2707 | 7.75E-15 | chr:6:32648036 |
| 6 rs9275170   | 32653726 G | 0.2707 | 7.75E-15 | chr:6:32648036 |
| 6 rs9271757   | 32593969 A | 2.634  | 7.75E-15 | chr:6:32648036 |
| 6 rs9272128   | 32600601 A | 0.2637 | 7.76E-15 | chr:6:32648036 |
| 6 rs9272129   | 32600602 T | 0.2637 | 7.76E-15 | chr:6:32648036 |
| 6 rs9274973   | 32642147 A | 0.2818 | 7.88E-15 | chr:6:32648036 |
| 6 rs9274974   | 32642152 A | 0.2818 | 7.88E-15 | chr:6:32648036 |
| 6 rs9275168   | 32653676 T | 0.2708 | 8.15E-15 | chr:6:32648036 |
| 6 rs9272012   | 32598156 A | 0.2258 | 8.21E-15 | chr:6:32648036 |
| 6 rs9272141   | 32600797 A | 0.2624 | 8.26E-15 | chr:6:32648036 |
| 6 rs9272716   | 32609367 G | 4.342  | 8.30E-15 | chr:6:32648036 |
| 6 rs28383381  | 32607288 A | 2.894  | 8.36E-15 | chr:6:32648036 |
| 6 rs376271339 | 32517804 C | 5.419  | 8.37E-15 | chr:6:32648036 |
| 6 rs9271853   | 32595117 T | 3.134  | 8.59E-15 | chr:6:32648036 |
| 6 rs9272037   | 32598844 C | 0.269  | 8.61E-15 | chr:6:32648036 |
| 6 rs200591586 | 32485857 A | 2.983  | 8.63E-15 | chr:6:32648036 |
| 6 rs28366329  | 32561819 A | 3.435  | 8.77E-15 | chr:6:32648036 |
| 6 rs7773030   | 32441396 G | 0.2323 | 8.89E-15 | chr:6:32648036 |
| 6 rs9268852   | 32429594 A | 0.2323 | 8.89E-15 | chr:6:32648036 |
| 6 rs9268863   | 32430289 A | 0.2323 | 8.89E-15 | chr:6:32648036 |
| 6 rs9268877   | 32431147 A | 0.2323 | 8.89E-15 | chr:6:32648036 |
| 6 rs9268912   | 32432509 C | 0.2323 | 8.89E-15 | chr:6:32648036 |
| 6 rs9268979   | 32435044 T | 0.2323 | 8.89E-15 | chr:6:32648036 |
| 6 rs9269080   | 32440969 G | 0.2323 | 8.89E-15 | chr:6:32648036 |
| 6 rs9269082   | 32441178 A | 0.2323 | 8.89E-15 | chr:6:32648036 |
| 6 rs9269084   | 32441199 A | 0.2323 | 8.89E-15 | chr:6:32648036 |
| 6 rs9269086   | 32441268 G | 0.2323 | 8.89E-15 | chr:6:32648036 |
| 6 rs28366297  | 32560829 C | 3.62   | 8.94E-15 | chr:6:32648036 |

|               |            |        |          |                |
|---------------|------------|--------|----------|----------------|
| 6 rs77131796  | 32480130 G | 2.554  | 9.12E-15 | chr:6:32648036 |
| 6 rs28383414  | 32608467 A | 3.455  | 9.32E-15 | chr:6:32648036 |
| 6 rs9391878   | 32439490 A | 6.2    | 9.40E-15 | chr:6:32648036 |
| 6 rs3104393   | 32594403 T | 3.091  | 9.45E-15 | chr:6:32648036 |
| 6 rs7739203   | 32441555 A | 0.2315 | 9.47E-15 | chr:6:32648036 |
| 6 rs556025    | 32570880 T | 3.746  | 9.48E-15 | chr:6:32648036 |
| 6 rs548434177 | 32538903 C | 3.104  | 9.49E-15 | chr:6:32648036 |
| 6 rs116661714 | 32538858 A | 3.434  | 9.50E-15 | chr:6:32648036 |
| 6 rs28383435  | 32608972 T | 3.345  | 9.52E-15 | chr:6:32648036 |
| 6 rs9271554   | 32590317 G | 3.648  | 9.55E-15 | chr:6:32648036 |
| 6 rs9273149   | 32612987 A | 3.305  | 9.82E-15 | chr:6:32648036 |
| 6 rs28383387  | 32607575 T | 2.678  | 9.83E-15 | chr:6:32648036 |
| 6 rs9271465   | 32588554 T | 3.531  | 9.90E-15 | chr:6:32648036 |
| 6 rs9272502   | 32606244 T | 3.031  | 1.01E-14 | chr:6:32648036 |
| 6 rs370635202 | 32495834 C | 2.873  | 1.01E-14 | chr:6:32648036 |
| 6 rs9271961   | 32597412 A | 0.2619 | 1.03E-14 | chr:6:32648036 |
| 6 rs9274997   | 32642673 C | 0.2828 | 1.04E-14 | chr:6:32648036 |
| 6 rs78279385  | 32451758 A | 3.816  | 1.06E-14 | chr:6:32648036 |
| 6 rs79476956  | 32508173 G | 2.755  | 1.07E-14 | chr:6:32648036 |
| 6 rs28366330  | 32561846 C | 3.4    | 1.07E-14 | chr:6:32648036 |
| 6 rs79579660  | 32543433 G | 3.333  | 1.08E-14 | chr:6:32648036 |
| 6 rs9271735   | 32593649 A | 3.201  | 1.10E-14 | chr:6:32648036 |
| 6 rs9275177   | 32654174 C | 0.2709 | 1.11E-14 | chr:6:32648036 |
| 6 rs9275178   | 32654181 G | 0.2709 | 1.11E-14 | chr:6:32648036 |
| 6 rs9274996   | 32642641 C | 0.2831 | 1.11E-14 | chr:6:32648036 |
| 6 rs35635216  | 32501743 A | 5.937  | 1.12E-14 | chr:6:32648036 |
| 6 rs35877117  | 32501719 T | 5.937  | 1.12E-14 | chr:6:32648036 |
| 6 rs9268881   | 32431606 T | 0.235  | 1.12E-14 | chr:6:32648036 |
| 6 rs9268883   | 32431638 T | 0.235  | 1.12E-14 | chr:6:32648036 |
| 6 rs75046889  | 32507835 C | 5.125  | 1.13E-14 | chr:6:32648036 |
| 6 rs9272031   | 32598779 C | 0.272  | 1.17E-14 | chr:6:32648036 |
| 6 rs28366323  | 32561609 G | 3.527  | 1.17E-14 | chr:6:32648036 |
| 6 rs28383416  | 32608483 C | 3.383  | 1.17E-14 | chr:6:32648036 |
| 6 rs9274907   | 32641281 A | 2.844  | 1.19E-14 | chr:6:32648036 |
| 6 rs75016307  | 32435767 C | 0.2533 | 1.20E-14 | chr:6:32648036 |
| 6 rs28383396  | 32607714 G | 3.132  | 1.21E-14 | chr:6:32648036 |
| 6 rs71565331  | 32451693 C | 3.849  | 1.23E-14 | chr:6:32648036 |
| 6 rs9271782   | 32594562 A | 0.2362 | 1.24E-14 | chr:6:32648036 |
| 6 rs115273610 | 32552547 T | 4.473  | 1.27E-14 | chr:6:32648036 |
| 6 rs9271929   | 32596650 C | 0.264  | 1.27E-14 | chr:6:32648036 |
| 6 rs111813052 | 32554277 A | 4.188  | 1.28E-14 | chr:6:32648036 |
| 6 rs9268846   | 32429245 G | 3.754  | 1.32E-14 | chr:6:32648036 |
| 6 rs9271788   | 32594734 G | 0.248  | 1.35E-14 | chr:6:32648036 |

|               |            |        |          |                |
|---------------|------------|--------|----------|----------------|
| 6 rs9272121   | 32600556 C | 0.2717 | 1.35E-14 | chr:6:32648036 |
| 6 rs558095162 | 32598504 T | 0.2637 | 1.36E-14 | chr:6:32648036 |
| 6 rs116176269 | 32490519 C | 3.598  | 1.36E-14 | chr:6:32648036 |
| 6 rs9269160   | 32446711 T | 0.2568 | 1.40E-14 | chr:6:32648036 |
| 6 rs34127991  | 32559131 A | 3.467  | 1.40E-14 | chr:6:32648036 |
| 6 rs34788621  | 32559124 C | 3.467  | 1.40E-14 | chr:6:32648036 |
| 6 rs9271947   | 32597095 T | 0.2589 | 1.42E-14 | chr:6:32648036 |
| 6 rs7453703   | 32440158 A | 0.2331 | 1.44E-14 | chr:6:32648036 |
| 6 rs1129735   | 32605295 T | 3.629  | 1.48E-14 | chr:6:32648036 |
| 6 rs9271951   | 32597172 A | 0.2752 | 1.49E-14 | chr:6:32648036 |
| 6 rs9274999   | 32642709 G | 0.2896 | 1.51E-14 | chr:6:32648036 |
| 6 rs111665695 | 32479429 G | 2.536  | 1.51E-14 | chr:6:32648036 |
| 6 rs3129783   | 32655730 A | 0.2614 | 1.51E-14 | chr:6:32648036 |
| 6 rs111405624 | 32554254 T | 4.246  | 1.53E-14 | chr:6:32648036 |
| 6 rs28383418  | 32608537 C | 3.336  | 1.55E-14 | chr:6:32648036 |
| 6 rs9271990   | 32597735 T | 0.1762 | 1.55E-14 | chr:6:32648036 |
| 6 rs9271991   | 32597738 G | 0.1762 | 1.55E-14 | chr:6:32648036 |
| 6 rs9269020   | 32436934 G | 3.355  | 1.55E-14 | chr:6:32648036 |
| 6 rs527369852 | 32453191 T | 0.2184 | 1.55E-14 | chr:6:32648036 |
| 6 rs9271970   | 32597550 A | 0.2402 | 1.56E-14 | chr:6:32648036 |
| 6 rs9274967   | 32642030 C | 2.953  | 1.56E-14 | chr:6:32648036 |
| 6 rs9271751   | 32593857 A | 2.514  | 1.60E-14 | chr:6:32648036 |
| 6 rs9274649   | 32636217 A | 4.141  | 1.60E-14 | chr:6:32648036 |
| 6 rs67497288  | 32503221 A | 3.442  | 1.61E-14 | chr:6:32648036 |
| 6 rs9268893   | 32431927 C | 0.243  | 1.61E-14 | chr:6:32648036 |
| 6 rs68174286  | 32503204 T | 3.405  | 1.62E-14 | chr:6:32648036 |
| 6 rs534490668 | 32433399 A | 0.2407 | 1.70E-14 | chr:6:32648036 |
| 6 rs9272847   | 32610695 T | 3.267  | 1.70E-14 | chr:6:32648036 |
| 6 rs28366311  | 32561137 G | 3.448  | 1.73E-14 | chr:6:32648036 |
| 6 rs116079706 | 32479557 C | 2.516  | 1.73E-14 | chr:6:32648036 |
| 6 rs115135140 | 32554855 G | 3.435  | 1.76E-14 | chr:6:32648036 |
| 6 rs9272071   | 32599487 C | 0.2535 | 1.77E-14 | chr:6:32648036 |
| 6 rs112716963 | 32485815 A | 2.972  | 1.77E-14 | chr:6:32648036 |
| 6 rs75459649  | 32505390 G | 2.71   | 1.82E-14 | chr:6:32648036 |
| 6 rs9271989   | 32597729 T | 0.1776 | 1.86E-14 | chr:6:32648036 |
| 6 rs9269078   | 32440879 C | 0.2369 | 1.87E-14 | chr:6:32648036 |
| 6 rs77311114  | 32458264 A | 3.394  | 1.88E-14 | chr:6:32648036 |
| 6 rs17204659  | 32557321 T | 5.897  | 1.89E-14 | chr:6:32648036 |
| 6 rs9271968   | 32597529 G | 0.2311 | 1.90E-14 | chr:6:32648036 |
| 6 rs114645331 | 32554776 T | 3.847  | 1.91E-14 | chr:6:32648036 |
| 6 rs116093550 | 32594395 G | 0.265  | 1.91E-14 | chr:6:32648036 |
| 6 rs116361489 | 32594396 T | 0.265  | 1.91E-14 | chr:6:32648036 |
| 6 rs9269190   | 32448500 T | 0.1779 | 1.92E-14 | chr:6:32648036 |

|               |            |        |          |                |
|---------------|------------|--------|----------|----------------|
| 6 rs9268888   | 32431867 G | 0.2434 | 1.95E-14 | chr:6:32648036 |
| 6 rs9272035   | 32598814 T | 0.2731 | 1.95E-14 | chr:6:32648036 |
| 6 rs9272528   | 32606617 G | 2.864  | 1.96E-14 | chr:6:32648036 |
| 6 rs28383462  | 32609619 T | 3.587  | 1.97E-14 | chr:6:32648036 |
| 6 rs9269042   | 32438387 C | 0.2406 | 1.97E-14 | chr:6:32648036 |
| 6 rs9272422   | 32605132 C | 4.359  | 1.99E-14 | chr:6:32648036 |
| 6 rs9271931   | 32596698 G | 0.2418 | 2.08E-14 | chr:6:32648036 |
| 6 rs9268932   | 32433290 T | 0.2407 | 2.11E-14 | chr:6:32648036 |
| 6 rs9271987   | 32597716 G | 0.1784 | 2.15E-14 | chr:6:32648036 |
| 6 rs67672162  | 32503251 T | 3.422  | 2.21E-14 | chr:6:32648036 |
| 6 rs67870913  | 32503258 T | 3.422  | 2.21E-14 | chr:6:32648036 |
| 6 rs7739375   | 32441679 A | 0.2329 | 2.21E-14 | chr:6:32648036 |
| 6 rs28366294  | 32560715 A | 3.489  | 2.27E-14 | chr:6:32648036 |
| 6 rs28366295  | 32560716 C | 3.489  | 2.27E-14 | chr:6:32648036 |
| 6 rs113600317 | 32553125 T | 3.658  | 2.28E-14 | chr:6:32648036 |
| 6 rs28383362  | 32606864 C | 2.721  | 2.28E-14 | chr:6:32648036 |
| 6 rs28383363  | 32606868 C | 2.721  | 2.28E-14 | chr:6:32648036 |
| 6 rs28366296  | 32560727 A | 3.491  | 2.30E-14 | chr:6:32648036 |
| 6 rs199617354 | 32644563 G | 5.569  | 2.30E-14 | chr:6:32648036 |
| 6 rs28366301  | 32560883 A | 3.547  | 2.32E-14 | chr:6:32648036 |
| 6 rs28383395  | 32607713 T | 3.078  | 2.33E-14 | chr:6:32648036 |
| 6 rs9274741   | 32637994 T | 0.2714 | 2.38E-14 | chr:6:32648036 |
| 6 rs9271739   | 32593692 T | 0.2587 | 2.39E-14 | chr:6:32648036 |
| 6 rs28383368  | 32607047 G | 2.753  | 2.41E-14 | chr:6:32648036 |
| 6 rs9271794   | 32594855 A | 0.2368 | 2.47E-14 | chr:6:32648036 |
| 6 rs9269071   | 32440467 T | 0.238  | 2.55E-14 | chr:6:32648036 |
| 6 rs9272075   | 32599593 G | 0.2645 | 2.55E-14 | chr:6:32648036 |
| 6 rs521539    | 32581973 A | 4.471  | 2.58E-14 | chr:6:32648036 |
| 6 rs560530    | 32577222 A | 4.471  | 2.58E-14 | chr:6:32648036 |
| 6 rs660895    | 32577380 G | 4.471  | 2.58E-14 | chr:6:32648036 |
| 6 rs9269079   | 32440910 T | 0.2404 | 2.59E-14 | chr:6:32648036 |
| 6 rs143722527 | 32479580 C | 2.48   | 2.59E-14 | chr:6:32648036 |
| 6 rs9275172   | 32653997 A | 0.272  | 2.64E-14 | chr:6:32648036 |
| 6 rs9275173   | 32654037 T | 0.272  | 2.64E-14 | chr:6:32648036 |
| 6 rs9271519   | 32589751 C | 3.431  | 2.68E-14 | chr:6:32648036 |
| 6 rs9271753   | 32593901 C | 2.538  | 2.69E-14 | chr:6:32648036 |
| 6 rs9271754   | 32593913 G | 2.538  | 2.69E-14 | chr:6:32648036 |
| 6 rs17210202  | 32555987 C | 4.636  | 2.72E-14 | chr:6:32648036 |
| 6 rs3817963   | 32368087 C | 3.883  | 2.72E-14 | chr:6:32648036 |
| 6 rs3817966   | 32367847 C | 3.883  | 2.72E-14 | chr:6:32648036 |
| 6 rs9268458   | 32350384 A | 3.883  | 2.72E-14 | chr:6:32648036 |
| 6 rs9269072   | 32440508 G | 0.2337 | 2.78E-14 | chr:6:32648036 |
| 6 rs28755181  | 32642013 A | 8.769  | 2.79E-14 | chr:6:32648036 |

|               |            |        |          |                |
|---------------|------------|--------|----------|----------------|
| 6 rs9272032   | 32598782 G | 0.2797 | 2.80E-14 | chr:6:32648036 |
| 6 rs28366331  | 32561880 G | 3.252  | 2.83E-14 | chr:6:32648036 |
| 6 rs28366332  | 32561885 A | 3.252  | 2.83E-14 | chr:6:32648036 |
| 6 rs28366333  | 32561887 C | 3.252  | 2.83E-14 | chr:6:32648036 |
| 6 rs9271988   | 32597725 A | 0.188  | 2.88E-14 | chr:6:32648036 |
| 6 rs532817093 | 32522191 G | 3.488  | 2.91E-14 | chr:6:32648036 |
| 6 rs115064018 | 32643752 A | 5.074  | 2.96E-14 | chr:6:32648036 |
| 6 rs114995226 | 32645799 A | 4.993  | 2.96E-14 | chr:6:32648036 |
| 6 rs9275001   | 32642738 T | 3.364  | 3.03E-14 | chr:6:32648036 |
| 6 rs9274745   | 32638058 C | 0.2921 | 3.03E-14 | chr:6:32648036 |
| 6 rs113923037 | 32457315 A | 2.809  | 3.10E-14 | chr:6:32648036 |
| 6 rs115630465 | 32482032 A | 2.96   | 3.21E-14 | chr:6:32648036 |
| 6 rs9268944   | 32433654 T | 0.2758 | 3.21E-14 | chr:6:32648036 |
| 6 rs4587163   | 32593167 T | 3.457  | 3.22E-14 | chr:6:32648036 |
| 6 rs545911074 | 32522990 C | 2.835  | 3.23E-14 | chr:6:32648036 |
| 6 rs552672286 | 32554258 C | 4.144  | 3.24E-14 | chr:6:32648036 |
| 6 rs149432428 | 32485861 G | 2.946  | 3.28E-14 | chr:6:32648036 |
| 6 rs77701583  | 32435699 C | 0.2562 | 3.29E-14 | chr:6:32648036 |
| 6 rs9271752   | 32593868 C | 2.479  | 3.29E-14 | chr:6:32648036 |
| 6 rs113220099 | 32510823 T | 2.753  | 3.38E-14 | chr:6:32648036 |
| 6 rs534964517 | 32517795 C | 5.183  | 3.41E-14 | chr:6:32648036 |
| 6 rs570640158 | 32517793 C | 5.183  | 3.41E-14 | chr:6:32648036 |
| 6 rs9273007   | 32611537 T | 2.978  | 3.43E-14 | chr:6:32648036 |
| 6 rs586610    | 32572311 C | 3.581  | 3.44E-14 | chr:6:32648036 |
| 6 rs3828829   | 32521233 T | 6.201  | 3.44E-14 | chr:6:32648036 |
| 6 rs9271986   | 32597700 A | 0.1624 | 3.49E-14 | chr:6:32648036 |
| 6 rs3819696   | 32538618 A | 4.135  | 3.56E-14 | chr:6:32648036 |
| 6 rs9271755   | 32593926 C | 2.532  | 3.59E-14 | chr:6:32648036 |
| 6 rs9271756   | 32593933 G | 2.532  | 3.59E-14 | chr:6:32648036 |
| 6 rs3188642   | 32610553 A | 3.315  | 3.63E-14 | chr:6:32648036 |
| 6 rs9271786   | 32594709 T | 0.2321 | 3.69E-14 | chr:6:32648036 |
| 6 rs566208536 | 32534745 A | 2.845  | 3.75E-14 | chr:6:32648036 |
| 6 rs9272153   | 32601018 C | 0.27   | 3.77E-14 | chr:6:32648036 |
| 6 rs3997868   | 32578590 G | 4.349  | 3.77E-14 | chr:6:32648036 |
| 6 rs138222522 | 32510733 T | 2.74   | 3.88E-14 | chr:6:32648036 |
| 6 rs28383365  | 32606942 A | 2.826  | 3.95E-14 | chr:6:32648036 |
| 6 rs28366300  | 32560875 T | 3.468  | 4.06E-14 | chr:6:32648036 |
| 6 rs67534237  | 32513587 G | 3.371  | 4.07E-14 | chr:6:32648036 |
| 6 rs2454138   | 32570401 A | 3.372  | 4.11E-14 | chr:6:32648036 |
| 6 rs2516049   | 32570400 C | 3.372  | 4.11E-14 | chr:6:32648036 |
| 6 rs111875855 | 32489668 T | 4.475  | 4.12E-14 | chr:6:32648036 |
| 6 rs9272124   | 32600581 A | 0.2802 | 4.13E-14 | chr:6:32648036 |
| 6 rs9271517   | 32589740 G | 3.378  | 4.26E-14 | chr:6:32648036 |

|               |            |        |          |                |
|---------------|------------|--------|----------|----------------|
| 6 rs9273154   | 32613028 A | 3.153  | 4.27E-14 | chr:6:32648036 |
| 6 rs9271784   | 32594704 A | 0.2331 | 4.42E-14 | chr:6:32648036 |
| 6 rs9271787   | 32594718 C | 0.257  | 4.54E-14 | chr:6:32648036 |
| 6 rs9271962   | 32597434 C | 0.2767 | 4.64E-14 | chr:6:32648036 |
| 6 rs9296027   | 32393062 G | 4.851  | 4.68E-14 | chr:6:32648036 |
| 6 rs9469109   | 32393161 T | 4.851  | 4.68E-14 | chr:6:32648036 |
| 6 rs9501622   | 32394251 A | 4.851  | 4.68E-14 | chr:6:32648036 |
| 6 rs147328574 | 32643801 G | 5.078  | 4.75E-14 | chr:6:32648036 |
| 6 rs9269211   | 32450058 C | 0.203  | 4.81E-14 | chr:6:32648036 |
| 6 rs7739357   | 32441641 A | 0.245  | 4.81E-14 | chr:6:32648036 |
| 6 rs28366299  | 32560870 A | 3.458  | 4.90E-14 | chr:6:32648036 |
| 6 rs9271983   | 32597647 T | 0.1946 | 4.99E-14 | chr:6:32648036 |
| 6 rs150332241 | 32489525 A | 2.986  | 5.04E-14 | chr:6:32648036 |
| 6 rs9272803   | 32610591 T | 3.31   | 5.08E-14 | chr:6:32648036 |
| 6 rs9271857   | 32595147 T | 0.2689 | 5.36E-14 | chr:6:32648036 |
| 6 rs9272195   | 32601830 G | 0.2773 | 5.58E-14 | chr:6:32648036 |
| 6 rs9271859   | 32595231 G | 0.2658 | 5.66E-14 | chr:6:32648036 |
| 6 rs9271978   | 32597632 C | 0.2264 | 5.76E-14 | chr:6:32648036 |
| 6 rs2294878   | 32367795 T | 3.589  | 5.85E-14 | chr:6:32648036 |
| 6 rs9268831   | 32427748 C | 0.2686 | 5.89E-14 | chr:6:32648036 |
| 6 rs9271954   | 32597216 C | 0.2885 | 5.89E-14 | chr:6:32648036 |
| 6 rs6914573   | 32639368 T | 2.962  | 5.99E-14 | chr:6:32648036 |
| 6 rs375970207 | 32524649 C | 3.015  | 6.01E-14 | chr:6:32648036 |
| 6 rs3793126   | 32371619 G | 3.742  | 6.07E-14 | chr:6:32648036 |
| 6 rs9272148   | 32600980 C | 0.2823 | 6.17E-14 | chr:6:32648036 |
| 6 rs79905009  | 32479493 G | 2.475  | 6.32E-14 | chr:6:32648036 |
| 6 rs9271768   | 32594188 T | 3.26   | 6.34E-14 | chr:6:32648036 |
| 6 rs3104361   | 32652278 T | 0.2777 | 6.37E-14 | chr:6:32648036 |
| 6 rs28383427  | 32608792 T | 3.175  | 6.40E-14 | chr:6:32648036 |
| 6 rs3763316   | 32376746 T | 3.759  | 6.46E-14 | chr:6:32648036 |
| 6 rs9271789   | 32594768 A | 0.2761 | 6.47E-14 | chr:6:32648036 |
| 6 rs9274881   | 32641065 C | 2.467  | 6.47E-14 | chr:6:32648036 |
| 6 rs78121285  | 32502174 A | 3.966  | 6.54E-14 | chr:6:32648036 |
| 6 rs9269070   | 32440451 G | 0.2356 | 6.68E-14 | chr:6:32648036 |
| 6 rs116292100 | 32482576 C | 2.454  | 6.74E-14 | chr:6:32648036 |
| 6 rs112324351 | 32457338 C | 2.755  | 6.76E-14 | chr:6:32648036 |
| 6 rs9275008   | 32642944 T | 0.3043 | 6.82E-14 | chr:6:32648036 |
| 6 rs9271876   | 32595448 G | 0.2724 | 6.83E-14 | chr:6:32648036 |
| 6 rs8180672   | 32347533 G | 3.747  | 6.87E-14 | chr:6:32648036 |
| 6 rs8180673   | 32347532 T | 3.747  | 6.87E-14 | chr:6:32648036 |
| 6 rs9271981   | 32597639 C | 0.2144 | 6.89E-14 | chr:6:32648036 |
| 6 rs112628749 | 32510769 T | 2.694  | 6.95E-14 | chr:6:32648036 |
| 6 rs112894757 | 32510777 T | 2.694  | 6.95E-14 | chr:6:32648036 |



|               |            |        |          |                |
|---------------|------------|--------|----------|----------------|
| 6 rs113766057 | 32510772 A | 2.694  | 6.95E-14 | chr:6:32648036 |
| 6 rs28371168  | 32610751 G | 3.24   | 7.03E-14 | chr:6:32648036 |
| 6 rs9272865   | 32610736 A | 3.271  | 7.16E-14 | chr:6:32648036 |
| 6 rs28383420  | 32608707 C | 3.181  | 7.22E-14 | chr:6:32648036 |
| 6 rs9501400   | 32394184 A | 4.609  | 7.29E-14 | chr:6:32648036 |
| 6 rs28895236  | 32437223 T | 3.913  | 7.30E-14 | chr:6:32648036 |
| 6 rs9271858   | 32595223 G | 0.268  | 7.33E-14 | chr:6:32648036 |
| 6 rs510205    | 32584693 G | 4.252  | 7.40E-14 | chr:6:32648036 |
| 6 rs3828799   | 32636062 C | 4.217  | 7.48E-14 | chr:6:32648036 |
| 6 rs3828800   | 32636063 A | 4.217  | 7.48E-14 | chr:6:32648036 |
| 6 rs3828801   | 32636071 T | 4.217  | 7.48E-14 | chr:6:32648036 |
| 6 rs9269083   | 32441193 A | 0.2509 | 7.50E-14 | chr:6:32648036 |
| 6 rs9275007   | 32642921 T | 0.2988 | 7.53E-14 | chr:6:32648036 |
| 6 rs199705602 | 32606584 G | 2.58   | 7.65E-14 | chr:6:32648036 |
| 6 rs182681205 | 32478580 G | 4.73   | 7.70E-14 | chr:6:32648036 |
| 6 rs566293744 | 32478581 A | 4.73   | 7.70E-14 | chr:6:32648036 |
| 6 rs9272151   | 32601005 G | 0.271  | 7.72E-14 | chr:6:32648036 |
| 6 rs9272152   | 32601007 A | 0.271  | 7.72E-14 | chr:6:32648036 |
| 6 rs146323402 | 32482443 C | 2.655  | 7.74E-14 | chr:6:32648036 |
| 6 rs28366192  | 32368436 T | 3.508  | 7.74E-14 | chr:6:32648036 |
| 6 rs28383419  | 32608622 A | 3.103  | 7.85E-14 | chr:6:32648036 |
| 6 rs3763314   | 32376618 C | 0.263  | 7.88E-14 | chr:6:32648036 |
| 6 rs6926737   | 32375745 G | 0.263  | 7.88E-14 | chr:6:32648036 |
| 6 rs9268501   | 32376882 T | 0.263  | 7.88E-14 | chr:6:32648036 |
| 6 rs9268502   | 32376932 C | 0.263  | 7.88E-14 | chr:6:32648036 |
| 6 rs9268503   | 32377061 C | 0.263  | 7.88E-14 | chr:6:32648036 |
| 6 rs9268504   | 32377116 C | 0.263  | 7.88E-14 | chr:6:32648036 |
| 6 rs183872958 | 32552538 T | 4.344  | 7.91E-14 | chr:6:32648036 |
| 6 rs9271964   | 32597464 C | 0.2692 | 7.91E-14 | chr:6:32648036 |
| 6 rs186302965 | 32498947 A | 2.579  | 7.94E-14 | chr:6:32648036 |
| 6 rs190230688 | 32498937 T | 2.579  | 7.94E-14 | chr:6:32648036 |
| 6 rs9268516   | 32379489 T | 3.729  | 8.10E-14 | chr:6:32648036 |
| 6 rs113608847 | 32554284 G | 3.408  | 8.38E-14 | chr:6:32648036 |
| 6 rs7745002   | 32615421 G | 2.679  | 8.46E-14 | chr:6:32648036 |
| 6 rs9274883   | 32641072 T | 2.436  | 8.52E-14 | chr:6:32648036 |
| 6 rs5007258   | 32379239 A | 0.2629 | 8.53E-14 | chr:6:32648036 |
| 6 rs5007259   | 32379101 T | 0.2629 | 8.53E-14 | chr:6:32648036 |
| 6 rs5007260   | 32379047 G | 0.2629 | 8.53E-14 | chr:6:32648036 |
| 6 rs5007261   | 32379031 G | 0.2629 | 8.53E-14 | chr:6:32648036 |
| 6 rs5007262   | 32379011 A | 0.2629 | 8.53E-14 | chr:6:32648036 |
| 6 rs5007263   | 32378982 A | 0.2629 | 8.53E-14 | chr:6:32648036 |
| 6 rs5007265   | 32378866 T | 0.2629 | 8.53E-14 | chr:6:32648036 |
| 6 rs5007266   | 32378834 T | 0.2629 | 8.53E-14 | chr:6:32648036 |

|             |            |        |          |                |
|-------------|------------|--------|----------|----------------|
| 6 rs6906730 | 32379445 T | 0.2629 | 8.53E-14 | chr:6:32648036 |
| 6 rs6911383 | 32379682 T | 0.2629 | 8.53E-14 | chr:6:32648036 |
| 6 rs6932542 | 32380262 A | 0.2629 | 8.53E-14 | chr:6:32648036 |
| 6 rs6932810 | 32380190 G | 0.2629 | 8.53E-14 | chr:6:32648036 |
| 6 rs6938337 | 32381041 C | 0.2629 | 8.53E-14 | chr:6:32648036 |
| 6 rs9268506 | 32377470 C | 0.2629 | 8.53E-14 | chr:6:32648036 |
| 6 rs9268507 | 32377539 A | 0.2629 | 8.53E-14 | chr:6:32648036 |
| 6 rs9268508 | 32377588 T | 0.2629 | 8.53E-14 | chr:6:32648036 |
| 6 rs9268513 | 32378787 T | 0.2629 | 8.53E-14 | chr:6:32648036 |
| 6 rs1980494 | 32347016 G | 3.734  | 8.58E-14 | chr:6:32648036 |
| 6 rs1980495 | 32346794 C | 3.734  | 8.58E-14 | chr:6:32648036 |
| 6 rs2076520 | 32371269 T | 3.734  | 8.58E-14 | chr:6:32648036 |
| 6 rs2076522 | 32371179 C | 3.734  | 8.58E-14 | chr:6:32648036 |
| 6 rs2076524 | 32370684 G | 3.734  | 8.58E-14 | chr:6:32648036 |
| 6 rs2076525 | 32370616 C | 3.734  | 8.58E-14 | chr:6:32648036 |
| 6 rs2395155 | 32347897 T | 3.734  | 8.58E-14 | chr:6:32648036 |
| 6 rs2395156 | 32348098 A | 3.734  | 8.58E-14 | chr:6:32648036 |
| 6 rs2395157 | 32348145 G | 3.734  | 8.58E-14 | chr:6:32648036 |
| 6 rs2894252 | 32345443 T | 3.734  | 8.58E-14 | chr:6:32648036 |
| 6 rs3763307 | 32374622 T | 3.734  | 8.58E-14 | chr:6:32648036 |
| 6 rs3817962 | 32368314 A | 3.734  | 8.58E-14 | chr:6:32648036 |
| 6 rs8180659 | 32347280 T | 3.734  | 8.58E-14 | chr:6:32648036 |
| 6 rs8180664 | 32347490 T | 3.734  | 8.58E-14 | chr:6:32648036 |
| 6 rs9268400 | 32340654 A | 3.734  | 8.58E-14 | chr:6:32648036 |
| 6 rs9268401 | 32341318 G | 3.734  | 8.58E-14 | chr:6:32648036 |
| 6 rs9268403 | 32341473 C | 3.734  | 8.58E-14 | chr:6:32648036 |
| 6 rs9268404 | 32341719 T | 3.734  | 8.58E-14 | chr:6:32648036 |
| 6 rs9268405 | 32342087 T | 3.734  | 8.58E-14 | chr:6:32648036 |
| 6 rs9268406 | 32342129 T | 3.734  | 8.58E-14 | chr:6:32648036 |
| 6 rs9268407 | 32342166 C | 3.734  | 8.58E-14 | chr:6:32648036 |
| 6 rs9268409 | 32342639 C | 3.734  | 8.58E-14 | chr:6:32648036 |
| 6 rs9268416 | 32343384 G | 3.734  | 8.58E-14 | chr:6:32648036 |
| 6 rs9268417 | 32343616 G | 3.734  | 8.58E-14 | chr:6:32648036 |
| 6 rs9268418 | 32343686 C | 3.734  | 8.58E-14 | chr:6:32648036 |
| 6 rs9268420 | 32343796 T | 3.734  | 8.58E-14 | chr:6:32648036 |
| 6 rs9268421 | 32343869 G | 3.734  | 8.58E-14 | chr:6:32648036 |
| 6 rs9268422 | 32343873 A | 3.734  | 8.58E-14 | chr:6:32648036 |
| 6 rs9268423 | 32343882 T | 3.734  | 8.58E-14 | chr:6:32648036 |
| 6 rs9268424 | 32343985 C | 3.734  | 8.58E-14 | chr:6:32648036 |
| 6 rs9268425 | 32344376 T | 3.734  | 8.58E-14 | chr:6:32648036 |
| 6 rs9268426 | 32344731 G | 3.734  | 8.58E-14 | chr:6:32648036 |
| 6 rs9268427 | 32344808 T | 3.734  | 8.58E-14 | chr:6:32648036 |
| 6 rs9268428 | 32344973 T | 3.734  | 8.58E-14 | chr:6:32648036 |

|               |            |        |          |                |
|---------------|------------|--------|----------|----------------|
| 6 rs9268429   | 32345052 G | 3.734  | 8.58E-14 | chr:6:32648036 |
| 6 rs9268431   | 32345514 G | 3.734  | 8.58E-14 | chr:6:32648036 |
| 6 rs9268432   | 32345667 G | 3.734  | 8.58E-14 | chr:6:32648036 |
| 6 rs9268436   | 32346637 G | 3.734  | 8.58E-14 | chr:6:32648036 |
| 6 rs9268439   | 32346701 A | 3.734  | 8.58E-14 | chr:6:32648036 |
| 6 rs9268446   | 32347749 G | 3.734  | 8.58E-14 | chr:6:32648036 |
| 6 rs9268447   | 32347831 C | 3.734  | 8.58E-14 | chr:6:32648036 |
| 6 rs9268448   | 32348463 G | 3.734  | 8.58E-14 | chr:6:32648036 |
| 6 rs9268449   | 32348467 A | 3.734  | 8.58E-14 | chr:6:32648036 |
| 6 rs9268450   | 32348690 A | 3.734  | 8.58E-14 | chr:6:32648036 |
| 6 rs9268452   | 32349494 G | 3.734  | 8.58E-14 | chr:6:32648036 |
| 6 rs9268453   | 32349571 C | 3.734  | 8.58E-14 | chr:6:32648036 |
| 6 rs9268454   | 32349711 G | 3.734  | 8.58E-14 | chr:6:32648036 |
| 6 rs9268456   | 32349946 A | 3.734  | 8.58E-14 | chr:6:32648036 |
| 6 rs9268457   | 32350036 G | 3.734  | 8.58E-14 | chr:6:32648036 |
| 6 rs9268459   | 32350776 A | 3.734  | 8.58E-14 | chr:6:32648036 |
| 6 rs9268461   | 32351901 A | 3.734  | 8.58E-14 | chr:6:32648036 |
| 6 rs9268462   | 32351991 A | 3.734  | 8.58E-14 | chr:6:32648036 |
| 6 rs9268474   | 32357165 C | 3.734  | 8.58E-14 | chr:6:32648036 |
| 6 rs9268475   | 32358231 T | 3.734  | 8.58E-14 | chr:6:32648036 |
| 6 rs9268477   | 32359121 A | 3.734  | 8.58E-14 | chr:6:32648036 |
| 6 rs9268478   | 32360258 A | 3.734  | 8.58E-14 | chr:6:32648036 |
| 6 rs9268480   | 32363844 T | 3.734  | 8.58E-14 | chr:6:32648036 |
| 6 rs9268481   | 32364356 G | 3.734  | 8.58E-14 | chr:6:32648036 |
| 6 rs9268482   | 32367777 T | 3.734  | 8.58E-14 | chr:6:32648036 |
| 6 rs9268491   | 32374131 G | 3.734  | 8.58E-14 | chr:6:32648036 |
| 6 rs546173503 | 32523200 C | 3.025  | 8.59E-14 | chr:6:32648036 |
| 6 rs9274902   | 32641220 C | 2.571  | 8.70E-14 | chr:6:32648036 |
| 6 rs9272871   | 32610747 C | 3.225  | 8.81E-14 | chr:6:32648036 |
| 6 rs28383453  | 32609358 T | 3.107  | 8.87E-14 | chr:6:32648036 |
| 6 rs28383384  | 32607414 A | 2.986  | 8.97E-14 | chr:6:32648036 |
| 6 rs28383385  | 32607416 A | 2.986  | 8.97E-14 | chr:6:32648036 |
| 6 rs72849274  | 32469068 T | 2.991  | 9.11E-14 | chr:6:32648036 |
| 6 rs28383382  | 32607320 C | 2.893  | 9.15E-14 | chr:6:32648036 |
| 6 rs9272084   | 32599680 T | 0.272  | 9.17E-14 | chr:6:32648036 |
| 6 rs9271854   | 32595118 A | 0.2733 | 9.17E-14 | chr:6:32648036 |
| 6 rs9271855   | 32595119 C | 0.2733 | 9.17E-14 | chr:6:32648036 |
| 6 rs9271856   | 32595120 A | 0.2733 | 9.17E-14 | chr:6:32648036 |
| 6 rs9274926   | 32641416 C | 2.515  | 9.30E-14 | chr:6:32648036 |
| 6 rs9274927   | 32641419 C | 2.515  | 9.30E-14 | chr:6:32648036 |
| 6 rs5024431   | 32684344 A | 3.828  | 9.38E-14 | chr:6:32648036 |
| 6 rs530934728 | 32684513 A | 3.828  | 9.38E-14 | chr:6:32648036 |
| 6 rs9271963   | 32597453 A | 0.2732 | 9.40E-14 | chr:6:32648036 |

|               |            |        |          |                |
|---------------|------------|--------|----------|----------------|
| 6 rs6935940   | 32683691 C | 3.826  | 9.52E-14 | chr:6:32648036 |
| 6 rs7755212   | 32441408 C | 0.2534 | 9.56E-14 | chr:6:32648036 |
| 6 rs9268949   | 32433798 T | 3.152  | 9.62E-14 | chr:6:32648036 |
| 6 rs9272150   | 32601000 A | 0.2729 | 9.65E-14 | chr:6:32648036 |
| 6 rs9268415   | 32343267 C | 3.723  | 1.01E-13 | chr:6:32648036 |
| 6 rs111634228 | 32594452 G | 0.2841 | 1.02E-13 | chr:6:32648036 |
| 6 rs6941393   | 32583200 A | 4.258  | 1.02E-13 | chr:6:32648036 |
| 6 rs6941972   | 32583529 A | 4.258  | 1.02E-13 | chr:6:32648036 |
| 6 rs370758801 | 32534736 T | 2.779  | 1.06E-13 | chr:6:32648036 |
| 6 rs9271748   | 32593830 G | 2.388  | 1.08E-13 | chr:6:32648036 |
| 6 rs9271749   | 32593836 T | 2.388  | 1.08E-13 | chr:6:32648036 |
| 6 rs9271750   | 32593837 G | 2.388  | 1.08E-13 | chr:6:32648036 |
| 6 rs9274656   | 32636351 C | 4.14   | 1.08E-13 | chr:6:32648036 |
| 6 rs7773182   | 32441422 T | 0.2538 | 1.11E-13 | chr:6:32648036 |
| 6 rs9270161   | 32555558 A | 0.2234 | 1.11E-13 | chr:6:32648036 |
| 6 rs4502931   | 32380782 T | 0.2652 | 1.11E-13 | chr:6:32648036 |
| 6 rs9268514   | 32378945 A | 3.705  | 1.11E-13 | chr:6:32648036 |
| 6 rs9268518   | 32380818 A | 0.2652 | 1.11E-13 | chr:6:32648036 |
| 6 rs9268519   | 32380826 G | 0.2652 | 1.11E-13 | chr:6:32648036 |
| 6 rs9268520   | 32380860 C | 0.2652 | 1.11E-13 | chr:6:32648036 |
| 6 rs968154    | 32380785 G | 0.2652 | 1.11E-13 | chr:6:32648036 |
| 6 rs9272072   | 32599563 G | 0.2864 | 1.12E-13 | chr:6:32648036 |
| 6 rs9268951   | 32433907 A | 3.275  | 1.17E-13 | chr:6:32648036 |
| 6 rs5007264   | 32378877 C | 0.2666 | 1.18E-13 | chr:6:32648036 |
| 6 rs114309058 | 32594470 A | 0.2874 | 1.26E-13 | chr:6:32648036 |
| 6 rs9272086   | 32599688 T | 0.276  | 1.29E-13 | chr:6:32648036 |
| 6 rs2858301   | 32643201 T | 4.801  | 1.30E-13 | chr:6:32648036 |
| 6 rs9271861   | 32595287 T | 0.2677 | 1.32E-13 | chr:6:32648036 |
| 6 rs3129755   | 32583057 A | 0.2586 | 1.32E-13 | chr:6:32648036 |
| 6 rs28383429  | 32608844 G | 3.062  | 1.32E-13 | chr:6:32648036 |
| 6 rs111357164 | 32482638 A | 2.399  | 1.33E-13 | chr:6:32648036 |
| 6 rs113823631 | 32553037 T | 3.344  | 1.35E-13 | chr:6:32648036 |
| 6 rs9274943   | 32641784 T | 2.516  | 1.35E-13 | chr:6:32648036 |
| 6 rs9274944   | 32641786 A | 2.516  | 1.35E-13 | chr:6:32648036 |
| 6 rs148395623 | 32524801 A | 3.02   | 1.37E-13 | chr:6:32648036 |
| 6 rs34403271  | 32550220 C | 3.822  | 1.40E-13 | chr:6:32648036 |
| 6 rs9274654   | 32636280 T | 4.02   | 1.42E-13 | chr:6:32648036 |
| 6 rs9274655   | 32636289 C | 4.02   | 1.42E-13 | chr:6:32648036 |
| 6 rs111690064 | 32520117 C | 5.242  | 1.45E-13 | chr:6:32648036 |
| 6 rs1130373   | 32634301 C | 4.018  | 1.45E-13 | chr:6:32648036 |
| 6 rs28724166  | 32555858 T | 0.3283 | 1.47E-13 | chr:6:32648036 |
| 6 rs143801964 | 32645680 C | 4.766  | 1.49E-13 | chr:6:32648036 |
| 6 rs9268412   | 32343018 A | 3.637  | 1.50E-13 | chr:6:32648036 |

|               |            |        |          |                |
|---------------|------------|--------|----------|----------------|
| 6 rs9268413   | 32343095 C | 3.637  | 1.50E-13 | chr:6:32648036 |
| 6 rs9268414   | 32343096 A | 3.637  | 1.50E-13 | chr:6:32648036 |
| 6 rs9272076   | 32599624 T | 0.2612 | 1.51E-13 | chr:6:32648036 |
| 6 rs9272077   | 32599625 G | 0.2612 | 1.51E-13 | chr:6:32648036 |
| 6 rs9271746   | 32593804 C | 2.403  | 1.53E-13 | chr:6:32648036 |
| 6 rs5026743   | 32439964 G | 0.2359 | 1.54E-13 | chr:6:32648036 |
| 6 rs111477174 | 32594457 G | 0.2888 | 1.55E-13 | chr:6:32648036 |
| 6 rs9271977   | 32597623 A | 0.2604 | 1.60E-13 | chr:6:32648036 |
| 6 rs146702867 | 32524800 G | 2.789  | 1.68E-13 | chr:6:32648036 |
| 6 rs185091810 | 32644431 A | 4.858  | 1.68E-13 | chr:6:32648036 |
| 6 rs9271865   | 32595360 T | 0.261  | 1.71E-13 | chr:6:32648036 |
| 6 rs114852415 | 32524759 A | 2.776  | 1.72E-13 | chr:6:32648036 |
| 6 rs140730237 | 32534669 C | 2.714  | 1.74E-13 | chr:6:32648036 |
| 6 rs35095850  | 32549935 G | 3.825  | 1.74E-13 | chr:6:32648036 |
| 6 rs35239661  | 32549923 T | 3.825  | 1.74E-13 | chr:6:32648036 |
| 6 rs35176742  | 32535525 A | 2.773  | 1.76E-13 | chr:6:32648036 |
| 6 rs9272073   | 32599570 T | 0.2927 | 1.76E-13 | chr:6:32648036 |
| 6 rs9274640   | 32636154 G | 4.024  | 1.79E-13 | chr:6:32648036 |
| 6 rs6936863   | 32684029 G | 3.743  | 1.81E-13 | chr:6:32648036 |
| 6 rs28746845  | 32634150 C | 3.396  | 1.82E-13 | chr:6:32648036 |
| 6 rs2294880   | 32367722 G | 3.634  | 1.83E-13 | chr:6:32648036 |
| 6 rs9272553   | 32607008 T | 2.77   | 1.86E-13 | chr:6:32648036 |
| 6 rs9272521   | 32606479 A | 3.151  | 1.89E-13 | chr:6:32648036 |
| 6 rs9274969   | 32642073 T | 2.839  | 1.89E-13 | chr:6:32648036 |
| 6 rs9269069   | 32440362 C | 0.2538 | 1.90E-13 | chr:6:32648036 |
| 6 rs72848212  | 32594898 T | 0.2254 | 1.92E-13 | chr:6:32648036 |
| 6 rs28752516  | 32583611 A | 0.2584 | 1.95E-13 | chr:6:32648036 |
| 6 rs35359983  | 32555022 A | 3.189  | 1.97E-13 | chr:6:32648036 |
| 6 rs112439682 | 32479972 T | 2.412  | 1.97E-13 | chr:6:32648036 |
| 6 rs66499101  | 32517332 A | 3.118  | 1.98E-13 | chr:6:32648036 |
| 6 rs17210293  | 32556165 T | 4.256  | 1.99E-13 | chr:6:32648036 |
| 6 rs9271985   | 32597679 T | 0.179  | 2.02E-13 | chr:6:32648036 |
| 6 rs9275010   | 32642966 T | 2.949  | 2.05E-13 | chr:6:32648036 |
| 6 rs9273040   | 32611958 G | 2.875  | 2.08E-13 | chr:6:32648036 |
| 6 rs661330    | 32577472 C | 4.06   | 2.11E-13 | chr:6:32648036 |
| 6 rs9271976   | 32597617 C | 0.264  | 2.17E-13 | chr:6:32648036 |
| 6 rs74323872  | 32479953 T | 2.406  | 2.17E-13 | chr:6:32648036 |
| 6 rs76135920  | 32479942 T | 2.406  | 2.17E-13 | chr:6:32648036 |
| 6 rs563774374 | 32506022 T | 2.449  | 2.17E-13 | chr:6:32648036 |
| 6 rs727939    | 32623463 G | 2.51   | 2.22E-13 | chr:6:32648036 |
| 6 rs9273044   | 32611971 C | 2.827  | 2.25E-13 | chr:6:32648036 |
| 6 rs9271847   | 32594993 G | 0.1562 | 2.26E-13 | chr:6:32648036 |
| 6 rs2395206   | 32452176 G | 0.2154 | 2.27E-13 | chr:6:32648036 |

|               |            |        |          |                |
|---------------|------------|--------|----------|----------------|
| 6 rs9274824   | 32639702 T | 2.598  | 2.29E-13 | chr:6:32648036 |
| 6 rs281863614 | 32630788 A | 2.643  | 2.34E-13 | chr:6:32648036 |
| 6 rs533002231 | 32346663 G | 3.629  | 2.42E-13 | chr:6:32648036 |
| 6 rs564024810 | 32346662 T | 3.629  | 2.42E-13 | chr:6:32648036 |
| 6 rs3828809   | 32636172 T | 3.951  | 2.43E-13 | chr:6:32648036 |
| 6 rs9272522   | 32606490 A | 3.1    | 2.56E-13 | chr:6:32648036 |
| 6 rs281863734 | 32630620 T | 3.688  | 2.61E-13 | chr:6:32648036 |
| 6 rs9271866   | 32595367 T | 0.2653 | 2.64E-13 | chr:6:32648036 |
| 6 rs9271867   | 32595368 G | 0.2653 | 2.64E-13 | chr:6:32648036 |
| 6 rs111608233 | 32541061 C | 3.19   | 2.66E-13 | chr:6:32648036 |
| 6 rs566143951 | 32490902 G | 2.487  | 2.67E-13 | chr:6:32648036 |
| 6 rs9271972   | 32597567 T | 0.2501 | 2.69E-13 | chr:6:32648036 |
| 6 rs9271863   | 32595334 A | 0.2596 | 2.70E-13 | chr:6:32648036 |
| 6 rs968155    | 32380715 C | 0.2724 | 2.72E-13 | chr:6:32648036 |
| 6 rs9271984   | 32597669 G | 0.1639 | 2.75E-13 | chr:6:32648036 |
| 6 rs9273042   | 32611964 T | 2.818  | 2.76E-13 | chr:6:32648036 |
| 6 rs115001626 | 32487462 T | 3.205  | 2.79E-13 | chr:6:32648036 |
| 6 rs9268484   | 32368513 T | 3.591  | 2.83E-13 | chr:6:32648036 |
| 6 rs281874968 | 32631308 A | 3.626  | 2.95E-13 | chr:6:32648036 |
| 6 rs566860331 | 32523586 G | 2.737  | 2.97E-13 | chr:6:32648036 |
| 6 rs146320947 | 32534206 A | 2.704  | 3.01E-13 | chr:6:32648036 |
| 6 rs115622534 | 32553023 G | 3.271  | 3.08E-13 | chr:6:32648036 |
| 6 rs1694126   | 32640905 A | 5.765  | 3.10E-13 | chr:6:32648036 |
| 6 rs180828183 | 32644430 T | 4.724  | 3.10E-13 | chr:6:32648036 |
| 6 rs114217086 | 32552954 G | 3.167  | 3.13E-13 | chr:6:32648036 |
| 6 rs116743472 | 32552953 T | 3.167  | 3.13E-13 | chr:6:32648036 |
| 6 rs112675983 | 32469251 T | 2.713  | 3.16E-13 | chr:6:32648036 |
| 6 rs9269085   | 32441202 C | 0.2623 | 3.23E-13 | chr:6:32648036 |
| 6 rs9272102   | 32599830 C | 0.3009 | 3.24E-13 | chr:6:32648036 |
| 6 rs9274977   | 32642247 G | 3.13   | 3.28E-13 | chr:6:32648036 |
| 6 rs9275011   | 32642969 T | 2.895  | 3.28E-13 | chr:6:32648036 |
| 6 rs28746825  | 32633472 G | 3.865  | 3.33E-13 | chr:6:32648036 |
| 6 rs542112343 | 32481790 A | 11.1   | 3.34E-13 | chr:6:32648036 |
| 6 rs112073772 | 32534421 T | 3.156  | 3.35E-13 | chr:6:32648036 |
| 6 rs9275062   | 32648337 C | 3.079  | 3.39E-13 | chr:6:32648036 |
| 6 rs28383361  | 32606846 A | 2.515  | 3.40E-13 | chr:6:32648036 |
| 6 rs578176287 | 32486099 G | 3.809  | 3.41E-13 | chr:6:32648036 |
| 6 rs192090456 | 32482101 C | 2.484  | 3.41E-13 | chr:6:32648036 |
| 6 rs9273022   | 32611737 C | 2.693  | 3.44E-13 | chr:6:32648036 |
| 6 rs9273502   | 32628389 C | 4.001  | 3.45E-13 | chr:6:32648036 |
| 6 rs9273503   | 32628390 T | 4.001  | 3.45E-13 | chr:6:32648036 |
| 6 rs28383433  | 32608887 G | 3.023  | 3.46E-13 | chr:6:32648036 |
| 6 rs140185715 | 32534808 A | 2.726  | 3.47E-13 | chr:6:32648036 |

|               |            |        |          |                |
|---------------|------------|--------|----------|----------------|
| 6 rs9271537   | 32589982 T | 0.2833 | 3.51E-13 | chr:6:32648036 |
| 6 rs9268499   | 32375695 A | 3.549  | 3.53E-13 | chr:6:32648036 |
| 6 rs9271745   | 32593786 G | 2.378  | 3.58E-13 | chr:6:32648036 |
| 6 rs72851018  | 32501379 C | 3.227  | 3.60E-13 | chr:6:32648036 |
| 6 rs9273045   | 32611982 C | 2.792  | 3.66E-13 | chr:6:32648036 |
| 6 rs537501315 | 32516973 A | 2.741  | 3.70E-13 | chr:6:32648036 |
| 6 rs111254573 | 32537570 G | 2.877  | 3.72E-13 | chr:6:32648036 |
| 6 rs532162239 | 32558725 T | 2.873  | 3.73E-13 | chr:6:32648036 |
| 6 rs547202137 | 32558728 A | 2.873  | 3.73E-13 | chr:6:32648036 |
| 6 rs116082814 | 32482278 T | 4.577  | 3.75E-13 | chr:6:32648036 |
| 6 rs28383434  | 32608925 T | 3.084  | 3.83E-13 | chr:6:32648036 |
| 6 rs118146750 | 32523174 A | 2.716  | 3.85E-13 | chr:6:32648036 |
| 6 rs9271862   | 32595333 C | 0.2626 | 3.87E-13 | chr:6:32648036 |
| 6 rs188413732 | 32498914 T | 2.82   | 3.99E-13 | chr:6:32648036 |
| 6 rs9271979   | 32597635 C | 0.2023 | 4.02E-13 | chr:6:32648036 |
| 6 rs530339951 | 32481788 G | 10.89  | 4.02E-13 | chr:6:32648036 |
| 6 rs41287333  | 32555046 T | 3.096  | 4.09E-13 | chr:6:32648036 |
| 6 rs9275073   | 32648513 C | 0.3199 | 4.11E-13 | chr:6:32648036 |
| 6 rs1049070   | 32634425 T | 3.813  | 4.13E-13 | chr:6:32648036 |
| 6 rs9271492   | 32589122 C | 0.2332 | 4.24E-13 | chr:6:32648036 |
| 6 rs35670775  | 32544455 T | 3.173  | 4.33E-13 | chr:6:32648036 |
| 6 rs116813230 | 32524784 A | 2.924  | 4.34E-13 | chr:6:32648036 |
| 6 rs281863414 | 32631058 G | 3.612  | 4.34E-13 | chr:6:32648036 |
| 6 rs28383386  | 32607567 A | 2.517  | 4.34E-13 | chr:6:32648036 |
| 6 rs9269219   | 32450333 T | 0.2492 | 4.40E-13 | chr:6:32648036 |
| 6 rs553565066 | 32523149 A | 2.69   | 4.50E-13 | chr:6:32648036 |
| 6 rs575020384 | 32486879 C | 2.986  | 4.53E-13 | chr:6:32648036 |
| 6 rs9271823   | 32594915 G | 0.2216 | 4.60E-13 | chr:6:32648036 |
| 6 rs9271824   | 32594916 G | 0.2216 | 4.60E-13 | chr:6:32648036 |
| 6 rs540368661 | 32538886 A | 3.004  | 4.65E-13 | chr:6:32648036 |
| 6 rs557630457 | 32554837 T | 3.561  | 4.80E-13 | chr:6:32648036 |
| 6 rs576005883 | 32554840 T | 3.561  | 4.80E-13 | chr:6:32648036 |
| 6 rs547758749 | 32558755 T | 2.801  | 4.81E-13 | chr:6:32648036 |
| 6 rs9271742   | 32593747 T | 2.371  | 4.81E-13 | chr:6:32648036 |
| 6 rs9271743   | 32593751 G | 2.371  | 4.81E-13 | chr:6:32648036 |
| 6 rs61343222  | 32480844 C | 2.327  | 4.82E-13 | chr:6:32648036 |
| 6 rs9269076   | 32440805 C | 0.2546 | 4.82E-13 | chr:6:32648036 |
| 6 rs9269077   | 32440806 C | 0.2546 | 4.82E-13 | chr:6:32648036 |
| 6 rs542371727 | 32554817 T | 3.538  | 4.93E-13 | chr:6:32648036 |
| 6 rs74583807  | 32469214 T | 2.68   | 5.16E-13 | chr:6:32648036 |
| 6 rs80293621  | 32469218 T | 2.68   | 5.16E-13 | chr:6:32648036 |
| 6 rs9273371   | 32626565 T | 3.497  | 5.43E-13 | chr:6:32648036 |
| 6 rs3828796   | 32635974 G | 3.98   | 5.44E-13 | chr:6:32648036 |

|               |            |        |          |                |
|---------------|------------|--------|----------|----------------|
| 6 rs9273866   | 32629639 C | 3.98   | 5.44E-13 | chr:6:32648036 |
| 6 rs9274661   | 32636443 C | 3.98   | 5.44E-13 | chr:6:32648036 |
| 6 rs9273157   | 32613052 G | 2.946  | 5.45E-13 | chr:6:32648036 |
| 6 rs28366260  | 32559536 A | 4.305  | 5.45E-13 | chr:6:32648036 |
| 6 rs536189184 | 32558823 A | 2.816  | 5.45E-13 | chr:6:32648036 |
| 6 rs9273155   | 32613042 C | 2.947  | 5.49E-13 | chr:6:32648036 |
| 6 rs12722061  | 32609221 C | 3.047  | 5.49E-13 | chr:6:32648036 |
| 6 rs555525561 | 32523608 T | 2.696  | 5.53E-13 | chr:6:32648036 |
| 6 rs9274946   | 32641828 G | 2.528  | 5.54E-13 | chr:6:32648036 |
| 6 rs116822312 | 32485747 T | 3.174  | 5.55E-13 | chr:6:32648036 |
| 6 rs570481252 | 32485746 A | 3.174  | 5.55E-13 | chr:6:32648036 |
| 6 rs74487484  | 32455661 T | 2.574  | 5.56E-13 | chr:6:32648036 |
| 6 rs28746846  | 32634261 T | 3.837  | 5.59E-13 | chr:6:32648036 |
| 6 rs28746847  | 32634262 G | 3.837  | 5.59E-13 | chr:6:32648036 |
| 6 rs540912133 | 32553011 G | 3.211  | 5.59E-13 | chr:6:32648036 |
| 6 rs573504840 | 32553010 T | 3.211  | 5.59E-13 | chr:6:32648036 |
| 6 rs9272574   | 32607281 A | 2.677  | 5.60E-13 | chr:6:32648036 |
| 6 rs78556970  | 32626865 A | 0.3203 | 5.61E-13 | chr:6:32648036 |
| 6 rs28371169  | 32610819 G | 2.903  | 5.64E-13 | chr:6:32648036 |
| 6 rs34533486  | 32544031 T | 2.989  | 5.67E-13 | chr:6:32648036 |
| 6 rs71534519  | 32508893 G | 0.3321 | 5.68E-13 | chr:6:32648036 |
| 6 rs535188034 | 32558790 T | 2.806  | 5.70E-13 | chr:6:32648036 |
| 6 rs553643750 | 32558791 G | 2.806  | 5.70E-13 | chr:6:32648036 |
| 6 rs3129766   | 32594441 G | 2.838  | 5.81E-13 | chr:6:32648036 |
| 6 rs1140342   | 32629141 T | 2.746  | 5.85E-13 | chr:6:32648036 |
| 6 rs540965243 | 32511378 C | 2.734  | 5.87E-13 | chr:6:32648036 |
| 6 rs543622960 | 32511362 C | 2.734  | 5.87E-13 | chr:6:32648036 |
| 6 rs558497977 | 32511365 A | 2.734  | 5.87E-13 | chr:6:32648036 |
| 6 rs576708145 | 32511375 C | 2.734  | 5.87E-13 | chr:6:32648036 |
| 6 rs28366278  | 32560183 A | 2.636  | 5.96E-13 | chr:6:32648036 |
| 6 rs113141487 | 32524887 G | 3.787  | 5.99E-13 | chr:6:32648036 |
| 6 rs9271741   | 32593734 T | 2.368  | 6.01E-13 | chr:6:32648036 |
| 6 rs34282199  | 32556218 T | 3.285  | 6.13E-13 | chr:6:32648036 |
| 6 rs28366283  | 32560288 C | 2.806  | 6.20E-13 | chr:6:32648036 |
| 6 rs3828792   | 32635828 C | 3.945  | 6.46E-13 | chr:6:32648036 |
| 6 rs113679564 | 32479745 C | 2.465  | 6.51E-13 | chr:6:32648036 |
| 6 rs1049072   | 32634355 A | 3.8    | 6.64E-13 | chr:6:32648036 |
| 6 rs139296575 | 32469233 A | 2.661  | 6.74E-13 | chr:6:32648036 |
| 6 rs547245894 | 32469227 C | 2.661  | 6.74E-13 | chr:6:32648036 |
| 6 rs545832221 | 32486887 A | 2.945  | 6.84E-13 | chr:6:32648036 |
| 6 rs556886924 | 32486883 C | 2.945  | 6.84E-13 | chr:6:32648036 |
| 6 rs112578359 | 32534909 A | 2.669  | 7.33E-13 | chr:6:32648036 |
| 6 rs28746798  | 32632558 C | 2.751  | 7.54E-13 | chr:6:32648036 |



|               |            |        |          |                |
|---------------|------------|--------|----------|----------------|
| 6 rs9272913   | 32610860 T | 2.83   | 7.70E-13 | chr:6:32648036 |
| 6 rs9272914   | 32610863 G | 2.83   | 7.70E-13 | chr:6:32648036 |
| 6 rs66466672  | 32508913 G | 0.3353 | 7.81E-13 | chr:6:32648036 |
| 6 rs76731120  | 32454239 C | 2.663  | 8.21E-13 | chr:6:32648036 |
| 6 rs2395191   | 32447085 T | 0.232  | 8.39E-13 | chr:6:32648036 |
| 6 rs28383312  | 32587090 T | 3.167  | 8.43E-13 | chr:6:32648036 |
| 6 rs9269068   | 32440270 A | 0.2385 | 8.54E-13 | chr:6:32648036 |
| 6 rs9274954   | 32641878 T | 2.455  | 8.61E-13 | chr:6:32648036 |
| 6 rs530423766 | 32610152 T | 2.675  | 8.73E-13 | chr:6:32648036 |
| 6 rs3828808   | 32636138 G | 3.863  | 8.86E-13 | chr:6:32648036 |
| 6 rs9273020   | 32611723 T | 2.606  | 9.02E-13 | chr:6:32648036 |
| 6 rs9273021   | 32611725 G | 2.606  | 9.02E-13 | chr:6:32648036 |
| 6 rs535905056 | 32511341 G | 2.709  | 9.04E-13 | chr:6:32648036 |
| 6 rs552568377 | 32511319 C | 2.709  | 9.04E-13 | chr:6:32648036 |
| 6 rs553395545 | 32511337 A | 2.709  | 9.04E-13 | chr:6:32648036 |
| 6 rs571140115 | 32511322 T | 2.709  | 9.04E-13 | chr:6:32648036 |
| 6 rs574932946 | 32511340 T | 2.709  | 9.04E-13 | chr:6:32648036 |
| 6 rs9274889   | 32641143 G | 2.311  | 9.08E-13 | chr:6:32648036 |
| 6 rs9268494   | 32375352 C | 3.424  | 9.23E-13 | chr:6:32648036 |
| 6 rs9268497   | 32375424 A | 3.424  | 9.23E-13 | chr:6:32648036 |
| 6 rs140571637 | 32516988 T | 2.804  | 9.29E-13 | chr:6:32648036 |
| 6 rs1065043   | 32611234 T | 2.687  | 9.57E-13 | chr:6:32648036 |
| 6 rs9272376   | 32604697 T | 2.671  | 9.59E-13 | chr:6:32648036 |
| 6 rs9272377   | 32604699 T | 2.671  | 9.59E-13 | chr:6:32648036 |
| 6 rs77867566  | 32485524 A | 3.61   | 9.86E-13 | chr:6:32648036 |
| 6 rs3134993   | 32637778 G | 0.2801 | 9.96E-13 | chr:6:32648036 |
| 6 rs9274955   | 32641890 G | 2.433  | 9.98E-13 | chr:6:32648036 |
| 6 rs9269067   | 32440242 G | 0.2388 | 9.98E-13 | chr:6:32648036 |
| 6 rs9272411   | 32604980 T | 0.3195 | 1.01E-12 | chr:6:32648036 |
| 6 rs585305    | 32572048 T | 3.032  | 1.02E-12 | chr:6:32648036 |
| 6 rs9272896   | 32610806 C | 2.873  | 1.02E-12 | chr:6:32648036 |
| 6 rs1135085   | 32522477 C | 4.577  | 1.04E-12 | chr:6:32648036 |
| 6 rs3763311   | 32376176 T | 3.412  | 1.11E-12 | chr:6:32648036 |
| 6 rs28366262  | 32559620 G | 3.701  | 1.12E-12 | chr:6:32648036 |
| 6 rs9272555   | 32607042 A | 2.598  | 1.13E-12 | chr:6:32648036 |
| 6 rs9272556   | 32607046 T | 2.598  | 1.13E-12 | chr:6:32648036 |
| 6 rs6457592   | 32425983 T | 0.2931 | 1.15E-12 | chr:6:32648036 |
| 6 rs9275642   | 32684935 T | 3.522  | 1.16E-12 | chr:6:32648036 |
| 6 rs112964544 | 32488402 A | 2.366  | 1.17E-12 | chr:6:32648036 |
| 6 rs9274949   | 32641855 G | 2.444  | 1.18E-12 | chr:6:32648036 |
| 6 rs281863425 | 32631044 A | 3.528  | 1.19E-12 | chr:6:32648036 |
| 6 rs281863426 | 32631043 C | 3.528  | 1.19E-12 | chr:6:32648036 |
| 6 rs28383370  | 32607152 C | 2.438  | 1.19E-12 | chr:6:32648036 |

|               |            |        |          |                |
|---------------|------------|--------|----------|----------------|
| 6 rs3207983   | 32609213 A | 2.974  | 1.19E-12 | chr:6:32648036 |
| 6 rs74503228  | 32454246 T | 2.647  | 1.23E-12 | chr:6:32648036 |
| 6 rs9272099   | 32599813 G | 0.3144 | 1.23E-12 | chr:6:32648036 |
| 6 rs536151678 | 32453543 C | 0.2449 | 1.23E-12 | chr:6:32648036 |
| 6 rs535696666 | 32523176 A | 2.828  | 1.26E-12 | chr:6:32648036 |
| 6 rs557617439 | 32523181 G | 2.828  | 1.26E-12 | chr:6:32648036 |
| 6 rs116719962 | 32489322 T | 0.3739 | 1.27E-12 | chr:6:32648036 |
| 6 rs138925158 | 32493114 A | 3.114  | 1.28E-12 | chr:6:32648036 |
| 6 rs28383455  | 32609380 T | 2.888  | 1.28E-12 | chr:6:32648036 |
| 6 rs9275070   | 32648449 T | 2.946  | 1.29E-12 | chr:6:32648036 |
| 6 rs141591416 | 32496019 A | 2.769  | 1.34E-12 | chr:6:32648036 |
| 6 rs28383431  | 32608856 C | 2.907  | 1.35E-12 | chr:6:32648036 |
| 6 rs9271846   | 32594980 A | 0.1515 | 1.36E-12 | chr:6:32648036 |
| 6 rs115991341 | 32506545 G | 0.4029 | 1.36E-12 | chr:6:32648036 |
| 6 rs28746843  | 32634137 C | 3.177  | 1.36E-12 | chr:6:32648036 |
| 6 rs28746844  | 32634139 T | 3.177  | 1.36E-12 | chr:6:32648036 |
| 6 rs542134915 | 32541099 C | 3.161  | 1.39E-12 | chr:6:32648036 |
| 6 rs28732308  | 32548990 T | 3.07   | 1.41E-12 | chr:6:32648036 |
| 6 rs17209964  | 32534471 T | 3.071  | 1.42E-12 | chr:6:32648036 |
| 6 rs9273187   | 32613376 T | 2.826  | 1.43E-12 | chr:6:32648036 |
| 6 rs9274886   | 32641086 C | 2.297  | 1.43E-12 | chr:6:32648036 |
| 6 rs9272538   | 32606809 C | 2.462  | 1.45E-12 | chr:6:32648036 |
| 6 rs9272905   | 32610836 T | 2.812  | 1.46E-12 | chr:6:32648036 |
| 6 rs7759742   | 32381736 T | 0.2945 | 1.48E-12 | chr:6:32648036 |
| 6 rs74973088  | 32457874 T | 0.3819 | 1.48E-12 | chr:6:32648036 |
| 6 rs9268495   | 32375371 T | 3.341  | 1.50E-12 | chr:6:32648036 |
| 6 rs9268496   | 32375374 A | 3.341  | 1.50E-12 | chr:6:32648036 |
| 6 rs28746839  | 32634090 C | 3.129  | 1.53E-12 | chr:6:32648036 |
| 6 rs28746840  | 32634091 C | 3.129  | 1.53E-12 | chr:6:32648036 |
| 6 rs28746841  | 32634094 C | 3.129  | 1.53E-12 | chr:6:32648036 |
| 6 rs28746842  | 32634098 G | 3.129  | 1.53E-12 | chr:6:32648036 |
| 6 rs72849269  | 32468939 G | 0.3645 | 1.54E-12 | chr:6:32648036 |
| 6 rs3830059   | 32634007 G | 3.702  | 1.56E-12 | chr:6:32648036 |
| 6 rs67408570  | 32508874 C | 2.923  | 1.56E-12 | chr:6:32648036 |
| 6 rs9271403   | 32587536 G | 3.031  | 1.59E-12 | chr:6:32648036 |
| 6 rs9272355   | 32604515 G | 0.3455 | 1.59E-12 | chr:6:32648036 |
| 6 rs9272357   | 32604522 C | 0.3455 | 1.59E-12 | chr:6:32648036 |
| 6 rs526784    | 32572030 A | 3.001  | 1.61E-12 | chr:6:32648036 |
| 6 rs9271842   | 32594953 A | 0.1679 | 1.62E-12 | chr:6:32648036 |
| 6 rs9271404   | 32587553 A | 3.043  | 1.63E-12 | chr:6:32648036 |
| 6 rs9274887   | 32641089 G | 2.293  | 1.63E-12 | chr:6:32648036 |
| 6 rs9275071   | 32648490 A | 2.983  | 1.65E-12 | chr:6:32648036 |
| 6 rs72508413  | 32454597 G | 0.2329 | 1.67E-12 | chr:6:32648036 |

|               |            |        |          |                |
|---------------|------------|--------|----------|----------------|
| 6 rs79874075  | 32455649 C | 2.518  | 1.67E-12 | chr:6:32648036 |
| 6 rs9272899   | 32610809 T | 2.936  | 1.69E-12 | chr:6:32648036 |
| 6 rs2647011   | 32661915 C | 0.2909 | 1.71E-12 | chr:6:32648036 |
| 6 rs565048403 | 32486809 T | 2.643  | 1.71E-12 | chr:6:32648036 |
| 6 rs6918317   | 32381210 T | 0.2918 | 1.71E-12 | chr:6:32648036 |
| 6 rs1049086   | 32629904 A | 0.2803 | 1.72E-12 | chr:6:32648036 |
| 6 rs28752527  | 32584928 C | 0.2764 | 1.72E-12 | chr:6:32648036 |
| 6 rs685244    | 32584769 A | 0.2765 | 1.73E-12 | chr:6:32648036 |
| 6 rs28479879  | 32452517 T | 0.2414 | 1.74E-12 | chr:6:32648036 |
| 6 rs9272092   | 32599756 C | 0.2856 | 1.74E-12 | chr:6:32648036 |
| 6 rs3104364   | 32603968 A | 0.3021 | 1.78E-12 | chr:6:32648036 |
| 6 rs541764084 | 32522223 G | 4.508  | 1.80E-12 | chr:6:32648036 |
| 6 rs6927022   | 32612397 G | 2.527  | 1.84E-12 | chr:6:32648036 |
| 6 rs74499753  | 32455651 G | 2.503  | 1.84E-12 | chr:6:32648036 |
| 6 rs28383221  | 32583212 A | 0.2764 | 1.86E-12 | chr:6:32648036 |
| 6 rs28383224  | 32583653 A | 0.2764 | 1.86E-12 | chr:6:32648036 |
| 6 rs28383230  | 32584088 T | 0.2764 | 1.86E-12 | chr:6:32648036 |
| 6 rs28383231  | 32584099 C | 0.2764 | 1.86E-12 | chr:6:32648036 |
| 6 rs1049092   | 32629802 A | 0.2802 | 1.87E-12 | chr:6:32648036 |
| 6 rs9273509   | 32628473 T | 0.3098 | 1.87E-12 | chr:6:32648036 |
| 6 rs9273510   | 32628474 G | 0.3098 | 1.87E-12 | chr:6:32648036 |
| 6 rs9272393   | 32604826 T | 0.3537 | 1.90E-12 | chr:6:32648036 |
| 6 rs35406650  | 32557291 G | 5.086  | 2.11E-12 | chr:6:32648036 |
| 6 rs17882603  | 32552067 C | 0.2996 | 2.15E-12 | chr:6:32648036 |
| 6 rs9274951   | 32641867 G | 2.381  | 2.16E-12 | chr:6:32648036 |
| 6 rs9274952   | 32641868 G | 2.381  | 2.16E-12 | chr:6:32648036 |
| 6 rs9273013   | 32611649 C | 0.3359 | 2.18E-12 | chr:6:32648036 |
| 6 rs9272520   | 32606475 C | 0.3695 | 2.18E-12 | chr:6:32648036 |
| 6 rs28746797  | 32632544 A | 2.684  | 2.19E-12 | chr:6:32648036 |
| 6 rs9271610   | 32591601 T | 0.2793 | 2.20E-12 | chr:6:32648036 |
| 6 rs9271611   | 32591609 G | 0.2793 | 2.20E-12 | chr:6:32648036 |
| 6 rs9271843   | 32594957 T | 0.1581 | 2.22E-12 | chr:6:32648036 |
| 6 rs9274891   | 32641152 C | 2.275  | 2.25E-12 | chr:6:32648036 |
| 6 rs574897295 | 32548550 A | 5.209  | 2.29E-12 | chr:6:32648036 |
| 6 rs28383423  | 32608752 T | 2.861  | 2.33E-12 | chr:6:32648036 |
| 6 rs3828806   | 32636130 C | 0.2971 | 2.41E-12 | chr:6:32648036 |
| 6 rs3828807   | 32636131 G | 0.2971 | 2.41E-12 | chr:6:32648036 |
| 6 rs28732275  | 32548403 A | 5.449  | 2.46E-12 | chr:6:32648036 |
| 6 rs9275069   | 32648437 G | 2.883  | 2.49E-12 | chr:6:32648036 |
| 6 rs553260480 | 32538534 A | 3.188  | 2.51E-12 | chr:6:32648036 |
| 6 rs9272980   | 32611357 T | 2.483  | 2.53E-12 | chr:6:32648036 |
| 6 rs73731412  | 32454215 G | 0.1911 | 2.54E-12 | chr:6:32648036 |
| 6 rs112572344 | 32473495 G | 2.634  | 2.60E-12 | chr:6:32648036 |

|               |            |        |          |                |
|---------------|------------|--------|----------|----------------|
| 6 rs28366253  | 32559456 A | 4.468  | 2.63E-12 | chr:6:32648036 |
| 6 rs28724164  | 32555762 C | 4.284  | 2.64E-12 | chr:6:32648036 |
| 6 rs6457594   | 32443961 A | 0.2272 | 2.69E-12 | chr:6:32648036 |
| 6 rs28746838  | 32634057 T | 3.622  | 2.70E-12 | chr:6:32648036 |
| 6 rs113085203 | 32512789 G | 2.494  | 2.74E-12 | chr:6:32648036 |
| 6 rs9271924   | 32596498 A | 0.2433 | 2.76E-12 | chr:6:32648036 |
| 6 rs9268492   | 32375280 G | 3.292  | 2.90E-12 | chr:6:32648036 |
| 6 rs9268493   | 32375330 A | 3.292  | 2.90E-12 | chr:6:32648036 |
| 6 rs28383424  | 32608756 G | 2.848  | 2.93E-12 | chr:6:32648036 |
| 6 rs28383425  | 32608761 C | 2.848  | 2.93E-12 | chr:6:32648036 |
| 6 rs1130430   | 32629161 G | 2.589  | 2.99E-12 | chr:6:32648036 |
| 6 rs183972385 | 32497183 G | 3.366  | 3.11E-12 | chr:6:32648036 |
| 6 rs3828798   | 32636038 A | 0.2952 | 3.12E-12 | chr:6:32648036 |
| 6 rs3828787   | 32635743 C | 3.671  | 3.25E-12 | chr:6:32648036 |
| 6 rs3828788   | 32635749 G | 3.671  | 3.25E-12 | chr:6:32648036 |
| 6 rs9272379   | 32604727 T | 0.3785 | 3.36E-12 | chr:6:32648036 |
| 6 rs9272441   | 32605380 T | 0.2949 | 3.40E-12 | chr:6:32648036 |
| 6 rs17843626  | 32621013 A | 2.304  | 3.46E-12 | chr:6:32648036 |
| 6 rs200094698 | 32532973 A | 2.57   | 3.47E-12 | chr:6:32648036 |
| 6 rs28752515  | 32583603 G | 0.2858 | 3.47E-12 | chr:6:32648036 |
| 6 rs34977583  | 32555377 A | 3.15   | 3.48E-12 | chr:6:32648036 |
| 6 rs369952885 | 32539033 C | 2.558  | 3.53E-12 | chr:6:32648036 |
| 6 rs28383241  | 32584319 C | 0.2855 | 3.55E-12 | chr:6:32648036 |
| 6 rs28383242  | 32584325 A | 0.2855 | 3.55E-12 | chr:6:32648036 |
| 6 rs3104367   | 32603487 T | 0.3107 | 3.55E-12 | chr:6:32648036 |
| 6 rs573304417 | 32488711 A | 2.59   | 3.57E-12 | chr:6:32648036 |
| 6 rs28383223  | 32583477 C | 0.286  | 3.59E-12 | chr:6:32648036 |
| 6 rs116575354 | 32524989 C | 2.877  | 3.63E-12 | chr:6:32648036 |
| 6 rs116661539 | 32537317 C | 2.576  | 3.67E-12 | chr:6:32648036 |
| 6 rs2858328   | 32658911 C | 0.2654 | 3.67E-12 | chr:6:32648036 |
| 6 rs74508474  | 32454156 C | 2.658  | 3.68E-12 | chr:6:32648036 |
| 6 rs79044903  | 32457771 A | 2.726  | 3.69E-12 | chr:6:32648036 |
| 6 rs28383371  | 32607154 T | 2.381  | 3.73E-12 | chr:6:32648036 |
| 6 rs9378268   | 32450915 A | 0.2511 | 3.75E-12 | chr:6:32648036 |
| 6 rs79471319  | 32627777 C | 3.693  | 3.80E-12 | chr:6:32648036 |
| 6 rs28619202  | 32451650 T | 0.2279 | 3.84E-12 | chr:6:32648036 |
| 6 rs4713589   | 32659435 G | 0.2657 | 3.86E-12 | chr:6:32648036 |
| 6 rs76270534  | 32497232 G | 3.088  | 3.89E-12 | chr:6:32648036 |
| 6 rs113046257 | 32512753 T | 2.476  | 3.96E-12 | chr:6:32648036 |
| 6 rs9272476   | 32605759 T | 0.3496 | 4.01E-12 | chr:6:32648036 |
| 6 rs72851102  | 32505568 G | 0.3489 | 4.02E-12 | chr:6:32648036 |
| 6 rs188782605 | 32540449 A | 2.612  | 4.05E-12 | chr:6:32648036 |
| 6 rs9271696   | 32593085 C | 0.2815 | 4.06E-12 | chr:6:32648036 |

|               |            |        |          |                |
|---------------|------------|--------|----------|----------------|
| 6 rs28383391  | 32607659 T | 2.681  | 4.09E-12 | chr:6:32648036 |
| 6 rs28383392  | 32607660 G | 2.681  | 4.09E-12 | chr:6:32648036 |
| 6 rs7738118   | 32684957 A | 3.327  | 4.10E-12 | chr:6:32648036 |
| 6 rs7738119   | 32684959 A | 3.327  | 4.10E-12 | chr:6:32648036 |
| 6 rs9275639   | 32684831 T | 3.327  | 4.10E-12 | chr:6:32648036 |
| 6 rs9275641   | 32684919 T | 3.327  | 4.10E-12 | chr:6:32648036 |
| 6 rs3828811   | 32636221 T | 0.2978 | 4.14E-12 | chr:6:32648036 |
| 6 rs28746824  | 32633398 C | 3.035  | 4.16E-12 | chr:6:32648036 |
| 6 rs9271925   | 32596540 G | 0.2391 | 4.17E-12 | chr:6:32648036 |
| 6 rs9271926   | 32596566 T | 0.2391 | 4.17E-12 | chr:6:32648036 |
| 6 rs28366326  | 32561676 C | 4.027  | 4.21E-12 | chr:6:32648036 |
| 6 rs60944058  | 32480632 C | 2.227  | 4.26E-12 | chr:6:32648036 |
| 6 rs58801850  | 32480757 T | 2.205  | 4.26E-12 | chr:6:32648036 |
| 6 rs540590778 | 32453500 T | 0.2459 | 4.27E-12 | chr:6:32648036 |
| 6 rs28383182  | 32571811 A | 2.941  | 4.40E-12 | chr:6:32648036 |
| 6 rs1130399   | 32629755 A | 3.552  | 4.41E-12 | chr:6:32648036 |
| 6 rs9271602   | 32591383 G | 2.942  | 4.44E-12 | chr:6:32648036 |
| 6 rs536427156 | 32453103 A | 0.2445 | 4.47E-12 | chr:6:32648036 |
| 6 rs35448211  | 32555067 T | 2.927  | 4.50E-12 | chr:6:32648036 |
| 6 rs35456626  | 32555066 A | 2.927  | 4.50E-12 | chr:6:32648036 |
| 6 rs28724200  | 32556248 G | 2.975  | 4.52E-12 | chr:6:32648036 |
| 6 rs9273036   | 32611898 G | 2.677  | 4.53E-12 | chr:6:32648036 |
| 6 rs6931740   | 32647469 G | 0.345  | 4.59E-12 | chr:6:32648036 |
| 6 rs72849254  | 32454200 T | 2.644  | 4.69E-12 | chr:6:32648036 |
| 6 rs9272491   | 32606046 A | 0.3392 | 4.74E-12 | chr:6:32648036 |
| 6 rs9274895   | 32641184 G | 2.214  | 4.76E-12 | chr:6:32648036 |
| 6 rs9274896   | 32641185 G | 2.214  | 4.76E-12 | chr:6:32648036 |
| 6 rs9272474   | 32605754 T | 0.3532 | 4.78E-12 | chr:6:32648036 |
| 6 rs187436363 | 32532613 G | 2.544  | 4.85E-12 | chr:6:32648036 |
| 6 rs9274922   | 32641350 G | 2.199  | 4.86E-12 | chr:6:32648036 |
| 6 rs9274501   | 32634032 A | 0.3154 | 4.95E-12 | chr:6:32648036 |
| 6 rs1065044   | 32611243 T | 2.582  | 5.05E-12 | chr:6:32648036 |
| 6 rs2647040   | 32667280 A | 0.2617 | 5.21E-12 | chr:6:32648036 |
| 6 rs3104363   | 32604000 G | 0.311  | 5.39E-12 | chr:6:32648036 |
| 6 rs567470347 | 32525111 C | 2.749  | 5.41E-12 | chr:6:32648036 |
| 6 rs533524385 | 32522291 G | 3.278  | 5.53E-12 | chr:6:32648036 |
| 6 rs559757855 | 32522285 C | 3.278  | 5.53E-12 | chr:6:32648036 |
| 6 rs7751376   | 32605437 C | 0.3184 | 5.56E-12 | chr:6:32648036 |
| 6 rs12722069  | 32609231 G | 2.946  | 5.60E-12 | chr:6:32648036 |
| 6 rs3207985   | 32609227 C | 2.946  | 5.60E-12 | chr:6:32648036 |
| 6 rs1140343   | 32629137 T | 0.3863 | 5.69E-12 | chr:6:32648036 |
| 6 rs75783927  | 32566712 C | 3.012  | 5.71E-12 | chr:6:32648036 |
| 6 rs62405567  | 32453372 A | 0.2432 | 5.74E-12 | chr:6:32648036 |

|               |            |        |          |                |
|---------------|------------|--------|----------|----------------|
| 6 rs9273372   | 32626590 C | 0.2958 | 5.76E-12 | chr:6:32648036 |
| 6 rs9273373   | 32626601 A | 0.2958 | 5.76E-12 | chr:6:32648036 |
| 6 rs9273374   | 32626614 A | 0.2958 | 5.76E-12 | chr:6:32648036 |
| 6 rs28383233  | 32584153 G | 0.2916 | 5.77E-12 | chr:6:32648036 |
| 6 rs3828790   | 32635809 T | 0.2955 | 5.92E-12 | chr:6:32648036 |
| 6 rs3828791   | 32635813 A | 0.2955 | 5.92E-12 | chr:6:32648036 |
| 6 rs34719927  | 32609514 C | 0.2958 | 5.93E-12 | chr:6:32648036 |
| 6 rs9273821   | 32629543 C | 3.588  | 6.02E-12 | chr:6:32648036 |
| 6 rs115397315 | 32525087 C | 2.602  | 6.12E-12 | chr:6:32648036 |
| 6 rs17203570  | 32446674 T | 3.023  | 6.12E-12 | chr:6:32648036 |
| 6 rs35063846  | 32550733 C | 2.92   | 6.15E-12 | chr:6:32648036 |
| 6 rs28746866  | 32635266 G | 3.45   | 6.20E-12 | chr:6:32648036 |
| 6 rs2858300   | 32643261 A | 4.284  | 6.26E-12 | chr:6:32648036 |
| 6 rs9273144   | 32612915 C | 2.827  | 6.29E-12 | chr:6:32648036 |
| 6 rs1063355   | 32627714 T | 0.2958 | 6.38E-12 | chr:6:32648036 |
| 6 rs9274660   | 32636434 A | 0.2958 | 6.38E-12 | chr:6:32648036 |
| 6 rs7758269   | 32598812 C | 0.2443 | 6.45E-12 | chr:6:32648036 |
| 6 rs2647048   | 32668705 A | 0.2647 | 6.63E-12 | chr:6:32648036 |
| 6 rs2858309   | 32668713 C | 0.2647 | 6.63E-12 | chr:6:32648036 |
| 6 rs28752514  | 32583576 T | 0.2946 | 6.66E-12 | chr:6:32648036 |
| 6 rs2856723   | 32667762 A | 0.2642 | 6.74E-12 | chr:6:32648036 |
| 6 rs1065048   | 32611265 T | 2.564  | 6.84E-12 | chr:6:32648036 |
| 6 rs1071630   | 32609126 T | 0.2958 | 6.84E-12 | chr:6:32648036 |
| 6 rs1130034   | 32605274 T | 0.2958 | 6.84E-12 | chr:6:32648036 |
| 6 rs34843907  | 32610059 T | 0.2958 | 6.84E-12 | chr:6:32648036 |
| 6 rs9272725   | 32609513 G | 0.2958 | 6.84E-12 | chr:6:32648036 |
| 6 rs9272756   | 32610047 T | 0.2958 | 6.84E-12 | chr:6:32648036 |
| 6 rs17209907  | 32446261 T | 3.271  | 6.85E-12 | chr:6:32648036 |
| 6 rs372568412 | 32523041 T | 2.85   | 6.89E-12 | chr:6:32648036 |
| 6 rs2647051   | 32670897 T | 0.2645 | 6.90E-12 | chr:6:32648036 |
| 6 rs2856699   | 32671765 A | 0.2645 | 6.90E-12 | chr:6:32648036 |
| 6 rs2856717   | 32670308 A | 0.2645 | 6.90E-12 | chr:6:32648036 |
| 6 rs2858305   | 32670464 G | 0.2645 | 6.90E-12 | chr:6:32648036 |
| 6 rs9275389   | 32669132 C | 0.2645 | 6.90E-12 | chr:6:32648036 |
| 6 rs9275521   | 32674952 T | 0.2645 | 6.90E-12 | chr:6:32648036 |
| 6 rs9272488   | 32606005 A | 0.3403 | 6.95E-12 | chr:6:32648036 |
| 6 rs76533559  | 32554897 G | 0.2419 | 6.99E-12 | chr:6:32648036 |
| 6 rs113276642 | 32525000 G | 2.823  | 7.00E-12 | chr:6:32648036 |
| 6 rs28746818  | 32633307 C | 3.046  | 7.00E-12 | chr:6:32648036 |
| 6 rs9271980   | 32597636 A | 0.1786 | 7.30E-12 | chr:6:32648036 |
| 6 rs9271982   | 32597640 A | 0.1786 | 7.30E-12 | chr:6:32648036 |
| 6 rs62405562  | 32451834 G | 3.278  | 7.30E-12 | chr:6:32648036 |
| 6 rs111659540 | 32551520 T | 3.372  | 7.32E-12 | chr:6:32648036 |

|               |            |        |          |                |
|---------------|------------|--------|----------|----------------|
| 6 rs9273380   | 32626895 G | 0.3457 | 7.33E-12 | chr:6:32648036 |
| 6 rs281875029 | 32631237 A | 3.24   | 7.42E-12 | chr:6:32648036 |
| 6 rs2856687   | 32654822 T | 0.2737 | 7.66E-12 | chr:6:32648036 |
| 6 rs28746790  | 32632459 C | 2.574  | 7.75E-12 | chr:6:32648036 |
| 6 rs2647016   | 32663925 C | 0.2713 | 7.78E-12 | chr:6:32648036 |
| 6 rs9269144   | 32445519 A | 0.2307 | 7.82E-12 | chr:6:32648036 |
| 6 rs116700831 | 32496074 T | 2.574  | 7.87E-12 | chr:6:32648036 |
| 6 rs9272093   | 32599777 T | 0.2818 | 7.88E-12 | chr:6:32648036 |
| 6 rs149802751 | 32486451 T | 3.193  | 8.03E-12 | chr:6:32648036 |
| 6 rs181885231 | 32486319 G | 6.05   | 8.08E-12 | chr:6:32648036 |
| 6 rs9273376   | 32626801 C | 0.3044 | 8.14E-12 | chr:6:32648036 |
| 6 rs9273070   | 32612241 T | 2.648  | 8.15E-12 | chr:6:32648036 |
| 6 rs1794500   | 32647442 C | 4.162  | 8.23E-12 | chr:6:32648036 |
| 6 rs9274351   | 32632425 A | 2.63   | 8.33E-12 | chr:6:32648036 |
| 6 rs9274352   | 32632433 G | 2.63   | 8.33E-12 | chr:6:32648036 |
| 6 rs9271445   | 32588299 T | 2.837  | 8.38E-12 | chr:6:32648036 |
| 6 rs182658314 | 32525847 T | 2.825  | 8.51E-12 | chr:6:32648036 |
| 6 rs9273052   | 32612041 G | 2.556  | 8.52E-12 | chr:6:32648036 |
| 6 rs9274106   | 32630176 T | 0.3404 | 8.59E-12 | chr:6:32648036 |
| 6 rs78543540  | 32457762 A | 2.681  | 8.61E-12 | chr:6:32648036 |
| 6 rs78095563  | 32533752 A | 2.444  | 8.63E-12 | chr:6:32648036 |
| 6 rs9273127   | 32612762 A | 2.784  | 8.64E-12 | chr:6:32648036 |
| 6 rs28746802  | 32632980 T | 2.821  | 8.72E-12 | chr:6:32648036 |
| 6 rs9272097   | 32599786 T | 0.2845 | 8.72E-12 | chr:6:32648036 |
| 6 rs9272098   | 32599787 G | 0.2845 | 8.72E-12 | chr:6:32648036 |
| 6 rs9271997   | 32597801 A | 0.2309 | 8.85E-12 | chr:6:32648036 |
| 6 rs2647046   | 32668336 A | 0.267  | 8.90E-12 | chr:6:32648036 |
| 6 rs2856722   | 32667958 A | 0.267  | 8.90E-12 | chr:6:32648036 |
| 6 rs2858310   | 32668323 G | 0.267  | 8.90E-12 | chr:6:32648036 |
| 6 rs572081630 | 32512882 T | 2.419  | 8.91E-12 | chr:6:32648036 |
| 6 rs369203790 | 32487650 A | 0.315  | 9.05E-12 | chr:6:32648036 |
| 6 rs28366362  | 32565213 C | 2.855  | 9.05E-12 | chr:6:32648036 |
| 6 rs28366363  | 32565355 A | 4.154  | 9.16E-12 | chr:6:32648036 |
| 6 rs535051941 | 32635364 C | 2.439  | 9.30E-12 | chr:6:32648036 |
| 6 rs552399105 | 32482223 T | 2.439  | 9.33E-12 | chr:6:32648036 |
| 6 rs9271434   | 32588058 A | 2.803  | 9.38E-12 | chr:6:32648036 |
| 6 rs9271971   | 32597561 A | 0.2606 | 9.40E-12 | chr:6:32648036 |
| 6 rs28366261  | 32559572 C | 3.309  | 9.53E-12 | chr:6:32648036 |
| 6 rs9274934   | 32641529 T | 2.193  | 9.55E-12 | chr:6:32648036 |
| 6 rs2646998   | 32665367 T | 0.2708 | 9.57E-12 | chr:6:32648036 |
| 6 rs2647001   | 32665086 C | 0.2708 | 9.57E-12 | chr:6:32648036 |
| 6 rs2647003   | 32664880 T | 0.2708 | 9.57E-12 | chr:6:32648036 |
| 6 rs2647012   | 32664458 T | 0.2708 | 9.57E-12 | chr:6:32648036 |

|                     |            |        |          |                |
|---------------------|------------|--------|----------|----------------|
| 6 rs2647013         | 32664284 C | 0.2708 | 9.57E-12 | chr:6:32648036 |
| 6 rs2647022         | 32663004 A | 0.2708 | 9.57E-12 | chr:6:32648036 |
| 6 rs2856666         | 32665285 G | 0.2708 | 9.57E-12 | chr:6:32648036 |
| 6 rs2856668         | 32663606 G | 0.2708 | 9.57E-12 | chr:6:32648036 |
| 6 rs2856670         | 32662904 G | 0.2708 | 9.57E-12 | chr:6:32648036 |
| 6 rs2856725         | 32666738 C | 0.2708 | 9.57E-12 | chr:6:32648036 |
| 6 rs2856727         | 32666397 C | 0.2708 | 9.57E-12 | chr:6:32648036 |
| 6 rs2858324         | 32660375 A | 0.2708 | 9.57E-12 | chr:6:32648036 |
| 6 rs28613510        | 32518507 G | 2.822  | 9.81E-12 | chr:6:32648036 |
| 6 rs281874783       | 32632660 G | 3.228  | 9.82E-12 | chr:6:32648036 |
| 6 rs9274390         | 32632659 T | 3.228  | 9.82E-12 | chr:6:32648036 |
| 6 rs28724252        | 32629549 A | 3.531  | 1.04E-11 | chr:6:32648036 |
| 6 rs2647043         | 32667549 A | 0.2674 | 1.04E-11 | chr:6:32648036 |
| 6 rs9272486;rs14789 | 32605982 G | 5.557  | 1.05E-11 | chr:6:32648036 |
| 6 rs28366263        | 32559663 C | 3.447  | 1.05E-11 | chr:6:32648036 |
| 6 rs9271965         | 32597473 C | 0.2565 | 1.05E-11 | chr:6:32648036 |
| 6 rs28366257        | 32559502 G | 4.03   | 1.05E-11 | chr:6:32648036 |
| 6 rs9272973         | 32611312 T | 2.403  | 1.07E-11 | chr:6:32648036 |
| 6 rs72508409        | 32451073 G | 0.2003 | 1.07E-11 | chr:6:32648036 |
| 6 rs28383389        | 32607596 A | 2.605  | 1.07E-11 | chr:6:32648036 |
| 6 rs9273558         | 32628965 G | 2.705  | 1.10E-11 | chr:6:32648036 |
| 6 rs191650130       | 32525856 T | 2.805  | 1.10E-11 | chr:6:32648036 |
| 6 rs9274357         | 32632457 G | 2.541  | 1.11E-11 | chr:6:32648036 |
| 6 rs544648056       | 32482213 A | 2.431  | 1.11E-11 | chr:6:32648036 |
| 6 rs112740890       | 32473461 G | 2.804  | 1.12E-11 | chr:6:32648036 |
| 6 rs9275212         | 32658327 G | 0.2725 | 1.13E-11 | chr:6:32648036 |
| 6 rs35305772        | 32556662 C | 2.789  | 1.15E-11 | chr:6:32648036 |
| 6 rs35979303        | 32450721 G | 0.2793 | 1.15E-11 | chr:6:32648036 |
| 6 rs9273048         | 32612008 C | 2.546  | 1.16E-11 | chr:6:32648036 |
| 6 rs9273129         | 32612774 A | 2.761  | 1.16E-11 | chr:6:32648036 |
| 6 rs9273130         | 32612775 A | 2.761  | 1.16E-11 | chr:6:32648036 |
| 6 rs35331833        | 32556635 A | 2.775  | 1.17E-11 | chr:6:32648036 |
| 6 rs2647018         | 32663447 T | 0.2733 | 1.18E-11 | chr:6:32648036 |
| 6 rs7755774         | 32444932 G | 0.2349 | 1.18E-11 | chr:6:32648036 |
| 6 rs9269114         | 32443425 A | 0.2343 | 1.18E-11 | chr:6:32648036 |
| 6 rs2894262         | 32447816 A | 0.233  | 1.20E-11 | chr:6:32648036 |
| 6 rs2894261         | 32447769 C | 0.2339 | 1.20E-11 | chr:6:32648036 |
| 6 rs7749242         | 32449030 A | 0.2339 | 1.20E-11 | chr:6:32648036 |
| 6 rs9268880         | 32431358 T | 0.2339 | 1.20E-11 | chr:6:32648036 |
| 6 rs9269110         | 32443269 A | 0.2339 | 1.20E-11 | chr:6:32648036 |
| 6 rs9269135         | 32445030 T | 0.2339 | 1.20E-11 | chr:6:32648036 |
| 6 rs9269141         | 32445270 C | 0.2339 | 1.20E-11 | chr:6:32648036 |
| 6 rs9269142         | 32445423 G | 0.2339 | 1.20E-11 | chr:6:32648036 |



|               |            |        |          |                |
|---------------|------------|--------|----------|----------------|
| 6 rs9269174   | 32447364 T | 0.2339 | 1.20E-11 | chr:6:32648036 |
| 6 rs9269175   | 32447451 G | 0.2339 | 1.20E-11 | chr:6:32648036 |
| 6 rs9269172   | 32447154 C | 0.2343 | 1.21E-11 | chr:6:32648036 |
| 6 rs9269176   | 32447545 T | 0.2343 | 1.21E-11 | chr:6:32648036 |
| 6 rs9269178   | 32447598 A | 0.2343 | 1.21E-11 | chr:6:32648036 |
| 6 rs1065047   | 32611260 G | 2.527  | 1.24E-11 | chr:6:32648036 |
| 6 rs34290324  | 32550947 G | 2.755  | 1.24E-11 | chr:6:32648036 |
| 6 rs2647020   | 32663256 T | 0.2731 | 1.24E-11 | chr:6:32648036 |
| 6 rs2647021   | 32663151 T | 0.2731 | 1.24E-11 | chr:6:32648036 |
| 6 rs187785448 | 32523396 T | 3.135  | 1.25E-11 | chr:6:32648036 |
| 6 rs2647078   | 32566096 G | 3.967  | 1.28E-11 | chr:6:32648036 |
| 6 rs28366273  | 32559997 C | 3.967  | 1.28E-11 | chr:6:32648036 |
| 6 rs28366318  | 32561422 G | 3.967  | 1.28E-11 | chr:6:32648036 |
| 6 rs28366287  | 32560419 C | 3.876  | 1.29E-11 | chr:6:32648036 |
| 6 rs9274987   | 32642405 T | 2.568  | 1.30E-11 | chr:6:32648036 |
| 6 rs9274988   | 32642406 T | 2.568  | 1.30E-11 | chr:6:32648036 |
| 6 rs9272387   | 32604776 G | 0.3813 | 1.31E-11 | chr:6:32648036 |
| 6 rs6924676   | 32445727 T | 0.2338 | 1.34E-11 | chr:6:32648036 |
| 6 rs78987802  | 32503728 C | 0.3719 | 1.35E-11 | chr:6:32648036 |
| 6 rs80048124  | 32503729 T | 0.3719 | 1.35E-11 | chr:6:32648036 |
| 6 rs28366215  | 32557310 C | 4.291  | 1.35E-11 | chr:6:32648036 |
| 6 rs6903608   | 32428285 C | 0.2338 | 1.35E-11 | chr:6:32648036 |
| 6 rs6919855   | 32429011 C | 0.2338 | 1.35E-11 | chr:6:32648036 |
| 6 rs9272793   | 32610495 A | 0.3052 | 1.36E-11 | chr:6:32648036 |
| 6 rs707947    | 32611068 G | 2.551  | 1.40E-11 | chr:6:32648036 |
| 6 rs28383347  | 32605689 A | 3.804  | 1.40E-11 | chr:6:32648036 |
| 6 rs9272970   | 32611301 T | 2.401  | 1.41E-11 | chr:6:32648036 |
| 6 rs9272540   | 32606834 C | 2.253  | 1.41E-11 | chr:6:32648036 |
| 6 rs4947345   | 32678260 T | 0.2748 | 1.42E-11 | chr:6:32648036 |
| 6 rs9272389   | 32604793 T | 0.3815 | 1.42E-11 | chr:6:32648036 |
| 6 rs113786216 | 32482238 G | 2.42   | 1.43E-11 | chr:6:32648036 |
| 6 rs28746865  | 32635248 T | 3.321  | 1.44E-11 | chr:6:32648036 |
| 6 rs34826728  | 32610109 A | 0.3051 | 1.46E-11 | chr:6:32648036 |
| 6 rs9268882   | 32431623 T | 0.2365 | 1.48E-11 | chr:6:32648036 |
| 6 rs481139    | 32576145 A | 2.96   | 1.48E-11 | chr:6:32648036 |
| 6 rs9273443   | 32627600 G | 0.3197 | 1.48E-11 | chr:6:32648036 |
| 6 rs530856834 | 32487008 T | 4.28   | 1.49E-11 | chr:6:32648036 |
| 6 rs1130156   | 32610968 G | 2.616  | 1.50E-11 | chr:6:32648036 |
| 6 rs2858318   | 32661302 T | 0.2766 | 1.50E-11 | chr:6:32648036 |
| 6 rs2858319   | 32661294 T | 0.2766 | 1.50E-11 | chr:6:32648036 |
| 6 rs543713    | 32573934 T | 2.965  | 1.51E-11 | chr:6:32648036 |
| 6 rs614348    | 32573877 C | 2.965  | 1.51E-11 | chr:6:32648036 |
| 6 rs28383438  | 32609038 T | 4.201  | 1.52E-11 | chr:6:32648036 |

|               |            |        |          |                |
|---------------|------------|--------|----------|----------------|
| 6 rs28528859  | 32451395 A | 3.653  | 1.53E-11 | chr:6:32648036 |
| 6 rs9271868   | 32595375 C | 0.1896 | 1.53E-11 | chr:6:32648036 |
| 6 rs9271869   | 32595376 A | 0.1896 | 1.53E-11 | chr:6:32648036 |
| 6 rs9271870   | 32595377 T | 0.1896 | 1.53E-11 | chr:6:32648036 |
| 6 rs9273445   | 32627646 A | 0.3124 | 1.54E-11 | chr:6:32648036 |
| 6 rs9272095   | 32599782 A | 0.2971 | 1.55E-11 | chr:6:32648036 |
| 6 rs9273128   | 32612769 C | 2.749  | 1.55E-11 | chr:6:32648036 |
| 6 rs9272525   | 32606559 A | 2.378  | 1.55E-11 | chr:6:32648036 |
| 6 rs9269118   | 32443641 G | 0.2334 | 1.57E-11 | chr:6:32648036 |
| 6 rs113860707 | 32479889 T | 2.265  | 1.58E-11 | chr:6:32648036 |
| 6 rs76072243  | 32479878 C | 2.265  | 1.58E-11 | chr:6:32648036 |
| 6 rs537959592 | 32496518 A | 2.942  | 1.58E-11 | chr:6:32648036 |
| 6 rs9273513   | 32628506 A | 3.42   | 1.58E-11 | chr:6:32648036 |
| 6 rs28838605  | 32510279 A | 0.3672 | 1.59E-11 | chr:6:32648036 |
| 6 rs28746803  | 32632983 T | 2.775  | 1.59E-11 | chr:6:32648036 |
| 6 rs28746804  | 32632989 G | 2.775  | 1.59E-11 | chr:6:32648036 |
| 6 rs28383170  | 32565722 T | 2.917  | 1.60E-11 | chr:6:32648036 |
| 6 rs28383171  | 32565735 T | 2.917  | 1.60E-11 | chr:6:32648036 |
| 6 rs1064985   | 32611034 A | 2.549  | 1.61E-11 | chr:6:32648036 |
| 6 rs9273133   | 32612801 C | 2.738  | 1.64E-11 | chr:6:32648036 |
| 6 rs28746816  | 32633261 A | 2.973  | 1.64E-11 | chr:6:32648036 |
| 6 rs536493456 | 32674838 G | 0.2802 | 1.68E-11 | chr:6:32648036 |
| 6 rs199720289 | 32481962 A | 2.567  | 1.70E-11 | chr:6:32648036 |
| 6 rs201894254 | 32481961 C | 2.567  | 1.70E-11 | chr:6:32648036 |
| 6 rs28371245  | 32647982 C | 2.353  | 1.71E-11 | chr:6:32648036 |
| 6 rs9269163   | 32446833 A | 0.2338 | 1.73E-11 | chr:6:32648036 |
| 6 rs9269165   | 32446843 A | 0.2338 | 1.73E-11 | chr:6:32648036 |
| 6 rs188055523 | 32496649 A | 2.743  | 1.73E-11 | chr:6:32648036 |
| 6 rs28371240  | 32647856 A | 4.191  | 1.75E-11 | chr:6:32648036 |
| 6 rs6923504   | 32428186 G | 0.2366 | 1.76E-11 | chr:6:32648036 |
| 6 rs2760979   | 32564786 T | 3.903  | 1.78E-11 | chr:6:32648036 |
| 6 rs28746851  | 32634506 T | 3.321  | 1.78E-11 | chr:6:32648036 |
| 6 rs28746835  | 32633959 C | 3.344  | 1.80E-11 | chr:6:32648036 |
| 6 rs11751601  | 32559520 T | 2.716  | 1.82E-11 | chr:6:32648036 |
| 6 rs113536850 | 32516432 A | 7.915  | 1.85E-11 | chr:6:32648036 |
| 6 rs114672263 | 32540417 G | 2.508  | 1.86E-11 | chr:6:32648036 |
| 6 rs1909096   | 32570877 G | 4.093  | 1.87E-11 | chr:6:32648036 |
| 6 rs2858869   | 32572666 G | 4.157  | 1.89E-11 | chr:6:32648036 |
| 6 rs9271442   | 32588260 A | 2.8    | 1.90E-11 | chr:6:32648036 |
| 6 rs28366290  | 32560554 C | 3.936  | 1.93E-11 | chr:6:32648036 |
| 6 rs28366291  | 32560607 T | 3.936  | 1.93E-11 | chr:6:32648036 |
| 6 rs28366292  | 32560614 A | 3.936  | 1.93E-11 | chr:6:32648036 |
| 6 rs9269159   | 32446691 G | 0.2482 | 1.93E-11 | chr:6:32648036 |

|               |            |        |          |                |
|---------------|------------|--------|----------|----------------|
| 6 rs72492329  | 32521136 A | 0.2369 | 1.95E-11 | chr:6:32648036 |
| 6 rs28952268  | 32446724 T | 2.836  | 1.95E-11 | chr:6:32648036 |
| 6 rs28383316  | 32589687 C | 4.204  | 1.97E-11 | chr:6:32648036 |
| 6 rs28383319  | 32591038 G | 4.147  | 1.98E-11 | chr:6:32648036 |
| 6 rs9274899   | 32641203 T | 2.147  | 2.00E-11 | chr:6:32648036 |
| 6 rs28383306  | 32586739 T | 4.166  | 2.02E-11 | chr:6:32648036 |
| 6 rs9271597   | 32591291 A | 2.835  | 2.04E-11 | chr:6:32648036 |
| 6 rs28383399  | 32607872 G | 3.842  | 2.05E-11 | chr:6:32648036 |
| 6 rs28366364  | 32565532 G | 2.773  | 2.06E-11 | chr:6:32648036 |
| 6 rs28366365  | 32565560 C | 2.773  | 2.06E-11 | chr:6:32648036 |
| 6 rs28366367  | 32565571 A | 2.773  | 2.06E-11 | chr:6:32648036 |
| 6 rs112031986 | 32488418 G | 2.239  | 2.06E-11 | chr:6:32648036 |
| 6 rs112074290 | 32479655 A | 2.306  | 2.06E-11 | chr:6:32648036 |
| 6 rs10456411  | 32615904 A | 3.223  | 2.06E-11 | chr:6:32648036 |
| 6 rs34580934  | 32550696 G | 2.946  | 2.07E-11 | chr:6:32648036 |
| 6 rs547199864 | 32558886 T | 2.589  | 2.07E-11 | chr:6:32648036 |
| 6 rs563197321 | 32458258 T | 3.264  | 2.08E-11 | chr:6:32648036 |
| 6 rs112475079 | 32488437 T | 2.234  | 2.10E-11 | chr:6:32648036 |
| 6 rs11568831  | 32634545 A | 3.332  | 2.12E-11 | chr:6:32648036 |
| 6 rs28366195  | 32393542 G | 10.29  | 2.14E-11 | chr:6:32648036 |
| 6 rs28746852  | 32634593 C | 3.351  | 2.14E-11 | chr:6:32648036 |
| 6 rs113520250 | 32554885 T | 2.805  | 2.15E-11 | chr:6:32648036 |
| 6 rs9273492   | 32628229 A | 3.417  | 2.15E-11 | chr:6:32648036 |
| 6 rs74614611  | 32541136 A | 2.589  | 2.17E-11 | chr:6:32648036 |
| 6 rs28383300  | 32586611 T | 4.111  | 2.17E-11 | chr:6:32648036 |
| 6 rs9272940   | 32611081 C | 2.524  | 2.18E-11 | chr:6:32648036 |
| 6 rs17843625  | 32620909 G | 2.24   | 2.20E-11 | chr:6:32648036 |
| 6 rs539956953 | 32489061 C | 2.511  | 2.20E-11 | chr:6:32648036 |
| 6 rs28746796  | 32632536 T | 2.517  | 2.21E-11 | chr:6:32648036 |
| 6 rs9274669   | 32636591 A | 0.3195 | 2.21E-11 | chr:6:32648036 |
| 6 rs9272454   | 32605525 C | 0.3019 | 2.22E-11 | chr:6:32648036 |
| 6 rs115967267 | 32488427 G | 2.241  | 2.25E-11 | chr:6:32648036 |
| 6 rs28383173  | 32566287 C | 2.88   | 2.28E-11 | chr:6:32648036 |
| 6 rs28383174  | 32566288 A | 2.88   | 2.28E-11 | chr:6:32648036 |
| 6 rs9272507   | 32606324 T | 0.3977 | 2.28E-11 | chr:6:32648036 |
| 6 rs9273031   | 32611849 C | 2.503  | 2.29E-11 | chr:6:32648036 |
| 6 rs2647080   | 32566646 A | 2.864  | 2.30E-11 | chr:6:32648036 |
| 6 rs9274898   | 32641199 T | 2.143  | 2.36E-11 | chr:6:32648036 |
| 6 rs66931410  | 32518235 T | 2.653  | 2.46E-11 | chr:6:32648036 |
| 6 rs28584364  | 32512048 C | 2.777  | 2.46E-11 | chr:6:32648036 |
| 6 rs541515279 | 32523465 T | 2.993  | 2.48E-11 | chr:6:32648036 |
| 6 rs1130162   | 32610997 G | 2.587  | 2.49E-11 | chr:6:32648036 |
| 6 rs375004483 | 32553996 G | 3.905  | 2.55E-11 | chr:6:32648036 |

|               |            |        |          |                |
|---------------|------------|--------|----------|----------------|
| 6 rs9272497   | 32606176 A | 0.3215 | 2.57E-11 | chr:6:32648036 |
| 6 rs143845848 | 32481954 A | 2.538  | 2.58E-11 | chr:6:32648036 |
| 6 rs532933450 | 32454488 C | 2.407  | 2.58E-11 | chr:6:32648036 |
| 6 rs9273496   | 32628283 A | 3.369  | 2.60E-11 | chr:6:32648036 |
| 6 rs528150408 | 32489042 G | 2.491  | 2.61E-11 | chr:6:32648036 |
| 6 rs9273071   | 32612251 G | 2.574  | 2.61E-11 | chr:6:32648036 |
| 6 rs9273002   | 32611513 G | 2.371  | 2.61E-11 | chr:6:32648036 |
| 6 rs9269137   | 32445147 C | 0.2448 | 2.65E-11 | chr:6:32648036 |
| 6 rs9269138   | 32445155 A | 0.2448 | 2.65E-11 | chr:6:32648036 |
| 6 rs9269139   | 32445156 G | 0.2448 | 2.65E-11 | chr:6:32648036 |
| 6 rs113436343 | 32492026 C | 2.455  | 2.68E-11 | chr:6:32648036 |
| 6 rs9273441   | 32627573 C | 0.349  | 2.68E-11 | chr:6:32648036 |
| 6 rs28366266  | 32559753 C | 3.679  | 2.69E-11 | chr:6:32648036 |
| 6 rs28746793  | 32632528 T | 2.508  | 2.70E-11 | chr:6:32648036 |
| 6 rs9272442   | 32605400 C | 0.3215 | 2.70E-11 | chr:6:32648036 |
| 6 rs28752531  | 32585031 T | 4.432  | 2.73E-11 | chr:6:32648036 |
| 6 rs563837736 | 32660582 A | 0.2927 | 2.76E-11 | chr:6:32648036 |
| 6 rs28366293  | 32560711 C | 3.855  | 2.80E-11 | chr:6:32648036 |
| 6 rs9275059   | 32648298 A | 2.604  | 2.80E-11 | chr:6:32648036 |
| 6 rs34232122  | 32556706 C | 2.784  | 2.82E-11 | chr:6:32648036 |
| 6 rs10947320  | 32581491 T | 4.049  | 2.82E-11 | chr:6:32648036 |
| 6 rs34865013  | 32553752 A | 3.272  | 2.83E-11 | chr:6:32648036 |
| 6 rs112528767 | 32485589 C | 2.252  | 2.85E-11 | chr:6:32648036 |
| 6 rs11568830  | 32634556 A | 3.304  | 2.85E-11 | chr:6:32648036 |
| 6 rs601481    | 32573293 C | 2.874  | 2.86E-11 | chr:6:32648036 |
| 6 rs368404259 | 32454575 C | 2.443  | 2.87E-11 | chr:6:32648036 |
| 6 rs28746863  | 32635172 T | 3.305  | 2.88E-11 | chr:6:32648036 |
| 6 rs9271694   | 32593051 C | 0.2498 | 2.89E-11 | chr:6:32648036 |
| 6 rs12192104  | 32580703 C | 4.077  | 2.92E-11 | chr:6:32648036 |
| 6 rs12206257  | 32576036 T | 4.077  | 2.92E-11 | chr:6:32648036 |
| 6 rs13193798  | 32574991 A | 4.077  | 2.92E-11 | chr:6:32648036 |
| 6 rs13205658  | 32577607 T | 4.077  | 2.92E-11 | chr:6:32648036 |
| 6 rs13206219  | 32577847 T | 4.077  | 2.92E-11 | chr:6:32648036 |
| 6 rs13206639  | 32578100 A | 4.077  | 2.92E-11 | chr:6:32648036 |
| 6 rs17211475  | 32602285 G | 4.077  | 2.92E-11 | chr:6:32648036 |
| 6 rs2647060   | 32569667 T | 4.077  | 2.92E-11 | chr:6:32648036 |
| 6 rs2647072   | 32573950 T | 4.077  | 2.92E-11 | chr:6:32648036 |
| 6 rs2647073   | 32574014 C | 4.077  | 2.92E-11 | chr:6:32648036 |
| 6 rs2760993   | 32573602 G | 4.077  | 2.92E-11 | chr:6:32648036 |
| 6 rs28383172  | 32565979 G | 4.077  | 2.92E-11 | chr:6:32648036 |
| 6 rs28383226  | 32583899 G | 4.077  | 2.92E-11 | chr:6:32648036 |
| 6 rs28383229  | 32584024 G | 4.077  | 2.92E-11 | chr:6:32648036 |
| 6 rs28383315  | 32587281 G | 4.077  | 2.92E-11 | chr:6:32648036 |

|               |            |        |          |                |
|---------------|------------|--------|----------|----------------|
| 6 rs28383325  | 32596310 C | 4.077  | 2.92E-11 | chr:6:32648036 |
| 6 rs28383330  | 32600340 G | 4.077  | 2.92E-11 | chr:6:32648036 |
| 6 rs28383344  | 32605067 G | 4.077  | 2.92E-11 | chr:6:32648036 |
| 6 rs28383345  | 32605234 A | 4.077  | 2.92E-11 | chr:6:32648036 |
| 6 rs28383458  | 32609476 C | 4.077  | 2.92E-11 | chr:6:32648036 |
| 6 rs28383459  | 32609520 A | 4.077  | 2.92E-11 | chr:6:32648036 |
| 6 rs28383466  | 32610277 G | 4.077  | 2.92E-11 | chr:6:32648036 |
| 6 rs28383467  | 32610330 T | 4.077  | 2.92E-11 | chr:6:32648036 |
| 6 rs2858868   | 32573120 C | 4.077  | 2.92E-11 | chr:6:32648036 |
| 6 rs28752513  | 32583459 C | 4.077  | 2.92E-11 | chr:6:32648036 |
| 6 rs281863304 | 32631473 T | 3.119  | 2.92E-11 | chr:6:32648036 |
| 6 rs1049073   | 32632717 A | 2.521  | 2.93E-11 | chr:6:32648036 |
| 6 rs28383404  | 32608090 T | 4.033  | 2.93E-11 | chr:6:32648036 |
| 6 rs9271600   | 32591332 G | 2.794  | 2.94E-11 | chr:6:32648036 |
| 6 rs9271601   | 32591337 T | 2.794  | 2.94E-11 | chr:6:32648036 |
| 6 rs28746819  | 32633320 C | 2.957  | 2.94E-11 | chr:6:32648036 |
| 6 rs9269116   | 32443458 T | 0.2341 | 2.95E-11 | chr:6:32648036 |
| 6 rs9273444   | 32627635 T | 0.3212 | 3.02E-11 | chr:6:32648036 |
| 6 rs73403121  | 32469012 T | 0.3927 | 3.12E-11 | chr:6:32648036 |
| 6 rs9271681   | 32592918 T | 0.2403 | 3.14E-11 | chr:6:32648036 |
| 6 rs28746815  | 32633253 G | 2.921  | 3.16E-11 | chr:6:32648036 |
| 6 rs28383168  | 32565588 C | 2.752  | 3.18E-11 | chr:6:32648036 |
| 6 rs28746823  | 32633373 T | 2.902  | 3.18E-11 | chr:6:32648036 |
| 6 rs79936591  | 32503543 A | 2.96   | 3.19E-11 | chr:6:32648036 |
| 6 rs3667      | 32610934 G | 2.558  | 3.19E-11 | chr:6:32648036 |
| 6 rs188549880 | 32485683 T | 2.822  | 3.20E-11 | chr:6:32648036 |
| 6 rs191859378 | 32485692 A | 2.822  | 3.20E-11 | chr:6:32648036 |
| 6 rs531642165 | 32472248 A | 4.524  | 3.21E-11 | chr:6:32648036 |
| 6 rs561310579 | 32472247 T | 4.524  | 3.21E-11 | chr:6:32648036 |
| 6 rs9272473   | 32605738 G | 0.3624 | 3.22E-11 | chr:6:32648036 |
| 6 rs28366361  | 32565197 A | 2.722  | 3.28E-11 | chr:6:32648036 |
| 6 rs76699014  | 32555838 T | 0.2223 | 3.31E-11 | chr:6:32648036 |
| 6 rs9269201   | 32449345 C | 0.2329 | 3.33E-11 | chr:6:32648036 |
| 6 rs9271618   | 32591752 A | 0.2518 | 3.34E-11 | chr:6:32648036 |
| 6 rs541685416 | 32558854 C | 2.564  | 3.36E-11 | chr:6:32648036 |
| 6 rs563619413 | 32558855 A | 2.564  | 3.36E-11 | chr:6:32648036 |
| 6 rs281863778 | 32630543 C | 0.3468 | 3.40E-11 | chr:6:32648036 |
| 6 rs28383314  | 32587213 T | 0.2785 | 3.43E-11 | chr:6:32648036 |
| 6 rs9273497   | 32628297 T | 0.3491 | 3.44E-11 | chr:6:32648036 |
| 6 rs16822763  | 32557981 G | 3.803  | 3.45E-11 | chr:6:32648036 |
| 6 rs9273025   | 32611760 T | 2.378  | 3.45E-11 | chr:6:32648036 |
| 6 rs28383327  | 32599077 C | 3.933  | 3.45E-11 | chr:6:32648036 |
| 6 rs28366324  | 32561616 C | 3.874  | 3.47E-11 | chr:6:32648036 |

|               |            |        |          |                |
|---------------|------------|--------|----------|----------------|
| 6 rs482162    | 32576019 C | 2.893  | 3.49E-11 | chr:6:32648036 |
| 6 rs482205    | 32576009 G | 2.893  | 3.49E-11 | chr:6:32648036 |
| 6 rs643889    | 32575918 T | 2.893  | 3.49E-11 | chr:6:32648036 |
| 6 rs28752498  | 32568652 A | 2.795  | 3.49E-11 | chr:6:32648036 |
| 6 rs5020946   | 32450089 T | 2.911  | 3.51E-11 | chr:6:32648036 |
| 6 rs28752494  | 32568240 A | 2.83   | 3.54E-11 | chr:6:32648036 |
| 6 rs75375694  | 32497814 T | 7.762  | 3.55E-11 | chr:6:32648036 |
| 6 rs28366357  | 32565138 T | 2.758  | 3.61E-11 | chr:6:32648036 |
| 6 rs28383320  | 32591368 C | 3.903  | 3.65E-11 | chr:6:32648036 |
| 6 rs28383321  | 32591411 C | 3.903  | 3.65E-11 | chr:6:32648036 |
| 6 rs9273062   | 32612161 A | 2.59   | 3.66E-11 | chr:6:32648036 |
| 6 rs9273063   | 32612166 T | 2.59   | 3.66E-11 | chr:6:32648036 |
| 6 rs28746864  | 32635230 A | 3.234  | 3.69E-11 | chr:6:32648036 |
| 6 rs28746834  | 32633899 C | 3.225  | 3.72E-11 | chr:6:32648036 |
| 6 rs28724021  | 32550695 T | 2.736  | 3.74E-11 | chr:6:32648036 |
| 6 rs281861609 | 32633350 A | 2.94   | 3.78E-11 | chr:6:32648036 |
| 6 rs281863770 | 32630557 G | 0.347  | 3.78E-11 | chr:6:32648036 |
| 6 rs28746821  | 32633348 G | 2.94   | 3.78E-11 | chr:6:32648036 |
| 6 rs2858317   | 32662280 C | 0.3301 | 3.84E-11 | chr:6:32648036 |
| 6 rs28383380  | 32607253 A | 2.27   | 3.91E-11 | chr:6:32648036 |
| 6 rs28752536  | 32598140 T | 3.919  | 3.94E-11 | chr:6:32648036 |
| 6 rs9272416   | 32605043 C | 0.3226 | 3.95E-11 | chr:6:32648036 |
| 6 rs6905297   | 32446100 C | 0.2304 | 3.97E-11 | chr:6:32648036 |
| 6 rs9274962   | 32641936 A | 2.295  | 3.97E-11 | chr:6:32648036 |
| 6 rs75351515  | 32635420 A | 2.419  | 4.00E-11 | chr:6:32648036 |
| 6 rs75375346  | 32596908 C | 0.2527 | 4.03E-11 | chr:6:32648036 |
| 6 rs9271489   | 32589051 A | 0.2571 | 4.03E-11 | chr:6:32648036 |
| 6 rs3828789   | 32635754 G | 0.3222 | 4.03E-11 | chr:6:32648036 |
| 6 rs9274986   | 32642386 A | 2.508  | 4.04E-11 | chr:6:32648036 |
| 6 rs28366351  | 32564990 A | 2.769  | 4.08E-11 | chr:6:32648036 |
| 6 rs28366352  | 32564993 C | 2.769  | 4.08E-11 | chr:6:32648036 |
| 6 rs28366353  | 32565004 G | 2.769  | 4.08E-11 | chr:6:32648036 |
| 6 rs113654440 | 32596946 A | 0.253  | 4.09E-11 | chr:6:32648036 |
| 6 rs9269157   | 32446483 T | 0.2503 | 4.09E-11 | chr:6:32648036 |
| 6 rs281863735 | 32630619 G | 0.36   | 4.13E-11 | chr:6:32648036 |
| 6 rs5020944   | 32450140 G | 2.905  | 4.15E-11 | chr:6:32648036 |
| 6 rs5020947   | 32450033 T | 2.905  | 4.15E-11 | chr:6:32648036 |
| 6 rs28366359  | 32565169 T | 2.696  | 4.18E-11 | chr:6:32648036 |
| 6 rs28366360  | 32565176 C | 2.696  | 4.18E-11 | chr:6:32648036 |
| 6 rs112357425 | 32473616 T | 2.204  | 4.20E-11 | chr:6:32648036 |
| 6 rs34276369  | 32614037 T | 2.583  | 4.23E-11 | chr:6:32648036 |
| 6 rs78533241  | 32502317 G | 0.3819 | 4.25E-11 | chr:6:32648036 |
| 6 rs36046522  | 32550931 A | 2.723  | 4.27E-11 | chr:6:32648036 |

|               |            |        |          |                |
|---------------|------------|--------|----------|----------------|
| 6 rs9272346   | 32604372 G | 0.3643 | 4.39E-11 | chr:6:32648036 |
| 6 rs114939096 | 32558978 T | 3.744  | 4.45E-11 | chr:6:32648036 |
| 6 rs28724250  | 32629530 T | 3.342  | 4.50E-11 | chr:6:32648036 |
| 6 rs28383343  | 32604974 T | 3.522  | 4.50E-11 | chr:6:32648036 |
| 6 rs28755178  | 32641503 G | 4.901  | 4.53E-11 | chr:6:32648036 |
| 6 rs35113548  | 32546299 A | 2.779  | 4.54E-11 | chr:6:32648036 |
| 6 rs28366356  | 32565091 T | 2.759  | 4.57E-11 | chr:6:32648036 |
| 6 rs116384287 | 32482031 T | 2.431  | 4.60E-11 | chr:6:32648036 |
| 6 rs554768713 | 32444943 G | 0.2599 | 4.60E-11 | chr:6:32648036 |
| 6 rs9275054   | 32648208 G | 2.434  | 4.61E-11 | chr:6:32648036 |
| 6 rs28366358  | 32565164 G | 2.693  | 4.67E-11 | chr:6:32648036 |
| 6 rs2647023   | 32643325 T | 4.044  | 4.67E-11 | chr:6:32648036 |
| 6 rs79401736  | 32503843 G | 0.3836 | 4.68E-11 | chr:6:32648036 |
| 6 rs9348889   | 32620255 C | 2.614  | 4.68E-11 | chr:6:32648036 |
| 6 rs9348890   | 32620256 C | 2.614  | 4.68E-11 | chr:6:32648036 |
| 6 rs28366264  | 32559674 A | 3.278  | 4.68E-11 | chr:6:32648036 |
| 6 rs281863219 | 32631570 A | 3.087  | 4.73E-11 | chr:6:32648036 |
| 6 rs9271567   | 32590456 T | 2.754  | 4.85E-11 | chr:6:32648036 |
| 6 rs62405566  | 32453095 T | 2.852  | 4.89E-11 | chr:6:32648036 |
| 6 rs9269205   | 32449851 T | 0.2353 | 4.94E-11 | chr:6:32648036 |
| 6 rs9268945   | 32433701 T | 0.2802 | 4.96E-11 | chr:6:32648036 |
| 6 rs9272545   | 32606885 G | 0.3213 | 4.98E-11 | chr:6:32648036 |
| 6 rs9272998   | 32611474 A | 2.324  | 4.99E-11 | chr:6:32648036 |
| 6 rs115124923 | 32510482 A | 2.962  | 5.04E-11 | chr:6:32648036 |
| 6 rs200501057 | 32487088 T | 5.004  | 5.07E-11 | chr:6:32648036 |
| 6 rs75259234  | 32453338 T | 2.865  | 5.08E-11 | chr:6:32648036 |
| 6 rs9271667   | 32592710 C | 0.2593 | 5.13E-11 | chr:6:32648036 |
| 6 rs35556553  | 32495213 C | 0.4177 | 5.13E-11 | chr:6:32648036 |
| 6 rs9271508   | 32589410 T | 0.2591 | 5.16E-11 | chr:6:32648036 |
| 6 rs538680043 | 32444933 T | 0.2546 | 5.16E-11 | chr:6:32648036 |
| 6 rs9274900   | 32641207 A | 2.111  | 5.17E-11 | chr:6:32648036 |
| 6 rs28383346  | 32605326 G | 3.927  | 5.20E-11 | chr:6:32648036 |
| 6 rs17203643  | 32447029 A | 7.592  | 5.23E-11 | chr:6:32648036 |
| 6 rs9272578   | 32607389 T | 0.3755 | 5.23E-11 | chr:6:32648036 |
| 6 rs72851098  | 32505477 C | 0.3815 | 5.24E-11 | chr:6:32648036 |
| 6 rs28383236  | 32584188 T | 0.3201 | 5.32E-11 | chr:6:32648036 |
| 6 rs9275055   | 32648220 C | 2.429  | 5.33E-11 | chr:6:32648036 |
| 6 rs2395202   | 32451906 T | 0.2632 | 5.40E-11 | chr:6:32648036 |
| 6 rs79485014  | 32541147 G | 2.536  | 5.41E-11 | chr:6:32648036 |
| 6 rs28477203  | 32599509 T | 3.915  | 5.46E-11 | chr:6:32648036 |
| 6 rs28383341  | 32604744 A | 2.98   | 5.50E-11 | chr:6:32648036 |
| 6 rs28752497  | 32568481 A | 2.831  | 5.51E-11 | chr:6:32648036 |
| 6 rs9394098   | 32449138 T | 2.877  | 5.51E-11 | chr:6:32648036 |

|               |            |        |          |                |
|---------------|------------|--------|----------|----------------|
| 6 rs111374340 | 32509477 G | 3.242  | 5.51E-11 | chr:6:32648036 |
| 6 rs4457186   | 32447653 G | 2.831  | 5.54E-11 | chr:6:32648036 |
| 6 rs12191360  | 32451361 C | 0.2559 | 5.56E-11 | chr:6:32648036 |
| 6 rs7776032   | 32444896 C | 0.2545 | 5.63E-11 | chr:6:32648036 |
| 6 rs9269126   | 32444915 C | 0.2545 | 5.63E-11 | chr:6:32648036 |
| 6 rs9272656   | 32608629 A | 0.3991 | 5.75E-11 | chr:6:32648036 |
| 6 rs76924329  | 32541094 G | 2.436  | 5.84E-11 | chr:6:32648036 |
| 6 rs9272467   | 32605705 G | 0.3642 | 5.84E-11 | chr:6:32648036 |
| 6 rs9272468   | 32605708 G | 0.3642 | 5.84E-11 | chr:6:32648036 |
| 6 rs377533335 | 32525985 G | 2.418  | 5.86E-11 | chr:6:32648036 |
| 6 rs149614319 | 32552223 A | 2.704  | 5.90E-11 | chr:6:32648036 |
| 6 rs67499532  | 32513184 G | 0.3651 | 5.92E-11 | chr:6:32648036 |
| 6 rs28895255  | 32445079 T | 2.835  | 5.95E-11 | chr:6:32648036 |
| 6 rs28895257  | 32445114 G | 2.835  | 5.95E-11 | chr:6:32648036 |
| 6 rs28895258  | 32445117 T | 2.835  | 5.95E-11 | chr:6:32648036 |
| 6 rs9269968   | 32552251 G | 2.419  | 5.97E-11 | chr:6:32648036 |
| 6 rs528864352 | 32452626 G | 2.859  | 5.99E-11 | chr:6:32648036 |
| 6 rs9274289   | 32631817 C | 2.409  | 6.15E-11 | chr:6:32648036 |
| 6 rs569809786 | 32431544 G | 3.034  | 6.20E-11 | chr:6:32648036 |
| 6 rs281863284 | 32631499 A | 2.27   | 6.27E-11 | chr:6:32648036 |
| 6 rs281863287 | 32631496 A | 2.27   | 6.27E-11 | chr:6:32648036 |
| 6 rs9271448   | 32588368 A | 2.654  | 6.28E-11 | chr:6:32648036 |
| 6 rs28746827  | 32633636 A | 3.075  | 6.34E-11 | chr:6:32648036 |
| 6 rs28746867  | 32635293 G | 3.208  | 6.38E-11 | chr:6:32648036 |
| 6 rs547947156 | 32373595 G | 0.3587 | 6.42E-11 | chr:6:32648036 |
| 6 rs28383463  | 32610105 G | 3.953  | 6.48E-11 | chr:6:32648036 |
| 6 rs79346779  | 32453655 A | 2.809  | 6.51E-11 | chr:6:32648036 |
| 6 rs28383335  | 32602892 T | 3.903  | 6.52E-11 | chr:6:32648036 |
| 6 rs28895264  | 32445792 T | 2.826  | 6.55E-11 | chr:6:32648036 |
| 6 rs28895266  | 32445799 G | 2.826  | 6.55E-11 | chr:6:32648036 |
| 6 rs77469652  | 32453532 C | 2.819  | 6.56E-11 | chr:6:32648036 |
| 6 rs28383342  | 32604924 T | 3.257  | 6.56E-11 | chr:6:32648036 |
| 6 rs9272995   | 32611466 G | 2.31   | 6.58E-11 | chr:6:32648036 |
| 6 rs17203626  | 32446994 A | 2.824  | 6.60E-11 | chr:6:32648036 |
| 6 rs17203636  | 32447014 A | 2.824  | 6.60E-11 | chr:6:32648036 |
| 6 rs28732246  | 32447219 A | 2.824  | 6.60E-11 | chr:6:32648036 |
| 6 rs29001478  | 32447162 A | 2.824  | 6.60E-11 | chr:6:32648036 |
| 6 rs29001620  | 32447216 T | 2.824  | 6.60E-11 | chr:6:32648036 |
| 6 rs29001652  | 32447111 G | 2.824  | 6.60E-11 | chr:6:32648036 |
| 6 rs34207893  | 32447616 C | 2.824  | 6.60E-11 | chr:6:32648036 |
| 6 rs35007143  | 32447518 A | 2.824  | 6.60E-11 | chr:6:32648036 |
| 6 rs35875942  | 32447563 C | 2.824  | 6.60E-11 | chr:6:32648036 |
| 6 rs9272330   | 32604213 C | 0.3666 | 6.61E-11 | chr:6:32648036 |



|               |            |        |          |                |
|---------------|------------|--------|----------|----------------|
| 6 rs28383340  | 32604431 T | 3.212  | 6.66E-11 | chr:6:32648036 |
| 6 rs9274957   | 32641914 C | 2.227  | 6.68E-11 | chr:6:32648036 |
| 6 rs9271630   | 32591989 G | 0.2608 | 6.68E-11 | chr:6:32648036 |
| 6 rs9272482   | 32605920 G | 0.3313 | 6.70E-11 | chr:6:32648036 |
| 6 rs9272484   | 32605943 G | 0.3313 | 6.70E-11 | chr:6:32648036 |
| 6 rs2858878   | 32620487 G | 2.18   | 6.74E-11 | chr:6:32648036 |
| 6 rs200986939 | 32543593 G | 2.655  | 6.74E-11 | chr:6:32648036 |
| 6 rs9271539   | 32590028 A | 0.263  | 6.79E-11 | chr:6:32648036 |
| 6 rs75876639  | 32457809 T | 2.862  | 6.84E-11 | chr:6:32648036 |
| 6 rs563316064 | 32602809 C | 8.26   | 7.09E-11 | chr:6:32648036 |
| 6 rs575430623 | 32602810 T | 8.26   | 7.09E-11 | chr:6:32648036 |
| 6 rs9271623   | 32591914 C | 0.2606 | 7.09E-11 | chr:6:32648036 |
| 6 rs9272513   | 32606380 T | 0.3879 | 7.11E-11 | chr:6:32648036 |
| 6 rs9273556   | 32628953 G | 2.295  | 7.24E-11 | chr:6:32648036 |
| 6 rs554832027 | 32444708 A | 2.822  | 7.26E-11 | chr:6:32648036 |
| 6 rs145878889 | 32609446 C | 8.323  | 7.28E-11 | chr:6:32648036 |
| 6 rs533028614 | 32609452 C | 8.323  | 7.28E-11 | chr:6:32648036 |
| 6 rs1064993   | 32611181 A | 2.373  | 7.31E-11 | chr:6:32648036 |
| 6 rs9271447   | 32588357 A | 2.646  | 7.36E-11 | chr:6:32648036 |
| 6 rs28732247  | 32447474 G | 2.82   | 7.47E-11 | chr:6:32648036 |
| 6 rs29001568  | 32447341 A | 2.82   | 7.47E-11 | chr:6:32648036 |
| 6 rs181125806 | 32546914 T | 3.522  | 7.51E-11 | chr:6:32648036 |
| 6 rs17203619  | 32446922 C | 2.82   | 7.58E-11 | chr:6:32648036 |
| 6 rs9271894   | 32595874 T | 0.2619 | 7.59E-11 | chr:6:32648036 |
| 6 rs12195589  | 32444584 T | 2.819  | 7.62E-11 | chr:6:32648036 |
| 6 rs28895259  | 32445258 G | 2.819  | 7.62E-11 | chr:6:32648036 |
| 6 rs28895261  | 32445306 A | 2.819  | 7.62E-11 | chr:6:32648036 |
| 6 rs115170898 | 32486493 G | 2.921  | 7.62E-11 | chr:6:32648036 |
| 6 rs9271527   | 32589867 T | 0.2663 | 7.67E-11 | chr:6:32648036 |
| 6 rs9273528   | 32628633 C | 3.267  | 7.72E-11 | chr:6:32648036 |
| 6 rs9380317   | 32620740 T | 2.164  | 7.73E-11 | chr:6:32648036 |
| 6 rs13193700  | 32575078 T | 2.739  | 7.74E-11 | chr:6:32648036 |
| 6 rs28752491  | 32568127 C | 3.94   | 7.75E-11 | chr:6:32648036 |
| 6 rs7748293   | 32448622 T | 0.2283 | 7.78E-11 | chr:6:32648036 |
| 6 rs79251508  | 32453632 G | 2.806  | 7.80E-11 | chr:6:32648036 |
| 6 rs28895254  | 32444946 T | 2.778  | 7.85E-11 | chr:6:32648036 |
| 6 rs9274607   | 32635713 T | 0.3311 | 7.88E-11 | chr:6:32648036 |
| 6 rs28404276  | 32510355 A | 0.382  | 7.97E-11 | chr:6:32648036 |
| 6 rs9272337   | 32604273 T | 4.256  | 7.99E-11 | chr:6:32648036 |
| 6 rs9394107   | 32620720 G | 2.169  | 8.03E-11 | chr:6:32648036 |
| 6 rs9271558   | 32590348 G | 0.265  | 8.04E-11 | chr:6:32648036 |
| 6 rs2395225   | 32590624 C | 0.2686 | 8.07E-11 | chr:6:32648036 |
| 6 rs9273356   | 32625989 A | 0.3394 | 8.15E-11 | chr:6:32648036 |

|               |            |        |          |                |
|---------------|------------|--------|----------|----------------|
| 6 rs28383326  | 32598671 C | 3.754  | 8.29E-11 | chr:6:32648036 |
| 6 rs28662053  | 32453107 G | 2.79   | 8.35E-11 | chr:6:32648036 |
| 6 rs139161600 | 32537046 G | 2.389  | 8.43E-11 | chr:6:32648036 |
| 6 rs28746807  | 32633085 G | 2.798  | 8.54E-11 | chr:6:32648036 |
| 6 rs12194148  | 32444198 T | 2.816  | 8.57E-11 | chr:6:32648036 |
| 6 rs12207473  | 32444330 C | 2.816  | 8.57E-11 | chr:6:32648036 |
| 6 rs13194665  | 32451526 G | 2.816  | 8.57E-11 | chr:6:32648036 |
| 6 rs13211921  | 32442836 G | 2.816  | 8.57E-11 | chr:6:32648036 |
| 6 rs17203514  | 32446071 G | 2.816  | 8.57E-11 | chr:6:32648036 |
| 6 rs17203563  | 32446459 A | 2.816  | 8.57E-11 | chr:6:32648036 |
| 6 rs17209887  | 32446051 C | 2.816  | 8.57E-11 | chr:6:32648036 |
| 6 rs1964995   | 32449411 C | 2.816  | 8.57E-11 | chr:6:32648036 |
| 6 rs28732244  | 32444096 T | 2.816  | 8.57E-11 | chr:6:32648036 |
| 6 rs28895242  | 32443666 C | 2.816  | 8.57E-11 | chr:6:32648036 |
| 6 rs28895247  | 32443890 A | 2.816  | 8.57E-11 | chr:6:32648036 |
| 6 rs28895249  | 32444021 T | 2.816  | 8.57E-11 | chr:6:32648036 |
| 6 rs28895265  | 32445793 G | 2.816  | 8.57E-11 | chr:6:32648036 |
| 6 rs4994854   | 32447900 C | 2.816  | 8.57E-11 | chr:6:32648036 |
| 6 rs4994855   | 32447873 G | 2.816  | 8.57E-11 | chr:6:32648036 |
| 6 rs4994859   | 32447715 G | 2.816  | 8.57E-11 | chr:6:32648036 |
| 6 rs9268839   | 32428772 G | 2.816  | 8.57E-11 | chr:6:32648036 |
| 6 rs9273103   | 32612576 C | 2.598  | 8.65E-11 | chr:6:32648036 |
| 6 rs28752501  | 32568995 A | 2.736  | 8.72E-11 | chr:6:32648036 |
| 6 rs9273350   | 32625885 C | 0.3588 | 8.73E-11 | chr:6:32648036 |
| 6 rs9269130   | 32444940 T | 0.2691 | 8.80E-11 | chr:6:32648036 |
| 6 rs113635105 | 32486238 T | 2.69   | 8.82E-11 | chr:6:32648036 |
| 6 rs373808866 | 32526226 A | 2.657  | 8.88E-11 | chr:6:32648036 |
| 6 rs9269041   | 32438243 G | 0.3074 | 8.89E-11 | chr:6:32648036 |
| 6 rs117468562 | 32446600 T | 8.131  | 8.97E-11 | chr:6:32648036 |
| 6 rs4713535   | 32445957 T | 8.131  | 8.97E-11 | chr:6:32648036 |
| 6 rs9469127   | 32444093 G | 8.131  | 8.97E-11 | chr:6:32648036 |
| 6 rs28383348  | 32605825 A | 3.806  | 9.18E-11 | chr:6:32648036 |
| 6 rs9274930   | 32641505 C | 2.096  | 9.25E-11 | chr:6:32648036 |
| 6 rs9274931   | 32641506 A | 2.096  | 9.25E-11 | chr:6:32648036 |
| 6 rs9274932   | 32641509 G | 2.096  | 9.25E-11 | chr:6:32648036 |
| 6 rs9274933   | 32641513 C | 2.096  | 9.25E-11 | chr:6:32648036 |
| 6 rs28752490  | 32567897 A | 2.803  | 9.45E-11 | chr:6:32648036 |
| 6 rs28454881  | 32451351 G | 2.849  | 9.53E-11 | chr:6:32648036 |
| 6 rs9273104   | 32612595 T | 2.592  | 9.63E-11 | chr:6:32648036 |
| 6 rs28366343  | 32564803 C | 2.681  | 9.77E-11 | chr:6:32648036 |
| 6 rs28366344  | 32564813 C | 2.681  | 9.77E-11 | chr:6:32648036 |
| 6 rs5018660   | 32449293 G | 2.822  | 9.78E-11 | chr:6:32648036 |
| 6 rs76483802  | 32454913 G | 0.2702 | 9.80E-11 | chr:6:32648036 |

|               |            |        |          |                |
|---------------|------------|--------|----------|----------------|
| 6 rs28383375  | 32607203 A | 2.203  | 9.82E-11 | chr:6:32648036 |
| 6 rs9271900   | 32596013 G | 0.2583 | 9.86E-11 | chr:6:32648036 |
| 6 rs564014805 | 32614277 A | 2.538  | 9.97E-11 | chr:6:32648036 |
| 6 rs114799674 | 32602880 A | 7.819  | 9.98E-11 | chr:6:32648036 |
| 6 rs115573799 | 32602884 C | 7.819  | 9.98E-11 | chr:6:32648036 |
| 6 rs17209866  | 32445992 A | 2.815  | 1.01E-10 | chr:6:32648036 |
| 6 rs9273073   | 32612279 C | 2.503  | 1.01E-10 | chr:6:32648036 |
| 6 rs144353907 | 32552226 C | 2.67   | 1.02E-10 | chr:6:32648036 |
| 6 rs115290336 | 32605107 G | 7.908  | 1.02E-10 | chr:6:32648036 |
| 6 rs28400568  | 32610557 A | 3.896  | 1.03E-10 | chr:6:32648036 |
| 6 rs28400569  | 32610567 T | 3.896  | 1.03E-10 | chr:6:32648036 |
| 6 rs115670233 | 32538001 T | 2.579  | 1.04E-10 | chr:6:32648036 |
| 6 rs112139952 | 32538061 T | 2.505  | 1.04E-10 | chr:6:32648036 |
| 6 rs191032570 | 32610632 A | 7.866  | 1.04E-10 | chr:6:32648036 |
| 6 rs138002663 | 32473542 C | 2.486  | 1.05E-10 | chr:6:32648036 |
| 6 rs7749092   | 32449050 T | 0.2333 | 1.05E-10 | chr:6:32648036 |
| 6 rs28653112  | 32518960 A | 0.3253 | 1.06E-10 | chr:6:32648036 |
| 6 rs559062197 | 32452802 T | 0.249  | 1.06E-10 | chr:6:32648036 |
| 6 rs281861581 | 32633380 A | 2.272  | 1.06E-10 | chr:6:32648036 |
| 6 rs75219938  | 32454278 T | 2.504  | 1.07E-10 | chr:6:32648036 |
| 6 rs7452937   | 32446484 A | 2.792  | 1.08E-10 | chr:6:32648036 |
| 6 rs9269027   | 32437466 A | 0.2509 | 1.08E-10 | chr:6:32648036 |
| 6 rs9272509   | 32606357 C | 0.3951 | 1.08E-10 | chr:6:32648036 |
| 6 rs28383333  | 32601786 A | 4.037  | 1.09E-10 | chr:6:32648036 |
| 6 rs559673115 | 32629239 G | 2.274  | 1.09E-10 | chr:6:32648036 |
| 6 rs9271566   | 32590443 G | 2.691  | 1.09E-10 | chr:6:32648036 |
| 6 rs9272983   | 32611392 T | 2.257  | 1.10E-10 | chr:6:32648036 |
| 6 rs9272984   | 32611393 G | 2.257  | 1.10E-10 | chr:6:32648036 |
| 6 rs79584190  | 32457822 T | 2.841  | 1.12E-10 | chr:6:32648036 |
| 6 rs71543454  | 32452399 A | 2.797  | 1.14E-10 | chr:6:32648036 |
| 6 rs71543455  | 32452409 C | 2.797  | 1.14E-10 | chr:6:32648036 |
| 6 rs71543453  | 32452361 T | 2.785  | 1.14E-10 | chr:6:32648036 |
| 6 rs9271522   | 32589791 C | 0.2757 | 1.14E-10 | chr:6:32648036 |
| 6 rs9273102   | 32612566 C | 2.578  | 1.16E-10 | chr:6:32648036 |
| 6 rs114991247 | 32583504 C | 7.787  | 1.18E-10 | chr:6:32648036 |
| 6 rs527493854 | 32675902 T | 0.2788 | 1.21E-10 | chr:6:32648036 |
| 6 rs576957502 | 32577205 A | 8.533  | 1.25E-10 | chr:6:32648036 |
| 6 rs138296677 | 32713598 C | 9.191  | 1.27E-10 | chr:6:32648036 |
| 6 rs141267330 | 32548054 G | 5.927  | 1.27E-10 | chr:6:32648036 |
| 6 rs187660953 | 32479046 T | 7.605  | 1.28E-10 | chr:6:32648036 |
| 6 rs535018592 | 32479048 C | 7.605  | 1.28E-10 | chr:6:32648036 |
| 6 rs552849289 | 32479044 G | 7.605  | 1.28E-10 | chr:6:32648036 |
| 6 rs9274562   | 32635000 A | 0.387  | 1.28E-10 | chr:6:32648036 |

|               |            |        |          |                |
|---------------|------------|--------|----------|----------------|
| 6 rs36206058  | 32626920 C | 0.3742 | 1.29E-10 | chr:6:32648036 |
| 6 rs28366269  | 32559913 T | 3.378  | 1.30E-10 | chr:6:32648036 |
| 6 rs113208447 | 32503314 A | 2.795  | 1.30E-10 | chr:6:32648036 |
| 6 rs9272568   | 32607209 G | 2.112  | 1.30E-10 | chr:6:32648036 |
| 6 rs9273107   | 32612620 G | 2.567  | 1.30E-10 | chr:6:32648036 |
| 6 rs201477797 | 32546931 C | 3.403  | 1.30E-10 | chr:6:32648036 |
| 6 rs9272567   | 32607200 C | 2.109  | 1.33E-10 | chr:6:32648036 |
| 6 rs73403128  | 32469280 G | 2.616  | 1.33E-10 | chr:6:32648036 |
| 6 rs369463108 | 32486827 G | 2.353  | 1.35E-10 | chr:6:32648036 |
| 6 rs1612904   | 32669018 C | 0.2785 | 1.35E-10 | chr:6:32648036 |
| 6 rs3129721   | 32676251 C | 0.2785 | 1.35E-10 | chr:6:32648036 |
| 6 rs28752493  | 32568165 C | 2.74   | 1.35E-10 | chr:6:32648036 |
| 6 rs71534530  | 32511211 A | 0.3999 | 1.36E-10 | chr:6:32648036 |
| 6 rs17210265  | 32556141 A | 3.481  | 1.37E-10 | chr:6:32648036 |
| 6 rs35957455  | 32521195 T | 0.3069 | 1.37E-10 | chr:6:32648036 |
| 6 rs9272563   | 32607158 C | 2.153  | 1.38E-10 | chr:6:32648036 |
| 6 rs9269210   | 32450037 C | 0.2446 | 1.38E-10 | chr:6:32648036 |
| 6 rs9273818   | 32629531 G | 3.238  | 1.38E-10 | chr:6:32648036 |
| 6 rs28371354  | 32710555 G | 8.301  | 1.39E-10 | chr:6:32648036 |
| 6 rs28371355  | 32710557 T | 8.301  | 1.39E-10 | chr:6:32648036 |
| 6 rs3187964   | 32605207 C | 0.3477 | 1.40E-10 | chr:6:32648036 |
| 6 rs2856713   | 32620422 T | 2.204  | 1.40E-10 | chr:6:32648036 |
| 6 rs533717266 | 32487694 C | 3.155  | 1.42E-10 | chr:6:32648036 |
| 6 rs28755177  | 32641412 A | 4.274  | 1.42E-10 | chr:6:32648036 |
| 6 rs28383329  | 32599645 T | 2.955  | 1.43E-10 | chr:6:32648036 |
| 6 rs9271887   | 32595679 A | 0.269  | 1.43E-10 | chr:6:32648036 |
| 6 rs9275596   | 32681631 C | 0.2783 | 1.44E-10 | chr:6:32648036 |
| 6 rs28752492  | 32568138 A | 2.709  | 1.45E-10 | chr:6:32648036 |
| 6 rs574170    | 32572904 A | 2.713  | 1.46E-10 | chr:6:32648036 |
| 6 rs9272350   | 32604410 T | 0.38   | 1.46E-10 | chr:6:32648036 |
| 6 rs9269129   | 32444938 G | 0.1743 | 1.46E-10 | chr:6:32648036 |
| 6 rs9272951   | 32611125 C | 2.297  | 1.46E-10 | chr:6:32648036 |
| 6 rs116485389 | 32600457 G | 7.478  | 1.46E-10 | chr:6:32648036 |
| 6 rs79128700  | 32454275 C | 2.485  | 1.46E-10 | chr:6:32648036 |
| 6 rs28383377  | 32607227 G | 2.175  | 1.46E-10 | chr:6:32648036 |
| 6 rs9272565   | 32607169 G | 2.127  | 1.47E-10 | chr:6:32648036 |
| 6 rs9273525   | 32628605 C | 3.181  | 1.47E-10 | chr:6:32648036 |
| 6 rs116751091 | 32480199 A | 7.703  | 1.48E-10 | chr:6:32648036 |
| 6 rs116651290 | 32561772 T | 7.378  | 1.48E-10 | chr:6:32648036 |
| 6 rs142399500 | 32489468 A | 0.3643 | 1.48E-10 | chr:6:32648036 |
| 6 rs9273382   | 32626925 A | 0.3747 | 1.49E-10 | chr:6:32648036 |
| 6 rs9273351   | 32625906 T | 0.3675 | 1.51E-10 | chr:6:32648036 |
| 6 rs116240177 | 32561662 C | 7.469  | 1.51E-10 | chr:6:32648036 |

|               |            |        |          |                |
|---------------|------------|--------|----------|----------------|
| 6 rs9272957   | 32611152 A | 2.328  | 1.52E-10 | chr:6:32648036 |
| 6 rs9271684   | 32592953 T | 0.2558 | 1.54E-10 | chr:6:32648036 |
| 6 rs375322271 | 32487077 C | 4.493  | 1.54E-10 | chr:6:32648036 |
| 6 rs146811934 | 32573153 C | 8.029  | 1.56E-10 | chr:6:32648036 |
| 6 rs4993691   | 32446981 G | 0.1739 | 1.56E-10 | chr:6:32648036 |
| 6 rs9394099   | 32449160 T | 2.805  | 1.58E-10 | chr:6:32648036 |
| 6 rs28383440  | 32609046 T | 3.855  | 1.58E-10 | chr:6:32648036 |
| 6 rs13193606  | 32575044 T | 2.687  | 1.58E-10 | chr:6:32648036 |
| 6 rs114762033 | 32602753 A | 7.461  | 1.59E-10 | chr:6:32648036 |
| 6 rs116334170 | 32598500 A | 7.461  | 1.59E-10 | chr:6:32648036 |
| 6 rs116517496 | 32595773 A | 7.461  | 1.59E-10 | chr:6:32648036 |
| 6 rs371537406 | 32602839 G | 7.461  | 1.59E-10 | chr:6:32648036 |
| 6 rs79451820  | 32541181 T | 2.703  | 1.59E-10 | chr:6:32648036 |
| 6 rs9268644   | 32408044 A | 0.3348 | 1.59E-10 | chr:6:32648036 |
| 6 rs601006    | 32573173 A | 2.669  | 1.59E-10 | chr:6:32648036 |
| 6 rs28732268  | 32548352 G | 2.779  | 1.59E-10 | chr:6:32648036 |
| 6 rs16822618  | 32410087 C | 6.749  | 1.61E-10 | chr:6:32648036 |
| 6 rs17203409  | 32442746 C | 6.749  | 1.61E-10 | chr:6:32648036 |
| 6 rs17203416  | 32442785 T | 6.749  | 1.61E-10 | chr:6:32648036 |
| 6 rs17209238  | 32434285 A | 6.749  | 1.61E-10 | chr:6:32648036 |
| 6 rs17209796  | 32442994 A | 6.749  | 1.61E-10 | chr:6:32648036 |
| 6 rs28752485  | 32391113 A | 6.749  | 1.61E-10 | chr:6:32648036 |
| 6 rs28752486  | 32392451 A | 6.749  | 1.61E-10 | chr:6:32648036 |
| 6 rs28752487  | 32417433 T | 6.749  | 1.61E-10 | chr:6:32648036 |
| 6 rs28752488  | 32419006 A | 6.749  | 1.61E-10 | chr:6:32648036 |
| 6 rs28752489  | 32421184 A | 6.749  | 1.61E-10 | chr:6:32648036 |
| 6 rs536107251 | 32437166 T | 6.749  | 1.61E-10 | chr:6:32648036 |
| 6 rs62403109  | 32430521 C | 6.749  | 1.61E-10 | chr:6:32648036 |
| 6 rs6911777   | 32409996 C | 6.749  | 1.61E-10 | chr:6:32648036 |
| 6 rs28746829  | 32633767 T | 2.91   | 1.61E-10 | chr:6:32648036 |
| 6 rs28746830  | 32633781 T | 2.91   | 1.61E-10 | chr:6:32648036 |
| 6 rs9274980   | 32642290 T | 2.487  | 1.61E-10 | chr:6:32648036 |
| 6 rs35130701  | 32594199 G | 0.2684 | 1.62E-10 | chr:6:32648036 |
| 6 rs28366341  | 32564784 C | 2.633  | 1.63E-10 | chr:6:32648036 |
| 6 rs76302731  | 32492228 C | 2.434  | 1.65E-10 | chr:6:32648036 |
| 6 rs78098131  | 32492238 T | 2.434  | 1.65E-10 | chr:6:32648036 |
| 6 rs114034156 | 32479305 G | 2.184  | 1.66E-10 | chr:6:32648036 |
| 6 rs114088880 | 32600279 G | 7.558  | 1.66E-10 | chr:6:32648036 |
| 6 rs114308959 | 32599445 G | 7.558  | 1.66E-10 | chr:6:32648036 |
| 6 rs115231411 | 32600409 T | 7.558  | 1.66E-10 | chr:6:32648036 |
| 6 rs115315696 | 32599028 G | 7.558  | 1.66E-10 | chr:6:32648036 |
| 6 rs115609519 | 32596968 G | 7.558  | 1.66E-10 | chr:6:32648036 |
| 6 rs115624624 | 32599083 A | 7.558  | 1.66E-10 | chr:6:32648036 |

|               |            |        |          |                |
|---------------|------------|--------|----------|----------------|
| 6 rs116202168 | 32599088 T | 7.558  | 1.66E-10 | chr:6:32648036 |
| 6 rs12526593  | 32590893 G | 7.558  | 1.66E-10 | chr:6:32648036 |
| 6 rs148822548 | 32568265 A | 7.558  | 1.66E-10 | chr:6:32648036 |
| 6 rs28421666  | 32592737 G | 7.558  | 1.66E-10 | chr:6:32648036 |
| 6 rs34139413  | 32555861 G | 7.558  | 1.66E-10 | chr:6:32648036 |
| 6 rs550642974 | 32599041 G | 7.558  | 1.66E-10 | chr:6:32648036 |
| 6 rs564621439 | 32598986 A | 7.558  | 1.66E-10 | chr:6:32648036 |
| 6 rs75467741  | 32457850 G | 2.776  | 1.67E-10 | chr:6:32648036 |
| 6 rs9269162   | 32446737 A | 0.2944 | 1.67E-10 | chr:6:32648036 |
| 6 rs9378264   | 32443451 A | 2.751  | 1.68E-10 | chr:6:32648036 |
| 6 rs9391881   | 32443432 G | 2.751  | 1.68E-10 | chr:6:32648036 |
| 6 rs9273772   | 32629438 T | 0.4001 | 1.71E-10 | chr:6:32648036 |
| 6 rs9272989   | 32611418 C | 2.244  | 1.72E-10 | chr:6:32648036 |
| 6 rs34559860  | 32556467 T | 2.573  | 1.74E-10 | chr:6:32648036 |
| 6 rs555685178 | 32609581 T | 7.653  | 1.75E-10 | chr:6:32648036 |
| 6 rs373813924 | 32602332 T | 7.799  | 1.76E-10 | chr:6:32648036 |
| 6 rs9391879   | 32443172 T | 2.748  | 1.76E-10 | chr:6:32648036 |
| 6 rs556781727 | 32482151 G | 2.479  | 1.77E-10 | chr:6:32648036 |
| 6 rs28895253  | 32444910 A | 2.72   | 1.78E-10 | chr:6:32648036 |
| 6 rs9272955   | 32611145 A | 2.321  | 1.78E-10 | chr:6:32648036 |
| 6 rs549954104 | 32554096 A | 4.189  | 1.78E-10 | chr:6:32648036 |
| 6 rs1049057   | 32634350 T | 0.3551 | 1.78E-10 | chr:6:32648036 |
| 6 rs7453498   | 32446717 T | 0.3078 | 1.80E-10 | chr:6:32648036 |
| 6 rs535694878 | 32512216 A | 0.3862 | 1.82E-10 | chr:6:32648036 |
| 6 rs556986229 | 32512217 G | 0.3862 | 1.82E-10 | chr:6:32648036 |
| 6 rs9271646   | 32592351 G | 0.2573 | 1.84E-10 | chr:6:32648036 |
| 6 rs9271647   | 32592354 G | 0.2573 | 1.84E-10 | chr:6:32648036 |
| 6 rs28383351  | 32606464 C | 2.882  | 1.85E-10 | chr:6:32648036 |
| 6 rs9272661   | 32608680 C | 0.4005 | 1.86E-10 | chr:6:32648036 |
| 6 rs117023022 | 32567751 G | 7.419  | 1.86E-10 | chr:6:32648036 |
| 6 rs113395139 | 32538431 C | 2.766  | 1.88E-10 | chr:6:32648036 |
| 6 rs28383379  | 32607242 A | 2.173  | 1.90E-10 | chr:6:32648036 |
| 6 rs111365964 | 32517646 G | 2.689  | 1.92E-10 | chr:6:32648036 |
| 6 rs9378266   | 32448189 T | 2.771  | 1.92E-10 | chr:6:32648036 |
| 6 rs9272508   | 32606325 A | 2.367  | 1.94E-10 | chr:6:32648036 |
| 6 rs7744001   | 32626086 A | 2.823  | 1.96E-10 | chr:6:32648036 |
| 6 rs12212951  | 32581233 C | 3.692  | 1.97E-10 | chr:6:32648036 |
| 6 rs9273046   | 32612003 T | 2.259  | 1.98E-10 | chr:6:32648036 |
| 6 rs9274470   | 32633617 G | 0.4206 | 1.99E-10 | chr:6:32648036 |
| 6 rs9378212   | 32445691 T | 2.76   | 1.99E-10 | chr:6:32648036 |
| 6 rs9275109   | 32649676 G | 0.2868 | 2.01E-10 | chr:6:32648036 |
| 6 rs9268914   | 32432556 C | 0.2615 | 2.06E-10 | chr:6:32648036 |
| 6 rs9269081   | 32441100 A | 0.2615 | 2.06E-10 | chr:6:32648036 |

|               |            |        |          |                |
|---------------|------------|--------|----------|----------------|
| 6 rs28371352  | 32708220 T | 7.884  | 2.08E-10 | chr:6:32648036 |
| 6 rs28371353  | 32710510 G | 7.884  | 2.08E-10 | chr:6:32648036 |
| 6 rs9272494   | 32606085 A | 0.3691 | 2.08E-10 | chr:6:32648036 |
| 6 rs13194770  | 32451570 T | 2.774  | 2.10E-10 | chr:6:32648036 |
| 6 rs9273108   | 32612626 T | 2.534  | 2.13E-10 | chr:6:32648036 |
| 6 rs28366274  | 32560107 T | 3.312  | 2.13E-10 | chr:6:32648036 |
| 6 rs28746861  | 32635120 A | 3.096  | 2.14E-10 | chr:6:32648036 |
| 6 rs9274561   | 32634953 A | 0.3738 | 2.15E-10 | chr:6:32648036 |
| 6 rs187769286 | 32541295 T | 2.481  | 2.15E-10 | chr:6:32648036 |
| 6 rs36215038  | 32522953 G | 2.373  | 2.21E-10 | chr:6:32648036 |
| 6 rs9272987   | 32611403 A | 2.224  | 2.21E-10 | chr:6:32648036 |
| 6 rs28383324  | 32594211 T | 3.676  | 2.22E-10 | chr:6:32648036 |
| 6 rs9274348   | 32632381 C | 2.116  | 2.23E-10 | chr:6:32648036 |
| 6 rs9273800   | 32629496 G | 0.3687 | 2.23E-10 | chr:6:32648036 |
| 6 rs28366223  | 32557616 A | 4.268  | 2.25E-10 | chr:6:32648036 |
| 6 rs4713555   | 32575524 T | 2.875  | 2.25E-10 | chr:6:32648036 |
| 6 rs79438035  | 32457830 G | 2.779  | 2.26E-10 | chr:6:32648036 |
| 6 rs9272642   | 32608303 C | 2.291  | 2.28E-10 | chr:6:32648036 |
| 6 rs9272643   | 32608304 A | 2.291  | 2.28E-10 | chr:6:32648036 |
| 6 rs9501613   | 32295717 T | 5.721  | 2.28E-10 | chr:6:32648036 |
| 6 rs9275057   | 32648253 G | 2.406  | 2.32E-10 | chr:6:32648036 |
| 6 rs34195090  | 32543412 T | 2.597  | 2.32E-10 | chr:6:32648036 |
| 6 rs28383331  | 32600772 A | 3.499  | 2.35E-10 | chr:6:32648036 |
| 6 rs536369182 | 32540338 A | 3.171  | 2.35E-10 | chr:6:32648036 |
| 6 rs9274747   | 32638071 A | 4.724  | 2.35E-10 | chr:6:32648036 |
| 6 rs28383378  | 32607239 A | 2.16   | 2.37E-10 | chr:6:32648036 |
| 6 rs9271649   | 32592359 G | 0.2605 | 2.38E-10 | chr:6:32648036 |
| 6 rs368699425 | 32602553 A | 7.648  | 2.39E-10 | chr:6:32648036 |
| 6 rs536721498 | 32522908 T | 3.058  | 2.40E-10 | chr:6:32648036 |
| 6 rs28746808  | 32633130 A | 3.004  | 2.40E-10 | chr:6:32648036 |
| 6 rs9273355   | 32625960 A | 0.3693 | 2.41E-10 | chr:6:32648036 |
| 6 rs1967688   | 32340068 T | 2.819  | 2.41E-10 | chr:6:32648036 |
| 6 rs138222079 | 32478552 A | 8.254  | 2.45E-10 | chr:6:32648036 |
| 6 rs141845951 | 32478545 G | 8.254  | 2.45E-10 | chr:6:32648036 |
| 6 rs146258419 | 32478547 G | 8.254  | 2.45E-10 | chr:6:32648036 |
| 6 rs544885839 | 32478543 G | 8.254  | 2.45E-10 | chr:6:32648036 |
| 6 rs549416161 | 32478553 T | 8.254  | 2.45E-10 | chr:6:32648036 |
| 6 rs560342391 | 32478544 C | 8.254  | 2.45E-10 | chr:6:32648036 |
| 6 rs560513052 | 32478550 A | 8.254  | 2.45E-10 | chr:6:32648036 |
| 6 rs571261659 | 32478556 T | 8.254  | 2.45E-10 | chr:6:32648036 |
| 6 rs28366321  | 32561576 G | 3.847  | 2.45E-10 | chr:6:32648036 |
| 6 rs542848544 | 32561578 G | 3.847  | 2.45E-10 | chr:6:32648036 |
| 6 rs1794493   | 32639578 G | 2.386  | 2.46E-10 | chr:6:32648036 |

|               |            |        |          |                |
|---------------|------------|--------|----------|----------------|
| 6 rs28383334  | 32601969 A | 3.229  | 2.47E-10 | chr:6:32648036 |
| 6 rs72508417  | 32459813 A | 0.3937 | 2.47E-10 | chr:6:32648036 |
| 6 rs9272583   | 32607453 C | 0.4258 | 2.48E-10 | chr:6:32648036 |
| 6 rs201181224 | 32429810 T | 0.2557 | 2.48E-10 | chr:6:32648036 |
| 6 rs9274306   | 32632006 G | 2.03   | 2.50E-10 | chr:6:32648036 |
| 6 rs28383318  | 32590352 T | 3.804  | 2.52E-10 | chr:6:32648036 |
| 6 rs17202787  | 32428397 A | 6.41   | 2.56E-10 | chr:6:32648036 |
| 6 rs113695046 | 32522072 T | 2.967  | 2.59E-10 | chr:6:32648036 |
| 6 rs142901825 | 32713602 C | 10.13  | 2.60E-10 | chr:6:32648036 |
| 6 rs9273526   | 32628617 C | 3.121  | 2.65E-10 | chr:6:32648036 |
| 6 rs113313722 | 32485641 T | 2.718  | 2.66E-10 | chr:6:32648036 |
| 6 rs12208101  | 32576812 A | 3.849  | 2.68E-10 | chr:6:32648036 |
| 6 rs12205706  | 32580999 T | 3.619  | 2.69E-10 | chr:6:32648036 |
| 6 rs17613424  | 32622195 T | 2.028  | 2.70E-10 | chr:6:32648036 |
| 6 rs9273354   | 32625952 C | 0.3697 | 2.70E-10 | chr:6:32648036 |
| 6 rs2647063   | 32570439 C | 3.787  | 2.71E-10 | chr:6:32648036 |
| 6 rs9273352   | 32625928 G | 0.3761 | 2.72E-10 | chr:6:32648036 |
| 6 rs28746792  | 32632503 T | 2.058  | 2.73E-10 | chr:6:32648036 |
| 6 rs17613417  | 32622190 G | 2.027  | 2.74E-10 | chr:6:32648036 |
| 6 rs150015084 | 32489423 G | 0.3949 | 2.75E-10 | chr:6:32648036 |
| 6 rs9273329   | 32623242 G | 0.3756 | 2.79E-10 | chr:6:32648036 |
| 6 rs673336    | 32577858 A | 0.2873 | 2.81E-10 | chr:6:32648036 |
| 6 rs9272609   | 32607750 T | 0.3929 | 2.81E-10 | chr:6:32648036 |
| 6 rs79350467  | 32527476 T | 2.732  | 2.84E-10 | chr:6:32648036 |
| 6 rs115503527 | 32602899 A | 7.353  | 2.84E-10 | chr:6:32648036 |
| 6 rs76386245  | 32541191 G | 2.65   | 2.87E-10 | chr:6:32648036 |
| 6 rs568639194 | 32486960 T | 3.928  | 2.87E-10 | chr:6:32648036 |
| 6 rs9274283   | 32631763 C | 2.03   | 2.90E-10 | chr:6:32648036 |
| 6 rs534234053 | 32490048 G | 3.594  | 2.93E-10 | chr:6:32648036 |
| 6 rs281863860 | 32630427 C | 2.626  | 2.94E-10 | chr:6:32648036 |
| 6 rs75876220  | 32454297 C | 2.51   | 2.94E-10 | chr:6:32648036 |
| 6 rs28383258  | 32585701 T | 3.672  | 2.94E-10 | chr:6:32648036 |
| 6 rs3828832   | 32521083 C | 0.3105 | 2.95E-10 | chr:6:32648036 |
| 6 rs9275453   | 32671937 T | 4.531  | 2.99E-10 | chr:6:32648036 |
| 6 rs9380309   | 32449820 G | 2.766  | 2.99E-10 | chr:6:32648036 |
| 6 rs34452456  | 32450678 C | 2.655  | 3.02E-10 | chr:6:32648036 |
| 6 rs9272990   | 32611427 A | 2.216  | 3.04E-10 | chr:6:32648036 |
| 6 rs113564685 | 32485651 A | 2.735  | 3.05E-10 | chr:6:32648036 |
| 6 rs73726814  | 32523235 C | 0.3302 | 3.09E-10 | chr:6:32648036 |
| 6 rs28724146  | 32555303 G | 2.606  | 3.10E-10 | chr:6:32648036 |
| 6 rs72848204  | 32594073 T | 0.2745 | 3.11E-10 | chr:6:32648036 |
| 6 rs9273767   | 32629432 A | 0.4031 | 3.11E-10 | chr:6:32648036 |
| 6 rs77592650  | 32457835 C | 2.742  | 3.12E-10 | chr:6:32648036 |



|               |            |        |          |                |
|---------------|------------|--------|----------|----------------|
| 6 rs7452864   | 32439077 T | 0.2653 | 3.12E-10 | chr:6:32648036 |
| 6 rs183897916 | 32541278 A | 2.459  | 3.14E-10 | chr:6:32648036 |
| 6 rs34594152  | 32556124 C | 3.361  | 3.15E-10 | chr:6:32648036 |
| 6 rs34756259  | 32556121 T | 3.361  | 3.15E-10 | chr:6:32648036 |
| 6 rs9268948   | 32433746 G | 0.2884 | 3.16E-10 | chr:6:32648036 |
| 6 rs5024432   | 32684468 T | 4.117  | 3.19E-10 | chr:6:32648036 |
| 6 rs527409566 | 32684514 G | 4.117  | 3.19E-10 | chr:6:32648036 |
| 6 rs28746859  | 32635007 A | 3.06   | 3.23E-10 | chr:6:32648036 |
| 6 rs115462544 | 32552229 A | 2.651  | 3.25E-10 | chr:6:32648036 |
| 6 rs9271703   | 32593280 T | 0.2765 | 3.29E-10 | chr:6:32648036 |
| 6 rs28383301  | 32586631 T | 3.591  | 3.31E-10 | chr:6:32648036 |
| 6 rs28383302  | 32586639 G | 3.591  | 3.31E-10 | chr:6:32648036 |
| 6 rs28383303  | 32586648 G | 3.591  | 3.31E-10 | chr:6:32648036 |
| 6 rs531127489 | 32453036 A | 2.83   | 3.34E-10 | chr:6:32648036 |
| 6 rs552565118 | 32453037 T | 2.83   | 3.34E-10 | chr:6:32648036 |
| 6 rs568480451 | 32609789 G | 8.034  | 3.37E-10 | chr:6:32648036 |
| 6 rs28366355  | 32565056 G | 2.578  | 3.39E-10 | chr:6:32648036 |
| 6 rs9269056   | 32439123 T | 0.2725 | 3.40E-10 | chr:6:32648036 |
| 6 rs17843694  | 32622173 C | 2.012  | 3.42E-10 | chr:6:32648036 |
| 6 rs17843696  | 32622178 G | 2.012  | 3.42E-10 | chr:6:32648036 |
| 6 rs7743412   | 32625884 T | 7.807  | 3.46E-10 | chr:6:32648036 |
| 6 rs144238786 | 32601770 T | 7.364  | 3.46E-10 | chr:6:32648036 |
| 6 rs186564411 | 32601771 G | 7.364  | 3.46E-10 | chr:6:32648036 |
| 6 rs199950886 | 32603075 G | 7.364  | 3.46E-10 | chr:6:32648036 |
| 6 rs28895241  | 32443665 C | 2.743  | 3.48E-10 | chr:6:32648036 |
| 6 rs11752288  | 32560670 T | 3.635  | 3.50E-10 | chr:6:32648036 |
| 6 rs531387949 | 32525307 C | 2.77   | 3.52E-10 | chr:6:32648036 |
| 6 rs571161365 | 32525310 T | 2.77   | 3.52E-10 | chr:6:32648036 |
| 6 rs2002778   | 32601647 C | 3.48   | 3.56E-10 | chr:6:32648036 |
| 6 rs9271880   | 32595596 C | 0.2655 | 3.60E-10 | chr:6:32648036 |
| 6 rs9273331   | 32623307 T | 2.142  | 3.60E-10 | chr:6:32648036 |
| 6 rs34405098  | 32523269 T | 0.3311 | 3.62E-10 | chr:6:32648036 |
| 6 rs536757162 | 32684641 A | 4.033  | 3.62E-10 | chr:6:32648036 |
| 6 rs552183536 | 32684630 C | 4.033  | 3.62E-10 | chr:6:32648036 |
| 6 rs9272154   | 32601019 A | 0.2779 | 3.63E-10 | chr:6:32648036 |
| 6 rs28752504  | 32569162 C | 2.578  | 3.66E-10 | chr:6:32648036 |
| 6 rs28383332  | 32601128 A | 3.211  | 3.67E-10 | chr:6:32648036 |
| 6 rs9273534   | 32628751 C | 0.3994 | 3.67E-10 | chr:6:32648036 |
| 6 rs76822178  | 32601188 T | 6.396  | 3.77E-10 | chr:6:32648036 |
| 6 rs17843584  | 32615668 G | 0.3912 | 3.78E-10 | chr:6:32648036 |
| 6 rs112112734 | 32453853 C | 2.682  | 3.80E-10 | chr:6:32648036 |
| 6 rs9275097   | 32649126 G | 4.415  | 3.80E-10 | chr:6:32648036 |
| 6 rs9275098   | 32649161 T | 4.415  | 3.80E-10 | chr:6:32648036 |

|               |            |        |          |                |
|---------------|------------|--------|----------|----------------|
| 6 rs9273584   | 32629064 T | 2.252  | 3.84E-10 | chr:6:32648036 |
| 6 rs115691564 | 32610122 T | 7.948  | 3.85E-10 | chr:6:32648036 |
| 6 rs116540263 | 32671372 A | 7.948  | 3.85E-10 | chr:6:32648036 |
| 6 rs117504034 | 32578569 G | 7.948  | 3.85E-10 | chr:6:32648036 |
| 6 rs12527228  | 32679992 T | 7.948  | 3.85E-10 | chr:6:32648036 |
| 6 rs140882479 | 32663083 G | 7.948  | 3.85E-10 | chr:6:32648036 |
| 6 rs184329235 | 32586596 G | 7.948  | 3.85E-10 | chr:6:32648036 |
| 6 rs191809968 | 32586595 A | 7.948  | 3.85E-10 | chr:6:32648036 |
| 6 rs193243151 | 32569394 A | 7.948  | 3.85E-10 | chr:6:32648036 |
| 6 rs201980192 | 32609063 T | 7.948  | 3.85E-10 | chr:6:32648036 |
| 6 rs4110707   | 32580859 G | 7.948  | 3.85E-10 | chr:6:32648036 |
| 6 rs4713588   | 32659502 A | 7.948  | 3.85E-10 | chr:6:32648036 |
| 6 rs575694449 | 32453238 A | 7.948  | 3.85E-10 | chr:6:32648036 |
| 6 rs9469142   | 32454166 T | 7.948  | 3.85E-10 | chr:6:32648036 |
| 6 rs28752528  | 32585007 T | 3.616  | 3.85E-10 | chr:6:32648036 |
| 6 rs9378213   | 32448398 G | 2.724  | 3.85E-10 | chr:6:32648036 |
| 6 rs76827441  | 32457868 C | 2.703  | 3.88E-10 | chr:6:32648036 |
| 6 rs139692935 | 32598983 A | 7.235  | 3.89E-10 | chr:6:32648036 |
| 6 rs546460367 | 32598985 A | 7.235  | 3.89E-10 | chr:6:32648036 |
| 6 rs75640879  | 32541021 T | 2.534  | 3.90E-10 | chr:6:32648036 |
| 6 rs28752524  | 32584862 A | 3.563  | 3.91E-10 | chr:6:32648036 |
| 6 rs28752525  | 32584868 C | 3.563  | 3.91E-10 | chr:6:32648036 |
| 6 rs74394575  | 32541164 A | 2.647  | 3.91E-10 | chr:6:32648036 |
| 6 rs5020950   | 32449965 C | 2.939  | 3.92E-10 | chr:6:32648036 |
| 6 rs72853912  | 32506766 C | 0.4158 | 3.92E-10 | chr:6:32648036 |
| 6 rs2076536   | 32339348 C | 0.3004 | 3.94E-10 | chr:6:32648036 |
| 6 rs564968289 | 32558618 A | 2.504  | 3.97E-10 | chr:6:32648036 |
| 6 rs114604222 | 32485623 G | 3.269  | 3.97E-10 | chr:6:32648036 |
| 6 rs9273043   | 32611968 G | 0.4272 | 3.97E-10 | chr:6:32648036 |
| 6 rs9273332   | 32623317 T | 2.125  | 3.98E-10 | chr:6:32648036 |
| 6 rs74894552  | 32502589 T | 0.41   | 3.99E-10 | chr:6:32648036 |
| 6 rs10947319  | 32581454 T | 3.536  | 4.00E-10 | chr:6:32648036 |
| 6 rs151025335 | 32556364 T | 7.287  | 4.03E-10 | chr:6:32648036 |
| 6 rs116573360 | 32598366 G | 6.672  | 4.03E-10 | chr:6:32648036 |
| 6 rs147493459 | 32598335 G | 6.672  | 4.03E-10 | chr:6:32648036 |
| 6 rs28366354  | 32565044 G | 2.57   | 4.03E-10 | chr:6:32648036 |
| 6 rs577051924 | 32473222 C | 2.44   | 4.04E-10 | chr:6:32648036 |
| 6 rs28383265  | 32585924 T | 3.62   | 4.07E-10 | chr:6:32648036 |
| 6 rs9269054   | 32439120 T | 0.2742 | 4.11E-10 | chr:6:32648036 |
| 6 rs115945461 | 32543417 A | 2.554  | 4.11E-10 | chr:6:32648036 |
| 6 rs6913471   | 32339925 A | 2.604  | 4.22E-10 | chr:6:32648036 |
| 6 rs536322397 | 32605366 C | 7.275  | 4.22E-10 | chr:6:32648036 |
| 6 rs139760267 | 32486391 G | 2.457  | 4.25E-10 | chr:6:32648036 |

|               |            |        |          |                |
|---------------|------------|--------|----------|----------------|
| 6 rs535730306 | 32541206 G | 2.611  | 4.31E-10 | chr:6:32648036 |
| 6 rs9273059   | 32612111 A | 2.44   | 4.34E-10 | chr:6:32648036 |
| 6 rs9273326   | 32623219 T | 0.3773 | 4.36E-10 | chr:6:32648036 |
| 6 rs17613410  | 32622186 C | 2.006  | 4.36E-10 | chr:6:32648036 |
| 6 rs67529500  | 32504757 C | 0.3269 | 4.37E-10 | chr:6:32648036 |
| 6 rs9273138   | 32612843 T | 2.521  | 4.39E-10 | chr:6:32648036 |
| 6 rs78798979  | 32593094 T | 6.668  | 4.41E-10 | chr:6:32648036 |
| 6 rs35912742  | 32543399 G | 2.55   | 4.43E-10 | chr:6:32648036 |
| 6 rs560921486 | 32543398 C | 2.55   | 4.43E-10 | chr:6:32648036 |
| 6 rs9273560   | 32628996 A | 2.109  | 4.46E-10 | chr:6:32648036 |
| 6 rs77329518  | 32637136 T | 7.797  | 4.46E-10 | chr:6:32648036 |
| 6 rs117125720 | 32581090 A | 7.114  | 4.52E-10 | chr:6:32648036 |
| 6 rs17210258  | 32556130 T | 3.316  | 4.52E-10 | chr:6:32648036 |
| 6 rs28383256  | 32585675 C | 3.619  | 4.53E-10 | chr:6:32648036 |
| 6 rs28383257  | 32585680 T | 3.619  | 4.53E-10 | chr:6:32648036 |
| 6 rs4959112   | 32597747 T | 4.442  | 4.59E-10 | chr:6:32648036 |
| 6 rs28366271  | 32559940 A | 3.192  | 4.62E-10 | chr:6:32648036 |
| 6 rs567058553 | 32454069 T | 7.8    | 4.67E-10 | chr:6:32648036 |
| 6 rs28383409  | 32608279 G | 2.486  | 4.69E-10 | chr:6:32648036 |
| 6 rs9274978   | 32642277 C | 2.402  | 4.70E-10 | chr:6:32648036 |
| 6 rs185580382 | 32541226 A | 2.616  | 4.75E-10 | chr:6:32648036 |
| 6 rs7744020   | 32626130 A | 2.741  | 4.75E-10 | chr:6:32648036 |
| 6 rs115016190 | 32600959 C | 6.412  | 4.77E-10 | chr:6:32648036 |
| 6 rs73729140  | 32521290 C | 0.2925 | 4.81E-10 | chr:6:32648036 |
| 6 rs115711192 | 32602161 T | 7.074  | 4.82E-10 | chr:6:32648036 |
| 6 rs561623787 | 32452602 T | 2.699  | 4.82E-10 | chr:6:32648036 |
| 6 rs181530339 | 32486626 C | 5.576  | 4.83E-10 | chr:6:32648036 |
| 6 rs9273333   | 32623325 C | 2.118  | 4.85E-10 | chr:6:32648036 |
| 6 rs17843573  | 32615400 C | 0.4016 | 4.91E-10 | chr:6:32648036 |
| 6 rs9272412   | 32604982 G | 3.71   | 4.91E-10 | chr:6:32648036 |
| 6 rs9272981   | 32611373 A | 2.086  | 4.92E-10 | chr:6:32648036 |
| 6 rs188803324 | 32537838 T | 2.545  | 4.93E-10 | chr:6:32648036 |
| 6 rs112842389 | 32519117 T | 6.371  | 4.94E-10 | chr:6:32648036 |
| 6 rs115742569 | 32516464 C | 0.2753 | 4.97E-10 | chr:6:32648036 |
| 6 rs555415494 | 32458424 G | 3.999  | 4.98E-10 | chr:6:32648036 |
| 6 rs28359884  | 32584330 C | 0.3899 | 4.99E-10 | chr:6:32648036 |
| 6 rs28383349  | 32606266 C | 3.132  | 4.99E-10 | chr:6:32648036 |
| 6 rs9268926   | 32433067 G | 3.23   | 5.04E-10 | chr:6:32648036 |
| 6 rs9272645   | 32608331 G | 2.239  | 5.04E-10 | chr:6:32648036 |
| 6 rs77115076  | 32454361 T | 2.502  | 5.04E-10 | chr:6:32648036 |
| 6 rs78358922  | 32454360 A | 2.502  | 5.04E-10 | chr:6:32648036 |
| 6 rs17613395  | 32622167 A | 1.995  | 5.05E-10 | chr:6:32648036 |
| 6 rs371989651 | 32598510 C | 6.706  | 5.10E-10 | chr:6:32648036 |

|               |            |        |          |                |
|---------------|------------|--------|----------|----------------|
| 6 rs115493697 | 32603359 A | 7.354  | 5.10E-10 | chr:6:32648036 |
| 6 rs529320352 | 32552783 G | 2.529  | 5.10E-10 | chr:6:32648036 |
| 6 rs9273531   | 32628712 T | 4.501  | 5.17E-10 | chr:6:32648036 |
| 6 rs72844144  | 32519125 A | 0.2753 | 5.23E-10 | chr:6:32648036 |
| 6 rs28383426  | 32608785 C | 3.708  | 5.24E-10 | chr:6:32648036 |
| 6 rs393125    | 32193899 A | 5.827  | 5.25E-10 | chr:6:32648036 |
| 6 rs479536    | 32193678 A | 5.827  | 5.25E-10 | chr:6:32648036 |
| 6 rs526945    | 32194982 A | 5.827  | 5.25E-10 | chr:6:32648036 |
| 6 rs113773636 | 32673719 G | 7.506  | 5.26E-10 | chr:6:32648036 |
| 6 rs143895212 | 32673761 T | 7.506  | 5.26E-10 | chr:6:32648036 |
| 6 rs9273328   | 32623233 G | 0.3843 | 5.26E-10 | chr:6:32648036 |
| 6 rs9275092   | 32648987 T | 4.347  | 5.27E-10 | chr:6:32648036 |
| 6 rs9275095   | 32649088 G | 4.347  | 5.27E-10 | chr:6:32648036 |
| 6 rs2395226   | 32590640 C | 7.559  | 5.28E-10 | chr:6:32648036 |
| 6 rs9273057   | 32612104 T | 2.43   | 5.29E-10 | chr:6:32648036 |
| 6 rs17613292  | 32621861 A | 2.047  | 5.30E-10 | chr:6:32648036 |
| 6 rs9274575   | 32635226 T | 0.4072 | 5.33E-10 | chr:6:32648036 |
| 6 rs17612555  | 32615366 G | 0.3968 | 5.39E-10 | chr:6:32648036 |
| 6 rs9273110   | 32612633 C | 2.471  | 5.41E-10 | chr:6:32648036 |
| 6 rs28383267  | 32585978 G | 3.675  | 5.43E-10 | chr:6:32648036 |
| 6 rs116070749 | 32501088 G | 5.804  | 5.44E-10 | chr:6:32648036 |
| 6 rs9271662   | 32592628 A | 0.2532 | 5.49E-10 | chr:6:32648036 |
| 6 rs75288201  | 32541031 A | 2.502  | 5.50E-10 | chr:6:32648036 |
| 6 rs367728179 | 32600771 G | 6.612  | 5.51E-10 | chr:6:32648036 |
| 6 rs12529318  | 32434314 T | 9.268  | 5.59E-10 | chr:6:32648036 |
| 6 rs149088066 | 32453495 C | 2.676  | 5.59E-10 | chr:6:32648036 |
| 6 rs281875005 | 32631266 G | 2.245  | 5.63E-10 | chr:6:32648036 |
| 6 rs17612625  | 32615702 A | 0.3751 | 5.64E-10 | chr:6:32648036 |
| 6 rs17612633  | 32615710 G | 0.3751 | 5.64E-10 | chr:6:32648036 |
| 6 rs547453065 | 32684638 C | 4.021  | 5.65E-10 | chr:6:32648036 |
| 6 rs549879698 | 32496675 G | 0.4221 | 5.67E-10 | chr:6:32648036 |
| 6 rs28383264  | 32585901 T | 3.563  | 5.70E-10 | chr:6:32648036 |
| 6 rs557048    | 32587001 T | 0.2506 | 5.77E-10 | chr:6:32648036 |
| 6 rs6457598   | 32444475 T | 0.2609 | 5.79E-10 | chr:6:32648036 |
| 6 rs9275640   | 32684890 C | 3.126  | 5.79E-10 | chr:6:32648036 |
| 6 rs9272533   | 32606665 C | 0.4229 | 5.80E-10 | chr:6:32648036 |
| 6 rs9274536   | 32634634 C | 0.4081 | 5.80E-10 | chr:6:32648036 |
| 6 rs76934421  | 32503722 T | 2.562  | 5.80E-10 | chr:6:32648036 |
| 6 rs17203612  | 32446853 T | 2.718  | 5.85E-10 | chr:6:32648036 |
| 6 rs114352945 | 32602648 T | 7.26   | 5.87E-10 | chr:6:32648036 |
| 6 rs66796862  | 32521664 C | 0.3319 | 5.91E-10 | chr:6:32648036 |
| 6 rs114866528 | 32599267 C | 6.655  | 5.91E-10 | chr:6:32648036 |
| 6 rs116633385 | 32599268 A | 6.655  | 5.91E-10 | chr:6:32648036 |

|               |            |        |          |                |
|---------------|------------|--------|----------|----------------|
| 6 rs143117432 | 32598186 T | 6.246  | 5.97E-10 | chr:6:32648036 |
| 6 rs114307619 | 32596625 A | 6.791  | 5.99E-10 | chr:6:32648036 |
| 6 rs1130382   | 32632672 A | 6.681  | 6.00E-10 | chr:6:32648036 |
| 6 rs116708054 | 32603761 C | 7.137  | 6.02E-10 | chr:6:32648036 |
| 6 rs2395520   | 32601462 G | 3.357  | 6.10E-10 | chr:6:32648036 |
| 6 rs28895267  | 32445916 T | 2.696  | 6.12E-10 | chr:6:32648036 |
| 6 rs28371177  | 32612990 T | 4.729  | 6.16E-10 | chr:6:32648036 |
| 6 rs9271533   | 32589952 T | 0.2903 | 6.19E-10 | chr:6:32648036 |
| 6 rs9271535   | 32589959 T | 0.2903 | 6.19E-10 | chr:6:32648036 |
| 6 rs79473311  | 32601382 G | 6.558  | 6.20E-10 | chr:6:32648036 |
| 6 rs79573551  | 32601416 T | 6.558  | 6.20E-10 | chr:6:32648036 |
| 6 rs3020628   | 32628784 C | 0.4079 | 6.27E-10 | chr:6:32648036 |
| 6 rs9273488   | 32628159 G | 3.078  | 6.29E-10 | chr:6:32648036 |
| 6 rs28746853  | 32634646 C | 2.926  | 6.30E-10 | chr:6:32648036 |
| 6 rs115908946 | 32600615 C | 6.683  | 6.32E-10 | chr:6:32648036 |
| 6 rs9273524   | 32628595 T | 0.3782 | 6.35E-10 | chr:6:32648036 |
| 6 rs114493852 | 32589327 A | 6.511  | 6.37E-10 | chr:6:32648036 |
| 6 rs9275184   | 32654714 C | 4.241  | 6.37E-10 | chr:6:32648036 |
| 6 rs4999342   | 32448098 T | 0.2581 | 6.39E-10 | chr:6:32648036 |
| 6 rs116135263 | 32517913 A | 2.901  | 6.41E-10 | chr:6:32648036 |
| 6 rs9269037   | 32437958 T | 0.2935 | 6.42E-10 | chr:6:32648036 |
| 6 rs73397416  | 32521951 C | 0.332  | 6.47E-10 | chr:6:32648036 |
| 6 rs17613431  | 32622203 T | 2.001  | 6.48E-10 | chr:6:32648036 |
| 6 rs62405564  | 32451847 T | 5.8    | 6.52E-10 | chr:6:32648036 |
| 6 rs9273535   | 32628760 A | 3.072  | 6.55E-10 | chr:6:32648036 |
| 6 rs28752500  | 32568769 T | 2.567  | 6.56E-10 | chr:6:32648036 |
| 6 rs114968544 | 32596711 C | 6.775  | 6.56E-10 | chr:6:32648036 |
| 6 rs34816445  | 32543286 A | 2.515  | 6.62E-10 | chr:6:32648036 |
| 6 rs28724142  | 32555235 A | 2.468  | 6.63E-10 | chr:6:32648036 |
| 6 rs28724143  | 32555236 T | 2.468  | 6.63E-10 | chr:6:32648036 |
| 6 rs9272971   | 32611302 C | 2.111  | 6.64E-10 | chr:6:32648036 |
| 6 rs114310549 | 32600248 A | 6.772  | 6.75E-10 | chr:6:32648036 |
| 6 rs115214276 | 32600032 C | 6.772  | 6.75E-10 | chr:6:32648036 |
| 6 rs116728358 | 32600062 G | 6.772  | 6.75E-10 | chr:6:32648036 |
| 6 rs115276762 | 32674178 T | 7.395  | 6.76E-10 | chr:6:32648036 |
| 6 rs115911154 | 32674194 G | 7.395  | 6.76E-10 | chr:6:32648036 |
| 6 rs117296796 | 32674192 G | 7.395  | 6.76E-10 | chr:6:32648036 |
| 6 rs150563163 | 32485928 C | 2.26   | 6.76E-10 | chr:6:32648036 |
| 6 rs9275206   | 32657565 G | 4.357  | 6.79E-10 | chr:6:32648036 |
| 6 rs9273026   | 32611769 C | 2.209  | 6.79E-10 | chr:6:32648036 |
| 6 rs113011827 | 32513453 T | 2.6    | 6.80E-10 | chr:6:32648036 |
| 6 rs28383262  | 32585773 T | 3.484  | 6.81E-10 | chr:6:32648036 |
| 6 rs17205970  | 32651923 C | 7.427  | 6.83E-10 | chr:6:32648036 |

|               |            |        |          |                |
|---------------|------------|--------|----------|----------------|
| 6 rs77236357  | 32459844 T | 0.4179 | 6.86E-10 | chr:6:32648036 |
| 6 rs67721312  | 32517556 T | 0.3322 | 6.91E-10 | chr:6:32648036 |
| 6 rs74194578  | 32517590 T | 0.3322 | 6.91E-10 | chr:6:32648036 |
| 6 rs9274459   | 32633409 A | 2.199  | 6.93E-10 | chr:6:32648036 |
| 6 rs115139056 | 32603425 A | 6.827  | 6.94E-10 | chr:6:32648036 |
| 6 rs9273547   | 32628844 T | 0.4273 | 7.01E-10 | chr:6:32648036 |
| 6 rs3957146   | 32681530 C | 4.338  | 7.04E-10 | chr:6:32648036 |
| 6 rs28371246  | 32647995 C | 2.124  | 7.05E-10 | chr:6:32648036 |
| 6 rs550717566 | 32609094 T | 2.828  | 7.09E-10 | chr:6:32648036 |
| 6 rs34190273  | 32543372 C | 2.522  | 7.14E-10 | chr:6:32648036 |
| 6 rs28383272  | 32586207 A | 3.524  | 7.16E-10 | chr:6:32648036 |
| 6 rs28383273  | 32586221 T | 3.524  | 7.16E-10 | chr:6:32648036 |
| 6 rs28383339  | 32604395 G | 3.034  | 7.18E-10 | chr:6:32648036 |
| 6 rs28383244  | 32584462 A | 3.491  | 7.21E-10 | chr:6:32648036 |
| 6 rs28383245  | 32584479 C | 3.491  | 7.21E-10 | chr:6:32648036 |
| 6 rs28383246  | 32584482 A | 3.491  | 7.21E-10 | chr:6:32648036 |
| 6 rs566863557 | 32550224 G | 6.621  | 7.21E-10 | chr:6:32648036 |
| 6 rs183124309 | 32541242 A | 2.583  | 7.28E-10 | chr:6:32648036 |
| 6 rs73726893  | 32548069 T | 5.553  | 7.30E-10 | chr:6:32648036 |
| 6 rs78017592  | 32508455 C | 2.423  | 7.40E-10 | chr:6:32648036 |
| 6 rs112935374 | 32493421 T | 0.3743 | 7.41E-10 | chr:6:32648036 |
| 6 rs115005201 | 32501172 A | 0.4102 | 7.42E-10 | chr:6:32648036 |
| 6 rs35779483  | 32626702 G | 2.693  | 7.43E-10 | chr:6:32648036 |
| 6 rs686250    | 32585055 A | 0.3471 | 7.45E-10 | chr:6:32648036 |
| 6 rs113233318 | 32503667 A | 5.462  | 7.49E-10 | chr:6:32648036 |
| 6 rs28366169  | 32238496 A | 5.871  | 7.52E-10 | chr:6:32648036 |
| 6 rs557236    | 32214995 A | 5.871  | 7.52E-10 | chr:6:32648036 |
| 6 rs28724149  | 32555334 G | 2.79   | 7.55E-10 | chr:6:32648036 |
| 6 rs114685974 | 32429516 A | 8.626  | 7.55E-10 | chr:6:32648036 |
| 6 rs115649989 | 32431488 A | 8.626  | 7.55E-10 | chr:6:32648036 |
| 6 rs533483364 | 32448886 A | 8.626  | 7.55E-10 | chr:6:32648036 |
| 6 rs73727927  | 32501214 G | 0.4105 | 7.55E-10 | chr:6:32648036 |
| 6 rs9273493   | 32628247 T | 0.3762 | 7.64E-10 | chr:6:32648036 |
| 6 rs281875010 | 32631261 T | 2.235  | 7.66E-10 | chr:6:32648036 |
| 6 rs9274510   | 32634184 A | 0.4105 | 7.75E-10 | chr:6:32648036 |
| 6 rs115201985 | 32526918 A | 0.4014 | 7.77E-10 | chr:6:32648036 |
| 6 rs9273305   | 32622927 C | 2.057  | 7.79E-10 | chr:6:32648036 |
| 6 rs67041740  | 32509273 C | 0.3354 | 7.85E-10 | chr:6:32648036 |
| 6 rs73729131  | 32520313 T | 0.3361 | 7.87E-10 | chr:6:32648036 |
| 6 rs2854273   | 32628776 C | 0.4089 | 7.89E-10 | chr:6:32648036 |
| 6 rs28383337  | 32603732 G | 3.707  | 7.89E-10 | chr:6:32648036 |
| 6 rs1130381   | 32632691 A | 6.76   | 7.91E-10 | chr:6:32648036 |
| 6 rs9272625   | 32608014 T | 0.4067 | 7.91E-10 | chr:6:32648036 |

|               |            |        |          |                |
|---------------|------------|--------|----------|----------------|
| 6 rs78654105  | 32510536 C | 5.611  | 7.93E-10 | chr:6:32648036 |
| 6 rs9271461   | 32588500 A | 2.464  | 7.99E-10 | chr:6:32648036 |
| 6 rs115368651 | 32602040 G | 7.174  | 8.02E-10 | chr:6:32648036 |
| 6 rs9273310   | 32622954 A | 3.119  | 8.05E-10 | chr:6:32648036 |
| 6 rs74948745  | 32537328 T | 2.101  | 8.13E-10 | chr:6:32648036 |
| 6 rs17613278  | 32621810 G | 2.149  | 8.14E-10 | chr:6:32648036 |
| 6 rs17613285  | 32621828 A | 2.149  | 8.14E-10 | chr:6:32648036 |
| 6 rs9274929   | 32641487 C | 2.002  | 8.25E-10 | chr:6:32648036 |
| 6 rs75380949  | 32541219 T | 2.578  | 8.25E-10 | chr:6:32648036 |
| 6 rs9272584   | 32607470 T | 2.249  | 8.29E-10 | chr:6:32648036 |
| 6 rs112103446 | 32522679 C | 0.257  | 8.31E-10 | chr:6:32648036 |
| 6 rs28746854  | 32634755 T | 2.922  | 8.38E-10 | chr:6:32648036 |
| 6 rs28746855  | 32634756 G | 2.922  | 8.38E-10 | chr:6:32648036 |
| 6 rs111903208 | 32661432 G | 7.318  | 8.44E-10 | chr:6:32648036 |
| 6 rs113138578 | 32661335 G | 7.318  | 8.44E-10 | chr:6:32648036 |
| 6 rs9273523   | 32628571 T | 3.013  | 8.44E-10 | chr:6:32648036 |
| 6 rs2858870   | 32572251 C | 3.655  | 8.45E-10 | chr:6:32648036 |
| 6 rs72844187  | 32521419 G | 0.3358 | 8.48E-10 | chr:6:32648036 |
| 6 rs9272974   | 32611315 T | 2.103  | 8.49E-10 | chr:6:32648036 |
| 6 rs9274453   | 32633369 A | 2.127  | 8.54E-10 | chr:6:32648036 |
| 6 rs546155165 | 32485659 G | 2.652  | 8.57E-10 | chr:6:32648036 |
| 6 rs78692977  | 32601164 A | 5.827  | 8.66E-10 | chr:6:32648036 |
| 6 rs9272647   | 32608508 A | 0.3937 | 8.70E-10 | chr:6:32648036 |
| 6 rs73727980  | 32511774 C | 0.3344 | 8.72E-10 | chr:6:32648036 |
| 6 rs73727981  | 32511791 C | 0.3344 | 8.72E-10 | chr:6:32648036 |
| 6 rs188630938 | 32482159 G | 2.4    | 8.78E-10 | chr:6:32648036 |
| 6 rs111842802 | 32538450 G | 2.618  | 8.80E-10 | chr:6:32648036 |
| 6 rs112232311 | 32538454 A | 2.618  | 8.80E-10 | chr:6:32648036 |
| 6 rs113192265 | 32511884 C | 2.655  | 8.83E-10 | chr:6:32648036 |
| 6 rs13204933  | 32583026 G | 3.451  | 8.88E-10 | chr:6:32648036 |
| 6 rs13212015  | 32580580 C | 3.451  | 8.88E-10 | chr:6:32648036 |
| 6 rs17840121  | 32577693 C | 3.451  | 8.88E-10 | chr:6:32648036 |
| 6 rs28383216  | 32580596 C | 3.451  | 8.88E-10 | chr:6:32648036 |
| 6 rs28383222  | 32583405 A | 3.451  | 8.88E-10 | chr:6:32648036 |
| 6 rs28383225  | 32583824 C | 3.451  | 8.88E-10 | chr:6:32648036 |
| 6 rs28383227  | 32583982 A | 3.451  | 8.88E-10 | chr:6:32648036 |
| 6 rs28383228  | 32583993 A | 3.451  | 8.88E-10 | chr:6:32648036 |
| 6 rs28383232  | 32584108 T | 3.451  | 8.88E-10 | chr:6:32648036 |
| 6 rs28383271  | 32586134 T | 3.451  | 8.88E-10 | chr:6:32648036 |
| 6 rs28383304  | 32586720 T | 3.451  | 8.88E-10 | chr:6:32648036 |
| 6 rs28752521  | 32584767 T | 3.451  | 8.88E-10 | chr:6:32648036 |
| 6 rs570600579 | 32584768 A | 3.451  | 8.88E-10 | chr:6:32648036 |
| 6 rs6932265   | 32579441 T | 3.451  | 8.88E-10 | chr:6:32648036 |

|               |            |        |          |                |
|---------------|------------|--------|----------|----------------|
| 6 rs149925556 | 32485700 C | 3.061  | 8.88E-10 | chr:6:32648036 |
| 6 rs28752533  | 32585058 A | 3.668  | 8.97E-10 | chr:6:32648036 |
| 6 rs3129732   | 32685240 G | 3.499  | 9.03E-10 | chr:6:32648036 |
| 6 rs9272976   | 32611341 A | 2.101  | 9.06E-10 | chr:6:32648036 |
| 6 rs28383235  | 32584184 C | 3.644  | 9.18E-10 | chr:6:32648036 |
| 6 rs113568276 | 32513127 A | 2.589  | 9.20E-10 | chr:6:32648036 |
| 6 rs551478079 | 32454023 G | 7.515  | 9.25E-10 | chr:6:32648036 |
| 6 rs185079571 | 32520557 G | 5.515  | 9.36E-10 | chr:6:32648036 |
| 6 rs28362368  | 32594040 G | 0.286  | 9.40E-10 | chr:6:32648036 |
| 6 rs9271452   | 32588385 A | 2.483  | 9.50E-10 | chr:6:32648036 |
| 6 rs184371991 | 32485729 A | 2.493  | 9.53E-10 | chr:6:32648036 |
| 6 rs115805770 | 32608432 T | 6.956  | 9.59E-10 | chr:6:32648036 |
| 6 rs28371250  | 32648039 T | 2.122  | 9.72E-10 | chr:6:32648036 |
| 6 rs376327303 | 32520719 A | 0.3336 | 9.73E-10 | chr:6:32648036 |
| 6 rs112280675 | 32522066 A | 0.313  | 9.74E-10 | chr:6:32648036 |
| 6 rs9272611   | 32607780 C | 0.3875 | 9.78E-10 | chr:6:32648036 |
| 6 rs75499602  | 32506794 T | 0.4388 | 9.80E-10 | chr:6:32648036 |
| 6 rs28383274  | 32586246 G | 3.495  | 9.84E-10 | chr:6:32648036 |
| 6 rs114849159 | 32552788 C | 2.488  | 9.85E-10 | chr:6:32648036 |
| 6 rs9273135   | 32612816 G | 2.106  | 9.88E-10 | chr:6:32648036 |
| 6 rs9271456   | 32588435 T | 2.375  | 9.94E-10 | chr:6:32648036 |
| 6 rs9273330   | 32623300 T | 2.124  | 9.95E-10 | chr:6:32648036 |
| 6 rs377552899 | 32630344 C | 2.568  | 1.00E-09 | chr:6:32648036 |
| 6 rs558237558 | 32453570 T | 7.617  | 1.01E-09 | chr:6:32648036 |
| 6 rs559964379 | 32453467 C | 7.617  | 1.01E-09 | chr:6:32648036 |
| 6 rs9271654   | 32592565 A | 0.2539 | 1.01E-09 | chr:6:32648036 |
| 6 rs9271657   | 32592582 C | 0.2539 | 1.01E-09 | chr:6:32648036 |
| 6 rs202210928 | 32541742 A | 2.516  | 1.02E-09 | chr:6:32648036 |
| 6 rs115806221 | 32514401 G | 0.3391 | 1.03E-09 | chr:6:32648036 |
| 6 rs34369284  | 32514144 T | 0.3391 | 1.03E-09 | chr:6:32648036 |
| 6 rs142125357 | 32487733 T | 2.934  | 1.04E-09 | chr:6:32648036 |
| 6 rs113225456 | 32521406 T | 0.338  | 1.05E-09 | chr:6:32648036 |
| 6 rs28383270  | 32586024 G | 3.539  | 1.05E-09 | chr:6:32648036 |
| 6 rs373544996 | 32663873 G | 4.251  | 1.06E-09 | chr:6:32648036 |
| 6 rs4273728   | 32678491 C | 4.251  | 1.06E-09 | chr:6:32648036 |
| 6 rs576628433 | 32598750 C | 5.868  | 1.06E-09 | chr:6:32648036 |
| 6 rs9274619   | 32635954 A | 4.251  | 1.06E-09 | chr:6:32648036 |
| 6 rs9275201   | 32656723 A | 4.251  | 1.06E-09 | chr:6:32648036 |
| 6 rs9275203   | 32656947 A | 4.251  | 1.06E-09 | chr:6:32648036 |
| 6 rs9275207   | 32657710 G | 4.251  | 1.06E-09 | chr:6:32648036 |
| 6 rs9275213   | 32658335 C | 4.251  | 1.06E-09 | chr:6:32648036 |
| 6 rs9275214   | 32658665 A | 4.251  | 1.06E-09 | chr:6:32648036 |
| 6 rs9275221   | 32659099 C | 4.251  | 1.06E-09 | chr:6:32648036 |



|               |            |        |          |                |
|---------------|------------|--------|----------|----------------|
| 6 rs9275223   | 32659839 A | 4.251  | 1.06E-09 | chr:6:32648036 |
| 6 rs9275275   | 32662607 A | 4.251  | 1.06E-09 | chr:6:32648036 |
| 6 rs9275293   | 32663308 C | 4.251  | 1.06E-09 | chr:6:32648036 |
| 6 rs9275296   | 32663431 C | 4.251  | 1.06E-09 | chr:6:32648036 |
| 6 rs9275300   | 32664126 G | 4.251  | 1.06E-09 | chr:6:32648036 |
| 6 rs9275307   | 32664990 T | 4.251  | 1.06E-09 | chr:6:32648036 |
| 6 rs9275308   | 32665255 A | 4.251  | 1.06E-09 | chr:6:32648036 |
| 6 rs9275310   | 32665319 G | 4.251  | 1.06E-09 | chr:6:32648036 |
| 6 rs9275311   | 32665640 T | 4.251  | 1.06E-09 | chr:6:32648036 |
| 6 rs9275313   | 32665759 T | 4.251  | 1.06E-09 | chr:6:32648036 |
| 6 rs9275314   | 32665909 A | 4.251  | 1.06E-09 | chr:6:32648036 |
| 6 rs9275315   | 32665912 A | 4.251  | 1.06E-09 | chr:6:32648036 |
| 6 rs9275324   | 32666635 T | 4.251  | 1.06E-09 | chr:6:32648036 |
| 6 rs9275325   | 32666651 T | 4.251  | 1.06E-09 | chr:6:32648036 |
| 6 rs9275326   | 32666660 T | 4.251  | 1.06E-09 | chr:6:32648036 |
| 6 rs9275334   | 32667107 C | 4.251  | 1.06E-09 | chr:6:32648036 |
| 6 rs9275387   | 32669013 C | 4.251  | 1.06E-09 | chr:6:32648036 |
| 6 rs9275394   | 32669454 C | 4.251  | 1.06E-09 | chr:6:32648036 |
| 6 rs9275395   | 32669483 G | 4.251  | 1.06E-09 | chr:6:32648036 |
| 6 rs9275400   | 32669761 G | 4.251  | 1.06E-09 | chr:6:32648036 |
| 6 rs9275422   | 32670548 A | 4.251  | 1.06E-09 | chr:6:32648036 |
| 6 rs9275426   | 32670912 C | 4.251  | 1.06E-09 | chr:6:32648036 |
| 6 rs9275429   | 32671057 A | 4.251  | 1.06E-09 | chr:6:32648036 |
| 6 rs9275430   | 32671086 T | 4.251  | 1.06E-09 | chr:6:32648036 |
| 6 rs9275434   | 32671247 T | 4.251  | 1.06E-09 | chr:6:32648036 |
| 6 rs9275435   | 32671332 C | 4.251  | 1.06E-09 | chr:6:32648036 |
| 6 rs9275437   | 32671412 T | 4.251  | 1.06E-09 | chr:6:32648036 |
| 6 rs9275442   | 32671755 A | 4.251  | 1.06E-09 | chr:6:32648036 |
| 6 rs9275445   | 32671811 A | 4.251  | 1.06E-09 | chr:6:32648036 |
| 6 rs9275476   | 32672624 C | 4.251  | 1.06E-09 | chr:6:32648036 |
| 6 rs9275477   | 32672641 C | 4.251  | 1.06E-09 | chr:6:32648036 |
| 6 rs9275486   | 32673099 A | 4.251  | 1.06E-09 | chr:6:32648036 |
| 6 rs9275495   | 32673574 T | 4.251  | 1.06E-09 | chr:6:32648036 |
| 6 rs9275503   | 32673931 G | 4.251  | 1.06E-09 | chr:6:32648036 |
| 6 rs9275530   | 32675523 C | 4.251  | 1.06E-09 | chr:6:32648036 |
| 6 rs9275532   | 32675634 G | 4.251  | 1.06E-09 | chr:6:32648036 |
| 6 rs9275541   | 32676159 G | 4.251  | 1.06E-09 | chr:6:32648036 |
| 6 rs9275583   | 32680299 A | 4.251  | 1.06E-09 | chr:6:32648036 |
| 6 rs9273136   | 32612823 C | 2.104  | 1.06E-09 | chr:6:32648036 |
| 6 rs9273137   | 32612827 A | 2.104  | 1.06E-09 | chr:6:32648036 |
| 6 rs114710684 | 32521237 G | 0.2453 | 1.06E-09 | chr:6:32648036 |
| 6 rs116783886 | 32521236 T | 0.2453 | 1.06E-09 | chr:6:32648036 |
| 6 rs9272607   | 32607735 G | 0.4358 | 1.06E-09 | chr:6:32648036 |

|               |            |        |          |                |
|---------------|------------|--------|----------|----------------|
| 6 rs66678933  | 32509320 T | 0.34   | 1.07E-09 | chr:6:32648036 |
| 6 rs72492304  | 32509311 C | 0.34   | 1.07E-09 | chr:6:32648036 |
| 6 rs9274573   | 32635205 C | 0.4208 | 1.07E-09 | chr:6:32648036 |
| 6 rs9274662   | 32636494 T | 0.3434 | 1.07E-09 | chr:6:32648036 |
| 6 rs3134988   | 32640772 G | 0.3905 | 1.08E-09 | chr:6:32648036 |
| 6 rs78074767  | 32611472 G | 2.014  | 1.08E-09 | chr:6:32648036 |
| 6 rs72492325  | 32520151 C | 0.3392 | 1.08E-09 | chr:6:32648036 |
| 6 rs189023101 | 32539744 T | 2.966  | 1.08E-09 | chr:6:32648036 |
| 6 rs9273541   | 32628787 T | 3.005  | 1.09E-09 | chr:6:32648036 |
| 6 rs9273111   | 32612643 A | 2.419  | 1.09E-09 | chr:6:32648036 |
| 6 rs115217308 | 32520296 A | 0.3412 | 1.10E-09 | chr:6:32648036 |
| 6 rs116173033 | 32520295 G | 0.3412 | 1.10E-09 | chr:6:32648036 |
| 6 rs9274564   | 32635048 G | 0.4399 | 1.10E-09 | chr:6:32648036 |
| 6 rs9271704   | 32593317 G | 0.282  | 1.11E-09 | chr:6:32648036 |
| 6 rs9271705   | 32593321 T | 0.282  | 1.11E-09 | chr:6:32648036 |
| 6 rs149860663 | 32548008 A | 4.768  | 1.13E-09 | chr:6:32648036 |
| 6 rs568924277 | 32606505 C | 2.828  | 1.13E-09 | chr:6:32648036 |
| 6 rs9275599   | 32682429 T | 4.317  | 1.13E-09 | chr:6:32648036 |
| 6 rs186962758 | 32541250 A | 2.546  | 1.13E-09 | chr:6:32648036 |
| 6 rs192184608 | 32540363 T | 2.939  | 1.14E-09 | chr:6:32648036 |
| 6 rs28366339  | 32564725 G | 2.309  | 1.15E-09 | chr:6:32648036 |
| 6 rs28366340  | 32564727 G | 2.309  | 1.15E-09 | chr:6:32648036 |
| 6 rs114929610 | 32602075 A | 6.807  | 1.17E-09 | chr:6:32648036 |
| 6 rs115596571 | 32602104 T | 6.807  | 1.17E-09 | chr:6:32648036 |
| 6 rs35600209  | 32556584 C | 2.456  | 1.17E-09 | chr:6:32648036 |
| 6 rs9272614   | 32607859 C | 0.3885 | 1.17E-09 | chr:6:32648036 |
| 6 rs115123240 | 32519919 G | 0.3421 | 1.18E-09 | chr:6:32648036 |
| 6 rs75207447  | 32480073 G | 6.858  | 1.19E-09 | chr:6:32648036 |
| 6 rs77122401  | 32480072 T | 6.858  | 1.19E-09 | chr:6:32648036 |
| 6 rs9273415   | 32627310 C | 0.4243 | 1.19E-09 | chr:6:32648036 |
| 6 rs9272254   | 32603098 C | 2.595  | 1.20E-09 | chr:6:32648036 |
| 6 rs9271458   | 32588453 A | 2.363  | 1.21E-09 | chr:6:32648036 |
| 6 rs75953322  | 32506798 C | 0.4418 | 1.22E-09 | chr:6:32648036 |
| 6 rs112032264 | 32660115 C | 6.931  | 1.22E-09 | chr:6:32648036 |
| 6 rs112117693 | 32662754 T | 6.931  | 1.22E-09 | chr:6:32648036 |
| 6 rs112317305 | 32667199 C | 6.931  | 1.22E-09 | chr:6:32648036 |
| 6 rs112466823 | 32660104 T | 6.931  | 1.22E-09 | chr:6:32648036 |
| 6 rs112535219 | 32662613 T | 6.931  | 1.22E-09 | chr:6:32648036 |
| 6 rs112574398 | 32658610 T | 6.931  | 1.22E-09 | chr:6:32648036 |
| 6 rs112608098 | 32665270 A | 6.931  | 1.22E-09 | chr:6:32648036 |
| 6 rs113194380 | 32671391 T | 6.931  | 1.22E-09 | chr:6:32648036 |
| 6 rs113666293 | 32656477 C | 6.931  | 1.22E-09 | chr:6:32648036 |
| 6 rs114218404 | 32664119 T | 6.931  | 1.22E-09 | chr:6:32648036 |

|   |             |          |   |        |          |                |
|---|-------------|----------|---|--------|----------|----------------|
| 6 | rs114325417 | 32666222 | A | 6.931  | 1.22E-09 | chr:6:32648036 |
| 6 | rs114744294 | 32660866 | G | 6.931  | 1.22E-09 | chr:6:32648036 |
| 6 | rs114801596 | 32663093 | G | 6.931  | 1.22E-09 | chr:6:32648036 |
| 6 | rs114996593 | 32658360 | C | 6.931  | 1.22E-09 | chr:6:32648036 |
| 6 | rs115262684 | 32666235 | A | 6.931  | 1.22E-09 | chr:6:32648036 |
| 6 | rs115341895 | 32649824 | T | 6.931  | 1.22E-09 | chr:6:32648036 |
| 6 | rs115577932 | 32663819 | T | 6.931  | 1.22E-09 | chr:6:32648036 |
| 6 | rs115777056 | 32664154 | A | 6.931  | 1.22E-09 | chr:6:32648036 |
| 6 | rs115842332 | 32666213 | A | 6.931  | 1.22E-09 | chr:6:32648036 |
| 6 | rs116147199 | 32658355 | G | 6.931  | 1.22E-09 | chr:6:32648036 |
| 6 | rs116459302 | 32666559 | T | 6.931  | 1.22E-09 | chr:6:32648036 |
| 6 | rs12525220  | 32675470 | A | 6.931  | 1.22E-09 | chr:6:32648036 |
| 6 | rs138256019 | 32673055 | A | 6.931  | 1.22E-09 | chr:6:32648036 |
| 6 | rs141345764 | 32673811 | T | 6.931  | 1.22E-09 | chr:6:32648036 |
| 6 | rs141748883 | 32663156 | C | 6.931  | 1.22E-09 | chr:6:32648036 |
| 6 | rs143607013 | 32658807 | T | 6.931  | 1.22E-09 | chr:6:32648036 |
| 6 | rs145250786 | 32658793 | A | 6.931  | 1.22E-09 | chr:6:32648036 |
| 6 | rs146797694 | 32658866 | T | 6.931  | 1.22E-09 | chr:6:32648036 |
| 6 | rs149005483 | 32674166 | T | 6.931  | 1.22E-09 | chr:6:32648036 |
| 6 | rs149999552 | 32658763 | C | 6.931  | 1.22E-09 | chr:6:32648036 |
| 6 | rs1694113   | 32650101 | A | 6.931  | 1.22E-09 | chr:6:32648036 |
| 6 | rs17427494  | 32665001 | A | 6.931  | 1.22E-09 | chr:6:32648036 |
| 6 | rs184950714 | 32636728 | A | 6.931  | 1.22E-09 | chr:6:32648036 |
| 6 | rs4713586   | 32659582 | G | 6.931  | 1.22E-09 | chr:6:32648036 |
| 6 | rs568935162 | 32662076 | G | 6.931  | 1.22E-09 | chr:6:32648036 |
| 6 | rs74756176  | 32664373 | T | 6.931  | 1.22E-09 | chr:6:32648036 |
| 6 | rs75084410  | 32636018 | A | 6.931  | 1.22E-09 | chr:6:32648036 |
| 6 | rs77537414  | 32664356 | C | 6.931  | 1.22E-09 | chr:6:32648036 |
| 6 | rs7754496   | 32657893 | T | 6.931  | 1.22E-09 | chr:6:32648036 |
| 6 | rs7775055   | 32657916 | C | 6.931  | 1.22E-09 | chr:6:32648036 |
| 6 | rs79951097  | 32662954 | C | 6.931  | 1.22E-09 | chr:6:32648036 |
| 6 | rs9273414   | 32627299 | A | 0.429  | 1.23E-09 | chr:6:32648036 |
| 6 | rs17613271  | 32621778 | G | 2.103  | 1.23E-09 | chr:6:32648036 |
| 6 | rs28366186  | 32349737 | G | 5.535  | 1.23E-09 | chr:6:32648036 |
| 6 | rs34265294  | 32489118 | A | 0.4304 | 1.23E-09 | chr:6:32648036 |
| 6 | rs17612533  | 32615307 | G | 2.072  | 1.23E-09 | chr:6:32648036 |
| 6 | rs576530137 | 32629015 | C | 1.998  | 1.25E-09 | chr:6:32648036 |
| 6 | rs2894257   | 32433276 | G | 0.133  | 1.26E-09 | chr:6:32648036 |
| 6 | rs428947    | 32195786 | A | 5.626  | 1.26E-09 | chr:6:32648036 |
| 6 | rs115712701 | 32501737 | C | 0.3419 | 1.26E-09 | chr:6:32648036 |
| 6 | rs114027542 | 32602231 | T | 6.775  | 1.28E-09 | chr:6:32648036 |
| 6 | rs9271688   | 32592992 | G | 0.2826 | 1.28E-09 | chr:6:32648036 |
| 6 | rs12192221  | 32580928 | G | 3.407  | 1.29E-09 | chr:6:32648036 |

|               |            |        |          |                |
|---------------|------------|--------|----------|----------------|
| 6 rs35301884  | 32513638 C | 0.3415 | 1.29E-09 | chr:6:32648036 |
| 6 rs13204672  | 32582796 G | 3.394  | 1.31E-09 | chr:6:32648036 |
| 6 rs3020625   | 32628835 A | 0.4354 | 1.31E-09 | chr:6:32648036 |
| 6 rs9273544   | 32628833 A | 0.4354 | 1.31E-09 | chr:6:32648036 |
| 6 rs75969927  | 32502416 C | 0.4231 | 1.31E-09 | chr:6:32648036 |
| 6 rs77639852  | 32601094 T | 5.84   | 1.31E-09 | chr:6:32648036 |
| 6 rs9273416   | 32627321 T | 0.42   | 1.33E-09 | chr:6:32648036 |
| 6 rs9273247   | 32614166 C | 1.953  | 1.33E-09 | chr:6:32648036 |
| 6 rs9273248   | 32614167 C | 1.953  | 1.33E-09 | chr:6:32648036 |
| 6 rs9273249   | 32614168 A | 1.953  | 1.33E-09 | chr:6:32648036 |
| 6 rs72844171  | 32520749 C | 0.3401 | 1.33E-09 | chr:6:32648036 |
| 6 rs150543195 | 32526028 A | 2.166  | 1.34E-09 | chr:6:32648036 |
| 6 rs75098126  | 32636108 G | 6.801  | 1.35E-09 | chr:6:32648036 |
| 6 rs75128960  | 32636087 A | 6.801  | 1.35E-09 | chr:6:32648036 |
| 6 rs9273559   | 32628967 T | 2.112  | 1.36E-09 | chr:6:32648036 |
| 6 rs66532036  | 32519319 A | 0.3411 | 1.37E-09 | chr:6:32648036 |
| 6 rs567852525 | 32452110 T | 3.082  | 1.37E-09 | chr:6:32648036 |
| 6 rs28752519  | 32584705 C | 3.396  | 1.37E-09 | chr:6:32648036 |
| 6 rs9273413   | 32627292 A | 0.4295 | 1.37E-09 | chr:6:32648036 |
| 6 rs562347537 | 32446227 A | 0.1848 | 1.37E-09 | chr:6:32648036 |
| 6 rs202226199 | 32540944 C | 0.4234 | 1.38E-09 | chr:6:32648036 |
| 6 rs17843699  | 32622238 G | 1.959  | 1.39E-09 | chr:6:32648036 |
| 6 rs111940905 | 32473454 G | 2.435  | 1.39E-09 | chr:6:32648036 |
| 6 rs17879746  | 32557422 T | 4.357  | 1.39E-09 | chr:6:32648036 |
| 6 rs3129758   | 32584625 A | 0.3407 | 1.40E-09 | chr:6:32648036 |
| 6 rs62405642  | 32517759 G | 0.3535 | 1.40E-09 | chr:6:32648036 |
| 6 rs9273321   | 32623096 G | 1.969  | 1.40E-09 | chr:6:32648036 |
| 6 rs114521853 | 32469316 C | 2.312  | 1.41E-09 | chr:6:32648036 |
| 6 rs553192397 | 32469317 A | 2.312  | 1.41E-09 | chr:6:32648036 |
| 6 rs35599691  | 32543117 G | 0.3755 | 1.42E-09 | chr:6:32648036 |
| 6 rs9273417   | 32627352 A | 0.4236 | 1.43E-09 | chr:6:32648036 |
| 6 rs112221534 | 32453603 A | 3.227  | 1.43E-09 | chr:6:32648036 |
| 6 rs199526678 | 32653823 G | 6.737  | 1.44E-09 | chr:6:32648036 |
| 6 rs76384124  | 32653855 A | 6.737  | 1.44E-09 | chr:6:32648036 |
| 6 rs17191234  | 32564681 C | 2.313  | 1.45E-09 | chr:6:32648036 |
| 6 rs9273432   | 32627485 T | 0.448  | 1.45E-09 | chr:6:32648036 |
| 6 rs559451013 | 32485704 G | 3.042  | 1.46E-09 | chr:6:32648036 |
| 6 rs17843679  | 32621888 G | 1.93   | 1.47E-09 | chr:6:32648036 |
| 6 rs17843680  | 32621893 G | 1.93   | 1.47E-09 | chr:6:32648036 |
| 6 rs28746860  | 32635033 G | 2.91   | 1.47E-09 | chr:6:32648036 |
| 6 rs75252378  | 32502610 C | 0.4231 | 1.48E-09 | chr:6:32648036 |
| 6 rs184006295 | 32558962 T | 3.505  | 1.48E-09 | chr:6:32648036 |
| 6 rs1980496   | 32340070 T | 2.816  | 1.49E-09 | chr:6:32648036 |

|               |            |        |          |                |
|---------------|------------|--------|----------|----------------|
| 6 rs9272383   | 32604749 T | 0.4295 | 1.49E-09 | chr:6:32648036 |
| 6 rs113045771 | 32503092 G | 0.4302 | 1.49E-09 | chr:6:32648036 |
| 6 rs542010760 | 32558928 A | 3.552  | 1.50E-09 | chr:6:32648036 |
| 6 rs113764407 | 32513432 T | 5.344  | 1.51E-09 | chr:6:32648036 |
| 6 rs113676040 | 32541775 C | 2.487  | 1.51E-09 | chr:6:32648036 |
| 6 rs184358099 | 32500832 G | 0.3415 | 1.52E-09 | chr:6:32648036 |
| 6 rs9271368   | 32586934 G | 0.3437 | 1.52E-09 | chr:6:32648036 |
| 6 rs574582728 | 32608989 T | 6.878  | 1.52E-09 | chr:6:32648036 |
| 6 rs9271454   | 32588422 T | 2.349  | 1.53E-09 | chr:6:32648036 |
| 6 rs9271455   | 32588423 G | 2.349  | 1.53E-09 | chr:6:32648036 |
| 6 rs9273370   | 32626492 G | 0.3483 | 1.53E-09 | chr:6:32648036 |
| 6 rs9275356   | 32667850 G | 4.171  | 1.54E-09 | chr:6:32648036 |
| 6 rs28752502  | 32569051 G | 3.532  | 1.55E-09 | chr:6:32648036 |
| 6 rs17843717  | 32630798 A | 2.776  | 1.56E-09 | chr:6:32648036 |
| 6 rs9256942   | 32557316 A | 0.2545 | 1.57E-09 | chr:6:32648036 |
| 6 rs9270290   | 32557319 T | 0.2545 | 1.57E-09 | chr:6:32648036 |
| 6 rs116109088 | 32599900 T | 6.487  | 1.59E-09 | chr:6:32648036 |
| 6 rs28746809  | 32633159 C | 2.863  | 1.59E-09 | chr:6:32648036 |
| 6 rs9268847   | 32429277 G | 0.2976 | 1.59E-09 | chr:6:32648036 |
| 6 rs68126668  | 32509603 A | 0.344  | 1.59E-09 | chr:6:32648036 |
| 6 rs9269204   | 32449797 C | 0.2564 | 1.61E-09 | chr:6:32648036 |
| 6 rs67081540  | 32512359 C | 0.348  | 1.62E-09 | chr:6:32648036 |
| 6 rs201574337 | 32453496 C | 2.659  | 1.63E-09 | chr:6:32648036 |
| 6 rs9272194   | 32601825 G | 0.4104 | 1.63E-09 | chr:6:32648036 |
| 6 rs114466578 | 32635501 G | 3.008  | 1.64E-09 | chr:6:32648036 |
| 6 rs114353707 | 32513535 C | 0.3449 | 1.64E-09 | chr:6:32648036 |
| 6 rs116817148 | 32513534 G | 0.3449 | 1.64E-09 | chr:6:32648036 |
| 6 rs28383250  | 32585525 T | 3.434  | 1.64E-09 | chr:6:32648036 |
| 6 rs28383251  | 32585567 T | 3.434  | 1.64E-09 | chr:6:32648036 |
| 6 rs28383252  | 32585574 T | 3.434  | 1.64E-09 | chr:6:32648036 |
| 6 rs57689942  | 32543079 A | 2.421  | 1.65E-09 | chr:6:32648036 |
| 6 rs200402299 | 32458349 A | 0.3861 | 1.65E-09 | chr:6:32648036 |
| 6 rs570560964 | 32523134 T | 3.906  | 1.65E-09 | chr:6:32648036 |
| 6 rs114520912 | 32517504 T | 0.3425 | 1.66E-09 | chr:6:32648036 |
| 6 rs113549588 | 32521091 G | 5.423  | 1.67E-09 | chr:6:32648036 |
| 6 rs9273433   | 32627489 A | 0.4488 | 1.67E-09 | chr:6:32648036 |
| 6 rs3998159   | 32682019 C | 4.201  | 1.70E-09 | chr:6:32648036 |
| 6 rs554742089 | 32451822 T | 3.061  | 1.72E-09 | chr:6:32648036 |
| 6 rs114926982 | 32390197 G | 8.709  | 1.72E-09 | chr:6:32648036 |
| 6 rs115596275 | 32420218 C | 8.709  | 1.72E-09 | chr:6:32648036 |
| 6 rs28366347  | 32564908 G | 2.339  | 1.73E-09 | chr:6:32648036 |
| 6 rs72844188  | 32521427 C | 0.3466 | 1.74E-09 | chr:6:32648036 |
| 6 rs114307375 | 32597081 G | 6.068  | 1.74E-09 | chr:6:32648036 |

|               |            |        |          |                |
|---------------|------------|--------|----------|----------------|
| 6 rs66814015  | 32505258 G | 0.4291 | 1.75E-09 | chr:6:32648036 |
| 6 rs74389316  | 32596869 T | 0.2684 | 1.75E-09 | chr:6:32648036 |
| 6 rs9271502   | 32589305 A | 2.437  | 1.76E-09 | chr:6:32648036 |
| 6 rs9271379   | 32587333 T | 0.2707 | 1.76E-09 | chr:6:32648036 |
| 6 rs111293660 | 32503087 T | 0.4323 | 1.77E-09 | chr:6:32648036 |
| 6 rs28383328  | 32599554 T | 2.766  | 1.78E-09 | chr:6:32648036 |
| 6 rs72492327  | 32520465 G | 0.3456 | 1.78E-09 | chr:6:32648036 |
| 6 rs536081339 | 32600597 T | 5.84   | 1.79E-09 | chr:6:32648036 |
| 6 rs28746810  | 32633185 T | 2.85   | 1.79E-09 | chr:6:32648036 |
| 6 rs9273049   | 32612034 T | 2.106  | 1.79E-09 | chr:6:32648036 |
| 6 rs372253974 | 32630329 C | 2.527  | 1.81E-09 | chr:6:32648036 |
| 6 rs139025848 | 32613234 T | 8.505  | 1.81E-09 | chr:6:32648036 |
| 6 rs3828848   | 32520665 C | 0.3454 | 1.81E-09 | chr:6:32648036 |
| 6 rs73729138  | 32520854 G | 0.3458 | 1.81E-09 | chr:6:32648036 |
| 6 rs116645664 | 32517505 C | 0.3427 | 1.81E-09 | chr:6:32648036 |
| 6 rs76819034  | 32457814 C | 2.453  | 1.82E-09 | chr:6:32648036 |
| 6 rs558998942 | 32637290 G | 8.076  | 1.82E-09 | chr:6:32648036 |
| 6 rs570990139 | 32513474 G | 5.314  | 1.82E-09 | chr:6:32648036 |
| 6 rs28383308  | 32586782 T | 3.397  | 1.82E-09 | chr:6:32648036 |
| 6 rs28383309  | 32586783 T | 3.397  | 1.82E-09 | chr:6:32648036 |
| 6 rs1140322   | 32632578 G | 2.115  | 1.83E-09 | chr:6:32648036 |
| 6 rs9273134   | 32612807 T | 2.074  | 1.84E-09 | chr:6:32648036 |
| 6 rs9272613   | 32607829 A | 0.3961 | 1.84E-09 | chr:6:32648036 |
| 6 rs117773289 | 32675292 G | 8.124  | 1.85E-09 | chr:6:32648036 |
| 6 rs114933571 | 32582616 G | 8.308  | 1.86E-09 | chr:6:32648036 |
| 6 rs9272547   | 32606949 T | 0.4301 | 1.86E-09 | chr:6:32648036 |
| 6 rs9275185   | 32655305 T | 4.032  | 1.86E-09 | chr:6:32648036 |
| 6 rs9273172   | 32613224 A | 0.4062 | 1.88E-09 | chr:6:32648036 |
| 6 rs3134996   | 32636866 A | 0.344  | 1.89E-09 | chr:6:32648036 |
| 6 rs17211105  | 32557606 A | 3.174  | 1.89E-09 | chr:6:32648036 |
| 6 rs9271871   | 32595383 C | 0.1958 | 1.90E-09 | chr:6:32648036 |
| 6 rs72851046  | 32501957 G | 0.3468 | 1.91E-09 | chr:6:32648036 |
| 6 rs72851047  | 32501962 T | 0.3468 | 1.91E-09 | chr:6:32648036 |
| 6 rs112348271 | 32504083 C | 4.43   | 1.91E-09 | chr:6:32648036 |
| 6 rs28383243  | 32584410 G | 3.352  | 1.95E-09 | chr:6:32648036 |
| 6 rs28383247  | 32584525 A | 3.352  | 1.95E-09 | chr:6:32648036 |
| 6 rs28752517  | 32584583 A | 3.352  | 1.95E-09 | chr:6:32648036 |
| 6 rs28752518  | 32584588 G | 3.352  | 1.95E-09 | chr:6:32648036 |
| 6 rs17612788  | 32620344 A | 2.061  | 1.96E-09 | chr:6:32648036 |
| 6 rs34955866  | 32546863 T | 2.543  | 1.96E-09 | chr:6:32648036 |
| 6 rs200374399 | 32482335 T | 0.441  | 1.97E-09 | chr:6:32648036 |
| 6 rs72492319  | 32511987 T | 0.3471 | 1.99E-09 | chr:6:32648036 |
| 6 rs75141783  | 32511944 A | 0.3471 | 1.99E-09 | chr:6:32648036 |

|               |            |        |          |                |
|---------------|------------|--------|----------|----------------|
| 6 rs9273320   | 32623072 G | 1.958  | 2.00E-09 | chr:6:32648036 |
| 6 rs145316959 | 32521201 T | 0.2411 | 2.00E-09 | chr:6:32648036 |
| 6 rs147192780 | 32489642 C | 2.299  | 2.01E-09 | chr:6:32648036 |
| 6 rs72508418  | 32459868 T | 0.4327 | 2.02E-09 | chr:6:32648036 |
| 6 rs13213605  | 32647764 C | 0.4715 | 2.02E-09 | chr:6:32648036 |
| 6 rs28366180  | 32289423 T | 5.608  | 2.02E-09 | chr:6:32648036 |
| 6 rs9271215   | 32579277 C | 0.3627 | 2.03E-09 | chr:6:32648036 |
| 6 rs199917364 | 32571349 G | 0.3563 | 2.07E-09 | chr:6:32648036 |
| 6 rs561026852 | 32571351 G | 0.3563 | 2.07E-09 | chr:6:32648036 |
| 6 rs115218431 | 32611504 C | 1.995  | 2.09E-09 | chr:6:32648036 |
| 6 rs116685323 | 32611510 C | 1.995  | 2.09E-09 | chr:6:32648036 |
| 6 rs149654721 | 32611509 C | 1.995  | 2.09E-09 | chr:6:32648036 |
| 6 rs17612541  | 32615308 T | 2.05   | 2.10E-09 | chr:6:32648036 |
| 6 rs17612548  | 32615312 A | 2.05   | 2.10E-09 | chr:6:32648036 |
| 6 rs9272546   | 32606941 T | 0.4308 | 2.10E-09 | chr:6:32648036 |
| 6 rs28383269  | 32585995 C | 3.45   | 2.11E-09 | chr:6:32648036 |
| 6 rs72853979  | 32511572 T | 0.3457 | 2.11E-09 | chr:6:32648036 |
| 6 rs9272193   | 32601785 T | 2.429  | 2.12E-09 | chr:6:32648036 |
| 6 rs72492351  | 32538451 C | 0.3062 | 2.13E-09 | chr:6:32648036 |
| 6 rs9271733   | 32593633 A | 0.2641 | 2.13E-09 | chr:6:32648036 |
| 6 rs17202449  | 32363722 G | 5.289  | 2.14E-09 | chr:6:32648036 |
| 6 rs28366190  | 32357274 T | 5.289  | 2.14E-09 | chr:6:32648036 |
| 6 rs28366191  | 32364190 G | 5.289  | 2.14E-09 | chr:6:32648036 |
| 6 rs28366193  | 32369323 A | 5.289  | 2.14E-09 | chr:6:32648036 |
| 6 rs28752484  | 32348669 C | 5.289  | 2.14E-09 | chr:6:32648036 |
| 6 rs540699517 | 32353283 C | 5.289  | 2.14E-09 | chr:6:32648036 |
| 6 rs72853909  | 32505798 A | 0.4324 | 2.14E-09 | chr:6:32648036 |
| 6 rs62405640  | 32516729 T | 0.351  | 2.14E-09 | chr:6:32648036 |
| 6 rs76033762  | 32516702 C | 0.351  | 2.14E-09 | chr:6:32648036 |
| 6 rs112004746 | 32518155 T | 0.3573 | 2.16E-09 | chr:6:32648036 |
| 6 rs561918072 | 32607733 A | 8.37   | 2.18E-09 | chr:6:32648036 |
| 6 rs67717173  | 32520137 T | 0.3488 | 2.18E-09 | chr:6:32648036 |
| 6 rs200951960 | 32510600 G | 2.426  | 2.20E-09 | chr:6:32648036 |
| 6 rs199923808 | 32663798 G | 6.494  | 2.21E-09 | chr:6:32648036 |
| 6 rs191277720 | 32458048 C | 2.758  | 2.21E-09 | chr:6:32648036 |
| 6 rs72853989  | 32512321 T | 0.3492 | 2.21E-09 | chr:6:32648036 |
| 6 rs74375951  | 32500923 G | 0.3482 | 2.21E-09 | chr:6:32648036 |
| 6 rs112670480 | 32661440 T | 6.943  | 2.21E-09 | chr:6:32648036 |
| 6 rs7774573   | 32657627 C | 6.506  | 2.21E-09 | chr:6:32648036 |
| 6 rs9273477   | 32628079 A | 2.944  | 2.22E-09 | chr:6:32648036 |
| 6 rs9271401   | 32587525 G | 0.281  | 2.23E-09 | chr:6:32648036 |
| 6 rs9271431   | 32588031 A | 2.492  | 2.24E-09 | chr:6:32648036 |
| 6 rs9272969   | 32611289 G | 2.101  | 2.26E-09 | chr:6:32648036 |

|               |            |        |          |                |
|---------------|------------|--------|----------|----------------|
| 6 rs72853983  | 32511854 A | 0.3491 | 2.28E-09 | chr:6:32648036 |
| 6 rs558149876 | 32541313 T | 2.438  | 2.28E-09 | chr:6:32648036 |
| 6 rs9274300   | 32631970 G | 1.943  | 2.30E-09 | chr:6:32648036 |
| 6 rs28819746  | 32509579 C | 0.3481 | 2.31E-09 | chr:6:32648036 |
| 6 rs185234644 | 32514792 C | 2.471  | 2.32E-09 | chr:6:32648036 |
| 6 rs114817791 | 32552774 A | 2.509  | 2.33E-09 | chr:6:32648036 |
| 6 rs151163549 | 32487745 G | 2.922  | 2.33E-09 | chr:6:32648036 |
| 6 rs9268486   | 32368560 T | 2.717  | 2.33E-09 | chr:6:32648036 |
| 6 rs28366285  | 32560330 C | 2.501  | 2.34E-09 | chr:6:32648036 |
| 6 rs9273132   | 32612800 G | 2.065  | 2.35E-09 | chr:6:32648036 |
| 6 rs9273319   | 32623050 T | 1.946  | 2.35E-09 | chr:6:32648036 |
| 6 rs67916930  | 32508823 G | 0.3493 | 2.36E-09 | chr:6:32648036 |
| 6 rs4959031   | 32597411 T | 5.875  | 2.37E-09 | chr:6:32648036 |
| 6 rs9269016   | 32436670 G | 0.3436 | 2.38E-09 | chr:6:32648036 |
| 6 rs560259947 | 32458033 C | 2.747  | 2.39E-09 | chr:6:32648036 |
| 6 rs115738641 | 32599980 G | 6.068  | 2.40E-09 | chr:6:32648036 |
| 6 rs79119980  | 32505272 T | 0.4348 | 2.40E-09 | chr:6:32648036 |
| 6 rs9274371   | 32632553 G | 2.045  | 2.41E-09 | chr:6:32648036 |
| 6 rs9274372   | 32632555 A | 2.045  | 2.41E-09 | chr:6:32648036 |
| 6 rs72492303  | 32509061 T | 0.3473 | 2.41E-09 | chr:6:32648036 |
| 6 rs28752496  | 32568321 C | 2.451  | 2.41E-09 | chr:6:32648036 |
| 6 rs550204266 | 32615268 C | 1.974  | 2.41E-09 | chr:6:32648036 |
| 6 rs9273038   | 32611931 A | 0.4424 | 2.42E-09 | chr:6:32648036 |
| 6 rs72844152  | 32519652 A | 0.3434 | 2.42E-09 | chr:6:32648036 |
| 6 rs1049163   | 32629193 T | 2.251  | 2.47E-09 | chr:6:32648036 |
| 6 rs28383183  | 32571829 A | 3.333  | 2.47E-09 | chr:6:32648036 |
| 6 rs9270891   | 32571828 G | 3.333  | 2.47E-09 | chr:6:32648036 |
| 6 rs9270892   | 32571830 T | 3.333  | 2.47E-09 | chr:6:32648036 |
| 6 rs536078405 | 32558888 A | 3.423  | 2.47E-09 | chr:6:32648036 |
| 6 rs115223053 | 32602624 C | 6.865  | 2.49E-09 | chr:6:32648036 |
| 6 rs117055012 | 32602628 G | 6.865  | 2.49E-09 | chr:6:32648036 |
| 6 rs113460787 | 32518089 T | 0.3512 | 2.50E-09 | chr:6:32648036 |
| 6 rs71536524  | 32520841 G | 0.432  | 2.53E-09 | chr:6:32648036 |
| 6 rs113604797 | 32502231 T | 5.107  | 2.54E-09 | chr:6:32648036 |
| 6 rs138238823 | 32598837 C | 5.355  | 2.56E-09 | chr:6:32648036 |
| 6 rs1064664   | 32552075 G | 0.2838 | 2.57E-09 | chr:6:32648036 |
| 6 rs1056316   | 32627494 C | 2.903  | 2.58E-09 | chr:6:32648036 |
| 6 rs9273079   | 32612326 T | 2.308  | 2.59E-09 | chr:6:32648036 |
| 6 rs9275167   | 32653263 G | 4.029  | 2.59E-09 | chr:6:32648036 |
| 6 rs17612640  | 32615754 G | 0.3961 | 2.60E-09 | chr:6:32648036 |
| 6 rs68175425  | 32517446 G | 0.3519 | 2.63E-09 | chr:6:32648036 |
| 6 rs2894379   | 32580911 C | 2.751  | 2.65E-09 | chr:6:32648036 |
| 6 rs66497315  | 32512407 C | 0.3512 | 2.66E-09 | chr:6:32648036 |



|               |            |        |          |                |
|---------------|------------|--------|----------|----------------|
| 6 rs72492314  | 32512421 A | 0.3512 | 2.66E-09 | chr:6:32648036 |
| 6 rs9275592   | 32680620 T | 4.097  | 2.66E-09 | chr:6:32648036 |
| 6 rs149589923 | 32500818 A | 0.3502 | 2.67E-09 | chr:6:32648036 |
| 6 rs17613299  | 32621901 G | 1.907  | 2.71E-09 | chr:6:32648036 |
| 6 rs192335575 | 32473563 A | 3.013  | 2.71E-09 | chr:6:32648036 |
| 6 rs79288835  | 32480027 C | 7.121  | 2.71E-09 | chr:6:32648036 |
| 6 rs138816958 | 32598798 C | 5.415  | 2.75E-09 | chr:6:32648036 |
| 6 rs9274503   | 32634103 T | 0.4417 | 2.76E-09 | chr:6:32648036 |
| 6 rs1129740   | 32609105 G | 0.4078 | 2.76E-09 | chr:6:32648036 |
| 6 rs3957148   | 32682137 G | 4.092  | 2.76E-09 | chr:6:32648036 |
| 6 rs28445646  | 32593952 G | 3.804  | 2.79E-09 | chr:6:32648036 |
| 6 rs72508430  | 32487172 T | 0.3042 | 2.82E-09 | chr:6:32648036 |
| 6 rs75178688  | 32502696 C | 3.547  | 2.82E-09 | chr:6:32648036 |
| 6 rs281863827 | 32630478 G | 3.813  | 2.90E-09 | chr:6:32648036 |
| 6 rs28383369  | 32607087 T | 2.609  | 2.91E-09 | chr:6:32648036 |
| 6 rs192376296 | 32577467 A | 8.743  | 2.95E-09 | chr:6:32648036 |
| 6 rs28720766  | 32595063 T | 5.451  | 2.95E-09 | chr:6:32648036 |
| 6 rs28366282  | 32560283 T | 2.48   | 2.96E-09 | chr:6:32648036 |
| 6 rs28383317  | 32590281 A | 3.443  | 2.98E-09 | chr:6:32648036 |
| 6 rs75861594  | 32518103 G | 0.3532 | 3.01E-09 | chr:6:32648036 |
| 6 rs67774869  | 32508794 C | 0.3525 | 3.02E-09 | chr:6:32648036 |
| 6 rs17612683  | 32615877 G | 1.955  | 3.02E-09 | chr:6:32648036 |
| 6 rs17843692  | 32622103 G | 1.933  | 3.09E-09 | chr:6:32648036 |
| 6 rs9272290   | 32603713 T | 0.4132 | 3.09E-09 | chr:6:32648036 |
| 6 rs73728002  | 32513993 A | 0.3549 | 3.12E-09 | chr:6:32648036 |
| 6 rs74615215  | 32458389 G | 0.3812 | 3.12E-09 | chr:6:32648036 |
| 6 rs9273339   | 32623430 A | 1.975  | 3.15E-09 | chr:6:32648036 |
| 6 rs9272232   | 32602630 C | 2.509  | 3.16E-09 | chr:6:32648036 |
| 6 rs9269560   | 32544371 C | 0.3475 | 3.17E-09 | chr:6:32648036 |
| 6 rs36030018  | 32667964 C | 6.647  | 3.19E-09 | chr:6:32648036 |
| 6 rs73727960  | 32508989 G | 0.3514 | 3.19E-09 | chr:6:32648036 |
| 6 rs9272586   | 32607492 C | 2.138  | 3.19E-09 | chr:6:32648036 |
| 6 rs28362132  | 32595276 T | 5.27   | 3.20E-09 | chr:6:32648036 |
| 6 rs549420226 | 32472494 C | 12.03  | 3.21E-09 | chr:6:32648036 |
| 6 rs567221110 | 32472487 A | 12.03  | 3.21E-09 | chr:6:32648036 |
| 6 rs113537193 | 32538333 C | 2.365  | 3.25E-09 | chr:6:32648036 |
| 6 rs111340421 | 32517174 G | 0.3556 | 3.26E-09 | chr:6:32648036 |
| 6 rs114015220 | 32510599 T | 0.3532 | 3.30E-09 | chr:6:32648036 |
| 6 rs114472333 | 32510598 T | 0.3532 | 3.30E-09 | chr:6:32648036 |
| 6 rs9273424   | 32627394 C | 0.4424 | 3.30E-09 | chr:6:32648036 |
| 6 rs9273425   | 32627396 C | 0.4424 | 3.30E-09 | chr:6:32648036 |
| 6 rs17843681  | 32621928 A | 1.895  | 3.30E-09 | chr:6:32648036 |
| 6 rs17843682  | 32621932 C | 1.895  | 3.30E-09 | chr:6:32648036 |

|               |            |        |          |                |
|---------------|------------|--------|----------|----------------|
| 6 rs74221689  | 32501936 A | 0.3544 | 3.31E-09 | chr:6:32648036 |
| 6 rs142706681 | 32552708 G | 3.217  | 3.34E-09 | chr:6:32648036 |
| 6 rs9271738   | 32593691 G | 0.2598 | 3.34E-09 | chr:6:32648036 |
| 6 rs9271850   | 32595060 G | 0.2852 | 3.35E-09 | chr:6:32648036 |
| 6 rs563869114 | 32503922 T | 4.5    | 3.36E-09 | chr:6:32648036 |
| 6 rs28534011  | 32602947 A | 6.627  | 3.37E-09 | chr:6:32648036 |
| 6 rs9269561   | 32544405 G | 0.3494 | 3.37E-09 | chr:6:32648036 |
| 6 rs17843676  | 32621759 G | 1.977  | 3.38E-09 | chr:6:32648036 |
| 6 rs66706092  | 32513915 T | 0.3589 | 3.43E-09 | chr:6:32648036 |
| 6 rs9272637   | 32608213 G | 0.4325 | 3.45E-09 | chr:6:32648036 |
| 6 rs112195215 | 32507445 A | 3.741  | 3.47E-09 | chr:6:32648036 |
| 6 rs115711695 | 32495994 A | 0.3277 | 3.48E-09 | chr:6:32648036 |
| 6 rs28383254  | 32585638 C | 3.333  | 3.50E-09 | chr:6:32648036 |
| 6 rs28383255  | 32585641 A | 3.333  | 3.50E-09 | chr:6:32648036 |
| 6 rs567321063 | 32496507 T | 2.322  | 3.50E-09 | chr:6:32648036 |
| 6 rs185933305 | 32481865 G | 4.413  | 3.50E-09 | chr:6:32648036 |
| 6 rs552085814 | 32554985 T | 2.565  | 3.56E-09 | chr:6:32648036 |
| 6 rs111945767 | 32517045 C | 0.3626 | 3.58E-09 | chr:6:32648036 |
| 6 rs3134998   | 32636757 T | 0.3552 | 3.61E-09 | chr:6:32648036 |
| 6 rs73727944  | 32504713 T | 0.3487 | 3.61E-09 | chr:6:32648036 |
| 6 rs77783340  | 32514313 T | 0.3565 | 3.61E-09 | chr:6:32648036 |
| 6 rs17843693  | 32622122 A | 2.238  | 3.62E-09 | chr:6:32648036 |
| 6 rs72492306  | 32509510 A | 0.3532 | 3.63E-09 | chr:6:32648036 |
| 6 rs1063349   | 32627906 T | 0.3945 | 3.65E-09 | chr:6:32648036 |
| 6 rs116707510 | 32605552 C | 7.516  | 3.65E-09 | chr:6:32648036 |
| 6 rs9268487   | 32368561 G | 2.728  | 3.66E-09 | chr:6:32648036 |
| 6 rs28366346  | 32564898 G | 2.313  | 3.67E-09 | chr:6:32648036 |
| 6 rs17613542  | 32630717 A | 2.689  | 3.68E-09 | chr:6:32648036 |
| 6 rs17613381  | 32622130 T | 1.928  | 3.69E-09 | chr:6:32648036 |
| 6 rs73727961  | 32509022 A | 0.3509 | 3.72E-09 | chr:6:32648036 |
| 6 rs28752495  | 32568315 T | 2.415  | 3.73E-09 | chr:6:32648036 |
| 6 rs28746805  | 32633050 G | 2.498  | 3.74E-09 | chr:6:32648036 |
| 6 rs9275051   | 32648153 C | 2.109  | 3.75E-09 | chr:6:32648036 |
| 6 rs72851025  | 32501459 C | 0.355  | 3.75E-09 | chr:6:32648036 |
| 6 rs73727909  | 32496036 T | 0.3373 | 3.77E-09 | chr:6:32648036 |
| 6 rs28724246  | 32629422 C | 2.906  | 3.77E-09 | chr:6:32648036 |
| 6 rs568551048 | 32507224 A | 0.4774 | 3.77E-09 | chr:6:32648036 |
| 6 rs9273487   | 32628149 G | 2.8    | 3.78E-09 | chr:6:32648036 |
| 6 rs9275351   | 32667793 A | 4.084  | 3.84E-09 | chr:6:32648036 |
| 6 rs9273250   | 32614180 T | 1.916  | 3.85E-09 | chr:6:32648036 |
| 6 rs9273309   | 32622949 G | 1.94   | 3.86E-09 | chr:6:32648036 |
| 6 rs146406015 | 32598870 T | 5.43   | 3.89E-09 | chr:6:32648036 |
| 6 rs67816706  | 32517266 T | 0.3716 | 3.91E-09 | chr:6:32648036 |

|               |            |        |          |                |
|---------------|------------|--------|----------|----------------|
| 6 rs2395153   | 32345595 G | 2.47   | 3.92E-09 | chr:6:32648036 |
| 6 rs9268435   | 32346491 A | 2.47   | 3.92E-09 | chr:6:32648036 |
| 6 rs115833135 | 32489672 A | 0.3194 | 3.93E-09 | chr:6:32648036 |
| 6 rs76723065  | 32510591 G | 0.3547 | 3.95E-09 | chr:6:32648036 |
| 6 rs547623312 | 32490893 T | 2.463  | 3.97E-09 | chr:6:32648036 |
| 6 rs113481821 | 32537776 T | 2.439  | 3.98E-09 | chr:6:32648036 |
| 6 rs72844111  | 32513938 C | 0.3608 | 3.98E-09 | chr:6:32648036 |
| 6 rs28383350  | 32606320 A | 2.78   | 4.01E-09 | chr:6:32648036 |
| 6 rs9275380   | 32668814 C | 3.799  | 4.02E-09 | chr:6:32648036 |
| 6 rs9275382   | 32668831 C | 3.799  | 4.02E-09 | chr:6:32648036 |
| 6 rs115350662 | 32597078 T | 6.247  | 4.02E-09 | chr:6:32648036 |
| 6 rs9270058   | 32553910 C | 0.3927 | 4.04E-09 | chr:6:32648036 |
| 6 rs72851028  | 32501615 A | 0.3568 | 4.04E-09 | chr:6:32648036 |
| 6 rs116763083 | 32569932 A | 6.496  | 4.09E-09 | chr:6:32648036 |
| 6 rs41489451  | 32569948 T | 6.496  | 4.09E-09 | chr:6:32648036 |
| 6 rs9272776   | 32610270 T | 0.3512 | 4.11E-09 | chr:6:32648036 |
| 6 rs148781980 | 32667577 G | 6.111  | 4.14E-09 | chr:6:32648036 |
| 6 rs9272629   | 32608096 G | 0.4008 | 4.16E-09 | chr:6:32648036 |
| 6 rs9273024   | 32611757 C | 2.049  | 4.19E-09 | chr:6:32648036 |
| 6 rs72492322  | 32519628 G | 0.3435 | 4.24E-09 | chr:6:32648036 |
| 6 rs563837291 | 32543667 T | 2.42   | 4.28E-09 | chr:6:32648036 |
| 6 rs28383358  | 32606779 A | 2.404  | 4.29E-09 | chr:6:32648036 |
| 6 rs113529604 | 32652971 A | 6.114  | 4.32E-09 | chr:6:32648036 |
| 6 rs59447698  | 32481125 G | 0.3836 | 4.34E-09 | chr:6:32648036 |
| 6 rs9273053   | 32612050 T | 2.092  | 4.35E-09 | chr:6:32648036 |
| 6 rs34589258  | 32543643 T | 2.414  | 4.36E-09 | chr:6:32648036 |
| 6 rs537679585 | 32543635 C | 2.414  | 4.36E-09 | chr:6:32648036 |
| 6 rs541333616 | 32543654 G | 2.414  | 4.36E-09 | chr:6:32648036 |
| 6 rs9272962   | 32611229 T | 2.139  | 4.38E-09 | chr:6:32648036 |
| 6 rs66738149  | 32501898 C | 0.3594 | 4.39E-09 | chr:6:32648036 |
| 6 rs72851044  | 32501886 A | 0.3594 | 4.39E-09 | chr:6:32648036 |
| 6 rs111437237 | 32537608 C | 2.106  | 4.42E-09 | chr:6:32648036 |
| 6 rs17843581  | 32615638 C | 2.021  | 4.42E-09 | chr:6:32648036 |
| 6 rs5016923   | 32502028 G | 0.3568 | 4.42E-09 | chr:6:32648036 |
| 6 rs74937819  | 32502037 A | 0.3568 | 4.42E-09 | chr:6:32648036 |
| 6 rs545690952 | 32541871 G | 2.366  | 4.43E-09 | chr:6:32648036 |
| 6 rs575354425 | 32541869 A | 2.366  | 4.43E-09 | chr:6:32648036 |
| 6 rs1281937   | 32578143 C | 0.2955 | 4.44E-09 | chr:6:32648036 |
| 6 rs73729745  | 32469136 A | 0.3662 | 4.44E-09 | chr:6:32648036 |
| 6 rs9394101   | 32449198 G | 2.682  | 4.46E-09 | chr:6:32648036 |
| 6 rs28366345  | 32564896 G | 2.305  | 4.48E-09 | chr:6:32648036 |
| 6 rs79881121  | 32502324 A | 0.438  | 4.50E-09 | chr:6:32648036 |
| 6 rs113850533 | 32516839 T | 0.3597 | 4.51E-09 | chr:6:32648036 |

|               |            |        |          |                |
|---------------|------------|--------|----------|----------------|
| 6 rs111901878 | 32516893 T | 0.3619 | 4.54E-09 | chr:6:32648036 |
| 6 rs1794510   | 32652171 A | 6.211  | 4.56E-09 | chr:6:32648036 |
| 6 rs536343459 | 32468799 G | 0.4052 | 4.58E-09 | chr:6:32648036 |
| 6 rs548006827 | 32468802 C | 0.4052 | 4.58E-09 | chr:6:32648036 |
| 6 rs565374501 | 32468798 G | 0.4052 | 4.58E-09 | chr:6:32648036 |
| 6 rs9271872   | 32595418 G | 0.2757 | 4.60E-09 | chr:6:32648036 |
| 6 rs9271873   | 32595421 A | 0.2757 | 4.60E-09 | chr:6:32648036 |
| 6 rs146130478 | 32499213 C | 2.037  | 4.62E-09 | chr:6:32648036 |
| 6 rs9273483   | 32628138 G | 0.4122 | 4.65E-09 | chr:6:32648036 |
| 6 rs9271499   | 32589291 T | 2.389  | 4.65E-09 | chr:6:32648036 |
| 6 rs200930495 | 32612460 A | 2.33   | 4.69E-09 | chr:6:32648036 |
| 6 rs9272628   | 32608093 T | 0.4014 | 4.70E-09 | chr:6:32648036 |
| 6 rs112460020 | 32540578 C | 2.157  | 4.70E-09 | chr:6:32648036 |
| 6 rs36032764  | 32557402 A | 3.991  | 4.73E-09 | chr:6:32648036 |
| 6 rs28635450  | 32592633 A | 6.677  | 4.75E-09 | chr:6:32648036 |
| 6 rs543726509 | 32493208 A | 0.4364 | 4.76E-09 | chr:6:32648036 |
| 6 rs199506689 | 32504701 T | 0.35   | 4.77E-09 | chr:6:32648036 |
| 6 rs9273514   | 32628538 G | 0.441  | 4.81E-09 | chr:6:32648036 |
| 6 rs9273515   | 32628539 G | 0.441  | 4.81E-09 | chr:6:32648036 |
| 6 rs9271385   | 32587409 A | 0.3684 | 4.82E-09 | chr:6:32648036 |
| 6 rs9272116   | 32600404 T | 2.502  | 4.83E-09 | chr:6:32648036 |
| 6 rs28383449  | 32609228 A | 3.523  | 4.83E-09 | chr:6:32648036 |
| 6 rs3188043   | 32609233 C | 3.523  | 4.83E-09 | chr:6:32648036 |
| 6 rs1140321   | 32632581 G | 2.065  | 4.84E-09 | chr:6:32648036 |
| 6 rs28383201  | 32574869 G | 2.37   | 4.84E-09 | chr:6:32648036 |
| 6 rs17843620  | 32620800 G | 2.028  | 4.84E-09 | chr:6:32648036 |
| 6 rs9274155   | 32630288 C | 2.632  | 4.84E-09 | chr:6:32648036 |
| 6 rs372332783 | 32603074 T | 6.415  | 4.87E-09 | chr:6:32648036 |
| 6 rs9273710   | 32629314 A | 2.079  | 4.88E-09 | chr:6:32648036 |
| 6 rs189546613 | 32601735 C | 6.699  | 4.89E-09 | chr:6:32648036 |
| 6 rs74485644  | 32501421 T | 0.3588 | 4.93E-09 | chr:6:32648036 |
| 6 rs115726960 | 32503171 A | 0.3528 | 4.99E-09 | chr:6:32648036 |
| 6 rs28383359  | 32606794 T | 0.4682 | 5.01E-09 | chr:6:32648036 |
| 6 rs114263604 | 32644859 T | 5.486  | 5.02E-09 | chr:6:32648036 |
| 6 rs41287328  | 32552698 G | 0.3139 | 5.08E-09 | chr:6:32648036 |
| 6 rs34261587  | 32547015 C | 2.635  | 5.08E-09 | chr:6:32648036 |
| 6 rs550953960 | 32547012 G | 2.635  | 5.08E-09 | chr:6:32648036 |
| 6 rs9271708   | 32593386 A | 0.3056 | 5.11E-09 | chr:6:32648036 |
| 6 rs9271709   | 32593392 A | 0.3056 | 5.11E-09 | chr:6:32648036 |
| 6 rs28383253  | 32585589 T | 3.275  | 5.13E-09 | chr:6:32648036 |
| 6 rs17613305  | 32621908 C | 1.883  | 5.14E-09 | chr:6:32648036 |
| 6 rs17613312  | 32621911 A | 1.883  | 5.14E-09 | chr:6:32648036 |
| 6 rs9271344   | 32583328 C | 0.3516 | 5.16E-09 | chr:6:32648036 |

|               |            |        |          |                |
|---------------|------------|--------|----------|----------------|
| 6 rs114969562 | 32594299 A | 0.2378 | 5.19E-09 | chr:6:32648036 |
| 6 rs141259629 | 32541319 A | 2.391  | 5.24E-09 | chr:6:32648036 |
| 6 rs9270772   | 32568967 C | 0.318  | 5.24E-09 | chr:6:32648036 |
| 6 rs9273294   | 32614575 A | 1.877  | 5.27E-09 | chr:6:32648036 |
| 6 rs17843683  | 32621947 C | 1.877  | 5.27E-09 | chr:6:32648036 |
| 6 rs17843684  | 32621948 A | 1.877  | 5.27E-09 | chr:6:32648036 |
| 6 rs73729122  | 32519777 G | 0.3572 | 5.27E-09 | chr:6:32648036 |
| 6 rs28383336  | 32603729 G | 2.839  | 5.30E-09 | chr:6:32648036 |
| 6 rs17843582  | 32615651 A | 2.041  | 5.32E-09 | chr:6:32648036 |
| 6 rs17843583  | 32615652 C | 2.041  | 5.32E-09 | chr:6:32648036 |
| 6 rs79463993  | 32455381 C | 7.252  | 5.36E-09 | chr:6:32648036 |
| 6 rs9271724   | 32593552 C | 0.2862 | 5.36E-09 | chr:6:32648036 |
| 6 rs77704988  | 32436217 C | 0.3084 | 5.37E-09 | chr:6:32648036 |
| 6 rs28724244  | 32629398 C | 2.876  | 5.40E-09 | chr:6:32648036 |
| 6 rs28366276  | 32560158 T | 2.478  | 5.42E-09 | chr:6:32648036 |
| 6 rs281863704 | 32630661 T | 0.4548 | 5.48E-09 | chr:6:32648036 |
| 6 rs72492311  | 32509979 T | 0.3598 | 5.48E-09 | chr:6:32648036 |
| 6 rs9271419   | 32587846 T | 2.454  | 5.57E-09 | chr:6:32648036 |
| 6 rs113787446 | 32518630 C | 0.3404 | 5.58E-09 | chr:6:32648036 |
| 6 rs114776163 | 32518625 G | 0.3404 | 5.58E-09 | chr:6:32648036 |
| 6 rs558652356 | 32608548 A | 5.82   | 5.60E-09 | chr:6:32648036 |
| 6 rs375846271 | 32640725 T | 6.528  | 5.62E-09 | chr:6:32648036 |
| 6 rs28383456  | 32609453 T | 7.368  | 5.62E-09 | chr:6:32648036 |
| 6 rs4959110   | 32597599 C | 5.909  | 5.63E-09 | chr:6:32648036 |
| 6 rs536146370 | 32519759 A | 0.3584 | 5.67E-09 | chr:6:32648036 |
| 6 rs74661798  | 32469675 A | 3.619  | 5.70E-09 | chr:6:32648036 |
| 6 rs9272218   | 32602238 C | 2.485  | 5.70E-09 | chr:6:32648036 |
| 6 rs3828852   | 32520595 A | 0.3604 | 5.72E-09 | chr:6:32648036 |
| 6 rs529879134 | 32523234 T | 3.459  | 5.73E-09 | chr:6:32648036 |
| 6 rs559096572 | 32523233 C | 3.459  | 5.73E-09 | chr:6:32648036 |
| 6 rs73727973  | 32509691 G | 0.3599 | 5.79E-09 | chr:6:32648036 |
| 6 rs9272118   | 32600448 C | 2.468  | 5.79E-09 | chr:6:32648036 |
| 6 rs74606007  | 32603973 C | 6.591  | 5.85E-09 | chr:6:32648036 |
| 6 rs567223085 | 32558648 T | 5.178  | 5.86E-09 | chr:6:32648036 |
| 6 rs191753563 | 32541255 T | 2.435  | 5.90E-09 | chr:6:32648036 |
| 6 rs541748268 | 32541259 T | 2.435  | 5.90E-09 | chr:6:32648036 |
| 6 rs72492307  | 32509519 C | 0.3603 | 5.90E-09 | chr:6:32648036 |
| 6 rs9273418   | 32627362 A | 0.4436 | 5.94E-09 | chr:6:32648036 |
| 6 rs9273419   | 32627365 T | 0.4436 | 5.94E-09 | chr:6:32648036 |
| 6 rs1063348   | 32627923 A | 0.4031 | 5.96E-09 | chr:6:32648036 |
| 6 rs17613326  | 32621949 C | 1.873  | 5.99E-09 | chr:6:32648036 |
| 6 rs115910284 | 32601655 A | 5.653  | 5.99E-09 | chr:6:32648036 |
| 6 rs9272518   | 32606446 T | 4.341  | 6.04E-09 | chr:6:32648036 |

|               |            |        |          |                |
|---------------|------------|--------|----------|----------------|
| 6 rs66521709  | 32509829 A | 0.3619 | 6.09E-09 | chr:6:32648036 |
| 6 rs9272229   | 32602568 C | 2.475  | 6.10E-09 | chr:6:32648036 |
| 6 rs9274278   | 32631711 T | 1.978  | 6.22E-09 | chr:6:32648036 |
| 6 rs28724141  | 32555231 T | 2.529  | 6.22E-09 | chr:6:32648036 |
| 6 rs9275383   | 32668846 T | 3.781  | 6.26E-09 | chr:6:32648036 |
| 6 rs17843591  | 32615856 C | 1.918  | 6.28E-09 | chr:6:32648036 |
| 6 rs34615209  | 32513862 T | 0.3646 | 6.29E-09 | chr:6:32648036 |
| 6 rs35687625  | 32513840 A | 0.3646 | 6.29E-09 | chr:6:32648036 |
| 6 rs9272114   | 32600317 T | 2.474  | 6.32E-09 | chr:6:32648036 |
| 6 rs200263528 | 32509009 C | 0.3586 | 6.34E-09 | chr:6:32648036 |
| 6 rs1140318   | 32632593 T | 2.051  | 6.34E-09 | chr:6:32648036 |
| 6 rs1140319   | 32632592 G | 2.051  | 6.34E-09 | chr:6:32648036 |
| 6 rs1140320   | 32632589 G | 2.051  | 6.34E-09 | chr:6:32648036 |
| 6 rs541946444 | 32543661 G | 2.393  | 6.36E-09 | chr:6:32648036 |
| 6 rs559273619 | 32543658 T | 2.393  | 6.36E-09 | chr:6:32648036 |
| 6 rs574821679 | 32543659 G | 2.393  | 6.36E-09 | chr:6:32648036 |
| 6 rs9272917   | 32610892 G | 1.957  | 6.39E-09 | chr:6:32648036 |
| 6 rs9272918   | 32610893 A | 1.957  | 6.39E-09 | chr:6:32648036 |
| 6 rs9274537   | 32634655 G | 0.4477 | 6.42E-09 | chr:6:32648036 |
| 6 rs573568722 | 32552765 G | 2.434  | 6.43E-09 | chr:6:32648036 |
| 6 rs9273288   | 32614511 A | 1.89   | 6.45E-09 | chr:6:32648036 |
| 6 rs113232784 | 32518256 A | 0.3687 | 6.45E-09 | chr:6:32648036 |
| 6 rs115077688 | 32503287 T | 0.3578 | 6.46E-09 | chr:6:32648036 |
| 6 rs17613243  | 32621683 G | 1.875  | 6.56E-09 | chr:6:32648036 |
| 6 rs17843671  | 32621682 T | 1.875  | 6.56E-09 | chr:6:32648036 |
| 6 rs139580312 | 32480261 A | 4.977  | 6.62E-09 | chr:6:32648036 |
| 6 rs17205640  | 32637413 A | 2.333  | 6.73E-09 | chr:6:32648036 |
| 6 rs147283577 | 32508191 A | 3.755  | 6.82E-09 | chr:6:32648036 |
| 6 rs17612802  | 32620359 T | 2.049  | 6.84E-09 | chr:6:32648036 |
| 6 rs545360810 | 32547987 T | 2.579  | 6.84E-09 | chr:6:32648036 |
| 6 rs78622201  | 32518405 A | 0.3647 | 6.91E-09 | chr:6:32648036 |
| 6 rs9273290   | 32614552 T | 1.87   | 6.92E-09 | chr:6:32648036 |
| 6 rs9273291   | 32614555 C | 1.87   | 6.92E-09 | chr:6:32648036 |
| 6 rs9274546   | 32634736 C | 0.4641 | 6.92E-09 | chr:6:32648036 |
| 6 rs34656332  | 32546995 A | 2.613  | 6.93E-09 | chr:6:32648036 |
| 6 rs568633464 | 32546993 T | 2.613  | 6.93E-09 | chr:6:32648036 |
| 6 rs572959230 | 32523220 T | 3.368  | 6.97E-09 | chr:6:32648036 |
| 6 rs115548659 | 32482582 G | 2.177  | 7.01E-09 | chr:6:32648036 |
| 6 rs9272231   | 32602617 C | 2.463  | 7.07E-09 | chr:6:32648036 |
| 6 rs71534527  | 32510978 G | 0.4565 | 7.16E-09 | chr:6:32648036 |
| 6 rs9273066   | 32612208 A | 2.034  | 7.17E-09 | chr:6:32648036 |
| 6 rs112515515 | 32513422 T | 0.3614 | 7.18E-09 | chr:6:32648036 |
| 6 rs9274257   | 32631415 C | 5.749  | 7.24E-09 | chr:6:32648036 |

|               |            |        |          |                |
|---------------|------------|--------|----------|----------------|
| 6 rs17612654  | 32615813 T | 1.923  | 7.30E-09 | chr:6:32648036 |
| 6 rs17612661  | 32615814 G | 1.923  | 7.30E-09 | chr:6:32648036 |
| 6 rs9272581   | 32607411 G | 0.4695 | 7.32E-09 | chr:6:32648036 |
| 6 rs562092898 | 32629544 A | 7.888  | 7.35E-09 | chr:6:32648036 |
| 6 rs482044    | 32576064 C | 2.467  | 7.36E-09 | chr:6:32648036 |
| 6 rs28366349  | 32564916 T | 2.246  | 7.39E-09 | chr:6:32648036 |
| 6 rs28366350  | 32564918 A | 2.246  | 7.39E-09 | chr:6:32648036 |
| 6 rs574335595 | 32564914 G | 2.246  | 7.39E-09 | chr:6:32648036 |
| 6 rs9271744   | 32593755 A | 2.553  | 7.48E-09 | chr:6:32648036 |
| 6 rs9272994   | 32611450 T | 1.926  | 7.49E-09 | chr:6:32648036 |
| 6 rs17843586  | 32615801 G | 1.932  | 7.52E-09 | chr:6:32648036 |
| 6 rs17843587  | 32615802 T | 1.932  | 7.52E-09 | chr:6:32648036 |
| 6 rs567179242 | 32526857 G | 2.398  | 7.54E-09 | chr:6:32648036 |
| 6 rs369883062 | 32519734 G | 0.3628 | 7.61E-09 | chr:6:32648036 |
| 6 rs9273224   | 32613804 T | 1.902  | 7.64E-09 | chr:6:32648036 |
| 6 rs181562347 | 32601738 G | 6.028  | 7.67E-09 | chr:6:32648036 |
| 6 rs183885674 | 32601732 G | 6.028  | 7.67E-09 | chr:6:32648036 |
| 6 rs79414789  | 32580591 C | 2.721  | 7.69E-09 | chr:6:32648036 |
| 6 rs17843701  | 32622256 T | 1.879  | 7.69E-09 | chr:6:32648036 |
| 6 rs17613250  | 32621699 C | 1.877  | 7.71E-09 | chr:6:32648036 |
| 6 rs9272105   | 32599999 G | 2.467  | 7.74E-09 | chr:6:32648036 |
| 6 rs17612858  | 32620622 A | 0.4562 | 7.75E-09 | chr:6:32648036 |
| 6 rs72508474  | 32508738 C | 0.3647 | 7.79E-09 | chr:6:32648036 |
| 6 rs115115354 | 32469671 C | 3.565  | 7.80E-09 | chr:6:32648036 |
| 6 rs116457146 | 32578632 T | 2.607  | 7.82E-09 | chr:6:32648036 |
| 6 rs17612518  | 32614927 T | 1.868  | 7.83E-09 | chr:6:32648036 |
| 6 rs1142338   | 32609322 T | 6.791  | 7.84E-09 | chr:6:32648036 |
| 6 rs9273392   | 32627046 A | 2.56   | 7.85E-09 | chr:6:32648036 |
| 6 rs9273393   | 32627050 A | 2.56   | 7.85E-09 | chr:6:32648036 |
| 6 rs9272131   | 32600671 T | 3.931  | 7.88E-09 | chr:6:32648036 |
| 6 rs9273225   | 32613817 G | 1.9    | 7.90E-09 | chr:6:32648036 |
| 6 rs9273226   | 32613824 T | 1.9    | 7.90E-09 | chr:6:32648036 |
| 6 rs9271728   | 32593592 C | 0.2848 | 7.93E-09 | chr:6:32648036 |
| 6 rs35697584  | 32522151 A | 0.3161 | 7.94E-09 | chr:6:32648036 |
| 6 rs138384712 | 32540458 G | 2.164  | 7.95E-09 | chr:6:32648036 |
| 6 rs66534143  | 32512601 C | 0.3766 | 7.95E-09 | chr:6:32648036 |
| 6 rs17203542  | 32446278 G | 2.645  | 7.98E-09 | chr:6:32648036 |
| 6 rs149521915 | 32489639 T | 0.3333 | 8.02E-09 | chr:6:32648036 |
| 6 rs76416479  | 32541140 C | 2.691  | 8.07E-09 | chr:6:32648036 |
| 6 rs113405235 | 32521796 C | 0.3242 | 8.11E-09 | chr:6:32648036 |
| 6 rs114598250 | 32605458 T | 7.397  | 8.11E-09 | chr:6:32648036 |
| 6 rs567798325 | 32605450 C | 7.397  | 8.11E-09 | chr:6:32648036 |
| 6 rs17843592  | 32615863 G | 1.91   | 8.21E-09 | chr:6:32648036 |

|               |            |        |          |                |
|---------------|------------|--------|----------|----------------|
| 6 rs9272178   | 32601427 G | 0.266  | 8.27E-09 | chr:6:32648036 |
| 6 rs28383263  | 32585843 T | 3.308  | 8.32E-09 | chr:6:32648036 |
| 6 rs116230912 | 32601690 G | 6.272  | 8.40E-09 | chr:6:32648036 |
| 6 rs548656751 | 32601705 T | 6.272  | 8.40E-09 | chr:6:32648036 |
| 6 rs9272265   | 32603412 C | 2.437  | 8.42E-09 | chr:6:32648036 |
| 6 rs181195070 | 32540376 A | 3.151  | 8.43E-09 | chr:6:32648036 |
| 6 rs139201366 | 32513186 A | 0.3537 | 8.48E-09 | chr:6:32648036 |
| 6 rs182137836 | 32480029 T | 6.145  | 8.50E-09 | chr:6:32648036 |
| 6 rs35121819  | 32453318 C | 2.651  | 8.51E-09 | chr:6:32648036 |
| 6 rs281863638 | 32630750 A | 2.628  | 8.55E-09 | chr:6:32648036 |
| 6 rs9273317   | 32623003 C | 1.91   | 8.62E-09 | chr:6:32648036 |
| 6 rs9273318   | 32623004 C | 1.91   | 8.62E-09 | chr:6:32648036 |
| 6 rs75901433  | 32499150 A | 0.4465 | 8.68E-09 | chr:6:32648036 |
| 6 rs116193532 | 32472961 A | 10.25  | 8.73E-09 | chr:6:32648036 |
| 6 rs75153374  | 32472958 G | 10.25  | 8.73E-09 | chr:6:32648036 |
| 6 rs566861    | 32576538 C | 0.3247 | 8.79E-09 | chr:6:32648036 |
| 6 rs72853940  | 32508945 T | 0.3649 | 8.83E-09 | chr:6:32648036 |
| 6 rs9272958   | 32611170 A | 1.949  | 8.85E-09 | chr:6:32648036 |
| 6 rs17843588  | 32615807 G | 1.926  | 9.04E-09 | chr:6:32648036 |
| 6 rs28895250  | 32444022 C | 2.582  | 9.07E-09 | chr:6:32648036 |
| 6 rs9273430   | 32627460 T | 0.4718 | 9.08E-09 | chr:6:32648036 |
| 6 rs9274940   | 32641754 G | 3.949  | 9.10E-09 | chr:6:32648036 |
| 6 rs12307601  | 32327354 G | 4.826  | 9.13E-09 | chr:6:32648036 |
| 6 rs28366167  | 32234058 G | 4.826  | 9.13E-09 | chr:6:32648036 |
| 6 rs28366175  | 32269578 C | 4.826  | 9.13E-09 | chr:6:32648036 |
| 6 rs28366181  | 32300563 A | 4.826  | 9.13E-09 | chr:6:32648036 |
| 6 rs28366182  | 32315486 G | 4.826  | 9.13E-09 | chr:6:32648036 |
| 6 rs28366184  | 32330351 G | 4.826  | 9.13E-09 | chr:6:32648036 |
| 6 rs9273251   | 32614193 G | 1.873  | 9.20E-09 | chr:6:32648036 |
| 6 rs9269846   | 32550234 C | 0.374  | 9.23E-09 | chr:6:32648036 |
| 6 rs9271392   | 32587456 G | 0.2829 | 9.30E-09 | chr:6:32648036 |
| 6 rs113140854 | 32634588 T | 8.199  | 9.32E-09 | chr:6:32648036 |
| 6 rs73727954  | 32508902 T | 0.3631 | 9.35E-09 | chr:6:32648036 |
| 6 rs113648142 | 32508762 T | 0.3673 | 9.37E-09 | chr:6:32648036 |
| 6 rs115055593 | 32468827 C | 0.4152 | 9.39E-09 | chr:6:32648036 |
| 6 rs9272177   | 32601361 C | 0.2625 | 9.41E-09 | chr:6:32648036 |
| 6 rs9272943   | 32611092 G | 1.878  | 9.51E-09 | chr:6:32648036 |
| 6 rs17843568  | 32614941 T | 1.856  | 9.55E-09 | chr:6:32648036 |
| 6 rs17843570  | 32614946 G | 1.856  | 9.55E-09 | chr:6:32648036 |
| 6 rs111649944 | 32518268 T | 0.3729 | 9.57E-09 | chr:6:32648036 |
| 6 rs9272201   | 32601875 G | 0.4369 | 9.59E-09 | chr:6:32648036 |
| 6 rs9271176   | 32578127 A | 0.3453 | 9.62E-09 | chr:6:32648036 |
| 6 rs142420626 | 32630303 C | 2.619  | 9.63E-09 | chr:6:32648036 |



|               |            |        |          |                |
|---------------|------------|--------|----------|----------------|
| 6 rs143303636 | 32539733 A | 2.643  | 9.67E-09 | chr:6:32648036 |
| 6 rs17613257  | 32621726 T | 1.859  | 9.70E-09 | chr:6:32648036 |
| 6 rs17613264  | 32621727 G | 1.859  | 9.70E-09 | chr:6:32648036 |
| 6 rs114612036 | 32607350 C | 6.511  | 9.78E-09 | chr:6:32648036 |
| 6 rs9274339   | 32632319 A | 1.911  | 9.79E-09 | chr:6:32648036 |
| 6 rs146797212 | 32507206 G | 0.4724 | 9.89E-09 | chr:6:32648036 |
| 6 rs17612510  | 32614883 T | 1.858  | 9.91E-09 | chr:6:32648036 |
| 6 rs140490584 | 32494053 A | 2.21   | 9.92E-09 | chr:6:32648036 |
| 6 rs17613181  | 32621550 G | 1.855  | 9.95E-09 | chr:6:32648036 |
| 6 rs28383417  | 32608507 C | 3.745  | 9.99E-09 | chr:6:32648036 |
| 6 rs17612676  | 32615841 A | 1.898  | 1.00E-08 | chr:6:32648036 |
| 6 rs17843589  | 32615843 A | 1.898  | 1.00E-08 | chr:6:32648036 |
| 6 rs5002706   | 32659332 A | 3.736  | 1.00E-08 | chr:6:32648036 |
| 6 rs9273479   | 32628093 T | 0.4402 | 1.01E-08 | chr:6:32648036 |
| 6 rs112261348 | 32537782 T | 2.375  | 1.02E-08 | chr:6:32648036 |
| 6 rs76133616  | 32506895 G | 0.4553 | 1.02E-08 | chr:6:32648036 |
| 6 rs9271729   | 32593600 A | 0.2881 | 1.02E-08 | chr:6:32648036 |
| 6 rs9273093   | 32612514 A | 2.281  | 1.04E-08 | chr:6:32648036 |
| 6 rs9271620   | 32591777 T | 2.438  | 1.04E-08 | chr:6:32648036 |
| 6 rs72847626  | 32538224 G | 2.243  | 1.05E-08 | chr:6:32648036 |
| 6 rs74535936  | 32510547 G | 0.368  | 1.05E-08 | chr:6:32648036 |
| 6 rs79617990  | 32600694 A | 0.2494 | 1.06E-08 | chr:6:32648036 |
| 6 rs9275379   | 32668804 T | 2.659  | 1.07E-08 | chr:6:32648036 |
| 6 rs1130116   | 32610535 A | 0.3714 | 1.07E-08 | chr:6:32648036 |
| 6 rs17843661  | 32621526 C | 1.853  | 1.08E-08 | chr:6:32648036 |
| 6 rs17843662  | 32621529 A | 1.853  | 1.08E-08 | chr:6:32648036 |
| 6 rs5002178   | 32611590 G | 0.3952 | 1.08E-08 | chr:6:32648036 |
| 6 rs138925198 | 32545794 G | 4.982  | 1.09E-08 | chr:6:32648036 |
| 6 rs111890942 | 32458131 C | 0.3708 | 1.10E-08 | chr:6:32648036 |
| 6 rs17203549  | 32446307 C | 2.598  | 1.10E-08 | chr:6:32648036 |
| 6 rs9272207   | 32601966 T | 2.276  | 1.12E-08 | chr:6:32648036 |
| 6 rs17843615  | 32620663 C | 1.948  | 1.12E-08 | chr:6:32648036 |
| 6 rs184981897 | 32486966 A | 0.3605 | 1.12E-08 | chr:6:32648036 |
| 6 rs17843614  | 32620661 G | 1.956  | 1.12E-08 | chr:6:32648036 |
| 6 rs111335405 | 32655722 G | 5.644  | 1.13E-08 | chr:6:32648036 |
| 6 rs9271562   | 32590411 A | 0.2902 | 1.14E-08 | chr:6:32648036 |
| 6 rs9406389   | 32517764 C | 3.467  | 1.14E-08 | chr:6:32648036 |
| 6 rs112507860 | 32496083 T | 0.4494 | 1.14E-08 | chr:6:32648036 |
| 6 rs71549282  | 32504906 T | 0.4539 | 1.15E-08 | chr:6:32648036 |
| 6 rs9273391   | 32627043 G | 2.528  | 1.15E-08 | chr:6:32648036 |
| 6 rs1130152   | 32610946 T | 1.907  | 1.16E-08 | chr:6:32648036 |
| 6 rs28383338  | 32603897 G | 2.633  | 1.16E-08 | chr:6:32648036 |
| 6 rs74394760  | 32513078 C | 0.3722 | 1.17E-08 | chr:6:32648036 |

|               |            |        |          |                |
|---------------|------------|--------|----------|----------------|
| 6 rs111289870 | 32512269 C | 0.3725 | 1.17E-08 | chr:6:32648036 |
| 6 rs9271484   | 32588905 T | 0.2894 | 1.17E-08 | chr:6:32648036 |
| 6 rs9274540   | 32634676 C | 0.4683 | 1.17E-08 | chr:6:32648036 |
| 6 rs9273482   | 32628127 T | 0.4271 | 1.17E-08 | chr:6:32648036 |
| 6 rs1130155   | 32610951 G | 1.907  | 1.17E-08 | chr:6:32648036 |
| 6 rs9273287   | 32614495 G | 1.867  | 1.18E-08 | chr:6:32648036 |
| 6 rs115296161 | 32603463 T | 5.856  | 1.18E-08 | chr:6:32648036 |
| 6 rs116236894 | 32603461 A | 5.856  | 1.18E-08 | chr:6:32648036 |
| 6 rs559861992 | 32603447 T | 5.856  | 1.18E-08 | chr:6:32648036 |
| 6 rs201795916 | 32514567 C | 0.3716 | 1.18E-08 | chr:6:32648036 |
| 6 rs72844118  | 32514539 T | 0.3715 | 1.19E-08 | chr:6:32648036 |
| 6 rs147023195 | 32518295 T | 0.3717 | 1.19E-08 | chr:6:32648036 |
| 6 rs9274506   | 32634141 T | 0.4611 | 1.19E-08 | chr:6:32648036 |
| 6 rs9273065   | 32612205 G | 2.013  | 1.20E-08 | chr:6:32648036 |
| 6 rs9273236   | 32613973 C | 1.863  | 1.20E-08 | chr:6:32648036 |
| 6 rs9273237   | 32613976 T | 1.863  | 1.20E-08 | chr:6:32648036 |
| 6 rs9273239   | 32613998 T | 1.955  | 1.20E-08 | chr:6:32648036 |
| 6 rs9273426   | 32627434 A | 0.4701 | 1.20E-08 | chr:6:32648036 |
| 6 rs9273427   | 32627441 A | 0.4701 | 1.20E-08 | chr:6:32648036 |
| 6 rs141840573 | 32537850 G | 2.249  | 1.22E-08 | chr:6:32648036 |
| 6 rs28366275  | 32560114 A | 2.494  | 1.22E-08 | chr:6:32648036 |
| 6 rs530595485 | 32525768 C | 2.525  | 1.23E-08 | chr:6:32648036 |
| 6 rs74821931  | 32517233 A | 0.3806 | 1.25E-08 | chr:6:32648036 |
| 6 rs9272043   | 32598946 T | 2.419  | 1.25E-08 | chr:6:32648036 |
| 6 rs9272045   | 32599006 C | 2.413  | 1.25E-08 | chr:6:32648036 |
| 6 rs115421755 | 32647108 A | 4.502  | 1.25E-08 | chr:6:32648036 |
| 6 rs9271550   | 32590274 A | 0.2893 | 1.26E-08 | chr:6:32648036 |
| 6 rs9273234   | 32613954 G | 1.861  | 1.26E-08 | chr:6:32648036 |
| 6 rs9273235   | 32613957 A | 1.861  | 1.26E-08 | chr:6:32648036 |
| 6 rs78240203  | 32600881 G | 0.256  | 1.26E-08 | chr:6:32648036 |
| 6 rs9271437   | 32588166 A | 0.2915 | 1.26E-08 | chr:6:32648036 |
| 6 rs113051760 | 32521691 G | 0.3546 | 1.27E-08 | chr:6:32648036 |
| 6 rs17424325  | 32521644 T | 0.3546 | 1.27E-08 | chr:6:32648036 |
| 6 rs9272263   | 32603295 A | 0.2579 | 1.28E-08 | chr:6:32648036 |
| 6 rs17209873  | 32446010 C | 2.582  | 1.29E-08 | chr:6:32648036 |
| 6 rs74950807  | 32513375 T | 0.3713 | 1.30E-08 | chr:6:32648036 |
| 6 rs76818741  | 32513378 A | 0.3713 | 1.30E-08 | chr:6:32648036 |
| 6 rs9271727   | 32593585 A | 0.2942 | 1.30E-08 | chr:6:32648036 |
| 6 rs113727677 | 32517010 C | 0.3857 | 1.30E-08 | chr:6:32648036 |
| 6 rs4959029   | 32591682 G | 0.2676 | 1.30E-08 | chr:6:32648036 |
| 6 rs9273230   | 32613930 A | 1.86   | 1.30E-08 | chr:6:32648036 |
| 6 rs9273231   | 32613937 A | 1.86   | 1.30E-08 | chr:6:32648036 |
| 6 rs79425366  | 32505939 G | 3.286  | 1.30E-08 | chr:6:32648036 |

|               |            |        |          |                |
|---------------|------------|--------|----------|----------------|
| 6 rs114146939 | 32459890 G | 0.4248 | 1.31E-08 | chr:6:32648036 |
| 6 rs116587947 | 32459889 T | 0.4248 | 1.31E-08 | chr:6:32648036 |
| 6 rs41545413  | 32489756 C | 3.21   | 1.32E-08 | chr:6:32648036 |
| 6 rs114025574 | 32603230 A | 6.471  | 1.32E-08 | chr:6:32648036 |
| 6 rs114774960 | 32603234 T | 6.471  | 1.32E-08 | chr:6:32648036 |
| 6 rs181940568 | 32455377 A | 6.897  | 1.33E-08 | chr:6:32648036 |
| 6 rs9273338   | 32623393 T | 1.896  | 1.34E-08 | chr:6:32648036 |
| 6 rs537929323 | 32545327 A | 4.575  | 1.34E-08 | chr:6:32648036 |
| 6 rs7770905   | 32598478 C | 0.2158 | 1.34E-08 | chr:6:32648036 |
| 6 rs28366272  | 32559975 A | 2.546  | 1.35E-08 | chr:6:32648036 |
| 6 rs13204736  | 32582603 A | 3.501  | 1.35E-08 | chr:6:32648036 |
| 6 rs9275496   | 32673714 C | 2.637  | 1.36E-08 | chr:6:32648036 |
| 6 rs9275497   | 32673726 G | 2.637  | 1.36E-08 | chr:6:32648036 |
| 6 rs9275498   | 32673749 T | 2.637  | 1.36E-08 | chr:6:32648036 |
| 6 rs9275499   | 32673778 G | 2.637  | 1.36E-08 | chr:6:32648036 |
| 6 rs9271424   | 32587922 C | 0.2912 | 1.37E-08 | chr:6:32648036 |
| 6 rs9271425   | 32587923 G | 0.2912 | 1.37E-08 | chr:6:32648036 |
| 6 rs707951    | 32609813 T | 0.3541 | 1.38E-08 | chr:6:32648036 |
| 6 rs186722453 | 32489497 A | 3.999  | 1.41E-08 | chr:6:32648036 |
| 6 rs9272618   | 32607927 C | 0.4692 | 1.41E-08 | chr:6:32648036 |
| 6 rs9273033   | 32611873 C | 2.023  | 1.41E-08 | chr:6:32648036 |
| 6 rs9273034   | 32611874 T | 2.023  | 1.41E-08 | chr:6:32648036 |
| 6 rs7756647   | 32582843 G | 0.3043 | 1.41E-08 | chr:6:32648036 |
| 6 rs9273232   | 32613944 T | 1.858  | 1.41E-08 | chr:6:32648036 |
| 6 rs9272712   | 32609341 T | 2.092  | 1.41E-08 | chr:6:32648036 |
| 6 rs9273312   | 32622973 T | 1.9    | 1.42E-08 | chr:6:32648036 |
| 6 rs1130158   | 32610972 A | 1.885  | 1.43E-08 | chr:6:32648036 |
| 6 rs2935907   | 32651136 A | 5.611  | 1.43E-08 | chr:6:32648036 |
| 6 rs9274639   | 32636146 T | 0.3156 | 1.43E-08 | chr:6:32648036 |
| 6 rs17843603  | 32620241 A | 2.092  | 1.44E-08 | chr:6:32648036 |
| 6 rs9273343   | 32623445 C | 1.911  | 1.44E-08 | chr:6:32648036 |
| 6 rs9272188   | 32601688 G | 0.2584 | 1.44E-08 | chr:6:32648036 |
| 6 rs9272679   | 32608931 C | 2.557  | 1.45E-08 | chr:6:32648036 |
| 6 rs9273242   | 32614080 C | 2.023  | 1.46E-08 | chr:6:32648036 |
| 6 rs9273311   | 32622967 A | 1.899  | 1.46E-08 | chr:6:32648036 |
| 6 rs2395201   | 32451897 G | 4.919  | 1.46E-08 | chr:6:32648036 |
| 6 rs149941420 | 32556454 G | 4.341  | 1.46E-08 | chr:6:32648036 |
| 6 rs28724203  | 32556419 A | 4.341  | 1.46E-08 | chr:6:32648036 |
| 6 rs28383390  | 32607657 C | 3.004  | 1.47E-08 | chr:6:32648036 |
| 6 rs138487125 | 32599812 T | 5.328  | 1.48E-08 | chr:6:32648036 |
| 6 rs9268399   | 32340236 A | 2.392  | 1.49E-08 | chr:6:32648036 |
| 6 rs114895321 | 32603154 G | 6.337  | 1.50E-08 | chr:6:32648036 |
| 6 rs115717621 | 32603163 T | 6.337  | 1.50E-08 | chr:6:32648036 |

|               |            |        |          |                |
|---------------|------------|--------|----------|----------------|
| 6 rs9272305   | 32603879 A | 7.144  | 1.51E-08 | chr:6:32648036 |
| 6 rs9274835   | 32639931 T | 3.395  | 1.51E-08 | chr:6:32648036 |
| 6 rs113209512 | 32508875 T | 0.3735 | 1.52E-08 | chr:6:32648036 |
| 6 rs9273163   | 32613114 T | 1.924  | 1.54E-08 | chr:6:32648036 |
| 6 rs35083835  | 32543784 T | 2.273  | 1.55E-08 | chr:6:32648036 |
| 6 rs9272181   | 32601563 A | 0.2772 | 1.55E-08 | chr:6:32648036 |
| 6 rs112300533 | 32517237 T | 0.384  | 1.56E-08 | chr:6:32648036 |
| 6 rs9273160   | 32613104 G | 1.915  | 1.57E-08 | chr:6:32648036 |
| 6 rs9273240   | 32614000 T | 1.947  | 1.58E-08 | chr:6:32648036 |
| 6 rs9274368   | 32632518 G | 1.946  | 1.58E-08 | chr:6:32648036 |
| 6 rs116358897 | 32546782 A | 2.773  | 1.58E-08 | chr:6:32648036 |
| 6 rs9273410   | 32627250 A | 2.153  | 1.58E-08 | chr:6:32648036 |
| 6 rs146650659 | 32646807 G | 4.424  | 1.60E-08 | chr:6:32648036 |
| 6 rs79996892  | 32507051 C | 0.4681 | 1.60E-08 | chr:6:32648036 |
| 6 rs9269542   | 32544042 G | 2.297  | 1.61E-08 | chr:6:32648036 |
| 6 rs9274438   | 32633181 T | 0.4555 | 1.61E-08 | chr:6:32648036 |
| 6 rs28366194  | 32381940 T | 4.233  | 1.61E-08 | chr:6:32648036 |
| 6 rs185812018 | 32632514 T | 1.936  | 1.62E-08 | chr:6:32648036 |
| 6 rs141274999 | 32608808 G | 5.899  | 1.62E-08 | chr:6:32648036 |
| 6 rs77455945  | 32608798 G | 5.899  | 1.62E-08 | chr:6:32648036 |
| 6 rs17613153  | 32621505 G | 1.836  | 1.64E-08 | chr:6:32648036 |
| 6 rs17613167  | 32621513 T | 1.836  | 1.64E-08 | chr:6:32648036 |
| 6 rs17613174  | 32621515 A | 1.836  | 1.64E-08 | chr:6:32648036 |
| 6 rs17612928  | 32620976 G | 1.89   | 1.64E-08 | chr:6:32648036 |
| 6 rs201628145 | 32489913 G | 3.203  | 1.64E-08 | chr:6:32648036 |
| 6 rs17612748  | 32620174 G | 1.901  | 1.65E-08 | chr:6:32648036 |
| 6 rs9272042   | 32598917 A | 2.393  | 1.65E-08 | chr:6:32648036 |
| 6 rs9272242   | 32602790 T | 2.385  | 1.66E-08 | chr:6:32648036 |
| 6 rs17843616  | 32620667 C | 1.928  | 1.67E-08 | chr:6:32648036 |
| 6 rs9273264   | 32614303 G | 1.871  | 1.69E-08 | chr:6:32648036 |
| 6 rs9275381   | 32668819 C | 2.609  | 1.70E-08 | chr:6:32648036 |
| 6 rs9275411   | 32670157 T | 2.609  | 1.70E-08 | chr:6:32648036 |
| 6 rs9272132   | 32600677 A | 2.377  | 1.70E-08 | chr:6:32648036 |
| 6 rs9272948   | 32611107 C | 1.855  | 1.70E-08 | chr:6:32648036 |
| 6 rs17843613  | 32620658 T | 1.943  | 1.71E-08 | chr:6:32648036 |
| 6 rs9270636   | 32565648 C | 0.307  | 1.71E-08 | chr:6:32648036 |
| 6 rs9270637   | 32565650 G | 0.307  | 1.71E-08 | chr:6:32648036 |
| 6 rs9270638   | 32565657 C | 0.307  | 1.71E-08 | chr:6:32648036 |
| 6 rs561567019 | 32487651 A | 3.697  | 1.71E-08 | chr:6:32648036 |
| 6 rs9273253   | 32614207 G | 1.848  | 1.73E-08 | chr:6:32648036 |
| 6 rs9275373   | 32668411 A | 3.629  | 1.73E-08 | chr:6:32648036 |
| 6 rs17612712  | 32615945 T | 1.891  | 1.75E-08 | chr:6:32648036 |
| 6 rs9271435   | 32588069 T | 2.285  | 1.75E-08 | chr:6:32648036 |

|               |            |        |          |                |
|---------------|------------|--------|----------|----------------|
| 6 rs147552591 | 32541678 G | 5.542  | 1.76E-08 | chr:6:32648036 |
| 6 rs375608727 | 32608735 G | 5.782  | 1.76E-08 | chr:6:32648036 |
| 6 rs9273255   | 32614228 G | 1.848  | 1.76E-08 | chr:6:32648036 |
| 6 rs112180912 | 32518436 A | 0.3789 | 1.76E-08 | chr:6:32648036 |
| 6 rs9275340   | 32667458 T | 2.589  | 1.77E-08 | chr:6:32648036 |
| 6 rs1130151   | 32610935 G | 1.891  | 1.78E-08 | chr:6:32648036 |
| 6 rs67461697  | 32518767 C | 0.35   | 1.78E-08 | chr:6:32648036 |
| 6 rs74290599  | 32518785 T | 0.35   | 1.78E-08 | chr:6:32648036 |
| 6 rs4568495   | 32672246 C | 2.626  | 1.79E-08 | chr:6:32648036 |
| 6 rs9275376   | 32668633 T | 2.626  | 1.79E-08 | chr:6:32648036 |
| 6 rs9275377   | 32668667 G | 2.626  | 1.79E-08 | chr:6:32648036 |
| 6 rs9275378   | 32668729 G | 2.626  | 1.79E-08 | chr:6:32648036 |
| 6 rs9275396   | 32669528 A | 2.626  | 1.79E-08 | chr:6:32648036 |
| 6 rs9275397   | 32669552 G | 2.626  | 1.79E-08 | chr:6:32648036 |
| 6 rs9275399   | 32669712 G | 2.626  | 1.79E-08 | chr:6:32648036 |
| 6 rs9275464   | 32672082 G | 2.626  | 1.79E-08 | chr:6:32648036 |
| 6 rs9275468   | 32672412 A | 2.626  | 1.79E-08 | chr:6:32648036 |
| 6 rs9275469   | 32672430 G | 2.626  | 1.79E-08 | chr:6:32648036 |
| 6 rs9275478   | 32672654 T | 2.626  | 1.79E-08 | chr:6:32648036 |
| 6 rs9275479   | 32672659 T | 2.626  | 1.79E-08 | chr:6:32648036 |
| 6 rs9275480   | 32672668 A | 2.626  | 1.79E-08 | chr:6:32648036 |
| 6 rs9275481   | 32672913 A | 2.626  | 1.79E-08 | chr:6:32648036 |
| 6 rs9275482   | 32672932 T | 2.626  | 1.79E-08 | chr:6:32648036 |
| 6 rs9275485   | 32673077 A | 2.626  | 1.79E-08 | chr:6:32648036 |
| 6 rs9275504   | 32673986 T | 2.626  | 1.79E-08 | chr:6:32648036 |
| 6 rs9275507   | 32674130 A | 2.626  | 1.79E-08 | chr:6:32648036 |
| 6 rs9275508   | 32674159 G | 2.626  | 1.79E-08 | chr:6:32648036 |
| 6 rs17843624  | 32620885 T | 1.862  | 1.79E-08 | chr:6:32648036 |
| 6 rs539444192 | 32525883 A | 1.919  | 1.79E-08 | chr:6:32648036 |
| 6 rs114579035 | 32545832 C | 4.09   | 1.80E-08 | chr:6:32648036 |
| 6 rs116190325 | 32510039 A | 0.3784 | 1.81E-08 | chr:6:32648036 |
| 6 rs9272339   | 32604274 A | 0.3757 | 1.81E-08 | chr:6:32648036 |
| 6 rs9272664   | 32608710 C | 0.4583 | 1.81E-08 | chr:6:32648036 |
| 6 rs192421684 | 32525868 A | 1.921  | 1.81E-08 | chr:6:32648036 |
| 6 rs114795214 | 32543759 T | 4.428  | 1.82E-08 | chr:6:32648036 |
| 6 rs9273257   | 32614240 G | 1.846  | 1.82E-08 | chr:6:32648036 |
| 6 rs118090646 | 32545605 A | 4.113  | 1.83E-08 | chr:6:32648036 |
| 6 rs9273261   | 32614284 G | 1.864  | 1.84E-08 | chr:6:32648036 |
| 6 rs76812385  | 32472490 G | 7.345  | 1.85E-08 | chr:6:32648036 |
| 6 rs9272173   | 32601268 C | 0.267  | 1.85E-08 | chr:6:32648036 |
| 6 rs533779530 | 32453612 G | 0.2664 | 1.85E-08 | chr:6:32648036 |
| 6 rs9270060   | 32553974 C | 2.879  | 1.86E-08 | chr:6:32648036 |
| 6 rs1130117   | 32610556 A | 2.67   | 1.87E-08 | chr:6:32648036 |

|               |            |        |          |                |
|---------------|------------|--------|----------|----------------|
| 6 rs9273337   | 32623377 T | 1.888  | 1.87E-08 | chr:6:32648036 |
| 6 rs9274362   | 32632486 C | 1.95   | 1.87E-08 | chr:6:32648036 |
| 6 rs115524254 | 32503565 C | 0.3726 | 1.87E-08 | chr:6:32648036 |
| 6 rs185779937 | 32551693 A | 5.315  | 1.89E-08 | chr:6:32648036 |
| 6 rs74633251  | 32460882 G | 4.286  | 1.89E-08 | chr:6:32648036 |
| 6 rs9271471   | 32588665 G | 0.3043 | 1.90E-08 | chr:6:32648036 |
| 6 rs9269931   | 32551708 G | 0.4226 | 1.91E-08 | chr:6:32648036 |
| 6 rs80235202  | 32503831 G | 2.167  | 1.91E-08 | chr:6:32648036 |
| 6 rs201414107 | 32647866 A | 4.077  | 1.93E-08 | chr:6:32648036 |
| 6 rs9275316   | 32665916 C | 2.606  | 1.93E-08 | chr:6:32648036 |
| 6 rs9275337   | 32667318 T | 2.618  | 1.96E-08 | chr:6:32648036 |
| 6 rs9273069   | 32612233 T | 1.89   | 1.97E-08 | chr:6:32648036 |
| 6 rs554886285 | 32545962 G | 3.886  | 1.98E-08 | chr:6:32648036 |
| 6 rs76391884  | 32604085 G | 6.53   | 1.98E-08 | chr:6:32648036 |
| 6 rs17612935  | 32620992 G | 1.881  | 1.99E-08 | chr:6:32648036 |
| 6 rs281874991 | 32631281 C | 0.459  | 2.00E-08 | chr:6:32648036 |
| 6 rs115664796 | 32508758 C | 0.3781 | 2.00E-08 | chr:6:32648036 |
| 6 rs66502326  | 32509411 T | 0.3805 | 2.00E-08 | chr:6:32648036 |
| 6 rs659204    | 32577001 G | 0.3353 | 2.01E-08 | chr:6:32648036 |
| 6 rs9275401   | 32669827 G | 2.598  | 2.02E-08 | chr:6:32648036 |
| 6 rs9275402   | 32669837 C | 2.598  | 2.02E-08 | chr:6:32648036 |
| 6 rs9275403   | 32669838 T | 2.598  | 2.02E-08 | chr:6:32648036 |
| 6 rs113301125 | 32458328 G | 0.4014 | 2.03E-08 | chr:6:32648036 |
| 6 rs9274555   | 32634882 T | 2.037  | 2.04E-08 | chr:6:32648036 |
| 6 rs72508464  | 32504341 T | 0.3745 | 2.04E-08 | chr:6:32648036 |
| 6 rs9273074   | 32612287 G | 1.871  | 2.04E-08 | chr:6:32648036 |
| 6 rs9273075   | 32612288 G | 1.871  | 2.04E-08 | chr:6:32648036 |
| 6 rs186618430 | 32542779 C | 2.305  | 2.05E-08 | chr:6:32648036 |
| 6 rs113064274 | 32496932 C | 0.4351 | 2.06E-08 | chr:6:32648036 |
| 6 rs72853971  | 32509938 C | 0.3771 | 2.06E-08 | chr:6:32648036 |
| 6 rs9272065   | 32599352 G | 0.2628 | 2.06E-08 | chr:6:32648036 |
| 6 rs9272066   | 32599374 A | 0.2628 | 2.06E-08 | chr:6:32648036 |
| 6 rs9272950   | 32611117 G | 1.844  | 2.06E-08 | chr:6:32648036 |
| 6 rs116209683 | 32510508 C | 0.378  | 2.06E-08 | chr:6:32648036 |
| 6 rs17843567  | 32614866 G | 1.832  | 2.08E-08 | chr:6:32648036 |
| 6 rs78776954  | 32600817 G | 0.2539 | 2.11E-08 | chr:6:32648036 |
| 6 rs115202951 | 32501311 T | 0.381  | 2.12E-08 | chr:6:32648036 |
| 6 rs72851061  | 32503672 C | 0.3764 | 2.12E-08 | chr:6:32648036 |
| 6 rs9270000   | 32552740 A | 2.177  | 2.12E-08 | chr:6:32648036 |
| 6 rs9273344   | 32623458 C | 1.899  | 2.13E-08 | chr:6:32648036 |
| 6 rs281863879 | 32630407 G | 1.922  | 2.13E-08 | chr:6:32648036 |
| 6 rs281863884 | 32630401 T | 1.922  | 2.13E-08 | chr:6:32648036 |
| 6 rs9274550   | 32634795 A | 2.059  | 2.14E-08 | chr:6:32648036 |

|               |            |        |          |                |
|---------------|------------|--------|----------|----------------|
| 6 rs9275446   | 32671841 G | 2.593  | 2.14E-08 | chr:6:32648036 |
| 6 rs9275447   | 32671843 C | 2.593  | 2.14E-08 | chr:6:32648036 |
| 6 rs9275448   | 32671848 T | 2.593  | 2.14E-08 | chr:6:32648036 |
| 6 rs116382869 | 32485481 A | 2.658  | 2.14E-08 | chr:6:32648036 |
| 6 rs536072485 | 32525875 T | 1.913  | 2.15E-08 | chr:6:32648036 |
| 6 rs28366320  | 32561551 A | 2.274  | 2.15E-08 | chr:6:32648036 |
| 6 rs9273209   | 32613610 T | 1.835  | 2.15E-08 | chr:6:32648036 |
| 6 rs9275332   | 32666943 A | 2.585  | 2.15E-08 | chr:6:32648036 |
| 6 rs9275151   | 32651936 T | 3.314  | 2.17E-08 | chr:6:32648036 |
| 6 rs9271417   | 32587818 C | 0.296  | 2.19E-08 | chr:6:32648036 |
| 6 rs9272176   | 32601333 T | 0.2721 | 2.19E-08 | chr:6:32648036 |
| 6 rs114671487 | 32545543 A | 4.771  | 2.19E-08 | chr:6:32648036 |
| 6 rs6457663   | 32739312 A | 4.636  | 2.19E-08 | chr:6:32648036 |
| 6 rs6919798   | 32732890 G | 4.636  | 2.19E-08 | chr:6:32648036 |
| 6 rs9276010   | 32694686 T | 4.636  | 2.19E-08 | chr:6:32648036 |
| 6 rs9276300   | 32703185 T | 4.636  | 2.19E-08 | chr:6:32648036 |
| 6 rs9276557   | 32723614 T | 4.636  | 2.19E-08 | chr:6:32648036 |
| 6 rs28417660  | 32603044 T | 5.985  | 2.19E-08 | chr:6:32648036 |
| 6 rs28635391  | 32603048 A | 5.985  | 2.19E-08 | chr:6:32648036 |
| 6 rs9270092   | 32554420 T | 0.3088 | 2.21E-08 | chr:6:32648036 |
| 6 rs115222936 | 32605039 T | 6.127  | 2.21E-08 | chr:6:32648036 |
| 6 rs35362560  | 32545459 T | 2.268  | 2.21E-08 | chr:6:32648036 |
| 6 rs35943148  | 32545458 C | 2.268  | 2.21E-08 | chr:6:32648036 |
| 6 rs544749594 | 32605025 G | 6.127  | 2.21E-08 | chr:6:32648036 |
| 6 rs28383366  | 32606980 A | 2.395  | 2.21E-08 | chr:6:32648036 |
| 6 rs34693360  | 32554114 A | 3.207  | 2.23E-08 | chr:6:32648036 |
| 6 rs113787140 | 32502901 A | 0.4597 | 2.25E-08 | chr:6:32648036 |
| 6 rs113220298 | 32510369 T | 0.3735 | 2.25E-08 | chr:6:32648036 |
| 6 rs9274592   | 32635400 C | 0.482  | 2.25E-08 | chr:6:32648036 |
| 6 rs35445101  | 32546879 G | 2.986  | 2.26E-08 | chr:6:32648036 |
| 6 rs9273279   | 32614426 T | 1.863  | 2.26E-08 | chr:6:32648036 |
| 6 rs9271587   | 32590916 G | 2.382  | 2.26E-08 | chr:6:32648036 |
| 6 rs9273314   | 32622986 C | 1.878  | 2.29E-08 | chr:6:32648036 |
| 6 rs9273315   | 32622990 T | 1.878  | 2.29E-08 | chr:6:32648036 |
| 6 rs76415507  | 32492589 G | 0.4776 | 2.29E-08 | chr:6:32648036 |
| 6 rs9275163   | 32652880 C | 3.116  | 2.32E-08 | chr:6:32648036 |
| 6 rs9271405   | 32587584 C | 0.303  | 2.32E-08 | chr:6:32648036 |
| 6 rs9274556   | 32634883 T | 2.033  | 2.32E-08 | chr:6:32648036 |
| 6 rs9273078   | 32612309 A | 1.881  | 2.33E-08 | chr:6:32648036 |
| 6 rs71538569  | 32541257 G | 2.257  | 2.34E-08 | chr:6:32648036 |
| 6 rs72853926  | 32508451 G | 0.373  | 2.35E-08 | chr:6:32648036 |
| 6 rs9272040   | 32598903 A | 2.358  | 2.35E-08 | chr:6:32648036 |
| 6 rs9272041   | 32598906 G | 2.358  | 2.35E-08 | chr:6:32648036 |

|               |            |        |          |                |
|---------------|------------|--------|----------|----------------|
| 6 rs35789108  | 32550126 G | 2.653  | 2.38E-08 | chr:6:32648036 |
| 6 rs9275374   | 32668526 T | 2.587  | 2.41E-08 | chr:6:32648036 |
| 6 rs9271412   | 32587685 T | 0.3025 | 2.41E-08 | chr:6:32648036 |
| 6 rs2515895   | 32628960 C | 2.334  | 2.42E-08 | chr:6:32648036 |
| 6 rs72851060  | 32503560 G | 0.3759 | 2.42E-08 | chr:6:32648036 |
| 6 rs28371173  | 32612057 A | 3.27   | 2.42E-08 | chr:6:32648036 |
| 6 rs9272221   | 32602334 C | 2.348  | 2.46E-08 | chr:6:32648036 |
| 6 rs72851064  | 32503928 C | 0.3805 | 2.47E-08 | chr:6:32648036 |
| 6 rs9271526   | 32589862 A | 0.3007 | 2.47E-08 | chr:6:32648036 |
| 6 rs17843595  | 32615971 A | 1.872  | 2.48E-08 | chr:6:32648036 |
| 6 rs17843596  | 32615972 A | 1.872  | 2.48E-08 | chr:6:32648036 |
| 6 rs115787103 | 32603417 A | 0.269  | 2.48E-08 | chr:6:32648036 |
| 6 rs35344500  | 32609525 C | 0.269  | 2.48E-08 | chr:6:32648036 |
| 6 rs9272230   | 32602602 A | 0.269  | 2.48E-08 | chr:6:32648036 |
| 6 rs9272434   | 32605325 T | 0.269  | 2.48E-08 | chr:6:32648036 |
| 6 rs9272626   | 32608041 C | 0.269  | 2.48E-08 | chr:6:32648036 |
| 6 rs9272686   | 32609015 T | 0.269  | 2.48E-08 | chr:6:32648036 |
| 6 rs9271237   | 32579651 G | 0.3182 | 2.49E-08 | chr:6:32648036 |
| 6 rs573459004 | 32479052 C | 3.9    | 2.49E-08 | chr:6:32648036 |
| 6 rs17612907  | 32620852 A | 1.843  | 2.50E-08 | chr:6:32648036 |
| 6 rs9271407   | 32587605 T | 0.3027 | 2.50E-08 | chr:6:32648036 |
| 6 rs2157337   | 32501144 T | 0.3817 | 2.51E-08 | chr:6:32648036 |
| 6 rs9279900   | 32607583 T | 1.93   | 2.51E-08 | chr:6:32648036 |
| 6 rs115834108 | 32459908 A | 0.4345 | 2.52E-08 | chr:6:32648036 |
| 6 rs9273274   | 32614405 T | 1.859  | 2.54E-08 | chr:6:32648036 |
| 6 rs9273275   | 32614407 G | 1.859  | 2.54E-08 | chr:6:32648036 |
| 6 rs17843593  | 32615950 C | 1.878  | 2.55E-08 | chr:6:32648036 |
| 6 rs17843594  | 32615952 C | 1.878  | 2.55E-08 | chr:6:32648036 |
| 6 rs9275323   | 32666609 C | 2.577  | 2.55E-08 | chr:6:32648036 |
| 6 rs185635851 | 32597724 T | 6.353  | 2.55E-08 | chr:6:32648036 |
| 6 rs35349656  | 32545433 G | 2.258  | 2.55E-08 | chr:6:32648036 |
| 6 rs73397403  | 32519849 G | 0.3796 | 2.55E-08 | chr:6:32648036 |
| 6 rs9273335   | 32623348 G | 1.866  | 2.55E-08 | chr:6:32648036 |
| 6 rs9271410   | 32587645 G | 0.3024 | 2.57E-08 | chr:6:32648036 |
| 6 rs9274565   | 32635067 A | 2.055  | 2.57E-08 | chr:6:32648036 |
| 6 rs372309258 | 32553670 T | 9.132  | 2.57E-08 | chr:6:32648036 |
| 6 rs114278037 | 32507173 G | 0.4828 | 2.57E-08 | chr:6:32648036 |
| 6 rs115824930 | 32507172 T | 0.4828 | 2.57E-08 | chr:6:32648036 |
| 6 rs9469164   | 32546147 T | 4.466  | 2.58E-08 | chr:6:32648036 |
| 6 rs72849265  | 32458208 T | 0.3801 | 2.59E-08 | chr:6:32648036 |
| 6 rs2187822   | 32449726 C | 2.574  | 2.60E-08 | chr:6:32648036 |
| 6 rs2856698   | 32636376 G | 0.3193 | 2.60E-08 | chr:6:32648036 |
| 6 rs9274557   | 32634887 T | 2.042  | 2.61E-08 | chr:6:32648036 |



|               |            |        |          |                |
|---------------|------------|--------|----------|----------------|
| 6 rs9272062   | 32599265 G | 2.338  | 2.61E-08 | chr:6:32648036 |
| 6 rs36101847  | 32550431 T | 2.73   | 2.61E-08 | chr:6:32648036 |
| 6 rs9275483   | 32673051 C | 2.602  | 2.62E-08 | chr:6:32648036 |
| 6 rs9275484   | 32673052 T | 2.602  | 2.62E-08 | chr:6:32648036 |
| 6 rs9273269   | 32614343 A | 1.857  | 2.62E-08 | chr:6:32648036 |
| 6 rs12665549  | 32517141 A | 0.3678 | 2.63E-08 | chr:6:32648036 |
| 6 rs9271586   | 32590899 T | 2.377  | 2.63E-08 | chr:6:32648036 |
| 6 rs9271588   | 32590953 C | 2.377  | 2.63E-08 | chr:6:32648036 |
| 6 rs73729111  | 32517525 T | 0.3845 | 2.63E-08 | chr:6:32648036 |
| 6 rs9275501   | 32673920 T | 2.578  | 2.65E-08 | chr:6:32648036 |
| 6 rs9275502   | 32673921 G | 2.578  | 2.65E-08 | chr:6:32648036 |
| 6 rs199680107 | 32489919 A | 3.761  | 2.66E-08 | chr:6:32648036 |
| 6 rs7758472   | 32599039 A | 0.2596 | 2.66E-08 | chr:6:32648036 |
| 6 rs1065036   | 32611029 C | 1.87   | 2.68E-08 | chr:6:32648036 |
| 6 rs9275046   | 32648080 C | 1.994  | 2.68E-08 | chr:6:32648036 |
| 6 rs9275487   | 32673174 T | 2.571  | 2.69E-08 | chr:6:32648036 |
| 6 rs9275488   | 32673269 A | 2.571  | 2.69E-08 | chr:6:32648036 |
| 6 rs9275489   | 32673272 T | 2.571  | 2.69E-08 | chr:6:32648036 |
| 6 rs9275491   | 32673424 T | 2.571  | 2.69E-08 | chr:6:32648036 |
| 6 rs9275492   | 32673446 T | 2.571  | 2.69E-08 | chr:6:32648036 |
| 6 rs187272234 | 32599617 C | 4.176  | 2.70E-08 | chr:6:32648036 |
| 6 rs28724151  | 32555378 T | 2.756  | 2.71E-08 | chr:6:32648036 |
| 6 rs9273346   | 32623475 G | 1.891  | 2.71E-08 | chr:6:32648036 |
| 6 rs3129967   | 32381461 T | 0.3347 | 2.73E-08 | chr:6:32648036 |
| 6 rs9273324   | 32623156 T | 1.946  | 2.73E-08 | chr:6:32648036 |
| 6 rs9273306   | 32622928 A | 1.865  | 2.74E-08 | chr:6:32648036 |
| 6 rs9273307   | 32622929 C | 1.865  | 2.74E-08 | chr:6:32648036 |
| 6 rs9469176   | 32551378 C | 6.078  | 2.76E-08 | chr:6:32648036 |
| 6 rs9271333   | 32582678 T | 0.3183 | 2.77E-08 | chr:6:32648036 |
| 6 rs28724234  | 32627535 T | 2.019  | 2.78E-08 | chr:6:32648036 |
| 6 rs11752506  | 32520273 A | 0.3741 | 2.80E-08 | chr:6:32648036 |
| 6 rs76662008  | 32580869 G | 0.3178 | 2.81E-08 | chr:6:32648036 |
| 6 rs28383393  | 32607698 G | 2.942  | 2.81E-08 | chr:6:32648036 |
| 6 rs28383394  | 32607700 T | 2.942  | 2.81E-08 | chr:6:32648036 |
| 6 rs181132649 | 32496193 G | 3.712  | 2.82E-08 | chr:6:32648036 |
| 6 rs77568742  | 32580790 C | 0.3185 | 2.82E-08 | chr:6:32648036 |
| 6 rs9275369   | 32668255 T | 2.576  | 2.83E-08 | chr:6:32648036 |
| 6 rs9275370   | 32668258 T | 2.576  | 2.83E-08 | chr:6:32648036 |
| 6 rs9275371   | 32668296 C | 2.576  | 2.83E-08 | chr:6:32648036 |
| 6 rs9275375   | 32668632 A | 2.576  | 2.83E-08 | chr:6:32648036 |
| 6 rs9275384   | 32668898 C | 2.576  | 2.83E-08 | chr:6:32648036 |
| 6 rs9275385   | 32668917 T | 2.576  | 2.83E-08 | chr:6:32648036 |
| 6 rs9275386   | 32668960 T | 2.576  | 2.83E-08 | chr:6:32648036 |

|               |            |        |          |                |
|---------------|------------|--------|----------|----------------|
| 6 rs9275388   | 32669084 C | 2.576  | 2.83E-08 | chr:6:32648036 |
| 6 rs9275390   | 32669156 C | 2.576  | 2.83E-08 | chr:6:32648036 |
| 6 rs9275393   | 32669439 A | 2.576  | 2.83E-08 | chr:6:32648036 |
| 6 rs9275398   | 32669568 C | 2.576  | 2.83E-08 | chr:6:32648036 |
| 6 rs9275404   | 32669878 C | 2.576  | 2.83E-08 | chr:6:32648036 |
| 6 rs9275405   | 32669883 G | 2.576  | 2.83E-08 | chr:6:32648036 |
| 6 rs9275406   | 32669955 T | 2.576  | 2.83E-08 | chr:6:32648036 |
| 6 rs9275407   | 32670037 T | 2.576  | 2.83E-08 | chr:6:32648036 |
| 6 rs9275408   | 32670110 C | 2.576  | 2.83E-08 | chr:6:32648036 |
| 6 rs9275410   | 32670145 A | 2.576  | 2.83E-08 | chr:6:32648036 |
| 6 rs9275417   | 32670214 C | 2.576  | 2.83E-08 | chr:6:32648036 |
| 6 rs9275418   | 32670244 G | 2.576  | 2.83E-08 | chr:6:32648036 |
| 6 rs9275421   | 32670477 A | 2.576  | 2.83E-08 | chr:6:32648036 |
| 6 rs9275423   | 32670564 T | 2.576  | 2.83E-08 | chr:6:32648036 |
| 6 rs9275424   | 32670576 G | 2.576  | 2.83E-08 | chr:6:32648036 |
| 6 rs9275425   | 32670874 A | 2.576  | 2.83E-08 | chr:6:32648036 |
| 6 rs9275427   | 32670915 T | 2.576  | 2.83E-08 | chr:6:32648036 |
| 6 rs9275431   | 32671140 A | 2.576  | 2.83E-08 | chr:6:32648036 |
| 6 rs9275432   | 32671185 T | 2.576  | 2.83E-08 | chr:6:32648036 |
| 6 rs9275433   | 32671206 C | 2.576  | 2.83E-08 | chr:6:32648036 |
| 6 rs9275436   | 32671399 G | 2.576  | 2.83E-08 | chr:6:32648036 |
| 6 rs9275438   | 32671508 T | 2.576  | 2.83E-08 | chr:6:32648036 |
| 6 rs9275439   | 32671521 C | 2.576  | 2.83E-08 | chr:6:32648036 |
| 6 rs9275440   | 32671596 T | 2.576  | 2.83E-08 | chr:6:32648036 |
| 6 rs9275441   | 32671676 A | 2.576  | 2.83E-08 | chr:6:32648036 |
| 6 rs9271591   | 32591141 A | 2.362  | 2.83E-08 | chr:6:32648036 |
| 6 rs9272070   | 32599485 T | 2.338  | 2.84E-08 | chr:6:32648036 |
| 6 rs9272262   | 32603291 T | 0.2706 | 2.85E-08 | chr:6:32648036 |
| 6 rs9272264   | 32603309 G | 0.2706 | 2.85E-08 | chr:6:32648036 |
| 6 rs9272728   | 32609593 G | 0.2706 | 2.85E-08 | chr:6:32648036 |
| 6 rs9272100   | 32599814 T | 0.2852 | 2.86E-08 | chr:6:32648036 |
| 6 rs540748076 | 32497184 A | 3.246  | 2.87E-08 | chr:6:32648036 |
| 6 rs114233058 | 32517386 T | 0.4013 | 2.87E-08 | chr:6:32648036 |
| 6 rs115916707 | 32517387 G | 0.4013 | 2.87E-08 | chr:6:32648036 |
| 6 rs35681661  | 32551076 A | 2.275  | 2.87E-08 | chr:6:32648036 |
| 6 rs1047985   | 32605216 A | 0.2652 | 2.88E-08 | chr:6:32648036 |
| 6 rs583177    | 32579567 A | 0.3188 | 2.93E-08 | chr:6:32648036 |
| 6 rs9271238   | 32579702 T | 0.3188 | 2.93E-08 | chr:6:32648036 |
| 6 rs9273277   | 32614414 A | 1.849  | 2.93E-08 | chr:6:32648036 |
| 6 rs9273278   | 32614415 C | 1.849  | 2.93E-08 | chr:6:32648036 |
| 6 rs9273266   | 32614326 A | 1.854  | 2.95E-08 | chr:6:32648036 |
| 6 rs9273267   | 32614330 C | 1.854  | 2.95E-08 | chr:6:32648036 |
| 6 rs17612781  | 32620311 C | 2.036  | 2.99E-08 | chr:6:32648036 |

|               |            |        |          |                |
|---------------|------------|--------|----------|----------------|
| 6 rs112457394 | 32469073 C | 0.395  | 3.02E-08 | chr:6:32648036 |
| 6 rs9271326   | 32582527 T | 0.3183 | 3.03E-08 | chr:6:32648036 |
| 6 rs148633289 | 32487229 T | 0.2809 | 3.03E-08 | chr:6:32648036 |
| 6 rs79638048  | 32519391 A | 0.3646 | 3.04E-08 | chr:6:32648036 |
| 6 rs9272063   | 32599303 T | 0.2674 | 3.04E-08 | chr:6:32648036 |
| 6 rs9273549   | 32628873 T | 2.396  | 3.06E-08 | chr:6:32648036 |
| 6 rs9275047   | 32648084 G | 1.989  | 3.09E-08 | chr:6:32648036 |
| 6 rs75518178  | 32505100 T | 2.264  | 3.10E-08 | chr:6:32648036 |
| 6 rs3207966   | 32605197 A | 0.2665 | 3.10E-08 | chr:6:32648036 |
| 6 rs9274837   | 32639972 T | 3.279  | 3.12E-08 | chr:6:32648036 |
| 6 rs9275208   | 32657722 A | 2.265  | 3.13E-08 | chr:6:32648036 |
| 6 rs9275210   | 32657817 T | 2.265  | 3.13E-08 | chr:6:32648036 |
| 6 rs9275320   | 32666469 C | 2.566  | 3.15E-08 | chr:6:32648036 |
| 6 rs79878723  | 32505682 T | 0.4758 | 3.15E-08 | chr:6:32648036 |
| 6 rs2647094   | 32580322 G | 0.3181 | 3.16E-08 | chr:6:32648036 |
| 6 rs2858862   | 32580321 T | 0.3181 | 3.16E-08 | chr:6:32648036 |
| 6 rs2858864   | 32578229 T | 0.3181 | 3.16E-08 | chr:6:32648036 |
| 6 rs3104420   | 32580028 A | 0.3181 | 3.16E-08 | chr:6:32648036 |
| 6 rs3104421   | 32580007 A | 0.3181 | 3.16E-08 | chr:6:32648036 |
| 6 rs550703793 | 32582451 T | 0.3181 | 3.16E-08 | chr:6:32648036 |
| 6 rs76946723  | 32578917 T | 0.3181 | 3.16E-08 | chr:6:32648036 |
| 6 rs79838044  | 32580632 C | 0.3181 | 3.16E-08 | chr:6:32648036 |
| 6 rs80243928  | 32580571 T | 0.3181 | 3.16E-08 | chr:6:32648036 |
| 6 rs9271262   | 32580585 G | 0.3181 | 3.16E-08 | chr:6:32648036 |
| 6 rs9271301   | 32581614 T | 0.3181 | 3.16E-08 | chr:6:32648036 |
| 6 rs9271334   | 32582711 C | 0.3181 | 3.16E-08 | chr:6:32648036 |
| 6 rs281861394 | 32633608 G | 2.751  | 3.17E-08 | chr:6:32648036 |
| 6 rs17612604  | 32615597 C | 1.898  | 3.17E-08 | chr:6:32648036 |
| 6 rs74824383  | 32624731 G | 1.814  | 3.17E-08 | chr:6:32648036 |
| 6 rs9273348   | 32623487 G | 1.886  | 3.18E-08 | chr:6:32648036 |
| 6 rs9273146   | 32612979 A | 0.468  | 3.20E-08 | chr:6:32648036 |
| 6 rs9273147   | 32612981 A | 0.468  | 3.20E-08 | chr:6:32648036 |
| 6 rs9275449   | 32671869 T | 2.556  | 3.22E-08 | chr:6:32648036 |
| 6 rs116178934 | 32605904 T | 5.963  | 3.22E-08 | chr:6:32648036 |
| 6 rs201854374 | 32507311 C | 0.4712 | 3.23E-08 | chr:6:32648036 |
| 6 rs28383360  | 32606824 A | 2.304  | 3.23E-08 | chr:6:32648036 |
| 6 rs114987387 | 32502131 G | 0.3851 | 3.24E-08 | chr:6:32648036 |
| 6 rs116316731 | 32502097 T | 0.3851 | 3.24E-08 | chr:6:32648036 |
| 6 rs114246255 | 32509461 G | 0.3849 | 3.25E-08 | chr:6:32648036 |
| 6 rs115704383 | 32509460 T | 0.3849 | 3.25E-08 | chr:6:32648036 |
| 6 rs72508473  | 32508399 G | 0.383  | 3.27E-08 | chr:6:32648036 |
| 6 rs9274830   | 32639836 A | 3.286  | 3.28E-08 | chr:6:32648036 |
| 6 rs28746794  | 32632532 C | 1.91   | 3.28E-08 | chr:6:32648036 |

|               |            |        |          |                |
|---------------|------------|--------|----------|----------------|
| 6 rs113734598 | 32546761 A | 2.669  | 3.29E-08 | chr:6:32648036 |
| 6 rs202231764 | 32508412 T | 0.3824 | 3.30E-08 | chr:6:32648036 |
| 6 rs9271330   | 32582640 A | 0.3214 | 3.30E-08 | chr:6:32648036 |
| 6 rs9275152   | 32652196 C | 3.509  | 3.30E-08 | chr:6:32648036 |
| 6 rs9275471   | 32672491 A | 2.565  | 3.31E-08 | chr:6:32648036 |
| 6 rs9275472   | 32672494 A | 2.565  | 3.31E-08 | chr:6:32648036 |
| 6 rs9275473   | 32672523 T | 2.565  | 3.31E-08 | chr:6:32648036 |
| 6 rs9275474   | 32672529 T | 2.565  | 3.31E-08 | chr:6:32648036 |
| 6 rs9275475   | 32672556 G | 2.565  | 3.31E-08 | chr:6:32648036 |
| 6 rs9272798   | 32610574 C | 0.4645 | 3.32E-08 | chr:6:32648036 |
| 6 rs9272799   | 32610576 G | 0.4645 | 3.32E-08 | chr:6:32648036 |
| 6 rs9272800   | 32610581 C | 0.4645 | 3.32E-08 | chr:6:32648036 |
| 6 rs9272801   | 32610584 T | 0.4645 | 3.32E-08 | chr:6:32648036 |
| 6 rs9268434   | 32346452 T | 2.308  | 3.34E-08 | chr:6:32648036 |
| 6 rs9273268   | 32614334 C | 1.851  | 3.35E-08 | chr:6:32648036 |
| 6 rs36042205  | 32543761 A | 2.205  | 3.36E-08 | chr:6:32648036 |
| 6 rs9275349   | 32667663 C | 3.477  | 3.39E-08 | chr:6:32648036 |
| 6 rs17612690  | 32615918 C | 1.874  | 3.41E-08 | chr:6:32648036 |
| 6 rs17612697  | 32615919 A | 1.874  | 3.41E-08 | chr:6:32648036 |
| 6 rs181471921 | 32507163 A | 0.4846 | 3.47E-08 | chr:6:32648036 |
| 6 rs5019292   | 32733719 A | 4.481  | 3.47E-08 | chr:6:32648036 |
| 6 rs9275309   | 32665258 T | 2.562  | 3.49E-08 | chr:6:32648036 |
| 6 rs9275322   | 32666560 G | 2.562  | 3.49E-08 | chr:6:32648036 |
| 6 rs9275329   | 32666831 T | 2.562  | 3.49E-08 | chr:6:32648036 |
| 6 rs3129968   | 32381472 C | 0.3369 | 3.50E-08 | chr:6:32648036 |
| 6 rs78287329  | 32485511 T | 2.611  | 3.50E-08 | chr:6:32648036 |
| 6 rs9274548   | 32634785 G | 2.022  | 3.53E-08 | chr:6:32648036 |
| 6 rs9272069   | 32599425 A | 0.2736 | 3.54E-08 | chr:6:32648036 |
| 6 rs35366682  | 32594354 C | 0.2436 | 3.55E-08 | chr:6:32648036 |
| 6 rs3117098   | 32358513 G | 0.339  | 3.57E-08 | chr:6:32648036 |
| 6 rs3117102   | 32350107 C | 0.339  | 3.57E-08 | chr:6:32648036 |
| 6 rs3117104   | 32348309 T | 0.339  | 3.57E-08 | chr:6:32648036 |
| 6 rs3117108   | 32342822 C | 0.339  | 3.57E-08 | chr:6:32648036 |
| 6 rs3129946   | 32346772 A | 0.339  | 3.57E-08 | chr:6:32648036 |
| 6 rs3129948   | 32354644 C | 0.339  | 3.57E-08 | chr:6:32648036 |
| 6 rs3129951   | 32358286 T | 0.339  | 3.57E-08 | chr:6:32648036 |
| 6 rs3129952   | 32359763 G | 0.339  | 3.57E-08 | chr:6:32648036 |
| 6 rs3129954   | 32365580 A | 0.339  | 3.57E-08 | chr:6:32648036 |
| 6 rs3129955   | 32365840 T | 0.339  | 3.57E-08 | chr:6:32648036 |
| 6 rs181280314 | 32481838 C | 3.83   | 3.63E-08 | chr:6:32648036 |
| 6 rs569932079 | 32481837 T | 3.83   | 3.63E-08 | chr:6:32648036 |
| 6 rs9275043   | 32648061 C | 1.984  | 3.67E-08 | chr:6:32648036 |
| 6 rs9272634   | 32608184 A | 0.4571 | 3.67E-08 | chr:6:32648036 |

|               |            |        |          |                |
|---------------|------------|--------|----------|----------------|
| 6 rs17843564  | 32614842 G | 1.815  | 3.69E-08 | chr:6:32648036 |
| 6 rs17843565  | 32614847 G | 1.815  | 3.69E-08 | chr:6:32648036 |
| 6 rs547521436 | 32486462 A | 4.545  | 3.72E-08 | chr:6:32648036 |
| 6 rs571627067 | 32486458 A | 4.545  | 3.72E-08 | chr:6:32648036 |
| 6 rs72508415  | 32459793 A | 0.3779 | 3.76E-08 | chr:6:32648036 |
| 6 rs7755283   | 32420512 C | 0.3386 | 3.76E-08 | chr:6:32648036 |
| 6 rs9268781   | 32420497 T | 0.3386 | 3.76E-08 | chr:6:32648036 |
| 6 rs3129961   | 32378940 C | 0.3389 | 3.78E-08 | chr:6:32648036 |
| 6 rs72853970  | 32509919 A | 0.388  | 3.79E-08 | chr:6:32648036 |
| 6 rs17843576  | 32615431 A | 1.966  | 3.80E-08 | chr:6:32648036 |
| 6 rs60160049  | 32510208 T | 0.4529 | 3.80E-08 | chr:6:32648036 |
| 6 rs1130391   | 32632624 T | 4.245  | 3.81E-08 | chr:6:32648036 |
| 6 rs77021177  | 32472668 G | 0.3886 | 3.82E-08 | chr:6:32648036 |
| 6 rs79645566  | 32505836 C | 0.4719 | 3.82E-08 | chr:6:32648036 |
| 6 rs17205647  | 32637418 A | 2.321  | 3.86E-08 | chr:6:32648036 |
| 6 rs74948575  | 32499220 A | 3.419  | 3.89E-08 | chr:6:32648036 |
| 6 rs9274580   | 32635345 A | 2.017  | 3.89E-08 | chr:6:32648036 |
| 6 rs9274581   | 32635347 C | 2.017  | 3.89E-08 | chr:6:32648036 |
| 6 rs9274582   | 32635348 C | 2.017  | 3.89E-08 | chr:6:32648036 |
| 6 rs112870228 | 32542121 G | 2.54   | 3.90E-08 | chr:6:32648036 |
| 6 rs2076529   | 32363955 C | 2.301  | 3.92E-08 | chr:6:32648036 |
| 6 rs2076533   | 32363527 T | 2.301  | 3.92E-08 | chr:6:32648036 |
| 6 rs3817973   | 32361111 T | 2.301  | 3.92E-08 | chr:6:32648036 |
| 6 rs4373382   | 32350868 C | 2.301  | 3.92E-08 | chr:6:32648036 |
| 6 rs4424066   | 32354428 G | 2.301  | 3.92E-08 | chr:6:32648036 |
| 6 rs9268460   | 32351283 C | 2.301  | 3.92E-08 | chr:6:32648036 |
| 6 rs9268472   | 32355605 A | 2.301  | 3.92E-08 | chr:6:32648036 |
| 6 rs9268473   | 32355683 G | 2.301  | 3.92E-08 | chr:6:32648036 |
| 6 rs9268476   | 32358942 A | 2.301  | 3.92E-08 | chr:6:32648036 |
| 6 rs9274554   | 32634870 G | 2.007  | 3.92E-08 | chr:6:32648036 |
| 6 rs78897911  | 32455586 A | 9.505  | 3.97E-08 | chr:6:32648036 |
| 6 rs114831840 | 32501301 C | 0.3896 | 3.97E-08 | chr:6:32648036 |
| 6 rs115303308 | 32501296 A | 0.3896 | 3.97E-08 | chr:6:32648036 |
| 6 rs9272220   | 32602306 A | 0.2752 | 3.98E-08 | chr:6:32648036 |
| 6 rs116405199 | 32504367 T | 0.3819 | 4.01E-08 | chr:6:32648036 |
| 6 rs78994392  | 32504362 T | 0.3819 | 4.01E-08 | chr:6:32648036 |
| 6 rs34648027  | 32545956 T | 2.227  | 4.02E-08 | chr:6:32648036 |
| 6 rs556430987 | 32542165 G | 2.541  | 4.04E-08 | chr:6:32648036 |
| 6 rs575389474 | 32542166 T | 2.541  | 4.04E-08 | chr:6:32648036 |
| 6 rs6937545   | 32418031 A | 0.3385 | 4.04E-08 | chr:6:32648036 |
| 6 rs6937696   | 32418018 C | 0.3385 | 4.04E-08 | chr:6:32648036 |
| 6 rs7744304   | 32425487 G | 0.3385 | 4.04E-08 | chr:6:32648036 |
| 6 rs7763262   | 32424882 T | 0.3385 | 4.04E-08 | chr:6:32648036 |

|               |            |        |          |                |
|---------------|------------|--------|----------|----------------|
| 6 rs9268766   | 32418710 C | 0.3385 | 4.04E-08 | chr:6:32648036 |
| 6 rs9268803   | 32423237 A | 0.3385 | 4.04E-08 | chr:6:32648036 |
| 6 rs9268812   | 32424568 A | 0.3385 | 4.04E-08 | chr:6:32648036 |
| 6 rs9274549   | 32634786 G | 2.018  | 4.04E-08 | chr:6:32648036 |
| 6 rs9273244   | 32614108 G | 1.937  | 4.05E-08 | chr:6:32648036 |
| 6 rs9273245   | 32614110 A | 1.937  | 4.05E-08 | chr:6:32648036 |
| 6 rs9275364   | 32668027 G | 2.526  | 4.05E-08 | chr:6:32648036 |
| 6 rs9275366   | 32668171 C | 2.526  | 4.05E-08 | chr:6:32648036 |
| 6 rs9275367   | 32668182 G | 2.526  | 4.05E-08 | chr:6:32648036 |
| 6 rs9275368   | 32668183 G | 2.526  | 4.05E-08 | chr:6:32648036 |
| 6 rs9275372   | 32668388 T | 2.526  | 4.05E-08 | chr:6:32648036 |
| 6 rs9275428   | 32670978 G | 2.53   | 4.07E-08 | chr:6:32648036 |
| 6 rs72851052  | 32502249 T | 0.3823 | 4.11E-08 | chr:6:32648036 |
| 6 rs72851053  | 32502250 G | 0.3823 | 4.11E-08 | chr:6:32648036 |
| 6 rs9273218   | 32613756 A | 1.835  | 4.13E-08 | chr:6:32648036 |
| 6 rs9273220   | 32613759 T | 1.835  | 4.13E-08 | chr:6:32648036 |
| 6 rs9272184   | 32601617 C | 0.2873 | 4.17E-08 | chr:6:32648036 |
| 6 rs9272241   | 32602787 A | 0.2626 | 4.17E-08 | chr:6:32648036 |
| 6 rs9272191   | 32601769 T | 0.2582 | 4.18E-08 | chr:6:32648036 |
| 6 rs9273313   | 32622979 C | 1.853  | 4.25E-08 | chr:6:32648036 |
| 6 rs1129808   | 32609312 A | 0.4891 | 4.27E-08 | chr:6:32648036 |
| 6 rs9269502   | 32543121 G | 0.347  | 4.28E-08 | chr:6:32648036 |
| 6 rs17843575  | 32615427 T | 1.962  | 4.30E-08 | chr:6:32648036 |
| 6 rs9272239   | 32602778 A | 2.302  | 4.30E-08 | chr:6:32648036 |
| 6 rs9273148   | 32612982 A | 2.588  | 4.31E-08 | chr:6:32648036 |
| 6 rs9274905   | 32641251 T | 0.5205 | 4.31E-08 | chr:6:32648036 |
| 6 rs1048726   | 32611012 T | 1.848  | 4.32E-08 | chr:6:32648036 |
| 6 rs544778198 | 32487633 A | 2.564  | 4.35E-08 | chr:6:32648036 |
| 6 rs9274584   | 32635365 A | 2      | 4.37E-08 | chr:6:32648036 |
| 6 rs564176274 | 32642025 T | 7.434  | 4.39E-08 | chr:6:32648036 |
| 6 rs9272515   | 32606406 G | 0.4259 | 4.48E-08 | chr:6:32648036 |
| 6 rs9272662   | 32608681 A | 0.445  | 4.49E-08 | chr:6:32648036 |
| 6 rs9273259   | 32614269 G | 1.821  | 4.51E-08 | chr:6:32648036 |
| 6 rs9273260   | 32614270 G | 1.821  | 4.51E-08 | chr:6:32648036 |
| 6 rs9275452   | 32671930 T | 2.522  | 4.52E-08 | chr:6:32648036 |
| 6 rs9275454   | 32671939 A | 2.522  | 4.52E-08 | chr:6:32648036 |
| 6 rs76415310  | 32513232 T | 0.3735 | 4.55E-08 | chr:6:32648036 |
| 6 rs2050188   | 32339897 C | 0.3647 | 4.58E-08 | chr:6:32648036 |
| 6 rs3129964   | 32380717 C | 0.3414 | 4.60E-08 | chr:6:32648036 |
| 6 rs9275357   | 32667891 C | 2.52   | 4.60E-08 | chr:6:32648036 |
| 6 rs9272104   | 32599918 T | 2.264  | 4.61E-08 | chr:6:32648036 |
| 6 rs71549283  | 32505038 A | 2.342  | 4.63E-08 | chr:6:32648036 |
| 6 rs9269233   | 32451762 A | 0.3094 | 4.66E-08 | chr:6:32648036 |

|               |            |        |          |                |
|---------------|------------|--------|----------|----------------|
| 6 rs113128948 | 32507129 T | 0.4841 | 4.69E-08 | chr:6:32648036 |
| 6 rs9272233   | 32602686 A | 0.2766 | 4.69E-08 | chr:6:32648036 |
| 6 rs9272234   | 32602691 A | 0.2766 | 4.69E-08 | chr:6:32648036 |
| 6 rs9269207   | 32449896 C | 0.3224 | 4.75E-08 | chr:6:32648036 |
| 6 rs184315023 | 32599644 T | 3.917  | 4.86E-08 | chr:6:32648036 |
| 6 rs139025277 | 32646859 G | 4.734  | 4.90E-08 | chr:6:32648036 |
| 6 rs1548306   | 32427179 A | 0.3301 | 4.92E-08 | chr:6:32648036 |
| 6 rs9274583   | 32635361 A | 2.008  | 4.92E-08 | chr:6:32648036 |
| 6 rs141308633 | 32587269 A | 4.336  | 4.94E-08 | chr:6:32648036 |
| 6 rs144934262 | 32587279 T | 4.336  | 4.94E-08 | chr:6:32648036 |
| 6 rs9272423   | 32605164 G | 0.284  | 4.98E-08 | chr:6:32648036 |
| 6 rs77462153  | 32531677 C | 1.923  | 5.01E-08 | chr:6:32648036 |
| 6 rs9271190   | 32578369 A | 0.3252 | 5.02E-08 | chr:6:32648036 |
| 6 rs17612610  | 32615611 T | 1.877  | 5.03E-08 | chr:6:32648036 |
| 6 rs17612617  | 32615613 T | 1.877  | 5.03E-08 | chr:6:32648036 |
| 6 rs9270199   | 32556238 A | 2.257  | 5.06E-08 | chr:6:32648036 |
| 6 rs111715999 | 32496166 T | 3.597  | 5.08E-08 | chr:6:32648036 |
| 6 rs9269234   | 32451788 C | 0.267  | 5.12E-08 | chr:6:32648036 |
| 6 rs116080026 | 32637492 T | 6.138  | 5.19E-08 | chr:6:32648036 |
| 6 rs9272593   | 32607558 G | 1.917  | 5.20E-08 | chr:6:32648036 |
| 6 rs9272594   | 32607561 T | 1.917  | 5.20E-08 | chr:6:32648036 |
| 6 rs9272214   | 32602096 G | 2.298  | 5.20E-08 | chr:6:32648036 |
| 6 rs75639337  | 32578656 T | 0.3259 | 5.24E-08 | chr:6:32648036 |
| 6 rs77064057  | 32578653 G | 0.3259 | 5.24E-08 | chr:6:32648036 |
| 6 rs9274336   | 32632287 G | 1.825  | 5.26E-08 | chr:6:32648036 |
| 6 rs9274587   | 32635377 A | 2.001  | 5.27E-08 | chr:6:32648036 |
| 6 rs9272056   | 32599180 G | 2.187  | 5.31E-08 | chr:6:32648036 |
| 6 rs146566004 | 32587249 A | 4.368  | 5.31E-08 | chr:6:32648036 |
| 6 rs560706382 | 32487641 C | 2.597  | 5.31E-08 | chr:6:32648036 |
| 6 rs9275563   | 32677912 T | 2.22   | 5.33E-08 | chr:6:32648036 |
| 6 rs9272023   | 32598558 C | 2.233  | 5.33E-08 | chr:6:32648036 |
| 6 rs9271712   | 32593432 A | 0.4649 | 5.35E-08 | chr:6:32648036 |
| 6 rs707949    | 32609952 C | 0.2794 | 5.38E-08 | chr:6:32648036 |
| 6 rs9272192   | 32601775 G | 0.2619 | 5.39E-08 | chr:6:32648036 |
| 6 rs557355024 | 32630464 C | 0.4908 | 5.42E-08 | chr:6:32648036 |
| 6 rs9274279   | 32631712 G | 1.881  | 5.46E-08 | chr:6:32648036 |
| 6 rs9275451   | 32671908 T | 2.51   | 5.46E-08 | chr:6:32648036 |
| 6 rs707952    | 32609806 T | 0.2845 | 5.48E-08 | chr:6:32648036 |
| 6 rs9272462   | 32605620 A | 0.2775 | 5.49E-08 | chr:6:32648036 |
| 6 rs17612496  | 32614752 G | 1.799  | 5.52E-08 | chr:6:32648036 |
| 6 rs373880870 | 32599763 T | 3.831  | 5.56E-08 | chr:6:32648036 |
| 6 rs17843600  | 32620148 G | 1.815  | 5.57E-08 | chr:6:32648036 |
| 6 rs9268779   | 32420397 T | 0.3142 | 5.58E-08 | chr:6:32648036 |

|               |            |        |          |                |
|---------------|------------|--------|----------|----------------|
| 6 rs9272480   | 32605800 G | 0.2781 | 5.58E-08 | chr:6:32648036 |
| 6 rs137976440 | 32489630 T | 0.3428 | 5.59E-08 | chr:6:32648036 |
| 6 rs116017457 | 32521909 T | 0.3744 | 5.61E-08 | chr:6:32648036 |
| 6 rs181107089 | 32599677 T | 3.94   | 5.62E-08 | chr:6:32648036 |
| 6 rs115240119 | 32605945 T | 5.845  | 5.63E-08 | chr:6:32648036 |
| 6 rs66924955  | 32507855 G | 0.3919 | 5.63E-08 | chr:6:32648036 |
| 6 rs72853919  | 32507852 C | 0.3919 | 5.63E-08 | chr:6:32648036 |
| 6 rs9273156   | 32613050 A | 1.905  | 5.65E-08 | chr:6:32648036 |
| 6 rs9273271   | 32614382 C | 1.833  | 5.68E-08 | chr:6:32648036 |
| 6 rs9274364   | 32632495 T | 0.5018 | 5.68E-08 | chr:6:32648036 |
| 6 rs113434238 | 32501204 T | 0.3955 | 5.70E-08 | chr:6:32648036 |
| 6 rs9273121   | 32612725 T | 1.865  | 5.70E-08 | chr:6:32648036 |
| 6 rs9273122   | 32612726 G | 1.865  | 5.70E-08 | chr:6:32648036 |
| 6 rs281863357 | 32631142 G | 1.993  | 5.70E-08 | chr:6:32648036 |
| 6 rs9272256   | 32603169 C | 0.2674 | 5.74E-08 | chr:6:32648036 |
| 6 rs9272495   | 32606133 A | 0.2818 | 5.77E-08 | chr:6:32648036 |
| 6 rs141961165 | 32506799 T | 0.4824 | 5.82E-08 | chr:6:32648036 |
| 6 rs79350521  | 32503147 T | 2.142  | 5.83E-08 | chr:6:32648036 |
| 6 rs150479833 | 32489846 T | 3.248  | 5.84E-08 | chr:6:32648036 |
| 6 rs9268468   | 32353166 A | 0.3514 | 5.89E-08 | chr:6:32648036 |
| 6 rs9469156   | 32545255 T | 4.307  | 5.91E-08 | chr:6:32648036 |
| 6 rs17612576  | 32615458 A | 1.908  | 5.92E-08 | chr:6:32648036 |
| 6 rs9271538   | 32589983 A | 0.3147 | 5.93E-08 | chr:6:32648036 |
| 6 rs72853928  | 32508486 T | 0.3847 | 5.95E-08 | chr:6:32648036 |
| 6 rs9271619   | 32591773 A | 0.2655 | 5.96E-08 | chr:6:32648036 |
| 6 rs9271188   | 32578320 T | 0.3276 | 6.01E-08 | chr:6:32648036 |
| 6 rs17612809  | 32620459 T | 1.834  | 6.22E-08 | chr:6:32648036 |
| 6 rs186819860 | 32486128 T | 5.852  | 6.24E-08 | chr:6:32648036 |
| 6 rs28366174  | 32266490 C | 4.479  | 6.26E-08 | chr:6:32648036 |
| 6 rs9273124   | 32612752 G | 1.863  | 6.33E-08 | chr:6:32648036 |
| 6 rs9273125   | 32612754 G | 1.863  | 6.33E-08 | chr:6:32648036 |
| 6 rs116611418 | 32459595 G | 0.4539 | 6.36E-08 | chr:6:32648036 |
| 6 rs185648871 | 32511098 T | 3.819  | 6.40E-08 | chr:6:32648036 |
| 6 rs587495    | 32572499 T | 0.2986 | 6.40E-08 | chr:6:32648036 |
| 6 rs17612489  | 32614749 A | 1.794  | 6.46E-08 | chr:6:32648036 |
| 6 rs113663338 | 32624847 T | 1.924  | 6.46E-08 | chr:6:32648036 |
| 6 rs35983205  | 32624829 C | 1.924  | 6.46E-08 | chr:6:32648036 |
| 6 rs4713572   | 32626952 C | 2.185  | 6.47E-08 | chr:6:32648036 |
| 6 rs577950360 | 32427099 C | 0.3046 | 6.48E-08 | chr:6:32648036 |
| 6 rs9272213   | 32602039 A | 0.2662 | 6.49E-08 | chr:6:32648036 |
| 6 rs17612878  | 32620733 T | 1.827  | 6.49E-08 | chr:6:32648036 |
| 6 rs9272206   | 32601933 T | 0.2744 | 6.56E-08 | chr:6:32648036 |
| 6 rs116585903 | 32487688 T | 0.2939 | 6.65E-08 | chr:6:32648036 |



|               |            |        |          |                |
|---------------|------------|--------|----------|----------------|
| 6 rs530370261 | 32519826 T | 0.3951 | 6.66E-08 | chr:6:32648036 |
| 6 rs72853927  | 32508474 G | 0.3876 | 6.67E-08 | chr:6:32648036 |
| 6 rs146335245 | 32662357 C | 5.739  | 6.71E-08 | chr:6:32648036 |
| 6 rs9272204   | 32601915 A | 0.2749 | 6.73E-08 | chr:6:32648036 |
| 6 rs9272167   | 32601212 G | 2.175  | 6.74E-08 | chr:6:32648036 |
| 6 rs116607676 | 32604139 A | 6.72   | 6.75E-08 | chr:6:32648036 |
| 6 rs9273757   | 32629417 C | 2.606  | 6.76E-08 | chr:6:32648036 |
| 6 rs9272670   | 32608820 C | 0.4776 | 6.79E-08 | chr:6:32648036 |
| 6 rs17613437  | 32622282 C | 1.794  | 6.81E-08 | chr:6:32648036 |
| 6 rs72853950  | 32509472 T | 0.3977 | 6.86E-08 | chr:6:32648036 |
| 6 rs539509361 | 32594399 G | 0.2843 | 6.89E-08 | chr:6:32648036 |
| 6 rs9273273   | 32614392 T | 1.823  | 6.96E-08 | chr:6:32648036 |
| 6 rs9268614   | 32402778 G | 2.614  | 7.00E-08 | chr:6:32648036 |
| 6 rs2076530   | 32363816 C | 2.281  | 7.01E-08 | chr:6:32648036 |
| 6 rs112016967 | 32460713 G | 3.889  | 7.08E-08 | chr:6:32648036 |
| 6 rs9272253   | 32603028 T | 0.2875 | 7.09E-08 | chr:6:32648036 |
| 6 rs9272390   | 32604795 T | 2.363  | 7.10E-08 | chr:6:32648036 |
| 6 rs502771    | 32578970 C | 0.3289 | 7.12E-08 | chr:6:32648036 |
| 6 rs3104411   | 32683653 G | 0.3919 | 7.12E-08 | chr:6:32648036 |
| 6 rs9274358   | 32632469 C | 1.884  | 7.13E-08 | chr:6:32648036 |
| 6 rs116715716 | 32506910 T | 0.4818 | 7.22E-08 | chr:6:32648036 |
| 6 rs3117105   | 32343714 T | 0.352  | 7.25E-08 | chr:6:32648036 |
| 6 rs111559749 | 32509012 T | 0.4038 | 7.25E-08 | chr:6:32648036 |
| 6 rs17612816  | 32620469 G | 1.829  | 7.26E-08 | chr:6:32648036 |
| 6 rs34801804  | 32555892 G | 0.2433 | 7.27E-08 | chr:6:32648036 |
| 6 rs9269965   | 32552219 G | 0.4131 | 7.31E-08 | chr:6:32648036 |
| 6 rs3129957   | 32368593 A | 0.3521 | 7.35E-08 | chr:6:32648036 |
| 6 rs547797725 | 32487827 A | 0.5018 | 7.37E-08 | chr:6:32648036 |
| 6 rs9272215   | 32602105 T | 0.2842 | 7.41E-08 | chr:6:32648036 |
| 6 rs9968904   | 32392710 A | 5.195  | 7.47E-08 | chr:6:32648036 |
| 6 rs9272602   | 32607666 A | 1.972  | 7.49E-08 | chr:6:32648036 |
| 6 rs9273123   | 32612733 A | 1.857  | 7.54E-08 | chr:6:32648036 |
| 6 rs9272190   | 32601760 G | 0.2719 | 7.57E-08 | chr:6:32648036 |
| 6 rs9271187   | 32578314 C | 0.3317 | 7.67E-08 | chr:6:32648036 |
| 6 rs17843618  | 32620743 T | 1.815  | 7.72E-08 | chr:6:32648036 |
| 6 rs17843608  | 32620454 C | 1.829  | 7.72E-08 | chr:6:32648036 |
| 6 rs9274545   | 32634702 A | 0.4976 | 7.72E-08 | chr:6:32648036 |
| 6 rs9271439   | 32588234 G | 0.3278 | 7.74E-08 | chr:6:32648036 |
| 6 rs67860869  | 32508349 C | 0.4007 | 7.81E-08 | chr:6:32648036 |
| 6 rs3134981   | 32646900 A | 0.3539 | 7.86E-08 | chr:6:32648036 |
| 6 rs9269202   | 32449523 T | 0.3277 | 7.87E-08 | chr:6:32648036 |
| 6 rs9273086   | 32612410 T | 1.982  | 7.92E-08 | chr:6:32648036 |
| 6 rs17612741  | 32616036 G | 1.821  | 7.92E-08 | chr:6:32648036 |

|               |            |        |          |                |
|---------------|------------|--------|----------|----------------|
| 6 rs9275416   | 32670196 T | 2.484  | 8.11E-08 | chr:6:32648036 |
| 6 rs139727756 | 32603562 A | 5.874  | 8.19E-08 | chr:6:32648036 |
| 6 rs549131306 | 32603558 T | 5.874  | 8.19E-08 | chr:6:32648036 |
| 6 rs9275219   | 32659077 T | 2.457  | 8.24E-08 | chr:6:32648036 |
| 6 rs9275220   | 32659087 C | 2.457  | 8.24E-08 | chr:6:32648036 |
| 6 rs9274551   | 32634834 T | 1.987  | 8.24E-08 | chr:6:32648036 |
| 6 rs75820413  | 32508505 G | 0.3873 | 8.24E-08 | chr:6:32648036 |
| 6 rs28366284  | 32560327 C | 0.425  | 8.31E-08 | chr:6:32648036 |
| 6 rs9272057   | 32599190 T | 2.165  | 8.31E-08 | chr:6:32648036 |
| 6 rs17612597  | 32615582 C | 1.862  | 8.35E-08 | chr:6:32648036 |
| 6 rs149071466 | 32542272 C | 6.695  | 8.37E-08 | chr:6:32648036 |
| 6 rs9272682   | 32608953 T | 0.2979 | 8.42E-08 | chr:6:32648036 |
| 6 rs9274543   | 32634695 G | 0.4984 | 8.54E-08 | chr:6:32648036 |
| 6 rs17612887  | 32620739 T | 1.813  | 8.58E-08 | chr:6:32648036 |
| 6 rs567147215 | 32486479 T | 4.358  | 8.65E-08 | chr:6:32648036 |
| 6 rs9274544   | 32634699 G | 0.4987 | 8.79E-08 | chr:6:32648036 |
| 6 rs9272199   | 32601852 G | 0.2443 | 8.96E-08 | chr:6:32648036 |
| 6 rs17612893  | 32620836 T | 1.806  | 8.99E-08 | chr:6:32648036 |
| 6 rs17612900  | 32620838 C | 1.806  | 8.99E-08 | chr:6:32648036 |
| 6 rs9273101   | 32612564 A | 1.911  | 9.00E-08 | chr:6:32648036 |
| 6 rs9272599   | 32607638 G | 1.951  | 9.03E-08 | chr:6:32648036 |
| 6 rs112275579 | 32478651 G | 0.4774 | 9.05E-08 | chr:6:32648036 |
| 6 rs78376382  | 32579305 G | 0.2904 | 9.10E-08 | chr:6:32648036 |
| 6 rs113134152 | 32554249 G | 2.201  | 9.14E-08 | chr:6:32648036 |
| 6 rs114171624 | 32514706 G | 0.408  | 9.18E-08 | chr:6:32648036 |
| 6 rs28366277  | 32560177 T | 0.4195 | 9.21E-08 | chr:6:32648036 |
| 6 rs28366279  | 32560222 C | 0.4195 | 9.21E-08 | chr:6:32648036 |
| 6 rs28724240  | 32629328 A | 2.612  | 9.41E-08 | chr:6:32648036 |
| 6 rs28724241  | 32629330 T | 2.612  | 9.41E-08 | chr:6:32648036 |
| 6 rs9271895   | 32595906 C | 0.2754 | 9.41E-08 | chr:6:32648036 |
| 6 rs13212080  | 32556451 T | 2.108  | 9.44E-08 | chr:6:32648036 |
| 6 rs502055    | 32579003 C | 0.3339 | 9.46E-08 | chr:6:32648036 |
| 6 rs9272561   | 32607141 G | 0.4974 | 9.47E-08 | chr:6:32648036 |
| 6 rs545379090 | 32469285 T | 0.405  | 9.55E-08 | chr:6:32648036 |
| 6 rs9268581   | 32396930 A | 2.59   | 9.55E-08 | chr:6:32648036 |
| 6 rs6921651   | 32595345 A | 0.4812 | 9.55E-08 | chr:6:32648036 |
| 6 rs199980256 | 32540924 A | 1.985  | 9.59E-08 | chr:6:32648036 |
| 6 rs9272238   | 32602777 T | 0.2734 | 9.60E-08 | chr:6:32648036 |
| 6 rs9272240   | 32602779 A | 0.2734 | 9.60E-08 | chr:6:32648036 |
| 6 rs9273401   | 32627129 G | 3.4    | 9.61E-08 | chr:6:32648036 |
| 6 rs17612865  | 32620723 T | 1.816  | 9.66E-08 | chr:6:32648036 |
| 6 rs9273243   | 32614091 A | 1.909  | 9.72E-08 | chr:6:32648036 |
| 6 rs12201153  | 32444156 T | 0.3769 | 9.73E-08 | chr:6:32648036 |

|               |            |        |          |                |
|---------------|------------|--------|----------|----------------|
| 6 rs9274346   | 32632367 T | 1.859  | 9.78E-08 | chr:6:32648036 |
| 6 rs374205    | 32196873 G | 3.709  | 9.78E-08 | chr:6:32648036 |
| 6 rs17843580  | 32615551 A | 0.4963 | 9.79E-08 | chr:6:32648036 |
| 6 rs9272243   | 32602857 G | 0.2844 | 9.88E-08 | chr:6:32648036 |
| 6 rs9272244   | 32602860 T | 0.2844 | 9.88E-08 | chr:6:32648036 |
| 6 rs9273398   | 32627115 T | 1.906  | 9.92E-08 | chr:6:32648036 |
| 6 rs9273399   | 32627117 A | 1.906  | 9.92E-08 | chr:6:32648036 |
| 6 rs72492356  | 32538899 C | 0.43   | 9.94E-08 | chr:6:32648036 |
| 6 rs9269532   | 32543825 C | 0.4523 | 9.99E-08 | chr:6:32648036 |
| 6 rs9271958   | 32597372 A | 0.2632 | 1.00E-07 | chr:6:32648036 |
| 6 rs673002    | 32577814 G | 0.2857 | 1.01E-07 | chr:6:32648036 |
| 6 rs9272170   | 32601243 C | 2.132  | 1.01E-07 | chr:6:32648036 |
| 6 rs9272172   | 32601260 G | 2.132  | 1.01E-07 | chr:6:32648036 |
| 6 rs28383376  | 32607219 A | 2.379  | 1.01E-07 | chr:6:32648036 |
| 6 rs9272601   | 32607652 T | 1.938  | 1.01E-07 | chr:6:32648036 |
| 6 rs9273176   | 32613300 A | 1.922  | 1.01E-07 | chr:6:32648036 |
| 6 rs9276437   | 32714168 G | 3.392  | 1.01E-07 | chr:6:32648036 |
| 6 rs35689343  | 32546079 T | 2.169  | 1.02E-07 | chr:6:32648036 |
| 6 rs9271462   | 32588501 C | 0.3418 | 1.02E-07 | chr:6:32648036 |
| 6 rs72844120  | 32514540 A | 0.3858 | 1.03E-07 | chr:6:32648036 |
| 6 rs144404284 | 32553401 A | 5.553  | 1.03E-07 | chr:6:32648036 |
| 6 rs9273704   | 32629297 T | 0.5106 | 1.03E-07 | chr:6:32648036 |
| 6 rs707962    | 32609974 G | 0.2905 | 1.04E-07 | chr:6:32648036 |
| 6 rs707963    | 32609969 G | 0.2905 | 1.04E-07 | chr:6:32648036 |
| 6 rs9268682   | 32415422 T | 2.236  | 1.04E-07 | chr:6:32648036 |
| 6 rs9268684   | 32415457 A | 2.236  | 1.04E-07 | chr:6:32648036 |
| 6 rs9268685   | 32415464 T | 2.236  | 1.04E-07 | chr:6:32648036 |
| 6 rs9273158   | 32613062 C | 1.876  | 1.04E-07 | chr:6:32648036 |
| 6 rs111705290 | 32513412 A | 0.3806 | 1.05E-07 | chr:6:32648036 |
| 6 rs563648725 | 32613130 G | 6.202  | 1.05E-07 | chr:6:32648036 |
| 6 rs9273438   | 32627523 G | 1.963  | 1.05E-07 | chr:6:32648036 |
| 6 rs17612872  | 32620726 C | 1.813  | 1.06E-07 | chr:6:32648036 |
| 6 rs9273215   | 32613712 A | 1.801  | 1.07E-07 | chr:6:32648036 |
| 6 rs9273241   | 32614025 T | 1.914  | 1.07E-07 | chr:6:32648036 |
| 6 rs72492310  | 32509867 G | 0.4021 | 1.07E-07 | chr:6:32648036 |
| 6 rs12195582  | 32444544 T | 2.46   | 1.08E-07 | chr:6:32648036 |
| 6 rs9273084   | 32612396 C | 1.959  | 1.09E-07 | chr:6:32648036 |
| 6 rs33964890  | 32583919 C | 2.369  | 1.10E-07 | chr:6:32648036 |
| 6 rs17612562  | 32615446 G | 1.88   | 1.10E-07 | chr:6:32648036 |
| 6 rs79973795  | 32505443 A | 0.4858 | 1.11E-07 | chr:6:32648036 |
| 6 rs539094532 | 32494755 A | 0.4799 | 1.12E-07 | chr:6:32648036 |
| 6 rs111938555 | 32509707 T | 0.3849 | 1.13E-07 | chr:6:32648036 |
| 6 rs9272622   | 32607986 G | 0.4434 | 1.15E-07 | chr:6:32648036 |

|               |            |        |          |                |
|---------------|------------|--------|----------|----------------|
| 6 rs113532078 | 32485889 G | 0.4839 | 1.15E-07 | chr:6:32648036 |
| 6 rs186817096 | 32558827 A | 6.818  | 1.15E-07 | chr:6:32648036 |
| 6 rs185185970 | 32494004 G | 2.489  | 1.15E-07 | chr:6:32648036 |
| 6 rs190523003 | 32494006 T | 2.489  | 1.15E-07 | chr:6:32648036 |
| 6 rs193114421 | 32494008 T | 2.489  | 1.15E-07 | chr:6:32648036 |
| 6 rs199616440 | 32510115 T | 0.3915 | 1.17E-07 | chr:6:32648036 |
| 6 rs56051108  | 32645530 A | 2.48   | 1.18E-07 | chr:6:32648036 |
| 6 rs79819213  | 32478705 T | 0.4817 | 1.18E-07 | chr:6:32648036 |
| 6 rs9269969   | 32552272 C | 0.3207 | 1.18E-07 | chr:6:32648036 |
| 6 rs9271668   | 32592774 T | 0.2792 | 1.19E-07 | chr:6:32648036 |
| 6 rs28366280  | 32560262 G | 2.187  | 1.19E-07 | chr:6:32648036 |
| 6 rs17203839  | 32555926 C | 0.2884 | 1.19E-07 | chr:6:32648036 |
| 6 rs113045321 | 32485583 C | 2.327  | 1.21E-07 | chr:6:32648036 |
| 6 rs9273436   | 32627517 G | 1.958  | 1.22E-07 | chr:6:32648036 |
| 6 rs6929044   | 32596951 C | 0.2794 | 1.22E-07 | chr:6:32648036 |
| 6 rs6929398   | 32596966 G | 0.2794 | 1.22E-07 | chr:6:32648036 |
| 6 rs2395195   | 32447989 A | 0.2452 | 1.22E-07 | chr:6:32648036 |
| 6 rs9270355   | 32558071 A | 0.3709 | 1.23E-07 | chr:6:32648036 |
| 6 rs9274298   | 32631902 T | 1.825  | 1.23E-07 | chr:6:32648036 |
| 6 rs146343230 | 32645702 A | 5      | 1.23E-07 | chr:6:32648036 |
| 6 rs9273561   | 32628998 C | 2.299  | 1.23E-07 | chr:6:32648036 |
| 6 rs35517695  | 32545385 A | 2.156  | 1.24E-07 | chr:6:32648036 |
| 6 rs2894256   | 32415585 A | 2.227  | 1.25E-07 | chr:6:32648036 |
| 6 rs9268687   | 32415540 T | 2.227  | 1.25E-07 | chr:6:32648036 |
| 6 rs72853949  | 32509435 T | 0.4101 | 1.26E-07 | chr:6:32648036 |
| 6 rs191329273 | 32627227 C | 6.496  | 1.27E-07 | chr:6:32648036 |
| 6 rs537977627 | 32510140 A | 0.4036 | 1.27E-07 | chr:6:32648036 |
| 6 rs553033826 | 32609097 C | 0.3153 | 1.27E-07 | chr:6:32648036 |
| 6 rs116232911 | 32496202 C | 0.4387 | 1.28E-07 | chr:6:32648036 |
| 6 rs77559661  | 32599512 T | 0.2904 | 1.28E-07 | chr:6:32648036 |
| 6 rs9268627   | 32405821 C | 2.56   | 1.28E-07 | chr:6:32648036 |
| 6 rs17843609  | 32620513 C | 1.805  | 1.29E-07 | chr:6:32648036 |
| 6 rs9272285   | 32603688 G | 0.2921 | 1.30E-07 | chr:6:32648036 |
| 6 rs561942189 | 32496432 G | 0.4898 | 1.30E-07 | chr:6:32648036 |
| 6 rs4599680   | 32566294 C | 0.2882 | 1.31E-07 | chr:6:32648036 |
| 6 rs9268464   | 32352568 T | 0.3647 | 1.31E-07 | chr:6:32648036 |
| 6 rs553666028 | 32543805 A | 2.343  | 1.32E-07 | chr:6:32648036 |
| 6 rs9272068   | 32599404 C | 0.3207 | 1.33E-07 | chr:6:32648036 |
| 6 rs9272197   | 32601840 T | 0.2421 | 1.34E-07 | chr:6:32648036 |
| 6 rs9272198   | 32601842 T | 0.2421 | 1.34E-07 | chr:6:32648036 |
| 6 rs9272160   | 32601130 G | 2.118  | 1.34E-07 | chr:6:32648036 |
| 6 rs9272101   | 32599824 T | 0.2867 | 1.34E-07 | chr:6:32648036 |
| 6 rs2395224   | 32590482 G | 0.2882 | 1.34E-07 | chr:6:32648036 |

|               |            |        |          |                |
|---------------|------------|--------|----------|----------------|
| 6 rs74205903  | 32501249 C | 0.4085 | 1.35E-07 | chr:6:32648036 |
| 6 rs9270623   | 32565331 C | 0.2878 | 1.35E-07 | chr:6:32648036 |
| 6 rs34597107  | 32536846 A | 1.846  | 1.36E-07 | chr:6:32648036 |
| 6 rs115141943 | 32538830 C | 0.3775 | 1.36E-07 | chr:6:32648036 |
| 6 rs115640078 | 32538839 T | 0.3775 | 1.36E-07 | chr:6:32648036 |
| 6 rs9273030   | 32611805 A | 1.864  | 1.36E-07 | chr:6:32648036 |
| 6 rs9271280   | 32581047 A | 0.3468 | 1.36E-07 | chr:6:32648036 |
| 6 rs74997284  | 32518934 G | 0.3578 | 1.36E-07 | chr:6:32648036 |
| 6 rs78326230  | 32518935 A | 0.3578 | 1.36E-07 | chr:6:32648036 |
| 6 rs77233532  | 32510740 A | 0.4926 | 1.37E-07 | chr:6:32648036 |
| 6 rs17843590  | 32615850 G | 1.815  | 1.37E-07 | chr:6:32648036 |
| 6 rs9272739   | 32609698 C | 3.28   | 1.37E-07 | chr:6:32648036 |
| 6 rs9271790   | 32594775 A | 0.2344 | 1.38E-07 | chr:6:32648036 |
| 6 rs9273191   | 32613424 T | 1.811  | 1.38E-07 | chr:6:32648036 |
| 6 rs2097432   | 32590771 C | 0.2874 | 1.38E-07 | chr:6:32648036 |
| 6 rs590999    | 32567508 A | 0.2874 | 1.38E-07 | chr:6:32648036 |
| 6 rs76190048  | 32566497 A | 0.2874 | 1.38E-07 | chr:6:32648036 |
| 6 rs9270665   | 32566232 T | 0.2874 | 1.38E-07 | chr:6:32648036 |
| 6 rs9271352   | 32583938 C | 0.2874 | 1.38E-07 | chr:6:32648036 |
| 6 rs9271541   | 32590070 C | 0.2874 | 1.38E-07 | chr:6:32648036 |
| 6 rs17612590  | 32615578 A | 1.845  | 1.38E-07 | chr:6:32648036 |
| 6 rs551270191 | 32453854 T | 0.2847 | 1.39E-07 | chr:6:32648036 |
| 6 rs281863177 | 32631620 T | 1.89   | 1.40E-07 | chr:6:32648036 |
| 6 rs2395196   | 32450154 T | 3.053  | 1.41E-07 | chr:6:32648036 |
| 6 rs17612727  | 32616003 T | 1.808  | 1.42E-07 | chr:6:32648036 |
| 6 rs17612734  | 32616004 G | 1.808  | 1.42E-07 | chr:6:32648036 |
| 6 rs17843577  | 32615510 C | 0.5026 | 1.42E-07 | chr:6:32648036 |
| 6 rs28366211  | 32557257 C | 3.396  | 1.42E-07 | chr:6:32648036 |
| 6 rs9270493   | 32559110 C | 0.2857 | 1.42E-07 | chr:6:32648036 |
| 6 rs17612475  | 32614706 A | 1.772  | 1.43E-07 | chr:6:32648036 |
| 6 rs17612482  | 32614726 T | 1.772  | 1.43E-07 | chr:6:32648036 |
| 6 rs17843563  | 32614705 G | 1.772  | 1.43E-07 | chr:6:32648036 |
| 6 rs3129763   | 32590925 A | 0.2872 | 1.46E-07 | chr:6:32648036 |
| 6 rs58769847  | 32481122 T | 0.4895 | 1.46E-07 | chr:6:32648036 |
| 6 rs9274464   | 32633489 T | 0.3383 | 1.46E-07 | chr:6:32648036 |
| 6 rs78942674  | 32509897 T | 0.4077 | 1.47E-07 | chr:6:32648036 |
| 6 rs111626267 | 32502273 T | 0.4021 | 1.48E-07 | chr:6:32648036 |
| 6 rs115573660 | 32502277 A | 0.4021 | 1.48E-07 | chr:6:32648036 |
| 6 rs537453284 | 32596036 A | 0.2819 | 1.48E-07 | chr:6:32648036 |
| 6 rs561145488 | 32444709 A | 0.4081 | 1.48E-07 | chr:6:32648036 |
| 6 rs72508419  | 32479451 T | 0.5196 | 1.49E-07 | chr:6:32648036 |
| 6 rs9273214   | 32613703 T | 1.776  | 1.49E-07 | chr:6:32648036 |
| 6 rs9269246   | 32454098 C | 0.2834 | 1.50E-07 | chr:6:32648036 |

|               |            |        |          |                |
|---------------|------------|--------|----------|----------------|
| 6 rs9273412   | 32627263 T | 0.4971 | 1.51E-07 | chr:6:32648036 |
| 6 rs17612831  | 32620507 T | 1.793  | 1.52E-07 | chr:6:32648036 |
| 6 rs67407114  | 32526500 A | 2.053  | 1.53E-07 | chr:6:32648036 |
| 6 rs9271792   | 32594843 T | 0.2084 | 1.53E-07 | chr:6:32648036 |
| 6 rs6929057   | 32597005 C | 0.3559 | 1.54E-07 | chr:6:32648036 |
| 6 rs72849282  | 32469335 T | 0.4093 | 1.54E-07 | chr:6:32648036 |
| 6 rs17843610  | 32620529 C | 1.796  | 1.55E-07 | chr:6:32648036 |
| 6 rs17843611  | 32620531 C | 1.796  | 1.55E-07 | chr:6:32648036 |
| 6 rs575662827 | 32543874 C | 4.976  | 1.58E-07 | chr:6:32648036 |
| 6 rs9271427   | 32587983 G | 0.293  | 1.58E-07 | chr:6:32648036 |
| 6 rs9271428   | 32587984 T | 0.293  | 1.58E-07 | chr:6:32648036 |
| 6 rs3135461   | 32680122 G | 0.2873 | 1.59E-07 | chr:6:32648036 |
| 6 rs71534526  | 32510974 C | 0.4995 | 1.61E-07 | chr:6:32648036 |
| 6 rs281864453 | 32628065 C | 0.4865 | 1.62E-07 | chr:6:32648036 |
| 6 rs3134982   | 32646884 T | 0.3673 | 1.62E-07 | chr:6:32648036 |
| 6 rs200582841 | 32453810 A | 0.2824 | 1.65E-07 | chr:6:32648036 |
| 6 rs28732242  | 32444078 G | 0.4066 | 1.67E-07 | chr:6:32648036 |
| 6 rs28732243  | 32444088 C | 0.4066 | 1.67E-07 | chr:6:32648036 |
| 6 rs9274442   | 32633231 C | 2.683  | 1.68E-07 | chr:6:32648036 |
| 6 rs55722612  | 32647158 G | 2.451  | 1.68E-07 | chr:6:32648036 |
| 6 rs2395516   | 32580657 C | 2.349  | 1.69E-07 | chr:6:32648036 |
| 6 rs536708130 | 32518949 G | 0.3612 | 1.69E-07 | chr:6:32648036 |
| 6 rs9391884   | 32448319 C | 0.39   | 1.69E-07 | chr:6:32648036 |
| 6 rs607998    | 32587038 A | 0.2915 | 1.70E-07 | chr:6:32648036 |
| 6 rs9273213   | 32613696 A | 1.782  | 1.70E-07 | chr:6:32648036 |
| 6 rs9273117   | 32612688 G | 1.826  | 1.72E-07 | chr:6:32648036 |
| 6 rs9273685   | 32629269 T | 2.56   | 1.75E-07 | chr:6:32648036 |
| 6 rs9273397   | 32627109 G | 1.888  | 1.75E-07 | chr:6:32648036 |
| 6 rs10093     | 32609173 G | 2.114  | 1.76E-07 | chr:6:32648036 |
| 6 rs78660114  | 32452767 G | 0.3901 | 1.76E-07 | chr:6:32648036 |
| 6 rs73401326  | 32454783 G | 0.4711 | 1.77E-07 | chr:6:32648036 |
| 6 rs17843612  | 32620536 A | 1.791  | 1.78E-07 | chr:6:32648036 |
| 6 rs113804375 | 32546703 G | 2.683  | 1.78E-07 | chr:6:32648036 |
| 6 rs9272052   | 32599155 G | 0.2718 | 1.78E-07 | chr:6:32648036 |
| 6 rs9273105   | 32612601 A | 1.889  | 1.79E-07 | chr:6:32648036 |
| 6 rs556985771 | 32552732 C | 2.889  | 1.80E-07 | chr:6:32648036 |
| 6 rs71549285  | 32505371 G | 0.5032 | 1.81E-07 | chr:6:32648036 |
| 6 rs71534520  | 32510146 G | 0.4091 | 1.81E-07 | chr:6:32648036 |
| 6 rs116519496 | 32607762 T | 7.733  | 1.81E-07 | chr:6:32648036 |
| 6 rs77114005  | 32594342 C | 0.2263 | 1.81E-07 | chr:6:32648036 |
| 6 rs7771972   | 32605557 T | 0.2956 | 1.82E-07 | chr:6:32648036 |
| 6 rs9274552   | 32634838 C | 1.941  | 1.82E-07 | chr:6:32648036 |
| 6 rs113319840 | 32507441 T | 0.4813 | 1.83E-07 | chr:6:32648036 |

|               |            |        |          |                |
|---------------|------------|--------|----------|----------------|
| 6 rs145586726 | 32489796 T | 3.498  | 1.83E-07 | chr:6:32648036 |
| 6 rs9271612   | 32591654 G | 0.2866 | 1.84E-07 | chr:6:32648036 |
| 6 rs9271613   | 32591666 T | 0.2866 | 1.84E-07 | chr:6:32648036 |
| 6 rs9271545   | 32590153 T | 0.2927 | 1.86E-07 | chr:6:32648036 |
| 6 rs9271578   | 32590635 T | 2.203  | 1.88E-07 | chr:6:32648036 |
| 6 rs114366563 | 32371390 T | 5.136  | 1.88E-07 | chr:6:32648036 |
| 6 rs115653647 | 32370993 T | 5.136  | 1.88E-07 | chr:6:32648036 |
| 6 rs116239570 | 32344331 A | 5.136  | 1.88E-07 | chr:6:32648036 |
| 6 rs116607050 | 32369077 C | 5.136  | 1.88E-07 | chr:6:32648036 |
| 6 rs561659545 | 32353463 C | 5.136  | 1.88E-07 | chr:6:32648036 |
| 6 rs1064173   | 32627480 A | 2.351  | 1.89E-07 | chr:6:32648036 |
| 6 rs281863167 | 32631632 A | 1.842  | 1.90E-07 | chr:6:32648036 |
| 6 rs71538592  | 32543831 C | 2.277  | 1.91E-07 | chr:6:32648036 |
| 6 rs9272571   | 32607251 C | 0.5275 | 1.92E-07 | chr:6:32648036 |
| 6 rs71538506  | 32534672 T | 1.851  | 1.94E-07 | chr:6:32648036 |
| 6 rs9272247   | 32602924 A | 0.2973 | 1.94E-07 | chr:6:32648036 |
| 6 rs9273407   | 32627211 C | 1.951  | 1.95E-07 | chr:6:32648036 |
| 6 rs17612838  | 32620538 C | 1.789  | 1.95E-07 | chr:6:32648036 |
| 6 rs9272246   | 32602903 C | 0.3004 | 1.95E-07 | chr:6:32648036 |
| 6 rs9268767   | 32419022 C | 2.199  | 1.96E-07 | chr:6:32648036 |
| 6 rs9273660   | 32629227 T | 2.291  | 1.96E-07 | chr:6:32648036 |
| 6 rs9273668   | 32629237 G | 2.291  | 1.96E-07 | chr:6:32648036 |
| 6 rs540002313 | 32599555 A | 0.3048 | 1.96E-07 | chr:6:32648036 |
| 6 rs75208983  | 32570079 C | 0.3081 | 1.99E-07 | chr:6:32648036 |
| 6 rs552372272 | 32546489 C | 4.137  | 1.99E-07 | chr:6:32648036 |
| 6 rs9273100   | 32612559 G | 1.868  | 2.00E-07 | chr:6:32648036 |
| 6 rs114758808 | 32457997 T | 0.4523 | 2.00E-07 | chr:6:32648036 |
| 6 rs9272179   | 32601451 T | 2.113  | 2.00E-07 | chr:6:32648036 |
| 6 rs72845719  | 32523634 C | 1.799  | 2.01E-07 | chr:6:32648036 |
| 6 rs9271633   | 32592072 G | 0.2921 | 2.02E-07 | chr:6:32648036 |
| 6 rs199973717 | 32493600 A | 2.117  | 2.03E-07 | chr:6:32648036 |
| 6 rs34017414  | 32554085 T | 2.15   | 2.04E-07 | chr:6:32648036 |
| 6 rs140120971 | 32510343 C | 0.4082 | 2.04E-07 | chr:6:32648036 |
| 6 rs143822887 | 32510344 A | 0.4082 | 2.04E-07 | chr:6:32648036 |
| 6 rs17843605  | 32620391 T | 1.85   | 2.05E-07 | chr:6:32648036 |
| 6 rs17843606  | 32620399 T | 1.85   | 2.05E-07 | chr:6:32648036 |
| 6 rs9272266   | 32603416 A | 0.3668 | 2.07E-07 | chr:6:32648036 |
| 6 rs200004305 | 32605204 G | 9.206  | 2.08E-07 | chr:6:32648036 |
| 6 rs72853968  | 32509883 C | 0.4141 | 2.09E-07 | chr:6:32648036 |
| 6 rs2395148   | 32321554 T | 6.216  | 2.09E-07 | chr:6:32648036 |
| 6 rs9469099   | 32308908 A | 6.216  | 2.09E-07 | chr:6:32648036 |
| 6 rs563226460 | 32490851 T | 0.4959 | 2.10E-07 | chr:6:32648036 |
| 6 rs9271626   | 32591944 A | 0.2917 | 2.10E-07 | chr:6:32648036 |

|               |            |        |          |                |
|---------------|------------|--------|----------|----------------|
| 6 rs9271627   | 32591949 T | 0.2917 | 2.10E-07 | chr:6:32648036 |
| 6 rs9271666   | 32592693 C | 0.2917 | 2.10E-07 | chr:6:32648036 |
| 6 rs28371176  | 32612839 G | 3.818  | 2.13E-07 | chr:6:32648036 |
| 6 rs76351919  | 32588703 C | 0.3062 | 2.15E-07 | chr:6:32648036 |
| 6 rs3135003   | 32591476 T | 0.2932 | 2.17E-07 | chr:6:32648036 |
| 6 rs9271656   | 32592574 A | 0.2344 | 2.17E-07 | chr:6:32648036 |
| 6 rs28724238  | 32629066 C | 2.521  | 2.17E-07 | chr:6:32648036 |
| 6 rs114928941 | 32321169 G | 6.825  | 2.18E-07 | chr:6:32648036 |
| 6 rs9273056   | 32612097 T | 0.5063 | 2.20E-07 | chr:6:32648036 |
| 6 rs4532479   | 32582194 T | 0.3222 | 2.20E-07 | chr:6:32648036 |
| 6 rs74945612  | 32505901 C | 0.5234 | 2.23E-07 | chr:6:32648036 |
| 6 rs9272675   | 32608888 G | 0.5002 | 2.24E-07 | chr:6:32648036 |
| 6 rs9270662   | 32566089 G | 0.2957 | 2.25E-07 | chr:6:32648036 |
| 6 rs9273081   | 32612336 A | 1.796  | 2.26E-07 | chr:6:32648036 |
| 6 rs72851096  | 32505357 C | 0.5068 | 2.26E-07 | chr:6:32648036 |
| 6 rs34824236  | 32585912 T | 2.609  | 2.26E-07 | chr:6:32648036 |
| 6 rs9272123   | 32600573 T | 0.2923 | 2.27E-07 | chr:6:32648036 |
| 6 rs17612719  | 32615990 C | 1.799  | 2.28E-07 | chr:6:32648036 |
| 6 rs9273166   | 32613146 G | 1.873  | 2.29E-07 | chr:6:32648036 |
| 6 rs17843578  | 32615520 G | 0.5102 | 2.32E-07 | chr:6:32648036 |
| 6 rs17843607  | 32620435 A | 1.837  | 2.33E-07 | chr:6:32648036 |
| 6 rs9271903   | 32596038 G | 0.2944 | 2.34E-07 | chr:6:32648036 |
| 6 rs9271904   | 32596040 G | 0.2944 | 2.34E-07 | chr:6:32648036 |
| 6 rs9271905   | 32596041 A | 0.2944 | 2.34E-07 | chr:6:32648036 |
| 6 rs117090280 | 32489265 T | 0.5104 | 2.35E-07 | chr:6:32648036 |
| 6 rs113505515 | 32547118 C | 3.052  | 2.35E-07 | chr:6:32648036 |
| 6 rs144411837 | 32510337 C | 0.4099 | 2.35E-07 | chr:6:32648036 |
| 6 rs17843621  | 32620827 T | 1.777  | 2.40E-07 | chr:6:32648036 |
| 6 rs115736509 | 32554782 T | 2.54   | 2.41E-07 | chr:6:32648036 |
| 6 rs9272425   | 32605178 C | 2.461  | 2.41E-07 | chr:6:32648036 |
| 6 rs9276498   | 32719081 A | 3.683  | 2.43E-07 | chr:6:32648036 |
| 6 rs567669160 | 32526283 T | 2.928  | 2.43E-07 | chr:6:32648036 |
| 6 rs9270600   | 32561693 T | 0.2997 | 2.44E-07 | chr:6:32648036 |
| 6 rs9268780   | 32420489 A | 2.182  | 2.44E-07 | chr:6:32648036 |
| 6 rs9272606   | 32607729 C | 0.4902 | 2.47E-07 | chr:6:32648036 |
| 6 rs9275052   | 32648156 G | 0.4914 | 2.51E-07 | chr:6:32648036 |
| 6 rs9270573   | 32561014 G | 0.2981 | 2.53E-07 | chr:6:32648036 |
| 6 rs9273118   | 32612691 G | 1.807  | 2.56E-07 | chr:6:32648036 |
| 6 rs78776915  | 32469380 T | 2.007  | 2.57E-07 | chr:6:32648036 |
| 6 rs4713552   | 32560984 T | 0.305  | 2.58E-07 | chr:6:32648036 |
| 6 rs9272562   | 32607151 A | 0.5305 | 2.59E-07 | chr:6:32648036 |
| 6 rs7743662   | 32425049 A | 2.182  | 2.59E-07 | chr:6:32648036 |
| 6 rs9270534   | 32559711 A | 0.3947 | 2.59E-07 | chr:6:32648036 |



|               |            |        |          |                |
|---------------|------------|--------|----------|----------------|
| 6 rs72849267  | 32468923 T | 0.4133 | 2.62E-07 | chr:6:32648036 |
| 6 rs144631592 | 32537513 A | 2.311  | 2.63E-07 | chr:6:32648036 |
| 6 rs189591509 | 32552746 G | 2.831  | 2.63E-07 | chr:6:32648036 |
| 6 rs2395521   | 32601700 T | 0.2342 | 2.64E-07 | chr:6:32648036 |
| 6 rs74211958  | 32469040 G | 0.4175 | 2.65E-07 | chr:6:32648036 |
| 6 rs564750830 | 32473372 G | 3.665  | 2.65E-07 | chr:6:32648036 |
| 6 rs79140398  | 32527093 C | 0.3714 | 2.65E-07 | chr:6:32648036 |
| 6 rs115137792 | 32510114 C | 0.4071 | 2.65E-07 | chr:6:32648036 |
| 6 rs9273179   | 32613305 G | 1.864  | 2.65E-07 | chr:6:32648036 |
| 6 rs9275766   | 32689362 G | 3.667  | 2.67E-07 | chr:6:32648036 |
| 6 rs115296342 | 32503526 C | 0.4073 | 2.67E-07 | chr:6:32648036 |
| 6 rs41556512  | 32489708 A | 2.602  | 2.67E-07 | chr:6:32648036 |
| 6 rs41559714  | 32489707 C | 2.602  | 2.67E-07 | chr:6:32648036 |
| 6 rs9273115   | 32612672 A | 1.812  | 2.68E-07 | chr:6:32648036 |
| 6 rs9270620   | 32565272 A | 0.3039 | 2.69E-07 | chr:6:32648036 |
| 6 rs9268788   | 32420866 T | 2.151  | 2.73E-07 | chr:6:32648036 |
| 6 rs9268789   | 32420888 G | 2.151  | 2.73E-07 | chr:6:32648036 |
| 6 rs16822820  | 32552060 T | 0.279  | 2.73E-07 | chr:6:32648036 |
| 6 rs9272182   | 32601564 G | 2.11   | 2.74E-07 | chr:6:32648036 |
| 6 rs9273112   | 32612648 T | 1.833  | 2.74E-07 | chr:6:32648036 |
| 6 rs139558884 | 32604167 C | 5.756  | 2.78E-07 | chr:6:32648036 |
| 6 rs116752065 | 32482564 G | 2.171  | 2.78E-07 | chr:6:32648036 |
| 6 rs201046358 | 32486438 A | 2.928  | 2.83E-07 | chr:6:32648036 |
| 6 rs9273096   | 32612540 C | 1.849  | 2.84E-07 | chr:6:32648036 |
| 6 rs72508445  | 32491851 T | 0.4967 | 2.84E-07 | chr:6:32648036 |
| 6 rs9273409   | 32627235 C | 0.5131 | 2.85E-07 | chr:6:32648036 |
| 6 rs28366241  | 32558219 G | 2.794  | 2.86E-07 | chr:6:32648036 |
| 6 rs111247469 | 32503071 T | 1.925  | 2.87E-07 | chr:6:32648036 |
| 6 rs116684175 | 32493853 T | 0.4911 | 2.87E-07 | chr:6:32648036 |
| 6 rs113924159 | 32486533 A | 1.964  | 2.89E-07 | chr:6:32648036 |
| 6 rs9273098   | 32612556 G | 1.851  | 2.90E-07 | chr:6:32648036 |
| 6 rs9272260   | 32603236 A | 0.2966 | 2.91E-07 | chr:6:32648036 |
| 6 rs2097441   | 32422259 C | 2.176  | 2.93E-07 | chr:6:32648036 |
| 6 rs548780888 | 32421328 A | 2.176  | 2.93E-07 | chr:6:32648036 |
| 6 rs6457588   | 32419908 C | 2.176  | 2.93E-07 | chr:6:32648036 |
| 6 rs6912728   | 32419547 T | 2.176  | 2.93E-07 | chr:6:32648036 |
| 6 rs7748085   | 32425742 G | 2.176  | 2.93E-07 | chr:6:32648036 |
| 6 rs7748310   | 32425605 A | 2.176  | 2.93E-07 | chr:6:32648036 |
| 6 rs7748825   | 32425914 C | 2.176  | 2.93E-07 | chr:6:32648036 |
| 6 rs9268673   | 32414433 T | 2.176  | 2.93E-07 | chr:6:32648036 |
| 6 rs9268677   | 32414668 A | 2.176  | 2.93E-07 | chr:6:32648036 |
| 6 rs9268681   | 32415386 A | 2.176  | 2.93E-07 | chr:6:32648036 |
| 6 rs9268693   | 32416826 T | 2.176  | 2.93E-07 | chr:6:32648036 |

|               |            |        |          |                |
|---------------|------------|--------|----------|----------------|
| 6 rs9268759   | 32417704 T | 2.176  | 2.93E-07 | chr:6:32648036 |
| 6 rs9268762   | 32418157 T | 2.176  | 2.93E-07 | chr:6:32648036 |
| 6 rs9268764   | 32418561 C | 2.176  | 2.93E-07 | chr:6:32648036 |
| 6 rs9268768   | 32419291 T | 2.176  | 2.93E-07 | chr:6:32648036 |
| 6 rs9268778   | 32420372 T | 2.176  | 2.93E-07 | chr:6:32648036 |
| 6 rs9268784   | 32420792 A | 2.176  | 2.93E-07 | chr:6:32648036 |
| 6 rs9268792   | 32421154 G | 2.176  | 2.93E-07 | chr:6:32648036 |
| 6 rs9268808   | 32424176 T | 2.176  | 2.93E-07 | chr:6:32648036 |
| 6 rs9268809   | 32424265 C | 2.176  | 2.93E-07 | chr:6:32648036 |
| 6 rs9268810   | 32424296 T | 2.176  | 2.93E-07 | chr:6:32648036 |
| 6 rs9268811   | 32424370 T | 2.176  | 2.93E-07 | chr:6:32648036 |
| 6 rs9268814   | 32424616 G | 2.176  | 2.93E-07 | chr:6:32648036 |
| 6 rs9268828   | 32426540 G | 2.176  | 2.93E-07 | chr:6:32648036 |
| 6 rs9268829   | 32426602 G | 2.176  | 2.93E-07 | chr:6:32648036 |
| 6 rs9273396   | 32627105 A | 1.869  | 2.94E-07 | chr:6:32648036 |
| 6 rs9271659   | 32592593 A | 0.239  | 2.96E-07 | chr:6:32648036 |
| 6 rs112780153 | 32510301 C | 0.4151 | 2.97E-07 | chr:6:32648036 |
| 6 rs72851063  | 32503901 T | 0.4203 | 2.98E-07 | chr:6:32648036 |
| 6 rs28891489  | 32650362 C | 0.3687 | 3.00E-07 | chr:6:32648036 |
| 6 rs111596698 | 32487123 G | 0.2783 | 3.00E-07 | chr:6:32648036 |
| 6 rs4410767   | 32448129 C | 2.3    | 3.02E-07 | chr:6:32648036 |
| 6 rs111354037 | 32579285 C | 0.3506 | 3.07E-07 | chr:6:32648036 |
| 6 rs9273082   | 32612339 T | 1.787  | 3.08E-07 | chr:6:32648036 |
| 6 rs7758465   | 32599031 A | 0.293  | 3.08E-07 | chr:6:32648036 |
| 6 rs201699945 | 32485856 C | 2.199  | 3.10E-07 | chr:6:32648036 |
| 6 rs2858332   | 32681161 G | 0.4533 | 3.10E-07 | chr:6:32648036 |
| 6 rs9270277   | 32557243 T | 0.3141 | 3.13E-07 | chr:6:32648036 |
| 6 rs111371469 | 32511491 G | 1.843  | 3.14E-07 | chr:6:32648036 |
| 6 rs71534537  | 32511486 A | 1.843  | 3.14E-07 | chr:6:32648036 |
| 6 rs9273167   | 32613163 A | 1.863  | 3.16E-07 | chr:6:32648036 |
| 6 rs9274594   | 32635435 C | 0.5105 | 3.16E-07 | chr:6:32648036 |
| 6 rs77149458  | 32487130 A | 0.3148 | 3.17E-07 | chr:6:32648036 |
| 6 rs28366214  | 32557292 C | 3.47   | 3.22E-07 | chr:6:32648036 |
| 6 rs115032171 | 32501241 G | 5.1    | 3.33E-07 | chr:6:32648036 |
| 6 rs77951594  | 32499128 A | 0.5368 | 3.34E-07 | chr:6:32648036 |
| 6 rs7762488   | 32416469 C | 2.17   | 3.36E-07 | chr:6:32648036 |
| 6 rs114527826 | 32594160 T | 0.2983 | 3.36E-07 | chr:6:32648036 |
| 6 rs28371212  | 32637538 A | 2.074  | 3.40E-07 | chr:6:32648036 |
| 6 rs114437758 | 32335657 G | 6.329  | 3.41E-07 | chr:6:32648036 |
| 6 rs116123674 | 32302163 G | 6.329  | 3.41E-07 | chr:6:32648036 |
| 6 rs56269008  | 32315722 A | 6.329  | 3.41E-07 | chr:6:32648036 |
| 6 rs116413420 | 32509466 T | 0.4247 | 3.42E-07 | chr:6:32648036 |
| 6 rs138535752 | 32489520 G | 0.4126 | 3.43E-07 | chr:6:32648036 |

|               |            |        |          |                |
|---------------|------------|--------|----------|----------------|
| 6 rs9273114   | 32612664 G | 1.805  | 3.45E-07 | chr:6:32648036 |
| 6 rs114375471 | 32493854 G | 0.4941 | 3.48E-07 | chr:6:32648036 |
| 6 rs537244054 | 32488017 G | 0.4867 | 3.49E-07 | chr:6:32648036 |
| 6 rs9469131   | 32445790 C | 3.832  | 3.51E-07 | chr:6:32648036 |
| 6 rs9272248   | 32602941 A | 0.3107 | 3.51E-07 | chr:6:32648036 |
| 6 rs549245394 | 32417278 A | 2.167  | 3.52E-07 | chr:6:32648036 |
| 6 rs530375211 | 32485401 A | 7.349  | 3.54E-07 | chr:6:32648036 |
| 6 rs532729735 | 32496679 T | 2.921  | 3.58E-07 | chr:6:32648036 |
| 6 rs9271763   | 32594061 G | 2.119  | 3.58E-07 | chr:6:32648036 |
| 6 rs141684647 | 32507289 T | 0.498  | 3.61E-07 | chr:6:32648036 |
| 6 rs9272719   | 32609387 A | 1.812  | 3.62E-07 | chr:6:32648036 |
| 6 rs9272720   | 32609389 T | 1.812  | 3.62E-07 | chr:6:32648036 |
| 6 rs17612704  | 32615921 T | 1.973  | 3.65E-07 | chr:6:32648036 |
| 6 rs9273390   | 32627042 C | 2.174  | 3.69E-07 | chr:6:32648036 |
| 6 rs116586023 | 32473199 T | 2.072  | 3.69E-07 | chr:6:32648036 |
| 6 rs9273027   | 32611783 G | 1.825  | 3.70E-07 | chr:6:32648036 |
| 6 rs9268798   | 32421735 C | 2.156  | 3.71E-07 | chr:6:32648036 |
| 6 rs9274595   | 32635450 G | 0.5117 | 3.71E-07 | chr:6:32648036 |
| 6 rs72492332  | 32523085 G | 0.4815 | 3.73E-07 | chr:6:32648036 |
| 6 rs28752523  | 32584772 T | 2.546  | 3.74E-07 | chr:6:32648036 |
| 6 rs114281696 | 32525925 G | 2.597  | 3.83E-07 | chr:6:32648036 |
| 6 rs9272164   | 32601154 A | 2.049  | 3.85E-07 | chr:6:32648036 |
| 6 rs9272081   | 32599655 C | 0.4991 | 3.86E-07 | chr:6:32648036 |
| 6 rs56249455  | 32644378 A | 2.412  | 3.87E-07 | chr:6:32648036 |
| 6 rs9272060   | 32599237 A | 0.2983 | 3.87E-07 | chr:6:32648036 |
| 6 rs9269401   | 32541342 T | 0.4368 | 3.89E-07 | chr:6:32648036 |
| 6 rs139910587 | 32490483 C | 0.5103 | 3.91E-07 | chr:6:32648036 |
| 6 rs28366286  | 32560387 T | 0.4507 | 3.93E-07 | chr:6:32648036 |
| 6 rs58302219  | 32430368 A | 3.75   | 4.02E-07 | chr:6:32648036 |
| 6 rs34646374  | 32554103 G | 3.299  | 4.05E-07 | chr:6:32648036 |
| 6 rs562479057 | 32496657 C | 2.795  | 4.11E-07 | chr:6:32648036 |
| 6 rs9270613   | 32565109 T | 0.2905 | 4.12E-07 | chr:6:32648036 |
| 6 rs73401349  | 32458094 C | 0.4286 | 4.13E-07 | chr:6:32648036 |
| 6 rs9272058   | 32599197 C | 0.2839 | 4.14E-07 | chr:6:32648036 |
| 6 rs9275355   | 32667829 C | 2.312  | 4.15E-07 | chr:6:32648036 |
| 6 rs9272648   | 32608524 C | 0.3247 | 4.16E-07 | chr:6:32648036 |
| 6 rs550680456 | 32479348 G | 0.4573 | 4.20E-07 | chr:6:32648036 |
| 6 rs34386495  | 32626730 T | 2.503  | 4.23E-07 | chr:6:32648036 |
| 6 rs74395243  | 32608116 A | 4.932  | 4.29E-07 | chr:6:32648036 |
| 6 rs79601580  | 32507591 G | 0.4828 | 4.31E-07 | chr:6:32648036 |
| 6 rs115303801 | 32512229 G | 0.4244 | 4.32E-07 | chr:6:32648036 |
| 6 rs112111526 | 32510317 A | 0.4192 | 4.33E-07 | chr:6:32648036 |
| 6 rs2840230   | 32596145 A | 3.516  | 4.40E-07 | chr:6:32648036 |

|               |            |        |          |                |
|---------------|------------|--------|----------|----------------|
| 6 rs9269928   | 32551655 A | 0.4753 | 4.40E-07 | chr:6:32648036 |
| 6 rs112582516 | 32481392 T | 0.4884 | 4.40E-07 | chr:6:32648036 |
| 6 rs2073045   | 32339548 A | 2.39   | 4.42E-07 | chr:6:32648036 |
| 6 rs41269945  | 32607853 T | 2.51   | 4.44E-07 | chr:6:32648036 |
| 6 rs115773472 | 32486484 G | 1.962  | 4.45E-07 | chr:6:32648036 |
| 6 rs41268938  | 32606616 T | 2.161  | 4.47E-07 | chr:6:32648036 |
| 6 rs139455771 | 32631775 T | 4.535  | 4.48E-07 | chr:6:32648036 |
| 6 rs41287329  | 32552728 G | 0.4116 | 4.50E-07 | chr:6:32648036 |
| 6 rs41287330  | 32552730 A | 0.4116 | 4.50E-07 | chr:6:32648036 |
| 6 rs9273083   | 32612343 C | 1.776  | 4.52E-07 | chr:6:32648036 |
| 6 rs9272275   | 32603603 T | 0.2681 | 4.54E-07 | chr:6:32648036 |
| 6 rs545350177 | 32565668 G | 0.3854 | 4.55E-07 | chr:6:32648036 |
| 6 rs114335201 | 32473206 C | 2.039  | 4.55E-07 | chr:6:32648036 |
| 6 rs3104410   | 32683324 C | 0.3983 | 4.58E-07 | chr:6:32648036 |
| 6 rs28383290  | 32586475 T | 2.813  | 4.59E-07 | chr:6:32648036 |
| 6 rs28383291  | 32586476 G | 2.813  | 4.59E-07 | chr:6:32648036 |
| 6 rs72508465  | 32505141 T | 0.4134 | 4.60E-07 | chr:6:32648036 |
| 6 rs9271524   | 32589820 C | 0.316  | 4.62E-07 | chr:6:32648036 |
| 6 rs9272180   | 32601461 C | 2.065  | 4.64E-07 | chr:6:32648036 |
| 6 rs3208105   | 32609222 A | 0.5075 | 4.65E-07 | chr:6:32648036 |
| 6 rs1142328   | 32609216 G | 0.5045 | 4.70E-07 | chr:6:32648036 |
| 6 rs113154956 | 32537479 C | 2.455  | 4.72E-07 | chr:6:32648036 |
| 6 rs9272597   | 32607605 G | 1.838  | 4.72E-07 | chr:6:32648036 |
| 6 rs9270639   | 32565658 T | 0.3301 | 4.78E-07 | chr:6:32648036 |
| 6 rs9273786   | 32629462 A | 2.41   | 4.81E-07 | chr:6:32648036 |
| 6 rs74812635  | 32573539 C | 0.3142 | 4.81E-07 | chr:6:32648036 |
| 6 rs75088009  | 32504884 G | 0.4209 | 4.83E-07 | chr:6:32648036 |
| 6 rs117317282 | 32497719 T | 3.647  | 4.84E-07 | chr:6:32648036 |
| 6 rs114165089 | 32219611 T | 5.936  | 4.87E-07 | chr:6:32648036 |
| 6 rs115739548 | 32245836 T | 5.936  | 4.87E-07 | chr:6:32648036 |
| 6 rs143229898 | 32214785 A | 5.936  | 4.87E-07 | chr:6:32648036 |
| 6 rs9296013   | 32216147 C | 5.936  | 4.87E-07 | chr:6:32648036 |
| 6 rs9270542   | 32559877 G | 0.4356 | 4.93E-07 | chr:6:32648036 |
| 6 rs186911188 | 32510905 G | 0.5122 | 4.93E-07 | chr:6:32648036 |
| 6 rs9270465   | 32558916 C | 0.4661 | 4.94E-07 | chr:6:32648036 |
| 6 rs9275032   | 32643839 T | 0.397  | 4.99E-07 | chr:6:32648036 |
| 6 rs139599717 | 32604992 T | 5.293  | 5.01E-07 | chr:6:32648036 |
| 6 rs9272140   | 32600780 G | 3.477  | 5.01E-07 | chr:6:32648036 |
| 6 rs3135344   | 32395036 C | 0.3931 | 5.03E-07 | chr:6:32648036 |
| 6 rs9272320   | 32604124 A | 2.033  | 5.03E-07 | chr:6:32648036 |
| 6 rs2647066   | 32571122 T | 2.426  | 5.06E-07 | chr:6:32648036 |
| 6 rs2760990   | 32571110 A | 2.426  | 5.06E-07 | chr:6:32648036 |
| 6 rs9275352   | 32667807 T | 2.299  | 5.06E-07 | chr:6:32648036 |

|               |            |        |          |                |
|---------------|------------|--------|----------|----------------|
| 6 rs9275353   | 32667815 G | 2.299  | 5.06E-07 | chr:6:32648036 |
| 6 rs9275354   | 32667820 G | 2.299  | 5.06E-07 | chr:6:32648036 |
| 6 rs78412103  | 32489695 C | 3.886  | 5.08E-07 | chr:6:32648036 |
| 6 rs28383278  | 32586312 C | 2.804  | 5.11E-07 | chr:6:32648036 |
| 6 rs281863631 | 32630761 T | 1.84   | 5.12E-07 | chr:6:32648036 |
| 6 rs9271386   | 32587416 T | 0.3702 | 5.14E-07 | chr:6:32648036 |
| 6 rs9273188   | 32613384 T | 1.817  | 5.19E-07 | chr:6:32648036 |
| 6 rs143945008 | 32513183 T | 0.3199 | 5.22E-07 | chr:6:32648036 |
| 6 rs9275588   | 32680423 G | 0.459  | 5.26E-07 | chr:6:32648036 |
| 6 rs9275589   | 32680441 T | 0.459  | 5.26E-07 | chr:6:32648036 |
| 6 rs9273119   | 32612699 A | 1.778  | 5.29E-07 | chr:6:32648036 |
| 6 rs9273185   | 32613340 G | 1.816  | 5.30E-07 | chr:6:32648036 |
| 6 rs3134992   | 32638783 T | 0.3542 | 5.30E-07 | chr:6:32648036 |
| 6 rs73727940  | 32503738 T | 0.4178 | 5.32E-07 | chr:6:32648036 |
| 6 rs17612583  | 32615470 A | 1.881  | 5.32E-07 | chr:6:32648036 |
| 6 rs674313    | 32578082 T | 0.3443 | 5.38E-07 | chr:6:32648036 |
| 6 rs200989645 | 32547130 T | 5.92   | 5.42E-07 | chr:6:32648036 |
| 6 rs112641502 | 32485567 C | 2.9    | 5.44E-07 | chr:6:32648036 |
| 6 rs9272036   | 32598841 G | 2.043  | 5.49E-07 | chr:6:32648036 |
| 6 rs9272142   | 32600800 G | 2.074  | 5.51E-07 | chr:6:32648036 |
| 6 rs113133909 | 32457928 T | 0.4014 | 5.53E-07 | chr:6:32648036 |
| 6 rs534859262 | 32457931 T | 0.4014 | 5.53E-07 | chr:6:32648036 |
| 6 rs281875165 | 32628559 C | 2.477  | 5.56E-07 | chr:6:32648036 |
| 6 rs539555344 | 32628560 T | 2.477  | 5.56E-07 | chr:6:32648036 |
| 6 rs9273519   | 32628558 A | 2.477  | 5.56E-07 | chr:6:32648036 |
| 6 rs71536581  | 32533030 C | 1.779  | 5.56E-07 | chr:6:32648036 |
| 6 rs532521348 | 32540463 A | 3.297  | 5.57E-07 | chr:6:32648036 |
| 6 rs558538827 | 32540478 C | 3.297  | 5.57E-07 | chr:6:32648036 |
| 6 rs9271528   | 32589923 T | 0.3142 | 5.59E-07 | chr:6:32648036 |
| 6 rs28383307  | 32586755 T | 2.515  | 5.59E-07 | chr:6:32648036 |
| 6 rs9271546   | 32590154 T | 0.464  | 5.67E-07 | chr:6:32648036 |
| 6 rs9271547   | 32590159 C | 0.464  | 5.67E-07 | chr:6:32648036 |
| 6 rs9272127   | 32600595 T | 2.024  | 5.69E-07 | chr:6:32648036 |
| 6 rs17843654  | 32621378 A | 1.726  | 5.70E-07 | chr:6:32648036 |
| 6 rs17211601  | 32602817 G | 0.3792 | 5.70E-07 | chr:6:32648036 |
| 6 rs28533091  | 32602864 A | 0.3792 | 5.70E-07 | chr:6:32648036 |
| 6 rs9274465   | 32633490 C | 2.517  | 5.71E-07 | chr:6:32648036 |
| 6 rs743862    | 32381939 C | 0.4018 | 5.73E-07 | chr:6:32648036 |
| 6 rs562462    | 32586437 C | 0.3204 | 5.75E-07 | chr:6:32648036 |
| 6 rs78316776  | 32508012 T | 0.5015 | 5.75E-07 | chr:6:32648036 |
| 6 rs112399032 | 32510947 T | 0.5089 | 5.78E-07 | chr:6:32648036 |
| 6 rs180756398 | 32458010 A | 0.4092 | 5.81E-07 | chr:6:32648036 |
| 6 rs71538508  | 32534917 T | 1.766  | 5.88E-07 | chr:6:32648036 |

|               |            |        |          |                |
|---------------|------------|--------|----------|----------------|
| 6 rs9273595   | 32629091 G | 2.231  | 5.89E-07 | chr:6:32648036 |
| 6 rs532830453 | 32486281 G | 2.856  | 5.92E-07 | chr:6:32648036 |
| 6 rs9273405   | 32627175 C | 1.806  | 5.94E-07 | chr:6:32648036 |
| 6 rs112138727 | 32497169 G | 0.462  | 5.95E-07 | chr:6:32648036 |
| 6 rs185236820 | 32488776 T | 0.5235 | 5.97E-07 | chr:6:32648036 |
| 6 rs17612669  | 32615816 A | 1.777  | 5.97E-07 | chr:6:32648036 |
| 6 rs75324027  | 32573629 G | 0.3311 | 5.99E-07 | chr:6:32648036 |
| 6 rs3828844   | 32520755 G | 0.3582 | 6.00E-07 | chr:6:32648036 |
| 6 rs111896611 | 32511183 T | 0.4233 | 6.01E-07 | chr:6:32648036 |
| 6 rs9271180   | 32578209 C | 0.3935 | 6.04E-07 | chr:6:32648036 |
| 6 rs115084652 | 32468978 T | 0.4236 | 6.09E-07 | chr:6:32648036 |
| 6 rs75236519  | 32460670 C | 0.4998 | 6.09E-07 | chr:6:32648036 |
| 6 rs12660447  | 32451491 A | 0.4135 | 6.15E-07 | chr:6:32648036 |
| 6 rs3998182   | 32561915 C | 0.3399 | 6.16E-07 | chr:6:32648036 |
| 6 rs35597441  | 32555545 T | 2.743  | 6.23E-07 | chr:6:32648036 |
| 6 rs17879702  | 32552123 A | 4.034  | 6.23E-07 | chr:6:32648036 |
| 6 rs114653292 | 32503516 G | 0.4242 | 6.34E-07 | chr:6:32648036 |
| 6 rs201175797 | 32557621 G | 4.029  | 6.36E-07 | chr:6:32648036 |
| 6 rs9271450   | 32588381 T | 0.3849 | 6.39E-07 | chr:6:32648036 |
| 6 rs9271451   | 32588382 T | 0.3849 | 6.39E-07 | chr:6:32648036 |
| 6 rs2395163   | 32387809 C | 2.43   | 6.41E-07 | chr:6:32648036 |
| 6 rs9270751   | 32568383 T | 0.4382 | 6.42E-07 | chr:6:32648036 |
| 6 rs112550762 | 32507514 A | 0.4941 | 6.43E-07 | chr:6:32648036 |
| 6 rs112538495 | 32485570 T | 2.88   | 6.45E-07 | chr:6:32648036 |
| 6 rs190526848 | 32488781 A | 0.5242 | 6.48E-07 | chr:6:32648036 |
| 6 rs72851100  | 32505511 C | 0.4295 | 6.48E-07 | chr:6:32648036 |
| 6 rs114198395 | 32502961 T | 0.4171 | 6.51E-07 | chr:6:32648036 |
| 6 rs116520213 | 32504424 T | 0.4262 | 6.52E-07 | chr:6:32648036 |
| 6 rs546636941 | 32504421 T | 0.4262 | 6.52E-07 | chr:6:32648036 |
| 6 rs375703547 | 32608217 C | 5.569  | 6.53E-07 | chr:6:32648036 |
| 6 rs9271376   | 32587113 G | 0.3482 | 6.60E-07 | chr:6:32648036 |
| 6 rs9274529   | 32634514 A | 0.4968 | 6.60E-07 | chr:6:32648036 |
| 6 rs536038224 | 32523371 C | 0.4876 | 6.61E-07 | chr:6:32648036 |
| 6 rs9271146   | 32577282 A | 0.3761 | 6.62E-07 | chr:6:32648036 |
| 6 rs115095329 | 32503497 A | 0.4191 | 6.64E-07 | chr:6:32648036 |
| 6 rs76034941  | 32503498 C | 0.4191 | 6.64E-07 | chr:6:32648036 |
| 6 rs9271690   | 32593003 C | 0.2918 | 6.66E-07 | chr:6:32648036 |
| 6 rs113523485 | 32489302 C | 0.3982 | 6.69E-07 | chr:6:32648036 |
| 6 rs9268806   | 32423609 A | 2.052  | 6.69E-07 | chr:6:32648036 |
| 6 rs28724138  | 32552617 G | 0.4479 | 6.79E-07 | chr:6:32648036 |
| 6 rs9272155   | 32601043 T | 2.007  | 6.83E-07 | chr:6:32648036 |
| 6 rs113085907 | 32510224 G | 0.4248 | 6.86E-07 | chr:6:32648036 |
| 6 rs281863610 | 32630794 G | 1.846  | 6.89E-07 | chr:6:32648036 |

|               |            |        |          |                |
|---------------|------------|--------|----------|----------------|
| 6 rs9273394   | 32627082 A | 0.4463 | 6.94E-07 | chr:6:32648036 |
| 6 rs678770    | 32570817 A | 0.3307 | 6.95E-07 | chr:6:32648036 |
| 6 rs9275587   | 32680379 T | 0.4628 | 6.97E-07 | chr:6:32648036 |
| 6 rs34004019  | 32626403 G | 0.3922 | 7.01E-07 | chr:6:32648036 |
| 6 rs34983241  | 32626397 T | 0.3922 | 7.01E-07 | chr:6:32648036 |
| 6 rs568483267 | 32626392 C | 0.3922 | 7.01E-07 | chr:6:32648036 |
| 6 rs113712418 | 32486269 G | 4.305  | 7.02E-07 | chr:6:32648036 |
| 6 rs34061722  | 32599337 T | 0.3766 | 7.09E-07 | chr:6:32648036 |
| 6 rs115852844 | 32603456 A | 0.3118 | 7.14E-07 | chr:6:32648036 |
| 6 rs552154060 | 32458032 G | 3.187  | 7.15E-07 | chr:6:32648036 |
| 6 rs12192620  | 32674318 A | 2.058  | 7.29E-07 | chr:6:32648036 |
| 6 rs28371271  | 32674343 A | 2.058  | 7.29E-07 | chr:6:32648036 |
| 6 rs12527746  | 32620237 A | 3.782  | 7.30E-07 | chr:6:32648036 |
| 6 rs116675816 | 32512131 A | 0.4358 | 7.34E-07 | chr:6:32648036 |
| 6 rs189940530 | 32490640 A | 2.238  | 7.35E-07 | chr:6:32648036 |
| 6 rs72508466  | 32505166 G | 0.4219 | 7.57E-07 | chr:6:32648036 |
| 6 rs9273406   | 32627180 C | 1.798  | 7.60E-07 | chr:6:32648036 |
| 6 rs17211580  | 32602754 A | 0.3796 | 7.62E-07 | chr:6:32648036 |
| 6 rs182191708 | 32490480 C | 0.5194 | 7.63E-07 | chr:6:32648036 |
| 6 rs74291249  | 32594098 A | 0.3152 | 7.70E-07 | chr:6:32648036 |
| 6 rs9273455   | 32627830 T | 2.501  | 7.71E-07 | chr:6:32648036 |
| 6 rs17612852  | 32620572 G | 0.3549 | 7.73E-07 | chr:6:32648036 |
| 6 rs28747023  | 32654807 A | 0.3841 | 7.79E-07 | chr:6:32648036 |
| 6 rs115795737 | 32459515 C | 3.499  | 7.80E-07 | chr:6:32648036 |
| 6 rs115391129 | 32263592 T | 6.044  | 7.82E-07 | chr:6:32648036 |
| 6 rs115543900 | 32283275 A | 6.044  | 7.82E-07 | chr:6:32648036 |
| 6 rs116416438 | 32270731 A | 6.044  | 7.82E-07 | chr:6:32648036 |
| 6 rs116758467 | 32283370 A | 6.044  | 7.82E-07 | chr:6:32648036 |
| 6 rs139712278 | 32228057 C | 6.044  | 7.82E-07 | chr:6:32648036 |
| 6 rs140736091 | 32229263 T | 6.044  | 7.82E-07 | chr:6:32648036 |
| 6 rs144832631 | 32238362 A | 6.044  | 7.82E-07 | chr:6:32648036 |
| 6 rs149448443 | 32227204 A | 6.044  | 7.82E-07 | chr:6:32648036 |
| 6 rs55944243  | 32273959 G | 6.044  | 7.82E-07 | chr:6:32648036 |
| 6 rs56036302  | 32272156 T | 6.044  | 7.82E-07 | chr:6:32648036 |
| 6 rs56299948  | 32275653 G | 6.044  | 7.82E-07 | chr:6:32648036 |
| 6 rs28407950  | 32626348 T | 0.3928 | 7.86E-07 | chr:6:32648036 |
| 6 rs28515515  | 32626432 T | 0.3928 | 7.86E-07 | chr:6:32648036 |
| 6 rs116133469 | 32503492 G | 0.4236 | 8.01E-07 | chr:6:32648036 |
| 6 rs114821537 | 32503522 G | 0.4289 | 8.04E-07 | chr:6:32648036 |
| 6 rs35874654  | 32609479 A | 2.512  | 8.11E-07 | chr:6:32648036 |
| 6 rs3134975   | 32652581 T | 0.3529 | 8.15E-07 | chr:6:32648036 |
| 6 rs28675927  | 32603488 G | 0.3982 | 8.17E-07 | chr:6:32648036 |
| 6 rs9272598   | 32607611 T | 1.819  | 8.18E-07 | chr:6:32648036 |

|               |            |        |          |                |
|---------------|------------|--------|----------|----------------|
| 6 rs9271460   | 32588463 A | 0.3964 | 8.19E-07 | chr:6:32648036 |
| 6 rs112483249 | 32526924 A | 0.4906 | 8.28E-07 | chr:6:32648036 |
| 6 rs9270475   | 32559007 T | 0.3069 | 8.30E-07 | chr:6:32648036 |
| 6 rs9276487   | 32718594 A | 3.553  | 8.38E-07 | chr:6:32648036 |
| 6 rs73728637  | 32594420 C | 0.3072 | 8.39E-07 | chr:6:32648036 |
| 6 rs73726822  | 32527272 G | 0.5147 | 8.40E-07 | chr:6:32648036 |
| 6 rs9272456   | 32605555 A | 2.463  | 8.45E-07 | chr:6:32648036 |
| 6 rs544126617 | 32510976 A | 0.5218 | 8.46E-07 | chr:6:32648036 |
| 6 rs577174379 | 32510979 G | 0.5218 | 8.46E-07 | chr:6:32648036 |
| 6 rs9273404   | 32627160 G | 1.793  | 8.54E-07 | chr:6:32648036 |
| 6 rs72508436  | 32487957 G | 2.059  | 8.55E-07 | chr:6:32648036 |
| 6 rs201439475 | 32502968 A | 0.4243 | 8.59E-07 | chr:6:32648036 |
| 6 rs528723549 | 32490420 G | 0.512  | 8.59E-07 | chr:6:32648036 |
| 6 rs201213928 | 32487444 T | 0.4775 | 8.59E-07 | chr:6:32648036 |
| 6 rs9273695   | 32629281 T | 2.249  | 8.61E-07 | chr:6:32648036 |
| 6 rs9273696   | 32629282 T | 2.249  | 8.61E-07 | chr:6:32648036 |
| 6 rs11970219  | 32500925 C | 0.3423 | 8.61E-07 | chr:6:32648036 |
| 6 rs17205177  | 32602518 G | 0.3797 | 8.62E-07 | chr:6:32648036 |
| 6 rs111675168 | 32487104 G | 2.317  | 8.81E-07 | chr:6:32648036 |
| 6 rs9270823   | 32570051 C | 0.3993 | 8.85E-07 | chr:6:32648036 |
| 6 rs9270824   | 32570055 T | 0.3993 | 8.85E-07 | chr:6:32648036 |
| 6 rs115696138 | 32504460 C | 0.4299 | 8.86E-07 | chr:6:32648036 |
| 6 rs3129724   | 32677560 A | 0.3292 | 8.89E-07 | chr:6:32648036 |
| 6 rs9276517   | 32720366 C | 3.528  | 8.91E-07 | chr:6:32648036 |
| 6 rs9276518   | 32720385 G | 3.528  | 8.91E-07 | chr:6:32648036 |
| 6 rs180720564 | 32485907 T | 0.5092 | 8.99E-07 | chr:6:32648036 |
| 6 rs192994337 | 32511083 A | 0.531  | 9.00E-07 | chr:6:32648036 |
| 6 rs116585338 | 32512812 G | 1.963  | 9.04E-07 | chr:6:32648036 |
| 6 rs559365047 | 32416936 A | 2.111  | 9.13E-07 | chr:6:32648036 |
| 6 rs9272470   | 32605714 G | 0.3032 | 9.17E-07 | chr:6:32648036 |
| 6 rs72492338  | 32527408 G | 0.358  | 9.30E-07 | chr:6:32648036 |
| 6 rs3129714   | 32657279 A | 2.044  | 9.35E-07 | chr:6:32648036 |
| 6 rs28747017  | 32654723 G | 0.3693 | 9.36E-07 | chr:6:32648036 |
| 6 rs9273494   | 32628256 T | 2.439  | 9.41E-07 | chr:6:32648036 |
| 6 rs9273143   | 32612899 G | 1.867  | 9.46E-07 | chr:6:32648036 |
| 6 rs140190321 | 32511008 T | 0.5354 | 9.48E-07 | chr:6:32648036 |
| 6 rs9272353   | 32604456 C | 2.245  | 9.49E-07 | chr:6:32648036 |
| 6 rs9270463   | 32558913 C | 0.48   | 9.52E-07 | chr:6:32648036 |
| 6 rs550053442 | 32599693 A | 0.3408 | 9.62E-07 | chr:6:32648036 |
| 6 rs112114145 | 32535188 A | 0.5523 | 9.62E-07 | chr:6:32648036 |
| 6 rs112349327 | 32502948 A | 0.4257 | 9.69E-07 | chr:6:32648036 |
| 6 rs9270839   | 32570375 A | 0.4103 | 9.73E-07 | chr:6:32648036 |
| 6 rs9270840   | 32570377 C | 0.4103 | 9.73E-07 | chr:6:32648036 |



|               |            |        |          |                |
|---------------|------------|--------|----------|----------------|
| 6 rs9274596   | 32635467 G | 0.5278 | 9.77E-07 | chr:6:32648036 |
| 6 rs28383279  | 32586318 T | 2.731  | 9.81E-07 | chr:6:32648036 |
| 6 rs79740987  | 32507712 G | 0.4215 | 9.87E-07 | chr:6:32648036 |
| 6 rs9272616   | 32607890 G | 0.3409 | 9.88E-07 | chr:6:32648036 |
| 6 rs17843619  | 32620775 A | 1.729  | 9.88E-07 | chr:6:32648036 |
| 6 rs9270679   | 32566743 A | 0.3885 | 9.91E-07 | chr:6:32648036 |
| 6 rs9270680   | 32566744 C | 0.3885 | 9.91E-07 | chr:6:32648036 |
| 6 rs28383281  | 32586344 G | 2.801  | 9.95E-07 | chr:6:32648036 |
| 6 rs112465099 | 32510430 G | 0.4386 | 9.97E-07 | chr:6:32648036 |
| 6 rs80083020  | 32510439 C | 0.4386 | 9.97E-07 | chr:6:32648036 |
| 6 rs535648472 | 32487066 T | 2.596  | 9.97E-07 | chr:6:32648036 |
| 6 rs112155110 | 32501417 T | 0.4428 | 9.98E-07 | chr:6:32648036 |
| 6 rs9271001   | 32574493 A | 0.4211 | 9.98E-07 | chr:6:32648036 |
| 6 rs9271002   | 32574497 T | 0.4211 | 9.98E-07 | chr:6:32648036 |
| 6 rs35779452  | 32599272 G | 0.3823 | 9.99E-07 | chr:6:32648036 |
| 6 rs200002589 | 32487791 T | 2.497  | 1.00E-06 | chr:6:32648036 |
| 6 rs281874798 | 32631843 T | 1.734  | 1.01E-06 | chr:6:32648036 |
| 6 rs9276496   | 32719017 A | 3.325  | 1.01E-06 | chr:6:32648036 |
| 6 rs9276497   | 32719027 A | 3.325  | 1.01E-06 | chr:6:32648036 |
| 6 rs41285651  | 32551785 C | 2.043  | 1.03E-06 | chr:6:32648036 |
| 6 rs3104417   | 32581022 A | 2.143  | 1.03E-06 | chr:6:32648036 |
| 6 rs3104418   | 32581021 A | 2.143  | 1.03E-06 | chr:6:32648036 |
| 6 rs3129747   | 32581008 C | 2.143  | 1.03E-06 | chr:6:32648036 |
| 6 rs3129748   | 32581015 A | 2.143  | 1.03E-06 | chr:6:32648036 |
| 6 rs28490182  | 32592476 T | 0.3464 | 1.03E-06 | chr:6:32648036 |
| 6 rs9272669   | 32608816 G | 0.3546 | 1.03E-06 | chr:6:32648036 |
| 6 rs151320068 | 32490243 T | 2.055  | 1.03E-06 | chr:6:32648036 |
| 6 rs2239804   | 32411523 C | 2.125  | 1.04E-06 | chr:6:32648036 |
| 6 rs6926374   | 32409305 G | 2.125  | 1.04E-06 | chr:6:32648036 |
| 6 rs6931646   | 32409781 T | 2.125  | 1.04E-06 | chr:6:32648036 |
| 6 rs9268658   | 32410716 A | 2.125  | 1.04E-06 | chr:6:32648036 |
| 6 rs113410894 | 32494024 T | 2.191  | 1.04E-06 | chr:6:32648036 |
| 6 rs535773    | 32577641 T | 0.3454 | 1.04E-06 | chr:6:32648036 |
| 6 rs554915730 | 32487483 G | 0.4095 | 1.05E-06 | chr:6:32648036 |
| 6 rs529580232 | 32512136 C | 0.4418 | 1.05E-06 | chr:6:32648036 |
| 6 rs551034683 | 32512138 A | 0.4418 | 1.05E-06 | chr:6:32648036 |
| 6 rs9273536   | 32628764 T | 2.374  | 1.05E-06 | chr:6:32648036 |
| 6 rs147266303 | 32510268 C | 0.4412 | 1.06E-06 | chr:6:32648036 |
| 6 rs557288207 | 32504452 T | 0.4332 | 1.07E-06 | chr:6:32648036 |
| 6 rs7760731   | 32583401 A | 0.3455 | 1.07E-06 | chr:6:32648036 |
| 6 rs537642129 | 32486566 G | 1.965  | 1.08E-06 | chr:6:32648036 |
| 6 rs549614349 | 32486567 A | 1.965  | 1.08E-06 | chr:6:32648036 |
| 6 rs554694614 | 32486589 A | 1.965  | 1.08E-06 | chr:6:32648036 |

|               |            |        |          |                |
|---------------|------------|--------|----------|----------------|
| 6 rs571188309 | 32486568 T | 1.965  | 1.08E-06 | chr:6:32648036 |
| 6 rs4538748   | 32657505 C | 2.038  | 1.08E-06 | chr:6:32648036 |
| 6 rs189345292 | 32571354 G | 3.546  | 1.09E-06 | chr:6:32648036 |
| 6 rs9271052   | 32575309 T | 0.3996 | 1.09E-06 | chr:6:32648036 |
| 6 rs9270931   | 32572547 A | 0.3998 | 1.10E-06 | chr:6:32648036 |
| 6 rs2647092   | 32584440 T | 0.3452 | 1.10E-06 | chr:6:32648036 |
| 6 rs617058    | 32574479 T | 0.3452 | 1.10E-06 | chr:6:32648036 |
| 6 rs642093    | 32582075 A | 0.3452 | 1.10E-06 | chr:6:32648036 |
| 6 rs3129782   | 32648719 G | 0.3385 | 1.11E-06 | chr:6:32648036 |
| 6 rs9270687   | 32566871 G | 0.4002 | 1.11E-06 | chr:6:32648036 |
| 6 rs9270688   | 32566872 T | 0.4002 | 1.11E-06 | chr:6:32648036 |
| 6 rs9270675   | 32566647 A | 0.3844 | 1.12E-06 | chr:6:32648036 |
| 6 rs2857208   | 32743103 C | 3.468  | 1.12E-06 | chr:6:32648036 |
| 6 rs9276685   | 32750857 G | 3.468  | 1.12E-06 | chr:6:32648036 |
| 6 rs647455    | 32576721 A | 0.3974 | 1.12E-06 | chr:6:32648036 |
| 6 rs647467    | 32576726 T | 0.3974 | 1.12E-06 | chr:6:32648036 |
| 6 rs116526477 | 32468879 T | 0.4236 | 1.13E-06 | chr:6:32648036 |
| 6 rs145365399 | 32517715 G | 12.71  | 1.13E-06 | chr:6:32648036 |
| 6 rs111725169 | 32512223 C | 0.4424 | 1.13E-06 | chr:6:32648036 |
| 6 rs9272279   | 32603658 C | 0.2748 | 1.14E-06 | chr:6:32648036 |
| 6 rs4311504   | 32593349 G | 0.3197 | 1.15E-06 | chr:6:32648036 |
| 6 rs72851056  | 32502944 A | 0.4287 | 1.15E-06 | chr:6:32648036 |
| 6 rs9272381   | 32604742 C | 2.177  | 1.15E-06 | chr:6:32648036 |
| 6 rs9272466   | 32605696 T | 2.418  | 1.15E-06 | chr:6:32648036 |
| 6 rs1142331   | 32609254 T | 1.853  | 1.16E-06 | chr:6:32648036 |
| 6 rs1142332   | 32609255 T | 1.853  | 1.16E-06 | chr:6:32648036 |
| 6 rs9272702   | 32609253 A | 1.853  | 1.16E-06 | chr:6:32648036 |
| 6 rs9274474   | 32633683 T | 2.463  | 1.16E-06 | chr:6:32648036 |
| 6 rs3134976   | 32652305 A | 0.3521 | 1.17E-06 | chr:6:32648036 |
| 6 rs9270523   | 32559584 T | 0.4388 | 1.17E-06 | chr:6:32648036 |
| 6 rs112427949 | 32511164 T | 0.4364 | 1.17E-06 | chr:6:32648036 |
| 6 rs9271737   | 32593690 T | 0.5081 | 1.18E-06 | chr:6:32648036 |
| 6 rs9271494   | 32589240 C | 2.566  | 1.18E-06 | chr:6:32648036 |
| 6 rs115333128 | 32485804 G | 0.5092 | 1.18E-06 | chr:6:32648036 |
| 6 rs9270822   | 32570025 C | 0.4002 | 1.19E-06 | chr:6:32648036 |
| 6 rs112692477 | 32506042 G | 0.4952 | 1.20E-06 | chr:6:32648036 |
| 6 rs9272183   | 32601604 C | 1.997  | 1.21E-06 | chr:6:32648036 |
| 6 rs35360625  | 32599435 C | 0.3876 | 1.21E-06 | chr:6:32648036 |
| 6 rs9272742   | 32609722 T | 2.371  | 1.22E-06 | chr:6:32648036 |
| 6 rs3134966   | 32674298 T | 0.332  | 1.22E-06 | chr:6:32648036 |
| 6 rs3134995   | 32672089 T | 0.332  | 1.22E-06 | chr:6:32648036 |
| 6 rs3134997   | 32672039 T | 0.332  | 1.22E-06 | chr:6:32648036 |
| 6 rs3135001   | 32670136 T | 0.332  | 1.22E-06 | chr:6:32648036 |

|               |            |        |          |                |
|---------------|------------|--------|----------|----------------|
| 6 rs182013486 | 32603534 C | 4.905  | 1.22E-06 | chr:6:32648036 |
| 6 rs28383280  | 32586342 G | 2.771  | 1.23E-06 | chr:6:32648036 |
| 6 rs204987    | 32168932 T | 8.389  | 1.23E-06 | chr:6:32648036 |
| 6 rs9272185   | 32601620 G | 1.985  | 1.24E-06 | chr:6:32648036 |
| 6 rs9272186   | 32601635 C | 1.985  | 1.24E-06 | chr:6:32648036 |
| 6 rs9274349   | 32632408 T | 1.775  | 1.24E-06 | chr:6:32648036 |
| 6 rs113536666 | 32719362 G | 3.452  | 1.24E-06 | chr:6:32648036 |
| 6 rs2395254   | 32716837 C | 3.452  | 1.24E-06 | chr:6:32648036 |
| 6 rs2395255   | 32721639 C | 3.452  | 1.24E-06 | chr:6:32648036 |
| 6 rs2858879   | 32719117 G | 3.452  | 1.24E-06 | chr:6:32648036 |
| 6 rs2894291   | 32716827 C | 3.452  | 1.24E-06 | chr:6:32648036 |
| 6 rs2894292   | 32721656 A | 3.452  | 1.24E-06 | chr:6:32648036 |
| 6 rs386621302 | 32718908 C | 3.452  | 1.24E-06 | chr:6:32648036 |
| 6 rs4351242   | 32717722 T | 3.452  | 1.24E-06 | chr:6:32648036 |
| 6 rs4370403   | 32717515 A | 3.452  | 1.24E-06 | chr:6:32648036 |
| 6 rs4394272   | 32717771 T | 3.452  | 1.24E-06 | chr:6:32648036 |
| 6 rs4415152   | 32717024 C | 3.452  | 1.24E-06 | chr:6:32648036 |
| 6 rs4470886   | 32721020 T | 3.452  | 1.24E-06 | chr:6:32648036 |
| 6 rs4498415   | 32720986 T | 3.452  | 1.24E-06 | chr:6:32648036 |
| 6 rs4548006   | 32717604 A | 3.452  | 1.24E-06 | chr:6:32648036 |
| 6 rs4585553   | 32716736 G | 3.452  | 1.24E-06 | chr:6:32648036 |
| 6 rs4642463   | 32721783 T | 3.452  | 1.24E-06 | chr:6:32648036 |
| 6 rs5014411   | 32719634 G | 3.452  | 1.24E-06 | chr:6:32648036 |
| 6 rs5014412   | 32719573 A | 3.452  | 1.24E-06 | chr:6:32648036 |
| 6 rs5014413   | 32719502 G | 3.452  | 1.24E-06 | chr:6:32648036 |
| 6 rs5014414   | 32719440 G | 3.452  | 1.24E-06 | chr:6:32648036 |
| 6 rs5014418   | 32719381 C | 3.452  | 1.24E-06 | chr:6:32648036 |
| 6 rs5017093   | 32717339 A | 3.452  | 1.24E-06 | chr:6:32648036 |
| 6 rs527659718 | 32719414 A | 3.452  | 1.24E-06 | chr:6:32648036 |
| 6 rs535308210 | 32719439 T | 3.452  | 1.24E-06 | chr:6:32648036 |
| 6 rs555798526 | 32718907 T | 3.452  | 1.24E-06 | chr:6:32648036 |
| 6 rs572884610 | 32719411 C | 3.452  | 1.24E-06 | chr:6:32648036 |
| 6 rs578222092 | 32720017 C | 3.452  | 1.24E-06 | chr:6:32648036 |
| 6 rs763028    | 32721484 A | 3.452  | 1.24E-06 | chr:6:32648036 |
| 6 rs763029    | 32721174 C | 3.452  | 1.24E-06 | chr:6:32648036 |
| 6 rs7757475   | 32724499 C | 3.452  | 1.24E-06 | chr:6:32648036 |
| 6 rs7774644   | 32724075 G | 3.452  | 1.24E-06 | chr:6:32648036 |
| 6 rs7774929   | 32724147 A | 3.452  | 1.24E-06 | chr:6:32648036 |
| 6 rs7774954   | 32724189 A | 3.452  | 1.24E-06 | chr:6:32648036 |
| 6 rs7774973   | 32724267 G | 3.452  | 1.24E-06 | chr:6:32648036 |
| 6 rs7775664   | 32724447 C | 3.452  | 1.24E-06 | chr:6:32648036 |
| 6 rs9272074   | 32599571 G | 0.5215 | 1.24E-06 | chr:6:32648036 |
| 6 rs9276436   | 32714083 C | 3.452  | 1.24E-06 | chr:6:32648036 |

|               |            |        |          |                |
|---------------|------------|--------|----------|----------------|
| 6 rs9276438   | 32714516 A | 3.452  | 1.24E-06 | chr:6:32648036 |
| 6 rs9276439   | 32714603 T | 3.452  | 1.24E-06 | chr:6:32648036 |
| 6 rs9276442   | 32714901 T | 3.452  | 1.24E-06 | chr:6:32648036 |
| 6 rs9276446   | 32715448 G | 3.452  | 1.24E-06 | chr:6:32648036 |
| 6 rs9276448   | 32715629 G | 3.452  | 1.24E-06 | chr:6:32648036 |
| 6 rs9276449   | 32715653 T | 3.452  | 1.24E-06 | chr:6:32648036 |
| 6 rs9276450   | 32715682 A | 3.452  | 1.24E-06 | chr:6:32648036 |
| 6 rs9276451   | 32715685 T | 3.452  | 1.24E-06 | chr:6:32648036 |
| 6 rs9276452   | 32715722 G | 3.452  | 1.24E-06 | chr:6:32648036 |
| 6 rs9276453   | 32715775 C | 3.452  | 1.24E-06 | chr:6:32648036 |
| 6 rs9276455   | 32715933 A | 3.452  | 1.24E-06 | chr:6:32648036 |
| 6 rs9276465   | 32716409 G | 3.452  | 1.24E-06 | chr:6:32648036 |
| 6 rs9276472   | 32717224 G | 3.452  | 1.24E-06 | chr:6:32648036 |
| 6 rs9276483   | 32718329 C | 3.452  | 1.24E-06 | chr:6:32648036 |
| 6 rs9276484   | 32718452 G | 3.452  | 1.24E-06 | chr:6:32648036 |
| 6 rs9276485   | 32718479 T | 3.452  | 1.24E-06 | chr:6:32648036 |
| 6 rs9276486   | 32718481 C | 3.452  | 1.24E-06 | chr:6:32648036 |
| 6 rs9276488   | 32718602 G | 3.452  | 1.24E-06 | chr:6:32648036 |
| 6 rs9276489   | 32718620 T | 3.452  | 1.24E-06 | chr:6:32648036 |
| 6 rs9276491   | 32718827 G | 3.452  | 1.24E-06 | chr:6:32648036 |
| 6 rs9276492   | 32718828 T | 3.452  | 1.24E-06 | chr:6:32648036 |
| 6 rs9276493   | 32718869 G | 3.452  | 1.24E-06 | chr:6:32648036 |
| 6 rs9276502   | 32719666 C | 3.452  | 1.24E-06 | chr:6:32648036 |
| 6 rs9276503   | 32719731 A | 3.452  | 1.24E-06 | chr:6:32648036 |
| 6 rs9276504   | 32719745 C | 3.452  | 1.24E-06 | chr:6:32648036 |
| 6 rs9276508   | 32720004 C | 3.452  | 1.24E-06 | chr:6:32648036 |
| 6 rs9276509   | 32720005 A | 3.452  | 1.24E-06 | chr:6:32648036 |
| 6 rs9276511   | 32720037 G | 3.452  | 1.24E-06 | chr:6:32648036 |
| 6 rs9276513   | 32720144 G | 3.452  | 1.24E-06 | chr:6:32648036 |
| 6 rs9276516   | 32720302 C | 3.452  | 1.24E-06 | chr:6:32648036 |
| 6 rs9276520   | 32720415 T | 3.452  | 1.24E-06 | chr:6:32648036 |
| 6 rs9276526   | 32720589 T | 3.452  | 1.24E-06 | chr:6:32648036 |
| 6 rs9276527   | 32720637 A | 3.452  | 1.24E-06 | chr:6:32648036 |
| 6 rs9276528   | 32720934 T | 3.452  | 1.24E-06 | chr:6:32648036 |
| 6 rs9276529   | 32720971 T | 3.452  | 1.24E-06 | chr:6:32648036 |
| 6 rs9276545   | 32722020 T | 3.452  | 1.24E-06 | chr:6:32648036 |
| 6 rs9276546   | 32722129 T | 3.452  | 1.24E-06 | chr:6:32648036 |
| 6 rs9276547   | 32722155 A | 3.452  | 1.24E-06 | chr:6:32648036 |
| 6 rs9276548   | 32722220 C | 3.452  | 1.24E-06 | chr:6:32648036 |
| 6 rs9276549   | 32722242 T | 3.452  | 1.24E-06 | chr:6:32648036 |
| 6 rs9276554   | 32722702 T | 3.452  | 1.24E-06 | chr:6:32648036 |
| 6 rs182965163 | 32454827 A | 0.5043 | 1.25E-06 | chr:6:32648036 |
| 6 rs202162787 | 32454828 G | 0.5043 | 1.25E-06 | chr:6:32648036 |

|               |            |        |          |                |
|---------------|------------|--------|----------|----------------|
| 6 rs9272085   | 32599685 C | 0.5165 | 1.25E-06 | chr:6:32648036 |
| 6 rs140747244 | 32488784 C | 0.5372 | 1.25E-06 | chr:6:32648036 |
| 6 rs201277695 | 32506116 G | 0.4615 | 1.25E-06 | chr:6:32648036 |
| 6 rs75492971  | 32506128 C | 0.4615 | 1.25E-06 | chr:6:32648036 |
| 6 rs9270764   | 32568701 C | 0.48   | 1.25E-06 | chr:6:32648036 |
| 6 rs6457681   | 32773497 T | 2.22   | 1.25E-06 | chr:6:32648036 |
| 6 rs139029897 | 32454882 G | 0.5163 | 1.26E-06 | chr:6:32648036 |
| 6 rs9270644   | 32565745 G | 0.4002 | 1.27E-06 | chr:6:32648036 |
| 6 rs9270827   | 32570132 C | 0.4007 | 1.27E-06 | chr:6:32648036 |
| 6 rs9270828   | 32570144 T | 0.4007 | 1.27E-06 | chr:6:32648036 |
| 6 rs17205928  | 32651737 G | 0.37   | 1.27E-06 | chr:6:32648036 |
| 6 rs17212279  | 32651713 G | 0.37   | 1.27E-06 | chr:6:32648036 |
| 6 rs533809152 | 32368841 T | 4.583  | 1.28E-06 | chr:6:32648036 |
| 6 rs7774268   | 32449754 C | 3.65   | 1.28E-06 | chr:6:32648036 |
| 6 rs9273841   | 32629582 C | 0.3389 | 1.28E-06 | chr:6:32648036 |
| 6 rs28383277  | 32586300 T | 2.761  | 1.28E-06 | chr:6:32648036 |
| 6 rs548129848 | 32525765 C | 1.829  | 1.29E-06 | chr:6:32648036 |
| 6 rs34927613  | 32600211 A | 0.3743 | 1.29E-06 | chr:6:32648036 |
| 6 rs9272089   | 32599717 G | 0.2872 | 1.30E-06 | chr:6:32648036 |
| 6 rs9270826   | 32570082 G | 0.4005 | 1.30E-06 | chr:6:32648036 |
| 6 rs548548482 | 32608153 A | 4.729  | 1.30E-06 | chr:6:32648036 |
| 6 rs9271500   | 32589300 T | 2.032  | 1.30E-06 | chr:6:32648036 |
| 6 rs9271501   | 32589301 G | 2.032  | 1.30E-06 | chr:6:32648036 |
| 6 rs114544105 | 32635629 A | 2.199  | 1.31E-06 | chr:6:32648036 |
| 6 rs9368716   | 32306090 A | 2.132  | 1.31E-06 | chr:6:32648036 |
| 6 rs3134970   | 32654202 T | 0.352  | 1.32E-06 | chr:6:32648036 |
| 6 rs9271049   | 32575265 T | 0.4005 | 1.32E-06 | chr:6:32648036 |
| 6 rs9271050   | 32575275 G | 0.4005 | 1.32E-06 | chr:6:32648036 |
| 6 rs9271051   | 32575290 T | 0.4005 | 1.32E-06 | chr:6:32648036 |
| 6 rs78806801  | 32503403 C | 0.43   | 1.32E-06 | chr:6:32648036 |
| 6 rs9272461   | 32605609 A | 2.441  | 1.32E-06 | chr:6:32648036 |
| 6 rs6911419   | 32409787 C | 2.105  | 1.32E-06 | chr:6:32648036 |
| 6 rs9273736   | 32629371 G | 2.312  | 1.33E-06 | chr:6:32648036 |
| 6 rs201624597 | 32527297 G | 0.5185 | 1.33E-06 | chr:6:32648036 |
| 6 rs28747016  | 32654706 A | 0.3779 | 1.34E-06 | chr:6:32648036 |
| 6 rs1049133   | 32629847 A | 0.3386 | 1.35E-06 | chr:6:32648036 |
| 6 rs1049225   | 32627747 A | 0.3386 | 1.35E-06 | chr:6:32648036 |
| 6 rs9269858   | 32550426 G | 0.4025 | 1.35E-06 | chr:6:32648036 |
| 6 rs11751908  | 32599862 G | 0.3829 | 1.36E-06 | chr:6:32648036 |
| 6 rs72849268  | 32468931 A | 2.015  | 1.36E-06 | chr:6:32648036 |
| 6 rs9271101   | 32576493 C | 0.4008 | 1.37E-06 | chr:6:32648036 |
| 6 rs9270808   | 32569607 G | 0.3949 | 1.37E-06 | chr:6:32648036 |
| 6 rs9270809   | 32569608 G | 0.3949 | 1.37E-06 | chr:6:32648036 |

|               |            |        |          |                |
|---------------|------------|--------|----------|----------------|
| 6 rs9270744   | 32568251 C | 0.445  | 1.37E-06 | chr:6:32648036 |
| 6 rs9272125   | 32600584 T | 1.972  | 1.38E-06 | chr:6:32648036 |
| 6 rs9274498   | 32633941 G | 2.454  | 1.38E-06 | chr:6:32648036 |
| 6 rs9270762   | 32568686 A | 0.4005 | 1.38E-06 | chr:6:32648036 |
| 6 rs17879995  | 32552072 G | 2.944  | 1.38E-06 | chr:6:32648036 |
| 6 rs281875048 | 32631217 T | 4.607  | 1.39E-06 | chr:6:32648036 |
| 6 rs2858863   | 32578278 T | 0.3496 | 1.39E-06 | chr:6:32648036 |
| 6 rs9270753   | 32568429 C | 0.4009 | 1.39E-06 | chr:6:32648036 |
| 6 rs9270754   | 32568471 G | 0.4009 | 1.39E-06 | chr:6:32648036 |
| 6 rs9273141   | 32612883 G | 1.832  | 1.39E-06 | chr:6:32648036 |
| 6 rs74197151  | 32469035 T | 0.4472 | 1.40E-06 | chr:6:32648036 |
| 6 rs148940091 | 32507101 C | 0.5257 | 1.41E-06 | chr:6:32648036 |
| 6 rs1063346   | 32627967 A | 0.5336 | 1.41E-06 | chr:6:32648036 |
| 6 rs3204428   | 32627969 C | 0.5336 | 1.41E-06 | chr:6:32648036 |
| 6 rs7754119   | 32449858 C | 2.379  | 1.41E-06 | chr:6:32648036 |
| 6 rs6900039   | 32623235 T | 4.093  | 1.42E-06 | chr:6:32648036 |
| 6 rs9270646   | 32565779 A | 0.4007 | 1.42E-06 | chr:6:32648036 |
| 6 rs3135190   | 32667946 T | 0.3346 | 1.43E-06 | chr:6:32648036 |
| 6 rs9270648   | 32565807 A | 0.4008 | 1.43E-06 | chr:6:32648036 |
| 6 rs9272665   | 32608721 A | 0.3494 | 1.44E-06 | chr:6:32648036 |
| 6 rs72851077  | 32504624 C | 0.4427 | 1.44E-06 | chr:6:32648036 |
| 6 rs3828805   | 32636120 T | 0.3515 | 1.45E-06 | chr:6:32648036 |
| 6 rs9273113   | 32612655 G | 1.745  | 1.45E-06 | chr:6:32648036 |
| 6 rs9271205   | 32578941 G | 0.401  | 1.46E-06 | chr:6:32648036 |
| 6 rs9271094   | 32576347 G | 0.4008 | 1.47E-06 | chr:6:32648036 |
| 6 rs281863463 | 32631000 C | 2.433  | 1.47E-06 | chr:6:32648036 |
| 6 rs17211510  | 32602430 A | 0.3908 | 1.47E-06 | chr:6:32648036 |
| 6 rs28407322  | 32603355 C | 0.3908 | 1.47E-06 | chr:6:32648036 |
| 6 rs28694749  | 32603029 C | 0.3908 | 1.47E-06 | chr:6:32648036 |
| 6 rs9273698   | 32629289 A | 2.206  | 1.48E-06 | chr:6:32648036 |
| 6 rs9274626   | 32636040 T | 0.3515 | 1.48E-06 | chr:6:32648036 |
| 6 rs79485855  | 32527253 T | 0.5298 | 1.49E-06 | chr:6:32648036 |
| 6 rs9268251   | 32295878 A | 0.3131 | 1.49E-06 | chr:6:32648036 |
| 6 rs9271083   | 32576102 T | 0.4006 | 1.50E-06 | chr:6:32648036 |
| 6 rs592362    | 32567795 G | 0.3497 | 1.50E-06 | chr:6:32648036 |
| 6 rs72851065  | 32504213 T | 0.4457 | 1.50E-06 | chr:6:32648036 |
| 6 rs72851066  | 32504216 T | 0.4457 | 1.50E-06 | chr:6:32648036 |
| 6 rs9273168   | 32613173 C | 1.798  | 1.51E-06 | chr:6:32648036 |
| 6 rs9270841   | 32570418 T | 0.4123 | 1.52E-06 | chr:6:32648036 |
| 6 rs9271070   | 32575701 G | 0.4014 | 1.52E-06 | chr:6:32648036 |
| 6 rs9271072   | 32575749 C | 0.4014 | 1.52E-06 | chr:6:32648036 |
| 6 rs114746879 | 32487080 T | 2.568  | 1.53E-06 | chr:6:32648036 |
| 6 rs116067927 | 32487074 G | 2.568  | 1.53E-06 | chr:6:32648036 |

|               |            |        |          |                |
|---------------|------------|--------|----------|----------------|
| 6 rs9271086   | 32576165 T | 0.4033 | 1.54E-06 | chr:6:32648036 |
| 6 rs9271087   | 32576170 C | 0.4033 | 1.54E-06 | chr:6:32648036 |
| 6 rs9271088   | 32576175 A | 0.4033 | 1.54E-06 | chr:6:32648036 |
| 6 rs9271089   | 32576177 T | 0.4033 | 1.54E-06 | chr:6:32648036 |
| 6 rs9271443   | 32588263 C | 0.3493 | 1.54E-06 | chr:6:32648036 |
| 6 rs9270689   | 32566909 A | 0.4013 | 1.56E-06 | chr:6:32648036 |
| 6 rs9269857   | 32550407 G | 0.403  | 1.56E-06 | chr:6:32648036 |
| 6 rs28747015  | 32654673 T | 0.3801 | 1.56E-06 | chr:6:32648036 |
| 6 rs556337500 | 32503531 A | 0.358  | 1.56E-06 | chr:6:32648036 |
| 6 rs571499647 | 32503532 G | 0.358  | 1.56E-06 | chr:6:32648036 |
| 6 rs113005201 | 32478712 T | 1.771  | 1.56E-06 | chr:6:32648036 |
| 6 rs9273142   | 32612886 C | 1.828  | 1.56E-06 | chr:6:32648036 |
| 6 rs114084676 | 32505216 C | 0.437  | 1.57E-06 | chr:6:32648036 |
| 6 rs9271170   | 32577889 T | 0.4013 | 1.57E-06 | chr:6:32648036 |
| 6 rs9273803   | 32629504 T | 2.315  | 1.58E-06 | chr:6:32648036 |
| 6 rs9273807   | 32629514 A | 2.315  | 1.58E-06 | chr:6:32648036 |
| 6 rs9271402   | 32587535 C | 0.3618 | 1.58E-06 | chr:6:32648036 |
| 6 rs35426875  | 32600135 C | 0.3859 | 1.58E-06 | chr:6:32648036 |
| 6 rs9270810   | 32569659 T | 0.3954 | 1.59E-06 | chr:6:32648036 |
| 6 rs9271140   | 32577083 C | 0.3986 | 1.59E-06 | chr:6:32648036 |
| 6 rs9271141   | 32577084 T | 0.3986 | 1.59E-06 | chr:6:32648036 |
| 6 rs7748270   | 32448599 C | 0.4496 | 1.60E-06 | chr:6:32648036 |
| 6 rs147717587 | 32623828 T | 2.247  | 1.60E-06 | chr:6:32648036 |
| 6 rs34965214  | 32609545 T | 2.445  | 1.60E-06 | chr:6:32648036 |
| 6 rs114618396 | 32608053 T | 5.061  | 1.60E-06 | chr:6:32648036 |
| 6 rs9270933   | 32572659 C | 0.4011 | 1.61E-06 | chr:6:32648036 |
| 6 rs9270740   | 32568193 A | 0.4418 | 1.61E-06 | chr:6:32648036 |
| 6 rs9270741   | 32568195 C | 0.4418 | 1.61E-06 | chr:6:32648036 |
| 6 rs28747048  | 32655584 T | 0.3781 | 1.62E-06 | chr:6:32648036 |
| 6 rs114327439 | 32505202 A | 0.4324 | 1.62E-06 | chr:6:32648036 |
| 6 rs9271139   | 32577038 T | 0.4013 | 1.64E-06 | chr:6:32648036 |
| 6 rs9272580   | 32607403 G | 0.3261 | 1.64E-06 | chr:6:32648036 |
| 6 rs9270145   | 32555325 T | 0.4086 | 1.65E-06 | chr:6:32648036 |
| 6 rs9271178   | 32578191 C | 0.4008 | 1.65E-06 | chr:6:32648036 |
| 6 rs9271179   | 32578196 G | 0.4008 | 1.65E-06 | chr:6:32648036 |
| 6 rs377506388 | 32487038 G | 2.528  | 1.65E-06 | chr:6:32648036 |
| 6 rs115010442 | 32505229 C | 0.439  | 1.66E-06 | chr:6:32648036 |
| 6 rs184135501 | 32540441 G | 2.96   | 1.66E-06 | chr:6:32648036 |
| 6 rs9271227   | 32579480 A | 0.4015 | 1.66E-06 | chr:6:32648036 |
| 6 rs9271228   | 32579481 A | 0.4015 | 1.66E-06 | chr:6:32648036 |
| 6 rs9272126   | 32600589 G | 1.959  | 1.66E-06 | chr:6:32648036 |
| 6 rs9270557   | 32560645 A | 0.4014 | 1.67E-06 | chr:6:32648036 |
| 6 rs17211545  | 32602608 C | 0.3943 | 1.68E-06 | chr:6:32648036 |

|               |            |        |          |                |
|---------------|------------|--------|----------|----------------|
| 6 rs9269187   | 32448440 T | 0.2508 | 1.69E-06 | chr:6:32648036 |
| 6 rs9270908   | 32572148 G | 0.4126 | 1.69E-06 | chr:6:32648036 |
| 6 rs9270909   | 32572179 A | 0.4126 | 1.69E-06 | chr:6:32648036 |
| 6 rs9275033   | 32644388 A | 0.3694 | 1.70E-06 | chr:6:32648036 |
| 6 rs3104414   | 32582612 A | 2.099  | 1.72E-06 | chr:6:32648036 |
| 6 rs28755168  | 32621793 T | 1.956  | 1.73E-06 | chr:6:32648036 |
| 6 rs9270830   | 32570181 G | 0.4043 | 1.73E-06 | chr:6:32648036 |
| 6 rs9270838   | 32570353 C | 0.4124 | 1.74E-06 | chr:6:32648036 |
| 6 rs548396690 | 32486555 T | 1.938  | 1.74E-06 | chr:6:32648036 |
| 6 rs567085288 | 32486556 G | 1.938  | 1.74E-06 | chr:6:32648036 |
| 6 rs13211123  | 32600249 C | 0.3842 | 1.74E-06 | chr:6:32648036 |
| 6 rs9270752   | 32568426 T | 0.3535 | 1.74E-06 | chr:6:32648036 |
| 6 rs28747043  | 32655508 G | 0.363  | 1.75E-06 | chr:6:32648036 |
| 6 rs28747044  | 32655516 C | 0.363  | 1.75E-06 | chr:6:32648036 |
| 6 rs9271135   | 32577002 A | 0.4013 | 1.75E-06 | chr:6:32648036 |
| 6 rs9271053   | 32575319 C | 0.4128 | 1.75E-06 | chr:6:32648036 |
| 6 rs9271241   | 32579870 G | 0.4016 | 1.75E-06 | chr:6:32648036 |
| 6 rs9272283   | 32603671 A | 0.2838 | 1.75E-06 | chr:6:32648036 |
| 6 rs9270714   | 32567488 A | 0.4015 | 1.77E-06 | chr:6:32648036 |
| 6 rs9270716   | 32567502 A | 0.4015 | 1.77E-06 | chr:6:32648036 |
| 6 rs9270678   | 32566686 T | 0.4018 | 1.77E-06 | chr:6:32648036 |
| 6 rs9270742   | 32568200 G | 0.4424 | 1.77E-06 | chr:6:32648036 |
| 6 rs1694133   | 32637015 T | 2.139  | 1.77E-06 | chr:6:32648036 |
| 6 rs3129726   | 32678206 G | 0.3462 | 1.77E-06 | chr:6:32648036 |
| 6 rs146225755 | 32491807 A | 0.5584 | 1.78E-06 | chr:6:32648036 |
| 6 rs3998183   | 32567946 T | 0.3544 | 1.78E-06 | chr:6:32648036 |
| 6 rs146825681 | 32512918 G | 1.921  | 1.80E-06 | chr:6:32648036 |
| 6 rs9272479   | 32605789 A | 0.2394 | 1.80E-06 | chr:6:32648036 |
| 6 rs28747047  | 32655578 T | 0.3823 | 1.81E-06 | chr:6:32648036 |
| 6 rs9271079   | 32576052 G | 0.4015 | 1.81E-06 | chr:6:32648036 |
| 6 rs9270755   | 32568522 G | 0.4131 | 1.81E-06 | chr:6:32648036 |
| 6 rs9270756   | 32568538 A | 0.4131 | 1.81E-06 | chr:6:32648036 |
| 6 rs9274674   | 32636610 A | 0.3758 | 1.81E-06 | chr:6:32648036 |
| 6 rs9271260   | 32580507 A | 0.4015 | 1.82E-06 | chr:6:32648036 |
| 6 rs2157051   | 32658624 G | 2.101  | 1.82E-06 | chr:6:32648036 |
| 6 rs114944990 | 32526885 C | 0.519  | 1.82E-06 | chr:6:32648036 |
| 6 rs9273286   | 32614494 A | 1.707  | 1.83E-06 | chr:6:32648036 |
| 6 rs9273480   | 32628103 T | 2.409  | 1.84E-06 | chr:6:32648036 |
| 6 rs191517186 | 32606859 C | 5.845  | 1.84E-06 | chr:6:32648036 |
| 6 rs9271182   | 32578230 A | 0.4014 | 1.84E-06 | chr:6:32648036 |
| 6 rs28747018  | 32654739 C | 0.3841 | 1.85E-06 | chr:6:32648036 |
| 6 rs116225018 | 32503380 C | 0.4311 | 1.85E-06 | chr:6:32648036 |
| 6 rs9272632   | 32608180 G | 0.3544 | 1.85E-06 | chr:6:32648036 |



|               |            |        |          |                |
|---------------|------------|--------|----------|----------------|
| 6 rs112944992 | 32510457 C | 0.4511 | 1.86E-06 | chr:6:32648036 |
| 6 rs201218424 | 32489963 A | 2.518  | 1.86E-06 | chr:6:32648036 |
| 6 rs9271092   | 32576296 A | 0.4041 | 1.86E-06 | chr:6:32648036 |
| 6 rs9270960   | 32573288 T | 0.4018 | 1.86E-06 | chr:6:32648036 |
| 6 rs9270961   | 32573289 G | 0.4018 | 1.86E-06 | chr:6:32648036 |
| 6 rs4193      | 32609236 G | 0.533  | 1.86E-06 | chr:6:32648036 |
| 6 rs9270999   | 32574438 G | 0.4019 | 1.87E-06 | chr:6:32648036 |
| 6 rs2454137   | 32570149 G | 0.354  | 1.87E-06 | chr:6:32648036 |
| 6 rs9269357   | 32540627 G | 0.4833 | 1.90E-06 | chr:6:32648036 |
| 6 rs601945    | 32573415 G | 2.487  | 1.90E-06 | chr:6:32648036 |
| 6 rs9271003   | 32574527 T | 0.4341 | 1.91E-06 | chr:6:32648036 |
| 6 rs9270794   | 32569260 T | 0.4004 | 1.92E-06 | chr:6:32648036 |
| 6 rs9274490   | 32633879 G | 2.429  | 1.92E-06 | chr:6:32648036 |
| 6 rs74208414  | 32501649 G | 0.3596 | 1.92E-06 | chr:6:32648036 |
| 6 rs9270230   | 32556787 C | 0.4018 | 1.93E-06 | chr:6:32648036 |
| 6 rs9270165   | 32555627 A | 0.4022 | 1.94E-06 | chr:6:32648036 |
| 6 rs9270166   | 32555633 G | 0.4022 | 1.94E-06 | chr:6:32648036 |
| 6 rs9273170   | 32613177 G | 1.79   | 1.94E-06 | chr:6:32648036 |
| 6 rs3129719   | 32661779 T | 0.3506 | 1.94E-06 | chr:6:32648036 |
| 6 rs9271163   | 32577733 C | 0.4018 | 1.95E-06 | chr:6:32648036 |
| 6 rs9271164   | 32577784 C | 0.4018 | 1.95E-06 | chr:6:32648036 |
| 6 rs9271165   | 32577785 A | 0.4018 | 1.95E-06 | chr:6:32648036 |
| 6 rs9271166   | 32577811 C | 0.4018 | 1.95E-06 | chr:6:32648036 |
| 6 rs9270811   | 32569721 A | 0.4019 | 1.95E-06 | chr:6:32648036 |
| 6 rs547409849 | 32503365 T | 0.4306 | 1.96E-06 | chr:6:32648036 |
| 6 rs565770331 | 32503366 C | 0.4306 | 1.96E-06 | chr:6:32648036 |
| 6 rs116048339 | 32468982 T | 0.4451 | 1.99E-06 | chr:6:32648036 |
| 6 rs116380301 | 32468983 T | 0.4451 | 1.99E-06 | chr:6:32648036 |
| 6 rs9271242   | 32579940 T | 0.4021 | 1.99E-06 | chr:6:32648036 |
| 6 rs9271243   | 32579951 C | 0.4021 | 1.99E-06 | chr:6:32648036 |
| 6 rs9271246   | 32580084 A | 0.4021 | 1.99E-06 | chr:6:32648036 |
| 6 rs9271247   | 32580112 A | 0.4021 | 1.99E-06 | chr:6:32648036 |
| 6 rs9271248   | 32580157 C | 0.4021 | 1.99E-06 | chr:6:32648036 |
| 6 rs9272785   | 32610401 A | 2.418  | 1.99E-06 | chr:6:32648036 |
| 6 rs9273542   | 32628812 T | 2.286  | 1.99E-06 | chr:6:32648036 |
| 6 rs9270674   | 32566598 C | 0.4021 | 1.99E-06 | chr:6:32648036 |
| 6 rs13208697  | 32583274 T | 2.408  | 2.00E-06 | chr:6:32648036 |
| 6 rs533688361 | 32480016 T | 0.5182 | 2.00E-06 | chr:6:32648036 |
| 6 rs28383461  | 32609607 A | 2.344  | 2.01E-06 | chr:6:32648036 |
| 6 rs77102498  | 32572583 G | 0.4135 | 2.01E-06 | chr:6:32648036 |
| 6 rs9270735   | 32568096 T | 0.4021 | 2.01E-06 | chr:6:32648036 |
| 6 rs9270736   | 32568097 G | 0.4021 | 2.01E-06 | chr:6:32648036 |
| 6 rs6922257   | 32595682 A | 3.12   | 2.01E-06 | chr:6:32648036 |

|               |            |        |          |                |
|---------------|------------|--------|----------|----------------|
| 6 rs607929    | 32586998 C | 2.026  | 2.01E-06 | chr:6:32648036 |
| 6 rs9272363   | 32604585 T | 2.151  | 2.01E-06 | chr:6:32648036 |
| 6 rs28357079  | 32557293 A | 3.36   | 2.02E-06 | chr:6:32648036 |
| 6 rs9271058   | 32575406 A | 0.4022 | 2.02E-06 | chr:6:32648036 |
| 6 rs9270225   | 32556683 G | 0.4022 | 2.02E-06 | chr:6:32648036 |
| 6 rs9270102   | 32554621 G | 0.4022 | 2.03E-06 | chr:6:32648036 |
| 6 rs9273529   | 32628698 T | 2.409  | 2.03E-06 | chr:6:32648036 |
| 6 rs9273530   | 32628699 G | 2.409  | 2.03E-06 | chr:6:32648036 |
| 6 rs3129720   | 32663631 T | 0.3505 | 2.03E-06 | chr:6:32648036 |
| 6 rs3134979   | 32650178 A | 0.3505 | 2.03E-06 | chr:6:32648036 |
| 6 rs3134994   | 32637680 T | 0.3505 | 2.03E-06 | chr:6:32648036 |
| 6 rs3135006   | 32667119 T | 0.3505 | 2.03E-06 | chr:6:32648036 |
| 6 rs35773267  | 32555944 T | 2.272  | 2.04E-06 | chr:6:32648036 |
| 6 rs9270868   | 32571117 G | 0.2993 | 2.04E-06 | chr:6:32648036 |
| 6 rs9270998   | 32574379 A | 0.4023 | 2.05E-06 | chr:6:32648036 |
| 6 rs9270650   | 32565854 C | 0.4022 | 2.05E-06 | chr:6:32648036 |
| 6 rs9271608   | 32591588 G | 2.448  | 2.06E-06 | chr:6:32648036 |
| 6 rs72508422  | 32481498 C | 0.5223 | 2.06E-06 | chr:6:32648036 |
| 6 rs9270577   | 32561074 A | 0.414  | 2.06E-06 | chr:6:32648036 |
| 6 rs3830058   | 32634010 G | 0.3705 | 2.06E-06 | chr:6:32648036 |
| 6 rs555503640 | 32486477 T | 0.54   | 2.06E-06 | chr:6:32648036 |
| 6 rs56347793  | 32646963 T | 2.236  | 2.07E-06 | chr:6:32648036 |
| 6 rs9271091   | 32576275 G | 0.4047 | 2.08E-06 | chr:6:32648036 |
| 6 rs186217224 | 32457967 C | 0.434  | 2.08E-06 | chr:6:32648036 |
| 6 rs542536566 | 32457959 T | 0.434  | 2.08E-06 | chr:6:32648036 |
| 6 rs116474488 | 32469226 T | 0.4496 | 2.08E-06 | chr:6:32648036 |
| 6 rs561980359 | 32557550 G | 3.271  | 2.08E-06 | chr:6:32648036 |
| 6 rs41269955  | 32608269 A | 2.419  | 2.09E-06 | chr:6:32648036 |
| 6 rs111632178 | 32511149 C | 0.4472 | 2.09E-06 | chr:6:32648036 |
| 6 rs111847217 | 32511131 G | 0.4472 | 2.09E-06 | chr:6:32648036 |
| 6 rs3997871   | 32580456 G | 0.4048 | 2.09E-06 | chr:6:32648036 |
| 6 rs9271257   | 32580444 G | 0.4048 | 2.09E-06 | chr:6:32648036 |
| 6 rs9271258   | 32580446 G | 0.4048 | 2.09E-06 | chr:6:32648036 |
| 6 rs9270763   | 32568695 C | 0.4908 | 2.09E-06 | chr:6:32648036 |
| 6 rs9274443   | 32633239 C | 0.4588 | 2.10E-06 | chr:6:32648036 |
| 6 rs9271068   | 32575674 C | 0.4024 | 2.10E-06 | chr:6:32648036 |
| 6 rs9271096   | 32576426 A | 0.4138 | 2.10E-06 | chr:6:32648036 |
| 6 rs116350000 | 32523418 G | 0.5301 | 2.11E-06 | chr:6:32648036 |
| 6 rs567019661 | 32490675 C | 2.146  | 2.11E-06 | chr:6:32648036 |
| 6 rs75588019  | 32568063 A | 0.3567 | 2.11E-06 | chr:6:32648036 |
| 6 rs9270682   | 32566772 G | 0.4049 | 2.11E-06 | chr:6:32648036 |
| 6 rs78387908  | 32503391 A | 0.495  | 2.13E-06 | chr:6:32648036 |
| 6 rs17206005  | 32652069 G | 0.3835 | 2.13E-06 | chr:6:32648036 |

|              |            |        |          |                |
|--------------|------------|--------|----------|----------------|
| 6 rs17206012 | 32652077 C | 0.3835 | 2.13E-06 | chr:6:32648036 |
| 6 rs1063343  | 32627992 T | 0.5331 | 2.13E-06 | chr:6:32648036 |
| 6 rs34763586 | 32608998 C | 2.42   | 2.15E-06 | chr:6:32648036 |
| 6 rs9273504  | 32628407 C | 2.4    | 2.15E-06 | chr:6:32648036 |
| 6 rs9273088  | 32612488 C | 1.757  | 2.15E-06 | chr:6:32648036 |
| 6 rs3104416  | 32581502 C | 0.4024 | 2.17E-06 | chr:6:32648036 |
| 6 rs3997874  | 32580741 A | 0.4024 | 2.17E-06 | chr:6:32648036 |
| 6 rs9269774  | 32548802 G | 0.4024 | 2.17E-06 | chr:6:32648036 |
| 6 rs9270668  | 32566308 A | 0.4024 | 2.17E-06 | chr:6:32648036 |
| 6 rs9270670  | 32566533 A | 0.4024 | 2.17E-06 | chr:6:32648036 |
| 6 rs9270671  | 32566549 T | 0.4024 | 2.17E-06 | chr:6:32648036 |
| 6 rs9270672  | 32566557 G | 0.4024 | 2.17E-06 | chr:6:32648036 |
| 6 rs9270692  | 32567006 C | 0.4024 | 2.17E-06 | chr:6:32648036 |
| 6 rs9270693  | 32567007 A | 0.4024 | 2.17E-06 | chr:6:32648036 |
| 6 rs9270694  | 32567024 C | 0.4024 | 2.17E-06 | chr:6:32648036 |
| 6 rs9270719  | 32567586 A | 0.4024 | 2.17E-06 | chr:6:32648036 |
| 6 rs9270720  | 32567627 T | 0.4024 | 2.17E-06 | chr:6:32648036 |
| 6 rs9270768  | 32568805 T | 0.4024 | 2.17E-06 | chr:6:32648036 |
| 6 rs9270786  | 32569164 C | 0.4024 | 2.17E-06 | chr:6:32648036 |
| 6 rs9270788  | 32569205 G | 0.4024 | 2.17E-06 | chr:6:32648036 |
| 6 rs9270791  | 32569232 C | 0.4024 | 2.17E-06 | chr:6:32648036 |
| 6 rs9270792  | 32569233 A | 0.4024 | 2.17E-06 | chr:6:32648036 |
| 6 rs9270813  | 32569790 C | 0.4024 | 2.17E-06 | chr:6:32648036 |
| 6 rs9270816  | 32569879 T | 0.4024 | 2.17E-06 | chr:6:32648036 |
| 6 rs9270817  | 32569911 A | 0.4024 | 2.17E-06 | chr:6:32648036 |
| 6 rs9270953  | 32573045 C | 0.4024 | 2.17E-06 | chr:6:32648036 |
| 6 rs9270981  | 32573932 A | 0.4024 | 2.17E-06 | chr:6:32648036 |
| 6 rs9270983  | 32573973 T | 0.4024 | 2.17E-06 | chr:6:32648036 |
| 6 rs9270985  | 32574027 T | 0.4024 | 2.17E-06 | chr:6:32648036 |
| 6 rs9270987  | 32574127 T | 0.4024 | 2.17E-06 | chr:6:32648036 |
| 6 rs9270988  | 32574130 A | 0.4024 | 2.17E-06 | chr:6:32648036 |
| 6 rs9271029  | 32575077 A | 0.4024 | 2.17E-06 | chr:6:32648036 |
| 6 rs9271060  | 32575513 C | 0.4024 | 2.17E-06 | chr:6:32648036 |
| 6 rs9271073  | 32575803 G | 0.4024 | 2.17E-06 | chr:6:32648036 |
| 6 rs9271075  | 32575852 A | 0.4024 | 2.17E-06 | chr:6:32648036 |
| 6 rs9271076  | 32575873 G | 0.4024 | 2.17E-06 | chr:6:32648036 |
| 6 rs9271077  | 32575925 G | 0.4024 | 2.17E-06 | chr:6:32648036 |
| 6 rs9271078  | 32575930 C | 0.4024 | 2.17E-06 | chr:6:32648036 |
| 6 rs9271097  | 32576439 C | 0.4024 | 2.17E-06 | chr:6:32648036 |
| 6 rs9271098  | 32576440 T | 0.4024 | 2.17E-06 | chr:6:32648036 |
| 6 rs9271100  | 32576478 T | 0.4024 | 2.17E-06 | chr:6:32648036 |
| 6 rs9271109  | 32576687 T | 0.4024 | 2.17E-06 | chr:6:32648036 |
| 6 rs9271110  | 32576688 G | 0.4024 | 2.17E-06 | chr:6:32648036 |

|               |            |        |          |                |
|---------------|------------|--------|----------|----------------|
| 6 rs9271174   | 32578040 C | 0.4024 | 2.17E-06 | chr:6:32648036 |
| 6 rs9271192   | 32578530 C | 0.4024 | 2.17E-06 | chr:6:32648036 |
| 6 rs9271201   | 32578818 C | 0.4024 | 2.17E-06 | chr:6:32648036 |
| 6 rs9271202   | 32578837 A | 0.4024 | 2.17E-06 | chr:6:32648036 |
| 6 rs9271239   | 32579769 T | 0.4024 | 2.17E-06 | chr:6:32648036 |
| 6 rs9271240   | 32579833 T | 0.4024 | 2.17E-06 | chr:6:32648036 |
| 6 rs9270537   | 32559725 T | 0.4704 | 2.18E-06 | chr:6:32648036 |
| 6 rs17880292  | 32552000 T | 4.54   | 2.19E-06 | chr:6:32648036 |
| 6 rs531329164 | 32496942 C | 2.641  | 2.21E-06 | chr:6:32648036 |
| 6 rs190614023 | 32500626 G | 0.3572 | 2.21E-06 | chr:6:32648036 |
| 6 rs3104376   | 32600003 T | 0.3285 | 2.22E-06 | chr:6:32648036 |
| 6 rs9391787   | 32448616 T | 0.426  | 2.25E-06 | chr:6:32648036 |
| 6 rs28371174  | 32612524 T | 3.11   | 2.26E-06 | chr:6:32648036 |
| 6 rs9268521   | 32381374 C | 2.269  | 2.27E-06 | chr:6:32648036 |
| 6 rs9268522   | 32381443 T | 2.269  | 2.27E-06 | chr:6:32648036 |
| 6 rs114324495 | 32486970 A | 0.4786 | 2.29E-06 | chr:6:32648036 |
| 6 rs112421947 | 32506163 T | 0.4823 | 2.29E-06 | chr:6:32648036 |
| 6 rs4637681   | 32623928 T | 1.731  | 2.30E-06 | chr:6:32648036 |
| 6 rs187265184 | 32525769 G | 1.801  | 2.30E-06 | chr:6:32648036 |
| 6 rs9270258   | 32557060 G | 0.4025 | 2.31E-06 | chr:6:32648036 |
| 6 rs114302967 | 32503839 C | 0.4423 | 2.32E-06 | chr:6:32648036 |
| 6 rs76054694  | 32503840 T | 0.4423 | 2.32E-06 | chr:6:32648036 |
| 6 rs9273539   | 32628779 T | 2.304  | 2.33E-06 | chr:6:32648036 |
| 6 rs9271090   | 32576247 T | 0.405  | 2.33E-06 | chr:6:32648036 |
| 6 rs9269990   | 32552588 A | 0.4678 | 2.34E-06 | chr:6:32648036 |
| 6 rs9274112   | 32630194 T | 0.4012 | 2.35E-06 | chr:6:32648036 |
| 6 rs9271185   | 32578286 G | 0.406  | 2.35E-06 | chr:6:32648036 |
| 6 rs9271186   | 32578297 A | 0.406  | 2.35E-06 | chr:6:32648036 |
| 6 rs531218774 | 32629372 A | 2.26   | 2.40E-06 | chr:6:32648036 |
| 6 rs33915496  | 32583979 G | 2.104  | 2.41E-06 | chr:6:32648036 |
| 6 rs9272090   | 32599736 C | 0.5362 | 2.41E-06 | chr:6:32648036 |
| 6 rs3134931   | 32190620 C | 2.161  | 2.41E-06 | chr:6:32648036 |
| 6 rs187582489 | 32539553 T | 0.5325 | 2.41E-06 | chr:6:32648036 |
| 6 rs9271189   | 32578357 C | 0.4062 | 2.42E-06 | chr:6:32648036 |
| 6 rs9270539   | 32559764 T | 0.4256 | 2.42E-06 | chr:6:32648036 |
| 6 rs9270489   | 32559077 C | 0.4088 | 2.42E-06 | chr:6:32648036 |
| 6 rs9272544   | 32606878 G | 1.823  | 2.42E-06 | chr:6:32648036 |
| 6 rs35248896  | 32607370 T | 2.349  | 2.42E-06 | chr:6:32648036 |
| 6 rs79267592  | 32578673 A | 0.4045 | 2.47E-06 | chr:6:32648036 |
| 6 rs9271193   | 32578566 T | 0.4045 | 2.47E-06 | chr:6:32648036 |
| 6 rs9271194   | 32578612 T | 0.4045 | 2.47E-06 | chr:6:32648036 |
| 6 rs36153736  | 32489955 G | 2.48   | 2.47E-06 | chr:6:32648036 |
| 6 rs527267556 | 32496496 C | 1.901  | 2.47E-06 | chr:6:32648036 |

|               |            |        |          |                |
|---------------|------------|--------|----------|----------------|
| 6 rs9270757   | 32568595 T | 0.492  | 2.48E-06 | chr:6:32648036 |
| 6 rs9270758   | 32568596 G | 0.492  | 2.48E-06 | chr:6:32648036 |
| 6 rs9274623   | 32635998 T | 2.386  | 2.49E-06 | chr:6:32648036 |
| 6 rs3104415   | 32582577 C | 2.085  | 2.49E-06 | chr:6:32648036 |
| 6 rs582591    | 32579373 A | 0.3598 | 2.50E-06 | chr:6:32648036 |
| 6 rs9271162   | 32577715 G | 0.4065 | 2.50E-06 | chr:6:32648036 |
| 6 rs116609988 | 32522988 A | 0.4904 | 2.50E-06 | chr:6:32648036 |
| 6 rs28747014  | 32654658 C | 0.3911 | 2.51E-06 | chr:6:32648036 |
| 6 rs538879571 | 32503698 A | 0.4439 | 2.53E-06 | chr:6:32648036 |
| 6 rs11970000  | 32598291 G | 0.3988 | 2.53E-06 | chr:6:32648036 |
| 6 rs28746817  | 32633287 T | 1.865  | 2.54E-06 | chr:6:32648036 |
| 6 rs3129717   | 32659308 T | 0.3568 | 2.56E-06 | chr:6:32648036 |
| 6 rs3134967   | 32659315 A | 0.3568 | 2.56E-06 | chr:6:32648036 |
| 6 rs9273140   | 32612868 C | 1.8    | 2.57E-06 | chr:6:32648036 |
| 6 rs9272385   | 32604763 C | 2.115  | 2.57E-06 | chr:6:32648036 |
| 6 rs55765078  | 32647433 C | 2.235  | 2.57E-06 | chr:6:32648036 |
| 6 rs7142      | 32610825 A | 0.5497 | 2.58E-06 | chr:6:32648036 |
| 6 rs9270081   | 32554243 T | 1.909  | 2.60E-06 | chr:6:32648036 |
| 6 rs9273873   | 32629650 C | 2.382  | 2.60E-06 | chr:6:32648036 |
| 6 rs9273902   | 32629716 C | 2.382  | 2.60E-06 | chr:6:32648036 |
| 6 rs17612845  | 32620541 A | 1.707  | 2.61E-06 | chr:6:32648036 |
| 6 rs9270522   | 32559541 T | 0.4334 | 2.61E-06 | chr:6:32648036 |
| 6 rs2239803   | 32411833 T | 2.056  | 2.63E-06 | chr:6:32648036 |
| 6 rs2395232   | 32640217 A | 0.3319 | 2.64E-06 | chr:6:32648036 |
| 6 rs9271115   | 32576731 C | 0.4626 | 2.64E-06 | chr:6:32648036 |
| 6 rs9270801   | 32569387 A | 0.4261 | 2.65E-06 | chr:6:32648036 |
| 6 rs115254515 | 32491895 T | 0.5679 | 2.65E-06 | chr:6:32648036 |
| 6 rs114682516 | 32503702 C | 0.4457 | 2.67E-06 | chr:6:32648036 |
| 6 rs558916921 | 32551899 C | 4.094  | 2.68E-06 | chr:6:32648036 |
| 6 rs116150265 | 32607526 C | 1.693  | 2.69E-06 | chr:6:32648036 |
| 6 rs9272589   | 32607524 C | 1.693  | 2.69E-06 | chr:6:32648036 |
| 6 rs10947296  | 32487724 C | 0.4716 | 2.73E-06 | chr:6:32648036 |
| 6 rs72845733  | 32527305 A | 0.5299 | 2.74E-06 | chr:6:32648036 |
| 6 rs9270302   | 32557479 A | 0.2207 | 2.74E-06 | chr:6:32648036 |
| 6 rs1136787   | 32487427 A | 0.5065 | 2.75E-06 | chr:6:32648036 |
| 6 rs111590055 | 32510177 C | 0.4545 | 2.75E-06 | chr:6:32648036 |
| 6 rs4713575   | 32627039 G | 1.849  | 2.77E-06 | chr:6:32648036 |
| 6 rs552461365 | 32482115 C | 0.508  | 2.79E-06 | chr:6:32648036 |
| 6 rs9276457   | 32715993 T | 3.314  | 2.79E-06 | chr:6:32648036 |
| 6 rs9276458   | 32716000 A | 3.314  | 2.79E-06 | chr:6:32648036 |
| 6 rs9276459   | 32716034 C | 3.314  | 2.79E-06 | chr:6:32648036 |
| 6 rs9276460   | 32716127 G | 3.314  | 2.79E-06 | chr:6:32648036 |
| 6 rs9276461   | 32716167 A | 3.314  | 2.79E-06 | chr:6:32648036 |

|               |            |        |          |                |
|---------------|------------|--------|----------|----------------|
| 6 rs9276462   | 32716170 C | 3.314  | 2.79E-06 | chr:6:32648036 |
| 6 rs9276463   | 32716181 C | 3.314  | 2.79E-06 | chr:6:32648036 |
| 6 rs9276464   | 32716294 T | 3.314  | 2.79E-06 | chr:6:32648036 |
| 6 rs9270962   | 32573434 C | 0.4153 | 2.81E-06 | chr:6:32648036 |
| 6 rs9270963   | 32573441 A | 0.4153 | 2.81E-06 | chr:6:32648036 |
| 6 rs9270964   | 32573442 T | 0.4153 | 2.81E-06 | chr:6:32648036 |
| 6 rs564794849 | 32551752 G | 1.988  | 2.83E-06 | chr:6:32648036 |
| 6 rs9272091   | 32599745 C | 0.5389 | 2.83E-06 | chr:6:32648036 |
| 6 rs185087225 | 32480024 G | 0.5255 | 2.83E-06 | chr:6:32648036 |
| 6 rs113908137 | 32523500 G | 0.5325 | 2.84E-06 | chr:6:32648036 |
| 6 rs34166207  | 32523510 A | 0.5325 | 2.84E-06 | chr:6:32648036 |
| 6 rs9270820   | 32569997 C | 0.4151 | 2.85E-06 | chr:6:32648036 |
| 6 rs1281947   | 32592009 G | 2.472  | 2.86E-06 | chr:6:32648036 |
| 6 rs3129751   | 32582189 C | 2.472  | 2.86E-06 | chr:6:32648036 |
| 6 rs3997872   | 32580617 A | 2.472  | 2.86E-06 | chr:6:32648036 |
| 6 rs9270802   | 32569392 T | 0.4265 | 2.88E-06 | chr:6:32648036 |
| 6 rs9270804   | 32569422 A | 0.4265 | 2.88E-06 | chr:6:32648036 |
| 6 rs9271103   | 32576540 T | 0.426  | 2.89E-06 | chr:6:32648036 |
| 6 rs9273139   | 32612860 G | 1.796  | 2.92E-06 | chr:6:32648036 |
| 6 rs9271144   | 32577220 G | 0.4153 | 2.93E-06 | chr:6:32648036 |
| 6 rs9271145   | 32577224 C | 0.4153 | 2.93E-06 | chr:6:32648036 |
| 6 rs77000541  | 32635605 A | 0.4427 | 2.93E-06 | chr:6:32648036 |
| 6 rs113017160 | 32503834 G | 0.4488 | 2.95E-06 | chr:6:32648036 |
| 6 rs28747045  | 32655537 C | 0.3794 | 2.95E-06 | chr:6:32648036 |
| 6 rs28747046  | 32655539 G | 0.3794 | 2.95E-06 | chr:6:32648036 |
| 6 rs4403294   | 32634922 A | 0.4041 | 2.96E-06 | chr:6:32648036 |
| 6 rs17212336  | 32652026 A | 0.3839 | 3.00E-06 | chr:6:32648036 |
| 6 rs185231254 | 32535257 A | 0.5854 | 3.01E-06 | chr:6:32648036 |
| 6 rs9270939   | 32572806 G | 0.4155 | 3.01E-06 | chr:6:32648036 |
| 6 rs188061573 | 32494061 T | 2.333  | 3.02E-06 | chr:6:32648036 |
| 6 rs9270732   | 32568018 C | 0.4156 | 3.02E-06 | chr:6:32648036 |
| 6 rs9270805   | 32569556 T | 0.4153 | 3.02E-06 | chr:6:32648036 |
| 6 rs200819822 | 32505189 G | 0.4454 | 3.02E-06 | chr:6:32648036 |
| 6 rs9270734   | 32568085 T | 0.4265 | 3.02E-06 | chr:6:32648036 |
| 6 rs116132127 | 32503328 A | 0.4418 | 3.04E-06 | chr:6:32648036 |
| 6 rs9271004   | 32574579 G | 0.437  | 3.05E-06 | chr:6:32648036 |
| 6 rs114629945 | 32503717 G | 0.4459 | 3.06E-06 | chr:6:32648036 |
| 6 rs9270759   | 32568681 C | 0.5004 | 3.06E-06 | chr:6:32648036 |
| 6 rs9270760   | 32568682 A | 0.5004 | 3.06E-06 | chr:6:32648036 |
| 6 rs115910196 | 32502304 T | 0.4546 | 3.07E-06 | chr:6:32648036 |
| 6 rs9270934   | 32572695 G | 0.4156 | 3.10E-06 | chr:6:32648036 |
| 6 rs9270935   | 32572701 A | 0.4156 | 3.10E-06 | chr:6:32648036 |
| 6 rs113900769 | 32503887 T | 0.4566 | 3.11E-06 | chr:6:32648036 |

|               |            |        |          |                |
|---------------|------------|--------|----------|----------------|
| 6 rs17205872  | 32651558 A | 0.3686 | 3.11E-06 | chr:6:32648036 |
| 6 rs9271112   | 32576717 T | 0.4638 | 3.12E-06 | chr:6:32648036 |
| 6 rs9271221   | 32579363 G | 0.4468 | 3.13E-06 | chr:6:32648036 |
| 6 rs9272489   | 32606030 T | 0.3163 | 3.13E-06 | chr:6:32648036 |
| 6 rs9270478   | 32559030 C | 0.4469 | 3.13E-06 | chr:6:32648036 |
| 6 rs3134968   | 32674059 A | 0.312  | 3.14E-06 | chr:6:32648036 |
| 6 rs3134969   | 32674027 C | 0.312  | 3.14E-06 | chr:6:32648036 |
| 6 rs3135002   | 32668439 A | 0.312  | 3.14E-06 | chr:6:32648036 |
| 6 rs534064478 | 32512189 T | 0.459  | 3.14E-06 | chr:6:32648036 |
| 6 rs546382275 | 32512190 G | 0.459  | 3.14E-06 | chr:6:32648036 |
| 6 rs9274115   | 32630205 T | 0.4155 | 3.14E-06 | chr:6:32648036 |
| 6 rs17212329  | 32652005 T | 0.3774 | 3.15E-06 | chr:6:32648036 |
| 6 rs17205998  | 32652050 G | 0.391  | 3.17E-06 | chr:6:32648036 |
| 6 rs9270954   | 32573058 C | 0.4269 | 3.17E-06 | chr:6:32648036 |
| 6 rs1049055   | 32634387 C | 0.3735 | 3.21E-06 | chr:6:32648036 |
| 6 rs9378125   | 32679732 G | 0.3908 | 3.21E-06 | chr:6:32648036 |
| 6 rs2395518   | 32597812 C | 2.284  | 3.22E-06 | chr:6:32648036 |
| 6 rs9274497   | 32633928 A | 2.369  | 3.22E-06 | chr:6:32648036 |
| 6 rs554680493 | 32611362 T | 8.009  | 3.22E-06 | chr:6:32648036 |
| 6 rs141404431 | 32538578 T | 0.4008 | 3.23E-06 | chr:6:32648036 |
| 6 rs143027966 | 32538579 T | 0.4008 | 3.23E-06 | chr:6:32648036 |
| 6 rs151286796 | 32538577 T | 0.4008 | 3.23E-06 | chr:6:32648036 |
| 6 rs4959105   | 32583146 T | 2.067  | 3.24E-06 | chr:6:32648036 |
| 6 rs9270677   | 32566655 T | 0.416  | 3.24E-06 | chr:6:32648036 |
| 6 rs9271342   | 32583122 C | 0.3745 | 3.24E-06 | chr:6:32648036 |
| 6 rs538116343 | 32521742 T | 0.454  | 3.25E-06 | chr:6:32648036 |
| 6 rs9274514   | 32634243 A | 2.364  | 3.26E-06 | chr:6:32648036 |
| 6 rs9276617   | 32743463 G | 4.798  | 1.84E-09 | chr:6:32746812 |
| 6 rs9276618   | 32743483 T | 4.798  | 1.84E-09 | chr:6:32746812 |
| 6 rs9276706   | 32756872 T | 4.553  | 3.69E-09 | chr:6:32746812 |
| 6 rs9276707   | 32756874 T | 4.553  | 3.69E-09 | chr:6:32746812 |
| 6 rs9276697   | 32756363 T | 4.542  | 3.94E-09 | chr:6:32746812 |
| 6 rs9276701   | 32756732 G | 4.542  | 3.94E-09 | chr:6:32746812 |
| 6 rs1158783   | 32758966 C | 4.537  | 4.22E-09 | chr:6:32746812 |
| 6 rs1842399   | 32753313 C | 4.537  | 4.22E-09 | chr:6:32746812 |
| 6 rs1988563   | 32753739 A | 4.537  | 4.22E-09 | chr:6:32746812 |
| 6 rs1988564   | 32753682 T | 4.537  | 4.22E-09 | chr:6:32746812 |
| 6 rs1988565   | 32753492 G | 4.537  | 4.22E-09 | chr:6:32746812 |
| 6 rs200039815 | 32749541 C | 4.537  | 4.22E-09 | chr:6:32746812 |
| 6 rs2170183   | 32745324 T | 4.537  | 4.22E-09 | chr:6:32746812 |
| 6 rs2261567   | 32754094 C | 4.537  | 4.22E-09 | chr:6:32746812 |
| 6 rs2621388   | 32757938 A | 4.537  | 4.22E-09 | chr:6:32746812 |
| 6 rs2621390   | 32757453 C | 4.537  | 4.22E-09 | chr:6:32746812 |

|               |            |       |          |                |
|---------------|------------|-------|----------|----------------|
| 6 rs2621391   | 32757158 C | 4.537 | 4.22E-09 | chr:6:32746812 |
| 6 rs2621392   | 32757001 C | 4.537 | 4.22E-09 | chr:6:32746812 |
| 6 rs2621393   | 32755216 C | 4.537 | 4.22E-09 | chr:6:32746812 |
| 6 rs2621401   | 32750279 T | 4.537 | 4.22E-09 | chr:6:32746812 |
| 6 rs2621404   | 32748633 G | 4.537 | 4.22E-09 | chr:6:32746812 |
| 6 rs2621406   | 32747959 G | 4.537 | 4.22E-09 | chr:6:32746812 |
| 6 rs2857167   | 32757396 A | 4.537 | 4.22E-09 | chr:6:32746812 |
| 6 rs2857168   | 32757131 T | 4.537 | 4.22E-09 | chr:6:32746812 |
| 6 rs2857169   | 32757080 T | 4.537 | 4.22E-09 | chr:6:32746812 |
| 6 rs2857170   | 32756961 A | 4.537 | 4.22E-09 | chr:6:32746812 |
| 6 rs2857172   | 32755023 T | 4.537 | 4.22E-09 | chr:6:32746812 |
| 6 rs2857173   | 32754920 G | 4.537 | 4.22E-09 | chr:6:32746812 |
| 6 rs2857178   | 32752788 G | 4.537 | 4.22E-09 | chr:6:32746812 |
| 6 rs2857183   | 32750982 A | 4.537 | 4.22E-09 | chr:6:32746812 |
| 6 rs2857187   | 32750031 C | 4.537 | 4.22E-09 | chr:6:32746812 |
| 6 rs2857191   | 32747971 A | 4.537 | 4.22E-09 | chr:6:32746812 |
| 6 rs2857194   | 32747273 A | 4.537 | 4.22E-09 | chr:6:32746812 |
| 6 rs2857195   | 32747060 C | 4.537 | 4.22E-09 | chr:6:32746812 |
| 6 rs2857196   | 32747012 G | 4.537 | 4.22E-09 | chr:6:32746812 |
| 6 rs2857197   | 32746984 T | 4.537 | 4.22E-09 | chr:6:32746812 |
| 6 rs2857198   | 32746920 T | 4.537 | 4.22E-09 | chr:6:32746812 |
| 6 rs2857199   | 32746012 A | 4.537 | 4.22E-09 | chr:6:32746812 |
| 6 rs368618879 | 32749540 C | 4.537 | 4.22E-09 | chr:6:32746812 |
| 6 rs719652    | 32752577 C | 4.537 | 4.22E-09 | chr:6:32746812 |
| 6 rs719653    | 32752566 C | 4.537 | 4.22E-09 | chr:6:32746812 |
| 6 rs9276672   | 32749606 C | 4.537 | 4.22E-09 | chr:6:32746812 |
| 6 rs9276674   | 32749704 T | 4.537 | 4.22E-09 | chr:6:32746812 |
| 6 rs9276693   | 32755937 T | 4.537 | 4.22E-09 | chr:6:32746812 |
| 6 rs9276704   | 32756825 T | 4.537 | 4.22E-09 | chr:6:32746812 |
| 6 rs2857207   | 32743173 A | 4.537 | 4.37E-09 | chr:6:32746812 |
| 6 rs9276613   | 32743192 C | 4.537 | 4.37E-09 | chr:6:32746812 |
| 6 rs9276614   | 32743193 A | 4.537 | 4.37E-09 | chr:6:32746812 |
| 6 rs9276622   | 32743624 T | 4.536 | 4.41E-09 | chr:6:32746812 |
| 6 rs2621411   | 32744321 T | 4.538 | 4.49E-09 | chr:6:32746812 |
| 6 rs2621414   | 32742059 T | 4.538 | 4.49E-09 | chr:6:32746812 |
| 6 rs2857205   | 32744145 A | 4.538 | 4.49E-09 | chr:6:32746812 |
| 6 rs2857206   | 32744050 G | 4.538 | 4.49E-09 | chr:6:32746812 |
| 6 rs571667159 | 32744572 A | 4.538 | 4.49E-09 | chr:6:32746812 |
| 6 rs9276615   | 32743217 C | 4.538 | 4.49E-09 | chr:6:32746812 |
| 6 rs9276619   | 32743548 A | 4.538 | 4.49E-09 | chr:6:32746812 |
| 6 rs9276620   | 32743614 A | 4.538 | 4.49E-09 | chr:6:32746812 |
| 6 rs9276621   | 32743617 A | 4.538 | 4.49E-09 | chr:6:32746812 |
| 6 rs9276624   | 32743652 G | 4.538 | 4.49E-09 | chr:6:32746812 |



|               |            |       |          |                |
|---------------|------------|-------|----------|----------------|
| 6 rs9276626   | 32743803 C | 4.538 | 4.49E-09 | chr:6:32746812 |
| 6 rs9276628   | 32743861 G | 4.538 | 4.49E-09 | chr:6:32746812 |
| 6 rs9276629   | 32743901 A | 4.538 | 4.49E-09 | chr:6:32746812 |
| 6 rs9276630   | 32743902 T | 4.538 | 4.49E-09 | chr:6:32746812 |
| 6 rs9276632   | 32744429 C | 4.538 | 4.49E-09 | chr:6:32746812 |
| 6 rs9276633   | 32744452 G | 4.538 | 4.49E-09 | chr:6:32746812 |
| 6 rs9276634   | 32744466 G | 4.538 | 4.49E-09 | chr:6:32746812 |
| 6 rs9276636   | 32744569 A | 4.538 | 4.49E-09 | chr:6:32746812 |
| 6 rs556160526 | 32743428 C | 5     | 4.76E-09 | chr:6:32746812 |
| 6 rs9276640   | 32744684 C | 4.461 | 4.97E-09 | chr:6:32746812 |
| 6 rs9276641   | 32744714 A | 4.461 | 4.97E-09 | chr:6:32746812 |
| 6 rs9276642   | 32744730 A | 4.461 | 4.97E-09 | chr:6:32746812 |
| 6 rs9276658   | 32746731 G | 4.461 | 4.97E-09 | chr:6:32746812 |
| 6 rs2857201   | 32745156 C | 4.439 | 5.19E-09 | chr:6:32746812 |
| 6 rs9276638   | 32744593 T | 4.462 | 5.28E-09 | chr:6:32746812 |
| 6 rs9276639   | 32744667 C | 4.462 | 5.28E-09 | chr:6:32746812 |
| 6 rs9276656   | 32746594 T | 4.459 | 5.29E-09 | chr:6:32746812 |
| 6 rs2621415   | 32741894 T | 4.506 | 5.56E-09 | chr:6:32746812 |
| 6 rs9276657   | 32746674 T | 4.432 | 5.76E-09 | chr:6:32746812 |
| 6 rs2621413   | 32742531 G | 4.506 | 5.94E-09 | chr:6:32746812 |
| 6 rs2621419   | 32741006 T | 4.506 | 5.94E-09 | chr:6:32746812 |
| 6 rs2857210   | 32741742 A | 4.506 | 5.94E-09 | chr:6:32746812 |
| 6 rs7742274   | 32746306 T | 4.218 | 7.56E-09 | chr:6:32746812 |
| 6 rs2857190   | 32748045 T | 4.327 | 8.02E-09 | chr:6:32746812 |
| 6 rs9276655   | 32746574 G | 4.302 | 8.90E-09 | chr:6:32746812 |
| 6 rs9276752   | 32772507 G | 4.212 | 1.28E-08 | chr:6:32746812 |
| 6 rs2621409   | 32746845 T | 4.188 | 1.34E-08 | chr:6:32746812 |
| 6 rs577416391 | 32745642 T | 3.674 | 1.59E-08 | chr:6:32746812 |
| 6 rs2157078   | 32762226 A | 4.005 | 2.91E-08 | chr:6:32746812 |
| 6 rs2157079   | 32762103 T | 4.005 | 2.91E-08 | chr:6:32746812 |
| 6 rs2157080   | 32761826 T | 4.005 | 2.91E-08 | chr:6:32746812 |
| 6 rs2157081   | 32761776 G | 4.005 | 2.91E-08 | chr:6:32746812 |
| 6 rs2187686   | 32761507 A | 4.005 | 2.91E-08 | chr:6:32746812 |
| 6 rs2857155   | 32761317 A | 4.005 | 2.91E-08 | chr:6:32746812 |
| 6 rs2894294   | 32760965 G | 4.005 | 2.91E-08 | chr:6:32746812 |
| 6 rs2857127   | 32776854 A | 3.998 | 3.05E-08 | chr:6:32746812 |
| 6 rs1600571   | 32770390 G | 4     | 3.11E-08 | chr:6:32746812 |
| 6 rs2067577   | 32762484 C | 4     | 3.11E-08 | chr:6:32746812 |
| 6 rs2187684   | 32764719 C | 4     | 3.11E-08 | chr:6:32746812 |
| 6 rs2199870   | 32773172 C | 4     | 3.11E-08 | chr:6:32746812 |
| 6 rs2199871   | 32773042 T | 4     | 3.11E-08 | chr:6:32746812 |
| 6 rs2257789   | 32765383 C | 4     | 3.11E-08 | chr:6:32746812 |
| 6 rs2621332   | 32780317 G | 4     | 3.11E-08 | chr:6:32746812 |

|              |            |       |          |                |
|--------------|------------|-------|----------|----------------|
| 6 rs2621334  | 32778052 A | 4     | 3.11E-08 | chr:6:32746812 |
| 6 rs2621336  | 32776976 C | 4     | 3.11E-08 | chr:6:32746812 |
| 6 rs2621343  | 32774788 C | 4     | 3.11E-08 | chr:6:32746812 |
| 6 rs2621351  | 32772004 G | 4     | 3.11E-08 | chr:6:32746812 |
| 6 rs2621352  | 32771887 C | 4     | 3.11E-08 | chr:6:32746812 |
| 6 rs2621353  | 32771531 G | 4     | 3.11E-08 | chr:6:32746812 |
| 6 rs2621354  | 32771354 T | 4     | 3.11E-08 | chr:6:32746812 |
| 6 rs2621371  | 32767091 G | 4     | 3.11E-08 | chr:6:32746812 |
| 6 rs2621375  | 32763974 T | 4     | 3.11E-08 | chr:6:32746812 |
| 6 rs2621376  | 32763521 T | 4     | 3.11E-08 | chr:6:32746812 |
| 6 rs2621378  | 32763040 G | 4     | 3.11E-08 | chr:6:32746812 |
| 6 rs2857113  | 32780201 C | 4     | 3.11E-08 | chr:6:32746812 |
| 6 rs2857116  | 32778153 A | 4     | 3.11E-08 | chr:6:32746812 |
| 6 rs2857121  | 32777533 T | 4     | 3.11E-08 | chr:6:32746812 |
| 6 rs2857122  | 32777472 G | 4     | 3.11E-08 | chr:6:32746812 |
| 6 rs2857124  | 32777305 T | 4     | 3.11E-08 | chr:6:32746812 |
| 6 rs2857126  | 32777140 C | 4     | 3.11E-08 | chr:6:32746812 |
| 6 rs2857128  | 32776832 A | 4     | 3.11E-08 | chr:6:32746812 |
| 6 rs2857129  | 32776623 A | 4     | 3.11E-08 | chr:6:32746812 |
| 6 rs2857130  | 32776414 T | 4     | 3.11E-08 | chr:6:32746812 |
| 6 rs2857133  | 32776120 A | 4     | 3.11E-08 | chr:6:32746812 |
| 6 rs2857135  | 32775821 A | 4     | 3.11E-08 | chr:6:32746812 |
| 6 rs2857136  | 32775686 A | 4     | 3.11E-08 | chr:6:32746812 |
| 6 rs2857137  | 32775602 A | 4     | 3.11E-08 | chr:6:32746812 |
| 6 rs2857139  | 32775465 C | 4     | 3.11E-08 | chr:6:32746812 |
| 6 rs2857141  | 32774385 A | 4     | 3.11E-08 | chr:6:32746812 |
| 6 rs2857143  | 32772636 A | 4     | 3.11E-08 | chr:6:32746812 |
| 6 rs2857144  | 32771610 A | 4     | 3.11E-08 | chr:6:32746812 |
| 6 rs2857150  | 32763821 A | 4     | 3.11E-08 | chr:6:32746812 |
| 6 rs2857151  | 32763514 A | 4     | 3.11E-08 | chr:6:32746812 |
| 6 rs2857152  | 32762654 A | 4     | 3.11E-08 | chr:6:32746812 |
| 6 rs2857154  | 32762616 A | 4     | 3.11E-08 | chr:6:32746812 |
| 6 rs28744285 | 32773349 A | 4     | 3.11E-08 | chr:6:32746812 |
| 6 rs28744286 | 32773352 C | 4     | 3.11E-08 | chr:6:32746812 |
| 6 rs3101941  | 32775563 A | 4     | 3.11E-08 | chr:6:32746812 |
| 6 rs6929856  | 32777198 C | 4     | 3.11E-08 | chr:6:32746812 |
| 6 rs6929867  | 32777216 C | 4     | 3.11E-08 | chr:6:32746812 |
| 6 rs9276766  | 32773350 C | 4     | 3.11E-08 | chr:6:32746812 |
| 6 rs7383433  | 32778531 A | 4.001 | 3.19E-08 | chr:6:32746812 |
| 6 rs2067098  | 32762307 T | 3.949 | 3.57E-08 | chr:6:32746812 |
| 6 rs7382236  | 32778622 T | 3.945 | 3.66E-08 | chr:6:32746812 |
| 6 rs2157083  | 32760655 C | 3.948 | 3.86E-08 | chr:6:32746812 |
| 6 rs2187687  | 32760539 T | 3.948 | 3.86E-08 | chr:6:32746812 |

|               |            |        |          |                |
|---------------|------------|--------|----------|----------------|
| 6 rs2857158   | 32760334 A | 3.948  | 3.86E-08 | chr:6:32746812 |
| 6 rs2857159   | 32760257 T | 3.948  | 3.86E-08 | chr:6:32746812 |
| 6 rs2857160   | 32760249 T | 3.948  | 3.86E-08 | chr:6:32746812 |
| 6 rs9276797   | 32778648 A | 3.926  | 4.08E-08 | chr:6:32746812 |
| 6 rs9276798   | 32778672 T | 3.901  | 4.91E-08 | chr:6:32746812 |
| 6 rs2857114   | 32779996 G | 3.763  | 6.10E-08 | chr:6:32746812 |
| 6 rs9276796   | 32778422 G | 3.763  | 6.10E-08 | chr:6:32746812 |
| 6 rs9276799   | 32778686 C | 3.768  | 6.47E-08 | chr:6:32746812 |
| 6 rs2621331   | 32780470 C | 3.737  | 7.79E-08 | chr:6:32746812 |
| 6 rs2621348   | 32772575 T | 3.759  | 8.48E-08 | chr:6:32746812 |
| 6 rs2621349   | 32772564 G | 3.759  | 8.48E-08 | chr:6:32746812 |
| 6 rs531930837 | 32772556 C | 3.759  | 8.48E-08 | chr:6:32746812 |
| 6 rs9276643   | 32744834 G | 3.916  | 2.85E-07 | chr:6:32746812 |
| 6 rs9276695   | 32756044 G | 3.917  | 2.96E-07 | chr:6:32746812 |
| 6 rs2621403   | 32749795 T | 3.397  | 5.59E-07 | chr:6:32746812 |
| 6 rs6917611   | 32774954 C | 0.2136 | 6.72E-07 | chr:6:32746812 |
| 6 rs9276800   | 32778709 G | 3.105  | 6.74E-07 | chr:6:32746812 |
| 6 rs2621394   | 32754409 A | 3.357  | 6.78E-07 | chr:6:32746812 |
| 6 rs2621395   | 32754367 G | 3.357  | 6.78E-07 | chr:6:32746812 |
| 6 rs2857175   | 32754398 G | 3.357  | 6.78E-07 | chr:6:32746812 |
| 6 rs9276673   | 32749611 G | 3.354  | 6.81E-07 | chr:6:32746812 |
| 6 rs9276698   | 32756386 G | 3.355  | 6.85E-07 | chr:6:32746812 |
| 6 rs9276703   | 32756794 A | 3.355  | 6.85E-07 | chr:6:32746812 |
| 6 rs9276684   | 32750856 G | 3.353  | 7.03E-07 | chr:6:32746812 |
| 6 rs2621405   | 32748039 C | 3.344  | 7.06E-07 | chr:6:32746812 |
| 6 rs1158785   | 32758571 T | 3.353  | 7.17E-07 | chr:6:32746812 |
| 6 rs2261566   | 32754081 T | 3.353  | 7.17E-07 | chr:6:32746812 |
| 6 rs2261684   | 32758667 A | 3.353  | 7.17E-07 | chr:6:32746812 |
| 6 rs2621384   | 32759273 C | 3.353  | 7.17E-07 | chr:6:32746812 |
| 6 rs2621386   | 32758268 C | 3.353  | 7.17E-07 | chr:6:32746812 |
| 6 rs2621387   | 32757971 C | 3.353  | 7.17E-07 | chr:6:32746812 |
| 6 rs2621389   | 32757532 C | 3.353  | 7.17E-07 | chr:6:32746812 |
| 6 rs2621399   | 32750951 C | 3.353  | 7.17E-07 | chr:6:32746812 |
| 6 rs2621400   | 32750318 G | 3.353  | 7.17E-07 | chr:6:32746812 |
| 6 rs2621407   | 32747569 C | 3.353  | 7.17E-07 | chr:6:32746812 |
| 6 rs2857164   | 32758219 C | 3.353  | 7.17E-07 | chr:6:32746812 |
| 6 rs2857166   | 32757594 G | 3.353  | 7.17E-07 | chr:6:32746812 |
| 6 rs2857174   | 32754768 T | 3.353  | 7.17E-07 | chr:6:32746812 |
| 6 rs2857177   | 32752840 T | 3.353  | 7.17E-07 | chr:6:32746812 |
| 6 rs2857182   | 32751179 A | 3.353  | 7.17E-07 | chr:6:32746812 |
| 6 rs2857189   | 32748943 G | 3.353  | 7.17E-07 | chr:6:32746812 |
| 6 rs2857192   | 32747550 T | 3.353  | 7.17E-07 | chr:6:32746812 |
| 6 rs538048882 | 32750625 A | 3.353  | 7.17E-07 | chr:6:32746812 |

|               |             |        |          |                 |
|---------------|-------------|--------|----------|-----------------|
| 6 rs9276694   | 32756030 T  | 3.353  | 7.17E-07 | chr:6:32746812  |
| 6 rs9276696   | 32756239 C  | 3.353  | 7.17E-07 | chr:6:32746812  |
| 6 rs9276705   | 32756833 T  | 3.353  | 7.17E-07 | chr:6:32746812  |
| 6 rs2857193   | 32747528 G  | 3.352  | 7.36E-07 | chr:6:32746812  |
| 6 rs2857171   | 32755572 A  | 3.353  | 7.41E-07 | chr:6:32746812  |
| 6 rs2857161   | 32759297 G  | 3.31   | 8.24E-07 | chr:6:32746812  |
| 6 rs2857165   | 32757737 G  | 3.31   | 8.42E-07 | chr:6:32746812  |
| 6 rs2621420   | 32740761 T  | 3.191  | 1.23E-06 | chr:6:32746812  |
| 6 rs9276801   | 32778710 T  | 2.967  | 1.41E-06 | chr:6:32746812  |
| 6 rs2621383   | 32759335 C  | 3.153  | 1.79E-06 | chr:6:32746812  |
| 6 rs9276806   | 32778736 A  | 2.879  | 2.05E-06 | chr:6:32746812  |
| 6 rs4148874   | 32797488 C  | 3.342  | 2.17E-06 | chr:6:32746812  |
| 6 rs2621421   | 32740671 G  | 3.092  | 2.20E-06 | chr:6:32746812  |
| 6 rs3763354   | 32786917 G  | 3.246  | 2.37E-06 | chr:6:32746812  |
| 6 rs2621380   | 32761353 C  | 3.19   | 2.52E-06 | chr:6:32746812  |
| 6 rs2187685   | 32764315 T  | 3.187  | 2.63E-06 | chr:6:32746812  |
| 6 rs2621377   | 32763110 C  | 3.187  | 2.63E-06 | chr:6:32746812  |
| 6 rs2621379   | 32762792 G  | 3.187  | 2.63E-06 | chr:6:32746812  |
| 6 rs2857153   | 32762641 C  | 3.187  | 2.63E-06 | chr:6:32746812  |
| 6 rs9276653   | 32746414 A  | 3.046  | 2.85E-06 | chr:6:32746812  |
| 6 rs9276678   | 32750082 C  | 3.205  | 2.96E-06 | chr:6:32746812  |
| 6 rs550743804 | 32742569 G  | 3.15   | 3.37E-06 | chr:6:32746812  |
| 6 rs2157082   | 32760714 G  | 3.099  | 3.50E-06 | chr:6:32746812  |
| 6 rs2621382   | 32760445 G  | 3.099  | 3.50E-06 | chr:6:32746812  |
| 6 rs9276189   | 32699325 A  | 3.744  | 3.71E-06 | chr:6:32746812  |
| 6 rs9276802   | 32778719 A  | 2.728  | 4.61E-06 | chr:6:32746812  |
| 6 rs9276803   | 32778721 C  | 2.728  | 4.61E-06 | chr:6:32746812  |
| 6 rs9276804   | 32778722 C  | 2.728  | 4.61E-06 | chr:6:32746812  |
| 6 rs9276805   | 32778723 A  | 2.728  | 4.61E-06 | chr:6:32746812  |
| 6 rs1044043   | 32793981 A  | 3.142  | 4.78E-06 | chr:6:32746812  |
| 6 rs9276609   | 32741487 G  | 0.2248 | 4.93E-06 | chr:6:32746812  |
| 6 rs9276699   | 32756567 T  | 0.2262 | 5.17E-06 | chr:6:32746812  |
| 6 rs7767167   | 32765182 G  | 3.464  | 5.29E-06 | chr:6:32746812  |
| 6 rs9276702   | 32756741 A  | 3.464  | 5.29E-06 | chr:6:32746812  |
| 7 rs67340855  | 158028782 C | 23.96  | 1.30E-30 | chr:7:158029482 |
| 7 rs67463190  | 158029292 T | 23.96  | 1.30E-30 | chr:7:158029482 |
| 7 rs67515424  | 158028692 T | 23.96  | 1.30E-30 | chr:7:158029482 |
| 7 rs73176122  | 158022065 G | 21.43  | 4.78E-30 | chr:7:158029482 |
| 7 rs56211164  | 158016764 A | 20.79  | 6.22E-30 | chr:7:158029482 |
| 7 rs73176116  | 158018041 T | 22.29  | 6.65E-30 | chr:7:158029482 |
| 7 rs73176117  | 158018530 A | 22.29  | 6.65E-30 | chr:7:158029482 |
| 7 rs73176123  | 158026203 G | 22.29  | 6.65E-30 | chr:7:158029482 |
| 7 rs55821220  | 158022462 G | 22.12  | 7.98E-30 | chr:7:158029482 |

|               |             |        |          |                 |
|---------------|-------------|--------|----------|-----------------|
| 7 rs114730739 | 158018607 C | 21.58  | 8.83E-30 | chr:7:158029482 |
| 7 rs12673825  | 158020274 C | 21.18  | 9.09E-30 | chr:7:158029482 |
| 7 rs73176110  | 158016190 T | 21.45  | 1.01E-29 | chr:7:158029482 |
| 7 rs73176115  | 158017202 C | 21.45  | 1.01E-29 | chr:7:158029482 |
| 7 rs73176118  | 158018536 A | 21.45  | 1.01E-29 | chr:7:158029482 |
| 7 rs73176112  | 158016362 G | 21.32  | 1.33E-29 | chr:7:158029482 |
| 7 rs73176114  | 158017101 G | 20.64  | 1.52E-29 | chr:7:158029482 |
| 7 rs59804289  | 158006512 G | 19.49  | 2.07E-29 | chr:7:158029482 |
| 7 rs12154635  | 158000947 G | 19.62  | 2.97E-29 | chr:7:158029482 |
| 7 rs55633973  | 158000392 A | 19.62  | 2.97E-29 | chr:7:158029482 |
| 7 rs56215385  | 158008987 A | 19.62  | 2.97E-29 | chr:7:158029482 |
| 7 rs73176107  | 158004804 G | 19.62  | 2.97E-29 | chr:7:158029482 |
| 7 rs73176108  | 158009978 A | 19.62  | 2.97E-29 | chr:7:158029482 |
| 7 rs73176109  | 158014524 G | 19.62  | 2.97E-29 | chr:7:158029482 |
| 7 rs55917540  | 157999549 C | 18.44  | 3.65E-29 | chr:7:158029482 |
| 7 rs17847433  | 157997673 A | 17.31  | 8.86E-29 | chr:7:158029482 |
| 7 rs73173702  | 157996475 G | 16.75  | 2.13E-28 | chr:7:158029482 |
| 7 rs73173694  | 157983465 A | 16.39  | 4.33E-28 | chr:7:158029482 |
| 7 rs73173701  | 157993472 C | 15.42  | 9.16E-28 | chr:7:158029482 |
| 7 rs10245306  | 158029340 G | 58.53  | 4.84E-25 | chr:7:158029482 |
| 7 rs73173690  | 157983241 C | 6.849  | 9.96E-23 | chr:7:158029482 |
| 7 rs56283944  | 157983840 A | 6.57   | 4.84E-22 | chr:7:158029482 |
| 7 rs6976575   | 157984182 G | 6.384  | 5.43E-22 | chr:7:158029482 |
| 7 rs73173689  | 157981830 A | 6.755  | 9.75E-22 | chr:7:158029482 |
| 7 rs67764605  | 157983029 A | 6.313  | 9.80E-22 | chr:7:158029482 |
| 7 rs4909140   | 158028901 G | 0.1969 | 9.94E-20 | chr:7:158029482 |
| 7 rs7780034   | 157982161 C | 4.315  | 1.74E-17 | chr:7:158029482 |
| 7 rs10244830  | 157981865 T | 4.207  | 2.94E-17 | chr:7:158029482 |
| 7 rs10260462  | 157981747 A | 4.206  | 6.37E-17 | chr:7:158029482 |
| 7 rs10237337  | 157939072 T | 0.2175 | 1.07E-14 | chr:7:158029482 |
| 7 rs2335848   | 158022103 G | 3.608  | 2.63E-14 | chr:7:158029482 |
| 7 rs10156036  | 158016777 C | 3.633  | 3.03E-14 | chr:7:158029482 |
| 7 rs6963124   | 158023589 A | 3.613  | 4.35E-14 | chr:7:158029482 |
| 7 rs6970487   | 158020147 G | 3.613  | 4.35E-14 | chr:7:158029482 |
| 7 rs10276960  | 158025026 C | 3.539  | 6.85E-14 | chr:7:158029482 |
| 7 rs2878538   | 158027427 G | 3.539  | 6.85E-14 | chr:7:158029482 |
| 7 rs3965316   | 158023815 T | 3.534  | 7.68E-14 | chr:7:158029482 |
| 7 rs6951312   | 158020287 A | 3.534  | 7.68E-14 | chr:7:158029482 |
| 7 rs6974918   | 158020284 G | 3.534  | 7.68E-14 | chr:7:158029482 |
| 7 rs6974924   | 158020293 C | 3.534  | 7.68E-14 | chr:7:158029482 |
| 7 rs4506155   | 158003981 A | 3.517  | 8.96E-14 | chr:7:158029482 |
| 7 rs4595081   | 158007923 T | 3.517  | 8.96E-14 | chr:7:158029482 |
| 7 rs10262127  | 158016574 C | 3.524  | 9.73E-14 | chr:7:158029482 |

|              |             |        |          |                 |
|--------------|-------------|--------|----------|-----------------|
| 7 rs10273930 | 158025121 G | 3.463  | 1.21E-13 | chr:7:158029482 |
| 7 rs6949642  | 158025328 A | 3.463  | 1.21E-13 | chr:7:158029482 |
| 7 rs6948273  | 158015457 C | 3.442  | 1.58E-13 | chr:7:158029482 |
| 7 rs10247985 | 158017478 G | 3.434  | 2.35E-13 | chr:7:158029482 |
| 7 rs6944416  | 158015560 G | 3.361  | 3.51E-13 | chr:7:158029482 |
| 7 rs4416779  | 157987251 C | 3.176  | 1.20E-12 | chr:7:158029482 |
| 7 rs6459852  | 157987496 A | 3.176  | 1.20E-12 | chr:7:158029482 |
| 7 rs1806612  | 157986458 C | 3.055  | 3.70E-12 | chr:7:158029482 |
| 7 rs59787925 | 157993749 T | 3.209  | 4.77E-12 | chr:7:158029482 |
| 7 rs34657686 | 157994153 C | 3.017  | 6.23E-12 | chr:7:158029482 |
| 7 rs7803502  | 157955479 A | 3.484  | 7.48E-12 | chr:7:158029482 |
| 7 rs10253547 | 157936187 A | 0.239  | 9.90E-12 | chr:7:158029482 |
| 7 rs10257376 | 157936992 C | 0.239  | 9.90E-12 | chr:7:158029482 |
| 7 rs4909104  | 157933101 A | 0.239  | 9.90E-12 | chr:7:158029482 |
| 7 rs4909105  | 157933842 T | 0.239  | 9.90E-12 | chr:7:158029482 |
| 7 rs10279290 | 157991041 G | 2.96   | 1.08E-11 | chr:7:158029482 |
| 7 rs6963290  | 157993603 C | 2.96   | 1.08E-11 | chr:7:158029482 |
| 7 rs6977941  | 157993780 A | 2.96   | 1.08E-11 | chr:7:158029482 |
| 7 rs4909289  | 157954904 A | 3.431  | 1.17E-11 | chr:7:158029482 |
| 7 rs4909103  | 157933021 C | 0.2416 | 1.26E-11 | chr:7:158029482 |
| 7 rs13239530 | 157946487 G | 3.017  | 1.41E-11 | chr:7:158029482 |
| 7 rs10229776 | 157937661 A | 0.2131 | 1.61E-11 | chr:7:158029482 |
| 7 rs13239545 | 157946537 G | 3.041  | 1.85E-11 | chr:7:158029482 |
| 7 rs4604380  | 157996809 A | 2.922  | 2.82E-11 | chr:7:158029482 |
| 7 rs6953878  | 157943641 C | 2.896  | 2.93E-11 | chr:7:158029482 |
| 7 rs13311524 | 157951689 G | 2.954  | 3.33E-11 | chr:7:158029482 |
| 7 rs13311355 | 157951417 G | 3.097  | 3.36E-11 | chr:7:158029482 |
| 7 rs4272321  | 157951835 A | 2.932  | 3.43E-11 | chr:7:158029482 |
| 7 rs6459842  | 157934557 A | 0.2866 | 3.57E-11 | chr:7:158029482 |
| 7 rs2335837  | 157973727 C | 2.969  | 3.62E-11 | chr:7:158029482 |
| 7 rs7781500  | 157933457 G | 0.2579 | 3.86E-11 | chr:7:158029482 |
| 7 rs10224535 | 157950927 T | 2.923  | 4.37E-11 | chr:7:158029482 |
| 7 rs10240982 | 157945595 C | 2.923  | 4.37E-11 | chr:7:158029482 |
| 7 rs10249331 | 157947596 C | 2.923  | 4.37E-11 | chr:7:158029482 |
| 7 rs10249470 | 157947741 C | 2.923  | 4.37E-11 | chr:7:158029482 |
| 7 rs10249575 | 157947800 C | 2.923  | 4.37E-11 | chr:7:158029482 |
| 7 rs10261447 | 157950405 C | 2.923  | 4.37E-11 | chr:7:158029482 |
| 7 rs10262458 | 157945872 T | 2.923  | 4.37E-11 | chr:7:158029482 |
| 7 rs10267749 | 157948002 A | 2.923  | 4.37E-11 | chr:7:158029482 |
| 7 rs10278059 | 157947718 G | 2.923  | 4.37E-11 | chr:7:158029482 |
| 7 rs1130498  | 157959636 G | 2.923  | 4.37E-11 | chr:7:158029482 |
| 7 rs11764094 | 157945346 C | 2.923  | 4.37E-11 | chr:7:158029482 |
| 7 rs11768856 | 157950238 C | 2.923  | 4.37E-11 | chr:7:158029482 |

|              |             |       |          |                 |
|--------------|-------------|-------|----------|-----------------|
| 7 rs11773288 | 157953021 G | 2.923 | 4.37E-11 | chr:7:158029482 |
| 7 rs11982237 | 157946250 G | 2.923 | 4.37E-11 | chr:7:158029482 |
| 7 rs12698160 | 157950214 G | 2.923 | 4.37E-11 | chr:7:158029482 |
| 7 rs13239222 | 157946232 G | 2.923 | 4.37E-11 | chr:7:158029482 |
| 7 rs2335479  | 157949109 G | 2.923 | 4.37E-11 | chr:7:158029482 |
| 7 rs2335480  | 157949159 A | 2.923 | 4.37E-11 | chr:7:158029482 |
| 7 rs2335481  | 157949291 C | 2.923 | 4.37E-11 | chr:7:158029482 |
| 7 rs2335483  | 157949839 T | 2.923 | 4.37E-11 | chr:7:158029482 |
| 7 rs2335484  | 157949954 A | 2.923 | 4.37E-11 | chr:7:158029482 |
| 7 rs2335841  | 157958504 C | 2.923 | 4.37E-11 | chr:7:158029482 |
| 7 rs2335850  | 157952182 G | 2.923 | 4.37E-11 | chr:7:158029482 |
| 7 rs28408979 | 157956847 C | 2.923 | 4.37E-11 | chr:7:158029482 |
| 7 rs28536012 | 157956916 C | 2.923 | 4.37E-11 | chr:7:158029482 |
| 7 rs35659509 | 157944903 G | 2.923 | 4.37E-11 | chr:7:158029482 |
| 7 rs36156632 | 157948566 C | 2.923 | 4.37E-11 | chr:7:158029482 |
| 7 rs62480764 | 157956960 G | 2.923 | 4.37E-11 | chr:7:158029482 |
| 7 rs62480765 | 157957053 A | 2.923 | 4.37E-11 | chr:7:158029482 |
| 7 rs6952591  | 157950777 G | 2.923 | 4.37E-11 | chr:7:158029482 |
| 7 rs7781963  | 157957938 A | 2.923 | 4.37E-11 | chr:7:158029482 |
| 7 rs7785926  | 157958014 T | 2.923 | 4.37E-11 | chr:7:158029482 |
| 7 rs7811514  | 157955908 T | 2.923 | 4.37E-11 | chr:7:158029482 |
| 7 rs13231411 | 157962067 T | 2.953 | 4.46E-11 | chr:7:158029482 |
| 7 rs35795717 | 157964407 T | 2.953 | 4.46E-11 | chr:7:158029482 |
| 7 rs71544550 | 157963744 T | 2.953 | 4.46E-11 | chr:7:158029482 |
| 7 rs7790985  | 157958919 T | 2.944 | 5.08E-11 | chr:7:158029482 |
| 7 rs7804408  | 157958922 C | 2.944 | 5.08E-11 | chr:7:158029482 |
| 7 rs6974608  | 157966054 A | 2.952 | 5.32E-11 | chr:7:158029482 |
| 7 rs11769916 | 157979792 G | 2.95  | 5.42E-11 | chr:7:158029482 |
| 7 rs7811697  | 157956030 T | 2.915 | 5.62E-11 | chr:7:158029482 |
| 7 rs4243839  | 157958591 C | 2.914 | 5.62E-11 | chr:7:158029482 |
| 7 rs4909288  | 157954508 T | 2.894 | 5.72E-11 | chr:7:158029482 |
| 7 rs62480235 | 157943806 A | 3.277 | 5.97E-11 | chr:7:158029482 |
| 7 rs2335836  | 157969901 C | 2.917 | 6.43E-11 | chr:7:158029482 |
| 7 rs2335838  | 157973776 T | 2.917 | 6.43E-11 | chr:7:158029482 |
| 7 rs4276632  | 157973935 C | 2.917 | 6.43E-11 | chr:7:158029482 |
| 7 rs6459849  | 157972985 G | 2.917 | 6.43E-11 | chr:7:158029482 |
| 7 rs6979649  | 157972751 A | 2.917 | 6.43E-11 | chr:7:158029482 |
| 7 rs7785124  | 157974450 A | 2.917 | 6.43E-11 | chr:7:158029482 |
| 7 rs28475667 | 157956936 G | 2.904 | 6.56E-11 | chr:7:158029482 |
| 7 rs10247715 | 157978403 A | 2.931 | 6.58E-11 | chr:7:158029482 |
| 7 rs4909126  | 157980144 G | 2.931 | 6.58E-11 | chr:7:158029482 |
| 7 rs4909119  | 157976267 A | 2.933 | 6.70E-11 | chr:7:158029482 |
| 7 rs34044187 | 157944788 C | 2.866 | 6.93E-11 | chr:7:158029482 |

|               |             |        |          |                 |
|---------------|-------------|--------|----------|-----------------|
| 7 rs11770067  | 157952852 A | 2.872  | 7.74E-11 | chr:7:158029482 |
| 7 rs11770102  | 157952836 T | 2.872  | 7.74E-11 | chr:7:158029482 |
| 7 rs11770806  | 157952937 T | 2.872  | 7.74E-11 | chr:7:158029482 |
| 7 rs4326331   | 157951887 T | 2.872  | 7.74E-11 | chr:7:158029482 |
| 7 rs10231396  | 157974744 A | 2.898  | 7.83E-11 | chr:7:158029482 |
| 7 rs10236195  | 157972460 G | 2.898  | 7.83E-11 | chr:7:158029482 |
| 7 rs2335839   | 157973881 T | 2.898  | 7.83E-11 | chr:7:158029482 |
| 7 rs10236479  | 157959506 T | 2.885  | 7.99E-11 | chr:7:158029482 |
| 7 rs12698161  | 157956141 C | 2.885  | 7.99E-11 | chr:7:158029482 |
| 7 rs13310163  | 157959145 C | 2.885  | 7.99E-11 | chr:7:158029482 |
| 7 rs13312556  | 157957305 G | 2.885  | 7.99E-11 | chr:7:158029482 |
| 7 rs4373473   | 157957688 G | 2.885  | 7.99E-11 | chr:7:158029482 |
| 7 rs4382420   | 157957463 A | 2.885  | 7.99E-11 | chr:7:158029482 |
| 7 rs4571685   | 157957344 C | 2.885  | 7.99E-11 | chr:7:158029482 |
| 7 rs4610688   | 157957331 C | 2.885  | 7.99E-11 | chr:7:158029482 |
| 7 rs7785034   | 157955510 C | 2.885  | 7.99E-11 | chr:7:158029482 |
| 7 rs7785775   | 157957900 T | 2.885  | 7.99E-11 | chr:7:158029482 |
| 7 rs7787191   | 157958783 T | 2.885  | 7.99E-11 | chr:7:158029482 |
| 7 rs7798359   | 157957947 G | 2.885  | 7.99E-11 | chr:7:158029482 |
| 7 rs7803824   | 157955671 A | 2.885  | 7.99E-11 | chr:7:158029482 |
| 7 rs7803864   | 157955743 A | 2.885  | 7.99E-11 | chr:7:158029482 |
| 7 rs7807680   | 157955925 A | 2.885  | 7.99E-11 | chr:7:158029482 |
| 7 rs36066197  | 157944692 C | 2.85   | 8.82E-11 | chr:7:158029482 |
| 7 rs10236752  | 157935752 G | 0.2961 | 8.85E-11 | chr:7:158029482 |
| 7 rs2335482   | 157949631 C | 2.866  | 1.05E-10 | chr:7:158029482 |
| 7 rs10237059  | 157979746 C | 2.879  | 1.17E-10 | chr:7:158029482 |
| 7 rs2335833   | 157966776 G | 2.879  | 1.17E-10 | chr:7:158029482 |
| 7 rs4909127   | 157980211 T | 2.879  | 1.17E-10 | chr:7:158029482 |
| 7 rs6459850   | 157975407 C | 2.879  | 1.17E-10 | chr:7:158029482 |
| 7 rs7809921   | 157978998 A | 2.879  | 1.17E-10 | chr:7:158029482 |
| 7 rs4476953   | 157957689 A | 2.821  | 1.41E-10 | chr:7:158029482 |
| 7 rs36021156  | 157962193 A | 2.864  | 1.44E-10 | chr:7:158029482 |
| 7 rs7799442   | 157957873 C | 2.827  | 1.64E-10 | chr:7:158029482 |
| 7 rs4104      | 157947033 G | 2.771  | 2.37E-10 | chr:7:158029482 |
| 7 rs10278558  | 157925239 T | 2.572  | 2.54E-10 | chr:7:158029482 |
| 7 rs10228083  | 157912213 T | 2.542  | 2.68E-10 | chr:7:158029482 |
| 7 rs10236157  | 157914050 T | 2.542  | 2.68E-10 | chr:7:158029482 |
| 7 rs113964323 | 157921852 T | 2.542  | 2.68E-10 | chr:7:158029482 |
| 7 rs11761540  | 157907394 T | 2.542  | 2.68E-10 | chr:7:158029482 |
| 7 rs12698140  | 157895564 A | 2.542  | 2.68E-10 | chr:7:158029482 |
| 7 rs13228073  | 157920698 C | 2.542  | 2.68E-10 | chr:7:158029482 |
| 7 rs3800860   | 157903504 T | 2.542  | 2.68E-10 | chr:7:158029482 |
| 7 rs62480206  | 157921425 A | 2.542  | 2.68E-10 | chr:7:158029482 |



|               |             |       |          |                 |
|---------------|-------------|-------|----------|-----------------|
| 7 rs62649317  | 157921924 T | 2.542 | 2.68E-10 | chr:7:158029482 |
| 7 rs111870581 | 157923768 T | 2.585 | 2.99E-10 | chr:7:158029482 |
| 7 rs115766253 | 157971545 A | 5.685 | 3.81E-10 | chr:7:158029482 |
| 7 rs73173628  | 157944923 A | 5.685 | 3.81E-10 | chr:7:158029482 |
| 7 rs7788947   | 157946684 T | 2.76  | 4.16E-10 | chr:7:158029482 |
| 7 rs10242289  | 157910620 C | 2.528 | 4.42E-10 | chr:7:158029482 |
| 7 rs2335851   | 157925600 T | 2.528 | 4.42E-10 | chr:7:158029482 |
| 7 rs4909256   | 157918314 C | 2.528 | 4.42E-10 | chr:7:158029482 |
| 7 rs4909265   | 157922864 G | 2.528 | 4.42E-10 | chr:7:158029482 |
| 7 rs4909269   | 157924037 T | 2.528 | 4.42E-10 | chr:7:158029482 |
| 7 rs4909270   | 157924502 A | 2.528 | 4.42E-10 | chr:7:158029482 |
| 7 rs57309474  | 157925844 C | 2.528 | 4.42E-10 | chr:7:158029482 |
| 7 rs60270099  | 157925130 A | 2.528 | 4.42E-10 | chr:7:158029482 |
| 7 rs61727967  | 157924773 C | 2.528 | 4.42E-10 | chr:7:158029482 |
| 7 rs7783830   | 157925272 G | 2.528 | 4.42E-10 | chr:7:158029482 |
| 7 rs111073100 | 157925296 T | 2.51  | 4.54E-10 | chr:7:158029482 |
| 7 rs62480760  | 157951563 A | 2.966 | 5.78E-10 | chr:7:158029482 |
| 7 rs4909266   | 157923125 C | 2.466 | 1.11E-09 | chr:7:158029482 |
| 7 rs55757155  | 157924621 C | 2.466 | 1.11E-09 | chr:7:158029482 |
| 7 rs56299768  | 157922341 G | 2.466 | 1.11E-09 | chr:7:158029482 |
| 7 rs73173675  | 157968726 A | 5.989 | 1.37E-09 | chr:7:158029482 |
| 7 rs10248317  | 157907748 A | 2.425 | 2.07E-09 | chr:7:158029482 |
| 7 rs12698151  | 157902701 G | 2.402 | 2.62E-09 | chr:7:158029482 |
| 7 rs78783432  | 157946307 G | 5.429 | 2.62E-09 | chr:7:158029482 |
| 7 rs3800857   | 157929294 A | 2.41  | 2.65E-09 | chr:7:158029482 |
| 7 rs73173650  | 157955341 A | 5.559 | 2.73E-09 | chr:7:158029482 |
| 7 rs73173673  | 157967320 C | 5.971 | 2.93E-09 | chr:7:158029482 |
| 7 rs73173631  | 157945313 C | 5.536 | 3.00E-09 | chr:7:158029482 |
| 7 rs11763127  | 157931893 C | 2.395 | 3.36E-09 | chr:7:158029482 |
| 7 rs10256104  | 157909360 C | 2.383 | 3.56E-09 | chr:7:158029482 |
| 7 rs10277112  | 157916913 A | 2.383 | 3.56E-09 | chr:7:158029482 |
| 7 rs1130501   | 157903538 G | 2.383 | 3.56E-09 | chr:7:158029482 |
| 7 rs12698149  | 157902360 T | 2.383 | 3.56E-09 | chr:7:158029482 |
| 7 rs12698150  | 157902486 A | 2.383 | 3.56E-09 | chr:7:158029482 |
| 7 rs12698153  | 157914911 T | 2.375 | 4.04E-09 | chr:7:158029482 |
| 7 rs56336654  | 157974619 C | 5.852 | 5.04E-09 | chr:7:158029482 |
| 7 rs72505554  | 157951996 C | 5.411 | 5.45E-09 | chr:7:158029482 |
| 7 rs73173633  | 157946600 A | 5.411 | 5.45E-09 | chr:7:158029482 |
| 7 rs73173642  | 157952604 C | 5.411 | 5.45E-09 | chr:7:158029482 |
| 7 rs73173643  | 157952691 T | 5.411 | 5.45E-09 | chr:7:158029482 |
| 7 rs73173652  | 157955494 A | 5.411 | 5.45E-09 | chr:7:158029482 |
| 7 rs73173663  | 157958243 T | 5.411 | 5.45E-09 | chr:7:158029482 |
| 7 rs4075738   | 157905782 C | 2.336 | 7.28E-09 | chr:7:158029482 |

|               |             |        |          |                 |
|---------------|-------------|--------|----------|-----------------|
| 7 rs73173626  | 157943182 C | 5.508  | 8.85E-09 | chr:7:158029482 |
| 7 rs112417415 | 157959169 C | 4.951  | 9.44E-09 | chr:7:158029482 |
| 7 rs67158162  | 157956672 T | 4.951  | 9.44E-09 | chr:7:158029482 |
| 7 rs72505555  | 157956168 C | 4.951  | 9.44E-09 | chr:7:158029482 |
| 7 rs9691947   | 157957644 T | 4.951  | 9.44E-09 | chr:7:158029482 |
| 7 rs11971401  | 157932023 C | 0.4341 | 1.63E-08 | chr:7:158029482 |
| 7 rs12698152  | 157902717 A | 2.27   | 1.64E-08 | chr:7:158029482 |
| 7 rs60853443  | 157944637 A | 4.937  | 1.82E-08 | chr:7:158029482 |
| 7 rs201346361 | 157955738 A | 4.819  | 1.84E-08 | chr:7:158029482 |
| 7 rs201627205 | 157955739 G | 4.819  | 1.84E-08 | chr:7:158029482 |
| 7 rs10434933  | 157930785 G | 0.3225 | 1.84E-08 | chr:7:158029482 |
| 7 rs62479642  | 158048866 C | 0.3833 | 2.35E-08 | chr:7:158029482 |
| 7 rs5022122   | 157951188 G | 3.989  | 2.43E-08 | chr:7:158029482 |
| 7 rs12668895  | 158046571 C | 0.3509 | 5.53E-08 | chr:7:158029482 |
| 7 rs2335832   | 157992083 T | 0.3579 | 6.80E-08 | chr:7:158029482 |
| 7 rs528695704 | 157981197 C | 2.236  | 6.84E-08 | chr:7:158029482 |
| 7 rs548832090 | 157981198 T | 2.236  | 6.84E-08 | chr:7:158029482 |
| 7 rs113769513 | 158026468 T | 0.2747 | 7.63E-08 | chr:7:158029482 |
| 7 rs111713670 | 157993049 C | 0.2753 | 7.67E-08 | chr:7:158029482 |
| 7 rs113418280 | 157992315 A | 0.2753 | 7.67E-08 | chr:7:158029482 |
| 7 rs111232532 | 158014843 A | 0.2822 | 8.55E-08 | chr:7:158029482 |
| 7 rs112369547 | 158015015 T | 0.2824 | 8.99E-08 | chr:7:158029482 |
| 7 rs7778866   | 158032634 T | 0.4401 | 1.23E-07 | chr:7:158029482 |
| 7 rs6944451   | 157985549 A | 8.596  | 1.23E-07 | chr:7:158029482 |
| 7 rs11978471  | 158044864 T | 0.3727 | 1.25E-07 | chr:7:158029482 |
| 7 rs114220465 | 157916924 T | 5.011  | 1.26E-07 | chr:7:158029482 |
| 7 rs151212443 | 157925947 A | 5.011  | 1.26E-07 | chr:7:158029482 |
| 7 rs10266773  | 158026974 A | 2.208  | 1.30E-07 | chr:7:158029482 |
| 7 rs4909156   | 158048114 G | 0.3716 | 1.31E-07 | chr:7:158029482 |
| 7 rs6968086   | 158034110 G | 0.4429 | 1.45E-07 | chr:7:158029482 |
| 7 rs6968106   | 158034148 G | 0.4429 | 1.45E-07 | chr:7:158029482 |
| 7 rs112608152 | 157959172 C | 0.2765 | 1.46E-07 | chr:7:158029482 |
| 7 rs113913841 | 157964619 A | 0.3073 | 1.69E-07 | chr:7:158029482 |
| 7 rs55777186  | 157970525 T | 0.3073 | 1.69E-07 | chr:7:158029482 |
| 7 rs10254474  | 158039181 T | 0.3785 | 1.72E-07 | chr:7:158029482 |
| 7 rs28552557  | 158038527 A | 0.3785 | 1.72E-07 | chr:7:158029482 |
| 7 rs4909053   | 158037397 T | 0.3785 | 1.72E-07 | chr:7:158029482 |
| 7 rs7796043   | 158039868 C | 0.3785 | 1.72E-07 | chr:7:158029482 |
| 7 rs7811307   | 158036434 G | 0.3785 | 1.72E-07 | chr:7:158029482 |
| 7 rs10240877  | 158040599 C | 0.3793 | 2.05E-07 | chr:7:158029482 |
| 7 rs10248016  | 158047638 C | 0.3793 | 2.05E-07 | chr:7:158029482 |
| 7 rs10248148  | 158047724 C | 0.3793 | 2.05E-07 | chr:7:158029482 |
| 7 rs10256056  | 158040689 A | 0.3793 | 2.05E-07 | chr:7:158029482 |

|               |             |        |          |                 |
|---------------|-------------|--------|----------|-----------------|
| 7 rs10949703  | 158043004 C | 0.3793 | 2.05E-07 | chr:7:158029482 |
| 7 rs12672995  | 158046569 G | 0.3793 | 2.05E-07 | chr:7:158029482 |
| 7 rs4305848   | 158043323 C | 0.3793 | 2.05E-07 | chr:7:158029482 |
| 7 rs4909056   | 158044335 A | 0.3793 | 2.05E-07 | chr:7:158029482 |
| 7 rs4909144   | 158041237 A | 0.3793 | 2.05E-07 | chr:7:158029482 |
| 7 rs4909150   | 158043863 T | 0.3793 | 2.05E-07 | chr:7:158029482 |
| 7 rs4909152   | 158045857 T | 0.3793 | 2.05E-07 | chr:7:158029482 |
| 7 rs4909154   | 158046103 A | 0.3793 | 2.05E-07 | chr:7:158029482 |
| 7 rs61724323  | 158041743 G | 0.3793 | 2.05E-07 | chr:7:158029482 |
| 7 rs6962178   | 158045207 C | 0.3793 | 2.05E-07 | chr:7:158029482 |
| 7 rs7782800   | 158040072 T | 0.3793 | 2.05E-07 | chr:7:158029482 |
| 7 rs7807015   | 158043097 T | 0.3793 | 2.05E-07 | chr:7:158029482 |
| 7 rs12672419  | 158045642 G | 0.4494 | 2.41E-07 | chr:7:158029482 |
| 7 rs4909057   | 158044535 T | 0.3818 | 2.46E-07 | chr:7:158029482 |
| 7 rs7791636   | 158032025 C | 0.4612 | 2.52E-07 | chr:7:158029482 |
| 7 rs13310233  | 158046614 T | 0.38   | 2.54E-07 | chr:7:158029482 |
| 7 rs73173621  | 157939551 C | 4.828  | 2.67E-07 | chr:7:158029482 |
| 7 rs56281292  | 158037529 A | 0.3868 | 2.76E-07 | chr:7:158029482 |
| 7 rs10235911  | 158038989 C | 0.453  | 2.88E-07 | chr:7:158029482 |
| 7 rs4909054   | 158039611 G | 0.453  | 2.88E-07 | chr:7:158029482 |
| 7 rs55990403  | 158039934 G | 0.453  | 2.88E-07 | chr:7:158029482 |
| 7 rs7795170   | 158036461 A | 0.453  | 2.88E-07 | chr:7:158029482 |
| 7 rs12669724  | 158043868 A | 0.455  | 3.58E-07 | chr:7:158029482 |
| 7 rs12670893  | 158045556 T | 0.455  | 3.58E-07 | chr:7:158029482 |
| 7 rs4521710   | 158043423 G | 0.455  | 3.58E-07 | chr:7:158029482 |
| 7 rs11766073  | 158060343 A | 0.4189 | 3.63E-07 | chr:7:158029482 |
| 7 rs6965596   | 157954391 T | 2.808  | 4.16E-07 | chr:7:158029482 |
| 7 rs6969761   | 157954483 G | 2.808  | 4.16E-07 | chr:7:158029482 |
| 7 rs7778335   | 157954132 A | 2.808  | 4.16E-07 | chr:7:158029482 |
| 7 rs112718162 | 157937814 T | 4.629  | 4.46E-07 | chr:7:158029482 |
| 7 rs9647693   | 157945685 G | 2.518  | 5.13E-07 | chr:7:158029482 |
| 7 rs6950296   | 158020379 A | 0.3208 | 5.17E-07 | chr:7:158029482 |
| 7 rs73173649  | 157955045 A | 2.763  | 5.21E-07 | chr:7:158029482 |
| 7 rs149862061 | 157939277 A | 4.674  | 5.22E-07 | chr:7:158029482 |
| 7 rs55650416  | 157937221 C | 4.674  | 5.22E-07 | chr:7:158029482 |
| 7 rs55990226  | 157937204 A | 4.674  | 5.22E-07 | chr:7:158029482 |
| 7 rs560682491 | 157937763 T | 4.674  | 5.22E-07 | chr:7:158029482 |
| 7 rs6943049   | 157936375 A | 4.674  | 5.22E-07 | chr:7:158029482 |
| 7 rs73173605  | 157935983 A | 4.674  | 5.22E-07 | chr:7:158029482 |
| 7 rs73173607  | 157936280 G | 4.674  | 5.22E-07 | chr:7:158029482 |
| 7 rs73173608  | 157936719 T | 4.674  | 5.22E-07 | chr:7:158029482 |
| 7 rs73173609  | 157937025 G | 4.674  | 5.22E-07 | chr:7:158029482 |
| 7 rs73173611  | 157937465 G | 4.674  | 5.22E-07 | chr:7:158029482 |

|               |             |        |          |                 |
|---------------|-------------|--------|----------|-----------------|
| 7 rs73173613  | 157937485 T | 4.674  | 5.22E-07 | chr:7:158029482 |
| 7 rs73173614  | 157937517 T | 4.674  | 5.22E-07 | chr:7:158029482 |
| 7 rs73173617  | 157938090 A | 4.674  | 5.22E-07 | chr:7:158029482 |
| 7 rs73173623  | 157939579 G | 4.674  | 5.22E-07 | chr:7:158029482 |
| 7 rs73173624  | 157941953 G | 4.674  | 5.22E-07 | chr:7:158029482 |
| 7 rs73173625  | 157942041 T | 4.674  | 5.22E-07 | chr:7:158029482 |
| 7 rs73173646  | 157953109 C | 2.711  | 5.42E-07 | chr:7:158029482 |
| 7 rs73173647  | 157953202 G | 2.711  | 5.42E-07 | chr:7:158029482 |
| 7 rs7801641   | 157954008 C | 2.711  | 5.42E-07 | chr:7:158029482 |
| 7 rs111357961 | 157939222 G | 4.519  | 5.46E-07 | chr:7:158029482 |
| 7 rs66598579  | 157988313 T | 2.44   | 5.61E-07 | chr:7:158029482 |
| 7 rs112569024 | 157944883 T | 0.2822 | 6.61E-07 | chr:7:158029482 |
| 7 rs80014417  | 157924074 A | 0.4702 | 7.17E-07 | chr:7:158029482 |
| 7 rs12533965  | 157942392 C | 0.2314 | 7.39E-07 | chr:7:158029482 |
| 7 rs59064278  | 157949456 T | 2.655  | 7.79E-07 | chr:7:158029482 |
| 7 rs58180441  | 158019047 A | 0.3307 | 8.29E-07 | chr:7:158029482 |
| 7 rs35995505  | 158019225 T | 0.331  | 8.38E-07 | chr:7:158029482 |
| 7 rs111872244 | 157937662 G | 4.559  | 8.92E-07 | chr:7:158029482 |
| 7 rs6970249   | 157954768 C | 2.704  | 9.03E-07 | chr:7:158029482 |
| 7 rs111852013 | 157973020 T | 2.746  | 9.22E-07 | chr:7:158029482 |
| 7 rs77030049  | 157970376 T | 2.746  | 9.22E-07 | chr:7:158029482 |
| 7 rs6459843   | 157951950 C | 2.65   | 9.57E-07 | chr:7:158029482 |
| 7 rs6459844   | 157952084 T | 2.65   | 9.57E-07 | chr:7:158029482 |
| 7 rs6459845   | 157952180 C | 2.65   | 9.57E-07 | chr:7:158029482 |
| 7 rs6459846   | 157952420 T | 2.65   | 9.57E-07 | chr:7:158029482 |
| 7 rs6459847   | 157952487 T | 2.65   | 9.57E-07 | chr:7:158029482 |
| 7 rs7803872   | 157952006 C | 2.65   | 9.57E-07 | chr:7:158029482 |
| 7 rs62649320  | 158041582 G | 0.4126 | 9.96E-07 | chr:7:158029482 |
| 7 rs192868665 | 157937712 T | 4.378  | 1.01E-06 | chr:7:158029482 |
| 7 rs73173616  | 157937636 T | 4.419  | 1.02E-06 | chr:7:158029482 |
| 7 rs73173604  | 157934888 A | 4.379  | 1.02E-06 | chr:7:158029482 |
| 7 rs79717697  | 157935079 T | 4.379  | 1.02E-06 | chr:7:158029482 |
| 7 rs62649321  | 158041585 G | 0.4128 | 1.07E-06 | chr:7:158029482 |
| 7 rs7792381   | 158032509 C | 0.4035 | 1.19E-06 | chr:7:158029482 |
| 7 rs10227009  | 158027455 C | 0.3108 | 1.21E-06 | chr:7:158029482 |
| 7 rs6950346   | 158025658 T | 0.3108 | 1.21E-06 | chr:7:158029482 |
| 7 rs10263846  | 157990941 T | 0.3224 | 1.24E-06 | chr:7:158029482 |
| 7 rs10275911  | 157990608 G | 0.3224 | 1.24E-06 | chr:7:158029482 |
| 7 rs10949702  | 157986125 C | 0.3224 | 1.24E-06 | chr:7:158029482 |
| 7 rs1806611   | 157986440 T | 0.3366 | 1.27E-06 | chr:7:158029482 |
| 7 rs10258997  | 158016559 G | 0.3103 | 1.29E-06 | chr:7:158029482 |
| 7 rs10256080  | 158019437 T | 0.343  | 1.34E-06 | chr:7:158029482 |
| 7 rs13234832  | 158014979 T | 0.341  | 1.34E-06 | chr:7:158029482 |

|               |             |        |          |                 |
|---------------|-------------|--------|----------|-----------------|
| 7 rs73173692  | 157983281 A | 5.73   | 1.47E-06 | chr:7:158029482 |
| 7 rs10231253  | 157983353 A | 0.3225 | 1.49E-06 | chr:7:158029482 |
| 7 rs881468    | 158077831 A | 2.889  | 1.49E-06 | chr:7:158029482 |
| 7 rs10215664  | 158015494 G | 0.3438 | 1.52E-06 | chr:7:158029482 |
| 7 rs10240498  | 158003705 A | 0.3438 | 1.52E-06 | chr:7:158029482 |
| 7 rs10246937  | 158007673 C | 0.3438 | 1.52E-06 | chr:7:158029482 |
| 7 rs10256328  | 158007074 A | 0.3438 | 1.52E-06 | chr:7:158029482 |
| 7 rs13234740  | 158014940 A | 0.3438 | 1.52E-06 | chr:7:158029482 |
| 7 rs6942658   | 158001150 A | 0.3438 | 1.52E-06 | chr:7:158029482 |
| 7 rs6942903   | 158001252 A | 0.3438 | 1.52E-06 | chr:7:158029482 |
| 7 rs9771103   | 157999823 T | 0.3438 | 1.52E-06 | chr:7:158029482 |
| 7 rs59914791  | 157976479 C | 2.705  | 1.55E-06 | chr:7:158029482 |
| 7 rs58090298  | 157944513 T | 2.61   | 1.59E-06 | chr:7:158029482 |
| 7 rs13311464  | 157951621 G | 2.157  | 1.60E-06 | chr:7:158029482 |
| 7 rs67598038  | 158028778 A | 0.3158 | 1.65E-06 | chr:7:158029482 |
| 7 rs117379346 | 158107231 T | 2.831  | 1.77E-06 | chr:7:158029482 |
| 7 rs117446941 | 157978483 T | 5.02   | 1.81E-06 | chr:7:158029482 |
| 7 rs73173618  | 157938329 T | 4.133  | 1.81E-06 | chr:7:158029482 |
| 7 rs3800855   | 157985149 G | 0.3282 | 1.85E-06 | chr:7:158029482 |
| 7 rs10268228  | 157985479 A | 0.3426 | 1.90E-06 | chr:7:158029482 |
| 7 rs10271711  | 157985854 A | 0.3426 | 1.90E-06 | chr:7:158029482 |
| 7 rs10271837  | 157985998 C | 0.3426 | 1.90E-06 | chr:7:158029482 |
| 7 rs10229663  | 157937600 T | 0.4781 | 1.94E-06 | chr:7:158029482 |
| 7 rs10215991  | 158015263 A | 0.354  | 2.17E-06 | chr:7:158029482 |
| 7 rs10215992  | 158015273 A | 0.354  | 2.17E-06 | chr:7:158029482 |
| 7 rs11766232  | 157847149 T | 3.095  | 2.35E-06 | chr:7:158029482 |
| 7 rs10215289  | 158015301 T | 0.354  | 2.42E-06 | chr:7:158029482 |
| 7 rs10257230  | 158015030 A | 0.354  | 2.42E-06 | chr:7:158029482 |
| 7 rs28712645  | 157863000 G | 0.4119 | 2.70E-06 | chr:7:158029482 |
| 7 rs9690755   | 157957874 A | 2.362  | 3.30E-06 | chr:7:158029482 |
| 7 rs3800856   | 157984992 A | 0.3531 | 3.71E-06 | chr:7:158029482 |
| 7 rs4909153   | 158046054 C | 0.4785 | 3.85E-06 | chr:7:158029482 |
| 7 rs188495239 | 157939361 C | 4.253  | 3.89E-06 | chr:7:158029482 |
| 7 rs373048748 | 157939318 T | 4.253  | 3.89E-06 | chr:7:158029482 |
| 7 rs376173592 | 157939321 G | 4.253  | 3.89E-06 | chr:7:158029482 |
| 7 rs562397432 | 157939353 C | 4.253  | 3.89E-06 | chr:7:158029482 |
| 7 rs186905024 | 157939391 T | 4.023  | 4.43E-06 | chr:7:158029482 |
| 7 rs1806669   | 158059661 G | 0.4654 | 4.47E-06 | chr:7:158029482 |
| 7 rs10215745  | 158015262 C | 0.3765 | 5.36E-06 | chr:7:158029482 |
| 7 rs7789111   | 158021519 C | 0.3541 | 5.47E-06 | chr:7:158029482 |
| 7 rs57852521  | 157867659 G | 3.05   | 5.49E-06 | chr:7:158029482 |
| 7 rs111902104 | 157881848 A | 0.4861 | 5.84E-06 | chr:7:158029482 |
| 7 rs112578537 | 157881838 C | 0.4861 | 5.84E-06 | chr:7:158029482 |

|               |             |        |          |                 |
|---------------|-------------|--------|----------|-----------------|
| 7 rs555956600 | 157881857 G | 0.4861 | 5.84E-06 | chr:7:158029482 |
| 7 rs111953248 | 157897965 G | 0.3285 | 5.98E-06 | chr:7:158029482 |
| 7 rs7804879   | 157929829 A | 0.3285 | 5.98E-06 | chr:7:158029482 |
| 7 rs79626170  | 157898916 T | 0.3285 | 5.98E-06 | chr:7:158029482 |
| 7 rs10282471  | 157997236 T | 0.3754 | 6.13E-06 | chr:7:158029482 |
| 7 rs67690616  | 157944193 A | 2.96   | 6.69E-06 | chr:7:158029482 |
| 7 rs200584961 | 157939311 G | 3.891  | 6.76E-06 | chr:7:158029482 |
| 7 rs58730603  | 158054764 T | 0.4731 | 7.07E-06 | chr:7:158029482 |
| 7 rs78559762  | 158054039 A | 0.4731 | 7.07E-06 | chr:7:158029482 |
| 7 rs10249710  | 158030463 A | 0.3343 | 7.43E-06 | chr:7:158029482 |
| 7 rs1806608   | 157857535 T | 2.984  | 7.81E-06 | chr:7:158029482 |
| 7 rs61012910  | 157862260 C | 2.984  | 7.81E-06 | chr:7:158029482 |
| 7 rs73171552  | 157849602 T | 2.984  | 7.81E-06 | chr:7:158029482 |
| 7 rs73171559  | 157856564 G | 2.984  | 7.81E-06 | chr:7:158029482 |
| 7 rs73171562  | 157858219 T | 2.984  | 7.81E-06 | chr:7:158029482 |
| 7 rs4909062   | 158103844 A | 1.906  | 7.83E-06 | chr:7:158029482 |
| 7 rs11773808  | 158057332 G | 0.4686 | 8.56E-06 | chr:7:158029482 |
| 7 rs184314080 | 157939399 T | 3.84   | 9.46E-06 | chr:7:158029482 |
| 7 rs118037635 | 157866369 T | 2.975  | 9.54E-06 | chr:7:158029482 |
| 7 rs73171566  | 157865466 T | 2.975  | 9.54E-06 | chr:7:158029482 |
| 7 rs4909061   | 158103810 C | 1.888  | 9.83E-06 | chr:7:158029482 |
| 7 rs111787182 | 157911633 C | 4.853  | 1.04E-05 | chr:7:158029482 |
| 7 rs73171551  | 157848979 A | 2.848  | 1.08E-05 | chr:7:158029482 |
| 7 rs1104921   | 158060317 A | 2.532  | 1.10E-05 | chr:7:158029482 |
| 7 rs10265818  | 157856505 C | 0.4405 | 1.14E-05 | chr:7:158029482 |
| 7 rs117590591 | 157848548 G | 2.899  | 1.20E-05 | chr:7:158029482 |
| 7 rs73171543  | 157847636 C | 2.899  | 1.20E-05 | chr:7:158029482 |
| 7 rs73171546  | 157848528 C | 2.899  | 1.20E-05 | chr:7:158029482 |
| 7 rs11771280  | 158058362 A | 0.4718 | 1.23E-05 | chr:7:158029482 |
| 7 rs2001314   | 158059744 G | 0.4718 | 1.23E-05 | chr:7:158029482 |
| 7 rs55913376  | 157959055 C | 0.4291 | 1.26E-05 | chr:7:158029482 |
| 7 rs3800865   | 157861490 G | 2.915  | 1.30E-05 | chr:7:158029482 |
| 7 rs73176136  | 158050952 T | 0.4736 | 1.45E-05 | chr:7:158029482 |
| 7 rs7777448   | 158031749 A | 1.89   | 1.49E-05 | chr:7:158029482 |
| 7 rs12671573  | 158046818 C | 1.871  | 1.50E-05 | chr:7:158029482 |
| 7 rs117550270 | 157848716 T | 2.835  | 1.66E-05 | chr:7:158029482 |
| 7 rs7782123   | 157957832 G | 0.3248 | 1.87E-05 | chr:7:158029482 |
| 7 rs11771191  | 158058079 T | 0.4791 | 1.90E-05 | chr:7:158029482 |
| 7 rs11767434  | 158054730 T | 0.4812 | 1.97E-05 | chr:7:158029482 |
| 7 rs11769815  | 158052846 C | 0.4812 | 1.97E-05 | chr:7:158029482 |
| 7 rs11970802  | 158054016 T | 0.4812 | 1.97E-05 | chr:7:158029482 |
| 7 rs58783144  | 158055144 T | 0.4812 | 1.97E-05 | chr:7:158029482 |
| 7 rs62649324  | 158055616 C | 0.4812 | 1.97E-05 | chr:7:158029482 |

|               |             |        |          |                 |
|---------------|-------------|--------|----------|-----------------|
| 7 rs116319804 | 157863570 G | 2.546  | 2.04E-05 | chr:7:158029482 |
| 7 rs118052470 | 158068207 A | 4.043  | 2.36E-05 | chr:7:158029482 |
| 7 rs2001313   | 158059742 C | 0.4858 | 2.37E-05 | chr:7:158029482 |
| 7 rs58823827  | 158054670 T | 0.4862 | 2.50E-05 | chr:7:158029482 |
| 7 rs60152593  | 157932473 T | 0.3423 | 2.65E-05 | chr:7:158029482 |
| 7 rs34419614  | 157851037 A | 2.248  | 2.81E-05 | chr:7:158029482 |
| 7 rs4909155   | 158046269 G | 0.5117 | 3.13E-05 | chr:7:158029482 |
| 8 rs2632852   | 18656224 T  | 95.43  | 8.00E-32 | chr:8:18651457  |
| 8 rs2129702   | 18656090 G  | 109.5  | 9.16E-32 | chr:8:18651457  |
| 8 rs28696248  | 18656314 G  | 155.3  | 1.75E-31 | chr:8:18651457  |
| 8 rs10503635  | 18654329 T  | 219.3  | 2.79E-30 | chr:8:18651457  |
| 8 rs11780872  | 18651376 T  | 237.3  | 3.53E-30 | chr:8:18651457  |
| 8 rs13250313  | 18652812 A  | 54.29  | 7.08E-26 | chr:8:18651457  |
| 8 rs13254153  | 18655330 C  | 20.32  | 1.83E-25 | chr:8:18651457  |
| 8 rs10108047  | 18650597 T  | 59.36  | 2.00E-25 | chr:8:18651457  |
| 8 rs35809948  | 18647701 G  | 36.64  | 1.14E-23 | chr:8:18651457  |
| 8 rs12680447  | 18654653 T  | 15.53  | 1.68E-21 | chr:8:18651457  |
| 8 rs10086769  | 18664962 C  | 11.6   | 4.29E-21 | chr:8:18651457  |
| 8 rs10102692  | 18665202 C  | 11.81  | 5.06E-21 | chr:8:18651457  |
| 8 rs73666724  | 18662204 A  | 11.92  | 3.49E-20 | chr:8:18651457  |
| 8 rs34650180  | 18633770 C  | 6.912  | 1.58E-19 | chr:8:18651457  |
| 8 rs13255143  | 18661844 G  | 8.605  | 6.24E-19 | chr:8:18651457  |
| 8 rs13261634  | 18653020 T  | 1235   | 4.19E-18 | chr:8:18651457  |
| 8 rs35764685  | 18661342 A  | 8.298  | 6.23E-18 | chr:8:18651457  |
| 8 rs17383368  | 18655746 C  | 4.922  | 2.35E-17 | chr:8:18651457  |
| 8 rs10503636  | 18654794 T  | 4.664  | 8.41E-17 | chr:8:18651457  |
| 8 rs35884486  | 18656382 A  | 4.576  | 1.74E-16 | chr:8:18651457  |
| 8 rs111916415 | 18656221 A  | 4.416  | 5.46E-16 | chr:8:18651457  |
| 8 rs335238    | 18642319 G  | 12.61  | 1.84E-15 | chr:8:18651457  |
| 8 rs6586762   | 18615706 T  | 4.64   | 9.60E-15 | chr:8:18651457  |
| 8 rs79965841  | 18656209 C  | 3.893  | 1.69E-14 | chr:8:18651457  |
| 8 rs10094591  | 18653299 T  | 2618   | 6.03E-13 | chr:8:18651457  |
| 8 rs11780185  | 18651428 A  | 2618   | 6.03E-13 | chr:8:18651457  |
| 8 rs57290482  | 18652460 T  | 2618   | 6.03E-13 | chr:8:18651457  |
| 8 rs57931874  | 18652499 C  | 2618   | 6.03E-13 | chr:8:18651457  |
| 8 rs60508084  | 18652637 A  | 2618   | 6.03E-13 | chr:8:18651457  |
| 8 rs10503633  | 18653742 G  | 2580   | 6.44E-13 | chr:8:18651457  |
| 8 rs11203998  | 18654206 C  | 2580   | 6.44E-13 | chr:8:18651457  |
| 8 rs11777761  | 18652934 C  | 2580   | 6.44E-13 | chr:8:18651457  |
| 8 rs11785249  | 18653313 G  | 2580   | 6.44E-13 | chr:8:18651457  |
| 8 rs10503634  | 18654293 C  | 2417   | 7.43E-13 | chr:8:18651457  |
| 8 rs2306825   | 18656805 A  | 4.059  | 1.42E-12 | chr:8:18651457  |
| 8 rs7837572   | 18665140 T  | 3.829  | 1.98E-12 | chr:8:18651457  |

|              |            |        |          |                |
|--------------|------------|--------|----------|----------------|
| 8 rs28447980 | 18606948 T | 8.618  | 2.23E-12 | chr:8:18651457 |
| 8 rs28666704 | 18607201 T | 8.618  | 2.23E-12 | chr:8:18651457 |
| 8 rs11775742 | 18665710 C | 0.2872 | 2.36E-12 | chr:8:18651457 |
| 8 rs10097648 | 18606611 A | 7.691  | 2.82E-12 | chr:8:18651457 |
| 8 rs2172289  | 18663483 A | 3.276  | 6.07E-12 | chr:8:18651457 |
| 8 rs1492285  | 18655251 A | 26.46  | 6.72E-12 | chr:8:18651457 |
| 8 rs1386688  | 18664294 G | 3.668  | 6.87E-12 | chr:8:18651457 |
| 8 rs11775676 | 18665492 C | 0.2973 | 7.17E-12 | chr:8:18651457 |
| 8 rs59437212 | 18610782 T | 7.028  | 2.02E-11 | chr:8:18651457 |
| 8 rs335249   | 18646833 T | 11.22  | 2.07E-11 | chr:8:18651457 |
| 8 rs335252   | 18647969 C | 11.22  | 2.07E-11 | chr:8:18651457 |
| 8 rs2638621  | 18656416 T | 24.59  | 2.32E-11 | chr:8:18651457 |
| 8 rs2638658  | 18669340 C | 3.135  | 3.82E-11 | chr:8:18651457 |
| 8 rs335253   | 18648477 T | 10.09  | 4.45E-11 | chr:8:18651457 |
| 8 rs335254   | 18649213 C | 10.09  | 4.45E-11 | chr:8:18651457 |
| 8 rs335255   | 18649785 C | 10.09  | 4.45E-11 | chr:8:18651457 |
| 8 rs7812892  | 18660674 A | 3.331  | 1.24E-10 | chr:8:18651457 |
| 8 rs335243   | 18643985 C | 7.976  | 1.32E-10 | chr:8:18651457 |
| 8 rs335240   | 18642610 G | 8.62   | 1.35E-10 | chr:8:18651457 |
| 8 rs11774165 | 18658950 G | 0.3358 | 1.51E-10 | chr:8:18651457 |
| 8 rs2069245  | 18657093 C | 0.3396 | 2.26E-10 | chr:8:18651457 |
| 8 rs13276530 | 18658346 A | 2.946  | 2.44E-10 | chr:8:18651457 |
| 8 rs11786923 | 18658007 G | 0.3403 | 2.90E-10 | chr:8:18651457 |
| 8 rs36085278 | 18659470 A | 2.912  | 3.16E-10 | chr:8:18651457 |
| 8 rs11986109 | 18657632 C | 0.3409 | 3.39E-10 | chr:8:18651457 |
| 8 rs11997879 | 18657450 A | 0.3409 | 3.39E-10 | chr:8:18651457 |
| 8 rs11993401 | 18657427 T | 0.3414 | 3.84E-10 | chr:8:18651457 |
| 8 rs28807223 | 18603183 C | 4.84   | 4.88E-10 | chr:8:18651457 |
| 8 rs34059664 | 18657698 G | 0.3458 | 4.92E-10 | chr:8:18651457 |
| 8 rs11786921 | 18657985 C | 0.3459 | 5.11E-10 | chr:8:18651457 |
| 8 rs2638653  | 18666210 G | 2.866  | 5.47E-10 | chr:8:18651457 |
| 8 rs11993467 | 18657661 T | 0.3464 | 5.57E-10 | chr:8:18651457 |
| 8 rs12549858 | 18654478 A | 0.2874 | 1.07E-09 | chr:8:18651457 |
| 8 rs7001013  | 18615974 T | 3.229  | 1.47E-09 | chr:8:18651457 |
| 8 rs11774752 | 18664654 C | 0.359  | 1.53E-09 | chr:8:18651457 |
| 8 rs17695883 | 18548739 C | 6.035  | 1.85E-09 | chr:8:18651457 |
| 8 rs60746929 | 18654480 T | 0.2916 | 2.47E-09 | chr:8:18651457 |
| 8 rs10111304 | 18650904 C | 0.3106 | 2.58E-09 | chr:8:18651457 |
| 8 rs17467874 | 18652744 C | 0.3126 | 2.62E-09 | chr:8:18651457 |
| 8 rs6987329  | 18616376 C | 3.145  | 3.02E-09 | chr:8:18651457 |
| 8 rs7012633  | 18618503 G | 3.212  | 3.09E-09 | chr:8:18651457 |
| 8 rs1388766  | 18667412 C | 21.19  | 3.24E-09 | chr:8:18651457 |
| 8 rs2469946  | 18652623 G | 14.4   | 3.35E-09 | chr:8:18651457 |



|              |            |        |          |                |
|--------------|------------|--------|----------|----------------|
| 8 rs233197   | 18640628 A | 8.205  | 3.43E-09 | chr:8:18651457 |
| 8 rs335225   | 18633305 A | 8.205  | 3.43E-09 | chr:8:18651457 |
| 8 rs4921611  | 18617581 G | 3.175  | 4.06E-09 | chr:8:18651457 |
| 8 rs335222   | 18634213 A | 8.413  | 5.13E-09 | chr:8:18651457 |
| 8 rs12544207 | 18619231 G | 3.126  | 5.60E-09 | chr:8:18651457 |
| 8 rs2172290  | 18668608 A | 2.585  | 1.02E-08 | chr:8:18651457 |
| 8 rs2638625  | 18659269 T | 2.519  | 1.06E-08 | chr:8:18651457 |
| 8 rs10087962 | 18668751 A | 2.69   | 1.18E-08 | chr:8:18651457 |
| 8 rs10105376 | 18668612 C | 2.69   | 1.18E-08 | chr:8:18651457 |
| 8 rs7018263  | 18554698 C | 3.527  | 1.22E-08 | chr:8:18651457 |
| 8 rs1386692  | 18658750 G | 2.498  | 1.28E-08 | chr:8:18651457 |
| 8 rs2632845  | 18660720 G | 2.484  | 1.51E-08 | chr:8:18651457 |
| 8 rs335242   | 18642711 A | 7.071  | 1.75E-08 | chr:8:18651457 |
| 8 rs335223   | 18634002 G | 14.59  | 1.94E-08 | chr:8:18651457 |
| 8 rs7014135  | 18623860 G | 12.47  | 2.18E-08 | chr:8:18651457 |
| 8 rs335226   | 18632945 T | 6.353  | 2.21E-08 | chr:8:18651457 |
| 8 rs335235   | 18638364 C | 12.44  | 2.26E-08 | chr:8:18651457 |
| 8 rs2632848  | 18659780 C | 2.462  | 2.35E-08 | chr:8:18651457 |
| 8 rs11780950 | 18668483 C | 0.3987 | 2.92E-08 | chr:8:18651457 |
| 8 rs3988322  | 18614526 C | 3.3    | 3.62E-08 | chr:8:18651457 |
| 8 rs11778625 | 18668681 G | 0.4025 | 3.92E-08 | chr:8:18651457 |
| 8 rs11996790 | 18656238 C | 0.3204 | 4.23E-08 | chr:8:18651457 |
| 8 rs12335185 | 18623326 A | 3.017  | 6.13E-08 | chr:8:18651457 |
| 8 rs335230   | 18629753 G | 8.417  | 6.29E-08 | chr:8:18651457 |
| 8 rs11203982 | 18546937 C | 3.702  | 7.23E-08 | chr:8:18651457 |
| 8 rs11774205 | 18534109 A | 3.606  | 1.56E-07 | chr:8:18651457 |
| 8 rs1565138  | 18601848 C | 2.742  | 1.67E-07 | chr:8:18651457 |
| 8 rs7841096  | 18632333 A | 2.198  | 2.37E-07 | chr:8:18651457 |
| 8 rs9694178  | 18517878 T | 2.909  | 2.54E-07 | chr:8:18651457 |
| 8 rs28791302 | 18629428 T | 3.691  | 2.81E-07 | chr:8:18651457 |
| 8 rs73199983 | 18628075 C | 3.691  | 2.81E-07 | chr:8:18651457 |
| 8 rs335224   | 18633772 C | 7.076  | 2.87E-07 | chr:8:18651457 |
| 8 rs335241   | 18642689 G | 14.4   | 2.91E-07 | chr:8:18651457 |
| 8 rs7841192  | 18523274 T | 2.922  | 3.24E-07 | chr:8:18651457 |
| 8 rs7821520  | 18549249 C | 3.178  | 3.69E-07 | chr:8:18651457 |
| 8 rs13262834 | 18610111 A | 10.9   | 3.70E-07 | chr:8:18651457 |
| 8 rs4921956  | 18620761 A | 3.681  | 3.80E-07 | chr:8:18651457 |
| 8 rs7834242  | 18534708 A | 3.45   | 3.81E-07 | chr:8:18651457 |
| 8 rs335247   | 18646433 C | 5.377  | 3.98E-07 | chr:8:18651457 |
| 8 rs1492282  | 18670353 A | 25.17  | 4.73E-07 | chr:8:18651457 |
| 8 rs7822288  | 18632327 G | 2.151  | 4.90E-07 | chr:8:18651457 |
| 8 rs7843528  | 18549584 T | 3.124  | 5.08E-07 | chr:8:18651457 |
| 8 rs7012188  | 18618272 T | 3.47   | 5.46E-07 | chr:8:18651457 |

|              |            |       |          |                |
|--------------|------------|-------|----------|----------------|
| 8 rs28656462 | 18606367 T | 5.195 | 6.32E-07 | chr:8:18651457 |
| 8 rs73199955 | 18607756 C | 5.195 | 6.32E-07 | chr:8:18651457 |
| 8 rs11783494 | 18628376 C | 2.158 | 6.66E-07 | chr:8:18651457 |
| 8 rs10094957 | 18593473 A | 16.93 | 1.03E-06 | chr:8:18651457 |
| 8 rs10096367 | 18594868 G | 16.93 | 1.03E-06 | chr:8:18651457 |
| 8 rs10096440 | 18598419 A | 16.93 | 1.03E-06 | chr:8:18651457 |
| 8 rs10097758 | 18598820 T | 16.93 | 1.03E-06 | chr:8:18651457 |
| 8 rs11203992 | 18597665 C | 16.93 | 1.03E-06 | chr:8:18651457 |
| 8 rs17127136 | 18593918 C | 16.93 | 1.03E-06 | chr:8:18651457 |
| 8 rs13264337 | 18626285 T | 2.109 | 1.10E-06 | chr:8:18651457 |
| 8 rs13282718 | 18625923 C | 2.109 | 1.10E-06 | chr:8:18651457 |
| 8 rs10110943 | 18612612 A | 3.354 | 1.10E-06 | chr:8:18651457 |
| 8 rs73199965 | 18616604 A | 2.858 | 1.11E-06 | chr:8:18651457 |
| 8 rs7824710  | 18517244 C | 2.478 | 1.32E-06 | chr:8:18651457 |
| 8 rs1121922  | 18519032 T | 2.704 | 1.45E-06 | chr:8:18651457 |
| 8 rs10099535 | 18604754 C | 22.45 | 1.52E-06 | chr:8:18651457 |
| 8 rs10107780 | 18606236 T | 22.45 | 1.52E-06 | chr:8:18651457 |
| 8 rs10111500 | 18607860 T | 22.45 | 1.52E-06 | chr:8:18651457 |
| 8 rs73199952 | 18604387 G | 5.267 | 1.56E-06 | chr:8:18651457 |
| 8 rs9644614  | 18630435 C | 2.065 | 1.89E-06 | chr:8:18651457 |
| 8 rs11783955 | 18630683 A | 2.069 | 1.94E-06 | chr:8:18651457 |
| 8 rs9644615  | 18630532 C | 2.074 | 1.94E-06 | chr:8:18651457 |
| 8 rs1982800  | 18624828 G | 2.067 | 2.06E-06 | chr:8:18651457 |
| 8 rs73199966 | 18616606 A | 2.864 | 2.06E-06 | chr:8:18651457 |
| 8 rs13439456 | 18592802 G | 15.95 | 2.07E-06 | chr:8:18651457 |
| 8 rs1487745  | 18621332 T | 2.968 | 2.08E-06 | chr:8:18651457 |
| 8 rs4921608  | 18539768 C | 2.924 | 2.13E-06 | chr:8:18651457 |
| 8 rs66672830 | 18601318 C | 4.681 | 2.19E-06 | chr:8:18651457 |
| 8 rs55804504 | 18602287 G | 4.678 | 2.22E-06 | chr:8:18651457 |
| 8 rs11778698 | 18623718 C | 2.05  | 2.30E-06 | chr:8:18651457 |
| 8 rs7844573  | 18632187 T | 2.063 | 2.36E-06 | chr:8:18651457 |
| 8 rs11203994 | 18629018 G | 2.051 | 2.49E-06 | chr:8:18651457 |
| 8 rs7000512  | 18646449 G | 2.036 | 2.53E-06 | chr:8:18651457 |
| 8 rs2898480  | 18602548 T | 2.536 | 2.56E-06 | chr:8:18651457 |
| 8 rs335233   | 18636629 A | 11.9  | 2.68E-06 | chr:8:18651457 |
| 8 rs9792382  | 18620570 C | 2.915 | 2.81E-06 | chr:8:18651457 |
| 8 rs4921961  | 18638070 T | 12.65 | 3.02E-06 | chr:8:18651457 |
| 8 rs1038610  | 18624424 C | 2.022 | 3.53E-06 | chr:8:18651457 |
| 8 rs1038611  | 18624327 C | 2.022 | 3.53E-06 | chr:8:18651457 |
| 8 rs4921951  | 18535768 C | 2.879 | 3.67E-06 | chr:8:18651457 |
| 8 rs13277764 | 18630927 G | 2.026 | 3.79E-06 | chr:8:18651457 |
| 8 rs10089453 | 18590065 A | 6.624 | 3.82E-06 | chr:8:18651457 |
| 8 rs28535285 | 18588658 T | 6.624 | 3.82E-06 | chr:8:18651457 |

|               |            |       |          |                |
|---------------|------------|-------|----------|----------------|
| 8 rs6980995   | 18590876 G | 6.624 | 3.82E-06 | chr:8:18651457 |
| 8 rs17127078  | 18565844 T | 4.577 | 4.53E-06 | chr:8:18651457 |
| 8 rs146384878 | 18623203 A | 5.388 | 5.30E-06 | chr:8:18651457 |
| 8 rs73199979  | 18623885 T | 5.388 | 5.30E-06 | chr:8:18651457 |
| 8 rs13277370  | 18645191 T | 1.974 | 5.63E-06 | chr:8:18651457 |
| 8 rs67028998  | 18628162 A | 3.223 | 5.91E-06 | chr:8:18651457 |
| 8 rs10888158  | 18565012 A | 5.214 | 5.97E-06 | chr:8:18651457 |
| 8 rs335220    | 18634828 A | 11.01 | 6.17E-06 | chr:8:18651457 |
| 8 rs335227    | 18632901 G | 11.01 | 6.17E-06 | chr:8:18651457 |
| 8 rs335228    | 18631439 G | 11.01 | 6.17E-06 | chr:8:18651457 |
| 8 rs335229    | 18629927 G | 11.01 | 6.17E-06 | chr:8:18651457 |
| 8 rs335246    | 18645679 C | 11.01 | 6.17E-06 | chr:8:18651457 |
| 8 rs12155629  | 18627775 G | 1.98  | 7.16E-06 | chr:8:18651457 |
| 8 rs55884038  | 18618142 C | 2.876 | 7.81E-06 | chr:8:18651457 |
| 8 rs3988321   | 18614241 A | 9.214 | 8.06E-06 | chr:8:18651457 |
| 8 rs11787013  | 18628418 A | 1.973 | 8.12E-06 | chr:8:18651457 |
| 8 rs7009615   | 18572835 C | 2.807 | 9.19E-06 | chr:8:18651457 |
| 8 rs113727796 | 18642443 C | 12.95 | 9.47E-06 | chr:8:18651457 |
| 8 rs10093710  | 18611809 G | 3.885 | 9.70E-06 | chr:8:18651457 |
| 8 rs111514843 | 18608851 A | 3.885 | 9.70E-06 | chr:8:18651457 |
| 8 rs151157085 | 18608740 C | 3.885 | 9.70E-06 | chr:8:18651457 |
| 8 rs28502684  | 18608723 A | 3.885 | 9.70E-06 | chr:8:18651457 |
| 8 rs28702887  | 18609522 C | 3.885 | 9.70E-06 | chr:8:18651457 |
| 8 rs6996801   | 18615696 G | 2.775 | 9.71E-06 | chr:8:18651457 |
| 8 rs972433    | 18554798 G | 3.822 | 9.81E-06 | chr:8:18651457 |
| 8 rs142679819 | 18610633 A | 4.262 | 1.01E-05 | chr:8:18651457 |
| 8 rs73199959  | 18612273 G | 4.262 | 1.01E-05 | chr:8:18651457 |
| 8 rs10106772  | 18612008 A | 4.055 | 1.02E-05 | chr:8:18651457 |
| 8 rs11988686  | 18617442 G | 2.782 | 1.06E-05 | chr:8:18651457 |
| 8 rs11779571  | 18544452 T | 1.955 | 1.07E-05 | chr:8:18651457 |
| 8 rs7842892   | 18518403 G | 2.299 | 1.13E-05 | chr:8:18651457 |
| 8 rs73199980  | 18624223 C | 4.889 | 1.14E-05 | chr:8:18651457 |
| 8 rs901729    | 18565805 A | 3.247 | 1.18E-05 | chr:8:18651457 |
| 8 rs12155627  | 18627512 G | 1.951 | 1.20E-05 | chr:8:18651457 |
| 8 rs13276483  | 18628009 T | 1.951 | 1.20E-05 | chr:8:18651457 |
| 8 rs111696817 | 18614366 A | 4.187 | 1.28E-05 | chr:8:18651457 |
| 8 rs112167868 | 18614265 A | 4.187 | 1.28E-05 | chr:8:18651457 |
| 8 rs73199961  | 18615397 C | 4.187 | 1.28E-05 | chr:8:18651457 |
| 8 rs17127179  | 18632112 T | 29.85 | 1.30E-05 | chr:8:18651457 |
| 8 rs4921958   | 18634096 A | 29.85 | 1.30E-05 | chr:8:18651457 |
| 8 rs56062960  | 18637485 C | 29.85 | 1.30E-05 | chr:8:18651457 |
| 8 rs57557661  | 18637442 C | 29.85 | 1.30E-05 | chr:8:18651457 |
| 8 rs7841184   | 18553345 C | 3.934 | 1.40E-05 | chr:8:18651457 |

|               |            |        |          |                |
|---------------|------------|--------|----------|----------------|
| 8 rs79076024  | 18614548 G | 2.634  | 1.42E-05 | chr:8:18651457 |
| 8 rs79441119  | 18632939 G | 8.165  | 1.44E-05 | chr:8:18651457 |
| 8 rs6994455   | 18618764 G | 2.753  | 1.48E-05 | chr:8:18651457 |
| 8 rs2131183   | 18664444 G | 1.955  | 1.70E-05 | chr:8:18651457 |
| 8 rs755683    | 18560687 C | 2.346  | 1.74E-05 | chr:8:18651457 |
| 8 rs73199976  | 18623101 G | 4.637  | 1.85E-05 | chr:8:18651457 |
| 8 rs113789696 | 18614878 A | 3.984  | 1.89E-05 | chr:8:18651457 |
| 8 rs9693275   | 18517858 C | 2.466  | 1.90E-05 | chr:8:18651457 |
| 8 rs6998281   | 18618557 C | 2.601  | 1.97E-05 | chr:8:18651457 |
| 8 rs7012496   | 18618427 T | 2.601  | 1.97E-05 | chr:8:18651457 |
| 8 rs7012651   | 18618539 T | 2.601  | 1.97E-05 | chr:8:18651457 |
| 8 rs4320588   | 18615090 A | 2.696  | 2.01E-05 | chr:8:18651457 |
| 8 rs10094532  | 18587676 A | 3.118  | 2.21E-05 | chr:8:18651457 |
| 8 rs4921607   | 18539039 G | 5.651  | 2.23E-05 | chr:8:18651457 |
| 8 rs4921953   | 18539825 C | 5.651  | 2.23E-05 | chr:8:18651457 |
| 8 rs6988943   | 18539254 G | 5.651  | 2.23E-05 | chr:8:18651457 |
| 8 rs58728600  | 18621831 G | 4.048  | 2.32E-05 | chr:8:18651457 |
| 8 rs73199972  | 18622105 G | 4.048  | 2.32E-05 | chr:8:18651457 |
| 8 rs112466950 | 18589441 A | 11.62  | 2.53E-05 | chr:8:18651457 |
| 8 rs140775288 | 18650627 A | 0.3181 | 2.98E-05 | chr:8:18651457 |
| 8 rs901733    | 18559665 G | 3.866  | 3.13E-05 | chr:8:18651457 |
| 8 rs111241636 | 18623207 C | 7.599  | 3.13E-05 | chr:8:18651457 |
| 8 rs10090564  | 18586732 T | 4.666  | 3.38E-05 | chr:8:18651457 |
| 8 rs12546585  | 18546783 C | 3.055  | 3.39E-05 | chr:8:18651457 |
| 8 rs17383361  | 18653137 A | 0.3227 | 3.42E-05 | chr:8:18651457 |
| 8 rs7830088   | 18636444 C | 5.853  | 3.43E-05 | chr:8:18651457 |
| 8 rs113962561 | 18609352 T | 4.026  | 3.48E-05 | chr:8:18651457 |
| 8 rs73199973  | 18622413 A | 4.029  | 3.51E-05 | chr:8:18651457 |
| 8 rs73199975  | 18622590 G | 4.029  | 3.51E-05 | chr:8:18651457 |
| 8 rs55709555  | 18618660 C | 4.249  | 3.58E-05 | chr:8:18651457 |
| 8 rs473731    | 37082568 G | 200.5  | 4.07E-29 | chr:8:37050885 |
| 8 rs240522    | 37087609 T | 208.8  | 7.11E-29 | chr:8:37050885 |
| 8 rs240524    | 37088271 T | 208.8  | 7.11E-29 | chr:8:37050885 |
| 8 rs240519    | 37085713 T | 228.9  | 1.50E-28 | chr:8:37050885 |
| 8 rs2697887   | 37078928 G | 228.9  | 1.50E-28 | chr:8:37050885 |
| 8 rs490027    | 37079215 C | 228.9  | 1.50E-28 | chr:8:37050885 |
| 8 rs494545    | 37079696 C | 228.9  | 1.50E-28 | chr:8:37050885 |
| 8 rs240518    | 37085509 C | 271.4  | 2.36E-28 | chr:8:37050885 |
| 8 rs2843834   | 37078884 T | 271.4  | 2.36E-28 | chr:8:37050885 |
| 8 rs2843835   | 37078820 T | 271.4  | 2.36E-28 | chr:8:37050885 |
| 8 rs495428    | 37079790 A | 271.4  | 2.36E-28 | chr:8:37050885 |
| 8 rs240523    | 37087732 T | 188.5  | 2.43E-28 | chr:8:37050885 |
| 8 rs4739336   | 37043012 A | 77.05  | 1.44E-26 | chr:8:37050885 |

|              |            |       |          |                |
|--------------|------------|-------|----------|----------------|
| 8 rs7841889  | 37045176 A | 77.05 | 1.44E-26 | chr:8:37050885 |
| 8 rs6981452  | 37046050 A | 52.66 | 2.78E-26 | chr:8:37050885 |
| 8 rs4739484  | 37082138 A | 157.6 | 3.41E-26 | chr:8:37050885 |
| 8 rs12334605 | 37045753 G | 45.65 | 2.35E-24 | chr:8:37050885 |
| 8 rs12334611 | 37045986 C | 45.65 | 2.35E-24 | chr:8:37050885 |
| 8 rs4739476  | 37046991 A | 45.65 | 2.35E-24 | chr:8:37050885 |
| 8 rs16875909 | 37043868 T | 70.2  | 3.03E-24 | chr:8:37050885 |
| 8 rs6988617  | 37042895 A | 70.2  | 3.03E-24 | chr:8:37050885 |
| 8 rs576019   | 37044187 T | 65.69 | 6.48E-24 | chr:8:37050885 |
| 8 rs240521   | 37086908 A | 787   | 1.25E-23 | chr:8:37050885 |
| 8 rs2697894  | 37076650 C | 787   | 1.25E-23 | chr:8:37050885 |
| 8 rs473160   | 37073161 C | 787   | 1.25E-23 | chr:8:37050885 |
| 8 rs473969   | 37055831 G | 787   | 1.25E-23 | chr:8:37050885 |
| 8 rs476305   | 37057139 A | 787   | 1.25E-23 | chr:8:37050885 |
| 8 rs489405   | 37053747 A | 787   | 1.25E-23 | chr:8:37050885 |
| 8 rs491607   | 37054032 G | 787   | 1.25E-23 | chr:8:37050885 |
| 8 rs493311   | 37060431 G | 787   | 1.25E-23 | chr:8:37050885 |
| 8 rs493477   | 37053824 C | 787   | 1.25E-23 | chr:8:37050885 |
| 8 rs493539   | 37069825 G | 787   | 1.25E-23 | chr:8:37050885 |
| 8 rs496362   | 37073368 T | 787   | 1.25E-23 | chr:8:37050885 |
| 8 rs500960   | 37073841 G | 787   | 1.25E-23 | chr:8:37050885 |
| 8 rs501761   | 37073910 C | 787   | 1.25E-23 | chr:8:37050885 |
| 8 rs507136   | 37066554 C | 787   | 1.25E-23 | chr:8:37050885 |
| 8 rs509011   | 37084128 C | 787   | 1.25E-23 | chr:8:37050885 |
| 8 rs510561   | 37055719 T | 787   | 1.25E-23 | chr:8:37050885 |
| 8 rs514719   | 37063207 T | 787   | 1.25E-23 | chr:8:37050885 |
| 8 rs519407   | 37062657 T | 787   | 1.25E-23 | chr:8:37050885 |
| 8 rs519676   | 37054785 T | 787   | 1.25E-23 | chr:8:37050885 |
| 8 rs525751   | 37080834 A | 787   | 1.25E-23 | chr:8:37050885 |
| 8 rs526765   | 37080954 A | 787   | 1.25E-23 | chr:8:37050885 |
| 8 rs527270   | 37059026 A | 787   | 1.25E-23 | chr:8:37050885 |
| 8 rs531990   | 37057541 T | 787   | 1.25E-23 | chr:8:37050885 |
| 8 rs537583   | 37058174 G | 787   | 1.25E-23 | chr:8:37050885 |
| 8 rs539797   | 37077235 G | 787   | 1.25E-23 | chr:8:37050885 |
| 8 rs542245   | 37062505 T | 787   | 1.25E-23 | chr:8:37050885 |
| 8 rs547855   | 37078106 A | 787   | 1.25E-23 | chr:8:37050885 |
| 8 rs551464   | 37068041 T | 787   | 1.25E-23 | chr:8:37050885 |
| 8 rs56097134 | 37067371 G | 787   | 1.25E-23 | chr:8:37050885 |
| 8 rs562346   | 37058605 C | 787   | 1.25E-23 | chr:8:37050885 |
| 8 rs567592   | 37052543 C | 787   | 1.25E-23 | chr:8:37050885 |
| 8 rs571788   | 37078413 T | 787   | 1.25E-23 | chr:8:37050885 |
| 8 rs571824   | 37077544 G | 787   | 1.25E-23 | chr:8:37050885 |
| 8 rs574667   | 37070657 C | 787   | 1.25E-23 | chr:8:37050885 |

|              |            |        |          |                |
|--------------|------------|--------|----------|----------------|
| 8 rs575360   | 37072211 T | 787    | 1.25E-23 | chr:8:37050885 |
| 8 rs575589   | 37077120 A | 787    | 1.25E-23 | chr:8:37050885 |
| 8 rs577113   | 37077012 G | 787    | 1.25E-23 | chr:8:37050885 |
| 8 rs579858   | 37072747 C | 787    | 1.25E-23 | chr:8:37050885 |
| 8 rs2843836  | 37076582 T | 578    | 1.33E-23 | chr:8:37050885 |
| 8 rs240517   | 37085448 A | 648    | 1.58E-23 | chr:8:37050885 |
| 8 rs240520   | 37086850 T | 648    | 1.58E-23 | chr:8:37050885 |
| 8 rs511544   | 37076504 G | 648    | 1.58E-23 | chr:8:37050885 |
| 8 rs532022   | 37074938 A | 648    | 1.58E-23 | chr:8:37050885 |
| 8 rs543162   | 37078419 C | 648    | 1.58E-23 | chr:8:37050885 |
| 8 rs553163   | 37085269 A | 648    | 1.58E-23 | chr:8:37050885 |
| 8 rs557361   | 37075388 A | 648    | 1.58E-23 | chr:8:37050885 |
| 8 rs74571086 | 37049958 G | 110    | 2.32E-22 | chr:8:37050885 |
| 8 rs34456013 | 37049781 A | 107.2  | 3.72E-22 | chr:8:37050885 |
| 8 rs16886251 | 37086493 A | 76.25  | 8.45E-15 | chr:8:37050885 |
| 8 rs990711   | 37058871 T | 0.2497 | 1.24E-11 | chr:8:37050885 |
| 8 rs4739483  | 37076718 C | 0.2534 | 1.73E-11 | chr:8:37050885 |
| 8 rs11985899 | 37083414 C | 60.16  | 1.17E-10 | chr:8:37050885 |
| 8 rs77442378 | 37050480 A | 10.81  | 1.48E-10 | chr:8:37050885 |
| 8 rs4739338  | 37067007 T | 55.66  | 3.24E-10 | chr:8:37050885 |
| 8 rs567469   | 37064847 A | 0.3061 | 1.87E-09 | chr:8:37050885 |
| 8 rs502356   | 37049066 T | 0.2739 | 2.37E-09 | chr:8:37050885 |
| 8 rs554464   | 37047250 A | 0.274  | 2.69E-09 | chr:8:37050885 |
| 8 rs557725   | 37048623 A | 0.274  | 2.69E-09 | chr:8:37050885 |
| 8 rs56256845 | 37143634 T | 6.78   | 2.00E-08 | chr:8:37050885 |
| 8 rs12545061 | 37056695 T | 0.3221 | 3.13E-08 | chr:8:37050885 |
| 8 rs13279893 | 37057678 G | 0.3221 | 3.13E-08 | chr:8:37050885 |
| 8 rs1850650  | 37065784 A | 0.3258 | 4.06E-08 | chr:8:37050885 |
| 8 rs9642715  | 37038245 T | 0.3482 | 4.72E-08 | chr:8:37050885 |
| 8 rs4237086  | 37088022 G | 0.3321 | 5.06E-08 | chr:8:37050885 |
| 8 rs7831869  | 37016552 G | 3.106  | 5.17E-08 | chr:8:37050885 |
| 8 rs9297249  | 37018014 T | 3.106  | 5.17E-08 | chr:8:37050885 |
| 8 rs9642764  | 36994086 A | 2.972  | 8.36E-08 | chr:8:37050885 |
| 8 rs479974   | 37039730 C | 13.58  | 2.51E-07 | chr:8:37050885 |
| 8 rs532410   | 37038633 G | 13.58  | 2.51E-07 | chr:8:37050885 |
| 8 rs534138   | 37038476 T | 13.58  | 2.51E-07 | chr:8:37050885 |
| 8 rs7844049  | 37017773 A | 3.064  | 2.52E-07 | chr:8:37050885 |
| 8 rs1475832  | 37018665 C | 3.059  | 2.58E-07 | chr:8:37050885 |
| 8 rs1518504  | 36996632 A | 2.826  | 3.04E-07 | chr:8:37050885 |
| 8 rs7840173  | 37049981 A | 0.3912 | 4.14E-07 | chr:8:37050885 |
| 8 rs471141   | 37067066 G | 45.5   | 6.66E-07 | chr:8:37050885 |
| 8 rs490827   | 37079275 G | 45.5   | 6.66E-07 | chr:8:37050885 |
| 8 rs511629   | 37060493 T | 45.5   | 6.66E-07 | chr:8:37050885 |

|               |            |        |          |                |
|---------------|------------|--------|----------|----------------|
| 8 rs516012    | 37054380 T | 45.5   | 6.66E-07 | chr:8:37050885 |
| 8 rs526525    | 37080867 C | 45.5   | 6.66E-07 | chr:8:37050885 |
| 8 rs484465    | 37045840 A | 0.2589 | 8.91E-07 | chr:8:37050885 |
| 8 rs576819    | 37039106 T | 0.3767 | 9.89E-07 | chr:8:37050885 |
| 8 rs567913    | 37042926 A | 0.379  | 1.01E-06 | chr:8:37050885 |
| 8 rs566144555 | 37070040 C | 157.2  | 1.16E-06 | chr:8:37050885 |
| 8 rs7814066   | 36994316 C | 2.624  | 1.22E-06 | chr:8:37050885 |
| 8 rs4739477   | 37047490 A | 0.4147 | 1.52E-06 | chr:8:37050885 |
| 8 rs7826398   | 37048751 A | 0.4147 | 1.52E-06 | chr:8:37050885 |
| 8 rs9642768   | 37046812 T | 0.4155 | 1.66E-06 | chr:8:37050885 |
| 8 rs9642765   | 37046467 T | 0.4156 | 1.69E-06 | chr:8:37050885 |
| 8 rs9642766   | 37046589 A | 0.4156 | 1.69E-06 | chr:8:37050885 |
| 8 rs28556854  | 36997023 A | 2.573  | 2.55E-06 | chr:8:37050885 |
| 8 rs680803    | 36999516 A | 2.494  | 2.65E-06 | chr:8:37050885 |
| 8 rs1401154   | 37026544 A | 2.575  | 2.68E-06 | chr:8:37050885 |
| 8 rs6998075   | 37027184 C | 2.575  | 2.68E-06 | chr:8:37050885 |
| 8 rs7010106   | 37031726 T | 2.575  | 2.68E-06 | chr:8:37050885 |
| 8 rs116961549 | 37079853 T | 38.08  | 2.97E-06 | chr:8:37050885 |
| 8 rs7812447   | 37036800 C | 2.6    | 3.09E-06 | chr:8:37050885 |
| 8 rs618738    | 36996216 C | 2.439  | 3.20E-06 | chr:8:37050885 |
| 8 rs2843840   | 36994436 C | 2.435  | 3.36E-06 | chr:8:37050885 |
| 8 rs543864    | 36995907 G | 2.432  | 3.46E-06 | chr:8:37050885 |
| 8 rs2843837   | 37050143 A | 0.278  | 4.04E-06 | chr:8:37050885 |
| 8 rs581187    | 37000735 C | 2.452  | 4.07E-06 | chr:8:37050885 |
| 8 rs140578349 | 37117952 T | 35.59  | 4.17E-06 | chr:8:37050885 |
| 8 rs147865709 | 37092827 C | 35.59  | 4.17E-06 | chr:8:37050885 |
| 8 rs472223    | 37073040 C | 0.4133 | 5.57E-06 | chr:8:37050885 |
| 8 rs475813    | 37065499 A | 0.4133 | 5.57E-06 | chr:8:37050885 |
| 8 rs481015    | 37075475 T | 0.4133 | 5.57E-06 | chr:8:37050885 |
| 8 rs516821    | 37070490 A | 0.4133 | 5.57E-06 | chr:8:37050885 |
| 8 rs489583    | 37003868 C | 2.414  | 6.14E-06 | chr:8:37050885 |
| 8 rs562670    | 36997621 T | 2.396  | 6.62E-06 | chr:8:37050885 |
| 8 rs147912255 | 37125607 C | 31.76  | 9.19E-06 | chr:8:37050885 |
| 8 rs529421    | 37038275 A | 0.4277 | 1.20E-05 | chr:8:37050885 |
| 8 rs11987291  | 37023612 G | 2.479  | 1.38E-05 | chr:8:37050885 |
| 8 rs11987372  | 37023909 T | 2.479  | 1.38E-05 | chr:8:37050885 |
| 8 rs16886118  | 37032724 A | 2.479  | 1.38E-05 | chr:8:37050885 |
| 8 rs7841774   | 37020255 G | 2.479  | 1.38E-05 | chr:8:37050885 |
| 8 rs72612125  | 37012403 T | 2.401  | 2.18E-05 | chr:8:37050885 |
| 8 rs7005136   | 37030919 T | 2.404  | 2.60E-05 | chr:8:37050885 |
| 8 rs1111603   | 37012084 G | 2.185  | 2.82E-05 | chr:8:37050885 |
| 8 rs1814907   | 37012025 C | 2.185  | 2.82E-05 | chr:8:37050885 |
| 8 rs508635    | 37011661 C | 2.185  | 2.82E-05 | chr:8:37050885 |

|               |            |       |          |                |
|---------------|------------|-------|----------|----------------|
| 8 rs517254    | 37007897 A | 2.191 | 3.41E-05 | chr:8:37050885 |
| 8 rs6468393   | 37001987 A | 2.321 | 3.49E-05 | chr:8:37050885 |
| 8 rs142639295 | 36962076 T | 9.453 | 3.79E-05 | chr:8:37050885 |
| 8 rs6981138   | 36999745 G | 2.301 | 4.26E-05 | chr:8:37050885 |
| 8 rs1089432   | 36987916 C | 2.968 | 4.64E-05 | chr:8:37050885 |
| 8 rs535885    | 36986979 C | 2.968 | 4.64E-05 | chr:8:37050885 |
| 8 rs550133    | 37008891 A | 2.128 | 4.95E-05 | chr:8:37050885 |
| 8 rs482343    | 37014097 C | 2.117 | 5.62E-05 | chr:8:37050885 |
| 8 rs148764079 | 7370001 A  | 122.9 | 1.89E-20 | chr:8:7355397  |
| 8 rs202154170 | 7199353 C  | 130.7 | 2.48E-20 | chr:8:7355397  |
| 8 rs75263993  | 7231781 G  | 98.25 | 9.04E-20 | chr:8:7355397  |
| 8 rs71511227  | 7226755 A  | 158.9 | 1.30E-19 | chr:8:7355397  |
| 8 rs191010533 | 7233827 A  | 93.3  | 1.33E-19 | chr:8:7355397  |
| 8 rs76597472  | 7206422 C  | 138.1 | 1.51E-19 | chr:8:7355397  |
| 8 rs182816244 | 7198922 G  | 102   | 1.65E-19 | chr:8:7355397  |
| 8 rs573461318 | 7829457 A  | 18.11 | 1.66E-19 | chr:8:7355397  |
| 8 rs536438281 | 7829295 A  | 18.85 | 2.83E-19 | chr:8:7355397  |
| 8 rs58448546  | 7222238 A  | 205.4 | 3.88E-19 | chr:8:7355397  |
| 8 rs9720262   | 7225176 A  | 205.4 | 3.88E-19 | chr:8:7355397  |
| 8 rs9720274   | 7225308 A  | 205.4 | 3.88E-19 | chr:8:7355397  |
| 8 rs145140607 | 7831549 G  | 16.24 | 4.04E-19 | chr:8:7355397  |
| 8 rs77864753  | 7280040 A  | 58.12 | 4.22E-19 | chr:8:7355397  |
| 8 rs79753474  | 7835900 C  | 18.01 | 4.26E-19 | chr:8:7355397  |
| 8 rs190107287 | 7240033 T  | 59.33 | 4.41E-19 | chr:8:7355397  |
| 8 rs369451600 | 7228577 A  | 59.33 | 4.41E-19 | chr:8:7355397  |
| 8 rs376067955 | 7244555 G  | 59.33 | 4.41E-19 | chr:8:7355397  |
| 8 rs537994281 | 7251907 A  | 59.33 | 4.41E-19 | chr:8:7355397  |
| 8 rs550449040 | 7206427 C  | 68.03 | 4.43E-19 | chr:8:7355397  |
| 8 rs34542490  | 7154190 C  | 138.6 | 5.15E-19 | chr:8:7355397  |
| 8 rs35340083  | 7154233 G  | 138.6 | 5.15E-19 | chr:8:7355397  |
| 8 rs71511225  | 7218805 G  | 211.4 | 5.73E-19 | chr:8:7355397  |
| 8 rs373416097 | 7829488 G  | 11.85 | 5.94E-19 | chr:8:7355397  |
| 8 rs567555351 | 7829112 A  | 19.3  | 6.27E-19 | chr:8:7355397  |
| 8 rs373838323 | 7831587 T  | 15.93 | 6.64E-19 | chr:8:7355397  |
| 8 rs572881405 | 7177417 G  | 187.6 | 7.59E-19 | chr:8:7355397  |
| 8 rs71509284  | 7172824 A  | 173   | 8.35E-19 | chr:8:7355397  |
| 8 rs118070999 | 7213936 A  | 244.9 | 1.29E-18 | chr:8:7355397  |
| 8 rs141575646 | 7213628 T  | 244.9 | 1.29E-18 | chr:8:7355397  |
| 8 rs3989702   | 7217618 A  | 244.9 | 1.29E-18 | chr:8:7355397  |
| 8 rs71241131  | 7223188 A  | 244.9 | 1.29E-18 | chr:8:7355397  |
| 8 rs71254994  | 7225761 T  | 244.9 | 1.29E-18 | chr:8:7355397  |
| 8 rs71260573  | 7225496 A  | 244.9 | 1.29E-18 | chr:8:7355397  |
| 8 rs71511223  | 7218117 T  | 244.9 | 1.29E-18 | chr:8:7355397  |



|               |           |       |          |               |
|---------------|-----------|-------|----------|---------------|
| 8 rs71511224  | 7218287 T | 244.9 | 1.29E-18 | chr:8:7355397 |
| 8 rs34616671  | 7154417 G | 97.02 | 1.45E-18 | chr:8:7355397 |
| 8 rs180768299 | 7833447 C | 18.97 | 1.73E-18 | chr:8:7355397 |
| 8 rs573869289 | 7826061 G | 99.8  | 1.95E-18 | chr:8:7355397 |
| 8 rs570398560 | 7199490 A | 57.74 | 1.97E-18 | chr:8:7355397 |
| 8 rs187300358 | 7829925 G | 11.68 | 1.98E-18 | chr:8:7355397 |
| 8 rs546887922 | 7829939 T | 11.68 | 1.98E-18 | chr:8:7355397 |
| 8 rs567019282 | 7829945 A | 11.68 | 1.98E-18 | chr:8:7355397 |
| 8 rs370699871 | 7201835 T | 252.1 | 2.02E-18 | chr:8:7355397 |
| 8 rs546834262 | 7203861 T | 234.6 | 2.41E-18 | chr:8:7355397 |
| 8 rs75437225  | 7222743 T | 224.4 | 2.53E-18 | chr:8:7355397 |
| 8 rs145384272 | 7829780 A | 20.59 | 2.65E-18 | chr:8:7355397 |
| 8 rs35855162  | 7154058 C | 135.2 | 2.79E-18 | chr:8:7355397 |
| 8 rs542348161 | 7198919 A | 64.08 | 2.84E-18 | chr:8:7355397 |
| 8 rs187151002 | 7198924 G | 68.92 | 2.98E-18 | chr:8:7355397 |
| 8 rs554462677 | 7198613 A | 68.92 | 2.98E-18 | chr:8:7355397 |
| 8 rs577501483 | 7198691 A | 68.92 | 2.98E-18 | chr:8:7355397 |
| 8 rs71511222  | 7216688 A | 340.8 | 3.32E-18 | chr:8:7355397 |
| 8 rs190171510 | 7156751 A | 250.6 | 3.43E-18 | chr:8:7355397 |
| 8 rs71509291  | 7179415 G | 250.6 | 3.43E-18 | chr:8:7355397 |
| 8 rs34002377  | 7155013 C | 94.23 | 4.04E-18 | chr:8:7355397 |
| 8 rs531764629 | 7172717 A | 219.5 | 4.73E-18 | chr:8:7355397 |
| 8 rs555846100 | 7174545 G | 230   | 5.57E-18 | chr:8:7355397 |
| 8 rs79407094  | 7835862 T | 21.88 | 5.90E-18 | chr:8:7355397 |
| 8 rs78168349  | 7255692 A | 113.4 | 7.61E-18 | chr:8:7355397 |
| 8 rs79674572  | 7204282 C | 54.46 | 8.26E-18 | chr:8:7355397 |
| 8 rs35292150  | 7154036 A | 342.3 | 9.00E-18 | chr:8:7355397 |
| 8 rs192094999 | 7830018 T | 14.16 | 9.85E-18 | chr:8:7355397 |
| 8 rs78947321  | 7833460 T | 22.85 | 1.13E-17 | chr:8:7355397 |
| 8 rs11985410  | 7202400 A | 56.66 | 1.20E-17 | chr:8:7355397 |
| 8 rs80002629  | 7199223 G | 59.44 | 1.39E-17 | chr:8:7355397 |
| 8 rs35348571  | 7154721 C | 325.6 | 1.48E-17 | chr:8:7355397 |
| 8 rs36116945  | 7154627 T | 325.6 | 1.48E-17 | chr:8:7355397 |
| 8 rs116727004 | 7202704 C | 54.6  | 1.63E-17 | chr:8:7355397 |
| 8 rs543368869 | 7340689 T | 328.3 | 2.52E-17 | chr:8:7355397 |
| 8 rs548024601 | 7158171 G | 145.7 | 3.33E-17 | chr:8:7355397 |
| 8 rs144469733 | 7204363 C | 50    | 3.42E-17 | chr:8:7355397 |
| 8 rs142491195 | 7206166 C | 38.43 | 4.47E-17 | chr:8:7355397 |
| 8 rs28548808  | 7341290 C | 596   | 6.04E-17 | chr:8:7355397 |
| 8 rs199686396 | 7830797 C | 147.2 | 9.79E-17 | chr:8:7355397 |
| 8 rs533497978 | 7187619 T | 232.9 | 1.05E-16 | chr:8:7355397 |
| 8 rs145885845 | 7841927 C | 31.69 | 1.97E-16 | chr:8:7355397 |
| 8 rs147886331 | 7545182 C | 57.22 | 2.34E-16 | chr:8:7355397 |

|               |           |       |          |               |
|---------------|-----------|-------|----------|---------------|
| 8 rs13257472  | 7059575 A | 32.04 | 2.63E-16 | chr:8:7355397 |
| 8 rs200962165 | 7156058 C | 33.07 | 2.75E-16 | chr:8:7355397 |
| 8 rs202233344 | 7156060 G | 33.07 | 2.75E-16 | chr:8:7355397 |
| 8 rs201877426 | 7058974 C | 32.03 | 2.83E-16 | chr:8:7355397 |
| 8 rs71509252  | 6993004 T | 42.34 | 4.78E-16 | chr:8:7355397 |
| 8 rs144460864 | 7336269 C | 449.9 | 6.93E-16 | chr:8:7355397 |
| 8 rs35158840  | 6996804 C | 44.04 | 7.63E-16 | chr:8:7355397 |
| 8 rs551102112 | 7829070 T | 48.42 | 8.26E-16 | chr:8:7355397 |
| 8 rs545793563 | 7543991 A | 52.33 | 1.01E-15 | chr:8:7355397 |
| 8 rs71509253  | 6993056 A | 41.98 | 1.68E-15 | chr:8:7355397 |
| 8 rs34501371  | 6969666 G | 44.94 | 2.16E-15 | chr:8:7355397 |
| 8 rs549409347 | 7545167 A | 33.52 | 2.29E-15 | chr:8:7355397 |
| 8 rs552674485 | 7375209 G | 26.88 | 2.33E-15 | chr:8:7355397 |
| 8 rs77333779  | 7375207 A | 26.88 | 2.33E-15 | chr:8:7355397 |
| 8 rs146193954 | 6977910 A | 40.45 | 2.57E-15 | chr:8:7355397 |
| 8 rs71509245  | 6954972 C | 38.63 | 2.63E-15 | chr:8:7355397 |
| 8 rs62639800  | 7372247 T | 51.38 | 5.06E-15 | chr:8:7355397 |
| 8 rs76206197  | 7371208 C | 51.77 | 5.22E-15 | chr:8:7355397 |
| 8 rs36116486  | 6952759 A | 24.21 | 5.24E-15 | chr:8:7355397 |
| 8 rs71509270  | 7085421 A | 46.66 | 6.43E-15 | chr:8:7355397 |
| 8 rs35604504  | 6983845 G | 31.2  | 7.67E-15 | chr:8:7355397 |
| 8 rs555905364 | 7292888 T | 53.96 | 1.58E-14 | chr:8:7355397 |
| 8 rs184701767 | 7052419 A | 14.78 | 1.76E-14 | chr:8:7355397 |
| 8 rs551253093 | 7085980 T | 50.46 | 2.64E-14 | chr:8:7355397 |
| 8 rs58346587  | 7198049 G | 42.17 | 2.89E-14 | chr:8:7355397 |
| 8 rs536482842 | 7537866 T | 17.02 | 3.90E-14 | chr:8:7355397 |
| 8 rs76725402  | 7538091 T | 18.88 | 4.85E-14 | chr:8:7355397 |
| 8 rs10090490  | 6959020 A | 21.13 | 5.96E-14 | chr:8:7355397 |
| 8 rs71509244  | 6954279 A | 21.13 | 5.96E-14 | chr:8:7355397 |
| 8 rs76475289  | 6953611 G | 21.13 | 5.96E-14 | chr:8:7355397 |
| 8 rs11786478  | 7388186 C | 8.733 | 6.16E-14 | chr:8:7355397 |
| 8 rs189302013 | 7054477 C | 12.05 | 1.79E-13 | chr:8:7355397 |
| 8 rs368652398 | 7053868 T | 11.99 | 3.37E-13 | chr:8:7355397 |
| 8 rs371255924 | 7053871 A | 11.99 | 3.37E-13 | chr:8:7355397 |
| 8 rs61090751  | 7198056 T | 18.12 | 5.49E-13 | chr:8:7355397 |
| 8 rs57426171  | 7053391 G | 11.28 | 5.71E-13 | chr:8:7355397 |
| 8 rs35763146  | 6943054 A | 17.05 | 6.58E-13 | chr:8:7355397 |
| 8 rs13268402  | 6942096 T | 16.22 | 7.94E-13 | chr:8:7355397 |
| 8 rs34284977  | 6947520 A | 16.22 | 7.94E-13 | chr:8:7355397 |
| 8 rs34693767  | 6941296 G | 16.22 | 7.94E-13 | chr:8:7355397 |
| 8 rs36160137  | 6941136 G | 16.22 | 7.94E-13 | chr:8:7355397 |
| 8 rs71509234  | 6941868 C | 16.22 | 7.94E-13 | chr:8:7355397 |
| 8 rs71509235  | 6941909 A | 16.22 | 7.94E-13 | chr:8:7355397 |

|               |           |       |          |               |
|---------------|-----------|-------|----------|---------------|
| 8 rs79934370  | 6943493 A | 16.22 | 7.94E-13 | chr:8:7355397 |
| 8 rs13278225  | 6982296 C | 15.42 | 1.66E-12 | chr:8:7355397 |
| 8 rs75561062  | 7077791 G | 25    | 1.70E-12 | chr:8:7355397 |
| 8 rs113931309 | 6949028 T | 14.83 | 2.23E-12 | chr:8:7355397 |
| 8 rs35025268  | 6950695 A | 15.39 | 2.42E-12 | chr:8:7355397 |
| 8 rs13263884  | 6938168 T | 15.97 | 2.42E-12 | chr:8:7355397 |
| 8 rs71509240  | 6949818 G | 14.47 | 2.96E-12 | chr:8:7355397 |
| 8 rs377296943 | 7053438 G | 9.247 | 3.52E-12 | chr:8:7355397 |
| 8 rs544637792 | 7352785 C | 49.01 | 3.59E-12 | chr:8:7355397 |
| 8 rs35052059  | 6950691 C | 14.43 | 4.98E-12 | chr:8:7355397 |
| 8 rs369623753 | 7156469 G | 10.94 | 5.08E-12 | chr:8:7355397 |
| 8 rs200140279 | 7052742 C | 9.527 | 5.45E-12 | chr:8:7355397 |
| 8 rs113235665 | 6944819 A | 12.96 | 7.78E-12 | chr:8:7355397 |
| 8 rs35822294  | 6943906 T | 12.96 | 7.78E-12 | chr:8:7355397 |
| 8 rs186213551 | 7795185 T | 35.92 | 9.06E-12 | chr:8:7355397 |
| 8 rs34305368  | 6944140 T | 12.17 | 1.17E-11 | chr:8:7355397 |
| 8 rs34067517  | 7193865 C | 64.98 | 1.70E-11 | chr:8:7355397 |
| 8 rs77372001  | 7193827 A | 64.98 | 1.70E-11 | chr:8:7355397 |
| 8 rs566228740 | 7795439 A | 47.02 | 1.74E-11 | chr:8:7355397 |
| 8 rs141402280 | 7388108 G | 6.098 | 2.89E-11 | chr:8:7355397 |
| 8 rs368865768 | 7726845 C | 22.6  | 3.21E-11 | chr:8:7355397 |
| 8 rs13261749  | 6938144 A | 11.46 | 6.06E-11 | chr:8:7355397 |
| 8 rs67189251  | 6938638 G | 10.58 | 6.82E-11 | chr:8:7355397 |
| 8 rs561221381 | 7196233 C | 47.59 | 2.43E-10 | chr:8:7355397 |
| 8 rs188014243 | 7835499 G | 8.877 | 2.77E-10 | chr:8:7355397 |
| 8 rs374334787 | 7054425 C | 7.105 | 4.16E-10 | chr:8:7355397 |
| 8 rs1806728   | 7218026 G | 11.73 | 1.32E-09 | chr:8:7355397 |
| 8 rs200109432 | 7830590 G | 6.126 | 1.74E-09 | chr:8:7355397 |
| 8 rs71509232  | 6932485 C | 12.15 | 2.02E-09 | chr:8:7355397 |
| 8 rs35996328  | 7172898 G | 89.38 | 2.66E-09 | chr:8:7355397 |
| 8 rs190359008 | 7830533 C | 4.875 | 4.64E-09 | chr:8:7355397 |
| 8 rs538230283 | 7830545 C | 4.875 | 4.64E-09 | chr:8:7355397 |
| 8 rs563432027 | 7822352 T | 4.742 | 5.15E-09 | chr:8:7355397 |
| 8 rs35819224  | 6899872 C | 20.04 | 5.94E-09 | chr:8:7355397 |
| 8 rs369528899 | 7154084 G | 123   | 7.91E-09 | chr:8:7355397 |
| 8 rs569565186 | 7830846 G | 7.283 | 1.06E-08 | chr:8:7355397 |
| 8 rs535050783 | 7193923 C | 116.7 | 5.69E-08 | chr:8:7355397 |
| 8 rs566252441 | 7193921 T | 116.7 | 5.69E-08 | chr:8:7355397 |
| 8 rs375557381 | 7154027 C | 57.4  | 8.51E-08 | chr:8:7355397 |
| 8 rs34147012  | 6950834 T | 4.341 | 1.49E-07 | chr:8:7355397 |
| 8 rs535677568 | 7129084 C | 5.521 | 1.51E-07 | chr:8:7355397 |
| 8 rs561132918 | 7196869 C | 46.08 | 2.06E-07 | chr:8:7355397 |
| 8 rs13264893  | 6938146 G | 4.908 | 8.56E-07 | chr:8:7355397 |

|               |           |        |          |               |
|---------------|-----------|--------|----------|---------------|
| 8 rs528343541 | 7829068 G | 4.323  | 1.30E-06 | chr:8:7355397 |
| 8 rs143836115 | 7056901 C | 3.363  | 1.39E-06 | chr:8:7355397 |
| 8 rs149000907 | 7056897 C | 3.363  | 1.39E-06 | chr:8:7355397 |
| 8 rs201926094 | 7057017 C | 3.245  | 1.98E-06 | chr:8:7355397 |
| 8 rs35121342  | 7057448 G | 3.236  | 2.07E-06 | chr:8:7355397 |
| 8 rs370324853 | 7128386 T | 4.958  | 2.10E-06 | chr:8:7355397 |
| 8 rs202219897 | 7057954 C | 3.234  | 2.12E-06 | chr:8:7355397 |
| 8 rs192046806 | 7060560 A | 3.264  | 2.26E-06 | chr:8:7355397 |
| 8 rs72626618  | 7060204 T | 3.199  | 2.34E-06 | chr:8:7355397 |
| 8 rs201048048 | 7055814 G | 3.188  | 2.97E-06 | chr:8:7355397 |
| 8 rs150819356 | 7059636 T | 3.163  | 2.99E-06 | chr:8:7355397 |
| 8 rs201712763 | 7065715 T | 3.029  | 5.79E-06 | chr:8:7355397 |
| 8 rs139167511 | 7062149 C | 3.007  | 5.89E-06 | chr:8:7355397 |
| 8 rs12546644  | 7061626 C | 0.3195 | 6.01E-06 | chr:8:7355397 |
| 8 rs112653198 | 7062217 T | 2.973  | 6.73E-06 | chr:8:7355397 |
| 8 rs544716184 | 6873766 G | 34.42  | 7.17E-06 | chr:8:7355397 |
| 8 rs561409022 | 6873767 T | 34.42  | 7.17E-06 | chr:8:7355397 |
| 8 rs555988748 | 7200677 C | 9.529  | 8.12E-06 | chr:8:7355397 |
| 8 rs35888273  | 6950837 T | 3.054  | 9.26E-06 | chr:8:7355397 |
| 8 rs146786921 | 7058858 G | 0.3369 | 1.05E-05 | chr:8:7355397 |
| 8 rs139974285 | 7061541 G | 0.3433 | 1.13E-05 | chr:8:7355397 |
| 8 rs549794331 | 7060807 A | 0.3279 | 1.14E-05 | chr:8:7355397 |
| 8 rs144193699 | 7061183 G | 0.3281 | 1.26E-05 | chr:8:7355397 |
| 8 rs202112245 | 7193826 A | 3.38   | 1.37E-05 | chr:8:7355397 |
| 8 rs199734642 | 7060917 C | 0.3495 | 2.12E-05 | chr:8:7355397 |
| 8 rs554690655 | 7191954 A | 17.61  | 2.31E-05 | chr:8:7355397 |
| 8 rs202020495 | 7474531 G | 2.95   | 2.52E-05 | chr:8:7355397 |
| 8 rs143545253 | 6899184 G | 17.88  | 2.57E-05 | chr:8:7355397 |
| 8 rs76139419  | 6898346 A | 17.88  | 2.57E-05 | chr:8:7355397 |
| 8 rs529238820 | 6953313 C | 38.91  | 2.60E-05 | chr:8:7355397 |
| 8 rs35088505  | 6973732 A | 3.188  | 2.99E-05 | chr:8:7355397 |
| 8 rs142234711 | 7191516 T | 64.61  | 3.09E-05 | chr:8:7355397 |
| 8 rs72626619  | 7062191 T | 0.3588 | 3.28E-05 | chr:8:7355397 |
| 8 rs58660626  | 6953310 G | 7.318  | 4.11E-05 | chr:8:7355397 |
| 8 rs201582865 | 7056690 T | 0.3818 | 4.15E-05 | chr:8:7355397 |
| 8 rs34940350  | 6951282 T | 2.969  | 4.79E-05 | chr:8:7355397 |
| 8 rs34394229  | 6952150 T | 2.977  | 5.04E-05 | chr:8:7355397 |
| 8 rs189914676 | 7833184 C | 16.65  | 5.19E-05 | chr:8:7355397 |
| 8 rs374560783 | 7128868 G | 3.019  | 5.20E-05 | chr:8:7355397 |
| 8 rs77553881  | 7128700 T | 25.47  | 5.40E-05 | chr:8:7355397 |

**Table S3: Associations of hiSNPs with polymorphic HERV-K insertions with East Asian super p**

| CHROM | RSID        | POS      | ALT | OR      | P-VAL    | HERV            |
|-------|-------------|----------|-----|---------|----------|-----------------|
| 11    | rs78599455  | 71884396 | A   | 0.07436 | 2.92E-10 | chr:11:71875416 |
| 11    | rs111264786 | 71885452 | A   | 0.08492 | 1.02E-09 | chr:11:71875416 |
| 11    | rs111594394 | 71879773 | T   | 0.08492 | 1.02E-09 | chr:11:71875416 |
| 11    | rs112068862 | 71885591 | T   | 0.08492 | 1.02E-09 | chr:11:71875416 |
| 11    | rs112227293 | 71883585 | G   | 0.08492 | 1.02E-09 | chr:11:71875416 |
| 11    | rs112843408 | 71879422 | T   | 0.08492 | 1.02E-09 | chr:11:71875416 |
| 11    | rs113654469 | 71875351 | A   | 0.08492 | 1.02E-09 | chr:11:71875416 |
| 11    | rs114480679 | 71883291 | G   | 0.08492 | 1.02E-09 | chr:11:71875416 |
| 11    | rs115282592 | 71885527 | G   | 0.08492 | 1.02E-09 | chr:11:71875416 |
| 11    | rs116305805 | 71874606 | T   | 0.08492 | 1.02E-09 | chr:11:71875416 |
| 11    | rs116526259 | 71878266 | T   | 0.08492 | 1.02E-09 | chr:11:71875416 |
| 11    | rs116700998 | 71874984 | C   | 0.08492 | 1.02E-09 | chr:11:71875416 |
| 11    | rs117909722 | 71874660 | C   | 0.08492 | 1.02E-09 | chr:11:71875416 |
| 11    | rs142294082 | 71876741 | G   | 0.08492 | 1.02E-09 | chr:11:71875416 |
| 11    | rs143497983 | 71881523 | T   | 0.08492 | 1.02E-09 | chr:11:71875416 |
| 11    | rs147259385 | 71876632 | T   | 0.08492 | 1.02E-09 | chr:11:71875416 |
| 11    | rs148742728 | 71876704 | G   | 0.08492 | 1.02E-09 | chr:11:71875416 |
| 11    | rs149792914 | 71880782 | G   | 0.08492 | 1.02E-09 | chr:11:71875416 |
| 11    | rs192125273 | 71884785 | T   | 0.08492 | 1.02E-09 | chr:11:71875416 |
| 11    | rs55693133  | 71878942 | T   | 0.08492 | 1.02E-09 | chr:11:71875416 |
| 11    | rs55853463  | 71878832 | T   | 0.08492 | 1.02E-09 | chr:11:71875416 |
| 11    | rs57561154  | 71879181 | T   | 0.08492 | 1.02E-09 | chr:11:71875416 |
| 11    | rs59894793  | 71874950 | G   | 0.08492 | 1.02E-09 | chr:11:71875416 |
| 11    | rs61194383  | 71877877 | T   | 0.08492 | 1.02E-09 | chr:11:71875416 |
| 11    | rs61427200  | 71882726 | T   | 0.08492 | 1.02E-09 | chr:11:71875416 |
| 11    | rs74498718  | 71886281 | C   | 0.08492 | 1.02E-09 | chr:11:71875416 |
| 11    | rs75445557  | 71885918 | C   | 0.08492 | 1.02E-09 | chr:11:71875416 |
| 11    | rs75576834  | 71877414 | A   | 0.08492 | 1.02E-09 | chr:11:71875416 |
| 11    | rs76789088  | 71882311 | T   | 0.08492 | 1.02E-09 | chr:11:71875416 |
| 11    | rs77672783  | 71880076 | C   | 0.08492 | 1.02E-09 | chr:11:71875416 |
| 11    | rs77780241  | 71876935 | C   | 0.08492 | 1.02E-09 | chr:11:71875416 |
| 11    | rs77840875  | 71885892 | C   | 0.08492 | 1.02E-09 | chr:11:71875416 |
| 11    | rs78222092  | 71884504 | A   | 0.08492 | 1.02E-09 | chr:11:71875416 |
| 11    | rs78244788  | 71885722 | G   | 0.08492 | 1.02E-09 | chr:11:71875416 |
| 11    | rs78309837  | 71884566 | G   | 0.08492 | 1.02E-09 | chr:11:71875416 |
| 11    | rs79147044  | 71874466 | A   | 0.08492 | 1.02E-09 | chr:11:71875416 |
| 11    | rs79775960  | 71878496 | G   | 0.08492 | 1.02E-09 | chr:11:71875416 |
| 11    | rs80101434  | 71881852 | G   | 0.08492 | 1.02E-09 | chr:11:71875416 |
| 11    | rs80194607  | 71885949 | A   | 0.08492 | 1.02E-09 | chr:11:71875416 |
| 11    | rs80285294  | 71883930 | T   | 0.08492 | 1.02E-09 | chr:11:71875416 |
| 11    | rs633738    | 71883540 | G   | 0.08623 | 1.25E-09 | chr:11:71875416 |

|    |             |             |         |          |                  |
|----|-------------|-------------|---------|----------|------------------|
| 11 | rs17162056  | 71906244 C  | 0.09213 | 2.66E-09 | chr:11:71875416  |
| 11 | rs17162064  | 71914326 G  | 0.09213 | 2.66E-09 | chr:11:71875416  |
| 11 | rs17162069  | 71915347 A  | 0.09213 | 2.66E-09 | chr:11:71875416  |
| 11 | rs74383603  | 71910415 A  | 0.09213 | 2.66E-09 | chr:11:71875416  |
| 11 | rs76101020  | 71905920 T  | 0.09213 | 2.66E-09 | chr:11:71875416  |
| 11 | rs59231055  | 71874020 A  | 0.08878 | 3.09E-09 | chr:11:71875416  |
| 11 | rs114319082 | 71875068 T  | 0.09818 | 4.25E-09 | chr:11:71875416  |
| 11 | rs201775009 | 71892477 C  | 0.1007  | 6.21E-09 | chr:11:71875416  |
| 11 | rs147420843 | 71898661 A  | 0.1014  | 7.29E-09 | chr:11:71875416  |
| 11 | rs1540087   | 71901491 A  | 0.1014  | 7.29E-09 | chr:11:71875416  |
| 11 | rs1893008   | 71894586 A  | 0.1014  | 7.29E-09 | chr:11:71875416  |
| 11 | rs3763796   | 71902245 G  | 0.1014  | 7.29E-09 | chr:11:71875416  |
| 11 | rs7109250   | 71901670 T  | 0.1014  | 7.29E-09 | chr:11:71875416  |
| 11 | rs7113391   | 71902555 A  | 0.1014  | 7.29E-09 | chr:11:71875416  |
| 11 | rs7125189   | 71901845 C  | 0.1014  | 7.29E-09 | chr:11:71875416  |
| 11 | rs112328417 | 71886904 G  | 0.1192  | 4.20E-08 | chr:11:71875416  |
| 11 | rs113425218 | 71886898 G  | 0.1192  | 4.20E-08 | chr:11:71875416  |
| 11 | rs185908679 | 71886903 T  | 0.1192  | 4.20E-08 | chr:11:71875416  |
| 11 | rs56876078  | 71874119 T  | 0.1462  | 6.57E-08 | chr:11:71875416  |
| 11 | rs112841775 | 71886881 T  | 0.1344  | 1.33E-07 | chr:11:71875416  |
| 11 | rs607629    | 71872282 G  | 0.1965  | 3.10E-07 | chr:11:71875416  |
| 11 | rs17847221  | 71939595 T  | 0.1218  | 7.69E-07 | chr:11:71875416  |
| 11 | rs2508873   | 71873483 A  | 0.2662  | 6.18E-06 | chr:11:71875416  |
| 11 | rs111540831 | 71859396 G  | 0.1162  | 9.17E-06 | chr:11:71875416  |
| 11 | rs146852285 | 71859549 T  | 0.1162  | 9.17E-06 | chr:11:71875416  |
| 11 | rs77210719  | 71865739 T  | 0.1162  | 9.17E-06 | chr:11:71875416  |
| 11 | rs70940825  | 71941687 C  | 0.1911  | 2.12E-05 | chr:11:71875416  |
| 11 | rs12417459  | 71947269 A  | 0.1697  | 3.56E-05 | chr:11:71875416  |
| 11 | rs140850664 | 71955067 T  | 0.1697  | 3.56E-05 | chr:11:71875416  |
| 11 | rs60462859  | 71972147 A  | 0.1697  | 3.56E-05 | chr:11:71875416  |
| 11 | rs58453558  | 71963651 C  | 0.1785  | 4.84E-05 | chr:11:71875416  |
| 12 | rs112002563 | 124077902 T | 65.54   | 1.57E-15 | chr:12:124066477 |
| 12 | rs111482432 | 124078585 G | 53.98   | 4.73E-14 | chr:12:124066477 |
| 12 | rs111963801 | 124041781 A | 53.98   | 4.73E-14 | chr:12:124066477 |
| 12 | rs112788090 | 124077754 T | 53.98   | 4.73E-14 | chr:12:124066477 |
| 12 | rs113088709 | 124095455 G | 53.98   | 4.73E-14 | chr:12:124066477 |
| 12 | rs113132248 | 124052510 G | 53.98   | 4.73E-14 | chr:12:124066477 |
| 12 | rs113620982 | 124086656 T | 53.98   | 4.73E-14 | chr:12:124066477 |
| 12 | rs114613914 | 124089740 G | 53.98   | 4.73E-14 | chr:12:124066477 |
| 12 | rs117647122 | 124051724 T | 53.98   | 4.73E-14 | chr:12:124066477 |
| 12 | rs12099985  | 124065667 C | 53.98   | 4.73E-14 | chr:12:124066477 |
| 12 | rs138318001 | 124054104 C | 53.98   | 4.73E-14 | chr:12:124066477 |
| 12 | rs141344174 | 124061093 A | 53.98   | 4.73E-14 | chr:12:124066477 |

|                |             |       |          |                  |
|----------------|-------------|-------|----------|------------------|
| 12 rs146908377 | 124077861 A | 53.98 | 4.73E-14 | chr:12:124066477 |
| 12 rs17881657  | 124092033 C | 53.98 | 4.73E-14 | chr:12:124066477 |
| 12 rs3850953   | 124091412 T | 53.98 | 4.73E-14 | chr:12:124066477 |
| 12 rs6488882   | 124056572 T | 53.98 | 4.73E-14 | chr:12:124066477 |
| 12 rs7306906   | 124100486 A | 53.98 | 4.73E-14 | chr:12:124066477 |
| 12 rs75468015  | 124054109 C | 53.98 | 4.73E-14 | chr:12:124066477 |
| 12 rs75700739  | 124084424 A | 53.98 | 4.73E-14 | chr:12:124066477 |
| 12 rs77114115  | 124096588 G | 53.98 | 4.73E-14 | chr:12:124066477 |
| 12 rs78068178  | 124059962 T | 53.98 | 4.73E-14 | chr:12:124066477 |
| 12 rs78702455  | 124054015 G | 53.98 | 4.73E-14 | chr:12:124066477 |
| 12 rs79296492  | 124083306 G | 53.98 | 4.73E-14 | chr:12:124066477 |
| 12 rs7964934   | 124058639 A | 53.98 | 4.73E-14 | chr:12:124066477 |
| 12 rs7965292   | 124081779 T | 53.98 | 4.73E-14 | chr:12:124066477 |
| 12 rs7973187   | 124068015 C | 53.98 | 4.73E-14 | chr:12:124066477 |
| 12 rs7973689   | 124090655 T | 53.98 | 4.73E-14 | chr:12:124066477 |
| 12 rs79847496  | 124089348 G | 53.98 | 4.73E-14 | chr:12:124066477 |
| 12 rs2333828   | 124049030 T | 44.6  | 7.91E-14 | chr:12:124066477 |
| 12 rs111853781 | 124051065 G | 50.28 | 8.59E-14 | chr:12:124066477 |
| 12 rs112298489 | 124042646 C | 50.28 | 8.59E-14 | chr:12:124066477 |
| 12 rs112704788 | 124042091 G | 50.28 | 8.59E-14 | chr:12:124066477 |
| 12 rs112931584 | 124044574 A | 50.28 | 8.59E-14 | chr:12:124066477 |
| 12 rs113254073 | 124052945 A | 50.28 | 8.59E-14 | chr:12:124066477 |
| 12 rs113381757 | 124052913 C | 50.28 | 8.59E-14 | chr:12:124066477 |
| 12 rs11832820  | 124047285 C | 50.28 | 8.59E-14 | chr:12:124066477 |
| 12 rs1983274   | 124049736 A | 50.28 | 8.59E-14 | chr:12:124066477 |
| 12 rs1983275   | 124049759 A | 50.28 | 8.59E-14 | chr:12:124066477 |
| 12 rs35917561  | 124041472 T | 50.28 | 8.59E-14 | chr:12:124066477 |
| 12 rs7294379   | 124053430 G | 50.28 | 8.59E-14 | chr:12:124066477 |
| 12 rs7309150   | 124053413 T | 50.28 | 8.59E-14 | chr:12:124066477 |
| 12 rs7953401   | 124050042 A | 50.28 | 8.59E-14 | chr:12:124066477 |
| 12 rs7968699   | 124052243 A | 50.28 | 8.59E-14 | chr:12:124066477 |
| 12 rs80260318  | 124048074 G | 50.28 | 8.59E-14 | chr:12:124066477 |
| 12 rs74322376  | 124251830 A | 35.36 | 1.46E-13 | chr:12:124066477 |
| 12 rs76455766  | 124250506 G | 35.36 | 1.46E-13 | chr:12:124066477 |
| 12 rs7308408   | 124053542 A | 46.44 | 1.52E-13 | chr:12:124066477 |
| 12 rs145600453 | 124049196 G | 47.78 | 1.64E-13 | chr:12:124066477 |
| 12 rs6488885   | 124119155 G | 55.43 | 1.73E-13 | chr:12:124066477 |
| 12 rs111260541 | 124226670 A | 47.66 | 2.16E-13 | chr:12:124066477 |
| 12 rs111291425 | 124204277 G | 47.66 | 2.16E-13 | chr:12:124066477 |
| 12 rs111421584 | 124147473 G | 47.66 | 2.16E-13 | chr:12:124066477 |
| 12 rs111553286 | 124163200 G | 47.66 | 2.16E-13 | chr:12:124066477 |
| 12 rs111768713 | 124234188 G | 47.66 | 2.16E-13 | chr:12:124066477 |
| 12 rs111776710 | 124172499 C | 47.66 | 2.16E-13 | chr:12:124066477 |

|                |             |       |                           |
|----------------|-------------|-------|---------------------------|
| 12 rs111795191 | 124151267 T | 47.66 | 2.16E-13 chr:12:124066477 |
| 12 rs111858039 | 124164575 T | 47.66 | 2.16E-13 chr:12:124066477 |
| 12 rs111865336 | 124210872 T | 47.66 | 2.16E-13 chr:12:124066477 |
| 12 rs111888114 | 124199424 T | 47.66 | 2.16E-13 chr:12:124066477 |
| 12 rs111942715 | 124180507 T | 47.66 | 2.16E-13 chr:12:124066477 |
| 12 rs112019281 | 124145916 C | 47.66 | 2.16E-13 chr:12:124066477 |
| 12 rs112095096 | 124215340 G | 47.66 | 2.16E-13 chr:12:124066477 |
| 12 rs112101306 | 124165079 C | 47.66 | 2.16E-13 chr:12:124066477 |
| 12 rs112158562 | 124192207 C | 47.66 | 2.16E-13 chr:12:124066477 |
| 12 rs112183155 | 124123436 A | 47.66 | 2.16E-13 chr:12:124066477 |
| 12 rs112237685 | 124137928 T | 47.66 | 2.16E-13 chr:12:124066477 |
| 12 rs112325438 | 124202498 A | 47.66 | 2.16E-13 chr:12:124066477 |
| 12 rs112358013 | 124125805 A | 47.66 | 2.16E-13 chr:12:124066477 |
| 12 rs112368000 | 124126470 A | 47.66 | 2.16E-13 chr:12:124066477 |
| 12 rs112482747 | 124196163 C | 47.66 | 2.16E-13 chr:12:124066477 |
| 12 rs112522115 | 124185161 G | 47.66 | 2.16E-13 chr:12:124066477 |
| 12 rs112525270 | 124192672 C | 47.66 | 2.16E-13 chr:12:124066477 |
| 12 rs112581027 | 124151981 G | 47.66 | 2.16E-13 chr:12:124066477 |
| 12 rs112713519 | 124208643 C | 47.66 | 2.16E-13 chr:12:124066477 |
| 12 rs112940220 | 124176510 T | 47.66 | 2.16E-13 chr:12:124066477 |
| 12 rs112955959 | 124185126 T | 47.66 | 2.16E-13 chr:12:124066477 |
| 12 rs113035936 | 124153130 T | 47.66 | 2.16E-13 chr:12:124066477 |
| 12 rs113038752 | 124220799 A | 47.66 | 2.16E-13 chr:12:124066477 |
| 12 rs113146172 | 124196338 A | 47.66 | 2.16E-13 chr:12:124066477 |
| 12 rs113175793 | 124123477 A | 47.66 | 2.16E-13 chr:12:124066477 |
| 12 rs113207719 | 124189779 A | 47.66 | 2.16E-13 chr:12:124066477 |
| 12 rs113212386 | 124109615 T | 47.66 | 2.16E-13 chr:12:124066477 |
| 12 rs113292231 | 124192347 T | 47.66 | 2.16E-13 chr:12:124066477 |
| 12 rs113349008 | 124175803 T | 47.66 | 2.16E-13 chr:12:124066477 |
| 12 rs113386205 | 124125875 T | 47.66 | 2.16E-13 chr:12:124066477 |
| 12 rs113421547 | 124234305 A | 47.66 | 2.16E-13 chr:12:124066477 |
| 12 rs113425875 | 124217119 T | 47.66 | 2.16E-13 chr:12:124066477 |
| 12 rs113613042 | 124163027 A | 47.66 | 2.16E-13 chr:12:124066477 |
| 12 rs113638879 | 124164895 A | 47.66 | 2.16E-13 chr:12:124066477 |
| 12 rs113727412 | 124131642 A | 47.66 | 2.16E-13 chr:12:124066477 |
| 12 rs11572928  | 124122663 G | 47.66 | 2.16E-13 chr:12:124066477 |
| 12 rs11572929  | 124122937 C | 47.66 | 2.16E-13 chr:12:124066477 |
| 12 rs11572931  | 124123070 A | 47.66 | 2.16E-13 chr:12:124066477 |
| 12 rs11572938  | 124125725 C | 47.66 | 2.16E-13 chr:12:124066477 |
| 12 rs11572962  | 124132856 A | 47.66 | 2.16E-13 chr:12:124066477 |
| 12 rs11572992  | 124141383 T | 47.66 | 2.16E-13 chr:12:124066477 |
| 12 rs11573002  | 124144150 T | 47.66 | 2.16E-13 chr:12:124066477 |
| 12 rs11573005  | 124144279 C | 47.66 | 2.16E-13 chr:12:124066477 |



|                |             |       |                           |
|----------------|-------------|-------|---------------------------|
| 12 rs11573006  | 124144359 C | 47.66 | 2.16E-13 chr:12:124066477 |
| 12 rs116985162 | 124211857 A | 47.66 | 2.16E-13 chr:12:124066477 |
| 12 rs117035856 | 124183249 C | 47.66 | 2.16E-13 chr:12:124066477 |
| 12 rs11831129  | 124110675 G | 47.66 | 2.16E-13 chr:12:124066477 |
| 12 rs142599916 | 124214892 G | 47.66 | 2.16E-13 chr:12:124066477 |
| 12 rs151281380 | 124222810 A | 47.66 | 2.16E-13 chr:12:124066477 |
| 12 rs1568031   | 124136607 T | 47.66 | 2.16E-13 chr:12:124066477 |
| 12 rs1913847   | 124151770 T | 47.66 | 2.16E-13 chr:12:124066477 |
| 12 rs34827093  | 124118248 G | 47.66 | 2.16E-13 chr:12:124066477 |
| 12 rs56816130  | 124183058 T | 47.66 | 2.16E-13 chr:12:124066477 |
| 12 rs58680194  | 124190648 A | 47.66 | 2.16E-13 chr:12:124066477 |
| 12 rs59279556  | 124128077 G | 47.66 | 2.16E-13 chr:12:124066477 |
| 12 rs60422010  | 124169010 T | 47.66 | 2.16E-13 chr:12:124066477 |
| 12 rs60577371  | 124158076 A | 47.66 | 2.16E-13 chr:12:124066477 |
| 12 rs61082817  | 124185855 A | 47.66 | 2.16E-13 chr:12:124066477 |
| 12 rs6488886   | 124120205 A | 47.66 | 2.16E-13 chr:12:124066477 |
| 12 rs6488889   | 124144793 C | 47.66 | 2.16E-13 chr:12:124066477 |
| 12 rs7310965   | 124245814 G | 47.66 | 2.16E-13 chr:12:124066477 |
| 12 rs73416265  | 124138060 A | 47.66 | 2.16E-13 chr:12:124066477 |
| 12 rs73416269  | 124142705 G | 47.66 | 2.16E-13 chr:12:124066477 |
| 12 rs73416277  | 124145822 G | 47.66 | 2.16E-13 chr:12:124066477 |
| 12 rs73416283  | 124149382 A | 47.66 | 2.16E-13 chr:12:124066477 |
| 12 rs73416298  | 124154446 C | 47.66 | 2.16E-13 chr:12:124066477 |
| 12 rs73416299  | 124156050 T | 47.66 | 2.16E-13 chr:12:124066477 |
| 12 rs73416301  | 124156637 T | 47.66 | 2.16E-13 chr:12:124066477 |
| 12 rs73418103  | 124156838 A | 47.66 | 2.16E-13 chr:12:124066477 |
| 12 rs73418104  | 124156914 A | 47.66 | 2.16E-13 chr:12:124066477 |
| 12 rs73418107  | 124157091 C | 47.66 | 2.16E-13 chr:12:124066477 |
| 12 rs73418114  | 124159484 T | 47.66 | 2.16E-13 chr:12:124066477 |
| 12 rs73418125  | 124162960 C | 47.66 | 2.16E-13 chr:12:124066477 |
| 12 rs73418139  | 124168543 C | 47.66 | 2.16E-13 chr:12:124066477 |
| 12 rs73418148  | 124171610 C | 47.66 | 2.16E-13 chr:12:124066477 |
| 12 rs73418153  | 124172706 G | 47.66 | 2.16E-13 chr:12:124066477 |
| 12 rs73418167  | 124179928 A | 47.66 | 2.16E-13 chr:12:124066477 |
| 12 rs73418179  | 124188103 T | 47.66 | 2.16E-13 chr:12:124066477 |
| 12 rs73420345  | 124234445 C | 47.66 | 2.16E-13 chr:12:124066477 |
| 12 rs74691387  | 124224357 C | 47.66 | 2.16E-13 chr:12:124066477 |
| 12 rs77765053  | 124245456 A | 47.66 | 2.16E-13 chr:12:124066477 |
| 12 rs77804131  | 124175086 T | 47.66 | 2.16E-13 chr:12:124066477 |
| 12 rs77988284  | 124225324 T | 47.66 | 2.16E-13 chr:12:124066477 |
| 12 rs78856277  | 124208524 A | 47.66 | 2.16E-13 chr:12:124066477 |
| 12 rs79138426  | 124204768 G | 47.66 | 2.16E-13 chr:12:124066477 |
| 12 rs7956769   | 124235890 G | 47.66 | 2.16E-13 chr:12:124066477 |

|                |             |       |          |                  |
|----------------|-------------|-------|----------|------------------|
| 12 rs786426    | 124086086 C | 54.91 | 2.24E-13 | chr:12:124066477 |
| 12 rs11572956  | 124130802 A | 44.37 | 2.36E-13 | chr:12:124066477 |
| 12 rs111795621 | 124012981 C | 43.54 | 2.88E-13 | chr:12:124066477 |
| 12 rs113246895 | 124013942 A | 43.54 | 2.88E-13 | chr:12:124066477 |
| 12 rs113350030 | 124178820 A | 44.76 | 4.04E-13 | chr:12:124066477 |
| 12 rs7297951   | 124053711 C | 44.94 | 4.17E-13 | chr:12:124066477 |
| 12 rs111806547 | 124246603 C | 35.48 | 4.27E-13 | chr:12:124066477 |
| 12 rs56862679  | 124241591 C | 35.48 | 4.27E-13 | chr:12:124066477 |
| 12 rs57623425  | 124209770 T | 35.48 | 4.27E-13 | chr:12:124066477 |
| 12 rs58507743  | 124208285 T | 35.48 | 4.27E-13 | chr:12:124066477 |
| 12 rs59827616  | 124209778 T | 35.48 | 4.27E-13 | chr:12:124066477 |
| 12 rs73420351  | 124246132 A | 35.48 | 4.27E-13 | chr:12:124066477 |
| 12 rs73420355  | 124247212 T | 35.48 | 4.27E-13 | chr:12:124066477 |
| 12 rs74713228  | 124207471 T | 35.48 | 4.27E-13 | chr:12:124066477 |
| 12 rs75169199  | 124217938 T | 35.48 | 4.27E-13 | chr:12:124066477 |
| 12 rs79730733  | 124247209 C | 35.48 | 4.27E-13 | chr:12:124066477 |
| 12 rs111687827 | 124051096 C | 43.22 | 4.56E-13 | chr:12:124066477 |
| 12 rs113129322 | 124027872 A | 41.04 | 4.98E-13 | chr:12:124066477 |
| 12 rs28627432  | 124029137 C | 41.04 | 4.98E-13 | chr:12:124066477 |
| 12 rs28743126  | 124028131 A | 41.04 | 4.98E-13 | chr:12:124066477 |
| 12 rs4534668   | 124029746 C | 41.04 | 4.98E-13 | chr:12:124066477 |
| 12 rs78878823  | 124016535 A | 41.04 | 4.98E-13 | chr:12:124066477 |
| 12 rs7974138   | 124011075 A | 35.71 | 5.44E-13 | chr:12:124066477 |
| 12 rs78441107  | 124251942 C | 33.14 | 7.69E-13 | chr:12:124066477 |
| 12 rs28711796  | 124008074 C | 33.4  | 7.83E-13 | chr:12:124066477 |
| 12 rs111601834 | 124116169 G | 40.57 | 1.48E-12 | chr:12:124066477 |
| 12 rs7134190   | 124116483 C | 40.57 | 1.48E-12 | chr:12:124066477 |
| 12 rs7301031   | 124116808 G | 40.57 | 1.48E-12 | chr:12:124066477 |
| 12 rs79606093  | 124111062 A | 40.57 | 1.48E-12 | chr:12:124066477 |
| 12 rs7301897   | 124250710 G | 23.26 | 4.45E-12 | chr:12:124066477 |
| 12 rs7316847   | 124250893 T | 23.26 | 4.45E-12 | chr:12:124066477 |
| 12 rs73420364  | 124251160 C | 23.26 | 4.45E-12 | chr:12:124066477 |
| 12 rs76728475  | 124250473 T | 23.26 | 4.45E-12 | chr:12:124066477 |
| 12 rs7302406   | 124252688 T | 20.26 | 6.36E-12 | chr:12:124066477 |
| 12 rs73418174  | 124186925 C | 22.07 | 6.44E-12 | chr:12:124066477 |
| 12 rs150972482 | 124251463 C | 22.27 | 6.49E-12 | chr:12:124066477 |
| 12 rs7296437   | 124254812 T | 18.88 | 9.96E-12 | chr:12:124066477 |
| 12 rs10082874  | 124051951 A | 25.17 | 1.10E-10 | chr:12:124066477 |
| 12 rs11615043  | 124056715 C | 25.17 | 1.10E-10 | chr:12:124066477 |
| 12 rs117887064 | 124074320 T | 25.17 | 1.10E-10 | chr:12:124066477 |
| 12 rs137909390 | 124078791 A | 25.17 | 1.10E-10 | chr:12:124066477 |
| 12 rs141542281 | 124075268 A | 25.17 | 1.10E-10 | chr:12:124066477 |
| 12 rs34099549  | 124085062 A | 25.17 | 1.10E-10 | chr:12:124066477 |

|                |             |       |          |                  |
|----------------|-------------|-------|----------|------------------|
| 12 rs74844896  | 124068924 C | 25.17 | 1.10E-10 | chr:12:124066477 |
| 12 rs76100851  | 124067280 T | 25.17 | 1.10E-10 | chr:12:124066477 |
| 12 rs77699179  | 124092437 A | 25.17 | 1.10E-10 | chr:12:124066477 |
| 12 rs78072538  | 124074848 T | 25.17 | 1.10E-10 | chr:12:124066477 |
| 12 rs786455    | 124054766 T | 25.17 | 1.10E-10 | chr:12:124066477 |
| 12 rs111516966 | 124035781 A | 23.79 | 1.33E-10 | chr:12:124066477 |
| 12 rs111790379 | 124022967 T | 23.79 | 1.33E-10 | chr:12:124066477 |
| 12 rs145594864 | 124024519 A | 23.79 | 1.33E-10 | chr:12:124066477 |
| 12 rs146502362 | 124041729 C | 23.79 | 1.33E-10 | chr:12:124066477 |
| 12 rs188848881 | 124042516 A | 23.79 | 1.33E-10 | chr:12:124066477 |
| 12 rs28691687  | 124023020 T | 23.79 | 1.33E-10 | chr:12:124066477 |
| 12 rs6488879   | 124027372 T | 23.79 | 1.33E-10 | chr:12:124066477 |
| 12 rs78067009  | 124019231 T | 23.79 | 1.33E-10 | chr:12:124066477 |
| 12 rs143130669 | 124046424 T | 23.4  | 1.74E-10 | chr:12:124066477 |
| 12 rs2458449   | 124053767 C | 23.95 | 1.81E-10 | chr:12:124066477 |
| 12 rs9777754   | 123960474 A | 10.79 | 3.97E-10 | chr:12:124066477 |
| 12 rs2048614   | 124011429 T | 19.69 | 4.67E-10 | chr:12:124066477 |
| 12 rs28361405  | 124012714 A | 19.69 | 4.67E-10 | chr:12:124066477 |
| 12 rs79370578  | 124007431 T | 19.69 | 4.67E-10 | chr:12:124066477 |
| 12 rs883503    | 124008897 C | 19.69 | 4.67E-10 | chr:12:124066477 |
| 12 rs9777813   | 123962482 C | 10.41 | 5.72E-10 | chr:12:124066477 |
| 12 rs3748268   | 124097824 G | 10.06 | 9.01E-10 | chr:12:124066477 |
| 12 rs884892    | 124097528 G | 10.06 | 9.01E-10 | chr:12:124066477 |
| 12 rs9697379   | 124005129 A | 17.38 | 1.18E-09 | chr:12:124066477 |
| 12 rs539447252 | 124216137 T | 30.39 | 1.24E-09 | chr:12:124066477 |
| 12 rs558454491 | 124216138 G | 30.39 | 1.24E-09 | chr:12:124066477 |
| 12 rs9697536   | 123995023 T | 8.755 | 1.51E-09 | chr:12:124066477 |
| 12 rs28454032  | 124034703 G | 13.23 | 1.62E-09 | chr:12:124066477 |
| 12 rs5027860   | 124032819 G | 13.23 | 1.62E-09 | chr:12:124066477 |
| 12 rs7965334   | 124036026 C | 13.23 | 1.62E-09 | chr:12:124066477 |
| 12 rs9697264   | 123983941 A | 9.052 | 1.74E-09 | chr:12:124066477 |
| 12 rs9697616   | 123976861 C | 9.052 | 1.74E-09 | chr:12:124066477 |
| 12 rs11497312  | 123962721 T | 10.52 | 1.88E-09 | chr:12:124066477 |
| 12 rs11497308  | 123990848 T | 8.442 | 1.91E-09 | chr:12:124066477 |
| 12 rs10846528  | 124052985 A | 8.411 | 2.02E-09 | chr:12:124066477 |
| 12 rs2048616   | 124049966 G | 8.411 | 2.02E-09 | chr:12:124066477 |
| 12 rs2458115   | 124053902 T | 8.411 | 2.02E-09 | chr:12:124066477 |
| 12 rs4310694   | 124050760 A | 8.411 | 2.02E-09 | chr:12:124066477 |
| 12 rs786454    | 124055358 C | 8.411 | 2.02E-09 | chr:12:124066477 |
| 12 rs28834793  | 124040064 G | 8.413 | 2.07E-09 | chr:12:124066477 |
| 12 rs7315326   | 124033885 G | 8.413 | 2.07E-09 | chr:12:124066477 |
| 12 rs4930716   | 124013306 A | 11.59 | 2.32E-09 | chr:12:124066477 |
| 12 rs7313179   | 124009190 T | 11.59 | 2.32E-09 | chr:12:124066477 |

|               |             |       |          |                  |
|---------------|-------------|-------|----------|------------------|
| 12 rs28711456 | 124012763 T | 11.57 | 2.54E-09 | chr:12:124066477 |
| 12 rs11560820 | 123966973 A | 8.635 | 3.41E-09 | chr:12:124066477 |
| 12 rs34031619 | 123965988 C | 8.635 | 3.41E-09 | chr:12:124066477 |
| 12 rs11615300 | 124100423 G | 7.502 | 3.87E-09 | chr:12:124066477 |
| 12 rs4078291  | 123975585 C | 8.26  | 3.87E-09 | chr:12:124066477 |
| 12 rs11522340 | 123958937 C | 8.618 | 3.93E-09 | chr:12:124066477 |
| 12 rs9723046  | 123959092 G | 8.618 | 3.93E-09 | chr:12:124066477 |
| 12 rs11497313 | 123962437 A | 8.587 | 4.36E-09 | chr:12:124066477 |
| 12 rs7959727  | 124022758 G | 7.82  | 4.62E-09 | chr:12:124066477 |
| 12 rs12817861 | 124046540 T | 7.57  | 4.83E-09 | chr:12:124066477 |
| 12 rs28712858 | 124007762 C | 7.905 | 5.79E-09 | chr:12:124066477 |
| 12 rs28478308 | 124017569 A | 7.613 | 5.80E-09 | chr:12:124066477 |
| 12 rs28662057 | 124017568 A | 7.613 | 5.80E-09 | chr:12:124066477 |
| 12 rs11522338 | 124004918 C | 7.567 | 6.81E-09 | chr:12:124066477 |
| 12 rs28701527 | 124011923 C | 7.404 | 7.03E-09 | chr:12:124066477 |
| 12 rs11522339 | 124004948 A | 7.582 | 7.27E-09 | chr:12:124066477 |
| 12 rs28580741 | 124013216 C | 7.421 | 7.29E-09 | chr:12:124066477 |
| 12 rs28741988 | 124013264 C | 7.421 | 7.29E-09 | chr:12:124066477 |
| 12 rs28450070 | 124013120 G | 7.428 | 7.44E-09 | chr:12:124066477 |
| 12 rs1057879  | 124013406 A | 7.426 | 7.66E-09 | chr:12:124066477 |
| 12 rs2048615  | 124011285 C | 7.426 | 7.66E-09 | chr:12:124066477 |
| 12 rs28371124 | 124012558 T | 7.426 | 7.66E-09 | chr:12:124066477 |
| 12 rs28430750 | 124012197 G | 7.426 | 7.66E-09 | chr:12:124066477 |
| 12 rs28478446 | 124014177 T | 7.426 | 7.66E-09 | chr:12:124066477 |
| 12 rs28497190 | 124012223 T | 7.426 | 7.66E-09 | chr:12:124066477 |
| 12 rs28535055 | 124014073 C | 7.426 | 7.66E-09 | chr:12:124066477 |
| 12 rs28605072 | 124011804 G | 7.426 | 7.66E-09 | chr:12:124066477 |
| 12 rs28707421 | 124010185 T | 7.426 | 7.66E-09 | chr:12:124066477 |
| 12 rs2333831  | 124012316 G | 7.433 | 7.81E-09 | chr:12:124066477 |
| 12 rs28496079 | 124006841 C | 7.447 | 8.56E-09 | chr:12:124066477 |
| 12 rs67516712 | 124201524 A | 7.755 | 9.31E-09 | chr:12:124066477 |
| 12 rs6606747  | 123949588 C | 7.38  | 1.18E-08 | chr:12:124066477 |
| 12 rs1051793  | 124144395 G | 7.301 | 1.21E-08 | chr:12:124066477 |
| 12 rs10846537 | 124138346 T | 7.301 | 1.21E-08 | chr:12:124066477 |
| 12 rs11609591 | 124174065 A | 7.301 | 1.21E-08 | chr:12:124066477 |
| 12 rs11614659 | 124167956 T | 7.301 | 1.21E-08 | chr:12:124066477 |
| 12 rs11829958 | 124173005 G | 7.301 | 1.21E-08 | chr:12:124066477 |
| 12 rs12819746 | 124193574 G | 7.301 | 1.21E-08 | chr:12:124066477 |
| 12 rs12825800 | 124193666 C | 7.301 | 1.21E-08 | chr:12:124066477 |
| 12 rs12828633 | 124179620 A | 7.301 | 1.21E-08 | chr:12:124066477 |
| 12 rs35114195 | 124176013 C | 7.301 | 1.21E-08 | chr:12:124066477 |
| 12 rs35158437 | 124160764 T | 7.301 | 1.21E-08 | chr:12:124066477 |
| 12 rs35649708 | 124151439 G | 7.301 | 1.21E-08 | chr:12:124066477 |

|               |             |       |          |                  |
|---------------|-------------|-------|----------|------------------|
| 12 rs4930708  | 124145697 C | 7.301 | 1.21E-08 | chr:12:124066477 |
| 12 rs6488897  | 124195483 C | 7.301 | 1.21E-08 | chr:12:124066477 |
| 12 rs66647364 | 124197280 C | 7.301 | 1.21E-08 | chr:12:124066477 |
| 12 rs7133199  | 124159185 C | 7.301 | 1.21E-08 | chr:12:124066477 |
| 12 rs7134074  | 124159885 T | 7.301 | 1.21E-08 | chr:12:124066477 |
| 12 rs7138503  | 124183827 G | 7.301 | 1.21E-08 | chr:12:124066477 |
| 12 rs7297576  | 124171323 C | 7.301 | 1.21E-08 | chr:12:124066477 |
| 12 rs7298831  | 124172555 T | 7.301 | 1.21E-08 | chr:12:124066477 |
| 12 rs7301065  | 124154838 A | 7.301 | 1.21E-08 | chr:12:124066477 |
| 12 rs7306549  | 124156897 G | 7.301 | 1.21E-08 | chr:12:124066477 |
| 12 rs7308862  | 124171151 T | 7.301 | 1.21E-08 | chr:12:124066477 |
| 12 rs7313032  | 124172731 A | 7.301 | 1.21E-08 | chr:12:124066477 |
| 12 rs7313140  | 124157188 G | 7.301 | 1.21E-08 | chr:12:124066477 |
| 12 rs7313261  | 124166937 A | 7.301 | 1.21E-08 | chr:12:124066477 |
| 12 rs7958693  | 124162750 A | 7.301 | 1.21E-08 | chr:12:124066477 |
| 12 rs7960951  | 124165829 A | 7.301 | 1.21E-08 | chr:12:124066477 |
| 12 rs7964443  | 124166500 C | 7.301 | 1.21E-08 | chr:12:124066477 |
| 12 rs7974279  | 124166411 T | 7.301 | 1.21E-08 | chr:12:124066477 |
| 12 rs11507744 | 123955845 C | 7.322 | 1.42E-08 | chr:12:124066477 |
| 12 rs3087496  | 123956749 A | 7.322 | 1.42E-08 | chr:12:124066477 |
| 12 rs9778112  | 123951474 C | 7.322 | 1.42E-08 | chr:12:124066477 |
| 12 rs11516176 | 123936016 C | 7.304 | 1.43E-08 | chr:12:124066477 |
| 12 rs11534428 | 123938488 A | 7.304 | 1.43E-08 | chr:12:124066477 |
| 12 rs11559494 | 123938353 T | 7.304 | 1.43E-08 | chr:12:124066477 |
| 12 rs28829651 | 123936900 G | 7.304 | 1.43E-08 | chr:12:124066477 |
| 12 rs35322317 | 123937147 C | 7.304 | 1.43E-08 | chr:12:124066477 |
| 12 rs4479070  | 123938954 T | 7.304 | 1.43E-08 | chr:12:124066477 |
| 12 rs7975636  | 123943673 C | 7.304 | 1.43E-08 | chr:12:124066477 |
| 12 rs11522337 | 124004843 C | 6.963 | 1.52E-08 | chr:12:124066477 |
| 12 rs7305701  | 124150013 C | 7.102 | 1.55E-08 | chr:12:124066477 |
| 12 rs7970602  | 124165056 T | 6.732 | 2.09E-08 | chr:12:124066477 |
| 12 rs10846549 | 124222687 C | 6.668 | 2.19E-08 | chr:12:124066477 |
| 12 rs10846550 | 124222695 T | 6.668 | 2.19E-08 | chr:12:124066477 |
| 12 rs11829661 | 124059488 A | 9.834 | 2.58E-08 | chr:12:124066477 |
| 12 rs10744161 | 124231355 A | 6.623 | 2.65E-08 | chr:12:124066477 |
| 12 rs34996665 | 124134656 T | 6.852 | 2.75E-08 | chr:12:124066477 |
| 12 rs1040156  | 124223364 A | 6.621 | 2.82E-08 | chr:12:124066477 |
| 12 rs10732574 | 124219121 A | 6.621 | 2.82E-08 | chr:12:124066477 |
| 12 rs10773031 | 124222909 G | 6.621 | 2.82E-08 | chr:12:124066477 |
| 12 rs10846551 | 124222811 G | 6.621 | 2.82E-08 | chr:12:124066477 |
| 12 rs12580486 | 124224335 T | 6.621 | 2.82E-08 | chr:12:124066477 |
| 12 rs2271661  | 124219910 T | 6.621 | 2.82E-08 | chr:12:124066477 |
| 12 rs2333835  | 124220879 T | 6.621 | 2.82E-08 | chr:12:124066477 |

|                |             |       |          |                  |
|----------------|-------------|-------|----------|------------------|
| 12 rs2333836   | 124220543 C | 6.621 | 2.82E-08 | chr:12:124066477 |
| 12 rs2333838   | 124220354 A | 6.621 | 2.82E-08 | chr:12:124066477 |
| 12 rs2333839   | 124216852 T | 6.621 | 2.82E-08 | chr:12:124066477 |
| 12 rs7300721   | 124219595 T | 6.621 | 2.82E-08 | chr:12:124066477 |
| 12 rs7308398   | 124226800 T | 6.621 | 2.82E-08 | chr:12:124066477 |
| 12 rs7398082   | 124225073 A | 6.621 | 2.82E-08 | chr:12:124066477 |
| 12 rs7399128   | 124225211 G | 6.621 | 2.82E-08 | chr:12:124066477 |
| 12 rs7295552   | 124223844 T | 6.612 | 3.05E-08 | chr:12:124066477 |
| 12 rs10773033  | 124231368 T | 6.412 | 3.48E-08 | chr:12:124066477 |
| 12 rs10734904  | 124204158 T | 6.411 | 3.69E-08 | chr:12:124066477 |
| 12 rs10734908  | 124219036 C | 6.411 | 3.69E-08 | chr:12:124066477 |
| 12 rs10744160  | 124225542 A | 6.411 | 3.69E-08 | chr:12:124066477 |
| 12 rs10744162  | 124243707 T | 6.411 | 3.69E-08 | chr:12:124066477 |
| 12 rs10773032  | 124226063 A | 6.411 | 3.69E-08 | chr:12:124066477 |
| 12 rs10773034  | 124234253 A | 6.411 | 3.69E-08 | chr:12:124066477 |
| 12 rs2333834   | 124246004 G | 6.411 | 3.69E-08 | chr:12:124066477 |
| 12 rs2333837   | 124220522 C | 6.411 | 3.69E-08 | chr:12:124066477 |
| 12 rs34247974  | 124224211 A | 6.411 | 3.69E-08 | chr:12:124066477 |
| 12 rs7397240   | 124217627 A | 6.411 | 3.69E-08 | chr:12:124066477 |
| 12 rs7397745   | 124218026 T | 6.411 | 3.69E-08 | chr:12:124066477 |
| 12 rs7397746   | 124218044 T | 6.411 | 3.69E-08 | chr:12:124066477 |
| 12 rs7398372   | 124217688 C | 6.411 | 3.69E-08 | chr:12:124066477 |
| 12 rs7398373   | 124217689 C | 6.411 | 3.69E-08 | chr:12:124066477 |
| 12 rs7398384   | 124217840 C | 6.411 | 3.69E-08 | chr:12:124066477 |
| 12 rs7398641   | 124218102 C | 6.411 | 3.69E-08 | chr:12:124066477 |
| 12 rs7398851   | 124215004 A | 6.411 | 3.69E-08 | chr:12:124066477 |
| 12 rs7974462   | 124214694 T | 6.411 | 3.69E-08 | chr:12:124066477 |
| 12 rs882563    | 124210549 C | 6.411 | 3.69E-08 | chr:12:124066477 |
| 12 rs9788204   | 124207209 C | 6.411 | 3.69E-08 | chr:12:124066477 |
| 12 rs786452    | 124057169 C | 7.697 | 4.57E-08 | chr:12:124066477 |
| 12 rs10846527  | 124043296 C | 32.67 | 5.68E-08 | chr:12:124066477 |
| 12 rs11057311  | 124121429 T | 32.67 | 5.68E-08 | chr:12:124066477 |
| 12 rs147460725 | 124038535 T | 32.67 | 5.68E-08 | chr:12:124066477 |
| 12 rs28880346  | 124038995 C | 32.67 | 5.68E-08 | chr:12:124066477 |
| 12 rs138877637 | 124259895 G | 12.05 | 6.92E-08 | chr:12:124066477 |
| 12 rs139800462 | 124258435 G | 12.05 | 6.92E-08 | chr:12:124066477 |
| 12 rs143203578 | 124267249 A | 12.05 | 6.92E-08 | chr:12:124066477 |
| 12 rs146797106 | 124285062 C | 12.05 | 6.92E-08 | chr:12:124066477 |
| 12 rs191640906 | 124281919 A | 12.05 | 6.92E-08 | chr:12:124066477 |
| 12 rs10082815  | 124249319 C | 6.365 | 7.49E-08 | chr:12:124066477 |
| 12 rs111786154 | 124273347 T | 10.26 | 9.38E-08 | chr:12:124066477 |
| 12 rs113494161 | 124271358 G | 10.26 | 9.38E-08 | chr:12:124066477 |
| 12 rs113630336 | 124262490 G | 10.26 | 9.38E-08 | chr:12:124066477 |

|                |             |        |          |                  |
|----------------|-------------|--------|----------|------------------|
| 12 rs117075581 | 124263505 G | 10.26  | 9.38E-08 | chr:12:124066477 |
| 12 rs56759847  | 124270105 C | 10.26  | 9.38E-08 | chr:12:124066477 |
| 12 rs573607966 | 124263760 T | 10.26  | 9.38E-08 | chr:12:124066477 |
| 12 rs77227125  | 124261784 C | 10.26  | 9.38E-08 | chr:12:124066477 |
| 12 rs76791219  | 124281322 C | 8.627  | 9.76E-08 | chr:12:124066477 |
| 12 rs71458805  | 124017254 G | 14.25  | 9.90E-08 | chr:12:124066477 |
| 12 rs9803100   | 124003496 T | 6.28   | 1.01E-07 | chr:12:124066477 |
| 12 rs7976110   | 124249818 A | 5.814  | 1.14E-07 | chr:12:124066477 |
| 12 rs112270131 | 124265430 C | 9.725  | 1.44E-07 | chr:12:124066477 |
| 12 rs7972413   | 124108296 C | 6.818  | 1.56E-07 | chr:12:124066477 |
| 12 rs11057307  | 124098213 C | 6.814  | 1.57E-07 | chr:12:124066477 |
| 12 rs6488883   | 124101347 C | 6.814  | 1.57E-07 | chr:12:124066477 |
| 12 rs7134896   | 124101858 A | 6.814  | 1.57E-07 | chr:12:124066477 |
| 12 rs7302183   | 124104460 G | 6.814  | 1.57E-07 | chr:12:124066477 |
| 12 rs7313628   | 124107015 A | 6.814  | 1.57E-07 | chr:12:124066477 |
| 12 rs112314627 | 124288672 G | 9.637  | 1.78E-07 | chr:12:124066477 |
| 12 rs112481221 | 124287068 G | 9.637  | 1.78E-07 | chr:12:124066477 |
| 12 rs113151285 | 124287133 A | 9.637  | 1.78E-07 | chr:12:124066477 |
| 12 rs113929291 | 124288815 G | 9.637  | 1.78E-07 | chr:12:124066477 |
| 12 rs141636772 | 124283576 T | 9.637  | 1.78E-07 | chr:12:124066477 |
| 12 rs57753261  | 124286216 G | 9.637  | 1.78E-07 | chr:12:124066477 |
| 12 rs59908178  | 124282316 G | 9.637  | 1.78E-07 | chr:12:124066477 |
| 12 rs61143657  | 124286217 G | 9.637  | 1.78E-07 | chr:12:124066477 |
| 12 rs75620660  | 124287220 T | 9.637  | 1.78E-07 | chr:12:124066477 |
| 12 rs76955253  | 124284336 T | 9.637  | 1.78E-07 | chr:12:124066477 |
| 12 rs77158395  | 124288707 A | 9.637  | 1.78E-07 | chr:12:124066477 |
| 12 rs77491573  | 124288264 A | 9.637  | 1.78E-07 | chr:12:124066477 |
| 12 rs3748269   | 124099925 C | 6.851  | 1.85E-07 | chr:12:124066477 |
| 12 rs117209788 | 124014251 T | 21.35  | 1.96E-07 | chr:12:124066477 |
| 12 rs143928387 | 124013220 T | 21.35  | 1.96E-07 | chr:12:124066477 |
| 12 rs908373    | 124113319 G | 6.354  | 2.04E-07 | chr:12:124066477 |
| 12 rs7300147   | 124116833 G | 0.1211 | 2.19E-07 | chr:12:124066477 |
| 12 rs13303189  | 124002762 T | 5.372  | 2.22E-07 | chr:12:124066477 |
| 12 rs2017181   | 124117257 G | 6.246  | 2.43E-07 | chr:12:124066477 |
| 12 rs11834698  | 124261929 G | 8.959  | 2.57E-07 | chr:12:124066477 |
| 12 rs36085880  | 124263740 A | 8.959  | 2.57E-07 | chr:12:124066477 |
| 12 rs59367942  | 124261128 C | 8.959  | 2.57E-07 | chr:12:124066477 |
| 12 rs79687357  | 124259487 T | 8.959  | 2.57E-07 | chr:12:124066477 |
| 12 rs75449541  | 123963976 T | 5.324  | 2.80E-07 | chr:12:124066477 |
| 12 rs77264359  | 124284162 T | 8.837  | 2.82E-07 | chr:12:124066477 |
| 12 rs11526043  | 123971491 G | 6.033  | 3.11E-07 | chr:12:124066477 |
| 12 rs35157218  | 123962785 T | 5.261  | 3.13E-07 | chr:12:124066477 |
| 12 rs1515814   | 124108699 A | 5.993  | 3.15E-07 | chr:12:124066477 |

|                |             |       |          |                  |
|----------------|-------------|-------|----------|------------------|
| 12 rs11057326  | 124148478 T | 5.21  | 3.19E-07 | chr:12:124066477 |
| 12 rs140607988 | 124301105 T | 10.79 | 3.34E-07 | chr:12:124066477 |
| 12 rs143713799 | 124298030 A | 10.79 | 3.34E-07 | chr:12:124066477 |
| 12 rs149687333 | 124308349 G | 10.79 | 3.34E-07 | chr:12:124066477 |
| 12 rs190661186 | 124316456 T | 10.79 | 3.34E-07 | chr:12:124066477 |
| 12 rs76602994  | 124311162 T | 10.79 | 3.34E-07 | chr:12:124066477 |
| 12 rs13303217  | 124001751 A | 5.119 | 3.38E-07 | chr:12:124066477 |
| 12 rs13303334  | 124002589 G | 5.119 | 3.38E-07 | chr:12:124066477 |
| 12 rs75722792  | 124000651 A | 5.119 | 3.38E-07 | chr:12:124066477 |
| 12 rs13303167  | 123961934 A | 5.19  | 3.54E-07 | chr:12:124066477 |
| 12 rs36084544  | 123959681 A | 5.19  | 3.54E-07 | chr:12:124066477 |
| 12 rs7980049   | 124291534 C | 7.557 | 3.61E-07 | chr:12:124066477 |
| 12 rs1543075   | 124086448 G | 6.058 | 3.67E-07 | chr:12:124066477 |
| 12 rs1543076   | 124086449 C | 6.058 | 3.67E-07 | chr:12:124066477 |
| 12 rs4040225   | 124096673 A | 6.058 | 3.67E-07 | chr:12:124066477 |
| 12 rs4456350   | 124058489 A | 6.058 | 3.67E-07 | chr:12:124066477 |
| 12 rs6551      | 124082240 C | 6.058 | 3.67E-07 | chr:12:124066477 |
| 12 rs786422    | 124083562 G | 6.058 | 3.67E-07 | chr:12:124066477 |
| 12 rs786425    | 124085502 G | 6.058 | 3.67E-07 | chr:12:124066477 |
| 12 rs786441    | 124062743 G | 6.058 | 3.67E-07 | chr:12:124066477 |
| 12 rs786443    | 124063891 T | 6.058 | 3.67E-07 | chr:12:124066477 |
| 12 rs786445    | 124068361 C | 6.058 | 3.67E-07 | chr:12:124066477 |
| 12 rs786447    | 124069667 A | 6.058 | 3.67E-07 | chr:12:124066477 |
| 12 rs786448    | 124070214 A | 6.058 | 3.67E-07 | chr:12:124066477 |
| 12 rs786449    | 124071728 C | 6.058 | 3.67E-07 | chr:12:124066477 |
| 12 rs786444    | 124065416 T | 6.065 | 3.69E-07 | chr:12:124066477 |
| 12 rs59224630  | 124003622 G | 7.647 | 3.75E-07 | chr:12:124066477 |
| 12 rs13303044  | 123994105 T | 5.093 | 3.85E-07 | chr:12:124066477 |
| 12 rs78426500  | 123997770 G | 5.093 | 3.85E-07 | chr:12:124066477 |
| 12 rs9777736   | 123992279 A | 5.093 | 3.85E-07 | chr:12:124066477 |
| 12 rs75889421  | 124298787 G | 7.653 | 3.88E-07 | chr:12:124066477 |
| 12 rs6488904   | 124250583 A | 4.758 | 3.90E-07 | chr:12:124066477 |
| 12 rs113739564 | 124251545 C | 4.763 | 3.98E-07 | chr:12:124066477 |
| 12 rs67399282  | 124251231 A | 4.763 | 3.98E-07 | chr:12:124066477 |
| 12 rs75275217  | 124297653 A | 7.508 | 4.56E-07 | chr:12:124066477 |
| 12 rs11572966  | 124134802 T | 27.09 | 4.57E-07 | chr:12:124066477 |
| 12 rs74585832  | 124278263 C | 8.504 | 4.62E-07 | chr:12:124066477 |
| 12 rs786423    | 124083898 G | 5.89  | 4.64E-07 | chr:12:124066477 |
| 12 rs6488878   | 124023932 T | 4.987 | 4.85E-07 | chr:12:124066477 |
| 12 rs112673999 | 124292569 G | 8.885 | 4.96E-07 | chr:12:124066477 |
| 12 rs112921890 | 124291095 G | 8.885 | 4.96E-07 | chr:12:124066477 |
| 12 rs144036481 | 124290473 G | 8.885 | 4.96E-07 | chr:12:124066477 |
| 12 rs75181091  | 124292748 A | 8.885 | 4.96E-07 | chr:12:124066477 |



|                |             |       |          |                  |
|----------------|-------------|-------|----------|------------------|
| 12 rs77682183  | 124291170 G | 8.885 | 4.96E-07 | chr:12:124066477 |
| 12 rs79320889  | 124290233 C | 8.885 | 4.96E-07 | chr:12:124066477 |
| 12 rs13303242  | 123998986 T | 5.592 | 5.56E-07 | chr:12:124066477 |
| 12 rs12827680  | 124240645 A | 5.765 | 5.70E-07 | chr:12:124066477 |
| 12 rs137963709 | 124020685 A | 27.37 | 5.96E-07 | chr:12:124066477 |
| 12 rs10846535  | 124130388 G | 5.856 | 6.03E-07 | chr:12:124066477 |
| 12 rs7966882   | 124128965 A | 5.856 | 6.03E-07 | chr:12:124066477 |
| 12 rs7971452   | 124126821 G | 5.863 | 6.13E-07 | chr:12:124066477 |
| 12 rs12099921  | 124289144 A | 8.222 | 6.56E-07 | chr:12:124066477 |
| 12 rs2250026   | 124198405 C | 5.737 | 6.75E-07 | chr:12:124066477 |
| 12 rs10846540  | 124169093 G | 5.74  | 6.98E-07 | chr:12:124066477 |
| 12 rs10846541  | 124176286 T | 5.74  | 6.98E-07 | chr:12:124066477 |
| 12 rs10846546  | 124187886 G | 5.74  | 6.98E-07 | chr:12:124066477 |
| 12 rs11057320  | 124141362 G | 5.74  | 6.98E-07 | chr:12:124066477 |
| 12 rs1969272   | 124170293 G | 5.74  | 6.98E-07 | chr:12:124066477 |
| 12 rs56176939  | 124184829 G | 5.74  | 6.98E-07 | chr:12:124066477 |
| 12 rs7135624   | 124147831 G | 5.74  | 6.98E-07 | chr:12:124066477 |
| 12 rs7137946   | 124177289 C | 5.74  | 6.98E-07 | chr:12:124066477 |
| 12 rs7139193   | 124171176 G | 5.74  | 6.98E-07 | chr:12:124066477 |
| 12 rs7301907   | 124172342 C | 5.74  | 6.98E-07 | chr:12:124066477 |
| 12 rs7302449   | 124172746 C | 5.74  | 6.98E-07 | chr:12:124066477 |
| 12 rs7316011   | 124185212 T | 5.74  | 6.98E-07 | chr:12:124066477 |
| 12 rs7966867   | 124179417 C | 5.74  | 6.98E-07 | chr:12:124066477 |
| 12 rs13303080  | 123981480 T | 4.849 | 7.68E-07 | chr:12:124066477 |
| 12 rs13303200  | 123981144 A | 4.849 | 7.68E-07 | chr:12:124066477 |
| 12 rs28380613  | 123977550 C | 4.849 | 7.68E-07 | chr:12:124066477 |
| 12 rs34351395  | 123979809 T | 4.849 | 7.68E-07 | chr:12:124066477 |
| 12 rs34762274  | 123975815 A | 4.849 | 7.68E-07 | chr:12:124066477 |
| 12 rs9697581   | 123976317 T | 4.849 | 7.68E-07 | chr:12:124066477 |
| 12 rs12815746  | 124126086 T | 5.951 | 7.72E-07 | chr:12:124066477 |
| 12 rs12813346  | 124201114 G | 5.659 | 8.07E-07 | chr:12:124066477 |
| 12 rs2222061   | 124194929 T | 5.57  | 8.76E-07 | chr:12:124066477 |
| 12 rs7959714   | 124022720 C | 4.705 | 9.22E-07 | chr:12:124066477 |
| 12 rs7135874   | 124252579 C | 4.377 | 9.88E-07 | chr:12:124066477 |
| 12 rs28667043  | 123951316 A | 4.746 | 1.00E-06 | chr:12:124066477 |
| 12 rs561060878 | 123977732 C | 15.9  | 1.08E-06 | chr:12:124066477 |
| 12 rs565233083 | 123969915 T | 15.9  | 1.08E-06 | chr:12:124066477 |
| 12 rs1533246   | 124019055 T | 4.575 | 1.10E-06 | chr:12:124066477 |
| 12 rs2333832   | 124020708 T | 4.575 | 1.10E-06 | chr:12:124066477 |
| 12 rs35016092  | 124022243 A | 4.575 | 1.10E-06 | chr:12:124066477 |
| 12 rs61953553  | 124022068 C | 4.575 | 1.10E-06 | chr:12:124066477 |
| 12 rs7303956   | 124020050 T | 4.575 | 1.10E-06 | chr:12:124066477 |
| 12 rs75844860  | 124295677 A | 6.702 | 1.32E-06 | chr:12:124066477 |

|                |             |       |          |                  |
|----------------|-------------|-------|----------|------------------|
| 12 rs78883615  | 124296519 A | 6.702 | 1.32E-06 | chr:12:124066477 |
| 12 rs9778001   | 123967172 C | 5.479 | 1.55E-06 | chr:12:124066477 |
| 12 rs543797894 | 124216144 C | 22.94 | 1.59E-06 | chr:12:124066477 |
| 12 rs555921218 | 124216145 T | 22.94 | 1.59E-06 | chr:12:124066477 |
| 12 rs574202014 | 124216146 G | 22.94 | 1.59E-06 | chr:12:124066477 |
| 12 rs576828450 | 124216143 C | 22.94 | 1.59E-06 | chr:12:124066477 |
| 12 rs34944476  | 124006269 T | 4.36  | 1.82E-06 | chr:12:124066477 |
| 12 rs112823641 | 124292928 G | 7.489 | 1.90E-06 | chr:12:124066477 |
| 12 rs6488901   | 124205009 C | 5.142 | 1.93E-06 | chr:12:124066477 |
| 12 rs28894691  | 123993839 A | 8.683 | 1.94E-06 | chr:12:124066477 |
| 12 rs79684108  | 124297208 C | 7.85  | 2.08E-06 | chr:12:124066477 |
| 12 rs10773029  | 124219000 G | 5.09  | 2.26E-06 | chr:12:124066477 |
| 12 rs144231643 | 124505728 A | 10.73 | 2.31E-06 | chr:12:124066477 |
| 12 rs77723510  | 123988040 A | 4.492 | 2.36E-06 | chr:12:124066477 |
| 12 rs9330649   | 123985834 A | 4.492 | 2.36E-06 | chr:12:124066477 |
| 12 rs9330650   | 123994669 G | 4.515 | 2.48E-06 | chr:12:124066477 |
| 12 rs11497310  | 123976928 A | 6.889 | 3.03E-06 | chr:12:124066477 |
| 12 rs11522341  | 123988872 T | 6.889 | 3.03E-06 | chr:12:124066477 |
| 12 rs11522342  | 123987503 T | 6.889 | 3.03E-06 | chr:12:124066477 |
| 12 rs11522343  | 123969828 G | 6.889 | 3.03E-06 | chr:12:124066477 |
| 12 rs11523309  | 123990909 A | 6.889 | 3.03E-06 | chr:12:124066477 |
| 12 rs28703907  | 123975260 T | 6.889 | 3.03E-06 | chr:12:124066477 |
| 12 rs78623288  | 123986771 C | 6.889 | 3.03E-06 | chr:12:124066477 |
| 12 rs9697415   | 123983542 G | 6.889 | 3.03E-06 | chr:12:124066477 |
| 12 rs9697423   | 123988504 A | 6.889 | 3.03E-06 | chr:12:124066477 |
| 12 rs9723026   | 123987680 A | 6.889 | 3.03E-06 | chr:12:124066477 |
| 12 rs11507743  | 123941864 T | 6.893 | 3.10E-06 | chr:12:124066477 |
| 12 rs11516174  | 123934200 C | 6.893 | 3.10E-06 | chr:12:124066477 |
| 12 rs11516175  | 123934296 C | 6.893 | 3.10E-06 | chr:12:124066477 |
| 12 rs61953496  | 123937785 G | 6.893 | 3.10E-06 | chr:12:124066477 |
| 12 rs74838047  | 123938411 G | 6.893 | 3.10E-06 | chr:12:124066477 |
| 12 rs77594973  | 123938416 G | 6.893 | 3.10E-06 | chr:12:124066477 |
| 12 rs7957839   | 123941055 T | 6.893 | 3.10E-06 | chr:12:124066477 |
| 12 rs9330647   | 123945620 T | 6.893 | 3.10E-06 | chr:12:124066477 |
| 12 rs9723244   | 123939394 T | 6.893 | 3.10E-06 | chr:12:124066477 |
| 12 rs9777715   | 123939131 G | 6.893 | 3.10E-06 | chr:12:124066477 |
| 12 rs9777830   | 123946812 C | 6.893 | 3.10E-06 | chr:12:124066477 |
| 12 rs9697330   | 123965901 C | 6.813 | 3.47E-06 | chr:12:124066477 |
| 12 rs112875110 | 124303111 T | 6.107 | 3.79E-06 | chr:12:124066477 |
| 12 rs74356540  | 124318226 T | 6.107 | 3.79E-06 | chr:12:124066477 |
| 12 rs78440621  | 124302210 C | 6.107 | 3.79E-06 | chr:12:124066477 |
| 12 rs11535679  | 123957640 A | 6.675 | 3.94E-06 | chr:12:124066477 |
| 12 rs28781570  | 123948106 A | 6.675 | 3.94E-06 | chr:12:124066477 |

|                      |             |       |          |                  |
|----------------------|-------------|-------|----------|------------------|
| 12 rs7964053         | 124318930 G | 6.727 | 4.67E-06 | chr:12:124066477 |
| 12 rs190060224;rs113 | 124299609 A | 7.629 | 4.80E-06 | chr:12:124066477 |
| 12 rs28493578        | 123978292 T | 6.557 | 4.80E-06 | chr:12:124066477 |
| 12 rs112751206       | 124231327 G | 17.12 | 5.12E-06 | chr:12:124066477 |
| 12 rs116330047       | 124321698 A | 6.668 | 5.15E-06 | chr:12:124066477 |
| 12 rs9803116         | 123957966 A | 4.323 | 5.34E-06 | chr:12:124066477 |
| 12 rs11833883        | 124559990 T | 9.222 | 6.27E-06 | chr:12:124066477 |
| 12 rs145799964       | 124547498 G | 9.222 | 6.27E-06 | chr:12:124066477 |
| 12 rs149292350       | 124544165 T | 9.222 | 6.27E-06 | chr:12:124066477 |
| 12 rs528270065       | 124539958 T | 9.222 | 6.27E-06 | chr:12:124066477 |
| 12 rs535920545       | 124550585 T | 9.222 | 6.27E-06 | chr:12:124066477 |
| 12 rs550548269       | 124548664 A | 9.222 | 6.27E-06 | chr:12:124066477 |
| 12 rs558886700       | 124558038 C | 9.222 | 6.27E-06 | chr:12:124066477 |
| 12 rs575888499       | 124561590 G | 9.222 | 6.27E-06 | chr:12:124066477 |
| 12 rs9697459         | 123988435 T | 4.193 | 7.06E-06 | chr:12:124066477 |
| 12 rs9697628         | 123989461 G | 4.193 | 7.06E-06 | chr:12:124066477 |
| 12 rs9697735         | 123989250 A | 4.193 | 7.06E-06 | chr:12:124066477 |
| 12 rs28557411        | 123987810 T | 4.169 | 7.84E-06 | chr:12:124066477 |
| 12 rs12369137        | 124254815 A | 4.979 | 8.39E-06 | chr:12:124066477 |
| 12 rs7305837         | 124252924 T | 5.712 | 8.59E-06 | chr:12:124066477 |
| 12 rs542038648       | 124086080 A | 11.81 | 9.08E-06 | chr:12:124066477 |
| 12 rs77440473        | 124339621 T | 7.14  | 1.00E-05 | chr:12:124066477 |
| 12 rs536294640       | 124097299 G | 18.75 | 1.19E-05 | chr:12:124066477 |
| 12 rs1114629         | 124280321 C | 3.745 | 1.24E-05 | chr:12:124066477 |
| 12 rs9888323         | 124278808 C | 3.741 | 1.29E-05 | chr:12:124066477 |
| 12 rs112184752       | 123948909 T | 3.959 | 1.42E-05 | chr:12:124066477 |
| 12 rs11507740        | 123939321 T | 3.959 | 1.42E-05 | chr:12:124066477 |
| 12 rs13303107        | 123939487 T | 3.959 | 1.42E-05 | chr:12:124066477 |
| 12 rs28413969        | 123946499 T | 3.959 | 1.42E-05 | chr:12:124066477 |
| 12 rs35090528        | 123949011 C | 3.959 | 1.42E-05 | chr:12:124066477 |
| 12 rs35370271        | 123952032 T | 3.959 | 1.42E-05 | chr:12:124066477 |
| 12 rs35970945        | 123955358 G | 3.959 | 1.42E-05 | chr:12:124066477 |
| 12 rs56412477        | 123952884 T | 3.959 | 1.42E-05 | chr:12:124066477 |
| 12 rs56860279        | 123941820 C | 3.959 | 1.42E-05 | chr:12:124066477 |
| 12 rs6606748         | 123952739 T | 3.959 | 1.42E-05 | chr:12:124066477 |
| 12 rs71456799        | 123941932 T | 3.959 | 1.42E-05 | chr:12:124066477 |
| 12 rs77662636        | 123938734 G | 3.959 | 1.42E-05 | chr:12:124066477 |
| 12 rs7960816         | 123939833 A | 3.959 | 1.42E-05 | chr:12:124066477 |
| 12 rs9803125         | 123942940 G | 5.822 | 1.44E-05 | chr:12:124066477 |
| 12 rs34934281        | 124330311 T | 6.792 | 1.50E-05 | chr:12:124066477 |
| 12 rs34047494        | 123934070 A | 3.914 | 1.53E-05 | chr:12:124066477 |
| 12 rs7306670         | 123947750 C | 3.927 | 1.73E-05 | chr:12:124066477 |
| 12 rs7964186         | 124319101 C | 4.991 | 1.77E-05 | chr:12:124066477 |

|                |             |       |          |                  |
|----------------|-------------|-------|----------|------------------|
| 12 rs28478828  | 123913756 T | 4.141 | 2.04E-05 | chr:12:124066477 |
| 12 rs11057357  | 124270939 A | 3.511 | 2.64E-05 | chr:12:124066477 |
| 12 rs116678672 | 124305831 T | 5.813 | 2.67E-05 | chr:12:124066477 |
| 12 rs74466484  | 124309794 A | 5.813 | 2.67E-05 | chr:12:124066477 |
| 12 rs75888655  | 124313730 A | 5.813 | 2.67E-05 | chr:12:124066477 |
| 12 rs76193411  | 124307067 G | 5.813 | 2.67E-05 | chr:12:124066477 |
| 12 rs77404667  | 124313563 T | 5.813 | 2.67E-05 | chr:12:124066477 |
| 12 rs77914770  | 124313594 A | 5.813 | 2.67E-05 | chr:12:124066477 |
| 12 rs11057359  | 124274781 T | 3.486 | 2.79E-05 | chr:12:124066477 |
| 12 rs28576315  | 123914122 G | 3.996 | 2.94E-05 | chr:12:124066477 |
| 12 rs10846557  | 124265053 T | 3.47  | 2.99E-05 | chr:12:124066477 |
| 12 rs28497891  | 123990904 G | 3.576 | 3.06E-05 | chr:12:124066477 |
| 12 rs10736017  | 44300037 A  | 44.96 | 1.10E-25 | chr:12:44313657  |
| 12 rs1731421   | 44285207 A  | 44.96 | 1.10E-25 | chr:12:44313657  |
| 12 rs1731427   | 44281449 T  | 44.96 | 1.10E-25 | chr:12:44313657  |
| 12 rs1731429   | 44280899 T  | 44.96 | 1.10E-25 | chr:12:44313657  |
| 12 rs1731447   | 44289250 A  | 44.96 | 1.10E-25 | chr:12:44313657  |
| 12 rs2614394   | 44282166 A  | 44.96 | 1.10E-25 | chr:12:44313657  |
| 12 rs4238090   | 44299833 T  | 44.96 | 1.10E-25 | chr:12:44313657  |
| 12 rs4354753   | 44293620 G  | 44.96 | 1.10E-25 | chr:12:44313657  |
| 12 rs4768052   | 44308910 T  | 44.96 | 1.10E-25 | chr:12:44313657  |
| 12 rs4768534   | 44298821 T  | 44.96 | 1.10E-25 | chr:12:44313657  |
| 12 rs7961078   | 44306167 A  | 44.96 | 1.10E-25 | chr:12:44313657  |
| 12 rs7979391   | 44295117 G  | 44.96 | 1.10E-25 | chr:12:44313657  |
| 12 rs199914146 | 44303005 G  | 6.809 | 1.59E-25 | chr:12:44313657  |
| 12 rs201261552 | 44302974 C  | 6.809 | 1.59E-25 | chr:12:44313657  |
| 12 rs201066998 | 44303041 G  | 6.723 | 1.93E-25 | chr:12:44313657  |
| 12 rs10785467  | 44309433 T  | 44.87 | 2.32E-25 | chr:12:44313657  |
| 12 rs199957779 | 44302961 T  | 6.736 | 2.60E-25 | chr:12:44313657  |
| 12 rs10880580  | 44297492 G  | 39.75 | 3.63E-25 | chr:12:44313657  |
| 12 rs201324668 | 44302939 C  | 6.721 | 3.63E-25 | chr:12:44313657  |
| 12 rs11182358  | 44363335 T  | 82.06 | 5.67E-25 | chr:12:44313657  |
| 12 rs202162002 | 44301820 A  | 6.766 | 9.34E-25 | chr:12:44313657  |
| 12 rs367898590 | 44301818 C  | 6.766 | 9.34E-25 | chr:12:44313657  |
| 12 rs375152458 | 44301817 T  | 6.766 | 9.34E-25 | chr:12:44313657  |
| 12 rs9668647   | 44301830 A  | 6.75  | 1.28E-24 | chr:12:44313657  |
| 12 rs12302508  | 44303914 A  | 35.29 | 1.71E-24 | chr:12:44313657  |
| 12 rs10880573  | 44226111 G  | 33.36 | 1.76E-24 | chr:12:44313657  |
| 12 rs11533717  | 44304261 G  | 32.9  | 2.01E-24 | chr:12:44313657  |
| 12 rs200356917 | 44301684 A  | 6.641 | 2.75E-24 | chr:12:44313657  |
| 12 rs201614323 | 44301725 T  | 6.804 | 2.98E-24 | chr:12:44313657  |
| 12 rs4768544   | 44309919 C  | 91.67 | 7.64E-24 | chr:12:44313657  |
| 12 rs9669053   | 44301883 G  | 6.756 | 9.52E-24 | chr:12:44313657  |

|               |            |       |          |                 |
|---------------|------------|-------|----------|-----------------|
| 12 rs9668752  | 44302117 T | 7.74  | 1.20E-23 | chr:12:44313657 |
| 12 rs7963981  | 44306066 T | 8.715 | 1.38E-23 | chr:12:44313657 |
| 12 rs7973769  | 44306028 G | 8.715 | 1.38E-23 | chr:12:44313657 |
| 12 rs7973774  | 44306044 G | 8.715 | 1.38E-23 | chr:12:44313657 |
| 12 rs9668657  | 44302174 A | 7.221 | 1.45E-23 | chr:12:44313657 |
| 12 rs10785469 | 44309459 G | 32.46 | 1.83E-23 | chr:12:44313657 |
| 12 rs1675755  | 44278773 G | 29.1  | 2.83E-23 | chr:12:44313657 |
| 12 rs7973886  | 44306134 G | 11.51 | 3.17E-23 | chr:12:44313657 |
| 12 rs1731454  | 44251107 T | 29.05 | 3.35E-23 | chr:12:44313657 |
| 12 rs1057486  | 44260041 G | 28.1  | 4.42E-23 | chr:12:44313657 |
| 12 rs10748377 | 44308151 T | 28.1  | 4.42E-23 | chr:12:44313657 |
| 12 rs10748378 | 44308153 A | 28.1  | 4.42E-23 | chr:12:44313657 |
| 12 rs10785462 | 44299067 A | 28.1  | 4.42E-23 | chr:12:44313657 |
| 12 rs10785463 | 44299093 T | 28.1  | 4.42E-23 | chr:12:44313657 |
| 12 rs10785466 | 44308052 A | 28.1  | 4.42E-23 | chr:12:44313657 |
| 12 rs10880578 | 44291513 C | 28.1  | 4.42E-23 | chr:12:44313657 |
| 12 rs10880585 | 44307982 C | 28.1  | 4.42E-23 | chr:12:44313657 |
| 12 rs11182324 | 44307868 C | 28.1  | 4.42E-23 | chr:12:44313657 |
| 12 rs11182325 | 44307930 G | 28.1  | 4.42E-23 | chr:12:44313657 |
| 12 rs1358705  | 44287850 C | 28.1  | 4.42E-23 | chr:12:44313657 |
| 12 rs1406787  | 44274699 T | 28.1  | 4.42E-23 | chr:12:44313657 |
| 12 rs1609548  | 44306947 G | 28.1  | 4.42E-23 | chr:12:44313657 |
| 12 rs1609549  | 44306994 A | 28.1  | 4.42E-23 | chr:12:44313657 |
| 12 rs1610291  | 44307158 A | 28.1  | 4.42E-23 | chr:12:44313657 |
| 12 rs1614042  | 44290018 C | 28.1  | 4.42E-23 | chr:12:44313657 |
| 12 rs1621279  | 44249011 C | 28.1  | 4.42E-23 | chr:12:44313657 |
| 12 rs1622590  | 44288061 G | 28.1  | 4.42E-23 | chr:12:44313657 |
| 12 rs1623667  | 44249258 T | 28.1  | 4.42E-23 | chr:12:44313657 |
| 12 rs1623829  | 44262745 A | 28.1  | 4.42E-23 | chr:12:44313657 |
| 12 rs1675756  | 44279540 T | 28.1  | 4.42E-23 | chr:12:44313657 |
| 12 rs1675758  | 44280027 G | 28.1  | 4.42E-23 | chr:12:44313657 |
| 12 rs1675764  | 44285480 T | 28.1  | 4.42E-23 | chr:12:44313657 |
| 12 rs1675765  | 44244855 T | 28.1  | 4.42E-23 | chr:12:44313657 |
| 12 rs1675767  | 44247135 G | 28.1  | 4.42E-23 | chr:12:44313657 |
| 12 rs1675769  | 44248400 T | 28.1  | 4.42E-23 | chr:12:44313657 |
| 12 rs1675781  | 44292513 A | 28.1  | 4.42E-23 | chr:12:44313657 |
| 12 rs1675785  | 44292747 G | 28.1  | 4.42E-23 | chr:12:44313657 |
| 12 rs1675787  | 44290928 T | 28.1  | 4.42E-23 | chr:12:44313657 |
| 12 rs1675789  | 44290545 A | 28.1  | 4.42E-23 | chr:12:44313657 |
| 12 rs1675790  | 44290447 C | 28.1  | 4.42E-23 | chr:12:44313657 |
| 12 rs1731423  | 44278469 G | 28.1  | 4.42E-23 | chr:12:44313657 |
| 12 rs1731430  | 44280809 A | 28.1  | 4.42E-23 | chr:12:44313657 |
| 12 rs1731431  | 44279870 G | 28.1  | 4.42E-23 | chr:12:44313657 |

|               |            |       |          |                 |
|---------------|------------|-------|----------|-----------------|
| 12 rs1731432  | 44279783 T | 28.1  | 4.42E-23 | chr:12:44313657 |
| 12 rs1731433  | 44279776 G | 28.1  | 4.42E-23 | chr:12:44313657 |
| 12 rs1731434  | 44272915 A | 28.1  | 4.42E-23 | chr:12:44313657 |
| 12 rs1731435  | 44292195 A | 28.1  | 4.42E-23 | chr:12:44313657 |
| 12 rs1731450  | 44246041 T | 28.1  | 4.42E-23 | chr:12:44313657 |
| 12 rs1731452  | 44249745 C | 28.1  | 4.42E-23 | chr:12:44313657 |
| 12 rs1731455  | 44260900 A | 28.1  | 4.42E-23 | chr:12:44313657 |
| 12 rs1731456  | 44286932 A | 28.1  | 4.42E-23 | chr:12:44313657 |
| 12 rs1731457  | 44286499 T | 28.1  | 4.42E-23 | chr:12:44313657 |
| 12 rs1731458  | 44285969 T | 28.1  | 4.42E-23 | chr:12:44313657 |
| 12 rs1731459  | 44285844 C | 28.1  | 4.42E-23 | chr:12:44313657 |
| 12 rs2219629  | 44235406 T | 28.1  | 4.42E-23 | chr:12:44313657 |
| 12 rs2407783  | 44300247 G | 28.1  | 4.42E-23 | chr:12:44313657 |
| 12 rs2407785  | 44300358 A | 28.1  | 4.42E-23 | chr:12:44313657 |
| 12 rs2407786  | 44300467 A | 28.1  | 4.42E-23 | chr:12:44313657 |
| 12 rs2447113  | 44282785 G | 28.1  | 4.42E-23 | chr:12:44313657 |
| 12 rs2951435  | 44291174 G | 28.1  | 4.42E-23 | chr:12:44313657 |
| 12 rs3990338  | 44300626 T | 28.1  | 4.42E-23 | chr:12:44313657 |
| 12 rs4238089  | 44299688 A | 28.1  | 4.42E-23 | chr:12:44313657 |
| 12 rs4238091  | 44299900 T | 28.1  | 4.42E-23 | chr:12:44313657 |
| 12 rs4363674  | 44307404 C | 28.1  | 4.42E-23 | chr:12:44313657 |
| 12 rs4469953  | 44307349 T | 28.1  | 4.42E-23 | chr:12:44313657 |
| 12 rs4537822  | 44299389 C | 28.1  | 4.42E-23 | chr:12:44313657 |
| 12 rs4572198  | 44298071 G | 28.1  | 4.42E-23 | chr:12:44313657 |
| 12 rs4572199  | 44298378 G | 28.1  | 4.42E-23 | chr:12:44313657 |
| 12 rs4609659  | 44298550 C | 28.1  | 4.42E-23 | chr:12:44313657 |
| 12 rs4768532  | 44279222 C | 28.1  | 4.42E-23 | chr:12:44313657 |
| 12 rs4768535  | 44298917 C | 28.1  | 4.42E-23 | chr:12:44313657 |
| 12 rs4768538  | 44300011 A | 28.1  | 4.42E-23 | chr:12:44313657 |
| 12 rs4768539  | 44303524 C | 28.1  | 4.42E-23 | chr:12:44313657 |
| 12 rs4768543  | 44308978 A | 28.1  | 4.42E-23 | chr:12:44313657 |
| 12 rs5019975  | 44299370 G | 28.1  | 4.42E-23 | chr:12:44313657 |
| 12 rs61930734 | 44304400 C | 28.1  | 4.42E-23 | chr:12:44313657 |
| 12 rs7295151  | 44308194 G | 28.1  | 4.42E-23 | chr:12:44313657 |
| 12 rs7305609  | 44240652 A | 28.1  | 4.42E-23 | chr:12:44313657 |
| 12 rs73096934 | 44241279 G | 28.1  | 4.42E-23 | chr:12:44313657 |
| 12 rs7954130  | 44301327 G | 28.1  | 4.42E-23 | chr:12:44313657 |
| 12 rs7954640  | 44301081 C | 28.1  | 4.42E-23 | chr:12:44313657 |
| 12 rs7955615  | 44295861 C | 28.1  | 4.42E-23 | chr:12:44313657 |
| 12 rs7974045  | 44306266 G | 28.1  | 4.42E-23 | chr:12:44313657 |
| 12 rs2407784  | 44300347 T | 27.19 | 5.05E-23 | chr:12:44313657 |
| 12 rs79916589 | 44289680 T | 27.76 | 5.47E-23 | chr:12:44313657 |
| 12 rs4768053  | 44309069 C | 25.72 | 5.80E-23 | chr:12:44313657 |

|               |            |       |          |                 |
|---------------|------------|-------|----------|-----------------|
| 12 rs10785468 | 44309434 G | 28.13 | 5.91E-23 | chr:12:44313657 |
| 12 rs11182293 | 44231482 A | 26.12 | 7.86E-23 | chr:12:44313657 |
| 12 rs11520309 | 44303103 A | 26.37 | 9.11E-23 | chr:12:44313657 |
| 12 rs7974046  | 44306269 G | 26.37 | 9.11E-23 | chr:12:44313657 |
| 12 rs10785460 | 44264906 T | 24.86 | 1.03E-22 | chr:12:44313657 |
| 12 rs10880579 | 44297491 A | 25.74 | 1.17E-22 | chr:12:44313657 |
| 12 rs7965330  | 44309602 A | 25.19 | 1.34E-22 | chr:12:44313657 |
| 12 rs7965240  | 44309591 A | 24.89 | 1.69E-22 | chr:12:44313657 |
| 12 rs2407787  | 44300709 G | 24.74 | 1.83E-22 | chr:12:44313657 |
| 12 rs3990339  | 44300728 G | 24.74 | 1.83E-22 | chr:12:44313657 |
| 12 rs4238092  | 44315762 C | 35.3  | 2.04E-22 | chr:12:44313657 |
| 12 rs11182326 | 44310333 G | 42.63 | 3.52E-22 | chr:12:44313657 |
| 12 rs11182328 | 44311277 G | 42.63 | 3.52E-22 | chr:12:44313657 |
| 12 rs11182345 | 44347202 C | 42.63 | 3.52E-22 | chr:12:44313657 |
| 12 rs11829881 | 44322395 G | 42.63 | 3.52E-22 | chr:12:44313657 |
| 12 rs12301015 | 44321160 T | 42.63 | 3.52E-22 | chr:12:44313657 |
| 12 rs12303804 | 44340018 A | 42.63 | 3.52E-22 | chr:12:44313657 |
| 12 rs12315094 | 44345773 A | 42.63 | 3.52E-22 | chr:12:44313657 |
| 12 rs7969641  | 44310268 T | 42.63 | 3.52E-22 | chr:12:44313657 |
| 12 rs12309681 | 44343202 T | 39.61 | 3.83E-22 | chr:12:44313657 |
| 12 rs2614395  | 44291851 G | 21.92 | 4.89E-22 | chr:12:44313657 |
| 12 rs4768536  | 44298961 A | 22.37 | 1.02E-21 | chr:12:44313657 |
| 12 rs17093971 | 44359265 T | 24.32 | 3.22E-20 | chr:12:44313657 |
| 12 rs7308588  | 44356119 A | 24.32 | 3.22E-20 | chr:12:44313657 |
| 12 rs7954384  | 44301587 G | 10.32 | 5.50E-20 | chr:12:44313657 |
| 12 rs7969754  | 44301580 A | 10.32 | 5.50E-20 | chr:12:44313657 |
| 12 rs7972025  | 44222722 T | 14.18 | 6.83E-20 | chr:12:44313657 |
| 12 rs59709721 | 44362347 A | 34.36 | 1.68E-19 | chr:12:44313657 |
| 12 rs12318365 | 44352760 T | 20.18 | 1.78E-19 | chr:12:44313657 |
| 12 rs11182294 | 44231539 T | 17.35 | 2.48E-16 | chr:12:44313657 |
| 12 rs1675760  | 44282981 G | 16.33 | 7.11E-16 | chr:12:44313657 |
| 12 rs1675786  | 44292760 C | 16.33 | 7.11E-16 | chr:12:44313657 |
| 12 rs1675791  | 44290267 G | 16.33 | 7.11E-16 | chr:12:44313657 |
| 12 rs1731422  | 44276369 G | 16.33 | 7.11E-16 | chr:12:44313657 |
| 12 rs1731425  | 44282630 T | 16.33 | 7.11E-16 | chr:12:44313657 |
| 12 rs73098836 | 44286253 A | 16.33 | 7.11E-16 | chr:12:44313657 |
| 12 rs7957146  | 44306759 G | 16.33 | 7.11E-16 | chr:12:44313657 |
| 12 rs7958314  | 44302430 T | 16.33 | 7.11E-16 | chr:12:44313657 |
| 12 rs7966024  | 44297013 G | 16.33 | 7.11E-16 | chr:12:44313657 |
| 12 rs7953229  | 44239350 T | 11.41 | 1.71E-14 | chr:12:44313657 |
| 12 rs7350559  | 44362805 G | 15.69 | 2.17E-14 | chr:12:44313657 |
| 12 rs1675775  | 44265524 A | 11.09 | 2.83E-14 | chr:12:44313657 |
| 12 rs1731441  | 44265523 G | 11.09 | 2.83E-14 | chr:12:44313657 |

|                |            |       |          |                 |
|----------------|------------|-------|----------|-----------------|
| 12 rs1731449   | 44244877 T | 11.09 | 2.83E-14 | chr:12:44313657 |
| 12 rs1731453   | 44250528 G | 11.09 | 2.83E-14 | chr:12:44313657 |
| 12 rs2699992   | 44278013 C | 11.09 | 2.83E-14 | chr:12:44313657 |
| 12 rs7965635   | 44238903 A | 11.09 | 2.83E-14 | chr:12:44313657 |
| 12 rs1675766   | 44244919 C | 10.61 | 9.08E-14 | chr:12:44313657 |
| 12 rs7965873   | 44354797 A | 312.3 | 1.00E-13 | chr:12:44313657 |
| 12 rs7971628   | 44353583 G | 311.7 | 1.17E-13 | chr:12:44313657 |
| 12 rs112105382 | 44241680 T | 17.53 | 1.38E-13 | chr:12:44313657 |
| 12 rs115692896 | 44349790 C | 35.06 | 1.75E-13 | chr:12:44313657 |
| 12 rs12297529  | 44319602 A | 35.06 | 1.75E-13 | chr:12:44313657 |
| 12 rs12297544  | 44319679 A | 35.06 | 1.75E-13 | chr:12:44313657 |
| 12 rs12301421  | 44346015 A | 35.06 | 1.75E-13 | chr:12:44313657 |
| 12 rs145822768 | 44350947 T | 35.06 | 1.75E-13 | chr:12:44313657 |
| 12 rs76876041  | 44355481 T | 35.06 | 1.75E-13 | chr:12:44313657 |
| 12 rs201859105 | 44232358 C | 20.1  | 2.12E-13 | chr:12:44313657 |
| 12 rs12302401  | 44333816 T | 16.68 | 2.57E-13 | chr:12:44313657 |
| 12 rs74364320  | 44361242 T | 40.13 | 3.25E-13 | chr:12:44313657 |
| 12 rs10082995  | 44232340 T | 8.211 | 4.10E-13 | chr:12:44313657 |
| 12 rs12228658  | 44277314 C | 17.98 | 4.87E-13 | chr:12:44313657 |
| 12 rs544503047 | 44291853 G | 16.32 | 7.89E-13 | chr:12:44313657 |
| 12 rs10748373  | 44253386 A | 7.53  | 1.33E-12 | chr:12:44313657 |
| 12 rs12314126  | 44236455 G | 7.53  | 1.33E-12 | chr:12:44313657 |
| 12 rs1461568   | 44267583 G | 7.53  | 1.33E-12 | chr:12:44313657 |
| 12 rs1675771   | 44252960 A | 7.53  | 1.33E-12 | chr:12:44313657 |
| 12 rs1675774   | 44266575 G | 7.53  | 1.33E-12 | chr:12:44313657 |
| 12 rs1675776   | 44265242 A | 7.53  | 1.33E-12 | chr:12:44313657 |
| 12 rs1675777   | 44264215 G | 7.53  | 1.33E-12 | chr:12:44313657 |
| 12 rs1675778   | 44263162 G | 7.53  | 1.33E-12 | chr:12:44313657 |
| 12 rs1675782   | 44258841 C | 7.53  | 1.33E-12 | chr:12:44313657 |
| 12 rs1675783   | 44257680 T | 7.53  | 1.33E-12 | chr:12:44313657 |
| 12 rs1675784   | 44257601 A | 7.53  | 1.33E-12 | chr:12:44313657 |
| 12 rs1675788   | 44273779 C | 7.53  | 1.33E-12 | chr:12:44313657 |
| 12 rs1731439   | 44266559 G | 7.53  | 1.33E-12 | chr:12:44313657 |
| 12 rs1731440   | 44265605 T | 7.53  | 1.33E-12 | chr:12:44313657 |
| 12 rs1731442   | 44262606 T | 7.53  | 1.33E-12 | chr:12:44313657 |
| 12 rs1731444   | 44262392 C | 7.53  | 1.33E-12 | chr:12:44313657 |
| 12 rs2447114   | 44252015 T | 7.53  | 1.33E-12 | chr:12:44313657 |
| 12 rs2447116   | 44262529 A | 7.53  | 1.33E-12 | chr:12:44313657 |
| 12 rs2951436   | 44261618 A | 7.53  | 1.33E-12 | chr:12:44313657 |
| 12 rs4768049   | 44256856 A | 7.53  | 1.33E-12 | chr:12:44313657 |
| 12 rs12298970  | 44237256 T | 7.492 | 1.60E-12 | chr:12:44313657 |
| 12 rs12311962  | 44237272 A | 7.492 | 1.60E-12 | chr:12:44313657 |
| 12 rs1731448   | 44244270 G | 7.226 | 2.03E-12 | chr:12:44313657 |



|                |            |        |          |                 |
|----------------|------------|--------|----------|-----------------|
| 12 rs1731438   | 44267863 A | 7.059  | 2.06E-12 | chr:12:44313657 |
| 12 rs117577677 | 44246366 C | 38.03  | 2.08E-12 | chr:12:44313657 |
| 12 rs2447115   | 44254494 A | 7.219  | 2.09E-12 | chr:12:44313657 |
| 12 rs7968199   | 44212237 G | 5.836  | 3.20E-12 | chr:12:44313657 |
| 12 rs10785485  | 44355693 A | 50.35  | 3.35E-12 | chr:12:44313657 |
| 12 rs11182331  | 44317153 C | 50.35  | 3.35E-12 | chr:12:44313657 |
| 12 rs11182334  | 44318590 G | 50.35  | 3.35E-12 | chr:12:44313657 |
| 12 rs11182336  | 44320611 G | 50.35  | 3.35E-12 | chr:12:44313657 |
| 12 rs11182340  | 44335190 G | 50.35  | 3.35E-12 | chr:12:44313657 |
| 12 rs11182343  | 44344206 A | 50.35  | 3.35E-12 | chr:12:44313657 |
| 12 rs11182347  | 44353617 G | 50.35  | 3.35E-12 | chr:12:44313657 |
| 12 rs11182349  | 44357759 G | 50.35  | 3.35E-12 | chr:12:44313657 |
| 12 rs11182351  | 44358078 T | 50.35  | 3.35E-12 | chr:12:44313657 |
| 12 rs11182352  | 44361158 G | 50.35  | 3.35E-12 | chr:12:44313657 |
| 12 rs117528618 | 44350676 G | 50.35  | 3.35E-12 | chr:12:44313657 |
| 12 rs140180348 | 44336849 T | 50.35  | 3.35E-12 | chr:12:44313657 |
| 12 rs146427438 | 44339234 T | 50.35  | 3.35E-12 | chr:12:44313657 |
| 12 rs150694122 | 44336742 A | 50.35  | 3.35E-12 | chr:12:44313657 |
| 12 rs200338856 | 44340179 G | 50.35  | 3.35E-12 | chr:12:44313657 |
| 12 rs79112229  | 44361616 G | 50.35  | 3.35E-12 | chr:12:44313657 |
| 12 rs80120468  | 44344737 G | 50.35  | 3.35E-12 | chr:12:44313657 |
| 12 rs80251371  | 44328497 T | 50.35  | 3.35E-12 | chr:12:44313657 |
| 12 rs12312338  | 44340209 T | 6.548  | 3.47E-12 | chr:12:44313657 |
| 12 rs75725665  | 44340195 T | 6.548  | 3.47E-12 | chr:12:44313657 |
| 12 rs116884551 | 44340736 C | 49.38  | 5.48E-12 | chr:12:44313657 |
| 12 rs186989426 | 44344787 C | 49.38  | 5.48E-12 | chr:12:44313657 |
| 12 rs4519146   | 44327240 A | 49.38  | 5.48E-12 | chr:12:44313657 |
| 12 rs78675197  | 44360787 A | 49.38  | 5.48E-12 | chr:12:44313657 |
| 12 rs79163779  | 44361704 T | 49.38  | 5.48E-12 | chr:12:44313657 |
| 12 rs7956245   | 44143520 T | 6.181  | 5.70E-12 | chr:12:44313657 |
| 12 rs4499064   | 44315170 T | 1605   | 7.61E-12 | chr:12:44313657 |
| 12 rs9849      | 44182951 C | 5.81   | 9.45E-12 | chr:12:44313657 |
| 12 rs11182280  | 44209584 C | 5.262  | 1.08E-11 | chr:12:44313657 |
| 12 rs11182290  | 44221032 A | 5.139  | 1.65E-11 | chr:12:44313657 |
| 12 rs10880575  | 44241681 G | 3.92   | 2.44E-11 | chr:12:44313657 |
| 12 rs2407782   | 44278489 A | 3.941  | 2.70E-11 | chr:12:44313657 |
| 12 rs10880583  | 44305868 T | 0.1972 | 3.87E-11 | chr:12:44313657 |
| 12 rs7971516   | 44353473 G | 1096   | 4.76E-11 | chr:12:44313657 |
| 12 rs11182298  | 44248189 A | 62.71  | 6.64E-11 | chr:12:44313657 |
| 12 rs11182300  | 44249025 T | 62.71  | 6.64E-11 | chr:12:44313657 |
| 12 rs11182301  | 44249779 C | 62.71  | 6.64E-11 | chr:12:44313657 |
| 12 rs11182303  | 44250800 A | 62.71  | 6.64E-11 | chr:12:44313657 |
| 12 rs11182304  | 44250895 A | 62.71  | 6.64E-11 | chr:12:44313657 |

|                |            |       |          |                 |
|----------------|------------|-------|----------|-----------------|
| 12 rs11182305  | 44250958 G | 62.71 | 6.64E-11 | chr:12:44313657 |
| 12 rs11182308  | 44252969 G | 62.71 | 6.64E-11 | chr:12:44313657 |
| 12 rs11182310  | 44255992 A | 62.71 | 6.64E-11 | chr:12:44313657 |
| 12 rs11182314  | 44260848 T | 62.71 | 6.64E-11 | chr:12:44313657 |
| 12 rs11182323  | 44306528 G | 62.71 | 6.64E-11 | chr:12:44313657 |
| 12 rs113386845 | 44239075 T | 62.71 | 6.64E-11 | chr:12:44313657 |
| 12 rs113451227 | 44247014 G | 62.71 | 6.64E-11 | chr:12:44313657 |
| 12 rs115482982 | 44250485 G | 62.71 | 6.64E-11 | chr:12:44313657 |
| 12 rs115601996 | 44242554 T | 62.71 | 6.64E-11 | chr:12:44313657 |
| 12 rs116608528 | 44239556 C | 62.71 | 6.64E-11 | chr:12:44313657 |
| 12 rs116609893 | 44241652 G | 62.71 | 6.64E-11 | chr:12:44313657 |
| 12 rs116930265 | 44299125 C | 62.71 | 6.64E-11 | chr:12:44313657 |
| 12 rs117543763 | 44264051 A | 62.71 | 6.64E-11 | chr:12:44313657 |
| 12 rs118062126 | 44243952 T | 62.71 | 6.64E-11 | chr:12:44313657 |
| 12 rs12227646  | 44245640 C | 62.71 | 6.64E-11 | chr:12:44313657 |
| 12 rs12229491  | 44255465 A | 62.71 | 6.64E-11 | chr:12:44313657 |
| 12 rs12229940  | 44244636 A | 62.71 | 6.64E-11 | chr:12:44313657 |
| 12 rs12230228  | 44303195 A | 62.71 | 6.64E-11 | chr:12:44313657 |
| 12 rs12230284  | 44245217 G | 62.71 | 6.64E-11 | chr:12:44313657 |
| 12 rs12230296  | 44245365 T | 62.71 | 6.64E-11 | chr:12:44313657 |
| 12 rs12230727  | 44247063 C | 62.71 | 6.64E-11 | chr:12:44313657 |
| 12 rs12230751  | 44247312 C | 62.71 | 6.64E-11 | chr:12:44313657 |
| 12 rs12231136  | 44268262 T | 62.71 | 6.64E-11 | chr:12:44313657 |
| 12 rs12231953  | 44245366 G | 62.71 | 6.64E-11 | chr:12:44313657 |
| 12 rs137888888 | 44246356 C | 62.71 | 6.64E-11 | chr:12:44313657 |
| 12 rs138541393 | 44246210 C | 62.71 | 6.64E-11 | chr:12:44313657 |
| 12 rs140628578 | 44239252 T | 62.71 | 6.64E-11 | chr:12:44313657 |
| 12 rs142324451 | 44246163 C | 62.71 | 6.64E-11 | chr:12:44313657 |
| 12 rs143317429 | 44239623 T | 62.71 | 6.64E-11 | chr:12:44313657 |
| 12 rs144999308 | 44241733 A | 62.71 | 6.64E-11 | chr:12:44313657 |
| 12 rs146784200 | 44239223 T | 62.71 | 6.64E-11 | chr:12:44313657 |
| 12 rs149174850 | 44246158 T | 62.71 | 6.64E-11 | chr:12:44313657 |
| 12 rs150307762 | 44246320 G | 62.71 | 6.64E-11 | chr:12:44313657 |
| 12 rs151064202 | 44242351 C | 62.71 | 6.64E-11 | chr:12:44313657 |
| 12 rs17093804  | 44272622 G | 62.71 | 6.64E-11 | chr:12:44313657 |
| 12 rs186673154 | 44261933 T | 62.71 | 6.64E-11 | chr:12:44313657 |
| 12 rs1948516   | 44238723 A | 62.71 | 6.64E-11 | chr:12:44313657 |
| 12 rs202009693 | 44267522 T | 62.71 | 6.64E-11 | chr:12:44313657 |
| 12 rs28758958  | 44306264 A | 62.71 | 6.64E-11 | chr:12:44313657 |
| 12 rs367990382 | 44301261 T | 62.71 | 6.64E-11 | chr:12:44313657 |
| 12 rs3829807   | 44255108 A | 62.71 | 6.64E-11 | chr:12:44313657 |
| 12 rs61930682  | 44240177 T | 62.71 | 6.64E-11 | chr:12:44313657 |
| 12 rs720944    | 44237303 C | 62.71 | 6.64E-11 | chr:12:44313657 |

|               |            |       |          |                 |
|---------------|------------|-------|----------|-----------------|
| 12 rs7296222  | 44238104 A | 62.71 | 6.64E-11 | chr:12:44313657 |
| 12 rs74373254 | 44240769 A | 62.71 | 6.64E-11 | chr:12:44313657 |
| 12 rs74775231 | 44246985 T | 62.71 | 6.64E-11 | chr:12:44313657 |
| 12 rs74888682 | 44237950 C | 62.71 | 6.64E-11 | chr:12:44313657 |
| 12 rs75158834 | 44280690 T | 62.71 | 6.64E-11 | chr:12:44313657 |
| 12 rs76048883 | 44250719 T | 62.71 | 6.64E-11 | chr:12:44313657 |
| 12 rs76240216 | 44244168 T | 62.71 | 6.64E-11 | chr:12:44313657 |
| 12 rs76350700 | 44240040 G | 62.71 | 6.64E-11 | chr:12:44313657 |
| 12 rs766961   | 44236021 G | 62.71 | 6.64E-11 | chr:12:44313657 |
| 12 rs76737056 | 44244225 G | 62.71 | 6.64E-11 | chr:12:44313657 |
| 12 rs77161382 | 44241297 T | 62.71 | 6.64E-11 | chr:12:44313657 |
| 12 rs77556291 | 44246646 C | 62.71 | 6.64E-11 | chr:12:44313657 |
| 12 rs77708558 | 44240597 G | 62.71 | 6.64E-11 | chr:12:44313657 |
| 12 rs77952333 | 44240015 A | 62.71 | 6.64E-11 | chr:12:44313657 |
| 12 rs78170106 | 44250279 G | 62.71 | 6.64E-11 | chr:12:44313657 |
| 12 rs78179678 | 44239907 C | 62.71 | 6.64E-11 | chr:12:44313657 |
| 12 rs78339833 | 44236763 G | 62.71 | 6.64E-11 | chr:12:44313657 |
| 12 rs78388987 | 44244204 C | 62.71 | 6.64E-11 | chr:12:44313657 |
| 12 rs79074543 | 44246752 C | 62.71 | 6.64E-11 | chr:12:44313657 |
| 12 rs79392152 | 44250626 C | 62.71 | 6.64E-11 | chr:12:44313657 |
| 12 rs79425253 | 44241126 T | 62.71 | 6.64E-11 | chr:12:44313657 |
| 12 rs79716923 | 44236764 C | 62.71 | 6.64E-11 | chr:12:44313657 |
| 12 rs79783862 | 44244432 A | 62.71 | 6.64E-11 | chr:12:44313657 |
| 12 rs79970551 | 44244859 A | 62.71 | 6.64E-11 | chr:12:44313657 |
| 12 rs80099331 | 44240349 T | 62.71 | 6.64E-11 | chr:12:44313657 |
| 12 rs11182332 | 44317599 A | 12.61 | 6.83E-11 | chr:12:44313657 |
| 12 rs73085705 | 44345490 T | 12.61 | 6.83E-11 | chr:12:44313657 |
| 12 rs3794262  | 44165430 A | 5.11  | 8.11E-11 | chr:12:44313657 |
| 12 rs3805198  | 44175934 T | 5.11  | 8.11E-11 | chr:12:44313657 |
| 12 rs4251459  | 44162566 C | 5.11  | 8.11E-11 | chr:12:44313657 |
| 12 rs4251460  | 44162768 C | 5.11  | 8.11E-11 | chr:12:44313657 |
| 12 rs4251465  | 44164169 T | 5.11  | 8.11E-11 | chr:12:44313657 |
| 12 rs4251495  | 44171096 G | 5.11  | 8.11E-11 | chr:12:44313657 |
| 12 rs4251496  | 44171097 C | 5.11  | 8.11E-11 | chr:12:44313657 |
| 12 rs4251497  | 44171131 A | 5.11  | 8.11E-11 | chr:12:44313657 |
| 12 rs4251532  | 44178083 T | 5.11  | 8.11E-11 | chr:12:44313657 |
| 12 rs4251533  | 44178175 G | 5.11  | 8.11E-11 | chr:12:44313657 |
| 12 rs4251555  | 44182312 C | 5.11  | 8.11E-11 | chr:12:44313657 |
| 12 rs10161163 | 44433103 C | 24.92 | 8.13E-11 | chr:12:44313657 |
| 12 rs10161301 | 44432919 A | 24.92 | 8.13E-11 | chr:12:44313657 |
| 12 rs11182376 | 44402498 G | 24.92 | 8.13E-11 | chr:12:44313657 |
| 12 rs11182389 | 44424153 A | 24.92 | 8.13E-11 | chr:12:44313657 |
| 12 rs11182401 | 44442917 T | 24.92 | 8.13E-11 | chr:12:44313657 |

|                |            |       |                          |
|----------------|------------|-------|--------------------------|
| 12 rs11182410  | 44456249 A | 24.92 | 8.13E-11 chr:12:44313657 |
| 12 rs114289528 | 44425403 C | 24.92 | 8.13E-11 chr:12:44313657 |
| 12 rs114457407 | 44426674 T | 24.92 | 8.13E-11 chr:12:44313657 |
| 12 rs114890225 | 44431883 A | 24.92 | 8.13E-11 chr:12:44313657 |
| 12 rs115287223 | 44439789 G | 24.92 | 8.13E-11 chr:12:44313657 |
| 12 rs116788397 | 44431142 T | 24.92 | 8.13E-11 chr:12:44313657 |
| 12 rs12296939  | 44426290 T | 24.92 | 8.13E-11 chr:12:44313657 |
| 12 rs12303163  | 44409858 T | 24.92 | 8.13E-11 chr:12:44313657 |
| 12 rs12303870  | 44405114 G | 24.92 | 8.13E-11 chr:12:44313657 |
| 12 rs12310801  | 44407385 A | 24.92 | 8.13E-11 chr:12:44313657 |
| 12 rs12319385  | 44446809 C | 24.92 | 8.13E-11 chr:12:44313657 |
| 12 rs12319439  | 44450614 G | 24.92 | 8.13E-11 chr:12:44313657 |
| 12 rs12319776  | 44454041 G | 24.92 | 8.13E-11 chr:12:44313657 |
| 12 rs12321287  | 44458521 A | 24.92 | 8.13E-11 chr:12:44313657 |
| 12 rs13378086  | 44445795 G | 24.92 | 8.13E-11 chr:12:44313657 |
| 12 rs17094016  | 44443417 T | 24.92 | 8.13E-11 chr:12:44313657 |
| 12 rs74389423  | 44418402 A | 24.92 | 8.13E-11 chr:12:44313657 |
| 12 rs76842947  | 44435161 T | 24.92 | 8.13E-11 chr:12:44313657 |
| 12 rs116861561 | 44256819 T | 61.37 | 1.00E-10 chr:12:44313657 |
| 12 rs139946355 | 44282948 C | 61.37 | 1.00E-10 chr:12:44313657 |
| 12 rs140988631 | 44242531 C | 61.37 | 1.00E-10 chr:12:44313657 |
| 12 rs141598641 | 44249695 T | 61.37 | 1.00E-10 chr:12:44313657 |
| 12 rs2199390   | 44235245 C | 61.37 | 1.00E-10 chr:12:44313657 |
| 12 rs528423997 | 44303078 G | 61.37 | 1.00E-10 chr:12:44313657 |
| 12 rs542685597 | 44303937 T | 61.37 | 1.00E-10 chr:12:44313657 |
| 12 rs566058745 | 44300960 A | 61.37 | 1.00E-10 chr:12:44313657 |
| 12 rs79110324  | 44296458 G | 61.37 | 1.00E-10 chr:12:44313657 |
| 12 rs2699993   | 44398254 T | 7.631 | 1.06E-10 chr:12:44313657 |
| 12 rs1057190   | 44148259 C | 5.022 | 1.12E-10 chr:12:44313657 |
| 12 rs10880557  | 44131697 C | 5.022 | 1.12E-10 chr:12:44313657 |
| 12 rs10880558  | 44132250 A | 5.022 | 1.12E-10 chr:12:44313657 |
| 12 rs10880562  | 44140311 G | 5.022 | 1.12E-10 chr:12:44313657 |
| 12 rs10880563  | 44141593 T | 5.022 | 1.12E-10 chr:12:44313657 |
| 12 rs10880565  | 44146248 C | 5.022 | 1.12E-10 chr:12:44313657 |
| 12 rs10880566  | 44146392 G | 5.022 | 1.12E-10 chr:12:44313657 |
| 12 rs11182240  | 44134755 C | 5.022 | 1.12E-10 chr:12:44313657 |
| 12 rs11182242  | 44135219 C | 5.022 | 1.12E-10 chr:12:44313657 |
| 12 rs11182246  | 44139805 T | 5.022 | 1.12E-10 chr:12:44313657 |
| 12 rs11182249  | 44145654 C | 5.022 | 1.12E-10 chr:12:44313657 |
| 12 rs11182250  | 44147174 G | 5.022 | 1.12E-10 chr:12:44313657 |
| 12 rs12310585  | 44133972 G | 5.022 | 1.12E-10 chr:12:44313657 |
| 12 rs12319024  | 44135647 A | 5.022 | 1.12E-10 chr:12:44313657 |
| 12 rs7311465   | 44141164 T | 5.022 | 1.12E-10 chr:12:44313657 |

|                |            |       |          |                 |
|----------------|------------|-------|----------|-----------------|
| 12 rs7969729   | 44142547 A | 5.022 | 1.12E-10 | chr:12:44313657 |
| 12 rs9783418   | 44144643 A | 5.022 | 1.12E-10 | chr:12:44313657 |
| 12 rs12301507  | 44394202 G | 6.528 | 1.29E-10 | chr:12:44313657 |
| 12 rs12308611  | 44132831 G | 4.96  | 1.43E-10 | chr:12:44313657 |
| 12 rs6582484   | 44190630 C | 4.715 | 1.74E-10 | chr:12:44313657 |
| 12 rs12312327  | 44134417 C | 4.849 | 1.79E-10 | chr:12:44313657 |
| 12 rs114631781 | 44397804 A | 33.11 | 1.94E-10 | chr:12:44313657 |
| 12 rs116190624 | 44401433 A | 33.11 | 1.94E-10 | chr:12:44313657 |
| 12 rs12321149  | 44399814 G | 33.11 | 1.94E-10 | chr:12:44313657 |
| 12 rs10506231  | 44206027 T | 4.471 | 2.09E-10 | chr:12:44313657 |
| 12 rs10880571  | 44207279 C | 4.471 | 2.09E-10 | chr:12:44313657 |
| 12 rs11182275  | 44206289 G | 4.471 | 2.09E-10 | chr:12:44313657 |
| 12 rs3764004   | 44201451 C | 4.471 | 2.09E-10 | chr:12:44313657 |
| 12 rs10785481  | 44325061 G | 787.3 | 2.18E-10 | chr:12:44313657 |
| 12 rs10880587  | 44311477 T | 787.3 | 2.18E-10 | chr:12:44313657 |
| 12 rs1881926   | 44319047 G | 787.3 | 2.18E-10 | chr:12:44313657 |
| 12 rs1881927   | 44318922 G | 787.3 | 2.18E-10 | chr:12:44313657 |
| 12 rs4768055   | 44317208 G | 787.3 | 2.18E-10 | chr:12:44313657 |
| 12 rs4768057   | 44332707 G | 787.3 | 2.18E-10 | chr:12:44313657 |
| 12 rs4768546   | 44336686 C | 787.3 | 2.18E-10 | chr:12:44313657 |
| 12 rs5023324   | 44327148 C | 787.3 | 2.18E-10 | chr:12:44313657 |
| 12 rs6582490   | 44329957 G | 787.3 | 2.18E-10 | chr:12:44313657 |
| 12 rs7974214   | 44319517 T | 787.3 | 2.18E-10 | chr:12:44313657 |
| 12 rs183971901 | 44228578 A | 58.3  | 2.19E-10 | chr:12:44313657 |
| 12 rs74423632  | 44229154 T | 58.3  | 2.19E-10 | chr:12:44313657 |
| 12 rs75842033  | 44228587 A | 58.3  | 2.19E-10 | chr:12:44313657 |
| 12 rs76030944  | 44226085 A | 58.3  | 2.19E-10 | chr:12:44313657 |
| 12 rs77056193  | 44225895 T | 58.3  | 2.19E-10 | chr:12:44313657 |
| 12 rs7311847   | 44315590 A | 781.8 | 2.30E-10 | chr:12:44313657 |
| 12 rs11182273  | 44202901 C | 4.376 | 2.55E-10 | chr:12:44313657 |
| 12 rs9669060   | 44301944 G | 3.462 | 2.75E-10 | chr:12:44313657 |
| 12 rs17121283  | 44185593 T | 4.565 | 4.20E-10 | chr:12:44313657 |
| 12 rs12313365  | 44433578 C | 5.578 | 4.21E-10 | chr:12:44313657 |
| 12 rs4768056   | 44322826 T | 688.8 | 4.65E-10 | chr:12:44313657 |
| 12 rs12301506  | 44129636 G | 3.94  | 4.83E-10 | chr:12:44313657 |
| 12 rs12320155  | 44394433 T | 15.14 | 4.87E-10 | chr:12:44313657 |
| 12 rs12315211  | 44133668 A | 5.36  | 5.74E-10 | chr:12:44313657 |
| 12 rs7979691   | 44142588 A | 5.627 | 5.78E-10 | chr:12:44313657 |
| 12 rs11504469  | 44096699 A | 5.621 | 5.88E-10 | chr:12:44313657 |
| 12 rs60029414  | 44096996 G | 5.621 | 5.88E-10 | chr:12:44313657 |
| 12 rs12301056  | 44098701 G | 5.381 | 1.14E-09 | chr:12:44313657 |
| 12 rs17093639  | 44132928 C | 5.381 | 1.14E-09 | chr:12:44313657 |
| 12 rs2464103   | 44279211 T | 7.555 | 1.18E-09 | chr:12:44313657 |

|                |            |        |          |                 |
|----------------|------------|--------|----------|-----------------|
| 12 rs6582494   | 44401246 A | 5.246  | 1.72E-09 | chr:12:44313657 |
| 12 rs117709201 | 44224088 T | 6.76   | 1.74E-09 | chr:12:44313657 |
| 12 rs10880616  | 44419249 G | 5.104  | 2.75E-09 | chr:12:44313657 |
| 12 rs10880617  | 44423914 T | 5.104  | 2.75E-09 | chr:12:44313657 |
| 12 rs11182396  | 44431156 G | 5.104  | 2.75E-09 | chr:12:44313657 |
| 12 rs11182402  | 44444897 C | 5.104  | 2.75E-09 | chr:12:44313657 |
| 12 rs12296857  | 44419592 A | 5.104  | 2.75E-09 | chr:12:44313657 |
| 12 rs17094013  | 44421518 G | 5.104  | 2.75E-09 | chr:12:44313657 |
| 12 rs10736018  | 44387942 G | 4.07   | 2.79E-09 | chr:12:44313657 |
| 12 rs10785492  | 44384727 C | 4.07   | 2.79E-09 | chr:12:44313657 |
| 12 rs10880608  | 44371763 G | 4.07   | 2.79E-09 | chr:12:44313657 |
| 12 rs2407788   | 44388354 A | 4.07   | 2.79E-09 | chr:12:44313657 |
| 12 rs7312422   | 44382509 C | 4.07   | 2.79E-09 | chr:12:44313657 |
| 12 rs11182312  | 44259319 G | 15.35  | 3.56E-09 | chr:12:44313657 |
| 12 rs11182317  | 44300705 A | 15.35  | 3.56E-09 | chr:12:44313657 |
| 12 rs12299112  | 44252616 A | 15.35  | 3.56E-09 | chr:12:44313657 |
| 12 rs12299151  | 44302543 G | 15.35  | 3.56E-09 | chr:12:44313657 |
| 12 rs12307180  | 44256942 T | 15.35  | 3.56E-09 | chr:12:44313657 |
| 12 rs12307644  | 44273062 G | 15.35  | 3.56E-09 | chr:12:44313657 |
| 12 rs12320752  | 44294435 T | 15.35  | 3.56E-09 | chr:12:44313657 |
| 12 rs1406786   | 44274673 G | 15.35  | 3.56E-09 | chr:12:44313657 |
| 12 rs145249872 | 44285415 T | 15.35  | 3.56E-09 | chr:12:44313657 |
| 12 rs151267396 | 44246174 T | 15.35  | 3.56E-09 | chr:12:44313657 |
| 12 rs1675759   | 44280458 T | 15.35  | 3.56E-09 | chr:12:44313657 |
| 12 rs7133336   | 44261915 G | 15.35  | 3.56E-09 | chr:12:44313657 |
| 12 rs7307888   | 44280981 A | 15.35  | 3.56E-09 | chr:12:44313657 |
| 12 rs78029959  | 44270446 T | 15.35  | 3.56E-09 | chr:12:44313657 |
| 12 rs7956766   | 44277073 A | 15.35  | 3.56E-09 | chr:12:44313657 |
| 12 rs7969724   | 44280202 T | 15.35  | 3.56E-09 | chr:12:44313657 |
| 12 rs80044299  | 44266866 A | 15.35  | 3.56E-09 | chr:12:44313657 |
| 12 rs80098499  | 44241292 T | 15.35  | 3.56E-09 | chr:12:44313657 |
| 12 rs10880574  | 44235427 G | 10.68  | 4.11E-09 | chr:12:44313657 |
| 12 rs61290421  | 44234529 T | 10.68  | 4.11E-09 | chr:12:44313657 |
| 12 rs1731424   | 44282880 G | 12.99  | 6.16E-09 | chr:12:44313657 |
| 12 rs551405916 | 44301953 C | 11.62  | 7.04E-09 | chr:12:44313657 |
| 12 rs7955148   | 44301433 T | 0.2296 | 8.31E-09 | chr:12:44313657 |
| 12 rs116612625 | 44470326 C | 10.16  | 1.04E-08 | chr:12:44313657 |
| 12 rs11182371  | 44394939 C | 8.32   | 1.10E-08 | chr:12:44313657 |
| 12 rs149139340 | 44304397 T | 10.01  | 1.14E-08 | chr:12:44313657 |
| 12 rs73096923  | 44236408 T | 10.01  | 1.14E-08 | chr:12:44313657 |
| 12 rs7315408   | 44308709 C | 10.01  | 1.14E-08 | chr:12:44313657 |
| 12 rs7979369   | 44242657 G | 10.01  | 1.14E-08 | chr:12:44313657 |
| 12 rs12302873  | 44146579 T | 4.401  | 1.46E-08 | chr:12:44313657 |

|                |            |       |          |                 |
|----------------|------------|-------|----------|-----------------|
| 12 rs142965099 | 44339268 A | 14.41 | 1.95E-08 | chr:12:44313657 |
| 12 rs75410353  | 44336522 G | 14.41 | 1.95E-08 | chr:12:44313657 |
| 12 rs75981654  | 44310128 A | 14.41 | 1.95E-08 | chr:12:44313657 |
| 12 rs80107150  | 44318342 T | 14.41 | 1.95E-08 | chr:12:44313657 |
| 12 rs10506233  | 44376031 C | 7.71  | 1.96E-08 | chr:12:44313657 |
| 12 rs11182363  | 44381348 C | 7.71  | 1.96E-08 | chr:12:44313657 |
| 12 rs7954870   | 44143149 A | 4.281 | 2.41E-08 | chr:12:44313657 |
| 12 rs12578394  | 44361955 C | 10.08 | 5.63E-08 | chr:12:44313657 |
| 12 rs77142311  | 44362408 A | 10.08 | 5.63E-08 | chr:12:44313657 |
| 12 rs79186285  | 44361175 T | 10.08 | 5.63E-08 | chr:12:44313657 |
| 12 rs28408299  | 44090479 A | 9.145 | 8.21E-08 | chr:12:44313657 |
| 12 rs10785489  | 44364261 C | 3.766 | 1.03E-07 | chr:12:44313657 |
| 12 rs4251475   | 44167093 G | 4.21  | 1.12E-07 | chr:12:44313657 |
| 12 rs12298711  | 44206759 T | 3.582 | 1.39E-07 | chr:12:44313657 |
| 12 rs117894155 | 44352005 G | 12.43 | 1.48E-07 | chr:12:44313657 |
| 12 rs139426779 | 44332767 T | 26.61 | 3.29E-07 | chr:12:44313657 |
| 12 rs192847975 | 44346705 G | 26.61 | 3.29E-07 | chr:12:44313657 |
| 12 rs117137831 | 44254126 G | 26.52 | 4.15E-07 | chr:12:44313657 |
| 12 rs12306662  | 44378314 G | 3.477 | 6.47E-07 | chr:12:44313657 |
| 12 rs11182287  | 44218539 C | 6.386 | 6.94E-07 | chr:12:44313657 |
| 12 rs10880561  | 44137426 T | 3.561 | 8.41E-07 | chr:12:44313657 |
| 12 rs17093754  | 44209423 A | 4.216 | 8.73E-07 | chr:12:44313657 |
| 12 rs4251463   | 44163295 T | 3.424 | 1.23E-06 | chr:12:44313657 |
| 12 rs4251466   | 44164441 T | 3.424 | 1.23E-06 | chr:12:44313657 |
| 12 rs4251489   | 44169945 T | 3.424 | 1.23E-06 | chr:12:44313657 |
| 12 rs4251540   | 44179579 T | 3.424 | 1.23E-06 | chr:12:44313657 |
| 12 rs4251545   | 44180295 A | 3.424 | 1.23E-06 | chr:12:44313657 |
| 12 rs191196752 | 44257898 A | 30.28 | 1.37E-06 | chr:12:44313657 |
| 12 rs147802186 | 44187010 T | 14.39 | 1.39E-06 | chr:12:44313657 |
| 12 rs113164777 | 44678125 T | 19.91 | 1.42E-06 | chr:12:44313657 |
| 12 rs114602706 | 44684601 G | 19.91 | 1.42E-06 | chr:12:44313657 |
| 12 rs17094419  | 44703038 G | 19.91 | 1.42E-06 | chr:12:44313657 |
| 12 rs77760509  | 44703077 C | 19.91 | 1.42E-06 | chr:12:44313657 |
| 12 rs10880559  | 44137338 G | 3.368 | 1.63E-06 | chr:12:44313657 |
| 12 rs10880560  | 44137382 C | 3.368 | 1.63E-06 | chr:12:44313657 |
| 12 rs4251431   | 44154690 T | 3.368 | 1.63E-06 | chr:12:44313657 |
| 12 rs10880552  | 44126037 G | 5.253 | 1.72E-06 | chr:12:44313657 |
| 12 rs10880553  | 44126151 T | 5.253 | 1.72E-06 | chr:12:44313657 |
| 12 rs10880554  | 44127236 G | 5.253 | 1.72E-06 | chr:12:44313657 |
| 12 rs10880555  | 44127523 C | 5.253 | 1.72E-06 | chr:12:44313657 |
| 12 rs10880556  | 44128846 T | 5.253 | 1.72E-06 | chr:12:44313657 |
| 12 rs7954843   | 44113010 A | 2.766 | 2.40E-06 | chr:12:44313657 |
| 12 rs4768054   | 44309743 A | 4.516 | 2.45E-06 | chr:12:44313657 |

|                |            |       |          |                 |
|----------------|------------|-------|----------|-----------------|
| 12 rs141317022 | 44195765 G | 4.08  | 2.60E-06 | chr:12:44313657 |
| 12 rs17093747  | 44205459 G | 4.085 | 2.71E-06 | chr:12:44313657 |
| 12 rs2166063   | 44202450 G | 4.085 | 2.71E-06 | chr:12:44313657 |
| 12 rs11182281  | 44213461 A | 4.509 | 3.62E-06 | chr:12:44313657 |
| 12 rs11182282  | 44214899 A | 4.509 | 3.62E-06 | chr:12:44313657 |
| 12 rs11182286  | 44217342 C | 4.509 | 3.62E-06 | chr:12:44313657 |
| 12 rs12226960  | 44213124 T | 4.509 | 3.62E-06 | chr:12:44313657 |
| 12 rs12230695  | 44215935 G | 4.509 | 3.62E-06 | chr:12:44313657 |
| 12 rs28437935  | 44214821 A | 4.509 | 3.62E-06 | chr:12:44313657 |
| 12 rs11182306  | 44251130 A | 118.8 | 3.77E-06 | chr:12:44313657 |
| 12 rs112006889 | 44196125 C | 3.938 | 4.20E-06 | chr:12:44313657 |
| 12 rs118045375 | 44185257 A | 3.938 | 4.20E-06 | chr:12:44313657 |
| 12 rs150213649 | 44195782 A | 3.938 | 4.20E-06 | chr:12:44313657 |
| 12 rs17093732  | 44191475 G | 3.938 | 4.20E-06 | chr:12:44313657 |
| 12 rs17093734  | 44194265 G | 3.938 | 4.20E-06 | chr:12:44313657 |
| 12 rs1802561   | 44189129 C | 3.938 | 4.20E-06 | chr:12:44313657 |
| 12 rs79866180  | 44193532 G | 3.938 | 4.20E-06 | chr:12:44313657 |
| 12 rs11182284  | 44217312 A | 4.4   | 4.59E-06 | chr:12:44313657 |
| 12 rs11608602  | 44215732 C | 4.309 | 5.36E-06 | chr:12:44313657 |
| 12 rs17094566  | 44774999 A | 13.44 | 6.27E-06 | chr:12:44313657 |
| 12 rs17094569  | 44776299 C | 13.44 | 6.27E-06 | chr:12:44313657 |
| 12 rs79201251  | 44785375 C | 13.44 | 6.27E-06 | chr:12:44313657 |
| 12 rs112350998 | 44141631 A | 21.33 | 9.39E-06 | chr:12:44313657 |
| 12 rs12302250  | 44103675 T | 21.33 | 9.39E-06 | chr:12:44313657 |
| 12 rs12305949  | 44135634 T | 21.33 | 9.39E-06 | chr:12:44313657 |
| 12 rs12318086  | 44143692 G | 21.33 | 9.39E-06 | chr:12:44313657 |
| 12 rs4251429   | 44154407 C | 21.33 | 9.39E-06 | chr:12:44313657 |
| 12 rs4251447   | 44158945 T | 21.33 | 9.39E-06 | chr:12:44313657 |
| 12 rs4251481   | 44168365 G | 21.33 | 9.39E-06 | chr:12:44313657 |
| 12 rs4251488   | 44169901 C | 21.33 | 9.39E-06 | chr:12:44313657 |
| 12 rs4251522   | 44175540 G | 21.33 | 9.39E-06 | chr:12:44313657 |
| 12 rs57291280  | 44146799 C | 21.33 | 9.39E-06 | chr:12:44313657 |
| 12 rs74567299  | 44132881 T | 21.33 | 9.39E-06 | chr:12:44313657 |
| 12 rs9971672   | 44107016 T | 21.33 | 9.39E-06 | chr:12:44313657 |
| 12 rs9971859   | 44140776 C | 21.33 | 9.39E-06 | chr:12:44313657 |
| 12 rs9971895   | 44140648 A | 21.33 | 9.39E-06 | chr:12:44313657 |
| 12 rs11503834  | 44097619 T | 21.12 | 9.53E-06 | chr:12:44313657 |
| 12 rs12301642  | 44093618 C | 35.39 | 1.10E-05 | chr:12:44313657 |
| 12 rs77797802  | 44042257 T | 35.39 | 1.10E-05 | chr:12:44313657 |
| 12 rs78544806  | 44066704 C | 35.39 | 1.10E-05 | chr:12:44313657 |
| 12 rs11182269  | 44194989 A | 4.212 | 1.23E-05 | chr:12:44313657 |
| 12 rs368883248 | 44575912 T | 3.713 | 1.33E-05 | chr:12:44313657 |
| 12 rs147015726 | 44303495 G | 17.35 | 1.36E-05 | chr:12:44313657 |



|                |            |         |          |                 |
|----------------|------------|---------|----------|-----------------|
| 12 rs552443866 | 44316626 T | 17.35   | 1.36E-05 | chr:12:44313657 |
| 12 rs374326271 | 44305863 C | 8.985   | 1.38E-05 | chr:12:44313657 |
| 12 rs112321143 | 44101181 C | 14.66   | 1.40E-05 | chr:12:44313657 |
| 12 rs7316581   | 44100153 C | 14.66   | 1.40E-05 | chr:12:44313657 |
| 12 rs842199    | 44457572 T | 2.384   | 1.52E-05 | chr:12:44313657 |
| 12 rs842202    | 44455107 T | 2.384   | 1.52E-05 | chr:12:44313657 |
| 12 rs12322164  | 44413166 A | 2.362   | 1.62E-05 | chr:12:44313657 |
| 12 rs1688723   | 44418659 A | 2.362   | 1.62E-05 | chr:12:44313657 |
| 12 rs859699    | 44414828 C | 2.362   | 1.62E-05 | chr:12:44313657 |
| 12 rs863580    | 44413924 T | 2.362   | 1.62E-05 | chr:12:44313657 |
| 12 rs112346532 | 44746165 C | 12.33   | 1.63E-05 | chr:12:44313657 |
| 12 rs17094496  | 44742659 G | 12.33   | 1.63E-05 | chr:12:44313657 |
| 12 rs79058711  | 44735899 C | 12.33   | 1.63E-05 | chr:12:44313657 |
| 12 rs143623549 | 44355732 A | 88.61   | 1.74E-05 | chr:12:44313657 |
| 12 rs1098878   | 44423339 C | 2.351   | 1.85E-05 | chr:12:44313657 |
| 12 rs75860385  | 44137050 C | 3.342   | 1.97E-05 | chr:12:44313657 |
| 12 rs75478629  | 44288040 A | 9.79    | 2.06E-05 | chr:12:44313657 |
| 12 rs145588607 | 44651119 C | 25.34   | 2.08E-05 | chr:12:44313657 |
| 12 rs180998863 | 44592760 A | 25.34   | 2.08E-05 | chr:12:44313657 |
| 12 rs561045231 | 44489751 T | 25.34   | 2.08E-05 | chr:12:44313657 |
| 12 rs10880606  | 44369103 A | 2.24    | 2.47E-05 | chr:12:44313657 |
| 12 rs11556066  | 44188507 G | 3.987   | 2.53E-05 | chr:12:44313657 |
| 12 rs376925605 | 44301553 A | 0.3503  | 2.63E-05 | chr:12:44313657 |
| 12 rs35980560  | 44185578 T | 4.019   | 2.66E-05 | chr:12:44313657 |
| 12 rs73093785  | 44186627 C | 4.019   | 2.66E-05 | chr:12:44313657 |
| 12 rs10880569  | 44201636 G | 3.469   | 2.76E-05 | chr:12:44313657 |
| 12 rs10880570  | 44202465 A | 3.469   | 2.76E-05 | chr:12:44313657 |
| 12 rs1816854   | 44205018 C | 3.469   | 2.76E-05 | chr:12:44313657 |
| 12 rs7966902   | 44200485 C | 3.469   | 2.76E-05 | chr:12:44313657 |
| 12 rs117657439 | 44257734 T | 8.489   | 2.89E-05 | chr:12:44313657 |
| 12 rs139428281 | 44258804 T | 8.489   | 2.89E-05 | chr:12:44313657 |
| 12 rs140201523 | 44267442 A | 8.489   | 2.89E-05 | chr:12:44313657 |
| 12 rs146156586 | 44262286 T | 8.489   | 2.89E-05 | chr:12:44313657 |
| 12 rs61957915  | 55742266 C | 0.0757  | 1.80E-14 | chr:12:55727213 |
| 12 rs537017437 | 55742569 T | 0.07697 | 2.56E-14 | chr:12:55727213 |
| 12 rs7314118   | 55737403 C | 0.09199 | 2.70E-14 | chr:12:55727213 |
| 12 rs7960719   | 55722035 A | 0.078   | 2.74E-14 | chr:12:55727213 |
| 12 rs11831714  | 55741742 G | 0.07711 | 2.89E-14 | chr:12:55727213 |
| 12 rs55659159  | 55747754 T | 0.07711 | 2.89E-14 | chr:12:55727213 |
| 12 rs55898514  | 55736238 A | 0.07711 | 2.89E-14 | chr:12:55727213 |
| 12 rs59136392  | 55748204 T | 0.07711 | 2.89E-14 | chr:12:55727213 |
| 12 rs59466585  | 55722736 G | 0.07711 | 2.89E-14 | chr:12:55727213 |
| 12 rs59676560  | 55745425 C | 0.07711 | 2.89E-14 | chr:12:55727213 |

|                |            |         |          |                 |
|----------------|------------|---------|----------|-----------------|
| 12 rs61071395  | 55721228 C | 0.07711 | 2.89E-14 | chr:12:55727213 |
| 12 rs61249728  | 55728922 G | 0.07711 | 2.89E-14 | chr:12:55727213 |
| 12 rs61957887  | 55721734 T | 0.07711 | 2.89E-14 | chr:12:55727213 |
| 12 rs61957898  | 55730423 C | 0.07711 | 2.89E-14 | chr:12:55727213 |
| 12 rs61957899  | 55731971 T | 0.07711 | 2.89E-14 | chr:12:55727213 |
| 12 rs61957924  | 55744100 C | 0.07711 | 2.89E-14 | chr:12:55727213 |
| 12 rs61957933  | 55744710 G | 0.07711 | 2.89E-14 | chr:12:55727213 |
| 12 rs61957936  | 55745719 G | 0.07711 | 2.89E-14 | chr:12:55727213 |
| 12 rs73118998  | 55736659 C | 0.07711 | 2.89E-14 | chr:12:55727213 |
| 12 rs73119000  | 55736662 A | 0.07711 | 2.89E-14 | chr:12:55727213 |
| 12 rs7313465   | 55736863 T | 0.07711 | 2.89E-14 | chr:12:55727213 |
| 12 rs7484522   | 55738240 G | 0.07711 | 2.89E-14 | chr:12:55727213 |
| 12 rs7955088   | 55732963 T | 0.07711 | 2.89E-14 | chr:12:55727213 |
| 12 rs7960760   | 55722311 G | 0.07711 | 2.89E-14 | chr:12:55727213 |
| 12 rs7971053   | 55729947 C | 0.07711 | 2.89E-14 | chr:12:55727213 |
| 12 rs11171416  | 55731490 G | 0.08437 | 2.97E-14 | chr:12:55727213 |
| 12 rs66516917  | 55749131 G | 0.09324 | 3.07E-14 | chr:12:55727213 |
| 12 rs7311751   | 55748847 G | 0.09321 | 3.31E-14 | chr:12:55727213 |
| 12 rs79104523  | 55749220 C | 0.09321 | 3.31E-14 | chr:12:55727213 |
| 12 rs12099811  | 55731200 A | 0.08453 | 3.36E-14 | chr:12:55727213 |
| 12 rs61957902  | 55738064 C | 0.07743 | 3.58E-14 | chr:12:55727213 |
| 12 rs12296692  | 55756851 C | 0.09376 | 3.63E-14 | chr:12:55727213 |
| 12 rs7484556   | 55738427 G | 0.07717 | 3.67E-14 | chr:12:55727213 |
| 12 rs11171430  | 55755254 G | 0.09387 | 4.01E-14 | chr:12:55727213 |
| 12 rs11171431  | 55757609 T | 0.09387 | 4.01E-14 | chr:12:55727213 |
| 12 rs11171432  | 55757696 C | 0.09387 | 4.01E-14 | chr:12:55727213 |
| 12 rs11171434  | 55758018 T | 0.09387 | 4.01E-14 | chr:12:55727213 |
| 12 rs11832308  | 55755506 A | 0.09387 | 4.01E-14 | chr:12:55727213 |
| 12 rs12318683  | 55755024 C | 0.09387 | 4.01E-14 | chr:12:55727213 |
| 12 rs146150551 | 55751301 C | 0.09387 | 4.01E-14 | chr:12:55727213 |
| 12 rs149898597 | 55753436 A | 0.09387 | 4.01E-14 | chr:12:55727213 |
| 12 rs56677471  | 55749967 A | 0.09387 | 4.01E-14 | chr:12:55727213 |
| 12 rs59347627  | 55758129 G | 0.09387 | 4.01E-14 | chr:12:55727213 |
| 12 rs61957943  | 55749330 G | 0.09387 | 4.01E-14 | chr:12:55727213 |
| 12 rs57757372  | 55718780 G | 0.07106 | 4.11E-14 | chr:12:55727213 |
| 12 rs58709231  | 55719090 C | 0.07106 | 4.11E-14 | chr:12:55727213 |
| 12 rs59097302  | 55719030 T | 0.07106 | 4.11E-14 | chr:12:55727213 |
| 12 rs60142559  | 55719192 G | 0.07106 | 4.11E-14 | chr:12:55727213 |
| 12 rs60220253  | 55717410 G | 0.07106 | 4.11E-14 | chr:12:55727213 |
| 12 rs61957879  | 55716971 C | 0.07106 | 4.11E-14 | chr:12:55727213 |
| 12 rs11171435  | 55758053 C | 0.09416 | 4.54E-14 | chr:12:55727213 |
| 12 rs13377995  | 55757380 G | 0.09455 | 4.72E-14 | chr:12:55727213 |
| 12 rs11171427  | 55742270 T | 0.1079  | 2.09E-13 | chr:12:55727213 |

|                |            |        |          |                 |
|----------------|------------|--------|----------|-----------------|
| 12 rs10431547  | 55745950 G | 0.1085 | 2.97E-13 | chr:12:55727213 |
| 12 rs10735860  | 55732664 C | 0.1085 | 2.97E-13 | chr:12:55727213 |
| 12 rs10783721  | 55732060 G | 0.1085 | 2.97E-13 | chr:12:55727213 |
| 12 rs10783723  | 55738137 G | 0.1085 | 2.97E-13 | chr:12:55727213 |
| 12 rs10783724  | 55746910 G | 0.1085 | 2.97E-13 | chr:12:55727213 |
| 12 rs10876741  | 55723575 C | 0.1085 | 2.97E-13 | chr:12:55727213 |
| 12 rs10876742  | 55737616 T | 0.1085 | 2.97E-13 | chr:12:55727213 |
| 12 rs10876747  | 55745162 A | 0.1085 | 2.97E-13 | chr:12:55727213 |
| 12 rs11171411  | 55719478 C | 0.1085 | 2.97E-13 | chr:12:55727213 |
| 12 rs11171426  | 55741827 T | 0.1085 | 2.97E-13 | chr:12:55727213 |
| 12 rs12301041  | 55718970 C | 0.1085 | 2.97E-13 | chr:12:55727213 |
| 12 rs4511372   | 55722251 C | 0.1085 | 2.97E-13 | chr:12:55727213 |
| 12 rs4759140   | 55733080 A | 0.1085 | 2.97E-13 | chr:12:55727213 |
| 12 rs7138676   | 55734240 G | 0.1085 | 2.97E-13 | chr:12:55727213 |
| 12 rs7487069   | 55744851 T | 0.1085 | 2.97E-13 | chr:12:55727213 |
| 12 rs7958843   | 55726716 T | 0.1085 | 2.97E-13 | chr:12:55727213 |
| 12 rs9795610   | 55740956 A | 0.1085 | 2.97E-13 | chr:12:55727213 |
| 12 rs7486665   | 55741380 A | 0.1085 | 3.26E-13 | chr:12:55727213 |
| 12 rs201131895 | 55740725 A | 0.1482 | 4.34E-13 | chr:12:55727213 |
| 12 rs376987469 | 55740755 G | 0.1482 | 4.34E-13 | chr:12:55727213 |
| 12 rs10735861  | 55762857 G | 0.123  | 4.51E-13 | chr:12:55727213 |
| 12 rs10735862  | 55763034 T | 0.123  | 4.51E-13 | chr:12:55727213 |
| 12 rs10747742  | 55748509 A | 0.123  | 4.51E-13 | chr:12:55727213 |
| 12 rs10747743  | 55755226 A | 0.123  | 4.51E-13 | chr:12:55727213 |
| 12 rs10783728  | 55762519 G | 0.123  | 4.51E-13 | chr:12:55727213 |
| 12 rs10783730  | 55763463 G | 0.123  | 4.51E-13 | chr:12:55727213 |
| 12 rs10876749  | 55754085 G | 0.123  | 4.51E-13 | chr:12:55727213 |
| 12 rs10876750  | 55757559 C | 0.123  | 4.51E-13 | chr:12:55727213 |
| 12 rs10876751  | 55759878 A | 0.123  | 4.51E-13 | chr:12:55727213 |
| 12 rs11171437  | 55761078 A | 0.123  | 4.51E-13 | chr:12:55727213 |
| 12 rs4758999   | 55756597 T | 0.123  | 4.51E-13 | chr:12:55727213 |
| 12 rs12578577  | 55716443 T | 0.1394 | 6.76E-13 | chr:12:55727213 |
| 12 rs12579852  | 55716569 A | 0.1394 | 6.76E-13 | chr:12:55727213 |
| 12 rs189794726 | 55743934 C | 0.1394 | 6.76E-13 | chr:12:55727213 |
| 12 rs4448777   | 55724981 C | 0.1394 | 6.76E-13 | chr:12:55727213 |
| 12 rs4590978   | 55725086 T | 0.1394 | 6.76E-13 | chr:12:55727213 |
| 12 rs55637917  | 55747565 C | 0.1394 | 6.76E-13 | chr:12:55727213 |
| 12 rs58480409  | 55719221 T | 0.1394 | 6.76E-13 | chr:12:55727213 |
| 12 rs58780687  | 55736498 C | 0.1394 | 6.76E-13 | chr:12:55727213 |
| 12 rs59213907  | 55728911 T | 0.1394 | 6.76E-13 | chr:12:55727213 |
| 12 rs60230359  | 55736550 C | 0.1394 | 6.76E-13 | chr:12:55727213 |
| 12 rs60586348  | 55745151 T | 0.1394 | 6.76E-13 | chr:12:55727213 |
| 12 rs60873827  | 55717769 C | 0.1394 | 6.76E-13 | chr:12:55727213 |

|                |            |         |          |                 |
|----------------|------------|---------|----------|-----------------|
| 12 rs61556775  | 55745640 C | 0.1394  | 6.76E-13 | chr:12:55727213 |
| 12 rs61957878  | 55716754 T | 0.1394  | 6.76E-13 | chr:12:55727213 |
| 12 rs61957884  | 55720177 G | 0.1394  | 6.76E-13 | chr:12:55727213 |
| 12 rs61957885  | 55720876 G | 0.1394  | 6.76E-13 | chr:12:55727213 |
| 12 rs61957914  | 55742041 A | 0.1394  | 6.76E-13 | chr:12:55727213 |
| 12 rs61957937  | 55746850 C | 0.1394  | 6.76E-13 | chr:12:55727213 |
| 12 rs61957938  | 55747266 G | 0.1394  | 6.76E-13 | chr:12:55727213 |
| 12 rs61957941  | 55748058 A | 0.1394  | 6.76E-13 | chr:12:55727213 |
| 12 rs66902680  | 55724080 C | 0.1394  | 6.76E-13 | chr:12:55727213 |
| 12 rs7959124   | 55726957 G | 0.1394  | 6.76E-13 | chr:12:55727213 |
| 12 rs7959837   | 55734511 A | 0.1394  | 6.76E-13 | chr:12:55727213 |
| 12 rs7976828   | 55726450 T | 0.1394  | 6.76E-13 | chr:12:55727213 |
| 12 rs10747746  | 55769082 T | 0.1363  | 1.20E-12 | chr:12:55727213 |
| 12 rs10747747  | 55772188 T | 0.1363  | 1.20E-12 | chr:12:55727213 |
| 12 rs10747748  | 55774581 G | 0.1363  | 1.20E-12 | chr:12:55727213 |
| 12 rs10747752  | 55793235 A | 0.1363  | 1.20E-12 | chr:12:55727213 |
| 12 rs10783731  | 55767702 T | 0.1363  | 1.20E-12 | chr:12:55727213 |
| 12 rs10876754  | 55767295 G | 0.1363  | 1.20E-12 | chr:12:55727213 |
| 12 rs10876763  | 55788546 C | 0.1363  | 1.20E-12 | chr:12:55727213 |
| 12 rs10876764  | 55789304 G | 0.1363  | 1.20E-12 | chr:12:55727213 |
| 12 rs11171441  | 55766596 T | 0.1363  | 1.20E-12 | chr:12:55727213 |
| 12 rs11171444  | 55766896 C | 0.1363  | 1.20E-12 | chr:12:55727213 |
| 12 rs11171449  | 55789447 A | 0.1363  | 1.20E-12 | chr:12:55727213 |
| 12 rs7485722   | 55770909 T | 0.1363  | 1.20E-12 | chr:12:55727213 |
| 12 rs7488140   | 55770771 G | 0.1363  | 1.20E-12 | chr:12:55727213 |
| 12 rs7488178   | 55770918 G | 0.1363  | 1.20E-12 | chr:12:55727213 |
| 12 rs4309772   | 55888672 C | 0.1635  | 1.30E-12 | chr:12:55727213 |
| 12 rs59003108  | 55888940 T | 0.1635  | 1.30E-12 | chr:12:55727213 |
| 12 rs12099665  | 55731191 T | 0.1475  | 1.39E-12 | chr:12:55727213 |
| 12 rs12099808  | 55731178 A | 0.1475  | 1.39E-12 | chr:12:55727213 |
| 12 rs11495497  | 55740640 G | 0.1163  | 1.43E-12 | chr:12:55727213 |
| 12 rs12582120  | 55830064 G | 0.1674  | 1.48E-12 | chr:12:55727213 |
| 12 rs11171433  | 55757797 T | 0.09906 | 1.90E-12 | chr:12:55727213 |
| 12 rs201409163 | 55827180 C | 0.167   | 1.99E-12 | chr:12:55727213 |
| 12 rs201554506 | 55826869 A | 0.167   | 1.99E-12 | chr:12:55727213 |
| 12 rs4318592   | 55837124 A | 0.167   | 1.99E-12 | chr:12:55727213 |
| 12 rs55797706  | 55836585 A | 0.167   | 1.99E-12 | chr:12:55727213 |
| 12 rs60643523  | 55842928 G | 0.167   | 1.99E-12 | chr:12:55727213 |
| 12 rs61956303  | 55818071 A | 0.167   | 1.99E-12 | chr:12:55727213 |
| 12 rs61956325  | 55827707 A | 0.167   | 1.99E-12 | chr:12:55727213 |
| 12 rs61956326  | 55827735 A | 0.167   | 1.99E-12 | chr:12:55727213 |
| 12 rs61956327  | 55828708 T | 0.167   | 1.99E-12 | chr:12:55727213 |
| 12 rs61956331  | 55840856 A | 0.167   | 1.99E-12 | chr:12:55727213 |

|                |            |        |          |                 |
|----------------|------------|--------|----------|-----------------|
| 12 rs6581047   | 55832001 G | 0.167  | 1.99E-12 | chr:12:55727213 |
| 12 rs7311929   | 55834833 G | 0.167  | 1.99E-12 | chr:12:55727213 |
| 12 rs7957446   | 55839631 C | 0.167  | 1.99E-12 | chr:12:55727213 |
| 12 rs7966770   | 55844717 C | 0.167  | 1.99E-12 | chr:12:55727213 |
| 12 rs7980098   | 55844694 G | 0.167  | 1.99E-12 | chr:12:55727213 |
| 12 rs61957788  | 55883248 A | 0.1666 | 2.07E-12 | chr:12:55727213 |
| 12 rs73326725  | 55749222 C | 0.1585 | 2.09E-12 | chr:12:55727213 |
| 12 rs200704134 | 55879280 T | 0.1673 | 2.17E-12 | chr:12:55727213 |
| 12 rs201855666 | 55879919 A | 0.1673 | 2.17E-12 | chr:12:55727213 |
| 12 rs10783734  | 55799682 G | 0.1467 | 2.32E-12 | chr:12:55727213 |
| 12 rs10876767  | 55797331 C | 0.1467 | 2.32E-12 | chr:12:55727213 |
| 12 rs10876768  | 55797728 A | 0.1467 | 2.32E-12 | chr:12:55727213 |
| 12 rs7294677   | 55800713 T | 0.1467 | 2.32E-12 | chr:12:55727213 |
| 12 rs4479639   | 55888719 G | 0.1585 | 2.46E-12 | chr:12:55727213 |
| 12 rs12579005  | 55853230 A | 0.1682 | 2.56E-12 | chr:12:55727213 |
| 12 rs4130004   | 55860773 T | 0.1682 | 2.56E-12 | chr:12:55727213 |
| 12 rs4343668   | 55868936 T | 0.1682 | 2.56E-12 | chr:12:55727213 |
| 12 rs4356858   | 55867290 T | 0.1682 | 2.56E-12 | chr:12:55727213 |
| 12 rs4453888   | 55887808 C | 0.1682 | 2.56E-12 | chr:12:55727213 |
| 12 rs56840674  | 55887691 T | 0.1682 | 2.56E-12 | chr:12:55727213 |
| 12 rs60066834  | 55877998 T | 0.1682 | 2.56E-12 | chr:12:55727213 |
| 12 rs60450959  | 55861373 T | 0.1682 | 2.56E-12 | chr:12:55727213 |
| 12 rs60683621  | 55863224 G | 0.1682 | 2.56E-12 | chr:12:55727213 |
| 12 rs61956358  | 55852286 T | 0.1682 | 2.56E-12 | chr:12:55727213 |
| 12 rs61957760  | 55859957 T | 0.1682 | 2.56E-12 | chr:12:55727213 |
| 12 rs61957763  | 55867540 A | 0.1682 | 2.56E-12 | chr:12:55727213 |
| 12 rs61957764  | 55867916 A | 0.1682 | 2.56E-12 | chr:12:55727213 |
| 12 rs61957765  | 55868561 C | 0.1682 | 2.56E-12 | chr:12:55727213 |
| 12 rs67290413  | 55869876 C | 0.1682 | 2.56E-12 | chr:12:55727213 |
| 12 rs7294659   | 55866519 C | 0.1682 | 2.56E-12 | chr:12:55727213 |
| 12 rs7304753   | 55886489 A | 0.1682 | 2.56E-12 | chr:12:55727213 |
| 12 rs7971742   | 55848486 G | 0.1682 | 2.56E-12 | chr:12:55727213 |
| 12 rs115471673 | 55766516 G | 0.1598 | 2.64E-12 | chr:12:55727213 |
| 12 rs12579408  | 55764348 A | 0.1598 | 2.64E-12 | chr:12:55727213 |
| 12 rs12581916  | 55764409 C | 0.1598 | 2.64E-12 | chr:12:55727213 |
| 12 rs12582005  | 55772837 A | 0.1598 | 2.64E-12 | chr:12:55727213 |
| 12 rs57050414  | 55776926 A | 0.1598 | 2.64E-12 | chr:12:55727213 |
| 12 rs58254871  | 55750281 A | 0.1598 | 2.64E-12 | chr:12:55727213 |
| 12 rs60249205  | 55758333 G | 0.1598 | 2.64E-12 | chr:12:55727213 |
| 12 rs60774348  | 55757717 G | 0.1598 | 2.64E-12 | chr:12:55727213 |
| 12 rs60991522  | 55781529 T | 0.1598 | 2.64E-12 | chr:12:55727213 |
| 12 rs61956269  | 55768023 T | 0.1598 | 2.64E-12 | chr:12:55727213 |
| 12 rs61956272  | 55779559 T | 0.1598 | 2.64E-12 | chr:12:55727213 |

|                |            |        |          |                 |
|----------------|------------|--------|----------|-----------------|
| 12 rs6581037   | 55767310 T | 0.1598 | 2.64E-12 | chr:12:55727213 |
| 12 rs67015069  | 55759968 A | 0.1598 | 2.64E-12 | chr:12:55727213 |
| 12 rs74844018  | 55766871 A | 0.1598 | 2.64E-12 | chr:12:55727213 |
| 12 rs7485053   | 55770126 C | 0.1598 | 2.64E-12 | chr:12:55727213 |
| 12 rs7489047   | 55759851 G | 0.1598 | 2.64E-12 | chr:12:55727213 |
| 12 rs12579346  | 55786856 G | 0.1615 | 3.14E-12 | chr:12:55727213 |
| 12 rs12581959  | 55787311 A | 0.1615 | 3.14E-12 | chr:12:55727213 |
| 12 rs3935215   | 55792401 A | 0.1615 | 3.14E-12 | chr:12:55727213 |
| 12 rs61956275  | 55786423 A | 0.1615 | 3.14E-12 | chr:12:55727213 |
| 12 rs61956290  | 55793833 G | 0.1615 | 3.14E-12 | chr:12:55727213 |
| 12 rs67934812  | 55785591 G | 0.1615 | 3.14E-12 | chr:12:55727213 |
| 12 rs7485979   | 55789043 A | 0.1615 | 3.14E-12 | chr:12:55727213 |
| 12 rs7485991   | 55789129 C | 0.1615 | 3.14E-12 | chr:12:55727213 |
| 12 rs7487419   | 55769801 G | 0.1612 | 3.31E-12 | chr:12:55727213 |
| 12 rs58316942  | 55718919 A | 0.146  | 3.51E-12 | chr:12:55727213 |
| 12 rs61957889  | 55724456 T | 0.146  | 3.51E-12 | chr:12:55727213 |
| 12 rs12579181  | 55887087 T | 0.1659 | 3.54E-12 | chr:12:55727213 |
| 12 rs7310335   | 55884439 T | 0.1659 | 3.54E-12 | chr:12:55727213 |
| 12 rs7316594   | 55887407 A | 0.1659 | 3.54E-12 | chr:12:55727213 |
| 12 rs10783737  | 55802733 G | 0.1528 | 3.72E-12 | chr:12:55727213 |
| 12 rs112892991 | 55808749 T | 0.1704 | 4.41E-12 | chr:12:55727213 |
| 12 rs59438785  | 55811665 G | 0.1704 | 4.41E-12 | chr:12:55727213 |
| 12 rs61547125  | 55814082 G | 0.1704 | 4.41E-12 | chr:12:55727213 |
| 12 rs61956300  | 55812640 G | 0.1704 | 4.41E-12 | chr:12:55727213 |
| 12 rs4376077   | 55872442 G | 0.1778 | 4.53E-12 | chr:12:55727213 |
| 12 rs112331945 | 55781657 T | 0.1616 | 4.54E-12 | chr:12:55727213 |
| 12 rs61566486  | 55781694 G | 0.1616 | 4.54E-12 | chr:12:55727213 |
| 12 rs61957946  | 55755778 C | 0.1681 | 5.48E-12 | chr:12:55727213 |
| 12 rs57361193  | 55883572 A | 0.1702 | 5.99E-12 | chr:12:55727213 |
| 12 rs12578879  | 55797773 T | 0.1707 | 6.71E-12 | chr:12:55727213 |
| 12 rs12580661  | 55803129 A | 0.1707 | 6.71E-12 | chr:12:55727213 |
| 12 rs12581060  | 55797484 C | 0.1707 | 6.71E-12 | chr:12:55727213 |
| 12 rs61956291  | 55797964 C | 0.1707 | 6.71E-12 | chr:12:55727213 |
| 12 rs61956292  | 55803346 C | 0.1707 | 6.71E-12 | chr:12:55727213 |
| 12 rs7487895   | 55796720 C | 0.1707 | 6.71E-12 | chr:12:55727213 |
| 12 rs7488940   | 55802591 T | 0.1707 | 6.71E-12 | chr:12:55727213 |
| 12 rs142753382 | 55872931 T | 0.1831 | 8.57E-12 | chr:12:55727213 |
| 12 rs145535298 | 55873030 C | 0.1831 | 8.57E-12 | chr:12:55727213 |
| 12 rs7487832   | 55782814 A | 0.1256 | 1.01E-11 | chr:12:55727213 |
| 12 rs7487833   | 55782819 A | 0.1256 | 1.01E-11 | chr:12:55727213 |
| 12 rs7486167   | 55783942 T | 0.1575 | 1.62E-11 | chr:12:55727213 |
| 12 rs7960126   | 55813605 G | 0.1703 | 1.82E-11 | chr:12:55727213 |
| 12 rs7487315   | 55782690 C | 0.1253 | 1.97E-11 | chr:12:55727213 |

|                |            |        |          |                 |
|----------------|------------|--------|----------|-----------------|
| 12 rs10783740  | 55824905 C | 0.1967 | 4.93E-11 | chr:12:55727213 |
| 12 rs12371318  | 55838476 C | 0.1967 | 4.93E-11 | chr:12:55727213 |
| 12 rs12826311  | 55828310 T | 0.1967 | 4.93E-11 | chr:12:55727213 |
| 12 rs4593071   | 55842842 G | 0.1967 | 4.93E-11 | chr:12:55727213 |
| 12 rs4759149   | 55827063 T | 0.1967 | 4.93E-11 | chr:12:55727213 |
| 12 rs7311797   | 55834721 T | 0.1967 | 4.93E-11 | chr:12:55727213 |
| 12 rs7486280   | 55823675 C | 0.1967 | 4.93E-11 | chr:12:55727213 |
| 12 rs7964964   | 55841398 T | 0.1967 | 4.93E-11 | chr:12:55727213 |
| 12 rs7966072   | 55829213 A | 0.1967 | 4.93E-11 | chr:12:55727213 |
| 12 rs10783741  | 55824985 C | 0.1923 | 5.95E-11 | chr:12:55727213 |
| 12 rs11171462  | 55838718 G | 0.1923 | 5.95E-11 | chr:12:55727213 |
| 12 rs7295548   | 55834719 A | 0.1923 | 5.95E-11 | chr:12:55727213 |
| 12 rs4759147   | 55770418 A | 0.1843 | 7.04E-11 | chr:12:55727213 |
| 12 rs373941107 | 55740754 T | 0.1931 | 7.65E-11 | chr:12:55727213 |
| 12 rs10876758  | 55781712 G | 0.1853 | 7.78E-11 | chr:12:55727213 |
| 12 rs10747744  | 55768014 T | 0.1788 | 8.43E-11 | chr:12:55727213 |
| 12 rs10747745  | 55768086 A | 0.1788 | 8.43E-11 | chr:12:55727213 |
| 12 rs10876753  | 55767068 T | 0.1788 | 8.43E-11 | chr:12:55727213 |
| 12 rs4759000   | 55766037 C | 0.1788 | 8.43E-11 | chr:12:55727213 |
| 12 rs4759145   | 55769542 A | 0.1788 | 8.43E-11 | chr:12:55727213 |
| 12 rs4759146   | 55770047 T | 0.1788 | 8.43E-11 | chr:12:55727213 |
| 12 rs10876759  | 55781717 A | 0.1858 | 9.53E-11 | chr:12:55727213 |
| 12 rs7952853   | 55845415 T | 0.2074 | 1.09E-10 | chr:12:55727213 |
| 12 rs143455470 | 55879325 A | 0.21   | 2.39E-10 | chr:12:55727213 |
| 12 rs9669227   | 55826498 T | 0.2931 | 1.40E-09 | chr:12:55727213 |
| 12 rs67246762  | 55889642 T | 0.2082 | 1.46E-09 | chr:12:55727213 |
| 12 rs73121057  | 55764909 A | 0.2065 | 1.07E-08 | chr:12:55727213 |
| 12 rs7485206   | 55739268 G | 3.892  | 2.16E-08 | chr:12:55727213 |
| 12 rs7485223   | 55739267 T | 3.892  | 2.16E-08 | chr:12:55727213 |
| 12 rs12579030  | 55689194 C | 0.3316 | 1.08E-06 | chr:12:55727213 |
| 12 rs12582734  | 55689572 A | 0.3316 | 1.08E-06 | chr:12:55727213 |
| 12 rs7971451   | 55699950 A | 0.3316 | 1.08E-06 | chr:12:55727213 |
| 12 rs12308286  | 55707326 A | 0.3505 | 1.64E-06 | chr:12:55727213 |
| 12 rs12579915  | 55696789 C | 0.3527 | 2.93E-06 | chr:12:55727213 |
| 12 rs12580194  | 55696558 A | 0.3527 | 2.93E-06 | chr:12:55727213 |
| 12 rs4491341   | 55697838 A | 0.3527 | 2.93E-06 | chr:12:55727213 |
| 12 rs56380243  | 55690727 G | 0.3527 | 2.93E-06 | chr:12:55727213 |
| 12 rs58408480  | 55699186 T | 0.3527 | 2.93E-06 | chr:12:55727213 |
| 12 rs61539173  | 55703206 T | 0.3527 | 2.93E-06 | chr:12:55727213 |
| 12 rs61957868  | 55695527 A | 0.3527 | 2.93E-06 | chr:12:55727213 |
| 12 rs7308316   | 55709162 A | 0.3527 | 2.93E-06 | chr:12:55727213 |
| 12 rs7968881   | 55694434 C | 0.3527 | 2.93E-06 | chr:12:55727213 |
| 12 rs12322662  | 55873461 T | 3.306  | 3.09E-06 | chr:12:55727213 |

|                |            |        |          |                 |
|----------------|------------|--------|----------|-----------------|
| 12 rs7974051   | 55713210 C | 0.3535 | 3.10E-06 | chr:12:55727213 |
| 12 rs4262806   | 55711562 A | 0.3537 | 3.12E-06 | chr:12:55727213 |
| 12 rs184796938 | 55872907 A | 3.273  | 3.42E-06 | chr:12:55727213 |
| 12 rs61957766  | 55872745 A | 3.273  | 3.42E-06 | chr:12:55727213 |
| 12 rs10783746  | 55861030 A | 3.272  | 3.71E-06 | chr:12:55727213 |
| 12 rs10783749  | 55875963 A | 3.272  | 3.71E-06 | chr:12:55727213 |
| 12 rs10876784  | 55871441 C | 3.272  | 3.71E-06 | chr:12:55727213 |
| 12 rs10876788  | 55877709 A | 3.272  | 3.71E-06 | chr:12:55727213 |
| 12 rs12322589  | 55873359 T | 3.272  | 3.71E-06 | chr:12:55727213 |
| 12 rs4130003   | 55860906 T | 3.272  | 3.71E-06 | chr:12:55727213 |
| 12 rs4370065   | 55864695 G | 3.272  | 3.71E-06 | chr:12:55727213 |
| 12 rs4425299   | 55874323 T | 3.272  | 3.71E-06 | chr:12:55727213 |
| 12 rs4513499   | 55878467 A | 3.272  | 3.71E-06 | chr:12:55727213 |
| 12 rs4759150   | 55865320 T | 3.272  | 3.71E-06 | chr:12:55727213 |
| 12 rs4759152   | 55878129 G | 3.272  | 3.71E-06 | chr:12:55727213 |
| 12 rs7309879   | 55876821 T | 3.272  | 3.71E-06 | chr:12:55727213 |
| 12 rs7310154   | 55877094 C | 3.272  | 3.71E-06 | chr:12:55727213 |
| 12 rs7314540   | 55877913 A | 3.272  | 3.71E-06 | chr:12:55727213 |
| 12 rs7965047   | 55884963 C | 3.272  | 3.71E-06 | chr:12:55727213 |
| 12 rs9737652   | 55878906 A | 3.272  | 3.71E-06 | chr:12:55727213 |
| 12 rs58332180  | 55711353 A | 0.3566 | 3.75E-06 | chr:12:55727213 |
| 12 rs7976741   | 55696028 A | 0.3694 | 4.05E-06 | chr:12:55727213 |
| 12 rs7977965   | 55860548 C | 3.24   | 4.36E-06 | chr:12:55727213 |
| 12 rs61956295  | 55805499 A | 3.106  | 4.47E-06 | chr:12:55727213 |
| 12 rs7300096   | 55805787 A | 3.106  | 4.47E-06 | chr:12:55727213 |
| 12 rs7487750   | 55818508 G | 3.084  | 6.30E-06 | chr:12:55727213 |
| 12 rs7487767   | 55818496 T | 3.084  | 6.30E-06 | chr:12:55727213 |
| 12 rs10783747  | 55868837 A | 3.139  | 6.35E-06 | chr:12:55727213 |
| 12 rs199601787 | 55695293 A | 0.2634 | 6.55E-06 | chr:12:55727213 |
| 12 rs200488153 | 55695289 T | 0.2634 | 6.55E-06 | chr:12:55727213 |
| 12 rs201572397 | 55695292 A | 0.2634 | 6.55E-06 | chr:12:55727213 |
| 12 rs9669534   | 55695284 G | 0.2634 | 6.55E-06 | chr:12:55727213 |
| 12 rs12579451  | 55694116 T | 0.3121 | 7.00E-06 | chr:12:55727213 |
| 12 rs12582022  | 55694360 G | 0.3121 | 7.00E-06 | chr:12:55727213 |
| 12 rs60206376  | 55703375 A | 0.3121 | 7.00E-06 | chr:12:55727213 |
| 12 rs7489134   | 55702567 G | 0.3121 | 7.00E-06 | chr:12:55727213 |
| 12 rs7489181   | 55702575 A | 0.3121 | 7.00E-06 | chr:12:55727213 |
| 12 rs11171483  | 55858919 C | 3.068  | 7.18E-06 | chr:12:55727213 |
| 12 rs10783742  | 55832499 A | 3.07   | 7.49E-06 | chr:12:55727213 |
| 12 rs10876780  | 55843263 A | 3.07   | 7.49E-06 | chr:12:55727213 |
| 12 rs10876781  | 55843936 A | 3.07   | 7.49E-06 | chr:12:55727213 |
| 12 rs11171468  | 55847999 G | 3.07   | 7.49E-06 | chr:12:55727213 |
| 12 rs11171470  | 55852060 T | 3.07   | 7.49E-06 | chr:12:55727213 |



|    |             |            |        |          |                 |
|----|-------------|------------|--------|----------|-----------------|
| 12 | rs3923056   | 55837986 T | 3.07   | 7.49E-06 | chr:12:55727213 |
| 12 | rs4349540   | 55857469 T | 3.07   | 7.49E-06 | chr:12:55727213 |
| 12 | rs4759001   | 55826648 T | 3.07   | 7.49E-06 | chr:12:55727213 |
| 12 | rs6581049   | 55835376 A | 3.07   | 7.49E-06 | chr:12:55727213 |
| 12 | rs7133266   | 55847268 C | 3.07   | 7.49E-06 | chr:12:55727213 |
| 12 | rs7296531   | 55835256 A | 3.07   | 7.49E-06 | chr:12:55727213 |
| 12 | rs79847204  | 55856831 G | 3.07   | 7.49E-06 | chr:12:55727213 |
| 12 | rs9971868   | 55836188 A | 3.07   | 7.49E-06 | chr:12:55727213 |
| 12 | rs73124916  | 55825800 G | 3.03   | 9.19E-06 | chr:12:55727213 |
| 12 | rs28896912  | 55880385 C | 3.076  | 1.07E-05 | chr:12:55727213 |
| 12 | rs10876774  | 55819933 C | 2.961  | 1.10E-05 | chr:12:55727213 |
| 12 | rs10876775  | 55821535 C | 2.961  | 1.10E-05 | chr:12:55727213 |
| 12 | rs9669226   | 55826496 C | 3.064  | 1.15E-05 | chr:12:55727213 |
| 12 | rs9737653   | 55878991 A | 3.009  | 1.24E-05 | chr:12:55727213 |
| 12 | rs7974512   | 55713606 G | 0.39   | 1.26E-05 | chr:12:55727213 |
| 12 | rs10876790  | 55879589 T | 3.013  | 1.39E-05 | chr:12:55727213 |
| 12 | rs10876773  | 55817115 A | 2.911  | 1.40E-05 | chr:12:55727213 |
| 12 | rs7310663   | 55809747 C | 2.911  | 1.40E-05 | chr:12:55727213 |
| 12 | rs11171556  | 55949852 A | 0.33   | 1.55E-05 | chr:12:55727213 |
| 12 | rs11532447  | 55957772 T | 0.33   | 1.55E-05 | chr:12:55727213 |
| 12 | rs11561427  | 55956274 T | 0.33   | 1.55E-05 | chr:12:55727213 |
| 12 | rs139464426 | 55958278 C | 0.33   | 1.55E-05 | chr:12:55727213 |
| 12 | rs146073724 | 55958414 A | 0.33   | 1.55E-05 | chr:12:55727213 |
| 12 | rs73118926  | 55703335 G | 0.3272 | 1.65E-05 | chr:12:55727213 |
| 12 | rs11171535  | 55914635 A | 0.3365 | 2.11E-05 | chr:12:55727213 |
| 12 | rs12230513  | 55916780 G | 0.3365 | 2.11E-05 | chr:12:55727213 |
| 12 | rs183973202 | 55935021 A | 0.3365 | 2.11E-05 | chr:12:55727213 |
| 12 | rs4324500   | 55935029 A | 0.3365 | 2.11E-05 | chr:12:55727213 |
| 12 | rs76126658  | 55942458 A | 0.3365 | 2.11E-05 | chr:12:55727213 |
| 12 | rs76179834  | 55936746 T | 0.3365 | 2.11E-05 | chr:12:55727213 |
| 12 | rs76783572  | 55936752 A | 0.3365 | 2.11E-05 | chr:12:55727213 |
| 12 | rs77755732  | 55924293 T | 0.3365 | 2.11E-05 | chr:12:55727213 |
| 12 | rs199557929 | 55955762 C | 0.2915 | 2.52E-05 | chr:12:55727213 |
| 12 | rs530835718 | 55740943 T | 3.513  | 2.70E-05 | chr:12:55727213 |
| 12 | rs73118932  | 55706631 T | 0.336  | 3.69E-05 | chr:12:55727213 |
| 12 | rs7304684   | 55895538 T | 0.3412 | 3.75E-05 | chr:12:55727213 |
| 12 | rs11171414  | 55729565 T | 3.276  | 4.82E-05 | chr:12:55727213 |
| 13 | rs2805699   | 90723189 A | 118.3  | 8.39E-11 | chr:13:90743183 |
| 13 | rs78645261  | 90754325 G | 118.3  | 8.39E-11 | chr:13:90743183 |
| 13 | rs78078484  | 90646090 A | 72.33  | 2.09E-10 | chr:13:90743183 |
| 13 | rs112632269 | 90731067 G | 95.71  | 4.69E-10 | chr:13:90743183 |
| 13 | rs112945355 | 90680625 T | 95.71  | 4.69E-10 | chr:13:90743183 |
| 13 | rs113169741 | 90685650 A | 95.71  | 4.69E-10 | chr:13:90743183 |

|                |            |       |          |                 |
|----------------|------------|-------|----------|-----------------|
| 13 rs114498245 | 90667379 A | 95.71 | 4.69E-10 | chr:13:90743183 |
| 13 rs115029999 | 90669505 G | 95.71 | 4.69E-10 | chr:13:90743183 |
| 13 rs116763682 | 90743619 A | 95.71 | 4.69E-10 | chr:13:90743183 |
| 13 rs1341654   | 90661565 A | 95.71 | 4.69E-10 | chr:13:90743183 |
| 13 rs137989181 | 90676229 T | 95.71 | 4.69E-10 | chr:13:90743183 |
| 13 rs16943737  | 90663135 G | 95.71 | 4.69E-10 | chr:13:90743183 |
| 13 rs16943738  | 90664242 G | 95.71 | 4.69E-10 | chr:13:90743183 |
| 13 rs16943826  | 90710255 C | 95.71 | 4.69E-10 | chr:13:90743183 |
| 13 rs1987095   | 90681873 C | 95.71 | 4.69E-10 | chr:13:90743183 |
| 13 rs1987156   | 90681662 A | 95.71 | 4.69E-10 | chr:13:90743183 |
| 13 rs2805748   | 90747577 A | 95.71 | 4.69E-10 | chr:13:90743183 |
| 13 rs41322051  | 90646840 G | 95.71 | 4.69E-10 | chr:13:90743183 |
| 13 rs41361347  | 90652322 G | 95.71 | 4.69E-10 | chr:13:90743183 |
| 13 rs57346044  | 90704533 C | 95.71 | 4.69E-10 | chr:13:90743183 |
| 13 rs74387961  | 90647017 A | 95.71 | 4.69E-10 | chr:13:90743183 |
| 13 rs74422803  | 90653835 T | 95.71 | 4.69E-10 | chr:13:90743183 |
| 13 rs74507286  | 90738994 T | 95.71 | 4.69E-10 | chr:13:90743183 |
| 13 rs74565296  | 90691322 T | 95.71 | 4.69E-10 | chr:13:90743183 |
| 13 rs74568779  | 90660687 A | 95.71 | 4.69E-10 | chr:13:90743183 |
| 13 rs75410608  | 90693188 A | 95.71 | 4.69E-10 | chr:13:90743183 |
| 13 rs75635330  | 90668043 C | 95.71 | 4.69E-10 | chr:13:90743183 |
| 13 rs75805202  | 90735664 G | 95.71 | 4.69E-10 | chr:13:90743183 |
| 13 rs76111549  | 90651195 A | 95.71 | 4.69E-10 | chr:13:90743183 |
| 13 rs76202013  | 90714744 C | 95.71 | 4.69E-10 | chr:13:90743183 |
| 13 rs76901628  | 90699709 C | 95.71 | 4.69E-10 | chr:13:90743183 |
| 13 rs76925939  | 90646777 T | 95.71 | 4.69E-10 | chr:13:90743183 |
| 13 rs77191234  | 90719556 G | 95.71 | 4.69E-10 | chr:13:90743183 |
| 13 rs77555222  | 90662826 C | 95.71 | 4.69E-10 | chr:13:90743183 |
| 13 rs78076983  | 90651105 G | 95.71 | 4.69E-10 | chr:13:90743183 |
| 13 rs78172895  | 90663325 A | 95.71 | 4.69E-10 | chr:13:90743183 |
| 13 rs78545676  | 90677712 G | 95.71 | 4.69E-10 | chr:13:90743183 |
| 13 rs78585383  | 90673119 T | 95.71 | 4.69E-10 | chr:13:90743183 |
| 13 rs78641456  | 90653738 G | 95.71 | 4.69E-10 | chr:13:90743183 |
| 13 rs78680587  | 90654218 A | 95.71 | 4.69E-10 | chr:13:90743183 |
| 13 rs78693129  | 90673027 T | 95.71 | 4.69E-10 | chr:13:90743183 |
| 13 rs78721625  | 90744516 T | 95.71 | 4.69E-10 | chr:13:90743183 |
| 13 rs78905293  | 90647677 T | 95.71 | 4.69E-10 | chr:13:90743183 |
| 13 rs78975634  | 90720218 G | 95.71 | 4.69E-10 | chr:13:90743183 |
| 13 rs78992908  | 90651318 A | 95.71 | 4.69E-10 | chr:13:90743183 |
| 13 rs79110442  | 90748308 G | 95.71 | 4.69E-10 | chr:13:90743183 |
| 13 rs79494540  | 90648492 C | 95.71 | 4.69E-10 | chr:13:90743183 |
| 13 rs79603316  | 90660753 A | 95.71 | 4.69E-10 | chr:13:90743183 |
| 13 rs79671279  | 90682347 T | 95.71 | 4.69E-10 | chr:13:90743183 |

|                |            |       |          |                 |
|----------------|------------|-------|----------|-----------------|
| 13 rs79785623  | 90752549 T | 95.71 | 4.69E-10 | chr:13:90743183 |
| 13 rs7985369   | 90671522 A | 95.71 | 4.69E-10 | chr:13:90743183 |
| 13 rs80014975  | 90678526 G | 95.71 | 4.69E-10 | chr:13:90743183 |
| 13 rs80233688  | 90723496 G | 95.71 | 4.69E-10 | chr:13:90743183 |
| 13 rs80350675  | 90647983 G | 95.71 | 4.69E-10 | chr:13:90743183 |
| 13 rs113355173 | 90805755 A | 64.45 | 1.10E-09 | chr:13:90743183 |
| 13 rs186610268 | 90795129 A | 64.45 | 1.10E-09 | chr:13:90743183 |
| 13 rs74734778  | 90805574 G | 64.45 | 1.10E-09 | chr:13:90743183 |
| 13 rs76649938  | 90799618 T | 64.45 | 1.10E-09 | chr:13:90743183 |
| 13 rs77533677  | 90798005 T | 53.15 | 2.12E-09 | chr:13:90743183 |
| 13 rs76821422  | 90696710 T | 67.26 | 2.74E-09 | chr:13:90743183 |
| 13 rs117605767 | 90638149 G | 82.03 | 2.59E-08 | chr:13:90743183 |
| 13 rs74593387  | 90592567 A | 60.25 | 3.07E-08 | chr:13:90743183 |
| 13 rs117983080 | 90804883 T | 91.56 | 3.13E-08 | chr:13:90743183 |
| 13 rs114291545 | 90749422 A | 1465  | 4.98E-08 | chr:13:90743183 |
| 13 rs115351275 | 90709635 T | 1465  | 4.98E-08 | chr:13:90743183 |
| 13 rs116060467 | 90710375 G | 1465  | 4.98E-08 | chr:13:90743183 |
| 13 rs116849433 | 90751369 G | 1465  | 4.98E-08 | chr:13:90743183 |
| 13 rs116973354 | 90722526 C | 1465  | 4.98E-08 | chr:13:90743183 |
| 13 rs117473905 | 90716349 C | 1465  | 4.98E-08 | chr:13:90743183 |
| 13 rs141011955 | 90729982 T | 1465  | 4.98E-08 | chr:13:90743183 |
| 13 rs143286281 | 90733243 T | 1465  | 4.98E-08 | chr:13:90743183 |
| 13 rs77168701  | 90718549 C | 1465  | 4.98E-08 | chr:13:90743183 |
| 13 rs79900586  | 90756056 T | 1465  | 4.98E-08 | chr:13:90743183 |
| 13 rs118067867 | 90739018 G | 1443  | 8.39E-08 | chr:13:90743183 |
| 13 rs117793157 | 90694205 C | 49.32 | 9.76E-08 | chr:13:90743183 |
| 13 rs139307145 | 90675441 C | 49.32 | 9.76E-08 | chr:13:90743183 |
| 13 rs534909547 | 90675272 A | 49.32 | 9.76E-08 | chr:13:90743183 |
| 13 rs548746627 | 90675256 C | 49.32 | 9.76E-08 | chr:13:90743183 |
| 13 rs55994643  | 90704398 A | 49.32 | 9.76E-08 | chr:13:90743183 |
| 13 rs565882327 | 90675264 C | 49.32 | 9.76E-08 | chr:13:90743183 |
| 13 rs74520633  | 90693303 T | 49.32 | 9.76E-08 | chr:13:90743183 |
| 13 rs76582632  | 90671100 T | 49.32 | 9.76E-08 | chr:13:90743183 |
| 13 rs77156828  | 90694151 C | 49.32 | 9.76E-08 | chr:13:90743183 |
| 13 rs77511551  | 90670611 T | 49.32 | 9.76E-08 | chr:13:90743183 |
| 13 rs77822207  | 90701077 G | 49.32 | 9.76E-08 | chr:13:90743183 |
| 13 rs78192708  | 90699764 C | 49.32 | 9.76E-08 | chr:13:90743183 |
| 13 rs78931332  | 90668211 T | 49.32 | 9.76E-08 | chr:13:90743183 |
| 13 rs79388488  | 90700311 T | 49.32 | 9.76E-08 | chr:13:90743183 |
| 13 rs118021824 | 90816034 A | 34.33 | 1.19E-07 | chr:13:90743183 |
| 13 rs2637400   | 90723289 T | 20.78 | 1.40E-07 | chr:13:90743183 |
| 13 rs2805701   | 90723284 A | 20.78 | 1.40E-07 | chr:13:90743183 |
| 13 rs115814336 | 90662321 A | 42.92 | 1.48E-07 | chr:13:90743183 |

|    |             |            |       |          |                 |
|----|-------------|------------|-------|----------|-----------------|
| 13 | rs117086767 | 90649822 G | 42.92 | 1.48E-07 | chr:13:90743183 |
| 13 | rs1857017   | 90652869 T | 42.92 | 1.48E-07 | chr:13:90743183 |
| 13 | rs2185648   | 90648598 G | 42.92 | 1.48E-07 | chr:13:90743183 |
| 13 | rs56373203  | 90660624 A | 42.92 | 1.48E-07 | chr:13:90743183 |
| 13 | rs7317856   | 90647978 A | 42.92 | 1.48E-07 | chr:13:90743183 |
| 13 | rs79024868  | 90664161 C | 42.92 | 1.48E-07 | chr:13:90743183 |
| 13 | rs7982868   | 90644770 G | 42.92 | 1.48E-07 | chr:13:90743183 |
| 13 | rs7989743   | 90644957 T | 42.92 | 1.48E-07 | chr:13:90743183 |
| 13 | rs7992539   | 90650150 G | 42.92 | 1.48E-07 | chr:13:90743183 |
| 13 | rs7994861   | 90650312 A | 42.92 | 1.48E-07 | chr:13:90743183 |
| 13 | rs8000961   | 90647503 A | 42.92 | 1.48E-07 | chr:13:90743183 |
| 13 | rs1341650   | 90648217 C | 40.18 | 1.97E-07 | chr:13:90743183 |
| 13 | rs117984132 | 90853139 T | 31.96 | 2.46E-07 | chr:13:90743183 |
| 13 | rs150706648 | 90738184 G | 985.2 | 2.54E-07 | chr:13:90743183 |
| 13 | rs1341649   | 90648220 T | 29.81 | 3.46E-07 | chr:13:90743183 |
| 13 | rs149865385 | 90872475 T | 40.44 | 2.81E-06 | chr:13:90743183 |
| 13 | rs7991374   | 90713284 G | 8.277 | 1.03E-05 | chr:13:90743183 |
| 13 | rs117569652 | 90616376 C | 10.03 | 1.87E-05 | chr:13:90743183 |
| 13 | rs202007641 | 90796668 T | 9.4   | 2.56E-05 | chr:13:90743183 |
| 13 | rs2637421   | 90740082 T | 5.928 | 3.21E-05 | chr:13:90743183 |
| 13 | rs2637426   | 90741000 A | 5.928 | 3.21E-05 | chr:13:90743183 |
| 13 | rs2637439   | 90732217 G | 5.928 | 3.21E-05 | chr:13:90743183 |
| 13 | rs2637398   | 90722150 T | 6.031 | 3.40E-05 | chr:13:90743183 |
| 13 | rs76200599  | 90606676 T | 92.68 | 3.41E-05 | chr:13:90743183 |
| 13 | rs76245692  | 90623318 T | 92.68 | 3.41E-05 | chr:13:90743183 |
| 13 | rs2805728   | 90742666 A | 5.773 | 3.80E-05 | chr:13:90743183 |
| 13 | rs2805704   | 90727635 A | 5.764 | 3.92E-05 | chr:13:90743183 |
| 13 | rs117715395 | 90805053 A | 8.146 | 5.49E-05 | chr:13:90743183 |
| 14 | rs6573762   | 20555920 A | 18.03 | 9.70E-21 | chr:14:20552746 |
| 14 | rs7401094   | 20555950 C | 18.03 | 9.70E-21 | chr:14:20552746 |
| 14 | rs1958722   | 20562590 G | 19.49 | 9.84E-21 | chr:14:20552746 |
| 14 | rs10136466  | 20550347 C | 21.93 | 2.64E-20 | chr:14:20552746 |
| 14 | rs11158659  | 20556212 A | 21.73 | 2.96E-20 | chr:14:20552746 |
| 14 | rs11158660  | 20556259 C | 21.73 | 2.96E-20 | chr:14:20552746 |
| 14 | rs12434437  | 20556447 T | 21.73 | 2.96E-20 | chr:14:20552746 |
| 14 | rs12434463  | 20556513 T | 21.73 | 2.96E-20 | chr:14:20552746 |
| 14 | rs4297617   | 20557961 T | 21.73 | 2.96E-20 | chr:14:20552746 |
| 14 | rs4438225   | 20557810 A | 21.73 | 2.96E-20 | chr:14:20552746 |
| 14 | rs4572311   | 20557971 C | 21.73 | 2.96E-20 | chr:14:20552746 |
| 14 | rs6573756   | 20555675 G | 21.73 | 2.96E-20 | chr:14:20552746 |
| 14 | rs6573757   | 20555744 A | 21.73 | 2.96E-20 | chr:14:20552746 |
| 14 | rs6573759   | 20555817 C | 21.73 | 2.96E-20 | chr:14:20552746 |
| 14 | rs7151579   | 20556265 G | 21.73 | 2.96E-20 | chr:14:20552746 |

|                |            |        |          |                 |
|----------------|------------|--------|----------|-----------------|
| 14 rs78783511  | 20555396 C | 21.73  | 2.96E-20 | chr:14:20552746 |
| 14 rs4360850   | 20558013 A | 21.61  | 3.53E-20 | chr:14:20552746 |
| 14 rs4981728   | 20560512 C | 14.86  | 7.79E-20 | chr:14:20552746 |
| 14 rs7153404   | 20550111 C | 10.62  | 1.99E-19 | chr:14:20552746 |
| 14 rs11158661  | 20556366 T | 10.61  | 2.94E-19 | chr:14:20552746 |
| 14 rs969774    | 20562080 T | 10.35  | 3.05E-19 | chr:14:20552746 |
| 14 rs4144238   | 20561971 C | 9.896  | 3.41E-19 | chr:14:20552746 |
| 14 rs4144239   | 20561922 C | 9.896  | 3.41E-19 | chr:14:20552746 |
| 14 rs4144240   | 20561753 C | 9.896  | 3.41E-19 | chr:14:20552746 |
| 14 rs12433363  | 20561341 A | 9.898  | 3.89E-19 | chr:14:20552746 |
| 14 rs12586923  | 20559937 A | 9.898  | 3.89E-19 | chr:14:20552746 |
| 14 rs12587536  | 20559906 T | 9.898  | 3.89E-19 | chr:14:20552746 |
| 14 rs12588910  | 20558938 C | 9.898  | 3.89E-19 | chr:14:20552746 |
| 14 rs12590521  | 20558876 T | 9.898  | 3.89E-19 | chr:14:20552746 |
| 14 rs12881697  | 20560434 G | 9.898  | 3.89E-19 | chr:14:20552746 |
| 14 rs12890274  | 20560354 T | 9.898  | 3.89E-19 | chr:14:20552746 |
| 14 rs57793822  | 20561481 A | 9.898  | 3.89E-19 | chr:14:20552746 |
| 14 rs58368472  | 20561378 T | 9.898  | 3.89E-19 | chr:14:20552746 |
| 14 rs7152272   | 20559234 A | 9.898  | 3.89E-19 | chr:14:20552746 |
| 14 rs7158086   | 20559451 T | 9.898  | 3.89E-19 | chr:14:20552746 |
| 14 rs7148411   | 20559282 G | 9.413  | 4.36E-19 | chr:14:20552746 |
| 14 rs12897224  | 20560235 C | 6.401  | 3.61E-16 | chr:14:20552746 |
| 14 rs369097102 | 20621303 G | 7.115  | 3.30E-12 | chr:14:20552746 |
| 14 rs7156327   | 20578170 C | 0.2904 | 2.97E-11 | chr:14:20552746 |
| 14 rs72669071  | 20568482 C | 5.58   | 6.63E-11 | chr:14:20552746 |
| 14 rs11844863  | 20568135 T | 0.3034 | 7.27E-11 | chr:14:20552746 |
| 14 rs112874053 | 20572537 C | 0.3067 | 1.03E-10 | chr:14:20552746 |
| 14 rs9743609   | 20573071 G | 0.3067 | 1.03E-10 | chr:14:20552746 |
| 14 rs9743620   | 20573576 G | 0.3104 | 1.26E-10 | chr:14:20552746 |
| 14 rs61993646  | 20574305 G | 3.787  | 1.30E-10 | chr:14:20552746 |
| 14 rs3939209   | 20578244 T | 0.3138 | 1.77E-10 | chr:14:20552746 |
| 14 rs7143710   | 20577918 C | 0.3159 | 1.80E-10 | chr:14:20552746 |
| 14 rs7159989   | 20577910 T | 0.3159 | 1.80E-10 | chr:14:20552746 |
| 14 rs36074339  | 20572229 C | 0.3131 | 1.82E-10 | chr:14:20552746 |
| 14 rs190993235 | 20574230 G | 0.3146 | 1.90E-10 | chr:14:20552746 |
| 14 rs2210191   | 20563840 A | 0.3188 | 2.93E-10 | chr:14:20552746 |
| 14 rs7151455   | 20577818 C | 0.3212 | 3.42E-10 | chr:14:20552746 |
| 14 rs11850994  | 20577628 T | 0.3245 | 4.69E-10 | chr:14:20552746 |
| 14 rs202152920 | 20575655 A | 0.3397 | 9.71E-10 | chr:14:20552746 |
| 14 rs201183120 | 20575571 A | 0.3446 | 1.94E-09 | chr:14:20552746 |
| 14 rs12890060  | 20565461 A | 0.3322 | 2.07E-09 | chr:14:20552746 |
| 14 rs1958724   | 20565487 C | 0.3322 | 2.07E-09 | chr:14:20552746 |
| 14 rs1958725   | 20565515 T | 0.3322 | 2.07E-09 | chr:14:20552746 |

|                |            |        |          |                 |
|----------------|------------|--------|----------|-----------------|
| 14 rs4303403   | 20565381 A | 0.3322 | 2.07E-09 | chr:14:20552746 |
| 14 rs7150862   | 20564461 G | 0.3322 | 2.07E-09 | chr:14:20552746 |
| 14 rs7156270   | 20564435 C | 0.3322 | 2.07E-09 | chr:14:20552746 |
| 14 rs7156816   | 20564737 C | 0.3322 | 2.07E-09 | chr:14:20552746 |
| 14 rs7159862   | 20569410 G | 0.3432 | 2.68E-09 | chr:14:20552746 |
| 14 rs36126932  | 20576705 T | 0.3476 | 3.68E-09 | chr:14:20552746 |
| 14 rs36142459  | 20576716 T | 0.3476 | 3.68E-09 | chr:14:20552746 |
| 14 rs12887942  | 20577454 T | 0.3481 | 3.77E-09 | chr:14:20552746 |
| 14 rs10149475  | 20565183 T | 0.3487 | 3.86E-09 | chr:14:20552746 |
| 14 rs2225388   | 20563664 T | 0.3429 | 5.31E-09 | chr:14:20552746 |
| 14 rs111429016 | 20577519 A | 0.3537 | 5.52E-09 | chr:14:20552746 |
| 14 rs145789052 | 20577567 G | 0.3537 | 5.52E-09 | chr:14:20552746 |
| 14 rs28750505  | 20577068 G | 0.3695 | 8.57E-09 | chr:14:20552746 |
| 14 rs28887469  | 20577050 C | 0.3724 | 1.03E-08 | chr:14:20552746 |
| 14 rs7144896   | 20563540 T | 0.3571 | 1.34E-08 | chr:14:20552746 |
| 14 rs7158044   | 20563508 T | 0.3571 | 1.34E-08 | chr:14:20552746 |
| 14 rs10150358  | 20552946 G | 2.902  | 2.36E-08 | chr:14:20552746 |
| 14 rs58438833  | 20552415 C | 2.902  | 2.36E-08 | chr:14:20552746 |
| 14 rs35344717  | 20568046 T | 0.3665 | 3.98E-08 | chr:14:20552746 |
| 14 rs4981066   | 20570809 A | 0.3665 | 3.98E-08 | chr:14:20552746 |
| 14 rs60649626  | 20568452 T | 0.3665 | 3.98E-08 | chr:14:20552746 |
| 14 rs67680230  | 20569553 A | 0.3665 | 3.98E-08 | chr:14:20552746 |
| 14 rs9707258   | 20573142 T | 0.3665 | 3.98E-08 | chr:14:20552746 |
| 14 rs1958726   | 20565683 C | 0.372  | 5.24E-08 | chr:14:20552746 |
| 14 rs1958727   | 20565936 C | 0.372  | 5.24E-08 | chr:14:20552746 |
| 14 rs12895600  | 20566286 A | 0.3722 | 5.61E-08 | chr:14:20552746 |
| 14 rs7152008   | 20566893 A | 0.3722 | 5.61E-08 | chr:14:20552746 |
| 14 rs12892241  | 20563896 C | 0.3841 | 1.34E-07 | chr:14:20552746 |
| 14 rs7140825   | 20563466 C | 0.4064 | 4.62E-07 | chr:14:20552746 |
| 14 rs7150250   | 20563495 C | 0.4064 | 4.62E-07 | chr:14:20552746 |
| 14 rs17242467  | 20608329 A | 2.689  | 1.14E-06 | chr:14:20552746 |
| 14 rs2318480   | 20591214 A | 2.689  | 1.14E-06 | chr:14:20552746 |
| 14 rs61993653  | 20633961 A | 2.596  | 2.18E-06 | chr:14:20552746 |
| 14 rs72638470  | 20636475 T | 2.596  | 2.18E-06 | chr:14:20552746 |
| 14 rs1756310   | 20645408 C | 0.2711 | 2.34E-06 | chr:14:20552746 |
| 14 rs1763740   | 20645415 G | 0.2711 | 2.34E-06 | chr:14:20552746 |
| 14 rs12588809  | 20572684 A | 0.4048 | 2.56E-06 | chr:14:20552746 |
| 14 rs374481570 | 20550995 A | 0.2337 | 1.64E-05 | chr:14:20552746 |
| 15 rs2729805   | 63374289 A | 0.2444 | 2.61E-11 | chr:15:63374594 |
| 15 rs2652805   | 63374129 A | 0.2453 | 3.10E-11 | chr:15:63374594 |
| 15 rs2652806   | 63374127 C | 0.2453 | 3.10E-11 | chr:15:63374594 |
| 15 rs2937855   | 63374677 G | 0.2453 | 3.10E-11 | chr:15:63374594 |
| 15 rs2729806   | 63373329 T | 0.2481 | 4.18E-11 | chr:15:63374594 |

|               |            |        |          |                 |
|---------------|------------|--------|----------|-----------------|
| 15 rs2652804  | 63374256 T | 0.2526 | 6.02E-11 | chr:15:63374594 |
| 15 rs4450350  | 63349952 A | 0.2817 | 6.04E-10 | chr:15:63374594 |
| 15 rs1574311  | 63346320 G | 0.2878 | 7.57E-10 | chr:15:63374594 |
| 15 rs16953467 | 63347997 A | 0.2878 | 7.57E-10 | chr:15:63374594 |
| 15 rs4238371  | 63347403 G | 0.2878 | 7.57E-10 | chr:15:63374594 |
| 15 rs7166724  | 63348395 G | 0.2878 | 7.57E-10 | chr:15:63374594 |
| 15 rs11071722 | 63350422 A | 0.2895 | 9.34E-10 | chr:15:63374594 |
| 15 rs7173072  | 63349564 C | 0.2895 | 9.34E-10 | chr:15:63374594 |
| 15 rs16946372 | 63347876 G | 0.2912 | 1.27E-09 | chr:15:63374594 |
| 15 rs1135403  | 63344958 G | 0.3002 | 1.38E-09 | chr:15:63374594 |
| 15 rs1071646  | 63351840 C | 0.2962 | 1.67E-09 | chr:15:63374594 |
| 15 rs6494387  | 63345526 A | 0.2826 | 2.14E-09 | chr:15:63374594 |
| 15 rs2937857  | 63369571 A | 0.3116 | 5.07E-09 | chr:15:63374594 |
| 15 rs1966032  | 63365471 C | 0.3131 | 5.64E-09 | chr:15:63374594 |
| 15 rs1966033  | 63365444 T | 0.3131 | 5.64E-09 | chr:15:63374594 |
| 15 rs2729811  | 63364783 T | 0.3131 | 5.64E-09 | chr:15:63374594 |
| 15 rs6738     | 63363901 C | 0.3131 | 5.64E-09 | chr:15:63374594 |
| 15 rs8519     | 63363654 A | 0.3131 | 5.64E-09 | chr:15:63374594 |
| 15 rs8038648  | 63379643 G | 0.2756 | 6.41E-08 | chr:15:63374594 |
| 15 rs2729780  | 63404639 C | 0.2854 | 8.80E-08 | chr:15:63374594 |
| 15 rs2652816  | 63403368 C | 0.2989 | 2.72E-07 | chr:15:63374594 |
| 15 rs2729781  | 63404265 T | 0.2989 | 2.72E-07 | chr:15:63374594 |
| 15 rs2729782  | 63403354 G | 0.2989 | 2.72E-07 | chr:15:63374594 |
| 15 rs2729783  | 63403316 G | 0.2989 | 2.72E-07 | chr:15:63374594 |
| 15 rs2729784  | 63402735 T | 0.2989 | 2.72E-07 | chr:15:63374594 |
| 15 rs2729785  | 63402574 G | 0.2989 | 2.72E-07 | chr:15:63374594 |
| 15 rs2729787  | 63401493 G | 0.2989 | 2.72E-07 | chr:15:63374594 |
| 15 rs2652815  | 63401345 T | 0.3041 | 3.75E-07 | chr:15:63374594 |
| 15 rs28583444 | 63357852 T | 0.2592 | 3.84E-07 | chr:15:63374594 |
| 15 rs4238372  | 63351488 G | 0.2733 | 4.71E-07 | chr:15:63374594 |
| 15 rs8032506  | 63371644 A | 0.2768 | 7.23E-07 | chr:15:63374594 |
| 15 rs12148828 | 63355339 T | 2.48   | 7.31E-07 | chr:15:63374594 |
| 15 rs11071721 | 63350218 T | 0.2684 | 7.89E-07 | chr:15:63374594 |
| 15 rs16946416 | 63356721 T | 0.2684 | 7.89E-07 | chr:15:63374594 |
| 15 rs2729826  | 63360446 G | 0.2684 | 7.89E-07 | chr:15:63374594 |
| 15 rs2729827  | 63360564 G | 0.2684 | 7.89E-07 | chr:15:63374594 |
| 15 rs4238370  | 63347363 T | 0.2684 | 7.89E-07 | chr:15:63374594 |
| 15 rs4775614  | 63351687 A | 0.2684 | 7.89E-07 | chr:15:63374594 |
| 15 rs7166624  | 63348594 A | 0.2684 | 7.89E-07 | chr:15:63374594 |
| 15 rs7170462  | 63345622 A | 0.2684 | 7.89E-07 | chr:15:63374594 |
| 15 rs34575783 | 63397686 G | 0.3215 | 9.30E-07 | chr:15:63374594 |
| 15 rs34786874 | 63397504 A | 0.3215 | 9.30E-07 | chr:15:63374594 |
| 15 rs36116701 | 63397494 T | 0.3215 | 9.30E-07 | chr:15:63374594 |

|               |            |        |          |                 |
|---------------|------------|--------|----------|-----------------|
| 15 rs68088462 | 63397617 T | 0.3215 | 9.30E-07 | chr:15:63374594 |
| 15 rs4775613  | 63349096 A | 2.468  | 1.04E-06 | chr:15:63374594 |
| 15 rs10162675 | 63370358 C | 0.277  | 1.05E-06 | chr:15:63374594 |
| 15 rs4468558  | 63346681 T | 0.2807 | 1.22E-06 | chr:15:63374594 |
| 15 rs11071723 | 63355275 A | 0.2776 | 1.24E-06 | chr:15:63374594 |
| 15 rs2729828  | 63361307 A | 0.2776 | 1.24E-06 | chr:15:63374594 |
| 15 rs2937859  | 63366282 G | 0.2776 | 1.24E-06 | chr:15:63374594 |
| 15 rs4774472  | 63353760 C | 0.2776 | 1.24E-06 | chr:15:63374594 |
| 15 rs7175602  | 63367032 C | 0.2776 | 1.24E-06 | chr:15:63374594 |
| 15 rs11637852 | 63397151 G | 0.3275 | 1.33E-06 | chr:15:63374594 |
| 15 rs2134265  | 63398196 G | 0.3275 | 1.33E-06 | chr:15:63374594 |
| 15 rs2652785  | 63397890 T | 0.3275 | 1.33E-06 | chr:15:63374594 |
| 15 rs2652832  | 63396928 T | 0.3275 | 1.33E-06 | chr:15:63374594 |
| 15 rs2652833  | 63396885 C | 0.3275 | 1.33E-06 | chr:15:63374594 |
| 15 rs2652835  | 63396408 T | 0.3275 | 1.33E-06 | chr:15:63374594 |
| 15 rs2652838  | 63396088 A | 0.3275 | 1.33E-06 | chr:15:63374594 |
| 15 rs2652840  | 63393220 T | 0.3275 | 1.33E-06 | chr:15:63374594 |
| 15 rs2652842  | 63391939 C | 0.3275 | 1.33E-06 | chr:15:63374594 |
| 15 rs2652843  | 63391648 T | 0.3275 | 1.33E-06 | chr:15:63374594 |
| 15 rs2652844  | 63391647 T | 0.3275 | 1.33E-06 | chr:15:63374594 |
| 15 rs2729789  | 63400345 G | 0.3275 | 1.33E-06 | chr:15:63374594 |
| 15 rs2729830  | 63395812 G | 0.3275 | 1.33E-06 | chr:15:63374594 |
| 15 rs2729833  | 63397044 G | 0.3275 | 1.33E-06 | chr:15:63374594 |
| 15 rs28768697 | 63394095 A | 0.3275 | 1.33E-06 | chr:15:63374594 |
| 15 rs28849975 | 63393922 T | 0.3275 | 1.33E-06 | chr:15:63374594 |
| 15 rs28860327 | 63393824 A | 0.3275 | 1.33E-06 | chr:15:63374594 |
| 15 rs7181141  | 63398552 A | 0.3275 | 1.33E-06 | chr:15:63374594 |
| 15 rs7182618  | 63398622 T | 0.3275 | 1.33E-06 | chr:15:63374594 |
| 15 rs76127683 | 63391362 G | 0.3275 | 1.33E-06 | chr:15:63374594 |
| 15 rs78015421 | 63391406 A | 0.3275 | 1.33E-06 | chr:15:63374594 |
| 15 rs8032104  | 63400584 A | 0.3275 | 1.33E-06 | chr:15:63374594 |
| 15 rs4774474  | 63405580 G | 0.2906 | 1.75E-06 | chr:15:63374594 |
| 15 rs2134263  | 63365394 T | 2.377  | 1.89E-06 | chr:15:63374594 |
| 15 rs3803501  | 63352092 A | 2.368  | 1.94E-06 | chr:15:63374594 |
| 15 rs2729788  | 63400378 G | 0.336  | 2.00E-06 | chr:15:63374594 |
| 15 rs2729801  | 63381095 A | 0.3422 | 2.69E-06 | chr:15:63374594 |
| 15 rs4344684  | 63397318 C | 0.348  | 3.91E-06 | chr:15:63374594 |
| 15 rs4619348  | 63359564 C | 2.273  | 4.82E-06 | chr:15:63374594 |
| 15 rs12899230 | 63369788 C | 0.264  | 1.11E-05 | chr:15:63374594 |
| 15 rs16953475 | 63348087 G | 2.298  | 1.72E-05 | chr:15:63374594 |
| 15 rs8037564  | 63379822 A | 0.3263 | 2.13E-05 | chr:15:63374594 |
| 15 rs35243299 | 63627576 A | 0.2938 | 2.15E-05 | chr:15:63374594 |
| 15 rs11558748 | 63363402 A | 3.168  | 2.37E-05 | chr:15:63374594 |



|                |            |       |          |                 |
|----------------|------------|-------|----------|-----------------|
| 19 rs75639671  | 21875393 C | 101.1 | 1.15E-29 | chr:19:21841536 |
| 19 rs12461755  | 21874224 G | 111.7 | 2.48E-29 | chr:19:21841536 |
| 19 rs11671415  | 21944782 A | 36.24 | 6.01E-29 | chr:19:21841536 |
| 19 rs12463030  | 21947607 C | 36.24 | 6.01E-29 | chr:19:21841536 |
| 19 rs17701305  | 21948020 G | 36.24 | 6.01E-29 | chr:19:21841536 |
| 19 rs7258769   | 21942872 A | 36.24 | 6.01E-29 | chr:19:21841536 |
| 19 rs12461975  | 21862108 A | 209.4 | 1.99E-28 | chr:19:21841536 |
| 19 rs10413152  | 21937846 A | 32.37 | 2.39E-28 | chr:19:21841536 |
| 19 rs12459852  | 21935851 A | 32.37 | 2.39E-28 | chr:19:21841536 |
| 19 rs12461775  | 21932062 C | 32.37 | 2.39E-28 | chr:19:21841536 |
| 19 rs146261958 | 21911514 A | 32.37 | 2.39E-28 | chr:19:21841536 |
| 19 rs74814265  | 21912203 G | 32.37 | 2.39E-28 | chr:19:21841536 |
| 19 rs75204354  | 21913614 A | 32.37 | 2.39E-28 | chr:19:21841536 |
| 19 rs114434735 | 21866989 T | 177.7 | 4.74E-28 | chr:19:21841536 |
| 19 rs117865432 | 21866980 G | 177.7 | 4.74E-28 | chr:19:21841536 |
| 19 rs115046417 | 21854616 G | 240.2 | 1.83E-27 | chr:19:21841536 |
| 19 rs116818044 | 21857932 A | 240.2 | 1.83E-27 | chr:19:21841536 |
| 19 rs12052180  | 21850463 C | 240.2 | 1.83E-27 | chr:19:21841536 |
| 19 rs12460252  | 21846543 A | 240.2 | 1.83E-27 | chr:19:21841536 |
| 19 rs12461654  | 21849302 A | 240.2 | 1.83E-27 | chr:19:21841536 |
| 19 rs12462750  | 21850703 G | 240.2 | 1.83E-27 | chr:19:21841536 |
| 19 rs138289834 | 21852693 C | 240.2 | 1.83E-27 | chr:19:21841536 |
| 19 rs144768538 | 21848501 G | 240.2 | 1.83E-27 | chr:19:21841536 |
| 19 rs146500963 | 21849138 G | 240.2 | 1.83E-27 | chr:19:21841536 |
| 19 rs1589279   | 21847351 C | 240.2 | 1.83E-27 | chr:19:21841536 |
| 19 rs1829501   | 21847506 C | 240.2 | 1.83E-27 | chr:19:21841536 |
| 19 rs58339212  | 21861075 T | 240.2 | 1.83E-27 | chr:19:21841536 |
| 19 rs58621185  | 21858531 A | 240.2 | 1.83E-27 | chr:19:21841536 |
| 19 rs59896423  | 21848375 T | 240.2 | 1.83E-27 | chr:19:21841536 |
| 19 rs59984853  | 21848526 A | 240.2 | 1.83E-27 | chr:19:21841536 |
| 19 rs73546506  | 21860575 A | 240.2 | 1.83E-27 | chr:19:21841536 |
| 19 rs79961580  | 21860730 A | 240.2 | 1.83E-27 | chr:19:21841536 |
| 19 rs113033092 | 21827530 C | 26.11 | 3.08E-27 | chr:19:21841536 |
| 19 rs67673622  | 21825103 C | 26.16 | 4.23E-27 | chr:19:21841536 |
| 19 rs59571905  | 21830875 T | 26.24 | 4.43E-27 | chr:19:21841536 |
| 19 rs111714111 | 21827774 A | 26.78 | 7.78E-27 | chr:19:21841536 |
| 19 rs111811317 | 21831260 A | 26.78 | 7.78E-27 | chr:19:21841536 |
| 19 rs113367038 | 21827121 G | 26.78 | 7.78E-27 | chr:19:21841536 |
| 19 rs115824809 | 21831481 T | 26.78 | 7.78E-27 | chr:19:21841536 |
| 19 rs116521177 | 21831596 T | 26.78 | 7.78E-27 | chr:19:21841536 |
| 19 rs12232815  | 21832363 C | 26.78 | 7.78E-27 | chr:19:21841536 |
| 19 rs12232857  | 21832320 A | 26.78 | 7.78E-27 | chr:19:21841536 |
| 19 rs35188146  | 21831014 G | 26.78 | 7.78E-27 | chr:19:21841536 |

|                |            |       |          |                 |
|----------------|------------|-------|----------|-----------------|
| 19 rs35837179  | 21831140 A | 26.78 | 7.78E-27 | chr:19:21841536 |
| 19 rs35933524  | 21828299 G | 26.78 | 7.78E-27 | chr:19:21841536 |
| 19 rs4809168   | 21828794 A | 26.78 | 7.78E-27 | chr:19:21841536 |
| 19 rs57155685  | 21831116 T | 26.78 | 7.78E-27 | chr:19:21841536 |
| 19 rs57973828  | 21831115 C | 26.78 | 7.78E-27 | chr:19:21841536 |
| 19 rs58039129  | 21827133 A | 26.78 | 7.78E-27 | chr:19:21841536 |
| 19 rs7250456   | 21831585 T | 26.78 | 7.78E-27 | chr:19:21841536 |
| 19 rs7250875   | 21831905 T | 26.78 | 7.78E-27 | chr:19:21841536 |
| 19 rs7253097   | 21828936 C | 26.78 | 7.78E-27 | chr:19:21841536 |
| 19 rs7253108   | 21828955 G | 26.78 | 7.78E-27 | chr:19:21841536 |
| 19 rs7253361   | 21829123 G | 26.78 | 7.78E-27 | chr:19:21841536 |
| 19 rs7254224   | 21828967 C | 26.78 | 7.78E-27 | chr:19:21841536 |
| 19 rs7257929   | 21829488 C | 26.78 | 7.78E-27 | chr:19:21841536 |
| 19 rs7258332   | 21829769 G | 26.78 | 7.78E-27 | chr:19:21841536 |
| 19 rs77728877  | 21827833 G | 26.78 | 7.78E-27 | chr:19:21841536 |
| 19 rs117182815 | 21825628 A | 26.77 | 8.56E-27 | chr:19:21841536 |
| 19 rs117740054 | 21825672 T | 26.77 | 8.56E-27 | chr:19:21841536 |
| 19 rs34891363  | 21825550 C | 26.77 | 8.56E-27 | chr:19:21841536 |
| 19 rs2139531   | 21832736 A | 26.25 | 8.59E-27 | chr:19:21841536 |
| 19 rs12460950  | 21824781 C | 26.52 | 9.68E-27 | chr:19:21841536 |
| 19 rs7257314   | 21829542 A | 26.79 | 1.02E-26 | chr:19:21841536 |
| 19 rs112867628 | 21828269 A | 26.96 | 1.04E-26 | chr:19:21841536 |
| 19 rs2139532   | 21832597 C | 26.91 | 1.13E-26 | chr:19:21841536 |
| 19 rs12232863  | 21832380 G | 26.86 | 1.18E-26 | chr:19:21841536 |
| 19 rs59724594  | 21831057 C | 26.86 | 1.18E-26 | chr:19:21841536 |
| 19 rs61517956  | 21833407 A | 26.99 | 1.29E-26 | chr:19:21841536 |
| 19 rs12459784  | 21941306 C | 25.51 | 1.61E-26 | chr:19:21841536 |
| 19 rs75322575  | 21833798 A | 29.08 | 3.25E-26 | chr:19:21841536 |
| 19 rs2139533   | 21832590 T | 26.95 | 3.50E-26 | chr:19:21841536 |
| 19 rs1520075   | 21833741 C | 27.91 | 4.10E-25 | chr:19:21841536 |
| 19 rs11085493  | 21948748 T | 21.27 | 5.51E-25 | chr:19:21841536 |
| 19 rs7250867   | 21831884 T | 17.13 | 1.31E-24 | chr:19:21841536 |
| 19 rs1520074   | 21833928 G | 10.31 | 1.78E-23 | chr:19:21841536 |
| 19 rs12984244  | 21833966 A | 10.45 | 3.81E-23 | chr:19:21841536 |
| 19 rs10414424  | 21858966 C | 35.18 | 9.73E-23 | chr:19:21841536 |
| 19 rs9304989   | 21824313 A | 9.971 | 1.48E-22 | chr:19:21841536 |
| 19 rs62109860  | 21833294 T | 6.684 | 2.55E-21 | chr:19:21841536 |
| 19 rs113005217 | 21845172 T | 581.6 | 2.74E-21 | chr:19:21841536 |
| 19 rs12984552  | 21834092 A | 11.87 | 3.01E-21 | chr:19:21841536 |
| 19 rs12979139  | 21843901 C | 13.54 | 6.31E-21 | chr:19:21841536 |
| 19 rs12979778  | 21843988 G | 12.53 | 6.37E-21 | chr:19:21841536 |
| 19 rs10418334  | 21823931 T | 12.54 | 6.58E-21 | chr:19:21841536 |
| 19 rs4808292   | 21841626 C | 12.59 | 6.59E-21 | chr:19:21841536 |

|                |            |       |          |                 |
|----------------|------------|-------|----------|-----------------|
| 19 rs4809171   | 21841170 A | 12.59 | 6.59E-21 | chr:19:21841536 |
| 19 rs57699265  | 21844083 C | 12.51 | 6.61E-21 | chr:19:21841536 |
| 19 rs10401456  | 21834185 T | 13.49 | 8.10E-21 | chr:19:21841536 |
| 19 rs10404030  | 21839783 A | 13.49 | 8.10E-21 | chr:19:21841536 |
| 19 rs10405733  | 21834482 C | 13.49 | 8.10E-21 | chr:19:21841536 |
| 19 rs12978741  | 21843568 G | 13.49 | 8.10E-21 | chr:19:21841536 |
| 19 rs12978776  | 21843616 G | 13.49 | 8.10E-21 | chr:19:21841536 |
| 19 rs12980130  | 21843569 T | 13.49 | 8.10E-21 | chr:19:21841536 |
| 19 rs28432246  | 21842163 T | 13.49 | 8.10E-21 | chr:19:21841536 |
| 19 rs28520521  | 21842340 T | 13.49 | 8.10E-21 | chr:19:21841536 |
| 19 rs4808287   | 21835411 T | 13.49 | 8.10E-21 | chr:19:21841536 |
| 19 rs4808289   | 21836844 T | 13.49 | 8.10E-21 | chr:19:21841536 |
| 19 rs4808290   | 21837075 C | 13.49 | 8.10E-21 | chr:19:21841536 |
| 19 rs4808293   | 21841796 G | 13.49 | 8.10E-21 | chr:19:21841536 |
| 19 rs4809170   | 21836678 T | 13.49 | 8.10E-21 | chr:19:21841536 |
| 19 rs6511280   | 21838492 C | 13.49 | 8.10E-21 | chr:19:21841536 |
| 19 rs7351087   | 21838147 A | 13.49 | 8.10E-21 | chr:19:21841536 |
| 19 rs7351088   | 21838146 C | 13.49 | 8.10E-21 | chr:19:21841536 |
| 19 rs8105369   | 21840734 C | 13.49 | 8.10E-21 | chr:19:21841536 |
| 19 rs8105649   | 21840765 G | 13.49 | 8.10E-21 | chr:19:21841536 |
| 19 rs8106449   | 21835586 C | 13.49 | 8.10E-21 | chr:19:21841536 |
| 19 rs9807876   | 21837709 G | 13.49 | 8.10E-21 | chr:19:21841536 |
| 19 rs12973147  | 21860793 C | 10.71 | 8.78E-21 | chr:19:21841536 |
| 19 rs6511281   | 21838565 T | 13.45 | 1.01E-20 | chr:19:21841536 |
| 19 rs10422946  | 21838785 C | 13.45 | 1.05E-20 | chr:19:21841536 |
| 19 rs9917005   | 21853097 G | 47.83 | 1.49E-20 | chr:19:21841536 |
| 19 rs6511279   | 21838240 C | 14.62 | 1.58E-20 | chr:19:21841536 |
| 19 rs12975447  | 21860974 T | 9.259 | 1.69E-20 | chr:19:21841536 |
| 19 rs2139534   | 21832567 G | 64.35 | 2.07E-20 | chr:19:21841536 |
| 19 rs12979269  | 21843781 G | 12.89 | 4.54E-20 | chr:19:21841536 |
| 19 rs111405107 | 21824157 A | 427.6 | 5.35E-20 | chr:19:21841536 |
| 19 rs111977553 | 21824165 T | 427.6 | 5.35E-20 | chr:19:21841536 |
| 19 rs10403795  | 21919081 A | 8.797 | 1.10E-19 | chr:19:21841536 |
| 19 rs10405142  | 21918928 T | 8.797 | 1.10E-19 | chr:19:21841536 |
| 19 rs10422982  | 21918221 C | 8.797 | 1.10E-19 | chr:19:21841536 |
| 19 rs113293163 | 21914189 A | 8.797 | 1.10E-19 | chr:19:21841536 |
| 19 rs11879157  | 21900898 T | 8.797 | 1.10E-19 | chr:19:21841536 |
| 19 rs3795247   | 21906428 C | 8.797 | 1.10E-19 | chr:19:21841536 |
| 19 rs4330044   | 21905838 T | 8.797 | 1.10E-19 | chr:19:21841536 |
| 19 rs4352176   | 21924392 C | 8.797 | 1.10E-19 | chr:19:21841536 |
| 19 rs4372817   | 21922642 A | 8.797 | 1.10E-19 | chr:19:21841536 |
| 19 rs4569404   | 21924445 A | 8.797 | 1.10E-19 | chr:19:21841536 |
| 19 rs4808296   | 21931214 A | 8.797 | 1.10E-19 | chr:19:21841536 |

|               |            |       |          |                 |
|---------------|------------|-------|----------|-----------------|
| 19 rs4808297  | 21935700 A | 8.797 | 1.10E-19 | chr:19:21841536 |
| 19 rs7252777  | 21907988 T | 8.797 | 1.10E-19 | chr:19:21841536 |
| 19 rs77464908 | 21898805 A | 8.797 | 1.10E-19 | chr:19:21841536 |
| 19 rs8101035  | 21934556 C | 8.797 | 1.10E-19 | chr:19:21841536 |
| 19 rs12971926 | 21837430 C | 7.42  | 2.13E-19 | chr:19:21841536 |
| 19 rs12972184 | 21835628 T | 7.42  | 2.13E-19 | chr:19:21841536 |
| 19 rs12975766 | 21840005 G | 7.42  | 2.13E-19 | chr:19:21841536 |
| 19 rs12979060 | 21843727 G | 7.42  | 2.13E-19 | chr:19:21841536 |
| 19 rs1850930  | 21839462 A | 7.42  | 2.13E-19 | chr:19:21841536 |
| 19 rs2139527  | 21839211 C | 7.42  | 2.13E-19 | chr:19:21841536 |
| 19 rs28711730 | 21842387 G | 7.42  | 2.13E-19 | chr:19:21841536 |
| 19 rs71333857 | 21844171 G | 7.126 | 2.77E-19 | chr:19:21841536 |
| 19 rs8108212  | 21845320 G | 7.311 | 3.50E-19 | chr:19:21841536 |
| 19 rs2359392  | 21854136 A | 6.561 | 4.56E-19 | chr:19:21841536 |
| 19 rs2359394  | 21854169 A | 6.561 | 4.56E-19 | chr:19:21841536 |
| 19 rs2359395  | 21854176 G | 6.561 | 4.56E-19 | chr:19:21841536 |
| 19 rs2359396  | 21854179 G | 6.561 | 4.56E-19 | chr:19:21841536 |
| 19 rs12459622 | 21852799 A | 6.492 | 6.73E-19 | chr:19:21841536 |
| 19 rs12459640 | 21852807 C | 6.492 | 6.73E-19 | chr:19:21841536 |
| 19 rs4490112  | 21850753 T | 6.664 | 6.81E-19 | chr:19:21841536 |
| 19 rs10854059 | 21859805 G | 6.478 | 7.13E-19 | chr:19:21841536 |
| 19 rs11668774 | 21859863 A | 6.478 | 7.13E-19 | chr:19:21841536 |
| 19 rs12461329 | 21860597 G | 6.478 | 7.13E-19 | chr:19:21841536 |
| 19 rs1818693  | 21858687 A | 6.478 | 7.13E-19 | chr:19:21841536 |
| 19 rs2015476  | 21859110 A | 6.478 | 7.13E-19 | chr:19:21841536 |
| 19 rs2015481  | 21858994 A | 6.478 | 7.13E-19 | chr:19:21841536 |
| 19 rs2015715  | 21858115 C | 6.478 | 7.13E-19 | chr:19:21841536 |
| 19 rs2015736  | 21857927 C | 6.478 | 7.13E-19 | chr:19:21841536 |
| 19 rs2359401  | 21855732 G | 6.65  | 7.15E-19 | chr:19:21841536 |
| 19 rs10164399 | 21856722 C | 6.467 | 8.61E-19 | chr:19:21841536 |
| 19 rs10164402 | 21856407 T | 6.467 | 8.61E-19 | chr:19:21841536 |
| 19 rs10164404 | 21856699 T | 6.467 | 8.61E-19 | chr:19:21841536 |
| 19 rs12459069 | 21852101 A | 6.467 | 8.61E-19 | chr:19:21841536 |
| 19 rs12459105 | 21852322 A | 6.467 | 8.61E-19 | chr:19:21841536 |
| 19 rs12459145 | 21852274 G | 6.467 | 8.61E-19 | chr:19:21841536 |
| 19 rs12459146 | 21852286 G | 6.467 | 8.61E-19 | chr:19:21841536 |
| 19 rs12459607 | 21852601 C | 6.467 | 8.61E-19 | chr:19:21841536 |
| 19 rs12459653 | 21852679 G | 6.467 | 8.61E-19 | chr:19:21841536 |
| 19 rs12459663 | 21852921 C | 6.467 | 8.61E-19 | chr:19:21841536 |
| 19 rs12460255 | 21853648 G | 6.467 | 8.61E-19 | chr:19:21841536 |
| 19 rs12460259 | 21853849 C | 6.467 | 8.61E-19 | chr:19:21841536 |
| 19 rs12460275 | 21853896 C | 6.467 | 8.61E-19 | chr:19:21841536 |
| 19 rs12972399 | 21850149 T | 6.467 | 8.61E-19 | chr:19:21841536 |

|                |            |        |          |                 |
|----------------|------------|--------|----------|-----------------|
| 19 rs12982600  | 21847694 C | 6.467  | 8.61E-19 | chr:19:21841536 |
| 19 rs12983456  | 21855124 G | 6.467  | 8.61E-19 | chr:19:21841536 |
| 19 rs12984472  | 21847713 T | 6.467  | 8.61E-19 | chr:19:21841536 |
| 19 rs1818696   | 21850359 C | 6.467  | 8.61E-19 | chr:19:21841536 |
| 19 rs1850931   | 21855226 G | 6.467  | 8.61E-19 | chr:19:21841536 |
| 19 rs1850932   | 21855223 C | 6.467  | 8.61E-19 | chr:19:21841536 |
| 19 rs1850934   | 21854928 T | 6.467  | 8.61E-19 | chr:19:21841536 |
| 19 rs1850935   | 21854623 T | 6.467  | 8.61E-19 | chr:19:21841536 |
| 19 rs2037356   | 21849559 C | 6.467  | 8.61E-19 | chr:19:21841536 |
| 19 rs2359388   | 21851081 T | 6.467  | 8.61E-19 | chr:19:21841536 |
| 19 rs2359389   | 21851157 A | 6.467  | 8.61E-19 | chr:19:21841536 |
| 19 rs2359390   | 21851459 G | 6.467  | 8.61E-19 | chr:19:21841536 |
| 19 rs2359399   | 21854394 C | 6.467  | 8.61E-19 | chr:19:21841536 |
| 19 rs2359400   | 21855574 C | 6.467  | 8.61E-19 | chr:19:21841536 |
| 19 rs2359405   | 21856187 G | 6.467  | 8.61E-19 | chr:19:21841536 |
| 19 rs3946575   | 21848698 C | 6.467  | 8.61E-19 | chr:19:21841536 |
| 19 rs4302166   | 21850861 C | 6.467  | 8.61E-19 | chr:19:21841536 |
| 19 rs4310994   | 21850923 A | 6.467  | 8.61E-19 | chr:19:21841536 |
| 19 rs4321314   | 21849668 C | 6.467  | 8.61E-19 | chr:19:21841536 |
| 19 rs4500887   | 21850985 G | 6.467  | 8.61E-19 | chr:19:21841536 |
| 19 rs7259640   | 21848238 G | 6.467  | 8.61E-19 | chr:19:21841536 |
| 19 rs8108289   | 21846845 A | 6.467  | 8.61E-19 | chr:19:21841536 |
| 19 rs12463364  | 21851610 A | 6.447  | 1.03E-18 | chr:19:21841536 |
| 19 rs2359398   | 21854389 C | 6.332  | 1.37E-18 | chr:19:21841536 |
| 19 rs10164296  | 21856328 A | 6.258  | 1.66E-18 | chr:19:21841536 |
| 19 rs2359403   | 21855836 C | 6.038  | 1.69E-18 | chr:19:21841536 |
| 19 rs2359404   | 21855839 G | 6.038  | 1.69E-18 | chr:19:21841536 |
| 19 rs4026206   | 21855856 G | 6.038  | 1.69E-18 | chr:19:21841536 |
| 19 rs12461611  | 21856280 G | 6.011  | 2.15E-18 | chr:19:21841536 |
| 19 rs34449776  | 21856309 A | 6.041  | 2.31E-18 | chr:19:21841536 |
| 19 rs35091166  | 21856300 G | 6.041  | 2.31E-18 | chr:19:21841536 |
| 19 rs12973337  | 21860723 G | 6.116  | 3.01E-18 | chr:19:21841536 |
| 19 rs34810593  | 21825360 A | 7.994  | 4.31E-18 | chr:19:21841536 |
| 19 rs66562280  | 21833014 C | 0.1324 | 5.22E-18 | chr:19:21841536 |
| 19 rs57660329  | 21841175 C | 876.8  | 9.55E-18 | chr:19:21841536 |
| 19 rs7256336   | 21842016 A | 876.8  | 9.55E-18 | chr:19:21841536 |
| 19 rs8105732   | 21841123 G | 876.8  | 9.55E-18 | chr:19:21841536 |
| 19 rs8105957   | 21841052 A | 876.8  | 9.55E-18 | chr:19:21841536 |
| 19 rs11670736  | 21952736 G | 8.243  | 1.46E-17 | chr:19:21841536 |
| 19 rs144847660 | 21823693 T | 841    | 1.64E-17 | chr:19:21841536 |
| 19 rs186258664 | 21844201 T | 844.1  | 1.65E-17 | chr:19:21841536 |
| 19 rs115635903 | 21844038 T | 834.8  | 1.82E-17 | chr:19:21841536 |
| 19 rs112439638 | 21962740 A | 7.449  | 5.29E-17 | chr:19:21841536 |

|                |            |       |          |                 |
|----------------|------------|-------|----------|-----------------|
| 19 rs145830617 | 21965007 A | 7.449 | 5.29E-17 | chr:19:21841536 |
| 19 rs56904798  | 21962115 A | 7.449 | 5.29E-17 | chr:19:21841536 |
| 19 rs117010520 | 22016401 A | 7.383 | 7.04E-17 | chr:19:21841536 |
| 19 rs117301126 | 21965998 A | 7.383 | 7.04E-17 | chr:19:21841536 |
| 19 rs117329296 | 21988033 T | 7.383 | 7.04E-17 | chr:19:21841536 |
| 19 rs117733188 | 22016400 A | 7.383 | 7.04E-17 | chr:19:21841536 |
| 19 rs117783733 | 22006570 T | 7.383 | 7.04E-17 | chr:19:21841536 |
| 19 rs118006675 | 22030918 T | 7.383 | 7.04E-17 | chr:19:21841536 |
| 19 rs118189822 | 21984558 C | 7.383 | 7.04E-17 | chr:19:21841536 |
| 19 rs12460775  | 21985091 C | 7.383 | 7.04E-17 | chr:19:21841536 |
| 19 rs12460998  | 21973146 C | 7.383 | 7.04E-17 | chr:19:21841536 |
| 19 rs12462082  | 21974486 T | 7.383 | 7.04E-17 | chr:19:21841536 |
| 19 rs12462120  | 21974940 T | 7.383 | 7.04E-17 | chr:19:21841536 |
| 19 rs12462709  | 21989391 C | 7.383 | 7.04E-17 | chr:19:21841536 |
| 19 rs12463064  | 21985132 G | 7.383 | 7.04E-17 | chr:19:21841536 |
| 19 rs141171541 | 22011873 T | 7.383 | 7.04E-17 | chr:19:21841536 |
| 19 rs141892265 | 21965652 C | 7.383 | 7.04E-17 | chr:19:21841536 |
| 19 rs142185394 | 21984590 A | 7.383 | 7.04E-17 | chr:19:21841536 |
| 19 rs147875950 | 21988064 A | 7.383 | 7.04E-17 | chr:19:21841536 |
| 19 rs17701347  | 21980434 T | 7.383 | 7.04E-17 | chr:19:21841536 |
| 19 rs17701366  | 21985740 G | 7.383 | 7.04E-17 | chr:19:21841536 |
| 19 rs3764576   | 22005000 G | 7.383 | 7.04E-17 | chr:19:21841536 |
| 19 rs58664716  | 21993467 G | 7.383 | 7.04E-17 | chr:19:21841536 |
| 19 rs60272092  | 22006953 A | 7.383 | 7.04E-17 | chr:19:21841536 |
| 19 rs74606132  | 22019517 T | 7.383 | 7.04E-17 | chr:19:21841536 |
| 19 rs74762678  | 22019157 C | 7.383 | 7.04E-17 | chr:19:21841536 |
| 19 rs75290521  | 22000435 G | 7.383 | 7.04E-17 | chr:19:21841536 |
| 19 rs75477359  | 21966566 A | 7.383 | 7.04E-17 | chr:19:21841536 |
| 19 rs75614465  | 21980134 A | 7.383 | 7.04E-17 | chr:19:21841536 |
| 19 rs75937847  | 22031912 A | 7.383 | 7.04E-17 | chr:19:21841536 |
| 19 rs76621431  | 22014914 C | 7.383 | 7.04E-17 | chr:19:21841536 |
| 19 rs77115676  | 21985611 A | 7.383 | 7.04E-17 | chr:19:21841536 |
| 19 rs77216709  | 21992940 G | 7.383 | 7.04E-17 | chr:19:21841536 |
| 19 rs77310041  | 21986116 G | 7.383 | 7.04E-17 | chr:19:21841536 |
| 19 rs77340617  | 21982326 T | 7.383 | 7.04E-17 | chr:19:21841536 |
| 19 rs77751145  | 22006138 G | 7.383 | 7.04E-17 | chr:19:21841536 |
| 19 rs78033062  | 21986636 A | 7.383 | 7.04E-17 | chr:19:21841536 |
| 19 rs78077628  | 21971443 C | 7.383 | 7.04E-17 | chr:19:21841536 |
| 19 rs78773989  | 22009807 G | 7.383 | 7.04E-17 | chr:19:21841536 |
| 19 rs79327994  | 21993765 T | 7.383 | 7.04E-17 | chr:19:21841536 |
| 19 rs12232841  | 21857227 T | 5.326 | 7.11E-17 | chr:19:21841536 |
| 19 rs12984679  | 21856993 A | 5.326 | 7.11E-17 | chr:19:21841536 |
| 19 rs59958574  | 21971589 T | 7.341 | 8.21E-17 | chr:19:21841536 |

|                |            |       |          |                 |
|----------------|------------|-------|----------|-----------------|
| 19 rs77086661  | 22032924 G | 7.374 | 9.72E-17 | chr:19:21841536 |
| 19 rs8111923   | 22021828 A | 7.259 | 9.83E-17 | chr:19:21841536 |
| 19 rs144038920 | 21965965 A | 7.248 | 9.85E-17 | chr:19:21841536 |
| 19 rs186336934 | 21890720 G | 16.05 | 1.85E-16 | chr:19:21841536 |
| 19 rs78823434  | 21982409 G | 7.11  | 2.32E-16 | chr:19:21841536 |
| 19 rs7248525   | 21996571 A | 7.121 | 2.90E-16 | chr:19:21841536 |
| 19 rs7259645   | 21842436 T | 4.82  | 1.20E-14 | chr:19:21841536 |
| 19 rs11085494  | 21952631 G | 4.863 | 2.71E-14 | chr:19:21841536 |
| 19 rs2457773   | 21993296 T | 5.138 | 3.06E-14 | chr:19:21841536 |
| 19 rs1510964   | 21992825 C | 5.117 | 4.26E-14 | chr:19:21841536 |
| 19 rs2435003   | 22006176 T | 5.117 | 4.26E-14 | chr:19:21841536 |
| 19 rs2435006   | 21998816 T | 5.117 | 4.26E-14 | chr:19:21841536 |
| 19 rs2435044   | 22024860 C | 5.117 | 4.26E-14 | chr:19:21841536 |
| 19 rs2457785   | 22026279 A | 5.117 | 4.26E-14 | chr:19:21841536 |
| 19 rs2457802   | 21997727 C | 5.041 | 6.07E-14 | chr:19:21841536 |
| 19 rs2136890   | 22033122 T | 5.063 | 6.85E-14 | chr:19:21841536 |
| 19 rs2435041   | 22034819 G | 5.063 | 6.85E-14 | chr:19:21841536 |
| 19 rs12459448  | 22040562 G | 5.057 | 5.45E-13 | chr:19:21841536 |
| 19 rs1397579   | 21976964 C | 4.178 | 1.18E-12 | chr:19:21841536 |
| 19 rs111517079 | 21838995 T | 1985  | 1.69E-12 | chr:19:21841536 |
| 19 rs80147175  | 21839022 G | 1985  | 1.69E-12 | chr:19:21841536 |
| 19 rs111912937 | 21844349 C | 1959  | 1.80E-12 | chr:19:21841536 |
| 19 rs113277169 | 21843728 T | 1959  | 1.80E-12 | chr:19:21841536 |
| 19 rs113310470 | 21844534 A | 1959  | 1.80E-12 | chr:19:21841536 |
| 19 rs116001081 | 21842717 T | 1959  | 1.80E-12 | chr:19:21841536 |
| 19 rs12232782  | 21835070 C | 1959  | 1.80E-12 | chr:19:21841536 |
| 19 rs12461057  | 21839205 G | 1959  | 1.80E-12 | chr:19:21841536 |
| 19 rs12463094  | 21839243 G | 1959  | 1.80E-12 | chr:19:21841536 |
| 19 rs138320974 | 21834230 C | 1959  | 1.80E-12 | chr:19:21841536 |
| 19 rs145365305 | 21843419 A | 1959  | 1.80E-12 | chr:19:21841536 |
| 19 rs147688845 | 21842839 A | 1959  | 1.80E-12 | chr:19:21841536 |
| 19 rs149505407 | 21839099 A | 1959  | 1.80E-12 | chr:19:21841536 |
| 19 rs28537769  | 21842349 A | 1959  | 1.80E-12 | chr:19:21841536 |
| 19 rs28640930  | 21842166 T | 1959  | 1.80E-12 | chr:19:21841536 |
| 19 rs28669973  | 21842253 A | 1959  | 1.80E-12 | chr:19:21841536 |
| 19 rs34069114  | 21838272 C | 1959  | 1.80E-12 | chr:19:21841536 |
| 19 rs58919976  | 21836187 A | 1959  | 1.80E-12 | chr:19:21841536 |
| 19 rs60312928  | 21838295 G | 1959  | 1.80E-12 | chr:19:21841536 |
| 19 rs61023946  | 21843077 T | 1959  | 1.80E-12 | chr:19:21841536 |
| 19 rs7260114   | 21842561 A | 1959  | 1.80E-12 | chr:19:21841536 |
| 19 rs78207079  | 21838528 T | 1959  | 1.80E-12 | chr:19:21841536 |
| 19 rs78554651  | 21838518 G | 1959  | 1.80E-12 | chr:19:21841536 |
| 19 rs79867595  | 21837552 C | 1959  | 1.80E-12 | chr:19:21841536 |

|                |            |        |          |                 |
|----------------|------------|--------|----------|-----------------|
| 19 rs8101178   | 21839402 A | 1959   | 1.80E-12 | chr:19:21841536 |
| 19 rs8101397   | 21839802 G | 1959   | 1.80E-12 | chr:19:21841536 |
| 19 rs8105107   | 21840531 G | 1959   | 1.80E-12 | chr:19:21841536 |
| 19 rs8105433   | 21840606 A | 1959   | 1.80E-12 | chr:19:21841536 |
| 19 rs8105700   | 21840972 T | 1959   | 1.80E-12 | chr:19:21841536 |
| 19 rs112076231 | 21834099 G | 1927   | 2.11E-12 | chr:19:21841536 |
| 19 rs6511283   | 21867819 C | 3.884  | 2.35E-12 | chr:19:21841536 |
| 19 rs10412709  | 21865359 C | 3.708  | 6.75E-12 | chr:19:21841536 |
| 19 rs1589280   | 21863419 T | 3.708  | 6.75E-12 | chr:19:21841536 |
| 19 rs1818697   | 21867497 A | 3.708  | 6.75E-12 | chr:19:21841536 |
| 19 rs1818698   | 21867499 T | 3.708  | 6.75E-12 | chr:19:21841536 |
| 19 rs7248761   | 21866423 A | 3.708  | 6.75E-12 | chr:19:21841536 |
| 19 rs7249701   | 21866865 G | 3.708  | 6.75E-12 | chr:19:21841536 |
| 19 rs11085491  | 21879352 T | 0.2541 | 1.63E-11 | chr:19:21841536 |
| 19 rs6511294   | 21978569 G | 3.387  | 3.60E-11 | chr:19:21841536 |
| 19 rs62110790  | 21867868 C | 0.2841 | 3.72E-11 | chr:19:21841536 |
| 19 rs10469371  | 21893614 T | 3.462  | 4.83E-11 | chr:19:21841536 |
| 19 rs10412225  | 21944450 G | 3.459  | 5.24E-11 | chr:19:21841536 |
| 19 rs10421113  | 21929885 T | 3.459  | 5.24E-11 | chr:19:21841536 |
| 19 rs10421342  | 21930003 T | 3.459  | 5.24E-11 | chr:19:21841536 |
| 19 rs10423041  | 21933943 C | 3.459  | 5.24E-11 | chr:19:21841536 |
| 19 rs11085492  | 21945186 G | 3.459  | 5.24E-11 | chr:19:21841536 |
| 19 rs4436888   | 21916489 C | 3.459  | 5.24E-11 | chr:19:21841536 |
| 19 rs4547465   | 21901056 A | 3.459  | 5.24E-11 | chr:19:21841536 |
| 19 rs4613201   | 21927706 C | 3.459  | 5.24E-11 | chr:19:21841536 |
| 19 rs4808295   | 21930317 A | 3.459  | 5.24E-11 | chr:19:21841536 |
| 19 rs58748216  | 21914122 T | 3.459  | 5.24E-11 | chr:19:21841536 |
| 19 rs7258859   | 21942723 G | 3.459  | 5.24E-11 | chr:19:21841536 |
| 19 rs8105002   | 21919934 A | 3.459  | 5.24E-11 | chr:19:21841536 |
| 19 rs8111464   | 21917939 G | 3.459  | 5.24E-11 | chr:19:21841536 |
| 19 rs56742849  | 21914115 T | 3.449  | 6.19E-11 | chr:19:21841536 |
| 19 rs4809175   | 21938744 G | 3.449  | 6.39E-11 | chr:19:21841536 |
| 19 rs4319879   | 21916767 G | 3.4    | 8.82E-11 | chr:19:21841536 |
| 19 rs10405075  | 21943707 C | 3.395  | 1.03E-10 | chr:19:21841536 |
| 19 rs1829503   | 21869343 A | 0.2753 | 1.10E-10 | chr:19:21841536 |
| 19 rs8113652   | 21921709 T | 3.194  | 3.85E-10 | chr:19:21841536 |
| 19 rs10410478  | 22020018 C | 3.195  | 1.01E-09 | chr:19:21841536 |
| 19 rs10413659  | 22017188 A | 3.195  | 1.01E-09 | chr:19:21841536 |
| 19 rs10418840  | 22016193 T | 3.195  | 1.01E-09 | chr:19:21841536 |
| 19 rs10420548  | 22017492 C | 3.195  | 1.01E-09 | chr:19:21841536 |
| 19 rs11672034  | 22020770 A | 3.195  | 1.01E-09 | chr:19:21841536 |
| 19 rs28480566  | 22020251 A | 3.195  | 1.01E-09 | chr:19:21841536 |
| 19 rs553746490 | 21926610 G | 11.44  | 1.22E-09 | chr:19:21841536 |



|                |            |        |          |                 |
|----------------|------------|--------|----------|-----------------|
| 19 rs10412066  | 21950337 C | 3.033  | 1.40E-09 | chr:19:21841536 |
| 19 rs371913957 | 21892737 C | 10.37  | 1.89E-09 | chr:19:21841536 |
| 19 rs546719573 | 21826992 A | 34.71  | 1.65E-08 | chr:19:21841536 |
| 19 rs12463222  | 21863913 T | 0.341  | 1.75E-08 | chr:19:21841536 |
| 19 rs12985113  | 21864344 T | 0.341  | 1.75E-08 | chr:19:21841536 |
| 19 rs2435048   | 22019697 G | 2.816  | 2.03E-08 | chr:19:21841536 |
| 19 rs62112965  | 22016291 C | 2.816  | 2.03E-08 | chr:19:21841536 |
| 19 rs57706029  | 21953161 C | 2.665  | 2.05E-08 | chr:19:21841536 |
| 19 rs67428643  | 21890127 C | 0.2983 | 3.00E-08 | chr:19:21841536 |
| 19 rs2359387   | 21847226 A | 0.3389 | 6.12E-08 | chr:19:21841536 |
| 19 rs12974976  | 21823495 A | 0.3441 | 7.49E-08 | chr:19:21841536 |
| 19 rs6511291   | 21950402 C | 0.3719 | 9.43E-08 | chr:19:21841536 |
| 19 rs7258660   | 21868584 C | 0.3427 | 1.01E-07 | chr:19:21841536 |
| 19 rs2359704   | 21964257 G | 2.492  | 1.14E-07 | chr:19:21841536 |
| 19 rs4075276   | 21961304 T | 2.49   | 1.28E-07 | chr:19:21841536 |
| 19 rs4381721   | 21951581 T | 0.3794 | 1.36E-07 | chr:19:21841536 |
| 19 rs4522535   | 21951615 T | 0.3794 | 1.36E-07 | chr:19:21841536 |
| 19 rs11085490  | 21873514 A | 0.3693 | 1.55E-07 | chr:19:21841536 |
| 19 rs11666760  | 21873509 C | 0.3693 | 1.55E-07 | chr:19:21841536 |
| 19 rs12461108  | 21872915 G | 0.3693 | 1.55E-07 | chr:19:21841536 |
| 19 rs12461114  | 21872934 G | 0.3693 | 1.55E-07 | chr:19:21841536 |
| 19 rs12461177  | 21873153 G | 0.3693 | 1.55E-07 | chr:19:21841536 |
| 19 rs12461213  | 21873289 A | 0.3693 | 1.55E-07 | chr:19:21841536 |
| 19 rs12971343  | 21872587 C | 0.3693 | 1.55E-07 | chr:19:21841536 |
| 19 rs12977693  | 21872241 T | 0.3693 | 1.55E-07 | chr:19:21841536 |
| 19 rs12985977  | 21872404 C | 0.3693 | 1.55E-07 | chr:19:21841536 |
| 19 rs12710186  | 21958004 T | 2.401  | 1.89E-07 | chr:19:21841536 |
| 19 rs4809179   | 21955379 T | 2.401  | 1.89E-07 | chr:19:21841536 |
| 19 rs6511292   | 21960494 T | 2.401  | 1.89E-07 | chr:19:21841536 |
| 19 rs56168029  | 21942877 A | 0.3846 | 2.12E-07 | chr:19:21841536 |
| 19 rs111522182 | 21835996 C | 3.348  | 2.51E-07 | chr:19:21841536 |
| 19 rs11085488  | 21862210 G | 0.3504 | 2.57E-07 | chr:19:21841536 |
| 19 rs11085489  | 21862213 G | 0.3504 | 2.57E-07 | chr:19:21841536 |
| 19 rs12978969  | 21872000 C | 0.3806 | 3.14E-07 | chr:19:21841536 |
| 19 rs6511285   | 21890339 A | 0.3778 | 3.95E-07 | chr:19:21841536 |
| 19 rs12972593  | 21932574 C | 0.4    | 4.34E-07 | chr:19:21841536 |
| 19 rs7246400   | 21909948 A | 0.3988 | 4.72E-07 | chr:19:21841536 |
| 19 rs7252798   | 21908053 C | 0.3988 | 4.72E-07 | chr:19:21841536 |
| 19 rs9676253   | 21969452 G | 2.339  | 4.97E-07 | chr:19:21841536 |
| 19 rs7252552   | 21968019 C | 2.335  | 5.35E-07 | chr:19:21841536 |
| 19 rs8182547   | 21967944 C | 2.335  | 5.35E-07 | chr:19:21841536 |
| 19 rs35717293  | 21912755 G | 0.402  | 5.74E-07 | chr:19:21841536 |
| 19 rs4319878   | 21924452 T | 0.402  | 5.74E-07 | chr:19:21841536 |

|                |            |        |          |                 |
|----------------|------------|--------|----------|-----------------|
| 19 rs8102320   | 21936885 G | 0.402  | 5.74E-07 | chr:19:21841536 |
| 19 rs2457800   | 21999952 G | 2.334  | 6.83E-07 | chr:19:21841536 |
| 19 rs61037485  | 21924189 A | 0.4038 | 7.47E-07 | chr:19:21841536 |
| 19 rs12463314  | 21973178 T | 2.311  | 7.91E-07 | chr:19:21841536 |
| 19 rs12979686  | 21975817 T | 2.311  | 7.91E-07 | chr:19:21841536 |
| 19 rs4809181   | 21974203 T | 2.311  | 7.91E-07 | chr:19:21841536 |
| 19 rs547391806 | 21930512 T | 9.657  | 7.92E-07 | chr:19:21841536 |
| 19 rs11671323  | 21879577 G | 0.4041 | 8.23E-07 | chr:19:21841536 |
| 19 rs950711    | 21977453 A | 2.301  | 9.37E-07 | chr:19:21841536 |
| 19 rs10414358  | 22011715 G | 2.29   | 1.15E-06 | chr:19:21841536 |
| 19 rs2457774   | 21993294 C | 2.29   | 1.15E-06 | chr:19:21841536 |
| 19 rs2457798   | 22002611 G | 2.29   | 1.15E-06 | chr:19:21841536 |
| 19 rs7247610   | 22006615 C | 2.29   | 1.15E-06 | chr:19:21841536 |
| 19 rs2435049   | 22016610 A | 2.281  | 1.24E-06 | chr:19:21841536 |
| 19 rs10407896  | 22019444 T | 2.27   | 1.48E-06 | chr:19:21841536 |
| 19 rs2244127   | 22016695 G | 2.27   | 1.48E-06 | chr:19:21841536 |
| 19 rs62110791  | 21869925 A | 0.3822 | 1.61E-06 | chr:19:21841536 |
| 19 rs12609186  | 21984052 C | 2.239  | 1.87E-06 | chr:19:21841536 |
| 19 rs2457784   | 22026514 C | 2.207  | 2.15E-06 | chr:19:21841536 |
| 19 rs10409238  | 21888264 C | 0.3929 | 2.34E-06 | chr:19:21841536 |
| 19 rs10417262  | 21892560 C | 0.3929 | 2.34E-06 | chr:19:21841536 |
| 19 rs7250085   | 21891497 A | 0.3929 | 2.34E-06 | chr:19:21841536 |
| 19 rs6511286   | 21892040 T | 0.3936 | 2.62E-06 | chr:19:21841536 |
| 19 rs12461146  | 21872832 C | 0.3865 | 2.63E-06 | chr:19:21841536 |
| 19 rs2435039   | 22036167 A | 2.189  | 2.65E-06 | chr:19:21841536 |
| 19 rs2457794   | 22031822 T | 2.181  | 2.94E-06 | chr:19:21841536 |
| 19 rs7508279   | 21832973 T | 0.3793 | 3.48E-06 | chr:19:21841536 |
| 19 rs2457792   | 22030057 A | 2.171  | 3.50E-06 | chr:19:21841536 |
| 19 rs2435036   | 22039105 C | 2.213  | 3.55E-06 | chr:19:21841536 |
| 19 rs10423556  | 21890121 C | 0.399  | 3.72E-06 | chr:19:21841536 |
| 19 rs12984655  | 21872572 A | 0.3952 | 4.01E-06 | chr:19:21841536 |
| 19 rs1877130   | 22030457 C | 2.141  | 5.44E-06 | chr:19:21841536 |
| 19 rs2435000   | 22011115 C | 2.181  | 7.43E-06 | chr:19:21841536 |
| 19 rs8107921   | 21947325 C | 0.4113 | 8.01E-06 | chr:19:21841536 |
| 19 rs62110822  | 21936769 A | 0.3972 | 2.32E-05 | chr:19:21841536 |
| 19 rs7256996   | 22006181 C | 0.3819 | 3.28E-05 | chr:19:21841536 |
| 19 rs1961316   | 22426154 A | 180.1  | 1.85E-35 | chr:19:22414379 |
| 19 rs11671416  | 22427254 C | 170.5  | 3.02E-35 | chr:19:22414379 |
| 19 rs57346017  | 22427336 G | 170.5  | 3.02E-35 | chr:19:22414379 |
| 19 rs62120010  | 22428480 A | 159.3  | 3.06E-35 | chr:19:22414379 |
| 19 rs808246    | 22430516 A | 159.3  | 3.06E-35 | chr:19:22414379 |
| 19 rs12460025  | 22318230 G | 68.49  | 3.86E-35 | chr:19:22414379 |
| 19 rs17554725  | 22317759 G | 68.49  | 3.86E-35 | chr:19:22414379 |

|                |            |         |          |                 |
|----------------|------------|---------|----------|-----------------|
| 19 rs1840718   | 22427586 T | 169.3   | 3.88E-35 | chr:19:22414379 |
| 19 rs7257051   | 22319292 G | 82.19   | 4.13E-35 | chr:19:22414379 |
| 19 rs8113700   | 22319421 A | 82.19   | 4.13E-35 | chr:19:22414379 |
| 19 rs1922685   | 22287970 C | 45.24   | 1.13E-34 | chr:19:22414379 |
| 19 rs7253490   | 22293706 A | 41.17   | 1.69E-34 | chr:19:22414379 |
| 19 rs7248898   | 22245354 A | 35.7    | 3.05E-34 | chr:19:22414379 |
| 19 rs8105767   | 22215441 G | 31.75   | 5.72E-34 | chr:19:22414379 |
| 19 rs3813591   | 22321256 C | 192.2   | 1.35E-31 | chr:19:22414379 |
| 19 rs1912576   | 22121293 C | 19.28   | 1.10E-29 | chr:19:22414379 |
| 19 rs1969193   | 22120269 C | 15.95   | 3.46E-28 | chr:19:22414379 |
| 19 rs1634466   | 22103726 G | 14.45   | 1.71E-27 | chr:19:22414379 |
| 19 rs2204581   | 22325017 T | 551.2   | 4.10E-27 | chr:19:22414379 |
| 19 rs1852418   | 22324418 A | 547.5   | 4.94E-27 | chr:19:22414379 |
| 19 rs1852417   | 22324637 A | 542.9   | 5.72E-27 | chr:19:22414379 |
| 19 rs456246    | 22327192 A | 542.9   | 5.72E-27 | chr:19:22414379 |
| 19 rs461661    | 22327559 T | 627.4   | 1.96E-26 | chr:19:22414379 |
| 19 rs283147    | 22438069 A | 0.04386 | 2.76E-26 | chr:19:22414379 |
| 19 rs283145    | 22438782 C | 0.06789 | 3.43E-26 | chr:19:22414379 |
| 19 rs421180    | 22335719 C | 674.5   | 3.82E-26 | chr:19:22414379 |
| 19 rs463200    | 22327489 C | 660.1   | 6.77E-26 | chr:19:22414379 |
| 19 rs2021560   | 22373470 C | 886.1   | 1.36E-25 | chr:19:22414379 |
| 19 rs2548937   | 22413188 T | 1029    | 2.65E-25 | chr:19:22414379 |
| 19 rs4025837   | 22413189 A | 1029    | 2.65E-25 | chr:19:22414379 |
| 19 rs387604    | 22332265 A | 879     | 5.64E-25 | chr:19:22414379 |
| 19 rs1830173   | 22388037 T | 879.4   | 5.68E-25 | chr:19:22414379 |
| 19 rs281177    | 22394727 T | 879.4   | 5.68E-25 | chr:19:22414379 |
| 19 rs451793    | 22361286 G | 879.4   | 5.68E-25 | chr:19:22414379 |
| 19 rs62112446  | 22368828 A | 879.4   | 5.68E-25 | chr:19:22414379 |
| 19 rs7253425   | 22381476 G | 879.4   | 5.68E-25 | chr:19:22414379 |
| 19 rs7343144   | 22369824 T | 879.4   | 5.68E-25 | chr:19:22414379 |
| 19 rs420218    | 22353589 T | 874.4   | 6.24E-25 | chr:19:22414379 |
| 19 rs60604817  | 22427565 G | 0.06971 | 9.08E-25 | chr:19:22414379 |
| 19 rs10411905  | 22427035 G | 0.07009 | 1.17E-24 | chr:19:22414379 |
| 19 rs3813590   | 22321273 T | 0.08137 | 1.25E-24 | chr:19:22414379 |
| 19 rs3813592   | 22321245 G | 0.08137 | 1.25E-24 | chr:19:22414379 |
| 19 rs11668081  | 22425615 A | 0.05036 | 1.29E-24 | chr:19:22414379 |
| 19 rs1091172   | 22432373 C | 0.06647 | 1.59E-24 | chr:19:22414379 |
| 19 rs111575233 | 22430482 A | 0.06626 | 1.59E-24 | chr:19:22414379 |
| 19 rs55784860  | 22431132 C | 0.06626 | 1.59E-24 | chr:19:22414379 |
| 19 rs59020942  | 22427750 T | 0.06626 | 1.59E-24 | chr:19:22414379 |
| 19 rs59574273  | 22427752 T | 0.06626 | 1.59E-24 | chr:19:22414379 |
| 19 rs11667657  | 22393601 C | 0.04737 | 1.60E-24 | chr:19:22414379 |
| 19 rs11672659  | 22394767 T | 0.04737 | 1.60E-24 | chr:19:22414379 |

|                |            |         |          |                 |
|----------------|------------|---------|----------|-----------------|
| 19 rs11672740  | 22394859 A | 0.04737 | 1.60E-24 | chr:19:22414379 |
| 19 rs12609320  | 22390462 C | 0.04737 | 1.60E-24 | chr:19:22414379 |
| 19 rs1609037   | 22380261 C | 0.04737 | 1.60E-24 | chr:19:22414379 |
| 19 rs1852420   | 22361902 T | 0.04737 | 1.60E-24 | chr:19:22414379 |
| 19 rs4390714   | 22369043 A | 0.04737 | 1.60E-24 | chr:19:22414379 |
| 19 rs4578792   | 22368982 G | 0.04737 | 1.60E-24 | chr:19:22414379 |
| 19 rs4932962   | 22372000 T | 0.04737 | 1.60E-24 | chr:19:22414379 |
| 19 rs149070103 | 22340413 G | 0.04735 | 1.74E-24 | chr:19:22414379 |
| 19 rs1830174   | 22344502 A | 0.04735 | 1.74E-24 | chr:19:22414379 |
| 19 rs4381717   | 22338981 A | 0.04735 | 1.74E-24 | chr:19:22414379 |
| 19 rs4602157   | 22339036 C | 0.04735 | 1.74E-24 | chr:19:22414379 |
| 19 rs4616412   | 22339005 G | 0.04735 | 1.74E-24 | chr:19:22414379 |
| 19 rs4932750   | 22333226 T | 0.04735 | 1.74E-24 | chr:19:22414379 |
| 19 rs10426665  | 22428809 G | 0.0661  | 1.74E-24 | chr:19:22414379 |
| 19 rs11671580  | 22326439 A | 0.05259 | 1.85E-24 | chr:19:22414379 |
| 19 rs12610367  | 22320848 T | 0.09233 | 2.18E-24 | chr:19:22414379 |
| 19 rs11671130  | 22329455 C | 0.04813 | 2.24E-24 | chr:19:22414379 |
| 19 rs4372816   | 22328376 G | 0.04813 | 2.24E-24 | chr:19:22414379 |
| 19 rs76490109  | 22330225 A | 0.04813 | 2.24E-24 | chr:19:22414379 |
| 19 rs11666326  | 22377109 A | 0.04809 | 2.27E-24 | chr:19:22414379 |
| 19 rs74416263  | 22342767 T | 0.03627 | 2.30E-24 | chr:19:22414379 |
| 19 rs2884867   | 22380662 A | 982.4   | 2.47E-24 | chr:19:22414379 |
| 19 rs281183    | 22397080 T | 1038    | 3.29E-24 | chr:19:22414379 |
| 19 rs281184    | 22397099 C | 1029    | 3.70E-24 | chr:19:22414379 |
| 19 rs11561612  | 22432845 A | 0.0725  | 3.92E-24 | chr:19:22414379 |
| 19 rs111684505 | 22401097 G | 0.03874 | 4.75E-24 | chr:19:22414379 |
| 19 rs73021832  | 22316144 C | 0.119   | 1.20E-23 | chr:19:22414379 |
| 19 rs17470104  | 22424418 A | 0.03577 | 1.33E-23 | chr:19:22414379 |
| 19 rs4123726   | 22419677 T | 0.03577 | 1.44E-23 | chr:19:22414379 |
| 19 rs4123729   | 22418142 C | 0.03577 | 1.44E-23 | chr:19:22414379 |
| 19 rs55758909  | 22420558 A | 0.03577 | 1.44E-23 | chr:19:22414379 |
| 19 rs56144642  | 22421516 C | 0.03577 | 1.44E-23 | chr:19:22414379 |
| 19 rs111352604 | 22314567 G | 0.1191  | 1.46E-23 | chr:19:22414379 |
| 19 rs12610034  | 22314528 A | 0.119   | 1.63E-23 | chr:19:22414379 |
| 19 rs12459032  | 22365552 A | 1116    | 1.64E-23 | chr:19:22414379 |
| 19 rs28760999  | 22365862 T | 1116    | 1.64E-23 | chr:19:22414379 |
| 19 rs11085516  | 22431751 T | 0.0686  | 1.72E-23 | chr:19:22414379 |
| 19 rs1526883   | 22366973 T | 1106    | 1.85E-23 | chr:19:22414379 |
| 19 rs414983    | 22357747 C | 1160    | 2.00E-23 | chr:19:22414379 |
| 19 rs11673195  | 22313814 C | 0.1203  | 2.12E-23 | chr:19:22414379 |
| 19 rs11669110  | 22296485 G | 0.1225  | 2.28E-23 | chr:19:22414379 |
| 19 rs149975047 | 22287938 A | 0.1225  | 2.28E-23 | chr:19:22414379 |
| 19 rs1526884   | 22303651 G | 0.1225  | 2.28E-23 | chr:19:22414379 |

|                |            |        |          |                 |
|----------------|------------|--------|----------|-----------------|
| 19 rs17459246  | 22278121 C | 0.1225 | 2.28E-23 | chr:19:22414379 |
| 19 rs191067451 | 22288201 A | 0.1225 | 2.28E-23 | chr:19:22414379 |
| 19 rs199643795 | 22291325 A | 0.1225 | 2.28E-23 | chr:19:22414379 |
| 19 rs367972720 | 22291197 C | 0.1225 | 2.28E-23 | chr:19:22414379 |
| 19 rs372140746 | 22291198 C | 0.1225 | 2.28E-23 | chr:19:22414379 |
| 19 rs4932957   | 22304745 T | 0.1225 | 2.28E-23 | chr:19:22414379 |
| 19 rs55886600  | 22276437 A | 0.1225 | 2.28E-23 | chr:19:22414379 |
| 19 rs56073035  | 22276298 G | 0.1225 | 2.28E-23 | chr:19:22414379 |
| 19 rs56207853  | 22292357 T | 0.1225 | 2.28E-23 | chr:19:22414379 |
| 19 rs72481609  | 22296819 C | 0.1225 | 2.28E-23 | chr:19:22414379 |
| 19 rs73019889  | 22277826 G | 0.1225 | 2.28E-23 | chr:19:22414379 |
| 19 rs73019900  | 22286680 A | 0.1225 | 2.28E-23 | chr:19:22414379 |
| 19 rs12609368  | 22263996 C | 0.1228 | 2.32E-23 | chr:19:22414379 |
| 19 rs400419    | 22345405 T | 1155   | 2.55E-23 | chr:19:22414379 |
| 19 rs400661    | 22345337 T | 1155   | 2.55E-23 | chr:19:22414379 |
| 19 rs416928    | 22345369 C | 1155   | 2.55E-23 | chr:19:22414379 |
| 19 rs447533    | 22345393 A | 1155   | 2.55E-23 | chr:19:22414379 |
| 19 rs382357    | 22343507 G | 1110   | 2.62E-23 | chr:19:22414379 |
| 19 rs2188970   | 22200382 G | 0.1319 | 2.63E-23 | chr:19:22414379 |
| 19 rs283163    | 22455077 C | 7.434  | 2.70E-23 | chr:19:22414379 |
| 19 rs372252339 | 22291126 T | 0.1233 | 2.83E-23 | chr:19:22414379 |
| 19 rs390730    | 22233509 C | 0.1227 | 3.17E-23 | chr:19:22414379 |
| 19 rs408687    | 22231123 T | 0.1227 | 3.17E-23 | chr:19:22414379 |
| 19 rs409439    | 22227432 C | 0.1227 | 3.17E-23 | chr:19:22414379 |
| 19 rs409835    | 22230671 T | 0.1227 | 3.17E-23 | chr:19:22414379 |
| 19 rs411020    | 22231102 G | 0.1227 | 3.17E-23 | chr:19:22414379 |
| 19 rs422344    | 22230956 G | 0.1227 | 3.17E-23 | chr:19:22414379 |
| 19 rs425781    | 22229306 A | 0.1227 | 3.17E-23 | chr:19:22414379 |
| 19 rs436662    | 22232107 C | 0.1227 | 3.17E-23 | chr:19:22414379 |
| 19 rs112205850 | 22261876 A | 0.1235 | 3.28E-23 | chr:19:22414379 |
| 19 rs1978719   | 22266101 A | 0.1235 | 3.28E-23 | chr:19:22414379 |
| 19 rs55728714  | 22262899 G | 0.1235 | 3.28E-23 | chr:19:22414379 |
| 19 rs56369285  | 22267185 C | 0.1235 | 3.28E-23 | chr:19:22414379 |
| 19 rs113023530 | 22261617 A | 0.1266 | 3.64E-23 | chr:19:22414379 |
| 19 rs61268244  | 22310130 T | 0.1258 | 3.69E-23 | chr:19:22414379 |
| 19 rs431328    | 22222236 A | 0.1344 | 3.80E-23 | chr:19:22414379 |
| 19 rs7255049   | 22213111 A | 0.1344 | 3.80E-23 | chr:19:22414379 |
| 19 rs11085509  | 22204573 T | 0.1338 | 4.08E-23 | chr:19:22414379 |
| 19 rs1988568   | 22205566 C | 0.1338 | 4.08E-23 | chr:19:22414379 |
| 19 rs1989120   | 22205528 T | 0.1338 | 4.08E-23 | chr:19:22414379 |
| 19 rs4244912   | 22203237 T | 0.1338 | 4.08E-23 | chr:19:22414379 |
| 19 rs401424    | 22232023 A | 0.128  | 4.77E-23 | chr:19:22414379 |
| 19 rs439574    | 22232024 A | 0.128  | 4.77E-23 | chr:19:22414379 |

|                |            |         |          |                 |
|----------------|------------|---------|----------|-----------------|
| 19 rs11667209  | 22259467 G | 0.1238  | 4.90E-23 | chr:19:22414379 |
| 19 rs11667274  | 22259666 G | 0.1238  | 4.90E-23 | chr:19:22414379 |
| 19 rs149619063 | 22248189 G | 0.1238  | 4.90E-23 | chr:19:22414379 |
| 19 rs4932949   | 22238666 A | 0.1238  | 4.90E-23 | chr:19:22414379 |
| 19 rs4932950   | 22243488 G | 0.1238  | 4.90E-23 | chr:19:22414379 |
| 19 rs4932952   | 22246788 A | 0.1238  | 4.90E-23 | chr:19:22414379 |
| 19 rs55735642  | 22241176 T | 0.1238  | 4.90E-23 | chr:19:22414379 |
| 19 rs73019842  | 22249909 G | 0.1238  | 4.90E-23 | chr:19:22414379 |
| 19 rs73019844  | 22249925 C | 0.1238  | 4.90E-23 | chr:19:22414379 |
| 19 rs12608810  | 22342002 A | 0.09034 | 5.26E-23 | chr:19:22414379 |
| 19 rs12461632  | 22245089 A | 0.1243  | 6.04E-23 | chr:19:22414379 |
| 19 rs2188969   | 22202783 A | 0.1355  | 6.26E-23 | chr:19:22414379 |
| 19 rs283142    | 22445651 C | 0.1014  | 6.29E-23 | chr:19:22414379 |
| 19 rs73019838  | 22247732 A | 0.127   | 6.54E-23 | chr:19:22414379 |
| 19 rs283140    | 22447450 C | 0.1067  | 7.54E-23 | chr:19:22414379 |
| 19 rs440539    | 22359330 A | 1245    | 8.21E-23 | chr:19:22414379 |
| 19 rs1654508   | 22219276 A | 0.1374  | 8.29E-23 | chr:19:22414379 |
| 19 rs2017962   | 22208751 T | 0.1374  | 8.29E-23 | chr:19:22414379 |
| 19 rs2078089   | 22209753 A | 0.1374  | 8.29E-23 | chr:19:22414379 |
| 19 rs2359821   | 22208314 C | 0.1374  | 8.29E-23 | chr:19:22414379 |
| 19 rs374537    | 22222802 G | 0.1374  | 8.29E-23 | chr:19:22414379 |
| 19 rs404822    | 22215967 A | 0.1374  | 8.29E-23 | chr:19:22414379 |
| 19 rs429184    | 22214352 A | 0.1374  | 8.29E-23 | chr:19:22414379 |
| 19 rs436039    | 22214873 T | 0.1374  | 8.29E-23 | chr:19:22414379 |
| 19 rs1018912   | 22156585 G | 0.1402  | 1.03E-22 | chr:19:22414379 |
| 19 rs10420483  | 22190378 A | 0.1402  | 1.03E-22 | chr:19:22414379 |
| 19 rs4290587   | 22164646 A | 0.1402  | 1.03E-22 | chr:19:22414379 |
| 19 rs7249976   | 22183920 A | 0.1402  | 1.03E-22 | chr:19:22414379 |
| 19 rs59448173  | 22251554 T | 0.1328  | 1.06E-22 | chr:19:22414379 |
| 19 rs379619    | 22341905 C | 1408    | 1.14E-22 | chr:19:22414379 |
| 19 rs465978    | 22342421 A | 1408    | 1.14E-22 | chr:19:22414379 |
| 19 rs78408635  | 22339824 G | 1408    | 1.14E-22 | chr:19:22414379 |
| 19 rs79196382  | 22339817 A | 1408    | 1.14E-22 | chr:19:22414379 |
| 19 rs142623791 | 22173025 A | 0.1401  | 1.16E-22 | chr:19:22414379 |
| 19 rs113493783 | 22333975 G | 1396    | 1.16E-22 | chr:19:22414379 |
| 19 rs142745046 | 22334261 C | 1396    | 1.16E-22 | chr:19:22414379 |
| 19 rs411557    | 22333324 C | 1396    | 1.16E-22 | chr:19:22414379 |
| 19 rs459017    | 22330531 C | 1396    | 1.16E-22 | chr:19:22414379 |
| 19 rs459539    | 22330699 T | 1396    | 1.16E-22 | chr:19:22414379 |
| 19 rs462577    | 22335500 A | 1396    | 1.16E-22 | chr:19:22414379 |
| 19 rs10403375  | 22389248 T | 1397    | 1.18E-22 | chr:19:22414379 |
| 19 rs10411854  | 22377604 T | 1397    | 1.18E-22 | chr:19:22414379 |
| 19 rs10412921  | 22386545 T | 1397    | 1.18E-22 | chr:19:22414379 |

|                |            |        |          |                 |
|----------------|------------|--------|----------|-----------------|
| 19 rs10419384  | 22391239 G | 1397   | 1.18E-22 | chr:19:22414379 |
| 19 rs10419666  | 22364492 T | 1397   | 1.18E-22 | chr:19:22414379 |
| 19 rs10425845  | 22370672 A | 1397   | 1.18E-22 | chr:19:22414379 |
| 19 rs1378915   | 22362527 A | 1397   | 1.18E-22 | chr:19:22414379 |
| 19 rs1852426   | 22385097 T | 1397   | 1.18E-22 | chr:19:22414379 |
| 19 rs1852428   | 22380017 A | 1397   | 1.18E-22 | chr:19:22414379 |
| 19 rs1918161   | 22374023 T | 1397   | 1.18E-22 | chr:19:22414379 |
| 19 rs1918162   | 22373949 C | 1397   | 1.18E-22 | chr:19:22414379 |
| 19 rs1988038   | 22356993 C | 1397   | 1.18E-22 | chr:19:22414379 |
| 19 rs281176    | 22394319 T | 1397   | 1.18E-22 | chr:19:22414379 |
| 19 rs281178    | 22395581 A | 1397   | 1.18E-22 | chr:19:22414379 |
| 19 rs281179    | 22396158 T | 1397   | 1.18E-22 | chr:19:22414379 |
| 19 rs281180    | 22396190 G | 1397   | 1.18E-22 | chr:19:22414379 |
| 19 rs281181    | 22396809 T | 1397   | 1.18E-22 | chr:19:22414379 |
| 19 rs381995    | 22361666 C | 1397   | 1.18E-22 | chr:19:22414379 |
| 19 rs3934143   | 22392238 G | 1397   | 1.18E-22 | chr:19:22414379 |
| 19 rs412658    | 22359440 T | 1397   | 1.18E-22 | chr:19:22414379 |
| 19 rs427945    | 22356325 G | 1397   | 1.18E-22 | chr:19:22414379 |
| 19 rs428455    | 22357247 A | 1397   | 1.18E-22 | chr:19:22414379 |
| 19 rs436431    | 22360919 T | 1397   | 1.18E-22 | chr:19:22414379 |
| 19 rs4371283   | 22373810 T | 1397   | 1.18E-22 | chr:19:22414379 |
| 19 rs4584959   | 22368977 C | 1397   | 1.18E-22 | chr:19:22414379 |
| 19 rs557388    | 22353206 G | 1397   | 1.18E-22 | chr:19:22414379 |
| 19 rs7343077   | 22367925 T | 1397   | 1.18E-22 | chr:19:22414379 |
| 19 rs8104929   | 22375868 T | 1397   | 1.18E-22 | chr:19:22414379 |
| 19 rs2522322   | 22358015 A | 1391   | 1.20E-22 | chr:19:22414379 |
| 19 rs112297561 | 22341110 C | 1394   | 1.26E-22 | chr:19:22414379 |
| 19 rs371540    | 22344391 G | 1394   | 1.26E-22 | chr:19:22414379 |
| 19 rs386720    | 22342796 T | 1394   | 1.26E-22 | chr:19:22414379 |
| 19 rs399307    | 22345794 T | 1394   | 1.26E-22 | chr:19:22414379 |
| 19 rs408240    | 22346403 G | 1394   | 1.26E-22 | chr:19:22414379 |
| 19 rs414385    | 22338577 T | 1394   | 1.26E-22 | chr:19:22414379 |
| 19 rs427343    | 22346138 T | 1394   | 1.26E-22 | chr:19:22414379 |
| 19 rs451905    | 22345649 T | 1394   | 1.26E-22 | chr:19:22414379 |
| 19 rs465150    | 22342486 G | 1394   | 1.26E-22 | chr:19:22414379 |
| 19 rs546256    | 22339777 T | 1394   | 1.26E-22 | chr:19:22414379 |
| 19 rs56256419  | 22345457 A | 1394   | 1.26E-22 | chr:19:22414379 |
| 19 rs56284384  | 22345461 T | 1394   | 1.26E-22 | chr:19:22414379 |
| 19 rs78957365  | 22341032 C | 1394   | 1.26E-22 | chr:19:22414379 |
| 19 rs10416248  | 22115865 A | 8.081  | 1.28E-22 | chr:19:22414379 |
| 19 rs2106869   | 22184693 C | 0.1405 | 1.28E-22 | chr:19:22414379 |
| 19 rs112826254 | 22334192 A | 1382   | 1.29E-22 | chr:19:22414379 |
| 19 rs395410    | 22336307 T | 1382   | 1.29E-22 | chr:19:22414379 |

|                |            |      |          |                 |
|----------------|------------|------|----------|-----------------|
| 19 rs420977    | 22335762 T | 1382 | 1.29E-22 | chr:19:22414379 |
| 19 rs421261    | 22334418 C | 1382 | 1.29E-22 | chr:19:22414379 |
| 19 rs457504    | 22331109 A | 1382 | 1.29E-22 | chr:19:22414379 |
| 19 rs458172    | 22329400 G | 1382 | 1.29E-22 | chr:19:22414379 |
| 19 rs461312    | 22333288 A | 1382 | 1.29E-22 | chr:19:22414379 |
| 19 rs461804    | 22328560 C | 1382 | 1.29E-22 | chr:19:22414379 |
| 19 rs462671    | 22328850 T | 1382 | 1.29E-22 | chr:19:22414379 |
| 19 rs465380    | 22335068 C | 1382 | 1.29E-22 | chr:19:22414379 |
| 19 rs76608558  | 22334370 A | 1382 | 1.29E-22 | chr:19:22414379 |
| 19 rs10419926  | 22364620 G | 1387 | 1.31E-22 | chr:19:22414379 |
| 19 rs10417143  | 22373303 A | 1383 | 1.31E-22 | chr:19:22414379 |
| 19 rs10418058  | 22391275 A | 1383 | 1.31E-22 | chr:19:22414379 |
| 19 rs10421426  | 22366423 T | 1383 | 1.31E-22 | chr:19:22414379 |
| 19 rs111581976 | 22370897 T | 1383 | 1.31E-22 | chr:19:22414379 |
| 19 rs121382    | 22348657 T | 1383 | 1.31E-22 | chr:19:22414379 |
| 19 rs1830172   | 22388211 T | 1383 | 1.31E-22 | chr:19:22414379 |
| 19 rs1852427   | 22375002 G | 1383 | 1.31E-22 | chr:19:22414379 |
| 19 rs2214352   | 22350938 C | 1383 | 1.31E-22 | chr:19:22414379 |
| 19 rs2360001   | 22379587 T | 1383 | 1.31E-22 | chr:19:22414379 |
| 19 rs2360002   | 22383362 A | 1383 | 1.31E-22 | chr:19:22414379 |
| 19 rs2522318   | 22350385 T | 1383 | 1.31E-22 | chr:19:22414379 |
| 19 rs2522319   | 22356056 C | 1383 | 1.31E-22 | chr:19:22414379 |
| 19 rs2522321   | 22358014 A | 1383 | 1.31E-22 | chr:19:22414379 |
| 19 rs281174    | 22392420 C | 1383 | 1.31E-22 | chr:19:22414379 |
| 19 rs28790613  | 22378639 T | 1383 | 1.31E-22 | chr:19:22414379 |
| 19 rs366501    | 22352375 C | 1383 | 1.31E-22 | chr:19:22414379 |
| 19 rs383678    | 22361741 C | 1383 | 1.31E-22 | chr:19:22414379 |
| 19 rs3855858   | 22385901 A | 1383 | 1.31E-22 | chr:19:22414379 |
| 19 rs409627    | 22357936 C | 1383 | 1.31E-22 | chr:19:22414379 |
| 19 rs427500    | 22356757 T | 1383 | 1.31E-22 | chr:19:22414379 |
| 19 rs436744    | 22355575 A | 1383 | 1.31E-22 | chr:19:22414379 |
| 19 rs445788    | 22354323 A | 1383 | 1.31E-22 | chr:19:22414379 |
| 19 rs446754    | 22361761 G | 1383 | 1.31E-22 | chr:19:22414379 |
| 19 rs449891    | 22352161 A | 1383 | 1.31E-22 | chr:19:22414379 |
| 19 rs453104    | 22354405 A | 1383 | 1.31E-22 | chr:19:22414379 |
| 19 rs4614861   | 22373841 C | 1383 | 1.31E-22 | chr:19:22414379 |
| 19 rs4932963   | 22388931 T | 1383 | 1.31E-22 | chr:19:22414379 |
| 19 rs682866    | 22360309 T | 1383 | 1.31E-22 | chr:19:22414379 |
| 19 rs7343076   | 22367903 C | 1383 | 1.31E-22 | chr:19:22414379 |
| 19 rs7343146   | 22369930 A | 1383 | 1.31E-22 | chr:19:22414379 |
| 19 rs8105545   | 22376246 T | 1383 | 1.31E-22 | chr:19:22414379 |
| 19 rs8106346   | 22376315 C | 1383 | 1.31E-22 | chr:19:22414379 |
| 19 rs6511309   | 22174292 T | 0.14 | 1.31E-22 | chr:19:22414379 |



|                |            |        |          |                 |
|----------------|------------|--------|----------|-----------------|
| 19 rs9636187   | 22173370 T | 0.14   | 1.31E-22 | chr:19:22414379 |
| 19 rs430560    | 22353560 C | 1376   | 1.43E-22 | chr:19:22414379 |
| 19 rs17769372  | 22114704 C | 8.033  | 1.58E-22 | chr:19:22414379 |
| 19 rs1848994   | 22111366 A | 8.033  | 1.58E-22 | chr:19:22414379 |
| 19 rs369128    | 22107866 T | 8.033  | 1.58E-22 | chr:19:22414379 |
| 19 rs283144    | 22439446 C | 0.1189 | 2.63E-22 | chr:19:22414379 |
| 19 rs10404322  | 22110669 G | 7.882  | 3.05E-22 | chr:19:22414379 |
| 19 rs11085518  | 22434898 C | 0.1188 | 4.13E-22 | chr:19:22414379 |
| 19 rs11085519  | 22434908 T | 0.1188 | 4.13E-22 | chr:19:22414379 |
| 19 rs11085520  | 22434988 G | 0.1188 | 4.13E-22 | chr:19:22414379 |
| 19 rs11085521  | 22435049 T | 0.1188 | 4.13E-22 | chr:19:22414379 |
| 19 rs8109519   | 22435128 T | 0.1188 | 4.13E-22 | chr:19:22414379 |
| 19 rs8108027   | 22115901 C | 7.642  | 4.55E-22 | chr:19:22414379 |
| 19 rs2360006   | 22433903 T | 0.1193 | 5.29E-22 | chr:19:22414379 |
| 19 rs8110568   | 22435291 C | 0.1194 | 5.39E-22 | chr:19:22414379 |
| 19 rs11085517  | 22433283 T | 0.1199 | 5.48E-22 | chr:19:22414379 |
| 19 rs55771377  | 22433422 G | 0.1199 | 5.48E-22 | chr:19:22414379 |
| 19 rs2666447   | 22132868 T | 0.1541 | 7.69E-22 | chr:19:22414379 |
| 19 rs2017521   | 22126138 T | 0.1539 | 8.08E-22 | chr:19:22414379 |
| 19 rs2175366   | 22128279 C | 0.1539 | 8.08E-22 | chr:19:22414379 |
| 19 rs2522104   | 22140849 T | 0.1539 | 8.08E-22 | chr:19:22414379 |
| 19 rs765527    | 22129555 C | 0.1539 | 8.08E-22 | chr:19:22414379 |
| 19 rs8109649   | 22435344 G | 0.1254 | 8.23E-22 | chr:19:22414379 |
| 19 rs8109766   | 22435340 T | 0.1254 | 8.23E-22 | chr:19:22414379 |
| 19 rs8112637   | 22435375 T | 0.1254 | 8.23E-22 | chr:19:22414379 |
| 19 rs281185    | 22398525 G | 1777   | 8.58E-22 | chr:19:22414379 |
| 19 rs440597    | 22096519 C | 7.502  | 9.18E-22 | chr:19:22414379 |
| 19 rs281182    | 22396907 T | 1765   | 9.35E-22 | chr:19:22414379 |
| 19 rs385774    | 22096075 A | 7.519  | 9.46E-22 | chr:19:22414379 |
| 19 rs57051328  | 22435951 A | 0.1294 | 1.13E-21 | chr:19:22414379 |
| 19 rs57684949  | 22435886 C | 0.1294 | 1.13E-21 | chr:19:22414379 |
| 19 rs61387248  | 22435806 A | 0.1294 | 1.13E-21 | chr:19:22414379 |
| 19 rs2262909   | 22135270 A | 0.1544 | 1.58E-21 | chr:19:22414379 |
| 19 rs183691981 | 22291525 C | 0.1427 | 2.19E-21 | chr:19:22414379 |
| 19 rs281162    | 22418472 A | 2154   | 2.90E-21 | chr:19:22414379 |
| 19 rs281170    | 22423336 T | 2154   | 2.90E-21 | chr:19:22414379 |
| 19 rs281190    | 22399788 G | 2079   | 3.04E-21 | chr:19:22414379 |
| 19 rs281160    | 22418046 T | 2147   | 3.06E-21 | chr:19:22414379 |
| 19 rs283139    | 22448069 C | 0.14   | 3.15E-21 | chr:19:22414379 |
| 19 rs2359996   | 22285500 T | 0.1652 | 4.48E-21 | chr:19:22414379 |
| 19 rs61649777  | 22436915 G | 0.1514 | 2.21E-20 | chr:19:22414379 |
| 19 rs281186    | 22398960 A | 2827   | 9.99E-20 | chr:19:22414379 |
| 19 rs281187    | 22399362 T | 2827   | 9.99E-20 | chr:19:22414379 |

|                |            |        |          |                 |
|----------------|------------|--------|----------|-----------------|
| 19 rs281188    | 22399389 A | 2827   | 9.99E-20 | chr:19:22414379 |
| 19 rs281191    | 22400166 C | 2827   | 9.99E-20 | chr:19:22414379 |
| 19 rs281193    | 22400609 A | 2827   | 9.99E-20 | chr:19:22414379 |
| 19 rs281194    | 22400802 A | 2827   | 9.99E-20 | chr:19:22414379 |
| 19 rs410794    | 22226159 G | 5.376  | 1.00E-19 | chr:19:22414379 |
| 19 rs281189    | 22399448 T | 2803   | 1.10E-19 | chr:19:22414379 |
| 19 rs283146    | 22438180 C | 0.1677 | 1.22E-19 | chr:19:22414379 |
| 19 rs2023338   | 22443261 T | 16.48  | 1.94E-19 | chr:19:22414379 |
| 19 rs183543741 | 22289845 T | 0.213  | 2.58E-19 | chr:19:22414379 |
| 19 rs193152926 | 22289796 A | 0.213  | 2.58E-19 | chr:19:22414379 |
| 19 rs375012052 | 22289851 A | 0.213  | 2.58E-19 | chr:19:22414379 |
| 19 rs281197    | 22404604 C | 3760   | 1.06E-18 | chr:19:22414379 |
| 19 rs2694449   | 22404047 A | 3739   | 1.13E-18 | chr:19:22414379 |
| 19 rs281195    | 22402480 T | 3739   | 1.13E-18 | chr:19:22414379 |
| 19 rs281199    | 22405501 T | 3739   | 1.13E-18 | chr:19:22414379 |
| 19 rs281200    | 22405888 G | 3739   | 1.13E-18 | chr:19:22414379 |
| 19 rs1651558   | 22089575 T | 5.628  | 2.97E-18 | chr:19:22414379 |
| 19 rs62119970  | 22417828 G | 4184   | 4.97E-18 | chr:19:22414379 |
| 19 rs60866819  | 22334909 C | 26.66  | 9.07E-18 | chr:19:22414379 |
| 19 rs62112416  | 22343674 C | 26.66  | 9.07E-18 | chr:19:22414379 |
| 19 rs62112447  | 22379833 G | 26.29  | 1.24E-17 | chr:19:22414379 |
| 19 rs62112374  | 22329197 T | 26.24  | 1.25E-17 | chr:19:22414379 |
| 19 rs62112420  | 22351653 G | 26.16  | 1.38E-17 | chr:19:22414379 |
| 19 rs62118346  | 22396430 A | 26.16  | 1.38E-17 | chr:19:22414379 |
| 19 rs28792372  | 22096971 C | 0.2324 | 1.43E-17 | chr:19:22414379 |
| 19 rs3867185   | 22413097 T | 25.98  | 1.68E-17 | chr:19:22414379 |
| 19 rs62119969  | 22405446 C | 25.98  | 1.68E-17 | chr:19:22414379 |
| 19 rs200235951 | 22368291 A | 0.1596 | 3.65E-17 | chr:19:22414379 |
| 19 rs58950778  | 22432275 T | 7.828  | 4.18E-17 | chr:19:22414379 |
| 19 rs371889380 | 22289791 T | 0.2653 | 1.98E-16 | chr:19:22414379 |
| 19 rs62112373  | 22319825 A | 16.23  | 6.92E-16 | chr:19:22414379 |
| 19 rs17554694  | 22317148 A | 16.15  | 7.57E-16 | chr:19:22414379 |
| 19 rs10415826  | 22248317 T | 12.09  | 9.17E-16 | chr:19:22414379 |
| 19 rs62119972  | 22425682 C | 21.04  | 1.03E-15 | chr:19:22414379 |
| 19 rs62112369  | 22313901 T | 17.57  | 1.87E-15 | chr:19:22414379 |
| 19 rs6511327   | 22286899 A | 9.518  | 2.10E-15 | chr:19:22414379 |
| 19 rs10401167  | 22291942 A | 15.4   | 2.18E-15 | chr:19:22414379 |
| 19 rs10425828  | 22283077 G | 15.4   | 2.18E-15 | chr:19:22414379 |
| 19 rs62111040  | 22287511 A | 15.4   | 2.18E-15 | chr:19:22414379 |
| 19 rs6511328   | 22286979 A | 15.4   | 2.18E-15 | chr:19:22414379 |
| 19 rs7256462   | 22281993 C | 15.4   | 2.18E-15 | chr:19:22414379 |
| 19 rs7259807   | 22291476 G | 15.4   | 2.18E-15 | chr:19:22414379 |
| 19 rs7260331   | 22291771 T | 15.4   | 2.18E-15 | chr:19:22414379 |

|                |            |       |          |                 |
|----------------|------------|-------|----------|-----------------|
| 19 rs8103279   | 22284340 G | 15.4  | 2.18E-15 | chr:19:22414379 |
| 19 rs8103374   | 22284319 T | 15.4  | 2.18E-15 | chr:19:22414379 |
| 19 rs8106762   | 22284736 T | 15.4  | 2.18E-15 | chr:19:22414379 |
| 19 rs62111039  | 22287336 G | 15.24 | 2.52E-15 | chr:19:22414379 |
| 19 rs79005568  | 22288069 G | 13.66 | 2.72E-15 | chr:19:22414379 |
| 19 rs62110861  | 22095764 T | 10.7  | 2.95E-15 | chr:19:22414379 |
| 19 rs10417916  | 22272615 C | 15.13 | 3.15E-15 | chr:19:22414379 |
| 19 rs10418804  | 22273015 C | 15.13 | 3.15E-15 | chr:19:22414379 |
| 19 rs10423457  | 22279267 C | 15.13 | 3.15E-15 | chr:19:22414379 |
| 19 rs10424447  | 22274042 G | 15.13 | 3.15E-15 | chr:19:22414379 |
| 19 rs10426159  | 22267324 A | 15.13 | 3.15E-15 | chr:19:22414379 |
| 19 rs1968446   | 22279047 C | 15.13 | 3.15E-15 | chr:19:22414379 |
| 19 rs2043319   | 22274595 G | 15.13 | 3.15E-15 | chr:19:22414379 |
| 19 rs28374572  | 22276478 C | 15.13 | 3.15E-15 | chr:19:22414379 |
| 19 rs28547927  | 22277137 A | 15.13 | 3.15E-15 | chr:19:22414379 |
| 19 rs28600030  | 22268443 A | 15.13 | 3.15E-15 | chr:19:22414379 |
| 19 rs28635943  | 22268712 T | 15.13 | 3.15E-15 | chr:19:22414379 |
| 19 rs6511321   | 22270068 G | 15.13 | 3.15E-15 | chr:19:22414379 |
| 19 rs8100768   | 22270468 C | 15.13 | 3.15E-15 | chr:19:22414379 |
| 19 rs12151358  | 22282608 A | 15.07 | 3.33E-15 | chr:19:22414379 |
| 19 rs145591522 | 22282893 G | 15.07 | 3.33E-15 | chr:19:22414379 |
| 19 rs1560716   | 22305901 G | 15.07 | 3.33E-15 | chr:19:22414379 |
| 19 rs1560717   | 22292247 G | 15.07 | 3.33E-15 | chr:19:22414379 |
| 19 rs1975168   | 22305826 T | 15.07 | 3.33E-15 | chr:19:22414379 |
| 19 rs1975169   | 22292098 A | 15.07 | 3.33E-15 | chr:19:22414379 |
| 19 rs62111032  | 22281349 G | 15.07 | 3.33E-15 | chr:19:22414379 |
| 19 rs62111033  | 22283395 A | 15.07 | 3.33E-15 | chr:19:22414379 |
| 19 rs62111034  | 22284720 C | 15.07 | 3.33E-15 | chr:19:22414379 |
| 19 rs62111037  | 22286563 T | 15.07 | 3.33E-15 | chr:19:22414379 |
| 19 rs62111038  | 22286614 G | 15.07 | 3.33E-15 | chr:19:22414379 |
| 19 rs62112362  | 22293113 G | 15.07 | 3.33E-15 | chr:19:22414379 |
| 19 rs62112364  | 22294903 A | 15.07 | 3.33E-15 | chr:19:22414379 |
| 19 rs7252547   | 22305481 C | 15.07 | 3.33E-15 | chr:19:22414379 |
| 19 rs7254050   | 22286741 A | 15.07 | 3.33E-15 | chr:19:22414379 |
| 19 rs959908    | 22281893 C | 15.07 | 3.33E-15 | chr:19:22414379 |
| 19 rs988211    | 22302536 T | 15.07 | 3.33E-15 | chr:19:22414379 |
| 19 rs62111027  | 22269019 C | 15.05 | 3.44E-15 | chr:19:22414379 |
| 19 rs10406485  | 22245002 T | 13.47 | 3.82E-15 | chr:19:22414379 |
| 19 rs111790701 | 22438463 T | 15.07 | 3.85E-15 | chr:19:22414379 |
| 19 rs143883891 | 22109757 C | 10.59 | 3.99E-15 | chr:19:22414379 |
| 19 rs62110863  | 22100508 C | 10.59 | 3.99E-15 | chr:19:22414379 |
| 19 rs62112368  | 22306775 A | 14.93 | 4.18E-15 | chr:19:22414379 |
| 19 rs10401922  | 22253252 A | 14.91 | 4.40E-15 | chr:19:22414379 |

|               |            |       |          |                 |
|---------------|------------|-------|----------|-----------------|
| 19 rs10404669 | 22241218 C | 14.91 | 4.40E-15 | chr:19:22414379 |
| 19 rs10405613 | 22244772 T | 14.91 | 4.40E-15 | chr:19:22414379 |
| 19 rs10405673 | 22244890 G | 14.91 | 4.40E-15 | chr:19:22414379 |
| 19 rs10406119 | 22245009 A | 14.91 | 4.40E-15 | chr:19:22414379 |
| 19 rs10406551 | 22244520 A | 14.91 | 4.40E-15 | chr:19:22414379 |
| 19 rs10406553 | 22237801 T | 14.91 | 4.40E-15 | chr:19:22414379 |
| 19 rs10406653 | 22238023 T | 14.91 | 4.40E-15 | chr:19:22414379 |
| 19 rs10407173 | 22246663 T | 14.91 | 4.40E-15 | chr:19:22414379 |
| 19 rs10407250 | 22238151 A | 14.91 | 4.40E-15 | chr:19:22414379 |
| 19 rs10408150 | 22245225 C | 14.91 | 4.40E-15 | chr:19:22414379 |
| 19 rs10411275 | 22259469 G | 14.91 | 4.40E-15 | chr:19:22414379 |
| 19 rs10411943 | 22259782 G | 14.91 | 4.40E-15 | chr:19:22414379 |
| 19 rs10412953 | 22238482 G | 14.91 | 4.40E-15 | chr:19:22414379 |
| 19 rs10413784 | 22246191 G | 14.91 | 4.40E-15 | chr:19:22414379 |
| 19 rs10415794 | 22248221 T | 14.91 | 4.40E-15 | chr:19:22414379 |
| 19 rs10415930 | 22248088 A | 14.91 | 4.40E-15 | chr:19:22414379 |
| 19 rs10417285 | 22248184 C | 14.91 | 4.40E-15 | chr:19:22414379 |
| 19 rs10419142 | 22252262 T | 14.91 | 4.40E-15 | chr:19:22414379 |
| 19 rs10420019 | 22251905 A | 14.91 | 4.40E-15 | chr:19:22414379 |
| 19 rs10420042 | 22251926 A | 14.91 | 4.40E-15 | chr:19:22414379 |
| 19 rs10422289 | 22256060 T | 14.91 | 4.40E-15 | chr:19:22414379 |
| 19 rs10423114 | 22249289 G | 14.91 | 4.40E-15 | chr:19:22414379 |
| 19 rs10423522 | 22243448 T | 14.91 | 4.40E-15 | chr:19:22414379 |
| 19 rs10423881 | 22243422 A | 14.91 | 4.40E-15 | chr:19:22414379 |
| 19 rs2043315  | 22252823 C | 14.91 | 4.40E-15 | chr:19:22414379 |
| 19 rs2043316  | 22251204 T | 14.91 | 4.40E-15 | chr:19:22414379 |
| 19 rs2043317  | 22251096 C | 14.91 | 4.40E-15 | chr:19:22414379 |
| 19 rs2163835  | 22242679 T | 14.91 | 4.40E-15 | chr:19:22414379 |
| 19 rs2163836  | 22242277 T | 14.91 | 4.40E-15 | chr:19:22414379 |
| 19 rs2163837  | 22242236 A | 14.91 | 4.40E-15 | chr:19:22414379 |
| 19 rs2359833  | 22242221 G | 14.91 | 4.40E-15 | chr:19:22414379 |
| 19 rs28822164 | 22245108 A | 14.91 | 4.40E-15 | chr:19:22414379 |
| 19 rs28857211 | 22243104 C | 14.91 | 4.40E-15 | chr:19:22414379 |
| 19 rs28894669 | 22243264 A | 14.91 | 4.40E-15 | chr:19:22414379 |
| 19 rs4257328  | 22240090 A | 14.91 | 4.40E-15 | chr:19:22414379 |
| 19 rs4510150  | 22239669 G | 14.91 | 4.40E-15 | chr:19:22414379 |
| 19 rs4542784  | 22239751 A | 14.91 | 4.40E-15 | chr:19:22414379 |
| 19 rs6511314  | 22236395 A | 14.91 | 4.40E-15 | chr:19:22414379 |
| 19 rs6511315  | 22236503 A | 14.91 | 4.40E-15 | chr:19:22414379 |
| 19 rs6511316  | 22237629 C | 14.91 | 4.40E-15 | chr:19:22414379 |
| 19 rs7247041  | 22249790 A | 14.91 | 4.40E-15 | chr:19:22414379 |
| 19 rs7247147  | 22249858 C | 14.91 | 4.40E-15 | chr:19:22414379 |
| 19 rs7247228  | 22250136 T | 14.91 | 4.40E-15 | chr:19:22414379 |

|                |            |       |          |                 |
|----------------|------------|-------|----------|-----------------|
| 19 rs7248305   | 22250271 A | 14.91 | 4.40E-15 | chr:19:22414379 |
| 19 rs7249591   | 22245345 C | 14.91 | 4.40E-15 | chr:19:22414379 |
| 19 rs7250852   | 22250510 A | 14.91 | 4.40E-15 | chr:19:22414379 |
| 19 rs7250905   | 22250743 T | 14.91 | 4.40E-15 | chr:19:22414379 |
| 19 rs7251660   | 22250614 C | 14.91 | 4.40E-15 | chr:19:22414379 |
| 19 rs7251884   | 22245530 T | 14.91 | 4.40E-15 | chr:19:22414379 |
| 19 rs7252023   | 22245646 G | 14.91 | 4.40E-15 | chr:19:22414379 |
| 19 rs7252550   | 22246017 T | 14.91 | 4.40E-15 | chr:19:22414379 |
| 19 rs7253053   | 22245685 C | 14.91 | 4.40E-15 | chr:19:22414379 |
| 19 rs7259971   | 22237319 G | 14.91 | 4.40E-15 | chr:19:22414379 |
| 19 rs8103518   | 22246952 C | 14.91 | 4.40E-15 | chr:19:22414379 |
| 19 rs8104144   | 22246913 C | 14.91 | 4.40E-15 | chr:19:22414379 |
| 19 rs8104630   | 22247277 C | 14.91 | 4.40E-15 | chr:19:22414379 |
| 19 rs8108651   | 22251464 G | 14.91 | 4.40E-15 | chr:19:22414379 |
| 19 rs8108976   | 22251701 A | 14.91 | 4.40E-15 | chr:19:22414379 |
| 19 rs8110047   | 22239502 G | 14.91 | 4.40E-15 | chr:19:22414379 |
| 19 rs8110841   | 22239436 C | 14.91 | 4.40E-15 | chr:19:22414379 |
| 19 rs9653142   | 22249596 G | 14.91 | 4.40E-15 | chr:19:22414379 |
| 19 rs9653157   | 22249490 C | 14.91 | 4.40E-15 | chr:19:22414379 |
| 19 rs9973249   | 22242160 A | 14.91 | 4.40E-15 | chr:19:22414379 |
| 19 rs62110990  | 22260441 T | 14.87 | 4.48E-15 | chr:19:22414379 |
| 19 rs16998834  | 22267037 C | 14.81 | 4.78E-15 | chr:19:22414379 |
| 19 rs62110989  | 22260299 G | 14.81 | 4.78E-15 | chr:19:22414379 |
| 19 rs62110992  | 22261516 G | 14.81 | 4.78E-15 | chr:19:22414379 |
| 19 rs62110993  | 22268260 A | 14.81 | 4.78E-15 | chr:19:22414379 |
| 19 rs62111028  | 22272397 T | 14.81 | 4.78E-15 | chr:19:22414379 |
| 19 rs62111029  | 22276601 A | 14.81 | 4.78E-15 | chr:19:22414379 |
| 19 rs62111030  | 22279375 A | 14.81 | 4.78E-15 | chr:19:22414379 |
| 19 rs368701052 | 22255803 A | 14.88 | 4.91E-15 | chr:19:22414379 |
| 19 rs10419184  | 22252342 G | 14.81 | 4.93E-15 | chr:19:22414379 |
| 19 rs10420898  | 22252331 C | 14.81 | 4.93E-15 | chr:19:22414379 |
| 19 rs10414685  | 22247749 T | 14.71 | 5.83E-15 | chr:19:22414379 |
| 19 rs10414861  | 22247761 G | 14.71 | 5.83E-15 | chr:19:22414379 |
| 19 rs8110969   | 22240222 T | 14.72 | 5.92E-15 | chr:19:22414379 |
| 19 rs8111854   | 22240213 C | 14.72 | 5.92E-15 | chr:19:22414379 |
| 19 rs11878866  | 22144367 C | 14.75 | 6.24E-15 | chr:19:22414379 |
| 19 rs11881563  | 22144992 T | 14.75 | 6.24E-15 | chr:19:22414379 |
| 19 rs11882234  | 22145727 T | 14.75 | 6.24E-15 | chr:19:22414379 |
| 19 rs1849004   | 22142455 C | 14.75 | 6.24E-15 | chr:19:22414379 |
| 19 rs57912102  | 22136043 C | 14.75 | 6.24E-15 | chr:19:22414379 |
| 19 rs79846980  | 22141343 C | 14.75 | 6.24E-15 | chr:19:22414379 |
| 19 rs8100042   | 22127841 A | 14.75 | 6.24E-15 | chr:19:22414379 |
| 19 rs8113460   | 22128006 T | 14.75 | 6.24E-15 | chr:19:22414379 |

|                |            |       |          |                 |
|----------------|------------|-------|----------|-----------------|
| 19 rs116220423 | 22237041 A | 14.6  | 6.64E-15 | chr:19:22414379 |
| 19 rs2359835   | 22242690 G | 14.6  | 6.64E-15 | chr:19:22414379 |
| 19 rs377529013 | 22242455 A | 14.6  | 6.64E-15 | chr:19:22414379 |
| 19 rs62110979  | 22245152 C | 14.6  | 6.64E-15 | chr:19:22414379 |
| 19 rs62110980  | 22245191 A | 14.6  | 6.64E-15 | chr:19:22414379 |
| 19 rs62110981  | 22246013 G | 14.6  | 6.64E-15 | chr:19:22414379 |
| 19 rs62110984  | 22252332 A | 14.6  | 6.64E-15 | chr:19:22414379 |
| 19 rs62110985  | 22256077 G | 14.6  | 6.64E-15 | chr:19:22414379 |
| 19 rs62110986  | 22256771 A | 14.6  | 6.64E-15 | chr:19:22414379 |
| 19 rs62110987  | 22257295 C | 14.6  | 6.64E-15 | chr:19:22414379 |
| 19 rs62110988  | 22259956 T | 14.6  | 6.64E-15 | chr:19:22414379 |
| 19 rs62112956  | 22235910 A | 14.6  | 6.64E-15 | chr:19:22414379 |
| 19 rs62112957  | 22238259 T | 14.6  | 6.64E-15 | chr:19:22414379 |
| 19 rs62112958  | 22239118 G | 14.6  | 6.64E-15 | chr:19:22414379 |
| 19 rs7246007   | 22240596 C | 14.6  | 6.64E-15 | chr:19:22414379 |
| 19 rs7252220   | 22245564 A | 14.6  | 6.64E-15 | chr:19:22414379 |
| 19 rs7252380   | 22245715 A | 14.6  | 6.64E-15 | chr:19:22414379 |
| 19 rs7252772   | 22245459 A | 14.6  | 6.64E-15 | chr:19:22414379 |
| 19 rs78646027  | 22257410 T | 14.6  | 6.64E-15 | chr:19:22414379 |
| 19 rs8110289   | 22239717 G | 14.6  | 6.64E-15 | chr:19:22414379 |
| 19 rs62110991  | 22260842 T | 6.815 | 8.16E-15 | chr:19:22414379 |
| 19 rs75167249  | 22128655 T | 14.57 | 8.26E-15 | chr:19:22414379 |
| 19 rs8110975   | 22240233 G | 14.41 | 8.93E-15 | chr:19:22414379 |
| 19 rs62112918  | 22227079 T | 16.28 | 9.27E-15 | chr:19:22414379 |
| 19 rs62112919  | 22227145 C | 16.28 | 9.27E-15 | chr:19:22414379 |
| 19 rs62112920  | 22227149 G | 16.28 | 9.27E-15 | chr:19:22414379 |
| 19 rs62112921  | 22227577 C | 16.28 | 9.27E-15 | chr:19:22414379 |
| 19 rs62112922  | 22228340 T | 16.28 | 9.27E-15 | chr:19:22414379 |
| 19 rs62112955  | 22234959 T | 16.28 | 9.27E-15 | chr:19:22414379 |
| 19 rs75025987  | 22230669 A | 16.28 | 9.27E-15 | chr:19:22414379 |
| 19 rs12461491  | 22304761 G | 12.55 | 1.06E-14 | chr:19:22414379 |
| 19 rs12461499  | 22304581 A | 12.55 | 1.06E-14 | chr:19:22414379 |
| 19 rs61237480  | 22306505 T | 12.55 | 1.06E-14 | chr:19:22414379 |
| 19 rs17701834  | 22121458 G | 14.41 | 1.09E-14 | chr:19:22414379 |
| 19 rs62112917  | 22226580 T | 16.14 | 1.12E-14 | chr:19:22414379 |
| 19 rs73021816  | 22306321 A | 12.42 | 1.16E-14 | chr:19:22414379 |
| 19 rs12150930  | 22223687 C | 14.2  | 1.32E-14 | chr:19:22414379 |
| 19 rs56064722  | 22312293 T | 12.44 | 1.38E-14 | chr:19:22414379 |
| 19 rs73021825  | 22313577 A | 12.44 | 1.38E-14 | chr:19:22414379 |
| 19 rs76995772  | 22311909 A | 12.44 | 1.38E-14 | chr:19:22414379 |
| 19 rs62111035  | 22286450 G | 5.416 | 1.42E-14 | chr:19:22414379 |
| 19 rs17450788  | 22224755 C | 14.11 | 1.46E-14 | chr:19:22414379 |
| 19 rs62112915  | 22223179 A | 14.11 | 1.46E-14 | chr:19:22414379 |

|                |            |       |          |                 |
|----------------|------------|-------|----------|-----------------|
| 19 rs369217217 | 22289248 C | 18.4  | 1.53E-14 | chr:19:22414379 |
| 19 rs73021823  | 22310164 A | 11.31 | 1.72E-14 | chr:19:22414379 |
| 19 rs117638181 | 22163014 G | 11.53 | 1.73E-14 | chr:19:22414379 |
| 19 rs2359811   | 22152876 G | 11.53 | 1.73E-14 | chr:19:22414379 |
| 19 rs62112863  | 22164515 G | 11.53 | 1.73E-14 | chr:19:22414379 |
| 19 rs62112871  | 22185295 C | 11.53 | 1.73E-14 | chr:19:22414379 |
| 19 rs62112872  | 22192425 C | 12.56 | 1.87E-14 | chr:19:22414379 |
| 19 rs62112865  | 22172333 T | 10.62 | 1.91E-14 | chr:19:22414379 |
| 19 rs11881224  | 22220340 A | 13.9  | 2.01E-14 | chr:19:22414379 |
| 19 rs2078180   | 22209846 A | 13.9  | 2.01E-14 | chr:19:22414379 |
| 19 rs2359820   | 22208114 T | 13.9  | 2.01E-14 | chr:19:22414379 |
| 19 rs60548522  | 22214874 A | 13.9  | 2.01E-14 | chr:19:22414379 |
| 19 rs62112907  | 22209569 G | 13.9  | 2.01E-14 | chr:19:22414379 |
| 19 rs62112908  | 22213956 G | 13.9  | 2.01E-14 | chr:19:22414379 |
| 19 rs62112913  | 22221067 G | 13.9  | 2.01E-14 | chr:19:22414379 |
| 19 rs62112914  | 22221407 A | 13.9  | 2.01E-14 | chr:19:22414379 |
| 19 rs6511313   | 22215905 A | 13.9  | 2.01E-14 | chr:19:22414379 |
| 19 rs8104559   | 22205167 C | 13.9  | 2.01E-14 | chr:19:22414379 |
| 19 rs8105895   | 22215457 T | 13.9  | 2.01E-14 | chr:19:22414379 |
| 19 rs8112751   | 22222458 T | 13.9  | 2.01E-14 | chr:19:22414379 |
| 19 rs2214300   | 22160537 T | 11.46 | 2.11E-14 | chr:19:22414379 |
| 19 rs62112864  | 22166026 T | 11.46 | 2.11E-14 | chr:19:22414379 |
| 19 rs62112870  | 22175976 A | 11.46 | 2.11E-14 | chr:19:22414379 |
| 19 rs111724992 | 22282718 C | 9.097 | 2.45E-14 | chr:19:22414379 |
| 19 rs12459299  | 22296261 G | 9.097 | 2.45E-14 | chr:19:22414379 |
| 19 rs12460058  | 22284531 A | 9.097 | 2.45E-14 | chr:19:22414379 |
| 19 rs12460610  | 22291277 C | 9.097 | 2.45E-14 | chr:19:22414379 |
| 19 rs12461719  | 22292841 T | 9.097 | 2.45E-14 | chr:19:22414379 |
| 19 rs12461745  | 22262667 T | 9.097 | 2.45E-14 | chr:19:22414379 |
| 19 rs190030543 | 22291079 T | 9.097 | 2.45E-14 | chr:19:22414379 |
| 19 rs4932955   | 22272845 A | 9.097 | 2.45E-14 | chr:19:22414379 |
| 19 rs56359043  | 22295283 G | 9.097 | 2.45E-14 | chr:19:22414379 |
| 19 rs6511324   | 22283994 T | 9.097 | 2.45E-14 | chr:19:22414379 |
| 19 rs7260631   | 22282906 G | 9.097 | 2.45E-14 | chr:19:22414379 |
| 19 rs73019896  | 22286350 A | 9.097 | 2.45E-14 | chr:19:22414379 |
| 19 rs73019902  | 22286707 A | 9.097 | 2.45E-14 | chr:19:22414379 |
| 19 rs8108310   | 22287184 T | 9.097 | 2.45E-14 | chr:19:22414379 |
| 19 rs62110983  | 22251780 A | 14.06 | 2.51E-14 | chr:19:22414379 |
| 19 rs4436884   | 22285163 C | 9.026 | 2.53E-14 | chr:19:22414379 |
| 19 rs4932956   | 22273797 G | 9.026 | 2.53E-14 | chr:19:22414379 |
| 19 rs55635227  | 22298116 C | 9.026 | 2.53E-14 | chr:19:22414379 |
| 19 rs56138218  | 22279031 A | 9.026 | 2.53E-14 | chr:19:22414379 |
| 19 rs56183023  | 22269366 C | 9.026 | 2.53E-14 | chr:19:22414379 |

|                |            |       |          |                 |
|----------------|------------|-------|----------|-----------------|
| 19 rs56242139  | 22295279 A | 9.026 | 2.53E-14 | chr:19:22414379 |
| 19 rs62121863  | 22504673 A | 8.156 | 2.73E-14 | chr:19:22414379 |
| 19 rs73019871  | 22265915 T | 9.006 | 3.24E-14 | chr:19:22414379 |
| 19 rs73019874  | 22267259 G | 9.006 | 3.24E-14 | chr:19:22414379 |
| 19 rs12460028  | 22284598 C | 8.985 | 3.37E-14 | chr:19:22414379 |
| 19 rs62118563  | 22529531 A | 7.134 | 3.72E-14 | chr:19:22414379 |
| 19 rs8105913   | 22201492 C | 15.23 | 3.74E-14 | chr:19:22414379 |
| 19 rs62120019  | 22493958 T | 7.138 | 3.79E-14 | chr:19:22414379 |
| 19 rs56320331  | 22297657 T | 8.413 | 3.85E-14 | chr:19:22414379 |
| 19 rs73021803  | 22286898 T | 8.075 | 4.46E-14 | chr:19:22414379 |
| 19 rs374309    | 22332298 G | 35.73 | 6.43E-14 | chr:19:22414379 |
| 19 rs201113571 | 22290840 T | 8.752 | 6.48E-14 | chr:19:22414379 |
| 19 rs12460852  | 22226289 T | 9.03  | 7.64E-14 | chr:19:22414379 |
| 19 rs112237385 | 22162147 C | 8.129 | 7.81E-14 | chr:19:22414379 |
| 19 rs12462668  | 22156943 A | 8.129 | 7.81E-14 | chr:19:22414379 |
| 19 rs2079063   | 22160674 T | 8.129 | 7.81E-14 | chr:19:22414379 |
| 19 rs2359829   | 22222155 G | 8.129 | 7.81E-14 | chr:19:22414379 |
| 19 rs4456632   | 22153634 A | 8.129 | 7.81E-14 | chr:19:22414379 |
| 19 rs57286877  | 22172618 G | 8.129 | 7.81E-14 | chr:19:22414379 |
| 19 rs60871663  | 22194240 T | 8.129 | 7.81E-14 | chr:19:22414379 |
| 19 rs6511310   | 22197285 A | 8.129 | 7.81E-14 | chr:19:22414379 |
| 19 rs67441682  | 22194829 C | 8.129 | 7.81E-14 | chr:19:22414379 |
| 19 rs67458228  | 22191841 T | 8.129 | 7.81E-14 | chr:19:22414379 |
| 19 rs68118096  | 22200804 T | 8.129 | 7.81E-14 | chr:19:22414379 |
| 19 rs7246239   | 22183049 A | 8.129 | 7.81E-14 | chr:19:22414379 |
| 19 rs7246992   | 22192047 A | 8.129 | 7.81E-14 | chr:19:22414379 |
| 19 rs7248938   | 22166196 G | 8.129 | 7.81E-14 | chr:19:22414379 |
| 19 rs7251237   | 22220858 A | 8.129 | 7.81E-14 | chr:19:22414379 |
| 19 rs7255484   | 22184978 C | 8.129 | 7.81E-14 | chr:19:22414379 |
| 19 rs7259460   | 22213945 A | 8.129 | 7.81E-14 | chr:19:22414379 |
| 19 rs7260454   | 22166739 T | 8.129 | 7.81E-14 | chr:19:22414379 |
| 19 rs73017852  | 22189239 G | 8.129 | 7.81E-14 | chr:19:22414379 |
| 19 rs73538835  | 22161066 A | 8.129 | 7.81E-14 | chr:19:22414379 |
| 19 rs80117552  | 22171367 C | 8.129 | 7.81E-14 | chr:19:22414379 |
| 19 rs8104333   | 22153801 C | 8.129 | 7.81E-14 | chr:19:22414379 |
| 19 rs12459526  | 22216669 T | 8.07  | 7.97E-14 | chr:19:22414379 |
| 19 rs12460903  | 22210184 C | 8.07  | 7.97E-14 | chr:19:22414379 |
| 19 rs12461536  | 22207464 G | 8.07  | 7.97E-14 | chr:19:22414379 |
| 19 rs12462824  | 22209767 G | 8.07  | 7.97E-14 | chr:19:22414379 |
| 19 rs1975167   | 22215066 T | 8.07  | 7.97E-14 | chr:19:22414379 |
| 19 rs2359827   | 22220016 C | 8.07  | 7.97E-14 | chr:19:22414379 |
| 19 rs2359828   | 22220287 G | 8.07  | 7.97E-14 | chr:19:22414379 |
| 19 rs4932940   | 22216366 G | 8.07  | 7.97E-14 | chr:19:22414379 |



|                |            |        |          |                 |
|----------------|------------|--------|----------|-----------------|
| 19 rs55638635  | 22210647 A | 8.07   | 7.97E-14 | chr:19:22414379 |
| 19 rs55772746  | 22224720 G | 8.07   | 7.97E-14 | chr:19:22414379 |
| 19 rs58132720  | 22225014 A | 8.07   | 7.97E-14 | chr:19:22414379 |
| 19 rs7247687   | 22214420 T | 8.07   | 7.97E-14 | chr:19:22414379 |
| 19 rs7248507   | 22214366 C | 8.07   | 7.97E-14 | chr:19:22414379 |
| 19 rs7248542   | 22214447 C | 8.07   | 7.97E-14 | chr:19:22414379 |
| 19 rs7253170   | 22209228 G | 8.07   | 7.97E-14 | chr:19:22414379 |
| 19 rs7255179   | 22213130 G | 8.07   | 7.97E-14 | chr:19:22414379 |
| 19 rs7258843   | 22213701 C | 8.07   | 7.97E-14 | chr:19:22414379 |
| 19 rs7259527   | 22214257 G | 8.07   | 7.97E-14 | chr:19:22414379 |
| 19 rs8103503   | 22216828 A | 8.07   | 7.97E-14 | chr:19:22414379 |
| 19 rs8103879   | 22211437 G | 8.07   | 7.97E-14 | chr:19:22414379 |
| 19 rs8106352   | 22208611 T | 8.07   | 7.97E-14 | chr:19:22414379 |
| 19 rs61616269  | 22397866 A | 5.745  | 8.99E-14 | chr:19:22414379 |
| 19 rs34556219  | 22382294 C | 34.74  | 9.42E-14 | chr:19:22414379 |
| 19 rs12459277  | 22235908 T | 8.992  | 1.01E-13 | chr:19:22414379 |
| 19 rs34878133  | 22230331 A | 8.992  | 1.01E-13 | chr:19:22414379 |
| 19 rs3752168   | 22235478 C | 8.992  | 1.01E-13 | chr:19:22414379 |
| 19 rs73019807  | 22231484 G | 8.992  | 1.01E-13 | chr:19:22414379 |
| 19 rs73019812  | 22232291 T | 8.992  | 1.01E-13 | chr:19:22414379 |
| 19 rs73019829  | 22239600 A | 8.992  | 1.01E-13 | chr:19:22414379 |
| 19 rs56408994  | 22162618 C | 7.704  | 1.07E-13 | chr:19:22414379 |
| 19 rs2359826   | 22214993 T | 7.668  | 1.12E-13 | chr:19:22414379 |
| 19 rs55674738  | 22196576 T | 7.989  | 1.16E-13 | chr:19:22414379 |
| 19 rs56226428  | 22229075 C | 8.895  | 1.32E-13 | chr:19:22414379 |
| 19 rs4932951   | 22246352 C | 8.352  | 1.52E-13 | chr:19:22414379 |
| 19 rs56036277  | 22257574 A | 8.352  | 1.52E-13 | chr:19:22414379 |
| 19 rs73019862  | 22260969 T | 8.352  | 1.52E-13 | chr:19:22414379 |
| 19 rs73019831  | 22242013 T | 8.287  | 1.54E-13 | chr:19:22414379 |
| 19 rs4932932   | 22203214 T | 7.149  | 1.85E-13 | chr:19:22414379 |
| 19 rs8100117   | 22195322 C | 7.13   | 1.95E-13 | chr:19:22414379 |
| 19 rs8109237   | 22202739 G | 7.13   | 1.95E-13 | chr:19:22414379 |
| 19 rs7258270   | 22155520 G | 7.427  | 2.04E-13 | chr:19:22414379 |
| 19 rs76969320  | 22338581 G | 0.2336 | 5.76E-13 | chr:19:22414379 |
| 19 rs555185638 | 22290846 C | 8.431  | 7.88E-13 | chr:19:22414379 |
| 19 rs283141    | 22445808 G | 0.2835 | 1.10E-12 | chr:19:22414379 |
| 19 rs281192    | 22400404 T | 5058   | 1.18E-12 | chr:19:22414379 |
| 19 rs11666460  | 22442350 C | 0.2412 | 1.29E-12 | chr:19:22414379 |
| 19 rs7259269   | 22441171 T | 0.2414 | 2.10E-12 | chr:19:22414379 |
| 19 rs1634475   | 22097368 T | 0.319  | 2.44E-12 | chr:19:22414379 |
| 19 rs62111036  | 22286451 G | 14.01  | 2.95E-12 | chr:19:22414379 |
| 19 rs76584077  | 22286457 C | 14.01  | 2.95E-12 | chr:19:22414379 |
| 19 rs283164    | 22453794 A | 0.3239 | 3.20E-12 | chr:19:22414379 |

|               |            |        |          |                 |
|---------------|------------|--------|----------|-----------------|
| 19 rs283165   | 22453422 C | 0.3239 | 3.20E-12 | chr:19:22414379 |
| 19 rs283168   | 22450922 A | 0.3239 | 3.20E-12 | chr:19:22414379 |
| 19 rs10409609 | 22439127 A | 0.2514 | 5.06E-12 | chr:19:22414379 |
| 19 rs12973144 | 22439646 A | 0.2514 | 5.06E-12 | chr:19:22414379 |
| 19 rs12973509 | 22439581 A | 0.2514 | 5.06E-12 | chr:19:22414379 |
| 19 rs12982551 | 22439042 C | 0.2514 | 5.06E-12 | chr:19:22414379 |
| 19 rs55992911 | 22397853 C | 25.46  | 6.15E-12 | chr:19:22414379 |
| 19 rs11879966 | 22443852 G | 0.2525 | 6.63E-12 | chr:19:22414379 |
| 19 rs1987409  | 22647287 T | 2.986  | 1.31E-11 | chr:19:22414379 |
| 19 rs807953   | 22117746 A | 0.3309 | 1.41E-11 | chr:19:22414379 |
| 19 rs807954   | 22117663 T | 0.3311 | 1.42E-11 | chr:19:22414379 |
| 19 rs1634471  | 22101226 C | 0.3335 | 1.95E-11 | chr:19:22414379 |
| 19 rs1634473  | 22100245 T | 0.3335 | 1.95E-11 | chr:19:22414379 |
| 19 rs807952   | 22117758 T | 0.3335 | 1.95E-11 | chr:19:22414379 |
| 19 rs1634454  | 22109737 G | 0.3328 | 2.18E-11 | chr:19:22414379 |
| 19 rs1634457  | 22107554 T | 0.3328 | 2.18E-11 | chr:19:22414379 |
| 19 rs1634458  | 22107140 G | 0.3328 | 2.18E-11 | chr:19:22414379 |
| 19 rs1634461  | 22104941 T | 0.3328 | 2.18E-11 | chr:19:22414379 |
| 19 rs1634470  | 22101471 T | 0.3328 | 2.18E-11 | chr:19:22414379 |
| 19 rs1634472  | 22100786 A | 0.3328 | 2.18E-11 | chr:19:22414379 |
| 19 rs1651560  | 22101699 G | 0.3328 | 2.18E-11 | chr:19:22414379 |
| 19 rs1651565  | 22104491 A | 0.3328 | 2.18E-11 | chr:19:22414379 |
| 19 rs1651566  | 22104548 G | 0.3328 | 2.18E-11 | chr:19:22414379 |
| 19 rs1651568  | 22105457 C | 0.3328 | 2.18E-11 | chr:19:22414379 |
| 19 rs1965612  | 22112924 T | 0.3328 | 2.18E-11 | chr:19:22414379 |
| 19 rs2522099  | 22111050 A | 0.3328 | 2.18E-11 | chr:19:22414379 |
| 19 rs2522100  | 22105122 A | 0.3328 | 2.18E-11 | chr:19:22414379 |
| 19 rs2666460  | 22110753 A | 0.3328 | 2.18E-11 | chr:19:22414379 |
| 19 rs57267325 | 22112131 C | 0.3328 | 2.18E-11 | chr:19:22414379 |
| 19 rs699640   | 22114144 T | 0.3328 | 2.18E-11 | chr:19:22414379 |
| 19 rs807955   | 22117652 G | 0.3328 | 2.18E-11 | chr:19:22414379 |
| 19 rs807958   | 22115982 A | 0.3328 | 2.18E-11 | chr:19:22414379 |
| 19 rs807960   | 22115656 T | 0.3328 | 2.18E-11 | chr:19:22414379 |
| 19 rs807962   | 22115299 A | 0.3328 | 2.18E-11 | chr:19:22414379 |
| 19 rs807963   | 22115170 A | 0.3328 | 2.18E-11 | chr:19:22414379 |
| 19 rs807964   | 22114802 C | 0.3328 | 2.18E-11 | chr:19:22414379 |
| 19 rs1008324  | 22103318 A | 0.333  | 2.26E-11 | chr:19:22414379 |
| 19 rs172216   | 22451989 A | 0.3428 | 2.67E-11 | chr:19:22414379 |
| 19 rs1620271  | 22104279 A | 0.3353 | 3.01E-11 | chr:19:22414379 |
| 19 rs1634456  | 22108960 G | 0.3353 | 3.01E-11 | chr:19:22414379 |
| 19 rs1634459  | 22106951 A | 0.3353 | 3.01E-11 | chr:19:22414379 |
| 19 rs1634460  | 22105192 A | 0.3353 | 3.01E-11 | chr:19:22414379 |
| 19 rs1634462  | 22104910 A | 0.3353 | 3.01E-11 | chr:19:22414379 |

|                |            |        |          |                 |
|----------------|------------|--------|----------|-----------------|
| 19 rs1634463   | 22104789 T | 0.3353 | 3.01E-11 | chr:19:22414379 |
| 19 rs1634464   | 22104599 A | 0.3353 | 3.01E-11 | chr:19:22414379 |
| 19 rs1634465   | 22104145 A | 0.3353 | 3.01E-11 | chr:19:22414379 |
| 19 rs1634468   | 22102503 T | 0.3353 | 3.01E-11 | chr:19:22414379 |
| 19 rs1634469   | 22101863 T | 0.3353 | 3.01E-11 | chr:19:22414379 |
| 19 rs1651561   | 22102191 G | 0.3353 | 3.01E-11 | chr:19:22414379 |
| 19 rs1651562   | 22103190 C | 0.3353 | 3.01E-11 | chr:19:22414379 |
| 19 rs1651563   | 22103272 G | 0.3353 | 3.01E-11 | chr:19:22414379 |
| 19 rs1651564   | 22103358 C | 0.3353 | 3.01E-11 | chr:19:22414379 |
| 19 rs1651567   | 22105244 C | 0.3353 | 3.01E-11 | chr:19:22414379 |
| 19 rs1651569   | 22106800 G | 0.3353 | 3.01E-11 | chr:19:22414379 |
| 19 rs1651570   | 22107283 G | 0.3353 | 3.01E-11 | chr:19:22414379 |
| 19 rs1651571   | 22108724 A | 0.3353 | 3.01E-11 | chr:19:22414379 |
| 19 rs1651572   | 22109563 A | 0.3353 | 3.01E-11 | chr:19:22414379 |
| 19 rs1848995   | 22111803 A | 0.3353 | 3.01E-11 | chr:19:22414379 |
| 19 rs1848997   | 22111868 T | 0.3353 | 3.01E-11 | chr:19:22414379 |
| 19 rs2522098   | 22111896 G | 0.3353 | 3.01E-11 | chr:19:22414379 |
| 19 rs2666459   | 22105130 C | 0.3353 | 3.01E-11 | chr:19:22414379 |
| 19 rs2666461   | 22111579 A | 0.3353 | 3.01E-11 | chr:19:22414379 |
| 19 rs988274    | 22110076 C | 0.3353 | 3.01E-11 | chr:19:22414379 |
| 19 rs138220002 | 22615616 T | 5.958  | 3.70E-11 | chr:19:22414379 |
| 19 rs1613145   | 22099638 A | 0.339  | 3.79E-11 | chr:19:22414379 |
| 19 rs1634467   | 22103475 C | 0.3419 | 4.63E-11 | chr:19:22414379 |
| 19 rs12461800  | 22145006 C | 6.081  | 4.66E-11 | chr:19:22414379 |
| 19 rs1912574   | 22125733 C | 6.081  | 4.66E-11 | chr:19:22414379 |
| 19 rs66814910  | 22148202 A | 6.081  | 4.66E-11 | chr:19:22414379 |
| 19 rs12972854  | 22444812 C | 0.2528 | 4.93E-11 | chr:19:22414379 |
| 19 rs1634455   | 22109050 T | 0.3391 | 4.98E-11 | chr:19:22414379 |
| 19 rs1117304   | 22096499 A | 0.3455 | 5.67E-11 | chr:19:22414379 |
| 19 rs1117305   | 22096460 T | 0.3455 | 5.67E-11 | chr:19:22414379 |
| 19 rs17206     | 22092727 T | 0.3457 | 5.96E-11 | chr:19:22414379 |
| 19 rs10417635  | 22146123 G | 5.769  | 7.34E-11 | chr:19:22414379 |
| 19 rs1995934   | 22128656 T | 5.769  | 7.34E-11 | chr:19:22414379 |
| 19 rs34044431  | 22128382 G | 5.769  | 7.34E-11 | chr:19:22414379 |
| 19 rs4932854   | 22143597 G | 5.769  | 7.34E-11 | chr:19:22414379 |
| 19 rs56058873  | 22142542 C | 5.769  | 7.34E-11 | chr:19:22414379 |
| 19 rs68053498  | 22131813 A | 5.769  | 7.34E-11 | chr:19:22414379 |
| 19 rs68061456  | 22142308 A | 5.769  | 7.34E-11 | chr:19:22414379 |
| 19 rs73015567  | 22128077 A | 5.769  | 7.34E-11 | chr:19:22414379 |
| 19 rs73015578  | 22132084 A | 5.769  | 7.34E-11 | chr:19:22414379 |
| 19 rs1634474   | 22098448 A | 0.3474 | 7.39E-11 | chr:19:22414379 |
| 19 rs283166    | 22453074 G | 0.3357 | 1.04E-10 | chr:19:22414379 |
| 19 rs757116    | 22098282 G | 0.3494 | 1.05E-10 | chr:19:22414379 |

|                      |            |        |          |                 |
|----------------------|------------|--------|----------|-----------------|
| 19 rs12985757        | 22444652 A | 0.2611 | 1.08E-10 | chr:19:22414379 |
| 19 rs12986108        | 22444577 T | 0.2611 | 1.08E-10 | chr:19:22414379 |
| 19 rs56061708        | 22128775 T | 5.496  | 1.12E-10 | chr:19:22414379 |
| 19 rs36123644        | 22444780 C | 0.2639 | 1.56E-10 | chr:19:22414379 |
| 19 rs553185985       | 22444776 T | 0.2639 | 1.56E-10 | chr:19:22414379 |
| 19 rs570214927       | 22444775 C | 0.2639 | 1.56E-10 | chr:19:22414379 |
| 19 rs283167          | 22452148 A | 0.3398 | 1.57E-10 | chr:19:22414379 |
| 19 rs1229926         | 22090871 T | 0.3576 | 1.77E-10 | chr:19:22414379 |
| 19 rs2040654         | 22193451 C | 0.3116 | 2.67E-10 | chr:19:22414379 |
| 19 rs10221484        | 22455170 G | 0.283  | 5.47E-10 | chr:19:22414379 |
| 19 rs73930941        | 22123495 C | 5.664  | 7.74E-10 | chr:19:22414379 |
| 19 rs397538          | 22329889 A | 0.2501 | 8.25E-10 | chr:19:22414379 |
| 19 rs404793          | 22329632 A | 0.2501 | 8.25E-10 | chr:19:22414379 |
| 19 rs458515          | 22330126 T | 0.2501 | 8.25E-10 | chr:19:22414379 |
| 19 rs2168492;rs56814 | 22425645 T | 0.2499 | 8.49E-10 | chr:19:22414379 |
| 19 rs808372          | 22470368 T | 0.2879 | 9.08E-10 | chr:19:22414379 |
| 19 rs436971          | 22461218 T | 0.2904 | 9.70E-10 | chr:19:22414379 |
| 19 rs2168491         | 22425589 G | 0.2465 | 1.10E-09 | chr:19:22414379 |
| 19 rs34312380        | 22390071 T | 0.2525 | 1.18E-09 | chr:19:22414379 |
| 19 rs34407605        | 22390084 T | 0.2525 | 1.18E-09 | chr:19:22414379 |
| 19 rs435638          | 22333121 A | 0.2518 | 1.18E-09 | chr:19:22414379 |
| 19 rs464038          | 22335569 G | 0.2518 | 1.18E-09 | chr:19:22414379 |
| 19 rs448861          | 22353606 A | 0.2515 | 1.21E-09 | chr:19:22414379 |
| 19 rs10221483        | 22455112 G | 0.2932 | 1.24E-09 | chr:19:22414379 |
| 19 rs11667886        | 22430941 T | 0.2356 | 1.27E-09 | chr:19:22414379 |
| 19 rs281166          | 22420798 G | 0.2527 | 1.58E-09 | chr:19:22414379 |
| 19 rs281168          | 22422638 A | 0.2527 | 1.58E-09 | chr:19:22414379 |
| 19 rs281169          | 22423276 T | 0.2527 | 1.58E-09 | chr:19:22414379 |
| 19 rs58361042        | 22436135 A | 0.3188 | 1.62E-09 | chr:19:22414379 |
| 19 rs617609          | 22326000 A | 0.2563 | 1.65E-09 | chr:19:22414379 |
| 19 rs11085515        | 22426520 C | 0.2443 | 1.69E-09 | chr:19:22414379 |
| 19 rs172183          | 22405532 A | 0.2514 | 1.82E-09 | chr:19:22414379 |
| 19 rs281196          | 22403293 G | 0.2514 | 1.82E-09 | chr:19:22414379 |
| 19 rs281198          | 22405169 G | 0.2514 | 1.82E-09 | chr:19:22414379 |
| 19 rs281203          | 22406377 C | 0.2514 | 1.82E-09 | chr:19:22414379 |
| 19 rs12610469        | 22454617 A | 0.2987 | 1.82E-09 | chr:19:22414379 |
| 19 rs11669885        | 22397422 A | 0.2581 | 1.93E-09 | chr:19:22414379 |
| 19 rs12609473        | 22378606 G | 0.2581 | 1.93E-09 | chr:19:22414379 |
| 19 rs12980808        | 22374080 G | 0.2581 | 1.93E-09 | chr:19:22414379 |
| 19 rs1830175         | 22382080 A | 0.2581 | 1.93E-09 | chr:19:22414379 |
| 19 rs2522317         | 22339626 G | 0.2581 | 1.93E-09 | chr:19:22414379 |
| 19 rs34364151        | 22393367 T | 0.2581 | 1.93E-09 | chr:19:22414379 |
| 19 rs368652          | 22356811 A | 0.2581 | 1.93E-09 | chr:19:22414379 |

|                |            |        |          |                 |
|----------------|------------|--------|----------|-----------------|
| 19 rs3951502   | 22368852 A | 0.2581 | 1.93E-09 | chr:19:22414379 |
| 19 rs424912    | 22347371 C | 0.2581 | 1.93E-09 | chr:19:22414379 |
| 19 rs431628    | 22359024 T | 0.2581 | 1.93E-09 | chr:19:22414379 |
| 19 rs437284    | 22354875 T | 0.2581 | 1.93E-09 | chr:19:22414379 |
| 19 rs605085    | 22355832 T | 0.2581 | 1.93E-09 | chr:19:22414379 |
| 19 rs9304995   | 22366432 A | 0.2581 | 1.93E-09 | chr:19:22414379 |
| 19 rs5827519   | 22280532 G | 9.864  | 2.04E-09 | chr:19:22414379 |
| 19 rs720893    | 22426404 G | 0.2555 | 2.21E-09 | chr:19:22414379 |
| 19 rs1865067   | 22323069 T | 0.2625 | 2.65E-09 | chr:19:22414379 |
| 19 rs10426106  | 22323268 T | 0.2617 | 2.96E-09 | chr:19:22414379 |
| 19 rs281172    | 22424697 T | 0.2574 | 3.00E-09 | chr:19:22414379 |
| 19 rs281164    | 22419523 T | 0.2622 | 3.13E-09 | chr:19:22414379 |
| 19 rs11085514  | 22425837 A | 0.2572 | 3.24E-09 | chr:19:22414379 |
| 19 rs281173    | 22424997 G | 0.2582 | 3.50E-09 | chr:19:22414379 |
| 19 rs1976314   | 22608853 T | 0.3983 | 3.81E-09 | chr:19:22414379 |
| 19 rs66562925  | 22158713 A | 5.488  | 4.33E-09 | chr:19:22414379 |
| 19 rs7245790   | 22320009 C | 0.275  | 5.07E-09 | chr:19:22414379 |
| 19 rs12462173  | 22120728 T | 5.223  | 5.16E-09 | chr:19:22414379 |
| 19 rs452556    | 22469057 A | 0.3765 | 9.81E-09 | chr:19:22414379 |
| 19 rs539301358 | 22444826 A | 0.2971 | 1.10E-08 | chr:19:22414379 |
| 19 rs557677690 | 22444827 A | 0.2971 | 1.10E-08 | chr:19:22414379 |
| 19 rs71333870  | 22444823 G | 0.2971 | 1.10E-08 | chr:19:22414379 |
| 19 rs78586060  | 22324280 C | 0.295  | 1.34E-08 | chr:19:22414379 |
| 19 rs808373    | 22469233 C | 0.3785 | 1.35E-08 | chr:19:22414379 |
| 19 rs10404620  | 22316577 A | 0.29   | 2.19E-08 | chr:19:22414379 |
| 19 rs4244914   | 22315389 A | 0.29   | 2.19E-08 | chr:19:22414379 |
| 19 rs8103471   | 22317314 T | 0.29   | 2.19E-08 | chr:19:22414379 |
| 19 rs10407936  | 22312059 A | 0.2932 | 2.57E-08 | chr:19:22414379 |
| 19 rs10411720  | 22308919 C | 0.2932 | 2.57E-08 | chr:19:22414379 |
| 19 rs10415817  | 22313214 C | 0.2932 | 2.57E-08 | chr:19:22414379 |
| 19 rs6511334   | 22307267 C | 0.2932 | 2.57E-08 | chr:19:22414379 |
| 19 rs10411951  | 22309055 C | 0.2999 | 4.00E-08 | chr:19:22414379 |
| 19 rs68168074  | 22120333 T | 4.873  | 4.88E-08 | chr:19:22414379 |
| 19 rs77808832  | 22120260 T | 4.852  | 5.00E-08 | chr:19:22414379 |
| 19 rs10419171  | 22640996 G | 4.237  | 5.10E-08 | chr:19:22414379 |
| 19 rs11523642  | 22639557 C | 4.237  | 5.10E-08 | chr:19:22414379 |
| 19 rs1605886   | 22641316 A | 4.237  | 5.10E-08 | chr:19:22414379 |
| 19 rs6511355   | 22643745 T | 4.237  | 5.10E-08 | chr:19:22414379 |
| 19 rs79174442  | 22644079 G | 4.237  | 5.10E-08 | chr:19:22414379 |
| 19 rs8107396   | 22643893 T | 4.237  | 5.10E-08 | chr:19:22414379 |
| 19 rs10404225  | 22493082 G | 0.3368 | 5.72E-08 | chr:19:22414379 |
| 19 rs1091182   | 22475622 A | 0.3368 | 5.72E-08 | chr:19:22414379 |
| 19 rs11085522  | 22505167 T | 0.3368 | 5.72E-08 | chr:19:22414379 |

|                      |            |        |          |                 |
|----------------------|------------|--------|----------|-----------------|
| 19 rs2116919         | 22491706 C | 0.3368 | 5.72E-08 | chr:19:22414379 |
| 19 rs4932755         | 22494816 A | 0.3368 | 5.72E-08 | chr:19:22414379 |
| 19 rs7254434         | 22500033 G | 0.3368 | 5.72E-08 | chr:19:22414379 |
| 19 rs7260210         | 22504803 A | 0.3368 | 5.72E-08 | chr:19:22414379 |
| 19 rs28420503        | 22316713 A | 0.3079 | 6.85E-08 | chr:19:22414379 |
| 19 rs72620592        | 22510560 T | 0.4306 | 7.18E-08 | chr:19:22414379 |
| 19 rs10409520        | 22512477 C | 0.341  | 7.42E-08 | chr:19:22414379 |
| 19 rs10409947        | 22512518 G | 0.341  | 7.42E-08 | chr:19:22414379 |
| 19 rs1808668         | 22518657 A | 0.341  | 7.42E-08 | chr:19:22414379 |
| 19 rs1975175         | 22515239 G | 0.341  | 7.42E-08 | chr:19:22414379 |
| 19 rs1991830         | 22514730 G | 0.341  | 7.42E-08 | chr:19:22414379 |
| 19 rs3862494         | 22519522 G | 0.341  | 7.42E-08 | chr:19:22414379 |
| 19 rs4358065         | 22521132 A | 0.341  | 7.42E-08 | chr:19:22414379 |
| 19 rs8106639         | 22509614 C | 0.341  | 7.42E-08 | chr:19:22414379 |
| 19 rs9304996         | 22486535 A | 0.3424 | 8.26E-08 | chr:19:22414379 |
| 19 rs72620596        | 22656023 T | 0.4518 | 1.03E-07 | chr:19:22414379 |
| 19 rs808369          | 22474282 T | 0.4112 | 1.26E-07 | chr:19:22414379 |
| 19 rs73924010        | 22648511 C | 3.781  | 1.45E-07 | chr:19:22414379 |
| 19 rs73924026        | 22658985 C | 3.723  | 1.54E-07 | chr:19:22414379 |
| 19 rs4932979         | 22532857 A | 0.3439 | 1.56E-07 | chr:19:22414379 |
| 19 rs117922051       | 22654504 A | 3.792  | 1.57E-07 | chr:19:22414379 |
| 19 rs57019979        | 22655945 C | 3.792  | 1.57E-07 | chr:19:22414379 |
| 19 rs58928851        | 22646035 A | 3.792  | 1.57E-07 | chr:19:22414379 |
| 19 rs59779285        | 22650260 G | 3.792  | 1.57E-07 | chr:19:22414379 |
| 19 rs59898872        | 22649917 C | 3.792  | 1.57E-07 | chr:19:22414379 |
| 19 rs60073357        | 22646449 G | 3.792  | 1.57E-07 | chr:19:22414379 |
| 19 rs73924012        | 22648815 C | 3.792  | 1.57E-07 | chr:19:22414379 |
| 19 rs73924015        | 22649401 G | 3.792  | 1.57E-07 | chr:19:22414379 |
| 19 rs78732600        | 22650735 G | 3.792  | 1.57E-07 | chr:19:22414379 |
| 19 rs143971182       | 22657107 A | 3.799  | 1.60E-07 | chr:19:22414379 |
| 19 rs73924024        | 22658132 T | 3.799  | 1.60E-07 | chr:19:22414379 |
| 19 rs3914066         | 22645634 C | 3.805  | 1.62E-07 | chr:19:22414379 |
| 19 rs4462726         | 22645716 A | 3.805  | 1.62E-07 | chr:19:22414379 |
| 19 rs452707          | 22304145 T | 0.3222 | 1.77E-07 | chr:19:22414379 |
| 19 rs73924019        | 22654910 T | 3.854  | 1.94E-07 | chr:19:22414379 |
| 19 rs6511312         | 22205349 T | 2.365  | 2.41E-07 | chr:19:22414379 |
| 19 rs2359817         | 22205523 T | 2.312  | 4.72E-07 | chr:19:22414379 |
| 19 rs7254235         | 22212505 G | 2.301  | 4.79E-07 | chr:19:22414379 |
| 19 rs2163846         | 22505844 C | 0.4239 | 4.89E-07 | chr:19:22414379 |
| 19 rs7252056         | 22494052 T | 0.4239 | 4.89E-07 | chr:19:22414379 |
| 19 rs7259376         | 22507705 A | 0.4239 | 4.89E-07 | chr:19:22414379 |
| 19 rs8104705         | 22498943 T | 0.4239 | 4.89E-07 | chr:19:22414379 |
| 19 rs973016;rs200712 | 22629481 A | 3.195  | 5.34E-07 | chr:19:22414379 |

|                |            |        |          |                 |
|----------------|------------|--------|----------|-----------------|
| 19 rs11668269  | 22513960 G | 0.4271 | 5.96E-07 | chr:19:22414379 |
| 19 rs1975174   | 22515251 G | 0.4271 | 5.96E-07 | chr:19:22414379 |
| 19 rs4932747   | 22279252 C | 0.3495 | 8.19E-07 | chr:19:22414379 |
| 19 rs139015281 | 22236622 A | 0.3315 | 8.95E-07 | chr:19:22414379 |
| 19 rs56227205  | 22326763 G | 0.3064 | 9.56E-07 | chr:19:22414379 |
| 19 rs2099347   | 22282614 T | 0.344  | 1.09E-06 | chr:19:22414379 |
| 19 rs200969060 | 22156855 A | 12.61  | 1.13E-06 | chr:19:22414379 |
| 19 rs7245491   | 22532793 C | 0.3928 | 1.47E-06 | chr:19:22414379 |
| 19 rs7245492   | 22532796 C | 0.3928 | 1.47E-06 | chr:19:22414379 |
| 19 rs7249672   | 22301523 C | 2.226  | 1.52E-06 | chr:19:22414379 |
| 19 rs1019938   | 22280954 T | 0.3512 | 1.55E-06 | chr:19:22414379 |
| 19 rs10408261  | 22298225 T | 0.3512 | 1.55E-06 | chr:19:22414379 |
| 19 rs1560718   | 22292212 C | 0.3512 | 1.55E-06 | chr:19:22414379 |
| 19 rs1978718   | 22293126 T | 0.3512 | 1.55E-06 | chr:19:22414379 |
| 19 rs4553749   | 22285063 C | 0.3512 | 1.55E-06 | chr:19:22414379 |
| 19 rs6511323   | 22281914 T | 0.3512 | 1.55E-06 | chr:19:22414379 |
| 19 rs6511326   | 22286679 T | 0.3512 | 1.55E-06 | chr:19:22414379 |
| 19 rs6511329   | 22287905 T | 0.3512 | 1.55E-06 | chr:19:22414379 |
| 19 rs6511333   | 22298363 T | 0.3512 | 1.55E-06 | chr:19:22414379 |
| 19 rs8100438   | 22301003 C | 0.3512 | 1.55E-06 | chr:19:22414379 |
| 19 rs8103088   | 22298322 G | 0.3512 | 1.55E-06 | chr:19:22414379 |
| 19 rs8111771   | 22287861 A | 0.3512 | 1.55E-06 | chr:19:22414379 |
| 19 rs987711    | 22300007 T | 0.3512 | 1.55E-06 | chr:19:22414379 |
| 19 rs368580269 | 22262752 T | 0.2641 | 1.86E-06 | chr:19:22414379 |
| 19 rs1985135   | 22523578 A | 0.3799 | 1.90E-06 | chr:19:22414379 |
| 19 rs60200804  | 22283368 T | 0.3514 | 1.91E-06 | chr:19:22414379 |
| 19 rs28456336  | 22268779 T | 0.3596 | 1.96E-06 | chr:19:22414379 |
| 19 rs146340942 | 22419760 G | 0.242  | 1.98E-06 | chr:19:22414379 |
| 19 rs2158132   | 22659300 G | 0.5032 | 2.28E-06 | chr:19:22414379 |
| 19 rs7249686   | 22621434 A | 0.4887 | 2.33E-06 | chr:19:22414379 |
| 19 rs55921217  | 22296943 C | 0.3601 | 2.50E-06 | chr:19:22414379 |
| 19 rs1036235   | 22279541 T | 0.3668 | 3.15E-06 | chr:19:22414379 |
| 19 rs2359995   | 22280060 C | 0.3668 | 3.15E-06 | chr:19:22414379 |
| 19 rs4932748   | 22279318 T | 0.3668 | 3.15E-06 | chr:19:22414379 |
| 19 rs4932954   | 22272454 T | 0.3668 | 3.15E-06 | chr:19:22414379 |
| 19 rs9304994   | 22272743 G | 0.3668 | 3.15E-06 | chr:19:22414379 |
| 19 rs10416816  | 22177756 T | 2.088  | 3.28E-06 | chr:19:22414379 |
| 19 rs10418345  | 22177755 C | 2.088  | 3.28E-06 | chr:19:22414379 |
| 19 rs58038983  | 22544165 T | 2.18   | 3.40E-06 | chr:19:22414379 |
| 19 rs6511325   | 22284357 A | 0.367  | 3.50E-06 | chr:19:22414379 |
| 19 rs2116895   | 22266669 T | 0.3742 | 3.56E-06 | chr:19:22414379 |
| 19 rs6511320   | 22267122 C | 0.3742 | 3.56E-06 | chr:19:22414379 |
| 19 rs7258192   | 22264658 G | 0.3742 | 3.56E-06 | chr:19:22414379 |

|                |            |        |          |                 |
|----------------|------------|--------|----------|-----------------|
| 19 rs11669179  | 22604729 G | 0.481  | 3.90E-06 | chr:19:22414379 |
| 19 rs11669270  | 22604816 A | 0.481  | 3.90E-06 | chr:19:22414379 |
| 19 rs11669353  | 22605103 C | 0.481  | 3.90E-06 | chr:19:22414379 |
| 19 rs11669356  | 22605120 T | 0.481  | 3.90E-06 | chr:19:22414379 |
| 19 rs7251413   | 22609759 T | 0.4837 | 4.58E-06 | chr:19:22414379 |
| 19 rs10404998  | 22608374 C | 0.4857 | 5.12E-06 | chr:19:22414379 |
| 19 rs10405295  | 22608556 C | 0.4857 | 5.12E-06 | chr:19:22414379 |
| 19 rs10416278  | 22607031 T | 0.4857 | 5.12E-06 | chr:19:22414379 |
| 19 rs11879678  | 22607312 A | 0.4857 | 5.12E-06 | chr:19:22414379 |
| 19 rs11879697  | 22607206 A | 0.4857 | 5.12E-06 | chr:19:22414379 |
| 19 rs34187872  | 22607883 A | 0.4857 | 5.12E-06 | chr:19:22414379 |
| 19 rs34643838  | 22608433 T | 0.4857 | 5.12E-06 | chr:19:22414379 |
| 19 rs34787405  | 22608148 A | 0.4857 | 5.12E-06 | chr:19:22414379 |
| 19 rs8101947   | 22605640 T | 0.4857 | 5.12E-06 | chr:19:22414379 |
| 19 rs113181884 | 22586084 C | 0.4527 | 5.19E-06 | chr:19:22414379 |
| 19 rs56768795  | 22586073 A | 0.4527 | 5.19E-06 | chr:19:22414379 |
| 19 rs57891222  | 22449958 T | 0.4667 | 5.27E-06 | chr:19:22414379 |
| 19 rs6511332   | 22288391 A | 0.3839 | 7.38E-06 | chr:19:22414379 |
| 19 rs2007506   | 22156992 T | 2      | 9.81E-06 | chr:19:22414379 |
| 19 rs2905575   | 22656127 A | 2.542  | 1.00E-05 | chr:19:22414379 |
| 19 rs1989119   | 22205665 G | 1.987  | 1.01E-05 | chr:19:22414379 |
| 19 rs2043318   | 22241615 G | 0.3988 | 1.01E-05 | chr:19:22414379 |
| 19 rs366849    | 22234941 G | 0.3988 | 1.01E-05 | chr:19:22414379 |
| 19 rs417331    | 22234478 T | 0.3988 | 1.01E-05 | chr:19:22414379 |
| 19 rs4244913   | 22239919 A | 0.3988 | 1.01E-05 | chr:19:22414379 |
| 19 rs632709    | 22233096 C | 0.3988 | 1.01E-05 | chr:19:22414379 |
| 19 rs8107039   | 22238990 G | 0.3988 | 1.01E-05 | chr:19:22414379 |
| 19 rs10419058  | 22309972 A | 2.059  | 1.02E-05 | chr:19:22414379 |
| 19 rs1963300   | 22180805 G | 1.983  | 1.13E-05 | chr:19:22414379 |
| 19 rs2078235   | 22181485 A | 1.983  | 1.13E-05 | chr:19:22414379 |
| 19 rs2359812   | 22153495 T | 1.983  | 1.13E-05 | chr:19:22414379 |
| 19 rs2359814   | 22171947 G | 1.983  | 1.13E-05 | chr:19:22414379 |
| 19 rs2359815   | 22187760 A | 1.983  | 1.13E-05 | chr:19:22414379 |
| 19 rs4025923   | 22185810 C | 1.983  | 1.13E-05 | chr:19:22414379 |
| 19 rs4932723   | 22180721 G | 1.983  | 1.13E-05 | chr:19:22414379 |
| 19 rs6511305   | 22162924 A | 1.983  | 1.13E-05 | chr:19:22414379 |
| 19 rs6511306   | 22163848 G | 1.983  | 1.13E-05 | chr:19:22414379 |
| 19 rs6511307   | 22164157 C | 1.983  | 1.13E-05 | chr:19:22414379 |
| 19 rs6511308   | 22164329 C | 1.983  | 1.13E-05 | chr:19:22414379 |
| 19 rs80045812  | 22172887 T | 1.983  | 1.13E-05 | chr:19:22414379 |
| 19 rs8101183   | 22170551 A | 1.983  | 1.13E-05 | chr:19:22414379 |
| 19 rs8111955   | 22190965 C | 1.983  | 1.13E-05 | chr:19:22414379 |
| 19 rs528388605 | 22342972 G | 0.2184 | 1.24E-05 | chr:19:22414379 |



|                |            |        |          |                 |
|----------------|------------|--------|----------|-----------------|
| 19 rs1989118   | 22205679 G | 1.977  | 1.25E-05 | chr:19:22414379 |
| 19 rs10403779  | 22258396 C | 0.4022 | 1.28E-05 | chr:19:22414379 |
| 19 rs7258080   | 22257625 A | 0.4022 | 1.28E-05 | chr:19:22414379 |
| 19 rs117003659 | 22430306 T | 0.341  | 1.31E-05 | chr:19:22414379 |
| 19 rs10401697  | 22167001 A | 1.973  | 1.40E-05 | chr:19:22414379 |
| 19 rs10402796  | 22174236 C | 1.973  | 1.40E-05 | chr:19:22414379 |
| 19 rs10416159  | 22168802 A | 1.973  | 1.40E-05 | chr:19:22414379 |
| 19 rs10418541  | 22177814 C | 1.973  | 1.40E-05 | chr:19:22414379 |
| 19 rs11085506  | 22181939 G | 1.973  | 1.40E-05 | chr:19:22414379 |
| 19 rs113092876 | 22165654 G | 1.973  | 1.40E-05 | chr:19:22414379 |
| 19 rs11670558  | 22171249 A | 1.973  | 1.40E-05 | chr:19:22414379 |
| 19 rs1987570   | 22153137 C | 1.973  | 1.40E-05 | chr:19:22414379 |
| 19 rs1987974   | 22158402 A | 1.973  | 1.40E-05 | chr:19:22414379 |
| 19 rs1987975   | 22158299 A | 1.973  | 1.40E-05 | chr:19:22414379 |
| 19 rs1988427   | 22169773 G | 1.973  | 1.40E-05 | chr:19:22414379 |
| 19 rs1988501   | 22175566 G | 1.973  | 1.40E-05 | chr:19:22414379 |
| 19 rs2079064   | 22160538 A | 1.973  | 1.40E-05 | chr:19:22414379 |
| 19 rs2106870   | 22184042 A | 1.973  | 1.40E-05 | chr:19:22414379 |
| 19 rs2214297   | 22177099 G | 1.973  | 1.40E-05 | chr:19:22414379 |
| 19 rs2359810   | 22152527 A | 1.973  | 1.40E-05 | chr:19:22414379 |
| 19 rs2359813   | 22168141 T | 1.973  | 1.40E-05 | chr:19:22414379 |
| 19 rs4378732   | 22153696 A | 1.973  | 1.40E-05 | chr:19:22414379 |
| 19 rs4574045   | 22171880 T | 1.973  | 1.40E-05 | chr:19:22414379 |
| 19 rs4592778   | 22188277 G | 1.973  | 1.40E-05 | chr:19:22414379 |
| 19 rs7247121   | 22161490 C | 1.973  | 1.40E-05 | chr:19:22414379 |
| 19 rs7248488   | 22188709 C | 1.973  | 1.40E-05 | chr:19:22414379 |
| 19 rs7249472   | 22183460 G | 1.973  | 1.40E-05 | chr:19:22414379 |
| 19 rs8103163   | 22174752 C | 1.973  | 1.40E-05 | chr:19:22414379 |
| 19 rs8103214   | 22158992 T | 1.973  | 1.40E-05 | chr:19:22414379 |
| 19 rs8103368   | 22174872 G | 1.973  | 1.40E-05 | chr:19:22414379 |
| 19 rs8108160   | 22190079 C | 1.973  | 1.40E-05 | chr:19:22414379 |
| 19 rs8108535   | 22160304 G | 1.973  | 1.40E-05 | chr:19:22414379 |
| 19 rs8108807   | 22185242 A | 1.973  | 1.40E-05 | chr:19:22414379 |
| 19 rs8112395   | 22185417 C | 1.973  | 1.40E-05 | chr:19:22414379 |
| 19 rs9304993   | 22178685 G | 1.973  | 1.40E-05 | chr:19:22414379 |
| 19 rs201005223 | 22574818 C | 0.49   | 1.41E-05 | chr:19:22414379 |
| 19 rs10425160  | 22194751 C | 1.981  | 1.45E-05 | chr:19:22414379 |
| 19 rs403850    | 22229593 T | 0.4127 | 1.66E-05 | chr:19:22414379 |
| 19 rs28881618  | 22254692 G | 0.409  | 1.76E-05 | chr:19:22414379 |
| 19 rs3752163   | 22256396 G | 0.409  | 1.76E-05 | chr:19:22414379 |
| 19 rs4932953   | 22249045 G | 0.409  | 1.76E-05 | chr:19:22414379 |
| 19 rs6511318   | 22245745 A | 0.409  | 1.76E-05 | chr:19:22414379 |
| 19 rs7251108   | 22250689 G | 0.409  | 1.76E-05 | chr:19:22414379 |

|                |            |        |          |                 |
|----------------|------------|--------|----------|-----------------|
| 19 rs7254363   | 22257048 C | 0.409  | 1.76E-05 | chr:19:22414379 |
| 19 rs7255666   | 22257264 T | 0.409  | 1.76E-05 | chr:19:22414379 |
| 19 rs66507626  | 22638052 T | 0.5268 | 2.03E-05 | chr:19:22414379 |
| 19 rs72620595  | 22637631 T | 0.5268 | 2.03E-05 | chr:19:22414379 |
| 19 rs4932984   | 22533255 T | 0.445  | 2.14E-05 | chr:19:22414379 |
| 19 rs4932990   | 22583691 A | 0.5012 | 2.17E-05 | chr:19:22414379 |
| 19 rs10419899  | 22157302 A | 1.937  | 2.19E-05 | chr:19:22414379 |
| 19 rs2214301   | 22154954 T | 1.914  | 2.24E-05 | chr:19:22414379 |
| 19 rs8108957   | 22154732 C | 1.914  | 2.24E-05 | chr:19:22414379 |
| 19 rs4024619   | 22586839 G | 0.5066 | 2.24E-05 | chr:19:22414379 |
| 19 rs16998944  | 22487437 G | 0.4937 | 2.25E-05 | chr:19:22414379 |
| 19 rs79585427  | 29843225 C | 87.03  | 7.06E-32 | chr:19:29855781 |
| 19 rs200026439 | 29845668 T | 101.2  | 7.19E-32 | chr:19:29855781 |
| 19 rs201163831 | 29845670 T | 101.2  | 7.19E-32 | chr:19:29855781 |
| 19 rs200136359 | 29843211 G | 84.42  | 1.69E-31 | chr:19:29855781 |
| 19 rs200658849 | 29843213 T | 84.42  | 1.69E-31 | chr:19:29855781 |
| 19 rs76108985  | 29843218 C | 84.42  | 1.69E-31 | chr:19:29855781 |
| 19 rs10426484  | 29866090 A | 35.43  | 5.68E-31 | chr:19:29855781 |
| 19 rs200273877 | 29841554 A | 56.52  | 1.44E-30 | chr:19:29855781 |
| 19 rs201714995 | 29841536 A | 56.52  | 1.44E-30 | chr:19:29855781 |
| 19 rs200009518 | 29841360 G | 54.92  | 3.92E-30 | chr:19:29855781 |
| 19 rs62109918  | 29845664 T | 136.2  | 1.28E-29 | chr:19:29855781 |
| 19 rs62109919  | 29845666 T | 136.2  | 1.28E-29 | chr:19:29855781 |
| 19 rs4591272   | 29841167 A | 52.41  | 2.48E-28 | chr:19:29855781 |
| 19 rs8100333   | 29866136 T | 144.6  | 2.85E-28 | chr:19:29855781 |
| 19 rs8100334   | 29866137 T | 144.6  | 2.85E-28 | chr:19:29855781 |
| 19 rs10402522  | 29861084 A | 211.5  | 5.40E-28 | chr:19:29855781 |
| 19 rs10403684  | 29860887 T | 211.5  | 5.40E-28 | chr:19:29855781 |
| 19 rs10404520  | 29860937 G | 211.5  | 5.40E-28 | chr:19:29855781 |
| 19 rs10404941  | 29861103 C | 211.5  | 5.40E-28 | chr:19:29855781 |
| 19 rs10422443  | 29860582 A | 211.5  | 5.40E-28 | chr:19:29855781 |
| 19 rs10424790  | 29860630 G | 211.5  | 5.40E-28 | chr:19:29855781 |
| 19 rs11880983  | 29859865 C | 211.5  | 5.40E-28 | chr:19:29855781 |
| 19 rs11882773  | 29859829 A | 211.5  | 5.40E-28 | chr:19:29855781 |
| 19 rs6509385   | 29861469 C | 211.5  | 5.40E-28 | chr:19:29855781 |
| 19 rs6509386   | 29861649 T | 211.5  | 5.40E-28 | chr:19:29855781 |
| 19 rs6509387   | 29861707 A | 211.5  | 5.40E-28 | chr:19:29855781 |
| 19 rs7246620   | 29861360 C | 211.5  | 5.40E-28 | chr:19:29855781 |
| 19 rs7258498   | 29860387 T | 211.5  | 5.40E-28 | chr:19:29855781 |
| 19 rs13345888  | 29842781 C | 228.4  | 5.47E-28 | chr:19:29855781 |
| 19 rs10412642  | 29871720 A | 200.4  | 7.47E-28 | chr:19:29855781 |
| 19 rs10421910  | 29868808 A | 200.4  | 7.47E-28 | chr:19:29855781 |
| 19 rs10422144  | 29868886 A | 200.4  | 7.47E-28 | chr:19:29855781 |

|               |            |       |          |                 |
|---------------|------------|-------|----------|-----------------|
| 19 rs10422587 | 29869112 A | 200.4 | 7.47E-28 | chr:19:29855781 |
| 19 rs12973626 | 29867364 C | 200.4 | 7.47E-28 | chr:19:29855781 |
| 19 rs12979074 | 29867103 A | 200.4 | 7.47E-28 | chr:19:29855781 |
| 19 rs12979587 | 29867327 A | 200.4 | 7.47E-28 | chr:19:29855781 |
| 19 rs12980588 | 29867736 A | 200.4 | 7.47E-28 | chr:19:29855781 |
| 19 rs1558365  | 29865746 C | 200.4 | 7.47E-28 | chr:19:29855781 |
| 19 rs1558366  | 29865847 T | 200.4 | 7.47E-28 | chr:19:29855781 |
| 19 rs17624933 | 29867883 T | 200.4 | 7.47E-28 | chr:19:29855781 |
| 19 rs1981675  | 29868188 T | 200.4 | 7.47E-28 | chr:19:29855781 |
| 19 rs1981677  | 29868499 A | 200.4 | 7.47E-28 | chr:19:29855781 |
| 19 rs4271695  | 29866742 A | 200.4 | 7.47E-28 | chr:19:29855781 |
| 19 rs4398199  | 29866833 C | 200.4 | 7.47E-28 | chr:19:29855781 |
| 19 rs4558517  | 29866993 T | 200.4 | 7.47E-28 | chr:19:29855781 |
| 19 rs4605284  | 29866673 T | 200.4 | 7.47E-28 | chr:19:29855781 |
| 19 rs4605285  | 29866853 G | 200.4 | 7.47E-28 | chr:19:29855781 |
| 19 rs8103925  | 29866287 G | 200.4 | 7.47E-28 | chr:19:29855781 |
| 19 rs10403689 | 29862797 A | 198.7 | 8.55E-28 | chr:19:29855781 |
| 19 rs10423850 | 29862444 A | 198.7 | 8.55E-28 | chr:19:29855781 |
| 19 rs11883246 | 29862074 G | 198.7 | 8.55E-28 | chr:19:29855781 |
| 19 rs1558362  | 29865141 T | 198.7 | 8.55E-28 | chr:19:29855781 |
| 19 rs56048673 | 29862967 A | 198.7 | 8.55E-28 | chr:19:29855781 |
| 19 rs6509388  | 29861882 G | 198.7 | 8.55E-28 | chr:19:29855781 |
| 19 rs6509389  | 29861958 G | 198.7 | 8.55E-28 | chr:19:29855781 |
| 19 rs6509390  | 29862034 T | 198.7 | 8.55E-28 | chr:19:29855781 |
| 19 rs7248809  | 29863240 G | 198.7 | 8.55E-28 | chr:19:29855781 |
| 19 rs7248884  | 29863662 T | 198.7 | 8.55E-28 | chr:19:29855781 |
| 19 rs7252555  | 29863630 C | 198.7 | 8.55E-28 | chr:19:29855781 |
| 19 rs7253279  | 29864696 A | 198.7 | 8.55E-28 | chr:19:29855781 |
| 19 rs7259512  | 29862045 G | 198.7 | 8.55E-28 | chr:19:29855781 |
| 19 rs12981862 | 29867527 G | 196.8 | 1.01E-27 | chr:19:29855781 |
| 19 rs12981877 | 29867555 T | 196.8 | 1.01E-27 | chr:19:29855781 |
| 19 rs1558364  | 29865345 A | 198.5 | 1.34E-27 | chr:19:29855781 |
| 19 rs9916951  | 29865388 G | 198.5 | 1.34E-27 | chr:19:29855781 |
| 19 rs10404170 | 29863044 C | 197.9 | 1.62E-27 | chr:19:29855781 |
| 19 rs7507344  | 29863087 A | 197.9 | 1.62E-27 | chr:19:29855781 |
| 19 rs7507798  | 29863083 C | 197.9 | 1.62E-27 | chr:19:29855781 |
| 19 rs13343404 | 29826240 A | 260.4 | 2.44E-27 | chr:19:29855781 |
| 19 rs28792508 | 29841216 C | 45.7  | 3.12E-27 | chr:19:29855781 |
| 19 rs62104321 | 29866339 C | 26.08 | 3.64E-27 | chr:19:29855781 |
| 19 rs10413763 | 29873400 A | 246.7 | 9.07E-27 | chr:19:29855781 |
| 19 rs10426495 | 29866098 C | 187.3 | 1.80E-26 | chr:19:29855781 |
| 19 rs12150922 | 29879068 T | 56.04 | 5.34E-26 | chr:19:29855781 |
| 19 rs10420190 | 29873997 A | 57.06 | 8.13E-26 | chr:19:29855781 |

|                |            |       |          |                 |
|----------------|------------|-------|----------|-----------------|
| 19 rs34786514  | 29878333 G | 65.53 | 8.33E-26 | chr:19:29855781 |
| 19 rs150191335 | 29843058 T | 362.8 | 1.38E-25 | chr:19:29855781 |
| 19 rs35900872  | 29871153 A | 329.1 | 2.55E-25 | chr:19:29855781 |
| 19 rs12608817  | 29808821 A | 318.2 | 5.61E-25 | chr:19:29855781 |
| 19 rs12610707  | 29808907 C | 318.2 | 5.61E-25 | chr:19:29855781 |
| 19 rs12610720  | 29808999 C | 318.2 | 5.61E-25 | chr:19:29855781 |
| 19 rs8099873   | 29808683 A | 318.2 | 5.61E-25 | chr:19:29855781 |
| 19 rs4804878   | 29873579 A | 75.99 | 5.91E-25 | chr:19:29855781 |
| 19 rs4805382   | 29873748 A | 75.99 | 5.91E-25 | chr:19:29855781 |
| 19 rs10401757  | 29866045 T | 293.8 | 6.02E-25 | chr:19:29855781 |
| 19 rs12978558  | 29807938 C | 315.7 | 6.28E-25 | chr:19:29855781 |
| 19 rs12978201  | 29805534 G | 214.5 | 8.53E-25 | chr:19:29855781 |
| 19 rs12150940  | 29840750 C | 466.7 | 2.80E-24 | chr:19:29855781 |
| 19 rs12151167  | 29840748 T | 466.7 | 2.80E-24 | chr:19:29855781 |
| 19 rs7508357   | 29841738 C | 397.6 | 3.16E-24 | chr:19:29855781 |
| 19 rs142004081 | 29841268 A | 27.31 | 4.63E-24 | chr:19:29855781 |
| 19 rs1981676   | 29868320 A | 410.3 | 5.35E-24 | chr:19:29855781 |
| 19 rs758770    | 29870136 G | 408.7 | 6.39E-24 | chr:19:29855781 |
| 19 rs7249606   | 29866089 C | 32.16 | 6.53E-24 | chr:19:29855781 |
| 19 rs62104320  | 29866335 T | 41.94 | 6.54E-24 | chr:19:29855781 |
| 19 rs10413925  | 29851859 T | 454.8 | 7.31E-24 | chr:19:29855781 |
| 19 rs10406127  | 29826758 T | 444.2 | 9.09E-24 | chr:19:29855781 |
| 19 rs10410330  | 29827372 C | 444.2 | 9.09E-24 | chr:19:29855781 |
| 19 rs10419817  | 29828620 T | 444.2 | 9.09E-24 | chr:19:29855781 |
| 19 rs10500239  | 29829980 C | 444.2 | 9.09E-24 | chr:19:29855781 |
| 19 rs1122022   | 29825214 A | 444.2 | 9.09E-24 | chr:19:29855781 |
| 19 rs2160717   | 29822729 T | 444.2 | 9.09E-24 | chr:19:29855781 |
| 19 rs2193499   | 29821859 A | 444.2 | 9.09E-24 | chr:19:29855781 |
| 19 rs2193500   | 29834892 G | 444.2 | 9.09E-24 | chr:19:29855781 |
| 19 rs28573811  | 29867469 T | 411.4 | 9.72E-24 | chr:19:29855781 |
| 19 rs10405922  | 29813264 C | 441.5 | 1.05E-23 | chr:19:29855781 |
| 19 rs10408576  | 29818131 A | 441.5 | 1.05E-23 | chr:19:29855781 |
| 19 rs10411884  | 29814875 T | 441.5 | 1.05E-23 | chr:19:29855781 |
| 19 rs10424492  | 29813431 A | 441.5 | 1.05E-23 | chr:19:29855781 |
| 19 rs10425611  | 29813263 T | 441.5 | 1.05E-23 | chr:19:29855781 |
| 19 rs11879307  | 29815370 A | 441.5 | 1.05E-23 | chr:19:29855781 |
| 19 rs17773647  | 29813079 G | 441.5 | 1.05E-23 | chr:19:29855781 |
| 19 rs28581734  | 29813167 T | 441.5 | 1.05E-23 | chr:19:29855781 |
| 19 rs8102048   | 29814240 A | 441.5 | 1.05E-23 | chr:19:29855781 |
| 19 rs10413814  | 29859044 A | 439.1 | 1.07E-23 | chr:19:29855781 |
| 19 rs12709912  | 29859443 C | 439.1 | 1.07E-23 | chr:19:29855781 |
| 19 rs13344917  | 29859503 C | 439.1 | 1.07E-23 | chr:19:29855781 |
| 19 rs8113604   | 29813727 G | 437.7 | 1.13E-23 | chr:19:29855781 |

|                |            |       |          |                 |
|----------------|------------|-------|----------|-----------------|
| 19 rs7253602   | 29864638 G | 40.31 | 1.14E-23 | chr:19:29855781 |
| 19 rs10401849  | 29860785 T | 47.86 | 1.49E-23 | chr:19:29855781 |
| 19 rs10404303  | 29860663 C | 47.86 | 1.49E-23 | chr:19:29855781 |
| 19 rs7258342   | 29859947 C | 47.86 | 1.49E-23 | chr:19:29855781 |
| 19 rs1860573   | 29879749 A | 38.96 | 1.58E-23 | chr:19:29855781 |
| 19 rs957166    | 29882508 T | 11.74 | 1.59E-23 | chr:19:29855781 |
| 19 rs10418201  | 29810677 G | 415.6 | 1.66E-23 | chr:19:29855781 |
| 19 rs10419653  | 29812484 G | 415.6 | 1.66E-23 | chr:19:29855781 |
| 19 rs10423930  | 29810687 G | 415.6 | 1.66E-23 | chr:19:29855781 |
| 19 rs10425007  | 29812397 C | 415.6 | 1.66E-23 | chr:19:29855781 |
| 19 rs11880160  | 29810859 A | 415.6 | 1.66E-23 | chr:19:29855781 |
| 19 rs11880387  | 29810986 A | 415.6 | 1.66E-23 | chr:19:29855781 |
| 19 rs2216341   | 29812294 T | 415.6 | 1.66E-23 | chr:19:29855781 |
| 19 rs727798    | 29811828 C | 415.6 | 1.66E-23 | chr:19:29855781 |
| 19 rs10403590  | 29844676 C | 445.7 | 1.66E-23 | chr:19:29855781 |
| 19 rs9749537   | 29844679 A | 445.7 | 1.66E-23 | chr:19:29855781 |
| 19 rs2865896   | 29872800 T | 47.89 | 2.03E-23 | chr:19:29855781 |
| 19 rs4805381   | 29872627 C | 47.89 | 2.03E-23 | chr:19:29855781 |
| 19 rs7249123   | 29870685 G | 47.89 | 2.03E-23 | chr:19:29855781 |
| 19 rs1981678   | 29868519 G | 46.74 | 2.39E-23 | chr:19:29855781 |
| 19 rs8107989   | 29867796 G | 46.74 | 2.39E-23 | chr:19:29855781 |
| 19 rs4805374   | 29862430 G | 46.42 | 2.62E-23 | chr:19:29855781 |
| 19 rs7252679   | 29863745 C | 46.42 | 2.62E-23 | chr:19:29855781 |
| 19 rs8107043   | 29864213 G | 46.42 | 2.62E-23 | chr:19:29855781 |
| 19 rs10415631  | 29810562 C | 411.4 | 2.71E-23 | chr:19:29855781 |
| 19 rs8111179   | 29809968 C | 411.4 | 2.71E-23 | chr:19:29855781 |
| 19 rs9797726   | 29842789 T | 534.1 | 2.87E-23 | chr:19:29855781 |
| 19 rs4805383   | 29873963 G | 39.15 | 3.00E-23 | chr:19:29855781 |
| 19 rs3960886   | 29878149 C | 39.08 | 3.19E-23 | chr:19:29855781 |
| 19 rs6509401   | 29877643 C | 39.08 | 3.19E-23 | chr:19:29855781 |
| 19 rs8109600   | 29877328 G | 39.08 | 3.19E-23 | chr:19:29855781 |
| 19 rs11883012  | 29874196 G | 46.45 | 3.22E-23 | chr:19:29855781 |
| 19 rs8108111   | 29809851 G | 300.7 | 4.99E-23 | chr:19:29855781 |
| 19 rs1558363   | 29865313 C | 57.64 | 6.08E-23 | chr:19:29855781 |
| 19 rs1076416   | 29879196 A | 22.17 | 1.34E-22 | chr:19:29855781 |
| 19 rs113093811 | 29852096 A | 703.8 | 5.59E-22 | chr:19:29855781 |
| 19 rs55711025  | 29880437 G | 10.15 | 8.53E-22 | chr:19:29855781 |
| 19 rs150522295 | 29841311 G | 20.98 | 8.59E-22 | chr:19:29855781 |
| 19 rs10422053  | 29881070 T | 10.15 | 1.00E-21 | chr:19:29855781 |
| 19 rs111164000 | 29881600 C | 10.15 | 1.00E-21 | chr:19:29855781 |
| 19 rs13346371  | 29880687 G | 10.15 | 1.00E-21 | chr:19:29855781 |
| 19 rs17703299  | 29880277 A | 10.15 | 1.00E-21 | chr:19:29855781 |
| 19 rs17703317  | 29880615 A | 10.15 | 1.00E-21 | chr:19:29855781 |

|                |            |       |          |                 |
|----------------|------------|-------|----------|-----------------|
| 19 rs56091016  | 29880529 C | 10.15 | 1.00E-21 | chr:19:29855781 |
| 19 rs56097453  | 29881537 A | 10.15 | 1.00E-21 | chr:19:29855781 |
| 19 rs9748993   | 29881310 C | 10.15 | 1.00E-21 | chr:19:29855781 |
| 19 rs8107864   | 29882147 T | 10.15 | 1.01E-21 | chr:19:29855781 |
| 19 rs55645533  | 29880453 T | 9.465 | 1.02E-21 | chr:19:29855781 |
| 19 rs13344206  | 29880707 A | 9.471 | 1.19E-21 | chr:19:29855781 |
| 19 rs1119169   | 29850778 T | 601.4 | 1.59E-21 | chr:19:29855781 |
| 19 rs200964938 | 29841291 G | 20.12 | 1.77E-21 | chr:19:29855781 |
| 19 rs10408748  | 29837390 T | 596.9 | 1.77E-21 | chr:19:29855781 |
| 19 rs10411489  | 29846018 C | 596.9 | 1.77E-21 | chr:19:29855781 |
| 19 rs10424375  | 29839089 A | 596.9 | 1.77E-21 | chr:19:29855781 |
| 19 rs34235250  | 29852282 C | 596.9 | 1.77E-21 | chr:19:29855781 |
| 19 rs67987964  | 29845533 G | 596.9 | 1.77E-21 | chr:19:29855781 |
| 19 rs13344861  | 29881433 A | 9.278 | 2.08E-21 | chr:19:29855781 |
| 19 rs8103504   | 29808196 C | 73.59 | 3.29E-21 | chr:19:29855781 |
| 19 rs11670844  | 29800673 T | 9.214 | 6.45E-21 | chr:19:29855781 |
| 19 rs2011890   | 29801011 A | 9.214 | 6.45E-21 | chr:19:29855781 |
| 19 rs957165    | 29882525 G | 8.369 | 7.32E-21 | chr:19:29855781 |
| 19 rs78286516  | 29843274 C | 643.2 | 7.50E-21 | chr:19:29855781 |
| 19 rs78902520  | 29843271 A | 643.2 | 7.50E-21 | chr:19:29855781 |
| 19 rs8100899   | 29808524 G | 65.02 | 1.14E-20 | chr:19:29855781 |
| 19 rs62108213  | 29830870 A | 737.1 | 1.21E-20 | chr:19:29855781 |
| 19 rs62108214  | 29830872 C | 737.1 | 1.21E-20 | chr:19:29855781 |
| 19 rs62108215  | 29830873 T | 737.1 | 1.21E-20 | chr:19:29855781 |
| 19 rs10402726  | 29826292 T | 715.5 | 1.62E-20 | chr:19:29855781 |
| 19 rs10405159  | 29826311 G | 715.5 | 1.62E-20 | chr:19:29855781 |
| 19 rs10410622  | 29826229 G | 715.5 | 1.62E-20 | chr:19:29855781 |
| 19 rs8113733   | 29807306 C | 67.07 | 1.71E-20 | chr:19:29855781 |
| 19 rs7257439   | 29816242 A | 95.12 | 2.32E-20 | chr:19:29855781 |
| 19 rs1558864   | 29823261 A | 95.1  | 2.72E-20 | chr:19:29855781 |
| 19 rs35308361  | 29830552 T | 95.1  | 2.72E-20 | chr:19:29855781 |
| 19 rs10420966  | 29816663 T | 94.72 | 2.96E-20 | chr:19:29855781 |
| 19 rs7253662   | 29815722 T | 94.72 | 2.96E-20 | chr:19:29855781 |
| 19 rs929691    | 29818042 C | 94.72 | 2.96E-20 | chr:19:29855781 |
| 19 rs12691091  | 29859430 C | 93.96 | 3.26E-20 | chr:19:29855781 |
| 19 rs7248644   | 29856939 C | 93.96 | 3.26E-20 | chr:19:29855781 |
| 19 rs8107741   | 29858602 G | 93.96 | 3.26E-20 | chr:19:29855781 |
| 19 rs7351109   | 29816574 C | 93.98 | 3.27E-20 | chr:19:29855781 |
| 19 rs74181477  | 29840703 A | 988.7 | 3.33E-20 | chr:19:29855781 |
| 19 rs7255472   | 29811968 C | 93.17 | 4.06E-20 | chr:19:29855781 |
| 19 rs8107456   | 29810347 C | 91.9  | 5.31E-20 | chr:19:29855781 |
| 19 rs6509383   | 29857637 C | 89.12 | 6.34E-20 | chr:19:29855781 |
| 19 rs1990391   | 29859164 T | 85.62 | 7.37E-20 | chr:19:29855781 |

|                |            |       |          |                 |
|----------------|------------|-------|----------|-----------------|
| 19 rs10407922  | 29833571 C | 974.7 | 1.07E-19 | chr:19:29855781 |
| 19 rs10424195  | 29883577 T | 6.682 | 1.12E-19 | chr:19:29855781 |
| 19 rs2903115   | 29837927 T | 123.5 | 6.89E-19 | chr:19:29855781 |
| 19 rs4804876   | 29853605 A | 120.7 | 1.01E-18 | chr:19:29855781 |
| 19 rs61631634  | 29852485 C | 120.7 | 1.01E-18 | chr:19:29855781 |
| 19 rs10421211  | 29852874 A | 114.5 | 1.53E-18 | chr:19:29855781 |
| 19 rs10404884  | 29839279 A | 114.5 | 2.28E-18 | chr:19:29855781 |
| 19 rs2012095   | 29801230 G | 6.088 | 3.15E-18 | chr:19:29855781 |
| 19 rs10407706  | 29799613 C | 5.783 | 9.73E-18 | chr:19:29855781 |
| 19 rs10421823  | 29835487 A | 1195  | 1.25E-17 | chr:19:29855781 |
| 19 rs10422614  | 29835503 G | 1195  | 1.25E-17 | chr:19:29855781 |
| 19 rs35379433  | 29834698 A | 1261  | 1.33E-17 | chr:19:29855781 |
| 19 rs140915866 | 29843043 G | 1381  | 1.40E-17 | chr:19:29855781 |
| 19 rs62109915  | 29843088 T | 1381  | 1.40E-17 | chr:19:29855781 |
| 19 rs10407716  | 29799624 G | 5.717 | 1.72E-17 | chr:19:29855781 |
| 19 rs10406849  | 29833391 A | 1364  | 2.04E-17 | chr:19:29855781 |
| 19 rs10405105  | 29833373 T | 1352  | 2.25E-17 | chr:19:29855781 |
| 19 rs9789288   | 29806349 T | 1054  | 3.72E-17 | chr:19:29855781 |
| 19 rs7259050   | 29799035 A | 5.053 | 7.92E-17 | chr:19:29855781 |
| 19 rs11671699  | 29882003 A | 7.52  | 1.26E-16 | chr:19:29855781 |
| 19 rs4805366   | 29799264 G | 4.91  | 2.65E-16 | chr:19:29855781 |
| 19 rs1012613   | 29796344 A | 4.627 | 5.17E-16 | chr:19:29855781 |
| 19 rs62111119  | 29795071 T | 4.291 | 2.36E-15 | chr:19:29855781 |
| 19 rs10425210  | 29792094 A | 4.011 | 1.65E-14 | chr:19:29855781 |
| 19 rs7507405   | 29841956 C | 2669  | 7.47E-13 | chr:19:29855781 |
| 19 rs7507869   | 29841938 C | 2669  | 7.47E-13 | chr:19:29855781 |
| 19 rs10405460  | 29840781 A | 2286  | 7.62E-13 | chr:19:29855781 |
| 19 rs10410829  | 29840787 T | 2286  | 7.62E-13 | chr:19:29855781 |
| 19 rs13344183  | 29841038 T | 2286  | 7.62E-13 | chr:19:29855781 |
| 19 rs35754631  | 29852145 C | 2962  | 8.26E-13 | chr:19:29855781 |
| 19 rs10416302  | 29851854 C | 2821  | 8.92E-13 | chr:19:29855781 |
| 19 rs7252876   | 29851938 A | 2821  | 8.92E-13 | chr:19:29855781 |
| 19 rs2111519   | 29794684 T | 3.411 | 9.97E-13 | chr:19:29855781 |
| 19 rs10401431  | 29829429 G | 2674  | 1.06E-12 | chr:19:29855781 |
| 19 rs10403475  | 29826676 C | 2674  | 1.06E-12 | chr:19:29855781 |
| 19 rs10404772  | 29821253 A | 2674  | 1.06E-12 | chr:19:29855781 |
| 19 rs10404828  | 29826537 T | 2674  | 1.06E-12 | chr:19:29855781 |
| 19 rs10405069  | 29833324 A | 2674  | 1.06E-12 | chr:19:29855781 |
| 19 rs10405212  | 29832150 G | 2674  | 1.06E-12 | chr:19:29855781 |
| 19 rs10406530  | 29832689 C | 2674  | 1.06E-12 | chr:19:29855781 |
| 19 rs10406567  | 29832755 C | 2674  | 1.06E-12 | chr:19:29855781 |
| 19 rs10407234  | 29833261 C | 2674  | 1.06E-12 | chr:19:29855781 |
| 19 rs10407240  | 29829500 C | 2674  | 1.06E-12 | chr:19:29855781 |

|               |            |      |                          |
|---------------|------------|------|--------------------------|
| 19 rs10408183 | 29823239 T | 2674 | 1.06E-12 chr:19:29855781 |
| 19 rs10409090 | 29823614 G | 2674 | 1.06E-12 chr:19:29855781 |
| 19 rs10409875 | 29827166 A | 2674 | 1.06E-12 chr:19:29855781 |
| 19 rs10410499 | 29827426 T | 2674 | 1.06E-12 chr:19:29855781 |
| 19 rs10411073 | 29826427 C | 2674 | 1.06E-12 chr:19:29855781 |
| 19 rs10411272 | 29826524 A | 2674 | 1.06E-12 chr:19:29855781 |
| 19 rs10411752 | 29826775 C | 2674 | 1.06E-12 chr:19:29855781 |
| 19 rs10413525 | 29833498 C | 2674 | 1.06E-12 chr:19:29855781 |
| 19 rs10413728 | 29833591 C | 2674 | 1.06E-12 chr:19:29855781 |
| 19 rs10415713 | 29831541 T | 2674 | 1.06E-12 chr:19:29855781 |
| 19 rs10415948 | 29824022 G | 2674 | 1.06E-12 chr:19:29855781 |
| 19 rs10416004 | 29831681 T | 2674 | 1.06E-12 chr:19:29855781 |
| 19 rs10416173 | 29824125 T | 2674 | 1.06E-12 chr:19:29855781 |
| 19 rs10416313 | 29831461 G | 2674 | 1.06E-12 chr:19:29855781 |
| 19 rs10416725 | 29831649 C | 2674 | 1.06E-12 chr:19:29855781 |
| 19 rs10417724 | 29819252 A | 2674 | 1.06E-12 chr:19:29855781 |
| 19 rs10419949 | 29828341 G | 2674 | 1.06E-12 chr:19:29855781 |
| 19 rs10422084 | 29835604 G | 2674 | 1.06E-12 chr:19:29855781 |
| 19 rs10423259 | 29820105 A | 2674 | 1.06E-12 chr:19:29855781 |
| 19 rs10424081 | 29832472 A | 2674 | 1.06E-12 chr:19:29855781 |
| 19 rs10425546 | 29832398 T | 2674 | 1.06E-12 chr:19:29855781 |
| 19 rs10425993 | 29832603 G | 2674 | 1.06E-12 chr:19:29855781 |
| 19 rs10853797 | 29821094 C | 2674 | 1.06E-12 chr:19:29855781 |
| 19 rs10853798 | 29821124 A | 2674 | 1.06E-12 chr:19:29855781 |
| 19 rs10853799 | 29821146 A | 2674 | 1.06E-12 chr:19:29855781 |
| 19 rs10853800 | 29821178 C | 2674 | 1.06E-12 chr:19:29855781 |
| 19 rs11083916 | 29821200 C | 2674 | 1.06E-12 chr:19:29855781 |
| 19 rs11083917 | 29821301 C | 2674 | 1.06E-12 chr:19:29855781 |
| 19 rs11881314 | 29830193 A | 2674 | 1.06E-12 chr:19:29855781 |
| 19 rs11881407 | 29829948 T | 2674 | 1.06E-12 chr:19:29855781 |
| 19 rs11881459 | 29830092 T | 2674 | 1.06E-12 chr:19:29855781 |
| 19 rs11881508 | 29830309 G | 2674 | 1.06E-12 chr:19:29855781 |
| 19 rs12610959 | 29827626 C | 2674 | 1.06E-12 chr:19:29855781 |
| 19 rs13345551 | 29826197 G | 2674 | 1.06E-12 chr:19:29855781 |
| 19 rs13346790 | 29825511 A | 2674 | 1.06E-12 chr:19:29855781 |
| 19 rs17773922 | 29830629 C | 2674 | 1.06E-12 chr:19:29855781 |
| 19 rs2111496  | 29822748 A | 2674 | 1.06E-12 chr:19:29855781 |
| 19 rs2111497  | 29822857 C | 2674 | 1.06E-12 chr:19:29855781 |
| 19 rs2111498  | 29822858 A | 2674 | 1.06E-12 chr:19:29855781 |
| 19 rs2160716  | 29822600 C | 2674 | 1.06E-12 chr:19:29855781 |
| 19 rs2216339  | 29821569 G | 2674 | 1.06E-12 chr:19:29855781 |
| 19 rs2216340  | 29823183 G | 2674 | 1.06E-12 chr:19:29855781 |
| 19 rs28488633 | 29823953 C | 2674 | 1.06E-12 chr:19:29855781 |



|               |            |        |          |                 |
|---------------|------------|--------|----------|-----------------|
| 19 rs28546871 | 29821491 C | 2674   | 1.06E-12 | chr:19:29855781 |
| 19 rs2865869  | 29821979 T | 2674   | 1.06E-12 | chr:19:29855781 |
| 19 rs2865870  | 29821980 C | 2674   | 1.06E-12 | chr:19:29855781 |
| 19 rs2865871  | 29822061 T | 2674   | 1.06E-12 | chr:19:29855781 |
| 19 rs2865872  | 29822103 C | 2674   | 1.06E-12 | chr:19:29855781 |
| 19 rs2865874  | 29825020 A | 2674   | 1.06E-12 | chr:19:29855781 |
| 19 rs2865877  | 29825180 C | 2674   | 1.06E-12 | chr:19:29855781 |
| 19 rs2865878  | 29825358 C | 2674   | 1.06E-12 | chr:19:29855781 |
| 19 rs35184298 | 29830558 A | 2674   | 1.06E-12 | chr:19:29855781 |
| 19 rs35615835 | 29827061 A | 2674   | 1.06E-12 | chr:19:29855781 |
| 19 rs4805368  | 29828621 G | 2674   | 1.06E-12 | chr:19:29855781 |
| 19 rs5007513  | 29821553 A | 2674   | 1.06E-12 | chr:19:29855781 |
| 19 rs62108163 | 29828752 T | 2674   | 1.06E-12 | chr:19:29855781 |
| 19 rs62108164 | 29828755 C | 2674   | 1.06E-12 | chr:19:29855781 |
| 19 rs8102393  | 29820560 C | 2674   | 1.06E-12 | chr:19:29855781 |
| 19 rs8103034  | 29830764 A | 2674   | 1.06E-12 | chr:19:29855781 |
| 19 rs8103862  | 29830747 A | 2674   | 1.06E-12 | chr:19:29855781 |
| 19 rs8106354  | 29831100 A | 2674   | 1.06E-12 | chr:19:29855781 |
| 19 rs8107378  | 29823430 C | 2674   | 1.06E-12 | chr:19:29855781 |
| 19 rs8107784  | 29824307 T | 2674   | 1.06E-12 | chr:19:29855781 |
| 19 rs8109855  | 29828233 T | 2674   | 1.06E-12 | chr:19:29855781 |
| 19 rs8111162  | 29824369 C | 2674   | 1.06E-12 | chr:19:29855781 |
| 19 rs8113496  | 29820529 G | 2674   | 1.06E-12 | chr:19:29855781 |
| 19 rs8113732  | 29820742 G | 2674   | 1.06E-12 | chr:19:29855781 |
| 19 rs979412   | 29818376 A | 2673   | 1.10E-12 | chr:19:29855781 |
| 19 rs2865875  | 29825068 A | 2663   | 1.10E-12 | chr:19:29855781 |
| 19 rs2865876  | 29825093 A | 2663   | 1.10E-12 | chr:19:29855781 |
| 19 rs2865888  | 29845818 C | 2283   | 1.13E-12 | chr:19:29855781 |
| 19 rs2903117  | 29847324 T | 2379   | 1.13E-12 | chr:19:29855781 |
| 19 rs7254854  | 29847388 A | 2379   | 1.13E-12 | chr:19:29855781 |
| 19 rs7256256  | 29847424 G | 2379   | 1.13E-12 | chr:19:29855781 |
| 19 rs10420835 | 29856760 T | 2642   | 1.14E-12 | chr:19:29855781 |
| 19 rs6417157  | 29858422 C | 2642   | 1.14E-12 | chr:19:29855781 |
| 19 rs8103720  | 29800499 C | 0.2619 | 1.17E-12 | chr:19:29855781 |
| 19 rs979413   | 29818635 A | 2554   | 1.17E-12 | chr:19:29855781 |
| 19 rs7507537  | 29841906 G | 2152   | 1.19E-12 | chr:19:29855781 |
| 19 rs62109922 | 29852078 T | 2251   | 1.20E-12 | chr:19:29855781 |
| 19 rs2193497  | 29821737 A | 2691   | 1.41E-12 | chr:19:29855781 |
| 19 rs2193498  | 29821753 G | 2691   | 1.41E-12 | chr:19:29855781 |
| 19 rs2903113  | 29821703 T | 2691   | 1.41E-12 | chr:19:29855781 |
| 19 rs2193501  | 29834999 A | 2585   | 1.55E-12 | chr:19:29855781 |
| 19 rs35349289 | 29830485 G | 2009   | 1.70E-12 | chr:19:29855781 |
| 19 rs35980661 | 29798605 G | 3.301  | 4.10E-12 | chr:19:29855781 |

|                      |            |        |          |                 |
|----------------------|------------|--------|----------|-----------------|
| 19 rs2111518         | 29794622 T | 0.3174 | 6.24E-12 | chr:19:29855781 |
| 19 rs36032197        | 29813521 T | 0.2758 | 4.16E-11 | chr:19:29855781 |
| 19 rs71363971        | 29813517 C | 0.2758 | 4.16E-11 | chr:19:29855781 |
| 19 rs62109953        | 29859207 T | 23.83  | 9.19E-11 | chr:19:29855781 |
| 19 rs62109920        | 29846656 G | 22.4   | 2.09E-10 | chr:19:29855781 |
| 19 rs741451          | 29805110 T | 13.22  | 1.37E-09 | chr:19:29855781 |
| 19 rs2011889         | 29800978 T | 13.03  | 1.62E-09 | chr:19:29855781 |
| 19 rs117284068       | 29813491 A | 18.95  | 1.98E-09 | chr:19:29855781 |
| 19 rs12610896        | 29812728 A | 18.95  | 1.98E-09 | chr:19:29855781 |
| 19 rs10401191        | 29792311 C | 0.3594 | 2.81E-09 | chr:19:29855781 |
| 19 rs62108165        | 29829502 T | 18.29  | 3.47E-09 | chr:19:29855781 |
| 19 rs12986207        | 29903677 A | 3.746  | 8.03E-09 | chr:19:29855781 |
| 19 rs73028769        | 29870748 C | 0.306  | 1.78E-08 | chr:19:29855781 |
| 19 rs73024995        | 29822198 G | 0.3062 | 1.83E-08 | chr:19:29855781 |
| 19 rs11671563        | 29901465 A | 3.549  | 1.86E-08 | chr:19:29855781 |
| 19 rs4805397         | 29906514 T | 3.475  | 5.08E-08 | chr:19:29855781 |
| 19 rs4805400         | 29907553 A | 3.475  | 5.08E-08 | chr:19:29855781 |
| 19 rs7247663         | 29909143 G | 3.475  | 5.08E-08 | chr:19:29855781 |
| 19 rs569196726       | 29881464 A | 3.886  | 6.57E-08 | chr:19:29855781 |
| 19 rs892074          | 29912414 G | 0.4022 | 7.18E-08 | chr:19:29855781 |
| 19 rs58785326        | 29911925 C | 0.4078 | 1.03E-07 | chr:19:29855781 |
| 19 rs57598720        | 29911930 G | 0.4101 | 1.40E-07 | chr:19:29855781 |
| 19 rs7254046         | 29910750 C | 0.4189 | 2.02E-07 | chr:19:29855781 |
| 19 rs12984061        | 29885279 A | 0.4307 | 4.23E-07 | chr:19:29855781 |
| 19 rs7259598         | 29886029 C | 0.4283 | 4.43E-07 | chr:19:29855781 |
| 19 rs4805390         | 29885676 G | 0.4304 | 4.56E-07 | chr:19:29855781 |
| 19 rs4805391         | 29885783 C | 0.4304 | 4.56E-07 | chr:19:29855781 |
| 19 rs4805387         | 29885553 C | 0.4401 | 7.64E-07 | chr:19:29855781 |
| 19 rs4805389         | 29885643 C | 0.4401 | 7.64E-07 | chr:19:29855781 |
| 19 rs8102600         | 29793077 G | 0.377  | 2.27E-06 | chr:19:29855781 |
| 19 rs8108536         | 29837645 T | 0.3471 | 9.16E-06 | chr:19:29855781 |
| 19 rs73016590        | 29911461 T | 0.3698 | 1.90E-05 | chr:19:29855781 |
| 19 rs892073          | 29912294 T | 0.3698 | 1.90E-05 | chr:19:29855781 |
| 19 rs73027078;rs5310 | 29845662 C | 0.4385 | 2.87E-05 | chr:19:29855781 |
| 19 rs7251052         | 29897537 G | 2.785  | 3.00E-05 | chr:19:29855781 |
| 19 rs144973495       | 29881947 A | 5.313  | 3.09E-05 | chr:19:29855781 |
| 19 rs10853806        | 29919866 T | 2.6    | 3.25E-05 | chr:19:29855781 |
| 19 rs11668020        | 29810321 T | 0.3188 | 3.48E-05 | chr:19:29855781 |
| 19 rs8102616         | 29930766 C | 1.925  | 3.67E-05 | chr:19:29855781 |
| 19 rs3045478         | 29868529 G | 8.068  | 3.74E-05 | chr:19:29855781 |
| 19 rs57392981        | 29856276 G | 13.15  | 3.79E-05 | chr:19:29855781 |
| 19 rs73018522        | 29921071 A | 0.3894 | 4.00E-05 | chr:19:29855781 |
| 19 rs62109951        | 29854071 T | 12.92  | 4.91E-05 | chr:19:29855781 |

|                |             |        |          |                 |
|----------------|-------------|--------|----------|-----------------|
| 19 rs11671079  | 29900846 G  | 0.5521 | 4.96E-05 | chr:19:29855781 |
| 19 rs112694418 | 52924249 C  | 4.318  | 3.01E-09 | chr:19:52924209 |
| 19 rs59950484  | 52924130 C  | 4.027  | 8.99E-09 | chr:19:52924209 |
| 19 rs28375755  | 52925067 A  | 3.927  | 1.31E-08 | chr:19:52924209 |
| 19 rs28462149  | 52925088 G  | 3.927  | 1.31E-08 | chr:19:52924209 |
| 19 rs59318859  | 52924127 T  | 3.93   | 1.33E-08 | chr:19:52924209 |
| 19 rs60439793  | 52923753 C  | 3.93   | 1.33E-08 | chr:19:52924209 |
| 19 rs73934457  | 52923971 G  | 3.93   | 1.33E-08 | chr:19:52924209 |
| 19 rs73934458  | 52924044 G  | 3.93   | 1.33E-08 | chr:19:52924209 |
| 19 rs61689498  | 52924136 A  | 3.884  | 1.53E-08 | chr:19:52924209 |
| 19 rs113590683 | 52924340 G  | 4.134  | 1.63E-08 | chr:19:52924209 |
| 19 rs28528760  | 52924984 C  | 3.827  | 1.95E-08 | chr:19:52924209 |
| 19 rs16983796  | 52925179 A  | 3.827  | 2.01E-08 | chr:19:52924209 |
| 19 rs73934459  | 52924049 G  | 3.679  | 2.15E-08 | chr:19:52924209 |
| 19 rs55952958  | 52923189 T  | 3.836  | 2.28E-08 | chr:19:52924209 |
| 19 rs56236739  | 52923275 C  | 3.836  | 2.28E-08 | chr:19:52924209 |
| 19 rs12461528  | 52925285 C  | 3.624  | 4.72E-08 | chr:19:52924209 |
| 19 rs7247111   | 52925118 A  | 2.54   | 1.08E-07 | chr:19:52924209 |
| 19 rs56902760  | 52924208 T  | 2.527  | 1.24E-07 | chr:19:52924209 |
| 19 rs369961637 | 52924884 A  | 3.434  | 9.04E-07 | chr:19:52924209 |
| 19 rs371913657 | 52924859 A  | 3.434  | 9.04E-07 | chr:19:52924209 |
| 19 rs558610644 | 52924875 T  | 3.434  | 9.04E-07 | chr:19:52924209 |
| 19 rs4085090   | 52924507 T  | 3.671  | 2.45E-06 | chr:19:52924209 |
| 19 rs113365590 | 52915967 G  | 2.139  | 3.97E-06 | chr:19:52924209 |
| 19 rs11668956  | 52909989 A  | 2.139  | 3.97E-06 | chr:19:52924209 |
| 19 rs2867973   | 52914495 C  | 2.139  | 3.97E-06 | chr:19:52924209 |
| 19 rs162124    | 52917590 G  | 2.102  | 4.42E-06 | chr:19:52924209 |
| 19 rs162123    | 52917626 A  | 2.05   | 7.95E-06 | chr:19:52924209 |
| 19 rs8106133   | 52921057 A  | 2.055  | 8.23E-06 | chr:19:52924209 |
| 19 rs4801914   | 52917723 G  | 2.038  | 1.06E-05 | chr:19:52924209 |
| 19 rs12461444  | 52903816 T  | 3.035  | 1.20E-05 | chr:19:52924209 |
| 19 rs73586046  | 52903145 A  | 3.035  | 1.20E-05 | chr:19:52924209 |
| 19 rs150990    | 52905907 G  | 2.065  | 2.18E-05 | chr:19:52924209 |
| 19 rs548489689 | 52924755 T  | 3.185  | 2.56E-05 | chr:19:52924209 |
| 19 rs567005277 | 52924766 C  | 3.185  | 2.56E-05 | chr:19:52924209 |
| 19 rs324091    | 52905067 A  | 2.033  | 3.14E-05 | chr:19:52924209 |
| 19 rs3745099   | 52901905 G  | 2.019  | 3.51E-05 | chr:19:52924209 |
| 19 rs111240956 | 52924334 C  | 2.988  | 4.07E-05 | chr:19:52924209 |
| 19 rs572684466 | 52924733 T  | 3.186  | 4.39E-05 | chr:19:52924209 |
| 19 rs73581150  | 52897799 T  | 2.801  | 6.21E-05 | chr:19:52924209 |
| 19 rs79085387  | 52902572 T  | 2.991  | 7.95E-05 | chr:19:52924209 |
| 19 rs2608515   | 52921344 T  | 1.91   | 9.53E-05 | chr:19:52924209 |
| 1 rs1853784    | 111804717 C | 96.66  | 5.75E-24 | chr:1:111802591 |

|               |             |        |          |                 |
|---------------|-------------|--------|----------|-----------------|
| 1 rs3118208   | 111812709 A | 38.78  | 9.84E-24 | chr:1:111802591 |
| 1 rs3118209   | 111812196 T | 41.66  | 1.32E-23 | chr:1:111802591 |
| 1 rs10857872  | 111838382 A | 8.51   | 2.67E-20 | chr:1:111802591 |
| 1 rs7411387   | 111837135 C | 8.51   | 2.67E-20 | chr:1:111802591 |
| 1 rs11102240  | 111844621 G | 8.065  | 6.57E-20 | chr:1:111802591 |
| 1 rs11102233  | 111827749 T | 9.958  | 1.09E-19 | chr:1:111802591 |
| 1 rs4259643   | 111814404 A | 113.1  | 2.51E-19 | chr:1:111802591 |
| 1 rs2764548   | 111808585 T | 0.1708 | 1.52E-18 | chr:1:111802591 |
| 1 rs2820059   | 111808392 G | 0.1708 | 1.52E-18 | chr:1:111802591 |
| 1 rs2820057   | 111811175 G | 146.9  | 3.16E-18 | chr:1:111802591 |
| 1 rs2494011   | 111806553 G | 12.46  | 2.97E-17 | chr:1:111802591 |
| 1 rs2764550   | 111808478 A | 12.22  | 4.80E-17 | chr:1:111802591 |
| 1 rs2820060   | 111807851 C | 12.22  | 4.80E-17 | chr:1:111802591 |
| 1 rs1575722   | 111803894 C | 12.04  | 5.07E-17 | chr:1:111802591 |
| 1 rs2477577   | 111809238 C | 12.13  | 5.39E-17 | chr:1:111802591 |
| 1 rs3122593   | 111810965 A | 0.2039 | 8.07E-17 | chr:1:111802591 |
| 1 rs117495492 | 111815317 A | 10.19  | 9.93E-17 | chr:1:111802591 |
| 1 rs12028469  | 111822648 A | 10.14  | 1.11E-16 | chr:1:111802591 |
| 1 rs17027272  | 111823851 A | 10.14  | 1.11E-16 | chr:1:111802591 |
| 1 rs1925358   | 111820367 T | 10.14  | 1.11E-16 | chr:1:111802591 |
| 1 rs2494014   | 111819921 G | 10.14  | 1.11E-16 | chr:1:111802591 |
| 1 rs4272622   | 111825435 C | 10.14  | 1.11E-16 | chr:1:111802591 |
| 1 rs4351635   | 111825754 T | 10.14  | 1.11E-16 | chr:1:111802591 |
| 1 rs4838895   | 111821459 T | 10.14  | 1.11E-16 | chr:1:111802591 |
| 1 rs61803493  | 111820997 C | 10.14  | 1.11E-16 | chr:1:111802591 |
| 1 rs9429593   | 111823315 T | 10.07  | 1.23E-16 | chr:1:111802591 |
| 1 rs3118206   | 111814461 G | 0.2119 | 1.44E-16 | chr:1:111802591 |
| 1 rs3122594   | 111813735 T | 0.2119 | 1.44E-16 | chr:1:111802591 |
| 1 rs3122595   | 111813951 T | 0.2119 | 1.44E-16 | chr:1:111802591 |
| 1 rs2104408   | 111810753 C | 201.6  | 1.65E-16 | chr:1:111802591 |
| 1 rs2820058   | 111811160 C | 195.4  | 2.12E-16 | chr:1:111802591 |
| 1 rs4240528   | 111802958 C | 0.2031 | 2.40E-16 | chr:1:111802591 |
| 1 rs11102231  | 111817468 A | 0.2179 | 3.41E-16 | chr:1:111802591 |
| 1 rs6687390   | 111825226 T | 0.2179 | 3.41E-16 | chr:1:111802591 |
| 1 rs11102238  | 111843082 G | 8.873  | 8.83E-16 | chr:1:111802591 |
| 1 rs3118204   | 111810952 A | 9.794  | 2.26E-15 | chr:1:111802591 |
| 1 rs41281400  | 111827898 A | 0.2152 | 3.24E-15 | chr:1:111802591 |
| 1 rs12034487  | 111805474 G | 6.937  | 2.43E-14 | chr:1:111802591 |
| 1 rs12026810  | 111846599 G | 6.36   | 2.48E-14 | chr:1:111802591 |
| 1 rs2494013   | 111813821 A | 0.2621 | 4.13E-14 | chr:1:111802591 |
| 1 rs3122591   | 111810174 C | 0.2779 | 1.18E-13 | chr:1:111802591 |
| 1 rs7525014   | 111835498 A | 0.3296 | 1.12E-11 | chr:1:111802591 |
| 1 rs10857867  | 111810878 A | 4.575  | 1.31E-11 | chr:1:111802591 |

|              |             |        |          |                 |
|--------------|-------------|--------|----------|-----------------|
| 1 rs4304581  | 111801635 G | 0.326  | 1.41E-11 | chr:1:111802591 |
| 1 rs6683292  | 111801402 G | 0.326  | 1.41E-11 | chr:1:111802591 |
| 1 rs6696410  | 111840987 A | 0.3392 | 3.03E-11 | chr:1:111802591 |
| 1 rs10776720 | 111808276 A | 1033   | 7.07E-11 | chr:1:111802591 |
| 1 rs10776719 | 111808180 T | 1018   | 7.64E-11 | chr:1:111802591 |
| 1 rs1590499  | 111804651 A | 1018   | 7.64E-11 | chr:1:111802591 |
| 1 rs2494012  | 111808937 T | 1018   | 7.64E-11 | chr:1:111802591 |
| 1 rs2764538  | 111804370 A | 1018   | 7.64E-11 | chr:1:111802591 |
| 1 rs2764549  | 111808546 C | 1018   | 7.64E-11 | chr:1:111802591 |
| 1 rs2820062  | 111805966 G | 1018   | 7.64E-11 | chr:1:111802591 |
| 1 rs10857869 | 111822699 T | 4.058  | 1.21E-10 | chr:1:111802591 |
| 1 rs12048213 | 111821434 T | 4.058  | 1.21E-10 | chr:1:111802591 |
| 1 rs12139505 | 111816865 A | 4.058  | 1.21E-10 | chr:1:111802591 |
| 1 rs4240529  | 111824744 A | 4.058  | 1.21E-10 | chr:1:111802591 |
| 1 rs11809538 | 111801853 A | 0.2874 | 1.39E-10 | chr:1:111802591 |
| 1 rs3927471  | 111802912 C | 0.2874 | 1.39E-10 | chr:1:111802591 |
| 1 rs61808280 | 111807687 C | 0.2875 | 1.70E-10 | chr:1:111802591 |
| 1 rs7550145  | 111804157 T | 0.2875 | 1.70E-10 | chr:1:111802591 |
| 1 rs9659635  | 111808642 A | 0.2875 | 1.70E-10 | chr:1:111802591 |
| 1 rs9660405  | 111808946 C | 0.2875 | 1.70E-10 | chr:1:111802591 |
| 1 rs2820082  | 111800472 T | 0.2988 | 6.63E-10 | chr:1:111802591 |
| 1 rs41282488 | 111828423 T | 0.2872 | 7.18E-10 | chr:1:111802591 |
| 1 rs11800770 | 111813650 T | 0.2996 | 1.27E-09 | chr:1:111802591 |
| 1 rs6671713  | 111815790 T | 0.2996 | 1.27E-09 | chr:1:111802591 |
| 1 rs10857870 | 111829220 C | 0.2942 | 1.35E-09 | chr:1:111802591 |
| 1 rs6537690  | 111824209 A | 0.306  | 2.84E-09 | chr:1:111802591 |
| 1 rs6537691  | 111824255 T | 0.306  | 2.84E-09 | chr:1:111802591 |
| 1 rs6655936  | 111821516 G | 0.306  | 2.84E-09 | chr:1:111802591 |
| 1 rs6688201  | 111826023 G | 0.306  | 2.84E-09 | chr:1:111802591 |
| 1 rs6688325  | 111826175 T | 0.306  | 2.84E-09 | chr:1:111802591 |
| 1 rs6698373  | 111816497 A | 0.306  | 2.84E-09 | chr:1:111802591 |
| 1 rs6702380  | 111818052 A | 0.306  | 2.84E-09 | chr:1:111802591 |
| 1 rs6703883  | 111820644 G | 0.306  | 2.84E-09 | chr:1:111802591 |
| 1 rs7512322  | 111818550 A | 0.306  | 2.84E-09 | chr:1:111802591 |
| 1 rs10494131 | 111824711 C | 0.3069 | 3.75E-09 | chr:1:111802591 |
| 1 rs4348720  | 111806066 A | 0.2844 | 1.90E-08 | chr:1:111802591 |
| 1 rs3891601  | 111805489 G | 0.3339 | 3.41E-08 | chr:1:111802591 |
| 1 rs1575721  | 111804605 C | 0.2901 | 5.50E-08 | chr:1:111802591 |
| 1 rs1575723  | 111803817 T | 0.2901 | 5.50E-08 | chr:1:111802591 |
| 1 rs2820061  | 111806570 T | 0.2901 | 5.50E-08 | chr:1:111802591 |
| 1 rs7515475  | 111801948 C | 0.2901 | 5.50E-08 | chr:1:111802591 |
| 1 rs11588487 | 111812241 T | 0.3384 | 5.63E-08 | chr:1:111802591 |
| 1 rs12733155 | 111812412 T | 0.3384 | 5.63E-08 | chr:1:111802591 |

|               |             |        |          |                 |
|---------------|-------------|--------|----------|-----------------|
| 1 rs11102229  | 111808446 G | 0.3411 | 5.87E-08 | chr:1:111802591 |
| 1 rs34487304  | 111804011 A | 0.3411 | 5.87E-08 | chr:1:111802591 |
| 1 rs59772828  | 111808783 A | 0.3411 | 5.87E-08 | chr:1:111802591 |
| 1 rs11102232  | 111818450 C | 0.3395 | 6.74E-08 | chr:1:111802591 |
| 1 rs11589353  | 111822680 G | 0.3395 | 6.74E-08 | chr:1:111802591 |
| 1 rs11589375  | 111822887 G | 0.3395 | 6.74E-08 | chr:1:111802591 |
| 1 rs12401376  | 111828474 A | 0.3395 | 6.74E-08 | chr:1:111802591 |
| 1 rs12411206  | 111822962 C | 0.3395 | 6.74E-08 | chr:1:111802591 |
| 1 rs12567865  | 111817250 A | 0.3395 | 6.74E-08 | chr:1:111802591 |
| 1 rs12758301  | 111822132 C | 0.3395 | 6.74E-08 | chr:1:111802591 |
| 1 rs35693821  | 111816294 G | 0.3395 | 6.74E-08 | chr:1:111802591 |
| 1 rs35884994  | 111816144 C | 0.3395 | 6.74E-08 | chr:1:111802591 |
| 1 rs4323713   | 111823220 T | 0.3395 | 6.74E-08 | chr:1:111802591 |
| 1 rs5029527   | 111818923 T | 0.3395 | 6.74E-08 | chr:1:111802591 |
| 1 rs58982671  | 111826007 T | 0.3395 | 6.74E-08 | chr:1:111802591 |
| 1 rs12724976  | 111813174 C | 0.3445 | 8.38E-08 | chr:1:111802591 |
| 1 rs2275254   | 111861974 T | 0.427  | 9.28E-08 | chr:1:111802591 |
| 1 rs17654531  | 111799685 G | 0.283  | 1.12E-07 | chr:1:111802591 |
| 1 rs11102246  | 111859419 C | 0.4303 | 1.22E-07 | chr:1:111802591 |
| 1 rs7519964   | 111859286 A | 0.4303 | 1.22E-07 | chr:1:111802591 |
| 1 rs7530251   | 111859300 G | 0.4303 | 1.22E-07 | chr:1:111802591 |
| 1 rs10776722  | 111828464 C | 3.352  | 1.59E-07 | chr:1:111802591 |
| 1 rs12139408  | 111816538 A | 3.357  | 1.73E-07 | chr:1:111802591 |
| 1 rs12728726  | 111819239 C | 3.357  | 1.73E-07 | chr:1:111802591 |
| 1 rs6694890   | 111827901 T | 3.357  | 1.73E-07 | chr:1:111802591 |
| 1 rs72693233  | 111800872 C | 0.3029 | 1.93E-07 | chr:1:111802591 |
| 1 rs7517252   | 111828817 A | 3.36   | 1.95E-07 | chr:1:111802591 |
| 1 rs112503681 | 111799266 A | 0.3036 | 2.35E-07 | chr:1:111802591 |
| 1 rs12135216  | 111809857 G | 0.3739 | 2.77E-07 | chr:1:111802591 |
| 1 rs2764541   | 111811430 C | 0.321  | 3.07E-07 | chr:1:111802591 |
| 1 rs3118205   | 111814475 C | 0.321  | 3.07E-07 | chr:1:111802591 |
| 1 rs12140893  | 111812832 A | 3.73   | 3.19E-07 | chr:1:111802591 |
| 1 rs10494132  | 111832223 C | 0.4072 | 3.51E-07 | chr:1:111802591 |
| 1 rs12144594  | 111834306 A | 0.4072 | 3.51E-07 | chr:1:111802591 |
| 1 rs12064178  | 111841263 G | 0.4131 | 5.01E-07 | chr:1:111802591 |
| 1 rs12734016  | 111842985 C | 0.3672 | 6.04E-07 | chr:1:111802591 |
| 1 rs72981843  | 111808146 C | 5.93   | 6.72E-07 | chr:1:111802591 |
| 1 rs17654501  | 111799137 T | 0.305  | 7.30E-07 | chr:1:111802591 |
| 1 rs113703527 | 111840317 A | 0.42   | 7.72E-07 | chr:1:111802591 |
| 1 rs41281398  | 111827466 T | 0.3293 | 9.04E-07 | chr:1:111802591 |
| 1 rs41281404  | 111828148 C | 0.3293 | 9.04E-07 | chr:1:111802591 |
| 1 rs76275224  | 111823994 T | 0.3293 | 9.04E-07 | chr:1:111802591 |
| 1 rs11578207  | 111837366 C | 0.3753 | 9.90E-07 | chr:1:111802591 |

|               |             |        |          |                 |
|---------------|-------------|--------|----------|-----------------|
| 1 rs11578209  | 111837382 A | 0.3753 | 9.90E-07 | chr:1:111802591 |
| 1 rs12402658  | 111840855 G | 0.3753 | 9.90E-07 | chr:1:111802591 |
| 1 rs12410579  | 111835047 G | 0.3753 | 9.90E-07 | chr:1:111802591 |
| 1 rs12410848  | 111834984 C | 0.3753 | 9.90E-07 | chr:1:111802591 |
| 1 rs12562861  | 111838002 A | 0.3753 | 9.90E-07 | chr:1:111802591 |
| 1 rs12735055  | 111842947 A | 0.3753 | 9.90E-07 | chr:1:111802591 |
| 1 rs12735944  | 111844348 T | 0.3753 | 9.90E-07 | chr:1:111802591 |
| 1 rs12736391  | 111844599 C | 0.3753 | 9.90E-07 | chr:1:111802591 |
| 1 rs12739716  | 111836168 T | 0.3753 | 9.90E-07 | chr:1:111802591 |
| 1 rs12739896  | 111844175 G | 0.3753 | 9.90E-07 | chr:1:111802591 |
| 1 rs12753801  | 111844522 C | 0.3753 | 9.90E-07 | chr:1:111802591 |
| 1 rs12755026  | 111844556 T | 0.3753 | 9.90E-07 | chr:1:111802591 |
| 1 rs12755376  | 111836023 T | 0.3753 | 9.90E-07 | chr:1:111802591 |
| 1 rs12758947  | 111842897 A | 0.3753 | 9.90E-07 | chr:1:111802591 |
| 1 rs142458373 | 111842752 C | 0.3753 | 9.90E-07 | chr:1:111802591 |
| 1 rs28805711  | 111844103 T | 0.3753 | 9.90E-07 | chr:1:111802591 |
| 1 rs28826608  | 111843891 T | 0.3753 | 9.90E-07 | chr:1:111802591 |
| 1 rs28849976  | 111844011 A | 0.3753 | 9.90E-07 | chr:1:111802591 |
| 1 rs28857204  | 111844087 T | 0.3753 | 9.90E-07 | chr:1:111802591 |
| 1 rs28889692  | 111844007 G | 0.3753 | 9.90E-07 | chr:1:111802591 |
| 1 rs34971749  | 111845082 T | 0.3753 | 9.90E-07 | chr:1:111802591 |
| 1 rs35360118  | 111839319 T | 0.3753 | 9.90E-07 | chr:1:111802591 |
| 1 rs35764762  | 111843214 G | 0.3753 | 9.90E-07 | chr:1:111802591 |
| 1 rs35779360  | 111839515 G | 0.3753 | 9.90E-07 | chr:1:111802591 |
| 1 rs35888305  | 111845241 C | 0.3753 | 9.90E-07 | chr:1:111802591 |
| 1 rs4406630   | 111834733 T | 0.3753 | 9.90E-07 | chr:1:111802591 |
| 1 rs4546920   | 111836846 T | 0.3753 | 9.90E-07 | chr:1:111802591 |
| 1 rs4546921   | 111836868 T | 0.3753 | 9.90E-07 | chr:1:111802591 |
| 1 rs4562620   | 111835713 A | 0.3753 | 9.90E-07 | chr:1:111802591 |
| 1 rs4838901   | 111838605 G | 0.3753 | 9.90E-07 | chr:1:111802591 |
| 1 rs4838902   | 111838694 T | 0.3753 | 9.90E-07 | chr:1:111802591 |
| 1 rs4838903   | 111838832 T | 0.3753 | 9.90E-07 | chr:1:111802591 |
| 1 rs4838904   | 111838962 C | 0.3753 | 9.90E-07 | chr:1:111802591 |
| 1 rs4839117   | 111839037 G | 0.3753 | 9.90E-07 | chr:1:111802591 |
| 1 rs61382086  | 111842094 T | 0.3753 | 9.90E-07 | chr:1:111802591 |
| 1 rs6669614   | 111840130 T | 0.3753 | 9.90E-07 | chr:1:111802591 |
| 1 rs6688167   | 111841315 C | 0.3753 | 9.90E-07 | chr:1:111802591 |
| 1 rs6688184   | 111841367 C | 0.3753 | 9.90E-07 | chr:1:111802591 |
| 1 rs6699184   | 111841409 A | 0.3753 | 9.90E-07 | chr:1:111802591 |
| 1 rs7413908   | 111842524 T | 0.3753 | 9.90E-07 | chr:1:111802591 |
| 1 rs7514165   | 111836591 G | 0.3753 | 9.90E-07 | chr:1:111802591 |
| 1 rs7525672   | 111836444 G | 0.3753 | 9.90E-07 | chr:1:111802591 |
| 1 rs7539071   | 111841089 G | 0.3753 | 9.90E-07 | chr:1:111802591 |

|   |             |           |   |        |          |                 |
|---|-------------|-----------|---|--------|----------|-----------------|
| 1 | rs77805328  | 111842813 | A | 0.3753 | 9.90E-07 | chr:1:111802591 |
| 1 | rs78611689  | 111840605 | G | 0.3753 | 9.90E-07 | chr:1:111802591 |
| 1 | rs12752158  | 111833937 | A | 0.3813 | 1.12E-06 | chr:1:111802591 |
| 1 | rs75510830  | 111842692 | C | 0.3776 | 1.29E-06 | chr:1:111802591 |
| 1 | rs76437095  | 111842681 | C | 0.3776 | 1.29E-06 | chr:1:111802591 |
| 1 | rs79096750  | 111842693 | A | 0.3776 | 1.29E-06 | chr:1:111802591 |
| 1 | rs11584291  | 111846803 | T | 0.3767 | 1.33E-06 | chr:1:111802591 |
| 1 | rs12562929  | 111846331 | G | 0.3767 | 1.33E-06 | chr:1:111802591 |
| 1 | rs12563147  | 111846300 | C | 0.3767 | 1.33E-06 | chr:1:111802591 |
| 1 | rs12563158  | 111846416 | G | 0.3767 | 1.33E-06 | chr:1:111802591 |
| 1 | rs12727314  | 111846533 | T | 0.3767 | 1.33E-06 | chr:1:111802591 |
| 1 | rs12751372  | 111846603 | C | 0.3767 | 1.33E-06 | chr:1:111802591 |
| 1 | rs34306809  | 111845903 | A | 0.3767 | 1.33E-06 | chr:1:111802591 |
| 1 | rs66475510  | 111845588 | A | 0.3767 | 1.33E-06 | chr:1:111802591 |
| 1 | rs10857875  | 111862502 | A | 0.4881 | 1.40E-06 | chr:1:111802591 |
| 1 | rs12738135  | 111809571 | G | 0.4085 | 1.68E-06 | chr:1:111802591 |
| 1 | rs10494134  | 111859912 | G | 0.491  | 1.76E-06 | chr:1:111802591 |
| 1 | rs12140873  | 111826055 | G | 3.239  | 1.78E-06 | chr:1:111802591 |
| 1 | rs10857866  | 111810876 | A | 3.606  | 2.83E-06 | chr:1:111802591 |
| 1 | rs4460637   | 111847226 | T | 0.4074 | 5.78E-06 | chr:1:111802591 |
| 1 | rs78768132  | 111817954 | G | 0.3505 | 7.08E-06 | chr:1:111802591 |
| 1 | rs2786160   | 111859176 | G | 0.4046 | 2.11E-05 | chr:1:111802591 |
| 1 | rs2820092   | 111862074 | T | 0.4046 | 2.11E-05 | chr:1:111802591 |
| 1 | rs7526459   | 111861475 | G | 0.4046 | 2.11E-05 | chr:1:111802591 |
| 1 | rs57294801  | 111896531 | T | 1.976  | 2.27E-05 | chr:1:111802591 |
| 1 | rs3806448   | 111832205 | A | 1.878  | 2.55E-05 | chr:1:111802591 |
| 1 | rs2820093   | 111863306 | T | 0.4135 | 3.06E-05 | chr:1:111802591 |
| 1 | rs3818820   | 111857120 | A | 0.4139 | 3.09E-05 | chr:1:111802591 |
| 1 | rs3818822   | 111857208 | A | 0.4139 | 3.09E-05 | chr:1:111802591 |
| 1 | rs56003810  | 111857107 | G | 0.4139 | 3.09E-05 | chr:1:111802591 |
| 1 | rs79918016  | 111851864 | G | 0.4139 | 3.09E-05 | chr:1:111802591 |
| 1 | rs10158004  | 111893708 | A | 1.917  | 4.65E-05 | chr:1:111802591 |
| 1 | rs1668      | 111893958 | G | 1.917  | 4.65E-05 | chr:1:111802591 |
| 3 | rs12495049  | 129810234 | T | 0.1397 | 7.04E-20 | chr:3:129776131 |
| 3 | rs11714778  | 129762082 | C | 0.1419 | 1.03E-19 | chr:3:129776131 |
| 3 | rs11716622  | 129809592 | A | 0.1419 | 1.03E-19 | chr:3:129776131 |
| 3 | rs73208686  | 129762898 | C | 0.1419 | 1.03E-19 | chr:3:129776131 |
| 3 | rs12634803  | 129807284 | T | 0.1396 | 1.18E-19 | chr:3:129776131 |
| 3 | rs11718709  | 129811323 | A | 0.1444 | 1.87E-19 | chr:3:129776131 |
| 3 | rs111717650 | 129814301 | A | 0.1491 | 3.30E-19 | chr:3:129776131 |
| 3 | rs73210759  | 129813745 | T | 0.1491 | 3.30E-19 | chr:3:129776131 |
| 3 | rs9758049   | 129814863 | A | 0.1536 | 7.86E-19 | chr:3:129776131 |
| 3 | rs6799884   | 129814251 | T | 0.129  | 1.69E-14 | chr:3:129776131 |



|               |             |        |          |                 |
|---------------|-------------|--------|----------|-----------------|
| 3 rs13093111  | 129754672 G | 0.2445 | 3.61E-14 | chr:3:129776131 |
| 3 rs12488592  | 129752490 T | 0.2552 | 9.05E-14 | chr:3:129776131 |
| 3 rs56088005  | 129821650 A | 0.2673 | 1.90E-12 | chr:3:129776131 |
| 3 rs61073628  | 129817316 T | 0.2794 | 2.61E-12 | chr:3:129776131 |
| 3 rs34233228  | 129750876 G | 0.3012 | 2.70E-12 | chr:3:129776131 |
| 3 rs111270043 | 129820915 T | 0.2824 | 3.15E-12 | chr:3:129776131 |
| 3 rs6804728   | 129820580 T | 0.2824 | 3.15E-12 | chr:3:129776131 |
| 3 rs6804887   | 129820568 A | 0.2824 | 3.15E-12 | chr:3:129776131 |
| 3 rs12632200  | 129816368 T | 0.283  | 3.48E-12 | chr:3:129776131 |
| 3 rs12637557  | 129815930 A | 0.283  | 3.48E-12 | chr:3:129776131 |
| 3 rs112581710 | 129820151 A | 0.2834 | 4.13E-12 | chr:3:129776131 |
| 3 rs113679585 | 129819332 A | 0.2834 | 4.13E-12 | chr:3:129776131 |
| 3 rs146549952 | 129816552 T | 0.2834 | 4.13E-12 | chr:3:129776131 |
| 3 rs56218598  | 129823899 A | 0.2834 | 4.13E-12 | chr:3:129776131 |
| 3 rs74203764  | 129817379 T | 0.2834 | 4.13E-12 | chr:3:129776131 |
| 3 rs75177871  | 129821816 G | 0.2834 | 4.13E-12 | chr:3:129776131 |
| 3 rs78806708  | 129822616 C | 0.2834 | 4.13E-12 | chr:3:129776131 |
| 3 rs9713334   | 129822494 T | 0.2834 | 4.13E-12 | chr:3:129776131 |
| 3 rs9713340   | 129822492 A | 0.2834 | 4.13E-12 | chr:3:129776131 |
| 3 rs9713344   | 129822552 A | 0.2834 | 4.13E-12 | chr:3:129776131 |
| 3 rs9713346   | 129822634 A | 0.2834 | 4.13E-12 | chr:3:129776131 |
| 3 rs79351951  | 129821985 A | 0.2853 | 5.35E-12 | chr:3:129776131 |
| 3 rs149652485 | 129830726 A | 0.2954 | 1.06E-11 | chr:3:129776131 |
| 3 rs112405295 | 129824844 A | 0.2914 | 1.37E-11 | chr:3:129776131 |
| 3 rs10934908  | 129840300 T | 0.2997 | 1.48E-11 | chr:3:129776131 |
| 3 rs75630148  | 129821465 T | 0.2902 | 1.50E-11 | chr:3:129776131 |
| 3 rs35882657  | 129750735 T | 0.3273 | 1.50E-11 | chr:3:129776131 |
| 3 rs56312715  | 129849847 A | 0.2994 | 1.68E-11 | chr:3:129776131 |
| 3 rs111775688 | 129826402 T | 0.3013 | 1.76E-11 | chr:3:129776131 |
| 3 rs113421391 | 129830961 C | 0.3013 | 1.76E-11 | chr:3:129776131 |
| 3 rs113674105 | 129830064 A | 0.3013 | 1.76E-11 | chr:3:129776131 |
| 3 rs12491391  | 129843530 G | 0.3013 | 1.76E-11 | chr:3:129776131 |
| 3 rs137960198 | 129828560 T | 0.3013 | 1.76E-11 | chr:3:129776131 |
| 3 rs28442137  | 129840485 T | 0.3013 | 1.76E-11 | chr:3:129776131 |
| 3 rs34158162  | 129828454 C | 0.3013 | 1.76E-11 | chr:3:129776131 |
| 3 rs4569696   | 129834986 A | 0.3013 | 1.76E-11 | chr:3:129776131 |
| 3 rs55908933  | 129835084 T | 0.3013 | 1.76E-11 | chr:3:129776131 |
| 3 rs56171265  | 129833240 T | 0.3013 | 1.76E-11 | chr:3:129776131 |
| 3 rs56292584  | 129833209 T | 0.3013 | 1.76E-11 | chr:3:129776131 |
| 3 rs56314950  | 129833031 T | 0.3013 | 1.76E-11 | chr:3:129776131 |
| 3 rs56957706  | 129845338 C | 0.3013 | 1.76E-11 | chr:3:129776131 |
| 3 rs60352193  | 129830922 C | 0.3013 | 1.76E-11 | chr:3:129776131 |
| 3 rs6809980   | 129847462 A | 0.3013 | 1.76E-11 | chr:3:129776131 |

|               |             |        |          |                 |
|---------------|-------------|--------|----------|-----------------|
| 3 rs73210763  | 129827901 G | 0.3013 | 1.76E-11 | chr:3:129776131 |
| 3 rs7428344   | 129826100 T | 0.3013 | 1.76E-11 | chr:3:129776131 |
| 3 rs7428346   | 129826002 T | 0.3013 | 1.76E-11 | chr:3:129776131 |
| 3 rs9754694   | 129844166 T | 0.3013 | 1.76E-11 | chr:3:129776131 |
| 3 rs9754720   | 129844403 T | 0.3013 | 1.76E-11 | chr:3:129776131 |
| 3 rs34831897  | 129759914 T | 0.3033 | 1.97E-11 | chr:3:129776131 |
| 3 rs55773357  | 129849781 T | 0.3058 | 2.93E-11 | chr:3:129776131 |
| 3 rs12233562  | 129845749 A | 0.3084 | 3.16E-11 | chr:3:129776131 |
| 3 rs12497818  | 129843254 C | 0.3095 | 3.23E-11 | chr:3:129776131 |
| 3 rs10934901  | 129747902 A | 0.3279 | 7.33E-11 | chr:3:129776131 |
| 3 rs11708560  | 129809131 A | 3.083  | 7.93E-11 | chr:3:129776131 |
| 3 rs7622131   | 129808869 A | 3.083  | 7.93E-11 | chr:3:129776131 |
| 3 rs35523538  | 129832419 C | 0.3082 | 1.03E-10 | chr:3:129776131 |
| 3 rs6806210   | 129807027 T | 3.012  | 1.32E-10 | chr:3:129776131 |
| 3 rs2403477   | 129864875 T | 0.3163 | 1.48E-10 | chr:3:129776131 |
| 3 rs73866092  | 129815599 C | 0.3583 | 2.79E-10 | chr:3:129776131 |
| 3 rs9815579   | 129755175 T | 0.3479 | 5.33E-10 | chr:3:129776131 |
| 3 rs9681064   | 129846313 C | 0.3834 | 7.91E-10 | chr:3:129776131 |
| 3 rs13066399  | 129811073 T | 2.844  | 9.12E-10 | chr:3:129776131 |
| 3 rs13062365  | 129888192 A | 0.3525 | 1.47E-09 | chr:3:129776131 |
| 3 rs10934906  | 129813062 T | 2.73   | 2.32E-09 | chr:3:129776131 |
| 3 rs12495527  | 129822950 A | 2.576  | 3.81E-09 | chr:3:129776131 |
| 3 rs10934912  | 129849479 T | 0.3898 | 4.67E-09 | chr:3:129776131 |
| 3 rs112577058 | 129818750 T | 2.554  | 5.46E-09 | chr:3:129776131 |
| 3 rs113076563 | 129818689 T | 2.554  | 5.46E-09 | chr:3:129776131 |
| 3 rs12638292  | 129816961 C | 2.554  | 5.46E-09 | chr:3:129776131 |
| 3 rs13083073  | 129819247 T | 2.554  | 5.46E-09 | chr:3:129776131 |
| 3 rs56039375  | 129818509 A | 2.554  | 5.46E-09 | chr:3:129776131 |
| 3 rs56235703  | 129818389 A | 2.554  | 5.46E-09 | chr:3:129776131 |
| 3 rs59443817  | 129817290 A | 2.554  | 5.46E-09 | chr:3:129776131 |
| 3 rs6784328   | 129822059 G | 0.3915 | 5.46E-09 | chr:3:129776131 |
| 3 rs6808888   | 129822441 A | 0.3915 | 5.46E-09 | chr:3:129776131 |
| 3 rs4487280   | 129813361 G | 2.608  | 6.79E-09 | chr:3:129776131 |
| 3 rs4610271   | 129813301 G | 2.608  | 6.79E-09 | chr:3:129776131 |
| 3 rs6766577   | 129814504 T | 2.608  | 6.79E-09 | chr:3:129776131 |
| 3 rs6802429   | 129814614 C | 2.608  | 6.79E-09 | chr:3:129776131 |
| 3 rs11720489  | 129848042 C | 2.521  | 6.81E-09 | chr:3:129776131 |
| 3 rs6788479   | 129817708 A | 2.539  | 7.17E-09 | chr:3:129776131 |
| 3 rs112987689 | 129824001 C | 2.538  | 7.25E-09 | chr:3:129776131 |
| 3 rs118004362 | 129820231 A | 2.536  | 7.44E-09 | chr:3:129776131 |
| 3 rs9758051   | 129814869 G | 2.597  | 8.36E-09 | chr:3:129776131 |
| 3 rs9826433   | 129757284 C | 2.474  | 8.50E-09 | chr:3:129776131 |
| 3 rs9812980   | 129814688 G | 2.59   | 8.91E-09 | chr:3:129776131 |

|               |             |        |          |                 |
|---------------|-------------|--------|----------|-----------------|
| 3 rs6776708   | 129847555 C | 0.4042 | 9.01E-09 | chr:3:129776131 |
| 3 rs9812703   | 129814528 G | 2.567  | 9.40E-09 | chr:3:129776131 |
| 3 rs56279301  | 129848747 C | 2.493  | 1.04E-08 | chr:3:129776131 |
| 3 rs59667515  | 129848796 A | 2.493  | 1.04E-08 | chr:3:129776131 |
| 3 rs9713120   | 129850043 C | 2.493  | 1.04E-08 | chr:3:129776131 |
| 3 rs58302754  | 129763329 A | 2.534  | 1.35E-08 | chr:3:129776131 |
| 3 rs17735722  | 129843196 A | 2.441  | 1.38E-08 | chr:3:129776131 |
| 3 rs57173421  | 129843153 A | 2.441  | 1.38E-08 | chr:3:129776131 |
| 3 rs10934907  | 129830493 T | 2.452  | 1.56E-08 | chr:3:129776131 |
| 3 rs113747501 | 129826513 T | 2.452  | 1.56E-08 | chr:3:129776131 |
| 3 rs11708901  | 129847846 T | 2.452  | 1.56E-08 | chr:3:129776131 |
| 3 rs11720599  | 129848148 G | 2.452  | 1.56E-08 | chr:3:129776131 |
| 3 rs12107141  | 129844617 T | 2.452  | 1.56E-08 | chr:3:129776131 |
| 3 rs12487314  | 129842009 T | 2.452  | 1.56E-08 | chr:3:129776131 |
| 3 rs12487371  | 129842190 T | 2.452  | 1.56E-08 | chr:3:129776131 |
| 3 rs12491387  | 129843518 A | 2.452  | 1.56E-08 | chr:3:129776131 |
| 3 rs12491430  | 129843630 A | 2.452  | 1.56E-08 | chr:3:129776131 |
| 3 rs12497879  | 129843468 G | 2.452  | 1.56E-08 | chr:3:129776131 |
| 3 rs12636674  | 129834567 G | 2.452  | 1.56E-08 | chr:3:129776131 |
| 3 rs28475731  | 129844692 C | 2.452  | 1.56E-08 | chr:3:129776131 |
| 3 rs28567533  | 129845174 C | 2.452  | 1.56E-08 | chr:3:129776131 |
| 3 rs28798137  | 129845247 G | 2.452  | 1.56E-08 | chr:3:129776131 |
| 3 rs34086701  | 129846916 T | 2.452  | 1.56E-08 | chr:3:129776131 |
| 3 rs35543987  | 129842031 G | 2.452  | 1.56E-08 | chr:3:129776131 |
| 3 rs376047039 | 129845958 A | 2.452  | 1.56E-08 | chr:3:129776131 |
| 3 rs4072146   | 129829463 C | 2.452  | 1.56E-08 | chr:3:129776131 |
| 3 rs4337672   | 129839907 C | 2.452  | 1.56E-08 | chr:3:129776131 |
| 3 rs55977977  | 129831316 A | 2.452  | 1.56E-08 | chr:3:129776131 |
| 3 rs56086823  | 129841378 G | 2.452  | 1.56E-08 | chr:3:129776131 |
| 3 rs56274321  | 129834254 T | 2.452  | 1.56E-08 | chr:3:129776131 |
| 3 rs61433746  | 129836538 C | 2.452  | 1.56E-08 | chr:3:129776131 |
| 3 rs6796054   | 129842995 C | 2.452  | 1.56E-08 | chr:3:129776131 |
| 3 rs6796817   | 129837836 C | 2.452  | 1.56E-08 | chr:3:129776131 |
| 3 rs6808274   | 129842797 T | 2.452  | 1.56E-08 | chr:3:129776131 |
| 3 rs72990317  | 129830425 A | 2.452  | 1.56E-08 | chr:3:129776131 |
| 3 rs73210765  | 129841875 G | 2.452  | 1.56E-08 | chr:3:129776131 |
| 3 rs7432233   | 129825955 A | 2.452  | 1.56E-08 | chr:3:129776131 |
| 3 rs74442213  | 129846119 G | 2.452  | 1.56E-08 | chr:3:129776131 |
| 3 rs9289355   | 129838184 T | 2.452  | 1.56E-08 | chr:3:129776131 |
| 3 rs9682942   | 129846098 C | 2.452  | 1.56E-08 | chr:3:129776131 |
| 3 rs9682954   | 129846247 C | 2.452  | 1.56E-08 | chr:3:129776131 |
| 3 rs9754713   | 129837151 A | 2.452  | 1.56E-08 | chr:3:129776131 |
| 3 rs9757129   | 129844461 A | 2.452  | 1.56E-08 | chr:3:129776131 |

|               |             |        |          |                 |
|---------------|-------------|--------|----------|-----------------|
| 3 rs11707425  | 129749980 G | 2.617  | 1.60E-08 | chr:3:129776131 |
| 3 rs4491951   | 129850208 C | 0.408  | 1.66E-08 | chr:3:129776131 |
| 3 rs73210760  | 129818875 A | 0.4019 | 1.70E-08 | chr:3:129776131 |
| 3 rs12233374  | 129845660 T | 2.434  | 2.07E-08 | chr:3:129776131 |
| 3 rs12632095  | 129757870 C | 2.443  | 2.23E-08 | chr:3:129776131 |
| 3 rs4619822   | 129850342 G | 2.431  | 2.24E-08 | chr:3:129776131 |
| 3 rs59318782  | 129842972 T | 2.411  | 2.40E-08 | chr:3:129776131 |
| 3 rs6795939   | 129842885 C | 2.411  | 2.40E-08 | chr:3:129776131 |
| 3 rs6796132   | 129842958 G | 2.411  | 2.40E-08 | chr:3:129776131 |
| 3 rs6808384   | 129842900 T | 2.411  | 2.40E-08 | chr:3:129776131 |
| 3 rs147534743 | 129849886 G | 0.4149 | 2.46E-08 | chr:3:129776131 |
| 3 rs9713121   | 129850044 G | 0.4149 | 2.46E-08 | chr:3:129776131 |
| 3 rs9713819   | 129849956 G | 0.4149 | 2.46E-08 | chr:3:129776131 |
| 3 rs28477611  | 129844824 T | 2.405  | 2.56E-08 | chr:3:129776131 |
| 3 rs28754684  | 129844800 T | 2.405  | 2.56E-08 | chr:3:129776131 |
| 3 rs61532278  | 129844947 G | 0.3171 | 2.61E-08 | chr:3:129776131 |
| 3 rs72990312  | 129826675 C | 0.3894 | 2.94E-08 | chr:3:129776131 |
| 3 rs12497877  | 129843458 G | 2.374  | 4.52E-08 | chr:3:129776131 |
| 3 rs113111443 | 129826394 T | 2.386  | 4.86E-08 | chr:3:129776131 |
| 3 rs112319225 | 129826344 T | 2.365  | 6.78E-08 | chr:3:129776131 |
| 3 rs6769324   | 129820903 T | 2.365  | 6.78E-08 | chr:3:129776131 |
| 3 rs10934909  | 129849297 T | 0.4362 | 7.88E-08 | chr:3:129776131 |
| 3 rs11712662  | 129848252 A | 2.35   | 8.80E-08 | chr:3:129776131 |
| 3 rs6774812   | 129844022 A | 2.35   | 8.80E-08 | chr:3:129776131 |
| 3 rs6809088   | 129837584 T | 2.35   | 8.80E-08 | chr:3:129776131 |
| 3 rs187016983 | 129845427 A | 0.45   | 9.46E-08 | chr:3:129776131 |
| 3 rs59803194  | 129845429 A | 0.45   | 9.46E-08 | chr:3:129776131 |
| 3 rs60351474  | 129845423 G | 0.45   | 9.46E-08 | chr:3:129776131 |
| 3 rs9758068   | 129815212 C | 2.37   | 9.64E-08 | chr:3:129776131 |
| 3 rs10934910  | 129849334 G | 0.4414 | 9.83E-08 | chr:3:129776131 |
| 3 rs10934911  | 129849366 C | 0.4414 | 9.83E-08 | chr:3:129776131 |
| 3 rs57573544  | 129845394 G | 0.4525 | 1.20E-07 | chr:3:129776131 |
| 3 rs58593172  | 129845403 G | 0.4525 | 1.20E-07 | chr:3:129776131 |
| 3 rs28726131  | 129844802 A | 2.303  | 1.44E-07 | chr:3:129776131 |
| 3 rs12233436  | 129845766 A | 2.302  | 1.45E-07 | chr:3:129776131 |
| 3 rs2929778   | 129811676 T | 2.393  | 1.47E-07 | chr:3:129776131 |
| 3 rs9713134   | 129850080 A | 0.4491 | 1.47E-07 | chr:3:129776131 |
| 3 rs9820641   | 129755932 G | 2.262  | 1.49E-07 | chr:3:129776131 |
| 3 rs56110318  | 129849681 G | 0.4459 | 1.62E-07 | chr:3:129776131 |
| 3 rs6439208   | 129808290 C | 2.392  | 1.73E-07 | chr:3:129776131 |
| 3 rs6779417   | 129810022 A | 2.396  | 1.77E-07 | chr:3:129776131 |
| 3 rs12186005  | 129760328 T | 2.375  | 1.99E-07 | chr:3:129776131 |
| 3 rs34445363  | 129944852 A | 0.4283 | 2.00E-07 | chr:3:129776131 |

|                     |             |        |          |                 |
|---------------------|-------------|--------|----------|-----------------|
| 3 rs7645772         | 129695373 C | 0.4196 | 2.05E-07 | chr:3:129776131 |
| 3 rs9758066         | 129815151 T | 0.434  | 2.20E-07 | chr:3:129776131 |
| 3 rs1708884         | 129672976 T | 2.162  | 2.73E-07 | chr:3:129776131 |
| 3 rs1708233         | 129672992 G | 2.137  | 4.19E-07 | chr:3:129776131 |
| 3 rs11721284;rs5742 | 129844950 G | 0.3882 | 4.90E-07 | chr:3:129776131 |
| 3 rs55935386        | 129707561 A | 0.4314 | 5.05E-07 | chr:3:129776131 |
| 3 rs13085868        | 129752864 G | 2.146  | 5.84E-07 | chr:3:129776131 |
| 3 rs10433409        | 129687780 T | 2.145  | 6.28E-07 | chr:3:129776131 |
| 3 rs28546464        | 129680046 A | 0.4747 | 9.19E-07 | chr:3:129776131 |
| 3 rs9846907         | 129757554 T | 2.11   | 1.07E-06 | chr:3:129776131 |
| 3 rs9754546         | 129815318 T | 2.128  | 1.33E-06 | chr:3:129776131 |
| 3 rs1708231         | 129675157 T | 2.476  | 1.45E-06 | chr:3:129776131 |
| 3 rs1708235         | 129671675 C | 2.398  | 1.60E-06 | chr:3:129776131 |
| 3 rs7641918         | 129707759 T | 0.4513 | 1.63E-06 | chr:3:129776131 |
| 3 rs1708236         | 129671670 T | 2.468  | 1.75E-06 | chr:3:129776131 |
| 3 rs10804593        | 129707167 T | 0.4633 | 2.78E-06 | chr:3:129776131 |
| 3 rs13090556        | 129671425 T | 0.4943 | 2.96E-06 | chr:3:129776131 |
| 3 rs12495240        | 129715796 G | 0.4647 | 3.48E-06 | chr:3:129776131 |
| 3 rs925613          | 129709647 T | 0.4687 | 3.82E-06 | chr:3:129776131 |
| 3 rs7428327         | 129826031 C | 2.021  | 4.09E-06 | chr:3:129776131 |
| 3 rs6797514         | 129672526 C | 1.961  | 4.45E-06 | chr:3:129776131 |
| 3 rs9289349         | 129714372 T | 0.4696 | 4.66E-06 | chr:3:129776131 |
| 3 rs2953796         | 129733968 G | 2.011  | 4.75E-06 | chr:3:129776131 |
| 3 rs2219024         | 130021245 T | 0.4728 | 4.89E-06 | chr:3:129776131 |
| 3 rs55891359        | 129760185 C | 2.117  | 5.02E-06 | chr:3:129776131 |
| 3 rs9681294         | 129717018 G | 0.472  | 5.04E-06 | chr:3:129776131 |
| 3 rs13080253        | 130019843 C | 0.4759 | 5.34E-06 | chr:3:129776131 |
| 3 rs9817705         | 129750377 G | 2.366  | 5.70E-06 | chr:3:129776131 |
| 3 rs11719350        | 130002155 A | 0.4785 | 6.01E-06 | chr:3:129776131 |
| 3 rs12490963        | 130006730 G | 0.4785 | 6.01E-06 | chr:3:129776131 |
| 3 rs1597930         | 130010817 G | 0.4785 | 6.01E-06 | chr:3:129776131 |
| 3 rs1869316         | 130012079 T | 0.4785 | 6.01E-06 | chr:3:129776131 |
| 3 rs2123565         | 130003077 C | 0.4785 | 6.01E-06 | chr:3:129776131 |
| 3 rs35180026        | 130016615 T | 0.4785 | 6.01E-06 | chr:3:129776131 |
| 3 rs10934895        | 129647645 C | 1.905  | 8.15E-06 | chr:3:129776131 |
| 3 rs1398709         | 129650840 C | 1.905  | 8.15E-06 | chr:3:129776131 |
| 3 rs6773003         | 129649651 C | 1.905  | 8.15E-06 | chr:3:129776131 |
| 3 rs7620330         | 129650270 G | 1.905  | 8.15E-06 | chr:3:129776131 |
| 3 rs62284266        | 130017800 T | 0.4852 | 8.59E-06 | chr:3:129776131 |
| 3 rs1901786         | 130021945 A | 0.4827 | 8.62E-06 | chr:3:129776131 |
| 3 rs880574          | 129681813 T | 0.5148 | 9.14E-06 | chr:3:129776131 |
| 3 rs880575          | 129681992 G | 0.5148 | 9.14E-06 | chr:3:129776131 |
| 3 rs6794445         | 129671849 G | 0.515  | 9.43E-06 | chr:3:129776131 |

|               |             |        |          |                 |
|---------------|-------------|--------|----------|-----------------|
| 3 rs9863859   | 129814862 T | 1.995  | 1.49E-05 | chr:3:129776131 |
| 3 rs938193    | 129674004 C | 2.036  | 1.76E-05 | chr:3:129776131 |
| 3 rs1453255   | 129977658 G | 0.5318 | 1.93E-05 | chr:3:129776131 |
| 3 rs9822888   | 129647209 C | 0.4974 | 2.10E-05 | chr:3:129776131 |
| 3 rs62281641  | 129954511 G | 0.5332 | 2.12E-05 | chr:3:129776131 |
| 3 rs12634323  | 129757836 C | 2.032  | 2.42E-05 | chr:3:129776131 |
| 3 rs2953754   | 129749442 A | 2.225  | 2.78E-05 | chr:3:129776131 |
| 3 rs10934931  | 129980208 T | 0.5371 | 2.80E-05 | chr:3:129776131 |
| 3 rs11711883  | 129960210 T | 0.5371 | 2.80E-05 | chr:3:129776131 |
| 3 rs11718032  | 129976592 T | 0.5371 | 2.80E-05 | chr:3:129776131 |
| 3 rs35856399  | 129960804 T | 0.5371 | 2.80E-05 | chr:3:129776131 |
| 3 rs62281647  | 129961513 T | 0.5371 | 2.80E-05 | chr:3:129776131 |
| 3 rs62281648  | 129963637 C | 0.5371 | 2.80E-05 | chr:3:129776131 |
| 3 rs75458981  | 129958106 C | 0.5371 | 2.80E-05 | chr:3:129776131 |
| 3 rs1708237   | 129671420 G | 2.395  | 2.85E-05 | chr:3:129776131 |
| 3 rs9866299   | 129687815 G | 0.5365 | 2.99E-05 | chr:3:129776131 |
| 3 rs7635782   | 129670605 T | 0.5423 | 3.14E-05 | chr:3:129776131 |
| 3 rs7630899   | 129685283 C | 0.5381 | 3.35E-05 | chr:3:129776131 |
| 3 rs7643221   | 129689066 A | 0.5381 | 3.35E-05 | chr:3:129776131 |
| 3 rs7643327   | 129689177 C | 0.5381 | 3.35E-05 | chr:3:129776131 |
| 3 rs9827848   | 129687128 A | 0.5381 | 3.35E-05 | chr:3:129776131 |
| 3 rs9832570   | 129687847 T | 0.5381 | 3.35E-05 | chr:3:129776131 |
| 3 rs9833637   | 129688384 A | 0.5381 | 3.35E-05 | chr:3:129776131 |
| 3 rs9865790   | 129687520 G | 0.5381 | 3.35E-05 | chr:3:129776131 |
| 3 rs9870300   | 129688039 G | 0.5381 | 3.35E-05 | chr:3:129776131 |
| 3 rs13091203  | 129692674 G | 0.5424 | 3.75E-05 | chr:3:129776131 |
| 3 rs112301199 | 129786534 G | 1.942  | 3.78E-05 | chr:3:129776131 |
| 3 rs949462    | 129663292 C | 0.5492 | 3.89E-05 | chr:3:129776131 |
| 3 rs9869918   | 129661667 C | 0.5492 | 3.89E-05 | chr:3:129776131 |
| 3 rs11705706  | 129743467 T | 1.934  | 3.95E-05 | chr:3:129776131 |
| 3 rs1104790   | 129673942 A | 1.994  | 3.96E-05 | chr:3:129776131 |
| 3 rs2953755   | 129749118 A | 2.181  | 4.02E-05 | chr:3:129776131 |
| 3 rs9844615   | 129748532 A | 2.181  | 4.02E-05 | chr:3:129776131 |
| 4 rs77466269  | 120269755 A | 0.1198 | 1.61E-17 | chr:4:120263688 |
| 4 rs190883674 | 120269780 G | 0.128  | 1.85E-17 | chr:4:120263688 |
| 4 rs201764844 | 120269768 C | 0.128  | 1.85E-17 | chr:4:120263688 |
| 4 rs10017001  | 120263293 G | 0.1448 | 1.74E-16 | chr:4:120263688 |
| 4 rs9994691   | 120263298 A | 0.1448 | 1.74E-16 | chr:4:120263688 |
| 4 rs10006495  | 120263315 G | 0.1487 | 2.63E-16 | chr:4:120263688 |
| 4 rs10006688  | 120263526 C | 0.1092 | 4.70E-16 | chr:4:120263688 |
| 4 rs143457155 | 120263622 C | 0.1114 | 4.82E-16 | chr:4:120263688 |
| 4 rs3864143   | 120266428 C | 0.1187 | 5.59E-16 | chr:4:120263688 |
| 4 rs6838457   | 120267367 G | 0.1083 | 6.31E-16 | chr:4:120263688 |

|               |             |        |          |                 |
|---------------|-------------|--------|----------|-----------------|
| 4 rs13121928  | 120266518 C | 0.1191 | 6.37E-16 | chr:4:120263688 |
| 4 rs28437684  | 120264849 A | 0.1081 | 6.79E-16 | chr:4:120263688 |
| 4 rs28551750  | 120264901 T | 0.1081 | 6.79E-16 | chr:4:120263688 |
| 4 rs28691602  | 120264770 C | 0.1081 | 6.79E-16 | chr:4:120263688 |
| 4 rs9995716   | 120264996 C | 0.1081 | 6.79E-16 | chr:4:120263688 |
| 4 rs10012408  | 120270771 A | 0.1086 | 7.23E-16 | chr:4:120263688 |
| 4 rs17517414  | 120262101 C | 0.1091 | 7.54E-16 | chr:4:120263688 |
| 4 rs28546691  | 120262832 A | 0.1094 | 8.02E-16 | chr:4:120263688 |
| 4 rs148893841 | 120263621 G | 0.1151 | 8.31E-16 | chr:4:120263688 |
| 4 rs10000544  | 120270705 A | 0.1097 | 8.94E-16 | chr:4:120263688 |
| 4 rs10005542  | 120268302 C | 0.1097 | 8.94E-16 | chr:4:120263688 |
| 4 rs10006192  | 120263022 C | 0.1097 | 8.94E-16 | chr:4:120263688 |
| 4 rs10010355  | 120261043 G | 0.1097 | 8.94E-16 | chr:4:120263688 |
| 4 rs10015579  | 120271802 C | 0.1097 | 8.94E-16 | chr:4:120263688 |
| 4 rs10015965  | 120268237 G | 0.1097 | 8.94E-16 | chr:4:120263688 |
| 4 rs10016241  | 120268553 C | 0.1097 | 8.94E-16 | chr:4:120263688 |
| 4 rs10022448  | 120270421 G | 0.1097 | 8.94E-16 | chr:4:120263688 |
| 4 rs10025925  | 120271744 T | 0.1097 | 8.94E-16 | chr:4:120263688 |
| 4 rs10028773  | 120265259 G | 0.1097 | 8.94E-16 | chr:4:120263688 |
| 4 rs114866537 | 120258608 T | 0.1097 | 8.94E-16 | chr:4:120263688 |
| 4 rs12502393  | 120271228 T | 0.1097 | 8.94E-16 | chr:4:120263688 |
| 4 rs12502524  | 120271414 A | 0.1097 | 8.94E-16 | chr:4:120263688 |
| 4 rs12506421  | 120271167 C | 0.1097 | 8.94E-16 | chr:4:120263688 |
| 4 rs12506445  | 120271237 C | 0.1097 | 8.94E-16 | chr:4:120263688 |
| 4 rs12506487  | 120271361 G | 0.1097 | 8.94E-16 | chr:4:120263688 |
| 4 rs12510133  | 120271344 C | 0.1097 | 8.94E-16 | chr:4:120263688 |
| 4 rs17009144  | 120270795 G | 0.1097 | 8.94E-16 | chr:4:120263688 |
| 4 rs17595727  | 120262074 C | 0.1097 | 8.94E-16 | chr:4:120263688 |
| 4 rs2136911   | 120265859 A | 0.1097 | 8.94E-16 | chr:4:120263688 |
| 4 rs2175381   | 120265967 C | 0.1097 | 8.94E-16 | chr:4:120263688 |
| 4 rs28369518  | 120271630 C | 0.1097 | 8.94E-16 | chr:4:120263688 |
| 4 rs28396837  | 120271541 A | 0.1097 | 8.94E-16 | chr:4:120263688 |
| 4 rs28572003  | 120268891 G | 0.1097 | 8.94E-16 | chr:4:120263688 |
| 4 rs28589345  | 120269080 A | 0.1097 | 8.94E-16 | chr:4:120263688 |
| 4 rs28599836  | 120268809 T | 0.1097 | 8.94E-16 | chr:4:120263688 |
| 4 rs28616635  | 120261861 C | 0.1097 | 8.94E-16 | chr:4:120263688 |
| 4 rs28714087  | 120270966 G | 0.1097 | 8.94E-16 | chr:4:120263688 |
| 4 rs28726222  | 120262672 C | 0.1097 | 8.94E-16 | chr:4:120263688 |
| 4 rs3864142   | 120266191 T | 0.1097 | 8.94E-16 | chr:4:120263688 |
| 4 rs3864144   | 120272605 T | 0.1097 | 8.94E-16 | chr:4:120263688 |
| 4 rs3986377   | 120260270 A | 0.1097 | 8.94E-16 | chr:4:120263688 |
| 4 rs4001390   | 120265783 C | 0.1097 | 8.94E-16 | chr:4:120263688 |
| 4 rs4473640   | 120260437 A | 0.1097 | 8.94E-16 | chr:4:120263688 |

|               |             |        |          |                 |
|---------------|-------------|--------|----------|-----------------|
| 4 rs555773279 | 120269424 T | 0.1097 | 8.94E-16 | chr:4:120263688 |
| 4 rs55820750  | 120269168 C | 0.1097 | 8.94E-16 | chr:4:120263688 |
| 4 rs6815291   | 120266982 A | 0.1097 | 8.94E-16 | chr:4:120263688 |
| 4 rs6815934   | 120267310 C | 0.1097 | 8.94E-16 | chr:4:120263688 |
| 4 rs6833140   | 120266822 A | 0.1097 | 8.94E-16 | chr:4:120263688 |
| 4 rs6838009   | 120267034 A | 0.1097 | 8.94E-16 | chr:4:120263688 |
| 4 rs79606892  | 120259606 C | 0.1097 | 8.94E-16 | chr:4:120263688 |
| 4 rs9307470   | 120261214 A | 0.1097 | 8.94E-16 | chr:4:120263688 |
| 4 rs9307471   | 120261262 A | 0.1097 | 8.94E-16 | chr:4:120263688 |
| 4 rs13122153  | 120266585 C | 0.1166 | 1.11E-15 | chr:4:120263688 |
| 4 rs12498657  | 120262866 C | 0.1172 | 1.19E-15 | chr:4:120263688 |
| 4 rs10023641  | 120258410 G | 0.1181 | 1.21E-15 | chr:4:120263688 |
| 4 rs1814814   | 120258124 G | 0.1181 | 1.21E-15 | chr:4:120263688 |
| 4 rs4422403   | 120258194 T | 0.1181 | 1.21E-15 | chr:4:120263688 |
| 4 rs11735886  | 120290215 C | 0.1229 | 1.22E-15 | chr:4:120263688 |
| 4 rs28622913  | 120261723 A | 0.1232 | 1.43E-15 | chr:4:120263688 |
| 4 rs28735977  | 120261738 T | 0.1232 | 1.43E-15 | chr:4:120263688 |
| 4 rs4145952   | 120155806 A | 0.1293 | 5.56E-15 | chr:4:120263688 |
| 4 rs12501602  | 120287935 T | 0.1282 | 1.05E-14 | chr:4:120263688 |
| 4 rs6848081   | 120286443 T | 0.1228 | 1.10E-14 | chr:4:120263688 |
| 4 rs13101722  | 120555975 C | 0.1166 | 1.23E-14 | chr:4:120263688 |
| 4 rs2389874   | 120554991 A | 0.1166 | 1.23E-14 | chr:4:120263688 |
| 4 rs2389879   | 120557684 G | 0.1166 | 1.23E-14 | chr:4:120263688 |
| 4 rs58583086  | 120556362 A | 0.1166 | 1.23E-14 | chr:4:120263688 |
| 4 rs59867181  | 120556467 C | 0.1166 | 1.23E-14 | chr:4:120263688 |
| 4 rs6534149   | 120559292 T | 0.1166 | 1.23E-14 | chr:4:120263688 |
| 4 rs9685057   | 120272333 G | 0.2155 | 1.35E-14 | chr:4:120263688 |
| 4 rs60378962  | 120280991 A | 0.1281 | 1.43E-14 | chr:4:120263688 |
| 4 rs78422072  | 120281042 T | 0.1281 | 1.43E-14 | chr:4:120263688 |
| 4 rs78971550  | 120281041 T | 0.1281 | 1.43E-14 | chr:4:120263688 |
| 4 rs1814813   | 120258207 G | 0.1287 | 1.48E-14 | chr:4:120263688 |
| 4 rs6847862   | 120286371 T | 0.1286 | 1.55E-14 | chr:4:120263688 |
| 4 rs6848380   | 120286403 A | 0.1286 | 1.55E-14 | chr:4:120263688 |
| 4 rs13125526  | 120288019 A | 0.129  | 1.59E-14 | chr:4:120263688 |
| 4 rs28439855  | 120262256 A | 0.177  | 1.74E-14 | chr:4:120263688 |
| 4 rs10002914  | 120292081 A | 0.1299 | 1.96E-14 | chr:4:120263688 |
| 4 rs10013652  | 120292256 G | 0.1299 | 1.96E-14 | chr:4:120263688 |
| 4 rs10021601  | 120282563 A | 0.1299 | 1.96E-14 | chr:4:120263688 |
| 4 rs10029303  | 120286755 A | 0.1299 | 1.96E-14 | chr:4:120263688 |
| 4 rs10517834  | 120286783 C | 0.1299 | 1.96E-14 | chr:4:120263688 |
| 4 rs10857066  | 120286596 T | 0.1299 | 1.96E-14 | chr:4:120263688 |
| 4 rs11098505  | 120284627 T | 0.1299 | 1.96E-14 | chr:4:120263688 |
| 4 rs11098506  | 120284971 G | 0.1299 | 1.96E-14 | chr:4:120263688 |



|               |             |        |          |                 |
|---------------|-------------|--------|----------|-----------------|
| 4 rs11098507  | 120288286 A | 0.1299 | 1.96E-14 | chr:4:120263688 |
| 4 rs12374244  | 120281972 T | 0.1299 | 1.96E-14 | chr:4:120263688 |
| 4 rs12374245  | 120282059 T | 0.1299 | 1.96E-14 | chr:4:120263688 |
| 4 rs12374346  | 120281705 A | 0.1299 | 1.96E-14 | chr:4:120263688 |
| 4 rs12374352  | 120281977 T | 0.1299 | 1.96E-14 | chr:4:120263688 |
| 4 rs12374396  | 120281619 C | 0.1299 | 1.96E-14 | chr:4:120263688 |
| 4 rs12499602  | 120284387 A | 0.1299 | 1.96E-14 | chr:4:120263688 |
| 4 rs12503082  | 120284317 G | 0.1299 | 1.96E-14 | chr:4:120263688 |
| 4 rs12510451  | 120289143 T | 0.1299 | 1.96E-14 | chr:4:120263688 |
| 4 rs12513310  | 120288039 A | 0.1299 | 1.96E-14 | chr:4:120263688 |
| 4 rs13104572  | 120285568 C | 0.1299 | 1.96E-14 | chr:4:120263688 |
| 4 rs13105020  | 120285688 T | 0.1299 | 1.96E-14 | chr:4:120263688 |
| 4 rs13132082  | 120285657 A | 0.1299 | 1.96E-14 | chr:4:120263688 |
| 4 rs28470894  | 120289405 G | 0.1299 | 1.96E-14 | chr:4:120263688 |
| 4 rs28488261  | 120289396 C | 0.1299 | 1.96E-14 | chr:4:120263688 |
| 4 rs28501434  | 120283773 T | 0.1299 | 1.96E-14 | chr:4:120263688 |
| 4 rs28581362  | 120283548 A | 0.1299 | 1.96E-14 | chr:4:120263688 |
| 4 rs28594160  | 120289456 G | 0.1299 | 1.96E-14 | chr:4:120263688 |
| 4 rs28668103  | 120291372 T | 0.1299 | 1.96E-14 | chr:4:120263688 |
| 4 rs28687057  | 120280812 G | 0.1299 | 1.96E-14 | chr:4:120263688 |
| 4 rs55845118  | 120290913 C | 0.1299 | 1.96E-14 | chr:4:120263688 |
| 4 rs67281037  | 120281157 C | 0.1299 | 1.96E-14 | chr:4:120263688 |
| 4 rs6824111   | 120285968 A | 0.1299 | 1.96E-14 | chr:4:120263688 |
| 4 rs6824169   | 120293175 C | 0.1299 | 1.96E-14 | chr:4:120263688 |
| 4 rs6846966   | 120293208 G | 0.1299 | 1.96E-14 | chr:4:120263688 |
| 4 rs6847586   | 120286069 A | 0.1299 | 1.96E-14 | chr:4:120263688 |
| 4 rs6857892   | 120282696 T | 0.1299 | 1.96E-14 | chr:4:120263688 |
| 4 rs71610270  | 120287436 G | 0.1299 | 1.96E-14 | chr:4:120263688 |
| 4 rs72676059  | 120290828 G | 0.1299 | 1.96E-14 | chr:4:120263688 |
| 4 rs73842616  | 120290683 A | 0.1299 | 1.96E-14 | chr:4:120263688 |
| 4 rs7677068   | 120291704 T | 0.1299 | 1.96E-14 | chr:4:120263688 |
| 4 rs9991221   | 120292107 C | 0.1299 | 1.96E-14 | chr:4:120263688 |
| 4 rs9995136   | 120286845 G | 0.1299 | 1.96E-14 | chr:4:120263688 |
| 4 rs4563482   | 120354480 G | 0.1414 | 2.31E-14 | chr:4:120263688 |
| 4 rs10434028  | 120294464 G | 0.131  | 2.48E-14 | chr:4:120263688 |
| 4 rs12510487  | 120289231 T | 0.1318 | 2.55E-14 | chr:4:120263688 |
| 4 rs4643791   | 120265619 A | 0.1846 | 2.87E-14 | chr:4:120263688 |
| 4 rs10020256  | 120287265 T | 0.1306 | 2.97E-14 | chr:4:120263688 |
| 4 rs200290730 | 120287492 A | 0.1306 | 2.97E-14 | chr:4:120263688 |
| 4 rs6847778   | 120293582 G | 0.1323 | 2.98E-14 | chr:4:120263688 |
| 4 rs74693727  | 120330155 T | 0.1348 | 3.04E-14 | chr:4:120263688 |
| 4 rs10017189  | 120263523 C | 0.1892 | 3.28E-14 | chr:4:120263688 |
| 4 rs10003742  | 120271798 C | 0.1854 | 3.53E-14 | chr:4:120263688 |

|               |             |        |          |                 |
|---------------|-------------|--------|----------|-----------------|
| 4 rs10004114  | 120259213 G | 0.1854 | 3.53E-14 | chr:4:120263688 |
| 4 rs10015883  | 120268146 G | 0.1854 | 3.53E-14 | chr:4:120263688 |
| 4 rs10213542  | 120260650 T | 0.1854 | 3.53E-14 | chr:4:120263688 |
| 4 rs9307472   | 120261415 C | 0.1854 | 3.53E-14 | chr:4:120263688 |
| 4 rs9637624   | 120274911 G | 0.1854 | 3.53E-14 | chr:4:120263688 |
| 4 rs56155624  | 120291026 G | 0.1429 | 3.99E-14 | chr:4:120263688 |
| 4 rs13134132  | 120324615 A | 0.1376 | 4.72E-14 | chr:4:120263688 |
| 4 rs9996940   | 120364542 T | 0.1376 | 4.72E-14 | chr:4:120263688 |
| 4 rs10518329  | 120401835 G | 0.1386 | 5.58E-14 | chr:4:120263688 |
| 4 rs6820115   | 120398182 C | 0.1386 | 5.58E-14 | chr:4:120263688 |
| 4 rs7665125   | 120402079 T | 0.1386 | 5.58E-14 | chr:4:120263688 |
| 4 rs9307475   | 120368556 A | 0.1388 | 5.64E-14 | chr:4:120263688 |
| 4 rs1814815   | 120258091 T | 0.1934 | 5.81E-14 | chr:4:120263688 |
| 4 rs2017058   | 120257739 C | 0.1956 | 6.90E-14 | chr:4:120263688 |
| 4 rs6843229   | 120424087 C | 0.1854 | 7.67E-14 | chr:4:120263688 |
| 4 rs9760422   | 120354126 G | 0.208  | 9.74E-14 | chr:4:120263688 |
| 4 rs10027517  | 120372234 G | 0.1917 | 1.04E-13 | chr:4:120263688 |
| 4 rs9996586   | 120326942 G | 0.1926 | 1.17E-13 | chr:4:120263688 |
| 4 rs12505876  | 120385472 A | 0.193  | 1.33E-13 | chr:4:120263688 |
| 4 rs35138262  | 120361169 T | 0.193  | 1.33E-13 | chr:4:120263688 |
| 4 rs3872807   | 120360251 A | 0.193  | 1.33E-13 | chr:4:120263688 |
| 4 rs9684327   | 120365441 G | 0.193  | 1.33E-13 | chr:4:120263688 |
| 4 rs9799664   | 120326678 T | 0.193  | 1.33E-13 | chr:4:120263688 |
| 4 rs7661498   | 120408108 C | 0.1931 | 1.45E-13 | chr:4:120263688 |
| 4 rs7692994   | 120427489 A | 0.1392 | 1.46E-13 | chr:4:120263688 |
| 4 rs10027431  | 120372142 G | 0.2166 | 1.56E-13 | chr:4:120263688 |
| 4 rs10027432  | 120372143 C | 0.2166 | 1.56E-13 | chr:4:120263688 |
| 4 rs13117947  | 120257060 G | 0.2034 | 1.66E-13 | chr:4:120263688 |
| 4 rs13139045  | 120168588 C | 0.1494 | 1.79E-13 | chr:4:120263688 |
| 4 rs1155577   | 120449810 C | 0.189  | 1.84E-13 | chr:4:120263688 |
| 4 rs12648182  | 120503891 T | 0.189  | 1.84E-13 | chr:4:120263688 |
| 4 rs140982995 | 120455483 T | 0.189  | 1.84E-13 | chr:4:120263688 |
| 4 rs142328963 | 120498647 T | 0.189  | 1.84E-13 | chr:4:120263688 |
| 4 rs142970247 | 120499656 T | 0.189  | 1.84E-13 | chr:4:120263688 |
| 4 rs146743180 | 120497433 C | 0.189  | 1.84E-13 | chr:4:120263688 |
| 4 rs36173322  | 120496491 C | 0.189  | 1.84E-13 | chr:4:120263688 |
| 4 rs59516282  | 120502016 G | 0.189  | 1.84E-13 | chr:4:120263688 |
| 4 rs76541370  | 120498280 A | 0.189  | 1.84E-13 | chr:4:120263688 |
| 4 rs80052400  | 120498134 G | 0.189  | 1.84E-13 | chr:4:120263688 |
| 4 rs9683520   | 120368199 C | 0.2096 | 2.00E-13 | chr:4:120263688 |
| 4 rs9684878   | 120368175 C | 0.2096 | 2.00E-13 | chr:4:120263688 |
| 4 rs2892869   | 120521297 T | 0.1894 | 2.12E-13 | chr:4:120263688 |
| 4 rs55661135  | 120506153 G | 0.1894 | 2.12E-13 | chr:4:120263688 |

|               |             |        |          |                 |
|---------------|-------------|--------|----------|-----------------|
| 4 rs56173225  | 120509972 G | 0.1894 | 2.12E-13 | chr:4:120263688 |
| 4 rs56843000  | 120516597 T | 0.1894 | 2.12E-13 | chr:4:120263688 |
| 4 rs72920701  | 120513230 G | 0.1894 | 2.12E-13 | chr:4:120263688 |
| 4 rs7678973   | 120511817 T | 0.1894 | 2.12E-13 | chr:4:120263688 |
| 4 rs66887589  | 120509279 T | 0.1896 | 2.28E-13 | chr:4:120263688 |
| 4 rs62322293  | 120330655 G | 0.2017 | 2.49E-13 | chr:4:120263688 |
| 4 rs13134517  | 120405262 A | 0.1969 | 2.51E-13 | chr:4:120263688 |
| 4 rs6534135   | 120406302 G | 0.1969 | 2.51E-13 | chr:4:120263688 |
| 4 rs9307477   | 120421809 A | 0.1969 | 2.51E-13 | chr:4:120263688 |
| 4 rs7694483   | 120405929 A | 0.1975 | 2.97E-13 | chr:4:120263688 |
| 4 rs10019421  | 120327198 T | 0.2261 | 3.08E-13 | chr:4:120263688 |
| 4 rs13104219  | 120438174 T | 0.1923 | 3.14E-13 | chr:4:120263688 |
| 4 rs3775842   | 120427732 A | 0.1923 | 3.14E-13 | chr:4:120263688 |
| 4 rs6844263   | 120433807 G | 0.1923 | 3.14E-13 | chr:4:120263688 |
| 4 rs1480933   | 120433248 T | 0.1936 | 3.93E-13 | chr:4:120263688 |
| 4 rs2389875   | 120557014 G | 0.2004 | 4.83E-13 | chr:4:120263688 |
| 4 rs10031129  | 120327201 C | 0.2284 | 5.14E-13 | chr:4:120263688 |
| 4 rs199865201 | 120332408 A | 0.2097 | 5.38E-13 | chr:4:120263688 |
| 4 rs4513552   | 120354657 T | 0.2434 | 6.24E-13 | chr:4:120263688 |
| 4 rs185481756 | 120246689 C | 0.1976 | 6.69E-13 | chr:4:120263688 |
| 4 rs9684723   | 120367735 C | 0.2344 | 7.10E-13 | chr:4:120263688 |
| 4 rs140584472 | 120246695 G | 0.1985 | 7.76E-13 | chr:4:120263688 |
| 4 rs9994488   | 120587781 T | 0.1629 | 7.80E-13 | chr:4:120263688 |
| 4 rs9994651   | 120587803 A | 0.1629 | 7.80E-13 | chr:4:120263688 |
| 4 rs3956479   | 120360863 T | 0.2442 | 8.01E-13 | chr:4:120263688 |
| 4 rs3956480   | 120360861 T | 0.2442 | 8.01E-13 | chr:4:120263688 |
| 4 rs41464847  | 120532401 A | 0.2026 | 8.35E-13 | chr:4:120263688 |
| 4 rs59590064  | 120539753 T | 0.2026 | 8.35E-13 | chr:4:120263688 |
| 4 rs6817317   | 120542827 A | 0.2026 | 8.35E-13 | chr:4:120263688 |
| 4 rs7672519   | 120544112 C | 0.2026 | 8.35E-13 | chr:4:120263688 |
| 4 rs7681980   | 120533223 G | 0.2026 | 8.35E-13 | chr:4:120263688 |
| 4 rs2389873   | 120554714 A | 0.2084 | 8.36E-13 | chr:4:120263688 |
| 4 rs4834792   | 120555696 T | 0.2084 | 8.36E-13 | chr:4:120263688 |
| 4 rs10518337  | 120574874 A | 0.2116 | 1.70E-12 | chr:4:120263688 |
| 4 rs34481394  | 120248374 T | 0.2065 | 2.35E-12 | chr:4:120263688 |
| 4 rs35231872  | 120248376 T | 0.2065 | 2.35E-12 | chr:4:120263688 |
| 4 rs35653026  | 120248378 G | 0.2065 | 2.35E-12 | chr:4:120263688 |
| 4 rs56838032  | 120329894 A | 0.2005 | 2.49E-12 | chr:4:120263688 |
| 4 rs28369503  | 120238925 A | 0.2173 | 4.64E-12 | chr:4:120263688 |
| 4 rs28458294  | 120238924 C | 0.2173 | 4.64E-12 | chr:4:120263688 |
| 4 rs9996494   | 120238880 A | 0.2173 | 4.64E-12 | chr:4:120263688 |
| 4 rs9996501   | 120238918 A | 0.2173 | 4.64E-12 | chr:4:120263688 |
| 4 rs9996644   | 120238877 T | 0.2173 | 4.64E-12 | chr:4:120263688 |

|               |             |        |          |                 |
|---------------|-------------|--------|----------|-----------------|
| 4 rs11723550  | 120289961 C | 0.2247 | 9.06E-12 | chr:4:120263688 |
| 4 rs878372    | 120238780 C | 0.217  | 9.42E-12 | chr:4:120263688 |
| 4 rs10212956  | 120254343 G | 0.2189 | 1.06E-11 | chr:4:120263688 |
| 4 rs1849457   | 120254355 G | 0.2189 | 1.06E-11 | chr:4:120263688 |
| 4 rs10003567  | 120241674 T | 0.2203 | 1.27E-11 | chr:4:120263688 |
| 4 rs10005237  | 120237897 C | 0.2203 | 1.27E-11 | chr:4:120263688 |
| 4 rs10005973  | 120271958 T | 0.2203 | 1.27E-11 | chr:4:120263688 |
| 4 rs10006259  | 120242145 T | 0.2203 | 1.27E-11 | chr:4:120263688 |
| 4 rs10024933  | 120253582 A | 0.2203 | 1.27E-11 | chr:4:120263688 |
| 4 rs10212714  | 120254302 C | 0.2203 | 1.27E-11 | chr:4:120263688 |
| 4 rs10212719  | 120254437 C | 0.2203 | 1.27E-11 | chr:4:120263688 |
| 4 rs10212775  | 120239244 C | 0.2203 | 1.27E-11 | chr:4:120263688 |
| 4 rs10213221  | 120255926 A | 0.2203 | 1.27E-11 | chr:4:120263688 |
| 4 rs10213267  | 120239074 G | 0.2203 | 1.27E-11 | chr:4:120263688 |
| 4 rs10213480  | 120254561 T | 0.2203 | 1.27E-11 | chr:4:120263688 |
| 4 rs10213554  | 120260785 A | 0.2203 | 1.27E-11 | chr:4:120263688 |
| 4 rs10518300  | 120249499 G | 0.2203 | 1.27E-11 | chr:4:120263688 |
| 4 rs11098501  | 120252017 G | 0.2203 | 1.27E-11 | chr:4:120263688 |
| 4 rs11098502  | 120252063 A | 0.2203 | 1.27E-11 | chr:4:120263688 |
| 4 rs11724409  | 120252361 G | 0.2203 | 1.27E-11 | chr:4:120263688 |
| 4 rs11732087  | 120239831 G | 0.2203 | 1.27E-11 | chr:4:120263688 |
| 4 rs11732686  | 120252330 A | 0.2203 | 1.27E-11 | chr:4:120263688 |
| 4 rs12498994  | 120250818 C | 0.2203 | 1.27E-11 | chr:4:120263688 |
| 4 rs12506610  | 120241659 C | 0.2203 | 1.27E-11 | chr:4:120263688 |
| 4 rs12507565  | 120251121 A | 0.2203 | 1.27E-11 | chr:4:120263688 |
| 4 rs12509621  | 120249660 C | 0.2203 | 1.27E-11 | chr:4:120263688 |
| 4 rs12510269  | 120241646 G | 0.2203 | 1.27E-11 | chr:4:120263688 |
| 4 rs12511640  | 120251248 C | 0.2203 | 1.27E-11 | chr:4:120263688 |
| 4 rs12513083  | 120249612 T | 0.2203 | 1.27E-11 | chr:4:120263688 |
| 4 rs12711071  | 120240934 C | 0.2203 | 1.27E-11 | chr:4:120263688 |
| 4 rs13108589  | 120268102 C | 0.2203 | 1.27E-11 | chr:4:120263688 |
| 4 rs140387830 | 120247916 G | 0.2203 | 1.27E-11 | chr:4:120263688 |
| 4 rs145027390 | 120247827 G | 0.2203 | 1.27E-11 | chr:4:120263688 |
| 4 rs1511017   | 120250805 A | 0.2203 | 1.27E-11 | chr:4:120263688 |
| 4 rs1511025   | 120240238 C | 0.2203 | 1.27E-11 | chr:4:120263688 |
| 4 rs17049949  | 120255290 G | 0.2203 | 1.27E-11 | chr:4:120263688 |
| 4 rs17595608  | 120250506 T | 0.2203 | 1.27E-11 | chr:4:120263688 |
| 4 rs1980024   | 120253047 T | 0.2203 | 1.27E-11 | chr:4:120263688 |
| 4 rs1980025   | 120252806 T | 0.2203 | 1.27E-11 | chr:4:120263688 |
| 4 rs1980026   | 120251643 A | 0.2203 | 1.27E-11 | chr:4:120263688 |
| 4 rs1980027   | 120251577 T | 0.2203 | 1.27E-11 | chr:4:120263688 |
| 4 rs2002047   | 120257228 G | 0.2203 | 1.27E-11 | chr:4:120263688 |
| 4 rs2036856   | 120249288 A | 0.2203 | 1.27E-11 | chr:4:120263688 |

|               |             |        |          |                 |
|---------------|-------------|--------|----------|-----------------|
| 4 rs2036857   | 120249240 C | 0.2203 | 1.27E-11 | chr:4:120263688 |
| 4 rs2036860   | 120248934 G | 0.2203 | 1.27E-11 | chr:4:120263688 |
| 4 rs28363929  | 120257103 G | 0.2203 | 1.27E-11 | chr:4:120263688 |
| 4 rs28373117  | 120253465 T | 0.2203 | 1.27E-11 | chr:4:120263688 |
| 4 rs28502463  | 120257023 C | 0.2203 | 1.27E-11 | chr:4:120263688 |
| 4 rs28643450  | 120245242 A | 0.2203 | 1.27E-11 | chr:4:120263688 |
| 4 rs28652763  | 120242312 T | 0.2203 | 1.27E-11 | chr:4:120263688 |
| 4 rs2964      | 120240131 C | 0.2203 | 1.27E-11 | chr:4:120263688 |
| 4 rs34425882  | 120253177 A | 0.2203 | 1.27E-11 | chr:4:120263688 |
| 4 rs3864141   | 120266007 A | 0.2203 | 1.27E-11 | chr:4:120263688 |
| 4 rs3956464   | 120256764 C | 0.2203 | 1.27E-11 | chr:4:120263688 |
| 4 rs4107728   | 120253910 A | 0.2203 | 1.27E-11 | chr:4:120263688 |
| 4 rs4443261   | 120249301 C | 0.2203 | 1.27E-11 | chr:4:120263688 |
| 4 rs4472123   | 120236630 A | 0.2203 | 1.27E-11 | chr:4:120263688 |
| 4 rs66900435  | 120249425 A | 0.2203 | 1.27E-11 | chr:4:120263688 |
| 4 rs714899    | 120243035 A | 0.2203 | 1.27E-11 | chr:4:120263688 |
| 4 rs72676046  | 120254681 C | 0.2203 | 1.27E-11 | chr:4:120263688 |
| 4 rs7671759   | 120248094 C | 0.2203 | 1.27E-11 | chr:4:120263688 |
| 4 rs7671797   | 120248157 G | 0.2203 | 1.27E-11 | chr:4:120263688 |
| 4 rs7671978   | 120248218 G | 0.2203 | 1.27E-11 | chr:4:120263688 |
| 4 rs7672129   | 120248176 T | 0.2203 | 1.27E-11 | chr:4:120263688 |
| 4 rs7672357   | 120248340 T | 0.2203 | 1.27E-11 | chr:4:120263688 |
| 4 rs7672372   | 120248406 G | 0.2203 | 1.27E-11 | chr:4:120263688 |
| 4 rs7672594   | 120248543 C | 0.2203 | 1.27E-11 | chr:4:120263688 |
| 4 rs7672778   | 120248585 G | 0.2203 | 1.27E-11 | chr:4:120263688 |
| 4 rs7689729   | 120256192 G | 0.2203 | 1.27E-11 | chr:4:120263688 |
| 4 rs7690338   | 120256468 G | 0.2203 | 1.27E-11 | chr:4:120263688 |
| 4 rs878376    | 120237702 A | 0.2203 | 1.27E-11 | chr:4:120263688 |
| 4 rs938056    | 120237453 T | 0.2203 | 1.27E-11 | chr:4:120263688 |
| 4 rs9991166   | 120237851 A | 0.2203 | 1.27E-11 | chr:4:120263688 |
| 4 rs9991959   | 120253773 C | 0.2203 | 1.27E-11 | chr:4:120263688 |
| 4 rs9993347   | 120258955 G | 0.2203 | 1.27E-11 | chr:4:120263688 |
| 4 rs9999724   | 120239944 T | 0.2203 | 1.27E-11 | chr:4:120263688 |
| 4 rs55816173  | 120247014 T | 0.2212 | 1.46E-11 | chr:4:120263688 |
| 4 rs10213158  | 120255829 T | 0.2218 | 1.52E-11 | chr:4:120263688 |
| 4 rs28713555  | 120251995 T | 0.2221 | 1.61E-11 | chr:4:120263688 |
| 4 rs1546506   | 120241240 C | 0.222  | 1.63E-11 | chr:4:120263688 |
| 4 rs907204    | 120238654 A | 0.2279 | 1.93E-11 | chr:4:120263688 |
| 4 rs907205    | 120238664 C | 0.2279 | 1.93E-11 | chr:4:120263688 |
| 4 rs7438634   | 120245754 C | 0.2263 | 2.26E-11 | chr:4:120263688 |
| 4 rs113263911 | 120255134 T | 0.2321 | 2.33E-11 | chr:4:120263688 |
| 4 rs10013042  | 120244482 T | 0.2273 | 2.41E-11 | chr:4:120263688 |
| 4 rs10003931  | 120259052 G | 0.2077 | 2.51E-11 | chr:4:120263688 |

|               |             |        |          |                 |
|---------------|-------------|--------|----------|-----------------|
| 4 rs2002049   | 120257417 G | 0.2313 | 2.63E-11 | chr:4:120263688 |
| 4 rs12507387  | 120247590 C | 0.2287 | 2.78E-11 | chr:4:120263688 |
| 4 rs12503171  | 120247196 G | 0.2291 | 2.82E-11 | chr:4:120263688 |
| 4 rs12507283  | 120247218 A | 0.2291 | 2.82E-11 | chr:4:120263688 |
| 4 rs1546503   | 120241167 C | 0.2291 | 2.86E-11 | chr:4:120263688 |
| 4 rs75420021  | 120246729 A | 0.2284 | 2.99E-11 | chr:4:120263688 |
| 4 rs13101526  | 120244456 T | 0.2296 | 3.12E-11 | chr:4:120263688 |
| 4 rs2715016   | 120452356 T | 0.2568 | 3.22E-11 | chr:4:120263688 |
| 4 rs373735748 | 120244580 T | 0.2247 | 4.48E-11 | chr:4:120263688 |
| 4 rs55884612  | 120244577 T | 0.2247 | 4.48E-11 | chr:4:120263688 |
| 4 rs140305554 | 120247693 C | 0.2119 | 6.54E-11 | chr:4:120263688 |
| 4 rs35280960  | 120257059 A | 0.2392 | 6.85E-11 | chr:4:120263688 |
| 4 rs12503360  | 120247506 C | 0.2389 | 7.28E-11 | chr:4:120263688 |
| 4 rs28787668  | 120554687 A | 0.2289 | 7.84E-11 | chr:4:120263688 |
| 4 rs55777923  | 120553264 T | 0.2254 | 8.04E-11 | chr:4:120263688 |
| 4 rs201965045 | 120254952 G | 0.2369 | 9.45E-11 | chr:4:120263688 |
| 4 rs10009566  | 120558608 C | 0.2301 | 9.52E-11 | chr:4:120263688 |
| 4 rs10012252  | 120559139 C | 0.2301 | 9.52E-11 | chr:4:120263688 |
| 4 rs11098534  | 120556772 G | 0.2301 | 9.52E-11 | chr:4:120263688 |
| 4 rs2389880   | 120559870 A | 0.2301 | 9.52E-11 | chr:4:120263688 |
| 4 rs28850368  | 120554313 A | 0.2301 | 9.52E-11 | chr:4:120263688 |
| 4 rs34835603  | 120553428 T | 0.2301 | 9.52E-11 | chr:4:120263688 |
| 4 rs3806808   | 120551085 C | 0.2301 | 9.52E-11 | chr:4:120263688 |
| 4 rs7676296   | 120555687 G | 0.2301 | 9.52E-11 | chr:4:120263688 |
| 4 rs28567749  | 120329211 C | 0.1932 | 9.92E-11 | chr:4:120263688 |
| 4 rs77222221  | 120329212 A | 0.1932 | 9.92E-11 | chr:4:120263688 |
| 4 rs10050092  | 120532085 C | 0.2301 | 1.13E-10 | chr:4:120263688 |
| 4 rs6832740   | 120546136 C | 0.2301 | 1.13E-10 | chr:4:120263688 |
| 4 rs6855918   | 120546299 T | 0.2301 | 1.13E-10 | chr:4:120263688 |
| 4 rs7693919   | 120540571 A | 0.2301 | 1.13E-10 | chr:4:120263688 |
| 4 rs62319649  | 120522579 T | 0.2599 | 1.34E-10 | chr:4:120263688 |
| 4 rs534745130 | 120246059 C | 0.2475 | 1.50E-10 | chr:4:120263688 |
| 4 rs200947437 | 120254755 C | 0.2515 | 1.59E-10 | chr:4:120263688 |
| 4 rs4834779   | 120425246 A | 0.1994 | 1.67E-10 | chr:4:120263688 |
| 4 rs12510923  | 120247381 G | 0.2536 | 2.62E-10 | chr:4:120263688 |
| 4 rs550821123 | 120327079 T | 0.2276 | 3.20E-10 | chr:4:120263688 |
| 4 rs12503309  | 120247397 A | 0.2573 | 3.50E-10 | chr:4:120263688 |
| 4 rs12503276  | 120247329 A | 0.258  | 3.63E-10 | chr:4:120263688 |
| 4 rs150376940 | 120305404 A | 0.2295 | 4.35E-10 | chr:4:120263688 |
| 4 rs10019309  | 120327085 T | 0.2316 | 4.35E-10 | chr:4:120263688 |
| 4 rs4001284   | 120334957 G | 0.3349 | 5.54E-10 | chr:4:120263688 |
| 4 rs28572238  | 120316686 G | 0.2366 | 5.71E-10 | chr:4:120263688 |
| 4 rs2322021   | 120295030 A | 0.2376 | 7.84E-10 | chr:4:120263688 |

|               |             |        |          |                 |
|---------------|-------------|--------|----------|-----------------|
| 4 rs143726128 | 120348512 C | 0.3421 | 7.96E-10 | chr:4:120263688 |
| 4 rs10028423  | 120294909 T | 0.2394 | 9.98E-10 | chr:4:120263688 |
| 4 rs28491261  | 120294900 A | 0.2394 | 9.98E-10 | chr:4:120263688 |
| 4 rs13128774  | 120246282 T | 0.2578 | 9.98E-10 | chr:4:120263688 |
| 4 rs10002083  | 120311152 T | 0.2391 | 1.02E-09 | chr:4:120263688 |
| 4 rs10005644  | 120298477 C | 0.2391 | 1.02E-09 | chr:4:120263688 |
| 4 rs10008386  | 120318809 A | 0.2391 | 1.02E-09 | chr:4:120263688 |
| 4 rs10008392  | 120318839 A | 0.2391 | 1.02E-09 | chr:4:120263688 |
| 4 rs10010801  | 120310028 C | 0.2391 | 1.02E-09 | chr:4:120263688 |
| 4 rs10011097  | 120310359 G | 0.2391 | 1.02E-09 | chr:4:120263688 |
| 4 rs10014719  | 120320715 A | 0.2391 | 1.02E-09 | chr:4:120263688 |
| 4 rs10014748  | 120300988 G | 0.2391 | 1.02E-09 | chr:4:120263688 |
| 4 rs10014845  | 120301077 G | 0.2391 | 1.02E-09 | chr:4:120263688 |
| 4 rs10016060  | 120298412 G | 0.2391 | 1.02E-09 | chr:4:120263688 |
| 4 rs10016448  | 120298845 G | 0.2391 | 1.02E-09 | chr:4:120263688 |
| 4 rs10020141  | 120318870 C | 0.2391 | 1.02E-09 | chr:4:120263688 |
| 4 rs10024844  | 120311528 G | 0.2391 | 1.02E-09 | chr:4:120263688 |
| 4 rs10025054  | 120311697 C | 0.2391 | 1.02E-09 | chr:4:120263688 |
| 4 rs10027498  | 120311987 C | 0.2391 | 1.02E-09 | chr:4:120263688 |
| 4 rs10027856  | 120304874 A | 0.2391 | 1.02E-09 | chr:4:120263688 |
| 4 rs10027976  | 120305042 T | 0.2391 | 1.02E-09 | chr:4:120263688 |
| 4 rs10028669  | 120295197 T | 0.2391 | 1.02E-09 | chr:4:120263688 |
| 4 rs10031718  | 120295892 T | 0.2391 | 1.02E-09 | chr:4:120263688 |
| 4 rs10222794  | 120302351 T | 0.2391 | 1.02E-09 | chr:4:120263688 |
| 4 rs10222798  | 120302419 T | 0.2391 | 1.02E-09 | chr:4:120263688 |
| 4 rs10222801  | 120302350 T | 0.2391 | 1.02E-09 | chr:4:120263688 |
| 4 rs10440343  | 120309787 C | 0.2391 | 1.02E-09 | chr:4:120263688 |
| 4 rs10440402  | 120307813 G | 0.2391 | 1.02E-09 | chr:4:120263688 |
| 4 rs10440403  | 120308047 T | 0.2391 | 1.02E-09 | chr:4:120263688 |
| 4 rs10857068  | 120317549 G | 0.2391 | 1.02E-09 | chr:4:120263688 |
| 4 rs11098508  | 120306607 G | 0.2391 | 1.02E-09 | chr:4:120263688 |
| 4 rs11098509  | 120306670 C | 0.2391 | 1.02E-09 | chr:4:120263688 |
| 4 rs11098510  | 120306793 T | 0.2391 | 1.02E-09 | chr:4:120263688 |
| 4 rs11098511  | 120306879 A | 0.2391 | 1.02E-09 | chr:4:120263688 |
| 4 rs11098512  | 120314161 T | 0.2391 | 1.02E-09 | chr:4:120263688 |
| 4 rs11098514  | 120317374 C | 0.2391 | 1.02E-09 | chr:4:120263688 |
| 4 rs1112817   | 120297800 C | 0.2391 | 1.02E-09 | chr:4:120263688 |
| 4 rs114019672 | 120306475 G | 0.2391 | 1.02E-09 | chr:4:120263688 |
| 4 rs11723839  | 120299673 A | 0.2391 | 1.02E-09 | chr:4:120263688 |
| 4 rs11726097  | 120301499 T | 0.2391 | 1.02E-09 | chr:4:120263688 |
| 4 rs11729050  | 120300066 C | 0.2391 | 1.02E-09 | chr:4:120263688 |
| 4 rs12498908  | 120308261 A | 0.2391 | 1.02E-09 | chr:4:120263688 |
| 4 rs12506148  | 120320348 T | 0.2391 | 1.02E-09 | chr:4:120263688 |

|               |             |        |          |                 |
|---------------|-------------|--------|----------|-----------------|
| 4 rs12506452  | 120308083 C | 0.2391 | 1.02E-09 | chr:4:120263688 |
| 4 rs12506546  | 120301618 C | 0.2391 | 1.02E-09 | chr:4:120263688 |
| 4 rs12509234  | 120319434 C | 0.2391 | 1.02E-09 | chr:4:120263688 |
| 4 rs13113483  | 120309039 T | 0.2391 | 1.02E-09 | chr:4:120263688 |
| 4 rs13127114  | 120314664 C | 0.2391 | 1.02E-09 | chr:4:120263688 |
| 4 rs13151285  | 120314741 A | 0.2391 | 1.02E-09 | chr:4:120263688 |
| 4 rs138611376 | 120306434 G | 0.2391 | 1.02E-09 | chr:4:120263688 |
| 4 rs140816585 | 120306228 C | 0.2391 | 1.02E-09 | chr:4:120263688 |
| 4 rs146523888 | 120308804 G | 0.2391 | 1.02E-09 | chr:4:120263688 |
| 4 rs28429722  | 120300093 A | 0.2391 | 1.02E-09 | chr:4:120263688 |
| 4 rs28551662  | 120309556 A | 0.2391 | 1.02E-09 | chr:4:120263688 |
| 4 rs28668716  | 120309875 C | 0.2391 | 1.02E-09 | chr:4:120263688 |
| 4 rs28714195  | 120316950 T | 0.2391 | 1.02E-09 | chr:4:120263688 |
| 4 rs28751034  | 120307097 A | 0.2391 | 1.02E-09 | chr:4:120263688 |
| 4 rs28793658  | 120307214 C | 0.2391 | 1.02E-09 | chr:4:120263688 |
| 4 rs28812279  | 120304152 C | 0.2391 | 1.02E-09 | chr:4:120263688 |
| 4 rs28884220  | 120307211 G | 0.2391 | 1.02E-09 | chr:4:120263688 |
| 4 rs4296662   | 120313440 G | 0.2391 | 1.02E-09 | chr:4:120263688 |
| 4 rs4373140   | 120307698 G | 0.2391 | 1.02E-09 | chr:4:120263688 |
| 4 rs4463052   | 120313258 C | 0.2391 | 1.02E-09 | chr:4:120263688 |
| 4 rs4507344   | 120307485 A | 0.2391 | 1.02E-09 | chr:4:120263688 |
| 4 rs4560394   | 120313435 G | 0.2391 | 1.02E-09 | chr:4:120263688 |
| 4 rs4604043   | 120314921 T | 0.2391 | 1.02E-09 | chr:4:120263688 |
| 4 rs59394118  | 120295551 G | 0.2391 | 1.02E-09 | chr:4:120263688 |
| 4 rs59866101  | 120296591 G | 0.2391 | 1.02E-09 | chr:4:120263688 |
| 4 rs6832410   | 120296800 G | 0.2391 | 1.02E-09 | chr:4:120263688 |
| 4 rs6833815   | 120318921 A | 0.2391 | 1.02E-09 | chr:4:120263688 |
| 4 rs6838617   | 120297423 T | 0.2391 | 1.02E-09 | chr:4:120263688 |
| 4 rs6858383   | 120296772 C | 0.2391 | 1.02E-09 | chr:4:120263688 |
| 4 rs7437420   | 120312903 G | 0.2391 | 1.02E-09 | chr:4:120263688 |
| 4 rs7658181   | 120310873 G | 0.2391 | 1.02E-09 | chr:4:120263688 |
| 4 rs7674500   | 120303593 T | 0.2391 | 1.02E-09 | chr:4:120263688 |
| 4 rs7674544   | 120303714 G | 0.2391 | 1.02E-09 | chr:4:120263688 |
| 4 rs7674556   | 120303729 G | 0.2391 | 1.02E-09 | chr:4:120263688 |
| 4 rs7677836   | 120310638 A | 0.2391 | 1.02E-09 | chr:4:120263688 |
| 4 rs7678238   | 120310832 C | 0.2391 | 1.02E-09 | chr:4:120263688 |
| 4 rs76990001  | 120302639 T | 0.2391 | 1.02E-09 | chr:4:120263688 |
| 4 rs7699346   | 120310542 T | 0.2391 | 1.02E-09 | chr:4:120263688 |
| 4 rs78036070  | 120302802 A | 0.2391 | 1.02E-09 | chr:4:120263688 |
| 4 rs79704848  | 120309351 A | 0.2391 | 1.02E-09 | chr:4:120263688 |
| 4 rs9307473   | 120300221 T | 0.2391 | 1.02E-09 | chr:4:120263688 |
| 4 rs9307474   | 120302496 A | 0.2391 | 1.02E-09 | chr:4:120263688 |
| 4 rs9994889   | 120305056 G | 0.2391 | 1.02E-09 | chr:4:120263688 |



|               |             |        |          |                 |
|---------------|-------------|--------|----------|-----------------|
| 4 rs9996417   | 120295862 C | 0.2391 | 1.02E-09 | chr:4:120263688 |
| 4 rs9996569   | 120299004 C | 0.2391 | 1.02E-09 | chr:4:120263688 |
| 4 rs9996677   | 120299148 A | 0.2391 | 1.02E-09 | chr:4:120263688 |
| 4 rs9998953   | 120296169 C | 0.2391 | 1.02E-09 | chr:4:120263688 |
| 4 rs12499377  | 120587215 A | 0.2392 | 1.13E-09 | chr:4:120263688 |
| 4 rs4504231   | 120586891 A | 0.2392 | 1.13E-09 | chr:4:120263688 |
| 4 rs4345162   | 120312959 A | 0.2402 | 1.19E-09 | chr:4:120263688 |
| 4 rs71612601  | 120332595 T | 0.241  | 1.22E-09 | chr:4:120263688 |
| 4 rs10006877  | 120242793 T | 0.2421 | 1.29E-09 | chr:4:120263688 |
| 4 rs10012456  | 120274039 T | 0.2421 | 1.29E-09 | chr:4:120263688 |
| 4 rs10017371  | 120293776 G | 0.2421 | 1.29E-09 | chr:4:120263688 |
| 4 rs1002152   | 120273387 A | 0.2421 | 1.29E-09 | chr:4:120263688 |
| 4 rs10026436  | 120288904 A | 0.2421 | 1.29E-09 | chr:4:120263688 |
| 4 rs1022145   | 120230979 G | 0.2421 | 1.29E-09 | chr:4:120263688 |
| 4 rs11722183  | 120280597 C | 0.2421 | 1.29E-09 | chr:4:120263688 |
| 4 rs11722872  | 120233030 C | 0.2421 | 1.29E-09 | chr:4:120263688 |
| 4 rs11728730  | 120275003 C | 0.2421 | 1.29E-09 | chr:4:120263688 |
| 4 rs11729991  | 120292700 T | 0.2421 | 1.29E-09 | chr:4:120263688 |
| 4 rs12505469  | 120249585 T | 0.2421 | 1.29E-09 | chr:4:120263688 |
| 4 rs13104396  | 120285649 T | 0.2421 | 1.29E-09 | chr:4:120263688 |
| 4 rs150131449 | 120288605 G | 0.2421 | 1.29E-09 | chr:4:120263688 |
| 4 rs1546502   | 120235898 G | 0.2421 | 1.29E-09 | chr:4:120263688 |
| 4 rs1546505   | 120241224 G | 0.2421 | 1.29E-09 | chr:4:120263688 |
| 4 rs2017057   | 120257711 G | 0.2421 | 1.29E-09 | chr:4:120263688 |
| 4 rs28403131  | 120285806 T | 0.2421 | 1.29E-09 | chr:4:120263688 |
| 4 rs28633994  | 120276037 G | 0.2421 | 1.29E-09 | chr:4:120263688 |
| 4 rs6838236   | 120267229 G | 0.2421 | 1.29E-09 | chr:4:120263688 |
| 4 rs6847075   | 120286043 T | 0.2421 | 1.29E-09 | chr:4:120263688 |
| 4 rs6847248   | 120225955 G | 0.2421 | 1.29E-09 | chr:4:120263688 |
| 4 rs6848580   | 120286492 A | 0.2421 | 1.29E-09 | chr:4:120263688 |
| 4 rs72676045  | 120254663 A | 0.2421 | 1.29E-09 | chr:4:120263688 |
| 4 rs7665192   | 120247065 A | 0.2421 | 1.29E-09 | chr:4:120263688 |
| 4 rs7672493   | 120248260 A | 0.2421 | 1.29E-09 | chr:4:120263688 |
| 4 rs878373    | 120237484 T | 0.2421 | 1.29E-09 | chr:4:120263688 |
| 4 rs192039339 | 120333191 C | 0.243  | 1.33E-09 | chr:4:120263688 |
| 4 rs72918579  | 120333222 C | 0.243  | 1.33E-09 | chr:4:120263688 |
| 4 rs75199754  | 120365198 A | 0.2408 | 1.36E-09 | chr:4:120263688 |
| 4 rs200149630 | 120356941 C | 0.2425 | 1.37E-09 | chr:4:120263688 |
| 4 rs371048191 | 120246107 C | 0.2347 | 1.43E-09 | chr:4:120263688 |
| 4 rs13435162  | 120304634 A | 0.2434 | 1.44E-09 | chr:4:120263688 |
| 4 rs368938172 | 120330272 G | 0.243  | 1.44E-09 | chr:4:120263688 |
| 4 rs4368585   | 120354482 G | 0.242  | 1.45E-09 | chr:4:120263688 |
| 4 rs4309825   | 120314881 G | 0.2392 | 1.50E-09 | chr:4:120263688 |

|               |             |        |          |                 |
|---------------|-------------|--------|----------|-----------------|
| 4 rs10032151  | 120391628 T | 0.2484 | 1.58E-09 | chr:4:120263688 |
| 4 rs10032158  | 120391632 T | 0.2484 | 1.58E-09 | chr:4:120263688 |
| 4 rs370222454 | 120359691 G | 0.2485 | 1.64E-09 | chr:4:120263688 |
| 4 rs6857105   | 120222298 G | 0.2445 | 1.66E-09 | chr:4:120263688 |
| 4 rs10020034  | 120294331 G | 0.2457 | 1.69E-09 | chr:4:120263688 |
| 4 rs3955380   | 120334410 A | 0.2447 | 1.70E-09 | chr:4:120263688 |
| 4 rs11098513  | 120316075 G | 0.2498 | 1.72E-09 | chr:4:120263688 |
| 4 rs71610282  | 120329093 C | 0.2448 | 1.74E-09 | chr:4:120263688 |
| 4 rs71612597  | 120331845 C | 0.2448 | 1.75E-09 | chr:4:120263688 |
| 4 rs28753180  | 120405367 T | 0.2492 | 1.81E-09 | chr:4:120263688 |
| 4 rs28789446  | 120405366 C | 0.2492 | 1.81E-09 | chr:4:120263688 |
| 4 rs4511986   | 120354674 C | 0.2381 | 1.84E-09 | chr:4:120263688 |
| 4 rs531826432 | 120327073 T | 0.2417 | 1.84E-09 | chr:4:120263688 |
| 4 rs28571649  | 120388867 A | 0.2479 | 2.05E-09 | chr:4:120263688 |
| 4 rs11735878  | 120290177 C | 0.2469 | 2.06E-09 | chr:4:120263688 |
| 4 rs72489565  | 120326819 C | 0.2512 | 2.08E-09 | chr:4:120263688 |
| 4 rs28653183  | 120372276 G | 0.2472 | 2.11E-09 | chr:4:120263688 |
| 4 rs7664458   | 120371967 G | 0.2472 | 2.11E-09 | chr:4:120263688 |
| 4 rs10026736  | 120384322 C | 0.2464 | 2.11E-09 | chr:4:120263688 |
| 4 rs7655048   | 120328284 A | 0.2484 | 2.20E-09 | chr:4:120263688 |
| 4 rs4001207   | 120331782 C | 0.2482 | 2.30E-09 | chr:4:120263688 |
| 4 rs6849889   | 120186348 C | 0.2563 | 2.34E-09 | chr:4:120263688 |
| 4 rs4833624   | 120585497 T | 0.2503 | 2.34E-09 | chr:4:120263688 |
| 4 rs7658368   | 120310922 T | 0.2488 | 2.36E-09 | chr:4:120263688 |
| 4 rs115044484 | 120326887 G | 0.2488 | 2.37E-09 | chr:4:120263688 |
| 4 rs140750089 | 120330539 A | 0.2488 | 2.37E-09 | chr:4:120263688 |
| 4 rs142609610 | 120327032 A | 0.2488 | 2.37E-09 | chr:4:120263688 |
| 4 rs7654700   | 120328125 A | 0.2488 | 2.37E-09 | chr:4:120263688 |
| 4 rs7654762   | 120328377 C | 0.2488 | 2.37E-09 | chr:4:120263688 |
| 4 rs7655177   | 120328622 G | 0.2488 | 2.37E-09 | chr:4:120263688 |
| 4 rs7655723   | 120328666 A | 0.2488 | 2.37E-09 | chr:4:120263688 |
| 4 rs7679468   | 120328333 C | 0.2488 | 2.37E-09 | chr:4:120263688 |
| 4 rs11098516  | 120317978 C | 0.2494 | 2.37E-09 | chr:4:120263688 |
| 4 rs12504149  | 120318577 A | 0.2494 | 2.37E-09 | chr:4:120263688 |
| 4 rs12508173  | 120318526 C | 0.2494 | 2.37E-09 | chr:4:120263688 |
| 4 rs12511625  | 120318135 G | 0.2494 | 2.37E-09 | chr:4:120263688 |
| 4 rs13116768  | 120318254 C | 0.2494 | 2.37E-09 | chr:4:120263688 |
| 4 rs71612602  | 120332781 A | 0.2496 | 2.39E-09 | chr:4:120263688 |
| 4 rs10518331  | 120323595 T | 0.2496 | 2.45E-09 | chr:4:120263688 |
| 4 rs10016944  | 120320894 A | 0.2499 | 2.47E-09 | chr:4:120263688 |
| 4 rs7695996   | 120322033 T | 0.2499 | 2.47E-09 | chr:4:120263688 |
| 4 rs7696465   | 120322114 A | 0.2499 | 2.47E-09 | chr:4:120263688 |
| 4 rs7696649   | 120322177 A | 0.2499 | 2.47E-09 | chr:4:120263688 |

|               |             |        |          |                 |
|---------------|-------------|--------|----------|-----------------|
| 4 rs7696857   | 120322321 A | 0.2499 | 2.47E-09 | chr:4:120263688 |
| 4 rs7696875   | 120322358 T | 0.2499 | 2.47E-09 | chr:4:120263688 |
| 4 rs9995234   | 120321827 G | 0.2499 | 2.47E-09 | chr:4:120263688 |
| 4 rs7673476   | 120248683 A | 0.3048 | 2.51E-09 | chr:4:120263688 |
| 4 rs56386062  | 120155135 C | 0.2541 | 2.63E-09 | chr:4:120263688 |
| 4 rs28495013  | 120375831 C | 0.2503 | 2.64E-09 | chr:4:120263688 |
| 4 rs73842633  | 120375464 A | 0.2503 | 2.64E-09 | chr:4:120263688 |
| 4 rs75396180  | 120375727 A | 0.2503 | 2.64E-09 | chr:4:120263688 |
| 4 rs76837541  | 120375428 G | 0.2503 | 2.64E-09 | chr:4:120263688 |
| 4 rs201664317 | 120330379 C | 0.252  | 2.72E-09 | chr:4:120263688 |
| 4 rs186992684 | 120336473 T | 0.2989 | 2.84E-09 | chr:4:120263688 |
| 4 rs4001211   | 120331544 G | 0.2394 | 2.89E-09 | chr:4:120263688 |
| 4 rs7654984   | 120328520 G | 0.2514 | 2.97E-09 | chr:4:120263688 |
| 4 rs10006525  | 120408931 G | 0.2517 | 3.01E-09 | chr:4:120263688 |
| 4 rs10006706  | 120409152 C | 0.2517 | 3.01E-09 | chr:4:120263688 |
| 4 rs10006793  | 120390791 G | 0.2517 | 3.01E-09 | chr:4:120263688 |
| 4 rs10008459  | 120394231 C | 0.2517 | 3.01E-09 | chr:4:120263688 |
| 4 rs10009450  | 120391258 G | 0.2517 | 3.01E-09 | chr:4:120263688 |
| 4 rs10017389  | 120381412 A | 0.2517 | 3.01E-09 | chr:4:120263688 |
| 4 rs10018726  | 120394010 G | 0.2517 | 3.01E-09 | chr:4:120263688 |
| 4 rs10019406  | 120364619 G | 0.2517 | 3.01E-09 | chr:4:120263688 |
| 4 rs10019522  | 120364728 G | 0.2517 | 3.01E-09 | chr:4:120263688 |
| 4 rs10020027  | 120381879 C | 0.2517 | 3.01E-09 | chr:4:120263688 |
| 4 rs10023569  | 120323316 T | 0.2517 | 3.01E-09 | chr:4:120263688 |
| 4 rs10026493  | 120384194 G | 0.2517 | 3.01E-09 | chr:4:120263688 |
| 4 rs10026516  | 120384253 A | 0.2517 | 3.01E-09 | chr:4:120263688 |
| 4 rs10026748  | 120384357 A | 0.2517 | 3.01E-09 | chr:4:120263688 |
| 4 rs10026952  | 120384564 A | 0.2517 | 3.01E-09 | chr:4:120263688 |
| 4 rs10031483  | 120422636 C | 0.2517 | 3.01E-09 | chr:4:120263688 |
| 4 rs10031665  | 120422852 C | 0.2517 | 3.01E-09 | chr:4:120263688 |
| 4 rs10034623  | 120397829 A | 0.2517 | 3.01E-09 | chr:4:120263688 |
| 4 rs10518328  | 120401779 A | 0.2517 | 3.01E-09 | chr:4:120263688 |
| 4 rs11098525  | 120390152 A | 0.2517 | 3.01E-09 | chr:4:120263688 |
| 4 rs11098526  | 120390359 T | 0.2517 | 3.01E-09 | chr:4:120263688 |
| 4 rs11098527  | 120399906 G | 0.2517 | 3.01E-09 | chr:4:120263688 |
| 4 rs11098530  | 120413154 T | 0.2517 | 3.01E-09 | chr:4:120263688 |
| 4 rs114860385 | 120355584 C | 0.2517 | 3.01E-09 | chr:4:120263688 |
| 4 rs116952757 | 120362969 C | 0.2517 | 3.01E-09 | chr:4:120263688 |
| 4 rs11729521  | 120416788 C | 0.2517 | 3.01E-09 | chr:4:120263688 |
| 4 rs11734241  | 120416872 G | 0.2517 | 3.01E-09 | chr:4:120263688 |
| 4 rs11934314  | 120376540 A | 0.2517 | 3.01E-09 | chr:4:120263688 |
| 4 rs11934940  | 120389369 G | 0.2517 | 3.01E-09 | chr:4:120263688 |
| 4 rs11935596  | 120412457 C | 0.2517 | 3.01E-09 | chr:4:120263688 |

|               |             |        |          |                 |
|---------------|-------------|--------|----------|-----------------|
| 4 rs11940028  | 120411907 C | 0.2517 | 3.01E-09 | chr:4:120263688 |
| 4 rs11941899  | 120382758 A | 0.2517 | 3.01E-09 | chr:4:120263688 |
| 4 rs11943877  | 120389047 T | 0.2517 | 3.01E-09 | chr:4:120263688 |
| 4 rs12499324  | 120393786 T | 0.2517 | 3.01E-09 | chr:4:120263688 |
| 4 rs12502909  | 120377529 T | 0.2517 | 3.01E-09 | chr:4:120263688 |
| 4 rs12505878  | 120385485 A | 0.2517 | 3.01E-09 | chr:4:120263688 |
| 4 rs12505953  | 120385681 A | 0.2517 | 3.01E-09 | chr:4:120263688 |
| 4 rs12507964  | 120413061 A | 0.2517 | 3.01E-09 | chr:4:120263688 |
| 4 rs12508504  | 120410607 C | 0.2517 | 3.01E-09 | chr:4:120263688 |
| 4 rs12510138  | 120423935 C | 0.2517 | 3.01E-09 | chr:4:120263688 |
| 4 rs13107475  | 120393011 T | 0.2517 | 3.01E-09 | chr:4:120263688 |
| 4 rs13133522  | 120324424 T | 0.2517 | 3.01E-09 | chr:4:120263688 |
| 4 rs13145352  | 120409963 C | 0.2517 | 3.01E-09 | chr:4:120263688 |
| 4 rs139379776 | 120332234 A | 0.2517 | 3.01E-09 | chr:4:120263688 |
| 4 rs1480931   | 120395809 A | 0.2517 | 3.01E-09 | chr:4:120263688 |
| 4 rs148358770 | 120382262 C | 0.2517 | 3.01E-09 | chr:4:120263688 |
| 4 rs149185281 | 120369277 A | 0.2517 | 3.01E-09 | chr:4:120263688 |
| 4 rs150657109 | 120377707 T | 0.2517 | 3.01E-09 | chr:4:120263688 |
| 4 rs17005535  | 120411562 T | 0.2517 | 3.01E-09 | chr:4:120263688 |
| 4 rs17006190  | 120418838 G | 0.2517 | 3.01E-09 | chr:4:120263688 |
| 4 rs17009122  | 120362403 A | 0.2517 | 3.01E-09 | chr:4:120263688 |
| 4 rs17046116  | 120387259 A | 0.2517 | 3.01E-09 | chr:4:120263688 |
| 4 rs17046118  | 120387496 G | 0.2517 | 3.01E-09 | chr:4:120263688 |
| 4 rs1809406   | 120377122 A | 0.2517 | 3.01E-09 | chr:4:120263688 |
| 4 rs185466280 | 120377740 T | 0.2517 | 3.01E-09 | chr:4:120263688 |
| 4 rs200822665 | 120357250 A | 0.2517 | 3.01E-09 | chr:4:120263688 |
| 4 rs201742833 | 120356668 T | 0.2517 | 3.01E-09 | chr:4:120263688 |
| 4 rs202150896 | 120367650 T | 0.2517 | 3.01E-09 | chr:4:120263688 |
| 4 rs2127820   | 120394534 A | 0.2517 | 3.01E-09 | chr:4:120263688 |
| 4 rs2127821   | 120394535 C | 0.2517 | 3.01E-09 | chr:4:120263688 |
| 4 rs2306455   | 120421969 A | 0.2517 | 3.01E-09 | chr:4:120263688 |
| 4 rs2389803   | 120393511 A | 0.2517 | 3.01E-09 | chr:4:120263688 |
| 4 rs2389809   | 120377399 C | 0.2517 | 3.01E-09 | chr:4:120263688 |
| 4 rs28394590  | 120373738 G | 0.2517 | 3.01E-09 | chr:4:120263688 |
| 4 rs28408407  | 120376030 G | 0.2517 | 3.01E-09 | chr:4:120263688 |
| 4 rs28441656  | 120376115 G | 0.2517 | 3.01E-09 | chr:4:120263688 |
| 4 rs28444327  | 120387946 G | 0.2517 | 3.01E-09 | chr:4:120263688 |
| 4 rs28461559  | 120387932 A | 0.2517 | 3.01E-09 | chr:4:120263688 |
| 4 rs28479042  | 120386876 C | 0.2517 | 3.01E-09 | chr:4:120263688 |
| 4 rs28499576  | 120386677 A | 0.2517 | 3.01E-09 | chr:4:120263688 |
| 4 rs28529639  | 120373104 T | 0.2517 | 3.01E-09 | chr:4:120263688 |
| 4 rs28567426  | 120373354 G | 0.2517 | 3.01E-09 | chr:4:120263688 |
| 4 rs28571712  | 120375980 A | 0.2517 | 3.01E-09 | chr:4:120263688 |

|               |             |        |          |                 |
|---------------|-------------|--------|----------|-----------------|
| 4 rs28587142  | 120386753 C | 0.2517 | 3.01E-09 | chr:4:120263688 |
| 4 rs28587175  | 120373172 C | 0.2517 | 3.01E-09 | chr:4:120263688 |
| 4 rs28626372  | 120373262 T | 0.2517 | 3.01E-09 | chr:4:120263688 |
| 4 rs28632018  | 120386730 C | 0.2517 | 3.01E-09 | chr:4:120263688 |
| 4 rs28655325  | 120372999 G | 0.2517 | 3.01E-09 | chr:4:120263688 |
| 4 rs28665282  | 120384186 T | 0.2517 | 3.01E-09 | chr:4:120263688 |
| 4 rs28685688  | 120420334 C | 0.2517 | 3.01E-09 | chr:4:120263688 |
| 4 rs28714318  | 120375830 T | 0.2517 | 3.01E-09 | chr:4:120263688 |
| 4 rs28845498  | 120405186 A | 0.2517 | 3.01E-09 | chr:4:120263688 |
| 4 rs2892848   | 120381341 T | 0.2517 | 3.01E-09 | chr:4:120263688 |
| 4 rs34004415  | 120381140 A | 0.2517 | 3.01E-09 | chr:4:120263688 |
| 4 rs34237553  | 120325273 C | 0.2517 | 3.01E-09 | chr:4:120263688 |
| 4 rs34378623  | 120368744 T | 0.2517 | 3.01E-09 | chr:4:120263688 |
| 4 rs34566984  | 120361270 A | 0.2517 | 3.01E-09 | chr:4:120263688 |
| 4 rs34792640  | 120368627 A | 0.2517 | 3.01E-09 | chr:4:120263688 |
| 4 rs34858317  | 120387110 C | 0.2517 | 3.01E-09 | chr:4:120263688 |
| 4 rs34858405  | 120381081 A | 0.2517 | 3.01E-09 | chr:4:120263688 |
| 4 rs34913743  | 120324918 G | 0.2517 | 3.01E-09 | chr:4:120263688 |
| 4 rs35063680  | 120387102 C | 0.2517 | 3.01E-09 | chr:4:120263688 |
| 4 rs35091806  | 120325529 A | 0.2517 | 3.01E-09 | chr:4:120263688 |
| 4 rs35111011  | 120366526 T | 0.2517 | 3.01E-09 | chr:4:120263688 |
| 4 rs35265692  | 120325135 C | 0.2517 | 3.01E-09 | chr:4:120263688 |
| 4 rs35494005  | 120361142 C | 0.2517 | 3.01E-09 | chr:4:120263688 |
| 4 rs3733519   | 120423448 G | 0.2517 | 3.01E-09 | chr:4:120263688 |
| 4 rs3733520   | 120423480 G | 0.2517 | 3.01E-09 | chr:4:120263688 |
| 4 rs3733523   | 120423719 T | 0.2517 | 3.01E-09 | chr:4:120263688 |
| 4 rs3733524   | 120423729 C | 0.2517 | 3.01E-09 | chr:4:120263688 |
| 4 rs3890049   | 120326283 A | 0.2517 | 3.01E-09 | chr:4:120263688 |
| 4 rs4001185   | 120376381 C | 0.2517 | 3.01E-09 | chr:4:120263688 |
| 4 rs4001190   | 120377619 A | 0.2517 | 3.01E-09 | chr:4:120263688 |
| 4 rs4001198   | 120325264 T | 0.2517 | 3.01E-09 | chr:4:120263688 |
| 4 rs4001305   | 120359236 T | 0.2517 | 3.01E-09 | chr:4:120263688 |
| 4 rs4079144   | 120325432 T | 0.2517 | 3.01E-09 | chr:4:120263688 |
| 4 rs4577559   | 120404043 G | 0.2517 | 3.01E-09 | chr:4:120263688 |
| 4 rs532415426 | 120359632 A | 0.2517 | 3.01E-09 | chr:4:120263688 |
| 4 rs545772518 | 120359643 G | 0.2517 | 3.01E-09 | chr:4:120263688 |
| 4 rs559457335 | 120359644 G | 0.2517 | 3.01E-09 | chr:4:120263688 |
| 4 rs56270433  | 120406030 T | 0.2517 | 3.01E-09 | chr:4:120263688 |
| 4 rs563816604 | 120359627 G | 0.2517 | 3.01E-09 | chr:4:120263688 |
| 4 rs59182778  | 120374798 C | 0.2517 | 3.01E-09 | chr:4:120263688 |
| 4 rs67265404  | 120359270 T | 0.2517 | 3.01E-09 | chr:4:120263688 |
| 4 rs6820376   | 120324476 G | 0.2517 | 3.01E-09 | chr:4:120263688 |
| 4 rs6822679   | 120402702 C | 0.2517 | 3.01E-09 | chr:4:120263688 |

|              |             |        |          |                 |
|--------------|-------------|--------|----------|-----------------|
| 4 rs6834796  | 120414693 C | 0.2517 | 3.01E-09 | chr:4:120263688 |
| 4 rs6837828  | 120392084 T | 0.2517 | 3.01E-09 | chr:4:120263688 |
| 4 rs6838814  | 120392443 A | 0.2517 | 3.01E-09 | chr:4:120263688 |
| 4 rs6842762  | 120398236 T | 0.2517 | 3.01E-09 | chr:4:120263688 |
| 4 rs6845714  | 120326138 T | 0.2517 | 3.01E-09 | chr:4:120263688 |
| 4 rs6846442  | 120326323 A | 0.2517 | 3.01E-09 | chr:4:120263688 |
| 4 rs6846620  | 120326404 A | 0.2517 | 3.01E-09 | chr:4:120263688 |
| 4 rs6848389  | 120402622 C | 0.2517 | 3.01E-09 | chr:4:120263688 |
| 4 rs6849171  | 120409549 A | 0.2517 | 3.01E-09 | chr:4:120263688 |
| 4 rs6849561  | 120409694 C | 0.2517 | 3.01E-09 | chr:4:120263688 |
| 4 rs71610279 | 120326643 C | 0.2517 | 3.01E-09 | chr:4:120263688 |
| 4 rs71610280 | 120326648 G | 0.2517 | 3.01E-09 | chr:4:120263688 |
| 4 rs71612595 | 120331428 T | 0.2517 | 3.01E-09 | chr:4:120263688 |
| 4 rs71612596 | 120331743 A | 0.2517 | 3.01E-09 | chr:4:120263688 |
| 4 rs71614422 | 120359340 A | 0.2517 | 3.01E-09 | chr:4:120263688 |
| 4 rs71614434 | 120368975 T | 0.2517 | 3.01E-09 | chr:4:120263688 |
| 4 rs71614437 | 120370156 C | 0.2517 | 3.01E-09 | chr:4:120263688 |
| 4 rs71614438 | 120371252 A | 0.2517 | 3.01E-09 | chr:4:120263688 |
| 4 rs71614442 | 120379346 T | 0.2517 | 3.01E-09 | chr:4:120263688 |
| 4 rs71614443 | 120379388 C | 0.2517 | 3.01E-09 | chr:4:120263688 |
| 4 rs71614444 | 120379436 G | 0.2517 | 3.01E-09 | chr:4:120263688 |
| 4 rs71614448 | 120387026 A | 0.2517 | 3.01E-09 | chr:4:120263688 |
| 4 rs71614449 | 120387055 T | 0.2517 | 3.01E-09 | chr:4:120263688 |
| 4 rs71629403 | 120372567 T | 0.2517 | 3.01E-09 | chr:4:120263688 |
| 4 rs72918577 | 120326701 A | 0.2517 | 3.01E-09 | chr:4:120263688 |
| 4 rs72918584 | 120362445 C | 0.2517 | 3.01E-09 | chr:4:120263688 |
| 4 rs7356491  | 120381974 T | 0.2517 | 3.01E-09 | chr:4:120263688 |
| 4 rs7436506  | 120393769 C | 0.2517 | 3.01E-09 | chr:4:120263688 |
| 4 rs74602693 | 120377647 T | 0.2517 | 3.01E-09 | chr:4:120263688 |
| 4 rs75122014 | 120362426 C | 0.2517 | 3.01E-09 | chr:4:120263688 |
| 4 rs75690486 | 120359788 A | 0.2517 | 3.01E-09 | chr:4:120263688 |
| 4 rs76525361 | 120359608 T | 0.2517 | 3.01E-09 | chr:4:120263688 |
| 4 rs7654529  | 120388230 A | 0.2517 | 3.01E-09 | chr:4:120263688 |
| 4 rs7654546  | 120388255 A | 0.2517 | 3.01E-09 | chr:4:120263688 |
| 4 rs7654587  | 120388406 T | 0.2517 | 3.01E-09 | chr:4:120263688 |
| 4 rs7656252  | 120404268 C | 0.2517 | 3.01E-09 | chr:4:120263688 |
| 4 rs76568951 | 120355570 C | 0.2517 | 3.01E-09 | chr:4:120263688 |
| 4 rs7659336  | 120385341 C | 0.2517 | 3.01E-09 | chr:4:120263688 |
| 4 rs7659501  | 120371552 T | 0.2517 | 3.01E-09 | chr:4:120263688 |
| 4 rs7659551  | 120371729 T | 0.2517 | 3.01E-09 | chr:4:120263688 |
| 4 rs76651228 | 120359559 G | 0.2517 | 3.01E-09 | chr:4:120263688 |
| 4 rs7681214  | 120385320 A | 0.2517 | 3.01E-09 | chr:4:120263688 |
| 4 rs7681544  | 120411255 C | 0.2517 | 3.01E-09 | chr:4:120263688 |

|               |             |        |          |                 |
|---------------|-------------|--------|----------|-----------------|
| 4 rs7681978   | 120383775 C | 0.2517 | 3.01E-09 | chr:4:120263688 |
| 4 rs7687843   | 120421211 T | 0.2517 | 3.01E-09 | chr:4:120263688 |
| 4 rs7688613   | 120384803 C | 0.2517 | 3.01E-09 | chr:4:120263688 |
| 4 rs77299866  | 120326716 T | 0.2517 | 3.01E-09 | chr:4:120263688 |
| 4 rs77934861  | 120324707 C | 0.2517 | 3.01E-09 | chr:4:120263688 |
| 4 rs79244813  | 120354847 C | 0.2517 | 3.01E-09 | chr:4:120263688 |
| 4 rs79446934  | 120326713 C | 0.2517 | 3.01E-09 | chr:4:120263688 |
| 4 rs79870274  | 120382190 T | 0.2517 | 3.01E-09 | chr:4:120263688 |
| 4 rs9683604   | 120363592 T | 0.2517 | 3.01E-09 | chr:4:120263688 |
| 4 rs9683609   | 120363692 G | 0.2517 | 3.01E-09 | chr:4:120263688 |
| 4 rs9684938   | 120363595 G | 0.2517 | 3.01E-09 | chr:4:120263688 |
| 4 rs9685777   | 120365965 A | 0.2517 | 3.01E-09 | chr:4:120263688 |
| 4 rs9685784   | 120366008 T | 0.2517 | 3.01E-09 | chr:4:120263688 |
| 4 rs9759478   | 120367998 A | 0.2517 | 3.01E-09 | chr:4:120263688 |
| 4 rs9760442   | 120367951 G | 0.2517 | 3.01E-09 | chr:4:120263688 |
| 4 rs9993199   | 120392873 A | 0.2517 | 3.01E-09 | chr:4:120263688 |
| 4 rs9994730   | 120381564 C | 0.2517 | 3.01E-09 | chr:4:120263688 |
| 4 rs9997340   | 120364809 C | 0.2517 | 3.01E-09 | chr:4:120263688 |
| 4 rs9998174   | 120366312 G | 0.2517 | 3.01E-09 | chr:4:120263688 |
| 4 rs9998585   | 120396802 A | 0.2517 | 3.01E-09 | chr:4:120263688 |
| 4 rs7654611   | 120328304 G | 0.2523 | 3.02E-09 | chr:4:120263688 |
| 4 rs9995244   | 120321858 G | 0.249  | 3.15E-09 | chr:4:120263688 |
| 4 rs71614435  | 120369711 A | 0.254  | 3.23E-09 | chr:4:120263688 |
| 4 rs13128602  | 120459366 G | 0.2469 | 3.26E-09 | chr:4:120263688 |
| 4 rs7674713   | 120322257 C | 0.258  | 3.30E-09 | chr:4:120263688 |
| 4 rs28549914  | 120322781 A | 0.2539 | 3.31E-09 | chr:4:120263688 |
| 4 rs58601355  | 120186367 C | 0.2615 | 3.35E-09 | chr:4:120263688 |
| 4 rs201087782 | 120327650 G | 0.2541 | 3.38E-09 | chr:4:120263688 |
| 4 rs79057525  | 120375389 G | 0.2532 | 3.40E-09 | chr:4:120263688 |
| 4 rs80259299  | 120336497 G | 0.1888 | 3.42E-09 | chr:4:120263688 |
| 4 rs35239065  | 120325130 C | 0.253  | 3.46E-09 | chr:4:120263688 |
| 4 rs66506550  | 120371445 A | 0.2531 | 3.47E-09 | chr:4:120263688 |
| 4 rs3822190   | 120428098 A | 0.2452 | 3.54E-09 | chr:4:120263688 |
| 4 rs3822191   | 120428101 T | 0.2452 | 3.54E-09 | chr:4:120263688 |
| 4 rs35165976  | 120325630 A | 0.2534 | 3.60E-09 | chr:4:120263688 |
| 4 rs34147052  | 120361591 C | 0.2533 | 3.65E-09 | chr:4:120263688 |
| 4 rs34965784  | 120361586 C | 0.2533 | 3.65E-09 | chr:4:120263688 |
| 4 rs74772011  | 120332334 C | 0.2535 | 3.68E-09 | chr:4:120263688 |
| 4 rs725449    | 120656892 G | 0.2956 | 3.73E-09 | chr:4:120263688 |
| 4 rs58416902  | 120374639 G | 0.2547 | 3.77E-09 | chr:4:120263688 |
| 4 rs10017335  | 120381523 G | 0.2542 | 3.84E-09 | chr:4:120263688 |
| 4 rs9994810   | 120381590 G | 0.2549 | 3.90E-09 | chr:4:120263688 |
| 4 rs10022262  | 120175152 G | 0.259  | 3.91E-09 | chr:4:120263688 |

|               |             |        |          |                 |
|---------------|-------------|--------|----------|-----------------|
| 4 rs10029750  | 120172543 G | 0.259  | 3.91E-09 | chr:4:120263688 |
| 4 rs1011054   | 120202387 A | 0.259  | 3.91E-09 | chr:4:120263688 |
| 4 rs10213342  | 120175237 G | 0.259  | 3.91E-09 | chr:4:120263688 |
| 4 rs11098499  | 120187611 T | 0.259  | 3.91E-09 | chr:4:120263688 |
| 4 rs11098500  | 120219239 A | 0.259  | 3.91E-09 | chr:4:120263688 |
| 4 rs11726229  | 120211580 T | 0.259  | 3.91E-09 | chr:4:120263688 |
| 4 rs11729897  | 120174453 T | 0.259  | 3.91E-09 | chr:4:120263688 |
| 4 rs12499598  | 120189303 C | 0.259  | 3.91E-09 | chr:4:120263688 |
| 4 rs12506395  | 120185094 T | 0.259  | 3.91E-09 | chr:4:120263688 |
| 4 rs12512517  | 120173245 G | 0.259  | 3.91E-09 | chr:4:120263688 |
| 4 rs13116504  | 120209412 C | 0.259  | 3.91E-09 | chr:4:120263688 |
| 4 rs13133044  | 120201252 C | 0.259  | 3.91E-09 | chr:4:120263688 |
| 4 rs13435802  | 120177960 T | 0.259  | 3.91E-09 | chr:4:120263688 |
| 4 rs199816242 | 120199351 T | 0.259  | 3.91E-09 | chr:4:120263688 |
| 4 rs28374891  | 120183550 A | 0.259  | 3.91E-09 | chr:4:120263688 |
| 4 rs28419773  | 120211061 C | 0.259  | 3.91E-09 | chr:4:120263688 |
| 4 rs28555550  | 120211040 G | 0.259  | 3.91E-09 | chr:4:120263688 |
| 4 rs34585914  | 120189194 T | 0.259  | 3.91E-09 | chr:4:120263688 |
| 4 rs34630083  | 120174569 G | 0.259  | 3.91E-09 | chr:4:120263688 |
| 4 rs35643470  | 120184948 C | 0.259  | 3.91E-09 | chr:4:120263688 |
| 4 rs3749591   | 120214030 G | 0.259  | 3.91E-09 | chr:4:120263688 |
| 4 rs6837898   | 120179154 T | 0.259  | 3.91E-09 | chr:4:120263688 |
| 4 rs7659194   | 120207147 G | 0.259  | 3.91E-09 | chr:4:120263688 |
| 4 rs1546504   | 120241179 T | 0.2545 | 3.91E-09 | chr:4:120263688 |
| 4 rs34954036  | 120366927 A | 0.2553 | 3.91E-09 | chr:4:120263688 |
| 4 rs3775841   | 120425777 C | 0.2487 | 3.95E-09 | chr:4:120263688 |
| 4 rs71610281  | 120328001 C | 0.2559 | 4.06E-09 | chr:4:120263688 |
| 4 rs187271184 | 120330448 A | 0.2482 | 4.16E-09 | chr:4:120263688 |
| 4 rs190803766 | 120330449 A | 0.2482 | 4.16E-09 | chr:4:120263688 |
| 4 rs9995045   | 120321636 T | 0.252  | 4.22E-09 | chr:4:120263688 |
| 4 rs71629404  | 120372724 G | 0.2564 | 4.26E-09 | chr:4:120263688 |
| 4 rs185413498 | 120327707 T | 0.2563 | 4.26E-09 | chr:4:120263688 |
| 4 rs2583604   | 120660715 T | 0.2904 | 4.36E-09 | chr:4:120263688 |
| 4 rs2583605   | 120659992 G | 0.2904 | 4.36E-09 | chr:4:120263688 |
| 4 rs13122709  | 120555356 A | 0.252  | 4.47E-09 | chr:4:120263688 |
| 4 rs7695292   | 120558446 G | 0.252  | 4.47E-09 | chr:4:120263688 |
| 4 rs200207680 | 120338383 T | 0.2569 | 4.66E-09 | chr:4:120263688 |
| 4 rs2389802   | 120325732 A | 0.2611 | 4.74E-09 | chr:4:120263688 |
| 4 rs10010696  | 120164303 C | 0.2617 | 4.76E-09 | chr:4:120263688 |
| 4 rs11734519  | 120171071 G | 0.2617 | 4.76E-09 | chr:4:120263688 |
| 4 rs11931312  | 120159023 C | 0.2617 | 4.76E-09 | chr:4:120263688 |
| 4 rs11944880  | 120159334 T | 0.2617 | 4.76E-09 | chr:4:120263688 |
| 4 rs1397608   | 120161744 G | 0.2617 | 4.76E-09 | chr:4:120263688 |



|              |             |        |          |                 |
|--------------|-------------|--------|----------|-----------------|
| 4 rs1511015  | 120170473 C | 0.2617 | 4.76E-09 | chr:4:120263688 |
| 4 rs1511018  | 120161580 T | 0.2617 | 4.76E-09 | chr:4:120263688 |
| 4 rs1511019  | 120166007 G | 0.2617 | 4.76E-09 | chr:4:120263688 |
| 4 rs1551     | 120158500 G | 0.2617 | 4.76E-09 | chr:4:120263688 |
| 4 rs34616304 | 120169435 T | 0.2617 | 4.76E-09 | chr:4:120263688 |
| 4 rs35197422 | 120169314 G | 0.2617 | 4.76E-09 | chr:4:120263688 |
| 4 rs35434465 | 120169378 G | 0.2617 | 4.76E-09 | chr:4:120263688 |
| 4 rs6815725  | 120158410 A | 0.2617 | 4.76E-09 | chr:4:120263688 |
| 4 rs7684942  | 120162201 T | 0.2617 | 4.76E-09 | chr:4:120263688 |
| 4 rs7685268  | 120162188 A | 0.2617 | 4.76E-09 | chr:4:120263688 |
| 4 rs2714973  | 120662172 G | 0.2911 | 5.03E-09 | chr:4:120263688 |
| 4 rs10004484 | 120442428 T | 0.251  | 5.13E-09 | chr:4:120263688 |
| 4 rs10008791 | 120431469 C | 0.251  | 5.13E-09 | chr:4:120263688 |
| 4 rs10009626 | 120470005 C | 0.251  | 5.13E-09 | chr:4:120263688 |
| 4 rs10013305 | 120450424 A | 0.251  | 5.13E-09 | chr:4:120263688 |
| 4 rs10018280 | 120478139 G | 0.251  | 5.13E-09 | chr:4:120263688 |
| 4 rs10019674 | 120443489 C | 0.251  | 5.13E-09 | chr:4:120263688 |
| 4 rs10030660 | 120436704 A | 0.251  | 5.13E-09 | chr:4:120263688 |
| 4 rs10034450 | 120455649 G | 0.251  | 5.13E-09 | chr:4:120263688 |
| 4 rs1010739  | 120463471 T | 0.251  | 5.13E-09 | chr:4:120263688 |
| 4 rs1010740  | 120463409 C | 0.251  | 5.13E-09 | chr:4:120263688 |
| 4 rs11098531 | 120465001 A | 0.251  | 5.13E-09 | chr:4:120263688 |
| 4 rs11098532 | 120490726 A | 0.251  | 5.13E-09 | chr:4:120263688 |
| 4 rs1155576  | 120450159 C | 0.251  | 5.13E-09 | chr:4:120263688 |
| 4 rs11723090 | 120490592 C | 0.251  | 5.13E-09 | chr:4:120263688 |
| 4 rs11731756 | 120478696 G | 0.251  | 5.13E-09 | chr:4:120263688 |
| 4 rs11736416 | 120431661 T | 0.251  | 5.13E-09 | chr:4:120263688 |
| 4 rs11737395 | 120520704 G | 0.251  | 5.13E-09 | chr:4:120263688 |
| 4 rs11933966 | 120476715 A | 0.251  | 5.13E-09 | chr:4:120263688 |
| 4 rs11947234 | 120474859 G | 0.251  | 5.13E-09 | chr:4:120263688 |
| 4 rs12498539 | 120468370 T | 0.251  | 5.13E-09 | chr:4:120263688 |
| 4 rs12498599 | 120468503 T | 0.251  | 5.13E-09 | chr:4:120263688 |
| 4 rs12505735 | 120532956 A | 0.251  | 5.13E-09 | chr:4:120263688 |
| 4 rs13134665 | 120426430 C | 0.251  | 5.13E-09 | chr:4:120263688 |
| 4 rs13136462 | 120543173 T | 0.251  | 5.13E-09 | chr:4:120263688 |
| 4 rs13140391 | 120503437 G | 0.251  | 5.13E-09 | chr:4:120263688 |
| 4 rs13140409 | 120503460 G | 0.251  | 5.13E-09 | chr:4:120263688 |
| 4 rs13149407 | 120437825 G | 0.251  | 5.13E-09 | chr:4:120263688 |
| 4 rs1383532  | 120434404 A | 0.251  | 5.13E-09 | chr:4:120263688 |
| 4 rs1383533  | 120434576 A | 0.251  | 5.13E-09 | chr:4:120263688 |
| 4 rs1480936  | 120462861 T | 0.251  | 5.13E-09 | chr:4:120263688 |
| 4 rs1480939  | 120456927 C | 0.251  | 5.13E-09 | chr:4:120263688 |
| 4 rs1480940  | 120457682 C | 0.251  | 5.13E-09 | chr:4:120263688 |

|               |             |       |          |                 |
|---------------|-------------|-------|----------|-----------------|
| 4 rs1552092   | 120488496 T | 0.251 | 5.13E-09 | chr:4:120263688 |
| 4 rs1552095   | 120460306 C | 0.251 | 5.13E-09 | chr:4:120263688 |
| 4 rs17050695  | 120489527 T | 0.251 | 5.13E-09 | chr:4:120263688 |
| 4 rs200898556 | 120500426 T | 0.251 | 5.13E-09 | chr:4:120263688 |
| 4 rs201236087 | 120474546 T | 0.251 | 5.13E-09 | chr:4:120263688 |
| 4 rs2086450   | 120496217 A | 0.251 | 5.13E-09 | chr:4:120263688 |
| 4 rs2127823   | 120485670 T | 0.251 | 5.13E-09 | chr:4:120263688 |
| 4 rs2170276   | 120485824 C | 0.251 | 5.13E-09 | chr:4:120263688 |
| 4 rs2291185   | 120434833 A | 0.251 | 5.13E-09 | chr:4:120263688 |
| 4 rs2306456   | 120472422 G | 0.251 | 5.13E-09 | chr:4:120263688 |
| 4 rs2306457   | 120472839 A | 0.251 | 5.13E-09 | chr:4:120263688 |
| 4 rs2389885   | 120533931 T | 0.251 | 5.13E-09 | chr:4:120263688 |
| 4 rs28394116  | 120524283 G | 0.251 | 5.13E-09 | chr:4:120263688 |
| 4 rs28535956  | 120536858 C | 0.251 | 5.13E-09 | chr:4:120263688 |
| 4 rs28578366  | 120536905 T | 0.251 | 5.13E-09 | chr:4:120263688 |
| 4 rs28718422  | 120466304 A | 0.251 | 5.13E-09 | chr:4:120263688 |
| 4 rs28735358  | 120482049 C | 0.251 | 5.13E-09 | chr:4:120263688 |
| 4 rs34308924  | 120481431 C | 0.251 | 5.13E-09 | chr:4:120263688 |
| 4 rs34868248  | 120442430 G | 0.251 | 5.13E-09 | chr:4:120263688 |
| 4 rs36040693  | 120477616 G | 0.251 | 5.13E-09 | chr:4:120263688 |
| 4 rs3733525   | 120447048 G | 0.251 | 5.13E-09 | chr:4:120263688 |
| 4 rs3736115   | 120488703 A | 0.251 | 5.13E-09 | chr:4:120263688 |
| 4 rs3756156   | 120524841 A | 0.251 | 5.13E-09 | chr:4:120263688 |
| 4 rs3775843   | 120427844 C | 0.251 | 5.13E-09 | chr:4:120263688 |
| 4 rs3775844   | 120428033 A | 0.251 | 5.13E-09 | chr:4:120263688 |
| 4 rs3775845   | 120432447 C | 0.251 | 5.13E-09 | chr:4:120263688 |
| 4 rs3775847   | 120447642 C | 0.251 | 5.13E-09 | chr:4:120263688 |
| 4 rs3775848   | 120447724 T | 0.251 | 5.13E-09 | chr:4:120263688 |
| 4 rs3775849   | 120450908 C | 0.251 | 5.13E-09 | chr:4:120263688 |
| 4 rs3775852   | 120454556 G | 0.251 | 5.13E-09 | chr:4:120263688 |
| 4 rs3775854   | 120471971 T | 0.251 | 5.13E-09 | chr:4:120263688 |
| 4 rs3775858   | 120486028 G | 0.251 | 5.13E-09 | chr:4:120263688 |
| 4 rs3822192   | 120445720 C | 0.251 | 5.13E-09 | chr:4:120263688 |
| 4 rs3822194   | 120471648 G | 0.251 | 5.13E-09 | chr:4:120263688 |
| 4 rs3822195   | 120471660 T | 0.251 | 5.13E-09 | chr:4:120263688 |
| 4 rs4001176   | 120500705 G | 0.251 | 5.13E-09 | chr:4:120263688 |
| 4 rs4596225   | 120496444 G | 0.251 | 5.13E-09 | chr:4:120263688 |
| 4 rs4998488   | 120500841 C | 0.251 | 5.13E-09 | chr:4:120263688 |
| 4 rs55825515  | 120486402 G | 0.251 | 5.13E-09 | chr:4:120263688 |
| 4 rs58452170  | 120459674 T | 0.251 | 5.13E-09 | chr:4:120263688 |
| 4 rs59732491  | 120489588 C | 0.251 | 5.13E-09 | chr:4:120263688 |
| 4 rs6534139   | 120449456 A | 0.251 | 5.13E-09 | chr:4:120263688 |
| 4 rs6534140   | 120455311 T | 0.251 | 5.13E-09 | chr:4:120263688 |

|               |             |        |          |                 |
|---------------|-------------|--------|----------|-----------------|
| 4 rs6534141   | 120485223 T | 0.251  | 5.13E-09 | chr:4:120263688 |
| 4 rs6829903   | 120506884 T | 0.251  | 5.13E-09 | chr:4:120263688 |
| 4 rs6833334   | 120504227 T | 0.251  | 5.13E-09 | chr:4:120263688 |
| 4 rs6835635   | 120458867 C | 0.251  | 5.13E-09 | chr:4:120263688 |
| 4 rs6847818   | 120469250 T | 0.251  | 5.13E-09 | chr:4:120263688 |
| 4 rs6853998   | 120475860 A | 0.251  | 5.13E-09 | chr:4:120263688 |
| 4 rs6858592   | 120458692 A | 0.251  | 5.13E-09 | chr:4:120263688 |
| 4 rs6858777   | 120475966 G | 0.251  | 5.13E-09 | chr:4:120263688 |
| 4 rs7657849   | 120455494 C | 0.251  | 5.13E-09 | chr:4:120263688 |
| 4 rs7658561   | 120479985 C | 0.251  | 5.13E-09 | chr:4:120263688 |
| 4 rs7664986   | 120429952 C | 0.251  | 5.13E-09 | chr:4:120263688 |
| 4 rs7669520   | 120515278 C | 0.251  | 5.13E-09 | chr:4:120263688 |
| 4 rs7678400   | 120461957 A | 0.251  | 5.13E-09 | chr:4:120263688 |
| 4 rs7680063   | 120479889 G | 0.251  | 5.13E-09 | chr:4:120263688 |
| 4 rs7680748   | 120479978 A | 0.251  | 5.13E-09 | chr:4:120263688 |
| 4 rs7688802   | 120451668 A | 0.251  | 5.13E-09 | chr:4:120263688 |
| 4 rs7695620   | 120452776 A | 0.251  | 5.13E-09 | chr:4:120263688 |
| 4 rs7699064   | 120428309 T | 0.251  | 5.13E-09 | chr:4:120263688 |
| 4 rs9884402   | 120489982 G | 0.251  | 5.13E-09 | chr:4:120263688 |
| 4 rs9995026   | 120490499 A | 0.251  | 5.13E-09 | chr:4:120263688 |
| 4 rs9997631   | 120469995 G | 0.251  | 5.13E-09 | chr:4:120263688 |
| 4 rs115227179 | 120355773 T | 0.2592 | 5.33E-09 | chr:4:120263688 |
| 4 rs12512646  | 120585733 A | 0.2603 | 5.33E-09 | chr:4:120263688 |
| 4 rs11724758  | 120239878 A | 0.3166 | 5.52E-09 | chr:4:120263688 |
| 4 rs2036858   | 120249237 C | 0.3166 | 5.52E-09 | chr:4:120263688 |
| 4 rs149826784 | 120330643 A | 0.2598 | 5.61E-09 | chr:4:120263688 |
| 4 rs13113112  | 120156040 T | 0.2637 | 5.66E-09 | chr:4:120263688 |
| 4 rs13114751  | 120156617 A | 0.2637 | 5.66E-09 | chr:4:120263688 |
| 4 rs35271032  | 120156659 T | 0.2637 | 5.66E-09 | chr:4:120263688 |
| 4 rs35916640  | 120155852 C | 0.2637 | 5.66E-09 | chr:4:120263688 |
| 4 rs4145951   | 120155817 G | 0.2637 | 5.66E-09 | chr:4:120263688 |
| 4 rs6814412   | 120170851 A | 0.2635 | 5.74E-09 | chr:4:120263688 |
| 4 rs2714966   | 120677425 C | 0.2932 | 5.81E-09 | chr:4:120263688 |
| 4 rs78709015  | 120367728 T | 0.2616 | 5.83E-09 | chr:4:120263688 |
| 4 rs12501610  | 120175763 T | 0.2642 | 6.17E-09 | chr:4:120263688 |
| 4 rs11722624  | 120673096 G | 0.2933 | 6.36E-09 | chr:4:120263688 |
| 4 rs11734863  | 120673259 A | 0.2933 | 6.36E-09 | chr:4:120263688 |
| 4 rs2252621   | 120675026 T | 0.2933 | 6.36E-09 | chr:4:120263688 |
| 4 rs2252625   | 120674899 C | 0.2933 | 6.36E-09 | chr:4:120263688 |
| 4 rs2256054   | 120669517 T | 0.2933 | 6.36E-09 | chr:4:120263688 |
| 4 rs2583596   | 120670120 T | 0.2933 | 6.36E-09 | chr:4:120263688 |
| 4 rs2583597   | 120670150 T | 0.2933 | 6.36E-09 | chr:4:120263688 |
| 4 rs2714976   | 120670555 C | 0.2933 | 6.36E-09 | chr:4:120263688 |

|               |             |        |          |                 |
|---------------|-------------|--------|----------|-----------------|
| 4 rs2714978   | 120670213 A | 0.2933 | 6.36E-09 | chr:4:120263688 |
| 4 rs2714980   | 120668765 G | 0.2933 | 6.36E-09 | chr:4:120263688 |
| 4 rs10017543  | 120321420 A | 0.2651 | 6.45E-09 | chr:4:120263688 |
| 4 rs146531121 | 120174794 A | 0.2701 | 6.65E-09 | chr:4:120263688 |
| 4 rs11098496  | 120167466 G | 0.2701 | 6.82E-09 | chr:4:120263688 |
| 4 rs4001195   | 120329676 G | 0.2617 | 6.96E-09 | chr:4:120263688 |
| 4 rs11098524  | 120390032 G | 0.2624 | 7.03E-09 | chr:4:120263688 |
| 4 rs12502423  | 120424172 C | 0.2617 | 7.04E-09 | chr:4:120263688 |
| 4 rs28374462  | 120386597 G | 0.2618 | 7.18E-09 | chr:4:120263688 |
| 4 rs28559989  | 120386627 T | 0.2618 | 7.18E-09 | chr:4:120263688 |
| 4 rs34818745  | 120257055 C | 0.2642 | 7.47E-09 | chr:4:120263688 |
| 4 rs552865294 | 120246034 A | 0.3284 | 7.69E-09 | chr:4:120263688 |
| 4 rs2714960   | 120630872 T | 0.293  | 7.69E-09 | chr:4:120263688 |
| 4 rs28634456  | 120375778 G | 0.267  | 7.77E-09 | chr:4:120263688 |
| 4 rs78332141  | 120375782 T | 0.267  | 7.77E-09 | chr:4:120263688 |
| 4 rs80242894  | 120375752 A | 0.267  | 7.77E-09 | chr:4:120263688 |
| 4 rs12502389  | 120454191 G | 0.2604 | 8.24E-09 | chr:4:120263688 |
| 4 rs10014822  | 120280143 T | 0.3229 | 8.67E-09 | chr:4:120263688 |
| 4 rs11728616  | 120440676 A | 0.2596 | 9.25E-09 | chr:4:120263688 |
| 4 rs35111518  | 120440682 G | 0.2596 | 9.25E-09 | chr:4:120263688 |
| 4 rs79026312  | 120440677 A | 0.2596 | 9.25E-09 | chr:4:120263688 |
| 4 rs2714965   | 120676814 A | 0.2905 | 9.55E-09 | chr:4:120263688 |
| 4 rs9762870   | 120367769 A | 0.2677 | 9.57E-09 | chr:4:120263688 |
| 4 rs3956463   | 120245748 A | 0.3251 | 9.65E-09 | chr:4:120263688 |
| 4 rs138401876 | 120370298 A | 0.2605 | 1.01E-08 | chr:4:120263688 |
| 4 rs78958430  | 120338339 T | 0.2671 | 1.07E-08 | chr:4:120263688 |
| 4 rs79262354  | 120338335 T | 0.2671 | 1.07E-08 | chr:4:120263688 |
| 4 rs2714970   | 120657355 C | 0.3051 | 1.14E-08 | chr:4:120263688 |
| 4 rs71595380  | 120329294 T | 0.2396 | 1.28E-08 | chr:4:120263688 |
| 4 rs10518336  | 120522934 A | 0.3178 | 1.40E-08 | chr:4:120263688 |
| 4 rs13435370  | 120334666 C | 0.2521 | 1.41E-08 | chr:4:120263688 |
| 4 rs71627788  | 120255728 G | 0.3376 | 1.43E-08 | chr:4:120263688 |
| 4 rs17005489  | 120649070 G | 0.3064 | 1.52E-08 | chr:4:120263688 |
| 4 rs2250346   | 120648078 C | 0.3064 | 1.52E-08 | chr:4:120263688 |
| 4 rs2583619   | 120652805 G | 0.3064 | 1.52E-08 | chr:4:120263688 |
| 4 rs2714961   | 120628627 T | 0.3064 | 1.52E-08 | chr:4:120263688 |
| 4 rs7437666   | 120653063 T | 0.3064 | 1.52E-08 | chr:4:120263688 |
| 4 rs201495048 | 120333126 A | 0.2461 | 1.57E-08 | chr:4:120263688 |
| 4 rs113574635 | 120279291 G | 0.2104 | 1.57E-08 | chr:4:120263688 |
| 4 rs9637625   | 120276345 G | 0.2104 | 1.57E-08 | chr:4:120263688 |
| 4 rs9637626   | 120276692 A | 0.2104 | 1.57E-08 | chr:4:120263688 |
| 4 rs199863129 | 120334013 T | 0.2729 | 1.57E-08 | chr:4:120263688 |
| 4 rs2245564   | 120625812 C | 0.3064 | 1.62E-08 | chr:4:120263688 |

|               |             |        |          |                 |
|---------------|-------------|--------|----------|-----------------|
| 4 rs2248806   | 120621423 C | 0.3064 | 1.62E-08 | chr:4:120263688 |
| 4 rs2583609   | 120623111 G | 0.3064 | 1.62E-08 | chr:4:120263688 |
| 4 rs373699192 | 120246109 A | 0.2546 | 1.68E-08 | chr:4:120263688 |
| 4 rs9683709   | 120365714 A | 0.2889 | 1.69E-08 | chr:4:120263688 |
| 4 rs13128933  | 120246249 A | 0.2971 | 1.73E-08 | chr:4:120263688 |
| 4 rs56372521  | 120374431 T | 0.26   | 1.85E-08 | chr:4:120263688 |
| 4 rs2256834   | 120663939 C | 0.2989 | 1.85E-08 | chr:4:120263688 |
| 4 rs2714985   | 120664142 A | 0.2989 | 1.85E-08 | chr:4:120263688 |
| 4 rs2389959   | 120689407 G | 0.3111 | 1.85E-08 | chr:4:120263688 |
| 4 rs2583602   | 120679347 G | 0.3111 | 1.85E-08 | chr:4:120263688 |
| 4 rs6534150   | 120685502 G | 0.3111 | 1.85E-08 | chr:4:120263688 |
| 4 rs7675857   | 120680581 T | 0.3111 | 1.85E-08 | chr:4:120263688 |
| 4 rs9997209   | 120683244 A | 0.3111 | 1.85E-08 | chr:4:120263688 |
| 4 rs6836219   | 120597941 C | 0.3176 | 2.00E-08 | chr:4:120263688 |
| 4 rs2583617   | 120644194 G | 0.3146 | 2.22E-08 | chr:4:120263688 |
| 4 rs2583608   | 120620379 T | 0.3132 | 2.26E-08 | chr:4:120263688 |
| 4 rs12504773  | 120562149 C | 0.273  | 2.26E-08 | chr:4:120263688 |
| 4 rs7680914   | 120563053 G | 0.273  | 2.26E-08 | chr:4:120263688 |
| 4 rs368648502 | 120331079 G | 0.2702 | 2.35E-08 | chr:4:120263688 |
| 4 rs17051356  | 120585308 T | 0.2735 | 2.41E-08 | chr:4:120263688 |
| 4 rs370990577 | 120327271 C | 0.2612 | 2.44E-08 | chr:4:120263688 |
| 4 rs117030010 | 120333095 C | 0.2542 | 2.59E-08 | chr:4:120263688 |
| 4 rs6822909   | 120691218 C | 0.3161 | 2.69E-08 | chr:4:120263688 |
| 4 rs4001175   | 120500667 A | 0.2725 | 2.76E-08 | chr:4:120263688 |
| 4 rs12512171  | 120662564 T | 0.3089 | 2.91E-08 | chr:4:120263688 |
| 4 rs7683474   | 120612853 C | 0.3056 | 3.10E-08 | chr:4:120263688 |
| 4 rs2715026   | 120616805 G | 0.3177 | 3.15E-08 | chr:4:120263688 |
| 4 rs13122890  | 120601731 G | 0.3052 | 3.45E-08 | chr:4:120263688 |
| 4 rs28450134  | 120376318 C | 0.2813 | 3.45E-08 | chr:4:120263688 |
| 4 rs73844769  | 120254829 C | 0.3563 | 3.58E-08 | chr:4:120263688 |
| 4 rs10022185  | 120571765 G | 0.2762 | 3.80E-08 | chr:4:120263688 |
| 4 rs12642411  | 120580525 C | 0.2762 | 3.80E-08 | chr:4:120263688 |
| 4 rs17051352  | 120581427 A | 0.2762 | 3.80E-08 | chr:4:120263688 |
| 4 rs2389882   | 120566733 C | 0.2762 | 3.80E-08 | chr:4:120263688 |
| 4 rs2389886   | 120570422 A | 0.2762 | 3.80E-08 | chr:4:120263688 |
| 4 rs2389887   | 120570644 C | 0.2762 | 3.80E-08 | chr:4:120263688 |
| 4 rs34278750  | 120571136 A | 0.2762 | 3.80E-08 | chr:4:120263688 |
| 4 rs7664440   | 120578540 G | 0.2762 | 3.80E-08 | chr:4:120263688 |
| 4 rs7671096   | 120579317 A | 0.2762 | 3.80E-08 | chr:4:120263688 |
| 4 rs1825061   | 120388902 T | 0.2792 | 3.88E-08 | chr:4:120263688 |
| 4 rs28504370  | 120388890 A | 0.2792 | 3.88E-08 | chr:4:120263688 |
| 4 rs7655035   | 120617004 T | 0.3066 | 3.95E-08 | chr:4:120263688 |
| 4 rs10001829  | 120665293 C | 0.3125 | 3.98E-08 | chr:4:120263688 |

|               |             |        |          |                 |
|---------------|-------------|--------|----------|-----------------|
| 4 rs2252565   | 120613111 C | 0.3334 | 4.32E-08 | chr:4:120263688 |
| 4 rs7693769   | 120658676 C | 0.3157 | 5.14E-08 | chr:4:120263688 |
| 4 rs72676074  | 120359841 C | 0.3062 | 5.19E-08 | chr:4:120263688 |
| 4 rs55732167  | 120141507 T | 3.862  | 5.20E-08 | chr:4:120263688 |
| 4 rs6842973   | 120694059 G | 0.3144 | 5.87E-08 | chr:4:120263688 |
| 4 rs62326352  | 120127046 C | 3.79   | 5.95E-08 | chr:4:120263688 |
| 4 rs2102541   | 120115379 G | 3.803  | 6.09E-08 | chr:4:120263688 |
| 4 rs62326348  | 120114659 G | 3.803  | 6.09E-08 | chr:4:120263688 |
| 4 rs4834762   | 120132690 T | 3.796  | 6.18E-08 | chr:4:120263688 |
| 4 rs62328369  | 120151494 A | 3.785  | 6.24E-08 | chr:4:120263688 |
| 4 rs2389903   | 120646281 G | 0.3131 | 6.26E-08 | chr:4:120263688 |
| 4 rs4337717   | 120643040 C | 0.3131 | 6.26E-08 | chr:4:120263688 |
| 4 rs181331234 | 120327890 C | 0.2831 | 6.73E-08 | chr:4:120263688 |
| 4 rs62321169  | 120591368 C | 0.3111 | 7.07E-08 | chr:4:120263688 |
| 4 rs2252708   | 120612158 A | 0.318  | 7.39E-08 | chr:4:120263688 |
| 4 rs6821717   | 120599661 T | 0.318  | 7.39E-08 | chr:4:120263688 |
| 4 rs78624933  | 120338651 C | 0.2642 | 7.43E-08 | chr:4:120263688 |
| 4 rs11937425  | 120235999 C | 3.127  | 7.78E-08 | chr:4:120263688 |
| 4 rs4094      | 120619421 G | 0.3178 | 8.25E-08 | chr:4:120263688 |
| 4 rs62326347  | 120109440 T | 3.733  | 8.26E-08 | chr:4:120263688 |
| 4 rs62326349  | 120116225 T | 3.733  | 8.26E-08 | chr:4:120263688 |
| 4 rs2389883   | 120567635 C | 0.2521 | 8.29E-08 | chr:4:120263688 |
| 4 rs12644283  | 120133549 G | 3.726  | 8.37E-08 | chr:4:120263688 |
| 4 rs72916543  | 120254961 T | 0.3686 | 8.92E-08 | chr:4:120263688 |
| 4 rs4287989   | 120700480 A | 0.3258 | 9.05E-08 | chr:4:120263688 |
| 4 rs13129661  | 120152909 G | 0.3041 | 9.10E-08 | chr:4:120263688 |
| 4 rs7678043   | 120698652 C | 0.3231 | 9.42E-08 | chr:4:120263688 |
| 4 rs12509811  | 120635685 T | 0.2636 | 9.44E-08 | chr:4:120263688 |
| 4 rs13103043  | 120665371 C | 0.3073 | 9.45E-08 | chr:4:120263688 |
| 4 rs11732403  | 120234725 G | 3.078  | 9.75E-08 | chr:4:120263688 |
| 4 rs34049297  | 120234722 C | 3.078  | 9.75E-08 | chr:4:120263688 |
| 4 rs199515440 | 120372424 T | 0.2601 | 9.85E-08 | chr:4:120263688 |
| 4 rs28663988  | 120620388 C | 0.3209 | 9.88E-08 | chr:4:120263688 |
| 4 rs10518301  | 120235125 C | 3.077  | 1.06E-07 | chr:4:120263688 |
| 4 rs11722847  | 120233121 T | 3.077  | 1.06E-07 | chr:4:120263688 |
| 4 rs13118936  | 120234402 A | 3.077  | 1.06E-07 | chr:4:120263688 |
| 4 rs4364243   | 120230860 T | 3.077  | 1.06E-07 | chr:4:120263688 |
| 4 rs9996382   | 120151012 A | 0.3591 | 1.10E-07 | chr:4:120263688 |
| 4 rs9884655   | 120700717 T | 0.3412 | 1.11E-07 | chr:4:120263688 |
| 4 rs11098493  | 120104113 G | 0.3169 | 1.16E-07 | chr:4:120263688 |
| 4 rs13139118  | 120233640 C | 3.072  | 1.20E-07 | chr:4:120263688 |
| 4 rs10434033  | 120582336 T | 0.2522 | 1.20E-07 | chr:4:120263688 |
| 4 rs113918125 | 120581639 G | 0.2522 | 1.20E-07 | chr:4:120263688 |

|               |             |        |          |                 |
|---------------|-------------|--------|----------|-----------------|
| 4 rs1962195   | 120575866 G | 0.2522 | 1.20E-07 | chr:4:120263688 |
| 4 rs2389891   | 120576177 G | 0.2522 | 1.20E-07 | chr:4:120263688 |
| 4 rs2389892   | 120577583 C | 0.2522 | 1.20E-07 | chr:4:120263688 |
| 4 rs372896807 | 120566079 A | 0.2522 | 1.20E-07 | chr:4:120263688 |
| 4 rs375123133 | 120566082 A | 0.2522 | 1.20E-07 | chr:4:120263688 |
| 4 rs56381021  | 120566077 C | 0.2522 | 1.20E-07 | chr:4:120263688 |
| 4 rs59225699  | 120582821 T | 0.2522 | 1.20E-07 | chr:4:120263688 |
| 4 rs62321166  | 120577103 A | 0.2522 | 1.20E-07 | chr:4:120263688 |
| 4 rs72924305  | 120581152 C | 0.2522 | 1.20E-07 | chr:4:120263688 |
| 4 rs72924312  | 120584019 A | 0.2522 | 1.20E-07 | chr:4:120263688 |
| 4 rs7670803   | 120579321 C | 0.2522 | 1.20E-07 | chr:4:120263688 |
| 4 rs7671191   | 120579548 C | 0.2522 | 1.20E-07 | chr:4:120263688 |
| 4 rs7684853   | 120581633 G | 0.2522 | 1.20E-07 | chr:4:120263688 |
| 4 rs9991735   | 120572128 T | 0.2522 | 1.20E-07 | chr:4:120263688 |
| 4 rs4452411   | 120700609 A | 0.3353 | 1.20E-07 | chr:4:120263688 |
| 4 rs7664591   | 120627116 C | 0.3237 | 1.21E-07 | chr:4:120263688 |
| 4 rs34209241  | 120634499 C | 0.3217 | 1.22E-07 | chr:4:120263688 |
| 4 rs4834804   | 120633428 T | 0.3217 | 1.22E-07 | chr:4:120263688 |
| 4 rs752650    | 120632387 C | 0.3217 | 1.22E-07 | chr:4:120263688 |
| 4 rs7694773   | 120652993 A | 0.3217 | 1.22E-07 | chr:4:120263688 |
| 4 rs59319494  | 120696060 G | 0.3452 | 1.25E-07 | chr:4:120263688 |
| 4 rs201085338 | 120347661 A | 0.3011 | 1.35E-07 | chr:4:120263688 |
| 4 rs10031033  | 120151452 T | 0.365  | 1.45E-07 | chr:4:120263688 |
| 4 rs62326344  | 120106420 G | 3.568  | 1.58E-07 | chr:4:120263688 |
| 4 rs62326345  | 120107683 A | 3.568  | 1.58E-07 | chr:4:120263688 |
| 4 rs62326346  | 120108263 A | 3.568  | 1.58E-07 | chr:4:120263688 |
| 4 rs200940395 | 120333454 C | 0.2359 | 1.64E-07 | chr:4:120263688 |
| 4 rs10018308  | 120657899 G | 0.3317 | 1.90E-07 | chr:4:120263688 |
| 4 rs28449467  | 120165673 C | 0.2517 | 2.11E-07 | chr:4:120263688 |
| 4 rs9884728   | 120127079 C | 0.371  | 2.56E-07 | chr:4:120263688 |
| 4 rs62328407  | 120221425 G | 3.243  | 2.60E-07 | chr:4:120263688 |
| 4 rs77377547  | 120217711 G | 3.205  | 2.84E-07 | chr:4:120263688 |
| 4 rs71610285  | 120329953 C | 0.2811 | 3.11E-07 | chr:4:120263688 |
| 4 rs10013032  | 120149419 C | 0.3735 | 3.11E-07 | chr:4:120263688 |
| 4 rs2203039   | 120132347 T | 0.3735 | 3.11E-07 | chr:4:120263688 |
| 4 rs4833612   | 120147596 A | 0.3735 | 3.11E-07 | chr:4:120263688 |
| 4 rs6534130   | 120131339 A | 0.3735 | 3.11E-07 | chr:4:120263688 |
| 4 rs6851130   | 120133712 G | 0.3735 | 3.11E-07 | chr:4:120263688 |
| 4 rs7441137   | 120133221 G | 0.3735 | 3.11E-07 | chr:4:120263688 |
| 4 rs951570    | 120150467 T | 0.3735 | 3.11E-07 | chr:4:120263688 |
| 4 rs368193355 | 120327846 C | 0.2854 | 3.45E-07 | chr:4:120263688 |
| 4 rs74529999  | 120327854 C | 0.2854 | 3.45E-07 | chr:4:120263688 |
| 4 rs532905339 | 120195910 T | 3.317  | 3.55E-07 | chr:4:120263688 |

|                     |             |        |          |                 |
|---------------------|-------------|--------|----------|-----------------|
| 4 rs527513020       | 120358891 C | 0.2329 | 3.97E-07 | chr:4:120263688 |
| 4 rs565835685       | 120358886 G | 0.2329 | 3.97E-07 | chr:4:120263688 |
| 4 rs2389957         | 120695322 T | 0.346  | 4.47E-07 | chr:4:120263688 |
| 4 rs2389958         | 120695256 T | 0.346  | 4.47E-07 | chr:4:120263688 |
| 4 rs2892892         | 120697553 A | 0.346  | 4.47E-07 | chr:4:120263688 |
| 4 rs4311295         | 120695280 G | 0.346  | 4.47E-07 | chr:4:120263688 |
| 4 rs4447844         | 120696623 G | 0.346  | 4.47E-07 | chr:4:120263688 |
| 4 rs11935130        | 120241725 A | 3.141  | 4.51E-07 | chr:4:120263688 |
| 4 rs12647635        | 120226932 T | 3.141  | 4.51E-07 | chr:4:120263688 |
| 4 rs10024967        | 120158734 T | 0.2627 | 4.61E-07 | chr:4:120263688 |
| 4 rs9884581         | 120699261 A | 0.3391 | 4.66E-07 | chr:4:120263688 |
| 4 rs17642800        | 120219534 C | 3.105  | 4.91E-07 | chr:4:120263688 |
| 4 rs13113885        | 120221176 C | 0.3592 | 4.99E-07 | chr:4:120263688 |
| 4 rs28864107        | 120229153 G | 3.111  | 5.19E-07 | chr:4:120263688 |
| 4 rs539206049;rs126 | 120187868 T | 3.145  | 5.28E-07 | chr:4:120263688 |
| 4 rs13122357        | 120601758 G | 0.3323 | 5.48E-07 | chr:4:120263688 |
| 4 rs10014947        | 120280077 A | 0.3581 | 5.55E-07 | chr:4:120263688 |
| 4 rs11737400        | 120279335 G | 0.3581 | 5.55E-07 | chr:4:120263688 |
| 4 rs13149954        | 120279041 A | 0.3581 | 5.55E-07 | chr:4:120263688 |
| 4 rs13150541        | 120279284 A | 0.3581 | 5.55E-07 | chr:4:120263688 |
| 4 rs28580295        | 120278873 T | 0.3581 | 5.55E-07 | chr:4:120263688 |
| 4 rs62320738        | 120279420 A | 0.3581 | 5.55E-07 | chr:4:120263688 |
| 4 rs62320739        | 120279459 C | 0.3581 | 5.55E-07 | chr:4:120263688 |
| 4 rs62320740        | 120279486 A | 0.3581 | 5.55E-07 | chr:4:120263688 |
| 4 rs71627791        | 120278765 G | 0.3581 | 5.55E-07 | chr:4:120263688 |
| 4 rs12646466        | 120268321 G | 3.106  | 5.61E-07 | chr:4:120263688 |
| 4 rs3905917         | 120268435 A | 3.106  | 5.61E-07 | chr:4:120263688 |
| 4 rs7681328         | 120274496 T | 3.106  | 5.61E-07 | chr:4:120263688 |
| 4 rs202019903       | 120344304 C | 0.2563 | 5.78E-07 | chr:4:120263688 |
| 4 rs28421394        | 120229248 A | 3.091  | 5.99E-07 | chr:4:120263688 |
| 4 rs28848291        | 120229356 G | 3.091  | 5.99E-07 | chr:4:120263688 |
| 4 rs4834768         | 120228641 G | 3.091  | 5.99E-07 | chr:4:120263688 |
| 4 rs4834769         | 120230446 G | 3.091  | 5.99E-07 | chr:4:120263688 |
| 4 rs56344202        | 120228425 T | 3.091  | 5.99E-07 | chr:4:120263688 |
| 4 rs574704366       | 120246403 G | 3.091  | 5.99E-07 | chr:4:120263688 |
| 4 rs62328426        | 120247732 C | 3.091  | 5.99E-07 | chr:4:120263688 |
| 4 rs4833625         | 120614593 G | 0.334  | 6.24E-07 | chr:4:120263688 |
| 4 rs2389881         | 120564618 C | 0.2719 | 6.39E-07 | chr:4:120263688 |
| 4 rs200672794       | 120350230 G | 0.2369 | 6.43E-07 | chr:4:120263688 |
| 4 rs11731571        | 120221185 A | 0.3635 | 6.46E-07 | chr:4:120263688 |
| 4 rs17049968        | 120159916 A | 3.064  | 6.94E-07 | chr:4:120263688 |
| 4 rs35372126        | 120181724 G | 3.064  | 6.94E-07 | chr:4:120263688 |
| 4 rs62328371        | 120165690 G | 3.064  | 6.94E-07 | chr:4:120263688 |



|               |             |        |          |                 |
|---------------|-------------|--------|----------|-----------------|
| 4 rs62328372  | 120166809 G | 3.064  | 6.94E-07 | chr:4:120263688 |
| 4 rs62328379  | 120178193 C | 3.064  | 6.94E-07 | chr:4:120263688 |
| 4 rs4833613   | 120150156 A | 0.3976 | 7.31E-07 | chr:4:120263688 |
| 4 rs370208580 | 120333619 G | 0.2606 | 7.40E-07 | chr:4:120263688 |
| 4 rs376876178 | 120333615 G | 0.2606 | 7.40E-07 | chr:4:120263688 |
| 4 rs4834773   | 120277395 G | 3.056  | 7.42E-07 | chr:4:120263688 |
| 4 rs74508090  | 120229759 C | 3.051  | 7.57E-07 | chr:4:120263688 |
| 4 rs4593113   | 120697811 C | 0.3529 | 7.69E-07 | chr:4:120263688 |
| 4 rs4834802   | 120614296 C | 0.3522 | 8.03E-07 | chr:4:120263688 |
| 4 rs62328373  | 120167453 C | 3.042  | 8.04E-07 | chr:4:120263688 |
| 4 rs10018153  | 120610535 A | 0.3388 | 8.20E-07 | chr:4:120263688 |
| 4 rs10026625  | 120280136 C | 0.3648 | 8.42E-07 | chr:4:120263688 |
| 4 rs12645965  | 120204761 A | 3.015  | 8.89E-07 | chr:4:120263688 |
| 4 rs12649811  | 120183939 T | 3.016  | 9.14E-07 | chr:4:120263688 |
| 4 rs187392552 | 120200618 C | 3.016  | 9.14E-07 | chr:4:120263688 |
| 4 rs4833614   | 120176338 T | 3.016  | 9.14E-07 | chr:4:120263688 |
| 4 rs56072232  | 120193715 T | 3.016  | 9.14E-07 | chr:4:120263688 |
| 4 rs62328374  | 120168837 A | 3.016  | 9.14E-07 | chr:4:120263688 |
| 4 rs62328376  | 120171735 G | 3.016  | 9.14E-07 | chr:4:120263688 |
| 4 rs62328377  | 120173569 A | 3.016  | 9.14E-07 | chr:4:120263688 |
| 4 rs62328398  | 120201031 A | 3.016  | 9.14E-07 | chr:4:120263688 |
| 4 rs76969560  | 120206724 T | 3.016  | 9.14E-07 | chr:4:120263688 |
| 4 rs200134651 | 120200519 A | 3.016  | 9.51E-07 | chr:4:120263688 |
| 4 rs10020420  | 120287431 C | 2.999  | 9.85E-07 | chr:4:120263688 |
| 4 rs6840053   | 120292233 A | 2.999  | 9.85E-07 | chr:4:120263688 |
| 4 rs11735819  | 120290194 C | 2.593  | 1.12E-06 | chr:4:120263688 |
| 4 rs73842685  | 120584839 A | 0.2613 | 1.13E-06 | chr:4:120263688 |
| 4 rs569705290 | 120333521 C | 0.2827 | 1.22E-06 | chr:4:120263688 |
| 4 rs10007283  | 120619656 G | 0.3585 | 1.23E-06 | chr:4:120263688 |
| 4 rs12331776  | 120617412 A | 0.3585 | 1.23E-06 | chr:4:120263688 |
| 4 rs12510467  | 120618359 A | 0.3585 | 1.23E-06 | chr:4:120263688 |
| 4 rs13111751  | 120050762 G | 0.3401 | 1.31E-06 | chr:4:120263688 |
| 4 rs28876485  | 120624447 T | 0.3446 | 1.37E-06 | chr:4:120263688 |
| 4 rs2714972   | 120649156 C | 0.3468 | 1.48E-06 | chr:4:120263688 |
| 4 rs12645079  | 120194512 C | 2.911  | 1.60E-06 | chr:4:120263688 |
| 4 rs35496605  | 120621914 C | 0.3504 | 1.66E-06 | chr:4:120263688 |
| 4 rs12650267  | 120195411 A | 2.898  | 1.72E-06 | chr:4:120263688 |
| 4 rs55689176  | 120626603 A | 0.3524 | 1.78E-06 | chr:4:120263688 |
| 4 rs11946739  | 120266472 T | 2.823  | 1.80E-06 | chr:4:120263688 |
| 4 rs1986695   | 120589750 C | 0.3422 | 1.83E-06 | chr:4:120263688 |
| 4 rs4834798   | 120591919 G | 0.3422 | 1.83E-06 | chr:4:120263688 |
| 4 rs4440203   | 120265438 G | 2.734  | 1.97E-06 | chr:4:120263688 |
| 4 rs62322287  | 120312172 A | 2.844  | 2.06E-06 | chr:4:120263688 |

|               |             |        |          |                 |
|---------------|-------------|--------|----------|-----------------|
| 4 rs10005177  | 120636476 T | 0.3552 | 2.13E-06 | chr:4:120263688 |
| 4 rs10011345  | 120638169 C | 0.3552 | 2.13E-06 | chr:4:120263688 |
| 4 rs10014793  | 120639522 T | 0.3552 | 2.13E-06 | chr:4:120263688 |
| 4 rs10032299  | 120206419 T | 0.3907 | 2.13E-06 | chr:4:120263688 |
| 4 rs1052633   | 120215314 G | 0.3907 | 2.13E-06 | chr:4:120263688 |
| 4 rs11098498  | 120187119 C | 0.3907 | 2.13E-06 | chr:4:120263688 |
| 4 rs12502919  | 120635917 T | 0.3552 | 2.13E-06 | chr:4:120263688 |
| 4 rs13141413  | 120644071 A | 0.3552 | 2.13E-06 | chr:4:120263688 |
| 4 rs13328038  | 120643320 T | 0.3552 | 2.13E-06 | chr:4:120263688 |
| 4 rs17005485  | 120648487 T | 0.3552 | 2.13E-06 | chr:4:120263688 |
| 4 rs2175383   | 120215836 A | 0.3907 | 2.13E-06 | chr:4:120263688 |
| 4 rs2389900   | 120633111 G | 0.3552 | 2.13E-06 | chr:4:120263688 |
| 4 rs2389902   | 120638756 G | 0.3552 | 2.13E-06 | chr:4:120263688 |
| 4 rs2389904   | 120646406 A | 0.3552 | 2.13E-06 | chr:4:120263688 |
| 4 rs28642385  | 120631599 A | 0.3552 | 2.13E-06 | chr:4:120263688 |
| 4 rs28847617  | 120637508 T | 0.3552 | 2.13E-06 | chr:4:120263688 |
| 4 rs34903755  | 120627444 C | 0.3552 | 2.13E-06 | chr:4:120263688 |
| 4 rs4001169   | 120639506 T | 0.3552 | 2.13E-06 | chr:4:120263688 |
| 4 rs4834805   | 120633506 T | 0.3552 | 2.13E-06 | chr:4:120263688 |
| 4 rs6822808   | 120217365 A | 0.3907 | 2.13E-06 | chr:4:120263688 |
| 4 rs6843509   | 120220196 A | 0.3907 | 2.13E-06 | chr:4:120263688 |
| 4 rs7659403   | 120207254 A | 0.3907 | 2.13E-06 | chr:4:120263688 |
| 4 rs7669436   | 120649398 A | 0.3552 | 2.13E-06 | chr:4:120263688 |
| 4 rs7686665   | 120627203 T | 0.3552 | 2.13E-06 | chr:4:120263688 |
| 4 rs7686695   | 120627289 T | 0.3552 | 2.13E-06 | chr:4:120263688 |
| 4 rs12642042  | 120310479 T | 2.84   | 2.32E-06 | chr:4:120263688 |
| 4 rs142534042 | 120308936 C | 2.84   | 2.32E-06 | chr:4:120263688 |
| 4 rs55827028  | 120297059 A | 2.84   | 2.32E-06 | chr:4:120263688 |
| 4 rs62322279  | 120298548 T | 2.84   | 2.32E-06 | chr:4:120263688 |
| 4 rs10006304  | 120124305 G | 0.366  | 2.46E-06 | chr:4:120263688 |
| 4 rs13126596  | 120140729 G | 0.366  | 2.46E-06 | chr:4:120263688 |
| 4 rs56122576  | 120129336 G | 0.366  | 2.46E-06 | chr:4:120263688 |
| 4 rs68128210  | 120137819 G | 0.366  | 2.46E-06 | chr:4:120263688 |
| 4 rs11098497  | 120187068 T | 0.393  | 2.47E-06 | chr:4:120263688 |
| 4 rs113409736 | 120195841 T | 2.814  | 2.49E-06 | chr:4:120263688 |
| 4 rs28723049  | 120620507 A | 0.3718 | 2.52E-06 | chr:4:120263688 |
| 4 rs28869613  | 120620588 A | 0.3718 | 2.52E-06 | chr:4:120263688 |
| 4 rs5008452   | 120621752 T | 0.3718 | 2.52E-06 | chr:4:120263688 |
| 4 rs9684358   | 120622560 C | 0.3718 | 2.52E-06 | chr:4:120263688 |
| 4 rs184174836 | 120196561 G | 0.3942 | 2.55E-06 | chr:4:120263688 |
| 4 rs144910036 | 120498353 C | 0.3864 | 2.70E-06 | chr:4:120263688 |
| 4 rs12649773  | 120305262 A | 2.795  | 3.03E-06 | chr:4:120263688 |
| 4 rs4833617   | 120305176 A | 2.795  | 3.03E-06 | chr:4:120263688 |

|               |             |        |          |                 |
|---------------|-------------|--------|----------|-----------------|
| 4 rs62322286  | 120307242 G | 2.795  | 3.03E-06 | chr:4:120263688 |
| 4 rs11731675  | 120212514 C | 0.4012 | 3.18E-06 | chr:4:120263688 |
| 4 rs11732621  | 120212883 G | 0.4012 | 3.18E-06 | chr:4:120263688 |
| 4 rs1459055   | 120056815 A | 0.3682 | 3.36E-06 | chr:4:120263688 |
| 4 rs10022508  | 120115228 G | 0.3771 | 3.66E-06 | chr:4:120263688 |
| 4 rs12509054  | 120115075 C | 0.3771 | 3.66E-06 | chr:4:120263688 |
| 4 rs150408742 | 120122911 A | 0.3771 | 3.66E-06 | chr:4:120263688 |
| 4 rs17839089  | 120111069 G | 0.3771 | 3.66E-06 | chr:4:120263688 |
| 4 rs28452522  | 120110784 G | 0.3771 | 3.66E-06 | chr:4:120263688 |
| 4 rs6822498   | 120120183 C | 0.3771 | 3.66E-06 | chr:4:120263688 |
| 4 rs6826823   | 120112098 C | 0.3771 | 3.66E-06 | chr:4:120263688 |
| 4 rs6832670   | 120118792 G | 0.3771 | 3.66E-06 | chr:4:120263688 |
| 4 rs6838674   | 120119376 G | 0.3771 | 3.66E-06 | chr:4:120263688 |
| 4 rs6845702   | 120120453 G | 0.3771 | 3.66E-06 | chr:4:120263688 |
| 4 rs6851169   | 120117510 C | 0.3771 | 3.66E-06 | chr:4:120263688 |
| 4 rs13138782  | 120124474 A | 0.3713 | 4.06E-06 | chr:4:120263688 |
| 4 rs10029669  | 120619666 T | 0.3853 | 4.13E-06 | chr:4:120263688 |
| 4 rs4834806   | 120656656 C | 0.4112 | 4.21E-06 | chr:4:120263688 |
| 4 rs12502503  | 120116255 T | 0.3792 | 4.29E-06 | chr:4:120263688 |
| 4 rs13119815  | 120662321 A | 0.387  | 4.47E-06 | chr:4:120263688 |
| 4 rs7679245   | 120328196 T | 2.607  | 4.48E-06 | chr:4:120263688 |
| 4 rs13102753  | 120672526 G | 0.3724 | 5.29E-06 | chr:4:120263688 |
| 4 rs10461203  | 120254808 C | 0.2525 | 5.67E-06 | chr:4:120263688 |
| 4 rs10518298  | 120262735 A | 0.2525 | 5.67E-06 | chr:4:120263688 |
| 4 rs111609258 | 120293635 C | 0.2525 | 5.67E-06 | chr:4:120263688 |
| 4 rs111977211 | 120253492 A | 0.2525 | 5.67E-06 | chr:4:120263688 |
| 4 rs112728016 | 120277552 T | 0.2525 | 5.67E-06 | chr:4:120263688 |
| 4 rs112760591 | 120293458 G | 0.2525 | 5.67E-06 | chr:4:120263688 |
| 4 rs113059419 | 120288832 A | 0.2525 | 5.67E-06 | chr:4:120263688 |
| 4 rs113917009 | 120291769 T | 0.2525 | 5.67E-06 | chr:4:120263688 |
| 4 rs13306357  | 120244134 G | 0.2525 | 5.67E-06 | chr:4:120263688 |
| 4 rs1397614   | 120243352 T | 0.2525 | 5.67E-06 | chr:4:120263688 |
| 4 rs150869392 | 120266218 A | 0.2525 | 5.67E-06 | chr:4:120263688 |
| 4 rs1511023   | 120237486 A | 0.2525 | 5.67E-06 | chr:4:120263688 |
| 4 rs184372266 | 120246462 G | 0.2525 | 5.67E-06 | chr:4:120263688 |
| 4 rs200041684 | 120271238 T | 0.2525 | 5.67E-06 | chr:4:120263688 |
| 4 rs2389748   | 120236249 T | 0.2525 | 5.67E-06 | chr:4:120263688 |
| 4 rs77203710  | 120242350 A | 0.2525 | 5.67E-06 | chr:4:120263688 |
| 4 rs12186259  | 120152039 T | 0.3819 | 5.82E-06 | chr:4:120263688 |
| 4 rs10011928  | 120662973 G | 0.3943 | 6.24E-06 | chr:4:120263688 |
| 4 rs10023652  | 120662947 C | 0.3943 | 6.24E-06 | chr:4:120263688 |
| 4 rs749526    | 120663649 T | 0.3943 | 6.24E-06 | chr:4:120263688 |
| 4 rs7699252   | 120659198 G | 0.3943 | 6.24E-06 | chr:4:120263688 |

|               |             |        |          |                 |
|---------------|-------------|--------|----------|-----------------|
| 4 rs874425    | 120664362 C | 0.3943 | 6.24E-06 | chr:4:120263688 |
| 4 rs201764925 | 120334210 A | 0.2841 | 6.32E-06 | chr:4:120263688 |
| 4 rs556868206 | 120378207 G | 0.2467 | 6.38E-06 | chr:4:120263688 |
| 4 rs376733907 | 120350133 C | 0.259  | 6.91E-06 | chr:4:120263688 |
| 4 rs13123591  | 120105990 G | 0.3904 | 7.44E-06 | chr:4:120263688 |
| 4 rs9995277   | 120108603 A | 0.3904 | 7.44E-06 | chr:4:120263688 |
| 4 rs111968273 | 120283707 T | 0.2623 | 8.57E-06 | chr:4:120263688 |
| 4 rs112314510 | 120283665 A | 0.2623 | 8.57E-06 | chr:4:120263688 |
| 4 rs113434765 | 120222291 A | 0.2628 | 8.77E-06 | chr:4:120263688 |
| 4 rs2583601   | 120676622 A | 0.4138 | 9.31E-06 | chr:4:120263688 |
| 4 rs7661020   | 120106982 C | 0.3965 | 9.90E-06 | chr:4:120263688 |
| 4 rs10434029  | 120363952 C | 0.2598 | 1.10E-05 | chr:4:120263688 |
| 4 rs111477123 | 120386427 T | 0.2598 | 1.10E-05 | chr:4:120263688 |
| 4 rs111496191 | 120360686 T | 0.2598 | 1.10E-05 | chr:4:120263688 |
| 4 rs112258044 | 120386676 T | 0.2598 | 1.10E-05 | chr:4:120263688 |
| 4 rs112414671 | 120324584 A | 0.2598 | 1.10E-05 | chr:4:120263688 |
| 4 rs113169612 | 120375582 A | 0.2598 | 1.10E-05 | chr:4:120263688 |
| 4 rs113425470 | 120361616 G | 0.2598 | 1.10E-05 | chr:4:120263688 |
| 4 rs115485232 | 120356499 A | 0.2598 | 1.10E-05 | chr:4:120263688 |
| 4 rs115560350 | 120374757 T | 0.2598 | 1.10E-05 | chr:4:120263688 |
| 4 rs115758343 | 120391526 A | 0.2598 | 1.10E-05 | chr:4:120263688 |
| 4 rs140068364 | 120361857 A | 0.2598 | 1.10E-05 | chr:4:120263688 |
| 4 rs150645820 | 120363022 A | 0.2598 | 1.10E-05 | chr:4:120263688 |
| 4 rs183181597 | 120325594 A | 0.2598 | 1.10E-05 | chr:4:120263688 |
| 4 rs184703141 | 120329609 T | 0.2598 | 1.10E-05 | chr:4:120263688 |
| 4 rs185357281 | 120324640 A | 0.2598 | 1.10E-05 | chr:4:120263688 |
| 4 rs199758570 | 120341667 A | 0.2598 | 1.10E-05 | chr:4:120263688 |
| 4 rs371282380 | 120330137 G | 0.2598 | 1.10E-05 | chr:4:120263688 |
| 4 rs4102980   | 120383987 A | 0.2598 | 1.10E-05 | chr:4:120263688 |
| 4 rs10019790  | 120667078 G | 0.4168 | 1.12E-05 | chr:4:120263688 |
| 4 rs10518332  | 120395973 G | 0.2658 | 1.42E-05 | chr:4:120263688 |
| 4 rs111658129 | 120484514 C | 0.2658 | 1.42E-05 | chr:4:120263688 |
| 4 rs113973710 | 120406848 A | 0.2658 | 1.42E-05 | chr:4:120263688 |
| 4 rs137887715 | 120474677 G | 0.2658 | 1.42E-05 | chr:4:120263688 |
| 4 rs17007472  | 120428653 C | 0.2658 | 1.42E-05 | chr:4:120263688 |
| 4 rs17051278  | 120399522 G | 0.2658 | 1.42E-05 | chr:4:120263688 |
| 4 rs75539164  | 120410245 T | 0.2658 | 1.42E-05 | chr:4:120263688 |
| 4 rs75603231  | 120477469 C | 0.2658 | 1.42E-05 | chr:4:120263688 |
| 4 rs76037365  | 120438336 T | 0.2658 | 1.42E-05 | chr:4:120263688 |
| 4 rs76584578  | 120474127 A | 0.2658 | 1.42E-05 | chr:4:120263688 |
| 4 rs78501811  | 120419300 C | 0.2658 | 1.42E-05 | chr:4:120263688 |
| 4 rs80178044  | 120484259 C | 0.2658 | 1.42E-05 | chr:4:120263688 |
| 4 rs10005075  | 120673870 G | 0.3919 | 1.43E-05 | chr:4:120263688 |

|               |             |        |          |                 |
|---------------|-------------|--------|----------|-----------------|
| 4 rs10023655  | 120671879 C | 0.3919 | 1.43E-05 | chr:4:120263688 |
| 4 rs13112498  | 120670520 C | 0.3919 | 1.43E-05 | chr:4:120263688 |
| 4 rs13119146  | 120670994 A | 0.3919 | 1.43E-05 | chr:4:120263688 |
| 4 rs17005677  | 120674786 C | 0.3919 | 1.43E-05 | chr:4:120263688 |
| 4 rs28535991  | 120662206 A | 0.3919 | 1.43E-05 | chr:4:120263688 |
| 4 rs28706824  | 120673378 A | 0.3919 | 1.43E-05 | chr:4:120263688 |
| 4 rs4834808   | 120674512 C | 0.3919 | 1.43E-05 | chr:4:120263688 |
| 4 rs9998665   | 120671724 G | 0.3919 | 1.43E-05 | chr:4:120263688 |
| 4 rs17359764  | 120563723 T | 0.2886 | 1.46E-05 | chr:4:120263688 |
| 4 rs113317707 | 120326082 C | 0.2675 | 1.49E-05 | chr:4:120263688 |
| 4 rs113224532 | 120311412 T | 0.2681 | 1.50E-05 | chr:4:120263688 |
| 4 rs113825627 | 120319836 C | 0.2681 | 1.50E-05 | chr:4:120263688 |
| 4 rs117856633 | 120313434 C | 0.2681 | 1.50E-05 | chr:4:120263688 |
| 4 rs143847948 | 120302322 A | 0.2681 | 1.50E-05 | chr:4:120263688 |
| 4 rs11736455  | 120685312 T | 0.4156 | 1.78E-05 | chr:4:120263688 |
| 4 rs12500145  | 120688312 A | 0.4156 | 1.78E-05 | chr:4:120263688 |
| 4 rs4447843   | 120680950 G | 0.4156 | 1.78E-05 | chr:4:120263688 |
| 4 rs7674894   | 120680189 G | 0.4156 | 1.78E-05 | chr:4:120263688 |
| 4 rs9999212   | 120655838 C | 0.3969 | 1.83E-05 | chr:4:120263688 |
| 4 rs1480934   | 120476006 C | 2.385  | 1.94E-05 | chr:4:120263688 |
| 4 rs10434030  | 120505390 T | 0.2751 | 2.03E-05 | chr:4:120263688 |
| 4 rs10434031  | 120506122 G | 0.2751 | 2.03E-05 | chr:4:120263688 |
| 4 rs112299847 | 120521686 A | 0.2751 | 2.03E-05 | chr:4:120263688 |
| 4 rs112381171 | 120509520 T | 0.2751 | 2.03E-05 | chr:4:120263688 |
| 4 rs112706654 | 120509055 A | 0.2751 | 2.03E-05 | chr:4:120263688 |
| 4 rs184304853 | 120513336 T | 0.2751 | 2.03E-05 | chr:4:120263688 |
| 4 rs184742992 | 120513081 G | 0.2751 | 2.03E-05 | chr:4:120263688 |
| 4 rs80066647  | 120509046 G | 0.2751 | 2.03E-05 | chr:4:120263688 |
| 4 rs111837430 | 120579362 A | 0.297  | 2.06E-05 | chr:4:120263688 |
| 4 rs17359910  | 120570769 C | 0.297  | 2.06E-05 | chr:4:120263688 |
| 4 rs17360333  | 120585414 G | 0.297  | 2.06E-05 | chr:4:120263688 |
| 4 rs58613543  | 120565393 C | 0.297  | 2.06E-05 | chr:4:120263688 |
| 4 rs72922580  | 120566773 T | 0.297  | 2.06E-05 | chr:4:120263688 |
| 4 rs72922588  | 120571103 C | 0.297  | 2.06E-05 | chr:4:120263688 |
| 4 rs72922598  | 120575095 G | 0.297  | 2.06E-05 | chr:4:120263688 |
| 4 rs80240725  | 120578969 G | 0.297  | 2.06E-05 | chr:4:120263688 |
| 4 rs75158005  | 120529383 A | 0.2763 | 2.11E-05 | chr:4:120263688 |
| 4 rs62409885  | 9642489 T   | 19.72  | 2.40E-23 | chr:4:9603240   |
| 4 rs11731648  | 9691863 T   | 18.02  | 3.24E-23 | chr:4:9603240   |
| 4 rs13102980  | 9697402 T   | 18.02  | 3.24E-23 | chr:4:9603240   |
| 4 rs13135989  | 9692108 A   | 18.02  | 3.24E-23 | chr:4:9603240   |
| 4 rs6821253   | 9690731 G   | 18.02  | 3.24E-23 | chr:4:9603240   |
| 4 rs9684596   | 9695983 G   | 18.02  | 3.24E-23 | chr:4:9603240   |

|               |           |         |          |               |
|---------------|-----------|---------|----------|---------------|
| 4 rs9684683   | 9691507 T | 18.02   | 3.24E-23 | chr:4:9603240 |
| 4 rs11733687  | 9643374 T | 19.32   | 3.27E-23 | chr:4:9603240 |
| 4 rs13141594  | 9690088 T | 17.66   | 4.72E-23 | chr:4:9603240 |
| 4 rs62409901  | 9652707 C | 18.6    | 4.74E-23 | chr:4:9603240 |
| 4 rs10939455  | 9672007 T | 18.68   | 4.82E-23 | chr:4:9603240 |
| 4 rs11726037  | 9657179 G | 18.68   | 4.82E-23 | chr:4:9603240 |
| 4 rs11726932  | 9656993 G | 18.68   | 4.82E-23 | chr:4:9603240 |
| 4 rs11733344  | 9670097 T | 18.68   | 4.82E-23 | chr:4:9603240 |
| 4 rs12645053  | 9668769 A | 18.68   | 4.82E-23 | chr:4:9603240 |
| 4 rs12647495  | 9668881 A | 18.68   | 4.82E-23 | chr:4:9603240 |
| 4 rs12647777  | 9664000 T | 18.68   | 4.82E-23 | chr:4:9603240 |
| 4 rs12649399  | 9668775 A | 18.68   | 4.82E-23 | chr:4:9603240 |
| 4 rs34793939  | 9674154 A | 18.68   | 4.82E-23 | chr:4:9603240 |
| 4 rs4274844   | 9676059 T | 18.68   | 4.82E-23 | chr:4:9603240 |
| 4 rs56141152  | 9661423 A | 18.68   | 4.82E-23 | chr:4:9603240 |
| 4 rs6827470   | 9667892 C | 18.68   | 4.82E-23 | chr:4:9603240 |
| 4 rs6856685   | 9665482 G | 18.68   | 4.82E-23 | chr:4:9603240 |
| 4 rs9761193   | 9669715 C | 18.68   | 4.82E-23 | chr:4:9603240 |
| 4 rs12511479  | 9650516 A | 18.54   | 4.96E-23 | chr:4:9603240 |
| 4 rs62409900  | 9652583 A | 18.54   | 4.96E-23 | chr:4:9603240 |
| 4 rs13101545  | 9684171 C | 17.66   | 5.35E-23 | chr:4:9603240 |
| 4 rs34113970  | 9686479 A | 17.66   | 5.35E-23 | chr:4:9603240 |
| 4 rs13115277  | 9683696 A | 17.61   | 5.64E-23 | chr:4:9603240 |
| 4 rs6811619   | 9613669 A | 20.32   | 5.79E-23 | chr:4:9603240 |
| 4 rs12512447  | 9586313 A | 13.76   | 5.92E-23 | chr:4:9603240 |
| 4 rs13138961  | 9585147 T | 13.76   | 5.92E-23 | chr:4:9603240 |
| 4 rs13136973  | 9574572 A | 13.81   | 6.19E-23 | chr:4:9603240 |
| 4 rs13147802  | 9572720 A | 13.81   | 6.19E-23 | chr:4:9603240 |
| 4 rs55634110  | 9643904 T | 17.67   | 6.35E-23 | chr:4:9603240 |
| 4 rs11730577  | 9592342 T | 38.19   | 6.69E-23 | chr:4:9603240 |
| 4 rs34172197  | 9634195 A | 17.71   | 6.86E-23 | chr:4:9603240 |
| 4 rs35497679  | 9636851 T | 17.71   | 6.86E-23 | chr:4:9603240 |
| 4 rs62411066  | 9638987 A | 17.71   | 6.86E-23 | chr:4:9603240 |
| 4 rs62411067  | 9639340 T | 17.71   | 6.86E-23 | chr:4:9603240 |
| 4 rs62411071  | 9640314 A | 17.71   | 6.86E-23 | chr:4:9603240 |
| 4 rs112714712 | 9643479 G | 18.03   | 6.90E-23 | chr:4:9603240 |
| 4 rs12502039  | 9658319 G | 18.39   | 7.22E-23 | chr:4:9603240 |
| 4 rs11723247  | 9656338 T | 17.26   | 7.37E-23 | chr:4:9603240 |
| 4 rs10939461  | 9681893 G | 17.77   | 7.55E-23 | chr:4:9603240 |
| 4 rs12510498  | 9606546 A | 33.52   | 8.51E-23 | chr:4:9603240 |
| 4 rs11734592  | 9641381 T | 16.79   | 9.44E-23 | chr:4:9603240 |
| 4 rs11728002  | 9632904 G | 0.09556 | 9.46E-23 | chr:4:9603240 |
| 4 rs11731299  | 9632932 C | 0.09556 | 9.46E-23 | chr:4:9603240 |

|              |           |        |          |               |
|--------------|-----------|--------|----------|---------------|
| 4 rs13141264 | 9698240 A | 15.56  | 1.33E-22 | chr:4:9603240 |
| 4 rs62409886 | 9642713 T | 16.96  | 1.35E-22 | chr:4:9603240 |
| 4 rs11737375 | 9607387 G | 36.6   | 1.39E-22 | chr:4:9603240 |
| 4 rs13133557 | 9609114 A | 36.43  | 1.42E-22 | chr:4:9603240 |
| 4 rs13147553 | 9610951 A | 36.43  | 1.42E-22 | chr:4:9603240 |
| 4 rs1812335  | 9608440 G | 36.43  | 1.42E-22 | chr:4:9603240 |
| 4 rs11724211 | 9695175 C | 15.44  | 1.55E-22 | chr:4:9603240 |
| 4 rs13103452 | 9694662 C | 15.53  | 1.66E-22 | chr:4:9603240 |
| 4 rs12510096 | 9646171 G | 15.25  | 1.75E-22 | chr:4:9603240 |
| 4 rs57746863 | 9645578 A | 15.25  | 1.75E-22 | chr:4:9603240 |
| 4 rs13134147 | 9611368 G | 40.33  | 2.10E-22 | chr:4:9603240 |
| 4 rs13141772 | 9575916 T | 28.88  | 2.25E-22 | chr:4:9603240 |
| 4 rs11729986 | 9605023 A | 40.77  | 2.72E-22 | chr:4:9603240 |
| 4 rs13105082 | 9604504 G | 40.77  | 2.72E-22 | chr:4:9603240 |
| 4 rs13123739 | 9604667 T | 40.77  | 2.72E-22 | chr:4:9603240 |
| 4 rs6815602  | 9592093 T | 48.7   | 4.51E-22 | chr:4:9603240 |
| 4 rs13132135 | 9583284 T | 33.83  | 4.99E-22 | chr:4:9603240 |
| 4 rs12509448 | 9577884 T | 26.05  | 5.10E-22 | chr:4:9603240 |
| 4 rs10805307 | 9580141 A | 23.06  | 5.60E-22 | chr:4:9603240 |
| 4 rs10939373 | 9579571 T | 23.06  | 5.60E-22 | chr:4:9603240 |
| 4 rs1842497  | 9579673 G | 23.06  | 5.60E-22 | chr:4:9603240 |
| 4 rs11727921 | 9632675 G | 0.1435 | 6.89E-22 | chr:4:9603240 |
| 4 rs11734220 | 9634271 C | 12.75  | 7.07E-22 | chr:4:9603240 |
| 4 rs1947868  | 9584808 C | 24.82  | 7.20E-22 | chr:4:9603240 |
| 4 rs11722510 | 9585639 A | 24.85  | 7.64E-22 | chr:4:9603240 |
| 4 rs11736658 | 9585855 T | 22.54  | 7.70E-22 | chr:4:9603240 |
| 4 rs13129232 | 9573407 T | 24.89  | 8.06E-22 | chr:4:9603240 |
| 4 rs13144634 | 9571273 G | 24.7   | 8.23E-22 | chr:4:9603240 |
| 4 rs13115165 | 9624808 A | 0.1152 | 8.33E-22 | chr:4:9603240 |
| 4 rs13125486 | 9575367 T | 25.02  | 8.66E-22 | chr:4:9603240 |
| 4 rs74920290 | 9631759 A | 0.148  | 8.79E-22 | chr:4:9603240 |
| 4 rs75569331 | 9631942 G | 0.148  | 8.79E-22 | chr:4:9603240 |
| 4 rs75957763 | 9631643 C | 0.148  | 8.79E-22 | chr:4:9603240 |
| 4 rs76746438 | 9631273 C | 0.148  | 8.79E-22 | chr:4:9603240 |
| 4 rs77675792 | 9632008 A | 0.148  | 8.79E-22 | chr:4:9603240 |
| 4 rs13127386 | 9636309 T | 14.08  | 9.18E-22 | chr:4:9603240 |
| 4 rs11732839 | 9597885 G | 53.35  | 1.06E-21 | chr:4:9603240 |
| 4 rs13108259 | 9603571 G | 53.35  | 1.06E-21 | chr:4:9603240 |
| 4 rs13120086 | 9599365 T | 53.35  | 1.06E-21 | chr:4:9603240 |
| 4 rs13141297 | 9602103 T | 53.35  | 1.06E-21 | chr:4:9603240 |
| 4 rs1871719  | 9594339 T | 53.35  | 1.06E-21 | chr:4:9603240 |
| 4 rs62409962 | 9600872 T | 53.35  | 1.06E-21 | chr:4:9603240 |
| 4 rs34554083 | 9634203 T | 12.14  | 1.09E-21 | chr:4:9603240 |

|               |           |         |          |               |
|---------------|-----------|---------|----------|---------------|
| 4 rs3864193   | 9584474 A | 27.27   | 1.31E-21 | chr:4:9603240 |
| 4 rs75000854  | 9631079 A | 0.1525  | 1.33E-21 | chr:4:9603240 |
| 4 rs7693695   | 9629380 A | 0.1525  | 1.33E-21 | chr:4:9603240 |
| 4 rs4102945   | 9581863 T | 27.21   | 1.37E-21 | chr:4:9603240 |
| 4 rs71615596  | 9635011 C | 11.65   | 1.50E-21 | chr:4:9603240 |
| 4 rs13134507  | 9697356 A | 11.5    | 1.57E-21 | chr:4:9603240 |
| 4 rs13123398  | 9677837 A | 11.53   | 1.75E-21 | chr:4:9603240 |
| 4 rs35737782  | 9674263 A | 11.53   | 1.75E-21 | chr:4:9603240 |
| 4 rs112404663 | 9624480 T | 0.1157  | 2.06E-21 | chr:4:9603240 |
| 4 rs13107086  | 9628088 G | 0.1565  | 2.16E-21 | chr:4:9603240 |
| 4 rs13140984  | 9637886 A | 11.36   | 2.30E-21 | chr:4:9603240 |
| 4 rs150084672 | 9619998 C | 0.1539  | 2.70E-21 | chr:4:9603240 |
| 4 rs13123294  | 9614786 C | 11.23   | 2.76E-21 | chr:4:9603240 |
| 4 rs13124589  | 9590540 T | 57.86   | 3.09E-21 | chr:4:9603240 |
| 4 rs12233698  | 9680271 C | 12.11   | 3.14E-21 | chr:4:9603240 |
| 4 rs62409888  | 9642756 A | 11.1    | 3.49E-21 | chr:4:9603240 |
| 4 rs13129861  | 9626802 A | 0.1625  | 3.83E-21 | chr:4:9603240 |
| 4 rs13130488  | 9627077 A | 0.1625  | 3.83E-21 | chr:4:9603240 |
| 4 rs13151183  | 9627066 G | 0.1625  | 3.83E-21 | chr:4:9603240 |
| 4 rs34407913  | 9627405 C | 0.1625  | 3.83E-21 | chr:4:9603240 |
| 4 rs10939447  | 9659957 T | 10.41   | 4.99E-21 | chr:4:9603240 |
| 4 rs11732596  | 9569361 T | 10.98   | 5.24E-21 | chr:4:9603240 |
| 4 rs13150819  | 9626909 G | 0.1655  | 5.78E-21 | chr:4:9603240 |
| 4 rs78943848  | 9624005 T | 0.1644  | 6.20E-21 | chr:4:9603240 |
| 4 rs13109135  | 9549749 T | 9.35    | 3.07E-20 | chr:4:9603240 |
| 4 rs6448969   | 9700056 A | 9.899   | 3.44E-20 | chr:4:9603240 |
| 4 rs1842490   | 9568457 G | 0.07158 | 5.77E-20 | chr:4:9603240 |
| 4 rs4102942   | 9568478 C | 0.06624 | 6.42E-20 | chr:4:9603240 |
| 4 rs9715222   | 9564999 T | 0.06624 | 6.42E-20 | chr:4:9603240 |
| 4 rs1880831   | 9568145 C | 0.06611 | 6.56E-20 | chr:4:9603240 |
| 4 rs11723541  | 9556165 C | 0.06613 | 6.78E-20 | chr:4:9603240 |
| 4 rs11728441  | 9558041 T | 0.06613 | 6.78E-20 | chr:4:9603240 |
| 4 rs12233701  | 9552436 C | 0.06613 | 6.78E-20 | chr:4:9603240 |
| 4 rs13107393  | 9562217 C | 0.06613 | 6.78E-20 | chr:4:9603240 |
| 4 rs13110253  | 9558556 G | 0.06613 | 6.78E-20 | chr:4:9603240 |
| 4 rs13116764  | 9561759 A | 0.06613 | 6.78E-20 | chr:4:9603240 |
| 4 rs13132153  | 9561479 G | 0.06613 | 6.78E-20 | chr:4:9603240 |
| 4 rs13138276  | 9562004 G | 0.06613 | 6.78E-20 | chr:4:9603240 |
| 4 rs13152653  | 9556775 G | 0.06613 | 6.78E-20 | chr:4:9603240 |
| 4 rs7442338   | 9560945 C | 0.06613 | 6.78E-20 | chr:4:9603240 |
| 4 rs12505958  | 9560131 A | 0.06187 | 7.28E-20 | chr:4:9603240 |
| 4 rs12233677  | 9549872 A | 0.06176 | 7.65E-20 | chr:4:9603240 |
| 4 rs12233678  | 9549951 A | 0.06176 | 7.65E-20 | chr:4:9603240 |



|               |           |         |          |               |
|---------------|-----------|---------|----------|---------------|
| 4 rs12233883  | 9549927 G | 0.06176 | 7.65E-20 | chr:4:9603240 |
| 4 rs12233884  | 9550045 G | 0.06176 | 7.65E-20 | chr:4:9603240 |
| 4 rs9684707   | 9569057 G | 0.08107 | 7.85E-20 | chr:4:9603240 |
| 4 rs4077929   | 9698730 A | 9.419   | 8.38E-20 | chr:4:9603240 |
| 4 rs7434710   | 9700062 A | 9.419   | 8.38E-20 | chr:4:9603240 |
| 4 rs13152465  | 9556695 G | 0.06164 | 8.84E-20 | chr:4:9603240 |
| 4 rs9714994   | 9589698 C | 0.01758 | 1.00E-19 | chr:4:9603240 |
| 4 rs12233771  | 9552965 T | 0.06259 | 1.05E-19 | chr:4:9603240 |
| 4 rs11734448  | 9563381 T | 0.07451 | 1.38E-19 | chr:4:9603240 |
| 4 rs13139813  | 9547169 C | 0.08507 | 2.21E-19 | chr:4:9603240 |
| 4 rs66534644  | 9711634 G | 8.774   | 3.57E-19 | chr:4:9603240 |
| 4 rs111921266 | 9591246 A | 0.1176  | 3.74E-19 | chr:4:9603240 |
| 4 rs7664612   | 9595727 A | 0.1179  | 3.93E-19 | chr:4:9603240 |
| 4 rs78121242  | 9591433 A | 0.01414 | 4.41E-19 | chr:4:9603240 |
| 4 rs2865009   | 9522285 A | 7.603   | 4.49E-19 | chr:4:9603240 |
| 4 rs6843276   | 9714147 T | 8.665   | 5.15E-19 | chr:4:9603240 |
| 4 rs12510091  | 9708661 A | 8.649   | 5.32E-19 | chr:4:9603240 |
| 4 rs6831476   | 9708183 T | 8.649   | 5.32E-19 | chr:4:9603240 |
| 4 rs13136075  | 9714968 A | 8.693   | 5.35E-19 | chr:4:9603240 |
| 4 rs13137016  | 9715392 A | 8.693   | 5.35E-19 | chr:4:9603240 |
| 4 rs13137196  | 9715456 A | 8.693   | 5.35E-19 | chr:4:9603240 |
| 4 rs12501880  | 9717975 T | 8.378   | 5.57E-19 | chr:4:9603240 |
| 4 rs13122952  | 9707740 A | 8.676   | 5.65E-19 | chr:4:9603240 |
| 4 rs11735687  | 9523738 T | 0.08452 | 6.15E-19 | chr:4:9603240 |
| 4 rs11728108  | 9590027 C | 0.015   | 6.43E-19 | chr:4:9603240 |
| 4 rs2902921   | 9591436 A | 0.01486 | 6.56E-19 | chr:4:9603240 |
| 4 rs6855316   | 9596183 C | 0.0153  | 6.59E-19 | chr:4:9603240 |
| 4 rs9684176   | 9716386 G | 8.498   | 6.96E-19 | chr:4:9603240 |
| 4 rs12508394  | 9702186 T | 8.596   | 6.98E-19 | chr:4:9603240 |
| 4 rs12641450  | 9529244 G | 0.09235 | 7.19E-19 | chr:4:9603240 |
| 4 rs13124998  | 9530491 G | 0.08914 | 7.25E-19 | chr:4:9603240 |
| 4 rs13136346  | 9528694 C | 0.08914 | 7.25E-19 | chr:4:9603240 |
| 4 rs13144880  | 9530438 C | 0.08914 | 7.25E-19 | chr:4:9603240 |
| 4 rs13151395  | 9709144 T | 8.318   | 9.55E-19 | chr:4:9603240 |
| 4 rs11943931  | 9706478 A | 8.338   | 1.23E-18 | chr:4:9603240 |
| 4 rs10939182  | 9511068 A | 0.1205  | 1.80E-18 | chr:4:9603240 |
| 4 rs9790487   | 9516638 T | 0.1205  | 1.80E-18 | chr:4:9603240 |
| 4 rs11722359  | 9508214 A | 0.1204  | 1.98E-18 | chr:4:9603240 |
| 4 rs11733952  | 9508241 G | 0.1204  | 1.98E-18 | chr:4:9603240 |
| 4 rs11737117  | 9507890 C | 0.1204  | 1.98E-18 | chr:4:9603240 |
| 4 rs13118864  | 9521311 T | 0.1125  | 2.32E-18 | chr:4:9603240 |
| 4 rs2127796   | 9510832 C | 0.1248  | 2.83E-18 | chr:4:9603240 |
| 4 rs11724460  | 9509698 A | 0.1247  | 3.11E-18 | chr:4:9603240 |

|               |           |         |          |               |
|---------------|-----------|---------|----------|---------------|
| 4 rs62410329  | 9504003 C | 0.1247  | 3.11E-18 | chr:4:9603240 |
| 4 rs11731863  | 9495756 T | 0.1321  | 3.58E-18 | chr:4:9603240 |
| 4 rs9714725   | 9589901 G | 0.02661 | 3.70E-18 | chr:4:9603240 |
| 4 rs12513044  | 9506678 A | 0.1249  | 3.89E-18 | chr:4:9603240 |
| 4 rs11729203  | 9569091 T | 6.673   | 4.00E-18 | chr:4:9603240 |
| 4 rs143193345 | 9622281 G | 0.2151  | 5.08E-18 | chr:4:9603240 |
| 4 rs2865076   | 9591550 C | 0.1388  | 6.00E-18 | chr:4:9603240 |
| 4 rs6448856   | 9595797 A | 0.1388  | 6.00E-18 | chr:4:9603240 |
| 4 rs6448858   | 9595918 T | 0.1388  | 6.00E-18 | chr:4:9603240 |
| 4 rs7672211   | 9597825 A | 0.1388  | 6.00E-18 | chr:4:9603240 |
| 4 rs10019130  | 9597356 A | 0.01241 | 6.32E-18 | chr:4:9603240 |
| 4 rs12645445  | 9599283 G | 0.01241 | 6.32E-18 | chr:4:9603240 |
| 4 rs13103207  | 9603672 C | 0.01241 | 6.32E-18 | chr:4:9603240 |
| 4 rs1842487   | 9597264 C | 0.01241 | 6.32E-18 | chr:4:9603240 |
| 4 rs2865079   | 9600388 G | 0.01241 | 6.32E-18 | chr:4:9603240 |
| 4 rs34968063  | 9599535 T | 0.01241 | 6.32E-18 | chr:4:9603240 |
| 4 rs35735545  | 9600181 A | 0.01241 | 6.32E-18 | chr:4:9603240 |
| 4 rs6448859   | 9596488 C | 0.01241 | 6.32E-18 | chr:4:9603240 |
| 4 rs6811235   | 9594627 G | 0.01241 | 6.32E-18 | chr:4:9603240 |
| 4 rs10212854  | 9590489 G | 0.01247 | 6.67E-18 | chr:4:9603240 |
| 4 rs2865075   | 9591384 C | 0.01247 | 6.67E-18 | chr:4:9603240 |
| 4 rs6837173   | 9590700 G | 0.01247 | 6.67E-18 | chr:4:9603240 |
| 4 rs6856351   | 9590718 C | 0.01247 | 6.67E-18 | chr:4:9603240 |
| 4 rs12647772  | 9599010 C | 0.1393  | 7.05E-18 | chr:4:9603240 |
| 4 rs1842488   | 9601268 G | 0.01262 | 7.41E-18 | chr:4:9603240 |
| 4 rs13101251  | 9588969 T | 0.1398  | 7.48E-18 | chr:4:9603240 |
| 4 rs6824806   | 9589427 G | 0.1398  | 7.48E-18 | chr:4:9603240 |
| 4 rs6856661   | 9689011 T | 0.1462  | 8.51E-18 | chr:4:9603240 |
| 4 rs7671092   | 9687441 C | 0.1462  | 8.51E-18 | chr:4:9603240 |
| 4 rs7686078   | 9687410 T | 0.1462  | 8.51E-18 | chr:4:9603240 |
| 4 rs55760760  | 9503473 G | 6.375   | 9.16E-18 | chr:4:9603240 |
| 4 rs13147425  | 9492966 A | 6.412   | 9.78E-18 | chr:4:9603240 |
| 4 rs10939390  | 9590105 G | 0.1456  | 1.03E-17 | chr:4:9603240 |
| 4 rs7692776   | 9506201 G | 6.346   | 1.13E-17 | chr:4:9603240 |
| 4 rs13131004  | 9612911 C | 0.1492  | 1.14E-17 | chr:4:9603240 |
| 4 rs4482762   | 9615140 A | 0.1492  | 1.14E-17 | chr:4:9603240 |
| 4 rs12501341  | 9589915 A | 0.126   | 1.18E-17 | chr:4:9603240 |
| 4 rs10939457  | 9677914 T | 0.1477  | 1.24E-17 | chr:4:9603240 |
| 4 rs13138869  | 9674967 T | 0.1477  | 1.24E-17 | chr:4:9603240 |
| 4 rs13139079  | 9675072 T | 0.1477  | 1.24E-17 | chr:4:9603240 |
| 4 rs7435906   | 9673736 A | 0.1477  | 1.24E-17 | chr:4:9603240 |
| 4 rs9884921   | 9676740 A | 0.1477  | 1.24E-17 | chr:4:9603240 |
| 4 rs13110996  | 9726276 T | 6.445   | 1.30E-17 | chr:4:9603240 |

|               |           |        |          |               |
|---------------|-----------|--------|----------|---------------|
| 4 rs112873333 | 9623915 C | 0.2247 | 1.33E-17 | chr:4:9603240 |
| 4 rs9684797   | 9684609 T | 0.1481 | 1.50E-17 | chr:4:9603240 |
| 4 rs9917965   | 9614520 A | 0.1513 | 1.84E-17 | chr:4:9603240 |
| 4 rs10022843  | 9604948 C | 0.1486 | 2.05E-17 | chr:4:9603240 |
| 4 rs6820385   | 9606357 G | 0.1486 | 2.05E-17 | chr:4:9603240 |
| 4 rs11724159  | 9727566 T | 6.936  | 2.61E-17 | chr:4:9603240 |
| 4 rs6845333   | 9614058 C | 0.1536 | 3.01E-17 | chr:4:9603240 |
| 4 rs11735679  | 9585384 G | 0.1482 | 3.08E-17 | chr:4:9603240 |
| 4 rs1947866   | 9584747 G | 0.1482 | 3.08E-17 | chr:4:9603240 |
| 4 rs9685853   | 9585655 G | 0.1482 | 3.08E-17 | chr:4:9603240 |
| 4 rs13145994  | 9623518 G | 0.2302 | 3.17E-17 | chr:4:9603240 |
| 4 rs10027164  | 9574763 A | 0.1511 | 4.27E-17 | chr:4:9603240 |
| 4 rs1825043   | 9573740 G | 0.1511 | 4.27E-17 | chr:4:9603240 |
| 4 rs3864192   | 9573978 A | 0.1511 | 4.27E-17 | chr:4:9603240 |
| 4 rs6448846   | 9580937 G | 0.1511 | 4.27E-17 | chr:4:9603240 |
| 4 rs6855045   | 9583518 T | 0.1511 | 4.27E-17 | chr:4:9603240 |
| 4 rs13129134  | 9721358 A | 6.718  | 4.71E-17 | chr:4:9603240 |
| 4 rs10005112  | 9732610 A | 6.683  | 5.52E-17 | chr:4:9603240 |
| 4 rs10939482  | 9735217 T | 6.683  | 5.52E-17 | chr:4:9603240 |
| 4 rs13127001  | 9731215 A | 6.683  | 5.52E-17 | chr:4:9603240 |
| 4 rs13140838  | 9732930 A | 6.683  | 5.52E-17 | chr:4:9603240 |
| 4 rs13131893  | 9744301 A | 6.62   | 5.91E-17 | chr:4:9603240 |
| 4 rs6448981   | 9740325 C | 5.678  | 6.01E-17 | chr:4:9603240 |
| 4 rs13132835  | 9729181 G | 6.486  | 6.58E-17 | chr:4:9603240 |
| 4 rs1811570   | 9587999 A | 0.1531 | 6.61E-17 | chr:4:9603240 |
| 4 rs6840249   | 9578971 G | 0.1533 | 6.80E-17 | chr:4:9603240 |
| 4 rs13142212  | 9722814 A | 6.593  | 7.12E-17 | chr:4:9603240 |
| 4 rs34441511  | 9738007 A | 6.585  | 7.74E-17 | chr:4:9603240 |
| 4 rs11930943  | 9742723 A | 6.49   | 8.08E-17 | chr:4:9603240 |
| 4 rs13118242  | 9585316 A | 0.1576 | 8.17E-17 | chr:4:9603240 |
| 4 rs13128435  | 9723672 G | 6.541  | 8.29E-17 | chr:4:9603240 |
| 4 rs6825221   | 9589620 G | 0.1508 | 8.58E-17 | chr:4:9603240 |
| 4 rs10939481  | 9735100 T | 6.447  | 8.62E-17 | chr:4:9603240 |
| 4 rs11942665  | 9742852 C | 6.388  | 9.24E-17 | chr:4:9603240 |
| 4 rs4563493   | 9743604 A | 6.388  | 9.24E-17 | chr:4:9603240 |
| 4 rs7435681   | 9743362 C | 6.388  | 9.24E-17 | chr:4:9603240 |
| 4 rs11729914  | 9721691 T | 6.401  | 1.19E-16 | chr:4:9603240 |
| 4 rs56884786  | 9736751 T | 6.451  | 1.28E-16 | chr:4:9603240 |
| 4 rs11722239  | 9482356 C | 5.841  | 1.42E-16 | chr:4:9603240 |
| 4 rs7668654   | 9744591 C | 5.451  | 1.49E-16 | chr:4:9603240 |
| 4 rs2127794   | 9510672 A | 5.47   | 3.01E-16 | chr:4:9603240 |
| 4 rs7657853   | 9687674 G | 0.1734 | 4.26E-16 | chr:4:9603240 |
| 4 rs7658414   | 9687969 G | 0.1734 | 4.26E-16 | chr:4:9603240 |

|               |           |        |          |               |
|---------------|-----------|--------|----------|---------------|
| 4 rs7691759   | 9688014 T | 0.1734 | 4.26E-16 | chr:4:9603240 |
| 4 rs10007689  | 9487133 G | 5.671  | 5.68E-16 | chr:4:9603240 |
| 4 rs11727040  | 9657302 T | 0.1753 | 6.47E-16 | chr:4:9603240 |
| 4 rs13116244  | 9678901 T | 0.1753 | 6.47E-16 | chr:4:9603240 |
| 4 rs13136183  | 9683883 C | 0.1753 | 6.47E-16 | chr:4:9603240 |
| 4 rs13136319  | 9685017 G | 0.1753 | 6.47E-16 | chr:4:9603240 |
| 4 rs28709958  | 9686042 T | 0.1753 | 6.47E-16 | chr:4:9603240 |
| 4 rs4274842   | 9676030 C | 0.1753 | 6.47E-16 | chr:4:9603240 |
| 4 rs4274843   | 9676042 C | 0.1753 | 6.47E-16 | chr:4:9603240 |
| 4 rs4370138   | 9667026 C | 0.1753 | 6.47E-16 | chr:4:9603240 |
| 4 rs4490459   | 9667257 T | 0.1753 | 6.47E-16 | chr:4:9603240 |
| 4 rs9714821   | 9653526 C | 0.1753 | 6.47E-16 | chr:4:9603240 |
| 4 rs9884933   | 9677246 A | 0.1753 | 6.47E-16 | chr:4:9603240 |
| 4 rs9990725   | 9674055 C | 0.1753 | 6.47E-16 | chr:4:9603240 |
| 4 rs13128352  | 9685728 T | 0.1751 | 7.49E-16 | chr:4:9603240 |
| 4 rs13119693  | 9451151 T | 5.414  | 7.94E-16 | chr:4:9603240 |
| 4 rs11943586  | 9746454 T | 5.668  | 1.17E-15 | chr:4:9603240 |
| 4 rs13122793  | 9748511 A | 5.668  | 1.17E-15 | chr:4:9603240 |
| 4 rs7677159   | 9745919 T | 5.668  | 1.17E-15 | chr:4:9603240 |
| 4 rs10025023  | 9543440 G | 0.1652 | 1.47E-15 | chr:4:9603240 |
| 4 rs13107139  | 9542907 A | 0.1652 | 1.47E-15 | chr:4:9603240 |
| 4 rs13128997  | 9543231 G | 0.1652 | 1.47E-15 | chr:4:9603240 |
| 4 rs11729432  | 9539552 G | 0.1652 | 1.59E-15 | chr:4:9603240 |
| 4 rs13113655  | 9751629 T | 5.52   | 1.87E-15 | chr:4:9603240 |
| 4 rs13143804  | 9753178 C | 5.388  | 2.20E-15 | chr:4:9603240 |
| 4 rs7671706   | 9749742 A | 5.437  | 2.22E-15 | chr:4:9603240 |
| 4 rs11734143  | 9538438 T | 0.1876 | 2.23E-15 | chr:4:9603240 |
| 4 rs199519389 | 9538430 T | 0.1876 | 2.23E-15 | chr:4:9603240 |
| 4 rs200667129 | 9538431 G | 0.1876 | 2.23E-15 | chr:4:9603240 |
| 4 rs201858621 | 9538429 G | 0.1876 | 2.23E-15 | chr:4:9603240 |
| 4 rs10014685  | 9545415 G | 0.1741 | 3.27E-15 | chr:4:9603240 |
| 4 rs10017411  | 9545951 G | 0.1741 | 3.27E-15 | chr:4:9603240 |
| 4 rs10027908  | 9545523 A | 0.1741 | 3.27E-15 | chr:4:9603240 |
| 4 rs10939280  | 9529545 T | 0.1771 | 3.27E-15 | chr:4:9603240 |
| 4 rs12645738  | 9529669 A | 0.1771 | 3.27E-15 | chr:4:9603240 |
| 4 rs13132266  | 9546033 C | 0.1741 | 3.27E-15 | chr:4:9603240 |
| 4 rs13119328  | 9751860 T | 4.755  | 3.45E-15 | chr:4:9603240 |
| 4 rs13150238  | 9751763 A | 4.755  | 3.45E-15 | chr:4:9603240 |
| 4 rs13127154  | 9516054 A | 0.1722 | 4.02E-15 | chr:4:9603240 |
| 4 rs9683488   | 9547215 T | 0.1751 | 4.22E-15 | chr:4:9603240 |
| 4 rs28430858  | 9626149 A | 0.1952 | 4.42E-15 | chr:4:9603240 |
| 4 rs10006755  | 9557642 A | 0.1875 | 4.47E-15 | chr:4:9603240 |
| 4 rs2170252   | 9560062 A | 0.1875 | 4.47E-15 | chr:4:9603240 |

|               |           |         |          |               |
|---------------|-----------|---------|----------|---------------|
| 4 rs9685223   | 9547260 G | 0.1819  | 5.15E-15 | chr:4:9603240 |
| 4 rs10023607  | 9545598 C | 0.1817  | 6.04E-15 | chr:4:9603240 |
| 4 rs9683494   | 9547264 T | 0.1767  | 6.63E-15 | chr:4:9603240 |
| 4 rs13150941  | 9694401 G | 0.2154  | 6.65E-15 | chr:4:9603240 |
| 4 rs13132213  | 9526790 A | 0.177   | 7.33E-15 | chr:4:9603240 |
| 4 rs2004246   | 9532476 T | 0.177   | 7.33E-15 | chr:4:9603240 |
| 4 rs6448634   | 9523588 G | 0.177   | 7.33E-15 | chr:4:9603240 |
| 4 rs6448635   | 9523753 G | 0.177   | 7.33E-15 | chr:4:9603240 |
| 4 rs6811970   | 9524003 G | 0.177   | 7.33E-15 | chr:4:9603240 |
| 4 rs9291527   | 9527162 A | 0.177   | 7.33E-15 | chr:4:9603240 |
| 4 rs9683863   | 9525076 A | 0.177   | 7.33E-15 | chr:4:9603240 |
| 4 rs9683870   | 9525148 A | 0.177   | 7.33E-15 | chr:4:9603240 |
| 4 rs10013288  | 9559218 T | 0.1916  | 8.19E-15 | chr:4:9603240 |
| 4 rs148801185 | 9567712 T | 0.1916  | 8.19E-15 | chr:4:9603240 |
| 4 rs1880830   | 9568295 A | 0.1916  | 8.19E-15 | chr:4:9603240 |
| 4 rs2049542   | 9553356 C | 0.1916  | 8.19E-15 | chr:4:9603240 |
| 4 rs2141035   | 9553370 G | 0.1916  | 8.19E-15 | chr:4:9603240 |
| 4 rs35706618  | 9561564 T | 0.1916  | 8.19E-15 | chr:4:9603240 |
| 4 rs13103566  | 9524305 G | 0.1772  | 8.34E-15 | chr:4:9603240 |
| 4 rs2004247   | 9532659 G | 0.1773  | 8.35E-15 | chr:4:9603240 |
| 4 rs28662985  | 9544175 A | 0.1761  | 8.80E-15 | chr:4:9603240 |
| 4 rs13114077  | 9413105 C | 4.9     | 9.11E-15 | chr:4:9603240 |
| 4 rs13143023  | 9537769 G | 0.1737  | 9.67E-15 | chr:4:9603240 |
| 4 rs9985673   | 9552897 C | 0.1915  | 1.02E-14 | chr:4:9603240 |
| 4 rs9997490   | 9529506 G | 0.08853 | 1.07E-14 | chr:4:9603240 |
| 4 rs13147565  | 9515927 G | 0.1789  | 1.15E-14 | chr:4:9603240 |
| 4 rs2003267   | 9534287 G | 0.1801  | 1.27E-14 | chr:4:9603240 |
| 4 rs11722202  | 9443894 T | 4.668   | 1.31E-14 | chr:4:9603240 |
| 4 rs10433844  | 9527567 C | 0.1846  | 1.34E-14 | chr:4:9603240 |
| 4 rs11939706  | 9531690 C | 0.1846  | 1.34E-14 | chr:4:9603240 |
| 4 rs11941465  | 9531661 A | 0.1846  | 1.34E-14 | chr:4:9603240 |
| 4 rs12648831  | 9447802 A | 4.785   | 1.60E-14 | chr:4:9603240 |
| 4 rs13120201  | 9687246 C | 0.194   | 1.72E-14 | chr:4:9603240 |
| 4 rs12499381  | 9515174 C | 0.1862  | 1.73E-14 | chr:4:9603240 |
| 4 rs13104123  | 9517330 G | 0.1862  | 1.73E-14 | chr:4:9603240 |
| 4 rs13108672  | 9514668 C | 0.1862  | 1.73E-14 | chr:4:9603240 |
| 4 rs13109658  | 9515121 C | 0.1862  | 1.73E-14 | chr:4:9603240 |
| 4 rs13110221  | 9517737 G | 0.1862  | 1.73E-14 | chr:4:9603240 |
| 4 rs13111328  | 9518187 G | 0.1862  | 1.73E-14 | chr:4:9603240 |
| 4 rs13124095  | 9516987 C | 0.1862  | 1.73E-14 | chr:4:9603240 |
| 4 rs13147088  | 9517687 T | 0.1862  | 1.73E-14 | chr:4:9603240 |
| 4 rs28588223  | 9519105 T | 0.1862  | 1.73E-14 | chr:4:9603240 |
| 4 rs9291572   | 9547598 T | 0.1892  | 1.75E-14 | chr:4:9603240 |

|               |           |        |          |               |
|---------------|-----------|--------|----------|---------------|
| 4 rs13101603  | 9521074 C | 0.1893 | 1.88E-14 | chr:4:9603240 |
| 4 rs13101631  | 9521113 C | 0.19   | 1.90E-14 | chr:4:9603240 |
| 4 rs13120116  | 9694454 C | 0.2266 | 1.91E-14 | chr:4:9603240 |
| 4 rs6814282   | 9692516 C | 0.2266 | 1.91E-14 | chr:4:9603240 |
| 4 rs9684173   | 9691519 G | 0.2266 | 1.91E-14 | chr:4:9603240 |
| 4 rs113355114 | 9631117 A | 0.204  | 1.97E-14 | chr:4:9603240 |
| 4 rs11729458  | 9630071 A | 0.204  | 1.97E-14 | chr:4:9603240 |
| 4 rs11933525  | 9630504 G | 0.204  | 1.97E-14 | chr:4:9603240 |
| 4 rs11939895  | 9630402 T | 0.204  | 1.97E-14 | chr:4:9603240 |
| 4 rs11939928  | 9630491 T | 0.204  | 1.97E-14 | chr:4:9603240 |
| 4 rs12505789  | 9630602 A | 0.204  | 1.97E-14 | chr:4:9603240 |
| 4 rs142275227 | 9631513 T | 0.204  | 1.97E-14 | chr:4:9603240 |
| 4 rs7666466   | 9629503 G | 0.204  | 1.97E-14 | chr:4:9603240 |
| 4 rs13152726  | 9520869 C | 0.1865 | 1.99E-14 | chr:4:9603240 |
| 4 rs6448881   | 9621124 T | 0.2031 | 2.10E-14 | chr:4:9603240 |
| 4 rs6448882   | 9621131 A | 0.2031 | 2.10E-14 | chr:4:9603240 |
| 4 rs28821561  | 9518791 G | 0.1871 | 2.13E-14 | chr:4:9603240 |
| 4 rs12503159  | 9536716 G | 0.1878 | 2.33E-14 | chr:4:9603240 |
| 4 rs6817051   | 9536262 A | 0.1878 | 2.33E-14 | chr:4:9603240 |
| 4 rs6817702   | 9536543 A | 0.1878 | 2.33E-14 | chr:4:9603240 |
| 4 rs6828582   | 9536679 T | 0.1878 | 2.33E-14 | chr:4:9603240 |
| 4 rs6837228   | 9536521 G | 0.1878 | 2.33E-14 | chr:4:9603240 |
| 4 rs6855334   | 9536037 C | 0.1878 | 2.33E-14 | chr:4:9603240 |
| 4 rs1815183   | 9499932 T | 0.1889 | 2.60E-14 | chr:4:9603240 |
| 4 rs13103668  | 9517095 G | 0.1879 | 2.69E-14 | chr:4:9603240 |
| 4 rs13143667  | 9781230 T | 4.883  | 3.11E-14 | chr:4:9603240 |
| 4 rs7690455   | 9758860 G | 4.348  | 3.18E-14 | chr:4:9603240 |
| 4 rs2086432   | 9511689 G | 0.1938 | 3.21E-14 | chr:4:9603240 |
| 4 rs3961015   | 9512110 C | 0.1938 | 3.21E-14 | chr:4:9603240 |
| 4 rs7658778   | 9512484 G | 0.1938 | 3.21E-14 | chr:4:9603240 |
| 4 rs9790388   | 9513010 G | 0.1938 | 3.21E-14 | chr:4:9603240 |
| 4 rs13120469  | 9623671 C | 0.2103 | 3.52E-14 | chr:4:9603240 |
| 4 rs143582873 | 9624071 G | 0.2103 | 3.52E-14 | chr:4:9603240 |
| 4 rs4352476   | 9621475 C | 0.2103 | 3.52E-14 | chr:4:9603240 |
| 4 rs4504250   | 9621700 T | 0.2103 | 3.52E-14 | chr:4:9603240 |
| 4 rs4558872   | 9621642 A | 0.2103 | 3.52E-14 | chr:4:9603240 |
| 4 rs4622998   | 9621659 C | 0.2103 | 3.52E-14 | chr:4:9603240 |
| 4 rs6448878   | 9620623 G | 0.2103 | 3.52E-14 | chr:4:9603240 |
| 4 rs6448879   | 9620994 T | 0.2103 | 3.52E-14 | chr:4:9603240 |
| 4 rs6448880   | 9621023 T | 0.2103 | 3.52E-14 | chr:4:9603240 |
| 4 rs7654517   | 9620028 A | 0.2103 | 3.52E-14 | chr:4:9603240 |
| 4 rs7661238   | 9620481 T | 0.2103 | 3.52E-14 | chr:4:9603240 |
| 4 rs7673959   | 9620145 G | 0.2103 | 3.52E-14 | chr:4:9603240 |

|              |           |        |          |               |
|--------------|-----------|--------|----------|---------------|
| 4 rs7693408  | 9623110 G | 0.2103 | 3.52E-14 | chr:4:9603240 |
| 4 rs79887705 | 9622505 T | 0.2103 | 3.52E-14 | chr:4:9603240 |
| 4 rs56139970 | 9802272 T | 4.874  | 3.57E-14 | chr:4:9603240 |
| 4 rs78469741 | 9631526 C | 0.2064 | 3.58E-14 | chr:4:9603240 |
| 4 rs7685396  | 9794724 A | 4.947  | 3.62E-14 | chr:4:9603240 |
| 4 rs13109001 | 9683156 G | 0.2376 | 3.84E-14 | chr:4:9603240 |
| 4 rs13139629 | 9683171 A | 0.2376 | 3.84E-14 | chr:4:9603240 |
| 4 rs13145821 | 9683168 T | 0.2376 | 3.84E-14 | chr:4:9603240 |
| 4 rs55700931 | 9683149 G | 0.2376 | 3.84E-14 | chr:4:9603240 |
| 4 rs59014980 | 9494946 T | 0.1927 | 4.53E-14 | chr:4:9603240 |
| 4 rs13145733 | 9760645 T | 4.74   | 4.60E-14 | chr:4:9603240 |
| 4 rs10939112 | 9496079 C | 0.1988 | 4.73E-14 | chr:4:9603240 |
| 4 rs11725001 | 9495320 G | 0.1988 | 4.73E-14 | chr:4:9603240 |
| 4 rs11725044 | 9495402 G | 0.1988 | 4.73E-14 | chr:4:9603240 |
| 4 rs12502545 | 9496170 G | 0.1988 | 4.73E-14 | chr:4:9603240 |
| 4 rs4554075  | 9497783 T | 0.1988 | 4.73E-14 | chr:4:9603240 |
| 4 rs1829413  | 9792339 A | 4.894  | 4.77E-14 | chr:4:9603240 |
| 4 rs13136567 | 9537043 G | 0.1989 | 5.16E-14 | chr:4:9603240 |
| 4 rs13129487 | 9771008 T | 4.663  | 5.20E-14 | chr:4:9603240 |
| 4 rs10012516 | 9797178 A | 4.816  | 5.86E-14 | chr:4:9603240 |
| 4 rs13106539 | 9797703 T | 4.816  | 5.86E-14 | chr:4:9603240 |
| 4 rs2280207  | 9799776 C | 4.865  | 5.95E-14 | chr:4:9603240 |
| 4 rs61175357 | 9434500 A | 4.509  | 6.04E-14 | chr:4:9603240 |
| 4 rs12502551 | 9496229 G | 0.2004 | 6.22E-14 | chr:4:9603240 |
| 4 rs13141123 | 9757904 C | 4.666  | 6.23E-14 | chr:4:9603240 |
| 4 rs13145809 | 9683143 T | 0.2403 | 6.30E-14 | chr:4:9603240 |
| 4 rs3961007  | 9501597 C | 0.1972 | 6.38E-14 | chr:4:9603240 |
| 4 rs56010928 | 9500918 G | 0.1972 | 6.38E-14 | chr:4:9603240 |
| 4 rs59501639 | 9500857 C | 0.1972 | 6.38E-14 | chr:4:9603240 |
| 4 rs10002614 | 9626095 T | 0.217  | 6.69E-14 | chr:4:9603240 |
| 4 rs36162019 | 9625137 C | 0.217  | 6.69E-14 | chr:4:9603240 |
| 4 rs6836718  | 9626703 A | 0.217  | 6.69E-14 | chr:4:9603240 |
| 4 rs6837106  | 9626304 T | 0.217  | 6.69E-14 | chr:4:9603240 |
| 4 rs6837700  | 9626577 T | 0.217  | 6.69E-14 | chr:4:9603240 |
| 4 rs9995183  | 9625793 C | 0.217  | 6.69E-14 | chr:4:9603240 |
| 4 rs9998663  | 9627053 C | 0.217  | 6.69E-14 | chr:4:9603240 |
| 4 rs9999630  | 9625826 A | 0.217  | 6.69E-14 | chr:4:9603240 |
| 4 rs62410330 | 9505018 C | 0.198  | 6.75E-14 | chr:4:9603240 |
| 4 rs6835741  | 9778911 A | 4.731  | 6.86E-14 | chr:4:9603240 |
| 4 rs10939423 | 9627362 A | 0.2163 | 7.25E-14 | chr:4:9603240 |
| 4 rs10939424 | 9627379 G | 0.2163 | 7.25E-14 | chr:4:9603240 |
| 4 rs13143798 | 9494961 C | 0.1958 | 7.60E-14 | chr:4:9603240 |
| 4 rs10938806 | 9439761 C | 4.244  | 7.71E-14 | chr:4:9603240 |

|               |           |        |          |               |
|---------------|-----------|--------|----------|---------------|
| 4 rs13141706  | 9818345 C | 4.418  | 7.76E-14 | chr:4:9603240 |
| 4 rs6841397   | 9815402 A | 4.711  | 7.90E-14 | chr:4:9603240 |
| 4 rs12643412  | 9420974 G | 4.413  | 8.60E-14 | chr:4:9603240 |
| 4 rs10003216  | 9766749 A | 4.563  | 8.78E-14 | chr:4:9603240 |
| 4 rs10004319  | 9761940 C | 4.563  | 8.78E-14 | chr:4:9603240 |
| 4 rs10013858  | 9762461 T | 4.563  | 8.78E-14 | chr:4:9603240 |
| 4 rs10015665  | 9768048 T | 4.563  | 8.78E-14 | chr:4:9603240 |
| 4 rs11726288  | 9767309 A | 4.563  | 8.78E-14 | chr:4:9603240 |
| 4 rs11731100  | 9767180 T | 4.563  | 8.78E-14 | chr:4:9603240 |
| 4 rs12507861  | 9777590 A | 4.563  | 8.78E-14 | chr:4:9603240 |
| 4 rs12509511  | 9769563 T | 4.563  | 8.78E-14 | chr:4:9603240 |
| 4 rs13117391  | 9764155 T | 4.563  | 8.78E-14 | chr:4:9603240 |
| 4 rs13140817  | 9762975 A | 4.563  | 8.78E-14 | chr:4:9603240 |
| 4 rs13145337  | 9770837 A | 4.563  | 8.78E-14 | chr:4:9603240 |
| 4 rs6815039   | 9777809 C | 4.563  | 8.78E-14 | chr:4:9603240 |
| 4 rs2280333   | 9811133 A | 4.712  | 9.06E-14 | chr:4:9603240 |
| 4 rs13112576  | 9781183 T | 4.634  | 9.44E-14 | chr:4:9603240 |
| 4 rs13129974  | 9779526 C | 4.626  | 1.03E-13 | chr:4:9603240 |
| 4 rs13148356  | 9817070 A | 4.658  | 1.04E-13 | chr:4:9603240 |
| 4 rs10006208  | 9621927 G | 0.2315 | 1.06E-13 | chr:4:9603240 |
| 4 rs10019518  | 9621923 A | 0.2315 | 1.06E-13 | chr:4:9603240 |
| 4 rs10005684  | 9626897 T | 0.2181 | 1.07E-13 | chr:4:9603240 |
| 4 rs10022923  | 9773438 A | 4.524  | 1.14E-13 | chr:4:9603240 |
| 4 rs13124141  | 9773237 A | 4.524  | 1.14E-13 | chr:4:9603240 |
| 4 rs13124305  | 9773273 A | 4.524  | 1.14E-13 | chr:4:9603240 |
| 4 rs13111135  | 9518109 G | 0.2155 | 1.21E-13 | chr:4:9603240 |
| 4 rs1967551   | 9785134 C | 4.39   | 1.33E-13 | chr:4:9603240 |
| 4 rs6817739   | 9442163 T | 4.198  | 1.34E-13 | chr:4:9603240 |
| 4 rs1967550   | 9785265 T | 4.433  | 1.86E-13 | chr:4:9603240 |
| 4 rs56205495  | 9789501 C | 4.433  | 1.86E-13 | chr:4:9603240 |
| 4 rs13108890  | 9494959 T | 0.2145 | 2.07E-13 | chr:4:9603240 |
| 4 rs10006201  | 9621908 G | 0.2395 | 2.18E-13 | chr:4:9603240 |
| 4 rs568086508 | 9494938 T | 0.2006 | 2.30E-13 | chr:4:9603240 |
| 4 rs11722326  | 9447272 T | 0.2345 | 2.41E-13 | chr:4:9603240 |
| 4 rs11736134  | 9447235 C | 0.2345 | 2.41E-13 | chr:4:9603240 |
| 4 rs28826976  | 9631246 A | 0.2313 | 2.44E-13 | chr:4:9603240 |
| 4 rs6836875   | 9626757 A | 0.2325 | 2.50E-13 | chr:4:9603240 |
| 4 rs11726471  | 9786732 C | 4.407  | 2.84E-13 | chr:4:9603240 |
| 4 rs2280206   | 9799237 C | 4.352  | 2.95E-13 | chr:4:9603240 |
| 4 rs11724549  | 9484511 A | 4.525  | 3.29E-13 | chr:4:9603240 |
| 4 rs10938839  | 9445662 C | 0.2358 | 3.34E-13 | chr:4:9603240 |
| 4 rs13104015  | 9448744 C | 0.2358 | 3.34E-13 | chr:4:9603240 |
| 4 rs2865004   | 9450173 C | 0.2358 | 3.34E-13 | chr:4:9603240 |



|               |           |        |          |               |
|---------------|-----------|--------|----------|---------------|
| 4 rs6815543   | 9447712 A | 0.2358 | 3.34E-13 | chr:4:9603240 |
| 4 rs6822257   | 9448087 T | 0.2358 | 3.34E-13 | chr:4:9603240 |
| 4 rs6829559   | 9449933 A | 0.2358 | 3.34E-13 | chr:4:9603240 |
| 4 rs6835868   | 9448039 G | 0.2358 | 3.34E-13 | chr:4:9603240 |
| 4 rs6844838   | 9452616 A | 0.2358 | 3.34E-13 | chr:4:9603240 |
| 4 rs6855905   | 9450744 G | 0.2358 | 3.34E-13 | chr:4:9603240 |
| 4 rs6857540   | 9446874 A | 0.2358 | 3.34E-13 | chr:4:9603240 |
| 4 rs7665884   | 9448306 T | 0.2358 | 3.34E-13 | chr:4:9603240 |
| 4 rs11733921  | 9632876 T | 0.2118 | 3.44E-13 | chr:4:9603240 |
| 4 rs13116952  | 9516058 C | 0.2229 | 3.45E-13 | chr:4:9603240 |
| 4 rs13127159  | 9516064 A | 0.2229 | 3.45E-13 | chr:4:9603240 |
| 4 rs12503896  | 9513756 C | 0.2024 | 3.69E-13 | chr:4:9603240 |
| 4 rs13123640  | 9494995 G | 0.2251 | 4.64E-13 | chr:4:9603240 |
| 4 rs13116993  | 9516115 C | 0.2302 | 5.16E-13 | chr:4:9603240 |
| 4 rs7679464   | 9801283 A | 4.462  | 6.06E-13 | chr:4:9603240 |
| 4 rs78221323  | 9622823 G | 0.1967 | 7.63E-13 | chr:4:9603240 |
| 4 rs12511327  | 9504446 G | 0.233  | 8.11E-13 | chr:4:9603240 |
| 4 rs7437720   | 9510396 A | 0.2588 | 8.82E-13 | chr:4:9603240 |
| 4 rs28784595  | 9646182 C | 0.2552 | 9.21E-13 | chr:4:9603240 |
| 4 rs9685705   | 9547134 C | 0.2283 | 1.13E-12 | chr:4:9603240 |
| 4 rs3762933   | 9825026 T | 4.165  | 1.14E-12 | chr:4:9603240 |
| 4 rs10938861  | 9450013 C | 4.182  | 1.19E-12 | chr:4:9603240 |
| 4 rs112123699 | 9624028 G | 0.2178 | 1.38E-12 | chr:4:9603240 |
| 4 rs11722280  | 9444065 C | 0.2573 | 1.61E-12 | chr:4:9603240 |
| 4 rs10212937  | 9485841 T | 0.2415 | 1.65E-12 | chr:4:9603240 |
| 4 rs11725337  | 9484986 T | 0.2415 | 1.65E-12 | chr:4:9603240 |
| 4 rs13102963  | 9488726 T | 0.2415 | 1.65E-12 | chr:4:9603240 |
| 4 rs1852357   | 9483070 G | 0.2415 | 1.65E-12 | chr:4:9603240 |
| 4 rs6851086   | 9708351 C | 0.2116 | 1.72E-12 | chr:4:9603240 |
| 4 rs2091390   | 9454637 G | 0.2475 | 2.16E-12 | chr:4:9603240 |
| 4 rs6448974   | 9715105 A | 0.1951 | 2.19E-12 | chr:4:9603240 |
| 4 rs10033094  | 9456014 G | 0.2439 | 2.27E-12 | chr:4:9603240 |
| 4 rs10033095  | 9456029 G | 0.2439 | 2.27E-12 | chr:4:9603240 |
| 4 rs10470804  | 9456676 C | 0.2439 | 2.27E-12 | chr:4:9603240 |
| 4 rs12501884  | 9455690 A | 0.2439 | 2.27E-12 | chr:4:9603240 |
| 4 rs12502001  | 9456060 A | 0.2439 | 2.27E-12 | chr:4:9603240 |
| 4 rs12644512  | 9482649 A | 0.2439 | 2.27E-12 | chr:4:9603240 |
| 4 rs13142300  | 9455621 G | 0.2439 | 2.27E-12 | chr:4:9603240 |
| 4 rs12501535  | 9456977 C | 0.2487 | 2.43E-12 | chr:4:9603240 |
| 4 rs7661469   | 9736709 A | 0.2001 | 2.43E-12 | chr:4:9603240 |
| 4 rs13101652  | 9707682 A | 0.1984 | 3.06E-12 | chr:4:9603240 |
| 4 rs9291607   | 9708798 G | 0.1984 | 3.06E-12 | chr:4:9603240 |
| 4 rs13101880  | 9707827 A | 0.1995 | 3.24E-12 | chr:4:9603240 |

|               |           |        |          |               |
|---------------|-----------|--------|----------|---------------|
| 4 rs2091391   | 9454734 A | 0.2505 | 3.26E-12 | chr:4:9603240 |
| 4 rs2103224   | 9453452 G | 0.2494 | 3.29E-12 | chr:4:9603240 |
| 4 rs6840936   | 9453059 C | 0.2494 | 3.29E-12 | chr:4:9603240 |
| 4 rs6850194   | 9452936 A | 0.2494 | 3.29E-12 | chr:4:9603240 |
| 4 rs6856153   | 9452898 T | 0.2494 | 3.29E-12 | chr:4:9603240 |
| 4 rs6858082   | 9454399 A | 0.2494 | 3.29E-12 | chr:4:9603240 |
| 4 rs6842850   | 9788598 A | 0.2906 | 3.30E-12 | chr:4:9603240 |
| 4 rs4407503   | 9714799 T | 0.1997 | 3.31E-12 | chr:4:9603240 |
| 4 rs4282175   | 9714684 A | 0.1988 | 3.36E-12 | chr:4:9603240 |
| 4 rs1107912   | 9820179 G | 3.972  | 3.60E-12 | chr:4:9603240 |
| 4 rs11726423  | 9819572 T | 3.972  | 3.60E-12 | chr:4:9603240 |
| 4 rs13105954  | 9868417 G | 4.001  | 3.78E-12 | chr:4:9603240 |
| 4 rs2292917   | 9867277 G | 4.001  | 3.78E-12 | chr:4:9603240 |
| 4 rs9685887   | 9706342 T | 0.2003 | 3.92E-12 | chr:4:9603240 |
| 4 rs7675599   | 9736516 G | 0.204  | 4.23E-12 | chr:4:9603240 |
| 4 rs7680888   | 9736888 G | 0.204  | 4.23E-12 | chr:4:9603240 |
| 4 rs7694044   | 9736576 C | 0.204  | 4.23E-12 | chr:4:9603240 |
| 4 rs13116446  | 9859897 A | 4.092  | 4.34E-12 | chr:4:9603240 |
| 4 rs2091392   | 9454876 G | 0.2518 | 4.54E-12 | chr:4:9603240 |
| 4 rs6448972   | 9709511 C | 0.203  | 4.62E-12 | chr:4:9603240 |
| 4 rs58934247  | 9589730 C | 0.199  | 5.04E-12 | chr:4:9603240 |
| 4 rs6843869   | 9634451 T | 0.1975 | 5.25E-12 | chr:4:9603240 |
| 4 rs56293131  | 9652279 G | 0.2    | 5.34E-12 | chr:4:9603240 |
| 4 rs7440232   | 9651744 T | 0.2    | 5.34E-12 | chr:4:9603240 |
| 4 rs9985764   | 9718719 A | 0.2042 | 5.38E-12 | chr:4:9603240 |
| 4 rs560594861 | 9730070 T | 5.24   | 5.47E-12 | chr:4:9603240 |
| 4 rs4407504   | 9717360 C | 0.2056 | 5.51E-12 | chr:4:9603240 |
| 4 rs7656342   | 9818116 G | 0.2879 | 5.55E-12 | chr:4:9603240 |
| 4 rs10805313  | 9703061 T | 0.205  | 5.92E-12 | chr:4:9603240 |
| 4 rs10805314  | 9703181 T | 0.205  | 5.92E-12 | chr:4:9603240 |
| 4 rs13119702  | 9702543 G | 0.205  | 5.92E-12 | chr:4:9603240 |
| 4 rs4521347   | 9701641 T | 0.205  | 5.92E-12 | chr:4:9603240 |
| 4 rs4536924   | 9704973 T | 0.205  | 5.92E-12 | chr:4:9603240 |
| 4 rs4621430   | 9702695 T | 0.205  | 5.92E-12 | chr:4:9603240 |
| 4 rs9992039   | 9702605 T | 0.205  | 5.92E-12 | chr:4:9603240 |
| 4 rs11726221  | 9853863 A | 3.941  | 6.28E-12 | chr:4:9603240 |
| 4 rs13152172  | 9855141 G | 3.941  | 6.28E-12 | chr:4:9603240 |
| 4 rs35629527  | 9864232 T | 3.941  | 6.28E-12 | chr:4:9603240 |
| 4 rs6831580   | 9852750 T | 3.941  | 6.28E-12 | chr:4:9603240 |
| 4 rs10004806  | 9732326 G | 0.2073 | 6.32E-12 | chr:4:9603240 |
| 4 rs10013760  | 9732325 C | 0.2073 | 6.32E-12 | chr:4:9603240 |
| 4 rs10021184  | 9732624 T | 0.2073 | 6.32E-12 | chr:4:9603240 |
| 4 rs10805317  | 9733636 A | 0.2073 | 6.32E-12 | chr:4:9603240 |

|               |           |        |          |               |
|---------------|-----------|--------|----------|---------------|
| 4 rs10939480  | 9735093 A | 0.2073 | 6.32E-12 | chr:4:9603240 |
| 4 rs11728960  | 9729781 A | 0.2073 | 6.32E-12 | chr:4:9603240 |
| 4 rs2176643   | 9733602 G | 0.2073 | 6.32E-12 | chr:4:9603240 |
| 4 rs6448982   | 9744131 C | 0.2073 | 6.32E-12 | chr:4:9603240 |
| 4 rs6811848   | 9732161 C | 0.2073 | 6.32E-12 | chr:4:9603240 |
| 4 rs6852897   | 9730941 C | 0.2073 | 6.32E-12 | chr:4:9603240 |
| 4 rs6856942   | 9730573 A | 0.2073 | 6.32E-12 | chr:4:9603240 |
| 4 rs7658268   | 9731348 A | 0.2073 | 6.32E-12 | chr:4:9603240 |
| 4 rs7667613   | 9734812 G | 0.2073 | 6.32E-12 | chr:4:9603240 |
| 4 rs7668469   | 9744530 T | 0.2073 | 6.32E-12 | chr:4:9603240 |
| 4 rs7678014   | 9734421 A | 0.2073 | 6.32E-12 | chr:4:9603240 |
| 4 rs7684214   | 9734585 T | 0.2073 | 6.32E-12 | chr:4:9603240 |
| 4 rs7685513   | 9728599 A | 0.2073 | 6.32E-12 | chr:4:9603240 |
| 4 rs6824636   | 9881851 G | 3.93   | 6.45E-12 | chr:4:9603240 |
| 4 rs6810736   | 9879728 T | 3.943  | 6.78E-12 | chr:4:9603240 |
| 4 rs6829800   | 9685856 A | 0.2079 | 7.04E-12 | chr:4:9603240 |
| 4 rs1320054   | 9870125 T | 3.948  | 7.19E-12 | chr:4:9603240 |
| 4 rs10004432  | 9726690 T | 0.2065 | 7.34E-12 | chr:4:9603240 |
| 4 rs10939473  | 9722105 A | 0.2065 | 7.34E-12 | chr:4:9603240 |
| 4 rs11944806  | 9723887 T | 0.2065 | 7.34E-12 | chr:4:9603240 |
| 4 rs13103552  | 9725302 C | 0.2065 | 7.34E-12 | chr:4:9603240 |
| 4 rs13122613  | 9723377 A | 0.2065 | 7.34E-12 | chr:4:9603240 |
| 4 rs13136217  | 9722292 G | 0.2065 | 7.34E-12 | chr:4:9603240 |
| 4 rs13142396  | 9722847 G | 0.2065 | 7.34E-12 | chr:4:9603240 |
| 4 rs2037313   | 9724711 T | 0.2065 | 7.34E-12 | chr:4:9603240 |
| 4 rs2037315   | 9722408 C | 0.2065 | 7.34E-12 | chr:4:9603240 |
| 4 rs2867341   | 9726973 G | 0.2065 | 7.34E-12 | chr:4:9603240 |
| 4 rs9997706   | 9727210 C | 0.2065 | 7.34E-12 | chr:4:9603240 |
| 4 rs185440030 | 9540111 G | 0.2256 | 7.45E-12 | chr:4:9603240 |
| 4 rs192818918 | 9540113 G | 0.2256 | 7.45E-12 | chr:4:9603240 |
| 4 rs71614255  | 9540107 G | 0.2256 | 7.45E-12 | chr:4:9603240 |
| 4 rs76618380  | 9540112 T | 0.2256 | 7.45E-12 | chr:4:9603240 |
| 4 rs6837618   | 9634403 A | 0.2008 | 7.56E-12 | chr:4:9603240 |
| 4 rs13148571  | 9873855 A | 3.946  | 7.91E-12 | chr:4:9603240 |
| 4 rs57960375  | 9618418 A | 3.274  | 8.37E-12 | chr:4:9603240 |
| 4 rs12511438  | 9702289 C | 0.2035 | 8.41E-12 | chr:4:9603240 |
| 4 rs10002984  | 9680733 T | 0.2053 | 8.50E-12 | chr:4:9603240 |
| 4 rs10010621  | 9668706 G | 0.2053 | 8.50E-12 | chr:4:9603240 |
| 4 rs10014408  | 9695145 T | 0.2053 | 8.50E-12 | chr:4:9603240 |
| 4 rs10014571  | 9662181 C | 0.2053 | 8.50E-12 | chr:4:9603240 |
| 4 rs11731656  | 9691910 A | 0.2053 | 8.50E-12 | chr:4:9603240 |
| 4 rs12506622  | 9690369 T | 0.2053 | 8.50E-12 | chr:4:9603240 |
| 4 rs13104360  | 9684804 C | 0.2053 | 8.50E-12 | chr:4:9603240 |

|               |           |        |          |               |
|---------------|-----------|--------|----------|---------------|
| 4 rs13148606  | 9660864 C | 0.2053 | 8.50E-12 | chr:4:9603240 |
| 4 rs4260537   | 9678215 A | 0.2053 | 8.50E-12 | chr:4:9603240 |
| 4 rs4440216   | 9681531 T | 0.2053 | 8.50E-12 | chr:4:9603240 |
| 4 rs4485817   | 9674732 G | 0.2053 | 8.50E-12 | chr:4:9603240 |
| 4 rs4532233   | 9668924 G | 0.2053 | 8.50E-12 | chr:4:9603240 |
| 4 rs4554077   | 9674736 G | 0.2053 | 8.50E-12 | chr:4:9603240 |
| 4 rs6448959   | 9683927 T | 0.2053 | 8.50E-12 | chr:4:9603240 |
| 4 rs6448960   | 9686586 T | 0.2053 | 8.50E-12 | chr:4:9603240 |
| 4 rs6812811   | 9672000 T | 0.2053 | 8.50E-12 | chr:4:9603240 |
| 4 rs6823671   | 9692517 A | 0.2053 | 8.50E-12 | chr:4:9603240 |
| 4 rs6829292   | 9692892 A | 0.2053 | 8.50E-12 | chr:4:9603240 |
| 4 rs6844051   | 9677232 C | 0.2053 | 8.50E-12 | chr:4:9603240 |
| 4 rs6848526   | 9670487 T | 0.2053 | 8.50E-12 | chr:4:9603240 |
| 4 rs6853779   | 9684468 A | 0.2053 | 8.50E-12 | chr:4:9603240 |
| 4 rs6855355   | 9672120 A | 0.2053 | 8.50E-12 | chr:4:9603240 |
| 4 rs6856401   | 9664027 G | 0.2053 | 8.50E-12 | chr:4:9603240 |
| 4 rs6858093   | 9681650 G | 0.2053 | 8.50E-12 | chr:4:9603240 |
| 4 rs7434744   | 9672688 A | 0.2053 | 8.50E-12 | chr:4:9603240 |
| 4 rs7654169   | 9654071 T | 0.2053 | 8.50E-12 | chr:4:9603240 |
| 4 rs7678732   | 9693253 T | 0.2053 | 8.50E-12 | chr:4:9603240 |
| 4 rs7680572   | 9687543 A | 0.2053 | 8.50E-12 | chr:4:9603240 |
| 4 rs7686230   | 9657345 T | 0.2053 | 8.50E-12 | chr:4:9603240 |
| 4 rs7691166   | 9687673 T | 0.2053 | 8.50E-12 | chr:4:9603240 |
| 4 rs9291604   | 9696677 T | 0.2053 | 8.50E-12 | chr:4:9603240 |
| 4 rs9685755   | 9670178 T | 0.2053 | 8.50E-12 | chr:4:9603240 |
| 4 rs9761757   | 9696996 T | 0.2053 | 8.50E-12 | chr:4:9603240 |
| 4 rs11731628  | 9601348 T | 0.2012 | 8.71E-12 | chr:4:9603240 |
| 4 rs147268581 | 9593254 T | 0.2046 | 9.38E-12 | chr:4:9603240 |
| 4 rs7695437   | 9734981 A | 0.2123 | 9.82E-12 | chr:4:9603240 |
| 4 rs9995655   | 9718931 G | 0.2117 | 1.00E-11 | chr:4:9603240 |
| 4 rs10939458  | 9677951 T | 0.2049 | 1.02E-11 | chr:4:9603240 |
| 4 rs10011580  | 9634989 A | 0.206  | 1.07E-11 | chr:4:9603240 |
| 4 rs10939428  | 9630041 A | 0.206  | 1.07E-11 | chr:4:9603240 |
| 4 rs11727601  | 9637799 G | 0.206  | 1.07E-11 | chr:4:9603240 |
| 4 rs11731624  | 9637608 A | 0.206  | 1.07E-11 | chr:4:9603240 |
| 4 rs11735475  | 9614926 T | 0.206  | 1.07E-11 | chr:4:9603240 |
| 4 rs139590336 | 9612695 A | 0.206  | 1.07E-11 | chr:4:9603240 |
| 4 rs143734288 | 9611958 C | 0.206  | 1.07E-11 | chr:4:9603240 |
| 4 rs4974812   | 9614598 C | 0.206  | 1.07E-11 | chr:4:9603240 |
| 4 rs4974815   | 9614158 T | 0.206  | 1.07E-11 | chr:4:9603240 |
| 4 rs4974816   | 9613067 A | 0.206  | 1.07E-11 | chr:4:9603240 |
| 4 rs4974818   | 9612995 T | 0.206  | 1.07E-11 | chr:4:9603240 |
| 4 rs58773742  | 9634764 A | 0.206  | 1.07E-11 | chr:4:9603240 |

|               |           |        |          |               |
|---------------|-----------|--------|----------|---------------|
| 4 rs59114318  | 9634777 A | 0.206  | 1.07E-11 | chr:4:9603240 |
| 4 rs59245820  | 9634816 G | 0.206  | 1.07E-11 | chr:4:9603240 |
| 4 rs6836184   | 9633711 A | 0.206  | 1.07E-11 | chr:4:9603240 |
| 4 rs6836196   | 9633728 A | 0.206  | 1.07E-11 | chr:4:9603240 |
| 4 rs6837988   | 9634543 A | 0.206  | 1.07E-11 | chr:4:9603240 |
| 4 rs6856161   | 9633826 G | 0.206  | 1.07E-11 | chr:4:9603240 |
| 4 rs9291589   | 9633410 C | 0.206  | 1.07E-11 | chr:4:9603240 |
| 4 rs552645918 | 9594483 A | 0.2049 | 1.09E-11 | chr:4:9603240 |
| 4 rs55813730  | 9595618 A | 0.2075 | 1.12E-11 | chr:4:9603240 |
| 4 rs6836878   | 9889069 T | 3.84   | 1.13E-11 | chr:4:9603240 |
| 4 rs10939437  | 9647252 G | 0.208  | 1.17E-11 | chr:4:9603240 |
| 4 rs112878601 | 9643563 G | 0.208  | 1.17E-11 | chr:4:9603240 |
| 4 rs11734925  | 9644507 G | 0.208  | 1.17E-11 | chr:4:9603240 |
| 4 rs4406018   | 9645618 A | 0.208  | 1.17E-11 | chr:4:9603240 |
| 4 rs56323944  | 9642872 T | 0.208  | 1.17E-11 | chr:4:9603240 |
| 4 rs56653599  | 9642038 T | 0.208  | 1.17E-11 | chr:4:9603240 |
| 4 rs62409890  | 9643102 T | 0.208  | 1.17E-11 | chr:4:9603240 |
| 4 rs62409891  | 9643131 C | 0.208  | 1.17E-11 | chr:4:9603240 |
| 4 rs10939389  | 9589959 T | 0.2385 | 1.18E-11 | chr:4:9603240 |
| 4 rs10939471  | 9721337 C | 0.2097 | 1.22E-11 | chr:4:9603240 |
| 4 rs10939472  | 9721616 G | 0.2097 | 1.22E-11 | chr:4:9603240 |
| 4 rs11730702  | 9721553 A | 0.2097 | 1.22E-11 | chr:4:9603240 |
| 4 rs7659176   | 9721066 A | 0.2097 | 1.22E-11 | chr:4:9603240 |
| 4 rs7664410   | 9720743 T | 0.2097 | 1.22E-11 | chr:4:9603240 |
| 4 rs7696036   | 9720895 C | 0.2097 | 1.22E-11 | chr:4:9603240 |
| 4 rs531217356 | 9591411 A | 0.2061 | 1.22E-11 | chr:4:9603240 |
| 4 rs11737821  | 9885245 T | 3.84   | 1.25E-11 | chr:4:9603240 |
| 4 rs1519098   | 9881158 A | 3.84   | 1.25E-11 | chr:4:9603240 |
| 4 rs35512765  | 9883233 T | 3.84   | 1.25E-11 | chr:4:9603240 |
| 4 rs6858644   | 9741681 T | 0.2132 | 1.27E-11 | chr:4:9603240 |
| 4 rs10939558  | 9844162 C | 3.763  | 1.28E-11 | chr:4:9603240 |
| 4 rs6843809   | 9655294 G | 0.2054 | 1.36E-11 | chr:4:9603240 |
| 4 rs1850741   | 9876793 T | 3.764  | 1.39E-11 | chr:4:9603240 |
| 4 rs4974861   | 9604139 T | 0.2066 | 1.39E-11 | chr:4:9603240 |
| 4 rs4974866   | 9575646 T | 0.2348 | 1.40E-11 | chr:4:9603240 |
| 4 rs11737243  | 9641272 T | 0.2023 | 1.47E-11 | chr:4:9603240 |
| 4 rs10939427  | 9628538 G | 0.2177 | 1.59E-11 | chr:4:9603240 |
| 4 rs62409884  | 9642370 T | 0.2063 | 1.67E-11 | chr:4:9603240 |
| 4 rs10939388  | 9589956 G | 0.2418 | 1.68E-11 | chr:4:9603240 |
| 4 rs4575993   | 9858744 G | 3.788  | 1.76E-11 | chr:4:9603240 |
| 4 rs13119059  | 9847860 C | 3.694  | 1.79E-11 | chr:4:9603240 |
| 4 rs11731224  | 9640971 G | 0.217  | 1.86E-11 | chr:4:9603240 |
| 4 rs4554078   | 9701544 A | 0.2174 | 1.88E-11 | chr:4:9603240 |

|               |           |        |                        |
|---------------|-----------|--------|------------------------|
| 4 rs114290083 | 9597994 T | 0.2119 | 2.01E-11 chr:4:9603240 |
| 4 rs114945335 | 9598191 T | 0.2119 | 2.01E-11 chr:4:9603240 |
| 4 rs115282360 | 9593376 T | 0.2119 | 2.01E-11 chr:4:9603240 |
| 4 rs115893429 | 9593818 A | 0.2119 | 2.01E-11 chr:4:9603240 |
| 4 rs116079424 | 9593204 C | 0.2119 | 2.01E-11 chr:4:9603240 |
| 4 rs116509172 | 9594123 G | 0.2119 | 2.01E-11 chr:4:9603240 |
| 4 rs116614494 | 9592153 T | 0.2119 | 2.01E-11 chr:4:9603240 |
| 4 rs11730426  | 9600216 T | 0.2119 | 2.01E-11 chr:4:9603240 |
| 4 rs117496616 | 9597238 C | 0.2119 | 2.01E-11 chr:4:9603240 |
| 4 rs137855378 | 9594243 T | 0.2119 | 2.01E-11 chr:4:9603240 |
| 4 rs138143241 | 9596395 T | 0.2119 | 2.01E-11 chr:4:9603240 |
| 4 rs138542917 | 9592759 G | 0.2119 | 2.01E-11 chr:4:9603240 |
| 4 rs139555537 | 9593067 T | 0.2119 | 2.01E-11 chr:4:9603240 |
| 4 rs142642407 | 9591168 A | 0.2119 | 2.01E-11 chr:4:9603240 |
| 4 rs143023917 | 9596151 G | 0.2119 | 2.01E-11 chr:4:9603240 |
| 4 rs143167350 | 9594342 T | 0.2119 | 2.01E-11 chr:4:9603240 |
| 4 rs144619625 | 9593363 C | 0.2119 | 2.01E-11 chr:4:9603240 |
| 4 rs146389512 | 9597589 A | 0.2119 | 2.01E-11 chr:4:9603240 |
| 4 rs147777706 | 9597845 A | 0.2119 | 2.01E-11 chr:4:9603240 |
| 4 rs148075169 | 9599421 A | 0.2119 | 2.01E-11 chr:4:9603240 |
| 4 rs148536222 | 9592032 T | 0.2119 | 2.01E-11 chr:4:9603240 |
| 4 rs149064572 | 9592378 A | 0.2119 | 2.01E-11 chr:4:9603240 |
| 4 rs149095671 | 9597966 C | 0.2119 | 2.01E-11 chr:4:9603240 |
| 4 rs149737988 | 9599039 A | 0.2119 | 2.01E-11 chr:4:9603240 |
| 4 rs190948268 | 9591497 T | 0.2119 | 2.01E-11 chr:4:9603240 |
| 4 rs200437010 | 9592158 G | 0.2119 | 2.01E-11 chr:4:9603240 |
| 4 rs34495260  | 9595324 C | 0.2119 | 2.01E-11 chr:4:9603240 |
| 4 rs34587049  | 9594498 T | 0.2119 | 2.01E-11 chr:4:9603240 |
| 4 rs35023412  | 9594927 G | 0.2119 | 2.01E-11 chr:4:9603240 |
| 4 rs35228193  | 9595003 T | 0.2119 | 2.01E-11 chr:4:9603240 |
| 4 rs35332449  | 9594812 G | 0.2119 | 2.01E-11 chr:4:9603240 |
| 4 rs35509001  | 9594871 A | 0.2119 | 2.01E-11 chr:4:9603240 |
| 4 rs35583251  | 9595042 C | 0.2119 | 2.01E-11 chr:4:9603240 |
| 4 rs4547793   | 9591708 C | 0.2119 | 2.01E-11 chr:4:9603240 |
| 4 rs56055745  | 9595453 T | 0.2119 | 2.01E-11 chr:4:9603240 |
| 4 rs56411540  | 9595441 C | 0.2119 | 2.01E-11 chr:4:9603240 |
| 4 rs57171822  | 9596455 A | 0.2119 | 2.01E-11 chr:4:9603240 |
| 4 rs57472005  | 9592238 G | 0.2119 | 2.01E-11 chr:4:9603240 |
| 4 rs73802906  | 9598448 T | 0.2119 | 2.01E-11 chr:4:9603240 |
| 4 rs73805540  | 9593964 G | 0.2119 | 2.01E-11 chr:4:9603240 |
| 4 rs75043790  | 9597656 G | 0.2119 | 2.01E-11 chr:4:9603240 |
| 4 rs76469957  | 9597617 G | 0.2119 | 2.01E-11 chr:4:9603240 |
| 4 rs9683933   | 9594670 A | 0.2119 | 2.01E-11 chr:4:9603240 |

|               |           |        |          |               |
|---------------|-----------|--------|----------|---------------|
| 4 rs9799500   | 9595891 A | 0.2119 | 2.01E-11 | chr:4:9603240 |
| 4 rs9799502   | 9595942 A | 0.2119 | 2.01E-11 | chr:4:9603240 |
| 4 rs9799575   | 9592812 A | 0.2119 | 2.01E-11 | chr:4:9603240 |
| 4 rs9799622   | 9595641 G | 0.2119 | 2.01E-11 | chr:4:9603240 |
| 4 rs9799684   | 9592993 T | 0.2119 | 2.01E-11 | chr:4:9603240 |
| 4 rs9799747   | 9592874 C | 0.2119 | 2.01E-11 | chr:4:9603240 |
| 4 rs9799753   | 9592618 A | 0.2119 | 2.01E-11 | chr:4:9603240 |
| 4 rs9799779   | 9592870 A | 0.2119 | 2.01E-11 | chr:4:9603240 |
| 4 rs4974826   | 9602042 T | 0.2126 | 2.02E-11 | chr:4:9603240 |
| 4 rs529654115 | 9627446 T | 0.209  | 2.26E-11 | chr:4:9603240 |
| 4 rs551252104 | 9627447 C | 0.209  | 2.26E-11 | chr:4:9603240 |
| 4 rs11726515  | 9611214 C | 0.2142 | 2.33E-11 | chr:4:9603240 |
| 4 rs28722891  | 9638572 T | 0.2142 | 2.33E-11 | chr:4:9603240 |
| 4 rs55934031  | 9613756 A | 0.2142 | 2.33E-11 | chr:4:9603240 |
| 4 rs56746271  | 9610873 T | 0.2142 | 2.33E-11 | chr:4:9603240 |
| 4 rs62411065  | 9638952 C | 0.2142 | 2.33E-11 | chr:4:9603240 |
| 4 rs6813740   | 9635102 T | 0.2142 | 2.33E-11 | chr:4:9603240 |
| 4 rs6847293   | 9639835 T | 0.2142 | 2.33E-11 | chr:4:9603240 |
| 4 rs185210675 | 9598974 G | 0.2114 | 2.47E-11 | chr:4:9603240 |
| 4 rs149930076 | 9591979 T | 0.2138 | 2.55E-11 | chr:4:9603240 |
| 4 rs4594723   | 9700910 A | 0.2142 | 2.56E-11 | chr:4:9603240 |
| 4 rs11733905  | 9603159 A | 0.2158 | 2.92E-11 | chr:4:9603240 |
| 4 rs11734986  | 9601497 T | 0.2158 | 2.92E-11 | chr:4:9603240 |
| 4 rs11735905  | 9601757 G | 0.2158 | 2.92E-11 | chr:4:9603240 |
| 4 rs11737520  | 9601215 C | 0.2158 | 2.92E-11 | chr:4:9603240 |
| 4 rs150736073 | 9590365 C | 0.2158 | 2.92E-11 | chr:4:9603240 |
| 4 rs35870323  | 9600326 C | 0.2158 | 2.92E-11 | chr:4:9603240 |
| 4 rs4974823   | 9602719 A | 0.2158 | 2.92E-11 | chr:4:9603240 |
| 4 rs4974824   | 9602608 C | 0.2158 | 2.92E-11 | chr:4:9603240 |
| 4 rs55916508  | 9589334 A | 0.2158 | 2.92E-11 | chr:4:9603240 |
| 4 rs55988830  | 9588757 C | 0.2158 | 2.92E-11 | chr:4:9603240 |
| 4 rs73802912  | 9602497 A | 0.2158 | 2.92E-11 | chr:4:9603240 |
| 4 rs73802915  | 9603200 A | 0.2158 | 2.92E-11 | chr:4:9603240 |
| 4 rs76304666  | 9590479 A | 0.2158 | 2.92E-11 | chr:4:9603240 |
| 4 rs78422890  | 9600765 T | 0.2158 | 2.92E-11 | chr:4:9603240 |
| 4 rs4974859   | 9604519 T | 0.2147 | 3.01E-11 | chr:4:9603240 |
| 4 rs13141635  | 9845985 C | 3.616  | 3.02E-11 | chr:4:9603240 |
| 4 rs13142238  | 9846244 C | 3.616  | 3.02E-11 | chr:4:9603240 |
| 4 rs141001435 | 9598071 C | 0.2199 | 3.52E-11 | chr:4:9603240 |
| 4 rs4974863   | 9590979 T | 0.2166 | 3.63E-11 | chr:4:9603240 |
| 4 rs13150882  | 9621101 T | 3.232  | 3.78E-11 | chr:4:9603240 |
| 4 rs59747264  | 9595447 G | 0.2174 | 3.81E-11 | chr:4:9603240 |
| 4 rs13128072  | 9636572 G | 0.2209 | 4.07E-11 | chr:4:9603240 |

|               |           |        |          |               |
|---------------|-----------|--------|----------|---------------|
| 4 rs76738832  | 9597809 A | 0.2188 | 4.14E-11 | chr:4:9603240 |
| 4 rs3975529   | 9584477 T | 0.2345 | 4.41E-11 | chr:4:9603240 |
| 4 rs28765135  | 9644325 G | 0.293  | 4.53E-11 | chr:4:9603240 |
| 4 rs28783176  | 9645220 A | 0.293  | 4.53E-11 | chr:4:9603240 |
| 4 rs4974825   | 9602228 T | 0.2213 | 4.60E-11 | chr:4:9603240 |
| 4 rs28627624  | 9637607 T | 0.295  | 4.76E-11 | chr:4:9603240 |
| 4 rs6828382   | 9634594 T | 0.295  | 4.76E-11 | chr:4:9603240 |
| 4 rs2090606   | 9831136 C | 0.3156 | 5.00E-11 | chr:4:9603240 |
| 4 rs368238943 | 9590182 T | 0.2175 | 5.09E-11 | chr:4:9603240 |
| 4 rs6818180   | 9667949 T | 0.2939 | 5.32E-11 | chr:4:9603240 |
| 4 rs6844646   | 9658265 G | 0.2939 | 5.32E-11 | chr:4:9603240 |
| 4 rs73805538  | 9591438 C | 0.2207 | 5.53E-11 | chr:4:9603240 |
| 4 rs114344194 | 9606720 C | 0.224  | 6.28E-11 | chr:4:9603240 |
| 4 rs11724183  | 9609894 G | 0.224  | 6.28E-11 | chr:4:9603240 |
| 4 rs11733660  | 9608377 C | 0.224  | 6.28E-11 | chr:4:9603240 |
| 4 rs142443233 | 9605502 T | 0.224  | 6.28E-11 | chr:4:9603240 |
| 4 rs1961552   | 9608306 C | 0.224  | 6.28E-11 | chr:4:9603240 |
| 4 rs2077679   | 9608089 A | 0.224  | 6.28E-11 | chr:4:9603240 |
| 4 rs4974853   | 9609115 C | 0.224  | 6.28E-11 | chr:4:9603240 |
| 4 rs4974854   | 9609087 G | 0.224  | 6.28E-11 | chr:4:9603240 |
| 4 rs4974856   | 9607691 C | 0.224  | 6.28E-11 | chr:4:9603240 |
| 4 rs4974858   | 9607122 G | 0.224  | 6.28E-11 | chr:4:9603240 |
| 4 rs56873393  | 9606840 A | 0.224  | 6.28E-11 | chr:4:9603240 |
| 4 rs7375281   | 9609506 T | 0.224  | 6.28E-11 | chr:4:9603240 |
| 4 rs7375292   | 9609618 T | 0.224  | 6.28E-11 | chr:4:9603240 |
| 4 rs9799674   | 9606025 C | 0.224  | 6.28E-11 | chr:4:9603240 |
| 4 rs9997906   | 9555408 A | 0.2396 | 6.39E-11 | chr:4:9603240 |
| 4 rs114657516 | 9593857 G | 0.2245 | 6.72E-11 | chr:4:9603240 |
| 4 rs6830692   | 9589873 C | 0.1593 | 6.84E-11 | chr:4:9603240 |
| 4 rs149362014 | 9586831 T | 0.2423 | 7.13E-11 | chr:4:9603240 |
| 4 rs13143814  | 9494984 C | 0.2772 | 7.23E-11 | chr:4:9603240 |
| 4 rs10009838  | 9833882 G | 0.3214 | 7.46E-11 | chr:4:9603240 |
| 4 rs1401439   | 9832622 G | 0.3214 | 7.46E-11 | chr:4:9603240 |
| 4 rs1401440   | 9832512 C | 0.3214 | 7.46E-11 | chr:4:9603240 |
| 4 rs1464258   | 9834107 G | 0.3214 | 7.46E-11 | chr:4:9603240 |
| 4 rs2102872   | 9831358 T | 0.3214 | 7.46E-11 | chr:4:9603240 |
| 4 rs6857478   | 9831882 C | 0.3214 | 7.46E-11 | chr:4:9603240 |
| 4 rs58724508  | 9642207 G | 0.2945 | 7.78E-11 | chr:4:9603240 |
| 4 rs4974865   | 9587937 A | 0.2329 | 8.12E-11 | chr:4:9603240 |
| 4 rs6834270   | 9756710 A | 0.2346 | 8.15E-11 | chr:4:9603240 |
| 4 rs28866958  | 9644586 C | 0.3011 | 8.47E-11 | chr:4:9603240 |
| 4 rs28624871  | 9519069 A | 0.2674 | 8.71E-11 | chr:4:9603240 |
| 4 rs57610759  | 9642093 A | 0.2976 | 8.72E-11 | chr:4:9603240 |



|               |           |        |          |               |
|---------------|-----------|--------|----------|---------------|
| 4 rs149630666 | 9598726 T | 0.2141 | 9.76E-11 | chr:4:9603240 |
| 4 rs115723792 | 9570902 G | 0.2461 | 1.00E-10 | chr:4:9603240 |
| 4 rs115847566 | 9579226 T | 0.2461 | 1.00E-10 | chr:4:9603240 |
| 4 rs11729940  | 9574743 A | 0.2461 | 1.00E-10 | chr:4:9603240 |
| 4 rs140355667 | 9578231 G | 0.2461 | 1.00E-10 | chr:4:9603240 |
| 4 rs140501910 | 9578396 C | 0.2461 | 1.00E-10 | chr:4:9603240 |
| 4 rs148852793 | 9570929 A | 0.2461 | 1.00E-10 | chr:4:9603240 |
| 4 rs2127793   | 9584728 T | 0.2461 | 1.00E-10 | chr:4:9603240 |
| 4 rs28729250  | 9584227 A | 0.2461 | 1.00E-10 | chr:4:9603240 |
| 4 rs3975528   | 9584444 C | 0.2461 | 1.00E-10 | chr:4:9603240 |
| 4 rs4974828   | 9572320 G | 0.2461 | 1.00E-10 | chr:4:9603240 |
| 4 rs4974829   | 9571976 T | 0.2461 | 1.00E-10 | chr:4:9603240 |
| 4 rs4974868   | 9572178 A | 0.2461 | 1.00E-10 | chr:4:9603240 |
| 4 rs4974869   | 9571360 G | 0.2461 | 1.00E-10 | chr:4:9603240 |
| 4 rs3872814   | 9498896 A | 0.2698 | 1.03E-10 | chr:4:9603240 |
| 4 rs111953893 | 9645341 C | 0.3074 | 1.03E-10 | chr:4:9603240 |
| 4 rs141992178 | 9645431 G | 0.3074 | 1.03E-10 | chr:4:9603240 |
| 4 rs28762742  | 9646007 A | 0.3074 | 1.03E-10 | chr:4:9603240 |
| 4 rs10020053  | 9821648 T | 0.3274 | 1.12E-10 | chr:4:9603240 |
| 4 rs188525933 | 9575159 A | 0.2469 | 1.15E-10 | chr:4:9603240 |
| 4 rs12501954  | 9515537 T | 0.2685 | 1.17E-10 | chr:4:9603240 |
| 4 rs13102699  | 9521611 C | 0.2685 | 1.17E-10 | chr:4:9603240 |
| 4 rs13104525  | 9517460 G | 0.2685 | 1.17E-10 | chr:4:9603240 |
| 4 rs13108939  | 9514819 C | 0.2685 | 1.17E-10 | chr:4:9603240 |
| 4 rs13124919  | 9521722 T | 0.2685 | 1.17E-10 | chr:4:9603240 |
| 4 rs13141402  | 9517958 A | 0.2685 | 1.17E-10 | chr:4:9603240 |
| 4 rs1818670   | 9745390 G | 0.2464 | 1.17E-10 | chr:4:9603240 |
| 4 rs6834512   | 9756836 A | 0.2415 | 1.17E-10 | chr:4:9603240 |
| 4 rs6834697   | 9756914 A | 0.2415 | 1.17E-10 | chr:4:9603240 |
| 4 rs9291512   | 9513465 T | 0.2685 | 1.17E-10 | chr:4:9603240 |
| 4 rs9291513   | 9513570 T | 0.2685 | 1.17E-10 | chr:4:9603240 |
| 4 rs9684013   | 9516690 C | 0.2685 | 1.17E-10 | chr:4:9603240 |
| 4 rs1850734   | 9752741 G | 0.2419 | 1.26E-10 | chr:4:9603240 |
| 4 rs1850735   | 9752592 T | 0.2419 | 1.26E-10 | chr:4:9603240 |
| 4 rs6414750   | 9752286 A | 0.2419 | 1.26E-10 | chr:4:9603240 |
| 4 rs7680057   | 9752332 A | 0.2419 | 1.26E-10 | chr:4:9603240 |
| 4 rs6822889   | 9826757 C | 0.3307 | 1.39E-10 | chr:4:9603240 |
| 4 rs9684136   | 9516619 A | 0.2705 | 1.47E-10 | chr:4:9603240 |
| 4 rs10004109  | 9550663 T | 0.2494 | 1.62E-10 | chr:4:9603240 |
| 4 rs10010844  | 9559610 A | 0.2494 | 1.62E-10 | chr:4:9603240 |
| 4 rs12644854  | 9558686 A | 0.2494 | 1.62E-10 | chr:4:9603240 |
| 4 rs12646317  | 9565838 A | 0.2494 | 1.62E-10 | chr:4:9603240 |
| 4 rs13117722  | 9561639 T | 0.2494 | 1.62E-10 | chr:4:9603240 |

|               |           |        |          |               |
|---------------|-----------|--------|----------|---------------|
| 4 rs13131681  | 9563930 A | 0.2494 | 1.62E-10 | chr:4:9603240 |
| 4 rs1817461   | 9551986 T | 0.2494 | 1.62E-10 | chr:4:9603240 |
| 4 rs6448816   | 9564484 T | 0.2494 | 1.62E-10 | chr:4:9603240 |
| 4 rs6448817   | 9564638 A | 0.2494 | 1.62E-10 | chr:4:9603240 |
| 4 rs6828352   | 9566644 T | 0.2494 | 1.62E-10 | chr:4:9603240 |
| 4 rs7437862   | 9562003 T | 0.2494 | 1.62E-10 | chr:4:9603240 |
| 4 rs9291574   | 9550709 A | 0.2494 | 1.62E-10 | chr:4:9603240 |
| 4 rs9291577   | 9565337 T | 0.2494 | 1.62E-10 | chr:4:9603240 |
| 4 rs9998120   | 9555633 A | 0.2494 | 1.62E-10 | chr:4:9603240 |
| 4 rs2049543   | 9496515 A | 0.2773 | 1.65E-10 | chr:4:9603240 |
| 4 rs13118112  | 9794580 T | 3.086  | 1.75E-10 | chr:4:9603240 |
| 4 rs11932164  | 9526162 C | 0.2721 | 1.81E-10 | chr:4:9603240 |
| 4 rs11935199  | 9526180 T | 0.2721 | 1.81E-10 | chr:4:9603240 |
| 4 rs4974831   | 9525674 C | 0.2721 | 1.81E-10 | chr:4:9603240 |
| 4 rs9715593   | 9522682 T | 0.2721 | 1.81E-10 | chr:4:9603240 |
| 4 rs6841978   | 9758140 A | 0.245  | 1.85E-10 | chr:4:9603240 |
| 4 rs62409887  | 9642748 G | 0.2429 | 1.89E-10 | chr:4:9603240 |
| 4 rs12642205  | 9504161 T | 0.2747 | 1.95E-10 | chr:4:9603240 |
| 4 rs9683495   | 9547275 T | 0.27   | 2.13E-10 | chr:4:9603240 |
| 4 rs11944635  | 9524295 A | 0.2732 | 2.14E-10 | chr:4:9603240 |
| 4 rs6832404   | 9494596 C | 0.285  | 2.35E-10 | chr:4:9603240 |
| 4 rs185725801 | 9588562 C | 0.2443 | 2.39E-10 | chr:4:9603240 |
| 4 rs73805537  | 9588589 C | 0.2443 | 2.39E-10 | chr:4:9603240 |
| 4 rs12649073  | 9694490 G | 0.3174 | 2.41E-10 | chr:4:9603240 |
| 4 rs6814274   | 9692502 T | 0.3174 | 2.41E-10 | chr:4:9603240 |
| 4 rs13125980  | 9492119 T | 0.2842 | 2.46E-10 | chr:4:9603240 |
| 4 rs12507049  | 9492364 C | 0.2867 | 2.67E-10 | chr:4:9603240 |
| 4 rs10031303  | 9841690 A | 0.3387 | 2.78E-10 | chr:4:9603240 |
| 4 rs7661082   | 9755665 C | 0.2597 | 2.96E-10 | chr:4:9603240 |
| 4 rs10939507  | 9768823 T | 0.2546 | 3.07E-10 | chr:4:9603240 |
| 4 rs7685974   | 9745082 T | 0.2507 | 3.15E-10 | chr:4:9603240 |
| 4 rs114809283 | 9578006 A | 0.2544 | 3.19E-10 | chr:4:9603240 |
| 4 rs6448728   | 9541220 T | 0.2644 | 3.39E-10 | chr:4:9603240 |
| 4 rs6448742   | 9542759 C | 0.2644 | 3.39E-10 | chr:4:9603240 |
| 4 rs10001006  | 9788498 T | 3.013  | 3.46E-10 | chr:4:9603240 |
| 4 rs11734974  | 9764564 T | 0.2534 | 3.62E-10 | chr:4:9603240 |
| 4 rs2867385   | 9795782 G | 0.2554 | 3.70E-10 | chr:4:9603240 |
| 4 rs2867386   | 9795784 G | 0.2554 | 3.70E-10 | chr:4:9603240 |
| 4 rs2867387   | 9795786 G | 0.2554 | 3.70E-10 | chr:4:9603240 |
| 4 rs6837003   | 9538422 T | 0.2663 | 3.84E-10 | chr:4:9603240 |
| 4 rs13133629  | 9521305 G | 0.284  | 4.12E-10 | chr:4:9603240 |
| 4 rs11931618  | 9488543 G | 0.2923 | 4.21E-10 | chr:4:9603240 |
| 4 rs10939258  | 9525869 G | 0.2855 | 4.35E-10 | chr:4:9603240 |

|              |           |        |          |               |
|--------------|-----------|--------|----------|---------------|
| 4 rs10939514 | 9773196 C | 0.2552 | 4.36E-10 | chr:4:9603240 |
| 4 rs11729600 | 9764686 T | 0.2552 | 4.36E-10 | chr:4:9603240 |
| 4 rs11733815 | 9764282 A | 0.2552 | 4.36E-10 | chr:4:9603240 |
| 4 rs11734890 | 9764373 T | 0.2552 | 4.36E-10 | chr:4:9603240 |
| 4 rs12501256 | 9780635 T | 0.2552 | 4.36E-10 | chr:4:9603240 |
| 4 rs1850737  | 9799287 G | 0.2552 | 4.36E-10 | chr:4:9603240 |
| 4 rs1850739  | 9797343 T | 0.2552 | 4.36E-10 | chr:4:9603240 |
| 4 rs1850744  | 9790712 T | 0.2552 | 4.36E-10 | chr:4:9603240 |
| 4 rs1878275  | 9777401 A | 0.2552 | 4.36E-10 | chr:4:9603240 |
| 4 rs2076907  | 9783428 G | 0.2552 | 4.36E-10 | chr:4:9603240 |
| 4 rs2280208  | 9800043 A | 0.2552 | 4.36E-10 | chr:4:9603240 |
| 4 rs3973946  | 9774688 G | 0.2552 | 4.36E-10 | chr:4:9603240 |
| 4 rs4299578  | 9762351 A | 0.2552 | 4.36E-10 | chr:4:9603240 |
| 4 rs6449000  | 9798612 G | 0.2552 | 4.36E-10 | chr:4:9603240 |
| 4 rs6833148  | 9760753 G | 0.2552 | 4.36E-10 | chr:4:9603240 |
| 4 rs7664304  | 9762210 A | 0.2552 | 4.36E-10 | chr:4:9603240 |
| 4 rs7667533  | 9763827 C | 0.2552 | 4.36E-10 | chr:4:9603240 |
| 4 rs7667534  | 9763829 C | 0.2552 | 4.36E-10 | chr:4:9603240 |
| 4 rs938556   | 9802366 A | 0.2552 | 4.36E-10 | chr:4:9603240 |
| 4 rs9685502  | 9779636 G | 0.2552 | 4.36E-10 | chr:4:9603240 |
| 4 rs938557   | 9827556 T | 0.3012 | 4.80E-10 | chr:4:9603240 |
| 4 rs6855095  | 9819977 G | 2.881  | 4.94E-10 | chr:4:9603240 |
| 4 rs6838124  | 9517908 C | 0.2757 | 5.02E-10 | chr:4:9603240 |
| 4 rs1401441  | 9832304 T | 0.3033 | 5.80E-10 | chr:4:9603240 |
| 4 rs1519092  | 9826801 T | 0.3033 | 5.80E-10 | chr:4:9603240 |
| 4 rs1878277  | 9825143 T | 0.3033 | 5.80E-10 | chr:4:9603240 |
| 4 rs1996335  | 9825814 A | 0.3033 | 5.80E-10 | chr:4:9603240 |
| 4 rs4697896  | 9828569 T | 0.3033 | 5.80E-10 | chr:4:9603240 |
| 4 rs6449028  | 9833226 C | 0.3033 | 5.80E-10 | chr:4:9603240 |
| 4 rs7689839  | 9515288 G | 0.278  | 5.83E-10 | chr:4:9603240 |
| 4 rs16898647 | 9599609 A | 0.249  | 6.00E-10 | chr:4:9603240 |
| 4 rs2867388  | 9796495 C | 0.2575 | 6.22E-10 | chr:4:9603240 |
| 4 rs6448964  | 9690292 A | 0.3035 | 6.71E-10 | chr:4:9603240 |
| 4 rs6848533  | 9690289 C | 0.3035 | 6.71E-10 | chr:4:9603240 |
| 4 rs7657127  | 9780078 C | 0.2649 | 6.96E-10 | chr:4:9603240 |
| 4 rs13115121 | 9897342 G | 3.242  | 7.03E-10 | chr:4:9603240 |
| 4 rs13122026 | 9898207 C | 3.242  | 7.03E-10 | chr:4:9603240 |
| 4 rs13129080 | 9904242 A | 3.242  | 7.03E-10 | chr:4:9603240 |
| 4 rs13129868 | 9897372 A | 3.242  | 7.03E-10 | chr:4:9603240 |
| 4 rs6449097  | 9896734 C | 3.242  | 7.03E-10 | chr:4:9603240 |
| 4 rs1533615  | 9804524 T | 0.26   | 7.26E-10 | chr:4:9603240 |
| 4 rs13103170 | 9488792 T | 0.302  | 7.41E-10 | chr:4:9603240 |
| 4 rs13104263 | 9489249 T | 0.302  | 7.41E-10 | chr:4:9603240 |

|              |           |        |          |               |
|--------------|-----------|--------|----------|---------------|
| 4 rs13141834 | 9487476 T | 0.302  | 7.41E-10 | chr:4:9603240 |
| 4 rs28768980 | 9489619 G | 0.302  | 7.41E-10 | chr:4:9603240 |
| 4 rs13136962 | 9900314 C | 3.212  | 8.89E-10 | chr:4:9603240 |
| 4 rs13140718 | 9902676 T | 3.212  | 8.89E-10 | chr:4:9603240 |
| 4 rs13151822 | 9902562 C | 3.212  | 8.89E-10 | chr:4:9603240 |
| 4 rs1401437  | 9819763 G | 0.3094 | 9.39E-10 | chr:4:9603240 |
| 4 rs1519093  | 9824019 T | 0.3094 | 9.39E-10 | chr:4:9603240 |
| 4 rs4697891  | 9822319 G | 0.3094 | 9.39E-10 | chr:4:9603240 |
| 4 rs7656266  | 9820644 A | 0.3094 | 9.39E-10 | chr:4:9603240 |
| 4 rs7669742  | 9822205 T | 0.3094 | 9.39E-10 | chr:4:9603240 |
| 4 rs7683059  | 9822275 G | 0.3094 | 9.39E-10 | chr:4:9603240 |
| 4 rs939131   | 9820950 A | 0.3094 | 9.39E-10 | chr:4:9603240 |
| 4 rs1519095  | 9810931 G | 0.2633 | 9.68E-10 | chr:4:9603240 |
| 4 rs1401442  | 9839447 C | 0.3102 | 1.04E-09 | chr:4:9603240 |
| 4 rs6847887  | 9883801 A | 0.3073 | 1.06E-09 | chr:4:9603240 |
| 4 rs11734893 | 9910441 A | 3.202  | 1.09E-09 | chr:4:9603240 |
| 4 rs13103429 | 9910635 T | 3.202  | 1.09E-09 | chr:4:9603240 |
| 4 rs13108825 | 9910663 G | 3.202  | 1.09E-09 | chr:4:9603240 |
| 4 rs13113546 | 9910467 G | 3.202  | 1.09E-09 | chr:4:9603240 |
| 4 rs2280202  | 9909295 C | 3.202  | 1.09E-09 | chr:4:9603240 |
| 4 rs2280205  | 9909923 A | 3.202  | 1.09E-09 | chr:4:9603240 |
| 4 rs7694136  | 9908791 G | 3.202  | 1.09E-09 | chr:4:9603240 |
| 4 rs4974833  | 9517080 A | 0.2861 | 1.15E-09 | chr:4:9603240 |
| 4 rs4974882  | 9517079 C | 0.2861 | 1.15E-09 | chr:4:9603240 |
| 4 rs7442171  | 9510966 G | 0.2861 | 1.15E-09 | chr:4:9603240 |
| 4 rs7689849  | 9515293 G | 0.2861 | 1.15E-09 | chr:4:9603240 |
| 4 rs9760961  | 9518763 A | 0.2861 | 1.15E-09 | chr:4:9603240 |
| 4 rs9760975  | 9518480 T | 0.2861 | 1.15E-09 | chr:4:9603240 |
| 4 rs13107656 | 9896938 G | 3.173  | 1.21E-09 | chr:4:9603240 |
| 4 rs13105347 | 9537183 C | 0.2822 | 1.24E-09 | chr:4:9603240 |
| 4 rs10939504 | 9767370 A | 0.2679 | 1.24E-09 | chr:4:9603240 |
| 4 rs6449100  | 9901563 T | 3.172  | 1.38E-09 | chr:4:9603240 |
| 4 rs1519099  | 9874130 T | 0.3152 | 1.43E-09 | chr:4:9603240 |
| 4 rs1519094  | 9817286 T | 0.2647 | 1.46E-09 | chr:4:9603240 |
| 4 rs12511107 | 9505163 A | 0.2893 | 1.50E-09 | chr:4:9603240 |
| 4 rs6414734  | 9506067 C | 0.2893 | 1.50E-09 | chr:4:9603240 |
| 4 rs6852191  | 9500188 T | 0.2893 | 1.50E-09 | chr:4:9603240 |
| 4 rs7435955  | 9510072 C | 0.2893 | 1.50E-09 | chr:4:9603240 |
| 4 rs7437687  | 9510251 A | 0.2893 | 1.50E-09 | chr:4:9603240 |
| 4 rs7659768  | 9508354 A | 0.2893 | 1.50E-09 | chr:4:9603240 |
| 4 rs9291502  | 9507607 C | 0.2893 | 1.50E-09 | chr:4:9603240 |
| 4 rs7664572  | 9808709 T | 0.2662 | 1.52E-09 | chr:4:9603240 |
| 4 rs12644592 | 9899068 A | 2.887  | 1.52E-09 | chr:4:9603240 |

|              |           |        |          |               |
|--------------|-----------|--------|----------|---------------|
| 4 rs60160622 | 9457328 C | 2.49   | 1.54E-09 | chr:4:9603240 |
| 4 rs13101778 | 9521143 T | 3.34   | 1.72E-09 | chr:4:9603240 |
| 4 rs28587815 | 9502346 G | 0.2894 | 1.84E-09 | chr:4:9603240 |
| 4 rs6858402  | 9500935 T | 0.2894 | 1.84E-09 | chr:4:9603240 |
| 4 rs4974886  | 9503349 T | 0.2896 | 1.91E-09 | chr:4:9603240 |
| 4 rs13104927 | 9536994 C | 0.2898 | 2.11E-09 | chr:4:9603240 |
| 4 rs13121631 | 9536993 T | 0.2898 | 2.11E-09 | chr:4:9603240 |
| 4 rs4974832  | 9522154 A | 0.2898 | 2.11E-09 | chr:4:9603240 |
| 4 rs4974873  | 9529080 A | 0.2898 | 2.11E-09 | chr:4:9603240 |
| 4 rs4974874  | 9529066 T | 0.2898 | 2.11E-09 | chr:4:9603240 |
| 4 rs4974875  | 9528736 A | 0.2898 | 2.11E-09 | chr:4:9603240 |
| 4 rs4974878  | 9525134 A | 0.2898 | 2.11E-09 | chr:4:9603240 |
| 4 rs6448632  | 9523490 A | 0.2898 | 2.11E-09 | chr:4:9603240 |
| 4 rs6448648  | 9526038 T | 0.2898 | 2.11E-09 | chr:4:9603240 |
| 4 rs6448649  | 9526086 T | 0.2898 | 2.11E-09 | chr:4:9603240 |
| 4 rs6810422  | 9535370 A | 0.2898 | 2.11E-09 | chr:4:9603240 |
| 4 rs6822409  | 9536012 T | 0.2898 | 2.11E-09 | chr:4:9603240 |
| 4 rs6829897  | 9535245 G | 0.2898 | 2.11E-09 | chr:4:9603240 |
| 4 rs9685067  | 9535838 T | 0.2898 | 2.11E-09 | chr:4:9603240 |
| 4 rs9761430  | 9530816 A | 0.2898 | 2.11E-09 | chr:4:9603240 |
| 4 rs10000759 | 9457303 T | 2.577  | 2.14E-09 | chr:4:9603240 |
| 4 rs61010333 | 9457333 A | 2.465  | 2.19E-09 | chr:4:9603240 |
| 4 rs939132   | 9820883 T | 0.3244 | 2.43E-09 | chr:4:9603240 |
| 4 rs11737685 | 9903121 G | 2.817  | 2.48E-09 | chr:4:9603240 |
| 4 rs2086431  | 9509791 T | 0.2965 | 2.50E-09 | chr:4:9603240 |
| 4 rs4974884  | 9507140 A | 0.2976 | 2.60E-09 | chr:4:9603240 |
| 4 rs6448442  | 9493899 A | 0.3002 | 2.76E-09 | chr:4:9603240 |
| 4 rs6811895  | 9495236 A | 0.3002 | 2.76E-09 | chr:4:9603240 |
| 4 rs3960679  | 9852745 T | 0.3251 | 2.99E-09 | chr:4:9603240 |
| 4 rs11732681 | 9902876 A | 3.093  | 3.10E-09 | chr:4:9603240 |
| 4 rs13114702 | 9895176 C | 3.017  | 3.53E-09 | chr:4:9603240 |
| 4 rs4974887  | 9496343 T | 0.3028 | 3.55E-09 | chr:4:9603240 |
| 4 rs4974888  | 9494435 G | 0.3028 | 3.55E-09 | chr:4:9603240 |
| 4 rs6820627  | 9491205 A | 0.3032 | 3.74E-09 | chr:4:9603240 |
| 4 rs59277193 | 9490919 C | 0.3065 | 3.80E-09 | chr:4:9603240 |
| 4 rs9685927  | 9516151 G | 0.3264 | 4.07E-09 | chr:4:9603240 |
| 4 rs13138625 | 9497153 G | 0.3072 | 4.93E-09 | chr:4:9603240 |
| 4 rs6449053  | 9846797 A | 0.3244 | 5.04E-09 | chr:4:9603240 |
| 4 rs6449027  | 9833140 G | 0.3203 | 5.21E-09 | chr:4:9603240 |
| 4 rs4697690  | 9822674 T | 0.3405 | 5.29E-09 | chr:4:9603240 |
| 4 rs10005183 | 9457254 A | 0.3428 | 6.44E-09 | chr:4:9603240 |
| 4 rs6824573  | 9589256 A | 0.2402 | 7.06E-09 | chr:4:9603240 |
| 4 rs2865050  | 9546117 G | 0.3009 | 7.22E-09 | chr:4:9603240 |

|               |           |        |          |               |
|---------------|-----------|--------|----------|---------------|
| 4 rs9715737   | 9546122 A | 0.3009 | 7.22E-09 | chr:4:9603240 |
| 4 rs370207286 | 9619127 T | 0.3804 | 7.28E-09 | chr:4:9603240 |
| 4 rs550435238 | 9619122 C | 0.3804 | 7.28E-09 | chr:4:9603240 |
| 4 rs570953421 | 9619123 C | 0.3804 | 7.28E-09 | chr:4:9603240 |
| 4 rs370014386 | 9240466 G | 0.3962 | 7.40E-09 | chr:4:9603240 |
| 4 rs13136903  | 9694522 T | 0.3007 | 7.45E-09 | chr:4:9603240 |
| 4 rs1878276   | 9824945 A | 0.34   | 7.73E-09 | chr:4:9603240 |
| 4 rs138499118 | 9631591 C | 0.3365 | 8.19E-09 | chr:4:9603240 |
| 4 rs11722581  | 9484762 C | 0.3163 | 8.38E-09 | chr:4:9603240 |
| 4 rs13104273  | 9489263 T | 0.3163 | 8.38E-09 | chr:4:9603240 |
| 4 rs13118026  | 9488747 G | 0.3163 | 8.38E-09 | chr:4:9603240 |
| 4 rs13149072  | 9489053 A | 0.3163 | 8.38E-09 | chr:4:9603240 |
| 4 rs2127797   | 9483343 A | 0.3163 | 8.38E-09 | chr:4:9603240 |
| 4 rs4974895   | 9491869 G | 0.3163 | 8.38E-09 | chr:4:9603240 |
| 4 rs6825697   | 9488798 G | 0.3163 | 8.38E-09 | chr:4:9603240 |
| 4 rs9714696   | 9485300 A | 0.3163 | 8.38E-09 | chr:4:9603240 |
| 4 rs6448331   | 9482110 T | 0.1976 | 9.04E-09 | chr:4:9603240 |
| 4 rs6855818   | 9635008 A | 0.3033 | 9.37E-09 | chr:4:9603240 |
| 4 rs12512543  | 9608445 A | 0.2487 | 1.12E-08 | chr:4:9603240 |
| 4 rs59507413  | 9606018 T | 0.2487 | 1.12E-08 | chr:4:9603240 |
| 4 rs59430272  | 9601484 C | 0.2514 | 1.17E-08 | chr:4:9603240 |
| 4 rs13123041  | 9537635 T | 0.3111 | 1.22E-08 | chr:4:9603240 |
| 4 rs6822573   | 9536662 A | 0.3094 | 1.23E-08 | chr:4:9603240 |
| 4 rs10005582  | 9626791 A | 0.3415 | 1.28E-08 | chr:4:9603240 |
| 4 rs28491253  | 9629512 T | 0.3415 | 1.28E-08 | chr:4:9603240 |
| 4 rs28851772  | 9630974 A | 0.3415 | 1.28E-08 | chr:4:9603240 |
| 4 rs56787100  | 9631153 T | 0.3415 | 1.28E-08 | chr:4:9603240 |
| 4 rs73082825  | 9627676 A | 0.3415 | 1.28E-08 | chr:4:9603240 |
| 4 rs13141246  | 9845784 T | 0.305  | 1.56E-08 | chr:4:9603240 |
| 4 rs150659411 | 9845787 T | 0.3033 | 1.71E-08 | chr:4:9603240 |
| 4 rs12506692  | 9596059 T | 0.2563 | 1.74E-08 | chr:4:9603240 |
| 4 rs12510176  | 9599593 G | 0.2563 | 1.74E-08 | chr:4:9603240 |
| 4 rs16898588  | 9595751 T | 0.2563 | 1.74E-08 | chr:4:9603240 |
| 4 rs56934553  | 9594735 A | 0.2563 | 1.74E-08 | chr:4:9603240 |
| 4 rs13141248  | 9845790 T | 0.3042 | 1.85E-08 | chr:4:9603240 |
| 4 rs10031125  | 9625879 A | 0.3436 | 2.00E-08 | chr:4:9603240 |
| 4 rs10049735  | 9626409 C | 0.3436 | 2.00E-08 | chr:4:9603240 |
| 4 rs28648949  | 9626132 C | 0.3436 | 2.00E-08 | chr:4:9603240 |
| 4 rs10012992  | 9594197 A | 0.3126 | 2.04E-08 | chr:4:9603240 |
| 4 rs112839156 | 9601686 A | 0.2585 | 2.14E-08 | chr:4:9603240 |
| 4 rs12509677  | 9602724 A | 0.2585 | 2.14E-08 | chr:4:9603240 |
| 4 rs60296945  | 9604068 T | 0.2585 | 2.14E-08 | chr:4:9603240 |
| 4 rs61267391  | 9600955 G | 0.2585 | 2.14E-08 | chr:4:9603240 |

|               |           |        |          |               |
|---------------|-----------|--------|----------|---------------|
| 4 rs73097911  | 9601929 A | 0.2585 | 2.14E-08 | chr:4:9603240 |
| 4 rs73097914  | 9602324 T | 0.2585 | 2.14E-08 | chr:4:9603240 |
| 4 rs73802916  | 9604035 C | 0.2585 | 2.14E-08 | chr:4:9603240 |
| 4 rs74183920  | 9603786 A | 0.2585 | 2.14E-08 | chr:4:9603240 |
| 4 rs10805342  | 9887086 T | 0.3239 | 2.79E-08 | chr:4:9603240 |
| 4 rs6825480   | 9860489 G | 0.3164 | 2.94E-08 | chr:4:9603240 |
| 4 rs60990443  | 9601319 T | 0.2637 | 2.97E-08 | chr:4:9603240 |
| 4 rs6820712   | 9548966 A | 0.3012 | 3.08E-08 | chr:4:9603240 |
| 4 rs111613333 | 9592284 A | 0.2664 | 3.30E-08 | chr:4:9603240 |
| 4 rs73095794  | 9596566 A | 0.2664 | 3.30E-08 | chr:4:9603240 |
| 4 rs73805539  | 9591699 C | 0.2664 | 3.30E-08 | chr:4:9603240 |
| 4 rs7691087   | 9595443 T | 0.2664 | 3.30E-08 | chr:4:9603240 |
| 4 rs114980491 | 9623328 T | 0.3519 | 3.72E-08 | chr:4:9603240 |
| 4 rs115870066 | 9622163 A | 0.3519 | 3.72E-08 | chr:4:9603240 |
| 4 rs147074482 | 9623653 T | 0.3519 | 3.72E-08 | chr:4:9603240 |
| 4 rs150602585 | 9621799 G | 0.3519 | 3.72E-08 | chr:4:9603240 |
| 4 rs151134492 | 9623039 A | 0.3519 | 3.72E-08 | chr:4:9603240 |
| 4 rs7692046   | 9620128 G | 0.3519 | 3.72E-08 | chr:4:9603240 |
| 4 rs4077928   | 9698985 C | 0.3291 | 3.97E-08 | chr:4:9603240 |
| 4 rs12500350  | 9455720 C | 0.3609 | 3.99E-08 | chr:4:9603240 |
| 4 rs6448330   | 9482096 C | 0.3347 | 4.08E-08 | chr:4:9603240 |
| 4 rs34027818  | 9605709 G | 0.2191 | 4.51E-08 | chr:4:9603240 |
| 4 rs1464259   | 9834462 A | 0.331  | 4.54E-08 | chr:4:9603240 |
| 4 rs142223268 | 9624727 C | 0.3201 | 5.32E-08 | chr:4:9603240 |
| 4 rs4697901   | 9863698 G | 0.3383 | 5.81E-08 | chr:4:9603240 |
| 4 rs28728462  | 9700392 A | 0.4009 | 5.89E-08 | chr:4:9603240 |
| 4 rs112018355 | 9611157 A | 0.2771 | 6.14E-08 | chr:4:9603240 |
| 4 rs4974847   | 9103949 G | 0.384  | 6.58E-08 | chr:4:9603240 |
| 4 rs142046528 | 9150921 C | 0.3997 | 6.58E-08 | chr:4:9603240 |
| 4 rs147598608 | 9150920 T | 0.3997 | 6.58E-08 | chr:4:9603240 |
| 4 rs10003673  | 9862300 G | 0.3412 | 7.06E-08 | chr:4:9603240 |
| 4 rs4697904   | 9888994 C | 0.3412 | 7.06E-08 | chr:4:9603240 |
| 4 rs9998765   | 9543673 T | 0.3121 | 7.20E-08 | chr:4:9603240 |
| 4 rs1988623   | 9146453 C | 0.3837 | 7.40E-08 | chr:4:9603240 |
| 4 rs3960990   | 9546135 G | 0.3341 | 8.04E-08 | chr:4:9603240 |
| 4 rs4134323   | 9146648 G | 0.3889 | 8.45E-08 | chr:4:9603240 |
| 4 rs4470626   | 9146647 T | 0.3889 | 8.45E-08 | chr:4:9603240 |
| 4 rs34307164  | 9157887 C | 0.3982 | 9.18E-08 | chr:4:9603240 |
| 4 rs147713730 | 9151955 A | 0.4033 | 9.64E-08 | chr:4:9603240 |
| 4 rs35796658  | 9153458 T | 0.4033 | 9.64E-08 | chr:4:9603240 |
| 4 rs4697905   | 9889042 T | 0.3467 | 9.95E-08 | chr:4:9603240 |
| 4 rs4974897   | 9481503 T | 0.3544 | 1.07E-07 | chr:4:9603240 |
| 4 rs373877999 | 9148992 G | 0.3862 | 1.11E-07 | chr:4:9603240 |

|               |           |         |          |               |
|---------------|-----------|---------|----------|---------------|
| 4 rs11726722  | 9637477 G | 0.04507 | 1.15E-07 | chr:4:9603240 |
| 4 rs150842956 | 9141573 C | 0.3893  | 1.24E-07 | chr:4:9603240 |
| 4 rs35959482  | 9148872 G | 0.3893  | 1.24E-07 | chr:4:9603240 |
| 4 rs36065425  | 9139983 A | 0.3893  | 1.24E-07 | chr:4:9603240 |
| 4 rs144799730 | 9134519 C | 0.3896  | 1.29E-07 | chr:4:9603240 |
| 4 rs6844565   | 9589627 C | 0.345   | 1.30E-07 | chr:4:9603240 |
| 4 rs12500995  | 9543938 T | 0.3213  | 1.33E-07 | chr:4:9603240 |
| 4 rs13138944  | 9546782 C | 0.3213  | 1.33E-07 | chr:4:9603240 |
| 4 rs13148830  | 9546733 A | 0.3213  | 1.33E-07 | chr:4:9603240 |
| 4 rs3864189   | 9546431 A | 0.3213  | 1.33E-07 | chr:4:9603240 |
| 4 rs6814417   | 9548214 A | 0.3213  | 1.33E-07 | chr:4:9603240 |
| 4 rs6834222   | 9548270 G | 0.3213  | 1.33E-07 | chr:4:9603240 |
| 4 rs6852352   | 9547724 C | 0.3213  | 1.33E-07 | chr:4:9603240 |
| 4 rs9291569   | 9545554 T | 0.3213  | 1.33E-07 | chr:4:9603240 |
| 4 rs9685700   | 9547040 C | 0.3213  | 1.33E-07 | chr:4:9603240 |
| 4 rs9685984   | 9547110 A | 0.3213  | 1.33E-07 | chr:4:9603240 |
| 4 rs373573643 | 9158076 C | 0.4109  | 1.77E-07 | chr:4:9603240 |
| 4 rs34918902  | 9140215 C | 0.393   | 1.82E-07 | chr:4:9603240 |
| 4 rs9291471   | 9486645 G | 0.3363  | 1.83E-07 | chr:4:9603240 |
| 4 rs113906552 | 9635435 T | 0.3431  | 1.85E-07 | chr:4:9603240 |
| 4 rs2101074   | 9598414 A | 0.3353  | 1.86E-07 | chr:4:9603240 |
| 4 rs77648749  | 9583407 A | 0.2803  | 1.92E-07 | chr:4:9603240 |
| 4 rs6830276   | 9589678 G | 0.3466  | 2.00E-07 | chr:4:9603240 |
| 4 rs9283694   | 9486357 A | 0.3375  | 2.45E-07 | chr:4:9603240 |
| 4 rs6825231   | 9589641 G | 0.3559  | 2.49E-07 | chr:4:9603240 |
| 4 rs6449397   | 9417515 G | 0.3306  | 2.80E-07 | chr:4:9603240 |
| 4 rs10939395  | 9595105 T | 0.3388  | 2.99E-07 | chr:4:9603240 |
| 4 rs10939406  | 9603769 T | 0.3388  | 2.99E-07 | chr:4:9603240 |
| 4 rs10939407  | 9604018 G | 0.3388  | 2.99E-07 | chr:4:9603240 |
| 4 rs13131693  | 9593418 T | 0.3388  | 2.99E-07 | chr:4:9603240 |
| 4 rs13152842  | 9588960 T | 0.3388  | 2.99E-07 | chr:4:9603240 |
| 4 rs1809400   | 9599703 T | 0.3388  | 2.99E-07 | chr:4:9603240 |
| 4 rs1809401   | 9599790 T | 0.3388  | 2.99E-07 | chr:4:9603240 |
| 4 rs1842489   | 9601365 C | 0.3388  | 2.99E-07 | chr:4:9603240 |
| 4 rs1871717   | 9594100 G | 0.3388  | 2.99E-07 | chr:4:9603240 |
| 4 rs1871718   | 9594106 A | 0.3388  | 2.99E-07 | chr:4:9603240 |
| 4 rs1871720   | 9594372 A | 0.3388  | 2.99E-07 | chr:4:9603240 |
| 4 rs1966999   | 9591989 G | 0.3388  | 2.99E-07 | chr:4:9603240 |
| 4 rs1967000   | 9592111 G | 0.3388  | 2.99E-07 | chr:4:9603240 |
| 4 rs2086430   | 9598327 C | 0.3388  | 2.99E-07 | chr:4:9603240 |
| 4 rs3975514   | 9591609 T | 0.3388  | 2.99E-07 | chr:4:9603240 |
| 4 rs4404541   | 9600193 G | 0.3388  | 2.99E-07 | chr:4:9603240 |
| 4 rs4974821   | 9602901 A | 0.3388  | 2.99E-07 | chr:4:9603240 |



|               |           |        |          |               |
|---------------|-----------|--------|----------|---------------|
| 4 rs4974822   | 9602787 A | 0.3388 | 2.99E-07 | chr:4:9603240 |
| 4 rs4974860   | 9604201 T | 0.3388 | 2.99E-07 | chr:4:9603240 |
| 4 rs4974862   | 9602780 T | 0.3388 | 2.99E-07 | chr:4:9603240 |
| 4 rs6448855   | 9595781 G | 0.3388 | 2.99E-07 | chr:4:9603240 |
| 4 rs6814674   | 9594719 T | 0.3388 | 2.99E-07 | chr:4:9603240 |
| 4 rs6815282   | 9595018 T | 0.3388 | 2.99E-07 | chr:4:9603240 |
| 4 rs6831341   | 9592225 T | 0.3388 | 2.99E-07 | chr:4:9603240 |
| 4 rs6853345   | 9589192 A | 0.3388 | 2.99E-07 | chr:4:9603240 |
| 4 rs6855527   | 9596313 C | 0.3388 | 2.99E-07 | chr:4:9603240 |
| 4 rs7672393   | 9597912 A | 0.3388 | 2.99E-07 | chr:4:9603240 |
| 4 rs9993066   | 9602631 T | 0.3388 | 2.99E-07 | chr:4:9603240 |
| 4 rs6448089   | 9449376 C | 0.3266 | 3.01E-07 | chr:4:9603240 |
| 4 rs7439835   | 9448802 G | 0.3266 | 3.01E-07 | chr:4:9603240 |
| 4 rs139901069 | 9582722 A | 0.2809 | 3.46E-07 | chr:4:9603240 |
| 4 rs11723334  | 9755323 A | 0.3038 | 3.61E-07 | chr:4:9603240 |
| 4 rs6849466   | 9589667 C | 0.357  | 3.80E-07 | chr:4:9603240 |
| 4 rs9759410   | 9479016 C | 0.4446 | 3.84E-07 | chr:4:9603240 |
| 4 rs9759787   | 9479020 A | 0.4446 | 3.84E-07 | chr:4:9603240 |
| 4 rs61485794  | 9592346 G | 0.3139 | 4.06E-07 | chr:4:9603240 |
| 4 rs6414722   | 9429499 T | 0.3363 | 4.14E-07 | chr:4:9603240 |
| 4 rs6816539   | 9437278 C | 0.3363 | 4.14E-07 | chr:4:9603240 |
| 4 rs7677359   | 9432616 T | 0.3363 | 4.14E-07 | chr:4:9603240 |
| 4 rs71612295  | 9388039 A | 2.115  | 4.39E-07 | chr:4:9603240 |
| 4 rs10027319  | 9377221 A | 0.4376 | 4.64E-07 | chr:4:9603240 |
| 4 rs58786763  | 9649755 A | 0.3472 | 5.40E-07 | chr:4:9603240 |
| 4 rs4974820   | 9604794 G | 0.3478 | 5.43E-07 | chr:4:9603240 |
| 4 rs6849083   | 9606355 A | 0.3478 | 5.43E-07 | chr:4:9603240 |
| 4 rs9291586   | 9605658 A | 0.3478 | 5.43E-07 | chr:4:9603240 |
| 4 rs6448048   | 9445275 G | 0.3417 | 5.62E-07 | chr:4:9603240 |
| 4 rs6448071   | 9448740 C | 0.3417 | 5.62E-07 | chr:4:9603240 |
| 4 rs4698055   | 9627821 A | 0.4307 | 6.24E-07 | chr:4:9603240 |
| 4 rs34580398  | 9546762 A | 0.3676 | 6.24E-07 | chr:4:9603240 |
| 4 rs57402803  | 9691353 T | 0.3512 | 6.57E-07 | chr:4:9603240 |
| 4 rs57553236  | 9688140 C | 0.3512 | 6.57E-07 | chr:4:9603240 |
| 4 rs57868742  | 9694076 G | 0.3512 | 6.57E-07 | chr:4:9603240 |
| 4 rs10031102  | 9372966 A | 0.4434 | 6.83E-07 | chr:4:9603240 |
| 4 rs11938651  | 9370908 C | 0.4434 | 6.83E-07 | chr:4:9603240 |
| 4 rs35232164  | 9371224 G | 0.4434 | 6.83E-07 | chr:4:9603240 |
| 4 rs6839616   | 9373632 T | 0.4434 | 6.83E-07 | chr:4:9603240 |
| 4 rs7658754   | 9374756 T | 0.4434 | 6.83E-07 | chr:4:9603240 |
| 4 rs112219402 | 9562271 G | 0.2425 | 6.96E-07 | chr:4:9603240 |
| 4 rs12500632  | 9554039 A | 0.2425 | 6.96E-07 | chr:4:9603240 |
| 4 rs10000206  | 9611952 C | 0.3526 | 7.17E-07 | chr:4:9603240 |

|               |           |        |          |               |
|---------------|-----------|--------|----------|---------------|
| 4 rs10007322  | 9611939 T | 0.3526 | 7.17E-07 | chr:4:9603240 |
| 4 rs10939410  | 9606851 T | 0.3526 | 7.17E-07 | chr:4:9603240 |
| 4 rs10939411  | 9606906 T | 0.3526 | 7.17E-07 | chr:4:9603240 |
| 4 rs10939413  | 9607827 T | 0.3526 | 7.17E-07 | chr:4:9603240 |
| 4 rs11736694  | 9607834 C | 0.3526 | 7.17E-07 | chr:4:9603240 |
| 4 rs11737872  | 9608680 C | 0.3526 | 7.17E-07 | chr:4:9603240 |
| 4 rs2004333   | 9609411 T | 0.3526 | 7.17E-07 | chr:4:9603240 |
| 4 rs2004334   | 9609566 A | 0.3526 | 7.17E-07 | chr:4:9603240 |
| 4 rs4974855   | 9608931 T | 0.3526 | 7.17E-07 | chr:4:9603240 |
| 4 rs4974857   | 9607133 T | 0.3526 | 7.17E-07 | chr:4:9603240 |
| 4 rs6855150   | 9606433 T | 0.3526 | 7.17E-07 | chr:4:9603240 |
| 4 rs6855313   | 9606475 T | 0.3526 | 7.17E-07 | chr:4:9603240 |
| 4 rs6855323   | 9606482 T | 0.3526 | 7.17E-07 | chr:4:9603240 |
| 4 rs734628    | 9610085 G | 0.3526 | 7.17E-07 | chr:4:9603240 |
| 4 rs9917942   | 9612378 T | 0.3526 | 7.17E-07 | chr:4:9603240 |
| 4 rs34301346  | 9377114 G | 0.4441 | 7.36E-07 | chr:4:9603240 |
| 4 rs34441317  | 9380622 C | 0.4441 | 7.36E-07 | chr:4:9603240 |
| 4 rs4590031   | 9391773 A | 0.4441 | 7.36E-07 | chr:4:9603240 |
| 4 rs4631045   | 9384497 T | 0.4441 | 7.36E-07 | chr:4:9603240 |
| 4 rs6449098   | 9381935 G | 0.4441 | 7.36E-07 | chr:4:9603240 |
| 4 rs6834525   | 9385855 G | 0.4441 | 7.36E-07 | chr:4:9603240 |
| 4 rs7686755   | 9379592 T | 0.4441 | 7.36E-07 | chr:4:9603240 |
| 4 rs142416166 | 9370544 T | 0.444  | 7.42E-07 | chr:4:9603240 |
| 4 rs6414725   | 9442822 A | 0.3429 | 7.65E-07 | chr:4:9603240 |
| 4 rs13118208  | 9585272 A | 0.3401 | 7.87E-07 | chr:4:9603240 |
| 4 rs9683873   | 9585416 A | 0.3401 | 7.87E-07 | chr:4:9603240 |
| 4 rs13118016  | 9585215 A | 0.3447 | 8.05E-07 | chr:4:9603240 |
| 4 rs60624904  | 9457380 A | 3.357  | 8.08E-07 | chr:4:9603240 |
| 4 rs75217961  | 9457381 A | 3.357  | 8.08E-07 | chr:4:9603240 |
| 4 rs4266292   | 9371953 A | 0.4462 | 8.37E-07 | chr:4:9603240 |
| 4 rs13122164  | 9396646 C | 0.4445 | 8.41E-07 | chr:4:9603240 |
| 4 rs1830148   | 9404002 T | 0.4445 | 8.41E-07 | chr:4:9603240 |
| 4 rs142797284 | 9634436 T | 0.356  | 8.65E-07 | chr:4:9603240 |
| 4 rs143992647 | 9639055 T | 0.356  | 8.65E-07 | chr:4:9603240 |
| 4 rs4974813   | 9614492 T | 0.356  | 8.65E-07 | chr:4:9603240 |
| 4 rs4974814   | 9614162 T | 0.356  | 8.65E-07 | chr:4:9603240 |
| 4 rs4974817   | 9613000 A | 0.356  | 8.65E-07 | chr:4:9603240 |
| 4 rs4974852   | 9612877 C | 0.356  | 8.65E-07 | chr:4:9603240 |
| 4 rs6842111   | 9612572 A | 0.356  | 8.65E-07 | chr:4:9603240 |
| 4 rs77118731  | 9633558 G | 0.356  | 8.65E-07 | chr:4:9603240 |
| 4 rs6836522   | 9686823 T | 0.3526 | 8.67E-07 | chr:4:9603240 |
| 4 rs111288527 | 9651346 G | 0.3552 | 8.92E-07 | chr:4:9603240 |
| 4 rs113258723 | 9643382 C | 0.3552 | 8.92E-07 | chr:4:9603240 |

|               |           |        |          |               |
|---------------|-----------|--------|----------|---------------|
| 4 rs148730952 | 9647892 T | 0.3552 | 8.92E-07 | chr:4:9603240 |
| 4 rs60568234  | 9648674 T | 0.3552 | 8.92E-07 | chr:4:9603240 |
| 4 rs61118685  | 9650877 A | 0.3552 | 8.92E-07 | chr:4:9603240 |
| 4 rs370700951 | 9146691 T | 0.4433 | 9.01E-07 | chr:4:9603240 |
| 4 rs11930969  | 9395211 C | 0.4472 | 9.22E-07 | chr:4:9603240 |
| 4 rs13143927  | 9403257 A | 0.4472 | 9.22E-07 | chr:4:9603240 |
| 4 rs3975637   | 9401478 T | 0.4472 | 9.22E-07 | chr:4:9603240 |
| 4 rs4279209   | 9393100 C | 0.4472 | 9.22E-07 | chr:4:9603240 |
| 4 rs4324541   | 9397374 C | 0.4472 | 9.22E-07 | chr:4:9603240 |
| 4 rs4569753   | 9394302 G | 0.4472 | 9.22E-07 | chr:4:9603240 |
| 4 rs13127266  | 9673542 T | 6.318  | 9.80E-07 | chr:4:9603240 |
| 4 rs13127267  | 9673543 T | 6.318  | 9.80E-07 | chr:4:9603240 |
| 4 rs151311132 | 9646020 C | 0.3485 | 1.01E-06 | chr:4:9603240 |
| 4 rs76078762  | 9656034 A | 0.3485 | 1.01E-06 | chr:4:9603240 |
| 4 rs10007500  | 9551938 A | 0.2529 | 1.02E-06 | chr:4:9603240 |
| 4 rs11938000  | 9553730 G | 0.2529 | 1.02E-06 | chr:4:9603240 |
| 4 rs12500696  | 9554200 A | 0.2529 | 1.02E-06 | chr:4:9603240 |
| 4 rs7671014   | 9379033 C | 0.4487 | 1.06E-06 | chr:4:9603240 |
| 4 rs111322624 | 9682780 T | 0.3591 | 1.11E-06 | chr:4:9603240 |
| 4 rs112611007 | 9667420 A | 0.3591 | 1.11E-06 | chr:4:9603240 |
| 4 rs13132773  | 9389465 A | 0.4496 | 1.11E-06 | chr:4:9603240 |
| 4 rs139020598 | 9656876 T | 0.3591 | 1.11E-06 | chr:4:9603240 |
| 4 rs142877628 | 9670746 T | 0.3591 | 1.11E-06 | chr:4:9603240 |
| 4 rs145156790 | 9671365 A | 0.3591 | 1.11E-06 | chr:4:9603240 |
| 4 rs149050104 | 9661523 T | 0.3591 | 1.11E-06 | chr:4:9603240 |
| 4 rs35199477  | 9674995 A | 0.3591 | 1.11E-06 | chr:4:9603240 |
| 4 rs35352906  | 9670773 T | 0.3591 | 1.11E-06 | chr:4:9603240 |
| 4 rs368426688 | 9667600 T | 0.3591 | 1.11E-06 | chr:4:9603240 |
| 4 rs4259062   | 9674245 T | 0.3591 | 1.11E-06 | chr:4:9603240 |
| 4 rs4260536   | 9678079 G | 0.3591 | 1.11E-06 | chr:4:9603240 |
| 4 rs4264827   | 9664677 A | 0.3591 | 1.11E-06 | chr:4:9603240 |
| 4 rs4362821   | 9668941 T | 0.3591 | 1.11E-06 | chr:4:9603240 |
| 4 rs4417968   | 9667070 T | 0.3591 | 1.11E-06 | chr:4:9603240 |
| 4 rs4446308   | 9678379 A | 0.3591 | 1.11E-06 | chr:4:9603240 |
| 4 rs4550924   | 9674437 T | 0.3591 | 1.11E-06 | chr:4:9603240 |
| 4 rs57685354  | 9655782 T | 0.3591 | 1.11E-06 | chr:4:9603240 |
| 4 rs61165916  | 9655464 A | 0.3591 | 1.11E-06 | chr:4:9603240 |
| 4 rs61199897  | 9657621 T | 0.3591 | 1.11E-06 | chr:4:9603240 |
| 4 rs6822851   | 9681151 A | 0.3591 | 1.11E-06 | chr:4:9603240 |
| 4 rs6822895   | 9681222 T | 0.3591 | 1.11E-06 | chr:4:9603240 |
| 4 rs6838107   | 9679002 C | 0.3591 | 1.11E-06 | chr:4:9603240 |
| 4 rs6858190   | 9679430 G | 0.3591 | 1.11E-06 | chr:4:9603240 |
| 4 rs72491232  | 9658479 G | 0.3591 | 1.11E-06 | chr:4:9603240 |

|               |           |        |          |               |
|---------------|-----------|--------|----------|---------------|
| 4 rs74532861  | 9656067 C | 0.3591 | 1.11E-06 | chr:4:9603240 |
| 4 rs75729554  | 9676179 T | 0.3591 | 1.11E-06 | chr:4:9603240 |
| 4 rs75965288  | 9656832 G | 0.3591 | 1.11E-06 | chr:4:9603240 |
| 4 rs7679526   | 9653286 T | 0.3591 | 1.11E-06 | chr:4:9603240 |
| 4 rs79367718  | 9673458 C | 0.3591 | 1.11E-06 | chr:4:9603240 |
| 4 rs79487290  | 9663694 A | 0.3591 | 1.11E-06 | chr:4:9603240 |
| 4 rs4697909   | 9896760 A | 0.4407 | 1.14E-06 | chr:4:9603240 |
| 4 rs373589525 | 9146716 C | 0.4459 | 1.15E-06 | chr:4:9603240 |
| 4 rs4134321   | 9146720 A | 0.4459 | 1.15E-06 | chr:4:9603240 |
| 4 rs4134322   | 9146705 T | 0.4459 | 1.15E-06 | chr:4:9603240 |
| 4 rs10027113  | 9445873 C | 0.3456 | 1.20E-06 | chr:4:9603240 |
| 4 rs150730953 | 9697831 C | 0.3629 | 1.22E-06 | chr:4:9603240 |
| 4 rs13124988  | 9582385 C | 0.3489 | 1.24E-06 | chr:4:9603240 |
| 4 rs13135278  | 9582422 A | 0.3489 | 1.24E-06 | chr:4:9603240 |
| 4 rs13141294  | 9582314 T | 0.3489 | 1.24E-06 | chr:4:9603240 |
| 4 rs6854838   | 9423250 T | 0.352  | 1.27E-06 | chr:4:9603240 |
| 4 rs111656532 | 9632606 A | 0.4419 | 1.30E-06 | chr:4:9603240 |
| 4 rs112271793 | 9631492 C | 0.4419 | 1.30E-06 | chr:4:9603240 |
| 4 rs1947867   | 9584773 A | 0.3488 | 1.36E-06 | chr:4:9603240 |
| 4 rs9684038   | 9585837 A | 0.3488 | 1.36E-06 | chr:4:9603240 |
| 4 rs9684206   | 9585751 T | 0.3488 | 1.36E-06 | chr:4:9603240 |
| 4 rs2864384   | 9171756 G | 0.5461 | 1.46E-06 | chr:4:9603240 |
| 4 rs564784987 | 9146694 C | 0.453  | 1.51E-06 | chr:4:9603240 |
| 4 rs576926798 | 9146695 G | 0.453  | 1.51E-06 | chr:4:9603240 |
| 4 rs10939362  | 9553684 T | 0.2623 | 1.55E-06 | chr:4:9603240 |
| 4 rs4235344   | 9902230 A | 0.4479 | 1.59E-06 | chr:4:9603240 |
| 4 rs4697911   | 9902340 G | 0.4479 | 1.59E-06 | chr:4:9603240 |
| 4 rs74821633  | 9690069 C | 0.3718 | 1.61E-06 | chr:4:9603240 |
| 4 rs4308361   | 9397027 A | 0.4579 | 1.66E-06 | chr:4:9603240 |
| 4 rs10939608  | 9907336 C | 0.446  | 1.70E-06 | chr:4:9603240 |
| 4 rs149257964 | 9146864 G | 0.4293 | 1.74E-06 | chr:4:9603240 |
| 4 rs35933336  | 9852516 G | 3.918  | 1.85E-06 | chr:4:9603240 |
| 4 rs146531882 | 9653818 T | 0.3637 | 1.88E-06 | chr:4:9603240 |
| 4 rs113133387 | 9642181 T | 0.3662 | 1.91E-06 | chr:4:9603240 |
| 4 rs150196562 | 9642725 G | 0.3662 | 1.91E-06 | chr:4:9603240 |
| 4 rs10939425  | 9627380 A | 0.448  | 1.92E-06 | chr:4:9603240 |
| 4 rs28475805  | 9628806 T | 0.448  | 1.92E-06 | chr:4:9603240 |
| 4 rs28578840  | 9629427 T | 0.448  | 1.92E-06 | chr:4:9603240 |
| 4 rs13105134  | 9390042 G | 0.4606 | 1.99E-06 | chr:4:9603240 |
| 4 rs57478100  | 9652472 A | 0.3651 | 2.01E-06 | chr:4:9603240 |
| 4 rs1811572   | 9117904 G | 0.4345 | 2.11E-06 | chr:4:9603240 |
| 4 rs10031337  | 9445792 A | 0.3611 | 2.12E-06 | chr:4:9603240 |
| 4 rs4974905   | 9405523 G | 0.4532 | 2.13E-06 | chr:4:9603240 |

|               |           |        |          |               |
|---------------|-----------|--------|----------|---------------|
| 4 rs2046112   | 9584367 T | 0.3578 | 2.13E-06 | chr:4:9603240 |
| 4 rs7439868   | 9575415 A | 0.3578 | 2.13E-06 | chr:4:9603240 |
| 4 rs7439897   | 9575506 A | 0.3578 | 2.13E-06 | chr:4:9603240 |
| 4 rs7683563   | 9574835 A | 0.3578 | 2.13E-06 | chr:4:9603240 |
| 4 rs6810574   | 9589675 A | 0.3833 | 2.21E-06 | chr:4:9603240 |
| 4 rs28694172  | 9628973 C | 0.3738 | 2.22E-06 | chr:4:9603240 |
| 4 rs149583330 | 9662001 T | 0.3669 | 2.22E-06 | chr:4:9603240 |
| 4 rs2864386   | 9171770 A | 0.5534 | 2.37E-06 | chr:4:9603240 |
| 4 rs58688978  | 9693903 A | 0.3718 | 2.48E-06 | chr:4:9603240 |
| 4 rs6827717   | 9695525 T | 0.3718 | 2.48E-06 | chr:4:9603240 |
| 4 rs73802957  | 9694235 T | 0.3718 | 2.48E-06 | chr:4:9603240 |
| 4 rs73802958  | 9694236 T | 0.3718 | 2.48E-06 | chr:4:9603240 |
| 4 rs73802959  | 9694487 A | 0.3718 | 2.48E-06 | chr:4:9603240 |
| 4 rs140766422 | 9180667 A | 0.5486 | 2.70E-06 | chr:4:9603240 |
| 4 rs2280203   | 9909559 T | 0.4524 | 2.72E-06 | chr:4:9603240 |
| 4 rs6449304   | 9406344 T | 0.4574 | 2.92E-06 | chr:4:9603240 |
| 4 rs12648085  | 9572407 G | 0.3654 | 3.07E-06 | chr:4:9603240 |
| 4 rs150107225 | 9180680 C | 0.5632 | 3.26E-06 | chr:4:9603240 |
| 4 rs566587205 | 9214012 T | 0.5078 | 3.36E-06 | chr:4:9603240 |
| 4 rs10012224  | 9569324 A | 0.3395 | 3.46E-06 | chr:4:9603240 |
| 4 rs113251875 | 9621763 C | 0.4553 | 3.48E-06 | chr:4:9603240 |
| 4 rs1815182   | 9407095 T | 0.4642 | 3.65E-06 | chr:4:9603240 |
| 4 rs182962990 | 9642562 T | 0.3693 | 3.77E-06 | chr:4:9603240 |
| 4 rs367753069 | 9250210 T | 0.3966 | 3.80E-06 | chr:4:9603240 |
| 4 rs145014366 | 9588718 C | 0.358  | 3.80E-06 | chr:4:9603240 |
| 4 rs6448296   | 9478331 C | 0.5104 | 3.82E-06 | chr:4:9603240 |
| 4 rs6839392   | 9613589 T | 0.3598 | 3.94E-06 | chr:4:9603240 |
| 4 rs142983895 | 9184615 A | 0.5548 | 3.98E-06 | chr:4:9603240 |
| 4 rs151106189 | 9184621 G | 0.5548 | 3.98E-06 | chr:4:9603240 |
| 4 rs13105133  | 9577464 T | 0.372  | 4.23E-06 | chr:4:9603240 |
| 4 rs13120121  | 9577601 G | 0.372  | 4.23E-06 | chr:4:9603240 |
| 4 rs35722426  | 9570769 C | 0.372  | 4.23E-06 | chr:4:9603240 |
| 4 rs150601421 | 9166470 A | 0.5565 | 4.25E-06 | chr:4:9603240 |
| 4 rs151158999 | 9152046 T | 0.4751 | 4.37E-06 | chr:4:9603240 |
| 4 rs4974864   | 9588259 G | 0.3864 | 4.40E-06 | chr:4:9603240 |
| 4 rs1976013   | 9151261 C | 0.3706 | 4.46E-06 | chr:4:9603240 |
| 4 rs13114616  | 9406118 T | 0.4694 | 4.59E-06 | chr:4:9603240 |
| 4 rs28785196  | 9623514 T | 0.4652 | 4.66E-06 | chr:4:9603240 |
| 4 rs6449285   | 9404509 A | 0.3712 | 4.80E-06 | chr:4:9603240 |
| 4 rs3976557   | 9184644 C | 0.557  | 4.97E-06 | chr:4:9603240 |
| 4 rs11728148  | 9718971 C | 0.4259 | 4.99E-06 | chr:4:9603240 |
| 4 rs6849780   | 9452734 A | 0.3627 | 5.11E-06 | chr:4:9603240 |
| 4 rs28846731  | 9623693 A | 0.4624 | 5.11E-06 | chr:4:9603240 |

|               |           |        |          |               |
|---------------|-----------|--------|----------|---------------|
| 4 rs6449240   | 9395261 A | 0.3729 | 5.15E-06 | chr:4:9603240 |
| 4 rs9995735   | 9658789 T | 0.3651 | 5.18E-06 | chr:4:9603240 |
| 4 rs139818635 | 9156498 A | 0.375  | 5.34E-06 | chr:4:9603240 |
| 4 rs6850088   | 9395855 A | 0.4593 | 5.55E-06 | chr:4:9603240 |
| 4 rs143761582 | 9138957 A | 0.3674 | 5.76E-06 | chr:4:9603240 |
| 4 rs73084845  | 9671025 T | 0.3708 | 5.81E-06 | chr:4:9603240 |
| 4 rs10027318  | 9377220 A | 0.3805 | 5.88E-06 | chr:4:9603240 |
| 4 rs6449294   | 9405944 T | 0.4736 | 5.99E-06 | chr:4:9603240 |
| 4 rs4323101   | 9418436 T | 0.3807 | 6.00E-06 | chr:4:9603240 |
| 4 rs3976519   | 9209250 A | 0.5588 | 6.02E-06 | chr:4:9603240 |
| 4 rs191173256 | 9172760 G | 0.5793 | 6.07E-06 | chr:4:9603240 |
| 4 rs186010061 | 9180211 A | 0.5653 | 6.07E-06 | chr:4:9603240 |
| 4 rs139486777 | 9184563 A | 0.4848 | 6.17E-06 | chr:4:9603240 |
| 4 rs9291627   | 9376566 T | 0.3764 | 6.28E-06 | chr:4:9603240 |
| 4 rs10939684  | 9398219 T | 0.3775 | 6.40E-06 | chr:4:9603240 |
| 4 rs11937431  | 9400149 C | 0.3775 | 6.40E-06 | chr:4:9603240 |
| 4 rs4974838   | 9395312 T | 0.3775 | 6.40E-06 | chr:4:9603240 |
| 4 rs4974907   | 9395452 A | 0.3775 | 6.40E-06 | chr:4:9603240 |
| 4 rs6449256   | 9396267 T | 0.3775 | 6.40E-06 | chr:4:9603240 |
| 4 rs7435413   | 9398631 A | 0.3775 | 6.40E-06 | chr:4:9603240 |
| 4 rs7436246   | 9398672 A | 0.3775 | 6.40E-06 | chr:4:9603240 |
| 4 rs9291649   | 9399248 T | 0.3775 | 6.40E-06 | chr:4:9603240 |
| 4 rs28866204  | 9623513 T | 0.4687 | 6.47E-06 | chr:4:9603240 |
| 4 rs10012148  | 9664294 A | 0.371  | 6.77E-06 | chr:4:9603240 |
| 4 rs10014826  | 9635408 C | 0.371  | 6.77E-06 | chr:4:9603240 |
| 4 rs10026706  | 9674011 A | 0.371  | 6.77E-06 | chr:4:9603240 |
| 4 rs12501304  | 9682548 T | 0.371  | 6.77E-06 | chr:4:9603240 |
| 4 rs12505906  | 9636906 A | 0.371  | 6.77E-06 | chr:4:9603240 |
| 4 rs142277140 | 9648076 C | 0.371  | 6.77E-06 | chr:4:9603240 |
| 4 rs143079510 | 9665042 T | 0.371  | 6.77E-06 | chr:4:9603240 |
| 4 rs143459149 | 9674515 G | 0.371  | 6.77E-06 | chr:4:9603240 |
| 4 rs150693830 | 9665588 T | 0.371  | 6.77E-06 | chr:4:9603240 |
| 4 rs150921853 | 9639169 T | 0.371  | 6.77E-06 | chr:4:9603240 |
| 4 rs201078836 | 9680043 T | 0.371  | 6.77E-06 | chr:4:9603240 |
| 4 rs28380563  | 9658392 T | 0.371  | 6.77E-06 | chr:4:9603240 |
| 4 rs28575773  | 9656525 A | 0.371  | 6.77E-06 | chr:4:9603240 |
| 4 rs28577902  | 9650657 A | 0.371  | 6.77E-06 | chr:4:9603240 |
| 4 rs28643508  | 9659221 C | 0.371  | 6.77E-06 | chr:4:9603240 |
| 4 rs28673739  | 9677529 T | 0.371  | 6.77E-06 | chr:4:9603240 |
| 4 rs28718562  | 9659961 G | 0.371  | 6.77E-06 | chr:4:9603240 |
| 4 rs28735278  | 9614378 A | 0.371  | 6.77E-06 | chr:4:9603240 |
| 4 rs28793127  | 9660482 T | 0.371  | 6.77E-06 | chr:4:9603240 |
| 4 rs4518243   | 9664634 C | 0.371  | 6.77E-06 | chr:4:9603240 |

|               |           |        |          |               |
|---------------|-----------|--------|----------|---------------|
| 4 rs59312718  | 9669434 T | 0.371  | 6.77E-06 | chr:4:9603240 |
| 4 rs73082901  | 9636762 C | 0.371  | 6.77E-06 | chr:4:9603240 |
| 4 rs73084810  | 9642699 G | 0.371  | 6.77E-06 | chr:4:9603240 |
| 4 rs73084818  | 9648875 T | 0.371  | 6.77E-06 | chr:4:9603240 |
| 4 rs73084842  | 9671015 T | 0.371  | 6.77E-06 | chr:4:9603240 |
| 4 rs73802943  | 9663020 C | 0.371  | 6.77E-06 | chr:4:9603240 |
| 4 rs7684741   | 9661843 A | 0.371  | 6.77E-06 | chr:4:9603240 |
| 4 rs7693691   | 9652934 C | 0.371  | 6.77E-06 | chr:4:9603240 |
| 4 rs77025480  | 9657754 A | 0.371  | 6.77E-06 | chr:4:9603240 |
| 4 rs80077135  | 9681299 G | 0.371  | 6.77E-06 | chr:4:9603240 |
| 4 rs9291600   | 9675669 A | 0.371  | 6.77E-06 | chr:4:9603240 |
| 4 rs4974843   | 9133386 T | 0.3746 | 6.84E-06 | chr:4:9603240 |
| 4 rs372468654 | 9184701 G | 0.562  | 7.17E-06 | chr:4:9603240 |
| 4 rs12504246  | 9692932 A | 0.372  | 7.18E-06 | chr:4:9603240 |
| 4 rs2902724   | 9171339 A | 0.5822 | 7.22E-06 | chr:4:9603240 |
| 4 rs12509371  | 9384846 C | 0.467  | 7.36E-06 | chr:4:9603240 |
| 4 rs57504588  | 9570006 A | 0.3942 | 7.52E-06 | chr:4:9603240 |
| 4 rs535950547 | 9169981 T | 0.5732 | 7.59E-06 | chr:4:9603240 |
| 4 rs3890174   | 9700774 G | 0.4734 | 7.66E-06 | chr:4:9603240 |
| 4 rs184310948 | 9172231 A | 0.5836 | 8.26E-06 | chr:4:9603240 |
| 4 rs34329516  | 9103427 G | 0.4617 | 8.49E-06 | chr:4:9603240 |
| 4 rs140773815 | 9154684 C | 0.3842 | 8.96E-06 | chr:4:9603240 |
| 4 rs142529802 | 9154569 G | 0.3842 | 8.96E-06 | chr:4:9603240 |
| 4 rs144519707 | 9154448 A | 0.3842 | 8.96E-06 | chr:4:9603240 |
| 4 rs144776921 | 9154426 C | 0.3842 | 8.96E-06 | chr:4:9603240 |
| 4 rs144863835 | 9151748 G | 0.3842 | 8.96E-06 | chr:4:9603240 |
| 4 rs149961376 | 9157527 T | 0.3842 | 8.96E-06 | chr:4:9603240 |
| 4 rs150547742 | 9157388 A | 0.3842 | 8.96E-06 | chr:4:9603240 |
| 4 rs182849524 | 9157623 T | 0.3842 | 8.96E-06 | chr:4:9603240 |
| 4 rs34664951  | 9154535 T | 0.3842 | 8.96E-06 | chr:4:9603240 |
| 4 rs35033276  | 9156426 T | 0.3842 | 8.96E-06 | chr:4:9603240 |
| 4 rs35589728  | 9156253 C | 0.3842 | 8.96E-06 | chr:4:9603240 |
| 4 rs369503499 | 9152616 T | 0.3842 | 8.96E-06 | chr:4:9603240 |
| 4 rs373986945 | 9152610 A | 0.3842 | 8.96E-06 | chr:4:9603240 |
| 4 rs3857167   | 9151470 A | 0.3842 | 8.96E-06 | chr:4:9603240 |
| 4 rs4417969   | 9152347 A | 0.3842 | 8.96E-06 | chr:4:9603240 |
| 4 rs4431224   | 9383717 T | 0.3842 | 8.96E-06 | chr:4:9603240 |
| 4 rs4504248   | 9380231 T | 0.3842 | 8.96E-06 | chr:4:9603240 |
| 4 rs4586932   | 9376371 T | 0.3842 | 8.96E-06 | chr:4:9603240 |
| 4 rs4618310   | 9382944 T | 0.3842 | 8.96E-06 | chr:4:9603240 |
| 4 rs57268491  | 9385199 C | 0.3842 | 8.96E-06 | chr:4:9603240 |
| 4 rs6414753   | 9372303 T | 0.3842 | 8.96E-06 | chr:4:9603240 |
| 4 rs6414754   | 9375984 T | 0.3842 | 8.96E-06 | chr:4:9603240 |

|               |           |        |          |               |
|---------------|-----------|--------|----------|---------------|
| 4 rs6414762   | 9382029 G | 0.3842 | 8.96E-06 | chr:4:9603240 |
| 4 rs6414771   | 9392955 C | 0.3842 | 8.96E-06 | chr:4:9603240 |
| 4 rs6449019   | 9375059 G | 0.3842 | 8.96E-06 | chr:4:9603240 |
| 4 rs6449025   | 9375416 C | 0.3842 | 8.96E-06 | chr:4:9603240 |
| 4 rs6449056   | 9377525 T | 0.3842 | 8.96E-06 | chr:4:9603240 |
| 4 rs6449099   | 9382245 A | 0.3842 | 8.96E-06 | chr:4:9603240 |
| 4 rs6449145   | 9387155 C | 0.3842 | 8.96E-06 | chr:4:9603240 |
| 4 rs6449148   | 9387204 A | 0.3842 | 8.96E-06 | chr:4:9603240 |
| 4 rs6449219   | 9393134 T | 0.3842 | 8.96E-06 | chr:4:9603240 |
| 4 rs6844461   | 9372640 A | 0.3842 | 8.96E-06 | chr:4:9603240 |
| 4 rs6846545   | 9390521 A | 0.3842 | 8.96E-06 | chr:4:9603240 |
| 4 rs6851747   | 9390660 A | 0.3842 | 8.96E-06 | chr:4:9603240 |
| 4 rs6858036   | 9370948 C | 0.3842 | 8.96E-06 | chr:4:9603240 |
| 4 rs7683749   | 9384363 A | 0.3842 | 8.96E-06 | chr:4:9603240 |
| 4 rs6838885   | 9606104 T | 0.3995 | 9.47E-06 | chr:4:9603240 |
| 4 rs6839486   | 9606411 A | 0.3995 | 9.47E-06 | chr:4:9603240 |
| 4 rs535688405 | 9173134 G | 0.5181 | 9.60E-06 | chr:4:9603240 |
| 4 rs568308137 | 9173131 G | 0.5181 | 9.60E-06 | chr:4:9603240 |
| 4 rs10001941  | 9688516 A | 0.379  | 9.63E-06 | chr:4:9603240 |
| 4 rs10011678  | 9688689 C | 0.379  | 9.63E-06 | chr:4:9603240 |
| 4 rs10024971  | 9694013 G | 0.379  | 9.63E-06 | chr:4:9603240 |
| 4 rs28546201  | 9684768 T | 0.379  | 9.63E-06 | chr:4:9603240 |
| 4 rs28691200  | 9684552 A | 0.379  | 9.63E-06 | chr:4:9603240 |
| 4 rs73088893  | 9695306 A | 0.379  | 9.63E-06 | chr:4:9603240 |
| 4 rs6283      | 9784631 C | 0.4848 | 9.77E-06 | chr:4:9603240 |
| 4 rs9996676   | 9678661 C | 0.3833 | 9.87E-06 | chr:4:9603240 |
| 4 rs146768165 | 9142282 G | 0.4372 | 1.00E-05 | chr:4:9603240 |
| 4 rs35854889  | 9103513 G | 0.4642 | 1.01E-05 | chr:4:9603240 |
| 4 rs11727674  | 9719981 T | 0.4744 | 1.01E-05 | chr:4:9603240 |
| 4 rs4974827   | 9588288 C | 0.461  | 1.01E-05 | chr:4:9603240 |
| 4 rs10013863  | 9667436 T | 0.3801 | 1.04E-05 | chr:4:9603240 |
| 4 rs9884683   | 9677137 A | 0.3802 | 1.04E-05 | chr:4:9603240 |
| 4 rs112166230 | 9564464 T | 0.4135 | 1.05E-05 | chr:4:9603240 |
| 4 rs11942505  | 9564504 T | 0.4135 | 1.05E-05 | chr:4:9603240 |
| 4 rs192147940 | 9184917 G | 0.5786 | 1.05E-05 | chr:4:9603240 |
| 4 rs28408800  | 9565507 T | 0.4135 | 1.05E-05 | chr:4:9603240 |
| 4 rs28733833  | 9564338 C | 0.4135 | 1.05E-05 | chr:4:9603240 |
| 4 rs6812931   | 9566656 A | 0.4135 | 1.05E-05 | chr:4:9603240 |
| 4 rs9685048   | 9568555 T | 0.4135 | 1.05E-05 | chr:4:9603240 |
| 4 rs9760761   | 9565469 T | 0.4135 | 1.05E-05 | chr:4:9603240 |
| 4 rs9884664   | 9563037 G | 0.4135 | 1.05E-05 | chr:4:9603240 |
| 4 rs539112023 | 9245598 G | 0.3446 | 1.10E-05 | chr:4:9603240 |
| 4 rs571713432 | 9245597 A | 0.3446 | 1.10E-05 | chr:4:9603240 |



|               |           |        |          |               |
|---------------|-----------|--------|----------|---------------|
| 4 rs192202534 | 9171643 A | 0.5878 | 1.11E-05 | chr:4:9603240 |
| 4 rs12171434  | 9647060 T | 0.3817 | 1.12E-05 | chr:4:9603240 |
| 4 rs28796640  | 9663788 T | 0.3862 | 1.14E-05 | chr:4:9603240 |
| 4 rs369296446 | 9184677 C | 0.5782 | 1.17E-05 | chr:4:9603240 |
| 4 rs565347219 | 9170379 C | 0.5882 | 1.19E-05 | chr:4:9603240 |
| 4 rs28851574  | 9644580 C | 0.3814 | 1.19E-05 | chr:4:9603240 |
| 4 rs28886660  | 9644540 G | 0.3814 | 1.19E-05 | chr:4:9603240 |
| 4 rs35343103  | 9134625 C | 0.4434 | 1.20E-05 | chr:4:9603240 |
| 4 rs147054838 | 9209382 A | 0.5689 | 1.24E-05 | chr:4:9603240 |
| 4 rs375833666 | 9212158 A | 0.5875 | 1.25E-05 | chr:4:9603240 |
| 4 rs149470045 | 9138170 A | 0.39   | 1.30E-05 | chr:4:9603240 |
| 4 rs10032544  | 9556417 A | 0.4178 | 1.31E-05 | chr:4:9603240 |
| 4 rs113137430 | 9562106 C | 0.4178 | 1.31E-05 | chr:4:9603240 |
| 4 rs113785368 | 9562216 G | 0.4178 | 1.31E-05 | chr:4:9603240 |
| 4 rs113919186 | 9561488 A | 0.4178 | 1.31E-05 | chr:4:9603240 |
| 4 rs2061995   | 9561739 A | 0.4178 | 1.31E-05 | chr:4:9603240 |
| 4 rs2865051   | 9552430 T | 0.4178 | 1.31E-05 | chr:4:9603240 |
| 4 rs56202639  | 9725168 C | 0.4908 | 1.31E-05 | chr:4:9603240 |
| 4 rs57867579  | 9725344 A | 0.4908 | 1.31E-05 | chr:4:9603240 |
| 4 rs6825744   | 9553832 A | 0.4178 | 1.31E-05 | chr:4:9603240 |
| 4 rs6849024   | 9553433 G | 0.4178 | 1.31E-05 | chr:4:9603240 |
| 4 rs9291575   | 9550798 G | 0.4178 | 1.31E-05 | chr:4:9603240 |
| 4 rs9884669   | 9563294 A | 0.4178 | 1.31E-05 | chr:4:9603240 |
| 4 rs9884684   | 9561232 A | 0.4178 | 1.31E-05 | chr:4:9603240 |
| 4 rs9884691   | 9561348 A | 0.4178 | 1.31E-05 | chr:4:9603240 |
| 4 rs9994111   | 9558344 A | 0.4178 | 1.31E-05 | chr:4:9603240 |
| 4 rs9997903   | 9555405 G | 0.4178 | 1.31E-05 | chr:4:9603240 |
| 4 rs56069457  | 9425607 C | 0.4387 | 1.31E-05 | chr:4:9603240 |
| 4 rs3976520   | 9209266 T | 0.5687 | 1.35E-05 | chr:4:9603240 |
| 4 rs3976521   | 9209272 A | 0.5687 | 1.35E-05 | chr:4:9603240 |
| 4 rs143756616 | 9211985 A | 0.4377 | 1.36E-05 | chr:4:9603240 |
| 4 rs34885962  | 9172134 T | 0.5598 | 1.41E-05 | chr:4:9603240 |
| 4 rs35397787  | 9172132 T | 0.5598 | 1.41E-05 | chr:4:9603240 |
| 4 rs6841523   | 9549516 A | 0.4204 | 1.47E-05 | chr:4:9603240 |
| 4 rs138241899 | 9143654 G | 0.4482 | 1.50E-05 | chr:4:9603240 |
| 4 rs139531174 | 9144200 A | 0.4482 | 1.50E-05 | chr:4:9603240 |
| 4 rs141129163 | 9145979 G | 0.4482 | 1.50E-05 | chr:4:9603240 |
| 4 rs142185832 | 9144352 G | 0.4482 | 1.50E-05 | chr:4:9603240 |
| 4 rs143296337 | 9142775 T | 0.4482 | 1.50E-05 | chr:4:9603240 |
| 4 rs143713351 | 9142597 C | 0.4482 | 1.50E-05 | chr:4:9603240 |
| 4 rs144362537 | 9135598 G | 0.4482 | 1.50E-05 | chr:4:9603240 |
| 4 rs145175146 | 9138856 C | 0.4482 | 1.50E-05 | chr:4:9603240 |
| 4 rs147538805 | 9143902 C | 0.4482 | 1.50E-05 | chr:4:9603240 |

|   |             |            |        |          |                |
|---|-------------|------------|--------|----------|----------------|
| 4 | rs148100487 | 9142645 G  | 0.4482 | 1.50E-05 | chr:4:9603240  |
| 4 | rs149108994 | 9144349 C  | 0.4482 | 1.50E-05 | chr:4:9603240  |
| 4 | rs151336389 | 9146467 G  | 0.4482 | 1.50E-05 | chr:4:9603240  |
| 4 | rs1904942   | 9144778 A  | 0.4482 | 1.50E-05 | chr:4:9603240  |
| 4 | rs2086493   | 9135431 C  | 0.4482 | 1.50E-05 | chr:4:9603240  |
| 4 | rs34257804  | 9139679 G  | 0.4482 | 1.50E-05 | chr:4:9603240  |
| 4 | rs34377195  | 9140410 A  | 0.4482 | 1.50E-05 | chr:4:9603240  |
| 4 | rs35143284  | 9139875 A  | 0.4482 | 1.50E-05 | chr:4:9603240  |
| 4 | rs35554314  | 9148327 C  | 0.4482 | 1.50E-05 | chr:4:9603240  |
| 4 | rs35860603  | 9141447 A  | 0.4482 | 1.50E-05 | chr:4:9603240  |
| 4 | rs35881783  | 9140558 T  | 0.4482 | 1.50E-05 | chr:4:9603240  |
| 4 | rs3857166   | 9136261 G  | 0.4482 | 1.50E-05 | chr:4:9603240  |
| 4 | rs3976607   | 9135820 C  | 0.4482 | 1.50E-05 | chr:4:9603240  |
| 4 | rs3976615   | 9133895 T  | 0.4482 | 1.50E-05 | chr:4:9603240  |
| 4 | rs4974840   | 9143368 A  | 0.4482 | 1.50E-05 | chr:4:9603240  |
| 4 | rs4974841   | 9143357 G  | 0.4482 | 1.50E-05 | chr:4:9603240  |
| 4 | rs11944560  | 9604670 G  | 0.4092 | 1.52E-05 | chr:4:9603240  |
| 4 | rs9991809   | 9607279 G  | 0.4092 | 1.52E-05 | chr:4:9603240  |
| 4 | rs2864990   | 9419428 T  | 0.4793 | 1.52E-05 | chr:4:9603240  |
| 4 | rs180735442 | 9166610 G  | 0.5943 | 1.56E-05 | chr:4:9603240  |
| 4 | rs186459074 | 9185836 G  | 0.589  | 1.56E-05 | chr:4:9603240  |
| 4 | rs2864343   | 9135179 G  | 0.4414 | 1.57E-05 | chr:4:9603240  |
| 4 | rs10032442  | 9578122 C  | 0.3813 | 1.58E-05 | chr:4:9603240  |
| 4 | rs137952652 | 9212124 A  | 0.5948 | 1.61E-05 | chr:4:9603240  |
| 4 | rs187263847 | 9173688 G  | 0.5651 | 1.61E-05 | chr:4:9603240  |
| 4 | rs35336824  | 9426514 G  | 0.4434 | 1.64E-05 | chr:4:9603240  |
| 5 | rs115017698 | 80424934 A | 96.6   | 3.34E-13 | chr:5:80442266 |
| 5 | rs116503403 | 80427691 A | 96.6   | 3.34E-13 | chr:5:80442266 |
| 5 | rs143086439 | 80424848 T | 96.6   | 3.34E-13 | chr:5:80442266 |
| 5 | rs115568758 | 80416113 C | 53.42  | 1.17E-11 | chr:5:80442266 |
| 5 | rs76834320  | 80416108 G | 53.42  | 1.17E-11 | chr:5:80442266 |
| 5 | rs7707396   | 80433658 G | 52.77  | 1.50E-11 | chr:5:80442266 |
| 5 | rs80015185  | 80435871 A | 52.77  | 1.50E-11 | chr:5:80442266 |
| 5 | rs145198622 | 80414774 T | 32.86  | 1.33E-10 | chr:5:80442266 |
| 5 | rs201257196 | 80384786 A | 14.05  | 5.75E-08 | chr:5:80442266 |
| 5 | rs114090431 | 80384788 A | 13.87  | 6.72E-08 | chr:5:80442266 |
| 5 | rs111809751 | 80316223 G | 44.82  | 2.35E-07 | chr:5:80442266 |
| 5 | rs111796768 | 80299334 A | 32.09  | 2.62E-07 | chr:5:80442266 |
| 5 | rs139650041 | 80311476 T | 32.09  | 2.62E-07 | chr:5:80442266 |
| 5 | rs17277408  | 80379572 T | 15.31  | 2.64E-07 | chr:5:80442266 |
| 5 | rs115860918 | 80393475 T | 113    | 9.78E-07 | chr:5:80442266 |
| 5 | rs190585232 | 80356070 T | 15.61  | 2.26E-06 | chr:5:80442266 |
| 5 | rs78530156  | 80404346 C | 21.95  | 2.27E-06 | chr:5:80442266 |

|               |            |         |          |                |
|---------------|------------|---------|----------|----------------|
| 5 rs76578068  | 80266639 A | 10.7    | 1.04E-05 | chr:5:80442266 |
| 5 rs4703822   | 80411221 A | 6.127   | 1.57E-05 | chr:5:80442266 |
| 5 rs26897     | 80416882 C | 30.85   | 1.92E-05 | chr:5:80442266 |
| 5 rs10462577  | 80296433 G | 4.939   | 2.28E-05 | chr:5:80442266 |
| 5 rs17212948  | 80406756 C | 4.578   | 4.25E-05 | chr:5:80442266 |
| 5 rs12655228  | 80293910 T | 7.07    | 4.94E-05 | chr:5:80442266 |
| 5 rs148143005 | 80359580 C | 155.6   | 5.07E-05 | chr:5:80442266 |
| 5 rs36068583  | 8942585 A  | 0.06566 | 2.98E-14 | chr:5:8937853  |
| 5 rs6555581   | 8932337 T  | 0.06644 | 3.43E-14 | chr:5:8937853  |
| 5 rs2962650   | 8937165 G  | 0.07415 | 5.93E-14 | chr:5:8937853  |
| 5 rs2963363   | 8928893 A  | 0.07415 | 5.93E-14 | chr:5:8937853  |
| 5 rs2963376   | 8942864 T  | 0.07415 | 5.93E-14 | chr:5:8937853  |
| 5 rs6861103   | 8928381 A  | 0.07415 | 5.93E-14 | chr:5:8937853  |
| 5 rs13160367  | 8936774 A  | 0.0701  | 7.55E-14 | chr:5:8937853  |
| 5 rs13168801  | 8943312 A  | 0.07935 | 8.37E-14 | chr:5:8937853  |
| 5 rs13189384  | 8943321 G  | 0.07935 | 8.37E-14 | chr:5:8937853  |
| 5 rs34626780  | 8943339 T  | 0.07149 | 9.19E-14 | chr:5:8937853  |
| 5 rs35951584  | 8943375 A  | 0.07149 | 9.19E-14 | chr:5:8937853  |
| 5 rs11949503  | 8937804 C  | 0.07141 | 1.24E-13 | chr:5:8937853  |
| 5 rs11955429  | 8941715 A  | 0.07141 | 1.24E-13 | chr:5:8937853  |
| 5 rs12186849  | 8933088 C  | 0.07141 | 1.24E-13 | chr:5:8937853  |
| 5 rs13157678  | 8931378 C  | 0.07141 | 1.24E-13 | chr:5:8937853  |
| 5 rs13160595  | 8929697 C  | 0.07141 | 1.24E-13 | chr:5:8937853  |
| 5 rs13165792  | 8943070 T  | 0.07141 | 1.24E-13 | chr:5:8937853  |
| 5 rs13166892  | 8931212 C  | 0.07141 | 1.24E-13 | chr:5:8937853  |
| 5 rs13169109  | 8943532 C  | 0.07141 | 1.24E-13 | chr:5:8937853  |
| 5 rs13170524  | 8934862 G  | 0.07141 | 1.24E-13 | chr:5:8937853  |
| 5 rs13180198  | 8936074 C  | 0.07141 | 1.24E-13 | chr:5:8937853  |
| 5 rs13181039  | 8936810 C  | 0.07141 | 1.24E-13 | chr:5:8937853  |
| 5 rs13181188  | 8936871 G  | 0.07141 | 1.24E-13 | chr:5:8937853  |
| 5 rs13185206  | 8943046 G  | 0.07141 | 1.24E-13 | chr:5:8937853  |
| 5 rs13186994  | 8930953 C  | 0.07141 | 1.24E-13 | chr:5:8937853  |
| 5 rs2962735   | 8942095 G  | 0.07141 | 1.24E-13 | chr:5:8937853  |
| 5 rs34108904  | 8943745 T  | 0.07141 | 1.24E-13 | chr:5:8937853  |
| 5 rs34251442  | 8942645 C  | 0.07141 | 1.24E-13 | chr:5:8937853  |
| 5 rs35376107  | 8942188 G  | 0.07141 | 1.24E-13 | chr:5:8937853  |
| 5 rs35495516  | 8942635 C  | 0.07141 | 1.24E-13 | chr:5:8937853  |
| 5 rs36075104  | 8937389 A  | 0.07141 | 1.24E-13 | chr:5:8937853  |
| 5 rs4505924   | 8936629 A  | 0.07141 | 1.24E-13 | chr:5:8937853  |
| 5 rs4526080   | 8941529 G  | 0.07141 | 1.24E-13 | chr:5:8937853  |
| 5 rs4563593   | 8933794 G  | 0.07141 | 1.24E-13 | chr:5:8937853  |
| 5 rs4585412   | 8941705 G  | 0.07141 | 1.24E-13 | chr:5:8937853  |
| 5 rs6555580   | 8932263 C  | 0.07141 | 1.24E-13 | chr:5:8937853  |

|              |           |         |          |               |
|--------------|-----------|---------|----------|---------------|
| 5 rs6555585  | 8935651 G | 0.07141 | 1.24E-13 | chr:5:8937853 |
| 5 rs6555586  | 8935800 A | 0.07141 | 1.24E-13 | chr:5:8937853 |
| 5 rs6862593  | 8928550 T | 0.07141 | 1.24E-13 | chr:5:8937853 |
| 5 rs6866047  | 8932660 T | 0.07141 | 1.24E-13 | chr:5:8937853 |
| 5 rs6870451  | 8938885 G | 0.07141 | 1.24E-13 | chr:5:8937853 |
| 5 rs6870477  | 8938935 G | 0.07141 | 1.24E-13 | chr:5:8937853 |
| 5 rs6884096  | 8932523 A | 0.07141 | 1.24E-13 | chr:5:8937853 |
| 5 rs6885789  | 8932782 T | 0.07141 | 1.24E-13 | chr:5:8937853 |
| 5 rs6888819  | 8929239 C | 0.07141 | 1.24E-13 | chr:5:8937853 |
| 5 rs6894834  | 8930468 G | 0.07141 | 1.24E-13 | chr:5:8937853 |
| 5 rs71611354 | 8942703 T | 0.07141 | 1.24E-13 | chr:5:8937853 |
| 5 rs76109783 | 8939954 A | 0.07141 | 1.24E-13 | chr:5:8937853 |
| 5 rs7735641  | 8935206 A | 0.07141 | 1.24E-13 | chr:5:8937853 |
| 5 rs4495147  | 8933733 T | 0.07194 | 1.42E-13 | chr:5:8937853 |
| 5 rs2963326  | 8933452 A | 0.07348 | 1.98E-13 | chr:5:8937853 |
| 5 rs2963327  | 8934159 G | 0.07348 | 1.98E-13 | chr:5:8937853 |
| 5 rs2963380  | 8945194 A | 0.07348 | 1.98E-13 | chr:5:8937853 |
| 5 rs2963384  | 8950534 T | 0.07329 | 2.06E-13 | chr:5:8937853 |
| 5 rs2963324  | 8933130 C | 0.1037  | 3.86E-13 | chr:5:8937853 |
| 5 rs1585204  | 8974023 A | 0.07219 | 3.99E-13 | chr:5:8937853 |
| 5 rs34814654 | 8958042 A | 0.07645 | 4.37E-13 | chr:5:8937853 |
| 5 rs6869307  | 8968310 G | 0.07645 | 4.37E-13 | chr:5:8937853 |
| 5 rs2963375  | 8942567 T | 0.08358 | 4.55E-13 | chr:5:8937853 |
| 5 rs2962724  | 8952042 T | 0.08331 | 4.61E-13 | chr:5:8937853 |
| 5 rs2962651  | 8935871 A | 0.0726  | 5.28E-13 | chr:5:8937853 |
| 5 rs2962654  | 8931393 A | 0.0726  | 5.28E-13 | chr:5:8937853 |
| 5 rs2963325  | 8933269 T | 0.0726  | 5.28E-13 | chr:5:8937853 |
| 5 rs2963337  | 8935632 G | 0.0726  | 5.28E-13 | chr:5:8937853 |
| 5 rs2963370  | 8940538 C | 0.0726  | 5.28E-13 | chr:5:8937853 |
| 5 rs2963371  | 8940701 G | 0.0726  | 5.28E-13 | chr:5:8937853 |
| 5 rs2962733  | 8945736 C | 0.07244 | 5.55E-13 | chr:5:8937853 |
| 5 rs80193320 | 8941404 C | 0.07341 | 5.80E-13 | chr:5:8937853 |
| 5 rs4452535  | 8958034 C | 0.08414 | 6.78E-13 | chr:5:8937853 |
| 5 rs2388006  | 8968700 C | 0.08097 | 6.85E-13 | chr:5:8937853 |
| 5 rs2388007  | 8968699 C | 0.08097 | 6.85E-13 | chr:5:8937853 |
| 5 rs16881756 | 8976859 G | 0.07711 | 7.75E-13 | chr:5:8937853 |
| 5 rs1947586  | 8974532 C | 0.07711 | 7.75E-13 | chr:5:8937853 |
| 5 rs1947587  | 8974402 A | 0.07711 | 7.75E-13 | chr:5:8937853 |
| 5 rs6555588  | 8977866 G | 0.07711 | 7.75E-13 | chr:5:8937853 |
| 5 rs6870017  | 8977512 A | 0.07711 | 7.75E-13 | chr:5:8937853 |
| 5 rs10038936 | 8965436 A | 0.07263 | 8.20E-13 | chr:5:8937853 |
| 5 rs10056871 | 8964318 C | 0.07263 | 8.20E-13 | chr:5:8937853 |
| 5 rs10058520 | 8964357 C | 0.07263 | 8.20E-13 | chr:5:8937853 |

|              |           |         |                        |
|--------------|-----------|---------|------------------------|
| 5 rs10062754 | 8972259 C | 0.07263 | 8.20E-13 chr:5:8937853 |
| 5 rs10512999 | 8963885 C | 0.07263 | 8.20E-13 chr:5:8937853 |
| 5 rs12521690 | 8967716 A | 0.07263 | 8.20E-13 chr:5:8937853 |
| 5 rs13163334 | 8962662 C | 0.07263 | 8.20E-13 chr:5:8937853 |
| 5 rs13164654 | 8972492 T | 0.07263 | 8.20E-13 chr:5:8937853 |
| 5 rs13175700 | 8967537 T | 0.07263 | 8.20E-13 chr:5:8937853 |
| 5 rs13185652 | 8967225 C | 0.07263 | 8.20E-13 chr:5:8937853 |
| 5 rs13188103 | 8964519 T | 0.07263 | 8.20E-13 chr:5:8937853 |
| 5 rs1902806  | 8965016 C | 0.07263 | 8.20E-13 chr:5:8937853 |
| 5 rs1902807  | 8964963 A | 0.07263 | 8.20E-13 chr:5:8937853 |
| 5 rs1902808  | 8964937 T | 0.07263 | 8.20E-13 chr:5:8937853 |
| 5 rs2219397  | 8971713 T | 0.07263 | 8.20E-13 chr:5:8937853 |
| 5 rs2219398  | 8971683 C | 0.07263 | 8.20E-13 chr:5:8937853 |
| 5 rs2388008  | 8968479 C | 0.07263 | 8.20E-13 chr:5:8937853 |
| 5 rs34958715 | 8970889 G | 0.07263 | 8.20E-13 chr:5:8937853 |
| 5 rs3921964  | 8972146 G | 0.07263 | 8.20E-13 chr:5:8937853 |
| 5 rs4431316  | 8964778 T | 0.07263 | 8.20E-13 chr:5:8937853 |
| 5 rs4432854  | 8966865 C | 0.07263 | 8.20E-13 chr:5:8937853 |
| 5 rs4624764  | 8958031 T | 0.07263 | 8.20E-13 chr:5:8937853 |
| 5 rs4627964  | 8968639 C | 0.07263 | 8.20E-13 chr:5:8937853 |
| 5 rs58854317 | 8968867 C | 0.07263 | 8.20E-13 chr:5:8937853 |
| 5 rs6555587  | 8969296 G | 0.07263 | 8.20E-13 chr:5:8937853 |
| 5 rs6862506  | 8965836 T | 0.07263 | 8.20E-13 chr:5:8937853 |
| 5 rs6863266  | 8966162 T | 0.07263 | 8.20E-13 chr:5:8937853 |
| 5 rs6871960  | 8963871 C | 0.07263 | 8.20E-13 chr:5:8937853 |
| 5 rs6875463  | 8963376 C | 0.07263 | 8.20E-13 chr:5:8937853 |
| 5 rs6877048  | 8973265 T | 0.07263 | 8.20E-13 chr:5:8937853 |
| 5 rs6880066  | 8969679 C | 0.07263 | 8.20E-13 chr:5:8937853 |
| 5 rs6880574  | 8969997 G | 0.07263 | 8.20E-13 chr:5:8937853 |
| 5 rs6883897  | 8966181 G | 0.07263 | 8.20E-13 chr:5:8937853 |
| 5 rs6884680  | 8968261 T | 0.07263 | 8.20E-13 chr:5:8937853 |
| 5 rs9313264  | 8961561 T | 0.07263 | 8.20E-13 chr:5:8937853 |
| 5 rs9313265  | 8964069 G | 0.07263 | 8.20E-13 chr:5:8937853 |
| 5 rs6880494  | 8977180 G | 0.07747 | 8.83E-13 chr:5:8937853 |
| 5 rs6866139  | 8966309 C | 0.07271 | 9.04E-13 chr:5:8937853 |
| 5 rs6884293  | 8968011 T | 0.07296 | 9.15E-13 chr:5:8937853 |
| 5 rs1947583  | 8980189 C | 0.08663 | 9.66E-13 chr:5:8937853 |
| 5 rs6876180  | 8977231 T | 0.08663 | 9.66E-13 chr:5:8937853 |
| 5 rs7730808  | 8977997 T | 0.08663 | 9.66E-13 chr:5:8937853 |
| 5 rs7730809  | 8977998 C | 0.08663 | 9.66E-13 chr:5:8937853 |
| 5 rs12513755 | 8958879 A | 0.0806  | 1.06E-12 chr:5:8937853 |
| 5 rs13155565 | 8965540 T | 0.0806  | 1.06E-12 chr:5:8937853 |
| 5 rs6883368  | 8968144 C | 0.0806  | 1.06E-12 chr:5:8937853 |

|               |           |         |          |               |
|---------------|-----------|---------|----------|---------------|
| 5 rs10040864  | 8965550 A | 0.08373 | 2.40E-12 | chr:5:8937853 |
| 5 rs13355363  | 8960849 A | 0.08373 | 2.40E-12 | chr:5:8937853 |
| 5 rs34352770  | 8970561 A | 0.08373 | 2.40E-12 | chr:5:8937853 |
| 5 rs59676981  | 8968807 T | 0.08373 | 2.40E-12 | chr:5:8937853 |
| 5 rs6861946   | 8966209 T | 0.08373 | 2.40E-12 | chr:5:8937853 |
| 5 rs6863109   | 8966159 T | 0.08373 | 2.40E-12 | chr:5:8937853 |
| 5 rs6869638   | 8968467 G | 0.08373 | 2.40E-12 | chr:5:8937853 |
| 5 rs6872524   | 8972999 T | 0.08373 | 2.40E-12 | chr:5:8937853 |
| 5 rs7723950   | 8959250 C | 0.08373 | 2.40E-12 | chr:5:8937853 |
| 5 rs7726068   | 8971413 G | 0.08373 | 2.40E-12 | chr:5:8937853 |
| 5 rs7728475   | 8969172 A | 0.08373 | 2.40E-12 | chr:5:8937853 |
| 5 rs11954862  | 8949344 C | 0.1193  | 3.82E-12 | chr:5:8937853 |
| 5 rs6868644   | 8981136 C | 0.1182  | 4.93E-12 | chr:5:8937853 |
| 5 rs12518501  | 8982887 T | 0.1262  | 5.39E-12 | chr:5:8937853 |
| 5 rs6873594   | 8930306 A | 0.1227  | 5.42E-12 | chr:5:8937853 |
| 5 rs115606914 | 8942429 T | 0.07412 | 5.64E-12 | chr:5:8937853 |
| 5 rs140461872 | 8942428 C | 0.07412 | 5.64E-12 | chr:5:8937853 |
| 5 rs61036506  | 8981340 G | 0.1242  | 5.67E-12 | chr:5:8937853 |
| 5 rs2962717   | 8978826 G | 0.1254  | 5.76E-12 | chr:5:8937853 |
| 5 rs12521160  | 8982888 G | 0.1378  | 1.09E-11 | chr:5:8937853 |
| 5 rs76169939  | 8934848 T | 0.1295  | 1.29E-11 | chr:5:8937853 |
| 5 rs74482613  | 8927592 C | 0.1302  | 1.49E-11 | chr:5:8937853 |
| 5 rs114656264 | 8942423 T | 0.1069  | 5.22E-11 | chr:5:8937853 |
| 5 rs115883187 | 8942422 C | 0.1069  | 5.22E-11 | chr:5:8937853 |
| 5 rs577492066 | 8948517 T | 0.1374  | 1.17E-10 | chr:5:8937853 |
| 5 rs2963382   | 8948523 C | 0.1686  | 1.42E-10 | chr:5:8937853 |
| 5 rs75014751  | 8965335 C | 0.1579  | 2.65E-10 | chr:5:8937853 |
| 5 rs79740539  | 8969856 C | 0.1579  | 2.65E-10 | chr:5:8937853 |
| 5 rs11134338  | 8983721 A | 0.1802  | 2.66E-10 | chr:5:8937853 |
| 5 rs11134339  | 8987697 A | 0.1802  | 2.66E-10 | chr:5:8937853 |
| 5 rs11134340  | 8987726 T | 0.1802  | 2.66E-10 | chr:5:8937853 |
| 5 rs11134341  | 8989290 C | 0.1802  | 2.66E-10 | chr:5:8937853 |
| 5 rs1124255   | 8984662 G | 0.1802  | 2.66E-10 | chr:5:8937853 |
| 5 rs1124256   | 8984616 T | 0.1802  | 2.66E-10 | chr:5:8937853 |
| 5 rs11738634  | 8983818 C | 0.1802  | 2.66E-10 | chr:5:8937853 |
| 5 rs12187003  | 8986008 A | 0.1802  | 2.66E-10 | chr:5:8937853 |
| 5 rs12187849  | 8987501 A | 0.1802  | 2.66E-10 | chr:5:8937853 |
| 5 rs12188659  | 8987572 G | 0.1802  | 2.66E-10 | chr:5:8937853 |
| 5 rs12189462  | 8986146 G | 0.1802  | 2.66E-10 | chr:5:8937853 |
| 5 rs12523277  | 8987940 T | 0.1802  | 2.66E-10 | chr:5:8937853 |
| 5 rs1457772   | 8985553 A | 0.1802  | 2.66E-10 | chr:5:8937853 |
| 5 rs16881805  | 8984147 A | 0.1802  | 2.66E-10 | chr:5:8937853 |
| 5 rs4472235   | 8984391 G | 0.1802  | 2.66E-10 | chr:5:8937853 |

|               |           |        |          |               |
|---------------|-----------|--------|----------|---------------|
| 5 rs4612031   | 8984728 G | 0.1802 | 2.66E-10 | chr:5:8937853 |
| 5 rs74774935  | 8985010 C | 0.1802 | 2.66E-10 | chr:5:8937853 |
| 5 rs75926318  | 8986713 T | 0.1802 | 2.66E-10 | chr:5:8937853 |
| 5 rs76025485  | 8986886 C | 0.1802 | 2.66E-10 | chr:5:8937853 |
| 5 rs76811960  | 8987051 A | 0.1802 | 2.66E-10 | chr:5:8937853 |
| 5 rs7703582   | 8988714 T | 0.1802 | 2.66E-10 | chr:5:8937853 |
| 5 rs7723456   | 8989021 G | 0.1802 | 2.66E-10 | chr:5:8937853 |
| 5 rs7727402   | 8988961 G | 0.1802 | 2.66E-10 | chr:5:8937853 |
| 5 rs77557093  | 8987082 T | 0.1802 | 2.66E-10 | chr:5:8937853 |
| 5 rs77709148  | 8988682 G | 0.1802 | 2.66E-10 | chr:5:8937853 |
| 5 rs78982025  | 8984905 T | 0.1802 | 2.66E-10 | chr:5:8937853 |
| 5 rs79028086  | 8984958 G | 0.1802 | 2.66E-10 | chr:5:8937853 |
| 5 rs80323589  | 8986254 A | 0.1802 | 2.66E-10 | chr:5:8937853 |
| 5 rs1947584   | 8980099 C | 0.1612 | 3.87E-10 | chr:5:8937853 |
| 5 rs11742324  | 9059996 G | 0.1442 | 5.37E-10 | chr:5:8937853 |
| 5 rs11745238  | 9059696 C | 0.1442 | 5.37E-10 | chr:5:8937853 |
| 5 rs12521925  | 9068974 T | 0.1442 | 5.37E-10 | chr:5:8937853 |
| 5 rs1354570   | 9059223 G | 0.1442 | 5.37E-10 | chr:5:8937853 |
| 5 rs16881898  | 9058104 G | 0.1442 | 5.37E-10 | chr:5:8937853 |
| 5 rs16881901  | 9062943 A | 0.1442 | 5.37E-10 | chr:5:8937853 |
| 5 rs16881913  | 9072053 G | 0.1442 | 5.37E-10 | chr:5:8937853 |
| 5 rs76397895  | 9058287 A | 0.1442 | 5.37E-10 | chr:5:8937853 |
| 5 rs7727526   | 9041573 C | 0.1442 | 5.37E-10 | chr:5:8937853 |
| 5 rs12516982  | 9038951 T | 0.1402 | 6.73E-10 | chr:5:8937853 |
| 5 rs140571419 | 9003153 T | 0.1402 | 6.73E-10 | chr:5:8937853 |
| 5 rs147259526 | 9005371 T | 0.1402 | 6.73E-10 | chr:5:8937853 |
| 5 rs16881875  | 9038043 A | 0.1402 | 6.73E-10 | chr:5:8937853 |
| 5 rs16881912  | 9071551 G | 0.1402 | 6.73E-10 | chr:5:8937853 |
| 5 rs1902809   | 9021827 A | 0.1402 | 6.73E-10 | chr:5:8937853 |
| 5 rs2388004   | 8996618 C | 0.1402 | 6.73E-10 | chr:5:8937853 |
| 5 rs6871654   | 9002625 T | 0.1402 | 6.73E-10 | chr:5:8937853 |
| 5 rs75330064  | 9068818 A | 0.1402 | 6.73E-10 | chr:5:8937853 |
| 5 rs78251142  | 9013906 C | 0.1402 | 6.73E-10 | chr:5:8937853 |
| 5 rs79769433  | 9058460 T | 0.1402 | 6.73E-10 | chr:5:8937853 |
| 5 rs11134342  | 8991036 A | 0.1806 | 6.89E-10 | chr:5:8937853 |
| 5 rs11134343  | 8999304 C | 0.1806 | 6.89E-10 | chr:5:8937853 |
| 5 rs11743644  | 9000098 A | 0.1806 | 6.89E-10 | chr:5:8937853 |
| 5 rs11750361  | 9000007 G | 0.1806 | 6.89E-10 | chr:5:8937853 |
| 5 rs11951651  | 8995163 C | 0.1806 | 6.89E-10 | chr:5:8937853 |
| 5 rs11952933  | 8993747 T | 0.1806 | 6.89E-10 | chr:5:8937853 |
| 5 rs12186781  | 8998527 G | 0.1806 | 6.89E-10 | chr:5:8937853 |
| 5 rs12189149  | 8998699 G | 0.1806 | 6.89E-10 | chr:5:8937853 |
| 5 rs1379574   | 8991576 A | 0.1806 | 6.89E-10 | chr:5:8937853 |

|               |           |        |          |               |
|---------------|-----------|--------|----------|---------------|
| 5 rs146404047 | 8998963 T | 0.1806 | 6.89E-10 | chr:5:8937853 |
| 5 rs6870588   | 8993002 C | 0.1806 | 6.89E-10 | chr:5:8937853 |
| 5 rs74864061  | 8993179 G | 0.1806 | 6.89E-10 | chr:5:8937853 |
| 5 rs7712850   | 8990532 A | 0.1806 | 6.89E-10 | chr:5:8937853 |
| 5 rs7733108   | 8990306 G | 0.1806 | 6.89E-10 | chr:5:8937853 |
| 5 rs77430208  | 8997524 G | 0.1806 | 6.89E-10 | chr:5:8937853 |
| 5 rs79649573  | 8997977 T | 0.1806 | 6.89E-10 | chr:5:8937853 |
| 5 rs11750358  | 8999971 T | 0.1811 | 7.68E-10 | chr:5:8937853 |
| 5 rs6889183   | 8968532 A | 0.1701 | 8.00E-10 | chr:5:8937853 |
| 5 rs75281373  | 8964076 A | 0.1701 | 8.00E-10 | chr:5:8937853 |
| 5 rs2388005   | 8996523 T | 0.1422 | 8.59E-10 | chr:5:8937853 |
| 5 rs11134347  | 9029842 C | 0.1846 | 1.19E-09 | chr:5:8937853 |
| 5 rs16881803  | 8983995 C | 0.1975 | 1.80E-09 | chr:5:8937853 |
| 5 rs74370667  | 8988253 C | 0.1975 | 1.80E-09 | chr:5:8937853 |
| 5 rs75435196  | 8987064 G | 0.1975 | 1.80E-09 | chr:5:8937853 |
| 5 rs76897293  | 8923448 A | 0.1833 | 1.82E-09 | chr:5:8937853 |
| 5 rs146470969 | 9001510 C | 0.189  | 1.99E-09 | chr:5:8937853 |
| 5 rs148681757 | 9001509 C | 0.189  | 1.99E-09 | chr:5:8937853 |
| 5 rs11134348  | 9073742 A | 0.1569 | 2.06E-09 | chr:5:8937853 |
| 5 rs144966221 | 9076273 T | 0.1569 | 2.06E-09 | chr:5:8937853 |
| 5 rs76643870  | 9072905 G | 0.1569 | 2.06E-09 | chr:5:8937853 |
| 5 rs78271112  | 9075331 G | 0.1569 | 2.06E-09 | chr:5:8937853 |
| 5 rs11739474  | 9073231 A | 0.1529 | 2.66E-09 | chr:5:8937853 |
| 5 rs12520615  | 9074053 A | 0.1529 | 2.66E-09 | chr:5:8937853 |
| 5 rs2290735   | 9044411 G | 0.1533 | 2.69E-09 | chr:5:8937853 |
| 5 rs75975896  | 9042458 T | 0.1533 | 2.69E-09 | chr:5:8937853 |
| 5 rs79198156  | 9060021 T | 0.1533 | 2.69E-09 | chr:5:8937853 |
| 5 rs16881943  | 9082436 A | 0.1607 | 3.02E-09 | chr:5:8937853 |
| 5 rs2388001   | 9077099 G | 0.1607 | 3.02E-09 | chr:5:8937853 |
| 5 rs562119632 | 9078710 G | 0.1607 | 3.02E-09 | chr:5:8937853 |
| 5 rs77025081  | 8892865 A | 0.188  | 3.37E-09 | chr:5:8937853 |
| 5 rs16881928  | 9078372 A | 0.1568 | 4.00E-09 | chr:5:8937853 |
| 5 rs112854697 | 9006793 C | 0.2011 | 5.02E-09 | chr:5:8937853 |
| 5 rs11738920  | 8991968 C | 0.2011 | 5.02E-09 | chr:5:8937853 |
| 5 rs11750315  | 8999860 A | 0.2011 | 5.02E-09 | chr:5:8937853 |
| 5 rs12517703  | 9011519 T | 0.2011 | 5.02E-09 | chr:5:8937853 |
| 5 rs143252128 | 9006280 T | 0.2011 | 5.02E-09 | chr:5:8937853 |
| 5 rs16881838  | 9012115 T | 0.2011 | 5.02E-09 | chr:5:8937853 |
| 5 rs376060904 | 9001673 A | 0.2011 | 5.02E-09 | chr:5:8937853 |
| 5 rs6897203   | 9002771 C | 0.2011 | 5.02E-09 | chr:5:8937853 |
| 5 rs75432582  | 9010227 T | 0.2011 | 5.02E-09 | chr:5:8937853 |
| 5 rs77037743  | 8991632 T | 0.2011 | 5.02E-09 | chr:5:8937853 |
| 5 rs7720782   | 8994422 C | 0.2011 | 5.02E-09 | chr:5:8937853 |



|               |           |        |          |               |
|---------------|-----------|--------|----------|---------------|
| 5 rs142852646 | 9076188 A | 0.1714 | 8.00E-09 | chr:5:8937853 |
| 5 rs76677754  | 9084176 T | 0.1797 | 3.26E-08 | chr:5:8937853 |
| 5 rs114496602 | 9079303 T | 0.1911 | 1.13E-07 | chr:5:8937853 |
| 5 rs2925902   | 8982517 T | 0.2492 | 1.31E-07 | chr:5:8937853 |
| 5 rs111387677 | 9004023 A | 0.2611 | 1.96E-07 | chr:5:8937853 |
| 5 rs2963351   | 8915179 T | 0.18   | 6.38E-07 | chr:5:8937853 |
| 5 rs12188723  | 8952085 C | 0.185  | 7.65E-07 | chr:5:8937853 |
| 5 rs35592900  | 8942245 T | 0.185  | 7.65E-07 | chr:5:8937853 |
| 5 rs35817870  | 8939620 G | 0.185  | 7.65E-07 | chr:5:8937853 |
| 5 rs4583857   | 8941558 G | 0.185  | 7.65E-07 | chr:5:8937853 |
| 5 rs75949059  | 8948201 T | 0.185  | 7.65E-07 | chr:5:8937853 |
| 5 rs77781846  | 8941171 G | 0.185  | 7.65E-07 | chr:5:8937853 |
| 5 rs34968754  | 8959664 G | 0.1903 | 1.03E-06 | chr:5:8937853 |
| 5 rs72739858  | 8983300 A | 0.2976 | 1.41E-06 | chr:5:8937853 |
| 5 rs181939    | 9045568 A | 0.3007 | 1.59E-06 | chr:5:8937853 |
| 5 rs2925903   | 8983680 C | 0.308  | 2.38E-06 | chr:5:8937853 |
| 5 rs2925905   | 8985794 T | 0.308  | 2.38E-06 | chr:5:8937853 |
| 5 rs2962715   | 9007827 T | 4.87   | 2.87E-06 | chr:5:8937853 |
| 5 rs10512996  | 8916550 A | 0.1935 | 2.92E-06 | chr:5:8937853 |
| 5 rs16881671  | 8917970 G | 0.1935 | 2.92E-06 | chr:5:8937853 |
| 5 rs16881672  | 8918651 G | 0.1935 | 2.92E-06 | chr:5:8937853 |
| 5 rs16881678  | 8920805 T | 0.1935 | 2.92E-06 | chr:5:8937853 |
| 5 rs2962675   | 8913429 C | 0.1935 | 2.92E-06 | chr:5:8937853 |
| 5 rs2962685   | 8901696 T | 0.1935 | 2.92E-06 | chr:5:8937853 |
| 5 rs2963329   | 8892991 C | 0.1935 | 2.92E-06 | chr:5:8937853 |
| 5 rs2963335   | 8901944 G | 0.1935 | 2.92E-06 | chr:5:8937853 |
| 5 rs3111057   | 8915303 C | 0.1935 | 2.92E-06 | chr:5:8937853 |
| 5 rs71611351  | 8896933 T | 0.1935 | 2.92E-06 | chr:5:8937853 |
| 5 rs9313260   | 8919349 G | 0.1935 | 2.92E-06 | chr:5:8937853 |
| 5 rs2925924   | 9019816 C | 0.3053 | 3.03E-06 | chr:5:8937853 |
| 5 rs6883135   | 8944432 T | 0.2033 | 3.09E-06 | chr:5:8937853 |
| 5 rs71611355  | 8950617 A | 0.2033 | 3.09E-06 | chr:5:8937853 |
| 5 rs2085514   | 9001414 A | 0.3133 | 4.00E-06 | chr:5:8937853 |
| 5 rs1457773   | 8978530 A | 0.209  | 4.09E-06 | chr:5:8937853 |
| 5 rs2085512   | 9014812 C | 0.3161 | 4.40E-06 | chr:5:8937853 |
| 5 rs2963349   | 8915030 C | 0.2016 | 4.46E-06 | chr:5:8937853 |
| 5 rs10037735  | 9004192 C | 0.3176 | 4.99E-06 | chr:5:8937853 |
| 5 rs10041221  | 9004208 T | 0.3176 | 4.99E-06 | chr:5:8937853 |
| 5 rs112110914 | 9006527 C | 0.3176 | 4.99E-06 | chr:5:8937853 |
| 5 rs1379567   | 9016944 C | 0.3176 | 4.99E-06 | chr:5:8937853 |
| 5 rs1379568   | 9016763 G | 0.3176 | 4.99E-06 | chr:5:8937853 |
| 5 rs1379569   | 9016719 C | 0.3176 | 4.99E-06 | chr:5:8937853 |
| 5 rs1379570   | 9016694 C | 0.3176 | 4.99E-06 | chr:5:8937853 |

|              |           |        |          |               |
|--------------|-----------|--------|----------|---------------|
| 5 rs1379573  | 9013983 T | 0.3176 | 4.99E-06 | chr:5:8937853 |
| 5 rs1598825  | 9021566 C | 0.3176 | 4.99E-06 | chr:5:8937853 |
| 5 rs2100642  | 9014917 C | 0.3176 | 4.99E-06 | chr:5:8937853 |
| 5 rs2925908  | 8991487 T | 0.3176 | 4.99E-06 | chr:5:8937853 |
| 5 rs2925909  | 8992098 C | 0.3176 | 4.99E-06 | chr:5:8937853 |
| 5 rs2925910  | 8992745 A | 0.3176 | 4.99E-06 | chr:5:8937853 |
| 5 rs2925919  | 9001913 G | 0.3176 | 4.99E-06 | chr:5:8937853 |
| 5 rs2925921  | 9005353 T | 0.3176 | 4.99E-06 | chr:5:8937853 |
| 5 rs2925922  | 9010282 T | 0.3176 | 4.99E-06 | chr:5:8937853 |
| 5 rs2925928  | 9032400 G | 0.3176 | 4.99E-06 | chr:5:8937853 |
| 5 rs2962702  | 9025608 A | 0.3176 | 4.99E-06 | chr:5:8937853 |
| 5 rs2962705  | 8997304 C | 0.3176 | 4.99E-06 | chr:5:8937853 |
| 5 rs2962707  | 8990084 G | 0.3176 | 4.99E-06 | chr:5:8937853 |
| 5 rs2962718  | 9008955 G | 0.3176 | 4.99E-06 | chr:5:8937853 |
| 5 rs2962720  | 9009675 C | 0.3176 | 4.99E-06 | chr:5:8937853 |
| 5 rs2962721  | 9010331 A | 0.3176 | 4.99E-06 | chr:5:8937853 |
| 5 rs4702602  | 9014396 G | 0.3176 | 4.99E-06 | chr:5:8937853 |
| 5 rs74980194 | 9003526 T | 0.3176 | 4.99E-06 | chr:5:8937853 |
| 5 rs78490007 | 9003525 G | 0.3176 | 4.99E-06 | chr:5:8937853 |
| 5 rs79211599 | 9003402 A | 0.3176 | 4.99E-06 | chr:5:8937853 |
| 5 rs12652085 | 8927217 A | 0.2119 | 5.78E-06 | chr:5:8937853 |
| 5 rs2962694  | 8889910 T | 0.3072 | 5.97E-06 | chr:5:8937853 |
| 5 rs786843   | 9040141 C | 0.3219 | 6.65E-06 | chr:5:8937853 |
| 5 rs2925923  | 9012388 T | 0.3299 | 6.71E-06 | chr:5:8937853 |
| 5 rs2198981  | 9028370 C | 0.3309 | 7.31E-06 | chr:5:8937853 |
| 5 rs7704003  | 8980181 C | 3.54   | 7.36E-06 | chr:5:8937853 |
| 5 rs786840   | 9041935 G | 0.3253 | 7.59E-06 | chr:5:8937853 |
| 5 rs1379566  | 9019532 A | 0.3318 | 7.84E-06 | chr:5:8937853 |
| 5 rs1379572  | 9014114 G | 0.3318 | 7.84E-06 | chr:5:8937853 |
| 5 rs1598826  | 9021310 T | 0.3318 | 7.84E-06 | chr:5:8937853 |
| 5 rs2925927  | 9031436 T | 0.3318 | 7.84E-06 | chr:5:8937853 |
| 5 rs7712539  | 8990300 A | 0.3318 | 7.84E-06 | chr:5:8937853 |
| 5 rs2962719  | 9009465 G | 0.3265 | 9.23E-06 | chr:5:8937853 |
| 5 rs2962701  | 9025032 T | 0.3334 | 9.28E-06 | chr:5:8937853 |
| 5 rs2962692  | 8892465 T | 0.2087 | 9.77E-06 | chr:5:8937853 |
| 5 rs2963341  | 8908533 G | 0.2087 | 9.77E-06 | chr:5:8937853 |
| 5 rs2963344  | 8909428 G | 0.2087 | 9.77E-06 | chr:5:8937853 |
| 5 rs2963345  | 8909508 T | 0.2087 | 9.77E-06 | chr:5:8937853 |
| 5 rs2963347  | 8910873 C | 0.2087 | 9.77E-06 | chr:5:8937853 |
| 5 rs35191363 | 8912793 T | 0.2087 | 9.77E-06 | chr:5:8937853 |
| 5 rs6555577  | 8924770 A | 0.2087 | 9.77E-06 | chr:5:8937853 |
| 5 rs12517597 | 9002094 C | 0.3297 | 9.83E-06 | chr:5:8937853 |
| 5 rs189854   | 9047029 C | 0.3337 | 1.01E-05 | chr:5:8937853 |

|   |             |             |         |          |                 |
|---|-------------|-------------|---------|----------|-----------------|
| 5 | rs2925920   | 9004597 T   | 0.3327  | 1.06E-05 | chr:5:8937853   |
| 5 | rs786847    | 9066464 A   | 0.3371  | 1.38E-05 | chr:5:8937853   |
| 5 | rs1566893   | 9076601 G   | 0.3449  | 1.97E-05 | chr:5:8937853   |
| 5 | rs1505063   | 9082519 G   | 0.3477  | 2.36E-05 | chr:5:8937853   |
| 5 | rs7708660   | 9072955 G   | 0.3536  | 2.46E-05 | chr:5:8937853   |
| 5 | rs1505067   | 9036790 C   | 0.3557  | 2.50E-05 | chr:5:8937853   |
| 5 | rs2100641   | 9014968 A   | 0.3557  | 2.50E-05 | chr:5:8937853   |
| 5 | rs2963360   | 8927205 G   | 0.2802  | 3.56E-05 | chr:5:8937853   |
| 5 | rs16881715  | 8960556 G   | 0.2709  | 3.67E-05 | chr:5:8937853   |
| 5 | rs2256037   | 9156232 A   | 0.3832  | 3.99E-05 | chr:5:8937853   |
| 5 | rs886509    | 9156012 C   | 0.3861  | 4.36E-05 | chr:5:8937853   |
| 6 | rs4252075   | 161128617 A | 3.739   | 3.95E-05 | chr:6:161270898 |
| 6 | rs3798903   | 161133335 C | 4.049   | 1.09E-05 | chr:6:161270898 |
| 6 | rs4252092   | 161133651 A | 4.1     | 9.48E-06 | chr:6:161270898 |
| 6 | rs3757019   | 161135111 T | 4.049   | 1.09E-05 | chr:6:161270898 |
| 6 | rs4252105   | 161136058 A | 4.049   | 1.09E-05 | chr:6:161270898 |
| 6 | rs14224     | 161137779 C | 4.407   | 2.46E-06 | chr:6:161270898 |
| 6 | rs1321201   | 161138181 C | 4.049   | 1.09E-05 | chr:6:161270898 |
| 6 | rs3778217   | 161139058 T | 4.407   | 2.46E-06 | chr:6:161270898 |
| 6 | rs1130656   | 161139480 T | 4.049   | 1.09E-05 | chr:6:161270898 |
| 6 | rs2295368   | 161139502 A | 4.049   | 1.09E-05 | chr:6:161270898 |
| 6 | rs4709458   | 161141158 C | 4.049   | 1.09E-05 | chr:6:161270898 |
| 6 | rs783145    | 161152449 G | 0.08614 | 2.91E-12 | chr:6:161270898 |
| 6 | rs783184    | 161163074 A | 0.2719  | 3.66E-07 | chr:6:161270898 |
| 6 | rs1084659   | 161163777 A | 0.1218  | 6.27E-11 | chr:6:161270898 |
| 6 | rs7454268   | 161166502 T | 5.713   | 2.38E-06 | chr:6:161270898 |
| 6 | rs13206066  | 161167452 G | 5.713   | 2.38E-06 | chr:6:161270898 |
| 6 | rs783182    | 161168548 G | 0.08673 | 5.86E-12 | chr:6:161270898 |
| 6 | rs783181    | 161168759 T | 0.1839  | 2.70E-09 | chr:6:161270898 |
| 6 | rs783180    | 161168961 G | 0.08673 | 5.86E-12 | chr:6:161270898 |
| 6 | rs783178    | 161169739 C | 0.08673 | 5.86E-12 | chr:6:161270898 |
| 6 | rs783177    | 161169815 C | 0.08673 | 5.86E-12 | chr:6:161270898 |
| 6 | rs783175    | 161171664 C | 0.2043  | 2.03E-08 | chr:6:161270898 |
| 6 | rs117016680 | 161171857 C | 0.2691  | 3.51E-06 | chr:6:161270898 |
| 6 | rs783174    | 161171919 C | 0.08673 | 5.86E-12 | chr:6:161270898 |
| 6 | rs783173    | 161172942 C | 0.08673 | 5.86E-12 | chr:6:161270898 |
| 6 | rs783171    | 161173610 A | 0.08673 | 5.86E-12 | chr:6:161270898 |
| 6 | rs11060     | 161173946 T | 0.08622 | 5.27E-12 | chr:6:161270898 |
| 6 | rs6690      | 161174138 A | 0.09783 | 1.05E-11 | chr:6:161270898 |
| 6 | rs783169    | 161174579 T | 0.08673 | 5.86E-12 | chr:6:161270898 |
| 6 | rs783168    | 161174594 A | 0.08673 | 5.86E-12 | chr:6:161270898 |
| 6 | rs783167    | 161174658 G | 0.2057  | 3.23E-08 | chr:6:161270898 |
| 6 | rs11902     | 161174871 C | 0.08673 | 5.86E-12 | chr:6:161270898 |

|               |             |         |          |                 |
|---------------|-------------|---------|----------|-----------------|
| 6 rs4252181   | 161175004 T | 0.1868  | 2.29E-06 | chr:6:161270898 |
| 6 rs9458023   | 161176256 A | 5.834   | 2.15E-06 | chr:6:161270898 |
| 6 rs783166    | 161177237 A | 0.1388  | 9.53E-06 | chr:6:161270898 |
| 6 rs117534432 | 161177443 T | 0.146   | 1.79E-05 | chr:6:161270898 |
| 6 rs783165    | 161177842 A | 0.09301 | 1.16E-11 | chr:6:161270898 |
| 6 rs1084658   | 161180477 G | 0.08673 | 5.86E-12 | chr:6:161270898 |
| 6 rs1084657   | 161181271 A | 0.1388  | 9.53E-06 | chr:6:161270898 |
| 6 rs1084655   | 161181923 C | 0.08673 | 5.86E-12 | chr:6:161270898 |
| 6 rs60198722  | 161181980 A | 0.1868  | 2.29E-06 | chr:6:161270898 |
| 6 rs1084654   | 161182100 G | 0.08116 | 5.17E-12 | chr:6:161270898 |
| 6 rs783164    | 161182327 T | 0.2057  | 3.23E-08 | chr:6:161270898 |
| 6 rs783163    | 161182401 A | 0.03597 | 2.01E-08 | chr:6:161270898 |
| 6 rs783162    | 161182954 A | 0.08673 | 5.86E-12 | chr:6:161270898 |
| 6 rs4440440   | 161183424 C | 5.834   | 2.15E-06 | chr:6:161270898 |
| 6 rs56262039  | 161183455 A | 0.1868  | 2.29E-06 | chr:6:161270898 |
| 6 rs783161    | 161183665 A | 0.2057  | 3.23E-08 | chr:6:161270898 |
| 6 rs783160    | 161183722 C | 0.2057  | 3.23E-08 | chr:6:161270898 |
| 6 rs783159    | 161185325 G | 0.08673 | 5.86E-12 | chr:6:161270898 |
| 6 rs9456580   | 161185380 T | 0.1868  | 2.29E-06 | chr:6:161270898 |
| 6 rs1830524   | 161186641 A | 0.2057  | 3.23E-08 | chr:6:161270898 |
| 6 rs7450979   | 161186889 T | 5.834   | 2.15E-06 | chr:6:161270898 |
| 6 rs1406891   | 161187080 T | 0.07422 | 2.34E-12 | chr:6:161270898 |
| 6 rs1406890   | 161187335 C | 0.07422 | 2.34E-12 | chr:6:161270898 |
| 6 rs1247551   | 161187517 T | 0.08673 | 5.86E-12 | chr:6:161270898 |
| 6 rs1247552   | 161187744 G | 0.08673 | 5.86E-12 | chr:6:161270898 |
| 6 rs59754710  | 161187850 C | 0.07422 | 2.34E-12 | chr:6:161270898 |
| 6 rs1247553   | 161188103 A | 0.07422 | 2.34E-12 | chr:6:161270898 |
| 6 rs1247554   | 161188613 T | 0.2226  | 2.13E-07 | chr:6:161270898 |
| 6 rs1247555   | 161189018 A | 0.08673 | 5.86E-12 | chr:6:161270898 |
| 6 rs1247556   | 161189595 G | 0.08673 | 5.86E-12 | chr:6:161270898 |
| 6 rs1247557   | 161189670 A | 0.08673 | 5.86E-12 | chr:6:161270898 |
| 6 rs1247558   | 161190199 A | 0.08673 | 5.86E-12 | chr:6:161270898 |
| 6 rs1652499   | 161191694 T | 0.2226  | 2.13E-07 | chr:6:161270898 |
| 6 rs1652500   | 161192189 C | 0.2226  | 2.13E-07 | chr:6:161270898 |
| 6 rs1740446   | 161194278 C | 0.07356 | 2.04E-12 | chr:6:161270898 |
| 6 rs62436701  | 161194298 T | 0.1518  | 7.71E-08 | chr:6:161270898 |
| 6 rs1652502   | 161194542 C | 0.0866  | 4.98E-12 | chr:6:161270898 |
| 6 rs2144727   | 161194814 C | 6.47    | 6.77E-07 | chr:6:161270898 |
| 6 rs12214168  | 161195801 T | 6.47    | 6.77E-07 | chr:6:161270898 |
| 6 rs12194271  | 161195895 G | 6.47    | 6.77E-07 | chr:6:161270898 |
| 6 rs12214254  | 161195932 A | 6.47    | 6.77E-07 | chr:6:161270898 |
| 6 rs1740444   | 161196476 G | 0.2226  | 2.13E-07 | chr:6:161270898 |
| 6 rs62436702  | 161196562 C | 0.1518  | 7.71E-08 | chr:6:161270898 |

|              |             |         |          |                 |
|--------------|-------------|---------|----------|-----------------|
| 6 rs1621801  | 161196966 A | 0.07372 | 2.02E-12 | chr:6:161270898 |
| 6 rs1740443  | 161197042 T | 0.07356 | 2.04E-12 | chr:6:161270898 |
| 6 rs1620921  | 161197087 A | 0.07356 | 2.04E-12 | chr:6:161270898 |
| 6 rs1740442  | 161197558 T | 0.07356 | 2.04E-12 | chr:6:161270898 |
| 6 rs1614840  | 161197845 A | 0.07356 | 2.04E-12 | chr:6:161270898 |
| 6 rs1652482  | 161197885 G | 0.0866  | 4.98E-12 | chr:6:161270898 |
| 6 rs62436703 | 161198379 T | 0.1599  | 1.24E-07 | chr:6:161270898 |
| 6 rs1652485  | 161198390 C | 0.2226  | 2.13E-07 | chr:6:161270898 |
| 6 rs1782600  | 161199014 T | 0.2226  | 2.13E-07 | chr:6:161270898 |
| 6 rs62436704 | 161199736 T | 0.1518  | 7.71E-08 | chr:6:161270898 |
| 6 rs62436705 | 161200486 T | 0.1518  | 7.71E-08 | chr:6:161270898 |
| 6 rs1652490  | 161200632 G | 0.2226  | 2.13E-07 | chr:6:161270898 |
| 6 rs11758027 | 161201112 A | 6.813   | 3.08E-07 | chr:6:161270898 |
| 6 rs1620875  | 161201175 A | 0.2226  | 2.13E-07 | chr:6:161270898 |
| 6 rs11756434 | 161201356 C | 6.813   | 3.08E-07 | chr:6:161270898 |
| 6 rs13206887 | 161201651 A | 6.813   | 3.08E-07 | chr:6:161270898 |
| 6 rs13196302 | 161201783 G | 6.813   | 3.08E-07 | chr:6:161270898 |
| 6 rs13196324 | 161201842 T | 6.813   | 3.08E-07 | chr:6:161270898 |
| 6 rs13199812 | 161201960 C | 6.813   | 3.08E-07 | chr:6:161270898 |
| 6 rs4709466  | 161202419 G | 6.813   | 3.08E-07 | chr:6:161270898 |
| 6 rs4708878  | 161203026 G | 6.813   | 3.08E-07 | chr:6:161270898 |
| 6 rs4709467  | 161203079 A | 6.904   | 2.79E-07 | chr:6:161270898 |
| 6 rs1740436  | 161203136 C | 0.2197  | 1.73E-07 | chr:6:161270898 |
| 6 rs56376510 | 161203138 A | 6.745   | 3.34E-07 | chr:6:161270898 |
| 6 rs4709468  | 161203142 C | 6.745   | 3.34E-07 | chr:6:161270898 |
| 6 rs4708880  | 161203148 C | 6.745   | 3.34E-07 | chr:6:161270898 |
| 6 rs4708881  | 161203159 T | 6.745   | 3.34E-07 | chr:6:161270898 |
| 6 rs4708882  | 161203182 T | 6.787   | 3.34E-07 | chr:6:161270898 |
| 6 rs9458025  | 161203435 C | 6.813   | 3.08E-07 | chr:6:161270898 |
| 6 rs9458026  | 161203466 A | 6.813   | 3.08E-07 | chr:6:161270898 |
| 6 rs34797199 | 161203769 T | 6.059   | 5.68E-07 | chr:6:161270898 |
| 6 rs13216458 | 161204262 C | 6.813   | 3.08E-07 | chr:6:161270898 |
| 6 rs12526591 | 161204311 A | 6.813   | 3.08E-07 | chr:6:161270898 |
| 6 rs1991598  | 161204488 A | 6.813   | 3.08E-07 | chr:6:161270898 |
| 6 rs1991599  | 161204643 T | 6.813   | 3.08E-07 | chr:6:161270898 |
| 6 rs1549741  | 161204783 T | 6.813   | 3.08E-07 | chr:6:161270898 |
| 6 rs1344729  | 161204841 T | 6.813   | 3.08E-07 | chr:6:161270898 |
| 6 rs1247561  | 161204856 C | 0.2226  | 2.13E-07 | chr:6:161270898 |
| 6 rs1965092  | 161204889 T | 6.813   | 3.08E-07 | chr:6:161270898 |
| 6 rs1344730  | 161204995 A | 6.65    | 6.00E-07 | chr:6:161270898 |
| 6 rs1344731  | 161205037 A | 6.813   | 3.08E-07 | chr:6:161270898 |
| 6 rs1247562  | 161205456 C | 0.2226  | 2.13E-07 | chr:6:161270898 |
| 6 rs1247563  | 161205949 G | 0.2226  | 2.13E-07 | chr:6:161270898 |

|              |             |         |          |                 |
|--------------|-------------|---------|----------|-----------------|
| 6 rs4708884  | 161206213 T | 6.813   | 3.08E-07 | chr:6:161270898 |
| 6 rs4708885  | 161206349 G | 6.813   | 3.08E-07 | chr:6:161270898 |
| 6 rs4708886  | 161206350 T | 6.525   | 6.42E-07 | chr:6:161270898 |
| 6 rs4708887  | 161206387 G | 6.813   | 3.08E-07 | chr:6:161270898 |
| 6 rs4709469  | 161206484 T | 6.813   | 3.08E-07 | chr:6:161270898 |
| 6 rs4708888  | 161206490 C | 6.813   | 3.08E-07 | chr:6:161270898 |
| 6 rs1247565  | 161206910 G | 0.2425  | 1.15E-08 | chr:6:161270898 |
| 6 rs12206847 | 161207395 C | 6.661   | 3.75E-07 | chr:6:161270898 |
| 6 rs9456585  | 161207448 A | 6.813   | 3.08E-07 | chr:6:161270898 |
| 6 rs9456586  | 161207643 A | 6.813   | 3.08E-07 | chr:6:161270898 |
| 6 rs2115869  | 161207892 A | 6.813   | 3.08E-07 | chr:6:161270898 |
| 6 rs2115870  | 161207992 G | 6.813   | 3.08E-07 | chr:6:161270898 |
| 6 rs2115871  | 161208007 T | 6.813   | 3.08E-07 | chr:6:161270898 |
| 6 rs1247568  | 161208386 C | 0.2226  | 2.13E-07 | chr:6:161270898 |
| 6 rs10455783 | 161208580 A | 6.813   | 3.08E-07 | chr:6:161270898 |
| 6 rs10455784 | 161208584 T | 6.813   | 3.08E-07 | chr:6:161270898 |
| 6 rs1247569  | 161208655 C | 0.2234  | 4.00E-07 | chr:6:161270898 |
| 6 rs34145009 | 161208656 T | 6.871   | 3.18E-07 | chr:6:161270898 |
| 6 rs13203571 | 161208765 G | 6.813   | 3.08E-07 | chr:6:161270898 |
| 6 rs4708889  | 161208868 G | 6.813   | 3.08E-07 | chr:6:161270898 |
| 6 rs1247570  | 161208957 T | 0.07358 | 1.73E-12 | chr:6:161270898 |
| 6 rs4708891  | 161209020 G | 6.813   | 3.08E-07 | chr:6:161270898 |
| 6 rs4708892  | 161209101 C | 6.813   | 3.08E-07 | chr:6:161270898 |
| 6 rs4708893  | 161209245 C | 6.813   | 3.08E-07 | chr:6:161270898 |
| 6 rs9458028  | 161209716 T | 6.813   | 3.08E-07 | chr:6:161270898 |
| 6 rs9458029  | 161209717 G | 6.813   | 3.08E-07 | chr:6:161270898 |
| 6 rs9458030  | 161209985 A | 6.813   | 3.08E-07 | chr:6:161270898 |
| 6 rs9458031  | 161210119 A | 6.813   | 3.08E-07 | chr:6:161270898 |
| 6 rs9458032  | 161210205 T | 6.813   | 3.08E-07 | chr:6:161270898 |
| 6 rs1652454  | 161210256 G | 0.07381 | 3.06E-12 | chr:6:161270898 |
| 6 rs13192114 | 161210258 A | 6.899   | 3.11E-07 | chr:6:161270898 |
| 6 rs13192211 | 161210266 A | 6.899   | 3.11E-07 | chr:6:161270898 |
| 6 rs1652455  | 161210349 C | 0.08703 | 3.92E-12 | chr:6:161270898 |
| 6 rs11758404 | 161210455 G | 6.813   | 3.08E-07 | chr:6:161270898 |
| 6 rs1740432  | 161210470 A | 0.07356 | 2.04E-12 | chr:6:161270898 |
| 6 rs28408689 | 161210522 A | 6.813   | 3.08E-07 | chr:6:161270898 |
| 6 rs11756055 | 161210622 T | 6.813   | 3.08E-07 | chr:6:161270898 |
| 6 rs66496533 | 161210741 C | 6.813   | 3.08E-07 | chr:6:161270898 |
| 6 rs62436729 | 161210806 T | 0.07356 | 2.04E-12 | chr:6:161270898 |
| 6 rs35332231 | 161210871 G | 6.813   | 3.08E-07 | chr:6:161270898 |
| 6 rs1613037  | 161210911 G | 8.453   | 3.80E-07 | chr:6:161270898 |
| 6 rs1615527  | 161211095 G | 0.07356 | 2.04E-12 | chr:6:161270898 |
| 6 rs9456587  | 161211226 G | 6.813   | 3.08E-07 | chr:6:161270898 |

|               |             |         |          |                 |
|---------------|-------------|---------|----------|-----------------|
| 6 rs9458035   | 161211234 C | 6.813   | 3.08E-07 | chr:6:161270898 |
| 6 rs9456588   | 161212564 G | 6.778   | 3.10E-07 | chr:6:161270898 |
| 6 rs9456589   | 161212704 A | 6.778   | 3.10E-07 | chr:6:161270898 |
| 6 rs9458036   | 161213047 C | 6.631   | 4.15E-07 | chr:6:161270898 |
| 6 rs1358755   | 161213427 C | 6.58    | 4.63E-07 | chr:6:161270898 |
| 6 rs1853022   | 161213636 C | 6.724   | 3.82E-07 | chr:6:161270898 |
| 6 rs9456590   | 161215252 G | 6.58    | 4.63E-07 | chr:6:161270898 |
| 6 rs4709470   | 161216023 A | 6.58    | 4.63E-07 | chr:6:161270898 |
| 6 rs1247571   | 161218651 A | 0.2009  | 5.33E-08 | chr:6:161270898 |
| 6 rs1853020   | 161221417 G | 6.414   | 8.00E-07 | chr:6:161270898 |
| 6 rs1835344   | 161223773 G | 6.414   | 8.00E-07 | chr:6:161270898 |
| 6 rs1590185   | 161225303 C | 6.414   | 8.00E-07 | chr:6:161270898 |
| 6 rs9458039   | 161225730 T | 6.414   | 8.00E-07 | chr:6:161270898 |
| 6 rs783150    | 161226939 T | 0.1275  | 1.49E-06 | chr:6:161270898 |
| 6 rs812482    | 161227652 G | 0.0618  | 1.02E-12 | chr:6:161270898 |
| 6 rs9885597   | 161227692 A | 7.001   | 2.87E-07 | chr:6:161270898 |
| 6 rs783153    | 161229578 T | 0.06768 | 1.79E-12 | chr:6:161270898 |
| 6 rs783154    | 161229780 G | 0.06768 | 1.79E-12 | chr:6:161270898 |
| 6 rs783155    | 161229797 G | 0.1678  | 8.80E-09 | chr:6:161270898 |
| 6 rs1782618   | 161230368 A | 0.06137 | 8.36E-13 | chr:6:161270898 |
| 6 rs1740448   | 161230370 T | 0.06719 | 1.47E-12 | chr:6:161270898 |
| 6 rs3846778   | 161230801 C | 0.2405  | 2.04E-06 | chr:6:161270898 |
| 6 rs783156    | 161231177 T | 0.06778 | 1.67E-12 | chr:6:161270898 |
| 6 rs9456592   | 161231592 T | 7.2     | 2.31E-07 | chr:6:161270898 |
| 6 rs9458040   | 161232224 C | 7.179   | 2.34E-07 | chr:6:161270898 |
| 6 rs13202192  | 161233181 T | 7.267   | 2.03E-07 | chr:6:161270898 |
| 6 rs2024839   | 161233418 C | 7.267   | 2.03E-07 | chr:6:161270898 |
| 6 rs12191929  | 161234926 G | 8.077   | 3.68E-08 | chr:6:161270898 |
| 6 rs2565721   | 161235098 A | 0.0461  | 6.41E-13 | chr:6:161270898 |
| 6 rs9458041   | 161235710 T | 8.081   | 3.56E-08 | chr:6:161270898 |
| 6 rs143687018 | 161237088 C | 7.146   | 9.09E-08 | chr:6:161270898 |
| 6 rs114581531 | 161237090 T | 7.146   | 9.09E-08 | chr:6:161270898 |
| 6 rs115032617 | 161237091 G | 7.146   | 9.09E-08 | chr:6:161270898 |
| 6 rs376125603 | 161237094 C | 7.146   | 9.09E-08 | chr:6:161270898 |
| 6 rs370751318 | 161237096 G | 7.146   | 9.09E-08 | chr:6:161270898 |
| 6 rs373974575 | 161237097 A | 7.146   | 9.09E-08 | chr:6:161270898 |
| 6 rs1652463   | 161237204 C | 0.02727 | 6.77E-13 | chr:6:161270898 |
| 6 rs10945698  | 161237551 C | 7.927   | 1.28E-08 | chr:6:161270898 |
| 6 rs45475797  | 161237891 A | 0.1389  | 3.87E-08 | chr:6:161270898 |
| 6 rs45485198  | 161237998 C | 0.1399  | 4.48E-08 | chr:6:161270898 |
| 6 rs2802356   | 161238215 G | 0.03307 | 5.13E-13 | chr:6:161270898 |
| 6 rs1835345   | 161240330 T | 7.945   | 1.26E-08 | chr:6:161270898 |
| 6 rs6925542   | 161241864 A | 8.036   | 1.05E-08 | chr:6:161270898 |

|               |             |          |          |                 |
|---------------|-------------|----------|----------|-----------------|
| 6 rs2565724   | 161241889 A | 0.02727  | 6.77E-13 | chr:6:161270898 |
| 6 rs2802357   | 161242350 T | 0.02727  | 6.77E-13 | chr:6:161270898 |
| 6 rs4708894   | 161243370 C | 7.943    | 1.27E-08 | chr:6:161270898 |
| 6 rs2802358   | 161243584 C | 0.02727  | 6.77E-13 | chr:6:161270898 |
| 6 rs2565725   | 161244359 A | 0.03307  | 5.13E-13 | chr:6:161270898 |
| 6 rs62436736  | 161244838 C | 0.1389   | 3.87E-08 | chr:6:161270898 |
| 6 rs1629794   | 161246303 G | 0.02727  | 6.77E-13 | chr:6:161270898 |
| 6 rs9346838   | 161247649 G | 0.09026  | 4.87E-11 | chr:6:161270898 |
| 6 rs1652465   | 161248552 T | 0.03307  | 5.13E-13 | chr:6:161270898 |
| 6 rs1782632   | 161249412 A | 0.03307  | 5.13E-13 | chr:6:161270898 |
| 6 rs1652466   | 161249569 T | 0.03307  | 5.13E-13 | chr:6:161270898 |
| 6 rs9355840   | 161251350 C | 7.968    | 1.15E-08 | chr:6:161270898 |
| 6 rs765351    | 161252685 C | 0.08889  | 3.04E-11 | chr:6:161270898 |
| 6 rs1247539   | 161252795 T | 0.1241   | 1.16E-06 | chr:6:161270898 |
| 6 rs1247541   | 161253485 T | 0.02994  | 5.51E-13 | chr:6:161270898 |
| 6 rs1652471   | 161254403 T | 0.02994  | 5.51E-13 | chr:6:161270898 |
| 6 rs9346839   | 161255046 C | 0.03529  | 5.55E-13 | chr:6:161270898 |
| 6 rs1937479   | 161255544 C | 0.02994  | 5.51E-13 | chr:6:161270898 |
| 6 rs9347445   | 161257418 G | 7.984    | 1.14E-08 | chr:6:161270898 |
| 6 rs2489942   | 161257961 G | 0.02994  | 5.51E-13 | chr:6:161270898 |
| 6 rs2465846   | 161258027 C | 0.02994  | 5.51E-13 | chr:6:161270898 |
| 6 rs2489948   | 161259549 G | 0.02937  | 5.45E-13 | chr:6:161270898 |
| 6 rs2489949   | 161259718 T | 0.009417 | 1.09E-10 | chr:6:161270898 |
| 6 rs2489951   | 161259799 T | 0.009417 | 1.09E-10 | chr:6:161270898 |
| 6 rs9458044   | 161259988 C | 7.354    | 3.51E-06 | chr:6:161270898 |
| 6 rs114592559 | 161259990 C | 6.447    | 1.79E-06 | chr:6:161270898 |
| 6 rs2465863   | 161260969 A | 0.009417 | 1.09E-10 | chr:6:161270898 |
| 6 rs2489958   | 161261109 T | 0.009417 | 1.09E-10 | chr:6:161270898 |
| 6 rs2465862   | 161261198 G | 0.009417 | 1.09E-10 | chr:6:161270898 |
| 6 rs2489960   | 161261315 C | 0.009417 | 1.09E-10 | chr:6:161270898 |
| 6 rs2489961   | 161261383 T | 0.009417 | 1.09E-10 | chr:6:161270898 |
| 6 rs2465861   | 161261486 T | 0.009417 | 1.09E-10 | chr:6:161270898 |
| 6 rs2465860   | 161261813 C | 0.1503   | 4.82E-11 | chr:6:161270898 |
| 6 rs9456593   | 161261833 C | 0.156    | 7.93E-11 | chr:6:161270898 |
| 6 rs9456594   | 161261839 T | 0.156    | 7.93E-11 | chr:6:161270898 |
| 6 rs202074609 | 161261844 A | 0.156    | 7.93E-11 | chr:6:161270898 |
| 6 rs9456595   | 161261845 C | 0.156    | 7.93E-11 | chr:6:161270898 |
| 6 rs200406291 | 161261860 A | 0.1531   | 2.38E-10 | chr:6:161270898 |
| 6 rs201418433 | 161261865 T | 0.1398   | 6.82E-10 | chr:6:161270898 |
| 6 rs9456596   | 161261870 T | 0.1531   | 2.38E-10 | chr:6:161270898 |
| 6 rs9458045   | 161262083 A | 0.009417 | 1.09E-10 | chr:6:161270898 |
| 6 rs9458046   | 161262133 G | 0.009417 | 1.09E-10 | chr:6:161270898 |
| 6 rs9458047   | 161262336 A | 0.009743 | 1.23E-10 | chr:6:161270898 |



|                     |             |          |          |                 |
|---------------------|-------------|----------|----------|-----------------|
| 6 rs2489965         | 161262607 C | 0.0095   | 1.21E-10 | chr:6:161270898 |
| 6 rs2489966         | 161262874 T | 0.009417 | 1.09E-10 | chr:6:161270898 |
| 6 rs2953496         | 161263032 A | 0.009378 | 1.09E-10 | chr:6:161270898 |
| 6 rs71551165        | 161263039 G | 6.837    | 1.47E-08 | chr:6:161270898 |
| 6 rs2997097         | 161263200 G | 0.009417 | 1.09E-10 | chr:6:161270898 |
| 6 rs139452685       | 161263330 C | 0.02272  | 2.27E-12 | chr:6:161270898 |
| 6 rs147841394       | 161263331 A | 0.02272  | 2.27E-12 | chr:6:161270898 |
| 6 rs76259860        | 161263334 G | 0.02263  | 2.31E-12 | chr:6:161270898 |
| 6 rs59942091        | 161263402 A | 0.01407  | 1.93E-11 | chr:6:161270898 |
| 6 rs12215233        | 161263453 A | 0.009417 | 1.09E-10 | chr:6:161270898 |
| 6 rs12194479        | 161263485 G | 0.009417 | 1.09E-10 | chr:6:161270898 |
| 6 rs12189741        | 161263528 T | 0.009417 | 1.09E-10 | chr:6:161270898 |
| 6 rs12191314        | 161263721 T | 0.009417 | 1.09E-10 | chr:6:161270898 |
| 6 rs12195948        | 161263790 A | 6.837    | 1.47E-08 | chr:6:161270898 |
| 6 rs12209829        | 161263938 C | 0.009417 | 1.09E-10 | chr:6:161270898 |
| 6 rs12196112        | 161264064 G | 0.009417 | 1.09E-10 | chr:6:161270898 |
| 6 rs67368974        | 161264124 A | 0.01496  | 1.82E-11 | chr:6:161270898 |
| 6 rs59536962        | 161264131 A | 0.02126  | 4.06E-12 | chr:6:161270898 |
| 6 rs12190057        | 161264201 G | 7.201    | 2.93E-08 | chr:6:161270898 |
| 6 rs2489968         | 161264408 G | 0.009417 | 1.09E-10 | chr:6:161270898 |
| 6 rs2489969         | 161264604 T | 0.009417 | 1.09E-10 | chr:6:161270898 |
| 6 rs11753819        | 161264775 G | 0.009447 | 1.19E-10 | chr:6:161270898 |
| 6 rs55968870        | 161264803 A | 0.009376 | 9.88E-11 | chr:6:161270898 |
| 6 rs56238146        | 161264866 G | 0.009376 | 9.88E-11 | chr:6:161270898 |
| 6 rs55900705        | 161264920 G | 0.009376 | 9.88E-11 | chr:6:161270898 |
| 6 rs56055227        | 161264940 G | 6.855    | 1.77E-08 | chr:6:161270898 |
| 6 rs76731838        | 161265072 T | 15.05    | 2.17E-12 | chr:6:161270898 |
| 6 rs75664940        | 161265073 C | 15.05    | 2.17E-12 | chr:6:161270898 |
| 6 rs144320744       | 161265076 T | 15.05    | 2.17E-12 | chr:6:161270898 |
| 6 rs66561051        | 161265144 C | 0.005527 | 1.21E-09 | chr:6:161270898 |
| 6 rs67613705        | 161265155 T | 0.005527 | 1.21E-09 | chr:6:161270898 |
| 6 rs66940842        | 161265190 C | 0.005577 | 1.19E-09 | chr:6:161270898 |
| 6 rs67721200        | 161265209 C | 0.009447 | 1.19E-10 | chr:6:161270898 |
| 6 rs62435277        | 161265332 C | 0.01025  | 1.27E-10 | chr:6:161270898 |
| 6 rs36162229        | 161265356 A | 6.855    | 1.77E-08 | chr:6:161270898 |
| 6 rs62435278        | 161265459 C | 0.009447 | 1.19E-10 | chr:6:161270898 |
| 6 rs62435280        | 161265620 C | 0.009447 | 1.19E-10 | chr:6:161270898 |
| 6 rs28698869        | 161265892 C | 0.009447 | 1.19E-10 | chr:6:161270898 |
| 6 rs75211522        | 161266022 T | 0.0848   | 1.46E-11 | chr:6:161270898 |
| 6 rs71551166;rs1494 | 161266025 G | 0.006307 | 2.90E-08 | chr:6:161270898 |
| 6 rs28488549        | 161266035 A | 0.009447 | 1.19E-10 | chr:6:161270898 |
| 6 rs28715036        | 161266045 G | 0.009447 | 1.19E-10 | chr:6:161270898 |
| 6 rs12176296        | 161266407 C | 0.009539 | 1.18E-10 | chr:6:161270898 |

|              |             |          |          |                 |
|--------------|-------------|----------|----------|-----------------|
| 6 rs12176297 | 161266417 C | 0.009539 | 1.18E-10 | chr:6:161270898 |
| 6 rs12173853 | 161266428 A | 0.009447 | 1.19E-10 | chr:6:161270898 |
| 6 rs12173859 | 161266513 A | 0.009447 | 1.19E-10 | chr:6:161270898 |
| 6 rs10945699 | 161266748 G | 0.009447 | 1.19E-10 | chr:6:161270898 |
| 6 rs10945700 | 161266764 T | 0.009447 | 1.19E-10 | chr:6:161270898 |
| 6 rs10945701 | 161266812 C | 0.008077 | 1.00E-10 | chr:6:161270898 |
| 6 rs11753537 | 161267022 T | 0.009447 | 1.19E-10 | chr:6:161270898 |
| 6 rs11753103 | 161267086 A | 0.009447 | 1.19E-10 | chr:6:161270898 |
| 6 rs11753560 | 161267122 T | 0.009447 | 1.19E-10 | chr:6:161270898 |
| 6 rs10945702 | 161267174 A | 0.009539 | 1.18E-10 | chr:6:161270898 |
| 6 rs13218423 | 161267283 T | 6.855    | 1.77E-08 | chr:6:161270898 |
| 6 rs9355841  | 161267335 A | 0.009447 | 1.19E-10 | chr:6:161270898 |
| 6 rs9355842  | 161267442 C | 0.009447 | 1.19E-10 | chr:6:161270898 |
| 6 rs9365214  | 161267556 C | 6.855    | 1.77E-08 | chr:6:161270898 |
| 6 rs9766397  | 161267843 A | 0.009447 | 1.19E-10 | chr:6:161270898 |
| 6 rs9295132  | 161267909 G | 0.009447 | 1.19E-10 | chr:6:161270898 |
| 6 rs13208565 | 161268025 A | 0.06171  | 2.07E-13 | chr:6:161270898 |
| 6 rs13208570 | 161268029 A | 0.06171  | 2.07E-13 | chr:6:161270898 |
| 6 rs13208572 | 161268036 A | 0.06171  | 2.07E-13 | chr:6:161270898 |
| 6 rs9765937  | 161268118 C | 0.06738  | 5.95E-13 | chr:6:161270898 |
| 6 rs9766526  | 161268119 T | 0.06738  | 5.95E-13 | chr:6:161270898 |
| 6 rs9765938  | 161268135 C | 0.009447 | 1.19E-10 | chr:6:161270898 |
| 6 rs9766533  | 161268200 T | 0.009447 | 1.19E-10 | chr:6:161270898 |
| 6 rs9766412  | 161268255 A | 0.009447 | 1.19E-10 | chr:6:161270898 |
| 6 rs67876803 | 161268321 G | 0.009447 | 1.19E-10 | chr:6:161270898 |
| 6 rs73029748 | 161268408 C | 0.009447 | 1.19E-10 | chr:6:161270898 |
| 6 rs73029749 | 161268411 T | 0.1268   | 1.04E-08 | chr:6:161270898 |
| 6 rs67591610 | 161268474 C | 0.009447 | 1.19E-10 | chr:6:161270898 |
| 6 rs66514671 | 161268507 T | 6.855    | 1.77E-08 | chr:6:161270898 |
| 6 rs62435284 | 161268570 A | 0.009447 | 1.19E-10 | chr:6:161270898 |
| 6 rs28515783 | 161268702 C | 0.09293  | 8.71E-12 | chr:6:161270898 |
| 6 rs28533078 | 161268730 G | 0.009447 | 1.19E-10 | chr:6:161270898 |
| 6 rs28670241 | 161268736 C | 0.009447 | 1.19E-10 | chr:6:161270898 |
| 6 rs9365215  | 161268788 A | 0.009761 | 1.42E-10 | chr:6:161270898 |
| 6 rs9355843  | 161268805 G | 0.009667 | 1.43E-10 | chr:6:161270898 |
| 6 rs9365216  | 161268818 G | 0.009667 | 1.43E-10 | chr:6:161270898 |
| 6 rs9355844  | 161268967 T | 0.009447 | 1.19E-10 | chr:6:161270898 |
| 6 rs9355845  | 161269097 A | 0.01248  | 2.22E-11 | chr:6:161270898 |
| 6 rs9355846  | 161269204 C | 0.009447 | 1.19E-10 | chr:6:161270898 |
| 6 rs9355320  | 161269256 A | 0.009447 | 1.19E-10 | chr:6:161270898 |
| 6 rs9347447  | 161269371 G | 0.01114  | 1.60E-10 | chr:6:161270898 |
| 6 rs9347448  | 161269737 C | 0.009447 | 1.19E-10 | chr:6:161270898 |
| 6 rs9347449  | 161269740 C | 0.009447 | 1.19E-10 | chr:6:161270898 |

|              |             |          |          |                 |
|--------------|-------------|----------|----------|-----------------|
| 6 rs3949208  | 161269749 T | 0.009447 | 1.19E-10 | chr:6:161270898 |
| 6 rs2186128  | 161269751 T | 0.009447 | 1.19E-10 | chr:6:161270898 |
| 6 rs9365217  | 161269849 T | 0.009447 | 1.19E-10 | chr:6:161270898 |
| 6 rs9347450  | 161269890 A | 0.009806 | 1.25E-10 | chr:6:161270898 |
| 6 rs9365218  | 161269903 A | 0.00952  | 1.21E-10 | chr:6:161270898 |
| 6 rs13217026 | 161269951 A | 0.009589 | 1.26E-10 | chr:6:161270898 |
| 6 rs13220254 | 161269958 T | 0.009589 | 1.26E-10 | chr:6:161270898 |
| 6 rs13201433 | 161269959 C | 0.009589 | 1.26E-10 | chr:6:161270898 |
| 6 rs9365219  | 161270070 A | 0.009447 | 1.19E-10 | chr:6:161270898 |
| 6 rs9347451  | 161270100 T | 0.009447 | 1.19E-10 | chr:6:161270898 |
| 6 rs76926711 | 161270283 C | 0.01115  | 2.05E-11 | chr:6:161270898 |
| 6 rs66746245 | 161270505 G | 6.855    | 1.77E-08 | chr:6:161270898 |
| 6 rs2465855  | 161270619 G | 0.009447 | 1.19E-10 | chr:6:161270898 |
| 6 rs9347452  | 161270827 C | 0.009447 | 1.19E-10 | chr:6:161270898 |
| 6 rs9347453  | 161270866 C | 0.01115  | 2.05E-11 | chr:6:161270898 |
| 6 rs9347454  | 161270870 C | 0.01115  | 2.05E-11 | chr:6:161270898 |
| 6 rs2489930  | 161271311 G | 0.009447 | 1.19E-10 | chr:6:161270898 |
| 6 rs2465856  | 161271369 C | 0.009447 | 1.19E-10 | chr:6:161270898 |
| 6 rs66507368 | 161271537 T | 6.855    | 1.77E-08 | chr:6:161270898 |
| 6 rs28597670 | 161271643 C | 0.009447 | 1.19E-10 | chr:6:161270898 |
| 6 rs28594774 | 161271666 T | 0.01022  | 1.19E-10 | chr:6:161270898 |
| 6 rs28448569 | 161271706 T | 0.009447 | 1.19E-10 | chr:6:161270898 |
| 6 rs28544460 | 161271777 T | 0.009052 | 1.16E-10 | chr:6:161270898 |
| 6 rs28655734 | 161271783 T | 0.009052 | 1.16E-10 | chr:6:161270898 |
| 6 rs28446193 | 161272078 A | 0.009447 | 1.19E-10 | chr:6:161270898 |
| 6 rs28711930 | 161272157 A | 0.009447 | 1.19E-10 | chr:6:161270898 |
| 6 rs9456598  | 161272283 A | 0.009447 | 1.19E-10 | chr:6:161270898 |
| 6 rs9458048  | 161272317 A | 0.009447 | 1.19E-10 | chr:6:161270898 |
| 6 rs9456599  | 161272401 A | 0.009447 | 1.19E-10 | chr:6:161270898 |
| 6 rs6926947  | 161272676 T | 0.1268   | 1.04E-08 | chr:6:161270898 |
| 6 rs9456600  | 161272696 T | 0.0143   | 1.96E-12 | chr:6:161270898 |
| 6 rs12196838 | 161272765 A | 0.01481  | 2.29E-11 | chr:6:161270898 |
| 6 rs68027339 | 161272813 G | 0.009447 | 1.19E-10 | chr:6:161270898 |
| 6 rs73603096 | 161272870 C | 47.65    | 3.51E-16 | chr:6:161270898 |
| 6 rs57127570 | 161272996 C | 0.009447 | 1.19E-10 | chr:6:161270898 |
| 6 rs60507137 | 161273066 A | 0.009447 | 1.19E-10 | chr:6:161270898 |
| 6 rs66542006 | 161273252 C | 0.009447 | 1.19E-10 | chr:6:161270898 |
| 6 rs68142848 | 161273257 T | 0.009447 | 1.19E-10 | chr:6:161270898 |
| 6 rs66533808 | 161273302 C | 0.009447 | 1.19E-10 | chr:6:161270898 |
| 6 rs67998011 | 161273327 G | 0.009447 | 1.19E-10 | chr:6:161270898 |
| 6 rs67136969 | 161273433 T | 0.009447 | 1.19E-10 | chr:6:161270898 |
| 6 rs2465866  | 161273489 G | 0.009447 | 1.19E-10 | chr:6:161270898 |
| 6 rs2465865  | 161273576 G | 0.009447 | 1.19E-10 | chr:6:161270898 |

|               |             |          |          |                 |
|---------------|-------------|----------|----------|-----------------|
| 6 rs2489931   | 161273628 A | 0.009447 | 1.19E-10 | chr:6:161270898 |
| 6 rs2489932   | 161273637 C | 0.009447 | 1.19E-10 | chr:6:161270898 |
| 6 rs2465864   | 161273785 G | 0.009447 | 1.19E-10 | chr:6:161270898 |
| 6 rs12153973  | 161273891 T | 0.009447 | 1.19E-10 | chr:6:161270898 |
| 6 rs12153845  | 161273987 C | 0.009447 | 1.19E-10 | chr:6:161270898 |
| 6 rs62435318  | 161274301 C | 0.009424 | 9.88E-11 | chr:6:161270898 |
| 6 rs112898058 | 161274433 A | 10.23    | 6.29E-09 | chr:6:161270898 |
| 6 rs115067610 | 161274512 T | 7.329    | 1.54E-07 | chr:6:161270898 |
| 6 rs74200112  | 161274513 C | 7.329    | 1.54E-07 | chr:6:161270898 |
| 6 rs6908103   | 161274560 T | 19.14    | 2.20E-13 | chr:6:161270898 |
| 6 rs74199274  | 161274567 G | 0.009447 | 1.19E-10 | chr:6:161270898 |
| 6 rs146201099 | 161274582 T | 0.04027  | 5.95E-13 | chr:6:161270898 |
| 6 rs373446157 | 161274587 A | 0.04035  | 6.10E-13 | chr:6:161270898 |
| 6 rs62435319  | 161274589 A | 0.04035  | 6.10E-13 | chr:6:161270898 |
| 6 rs376433866 | 161274602 G | 0.07707  | 1.28E-12 | chr:6:161270898 |
| 6 rs370624331 | 161274612 T | 0.01156  | 3.20E-11 | chr:6:161270898 |
| 6 rs573457182 | 161274613 G | 0.01156  | 3.20E-11 | chr:6:161270898 |
| 6 rs538674856 | 161274614 T | 0.01156  | 3.20E-11 | chr:6:161270898 |
| 6 rs558873783 | 161274615 A | 0.01156  | 3.20E-11 | chr:6:161270898 |
| 6 rs144015366 | 161274617 A | 0.01156  | 3.20E-11 | chr:6:161270898 |
| 6 rs7383363   | 161274962 A | 0.009204 | 1.27E-10 | chr:6:161270898 |
| 6 rs7381975   | 161275254 G | 0.009447 | 1.19E-10 | chr:6:161270898 |
| 6 rs13216274  | 161275309 A | 0.009447 | 1.19E-10 | chr:6:161270898 |
| 6 rs13200798  | 161275510 C | 0.009447 | 1.19E-10 | chr:6:161270898 |
| 6 rs13219765  | 161275516 T | 0.009447 | 1.19E-10 | chr:6:161270898 |
| 6 rs13219777  | 161275735 G | 6.855    | 1.77E-08 | chr:6:161270898 |
| 6 rs13192981  | 161275824 T | 0.009447 | 1.19E-10 | chr:6:161270898 |
| 6 rs13203412  | 161275871 G | 0.009447 | 1.19E-10 | chr:6:161270898 |
| 6 rs13203427  | 161275892 G | 0.009447 | 1.19E-10 | chr:6:161270898 |
| 6 rs7383738   | 161276047 A | 0.009447 | 1.19E-10 | chr:6:161270898 |
| 6 rs7382318   | 161276128 G | 0.009447 | 1.19E-10 | chr:6:161270898 |
| 6 rs7381442   | 161276215 T | 0.009447 | 1.19E-10 | chr:6:161270898 |
| 6 rs7382435   | 161276434 C | 0.009447 | 1.19E-10 | chr:6:161270898 |
| 6 rs7382456   | 161276583 C | 0.009447 | 1.19E-10 | chr:6:161270898 |
| 6 rs9365221   | 161276676 G | 0.009447 | 1.19E-10 | chr:6:161270898 |
| 6 rs9347455   | 161276752 C | 0.009447 | 1.19E-10 | chr:6:161270898 |
| 6 rs9355847   | 161276847 G | 6.863    | 1.68E-08 | chr:6:161270898 |
| 6 rs9365222   | 161276870 T | 6.855    | 1.77E-08 | chr:6:161270898 |
| 6 rs9347456   | 161276965 C | 0.009274 | 1.23E-10 | chr:6:161270898 |
| 6 rs73604919  | 161277020 A | 0.009447 | 1.19E-10 | chr:6:161270898 |
| 6 rs9347458   | 161277046 C | 0.009396 | 1.19E-10 | chr:6:161270898 |
| 6 rs377289957 | 161277231 C | 8.229    | 1.84E-09 | chr:6:161270898 |
| 6 rs9689453   | 161278910 A | 0.2271   | 6.46E-08 | chr:6:161270898 |

|              |             |         |          |                 |
|--------------|-------------|---------|----------|-----------------|
| 6 rs4709473  | 161278938 T | 0.2271  | 6.46E-08 | chr:6:161270898 |
| 6 rs9689560  | 161279081 T | 0.2339  | 2.47E-08 | chr:6:161270898 |
| 6 rs10945703 | 161279258 G | 0.1964  | 2.12E-09 | chr:6:161270898 |
| 6 rs59450759 | 161279302 A | 0.198   | 2.37E-09 | chr:6:161270898 |
| 6 rs58508475 | 161279395 A | 0.1241  | 3.50E-11 | chr:6:161270898 |
| 6 rs13206496 | 161279478 T | 0.2238  | 2.27E-08 | chr:6:161270898 |
| 6 rs9365224  | 161279539 G | 0.2188  | 1.63E-08 | chr:6:161270898 |
| 6 rs9347462  | 161279599 G | 0.2093  | 3.65E-09 | chr:6:161270898 |
| 6 rs9347463  | 161279690 C | 0.2175  | 6.81E-09 | chr:6:161270898 |
| 6 rs9365226  | 161279734 A | 0.2175  | 6.81E-09 | chr:6:161270898 |
| 6 rs2465848  | 161280023 C | 0.01408 | 2.10E-11 | chr:6:161270898 |
| 6 rs2465849  | 161280167 C | 0.01373 | 1.97E-11 | chr:6:161270898 |
| 6 rs2489936  | 161280325 G | 0.01792 | 8.09E-12 | chr:6:161270898 |
| 6 rs1247513  | 161280379 T | 0.1086  | 7.79E-11 | chr:6:161270898 |
| 6 rs2243944  | 161280766 C | 0.01792 | 8.09E-12 | chr:6:161270898 |
| 6 rs1806449  | 161280932 G | 0.01792 | 8.09E-12 | chr:6:161270898 |
| 6 rs2465850  | 161281175 T | 0.01792 | 8.09E-12 | chr:6:161270898 |
| 6 rs1892347  | 161281358 A | 0.02331 | 3.19E-12 | chr:6:161270898 |
| 6 rs1892348  | 161281390 T | 0.01792 | 8.09E-12 | chr:6:161270898 |
| 6 rs2489938  | 161282377 G | 0.01373 | 1.97E-11 | chr:6:161270898 |
| 6 rs2465857  | 161282500 C | 0.01792 | 8.09E-12 | chr:6:161270898 |
| 6 rs2465859  | 161282713 C | 0.01792 | 8.09E-12 | chr:6:161270898 |
| 6 rs5013438  | 161283051 A | 0.02165 | 4.58E-12 | chr:6:161270898 |
| 6 rs5013439  | 161283060 G | 0.02165 | 4.58E-12 | chr:6:161270898 |
| 6 rs5013440  | 161283064 A | 0.02165 | 4.58E-12 | chr:6:161270898 |
| 6 rs5013441  | 161283071 A | 0.02165 | 4.58E-12 | chr:6:161270898 |
| 6 rs2997093  | 161283133 T | 0.02165 | 4.58E-12 | chr:6:161270898 |
| 6 rs2997094  | 161283135 T | 0.02165 | 4.58E-12 | chr:6:161270898 |
| 6 rs2953494  | 161283178 G | 0.02165 | 4.58E-12 | chr:6:161270898 |
| 6 rs2953495  | 161283183 C | 0.01792 | 8.09E-12 | chr:6:161270898 |
| 6 rs2997095  | 161283204 A | 0.01792 | 8.09E-12 | chr:6:161270898 |
| 6 rs1247514  | 161283586 C | 0.1438  | 4.18E-08 | chr:6:161270898 |
| 6 rs62435345 | 161283600 T | 0.01792 | 8.09E-12 | chr:6:161270898 |
| 6 rs2255792  | 161284473 C | 0.05926 | 4.01E-11 | chr:6:161270898 |
| 6 rs1937487  | 161284779 T | 0.06472 | 8.05E-11 | chr:6:161270898 |
| 6 rs1937486  | 161284845 G | 0.05972 | 4.43E-11 | chr:6:161270898 |
| 6 rs1937485  | 161284895 A | 0.04754 | 2.47E-11 | chr:6:161270898 |
| 6 rs1937484  | 161286950 T | 0.0706  | 4.46E-11 | chr:6:161270898 |
| 6 rs2465868  | 161287333 C | 0.07082 | 4.84E-11 | chr:6:161270898 |
| 6 rs2489943  | 161288640 C | 0.0706  | 4.46E-11 | chr:6:161270898 |
| 6 rs2953492  | 161289895 G | 0.0706  | 4.46E-11 | chr:6:161270898 |
| 6 rs1782624  | 161290595 G | 0.0706  | 4.46E-11 | chr:6:161270898 |
| 6 rs1782625  | 161290812 T | 0.0706  | 4.46E-11 | chr:6:161270898 |

|               |             |         |          |                 |
|---------------|-------------|---------|----------|-----------------|
| 6 rs2953493   | 161291617 C | 0.0706  | 4.46E-11 | chr:6:161270898 |
| 6 rs77352912  | 161297026 C | 0.2141  | 2.10E-06 | chr:6:161270898 |
| 6 rs2997096   | 161298263 T | 0.08201 | 1.24E-11 | chr:6:161270898 |
| 6 rs1247515   | 161302267 A | 0.2878  | 6.93E-07 | chr:6:161270898 |
| 6 rs2465833   | 161302883 G | 0.2878  | 6.93E-07 | chr:6:161270898 |
| 6 rs1247519   | 161303720 A | 0.0828  | 1.44E-11 | chr:6:161270898 |
| 6 rs4708895   | 161309155 T | 0.271   | 2.91E-07 | chr:6:161270898 |
| 6 rs1261931   | 161311849 T | 0.1349  | 4.24E-10 | chr:6:161270898 |
| 6 rs1247520   | 161312344 T | 0.1349  | 4.24E-10 | chr:6:161270898 |
| 6 rs73017757  | 161315757 A | 0.2584  | 2.78E-05 | chr:6:161270898 |
| 6 rs62436886  | 161315795 A | 0.2584  | 2.78E-05 | chr:6:161270898 |
| 6 rs60897688  | 161316063 A | 0.2584  | 2.78E-05 | chr:6:161270898 |
| 6 rs62436888  | 161316375 C | 0.2584  | 2.78E-05 | chr:6:161270898 |
| 6 rs6917099   | 161316478 A | 0.2584  | 2.78E-05 | chr:6:161270898 |
| 6 rs6902594   | 161316919 G | 0.2584  | 2.78E-05 | chr:6:161270898 |
| 6 rs6923460   | 161316970 T | 0.2584  | 2.78E-05 | chr:6:161270898 |
| 6 rs1937473   | 161317305 T | 0.2584  | 2.78E-05 | chr:6:161270898 |
| 6 rs57154076  | 161317615 A | 0.2584  | 2.78E-05 | chr:6:161270898 |
| 6 rs62436890  | 161317745 G | 0.2584  | 2.78E-05 | chr:6:161270898 |
| 6 rs1937471   | 161317961 T | 0.2584  | 2.78E-05 | chr:6:161270898 |
| 6 rs1937470   | 161318009 G | 0.2584  | 2.78E-05 | chr:6:161270898 |
| 6 rs62436891  | 161318736 A | 0.2584  | 2.78E-05 | chr:6:161270898 |
| 6 rs62436892  | 161318811 T | 0.2584  | 2.78E-05 | chr:6:161270898 |
| 6 rs62436893  | 161319046 A | 0.2584  | 2.78E-05 | chr:6:161270898 |
| 6 rs73017769  | 161319183 T | 0.2584  | 2.78E-05 | chr:6:161270898 |
| 6 rs73017771  | 161319223 T | 0.2584  | 2.78E-05 | chr:6:161270898 |
| 6 rs73017775  | 161319251 T | 0.2584  | 2.78E-05 | chr:6:161270898 |
| 6 rs77819438  | 161319569 A | 0.2584  | 2.78E-05 | chr:6:161270898 |
| 6 rs79551445  | 161319570 A | 0.2544  | 2.37E-05 | chr:6:161270898 |
| 6 rs62436894  | 161319573 A | 0.2584  | 2.78E-05 | chr:6:161270898 |
| 6 rs73019785  | 161337875 G | 0.2723  | 2.97E-05 | chr:6:161270898 |
| 6 rs111793381 | 161338203 A | 0.2723  | 2.97E-05 | chr:6:161270898 |
| 6 rs62436933  | 161346830 A | 0.2758  | 4.16E-05 | chr:6:161270898 |
| 6 rs873039    | 161347469 G | 0.2723  | 2.97E-05 | chr:6:161270898 |
| 6 rs935181    | 161348069 C | 0.2723  | 2.97E-05 | chr:6:161270898 |
| 6 rs73021716  | 161348131 T | 0.2723  | 2.97E-05 | chr:6:161270898 |
| 6 rs73021719  | 161348134 A | 0.2723  | 2.97E-05 | chr:6:161270898 |
| 6 rs935179    | 161348174 C | 0.2723  | 2.97E-05 | chr:6:161270898 |
| 6 rs935178    | 161348194 C | 0.2723  | 2.97E-05 | chr:6:161270898 |
| 6 rs62436934  | 161348267 A | 0.2723  | 2.97E-05 | chr:6:161270898 |
| 6 rs62436935  | 161348273 C | 0.2723  | 2.97E-05 | chr:6:161270898 |
| 6 rs62436936  | 161348391 T | 0.2723  | 2.97E-05 | chr:6:161270898 |
| 6 rs62436937  | 161348393 G | 0.2723  | 2.97E-05 | chr:6:161270898 |

|               |             |        |          |                 |
|---------------|-------------|--------|----------|-----------------|
| 6 rs62436938  | 161349554 C | 0.2723 | 2.97E-05 | chr:6:161270898 |
| 6 rs60343440  | 161349841 A | 0.2723 | 2.97E-05 | chr:6:161270898 |
| 6 rs56219422  | 161350176 T | 0.2723 | 2.97E-05 | chr:6:161270898 |
| 6 rs61070418  | 161350274 G | 0.2723 | 2.97E-05 | chr:6:161270898 |
| 6 rs56009524  | 161350292 T | 0.2723 | 2.97E-05 | chr:6:161270898 |
| 6 rs1584059   | 161350782 C | 0.2723 | 2.97E-05 | chr:6:161270898 |
| 6 rs59962866  | 161351208 C | 0.2723 | 2.97E-05 | chr:6:161270898 |
| 6 rs111437733 | 161352256 G | 0.2765 | 3.56E-05 | chr:6:161270898 |
| 6 rs113434238 | 32501204 T  | 4.96   | 3.48E-11 | chr:6:32505702  |
| 6 rs74205903  | 32501249 C  | 4.966  | 3.90E-11 | chr:6:32505702  |
| 6 rs111890942 | 32458131 C  | 4.822  | 4.13E-11 | chr:6:32505702  |
| 6 rs72492329  | 32521136 A  | 9.686  | 5.99E-11 | chr:6:32505702  |
| 6 rs73727940  | 32503738 T  | 4.584  | 7.05E-11 | chr:6:32505702  |
| 6 rs115137792 | 32510114 C  | 5.491  | 1.05E-10 | chr:6:32505702  |
| 6 rs199616440 | 32510115 T  | 5.491  | 1.05E-10 | chr:6:32505702  |
| 6 rs9269560   | 32544371 C  | 5.77   | 1.06E-10 | chr:6:32505702  |
| 6 rs140120971 | 32510343 C  | 4.499  | 1.10E-10 | chr:6:32505702  |
| 6 rs143822887 | 32510344 A  | 4.499  | 1.10E-10 | chr:6:32505702  |
| 6 rs113220298 | 32510369 T  | 4.708  | 1.14E-10 | chr:6:32505702  |
| 6 rs66924955  | 32507855 G  | 4.931  | 1.16E-10 | chr:6:32505702  |
| 6 rs72853919  | 32507852 C  | 4.931  | 1.16E-10 | chr:6:32505702  |
| 6 rs34405098  | 32523269 T  | 6.165  | 1.22E-10 | chr:6:32505702  |
| 6 rs9269561   | 32544405 G  | 5.632  | 1.28E-10 | chr:6:32505702  |
| 6 rs113209512 | 32508875 T  | 5.194  | 1.29E-10 | chr:6:32505702  |
| 6 rs73726814  | 32523235 C  | 6.176  | 1.29E-10 | chr:6:32505702  |
| 6 rs74394760  | 32513078 C  | 5.369  | 1.33E-10 | chr:6:32505702  |
| 6 rs67529500  | 32504757 C  | 5.271  | 1.48E-10 | chr:6:32505702  |
| 6 rs67461697  | 32518767 C  | 5.636  | 1.54E-10 | chr:6:32505702  |
| 6 rs74290599  | 32518785 T  | 5.636  | 1.54E-10 | chr:6:32505702  |
| 6 rs144411837 | 32510337 C  | 4.485  | 1.55E-10 | chr:6:32505702  |
| 6 rs546964381 | 32511275 G  | 4.871  | 1.65E-10 | chr:6:32505702  |
| 6 rs112515515 | 32513422 T  | 5.422  | 1.70E-10 | chr:6:32505702  |
| 6 rs3828848   | 32520665 C  | 5.424  | 1.79E-10 | chr:6:32505702  |
| 6 rs74950807  | 32513375 T  | 5.419  | 1.86E-10 | chr:6:32505702  |
| 6 rs76818741  | 32513378 A  | 5.419  | 1.86E-10 | chr:6:32505702  |
| 6 rs558956689 | 32511276 G  | 4.862  | 1.89E-10 | chr:6:32505702  |
| 6 rs114831840 | 32501301 C  | 4.659  | 2.08E-10 | chr:6:32505702  |
| 6 rs115303308 | 32501296 A  | 4.659  | 2.08E-10 | chr:6:32505702  |
| 6 rs114520912 | 32517504 T  | 5.287  | 2.14E-10 | chr:6:32505702  |
| 6 rs116645664 | 32517505 C  | 5.287  | 2.14E-10 | chr:6:32505702  |
| 6 rs115726960 | 32503171 A  | 4.974  | 2.22E-10 | chr:6:32505702  |
| 6 rs72853989  | 32512321 T  | 5.252  | 2.35E-10 | chr:6:32505702  |
| 6 rs41287328  | 32552698 G  | 4.591  | 2.36E-10 | chr:6:32505702  |

|               |            |       |          |                |
|---------------|------------|-------|----------|----------------|
| 6 rs72853968  | 32509883 C | 5.269 | 2.37E-10 | chr:6:32505702 |
| 6 rs74375951  | 32500923 G | 5.153 | 2.38E-10 | chr:6:32505702 |
| 6 rs66678933  | 32509320 T | 5.283 | 2.39E-10 | chr:6:32505702 |
| 6 rs72492304  | 32509311 C | 5.283 | 2.39E-10 | chr:6:32505702 |
| 6 rs116405199 | 32504367 T | 4.656 | 2.40E-10 | chr:6:32505702 |
| 6 rs78994392  | 32504362 T | 4.656 | 2.40E-10 | chr:6:32505702 |
| 6 rs68175425  | 32517446 G | 5.288 | 2.42E-10 | chr:6:32505702 |
| 6 rs72492310  | 32509867 G | 5.273 | 2.42E-10 | chr:6:32505702 |
| 6 rs116085924 | 32514884 G | 4.173 | 2.47E-10 | chr:6:32505702 |
| 6 rs2157337   | 32501144 T | 4.636 | 2.48E-10 | chr:6:32505702 |
| 6 rs66532036  | 32519319 A | 5.373 | 2.52E-10 | chr:6:32505702 |
| 6 rs67041740  | 32509273 C | 5.286 | 2.52E-10 | chr:6:32505702 |
| 6 rs72853904  | 32505575 T | 4.642 | 2.53E-10 | chr:6:32505702 |
| 6 rs562624040 | 32513024 C | 4.471 | 2.59E-10 | chr:6:32505702 |
| 6 rs72853970  | 32509919 A | 5.275 | 2.60E-10 | chr:6:32505702 |
| 6 rs72508465  | 32505141 T | 4.06  | 2.61E-10 | chr:6:32505702 |
| 6 rs376327303 | 32520719 A | 5.293 | 2.62E-10 | chr:6:32505702 |
| 6 rs72492307  | 32509519 C | 5.234 | 2.64E-10 | chr:6:32505702 |
| 6 rs115202951 | 32501311 T | 4.656 | 2.70E-10 | chr:6:32505702 |
| 6 rs73727973  | 32509691 G | 5.279 | 2.71E-10 | chr:6:32505702 |
| 6 rs73729138  | 32520854 G | 5.357 | 2.74E-10 | chr:6:32505702 |
| 6 rs72492356  | 32538899 C | 5.638 | 2.80E-10 | chr:6:32505702 |
| 6 rs74202712  | 32502546 G | 3.767 | 2.82E-10 | chr:6:32505702 |
| 6 rs72492311  | 32509979 T | 5.284 | 2.83E-10 | chr:6:32505702 |
| 6 rs73727980  | 32511774 C | 5.286 | 2.85E-10 | chr:6:32505702 |
| 6 rs73727981  | 32511791 C | 5.286 | 2.85E-10 | chr:6:32505702 |
| 6 rs66521709  | 32509829 A | 5.28  | 2.86E-10 | chr:6:32505702 |
| 6 rs72851061  | 32503672 C | 4.65  | 2.87E-10 | chr:6:32505702 |
| 6 rs72853971  | 32509938 C | 5.28  | 2.89E-10 | chr:6:32505702 |
| 6 rs67916930  | 32508823 G | 5.208 | 2.90E-10 | chr:6:32505702 |
| 6 rs62405640  | 32516729 T | 5.313 | 2.91E-10 | chr:6:32505702 |
| 6 rs76033762  | 32516702 C | 5.313 | 2.91E-10 | chr:6:32505702 |
| 6 rs112111526 | 32510317 A | 4.412 | 2.95E-10 | chr:6:32505702 |
| 6 rs72492306  | 32509510 A | 5.238 | 2.99E-10 | chr:6:32505702 |
| 6 rs72851100  | 32505511 C | 4.418 | 3.01E-10 | chr:6:32505702 |
| 6 rs72853983  | 32511854 A | 5.286 | 3.05E-10 | chr:6:32505702 |
| 6 rs111590055 | 32510177 C | 4.407 | 3.06E-10 | chr:6:32505702 |
| 6 rs140209363 | 32492971 C | 3.835 | 3.13E-10 | chr:6:32505702 |
| 6 rs7743846   | 32505600 C | 4.205 | 3.13E-10 | chr:6:32505702 |
| 6 rs72492303  | 32509061 T | 5.204 | 3.16E-10 | chr:6:32505702 |
| 6 rs72492314  | 32512421 A | 5.027 | 3.16E-10 | chr:6:32505702 |
| 6 rs28819746  | 32509579 C | 5.286 | 3.16E-10 | chr:6:32505702 |
| 6 rs67774869  | 32508794 C | 5.204 | 3.16E-10 | chr:6:32505702 |



|               |            |       |          |                |
|---------------|------------|-------|----------|----------------|
| 6 rs114353707 | 32513535 C | 5.286 | 3.17E-10 | chr:6:32505702 |
| 6 rs116817148 | 32513534 G | 5.286 | 3.17E-10 | chr:6:32505702 |
| 6 rs72844171  | 32520749 C | 5.289 | 3.18E-10 | chr:6:32505702 |
| 6 rs72844188  | 32521427 C | 5.289 | 3.18E-10 | chr:6:32505702 |
| 6 rs72853979  | 32511572 T | 5.288 | 3.18E-10 | chr:6:32505702 |
| 6 rs72492315  | 32512466 C | 4.306 | 3.19E-10 | chr:6:32505702 |
| 6 rs76940575  | 32502590 C | 3.768 | 3.22E-10 | chr:6:32505702 |
| 6 rs67721312  | 32517556 T | 5.29  | 3.23E-10 | chr:6:32505702 |
| 6 rs74194578  | 32517590 T | 5.29  | 3.23E-10 | chr:6:32505702 |
| 6 rs111945767 | 32517045 C | 5.245 | 3.23E-10 | chr:6:32505702 |
| 6 rs68126668  | 32509603 A | 5.292 | 3.30E-10 | chr:6:32505702 |
| 6 rs72508466  | 32505166 G | 3.896 | 3.33E-10 | chr:6:32505702 |
| 6 rs35301884  | 32513638 C | 5.292 | 3.33E-10 | chr:6:32505702 |
| 6 rs72492319  | 32511987 T | 5.292 | 3.33E-10 | chr:6:32505702 |
| 6 rs73397416  | 32521951 C | 5.292 | 3.33E-10 | chr:6:32505702 |
| 6 rs75141783  | 32511944 A | 5.292 | 3.33E-10 | chr:6:32505702 |
| 6 rs72508430  | 32487172 T | 5.418 | 3.35E-10 | chr:6:32505702 |
| 6 rs149589923 | 32500818 A | 4.684 | 3.37E-10 | chr:6:32505702 |
| 6 rs74211571  | 32502566 T | 3.764 | 3.45E-10 | chr:6:32505702 |
| 6 rs66497315  | 32512407 C | 5.026 | 3.47E-10 | chr:6:32505702 |
| 6 rs73729745  | 32469136 A | 4.638 | 3.50E-10 | chr:6:32505702 |
| 6 rs72508464  | 32504341 T | 4.645 | 3.56E-10 | chr:6:32505702 |
| 6 rs72492325  | 32520151 C | 5.251 | 3.60E-10 | chr:6:32505702 |
| 6 rs115712701 | 32501737 C | 5.293 | 3.61E-10 | chr:6:32505702 |
| 6 rs73729111  | 32517525 T | 5.313 | 3.67E-10 | chr:6:32505702 |
| 6 rs116190325 | 32510039 A | 5.299 | 3.67E-10 | chr:6:32505702 |
| 6 rs115123240 | 32519919 G | 5.157 | 3.68E-10 | chr:6:32505702 |
| 6 rs72492327  | 32520465 G | 5.206 | 3.76E-10 | chr:6:32505702 |
| 6 rs74485644  | 32501421 T | 4.932 | 3.78E-10 | chr:6:32505702 |
| 6 rs184358099 | 32500832 G | 4.674 | 3.86E-10 | chr:6:32505702 |
| 6 rs78942674  | 32509897 T | 5.241 | 3.86E-10 | chr:6:32505702 |
| 6 rs537977627 | 32510140 A | 4.644 | 3.88E-10 | chr:6:32505702 |
| 6 rs71534520  | 32510146 G | 4.644 | 3.88E-10 | chr:6:32505702 |
| 6 rs66502326  | 32509411 T | 5.126 | 3.91E-10 | chr:6:32505702 |
| 6 rs67717173  | 32520137 T | 5.252 | 3.94E-10 | chr:6:32505702 |
| 6 rs73727944  | 32504713 T | 4.434 | 4.01E-10 | chr:6:32505702 |
| 6 rs35687625  | 32513840 A | 5.224 | 4.04E-10 | chr:6:32505702 |
| 6 rs72849265  | 32458208 T | 3.951 | 4.29E-10 | chr:6:32505702 |
| 6 rs113085907 | 32510224 G | 4.387 | 4.45E-10 | chr:6:32505702 |
| 6 rs75861594  | 32518103 G | 5.112 | 4.45E-10 | chr:6:32505702 |
| 6 rs114246255 | 32509461 G | 4.806 | 4.46E-10 | chr:6:32505702 |
| 6 rs115704383 | 32509460 T | 4.806 | 4.46E-10 | chr:6:32505702 |
| 6 rs112457394 | 32469073 C | 4.582 | 4.47E-10 | chr:6:32505702 |

|               |            |       |          |                |
|---------------|------------|-------|----------|----------------|
| 6 rs111289870 | 32512269 C | 4.891 | 4.63E-10 | chr:6:32505702 |
| 6 rs35957455  | 32521195 T | 5.227 | 4.69E-10 | chr:6:32505702 |
| 6 rs113460787 | 32518089 T | 5.114 | 4.73E-10 | chr:6:32505702 |
| 6 rs72851025  | 32501459 C | 4.93  | 4.78E-10 | chr:6:32505702 |
| 6 rs111340421 | 32517174 G | 5.018 | 4.94E-10 | chr:6:32505702 |
| 6 rs3828852   | 32520595 A | 4.965 | 5.02E-10 | chr:6:32505702 |
| 6 rs72851046  | 32501957 G | 5.02  | 5.19E-10 | chr:6:32505702 |
| 6 rs72851047  | 32501962 T | 5.02  | 5.19E-10 | chr:6:32505702 |
| 6 rs35697584  | 32522151 A | 5.501 | 5.32E-10 | chr:6:32505702 |
| 6 rs72851028  | 32501615 A | 4.948 | 5.34E-10 | chr:6:32505702 |
| 6 rs72853949  | 32509435 T | 5.114 | 5.39E-10 | chr:6:32505702 |
| 6 rs72853950  | 32509472 T | 4.81  | 5.49E-10 | chr:6:32505702 |
| 6 rs67081540  | 32512359 C | 5.261 | 5.50E-10 | chr:6:32505702 |
| 6 rs116209683 | 32510508 C | 4.654 | 5.61E-10 | chr:6:32505702 |
| 6 rs113850533 | 32516839 T | 5.112 | 5.63E-10 | chr:6:32505702 |
| 6 rs74221689  | 32501936 A | 5.019 | 5.83E-10 | chr:6:32505702 |
| 6 rs113648142 | 32508762 T | 4.878 | 5.88E-10 | chr:6:32505702 |
| 6 rs72508474  | 32508738 C | 4.878 | 5.88E-10 | chr:6:32505702 |
| 6 rs115806221 | 32514401 G | 4.94  | 5.93E-10 | chr:6:32505702 |
| 6 rs9270034   | 32553418 G | 6.08  | 5.93E-10 | chr:6:32505702 |
| 6 rs113787446 | 32518630 C | 5.193 | 5.97E-10 | chr:6:32505702 |
| 6 rs114776163 | 32518625 G | 5.193 | 5.97E-10 | chr:6:32505702 |
| 6 rs147266303 | 32510268 C | 4.38  | 6.03E-10 | chr:6:32505702 |
| 6 rs147023195 | 32518295 T | 4.74  | 6.12E-10 | chr:6:32505702 |
| 6 rs74937819  | 32502037 A | 4.933 | 6.28E-10 | chr:6:32505702 |
| 6 rs113232784 | 32518256 A | 4.621 | 6.37E-10 | chr:6:32505702 |
| 6 rs111901878 | 32516893 T | 5.028 | 6.49E-10 | chr:6:32505702 |
| 6 rs369883062 | 32519734 G | 4.832 | 6.58E-10 | chr:6:32505702 |
| 6 rs74535936  | 32510547 G | 4.644 | 6.64E-10 | chr:6:32505702 |
| 6 rs66706092  | 32513915 T | 4.949 | 6.67E-10 | chr:6:32505702 |
| 6 rs72844111  | 32513938 C | 4.949 | 6.67E-10 | chr:6:32505702 |
| 6 rs73728002  | 32513993 A | 4.949 | 6.67E-10 | chr:6:32505702 |
| 6 rs5016923   | 32502028 G | 4.93  | 6.72E-10 | chr:6:32505702 |
| 6 rs115217308 | 32520296 A | 4.866 | 6.73E-10 | chr:6:32505702 |
| 6 rs116173033 | 32520295 G | 4.866 | 6.73E-10 | chr:6:32505702 |
| 6 rs66796862  | 32521664 C | 5.046 | 6.80E-10 | chr:6:32505702 |
| 6 rs76533559  | 32554897 G | 5.121 | 6.81E-10 | chr:6:32505702 |
| 6 rs113225456 | 32521406 T | 5.046 | 6.82E-10 | chr:6:32505702 |
| 6 rs72844187  | 32521419 G | 5.046 | 6.82E-10 | chr:6:32505702 |
| 6 rs72492322  | 32519628 G | 5.05  | 6.92E-10 | chr:6:32505702 |
| 6 rs34369284  | 32514144 T | 4.948 | 7.00E-10 | chr:6:32505702 |
| 6 rs112004746 | 32518155 T | 4.832 | 7.02E-10 | chr:6:32505702 |
| 6 rs73729131  | 32520313 T | 4.867 | 7.07E-10 | chr:6:32505702 |

|               |            |       |          |                |
|---------------|------------|-------|----------|----------------|
| 6 rs66534143  | 32512601 C | 4.863 | 7.12E-10 | chr:6:32505702 |
| 6 rs114171624 | 32514706 G | 4.202 | 7.26E-10 | chr:6:32505702 |
| 6 rs116413420 | 32509466 T | 4.795 | 7.30E-10 | chr:6:32505702 |
| 6 rs72851052  | 32502249 T | 3.923 | 7.36E-10 | chr:6:32505702 |
| 6 rs72851053  | 32502250 G | 3.923 | 7.36E-10 | chr:6:32505702 |
| 6 rs112280675 | 32522066 A | 5.102 | 7.42E-10 | chr:6:32505702 |
| 6 rs41287329  | 32552728 G | 4.03  | 7.46E-10 | chr:6:32505702 |
| 6 rs41287330  | 32552730 A | 4.03  | 7.46E-10 | chr:6:32505702 |
| 6 rs73729122  | 32519777 G | 4.981 | 7.48E-10 | chr:6:32505702 |
| 6 rs11751146  | 32514899 T | 3.845 | 7.49E-10 | chr:6:32505702 |
| 6 rs72851066  | 32504216 T | 3.996 | 7.59E-10 | chr:6:32505702 |
| 6 rs114233058 | 32517386 T | 4.614 | 7.60E-10 | chr:6:32505702 |
| 6 rs115916707 | 32517387 G | 4.614 | 7.60E-10 | chr:6:32505702 |
| 6 rs73727954  | 32508902 T | 4.58  | 7.75E-10 | chr:6:32505702 |
| 6 rs73729140  | 32521290 C | 5.537 | 7.80E-10 | chr:6:32505702 |
| 6 rs111649944 | 32518268 T | 4.529 | 7.92E-10 | chr:6:32505702 |
| 6 rs112944992 | 32510457 C | 4.191 | 8.04E-10 | chr:6:32505702 |
| 6 rs112180912 | 32518436 A | 4.641 | 8.17E-10 | chr:6:32505702 |
| 6 rs72851064  | 32503928 C | 4.623 | 8.18E-10 | chr:6:32505702 |
| 6 rs72851065  | 32504213 T | 3.994 | 8.19E-10 | chr:6:32505702 |
| 6 rs3828832   | 32521083 C | 5.003 | 8.20E-10 | chr:6:32505702 |
| 6 rs115664796 | 32508758 C | 4.867 | 8.41E-10 | chr:6:32505702 |
| 6 rs9269750   | 32548141 G | 6.187 | 8.49E-10 | chr:6:32505702 |
| 6 rs9269317   | 32539767 T | 4.446 | 8.89E-10 | chr:6:32505702 |
| 6 rs73727961  | 32509022 A | 4.578 | 8.97E-10 | chr:6:32505702 |
| 6 rs114987387 | 32502131 G | 4.622 | 9.04E-10 | chr:6:32505702 |
| 6 rs536146370 | 32519759 A | 4.801 | 9.06E-10 | chr:6:32505702 |
| 6 rs34615209  | 32513862 T | 4.886 | 9.07E-10 | chr:6:32505702 |
| 6 rs9269749   | 32548136 G | 5.202 | 9.31E-10 | chr:6:32505702 |
| 6 rs72853940  | 32508945 T | 4.574 | 9.90E-10 | chr:6:32505702 |
| 6 rs62405642  | 32517759 G | 4.796 | 9.93E-10 | chr:6:32505702 |
| 6 rs114899212 | 32524951 G | 5.034 | 1.01E-09 | chr:6:32505702 |
| 6 rs74715621  | 32508285 G | 3.349 | 1.02E-09 | chr:6:32505702 |
| 6 rs115524254 | 32503565 C | 4.159 | 1.02E-09 | chr:6:32505702 |
| 6 rs115333128 | 32485804 G | 3.472 | 1.04E-09 | chr:6:32505702 |
| 6 rs35179057  | 32523349 C | 5.202 | 1.05E-09 | chr:6:32505702 |
| 6 rs114302967 | 32503839 C | 3.786 | 1.07E-09 | chr:6:32505702 |
| 6 rs76054694  | 32503840 T | 3.786 | 1.07E-09 | chr:6:32505702 |
| 6 rs113017160 | 32503834 G | 3.786 | 1.10E-09 | chr:6:32505702 |
| 6 rs112780153 | 32510301 C | 4.461 | 1.15E-09 | chr:6:32505702 |
| 6 rs115077688 | 32503287 T | 4.36  | 1.15E-09 | chr:6:32505702 |
| 6 rs78622201  | 32518405 A | 4.63  | 1.26E-09 | chr:6:32505702 |
| 6 rs114715427 | 32538850 A | 4.205 | 1.31E-09 | chr:6:32505702 |

|               |            |       |          |                |
|---------------|------------|-------|----------|----------------|
| 6 rs72844144  | 32519125 A | 6.709 | 1.32E-09 | chr:6:32505702 |
| 6 rs115018431 | 32534360 T | 4.153 | 1.36E-09 | chr:6:32505702 |
| 6 rs77783340  | 32514313 T | 4.636 | 1.38E-09 | chr:6:32505702 |
| 6 rs201795916 | 32514567 C | 4.538 | 1.38E-09 | chr:6:32505702 |
| 6 rs72844118  | 32514539 T | 4.538 | 1.38E-09 | chr:6:32505702 |
| 6 rs139201366 | 32513186 A | 4.957 | 1.39E-09 | chr:6:32505702 |
| 6 rs72851055  | 32502814 C | 3.403 | 1.41E-09 | chr:6:32505702 |
| 6 rs199506689 | 32504701 T | 4.099 | 1.50E-09 | chr:6:32505702 |
| 6 rs73729106  | 32514288 T | 4.63  | 1.50E-09 | chr:6:32505702 |
| 6 rs112709345 | 32501541 T | 5.126 | 1.52E-09 | chr:6:32505702 |
| 6 rs66738149  | 32501898 C | 4.695 | 1.55E-09 | chr:6:32505702 |
| 6 rs72851044  | 32501886 A | 4.695 | 1.55E-09 | chr:6:32505702 |
| 6 rs72508417  | 32459813 A | 3.761 | 1.59E-09 | chr:6:32505702 |
| 6 rs72844152  | 32519652 A | 4.64  | 1.63E-09 | chr:6:32505702 |
| 6 rs73401349  | 32458094 C | 3.619 | 1.65E-09 | chr:6:32505702 |
| 6 rs72853923  | 32508222 G | 3.248 | 1.66E-09 | chr:6:32505702 |
| 6 rs72851060  | 32503560 G | 4.007 | 1.69E-09 | chr:6:32505702 |
| 6 rs111626267 | 32502273 T | 3.735 | 1.72E-09 | chr:6:32505702 |
| 6 rs115573660 | 32502277 A | 3.735 | 1.72E-09 | chr:6:32505702 |
| 6 rs72851063  | 32503901 T | 4.149 | 1.74E-09 | chr:6:32505702 |
| 6 rs9270363   | 32558137 T | 5.297 | 1.74E-09 | chr:6:32505702 |
| 6 rs72853924  | 32508239 G | 3.247 | 1.74E-09 | chr:6:32505702 |
| 6 rs200819822 | 32505189 G | 3.55  | 1.78E-09 | chr:6:32505702 |
| 6 rs112155110 | 32501417 T | 4.926 | 1.80E-09 | chr:6:32505702 |
| 6 rs572581776 | 32526776 G | 3.846 | 1.84E-09 | chr:6:32505702 |
| 6 rs80083020  | 32510439 C | 3.97  | 1.89E-09 | chr:6:32505702 |
| 6 rs113727677 | 32517010 C | 4.728 | 1.90E-09 | chr:6:32505702 |
| 6 rs72851029  | 32501639 T | 5.572 | 1.92E-09 | chr:6:32505702 |
| 6 rs557288207 | 32504452 T | 3.691 | 1.95E-09 | chr:6:32505702 |
| 6 rs114015220 | 32510599 T | 4.362 | 1.95E-09 | chr:6:32505702 |
| 6 rs114472333 | 32510598 T | 4.362 | 1.95E-09 | chr:6:32505702 |
| 6 rs76723065  | 32510591 G | 4.362 | 1.95E-09 | chr:6:32505702 |
| 6 rs139029897 | 32454882 G | 3.682 | 2.03E-09 | chr:6:32505702 |
| 6 rs545949191 | 32502900 A | 3.47  | 2.03E-09 | chr:6:32505702 |
| 6 rs115141943 | 32538830 C | 4.105 | 2.04E-09 | chr:6:32505702 |
| 6 rs116748457 | 32514768 G | 4.053 | 2.13E-09 | chr:6:32505702 |
| 6 rs200263528 | 32509009 C | 4.31  | 2.14E-09 | chr:6:32505702 |
| 6 rs115910196 | 32502304 T | 3.44  | 2.15E-09 | chr:6:32505702 |
| 6 rs67860869  | 32508349 C | 3.947 | 2.15E-09 | chr:6:32505702 |
| 6 rs3828844   | 32520755 G | 4.235 | 2.17E-09 | chr:6:32505702 |
| 6 rs543726509 | 32493208 A | 4.193 | 2.18E-09 | chr:6:32505702 |
| 6 rs115081905 | 32508276 T | 3.234 | 2.19E-09 | chr:6:32505702 |
| 6 rs72508418  | 32459868 T | 3.722 | 2.28E-09 | chr:6:32505702 |

|               |            |       |          |                |
|---------------|------------|-------|----------|----------------|
| 6 rs77236357  | 32459844 T | 3.722 | 2.28E-09 | chr:6:32505702 |
| 6 rs116316731 | 32502097 T | 4.348 | 2.44E-09 | chr:6:32505702 |
| 6 rs72492332  | 32523085 G | 4.987 | 2.45E-09 | chr:6:32505702 |
| 6 rs9269565   | 32544500 A | 4.93  | 2.45E-09 | chr:6:32505702 |
| 6 rs115640078 | 32538839 T | 4.002 | 2.46E-09 | chr:6:32505702 |
| 6 rs115696138 | 32504460 C | 3.672 | 2.57E-09 | chr:6:32505702 |
| 6 rs73727960  | 32508989 G | 4.296 | 2.68E-09 | chr:6:32505702 |
| 6 rs116520213 | 32504424 T | 3.657 | 2.69E-09 | chr:6:32505702 |
| 6 rs546636941 | 32504421 T | 3.657 | 2.69E-09 | chr:6:32505702 |
| 6 rs74997284  | 32518934 G | 4.621 | 2.77E-09 | chr:6:32505702 |
| 6 rs78326230  | 32518935 A | 4.621 | 2.77E-09 | chr:6:32505702 |
| 6 rs538174489 | 32508201 T | 3.221 | 2.78E-09 | chr:6:32505702 |
| 6 rs113871699 | 32509693 T | 5.267 | 2.79E-09 | chr:6:32505702 |
| 6 rs73727972  | 32509683 G | 5.267 | 2.79E-09 | chr:6:32505702 |
| 6 rs9269278   | 32539269 A | 4.794 | 2.88E-09 | chr:6:32505702 |
| 6 rs9269279   | 32539274 G | 4.794 | 2.88E-09 | chr:6:32505702 |
| 6 rs9270474   | 32559003 G | 5.11  | 2.89E-09 | chr:6:32505702 |
| 6 rs9269532   | 32543825 C | 4.76  | 2.89E-09 | chr:6:32505702 |
| 6 rs9269277   | 32539265 A | 4.8   | 2.91E-09 | chr:6:32505702 |
| 6 rs9269280   | 32539279 C | 4.8   | 2.93E-09 | chr:6:32505702 |
| 6 rs9270485   | 32559064 C | 5.16  | 3.04E-09 | chr:6:32505702 |
| 6 rs536708130 | 32518949 G | 4.613 | 3.08E-09 | chr:6:32505702 |
| 6 rs536038224 | 32523371 C | 4.328 | 3.10E-09 | chr:6:32505702 |
| 6 rs115742569 | 32516464 C | 6.848 | 3.11E-09 | chr:6:32505702 |
| 6 rs34265294  | 32489118 A | 3.549 | 3.12E-09 | chr:6:32505702 |
| 6 rs115673628 | 32505419 G | 3.108 | 3.16E-09 | chr:6:32505702 |
| 6 rs9269985   | 32552532 A | 4.477 | 3.25E-09 | chr:6:32505702 |
| 6 rs182965163 | 32454827 A | 3.875 | 3.41E-09 | chr:6:32505702 |
| 6 rs202162787 | 32454828 G | 3.875 | 3.41E-09 | chr:6:32505702 |
| 6 rs111559749 | 32509012 T | 4.286 | 3.50E-09 | chr:6:32505702 |
| 6 rs114164335 | 32532128 C | 3.839 | 3.55E-09 | chr:6:32505702 |
| 6 rs9269393   | 32541222 A | 3.676 | 3.66E-09 | chr:6:32505702 |
| 6 rs9270549   | 32560440 A | 5.375 | 3.75E-09 | chr:6:32505702 |
| 6 rs9270550   | 32560441 G | 5.375 | 3.75E-09 | chr:6:32505702 |
| 6 rs72492317  | 32512501 A | 4.165 | 3.79E-09 | chr:6:32505702 |
| 6 rs9270481   | 32559045 C | 5.104 | 3.85E-09 | chr:6:32505702 |
| 6 rs148817433 | 32493266 G | 5.048 | 3.92E-09 | chr:6:32505702 |
| 6 rs112300533 | 32517237 T | 4.263 | 3.92E-09 | chr:6:32505702 |
| 6 rs74821931  | 32517233 A | 4.263 | 3.92E-09 | chr:6:32505702 |
| 6 rs72492351  | 32538451 C | 4.308 | 3.94E-09 | chr:6:32505702 |
| 6 rs75088009  | 32504884 G | 3.791 | 3.96E-09 | chr:6:32505702 |
| 6 rs73726819  | 32526540 G | 4.909 | 3.99E-09 | chr:6:32505702 |
| 6 rs9270589   | 32561390 T | 5.235 | 4.06E-09 | chr:6:32505702 |

|               |            |       |          |                |
|---------------|------------|-------|----------|----------------|
| 6 rs9270590   | 32561392 A | 5.235 | 4.06E-09 | chr:6:32505702 |
| 6 rs9269276   | 32539244 C | 4.838 | 4.17E-09 | chr:6:32505702 |
| 6 rs112465099 | 32510430 G | 3.775 | 4.19E-09 | chr:6:32505702 |
| 6 rs116541769 | 32524870 T | 3.304 | 4.26E-09 | chr:6:32505702 |
| 6 rs193201719 | 32505807 T | 3.157 | 4.37E-09 | chr:6:32505702 |
| 6 rs9269314   | 32539715 G | 3.88  | 4.40E-09 | chr:6:32505702 |
| 6 rs114034298 | 32505797 C | 3.228 | 4.50E-09 | chr:6:32505702 |
| 6 rs112103446 | 32522679 C | 13.24 | 4.67E-09 | chr:6:32505702 |
| 6 rs9269254   | 32454327 T | 5.274 | 4.69E-09 | chr:6:32505702 |
| 6 rs9269237   | 32453583 T | 4.875 | 4.87E-09 | chr:6:32505702 |
| 6 rs67816706  | 32517266 T | 4.297 | 4.96E-09 | chr:6:32505702 |
| 6 rs142127023 | 32532178 T | 3.529 | 5.01E-09 | chr:6:32505702 |
| 6 rs142670190 | 32532172 T | 3.529 | 5.01E-09 | chr:6:32505702 |
| 6 rs144412121 | 32532179 G | 3.529 | 5.01E-09 | chr:6:32505702 |
| 6 rs79338946  | 32502822 T | 3.26  | 5.24E-09 | chr:6:32505702 |
| 6 rs9269563   | 32544456 T | 4.455 | 5.30E-09 | chr:6:32505702 |
| 6 rs111705290 | 32513412 A | 4.163 | 5.39E-09 | chr:6:32505702 |
| 6 rs9269272   | 32539114 A | 5.258 | 5.40E-09 | chr:6:32505702 |
| 6 rs9269281   | 32539309 A | 4.214 | 5.42E-09 | chr:6:32505702 |
| 6 rs9270556   | 32560606 A | 5.168 | 5.49E-09 | chr:6:32505702 |
| 6 rs538718414 | 32508207 T | 3.052 | 5.56E-09 | chr:6:32505702 |
| 6 rs556173675 | 32508202 G | 3.052 | 5.56E-09 | chr:6:32505702 |
| 6 rs115303801 | 32512229 G | 3.797 | 5.58E-09 | chr:6:32505702 |
| 6 rs9270529   | 32559658 T | 4.174 | 5.67E-09 | chr:6:32505702 |
| 6 rs73727927  | 32501214 G | 4.301 | 5.97E-09 | chr:6:32505702 |
| 6 rs142162694 | 32532071 T | 4.012 | 5.97E-09 | chr:6:32505702 |
| 6 rs148633289 | 32487229 T | 6.879 | 6.02E-09 | chr:6:32505702 |
| 6 rs9269252   | 32454293 A | 4.52  | 6.03E-09 | chr:6:32505702 |
| 6 rs476602    | 32569792 C | 5.192 | 6.06E-09 | chr:6:32505702 |
| 6 rs2395225   | 32590624 C | 4.732 | 6.10E-09 | chr:6:32505702 |
| 6 rs540304678 | 32536503 C | 3.491 | 6.10E-09 | chr:6:32505702 |
| 6 rs141404431 | 32538578 T | 3.677 | 6.13E-09 | chr:6:32505702 |
| 6 rs143027966 | 32538579 T | 3.677 | 6.13E-09 | chr:6:32505702 |
| 6 rs151286796 | 32538577 T | 3.677 | 6.13E-09 | chr:6:32505702 |
| 6 rs111290332 | 32533327 A | 4.22  | 6.15E-09 | chr:6:32505702 |
| 6 rs9269299   | 32539541 C | 3.931 | 6.17E-09 | chr:6:32505702 |
| 6 rs149581890 | 32530684 A | 5.187 | 6.18E-09 | chr:6:32505702 |
| 6 rs537722644 | 32525112 A | 3.192 | 6.24E-09 | chr:6:32505702 |
| 6 rs9271533   | 32589952 T | 4.462 | 6.25E-09 | chr:6:32505702 |
| 6 rs9271535   | 32589959 T | 4.462 | 6.25E-09 | chr:6:32505702 |
| 6 rs73401326  | 32454783 G | 3.87  | 6.29E-09 | chr:6:32505702 |
| 6 rs535694878 | 32512216 A | 3.695 | 6.29E-09 | chr:6:32505702 |
| 6 rs556986229 | 32512217 G | 3.695 | 6.29E-09 | chr:6:32505702 |

|               |            |       |          |                |
|---------------|------------|-------|----------|----------------|
| 6 rs575449137 | 32536491 A | 3.493 | 6.32E-09 | chr:6:32505702 |
| 6 rs2516050   | 32570352 A | 5.018 | 6.48E-09 | chr:6:32505702 |
| 6 rs9269301   | 32539561 T | 3.803 | 6.50E-09 | chr:6:32505702 |
| 6 rs187085470 | 32533998 G | 3.556 | 6.53E-09 | chr:6:32505702 |
| 6 rs111725169 | 32512223 C | 3.795 | 6.54E-09 | chr:6:32505702 |
| 6 rs538116343 | 32521742 T | 3.794 | 6.54E-09 | chr:6:32505702 |
| 6 rs9269271   | 32539107 C | 3.472 | 6.60E-09 | chr:6:32505702 |
| 6 rs76415310  | 32513232 T | 4.062 | 6.63E-09 | chr:6:32505702 |
| 6 rs142475334 | 32533988 A | 3.589 | 6.69E-09 | chr:6:32505702 |
| 6 rs72508413  | 32454597 G | 4.513 | 6.72E-09 | chr:6:32505702 |
| 6 rs115089463 | 32525092 A | 3.23  | 6.79E-09 | chr:6:32505702 |
| 6 rs115249219 | 32479677 G | 3.624 | 6.90E-09 | chr:6:32505702 |
| 6 rs76483802  | 32454913 G | 4.299 | 6.98E-09 | chr:6:32505702 |
| 6 rs9270126   | 32555052 T | 4.508 | 7.13E-09 | chr:6:32505702 |
| 6 rs628754    | 32574787 A | 4.613 | 7.17E-09 | chr:6:32505702 |
| 6 rs144578241 | 32536479 A | 3.491 | 7.19E-09 | chr:6:32505702 |
| 6 rs9270806   | 32569563 T | 4.928 | 7.25E-09 | chr:6:32505702 |
| 6 rs9270807   | 32569572 A | 4.928 | 7.25E-09 | chr:6:32505702 |
| 6 rs115065497 | 32530466 C | 4.741 | 7.39E-09 | chr:6:32505702 |
| 6 rs75732937  | 32487268 G | 4.676 | 7.49E-09 | chr:6:32505702 |
| 6 rs117090280 | 32489265 T | 3.249 | 7.52E-09 | chr:6:32505702 |
| 6 rs114328264 | 32534675 T | 3.341 | 7.55E-09 | chr:6:32505702 |
| 6 rs529580232 | 32512136 C | 3.832 | 7.62E-09 | chr:6:32505702 |
| 6 rs551034683 | 32512138 A | 3.832 | 7.62E-09 | chr:6:32505702 |
| 6 rs545154111 | 32530754 C | 3.883 | 7.63E-09 | chr:6:32505702 |
| 6 rs9269274   | 32539170 C | 5.514 | 7.68E-09 | chr:6:32505702 |
| 6 rs9269275   | 32539172 G | 5.514 | 7.68E-09 | chr:6:32505702 |
| 6 rs9270115   | 32554934 T | 5.115 | 7.69E-09 | chr:6:32505702 |
| 6 rs189233809 | 32530497 T | 5.068 | 7.80E-09 | chr:6:32505702 |
| 6 rs193053660 | 32530503 C | 5.068 | 7.80E-09 | chr:6:32505702 |
| 6 rs533498287 | 32530506 C | 5.068 | 7.80E-09 | chr:6:32505702 |
| 6 rs566699769 | 32530505 A | 5.068 | 7.80E-09 | chr:6:32505702 |
| 6 rs78278896  | 32508647 G | 4.45  | 7.95E-09 | chr:6:32505702 |
| 6 rs202231764 | 32508412 T | 3.481 | 7.98E-09 | chr:6:32505702 |
| 6 rs76662624  | 32503880 A | 3.499 | 8.10E-09 | chr:6:32505702 |
| 6 rs116675816 | 32512131 A | 3.83  | 8.11E-09 | chr:6:32505702 |
| 6 rs72845747  | 32530054 T | 4.57  | 8.15E-09 | chr:6:32505702 |
| 6 rs9269292   | 32539450 T | 3.916 | 8.15E-09 | chr:6:32505702 |
| 6 rs9269270   | 32539081 G | 3.343 | 8.20E-09 | chr:6:32505702 |
| 6 rs9269524   | 32543671 C | 4.35  | 8.28E-09 | chr:6:32505702 |
| 6 rs111938555 | 32509707 T | 4.044 | 8.29E-09 | chr:6:32505702 |
| 6 rs9269873   | 32550796 A | 5.128 | 8.31E-09 | chr:6:32505702 |
| 6 rs545853065 | 32531737 G | 4.037 | 8.35E-09 | chr:6:32505702 |

|               |            |        |          |                |
|---------------|------------|--------|----------|----------------|
| 6 rs556948697 | 32531729 C | 4.037  | 8.35E-09 | chr:6:32505702 |
| 6 rs550643609 | 32502794 A | 3.094  | 8.40E-09 | chr:6:32505702 |
| 6 rs112458679 | 32512167 G | 3.75   | 8.46E-09 | chr:6:32505702 |
| 6 rs75820413  | 32508505 G | 3.297  | 8.60E-09 | chr:6:32505702 |
| 6 rs9269304   | 32539585 T | 3.676  | 8.80E-09 | chr:6:32505702 |
| 6 rs9270045   | 32553662 G | 4.832  | 8.86E-09 | chr:6:32505702 |
| 6 rs139868705 | 32532075 A | 3.793  | 9.14E-09 | chr:6:32505702 |
| 6 rs142891616 | 32534325 T | 3.432  | 9.27E-09 | chr:6:32505702 |
| 6 rs73726810  | 32522857 A | 4.786  | 9.38E-09 | chr:6:32505702 |
| 6 rs9269288   | 32539408 A | 3.857  | 9.57E-09 | chr:6:32505702 |
| 6 rs111383925 | 32532741 C | 5.234  | 9.58E-09 | chr:6:32505702 |
| 6 rs111566749 | 32532746 A | 5.234  | 9.58E-09 | chr:6:32505702 |
| 6 rs9271558   | 32590348 G | 4.532  | 9.70E-09 | chr:6:32505702 |
| 6 rs113955073 | 32522932 C | 3.863  | 9.73E-09 | chr:6:32505702 |
| 6 rs151210153 | 32531734 A | 4.035  | 9.75E-09 | chr:6:32505702 |
| 6 rs9269286   | 32539396 A | 3.663  | 9.89E-09 | chr:6:32505702 |
| 6 rs9271508   | 32589410 T | 4.746  | 9.89E-09 | chr:6:32505702 |
| 6 rs9271539   | 32590028 A | 4.746  | 9.89E-09 | chr:6:32505702 |
| 6 rs79140398  | 32527093 C | 4.995  | 9.89E-09 | chr:6:32505702 |
| 6 rs9269921   | 32551568 G | 3.365  | 9.95E-09 | chr:6:32505702 |
| 6 rs9269273   | 32539129 A | 3.462  | 1.00E-08 | chr:6:32505702 |
| 6 rs9269284   | 32539381 G | 3.884  | 1.02E-08 | chr:6:32505702 |
| 6 rs9270597   | 32561598 G | 4.979  | 1.02E-08 | chr:6:32505702 |
| 6 rs9271887   | 32595679 A | 4.743  | 1.03E-08 | chr:6:32505702 |
| 6 rs575744181 | 32533771 A | 3.169  | 1.03E-08 | chr:6:32505702 |
| 6 rs534655111 | 32531220 T | 3.739  | 1.05E-08 | chr:6:32505702 |
| 6 rs114633631 | 32531706 A | 4.318  | 1.05E-08 | chr:6:32505702 |
| 6 rs9271492   | 32589122 C | 4.866  | 1.05E-08 | chr:6:32505702 |
| 6 rs4959029   | 32591682 G | 5.785  | 1.05E-08 | chr:6:32505702 |
| 6 rs9270317   | 32557643 G | 0.1487 | 1.06E-08 | chr:6:32505702 |
| 6 rs115978041 | 32522923 C | 3.848  | 1.06E-08 | chr:6:32505702 |
| 6 rs9270121   | 32555009 C | 4.68   | 1.07E-08 | chr:6:32505702 |
| 6 rs527678609 | 32530435 A | 4.12   | 1.07E-08 | chr:6:32505702 |
| 6 rs540951197 | 32530439 C | 4.12   | 1.07E-08 | chr:6:32505702 |
| 6 rs562335725 | 32530443 A | 4.12   | 1.07E-08 | chr:6:32505702 |
| 6 rs17879599  | 32551959 G | 7.066  | 1.07E-08 | chr:6:32505702 |
| 6 rs17881965  | 32551961 C | 7.066  | 1.07E-08 | chr:6:32505702 |
| 6 rs17885388  | 32551962 T | 7.066  | 1.07E-08 | chr:6:32505702 |
| 6 rs189557518 | 32526205 A | 3.36   | 1.07E-08 | chr:6:32505702 |
| 6 rs115104630 | 32502387 A | 3.131  | 1.08E-08 | chr:6:32505702 |
| 6 rs72845756  | 32530545 C | 5.126  | 1.08E-08 | chr:6:32505702 |
| 6 rs113573823 | 32532719 C | 4.811  | 1.09E-08 | chr:6:32505702 |
| 6 rs72845757  | 32530563 A | 5.155  | 1.09E-08 | chr:6:32505702 |



|               |            |       |          |                |
|---------------|------------|-------|----------|----------------|
| 6 rs532508742 | 32530749 C | 3.68  | 1.11E-08 | chr:6:32505702 |
| 6 rs113900769 | 32503887 T | 3.474 | 1.12E-08 | chr:6:32505702 |
| 6 rs72492343  | 32532385 T | 4.782 | 1.12E-08 | chr:6:32505702 |
| 6 rs9269578   | 32544743 T | 4.039 | 1.12E-08 | chr:6:32505702 |
| 6 rs72492350  | 32538088 T | 4.08  | 1.14E-08 | chr:6:32505702 |
| 6 rs568869869 | 32502799 G | 3.159 | 1.15E-08 | chr:6:32505702 |
| 6 rs9271489   | 32589051 A | 4.61  | 1.15E-08 | chr:6:32505702 |
| 6 rs9269302   | 32539574 T | 3.675 | 1.16E-08 | chr:6:32505702 |
| 6 rs9269293   | 32539463 G | 3.918 | 1.17E-08 | chr:6:32505702 |
| 6 rs72492341  | 32531636 G | 4.391 | 1.19E-08 | chr:6:32505702 |
| 6 rs9270884   | 32571734 G | 4.46  | 1.19E-08 | chr:6:32505702 |
| 6 rs9270592   | 32561429 T | 4.777 | 1.19E-08 | chr:6:32505702 |
| 6 rs11752506  | 32520273 A | 3.941 | 1.19E-08 | chr:6:32505702 |
| 6 rs72492344  | 32532494 A | 4.354 | 1.20E-08 | chr:6:32505702 |
| 6 rs563850361 | 32531744 G | 4.058 | 1.21E-08 | chr:6:32505702 |
| 6 rs9269465   | 32542247 G | 4.501 | 1.21E-08 | chr:6:32505702 |
| 6 rs112302151 | 32530628 T | 4.999 | 1.21E-08 | chr:6:32505702 |
| 6 rs563246799 | 32533766 C | 3.165 | 1.21E-08 | chr:6:32505702 |
| 6 rs201947932 | 32534556 T | 3.912 | 1.22E-08 | chr:6:32505702 |
| 6 rs534064478 | 32512189 T | 3.726 | 1.23E-08 | chr:6:32505702 |
| 6 rs546382275 | 32512190 G | 3.726 | 1.23E-08 | chr:6:32505702 |
| 6 rs12660259  | 32531709 A | 4.051 | 1.24E-08 | chr:6:32505702 |
| 6 rs76259812  | 32524672 C | 3.157 | 1.25E-08 | chr:6:32505702 |
| 6 rs373666709 | 32531748 A | 4.062 | 1.25E-08 | chr:6:32505702 |
| 6 rs189832895 | 32533972 T | 3.312 | 1.26E-08 | chr:6:32505702 |
| 6 rs575033700 | 32533973 T | 3.312 | 1.26E-08 | chr:6:32505702 |
| 6 rs116335331 | 32532577 T | 3.41  | 1.26E-08 | chr:6:32505702 |
| 6 rs9270004   | 32552795 T | 5.375 | 1.27E-08 | chr:6:32505702 |
| 6 rs9270525   | 32559595 G | 3.759 | 1.27E-08 | chr:6:32505702 |
| 6 rs143426018 | 32536888 G | 3.739 | 1.29E-08 | chr:6:32505702 |
| 6 rs72845749  | 32530081 T | 5.051 | 1.29E-08 | chr:6:32505702 |
| 6 rs72845750  | 32530093 G | 5.051 | 1.29E-08 | chr:6:32505702 |
| 6 rs80011743  | 32531770 G | 4.37  | 1.30E-08 | chr:6:32505702 |
| 6 rs552961071 | 32533756 T | 3.163 | 1.30E-08 | chr:6:32505702 |
| 6 rs574369672 | 32533757 G | 3.163 | 1.30E-08 | chr:6:32505702 |
| 6 rs145219524 | 32533964 T | 3.313 | 1.31E-08 | chr:6:32505702 |
| 6 rs9271894   | 32595874 T | 4.687 | 1.31E-08 | chr:6:32505702 |
| 6 rs112999094 | 32511386 T | 4.331 | 1.31E-08 | chr:6:32505702 |
| 6 rs142592433 | 32511392 T | 4.331 | 1.31E-08 | chr:6:32505702 |
| 6 rs116180191 | 32534588 A | 3.851 | 1.32E-08 | chr:6:32505702 |
| 6 rs111749494 | 32532432 A | 4.743 | 1.33E-08 | chr:6:32505702 |
| 6 rs112501266 | 32532428 C | 4.743 | 1.33E-08 | chr:6:32505702 |
| 6 rs183667786 | 32533749 C | 3.163 | 1.33E-08 | chr:6:32505702 |

|               |            |       |          |                |
|---------------|------------|-------|----------|----------------|
| 6 rs188327097 | 32533734 A | 3.163 | 1.33E-08 | chr:6:32505702 |
| 6 rs558887953 | 32533750 A | 3.163 | 1.33E-08 | chr:6:32505702 |
| 6 rs531336617 | 32530792 C | 3.318 | 1.33E-08 | chr:6:32505702 |
| 6 rs549516674 | 32530793 A | 3.318 | 1.33E-08 | chr:6:32505702 |
| 6 rs567265210 | 32530790 T | 3.318 | 1.33E-08 | chr:6:32505702 |
| 6 rs181939518 | 32533977 C | 3.314 | 1.34E-08 | chr:6:32505702 |
| 6 rs9269515   | 32543469 C | 4.671 | 1.35E-08 | chr:6:32505702 |
| 6 rs112236587 | 32530615 C | 4.966 | 1.35E-08 | chr:6:32505702 |
| 6 rs112715773 | 32530608 C | 4.966 | 1.35E-08 | chr:6:32505702 |
| 6 rs114327439 | 32505202 A | 3.193 | 1.37E-08 | chr:6:32505702 |
| 6 rs9270894   | 32571872 G | 4.158 | 1.37E-08 | chr:6:32505702 |
| 6 rs115774308 | 32530778 T | 3.477 | 1.38E-08 | chr:6:32505702 |
| 6 rs541874222 | 32533761 G | 3.163 | 1.38E-08 | chr:6:32505702 |
| 6 rs112882980 | 32533222 C | 4.372 | 1.38E-08 | chr:6:32505702 |
| 6 rs9270598   | 32561618 C | 4.812 | 1.39E-08 | chr:6:32505702 |
| 6 rs74197204  | 32507695 G | 3.123 | 1.39E-08 | chr:6:32505702 |
| 6 rs115127109 | 32530038 T | 4.281 | 1.40E-08 | chr:6:32505702 |
| 6 rs544574563 | 32534337 G | 3.289 | 1.40E-08 | chr:6:32505702 |
| 6 rs115946871 | 32530011 C | 4.638 | 1.41E-08 | chr:6:32505702 |
| 6 rs185436529 | 32530740 A | 3.675 | 1.42E-08 | chr:6:32505702 |
| 6 rs9270558   | 32560667 A | 4.832 | 1.43E-08 | chr:6:32505702 |
| 6 rs78274956  | 32526351 A | 3.859 | 1.43E-08 | chr:6:32505702 |
| 6 rs9271623   | 32591914 C | 4.541 | 1.44E-08 | chr:6:32505702 |
| 6 rs9271630   | 32591989 G | 4.541 | 1.44E-08 | chr:6:32505702 |
| 6 rs201024350 | 32536869 C | 3.743 | 1.45E-08 | chr:6:32505702 |
| 6 rs72845755  | 32530385 G | 5.229 | 1.45E-08 | chr:6:32505702 |
| 6 rs9270578   | 32561093 A | 4.737 | 1.46E-08 | chr:6:32505702 |
| 6 rs148619571 | 32536155 A | 3.658 | 1.46E-08 | chr:6:32505702 |
| 6 rs9271900   | 32596013 G | 4.511 | 1.47E-08 | chr:6:32505702 |
| 6 rs199798245 | 32530708 C | 3.901 | 1.48E-08 | chr:6:32505702 |
| 6 rs200856733 | 32530709 A | 3.901 | 1.48E-08 | chr:6:32505702 |
| 6 rs543318785 | 32530714 C | 3.901 | 1.48E-08 | chr:6:32505702 |
| 6 rs572746069 | 32530713 C | 3.901 | 1.48E-08 | chr:6:32505702 |
| 6 rs142142101 | 32534657 G | 3.202 | 1.49E-08 | chr:6:32505702 |
| 6 rs9270530   | 32559686 A | 3.811 | 1.50E-08 | chr:6:32505702 |
| 6 rs9269998   | 32552721 G | 3.634 | 1.51E-08 | chr:6:32505702 |
| 6 rs7765211   | 32502346 A | 3.26  | 1.52E-08 | chr:6:32505702 |
| 6 rs9271527   | 32589867 T | 4.49  | 1.52E-08 | chr:6:32505702 |
| 6 rs138253052 | 32536103 A | 3.396 | 1.54E-08 | chr:6:32505702 |
| 6 rs112013291 | 32536551 A | 3.177 | 1.54E-08 | chr:6:32505702 |
| 6 rs9270583   | 32561229 G | 4.728 | 1.55E-08 | chr:6:32505702 |
| 6 rs538879571 | 32503698 A | 3.215 | 1.57E-08 | chr:6:32505702 |
| 6 rs9270593   | 32561445 G | 4.681 | 1.58E-08 | chr:6:32505702 |

|               |            |       |          |                |
|---------------|------------|-------|----------|----------------|
| 6 rs141124032 | 32533299 G | 3.875 | 1.59E-08 | chr:6:32505702 |
| 6 rs146280841 | 32533291 A | 3.875 | 1.59E-08 | chr:6:32505702 |
| 6 rs148731245 | 32533293 C | 3.875 | 1.59E-08 | chr:6:32505702 |
| 6 rs113737511 | 32533392 G | 3.342 | 1.60E-08 | chr:6:32505702 |
| 6 rs112720311 | 32529995 A | 4.663 | 1.60E-08 | chr:6:32505702 |
| 6 rs114821537 | 32503522 G | 3.406 | 1.60E-08 | chr:6:32505702 |
| 6 rs73397495  | 32534640 C | 3.2   | 1.62E-08 | chr:6:32505702 |
| 6 rs112083186 | 32531320 A | 4.763 | 1.62E-08 | chr:6:32505702 |
| 6 rs9271872   | 32595418 G | 4.008 | 1.62E-08 | chr:6:32505702 |
| 6 rs9271873   | 32595421 A | 4.008 | 1.62E-08 | chr:6:32505702 |
| 6 rs368398419 | 32510709 C | 2.993 | 1.62E-08 | chr:6:32505702 |
| 6 rs371989616 | 32510718 T | 2.993 | 1.62E-08 | chr:6:32505702 |
| 6 rs184303918 | 32529976 G | 4.669 | 1.63E-08 | chr:6:32505702 |
| 6 rs78085354  | 32529981 G | 4.669 | 1.63E-08 | chr:6:32505702 |
| 6 rs150423066 | 32506995 A | 3.248 | 1.66E-08 | chr:6:32505702 |
| 6 rs199893280 | 32531226 C | 3.747 | 1.66E-08 | chr:6:32505702 |
| 6 rs35255303  | 32536356 A | 4.446 | 1.67E-08 | chr:6:32505702 |
| 6 rs138912409 | 32533684 A | 3.972 | 1.67E-08 | chr:6:32505702 |
| 6 rs143506542 | 32533686 T | 3.972 | 1.67E-08 | chr:6:32505702 |
| 6 rs9271618   | 32591752 A | 4.67  | 1.67E-08 | chr:6:32505702 |
| 6 rs9269291   | 32539445 A | 3.563 | 1.69E-08 | chr:6:32505702 |
| 6 rs537686051 | 32531213 G | 3.549 | 1.70E-08 | chr:6:32505702 |
| 6 rs552586675 | 32531215 G | 3.549 | 1.70E-08 | chr:6:32505702 |
| 6 rs571171259 | 32531218 G | 3.549 | 1.70E-08 | chr:6:32505702 |
| 6 rs111548649 | 32533365 G | 3.341 | 1.70E-08 | chr:6:32505702 |
| 6 rs74201443  | 32530321 G | 5.265 | 1.70E-08 | chr:6:32505702 |
| 6 rs28404276  | 32510355 A | 4.042 | 1.73E-08 | chr:6:32505702 |
| 6 rs9270465   | 32558916 C | 3.56  | 1.73E-08 | chr:6:32505702 |
| 6 rs72845752  | 32530285 T | 5.275 | 1.73E-08 | chr:6:32505702 |
| 6 rs72845754  | 32530286 G | 5.275 | 1.73E-08 | chr:6:32505702 |
| 6 rs73397403  | 32519849 G | 3.87  | 1.73E-08 | chr:6:32505702 |
| 6 rs182890820 | 32527218 T | 3.251 | 1.76E-08 | chr:6:32505702 |
| 6 rs9269880   | 32550916 G | 3.946 | 1.77E-08 | chr:6:32505702 |
| 6 rs147819405 | 32533096 A | 3.613 | 1.78E-08 | chr:6:32505702 |
| 6 rs9269392   | 32541163 C | 3.14  | 1.78E-08 | chr:6:32505702 |
| 6 rs138296162 | 32536852 T | 3.722 | 1.78E-08 | chr:6:32505702 |
| 6 rs146382271 | 32511291 T | 3.768 | 1.79E-08 | chr:6:32505702 |
| 6 rs147034082 | 32539600 A | 3.495 | 1.79E-08 | chr:6:32505702 |
| 6 rs150154760 | 32479531 T | 3.96  | 1.80E-08 | chr:6:32505702 |
| 6 rs73727912  | 32496944 C | 3.272 | 1.80E-08 | chr:6:32505702 |
| 6 rs72847615  | 32536863 A | 3.722 | 1.81E-08 | chr:6:32505702 |
| 6 rs115469967 | 32530190 A | 5.128 | 1.82E-08 | chr:6:32505702 |
| 6 rs77340266  | 32530200 A | 5.128 | 1.82E-08 | chr:6:32505702 |

|               |            |       |          |                |
|---------------|------------|-------|----------|----------------|
| 6 rs9270003   | 32552779 T | 5.234 | 1.82E-08 | chr:6:32505702 |
| 6 rs146621647 | 32531602 T | 3.965 | 1.82E-08 | chr:6:32505702 |
| 6 rs180942055 | 32507976 T | 2.836 | 1.83E-08 | chr:6:32505702 |
| 6 rs186170828 | 32507977 G | 2.836 | 1.83E-08 | chr:6:32505702 |
| 6 rs369369329 | 32533784 C | 3.094 | 1.83E-08 | chr:6:32505702 |
| 6 rs139796058 | 32531715 A | 3.816 | 1.83E-08 | chr:6:32505702 |
| 6 rs116017457 | 32521909 T | 3.883 | 1.84E-08 | chr:6:32505702 |
| 6 rs34166207  | 32523510 A | 4.216 | 1.85E-08 | chr:6:32505702 |
| 6 rs111338570 | 32533670 C | 4.115 | 1.86E-08 | chr:6:32505702 |
| 6 rs113042858 | 32533666 T | 4.115 | 1.86E-08 | chr:6:32505702 |
| 6 rs34966632  | 32536306 G | 3.639 | 1.88E-08 | chr:6:32505702 |
| 6 rs679243    | 32570959 T | 4.235 | 1.88E-08 | chr:6:32505702 |
| 6 rs28584364  | 32512048 T | 4.729 | 1.89E-08 | chr:6:32505702 |
| 6 rs9269965   | 32552219 G | 3.541 | 1.89E-08 | chr:6:32505702 |
| 6 rs9269964   | 32552212 T | 3.837 | 1.90E-08 | chr:6:32505702 |
| 6 rs9270463   | 32558913 C | 3.536 | 1.90E-08 | chr:6:32505702 |
| 6 rs115005201 | 32501172 A | 4.04  | 1.90E-08 | chr:6:32505702 |
| 6 rs113504992 | 32531418 T | 4.791 | 1.91E-08 | chr:6:32505702 |
| 6 rs9270524   | 32559588 A | 3.753 | 1.91E-08 | chr:6:32505702 |
| 6 rs143321288 | 32531487 A | 4.788 | 1.92E-08 | chr:6:32505702 |
| 6 rs76454806  | 32530145 C | 4.685 | 1.95E-08 | chr:6:32505702 |
| 6 rs80142174  | 32530144 G | 4.685 | 1.95E-08 | chr:6:32505702 |
| 6 rs72845745  | 32529961 T | 4.427 | 1.95E-08 | chr:6:32505702 |
| 6 rs563226460 | 32490851 T | 3.111 | 1.96E-08 | chr:6:32505702 |
| 6 rs9270533   | 32559709 T | 3.638 | 1.98E-08 | chr:6:32505702 |
| 6 rs9270538   | 32559758 A | 4.296 | 1.99E-08 | chr:6:32505702 |
| 6 rs9271662   | 32592628 A | 4.09  | 1.99E-08 | chr:6:32505702 |
| 6 rs111896611 | 32511183 T | 3.23  | 2.00E-08 | chr:6:32505702 |
| 6 rs148573031 | 32530691 A | 3.673 | 2.00E-08 | chr:6:32505702 |
| 6 rs530370261 | 32519826 T | 3.844 | 2.04E-08 | chr:6:32505702 |
| 6 rs115296342 | 32503526 C | 3.341 | 2.05E-08 | chr:6:32505702 |
| 6 rs576314890 | 32523379 T | 4.358 | 2.05E-08 | chr:6:32505702 |
| 6 rs72492340  | 32531385 C | 4.427 | 2.06E-08 | chr:6:32505702 |
| 6 rs72845768  | 32531377 C | 4.427 | 2.06E-08 | chr:6:32505702 |
| 6 rs528792740 | 32533803 G | 3.062 | 2.07E-08 | chr:6:32505702 |
| 6 rs546913114 | 32533805 T | 3.062 | 2.07E-08 | chr:6:32505702 |
| 6 rs562082330 | 32533812 G | 3.062 | 2.07E-08 | chr:6:32505702 |
| 6 rs9270535   | 32559714 A | 3.638 | 2.09E-08 | chr:6:32505702 |
| 6 rs116670844 | 32490925 T | 3.152 | 2.10E-08 | chr:6:32505702 |
| 6 rs116299701 | 32534068 A | 3.147 | 2.11E-08 | chr:6:32505702 |
| 6 rs67283303  | 32531253 T | 4.083 | 2.12E-08 | chr:6:32505702 |
| 6 rs114146939 | 32459890 G | 2.75  | 2.12E-08 | chr:6:32505702 |
| 6 rs115834108 | 32459908 A | 2.75  | 2.12E-08 | chr:6:32505702 |

|               |            |       |          |                |
|---------------|------------|-------|----------|----------------|
| 6 rs116587947 | 32459889 T | 2.75  | 2.12E-08 | chr:6:32505702 |
| 6 rs111342306 | 32531091 C | 3.861 | 2.13E-08 | chr:6:32505702 |
| 6 rs111948873 | 32531081 G | 3.861 | 2.13E-08 | chr:6:32505702 |
| 6 rs113209820 | 32531088 T | 3.861 | 2.13E-08 | chr:6:32505702 |
| 6 rs201766754 | 32531843 G | 3.892 | 2.15E-08 | chr:6:32505702 |
| 6 rs114106672 | 32532692 A | 3.902 | 2.16E-08 | chr:6:32505702 |
| 6 rs75404103  | 32531348 G | 4.095 | 2.17E-08 | chr:6:32505702 |
| 6 rs141293894 | 32536200 G | 3.446 | 2.18E-08 | chr:6:32505702 |
| 6 rs544548886 | 32505381 T | 2.887 | 2.18E-08 | chr:6:32505702 |
| 6 rs112780983 | 32511348 G | 3.953 | 2.21E-08 | chr:6:32505702 |
| 6 rs139013960 | 32531606 G | 3.872 | 2.23E-08 | chr:6:32505702 |
| 6 rs115833135 | 32489672 A | 4.035 | 2.24E-08 | chr:6:32505702 |
| 6 rs114682516 | 32503702 C | 3.122 | 2.25E-08 | chr:6:32505702 |
| 6 rs9271646   | 32592351 G | 4.444 | 2.26E-08 | chr:6:32505702 |
| 6 rs114085331 | 32479430 A | 3.777 | 2.26E-08 | chr:6:32505702 |
| 6 rs9270567   | 32560801 G | 4.626 | 2.29E-08 | chr:6:32505702 |
| 6 rs35130701  | 32594199 G | 4.469 | 2.33E-08 | chr:6:32505702 |
| 6 rs9270576   | 32561068 T | 4.566 | 2.33E-08 | chr:6:32505702 |
| 6 rs545350177 | 32565668 G | 3.815 | 2.34E-08 | chr:6:32505702 |
| 6 rs76571178  | 32525159 A | 2.967 | 2.34E-08 | chr:6:32505702 |
| 6 rs78107833  | 32531807 T | 4.098 | 2.35E-08 | chr:6:32505702 |
| 6 rs557163190 | 32526172 G | 3.157 | 2.36E-08 | chr:6:32505702 |
| 6 rs9271703   | 32593280 T | 4.519 | 2.38E-08 | chr:6:32505702 |
| 6 rs9269506   | 32543187 A | 4.344 | 2.39E-08 | chr:6:32505702 |
| 6 rs145092566 | 32454838 A | 3.46  | 2.41E-08 | chr:6:32505702 |
| 6 rs9269310   | 32539628 A | 3.448 | 2.41E-08 | chr:6:32505702 |
| 6 rs9270521   | 32559529 C | 4.276 | 2.51E-08 | chr:6:32505702 |
| 6 rs537366043 | 32531076 T | 3.643 | 2.51E-08 | chr:6:32505702 |
| 6 rs570295314 | 32531074 G | 3.643 | 2.51E-08 | chr:6:32505702 |
| 6 rs569119670 | 32532359 C | 3.316 | 2.51E-08 | chr:6:32505702 |
| 6 rs9270543   | 32559881 A | 3.703 | 2.52E-08 | chr:6:32505702 |
| 6 rs9270544   | 32559882 T | 3.703 | 2.52E-08 | chr:6:32505702 |
| 6 rs113051760 | 32521691 G | 3.883 | 2.52E-08 | chr:6:32505702 |
| 6 rs17424325  | 32521644 T | 3.883 | 2.52E-08 | chr:6:32505702 |
| 6 rs116350000 | 32523418 G | 3.812 | 2.52E-08 | chr:6:32505702 |
| 6 rs111355475 | 32554266 T | 5.321 | 2.53E-08 | chr:6:32505702 |
| 6 rs9270084   | 32554267 G | 5.321 | 2.53E-08 | chr:6:32505702 |
| 6 rs9270085   | 32554271 C | 5.321 | 2.53E-08 | chr:6:32505702 |
| 6 rs1064664   | 32552075 G | 3.821 | 2.56E-08 | chr:6:32505702 |
| 6 rs114653292 | 32503516 G | 3.282 | 2.58E-08 | chr:6:32505702 |
| 6 rs140527559 | 32536500 G | 3.286 | 2.59E-08 | chr:6:32505702 |
| 6 rs147611303 | 32536497 A | 3.286 | 2.59E-08 | chr:6:32505702 |
| 6 rs9271522   | 32589791 C | 4.338 | 2.64E-08 | chr:6:32505702 |

|               |            |       |          |                |
|---------------|------------|-------|----------|----------------|
| 6 rs138129967 | 32532324 C | 3.222 | 2.68E-08 | chr:6:32505702 |
| 6 rs145319447 | 32536492 C | 3.287 | 2.69E-08 | chr:6:32505702 |
| 6 rs9269549   | 32544202 G | 5.938 | 2.71E-08 | chr:6:32505702 |
| 6 rs72851077  | 32504624 C | 3.228 | 2.71E-08 | chr:6:32505702 |
| 6 rs115980757 | 32536914 C | 3.15  | 2.71E-08 | chr:6:32505702 |
| 6 rs67011649  | 32532599 G | 3.375 | 2.72E-08 | chr:6:32505702 |
| 6 rs9270580   | 32561123 C | 4.535 | 2.72E-08 | chr:6:32505702 |
| 6 rs9270526   | 32559597 A | 3.566 | 2.77E-08 | chr:6:32505702 |
| 6 rs9270527   | 32559600 A | 3.566 | 2.77E-08 | chr:6:32505702 |
| 6 rs9270528   | 32559603 C | 3.566 | 2.77E-08 | chr:6:32505702 |
| 6 rs9269629   | 32545635 A | 4.739 | 2.82E-08 | chr:6:32505702 |
| 6 rs9269630   | 32545644 T | 4.739 | 2.82E-08 | chr:6:32505702 |
| 6 rs112719175 | 32533401 T | 3.195 | 2.82E-08 | chr:6:32505702 |
| 6 rs371994404 | 32532317 A | 3.22  | 2.87E-08 | chr:6:32505702 |
| 6 rs73726834  | 32531111 C | 3.826 | 2.91E-08 | chr:6:32505702 |
| 6 rs116465569 | 32536986 C | 3.543 | 3.01E-08 | chr:6:32505702 |
| 6 rs145896370 | 32533718 A | 3.378 | 3.01E-08 | chr:6:32505702 |
| 6 rs114905947 | 32533016 C | 3.462 | 3.01E-08 | chr:6:32505702 |
| 6 rs476775    | 32569722 T | 4.446 | 3.02E-08 | chr:6:32505702 |
| 6 rs9269311   | 32539654 C | 3.844 | 3.05E-08 | chr:6:32505702 |
| 6 rs145340642 | 32485963 A | 3.498 | 3.08E-08 | chr:6:32505702 |
| 6 rs9270570   | 32560978 G | 4.52  | 3.09E-08 | chr:6:32505702 |
| 6 rs113204386 | 32531339 G | 3.851 | 3.10E-08 | chr:6:32505702 |
| 6 rs114452447 | 32532262 A | 3.089 | 3.10E-08 | chr:6:32505702 |
| 6 rs78918008  | 32532281 A | 3.089 | 3.10E-08 | chr:6:32505702 |
| 6 rs9269580   | 32544784 A | 4.894 | 3.12E-08 | chr:6:32505702 |
| 6 rs9269508   | 32543248 T | 4.544 | 3.12E-08 | chr:6:32505702 |
| 6 rs77712892  | 32503570 T | 3.421 | 3.14E-08 | chr:6:32505702 |
| 6 rs9270562   | 32560757 T | 4.283 | 3.17E-08 | chr:6:32505702 |
| 6 rs112310670 | 32531136 C | 3.691 | 3.18E-08 | chr:6:32505702 |
| 6 rs112649230 | 32531140 G | 3.691 | 3.18E-08 | chr:6:32505702 |
| 6 rs113908137 | 32523500 G | 3.975 | 3.21E-08 | chr:6:32505702 |
| 6 rs554443954 | 32496557 T | 3.013 | 3.25E-08 | chr:6:32505702 |
| 6 rs114362560 | 32504503 A | 3.124 | 3.26E-08 | chr:6:32505702 |
| 6 rs543107154 | 32532351 C | 3.203 | 3.28E-08 | chr:6:32505702 |
| 6 rs561232678 | 32532352 A | 3.203 | 3.28E-08 | chr:6:32505702 |
| 6 rs68009841  | 32507731 T | 2.945 | 3.29E-08 | chr:6:32505702 |
| 6 rs111529629 | 32533843 G | 3.043 | 3.30E-08 | chr:6:32505702 |
| 6 rs9270565   | 32560774 T | 4.226 | 3.31E-08 | chr:6:32505702 |
| 6 rs9270566   | 32560775 G | 4.226 | 3.31E-08 | chr:6:32505702 |
| 6 rs111596698 | 32487123 G | 3.743 | 3.34E-08 | chr:6:32505702 |
| 6 rs116152468 | 32536921 T | 3.139 | 3.45E-08 | chr:6:32505702 |
| 6 rs9269906   | 32551309 A | 3.647 | 3.46E-08 | chr:6:32505702 |

|               |            |       |          |                |
|---------------|------------|-------|----------|----------------|
| 6 rs73726842  | 32533029 A | 3.412 | 3.49E-08 | chr:6:32505702 |
| 6 rs73726843  | 32533042 C | 3.412 | 3.49E-08 | chr:6:32505702 |
| 6 rs559863405 | 32536118 G | 3.275 | 3.52E-08 | chr:6:32505702 |
| 6 rs9270503   | 32559181 G | 4.467 | 3.52E-08 | chr:6:32505702 |
| 6 rs9270504   | 32559184 A | 4.467 | 3.52E-08 | chr:6:32505702 |
| 6 rs113655203 | 32533247 T | 3.89  | 3.58E-08 | chr:6:32505702 |
| 6 rs9271667   | 32592710 C | 4.375 | 3.61E-08 | chr:6:32505702 |
| 6 rs116422126 | 32504500 G | 3.118 | 3.65E-08 | chr:6:32505702 |
| 6 rs113133909 | 32457928 T | 2.737 | 3.75E-08 | chr:6:32505702 |
| 6 rs534859262 | 32457931 T | 2.737 | 3.75E-08 | chr:6:32505702 |
| 6 rs9272239   | 32602778 G | 4.507 | 3.82E-08 | chr:6:32505702 |
| 6 rs9272242   | 32602790 C | 4.507 | 3.82E-08 | chr:6:32505702 |
| 6 rs551009500 | 32533836 T | 2.942 | 3.84E-08 | chr:6:32505702 |
| 6 rs569299936 | 32533837 A | 2.942 | 3.84E-08 | chr:6:32505702 |
| 6 rs34508462  | 32523476 C | 3.747 | 3.85E-08 | chr:6:32505702 |
| 6 rs150117381 | 32505388 C | 2.81  | 3.85E-08 | chr:6:32505702 |
| 6 rs9269725   | 32547359 C | 4.601 | 3.87E-08 | chr:6:32505702 |
| 6 rs9269726   | 32547360 T | 4.601 | 3.87E-08 | chr:6:32505702 |
| 6 rs142206489 | 32536167 A | 3.365 | 3.89E-08 | chr:6:32505702 |
| 6 rs72853926  | 32508451 G | 3.118 | 3.89E-08 | chr:6:32505702 |
| 6 rs9270877   | 32571318 G | 3.825 | 3.90E-08 | chr:6:32505702 |
| 6 rs9270878   | 32571320 A | 3.825 | 3.90E-08 | chr:6:32505702 |
| 6 rs9269555   | 32544311 A | 4.47  | 3.91E-08 | chr:6:32505702 |
| 6 rs9269542   | 32544042 A | 4.077 | 3.92E-08 | chr:6:32505702 |
| 6 rs112621731 | 32501245 G | 3.742 | 3.93E-08 | chr:6:32505702 |
| 6 rs9272132   | 32600677 G | 4.507 | 3.98E-08 | chr:6:32505702 |
| 6 rs7765332   | 32502374 A | 2.997 | 3.98E-08 | chr:6:32505702 |
| 6 rs114020016 | 32524824 T | 2.932 | 4.00E-08 | chr:6:32505702 |
| 6 rs530242049 | 32536125 C | 3.258 | 4.03E-08 | chr:6:32505702 |
| 6 rs140538649 | 32507946 T | 2.767 | 4.06E-08 | chr:6:32505702 |
| 6 rs539226504 | 32507944 A | 2.767 | 4.06E-08 | chr:6:32505702 |
| 6 rs555706008 | 32507953 G | 2.767 | 4.06E-08 | chr:6:32505702 |
| 6 rs372618919 | 32529918 G | 3.447 | 4.08E-08 | chr:6:32505702 |
| 6 rs573629697 | 32507971 G | 2.77  | 4.09E-08 | chr:6:32505702 |
| 6 rs566710022 | 32507505 T | 2.958 | 4.09E-08 | chr:6:32505702 |
| 6 rs66754072  | 32532402 A | 3.661 | 4.10E-08 | chr:6:32505702 |
| 6 rs9270541   | 32559864 T | 3.894 | 4.11E-08 | chr:6:32505702 |
| 6 rs139128138 | 32533420 G | 3.066 | 4.13E-08 | chr:6:32505702 |
| 6 rs149932905 | 32533421 G | 3.066 | 4.13E-08 | chr:6:32505702 |
| 6 rs72845758  | 32531178 C | 3.364 | 4.16E-08 | chr:6:32505702 |
| 6 rs9272221   | 32602334 A | 4.511 | 4.17E-08 | chr:6:32505702 |
| 6 rs9270080   | 32554197 G | 4.033 | 4.20E-08 | chr:6:32505702 |
| 6 rs114451225 | 32538025 G | 3.215 | 4.22E-08 | chr:6:32505702 |

|               |            |       |          |                |
|---------------|------------|-------|----------|----------------|
| 6 rs201648725 | 32538024 C | 3.215 | 4.22E-08 | chr:6:32505702 |
| 6 rs9271694   | 32593051 C | 4.32  | 4.25E-08 | chr:6:32505702 |
| 6 rs112479577 | 32533856 A | 3.042 | 4.25E-08 | chr:6:32505702 |
| 6 rs185884622 | 32526169 C | 3.228 | 4.27E-08 | chr:6:32505702 |
| 6 rs9270876   | 32571314 A | 3.823 | 4.28E-08 | chr:6:32505702 |
| 6 rs9269373   | 32540873 G | 3.036 | 4.28E-08 | chr:6:32505702 |
| 6 rs146356328 | 32535965 T | 3.401 | 4.32E-08 | chr:6:32505702 |
| 6 rs9269728   | 32547385 T | 4.255 | 4.36E-08 | chr:6:32505702 |
| 6 rs533614924 | 32532227 A | 2.976 | 4.36E-08 | chr:6:32505702 |
| 6 rs72845759  | 32531182 G | 3.366 | 4.37E-08 | chr:6:32505702 |
| 6 rs9270869   | 32571155 C | 4.029 | 4.46E-08 | chr:6:32505702 |
| 6 rs9270871   | 32571160 G | 4.029 | 4.46E-08 | chr:6:32505702 |
| 6 rs76325796  | 32507653 A | 2.929 | 4.46E-08 | chr:6:32505702 |
| 6 rs77077499  | 32507652 T | 2.929 | 4.46E-08 | chr:6:32505702 |
| 6 rs72508473  | 32508399 G | 3.274 | 4.47E-08 | chr:6:32505702 |
| 6 rs72492347  | 32533142 G | 3.122 | 4.48E-08 | chr:6:32505702 |
| 6 rs576810845 | 32530891 T | 3.163 | 4.49E-08 | chr:6:32505702 |
| 6 rs201954564 | 32497824 A | 6.023 | 4.51E-08 | chr:6:32505702 |
| 6 rs541088090 | 32533411 T | 3.063 | 4.51E-08 | chr:6:32505702 |
| 6 rs72848204  | 32594073 T | 4.202 | 4.53E-08 | chr:6:32505702 |
| 6 rs75019606  | 32531924 C | 3.052 | 4.54E-08 | chr:6:32505702 |
| 6 rs115095329 | 32503497 A | 3.144 | 4.55E-08 | chr:6:32505702 |
| 6 rs116133469 | 32503492 G | 3.144 | 4.55E-08 | chr:6:32505702 |
| 6 rs76034941  | 32503498 C | 3.144 | 4.55E-08 | chr:6:32505702 |
| 6 rs139547629 | 32485944 G | 3.414 | 4.57E-08 | chr:6:32505702 |
| 6 rs72844120  | 32514540 A | 3.57  | 4.59E-08 | chr:6:32505702 |
| 6 rs114418909 | 32531852 C | 3.468 | 4.60E-08 | chr:6:32505702 |
| 6 rs116479032 | 32531853 A | 3.468 | 4.60E-08 | chr:6:32505702 |
| 6 rs114435848 | 32532546 T | 3.111 | 4.61E-08 | chr:6:32505702 |
| 6 rs151297998 | 32530904 C | 3.164 | 4.66E-08 | chr:6:32505702 |
| 6 rs558696616 | 32530898 C | 3.164 | 4.66E-08 | chr:6:32505702 |
| 6 rs577240453 | 32530899 T | 3.164 | 4.66E-08 | chr:6:32505702 |
| 6 rs9269481   | 32542582 A | 5.06  | 4.69E-08 | chr:6:32505702 |
| 6 rs9269651   | 32546074 T | 4.823 | 4.70E-08 | chr:6:32505702 |
| 6 rs143796398 | 32536259 T | 3.113 | 4.71E-08 | chr:6:32505702 |
| 6 rs35479797  | 32535900 T | 3.542 | 4.72E-08 | chr:6:32505702 |
| 6 rs77501456  | 32523627 G | 3.536 | 4.72E-08 | chr:6:32505702 |
| 6 rs73727915  | 32497046 T | 3.897 | 4.77E-08 | chr:6:32505702 |
| 6 rs79740987  | 32507712 G | 2.924 | 4.81E-08 | chr:6:32505702 |
| 6 rs17203839  | 32555926 C | 5.573 | 4.88E-08 | chr:6:32505702 |
| 6 rs138991250 | 32534855 G | 3.138 | 4.92E-08 | chr:6:32505702 |
| 6 rs9272214   | 32602096 A | 4.506 | 4.92E-08 | chr:6:32505702 |
| 6 rs9272265   | 32603412 T | 4.509 | 4.94E-08 | chr:6:32505702 |



|               |            |       |          |                |
|---------------|------------|-------|----------|----------------|
| 6 rs73407208  | 32491721 T | 3.172 | 4.95E-08 | chr:6:32505702 |
| 6 rs9272118   | 32600448 T | 4.513 | 5.00E-08 | chr:6:32505702 |
| 6 rs535866271 | 32486668 G | 3.051 | 5.09E-08 | chr:6:32505702 |
| 6 rs9271850   | 32595060 G | 3.96  | 5.12E-08 | chr:6:32505702 |
| 6 rs9270548   | 32559960 T | 3.672 | 5.14E-08 | chr:6:32505702 |
| 6 rs9270540   | 32559848 C | 3.892 | 5.19E-08 | chr:6:32505702 |
| 6 rs76666064  | 32530841 C | 2.944 | 5.20E-08 | chr:6:32505702 |
| 6 rs530662953 | 32504587 C | 3.11  | 5.21E-08 | chr:6:32505702 |
| 6 rs111769716 | 32530819 G | 2.941 | 5.24E-08 | chr:6:32505702 |
| 6 rs547631481 | 32507531 A | 2.87  | 5.27E-08 | chr:6:32505702 |
| 6 rs9272116   | 32600404 C | 4.516 | 5.28E-08 | chr:6:32505702 |
| 6 rs137976440 | 32489630 T | 3.659 | 5.28E-08 | chr:6:32505702 |
| 6 rs1136756   | 32552134 G | 5.889 | 5.29E-08 | chr:6:32505702 |
| 6 rs76415507  | 32492589 G | 2.929 | 5.31E-08 | chr:6:32505702 |
| 6 rs9270572   | 32561010 T | 4.352 | 5.34E-08 | chr:6:32505702 |
| 6 rs9272229   | 32602568 T | 4.513 | 5.35E-08 | chr:6:32505702 |
| 6 rs111786536 | 32523589 C | 3.448 | 5.39E-08 | chr:6:32505702 |
| 6 rs9270547   | 32559951 G | 3.647 | 5.39E-08 | chr:6:32505702 |
| 6 rs75375346  | 32596908 C | 4.177 | 5.40E-08 | chr:6:32505702 |
| 6 rs9272232   | 32602630 T | 4.514 | 5.41E-08 | chr:6:32505702 |
| 6 rs9272114   | 32600317 C | 4.514 | 5.45E-08 | chr:6:32505702 |
| 6 rs78806801  | 32503403 C | 2.983 | 5.48E-08 | chr:6:32505702 |
| 6 rs9272218   | 32602238 T | 4.516 | 5.53E-08 | chr:6:32505702 |
| 6 rs111425203 | 32534872 T | 3.117 | 5.53E-08 | chr:6:32505702 |
| 6 rs529484704 | 32507478 C | 2.885 | 5.55E-08 | chr:6:32505702 |
| 6 rs569509899 | 32507490 G | 2.885 | 5.55E-08 | chr:6:32505702 |
| 6 rs9269574   | 32544711 C | 3.368 | 5.58E-08 | chr:6:32505702 |
| 6 rs68146539  | 32532928 C | 3.105 | 5.61E-08 | chr:6:32505702 |
| 6 rs575209356 | 32525806 A | 2.893 | 5.61E-08 | chr:6:32505702 |
| 6 rs9269642   | 32545877 T | 4.546 | 5.63E-08 | chr:6:32505702 |
| 6 rs9272045   | 32599006 T | 4.415 | 5.67E-08 | chr:6:32505702 |
| 6 rs11757123  | 32520094 C | 4.362 | 5.69E-08 | chr:6:32505702 |
| 6 rs150598903 | 32489395 T | 2.959 | 5.70E-08 | chr:6:32505702 |
| 6 rs533779530 | 32453612 G | 3.813 | 5.70E-08 | chr:6:32505702 |
| 6 rs9269923   | 32551604 T | 3.07  | 5.74E-08 | chr:6:32505702 |
| 6 rs9270210   | 32556475 T | 3.289 | 5.80E-08 | chr:6:32505702 |
| 6 rs9270861   | 32570979 A | 3.631 | 5.81E-08 | chr:6:32505702 |
| 6 rs9270862   | 32570981 C | 3.631 | 5.81E-08 | chr:6:32505702 |
| 6 rs9270863   | 32570982 A | 3.631 | 5.81E-08 | chr:6:32505702 |
| 6 rs77149458  | 32487130 A | 4.8   | 5.84E-08 | chr:6:32505702 |
| 6 rs74786163  | 32507780 T | 2.9   | 5.84E-08 | chr:6:32505702 |
| 6 rs142393802 | 32508021 T | 2.732 | 5.85E-08 | chr:6:32505702 |
| 6 rs9269635   | 32545720 G | 4.996 | 5.90E-08 | chr:6:32505702 |

|               |            |       |          |                |
|---------------|------------|-------|----------|----------------|
| 6 rs9269636   | 32545772 C | 4.996 | 5.90E-08 | chr:6:32505702 |
| 6 rs115573308 | 32533118 T | 3.096 | 5.91E-08 | chr:6:32505702 |
| 6 rs9270559   | 32560698 G | 4.381 | 5.96E-08 | chr:6:32505702 |
| 6 rs116102092 | 32538672 A | 3.419 | 6.00E-08 | chr:6:32505702 |
| 6 rs112200867 | 32485949 G | 3.386 | 6.05E-08 | chr:6:32505702 |
| 6 rs145177101 | 32536632 G | 2.915 | 6.07E-08 | chr:6:32505702 |
| 6 rs9270574   | 32561028 T | 4.296 | 6.11E-08 | chr:6:32505702 |
| 6 rs9269885   | 32550971 T | 3.51  | 6.13E-08 | chr:6:32505702 |
| 6 rs9269886   | 32550976 A | 3.51  | 6.13E-08 | chr:6:32505702 |
| 6 rs187058069 | 32486665 A | 2.94  | 6.14E-08 | chr:6:32505702 |
| 6 rs543093016 | 32532533 A | 3.026 | 6.14E-08 | chr:6:32505702 |
| 6 rs9271647   | 32592354 G | 4.149 | 6.23E-08 | chr:6:32505702 |
| 6 rs9271649   | 32592359 G | 4.149 | 6.23E-08 | chr:6:32505702 |
| 6 rs147668426 | 32507931 G | 2.734 | 6.23E-08 | chr:6:32505702 |
| 6 rs571430728 | 32507938 T | 2.734 | 6.23E-08 | chr:6:32505702 |
| 6 rs680061    | 32571098 G | 3.882 | 6.24E-08 | chr:6:32505702 |
| 6 rs113654440 | 32596946 A | 4.2   | 6.24E-08 | chr:6:32505702 |
| 6 rs138940568 | 32536635 T | 2.915 | 6.28E-08 | chr:6:32505702 |
| 6 rs36218423  | 32524832 C | 2.918 | 6.32E-08 | chr:6:32505702 |
| 6 rs9272043   | 32598946 G | 4.419 | 6.35E-08 | chr:6:32505702 |
| 6 rs142198554 | 32531887 T | 3.041 | 6.39E-08 | chr:6:32505702 |
| 6 rs546856170 | 32531888 G | 3.041 | 6.39E-08 | chr:6:32505702 |
| 6 rs116585903 | 32487688 T | 5.164 | 6.43E-08 | chr:6:32505702 |
| 6 rs116787876 | 32491139 G | 3.181 | 6.51E-08 | chr:6:32505702 |
| 6 rs111979375 | 32538231 T | 3.156 | 6.55E-08 | chr:6:32505702 |
| 6 rs72657675  | 32532955 G | 3.1   | 6.60E-08 | chr:6:32505702 |
| 6 rs9269879   | 32550906 G | 4.123 | 6.71E-08 | chr:6:32505702 |
| 6 rs114629945 | 32503717 G | 2.932 | 6.71E-08 | chr:6:32505702 |
| 6 rs116103612 | 32503716 A | 2.932 | 6.71E-08 | chr:6:32505702 |
| 6 rs9269717   | 32547303 T | 4.568 | 6.76E-08 | chr:6:32505702 |
| 6 rs9272023   | 32598558 G | 4.245 | 6.81E-08 | chr:6:32505702 |
| 6 rs111847217 | 32511131 G | 3.055 | 6.88E-08 | chr:6:32505702 |
| 6 rs76509141  | 32504529 C | 3.02  | 7.05E-08 | chr:6:32505702 |
| 6 rs114795116 | 32491112 T | 3.18  | 7.06E-08 | chr:6:32505702 |
| 6 rs73726852  | 32538295 C | 3.034 | 7.16E-08 | chr:6:32505702 |
| 6 rs73726176  | 32490760 G | 3.371 | 7.17E-08 | chr:6:32505702 |
| 6 rs73726177  | 32490762 G | 3.371 | 7.17E-08 | chr:6:32505702 |
| 6 rs9269582   | 32544787 T | 3.675 | 7.21E-08 | chr:6:32505702 |
| 6 rs9271880   | 32595596 C | 3.891 | 7.26E-08 | chr:6:32505702 |
| 6 rs531476760 | 32490069 C | 2.82  | 7.26E-08 | chr:6:32505702 |
| 6 rs9269269   | 32539055 C | 4.453 | 7.32E-08 | chr:6:32505702 |
| 6 rs111632178 | 32511149 C | 3.051 | 7.34E-08 | chr:6:32505702 |
| 6 rs112427949 | 32511164 T | 3.051 | 7.34E-08 | chr:6:32505702 |

|               |            |       |          |                |
|---------------|------------|-------|----------|----------------|
| 6 rs201917227 | 32531870 C | 3.039 | 7.35E-08 | chr:6:32505702 |
| 6 rs566973051 | 32531876 C | 3.039 | 7.35E-08 | chr:6:32505702 |
| 6 rs9272070   | 32599485 G | 4.36  | 7.42E-08 | chr:6:32505702 |
| 6 rs72853927  | 32508474 G | 3.008 | 7.52E-08 | chr:6:32505702 |
| 6 rs72853928  | 32508486 T | 3.008 | 7.52E-08 | chr:6:32505702 |
| 6 rs115278245 | 32531057 A | 3.287 | 7.59E-08 | chr:6:32505702 |
| 6 rs139726276 | 32524769 G | 2.853 | 7.66E-08 | chr:6:32505702 |
| 6 rs115407919 | 32531056 C | 3.288 | 7.72E-08 | chr:6:32505702 |
| 6 rs9272254   | 32603098 T | 4.394 | 7.76E-08 | chr:6:32505702 |
| 6 rs115077617 | 32532645 C | 3.166 | 7.83E-08 | chr:6:32505702 |
| 6 rs71536602  | 32534455 C | 3.433 | 7.88E-08 | chr:6:32505702 |
| 6 rs181190479 | 32533905 G | 2.912 | 7.90E-08 | chr:6:32505702 |
| 6 rs188265524 | 32533903 G | 2.912 | 7.90E-08 | chr:6:32505702 |
| 6 rs115156211 | 32533440 A | 2.922 | 7.91E-08 | chr:6:32505702 |
| 6 rs552472567 | 32533447 C | 2.922 | 7.91E-08 | chr:6:32505702 |
| 6 rs570478088 | 32533448 A | 2.922 | 7.91E-08 | chr:6:32505702 |
| 6 rs9271708   | 32593386 A | 3.825 | 8.35E-08 | chr:6:32505702 |
| 6 rs9271709   | 32593392 A | 3.825 | 8.35E-08 | chr:6:32505702 |
| 6 rs532050307 | 32469431 C | 2.768 | 8.38E-08 | chr:6:32505702 |
| 6 rs371747477 | 32489266 T | 3.06  | 8.43E-08 | chr:6:32505702 |
| 6 rs9272062   | 32599265 A | 4.266 | 8.46E-08 | chr:6:32505702 |
| 6 rs116225018 | 32503380 C | 2.953 | 8.48E-08 | chr:6:32505702 |
| 6 rs9270466   | 32558929 T | 3.317 | 8.53E-08 | chr:6:32505702 |
| 6 rs193192981 | 32533553 G | 2.915 | 8.55E-08 | chr:6:32505702 |
| 6 rs186804046 | 32479321 C | 3.033 | 8.56E-08 | chr:6:32505702 |
| 6 rs149685121 | 32530946 C | 3.077 | 8.60E-08 | chr:6:32505702 |
| 6 rs141056608 | 32537440 C | 3.315 | 8.65E-08 | chr:6:32505702 |
| 6 rs146946148 | 32537444 T | 3.315 | 8.65E-08 | chr:6:32505702 |
| 6 rs115055593 | 32468827 C | 2.775 | 8.71E-08 | chr:6:32505702 |
| 6 rs9269501   | 32543118 T | 5.04  | 8.72E-08 | chr:6:32505702 |
| 6 rs9270462   | 32558912 G | 3.296 | 8.75E-08 | chr:6:32505702 |
| 6 rs140569663 | 32530944 A | 3.077 | 8.76E-08 | chr:6:32505702 |
| 6 rs536343459 | 32468799 G | 2.784 | 8.79E-08 | chr:6:32505702 |
| 6 rs548006827 | 32468802 C | 2.784 | 8.79E-08 | chr:6:32505702 |
| 6 rs565374501 | 32468798 G | 2.784 | 8.79E-08 | chr:6:32505702 |
| 6 rs149521915 | 32489639 T | 3.553 | 8.86E-08 | chr:6:32505702 |
| 6 rs9269250   | 32454269 T | 4.212 | 8.90E-08 | chr:6:32505702 |
| 6 rs9272009   | 32598063 T | 3.922 | 8.93E-08 | chr:6:32505702 |
| 6 rs9269962   | 32552177 A | 5.124 | 8.97E-08 | chr:6:32505702 |
| 6 rs571525080 | 32469429 A | 2.763 | 9.05E-08 | chr:6:32505702 |
| 6 rs9272635   | 32608193 C | 3.591 | 9.05E-08 | chr:6:32505702 |
| 6 rs73729340  | 32560155 A | 3.243 | 9.08E-08 | chr:6:32505702 |
| 6 rs12661707  | 32531245 T | 3.242 | 9.15E-08 | chr:6:32505702 |

|               |            |       |          |                |
|---------------|------------|-------|----------|----------------|
| 6 rs112009323 | 32532001 C | 2.947 | 9.26E-08 | chr:6:32505702 |
| 6 rs112562347 | 32532004 T | 2.947 | 9.26E-08 | chr:6:32505702 |
| 6 rs113725551 | 32511420 G | 4.904 | 9.34E-08 | chr:6:32505702 |
| 6 rs74615215  | 32458389 G | 2.694 | 9.44E-08 | chr:6:32505702 |
| 6 rs554566424 | 32496605 A | 2.806 | 9.49E-08 | chr:6:32505702 |
| 6 rs116088388 | 32488961 C | 3.022 | 9.66E-08 | chr:6:32505702 |
| 6 rs139007218 | 32488958 C | 3.022 | 9.66E-08 | chr:6:32505702 |
| 6 rs547797725 | 32487827 A | 2.757 | 9.80E-08 | chr:6:32505702 |
| 6 rs143742917 | 32533480 A | 2.923 | 9.85E-08 | chr:6:32505702 |
| 6 rs146783438 | 32533483 A | 2.923 | 9.85E-08 | chr:6:32505702 |
| 6 rs148743468 | 32533479 C | 2.923 | 9.85E-08 | chr:6:32505702 |
| 6 rs75503609  | 32530929 A | 3.072 | 9.88E-08 | chr:6:32505702 |
| 6 rs9271717   | 32593453 G | 3.359 | 9.89E-08 | chr:6:32505702 |
| 6 rs116609988 | 32522988 A | 3.29  | 1.00E-07 | chr:6:32505702 |
| 6 rs544698989 | 32558169 A | 5.877 | 1.00E-07 | chr:6:32505702 |
| 6 rs111843909 | 32531043 T | 3.287 | 1.02E-07 | chr:6:32505702 |
| 6 rs142110991 | 32537496 C | 4.075 | 1.02E-07 | chr:6:32505702 |
| 6 rs182374257 | 32525306 T | 2.934 | 1.02E-07 | chr:6:32505702 |
| 6 rs28613510  | 32518507 A | 4.047 | 1.02E-07 | chr:6:32505702 |
| 6 rs561017744 | 32547528 T | 4.132 | 1.03E-07 | chr:6:32505702 |
| 6 rs74207695  | 32502631 C | 2.783 | 1.03E-07 | chr:6:32505702 |
| 6 rs2647011   | 32661915 C | 3.575 | 1.04E-07 | chr:6:32505702 |
| 6 rs554894601 | 32497146 A | 4.18  | 1.05E-07 | chr:6:32505702 |
| 6 rs373964410 | 32497086 A | 3.986 | 1.06E-07 | chr:6:32505702 |
| 6 rs147315656 | 32530869 T | 2.919 | 1.06E-07 | chr:6:32505702 |
| 6 rs9269705   | 32547182 T | 3.646 | 1.08E-07 | chr:6:32505702 |
| 6 rs572123865 | 32497098 A | 3.986 | 1.08E-07 | chr:6:32505702 |
| 6 rs549042477 | 32547505 G | 3.863 | 1.09E-07 | chr:6:32505702 |
| 6 rs183777110 | 32505375 T | 2.714 | 1.09E-07 | chr:6:32505702 |
| 6 rs77413629  | 32505374 G | 2.714 | 1.09E-07 | chr:6:32505702 |
| 6 rs9272104   | 32599918 C | 3.905 | 1.10E-07 | chr:6:32505702 |
| 6 rs115277180 | 32533468 C | 2.916 | 1.10E-07 | chr:6:32505702 |
| 6 rs374264352 | 32532969 A | 2.983 | 1.10E-07 | chr:6:32505702 |
| 6 rs9272119   | 32600470 C | 4.117 | 1.10E-07 | chr:6:32505702 |
| 6 rs9271927   | 32596647 C | 3.987 | 1.12E-07 | chr:6:32505702 |
| 6 rs9271928   | 32596648 A | 3.987 | 1.12E-07 | chr:6:32505702 |
| 6 rs9271929   | 32596650 C | 3.987 | 1.12E-07 | chr:6:32505702 |
| 6 rs9272109   | 32600253 T | 3.913 | 1.12E-07 | chr:6:32505702 |
| 6 rs145520715 | 32530952 T | 3.07  | 1.12E-07 | chr:6:32505702 |
| 6 rs569725476 | 32479351 T | 3.014 | 1.12E-07 | chr:6:32505702 |
| 6 rs67642277  | 32538067 A | 4.239 | 1.12E-07 | chr:6:32505702 |
| 6 rs73729339  | 32560017 A | 3.233 | 1.13E-07 | chr:6:32505702 |
| 6 rs74207277  | 32560091 T | 3.233 | 1.13E-07 | chr:6:32505702 |

|               |            |       |          |                |
|---------------|------------|-------|----------|----------------|
| 6 rs9269212   | 32450249 A | 9.04  | 1.13E-07 | chr:6:32505702 |
| 6 rs9269213   | 32450250 A | 9.04  | 1.13E-07 | chr:6:32505702 |
| 6 rs9271890   | 32595779 A | 4.123 | 1.13E-07 | chr:6:32505702 |
| 6 rs9271891   | 32595783 T | 4.123 | 1.13E-07 | chr:6:32505702 |
| 6 rs28362368  | 32594040 G | 3.949 | 1.14E-07 | chr:6:32505702 |
| 6 rs9272105   | 32599999 A | 4.182 | 1.18E-07 | chr:6:32505702 |
| 6 rs9270451   | 32558838 A | 3.748 | 1.19E-07 | chr:6:32505702 |
| 6 rs9272007   | 32598038 T | 3.781 | 1.19E-07 | chr:6:32505702 |
| 6 rs9269396   | 32541290 A | 3.667 | 1.20E-07 | chr:6:32505702 |
| 6 rs9270047   | 32553697 C | 3.955 | 1.20E-07 | chr:6:32505702 |
| 6 rs143442815 | 32489863 C | 3.318 | 1.23E-07 | chr:6:32505702 |
| 6 rs9270446   | 32558775 G | 3.395 | 1.24E-07 | chr:6:32505702 |
| 6 rs116473597 | 32482374 T | 2.598 | 1.24E-07 | chr:6:32505702 |
| 6 rs556568526 | 32482353 T | 2.598 | 1.24E-07 | chr:6:32505702 |
| 6 rs578020847 | 32482368 C | 2.598 | 1.24E-07 | chr:6:32505702 |
| 6 rs9269327   | 32540001 T | 3.246 | 1.24E-07 | chr:6:32505702 |
| 6 rs145245177 | 32530955 C | 3.067 | 1.25E-07 | chr:6:32505702 |
| 6 rs148812784 | 32530954 C | 3.067 | 1.25E-07 | chr:6:32505702 |
| 6 rs9269732   | 32547425 C | 3.336 | 1.26E-07 | chr:6:32505702 |
| 6 rs532618689 | 32508064 T | 2.68  | 1.26E-07 | chr:6:32505702 |
| 6 rs549780202 | 32508055 T | 2.68  | 1.26E-07 | chr:6:32505702 |
| 6 rs564974789 | 32508061 A | 2.68  | 1.26E-07 | chr:6:32505702 |
| 6 rs77178107  | 32533511 C | 2.816 | 1.28E-07 | chr:6:32505702 |
| 6 rs77814554  | 32533509 C | 2.816 | 1.28E-07 | chr:6:32505702 |
| 6 rs183134414 | 32511069 T | 2.761 | 1.29E-07 | chr:6:32505702 |
| 6 rs9272130   | 32600638 G | 4.115 | 1.29E-07 | chr:6:32505702 |
| 6 rs9271384   | 32587408 T | 3.567 | 1.30E-07 | chr:6:32505702 |
| 6 rs9271888   | 32595732 C | 4.114 | 1.30E-07 | chr:6:32505702 |
| 6 rs9271889   | 32595747 A | 4.114 | 1.30E-07 | chr:6:32505702 |
| 6 rs9269328   | 32540018 T | 3.286 | 1.30E-07 | chr:6:32505702 |
| 6 rs9272201   | 32601875 G | 3.352 | 1.30E-07 | chr:6:32505702 |
| 6 rs66501603  | 32538002 A | 2.952 | 1.31E-07 | chr:6:32505702 |
| 6 rs116609655 | 32503059 C | 2.754 | 1.32E-07 | chr:6:32505702 |
| 6 rs141631850 | 32496670 C | 3.45  | 1.32E-07 | chr:6:32505702 |
| 6 rs9271892   | 32595813 C | 4.112 | 1.34E-07 | chr:6:32505702 |
| 6 rs182767311 | 32533523 C | 2.813 | 1.34E-07 | chr:6:32505702 |
| 6 rs9272108   | 32600228 C | 3.898 | 1.34E-07 | chr:6:32505702 |
| 6 rs150860760 | 32486709 C | 3.025 | 1.34E-07 | chr:6:32505702 |
| 6 rs34539464  | 32560339 G | 3.14  | 1.39E-07 | chr:6:32505702 |
| 6 rs76235954  | 32512815 A | 2.89  | 1.39E-07 | chr:6:32505702 |
| 6 rs149234868 | 32454921 G | 3.127 | 1.39E-07 | chr:6:32505702 |
| 6 rs9272008   | 32598042 A | 3.763 | 1.39E-07 | chr:6:32505702 |
| 6 rs114012503 | 32537489 G | 3.966 | 1.40E-07 | chr:6:32505702 |

|               |            |       |          |                |
|---------------|------------|-------|----------|----------------|
| 6 rs556337500 | 32503531 A | 3.076 | 1.40E-07 | chr:6:32505702 |
| 6 rs571499647 | 32503532 G | 3.076 | 1.40E-07 | chr:6:32505702 |
| 6 rs9269736   | 32547440 T | 3.335 | 1.41E-07 | chr:6:32505702 |
| 6 rs112349327 | 32502948 A | 2.842 | 1.41E-07 | chr:6:32505702 |
| 6 rs72851056  | 32502944 A | 2.842 | 1.41E-07 | chr:6:32505702 |
| 6 rs9270405   | 32558444 T | 3.418 | 1.42E-07 | chr:6:32505702 |
| 6 rs539796570 | 32526182 C | 3.179 | 1.43E-07 | chr:6:32505702 |
| 6 rs75519123  | 32469404 G | 2.739 | 1.44E-07 | chr:6:32505702 |
| 6 rs28366259  | 32559516 C | 3.937 | 1.44E-07 | chr:6:32505702 |
| 6 rs66931410  | 32518235 C | 3.945 | 1.44E-07 | chr:6:32505702 |
| 6 rs570715978 | 32479382 T | 2.984 | 1.45E-07 | chr:6:32505702 |
| 6 rs116241189 | 32506751 A | 3.004 | 1.45E-07 | chr:6:32505702 |
| 6 rs72853911  | 32506759 G | 3.004 | 1.45E-07 | chr:6:32505702 |
| 6 rs371337007 | 32493146 A | 4.075 | 1.45E-07 | chr:6:32505702 |
| 6 rs9272026   | 32598618 G | 4.128 | 1.46E-07 | chr:6:32505702 |
| 6 rs9272027   | 32598622 G | 4.128 | 1.46E-07 | chr:6:32505702 |
| 6 rs9269727   | 32547371 C | 3.212 | 1.47E-07 | chr:6:32505702 |
| 6 rs374408836 | 32507582 C | 2.761 | 1.47E-07 | chr:6:32505702 |
| 6 rs544353633 | 32507596 G | 2.761 | 1.47E-07 | chr:6:32505702 |
| 6 rs138921502 | 32538132 C | 4.346 | 1.47E-07 | chr:6:32505702 |
| 6 rs9271876   | 32595448 G | 3.313 | 1.47E-07 | chr:6:32505702 |
| 6 rs9271955   | 32597281 A | 4.102 | 1.48E-07 | chr:6:32505702 |
| 6 rs9271957   | 32597335 C | 4.102 | 1.48E-07 | chr:6:32505702 |
| 6 rs12665549  | 32517141 A | 3.73  | 1.48E-07 | chr:6:32505702 |
| 6 rs11758321  | 32533413 G | 2.822 | 1.49E-07 | chr:6:32505702 |
| 6 rs74197151  | 32469035 T | 2.722 | 1.49E-07 | chr:6:32505702 |
| 6 rs9270157   | 32555411 T | 4.796 | 1.52E-07 | chr:6:32505702 |
| 6 rs9272194   | 32601825 G | 3.353 | 1.52E-07 | chr:6:32505702 |
| 6 rs545379090 | 32469285 T | 2.887 | 1.53E-07 | chr:6:32505702 |
| 6 rs9271896   | 32595907 A | 4.101 | 1.56E-07 | chr:6:32505702 |
| 6 rs35772438  | 32530407 T | 4.255 | 1.56E-07 | chr:6:32505702 |
| 6 rs373289038 | 32535643 A | 2.868 | 1.58E-07 | chr:6:32505702 |
| 6 rs376459798 | 32535644 A | 2.868 | 1.58E-07 | chr:6:32505702 |
| 6 rs9271657   | 32592582 C | 3.687 | 1.58E-07 | chr:6:32505702 |
| 6 rs9272040   | 32598903 G | 4.103 | 1.59E-07 | chr:6:32505702 |
| 6 rs9272041   | 32598906 A | 4.103 | 1.59E-07 | chr:6:32505702 |
| 6 rs9272042   | 32598917 C | 4.103 | 1.59E-07 | chr:6:32505702 |
| 6 rs36207014  | 32560332 A | 3.11  | 1.61E-07 | chr:6:32505702 |
| 6 rs9270520   | 32559493 T | 3.852 | 1.61E-07 | chr:6:32505702 |
| 6 rs79638048  | 32519391 A | 3.773 | 1.63E-07 | chr:6:32505702 |
| 6 rs9272057   | 32599190 A | 3.791 | 1.64E-07 | chr:6:32505702 |
| 6 rs139485758 | 32487265 G | 8.671 | 1.66E-07 | chr:6:32505702 |
| 6 rs113523485 | 32489302 C | 2.92  | 1.66E-07 | chr:6:32505702 |

|               |            |       |          |                |
|---------------|------------|-------|----------|----------------|
| 6 rs9271879   | 32595489 T | 3.556 | 1.67E-07 | chr:6:32505702 |
| 6 rs79881121  | 32502324 A | 3.143 | 1.67E-07 | chr:6:32505702 |
| 6 rs9272117   | 32600411 T | 4.098 | 1.68E-07 | chr:6:32505702 |
| 6 rs9271932   | 32596714 C | 4.024 | 1.69E-07 | chr:6:32505702 |
| 6 rs9271933   | 32596717 A | 4.024 | 1.69E-07 | chr:6:32505702 |
| 6 rs72849282  | 32469335 T | 2.824 | 1.69E-07 | chr:6:32505702 |
| 6 rs542536566 | 32457959 T | 2.584 | 1.69E-07 | chr:6:32505702 |
| 6 rs116132127 | 32503328 A | 2.852 | 1.69E-07 | chr:6:32505702 |
| 6 rs192164737 | 32508091 G | 2.63  | 1.70E-07 | chr:6:32505702 |
| 6 rs199636459 | 32507758 A | 2.673 | 1.71E-07 | chr:6:32505702 |
| 6 rs540194362 | 32507768 G | 2.673 | 1.71E-07 | chr:6:32505702 |
| 6 rs9271688   | 32592992 G | 3.788 | 1.72E-07 | chr:6:32505702 |
| 6 rs9272005   | 32597992 G | 3.758 | 1.73E-07 | chr:6:32505702 |
| 6 rs9272006   | 32597993 T | 3.758 | 1.73E-07 | chr:6:32505702 |
| 6 rs560277143 | 32547480 G | 2.996 | 1.73E-07 | chr:6:32505702 |
| 6 rs566252979 | 32496600 T | 2.718 | 1.74E-07 | chr:6:32505702 |
| 6 rs9272195   | 32601830 G | 3.394 | 1.76E-07 | chr:6:32505702 |
| 6 rs2858328   | 32658911 C | 3.615 | 1.76E-07 | chr:6:32505702 |
| 6 rs9270055   | 32553874 C | 4.625 | 1.77E-07 | chr:6:32505702 |
| 6 rs565682004 | 32526900 G | 5.313 | 1.78E-07 | chr:6:32505702 |
| 6 rs9271930   | 32596677 G | 3.97  | 1.78E-07 | chr:6:32505702 |
| 6 rs558533142 | 32479366 C | 2.969 | 1.79E-07 | chr:6:32505702 |
| 6 rs144064415 | 32536140 T | 3.322 | 1.80E-07 | chr:6:32505702 |
| 6 rs115010442 | 32505229 C | 2.841 | 1.82E-07 | chr:6:32505702 |
| 6 rs186217224 | 32457967 C | 2.581 | 1.83E-07 | chr:6:32505702 |
| 6 rs9270433   | 32558670 A | 3.322 | 1.83E-07 | chr:6:32505702 |
| 6 rs9271959   | 32597377 C | 3.694 | 1.83E-07 | chr:6:32505702 |
| 6 rs9270436   | 32558693 T | 3.166 | 1.83E-07 | chr:6:32505702 |
| 6 rs9272207   | 32601966 C | 3.242 | 1.85E-07 | chr:6:32505702 |
| 6 rs71542413  | 32560240 T | 3.092 | 1.85E-07 | chr:6:32505702 |
| 6 rs182191708 | 32490480 C | 2.895 | 1.87E-07 | chr:6:32505702 |
| 6 rs9272004   | 32597964 A | 3.952 | 1.87E-07 | chr:6:32505702 |
| 6 rs542648047 | 32535499 T | 2.762 | 1.87E-07 | chr:6:32505702 |
| 6 rs114084676 | 32505216 C | 2.837 | 1.89E-07 | chr:6:32505702 |
| 6 rs547755130 | 32486547 C | 2.748 | 1.89E-07 | chr:6:32505702 |
| 6 rs565956329 | 32486548 A | 2.748 | 1.89E-07 | chr:6:32505702 |
| 6 rs72853925  | 32508330 G | 3.262 | 1.90E-07 | chr:6:32505702 |
| 6 rs9271654   | 32592565 A | 3.629 | 1.93E-07 | chr:6:32505702 |
| 6 rs9271681   | 32592918 T | 3.888 | 1.96E-07 | chr:6:32505702 |
| 6 rs533418679 | 32526140 A | 2.839 | 1.97E-07 | chr:6:32505702 |
| 6 rs9271915   | 32596294 C | 4.086 | 2.01E-07 | chr:6:32505702 |
| 6 rs116531157 | 32547565 G | 5.179 | 2.01E-07 | chr:6:32505702 |
| 6 rs9271899   | 32596007 G | 3.862 | 2.02E-07 | chr:6:32505702 |

|               |            |       |          |                |
|---------------|------------|-------|----------|----------------|
| 6 rs9271917   | 32596336 G | 4.084 | 2.02E-07 | chr:6:32505702 |
| 6 rs9270413   | 32558495 T | 3.705 | 2.04E-07 | chr:6:32505702 |
| 6 rs9270414   | 32558497 T | 3.705 | 2.04E-07 | chr:6:32505702 |
| 6 rs9271918   | 32596352 T | 4.086 | 2.07E-07 | chr:6:32505702 |
| 6 rs115232480 | 32536206 G | 3.315 | 2.07E-07 | chr:6:32505702 |
| 6 rs191239160 | 32525992 C | 2.944 | 2.07E-07 | chr:6:32505702 |
| 6 rs139910587 | 32490483 C | 2.875 | 2.11E-07 | chr:6:32505702 |
| 6 rs537678001 | 32527268 G | 3.012 | 2.15E-07 | chr:6:32505702 |
| 6 rs116048339 | 32468982 T | 2.626 | 2.17E-07 | chr:6:32505702 |
| 6 rs116380301 | 32468983 T | 2.626 | 2.17E-07 | chr:6:32505702 |
| 6 rs72492335  | 32526460 C | 3.346 | 2.18E-07 | chr:6:32505702 |
| 6 rs190345143 | 32537926 G | 2.634 | 2.20E-07 | chr:6:32505702 |
| 6 rs72508415  | 32459793 A | 2.888 | 2.20E-07 | chr:6:32505702 |
| 6 rs544527733 | 32503091 T | 2.685 | 2.22E-07 | chr:6:32505702 |
| 6 rs573273966 | 32507131 C | 2.659 | 2.24E-07 | chr:6:32505702 |
| 6 rs181549666 | 32482352 A | 2.562 | 2.26E-07 | chr:6:32505702 |
| 6 rs370864292 | 32532975 A | 2.867 | 2.27E-07 | chr:6:32505702 |
| 6 rs560693076 | 32532972 C | 2.867 | 2.27E-07 | chr:6:32505702 |
| 6 rs9271901   | 32596027 T | 3.851 | 2.31E-07 | chr:6:32505702 |
| 6 rs9271651   | 32592385 T | 4.054 | 2.33E-07 | chr:6:32505702 |
| 6 rs9272110   | 32600287 C | 3.87  | 2.34E-07 | chr:6:32505702 |
| 6 rs9272113   | 32600291 C | 3.87  | 2.34E-07 | chr:6:32505702 |
| 6 rs112471393 | 32538228 T | 3.025 | 2.37E-07 | chr:6:32505702 |
| 6 rs9271733   | 32593633 A | 3.435 | 2.40E-07 | chr:6:32505702 |
| 6 rs9272067   | 32599401 A | 3.942 | 2.41E-07 | chr:6:32505702 |
| 6 rs137863146 | 32489871 G | 3.075 | 2.43E-07 | chr:6:32505702 |
| 6 rs9269969   | 32552272 C | 3.559 | 2.43E-07 | chr:6:32505702 |
| 6 rs9270448   | 32558819 T | 3.519 | 2.44E-07 | chr:6:32505702 |
| 6 rs11751496  | 32533549 T | 2.705 | 2.46E-07 | chr:6:32505702 |
| 6 rs9272134   | 32600705 G | 3.855 | 2.47E-07 | chr:6:32505702 |
| 6 rs9270458   | 32558900 G | 3.161 | 2.48E-07 | chr:6:32505702 |
| 6 rs9272013   | 32598224 T | 3.839 | 2.49E-07 | chr:6:32505702 |
| 6 rs200402299 | 32458349 A | 2.574 | 2.50E-07 | chr:6:32505702 |
| 6 rs9272059   | 32599223 C | 3.832 | 2.51E-07 | chr:6:32505702 |
| 6 rs9272061   | 32599250 A | 3.833 | 2.52E-07 | chr:6:32505702 |
| 6 rs9272044   | 32598971 A | 3.938 | 2.53E-07 | chr:6:32505702 |
| 6 rs114198395 | 32502961 T | 2.751 | 2.56E-07 | chr:6:32505702 |
| 6 rs9271997   | 32597801 A | 3.79  | 2.57E-07 | chr:6:32505702 |
| 6 rs67499532  | 32513184 G | 3.863 | 2.57E-07 | chr:6:32505702 |
| 6 rs533688361 | 32480016 T | 2.58  | 2.58E-07 | chr:6:32505702 |
| 6 rs142795234 | 32487593 G | 3.124 | 2.58E-07 | chr:6:32505702 |
| 6 rs536387398 | 32507125 A | 2.637 | 2.60E-07 | chr:6:32505702 |
| 6 rs116526477 | 32468879 T | 2.708 | 2.62E-07 | chr:6:32505702 |



|               |            |       |          |                |
|---------------|------------|-------|----------|----------------|
| 6 rs9272064   | 32599338 T | 3.938 | 2.62E-07 | chr:6:32505702 |
| 6 rs574264514 | 32547472 C | 2.928 | 2.64E-07 | chr:6:32505702 |
| 6 rs9272193   | 32601785 G | 3.436 | 2.66E-07 | chr:6:32505702 |
| 6 rs185087225 | 32480024 G | 2.578 | 2.67E-07 | chr:6:32505702 |
| 6 rs6920012   | 32556186 G | 3.921 | 2.78E-07 | chr:6:32505702 |
| 6 rs9269785   | 32549053 T | 4.427 | 2.79E-07 | chr:6:32505702 |
| 6 rs9269787   | 32549070 G | 4.427 | 2.79E-07 | chr:6:32505702 |
| 6 rs201614260 | 32557436 G | 6.394 | 2.80E-07 | chr:6:32505702 |
| 6 rs555383676 | 32507771 A | 2.641 | 2.80E-07 | chr:6:32505702 |
| 6 rs559286232 | 32527271 C | 2.995 | 2.81E-07 | chr:6:32505702 |
| 6 rs9271877   | 32595469 C | 3.281 | 2.81E-07 | chr:6:32505702 |
| 6 rs76317804  | 32469375 T | 2.654 | 2.82E-07 | chr:6:32505702 |
| 6 rs562852671 | 32512142 T | 2.634 | 2.86E-07 | chr:6:32505702 |
| 6 rs182090170 | 32537941 G | 2.606 | 2.87E-07 | chr:6:32505702 |
| 6 rs9272015   | 32598299 A | 3.712 | 2.87E-07 | chr:6:32505702 |
| 6 rs116100204 | 32531556 T | 3.142 | 2.89E-07 | chr:6:32505702 |
| 6 rs9269381   | 32540927 C | 3.428 | 2.96E-07 | chr:6:32505702 |
| 6 rs138408209 | 32537509 T | 3.819 | 3.00E-07 | chr:6:32505702 |
| 6 rs9272135   | 32600723 A | 3.652 | 3.01E-07 | chr:6:32505702 |
| 6 rs9272136   | 32600730 T | 3.652 | 3.01E-07 | chr:6:32505702 |
| 6 rs9272137   | 32600738 C | 3.652 | 3.01E-07 | chr:6:32505702 |
| 6 rs9271910   | 32596183 C | 3.857 | 3.03E-07 | chr:6:32505702 |
| 6 rs115380393 | 32503020 T | 2.685 | 3.05E-07 | chr:6:32505702 |
| 6 rs116011937 | 32486884 G | 2.952 | 3.05E-07 | chr:6:32505702 |
| 6 rs73729756  | 32482020 G | 2.587 | 3.09E-07 | chr:6:32505702 |
| 6 rs201439475 | 32502968 A | 2.737 | 3.19E-07 | chr:6:32505702 |
| 6 rs545256869 | 32512858 T | 2.737 | 3.19E-07 | chr:6:32505702 |
| 6 rs9271960   | 32597385 T | 3.591 | 3.20E-07 | chr:6:32505702 |
| 6 rs9272029   | 32598707 G | 3.857 | 3.34E-07 | chr:6:32505702 |
| 6 rs9271922   | 32596444 A | 3.826 | 3.38E-07 | chr:6:32505702 |
| 6 rs9272081   | 32599655 C | 2.874 | 3.41E-07 | chr:6:32505702 |
| 6 rs9270123   | 32555032 A | 4.153 | 3.41E-07 | chr:6:32505702 |
| 6 rs9272120   | 32600501 G | 3.834 | 3.42E-07 | chr:6:32505702 |
| 6 rs11970219  | 32500925 C | 3.594 | 3.43E-07 | chr:6:32505702 |
| 6 rs9269887   | 32550979 C | 3.193 | 3.46E-07 | chr:6:32505702 |
| 6 rs9271897   | 32595954 A | 3.827 | 3.49E-07 | chr:6:32505702 |
| 6 rs9271898   | 32595972 A | 3.827 | 3.49E-07 | chr:6:32505702 |
| 6 rs9269734   | 32547433 G | 2.982 | 3.51E-07 | chr:6:32505702 |
| 6 rs116611418 | 32459595 G | 2.474 | 3.52E-07 | chr:6:32505702 |
| 6 rs9271707   | 32593356 T | 3.64  | 3.54E-07 | chr:6:32505702 |
| 6 rs9270743   | 32568242 G | 4.067 | 3.56E-07 | chr:6:32505702 |
| 6 rs556200726 | 32525900 A | 2.619 | 3.58E-07 | chr:6:32505702 |
| 6 rs71542414  | 32560247 G | 2.963 | 3.59E-07 | chr:6:32505702 |

|                     |            |       |          |                |
|---------------------|------------|-------|----------|----------------|
| 6 rs72847623        | 32538044 G | 2.876 | 3.61E-07 | chr:6:32505702 |
| 6 rs141114903       | 32487814 G | 2.738 | 3.65E-07 | chr:6:32505702 |
| 6 rs71536568        | 32531151 A | 4.268 | 3.65E-07 | chr:6:32505702 |
| 6 rs9271878         | 32595474 C | 3.259 | 3.65E-07 | chr:6:32505702 |
| 6 rs9272028         | 32598706 T | 3.824 | 3.70E-07 | chr:6:32505702 |
| 6 rs9271663         | 32592636 A | 3.371 | 3.71E-07 | chr:6:32505702 |
| 6 rs72508469        | 32505309 C | 2.621 | 3.72E-07 | chr:6:32505702 |
| 6 rs9272001         | 32597901 G | 3.827 | 3.72E-07 | chr:6:32505702 |
| 6 rs79364663        | 32504085 C | 2.795 | 3.75E-07 | chr:6:32505702 |
| 6 rs376217655       | 32505666 T | 2.564 | 3.77E-07 | chr:6:32505702 |
| 6 rs190526848       | 32488781 A | 2.612 | 3.81E-07 | chr:6:32505702 |
| 6 rs180756398       | 32458010 A | 2.56  | 3.86E-07 | chr:6:32505702 |
| 6 rs9271684         | 32592953 T | 3.688 | 3.88E-07 | chr:6:32505702 |
| 6 rs4713589         | 32659435 G | 3.554 | 3.89E-07 | chr:6:32505702 |
| 6 rs9269720         | 32547319 C | 4.42  | 3.90E-07 | chr:6:32505702 |
| 6 rs138130801       | 32486866 T | 3.001 | 3.91E-07 | chr:6:32505702 |
| 6 rs9269722         | 32547328 G | 4.059 | 3.94E-07 | chr:6:32505702 |
| 6 rs9269968         | 32552251 A | 3.54  | 3.96E-07 | chr:6:32505702 |
| 6 rs9272056         | 32599180 A | 3.559 | 3.97E-07 | chr:6:32505702 |
| 6 rs199973717       | 32493600 G | 3.874 | 4.00E-07 | chr:6:32505702 |
| 6 rs147962567;rs359 | 32557378 C | 6.818 | 4.02E-07 | chr:6:32505702 |
| 6 rs185236820       | 32488776 T | 2.607 | 4.12E-07 | chr:6:32505702 |
| 6 rs9271934         | 32596773 T | 3.757 | 4.12E-07 | chr:6:32505702 |
| 6 rs9272103         | 32599896 T | 3.476 | 4.14E-07 | chr:6:32505702 |
| 6 rs74208414        | 32501649 G | 3.532 | 4.21E-07 | chr:6:32505702 |
| 6 rs72849267        | 32468923 T | 2.726 | 4.22E-07 | chr:6:32505702 |
| 6 rs36165851        | 32489981 A | 2.766 | 4.22E-07 | chr:6:32505702 |
| 6 rs141020324       | 32469001 A | 2.553 | 4.25E-07 | chr:6:32505702 |
| 6 rs144975609       | 32468997 A | 2.553 | 4.25E-07 | chr:6:32505702 |
| 6 rs114638791       | 32538268 A | 2.784 | 4.28E-07 | chr:6:32505702 |
| 6 rs542755566       | 32525942 G | 2.871 | 4.29E-07 | chr:6:32505702 |
| 6 rs9270464         | 32558914 G | 2.971 | 4.31E-07 | chr:6:32505702 |
| 6 rs149088066       | 32453495 T | 4.441 | 4.32E-07 | chr:6:32505702 |
| 6 rs34376317        | 32536678 T | 2.825 | 4.49E-07 | chr:6:32505702 |
| 6 rs9271966         | 32597507 T | 3.041 | 4.52E-07 | chr:6:32505702 |
| 6 rs114840252       | 32504071 T | 2.741 | 4.53E-07 | chr:6:32505702 |
| 6 rs9272142         | 32600800 C | 3.525 | 4.55E-07 | chr:6:32505702 |
| 6 rs374248993       | 32496534 C | 2.711 | 4.55E-07 | chr:6:32505702 |
| 6 rs9271914         | 32596238 C | 3.805 | 4.62E-07 | chr:6:32505702 |
| 6 rs9270423         | 32558580 A | 3.241 | 4.62E-07 | chr:6:32505702 |
| 6 rs9272085         | 32599685 C | 2.782 | 4.70E-07 | chr:6:32505702 |
| 6 rs9271727         | 32593585 A | 3.312 | 4.72E-07 | chr:6:32505702 |
| 6 rs9271728         | 32593592 C | 3.312 | 4.72E-07 | chr:6:32505702 |

|               |            |        |          |                |
|---------------|------------|--------|----------|----------------|
| 6 rs73726194  | 32492199 T | 3.454  | 4.75E-07 | chr:6:32505702 |
| 6 rs116490940 | 32503056 T | 2.695  | 4.75E-07 | chr:6:32505702 |
| 6 rs9270171   | 32555685 A | 0.2117 | 4.81E-07 | chr:6:32505702 |
| 6 rs9270172   | 32555687 G | 0.2117 | 4.81E-07 | chr:6:32505702 |
| 6 rs113353313 | 32538242 G | 2.769  | 4.84E-07 | chr:6:32505702 |
| 6 rs34801804  | 32555892 G | 7.35   | 4.84E-07 | chr:6:32505702 |
| 6 rs9271724   | 32593552 C | 3.357  | 4.89E-07 | chr:6:32505702 |
| 6 rs9271615   | 32591686 G | 3.807  | 4.91E-07 | chr:6:32505702 |
| 6 rs74211958  | 32469040 G | 2.651  | 4.93E-07 | chr:6:32505702 |
| 6 rs9269723   | 32547336 C | 3.771  | 4.95E-07 | chr:6:32505702 |
| 6 rs9269493   | 32542990 T | 0.1775 | 4.96E-07 | chr:6:32505702 |
| 6 rs9272383   | 32604749 T | 3.07   | 4.97E-07 | chr:6:32505702 |
| 6 rs9272016   | 32598346 T | 3.521  | 4.99E-07 | chr:6:32505702 |
| 6 rs113405235 | 32521796 C | 3.357  | 4.99E-07 | chr:6:32505702 |
| 6 rs9269731   | 32547408 T | 3.502  | 5.00E-07 | chr:6:32505702 |
| 6 rs115493349 | 32527153 G | 3.166  | 5.02E-07 | chr:6:32505702 |
| 6 rs185520080 | 32505872 C | 2.491  | 5.04E-07 | chr:6:32505702 |
| 6 rs149361627 | 32486988 C | 3.809  | 5.10E-07 | chr:6:32505702 |
| 6 rs187402303 | 32486990 C | 3.809  | 5.10E-07 | chr:6:32505702 |
| 6 rs542087123 | 32486994 T | 3.809  | 5.10E-07 | chr:6:32505702 |
| 6 rs9272049   | 32599045 G | 3.729  | 5.14E-07 | chr:6:32505702 |
| 6 rs79749596  | 32534021 C | 3.321  | 5.15E-07 | chr:6:32505702 |
| 6 rs116474488 | 32469226 T | 2.579  | 5.19E-07 | chr:6:32505702 |
| 6 rs561942189 | 32496432 G | 2.622  | 5.19E-07 | chr:6:32505702 |
| 6 rs114769197 | 32538217 A | 2.713  | 5.25E-07 | chr:6:32505702 |
| 6 rs115724613 | 32538216 C | 2.713  | 5.25E-07 | chr:6:32505702 |
| 6 rs17204294  | 32492179 A | 3.456  | 5.31E-07 | chr:6:32505702 |
| 6 rs140747244 | 32488784 C | 2.596  | 5.35E-07 | chr:6:32505702 |
| 6 rs553897781 | 32505335 A | 2.572  | 5.40E-07 | chr:6:32505702 |
| 6 rs9270555   | 32560584 C | 0.2404 | 5.45E-07 | chr:6:32505702 |
| 6 rs6457602   | 32542298 C | 3.551  | 5.46E-07 | chr:6:32505702 |
| 6 rs550051341 | 32505851 C | 2.487  | 5.46E-07 | chr:6:32505702 |
| 6 rs571586981 | 32505852 A | 2.487  | 5.46E-07 | chr:6:32505702 |
| 6 rs9271729   | 32593600 A | 3.302  | 5.47E-07 | chr:6:32505702 |
| 6 rs72508434  | 32487563 T | 3.144  | 5.48E-07 | chr:6:32505702 |
| 6 rs114969562 | 32594299 A | 3.372  | 5.54E-07 | chr:6:32505702 |
| 6 rs112740757 | 32481965 G | 2.611  | 5.56E-07 | chr:6:32505702 |
| 6 rs541499994 | 32510983 C | 2.602  | 5.64E-07 | chr:6:32505702 |
| 6 rs9269484   | 32542711 C | 0.1815 | 5.70E-07 | chr:6:32505702 |
| 6 rs547409849 | 32503365 T | 2.703  | 5.78E-07 | chr:6:32505702 |
| 6 rs565770331 | 32503366 C | 2.703  | 5.78E-07 | chr:6:32505702 |
| 6 rs528723549 | 32490420 G | 2.648  | 5.83E-07 | chr:6:32505702 |
| 6 rs140028862 | 32496684 A | 3.321  | 5.83E-07 | chr:6:32505702 |

|               |            |        |          |                |
|---------------|------------|--------|----------|----------------|
| 6 rs145528327 | 32496685 G | 3.321  | 5.83E-07 | chr:6:32505702 |
| 6 rs148866368 | 32531582 A | 2.714  | 5.84E-07 | chr:6:32505702 |
| 6 rs9269940   | 32551879 C | 3.785  | 5.87E-07 | chr:6:32505702 |
| 6 rs9271738   | 32593691 G | 3.384  | 5.96E-07 | chr:6:32505702 |
| 6 rs9269891   | 32551017 T | 2.841  | 5.96E-07 | chr:6:32505702 |
| 6 rs9271906   | 32596048 A | 3.599  | 5.98E-07 | chr:6:32505702 |
| 6 rs9272091   | 32599745 C | 2.647  | 6.00E-07 | chr:6:32505702 |
| 6 rs9269792   | 32549128 C | 0.1935 | 6.06E-07 | chr:6:32505702 |
| 6 rs9269547   | 32544173 T | 0.1737 | 6.06E-07 | chr:6:32505702 |
| 6 rs9269653   | 32546080 A | 0.2065 | 6.06E-07 | chr:6:32505702 |
| 6 rs9271699   | 32593179 G | 3.484  | 6.09E-07 | chr:6:32505702 |
| 6 rs113432958 | 32538366 A | 3.297  | 6.13E-07 | chr:6:32505702 |
| 6 rs116708952 | 32486590 A | 2.573  | 6.28E-07 | chr:6:32505702 |
| 6 rs9270772   | 32568967 C | 3.282  | 6.31E-07 | chr:6:32505702 |
| 6 rs9269581   | 32544785 G | 5.094  | 6.39E-07 | chr:6:32505702 |
| 6 rs556704361 | 32450273 G | 12.03  | 6.43E-07 | chr:6:32505702 |
| 6 rs115084652 | 32468978 T | 2.554  | 6.55E-07 | chr:6:32505702 |
| 6 rs73726198  | 32492262 C | 2.943  | 6.55E-07 | chr:6:32505702 |
| 6 rs9270387   | 32558317 C | 3.273  | 6.58E-07 | chr:6:32505702 |
| 6 rs146103980 | 32493373 G | 3.537  | 6.74E-07 | chr:6:32505702 |
| 6 rs35932914  | 32622150 A | 2.837  | 6.83E-07 | chr:6:32505702 |
| 6 rs68152293  | 32561020 A | 2.91   | 6.86E-07 | chr:6:32505702 |
| 6 rs146758209 | 32496618 C | 2.923  | 6.89E-07 | chr:6:32505702 |
| 6 rs9272090   | 32599736 C | 2.641  | 6.90E-07 | chr:6:32505702 |
| 6 rs552507937 | 32497354 A | 2.553  | 6.95E-07 | chr:6:32505702 |
| 6 rs536803934 | 32526907 T | 4.818  | 6.98E-07 | chr:6:32505702 |
| 6 rs545728465 | 32547479 T | 2.802  | 6.99E-07 | chr:6:32505702 |
| 6 rs9269326   | 32539996 G | 3.256  | 7.00E-07 | chr:6:32505702 |
| 6 rs370779031 | 32535688 A | 2.673  | 7.05E-07 | chr:6:32505702 |
| 6 rs375377896 | 32535693 A | 2.673  | 7.05E-07 | chr:6:32505702 |
| 6 rs187395433 | 32510968 G | 2.585  | 7.11E-07 | chr:6:32505702 |
| 6 rs536463096 | 32510951 G | 2.585  | 7.11E-07 | chr:6:32505702 |
| 6 rs527285388 | 32535496 T | 2.598  | 7.14E-07 | chr:6:32505702 |
| 6 rs182793436 | 32547530 T | 3.08   | 7.15E-07 | chr:6:32505702 |
| 6 rs9272146   | 32600914 C | 3.588  | 7.16E-07 | chr:6:32505702 |
| 6 rs9271920   | 32596430 G | 3.642  | 7.20E-07 | chr:6:32505702 |
| 6 rs9271921   | 32596431 G | 3.642  | 7.20E-07 | chr:6:32505702 |
| 6 rs9271964   | 32597464 C | 2.874  | 7.23E-07 | chr:6:32505702 |
| 6 rs9269413   | 32541458 C | 0.1929 | 7.24E-07 | chr:6:32505702 |
| 6 rs71534530  | 32511211 A | 2.963  | 7.25E-07 | chr:6:32505702 |
| 6 rs2760994   | 32574308 C | 0.2422 | 7.39E-07 | chr:6:32505702 |
| 6 rs71542415  | 32560298 C | 2.84   | 7.48E-07 | chr:6:32505702 |
| 6 rs74921648  | 32560307 A | 2.84   | 7.48E-07 | chr:6:32505702 |

|               |            |        |          |                |
|---------------|------------|--------|----------|----------------|
| 6 rs146225755 | 32491807 A | 2.638  | 7.65E-07 | chr:6:32505702 |
| 6 rs561971374 | 32503086 A | 2.587  | 7.65E-07 | chr:6:32505702 |
| 6 rs535043779 | 32497358 A | 2.545  | 7.66E-07 | chr:6:32505702 |
| 6 rs570739482 | 32497356 C | 2.545  | 7.66E-07 | chr:6:32505702 |
| 6 rs1064717   | 32546615 G | 0.1851 | 7.84E-07 | chr:6:32505702 |
| 6 rs79604868  | 32504073 A | 2.698  | 7.91E-07 | chr:6:32505702 |
| 6 rs9270406   | 32558448 T | 3.527  | 8.03E-07 | chr:6:32505702 |
| 6 rs9271909   | 32596177 T | 3.602  | 8.03E-07 | chr:6:32505702 |
| 6 rs535381236 | 32468870 G | 2.5    | 8.09E-07 | chr:6:32505702 |
| 6 rs559249402 | 32468864 C | 2.5    | 8.09E-07 | chr:6:32505702 |
| 6 rs577621741 | 32468866 A | 2.5    | 8.09E-07 | chr:6:32505702 |
| 6 rs540049194 | 32503078 A | 2.584  | 8.16E-07 | chr:6:32505702 |
| 6 rs138535752 | 32489520 G | 3.106  | 8.31E-07 | chr:6:32505702 |
| 6 rs72508468  | 32505288 C | 2.566  | 8.32E-07 | chr:6:32505702 |
| 6 rs9271919   | 32596423 G | 3.579  | 8.40E-07 | chr:6:32505702 |
| 6 rs183231933 | 32524320 T | 2.596  | 8.42E-07 | chr:6:32505702 |
| 6 rs71542412  | 32560190 C | 2.857  | 8.42E-07 | chr:6:32505702 |
| 6 rs13213605  | 32647764 C | 2.884  | 8.45E-07 | chr:6:32505702 |
| 6 rs9272055   | 32599176 A | 3.35   | 8.53E-07 | chr:6:32505702 |
| 6 rs74197584  | 32502717 T | 2.435  | 8.61E-07 | chr:6:32505702 |
| 6 rs67515384  | 32505271 A | 2.559  | 8.68E-07 | chr:6:32505702 |
| 6 rs560625026 | 32546591 C | 0.1871 | 8.70E-07 | chr:6:32505702 |
| 6 rs373664556 | 32508561 C | 2.639  | 8.70E-07 | chr:6:32505702 |
| 6 rs9271912   | 32596207 T | 3.603  | 8.77E-07 | chr:6:32505702 |
| 6 rs17210637  | 32492176 G | 3.184  | 8.78E-07 | chr:6:32505702 |
| 6 rs72508432  | 32487524 A | 3.182  | 8.89E-07 | chr:6:32505702 |
| 6 rs115254515 | 32491895 T | 2.684  | 8.90E-07 | chr:6:32505702 |
| 6 rs62405575  | 32458259 G | 3.103  | 9.00E-07 | chr:6:32505702 |
| 6 rs367997563 | 32535716 C | 2.658  | 9.00E-07 | chr:6:32505702 |
| 6 rs542233442 | 32535702 A | 2.658  | 9.00E-07 | chr:6:32505702 |
| 6 rs560908329 | 32535706 G | 2.658  | 9.00E-07 | chr:6:32505702 |
| 6 rs9270081   | 32554243 A | 3.833  | 9.01E-07 | chr:6:32505702 |
| 6 rs9271913   | 32596222 A | 3.602  | 9.03E-07 | chr:6:32505702 |
| 6 rs114354029 | 32598764 G | 3.262  | 9.16E-07 | chr:6:32505702 |
| 6 rs9269713   | 32547252 A | 3.7    | 9.33E-07 | chr:6:32505702 |
| 6 rs76376937  | 32508568 G | 2.636  | 9.33E-07 | chr:6:32505702 |
| 6 rs9271907   | 32596123 T | 3.567  | 9.37E-07 | chr:6:32505702 |
| 6 rs9271720   | 32593507 A | 3.549  | 9.40E-07 | chr:6:32505702 |
| 6 rs9271939   | 32596921 C | 3.528  | 9.41E-07 | chr:6:32505702 |
| 6 rs9272141   | 32600797 A | 3.355  | 9.44E-07 | chr:6:32505702 |
| 6 rs9272143   | 32600803 C | 3.355  | 9.44E-07 | chr:6:32505702 |
| 6 rs181916895 | 32525947 G | 2.765  | 9.50E-07 | chr:6:32505702 |
| 6 rs572264676 | 32490134 C | 2.531  | 9.54E-07 | chr:6:32505702 |

|               |            |        |          |                |
|---------------|------------|--------|----------|----------------|
| 6 rs140849564 | 32490607 G | 2.682  | 9.68E-07 | chr:6:32505702 |
| 6 rs115563246 | 32489734 A | 3.547  | 9.68E-07 | chr:6:32505702 |
| 6 rs115817940 | 32489735 T | 3.547  | 9.68E-07 | chr:6:32505702 |
| 6 rs527732063 | 32606476 A | 4.328  | 9.68E-07 | chr:6:32505702 |
| 6 rs17203769  | 32555721 C | 5.594  | 9.81E-07 | chr:6:32505702 |
| 6 rs17203776  | 32555722 A | 5.594  | 9.81E-07 | chr:6:32505702 |
| 6 rs114961271 | 32503352 T | 2.629  | 9.84E-07 | chr:6:32505702 |
| 6 rs559903629 | 32510984 A | 2.602  | 9.86E-07 | chr:6:32505702 |
| 6 rs116224274 | 32508583 C | 2.631  | 1.01E-06 | chr:6:32505702 |
| 6 rs77173653  | 32508587 G | 2.631  | 1.01E-06 | chr:6:32505702 |
| 6 rs9270487   | 32559076 G | 3.525  | 1.01E-06 | chr:6:32505702 |
| 6 rs9272054   | 32599164 A | 3.4    | 1.01E-06 | chr:6:32505702 |
| 6 rs143945008 | 32513183 T | 3.669  | 1.01E-06 | chr:6:32505702 |
| 6 rs9272100   | 32599814 T | 3.466  | 1.01E-06 | chr:6:32505702 |
| 6 rs111358198 | 32547489 C | 3.46   | 1.03E-06 | chr:6:32505702 |
| 6 rs9274902   | 32641220 C | 0.2304 | 1.03E-06 | chr:6:32505702 |
| 6 rs549879919 | 32491969 G | 2.655  | 1.04E-06 | chr:6:32505702 |
| 6 rs74389316  | 32596869 T | 3.6    | 1.04E-06 | chr:6:32505702 |
| 6 rs112512219 | 32532021 G | 2.632  | 1.05E-06 | chr:6:32505702 |
| 6 rs9271712   | 32593432 A | 2.902  | 1.06E-06 | chr:6:32505702 |
| 6 rs116711613 | 32492041 A | 2.711  | 1.07E-06 | chr:6:32505702 |
| 6 rs75236519  | 32460670 C | 2.379  | 1.07E-06 | chr:6:32505702 |
| 6 rs9269708   | 32547232 T | 3.722  | 1.08E-06 | chr:6:32505702 |
| 6 rs9269709   | 32547237 C | 3.722  | 1.08E-06 | chr:6:32505702 |
| 6 rs9269502   | 32543121 G | 3.384  | 1.08E-06 | chr:6:32505702 |
| 6 rs562045282 | 32502681 T | 2.418  | 1.09E-06 | chr:6:32505702 |
| 6 rs41287232  | 32547320 A | 2.884  | 1.09E-06 | chr:6:32505702 |
| 6 rs538727527 | 32505332 T | 2.496  | 1.10E-06 | chr:6:32505702 |
| 6 rs9272074   | 32599571 G | 2.894  | 1.11E-06 | chr:6:32505702 |
| 6 rs34645444  | 32522634 T | 0.1998 | 1.11E-06 | chr:6:32505702 |
| 6 rs576289202 | 32452609 A | 8.105  | 1.13E-06 | chr:6:32505702 |
| 6 rs9271648   | 32592358 T | 3.415  | 1.14E-06 | chr:6:32505702 |
| 6 rs199514452 | 32557489 T | 5.565  | 1.15E-06 | chr:6:32505702 |
| 6 rs201540428 | 32557486 A | 5.565  | 1.15E-06 | chr:6:32505702 |
| 6 rs28590669  | 32621443 G | 2.722  | 1.19E-06 | chr:6:32505702 |
| 6 rs28886951  | 32622035 T | 2.722  | 1.19E-06 | chr:6:32505702 |
| 6 rs55986091  | 32623713 A | 2.722  | 1.19E-06 | chr:6:32505702 |
| 6 rs41287231  | 32547316 A | 2.879  | 1.20E-06 | chr:6:32505702 |
| 6 rs112815590 | 32504110 T | 2.661  | 1.20E-06 | chr:6:32505702 |
| 6 rs9269579   | 32544772 A | 3.938  | 1.21E-06 | chr:6:32505702 |
| 6 rs9271715   | 32593441 T | 2.911  | 1.23E-06 | chr:6:32505702 |
| 6 rs9271716   | 32593442 G | 2.911  | 1.23E-06 | chr:6:32505702 |
| 6 rs9271653   | 32592556 C | 3.167  | 1.24E-06 | chr:6:32505702 |

|               |            |        |          |                |
|---------------|------------|--------|----------|----------------|
| 6 rs9271787   | 32594718 C | 2.799  | 1.24E-06 | chr:6:32505702 |
| 6 rs9270388   | 32558343 T | 2.772  | 1.25E-06 | chr:6:32505702 |
| 6 rs9270276   | 32557240 A | 0.2279 | 1.25E-06 | chr:6:32505702 |
| 6 rs73731415  | 32454428 G | 4.848  | 1.26E-06 | chr:6:32505702 |
| 6 rs9270639   | 32565658 T | 3.14   | 1.27E-06 | chr:6:32505702 |
| 6 rs141022812 | 32533567 A | 2.62   | 1.28E-06 | chr:6:32505702 |
| 6 rs113749865 | 32481973 C | 2.604  | 1.28E-06 | chr:6:32505702 |
| 6 rs112582516 | 32481392 T | 2.316  | 1.28E-06 | chr:6:32505702 |
| 6 rs555503640 | 32486477 T | 2.419  | 1.29E-06 | chr:6:32505702 |
| 6 rs552461365 | 32482115 C | 2.324  | 1.32E-06 | chr:6:32505702 |
| 6 rs9271886   | 32595633 T | 3.102  | 1.32E-06 | chr:6:32505702 |
| 6 rs114015773 | 32537468 T | 3.886  | 1.33E-06 | chr:6:32505702 |
| 6 rs9271704   | 32593317 G | 3.434  | 1.33E-06 | chr:6:32505702 |
| 6 rs9271705   | 32593321 T | 3.434  | 1.33E-06 | chr:6:32505702 |
| 6 rs111338793 | 32486248 G | 2.587  | 1.34E-06 | chr:6:32505702 |
| 6 rs113787140 | 32502901 A | 2.747  | 1.36E-06 | chr:6:32505702 |
| 6 rs9269388   | 32541102 T | 2.993  | 1.37E-06 | chr:6:32505702 |
| 6 rs201843924 | 32486878 G | 4.101  | 1.40E-06 | chr:6:32505702 |
| 6 rs72508426  | 32485598 G | 2.675  | 1.40E-06 | chr:6:32505702 |
| 6 rs9270391   | 32558361 A | 2.74   | 1.41E-06 | chr:6:32505702 |
| 6 rs9270638   | 32565657 C | 3.071  | 1.42E-06 | chr:6:32505702 |
| 6 rs182520386 | 32537710 C | 2.765  | 1.42E-06 | chr:6:32505702 |
| 6 rs35224566  | 32592313 C | 4.963  | 1.43E-06 | chr:6:32505702 |
| 6 rs116830840 | 32537945 T | 2.541  | 1.45E-06 | chr:6:32505702 |
| 6 rs4548048   | 32625022 T | 2.705  | 1.46E-06 | chr:6:32505702 |
| 6 rs9274364   | 32632495 T | 2.65   | 1.46E-06 | chr:6:32505702 |
| 6 rs9271962   | 32597434 C | 2.856  | 1.47E-06 | chr:6:32505702 |
| 6 rs189723252 | 32494948 T | 2.644  | 1.48E-06 | chr:6:32505702 |
| 6 rs9270636   | 32565648 C | 3.068  | 1.48E-06 | chr:6:32505702 |
| 6 rs9270637   | 32565650 G | 3.068  | 1.48E-06 | chr:6:32505702 |
| 6 rs9271861   | 32595287 T | 2.758  | 1.53E-06 | chr:6:32505702 |
| 6 rs9271789   | 32594768 A | 2.891  | 1.54E-06 | chr:6:32505702 |
| 6 rs9271791   | 32594810 A | 2.833  | 1.54E-06 | chr:6:32505702 |
| 6 rs534024500 | 32507307 G | 2.427  | 1.55E-06 | chr:6:32505702 |
| 6 rs9272092   | 32599756 C | 2.583  | 1.57E-06 | chr:6:32505702 |
| 6 rs73727946  | 32504967 C | 2.721  | 1.58E-06 | chr:6:32505702 |
| 6 rs200582841 | 32453810 A | 4.138  | 1.60E-06 | chr:6:32505702 |
| 6 rs6931740   | 32647469 G | 2.727  | 1.62E-06 | chr:6:32505702 |
| 6 rs115814063 | 32492093 C | 2.717  | 1.63E-06 | chr:6:32505702 |
| 6 rs9271961   | 32597412 A | 3.033  | 1.66E-06 | chr:6:32505702 |
| 6 rs72508441  | 32490752 A | 3.264  | 1.67E-06 | chr:6:32505702 |
| 6 rs571341495 | 32505326 G | 2.464  | 1.68E-06 | chr:6:32505702 |
| 6 rs7758269   | 32598812 C | 3.129  | 1.69E-06 | chr:6:32505702 |

|               |            |        |          |                |
|---------------|------------|--------|----------|----------------|
| 6 rs9270606   | 32564869 T | 3.117  | 1.69E-06 | chr:6:32505702 |
| 6 rs9275000   | 32642719 T | 0.1751 | 1.69E-06 | chr:6:32505702 |
| 6 rs9272138   | 32600757 A | 3.237  | 1.70E-06 | chr:6:32505702 |
| 6 rs9270599   | 32561656 G | 0.2676 | 1.77E-06 | chr:6:32505702 |
| 6 rs9269324   | 32539978 G | 3.047  | 1.81E-06 | chr:6:32505702 |
| 6 rs71536560  | 32529163 G | 2.524  | 1.81E-06 | chr:6:32505702 |
| 6 rs113091576 | 32491986 C | 2.562  | 1.83E-06 | chr:6:32505702 |
| 6 rs115878723 | 32503335 A | 2.554  | 1.85E-06 | chr:6:32505702 |
| 6 rs531982544 | 32503334 C | 2.554  | 1.85E-06 | chr:6:32505702 |
| 6 rs184981897 | 32486966 A | 2.791  | 1.85E-06 | chr:6:32505702 |
| 6 rs67240795  | 32530458 C | 0.2346 | 1.88E-06 | chr:6:32505702 |
| 6 rs9270505   | 32559216 G | 3.609  | 1.88E-06 | chr:6:32505702 |
| 6 rs111779823 | 32491965 A | 2.633  | 1.89E-06 | chr:6:32505702 |
| 6 rs145606733 | 32491959 G | 2.633  | 1.89E-06 | chr:6:32505702 |
| 6 rs28584179  | 32626119 T | 4.838  | 1.92E-06 | chr:6:32505702 |
| 6 rs35867827  | 32592068 C | 4.838  | 1.92E-06 | chr:6:32505702 |
| 6 rs9272167   | 32601212 A | 3.012  | 1.92E-06 | chr:6:32505702 |
| 6 rs9272094   | 32599781 C | 2.49   | 1.93E-06 | chr:6:32505702 |
| 6 rs9272096   | 32599784 C | 2.49   | 1.93E-06 | chr:6:32505702 |
| 6 rs192837519 | 32547544 G | 2.966  | 1.94E-06 | chr:6:32505702 |
| 6 rs112861810 | 32494029 G | 2.472  | 1.94E-06 | chr:6:32505702 |
| 6 rs9271963   | 32597453 A | 2.748  | 1.96E-06 | chr:6:32505702 |
| 6 rs531950386 | 32486540 T | 2.453  | 2.01E-06 | chr:6:32505702 |
| 6 rs34812354  | 32530046 T | 0.2373 | 2.02E-06 | chr:6:32505702 |
| 6 rs9271999   | 32597832 G | 3.118  | 2.03E-06 | chr:6:32505702 |
| 6 rs9272000   | 32597834 T | 3.118  | 2.03E-06 | chr:6:32505702 |
| 6 rs66874970  | 32530748 G | 3.545  | 2.03E-06 | chr:6:32505702 |
| 6 rs545503784 | 32537034 A | 2.532  | 2.03E-06 | chr:6:32505702 |
| 6 rs560891265 | 32537038 C | 2.532  | 2.03E-06 | chr:6:32505702 |
| 6 rs578162447 | 32537032 G | 2.532  | 2.03E-06 | chr:6:32505702 |
| 6 rs111823263 | 32482045 G | 2.396  | 2.03E-06 | chr:6:32505702 |
| 6 rs182987687 | 32506870 C | 2.388  | 2.04E-06 | chr:6:32505702 |
| 6 rs189968693 | 32506863 A | 2.388  | 2.04E-06 | chr:6:32505702 |
| 6 rs67979569  | 32530540 T | 0.211  | 2.05E-06 | chr:6:32505702 |
| 6 rs9270052   | 32553807 G | 0.1649 | 2.05E-06 | chr:6:32505702 |
| 6 rs9271970   | 32597550 A | 2.832  | 2.06E-06 | chr:6:32505702 |
| 6 rs539509361 | 32594399 G | 3.171  | 2.09E-06 | chr:6:32505702 |
| 6 rs9271977   | 32597623 A | 2.809  | 2.09E-06 | chr:6:32505702 |
| 6 rs35603463  | 32531745 T | 0.2616 | 2.11E-06 | chr:6:32505702 |
| 6 rs565113427 | 32647098 C | 2.614  | 2.14E-06 | chr:6:32505702 |
| 6 rs72508422  | 32481498 C | 2.28   | 2.15E-06 | chr:6:32505702 |
| 6 rs186020633 | 32535771 A | 2.913  | 2.17E-06 | chr:6:32505702 |
| 6 rs9271881   | 32595604 A | 3.04   | 2.19E-06 | chr:6:32505702 |



|               |            |        |          |                |
|---------------|------------|--------|----------|----------------|
| 6 rs116181884 | 32487509 C | 2.972  | 2.19E-06 | chr:6:32505702 |
| 6 rs9271908   | 32596131 T | 3.373  | 2.19E-06 | chr:6:32505702 |
| 6 rs113705304 | 32590453 G | 4.586  | 2.21E-06 | chr:6:32505702 |
| 6 rs67927015  | 32531442 T | 0.2077 | 2.24E-06 | chr:6:32505702 |
| 6 rs71536570  | 32531422 C | 0.2077 | 2.24E-06 | chr:6:32505702 |
| 6 rs9275003   | 32642769 C | 0.1792 | 2.25E-06 | chr:6:32505702 |
| 6 rs9269813   | 32549681 G | 0.1962 | 2.25E-06 | chr:6:32505702 |
| 6 rs9271858   | 32595223 G | 2.744  | 2.29E-06 | chr:6:32505702 |
| 6 rs9271859   | 32595231 G | 2.744  | 2.29E-06 | chr:6:32505702 |
| 6 rs188426982 | 32506878 A | 2.38   | 2.35E-06 | chr:6:32505702 |
| 6 rs191423596 | 32506888 C | 2.38   | 2.35E-06 | chr:6:32505702 |
| 6 rs9272183   | 32601604 T | 3.078  | 2.35E-06 | chr:6:32505702 |
| 6 rs76564265  | 32530582 G | 0.2071 | 2.36E-06 | chr:6:32505702 |
| 6 rs9269308   | 32539620 A | 2.581  | 2.38E-06 | chr:6:32505702 |
| 6 rs140993369 | 32535968 G | 0.2713 | 2.38E-06 | chr:6:32505702 |
| 6 rs34046799  | 32625442 A | 2.615  | 2.41E-06 | chr:6:32505702 |
| 6 rs28442287  | 32626007 T | 4.579  | 2.41E-06 | chr:6:32505702 |
| 6 rs35115714  | 32532460 C | 0.2335 | 2.43E-06 | chr:6:32505702 |
| 6 rs569972115 | 32535638 A | 3.064  | 2.44E-06 | chr:6:32505702 |
| 6 rs35464393  | 32530198 T | 0.205  | 2.45E-06 | chr:6:32505702 |
| 6 rs376533971 | 32540407 T | 2.662  | 2.45E-06 | chr:6:32505702 |
| 6 rs9275192   | 32656305 A | 0.2677 | 2.46E-06 | chr:6:32505702 |
| 6 rs9275193   | 32656306 A | 0.2677 | 2.46E-06 | chr:6:32505702 |
| 6 rs528638684 | 32490600 T | 2.539  | 2.46E-06 | chr:6:32505702 |
| 6 rs67454457  | 32530767 A | 3.297  | 2.47E-06 | chr:6:32505702 |
| 6 rs553177248 | 32529916 A | 2.624  | 2.48E-06 | chr:6:32505702 |
| 6 rs75174683  | 32504101 G | 2.569  | 2.48E-06 | chr:6:32505702 |
| 6 rs9271884   | 32595628 C | 2.963  | 2.49E-06 | chr:6:32505702 |
| 6 rs9271885   | 32595629 T | 2.963  | 2.49E-06 | chr:6:32505702 |
| 6 rs9271882   | 32595605 T | 3.026  | 2.50E-06 | chr:6:32505702 |
| 6 rs9272155   | 32601043 C | 2.842  | 2.50E-06 | chr:6:32505702 |
| 6 rs41287233  | 32547329 G | 2.72   | 2.52E-06 | chr:6:32505702 |
| 6 rs9275577   | 32679345 A | 3.197  | 2.52E-06 | chr:6:32505702 |
| 6 rs74379225  | 32606742 G | 4.136  | 2.54E-06 | chr:6:32505702 |
| 6 rs202042857 | 32540564 G | 2.815  | 2.56E-06 | chr:6:32505702 |
| 6 rs62405573  | 32458239 T | 2.636  | 2.60E-06 | chr:6:32505702 |
| 6 rs9275002   | 32642761 A | 0.1808 | 2.60E-06 | chr:6:32505702 |
| 6 rs369376349 | 32458425 A | 2.452  | 2.63E-06 | chr:6:32505702 |
| 6 rs9270616   | 32565154 G | 3.024  | 2.66E-06 | chr:6:32505702 |
| 6 rs533608307 | 32633023 T | 2.63   | 2.67E-06 | chr:6:32505702 |
| 6 rs62405572  | 32458232 G | 2.638  | 2.69E-06 | chr:6:32505702 |
| 6 rs66869156  | 32531295 T | 0.2318 | 2.70E-06 | chr:6:32505702 |
| 6 rs41287229  | 32547304 A | 2.762  | 2.75E-06 | chr:6:32505702 |

|               |            |        |          |                |
|---------------|------------|--------|----------|----------------|
| 6 rs41287230  | 32547308 A | 2.762  | 2.75E-06 | chr:6:32505702 |
| 6 rs9272170   | 32601243 G | 2.947  | 2.83E-06 | chr:6:32505702 |
| 6 rs6933740   | 32537804 T | 2.455  | 2.83E-06 | chr:6:32505702 |
| 6 rs34376179  | 32591238 G | 4.231  | 2.84E-06 | chr:6:32505702 |
| 6 rs34967069  | 32591248 T | 4.231  | 2.84E-06 | chr:6:32505702 |
| 6 rs35316732  | 32591232 T | 4.231  | 2.84E-06 | chr:6:32505702 |
| 6 rs35407265  | 32591226 G | 4.231  | 2.84E-06 | chr:6:32505702 |
| 6 rs115772678 | 32552686 G | 3.901  | 2.87E-06 | chr:6:32505702 |
| 6 rs55866704  | 32624001 T | 2.474  | 2.91E-06 | chr:6:32505702 |
| 6 rs9271794   | 32594855 A | 2.592  | 2.95E-06 | chr:6:32505702 |
| 6 rs1049055   | 32634387 C | 3.707  | 2.97E-06 | chr:6:32505702 |
| 6 rs114565678 | 32469224 A | 2.425  | 3.02E-06 | chr:6:32505702 |
| 6 rs28704178  | 32621483 A | 2.629  | 3.03E-06 | chr:6:32505702 |
| 6 rs28755250  | 32644755 G | 0.282  | 3.03E-06 | chr:6:32505702 |
| 6 rs9272182   | 32601564 A | 3.066  | 3.06E-06 | chr:6:32505702 |
| 6 rs115663137 | 32502992 C | 2.457  | 3.10E-06 | chr:6:32505702 |
| 6 rs114758808 | 32457997 T | 2.363  | 3.11E-06 | chr:6:32505702 |
| 6 rs9271945   | 32597034 A | 3.324  | 3.12E-06 | chr:6:32505702 |
| 6 rs35855915  | 32532691 G | 0.2767 | 3.21E-06 | chr:6:32505702 |
| 6 rs7768875   | 32560752 T | 3.087  | 3.21E-06 | chr:6:32505702 |
| 6 rs67704526  | 32536650 T | 2.447  | 3.23E-06 | chr:6:32505702 |
| 6 rs566775437 | 32525993 A | 2.464  | 3.23E-06 | chr:6:32505702 |
| 6 rs28755251  | 32644775 T | 0.2832 | 3.25E-06 | chr:6:32505702 |
| 6 rs9272003   | 32597940 G | 3.356  | 3.28E-06 | chr:6:32505702 |
| 6 rs9275004   | 32642839 G | 0.2046 | 3.30E-06 | chr:6:32505702 |
| 6 rs9275006   | 32642852 T | 0.2046 | 3.30E-06 | chr:6:32505702 |
| 6 rs71536577  | 32532356 C | 3.099  | 3.31E-06 | chr:6:32505702 |
| 6 rs9269246   | 32454098 C | 4.084  | 3.33E-06 | chr:6:32505702 |
| 6 rs34518860  | 32594103 A | 4.726  | 3.35E-06 | chr:6:32505702 |
| 6 rs9270585   | 32561300 C | 0.1924 | 3.35E-06 | chr:6:32505702 |
| 6 rs62404143  | 32633467 G | 4.319  | 3.40E-06 | chr:6:32505702 |
| 6 rs9270588   | 32561327 C | 0.1912 | 3.40E-06 | chr:6:32505702 |
| 6 rs28755244  | 32644631 A | 0.2843 | 3.40E-06 | chr:6:32505702 |
| 6 rs190771556 | 32485893 T | 2.71   | 3.41E-06 | chr:6:32505702 |
| 6 rs2395194   | 32447953 A | 3.995  | 3.45E-06 | chr:6:32505702 |
| 6 rs34105415  | 32532251 A | 2.949  | 3.47E-06 | chr:6:32505702 |
| 6 rs36054655  | 32532260 G | 2.949  | 3.47E-06 | chr:6:32505702 |
| 6 rs57172910  | 32529365 T | 2.296  | 3.47E-06 | chr:6:32505702 |
| 6 rs115627609 | 32485579 T | 2.575  | 3.50E-06 | chr:6:32505702 |
| 6 rs536237965 | 32535621 T | 2.96   | 3.51E-06 | chr:6:32505702 |
| 6 rs9270272   | 32557213 G | 0.2021 | 3.51E-06 | chr:6:32505702 |
| 6 rs9272099   | 32599813 G | 2.697  | 3.52E-06 | chr:6:32505702 |
| 6 rs66491634  | 32528457 T | 2.359  | 3.52E-06 | chr:6:32505702 |

|               |            |        |          |                |
|---------------|------------|--------|----------|----------------|
| 6 rs28755333  | 32646691 G | 0.2716 | 3.53E-06 | chr:6:32505702 |
| 6 rs9271857   | 32595147 T | 2.912  | 3.55E-06 | chr:6:32505702 |
| 6 rs9271788   | 32594734 G | 2.709  | 3.55E-06 | chr:6:32505702 |
| 6 rs9272002   | 32597924 G | 3.344  | 3.57E-06 | chr:6:32505702 |
| 6 rs553518894 | 32486504 T | 3.073  | 3.61E-06 | chr:6:32505702 |
| 6 rs201769738 | 32591687 A | 4.43   | 3.61E-06 | chr:6:32505702 |
| 6 rs34915133  | 32591422 G | 4.43   | 3.61E-06 | chr:6:32505702 |
| 6 rs35001273  | 32591664 A | 4.43   | 3.61E-06 | chr:6:32505702 |
| 6 rs73728618  | 32591567 A | 4.43   | 3.61E-06 | chr:6:32505702 |
| 6 rs9271711   | 32593430 T | 2.703  | 3.64E-06 | chr:6:32505702 |
| 6 rs9271714   | 32593434 G | 2.703  | 3.64E-06 | chr:6:32505702 |
| 6 rs9270632   | 32565533 A | 2.961  | 3.69E-06 | chr:6:32505702 |
| 6 rs28755249  | 32644701 A | 0.2863 | 3.72E-06 | chr:6:32505702 |
| 6 rs9270591   | 32561424 C | 0.1921 | 3.73E-06 | chr:6:32505702 |
| 6 rs143742029 | 32486683 C | 2.708  | 3.76E-06 | chr:6:32505702 |
| 6 rs9269715   | 32547278 G | 2.795  | 3.77E-06 | chr:6:32505702 |
| 6 rs67829983  | 32531335 C | 0.2794 | 3.77E-06 | chr:6:32505702 |
| 6 rs28755242  | 32644577 G | 0.2867 | 3.80E-06 | chr:6:32505702 |
| 6 rs28755243  | 32644594 A | 0.2867 | 3.80E-06 | chr:6:32505702 |
| 6 rs9272075   | 32599593 G | 2.684  | 3.81E-06 | chr:6:32505702 |
| 6 rs113409465 | 32511143 T | 2.891  | 3.82E-06 | chr:6:32505702 |
| 6 rs9274905   | 32641251 T | 2.603  | 3.83E-06 | chr:6:32505702 |
| 6 rs9270604   | 32564800 C | 2.989  | 3.89E-06 | chr:6:32505702 |
| 6 rs9270560   | 32560741 T | 0.1745 | 3.90E-06 | chr:6:32505702 |
| 6 rs76867035  | 32607270 G | 3.853  | 3.92E-06 | chr:6:32505702 |
| 6 rs28755334  | 32646759 G | 0.2718 | 3.93E-06 | chr:6:32505702 |
| 6 rs9272036   | 32598841 A | 3.042  | 3.93E-06 | chr:6:32505702 |
| 6 rs9269783   | 32549001 A | 0.1834 | 3.94E-06 | chr:6:32505702 |
| 6 rs541505856 | 32490394 T | 2.473  | 3.94E-06 | chr:6:32505702 |
| 6 rs9275156   | 32652486 C | 0.2523 | 3.95E-06 | chr:6:32505702 |
| 6 rs79498062  | 32533785 G | 2.782  | 3.96E-06 | chr:6:32505702 |
| 6 rs7771747   | 32498931 A | 2.341  | 3.97E-06 | chr:6:32505702 |
| 6 rs9272032   | 32598782 G | 2.948  | 4.00E-06 | chr:6:32505702 |
| 6 rs9272097   | 32599786 T | 2.467  | 4.02E-06 | chr:6:32505702 |
| 6 rs9272098   | 32599787 G | 2.467  | 4.02E-06 | chr:6:32505702 |
| 6 rs35366052  | 32531923 A | 2.948  | 4.03E-06 | chr:6:32505702 |
| 6 rs9271691   | 32593006 G | 2.986  | 4.05E-06 | chr:6:32505702 |
| 6 rs9271692   | 32593010 A | 2.986  | 4.05E-06 | chr:6:32505702 |
| 6 rs113397282 | 32488050 C | 8.739  | 4.07E-06 | chr:6:32505702 |
| 6 rs186176074 | 32488044 C | 8.739  | 4.07E-06 | chr:6:32505702 |
| 6 rs75729173  | 32533813 T | 2.776  | 4.13E-06 | chr:6:32505702 |
| 6 rs28755240  | 32644562 A | 0.2876 | 4.20E-06 | chr:6:32505702 |
| 6 rs6921651   | 32595345 A | 2.613  | 4.25E-06 | chr:6:32505702 |

|               |            |        |          |                |
|---------------|------------|--------|----------|----------------|
| 6 rs9271937   | 32596870 G | 3.129  | 4.27E-06 | chr:6:32505702 |
| 6 rs9271976   | 32597617 C | 2.694  | 4.27E-06 | chr:6:32505702 |
| 6 rs9272031   | 32598779 C | 2.943  | 4.27E-06 | chr:6:32505702 |
| 6 rs71536576  | 32532346 T | 2.955  | 4.29E-06 | chr:6:32505702 |
| 6 rs74223623  | 32492102 T | 2.521  | 4.30E-06 | chr:6:32505702 |
| 6 rs9269918   | 32551502 A | 0.2853 | 4.32E-06 | chr:6:32505702 |
| 6 rs148437409 | 32598479 C | 2.807  | 4.33E-06 | chr:6:32505702 |
| 6 rs139188913 | 32485921 A | 2.515  | 4.33E-06 | chr:6:32505702 |
| 6 rs71536585  | 32533131 T | 3.084  | 4.34E-06 | chr:6:32505702 |
| 6 rs572411223 | 32454634 T | 3.485  | 4.35E-06 | chr:6:32505702 |
| 6 rs9270773   | 32568990 G | 2.828  | 4.35E-06 | chr:6:32505702 |
| 6 rs9275157   | 32652552 A | 0.2462 | 4.35E-06 | chr:6:32505702 |
| 6 rs28755335  | 32646763 T | 0.2739 | 4.38E-06 | chr:6:32505702 |
| 6 rs9270159   | 32555508 C | 3.652  | 4.38E-06 | chr:6:32505702 |
| 6 rs112507860 | 32496083 T | 2.239  | 4.45E-06 | chr:6:32505702 |
| 6 rs1141883   | 32546592 A | 0.2104 | 4.46E-06 | chr:6:32505702 |
| 6 rs73732214  | 32623528 A | 2.492  | 4.47E-06 | chr:6:32505702 |
| 6 rs28755222  | 32644264 C | 5.759  | 1.36E-27 | chr:6:32648036 |
| 6 rs28755223  | 32644276 A | 5.635  | 1.46E-27 | chr:6:32648036 |
| 6 rs28755272  | 32645529 C | 7.049  | 1.65E-27 | chr:6:32648036 |
| 6 rs28755239  | 32644463 C | 8.614  | 1.67E-27 | chr:6:32648036 |
| 6 rs28755219  | 32644226 C | 5.85   | 2.03E-27 | chr:6:32648036 |
| 6 rs28755224  | 32644285 T | 5.509  | 2.18E-27 | chr:6:32648036 |
| 6 rs28755234  | 32644391 T | 7.523  | 2.33E-27 | chr:6:32648036 |
| 6 rs28755273  | 32645534 A | 6.878  | 2.47E-27 | chr:6:32648036 |
| 6 rs28755220  | 32644238 C | 5.731  | 2.51E-27 | chr:6:32648036 |
| 6 rs28755221  | 32644239 A | 5.731  | 2.51E-27 | chr:6:32648036 |
| 6 rs28755279  | 32645626 C | 8.225  | 2.54E-27 | chr:6:32648036 |
| 6 rs28755235  | 32644423 T | 7.699  | 2.54E-27 | chr:6:32648036 |
| 6 rs28755236  | 32644428 G | 7.699  | 2.54E-27 | chr:6:32648036 |
| 6 rs28755277  | 32645598 T | 7.435  | 2.71E-27 | chr:6:32648036 |
| 6 rs28755278  | 32645599 G | 7.435  | 2.71E-27 | chr:6:32648036 |
| 6 rs28755218  | 32644190 T | 6.063  | 2.77E-27 | chr:6:32648036 |
| 6 rs28755240  | 32644562 A | 8.768  | 2.93E-27 | chr:6:32648036 |
| 6 rs28755206  | 32644010 G | 5.752  | 3.71E-27 | chr:6:32648036 |
| 6 rs28755229  | 32644305 A | 5.449  | 3.84E-27 | chr:6:32648036 |
| 6 rs112838245 | 32645820 G | 8.788  | 4.04E-27 | chr:6:32648036 |
| 6 rs113838733 | 32645825 C | 8.788  | 4.04E-27 | chr:6:32648036 |
| 6 rs28755242  | 32644577 G | 8.493  | 4.17E-27 | chr:6:32648036 |
| 6 rs28755243  | 32644594 A | 8.493  | 4.17E-27 | chr:6:32648036 |
| 6 rs202178406 | 32645770 G | 8.184  | 4.29E-27 | chr:6:32648036 |
| 6 rs28371224  | 32647628 A | 7.239  | 4.30E-27 | chr:6:32648036 |
| 6 rs28755271  | 32645497 T | 6.547  | 4.63E-27 | chr:6:32648036 |

|               |            |       |          |                |
|---------------|------------|-------|----------|----------------|
| 6 rs28755280  | 32645660 A | 7.967 | 4.65E-27 | chr:6:32648036 |
| 6 rs28755325  | 32646521 A | 8.174 | 4.73E-27 | chr:6:32648036 |
| 6 rs28755276  | 32645578 C | 6.999 | 4.99E-27 | chr:6:32648036 |
| 6 rs199945715 | 32645744 T | 7.677 | 5.03E-27 | chr:6:32648036 |
| 6 rs201805319 | 32645737 G | 7.677 | 5.03E-27 | chr:6:32648036 |
| 6 rs116005148 | 32645766 A | 7.935 | 5.06E-27 | chr:6:32648036 |
| 6 rs28755250  | 32644755 G | 8.821 | 5.34E-27 | chr:6:32648036 |
| 6 rs28755225  | 32644290 T | 5.302 | 5.35E-27 | chr:6:32648036 |
| 6 rs28755293  | 32646010 T | 9.08  | 5.41E-27 | chr:6:32648036 |
| 6 rs28755216  | 32644135 A | 5.423 | 5.45E-27 | chr:6:32648036 |
| 6 rs28371225  | 32647640 A | 7.018 | 5.53E-27 | chr:6:32648036 |
| 6 rs28371222  | 32647611 T | 7.227 | 5.57E-27 | chr:6:32648036 |
| 6 rs28371223  | 32647617 G | 7.227 | 5.57E-27 | chr:6:32648036 |
| 6 rs28371241  | 32647906 G | 7.43  | 5.76E-27 | chr:6:32648036 |
| 6 rs28755292  | 32645974 A | 8.785 | 5.89E-27 | chr:6:32648036 |
| 6 rs28755270  | 32645489 A | 6.355 | 6.43E-27 | chr:6:32648036 |
| 6 rs28755251  | 32644775 T | 8.473 | 6.44E-27 | chr:6:32648036 |
| 6 rs28755370  | 32647353 G | 7.203 | 6.48E-27 | chr:6:32648036 |
| 6 rs28755371  | 32647357 C | 7.203 | 6.48E-27 | chr:6:32648036 |
| 6 rs28755368  | 32647280 C | 8.471 | 6.58E-27 | chr:6:32648036 |
| 6 rs28755369  | 32647313 G | 8.471 | 6.58E-27 | chr:6:32648036 |
| 6 rs28755324  | 32646494 T | 7.397 | 6.83E-27 | chr:6:32648036 |
| 6 rs28755290  | 32645871 C | 8.745 | 7.39E-27 | chr:6:32648036 |
| 6 rs28371221  | 32647556 C | 7.7   | 7.53E-27 | chr:6:32648036 |
| 6 rs28755291  | 32645906 G | 9.095 | 7.83E-27 | chr:6:32648036 |
| 6 rs28371242  | 32647935 G | 6.958 | 7.92E-27 | chr:6:32648036 |
| 6 rs28371243  | 32647946 C | 6.958 | 7.92E-27 | chr:6:32648036 |
| 6 rs28755252  | 32644806 G | 8.472 | 7.94E-27 | chr:6:32648036 |
| 6 rs114954038 | 32645693 T | 7.495 | 7.96E-27 | chr:6:32648036 |
| 6 rs115932399 | 32645695 T | 7.495 | 7.96E-27 | chr:6:32648036 |
| 6 rs28755244  | 32644631 A | 8.138 | 8.07E-27 | chr:6:32648036 |
| 6 rs28755367  | 32647215 A | 7.982 | 8.38E-27 | chr:6:32648036 |
| 6 rs28755209  | 32644049 T | 5.302 | 9.19E-27 | chr:6:32648036 |
| 6 rs28755203  | 32643947 G | 8.112 | 9.28E-27 | chr:6:32648036 |
| 6 rs28755204  | 32643953 T | 8.112 | 9.28E-27 | chr:6:32648036 |
| 6 rs28371220  | 32647546 A | 7.468 | 9.47E-27 | chr:6:32648036 |
| 6 rs28755208  | 32644036 C | 5.303 | 9.78E-27 | chr:6:32648036 |
| 6 rs28755246  | 32644670 C | 7.474 | 1.01E-26 | chr:6:32648036 |
| 6 rs28755247  | 32644680 T | 7.474 | 1.01E-26 | chr:6:32648036 |
| 6 rs28755192  | 32643687 T | 8.78  | 1.03E-26 | chr:6:32648036 |
| 6 rs28755249  | 32644701 A | 7.839 | 1.04E-26 | chr:6:32648036 |
| 6 rs28755212  | 32644094 C | 5.289 | 1.05E-26 | chr:6:32648036 |
| 6 rs28755213  | 32644099 G | 5.289 | 1.05E-26 | chr:6:32648036 |

|               |            |       |          |                |
|---------------|------------|-------|----------|----------------|
| 6 rs28371215  | 32647476 G | 6.329 | 1.07E-26 | chr:6:32648036 |
| 6 rs28371216  | 32647491 C | 6.329 | 1.07E-26 | chr:6:32648036 |
| 6 rs28371217  | 32647495 A | 6.329 | 1.07E-26 | chr:6:32648036 |
| 6 rs28755253  | 32644869 T | 7.339 | 1.09E-26 | chr:6:32648036 |
| 6 rs28755254  | 32644878 C | 7.339 | 1.09E-26 | chr:6:32648036 |
| 6 rs28755343  | 32646866 A | 5.863 | 1.10E-26 | chr:6:32648036 |
| 6 rs28755230  | 32644328 G | 6.03  | 1.11E-26 | chr:6:32648036 |
| 6 rs28755333  | 32646691 G | 7.024 | 1.11E-26 | chr:6:32648036 |
| 6 rs28755366  | 32647187 T | 7.653 | 1.14E-26 | chr:6:32648036 |
| 6 rs554654579 | 32644070 C | 5.288 | 1.17E-26 | chr:6:32648036 |
| 6 rs113898828 | 32643755 T | 8.194 | 1.17E-26 | chr:6:32648036 |
| 6 rs114642759 | 32643766 T | 8.194 | 1.17E-26 | chr:6:32648036 |
| 6 rs140232909 | 32643883 A | 7.846 | 1.18E-26 | chr:6:32648036 |
| 6 rs28755202  | 32643894 G | 7.846 | 1.18E-26 | chr:6:32648036 |
| 6 rs28755259  | 32644983 A | 6.651 | 1.18E-26 | chr:6:32648036 |
| 6 rs28755215  | 32644128 G | 5.191 | 1.21E-26 | chr:6:32648036 |
| 6 rs28755193  | 32643704 C | 8.479 | 1.22E-26 | chr:6:32648036 |
| 6 rs28755245  | 32644658 T | 7.224 | 1.39E-26 | chr:6:32648036 |
| 6 rs28755226  | 32644297 G | 5.027 | 1.54E-26 | chr:6:32648036 |
| 6 rs28755227  | 32644299 C | 5.027 | 1.54E-26 | chr:6:32648036 |
| 6 rs28755228  | 32644300 A | 5.027 | 1.54E-26 | chr:6:32648036 |
| 6 rs28755231  | 32644337 G | 5.878 | 1.60E-26 | chr:6:32648036 |
| 6 rs28755214  | 32644111 C | 5.176 | 1.61E-26 | chr:6:32648036 |
| 6 rs28371226  | 32647665 T | 6.111 | 1.64E-26 | chr:6:32648036 |
| 6 rs28755342  | 32646861 T | 5.717 | 1.65E-26 | chr:6:32648036 |
| 6 rs28755334  | 32646759 G | 6.764 | 1.66E-26 | chr:6:32648036 |
| 6 rs28755268  | 32645469 A | 6.025 | 1.67E-26 | chr:6:32648036 |
| 6 rs28755294  | 32646047 C | 6.323 | 1.87E-26 | chr:6:32648036 |
| 6 rs28755217  | 32644159 C | 5.454 | 1.91E-26 | chr:6:32648036 |
| 6 rs28755188  | 32643548 C | 7.946 | 1.92E-26 | chr:6:32648036 |
| 6 rs28755189  | 32643552 C | 7.946 | 1.92E-26 | chr:6:32648036 |
| 6 rs28755190  | 32643583 C | 7.91  | 1.94E-26 | chr:6:32648036 |
| 6 rs28755191  | 32643584 G | 7.91  | 1.94E-26 | chr:6:32648036 |
| 6 rs28755233  | 32644350 C | 5.863 | 2.08E-26 | chr:6:32648036 |
| 6 rs9275192   | 32656305 A | 7.951 | 2.15E-26 | chr:6:32648036 |
| 6 rs9275193   | 32656306 A | 7.951 | 2.15E-26 | chr:6:32648036 |
| 6 rs28371218  | 32647508 C | 6.284 | 2.26E-26 | chr:6:32648036 |
| 6 rs28371219  | 32647510 A | 6.284 | 2.26E-26 | chr:6:32648036 |
| 6 rs28755335  | 32646763 T | 6.598 | 2.48E-26 | chr:6:32648036 |
| 6 rs28755295  | 32646054 A | 6.154 | 2.72E-26 | chr:6:32648036 |
| 6 rs28755304  | 32646193 T | 5.94  | 2.76E-26 | chr:6:32648036 |
| 6 rs28755300  | 32646132 A | 5.576 | 2.90E-26 | chr:6:32648036 |
| 6 rs28755301  | 32646134 A | 5.576 | 2.90E-26 | chr:6:32648036 |

|               |            |       |          |                |
|---------------|------------|-------|----------|----------------|
| 6 rs28755323  | 32646469 A | 6.097 | 2.94E-26 | chr:6:32648036 |
| 6 rs28755186  | 32643479 C | 7.376 | 3.06E-26 | chr:6:32648036 |
| 6 rs28371213  | 32646059 G | 6.05  | 3.09E-26 | chr:6:32648036 |
| 6 rs28371214  | 32646061 G | 6.05  | 3.09E-26 | chr:6:32648036 |
| 6 rs141967600 | 32643824 T | 7.136 | 3.13E-26 | chr:6:32648036 |
| 6 rs28755187  | 32643516 A | 7.507 | 3.49E-26 | chr:6:32648036 |
| 6 rs2856678   | 32655830 A | 8.607 | 3.57E-26 | chr:6:32648036 |
| 6 rs28755266  | 32645432 T | 5.928 | 3.57E-26 | chr:6:32648036 |
| 6 rs28755267  | 32645446 C | 5.928 | 3.57E-26 | chr:6:32648036 |
| 6 rs9275021   | 32643220 A | 5.949 | 3.87E-26 | chr:6:32648036 |
| 6 rs114557541 | 32643844 T | 6.934 | 4.20E-26 | chr:6:32648036 |
| 6 rs116493570 | 32643860 T | 6.934 | 4.20E-26 | chr:6:32648036 |
| 6 rs28755263  | 32645109 A | 5.838 | 5.65E-26 | chr:6:32648036 |
| 6 rs28755326  | 32646588 A | 6.129 | 6.14E-26 | chr:6:32648036 |
| 6 rs9275019   | 32643166 T | 5.992 | 6.68E-26 | chr:6:32648036 |
| 6 rs28755302  | 32646143 G | 5.333 | 6.75E-26 | chr:6:32648036 |
| 6 rs28755303  | 32646145 G | 5.333 | 6.75E-26 | chr:6:32648036 |
| 6 rs28755260  | 32645073 C | 6.016 | 7.38E-26 | chr:6:32648036 |
| 6 rs28755261  | 32645075 G | 6.016 | 7.38E-26 | chr:6:32648036 |
| 6 rs28755372  | 32647383 A | 5.788 | 7.60E-26 | chr:6:32648036 |
| 6 rs9275020   | 32643184 T | 5.905 | 8.06E-26 | chr:6:32648036 |
| 6 rs9275031   | 32643420 A | 5.887 | 8.08E-26 | chr:6:32648036 |
| 6 rs28755365  | 32647150 C | 5.76  | 8.15E-26 | chr:6:32648036 |
| 6 rs9275022   | 32643251 G | 5.396 | 8.18E-26 | chr:6:32648036 |
| 6 rs28755255  | 32644915 G | 5.627 | 9.02E-26 | chr:6:32648036 |
| 6 rs28755256  | 32644919 G | 5.627 | 9.02E-26 | chr:6:32648036 |
| 6 rs28755373  | 32647388 A | 5.655 | 9.54E-26 | chr:6:32648036 |
| 6 rs28755344  | 32646904 C | 5.489 | 1.08E-25 | chr:6:32648036 |
| 6 rs28755296  | 32646085 G | 5.375 | 1.11E-25 | chr:6:32648036 |
| 6 rs28755297  | 32646087 G | 5.375 | 1.11E-25 | chr:6:32648036 |
| 6 rs28755298  | 32646094 T | 5.375 | 1.11E-25 | chr:6:32648036 |
| 6 rs28371239  | 32647854 C | 5.337 | 1.37E-25 | chr:6:32648036 |
| 6 rs28755262  | 32645088 T | 5.79  | 1.42E-25 | chr:6:32648036 |
| 6 rs28371228  | 32647698 A | 5.38  | 1.43E-25 | chr:6:32648036 |
| 6 rs28755299  | 32646107 A | 5.314 | 1.59E-25 | chr:6:32648036 |
| 6 rs28755264  | 32645131 G | 5.446 | 2.06E-25 | chr:6:32648036 |
| 6 rs28755265  | 32645144 A | 5.446 | 2.06E-25 | chr:6:32648036 |
| 6 rs28755340  | 32646830 G | 5.093 | 2.24E-25 | chr:6:32648036 |
| 6 rs28755341  | 32646837 C | 5.104 | 2.30E-25 | chr:6:32648036 |
| 6 rs28755338  | 32646804 T | 4.867 | 2.37E-25 | chr:6:32648036 |
| 6 rs28371238  | 32647846 C | 5.141 | 2.50E-25 | chr:6:32648036 |
| 6 rs28755305  | 32646232 G | 5.256 | 2.92E-25 | chr:6:32648036 |
| 6 rs28755306  | 32646238 T | 5.256 | 2.92E-25 | chr:6:32648036 |

|              |            |       |          |                |
|--------------|------------|-------|----------|----------------|
| 6 rs28755307 | 32646241 A | 5.256 | 2.92E-25 | chr:6:32648036 |
| 6 rs28755327 | 32646604 A | 5.684 | 3.01E-25 | chr:6:32648036 |
| 6 rs3129778  | 32646252 T | 5.186 | 3.38E-25 | chr:6:32648036 |
| 6 rs9275018  | 32643139 T | 5.274 | 3.41E-25 | chr:6:32648036 |
| 6 rs28755258 | 32644958 C | 5.321 | 4.00E-25 | chr:6:32648036 |
| 6 rs28755309 | 32646279 G | 4.888 | 4.08E-25 | chr:6:32648036 |
| 6 rs28755339 | 32646817 G | 4.883 | 4.49E-25 | chr:6:32648036 |
| 6 rs9275023  | 32643276 T | 4.845 | 4.56E-25 | chr:6:32648036 |
| 6 rs9275024  | 32643281 A | 4.845 | 4.56E-25 | chr:6:32648036 |
| 6 rs28755349 | 32646978 C | 5.291 | 4.71E-25 | chr:6:32648036 |
| 6 rs28755308 | 32646274 C | 4.861 | 5.45E-25 | chr:6:32648036 |
| 6 rs28755364 | 32647133 T | 4.88  | 5.58E-25 | chr:6:32648036 |
| 6 rs28755257 | 32644953 T | 5.216 | 6.19E-25 | chr:6:32648036 |
| 6 rs28755345 | 32646930 C | 5.05  | 6.77E-25 | chr:6:32648036 |
| 6 rs9275017  | 32643130 T | 5.162 | 7.20E-25 | chr:6:32648036 |
| 6 rs9275156  | 32652486 C | 11.4  | 8.33E-25 | chr:6:32648036 |
| 6 rs28755331 | 32646647 A | 5.01  | 9.54E-25 | chr:6:32648036 |
| 6 rs28755332 | 32646648 T | 5.01  | 9.54E-25 | chr:6:32648036 |
| 6 rs28755314 | 32646366 G | 4.84  | 9.95E-25 | chr:6:32648036 |
| 6 rs28755315 | 32646369 G | 4.84  | 9.95E-25 | chr:6:32648036 |
| 6 rs9274868  | 32640752 G | 14.24 | 1.03E-24 | chr:6:32648036 |
| 6 rs9274879  | 32640918 G | 9.324 | 1.05E-24 | chr:6:32648036 |
| 6 rs28755346 | 32646940 T | 4.95  | 1.08E-24 | chr:6:32648036 |
| 6 rs28755350 | 32646997 G | 5.152 | 1.11E-24 | chr:6:32648036 |
| 6 rs28755347 | 32646955 T | 4.923 | 1.14E-24 | chr:6:32648036 |
| 6 rs28755312 | 32646342 T | 4.717 | 1.23E-24 | chr:6:32648036 |
| 6 rs28755313 | 32646343 G | 4.717 | 1.23E-24 | chr:6:32648036 |
| 6 rs28755374 | 32647404 T | 4.848 | 1.44E-24 | chr:6:32648036 |
| 6 rs28755375 | 32647411 C | 4.848 | 1.44E-24 | chr:6:32648036 |
| 6 rs28755376 | 32647412 A | 4.848 | 1.44E-24 | chr:6:32648036 |
| 6 rs28755330 | 32646637 A | 4.945 | 1.48E-24 | chr:6:32648036 |
| 6 rs28755328 | 32646616 C | 4.938 | 1.81E-24 | chr:6:32648036 |
| 6 rs28755329 | 32646617 A | 4.938 | 1.81E-24 | chr:6:32648036 |
| 6 rs28755310 | 32646304 T | 4.664 | 1.91E-24 | chr:6:32648036 |
| 6 rs28755311 | 32646309 C | 4.664 | 1.91E-24 | chr:6:32648036 |
| 6 rs9274964  | 32641972 T | 11.34 | 1.98E-24 | chr:6:32648036 |
| 6 rs9274965  | 32641984 A | 10.97 | 2.09E-24 | chr:6:32648036 |
| 6 rs28755353 | 32647040 A | 4.738 | 2.58E-24 | chr:6:32648036 |
| 6 rs9274860  | 32640556 A | 11.22 | 2.89E-24 | chr:6:32648036 |
| 6 rs9274966  | 32642019 A | 10.89 | 2.90E-24 | chr:6:32648036 |
| 6 rs9274858  | 32640546 A | 10.72 | 3.65E-24 | chr:6:32648036 |
| 6 rs28755361 | 32647113 G | 4.458 | 4.53E-24 | chr:6:32648036 |
| 6 rs9275067  | 32648414 C | 16.4  | 4.75E-24 | chr:6:32648036 |



|               |            |       |          |                |
|---------------|------------|-------|----------|----------------|
| 6 rs9274856   | 32640539 T | 10.12 | 4.87E-24 | chr:6:32648036 |
| 6 rs7775228   | 32658079 C | 13.68 | 5.06E-24 | chr:6:32648036 |
| 6 rs28755316  | 32646395 G | 4.517 | 5.21E-24 | chr:6:32648036 |
| 6 rs28755317  | 32646396 G | 4.517 | 5.21E-24 | chr:6:32648036 |
| 6 rs28755354  | 32647045 T | 4.583 | 5.33E-24 | chr:6:32648036 |
| 6 rs9275015   | 32643108 A | 4.602 | 5.52E-24 | chr:6:32648036 |
| 6 rs9275016   | 32643109 G | 4.602 | 5.52E-24 | chr:6:32648036 |
| 6 rs9274936   | 32641625 T | 8.983 | 6.93E-24 | chr:6:32648036 |
| 6 rs28755362  | 32647119 C | 4.42  | 7.60E-24 | chr:6:32648036 |
| 6 rs28755363  | 32647120 T | 4.42  | 7.60E-24 | chr:6:32648036 |
| 6 rs9275066   | 32648404 T | 18.21 | 8.23E-24 | chr:6:32648036 |
| 6 rs9275080   | 32648627 T | 16.76 | 9.66E-24 | chr:6:32648036 |
| 6 rs9275075   | 32648550 A | 12.8  | 1.04E-23 | chr:6:32648036 |
| 6 rs9275076   | 32648553 G | 12.8  | 1.04E-23 | chr:6:32648036 |
| 6 rs201341530 | 32639456 C | 11.59 | 1.12E-23 | chr:6:32648036 |
| 6 rs9275157   | 32652552 A | 13.59 | 1.29E-23 | chr:6:32648036 |
| 6 rs3129713   | 32657255 T | 12.69 | 1.36E-23 | chr:6:32648036 |
| 6 rs3129715   | 32657281 T | 12.69 | 1.36E-23 | chr:6:32648036 |
| 6 rs9275079   | 32648614 C | 16.52 | 1.42E-23 | chr:6:32648036 |
| 6 rs9275077   | 32648565 C | 13.28 | 1.43E-23 | chr:6:32648036 |
| 6 rs9274939   | 32641751 A | 7.744 | 1.43E-23 | chr:6:32648036 |
| 6 rs202086737 | 32639459 G | 11.47 | 1.43E-23 | chr:6:32648036 |
| 6 rs28755351  | 32647012 G | 4.574 | 1.48E-23 | chr:6:32648036 |
| 6 rs9274862   | 32640595 T | 14.13 | 1.58E-23 | chr:6:32648036 |
| 6 rs28755352  | 32647027 T | 4.476 | 1.58E-23 | chr:6:32648036 |
| 6 rs28755322  | 32646455 A | 4.382 | 1.90E-23 | chr:6:32648036 |
| 6 rs9274892   | 32641161 G | 4.769 | 2.06E-23 | chr:6:32648036 |
| 6 rs9274893   | 32641165 T | 4.782 | 2.11E-23 | chr:6:32648036 |
| 6 rs9274941   | 32641755 G | 7.518 | 2.17E-23 | chr:6:32648036 |
| 6 rs9275009   | 32642958 A | 13.01 | 2.22E-23 | chr:6:32648036 |
| 6 rs9275064   | 32648381 T | 17.34 | 2.23E-23 | chr:6:32648036 |
| 6 rs9274863   | 32640611 C | 14.65 | 2.34E-23 | chr:6:32648036 |
| 6 rs9274882   | 32641066 T | 4.851 | 2.47E-23 | chr:6:32648036 |
| 6 rs9274938   | 32641673 C | 11.92 | 2.70E-23 | chr:6:32648036 |
| 6 rs9274874   | 32640849 T | 5.92  | 2.78E-23 | chr:6:32648036 |
| 6 rs9275072   | 32648502 T | 19.94 | 3.11E-23 | chr:6:32648036 |
| 6 rs112819910 | 32639344 T | 8.597 | 3.25E-23 | chr:6:32648036 |
| 6 rs9274812   | 32639573 T | 12.61 | 3.64E-23 | chr:6:32648036 |
| 6 rs28755356  | 32647059 G | 4.366 | 3.71E-23 | chr:6:32648036 |
| 6 rs28755357  | 32647061 C | 4.366 | 3.71E-23 | chr:6:32648036 |
| 6 rs9274972   | 32642126 T | 13.24 | 3.75E-23 | chr:6:32648036 |
| 6 rs2935909   | 32655962 G | 11.51 | 3.89E-23 | chr:6:32648036 |
| 6 rs3021056   | 32655921 T | 11.51 | 3.89E-23 | chr:6:32648036 |

|               |            |       |          |                |
|---------------|------------|-------|----------|----------------|
| 6 rs9274992   | 32642577 G | 20.56 | 3.96E-23 | chr:6:32648036 |
| 6 rs28755360  | 32647099 C | 4.153 | 4.10E-23 | chr:6:32648036 |
| 6 rs9274970   | 32642095 T | 9.796 | 4.42E-23 | chr:6:32648036 |
| 6 rs10456069  | 32659520 T | 10.99 | 4.65E-23 | chr:6:32648036 |
| 6 rs10456070  | 32659527 A | 10.99 | 4.65E-23 | chr:6:32648036 |
| 6 rs2646995   | 32650492 A | 11.04 | 5.02E-23 | chr:6:32648036 |
| 6 rs9274894   | 32641180 G | 4.491 | 5.18E-23 | chr:6:32648036 |
| 6 rs9274847   | 32640143 G | 11.24 | 5.99E-23 | chr:6:32648036 |
| 6 rs9274948   | 32641847 T | 6.497 | 6.03E-23 | chr:6:32648036 |
| 6 rs9274842   | 32640095 A | 13.05 | 6.46E-23 | chr:6:32648036 |
| 6 rs74379773  | 32662724 C | 10.83 | 7.68E-23 | chr:6:32648036 |
| 6 rs144949632 | 32639331 A | 8.006 | 8.06E-23 | chr:6:32648036 |
| 6 rs148651202 | 32639332 T | 8.006 | 8.06E-23 | chr:6:32648036 |
| 6 rs2647017   | 32663772 G | 10.8  | 8.19E-23 | chr:6:32648036 |
| 6 rs28371267  | 32663578 T | 10.8  | 8.19E-23 | chr:6:32648036 |
| 6 rs2858313   | 32663919 G | 10.8  | 8.19E-23 | chr:6:32648036 |
| 6 rs1694122   | 32642845 G | 16.29 | 8.33E-23 | chr:6:32648036 |
| 6 rs1794497   | 32649180 C | 10.77 | 8.46E-23 | chr:6:32648036 |
| 6 rs17206238  | 32665761 T | 10.83 | 8.63E-23 | chr:6:32648036 |
| 6 rs1794495   | 32649347 C | 10.83 | 8.63E-23 | chr:6:32648036 |
| 6 rs2646994   | 32665813 T | 10.83 | 8.63E-23 | chr:6:32648036 |
| 6 rs2647002   | 32657082 G | 10.83 | 8.63E-23 | chr:6:32648036 |
| 6 rs2647005   | 32664760 G | 10.83 | 8.63E-23 | chr:6:32648036 |
| 6 rs2647007   | 32664677 G | 10.83 | 8.63E-23 | chr:6:32648036 |
| 6 rs2647008   | 32661515 C | 10.83 | 8.63E-23 | chr:6:32648036 |
| 6 rs2647009   | 32661615 A | 10.83 | 8.63E-23 | chr:6:32648036 |
| 6 rs2647010   | 32661641 G | 10.83 | 8.63E-23 | chr:6:32648036 |
| 6 rs2647014   | 32664279 T | 10.83 | 8.63E-23 | chr:6:32648036 |
| 6 rs2647015   | 32664093 G | 10.83 | 8.63E-23 | chr:6:32648036 |
| 6 rs28371258  | 32658513 C | 10.83 | 8.63E-23 | chr:6:32648036 |
| 6 rs2856669   | 32663360 A | 10.83 | 8.63E-23 | chr:6:32648036 |
| 6 rs2856673   | 32659822 T | 10.83 | 8.63E-23 | chr:6:32648036 |
| 6 rs28371265  | 32659263 C | 10.78 | 8.97E-23 | chr:6:32648036 |
| 6 rs2858303   | 32650550 C | 10.59 | 9.24E-23 | chr:6:32648036 |
| 6 rs28371231  | 32647735 A | 4.081 | 9.30E-23 | chr:6:32648036 |
| 6 rs9274811   | 32639511 T | 14.85 | 1.03E-22 | chr:6:32648036 |
| 6 rs9274963   | 32641942 C | 7.512 | 1.04E-22 | chr:6:32648036 |
| 6 rs9274947   | 32641832 A | 6.287 | 1.07E-22 | chr:6:32648036 |
| 6 rs9274890   | 32641148 A | 4.531 | 1.15E-22 | chr:6:32648036 |
| 6 rs9274993   | 32642582 A | 24.02 | 1.22E-22 | chr:6:32648036 |
| 6 rs9275164   | 32652929 C | 13.73 | 1.29E-22 | chr:6:32648036 |
| 6 rs9274876   | 32640864 G | 5.446 | 1.34E-22 | chr:6:32648036 |
| 6 rs141881212 | 32639387 G | 7.491 | 1.34E-22 | chr:6:32648036 |

|               |            |       |          |                |
|---------------|------------|-------|----------|----------------|
| 6 rs9274888   | 32641142 A | 4.489 | 1.34E-22 | chr:6:32648036 |
| 6 rs9274984   | 32642378 C | 8.736 | 1.56E-22 | chr:6:32648036 |
| 6 rs9274985   | 32642379 A | 8.736 | 1.56E-22 | chr:6:32648036 |
| 6 rs28371229  | 32647728 C | 4.012 | 1.57E-22 | chr:6:32648036 |
| 6 rs28371230  | 32647729 C | 4.012 | 1.57E-22 | chr:6:32648036 |
| 6 rs139025169 | 32639390 A | 7.428 | 1.74E-22 | chr:6:32648036 |
| 6 rs9274757   | 32638280 C | 19.09 | 1.82E-22 | chr:6:32648036 |
| 6 rs9274780   | 32638741 G | 17.56 | 1.95E-22 | chr:6:32648036 |
| 6 rs9275002   | 32642761 A | 27.11 | 1.99E-22 | chr:6:32648036 |
| 6 rs9274982   | 32642335 A | 8.628 | 2.02E-22 | chr:6:32648036 |
| 6 rs9274983   | 32642337 C | 8.628 | 2.02E-22 | chr:6:32648036 |
| 6 rs9274950   | 32641864 T | 6.195 | 2.06E-22 | chr:6:32648036 |
| 6 rs9275159   | 32652607 T | 16.23 | 2.37E-22 | chr:6:32648036 |
| 6 rs9275003   | 32642769 C | 26.36 | 2.47E-22 | chr:6:32648036 |
| 6 rs9274782   | 32638795 C | 17.52 | 2.48E-22 | chr:6:32648036 |
| 6 rs9274981   | 32642313 G | 8.263 | 2.61E-22 | chr:6:32648036 |
| 6 rs28371254  | 32657452 C | 10.17 | 2.63E-22 | chr:6:32648036 |
| 6 rs9274925   | 32641411 T | 3.942 | 2.72E-22 | chr:6:32648036 |
| 6 rs2858325   | 32660366 G | 10.17 | 2.73E-22 | chr:6:32648036 |
| 6 rs9274897   | 32641195 C | 4.177 | 2.94E-22 | chr:6:32648036 |
| 6 rs9274841   | 32640059 A | 15.36 | 3.07E-22 | chr:6:32648036 |
| 6 rs9274975   | 32642187 G | 20.44 | 3.19E-22 | chr:6:32648036 |
| 6 rs9275000   | 32642719 T | 25.5  | 3.38E-22 | chr:6:32648036 |
| 6 rs9274840   | 32640035 T | 16.86 | 3.52E-22 | chr:6:32648036 |
| 6 rs9274989   | 32642424 A | 8.692 | 3.61E-22 | chr:6:32648036 |
| 6 rs3021175   | 32651404 C | 9.547 | 4.03E-22 | chr:6:32648036 |
| 6 rs9275211   | 32657844 C | 16.23 | 4.04E-22 | chr:6:32648036 |
| 6 rs9274976   | 32642220 A | 22.16 | 4.30E-22 | chr:6:32648036 |
| 6 rs9274779   | 32638726 A | 17.29 | 4.32E-22 | chr:6:32648036 |
| 6 rs9274791   | 32639163 T | 17.4  | 4.44E-22 | chr:6:32648036 |
| 6 rs28371232  | 32647761 T | 3.924 | 4.50E-22 | chr:6:32648036 |
| 6 rs9274924   | 32641403 T | 3.891 | 4.71E-22 | chr:6:32648036 |
| 6 rs2858327   | 32658935 G | 9.839 | 4.99E-22 | chr:6:32648036 |
| 6 rs9275025   | 32643303 T | 3.82  | 4.99E-22 | chr:6:32648036 |
| 6 rs9274884   | 32641078 C | 4.425 | 5.57E-22 | chr:6:32648036 |
| 6 rs9274885   | 32641081 T | 4.435 | 5.65E-22 | chr:6:32648036 |
| 6 rs28371233  | 32647762 G | 3.91  | 6.04E-22 | chr:6:32648036 |
| 6 rs9274793   | 32639247 C | 17.71 | 6.13E-22 | chr:6:32648036 |
| 6 rs9274903   | 32641221 A | 4.034 | 6.46E-22 | chr:6:32648036 |
| 6 rs9274979   | 32642280 T | 7.836 | 6.48E-22 | chr:6:32648036 |
| 6 rs2856682   | 32655405 T | 9.6   | 7.19E-22 | chr:6:32648036 |
| 6 rs28371247  | 32648003 C | 7.303 | 7.26E-22 | chr:6:32648036 |
| 6 rs28755336  | 32646798 A | 5.13  | 7.52E-22 | chr:6:32648036 |

|              |            |       |          |                |
|--------------|------------|-------|----------|----------------|
| 6 rs28755337 | 32646799 C | 5.13  | 7.52E-22 | chr:6:32648036 |
| 6 rs9275083  | 32648694 C | 25.44 | 7.60E-22 | chr:6:32648036 |
| 6 rs9274854  | 32640473 T | 17.76 | 9.96E-22 | chr:6:32648036 |
| 6 rs28371272 | 32674440 C | 9.415 | 1.33E-21 | chr:6:32648036 |
| 6 rs28371273 | 32674442 C | 9.415 | 1.33E-21 | chr:6:32648036 |
| 6 rs28371252 | 32653732 A | 8.959 | 1.45E-21 | chr:6:32648036 |
| 6 rs9275205  | 32657560 C | 24.02 | 1.47E-21 | chr:6:32648036 |
| 6 rs2858323  | 32660707 T | 9.051 | 1.68E-21 | chr:6:32648036 |
| 6 rs9274789  | 32639143 C | 18    | 1.70E-21 | chr:6:32648036 |
| 6 rs2858316  | 32662501 T | 9.063 | 1.77E-21 | chr:6:32648036 |
| 6 rs9274821  | 32639670 G | 6.794 | 1.91E-21 | chr:6:32648036 |
| 6 rs9274819  | 32639646 C | 6.474 | 2.05E-21 | chr:6:32648036 |
| 6 rs28755319 | 32646445 C | 3.805 | 2.12E-21 | chr:6:32648036 |
| 6 rs9274826  | 32639725 A | 6.792 | 2.14E-21 | chr:6:32648036 |
| 6 rs9274827  | 32639726 T | 6.792 | 2.14E-21 | chr:6:32648036 |
| 6 rs28755318 | 32646416 T | 3.752 | 2.26E-21 | chr:6:32648036 |
| 6 rs12192514 | 32674240 T | 9.266 | 2.26E-21 | chr:6:32648036 |
| 6 rs17212616 | 32674617 A | 9.266 | 2.26E-21 | chr:6:32648036 |
| 6 rs2647049  | 32672681 A | 9.266 | 2.26E-21 | chr:6:32648036 |
| 6 rs28371270 | 32674296 G | 9.266 | 2.26E-21 | chr:6:32648036 |
| 6 rs2856705  | 32670956 T | 9.266 | 2.26E-21 | chr:6:32648036 |
| 6 rs2858308  | 32670000 T | 9.266 | 2.26E-21 | chr:6:32648036 |
| 6 rs28371237 | 32647816 G | 3.821 | 2.30E-21 | chr:6:32648036 |
| 6 rs9274742  | 32638037 C | 26.3  | 2.40E-21 | chr:6:32648036 |
| 6 rs2516006  | 32650268 C | 26.84 | 2.81E-21 | chr:6:32648036 |
| 6 rs2647082  | 32628146 A | 7.316 | 3.65E-21 | chr:6:32648036 |
| 6 rs28371253 | 32654257 T | 7.659 | 3.79E-21 | chr:6:32648036 |
| 6 rs9275165  | 32652956 G | 20.55 | 4.17E-21 | chr:6:32648036 |
| 6 rs9274767  | 32638541 G | 20.79 | 4.71E-21 | chr:6:32648036 |
| 6 rs9274768  | 32638544 C | 20.79 | 4.71E-21 | chr:6:32648036 |
| 6 rs16898262 | 32677397 G | 8.744 | 4.86E-21 | chr:6:32648036 |
| 6 rs9274825  | 32639710 C | 6.523 | 5.00E-21 | chr:6:32648036 |
| 6 rs10456068 | 32659419 C | 8.557 | 5.14E-21 | chr:6:32648036 |
| 6 rs9275147  | 32651557 T | 20.99 | 5.31E-21 | chr:6:32648036 |
| 6 rs28371235 | 32647786 G | 3.72  | 5.87E-21 | chr:6:32648036 |
| 6 rs9274784  | 32638878 G | 20.53 | 6.08E-21 | chr:6:32648036 |
| 6 rs9274785  | 32638907 C | 20.53 | 6.08E-21 | chr:6:32648036 |
| 6 rs28371274 | 32674558 C | 8.77  | 6.29E-21 | chr:6:32648036 |
| 6 rs9274832  | 32639875 T | 23.97 | 7.02E-21 | chr:6:32648036 |
| 6 rs9274833  | 32639885 T | 23.97 | 7.02E-21 | chr:6:32648036 |
| 6 rs28371234 | 32647779 A | 3.655 | 7.67E-21 | chr:6:32648036 |
| 6 rs9275030  | 32643351 T | 3.537 | 7.73E-21 | chr:6:32648036 |
| 6 rs28371236 | 32647803 G | 3.705 | 8.20E-21 | chr:6:32648036 |

|               |            |        |          |                |
|---------------|------------|--------|----------|----------------|
| 6 rs9275026   | 32643318 T | 3.525  | 8.28E-21 | chr:6:32648036 |
| 6 rs9275027   | 32643320 C | 3.525  | 8.28E-21 | chr:6:32648036 |
| 6 rs9274750   | 32638114 C | 23.27  | 8.43E-21 | chr:6:32648036 |
| 6 rs9274838   | 32639973 G | 23.63  | 9.23E-21 | chr:6:32648036 |
| 6 rs9275166   | 32652963 C | 22.82  | 9.47E-21 | chr:6:32648036 |
| 6 rs9274727   | 32637696 G | 12.63  | 9.69E-21 | chr:6:32648036 |
| 6 rs28755320  | 32646449 C | 3.746  | 9.88E-21 | chr:6:32648036 |
| 6 rs28755321  | 32646451 T | 3.746  | 9.88E-21 | chr:6:32648036 |
| 6 rs9274906   | 32641252 A | 3.626  | 1.10E-20 | chr:6:32648036 |
| 6 rs9274823   | 32639695 T | 6.177  | 1.10E-20 | chr:6:32648036 |
| 6 rs9274761   | 32638371 G | 23.18  | 1.22E-20 | chr:6:32648036 |
| 6 rs9274762   | 32638411 G | 23.18  | 1.22E-20 | chr:6:32648036 |
| 6 rs9274765   | 32638510 T | 23.06  | 1.23E-20 | chr:6:32648036 |
| 6 rs9274766   | 32638512 A | 23.06  | 1.23E-20 | chr:6:32648036 |
| 6 rs9275004   | 32642839 G | 28.38  | 1.28E-20 | chr:6:32648036 |
| 6 rs9275006   | 32642852 T | 28.38  | 1.28E-20 | chr:6:32648036 |
| 6 rs9274818   | 32639624 G | 5.732  | 1.33E-20 | chr:6:32648036 |
| 6 rs9275028   | 32643328 C | 3.486  | 1.36E-20 | chr:6:32648036 |
| 6 rs9275029   | 32643336 A | 3.472  | 1.62E-20 | chr:6:32648036 |
| 6 rs9274816   | 32639621 A | 5.717  | 2.02E-20 | chr:6:32648036 |
| 6 rs9274817   | 32639623 T | 5.717  | 2.02E-20 | chr:6:32648036 |
| 6 rs9275179   | 32654275 G | 25.68  | 2.42E-20 | chr:6:32648036 |
| 6 rs9275149   | 32651616 T | 26.7   | 2.75E-20 | chr:6:32648036 |
| 6 rs9275150   | 32651617 G | 26.7   | 2.75E-20 | chr:6:32648036 |
| 6 rs9274787   | 32639028 A | 26.23  | 2.90E-20 | chr:6:32648036 |
| 6 rs9274788   | 32639036 C | 26.23  | 2.90E-20 | chr:6:32648036 |
| 6 rs9274775   | 32638643 G | 26.21  | 2.99E-20 | chr:6:32648036 |
| 6 rs2856680   | 32655606 G | 7.666  | 3.34E-20 | chr:6:32648036 |
| 6 rs537750078 | 32661051 A | 8.483  | 4.69E-20 | chr:6:32648036 |
| 6 rs9274945   | 32641796 C | 4.829  | 5.20E-20 | chr:6:32648036 |
| 6 rs2935908   | 32652606 C | 6.565  | 5.68E-20 | chr:6:32648036 |
| 6 rs9275171   | 32653972 G | 7.462  | 6.56E-20 | chr:6:32648036 |
| 6 rs9274958   | 32641915 G | 5.091  | 7.38E-20 | chr:6:32648036 |
| 6 rs9274959   | 32641916 C | 5.091  | 7.38E-20 | chr:6:32648036 |
| 6 rs9274960   | 32641917 A | 5.091  | 7.38E-20 | chr:6:32648036 |
| 6 rs9275187   | 32656038 T | 0.2076 | 7.75E-20 | chr:6:32648036 |
| 6 rs3021176   | 32652469 A | 5.473  | 1.20E-19 | chr:6:32648036 |
| 6 rs9275175   | 32654147 A | 7.688  | 1.38E-19 | chr:6:32648036 |
| 6 rs9275176   | 32654157 G | 7.688  | 1.38E-19 | chr:6:32648036 |
| 6 rs9274852   | 32640289 A | 7.184  | 1.41E-19 | chr:6:32648036 |
| 6 rs9274921   | 32641341 T | 3.284  | 1.44E-19 | chr:6:32648036 |
| 6 rs28584364  | 32512048 T | 0.1673 | 2.07E-19 | chr:6:32648036 |
| 6 rs1049087   | 32629889 G | 0.1641 | 2.67E-19 | chr:6:32648036 |

|               |            |        |          |                |
|---------------|------------|--------|----------|----------------|
| 6 rs9275113   | 32649825 G | 35.02  | 4.60E-19 | chr:6:32648036 |
| 6 rs9275115   | 32649941 C | 35.25  | 5.39E-19 | chr:6:32648036 |
| 6 rs2647045   | 32668100 A | 12.05  | 6.44E-19 | chr:6:32648036 |
| 6 rs9274920   | 32641328 A | 3.155  | 7.13E-19 | chr:6:32648036 |
| 6 rs9274777   | 32638686 T | 0.2379 | 7.50E-19 | chr:6:32648036 |
| 6 rs9274783   | 32638816 A | 0.2379 | 7.50E-19 | chr:6:32648036 |
| 6 rs114466578 | 32635501 G | 5.664  | 8.62E-19 | chr:6:32648036 |
| 6 rs66931410  | 32518235 C | 0.2068 | 8.69E-19 | chr:6:32648036 |
| 6 rs74750549  | 32511488 T | 3.481  | 9.91E-19 | chr:6:32648036 |
| 6 rs28613510  | 32518507 A | 0.1934 | 1.03E-18 | chr:6:32648036 |
| 6 rs9274907   | 32641281 A | 3.289  | 1.05E-18 | chr:6:32648036 |
| 6 rs9272229   | 32602568 T | 0.1738 | 1.39E-18 | chr:6:32648036 |
| 6 rs9272232   | 32602630 T | 0.1739 | 1.41E-18 | chr:6:32648036 |
| 6 rs3021059   | 32652344 T | 41.22  | 2.06E-18 | chr:6:32648036 |
| 6 rs9272132   | 32600677 G | 0.1837 | 2.67E-18 | chr:6:32648036 |
| 6 rs2856681   | 32655524 T | 5.81   | 2.92E-18 | chr:6:32648036 |
| 6 rs147717587 | 32623828 T | 3.53   | 2.99E-18 | chr:6:32648036 |
| 6 rs7750477   | 32651707 G | 41.47  | 3.75E-18 | chr:6:32648036 |
| 6 rs9275093   | 32649047 T | 41.18  | 4.57E-18 | chr:6:32648036 |
| 6 rs9275094   | 32649062 C | 41.29  | 4.57E-18 | chr:6:32648036 |
| 6 rs3021062   | 32651741 T | 41.46  | 4.69E-18 | chr:6:32648036 |
| 6 rs9270567   | 32560801 G | 0.215  | 4.85E-18 | chr:6:32648036 |
| 6 rs9274902   | 32641220 C | 3.217  | 5.21E-18 | chr:6:32648036 |
| 6 rs9272040   | 32598903 G | 0.1899 | 5.56E-18 | chr:6:32648036 |
| 6 rs9272041   | 32598906 A | 0.1899 | 5.56E-18 | chr:6:32648036 |
| 6 rs9272042   | 32598917 C | 0.1899 | 5.56E-18 | chr:6:32648036 |
| 6 rs9272254   | 32603098 T | 0.1868 | 5.66E-18 | chr:6:32648036 |
| 6 rs9275190   | 32656228 A | 0.2439 | 5.86E-18 | chr:6:32648036 |
| 6 rs9275191   | 32656235 T | 0.2439 | 5.86E-18 | chr:6:32648036 |
| 6 rs28755355  | 32647058 C | 4.239  | 6.19E-18 | chr:6:32648036 |
| 6 rs28755358  | 32647062 A | 4.239  | 6.19E-18 | chr:6:32648036 |
| 6 rs28755359  | 32647064 T | 4.239  | 6.19E-18 | chr:6:32648036 |
| 6 rs67927015  | 32531442 T | 3.242  | 6.37E-18 | chr:6:32648036 |
| 6 rs71536570  | 32531422 C | 3.242  | 6.37E-18 | chr:6:32648036 |
| 6 rs9272179   | 32601451 C | 0.2038 | 6.52E-18 | chr:6:32648036 |
| 6 rs9272180   | 32601461 T | 0.2038 | 6.52E-18 | chr:6:32648036 |
| 6 rs9272116   | 32600404 C | 0.188  | 7.71E-18 | chr:6:32648036 |
| 6 rs9272125   | 32600584 G | 0.2051 | 7.79E-18 | chr:6:32648036 |
| 6 rs9272218   | 32602238 T | 0.188  | 7.84E-18 | chr:6:32648036 |
| 6 rs9272043   | 32598946 G | 0.1916 | 7.90E-18 | chr:6:32648036 |
| 6 rs9272118   | 32600448 T | 0.1901 | 8.19E-18 | chr:6:32648036 |
| 6 rs476602    | 32569792 C | 0.1947 | 8.25E-18 | chr:6:32648036 |
| 6 rs2516050   | 32570352 A | 0.1915 | 8.59E-18 | chr:6:32648036 |

|              |            |        |          |                |
|--------------|------------|--------|----------|----------------|
| 6 rs476775   | 32569722 T | 0.1975 | 8.85E-18 | chr:6:32648036 |
| 6 rs9272214  | 32602096 A | 0.1916 | 9.01E-18 | chr:6:32648036 |
| 6 rs9274928  | 32641484 T | 3.572  | 9.09E-18 | chr:6:32648036 |
| 6 rs7774434  | 32657578 T | 0.1604 | 9.44E-18 | chr:6:32648036 |
| 6 rs67829983 | 32531335 C | 3.097  | 9.81E-18 | chr:6:32648036 |
| 6 rs28404276 | 32510355 A | 0.214  | 9.86E-18 | chr:6:32648036 |
| 6 rs628754   | 32574787 A | 0.2039 | 1.01E-17 | chr:6:32648036 |
| 6 rs9272104  | 32599918 C | 0.2012 | 1.07E-17 | chr:6:32648036 |
| 6 rs35464393 | 32530198 T | 3.258  | 1.08E-17 | chr:6:32648036 |
| 6 rs9272265  | 32603412 T | 0.1923 | 1.11E-17 | chr:6:32648036 |
| 6 rs9272126  | 32600589 C | 0.2077 | 1.15E-17 | chr:6:32648036 |
| 6 rs9270559  | 32560698 G | 0.2175 | 1.16E-17 | chr:6:32648036 |
| 6 rs9270580  | 32561123 C | 0.2161 | 1.16E-17 | chr:6:32648036 |
| 6 rs9270529  | 32559658 T | 0.1997 | 1.21E-17 | chr:6:32648036 |
| 6 rs9270556  | 32560606 A | 0.2029 | 1.27E-17 | chr:6:32648036 |
| 6 rs9270583  | 32561229 G | 0.2027 | 1.35E-17 | chr:6:32648036 |
| 6 rs9272239  | 32602778 G | 0.1992 | 1.38E-17 | chr:6:32648036 |
| 6 rs9272242  | 32602790 C | 0.1992 | 1.38E-17 | chr:6:32648036 |
| 6 rs9270565  | 32560774 T | 0.2342 | 1.51E-17 | chr:6:32648036 |
| 6 rs9270566  | 32560775 G | 0.2342 | 1.51E-17 | chr:6:32648036 |
| 6 rs9274917  | 32641317 C | 2.954  | 1.63E-17 | chr:6:32648036 |
| 6 rs9274918  | 32641318 A | 2.954  | 1.63E-17 | chr:6:32648036 |
| 6 rs55673904 | 32645076 T | 3.778  | 1.68E-17 | chr:6:32648036 |
| 6 rs9272114  | 32600317 C | 0.1934 | 1.70E-17 | chr:6:32648036 |
| 6 rs9272182  | 32601564 A | 0.2135 | 1.72E-17 | chr:6:32648036 |
| 6 rs9270806  | 32569563 T | 0.1984 | 1.78E-17 | chr:6:32648036 |
| 6 rs9270807  | 32569572 A | 0.1984 | 1.78E-17 | chr:6:32648036 |
| 6 rs9272127  | 32600595 C | 0.2112 | 1.88E-17 | chr:6:32648036 |
| 6 rs66869156 | 32531295 T | 3.123  | 2.06E-17 | chr:6:32648036 |
| 6 rs35115714 | 32532460 C | 3.097  | 2.11E-17 | chr:6:32648036 |
| 6 rs9274919  | 32641320 G | 2.934  | 2.15E-17 | chr:6:32648036 |
| 6 rs9270578  | 32561093 A | 0.2179 | 2.40E-17 | chr:6:32648036 |
| 6 rs9270589  | 32561390 T | 0.1977 | 2.60E-17 | chr:6:32648036 |
| 6 rs9270590  | 32561392 A | 0.1977 | 2.60E-17 | chr:6:32648036 |
| 6 rs67454457 | 32530767 A | 0.3448 | 2.63E-17 | chr:6:32648036 |
| 6 rs9270562  | 32560757 T | 0.2349 | 2.63E-17 | chr:6:32648036 |
| 6 rs9269968  | 32552251 A | 0.287  | 2.71E-17 | chr:6:32648036 |
| 6 rs67499532 | 32513184 G | 0.1948 | 2.88E-17 | chr:6:32648036 |
| 6 rs9274640  | 32636154 G | 4.772  | 2.98E-17 | chr:6:32648036 |
| 6 rs9275121  | 32650185 G | 53.11  | 3.03E-17 | chr:6:32648036 |
| 6 rs9272045  | 32599006 T | 0.2036 | 3.19E-17 | chr:6:32648036 |
| 6 rs9273821  | 32629543 C | 4.742  | 3.20E-17 | chr:6:32648036 |
| 6 rs9270574  | 32561028 T | 0.2328 | 3.25E-17 | chr:6:32648036 |

|              |            |        |          |                |
|--------------|------------|--------|----------|----------------|
| 6 rs9270530  | 32559686 A | 0.2074 | 3.26E-17 | chr:6:32648036 |
| 6 rs9272105  | 32599999 A | 0.204  | 3.32E-17 | chr:6:32648036 |
| 6 rs9270558  | 32560667 A | 0.2191 | 3.38E-17 | chr:6:32648036 |
| 6 rs28796313 | 32528538 C | 0.3548 | 3.43E-17 | chr:6:32648036 |
| 6 rs9270570  | 32560978 G | 0.2273 | 3.50E-17 | chr:6:32648036 |
| 6 rs9270538  | 32559758 A | 0.213  | 3.50E-17 | chr:6:32648036 |
| 6 rs9275122  | 32650233 C | 52.61  | 3.52E-17 | chr:6:32648036 |
| 6 rs9270592  | 32561429 T | 0.2024 | 3.61E-17 | chr:6:32648036 |
| 6 rs9272070  | 32599485 G | 0.2085 | 3.61E-17 | chr:6:32648036 |
| 6 rs9272221  | 32602334 A | 0.2049 | 3.77E-17 | chr:6:32648036 |
| 6 rs9270869  | 32571155 C | 0.2133 | 3.87E-17 | chr:6:32648036 |
| 6 rs9270871  | 32571160 G | 0.2133 | 3.87E-17 | chr:6:32648036 |
| 6 rs9275137  | 32650880 C | 51.36  | 3.94E-17 | chr:6:32648036 |
| 6 rs79749596 | 32534021 C | 0.3102 | 3.98E-17 | chr:6:32648036 |
| 6 rs9275181  | 32654325 G | 51.26  | 4.01E-17 | chr:6:32648036 |
| 6 rs9270572  | 32561010 T | 0.2318 | 4.08E-17 | chr:6:32648036 |
| 6 rs3021060  | 32651846 C | 51.62  | 4.14E-17 | chr:6:32648036 |
| 6 rs3021061  | 32651839 G | 51.62  | 4.14E-17 | chr:6:32648036 |
| 6 rs9270535  | 32559714 A | 0.2115 | 4.21E-17 | chr:6:32648036 |
| 6 rs9275140  | 32651018 A | 50.98  | 4.22E-17 | chr:6:32648036 |
| 6 rs9275090  | 32648971 G | 50.76  | 4.29E-17 | chr:6:32648036 |
| 6 rs67387464 | 32530892 A | 0.3499 | 4.83E-17 | chr:6:32648036 |
| 6 rs67455807 | 32530881 C | 0.3499 | 4.83E-17 | chr:6:32648036 |
| 6 rs76564265 | 32530582 G | 3.093  | 4.90E-17 | chr:6:32648036 |
| 6 rs3104362  | 32656697 G | 50.61  | 4.92E-17 | chr:6:32648036 |
| 6 rs3828799  | 32636062 C | 4.656  | 4.93E-17 | chr:6:32648036 |
| 6 rs3828800  | 32636063 A | 4.656  | 4.93E-17 | chr:6:32648036 |
| 6 rs3828801  | 32636071 T | 4.656  | 4.93E-17 | chr:6:32648036 |
| 6 rs9275144  | 32651218 A | 50.53  | 4.98E-17 | chr:6:32648036 |
| 6 rs2856677  | 32656815 T | 50.59  | 5.28E-17 | chr:6:32648036 |
| 6 rs9270549  | 32560440 A | 0.2217 | 5.31E-17 | chr:6:32648036 |
| 6 rs9270550  | 32560441 G | 0.2217 | 5.31E-17 | chr:6:32648036 |
| 6 rs9275110  | 32649723 C | 50.18  | 5.33E-17 | chr:6:32648036 |
| 6 rs9275111  | 32649735 T | 50.18  | 5.33E-17 | chr:6:32648036 |
| 6 rs2856691  | 32653435 A | 50.25  | 5.48E-17 | chr:6:32648036 |
| 6 rs34812354 | 32530046 T | 2.972  | 5.57E-17 | chr:6:32648036 |
| 6 rs9275096  | 32649096 T | 50.05  | 5.65E-17 | chr:6:32648036 |
| 6 rs9270004  | 32552795 T | 0.2668 | 5.82E-17 | chr:6:32648036 |
| 6 rs67979569 | 32530540 T | 3.012  | 5.95E-17 | chr:6:32648036 |
| 6 rs9270474  | 32559003 G | 0.2229 | 6.07E-17 | chr:6:32648036 |
| 6 rs9270593  | 32561445 G | 0.2096 | 6.08E-17 | chr:6:32648036 |
| 6 rs9270533  | 32559709 T | 0.2135 | 6.09E-17 | chr:6:32648036 |
| 6 rs28724250 | 32629530 T | 4.501  | 6.18E-17 | chr:6:32648036 |



|               |            |        |          |                |
|---------------|------------|--------|----------|----------------|
| 6 rs28746834  | 32633899 C | 4.222  | 6.33E-17 | chr:6:32648036 |
| 6 rs9275188   | 32656136 C | 0.2486 | 6.65E-17 | chr:6:32648036 |
| 6 rs9275189   | 32656137 A | 0.2486 | 6.65E-17 | chr:6:32648036 |
| 6 rs9270877   | 32571318 G | 0.2129 | 6.83E-17 | chr:6:32648036 |
| 6 rs9270878   | 32571320 A | 0.2129 | 6.83E-17 | chr:6:32648036 |
| 6 rs4637681   | 32623928 T | 2.942  | 7.45E-17 | chr:6:32648036 |
| 6 rs607929    | 32586998 G | 0.2059 | 8.48E-17 | chr:6:32648036 |
| 6 rs9272201   | 32601875 G | 0.2067 | 8.81E-17 | chr:6:32648036 |
| 6 rs35603463  | 32531745 T | 2.91   | 8.95E-17 | chr:6:32648036 |
| 6 rs71534539  | 32512754 A | 0.2764 | 8.97E-17 | chr:6:32648036 |
| 6 rs79498062  | 32533785 G | 0.3576 | 9.23E-17 | chr:6:32648036 |
| 6 rs9270598   | 32561618 C | 0.2261 | 9.26E-17 | chr:6:32648036 |
| 6 rs78953426  | 32529417 G | 0.3604 | 9.47E-17 | chr:6:32648036 |
| 6 rs3828809   | 32636172 T | 4.579  | 9.68E-17 | chr:6:32648036 |
| 6 rs115005201 | 32501172 A | 0.2316 | 9.86E-17 | chr:6:32648036 |
| 6 rs9270876   | 32571314 A | 0.2156 | 1.02E-16 | chr:6:32648036 |
| 6 rs9275194   | 32656334 T | 0.2643 | 1.02E-16 | chr:6:32648036 |
| 6 rs9270045   | 32553662 G | 0.2128 | 1.05E-16 | chr:6:32648036 |
| 6 rs115249219 | 32479677 G | 0.2579 | 1.10E-16 | chr:6:32648036 |
| 6 rs28793944  | 32528004 T | 0.361  | 1.12E-16 | chr:6:32648036 |
| 6 rs9270772   | 32568967 C | 0.1875 | 1.12E-16 | chr:6:32648036 |
| 6 rs71538515  | 32535300 G | 0.3631 | 1.12E-16 | chr:6:32648036 |
| 6 rs71536577  | 32532356 C | 0.3533 | 1.16E-16 | chr:6:32648036 |
| 6 rs9270576   | 32561068 T | 0.2368 | 1.22E-16 | chr:6:32648036 |
| 6 rs9270121   | 32555009 C | 0.2134 | 1.25E-16 | chr:6:32648036 |
| 6 rs9272172   | 32601260 C | 0.2273 | 1.26E-16 | chr:6:32648036 |
| 6 rs2856695   | 32651894 A | 0.2024 | 1.27E-16 | chr:6:32648036 |
| 6 rs6921651   | 32595345 A | 0.2177 | 1.28E-16 | chr:6:32648036 |
| 6 rs3997832   | 32637497 C | 4.448  | 1.28E-16 | chr:6:32648036 |
| 6 rs9270861   | 32570979 A | 0.2239 | 1.30E-16 | chr:6:32648036 |
| 6 rs9270862   | 32570981 C | 0.2239 | 1.30E-16 | chr:6:32648036 |
| 6 rs9270863   | 32570982 A | 0.2239 | 1.30E-16 | chr:6:32648036 |
| 6 rs9269254   | 32454327 T | 0.2182 | 1.35E-16 | chr:6:32648036 |
| 6 rs9270540   | 32559848 C | 0.2331 | 1.47E-16 | chr:6:32648036 |
| 6 rs680061    | 32571098 G | 0.2252 | 1.49E-16 | chr:6:32648036 |
| 6 rs679243    | 32570959 T | 0.2216 | 1.49E-16 | chr:6:32648036 |
| 6 rs9274656   | 32636351 C | 4.57   | 1.51E-16 | chr:6:32648036 |
| 6 rs75729173  | 32533813 T | 0.3631 | 1.60E-16 | chr:6:32648036 |
| 6 rs35855915  | 32532691 G | 2.914  | 1.69E-16 | chr:6:32648036 |
| 6 rs618095    | 32574736 A | 0.2033 | 1.71E-16 | chr:6:32648036 |
| 6 rs79881121  | 32502324 A | 0.2243 | 1.72E-16 | chr:6:32648036 |
| 6 rs71536576  | 32532346 T | 0.3561 | 1.72E-16 | chr:6:32648036 |
| 6 rs9272193   | 32601785 G | 0.2288 | 1.73E-16 | chr:6:32648036 |

|               |            |        |          |                |
|---------------|------------|--------|----------|----------------|
| 6 rs9272057   | 32599190 A | 0.2318 | 1.76E-16 | chr:6:32648036 |
| 6 rs9272170   | 32601243 G | 0.2299 | 1.79E-16 | chr:6:32648036 |
| 6 rs9272164   | 32601154 C | 0.2288 | 1.83E-16 | chr:6:32648036 |
| 6 rs9272142   | 32600800 C | 0.227  | 1.90E-16 | chr:6:32648036 |
| 6 rs34105415  | 32532251 A | 0.3582 | 1.90E-16 | chr:6:32648036 |
| 6 rs36054655  | 32532260 G | 0.3582 | 1.90E-16 | chr:6:32648036 |
| 6 rs75094512  | 32529708 C | 0.3661 | 2.03E-16 | chr:6:32648036 |
| 6 rs71536584  | 32533116 A | 0.3573 | 2.03E-16 | chr:6:32648036 |
| 6 rs9270503   | 32559181 G | 0.2455 | 2.08E-16 | chr:6:32648036 |
| 6 rs9270504   | 32559184 A | 0.2455 | 2.08E-16 | chr:6:32648036 |
| 6 rs9272183   | 32601604 T | 0.2342 | 2.09E-16 | chr:6:32648036 |
| 6 rs9272185   | 32601620 A | 0.2349 | 2.09E-16 | chr:6:32648036 |
| 6 rs9272186   | 32601635 T | 0.2349 | 2.09E-16 | chr:6:32648036 |
| 6 rs9274749   | 32638094 G | 0.2218 | 2.11E-16 | chr:6:32648036 |
| 6 rs9270597   | 32561598 G | 0.2382 | 2.27E-16 | chr:6:32648036 |
| 6 rs66874970  | 32530748 G | 0.3572 | 2.37E-16 | chr:6:32648036 |
| 6 rs9270481   | 32559045 C | 0.2338 | 2.37E-16 | chr:6:32648036 |
| 6 rs9272207   | 32601966 C | 0.2334 | 2.47E-16 | chr:6:32648036 |
| 6 rs73727927  | 32501214 G | 0.2413 | 2.51E-16 | chr:6:32648036 |
| 6 rs9274748   | 32638086 G | 0.2281 | 2.53E-16 | chr:6:32648036 |
| 6 rs9272023   | 32598558 G | 0.2235 | 2.55E-16 | chr:6:32648036 |
| 6 rs9270976   | 32573728 G | 0.2083 | 2.63E-16 | chr:6:32648036 |
| 6 rs9270739   | 32568150 T | 0.2086 | 2.65E-16 | chr:6:32648036 |
| 6 rs75184770  | 32529709 A | 0.3665 | 2.73E-16 | chr:6:32648036 |
| 6 rs67336789  | 32533094 C | 0.3586 | 2.95E-16 | chr:6:32648036 |
| 6 rs3021304   | 32575658 C | 0.2162 | 3.13E-16 | chr:6:32648036 |
| 6 rs9269873   | 32550796 A | 0.25   | 3.14E-16 | chr:6:32648036 |
| 6 rs9272062   | 32599265 A | 0.2319 | 3.18E-16 | chr:6:32648036 |
| 6 rs9270003   | 32552779 T | 0.2865 | 3.21E-16 | chr:6:32648036 |
| 6 rs9272074   | 32599571 G | 0.2256 | 3.21E-16 | chr:6:32648036 |
| 6 rs71536585  | 32533131 T | 0.361  | 3.22E-16 | chr:6:32648036 |
| 6 rs9270081   | 32554243 A | 0.2971 | 3.39E-16 | chr:6:32648036 |
| 6 rs28746851  | 32634506 T | 3.98   | 3.45E-16 | chr:6:32648036 |
| 6 rs615672    | 32574171 C | 0.2107 | 3.55E-16 | chr:6:32648036 |
| 6 rs9272160   | 32601130 A | 0.2366 | 4.14E-16 | chr:6:32648036 |
| 6 rs71536602  | 32534455 C | 0.2208 | 4.34E-16 | chr:6:32648036 |
| 6 rs9270803   | 32569415 A | 0.2134 | 4.38E-16 | chr:6:32648036 |
| 6 rs9271720   | 32593507 A | 0.2011 | 4.41E-16 | chr:6:32648036 |
| 6 rs9269250   | 32454269 T | 0.2559 | 4.59E-16 | chr:6:32648036 |
| 6 rs201795916 | 32514567 C | 0.2112 | 4.65E-16 | chr:6:32648036 |
| 6 rs72844118  | 32514539 T | 0.2112 | 4.65E-16 | chr:6:32648036 |
| 6 rs9270485   | 32559064 C | 0.2391 | 4.68E-16 | chr:6:32648036 |
| 6 rs67410451  | 32533352 G | 0.3616 | 4.93E-16 | chr:6:32648036 |

|               |            |        |          |                |
|---------------|------------|--------|----------|----------------|
| 6 rs9270543   | 32559881 A | 0.2447 | 4.95E-16 | chr:6:32648036 |
| 6 rs9270544   | 32559882 T | 0.2447 | 4.95E-16 | chr:6:32648036 |
| 6 rs543726509 | 32493208 A | 0.2304 | 5.14E-16 | chr:6:32648036 |
| 6 rs9272167   | 32601212 A | 0.2379 | 5.24E-16 | chr:6:32648036 |
| 6 rs9274685   | 32636844 T | 0.2013 | 5.36E-16 | chr:6:32648036 |
| 6 rs9274687   | 32636882 C | 0.2013 | 5.36E-16 | chr:6:32648036 |
| 6 rs9274880   | 32641011 A | 0.2757 | 5.48E-16 | chr:6:32648036 |
| 6 rs9272036   | 32598841 A | 0.2364 | 5.63E-16 | chr:6:32648036 |
| 6 rs3021303   | 32575746 T | 0.2152 | 5.76E-16 | chr:6:32648036 |
| 6 rs9269515   | 32543469 C | 0.2361 | 5.87E-16 | chr:6:32648036 |
| 6 rs486912    | 32575493 G | 0.2152 | 5.89E-16 | chr:6:32648036 |
| 6 rs616187    | 32574305 A | 0.2152 | 5.89E-16 | chr:6:32648036 |
| 6 rs74587827  | 32567757 A | 0.2152 | 5.89E-16 | chr:6:32648036 |
| 6 rs9270894   | 32571872 G | 0.2655 | 5.91E-16 | chr:6:32648036 |
| 6 rs71536590  | 32533587 G | 0.3651 | 5.93E-16 | chr:6:32648036 |
| 6 rs9270541   | 32559864 T | 0.2456 | 6.07E-16 | chr:6:32648036 |
| 6 rs9272155   | 32601043 C | 0.2471 | 6.12E-16 | chr:6:32648036 |
| 6 rs2858866   | 32575391 C | 0.2167 | 6.17E-16 | chr:6:32648036 |
| 6 rs137863146 | 32489871 G | 0.1533 | 6.18E-16 | chr:6:32648036 |
| 6 rs541195    | 32567321 T | 0.2137 | 6.29E-16 | chr:6:32648036 |
| 6 rs2858867   | 32575325 G | 0.2182 | 6.29E-16 | chr:6:32648036 |
| 6 rs9269555   | 32544311 A | 0.2603 | 6.54E-16 | chr:6:32648036 |
| 6 rs9270521   | 32559529 C | 0.2437 | 6.63E-16 | chr:6:32648036 |
| 6 rs9271848   | 32595027 G | 0.1953 | 6.70E-16 | chr:6:32648036 |
| 6 rs371747477 | 32489266 T | 0.2847 | 7.01E-16 | chr:6:32648036 |
| 6 rs77052117  | 32533886 G | 0.3727 | 7.03E-16 | chr:6:32648036 |
| 6 rs67240795  | 32530458 C | 2.839  | 7.04E-16 | chr:6:32648036 |
| 6 rs9272056   | 32599180 A | 0.2448 | 7.11E-16 | chr:6:32648036 |
| 6 rs73726819  | 32526540 G | 0.2222 | 7.40E-16 | chr:6:32648036 |
| 6 rs9271959   | 32597377 C | 0.2049 | 7.64E-16 | chr:6:32648036 |
| 6 rs9275117   | 32649965 T | 65.84  | 8.07E-16 | chr:6:32648036 |
| 6 rs9274649   | 32636217 A | 3.942  | 8.16E-16 | chr:6:32648036 |
| 6 rs71534530  | 32511211 A | 0.2591 | 8.41E-16 | chr:6:32648036 |
| 6 rs9275182   | 32654390 T | 65.35  | 8.59E-16 | chr:6:32648036 |
| 6 rs9271707   | 32593356 T | 0.2105 | 8.68E-16 | chr:6:32648036 |
| 6 rs9272194   | 32601825 G | 0.2378 | 8.73E-16 | chr:6:32648036 |
| 6 rs9275107   | 32649508 G | 65.65  | 8.80E-16 | chr:6:32648036 |
| 6 rs9275108   | 32649609 A | 65.65  | 8.80E-16 | chr:6:32648036 |
| 6 rs481245    | 32576114 C | 0.2182 | 8.96E-16 | chr:6:32648036 |
| 6 rs9270115   | 32554934 T | 0.2483 | 9.00E-16 | chr:6:32648036 |
| 6 rs9272130   | 32600638 G | 0.2052 | 9.13E-16 | chr:6:32648036 |
| 6 rs614437    | 32573941 G | 0.2196 | 9.34E-16 | chr:6:32648036 |
| 6 rs67642277  | 32538067 A | 0.3374 | 9.43E-16 | chr:6:32648036 |

|               |            |        |          |                |
|---------------|------------|--------|----------|----------------|
| 6 rs687675    | 32567316 G | 0.218  | 9.73E-16 | chr:6:32648036 |
| 6 rs138921502 | 32538132 C | 0.3442 | 9.73E-16 | chr:6:32648036 |
| 6 rs535694878 | 32512216 A | 0.2316 | 9.74E-16 | chr:6:32648036 |
| 6 rs556986229 | 32512217 G | 0.2316 | 9.74E-16 | chr:6:32648036 |
| 6 rs71536582  | 32533078 G | 2.769  | 1.02E-15 | chr:6:32648036 |
| 6 rs2856675   | 32658768 A | 5.158  | 1.04E-15 | chr:6:32648036 |
| 6 rs2856683   | 32655218 G | 64.91  | 1.04E-15 | chr:6:32648036 |
| 6 rs2856692   | 32653385 G | 64.7   | 1.04E-15 | chr:6:32648036 |
| 6 rs3129785   | 32656724 T | 64.57  | 1.05E-15 | chr:6:32648036 |
| 6 rs71536568  | 32531151 A | 0.3565 | 1.07E-15 | chr:6:32648036 |
| 6 rs28371261  | 32658727 A | 5.13   | 1.09E-15 | chr:6:32648036 |
| 6 rs4947342   | 32653070 A | 64.05  | 1.12E-15 | chr:6:32648036 |
| 6 rs281874783 | 32632660 G | 4.212  | 1.21E-15 | chr:6:32648036 |
| 6 rs9274390   | 32632659 T | 4.212  | 1.21E-15 | chr:6:32648036 |
| 6 rs9270363   | 32558137 T | 0.2506 | 1.22E-15 | chr:6:32648036 |
| 6 rs9270604   | 32564800 C | 0.2371 | 1.22E-15 | chr:6:32648036 |
| 6 rs615719    | 32574204 A | 0.2248 | 1.22E-15 | chr:6:32648036 |
| 6 rs9270975   | 32573726 G | 0.2207 | 1.28E-15 | chr:6:32648036 |
| 6 rs9271651   | 32592385 T | 0.2077 | 1.34E-15 | chr:6:32648036 |
| 6 rs66502252  | 32528521 C | 0.3776 | 1.37E-15 | chr:6:32648036 |
| 6 rs9271915   | 32596294 C | 0.2101 | 1.37E-15 | chr:6:32648036 |
| 6 rs615698    | 32574190 G | 0.2266 | 1.37E-15 | chr:6:32648036 |
| 6 rs141961165 | 32506799 T | 0.2766 | 1.40E-15 | chr:6:32648036 |
| 6 rs9269396   | 32541290 A | 0.3483 | 1.42E-15 | chr:6:32648036 |
| 6 rs9271960   | 32597385 T | 0.209  | 1.44E-15 | chr:6:32648036 |
| 6 rs9272383   | 32604749 T | 0.2703 | 1.45E-15 | chr:6:32648036 |
| 6 rs9271914   | 32596238 C | 0.2129 | 1.46E-15 | chr:6:32648036 |
| 6 rs113128948 | 32507129 T | 0.2881 | 1.51E-15 | chr:6:32648036 |
| 6 rs9275195   | 32656405 T | 0.2529 | 1.57E-15 | chr:6:32648036 |
| 6 rs9275196   | 32656406 G | 0.2529 | 1.57E-15 | chr:6:32648036 |
| 6 rs9269547   | 32544173 T | 3.469  | 1.58E-15 | chr:6:32648036 |
| 6 rs9270547   | 32559951 G | 0.2569 | 1.62E-15 | chr:6:32648036 |
| 6 rs9272147   | 32600976 G | 0.2593 | 1.62E-15 | chr:6:32648036 |
| 6 rs76415507  | 32492589 G | 0.2438 | 1.64E-15 | chr:6:32648036 |
| 6 rs9270667   | 32566306 C | 0.2219 | 1.64E-15 | chr:6:32648036 |
| 6 rs9274740   | 32637968 A | 0.2121 | 1.66E-15 | chr:6:32648036 |
| 6 rs9270769   | 32568907 A | 0.2263 | 1.75E-15 | chr:6:32648036 |
| 6 rs9270770   | 32568910 A | 0.2263 | 1.75E-15 | chr:6:32648036 |
| 6 rs62405640  | 32516729 T | 0.2283 | 1.77E-15 | chr:6:32648036 |
| 6 rs76033762  | 32516702 C | 0.2283 | 1.77E-15 | chr:6:32648036 |
| 6 rs9270663   | 32566101 G | 0.2227 | 1.78E-15 | chr:6:32648036 |
| 6 rs78622201  | 32518405 A | 0.2245 | 1.87E-15 | chr:6:32648036 |
| 6 rs73729111  | 32517525 T | 0.2215 | 1.87E-15 | chr:6:32648036 |

|               |            |        |          |                |
|---------------|------------|--------|----------|----------------|
| 6 rs1141883   | 32546592 A | 2.933  | 1.97E-15 | chr:6:32648036 |
| 6 rs2858875   | 32566649 C | 0.2235 | 2.03E-15 | chr:6:32648036 |
| 6 rs72853979  | 32511572 T | 0.2252 | 2.08E-15 | chr:6:32648036 |
| 6 rs113850533 | 32516839 T | 0.2282 | 2.09E-15 | chr:6:32648036 |
| 6 rs9275155   | 32652484 T | 0.2514 | 2.11E-15 | chr:6:32648036 |
| 6 rs72851028  | 32501615 A | 0.2249 | 2.12E-15 | chr:6:32648036 |
| 6 rs9271918   | 32596352 T | 0.2139 | 2.12E-15 | chr:6:32648036 |
| 6 rs9271691   | 32593006 G | 0.2113 | 2.14E-15 | chr:6:32648036 |
| 6 rs9271692   | 32593010 A | 0.2113 | 2.14E-15 | chr:6:32648036 |
| 6 rs9270606   | 32564869 T | 0.2519 | 2.15E-15 | chr:6:32648036 |
| 6 rs117488551 | 32628509 G | 6.845  | 2.17E-15 | chr:6:32648036 |
| 6 rs9271955   | 32597281 A | 0.213  | 2.18E-15 | chr:6:32648036 |
| 6 rs9271957   | 32597335 C | 0.213  | 2.18E-15 | chr:6:32648036 |
| 6 rs28371256  | 32658366 C | 5.052  | 2.22E-15 | chr:6:32648036 |
| 6 rs28371257  | 32658375 G | 5.052  | 2.22E-15 | chr:6:32648036 |
| 6 rs9274726   | 32637593 C | 0.2188 | 2.22E-15 | chr:6:32648036 |
| 6 rs9274731   | 32637823 A | 0.2642 | 2.23E-15 | chr:6:32648036 |
| 6 rs35366052  | 32531923 A | 0.3784 | 2.24E-15 | chr:6:32648036 |
| 6 rs34983499  | 32628176 A | 6.298  | 2.25E-15 | chr:6:32648036 |
| 6 rs117000147 | 32634058 T | 6.285  | 2.29E-15 | chr:6:32648036 |
| 6 rs9274698   | 32637095 A | 0.2225 | 2.33E-15 | chr:6:32648036 |
| 6 rs9270728   | 32567956 C | 0.2264 | 2.33E-15 | chr:6:32648036 |
| 6 rs34750967  | 32628487 C | 6.964  | 2.34E-15 | chr:6:32648036 |
| 6 rs72508464  | 32504341 T | 0.2188 | 2.36E-15 | chr:6:32648036 |
| 6 rs9272001   | 32597901 G | 0.2156 | 2.37E-15 | chr:6:32648036 |
| 6 rs9272120   | 32600501 G | 0.215  | 2.45E-15 | chr:6:32648036 |
| 6 rs9270787   | 32569174 T | 0.2253 | 2.47E-15 | chr:6:32648036 |
| 6 rs9272110   | 32600287 C | 0.2149 | 2.51E-15 | chr:6:32648036 |
| 6 rs9272113   | 32600291 C | 0.2149 | 2.51E-15 | chr:6:32648036 |
| 6 rs9271886   | 32595633 T | 0.2057 | 2.54E-15 | chr:6:32648036 |
| 6 rs182520386 | 32537710 C | 0.3721 | 2.54E-15 | chr:6:32648036 |
| 6 rs114520912 | 32517504 T | 0.2243 | 2.56E-15 | chr:6:32648036 |
| 6 rs116645664 | 32517505 C | 0.2243 | 2.56E-15 | chr:6:32648036 |
| 6 rs113787446 | 32518630 C | 0.2081 | 2.69E-15 | chr:6:32648036 |
| 6 rs114776163 | 32518625 G | 0.2081 | 2.69E-15 | chr:6:32648036 |
| 6 rs9270661   | 32566087 G | 0.2264 | 2.70E-15 | chr:6:32648036 |
| 6 rs9271648   | 32592358 T | 0.2203 | 2.71E-15 | chr:6:32648036 |
| 6 rs115021731 | 32489671 G | 0.2682 | 2.71E-15 | chr:6:32648036 |
| 6 rs115806221 | 32514401 G | 0.2266 | 2.71E-15 | chr:6:32648036 |
| 6 rs9271883   | 32595610 A | 0.205  | 2.74E-15 | chr:6:32648036 |
| 6 rs117067420 | 32627654 A | 6.455  | 2.85E-15 | chr:6:32648036 |
| 6 rs117407437 | 32629631 T | 6.455  | 2.85E-15 | chr:6:32648036 |
| 6 rs117780937 | 32629685 A | 6.455  | 2.85E-15 | chr:6:32648036 |

|               |            |        |          |                |
|---------------|------------|--------|----------|----------------|
| 6 rs117806464 | 32626447 A | 6.455  | 2.85E-15 | chr:6:32648036 |
| 6 rs12722106  | 32634282 G | 6.455  | 2.85E-15 | chr:6:32648036 |
| 6 rs3210146   | 32634447 G | 6.455  | 2.85E-15 | chr:6:32648036 |
| 6 rs34236112  | 32634394 A | 6.455  | 2.85E-15 | chr:6:32648036 |
| 6 rs79369121  | 32636262 A | 6.455  | 2.85E-15 | chr:6:32648036 |
| 6 rs9273861   | 32629619 A | 6.455  | 2.85E-15 | chr:6:32648036 |
| 6 rs9270651   | 32565884 T | 0.2258 | 2.87E-15 | chr:6:32648036 |
| 6 rs9270652   | 32565905 T | 0.2258 | 2.87E-15 | chr:6:32648036 |
| 6 rs9274730   | 32637817 G | 0.2651 | 2.89E-15 | chr:6:32648036 |
| 6 rs9271932   | 32596714 C | 0.223  | 2.92E-15 | chr:6:32648036 |
| 6 rs9271933   | 32596717 A | 0.223  | 2.92E-15 | chr:6:32648036 |
| 6 rs111901878 | 32516893 T | 0.234  | 2.95E-15 | chr:6:32648036 |
| 6 rs17613465  | 32622359 A | 2.949  | 3.01E-15 | chr:6:32648036 |
| 6 rs9271913   | 32596222 A | 0.2193 | 3.05E-15 | chr:6:32648036 |
| 6 rs72853983  | 32511854 A | 0.2281 | 3.06E-15 | chr:6:32648036 |
| 6 rs67721312  | 32517556 T | 0.2291 | 3.07E-15 | chr:6:32648036 |
| 6 rs74194578  | 32517590 T | 0.2291 | 3.07E-15 | chr:6:32648036 |
| 6 rs9271934   | 32596773 T | 0.2227 | 3.08E-15 | chr:6:32648036 |
| 6 rs680151    | 32571166 G | 0.2278 | 3.09E-15 | chr:6:32648036 |
| 6 rs9270771   | 32568964 T | 0.2304 | 3.09E-15 | chr:6:32648036 |
| 6 rs9271917   | 32596336 G | 0.2174 | 3.13E-15 | chr:6:32648036 |
| 6 rs117090280 | 32489265 T | 0.2702 | 3.33E-15 | chr:6:32648036 |
| 6 rs112458679 | 32512167 G | 0.21   | 3.35E-15 | chr:6:32648036 |
| 6 rs114353707 | 32513535 C | 0.2314 | 3.46E-15 | chr:6:32648036 |
| 6 rs116817148 | 32513534 G | 0.2314 | 3.46E-15 | chr:6:32648036 |
| 6 rs117403290 | 32634476 A | 6.636  | 3.51E-15 | chr:6:32648036 |
| 6 rs142795234 | 32487593 G | 0.2604 | 3.53E-15 | chr:6:32648036 |
| 6 rs9270773   | 32568990 G | 0.2305 | 3.56E-15 | chr:6:32648036 |
| 6 rs9272117   | 32600411 T | 0.2198 | 3.65E-15 | chr:6:32648036 |
| 6 rs375846271 | 32640725 T | 6.356  | 3.71E-15 | chr:6:32648036 |
| 6 rs68110554  | 32528475 T | 0.3826 | 3.77E-15 | chr:6:32648036 |
| 6 rs9271459   | 32588457 C | 0.2885 | 3.78E-15 | chr:6:32648036 |
| 6 rs9270654   | 32565946 G | 0.23   | 3.80E-15 | chr:6:32648036 |
| 6 rs75237145  | 32594295 T | 0.2168 | 3.82E-15 | chr:6:32648036 |
| 6 rs72853970  | 32509919 A | 0.2313 | 3.87E-15 | chr:6:32648036 |
| 6 rs34692792  | 32633541 G | 6.162  | 3.88E-15 | chr:6:32648036 |
| 6 rs9274683   | 32636780 G | 0.2209 | 3.99E-15 | chr:6:32648036 |
| 6 rs9274684   | 32636785 C | 0.2209 | 3.99E-15 | chr:6:32648036 |
| 6 rs35687625  | 32513840 A | 0.2339 | 4.00E-15 | chr:6:32648036 |
| 6 rs117578558 | 32628160 T | 5.846  | 4.02E-15 | chr:6:32648036 |
| 6 rs66521709  | 32509829 A | 0.2323 | 4.02E-15 | chr:6:32648036 |
| 6 rs72508418  | 32459868 T | 0.2819 | 4.17E-15 | chr:6:32648036 |
| 6 rs77236357  | 32459844 T | 0.2819 | 4.17E-15 | chr:6:32648036 |

|               |            |        |          |                |
|---------------|------------|--------|----------|----------------|
| 6 rs72853971  | 32509938 C | 0.2322 | 4.17E-15 | chr:6:32648036 |
| 6 rs116748457 | 32514768 G | 0.2252 | 4.18E-15 | chr:6:32648036 |
| 6 rs9274689   | 32636930 T | 0.2508 | 4.18E-15 | chr:6:32648036 |
| 6 rs9270548   | 32559960 T | 0.2649 | 4.19E-15 | chr:6:32648036 |
| 6 rs28819746  | 32509579 C | 0.2319 | 4.20E-15 | chr:6:32648036 |
| 6 rs9272119   | 32600470 C | 0.2237 | 4.24E-15 | chr:6:32648036 |
| 6 rs72853940  | 32508945 T | 0.2279 | 4.24E-15 | chr:6:32648036 |
| 6 rs9271884   | 32595628 C | 0.2107 | 4.35E-15 | chr:6:32648036 |
| 6 rs9271885   | 32595629 T | 0.2107 | 4.35E-15 | chr:6:32648036 |
| 6 rs9270520   | 32559493 T | 0.2788 | 4.36E-15 | chr:6:32648036 |
| 6 rs72492307  | 32509519 C | 0.2349 | 4.38E-15 | chr:6:32648036 |
| 6 rs281864445 | 32628145 C | 5.837  | 4.39E-15 | chr:6:32648036 |
| 6 rs68175425  | 32517446 G | 0.2306 | 4.45E-15 | chr:6:32648036 |
| 6 rs73727980  | 32511774 C | 0.2325 | 4.47E-15 | chr:6:32648036 |
| 6 rs73727981  | 32511791 C | 0.2325 | 4.47E-15 | chr:6:32648036 |
| 6 rs9270653   | 32565940 A | 0.2301 | 4.49E-15 | chr:6:32648036 |
| 6 rs9270655   | 32565966 T | 0.2301 | 4.49E-15 | chr:6:32648036 |
| 6 rs9270657   | 32566021 G | 0.2301 | 4.49E-15 | chr:6:32648036 |
| 6 rs73727960  | 32508989 G | 0.2306 | 4.57E-15 | chr:6:32648036 |
| 6 rs9270525   | 32559595 G | 0.2571 | 4.60E-15 | chr:6:32648036 |
| 6 rs9270609   | 32565051 T | 0.2518 | 4.60E-15 | chr:6:32648036 |
| 6 rs281863397 | 32631080 T | 5.089  | 4.64E-15 | chr:6:32648036 |
| 6 rs9272044   | 32598971 A | 0.2225 | 4.69E-15 | chr:6:32648036 |
| 6 rs35301884  | 32513638 C | 0.2338 | 4.72E-15 | chr:6:32648036 |
| 6 rs72492319  | 32511987 T | 0.2338 | 4.72E-15 | chr:6:32648036 |
| 6 rs73397416  | 32521951 C | 0.2338 | 4.72E-15 | chr:6:32648036 |
| 6 rs75141783  | 32511944 A | 0.2338 | 4.72E-15 | chr:6:32648036 |
| 6 rs9271912   | 32596207 T | 0.2229 | 4.80E-15 | chr:6:32648036 |
| 6 rs9270636   | 32565648 C | 0.2155 | 4.95E-15 | chr:6:32648036 |
| 6 rs9270637   | 32565650 G | 0.2155 | 4.95E-15 | chr:6:32648036 |
| 6 rs199973717 | 32493600 G | 0.2388 | 5.08E-15 | chr:6:32648036 |
| 6 rs9270621   | 32565283 A | 0.2339 | 5.14E-15 | chr:6:32648036 |
| 6 rs34265294  | 32489118 A | 0.2799 | 5.16E-15 | chr:6:32648036 |
| 6 rs9272121   | 32600556 C | 0.22   | 5.24E-15 | chr:6:32648036 |
| 6 rs149234868 | 32454921 G | 0.3128 | 5.27E-15 | chr:6:32648036 |
| 6 rs118038025 | 32625692 C | 2.669  | 5.29E-15 | chr:6:32648036 |
| 6 rs139910587 | 32490483 C | 0.2653 | 5.36E-15 | chr:6:32648036 |
| 6 rs9271615   | 32591686 G | 0.2237 | 5.40E-15 | chr:6:32648036 |
| 6 rs73729138  | 32520854 G | 0.2338 | 5.48E-15 | chr:6:32648036 |
| 6 rs9274935   | 32641580 T | 0.3323 | 5.51E-15 | chr:6:32648036 |
| 6 rs67912528  | 32536466 A | 0.3631 | 5.56E-15 | chr:6:32648036 |
| 6 rs34615209  | 32513862 T | 0.2364 | 5.62E-15 | chr:6:32648036 |
| 6 rs28366259  | 32559516 C | 0.2731 | 5.67E-15 | chr:6:32648036 |

|               |            |        |          |                |
|---------------|------------|--------|----------|----------------|
| 6 rs72492310  | 32509867 G | 0.2353 | 5.68E-15 | chr:6:32648036 |
| 6 rs3828832   | 32521083 C | 0.2286 | 5.71E-15 | chr:6:32648036 |
| 6 rs68126668  | 32509603 A | 0.2343 | 6.02E-15 | chr:6:32648036 |
| 6 rs9271922   | 32596444 A | 0.2262 | 6.04E-15 | chr:6:32648036 |
| 6 rs72492311  | 32509979 T | 0.2353 | 6.12E-15 | chr:6:32648036 |
| 6 rs72492325  | 32520151 C | 0.2382 | 6.16E-15 | chr:6:32648036 |
| 6 rs9273492   | 32628229 A | 3.8    | 6.17E-15 | chr:6:32648036 |
| 6 rs9271881   | 32595604 A | 0.2149 | 6.19E-15 | chr:6:32648036 |
| 6 rs114246255 | 32509461 G | 0.2416 | 6.21E-15 | chr:6:32648036 |
| 6 rs115704383 | 32509460 T | 0.2416 | 6.21E-15 | chr:6:32648036 |
| 6 rs9271896   | 32595907 A | 0.2255 | 6.25E-15 | chr:6:32648036 |
| 6 rs182191708 | 32490480 C | 0.2653 | 6.31E-15 | chr:6:32648036 |
| 6 rs73727973  | 32509691 G | 0.2349 | 6.36E-15 | chr:6:32648036 |
| 6 rs72508417  | 32459813 A | 0.271  | 6.40E-15 | chr:6:32648036 |
| 6 rs9271892   | 32595813 C | 0.2259 | 6.46E-15 | chr:6:32648036 |
| 6 rs9270526   | 32559597 A | 0.2605 | 6.52E-15 | chr:6:32648036 |
| 6 rs9270527   | 32559600 A | 0.2605 | 6.52E-15 | chr:6:32648036 |
| 6 rs9270528   | 32559603 C | 0.2605 | 6.52E-15 | chr:6:32648036 |
| 6 rs113787140 | 32502901 A | 0.2748 | 6.59E-15 | chr:6:32648036 |
| 6 rs78621519  | 32628536 C | 6.543  | 6.65E-15 | chr:6:32648036 |
| 6 rs116405199 | 32504367 T | 0.2264 | 6.67E-15 | chr:6:32648036 |
| 6 rs78994392  | 32504362 T | 0.2264 | 6.67E-15 | chr:6:32648036 |
| 6 rs9271890   | 32595779 A | 0.2277 | 6.68E-15 | chr:6:32648036 |
| 6 rs9271891   | 32595783 T | 0.2277 | 6.68E-15 | chr:6:32648036 |
| 6 rs115712701 | 32501737 C | 0.2367 | 6.73E-15 | chr:6:32648036 |
| 6 rs9271712   | 32593432 A | 0.2627 | 6.74E-15 | chr:6:32648036 |
| 6 rs147023195 | 32518295 T | 0.2391 | 6.80E-15 | chr:6:32648036 |
| 6 rs9272108   | 32600228 C | 0.2257 | 6.81E-15 | chr:6:32648036 |
| 6 rs9272134   | 32600705 G | 0.22   | 6.88E-15 | chr:6:32648036 |
| 6 rs28846812  | 32527845 G | 0.3872 | 6.97E-15 | chr:6:32648036 |
| 6 rs534064478 | 32512189 T | 0.2228 | 7.20E-15 | chr:6:32648036 |
| 6 rs546382275 | 32512190 G | 0.2228 | 7.20E-15 | chr:6:32648036 |
| 6 rs74997284  | 32518934 G | 0.1993 | 7.20E-15 | chr:6:32648036 |
| 6 rs78326230  | 32518935 A | 0.1993 | 7.20E-15 | chr:6:32648036 |
| 6 rs72844171  | 32520749 C | 0.2374 | 7.30E-15 | chr:6:32648036 |
| 6 rs9272124   | 32600581 A | 0.2246 | 7.37E-15 | chr:6:32648036 |
| 6 rs9270642   | 32565707 T | 0.2364 | 7.43E-15 | chr:6:32648036 |
| 6 rs72844188  | 32521427 C | 0.2377 | 7.44E-15 | chr:6:32648036 |
| 6 rs9270638   | 32565657 C | 0.2186 | 7.50E-15 | chr:6:32648036 |
| 6 rs201814598 | 32633493 A | 5.696  | 7.51E-15 | chr:6:32648036 |
| 6 rs1064664   | 32552075 G | 0.2268 | 7.53E-15 | chr:6:32648036 |
| 6 rs35957455  | 32521195 T | 0.2336 | 7.54E-15 | chr:6:32648036 |
| 6 rs72853950  | 32509472 T | 0.2426 | 7.61E-15 | chr:6:32648036 |



|               |            |        |          |                |
|---------------|------------|--------|----------|----------------|
| 6 rs9275154   | 32652435 C | 0.2537 | 7.61E-15 | chr:6:32648036 |
| 6 rs9270658   | 32566072 C | 0.235  | 7.84E-15 | chr:6:32648036 |
| 6 rs9270659   | 32566076 T | 0.235  | 7.84E-15 | chr:6:32648036 |
| 6 rs9270660   | 32566077 G | 0.235  | 7.84E-15 | chr:6:32648036 |
| 6 rs117844647 | 32633594 C | 6.089  | 7.89E-15 | chr:6:32648036 |
| 6 rs66532036  | 32519319 A | 0.237  | 7.90E-15 | chr:6:32648036 |
| 6 rs9270616   | 32565154 G | 0.2525 | 7.93E-15 | chr:6:32648036 |
| 6 rs114638791 | 32538268 A | 0.1765 | 7.94E-15 | chr:6:32648036 |
| 6 rs9271935   | 32596831 C | 0.2314 | 7.97E-15 | chr:6:32648036 |
| 6 rs646159    | 32576446 T | 0.2419 | 8.08E-15 | chr:6:32648036 |
| 6 rs9271945   | 32597034 A | 0.2248 | 8.17E-15 | chr:6:32648036 |
| 6 rs76483802  | 32454913 G | 0.1941 | 8.18E-15 | chr:6:32648036 |
| 6 rs66796862  | 32521664 C | 0.237  | 8.33E-15 | chr:6:32648036 |
| 6 rs9270524   | 32559588 A | 0.2627 | 8.50E-15 | chr:6:32648036 |
| 6 rs113225456 | 32521406 T | 0.2374 | 8.51E-15 | chr:6:32648036 |
| 6 rs72844187  | 32521419 G | 0.2374 | 8.51E-15 | chr:6:32648036 |
| 6 rs72853968  | 32509883 C | 0.2389 | 8.59E-15 | chr:6:32648036 |
| 6 rs72492327  | 32520465 G | 0.24   | 8.71E-15 | chr:6:32648036 |
| 6 rs9270034   | 32553418 G | 0.2325 | 9.02E-15 | chr:6:32648036 |
| 6 rs111945767 | 32517045 C | 0.2567 | 9.04E-15 | chr:6:32648036 |
| 6 rs117867884 | 32628716 T | 6.155  | 9.08E-15 | chr:6:32648036 |
| 6 rs117988605 | 32628705 A | 6.155  | 9.08E-15 | chr:6:32648036 |
| 6 rs9270796   | 32569293 A | 0.238  | 9.10E-15 | chr:6:32648036 |
| 6 rs115123240 | 32519919 G | 0.2416 | 9.19E-15 | chr:6:32648036 |
| 6 rs9270647   | 32565805 C | 0.2373 | 9.32E-15 | chr:6:32648036 |
| 6 rs9270649   | 32565808 A | 0.2373 | 9.32E-15 | chr:6:32648036 |
| 6 rs73727954  | 32508902 T | 0.2345 | 9.42E-15 | chr:6:32648036 |
| 6 rs67717173  | 32520137 T | 0.2428 | 9.43E-15 | chr:6:32648036 |
| 6 rs4639377   | 32625283 T | 2.667  | 9.46E-15 | chr:6:32648036 |
| 6 rs146225755 | 32491807 A | 0.2965 | 9.51E-15 | chr:6:32648036 |
| 6 rs9268499   | 32375695 A | 4.705  | 9.52E-15 | chr:6:32648036 |
| 6 rs9271919   | 32596423 G | 0.2309 | 9.64E-15 | chr:6:32648036 |
| 6 rs9271882   | 32595605 T | 0.2197 | 9.70E-15 | chr:6:32648036 |
| 6 rs113209512 | 32508875 T | 0.235  | 9.74E-15 | chr:6:32648036 |
| 6 rs114171624 | 32514706 G | 0.2296 | 9.80E-15 | chr:6:32648036 |
| 6 rs34369284  | 32514144 T | 0.2404 | 9.85E-15 | chr:6:32648036 |
| 6 rs72492306  | 32509510 A | 0.2432 | 9.92E-15 | chr:6:32648036 |
| 6 rs9271888   | 32595732 C | 0.23   | 9.95E-15 | chr:6:32648036 |
| 6 rs9271889   | 32595747 A | 0.23   | 9.95E-15 | chr:6:32648036 |
| 6 rs9269484   | 32542711 C | 2.803  | 9.96E-15 | chr:6:32648036 |
| 6 rs112180912 | 32518436 A | 0.2373 | 1.01E-14 | chr:6:32648036 |
| 6 rs9274778   | 32638694 G | 0.2576 | 1.01E-14 | chr:6:32648036 |
| 6 rs376327303 | 32520719 A | 0.2386 | 1.02E-14 | chr:6:32648036 |

|               |            |        |          |                |
|---------------|------------|--------|----------|----------------|
| 6 rs72492303  | 32509061 T | 0.2402 | 1.04E-14 | chr:6:32648036 |
| 6 rs72851046  | 32501957 G | 0.2394 | 1.04E-14 | chr:6:32648036 |
| 6 rs72851047  | 32501962 T | 0.2394 | 1.04E-14 | chr:6:32648036 |
| 6 rs116850050 | 32633987 T | 6.173  | 1.05E-14 | chr:6:32648036 |
| 6 rs34029741  | 32633975 T | 6.173  | 1.05E-14 | chr:6:32648036 |
| 6 rs9270123   | 32555032 A | 0.3079 | 1.05E-14 | chr:6:32648036 |
| 6 rs183607390 | 32634227 T | 6.161  | 1.05E-14 | chr:6:32648036 |
| 6 rs536708130 | 32518949 G | 0.2028 | 1.07E-14 | chr:6:32648036 |
| 6 rs537977627 | 32510140 A | 0.229  | 1.10E-14 | chr:6:32648036 |
| 6 rs71534520  | 32510146 G | 0.229  | 1.10E-14 | chr:6:32648036 |
| 6 rs112280675 | 32522066 A | 0.2346 | 1.11E-14 | chr:6:32648036 |
| 6 rs36222416  | 32634339 G | 6.09   | 1.11E-14 | chr:6:32648036 |
| 6 rs9271930   | 32596677 G | 0.2335 | 1.11E-14 | chr:6:32648036 |
| 6 rs9271927   | 32596647 C | 0.2354 | 1.11E-14 | chr:6:32648036 |
| 6 rs9271928   | 32596648 A | 0.2354 | 1.11E-14 | chr:6:32648036 |
| 6 rs9271929   | 32596650 C | 0.2354 | 1.11E-14 | chr:6:32648036 |
| 6 rs3021057   | 32652363 C | 0.2555 | 1.12E-14 | chr:6:32648036 |
| 6 rs9271910   | 32596183 C | 0.23   | 1.13E-14 | chr:6:32648036 |
| 6 rs9272128   | 32600601 A | 0.2253 | 1.13E-14 | chr:6:32648036 |
| 6 rs9272129   | 32600602 T | 0.2253 | 1.13E-14 | chr:6:32648036 |
| 6 rs73729339  | 32560017 A | 0.264  | 1.13E-14 | chr:6:32648036 |
| 6 rs74207277  | 32560091 T | 0.264  | 1.13E-14 | chr:6:32648036 |
| 6 rs281864239 | 32629515 G | 6.069  | 1.14E-14 | chr:6:32648036 |
| 6 rs139029897 | 32454882 G | 0.276  | 1.14E-14 | chr:6:32648036 |
| 6 rs139676734 | 32629518 G | 6.098  | 1.15E-14 | chr:6:32648036 |
| 6 rs72844120  | 32514540 A | 0.223  | 1.16E-14 | chr:6:32648036 |
| 6 rs9271937   | 32596870 G | 0.2356 | 1.19E-14 | chr:6:32648036 |
| 6 rs116937403 | 32628316 G | 6.288  | 1.19E-14 | chr:6:32648036 |
| 6 rs117531835 | 32628315 T | 6.288  | 1.19E-14 | chr:6:32648036 |
| 6 rs9272081   | 32599655 C | 0.2506 | 1.22E-14 | chr:6:32648036 |
| 6 rs149503020 | 32625802 G | 3.174  | 1.23E-14 | chr:6:32648036 |
| 6 rs111340421 | 32517174 G | 0.2496 | 1.24E-14 | chr:6:32648036 |
| 6 rs1064717   | 32546615 G | 2.81   | 1.24E-14 | chr:6:32648036 |
| 6 rs67041740  | 32509273 C | 0.2404 | 1.24E-14 | chr:6:32648036 |
| 6 rs9272029   | 32598707 G | 0.2279 | 1.25E-14 | chr:6:32648036 |
| 6 rs73729106  | 32514288 T | 0.2405 | 1.27E-14 | chr:6:32648036 |
| 6 rs9270632   | 32565533 A | 0.2501 | 1.27E-14 | chr:6:32648036 |
| 6 rs9271920   | 32596430 G | 0.2314 | 1.27E-14 | chr:6:32648036 |
| 6 rs9271921   | 32596431 G | 0.2314 | 1.27E-14 | chr:6:32648036 |
| 6 rs71534526  | 32510974 C | 0.2748 | 1.28E-14 | chr:6:32648036 |
| 6 rs34908677  | 32637498 A | 7.002  | 1.29E-14 | chr:6:32648036 |
| 6 rs9270612   | 32565106 C | 0.2556 | 1.31E-14 | chr:6:32648036 |
| 6 rs9270614   | 32565115 A | 0.2556 | 1.31E-14 | chr:6:32648036 |

|               |            |        |          |                |
|---------------|------------|--------|----------|----------------|
| 6 rs9271492   | 32589122 C | 0.2264 | 1.34E-14 | chr:6:32648036 |
| 6 rs9275158   | 32652582 G | 0.2597 | 1.34E-14 | chr:6:32648036 |
| 6 rs28809558  | 32529190 A | 0.3911 | 1.35E-14 | chr:6:32648036 |
| 6 rs77783340  | 32514313 T | 0.2412 | 1.36E-14 | chr:6:32648036 |
| 6 rs9270087   | 32554294 A | 0.287  | 1.37E-14 | chr:6:32648036 |
| 6 rs9270618   | 32565236 T | 0.2496 | 1.40E-14 | chr:6:32648036 |
| 6 rs73727912  | 32496944 C | 0.2293 | 1.41E-14 | chr:6:32648036 |
| 6 rs9271948   | 32597105 A | 0.2275 | 1.45E-14 | chr:6:32648036 |
| 6 rs66706092  | 32513915 T | 0.2433 | 1.47E-14 | chr:6:32648036 |
| 6 rs72844111  | 32513938 C | 0.2433 | 1.47E-14 | chr:6:32648036 |
| 6 rs73728002  | 32513993 A | 0.2433 | 1.47E-14 | chr:6:32648036 |
| 6 rs9270782   | 32569119 G | 0.2382 | 1.49E-14 | chr:6:32648036 |
| 6 rs9274690   | 32636940 A | 0.2659 | 1.51E-14 | chr:6:32648036 |
| 6 rs73729340  | 32560155 A | 0.2646 | 1.51E-14 | chr:6:32648036 |
| 6 rs71542413  | 32560240 T | 0.2652 | 1.52E-14 | chr:6:32648036 |
| 6 rs9271897   | 32595954 A | 0.2337 | 1.52E-14 | chr:6:32648036 |
| 6 rs9271898   | 32595972 A | 0.2337 | 1.52E-14 | chr:6:32648036 |
| 6 rs528723549 | 32490420 G | 0.2141 | 1.53E-14 | chr:6:32648036 |
| 6 rs140209363 | 32492971 C | 0.2145 | 1.55E-14 | chr:6:32648036 |
| 6 rs74221689  | 32501936 A | 0.2432 | 1.58E-14 | chr:6:32648036 |
| 6 rs9271907   | 32596123 T | 0.2354 | 1.58E-14 | chr:6:32648036 |
| 6 rs281864446 | 32628141 A | 5.327  | 1.60E-14 | chr:6:32648036 |
| 6 rs72851061  | 32503672 C | 0.2305 | 1.61E-14 | chr:6:32648036 |
| 6 rs9272135   | 32600723 A | 0.2306 | 1.62E-14 | chr:6:32648036 |
| 6 rs9272136   | 32600730 T | 0.2306 | 1.62E-14 | chr:6:32648036 |
| 6 rs9272137   | 32600738 C | 0.2306 | 1.62E-14 | chr:6:32648036 |
| 6 rs9270463   | 32558913 C | 0.3294 | 1.68E-14 | chr:6:32648036 |
| 6 rs9274696   | 32637007 G | 0.2828 | 1.69E-14 | chr:6:32648036 |
| 6 rs9272109   | 32600253 T | 0.2331 | 1.70E-14 | chr:6:32648036 |
| 6 rs66738149  | 32501898 C | 0.2446 | 1.70E-14 | chr:6:32648036 |
| 6 rs72851044  | 32501886 A | 0.2446 | 1.70E-14 | chr:6:32648036 |
| 6 rs9271909   | 32596177 T | 0.2331 | 1.72E-14 | chr:6:32648036 |
| 6 rs9270884   | 32571734 G | 0.292  | 1.73E-14 | chr:6:32648036 |
| 6 rs9271939   | 32596921 C | 0.2372 | 1.74E-14 | chr:6:32648036 |
| 6 rs561942189 | 32496432 G | 0.2321 | 1.75E-14 | chr:6:32648036 |
| 6 rs9271908   | 32596131 T | 0.2354 | 1.84E-14 | chr:6:32648036 |
| 6 rs116715716 | 32506910 T | 0.2285 | 1.87E-14 | chr:6:32648036 |
| 6 rs5016923   | 32502028 G | 0.246  | 1.88E-14 | chr:6:32648036 |
| 6 rs66678933  | 32509320 T | 0.245  | 1.88E-14 | chr:6:32648036 |
| 6 rs72492304  | 32509311 C | 0.245  | 1.88E-14 | chr:6:32648036 |
| 6 rs182275627 | 32628304 T | 6.027  | 1.89E-14 | chr:6:32648036 |
| 6 rs3129784   | 32656608 G | 0.2577 | 1.90E-14 | chr:6:32648036 |
| 6 rs9270071   | 32554097 T | 0.2384 | 1.91E-14 | chr:6:32648036 |

|               |            |        |          |                |
|---------------|------------|--------|----------|----------------|
| 6 rs9270465   | 32558916 C | 0.3293 | 1.92E-14 | chr:6:32648036 |
| 6 rs111649944 | 32518268 T | 0.2527 | 1.97E-14 | chr:6:32648036 |
| 6 rs9270745   | 32568264 A | 0.2442 | 1.98E-14 | chr:6:32648036 |
| 6 rs9269493   | 32542990 T | 2.792  | 2.00E-14 | chr:6:32648036 |
| 6 rs73729131  | 32520313 T | 0.2494 | 2.00E-14 | chr:6:32648036 |
| 6 rs113353313 | 32538242 G | 0.19   | 2.01E-14 | chr:6:32648036 |
| 6 rs560625026 | 32546591 C | 2.775  | 2.01E-14 | chr:6:32648036 |
| 6 rs9269998   | 32552721 G | 0.3033 | 2.01E-14 | chr:6:32648036 |
| 6 rs67774869  | 32508794 C | 0.2479 | 2.02E-14 | chr:6:32648036 |
| 6 rs113460787 | 32518089 T | 0.2505 | 2.06E-14 | chr:6:32648036 |
| 6 rs9274679   | 32636653 T | 0.2487 | 2.07E-14 | chr:6:32648036 |
| 6 rs9274693   | 32636972 C | 0.3038 | 2.09E-14 | chr:6:32648036 |
| 6 rs281864242 | 32629508 G | 5.914  | 2.11E-14 | chr:6:32648036 |
| 6 rs116190325 | 32510039 A | 0.2454 | 2.11E-14 | chr:6:32648036 |
| 6 rs3828848   | 32520665 C | 0.244  | 2.15E-14 | chr:6:32648036 |
| 6 rs200160235 | 32628070 C | 4.529  | 2.21E-14 | chr:6:32648036 |
| 6 rs35908913  | 32628358 A | 6.131  | 2.23E-14 | chr:6:32648036 |
| 6 rs9270446   | 32558775 G | 0.351  | 2.23E-14 | chr:6:32648036 |
| 6 rs9272067   | 32599401 A | 0.2431 | 2.26E-14 | chr:6:32648036 |
| 6 rs184358099 | 32500832 G | 0.2376 | 2.27E-14 | chr:6:32648036 |
| 6 rs9274697   | 32637016 A | 0.284  | 2.29E-14 | chr:6:32648036 |
| 6 rs9271906   | 32596048 A | 0.2404 | 2.34E-14 | chr:6:32648036 |
| 6 rs9274715   | 32637391 G | 0.2868 | 2.34E-14 | chr:6:32648036 |
| 6 rs9274773   | 32638620 A | 0.2559 | 2.34E-14 | chr:6:32648036 |
| 6 rs9274774   | 32638630 A | 0.2559 | 2.34E-14 | chr:6:32648036 |
| 6 rs140849564 | 32490607 G | 0.3094 | 2.38E-14 | chr:6:32648036 |
| 6 rs34405098  | 32523269 T | 0.2611 | 2.40E-14 | chr:6:32648036 |
| 6 rs62405642  | 32517759 G | 0.2579 | 2.44E-14 | chr:6:32648036 |
| 6 rs281861730 | 32633222 A | 5.097  | 2.46E-14 | chr:6:32648036 |
| 6 rs566252979 | 32496600 T | 0.2236 | 2.46E-14 | chr:6:32648036 |
| 6 rs117706971 | 32628392 A | 6.262  | 2.50E-14 | chr:6:32648036 |
| 6 rs117899140 | 32628394 G | 6.262  | 2.50E-14 | chr:6:32648036 |
| 6 rs34242724  | 32628363 G | 6.262  | 2.50E-14 | chr:6:32648036 |
| 6 rs34473650  | 32628362 A | 6.262  | 2.50E-14 | chr:6:32648036 |
| 6 rs68152293  | 32561020 A | 0.2982 | 2.52E-14 | chr:6:32648036 |
| 6 rs9269237   | 32453583 T | 0.2416 | 2.54E-14 | chr:6:32648036 |
| 6 rs111289870 | 32512269 C | 0.2513 | 2.55E-14 | chr:6:32648036 |
| 6 rs9275161   | 32652636 T | 0.2622 | 2.56E-14 | chr:6:32648036 |
| 6 rs9271947   | 32597095 T | 0.2274 | 2.56E-14 | chr:6:32648036 |
| 6 rs9270154   | 32555389 G | 0.2422 | 2.66E-14 | chr:6:32648036 |
| 6 rs9272028   | 32598706 T | 0.2365 | 2.66E-14 | chr:6:32648036 |
| 6 rs116209683 | 32510508 C | 0.246  | 2.67E-14 | chr:6:32648036 |
| 6 rs1766      | 32627795 A | 0.3015 | 2.68E-14 | chr:6:32648036 |

|               |            |        |          |                |
|---------------|------------|--------|----------|----------------|
| 6 rs9270047   | 32553697 C | 0.2486 | 2.72E-14 | chr:6:32648036 |
| 6 rs547797725 | 32487827 A | 0.3208 | 2.74E-14 | chr:6:32648036 |
| 6 rs9274790   | 32639155 A | 0.2711 | 2.78E-14 | chr:6:32648036 |
| 6 rs200177238 | 32628609 T | 6.044  | 2.84E-14 | chr:6:32648036 |
| 6 rs200955452 | 32628611 T | 6.044  | 2.84E-14 | chr:6:32648036 |
| 6 rs113648142 | 32508762 T | 0.2503 | 2.87E-14 | chr:6:32648036 |
| 6 rs72508474  | 32508738 C | 0.2503 | 2.87E-14 | chr:6:32648036 |
| 6 rs182965163 | 32454827 A | 0.2876 | 2.88E-14 | chr:6:32648036 |
| 6 rs202162787 | 32454828 G | 0.2876 | 2.88E-14 | chr:6:32648036 |
| 6 rs9270746   | 32568284 T | 0.248  | 2.88E-14 | chr:6:32648036 |
| 6 rs9274743   | 32638042 A | 0.2566 | 2.89E-14 | chr:6:32648036 |
| 6 rs9274744   | 32638054 G | 0.2566 | 2.89E-14 | chr:6:32648036 |
| 6 rs9274746   | 32638060 G | 0.2566 | 2.89E-14 | chr:6:32648036 |
| 6 rs115217308 | 32520296 A | 0.2526 | 2.92E-14 | chr:6:32648036 |
| 6 rs116173033 | 32520295 G | 0.2526 | 2.92E-14 | chr:6:32648036 |
| 6 rs9272054   | 32599164 A | 0.2427 | 2.94E-14 | chr:6:32648036 |
| 6 rs9272085   | 32599685 C | 0.2557 | 2.98E-14 | chr:6:32648036 |
| 6 rs9274702   | 32637184 C | 0.2683 | 3.01E-14 | chr:6:32648036 |
| 6 rs9256938   | 32547194 A | 0.405  | 3.05E-14 | chr:6:32648036 |
| 6 rs74937819  | 32502037 A | 0.2504 | 3.08E-14 | chr:6:32648036 |
| 6 rs118117192 | 32633210 T | 5.123  | 3.13E-14 | chr:6:32648036 |
| 6 rs554566424 | 32496605 A | 0.233  | 3.19E-14 | chr:6:32648036 |
| 6 rs74375951  | 32500923 G | 0.2489 | 3.19E-14 | chr:6:32648036 |
| 6 rs281861320 | 32633696 C | 4.928  | 3.20E-14 | chr:6:32648036 |
| 6 rs114987387 | 32502131 G | 0.2507 | 3.21E-14 | chr:6:32648036 |
| 6 rs9274738   | 32637909 A | 0.2734 | 3.22E-14 | chr:6:32648036 |
| 6 rs116316731 | 32502097 T | 0.2513 | 3.22E-14 | chr:6:32648036 |
| 6 rs72508413  | 32454597 G | 0.236  | 3.25E-14 | chr:6:32648036 |
| 6 rs9274937   | 32641631 G | 0.3291 | 3.27E-14 | chr:6:32648036 |
| 6 rs72492322  | 32519628 G | 0.2418 | 3.27E-14 | chr:6:32648036 |
| 6 rs75861594  | 32518103 G | 0.2552 | 3.29E-14 | chr:6:32648036 |
| 6 rs9271879   | 32595489 T | 0.2355 | 3.32E-14 | chr:6:32648036 |
| 6 rs67916930  | 32508823 G | 0.2525 | 3.33E-14 | chr:6:32648036 |
| 6 rs9272064   | 32599338 T | 0.246  | 3.38E-14 | chr:6:32648036 |
| 6 rs9274717   | 32637454 C | 0.2771 | 3.55E-14 | chr:6:32648036 |
| 6 rs200263528 | 32509009 C | 0.2493 | 3.57E-14 | chr:6:32648036 |
| 6 rs74950807  | 32513375 T | 0.2513 | 3.59E-14 | chr:6:32648036 |
| 6 rs76818741  | 32513378 A | 0.2513 | 3.59E-14 | chr:6:32648036 |
| 6 rs149589923 | 32500818 A | 0.2417 | 3.59E-14 | chr:6:32648036 |
| 6 rs73726814  | 32523235 C | 0.2645 | 3.65E-14 | chr:6:32648036 |
| 6 rs281861725 | 32633227 T | 4.934  | 3.66E-14 | chr:6:32648036 |
| 6 rs9270448   | 32558819 T | 0.3566 | 3.68E-14 | chr:6:32648036 |
| 6 rs115254515 | 32491895 T | 0.3172 | 3.70E-14 | chr:6:32648036 |

|               |            |        |          |                |
|---------------|------------|--------|----------|----------------|
| 6 rs9272138   | 32600757 A | 0.2394 | 3.75E-14 | chr:6:32648036 |
| 6 rs9269501   | 32543118 T | 0.3519 | 3.76E-14 | chr:6:32648036 |
| 6 rs73401326  | 32454783 G | 0.296  | 3.77E-14 | chr:6:32648036 |
| 6 rs28746789  | 32632456 T | 3.287  | 3.77E-14 | chr:6:32648036 |
| 6 rs113232784 | 32518256 A | 0.2572 | 3.78E-14 | chr:6:32648036 |
| 6 rs74535936  | 32510547 G | 0.2485 | 3.79E-14 | chr:6:32648036 |
| 6 rs79692442  | 32623073 C | 3.375  | 3.82E-14 | chr:6:32648036 |
| 6 rs9271901   | 32596027 T | 0.2445 | 3.84E-14 | chr:6:32648036 |
| 6 rs9269252   | 32454293 A | 0.2838 | 3.85E-14 | chr:6:32648036 |
| 6 rs9274736   | 32637905 T | 0.2737 | 3.87E-14 | chr:6:32648036 |
| 6 rs9274691   | 32636957 T | 0.3142 | 3.91E-14 | chr:6:32648036 |
| 6 rs9274692   | 32636958 T | 0.3142 | 3.91E-14 | chr:6:32648036 |
| 6 rs117280913 | 32636681 T | 5.815  | 3.94E-14 | chr:6:32648036 |
| 6 rs9272156   | 32601081 C | 0.2305 | 4.07E-14 | chr:6:32648036 |
| 6 rs9271899   | 32596007 G | 0.2453 | 4.11E-14 | chr:6:32648036 |
| 6 rs9274734   | 32637887 T | 0.2737 | 4.18E-14 | chr:6:32648036 |
| 6 rs117789582 | 32627603 A | 5.359  | 4.19E-14 | chr:6:32648036 |
| 6 rs116413420 | 32509466 T | 0.2621 | 4.30E-14 | chr:6:32648036 |
| 6 rs113749865 | 32481973 C | 0.274  | 4.31E-14 | chr:6:32648036 |
| 6 rs71542414  | 32560247 G | 0.2736 | 4.35E-14 | chr:6:32648036 |
| 6 rs113432958 | 32538366 A | 0.2475 | 4.50E-14 | chr:6:32648036 |
| 6 rs659204    | 32577001 G | 0.2075 | 4.53E-14 | chr:6:32648036 |
| 6 rs9270433   | 32558670 A | 0.3665 | 4.54E-14 | chr:6:32648036 |
| 6 rs9275148   | 32651585 T | 0.2601 | 4.57E-14 | chr:6:32648036 |
| 6 rs66502326  | 32509411 T | 0.2591 | 4.60E-14 | chr:6:32648036 |
| 6 rs116085924 | 32514884 G | 0.2226 | 4.61E-14 | chr:6:32648036 |
| 6 rs4308604   | 32624618 C | 2.85   | 4.61E-14 | chr:6:32648036 |
| 6 rs9275127   | 32650314 T | 88.9   | 4.61E-14 | chr:6:32648036 |
| 6 rs73726198  | 32492262 C | 0.3888 | 4.65E-14 | chr:6:32648036 |
| 6 rs9275132   | 32650500 A | 89.15  | 4.65E-14 | chr:6:32648036 |
| 6 rs281860822 | 32634503 G | 6.115  | 4.67E-14 | chr:6:32648036 |
| 6 rs117660270 | 32624677 A | 3.06   | 4.72E-14 | chr:6:32648036 |
| 6 rs144605209 | 32623968 G | 3.06   | 4.72E-14 | chr:6:32648036 |
| 6 rs147753413 | 32625025 T | 3.06   | 4.72E-14 | chr:6:32648036 |
| 6 rs58298103  | 32624581 T | 3.06   | 4.72E-14 | chr:6:32648036 |
| 6 rs72853989  | 32512321 T | 0.2558 | 4.79E-14 | chr:6:32648036 |
| 6 rs9272195   | 32601830 G | 0.2418 | 4.85E-14 | chr:6:32648036 |
| 6 rs281860823 | 32634497 A | 6.141  | 4.95E-14 | chr:6:32648036 |
| 6 rs281863289 | 32631494 C | 3.97   | 5.01E-14 | chr:6:32648036 |
| 6 rs9272103   | 32599896 T | 0.2403 | 5.12E-14 | chr:6:32648036 |
| 6 rs74394760  | 32513078 C | 0.2515 | 5.13E-14 | chr:6:32648036 |
| 6 rs117118927 | 32625957 G | 5.358  | 5.14E-14 | chr:6:32648036 |
| 6 rs9269311   | 32539654 C | 0.3568 | 5.16E-14 | chr:6:32648036 |

|               |            |        |          |                |
|---------------|------------|--------|----------|----------------|
| 6 rs150543976 | 32631713 C | 3.53   | 5.17E-14 | chr:6:32648036 |
| 6 rs67461697  | 32518767 C | 0.2405 | 5.19E-14 | chr:6:32648036 |
| 6 rs74290599  | 32518785 T | 0.2405 | 5.19E-14 | chr:6:32648036 |
| 6 rs9274720   | 32637479 G | 0.2888 | 5.19E-14 | chr:6:32648036 |
| 6 rs9270106   | 32554770 G | 0.1815 | 5.20E-14 | chr:6:32648036 |
| 6 rs9270462   | 32558912 G | 0.35   | 5.21E-14 | chr:6:32648036 |
| 6 rs202088642 | 32634993 C | 5.172  | 5.22E-14 | chr:6:32648036 |
| 6 rs3021058   | 32652359 A | 0.2574 | 5.23E-14 | chr:6:32648036 |
| 6 rs147613458 | 32631911 G | 3.292  | 5.25E-14 | chr:6:32648036 |
| 6 rs73727961  | 32509022 A | 0.2534 | 5.26E-14 | chr:6:32648036 |
| 6 rs142491022 | 32633939 C | 5.816  | 5.31E-14 | chr:6:32648036 |
| 6 rs9272049   | 32599045 G | 0.249  | 5.32E-14 | chr:6:32648036 |
| 6 rs2856688   | 32654640 T | 88.4   | 5.32E-14 | chr:6:32648036 |
| 6 rs9275100   | 32649308 G | 88.4   | 5.32E-14 | chr:6:32648036 |
| 6 rs9275134   | 32650612 G | 88.4   | 5.32E-14 | chr:6:32648036 |
| 6 rs9271954   | 32597216 C | 0.2456 | 5.33E-14 | chr:6:32648036 |
| 6 rs281863467 | 32630995 G | 4.968  | 5.33E-14 | chr:6:32648036 |
| 6 rs9270466   | 32558929 T | 0.3493 | 5.35E-14 | chr:6:32648036 |
| 6 rs9272094   | 32599781 C | 0.2373 | 5.39E-14 | chr:6:32648036 |
| 6 rs9272096   | 32599784 C | 0.2373 | 5.39E-14 | chr:6:32648036 |
| 6 rs9272026   | 32598618 G | 0.2434 | 5.46E-14 | chr:6:32648036 |
| 6 rs9272027   | 32598622 G | 0.2434 | 5.46E-14 | chr:6:32648036 |
| 6 rs17205970  | 32651923 C | 5.863  | 5.47E-14 | chr:6:32648036 |
| 6 rs9275563   | 32677912 C | 0.2728 | 5.59E-14 | chr:6:32648036 |
| 6 rs116830840 | 32537945 T | 0.3745 | 5.64E-14 | chr:6:32648036 |
| 6 rs72844152  | 32519652 A | 0.2523 | 5.67E-14 | chr:6:32648036 |
| 6 rs9275104   | 32649388 C | 87.57  | 5.77E-14 | chr:6:32648036 |
| 6 rs117944321 | 32633138 A | 4.314  | 5.86E-14 | chr:6:32648036 |
| 6 rs281863713 | 32630652 C | 4.682  | 5.88E-14 | chr:6:32648036 |
| 6 rs9274188   | 32630667 G | 4.682  | 5.88E-14 | chr:6:32648036 |
| 6 rs151109211 | 32635552 T | 5.048  | 5.90E-14 | chr:6:32648036 |
| 6 rs148940091 | 32507101 C | 0.2431 | 5.99E-14 | chr:6:32648036 |
| 6 rs115664796 | 32508758 C | 0.2587 | 6.05E-14 | chr:6:32648036 |
| 6 rs60986879  | 32529685 G | 0.4057 | 6.29E-14 | chr:6:32648036 |
| 6 rs80083020  | 32510439 C | 0.2491 | 6.29E-14 | chr:6:32648036 |
| 6 rs2856679   | 32655615 C | 0.2594 | 6.29E-14 | chr:6:32648036 |
| 6 rs9269653   | 32546080 A | 2.665  | 6.38E-14 | chr:6:32648036 |
| 6 rs73729140  | 32521290 C | 0.2323 | 6.40E-14 | chr:6:32648036 |
| 6 rs117016875 | 32628578 T | 6.093  | 6.43E-14 | chr:6:32648036 |
| 6 rs117509699 | 32628590 C | 6.093  | 6.43E-14 | chr:6:32648036 |
| 6 rs9271876   | 32595448 G | 0.2203 | 6.46E-14 | chr:6:32648036 |
| 6 rs116708952 | 32486590 A | 0.3282 | 6.64E-14 | chr:6:32648036 |
| 6 rs78942674  | 32509897 T | 0.2615 | 6.75E-14 | chr:6:32648036 |

|               |            |        |          |                |
|---------------|------------|--------|----------|----------------|
| 6 rs115137792 | 32510114 C | 0.233  | 6.77E-14 | chr:6:32648036 |
| 6 rs199616440 | 32510115 T | 0.233  | 6.77E-14 | chr:6:32648036 |
| 6 rs73726852  | 32538295 C | 0.2232 | 6.79E-14 | chr:6:32648036 |
| 6 rs281862676 | 32631832 T | 3.065  | 6.79E-14 | chr:6:32648036 |
| 6 rs281862684 | 32631823 G | 3.065  | 6.79E-14 | chr:6:32648036 |
| 6 rs35179057  | 32523349 C | 0.2935 | 6.83E-14 | chr:6:32648036 |
| 6 rs647455    | 32576721 A | 0.2008 | 6.90E-14 | chr:6:32648036 |
| 6 rs647467    | 32576726 T | 0.2008 | 6.90E-14 | chr:6:32648036 |
| 6 rs9275162   | 32652687 T | 0.2608 | 6.92E-14 | chr:6:32648036 |
| 6 rs112465099 | 32510430 G | 0.2486 | 6.97E-14 | chr:6:32648036 |
| 6 rs9272004   | 32597964 A | 0.2453 | 7.12E-14 | chr:6:32648036 |
| 6 rs28746774  | 32632173 T | 3.007  | 7.15E-14 | chr:6:32648036 |
| 6 rs9269561   | 32544405 G | 0.2534 | 7.18E-14 | chr:6:32648036 |
| 6 rs72851025  | 32501459 C | 0.2554 | 7.25E-14 | chr:6:32648036 |
| 6 rs71536561  | 32529179 C | 0.3942 | 7.48E-14 | chr:6:32648036 |
| 6 rs115524254 | 32503565 C | 0.2368 | 7.56E-14 | chr:6:32648036 |
| 6 rs118120568 | 32634586 G | 5.262  | 7.58E-14 | chr:6:32648036 |
| 6 rs9274849   | 32640157 A | 0.2921 | 7.66E-14 | chr:6:32648036 |
| 6 rs9269906   | 32551309 A | 0.3805 | 7.74E-14 | chr:6:32648036 |
| 6 rs9270436   | 32558693 T | 0.3735 | 7.81E-14 | chr:6:32648036 |
| 6 rs112004746 | 32518155 T | 0.2662 | 7.87E-14 | chr:6:32648036 |
| 6 rs74485644  | 32501421 T | 0.2566 | 7.99E-14 | chr:6:32648036 |
| 6 rs67529500  | 32504757 C | 0.254  | 8.15E-14 | chr:6:32648036 |
| 6 rs72851064  | 32503928 C | 0.255  | 8.19E-14 | chr:6:32648036 |
| 6 rs9269879   | 32550906 G | 0.3383 | 8.30E-14 | chr:6:32648036 |
| 6 rs9274093   | 32630151 C | 5.019  | 8.37E-14 | chr:6:32648036 |
| 6 rs117199460 | 32622114 C | 3.044  | 8.43E-14 | chr:6:32648036 |
| 6 rs528638684 | 32490600 T | 0.3155 | 8.43E-14 | chr:6:32648036 |
| 6 rs9274845   | 32640134 C | 0.2932 | 8.44E-14 | chr:6:32648036 |
| 6 rs9274718   | 32637469 T | 0.295  | 8.72E-14 | chr:6:32648036 |
| 6 rs9274719   | 32637470 T | 0.295  | 8.72E-14 | chr:6:32648036 |
| 6 rs114293611 | 32487353 C | 0.251  | 8.77E-14 | chr:6:32648036 |
| 6 rs9272031   | 32598779 C | 0.2495 | 8.81E-14 | chr:6:32648036 |
| 6 rs150598903 | 32489395 T | 0.305  | 8.90E-14 | chr:6:32648036 |
| 6 rs72851060  | 32503560 G | 0.2357 | 9.20E-14 | chr:6:32648036 |
| 6 rs281860814 | 32634572 G | 5.275  | 9.29E-14 | chr:6:32648036 |
| 6 rs535866271 | 32486668 G | 0.3497 | 9.44E-14 | chr:6:32648036 |
| 6 rs9269563   | 32544456 T | 0.2997 | 9.47E-14 | chr:6:32648036 |
| 6 rs9272146   | 32600914 C | 0.2511 | 9.60E-14 | chr:6:32648036 |
| 6 rs281862705 | 32631798 G | 3.055  | 9.74E-14 | chr:6:32648036 |
| 6 rs9274407   | 32632832 A | 4.246  | 9.82E-14 | chr:6:32648036 |
| 6 rs72492329  | 32521136 A | 0.2137 | 9.83E-14 | chr:6:32648036 |
| 6 rs117734503 | 32634607 T | 5.052  | 9.90E-14 | chr:6:32648036 |



|               |            |        |          |                |
|---------------|------------|--------|----------|----------------|
| 6 rs114769197 | 32538217 A | 0.1898 | 9.97E-14 | chr:6:32648036 |
| 6 rs115724613 | 32538216 C | 0.1898 | 9.97E-14 | chr:6:32648036 |
| 6 rs9269269   | 32539055 C | 0.398  | 1.04E-13 | chr:6:32648036 |
| 6 rs117069212 | 32628823 T | 5.327  | 1.04E-13 | chr:6:32648036 |
| 6 rs281875002 | 32631269 T | 3.822  | 1.05E-13 | chr:6:32648036 |
| 6 rs9270626   | 32565443 T | 0.256  | 1.06E-13 | chr:6:32648036 |
| 6 rs35702610  | 32628914 G | 4.723  | 1.06E-13 | chr:6:32648036 |
| 6 rs673336    | 32577858 A | 0.2244 | 1.06E-13 | chr:6:32648036 |
| 6 rs281863762 | 32630565 C | 5.052  | 1.13E-13 | chr:6:32648036 |
| 6 rs9274792   | 32639224 A | 0.2681 | 1.14E-13 | chr:6:32648036 |
| 6 rs117921525 | 32672734 A | 5.713  | 1.18E-13 | chr:6:32648036 |
| 6 rs118164855 | 32634914 T | 4.896  | 1.18E-13 | chr:6:32648036 |
| 6 rs66534143  | 32512601 C | 0.275  | 1.19E-13 | chr:6:32648036 |
| 6 rs147266303 | 32510268 C | 0.2506 | 1.19E-13 | chr:6:32648036 |
| 6 rs35409710  | 32628903 A | 4.737  | 1.20E-13 | chr:6:32648036 |
| 6 rs9271961   | 32597412 A | 0.2482 | 1.21E-13 | chr:6:32648036 |
| 6 rs9269749   | 32548136 G | 0.2649 | 1.23E-13 | chr:6:32648036 |
| 6 rs9269317   | 32539767 T | 0.3032 | 1.24E-13 | chr:6:32648036 |
| 6 rs111559749 | 32509012 T | 0.2643 | 1.25E-13 | chr:6:32648036 |
| 6 rs281862650 | 32631863 C | 3.198  | 1.25E-13 | chr:6:32648036 |
| 6 rs9275146   | 32651495 G | 0.2612 | 1.27E-13 | chr:6:32648036 |
| 6 rs144922634 | 32639093 T | 5.069  | 1.27E-13 | chr:6:32648036 |
| 6 rs9272032   | 32598782 G | 0.2518 | 1.27E-13 | chr:6:32648036 |
| 6 rs9269560   | 32544371 C | 0.2574 | 1.28E-13 | chr:6:32648036 |
| 6 rs112515515 | 32513422 T | 0.2623 | 1.28E-13 | chr:6:32648036 |
| 6 rs9274751   | 32638138 T | 0.2711 | 1.32E-13 | chr:6:32648036 |
| 6 rs9272102   | 32599830 C | 0.2369 | 1.32E-13 | chr:6:32648036 |
| 6 rs9274753   | 32638176 C | 0.271  | 1.33E-13 | chr:6:32648036 |
| 6 rs115077688 | 32503287 T | 0.2632 | 1.35E-13 | chr:6:32648036 |
| 6 rs117783863 | 32629479 T | 5.271  | 1.36E-13 | chr:6:32648036 |
| 6 rs112861810 | 32494029 G | 0.3177 | 1.37E-13 | chr:6:32648036 |
| 6 rs189017474 | 32633823 G | 4.487  | 1.38E-13 | chr:6:32648036 |
| 6 rs281861227 | 32633822 T | 4.487  | 1.38E-13 | chr:6:32648036 |
| 6 rs114354029 | 32598764 G | 0.2554 | 1.40E-13 | chr:6:32648036 |
| 6 rs281874847 | 32631396 C | 4.472  | 1.40E-13 | chr:6:32648036 |
| 6 rs9275180   | 32654278 C | 0.2682 | 1.40E-13 | chr:6:32648036 |
| 6 rs3828852   | 32520595 A | 0.253  | 1.41E-13 | chr:6:32648036 |
| 6 rs115726960 | 32503171 A | 0.2711 | 1.41E-13 | chr:6:32648036 |
| 6 rs112740757 | 32481965 G | 0.2572 | 1.42E-13 | chr:6:32648036 |
| 6 rs9272059   | 32599223 C | 0.2618 | 1.42E-13 | chr:6:32648036 |
| 6 rs9274710   | 32637287 C | 0.3161 | 1.42E-13 | chr:6:32648036 |
| 6 rs9272003   | 32597940 G | 0.2433 | 1.49E-13 | chr:6:32648036 |
| 6 rs9269413   | 32541458 C | 2.586  | 1.50E-13 | chr:6:32648036 |

|               |            |        |          |                |
|---------------|------------|--------|----------|----------------|
| 6 rs9272002   | 32597924 G | 0.2431 | 1.51E-13 | chr:6:32648036 |
| 6 rs73727940  | 32503738 T | 0.2378 | 1.51E-13 | chr:6:32648036 |
| 6 rs112453089 | 32639270 T | 0.2823 | 1.52E-13 | chr:6:32648036 |
| 6 rs9274794   | 32639264 T | 0.2823 | 1.52E-13 | chr:6:32648036 |
| 6 rs9270122   | 32555031 T | 0.2325 | 1.56E-13 | chr:6:32648036 |
| 6 rs9272212   | 32602033 A | 0.256  | 1.56E-13 | chr:6:32648036 |
| 6 rs75732937  | 32487268 G | 0.1079 | 1.57E-13 | chr:6:32648036 |
| 6 rs116675816 | 32512131 A | 0.2592 | 1.57E-13 | chr:6:32648036 |
| 6 rs9270631   | 32565505 T | 0.2637 | 1.59E-13 | chr:6:32648036 |
| 6 rs12722107  | 32632833 G | 4.753  | 1.66E-13 | chr:6:32648036 |
| 6 rs3204373   | 32632801 A | 4.753  | 1.66E-13 | chr:6:32648036 |
| 6 rs75700544  | 32469300 C | 0.3455 | 1.68E-13 | chr:6:32648036 |
| 6 rs9272174   | 32601307 T | 0.2513 | 1.69E-13 | chr:6:32648036 |
| 6 rs112944992 | 32510457 C | 0.2592 | 1.70E-13 | chr:6:32648036 |
| 6 rs9275199   | 32656680 C | 0.2614 | 1.76E-13 | chr:6:32648036 |
| 6 rs28747023  | 32654807 A | 0.2608 | 1.77E-13 | chr:6:32648036 |
| 6 rs535728917 | 32628553 T | 5.747  | 1.77E-13 | chr:6:32648036 |
| 6 rs35697584  | 32522151 A | 0.2528 | 1.80E-13 | chr:6:32648036 |
| 6 rs574714830 | 32494119 A | 0.3813 | 1.80E-13 | chr:6:32648036 |
| 6 rs9274864   | 32640646 A | 0.2885 | 1.80E-13 | chr:6:32648036 |
| 6 rs281874932 | 32631353 T | 4.493  | 1.81E-13 | chr:6:32648036 |
| 6 rs58095553  | 32457733 A | 0.3043 | 1.84E-13 | chr:6:32648036 |
| 6 rs58937009  | 32457727 T | 0.3043 | 1.84E-13 | chr:6:32648036 |
| 6 rs281864287 | 32629111 C | 5.617  | 1.85E-13 | chr:6:32648036 |
| 6 rs281864289 | 32629109 T | 5.617  | 1.85E-13 | chr:6:32648036 |
| 6 rs9273609   | 32629112 A | 5.617  | 1.85E-13 | chr:6:32648036 |
| 6 rs546964381 | 32511275 G | 0.3035 | 1.86E-13 | chr:6:32648036 |
| 6 rs9271854   | 32595118 A | 0.2565 | 1.87E-13 | chr:6:32648036 |
| 6 rs9271855   | 32595119 C | 0.2565 | 1.87E-13 | chr:6:32648036 |
| 6 rs9271856   | 32595120 A | 0.2565 | 1.87E-13 | chr:6:32648036 |
| 6 rs563226460 | 32490851 T | 0.2447 | 1.88E-13 | chr:6:32648036 |
| 6 rs2856689   | 32654551 A | 0.2687 | 1.89E-13 | chr:6:32648036 |
| 6 rs9274867   | 32640745 G | 0.3171 | 1.92E-13 | chr:6:32648036 |
| 6 rs66497315  | 32512407 C | 0.2674 | 1.93E-13 | chr:6:32648036 |
| 6 rs9274771   | 32638581 T | 0.2657 | 1.93E-13 | chr:6:32648036 |
| 6 rs9274772   | 32638583 A | 0.2657 | 1.93E-13 | chr:6:32648036 |
| 6 rs535051941 | 32635364 T | 0.3516 | 1.94E-13 | chr:6:32648036 |
| 6 rs9274752   | 32638163 T | 0.2717 | 1.97E-13 | chr:6:32648036 |
| 6 rs71542412  | 32560190 C | 0.3296 | 1.99E-13 | chr:6:32648036 |
| 6 rs9269232   | 32451760 T | 0.2443 | 2.00E-13 | chr:6:32648036 |
| 6 rs9269581   | 32544785 G | 0.4002 | 2.01E-13 | chr:6:32648036 |
| 6 rs115303801 | 32512229 G | 0.2579 | 2.02E-13 | chr:6:32648036 |
| 6 rs9270458   | 32558900 G | 0.3627 | 2.08E-13 | chr:6:32648036 |

|               |            |        |          |                |
|---------------|------------|--------|----------|----------------|
| 6 rs536343459 | 32468799 G | 0.2024 | 2.08E-13 | chr:6:32648036 |
| 6 rs548006827 | 32468802 C | 0.2024 | 2.08E-13 | chr:6:32648036 |
| 6 rs565374501 | 32468798 G | 0.2024 | 2.08E-13 | chr:6:32648036 |
| 6 rs9271699   | 32593179 G | 0.2575 | 2.08E-13 | chr:6:32648036 |
| 6 rs9270451   | 32558838 A | 0.3654 | 2.09E-13 | chr:6:32648036 |
| 6 rs150008425 | 32622991 A | 3.286  | 2.09E-13 | chr:6:32648036 |
| 6 rs113051760 | 32521691 G | 0.2533 | 2.13E-13 | chr:6:32648036 |
| 6 rs17424325  | 32521644 T | 0.2533 | 2.13E-13 | chr:6:32648036 |
| 6 rs9274193   | 32630741 T | 2.991  | 2.13E-13 | chr:6:32648036 |
| 6 rs17206287  | 32674725 G | 4.253  | 2.14E-13 | chr:6:32648036 |
| 6 rs115333128 | 32485804 G | 0.2342 | 2.15E-13 | chr:6:32648036 |
| 6 rs28646006  | 32527793 T | 0.4097 | 2.16E-13 | chr:6:32648036 |
| 6 rs566861    | 32576538 C | 0.2334 | 2.17E-13 | chr:6:32648036 |
| 6 rs35479797  | 32535900 T | 0.3392 | 2.17E-13 | chr:6:32648036 |
| 6 rs9271877   | 32595469 C | 0.2465 | 2.18E-13 | chr:6:32648036 |
| 6 rs9274865   | 32640671 C | 0.3004 | 2.19E-13 | chr:6:32648036 |
| 6 rs9271739   | 32593692 T | 0.2171 | 2.20E-13 | chr:6:32648036 |
| 6 rs9272091   | 32599745 C | 0.2646 | 2.21E-13 | chr:6:32648036 |
| 6 rs9272090   | 32599736 C | 0.2683 | 2.23E-13 | chr:6:32648036 |
| 6 rs115055593 | 32468827 C | 0.1975 | 2.23E-13 | chr:6:32648036 |
| 6 rs529580232 | 32512136 C | 0.2622 | 2.25E-13 | chr:6:32648036 |
| 6 rs551034683 | 32512138 A | 0.2622 | 2.25E-13 | chr:6:32648036 |
| 6 rs201414107 | 32647866 A | 3.526  | 2.26E-13 | chr:6:32648036 |
| 6 rs36207014  | 32560332 A | 0.2913 | 2.26E-13 | chr:6:32648036 |
| 6 rs9271537   | 32589982 T | 0.2487 | 2.32E-13 | chr:6:32648036 |
| 6 rs67816706  | 32517266 T | 0.2898 | 2.35E-13 | chr:6:32648036 |
| 6 rs9272171   | 32601249 G | 0.2471 | 2.35E-13 | chr:6:32648036 |
| 6 rs3204379   | 32632642 T | 4.108  | 2.35E-13 | chr:6:32648036 |
| 6 rs111938555 | 32509707 T | 0.2547 | 2.37E-13 | chr:6:32648036 |
| 6 rs72851052  | 32502249 T | 0.2397 | 2.39E-13 | chr:6:32648036 |
| 6 rs72851053  | 32502250 G | 0.2397 | 2.39E-13 | chr:6:32648036 |
| 6 rs281863206 | 32631583 T | 4.279  | 2.39E-13 | chr:6:32648036 |
| 6 rs9274764   | 32638490 A | 0.2662 | 2.41E-13 | chr:6:32648036 |
| 6 rs116882546 | 32631390 C | 4.125  | 2.43E-13 | chr:6:32648036 |
| 6 rs2856690   | 32654536 T | 0.2694 | 2.47E-13 | chr:6:32648036 |
| 6 rs9271857   | 32595147 T | 0.2616 | 2.47E-13 | chr:6:32648036 |
| 6 rs281862269 | 32632328 A | 2.925  | 2.49E-13 | chr:6:32648036 |
| 6 rs9272141   | 32600797 A | 0.257  | 2.50E-13 | chr:6:32648036 |
| 6 rs9272143   | 32600803 C | 0.257  | 2.50E-13 | chr:6:32648036 |
| 6 rs111590055 | 32510177 C | 0.2499 | 2.57E-13 | chr:6:32648036 |
| 6 rs9274846   | 32640142 C | 0.3068 | 2.58E-13 | chr:6:32648036 |
| 6 rs9274848   | 32640149 C | 0.3068 | 2.58E-13 | chr:6:32648036 |
| 6 rs72851066  | 32504216 T | 0.2522 | 2.59E-13 | chr:6:32648036 |

|               |            |        |          |                |
|---------------|------------|--------|----------|----------------|
| 6 rs9271951   | 32597172 A | 0.2606 | 2.62E-13 | chr:6:32648036 |
| 6 rs9271696   | 32593085 C | 0.2185 | 2.62E-13 | chr:6:32648036 |
| 6 rs9274839   | 32640015 A | 0.2698 | 2.64E-13 | chr:6:32648036 |
| 6 rs112111526 | 32510317 A | 0.2597 | 2.66E-13 | chr:6:32648036 |
| 6 rs572264676 | 32490134 C | 0.3614 | 2.66E-13 | chr:6:32648036 |
| 6 rs114233058 | 32517386 T | 0.2901 | 2.66E-13 | chr:6:32648036 |
| 6 rs115916707 | 32517387 G | 0.2901 | 2.66E-13 | chr:6:32648036 |
| 6 rs9274754   | 32638261 T | 0.2836 | 2.66E-13 | chr:6:32648036 |
| 6 rs9274755   | 32638262 G | 0.2836 | 2.66E-13 | chr:6:32648036 |
| 6 rs113085907 | 32510224 G | 0.2559 | 2.67E-13 | chr:6:32648036 |
| 6 rs9275141   | 32651117 T | 0.2621 | 2.67E-13 | chr:6:32648036 |
| 6 rs558956689 | 32511276 G | 0.3093 | 2.71E-13 | chr:6:32648036 |
| 6 rs9274869   | 32640759 C | 0.3169 | 2.72E-13 | chr:6:32648036 |
| 6 rs34539464  | 32560339 G | 0.2915 | 2.74E-13 | chr:6:32648036 |
| 6 rs9274834   | 32639895 A | 0.2732 | 2.76E-13 | chr:6:32648036 |
| 6 rs116017457 | 32521909 T | 0.2558 | 2.77E-13 | chr:6:32648036 |
| 6 rs9269543   | 32544061 T | 2.986  | 2.82E-13 | chr:6:32648036 |
| 6 rs28891489  | 32650362 C | 0.2663 | 2.86E-13 | chr:6:32648036 |
| 6 rs143442815 | 32489863 C | 0.1959 | 2.87E-13 | chr:6:32648036 |
| 6 rs9274763   | 32638427 A | 0.2665 | 2.88E-13 | chr:6:32648036 |
| 6 rs9274843   | 32640096 A | 0.2901 | 2.89E-13 | chr:6:32648036 |
| 6 rs117233242 | 32635195 C | 5.257  | 2.92E-13 | chr:6:32648036 |
| 6 rs11752506  | 32520273 A | 0.2618 | 2.93E-13 | chr:6:32648036 |
| 6 rs199884023 | 32639449 G | 0.3151 | 2.94E-13 | chr:6:32648036 |
| 6 rs146003607 | 32635211 C | 5.282  | 2.95E-13 | chr:6:32648036 |
| 6 rs9269465   | 32542247 G | 0.3442 | 2.99E-13 | chr:6:32648036 |
| 6 rs72492314  | 32512421 A | 0.2725 | 3.01E-13 | chr:6:32648036 |
| 6 rs116984222 | 32633648 C | 4.315  | 3.02E-13 | chr:6:32648036 |
| 6 rs9270423   | 32558580 A | 0.3926 | 3.10E-13 | chr:6:32648036 |
| 6 rs281863558 | 32630869 A | 4.832  | 3.10E-13 | chr:6:32648036 |
| 6 rs281863585 | 32630833 G | 4.832  | 3.10E-13 | chr:6:32648036 |
| 6 rs9269713   | 32547252 A | 0.4115 | 3.11E-13 | chr:6:32648036 |
| 6 rs547755130 | 32486547 C | 0.3457 | 3.12E-13 | chr:6:32648036 |
| 6 rs565956329 | 32486548 A | 0.3457 | 3.12E-13 | chr:6:32648036 |
| 6 rs118132027 | 32635282 T | 5.455  | 3.12E-13 | chr:6:32648036 |
| 6 rs371957643 | 32635300 C | 5.455  | 3.12E-13 | chr:6:32648036 |
| 6 rs111725169 | 32512223 C | 0.2687 | 3.13E-13 | chr:6:32648036 |
| 6 rs9275091   | 32648972 C | 0.266  | 3.19E-13 | chr:6:32648036 |
| 6 rs111937677 | 32639316 A | 0.3176 | 3.26E-13 | chr:6:32648036 |
| 6 rs73397403  | 32519849 G | 0.2599 | 3.29E-13 | chr:6:32648036 |
| 6 rs9274836   | 32639956 G | 0.2735 | 3.29E-13 | chr:6:32648036 |
| 6 rs72508465  | 32505141 T | 0.2222 | 3.31E-13 | chr:6:32648036 |
| 6 rs71542415  | 32560298 C | 0.2961 | 3.36E-13 | chr:6:32648036 |

|               |            |        |          |                |
|---------------|------------|--------|----------|----------------|
| 6 rs74921648  | 32560307 A | 0.2961 | 3.36E-13 | chr:6:32648036 |
| 6 rs144101223 | 32633098 T | 3.505  | 3.36E-13 | chr:6:32648036 |
| 6 rs113220298 | 32510369 T | 0.2637 | 3.44E-13 | chr:6:32648036 |
| 6 rs9272071   | 32599487 C | 0.2583 | 3.45E-13 | chr:6:32648036 |
| 6 rs9275119   | 32650031 G | 0.2588 | 3.47E-13 | chr:6:32648036 |
| 6 rs72851065  | 32504213 T | 0.2564 | 3.49E-13 | chr:6:32648036 |
| 6 rs117360622 | 32635270 A | 5.538  | 3.51E-13 | chr:6:32648036 |
| 6 rs9275143   | 32651192 A | 0.2639 | 3.54E-13 | chr:6:32648036 |
| 6 rs9272061   | 32599250 A | 0.2705 | 3.55E-13 | chr:6:32648036 |
| 6 rs76533559  | 32554897 G | 0.2214 | 3.57E-13 | chr:6:32648036 |
| 6 rs147719302 | 32642955 A | 5.833  | 3.58E-13 | chr:6:32648036 |
| 6 rs9275138   | 32650958 A | 0.2623 | 3.67E-13 | chr:6:32648036 |
| 6 rs9271863   | 32595334 A | 0.1894 | 3.69E-13 | chr:6:32648036 |
| 6 rs115202951 | 32501311 T | 0.2628 | 3.71E-13 | chr:6:32648036 |
| 6 rs73727915  | 32497046 T | 0.3138 | 3.74E-13 | chr:6:32648036 |
| 6 rs9272153   | 32601018 C | 0.2522 | 3.74E-13 | chr:6:32648036 |
| 6 rs117337127 | 32633654 G | 4.315  | 3.78E-13 | chr:6:32648036 |
| 6 rs116969302 | 32633866 T | 4.473  | 3.79E-13 | chr:6:32648036 |
| 6 rs281861181 | 32633880 T | 4.473  | 3.79E-13 | chr:6:32648036 |
| 6 rs9272161   | 32601139 G | 0.2467 | 3.80E-13 | chr:6:32648036 |
| 6 rs9272162   | 32601140 A | 0.2467 | 3.80E-13 | chr:6:32648036 |
| 6 rs9272163   | 32601146 T | 0.2467 | 3.80E-13 | chr:6:32648036 |
| 6 rs73726176  | 32490760 G | 0.3087 | 3.83E-13 | chr:6:32648036 |
| 6 rs73726177  | 32490762 G | 0.3087 | 3.83E-13 | chr:6:32648036 |
| 6 rs41287328  | 32552698 G | 0.2274 | 3.85E-13 | chr:6:32648036 |
| 6 rs72844144  | 32519125 A | 0.2254 | 3.89E-13 | chr:6:32648036 |
| 6 rs2858330   | 32658715 T | 0.2632 | 3.95E-13 | chr:6:32648036 |
| 6 rs9271866   | 32595367 T | 0.1985 | 3.97E-13 | chr:6:32648036 |
| 6 rs9271867   | 32595368 G | 0.1985 | 3.97E-13 | chr:6:32648036 |
| 6 rs111626267 | 32502273 T | 0.2469 | 4.02E-13 | chr:6:32648036 |
| 6 rs115573660 | 32502277 A | 0.2469 | 4.02E-13 | chr:6:32648036 |
| 6 rs112155110 | 32501417 T | 0.2718 | 4.04E-13 | chr:6:32648036 |
| 6 rs117570697 | 32634665 A | 4.789  | 4.06E-13 | chr:6:32648036 |
| 6 rs9270413   | 32558495 T | 0.407  | 4.07E-13 | chr:6:32648036 |
| 6 rs9270414   | 32558497 T | 0.407  | 4.07E-13 | chr:6:32648036 |
| 6 rs6920012   | 32556186 G | 0.2475 | 4.09E-13 | chr:6:32648036 |
| 6 rs281863510 | 32630936 C | 4.445  | 4.12E-13 | chr:6:32648036 |
| 6 rs9270383   | 32558298 T | 0.3008 | 4.13E-13 | chr:6:32648036 |
| 6 rs73729122  | 32519777 G | 0.2665 | 4.18E-13 | chr:6:32648036 |
| 6 rs4713589   | 32659435 G | 0.2457 | 4.19E-13 | chr:6:32648036 |
| 6 rs114015220 | 32510599 T | 0.2724 | 4.20E-13 | chr:6:32648036 |
| 6 rs114472333 | 32510598 T | 0.2724 | 4.20E-13 | chr:6:32648036 |
| 6 rs76723065  | 32510591 G | 0.2724 | 4.20E-13 | chr:6:32648036 |

|               |            |        |          |                |
|---------------|------------|--------|----------|----------------|
| 6 rs9270143   | 32555256 T | 0.2689 | 4.23E-13 | chr:6:32648036 |
| 6 rs143370221 | 32633004 T | 3.411  | 4.23E-13 | chr:6:32648036 |
| 6 rs9270388   | 32558343 T | 0.3707 | 4.24E-13 | chr:6:32648036 |
| 6 rs9269532   | 32543825 C | 0.3407 | 4.31E-13 | chr:6:32648036 |
| 6 rs76415310  | 32513232 T | 0.2613 | 4.42E-13 | chr:6:32648036 |
| 6 rs9275116   | 32649952 T | 0.2595 | 4.43E-13 | chr:6:32648036 |
| 6 rs9275118   | 32649996 A | 0.2595 | 4.43E-13 | chr:6:32648036 |
| 6 rs112313206 | 32598405 T | 0.2667 | 4.60E-13 | chr:6:32648036 |
| 6 rs9274756   | 32638269 A | 0.2907 | 4.66E-13 | chr:6:32648036 |
| 6 rs3104361   | 32652278 T | 0.2703 | 4.67E-13 | chr:6:32648036 |
| 6 rs9272158   | 32601122 A | 0.2571 | 4.86E-13 | chr:6:32648036 |
| 6 rs139201366 | 32513186 A | 0.2529 | 4.91E-13 | chr:6:32648036 |
| 6 rs369883062 | 32519734 G | 0.2745 | 5.08E-13 | chr:6:32648036 |
| 6 rs9271865   | 32595360 T | 0.2038 | 5.08E-13 | chr:6:32648036 |
| 6 rs114831840 | 32501301 C | 0.265  | 5.13E-13 | chr:6:32648036 |
| 6 rs115303308 | 32501296 A | 0.265  | 5.13E-13 | chr:6:32648036 |
| 6 rs2157337   | 32501144 T | 0.27   | 5.17E-13 | chr:6:32648036 |
| 6 rs2856693   | 32653283 C | 0.2637 | 5.19E-13 | chr:6:32648036 |
| 6 rs72853949  | 32509435 T | 0.2845 | 5.19E-13 | chr:6:32648036 |
| 6 rs9271924   | 32596498 A | 0.221  | 5.21E-13 | chr:6:32648036 |
| 6 rs71536564  | 32529818 C | 0.4183 | 5.22E-13 | chr:6:32648036 |
| 6 rs111477174 | 32594457 G | 0.2606 | 5.32E-13 | chr:6:32648036 |
| 6 rs114309058 | 32594470 A | 0.2606 | 5.32E-13 | chr:6:32648036 |
| 6 rs541430730 | 32635225 T | 5.126  | 5.36E-13 | chr:6:32648036 |
| 6 rs74205903  | 32501249 C | 0.2679 | 5.40E-13 | chr:6:32648036 |
| 6 rs9274759   | 32638315 G | 0.2775 | 5.46E-13 | chr:6:32648036 |
| 6 rs9274760   | 32638348 A | 0.2775 | 5.46E-13 | chr:6:32648036 |
| 6 rs17613347  | 32621980 T | 2.78   | 5.46E-13 | chr:6:32648036 |
| 6 rs141507870 | 32632369 A | 3.16   | 5.48E-13 | chr:6:32648036 |
| 6 rs150457662 | 32632371 T | 3.16   | 5.48E-13 | chr:6:32648036 |
| 6 rs182578413 | 32632290 C | 2.907  | 5.49E-13 | chr:6:32648036 |
| 6 rs11751146  | 32514899 T | 0.219  | 5.52E-13 | chr:6:32648036 |
| 6 rs9275126   | 32650307 A | 0.26   | 5.52E-13 | chr:6:32648036 |
| 6 rs115742569 | 32516464 C | 0.2232 | 5.60E-13 | chr:6:32648036 |
| 6 rs281862190 | 32632462 C | 3.582  | 5.61E-13 | chr:6:32648036 |
| 6 rs9275139   | 32651005 C | 0.2632 | 5.66E-13 | chr:6:32648036 |
| 6 rs9275130   | 32650409 T | 0.2602 | 5.67E-13 | chr:6:32648036 |
| 6 rs71536552  | 32527775 C | 0.4154 | 5.71E-13 | chr:6:32648036 |
| 6 rs141114903 | 32487814 G | 0.3899 | 5.91E-13 | chr:6:32648036 |
| 6 rs554894601 | 32497146 A | 0.3086 | 6.00E-13 | chr:6:32648036 |
| 6 rs9275125   | 32650293 A | 0.2598 | 6.03E-13 | chr:6:32648036 |
| 6 rs72492340  | 32531385 C | 0.382  | 6.03E-13 | chr:6:32648036 |
| 6 rs72845768  | 32531377 C | 0.382  | 6.03E-13 | chr:6:32648036 |

|               |            |        |          |                |
|---------------|------------|--------|----------|----------------|
| 6 rs9272055   | 32599176 A | 0.2742 | 6.09E-13 | chr:6:32648036 |
| 6 rs9275114   | 32649897 G | 0.2604 | 6.10E-13 | chr:6:32648036 |
| 6 rs117898330 | 32632965 T | 3.702  | 6.13E-13 | chr:6:32648036 |
| 6 rs9271862   | 32595333 C | 0.1904 | 6.13E-13 | chr:6:32648036 |
| 6 rs140120971 | 32510343 C | 0.2612 | 6.14E-13 | chr:6:32648036 |
| 6 rs143822887 | 32510344 A | 0.2612 | 6.14E-13 | chr:6:32648036 |
| 6 rs9274769   | 32638547 T | 0.2783 | 6.15E-13 | chr:6:32648036 |
| 6 rs9272005   | 32597992 G | 0.2658 | 6.18E-13 | chr:6:32648036 |
| 6 rs9272006   | 32597993 T | 0.2658 | 6.18E-13 | chr:6:32648036 |
| 6 rs4947340   | 32435338 T | 3.491  | 6.21E-13 | chr:6:32648036 |
| 6 rs17843688  | 32622036 A | 2.742  | 6.30E-13 | chr:6:32648036 |
| 6 rs75820413  | 32508505 G | 0.2325 | 6.32E-13 | chr:6:32648036 |
| 6 rs9275088   | 32648931 T | 0.2679 | 6.50E-13 | chr:6:32648036 |
| 6 rs9275089   | 32648947 A | 0.2679 | 6.50E-13 | chr:6:32648036 |
| 6 rs9272166   | 32601209 C | 0.2556 | 6.50E-13 | chr:6:32648036 |
| 6 rs117621674 | 32634649 T | 4.704  | 6.52E-13 | chr:6:32648036 |
| 6 rs138033214 | 32632979 A | 3.594  | 6.54E-13 | chr:6:32648036 |
| 6 rs2858329   | 32658801 A | 0.2688 | 6.58E-13 | chr:6:32648036 |
| 6 rs9269565   | 32544500 A | 0.3492 | 6.61E-13 | chr:6:32648036 |
| 6 rs9274758   | 32638290 A | 0.2913 | 6.62E-13 | chr:6:32648036 |
| 6 rs114375471 | 32493854 G | 0.307  | 6.63E-13 | chr:6:32648036 |
| 6 rs116684175 | 32493853 T | 0.307  | 6.63E-13 | chr:6:32648036 |
| 6 rs9269702   | 32547143 G | 2.605  | 6.65E-13 | chr:6:32648036 |
| 6 rs77712892  | 32503570 T | 0.2315 | 6.99E-13 | chr:6:32648036 |
| 6 rs74223623  | 32492102 T | 0.394  | 7.09E-13 | chr:6:32648036 |
| 6 rs71536560  | 32529163 G | 0.4044 | 7.15E-13 | chr:6:32648036 |
| 6 rs113405235 | 32521796 C | 0.252  | 7.15E-13 | chr:6:32648036 |
| 6 rs9271348   | 32583742 G | 3.394  | 7.16E-13 | chr:6:32648036 |
| 6 rs374248993 | 32496534 C | 0.2857 | 7.24E-13 | chr:6:32648036 |
| 6 rs2856676   | 32656833 G | 0.269  | 7.31E-13 | chr:6:32648036 |
| 6 rs9272035   | 32598814 T | 0.2689 | 7.33E-13 | chr:6:32648036 |
| 6 rs281863538 | 32630897 C | 4.471  | 7.38E-13 | chr:6:32648036 |
| 6 rs72492317  | 32512501 A | 0.2781 | 7.56E-13 | chr:6:32648036 |
| 6 rs9270093   | 32554435 T | 0.2175 | 7.63E-13 | chr:6:32648036 |
| 6 rs9271878   | 32595474 C | 0.2627 | 7.64E-13 | chr:6:32648036 |
| 6 rs9270391   | 32558361 A | 0.3798 | 7.71E-13 | chr:6:32648036 |
| 6 rs72508434  | 32487563 T | 0.3105 | 7.77E-13 | chr:6:32648036 |
| 6 rs144411837 | 32510337 C | 0.2653 | 7.80E-13 | chr:6:32648036 |
| 6 rs9272037   | 32598844 C | 0.2694 | 7.88E-13 | chr:6:32648036 |
| 6 rs113434238 | 32501204 T | 0.2685 | 7.89E-13 | chr:6:32648036 |
| 6 rs536146370 | 32519759 A | 0.2754 | 7.89E-13 | chr:6:32648036 |
| 6 rs67081540  | 32512359 C | 0.2864 | 7.95E-13 | chr:6:32648036 |
| 6 rs9272013   | 32598224 T | 0.2703 | 7.99E-13 | chr:6:32648036 |

|               |            |        |          |                |
|---------------|------------|--------|----------|----------------|
| 6 rs9275136   | 32650757 C | 0.2649 | 8.04E-13 | chr:6:32648036 |
| 6 rs73401349  | 32458094 C | 0.265  | 8.05E-13 | chr:6:32648036 |
| 6 rs7758269   | 32598812 C | 0.2587 | 8.17E-13 | chr:6:32648036 |
| 6 rs9269387   | 32541058 G | 0.3098 | 8.20E-13 | chr:6:32648036 |
| 6 rs9270157   | 32555411 T | 0.3422 | 8.22E-13 | chr:6:32648036 |
| 6 rs9271995   | 32597777 A | 0.2426 | 8.32E-13 | chr:6:32648036 |
| 6 rs2856684   | 32655095 T | 0.2652 | 8.42E-13 | chr:6:32648036 |
| 6 rs2856685   | 32655072 A | 0.2652 | 8.42E-13 | chr:6:32648036 |
| 6 rs9270171   | 32555685 A | 4.225  | 8.44E-13 | chr:6:32648036 |
| 6 rs9270172   | 32555687 G | 4.225  | 8.44E-13 | chr:6:32648036 |
| 6 rs575576508 | 32485670 A | 0.331  | 8.45E-13 | chr:6:32648036 |
| 6 rs9274805   | 32639429 G | 0.3293 | 8.49E-13 | chr:6:32648036 |
| 6 rs72492362  | 32543969 G | 0.3285 | 8.53E-13 | chr:6:32648036 |
| 6 rs115141943 | 32538830 C | 0.2856 | 8.55E-13 | chr:6:32648036 |
| 6 rs111634228 | 32594452 G | 0.2651 | 8.55E-13 | chr:6:32648036 |
| 6 rs281862289 | 32632297 G | 2.867  | 8.57E-13 | chr:6:32648036 |
| 6 rs541682094 | 32632298 A | 2.867  | 8.57E-13 | chr:6:32648036 |
| 6 rs9274338   | 32632310 C | 2.867  | 8.57E-13 | chr:6:32648036 |
| 6 rs116102092 | 32538672 A | 0.2545 | 8.57E-13 | chr:6:32648036 |
| 6 rs9269314   | 32539715 G | 0.3511 | 8.64E-13 | chr:6:32648036 |
| 6 rs113871699 | 32509693 T | 0.2796 | 8.65E-13 | chr:6:32648036 |
| 6 rs73727972  | 32509683 G | 0.2796 | 8.65E-13 | chr:6:32648036 |
| 6 rs9275112   | 32649773 G | 0.2609 | 8.72E-13 | chr:6:32648036 |
| 6 rs569962367 | 32485726 C | 0.3233 | 8.72E-13 | chr:6:32648036 |
| 6 rs139172132 | 32632566 C | 3.476  | 8.75E-13 | chr:6:32648036 |
| 6 rs150769232 | 32632563 A | 3.476  | 8.75E-13 | chr:6:32648036 |
| 6 rs9269885   | 32550971 T | 0.3689 | 8.87E-13 | chr:6:32648036 |
| 6 rs9269886   | 32550976 A | 0.3689 | 8.87E-13 | chr:6:32648036 |
| 6 rs9275131   | 32650467 C | 0.2647 | 8.87E-13 | chr:6:32648036 |
| 6 rs116093550 | 32594395 G | 0.2644 | 9.09E-13 | chr:6:32648036 |
| 6 rs116361489 | 32594396 T | 0.2644 | 9.09E-13 | chr:6:32648036 |
| 6 rs9271369   | 32586992 G | 3.279  | 9.19E-13 | chr:6:32648036 |
| 6 rs9271370   | 32586995 C | 3.279  | 9.19E-13 | chr:6:32648036 |
| 6 rs9275123   | 32650256 G | 0.2605 | 9.26E-13 | chr:6:32648036 |
| 6 rs2647000   | 32656890 T | 0.2697 | 9.28E-13 | chr:6:32648036 |
| 6 rs9275202   | 32656869 A | 0.2697 | 9.28E-13 | chr:6:32648036 |
| 6 rs116711613 | 32492041 A | 0.3848 | 9.37E-13 | chr:6:32648036 |
| 6 rs9272009   | 32598063 T | 0.2756 | 9.38E-13 | chr:6:32648036 |
| 6 rs562624040 | 32513024 C | 0.2756 | 9.40E-13 | chr:6:32648036 |
| 6 rs9275101   | 32649355 G | 0.2647 | 9.46E-13 | chr:6:32648036 |
| 6 rs9275102   | 32649361 G | 0.2647 | 9.46E-13 | chr:6:32648036 |
| 6 rs9275103   | 32649386 T | 0.2647 | 9.46E-13 | chr:6:32648036 |
| 6 rs9275105   | 32649416 C | 0.2647 | 9.46E-13 | chr:6:32648036 |



|               |            |        |          |                |
|---------------|------------|--------|----------|----------------|
| 6 rs62405572  | 32458232 G | 0.3248 | 9.49E-13 | chr:6:32648036 |
| 6 rs7743846   | 32505600 C | 0.2657 | 9.52E-13 | chr:6:32648036 |
| 6 rs548946394 | 32635220 A | 5.04   | 9.62E-13 | chr:6:32648036 |
| 6 rs112300533 | 32517237 T | 0.3034 | 9.65E-13 | chr:6:32648036 |
| 6 rs74821931  | 32517233 A | 0.3034 | 9.65E-13 | chr:6:32648036 |
| 6 rs150423066 | 32506995 A | 0.2493 | 9.67E-13 | chr:6:32648036 |
| 6 rs79140398  | 32527093 C | 0.24   | 9.70E-13 | chr:6:32648036 |
| 6 rs9270052   | 32553807 G | 3.143  | 9.89E-13 | chr:6:32648036 |
| 6 rs9269708   | 32547232 T | 0.418  | 9.92E-13 | chr:6:32648036 |
| 6 rs9269709   | 32547237 C | 0.418  | 9.92E-13 | chr:6:32648036 |
| 6 rs9275135   | 32650736 T | 0.2654 | 1.01E-12 | chr:6:32648036 |
| 6 rs112103446 | 32522679 C | 0.2159 | 1.01E-12 | chr:6:32648036 |
| 6 rs143742029 | 32486683 C | 0.4214 | 1.01E-12 | chr:6:32648036 |
| 6 rs117626117 | 32629087 G | 5.25   | 1.02E-12 | chr:6:32648036 |
| 6 rs115640078 | 32538839 T | 0.2894 | 1.02E-12 | chr:6:32648036 |
| 6 rs9274995   | 32642615 C | 0.2902 | 1.03E-12 | chr:6:32648036 |
| 6 rs9275106   | 32649475 T | 0.2652 | 1.03E-12 | chr:6:32648036 |
| 6 rs111779823 | 32491965 A | 0.3823 | 1.06E-12 | chr:6:32648036 |
| 6 rs145606733 | 32491959 G | 0.3823 | 1.06E-12 | chr:6:32648036 |
| 6 rs116520213 | 32504424 T | 0.2658 | 1.08E-12 | chr:6:32648036 |
| 6 rs546636941 | 32504421 T | 0.2658 | 1.08E-12 | chr:6:32648036 |
| 6 rs9271326   | 32582527 T | 0.2312 | 1.09E-12 | chr:6:32648036 |
| 6 rs9272072   | 32599563 G | 0.2442 | 1.09E-12 | chr:6:32648036 |
| 6 rs9269715   | 32547278 G | 0.4112 | 1.09E-12 | chr:6:32648036 |
| 6 rs530370261 | 32519826 T | 0.2676 | 1.09E-12 | chr:6:32648036 |
| 6 rs1059350   | 32489794 A | 0.3106 | 1.10E-12 | chr:6:32648036 |
| 6 rs141631850 | 32496670 C | 0.3516 | 1.10E-12 | chr:6:32648036 |
| 6 rs9269542   | 32544042 A | 0.3224 | 1.10E-12 | chr:6:32648036 |
| 6 rs9274861   | 32640592 C | 0.3223 | 1.11E-12 | chr:6:32648036 |
| 6 rs72851100  | 32505511 C | 0.2776 | 1.12E-12 | chr:6:32648036 |
| 6 rs9274855   | 32640494 G | 0.2861 | 1.13E-12 | chr:6:32648036 |
| 6 rs9274997   | 32642673 C | 0.2727 | 1.14E-12 | chr:6:32648036 |
| 6 rs572123865 | 32497098 A | 0.3226 | 1.15E-12 | chr:6:32648036 |
| 6 rs9269792   | 32549128 C | 3.257  | 1.15E-12 | chr:6:32648036 |
| 6 rs542465996 | 32485661 G | 0.3337 | 1.15E-12 | chr:6:32648036 |
| 6 rs563816645 | 32485662 A | 0.3337 | 1.15E-12 | chr:6:32648036 |
| 6 rs113504992 | 32531418 T | 0.3863 | 1.16E-12 | chr:6:32648036 |
| 6 rs72492356  | 32538899 C | 0.3287 | 1.17E-12 | chr:6:32648036 |
| 6 rs115814063 | 32492093 C | 0.3996 | 1.19E-12 | chr:6:32648036 |
| 6 rs2856686   | 32654869 T | 0.2654 | 1.19E-12 | chr:6:32648036 |
| 6 rs17204294  | 32492179 A | 0.41   | 1.20E-12 | chr:6:32648036 |
| 6 rs9272151   | 32601005 G | 0.2614 | 1.20E-12 | chr:6:32648036 |
| 6 rs9272152   | 32601007 A | 0.2614 | 1.20E-12 | chr:6:32648036 |

|               |            |        |          |                |
|---------------|------------|--------|----------|----------------|
| 6 rs9271999   | 32597832 G | 0.2722 | 1.21E-12 | chr:6:32648036 |
| 6 rs9272000   | 32597834 T | 0.2722 | 1.21E-12 | chr:6:32648036 |
| 6 rs9275087   | 32648893 T | 0.2695 | 1.22E-12 | chr:6:32648036 |
| 6 rs116787876 | 32491139 G | 0.3247 | 1.24E-12 | chr:6:32648036 |
| 6 rs114715427 | 32538850 A | 0.3132 | 1.28E-12 | chr:6:32648036 |
| 6 rs9272099   | 32599813 G | 0.2403 | 1.28E-12 | chr:6:32648036 |
| 6 rs9274806   | 32639441 A | 0.3307 | 1.29E-12 | chr:6:32648036 |
| 6 rs143321288 | 32531487 A | 0.3889 | 1.30E-12 | chr:6:32648036 |
| 6 rs28832872  | 32529015 C | 0.4236 | 1.31E-12 | chr:6:32648036 |
| 6 rs73401330  | 32454968 A | 2.476  | 1.31E-12 | chr:6:32648036 |
| 6 rs9271970   | 32597550 A | 0.2476 | 1.32E-12 | chr:6:32648036 |
| 6 rs112138727 | 32497169 G | 0.2265 | 1.33E-12 | chr:6:32648036 |
| 6 rs118157864 | 32627197 T | 3.701  | 1.34E-12 | chr:6:32648036 |
| 6 rs72492332  | 32523085 G | 0.356  | 1.34E-12 | chr:6:32648036 |
| 6 rs142144985 | 32632561 T | 3.473  | 1.34E-12 | chr:6:32648036 |
| 6 rs35859703  | 32535295 G | 0.4194 | 1.36E-12 | chr:6:32648036 |
| 6 rs2856667   | 32665079 T | 0.2655 | 1.38E-12 | chr:6:32648036 |
| 6 rs4642516   | 32657543 G | 0.2655 | 1.38E-12 | chr:6:32648036 |
| 6 rs7754464   | 32657818 A | 0.2655 | 1.38E-12 | chr:6:32648036 |
| 6 rs9275145   | 32651363 C | 0.2655 | 1.38E-12 | chr:6:32648036 |
| 6 rs62405573  | 32458239 T | 0.3294 | 1.38E-12 | chr:6:32648036 |
| 6 rs9271653   | 32592556 C | 0.2726 | 1.41E-12 | chr:6:32648036 |
| 6 rs72849265  | 32458208 T | 0.2776 | 1.42E-12 | chr:6:32648036 |
| 6 rs9274853   | 32640420 G | 0.2869 | 1.42E-12 | chr:6:32648036 |
| 6 rs9271966   | 32597507 T | 0.2541 | 1.46E-12 | chr:6:32648036 |
| 6 rs9270277   | 32557243 T | 0.2056 | 1.46E-12 | chr:6:32648036 |
| 6 rs9271333   | 32582678 T | 0.2373 | 1.47E-12 | chr:6:32648036 |
| 6 rs185236820 | 32488776 T | 0.3132 | 1.49E-12 | chr:6:32648036 |
| 6 rs141142229 | 32491805 C | 0.305  | 1.50E-12 | chr:6:32648036 |
| 6 rs72853904  | 32505575 T | 0.2825 | 1.52E-12 | chr:6:32648036 |
| 6 rs572581776 | 32526776 G | 0.2795 | 1.52E-12 | chr:6:32648036 |
| 6 rs9272073   | 32599570 T | 0.2463 | 1.54E-12 | chr:6:32648036 |
| 6 rs9271334   | 32582711 C | 0.2367 | 1.58E-12 | chr:6:32648036 |
| 6 rs7754885   | 32657858 G | 0.2699 | 1.60E-12 | chr:6:32648036 |
| 6 rs9271190   | 32578369 A | 0.2343 | 1.61E-12 | chr:6:32648036 |
| 6 rs555503640 | 32486477 T | 0.278  | 1.62E-12 | chr:6:32648036 |
| 6 rs9271301   | 32581614 T | 0.2306 | 1.63E-12 | chr:6:32648036 |
| 6 rs9271931   | 32596698 G | 0.2382 | 1.66E-12 | chr:6:32648036 |
| 6 rs74201443  | 32530321 G | 0.3879 | 1.68E-12 | chr:6:32648036 |
| 6 rs9274490   | 32633879 G | 2.939  | 1.68E-12 | chr:6:32648036 |
| 6 rs281860801 | 32634679 G | 4.359  | 1.69E-12 | chr:6:32648036 |
| 6 rs373964410 | 32497086 A | 0.3267 | 1.71E-12 | chr:6:32648036 |
| 6 rs112457394 | 32469073 C | 0.2983 | 1.72E-12 | chr:6:32648036 |

|               |            |        |          |                |
|---------------|------------|--------|----------|----------------|
| 6 rs72851063  | 32503901 T | 0.2802 | 1.77E-12 | chr:6:32648036 |
| 6 rs9275086   | 32648809 A | 0.2734 | 1.80E-12 | chr:6:32648036 |
| 6 rs72492351  | 32538451 C | 0.2989 | 1.80E-12 | chr:6:32648036 |
| 6 rs1281937   | 32578143 C | 0.2366 | 1.80E-12 | chr:6:32648036 |
| 6 rs2858864   | 32578229 T | 0.2366 | 1.80E-12 | chr:6:32648036 |
| 6 rs3104420   | 32580028 A | 0.2366 | 1.80E-12 | chr:6:32648036 |
| 6 rs3104421   | 32580007 A | 0.2366 | 1.80E-12 | chr:6:32648036 |
| 6 rs550703793 | 32582451 T | 0.2366 | 1.80E-12 | chr:6:32648036 |
| 6 rs76946723  | 32578917 T | 0.2366 | 1.80E-12 | chr:6:32648036 |
| 6 rs79838044  | 32580632 C | 0.2366 | 1.80E-12 | chr:6:32648036 |
| 6 rs80243928  | 32580571 T | 0.2366 | 1.80E-12 | chr:6:32648036 |
| 6 rs9271237   | 32579651 G | 0.2366 | 1.80E-12 | chr:6:32648036 |
| 6 rs9271238   | 32579702 T | 0.2366 | 1.80E-12 | chr:6:32648036 |
| 6 rs9271262   | 32580585 G | 0.2366 | 1.80E-12 | chr:6:32648036 |
| 6 rs76662008  | 32580869 G | 0.2388 | 1.81E-12 | chr:6:32648036 |
| 6 rs148451580 | 32498626 A | 0.154  | 1.84E-12 | chr:6:32648036 |
| 6 rs72492315  | 32512466 C | 0.2805 | 1.92E-12 | chr:6:32648036 |
| 6 rs114328264 | 32534675 T | 0.3519 | 1.95E-12 | chr:6:32648036 |
| 6 rs533779530 | 32453612 G | 0.2709 | 1.97E-12 | chr:6:32648036 |
| 6 rs75088009  | 32504884 G | 0.2841 | 1.98E-12 | chr:6:32648036 |
| 6 rs2858328   | 32658911 C | 0.2593 | 1.98E-12 | chr:6:32648036 |
| 6 rs115469967 | 32530190 A | 0.3914 | 1.99E-12 | chr:6:32648036 |
| 6 rs77340266  | 32530200 A | 0.3914 | 1.99E-12 | chr:6:32648036 |
| 6 rs113955073 | 32522932 C | 0.3473 | 1.99E-12 | chr:6:32648036 |
| 6 rs4532479   | 32582194 T | 0.23   | 2.01E-12 | chr:6:32648036 |
| 6 rs9269508   | 32543248 T | 0.383  | 2.01E-12 | chr:6:32648036 |
| 6 rs73729745  | 32469136 A | 0.2972 | 2.02E-12 | chr:6:32648036 |
| 6 rs139195061 | 32491813 A | 0.3096 | 2.03E-12 | chr:6:32648036 |
| 6 rs190526848 | 32488781 A | 0.3161 | 2.04E-12 | chr:6:32648036 |
| 6 rs73729756  | 32482020 G | 0.2251 | 2.05E-12 | chr:6:32648036 |
| 6 rs148817433 | 32493266 G | 0.251  | 2.07E-12 | chr:6:32648036 |
| 6 rs72492344  | 32532494 A | 0.3983 | 2.10E-12 | chr:6:32648036 |
| 6 rs9271663   | 32592636 A | 0.2761 | 2.13E-12 | chr:6:32648036 |
| 6 rs9270382   | 32558285 A | 0.3798 | 2.15E-12 | chr:6:32648036 |
| 6 rs148619571 | 32536155 A | 0.3866 | 2.17E-12 | chr:6:32648036 |
| 6 rs76259812  | 32524672 C | 0.317  | 2.19E-12 | chr:6:32648036 |
| 6 rs583177    | 32579567 A | 0.2347 | 2.22E-12 | chr:6:32648036 |
| 6 rs9272008   | 32598042 A | 0.2818 | 2.23E-12 | chr:6:32648036 |
| 6 rs9272148   | 32600980 C | 0.2826 | 2.24E-12 | chr:6:32648036 |
| 6 rs113204386 | 32531339 G | 0.3986 | 2.24E-12 | chr:6:32648036 |
| 6 rs112709345 | 32501541 T | 0.2969 | 2.26E-12 | chr:6:32648036 |
| 6 rs9274707   | 32637266 A | 0.3538 | 2.26E-12 | chr:6:32648036 |
| 6 rs9274708   | 32637267 G | 0.3538 | 2.26E-12 | chr:6:32648036 |

|               |            |        |          |                |
|---------------|------------|--------|----------|----------------|
| 6 rs142475334 | 32533988 A | 0.3729 | 2.29E-12 | chr:6:32648036 |
| 6 rs9271280   | 32581047 A | 0.237  | 2.34E-12 | chr:6:32648036 |
| 6 rs35255303  | 32536356 A | 0.3958 | 2.35E-12 | chr:6:32648036 |
| 6 rs72845752  | 32530285 T | 0.3907 | 2.40E-12 | chr:6:32648036 |
| 6 rs72845754  | 32530286 G | 0.3907 | 2.40E-12 | chr:6:32648036 |
| 6 rs9271330   | 32582640 A | 0.2419 | 2.42E-12 | chr:6:32648036 |
| 6 rs114758808 | 32457997 T | 0.1873 | 2.43E-12 | chr:6:32648036 |
| 6 rs9275133   | 32650588 A | 0.2742 | 2.44E-12 | chr:6:32648036 |
| 6 rs114795116 | 32491112 T | 0.3345 | 2.44E-12 | chr:6:32648036 |
| 6 rs538879571 | 32503698 A | 0.244  | 2.44E-12 | chr:6:32648036 |
| 6 rs9274498   | 32633941 G | 3.08   | 2.46E-12 | chr:6:32648036 |
| 6 rs369376349 | 32458425 A | 0.3128 | 2.52E-12 | chr:6:32648036 |
| 6 rs9272150   | 32601000 A | 0.2723 | 2.54E-12 | chr:6:32648036 |
| 6 rs77568742  | 32580790 C | 0.2407 | 2.58E-12 | chr:6:32648036 |
| 6 rs142142101 | 32534657 G | 0.3543 | 2.60E-12 | chr:6:32648036 |
| 6 rs9270641   | 32565667 G | 0.2113 | 2.61E-12 | chr:6:32648036 |
| 6 rs73726194  | 32492199 T | 0.4183 | 2.63E-12 | chr:6:32648036 |
| 6 rs9274306   | 32632006 G | 2.368  | 2.66E-12 | chr:6:32648036 |
| 6 rs9274171   | 32630391 C | 3.396  | 2.70E-12 | chr:6:32648036 |
| 6 rs200402299 | 32458349 A | 0.2323 | 2.72E-12 | chr:6:32648036 |
| 6 rs112815590 | 32504110 T | 0.268  | 2.76E-12 | chr:6:32648036 |
| 6 rs117369774 | 32628991 T | 4.624  | 2.83E-12 | chr:6:32648036 |
| 6 rs117656997 | 32628992 T | 4.624  | 2.83E-12 | chr:6:32648036 |
| 6 rs114682516 | 32503702 C | 0.2383 | 2.88E-12 | chr:6:32648036 |
| 6 rs113900769 | 32503887 T | 0.2728 | 2.91E-12 | chr:6:32648036 |
| 6 rs111705290 | 32513412 A | 0.2792 | 2.93E-12 | chr:6:32648036 |
| 6 rs502055    | 32579003 C | 0.2407 | 2.96E-12 | chr:6:32648036 |
| 6 rs502771    | 32578970 C | 0.2407 | 2.96E-12 | chr:6:32648036 |
| 6 rs9272165   | 32601170 C | 0.2753 | 2.99E-12 | chr:6:32648036 |
| 6 rs9271972   | 32597567 T | 0.2416 | 3.00E-12 | chr:6:32648036 |
| 6 rs9269326   | 32539996 G | 0.3221 | 3.05E-12 | chr:6:32648036 |
| 6 rs139346361 | 32622789 A | 2.594  | 3.06E-12 | chr:6:32648036 |
| 6 rs9273588   | 32629074 A | 5.532  | 3.07E-12 | chr:6:32648036 |
| 6 rs72845749  | 32530081 T | 0.3987 | 3.07E-12 | chr:6:32648036 |
| 6 rs72845750  | 32530093 G | 0.3987 | 3.07E-12 | chr:6:32648036 |
| 6 rs114629945 | 32503717 G | 0.2211 | 3.08E-12 | chr:6:32648036 |
| 6 rs116103612 | 32503716 A | 0.2211 | 3.08E-12 | chr:6:32648036 |
| 6 rs28746784  | 32632261 T | 2.488  | 3.12E-12 | chr:6:32648036 |
| 6 rs9275013   | 32643011 T | 0.3211 | 3.14E-12 | chr:6:32648036 |
| 6 rs9275014   | 32643023 G | 0.3211 | 3.14E-12 | chr:6:32648036 |
| 6 rs146650659 | 32646807 G | 3.379  | 3.17E-12 | chr:6:32648036 |
| 6 rs75404103  | 32531348 G | 0.4022 | 3.20E-12 | chr:6:32648036 |
| 6 rs115978041 | 32522923 C | 0.3543 | 3.27E-12 | chr:6:32648036 |

|               |            |        |          |                |
|---------------|------------|--------|----------|----------------|
| 6 rs9274996   | 32642641 C | 0.2897 | 3.30E-12 | chr:6:32648036 |
| 6 rs9269288   | 32539408 A | 0.4042 | 3.37E-12 | chr:6:32648036 |
| 6 rs111823263 | 32482045 G | 0.2158 | 3.37E-12 | chr:6:32648036 |
| 6 rs553518894 | 32486504 T | 0.2317 | 3.44E-12 | chr:6:32648036 |
| 6 rs111383925 | 32532741 C | 0.3968 | 3.46E-12 | chr:6:32648036 |
| 6 rs111566749 | 32532746 A | 0.3968 | 3.46E-12 | chr:6:32648036 |
| 6 rs73397495  | 32534640 C | 0.3579 | 3.46E-12 | chr:6:32648036 |
| 6 rs9269506   | 32543187 A | 0.3734 | 3.48E-12 | chr:6:32648036 |
| 6 rs140747244 | 32488784 C | 0.3278 | 3.49E-12 | chr:6:32648036 |
| 6 rs41287329  | 32552728 G | 0.2679 | 3.51E-12 | chr:6:32648036 |
| 6 rs41287330  | 32552730 A | 0.2679 | 3.51E-12 | chr:6:32648036 |
| 6 rs9272007   | 32598038 T | 0.2871 | 3.52E-12 | chr:6:32648036 |
| 6 rs146618240 | 32482102 G | 0.3029 | 3.55E-12 | chr:6:32648036 |
| 6 rs281862211 | 32632418 G | 3.126  | 3.59E-12 | chr:6:32648036 |
| 6 rs111749494 | 32532432 A | 0.3998 | 3.61E-12 | chr:6:32648036 |
| 6 rs112501266 | 32532428 C | 0.3998 | 3.61E-12 | chr:6:32648036 |
| 6 rs117992092 | 32635098 C | 3.929  | 3.65E-12 | chr:6:32648036 |
| 6 rs138352855 | 32630286 A | 3.55   | 3.67E-12 | chr:6:32648036 |
| 6 rs9270159   | 32555508 C | 0.2709 | 3.73E-12 | chr:6:32648036 |
| 6 rs3828844   | 32520755 G | 0.2641 | 3.76E-12 | chr:6:32648036 |
| 6 rs9270591   | 32561424 C | 3.276  | 3.84E-12 | chr:6:32648036 |
| 6 rs9269281   | 32539309 A | 0.4007 | 3.96E-12 | chr:6:32648036 |
| 6 rs117384891 | 32635124 G | 4.177  | 4.04E-12 | chr:6:32648036 |
| 6 rs117912793 | 32635123 G | 4.177  | 4.04E-12 | chr:6:32648036 |
| 6 rs9271978   | 32597632 C | 0.2507 | 4.07E-12 | chr:6:32648036 |
| 6 rs9272015   | 32598299 A | 0.2847 | 4.11E-12 | chr:6:32648036 |
| 6 rs112083186 | 32531320 A | 0.4014 | 4.14E-12 | chr:6:32648036 |
| 6 rs73727944  | 32504713 T | 0.2844 | 4.18E-12 | chr:6:32648036 |
| 6 rs66924955  | 32507855 G | 0.2916 | 4.19E-12 | chr:6:32648036 |
| 6 rs72853919  | 32507852 C | 0.2916 | 4.19E-12 | chr:6:32648036 |
| 6 rs17203839  | 32555926 C | 0.2245 | 4.19E-12 | chr:6:32648036 |
| 6 rs9272016   | 32598346 T | 0.2869 | 4.19E-12 | chr:6:32648036 |
| 6 rs145092566 | 32454838 A | 0.3034 | 4.22E-12 | chr:6:32648036 |
| 6 rs35772438  | 32530407 T | 0.4072 | 4.23E-12 | chr:6:32648036 |
| 6 rs9269292   | 32539450 T | 0.3879 | 4.28E-12 | chr:6:32648036 |
| 6 rs72508466  | 32505166 G | 0.2494 | 4.33E-12 | chr:6:32648036 |
| 6 rs9269293   | 32539463 G | 0.3875 | 4.36E-12 | chr:6:32648036 |
| 6 rs75639337  | 32578656 T | 0.2445 | 4.39E-12 | chr:6:32648036 |
| 6 rs77064057  | 32578653 G | 0.2445 | 4.39E-12 | chr:6:32648036 |
| 6 rs9271977   | 32597623 A | 0.2655 | 4.43E-12 | chr:6:32648036 |
| 6 rs533688361 | 32480016 T | 0.2414 | 4.49E-12 | chr:6:32648036 |
| 6 rs76454806  | 32530145 C | 0.4018 | 4.51E-12 | chr:6:32648036 |
| 6 rs80142174  | 32530144 G | 0.4018 | 4.51E-12 | chr:6:32648036 |

|               |            |        |          |                |
|---------------|------------|--------|----------|----------------|
| 6 rs72492350  | 32538088 T | 0.3889 | 4.55E-12 | chr:6:32648036 |
| 6 rs9269286   | 32539396 A | 0.4074 | 4.57E-12 | chr:6:32648036 |
| 6 rs9269284   | 32539381 G | 0.4042 | 4.58E-12 | chr:6:32648036 |
| 6 rs9271925   | 32596540 G | 0.2289 | 4.59E-12 | chr:6:32648036 |
| 6 rs9271926   | 32596566 T | 0.2289 | 4.59E-12 | chr:6:32648036 |
| 6 rs115018431 | 32534360 T | 0.3781 | 4.69E-12 | chr:6:32648036 |
| 6 rs77296290  | 32635296 T | 2.96   | 4.72E-12 | chr:6:32648036 |
| 6 rs1049073   | 32632717 G | 0.3662 | 4.74E-12 | chr:6:32648036 |
| 6 rs185087225 | 32480024 G | 0.2478 | 4.77E-12 | chr:6:32648036 |
| 6 rs79364663  | 32504085 C | 0.2731 | 4.79E-12 | chr:6:32648036 |
| 6 rs74615215  | 32458389 G | 0.2154 | 4.79E-12 | chr:6:32648036 |
| 6 rs371337007 | 32493146 A | 0.3637 | 4.86E-12 | chr:6:32648036 |
| 6 rs111890942 | 32458131 C | 0.3025 | 4.90E-12 | chr:6:32648036 |
| 6 rs9271861   | 32595287 T | 0.2544 | 4.90E-12 | chr:6:32648036 |
| 6 rs7756647   | 32582843 G | 0.2271 | 4.95E-12 | chr:6:32648036 |
| 6 rs112471393 | 32538228 T | 0.169  | 4.99E-12 | chr:6:32648036 |
| 6 rs75174683  | 32504101 G | 0.2731 | 5.04E-12 | chr:6:32648036 |
| 6 rs9269274   | 32539170 C | 0.396  | 5.05E-12 | chr:6:32648036 |
| 6 rs9269275   | 32539172 G | 0.396  | 5.05E-12 | chr:6:32648036 |
| 6 rs9275082   | 32648684 A | 0.2995 | 5.05E-12 | chr:6:32648036 |
| 6 rs9271717   | 32593453 G | 0.2793 | 5.07E-12 | chr:6:32648036 |
| 6 rs9270588   | 32561327 C | 3.215  | 5.09E-12 | chr:6:32648036 |
| 6 rs9273762   | 32629423 A | 4.648  | 5.16E-12 | chr:6:32648036 |
| 6 rs9273766   | 32629430 T | 4.648  | 5.16E-12 | chr:6:32648036 |
| 6 rs9273768   | 32629433 G | 4.648  | 5.16E-12 | chr:6:32648036 |
| 6 rs78278896  | 32508647 G | 0.3068 | 5.17E-12 | chr:6:32648036 |
| 6 rs9269921   | 32551568 G | 0.3424 | 5.18E-12 | chr:6:32648036 |
| 6 rs9271858   | 32595223 G | 0.2668 | 5.23E-12 | chr:6:32648036 |
| 6 rs9271859   | 32595231 G | 0.2668 | 5.23E-12 | chr:6:32648036 |
| 6 rs199506689 | 32504701 T | 0.2828 | 5.24E-12 | chr:6:32648036 |
| 6 rs201947932 | 32534556 T | 0.3884 | 5.25E-12 | chr:6:32648036 |
| 6 rs111338570 | 32533670 C | 0.4043 | 5.34E-12 | chr:6:32648036 |
| 6 rs113042858 | 32533666 T | 0.4043 | 5.34E-12 | chr:6:32648036 |
| 6 rs113908137 | 32523500 G | 0.3899 | 5.38E-12 | chr:6:32648036 |
| 6 rs72853927  | 32508474 G | 0.2676 | 5.47E-12 | chr:6:32648036 |
| 6 rs72853928  | 32508486 T | 0.2676 | 5.47E-12 | chr:6:32648036 |
| 6 rs202231764 | 32508412 T | 0.2785 | 5.52E-12 | chr:6:32648036 |
| 6 rs74202712  | 32502546 G | 0.2419 | 5.54E-12 | chr:6:32648036 |
| 6 rs149361627 | 32486988 C | 0.3833 | 5.55E-12 | chr:6:32648036 |
| 6 rs187402303 | 32486990 C | 0.3833 | 5.55E-12 | chr:6:32648036 |
| 6 rs542087123 | 32486994 T | 0.3833 | 5.55E-12 | chr:6:32648036 |
| 6 rs138912409 | 32533684 A | 0.4021 | 5.56E-12 | chr:6:32648036 |
| 6 rs143506542 | 32533686 T | 0.4021 | 5.56E-12 | chr:6:32648036 |

|               |            |        |          |                |
|---------------|------------|--------|----------|----------------|
| 6 rs111338793 | 32486248 G | 0.2858 | 5.57E-12 | chr:6:32648036 |
| 6 rs9270317   | 32557643 G | 4.237  | 5.59E-12 | chr:6:32648036 |
| 6 rs111596698 | 32487123 G | 0.1275 | 5.69E-12 | chr:6:32648036 |
| 6 rs113017160 | 32503834 G | 0.2763 | 5.75E-12 | chr:6:32648036 |
| 6 rs76662624  | 32503880 A | 0.2802 | 5.76E-12 | chr:6:32648036 |
| 6 rs72508430  | 32487172 T | 0.2699 | 5.80E-12 | chr:6:32648036 |
| 6 rs9274881   | 32641065 C | 2.337  | 5.81E-12 | chr:6:32648036 |
| 6 rs113688645 | 32621088 T | 2.603  | 5.83E-12 | chr:6:32648036 |
| 6 rs72845757  | 32530563 A | 0.4046 | 5.94E-12 | chr:6:32648036 |
| 6 rs9272079   | 32599632 T | 0.2811 | 6.01E-12 | chr:6:32648036 |
| 6 rs9272080   | 32599633 G | 0.2811 | 6.01E-12 | chr:6:32648036 |
| 6 rs9271715   | 32593441 T | 0.2755 | 6.08E-12 | chr:6:32648036 |
| 6 rs9271716   | 32593442 G | 0.2755 | 6.08E-12 | chr:6:32648036 |
| 6 rs536038224 | 32523371 C | 0.3706 | 6.08E-12 | chr:6:32648036 |
| 6 rs9271780   | 32594535 C | 0.2212 | 6.22E-12 | chr:6:32648036 |
| 6 rs9269923   | 32551604 T | 0.2945 | 6.24E-12 | chr:6:32648036 |
| 6 rs114164335 | 32532128 C | 0.3896 | 6.26E-12 | chr:6:32648036 |
| 6 rs140768369 | 32643975 G | 3.257  | 6.29E-12 | chr:6:32648036 |
| 6 rs72492343  | 32532385 T | 0.4042 | 6.31E-12 | chr:6:32648036 |
| 6 rs74786163  | 32507780 T | 0.2216 | 6.35E-12 | chr:6:32648036 |
| 6 rs72845755  | 32530385 G | 0.4022 | 6.53E-12 | chr:6:32648036 |
| 6 rs111358198 | 32547489 C | 0.4368 | 6.56E-12 | chr:6:32648036 |
| 6 rs141022812 | 32533567 A | 0.4273 | 6.58E-12 | chr:6:32648036 |
| 6 rs9270585   | 32561300 C | 3.151  | 6.66E-12 | chr:6:32648036 |
| 6 rs80011743  | 32531770 G | 0.4071 | 6.67E-12 | chr:6:32648036 |
| 6 rs530662953 | 32504587 C | 0.2758 | 6.70E-12 | chr:6:32648036 |
| 6 rs34166207  | 32523510 A | 0.3939 | 6.83E-12 | chr:6:32648036 |
| 6 rs145219524 | 32533964 T | 0.3778 | 6.91E-12 | chr:6:32648036 |
| 6 rs9269723   | 32547336 C | 0.4409 | 7.03E-12 | chr:6:32648036 |
| 6 rs9271781   | 32594547 A | 0.2206 | 7.09E-12 | chr:6:32648036 |
| 6 rs9271782   | 32594562 A | 0.2206 | 7.09E-12 | chr:6:32648036 |
| 6 rs187058069 | 32486665 A | 0.3799 | 7.13E-12 | chr:6:32648036 |
| 6 rs113573823 | 32532719 C | 0.4047 | 7.14E-12 | chr:6:32648036 |
| 6 rs557048    | 32587001 T | 0.2427 | 7.14E-12 | chr:6:32648036 |
| 6 rs116299701 | 32534068 A | 0.3852 | 7.19E-12 | chr:6:32648036 |
| 6 rs139796058 | 32531715 A | 0.41   | 7.27E-12 | chr:6:32648036 |
| 6 rs9269880   | 32550916 G | 0.3797 | 7.31E-12 | chr:6:32648036 |
| 6 rs9274895   | 32641184 G | 2.272  | 7.36E-12 | chr:6:32648036 |
| 6 rs9274896   | 32641185 G | 2.272  | 7.36E-12 | chr:6:32648036 |
| 6 rs9270377   | 32558260 T | 0.3688 | 7.37E-12 | chr:6:32648036 |
| 6 rs143133357 | 32625820 C | 2.579  | 7.40E-12 | chr:6:32648036 |
| 6 rs2647094   | 32580322 G | 0.2501 | 7.55E-12 | chr:6:32648036 |
| 6 rs2858862   | 32580321 T | 0.2501 | 7.55E-12 | chr:6:32648036 |

|               |            |        |          |                |
|---------------|------------|--------|----------|----------------|
| 6 rs184981897 | 32486966 A | 0.1337 | 7.70E-12 | chr:6:32648036 |
| 6 rs141404431 | 32538578 T | 0.2822 | 7.90E-12 | chr:6:32648036 |
| 6 rs143027966 | 32538579 T | 0.2822 | 7.90E-12 | chr:6:32648036 |
| 6 rs151286796 | 32538577 T | 0.2822 | 7.90E-12 | chr:6:32648036 |
| 6 rs114840252 | 32504071 T | 0.2713 | 7.95E-12 | chr:6:32648036 |
| 6 rs114302967 | 32503839 C | 0.2796 | 7.96E-12 | chr:6:32648036 |
| 6 rs76054694  | 32503840 T | 0.2796 | 7.96E-12 | chr:6:32648036 |
| 6 rs9275589   | 32680441 T | 0.2898 | 7.96E-12 | chr:6:32648036 |
| 6 rs113374318 | 32639415 G | 0.3492 | 8.04E-12 | chr:6:32648036 |
| 6 rs79740987  | 32507712 G | 0.2425 | 8.26E-12 | chr:6:32648036 |
| 6 rs73731412  | 32454215 G | 0.2159 | 8.26E-12 | chr:6:32648036 |
| 6 rs138253052 | 32536103 A | 0.4015 | 8.30E-12 | chr:6:32648036 |
| 6 rs68141327  | 32535354 C | 0.4308 | 8.31E-12 | chr:6:32648036 |
| 6 rs9271789   | 32594768 A | 0.2874 | 8.35E-12 | chr:6:32648036 |
| 6 rs116526477 | 32468879 T | 0.2433 | 8.76E-12 | chr:6:32648036 |
| 6 rs112302151 | 32530628 T | 0.4025 | 8.84E-12 | chr:6:32648036 |
| 6 rs146758209 | 32496618 C | 0.348  | 8.99E-12 | chr:6:32648036 |
| 6 rs554443954 | 32496557 T | 0.2762 | 9.05E-12 | chr:6:32648036 |
| 6 rs74211571  | 32502566 T | 0.2599 | 9.05E-12 | chr:6:32648036 |
| 6 rs115296342 | 32503526 C | 0.279  | 9.13E-12 | chr:6:32648036 |
| 6 rs111896611 | 32511183 T | 0.2692 | 9.23E-12 | chr:6:32648036 |
| 6 rs9269722   | 32547328 G | 0.4435 | 9.31E-12 | chr:6:32648036 |
| 6 rs72851077  | 32504624 C | 0.2854 | 9.43E-12 | chr:6:32648036 |
| 6 rs9271981   | 32597639 C | 0.2496 | 9.54E-12 | chr:6:32648036 |
| 6 rs76325796  | 32507653 A | 0.2397 | 9.60E-12 | chr:6:32648036 |
| 6 rs77077499  | 32507652 T | 0.2397 | 9.60E-12 | chr:6:32648036 |
| 6 rs189832895 | 32533972 T | 0.3815 | 9.69E-12 | chr:6:32648036 |
| 6 rs575033700 | 32533973 T | 0.3815 | 9.69E-12 | chr:6:32648036 |
| 6 rs181939518 | 32533977 C | 0.3819 | 9.70E-12 | chr:6:32648036 |
| 6 rs72845756  | 32530545 C | 0.4106 | 9.70E-12 | chr:6:32648036 |
| 6 rs115127109 | 32530038 T | 0.4141 | 9.85E-12 | chr:6:32648036 |
| 6 rs9271968   | 32597529 G | 0.2612 | 9.86E-12 | chr:6:32648036 |
| 6 rs76509141  | 32504529 C | 0.2734 | 9.87E-12 | chr:6:32648036 |
| 6 rs9275001   | 32642738 C | 0.3124 | 1.00E-11 | chr:6:32648036 |
| 6 rs545038190 | 32630327 A | 3.079  | 1.00E-11 | chr:6:32648036 |
| 6 rs116224274 | 32508583 C | 0.2654 | 1.00E-11 | chr:6:32648036 |
| 6 rs77173653  | 32508587 G | 0.2654 | 1.00E-11 | chr:6:32648036 |
| 6 rs9274857   | 32640542 C | 0.3591 | 1.01E-11 | chr:6:32648036 |
| 6 rs112999094 | 32511386 T | 0.396  | 1.01E-11 | chr:6:32648036 |
| 6 rs142592433 | 32511392 T | 0.396  | 1.01E-11 | chr:6:32648036 |
| 6 rs9271976   | 32597617 C | 0.2759 | 1.01E-11 | chr:6:32648036 |
| 6 rs116350000 | 32523418 G | 0.402  | 1.03E-11 | chr:6:32648036 |
| 6 rs114633631 | 32531706 A | 0.4142 | 1.04E-11 | chr:6:32648036 |



|               |            |        |          |                |
|---------------|------------|--------|----------|----------------|
| 6 rs187085470 | 32533998 G | 0.3844 | 1.04E-11 | chr:6:32648036 |
| 6 rs72845747  | 32530054 T | 0.4149 | 1.04E-11 | chr:6:32648036 |
| 6 rs79682288  | 32460628 T | 0.4633 | 1.04E-11 | chr:6:32648036 |
| 6 rs113091576 | 32491986 C | 0.3698 | 1.05E-11 | chr:6:32648036 |
| 6 rs9271187   | 32578314 C | 0.2512 | 1.05E-11 | chr:6:32648036 |
| 6 rs9271188   | 32578320 T | 0.2512 | 1.05E-11 | chr:6:32648036 |
| 6 rs9274946   | 32641828 A | 0.4192 | 1.05E-11 | chr:6:32648036 |
| 6 rs9272245   | 32602872 C | 3.093  | 1.05E-11 | chr:6:32648036 |
| 6 rs116181884 | 32487509 C | 0.3342 | 1.05E-11 | chr:6:32648036 |
| 6 rs3828806   | 32636130 C | 0.3013 | 1.05E-11 | chr:6:32648036 |
| 6 rs3828807   | 32636131 G | 0.3013 | 1.05E-11 | chr:6:32648036 |
| 6 rs545379090 | 32469285 T | 0.2821 | 1.06E-11 | chr:6:32648036 |
| 6 rs373664556 | 32508561 C | 0.263  | 1.07E-11 | chr:6:32648036 |
| 6 rs114821537 | 32503522 G | 0.2789 | 1.09E-11 | chr:6:32648036 |
| 6 rs111823185 | 32492457 C | 0.4585 | 1.09E-11 | chr:6:32648036 |
| 6 rs9271983   | 32597647 T | 0.2466 | 1.10E-11 | chr:6:32648036 |
| 6 rs556337500 | 32503531 A | 0.2742 | 1.10E-11 | chr:6:32648036 |
| 6 rs571499647 | 32503532 G | 0.2742 | 1.10E-11 | chr:6:32648036 |
| 6 rs115696138 | 32504460 C | 0.2935 | 1.11E-11 | chr:6:32648036 |
| 6 rs9270560   | 32560741 T | 2.837  | 1.12E-11 | chr:6:32648036 |
| 6 rs9271791   | 32594810 A | 0.284  | 1.15E-11 | chr:6:32648036 |
| 6 rs116180191 | 32534588 A | 0.3987 | 1.17E-11 | chr:6:32648036 |
| 6 rs3134993   | 32637778 G | 0.2854 | 1.19E-11 | chr:6:32648036 |
| 6 rs76940575  | 32502590 C | 0.2622 | 1.20E-11 | chr:6:32648036 |
| 6 rs34508462  | 32523476 C | 0.4003 | 1.21E-11 | chr:6:32648036 |
| 6 rs145316959 | 32521201 T | 0.2198 | 1.23E-11 | chr:6:32648036 |
| 6 rs9270505   | 32559216 G | 0.3591 | 1.23E-11 | chr:6:32648036 |
| 6 rs541218925 | 32488717 T | 0.4112 | 1.24E-11 | chr:6:32648036 |
| 6 rs9270118   | 32554983 C | 2.793  | 1.24E-11 | chr:6:32648036 |
| 6 rs9270119   | 32554987 A | 2.793  | 1.24E-11 | chr:6:32648036 |
| 6 rs9270120   | 32554990 C | 2.793  | 1.24E-11 | chr:6:32648036 |
| 6 rs9274900   | 32641207 A | 2.24   | 1.24E-11 | chr:6:32648036 |
| 6 rs151210153 | 32531734 A | 0.4146 | 1.25E-11 | chr:6:32648036 |
| 6 rs9274899   | 32641203 T | 2.241  | 1.25E-11 | chr:6:32648036 |
| 6 rs72849282  | 32469335 T | 0.2745 | 1.29E-11 | chr:6:32648036 |
| 6 rs68009841  | 32507731 T | 0.2358 | 1.30E-11 | chr:6:32648036 |
| 6 rs139726276 | 32524769 G | 0.3072 | 1.31E-11 | chr:6:32648036 |
| 6 rs112236587 | 32530615 C | 0.4072 | 1.31E-11 | chr:6:32648036 |
| 6 rs112715773 | 32530608 C | 0.4072 | 1.31E-11 | chr:6:32648036 |
| 6 rs9269328   | 32540018 T | 0.2792 | 1.32E-11 | chr:6:32648036 |
| 6 rs2157051   | 32658624 G | 3.735  | 1.32E-11 | chr:6:32648036 |
| 6 rs76376937  | 32508568 G | 0.2678 | 1.32E-11 | chr:6:32648036 |
| 6 rs545853065 | 32531737 G | 0.4155 | 1.33E-11 | chr:6:32648036 |

|               |            |        |          |                |
|---------------|------------|--------|----------|----------------|
| 6 rs556948697 | 32531729 C | 0.4155 | 1.33E-11 | chr:6:32648036 |
| 6 rs115095329 | 32503497 A | 0.2728 | 1.33E-11 | chr:6:32648036 |
| 6 rs116133469 | 32503492 G | 0.2728 | 1.33E-11 | chr:6:32648036 |
| 6 rs76034941  | 32503498 C | 0.2728 | 1.33E-11 | chr:6:32648036 |
| 6 rs9274705   | 32637245 G | 0.3605 | 1.34E-11 | chr:6:32648036 |
| 6 rs9271610   | 32591601 T | 0.2653 | 1.36E-11 | chr:6:32648036 |
| 6 rs9271611   | 32591609 G | 0.2653 | 1.36E-11 | chr:6:32648036 |
| 6 rs113727677 | 32517010 C | 0.2909 | 1.37E-11 | chr:6:32648036 |
| 6 rs115833135 | 32489672 A | 0.2556 | 1.38E-11 | chr:6:32648036 |
| 6 rs141127771 | 32632200 A | 2.508  | 1.39E-11 | chr:6:32648036 |
| 6 rs78107833  | 32531807 T | 0.4149 | 1.41E-11 | chr:6:32648036 |
| 6 rs114146939 | 32459890 G | 0.2144 | 1.42E-11 | chr:6:32648036 |
| 6 rs115834108 | 32459908 A | 0.2144 | 1.42E-11 | chr:6:32648036 |
| 6 rs116587947 | 32459889 T | 0.2144 | 1.42E-11 | chr:6:32648036 |
| 6 rs2647042   | 32667548 C | 0.2901 | 1.42E-11 | chr:6:32648036 |
| 6 rs72853926  | 32508451 G | 0.2825 | 1.45E-11 | chr:6:32648036 |
| 6 rs9270582   | 32561161 T | 8.957  | 1.47E-11 | chr:6:32648036 |
| 6 rs12665158  | 32482007 T | 0.2233 | 1.49E-11 | chr:6:32648036 |
| 6 rs9275577   | 32679345 A | 0.2977 | 1.50E-11 | chr:6:32648036 |
| 6 rs9269720   | 32547319 C | 0.4464 | 1.52E-11 | chr:6:32648036 |
| 6 rs9272226   | 32602396 C | 3.124  | 1.52E-11 | chr:6:32648036 |
| 6 rs281863357 | 32631142 G | 2.457  | 1.52E-11 | chr:6:32648036 |
| 6 rs148633289 | 32487229 T | 0.2037 | 1.53E-11 | chr:6:32648036 |
| 6 rs576810845 | 32530891 T | 0.4183 | 1.55E-11 | chr:6:32648036 |
| 6 rs572411223 | 32454634 T | 0.3413 | 1.56E-11 | chr:6:32648036 |
| 6 rs139868705 | 32532075 A | 0.4107 | 1.58E-11 | chr:6:32648036 |
| 6 rs9275588   | 32680423 G | 0.299  | 1.59E-11 | chr:6:32648036 |
| 6 rs9274898   | 32641199 T | 2.233  | 1.60E-11 | chr:6:32648036 |
| 6 rs9271986   | 32597700 A | 0.2386 | 1.61E-11 | chr:6:32648036 |
| 6 rs17210637  | 32492176 G | 0.4253 | 1.61E-11 | chr:6:32648036 |
| 6 rs9270072   | 32554115 A | 4.183  | 1.64E-11 | chr:6:32648036 |
| 6 rs9269327   | 32540001 T | 0.2838 | 1.65E-11 | chr:6:32648036 |
| 6 rs114362560 | 32504503 A | 0.2852 | 1.70E-11 | chr:6:32648036 |
| 6 rs114020016 | 32524824 T | 0.3031 | 1.70E-11 | chr:6:32648036 |
| 6 rs537678001 | 32527268 G | 0.2616 | 1.71E-11 | chr:6:32648036 |
| 6 rs116611418 | 32459595 G | 0.2447 | 1.72E-11 | chr:6:32648036 |
| 6 rs9274733   | 32637874 C | 0.3261 | 1.72E-11 | chr:6:32648036 |
| 6 rs117158956 | 32646666 A | 3.197  | 1.74E-11 | chr:6:32648036 |
| 6 rs9270126   | 32555052 T | 0.2757 | 1.75E-11 | chr:6:32648036 |
| 6 rs200819822 | 32505189 G | 0.2564 | 1.75E-11 | chr:6:32648036 |
| 6 rs9270250   | 32557001 C | 0.2579 | 1.77E-11 | chr:6:32648036 |
| 6 rs9270251   | 32557003 A | 0.2579 | 1.77E-11 | chr:6:32648036 |
| 6 rs114653292 | 32503516 G | 0.2864 | 1.83E-11 | chr:6:32648036 |

|               |            |        |          |                |
|---------------|------------|--------|----------|----------------|
| 6 rs114905947 | 32533016 C | 0.4001 | 1.84E-11 | chr:6:32648036 |
| 6 rs112310670 | 32531136 C | 0.4207 | 1.84E-11 | chr:6:32648036 |
| 6 rs112649230 | 32531140 G | 0.4207 | 1.84E-11 | chr:6:32648036 |
| 6 rs9269272   | 32539114 A | 0.4118 | 1.85E-11 | chr:6:32648036 |
| 6 rs9269629   | 32545635 A | 0.4043 | 1.86E-11 | chr:6:32648036 |
| 6 rs9269630   | 32545644 T | 0.4043 | 1.86E-11 | chr:6:32648036 |
| 6 rs71536562  | 32529207 C | 0.4368 | 1.87E-11 | chr:6:32648036 |
| 6 rs543093016 | 32532533 A | 0.4048 | 1.88E-11 | chr:6:32648036 |
| 6 rs9270162   | 32555560 A | 0.2487 | 1.91E-11 | chr:6:32648036 |
| 6 rs72508445  | 32491851 T | 0.3246 | 1.93E-11 | chr:6:32648036 |
| 6 rs9275081   | 32648669 C | 0.3171 | 1.99E-11 | chr:6:32648036 |
| 6 rs12660259  | 32531709 A | 0.4206 | 2.03E-11 | chr:6:32648036 |
| 6 rs117616320 | 32494704 A | 0.2239 | 2.04E-11 | chr:6:32648036 |
| 6 rs145896370 | 32533718 A | 0.417  | 2.07E-11 | chr:6:32648036 |
| 6 rs151297998 | 32530904 C | 0.421  | 2.07E-11 | chr:6:32648036 |
| 6 rs558696616 | 32530898 C | 0.421  | 2.07E-11 | chr:6:32648036 |
| 6 rs577240453 | 32530899 T | 0.421  | 2.07E-11 | chr:6:32648036 |
| 6 rs9269386   | 32541050 A | 0.3572 | 2.11E-11 | chr:6:32648036 |
| 6 rs9270634   | 32565625 G | 0.2882 | 2.12E-11 | chr:6:32648036 |
| 6 rs9272075   | 32599593 G | 0.2788 | 2.12E-11 | chr:6:32648036 |
| 6 rs112882980 | 32533222 C | 0.4111 | 2.13E-11 | chr:6:32648036 |
| 6 rs116541769 | 32524870 T | 0.314  | 2.15E-11 | chr:6:32648036 |
| 6 rs142162694 | 32532071 T | 0.414  | 2.17E-11 | chr:6:32648036 |
| 6 rs114710684 | 32521237 G | 0.2255 | 2.18E-11 | chr:6:32648036 |
| 6 rs116783886 | 32521236 T | 0.2255 | 2.18E-11 | chr:6:32648036 |
| 6 rs116100204 | 32531556 T | 0.4328 | 2.18E-11 | chr:6:32648036 |
| 6 rs114106672 | 32532692 A | 0.4187 | 2.20E-11 | chr:6:32648036 |
| 6 rs184303918 | 32529976 G | 0.4176 | 2.21E-11 | chr:6:32648036 |
| 6 rs78085354  | 32529981 G | 0.4176 | 2.21E-11 | chr:6:32648036 |
| 6 rs563850361 | 32531744 G | 0.4193 | 2.22E-11 | chr:6:32648036 |
| 6 rs200582841 | 32453810 A | 0.2516 | 2.23E-11 | chr:6:32648036 |
| 6 rs9270334   | 32557908 G | 0.253  | 2.24E-11 | chr:6:32648036 |
| 6 rs72851029  | 32501639 T | 0.3125 | 2.24E-11 | chr:6:32648036 |
| 6 rs147315656 | 32530869 T | 0.4222 | 2.27E-11 | chr:6:32648036 |
| 6 rs9270272   | 32557213 G | 3.379  | 2.27E-11 | chr:6:32648036 |
| 6 rs73726842  | 32533029 A | 0.4041 | 2.28E-11 | chr:6:32648036 |
| 6 rs73726843  | 32533042 C | 0.4041 | 2.28E-11 | chr:6:32648036 |
| 6 rs9270080   | 32554197 G | 0.282  | 2.29E-11 | chr:6:32648036 |
| 6 rs116422126 | 32504500 G | 0.2908 | 2.31E-11 | chr:6:32648036 |
| 6 rs9271043   | 32575177 A | 3.116  | 2.33E-11 | chr:6:32648036 |
| 6 rs67283303  | 32531253 T | 0.4232 | 2.35E-11 | chr:6:32648036 |
| 6 rs74197204  | 32507695 G | 0.2764 | 2.39E-11 | chr:6:32648036 |
| 6 rs9272012   | 32598156 A | 0.2825 | 2.40E-11 | chr:6:32648036 |

|               |            |        |          |                |
|---------------|------------|--------|----------|----------------|
| 6 rs114435848 | 32532546 T | 0.4095 | 2.40E-11 | chr:6:32648036 |
| 6 rs148437409 | 32598479 C | 0.3056 | 2.40E-11 | chr:6:32648036 |
| 6 rs9270747   | 32568292 A | 2.762  | 2.42E-11 | chr:6:32648036 |
| 6 rs557288207 | 32504452 T | 0.3027 | 2.46E-11 | chr:6:32648036 |
| 6 rs79604868  | 32504073 A | 0.2931 | 2.47E-11 | chr:6:32648036 |
| 6 rs9269967   | 32552239 T | 0.2203 | 2.50E-11 | chr:6:32648036 |
| 6 rs1049086   | 32629904 A | 0.2869 | 2.52E-11 | chr:6:32648036 |
| 6 rs1049092   | 32629802 A | 0.2869 | 2.52E-11 | chr:6:32648036 |
| 6 rs9271847   | 32594993 G | 0.2087 | 2.53E-11 | chr:6:32648036 |
| 6 rs9274922   | 32641350 G | 2.147  | 2.55E-11 | chr:6:32648036 |
| 6 rs9271711   | 32593430 T | 0.2886 | 2.56E-11 | chr:6:32648036 |
| 6 rs9271714   | 32593434 G | 0.2886 | 2.56E-11 | chr:6:32648036 |
| 6 rs9274887   | 32641089 G | 2.212  | 2.59E-11 | chr:6:32648036 |
| 6 rs9269750   | 32548141 G | 0.2959 | 2.60E-11 | chr:6:32648036 |
| 6 rs113666104 | 32460222 C | 2.115  | 2.61E-11 | chr:6:32648036 |
| 6 rs545256869 | 32512858 T | 0.2821 | 2.64E-11 | chr:6:32648036 |
| 6 rs9274926   | 32641416 C | 2.217  | 2.66E-11 | chr:6:32648036 |
| 6 rs9274927   | 32641419 C | 2.217  | 2.66E-11 | chr:6:32648036 |
| 6 rs72508432  | 32487524 A | 0.3417 | 2.67E-11 | chr:6:32648036 |
| 6 rs78806801  | 32503403 C | 0.2818 | 2.71E-11 | chr:6:32648036 |
| 6 rs368127976 | 32497090 T | 2.439  | 2.73E-11 | chr:6:32648036 |
| 6 rs9269651   | 32546074 T | 0.4154 | 2.75E-11 | chr:6:32648036 |
| 6 rs9274977   | 32642247 A | 0.3148 | 2.86E-11 | chr:6:32648036 |
| 6 rs115421755 | 32647108 A | 3.07   | 2.90E-11 | chr:6:32648036 |
| 6 rs111979375 | 32538231 T | 0.1684 | 2.91E-11 | chr:6:32648036 |
| 6 rs115830407 | 32482484 G | 0.3576 | 2.92E-11 | chr:6:32648036 |
| 6 rs1794493   | 32639578 A | 0.352  | 2.94E-11 | chr:6:32648036 |
| 6 rs187653175 | 32490127 A | 0.3816 | 2.95E-11 | chr:6:32648036 |
| 6 rs2760994   | 32574308 C | 2.892  | 2.97E-11 | chr:6:32648036 |
| 6 rs111632178 | 32511149 C | 0.2706 | 3.00E-11 | chr:6:32648036 |
| 6 rs112427949 | 32511164 T | 0.2706 | 3.00E-11 | chr:6:32648036 |
| 6 rs9271142   | 32577090 T | 3.017  | 3.04E-11 | chr:6:32648036 |
| 6 rs551009500 | 32533836 T | 0.4235 | 3.12E-11 | chr:6:32648036 |
| 6 rs569299936 | 32533837 A | 0.4235 | 3.12E-11 | chr:6:32648036 |
| 6 rs199987570 | 32629267 T | 5.226  | 3.14E-11 | chr:6:32648036 |
| 6 rs114327439 | 32505202 A | 0.2639 | 3.14E-11 | chr:6:32648036 |
| 6 rs9274713   | 32637341 C | 0.3493 | 3.15E-11 | chr:6:32648036 |
| 6 rs373666709 | 32531748 A | 0.4231 | 3.16E-11 | chr:6:32648036 |
| 6 rs75519123  | 32469404 G | 0.2433 | 3.20E-11 | chr:6:32648036 |
| 6 rs563246799 | 32533766 C | 0.4183 | 3.25E-11 | chr:6:32648036 |
| 6 rs200786989 | 32494716 T | 0.4396 | 3.25E-11 | chr:6:32648036 |
| 6 rs78583156  | 32457599 T | 2.759  | 3.30E-11 | chr:6:32648036 |
| 6 rs9274564   | 32635048 G | 0.3793 | 3.31E-11 | chr:6:32648036 |

|               |            |        |          |                |
|---------------|------------|--------|----------|----------------|
| 6 rs67011649  | 32532599 G | 0.4135 | 3.36E-11 | chr:6:32648036 |
| 6 rs542648047 | 32535499 T | 0.3897 | 3.40E-11 | chr:6:32648036 |
| 6 rs66501603  | 32538002 A | 0.4255 | 3.41E-11 | chr:6:32648036 |
| 6 rs76571178  | 32525159 A | 0.3448 | 3.43E-11 | chr:6:32648036 |
| 6 rs111290332 | 32533327 A | 0.4151 | 3.47E-11 | chr:6:32648036 |
| 6 rs9274999   | 32642709 G | 0.3229 | 3.49E-11 | chr:6:32648036 |
| 6 rs9272076   | 32599624 T | 0.2566 | 3.49E-11 | chr:6:32648036 |
| 6 rs9272077   | 32599625 G | 0.2566 | 3.49E-11 | chr:6:32648036 |
| 6 rs9274886   | 32641086 C | 2.204  | 3.57E-11 | chr:6:32648036 |
| 6 rs2760982   | 32565495 C | 0.278  | 3.57E-11 | chr:6:32648036 |
| 6 rs540724932 | 32644934 A | 3.118  | 3.61E-11 | chr:6:32648036 |
| 6 rs112620090 | 32460199 C | 2.103  | 3.62E-11 | chr:6:32648036 |
| 6 rs115493349 | 32527153 G | 0.2502 | 3.63E-11 | chr:6:32648036 |
| 6 rs538116343 | 32521742 T | 0.3135 | 3.65E-11 | chr:6:32648036 |
| 6 rs74197151  | 32469035 T | 0.2723 | 3.72E-11 | chr:6:32648036 |
| 6 rs72845745  | 32529961 T | 0.4223 | 3.83E-11 | chr:6:32648036 |
| 6 rs9271788   | 32594734 G | 0.3029 | 3.84E-11 | chr:6:32648036 |
| 6 rs111354037 | 32579285 C | 0.253  | 3.87E-11 | chr:6:32648036 |
| 6 rs9274873   | 32640818 A | 0.3902 | 3.88E-11 | chr:6:32648036 |
| 6 rs112780153 | 32510301 C | 0.2837 | 3.90E-11 | chr:6:32648036 |
| 6 rs9274967   | 32642030 T | 0.371  | 3.90E-11 | chr:6:32648036 |
| 6 rs142127023 | 32532178 T | 0.4065 | 3.91E-11 | chr:6:32648036 |
| 6 rs142670190 | 32532172 T | 0.4065 | 3.91E-11 | chr:6:32648036 |
| 6 rs144412121 | 32532179 G | 0.4065 | 3.91E-11 | chr:6:32648036 |
| 6 rs9256943   | 32557423 T | 0.1763 | 3.91E-11 | chr:6:32648036 |
| 6 rs115946871 | 32530011 C | 0.4242 | 3.95E-11 | chr:6:32648036 |
| 6 rs112720311 | 32529995 A | 0.4234 | 3.98E-11 | chr:6:32648036 |
| 6 rs571525080 | 32469429 A | 0.2266 | 4.00E-11 | chr:6:32648036 |
| 6 rs113655203 | 32533247 T | 0.4242 | 4.01E-11 | chr:6:32648036 |
| 6 rs112780983 | 32511348 G | 0.4068 | 4.03E-11 | chr:6:32648036 |
| 6 rs138129967 | 32532324 C | 0.4263 | 4.04E-11 | chr:6:32648036 |
| 6 rs9269549   | 32544202 G | 0.3917 | 4.07E-11 | chr:6:32648036 |
| 6 rs111847217 | 32511131 G | 0.2742 | 4.16E-11 | chr:6:32648036 |
| 6 rs371994404 | 32532317 A | 0.4268 | 4.17E-11 | chr:6:32648036 |
| 6 rs67860869  | 32508349 C | 0.3207 | 4.24E-11 | chr:6:32648036 |
| 6 rs541874222 | 32533761 G | 0.4213 | 4.33E-11 | chr:6:32648036 |
| 6 rs2858317   | 32662280 C | 0.2985 | 4.37E-11 | chr:6:32648036 |
| 6 rs2002777   | 32601332 G | 2.65   | 4.43E-11 | chr:6:32648036 |
| 6 rs115774308 | 32530778 T | 0.4298 | 4.44E-11 | chr:6:32648036 |
| 6 rs9270445   | 32558757 G | 0.4468 | 4.44E-11 | chr:6:32648036 |
| 6 rs76235954  | 32512815 A | 0.306  | 4.44E-11 | chr:6:32648036 |
| 6 rs576530137 | 32629015 G | 0.4502 | 4.52E-11 | chr:6:32648036 |
| 6 rs75503609  | 32530929 A | 0.4253 | 4.52E-11 | chr:6:32648036 |

|               |            |        |          |                |
|---------------|------------|--------|----------|----------------|
| 6 rs114565678 | 32469224 A | 0.2941 | 4.55E-11 | chr:6:32648036 |
| 6 rs9271971   | 32597561 A | 0.2329 | 4.58E-11 | chr:6:32648036 |
| 6 rs116474488 | 32469226 T | 0.2484 | 4.59E-11 | chr:6:32648036 |
| 6 rs114020256 | 32601797 A | 0.2854 | 4.61E-11 | chr:6:32648036 |
| 6 rs545350177 | 32565668 G | 0.331  | 4.61E-11 | chr:6:32648036 |
| 6 rs72849267  | 32468923 T | 0.2982 | 4.64E-11 | chr:6:32648036 |
| 6 rs72845759  | 32531182 G | 0.4299 | 4.68E-11 | chr:6:32648036 |
| 6 rs9269502   | 32543121 G | 0.3109 | 4.68E-11 | chr:6:32648036 |
| 6 rs182374257 | 32525306 T | 0.4021 | 4.71E-11 | chr:6:32648036 |
| 6 rs9271979   | 32597635 C | 0.2424 | 4.71E-11 | chr:6:32648036 |
| 6 rs189233809 | 32530497 T | 0.4277 | 4.87E-11 | chr:6:32648036 |
| 6 rs193053660 | 32530503 C | 0.4277 | 4.87E-11 | chr:6:32648036 |
| 6 rs533498287 | 32530506 C | 0.4277 | 4.87E-11 | chr:6:32648036 |
| 6 rs566699769 | 32530505 A | 0.4277 | 4.87E-11 | chr:6:32648036 |
| 6 rs9271130   | 32576894 T | 0.3796 | 4.87E-11 | chr:6:32648036 |
| 6 rs187064714 | 32490378 C | 0.43   | 4.89E-11 | chr:6:32648036 |
| 6 rs9271962   | 32597434 C | 0.2971 | 4.93E-11 | chr:6:32648036 |
| 6 rs67345629  | 32529268 T | 0.4455 | 4.97E-11 | chr:6:32648036 |
| 6 rs115910196 | 32502304 T | 0.2817 | 5.05E-11 | chr:6:32648036 |
| 6 rs549879919 | 32491969 G | 0.3874 | 5.08E-11 | chr:6:32648036 |
| 6 rs115563246 | 32489734 A | 0.2091 | 5.10E-11 | chr:6:32648036 |
| 6 rs115817940 | 32489735 T | 0.2091 | 5.10E-11 | chr:6:32648036 |
| 6 rs116152468 | 32536921 T | 0.432  | 5.14E-11 | chr:6:32648036 |
| 6 rs9269524   | 32543671 C | 0.3838 | 5.15E-11 | chr:6:32648036 |
| 6 rs9272093   | 32599777 T | 0.1907 | 5.19E-11 | chr:6:32648036 |
| 6 rs149581890 | 32530684 A | 0.4257 | 5.20E-11 | chr:6:32648036 |
| 6 rs559286232 | 32527271 C | 0.2808 | 5.23E-11 | chr:6:32648036 |
| 6 rs9269481   | 32542582 A | 0.4254 | 5.29E-11 | chr:6:32648036 |
| 6 rs532050307 | 32469431 C | 0.2299 | 5.31E-11 | chr:6:32648036 |
| 6 rs28371227  | 32647666 G | 2.877  | 5.39E-11 | chr:6:32648036 |
| 6 rs41263822  | 32632447 A | 0.4029 | 5.41E-11 | chr:6:32648036 |
| 6 rs701831    | 32549401 T | 3.624  | 5.44E-11 | chr:6:32648036 |
| 6 rs115104630 | 32502387 A | 0.2617 | 5.48E-11 | chr:6:32648036 |
| 6 rs9274871   | 32640792 A | 0.389  | 5.49E-11 | chr:6:32648036 |
| 6 rs9274872   | 32640793 A | 0.389  | 5.49E-11 | chr:6:32648036 |
| 6 rs9271784   | 32594704 A | 0.2605 | 5.55E-11 | chr:6:32648036 |
| 6 rs9271787   | 32594718 C | 0.2972 | 5.56E-11 | chr:6:32648036 |
| 6 rs140028862 | 32496684 A | 0.3838 | 5.56E-11 | chr:6:32648036 |
| 6 rs145528327 | 32496685 G | 0.3838 | 5.56E-11 | chr:6:32648036 |
| 6 rs543107154 | 32532351 C | 0.4306 | 5.58E-11 | chr:6:32648036 |
| 6 rs561232678 | 32532352 A | 0.4306 | 5.58E-11 | chr:6:32648036 |
| 6 rs113174592 | 32457619 C | 2.709  | 5.60E-11 | chr:6:32648036 |
| 6 rs528792740 | 32533803 G | 0.4305 | 5.63E-11 | chr:6:32648036 |

|               |            |        |          |                |
|---------------|------------|--------|----------|----------------|
| 6 rs546913114 | 32533805 T | 0.4305 | 5.63E-11 | chr:6:32648036 |
| 6 rs562082330 | 32533812 G | 0.4305 | 5.63E-11 | chr:6:32648036 |
| 6 rs552961071 | 32533756 T | 0.4241 | 5.66E-11 | chr:6:32648036 |
| 6 rs574369672 | 32533757 G | 0.4241 | 5.66E-11 | chr:6:32648036 |
| 6 rs141124032 | 32533299 G | 0.4181 | 5.66E-11 | chr:6:32648036 |
| 6 rs146280841 | 32533291 A | 0.4181 | 5.66E-11 | chr:6:32648036 |
| 6 rs148731245 | 32533293 C | 0.4181 | 5.66E-11 | chr:6:32648036 |
| 6 rs145177101 | 32536632 G | 0.4321 | 5.70E-11 | chr:6:32648036 |
| 6 rs9270965   | 32573471 A | 2.973  | 5.71E-11 | chr:6:32648036 |
| 6 rs34966632  | 32536306 G | 0.4218 | 5.71E-11 | chr:6:32648036 |
| 6 rs569119670 | 32532359 C | 0.4318 | 5.72E-11 | chr:6:32648036 |
| 6 rs143742917 | 32533480 A | 0.431  | 5.80E-11 | chr:6:32648036 |
| 6 rs146783438 | 32533483 A | 0.431  | 5.80E-11 | chr:6:32648036 |
| 6 rs148743468 | 32533479 C | 0.431  | 5.80E-11 | chr:6:32648036 |
| 6 rs77149458  | 32487130 A | 0.206  | 5.82E-11 | chr:6:32648036 |
| 6 rs9275084   | 32648722 A | 0.3236 | 5.91E-11 | chr:6:32648036 |
| 6 rs9275085   | 32648735 G | 0.3236 | 5.91E-11 | chr:6:32648036 |
| 6 rs180756398 | 32458010 A | 0.1992 | 5.93E-11 | chr:6:32648036 |
| 6 rs116088388 | 32488961 C | 0.4109 | 6.01E-11 | chr:6:32648036 |
| 6 rs139007218 | 32488958 C | 0.4109 | 6.01E-11 | chr:6:32648036 |
| 6 rs9273556   | 32628953 C | 0.4025 | 6.03E-11 | chr:6:32648036 |
| 6 rs116335331 | 32532577 T | 0.4193 | 6.09E-11 | chr:6:32648036 |
| 6 rs9274883   | 32641072 T | 2.183  | 6.11E-11 | chr:6:32648036 |
| 6 rs72492341  | 32531636 G | 0.4287 | 6.12E-11 | chr:6:32648036 |
| 6 rs185436529 | 32530740 A | 0.4317 | 6.16E-11 | chr:6:32648036 |
| 6 rs138636844 | 32486961 A | 0.2768 | 6.18E-11 | chr:6:32648036 |
| 6 rs9269246   | 32454098 C | 0.2598 | 6.22E-11 | chr:6:32648036 |
| 6 rs3828802   | 32636073 A | 2.778  | 6.24E-11 | chr:6:32648036 |
| 6 rs115277180 | 32533468 C | 0.4327 | 6.26E-11 | chr:6:32648036 |
| 6 rs531476760 | 32490069 C | 0.273  | 6.29E-11 | chr:6:32648036 |
| 6 rs72508468  | 32505288 C | 0.2475 | 6.30E-11 | chr:6:32648036 |
| 6 rs187104995 | 32460014 A | 2.109  | 6.30E-11 | chr:6:32648036 |
| 6 rs9273560   | 32628996 C | 0.4388 | 6.31E-11 | chr:6:32648036 |
| 6 rs9274828   | 32639737 A | 0.398  | 6.38E-11 | chr:6:32648036 |
| 6 rs575744181 | 32533771 A | 0.4258 | 6.44E-11 | chr:6:32648036 |
| 6 rs9269891   | 32551017 T | 0.3769 | 6.47E-11 | chr:6:32648036 |
| 6 rs369369329 | 32533784 C | 0.4305 | 6.47E-11 | chr:6:32648036 |
| 6 rs74211958  | 32469040 G | 0.3068 | 6.51E-11 | chr:6:32648036 |
| 6 rs9270513   | 32559400 T | 2.292  | 6.51E-11 | chr:6:32648036 |
| 6 rs9271990   | 32597735 T | 0.2476 | 6.55E-11 | chr:6:32648036 |
| 6 rs9271991   | 32597738 G | 0.2476 | 6.55E-11 | chr:6:32648036 |
| 6 rs9272086   | 32599688 T | 0.2554 | 6.78E-11 | chr:6:32648036 |
| 6 rs9268495   | 32375371 A | 0.3223 | 6.80E-11 | chr:6:32648036 |

|               |            |        |          |                |
|---------------|------------|--------|----------|----------------|
| 6 rs9268496   | 32375374 G | 0.3223 | 6.80E-11 | chr:6:32648036 |
| 6 rs9268497   | 32375424 G | 0.3223 | 6.80E-11 | chr:6:32648036 |
| 6 rs9273584   | 32629064 A | 0.4404 | 7.02E-11 | chr:6:32648036 |
| 6 rs9274891   | 32641152 C | 2.201  | 7.03E-11 | chr:6:32648036 |
| 6 rs150860760 | 32486709 C | 0.4162 | 7.05E-11 | chr:6:32648036 |
| 6 rs72845758  | 32531178 C | 0.435  | 7.10E-11 | chr:6:32648036 |
| 6 rs9269578   | 32544743 T | 0.4066 | 7.19E-11 | chr:6:32648036 |
| 6 rs17205191  | 32602556 A | 0.3059 | 7.26E-11 | chr:6:32648036 |
| 6 rs116609988 | 32522988 A | 0.3877 | 7.44E-11 | chr:6:32648036 |
| 6 rs9269635   | 32545720 G | 0.4295 | 7.47E-11 | chr:6:32648036 |
| 6 rs9269636   | 32545772 C | 0.4295 | 7.47E-11 | chr:6:32648036 |
| 6 rs111786536 | 32523589 C | 0.4265 | 7.56E-11 | chr:6:32648036 |
| 6 rs9271794   | 32594855 A | 0.2793 | 7.63E-11 | chr:6:32648036 |
| 6 rs9270065   | 32554022 G | 0.2936 | 7.65E-11 | chr:6:32648036 |
| 6 rs183667786 | 32533749 C | 0.4273 | 7.67E-11 | chr:6:32648036 |
| 6 rs188327097 | 32533734 A | 0.4273 | 7.67E-11 | chr:6:32648036 |
| 6 rs558887953 | 32533750 A | 0.4273 | 7.67E-11 | chr:6:32648036 |
| 6 rs9274815   | 32639620 A | 0.4211 | 7.71E-11 | chr:6:32648036 |
| 6 rs72508415  | 32459793 A | 0.3161 | 7.74E-11 | chr:6:32648036 |
| 6 rs529484704 | 32507478 C | 0.2197 | 7.84E-11 | chr:6:32648036 |
| 6 rs569509899 | 32507490 G | 0.2197 | 7.84E-11 | chr:6:32648036 |
| 6 rs9271786   | 32594709 T | 0.2655 | 7.87E-11 | chr:6:32648036 |
| 6 rs9270132   | 32555122 A | 0.2924 | 7.95E-11 | chr:6:32648036 |
| 6 rs1130430   | 32629161 A | 0.3888 | 8.06E-11 | chr:6:32648036 |
| 6 rs7765332   | 32502374 A | 0.2616 | 8.09E-11 | chr:6:32648036 |
| 6 rs2647011   | 32661915 C | 0.3003 | 8.11E-11 | chr:6:32648036 |
| 6 rs9270599   | 32561656 G | 2.733  | 8.16E-11 | chr:6:32648036 |
| 6 rs9269918   | 32551502 A | 2.254  | 8.18E-11 | chr:6:32648036 |
| 6 rs146356328 | 32535965 T | 0.4099 | 8.32E-11 | chr:6:32648036 |
| 6 rs77312051  | 32457665 A | 2.631  | 8.42E-11 | chr:6:32648036 |
| 6 rs138940568 | 32536635 T | 0.437  | 8.42E-11 | chr:6:32648036 |
| 6 rs3817963   | 32368087 C | 3.287  | 8.47E-11 | chr:6:32648036 |
| 6 rs114899212 | 32524951 G | 0.3558 | 8.49E-11 | chr:6:32648036 |
| 6 rs114084676 | 32505216 C | 0.2828 | 8.56E-11 | chr:6:32648036 |
| 6 rs28533694  | 32587235 T | 0.3092 | 8.64E-11 | chr:6:32648036 |
| 6 rs116241189 | 32506751 A | 0.3263 | 8.67E-11 | chr:6:32648036 |
| 6 rs72853911  | 32506759 G | 0.3263 | 8.67E-11 | chr:6:32648036 |
| 6 rs9274889   | 32641143 G | 2.194  | 8.73E-11 | chr:6:32648036 |
| 6 rs9274878   | 32640889 C | 0.4196 | 8.74E-11 | chr:6:32648036 |
| 6 rs545154111 | 32530754 C | 0.4362 | 8.82E-11 | chr:6:32648036 |
| 6 rs145245177 | 32530955 C | 0.4331 | 8.94E-11 | chr:6:32648036 |
| 6 rs148812784 | 32530954 C | 0.4331 | 8.94E-11 | chr:6:32648036 |
| 6 rs149685121 | 32530946 C | 0.433  | 8.95E-11 | chr:6:32648036 |



|               |            |        |          |                |
|---------------|------------|--------|----------|----------------|
| 6 rs72847615  | 32536863 A | 0.4303 | 8.99E-11 | chr:6:32648036 |
| 6 rs184538485 | 32490366 C | 0.4353 | 9.00E-11 | chr:6:32648036 |
| 6 rs113523485 | 32489302 C | 0.2786 | 9.02E-11 | chr:6:32648036 |
| 6 rs9270514   | 32559418 G | 2.278  | 9.04E-11 | chr:6:32648036 |
| 6 rs532508742 | 32530749 C | 0.4363 | 9.05E-11 | chr:6:32648036 |
| 6 rs111529629 | 32533843 G | 0.4368 | 9.08E-11 | chr:6:32648036 |
| 6 rs114451225 | 32538025 G | 0.4362 | 9.12E-11 | chr:6:32648036 |
| 6 rs201648725 | 32538024 C | 0.4362 | 9.12E-11 | chr:6:32648036 |
| 6 rs9275208   | 32657722 G | 0.3172 | 9.15E-11 | chr:6:32648036 |
| 6 rs9275210   | 32657817 C | 0.3172 | 9.15E-11 | chr:6:32648036 |
| 6 rs9272084   | 32599680 T | 0.2644 | 9.27E-11 | chr:6:32648036 |
| 6 rs138296162 | 32536852 T | 0.431  | 9.32E-11 | chr:6:32648036 |
| 6 rs73726834  | 32531111 C | 0.4368 | 9.37E-11 | chr:6:32648036 |
| 6 rs72851055  | 32502814 C | 0.256  | 9.38E-11 | chr:6:32648036 |
| 6 rs529763782 | 32493737 T | 0.3831 | 9.42E-11 | chr:6:32648036 |
| 6 rs76317804  | 32469375 T | 0.2707 | 9.50E-11 | chr:6:32648036 |
| 6 rs36218423  | 32524832 C | 0.318  | 9.50E-11 | chr:6:32648036 |
| 6 rs78456540  | 32554726 A | 8.715  | 9.58E-11 | chr:6:32648036 |
| 6 rs9269736   | 32547440 T | 0.4573 | 9.62E-11 | chr:6:32648036 |
| 6 rs9269277   | 32539265 A | 0.4328 | 9.78E-11 | chr:6:32648036 |
| 6 rs111843909 | 32531043 T | 0.4373 | 9.88E-11 | chr:6:32648036 |
| 6 rs78279385  | 32451758 A | 3.162  | 9.90E-11 | chr:6:32648036 |
| 6 rs62405575  | 32458259 G | 0.4182 | 9.94E-11 | chr:6:32648036 |
| 6 rs9269280   | 32539279 C | 0.4334 | 9.97E-11 | chr:6:32648036 |
| 6 rs72508473  | 32508399 G | 0.3282 | 1.01E-10 | chr:6:32648036 |
| 6 rs67515384  | 32505271 A | 0.2557 | 1.02E-10 | chr:6:32648036 |
| 6 rs545949191 | 32502900 A | 0.3028 | 1.04E-10 | chr:6:32648036 |
| 6 rs537686051 | 32531213 G | 0.4375 | 1.05E-10 | chr:6:32648036 |
| 6 rs552586675 | 32531215 G | 0.4375 | 1.05E-10 | chr:6:32648036 |
| 6 rs571171259 | 32531218 G | 0.4375 | 1.05E-10 | chr:6:32648036 |
| 6 rs9271963   | 32597453 A | 0.2962 | 1.06E-10 | chr:6:32648036 |
| 6 rs9268494   | 32375352 A | 0.3295 | 1.09E-10 | chr:6:32648036 |
| 6 rs199798245 | 32530708 C | 0.4365 | 1.10E-10 | chr:6:32648036 |
| 6 rs200856733 | 32530709 A | 0.4365 | 1.10E-10 | chr:6:32648036 |
| 6 rs543318785 | 32530714 C | 0.4365 | 1.10E-10 | chr:6:32648036 |
| 6 rs572746069 | 32530713 C | 0.4365 | 1.10E-10 | chr:6:32648036 |
| 6 rs9271964   | 32597464 C | 0.2983 | 1.11E-10 | chr:6:32648036 |
| 6 rs9269276   | 32539244 C | 0.4342 | 1.12E-10 | chr:6:32648036 |
| 6 rs182336149 | 32494269 G | 0.4605 | 1.12E-10 | chr:6:32648036 |
| 6 rs9274510   | 32634184 A | 0.3601 | 1.13E-10 | chr:6:32648036 |
| 6 rs9270371   | 32558190 T | 0.2898 | 1.15E-10 | chr:6:32648036 |
| 6 rs116670844 | 32490925 T | 0.2026 | 1.15E-10 | chr:6:32648036 |
| 6 rs281864260 | 32629365 G | 4.27   | 1.15E-10 | chr:6:32648036 |

|               |            |        |          |                |
|---------------|------------|--------|----------|----------------|
| 6 rs9274877   | 32640877 A | 0.4322 | 1.16E-10 | chr:6:32648036 |
| 6 rs9272022   | 32598529 G | 0.325  | 1.17E-10 | chr:6:32648036 |
| 6 rs115980757 | 32536914 C | 0.4401 | 1.18E-10 | chr:6:32648036 |
| 6 rs9271989   | 32597729 T | 0.2482 | 1.18E-10 | chr:6:32648036 |
| 6 rs7765211   | 32502346 A | 0.2973 | 1.20E-10 | chr:6:32648036 |
| 6 rs9271984   | 32597669 G | 0.2504 | 1.20E-10 | chr:6:32648036 |
| 6 rs9270405   | 32558444 T | 0.4493 | 1.20E-10 | chr:6:32648036 |
| 6 rs561017744 | 32547528 T | 0.4557 | 1.21E-10 | chr:6:32648036 |
| 6 rs3817966   | 32367847 C | 3.249  | 1.21E-10 | chr:6:32648036 |
| 6 rs9268458   | 32350384 A | 3.249  | 1.21E-10 | chr:6:32648036 |
| 6 rs116225018 | 32503380 C | 0.3097 | 1.21E-10 | chr:6:32648036 |
| 6 rs139485758 | 32487265 G | 0.1207 | 1.23E-10 | chr:6:32648036 |
| 6 rs547631481 | 32507531 A | 0.2485 | 1.23E-10 | chr:6:32648036 |
| 6 rs3828811   | 32636221 T | 0.3356 | 1.23E-10 | chr:6:32648036 |
| 6 rs531336617 | 32530792 C | 0.4421 | 1.23E-10 | chr:6:32648036 |
| 6 rs549516674 | 32530793 A | 0.4421 | 1.23E-10 | chr:6:32648036 |
| 6 rs567265210 | 32530790 T | 0.4421 | 1.23E-10 | chr:6:32648036 |
| 6 rs145520715 | 32530952 T | 0.4373 | 1.26E-10 | chr:6:32648036 |
| 6 rs9271823   | 32594915 G | 0.2566 | 1.26E-10 | chr:6:32648036 |
| 6 rs9271824   | 32594916 G | 0.2566 | 1.26E-10 | chr:6:32648036 |
| 6 rs558095162 | 32598504 T | 0.3249 | 1.27E-10 | chr:6:32648036 |
| 6 rs114418909 | 32531852 C | 0.4412 | 1.27E-10 | chr:6:32648036 |
| 6 rs116479032 | 32531853 A | 0.4412 | 1.27E-10 | chr:6:32648036 |
| 6 rs281861581 | 32633380 G | 0.4051 | 1.27E-10 | chr:6:32648036 |
| 6 rs9276655   | 32746574 G | 3.209  | 1.28E-10 | chr:6:32648036 |
| 6 rs140527559 | 32536500 G | 0.4411 | 1.28E-10 | chr:6:32648036 |
| 6 rs147611303 | 32536497 A | 0.4411 | 1.28E-10 | chr:6:32648036 |
| 6 rs533614924 | 32532227 A | 0.4352 | 1.29E-10 | chr:6:32648036 |
| 6 rs555383676 | 32507771 A | 0.2362 | 1.32E-10 | chr:6:32648036 |
| 6 rs140569663 | 32530944 A | 0.4379 | 1.32E-10 | chr:6:32648036 |
| 6 rs142891616 | 32534325 T | 0.4413 | 1.33E-10 | chr:6:32648036 |
| 6 rs9270282   | 32557271 A | 8.8    | 1.35E-10 | chr:6:32648036 |
| 6 rs9274875   | 32640863 A | 0.4385 | 1.35E-10 | chr:6:32648036 |
| 6 rs559109541 | 32493714 T | 0.3876 | 1.36E-10 | chr:6:32648036 |
| 6 rs79338946  | 32502822 T | 0.2557 | 1.37E-10 | chr:6:32648036 |
| 6 rs9270555   | 32560584 C | 2.697  | 1.37E-10 | chr:6:32648036 |
| 6 rs9269278   | 32539269 A | 0.437  | 1.37E-10 | chr:6:32648036 |
| 6 rs9269279   | 32539274 G | 0.437  | 1.37E-10 | chr:6:32648036 |
| 6 rs114029309 | 32521341 G | 3.46   | 1.38E-10 | chr:6:32648036 |
| 6 rs74208414  | 32501649 G | 0.2827 | 1.39E-10 | chr:6:32648036 |
| 6 rs201024350 | 32536869 C | 0.4342 | 1.40E-10 | chr:6:32648036 |
| 6 rs9275007   | 32642921 T | 0.3464 | 1.40E-10 | chr:6:32648036 |
| 6 rs11757123  | 32520094 C | 0.3246 | 1.41E-10 | chr:6:32648036 |

|               |            |        |          |                |
|---------------|------------|--------|----------|----------------|
| 6 rs367997563 | 32535716 C | 0.3369 | 1.43E-10 | chr:6:32648036 |
| 6 rs542233442 | 32535702 A | 0.3369 | 1.43E-10 | chr:6:32648036 |
| 6 rs560908329 | 32535706 G | 0.3369 | 1.43E-10 | chr:6:32648036 |
| 6 rs77501456  | 32523627 G | 0.4373 | 1.43E-10 | chr:6:32648036 |
| 6 rs9270743   | 32568242 G | 0.386  | 1.43E-10 | chr:6:32648036 |
| 6 rs534655111 | 32531220 T | 0.4408 | 1.44E-10 | chr:6:32648036 |
| 6 rs114452447 | 32532262 A | 0.4383 | 1.45E-10 | chr:6:32648036 |
| 6 rs78918008  | 32532281 A | 0.4383 | 1.45E-10 | chr:6:32648036 |
| 6 rs9270186   | 32555935 G | 0.2487 | 1.45E-10 | chr:6:32648036 |
| 6 rs77178107  | 32533511 C | 0.4416 | 1.46E-10 | chr:6:32648036 |
| 6 rs77814554  | 32533509 C | 0.4416 | 1.46E-10 | chr:6:32648036 |
| 6 rs9270190   | 32556064 G | 9.059  | 1.47E-10 | chr:6:32648036 |
| 6 rs74715621  | 32508285 G | 0.2535 | 1.48E-10 | chr:6:32648036 |
| 6 rs9268926   | 32433067 G | 3.887  | 1.49E-10 | chr:6:32648036 |
| 6 rs115010442 | 32505229 C | 0.2927 | 1.50E-10 | chr:6:32648036 |
| 6 rs187428266 | 32540161 A | 0.3891 | 1.50E-10 | chr:6:32648036 |
| 6 rs199893280 | 32531226 C | 0.4399 | 1.50E-10 | chr:6:32648036 |
| 6 rs374408836 | 32507582 C | 0.2757 | 1.52E-10 | chr:6:32648036 |
| 6 rs544353633 | 32507596 G | 0.2757 | 1.52E-10 | chr:6:32648036 |
| 6 rs9271987   | 32597716 G | 0.2546 | 1.55E-10 | chr:6:32648036 |
| 6 rs9269964   | 32552212 T | 0.3198 | 1.55E-10 | chr:6:32648036 |
| 6 rs77724699  | 32529470 G | 0.4401 | 1.56E-10 | chr:6:32648036 |
| 6 rs9275071   | 32648490 G | 0.3386 | 1.56E-10 | chr:6:32648036 |
| 6 rs9269642   | 32545877 T | 0.4337 | 1.57E-10 | chr:6:32648036 |
| 6 rs113496464 | 32494011 G | 0.4651 | 1.57E-10 | chr:6:32648036 |
| 6 rs9269310   | 32539628 A | 0.4195 | 1.58E-10 | chr:6:32648036 |
| 6 rs116076321 | 32491324 G | 0.4738 | 1.59E-10 | chr:6:32648036 |
| 6 rs116346282 | 32491333 T | 0.4738 | 1.59E-10 | chr:6:32648036 |
| 6 rs9269728   | 32547385 T | 0.4606 | 1.59E-10 | chr:6:32648036 |
| 6 rs9271985   | 32597679 T | 0.2541 | 1.60E-10 | chr:6:32648036 |
| 6 rs183801733 | 32645114 A | 2.922  | 1.64E-10 | chr:6:32648036 |
| 6 rs9270276   | 32557240 A | 3.424  | 1.68E-10 | chr:6:32648036 |
| 6 rs115065497 | 32530466 C | 0.4387 | 1.69E-10 | chr:6:32648036 |
| 6 rs145319447 | 32536492 C | 0.444  | 1.70E-10 | chr:6:32648036 |
| 6 rs116576082 | 32490170 C | 0.464  | 1.74E-10 | chr:6:32648036 |
| 6 rs28891461  | 32642018 T | 0.3603 | 1.74E-10 | chr:6:32648036 |
| 6 rs116609655 | 32503059 C | 0.2498 | 1.74E-10 | chr:6:32648036 |
| 6 rs3129783   | 32655730 A | 0.3378 | 1.75E-10 | chr:6:32648036 |
| 6 rs74524959  | 32574739 G | 0.2697 | 1.75E-10 | chr:6:32648036 |
| 6 rs181494824 | 32490081 C | 0.4743 | 1.76E-10 | chr:6:32648036 |
| 6 rs532143340 | 32490078 G | 0.4743 | 1.76E-10 | chr:6:32648036 |
| 6 rs35139945  | 32626267 T | 3.55   | 1.76E-10 | chr:6:32648036 |
| 6 rs550643609 | 32502794 A | 0.2396 | 1.77E-10 | chr:6:32648036 |

|               |            |        |          |                |
|---------------|------------|--------|----------|----------------|
| 6 rs9269985   | 32552532 A | 0.3882 | 1.78E-10 | chr:6:32648036 |
| 6 rs112479577 | 32533856 A | 0.4445 | 1.79E-10 | chr:6:32648036 |
| 6 rs535381236 | 32468870 G | 0.2289 | 1.81E-10 | chr:6:32648036 |
| 6 rs559249402 | 32468864 C | 0.2289 | 1.81E-10 | chr:6:32648036 |
| 6 rs577621741 | 32468866 A | 0.2289 | 1.81E-10 | chr:6:32648036 |
| 6 rs370779031 | 32535688 A | 0.3379 | 1.83E-10 | chr:6:32648036 |
| 6 rs375377896 | 32535693 A | 0.3379 | 1.83E-10 | chr:6:32648036 |
| 6 rs9270511   | 32559371 T | 2.201  | 1.83E-10 | chr:6:32648036 |
| 6 rs544574563 | 32534337 G | 0.4448 | 1.83E-10 | chr:6:32648036 |
| 6 rs1136756   | 32552134 G | 0.2422 | 1.86E-10 | chr:6:32648036 |
| 6 rs9270601   | 32561743 G | 9.196  | 1.88E-10 | chr:6:32648036 |
| 6 rs182890820 | 32527218 T | 0.2992 | 1.88E-10 | chr:6:32648036 |
| 6 rs9274562   | 32635000 A | 0.3771 | 1.91E-10 | chr:6:32648036 |
| 6 rs115156211 | 32533440 A | 0.4448 | 1.91E-10 | chr:6:32648036 |
| 6 rs552472567 | 32533447 C | 0.4448 | 1.91E-10 | chr:6:32648036 |
| 6 rs570478088 | 32533448 A | 0.4448 | 1.91E-10 | chr:6:32648036 |
| 6 rs72853924  | 32508239 G | 0.2349 | 1.92E-10 | chr:6:32648036 |
| 6 rs146621647 | 32531602 T | 0.4396 | 1.92E-10 | chr:6:32648036 |
| 6 rs78274956  | 32526351 A | 0.3838 | 1.92E-10 | chr:6:32648036 |
| 6 rs9275073   | 32648513 C | 0.343  | 1.94E-10 | chr:6:32648036 |
| 6 rs111769716 | 32530819 G | 0.4451 | 1.95E-10 | chr:6:32648036 |
| 6 rs139128138 | 32533420 G | 0.4439 | 1.95E-10 | chr:6:32648036 |
| 6 rs149932905 | 32533421 G | 0.4439 | 1.95E-10 | chr:6:32648036 |
| 6 rs182767311 | 32533523 C | 0.4453 | 1.96E-10 | chr:6:32648036 |
| 6 rs72848212  | 32594898 T | 0.2928 | 1.96E-10 | chr:6:32648036 |
| 6 rs9272095   | 32599782 A | 0.2109 | 2.00E-10 | chr:6:32648036 |
| 6 rs9274969   | 32642073 G | 0.3964 | 2.02E-10 | chr:6:32648036 |
| 6 rs13211570  | 32556146 G | 0.2629 | 2.02E-10 | chr:6:32648036 |
| 6 rs13211672  | 32556145 T | 0.2629 | 2.02E-10 | chr:6:32648036 |
| 6 rs9269393   | 32541222 A | 0.4375 | 2.03E-10 | chr:6:32648036 |
| 6 rs9270374   | 32558216 G | 2.43   | 2.05E-10 | chr:6:32648036 |
| 6 rs116465569 | 32536986 C | 0.4498 | 2.05E-10 | chr:6:32648036 |
| 6 rs9269907   | 32551324 A | 2.134  | 2.06E-10 | chr:6:32648036 |
| 6 rs9269574   | 32544711 C | 0.3936 | 2.06E-10 | chr:6:32648036 |
| 6 rs199636459 | 32507758 A | 0.2097 | 2.09E-10 | chr:6:32648036 |
| 6 rs540194362 | 32507768 G | 0.2097 | 2.09E-10 | chr:6:32648036 |
| 6 rs1049057   | 32634350 T | 0.3318 | 2.11E-10 | chr:6:32648036 |
| 6 rs193297314 | 32646403 T | 2.998  | 2.15E-10 | chr:6:32648036 |
| 6 rs549042477 | 32547505 G | 0.4633 | 2.15E-10 | chr:6:32648036 |
| 6 rs28891413  | 32640548 T | 0.343  | 2.17E-10 | chr:6:32648036 |
| 6 rs28679786  | 32526272 T | 2.245  | 2.18E-10 | chr:6:32648036 |
| 6 rs281863631 | 32630761 C | 0.4071 | 2.18E-10 | chr:6:32648036 |
| 6 rs111983899 | 32639389 C | 0.394  | 2.18E-10 | chr:6:32648036 |

|               |            |        |          |                |
|---------------|------------|--------|----------|----------------|
| 6 rs9270575   | 32561049 A | 7.301  | 2.19E-10 | chr:6:32648036 |
| 6 rs9271988   | 32597725 A | 0.256  | 2.20E-10 | chr:6:32648036 |
| 6 rs147819405 | 32533096 A | 0.4449 | 2.26E-10 | chr:6:32648036 |
| 6 rs201766754 | 32531843 G | 0.4462 | 2.27E-10 | chr:6:32648036 |
| 6 rs66754072  | 32532402 A | 0.4182 | 2.28E-10 | chr:6:32648036 |
| 6 rs35372932  | 32564985 T | 0.2381 | 2.30E-10 | chr:6:32648036 |
| 6 rs9274540   | 32634676 C | 0.4133 | 2.30E-10 | chr:6:32648036 |
| 6 rs9275070   | 32648449 C | 0.3486 | 2.31E-10 | chr:6:32648036 |
| 6 rs9270484   | 32559063 A | 8.565  | 2.32E-10 | chr:6:32648036 |
| 6 rs576314890 | 32523379 T | 0.4333 | 2.32E-10 | chr:6:32648036 |
| 6 rs114034298 | 32505797 C | 0.3028 | 2.33E-10 | chr:6:32648036 |
| 6 rs9274949   | 32641855 A | 0.4409 | 2.34E-10 | chr:6:32648036 |
| 6 rs72853923  | 32508222 G | 0.2393 | 2.35E-10 | chr:6:32648036 |
| 6 rs368398419 | 32510709 C | 0.2776 | 2.40E-10 | chr:6:32648036 |
| 6 rs371989616 | 32510718 T | 0.2776 | 2.40E-10 | chr:6:32648036 |
| 6 rs112009323 | 32532001 C | 0.4389 | 2.42E-10 | chr:6:32648036 |
| 6 rs112562347 | 32532004 T | 0.4389 | 2.42E-10 | chr:6:32648036 |
| 6 rs9269732   | 32547425 C | 0.467  | 2.43E-10 | chr:6:32648036 |
| 6 rs553897781 | 32505335 A | 0.2467 | 2.43E-10 | chr:6:32648036 |
| 6 rs9269969   | 32552272 C | 0.287  | 2.45E-10 | chr:6:32648036 |
| 6 rs111342306 | 32531091 C | 0.4468 | 2.46E-10 | chr:6:32648036 |
| 6 rs111948873 | 32531081 G | 0.4468 | 2.46E-10 | chr:6:32648036 |
| 6 rs113209820 | 32531088 T | 0.4468 | 2.46E-10 | chr:6:32648036 |
| 6 rs74207695  | 32502631 C | 0.2583 | 2.53E-10 | chr:6:32648036 |
| 6 rs9271980   | 32597636 A | 0.2085 | 2.56E-10 | chr:6:32648036 |
| 6 rs9271982   | 32597640 A | 0.2085 | 2.56E-10 | chr:6:32648036 |
| 6 rs112200867 | 32485949 G | 0.1758 | 2.57E-10 | chr:6:32648036 |
| 6 rs73726810  | 32522857 A | 0.3902 | 2.58E-10 | chr:6:32648036 |
| 6 rs9274503   | 32634103 T | 0.3871 | 2.60E-10 | chr:6:32648036 |
| 6 rs41263824  | 32632515 A | 0.4069 | 2.61E-10 | chr:6:32648036 |
| 6 rs9272097   | 32599786 T | 0.2059 | 2.61E-10 | chr:6:32648036 |
| 6 rs9272098   | 32599787 G | 0.2059 | 2.61E-10 | chr:6:32648036 |
| 6 rs143426018 | 32536888 G | 0.4419 | 2.68E-10 | chr:6:32648036 |
| 6 rs115740813 | 32560534 T | 0.239  | 2.69E-10 | chr:6:32648036 |
| 6 rs7744001   | 32626086 A | 3.052  | 2.71E-10 | chr:6:32648036 |
| 6 rs9269291   | 32539445 A | 0.3997 | 2.74E-10 | chr:6:32648036 |
| 6 rs571341495 | 32505326 G | 0.256  | 2.76E-10 | chr:6:32648036 |
| 6 rs193192981 | 32533553 G | 0.4498 | 2.79E-10 | chr:6:32648036 |
| 6 rs115278245 | 32531057 A | 0.4495 | 2.80E-10 | chr:6:32648036 |
| 6 rs9272092   | 32599756 C | 0.2419 | 2.85E-10 | chr:6:32648036 |
| 6 rs113737511 | 32533392 G | 0.4485 | 2.87E-10 | chr:6:32648036 |
| 6 rs116048339 | 32468982 T | 0.2718 | 2.87E-10 | chr:6:32648036 |
| 6 rs116380301 | 32468983 T | 0.2718 | 2.87E-10 | chr:6:32648036 |

|               |            |        |          |                |
|---------------|------------|--------|----------|----------------|
| 6 rs373289038 | 32535643 A | 0.3553 | 2.89E-10 | chr:6:32648036 |
| 6 rs376459798 | 32535644 A | 0.3553 | 2.89E-10 | chr:6:32648036 |
| 6 rs138130801 | 32486866 T | 0.3523 | 2.91E-10 | chr:6:32648036 |
| 6 rs72508469  | 32505309 C | 0.2622 | 2.92E-10 | chr:6:32648036 |
| 6 rs9271843   | 32594957 T | 0.2418 | 2.96E-10 | chr:6:32648036 |
| 6 rs544527733 | 32503091 T | 0.252  | 2.98E-10 | chr:6:32648036 |
| 6 rs139013960 | 32531606 G | 0.4447 | 3.00E-10 | chr:6:32648036 |
| 6 rs115081905 | 32508276 T | 0.2613 | 3.02E-10 | chr:6:32648036 |
| 6 rs193201719 | 32505807 T | 0.2875 | 3.03E-10 | chr:6:32648036 |
| 6 rs9271846   | 32594980 A | 0.2226 | 3.06E-10 | chr:6:32648036 |
| 6 rs2858312   | 32667230 C | 2.909  | 3.12E-10 | chr:6:32648036 |
| 6 rs111344982 | 32473588 A | 0.467  | 3.18E-10 | chr:6:32648036 |
| 6 rs111355475 | 32554266 T | 0.4135 | 3.20E-10 | chr:6:32648036 |
| 6 rs9270084   | 32554267 G | 0.4135 | 3.20E-10 | chr:6:32648036 |
| 6 rs9270085   | 32554271 C | 0.4135 | 3.20E-10 | chr:6:32648036 |
| 6 rs72492335  | 32526460 C | 0.3797 | 3.21E-10 | chr:6:32648036 |
| 6 rs9270074   | 32554129 C | 0.3249 | 3.21E-10 | chr:6:32648036 |
| 6 rs181190479 | 32533905 G | 0.4121 | 3.23E-10 | chr:6:32648036 |
| 6 rs188265524 | 32533903 G | 0.4121 | 3.23E-10 | chr:6:32648036 |
| 6 rs79638048  | 32519391 A | 0.3    | 3.25E-10 | chr:6:32648036 |
| 6 rs139547629 | 32485944 G | 0.1689 | 3.26E-10 | chr:6:32648036 |
| 6 rs143972840 | 32491242 C | 0.4491 | 3.28E-10 | chr:6:32648036 |
| 6 rs9275069   | 32648437 A | 0.3561 | 3.29E-10 | chr:6:32648036 |
| 6 rs558533142 | 32479366 C | 0.2162 | 3.31E-10 | chr:6:32648036 |
| 6 rs9270512   | 32559380 G | 2.181  | 3.32E-10 | chr:6:32648036 |
| 6 rs566710022 | 32507505 T | 0.2765 | 3.36E-10 | chr:6:32648036 |
| 6 rs9270781   | 32569111 G | 0.2953 | 3.37E-10 | chr:6:32648036 |
| 6 rs538727527 | 32505332 T | 0.2519 | 3.38E-10 | chr:6:32648036 |
| 6 rs183134414 | 32511069 T | 0.2704 | 3.42E-10 | chr:6:32648036 |
| 6 rs281864453 | 32628065 C | 0.3795 | 3.45E-10 | chr:6:32648036 |
| 6 rs9256942   | 32557316 A | 0.2505 | 3.45E-10 | chr:6:32648036 |
| 6 rs9270290   | 32557319 T | 0.2505 | 3.45E-10 | chr:6:32648036 |
| 6 rs115077617 | 32532645 C | 0.4385 | 3.49E-10 | chr:6:32648036 |
| 6 rs4959029   | 32591682 G | 0.2392 | 3.53E-10 | chr:6:32648036 |
| 6 rs201844955 | 32492907 T | 2.129  | 3.56E-10 | chr:6:32648036 |
| 6 rs531950386 | 32486540 T | 0.382  | 3.60E-10 | chr:6:32648036 |
| 6 rs115380393 | 32503020 T | 0.2868 | 3.62E-10 | chr:6:32648036 |
| 6 rs9271842   | 32594953 A | 0.2517 | 3.64E-10 | chr:6:32648036 |
| 6 rs149521915 | 32489639 T | 0.3137 | 3.64E-10 | chr:6:32648036 |
| 6 rs147034082 | 32539600 A | 0.4169 | 3.65E-10 | chr:6:32648036 |
| 6 rs187395433 | 32510968 G | 0.2783 | 3.67E-10 | chr:6:32648036 |
| 6 rs536463096 | 32510951 G | 0.2783 | 3.67E-10 | chr:6:32648036 |
| 6 rs9269725   | 32547359 C | 0.4677 | 3.68E-10 | chr:6:32648036 |

|               |            |        |          |                |
|---------------|------------|--------|----------|----------------|
| 6 rs9269726   | 32547360 T | 0.4677 | 3.68E-10 | chr:6:32648036 |
| 6 rs541088090 | 32533411 T | 0.4513 | 3.68E-10 | chr:6:32648036 |
| 6 rs281863661 | 32630720 T | 2.341  | 3.70E-10 | chr:6:32648036 |
| 6 rs141020324 | 32469001 A | 0.2751 | 3.72E-10 | chr:6:32648036 |
| 6 rs144975609 | 32468997 A | 0.2751 | 3.72E-10 | chr:6:32648036 |
| 6 rs569229779 | 32634614 C | 0.4131 | 3.72E-10 | chr:6:32648036 |
| 6 rs111548649 | 32533365 G | 0.4515 | 3.74E-10 | chr:6:32648036 |
| 6 rs112719175 | 32533401 T | 0.4514 | 3.77E-10 | chr:6:32648036 |
| 6 rs66491634  | 32528457 T | 0.4594 | 3.79E-10 | chr:6:32648036 |
| 6 rs182090170 | 32537941 G | 0.4263 | 3.83E-10 | chr:6:32648036 |
| 6 rs2760981   | 32565465 G | 2.574  | 3.91E-10 | chr:6:32648036 |
| 6 rs561971374 | 32503086 A | 0.2505 | 3.92E-10 | chr:6:32648036 |
| 6 rs116132127 | 32503328 A | 0.3212 | 3.99E-10 | chr:6:32648036 |
| 6 rs9275078   | 32648592 A | 0.3551 | 4.00E-10 | chr:6:32648036 |
| 6 rs6938928   | 32569711 C | 0.3079 | 4.06E-10 | chr:6:32648036 |
| 6 rs6938929   | 32569712 A | 0.3079 | 4.06E-10 | chr:6:32648036 |
| 6 rs528413248 | 32683255 G | 3.479  | 4.08E-10 | chr:6:32648036 |
| 6 rs567852525 | 32452110 T | 3.709  | 4.09E-10 | chr:6:32648036 |
| 6 rs143796398 | 32536259 T | 0.4331 | 4.11E-10 | chr:6:32648036 |
| 6 rs538718414 | 32508207 T | 0.2341 | 4.12E-10 | chr:6:32648036 |
| 6 rs556173675 | 32508202 G | 0.2341 | 4.12E-10 | chr:6:32648036 |
| 6 rs112326475 | 32489980 C | 0.4626 | 4.13E-10 | chr:6:32648036 |
| 6 rs115407919 | 32531056 C | 0.4543 | 4.14E-10 | chr:6:32648036 |
| 6 rs9269995   | 32552681 C | 0.2904 | 4.36E-10 | chr:6:32648036 |
| 6 rs9269771   | 32548734 T | 3.186  | 4.37E-10 | chr:6:32648036 |
| 6 rs9269580   | 32544784 A | 0.4606 | 4.37E-10 | chr:6:32648036 |
| 6 rs9269392   | 32541163 C | 0.4194 | 4.46E-10 | chr:6:32648036 |
| 6 rs9273479   | 32628093 T | 0.3885 | 4.47E-10 | chr:6:32648036 |
| 6 rs540049194 | 32503078 A | 0.258  | 4.52E-10 | chr:6:32648036 |
| 6 rs76666064  | 32530841 C | 0.4542 | 4.53E-10 | chr:6:32648036 |
| 6 rs527678609 | 32530435 A | 0.4519 | 4.59E-10 | chr:6:32648036 |
| 6 rs540951197 | 32530439 C | 0.4519 | 4.59E-10 | chr:6:32648036 |
| 6 rs562335725 | 32530443 A | 0.4519 | 4.59E-10 | chr:6:32648036 |
| 6 rs145340642 | 32485963 A | 0.171  | 4.61E-10 | chr:6:32648036 |
| 6 rs563837736 | 32660582 A | 0.293  | 4.63E-10 | chr:6:32648036 |
| 6 rs114011941 | 32487978 T | 2.141  | 4.65E-10 | chr:6:32648036 |
| 6 rs9269734   | 32547433 G | 0.4714 | 4.65E-10 | chr:6:32648036 |
| 6 rs112507860 | 32496083 T | 0.1642 | 4.67E-10 | chr:6:32648036 |
| 6 rs569725476 | 32479351 T | 0.213  | 4.73E-10 | chr:6:32648036 |
| 6 rs140973961 | 32487987 C | 2.112  | 4.74E-10 | chr:6:32648036 |
| 6 rs145437633 | 32487776 C | 0.4842 | 4.75E-10 | chr:6:32648036 |
| 6 rs9270167   | 32555640 G | 0.2651 | 4.89E-10 | chr:6:32648036 |
| 6 rs115878723 | 32503335 A | 0.3177 | 4.98E-10 | chr:6:32648036 |

|               |            |        |          |                |
|---------------|------------|--------|----------|----------------|
| 6 rs531982544 | 32503334 C | 0.3177 | 4.98E-10 | chr:6:32648036 |
| 6 rs9274951   | 32641867 A | 0.4489 | 4.98E-10 | chr:6:32648036 |
| 6 rs9274952   | 32641868 T | 0.4489 | 4.98E-10 | chr:6:32648036 |
| 6 rs9272154   | 32601019 A | 0.2872 | 5.02E-10 | chr:6:32648036 |
| 6 rs9269302   | 32539574 T | 0.4194 | 5.02E-10 | chr:6:32648036 |
| 6 rs147857322 | 32599601 A | 0.3024 | 5.03E-10 | chr:6:32648036 |
| 6 rs115084652 | 32468978 T | 0.308  | 5.03E-10 | chr:6:32648036 |
| 6 rs562852671 | 32512142 T | 0.2235 | 5.15E-10 | chr:6:32648036 |
| 6 rs9274336   | 32632287 A | 0.476  | 5.18E-10 | chr:6:32648036 |
| 6 rs146103980 | 32493373 G | 0.1839 | 5.25E-10 | chr:6:32648036 |
| 6 rs9274550   | 32634795 G | 0.4174 | 5.28E-10 | chr:6:32648036 |
| 6 rs73407208  | 32491721 T | 0.2439 | 5.36E-10 | chr:6:32648036 |
| 6 rs9275168   | 32653676 T | 0.3227 | 5.39E-10 | chr:6:32648036 |
| 6 rs372618919 | 32529918 G | 0.4558 | 5.42E-10 | chr:6:32648036 |
| 6 rs113133909 | 32457928 T | 0.2095 | 5.46E-10 | chr:6:32648036 |
| 6 rs534859262 | 32457931 T | 0.2095 | 5.46E-10 | chr:6:32648036 |
| 6 rs142198554 | 32531887 T | 0.4578 | 5.52E-10 | chr:6:32648036 |
| 6 rs546856170 | 32531888 G | 0.4578 | 5.52E-10 | chr:6:32648036 |
| 6 rs2621413   | 32742531 G | 3.086  | 5.55E-10 | chr:6:32648036 |
| 6 rs2621415   | 32741894 T | 3.086  | 5.55E-10 | chr:6:32648036 |
| 6 rs2621419   | 32741006 T | 3.086  | 5.55E-10 | chr:6:32648036 |
| 6 rs111425203 | 32534872 T | 0.453  | 5.56E-10 | chr:6:32648036 |
| 6 rs12665549  | 32517141 A | 0.3079 | 5.58E-10 | chr:6:32648036 |
| 6 rs200433535 | 32565050 A | 0.2469 | 5.59E-10 | chr:6:32648036 |
| 6 rs116328963 | 32491938 T | 0.4665 | 5.68E-10 | chr:6:32648036 |
| 6 rs201917227 | 32531870 C | 0.4581 | 5.71E-10 | chr:6:32648036 |
| 6 rs34376317  | 32536678 T | 0.4221 | 5.71E-10 | chr:6:32648036 |
| 6 rs566973051 | 32531876 C | 0.4581 | 5.71E-10 | chr:6:32648036 |
| 6 rs9274943   | 32641784 T | 2.116  | 5.71E-10 | chr:6:32648036 |
| 6 rs9274944   | 32641786 A | 2.116  | 5.71E-10 | chr:6:32648036 |
| 6 rs531043234 | 32493428 C | 0.1877 | 5.77E-10 | chr:6:32648036 |
| 6 rs9274954   | 32641878 C | 0.4409 | 5.84E-10 | chr:6:32648036 |
| 6 rs568869869 | 32502799 G | 0.2347 | 5.87E-10 | chr:6:32648036 |
| 6 rs144901015 | 32489992 T | 0.4671 | 5.87E-10 | chr:6:32648036 |
| 6 rs188812628 | 32489994 A | 0.4671 | 5.87E-10 | chr:6:32648036 |
| 6 rs11752229  | 32560478 T | 0.2493 | 5.95E-10 | chr:6:32648036 |
| 6 rs116011937 | 32486884 G | 0.3576 | 5.98E-10 | chr:6:32648036 |
| 6 rs537366043 | 32531076 T | 0.4574 | 6.00E-10 | chr:6:32648036 |
| 6 rs570295314 | 32531074 G | 0.4574 | 6.00E-10 | chr:6:32648036 |
| 6 rs9274955   | 32641890 A | 0.4406 | 6.00E-10 | chr:6:32648036 |
| 6 rs9269717   | 32547303 T | 0.4748 | 6.05E-10 | chr:6:32648036 |
| 6 rs3763311   | 32376176 T | 2.96   | 6.08E-10 | chr:6:32648036 |
| 6 rs111374340 | 32509477 G | 3.485  | 6.11E-10 | chr:6:32648036 |



|               |            |        |          |                |
|---------------|------------|--------|----------|----------------|
| 6 rs75620297  | 32457324 T | 0.3944 | 6.14E-10 | chr:6:32648036 |
| 6 rs78845660  | 32457325 G | 0.3944 | 6.14E-10 | chr:6:32648036 |
| 6 rs112835078 | 32485838 C | 0.0626 | 6.17E-10 | chr:6:32648036 |
| 6 rs114258010 | 32559284 G | 0.2456 | 6.20E-10 | chr:6:32648036 |
| 6 rs3020625   | 32628835 A | 0.407  | 6.22E-10 | chr:6:32648036 |
| 6 rs9273544   | 32628833 A | 0.407  | 6.22E-10 | chr:6:32648036 |
| 6 rs9270509   | 32559355 A | 2.116  | 6.29E-10 | chr:6:32648036 |
| 6 rs116531157 | 32547565 G | 0.4796 | 6.29E-10 | chr:6:32648036 |
| 6 rs201954564 | 32497824 A | 0.243  | 6.39E-10 | chr:6:32648036 |
| 6 rs2858314   | 32663448 A | 2.876  | 6.52E-10 | chr:6:32648036 |
| 6 rs143945008 | 32513183 T | 0.2856 | 6.52E-10 | chr:6:32648036 |
| 6 rs9274973   | 32642147 A | 0.3752 | 6.57E-10 | chr:6:32648036 |
| 6 rs9274974   | 32642152 A | 0.3752 | 6.57E-10 | chr:6:32648036 |
| 6 rs115673628 | 32505419 G | 0.2416 | 6.57E-10 | chr:6:32648036 |
| 6 rs138991250 | 32534855 G | 0.4538 | 6.61E-10 | chr:6:32648036 |
| 6 rs2856687   | 32654822 T | 0.2928 | 6.66E-10 | chr:6:32648036 |
| 6 rs137976440 | 32489630 T | 0.3145 | 6.73E-10 | chr:6:32648036 |
| 6 rs11752754  | 32569500 T | 0.2496 | 6.75E-10 | chr:6:32648036 |
| 6 rs570715978 | 32479382 T | 0.2261 | 6.81E-10 | chr:6:32648036 |
| 6 rs9274557   | 32634887 G | 0.4277 | 6.81E-10 | chr:6:32648036 |
| 6 rs9274584   | 32635365 G | 0.4389 | 6.83E-10 | chr:6:32648036 |
| 6 rs9275062   | 32648337 T | 0.3549 | 6.85E-10 | chr:6:32648036 |
| 6 rs75976095  | 32561250 G | 0.253  | 6.92E-10 | chr:6:32648036 |
| 6 rs559863405 | 32536118 G | 0.3767 | 7.06E-10 | chr:6:32648036 |
| 6 rs34171523  | 32655954 G | 0.344  | 7.09E-10 | chr:6:32648036 |
| 6 rs554742089 | 32451822 T | 3.621  | 7.13E-10 | chr:6:32648036 |
| 6 rs117804693 | 32622621 T | 2.19   | 7.17E-10 | chr:6:32648036 |
| 6 rs9271850   | 32595060 G | 0.2157 | 7.17E-10 | chr:6:32648036 |
| 6 rs9269304   | 32539585 T | 0.4253 | 7.18E-10 | chr:6:32648036 |
| 6 rs9275068   | 32648418 C | 4.077  | 7.26E-10 | chr:6:32648036 |
| 6 rs9270314   | 32557617 T | 0.2825 | 7.27E-10 | chr:6:32648036 |
| 6 rs527285388 | 32535496 T | 0.4151 | 7.29E-10 | chr:6:32648036 |
| 6 rs115663137 | 32502992 C | 0.2897 | 7.30E-10 | chr:6:32648036 |
| 6 rs2646998   | 32665367 T | 0.2926 | 7.31E-10 | chr:6:32648036 |
| 6 rs2647001   | 32665086 C | 0.2926 | 7.31E-10 | chr:6:32648036 |
| 6 rs2647003   | 32664880 T | 0.2926 | 7.31E-10 | chr:6:32648036 |
| 6 rs2647012   | 32664458 T | 0.2926 | 7.31E-10 | chr:6:32648036 |
| 6 rs2647013   | 32664284 C | 0.2926 | 7.31E-10 | chr:6:32648036 |
| 6 rs2647016   | 32663925 C | 0.2926 | 7.31E-10 | chr:6:32648036 |
| 6 rs2647018   | 32663447 T | 0.2926 | 7.31E-10 | chr:6:32648036 |
| 6 rs2647020   | 32663256 T | 0.2926 | 7.31E-10 | chr:6:32648036 |
| 6 rs2647021   | 32663151 T | 0.2926 | 7.31E-10 | chr:6:32648036 |
| 6 rs2856666   | 32665285 G | 0.2926 | 7.31E-10 | chr:6:32648036 |

|               |            |        |          |                |
|---------------|------------|--------|----------|----------------|
| 6 rs2856670   | 32662904 G | 0.2926 | 7.31E-10 | chr:6:32648036 |
| 6 rs2856725   | 32666738 C | 0.2926 | 7.31E-10 | chr:6:32648036 |
| 6 rs2856727   | 32666397 C | 0.2926 | 7.31E-10 | chr:6:32648036 |
| 6 rs2858324   | 32660375 A | 0.2926 | 7.31E-10 | chr:6:32648036 |
| 6 rs72657675  | 32532955 G | 0.4117 | 7.38E-10 | chr:6:32648036 |
| 6 rs74397916  | 32457216 G | 0.4881 | 7.40E-10 | chr:6:32648036 |
| 6 rs76002501  | 32457221 T | 0.4881 | 7.40E-10 | chr:6:32648036 |
| 6 rs79503340  | 32457224 T | 0.4881 | 7.40E-10 | chr:6:32648036 |
| 6 rs9269301   | 32539561 T | 0.4252 | 7.45E-10 | chr:6:32648036 |
| 6 rs9270438   | 32558703 G | 2.057  | 7.47E-10 | chr:6:32648036 |
| 6 rs2856698   | 32636376 G | 0.2512 | 7.51E-10 | chr:6:32648036 |
| 6 rs28471056  | 32603563 G | 0.2668 | 7.67E-10 | chr:6:32648036 |
| 6 rs6689      | 32627700 G | 0.2805 | 7.91E-10 | chr:6:32648036 |
| 6 rs79246516  | 32486024 G | 0.2536 | 7.95E-10 | chr:6:32648036 |
| 6 rs9270406   | 32558448 T | 0.4846 | 8.11E-10 | chr:6:32648036 |
| 6 rs9270507   | 32559326 T | 2.106  | 8.19E-10 | chr:6:32648036 |
| 6 rs9275010   | 32642966 C | 0.3986 | 8.41E-10 | chr:6:32648036 |
| 6 rs9275011   | 32642969 C | 0.3986 | 8.41E-10 | chr:6:32648036 |
| 6 rs9270508   | 32559347 G | 2.105  | 8.48E-10 | chr:6:32648036 |
| 6 rs28746937  | 32651401 T | 0.3052 | 8.61E-10 | chr:6:32648036 |
| 6 rs28746939  | 32651416 C | 0.3052 | 8.61E-10 | chr:6:32648036 |
| 6 rs75364295  | 32529696 A | 0.474  | 8.68E-10 | chr:6:32648036 |
| 6 rs75019606  | 32531924 C | 0.4622 | 8.69E-10 | chr:6:32648036 |
| 6 rs9273547   | 32628844 T | 0.4087 | 8.80E-10 | chr:6:32648036 |
| 6 rs28891487  | 32650312 T | 0.3081 | 8.81E-10 | chr:6:32648036 |
| 6 rs190345143 | 32537926 G | 0.4346 | 8.99E-10 | chr:6:32648036 |
| 6 rs547409849 | 32503365 T | 0.334  | 8.99E-10 | chr:6:32648036 |
| 6 rs565770331 | 32503366 C | 0.334  | 8.99E-10 | chr:6:32648036 |
| 6 rs75351515  | 32635420 G | 0.4317 | 9.11E-10 | chr:6:32648036 |
| 6 rs541499994 | 32510983 C | 0.2924 | 9.11E-10 | chr:6:32648036 |
| 6 rs34801804  | 32555892 G | 0.2633 | 9.22E-10 | chr:6:32648036 |
| 6 rs11757382  | 32569637 C | 0.3189 | 9.25E-10 | chr:6:32648036 |
| 6 rs186217224 | 32457967 C | 0.1866 | 9.27E-10 | chr:6:32648036 |
| 6 rs139188913 | 32485921 A | 0.1866 | 9.30E-10 | chr:6:32648036 |
| 6 rs71536557  | 32528926 T | 0.4651 | 9.38E-10 | chr:6:32648036 |
| 6 rs28746919  | 32649806 A | 0.3058 | 9.38E-10 | chr:6:32648036 |
| 6 rs28746920  | 32649813 A | 0.3058 | 9.38E-10 | chr:6:32648036 |
| 6 rs77411399  | 32472713 A | 0.4841 | 9.40E-10 | chr:6:32648036 |
| 6 rs80110355  | 32472719 G | 0.4841 | 9.40E-10 | chr:6:32648036 |
| 6 rs77052909  | 32487023 A | 2.31   | 9.55E-10 | chr:6:32648036 |
| 6 rs116490940 | 32503056 T | 0.2546 | 9.55E-10 | chr:6:32648036 |
| 6 rs115124923 | 32510482 A | 3.104  | 9.55E-10 | chr:6:32648036 |
| 6 rs28891488  | 32650345 T | 0.3102 | 9.70E-10 | chr:6:32648036 |

|               |            |        |          |                |
|---------------|------------|--------|----------|----------------|
| 6 rs9268833   | 32428062 T | 3.399  | 9.74E-10 | chr:6:32648036 |
| 6 rs9268834   | 32428079 A | 3.399  | 9.74E-10 | chr:6:32648036 |
| 6 rs9268835   | 32428115 A | 3.399  | 9.74E-10 | chr:6:32648036 |
| 6 rs9268838   | 32428715 A | 3.399  | 9.74E-10 | chr:6:32648036 |
| 6 rs28371212  | 32637538 A | 2.502  | 9.76E-10 | chr:6:32648036 |
| 6 rs199940149 | 32536733 G | 0.4348 | 1.01E-09 | chr:6:32648036 |
| 6 rs530242049 | 32536125 C | 0.3823 | 1.01E-09 | chr:6:32648036 |
| 6 rs116360287 | 32482303 T | 0.4199 | 1.01E-09 | chr:6:32648036 |
| 6 rs9275008   | 32642944 T | 0.378  | 1.01E-09 | chr:6:32648036 |
| 6 rs530613608 | 32495889 T | 0.4057 | 1.02E-09 | chr:6:32648036 |
| 6 rs11970219  | 32500925 C | 0.3066 | 1.02E-09 | chr:6:32648036 |
| 6 rs9274536   | 32634634 C | 0.4194 | 1.03E-09 | chr:6:32648036 |
| 6 rs9274580   | 32635345 G | 0.4397 | 1.04E-09 | chr:6:32648036 |
| 6 rs9274581   | 32635347 A | 0.4397 | 1.04E-09 | chr:6:32648036 |
| 6 rs9274582   | 32635348 T | 0.4397 | 1.04E-09 | chr:6:32648036 |
| 6 rs28746963  | 32653079 T | 0.3128 | 1.04E-09 | chr:6:32648036 |
| 6 rs28746964  | 32653083 G | 0.3128 | 1.04E-09 | chr:6:32648036 |
| 6 rs2647022   | 32663004 A | 0.2963 | 1.04E-09 | chr:6:32648036 |
| 6 rs540304678 | 32536503 C | 0.4319 | 1.05E-09 | chr:6:32648036 |
| 6 rs9274583   | 32635361 G | 0.4416 | 1.06E-09 | chr:6:32648036 |
| 6 rs2858318   | 32661302 T | 0.2967 | 1.07E-09 | chr:6:32648036 |
| 6 rs2858319   | 32661294 T | 0.2967 | 1.07E-09 | chr:6:32648036 |
| 6 rs9271880   | 32595596 C | 0.2358 | 1.07E-09 | chr:6:32648036 |
| 6 rs535043779 | 32497358 A | 0.2759 | 1.08E-09 | chr:6:32648036 |
| 6 rs570739482 | 32497356 C | 0.2759 | 1.08E-09 | chr:6:32648036 |
| 6 rs114961271 | 32503352 T | 0.3325 | 1.10E-09 | chr:6:32648036 |
| 6 rs9271688   | 32592992 G | 0.248  | 1.10E-09 | chr:6:32648036 |
| 6 rs116501574 | 32488107 C | 0.4145 | 1.11E-09 | chr:6:32648036 |
| 6 rs9274537   | 32634655 G | 0.4264 | 1.11E-09 | chr:6:32648036 |
| 6 rs2856668   | 32663606 G | 0.2977 | 1.12E-09 | chr:6:32648036 |
| 6 rs66884109  | 32518369 G | 2.8    | 1.12E-09 | chr:6:32648036 |
| 6 rs9269783   | 32549001 A | 2.572  | 1.13E-09 | chr:6:32648036 |
| 6 rs9275212   | 32658327 G | 0.2979 | 1.13E-09 | chr:6:32648036 |
| 6 rs28747024  | 32654830 A | 0.3127 | 1.15E-09 | chr:6:32648036 |
| 6 rs28747025  | 32654831 C | 0.3127 | 1.15E-09 | chr:6:32648036 |
| 6 rs9269299   | 32539541 C | 0.4332 | 1.17E-09 | chr:6:32648036 |
| 6 rs9271684   | 32592953 T | 0.2577 | 1.18E-09 | chr:6:32648036 |
| 6 rs72847623  | 32538044 G | 0.4082 | 1.19E-09 | chr:6:32648036 |
| 6 rs1130429   | 32629210 T | 6.131  | 1.19E-09 | chr:6:32648036 |
| 6 rs11754183  | 32566156 A | 0.2569 | 1.20E-09 | chr:6:32648036 |
| 6 rs186804046 | 32479321 C | 0.2257 | 1.21E-09 | chr:6:32648036 |
| 6 rs9275169   | 32653721 T | 0.3254 | 1.23E-09 | chr:6:32648036 |
| 6 rs9275170   | 32653726 G | 0.3254 | 1.23E-09 | chr:6:32648036 |

|               |            |        |          |                |
|---------------|------------|--------|----------|----------------|
| 6 rs115089463 | 32525092 A | 0.4006 | 1.25E-09 | chr:6:32648036 |
| 6 rs9271623   | 32591914 C | 0.2739 | 1.27E-09 | chr:6:32648036 |
| 6 rs9271630   | 32591989 G | 0.2739 | 1.27E-09 | chr:6:32648036 |
| 6 rs9271384   | 32587408 T | 0.3147 | 1.28E-09 | chr:6:32648036 |
| 6 rs80216275  | 32469383 A | 0.3776 | 1.29E-09 | chr:6:32648036 |
| 6 rs544548886 | 32505381 T | 0.2698 | 1.29E-09 | chr:6:32648036 |
| 6 rs2647046   | 32668336 A | 0.3035 | 1.30E-09 | chr:6:32648036 |
| 6 rs28746921  | 32649831 A | 0.3092 | 1.31E-09 | chr:6:32648036 |
| 6 rs3129725   | 32677623 T | 0.3158 | 1.31E-09 | chr:6:32648036 |
| 6 rs77561985  | 32457236 G | 2.008  | 1.32E-09 | chr:6:32648036 |
| 6 rs79199186  | 32457248 C | 2.008  | 1.32E-09 | chr:6:32648036 |
| 6 rs75236519  | 32460670 C | 0.3951 | 1.32E-09 | chr:6:32648036 |
| 6 rs78937964  | 32456778 G | 0.4479 | 1.36E-09 | chr:6:32648036 |
| 6 rs35058673  | 32523008 C | 2.381  | 1.37E-09 | chr:6:32648036 |
| 6 rs538174489 | 32508201 T | 0.2163 | 1.37E-09 | chr:6:32648036 |
| 6 rs113668017 | 32488741 C | 0.4852 | 1.38E-09 | chr:6:32648036 |
| 6 rs28528859  | 32451395 A | 3.546  | 1.38E-09 | chr:6:32648036 |
| 6 rs150117381 | 32505388 C | 0.2547 | 1.39E-09 | chr:6:32648036 |
| 6 rs575449137 | 32536491 A | 0.4353 | 1.40E-09 | chr:6:32648036 |
| 6 rs28362368  | 32594040 G | 0.2563 | 1.40E-09 | chr:6:32648036 |
| 6 rs543214902 | 32488064 A | 2.088  | 1.40E-09 | chr:6:32648036 |
| 6 rs68146539  | 32532928 C | 0.42   | 1.42E-09 | chr:6:32648036 |
| 6 rs2857210   | 32741742 A | 2.966  | 1.43E-09 | chr:6:32648036 |
| 6 rs376217655 | 32505666 T | 0.2095 | 1.44E-09 | chr:6:32648036 |
| 6 rs77000541  | 32635605 A | 0.2866 | 1.44E-09 | chr:6:32648036 |
| 6 rs80177780  | 32490421 C | 2.088  | 1.45E-09 | chr:6:32648036 |
| 6 rs28747021  | 32654772 G | 0.3139 | 1.47E-09 | chr:6:32648036 |
| 6 rs9274555   | 32634882 C | 0.4397 | 1.47E-09 | chr:6:32648036 |
| 6 rs9274556   | 32634883 C | 0.4397 | 1.47E-09 | chr:6:32648036 |
| 6 rs552507937 | 32497354 A | 0.2808 | 1.47E-09 | chr:6:32648036 |
| 6 rs4947345   | 32678260 T | 0.3088 | 1.48E-09 | chr:6:32648036 |
| 6 rs72848204  | 32594073 T | 0.2587 | 1.48E-09 | chr:6:32648036 |
| 6 rs542536566 | 32457959 T | 0.176  | 1.49E-09 | chr:6:32648036 |
| 6 rs115919900 | 32555832 T | 0.3329 | 1.52E-09 | chr:6:32648036 |
| 6 rs9270169   | 32555661 C | 0.2681 | 1.53E-09 | chr:6:32648036 |
| 6 rs9269962   | 32552177 A | 0.2792 | 1.54E-09 | chr:6:32648036 |
| 6 rs115573308 | 32533118 T | 0.4557 | 1.54E-09 | chr:6:32648036 |
| 6 rs183777110 | 32505375 T | 0.2657 | 1.55E-09 | chr:6:32648036 |
| 6 rs77413629  | 32505374 G | 0.2657 | 1.55E-09 | chr:6:32648036 |
| 6 rs17205844  | 32651254 G | 0.315  | 1.56E-09 | chr:6:32648036 |
| 6 rs17205851  | 32651265 C | 0.315  | 1.56E-09 | chr:6:32648036 |
| 6 rs9270387   | 32558317 C | 0.4269 | 1.56E-09 | chr:6:32648036 |
| 6 rs9270455   | 32558878 C | 2.073  | 1.57E-09 | chr:6:32648036 |

|                     |            |        |          |                |
|---------------------|------------|--------|----------|----------------|
| 6 rs150400275       | 32488059 C | 2.074  | 1.60E-09 | chr:6:32648036 |
| 6 rs28746961        | 32652968 G | 0.3054 | 1.60E-09 | chr:6:32648036 |
| 6 rs112013291       | 32536551 A | 0.4416 | 1.61E-09 | chr:6:32648036 |
| 6 rs281863666       | 32630713 C | 2.515  | 1.64E-09 | chr:6:32648036 |
| 6 rs10947310        | 32567379 G | 0.2782 | 1.65E-09 | chr:6:32648036 |
| 6 rs28371331        | 32679301 A | 0.3894 | 1.67E-09 | chr:6:32648036 |
| 6 rs560277143       | 32547480 G | 0.4479 | 1.68E-09 | chr:6:32648036 |
| 6 rs28747006        | 32654453 T | 0.3164 | 1.69E-09 | chr:6:32648036 |
| 6 rs28747007        | 32654475 A | 0.3164 | 1.69E-09 | chr:6:32648036 |
| 6 rs9273509         | 32628473 T | 0.3594 | 1.70E-09 | chr:6:32648036 |
| 6 rs9273510         | 32628474 G | 0.3594 | 1.70E-09 | chr:6:32648036 |
| 6 rs9272068         | 32599404 C | 0.2694 | 1.72E-09 | chr:6:32648036 |
| 6 rs28746962        | 32652979 A | 0.3082 | 1.73E-09 | chr:6:32648036 |
| 6 rs114969562       | 32594299 A | 0.1731 | 1.75E-09 | chr:6:32648036 |
| 6 rs674313          | 32578082 T | 0.2575 | 1.75E-09 | chr:6:32648036 |
| 6 rs201439475       | 32502968 A | 0.3276 | 1.75E-09 | chr:6:32648036 |
| 6 rs28746926        | 32650026 C | 0.3158 | 1.76E-09 | chr:6:32648036 |
| 6 rs28746927        | 32650029 T | 0.3158 | 1.76E-09 | chr:6:32648036 |
| 6 rs17205858        | 32651297 C | 0.3185 | 1.76E-09 | chr:6:32648036 |
| 6 rs9269798         | 32549296 A | 3.026  | 1.76E-09 | chr:6:32648036 |
| 6 rs9270639         | 32565658 T | 0.2486 | 1.77E-09 | chr:6:32648036 |
| 6 rs28746918        | 32649769 T | 0.3171 | 1.77E-09 | chr:6:32648036 |
| 6 rs1049163         | 32629193 T | 2.344  | 1.79E-09 | chr:6:32648036 |
| 6 rs113151974       | 32488037 T | 2.058  | 1.84E-09 | chr:6:32648036 |
| 6 rs144578241       | 32536479 A | 0.4386 | 1.86E-09 | chr:6:32648036 |
| 6 rs532180052       | 32492929 C | 2.095  | 1.91E-09 | chr:6:32648036 |
| 6 rs9274561         | 32634953 A | 0.3785 | 1.94E-09 | chr:6:32648036 |
| 6 rs576289202       | 32452609 A | 0.2805 | 1.95E-09 | chr:6:32648036 |
| 6 rs73727946        | 32504967 C | 0.2776 | 1.95E-09 | chr:6:32648036 |
| 6 rs112621731       | 32501245 G | 0.2939 | 1.96E-09 | chr:6:32648036 |
| 6 rs17212132        | 32651008 A | 0.3149 | 1.98E-09 | chr:6:32648036 |
| 6 rs144064415       | 32536140 T | 0.4693 | 2.01E-09 | chr:6:32648036 |
| 6 rs28746936        | 32651393 A | 0.318  | 2.01E-09 | chr:6:32648036 |
| 6 rs9270086         | 32554283 A | 0.3603 | 2.08E-09 | chr:6:32648036 |
| 6 rs9271681         | 32592918 T | 0.2686 | 2.09E-09 | chr:6:32648036 |
| 6 rs72848261        | 32601790 C | 0.2828 | 2.12E-09 | chr:6:32648036 |
| 6 rs147962567;rs359 | 32557378 C | 0.2421 | 2.13E-09 | chr:6:32648036 |
| 6 rs2856717         | 32670308 A | 0.3093 | 2.15E-09 | chr:6:32648036 |
| 6 rs9274551         | 32634834 C | 0.4374 | 2.16E-09 | chr:6:32648036 |
| 6 rs17212062        | 32650648 G | 0.3221 | 2.19E-09 | chr:6:32648036 |
| 6 rs17212069        | 32650667 G | 0.3221 | 2.19E-09 | chr:6:32648036 |
| 6 rs72492338        | 32527408 G | 0.3007 | 2.19E-09 | chr:6:32648036 |
| 6 rs201843924       | 32486878 G | 0.2235 | 2.22E-09 | chr:6:32648036 |

|               |            |        |          |                |
|---------------|------------|--------|----------|----------------|
| 6 rs11751673  | 32559885 G | 0.233  | 2.23E-09 | chr:6:32648036 |
| 6 rs113474692 | 32529177 A | 0.4649 | 2.25E-09 | chr:6:32648036 |
| 6 rs9269924   | 32551605 C | 0.4704 | 2.28E-09 | chr:6:32648036 |
| 6 rs7771747   | 32498931 A | 0.2788 | 2.31E-09 | chr:6:32648036 |
| 6 rs28746966  | 32653145 C | 0.3231 | 2.32E-09 | chr:6:32648036 |
| 6 rs9275172   | 32653997 A | 0.3205 | 2.33E-09 | chr:6:32648036 |
| 6 rs9275173   | 32654037 T | 0.3205 | 2.33E-09 | chr:6:32648036 |
| 6 rs147668426 | 32507931 G | 0.2117 | 2.34E-09 | chr:6:32648036 |
| 6 rs571430728 | 32507938 T | 0.2117 | 2.34E-09 | chr:6:32648036 |
| 6 rs189557518 | 32526205 A | 0.4303 | 2.37E-09 | chr:6:32648036 |
| 6 rs114198395 | 32502961 T | 0.333  | 2.40E-09 | chr:6:32648036 |
| 6 rs28534491  | 32526396 A | 2.251  | 2.41E-09 | chr:6:32648036 |
| 6 rs9269603   | 32545106 A | 2.18   | 2.42E-09 | chr:6:32648036 |
| 6 rs9274587   | 32635377 C | 0.4537 | 2.43E-09 | chr:6:32648036 |
| 6 rs9272249   | 32602952 A | 0.2539 | 2.43E-09 | chr:6:32648036 |
| 6 rs9272250   | 32602958 T | 0.2539 | 2.43E-09 | chr:6:32648036 |
| 6 rs116541446 | 32497494 T | 0.231  | 2.45E-09 | chr:6:32648036 |
| 6 rs142886879 | 32497484 C | 0.231  | 2.45E-09 | chr:6:32648036 |
| 6 rs73727917  | 32497510 A | 0.231  | 2.45E-09 | chr:6:32648036 |
| 6 rs9273534   | 32628751 C | 0.3966 | 2.45E-09 | chr:6:32648036 |
| 6 rs9271646   | 32592351 G | 0.2723 | 2.46E-09 | chr:6:32648036 |
| 6 rs28747022  | 32654785 A | 0.3214 | 2.47E-09 | chr:6:32648036 |
| 6 rs9270326   | 32557812 C | 2.632  | 2.49E-09 | chr:6:32648036 |
| 6 rs554915730 | 32487483 G | 0.2087 | 2.49E-09 | chr:6:32648036 |
| 6 rs28746910  | 32649127 G | 0.3212 | 2.50E-09 | chr:6:32648036 |
| 6 rs9269925   | 32551613 A | 0.4588 | 2.50E-09 | chr:6:32648036 |
| 6 rs2647048   | 32668705 A | 0.3093 | 2.51E-09 | chr:6:32648036 |
| 6 rs2647051   | 32670897 T | 0.3093 | 2.51E-09 | chr:6:32648036 |
| 6 rs2856699   | 32671765 A | 0.3093 | 2.51E-09 | chr:6:32648036 |
| 6 rs2856722   | 32667958 A | 0.3093 | 2.51E-09 | chr:6:32648036 |
| 6 rs2858305   | 32670464 G | 0.3093 | 2.51E-09 | chr:6:32648036 |
| 6 rs2858309   | 32668713 C | 0.3093 | 2.51E-09 | chr:6:32648036 |
| 6 rs2858310   | 32668323 G | 0.3093 | 2.51E-09 | chr:6:32648036 |
| 6 rs9275389   | 32669132 C | 0.3093 | 2.51E-09 | chr:6:32648036 |
| 6 rs9275521   | 32674952 T | 0.3093 | 2.51E-09 | chr:6:32648036 |
| 6 rs28747017  | 32654723 G | 0.3219 | 2.51E-09 | chr:6:32648036 |
| 6 rs28747018  | 32654739 C | 0.3219 | 2.51E-09 | chr:6:32648036 |
| 6 rs9270302   | 32557479 A | 0.205  | 2.52E-09 | chr:6:32648036 |
| 6 rs148728069 | 32496097 T | 0.4607 | 2.53E-09 | chr:6:32648036 |
| 6 rs79939898  | 32488685 A | 1.957  | 2.55E-09 | chr:6:32648036 |
| 6 rs112597150 | 32511531 G | 2.153  | 2.55E-09 | chr:6:32648036 |
| 6 rs28371330  | 32679283 C | 0.3957 | 2.55E-09 | chr:6:32648036 |
| 6 rs67968776  | 32531554 C | 2.106  | 2.55E-09 | chr:6:32648036 |

|               |            |        |          |                |
|---------------|------------|--------|----------|----------------|
| 6 rs186995982 | 32494270 A | 0.4887 | 2.56E-09 | chr:6:32648036 |
| 6 rs28747004  | 32654379 A | 0.3211 | 2.57E-09 | chr:6:32648036 |
| 6 rs28747005  | 32654401 G | 0.3211 | 2.57E-09 | chr:6:32648036 |
| 6 rs537722644 | 32525112 A | 0.3847 | 2.60E-09 | chr:6:32648036 |
| 6 rs17212279  | 32651713 G | 0.3177 | 2.64E-09 | chr:6:32648036 |
| 6 rs9274339   | 32632319 G | 0.4861 | 2.67E-09 | chr:6:32648036 |
| 6 rs370864292 | 32532975 A | 0.4278 | 2.68E-09 | chr:6:32648036 |
| 6 rs560693076 | 32532972 C | 0.4278 | 2.68E-09 | chr:6:32648036 |
| 6 rs71542460  | 32632022 G | 0.4472 | 2.69E-09 | chr:6:32648036 |
| 6 rs71534598  | 32516972 T | 2.624  | 2.72E-09 | chr:6:32648036 |
| 6 rs17205738  | 32650762 G | 0.3219 | 2.74E-09 | chr:6:32648036 |
| 6 rs3020628   | 32628784 C | 0.4038 | 2.77E-09 | chr:6:32648036 |
| 6 rs28772271  | 32656901 C | 0.3227 | 2.78E-09 | chr:6:32648036 |
| 6 rs146382271 | 32511291 T | 0.3603 | 2.82E-09 | chr:6:32648036 |
| 6 rs116551340 | 32527461 C | 0.2817 | 2.83E-09 | chr:6:32648036 |
| 6 rs17205717  | 32650746 C | 0.3231 | 2.83E-09 | chr:6:32648036 |
| 6 rs9271694   | 32593051 C | 0.2749 | 2.83E-09 | chr:6:32648036 |
| 6 rs28891483  | 32649254 T | 0.3245 | 2.84E-09 | chr:6:32648036 |
| 6 rs28891484  | 32649261 A | 0.3245 | 2.84E-09 | chr:6:32648036 |
| 6 rs28891485  | 32649274 T | 0.3245 | 2.84E-09 | chr:6:32648036 |
| 6 rs4570006   | 32657257 T | 0.3251 | 2.88E-09 | chr:6:32648036 |
| 6 rs28371329  | 32679236 G | 0.3972 | 2.89E-09 | chr:6:32648036 |
| 6 rs17212343  | 32652147 G | 0.3248 | 2.89E-09 | chr:6:32648036 |
| 6 rs9269324   | 32539978 G | 0.3713 | 2.90E-09 | chr:6:32648036 |
| 6 rs2647040   | 32667280 A | 0.3095 | 2.91E-09 | chr:6:32648036 |
| 6 rs2856723   | 32667762 A | 0.3095 | 2.91E-09 | chr:6:32648036 |
| 6 rs9274986   | 32642386 G | 0.4237 | 2.92E-09 | chr:6:32648036 |
| 6 rs66969006  | 32501522 G | 2.783  | 2.98E-09 | chr:6:32648036 |
| 6 rs28635588  | 32519041 G | 2.878  | 2.99E-09 | chr:6:32648036 |
| 6 rs9271618   | 32591752 A | 0.2804 | 2.99E-09 | chr:6:32648036 |
| 6 rs17212076  | 32650724 G | 0.3247 | 3.03E-09 | chr:6:32648036 |
| 6 rs1049059   | 32634313 G | 0.3001 | 3.04E-09 | chr:6:32648036 |
| 6 rs9274573   | 32635205 C | 0.4221 | 3.04E-09 | chr:6:32648036 |
| 6 rs28483671  | 32526854 G | 2.184  | 3.05E-09 | chr:6:32648036 |
| 6 rs112349327 | 32502948 A | 0.343  | 3.10E-09 | chr:6:32648036 |
| 6 rs72851056  | 32502944 A | 0.343  | 3.10E-09 | chr:6:32648036 |
| 6 rs188426982 | 32506878 A | 0.224  | 3.11E-09 | chr:6:32648036 |
| 6 rs191423596 | 32506888 C | 0.224  | 3.11E-09 | chr:6:32648036 |
| 6 rs34714667  | 32536370 C | 2.101  | 3.11E-09 | chr:6:32648036 |
| 6 rs72508440  | 32489908 A | 0.4609 | 3.13E-09 | chr:6:32648036 |
| 6 rs1141867   | 32485491 T | 0.4345 | 3.17E-09 | chr:6:32648036 |
| 6 rs28746922  | 32649844 G | 0.3218 | 3.17E-09 | chr:6:32648036 |
| 6 rs28746923  | 32649849 G | 0.3218 | 3.17E-09 | chr:6:32648036 |

|               |            |        |          |                |
|---------------|------------|--------|----------|----------------|
| 6 rs28746924  | 32649854 A | 0.3218 | 3.17E-09 | chr:6:32648036 |
| 6 rs574264514 | 32547472 C | 0.4608 | 3.18E-09 | chr:6:32648036 |
| 6 rs28371328  | 32679216 G | 0.3985 | 3.21E-09 | chr:6:32648036 |
| 6 rs143508244 | 32488011 G | 1.98   | 3.21E-09 | chr:6:32648036 |
| 6 rs111902726 | 32469463 C | 1.999  | 3.24E-09 | chr:6:32648036 |
| 6 rs28437335  | 32657644 C | 0.3277 | 3.25E-09 | chr:6:32648036 |
| 6 rs9405119   | 32657681 G | 0.3277 | 3.25E-09 | chr:6:32648036 |
| 6 rs115070082 | 32491393 C | 1.964  | 3.28E-09 | chr:6:32648036 |
| 6 rs28371332  | 32679311 A | 0.3976 | 3.28E-09 | chr:6:32648036 |
| 6 rs28746905  | 32648842 T | 0.3275 | 3.30E-09 | chr:6:32648036 |
| 6 rs28746906  | 32648863 A | 0.3275 | 3.30E-09 | chr:6:32648036 |
| 6 rs9273497   | 32628297 T | 0.3753 | 3.31E-09 | chr:6:32648036 |
| 6 rs9274575   | 32635226 T | 0.418  | 3.37E-09 | chr:6:32648036 |
| 6 rs66468365  | 32518310 A | 2.568  | 3.41E-09 | chr:6:32648036 |
| 6 rs28746933  | 32650411 G | 0.3276 | 3.41E-09 | chr:6:32648036 |
| 6 rs28746934  | 32650436 C | 0.3276 | 3.41E-09 | chr:6:32648036 |
| 6 rs61146035  | 32496467 T | 2.024  | 3.43E-09 | chr:6:32648036 |
| 6 rs9271647   | 32592354 G | 0.2772 | 3.45E-09 | chr:6:32648036 |
| 6 rs9271649   | 32592359 G | 0.2772 | 3.45E-09 | chr:6:32648036 |
| 6 rs71538505  | 32534576 T | 2.113  | 3.45E-09 | chr:6:32648036 |
| 6 rs17212104  | 32650883 G | 0.3269 | 3.52E-09 | chr:6:32648036 |
| 6 rs545728465 | 32547479 T | 0.4672 | 3.53E-09 | chr:6:32648036 |
| 6 rs12661707  | 32531245 T | 0.4671 | 3.54E-09 | chr:6:32648036 |
| 6 rs9274824   | 32639702 C | 0.4392 | 3.54E-09 | chr:6:32648036 |
| 6 rs28747019  | 32654757 A | 0.3256 | 3.55E-09 | chr:6:32648036 |
| 6 rs28747020  | 32654760 C | 0.3256 | 3.55E-09 | chr:6:32648036 |
| 6 rs28746907  | 32648937 A | 0.3233 | 3.55E-09 | chr:6:32648036 |
| 6 rs9270369   | 32558183 T | 2.067  | 3.57E-09 | chr:6:32648036 |
| 6 rs9271708   | 32593386 A | 0.2533 | 3.58E-09 | chr:6:32648036 |
| 6 rs9271709   | 32593392 A | 0.2533 | 3.58E-09 | chr:6:32648036 |
| 6 rs67077728  | 32520338 A | 2.956  | 3.61E-09 | chr:6:32648036 |
| 6 rs180942055 | 32507976 T | 0.2344 | 3.63E-09 | chr:6:32648036 |
| 6 rs186170828 | 32507977 G | 0.2344 | 3.63E-09 | chr:6:32648036 |
| 6 rs2854273   | 32628776 C | 0.4049 | 3.68E-09 | chr:6:32648036 |
| 6 rs115881023 | 32491453 G | 1.915  | 3.72E-09 | chr:6:32648036 |
| 6 rs73726187  | 32491461 A | 1.915  | 3.72E-09 | chr:6:32648036 |
| 6 rs1064697   | 32546828 C | 2.19   | 3.73E-09 | chr:6:32648036 |
| 6 rs557163190 | 32526172 G | 0.4486 | 3.74E-09 | chr:6:32648036 |
| 6 rs1694133   | 32637015 T | 2.59   | 3.77E-09 | chr:6:32648036 |
| 6 rs374264352 | 32532969 A | 0.433  | 3.79E-09 | chr:6:32648036 |
| 6 rs28891486  | 32649408 T | 0.3277 | 3.83E-09 | chr:6:32648036 |
| 6 rs9271868   | 32595375 C | 0.1403 | 3.84E-09 | chr:6:32648036 |
| 6 rs9271869   | 32595376 A | 0.1403 | 3.84E-09 | chr:6:32648036 |



|               |            |        |          |                |
|---------------|------------|--------|----------|----------------|
| 6 rs9271870   | 32595377 T | 0.1403 | 3.84E-09 | chr:6:32648036 |
| 6 rs28746928  | 32650060 G | 0.3261 | 3.86E-09 | chr:6:32648036 |
| 6 rs28746929  | 32650068 G | 0.3261 | 3.86E-09 | chr:6:32648036 |
| 6 rs28746930  | 32650074 A | 0.3261 | 3.86E-09 | chr:6:32648036 |
| 6 rs72492347  | 32533142 G | 0.4659 | 3.87E-09 | chr:6:32648036 |
| 6 rs17206049  | 32652336 A | 0.2907 | 3.90E-09 | chr:6:32648036 |
| 6 rs28747016  | 32654706 A | 0.3286 | 3.95E-09 | chr:6:32648036 |
| 6 rs114077582 | 32454654 G | 0.1802 | 3.98E-09 | chr:6:32648036 |
| 6 rs34102154  | 32572106 A | 0.3457 | 3.99E-09 | chr:6:32648036 |
| 6 rs28746911  | 32649200 C | 0.3287 | 4.00E-09 | chr:6:32648036 |
| 6 rs28747015  | 32654673 T | 0.3291 | 4.02E-09 | chr:6:32648036 |
| 6 rs552461365 | 32482115 C | 0.1509 | 4.04E-09 | chr:6:32648036 |
| 6 rs573629697 | 32507971 G | 0.2332 | 4.04E-09 | chr:6:32648036 |
| 6 rs9271508   | 32589410 T | 0.2875 | 4.04E-09 | chr:6:32648036 |
| 6 rs9271539   | 32590028 A | 0.2875 | 4.04E-09 | chr:6:32648036 |
| 6 rs28746955  | 32652858 C | 0.2624 | 4.09E-09 | chr:6:32648036 |
| 6 rs140538649 | 32507946 T | 0.2059 | 4.10E-09 | chr:6:32648036 |
| 6 rs539226504 | 32507944 A | 0.2059 | 4.10E-09 | chr:6:32648036 |
| 6 rs555706008 | 32507953 G | 0.2059 | 4.10E-09 | chr:6:32648036 |
| 6 rs28371325  | 32679188 C | 0.4005 | 4.12E-09 | chr:6:32648036 |
| 6 rs28371326  | 32679202 A | 0.4005 | 4.12E-09 | chr:6:32648036 |
| 6 rs148573031 | 32530691 A | 0.4631 | 4.12E-09 | chr:6:32648036 |
| 6 rs28371245  | 32647982 T | 0.4639 | 4.22E-09 | chr:6:32648036 |
| 6 rs35455030  | 32522650 T | 2.44   | 4.24E-09 | chr:6:32648036 |
| 6 rs73727909  | 32496036 T | 0.1362 | 4.24E-09 | chr:6:32648036 |
| 6 rs11756331  | 32559929 G | 0.2683 | 4.28E-09 | chr:6:32648036 |
| 6 rs9272216   | 32602131 G | 0.2736 | 4.28E-09 | chr:6:32648036 |
| 6 rs9272251   | 32602966 G | 0.2639 | 4.29E-09 | chr:6:32648036 |
| 6 rs72508409  | 32451073 G | 0.2756 | 4.31E-09 | chr:6:32648036 |
| 6 rs113813386 | 32536930 C | 1.98   | 4.32E-09 | chr:6:32648036 |
| 6 rs143631084 | 32632190 A | 0.483  | 4.35E-09 | chr:6:32648036 |
| 6 rs145244319 | 32632189 A | 0.483  | 4.35E-09 | chr:6:32648036 |
| 6 rs534068560 | 32469501 C | 1.989  | 4.35E-09 | chr:6:32648036 |
| 6 rs11751496  | 32533549 T | 0.4671 | 4.36E-09 | chr:6:32648036 |
| 6 rs9271965   | 32597473 C | 0.2768 | 4.36E-09 | chr:6:32648036 |
| 6 rs148826043 | 32457265 G | 1.966  | 4.47E-09 | chr:6:32648036 |
| 6 rs6905161   | 32505249 A | 0.2642 | 4.47E-09 | chr:6:32648036 |
| 6 rs17205837  | 32651222 C | 0.3283 | 4.50E-09 | chr:6:32648036 |
| 6 rs17212188  | 32651216 A | 0.3283 | 4.50E-09 | chr:6:32648036 |
| 6 rs3997873   | 32580723 G | 2.952  | 4.50E-09 | chr:6:32648036 |
| 6 rs2647085   | 32680124 C | 2.527  | 4.51E-09 | chr:6:32648036 |
| 6 rs9391743   | 32680172 C | 2.527  | 4.51E-09 | chr:6:32648036 |
| 6 rs9404996   | 32680173 A | 2.527  | 4.51E-09 | chr:6:32648036 |

|               |            |        |          |                |
|---------------|------------|--------|----------|----------------|
| 6 rs9271527   | 32589867 T | 0.2919 | 4.51E-09 | chr:6:32648036 |
| 6 rs9274987   | 32642405 G | 0.4348 | 4.54E-09 | chr:6:32648036 |
| 6 rs9274988   | 32642406 G | 0.4348 | 4.54E-09 | chr:6:32648036 |
| 6 rs9274722   | 32637527 A | 2.512  | 4.56E-09 | chr:6:32648036 |
| 6 rs28747026  | 32654860 G | 0.3321 | 4.58E-09 | chr:6:32648036 |
| 6 rs182530265 | 32537723 T | 1.918  | 4.58E-09 | chr:6:32648036 |
| 6 rs9271874   | 32595424 T | 2.484  | 4.61E-09 | chr:6:32648036 |
| 6 rs4538747   | 32657334 A | 0.3325 | 4.69E-09 | chr:6:32648036 |
| 6 rs9271489   | 32589051 A | 0.2921 | 4.75E-09 | chr:6:32648036 |
| 6 rs62404128  | 32618728 C | 2.022  | 4.84E-09 | chr:6:32648036 |
| 6 rs182987687 | 32506870 C | 0.2019 | 4.87E-09 | chr:6:32648036 |
| 6 rs189968693 | 32506863 A | 0.2019 | 4.87E-09 | chr:6:32648036 |
| 6 rs28746903  | 32648768 T | 0.3326 | 4.95E-09 | chr:6:32648036 |
| 6 rs28746904  | 32648773 C | 0.3326 | 4.95E-09 | chr:6:32648036 |
| 6 rs73726184  | 32491446 C | 1.906  | 4.97E-09 | chr:6:32648036 |
| 6 rs115566240 | 32601718 T | 0.3491 | 5.07E-09 | chr:6:32648036 |
| 6 rs28371322  | 32679047 G | 0.4018 | 5.07E-09 | chr:6:32648036 |
| 6 rs28371323  | 32679059 T | 0.4018 | 5.07E-09 | chr:6:32648036 |
| 6 rs28371324  | 32679068 T | 0.4018 | 5.07E-09 | chr:6:32648036 |
| 6 rs559903629 | 32510984 A | 0.2982 | 5.10E-09 | chr:6:32648036 |
| 6 rs532618689 | 32508064 T | 0.2835 | 5.16E-09 | chr:6:32648036 |
| 6 rs549780202 | 32508055 T | 0.2835 | 5.16E-09 | chr:6:32648036 |
| 6 rs564974789 | 32508061 A | 0.2835 | 5.16E-09 | chr:6:32648036 |
| 6 rs2856664   | 32665616 G | 0.3977 | 5.21E-09 | chr:6:32648036 |
| 6 rs35130701  | 32594199 G | 0.2827 | 5.24E-09 | chr:6:32648036 |
| 6 rs9271704   | 32593317 G | 0.2738 | 5.32E-09 | chr:6:32648036 |
| 6 rs9271705   | 32593321 T | 0.2738 | 5.32E-09 | chr:6:32648036 |
| 6 rs17212909  | 32680862 T | 2.52   | 5.36E-09 | chr:6:32648036 |
| 6 rs9271724   | 32593552 C | 0.2535 | 5.36E-09 | chr:6:32648036 |
| 6 rs551270191 | 32453854 T | 0.3071 | 5.44E-09 | chr:6:32648036 |
| 6 rs200439840 | 32487913 T | 2.02   | 5.45E-09 | chr:6:32648036 |
| 6 rs190771556 | 32485893 T | 0.1826 | 5.54E-09 | chr:6:32648036 |
| 6 rs536387398 | 32507125 A | 0.2582 | 5.68E-09 | chr:6:32648036 |
| 6 rs17206070  | 32652361 C | 0.2957 | 5.69E-09 | chr:6:32648036 |
| 6 rs28772268  | 32656872 A | 0.3317 | 5.70E-09 | chr:6:32648036 |
| 6 rs28772269  | 32656878 C | 0.3317 | 5.70E-09 | chr:6:32648036 |
| 6 rs28772270  | 32656881 T | 0.3317 | 5.70E-09 | chr:6:32648036 |
| 6 rs2856726   | 32666721 A | 0.3991 | 5.71E-09 | chr:6:32648036 |
| 6 rs542166615 | 32488724 G | 0.4993 | 5.72E-09 | chr:6:32648036 |
| 6 rs1049061   | 32634303 A | 0.3082 | 5.74E-09 | chr:6:32648036 |
| 6 rs534024500 | 32507307 G | 0.2028 | 5.86E-09 | chr:6:32648036 |
| 6 rs28819133  | 32527988 C | 1.988  | 5.88E-09 | chr:6:32648036 |
| 6 rs60993360  | 32473694 A | 1.9    | 5.89E-09 | chr:6:32648036 |

|               |            |        |          |                |
|---------------|------------|--------|----------|----------------|
| 6 rs9269273   | 32539129 A | 0.4459 | 5.92E-09 | chr:6:32648036 |
| 6 rs9271887   | 32595679 A | 0.2869 | 5.93E-09 | chr:6:32648036 |
| 6 rs200254403 | 32487102 C | 0.4972 | 5.94E-09 | chr:6:32648036 |
| 6 rs76934421  | 32503722 T | 2.726  | 5.94E-09 | chr:6:32648036 |
| 6 rs573273966 | 32507131 C | 0.2574 | 5.94E-09 | chr:6:32648036 |
| 6 rs71538517  | 32535399 A | 1.919  | 5.96E-09 | chr:6:32648036 |
| 6 rs72508422  | 32481498 C | 0.1617 | 6.01E-09 | chr:6:32648036 |
| 6 rs17212090  | 32650809 T | 0.3363 | 6.01E-09 | chr:6:32648036 |
| 6 rs146344255 | 32490158 A | 0.5042 | 6.01E-09 | chr:6:32648036 |
| 6 rs192164737 | 32508091 G | 0.263  | 6.05E-09 | chr:6:32648036 |
| 6 rs9269627   | 32545604 C | 2.163  | 6.06E-09 | chr:6:32648036 |
| 6 rs185884622 | 32526169 C | 0.4563 | 6.09E-09 | chr:6:32648036 |
| 6 rs67767519  | 32534275 T | 1.976  | 6.09E-09 | chr:6:32648036 |
| 6 rs34442507  | 32513531 T | 2.904  | 6.14E-09 | chr:6:32648036 |
| 6 rs28891493  | 32662509 T | 0.3346 | 6.17E-09 | chr:6:32648036 |
| 6 rs9271353   | 32584014 T | 2.941  | 6.20E-09 | chr:6:32648036 |
| 6 rs9271703   | 32593280 T | 0.2907 | 6.21E-09 | chr:6:32648036 |
| 6 rs28746947  | 32652747 A | 0.2939 | 6.24E-09 | chr:6:32648036 |
| 6 rs9296035   | 32657888 G | 0.336  | 6.26E-09 | chr:6:32648036 |
| 6 rs73731415  | 32454428 G | 0.2953 | 6.27E-09 | chr:6:32648036 |
| 6 rs9271533   | 32589952 T | 0.303  | 6.33E-09 | chr:6:32648036 |
| 6 rs9271535   | 32589959 T | 0.303  | 6.33E-09 | chr:6:32648036 |
| 6 rs34230758  | 32633558 G | 0.3184 | 6.33E-09 | chr:6:32648036 |
| 6 rs191570792 | 32486624 A | 0.2743 | 6.35E-09 | chr:6:32648036 |
| 6 rs1694116   | 32647839 A | 2.601  | 6.42E-09 | chr:6:32648036 |
| 6 rs2647043   | 32667549 A | 0.3193 | 6.43E-09 | chr:6:32648036 |
| 6 rs9274724   | 32637531 G | 2.482  | 6.45E-09 | chr:6:32648036 |
| 6 rs73403117  | 32468956 T | 0.3214 | 6.46E-09 | chr:6:32648036 |
| 6 rs28747013  | 32654596 A | 0.3361 | 6.51E-09 | chr:6:32648036 |
| 6 rs28746916  | 32649579 A | 0.339  | 6.53E-09 | chr:6:32648036 |
| 6 rs9271522   | 32589791 C | 0.3001 | 6.57E-09 | chr:6:32648036 |
| 6 rs73403198  | 32473419 T | 1.897  | 6.58E-09 | chr:6:32648036 |
| 6 rs28747000  | 32654280 A | 0.3134 | 6.62E-09 | chr:6:32648036 |
| 6 rs28747001  | 32654284 G | 0.3134 | 6.62E-09 | chr:6:32648036 |
| 6 rs181549666 | 32482352 A | 0.1199 | 6.68E-09 | chr:6:32648036 |
| 6 rs28747014  | 32654658 C | 0.3365 | 6.71E-09 | chr:6:32648036 |
| 6 rs542310115 | 32457255 A | 0.5145 | 6.72E-09 | chr:6:32648036 |
| 6 rs55723336  | 32457250 G | 0.5145 | 6.72E-09 | chr:6:32648036 |
| 6 rs572047956 | 32457254 C | 0.5145 | 6.72E-09 | chr:6:32648036 |
| 6 rs28371311  | 32678265 A | 0.4025 | 6.72E-09 | chr:6:32648036 |
| 6 rs17205998  | 32652050 G | 0.337  | 6.74E-09 | chr:6:32648036 |
| 6 rs17206005  | 32652069 G | 0.337  | 6.74E-09 | chr:6:32648036 |
| 6 rs17206012  | 32652077 C | 0.337  | 6.74E-09 | chr:6:32648036 |

|               |            |        |          |                |
|---------------|------------|--------|----------|----------------|
| 6 rs28375776  | 32606658 G | 0.358  | 6.77E-09 | chr:6:32648036 |
| 6 rs9269373   | 32540873 G | 0.4567 | 6.79E-09 | chr:6:32648036 |
| 6 rs34159523  | 32535422 T | 1.91   | 6.80E-09 | chr:6:32648036 |
| 6 rs28371250  | 32648039 C | 0.4709 | 6.83E-09 | chr:6:32648036 |
| 6 rs9275177   | 32654174 C | 0.3368 | 6.89E-09 | chr:6:32648036 |
| 6 rs9275178   | 32654181 G | 0.3368 | 6.89E-09 | chr:6:32648036 |
| 6 rs17581425  | 32680585 C | 2.507  | 6.92E-09 | chr:6:32648036 |
| 6 rs28371346  | 32680532 C | 2.507  | 6.92E-09 | chr:6:32648036 |
| 6 rs28371347  | 32680537 C | 2.507  | 6.92E-09 | chr:6:32648036 |
| 6 rs28371348  | 32680563 A | 2.507  | 6.92E-09 | chr:6:32648036 |
| 6 rs28747028  | 32654989 T | 0.3373 | 6.94E-09 | chr:6:32648036 |
| 6 rs6935723   | 32681669 C | 2.506  | 6.95E-09 | chr:6:32648036 |
| 6 rs113208447 | 32503314 A | 2.871  | 6.96E-09 | chr:6:32648036 |
| 6 rs9271894   | 32595874 T | 0.2926 | 7.00E-09 | chr:6:32648036 |
| 6 rs1130431   | 32629155 A | 0.4004 | 7.02E-09 | chr:6:32648036 |
| 6 rs17205747  | 32650911 T | 0.3347 | 7.04E-09 | chr:6:32648036 |
| 6 rs17581326  | 32678753 A | 0.3983 | 7.05E-09 | chr:6:32648036 |
| 6 rs28371318  | 32678740 A | 0.3983 | 7.05E-09 | chr:6:32648036 |
| 6 rs28371319  | 32678795 T | 0.3983 | 7.05E-09 | chr:6:32648036 |
| 6 rs77760122  | 32678789 T | 0.3983 | 7.05E-09 | chr:6:32648036 |
| 6 rs35656734  | 32600153 T | 0.3638 | 7.10E-09 | chr:6:32648036 |
| 6 rs9405042   | 32657020 G | 0.3374 | 7.10E-09 | chr:6:32648036 |
| 6 rs28746946  | 32652715 A | 0.3079 | 7.12E-09 | chr:6:32648036 |
| 6 rs9272255   | 32603133 T | 0.2814 | 7.13E-09 | chr:6:32648036 |
| 6 rs2395225   | 32590624 C | 0.3012 | 7.17E-09 | chr:6:32648036 |
| 6 rs9269698   | 32546986 G | 2.153  | 7.23E-09 | chr:6:32648036 |
| 6 rs9274045   | 32630055 C | 0.4523 | 7.25E-09 | chr:6:32648036 |
| 6 rs142393802 | 32508021 T | 0.285  | 7.28E-09 | chr:6:32648036 |
| 6 rs17212336  | 32652026 A | 0.3379 | 7.30E-09 | chr:6:32648036 |
| 6 rs73397431  | 32523385 A | 2.126  | 7.32E-09 | chr:6:32648036 |
| 6 rs4959108   | 32591922 G | 2.904  | 7.33E-09 | chr:6:32648036 |
| 6 rs33998225  | 32513883 T | 2.9    | 7.35E-09 | chr:6:32648036 |
| 6 rs35997662  | 32513575 G | 2.9    | 7.35E-09 | chr:6:32648036 |
| 6 rs58495148  | 32520816 G | 2.9    | 7.35E-09 | chr:6:32648036 |
| 6 rs61615404  | 32520785 T | 2.9    | 7.35E-09 | chr:6:32648036 |
| 6 rs2646996   | 32665741 A | 0.4014 | 7.45E-09 | chr:6:32648036 |
| 6 rs6934725   | 32666019 G | 0.4014 | 7.45E-09 | chr:6:32648036 |
| 6 rs13213605  | 32647764 C | 0.4747 | 7.48E-09 | chr:6:32648036 |
| 6 rs9269388   | 32541102 T | 0.367  | 7.50E-09 | chr:6:32648036 |
| 6 rs28746956  | 32652877 G | 0.2769 | 7.50E-09 | chr:6:32648036 |
| 6 rs73731419  | 32454694 C | 2.1    | 7.58E-09 | chr:6:32648036 |
| 6 rs28891480  | 32642843 G | 0.3422 | 7.61E-09 | chr:6:32648036 |
| 6 rs28746932  | 32650217 A | 0.3407 | 7.61E-09 | chr:6:32648036 |

|               |            |        |          |                |
|---------------|------------|--------|----------|----------------|
| 6 rs28746972  | 32653406 G | 0.3366 | 7.71E-09 | chr:6:32648036 |
| 6 rs9272566   | 32607175 A | 0.3838 | 7.75E-09 | chr:6:32648036 |
| 6 rs112269347 | 32486197 T | 0.5026 | 7.76E-09 | chr:6:32648036 |
| 6 rs9270055   | 32553874 C | 0.3262 | 7.79E-09 | chr:6:32648036 |
| 6 rs67704526  | 32536650 T | 0.4558 | 7.90E-09 | chr:6:32648036 |
| 6 rs9272635   | 32608193 C | 0.3159 | 7.91E-09 | chr:6:32648036 |
| 6 rs17612942  | 32620999 A | 0.44   | 7.92E-09 | chr:6:32648036 |
| 6 rs9270131   | 32555121 A | 2.176  | 7.95E-09 | chr:6:32648036 |
| 6 rs2647083   | 32679722 C | 0.4037 | 7.97E-09 | chr:6:32648036 |
| 6 rs28746897  | 32648396 G | 0.3494 | 7.97E-09 | chr:6:32648036 |
| 6 rs17206392  | 32675171 C | 0.4023 | 7.99E-09 | chr:6:32648036 |
| 6 rs550743804 | 32742569 G | 2.299  | 8.01E-09 | chr:6:32648036 |
| 6 rs9269271   | 32539107 C | 0.4507 | 8.22E-09 | chr:6:32648036 |
| 6 rs9269640   | 32545862 C | 2.138  | 8.23E-09 | chr:6:32648036 |
| 6 rs28524681  | 32518584 A | 2.628  | 8.31E-09 | chr:6:32648036 |
| 6 rs28891481  | 32642899 A | 0.3411 | 8.39E-09 | chr:6:32648036 |
| 6 rs28891482  | 32642906 A | 0.3411 | 8.39E-09 | chr:6:32648036 |
| 6 rs71536575  | 32531971 G | 1.93   | 8.43E-09 | chr:6:32648036 |
| 6 rs7745656   | 32680970 T | 2.475  | 8.48E-09 | chr:6:32648036 |
| 6 rs17219302  | 32680725 C | 2.475  | 8.61E-09 | chr:6:32648036 |
| 6 rs17219309  | 32680727 C | 2.475  | 8.61E-09 | chr:6:32648036 |
| 6 rs117966543 | 32612934 C | 2.982  | 8.64E-09 | chr:6:32648036 |
| 6 rs1130368   | 32632818 G | 0.3135 | 8.88E-09 | chr:6:32648036 |
| 6 rs28371345  | 32680247 A | 2.473  | 8.89E-09 | chr:6:32648036 |
| 6 rs9391744   | 32680227 T | 2.473  | 8.89E-09 | chr:6:32648036 |
| 6 rs9391745   | 32680283 G | 2.473  | 8.89E-09 | chr:6:32648036 |
| 6 rs9404997   | 32680288 A | 2.473  | 8.89E-09 | chr:6:32648036 |
| 6 rs9501184   | 32680199 A | 2.473  | 8.89E-09 | chr:6:32648036 |
| 6 rs28746913  | 32649517 A | 0.3435 | 9.10E-09 | chr:6:32648036 |
| 6 rs28746914  | 32649536 C | 0.3435 | 9.10E-09 | chr:6:32648036 |
| 6 rs28746915  | 32649543 A | 0.3435 | 9.10E-09 | chr:6:32648036 |
| 6 rs562359765 | 32496477 T | 1.98   | 9.11E-09 | chr:6:32648036 |
| 6 rs73407287  | 32494883 G | 0.4993 | 9.14E-09 | chr:6:32648036 |
| 6 rs9269887   | 32550979 C | 0.3978 | 9.18E-09 | chr:6:32648036 |
| 6 rs9271413   | 32587768 G | 2.831  | 9.29E-09 | chr:6:32648036 |
| 6 rs16898264  | 32677152 G | 0.4047 | 9.40E-09 | chr:6:32648036 |
| 6 rs67147537  | 32634426 A | 0.3058 | 9.40E-09 | chr:6:32648036 |
| 6 rs17212329  | 32652005 T | 0.3395 | 9.41E-09 | chr:6:32648036 |
| 6 rs112851809 | 32491633 T | 0.3846 | 9.43E-09 | chr:6:32648036 |
| 6 rs9271667   | 32592710 C | 0.2958 | 9.45E-09 | chr:6:32648036 |
| 6 rs9272646   | 32608394 C | 0.2938 | 9.47E-09 | chr:6:32648036 |
| 6 rs146711239 | 32495746 C | 1.89   | 9.48E-09 | chr:6:32648036 |
| 6 rs138535752 | 32489520 G | 0.284  | 9.51E-09 | chr:6:32648036 |

|               |            |        |          |                |
|---------------|------------|--------|----------|----------------|
| 6 rs17205830  | 32651180 C | 0.3336 | 9.56E-09 | chr:6:32648036 |
| 6 rs199855998 | 32487096 C | 0.4989 | 9.64E-09 | chr:6:32648036 |
| 6 rs201958319 | 32487094 C | 0.4989 | 9.64E-09 | chr:6:32648036 |
| 6 rs3129757   | 32584609 A | 2.885  | 9.74E-09 | chr:6:32648036 |
| 6 rs9269766   | 32548703 T | 2.885  | 9.74E-09 | chr:6:32648036 |
| 6 rs9270189   | 32556030 C | 2.885  | 9.74E-09 | chr:6:32648036 |
| 6 rs9271069   | 32575700 A | 2.885  | 9.74E-09 | chr:6:32648036 |
| 6 rs9271351   | 32583860 C | 2.885  | 9.74E-09 | chr:6:32648036 |
| 6 rs9271354   | 32584066 C | 2.885  | 9.74E-09 | chr:6:32648036 |
| 6 rs9271366   | 32586854 G | 2.885  | 9.74E-09 | chr:6:32648036 |
| 6 rs61362782  | 32517084 C | 2.771  | 9.83E-09 | chr:6:32648036 |
| 6 rs9272687   | 32609057 A | 0.2939 | 9.85E-09 | chr:6:32648036 |
| 6 rs148612288 | 32498953 G | 0.266  | 9.90E-09 | chr:6:32648036 |
| 6 rs546033671 | 32498932 G | 0.266  | 9.90E-09 | chr:6:32648036 |
| 6 rs2395179   | 32407302 G | 0.2818 | 9.95E-09 | chr:6:32648036 |
| 6 rs2395180   | 32407310 G | 0.2818 | 9.95E-09 | chr:6:32648036 |
| 6 rs2647084   | 32679779 A | 0.4057 | 1.01E-08 | chr:6:32648036 |
| 6 rs28371339  | 32679758 G | 0.4057 | 1.01E-08 | chr:6:32648036 |
| 6 rs9269419   | 32541506 G | 2.081  | 1.02E-08 | chr:6:32648036 |
| 6 rs28746908  | 32648963 A | 0.3354 | 1.02E-08 | chr:6:32648036 |
| 6 rs9274688   | 32636900 T | 2.635  | 1.02E-08 | chr:6:32648036 |
| 6 rs28747003  | 32654322 C | 0.3383 | 1.02E-08 | chr:6:32648036 |
| 6 rs17581404  | 32679518 A | 0.406  | 1.04E-08 | chr:6:32648036 |
| 6 rs28747064  | 32656770 G | 0.3422 | 1.05E-08 | chr:6:32648036 |
| 6 rs539796570 | 32526182 C | 0.4662 | 1.05E-08 | chr:6:32648036 |
| 6 rs9469151   | 32480371 A | 1.858  | 1.06E-08 | chr:6:32648036 |
| 6 rs17205907  | 32651649 G | 0.3401 | 1.08E-08 | chr:6:32648036 |
| 6 rs201850026 | 32487100 C | 0.5033 | 1.08E-08 | chr:6:32648036 |
| 6 rs11963017  | 32657863 C | 0.3416 | 1.09E-08 | chr:6:32648036 |
| 6 rs11967921  | 32657855 A | 0.3416 | 1.09E-08 | chr:6:32648036 |
| 6 rs11967958  | 32657849 A | 0.3416 | 1.09E-08 | chr:6:32648036 |
| 6 rs556704361 | 32450273 G | 0.2911 | 1.09E-08 | chr:6:32648036 |
| 6 rs72508441  | 32490752 A | 0.4364 | 1.09E-08 | chr:6:32648036 |
| 6 rs2647088   | 32681518 G | 2.462  | 1.09E-08 | chr:6:32648036 |
| 6 rs2647089   | 32681568 C | 2.462  | 1.09E-08 | chr:6:32648036 |
| 6 rs3916766   | 32681645 A | 2.462  | 1.09E-08 | chr:6:32648036 |
| 6 rs9271377   | 32587165 G | 0.3177 | 1.10E-08 | chr:6:32648036 |
| 6 rs66482188  | 32518312 A | 2.435  | 1.10E-08 | chr:6:32648036 |
| 6 rs34698520  | 32556631 T | 0.2939 | 1.10E-08 | chr:6:32648036 |
| 6 rs9270454   | 32558862 G | 2.726  | 1.10E-08 | chr:6:32648036 |
| 6 rs9270210   | 32556475 T | 0.4365 | 1.11E-08 | chr:6:32648036 |
| 6 rs17219288  | 32680696 A | 2.461  | 1.11E-08 | chr:6:32648036 |
| 6 rs17219295  | 32680697 T | 2.461  | 1.11E-08 | chr:6:32648036 |

|                     |            |        |          |                |
|---------------------|------------|--------|----------|----------------|
| 6 rs3104374         | 32600288 C | 9.426  | 1.11E-08 | chr:6:32648036 |
| 6 rs28383461        | 32609607 A | 2.492  | 1.11E-08 | chr:6:32648036 |
| 6 rs28492022        | 32524546 T | 1.901  | 1.12E-08 | chr:6:32648036 |
| 6 rs11758321        | 32533413 G | 0.4792 | 1.13E-08 | chr:6:32648036 |
| 6 rs9269674         | 32546485 A | 2.115  | 1.13E-08 | chr:6:32648036 |
| 6 rs36165851        | 32489981 A | 0.4556 | 1.14E-08 | chr:6:32648036 |
| 6 rs76045537        | 32594152 C | 0.2955 | 1.14E-08 | chr:6:32648036 |
| 6 rs11346111;rs9268 | 32429153 G | 3.722  | 1.15E-08 | chr:6:32648036 |
| 6 rs9269270         | 32539081 G | 0.4558 | 1.16E-08 | chr:6:32648036 |
| 6 rs9271871         | 32595383 C | 0.1422 | 1.16E-08 | chr:6:32648036 |
| 6 rs2856721         | 32668031 A | 0.4063 | 1.16E-08 | chr:6:32648036 |
| 6 rs9272685         | 32608991 G | 0.2987 | 1.16E-08 | chr:6:32648036 |
| 6 rs17206371        | 32675147 C | 0.4065 | 1.17E-08 | chr:6:32648036 |
| 6 rs28746931        | 32650194 G | 0.3473 | 1.18E-08 | chr:6:32648036 |
| 6 rs143423439       | 32593938 T | 2.573  | 1.19E-08 | chr:6:32648036 |
| 6 rs2395195         | 32447989 A | 0.3205 | 1.19E-08 | chr:6:32648036 |
| 6 rs73729452        | 32632547 C | 2.323  | 1.19E-08 | chr:6:32648036 |
| 6 rs28746998        | 32654246 T | 0.3221 | 1.19E-08 | chr:6:32648036 |
| 6 rs78753889        | 32533755 A | 1.906  | 1.20E-08 | chr:6:32648036 |
| 6 rs66481651        | 32633630 T | 0.3711 | 1.20E-08 | chr:6:32648036 |
| 6 rs551634237       | 32496485 C | 1.971  | 1.21E-08 | chr:6:32648036 |
| 6 rs28371306        | 32677751 T | 0.407  | 1.22E-08 | chr:6:32648036 |
| 6 rs28371307        | 32677761 A | 0.407  | 1.22E-08 | chr:6:32648036 |
| 6 rs28746973        | 32653442 A | 0.3427 | 1.22E-08 | chr:6:32648036 |
| 6 rs28746974        | 32653443 A | 0.3427 | 1.22E-08 | chr:6:32648036 |
| 6 rs28746912        | 32649451 G | 0.3469 | 1.22E-08 | chr:6:32648036 |
| 6 rs28746944        | 32652651 A | 0.3139 | 1.24E-08 | chr:6:32648036 |
| 6 rs9272236         | 32602702 C | 0.2935 | 1.25E-08 | chr:6:32648036 |
| 6 rs17615293        | 32679489 A | 0.4074 | 1.25E-08 | chr:6:32648036 |
| 6 rs28371349        | 32681928 T | 2.44   | 1.25E-08 | chr:6:32648036 |
| 6 rs28746902        | 32648713 A | 0.3497 | 1.26E-08 | chr:6:32648036 |
| 6 rs41288065        | 32549048 A | 0.271  | 1.27E-08 | chr:6:32648036 |
| 6 rs2395181         | 32407404 C | 0.284  | 1.28E-08 | chr:6:32648036 |
| 6 rs114141268       | 32454899 G | 1.883  | 1.29E-08 | chr:6:32648036 |
| 6 rs9270229         | 32556783 T | 2.542  | 1.29E-08 | chr:6:32648036 |
| 6 rs28755383        | 32676393 C | 0.4079 | 1.30E-08 | chr:6:32648036 |
| 6 rs28755384        | 32676398 T | 0.4079 | 1.30E-08 | chr:6:32648036 |
| 6 rs28371281        | 32675814 A | 0.4079 | 1.30E-08 | chr:6:32648036 |
| 6 rs28371282        | 32675815 C | 0.4079 | 1.30E-08 | chr:6:32648036 |
| 6 rs28371312        | 32678306 C | 0.4079 | 1.30E-08 | chr:6:32648036 |
| 6 rs28371313        | 32678309 C | 0.4079 | 1.30E-08 | chr:6:32648036 |
| 6 rs28371315        | 32678388 T | 0.4079 | 1.30E-08 | chr:6:32648036 |
| 6 rs2647087         | 32681049 C | 2.434  | 1.31E-08 | chr:6:32648036 |

|               |            |        |          |                |
|---------------|------------|--------|----------|----------------|
| 6 rs2858333   | 32681085 G | 2.434  | 1.31E-08 | chr:6:32648036 |
| 6 rs9271558   | 32590348 G | 0.3142 | 1.32E-08 | chr:6:32648036 |
| 6 rs34393345  | 32536297 C | 1.972  | 1.33E-08 | chr:6:32648036 |
| 6 rs12203586  | 32679591 G | 0.4083 | 1.34E-08 | chr:6:32648036 |
| 6 rs6916779   | 32684317 C | 3.152  | 1.34E-08 | chr:6:32648036 |
| 6 rs9275607   | 32683645 G | 3.152  | 1.34E-08 | chr:6:32648036 |
| 6 rs9275608   | 32683708 G | 3.152  | 1.34E-08 | chr:6:32648036 |
| 6 rs9275609   | 32683713 G | 3.152  | 1.34E-08 | chr:6:32648036 |
| 6 rs9275610   | 32683750 C | 3.152  | 1.34E-08 | chr:6:32648036 |
| 6 rs9378124   | 32679605 A | 0.4083 | 1.34E-08 | chr:6:32648036 |
| 6 rs9391742   | 32679608 C | 0.4083 | 1.34E-08 | chr:6:32648036 |
| 6 rs79936591  | 32503543 A | 2.688  | 1.35E-08 | chr:6:32648036 |
| 6 rs3997849   | 32682402 T | 2.577  | 1.36E-08 | chr:6:32648036 |
| 6 rs9269940   | 32551879 C | 0.3886 | 1.36E-08 | chr:6:32648036 |
| 6 rs9274592   | 32635400 C | 0.473  | 1.39E-08 | chr:6:32648036 |
| 6 rs17212427  | 32652425 C | 0.3029 | 1.39E-08 | chr:6:32648036 |
| 6 rs9271997   | 32597801 A | 0.2927 | 1.41E-08 | chr:6:32648036 |
| 6 rs9269268   | 32454667 T | 2.113  | 1.42E-08 | chr:6:32648036 |
| 6 rs9269965   | 32552219 G | 0.3816 | 1.42E-08 | chr:6:32648036 |
| 6 rs113683581 | 32464039 G | 1.846  | 1.43E-08 | chr:6:32648036 |
| 6 rs17205754  | 32650930 C | 0.3438 | 1.43E-08 | chr:6:32648036 |
| 6 rs28747029  | 32655096 A | 0.347  | 1.43E-08 | chr:6:32648036 |
| 6 rs28747030  | 32655104 A | 0.347  | 1.43E-08 | chr:6:32648036 |
| 6 rs28747031  | 32655125 A | 0.347  | 1.43E-08 | chr:6:32648036 |
| 6 rs1130432   | 32629129 C | 0.4056 | 1.43E-08 | chr:6:32648036 |
| 6 rs552311831 | 32683247 G | 3.175  | 1.44E-08 | chr:6:32648036 |
| 6 rs564243097 | 32683251 G | 3.175  | 1.44E-08 | chr:6:32648036 |
| 6 rs17205928  | 32651737 G | 0.346  | 1.44E-08 | chr:6:32648036 |
| 6 rs9274741   | 32637994 T | 0.3397 | 1.44E-08 | chr:6:32648036 |
| 6 rs9270007   | 32552907 G | 2.307  | 1.45E-08 | chr:6:32648036 |
| 6 rs1060270   | 32546603 A | 2.116  | 1.45E-08 | chr:6:32648036 |
| 6 rs77464688  | 32460057 C | 1.854  | 1.45E-08 | chr:6:32648036 |
| 6 rs142206489 | 32536167 A | 0.4123 | 1.45E-08 | chr:6:32648036 |
| 6 rs9268644   | 32408044 A | 0.2859 | 1.45E-08 | chr:6:32648036 |
| 6 rs545503784 | 32537034 A | 0.4215 | 1.47E-08 | chr:6:32648036 |
| 6 rs560891265 | 32537038 C | 0.4215 | 1.47E-08 | chr:6:32648036 |
| 6 rs578162447 | 32537032 G | 0.4215 | 1.47E-08 | chr:6:32648036 |
| 6 rs9271738   | 32593691 G | 0.2329 | 1.47E-08 | chr:6:32648036 |
| 6 rs540650889 | 32564607 G | 2.374  | 1.48E-08 | chr:6:32648036 |
| 6 rs564834023 | 32564605 A | 2.374  | 1.48E-08 | chr:6:32648036 |
| 6 rs576753294 | 32564606 G | 2.374  | 1.48E-08 | chr:6:32648036 |
| 6 rs9271872   | 32595418 G | 0.2127 | 1.48E-08 | chr:6:32648036 |
| 6 rs9271873   | 32595421 A | 0.2127 | 1.48E-08 | chr:6:32648036 |



|               |            |        |          |                |
|---------------|------------|--------|----------|----------------|
| 6 rs116182620 | 32479521 G | 0.221  | 1.48E-08 | chr:6:32648036 |
| 6 rs9272219   | 32602269 T | 0.2992 | 1.49E-08 | chr:6:32648036 |
| 6 rs9271687   | 32592985 A | 2.476  | 1.51E-08 | chr:6:32648036 |
| 6 rs9269705   | 32547182 T | 0.3815 | 1.51E-08 | chr:6:32648036 |
| 6 rs28371279  | 32675751 T | 0.4122 | 1.52E-08 | chr:6:32648036 |
| 6 rs28371280  | 32675760 A | 0.4122 | 1.52E-08 | chr:6:32648036 |
| 6 rs17581305  | 32677353 G | 0.4123 | 1.52E-08 | chr:6:32648036 |
| 6 rs28371297  | 32677315 T | 0.4123 | 1.52E-08 | chr:6:32648036 |
| 6 rs28371298  | 32677321 A | 0.4123 | 1.52E-08 | chr:6:32648036 |
| 6 rs35585151  | 32600046 A | 0.3683 | 1.53E-08 | chr:6:32648036 |
| 6 rs9689437   | 32567650 C | 0.3167 | 1.54E-08 | chr:6:32648036 |
| 6 rs9689836   | 32567603 T | 0.3167 | 1.54E-08 | chr:6:32648036 |
| 6 rs9271423   | 32587897 G | 2.809  | 1.54E-08 | chr:6:32648036 |
| 6 rs199707618 | 32565437 A | 0.2761 | 1.55E-08 | chr:6:32648036 |
| 6 rs28772272  | 32656980 T | 0.348  | 1.55E-08 | chr:6:32648036 |
| 6 rs9378274   | 32656983 A | 0.348  | 1.55E-08 | chr:6:32648036 |
| 6 rs9391891   | 32656975 A | 0.348  | 1.55E-08 | chr:6:32648036 |
| 6 rs17205640  | 32637413 A | 2.279  | 1.55E-08 | chr:6:32648036 |
| 6 rs17212251  | 32651629 C | 0.3451 | 1.56E-08 | chr:6:32648036 |
| 6 rs28746909  | 32648975 A | 0.3424 | 1.58E-08 | chr:6:32648036 |
| 6 rs66758173  | 32520729 G | 2.757  | 1.59E-08 | chr:6:32648036 |
| 6 rs34382945  | 32537290 C | 1.867  | 1.60E-08 | chr:6:32648036 |
| 6 rs17206420  | 32675242 T | 0.4097 | 1.61E-08 | chr:6:32648036 |
| 6 rs17212720  | 32675207 C | 0.4097 | 1.61E-08 | chr:6:32648036 |
| 6 rs17212748  | 32675266 C | 0.4097 | 1.61E-08 | chr:6:32648036 |
| 6 rs17212762  | 32675312 T | 0.4097 | 1.61E-08 | chr:6:32648036 |
| 6 rs17212832  | 32675497 T | 0.4097 | 1.61E-08 | chr:6:32648036 |
| 6 rs17219176  | 32675313 G | 0.4097 | 1.61E-08 | chr:6:32648036 |
| 6 rs17219239  | 32675511 C | 0.4097 | 1.61E-08 | chr:6:32648036 |
| 6 rs201544520 | 32678425 T | 0.4097 | 1.61E-08 | chr:6:32648036 |
| 6 rs2647047   | 32668704 C | 0.4097 | 1.61E-08 | chr:6:32648036 |
| 6 rs2647050   | 32669767 T | 0.4097 | 1.61E-08 | chr:6:32648036 |
| 6 rs28371292  | 32676299 T | 0.4097 | 1.61E-08 | chr:6:32648036 |
| 6 rs28371293  | 32677099 T | 0.4097 | 1.61E-08 | chr:6:32648036 |
| 6 rs28371294  | 32677124 T | 0.4097 | 1.61E-08 | chr:6:32648036 |
| 6 rs28371295  | 32677129 A | 0.4097 | 1.61E-08 | chr:6:32648036 |
| 6 rs28371316  | 32678502 A | 0.4097 | 1.61E-08 | chr:6:32648036 |
| 6 rs28371317  | 32678634 T | 0.4097 | 1.61E-08 | chr:6:32648036 |
| 6 rs2856718   | 32670255 C | 0.4097 | 1.61E-08 | chr:6:32648036 |
| 6 rs2856720   | 32668657 C | 0.4097 | 1.61E-08 | chr:6:32648036 |
| 6 rs3957217   | 32678509 A | 0.4097 | 1.61E-08 | chr:6:32648036 |
| 6 rs76881453  | 32678607 G | 0.4097 | 1.61E-08 | chr:6:32648036 |
| 6 rs9280103   | 32669128 T | 0.4097 | 1.61E-08 | chr:6:32648036 |

|               |            |        |          |                |
|---------------|------------|--------|----------|----------------|
| 6 rs28746994  | 32654094 A | 0.3323 | 1.62E-08 | chr:6:32648036 |
| 6 rs3129845   | 32396277 G | 0.2899 | 1.63E-08 | chr:6:32648036 |
| 6 rs3129846   | 32396475 G | 0.2899 | 1.63E-08 | chr:6:32648036 |
| 6 rs3129876   | 32408012 A | 0.2899 | 1.63E-08 | chr:6:32648036 |
| 6 rs3135343   | 32396313 T | 0.2899 | 1.63E-08 | chr:6:32648036 |
| 6 rs71542437  | 32630223 T | 0.3522 | 1.64E-08 | chr:6:32648036 |
| 6 rs9274131   | 32630236 A | 0.3522 | 1.64E-08 | chr:6:32648036 |
| 6 rs9274716   | 32637404 A | 2.574  | 1.65E-08 | chr:6:32648036 |
| 6 rs114207523 | 32482125 C | 1.916  | 1.65E-08 | chr:6:32648036 |
| 6 rs141293894 | 32536200 G | 0.4216 | 1.65E-08 | chr:6:32648036 |
| 6 rs28371333  | 32679346 G | 0.4156 | 1.66E-08 | chr:6:32648036 |
| 6 rs79052058  | 32459475 C | 1.871  | 1.66E-08 | chr:6:32648036 |
| 6 rs6931740   | 32647469 G | 0.3833 | 1.67E-08 | chr:6:32648036 |
| 6 rs28746960  | 32652938 G | 0.3352 | 1.68E-08 | chr:6:32648036 |
| 6 rs565682004 | 32526900 G | 0.195  | 1.68E-08 | chr:6:32648036 |
| 6 rs17212420  | 32652400 T | 0.319  | 1.69E-08 | chr:6:32648036 |
| 6 rs113861133 | 32601911 C | 0.314  | 1.70E-08 | chr:6:32648036 |
| 6 rs1142323   | 32609192 G | 0.3044 | 1.70E-08 | chr:6:32648036 |
| 6 rs17206343  | 32675032 C | 0.4126 | 1.71E-08 | chr:6:32648036 |
| 6 rs17212671  | 32675002 T | 0.4126 | 1.71E-08 | chr:6:32648036 |
| 6 rs9269511   | 32543298 C | 2.117  | 1.72E-08 | chr:6:32648036 |
| 6 rs544942689 | 32457249 A | 0.5238 | 1.73E-08 | chr:6:32648036 |
| 6 rs73726188  | 32491582 C | 0.5188 | 1.73E-08 | chr:6:32648036 |
| 6 rs28746999  | 32654258 A | 0.3269 | 1.75E-08 | chr:6:32648036 |
| 6 rs9271900   | 32596013 G | 0.3011 | 1.76E-08 | chr:6:32648036 |
| 6 rs34195497  | 32526670 G | 2.307  | 1.77E-08 | chr:6:32648036 |
| 6 rs73401361  | 32460045 G | 1.851  | 1.78E-08 | chr:6:32648036 |
| 6 rs181244719 | 32498916 C | 0.2091 | 1.80E-08 | chr:6:32648036 |
| 6 rs183703563 | 32498913 A | 0.2091 | 1.80E-08 | chr:6:32648036 |
| 6 rs66957194  | 32634263 T | 0.3073 | 1.81E-08 | chr:6:32648036 |
| 6 rs72844399  | 32634264 T | 0.3073 | 1.81E-08 | chr:6:32648036 |
| 6 rs71542417  | 32566892 G | 0.3209 | 1.82E-08 | chr:6:32648036 |
| 6 rs28747065  | 32656806 C | 0.3515 | 1.82E-08 | chr:6:32648036 |
| 6 rs28747066  | 32656817 A | 0.3515 | 1.82E-08 | chr:6:32648036 |
| 6 rs115659386 | 32491132 T | 1.891  | 1.82E-08 | chr:6:32648036 |
| 6 rs149165901 | 32488078 G | 1.936  | 1.82E-08 | chr:6:32648036 |
| 6 rs9272496   | 32606144 G | 0.2589 | 1.82E-08 | chr:6:32648036 |
| 6 rs2859077   | 32702562 A | 3.02   | 1.84E-08 | chr:6:32648036 |
| 6 rs9272478   | 32605767 T | 0.286  | 1.84E-08 | chr:6:32648036 |
| 6 rs113693373 | 32458769 T | 1.839  | 1.84E-08 | chr:6:32648036 |
| 6 rs77532237  | 32460050 T | 1.847  | 1.85E-08 | chr:6:32648036 |
| 6 rs9274709   | 32637275 G | 2.552  | 1.85E-08 | chr:6:32648036 |
| 6 rs576371337 | 32493199 C | 2.298  | 1.85E-08 | chr:6:32648036 |

|               |            |        |          |                |
|---------------|------------|--------|----------|----------------|
| 6 rs3129762   | 32585755 T | 2.794  | 1.86E-08 | chr:6:32648036 |
| 6 rs73729754  | 32479668 G | 1.894  | 1.87E-08 | chr:6:32648036 |
| 6 rs9269582   | 32544787 T | 0.4895 | 1.88E-08 | chr:6:32648036 |
| 6 rs28371309  | 32678234 G | 0.4185 | 1.88E-08 | chr:6:32648036 |
| 6 rs28371310  | 32678246 T | 0.4185 | 1.88E-08 | chr:6:32648036 |
| 6 rs115227911 | 32631831 C | 0.4394 | 1.89E-08 | chr:6:32648036 |
| 6 rs9274728   | 32637772 G | 2.591  | 1.89E-08 | chr:6:32648036 |
| 6 rs17205949  | 32651816 A | 0.353  | 1.89E-08 | chr:6:32648036 |
| 6 rs17212286  | 32651819 A | 0.353  | 1.89E-08 | chr:6:32648036 |
| 6 rs28490179  | 32519005 C | 2.635  | 1.89E-08 | chr:6:32648036 |
| 6 rs57172910  | 32529365 T | 0.4717 | 1.90E-08 | chr:6:32648036 |
| 6 rs139465672 | 32454920 C | 1.876  | 1.92E-08 | chr:6:32648036 |
| 6 rs28755385  | 32676425 C | 0.4143 | 1.93E-08 | chr:6:32648036 |
| 6 rs28755386  | 32676484 C | 0.4143 | 1.93E-08 | chr:6:32648036 |
| 6 rs17205914  | 32651680 G | 0.3426 | 1.93E-08 | chr:6:32648036 |
| 6 rs17205921  | 32651685 T | 0.3426 | 1.93E-08 | chr:6:32648036 |
| 6 rs17212258  | 32651690 T | 0.3426 | 1.93E-08 | chr:6:32648036 |
| 6 rs17212265  | 32651694 T | 0.3426 | 1.93E-08 | chr:6:32648036 |
| 6 rs111304729 | 32488718 T | 0.5105 | 1.93E-08 | chr:6:32648036 |
| 6 rs28371320  | 32678877 T | 0.4143 | 1.94E-08 | chr:6:32648036 |
| 6 rs28371321  | 32678894 T | 0.4143 | 1.94E-08 | chr:6:32648036 |
| 6 rs17205823  | 32651168 T | 0.3413 | 1.94E-08 | chr:6:32648036 |
| 6 rs17212867  | 32675691 G | 0.4144 | 1.95E-08 | chr:6:32648036 |
| 6 rs17212881  | 32675709 A | 0.4144 | 1.95E-08 | chr:6:32648036 |
| 6 rs28371278  | 32675733 A | 0.4144 | 1.95E-08 | chr:6:32648036 |
| 6 rs9270917   | 32572294 G | 2.246  | 1.95E-08 | chr:6:32648036 |
| 6 rs1049088   | 32629868 G | 0.3069 | 1.98E-08 | chr:6:32648036 |
| 6 rs36233043  | 32629718 A | 0.3069 | 1.98E-08 | chr:6:32648036 |
| 6 rs9273912   | 32629737 T | 0.3069 | 1.98E-08 | chr:6:32648036 |
| 6 rs9275043   | 32648061 T | 0.4798 | 1.99E-08 | chr:6:32648036 |
| 6 rs28746993  | 32654030 C | 0.3386 | 2.00E-08 | chr:6:32648036 |
| 6 rs1047993   | 32605271 T | 0.3028 | 2.02E-08 | chr:6:32648036 |
| 6 rs28371305  | 32677690 T | 0.4151 | 2.03E-08 | chr:6:32648036 |
| 6 rs17205942  | 32651798 T | 0.3544 | 2.03E-08 | chr:6:32648036 |
| 6 rs3873451   | 32683240 G | 3.174  | 2.06E-08 | chr:6:32648036 |
| 6 rs28755391  | 32678002 C | 0.4153 | 2.07E-08 | chr:6:32648036 |
| 6 rs3129875   | 32407468 C | 0.2921 | 2.09E-08 | chr:6:32648036 |
| 6 rs9271727   | 32593585 A | 0.2631 | 2.10E-08 | chr:6:32648036 |
| 6 rs9271728   | 32593592 C | 0.2631 | 2.10E-08 | chr:6:32648036 |
| 6 rs11752154  | 32568678 A | 0.2768 | 2.12E-08 | chr:6:32648036 |
| 6 rs11752186  | 32568672 A | 0.2768 | 2.12E-08 | chr:6:32648036 |
| 6 rs35985055  | 32536245 G | 1.942  | 2.12E-08 | chr:6:32648036 |
| 6 rs116001816 | 32473686 G | 1.841  | 2.13E-08 | chr:6:32648036 |

|               |            |        |          |                |
|---------------|------------|--------|----------|----------------|
| 6 rs9270602   | 32561794 C | 2.667  | 2.14E-08 | chr:6:32648036 |
| 6 rs28747032  | 32655180 C | 0.353  | 2.16E-08 | chr:6:32648036 |
| 6 rs28747033  | 32655213 C | 0.353  | 2.16E-08 | chr:6:32648036 |
| 6 rs28747034  | 32655257 T | 0.353  | 2.16E-08 | chr:6:32648036 |
| 6 rs75375346  | 32596908 C | 0.3018 | 2.16E-08 | chr:6:32648036 |
| 6 rs36183131  | 32522401 G | 2.571  | 2.17E-08 | chr:6:32648036 |
| 6 rs28371246  | 32647995 T | 0.4949 | 2.17E-08 | chr:6:32648036 |
| 6 rs2647025   | 32635949 A | 2.588  | 2.19E-08 | chr:6:32648036 |
| 6 rs71542459  | 32631994 A | 0.4599 | 2.20E-08 | chr:6:32648036 |
| 6 rs1049107   | 32629936 T | 0.3134 | 2.21E-08 | chr:6:32648036 |
| 6 rs2859120   | 32697293 T | 2.974  | 2.21E-08 | chr:6:32648036 |
| 6 rs112931124 | 32491533 G | 1.837  | 2.23E-08 | chr:6:32648036 |
| 6 rs114996015 | 32491524 C | 1.837  | 2.23E-08 | chr:6:32648036 |
| 6 rs189723252 | 32494948 T | 0.1731 | 2.23E-08 | chr:6:32648036 |
| 6 rs3135005   | 32586019 A | 2.706  | 2.25E-08 | chr:6:32648036 |
| 6 rs534262225 | 32646454 T | 0.357  | 2.25E-08 | chr:6:32648036 |
| 6 rs550051341 | 32505851 C | 0.2339 | 2.26E-08 | chr:6:32648036 |
| 6 rs571586981 | 32505852 A | 0.2339 | 2.26E-08 | chr:6:32648036 |
| 6 rs72492342  | 32531678 A | 2.017  | 2.26E-08 | chr:6:32648036 |
| 6 rs9272418   | 32605091 G | 0.3049 | 2.26E-08 | chr:6:32648036 |
| 6 rs9272419   | 32605097 T | 0.3049 | 2.26E-08 | chr:6:32648036 |
| 6 rs9272421   | 32605118 A | 0.3049 | 2.26E-08 | chr:6:32648036 |
| 6 rs28746925  | 32649932 G | 0.3532 | 2.29E-08 | chr:6:32648036 |
| 6 rs9270068   | 32554070 A | 0.372  | 2.29E-08 | chr:6:32648036 |
| 6 rs191239464 | 32488845 A | 1.85   | 2.30E-08 | chr:6:32648036 |
| 6 rs9274639   | 32636146 T | 0.3437 | 2.30E-08 | chr:6:32648036 |
| 6 rs112582516 | 32481392 T | 0.1537 | 2.35E-08 | chr:6:32648036 |
| 6 rs17205782  | 32651051 T | 0.3431 | 2.37E-08 | chr:6:32648036 |
| 6 rs17205788  | 32651056 A | 0.3431 | 2.37E-08 | chr:6:32648036 |
| 6 rs9269458   | 32542148 A | 2.024  | 2.38E-08 | chr:6:32648036 |
| 6 rs9269461   | 32542161 C | 2.024  | 2.38E-08 | chr:6:32648036 |
| 6 rs72492333  | 32523401 C | 2.037  | 2.41E-08 | chr:6:32648036 |
| 6 rs74729707  | 32566501 T | 0.3242 | 2.42E-08 | chr:6:32648036 |
| 6 rs281863130 | 32631671 G | 0.4154 | 2.43E-08 | chr:6:32648036 |
| 6 rs67961283  | 32512947 G | 1.872  | 2.43E-08 | chr:6:32648036 |
| 6 rs28371301  | 32677453 C | 0.4198 | 2.44E-08 | chr:6:32648036 |
| 6 rs28371302  | 32677454 T | 0.4198 | 2.44E-08 | chr:6:32648036 |
| 6 rs112951059 | 32479534 C | 1.854  | 2.46E-08 | chr:6:32648036 |
| 6 rs77117066  | 32535516 C | 1.901  | 2.46E-08 | chr:6:32648036 |
| 6 rs9269258   | 32454462 G | 2.123  | 2.47E-08 | chr:6:32648036 |
| 6 rs9269259   | 32454463 T | 2.123  | 2.47E-08 | chr:6:32648036 |
| 6 rs9269260   | 32454466 A | 2.123  | 2.47E-08 | chr:6:32648036 |
| 6 rs9275046   | 32648080 T | 0.4789 | 2.50E-08 | chr:6:32648036 |

|               |            |        |          |                |
|---------------|------------|--------|----------|----------------|
| 6 rs9275047   | 32648084 A | 0.4789 | 2.50E-08 | chr:6:32648036 |
| 6 rs9271733   | 32593633 A | 0.2621 | 2.51E-08 | chr:6:32648036 |
| 6 rs113205696 | 32486549 T | 1.854  | 2.51E-08 | chr:6:32648036 |
| 6 rs532278758 | 32488073 A | 1.925  | 2.52E-08 | chr:6:32648036 |
| 6 rs565094428 | 32488072 A | 1.925  | 2.52E-08 | chr:6:32648036 |
| 6 rs71536520  | 32520362 A | 2.687  | 2.53E-08 | chr:6:32648036 |
| 6 rs34289950  | 32503739 A | 2.418  | 2.55E-08 | chr:6:32648036 |
| 6 rs575209356 | 32525806 A | 0.4458 | 2.56E-08 | chr:6:32648036 |
| 6 rs28371283  | 32675900 A | 0.4205 | 2.56E-08 | chr:6:32648036 |
| 6 rs28371284  | 32675901 C | 0.4205 | 2.56E-08 | chr:6:32648036 |
| 6 rs28746957  | 32652893 C | 0.316  | 2.59E-08 | chr:6:32648036 |
| 6 rs73729753  | 32479582 G | 1.856  | 2.61E-08 | chr:6:32648036 |
| 6 rs112216251 | 32490149 A | 1.878  | 2.62E-08 | chr:6:32648036 |
| 6 rs115022955 | 32491218 G | 1.833  | 2.62E-08 | chr:6:32648036 |
| 6 rs185520080 | 32505872 C | 0.2371 | 2.64E-08 | chr:6:32648036 |
| 6 rs202075303 | 32496326 T | 0.3692 | 2.64E-08 | chr:6:32648036 |
| 6 rs113586210 | 32517050 T | 2.458  | 2.65E-08 | chr:6:32648036 |
| 6 rs17212776  | 32675399 T | 0.4177 | 2.66E-08 | chr:6:32648036 |
| 6 rs17212804  | 32675416 C | 0.4177 | 2.66E-08 | chr:6:32648036 |
| 6 rs17212818  | 32675449 T | 0.4177 | 2.66E-08 | chr:6:32648036 |
| 6 rs17219211  | 32675424 A | 0.4177 | 2.66E-08 | chr:6:32648036 |
| 6 rs9271481   | 32588877 A | 2.707  | 2.66E-08 | chr:6:32648036 |
| 6 rs115711695 | 32495994 A | 0.1486 | 2.66E-08 | chr:6:32648036 |
| 6 rs9271401   | 32587525 G | 0.2659 | 2.68E-08 | chr:6:32648036 |
| 6 rs68124732  | 32514384 T | 2.439  | 2.69E-08 | chr:6:32648036 |
| 6 rs9272464   | 32605648 G | 0.2832 | 2.70E-08 | chr:6:32648036 |
| 6 rs9272465   | 32605655 A | 0.2832 | 2.70E-08 | chr:6:32648036 |
| 6 rs9269626   | 32545561 T | 2.137  | 2.72E-08 | chr:6:32648036 |
| 6 rs17205647  | 32637418 A | 2.282  | 2.73E-08 | chr:6:32648036 |
| 6 rs112985748 | 32460093 T | 1.845  | 2.74E-08 | chr:6:32648036 |
| 6 rs73726165  | 32488092 G | 1.924  | 2.75E-08 | chr:6:32648036 |
| 6 rs73726182  | 32491309 C | 1.848  | 2.75E-08 | chr:6:32648036 |
| 6 rs71538511  | 32534976 T | 1.856  | 2.75E-08 | chr:6:32648036 |
| 6 rs2856704   | 32671014 C | 0.4183 | 2.78E-08 | chr:6:32648036 |
| 6 rs2858304   | 32671044 G | 0.4183 | 2.78E-08 | chr:6:32648036 |
| 6 rs35570280  | 32522434 T | 2.56   | 2.82E-08 | chr:6:32648036 |
| 6 rs71542458  | 32631984 C | 0.4622 | 2.84E-08 | chr:6:32648036 |
| 6 rs9269263   | 32454581 C | 2.173  | 2.86E-08 | chr:6:32648036 |
| 6 rs77830931  | 32685158 A | 3.854  | 2.87E-08 | chr:6:32648036 |
| 6 rs9270643   | 32565721 T | 2.676  | 2.88E-08 | chr:6:32648036 |
| 6 rs78676523  | 32596237 G | 3.308  | 2.89E-08 | chr:6:32648036 |
| 6 rs28891479  | 32642750 A | 0.3678 | 2.91E-08 | chr:6:32648036 |
| 6 rs4473904   | 32635590 G | 0.3794 | 2.91E-08 | chr:6:32648036 |

|               |            |        |          |                |
|---------------|------------|--------|----------|----------------|
| 6 rs28755387  | 32676488 A | 0.421  | 2.91E-08 | chr:6:32648036 |
| 6 rs75393164  | 32472553 T | 1.831  | 2.92E-08 | chr:6:32648036 |
| 6 rs17205809  | 32651135 A | 0.3485 | 2.93E-08 | chr:6:32648036 |
| 6 rs28746953  | 32652823 G | 0.3044 | 2.94E-08 | chr:6:32648036 |
| 6 rs28746954  | 32652826 C | 0.3044 | 2.94E-08 | chr:6:32648036 |
| 6 rs112967446 | 32490545 C | 1.844  | 2.96E-08 | chr:6:32648036 |
| 6 rs112703392 | 32479016 A | 1.839  | 2.98E-08 | chr:6:32648036 |
| 6 rs112438042 | 32490593 T | 1.868  | 3.01E-08 | chr:6:32648036 |
| 6 rs1064701   | 32546795 T | 2.021  | 3.01E-08 | chr:6:32648036 |
| 6 rs17206035  | 32652224 C | 0.3413 | 3.01E-08 | chr:6:32648036 |
| 6 rs35373206  | 32522683 C | 2.158  | 3.03E-08 | chr:6:32648036 |
| 6 rs17205761  | 32650934 A | 0.3541 | 3.04E-08 | chr:6:32648036 |
| 6 rs17205768  | 32650937 C | 0.3541 | 3.04E-08 | chr:6:32648036 |
| 6 rs3104403   | 32681833 T | 2.356  | 3.05E-08 | chr:6:32648036 |
| 6 rs2859102   | 32699054 G | 3.106  | 3.07E-08 | chr:6:32648036 |
| 6 rs9276187   | 32699207 C | 3.106  | 3.07E-08 | chr:6:32648036 |
| 6 rs1048372   | 32610436 C | 0.4164 | 3.08E-08 | chr:6:32648036 |
| 6 rs41270871  | 32628224 A | 0.2507 | 3.08E-08 | chr:6:32648036 |
| 6 rs72849287  | 32473321 G | 1.813  | 3.08E-08 | chr:6:32648036 |
| 6 rs9271729   | 32593600 A | 0.2721 | 3.09E-08 | chr:6:32648036 |
| 6 rs28624101  | 32525291 C | 1.921  | 3.10E-08 | chr:6:32648036 |
| 6 rs111966786 | 32458797 G | 1.822  | 3.13E-08 | chr:6:32648036 |
| 6 rs9270715   | 32567491 G | 2.668  | 3.15E-08 | chr:6:32648036 |
| 6 rs112707813 | 32473412 T | 1.829  | 3.16E-08 | chr:6:32648036 |
| 6 rs67920980  | 32534712 A | 1.919  | 3.16E-08 | chr:6:32648036 |
| 6 rs181916895 | 32525947 G | 0.3732 | 3.17E-08 | chr:6:32648036 |
| 6 rs9274737   | 32637907 C | 2.532  | 3.18E-08 | chr:6:32648036 |
| 6 rs9275055   | 32648220 T | 0.4765 | 3.18E-08 | chr:6:32648036 |
| 6 rs62405633  | 32514566 T | 2.568  | 3.19E-08 | chr:6:32648036 |
| 6 rs80141235  | 32503689 A | 2.327  | 3.20E-08 | chr:6:32648036 |
| 6 rs9274596   | 32635467 G | 0.4742 | 3.21E-08 | chr:6:32648036 |
| 6 rs66727344  | 32631946 A | 0.4453 | 3.23E-08 | chr:6:32648036 |
| 6 rs9269334   | 32540158 C | 1.894  | 3.24E-08 | chr:6:32648036 |
| 6 rs28891459  | 32642001 T | 0.355  | 3.25E-08 | chr:6:32648036 |
| 6 rs28746896  | 32648243 A | 0.3765 | 3.27E-08 | chr:6:32648036 |
| 6 rs9274929   | 32641487 C | 1.858  | 3.27E-08 | chr:6:32648036 |
| 6 rs9269315   | 32539719 G | 1.924  | 3.28E-08 | chr:6:32648036 |
| 6 rs73729748  | 32469312 C | 1.91   | 3.28E-08 | chr:6:32648036 |
| 6 rs546195473 | 32481942 G | 1.862  | 3.29E-08 | chr:6:32648036 |
| 6 rs75073083  | 32472471 C | 1.824  | 3.30E-08 | chr:6:32648036 |
| 6 rs75153822  | 32472472 A | 1.824  | 3.30E-08 | chr:6:32648036 |
| 6 rs9270150   | 32555357 T | 2.483  | 3.32E-08 | chr:6:32648036 |
| 6 rs9270027   | 32553294 G | 2.693  | 3.32E-08 | chr:6:32648036 |

|               |            |        |          |                |
|---------------|------------|--------|----------|----------------|
| 6 rs72844386  | 32631777 T | 0.4304 | 3.33E-08 | chr:6:32648036 |
| 6 rs73726183  | 32491399 A | 1.892  | 3.35E-08 | chr:6:32648036 |
| 6 rs72508420  | 32479456 C | 1.893  | 3.38E-08 | chr:6:32648036 |
| 6 rs72849291  | 32479924 C | 1.874  | 3.39E-08 | chr:6:32648036 |
| 6 rs28371285  | 32675929 C | 0.425  | 3.39E-08 | chr:6:32648036 |
| 6 rs28371286  | 32675994 C | 0.4249 | 3.40E-08 | chr:6:32648036 |
| 6 rs28371287  | 32676040 C | 0.4249 | 3.40E-08 | chr:6:32648036 |
| 6 rs28371288  | 32676043 C | 0.4249 | 3.40E-08 | chr:6:32648036 |
| 6 rs9272782   | 32610371 G | 0.3098 | 3.41E-08 | chr:6:32648036 |
| 6 rs9272783   | 32610378 T | 0.3098 | 3.41E-08 | chr:6:32648036 |
| 6 rs9272784   | 32610379 A | 0.3098 | 3.41E-08 | chr:6:32648036 |
| 6 rs111458169 | 32458991 A | 1.823  | 3.41E-08 | chr:6:32648036 |
| 6 rs566017883 | 32661746 A | 0.2076 | 3.41E-08 | chr:6:32648036 |
| 6 rs9268641   | 32406887 T | 0.2828 | 3.43E-08 | chr:6:32648036 |
| 6 rs76507644  | 32460002 A | 1.824  | 3.44E-08 | chr:6:32648036 |
| 6 rs113654440 | 32596946 A | 0.3073 | 3.45E-08 | chr:6:32648036 |
| 6 rs34626925  | 32536257 A | 1.928  | 3.45E-08 | chr:6:32648036 |
| 6 rs9269381   | 32540927 C | 0.4959 | 3.46E-08 | chr:6:32648036 |
| 6 rs9272453   | 32605512 C | 0.3081 | 3.46E-08 | chr:6:32648036 |
| 6 rs36192217  | 32522339 A | 2.52   | 3.48E-08 | chr:6:32648036 |
| 6 rs115356556 | 32496609 G | 1.899  | 3.48E-08 | chr:6:32648036 |
| 6 rs75150448  | 32620831 A | 1.997  | 3.49E-08 | chr:6:32648036 |
| 6 rs28371290  | 32676125 C | 0.4221 | 3.51E-08 | chr:6:32648036 |
| 6 rs28371291  | 32676131 T | 0.4221 | 3.51E-08 | chr:6:32648036 |
| 6 rs34153824  | 32627627 T | 0.3344 | 3.51E-08 | chr:6:32648036 |
| 6 rs186020633 | 32535771 A | 0.4149 | 3.55E-08 | chr:6:32648036 |
| 6 rs9276506   | 32719914 C | 2.94   | 3.55E-08 | chr:6:32648036 |
| 6 rs151005270 | 32601874 T | 0.3308 | 3.56E-08 | chr:6:32648036 |
| 6 rs147317423 | 32516905 T | 2.44   | 3.56E-08 | chr:6:32648036 |
| 6 rs11756095  | 32565690 C | 0.3293 | 3.58E-08 | chr:6:32648036 |
| 6 rs9274711   | 32637289 T | 2.477  | 3.60E-08 | chr:6:32648036 |
| 6 rs74428884  | 32479872 C | 1.841  | 3.60E-08 | chr:6:32648036 |
| 6 rs145612808 | 32490538 C | 1.835  | 3.62E-08 | chr:6:32648036 |
| 6 rs114085331 | 32479430 A | 0.1453 | 3.62E-08 | chr:6:32648036 |
| 6 rs9272014   | 32598262 A | 0.3081 | 3.63E-08 | chr:6:32648036 |
| 6 rs9270088   | 32554300 T | 2.331  | 3.66E-08 | chr:6:32648036 |
| 6 rs62405587  | 32504965 C | 2.288  | 3.66E-08 | chr:6:32648036 |
| 6 rs57053495  | 32458277 T | 1.872  | 3.67E-08 | chr:6:32648036 |
| 6 rs9274594   | 32635435 C | 0.479  | 3.67E-08 | chr:6:32648036 |
| 6 rs9268581   | 32396930 A | 2.893  | 3.67E-08 | chr:6:32648036 |
| 6 rs9268614   | 32402778 G | 2.893  | 3.67E-08 | chr:6:32648036 |
| 6 rs9268627   | 32405821 C | 2.893  | 3.67E-08 | chr:6:32648036 |
| 6 rs59447698  | 32481125 G | 0.1443 | 3.69E-08 | chr:6:32648036 |

|               |            |        |          |                |
|---------------|------------|--------|----------|----------------|
| 6 rs116718235 | 32523674 G | 1.841  | 3.71E-08 | chr:6:32648036 |
| 6 rs78653427  | 32523703 C | 1.841  | 3.71E-08 | chr:6:32648036 |
| 6 rs9271025   | 32574990 T | 2.599  | 3.72E-08 | chr:6:32648036 |
| 6 rs185654397 | 32490665 G | 1.943  | 3.73E-08 | chr:6:32648036 |
| 6 rs66982628  | 32534863 A | 1.901  | 3.74E-08 | chr:6:32648036 |
| 6 rs9269889   | 32550995 G | 1.947  | 3.77E-08 | chr:6:32648036 |
| 6 rs71538512  | 32534994 G | 1.841  | 3.77E-08 | chr:6:32648036 |
| 6 rs72492309  | 32509754 T | 2.669  | 3.78E-08 | chr:6:32648036 |
| 6 rs9270717   | 32567506 C | 2.663  | 3.80E-08 | chr:6:32648036 |
| 6 rs9274962   | 32641936 G | 0.4888 | 3.80E-08 | chr:6:32648036 |
| 6 rs138371581 | 32479589 T | 1.835  | 3.80E-08 | chr:6:32648036 |
| 6 rs144026893 | 32479591 A | 1.835  | 3.80E-08 | chr:6:32648036 |
| 6 rs3129873   | 32407433 C | 0.2802 | 3.81E-08 | chr:6:32648036 |
| 6 rs3129874   | 32407440 C | 0.2802 | 3.81E-08 | chr:6:32648036 |
| 6 rs28747035  | 32655316 C | 0.3597 | 3.84E-08 | chr:6:32648036 |
| 6 rs28747037  | 32655336 C | 0.3597 | 3.84E-08 | chr:6:32648036 |
| 6 rs72853925  | 32508330 G | 0.4476 | 3.84E-08 | chr:6:32648036 |
| 6 rs149025589 | 32490000 T | 1.855  | 3.84E-08 | chr:6:32648036 |
| 6 rs189139309 | 32516915 G | 2.458  | 3.84E-08 | chr:6:32648036 |
| 6 rs148834340 | 32489825 A | 0.1484 | 3.89E-08 | chr:6:32648036 |
| 6 rs113805201 | 32490549 G | 1.835  | 3.92E-08 | chr:6:32648036 |
| 6 rs59142330  | 32624507 C | 0.4398 | 3.95E-08 | chr:6:32648036 |
| 6 rs9269693   | 32546866 T | 2.019  | 3.96E-08 | chr:6:32648036 |
| 6 rs28891458  | 32641963 T | 0.3542 | 3.98E-08 | chr:6:32648036 |
| 6 rs77850263  | 32460232 A | 1.801  | 4.03E-08 | chr:6:32648036 |
| 6 rs79851609  | 32460241 A | 1.801  | 4.03E-08 | chr:6:32648036 |
| 6 rs9272455   | 32605543 G | 0.2946 | 4.04E-08 | chr:6:32648036 |
| 6 rs73726846  | 32537640 C | 1.829  | 4.05E-08 | chr:6:32648036 |
| 6 rs3104392   | 32594425 C | 2.492  | 4.06E-08 | chr:6:32648036 |
| 6 rs28746880  | 32638146 A | 0.3437 | 4.08E-08 | chr:6:32648036 |
| 6 rs28746881  | 32638153 T | 0.3437 | 4.08E-08 | chr:6:32648036 |
| 6 rs113441266 | 32479312 A | 0.2483 | 4.08E-08 | chr:6:32648036 |
| 6 rs148598843 | 32479311 A | 0.2483 | 4.08E-08 | chr:6:32648036 |
| 6 rs183030488 | 32459167 T | 1.813  | 4.11E-08 | chr:6:32648036 |
| 6 rs28772284  | 32674313 T | 0.3699 | 4.12E-08 | chr:6:32648036 |
| 6 rs28772285  | 32674380 T | 0.3699 | 4.12E-08 | chr:6:32648036 |
| 6 rs28772286  | 32674385 C | 0.3699 | 4.12E-08 | chr:6:32648036 |
| 6 rs28772287  | 32674400 C | 0.3699 | 4.12E-08 | chr:6:32648036 |
| 6 rs9274930   | 32641505 C | 1.851  | 4.12E-08 | chr:6:32648036 |
| 6 rs9274931   | 32641506 A | 1.851  | 4.12E-08 | chr:6:32648036 |
| 6 rs9269485   | 32542728 T | 1.99   | 4.12E-08 | chr:6:32648036 |
| 6 rs114269927 | 32575209 A | 0.3773 | 4.14E-08 | chr:6:32648036 |
| 6 rs9275054   | 32648208 A | 0.4792 | 4.15E-08 | chr:6:32648036 |



|               |            |        |          |                |
|---------------|------------|--------|----------|----------------|
| 6 rs112365225 | 32473740 G | 1.811  | 4.21E-08 | chr:6:32648036 |
| 6 rs187933457 | 32473756 C | 1.811  | 4.21E-08 | chr:6:32648036 |
| 6 rs189917865 | 32473758 G | 1.811  | 4.21E-08 | chr:6:32648036 |
| 6 rs112736406 | 32618487 T | 1.961  | 4.22E-08 | chr:6:32648036 |
| 6 rs3763317   | 32376788 C | 0.3672 | 4.23E-08 | chr:6:32648036 |
| 6 rs111863034 | 32473388 C | 1.812  | 4.25E-08 | chr:6:32648036 |
| 6 rs113941649 | 32473379 C | 1.812  | 4.25E-08 | chr:6:32648036 |
| 6 rs71538510  | 32534959 A | 1.841  | 4.26E-08 | chr:6:32648036 |
| 6 rs28747038  | 32655368 A | 0.3624 | 4.29E-08 | chr:6:32648036 |
| 6 rs111625346 | 32610050 C | 0.3095 | 4.30E-08 | chr:6:32648036 |
| 6 rs9272755   | 32610044 C | 0.3095 | 4.30E-08 | chr:6:32648036 |
| 6 rs9269340   | 32540333 T | 0.3253 | 4.30E-08 | chr:6:32648036 |
| 6 rs9269437   | 32541868 C | 2.049  | 4.31E-08 | chr:6:32648036 |
| 6 rs9269438   | 32541881 C | 2.049  | 4.31E-08 | chr:6:32648036 |
| 6 rs77123178  | 32459451 T | 1.84   | 4.32E-08 | chr:6:32648036 |
| 6 rs9274364   | 32632495 T | 0.4293 | 4.33E-08 | chr:6:32648036 |
| 6 rs28746894  | 32648173 T | 0.3769 | 4.34E-08 | chr:6:32648036 |
| 6 rs9269491   | 32542844 A | 2.079  | 4.34E-08 | chr:6:32648036 |
| 6 rs542755566 | 32525942 G | 0.3803 | 4.35E-08 | chr:6:32648036 |
| 6 rs201639066 | 32516705 T | 2.411  | 4.35E-08 | chr:6:32648036 |
| 6 rs62405638  | 32516715 T | 2.411  | 4.35E-08 | chr:6:32648036 |
| 6 rs62405639  | 32516724 C | 2.411  | 4.35E-08 | chr:6:32648036 |
| 6 rs28371308  | 32678162 T | 0.4293 | 4.42E-08 | chr:6:32648036 |
| 6 rs71549223  | 32498094 G | 2.666  | 4.43E-08 | chr:6:32648036 |
| 6 rs115030899 | 32489432 A | 1.834  | 4.43E-08 | chr:6:32648036 |
| 6 rs113201561 | 32480412 T | 1.798  | 4.44E-08 | chr:6:32648036 |
| 6 rs9274934   | 32641529 T | 1.854  | 4.47E-08 | chr:6:32648036 |
| 6 rs9269256   | 32454401 A | 2.199  | 4.47E-08 | chr:6:32648036 |
| 6 rs112017333 | 32633501 G | 0.3381 | 4.47E-08 | chr:6:32648036 |
| 6 rs2395515   | 32580637 C | 2.663  | 4.47E-08 | chr:6:32648036 |
| 6 rs67342079  | 32504133 G | 2.321  | 4.50E-08 | chr:6:32648036 |
| 6 rs186920750 | 32459175 T | 1.802  | 4.50E-08 | chr:6:32648036 |
| 6 rs191818300 | 32459176 A | 1.802  | 4.50E-08 | chr:6:32648036 |
| 6 rs112870813 | 32491199 A | 1.812  | 4.53E-08 | chr:6:32648036 |
| 6 rs148630431 | 32460019 G | 1.809  | 4.53E-08 | chr:6:32648036 |
| 6 rs202015091 | 32520214 C | 2.431  | 4.53E-08 | chr:6:32648036 |
| 6 rs3104409   | 32683121 G | 2.968  | 4.54E-08 | chr:6:32648036 |
| 6 rs182778036 | 32482517 C | 1.832  | 4.55E-08 | chr:6:32648036 |
| 6 rs35366682  | 32594354 C | 0.1693 | 4.56E-08 | chr:6:32648036 |
| 6 rs113601089 | 32479182 T | 1.799  | 4.58E-08 | chr:6:32648036 |
| 6 rs28746970  | 32653259 C | 0.3637 | 4.66E-08 | chr:6:32648036 |
| 6 rs115232480 | 32536206 G | 0.5079 | 4.68E-08 | chr:6:32648036 |
| 6 rs74945164  | 32460447 A | 1.797  | 4.70E-08 | chr:6:32648036 |

|               |            |        |          |                |
|---------------|------------|--------|----------|----------------|
| 6 rs34413716  | 32496943 A | 1.929  | 4.71E-08 | chr:6:32648036 |
| 6 rs71536548  | 32524626 T | 1.878  | 4.71E-08 | chr:6:32648036 |
| 6 rs9270101   | 32554607 T | 2.639  | 4.73E-08 | chr:6:32648036 |
| 6 rs35874713  | 32503771 G | 2.415  | 4.75E-08 | chr:6:32648036 |
| 6 rs28746971  | 32653272 A | 0.3631 | 4.77E-08 | chr:6:32648036 |
| 6 rs147295786 | 32479598 A | 1.828  | 4.80E-08 | chr:6:32648036 |
| 6 rs9270299   | 32557435 A | 2.893  | 4.80E-08 | chr:6:32648036 |
| 6 rs9269295   | 32539475 C | 0.4476 | 4.83E-08 | chr:6:32648036 |
| 6 rs75310737  | 32454993 C | 1.937  | 4.83E-08 | chr:6:32648036 |
| 6 rs2621331   | 32780470 C | 2.536  | 4.84E-08 | chr:6:32648036 |
| 6 rs112055096 | 32479363 G | 1.825  | 4.86E-08 | chr:6:32648036 |
| 6 rs75722399  | 32460615 G | 1.793  | 4.87E-08 | chr:6:32648036 |
| 6 rs76753608  | 32460766 G | 1.793  | 4.87E-08 | chr:6:32648036 |
| 6 rs77103549  | 32474022 T | 1.793  | 4.87E-08 | chr:6:32648036 |
| 6 rs79184871  | 32473972 A | 1.793  | 4.87E-08 | chr:6:32648036 |
| 6 rs74867813  | 32480008 C | 1.805  | 4.88E-08 | chr:6:32648036 |
| 6 rs111906147 | 32491235 T | 1.805  | 4.90E-08 | chr:6:32648036 |
| 6 rs622137    | 32569852 A | 2.559  | 4.91E-08 | chr:6:32648036 |
| 6 rs113725551 | 32511420 G | 0.5027 | 4.92E-08 | chr:6:32648036 |
| 6 rs75498325  | 32460514 C | 1.795  | 4.92E-08 | chr:6:32648036 |
| 6 rs77089552  | 32460533 A | 1.795  | 4.92E-08 | chr:6:32648036 |
| 6 rs77707664  | 32460541 G | 1.795  | 4.92E-08 | chr:6:32648036 |
| 6 rs78767260  | 32460491 A | 1.795  | 4.92E-08 | chr:6:32648036 |
| 6 rs79705649  | 32460549 T | 1.795  | 4.92E-08 | chr:6:32648036 |
| 6 rs80221542  | 32460512 T | 1.795  | 4.92E-08 | chr:6:32648036 |
| 6 rs2395172   | 32399842 C | 0.2871 | 4.92E-08 | chr:6:32648036 |
| 6 rs2395174   | 32404878 G | 0.2871 | 4.92E-08 | chr:6:32648036 |
| 6 rs2395176   | 32405062 T | 0.2871 | 4.92E-08 | chr:6:32648036 |
| 6 rs2395177   | 32405076 C | 0.2871 | 4.92E-08 | chr:6:32648036 |
| 6 rs3129844   | 32395835 G | 0.2871 | 4.92E-08 | chr:6:32648036 |
| 6 rs3129847   | 32396506 G | 0.2871 | 4.92E-08 | chr:6:32648036 |
| 6 rs3129848   | 32397049 A | 0.2871 | 4.92E-08 | chr:6:32648036 |
| 6 rs3129851   | 32397712 C | 0.2871 | 4.92E-08 | chr:6:32648036 |
| 6 rs3129853   | 32398648 A | 0.2871 | 4.92E-08 | chr:6:32648036 |
| 6 rs3129857   | 32399785 G | 0.2871 | 4.92E-08 | chr:6:32648036 |
| 6 rs3129858   | 32400520 A | 0.2871 | 4.92E-08 | chr:6:32648036 |
| 6 rs3129864   | 32404043 G | 0.2871 | 4.92E-08 | chr:6:32648036 |
| 6 rs3129870   | 32406100 T | 0.2871 | 4.92E-08 | chr:6:32648036 |
| 6 rs3129872   | 32407153 T | 0.2871 | 4.92E-08 | chr:6:32648036 |
| 6 rs3129877   | 32408597 A | 0.2871 | 4.92E-08 | chr:6:32648036 |
| 6 rs3135337   | 32401534 T | 0.2871 | 4.92E-08 | chr:6:32648036 |
| 6 rs3135339   | 32399261 G | 0.2871 | 4.92E-08 | chr:6:32648036 |
| 6 rs3135340   | 32398872 G | 0.2871 | 4.92E-08 | chr:6:32648036 |

|               |            |        |          |                |
|---------------|------------|--------|----------|----------------|
| 6 rs3135396   | 32404213 T | 0.2871 | 4.92E-08 | chr:6:32648036 |
| 6 rs3135398   | 32403934 T | 0.2871 | 4.92E-08 | chr:6:32648036 |
| 6 rs4988820   | 32399158 T | 0.2871 | 4.92E-08 | chr:6:32648036 |
| 6 rs4988821   | 32399022 G | 0.2871 | 4.92E-08 | chr:6:32648036 |
| 6 rs4988822   | 32398975 T | 0.2871 | 4.92E-08 | chr:6:32648036 |
| 6 rs5000563   | 32404135 G | 0.2871 | 4.92E-08 | chr:6:32648036 |
| 6 rs9268632   | 32406412 G | 0.2871 | 4.92E-08 | chr:6:32648036 |
| 6 rs9271203   | 32578885 T | 2.635  | 4.93E-08 | chr:6:32648036 |
| 6 rs76749487  | 32460286 A | 1.796  | 4.94E-08 | chr:6:32648036 |
| 6 rs77361953  | 32460295 T | 1.796  | 4.94E-08 | chr:6:32648036 |
| 6 rs183233576 | 32495781 A | 1.813  | 4.96E-08 | chr:6:32648036 |
| 6 rs189231639 | 32495784 G | 1.813  | 4.96E-08 | chr:6:32648036 |
| 6 rs1966001   | 32581782 C | 2.605  | 4.97E-08 | chr:6:32648036 |
| 6 rs281863750 | 32630587 T | 0.343  | 4.97E-08 | chr:6:32648036 |
| 6 rs9269840   | 32550150 A | 2.635  | 5.01E-08 | chr:6:32648036 |
| 6 rs112886967 | 32480285 C | 1.835  | 5.02E-08 | chr:6:32648036 |
| 6 rs112918203 | 32480282 A | 1.835  | 5.02E-08 | chr:6:32648036 |
| 6 rs114340096 | 32480262 T | 1.835  | 5.02E-08 | chr:6:32648036 |
| 6 rs79265816  | 32472664 A | 1.966  | 5.04E-08 | chr:6:32648036 |
| 6 rs9274187   | 32630613 C | 0.3524 | 5.04E-08 | chr:6:32648036 |
| 6 rs112216801 | 32601838 A | 0.332  | 5.04E-08 | chr:6:32648036 |
| 6 rs540002313 | 32599555 A | 0.2842 | 5.04E-08 | chr:6:32648036 |
| 6 rs281863194 | 32631600 T | 0.3584 | 5.06E-08 | chr:6:32648036 |
| 6 rs28453305  | 32501842 G | 2.636  | 5.06E-08 | chr:6:32648036 |
| 6 rs35350417  | 32513687 C | 2.636  | 5.06E-08 | chr:6:32648036 |
| 6 rs540547808 | 32520962 A | 2.636  | 5.06E-08 | chr:6:32648036 |
| 6 rs62405593  | 32511602 A | 2.636  | 5.06E-08 | chr:6:32648036 |
| 6 rs62405635  | 32516494 G | 2.636  | 5.06E-08 | chr:6:32648036 |
| 6 rs62405636  | 32516526 G | 2.636  | 5.06E-08 | chr:6:32648036 |
| 6 rs62405637  | 32516706 C | 2.636  | 5.06E-08 | chr:6:32648036 |
| 6 rs66559992  | 32511698 A | 2.636  | 5.06E-08 | chr:6:32648036 |
| 6 rs67000090  | 32519392 G | 2.636  | 5.06E-08 | chr:6:32648036 |
| 6 rs67255973  | 32514248 A | 2.636  | 5.06E-08 | chr:6:32648036 |
| 6 rs67598791  | 32498067 T | 2.636  | 5.06E-08 | chr:6:32648036 |
| 6 rs67600647  | 32519504 G | 2.636  | 5.06E-08 | chr:6:32648036 |
| 6 rs71536525  | 32521302 A | 2.636  | 5.06E-08 | chr:6:32648036 |
| 6 rs76413308  | 32520961 G | 2.636  | 5.06E-08 | chr:6:32648036 |
| 6 rs79202843  | 32512007 T | 2.636  | 5.06E-08 | chr:6:32648036 |
| 6 rs9270984   | 32573991 T | 2.616  | 5.06E-08 | chr:6:32648036 |
| 6 rs74186130  | 32632859 G | 0.3475 | 5.08E-08 | chr:6:32648036 |
| 6 rs28755388  | 32677898 C | 2.29   | 5.09E-08 | chr:6:32648036 |
| 6 rs9272781   | 32610357 T | 0.3123 | 5.09E-08 | chr:6:32648036 |
| 6 rs9269731   | 32547408 T | 0.2385 | 5.10E-08 | chr:6:32648036 |

|               |            |         |          |                |
|---------------|------------|---------|----------|----------------|
| 6 rs9271471   | 32588665 G | 0.2692  | 5.12E-08 | chr:6:32648036 |
| 6 rs9274932   | 32641509 G | 1.845   | 5.14E-08 | chr:6:32648036 |
| 6 rs9274933   | 32641513 C | 1.845   | 5.14E-08 | chr:6:32648036 |
| 6 rs17206084  | 32652461 T | 0.301   | 5.14E-08 | chr:6:32648036 |
| 6 rs9274595   | 32635450 G | 0.4787  | 5.15E-08 | chr:6:32648036 |
| 6 rs9270046   | 32553683 A | 2.602   | 5.15E-08 | chr:6:32648036 |
| 6 rs71549276  | 32504030 A | 2.347   | 5.16E-08 | chr:6:32648036 |
| 6 rs28371289  | 32676075 A | 0.4288  | 5.21E-08 | chr:6:32648036 |
| 6 rs9271394   | 32587480 T | 2.515   | 5.21E-08 | chr:6:32648036 |
| 6 rs75371622  | 32459470 T | 1.807   | 5.22E-08 | chr:6:32648036 |
| 6 rs534657806 | 32479390 G | 1.818   | 5.22E-08 | chr:6:32648036 |
| 6 rs552987547 | 32479394 A | 1.818   | 5.22E-08 | chr:6:32648036 |
| 6 rs199514452 | 32557489 T | 0.07288 | 5.23E-08 | chr:6:32648036 |
| 6 rs201540428 | 32557486 A | 0.07288 | 5.23E-08 | chr:6:32648036 |
| 6 rs9272196   | 32601834 G | 0.1865  | 5.23E-08 | chr:6:32648036 |
| 6 rs28747067  | 32656832 T | 0.3665  | 5.24E-08 | chr:6:32648036 |
| 6 rs140656634 | 32473259 G | 1.793   | 5.26E-08 | chr:6:32648036 |
| 6 rs142633963 | 32473248 C | 1.793   | 5.26E-08 | chr:6:32648036 |
| 6 rs9270079   | 32554189 G | 2.517   | 5.32E-08 | chr:6:32648036 |
| 6 rs9270633   | 32565562 A | 2.533   | 5.36E-08 | chr:6:32648036 |
| 6 rs71536505  | 32517251 G | 2.331   | 5.38E-08 | chr:6:32648036 |
| 6 rs9269727   | 32547371 C | 0.5133  | 5.38E-08 | chr:6:32648036 |
| 6 rs111501833 | 32486545 T | 1.817   | 5.40E-08 | chr:6:32648036 |
| 6 rs9270986   | 32574060 A | 2.628   | 5.40E-08 | chr:6:32648036 |
| 6 rs9274669   | 32636591 A | 0.3977  | 5.45E-08 | chr:6:32648036 |
| 6 rs9270022   | 32553142 C | 2.437   | 5.47E-08 | chr:6:32648036 |
| 6 rs9271062   | 32575575 T | 2.609   | 5.51E-08 | chr:6:32648036 |
| 6 rs9274735   | 32637896 A | 2.485   | 5.52E-08 | chr:6:32648036 |
| 6 rs114066419 | 32490850 T | 1.833   | 5.52E-08 | chr:6:32648036 |
| 6 rs4329147   | 32566577 C | 2.628   | 5.53E-08 | chr:6:32648036 |
| 6 rs183801839 | 32490679 G | 1.809   | 5.53E-08 | chr:6:32648036 |
| 6 rs17205977  | 32651927 C | 0.3673  | 5.53E-08 | chr:6:32648036 |
| 6 rs149088066 | 32453495 T | 0.4332  | 5.54E-08 | chr:6:32648036 |
| 6 rs112925453 | 32537376 A | 1.808   | 5.55E-08 | chr:6:32648036 |
| 6 rs9270082   | 32554257 G | 2.184   | 5.56E-08 | chr:6:32648036 |
| 6 rs28755389  | 32677968 C | 0.4315  | 5.56E-08 | chr:6:32648036 |
| 6 rs28755390  | 32677969 A | 0.4315  | 5.56E-08 | chr:6:32648036 |
| 6 rs281863724 | 32630634 G | 0.3593  | 5.61E-08 | chr:6:32648036 |
| 6 rs9274706   | 32637265 G | 2.472   | 5.62E-08 | chr:6:32648036 |
| 6 rs28891422  | 32640936 C | 0.3002  | 5.66E-08 | chr:6:32648036 |
| 6 rs115272081 | 32519782 A | 2.431   | 5.67E-08 | chr:6:32648036 |
| 6 rs66467908  | 32509787 C | 2.612   | 5.69E-08 | chr:6:32648036 |
| 6 rs1130451   | 32627527 A | 0.3909  | 5.70E-08 | chr:6:32648036 |

|               |            |        |          |                |
|---------------|------------|--------|----------|----------------|
| 6 rs71536503  | 32517119 G | 2.588  | 5.72E-08 | chr:6:32648036 |
| 6 rs281863157 | 32631643 C | 0.4227 | 5.73E-08 | chr:6:32648036 |
| 6 rs66583884  | 32501652 G | 2.59   | 5.73E-08 | chr:6:32648036 |
| 6 rs9271159   | 32577645 C | 2.559  | 5.73E-08 | chr:6:32648036 |
| 6 rs9270564   | 32560773 G | 2.215  | 5.75E-08 | chr:6:32648036 |
| 6 rs202187184 | 32519848 C | 2.396  | 5.80E-08 | chr:6:32648036 |
| 6 rs530790448 | 32519846 T | 2.396  | 5.80E-08 | chr:6:32648036 |
| 6 rs28772280  | 32673899 T | 0.3749 | 5.82E-08 | chr:6:32648036 |
| 6 rs28746882  | 32638175 A | 0.35   | 5.82E-08 | chr:6:32648036 |
| 6 rs9274699   | 32637096 A | 2.496  | 5.84E-08 | chr:6:32648036 |
| 6 rs62405576  | 32484706 A | 1.8    | 5.84E-08 | chr:6:32648036 |
| 6 rs62405577  | 32484729 T | 1.8    | 5.84E-08 | chr:6:32648036 |
| 6 rs72849289  | 32479625 C | 1.823  | 5.84E-08 | chr:6:32648036 |
| 6 rs188738201 | 32474550 T | 1.79   | 5.86E-08 | chr:6:32648036 |
| 6 rs116577630 | 32486639 T | 1.804  | 5.89E-08 | chr:6:32648036 |
| 6 rs142829465 | 32486625 G | 1.804  | 5.89E-08 | chr:6:32648036 |
| 6 rs147404658 | 32486632 T | 1.804  | 5.89E-08 | chr:6:32648036 |
| 6 rs66935282  | 32520683 G | 2.587  | 5.91E-08 | chr:6:32648036 |
| 6 rs114704467 | 32460038 G | 1.801  | 5.94E-08 | chr:6:32648036 |
| 6 rs144441217 | 32460025 G | 1.801  | 5.94E-08 | chr:6:32648036 |
| 6 rs1049100   | 32629963 T | 0.3331 | 5.95E-08 | chr:6:32648036 |
| 6 rs73726175  | 32490624 G | 1.828  | 6.00E-08 | chr:6:32648036 |
| 6 rs9269478   | 32542551 G | 1.989  | 6.04E-08 | chr:6:32648036 |
| 6 rs9269480   | 32542568 T | 1.989  | 6.04E-08 | chr:6:32648036 |
| 6 rs9270147   | 32555337 T | 0.3644 | 6.04E-08 | chr:6:32648036 |
| 6 rs9269397   | 32541292 C | 1.883  | 6.04E-08 | chr:6:32648036 |
| 6 rs112869991 | 32537703 G | 1.809  | 6.05E-08 | chr:6:32648036 |
| 6 rs190033297 | 32537722 A | 1.809  | 6.05E-08 | chr:6:32648036 |
| 6 rs145704749 | 32454744 C | 2.053  | 6.07E-08 | chr:6:32648036 |
| 6 rs79054061  | 32459999 C | 1.798  | 6.10E-08 | chr:6:32648036 |
| 6 rs115063919 | 32491272 A | 1.801  | 6.11E-08 | chr:6:32648036 |
| 6 rs72508421  | 32479491 T | 1.867  | 6.11E-08 | chr:6:32648036 |
| 6 rs73726163  | 32487743 C | 1.882  | 6.14E-08 | chr:6:32648036 |
| 6 rs10947315  | 32568937 C | 0.336  | 6.20E-08 | chr:6:32648036 |
| 6 rs116112640 | 32479603 C | 1.82   | 6.23E-08 | chr:6:32648036 |
| 6 rs9271484   | 32588905 T | 0.2663 | 6.25E-08 | chr:6:32648036 |
| 6 rs28639433  | 32519108 G | 2.584  | 6.25E-08 | chr:6:32648036 |
| 6 rs535541263 | 32479347 T | 1.814  | 6.27E-08 | chr:6:32648036 |
| 6 rs77601645  | 32480012 C | 1.796  | 6.27E-08 | chr:6:32648036 |
| 6 rs9272261   | 32603242 A | 0.3151 | 6.27E-08 | chr:6:32648036 |
| 6 rs371225543 | 32601968 T | 0.3271 | 6.28E-08 | chr:6:32648036 |
| 6 rs113079522 | 32460170 C | 1.792  | 6.29E-08 | chr:6:32648036 |
| 6 rs113255123 | 32460157 T | 1.792  | 6.29E-08 | chr:6:32648036 |

|               |            |        |          |                |
|---------------|------------|--------|----------|----------------|
| 6 rs79487517  | 32460592 G | 1.784  | 6.31E-08 | chr:6:32648036 |
| 6 rs114193109 | 32488504 A | 1.793  | 6.32E-08 | chr:6:32648036 |
| 6 rs9269486   | 32542791 C | 1.983  | 6.32E-08 | chr:6:32648036 |
| 6 rs9269540   | 32544002 C | 2.1    | 6.33E-08 | chr:6:32648036 |
| 6 rs2858320   | 32661293 A | 0.3652 | 6.33E-08 | chr:6:32648036 |
| 6 rs28455809  | 32525259 T | 1.911  | 6.36E-08 | chr:6:32648036 |
| 6 rs3997848   | 32682394 G | 2.49   | 6.39E-08 | chr:6:32648036 |
| 6 rs28772724  | 32509357 T | 2.386  | 6.41E-08 | chr:6:32648036 |
| 6 rs72844390  | 32633436 T | 0.389  | 6.42E-08 | chr:6:32648036 |
| 6 rs28746968  | 32653247 T | 0.3684 | 6.46E-08 | chr:6:32648036 |
| 6 rs28746969  | 32653248 G | 0.3684 | 6.46E-08 | chr:6:32648036 |
| 6 rs77596642  | 32633483 T | 0.3452 | 6.47E-08 | chr:6:32648036 |
| 6 rs4246055   | 32592360 T | 0.3123 | 6.47E-08 | chr:6:32648036 |
| 6 rs72845794  | 32534087 T | 1.84   | 6.50E-08 | chr:6:32648036 |
| 6 rs28615351  | 32525270 T | 1.904  | 6.51E-08 | chr:6:32648036 |
| 6 rs9271466   | 32588606 C | 2.531  | 6.53E-08 | chr:6:32648036 |
| 6 rs9272200   | 32601868 C | 0.1991 | 6.54E-08 | chr:6:32648036 |
| 6 rs538187149 | 32591690 C | 2.302  | 6.56E-08 | chr:6:32648036 |
| 6 rs9271554   | 32590317 G | 2.537  | 6.57E-08 | chr:6:32648036 |
| 6 rs9271417   | 32587818 C | 0.2624 | 6.62E-08 | chr:6:32648036 |
| 6 rs1130455   | 32627405 G | 0.393  | 6.65E-08 | chr:6:32648036 |
| 6 rs72508444  | 32491387 G | 1.825  | 6.65E-08 | chr:6:32648036 |
| 6 rs28891410  | 32640424 G | 0.3608 | 6.66E-08 | chr:6:32648036 |
| 6 rs2308759   | 32549596 T | 2.622  | 6.67E-08 | chr:6:32648036 |
| 6 rs9269762   | 32548321 C | 2.622  | 6.67E-08 | chr:6:32648036 |
| 6 rs9269764   | 32548681 T | 2.622  | 6.67E-08 | chr:6:32648036 |
| 6 rs9269793   | 32549236 T | 2.622  | 6.67E-08 | chr:6:32648036 |
| 6 rs9269795   | 32549259 G | 2.622  | 6.67E-08 | chr:6:32648036 |
| 6 rs9269797   | 32549284 G | 2.622  | 6.67E-08 | chr:6:32648036 |
| 6 rs9270040   | 32553508 A | 2.622  | 6.67E-08 | chr:6:32648036 |
| 6 rs9270041   | 32553531 C | 2.622  | 6.67E-08 | chr:6:32648036 |
| 6 rs9270043   | 32553598 G | 2.622  | 6.67E-08 | chr:6:32648036 |
| 6 rs9270980   | 32573909 C | 2.622  | 6.67E-08 | chr:6:32648036 |
| 6 rs9271161   | 32577713 T | 2.622  | 6.67E-08 | chr:6:32648036 |
| 6 rs9272208   | 32601967 G | 0.2677 | 6.69E-08 | chr:6:32648036 |
| 6 rs146892544 | 32489510 G | 1.855  | 6.74E-08 | chr:6:32648036 |
| 6 rs112968327 | 32488860 T | 1.825  | 6.75E-08 | chr:6:32648036 |
| 6 rs9272100   | 32599814 T | 0.2161 | 6.79E-08 | chr:6:32648036 |
| 6 rs542007949 | 32468730 A | 1.821  | 6.81E-08 | chr:6:32648036 |
| 6 rs3104407   | 32682452 A | 2.286  | 6.87E-08 | chr:6:32648036 |
| 6 rs67965605  | 32517293 T | 2.387  | 6.88E-08 | chr:6:32648036 |
| 6 rs17205795  | 32651066 T | 0.3586 | 6.90E-08 | chr:6:32648036 |
| 6 rs17205802  | 32651072 G | 0.3586 | 6.90E-08 | chr:6:32648036 |

|               |            |        |          |                |
|---------------|------------|--------|----------|----------------|
| 6 rs75127169  | 32460082 G | 1.802  | 6.91E-08 | chr:6:32648036 |
| 6 rs732163    | 32394911 A | 2.659  | 6.91E-08 | chr:6:32648036 |
| 6 rs9270105   | 32554760 A | 2.37   | 6.91E-08 | chr:6:32648036 |
| 6 rs9269780   | 32548932 A | 2.32   | 6.92E-08 | chr:6:32648036 |
| 6 rs116544033 | 32605361 G | 0.3139 | 6.92E-08 | chr:6:32648036 |
| 6 rs9272266   | 32603416 A | 0.3553 | 6.94E-08 | chr:6:32648036 |
| 6 rs28746883  | 32638392 T | 0.3605 | 7.04E-08 | chr:6:32648036 |
| 6 rs28746884  | 32638395 T | 0.3605 | 7.04E-08 | chr:6:32648036 |
| 6 rs66857824  | 32512539 C | 2.369  | 7.04E-08 | chr:6:32648036 |
| 6 rs113169828 | 32484743 A | 1.791  | 7.06E-08 | chr:6:32648036 |
| 6 rs114278921 | 32479544 A | 0.2206 | 7.07E-08 | chr:6:32648036 |
| 6 rs9270170   | 32555680 G | 0.3194 | 7.09E-08 | chr:6:32648036 |
| 6 rs76069911  | 32525747 G | 0.5023 | 7.09E-08 | chr:6:32648036 |
| 6 rs1130397   | 32632587 G | 0.4095 | 7.10E-08 | chr:6:32648036 |
| 6 rs9270010   | 32552930 T | 2.108  | 7.11E-08 | chr:6:32648036 |
| 6 rs67503094  | 32520259 C | 2.471  | 7.11E-08 | chr:6:32648036 |
| 6 rs9271055   | 32575369 G | 2.57   | 7.14E-08 | chr:6:32648036 |
| 6 rs9271056   | 32575378 T | 2.57   | 7.14E-08 | chr:6:32648036 |
| 6 rs73405196  | 32490586 G | 1.835  | 7.16E-08 | chr:6:32648036 |
| 6 rs71534541  | 32513076 C | 2.496  | 7.17E-08 | chr:6:32648036 |
| 6 rs181156275 | 32607444 T | 2.682  | 7.20E-08 | chr:6:32648036 |
| 6 rs9269634   | 32545706 A | 1.969  | 7.21E-08 | chr:6:32648036 |
| 6 rs35083819  | 32526526 A | 2.38   | 7.21E-08 | chr:6:32648036 |
| 6 rs116025685 | 32489041 T | 0.5366 | 7.22E-08 | chr:6:32648036 |
| 6 rs146436875 | 32498948 G | 0.1566 | 7.25E-08 | chr:6:32648036 |
| 6 rs148879657 | 32498940 G | 0.1566 | 7.25E-08 | chr:6:32648036 |
| 6 rs76785915  | 32460841 A | 1.784  | 7.27E-08 | chr:6:32648036 |
| 6 rs77078150  | 32460831 G | 1.784  | 7.27E-08 | chr:6:32648036 |
| 6 rs9272168   | 32601222 C | 0.3338 | 7.28E-08 | chr:6:32648036 |
| 6 rs140781802 | 32489874 A | 0.3948 | 7.29E-08 | chr:6:32648036 |
| 6 rs9275059   | 32648298 T | 0.4506 | 7.31E-08 | chr:6:32648036 |
| 6 rs9271412   | 32587685 T | 0.2681 | 7.32E-08 | chr:6:32648036 |
| 6 rs9271061   | 32575544 A | 2.596  | 7.36E-08 | chr:6:32648036 |
| 6 rs9271124   | 32576846 C | 2.072  | 7.36E-08 | chr:6:32648036 |
| 6 rs76752213  | 32509416 A | 2.373  | 7.39E-08 | chr:6:32648036 |
| 6 rs9270700   | 32567306 C | 2.347  | 7.41E-08 | chr:6:32648036 |
| 6 rs9274739   | 32637940 T | 2.47   | 7.44E-08 | chr:6:32648036 |
| 6 rs9270096   | 32554487 T | 2.508  | 7.45E-08 | chr:6:32648036 |
| 6 rs116630455 | 32601946 C | 0.3356 | 7.45E-08 | chr:6:32648036 |
| 6 rs114680412 | 32520248 A | 2.376  | 7.47E-08 | chr:6:32648036 |
| 6 rs59350153  | 32509935 T | 2.374  | 7.47E-08 | chr:6:32648036 |
| 6 rs3793127   | 32371915 T | 2.883  | 7.48E-08 | chr:6:32648036 |
| 6 rs9274905   | 32641251 T | 0.5298 | 7.50E-08 | chr:6:32648036 |

|               |            |        |          |                |
|---------------|------------|--------|----------|----------------|
| 6 rs28891423  | 32640970 A | 0.2963 | 7.53E-08 | chr:6:32648036 |
| 6 rs28891424  | 32640984 G | 0.2963 | 7.53E-08 | chr:6:32648036 |
| 6 rs113015546 | 32496794 T | 2.418  | 7.54E-08 | chr:6:32648036 |
| 6 rs113962966 | 32496783 G | 2.418  | 7.54E-08 | chr:6:32648036 |
| 6 rs28746943  | 32652634 A | 0.3325 | 7.56E-08 | chr:6:32648036 |
| 6 rs147402766 | 32460027 G | 1.793  | 7.59E-08 | chr:6:32648036 |
| 6 rs556200726 | 32525900 A | 0.4861 | 7.63E-08 | chr:6:32648036 |
| 6 rs28746958  | 32652913 C | 0.3415 | 7.63E-08 | chr:6:32648036 |
| 6 rs28746959  | 32652914 A | 0.3415 | 7.63E-08 | chr:6:32648036 |
| 6 rs6929057   | 32597005 C | 0.3538 | 7.63E-08 | chr:6:32648036 |
| 6 rs75013350  | 32460390 T | 1.786  | 7.63E-08 | chr:6:32648036 |
| 6 rs9270402   | 32558429 T | 1.849  | 7.67E-08 | chr:6:32648036 |
| 6 rs9269672   | 32546433 C | 1.981  | 7.68E-08 | chr:6:32648036 |
| 6 rs34303755  | 32450613 C | 2.496  | 7.69E-08 | chr:6:32648036 |
| 6 rs112654908 | 32519968 C | 2.432  | 7.70E-08 | chr:6:32648036 |
| 6 rs111596400 | 32499154 C | 1.851  | 7.71E-08 | chr:6:32648036 |
| 6 rs68122208  | 32508981 A | 2.495  | 7.71E-08 | chr:6:32648036 |
| 6 rs77020460  | 32633494 C | 0.3499 | 7.71E-08 | chr:6:32648036 |
| 6 rs114352435 | 32491257 A | 1.795  | 7.73E-08 | chr:6:32648036 |
| 6 rs116277159 | 32488260 A | 1.812  | 7.80E-08 | chr:6:32648036 |
| 6 rs72508424  | 32481590 G | 1.782  | 7.81E-08 | chr:6:32648036 |
| 6 rs9272122   | 32600562 C | 2.255  | 7.81E-08 | chr:6:32648036 |
| 6 rs9270902   | 32571962 A | 2.289  | 7.83E-08 | chr:6:32648036 |
| 6 rs28746941  | 32652553 C | 0.3198 | 7.84E-08 | chr:6:32648036 |
| 6 rs28746942  | 32652556 A | 0.3198 | 7.84E-08 | chr:6:32648036 |
| 6 rs558792088 | 32493994 C | 1.82   | 7.86E-08 | chr:6:32648036 |
| 6 rs9270031   | 32553340 T | 2.533  | 7.88E-08 | chr:6:32648036 |
| 6 rs116721417 | 32486517 T | 1.804  | 7.88E-08 | chr:6:32648036 |
| 6 rs541505856 | 32490394 T | 0.4756 | 7.89E-08 | chr:6:32648036 |
| 6 rs28645249  | 32525235 T | 1.904  | 8.02E-08 | chr:6:32648036 |
| 6 rs139036786 | 32459978 G | 1.789  | 8.03E-08 | chr:6:32648036 |
| 6 rs77539933  | 32459985 C | 1.789  | 8.03E-08 | chr:6:32648036 |
| 6 rs3828793   | 32635883 T | 0.3277 | 8.06E-08 | chr:6:32648036 |
| 6 rs17212153  | 32651092 T | 0.3606 | 8.12E-08 | chr:6:32648036 |
| 6 rs17212160  | 32651097 G | 0.3606 | 8.12E-08 | chr:6:32648036 |
| 6 rs111286052 | 32537733 C | 1.796  | 8.13E-08 | chr:6:32648036 |
| 6 rs9269289   | 32539416 G | 1.849  | 8.14E-08 | chr:6:32648036 |
| 6 rs9269785   | 32549053 T | 0.3751 | 8.16E-08 | chr:6:32648036 |
| 6 rs9269787   | 32549070 G | 0.3751 | 8.16E-08 | chr:6:32648036 |
| 6 rs9271462   | 32588501 C | 0.2881 | 8.24E-08 | chr:6:32648036 |
| 6 rs9271532   | 32589945 C | 2.5    | 8.24E-08 | chr:6:32648036 |
| 6 rs9269656   | 32546203 A | 1.935  | 8.24E-08 | chr:6:32648036 |
| 6 rs9269657   | 32546205 A | 1.935  | 8.24E-08 | chr:6:32648036 |



|               |            |        |          |                |
|---------------|------------|--------|----------|----------------|
| 6 rs9271437   | 32588166 A | 0.2714 | 8.24E-08 | chr:6:32648036 |
| 6 rs115176251 | 32538129 G | 1.884  | 8.30E-08 | chr:6:32648036 |
| 6 rs9271256   | 32580411 A | 2.565  | 8.31E-08 | chr:6:32648036 |
| 6 rs9268521   | 32381374 C | 2.819  | 8.32E-08 | chr:6:32648036 |
| 6 rs9268522   | 32381443 T | 2.819  | 8.32E-08 | chr:6:32648036 |
| 6 rs34665982  | 32560306 C | 0.4886 | 8.33E-08 | chr:6:32648036 |
| 6 rs34072909  | 32513966 A | 2.571  | 8.34E-08 | chr:6:32648036 |
| 6 rs28891398  | 32639857 A | 0.3646 | 8.36E-08 | chr:6:32648036 |
| 6 rs28891399  | 32639876 C | 0.3646 | 8.36E-08 | chr:6:32648036 |
| 6 rs115951776 | 32490601 G | 1.814  | 8.37E-08 | chr:6:32648036 |
| 6 rs146381913 | 32485905 A | 1.824  | 8.41E-08 | chr:6:32648036 |
| 6 rs67987819  | 32497655 A | 2.569  | 8.43E-08 | chr:6:32648036 |
| 6 rs138246653 | 32488519 T | 1.797  | 8.43E-08 | chr:6:32648036 |
| 6 rs9270563   | 32560764 T | 2.221  | 8.45E-08 | chr:6:32648036 |
| 6 rs113712440 | 32459266 T | 1.798  | 8.49E-08 | chr:6:32648036 |
| 6 rs74673002  | 32469496 A | 1.821  | 8.50E-08 | chr:6:32648036 |
| 6 rs75238419  | 32469491 T | 1.821  | 8.50E-08 | chr:6:32648036 |
| 6 rs78819244  | 32469510 T | 1.821  | 8.50E-08 | chr:6:32648036 |
| 6 rs80281605  | 32469505 G | 1.821  | 8.50E-08 | chr:6:32648036 |
| 6 rs111797109 | 32511650 T | 2.393  | 8.52E-08 | chr:6:32648036 |
| 6 rs28675927  | 32603488 G | 0.364  | 8.54E-08 | chr:6:32648036 |
| 6 rs530399256 | 32458027 G | 1.866  | 8.59E-08 | chr:6:32648036 |
| 6 rs569631652 | 32458026 T | 1.866  | 8.59E-08 | chr:6:32648036 |
| 6 rs17412833  | 32632598 T | 0.4107 | 8.62E-08 | chr:6:32648036 |
| 6 rs28746952  | 32652798 G | 0.3262 | 8.63E-08 | chr:6:32648036 |
| 6 rs9269701   | 32547053 A | 2.013  | 8.66E-08 | chr:6:32648036 |
| 6 rs9269779   | 32548920 A | 2.312  | 8.68E-08 | chr:6:32648036 |
| 6 rs9271956   | 32597313 T | 2.573  | 8.68E-08 | chr:6:32648036 |
| 6 rs79508322  | 32512049 A | 2.376  | 8.69E-08 | chr:6:32648036 |
| 6 rs9269296   | 32539509 G | 0.4524 | 8.69E-08 | chr:6:32648036 |
| 6 rs34091356  | 32523556 A | 1.942  | 8.69E-08 | chr:6:32648036 |
| 6 rs9270019   | 32553053 G | 2.248  | 8.73E-08 | chr:6:32648036 |
| 6 rs9269489   | 32542832 T | 2.007  | 8.73E-08 | chr:6:32648036 |
| 6 rs17212448  | 32652519 C | 0.2753 | 8.73E-08 | chr:6:32648036 |
| 6 rs35957722  | 32450580 C | 2.484  | 8.73E-08 | chr:6:32648036 |
| 6 rs71536527  | 32521477 T | 2.565  | 8.84E-08 | chr:6:32648036 |
| 6 rs112956435 | 32519929 C | 2.417  | 8.86E-08 | chr:6:32648036 |
| 6 rs58265620  | 32456760 T | 1.784  | 8.87E-08 | chr:6:32648036 |
| 6 rs74655967  | 32492468 G | 1.785  | 8.89E-08 | chr:6:32648036 |
| 6 rs76784864  | 32492453 C | 1.785  | 8.89E-08 | chr:6:32648036 |
| 6 rs9269607   | 32545168 G | 1.932  | 8.90E-08 | chr:6:32648036 |
| 6 rs9469214   | 32636623 T | 2.337  | 8.92E-08 | chr:6:32648036 |
| 6 rs9269768   | 32548727 A | 2.593  | 8.93E-08 | chr:6:32648036 |

|               |            |        |          |                |
|---------------|------------|--------|----------|----------------|
| 6 rs79050133  | 32481680 A | 1.8    | 8.98E-08 | chr:6:32648036 |
| 6 rs79982994  | 32481693 A | 1.8    | 8.98E-08 | chr:6:32648036 |
| 6 rs77734842  | 32503641 A | 2.46   | 8.99E-08 | chr:6:32648036 |
| 6 rs28746886  | 32639083 C | 0.3609 | 9.00E-08 | chr:6:32648036 |
| 6 rs28746887  | 32639096 T | 0.3609 | 9.00E-08 | chr:6:32648036 |
| 6 rs28891379  | 32639107 C | 0.3609 | 9.00E-08 | chr:6:32648036 |
| 6 rs72492324  | 32520018 T | 2.544  | 9.04E-08 | chr:6:32648036 |
| 6 rs28467173  | 32512180 A | 2.338  | 9.07E-08 | chr:6:32648036 |
| 6 rs147478643 | 32499006 G | 1.889  | 9.08E-08 | chr:6:32648036 |
| 6 rs116384190 | 32520337 G | 2.371  | 9.12E-08 | chr:6:32648036 |
| 6 rs111499705 | 32460116 A | 1.792  | 9.14E-08 | chr:6:32648036 |
| 6 rs9269476   | 32542501 T | 1.976  | 9.19E-08 | chr:6:32648036 |
| 6 rs77207275  | 32460684 C | 1.774  | 9.23E-08 | chr:6:32648036 |
| 6 rs28746900  | 32648652 G | 0.3916 | 9.29E-08 | chr:6:32648036 |
| 6 rs2858332   | 32681161 G | 0.3815 | 9.30E-08 | chr:6:32648036 |
| 6 rs66863443  | 32514284 A | 2.486  | 9.33E-08 | chr:6:32648036 |
| 6 rs67571763  | 32514302 A | 2.486  | 9.33E-08 | chr:6:32648036 |
| 6 rs477515    | 32569691 A | 2.46   | 9.39E-08 | chr:6:32648036 |
| 6 rs72508471  | 32505640 G | 1.96   | 9.39E-08 | chr:6:32648036 |
| 6 rs138063539 | 32496314 T | 1.805  | 9.39E-08 | chr:6:32648036 |
| 6 rs4502931   | 32380782 T | 0.3722 | 9.40E-08 | chr:6:32648036 |
| 6 rs9268518   | 32380818 A | 0.3722 | 9.40E-08 | chr:6:32648036 |
| 6 rs9268519   | 32380826 G | 0.3722 | 9.40E-08 | chr:6:32648036 |
| 6 rs9268520   | 32380860 C | 0.3722 | 9.40E-08 | chr:6:32648036 |
| 6 rs968154    | 32380785 G | 0.3722 | 9.40E-08 | chr:6:32648036 |
| 6 rs968155    | 32380715 C | 0.3722 | 9.40E-08 | chr:6:32648036 |
| 6 rs549250780 | 32459294 T | 1.8    | 9.40E-08 | chr:6:32648036 |
| 6 rs560518806 | 32459292 A | 1.8    | 9.40E-08 | chr:6:32648036 |
| 6 rs9269553   | 32544287 C | 2.034  | 9.42E-08 | chr:6:32648036 |
| 6 rs189503580 | 32488022 G | 0.2092 | 9.45E-08 | chr:6:32648036 |
| 6 rs577424330 | 32488029 T | 0.2092 | 9.45E-08 | chr:6:32648036 |
| 6 rs10947314  | 32568806 A | 0.3391 | 9.45E-08 | chr:6:32648036 |
| 6 rs281874806 | 32631449 C | 0.3898 | 9.46E-08 | chr:6:32648036 |
| 6 rs376533971 | 32540407 T | 0.4242 | 9.46E-08 | chr:6:32648036 |
| 6 rs71536510  | 32518262 T | 2.222  | 9.50E-08 | chr:6:32648036 |
| 6 rs71536511  | 32518265 A | 2.222  | 9.50E-08 | chr:6:32648036 |
| 6 rs9270015   | 32552983 A | 2.215  | 9.50E-08 | chr:6:32648036 |
| 6 rs35838968  | 32488241 A | 1.806  | 9.56E-08 | chr:6:32648036 |
| 6 rs73726168  | 32488244 T | 1.806  | 9.56E-08 | chr:6:32648036 |
| 6 rs9406389   | 32517764 C | 3.394  | 9.61E-08 | chr:6:32648036 |
| 6 rs145540045 | 32490643 A | 1.809  | 9.67E-08 | chr:6:32648036 |
| 6 rs28891373  | 32638744 A | 0.3335 | 9.68E-08 | chr:6:32648036 |
| 6 rs28891374  | 32638750 G | 0.3335 | 9.68E-08 | chr:6:32648036 |

|               |            |        |          |                |
|---------------|------------|--------|----------|----------------|
| 6 rs28891375  | 32638757 A | 0.3335 | 9.68E-08 | chr:6:32648036 |
| 6 rs111343881 | 32521022 C | 2.506  | 9.69E-08 | chr:6:32648036 |
| 6 rs113459411 | 32521026 G | 2.506  | 9.69E-08 | chr:6:32648036 |
| 6 rs1049056   | 32634369 A | 0.345  | 9.70E-08 | chr:6:32648036 |
| 6 rs66723041  | 32520707 G | 2.524  | 9.72E-08 | chr:6:32648036 |
| 6 rs68123256  | 32520727 G | 2.524  | 9.72E-08 | chr:6:32648036 |
| 6 rs201598673 | 32485853 C | 1.832  | 9.74E-08 | chr:6:32648036 |
| 6 rs192837519 | 32547544 G | 0.3904 | 9.77E-08 | chr:6:32648036 |
| 6 rs28746967  | 32653231 C | 0.3754 | 9.77E-08 | chr:6:32648036 |
| 6 rs28891409  | 32640401 G | 0.367  | 9.83E-08 | chr:6:32648036 |
| 6 rs74579911  | 32534010 A | 1.883  | 9.84E-08 | chr:6:32648036 |
| 6 rs34288859  | 32545996 A | 1.95   | 9.84E-08 | chr:6:32648036 |
| 6 rs557676328 | 32459223 T | 1.778  | 9.89E-08 | chr:6:32648036 |
| 6 rs573113955 | 32459233 G | 1.778  | 9.89E-08 | chr:6:32648036 |
| 6 rs9271347   | 32583543 A | 2.573  | 9.89E-08 | chr:6:32648036 |
| 6 rs530308982 | 32492966 T | 1.877  | 9.93E-08 | chr:6:32648036 |
| 6 rs565684347 | 32492964 T | 1.877  | 9.93E-08 | chr:6:32648036 |
| 6 rs75424998  | 32472830 A | 1.778  | 9.97E-08 | chr:6:32648036 |
| 6 rs80326593  | 32472827 T | 1.778  | 9.97E-08 | chr:6:32648036 |
| 6 rs28366301  | 32560883 A | 2.487  | 9.99E-08 | chr:6:32648036 |
| 6 rs9269467   | 32542290 A | 2.032  | 1.00E-07 | chr:6:32648036 |
| 6 rs9270568   | 32560808 G | 2.307  | 1.00E-07 | chr:6:32648036 |
| 6 rs9272437   | 32605356 G | 0.3186 | 1.00E-07 | chr:6:32648036 |
| 6 rs9272438   | 32605358 G | 0.3186 | 1.00E-07 | chr:6:32648036 |
| 6 rs114227752 | 32479232 G | 1.772  | 1.01E-07 | chr:6:32648036 |
| 6 rs66713918  | 32509179 T | 2.45   | 1.01E-07 | chr:6:32648036 |
| 6 rs67111333  | 32509188 A | 2.45   | 1.01E-07 | chr:6:32648036 |
| 6 rs9271126   | 32576873 G | 2.056  | 1.01E-07 | chr:6:32648036 |
| 6 rs9272224   | 32602352 T | 0.3195 | 1.02E-07 | chr:6:32648036 |
| 6 rs9269499   | 32543091 C | 1.954  | 1.02E-07 | chr:6:32648036 |
| 6 rs573321101 | 32479500 G | 0.1631 | 1.02E-07 | chr:6:32648036 |
| 6 rs9271460   | 32588463 A | 0.3056 | 1.02E-07 | chr:6:32648036 |
| 6 rs188122191 | 32486511 T | 1.795  | 1.03E-07 | chr:6:32648036 |
| 6 rs111752517 | 32482568 A | 1.783  | 1.03E-07 | chr:6:32648036 |
| 6 rs181159261 | 32490653 G | 1.803  | 1.03E-07 | chr:6:32648036 |
| 6 rs28746995  | 32654116 A | 0.3651 | 1.03E-07 | chr:6:32648036 |
| 6 rs3129749   | 32581333 G | 2.516  | 1.03E-07 | chr:6:32648036 |
| 6 rs118146750 | 32523174 A | 2.466  | 1.03E-07 | chr:6:32648036 |
| 6 rs28371205  | 32636693 C | 2.364  | 1.03E-07 | chr:6:32648036 |
| 6 rs28371206  | 32636696 A | 2.364  | 1.03E-07 | chr:6:32648036 |
| 6 rs28371207  | 32636701 G | 2.364  | 1.03E-07 | chr:6:32648036 |
| 6 rs9270994   | 32574250 T | 2.531  | 1.04E-07 | chr:6:32648036 |
| 6 rs114548292 | 32486491 T | 1.788  | 1.05E-07 | chr:6:32648036 |

|               |            |        |          |                |
|---------------|------------|--------|----------|----------------|
| 6 rs113856962 | 32492899 T | 1.817  | 1.05E-07 | chr:6:32648036 |
| 6 rs113686014 | 32509551 A | 2.372  | 1.06E-07 | chr:6:32648036 |
| 6 rs79957603  | 32509348 A | 2.335  | 1.06E-07 | chr:6:32648036 |
| 6 rs9269431   | 32541655 C | 1.899  | 1.06E-07 | chr:6:32648036 |
| 6 rs139212224 | 32496628 A | 1.88   | 1.06E-07 | chr:6:32648036 |
| 6 rs74569570  | 32473816 C | 1.779  | 1.06E-07 | chr:6:32648036 |
| 6 rs74588093  | 32473810 G | 1.779  | 1.06E-07 | chr:6:32648036 |
| 6 rs62405631  | 32514500 C | 2.355  | 1.06E-07 | chr:6:32648036 |
| 6 rs28891405  | 32640288 T | 0.3631 | 1.07E-07 | chr:6:32648036 |
| 6 rs9270111   | 32554867 C | 2.477  | 1.07E-07 | chr:6:32648036 |
| 6 rs281874809 | 32631446 G | 0.3901 | 1.07E-07 | chr:6:32648036 |
| 6 rs111621461 | 32520050 T | 2.364  | 1.08E-07 | chr:6:32648036 |
| 6 rs556025    | 32570880 T | 2.486  | 1.08E-07 | chr:6:32648036 |
| 6 rs28746891  | 32648112 G | 0.3823 | 1.09E-07 | chr:6:32648036 |
| 6 rs116597030 | 32479282 C | 1.768  | 1.09E-07 | chr:6:32648036 |
| 6 rs62405584  | 32504801 T | 2.514  | 1.09E-07 | chr:6:32648036 |
| 6 rs9270656   | 32566011 C | 2.557  | 1.09E-07 | chr:6:32648036 |
| 6 rs114908590 | 32459327 A | 1.789  | 1.09E-07 | chr:6:32648036 |
| 6 rs116837861 | 32459326 C | 1.789  | 1.09E-07 | chr:6:32648036 |
| 6 rs148620529 | 32525509 C | 0.5243 | 1.10E-07 | chr:6:32648036 |
| 6 rs28746892  | 32648135 T | 0.3831 | 1.10E-07 | chr:6:32648036 |
| 6 rs28746893  | 32648136 G | 0.3831 | 1.10E-07 | chr:6:32648036 |
| 6 rs9270091   | 32554416 C | 2.316  | 1.10E-07 | chr:6:32648036 |
| 6 rs139038289 | 32472940 C | 1.812  | 1.10E-07 | chr:6:32648036 |
| 6 rs17212441  | 32652494 C | 0.292  | 1.11E-07 | chr:6:32648036 |
| 6 rs67894469  | 32504015 A | 2.339  | 1.11E-07 | chr:6:32648036 |
| 6 rs9275524   | 32675109 T | 0.3774 | 1.11E-07 | chr:6:32648036 |
| 6 rs9275572   | 32678999 A | 0.3774 | 1.11E-07 | chr:6:32648036 |
| 6 rs3129750   | 32581515 G | 2.495  | 1.11E-07 | chr:6:32648036 |
| 6 rs141423953 | 32459205 C | 1.783  | 1.11E-07 | chr:6:32648036 |
| 6 rs9270997   | 32574374 G | 2.555  | 1.12E-07 | chr:6:32648036 |
| 6 rs140350368 | 32458023 A | 1.857  | 1.12E-07 | chr:6:32648036 |
| 6 rs72844103  | 32513249 A | 2.511  | 1.12E-07 | chr:6:32648036 |
| 6 rs72844104  | 32513250 C | 2.511  | 1.12E-07 | chr:6:32648036 |
| 6 rs9270094   | 32554445 G | 2.329  | 1.12E-07 | chr:6:32648036 |
| 6 rs9269675   | 32546515 C | 2.004  | 1.13E-07 | chr:6:32648036 |
| 6 rs373974466 | 32492930 A | 1.845  | 1.13E-07 | chr:6:32648036 |
| 6 rs76388981  | 32457013 A | 1.8    | 1.13E-07 | chr:6:32648036 |
| 6 rs9275556   | 32677190 C | 0.3777 | 1.13E-07 | chr:6:32648036 |
| 6 rs9275557   | 32677199 C | 0.3777 | 1.13E-07 | chr:6:32648036 |
| 6 rs28724031  | 32550819 A | 2.447  | 1.13E-07 | chr:6:32648036 |
| 6 rs67353091  | 32524684 A | 1.955  | 1.14E-07 | chr:6:32648036 |
| 6 rs9271191   | 32578449 T | 2.552  | 1.14E-07 | chr:6:32648036 |

|               |            |        |          |                |
|---------------|------------|--------|----------|----------------|
| 6 rs112441817 | 32493977 G | 1.831  | 1.14E-07 | chr:6:32648036 |
| 6 rs9270025   | 32553236 C | 2.553  | 1.14E-07 | chr:6:32648036 |
| 6 rs140006648 | 32499015 T | 1.877  | 1.15E-07 | chr:6:32648036 |
| 6 rs9275720   | 32688432 T | 2.705  | 1.15E-07 | chr:6:32648036 |
| 6 rs17211580  | 32602754 A | 0.364  | 1.15E-07 | chr:6:32648036 |
| 6 rs370791576 | 32517082 A | 2.346  | 1.15E-07 | chr:6:32648036 |
| 6 rs115706291 | 32520256 A | 2.338  | 1.15E-07 | chr:6:32648036 |
| 6 rs9275533   | 32675750 G | 0.3776 | 1.15E-07 | chr:6:32648036 |
| 6 rs9275535   | 32675789 G | 0.3776 | 1.15E-07 | chr:6:32648036 |
| 6 rs9275536   | 32675829 A | 0.3776 | 1.15E-07 | chr:6:32648036 |
| 6 rs71536528  | 32521484 G | 2.553  | 1.16E-07 | chr:6:32648036 |
| 6 rs75224370  | 32492320 G | 1.765  | 1.16E-07 | chr:6:32648036 |
| 6 rs116019553 | 32494190 G | 1.785  | 1.18E-07 | chr:6:32648036 |
| 6 rs9271227   | 32579480 A | 2.41   | 1.18E-07 | chr:6:32648036 |
| 6 rs9271228   | 32579481 A | 2.41   | 1.18E-07 | chr:6:32648036 |
| 6 rs77274878  | 32523348 A | 2.365  | 1.18E-07 | chr:6:32648036 |
| 6 rs116485144 | 32633249 C | 0.4048 | 1.18E-07 | chr:6:32648036 |
| 6 rs9271405   | 32587584 C | 0.2765 | 1.18E-07 | chr:6:32648036 |
| 6 rs9271407   | 32587605 T | 0.2765 | 1.18E-07 | chr:6:32648036 |
| 6 rs9271410   | 32587645 G | 0.2765 | 1.18E-07 | chr:6:32648036 |
| 6 rs11752277  | 32537771 G | 0.4525 | 1.19E-07 | chr:6:32648036 |
| 6 rs3763309   | 32375973 A | 2.831  | 1.19E-07 | chr:6:32648036 |
| 6 rs3763312   | 32376348 A | 2.831  | 1.19E-07 | chr:6:32648036 |
| 6 rs9268433   | 32345891 G | 2.831  | 1.19E-07 | chr:6:32648036 |
| 6 rs9268451   | 32349086 C | 2.831  | 1.19E-07 | chr:6:32648036 |
| 6 rs9268455   | 32349772 T | 2.831  | 1.19E-07 | chr:6:32648036 |
| 6 rs111478896 | 32507910 T | 0.1328 | 1.19E-07 | chr:6:32648036 |
| 6 rs79299257  | 32457057 A | 1.77   | 1.19E-07 | chr:6:32648036 |
| 6 rs9275573   | 32679146 C | 0.3778 | 1.20E-07 | chr:6:32648036 |
| 6 rs74432088  | 32456899 A | 1.774  | 1.20E-07 | chr:6:32648036 |
| 6 rs75077509  | 32456916 C | 1.774  | 1.20E-07 | chr:6:32648036 |
| 6 rs77159790  | 32456912 G | 1.774  | 1.20E-07 | chr:6:32648036 |
| 6 rs79963281  | 32456898 C | 1.774  | 1.20E-07 | chr:6:32648036 |
| 6 rs9269902   | 32551197 C | 1.904  | 1.21E-07 | chr:6:32648036 |
| 6 rs72849262  | 32456132 G | 1.871  | 1.21E-07 | chr:6:32648036 |
| 6 rs75699330  | 32456139 A | 1.871  | 1.21E-07 | chr:6:32648036 |
| 6 rs529539073 | 32473776 T | 1.78   | 1.21E-07 | chr:6:32648036 |
| 6 rs281863464 | 32630999 T | 0.356  | 1.22E-07 | chr:6:32648036 |
| 6 rs34182525  | 32523438 G | 1.941  | 1.22E-07 | chr:6:32648036 |
| 6 rs115359984 | 32491821 A | 1.778  | 1.22E-07 | chr:6:32648036 |
| 6 rs114786900 | 32491902 G | 1.787  | 1.22E-07 | chr:6:32648036 |
| 6 rs116089647 | 32491900 G | 1.787  | 1.22E-07 | chr:6:32648036 |
| 6 rs71549250  | 32501548 G | 2.433  | 1.22E-07 | chr:6:32648036 |

|               |            |        |          |                |
|---------------|------------|--------|----------|----------------|
| 6 rs9271439   | 32588234 G | 0.2783 | 1.22E-07 | chr:6:32648036 |
| 6 rs71549251  | 32501574 A | 2.472  | 1.22E-07 | chr:6:32648036 |
| 6 rs55716134  | 32538719 G | 2.274  | 1.22E-07 | chr:6:32648036 |
| 6 rs9269933   | 32551720 C | 1.873  | 1.23E-07 | chr:6:32648036 |
| 6 rs113310401 | 32473554 A | 1.872  | 1.24E-07 | chr:6:32648036 |
| 6 rs79601710  | 32472593 A | 1.776  | 1.24E-07 | chr:6:32648036 |
| 6 rs114313885 | 32473628 G | 1.77   | 1.24E-07 | chr:6:32648036 |
| 6 rs114666889 | 32473636 A | 1.77   | 1.24E-07 | chr:6:32648036 |
| 6 rs115214341 | 32473641 A | 1.77   | 1.24E-07 | chr:6:32648036 |
| 6 rs9272271   | 32603526 T | 0.2995 | 1.24E-07 | chr:6:32648036 |
| 6 rs9272272   | 32603530 A | 0.2995 | 1.24E-07 | chr:6:32648036 |
| 6 rs9274957   | 32641914 T | 0.5161 | 1.26E-07 | chr:6:32648036 |
| 6 rs1064707   | 32546743 C | 1.957  | 1.26E-07 | chr:6:32648036 |
| 6 rs75793795  | 32499131 T | 1.843  | 1.26E-07 | chr:6:32648036 |
| 6 rs28464944  | 32525369 G | 1.819  | 1.27E-07 | chr:6:32648036 |
| 6 rs28891473  | 32642525 T | 0.3933 | 1.27E-07 | chr:6:32648036 |
| 6 rs9268884   | 32431640 A | 2.45   | 1.27E-07 | chr:6:32648036 |
| 6 rs79433911  | 32534028 T | 1.875  | 1.27E-07 | chr:6:32648036 |
| 6 rs9270078   | 32554179 A | 1.943  | 1.27E-07 | chr:6:32648036 |
| 6 rs9271540   | 32590029 C | 2.468  | 1.27E-07 | chr:6:32648036 |
| 6 rs79617281  | 32472820 A | 1.778  | 1.28E-07 | chr:6:32648036 |
| 6 rs112616562 | 32618404 A | 1.907  | 1.28E-07 | chr:6:32648036 |
| 6 rs9269492   | 32542924 C | 1.999  | 1.28E-07 | chr:6:32648036 |
| 6 rs28891411  | 32640509 A | 0.3699 | 1.28E-07 | chr:6:32648036 |
| 6 rs76840420  | 32501567 G | 0.2707 | 1.28E-07 | chr:6:32648036 |
| 6 rs17212371  | 32652259 A | 0.3661 | 1.28E-07 | chr:6:32648036 |
| 6 rs9275538   | 32676017 T | 0.3807 | 1.28E-07 | chr:6:32648036 |
| 6 rs1044043   | 32793981 A | 2.553  | 1.28E-07 | chr:6:32648036 |
| 6 rs537009891 | 32497028 C | 1.902  | 1.28E-07 | chr:6:32648036 |
| 6 rs570057212 | 32497023 C | 1.902  | 1.28E-07 | chr:6:32648036 |
| 6 rs12215313  | 32441276 T | 2.516  | 1.29E-07 | chr:6:32648036 |
| 6 rs9270226   | 32556689 G | 2.386  | 1.30E-07 | chr:6:32648036 |
| 6 rs113190834 | 32478834 G | 1.772  | 1.30E-07 | chr:6:32648036 |
| 6 rs28568890  | 32505767 G | 2.093  | 1.30E-07 | chr:6:32648036 |
| 6 rs540141541 | 32487480 G | 0.1963 | 1.30E-07 | chr:6:32648036 |
| 6 rs72492318  | 32512506 A | 2.197  | 1.31E-07 | chr:6:32648036 |
| 6 rs78338612  | 32459408 G | 1.793  | 1.31E-07 | chr:6:32648036 |
| 6 rs112875478 | 32497019 T | 1.904  | 1.31E-07 | chr:6:32648036 |
| 6 rs9269444   | 32541974 C | 2.078  | 1.31E-07 | chr:6:32648036 |
| 6 rs281863499 | 32630949 G | 0.3587 | 1.32E-07 | chr:6:32648036 |
| 6 rs281863504 | 32630944 A | 0.3587 | 1.32E-07 | chr:6:32648036 |
| 6 rs17205409  | 32636640 C | 2.297  | 1.32E-07 | chr:6:32648036 |
| 6 rs17205416  | 32636641 A | 2.297  | 1.32E-07 | chr:6:32648036 |

|               |            |        |          |                |
|---------------|------------|--------|----------|----------------|
| 6 rs9272802   | 32610589 T | 0.3195 | 1.32E-07 | chr:6:32648036 |
| 6 rs79788626  | 32490246 C | 0.4331 | 1.33E-07 | chr:6:32648036 |
| 6 rs74768610  | 32509868 C | 2.379  | 1.33E-07 | chr:6:32648036 |
| 6 rs79215033  | 32509858 G | 2.379  | 1.33E-07 | chr:6:32648036 |
| 6 rs28746951  | 32652795 A | 0.3364 | 1.33E-07 | chr:6:32648036 |
| 6 rs28746996  | 32654214 C | 0.3733 | 1.33E-07 | chr:6:32648036 |
| 6 rs3998157   | 32678477 C | 0.3781 | 1.33E-07 | chr:6:32648036 |
| 6 rs4273729   | 32678597 C | 0.3781 | 1.33E-07 | chr:6:32648036 |
| 6 rs9275516   | 32674643 A | 0.3781 | 1.33E-07 | chr:6:32648036 |
| 6 rs9275517   | 32674649 A | 0.3781 | 1.33E-07 | chr:6:32648036 |
| 6 rs9275526   | 32675237 G | 0.3781 | 1.33E-07 | chr:6:32648036 |
| 6 rs533015777 | 32496481 C | 1.859  | 1.33E-07 | chr:6:32648036 |
| 6 rs114828939 | 32489204 G | 1.778  | 1.34E-07 | chr:6:32648036 |
| 6 rs9269448   | 32542011 C | 2.049  | 1.34E-07 | chr:6:32648036 |
| 6 rs9272050   | 32599071 G | 2.266  | 1.34E-07 | chr:6:32648036 |
| 6 rs67303455  | 32633153 G | 0.4022 | 1.34E-07 | chr:6:32648036 |
| 6 rs75781111  | 32458280 A | 1.812  | 1.34E-07 | chr:6:32648036 |
| 6 rs546754435 | 32609223 T | 0.3201 | 1.35E-07 | chr:6:32648036 |
| 6 rs568289532 | 32609224 C | 0.3201 | 1.35E-07 | chr:6:32648036 |
| 6 rs9270097   | 32554506 C | 2.299  | 1.35E-07 | chr:6:32648036 |
| 6 rs141174036 | 32488178 G | 1.78   | 1.36E-07 | chr:6:32648036 |
| 6 rs9270707   | 32567351 A | 2.129  | 1.36E-07 | chr:6:32648036 |
| 6 rs111570293 | 32473792 T | 1.767  | 1.36E-07 | chr:6:32648036 |
| 6 rs143375763 | 32488545 G | 1.766  | 1.36E-07 | chr:6:32648036 |
| 6 rs149642638 | 32488527 C | 1.766  | 1.36E-07 | chr:6:32648036 |
| 6 rs144607337 | 32488788 G | 1.778  | 1.37E-07 | chr:6:32648036 |
| 6 rs563135592 | 32458504 G | 1.763  | 1.37E-07 | chr:6:32648036 |
| 6 rs111543935 | 32468718 A | 1.78   | 1.37E-07 | chr:6:32648036 |
| 6 rs77247372  | 32633415 T | 0.4248 | 1.37E-07 | chr:6:32648036 |
| 6 rs77413079  | 32458003 C | 1.852  | 1.37E-07 | chr:6:32648036 |
| 6 rs9272203   | 32601886 G | 0.2442 | 1.38E-07 | chr:6:32648036 |
| 6 rs9269892   | 32551054 C | 1.864  | 1.39E-07 | chr:6:32648036 |
| 6 rs9269893   | 32551058 A | 1.864  | 1.39E-07 | chr:6:32648036 |
| 6 rs9269895   | 32551068 C | 1.864  | 1.39E-07 | chr:6:32648036 |
| 6 rs74188963  | 32632915 A | 0.4015 | 1.39E-07 | chr:6:32648036 |
| 6 rs9269427   | 32541581 T | 1.889  | 1.39E-07 | chr:6:32648036 |
| 6 rs58427731  | 32493017 C | 1.884  | 1.39E-07 | chr:6:32648036 |
| 6 rs17205128  | 32602217 G | 0.365  | 1.40E-07 | chr:6:32648036 |
| 6 rs17205135  | 32602222 G | 0.365  | 1.40E-07 | chr:6:32648036 |
| 6 rs17211510  | 32602430 A | 0.365  | 1.40E-07 | chr:6:32648036 |
| 6 rs3104391   | 32594901 T | 2.155  | 1.40E-07 | chr:6:32648036 |
| 6 rs28747047  | 32655578 T | 0.3794 | 1.40E-07 | chr:6:32648036 |
| 6 rs9270095   | 32554482 G | 2.273  | 1.41E-07 | chr:6:32648036 |

|               |            |        |          |                |
|---------------|------------|--------|----------|----------------|
| 6 rs532386490 | 32487826 A | 1.775  | 1.41E-07 | chr:6:32648036 |
| 6 rs67110942  | 32626885 C | 2.079  | 1.42E-07 | chr:6:32648036 |
| 6 rs74587162  | 32509455 C | 2.329  | 1.42E-07 | chr:6:32648036 |
| 6 rs28366302  | 32560934 C | 2.446  | 1.43E-07 | chr:6:32648036 |
| 6 rs17211545  | 32602608 C | 0.3651 | 1.43E-07 | chr:6:32648036 |
| 6 rs9268954   | 32434011 A | 2.257  | 1.43E-07 | chr:6:32648036 |
| 6 rs9271432   | 32588056 T | 2.396  | 1.45E-07 | chr:6:32648036 |
| 6 rs9271433   | 32588057 G | 2.396  | 1.45E-07 | chr:6:32648036 |
| 6 rs67311368  | 32633351 A | 0.4471 | 1.45E-07 | chr:6:32648036 |
| 6 rs9271125   | 32576865 G | 2.022  | 1.45E-07 | chr:6:32648036 |
| 6 rs9274745   | 32638058 C | 0.3975 | 1.45E-07 | chr:6:32648036 |
| 6 rs60255287  | 32525754 T | 1.837  | 1.46E-07 | chr:6:32648036 |
| 6 rs9271424   | 32587922 C | 0.2821 | 1.47E-07 | chr:6:32648036 |
| 6 rs9271425   | 32587923 G | 0.2821 | 1.47E-07 | chr:6:32648036 |
| 6 rs9271398   | 32587508 C | 2.411  | 1.47E-07 | chr:6:32648036 |
| 6 rs546744649 | 32490889 G | 1.787  | 1.48E-07 | chr:6:32648036 |
| 6 rs9269504   | 32543162 T | 2.008  | 1.48E-07 | chr:6:32648036 |
| 6 rs9271430   | 32588002 C | 2.393  | 1.48E-07 | chr:6:32648036 |
| 6 rs28657910  | 32526822 T | 1.972  | 1.49E-07 | chr:6:32648036 |
| 6 rs3200830   | 32520774 T | 2.337  | 1.50E-07 | chr:6:32648036 |
| 6 rs9272225   | 32602372 T | 0.3273 | 1.50E-07 | chr:6:32648036 |
| 6 rs9272535   | 32606756 A | 0.2806 | 1.50E-07 | chr:6:32648036 |
| 6 rs28891407  | 32640359 T | 0.3715 | 1.51E-07 | chr:6:32648036 |
| 6 rs28891408  | 32640382 A | 0.3715 | 1.51E-07 | chr:6:32648036 |
| 6 rs72853908  | 32505652 A | 1.943  | 1.51E-07 | chr:6:32648036 |
| 6 rs11751908  | 32599862 G | 0.3476 | 1.51E-07 | chr:6:32648036 |
| 6 rs181332009 | 32459293 T | 1.776  | 1.51E-07 | chr:6:32648036 |
| 6 rs188621671 | 32459289 A | 1.776  | 1.51E-07 | chr:6:32648036 |
| 6 rs9270048   | 32553705 A | 2.437  | 1.51E-07 | chr:6:32648036 |
| 6 rs9271155   | 32577586 G | 2.481  | 1.51E-07 | chr:6:32648036 |
| 6 rs9272257   | 32603189 T | 0.3063 | 1.52E-07 | chr:6:32648036 |
| 6 rs9272258   | 32603191 T | 0.3063 | 1.52E-07 | chr:6:32648036 |
| 6 rs9272259   | 32603192 G | 0.3063 | 1.52E-07 | chr:6:32648036 |
| 6 rs9271624   | 32591921 T | 2.418  | 1.53E-07 | chr:6:32648036 |
| 6 rs9271628   | 32591971 G | 2.418  | 1.53E-07 | chr:6:32648036 |
| 6 rs372591108 | 32490132 G | 0.4934 | 1.53E-07 | chr:6:32648036 |
| 6 rs9271643   | 32592229 A | 2.427  | 1.53E-07 | chr:6:32648036 |
| 6 rs113695046 | 32522072 T | 2.414  | 1.53E-07 | chr:6:32648036 |
| 6 rs9271526   | 32589862 A | 0.2817 | 1.54E-07 | chr:6:32648036 |
| 6 rs76977906  | 32506086 A | 1.872  | 1.55E-07 | chr:6:32648036 |
| 6 rs9274700   | 32637180 G | 2.363  | 1.56E-07 | chr:6:32648036 |
| 6 rs9274704   | 32637213 G | 2.363  | 1.56E-07 | chr:6:32648036 |
| 6 rs28891406  | 32640336 A | 0.3689 | 1.56E-07 | chr:6:32648036 |



|               |            |        |          |                |
|---------------|------------|--------|----------|----------------|
| 6 rs116518095 | 32459351 G | 1.78   | 1.56E-07 | chr:6:32648036 |
| 6 rs77950401  | 32456891 A | 1.764  | 1.57E-07 | chr:6:32648036 |
| 6 rs548717541 | 32674839 G | 0.3819 | 1.57E-07 | chr:6:32648036 |
| 6 rs28747061  | 32656653 T | 0.3702 | 1.57E-07 | chr:6:32648036 |
| 6 rs28747062  | 32656661 C | 0.3702 | 1.57E-07 | chr:6:32648036 |
| 6 rs28747063  | 32656668 C | 0.3702 | 1.57E-07 | chr:6:32648036 |
| 6 rs34582150  | 32503930 C | 2.421  | 1.57E-07 | chr:6:32648036 |
| 6 rs9270918   | 32572302 G | 2.063  | 1.57E-07 | chr:6:32648036 |
| 6 rs9270919   | 32572305 G | 2.063  | 1.57E-07 | chr:6:32648036 |
| 6 rs28747011  | 32654554 G | 0.3738 | 1.58E-07 | chr:6:32648036 |
| 6 rs561142110 | 32654552 G | 0.3738 | 1.58E-07 | chr:6:32648036 |
| 6 rs9270050   | 32553740 G | 2.127  | 1.58E-07 | chr:6:32648036 |
| 6 rs74203503  | 32632973 C | 0.4409 | 1.58E-07 | chr:6:32648036 |
| 6 rs116254278 | 32521312 A | 2.389  | 1.59E-07 | chr:6:32648036 |
| 6 rs5007258   | 32379239 A | 0.3807 | 1.59E-07 | chr:6:32648036 |
| 6 rs5007259   | 32379101 T | 0.3807 | 1.59E-07 | chr:6:32648036 |
| 6 rs5007260   | 32379047 G | 0.3807 | 1.59E-07 | chr:6:32648036 |
| 6 rs5007266   | 32378834 T | 0.3807 | 1.59E-07 | chr:6:32648036 |
| 6 rs6906730   | 32379445 T | 0.3807 | 1.59E-07 | chr:6:32648036 |
| 6 rs6911383   | 32379682 T | 0.3807 | 1.59E-07 | chr:6:32648036 |
| 6 rs6932542   | 32380262 A | 0.3807 | 1.59E-07 | chr:6:32648036 |
| 6 rs6932810   | 32380190 G | 0.3807 | 1.59E-07 | chr:6:32648036 |
| 6 rs6938337   | 32381041 C | 0.3807 | 1.59E-07 | chr:6:32648036 |
| 6 rs9268501   | 32376882 T | 0.3807 | 1.59E-07 | chr:6:32648036 |
| 6 rs9268502   | 32376932 C | 0.3807 | 1.59E-07 | chr:6:32648036 |
| 6 rs9268504   | 32377116 C | 0.3807 | 1.59E-07 | chr:6:32648036 |
| 6 rs9268506   | 32377470 C | 0.3807 | 1.59E-07 | chr:6:32648036 |
| 6 rs9268507   | 32377539 A | 0.3807 | 1.59E-07 | chr:6:32648036 |
| 6 rs9268508   | 32377588 T | 0.3807 | 1.59E-07 | chr:6:32648036 |
| 6 rs9268513   | 32378787 T | 0.3807 | 1.59E-07 | chr:6:32648036 |
| 6 rs76803697  | 32459456 A | 1.79   | 1.59E-07 | chr:6:32648036 |
| 6 rs9270227   | 32556699 T | 2.052  | 1.60E-07 | chr:6:32648036 |
| 6 rs9270141   | 32555217 T | 2.234  | 1.60E-07 | chr:6:32648036 |
| 6 rs142804168 | 32487361 A | 0.1787 | 1.61E-07 | chr:6:32648036 |
| 6 rs28891403  | 32640257 C | 0.3708 | 1.62E-07 | chr:6:32648036 |
| 6 rs28891404  | 32640268 A | 0.3708 | 1.62E-07 | chr:6:32648036 |
| 6 rs71538525  | 32536630 A | 1.78   | 1.62E-07 | chr:6:32648036 |
| 6 rs9271550   | 32590274 A | 0.2817 | 1.62E-07 | chr:6:32648036 |
| 6 rs2516051   | 32570184 T | 2.449  | 1.62E-07 | chr:6:32648036 |
| 6 rs2516052   | 32570147 G | 2.449  | 1.62E-07 | chr:6:32648036 |
| 6 rs111724472 | 32478484 T | 1.758  | 1.63E-07 | chr:6:32648036 |
| 6 rs28746901  | 32648681 T | 0.3937 | 1.63E-07 | chr:6:32648036 |
| 6 rs115731929 | 32496295 A | 1.769  | 1.63E-07 | chr:6:32648036 |

|               |            |        |          |                |
|---------------|------------|--------|----------|----------------|
| 6 rs17205177  | 32602518 G | 0.3654 | 1.64E-07 | chr:6:32648036 |
| 6 rs17211601  | 32602817 G | 0.3654 | 1.64E-07 | chr:6:32648036 |
| 6 rs28407322  | 32603355 C | 0.3654 | 1.64E-07 | chr:6:32648036 |
| 6 rs28533091  | 32602864 A | 0.3654 | 1.64E-07 | chr:6:32648036 |
| 6 rs28694749  | 32603029 C | 0.3654 | 1.64E-07 | chr:6:32648036 |
| 6 rs34481656  | 32501664 G | 2.31   | 1.64E-07 | chr:6:32648036 |
| 6 rs28396311  | 32628190 C | 0.3543 | 1.64E-07 | chr:6:32648036 |
| 6 rs62405565  | 32452281 G | 2.452  | 1.65E-07 | chr:6:32648036 |
| 6 rs182144635 | 32459309 T | 1.781  | 1.65E-07 | chr:6:32648036 |
| 6 rs191593025 | 32459304 T | 1.781  | 1.65E-07 | chr:6:32648036 |
| 6 rs113534515 | 32460798 C | 3.05   | 1.65E-07 | chr:6:32648036 |
| 6 rs28746899  | 32648646 A | 0.4028 | 1.66E-07 | chr:6:32648036 |
| 6 rs9272840   | 32610683 T | 0.3003 | 1.66E-07 | chr:6:32648036 |
| 6 rs376174259 | 32487609 C | 1.799  | 1.66E-07 | chr:6:32648036 |
| 6 rs113986678 | 32497205 T | 1.861  | 1.67E-07 | chr:6:32648036 |
| 6 rs71565340  | 32452506 T | 2.448  | 1.67E-07 | chr:6:32648036 |
| 6 rs74317846  | 32457217 G | 1.758  | 1.67E-07 | chr:6:32648036 |
| 6 rs9270216   | 32556580 T | 0.4114 | 1.67E-07 | chr:6:32648036 |
| 6 rs17209950  | 32446588 A | 2.448  | 1.68E-07 | chr:6:32648036 |
| 6 rs9274323   | 32632205 T | 0.5035 | 1.68E-07 | chr:6:32648036 |
| 6 rs9271662   | 32592628 A | 0.3086 | 1.68E-07 | chr:6:32648036 |
| 6 rs118128111 | 32613112 C | 2.702  | 1.69E-07 | chr:6:32648036 |
| 6 rs9271379   | 32587333 T | 0.2816 | 1.69E-07 | chr:6:32648036 |
| 6 rs7770879   | 32598423 A | 0.3416 | 1.70E-07 | chr:6:32648036 |
| 6 rs7771138   | 32598419 A | 0.3416 | 1.70E-07 | chr:6:32648036 |
| 6 rs190202109 | 32525736 G | 0.514  | 1.70E-07 | chr:6:32648036 |
| 6 rs113023734 | 32490098 A | 1.777  | 1.71E-07 | chr:6:32648036 |
| 6 rs199705602 | 32606584 A | 0.5047 | 1.71E-07 | chr:6:32648036 |
| 6 rs9270098   | 32554517 T | 2.29   | 1.71E-07 | chr:6:32648036 |
| 6 rs74949117  | 32506846 T | 1.931  | 1.72E-07 | chr:6:32648036 |
| 6 rs9268965   | 32434240 A | 2.435  | 1.72E-07 | chr:6:32648036 |
| 6 rs9270815   | 32569859 A | 2.513  | 1.72E-07 | chr:6:32648036 |
| 6 rs28746949  | 32652774 A | 0.3368 | 1.73E-07 | chr:6:32648036 |
| 6 rs68027833  | 32630028 A | 0.3981 | 1.73E-07 | chr:6:32648036 |
| 6 rs9271160   | 32577646 A | 2.512  | 1.73E-07 | chr:6:32648036 |
| 6 rs9275513   | 32674564 A | 0.3819 | 1.73E-07 | chr:6:32648036 |
| 6 rs9275515   | 32674573 T | 0.3819 | 1.73E-07 | chr:6:32648036 |
| 6 rs9275540   | 32676139 T | 0.3819 | 1.73E-07 | chr:6:32648036 |
| 6 rs376343292 | 32514901 C | 1.844  | 1.73E-07 | chr:6:32648036 |
| 6 rs9268905   | 32432077 C | 2.444  | 1.73E-07 | chr:6:32648036 |
| 6 rs9270225   | 32556683 G | 2.275  | 1.74E-07 | chr:6:32648036 |
| 6 rs546173503 | 32523200 C | 2.515  | 1.74E-07 | chr:6:32648036 |
| 6 rs111840744 | 32491048 G | 1.77   | 1.74E-07 | chr:6:32648036 |

|               |            |        |          |                |
|---------------|------------|--------|----------|----------------|
| 6 rs9270840   | 32570377 C | 2.278  | 1.74E-07 | chr:6:32648036 |
| 6 rs111894799 | 32473167 C | 1.761  | 1.74E-07 | chr:6:32648036 |
| 6 rs4585607   | 32624407 A | 1.88   | 1.74E-07 | chr:6:32648036 |
| 6 rs76153169  | 32484651 G | 1.753  | 1.75E-07 | chr:6:32648036 |
| 6 rs79394030  | 32484625 T | 1.753  | 1.75E-07 | chr:6:32648036 |
| 6 rs9272683   | 32608969 G | 0.3621 | 1.75E-07 | chr:6:32648036 |
| 6 rs113011827 | 32513453 T | 2.322  | 1.75E-07 | chr:6:32648036 |
| 6 rs77852709  | 32456753 T | 1.752  | 1.75E-07 | chr:6:32648036 |
| 6 rs28891435  | 32641241 G | 0.4309 | 1.75E-07 | chr:6:32648036 |
| 6 rs185641567 | 32488562 C | 1.753  | 1.76E-07 | chr:6:32648036 |
| 6 rs9391877   | 32438867 T | 2.434  | 1.76E-07 | chr:6:32648036 |
| 6 rs9405108   | 32438648 T | 2.434  | 1.76E-07 | chr:6:32648036 |
| 6 rs9405109   | 32439029 C | 2.434  | 1.76E-07 | chr:6:32648036 |
| 6 rs75796665  | 32473799 T | 1.76   | 1.77E-07 | chr:6:32648036 |
| 6 rs9271085   | 32576152 T | 2.384  | 1.77E-07 | chr:6:32648036 |
| 6 rs75635252  | 32509332 G | 2.285  | 1.78E-07 | chr:6:32648036 |
| 6 rs79207037  | 32509294 A | 2.285  | 1.78E-07 | chr:6:32648036 |
| 6 rs62405644  | 32517933 T | 2.456  | 1.78E-07 | chr:6:32648036 |
| 6 rs9271654   | 32592565 A | 0.3098 | 1.78E-07 | chr:6:32648036 |
| 6 rs112523731 | 32482598 T | 1.762  | 1.79E-07 | chr:6:32648036 |
| 6 rs57588792  | 32510012 A | 2.312  | 1.79E-07 | chr:6:32648036 |
| 6 rs9271538   | 32589983 A | 0.289  | 1.79E-07 | chr:6:32648036 |
| 6 rs79357367  | 32457242 C | 1.77   | 1.79E-07 | chr:6:32648036 |
| 6 rs75744841  | 32503575 C | 2.299  | 1.79E-07 | chr:6:32648036 |
| 6 rs41316235  | 32650402 C | 0.2263 | 1.79E-07 | chr:6:32648036 |
| 6 rs28366299  | 32560870 A | 2.434  | 1.80E-07 | chr:6:32648036 |
| 6 rs9270016   | 32553003 T | 2.146  | 1.80E-07 | chr:6:32648036 |
| 6 rs9270018   | 32553026 G | 2.146  | 1.80E-07 | chr:6:32648036 |
| 6 rs79890132  | 32517668 A | 2.31   | 1.80E-07 | chr:6:32648036 |
| 6 rs79696067  | 32469825 T | 1.771  | 1.81E-07 | chr:6:32648036 |
| 6 rs17209280  | 32440269 G | 0.2375 | 1.81E-07 | chr:6:32648036 |
| 6 rs9270920   | 32572322 C | 2.056  | 1.82E-07 | chr:6:32648036 |
| 6 rs9270921   | 32572326 C | 2.056  | 1.82E-07 | chr:6:32648036 |
| 6 rs183899028 | 32459275 G | 1.775  | 1.82E-07 | chr:6:32648036 |
| 6 rs570540391 | 32494107 G | 1.783  | 1.82E-07 | chr:6:32648036 |
| 6 rs9271392   | 32587456 G | 0.286  | 1.82E-07 | chr:6:32648036 |
| 6 rs28891397  | 32639777 A | 0.373  | 1.83E-07 | chr:6:32648036 |
| 6 rs28366267  | 32559781 C | 2.348  | 1.83E-07 | chr:6:32648036 |
| 6 rs57586748  | 32526068 T | 1.805  | 1.83E-07 | chr:6:32648036 |
| 6 rs17206042  | 32652244 A | 0.3719 | 1.84E-07 | chr:6:32648036 |
| 6 rs9270923   | 32572405 C | 2.268  | 1.84E-07 | chr:6:32648036 |
| 6 rs9272724   | 32609506 C | 0.3378 | 1.84E-07 | chr:6:32648036 |
| 6 rs9269905   | 32551291 T | 1.79   | 1.86E-07 | chr:6:32648036 |

|               |            |        |          |                |
|---------------|------------|--------|----------|----------------|
| 6 rs9270595   | 32561579 C | 2.244  | 1.86E-07 | chr:6:32648036 |
| 6 rs76224106  | 32456928 C | 1.757  | 1.86E-07 | chr:6:32648036 |
| 6 rs9269212   | 32450249 A | 0.316  | 1.86E-07 | chr:6:32648036 |
| 6 rs9269213   | 32450250 A | 0.316  | 1.86E-07 | chr:6:32648036 |
| 6 rs9269609   | 32545211 T | 1.863  | 1.86E-07 | chr:6:32648036 |
| 6 rs9269610   | 32545218 C | 1.863  | 1.86E-07 | chr:6:32648036 |
| 6 rs149125987 | 32459364 A | 1.777  | 1.88E-07 | chr:6:32648036 |
| 6 rs534009461 | 32459357 T | 1.777  | 1.88E-07 | chr:6:32648036 |
| 6 rs77765274  | 32459950 A | 1.772  | 1.88E-07 | chr:6:32648036 |
| 6 rs9271549   | 32590248 C | 2.434  | 1.88E-07 | chr:6:32648036 |
| 6 rs75802100  | 32503825 T | 2.261  | 1.88E-07 | chr:6:32648036 |
| 6 rs9271542   | 32590091 G | 2.433  | 1.88E-07 | chr:6:32648036 |
| 6 rs28891462  | 32642026 A | 0.3865 | 1.89E-07 | chr:6:32648036 |
| 6 rs9270035   | 32553446 G | 2.454  | 1.89E-07 | chr:6:32648036 |
| 6 rs9270036   | 32553475 A | 2.454  | 1.89E-07 | chr:6:32648036 |
| 6 rs9271082   | 32576086 T | 2.423  | 1.89E-07 | chr:6:32648036 |
| 6 rs34297496  | 32634229 T | 0.2249 | 1.89E-07 | chr:6:32648036 |
| 6 rs41270907  | 32629613 G | 0.2249 | 1.89E-07 | chr:6:32648036 |
| 6 rs41270911  | 32629618 A | 0.2249 | 1.89E-07 | chr:6:32648036 |
| 6 rs41270915  | 32629692 T | 0.2249 | 1.89E-07 | chr:6:32648036 |
| 6 rs522308    | 32581922 T | 2.455  | 1.89E-07 | chr:6:32648036 |
| 6 rs3104406   | 32682443 G | 0.4421 | 1.90E-07 | chr:6:32648036 |
| 6 rs529557359 | 32490848 G | 1.774  | 1.90E-07 | chr:6:32648036 |
| 6 rs9269322   | 32539924 C | 2.267  | 1.90E-07 | chr:6:32648036 |
| 6 rs9270230   | 32556787 C | 2.356  | 1.90E-07 | chr:6:32648036 |
| 6 rs9269407   | 32541376 T | 1.906  | 1.91E-07 | chr:6:32648036 |
| 6 rs17212216  | 32651509 C | 0.3799 | 1.92E-07 | chr:6:32648036 |
| 6 rs34927613  | 32600211 A | 0.3558 | 1.93E-07 | chr:6:32648036 |
| 6 rs76782015  | 32459937 T | 1.766  | 1.93E-07 | chr:6:32648036 |
| 6 rs145649164 | 32601918 A | 0.3573 | 1.93E-07 | chr:6:32648036 |
| 6 rs28746965  | 32653136 G | 0.3581 | 1.94E-07 | chr:6:32648036 |
| 6 rs9269773   | 32548786 T | 2.486  | 1.95E-07 | chr:6:32648036 |
| 6 rs79187454  | 32499123 G | 1.836  | 1.96E-07 | chr:6:32648036 |
| 6 rs62405592  | 32508757 A | 2.423  | 1.96E-07 | chr:6:32648036 |
| 6 rs28366281  | 32560266 T | 2.136  | 1.98E-07 | chr:6:32648036 |
| 6 rs112360905 | 32509019 G | 2.281  | 1.98E-07 | chr:6:32648036 |
| 6 rs115222035 | 32478706 A | 0.1302 | 1.98E-07 | chr:6:32648036 |
| 6 rs111432098 | 32520940 G | 2.324  | 1.99E-07 | chr:6:32648036 |
| 6 rs113487704 | 32485790 A | 1.804  | 1.99E-07 | chr:6:32648036 |
| 6 rs79250000  | 32487686 G | 1.859  | 1.99E-07 | chr:6:32648036 |
| 6 rs72847605  | 32535563 A | 1.884  | 1.99E-07 | chr:6:32648036 |
| 6 rs28891460  | 32642016 G | 0.3876 | 1.99E-07 | chr:6:32648036 |
| 6 rs9272231   | 32602617 C | 2.215  | 1.99E-07 | chr:6:32648036 |

|               |            |        |          |                |
|---------------|------------|--------|----------|----------------|
| 6 rs9269525   | 32543676 C | 1.927  | 2.00E-07 | chr:6:32648036 |
| 6 rs28746950  | 32652785 A | 0.3458 | 2.00E-07 | chr:6:32648036 |
| 6 rs72508449  | 32492032 T | 1.77   | 2.00E-07 | chr:6:32648036 |
| 6 rs9268503   | 32377061 C | 0.3824 | 2.02E-07 | chr:6:32648036 |
| 6 rs2395517   | 32597792 A | 2.45   | 2.02E-07 | chr:6:32648036 |
| 6 rs535476317 | 32570019 A | 2.422  | 2.02E-07 | chr:6:32648036 |
| 6 rs191303459 | 32457213 C | 1.753  | 2.03E-07 | chr:6:32648036 |
| 6 rs115744566 | 32504372 T | 2.338  | 2.03E-07 | chr:6:32648036 |
| 6 rs674449961 | 32497550 G | 2.166  | 2.03E-07 | chr:6:32648036 |
| 6 rs13211123  | 32600249 C | 0.3546 | 2.04E-07 | chr:6:32648036 |
| 6 rs78992700  | 32503806 A | 2.317  | 2.05E-07 | chr:6:32648036 |
| 6 rs534289980 | 32490871 A | 1.779  | 2.06E-07 | chr:6:32648036 |
| 6 rs551839031 | 32490868 C | 1.779  | 2.06E-07 | chr:6:32648036 |
| 6 rs566929862 | 32490870 G | 1.779  | 2.06E-07 | chr:6:32648036 |
| 6 rs536427156 | 32453103 A | 0.4398 | 2.07E-07 | chr:6:32648036 |
| 6 rs115003145 | 32496949 A | 1.888  | 2.07E-07 | chr:6:32648036 |
| 6 rs9270790   | 32569230 G | 2.482  | 2.07E-07 | chr:6:32648036 |
| 6 rs73401342  | 32455812 C | 1.766  | 2.08E-07 | chr:6:32648036 |
| 6 rs113484779 | 32514162 T | 2.301  | 2.08E-07 | chr:6:32648036 |
| 6 rs113961302 | 32514219 G | 2.301  | 2.08E-07 | chr:6:32648036 |
| 6 rs9271426   | 32587973 A | 2.373  | 2.08E-07 | chr:6:32648036 |
| 6 rs116855451 | 32732533 C | 3.462  | 2.08E-07 | chr:6:32648036 |
| 6 rs116892158 | 32732603 C | 3.462  | 2.08E-07 | chr:6:32648036 |
| 6 rs117026677 | 32728027 C | 3.462  | 2.08E-07 | chr:6:32648036 |
| 6 rs117056446 | 32732923 A | 3.462  | 2.08E-07 | chr:6:32648036 |
| 6 rs117162283 | 32735434 A | 3.462  | 2.08E-07 | chr:6:32648036 |
| 6 rs117177698 | 32731377 A | 3.462  | 2.08E-07 | chr:6:32648036 |
| 6 rs117189255 | 32732807 A | 3.462  | 2.08E-07 | chr:6:32648036 |
| 6 rs117443797 | 32735475 G | 3.462  | 2.08E-07 | chr:6:32648036 |
| 6 rs117557023 | 32731608 T | 3.462  | 2.08E-07 | chr:6:32648036 |
| 6 rs117728701 | 32721726 C | 3.462  | 2.08E-07 | chr:6:32648036 |
| 6 rs117784767 | 32733404 T | 3.462  | 2.08E-07 | chr:6:32648036 |
| 6 rs117807149 | 32732156 A | 3.462  | 2.08E-07 | chr:6:32648036 |
| 6 rs117987908 | 32722563 A | 3.462  | 2.08E-07 | chr:6:32648036 |
| 6 rs2071548   | 32731601 G | 3.462  | 2.08E-07 | chr:6:32648036 |
| 6 rs2071549   | 32731590 C | 3.462  | 2.08E-07 | chr:6:32648036 |
| 6 rs57361865  | 32734891 T | 3.462  | 2.08E-07 | chr:6:32648036 |
| 6 rs73404808  | 32731932 G | 3.462  | 2.08E-07 | chr:6:32648036 |
| 6 rs73404817  | 32732661 G | 3.462  | 2.08E-07 | chr:6:32648036 |
| 6 rs73404818  | 32732736 A | 3.462  | 2.08E-07 | chr:6:32648036 |
| 6 rs73404819  | 32732811 T | 3.462  | 2.08E-07 | chr:6:32648036 |
| 6 rs76453595  | 32732201 G | 3.462  | 2.08E-07 | chr:6:32648036 |
| 6 rs79433101  | 32732586 A | 3.462  | 2.08E-07 | chr:6:32648036 |

|               |            |        |          |                |
|---------------|------------|--------|----------|----------------|
| 6 rs182793436 | 32547530 T | 0.4054 | 2.08E-07 | chr:6:32648036 |
| 6 rs9272222   | 32602336 A | 0.3297 | 2.08E-07 | chr:6:32648036 |
| 6 rs3129767   | 32594975 G | 2.117  | 2.09E-07 | chr:6:32648036 |
| 6 rs3207984   | 32609214 T | 0.3295 | 2.09E-07 | chr:6:32648036 |
| 6 rs200071340 | 32489937 A | 0.2854 | 2.10E-07 | chr:6:32648036 |
| 6 rs201056052 | 32489935 G | 0.2854 | 2.10E-07 | chr:6:32648036 |
| 6 rs533509110 | 32482220 C | 1.761  | 2.11E-07 | chr:6:32648036 |
| 6 rs562851322 | 32482216 A | 1.761  | 2.11E-07 | chr:6:32648036 |
| 6 rs9269934   | 32551721 A | 0.503  | 2.11E-07 | chr:6:32648036 |
| 6 rs9275518   | 32674700 G | 0.3858 | 2.12E-07 | chr:6:32648036 |
| 6 rs13202749  | 32585299 G | 0.3473 | 2.12E-07 | chr:6:32648036 |
| 6 rs9274980   | 32642290 G | 0.4785 | 2.12E-07 | chr:6:32648036 |
| 6 rs9272448   | 32605439 T | 0.3175 | 2.12E-07 | chr:6:32648036 |
| 6 rs9269655   | 32546132 G | 1.892  | 2.12E-07 | chr:6:32648036 |
| 6 rs9270554   | 32560546 C | 2.251  | 2.12E-07 | chr:6:32648036 |
| 6 rs536833125 | 32677669 C | 0.3897 | 2.13E-07 | chr:6:32648036 |
| 6 rs3828849   | 32520664 A | 2.308  | 2.13E-07 | chr:6:32648036 |
| 6 rs66948209  | 32505043 T | 2.109  | 2.13E-07 | chr:6:32648036 |
| 6 rs78281855  | 32459437 T | 1.773  | 2.13E-07 | chr:6:32648036 |
| 6 rs150773158 | 32488722 A | 1.761  | 2.13E-07 | chr:6:32648036 |
| 6 rs17205114  | 32602196 G | 0.3718 | 2.16E-07 | chr:6:32648036 |
| 6 rs17211454  | 32602179 A | 0.3718 | 2.16E-07 | chr:6:32648036 |
| 6 rs13213821  | 32585199 G | 0.451  | 2.17E-07 | chr:6:32648036 |
| 6 rs13217434  | 32585388 C | 0.451  | 2.17E-07 | chr:6:32648036 |
| 6 rs281863221 | 32631568 C | 0.3851 | 2.17E-07 | chr:6:32648036 |
| 6 rs9270089   | 32554351 T | 2.376  | 2.17E-07 | chr:6:32648036 |
| 6 rs28891472  | 32642515 C | 0.4046 | 2.17E-07 | chr:6:32648036 |
| 6 rs9269929   | 32551680 T | 1.855  | 2.17E-07 | chr:6:32648036 |
| 6 rs9275587   | 32680379 T | 0.3947 | 2.18E-07 | chr:6:32648036 |
| 6 rs9271525   | 32589842 G | 2.427  | 2.19E-07 | chr:6:32648036 |
| 6 rs28891381  | 32639179 A | 0.3628 | 2.19E-07 | chr:6:32648036 |
| 6 rs4279477   | 32634901 G | 0.4271 | 2.20E-07 | chr:6:32648036 |
| 6 rs112749594 | 32485397 G | 1.761  | 2.20E-07 | chr:6:32648036 |
| 6 rs114861997 | 32459359 C | 1.757  | 2.21E-07 | chr:6:32648036 |
| 6 rs28435909  | 32606695 C | 0.3836 | 2.24E-07 | chr:6:32648036 |
| 6 rs73726200  | 32492592 A | 1.746  | 2.24E-07 | chr:6:32648036 |
| 6 rs113104010 | 32482544 G | 1.754  | 2.25E-07 | chr:6:32648036 |
| 6 rs115009189 | 32487605 T | 1.785  | 2.25E-07 | chr:6:32648036 |
| 6 rs9271080   | 32576076 C | 2.444  | 2.25E-07 | chr:6:32648036 |
| 6 rs191737659 | 32488564 G | 1.745  | 2.26E-07 | chr:6:32648036 |
| 6 rs77122291  | 32559019 A | 2.364  | 2.26E-07 | chr:6:32648036 |
| 6 rs74930081  | 32474088 C | 1.78   | 2.26E-07 | chr:6:32648036 |
| 6 rs75800703  | 32474096 T | 1.78   | 2.26E-07 | chr:6:32648036 |

|               |            |        |          |                |
|---------------|------------|--------|----------|----------------|
| 6 rs76659340  | 32474090 G | 1.78   | 2.26E-07 | chr:6:32648036 |
| 6 rs77017079  | 32474095 C | 1.78   | 2.26E-07 | chr:6:32648036 |
| 6 rs67947168  | 32508922 T | 2.379  | 2.27E-07 | chr:6:32648036 |
| 6 rs142092031 | 32491042 A | 1.758  | 2.27E-07 | chr:6:32648036 |
| 6 rs73726196  | 32492261 A | 1.746  | 2.27E-07 | chr:6:32648036 |
| 6 rs17212350  | 32652173 G | 0.3811 | 2.27E-07 | chr:6:32648036 |
| 6 rs17212357  | 32652174 T | 0.3811 | 2.27E-07 | chr:6:32648036 |
| 6 rs17212364  | 32652176 G | 0.3811 | 2.27E-07 | chr:6:32648036 |
| 6 rs9272274   | 32603599 T | 0.3133 | 2.27E-07 | chr:6:32648036 |
| 6 rs12197312  | 32442180 C | 2.421  | 2.29E-07 | chr:6:32648036 |
| 6 rs12215261  | 32441150 T | 2.421  | 2.29E-07 | chr:6:32648036 |
| 6 rs28895223  | 32435550 A | 2.421  | 2.29E-07 | chr:6:32648036 |
| 6 rs28895234  | 32437050 G | 2.421  | 2.29E-07 | chr:6:32648036 |
| 6 rs7747529   | 32431124 A | 2.421  | 2.29E-07 | chr:6:32648036 |
| 6 rs77777792  | 32451289 T | 2.421  | 2.29E-07 | chr:6:32648036 |
| 6 rs79452641  | 32451288 C | 2.421  | 2.29E-07 | chr:6:32648036 |
| 6 rs9268849   | 32429327 T | 2.421  | 2.29E-07 | chr:6:32648036 |
| 6 rs9268853   | 32429643 C | 2.421  | 2.29E-07 | chr:6:32648036 |
| 6 rs9268858   | 32429758 C | 2.421  | 2.29E-07 | chr:6:32648036 |
| 6 rs9268860   | 32429825 T | 2.421  | 2.29E-07 | chr:6:32648036 |
| 6 rs9268864   | 32430326 A | 2.421  | 2.29E-07 | chr:6:32648036 |
| 6 rs9268906   | 32432181 G | 2.421  | 2.29E-07 | chr:6:32648036 |
| 6 rs9268923   | 32432835 T | 2.421  | 2.29E-07 | chr:6:32648036 |
| 6 rs9268969   | 32434349 T | 2.421  | 2.29E-07 | chr:6:32648036 |
| 6 rs9268970   | 32434361 A | 2.421  | 2.29E-07 | chr:6:32648036 |
| 6 rs9348886   | 32441008 T | 2.421  | 2.29E-07 | chr:6:32648036 |
| 6 rs9368725   | 32438159 T | 2.421  | 2.29E-07 | chr:6:32648036 |
| 6 rs9380306   | 32438298 G | 2.421  | 2.29E-07 | chr:6:32648036 |
| 6 rs9391781   | 32434850 C | 2.421  | 2.29E-07 | chr:6:32648036 |
| 6 rs9405040   | 32439393 C | 2.421  | 2.29E-07 | chr:6:32648036 |
| 6 rs9405112   | 32445600 A | 2.421  | 2.29E-07 | chr:6:32648036 |
| 6 rs3763314   | 32376618 C | 0.3867 | 2.29E-07 | chr:6:32648036 |
| 6 rs6926737   | 32375745 G | 0.3867 | 2.29E-07 | chr:6:32648036 |
| 6 rs114810729 | 32489969 C | 0.2015 | 2.30E-07 | chr:6:32648036 |
| 6 rs75170544  | 32513285 T | 2.293  | 2.30E-07 | chr:6:32648036 |
| 6 rs5007261   | 32379031 G | 0.3869 | 2.31E-07 | chr:6:32648036 |
| 6 rs5007262   | 32379011 A | 0.3869 | 2.31E-07 | chr:6:32648036 |
| 6 rs5007263   | 32378982 A | 0.3869 | 2.31E-07 | chr:6:32648036 |
| 6 rs5007264   | 32378877 C | 0.3869 | 2.31E-07 | chr:6:32648036 |
| 6 rs5007265   | 32378866 T | 0.3869 | 2.31E-07 | chr:6:32648036 |
| 6 rs113521434 | 32520460 T | 2.3    | 2.31E-07 | chr:6:32648036 |
| 6 rs3104383   | 32598784 G | 2.246  | 2.32E-07 | chr:6:32648036 |
| 6 rs35567463  | 32633970 A | 0.3702 | 2.33E-07 | chr:6:32648036 |

|               |            |        |          |                |
|---------------|------------|--------|----------|----------------|
| 6 rs78855616  | 32456731 G | 1.74   | 2.33E-07 | chr:6:32648036 |
| 6 rs77495163  | 32517859 G | 2.295  | 2.34E-07 | chr:6:32648036 |
| 6 rs9286790   | 32439828 A | 2.407  | 2.34E-07 | chr:6:32648036 |
| 6 rs115724954 | 32498958 G | 1.843  | 2.34E-07 | chr:6:32648036 |
| 6 rs28688825  | 32587157 G | 0.3505 | 2.36E-07 | chr:6:32648036 |
| 6 rs28451423  | 32627192 A | 0.4291 | 2.36E-07 | chr:6:32648036 |
| 6 rs9272627   | 32608060 A | 2.393  | 2.36E-07 | chr:6:32648036 |
| 6 rs115622534 | 32553023 G | 2.601  | 2.37E-07 | chr:6:32648036 |
| 6 rs540912133 | 32553011 G | 2.601  | 2.37E-07 | chr:6:32648036 |
| 6 rs573504840 | 32553010 T | 2.601  | 2.37E-07 | chr:6:32648036 |
| 6 rs62405598  | 32513708 C | 2.3    | 2.37E-07 | chr:6:32648036 |
| 6 rs9268960   | 32434130 C | 2.252  | 2.37E-07 | chr:6:32648036 |
| 6 rs9268961   | 32434135 A | 2.252  | 2.37E-07 | chr:6:32648036 |
| 6 rs200581589 | 32489930 G | 0.2925 | 2.38E-07 | chr:6:32648036 |
| 6 rs28430392  | 32623550 C | 0.4745 | 2.38E-07 | chr:6:32648036 |
| 6 rs77932560  | 32473832 C | 1.753  | 2.39E-07 | chr:6:32648036 |
| 6 rs61433897  | 32498787 T | 2.122  | 2.40E-07 | chr:6:32648036 |
| 6 rs9271450   | 32588381 T | 0.3246 | 2.40E-07 | chr:6:32648036 |
| 6 rs9271451   | 32588382 T | 0.3246 | 2.40E-07 | chr:6:32648036 |
| 6 rs9270076   | 32554174 A | 1.94   | 2.40E-07 | chr:6:32648036 |
| 6 rs9269536   | 32543923 C | 1.966  | 2.41E-07 | chr:6:32648036 |
| 6 rs2395191   | 32447085 T | 0.4528 | 2.41E-07 | chr:6:32648036 |
| 6 rs112512219 | 32532021 G | 0.4878 | 2.41E-07 | chr:6:32648036 |
| 6 rs111343297 | 32520080 G | 2.384  | 2.42E-07 | chr:6:32648036 |
| 6 rs535042292 | 32494125 T | 1.785  | 2.42E-07 | chr:6:32648036 |
| 6 rs556542190 | 32494126 C | 1.785  | 2.42E-07 | chr:6:32648036 |
| 6 rs62405629  | 32513885 T | 2.285  | 2.43E-07 | chr:6:32648036 |
| 6 rs113454243 | 32494723 C | 1.771  | 2.46E-07 | chr:6:32648036 |
| 6 rs77506702  | 32518704 G | 2.288  | 2.46E-07 | chr:6:32648036 |
| 6 rs3997874   | 32580741 A | 2.384  | 2.47E-07 | chr:6:32648036 |
| 6 rs28624072  | 32527296 G | 2.047  | 2.48E-07 | chr:6:32648036 |
| 6 rs79868762  | 32457098 C | 1.748  | 2.48E-07 | chr:6:32648036 |
| 6 rs552368468 | 32494104 T | 1.775  | 2.48E-07 | chr:6:32648036 |
| 6 rs9271657   | 32592582 C | 0.3138 | 2.49E-07 | chr:6:32648036 |
| 6 rs138536568 | 32496645 T | 1.844  | 2.50E-07 | chr:6:32648036 |
| 6 rs9270090   | 32554386 G | 2.341  | 2.50E-07 | chr:6:32648036 |
| 6 rs79870380  | 32456843 A | 1.742  | 2.50E-07 | chr:6:32648036 |
| 6 rs28747012  | 32654558 C | 0.3824 | 2.50E-07 | chr:6:32648036 |
| 6 rs9271504   | 32589368 A | 2.411  | 2.51E-07 | chr:6:32648036 |
| 6 rs9270839   | 32570375 A | 2.249  | 2.52E-07 | chr:6:32648036 |
| 6 rs72853905  | 32505609 A | 2.029  | 2.54E-07 | chr:6:32648036 |
| 6 rs113440750 | 32486682 A | 1.761  | 2.55E-07 | chr:6:32648036 |
| 6 rs9271584   | 32590870 C | 2.407  | 2.55E-07 | chr:6:32648036 |



|               |            |        |          |                |
|---------------|------------|--------|----------|----------------|
| 6 rs9271585   | 32590879 A | 2.407  | 2.55E-07 | chr:6:32648036 |
| 6 rs9271438   | 32588193 G | 2.367  | 2.55E-07 | chr:6:32648036 |
| 6 rs28732302  | 32548855 C | 2.405  | 2.56E-07 | chr:6:32648036 |
| 6 rs3188543   | 32610403 A | 2.397  | 2.58E-07 | chr:6:32648036 |
| 6 rs111250937 | 32490371 T | 1.79   | 2.58E-07 | chr:6:32648036 |
| 6 rs75961603  | 32456687 G | 1.756  | 2.58E-07 | chr:6:32648036 |
| 6 rs76263067  | 32456694 C | 1.756  | 2.58E-07 | chr:6:32648036 |
| 6 rs9269558   | 32544351 A | 2.248  | 2.58E-07 | chr:6:32648036 |
| 6 rs9269187   | 32448440 T | 0.307  | 2.58E-07 | chr:6:32648036 |
| 6 rs62405579  | 32498134 C | 2.282  | 2.58E-07 | chr:6:32648036 |
| 6 rs9274978   | 32642277 T | 0.4803 | 2.59E-07 | chr:6:32648036 |
| 6 rs62405643  | 32517807 C | 0.3207 | 2.59E-07 | chr:6:32648036 |
| 6 rs9271637   | 32592124 G | 2.362  | 2.59E-07 | chr:6:32648036 |
| 6 rs9271184   | 32578285 A | 2.415  | 2.59E-07 | chr:6:32648036 |
| 6 rs541542451 | 32493738 T | 0.2702 | 2.60E-07 | chr:6:32648036 |
| 6 rs9269439   | 32541898 C | 1.903  | 2.60E-07 | chr:6:32648036 |
| 6 rs375383446 | 32468702 G | 1.744  | 2.61E-07 | chr:6:32648036 |
| 6 rs71538524  | 32536592 G | 1.758  | 2.62E-07 | chr:6:32648036 |
| 6 rs75176490  | 32472604 C | 1.756  | 2.62E-07 | chr:6:32648036 |
| 6 rs75427248  | 32472605 C | 1.756  | 2.62E-07 | chr:6:32648036 |
| 6 rs9272672   | 32608849 C | 0.3712 | 2.62E-07 | chr:6:32648036 |
| 6 rs9270594   | 32561526 C | 2.304  | 2.63E-07 | chr:6:32648036 |
| 6 rs115109434 | 32486667 G | 1.756  | 2.65E-07 | chr:6:32648036 |
| 6 rs72492316  | 32512481 A | 2.149  | 2.66E-07 | chr:6:32648036 |
| 6 rs73405151  | 32486756 T | 2.183  | 2.66E-07 | chr:6:32648036 |
| 6 rs28747045  | 32655537 C | 0.3845 | 2.67E-07 | chr:6:32648036 |
| 6 rs28747046  | 32655539 G | 0.3845 | 2.67E-07 | chr:6:32648036 |
| 6 rs41270887  | 32628722 T | 0.2309 | 2.68E-07 | chr:6:32648036 |
| 6 rs9272744   | 32609746 T | 2.348  | 2.71E-07 | chr:6:32648036 |
| 6 rs138087636 | 32517031 T | 2.274  | 2.73E-07 | chr:6:32648036 |
| 6 rs78383232  | 32458292 T | 1.789  | 2.73E-07 | chr:6:32648036 |
| 6 rs80172909  | 32458289 T | 1.789  | 2.73E-07 | chr:6:32648036 |
| 6 rs9269014   | 32436529 A | 2.019  | 2.73E-07 | chr:6:32648036 |
| 6 rs28366298  | 32560859 C | 2.394  | 2.73E-07 | chr:6:32648036 |
| 6 rs370787440 | 32521596 G | 2.291  | 2.74E-07 | chr:6:32648036 |
| 6 rs373804788 | 32521591 T | 2.291  | 2.74E-07 | chr:6:32648036 |
| 6 rs577283712 | 32468700 T | 1.754  | 2.76E-07 | chr:6:32648036 |
| 6 rs149189956 | 32499047 C | 1.87   | 2.76E-07 | chr:6:32648036 |
| 6 rs142640349 | 32485925 T | 1.754  | 2.78E-07 | chr:6:32648036 |
| 6 rs35747774  | 32487050 C | 0.1181 | 2.78E-07 | chr:6:32648036 |
| 6 rs67170736  | 32504571 T | 2.228  | 2.78E-07 | chr:6:32648036 |
| 6 rs9269409   | 32541426 G | 1.87   | 2.80E-07 | chr:6:32648036 |
| 6 rs9271364   | 32586787 G | 0.4315 | 2.80E-07 | chr:6:32648036 |

|               |            |        |          |                |
|---------------|------------|--------|----------|----------------|
| 6 rs78450703  | 32513216 T | 2.259  | 2.80E-07 | chr:6:32648036 |
| 6 rs36205178  | 32627938 T | 0.2277 | 2.81E-07 | chr:6:32648036 |
| 6 rs112742095 | 32489354 C | 1.805  | 2.82E-07 | chr:6:32648036 |
| 6 rs148957557 | 32632332 A | 0.4913 | 2.84E-07 | chr:6:32648036 |
| 6 rs144328416 | 32639464 T | 0.3774 | 2.85E-07 | chr:6:32648036 |
| 6 rs148777223 | 32639465 G | 0.3774 | 2.85E-07 | chr:6:32648036 |
| 6 rs9270761   | 32568685 T | 0.2351 | 2.85E-07 | chr:6:32648036 |
| 6 rs9269343   | 32540383 T | 1.805  | 2.86E-07 | chr:6:32648036 |
| 6 rs9271123   | 32576838 C | 1.97   | 2.87E-07 | chr:6:32648036 |
| 6 rs71542468  | 32634681 T | 0.4442 | 2.87E-07 | chr:6:32648036 |
| 6 rs551005038 | 32494090 T | 1.76   | 2.88E-07 | chr:6:32648036 |
| 6 rs537372552 | 32493009 A | 1.841  | 2.88E-07 | chr:6:32648036 |
| 6 rs570284595 | 32493008 A | 1.841  | 2.88E-07 | chr:6:32648036 |
| 6 rs116691706 | 32469222 C | 1.784  | 2.89E-07 | chr:6:32648036 |
| 6 rs9270196   | 32556200 T | 2.034  | 2.89E-07 | chr:6:32648036 |
| 6 rs188804041 | 32488036 A | 0.4333 | 2.90E-07 | chr:6:32648036 |
| 6 rs535696666 | 32523176 A | 2.506  | 2.90E-07 | chr:6:32648036 |
| 6 rs116748043 | 32488162 A | 1.751  | 2.91E-07 | chr:6:32648036 |
| 6 rs67382147  | 32507752 T | 2.022  | 2.91E-07 | chr:6:32648036 |
| 6 rs28366300  | 32560875 T | 2.39   | 2.91E-07 | chr:6:32648036 |
| 6 rs114481954 | 32487603 G | 1.773  | 2.92E-07 | chr:6:32648036 |
| 6 rs113623173 | 32510438 T | 2.174  | 2.93E-07 | chr:6:32648036 |
| 6 rs72844401  | 32634717 A | 0.443  | 2.94E-07 | chr:6:32648036 |
| 6 rs9366801   | 32440276 T | 2.41   | 2.94E-07 | chr:6:32648036 |
| 6 rs139616859 | 32490192 C | 1.761  | 2.95E-07 | chr:6:32648036 |
| 6 rs3104370   | 32602341 G | 2.442  | 2.95E-07 | chr:6:32648036 |
| 6 rs28383439  | 32609042 A | 2.393  | 2.96E-07 | chr:6:32648036 |
| 6 rs74528051  | 32456553 A | 1.73   | 2.97E-07 | chr:6:32648036 |
| 6 rs75103235  | 32456602 G | 1.73   | 2.97E-07 | chr:6:32648036 |
| 6 rs75814086  | 32456513 A | 1.73   | 2.97E-07 | chr:6:32648036 |
| 6 rs79175537  | 32456573 C | 1.73   | 2.97E-07 | chr:6:32648036 |
| 6 rs9271229   | 32579515 A | 2.346  | 2.99E-07 | chr:6:32648036 |
| 6 rs9271230   | 32579519 C | 2.346  | 2.99E-07 | chr:6:32648036 |
| 6 rs9271231   | 32579520 T | 2.346  | 2.99E-07 | chr:6:32648036 |
| 6 rs9272649   | 32608550 C | 0.3539 | 2.99E-07 | chr:6:32648036 |
| 6 rs78745522  | 32500941 A | 2.392  | 2.99E-07 | chr:6:32648036 |
| 6 rs9269571   | 32544650 T | 1.938  | 3.00E-07 | chr:6:32648036 |
| 6 rs68141957  | 32505551 A | 2.243  | 3.00E-07 | chr:6:32648036 |
| 6 rs111365964 | 32517646 G | 2.266  | 3.00E-07 | chr:6:32648036 |
| 6 rs9272443   | 32605418 A | 2.325  | 3.01E-07 | chr:6:32648036 |
| 6 rs9272444   | 32605419 C | 2.325  | 3.01E-07 | chr:6:32648036 |
| 6 rs9274695   | 32636997 T | 2.087  | 3.01E-07 | chr:6:32648036 |
| 6 rs9270988   | 32574130 A | 2.361  | 3.01E-07 | chr:6:32648036 |

|               |            |        |          |                |
|---------------|------------|--------|----------|----------------|
| 6 rs115284487 | 32482525 A | 1.741  | 3.02E-07 | chr:6:32648036 |
| 6 rs9269572   | 32544681 G | 1.923  | 3.02E-07 | chr:6:32648036 |
| 6 rs72508426  | 32485598 G | 0.1367 | 3.03E-07 | chr:6:32648036 |
| 6 rs542415189 | 32490064 A | 1.744  | 3.04E-07 | chr:6:32648036 |
| 6 rs550062535 | 32490073 A | 1.744  | 3.04E-07 | chr:6:32648036 |
| 6 rs561137564 | 32490065 T | 1.744  | 3.04E-07 | chr:6:32648036 |
| 6 rs565208099 | 32490074 T | 1.744  | 3.04E-07 | chr:6:32648036 |
| 6 rs574631903 | 32490062 T | 1.744  | 3.04E-07 | chr:6:32648036 |
| 6 rs9271511   | 32589483 A | 2.395  | 3.04E-07 | chr:6:32648036 |
| 6 rs67851010  | 32501347 G | 2.368  | 3.05E-07 | chr:6:32648036 |
| 6 rs75885006  | 32459383 G | 1.747  | 3.05E-07 | chr:6:32648036 |
| 6 rs72851070  | 32504395 G | 2.319  | 3.06E-07 | chr:6:32648036 |
| 6 rs2395163   | 32387809 C | 2.641  | 3.07E-07 | chr:6:32648036 |
| 6 rs28383413  | 32608417 A | 2.314  | 3.09E-07 | chr:6:32648036 |
| 6 rs529924829 | 32486993 G | 0.1595 | 3.11E-07 | chr:6:32648036 |
| 6 rs9269781   | 32548937 G | 2.153  | 3.11E-07 | chr:6:32648036 |
| 6 rs536493456 | 32674838 G | 0.3874 | 3.12E-07 | chr:6:32648036 |
| 6 rs9272680   | 32608932 T | 0.3717 | 3.14E-07 | chr:6:32648036 |
| 6 rs9269541   | 32544010 A | 1.972  | 3.14E-07 | chr:6:32648036 |
| 6 rs71542429  | 32630066 C | 0.4575 | 3.14E-07 | chr:6:32648036 |
| 6 rs77831735  | 32456795 G | 1.732  | 3.16E-07 | chr:6:32648036 |
| 6 rs77923331  | 32456793 A | 1.732  | 3.16E-07 | chr:6:32648036 |
| 6 rs78539152  | 32456790 C | 1.732  | 3.16E-07 | chr:6:32648036 |
| 6 rs78999765  | 32456812 A | 1.732  | 3.16E-07 | chr:6:32648036 |
| 6 rs79493873  | 32456819 G | 1.732  | 3.16E-07 | chr:6:32648036 |
| 6 rs116630121 | 32493902 A | 0.5149 | 3.16E-07 | chr:6:32648036 |
| 6 rs1048052   | 32609230 C | 0.3234 | 3.17E-07 | chr:6:32648036 |
| 6 rs568465013 | 32609229 A | 0.3234 | 3.17E-07 | chr:6:32648036 |
| 6 rs180731180 | 32535770 C | 0.4504 | 3.18E-07 | chr:6:32648036 |
| 6 rs4406272   | 32632080 C | 1.828  | 3.20E-07 | chr:6:32648036 |
| 6 rs9270835   | 32570281 G | 2.292  | 3.20E-07 | chr:6:32648036 |
| 6 rs199882626 | 32517752 A | 2.259  | 3.22E-07 | chr:6:32648036 |
| 6 rs77110097  | 32456691 T | 1.748  | 3.24E-07 | chr:6:32648036 |
| 6 rs28366288  | 32560432 T | 2.351  | 3.24E-07 | chr:6:32648036 |
| 6 rs9269454   | 32542086 A | 1.903  | 3.25E-07 | chr:6:32648036 |
| 6 rs9270789   | 32569208 A | 0.2527 | 3.25E-07 | chr:6:32648036 |
| 6 rs66967821  | 32629506 G | 0.396  | 3.25E-07 | chr:6:32648036 |
| 6 rs74185458  | 32503875 T | 2.199  | 3.25E-07 | chr:6:32648036 |
| 6 rs9269611   | 32545248 C | 1.858  | 3.26E-07 | chr:6:32648036 |
| 6 rs62405630  | 32513942 T | 2.264  | 3.27E-07 | chr:6:32648036 |
| 6 rs4286817   | 32608821 A | 2.22   | 3.28E-07 | chr:6:32648036 |
| 6 rs28891369  | 32638602 T | 0.3826 | 3.28E-07 | chr:6:32648036 |
| 6 rs79468266  | 32506982 A | 2.137  | 3.28E-07 | chr:6:32648036 |

|               |            |        |          |                |
|---------------|------------|--------|----------|----------------|
| 6 rs536803934 | 32526907 T | 0.2264 | 3.30E-07 | chr:6:32648036 |
| 6 rs141005752 | 32498813 G | 0.1963 | 3.32E-07 | chr:6:32648036 |
| 6 rs75044322  | 32455827 A | 1.741  | 3.32E-07 | chr:6:32648036 |
| 6 rs75592097  | 32455828 T | 1.741  | 3.32E-07 | chr:6:32648036 |
| 6 rs9270714   | 32567488 A | 2.353  | 3.34E-07 | chr:6:32648036 |
| 6 rs9270716   | 32567502 A | 2.353  | 3.34E-07 | chr:6:32648036 |
| 6 rs111359734 | 32499033 A | 1.849  | 3.36E-07 | chr:6:32648036 |
| 6 rs1056315   | 32627515 A | 0.3148 | 3.38E-07 | chr:6:32648036 |
| 6 rs187170383 | 32459337 T | 1.756  | 3.39E-07 | chr:6:32648036 |
| 6 rs74389316  | 32596869 T | 0.3202 | 3.40E-07 | chr:6:32648036 |
| 6 rs140066841 | 32489521 A | 1.785  | 3.41E-07 | chr:6:32648036 |
| 6 rs552839730 | 32458073 A | 1.824  | 3.42E-07 | chr:6:32648036 |
| 6 rs28891376  | 32638788 C | 0.3581 | 3.42E-07 | chr:6:32648036 |
| 6 rs9270368   | 32558182 C | 1.854  | 3.43E-07 | chr:6:32648036 |
| 6 rs9270109   | 32554816 A | 2.518  | 3.43E-07 | chr:6:32648036 |
| 6 rs28891476  | 32642584 A | 0.4061 | 3.44E-07 | chr:6:32648036 |
| 6 rs9272446   | 32605423 C | 0.3322 | 3.44E-07 | chr:6:32648036 |
| 6 rs115627609 | 32485579 T | 0.1387 | 3.45E-07 | chr:6:32648036 |
| 6 rs28366223  | 32557616 A | 3.451  | 3.45E-07 | chr:6:32648036 |
| 6 rs76155697  | 32492054 A | 1.748  | 3.45E-07 | chr:6:32648036 |
| 6 rs9270545   | 32559916 C | 2.098  | 3.45E-07 | chr:6:32648036 |
| 6 rs9270546   | 32559917 T | 2.098  | 3.45E-07 | chr:6:32648036 |
| 6 rs9272463   | 32605646 G | 2.308  | 3.45E-07 | chr:6:32648036 |
| 6 rs71534528  | 32511054 T | 1.868  | 3.46E-07 | chr:6:32648036 |
| 6 rs72508450  | 32492124 T | 1.743  | 3.46E-07 | chr:6:32648036 |
| 6 rs79662721  | 32499145 C | 1.783  | 3.48E-07 | chr:6:32648036 |
| 6 rs9269353   | 32540568 C | 1.801  | 3.48E-07 | chr:6:32648036 |
| 6 rs9270842   | 32570461 C | 2.315  | 3.48E-07 | chr:6:32648036 |
| 6 rs9270557   | 32560645 A | 2.323  | 3.48E-07 | chr:6:32648036 |
| 6 rs150967448 | 32478905 G | 1.74   | 3.49E-07 | chr:6:32648036 |
| 6 rs9270198   | 32556227 C | 1.994  | 3.49E-07 | chr:6:32648036 |
| 6 rs549069478 | 32526275 A | 1.853  | 3.51E-07 | chr:6:32648036 |
| 6 rs28747008  | 32654530 T | 0.3896 | 3.51E-07 | chr:6:32648036 |
| 6 rs28747009  | 32654531 A | 0.3896 | 3.51E-07 | chr:6:32648036 |
| 6 rs9271344   | 32583328 C | 0.3131 | 3.51E-07 | chr:6:32648036 |
| 6 rs143732234 | 32632335 A | 0.4931 | 3.52E-07 | chr:6:32648036 |
| 6 rs28383181  | 32571669 T | 2.378  | 3.52E-07 | chr:6:32648036 |
| 6 rs139753177 | 32478619 G | 1.813  | 3.53E-07 | chr:6:32648036 |
| 6 rs9269523   | 32543647 C | 1.908  | 3.54E-07 | chr:6:32648036 |
| 6 rs9270357   | 32558092 C | 1.883  | 3.55E-07 | chr:6:32648036 |
| 6 rs9270358   | 32558096 A | 1.883  | 3.55E-07 | chr:6:32648036 |
| 6 rs112146790 | 32490908 A | 1.742  | 3.55E-07 | chr:6:32648036 |
| 6 rs72508442  | 32490820 C | 1.814  | 3.55E-07 | chr:6:32648036 |

|               |            |        |          |                |
|---------------|------------|--------|----------|----------------|
| 6 rs80011953  | 32487649 C | 1.782  | 3.56E-07 | chr:6:32648036 |
| 6 rs9270581   | 32561143 C | 2.159  | 3.58E-07 | chr:6:32648036 |
| 6 rs142972412 | 32454837 T | 1.779  | 3.59E-07 | chr:6:32648036 |
| 6 rs9405110   | 32439108 C | 2.378  | 3.61E-07 | chr:6:32648036 |
| 6 rs72851099  | 32505508 C | 2.21   | 3.61E-07 | chr:6:32648036 |
| 6 rs534844654 | 32494112 A | 1.762  | 3.61E-07 | chr:6:32648036 |
| 6 rs28374500  | 32526944 C | 1.996  | 3.62E-07 | chr:6:32648036 |
| 6 rs9270753   | 32568429 C | 2.281  | 3.63E-07 | chr:6:32648036 |
| 6 rs28746948  | 32652763 G | 0.353  | 3.63E-07 | chr:6:32648036 |
| 6 rs75979302  | 32494113 A | 1.761  | 3.64E-07 | chr:6:32648036 |
| 6 rs34036879  | 32453336 T | 2.376  | 3.65E-07 | chr:6:32648036 |
| 6 rs28844904  | 32509895 G | 2.359  | 3.66E-07 | chr:6:32648036 |
| 6 rs148866368 | 32531582 A | 0.5017 | 3.67E-07 | chr:6:32648036 |
| 6 rs9269544   | 32544129 G | 1.966  | 3.67E-07 | chr:6:32648036 |
| 6 rs68081734  | 32628828 C | 0.4391 | 3.68E-07 | chr:6:32648036 |
| 6 rs3104380   | 32599042 G | 2.379  | 3.69E-07 | chr:6:32648036 |
| 6 rs113321784 | 32493147 T | 2.048  | 3.70E-07 | chr:6:32648036 |
| 6 rs9275057   | 32648253 T | 0.4964 | 3.70E-07 | chr:6:32648036 |
| 6 rs4959111   | 32597720 C | 0.307  | 3.71E-07 | chr:6:32648036 |
| 6 rs79580861  | 32457027 A | 1.745  | 3.72E-07 | chr:6:32648036 |
| 6 rs9275567   | 32678131 A | 0.4008 | 3.72E-07 | chr:6:32648036 |
| 6 rs9275569   | 32678136 C | 0.4008 | 3.72E-07 | chr:6:32648036 |
| 6 rs9270749   | 32568316 A | 2.288  | 3.73E-07 | chr:6:32648036 |
| 6 rs9271523   | 32589806 G | 2.379  | 3.73E-07 | chr:6:32648036 |
| 6 rs71536521  | 32520558 A | 2.268  | 3.74E-07 | chr:6:32648036 |
| 6 rs71549224  | 32498235 A | 2.321  | 3.74E-07 | chr:6:32648036 |
| 6 rs9270099   | 32554540 A | 2.342  | 3.74E-07 | chr:6:32648036 |
| 6 rs2395185   | 32433167 T | 2.365  | 3.75E-07 | chr:6:32648036 |
| 6 rs2395186   | 32433192 G | 2.365  | 3.75E-07 | chr:6:32648036 |
| 6 rs35652190  | 32544828 T | 1.767  | 3.75E-07 | chr:6:32648036 |
| 6 rs28747056  | 32656544 G | 0.3861 | 3.75E-07 | chr:6:32648036 |
| 6 rs28747057  | 32656553 T | 0.3861 | 3.75E-07 | chr:6:32648036 |
| 6 rs28747058  | 32656554 G | 0.3861 | 3.75E-07 | chr:6:32648036 |
| 6 rs28747059  | 32656558 G | 0.3861 | 3.75E-07 | chr:6:32648036 |
| 6 rs73728598  | 32601447 G | 0.3392 | 3.76E-07 | chr:6:32648036 |
| 6 rs7771596   | 32498881 G | 1.896  | 3.76E-07 | chr:6:32648036 |
| 6 rs78569932  | 32498885 T | 1.896  | 3.76E-07 | chr:6:32648036 |
| 6 rs113568276 | 32513127 A | 2.242  | 3.77E-07 | chr:6:32648036 |
| 6 rs9274211   | 32630925 T | 0.3805 | 3.78E-07 | chr:6:32648036 |
| 6 rs9270677   | 32566655 T | 2.286  | 3.78E-07 | chr:6:32648036 |
| 6 rs9405038   | 32437614 T | 2.402  | 3.78E-07 | chr:6:32648036 |
| 6 rs9270804   | 32569422 A | 2.187  | 3.82E-07 | chr:6:32648036 |
| 6 rs17203846  | 32555989 A | 2.37   | 3.83E-07 | chr:6:32648036 |

|               |            |        |          |                |
|---------------|------------|--------|----------|----------------|
| 6 rs9270516   | 32559468 T | 2.087  | 3.84E-07 | chr:6:32648036 |
| 6 rs9270517   | 32559472 T | 2.087  | 3.84E-07 | chr:6:32648036 |
| 6 rs28772304  | 32682114 T | 2.163  | 3.84E-07 | chr:6:32648036 |
| 6 rs116473597 | 32482374 T | 0.1215 | 3.85E-07 | chr:6:32648036 |
| 6 rs556568526 | 32482353 T | 0.1215 | 3.85E-07 | chr:6:32648036 |
| 6 rs578020847 | 32482368 C | 0.1215 | 3.85E-07 | chr:6:32648036 |
| 6 rs9272493   | 32606076 C | 0.2708 | 3.87E-07 | chr:6:32648036 |
| 6 rs58537387  | 32510176 T | 2.149  | 3.88E-07 | chr:6:32648036 |
| 6 rs114561193 | 32473120 A | 0.5556 | 3.89E-07 | chr:6:32648036 |
| 6 rs17203769  | 32555721 C | 0.2015 | 3.89E-07 | chr:6:32648036 |
| 6 rs17203776  | 32555722 A | 0.2015 | 3.89E-07 | chr:6:32648036 |
| 6 rs28746982  | 32653703 A | 0.3891 | 3.91E-07 | chr:6:32648036 |
| 6 rs9272420   | 32605101 G | 2.36   | 3.91E-07 | chr:6:32648036 |
| 6 rs557617439 | 32523181 G | 2.472  | 3.92E-07 | chr:6:32648036 |
| 6 rs77687660  | 32507226 G | 1.858  | 3.93E-07 | chr:6:32648036 |
| 6 rs3997871   | 32580456 G | 2.326  | 3.93E-07 | chr:6:32648036 |
| 6 rs9271257   | 32580444 G | 2.326  | 3.93E-07 | chr:6:32648036 |
| 6 rs9271258   | 32580446 G | 2.326  | 3.93E-07 | chr:6:32648036 |
| 6 rs28895235  | 32437160 A | 2.396  | 3.94E-07 | chr:6:32648036 |
| 6 rs9270026   | 32553262 A | 2.366  | 3.94E-07 | chr:6:32648036 |
| 6 rs9272458   | 32605558 G | 2.385  | 3.95E-07 | chr:6:32648036 |
| 6 rs9270502   | 32559175 C | 2.205  | 3.96E-07 | chr:6:32648036 |
| 6 rs75657395  | 32505965 C | 1.816  | 3.96E-07 | chr:6:32648036 |
| 6 rs68176300  | 32526490 T | 1.963  | 3.96E-07 | chr:6:32648036 |
| 6 rs28383416  | 32608483 C | 2.315  | 3.97E-07 | chr:6:32648036 |
| 6 rs28746997  | 32654225 T | 0.3914 | 3.97E-07 | chr:6:32648036 |
| 6 rs74696032  | 32473866 A | 1.73   | 4.02E-07 | chr:6:32648036 |
| 6 rs79747029  | 32473889 C | 1.73   | 4.02E-07 | chr:6:32648036 |
| 6 rs570494819 | 32493038 A | 1.824  | 4.03E-07 | chr:6:32648036 |
| 6 rs116816411 | 32489202 G | 1.743  | 4.03E-07 | chr:6:32648036 |
| 6 rs1049222   | 32627752 C | 0.3733 | 4.03E-07 | chr:6:32648036 |
| 6 rs9268947   | 32433741 A | 2.13   | 4.04E-07 | chr:6:32648036 |
| 6 rs28366308  | 32561043 T | 2.347  | 4.04E-07 | chr:6:32648036 |
| 6 rs77789453  | 32512013 C | 2.476  | 4.07E-07 | chr:6:32648036 |
| 6 rs114868939 | 32633270 T | 0.4282 | 4.08E-07 | chr:6:32648036 |
| 6 rs9270211   | 32556487 T | 1.865  | 4.10E-07 | chr:6:32648036 |
| 6 rs28891371  | 32638713 T | 0.371  | 4.10E-07 | chr:6:32648036 |
| 6 rs9270208   | 32556402 G | 1.924  | 4.12E-07 | chr:6:32648036 |
| 6 rs1071639   | 32627882 T | 0.3746 | 4.13E-07 | chr:6:32648036 |
| 6 rs13215699  | 32601153 A | 0.3174 | 4.16E-07 | chr:6:32648036 |
| 6 rs9268963   | 32434149 T | 2.226  | 4.18E-07 | chr:6:32648036 |
| 6 rs9270182   | 32555833 A | 2.378  | 4.18E-07 | chr:6:32648036 |
| 6 rs77888377  | 32607055 C | 0.3566 | 4.18E-07 | chr:6:32648036 |

|               |            |        |          |                |
|---------------|------------|--------|----------|----------------|
| 6 rs9268399   | 32340236 A | 2.242  | 4.22E-07 | chr:6:32648036 |
| 6 rs9269351   | 32540551 G | 1.776  | 4.22E-07 | chr:6:32648036 |
| 6 rs9269352   | 32540552 T | 1.776  | 4.22E-07 | chr:6:32648036 |
| 6 rs9270265   | 32557127 A | 2.38   | 4.22E-07 | chr:6:32648036 |
| 6 rs78669605  | 32469805 C | 1.776  | 4.23E-07 | chr:6:32648036 |
| 6 rs112993783 | 32478652 A | 0.3071 | 4.23E-07 | chr:6:32648036 |
| 6 rs140036576 | 32478632 T | 0.3071 | 4.23E-07 | chr:6:32648036 |
| 6 rs562057037 | 32441392 T | 2.418  | 4.23E-07 | chr:6:32648036 |
| 6 rs72848256  | 32601531 G | 0.3559 | 4.23E-07 | chr:6:32648036 |
| 6 rs9270751   | 32568383 T | 1.97   | 4.24E-07 | chr:6:32648036 |
| 6 rs78135308  | 32492146 G | 1.736  | 4.24E-07 | chr:6:32648036 |
| 6 rs2454137   | 32570149 G | 0.2716 | 4.25E-07 | chr:6:32648036 |
| 6 rs111484816 | 32509034 G | 2.227  | 4.25E-07 | chr:6:32648036 |
| 6 rs74738572  | 32501420 G | 2.313  | 4.25E-07 | chr:6:32648036 |
| 6 rs13208071  | 32555489 A | 0.2839 | 4.28E-07 | chr:6:32648036 |
| 6 rs28895225  | 32435684 C | 2.332  | 4.29E-07 | chr:6:32648036 |
| 6 rs4713575   | 32627039 A | 0.451  | 4.30E-07 | chr:6:32648036 |
| 6 rs9271562   | 32590411 A | 0.3121 | 4.30E-07 | chr:6:32648036 |
| 6 rs79677293  | 32456156 C | 1.772  | 4.30E-07 | chr:6:32648036 |
| 6 rs28366303  | 32560963 G | 2.344  | 4.32E-07 | chr:6:32648036 |
| 6 rs28366310  | 32561128 C | 2.327  | 4.32E-07 | chr:6:32648036 |
| 6 rs9270553   | 32560523 A | 2.19   | 4.33E-07 | chr:6:32648036 |
| 6 rs9272449   | 32605451 G | 0.3391 | 4.33E-07 | chr:6:32648036 |
| 6 rs9271128   | 32576888 A | 2.331  | 4.33E-07 | chr:6:32648036 |
| 6 rs9271129   | 32576889 A | 2.331  | 4.33E-07 | chr:6:32648036 |
| 6 rs28891415  | 32640691 C | 0.3732 | 4.35E-07 | chr:6:32648036 |
| 6 rs28891416  | 32640692 T | 0.3732 | 4.35E-07 | chr:6:32648036 |
| 6 rs9368726   | 32438542 C | 2.347  | 4.35E-07 | chr:6:32648036 |
| 6 rs533358873 | 32494989 C | 1.752  | 4.35E-07 | chr:6:32648036 |
| 6 rs79428469  | 32602034 C | 0.3827 | 4.36E-07 | chr:6:32648036 |
| 6 rs112795930 | 32538556 G | 1.947  | 4.38E-07 | chr:6:32648036 |
| 6 rs9271409   | 32587628 C | 2.347  | 4.38E-07 | chr:6:32648036 |
| 6 rs144016913 | 32487214 T | 1.921  | 4.39E-07 | chr:6:32648036 |
| 6 rs9270908   | 32572148 G | 2.231  | 4.40E-07 | chr:6:32648036 |
| 6 rs9270830   | 32570181 G | 2.305  | 4.41E-07 | chr:6:32648036 |
| 6 rs9269910   | 32551350 T | 1.842  | 4.42E-07 | chr:6:32648036 |
| 6 rs9271517   | 32589740 G | 2.347  | 4.42E-07 | chr:6:32648036 |
| 6 rs540780180 | 32468744 T | 1.726  | 4.43E-07 | chr:6:32648036 |
| 6 rs9271400   | 32587520 T | 2.308  | 4.46E-07 | chr:6:32648036 |
| 6 rs9270531   | 32559695 T | 1.979  | 4.46E-07 | chr:6:32648036 |
| 6 rs113934686 | 32491971 C | 1.761  | 4.46E-07 | chr:6:32648036 |
| 6 rs9271544   | 32590120 A | 2.356  | 4.46E-07 | chr:6:32648036 |
| 6 rs35254656  | 32628472 G | 0.2363 | 4.47E-07 | chr:6:32648036 |

|               |            |        |          |                |
|---------------|------------|--------|----------|----------------|
| 6 rs9270834   | 32570266 C | 2.253  | 4.49E-07 | chr:6:32648036 |
| 6 rs28383397  | 32607820 T | 2.209  | 4.51E-07 | chr:6:32648036 |
| 6 rs113409465 | 32511143 T | 0.3574 | 4.51E-07 | chr:6:32648036 |
| 6 rs35063846  | 32550733 C | 2.405  | 4.51E-07 | chr:6:32648036 |
| 6 rs75600369  | 32472931 T | 1.751  | 4.51E-07 | chr:6:32648036 |
| 6 rs77290417  | 32472934 A | 1.751  | 4.51E-07 | chr:6:32648036 |
| 6 rs17427431  | 32663644 A | 0.27   | 4.53E-07 | chr:6:32648036 |
| 6 rs35122881  | 32663677 T | 0.27   | 4.53E-07 | chr:6:32648036 |
| 6 rs113528607 | 32500928 G | 2.204  | 4.54E-07 | chr:6:32648036 |
| 6 rs72849286  | 32472873 C | 1.733  | 4.54E-07 | chr:6:32648036 |
| 6 rs80011694  | 32460318 A | 1.735  | 4.54E-07 | chr:6:32648036 |
| 6 rs80296745  | 32478683 T | 0.3067 | 4.55E-07 | chr:6:32648036 |
| 6 rs35789108  | 32550126 G | 2.541  | 4.58E-07 | chr:6:32648036 |
| 6 rs9271093   | 32576341 G | 2.378  | 4.60E-07 | chr:6:32648036 |
| 6 rs551468481 | 32518258 G | 2.217  | 4.61E-07 | chr:6:32648036 |
| 6 rs3104386   | 32596937 G | 2.348  | 4.62E-07 | chr:6:32648036 |
| 6 rs281863608 | 32630797 A | 0.4248 | 4.64E-07 | chr:6:32648036 |
| 6 rs9269336   | 32540285 G | 1.793  | 4.64E-07 | chr:6:32648036 |
| 6 rs9270841   | 32570418 T | 2.196  | 4.65E-07 | chr:6:32648036 |
| 6 rs9270073   | 32554123 G | 1.892  | 4.68E-07 | chr:6:32648036 |
| 6 rs66781242  | 32507812 G | 2.317  | 4.71E-07 | chr:6:32648036 |
| 6 rs9271464   | 32588544 T | 2.306  | 4.71E-07 | chr:6:32648036 |
| 6 rs9271465   | 32588554 T | 2.306  | 4.71E-07 | chr:6:32648036 |
| 6 rs559845849 | 32468717 C | 1.736  | 4.71E-07 | chr:6:32648036 |
| 6 rs77484451  | 32472893 C | 1.732  | 4.72E-07 | chr:6:32648036 |
| 6 rs559804139 | 32506590 T | 1.775  | 4.72E-07 | chr:6:32648036 |
| 6 rs201691501 | 32458079 G | 1.807  | 4.73E-07 | chr:6:32648036 |
| 6 rs6932517   | 32678182 C | 0.4102 | 4.74E-07 | chr:6:32648036 |
| 6 rs9275570   | 32678199 G | 0.4102 | 4.74E-07 | chr:6:32648036 |
| 6 rs28383415  | 32608473 A | 2.287  | 4.74E-07 | chr:6:32648036 |
| 6 rs71542467  | 32634677 A | 0.4474 | 4.75E-07 | chr:6:32648036 |
| 6 rs74500484  | 32506993 G | 2.103  | 4.75E-07 | chr:6:32648036 |
| 6 rs9269529   | 32543733 T | 1.909  | 4.76E-07 | chr:6:32648036 |
| 6 rs9269530   | 32543734 T | 1.909  | 4.76E-07 | chr:6:32648036 |
| 6 rs111874278 | 32482181 C | 1.734  | 4.77E-07 | chr:6:32648036 |
| 6 rs113147593 | 32482176 C | 1.734  | 4.77E-07 | chr:6:32648036 |
| 6 rs73726847  | 32537646 C | 1.718  | 4.77E-07 | chr:6:32648036 |
| 6 rs9272273   | 32603583 G | 0.3277 | 4.78E-07 | chr:6:32648036 |
| 6 rs28891474  | 32642565 T | 0.4151 | 4.79E-07 | chr:6:32648036 |
| 6 rs28891475  | 32642570 C | 0.4151 | 4.79E-07 | chr:6:32648036 |
| 6 rs9270148   | 32555351 A | 2.379  | 4.79E-07 | chr:6:32648036 |
| 6 rs9270149   | 32555352 A | 2.379  | 4.79E-07 | chr:6:32648036 |
| 6 rs116006560 | 32537193 G | 1.715  | 4.82E-07 | chr:6:32648036 |



|               |            |        |          |                |
|---------------|------------|--------|----------|----------------|
| 6 rs74507717  | 32459917 G | 1.736  | 4.83E-07 | chr:6:32648036 |
| 6 rs115328397 | 32486181 A | 1.718  | 4.84E-07 | chr:6:32648036 |
| 6 rs145238941 | 32486179 T | 1.718  | 4.84E-07 | chr:6:32648036 |
| 6 rs4520043   | 32572495 A | 2.482  | 4.85E-07 | chr:6:32648036 |
| 6 rs9270936   | 32572755 A | 2.482  | 4.85E-07 | chr:6:32648036 |
| 6 rs9271148   | 32577442 T | 2.482  | 4.85E-07 | chr:6:32648036 |
| 6 rs71534529  | 32511059 A | 1.849  | 4.87E-07 | chr:6:32648036 |
| 6 rs9272314   | 32604037 G | 0.3391 | 4.87E-07 | chr:6:32648036 |
| 6 rs9272315   | 32604039 C | 0.3391 | 4.87E-07 | chr:6:32648036 |
| 6 rs113182435 | 32518236 A | 2.211  | 4.88E-07 | chr:6:32648036 |
| 6 rs77930301  | 32472943 T | 1.75   | 4.92E-07 | chr:6:32648036 |
| 6 rs77213787  | 32456976 A | 1.736  | 4.92E-07 | chr:6:32648036 |
| 6 rs192031964 | 32494149 T | 1.74   | 4.93E-07 | chr:6:32648036 |
| 6 rs200884300 | 32494152 T | 1.74   | 4.93E-07 | chr:6:32648036 |
| 6 rs28688207  | 32628660 C | 2.368  | 4.93E-07 | chr:6:32648036 |
| 6 rs9269567   | 32544572 A | 1.898  | 4.95E-07 | chr:6:32648036 |
| 6 rs9269568   | 32544577 C | 1.898  | 4.95E-07 | chr:6:32648036 |
| 6 rs62405591  | 32508704 A | 2.259  | 4.96E-07 | chr:6:32648036 |
| 6 rs35231986  | 32501455 T | 2.309  | 4.98E-07 | chr:6:32648036 |
| 6 rs9269285   | 32539391 T | 1.742  | 4.99E-07 | chr:6:32648036 |
| 6 rs9270102   | 32554621 G | 2.328  | 4.99E-07 | chr:6:32648036 |
| 6 rs9270051   | 32553751 T | 2.005  | 5.00E-07 | chr:6:32648036 |
| 6 rs35121819  | 32453318 T | 0.441  | 5.00E-07 | chr:6:32648036 |
| 6 rs112158360 | 32514050 G | 2.262  | 5.00E-07 | chr:6:32648036 |
| 6 rs112587701 | 32514041 A | 2.262  | 5.00E-07 | chr:6:32648036 |
| 6 rs59894631  | 32505869 A | 1.9    | 5.01E-07 | chr:6:32648036 |
| 6 rs73407285  | 32494665 C | 1.958  | 5.02E-07 | chr:6:32648036 |
| 6 rs114164610 | 32498960 G | 1.823  | 5.02E-07 | chr:6:32648036 |
| 6 rs112037641 | 32489259 T | 1.773  | 5.02E-07 | chr:6:32648036 |
| 6 rs34145408  | 32602124 T | 0.3888 | 5.03E-07 | chr:6:32648036 |
| 6 rs281863879 | 32630407 A | 0.5603 | 5.03E-07 | chr:6:32648036 |
| 6 rs68115965  | 32529669 C | 0.3922 | 5.04E-07 | chr:6:32648036 |
| 6 rs112103673 | 32491659 T | 1.825  | 5.04E-07 | chr:6:32648036 |
| 6 rs28895236  | 32437223 T | 2.388  | 5.06E-07 | chr:6:32648036 |
| 6 rs9271170   | 32577889 T | 2.328  | 5.08E-07 | chr:6:32648036 |
| 6 rs9271171   | 32577907 C | 2.328  | 5.08E-07 | chr:6:32648036 |
| 6 rs9272644   | 32608322 T | 2.07   | 5.08E-07 | chr:6:32648036 |
| 6 rs71534504  | 32505433 C | 1.92   | 5.08E-07 | chr:6:32648036 |
| 6 rs9270985   | 32574027 T | 2.314  | 5.09E-07 | chr:6:32648036 |
| 6 rs9270987   | 32574127 T | 2.314  | 5.09E-07 | chr:6:32648036 |
| 6 rs375350961 | 32521793 G | 2.317  | 5.10E-07 | chr:6:32648036 |
| 6 rs78658333  | 32455810 G | 1.726  | 5.11E-07 | chr:6:32648036 |
| 6 rs35353422  | 32633948 A | 0.2351 | 5.12E-07 | chr:6:32648036 |

|               |            |        |          |                |
|---------------|------------|--------|----------|----------------|
| 6 rs9271205   | 32578941 G | 2.325  | 5.14E-07 | chr:6:32648036 |
| 6 rs9269815   | 32549726 A | 2.293  | 5.14E-07 | chr:6:32648036 |
| 6 rs9269816   | 32549727 T | 2.293  | 5.14E-07 | chr:6:32648036 |
| 6 rs77096675  | 32472910 T | 1.741  | 5.18E-07 | chr:6:32648036 |
| 6 rs111838566 | 32517727 G | 2.345  | 5.19E-07 | chr:6:32648036 |
| 6 rs9270981   | 32573932 A | 2.324  | 5.19E-07 | chr:6:32648036 |
| 6 rs112061353 | 32615243 C | 1.845  | 5.19E-07 | chr:6:32648036 |
| 6 rs78733108  | 32517511 G | 2.266  | 5.19E-07 | chr:6:32648036 |
| 6 rs78047056  | 32506835 G | 1.862  | 5.19E-07 | chr:6:32648036 |
| 6 rs184659090 | 32489973 A | 0.326  | 5.21E-07 | chr:6:32648036 |
| 6 rs9271024   | 32574954 T | 2.268  | 5.21E-07 | chr:6:32648036 |
| 6 rs9271408   | 32587613 T | 2.328  | 5.21E-07 | chr:6:32648036 |
| 6 rs9271621   | 32591841 A | 2.307  | 5.22E-07 | chr:6:32648036 |
| 6 rs75085141  | 32502522 T | 1.899  | 5.23E-07 | chr:6:32648036 |
| 6 rs75310651  | 32502513 A | 1.899  | 5.23E-07 | chr:6:32648036 |
| 6 rs9271172   | 32577975 C | 2.324  | 5.23E-07 | chr:6:32648036 |
| 6 rs9271173   | 32577981 A | 2.324  | 5.23E-07 | chr:6:32648036 |
| 6 rs9270710   | 32567368 C | 2.057  | 5.24E-07 | chr:6:32648036 |
| 6 rs9270719   | 32567586 A | 2.325  | 5.24E-07 | chr:6:32648036 |
| 6 rs9270720   | 32567627 T | 2.325  | 5.24E-07 | chr:6:32648036 |
| 6 rs72844397  | 32634073 A | 0.4169 | 5.25E-07 | chr:6:32648036 |
| 6 rs77693147  | 32469247 C | 1.762  | 5.26E-07 | chr:6:32648036 |
| 6 rs71534503  | 32505394 G | 1.894  | 5.26E-07 | chr:6:32648036 |
| 6 rs28891471  | 32642473 G | 0.4213 | 5.27E-07 | chr:6:32648036 |
| 6 rs9270584   | 32561277 C | 2.27   | 5.29E-07 | chr:6:32648036 |
| 6 rs535640756 | 32455839 T | 1.725  | 5.29E-07 | chr:6:32648036 |
| 6 rs9270322   | 32557776 C | 2.239  | 5.29E-07 | chr:6:32648036 |
| 6 rs9270836   | 32570325 A | 2.27   | 5.30E-07 | chr:6:32648036 |
| 6 rs9273375   | 32626786 G | 2.334  | 5.30E-07 | chr:6:32648036 |
| 6 rs79563328  | 32455801 C | 1.728  | 5.32E-07 | chr:6:32648036 |
| 6 rs9271152   | 32577531 T | 2.319  | 5.33E-07 | chr:6:32648036 |
| 6 rs9272450   | 32605478 T | 0.3382 | 5.33E-07 | chr:6:32648036 |
| 6 rs28891477  | 32642603 C | 0.4109 | 5.34E-07 | chr:6:32648036 |
| 6 rs28891478  | 32642605 G | 0.4109 | 5.34E-07 | chr:6:32648036 |
| 6 rs9270552   | 32560520 G | 2.157  | 5.35E-07 | chr:6:32648036 |
| 6 rs9270107   | 32554774 A | 2.163  | 5.35E-07 | chr:6:32648036 |
| 6 rs71538523  | 32536504 A | 1.745  | 5.35E-07 | chr:6:32648036 |
| 6 rs28654725  | 32435542 G | 2.331  | 5.36E-07 | chr:6:32648036 |
| 6 rs28895224  | 32435556 G | 2.331  | 5.36E-07 | chr:6:32648036 |
| 6 rs7748454   | 32448698 C | 2.84   | 5.37E-07 | chr:6:32648036 |
| 6 rs9270754   | 32568471 G | 2.265  | 5.40E-07 | chr:6:32648036 |
| 6 rs9271633   | 32592072 G | 0.2524 | 5.41E-07 | chr:6:32648036 |
| 6 rs559673115 | 32629239 A | 0.5508 | 5.43E-07 | chr:6:32648036 |

|               |            |         |          |                |
|---------------|------------|---------|----------|----------------|
| 6 rs75224167  | 32525748 C | 1.802   | 5.47E-07 | chr:6:32648036 |
| 6 rs111537693 | 32482481 T | 1.731   | 5.47E-07 | chr:6:32648036 |
| 6 rs112135250 | 32482504 A | 1.731   | 5.47E-07 | chr:6:32648036 |
| 6 rs9270801   | 32569387 A | 2.152   | 5.48E-07 | chr:6:32648036 |
| 6 rs9270802   | 32569392 T | 2.152   | 5.48E-07 | chr:6:32648036 |
| 6 rs149079064 | 32490391 A | 1.774   | 5.48E-07 | chr:6:32648036 |
| 6 rs75078575  | 32457258 T | 1.729   | 5.49E-07 | chr:6:32648036 |
| 6 rs537206245 | 32514754 C | 2.142   | 5.50E-07 | chr:6:32648036 |
| 6 rs539579029 | 32514764 T | 2.142   | 5.50E-07 | chr:6:32648036 |
| 6 rs2133035   | 32596475 A | 2.33    | 5.50E-07 | chr:6:32648036 |
| 6 rs116160472 | 32485643 G | 0.1346  | 5.54E-07 | chr:6:32648036 |
| 6 rs57583084  | 32525850 T | 1.767   | 5.55E-07 | chr:6:32648036 |
| 6 rs28366215  | 32557310 C | 2.758   | 5.56E-07 | chr:6:32648036 |
| 6 rs6918317   | 32381210 T | 0.3994  | 5.56E-07 | chr:6:32648036 |
| 6 rs7759742   | 32381736 T | 0.3994  | 5.56E-07 | chr:6:32648036 |
| 6 rs67792106  | 32528323 G | 0.3926  | 5.59E-07 | chr:6:32648036 |
| 6 rs9269308   | 32539620 A | 0.446   | 5.59E-07 | chr:6:32648036 |
| 6 rs113506020 | 32482261 T | 1.729   | 5.60E-07 | chr:6:32648036 |
| 6 rs201840950 | 32487091 G | 0.09053 | 5.62E-07 | chr:6:32648036 |
| 6 rs139860555 | 32488710 G | 1.73    | 5.63E-07 | chr:6:32648036 |
| 6 rs9272655   | 32608610 C | 0.3023  | 5.66E-07 | chr:6:32648036 |
| 6 rs9270974   | 32573713 C | 2.263   | 5.66E-07 | chr:6:32648036 |
| 6 rs113522240 | 32512591 G | 2.211   | 5.68E-07 | chr:6:32648036 |
| 6 rs111897614 | 32503177 T | 2.173   | 5.70E-07 | chr:6:32648036 |
| 6 rs9271260   | 32580507 A | 2.295   | 5.71E-07 | chr:6:32648036 |
| 6 rs9270670   | 32566533 A | 2.318   | 5.71E-07 | chr:6:32648036 |
| 6 rs9270671   | 32566549 T | 2.318   | 5.71E-07 | chr:6:32648036 |
| 6 rs9270672   | 32566557 G | 2.318   | 5.71E-07 | chr:6:32648036 |
| 6 rs41270903  | 32629497 G | 0.233   | 5.73E-07 | chr:6:32648036 |
| 6 rs570194309 | 32590602 C | 2.331   | 5.76E-07 | chr:6:32648036 |
| 6 rs9271127   | 32576887 C | 1.934   | 5.78E-07 | chr:6:32648036 |
| 6 rs9271574   | 32590590 G | 2.326   | 5.79E-07 | chr:6:32648036 |
| 6 rs9271560   | 32590381 T | 2.315   | 5.82E-07 | chr:6:32648036 |
| 6 rs73729750  | 32473503 G | 1.817   | 5.82E-07 | chr:6:32648036 |
| 6 rs9469220   | 32658310 G | 0.4588  | 5.82E-07 | chr:6:32648036 |
| 6 rs76567100  | 32505781 G | 1.991   | 5.85E-07 | chr:6:32648036 |
| 6 rs372276684 | 32639148 G | 0.3791  | 5.87E-07 | chr:6:32648036 |
| 6 rs112296425 | 32521984 G | 2.506   | 5.88E-07 | chr:6:32648036 |
| 6 rs2395521   | 32601700 T | 0.2558  | 5.88E-07 | chr:6:32648036 |
| 6 rs114954902 | 32517768 A | 2.211   | 5.89E-07 | chr:6:32648036 |
| 6 rs9270690   | 32566948 G | 2.31    | 5.90E-07 | chr:6:32648036 |
| 6 rs9270691   | 32566972 G | 2.31    | 5.90E-07 | chr:6:32648036 |
| 6 rs9271589   | 32591128 A | 2.268   | 5.91E-07 | chr:6:32648036 |

|               |            |        |          |                |
|---------------|------------|--------|----------|----------------|
| 6 rs369557153 | 32496523 T | 1.793  | 5.91E-07 | chr:6:32648036 |
| 6 rs9270909   | 32572179 A | 2.218  | 5.91E-07 | chr:6:32648036 |
| 6 rs111410640 | 32521831 A | 2.252  | 5.92E-07 | chr:6:32648036 |
| 6 rs78242887  | 32472899 T | 1.725  | 5.93E-07 | chr:6:32648036 |
| 6 rs9269545   | 32544145 T | 1.948  | 5.93E-07 | chr:6:32648036 |
| 6 rs281862257 | 32632345 C | 0.5004 | 5.95E-07 | chr:6:32648036 |
| 6 rs281862258 | 32632344 C | 0.5004 | 5.95E-07 | chr:6:32648036 |
| 6 rs571388666 | 32632340 A | 0.5004 | 5.95E-07 | chr:6:32648036 |
| 6 rs28366309  | 32561048 T | 2.311  | 5.98E-07 | chr:6:32648036 |
| 6 rs9270784   | 32569157 C | 1.95   | 5.98E-07 | chr:6:32648036 |
| 6 rs9270785   | 32569158 T | 1.95   | 5.98E-07 | chr:6:32648036 |
| 6 rs9273173   | 32613231 A | 0.3866 | 5.99E-07 | chr:6:32648036 |
| 6 rs28891412  | 32640538 T | 0.3913 | 5.99E-07 | chr:6:32648036 |
| 6 rs9271516   | 32589668 A | 2.328  | 6.00E-07 | chr:6:32648036 |
| 6 rs9272498   | 32606217 A | 2.18   | 6.01E-07 | chr:6:32648036 |
| 6 rs77114005  | 32594342 C | 0.1532 | 6.03E-07 | chr:6:32648036 |
| 6 rs9270431   | 32558664 C | 1.765  | 6.03E-07 | chr:6:32648036 |
| 6 rs9270432   | 32558665 C | 1.765  | 6.03E-07 | chr:6:32648036 |
| 6 rs9274295   | 32631866 A | 1.82   | 6.04E-07 | chr:6:32648036 |
| 6 rs9271676   | 32592868 C | 2.293  | 6.10E-07 | chr:6:32648036 |
| 6 rs35372060  | 32447667 T | 2.33   | 6.10E-07 | chr:6:32648036 |
| 6 rs28366297  | 32560829 C | 2.31   | 6.10E-07 | chr:6:32648036 |
| 6 rs9270579   | 32561098 A | 2.193  | 6.11E-07 | chr:6:32648036 |
| 6 rs9274304   | 32631986 G | 1.78   | 6.13E-07 | chr:6:32648036 |
| 6 rs9270827   | 32570132 C | 2.265  | 6.14E-07 | chr:6:32648036 |
| 6 rs9270828   | 32570144 T | 2.265  | 6.14E-07 | chr:6:32648036 |
| 6 rs28746895  | 32648221 T | 0.4219 | 6.17E-07 | chr:6:32648036 |
| 6 rs9271109   | 32576687 T | 2.299  | 6.19E-07 | chr:6:32648036 |
| 6 rs9271110   | 32576688 G | 2.299  | 6.19E-07 | chr:6:32648036 |
| 6 rs28747043  | 32655508 G | 0.3961 | 6.23E-07 | chr:6:32648036 |
| 6 rs9272492   | 32606052 G | 2.152  | 6.24E-07 | chr:6:32648036 |
| 6 rs9271402   | 32587535 C | 0.2924 | 6.24E-07 | chr:6:32648036 |
| 6 rs9269290   | 32539424 A | 1.746  | 6.26E-07 | chr:6:32648036 |
| 6 rs9271100   | 32576478 T | 2.298  | 6.26E-07 | chr:6:32648036 |
| 6 rs9271521   | 32589783 T | 2.33   | 6.29E-07 | chr:6:32648036 |
| 6 rs71545427  | 32459704 T | 1.714  | 6.31E-07 | chr:6:32648036 |
| 6 rs281863884 | 32630401 C | 0.5628 | 6.31E-07 | chr:6:32648036 |
| 6 rs115308106 | 32683666 A | 3.43   | 6.36E-07 | chr:6:32648036 |
| 6 rs6915986   | 32683898 C | 3.43   | 6.36E-07 | chr:6:32648036 |
| 6 rs6936707   | 32684069 T | 3.43   | 6.36E-07 | chr:6:32648036 |
| 6 rs191239160 | 32525992 C | 0.5392 | 6.36E-07 | chr:6:32648036 |
| 6 rs17210202  | 32555987 C | 2.415  | 6.39E-07 | chr:6:32648036 |
| 6 rs9269908   | 32551329 G | 1.735  | 6.40E-07 | chr:6:32648036 |

|               |            |        |          |                |
|---------------|------------|--------|----------|----------------|
| 6 rs9269909   | 32551334 T | 1.735  | 6.40E-07 | chr:6:32648036 |
| 6 rs66512233  | 32497451 A | 1.952  | 6.40E-07 | chr:6:32648036 |
| 6 rs112668737 | 32489345 A | 1.762  | 6.41E-07 | chr:6:32648036 |
| 6 rs28891414  | 32640593 T | 0.3944 | 6.41E-07 | chr:6:32648036 |
| 6 rs9271325   | 32582513 C | 2.209  | 6.41E-07 | chr:6:32648036 |
| 6 rs78443865  | 32456951 G | 1.727  | 6.42E-07 | chr:6:32648036 |
| 6 rs9271223   | 32579372 T | 2.285  | 6.42E-07 | chr:6:32648036 |
| 6 rs28724243  | 32629347 C | 1.945  | 6.43E-07 | chr:6:32648036 |
| 6 rs9270692   | 32567006 C | 2.294  | 6.43E-07 | chr:6:32648036 |
| 6 rs9270693   | 32567007 A | 2.294  | 6.43E-07 | chr:6:32648036 |
| 6 rs9270694   | 32567024 C | 2.294  | 6.43E-07 | chr:6:32648036 |
| 6 rs9271582   | 32590774 C | 2.32   | 6.43E-07 | chr:6:32648036 |
| 6 rs9271583   | 32590780 C | 2.32   | 6.43E-07 | chr:6:32648036 |
| 6 rs28383200  | 32574540 A | 2.286  | 6.43E-07 | chr:6:32648036 |
| 6 rs564743883 | 32497175 T | 1.793  | 6.44E-07 | chr:6:32648036 |
| 6 rs115428791 | 32473101 A | 1.73   | 6.46E-07 | chr:6:32648036 |
| 6 rs116274877 | 32473099 C | 1.73   | 6.46E-07 | chr:6:32648036 |
| 6 rs116758859 | 32473104 T | 1.73   | 6.46E-07 | chr:6:32648036 |
| 6 rs9272676   | 32608903 C | 0.3815 | 6.47E-07 | chr:6:32648036 |
| 6 rs9272677   | 32608907 A | 0.3815 | 6.47E-07 | chr:6:32648036 |
| 6 rs9269566   | 32544561 G | 1.888  | 6.50E-07 | chr:6:32648036 |
| 6 rs9270737   | 32568107 A | 2.144  | 6.51E-07 | chr:6:32648036 |
| 6 rs150596400 | 32486953 A | 1.759  | 6.52E-07 | chr:6:32648036 |
| 6 rs113242918 | 32486202 G | 1.718  | 6.52E-07 | chr:6:32648036 |
| 6 rs10947290  | 32446269 A | 0.2371 | 6.52E-07 | chr:6:32648036 |
| 6 rs74816744  | 32502447 A | 1.926  | 6.53E-07 | chr:6:32648036 |
| 6 rs79076719  | 32502455 C | 1.926  | 6.53E-07 | chr:6:32648036 |
| 6 rs200248344 | 32494937 C | 1.768  | 6.53E-07 | chr:6:32648036 |
| 6 rs9270977   | 32573748 A | 2.232  | 6.54E-07 | chr:6:32648036 |
| 6 rs9270978   | 32573754 T | 2.232  | 6.54E-07 | chr:6:32648036 |
| 6 rs7756741   | 32583198 A | 0.2913 | 6.55E-07 | chr:6:32648036 |
| 6 rs114730467 | 32491153 T | 1.726  | 6.55E-07 | chr:6:32648036 |
| 6 rs9271519   | 32589751 C | 2.311  | 6.56E-07 | chr:6:32648036 |
| 6 rs9270928   | 32572461 G | 2.244  | 6.57E-07 | chr:6:32648036 |
| 6 rs9270537   | 32559725 T | 1.986  | 6.57E-07 | chr:6:32648036 |
| 6 rs28366323  | 32561609 G | 2.308  | 6.58E-07 | chr:6:32648036 |
| 6 rs71536522  | 32520583 A | 2.166  | 6.59E-07 | chr:6:32648036 |
| 6 rs553565066 | 32523149 A | 2.346  | 6.59E-07 | chr:6:32648036 |
| 6 rs67020511  | 32513415 C | 2.335  | 6.59E-07 | chr:6:32648036 |
| 6 rs9268889   | 32431886 G | 2.294  | 6.60E-07 | chr:6:32648036 |
| 6 rs7769413   | 32542059 T | 1.89   | 6.61E-07 | chr:6:32648036 |
| 6 rs9273394   | 32627082 A | 0.4738 | 6.62E-07 | chr:6:32648036 |
| 6 rs79010350  | 32505668 G | 1.872  | 6.63E-07 | chr:6:32648036 |

|               |            |        |          |                |
|---------------|------------|--------|----------|----------------|
| 6 rs28383398  | 32607828 T | 2.178  | 6.64E-07 | chr:6:32648036 |
| 6 rs77375484  | 32505909 T | 1.842  | 6.66E-07 | chr:6:32648036 |
| 6 rs78912960  | 32505908 G | 1.842  | 6.66E-07 | chr:6:32648036 |
| 6 rs16870187  | 32498584 C | 1.936  | 6.66E-07 | chr:6:32648036 |
| 6 rs9269825   | 32549849 C | 2.257  | 6.67E-07 | chr:6:32648036 |
| 6 rs116575354 | 32524989 C | 2.522  | 6.68E-07 | chr:6:32648036 |
| 6 rs185345582 | 32486299 C | 0.5333 | 6.68E-07 | chr:6:32648036 |
| 6 rs189059541 | 32489501 T | 1.742  | 6.70E-07 | chr:6:32648036 |
| 6 rs9270197   | 32556203 A | 1.978  | 6.70E-07 | chr:6:32648036 |
| 6 rs9270938   | 32572763 G | 2.45   | 6.72E-07 | chr:6:32648036 |
| 6 rs9270551   | 32560501 G | 2.148  | 6.76E-07 | chr:6:32648036 |
| 6 rs9271058   | 32575406 A | 2.28   | 6.76E-07 | chr:6:32648036 |
| 6 rs113823631 | 32553037 T | 2.47   | 6.76E-07 | chr:6:32648036 |
| 6 rs28366311  | 32561137 G | 2.29   | 6.77E-07 | chr:6:32648036 |
| 6 rs41270921  | 32630169 C | 0.1728 | 6.78E-07 | chr:6:32648036 |
| 6 rs9271101   | 32576493 C | 2.28   | 6.79E-07 | chr:6:32648036 |
| 6 rs28383457  | 32609456 T | 2.288  | 6.80E-07 | chr:6:32648036 |
| 6 rs9270755   | 32568522 G | 2.208  | 6.81E-07 | chr:6:32648036 |
| 6 rs35399335  | 32556338 G | 2.308  | 6.81E-07 | chr:6:32648036 |
| 6 rs9270983   | 32573973 T | 2.3    | 6.83E-07 | chr:6:32648036 |
| 6 rs553177248 | 32529916 A | 0.5131 | 6.83E-07 | chr:6:32648036 |
| 6 rs76914018  | 32436250 T | 2.138  | 6.83E-07 | chr:6:32648036 |
| 6 rs77244909  | 32436240 C | 2.138  | 6.83E-07 | chr:6:32648036 |
| 6 rs115754308 | 32518466 T | 2.204  | 6.84E-07 | chr:6:32648036 |
| 6 rs9270711   | 32567375 A | 2.045  | 6.85E-07 | chr:6:32648036 |
| 6 rs9270712   | 32567380 T | 2.045  | 6.85E-07 | chr:6:32648036 |
| 6 rs9270713   | 32567381 G | 2.045  | 6.85E-07 | chr:6:32648036 |
| 6 rs28747052  | 32655703 T | 0.3965 | 6.85E-07 | chr:6:32648036 |
| 6 rs9269399   | 32541300 G | 1.759  | 6.85E-07 | chr:6:32648036 |
| 6 rs9272674   | 32608885 T | 0.3896 | 6.86E-07 | chr:6:32648036 |
| 6 rs9271103   | 32576540 T | 2.27   | 6.94E-07 | chr:6:32648036 |
| 6 rs574347579 | 32514817 A | 2.124  | 6.95E-07 | chr:6:32648036 |
| 6 rs28746989  | 32653873 T | 0.3906 | 6.96E-07 | chr:6:32648036 |
| 6 rs76539678  | 32506942 C | 2.055  | 6.96E-07 | chr:6:32648036 |
| 6 rs9270258   | 32557060 G | 2.31   | 6.97E-07 | chr:6:32648036 |
| 6 rs9270723   | 32567798 G | 2.31   | 6.97E-07 | chr:6:32648036 |
| 6 rs9270724   | 32567820 A | 2.31   | 6.97E-07 | chr:6:32648036 |
| 6 rs9271162   | 32577715 G | 2.31   | 6.97E-07 | chr:6:32648036 |
| 6 rs9271163   | 32577733 C | 2.31   | 6.97E-07 | chr:6:32648036 |
| 6 rs9271164   | 32577784 C | 2.31   | 6.97E-07 | chr:6:32648036 |
| 6 rs9271165   | 32577785 A | 2.31   | 6.97E-07 | chr:6:32648036 |
| 6 rs9271166   | 32577811 C | 2.31   | 6.97E-07 | chr:6:32648036 |
| 6 rs9271168   | 32577854 G | 2.31   | 6.97E-07 | chr:6:32648036 |

|               |            |        |          |                |
|---------------|------------|--------|----------|----------------|
| 6 rs9271174   | 32578040 C | 2.31   | 6.97E-07 | chr:6:32648036 |
| 6 rs9271201   | 32578818 C | 2.31   | 6.97E-07 | chr:6:32648036 |
| 6 rs9271202   | 32578837 A | 2.31   | 6.97E-07 | chr:6:32648036 |
| 6 rs28723989  | 32550116 T | 2.485  | 7.00E-07 | chr:6:32648036 |
| 6 rs3828851   | 32520621 A | 2.194  | 7.02E-07 | chr:6:32648036 |
| 6 rs557371502 | 32520639 A | 2.194  | 7.02E-07 | chr:6:32648036 |
| 6 rs9271135   | 32577002 A | 2.278  | 7.03E-07 | chr:6:32648036 |
| 6 rs28366304  | 32560981 G | 2.3    | 7.05E-07 | chr:6:32648036 |
| 6 rs28366305  | 32560982 T | 2.3    | 7.05E-07 | chr:6:32648036 |
| 6 rs9271520   | 32589771 G | 2.314  | 7.05E-07 | chr:6:32648036 |
| 6 rs139656455 | 32462750 G | 1.914  | 7.09E-07 | chr:6:32648036 |
| 6 rs78398255  | 32492085 G | 1.713  | 7.11E-07 | chr:6:32648036 |
| 6 rs117891841 | 32683501 C | 3.437  | 7.12E-07 | chr:6:32648036 |
| 6 rs118106816 | 32684290 A | 3.437  | 7.12E-07 | chr:6:32648036 |
| 6 rs143420170 | 32684942 A | 3.437  | 7.12E-07 | chr:6:32648036 |
| 6 rs148972588 | 32684705 A | 3.437  | 7.12E-07 | chr:6:32648036 |
| 6 rs28891372  | 32638727 A | 0.3796 | 7.12E-07 | chr:6:32648036 |
| 6 rs9270953   | 32573045 C | 2.299  | 7.12E-07 | chr:6:32648036 |
| 6 rs28732291  | 32548697 G | 2.377  | 7.16E-07 | chr:6:32648036 |
| 6 rs9272297   | 32603811 C | 0.3045 | 7.18E-07 | chr:6:32648036 |
| 6 rs9272298   | 32603812 T | 0.3045 | 7.18E-07 | chr:6:32648036 |
| 6 rs9270278   | 32557253 C | 2.307  | 7.18E-07 | chr:6:32648036 |
| 6 rs9270281   | 32557267 A | 2.307  | 7.18E-07 | chr:6:32648036 |
| 6 rs34645444  | 32522634 T | 2.03   | 7.19E-07 | chr:6:32648036 |
| 6 rs79781139  | 32455847 A | 1.711  | 7.25E-07 | chr:6:32648036 |
| 6 rs10947296  | 32487724 C | 1.811  | 7.28E-07 | chr:6:32648036 |
| 6 rs142793258 | 32489883 G | 1.749  | 7.29E-07 | chr:6:32648036 |
| 6 rs78214806  | 32455838 G | 1.711  | 7.32E-07 | chr:6:32648036 |
| 6 rs1049213   | 32627773 A | 2.253  | 7.32E-07 | chr:6:32648036 |
| 6 rs9270425   | 32558627 G | 1.748  | 7.36E-07 | chr:6:32648036 |
| 6 rs28383406  | 32608179 C | 2.298  | 7.36E-07 | chr:6:32648036 |
| 6 rs9271060   | 32575513 C | 2.296  | 7.36E-07 | chr:6:32648036 |
| 6 rs9272612   | 32607821 A | 0.3425 | 7.36E-07 | chr:6:32648036 |
| 6 rs77460382  | 32472733 G | 1.724  | 7.37E-07 | chr:6:32648036 |
| 6 rs9272630   | 32608150 A | 0.3222 | 7.38E-07 | chr:6:32648036 |
| 6 rs9272631   | 32608152 C | 0.3222 | 7.38E-07 | chr:6:32648036 |
| 6 rs114645331 | 32554776 T | 2.562  | 7.38E-07 | chr:6:32648036 |
| 6 rs3104377   | 32599689 C | 1.992  | 7.39E-07 | chr:6:32648036 |
| 6 rs9269854   | 32550331 T | 2.253  | 7.39E-07 | chr:6:32648036 |
| 6 rs9272247   | 32602924 A | 0.2465 | 7.39E-07 | chr:6:32648036 |
| 6 rs9269817   | 32549746 A | 2.274  | 7.43E-07 | chr:6:32648036 |
| 6 rs9270569   | 32560899 C | 2.159  | 7.43E-07 | chr:6:32648036 |
| 6 rs28769628  | 32510281 A | 2.138  | 7.43E-07 | chr:6:32648036 |

|               |            |        |          |                |
|---------------|------------|--------|----------|----------------|
| 6 rs9271576   | 32590612 C | 2.306  | 7.46E-07 | chr:6:32648036 |
| 6 rs576791046 | 32478904 G | 0.1257 | 7.46E-07 | chr:6:32648036 |
| 6 rs28746983  | 32653760 T | 0.3971 | 7.46E-07 | chr:6:32648036 |
| 6 rs74291249  | 32594098 A | 0.2462 | 7.51E-07 | chr:6:32648036 |
| 6 rs71549286  | 32505386 C | 1.872  | 7.51E-07 | chr:6:32648036 |
| 6 rs9270843   | 32570478 A | 2.251  | 7.55E-07 | chr:6:32648036 |
| 6 rs114651315 | 32601278 T | 0.3367 | 7.55E-07 | chr:6:32648036 |
| 6 rs1694114   | 32651978 A | 0.4169 | 7.58E-07 | chr:6:32648036 |
| 6 rs111517012 | 32554675 G | 2.318  | 7.62E-07 | chr:6:32648036 |
| 6 rs35675330  | 32554653 A | 2.318  | 7.62E-07 | chr:6:32648036 |
| 6 rs66777350  | 32528293 A | 0.3993 | 7.66E-07 | chr:6:32648036 |
| 6 rs71536553  | 32528297 G | 0.3993 | 7.66E-07 | chr:6:32648036 |
| 6 rs72848263  | 32602065 C | 0.3968 | 7.66E-07 | chr:6:32648036 |
| 6 rs28383405  | 32608108 T | 2.199  | 7.68E-07 | chr:6:32648036 |
| 6 rs76939305  | 32491107 G | 1.72   | 7.68E-07 | chr:6:32648036 |
| 6 rs112128028 | 32633870 C | 0.4366 | 7.68E-07 | chr:6:32648036 |
| 6 rs9296027   | 32393062 G | 2.374  | 7.69E-07 | chr:6:32648036 |
| 6 rs9469109   | 32393161 T | 2.374  | 7.69E-07 | chr:6:32648036 |
| 6 rs9501622   | 32394251 A | 2.374  | 7.69E-07 | chr:6:32648036 |
| 6 rs28383313  | 32587117 G | 2.28   | 7.70E-07 | chr:6:32648036 |
| 6 rs28366212  | 32557259 T | 2.222  | 7.72E-07 | chr:6:32648036 |
| 6 rs28366213  | 32557263 A | 2.222  | 7.72E-07 | chr:6:32648036 |
| 6 rs6933740   | 32537804 T | 0.4623 | 7.78E-07 | chr:6:32648036 |
| 6 rs28891400  | 32640074 T | 0.3953 | 7.80E-07 | chr:6:32648036 |
| 6 rs28891401  | 32640075 G | 0.3953 | 7.80E-07 | chr:6:32648036 |
| 6 rs9271239   | 32579769 T | 2.278  | 7.83E-07 | chr:6:32648036 |
| 6 rs9271240   | 32579833 T | 2.278  | 7.83E-07 | chr:6:32648036 |
| 6 rs9271241   | 32579870 G | 2.278  | 7.83E-07 | chr:6:32648036 |
| 6 rs9271242   | 32579940 T | 2.278  | 7.83E-07 | chr:6:32648036 |
| 6 rs9271243   | 32579951 C | 2.278  | 7.83E-07 | chr:6:32648036 |
| 6 rs113600317 | 32553125 T | 2.392  | 7.84E-07 | chr:6:32648036 |
| 6 rs9270231   | 32556788 A | 2.093  | 7.85E-07 | chr:6:32648036 |
| 6 rs74324877  | 32517782 C | 2.191  | 7.87E-07 | chr:6:32648036 |
| 6 rs112927854 | 32663259 T | 0.2821 | 7.87E-07 | chr:6:32648036 |
| 6 rs12528622  | 32658259 A | 0.2821 | 7.87E-07 | chr:6:32648036 |
| 6 rs13191875  | 32663403 A | 0.2821 | 7.87E-07 | chr:6:32648036 |
| 6 rs13206007  | 32663442 G | 0.2821 | 7.87E-07 | chr:6:32648036 |
| 6 rs13206018  | 32663497 T | 0.2821 | 7.87E-07 | chr:6:32648036 |
| 6 rs68067315  | 32663340 A | 0.2821 | 7.87E-07 | chr:6:32648036 |
| 6 rs9271213   | 32579211 G | 2.278  | 7.88E-07 | chr:6:32648036 |
| 6 rs185234644 | 32514792 C | 2.115  | 7.89E-07 | chr:6:32648036 |
| 6 rs2647092   | 32584440 T | 0.2905 | 7.91E-07 | chr:6:32648036 |
| 6 rs535773    | 32577641 T | 0.2905 | 7.91E-07 | chr:6:32648036 |



|               |            |        |          |                |
|---------------|------------|--------|----------|----------------|
| 6 rs592362    | 32567795 G | 0.2905 | 7.91E-07 | chr:6:32648036 |
| 6 rs642093    | 32582075 A | 0.2905 | 7.91E-07 | chr:6:32648036 |
| 6 rs7760731   | 32583401 A | 0.2905 | 7.91E-07 | chr:6:32648036 |
| 6 rs9271342   | 32583122 C | 0.2905 | 7.91E-07 | chr:6:32648036 |
| 6 rs9269395   | 32541282 T | 1.758  | 7.93E-07 | chr:6:32648036 |
| 6 rs28366325  | 32561659 C | 2.298  | 7.93E-07 | chr:6:32648036 |
| 6 rs9271247   | 32580112 A | 2.275  | 7.94E-07 | chr:6:32648036 |
| 6 rs112498945 | 32496346 T | 1.739  | 7.94E-07 | chr:6:32648036 |
| 6 rs9270933   | 32572659 C | 2.278  | 7.94E-07 | chr:6:32648036 |
| 6 rs9270934   | 32572695 G | 2.278  | 7.94E-07 | chr:6:32648036 |
| 6 rs9270935   | 32572701 A | 2.278  | 7.94E-07 | chr:6:32648036 |
| 6 rs28383418  | 32608537 C | 2.242  | 7.94E-07 | chr:6:32648036 |
| 6 rs9275565   | 32677938 T | 0.4211 | 7.95E-07 | chr:6:32648036 |
| 6 rs9270800   | 32569335 T | 2.08   | 7.96E-07 | chr:6:32648036 |
| 6 rs185282713 | 32517018 C | 2.188  | 7.98E-07 | chr:6:32648036 |
| 6 rs34061722  | 32599337 T | 0.3958 | 7.99E-07 | chr:6:32648036 |
| 6 rs114553448 | 32537139 A | 1.726  | 8.00E-07 | chr:6:32648036 |
| 6 rs3104379   | 32599114 G | 2.318  | 8.03E-07 | chr:6:32648036 |
| 6 rs35840159  | 32556332 G | 2.269  | 8.04E-07 | chr:6:32648036 |
| 6 rs9270838   | 32570353 C | 2.225  | 8.06E-07 | chr:6:32648036 |
| 6 rs9269668   | 32546394 G | 1.831  | 8.07E-07 | chr:6:32648036 |
| 6 rs140590517 | 32518282 A | 2.175  | 8.07E-07 | chr:6:32648036 |
| 6 rs9270831   | 32570221 G | 2.223  | 8.10E-07 | chr:6:32648036 |
| 6 rs9269622   | 32545523 G | 1.908  | 8.14E-07 | chr:6:32648036 |
| 6 rs144341703 | 32490204 A | 1.726  | 8.16E-07 | chr:6:32648036 |
| 6 rs550053442 | 32599693 A | 0.291  | 8.16E-07 | chr:6:32648036 |
| 6 rs543565508 | 32490369 C | 1.736  | 8.16E-07 | chr:6:32648036 |
| 6 rs9270054   | 32553871 A | 2.179  | 8.19E-07 | chr:6:32648036 |
| 6 rs9271411   | 32587661 A | 2.295  | 8.20E-07 | chr:6:32648036 |
| 6 rs138961230 | 32499244 C | 1.854  | 8.22E-07 | chr:6:32648036 |
| 6 rs28747049  | 32655659 C | 0.4027 | 8.22E-07 | chr:6:32648036 |
| 6 rs28747050  | 32655674 C | 0.4027 | 8.22E-07 | chr:6:32648036 |
| 6 rs3828826   | 32485988 A | 0.1152 | 8.23E-07 | chr:6:32648036 |
| 6 rs113096063 | 32503161 T | 2.134  | 8.24E-07 | chr:6:32648036 |
| 6 rs113351668 | 32503167 A | 2.134  | 8.24E-07 | chr:6:32648036 |
| 6 rs77048791  | 32503986 T | 2.127  | 8.26E-07 | chr:6:32648036 |
| 6 rs2002779   | 32601684 T | 2.241  | 8.29E-07 | chr:6:32648036 |
| 6 rs9269821   | 32549808 G | 2.214  | 8.31E-07 | chr:6:32648036 |
| 6 rs9271132   | 32576962 T | 2.234  | 8.36E-07 | chr:6:32648036 |
| 6 rs9271133   | 32576963 G | 2.234  | 8.36E-07 | chr:6:32648036 |
| 6 rs562045282 | 32502681 T | 0.1432 | 8.37E-07 | chr:6:32648036 |
| 6 rs71565334  | 32451947 T | 2.3    | 8.38E-07 | chr:6:32648036 |
| 6 rs71565335  | 32451954 C | 2.3    | 8.38E-07 | chr:6:32648036 |

|               |            |        |          |                |
|---------------|------------|--------|----------|----------------|
| 6 rs71565336  | 32451963 A | 2.3    | 8.38E-07 | chr:6:32648036 |
| 6 rs7768875   | 32560752 T | 0.3888 | 8.40E-07 | chr:6:32648036 |
| 6 rs9272485   | 32605972 G | 2.178  | 8.41E-07 | chr:6:32648036 |
| 6 rs71565333  | 32451902 T | 2.289  | 8.42E-07 | chr:6:32648036 |
| 6 rs9271675   | 32592862 C | 2.266  | 8.43E-07 | chr:6:32648036 |
| 6 rs9271252   | 32580288 C | 2.273  | 8.45E-07 | chr:6:32648036 |
| 6 rs9271255   | 32580357 C | 2.273  | 8.45E-07 | chr:6:32648036 |
| 6 rs9271561   | 32590393 G | 2.283  | 8.46E-07 | chr:6:32648036 |
| 6 rs9269283   | 32539355 G | 1.747  | 8.47E-07 | chr:6:32648036 |
| 6 rs184003    | 32150296 A | 0.3736 | 8.49E-07 | chr:6:32648036 |
| 6 rs79238108  | 32459807 C | 1.849  | 8.50E-07 | chr:6:32648036 |
| 6 rs115260061 | 32489008 T | 1.715  | 8.51E-07 | chr:6:32648036 |
| 6 rs34127991  | 32559131 A | 2.254  | 8.55E-07 | chr:6:32648036 |
| 6 rs34788621  | 32559124 C | 2.254  | 8.55E-07 | chr:6:32648036 |
| 6 rs71549279  | 32504585 T | 2.109  | 8.57E-07 | chr:6:32648036 |
| 6 rs113251427 | 32486618 G | 0.4773 | 8.59E-07 | chr:6:32648036 |
| 6 rs183231933 | 32524320 T | 0.5488 | 8.59E-07 | chr:6:32648036 |
| 6 rs113620044 | 32498980 G | 1.797  | 8.63E-07 | chr:6:32648036 |
| 6 rs71542455  | 32631434 C | 0.3299 | 8.63E-07 | chr:6:32648036 |
| 6 rs9269649   | 32546067 C | 1.818  | 8.66E-07 | chr:6:32648036 |
| 6 rs28366317  | 32561411 T | 2.28   | 8.67E-07 | chr:6:32648036 |
| 6 rs9269369   | 32540777 G | 1.727  | 8.68E-07 | chr:6:32648036 |
| 6 rs9269370   | 32540784 C | 1.727  | 8.68E-07 | chr:6:32648036 |
| 6 rs28746992  | 32653919 G | 0.3895 | 8.71E-07 | chr:6:32648036 |
| 6 rs35326979  | 32653917 G | 0.3895 | 8.71E-07 | chr:6:32648036 |
| 6 rs281863503 | 32630945 T | 0.2608 | 8.72E-07 | chr:6:32648036 |
| 6 rs114312361 | 32496676 G | 1.807  | 8.75E-07 | chr:6:32648036 |
| 6 rs114195502 | 32486943 T | 1.747  | 8.77E-07 | chr:6:32648036 |
| 6 rs9270215   | 32556548 G | 1.801  | 8.78E-07 | chr:6:32648036 |
| 6 rs28747044  | 32655516 C | 0.4021 | 8.82E-07 | chr:6:32648036 |
| 6 rs28891470  | 32642454 T | 0.4325 | 8.82E-07 | chr:6:32648036 |
| 6 rs66514134  | 32504179 A | 2.071  | 8.83E-07 | chr:6:32648036 |
| 6 rs28708891  | 32527235 G | 1.839  | 8.84E-07 | chr:6:32648036 |
| 6 rs72851020  | 32501393 C | 2.252  | 8.85E-07 | chr:6:32648036 |
| 6 rs9269669   | 32546418 C | 1.82   | 8.88E-07 | chr:6:32648036 |
| 6 rs1140310   | 32632783 C | 0.4054 | 8.88E-07 | chr:6:32648036 |
| 6 rs9271063   | 32575584 A | 2.262  | 8.89E-07 | chr:6:32648036 |
| 6 rs9270689   | 32566909 A | 2.256  | 8.92E-07 | chr:6:32648036 |
| 6 rs9270617   | 32565192 T | 2.16   | 8.96E-07 | chr:6:32648036 |
| 6 rs536151678 | 32453543 C | 0.4717 | 8.97E-07 | chr:6:32648036 |
| 6 rs9270698   | 32567297 T | 2.087  | 8.97E-07 | chr:6:32648036 |
| 6 rs9270699   | 32567298 G | 2.087  | 8.97E-07 | chr:6:32648036 |
| 6 rs9272178   | 32601427 G | 0.2895 | 9.01E-07 | chr:6:32648036 |

|               |            |        |          |                |
|---------------|------------|--------|----------|----------------|
| 6 rs28732284  | 32548667 C | 2.369  | 9.01E-07 | chr:6:32648036 |
| 6 rs41270875  | 32628272 G | 0.2661 | 9.02E-07 | chr:6:32648036 |
| 6 rs76687830  | 32456190 G | 1.697  | 9.02E-07 | chr:6:32648036 |
| 6 rs78819855  | 32456198 T | 1.697  | 9.02E-07 | chr:6:32648036 |
| 6 rs74197584  | 32502717 T | 0.1479 | 9.04E-07 | chr:6:32648036 |
| 6 rs9272479   | 32605789 A | 0.2585 | 9.04E-07 | chr:6:32648036 |
| 6 rs539094532 | 32494755 A | 1.691  | 9.06E-07 | chr:6:32648036 |
| 6 rs9271053   | 32575319 C | 2.214  | 9.10E-07 | chr:6:32648036 |
| 6 rs76351919  | 32588703 C | 0.2823 | 9.13E-07 | chr:6:32648036 |
| 6 rs9271087   | 32576170 C | 2.197  | 9.16E-07 | chr:6:32648036 |
| 6 rs9271088   | 32576175 A | 2.197  | 9.16E-07 | chr:6:32648036 |
| 6 rs9271089   | 32576177 T | 2.197  | 9.16E-07 | chr:6:32648036 |
| 6 rs9270622   | 32565329 C | 2.202  | 9.17E-07 | chr:6:32648036 |
| 6 rs114716760 | 32482279 A | 1.713  | 9.18E-07 | chr:6:32648036 |
| 6 rs189209601 | 32524561 A | 0.3128 | 9.19E-07 | chr:6:32648036 |
| 6 rs375577071 | 32677526 C | 2.164  | 9.23E-07 | chr:6:32648036 |
| 6 rs9270158   | 32555460 G | 2.128  | 9.24E-07 | chr:6:32648036 |
| 6 rs564551505 | 32644523 C | 0.3252 | 9.24E-07 | chr:6:32648036 |
| 6 rs35828545  | 32600099 C | 0.3872 | 9.30E-07 | chr:6:32648036 |
| 6 rs9271626   | 32591944 A | 0.2754 | 9.30E-07 | chr:6:32648036 |
| 6 rs9271627   | 32591949 T | 0.2754 | 9.30E-07 | chr:6:32648036 |
| 6 rs28891390  | 32639545 T | 0.4081 | 9.30E-07 | chr:6:32648036 |
| 6 rs9269505   | 32543169 T | 1.876  | 9.33E-07 | chr:6:32648036 |
| 6 rs9270778   | 32569050 A | 2.18   | 9.36E-07 | chr:6:32648036 |
| 6 rs28455662  | 32510393 A | 2.145  | 9.40E-07 | chr:6:32648036 |
| 6 rs9270979   | 32573780 A | 2.241  | 9.40E-07 | chr:6:32648036 |
| 6 rs76792006  | 32499070 C | 1.82   | 9.41E-07 | chr:6:32648036 |
| 6 rs79967157  | 32499074 T | 1.82   | 9.41E-07 | chr:6:32648036 |
| 6 rs75420369  | 32511920 A | 2.367  | 9.42E-07 | chr:6:32648036 |
| 6 rs75851392  | 32455859 C | 1.703  | 9.42E-07 | chr:6:32648036 |
| 6 rs140571637 | 32516988 T | 2.127  | 9.42E-07 | chr:6:32648036 |
| 6 rs9269819   | 32549782 C | 2.264  | 9.43E-07 | chr:6:32648036 |
| 6 rs28776176  | 32509417 A | 2.252  | 9.46E-07 | chr:6:32648036 |
| 6 rs67813643  | 32505126 G | 2.094  | 9.49E-07 | chr:6:32648036 |
| 6 rs28366307  | 32560995 C | 2.285  | 9.51E-07 | chr:6:32648036 |
| 6 rs113276642 | 32525000 G | 2.471  | 9.52E-07 | chr:6:32648036 |
| 6 rs75244979  | 32498919 G | 1.82   | 9.52E-07 | chr:6:32648036 |
| 6 rs113698029 | 32491085 A | 1.715  | 9.54E-07 | chr:6:32648036 |
| 6 rs28746889  | 32648034 C | 0.4179 | 9.54E-07 | chr:6:32648036 |
| 6 rs9270366   | 32558175 C | 1.804  | 9.56E-07 | chr:6:32648036 |
| 6 rs1049219   | 32627763 T | 0.3968 | 9.56E-07 | chr:6:32648036 |
| 6 rs9270077   | 32554178 T | 2.121  | 9.58E-07 | chr:6:32648036 |
| 6 rs71549270  | 32503039 A | 1.899  | 9.62E-07 | chr:6:32648036 |

|               |            |        |          |                |
|---------------|------------|--------|----------|----------------|
| 6 rs74745419  | 32457291 G | 1.729  | 9.63E-07 | chr:6:32648036 |
| 6 rs76209082  | 32501127 C | 2.153  | 9.63E-07 | chr:6:32648036 |
| 6 rs192052326 | 32528176 T | 0.5248 | 9.65E-07 | chr:6:32648036 |
| 6 rs9271470   | 32588662 T | 2.248  | 9.65E-07 | chr:6:32648036 |
| 6 rs556705917 | 32486092 T | 1.702  | 9.71E-07 | chr:6:32648036 |
| 6 rs9270740   | 32568193 A | 2.07   | 9.81E-07 | chr:6:32648036 |
| 6 rs9270741   | 32568195 C | 2.07   | 9.81E-07 | chr:6:32648036 |
| 6 rs9270742   | 32568200 G | 2.07   | 9.81E-07 | chr:6:32648036 |
| 6 rs9270914   | 32572249 A | 2.047  | 9.86E-07 | chr:6:32648036 |
| 6 rs4341046   | 32567880 C | 2.267  | 9.91E-07 | chr:6:32648036 |
| 6 rs9271052   | 32575309 T | 2.189  | 9.92E-07 | chr:6:32648036 |
| 6 rs1049175   | 32628001 C | 0.4349 | 9.93E-07 | chr:6:32648036 |
| 6 rs111982397 | 32486844 A | 1.901  | 9.95E-07 | chr:6:32648036 |
| 6 rs9270427   | 32558649 C | 1.753  | 9.95E-07 | chr:6:32648036 |
| 6 rs9270428   | 32558652 G | 1.753  | 9.95E-07 | chr:6:32648036 |
| 6 rs2858302   | 32636756 C | 0.4939 | 9.96E-07 | chr:6:32648036 |
| 6 rs7757916   | 32558284 C | 0.3635 | 9.99E-07 | chr:6:32648036 |
| 6 rs9272435   | 32605336 A | 2.256  | 1.00E-06 | chr:6:32648036 |
| 6 rs28747051  | 32655686 T | 0.4045 | 1.00E-06 | chr:6:32648036 |
| 6 rs1391372   | 32603668 G | 0.3122 | 1.01E-06 | chr:6:32648036 |
| 6 rs9269813   | 32549681 G | 2.315  | 1.01E-06 | chr:6:32648036 |
| 6 rs9270586   | 32561302 G | 2.215  | 1.01E-06 | chr:6:32648036 |
| 6 rs9270587   | 32561305 T | 2.215  | 1.01E-06 | chr:6:32648036 |
| 6 rs28746885  | 32638871 G | 0.4024 | 1.01E-06 | chr:6:32648036 |
| 6 rs28891377  | 32638888 C | 0.4024 | 1.01E-06 | chr:6:32648036 |
| 6 rs28891378  | 32638894 T | 0.4024 | 1.01E-06 | chr:6:32648036 |
| 6 rs28383414  | 32608467 A | 2.213  | 1.02E-06 | chr:6:32648036 |
| 6 rs9270662   | 32566089 G | 0.2708 | 1.02E-06 | chr:6:32648036 |
| 6 rs9271236   | 32579645 C | 2.236  | 1.02E-06 | chr:6:32648036 |
| 6 rs9271474   | 32588707 A | 2.265  | 1.02E-06 | chr:6:32648036 |
| 6 rs9272499   | 32606229 C | 0.3111 | 1.02E-06 | chr:6:32648036 |
| 6 rs9272500   | 32606238 C | 0.3111 | 1.02E-06 | chr:6:32648036 |
| 6 rs9272501   | 32606239 A | 0.3111 | 1.02E-06 | chr:6:32648036 |
| 6 rs9271104   | 32576561 G | 2.228  | 1.02E-06 | chr:6:32648036 |
| 6 rs9271221   | 32579363 G | 1.974  | 1.02E-06 | chr:6:32648036 |
| 6 rs28724242  | 32629331 G | 1.913  | 1.02E-06 | chr:6:32648036 |
| 6 rs141487324 | 32632159 A | 1.785  | 1.03E-06 | chr:6:32648036 |
| 6 rs9270668   | 32566308 A | 2.263  | 1.04E-06 | chr:6:32648036 |
| 6 rs34462676  | 32628922 C | 2.095  | 1.04E-06 | chr:6:32648036 |
| 6 rs72849285  | 32472797 G | 1.715  | 1.04E-06 | chr:6:32648036 |
| 6 rs115791752 | 32493460 T | 1.729  | 1.04E-06 | chr:6:32648036 |
| 6 rs3135392   | 32409242 A | 0.4341 | 1.05E-06 | chr:6:32648036 |
| 6 rs9270752   | 32568426 T | 0.2949 | 1.05E-06 | chr:6:32648036 |

|               |            |        |          |                |
|---------------|------------|--------|----------|----------------|
| 6 rs9270832   | 32570228 T | 2.212  | 1.05E-06 | chr:6:32648036 |
| 6 rs9270435   | 32558686 A | 1.737  | 1.05E-06 | chr:6:32648036 |
| 6 rs9272774   | 32610255 A | 2.26   | 1.05E-06 | chr:6:32648036 |
| 6 rs9270619   | 32565243 A | 2.193  | 1.06E-06 | chr:6:32648036 |
| 6 rs149318044 | 32537511 G | 1.704  | 1.06E-06 | chr:6:32648036 |
| 6 rs66861400  | 32631701 G | 0.4329 | 1.06E-06 | chr:6:32648036 |
| 6 rs112248469 | 32639383 G | 0.3987 | 1.06E-06 | chr:6:32648036 |
| 6 rs9268516   | 32379489 T | 2.49   | 1.07E-06 | chr:6:32648036 |
| 6 rs143517539 | 32464463 T | 1.914  | 1.07E-06 | chr:6:32648036 |
| 6 rs1136905   | 32486437 C | 0.5749 | 1.07E-06 | chr:6:32648036 |
| 6 rs114133813 | 32526300 T | 1.84   | 1.07E-06 | chr:6:32648036 |
| 6 rs111403760 | 32517303 C | 2.152  | 1.07E-06 | chr:6:32648036 |
| 6 rs9270434   | 32558676 T | 1.737  | 1.08E-06 | chr:6:32648036 |
| 6 rs4478449   | 32571801 A | 1.935  | 1.08E-06 | chr:6:32648036 |
| 6 rs9270233   | 32556829 G | 2.091  | 1.08E-06 | chr:6:32648036 |
| 6 rs147810605 | 32490331 G | 0.5772 | 1.09E-06 | chr:6:32648036 |
| 6 rs9270998   | 32574379 A | 2.261  | 1.09E-06 | chr:6:32648036 |
| 6 rs9271693   | 32593033 T | 2.233  | 1.09E-06 | chr:6:32648036 |
| 6 rs35984981  | 32554725 T | 2.269  | 1.09E-06 | chr:6:32648036 |
| 6 rs72848251  | 32601288 A | 0.3464 | 1.09E-06 | chr:6:32648036 |
| 6 rs79267592  | 32578673 A | 2.259  | 1.09E-06 | chr:6:32648036 |
| 6 rs9271192   | 32578530 C | 2.259  | 1.09E-06 | chr:6:32648036 |
| 6 rs9271193   | 32578566 T | 2.259  | 1.09E-06 | chr:6:32648036 |
| 6 rs9271194   | 32578612 T | 2.259  | 1.09E-06 | chr:6:32648036 |
| 6 rs9271198   | 32578726 G | 2.259  | 1.09E-06 | chr:6:32648036 |
| 6 rs9271199   | 32578735 A | 2.259  | 1.09E-06 | chr:6:32648036 |
| 6 rs9271200   | 32578756 C | 2.259  | 1.09E-06 | chr:6:32648036 |
| 6 rs9270696   | 32567155 G | 2.263  | 1.09E-06 | chr:6:32648036 |
| 6 rs9270323   | 32557782 G | 2.208  | 1.10E-06 | chr:6:32648036 |
| 6 rs115736509 | 32554782 T | 2.521  | 1.10E-06 | chr:6:32648036 |
| 6 rs9272101   | 32599824 T | 0.2588 | 1.10E-06 | chr:6:32648036 |
| 6 rs114567049 | 32601719 A | 0.3833 | 1.10E-06 | chr:6:32648036 |
| 6 rs114803358 | 32601708 A | 0.3833 | 1.10E-06 | chr:6:32648036 |
| 6 rs28366327  | 32561678 A | 2.272  | 1.10E-06 | chr:6:32648036 |
| 6 rs34075049  | 32554935 A | 2.245  | 1.10E-06 | chr:6:32648036 |
| 6 rs9270817   | 32569911 A | 2.26   | 1.10E-06 | chr:6:32648036 |
| 6 rs116576223 | 32486948 C | 1.74   | 1.11E-06 | chr:6:32648036 |
| 6 rs79042439  | 32457285 A | 1.726  | 1.11E-06 | chr:6:32648036 |
| 6 rs9268830   | 32427572 G | 0.3944 | 1.11E-06 | chr:6:32648036 |
| 6 rs68082907  | 32634118 G | 0.4377 | 1.11E-06 | chr:6:32648036 |
| 6 rs1049177   | 32627991 T | 0.4379 | 1.11E-06 | chr:6:32648036 |
| 6 rs1049178   | 32627988 G | 0.4379 | 1.11E-06 | chr:6:32648036 |
| 6 rs28891467  | 32642307 A | 0.4488 | 1.11E-06 | chr:6:32648036 |

|               |            |        |          |                |
|---------------|------------|--------|----------|----------------|
| 6 rs28891468  | 32642319 T | 0.4488 | 1.11E-06 | chr:6:32648036 |
| 6 rs9270536   | 32559720 C | 2.258  | 1.12E-06 | chr:6:32648036 |
| 6 rs78681324  | 32490721 C | 1.843  | 1.12E-06 | chr:6:32648036 |
| 6 rs8192589   | 32187637 T | 3.971  | 1.13E-06 | chr:6:32648036 |
| 6 rs4496841   | 32389997 C | 2.332  | 1.13E-06 | chr:6:32648036 |
| 6 rs9269282   | 32539339 A | 1.733  | 1.13E-06 | chr:6:32648036 |
| 6 rs9271607   | 32591566 G | 2.246  | 1.13E-06 | chr:6:32648036 |
| 6 rs9271609   | 32591597 C | 2.246  | 1.13E-06 | chr:6:32648036 |
| 6 rs76612829  | 32506695 G | 1.931  | 1.13E-06 | chr:6:32648036 |
| 6 rs9271674   | 32592845 C | 2.24   | 1.14E-06 | chr:6:32648036 |
| 6 rs9270426   | 32558632 T | 1.736  | 1.14E-06 | chr:6:32648036 |
| 6 rs9271022   | 32574881 A | 2.101  | 1.14E-06 | chr:6:32648036 |
| 6 rs9270960   | 32573288 T | 2.229  | 1.15E-06 | chr:6:32648036 |
| 6 rs9270961   | 32573289 G | 2.229  | 1.15E-06 | chr:6:32648036 |
| 6 rs34304006  | 32588007 C | 0.3488 | 1.15E-06 | chr:6:32648036 |
| 6 rs113701066 | 32493427 C | 1.716  | 1.16E-06 | chr:6:32648036 |
| 6 rs9272248   | 32602941 A | 0.2604 | 1.16E-06 | chr:6:32648036 |
| 6 rs62405571  | 32458228 T | 1.771  | 1.17E-06 | chr:6:32648036 |
| 6 rs35971290  | 32550235 G | 2.453  | 1.17E-06 | chr:6:32648036 |
| 6 rs9270678   | 32566686 T | 2.23   | 1.17E-06 | chr:6:32648036 |
| 6 rs117170427 | 32685581 T | 3.353  | 1.18E-06 | chr:6:32648036 |
| 6 rs117176906 | 32688471 C | 3.353  | 1.18E-06 | chr:6:32648036 |
| 6 rs117333568 | 32694554 A | 3.353  | 1.18E-06 | chr:6:32648036 |
| 6 rs117585720 | 32695843 T | 3.353  | 1.18E-06 | chr:6:32648036 |
| 6 rs118062172 | 32695764 T | 3.353  | 1.18E-06 | chr:6:32648036 |
| 6 rs141151216 | 32698274 C | 3.353  | 1.18E-06 | chr:6:32648036 |
| 6 rs145080549 | 32693350 T | 3.353  | 1.18E-06 | chr:6:32648036 |
| 6 rs149332897 | 32686922 T | 3.353  | 1.18E-06 | chr:6:32648036 |
| 6 rs2859061   | 32693114 C | 3.353  | 1.18E-06 | chr:6:32648036 |
| 6 rs2859063   | 32692860 C | 3.353  | 1.18E-06 | chr:6:32648036 |
| 6 rs2859103   | 32699007 A | 3.353  | 1.18E-06 | chr:6:32648036 |
| 6 rs2859104   | 32698809 T | 3.353  | 1.18E-06 | chr:6:32648036 |
| 6 rs2859106   | 32698462 T | 3.353  | 1.18E-06 | chr:6:32648036 |
| 6 rs2859107   | 32698297 G | 3.353  | 1.18E-06 | chr:6:32648036 |
| 6 rs2859114   | 32697741 C | 3.353  | 1.18E-06 | chr:6:32648036 |
| 6 rs2859115   | 32697603 T | 3.353  | 1.18E-06 | chr:6:32648036 |
| 6 rs2859116   | 32697579 A | 3.353  | 1.18E-06 | chr:6:32648036 |
| 6 rs2859117   | 32697370 C | 3.353  | 1.18E-06 | chr:6:32648036 |
| 6 rs2859123   | 32696901 T | 3.353  | 1.18E-06 | chr:6:32648036 |
| 6 rs2859126   | 32696358 C | 3.353  | 1.18E-06 | chr:6:32648036 |
| 6 rs541055632 | 32697307 C | 3.353  | 1.18E-06 | chr:6:32648036 |
| 6 rs555287924 | 32693910 T | 3.353  | 1.18E-06 | chr:6:32648036 |
| 6 rs78575049  | 32698137 T | 3.353  | 1.18E-06 | chr:6:32648036 |

|               |            |        |          |                |
|---------------|------------|--------|----------|----------------|
| 6 rs28366316  | 32561246 C | 2.251  | 1.19E-06 | chr:6:32648036 |
| 6 rs9271250   | 32580234 G | 2.232  | 1.19E-06 | chr:6:32648036 |
| 6 rs9271251   | 32580241 C | 2.232  | 1.19E-06 | chr:6:32648036 |
| 6 rs139999228 | 32524711 C | 0.2287 | 1.19E-06 | chr:6:32648036 |
| 6 rs67955939  | 32634188 C | 0.4293 | 1.19E-06 | chr:6:32648036 |
| 6 rs9271248   | 32580157 C | 2.232  | 1.19E-06 | chr:6:32648036 |
| 6 rs28366306  | 32560990 A | 2.253  | 1.20E-06 | chr:6:32648036 |
| 6 rs17206252  | 32665915 C | 0.2887 | 1.20E-06 | chr:6:32648036 |
| 6 rs202038991 | 32509105 C | 2.199  | 1.20E-06 | chr:6:32648036 |
| 6 rs9271246   | 32580084 A | 2.229  | 1.20E-06 | chr:6:32648036 |
| 6 rs9271225   | 32579420 C | 2.042  | 1.21E-06 | chr:6:32648036 |
| 6 rs9271049   | 32575265 T | 2.183  | 1.21E-06 | chr:6:32648036 |
| 6 rs9271050   | 32575275 G | 2.183  | 1.21E-06 | chr:6:32648036 |
| 6 rs9271051   | 32575290 T | 2.183  | 1.21E-06 | chr:6:32648036 |
| 6 rs9271026   | 32574994 T | 2.181  | 1.21E-06 | chr:6:32648036 |
| 6 rs2854260   | 32634074 T | 0.2424 | 1.22E-06 | chr:6:32648036 |
| 6 rs9270866   | 32571043 G | 2.178  | 1.23E-06 | chr:6:32648036 |
| 6 rs115654776 | 32501015 T | 2.205  | 1.23E-06 | chr:6:32648036 |
| 6 rs77339454  | 32503567 A | 2.021  | 1.23E-06 | chr:6:32648036 |
| 6 rs55712910  | 32538806 A | 2.003  | 1.23E-06 | chr:6:32648036 |
| 6 rs35507994  | 32489117 A | 1.808  | 1.24E-06 | chr:6:32648036 |
| 6 rs9272317   | 32604051 T | 2.237  | 1.24E-06 | chr:6:32648036 |
| 6 rs113333416 | 32506627 C | 1.836  | 1.25E-06 | chr:6:32648036 |
| 6 rs28383427  | 32608792 T | 2.224  | 1.26E-06 | chr:6:32648036 |
| 6 rs71549271  | 32503050 G | 1.88   | 1.26E-06 | chr:6:32648036 |
| 6 rs13211632  | 32600555 T | 0.3612 | 1.26E-06 | chr:6:32648036 |
| 6 rs9271469   | 32588630 C | 2.221  | 1.27E-06 | chr:6:32648036 |
| 6 rs73726164  | 32487937 A | 0.4233 | 1.27E-06 | chr:6:32648036 |
| 6 rs112594243 | 32489254 A | 1.727  | 1.27E-06 | chr:6:32648036 |
| 6 rs116819869 | 32489247 T | 1.727  | 1.27E-06 | chr:6:32648036 |
| 6 rs2308891   | 32610009 G | 2.22   | 1.27E-06 | chr:6:32648036 |
| 6 rs13211653  | 32597088 G | 0.2813 | 1.27E-06 | chr:6:32648036 |
| 6 rs707949    | 32609952 C | 0.264  | 1.28E-06 | chr:6:32648036 |
| 6 rs9270271   | 32557209 T | 2.134  | 1.28E-06 | chr:6:32648036 |
| 6 rs76566845  | 32469756 G | 1.744  | 1.29E-06 | chr:6:32648036 |
| 6 rs111757290 | 32517856 T | 2.611  | 1.29E-06 | chr:6:32648036 |
| 6 rs9270735   | 32568096 T | 2.241  | 1.30E-06 | chr:6:32648036 |
| 6 rs9270736   | 32568097 G | 2.241  | 1.30E-06 | chr:6:32648036 |
| 6 rs9268434   | 32346452 T | 2.181  | 1.30E-06 | chr:6:32648036 |
| 6 rs9271644   | 32592337 A | 2.222  | 1.30E-06 | chr:6:32648036 |
| 6 rs17850459  | 32486358 T | 1.7    | 1.30E-06 | chr:6:32648036 |
| 6 rs9270820   | 32569997 C | 2.204  | 1.31E-06 | chr:6:32648036 |
| 6 rs75503615  | 32608934 T | 2.178  | 1.32E-06 | chr:6:32648036 |

|               |            |        |          |                |
|---------------|------------|--------|----------|----------------|
| 6 rs111911331 | 32493298 G | 2.135  | 1.32E-06 | chr:6:32648036 |
| 6 rs111289085 | 32639359 T | 0.4019 | 1.32E-06 | chr:6:32648036 |
| 6 rs9269325   | 32539979 G | 1.951  | 1.32E-06 | chr:6:32648036 |
| 6 rs9269338   | 32540304 G | 0.3055 | 1.32E-06 | chr:6:32648036 |
| 6 rs112895453 | 32510602 G | 2.107  | 1.33E-06 | chr:6:32648036 |
| 6 rs79005639  | 32510582 C | 2.107  | 1.33E-06 | chr:6:32648036 |
| 6 rs9270991   | 32574200 G | 2.162  | 1.33E-06 | chr:6:32648036 |
| 6 rs9270992   | 32574202 C | 2.162  | 1.33E-06 | chr:6:32648036 |
| 6 rs13211628  | 32600548 G | 0.3644 | 1.34E-06 | chr:6:32648036 |
| 6 rs9270674   | 32566598 C | 2.221  | 1.34E-06 | chr:6:32648036 |
| 6 rs9272641   | 32608294 A | 0.3199 | 1.34E-06 | chr:6:32648036 |
| 6 rs28383460  | 32609586 G | 2.24   | 1.35E-06 | chr:6:32648036 |
| 6 rs9270794   | 32569260 T | 2.215  | 1.35E-06 | chr:6:32648036 |
| 6 rs9469143   | 32454232 C | 2.22   | 1.36E-06 | chr:6:32648036 |
| 6 rs72844321  | 32629408 G | 0.4812 | 1.36E-06 | chr:6:32648036 |
| 6 rs9269868   | 32550702 C | 1.934  | 1.36E-06 | chr:6:32648036 |
| 6 rs75140942  | 32469389 G | 1.861  | 1.36E-06 | chr:6:32648036 |
| 6 rs9270756   | 32568538 A | 2.153  | 1.37E-06 | chr:6:32648036 |
| 6 rs1980494   | 32347016 G | 2.48   | 1.37E-06 | chr:6:32648036 |
| 6 rs1980495   | 32346794 C | 2.48   | 1.37E-06 | chr:6:32648036 |
| 6 rs2076522   | 32371179 C | 2.48   | 1.37E-06 | chr:6:32648036 |
| 6 rs2076524   | 32370684 G | 2.48   | 1.37E-06 | chr:6:32648036 |
| 6 rs2076525   | 32370616 C | 2.48   | 1.37E-06 | chr:6:32648036 |
| 6 rs2294880   | 32367722 G | 2.48   | 1.37E-06 | chr:6:32648036 |
| 6 rs2395155   | 32347897 T | 2.48   | 1.37E-06 | chr:6:32648036 |
| 6 rs2395156   | 32348098 A | 2.48   | 1.37E-06 | chr:6:32648036 |
| 6 rs2395157   | 32348145 G | 2.48   | 1.37E-06 | chr:6:32648036 |
| 6 rs2894252   | 32345443 T | 2.48   | 1.37E-06 | chr:6:32648036 |
| 6 rs3763316   | 32376746 T | 2.48   | 1.37E-06 | chr:6:32648036 |
| 6 rs3793126   | 32371619 G | 2.48   | 1.37E-06 | chr:6:32648036 |
| 6 rs3817962   | 32368314 A | 2.48   | 1.37E-06 | chr:6:32648036 |
| 6 rs8180659   | 32347280 T | 2.48   | 1.37E-06 | chr:6:32648036 |
| 6 rs8180664   | 32347490 T | 2.48   | 1.37E-06 | chr:6:32648036 |
| 6 rs8180672   | 32347533 G | 2.48   | 1.37E-06 | chr:6:32648036 |
| 6 rs8180673   | 32347532 T | 2.48   | 1.37E-06 | chr:6:32648036 |
| 6 rs9268400   | 32340654 A | 2.48   | 1.37E-06 | chr:6:32648036 |
| 6 rs9268401   | 32341318 G | 2.48   | 1.37E-06 | chr:6:32648036 |
| 6 rs9268403   | 32341473 C | 2.48   | 1.37E-06 | chr:6:32648036 |
| 6 rs9268404   | 32341719 T | 2.48   | 1.37E-06 | chr:6:32648036 |
| 6 rs9268405   | 32342087 T | 2.48   | 1.37E-06 | chr:6:32648036 |
| 6 rs9268406   | 32342129 T | 2.48   | 1.37E-06 | chr:6:32648036 |
| 6 rs9268407   | 32342166 C | 2.48   | 1.37E-06 | chr:6:32648036 |
| 6 rs9268409   | 32342639 C | 2.48   | 1.37E-06 | chr:6:32648036 |



|               |            |        |          |                |
|---------------|------------|--------|----------|----------------|
| 6 rs9268412   | 32343018 A | 2.48   | 1.37E-06 | chr:6:32648036 |
| 6 rs9268413   | 32343095 C | 2.48   | 1.37E-06 | chr:6:32648036 |
| 6 rs9268414   | 32343096 A | 2.48   | 1.37E-06 | chr:6:32648036 |
| 6 rs9268415   | 32343267 C | 2.48   | 1.37E-06 | chr:6:32648036 |
| 6 rs9268416   | 32343384 G | 2.48   | 1.37E-06 | chr:6:32648036 |
| 6 rs9268417   | 32343616 G | 2.48   | 1.37E-06 | chr:6:32648036 |
| 6 rs9268418   | 32343686 C | 2.48   | 1.37E-06 | chr:6:32648036 |
| 6 rs9268420   | 32343796 T | 2.48   | 1.37E-06 | chr:6:32648036 |
| 6 rs9268421   | 32343869 G | 2.48   | 1.37E-06 | chr:6:32648036 |
| 6 rs9268422   | 32343873 A | 2.48   | 1.37E-06 | chr:6:32648036 |
| 6 rs9268423   | 32343882 T | 2.48   | 1.37E-06 | chr:6:32648036 |
| 6 rs9268424   | 32343985 C | 2.48   | 1.37E-06 | chr:6:32648036 |
| 6 rs9268425   | 32344376 T | 2.48   | 1.37E-06 | chr:6:32648036 |
| 6 rs9268426   | 32344731 G | 2.48   | 1.37E-06 | chr:6:32648036 |
| 6 rs9268427   | 32344808 T | 2.48   | 1.37E-06 | chr:6:32648036 |
| 6 rs9268428   | 32344973 T | 2.48   | 1.37E-06 | chr:6:32648036 |
| 6 rs9268431   | 32345514 G | 2.48   | 1.37E-06 | chr:6:32648036 |
| 6 rs9268432   | 32345667 G | 2.48   | 1.37E-06 | chr:6:32648036 |
| 6 rs9268439   | 32346701 A | 2.48   | 1.37E-06 | chr:6:32648036 |
| 6 rs9268446   | 32347749 G | 2.48   | 1.37E-06 | chr:6:32648036 |
| 6 rs9268447   | 32347831 C | 2.48   | 1.37E-06 | chr:6:32648036 |
| 6 rs9268448   | 32348463 G | 2.48   | 1.37E-06 | chr:6:32648036 |
| 6 rs9268449   | 32348467 A | 2.48   | 1.37E-06 | chr:6:32648036 |
| 6 rs9268450   | 32348690 A | 2.48   | 1.37E-06 | chr:6:32648036 |
| 6 rs9268452   | 32349494 G | 2.48   | 1.37E-06 | chr:6:32648036 |
| 6 rs9268453   | 32349571 C | 2.48   | 1.37E-06 | chr:6:32648036 |
| 6 rs9268454   | 32349711 G | 2.48   | 1.37E-06 | chr:6:32648036 |
| 6 rs9268456   | 32349946 A | 2.48   | 1.37E-06 | chr:6:32648036 |
| 6 rs9268457   | 32350036 G | 2.48   | 1.37E-06 | chr:6:32648036 |
| 6 rs9268459   | 32350776 A | 2.48   | 1.37E-06 | chr:6:32648036 |
| 6 rs9268461   | 32351901 A | 2.48   | 1.37E-06 | chr:6:32648036 |
| 6 rs9268462   | 32351991 A | 2.48   | 1.37E-06 | chr:6:32648036 |
| 6 rs9268474   | 32357165 C | 2.48   | 1.37E-06 | chr:6:32648036 |
| 6 rs9268475   | 32358231 T | 2.48   | 1.37E-06 | chr:6:32648036 |
| 6 rs9268480   | 32363844 T | 2.48   | 1.37E-06 | chr:6:32648036 |
| 6 rs9268481   | 32364356 G | 2.48   | 1.37E-06 | chr:6:32648036 |
| 6 rs9268482   | 32367777 T | 2.48   | 1.37E-06 | chr:6:32648036 |
| 6 rs9268491   | 32374131 G | 2.48   | 1.37E-06 | chr:6:32648036 |
| 6 rs9268514   | 32378945 A | 2.48   | 1.37E-06 | chr:6:32648036 |
| 6 rs9271086   | 32576165 T | 2.157  | 1.37E-06 | chr:6:32648036 |
| 6 rs9272215   | 32602105 T | 0.2767 | 1.37E-06 | chr:6:32648036 |
| 6 rs28746984  | 32653819 A | 0.4084 | 1.37E-06 | chr:6:32648036 |
| 6 rs114170927 | 32537028 C | 1.745  | 1.37E-06 | chr:6:32648036 |

|               |            |        |          |                |
|---------------|------------|--------|----------|----------------|
| 6 rs3135365   | 32389255 C | 2.425  | 1.37E-06 | chr:6:32648036 |
| 6 rs73395560  | 32514671 C | 1.957  | 1.38E-06 | chr:6:32648036 |
| 6 rs1063347   | 32627956 C | 1.963  | 1.38E-06 | chr:6:32648036 |
| 6 rs75469638  | 32490715 A | 1.83   | 1.38E-06 | chr:6:32648036 |
| 6 rs9272475   | 32605756 G | 0.2705 | 1.39E-06 | chr:6:32648036 |
| 6 rs9272477   | 32605761 A | 0.2705 | 1.39E-06 | chr:6:32648036 |
| 6 rs9272065   | 32599352 G | 0.2803 | 1.39E-06 | chr:6:32648036 |
| 6 rs9272066   | 32599374 A | 0.2803 | 1.39E-06 | chr:6:32648036 |
| 6 rs9272069   | 32599425 A | 0.2803 | 1.39E-06 | chr:6:32648036 |
| 6 rs143008902 | 32639447 A | 0.4002 | 1.39E-06 | chr:6:32648036 |
| 6 rs9271685   | 32592970 C | 2.175  | 1.39E-06 | chr:6:32648036 |
| 6 rs13207893  | 32586922 C | 0.325  | 1.40E-06 | chr:6:32648036 |
| 6 rs9269859   | 32550439 A | 2.18   | 1.40E-06 | chr:6:32648036 |
| 6 rs9268848   | 32429303 G | 0.4671 | 1.40E-06 | chr:6:32648036 |
| 6 rs35915063  | 32633519 G | 0.2443 | 1.40E-06 | chr:6:32648036 |
| 6 rs2308890   | 32610008 T | 2.228  | 1.40E-06 | chr:6:32648036 |
| 6 rs56144236  | 32720219 A | 3.089  | 1.41E-06 | chr:6:32648036 |
| 6 rs9270213   | 32556494 A | 1.795  | 1.41E-06 | chr:6:32648036 |
| 6 rs9269470   | 32542305 G | 1.839  | 1.41E-06 | chr:6:32648036 |
| 6 rs9269471   | 32542322 A | 1.839  | 1.41E-06 | chr:6:32648036 |
| 6 rs28724136  | 32552586 T | 0.3098 | 1.42E-06 | chr:6:32648036 |
| 6 rs28383407  | 32608187 T | 2.129  | 1.43E-06 | chr:6:32648036 |
| 6 rs9272246   | 32602903 C | 0.2689 | 1.43E-06 | chr:6:32648036 |
| 6 rs113705785 | 32456018 T | 1.716  | 1.43E-06 | chr:6:32648036 |
| 6 rs9270489   | 32559077 C | 2.229  | 1.43E-06 | chr:6:32648036 |
| 6 rs9269309   | 32539625 T | 1.737  | 1.44E-06 | chr:6:32648036 |
| 6 rs9271105   | 32576577 T | 2.171  | 1.44E-06 | chr:6:32648036 |
| 6 rs67842782  | 32632386 T | 0.4996 | 1.44E-06 | chr:6:32648036 |
| 6 rs9270457   | 32558887 A | 1.743  | 1.44E-06 | chr:6:32648036 |
| 6 rs35360625  | 32599435 C | 0.4095 | 1.44E-06 | chr:6:32648036 |
| 6 rs79425107  | 32505830 T | 1.844  | 1.44E-06 | chr:6:32648036 |
| 6 rs9270912   | 32572224 A | 2.045  | 1.45E-06 | chr:6:32648036 |
| 6 rs9270913   | 32572229 A | 2.045  | 1.45E-06 | chr:6:32648036 |
| 6 rs6457602   | 32542298 C | 0.3882 | 1.45E-06 | chr:6:32648036 |
| 6 rs72848254  | 32601375 G | 0.3699 | 1.45E-06 | chr:6:32648036 |
| 6 rs145260193 | 32455012 G | 1.78   | 1.45E-06 | chr:6:32648036 |
| 6 rs9271097   | 32576439 C | 2.217  | 1.46E-06 | chr:6:32648036 |
| 6 rs9271098   | 32576440 T | 2.217  | 1.46E-06 | chr:6:32648036 |
| 6 rs9270811   | 32569721 A | 2.194  | 1.46E-06 | chr:6:32648036 |
| 6 rs9268944   | 32433654 T | 0.4933 | 1.46E-06 | chr:6:32648036 |
| 6 rs71549226  | 32498312 C | 2.008  | 1.47E-06 | chr:6:32648036 |
| 6 rs9269888   | 32550980 C | 1.769  | 1.47E-06 | chr:6:32648036 |
| 6 rs9270695   | 32567154 A | 2.237  | 1.47E-06 | chr:6:32648036 |

|               |            |        |          |                |
|---------------|------------|--------|----------|----------------|
| 6 rs3998183   | 32567946 T | 0.2997 | 1.48E-06 | chr:6:32648036 |
| 6 rs9274326   | 32632237 C | 1.768  | 1.48E-06 | chr:6:32648036 |
| 6 rs113192265 | 32511884 C | 2.264  | 1.50E-06 | chr:6:32648036 |
| 6 rs76384286  | 32472725 C | 1.691  | 1.51E-06 | chr:6:32648036 |
| 6 rs9272025   | 32598581 A | 2.187  | 1.51E-06 | chr:6:32648036 |
| 6 rs9268429   | 32345052 G | 2.425  | 1.51E-06 | chr:6:32648036 |
| 6 rs9274297   | 32631878 G | 0.5396 | 1.51E-06 | chr:6:32648036 |
| 6 rs147841808 | 32601807 G | 0.2933 | 1.52E-06 | chr:6:32648036 |
| 6 rs72849276  | 32469075 C | 2.11   | 1.52E-06 | chr:6:32648036 |
| 6 rs115991341 | 32506545 G | 0.5724 | 1.52E-06 | chr:6:32648036 |
| 6 rs200951960 | 32510600 G | 2.094  | 1.53E-06 | chr:6:32648036 |
| 6 rs9270732   | 32568018 C | 2.219  | 1.53E-06 | chr:6:32648036 |
| 6 rs9269897   | 32551112 G | 1.744  | 1.54E-06 | chr:6:32648036 |
| 6 rs539509361 | 32594399 G | 0.275  | 1.54E-06 | chr:6:32648036 |
| 6 rs200367341 | 32490296 A | 1.697  | 1.54E-06 | chr:6:32648036 |
| 6 rs9271140   | 32577083 C | 2.203  | 1.55E-06 | chr:6:32648036 |
| 6 rs9271141   | 32577084 T | 2.203  | 1.55E-06 | chr:6:32648036 |
| 6 rs111409670 | 32518069 C | 2.283  | 1.55E-06 | chr:6:32648036 |
| 6 rs9270577   | 32561074 A | 2.114  | 1.56E-06 | chr:6:32648036 |
| 6 rs113947393 | 32537950 C | 1.679  | 1.56E-06 | chr:6:32648036 |
| 6 rs3104416   | 32581502 C | 2.18   | 1.56E-06 | chr:6:32648036 |
| 6 rs9272123   | 32600573 T | 0.2556 | 1.57E-06 | chr:6:32648036 |
| 6 rs9272181   | 32601563 A | 0.2949 | 1.57E-06 | chr:6:32648036 |
| 6 rs9269884   | 32550969 A | 1.78   | 1.58E-06 | chr:6:32648036 |
| 6 rs72853910  | 32505875 C | 1.826  | 1.58E-06 | chr:6:32648036 |
| 6 rs79648921  | 32455777 C | 1.688  | 1.58E-06 | chr:6:32648036 |
| 6 rs75588019  | 32568063 A | 0.2957 | 1.59E-06 | chr:6:32648036 |
| 6 rs9271027   | 32575047 G | 2.038  | 1.59E-06 | chr:6:32648036 |
| 6 rs9271028   | 32575049 A | 2.038  | 1.59E-06 | chr:6:32648036 |
| 6 rs35273588  | 32633502 C | 0.2463 | 1.59E-06 | chr:6:32648036 |
| 6 rs68144909  | 32527939 A | 0.4055 | 1.60E-06 | chr:6:32648036 |
| 6 rs9270142   | 32555253 A | 2.079  | 1.60E-06 | chr:6:32648036 |
| 6 rs28772283  | 32674277 A | 0.4387 | 1.60E-06 | chr:6:32648036 |
| 6 rs9269890   | 32551010 G | 1.738  | 1.60E-06 | chr:6:32648036 |
| 6 rs191795965 | 32455073 T | 1.764  | 1.61E-06 | chr:6:32648036 |
| 6 rs9270816   | 32569879 T | 2.227  | 1.61E-06 | chr:6:32648036 |
| 6 rs141890570 | 32667412 A | 0.2935 | 1.62E-06 | chr:6:32648036 |
| 6 rs74508474  | 32454156 C | 2.161  | 1.62E-06 | chr:6:32648036 |
| 6 rs1130457   | 32627367 T | 1.937  | 1.63E-06 | chr:6:32648036 |
| 6 rs1130386   | 32632650 C | 0.4907 | 1.63E-06 | chr:6:32648036 |
| 6 rs111342235 | 32482142 T | 1.692  | 1.63E-06 | chr:6:32648036 |
| 6 rs9270880   | 32571659 G | 1.801  | 1.64E-06 | chr:6:32648036 |
| 6 rs111693298 | 32518251 T | 2.104  | 1.64E-06 | chr:6:32648036 |

|               |            |        |          |                |
|---------------|------------|--------|----------|----------------|
| 6 rs9270650   | 32565854 C | 2.214  | 1.64E-06 | chr:6:32648036 |
| 6 rs9270826   | 32570082 G | 2.149  | 1.65E-06 | chr:6:32648036 |
| 6 rs9270971   | 32573598 T | 2.213  | 1.65E-06 | chr:6:32648036 |
| 6 rs9270972   | 32573621 C | 2.213  | 1.65E-06 | chr:6:32648036 |
| 6 rs9271571   | 32590483 T | 2.229  | 1.65E-06 | chr:6:32648036 |
| 6 rs28848198  | 32529106 G | 0.3099 | 1.66E-06 | chr:6:32648036 |
| 6 rs80247743  | 32527206 G | 2.064  | 1.66E-06 | chr:6:32648036 |
| 6 rs9270335   | 32557913 A | 1.962  | 1.66E-06 | chr:6:32648036 |
| 6 rs9270738   | 32568118 T | 2.072  | 1.66E-06 | chr:6:32648036 |
| 6 rs79293578  | 32503561 T | 2.002  | 1.67E-06 | chr:6:32648036 |
| 6 rs76753104  | 32486926 C | 1.712  | 1.68E-06 | chr:6:32648036 |
| 6 rs28747048  | 32655584 T | 0.4179 | 1.68E-06 | chr:6:32648036 |
| 6 rs28366319  | 32561495 A | 2.217  | 1.68E-06 | chr:6:32648036 |
| 6 rs114814137 | 32482109 T | 1.698  | 1.69E-06 | chr:6:32648036 |
| 6 rs144226130 | 32482096 T | 1.698  | 1.69E-06 | chr:6:32648036 |
| 6 rs9271528   | 32589923 T | 0.2959 | 1.69E-06 | chr:6:32648036 |
| 6 rs35081742  | 32553608 T | 2.492  | 1.69E-06 | chr:6:32648036 |
| 6 rs36203457  | 32628548 G | 0.2699 | 1.69E-06 | chr:6:32648036 |
| 6 rs9269827   | 32549866 C | 2.157  | 1.69E-06 | chr:6:32648036 |
| 6 rs150720930 | 32537212 T | 1.675  | 1.69E-06 | chr:6:32648036 |
| 6 rs281863594 | 32630820 G | 0.5082 | 1.70E-06 | chr:6:32648036 |
| 6 rs9271472   | 32588700 T | 2.211  | 1.70E-06 | chr:6:32648036 |
| 6 rs79350521  | 32503147 T | 2.052  | 1.70E-06 | chr:6:32648036 |
| 6 rs9269527   | 32543691 A | 1.838  | 1.70E-06 | chr:6:32648036 |
| 6 rs28891456  | 32641919 C | 0.4106 | 1.70E-06 | chr:6:32648036 |
| 6 rs139672306 | 32486447 G | 1.683  | 1.71E-06 | chr:6:32648036 |
| 6 rs9271064   | 32575601 A | 2.178  | 1.71E-06 | chr:6:32648036 |
| 6 rs72845725  | 32525566 A | 0.5575 | 1.71E-06 | chr:6:32648036 |
| 6 rs9270808   | 32569607 G | 2.191  | 1.71E-06 | chr:6:32648036 |
| 6 rs9270809   | 32569608 G | 2.191  | 1.71E-06 | chr:6:32648036 |
| 6 rs9270810   | 32569659 T | 2.191  | 1.71E-06 | chr:6:32648036 |
| 6 rs138825368 | 32518375 A | 2.133  | 1.71E-06 | chr:6:32648036 |
| 6 rs28366268  | 32559874 G | 2.098  | 1.73E-06 | chr:6:32648036 |
| 6 rs9270768   | 32568805 T | 2.179  | 1.74E-06 | chr:6:32648036 |
| 6 rs375309052 | 32487908 A | 0.4252 | 1.74E-06 | chr:6:32648036 |
| 6 rs9269958   | 32552143 C | 1.812  | 1.74E-06 | chr:6:32648036 |
| 6 rs9269959   | 32552144 A | 1.812  | 1.74E-06 | chr:6:32648036 |
| 6 rs2076529   | 32363955 C | 2.164  | 1.75E-06 | chr:6:32648036 |
| 6 rs2076533   | 32363527 T | 2.164  | 1.75E-06 | chr:6:32648036 |
| 6 rs28383389  | 32607596 A | 2.138  | 1.75E-06 | chr:6:32648036 |
| 6 rs3817973   | 32361111 T | 2.164  | 1.75E-06 | chr:6:32648036 |
| 6 rs4373382   | 32350868 C | 2.164  | 1.75E-06 | chr:6:32648036 |
| 6 rs4424066   | 32354428 G | 2.164  | 1.75E-06 | chr:6:32648036 |

|               |            |        |          |                |
|---------------|------------|--------|----------|----------------|
| 6 rs9268460   | 32351283 C | 2.164  | 1.75E-06 | chr:6:32648036 |
| 6 rs9268472   | 32355605 A | 2.164  | 1.75E-06 | chr:6:32648036 |
| 6 rs9268473   | 32355683 G | 2.164  | 1.75E-06 | chr:6:32648036 |
| 6 rs9268476   | 32358942 A | 2.164  | 1.75E-06 | chr:6:32648036 |
| 6 rs9270813   | 32569790 C | 2.208  | 1.75E-06 | chr:6:32648036 |
| 6 rs9269774   | 32548802 G | 2.21   | 1.75E-06 | chr:6:32648036 |
| 6 rs9270165   | 32555627 A | 2.237  | 1.75E-06 | chr:6:32648036 |
| 6 rs9270166   | 32555633 G | 2.237  | 1.75E-06 | chr:6:32648036 |
| 6 rs72849254  | 32454200 T | 2.153  | 1.76E-06 | chr:6:32648036 |
| 6 rs117849668 | 32708811 A | 3.289  | 1.76E-06 | chr:6:32648036 |
| 6 rs118053420 | 32726213 T | 3.289  | 1.76E-06 | chr:6:32648036 |
| 6 rs118185960 | 32726159 C | 3.289  | 1.76E-06 | chr:6:32648036 |
| 6 rs2301270   | 32726162 A | 3.289  | 1.76E-06 | chr:6:32648036 |
| 6 rs60561792  | 32708075 A | 3.289  | 1.76E-06 | chr:6:32648036 |
| 6 rs79517313  | 32713044 T | 3.289  | 1.76E-06 | chr:6:32648036 |
| 6 rs544698989 | 32558169 A | 0.2931 | 1.77E-06 | chr:6:32648036 |
| 6 rs582591    | 32579373 A | 0.2938 | 1.77E-06 | chr:6:32648036 |
| 6 rs9272626   | 32608041 C | 0.2873 | 1.77E-06 | chr:6:32648036 |
| 6 rs9271122   | 32576821 G | 1.83   | 1.77E-06 | chr:6:32648036 |
| 6 rs9271020   | 32574840 T | 2.047  | 1.77E-06 | chr:6:32648036 |
| 6 rs142408103 | 32491945 T | 1.697  | 1.78E-06 | chr:6:32648036 |
| 6 rs4599680   | 32566294 C | 0.2929 | 1.78E-06 | chr:6:32648036 |
| 6 rs9271903   | 32596038 G | 0.2883 | 1.78E-06 | chr:6:32648036 |
| 6 rs9271904   | 32596040 G | 0.2883 | 1.78E-06 | chr:6:32648036 |
| 6 rs9271905   | 32596041 A | 0.2883 | 1.78E-06 | chr:6:32648036 |
| 6 rs113299215 | 32473089 T | 1.737  | 1.78E-06 | chr:6:32648036 |
| 6 rs41270920  | 32630137 C | 0.1974 | 1.78E-06 | chr:6:32648036 |
| 6 rs9378165   | 32510651 G | 2.079  | 1.79E-06 | chr:6:32648036 |
| 6 rs554943670 | 32516971 G | 2.128  | 1.80E-06 | chr:6:32648036 |
| 6 rs9272615   | 32607882 A | 0.3398 | 1.80E-06 | chr:6:32648036 |
| 6 rs9270437   | 32558694 A | 1.714  | 1.80E-06 | chr:6:32648036 |
| 6 rs169503    | 32157639 T | 0.3506 | 1.80E-06 | chr:6:32648036 |
| 6 rs34405843  | 32587994 G | 0.3586 | 1.80E-06 | chr:6:32648036 |
| 6 rs9271156   | 32577590 G | 2.196  | 1.81E-06 | chr:6:32648036 |
| 6 rs117042488 | 32699240 T | 3.284  | 1.81E-06 | chr:6:32648036 |
| 6 rs150981172 | 32702000 A | 3.284  | 1.81E-06 | chr:6:32648036 |
| 6 rs2859067   | 32703974 T | 3.284  | 1.81E-06 | chr:6:32648036 |
| 6 rs2859073   | 32703250 G | 3.284  | 1.81E-06 | chr:6:32648036 |
| 6 rs2859092   | 32700658 T | 3.284  | 1.81E-06 | chr:6:32648036 |
| 6 rs2859096   | 32700122 T | 3.284  | 1.81E-06 | chr:6:32648036 |
| 6 rs2859099   | 32699515 T | 3.284  | 1.81E-06 | chr:6:32648036 |
| 6 rs9270947   | 32572961 G | 2.015  | 1.82E-06 | chr:6:32648036 |
| 6 rs9270791   | 32569232 C | 2.208  | 1.82E-06 | chr:6:32648036 |

|               |            |        |          |                |
|---------------|------------|--------|----------|----------------|
| 6 rs9270792   | 32569233 A | 2.208  | 1.82E-06 | chr:6:32648036 |
| 6 rs28746888  | 32648015 A | 0.4302 | 1.82E-06 | chr:6:32648036 |
| 6 rs9271076   | 32575873 G | 2.195  | 1.83E-06 | chr:6:32648036 |
| 6 rs9272487   | 32606002 T | 0.3095 | 1.83E-06 | chr:6:32648036 |
| 6 rs9270615   | 32565152 T | 2.082  | 1.83E-06 | chr:6:32648036 |
| 6 rs281863398 | 32631079 A | 0.446  | 1.84E-06 | chr:6:32648036 |
| 6 rs71549277  | 32504035 T | 1.881  | 1.84E-06 | chr:6:32648036 |
| 6 rs9270833   | 32570238 T | 2.186  | 1.84E-06 | chr:6:32648036 |
| 6 rs71536532  | 32523756 A | 1.69   | 1.84E-06 | chr:6:32648036 |
| 6 rs114162389 | 32486292 G | 1.688  | 1.85E-06 | chr:6:32648036 |
| 6 rs116603761 | 32486291 T | 1.688  | 1.85E-06 | chr:6:32648036 |
| 6 rs2859105   | 32698730 C | 3.281  | 1.85E-06 | chr:6:32648036 |
| 6 rs707952    | 32609806 T | 0.286  | 1.86E-06 | chr:6:32648036 |
| 6 rs9271619   | 32591773 A | 0.286  | 1.86E-06 | chr:6:32648036 |
| 6 rs9272188   | 32601688 G | 0.286  | 1.86E-06 | chr:6:32648036 |
| 6 rs9272253   | 32603028 T | 0.286  | 1.86E-06 | chr:6:32648036 |
| 6 rs9272686   | 32609015 T | 0.286  | 1.86E-06 | chr:6:32648036 |
| 6 rs116116272 | 32537911 G | 1.685  | 1.87E-06 | chr:6:32648036 |
| 6 rs9270644   | 32565745 G | 2.183  | 1.87E-06 | chr:6:32648036 |
| 6 rs115135140 | 32554855 G | 2.237  | 1.88E-06 | chr:6:32648036 |
| 6 rs9271189   | 32578357 C | 2.19   | 1.88E-06 | chr:6:32648036 |
| 6 rs9270404   | 32558441 G | 1.687  | 1.88E-06 | chr:6:32648036 |
| 6 rs9271070   | 32575701 G | 2.185  | 1.89E-06 | chr:6:32648036 |
| 6 rs9275109   | 32649676 G | 0.3435 | 1.89E-06 | chr:6:32648036 |
| 6 rs9272436   | 32605353 G | 0.3487 | 1.89E-06 | chr:6:32648036 |
| 6 rs2097432   | 32590771 C | 0.2936 | 1.89E-06 | chr:6:32648036 |
| 6 rs3129763   | 32590925 A | 0.2936 | 1.89E-06 | chr:6:32648036 |
| 6 rs74323244  | 32503921 C | 2.058  | 1.89E-06 | chr:6:32648036 |
| 6 rs9271524   | 32589820 C | 0.2936 | 1.89E-06 | chr:6:32648036 |
| 6 rs145365399 | 32517715 G | 4.675  | 1.89E-06 | chr:6:32648036 |
| 6 rs9270937   | 32572757 A | 2.187  | 1.89E-06 | chr:6:32648036 |
| 6 rs28366328  | 32561766 G | 2.22   | 1.89E-06 | chr:6:32648036 |
| 6 rs9270780   | 32569108 C | 1.879  | 1.90E-06 | chr:6:32648036 |
| 6 rs9272263   | 32603295 A | 0.278  | 1.90E-06 | chr:6:32648036 |
| 6 rs9271075   | 32575852 A | 2.192  | 1.90E-06 | chr:6:32648036 |
| 6 rs9271023   | 32574895 T | 2.094  | 1.91E-06 | chr:6:32648036 |
| 6 rs17212230  | 32651588 A | 0.42   | 1.91E-06 | chr:6:32648036 |
| 6 rs9272318   | 32604059 G | 2.162  | 1.91E-06 | chr:6:32648036 |
| 6 rs9268477   | 32359121 A | 2.414  | 1.92E-06 | chr:6:32648036 |
| 6 rs9270865   | 32571011 G | 2.096  | 1.92E-06 | chr:6:32648036 |
| 6 rs9273501   | 32628361 A | 2.076  | 1.93E-06 | chr:6:32648036 |
| 6 rs9270822   | 32570025 C | 2.119  | 1.93E-06 | chr:6:32648036 |
| 6 rs9273011   | 32611611 C | 0.3442 | 1.93E-06 | chr:6:32648036 |

|               |            |        |          |                |
|---------------|------------|--------|----------|----------------|
| 6 rs71536558  | 32529031 C | 0.3293 | 1.93E-06 | chr:6:32648036 |
| 6 rs9271116   | 32576764 T | 1.902  | 1.93E-06 | chr:6:32648036 |
| 6 rs9271443   | 32588263 C | 0.2933 | 1.93E-06 | chr:6:32648036 |
| 6 rs9271480   | 32588831 A | 2.22   | 1.93E-06 | chr:6:32648036 |
| 6 rs77194371  | 32455756 T | 1.676  | 1.93E-06 | chr:6:32648036 |
| 6 rs9270819   | 32569972 T | 2.165  | 1.94E-06 | chr:6:32648036 |
| 6 rs1130390   | 32632647 C | 0.4294 | 1.94E-06 | chr:6:32648036 |
| 6 rs2858863   | 32578278 T | 0.301  | 1.94E-06 | chr:6:32648036 |
| 6 rs9272024   | 32598559 A | 2.195  | 1.95E-06 | chr:6:32648036 |
| 6 rs77594561  | 32501273 G | 2.18   | 1.96E-06 | chr:6:32648036 |
| 6 rs77604461  | 32501282 C | 2.18   | 1.96E-06 | chr:6:32648036 |
| 6 rs149038762 | 32475948 G | 0.5939 | 1.96E-06 | chr:6:32648036 |
| 6 rs9271090   | 32576247 T | 2.181  | 1.98E-06 | chr:6:32648036 |
| 6 rs2076520   | 32371269 T | 2.434  | 1.98E-06 | chr:6:32648036 |
| 6 rs9272503   | 32606286 C | 2      | 1.99E-06 | chr:6:32648036 |
| 6 rs77964335  | 32457866 T | 1.75   | 1.99E-06 | chr:6:32648036 |
| 6 rs9271563   | 32590428 C | 2.208  | 1.99E-06 | chr:6:32648036 |
| 6 rs112723263 | 32538718 T | 2.067  | 1.99E-06 | chr:6:32648036 |
| 6 rs79617990  | 32600694 A | 0.2739 | 1.99E-06 | chr:6:32648036 |
| 6 rs9270859   | 32570894 T | 2.18   | 2.00E-06 | chr:6:32648036 |
| 6 rs590999    | 32567508 A | 0.2927 | 2.00E-06 | chr:6:32648036 |
| 6 rs76190048  | 32566497 A | 0.2927 | 2.00E-06 | chr:6:32648036 |
| 6 rs9271352   | 32583938 C | 0.2927 | 2.00E-06 | chr:6:32648036 |
| 6 rs9271541   | 32590070 C | 0.2927 | 2.00E-06 | chr:6:32648036 |
| 6 rs71536517  | 32519828 T | 2.058  | 2.01E-06 | chr:6:32648036 |
| 6 rs9272667   | 32608760 C | 0.3842 | 2.01E-06 | chr:6:32648036 |
| 6 rs9272668   | 32608763 A | 0.3842 | 2.01E-06 | chr:6:32648036 |
| 6 rs9271488   | 32589000 T | 2.21   | 2.03E-06 | chr:6:32648036 |
| 6 rs9270209   | 32556443 A | 1.813  | 2.03E-06 | chr:6:32648036 |
| 6 rs77024756  | 32498558 A | 1.863  | 2.03E-06 | chr:6:32648036 |
| 6 rs9271079   | 32576052 G | 2.179  | 2.04E-06 | chr:6:32648036 |
| 6 rs9270461   | 32558911 C | 1.733  | 2.04E-06 | chr:6:32648036 |
| 6 rs116645073 | 32493436 G | 1.695  | 2.05E-06 | chr:6:32648036 |
| 6 rs1694123   | 32642759 G | 3.811  | 2.05E-06 | chr:6:32648036 |
| 6 rs113972770 | 32501169 C | 2.067  | 2.05E-06 | chr:6:32648036 |
| 6 rs117341244 | 32687260 T | 3.267  | 2.06E-06 | chr:6:32648036 |
| 6 rs9270799   | 32569318 T | 0.2868 | 2.06E-06 | chr:6:32648036 |
| 6 rs9271149   | 32577455 A | 2.178  | 2.06E-06 | chr:6:32648036 |
| 6 rs41270883  | 32628597 T | 0.272  | 2.07E-06 | chr:6:32648036 |
| 6 rs9270788   | 32569205 G | 2.179  | 2.07E-06 | chr:6:32648036 |
| 6 rs75880270  | 32505320 T | 1.89   | 2.07E-06 | chr:6:32648036 |
| 6 rs9271769   | 32594217 T | 2.192  | 2.08E-06 | chr:6:32648036 |
| 6 rs71549252  | 32501613 C | 2.395  | 2.08E-06 | chr:6:32648036 |

|               |            |        |          |                |
|---------------|------------|--------|----------|----------------|
| 6 rs9273060   | 32612114 G | 0.448  | 2.09E-06 | chr:6:32648036 |
| 6 rs116135263 | 32517913 A | 2.326  | 2.10E-06 | chr:6:32648036 |
| 6 rs9271219   | 32579354 C | 1.911  | 2.10E-06 | chr:6:32648036 |
| 6 rs9271220   | 32579355 A | 1.911  | 2.10E-06 | chr:6:32648036 |
| 6 rs34614226  | 32554963 A | 2.198  | 2.10E-06 | chr:6:32648036 |
| 6 rs112944250 | 32488489 A | 1.665  | 2.11E-06 | chr:6:32648036 |
| 6 rs9270777   | 32569038 T | 1.84   | 2.12E-06 | chr:6:32648036 |
| 6 rs2858881   | 32703845 C | 2.942  | 2.12E-06 | chr:6:32648036 |
| 6 rs2859070   | 32703540 T | 2.942  | 2.12E-06 | chr:6:32648036 |
| 6 rs9268478   | 32360258 A | 2.433  | 2.13E-06 | chr:6:32648036 |
| 6 rs9270898   | 32571903 T | 1.789  | 2.13E-06 | chr:6:32648036 |
| 6 rs4484563   | 32497254 C | 1.926  | 2.14E-06 | chr:6:32648036 |
| 6 rs533002231 | 32346663 G | 2.431  | 2.15E-06 | chr:6:32648036 |
| 6 rs564024810 | 32346662 T | 2.431  | 2.15E-06 | chr:6:32648036 |
| 6 rs9268436   | 32346637 G | 2.431  | 2.15E-06 | chr:6:32648036 |
| 6 rs569809786 | 32431544 G | 2.443  | 2.15E-06 | chr:6:32648036 |
| 6 rs9268484   | 32368513 T | 2.431  | 2.16E-06 | chr:6:32648036 |
| 6 rs73731427  | 32468906 T | 1.95   | 2.16E-06 | chr:6:32648036 |
| 6 rs67388151  | 32504700 T | 2.102  | 2.16E-06 | chr:6:32648036 |
| 6 rs17843648  | 32621300 T | 0.4445 | 2.18E-06 | chr:6:32648036 |
| 6 rs9270648   | 32565807 A | 2.152  | 2.19E-06 | chr:6:32648036 |
| 6 rs9270124   | 32555040 C | 2.155  | 2.19E-06 | chr:6:32648036 |
| 6 rs28891420  | 32640866 A | 0.3611 | 2.20E-06 | chr:6:32648036 |
| 6 rs9272730   | 32609634 G | 2.157  | 2.21E-06 | chr:6:32648036 |
| 6 rs35083835  | 32543784 T | 2.438  | 2.21E-06 | chr:6:32648036 |
| 6 rs281862007 | 32632894 C | 0.4473 | 2.21E-06 | chr:6:32648036 |
| 6 rs9270449   | 32558824 T | 1.78   | 2.21E-06 | chr:6:32648036 |
| 6 rs9269575   | 32544714 G | 1.763  | 2.21E-06 | chr:6:32648036 |
| 6 rs112177836 | 32503658 A | 2.02   | 2.22E-06 | chr:6:32648036 |
| 6 rs9273175   | 32613273 A | 0.4096 | 2.22E-06 | chr:6:32648036 |
| 6 rs146905608 | 32455901 T | 1.665  | 2.24E-06 | chr:6:32648036 |
| 6 rs9271416   | 32587812 A | 2.202  | 2.24E-06 | chr:6:32648036 |
| 6 rs9269576   | 32544724 A | 1.746  | 2.25E-06 | chr:6:32648036 |
| 6 rs114031016 | 32520035 T | 2.457  | 2.25E-06 | chr:6:32648036 |
| 6 rs116585903 | 32487688 T | 0.3402 | 2.25E-06 | chr:6:32648036 |
| 6 rs9271139   | 32577038 T | 2.177  | 2.27E-06 | chr:6:32648036 |
| 6 rs9270844   | 32570550 T | 2.084  | 2.29E-06 | chr:6:32648036 |
| 6 rs78247055  | 32499214 A | 1.796  | 2.29E-06 | chr:6:32648036 |
| 6 rs9270858   | 32570859 C | 2.151  | 2.29E-06 | chr:6:32648036 |
| 6 rs9270456   | 32558879 A | 1.731  | 2.30E-06 | chr:6:32648036 |
| 6 rs112076887 | 32486278 C | 1.685  | 2.31E-06 | chr:6:32648036 |
| 6 rs201574337 | 32453496 T | 0.4781 | 2.32E-06 | chr:6:32648036 |
| 6 rs28747060  | 32656614 T | 0.4156 | 2.32E-06 | chr:6:32648036 |



|               |            |        |          |                |
|---------------|------------|--------|----------|----------------|
| 6 rs9270232   | 32556811 C | 2.051  | 2.33E-06 | chr:6:32648036 |
| 6 rs9270125   | 32555049 A | 2.129  | 2.33E-06 | chr:6:32648036 |
| 6 rs9272063   | 32599303 T | 0.2924 | 2.33E-06 | chr:6:32648036 |
| 6 rs28366296  | 32560727 A | 2.191  | 2.34E-06 | chr:6:32648036 |
| 6 rs35779452  | 32599272 G | 0.4197 | 2.34E-06 | chr:6:32648036 |
| 6 rs9270922   | 32572388 T | 2.023  | 2.35E-06 | chr:6:32648036 |
| 6 rs9270924   | 32572408 G | 2.023  | 2.35E-06 | chr:6:32648036 |
| 6 rs9272197   | 32601840 T | 0.1686 | 2.35E-06 | chr:6:32648036 |
| 6 rs9272198   | 32601842 T | 0.1686 | 2.35E-06 | chr:6:32648036 |
| 6 rs9269389   | 32541106 C | 1.702  | 2.35E-06 | chr:6:32648036 |
| 6 rs28891418  | 32640859 C | 0.3633 | 2.36E-06 | chr:6:32648036 |
| 6 rs28891419  | 32640861 C | 0.3633 | 2.36E-06 | chr:6:32648036 |
| 6 rs35095850  | 32549935 G | 2.317  | 2.36E-06 | chr:6:32648036 |
| 6 rs35239661  | 32549923 T | 2.317  | 2.36E-06 | chr:6:32648036 |
| 6 rs9271091   | 32576275 G | 2.174  | 2.37E-06 | chr:6:32648036 |
| 6 rs9271092   | 32576296 A | 2.174  | 2.37E-06 | chr:6:32648036 |
| 6 rs9270875   | 32571310 A | 1.989  | 2.37E-06 | chr:6:32648036 |
| 6 rs6914573   | 32639368 A | 0.4791 | 2.39E-06 | chr:6:32648036 |
| 6 rs9270805   | 32569556 T | 2.132  | 2.40E-06 | chr:6:32648036 |
| 6 rs111899294 | 32517912 C | 2.328  | 2.41E-06 | chr:6:32648036 |
| 6 rs28366313  | 32561186 A | 2.184  | 2.41E-06 | chr:6:32648036 |
| 6 rs79076469  | 32501124 A | 2.059  | 2.42E-06 | chr:6:32648036 |
| 6 rs9270534   | 32559711 A | 2.102  | 2.43E-06 | chr:6:32648036 |
| 6 rs4713552   | 32560984 T | 0.317  | 2.44E-06 | chr:6:32648036 |
| 6 rs62405589  | 32508516 G | 1.91   | 2.44E-06 | chr:6:32648036 |
| 6 rs17204659  | 32557321 T | 2.684  | 2.45E-06 | chr:6:32648036 |
| 6 rs9272472   | 32605724 G | 2.049  | 2.45E-06 | chr:6:32648036 |
| 6 rs115351077 | 32537900 A | 1.672  | 2.45E-06 | chr:6:32648036 |
| 6 rs9271016   | 32574767 C | 1.85   | 2.46E-06 | chr:6:32648036 |
| 6 rs9270762   | 32568686 A | 2.086  | 2.46E-06 | chr:6:32648036 |
| 6 rs34902284  | 32556300 T | 2.173  | 2.47E-06 | chr:6:32648036 |
| 6 rs112771527 | 32486868 T | 1.709  | 2.47E-06 | chr:6:32648036 |
| 6 rs41316196  | 32634164 A | 0.2631 | 2.48E-06 | chr:6:32648036 |
| 6 rs9276656   | 32746594 T | 2.536  | 2.48E-06 | chr:6:32648036 |
| 6 rs9270708   | 32567353 A | 1.89   | 2.49E-06 | chr:6:32648036 |
| 6 rs17205184  | 32602551 A | 0.3951 | 2.49E-06 | chr:6:32648036 |
| 6 rs62404084  | 32603321 T | 0.3951 | 2.49E-06 | chr:6:32648036 |
| 6 rs9271021   | 32574863 G | 2.03   | 2.49E-06 | chr:6:32648036 |
| 6 rs71542465  | 32632529 A | 0.4772 | 2.51E-06 | chr:6:32648036 |
| 6 rs9274370   | 32632527 A | 0.4772 | 2.51E-06 | chr:6:32648036 |
| 6 rs139523312 | 32462924 A | 1.818  | 2.51E-06 | chr:6:32648036 |
| 6 rs114003122 | 32633934 T | 0.442  | 2.52E-06 | chr:6:32648036 |
| 6 rs116617461 | 32633935 G | 0.442  | 2.52E-06 | chr:6:32648036 |

|               |            |        |          |                |
|---------------|------------|--------|----------|----------------|
| 6 rs9270607   | 32564915 T | 1.916  | 2.52E-06 | chr:6:32648036 |
| 6 rs72508435  | 32487662 G | 1.724  | 2.53E-06 | chr:6:32648036 |
| 6 rs80133970  | 32457880 A | 1.736  | 2.53E-06 | chr:6:32648036 |
| 6 rs77102498  | 32572583 G | 2.121  | 2.54E-06 | chr:6:32648036 |
| 6 rs9272325   | 32604156 A | 0.3342 | 2.54E-06 | chr:6:32648036 |
| 6 rs78776954  | 32600817 G | 0.2759 | 2.55E-06 | chr:6:32648036 |
| 6 rs9270951   | 32573039 C | 2.079  | 2.55E-06 | chr:6:32648036 |
| 6 rs9270952   | 32573040 A | 2.079  | 2.55E-06 | chr:6:32648036 |
| 6 rs9270954   | 32573058 C | 2.079  | 2.55E-06 | chr:6:32648036 |
| 6 rs17205170  | 32602483 T | 0.3604 | 2.56E-06 | chr:6:32648036 |
| 6 rs35062987  | 32590735 T | 0.3604 | 2.56E-06 | chr:6:32648036 |
| 6 rs9272230   | 32602602 A | 0.2907 | 2.56E-06 | chr:6:32648036 |
| 6 rs9272233   | 32602686 A | 0.2907 | 2.56E-06 | chr:6:32648036 |
| 6 rs9272234   | 32602691 A | 0.2907 | 2.56E-06 | chr:6:32648036 |
| 6 rs72844157  | 32520071 A | 2.219  | 2.56E-06 | chr:6:32648036 |
| 6 rs9270999   | 32574438 G | 2.169  | 2.56E-06 | chr:6:32648036 |
| 6 rs114015803 | 32485879 T | 0.2636 | 2.57E-06 | chr:6:32648036 |
| 6 rs114693948 | 32485873 T | 0.2636 | 2.57E-06 | chr:6:32648036 |
| 6 rs9270236   | 32556887 C | 1.998  | 2.58E-06 | chr:6:32648036 |
| 6 rs9270237   | 32556908 C | 1.998  | 2.58E-06 | chr:6:32648036 |
| 6 rs9270242   | 32556964 C | 2.106  | 2.58E-06 | chr:6:32648036 |
| 6 rs9270243   | 32556965 T | 2.106  | 2.58E-06 | chr:6:32648036 |
| 6 rs9270244   | 32556967 T | 2.106  | 2.58E-06 | chr:6:32648036 |
| 6 rs9270823   | 32570051 C | 2.089  | 2.58E-06 | chr:6:32648036 |
| 6 rs9270824   | 32570055 T | 2.089  | 2.58E-06 | chr:6:32648036 |
| 6 rs78240203  | 32600881 G | 0.2912 | 2.59E-06 | chr:6:32648036 |
| 6 rs9272052   | 32599155 G | 0.2565 | 2.59E-06 | chr:6:32648036 |
| 6 rs41316200  | 32634183 T | 0.2617 | 2.60E-06 | chr:6:32648036 |
| 6 rs9270610   | 32565053 C | 1.99   | 2.60E-06 | chr:6:32648036 |
| 6 rs9271077   | 32575925 G | 2.175  | 2.61E-06 | chr:6:32648036 |
| 6 rs9271078   | 32575930 C | 2.175  | 2.61E-06 | chr:6:32648036 |
| 6 rs9268628   | 32405865 C | 0.4171 | 2.61E-06 | chr:6:32648036 |
| 6 rs2856724   | 32585161 G | 0.364  | 2.61E-06 | chr:6:32648036 |
| 6 rs75301863  | 32457566 T | 1.784  | 2.61E-06 | chr:6:32648036 |
| 6 rs74199853  | 32632542 C | 0.4766 | 2.62E-06 | chr:6:32648036 |
| 6 rs7771972   | 32605557 T | 0.2708 | 2.62E-06 | chr:6:32648036 |
| 6 rs75509903  | 32502337 A | 1.983  | 2.63E-06 | chr:6:32648036 |
| 6 rs75779249  | 32457462 T | 1.715  | 2.63E-06 | chr:6:32648036 |
| 6 rs281863600 | 32630811 A | 0.3069 | 2.63E-06 | chr:6:32648036 |
| 6 rs9271143   | 32577165 T | 2.032  | 2.64E-06 | chr:6:32648036 |
| 6 rs377523750 | 32496547 C | 1.72   | 2.64E-06 | chr:6:32648036 |
| 6 rs28746981  | 32653677 T | 0.4244 | 2.66E-06 | chr:6:32648036 |
| 6 rs9270223   | 32556657 C | 1.783  | 2.67E-06 | chr:6:32648036 |

|               |            |        |          |                |
|---------------|------------|--------|----------|----------------|
| 6 rs9271503   | 32589326 A | 2.192  | 2.68E-06 | chr:6:32648036 |
| 6 rs3763307   | 32374622 T | 2.427  | 2.68E-06 | chr:6:32648036 |
| 6 rs9270845   | 32570571 T | 2.057  | 2.68E-06 | chr:6:32648036 |
| 6 rs9270846   | 32570577 A | 2.057  | 2.68E-06 | chr:6:32648036 |
| 6 rs9269587   | 32544880 C | 1.713  | 2.69E-06 | chr:6:32648036 |
| 6 rs9270851   | 32570776 C | 2.162  | 2.70E-06 | chr:6:32648036 |
| 6 rs113486815 | 32487588 G | 1.742  | 2.70E-06 | chr:6:32648036 |
| 6 rs9272276   | 32603634 C | 0.3548 | 2.71E-06 | chr:6:32648036 |
| 6 rs9270795   | 32569263 C | 1.897  | 2.72E-06 | chr:6:32648036 |
| 6 rs281874965 | 32631311 T | 0.4633 | 2.72E-06 | chr:6:32648036 |
| 6 rs67456882  | 32496180 G | 1.695  | 2.74E-06 | chr:6:32648036 |
| 6 rs75076975  | 32610134 A | 2.168  | 2.74E-06 | chr:6:32648036 |
| 6 rs9270945   | 32572948 A | 1.983  | 2.74E-06 | chr:6:32648036 |
| 6 rs9270946   | 32572952 G | 1.983  | 2.74E-06 | chr:6:32648036 |
| 6 rs35426875  | 32600135 C | 0.4122 | 2.75E-06 | chr:6:32648036 |
| 6 rs28490365  | 32527221 G | 1.788  | 2.76E-06 | chr:6:32648036 |
| 6 rs75802832  | 32502295 C | 1.937  | 2.76E-06 | chr:6:32648036 |
| 6 rs115032171 | 32501241 G | 2.927  | 2.76E-06 | chr:6:32648036 |
| 6 rs76493232  | 32507047 T | 1.844  | 2.77E-06 | chr:6:32648036 |
| 6 rs28366312  | 32561175 C | 2.17   | 2.79E-06 | chr:6:32648036 |
| 6 rs9271218   | 32579327 G | 1.899  | 2.79E-06 | chr:6:32648036 |
| 6 rs9272262   | 32603291 T | 0.2922 | 2.80E-06 | chr:6:32648036 |
| 6 rs9272264   | 32603309 G | 0.2922 | 2.80E-06 | chr:6:32648036 |
| 6 rs9271764   | 32594159 A | 2.162  | 2.80E-06 | chr:6:32648036 |
| 6 rs9271765   | 32594166 G | 2.162  | 2.80E-06 | chr:6:32648036 |
| 6 rs9271072   | 32575749 C | 2.15   | 2.80E-06 | chr:6:32648036 |
| 6 rs9271073   | 32575803 G | 2.15   | 2.80E-06 | chr:6:32648036 |
| 6 rs281863382 | 32631104 G | 0.4729 | 2.80E-06 | chr:6:32648036 |
| 6 rs9271178   | 32578191 C | 2.153  | 2.81E-06 | chr:6:32648036 |
| 6 rs9271179   | 32578196 G | 2.153  | 2.81E-06 | chr:6:32648036 |
| 6 rs9271180   | 32578209 C | 2.153  | 2.81E-06 | chr:6:32648036 |
| 6 rs9270180   | 32555805 A | 2.141  | 2.81E-06 | chr:6:32648036 |
| 6 rs9270646   | 32565779 A | 2.14   | 2.82E-06 | chr:6:32648036 |
| 6 rs9272060   | 32599237 A | 0.2834 | 2.82E-06 | chr:6:32648036 |
| 6 rs111513373 | 32520272 T | 2.061  | 2.83E-06 | chr:6:32648036 |
| 6 rs537501315 | 32516973 A | 2.09   | 2.83E-06 | chr:6:32648036 |
| 6 rs74614611  | 32541136 A | 2.377  | 2.83E-06 | chr:6:32648036 |
| 6 rs77256976  | 32457488 C | 1.724  | 2.83E-06 | chr:6:32648036 |
| 6 rs77764113  | 32455928 T | 1.661  | 2.84E-06 | chr:6:32648036 |
| 6 rs9272495   | 32606133 A | 0.2899 | 2.85E-06 | chr:6:32648036 |
| 6 rs28891391  | 32639577 T | 0.4318 | 2.86E-06 | chr:6:32648036 |
| 6 rs112100135 | 32483024 A | 1.674  | 2.88E-06 | chr:6:32648036 |
| 6 rs112281380 | 32482990 C | 1.674  | 2.88E-06 | chr:6:32648036 |

|   |             |           |   |        |          |                 |
|---|-------------|-----------|---|--------|----------|-----------------|
| 6 | rs112388251 | 32483060  | A | 1.674  | 2.88E-06 | chr:6:32648036  |
| 6 | rs28787299  | 32618811  | A | 0.5377 | 2.89E-06 | chr:6:32648036  |
| 6 | rs9272177   | 32601361  | C | 0.3125 | 2.89E-06 | chr:6:32648036  |
| 6 | rs79202302  | 32455906  | A | 1.657  | 2.89E-06 | chr:6:32648036  |
| 6 | rs3129967   | 32381461  | T | 0.4231 | 2.89E-06 | chr:6:32648036  |
| 6 | rs3129968   | 32381472  | C | 0.4231 | 2.89E-06 | chr:6:32648036  |
| 6 | rs9270665   | 32566232  | T | 0.2996 | 2.89E-06 | chr:6:32648036  |
| 6 | rs9272184   | 32601617  | C | 0.3058 | 2.89E-06 | chr:6:32648036  |
| 6 | rs72848230  | 32597228  | A | 0.3163 | 2.91E-06 | chr:6:32648036  |
| 6 | rs28383429  | 32608844  | G | 2.182  | 2.91E-06 | chr:6:32648036  |
| 6 | rs200947640 | 32537456  | A | 1.663  | 2.91E-06 | chr:6:32648036  |
| 6 | rs9272173   | 32601268  | C | 0.2965 | 2.91E-06 | chr:6:32648036  |
| 6 | rs9271668   | 32592774  | T | 0.2962 | 2.95E-06 | chr:6:32648036  |
| 6 | rs9272199   | 32601852  | G | 0.188  | 2.95E-06 | chr:6:32648036  |
| 6 | rs3129766   | 32594441  | G | 2.113  | 2.96E-06 | chr:6:32648036  |
| 6 | rs9273723   | 32629346  | C | 0.5209 | 2.96E-06 | chr:6:32648036  |
| 6 | rs76270534  | 32497232  | G | 1.974  | 2.96E-06 | chr:6:32648036  |
| 6 | rs9275183   | 32654502  | G | 3.758  | 2.97E-06 | chr:6:32648036  |
| 6 | rs117160199 | 32707371  | A | 3.168  | 2.98E-06 | chr:6:32648036  |
| 6 | rs147973732 | 32705674  | T | 3.168  | 2.98E-06 | chr:6:32648036  |
| 6 | rs2858880   | 32704884  | A | 3.168  | 2.98E-06 | chr:6:32648036  |
| 6 | rs528252397 | 32701717  | T | 3.17   | 2.98E-06 | chr:6:32648036  |
| 6 | rs9270424   | 32558594  | G | 1.68   | 2.98E-06 | chr:6:32648036  |
| 6 | rs9270900   | 32571932  | A | 1.735  | 3.00E-06 | chr:6:32648036  |
| 6 | rs9270901   | 32571933  | C | 1.735  | 3.00E-06 | chr:6:32648036  |
| 6 | rs9270857   | 32570849  | G | 2.137  | 3.01E-06 | chr:6:32648036  |
| 6 | rs9270767   | 32568770  | T | 1.949  | 3.02E-06 | chr:6:32648036  |
| 6 | rs115438271 | 32537610  | A | 0.338  | 3.02E-06 | chr:6:32648036  |
| 6 | rs200623105 | 32540757  | G | 1.695  | 3.03E-06 | chr:6:32648036  |
| 6 | rs75324027  | 32573629  | G | 0.3272 | 3.03E-06 | chr:6:32648036  |
| 6 | rs113795374 | 32507296  | G | 1.822  | 3.04E-06 | chr:6:32648036  |
| 7 | rs59804289  | 158006512 | G | 33.43  | 8.59E-29 | chr:7:158029482 |
| 7 | rs73173701  | 157993472 | C | 83.28  | 1.06E-27 | chr:7:158029482 |
| 7 | rs73173694  | 157983465 | A | 79.98  | 2.35E-27 | chr:7:158029482 |
| 7 | rs67515424  | 158028692 | T | 145    | 3.46E-27 | chr:7:158029482 |
| 7 | rs67340855  | 158028782 | C | 174.9  | 7.12E-26 | chr:7:158029482 |
| 7 | rs67463190  | 158029292 | T | 174.9  | 7.12E-26 | chr:7:158029482 |
| 7 | rs56211164  | 158016764 | A | 20.16  | 1.27E-25 | chr:7:158029482 |
| 7 | rs73176122  | 158022065 | G | 20.16  | 1.27E-25 | chr:7:158029482 |
| 7 | rs12673825  | 158020274 | C | 19.79  | 1.75E-25 | chr:7:158029482 |
| 7 | rs114730739 | 158018607 | C | 168.7  | 2.26E-25 | chr:7:158029482 |
| 7 | rs12154635  | 158000947 | G | 168.7  | 2.26E-25 | chr:7:158029482 |
| 7 | rs55633973  | 158000392 | A | 168.7  | 2.26E-25 | chr:7:158029482 |

|               |             |        |          |                 |
|---------------|-------------|--------|----------|-----------------|
| 7 rs55821220  | 158022462 G | 168.7  | 2.26E-25 | chr:7:158029482 |
| 7 rs55917540  | 157999549 C | 168.7  | 2.26E-25 | chr:7:158029482 |
| 7 rs56215385  | 158008987 A | 168.7  | 2.26E-25 | chr:7:158029482 |
| 7 rs73176107  | 158004804 G | 168.7  | 2.26E-25 | chr:7:158029482 |
| 7 rs73176108  | 158009978 A | 168.7  | 2.26E-25 | chr:7:158029482 |
| 7 rs73176109  | 158014524 G | 168.7  | 2.26E-25 | chr:7:158029482 |
| 7 rs73176110  | 158016190 T | 168.7  | 2.26E-25 | chr:7:158029482 |
| 7 rs73176112  | 158016362 G | 168.7  | 2.26E-25 | chr:7:158029482 |
| 7 rs73176114  | 158017101 G | 168.7  | 2.26E-25 | chr:7:158029482 |
| 7 rs73176115  | 158017202 C | 168.7  | 2.26E-25 | chr:7:158029482 |
| 7 rs73176116  | 158018041 T | 168.7  | 2.26E-25 | chr:7:158029482 |
| 7 rs73176118  | 158018536 A | 168.7  | 2.26E-25 | chr:7:158029482 |
| 7 rs73176123  | 158026203 G | 168.7  | 2.26E-25 | chr:7:158029482 |
| 7 rs73176124  | 158026709 A | 167.9  | 2.46E-25 | chr:7:158029482 |
| 7 rs73176117  | 158018530 A | 167.2  | 2.79E-25 | chr:7:158029482 |
| 7 rs73173702  | 157996475 G | 151    | 6.72E-25 | chr:7:158029482 |
| 7 rs17847433  | 157997673 A | 142.2  | 1.57E-24 | chr:7:158029482 |
| 7 rs10245306  | 158029340 G | 32.72  | 2.51E-18 | chr:7:158029482 |
| 7 rs67764605  | 157983029 A | 5.916  | 3.31E-16 | chr:7:158029482 |
| 7 rs66598579  | 157988313 T | 5.007  | 1.32E-12 | chr:7:158029482 |
| 7 rs56283944  | 157983840 A | 3.388  | 8.50E-11 | chr:7:158029482 |
| 7 rs10236752  | 157935752 G | 0.2772 | 1.17E-10 | chr:7:158029482 |
| 7 rs59787925  | 157993749 T | 3.45   | 1.51E-09 | chr:7:158029482 |
| 7 rs6963290   | 157993603 C | 2.906  | 2.19E-09 | chr:7:158029482 |
| 7 rs6977941   | 157993780 A | 2.906  | 2.19E-09 | chr:7:158029482 |
| 7 rs10279290  | 157991041 G | 2.904  | 2.36E-09 | chr:7:158029482 |
| 7 rs10256080  | 158019437 T | 0.2691 | 2.87E-09 | chr:7:158029482 |
| 7 rs1806612   | 157986458 C | 2.858  | 3.27E-09 | chr:7:158029482 |
| 7 rs10215745  | 158015262 C | 0.272  | 3.76E-09 | chr:7:158029482 |
| 7 rs373313597 | 158030148 T | 5.322  | 5.89E-09 | chr:7:158029482 |
| 7 rs10266773  | 158026974 A | 2.762  | 7.43E-09 | chr:7:158029482 |
| 7 rs34657686  | 157994153 C | 2.723  | 1.00E-08 | chr:7:158029482 |
| 7 rs73173690  | 157983241 C | 2.765  | 1.16E-08 | chr:7:158029482 |
| 7 rs73173628  | 157944923 A | 4.15   | 1.21E-08 | chr:7:158029482 |
| 7 rs10247985  | 158017478 G | 2.584  | 2.20E-08 | chr:7:158029482 |
| 7 rs6944416   | 158015560 G | 2.556  | 2.54E-08 | chr:7:158029482 |
| 7 rs4909140   | 158028901 G | 0.3431 | 2.72E-08 | chr:7:158029482 |
| 7 rs10262127  | 158016574 C | 2.544  | 3.09E-08 | chr:7:158029482 |
| 7 rs6459842   | 157934557 A | 0.346  | 5.74E-08 | chr:7:158029482 |
| 7 rs6976575   | 157984182 G | 2.495  | 1.13E-07 | chr:7:158029482 |
| 7 rs10215289  | 158015301 T | 0.3167 | 1.70E-07 | chr:7:158029482 |
| 7 rs10246937  | 158007673 C | 0.3212 | 2.05E-07 | chr:7:158029482 |
| 7 rs10256328  | 158007074 A | 0.3212 | 2.05E-07 | chr:7:158029482 |

|               |             |        |          |                 |
|---------------|-------------|--------|----------|-----------------|
| 7 rs10257230  | 158015030 A | 0.3212 | 2.05E-07 | chr:7:158029482 |
| 7 rs13234740  | 158014940 A | 0.3212 | 2.05E-07 | chr:7:158029482 |
| 7 rs13234832  | 158014979 T | 0.3212 | 2.05E-07 | chr:7:158029482 |
| 7 rs35995505  | 158019225 T | 0.3212 | 2.05E-07 | chr:7:158029482 |
| 7 rs58180441  | 158019047 A | 0.3212 | 2.05E-07 | chr:7:158029482 |
| 7 rs6950296   | 158020379 A | 0.3212 | 2.05E-07 | chr:7:158029482 |
| 7 rs10282471  | 157997236 T | 0.3276 | 2.24E-07 | chr:7:158029482 |
| 7 rs10215664  | 158015494 G | 0.3244 | 2.33E-07 | chr:7:158029482 |
| 7 rs10215991  | 158015263 A | 0.3247 | 2.61E-07 | chr:7:158029482 |
| 7 rs10215992  | 158015273 A | 0.3247 | 2.61E-07 | chr:7:158029482 |
| 7 rs10240498  | 158003705 A | 0.3245 | 2.79E-07 | chr:7:158029482 |
| 7 rs6942658   | 158001150 A | 0.3245 | 2.79E-07 | chr:7:158029482 |
| 7 rs6942903   | 158001252 A | 0.3245 | 2.79E-07 | chr:7:158029482 |
| 7 rs9771103   | 157999823 T | 0.3245 | 2.79E-07 | chr:7:158029482 |
| 7 rs6459852   | 157987496 A | 2.419  | 3.74E-07 | chr:7:158029482 |
| 7 rs73173692  | 157983281 A | 17.18  | 3.78E-07 | chr:7:158029482 |
| 7 rs7781500   | 157933457 G | 0.3294 | 3.89E-07 | chr:7:158029482 |
| 7 rs73173689  | 157981830 A | 2.44   | 6.02E-07 | chr:7:158029482 |
| 7 rs4909289   | 157954904 A | 2.462  | 6.80E-07 | chr:7:158029482 |
| 7 rs4604380   | 157996809 A | 2.313  | 8.63E-07 | chr:7:158029482 |
| 7 rs201346361 | 157955738 A | 12.27  | 1.21E-06 | chr:7:158029482 |
| 7 rs201627205 | 157955739 G | 12.27  | 1.21E-06 | chr:7:158029482 |
| 7 rs56336654  | 157974619 C | 12.27  | 1.21E-06 | chr:7:158029482 |
| 7 rs72505554  | 157951996 C | 12.27  | 1.21E-06 | chr:7:158029482 |
| 7 rs73173626  | 157943182 C | 12.27  | 1.21E-06 | chr:7:158029482 |
| 7 rs73173631  | 157945313 C | 12.27  | 1.21E-06 | chr:7:158029482 |
| 7 rs73173652  | 157955494 A | 12.27  | 1.21E-06 | chr:7:158029482 |
| 7 rs73173663  | 157958243 T | 12.27  | 1.21E-06 | chr:7:158029482 |
| 7 rs73173673  | 157967320 C | 12.27  | 1.21E-06 | chr:7:158029482 |
| 7 rs73173675  | 157968726 A | 12.27  | 1.21E-06 | chr:7:158029482 |
| 7 rs78783432  | 157946307 G | 12.27  | 1.21E-06 | chr:7:158029482 |
| 7 rs4506155   | 158003981 A | 2.253  | 1.23E-06 | chr:7:158029482 |
| 7 rs4416779   | 157987251 C | 2.261  | 1.57E-06 | chr:7:158029482 |
| 7 rs73173633  | 157946600 A | 11.77  | 1.76E-06 | chr:7:158029482 |
| 7 rs6948273   | 158015457 C | 2.19   | 2.22E-06 | chr:7:158029482 |
| 7 rs67598038  | 158028778 A | 0.3129 | 2.27E-06 | chr:7:158029482 |
| 7 rs6951312   | 158020287 A | 2.188  | 2.40E-06 | chr:7:158029482 |
| 7 rs6974918   | 158020284 G | 2.188  | 2.40E-06 | chr:7:158029482 |
| 7 rs6974924   | 158020293 C | 2.188  | 2.40E-06 | chr:7:158029482 |
| 7 rs4909276   | 157933094 C | 0.4336 | 2.57E-06 | chr:7:158029482 |
| 7 rs111357961 | 157939222 G | 11.37  | 2.71E-06 | chr:7:158029482 |
| 7 rs112718162 | 157937814 T | 11.37  | 2.71E-06 | chr:7:158029482 |
| 7 rs149862061 | 157939277 A | 11.37  | 2.71E-06 | chr:7:158029482 |

|               |             |        |          |                 |
|---------------|-------------|--------|----------|-----------------|
| 7 rs55650416  | 157937221 C | 11.37  | 2.71E-06 | chr:7:158029482 |
| 7 rs55990226  | 157937204 A | 11.37  | 2.71E-06 | chr:7:158029482 |
| 7 rs560682491 | 157937763 T | 11.37  | 2.71E-06 | chr:7:158029482 |
| 7 rs6943049   | 157936375 A | 11.37  | 2.71E-06 | chr:7:158029482 |
| 7 rs73173605  | 157935983 A | 11.37  | 2.71E-06 | chr:7:158029482 |
| 7 rs73173607  | 157936280 G | 11.37  | 2.71E-06 | chr:7:158029482 |
| 7 rs73173608  | 157936719 T | 11.37  | 2.71E-06 | chr:7:158029482 |
| 7 rs73173609  | 157937025 G | 11.37  | 2.71E-06 | chr:7:158029482 |
| 7 rs73173611  | 157937465 G | 11.37  | 2.71E-06 | chr:7:158029482 |
| 7 rs73173613  | 157937485 T | 11.37  | 2.71E-06 | chr:7:158029482 |
| 7 rs73173614  | 157937517 T | 11.37  | 2.71E-06 | chr:7:158029482 |
| 7 rs73173616  | 157937636 T | 11.37  | 2.71E-06 | chr:7:158029482 |
| 7 rs73173617  | 157938090 A | 11.37  | 2.71E-06 | chr:7:158029482 |
| 7 rs73173624  | 157941953 G | 11.37  | 2.71E-06 | chr:7:158029482 |
| 7 rs73173625  | 157942041 T | 11.37  | 2.71E-06 | chr:7:158029482 |
| 7 rs192868665 | 157937712 T | 9.42   | 3.46E-06 | chr:7:158029482 |
| 7 rs10229663  | 157937600 T | 0.4409 | 3.56E-06 | chr:7:158029482 |
| 7 rs2335848   | 158022103 G | 2.153  | 3.80E-06 | chr:7:158029482 |
| 7 rs1104921   | 158060317 A | 7.525  | 3.83E-06 | chr:7:158029482 |
| 7 rs4909107   | 157934938 A | 0.4403 | 3.97E-06 | chr:7:158029482 |
| 7 rs10258997  | 158016559 G | 0.3294 | 4.15E-06 | chr:7:158029482 |
| 7 rs73173604  | 157934888 A | 10.94  | 4.32E-06 | chr:7:158029482 |
| 7 rs79717697  | 157935079 T | 10.94  | 4.32E-06 | chr:7:158029482 |
| 7 rs10227009  | 158027455 C | 0.3293 | 4.51E-06 | chr:7:158029482 |
| 7 rs6950346   | 158025658 T | 0.3293 | 4.51E-06 | chr:7:158029482 |
| 7 rs73173623  | 157939579 G | 10.86  | 4.51E-06 | chr:7:158029482 |
| 7 rs73173642  | 157952604 C | 6.118  | 4.77E-06 | chr:7:158029482 |
| 7 rs73173643  | 157952691 T | 6.118  | 4.77E-06 | chr:7:158029482 |
| 7 rs10237337  | 157939072 T | 0.3712 | 4.85E-06 | chr:7:158029482 |
| 7 rs1806611   | 157986440 T | 0.3899 | 4.96E-06 | chr:7:158029482 |
| 7 rs111872244 | 157937662 G | 18.03  | 5.50E-06 | chr:7:158029482 |
| 7 rs60853443  | 157944637 A | 6      | 5.67E-06 | chr:7:158029482 |
| 7 rs117432206 | 157962519 A | 3.391  | 5.69E-06 | chr:7:158029482 |
| 7 rs10273930  | 158025121 G | 2.124  | 5.73E-06 | chr:7:158029482 |
| 7 rs10276960  | 158025026 C | 2.124  | 5.73E-06 | chr:7:158029482 |
| 7 rs3965316   | 158023815 T | 2.124  | 5.73E-06 | chr:7:158029482 |
| 7 rs4595081   | 158007923 T | 2.124  | 5.73E-06 | chr:7:158029482 |
| 7 rs6949642   | 158025328 A | 2.124  | 5.73E-06 | chr:7:158029482 |
| 7 rs6963124   | 158023589 A | 2.124  | 5.73E-06 | chr:7:158029482 |
| 7 rs6970487   | 158020147 G | 2.124  | 5.73E-06 | chr:7:158029482 |
| 7 rs188495239 | 157939361 C | 13.44  | 6.39E-06 | chr:7:158029482 |
| 7 rs200584961 | 157939311 G | 12.91  | 6.72E-06 | chr:7:158029482 |
| 7 rs10268228  | 157985479 A | 0.3919 | 6.79E-06 | chr:7:158029482 |

|               |             |        |          |                 |
|---------------|-------------|--------|----------|-----------------|
| 7 rs10271711  | 157985854 A | 0.3919 | 6.79E-06 | chr:7:158029482 |
| 7 rs2878538   | 158027427 G | 2.114  | 6.79E-06 | chr:7:158029482 |
| 7 rs12670590  | 157939058 A | 2.24   | 6.99E-06 | chr:7:158029482 |
| 7 rs11971401  | 157932023 C | 0.4645 | 7.39E-06 | chr:7:158029482 |
| 7 rs10156036  | 158016777 C | 2.096  | 7.52E-06 | chr:7:158029482 |
| 7 rs7789111   | 158021519 C | 0.3576 | 8.03E-06 | chr:7:158029482 |
| 7 rs10249710  | 158030463 A | 0.3275 | 8.24E-06 | chr:7:158029482 |
| 7 rs537964839 | 157998402 T | 29.09  | 1.09E-05 | chr:7:158029482 |
| 7 rs73173618  | 157938329 T | 6.289  | 1.34E-05 | chr:7:158029482 |
| 7 rs73171602  | 157932658 T | 9.627  | 1.71E-05 | chr:7:158029482 |
| 7 rs3800856   | 157984992 A | 0.4037 | 1.79E-05 | chr:7:158029482 |
| 7 rs373048748 | 157939318 T | 11.49  | 2.08E-05 | chr:7:158029482 |
| 7 rs376173592 | 157939321 G | 11.49  | 2.08E-05 | chr:7:158029482 |
| 7 rs10271837  | 157985998 C | 0.4216 | 2.27E-05 | chr:7:158029482 |
| 7 rs184314080 | 157939399 T | 9.321  | 2.41E-05 | chr:7:158029482 |
| 7 rs186905024 | 157939391 T | 9.321  | 2.41E-05 | chr:7:158029482 |
| 7 rs117095676 | 158048702 G | 10.79  | 3.23E-05 | chr:7:158029482 |
| 7 rs562397432 | 157939353 C | 10.8   | 3.72E-05 | chr:7:158029482 |
| 8 rs10503635  | 18654329 T  | 140.3  | 4.48E-21 | chr:8:18651457  |
| 8 rs2172289   | 18663483 A  | 7.699  | 6.46E-21 | chr:8:18651457  |
| 8 rs28696248  | 18656314 G  | 62.74  | 2.16E-20 | chr:8:18651457  |
| 8 rs12680447  | 18654653 T  | 9.496  | 2.79E-20 | chr:8:18651457  |
| 8 rs10111304  | 18650904 C  | 0.1241 | 3.16E-20 | chr:8:18651457  |
| 8 rs17467874  | 18652744 C  | 0.1205 | 3.88E-20 | chr:8:18651457  |
| 8 rs12549858  | 18654478 A  | 0.1516 | 2.64E-19 | chr:8:18651457  |
| 8 rs60746929  | 18654480 T  | 0.1587 | 4.52E-19 | chr:8:18651457  |
| 8 rs2469946   | 18652623 G  | 12.92  | 1.93E-18 | chr:8:18651457  |
| 8 rs11780872  | 18651376 T  | 337    | 1.99E-18 | chr:8:18651457  |
| 8 rs335256    | 18650834 T  | 0.173  | 2.93E-18 | chr:8:18651457  |
| 8 rs11996790  | 18656238 C  | 0.1821 | 7.83E-18 | chr:8:18651457  |
| 8 rs11203998  | 18654206 C  | 227.6  | 2.13E-17 | chr:8:18651457  |
| 8 rs10503634  | 18654293 C  | 223.4  | 2.97E-17 | chr:8:18651457  |
| 8 rs2248631   | 18656601 G  | 9.317  | 1.00E-16 | chr:8:18651457  |
| 8 rs335233    | 18636629 A  | 9.131  | 1.11E-16 | chr:8:18651457  |
| 8 rs6586762   | 18615706 T  | 5.164  | 8.86E-16 | chr:8:18651457  |
| 8 rs335220    | 18634828 A  | 7.997  | 1.75E-15 | chr:8:18651457  |
| 8 rs13261634  | 18653020 T  | 507.8  | 1.83E-15 | chr:8:18651457  |
| 8 rs335247    | 18646433 C  | 7.334  | 2.38E-15 | chr:8:18651457  |
| 8 rs335223    | 18634002 G  | 6.895  | 4.01E-15 | chr:8:18651457  |
| 8 rs2638653   | 18666210 G  | 4.661  | 4.04E-15 | chr:8:18651457  |
| 8 rs2638658   | 18669340 C  | 4.525  | 1.06E-14 | chr:8:18651457  |
| 8 rs12547198  | 18657577 G  | 6.55   | 1.46E-14 | chr:8:18651457  |
| 8 rs2638624   | 18657753 T  | 6.55   | 1.46E-14 | chr:8:18651457  |



|               |            |        |          |                |
|---------------|------------|--------|----------|----------------|
| 8 rs1386693   | 18657328 C | 6.519  | 1.53E-14 | chr:8:18651457 |
| 8 rs335246    | 18645679 C | 6.003  | 2.89E-14 | chr:8:18651457 |
| 8 rs335227    | 18632901 G | 8.076  | 3.30E-14 | chr:8:18651457 |
| 8 rs17383361  | 18653137 A | 0.2325 | 3.30E-14 | chr:8:18651457 |
| 8 rs335232    | 18636126 A | 0.2533 | 4.28E-14 | chr:8:18651457 |
| 8 rs335234    | 18637444 T | 0.2686 | 9.58E-14 | chr:8:18651457 |
| 8 rs335241    | 18642689 G | 5.732  | 1.05E-13 | chr:8:18651457 |
| 8 rs2244320   | 18670908 G | 5.138  | 1.15E-13 | chr:8:18651457 |
| 8 rs2129702   | 18656090 G | 7.343  | 1.21E-13 | chr:8:18651457 |
| 8 rs2632842   | 18661610 G | 5.437  | 1.57E-13 | chr:8:18651457 |
| 8 rs335239    | 18642504 A | 5.665  | 1.75E-13 | chr:8:18651457 |
| 8 rs2638655   | 18666674 G | 5.244  | 1.90E-13 | chr:8:18651457 |
| 8 rs2468000   | 18659605 G | 5.445  | 2.10E-13 | chr:8:18651457 |
| 8 rs2469947   | 18659475 T | 5.445  | 2.10E-13 | chr:8:18651457 |
| 8 rs2638626   | 18659324 T | 5.445  | 2.10E-13 | chr:8:18651457 |
| 8 rs1386690   | 18659019 C | 5.424  | 2.11E-13 | chr:8:18651457 |
| 8 rs1487752   | 18670235 G | 5.138  | 2.13E-13 | chr:8:18651457 |
| 8 rs335248    | 18646733 C | 0.2814 | 2.26E-13 | chr:8:18651457 |
| 8 rs140775288 | 18650627 A | 0.2531 | 2.40E-13 | chr:8:18651457 |
| 8 rs2172290   | 18668608 A | 3.788  | 2.86E-13 | chr:8:18651457 |
| 8 rs2632847   | 18659928 A | 5.368  | 3.36E-13 | chr:8:18651457 |
| 8 rs2638646   | 18659765 A | 5.368  | 3.36E-13 | chr:8:18651457 |
| 8 rs2638647   | 18660007 A | 5.368  | 3.36E-13 | chr:8:18651457 |
| 8 rs335244    | 18645147 A | 0.2763 | 3.63E-13 | chr:8:18651457 |
| 8 rs2632850   | 18657953 C | 5.279  | 4.05E-13 | chr:8:18651457 |
| 8 rs335237    | 18641291 C | 0.2819 | 4.09E-13 | chr:8:18651457 |
| 8 rs2638648   | 18660386 T | 5.212  | 4.56E-13 | chr:8:18651457 |
| 8 rs1386691   | 18658929 C | 4.755  | 1.42E-12 | chr:8:18651457 |
| 8 rs1386689   | 18664022 A | 5.153  | 1.52E-12 | chr:8:18651457 |
| 8 rs1487753   | 18665523 T | 0.2947 | 3.61E-12 | chr:8:18651457 |
| 8 rs2632843   | 18661305 G | 4.494  | 4.31E-12 | chr:8:18651457 |
| 8 rs13250313  | 18652812 A | 8.849  | 4.63E-12 | chr:8:18651457 |
| 8 rs2638652   | 18665045 T | 0.3046 | 4.91E-12 | chr:8:18651457 |
| 8 rs2638650   | 18661521 T | 4.498  | 5.73E-12 | chr:8:18651457 |
| 8 rs2632849   | 18658425 G | 0.2966 | 5.85E-12 | chr:8:18651457 |
| 8 rs7014135   | 18623860 G | 5.981  | 7.17E-12 | chr:8:18651457 |
| 8 rs2632852   | 18656224 T | 5.209  | 8.42E-12 | chr:8:18651457 |
| 8 rs13254153  | 18655330 C | 7.352  | 9.99E-12 | chr:8:18651457 |
| 8 rs10108047  | 18650597 T | 8.401  | 1.38E-11 | chr:8:18651457 |
| 8 rs17383284  | 18644651 A | 0.2926 | 1.62E-11 | chr:8:18651457 |
| 8 rs7845297   | 18632736 T | 3.184  | 2.51E-11 | chr:8:18651457 |
| 8 rs2632846   | 18660016 C | 0.3086 | 2.81E-11 | chr:8:18651457 |
| 8 rs335230    | 18629753 G | 5.105  | 4.23E-11 | chr:8:18651457 |

|              |            |        |          |                |
|--------------|------------|--------|----------|----------------|
| 8 rs34650180 | 18633770 C | 3.371  | 5.11E-11 | chr:8:18651457 |
| 8 rs11777761 | 18652934 C | 952.7  | 6.66E-11 | chr:8:18651457 |
| 8 rs11780185 | 18651428 A | 952.7  | 6.66E-11 | chr:8:18651457 |
| 8 rs57290482 | 18652460 T | 952.7  | 6.66E-11 | chr:8:18651457 |
| 8 rs57931874 | 18652499 C | 952.7  | 6.66E-11 | chr:8:18651457 |
| 8 rs60508084 | 18652637 A | 952.7  | 6.66E-11 | chr:8:18651457 |
| 8 rs335228   | 18631439 G | 4.896  | 1.12E-10 | chr:8:18651457 |
| 8 rs335229   | 18629927 G | 4.896  | 1.12E-10 | chr:8:18651457 |
| 8 rs6586763  | 18632062 T | 0.3235 | 1.16E-10 | chr:8:18651457 |
| 8 rs77501580 | 18661520 A | 0.3066 | 1.38E-10 | chr:8:18651457 |
| 8 rs6586764  | 18632093 T | 0.3268 | 1.62E-10 | chr:8:18651457 |
| 8 rs335251   | 18647338 G | 2.953  | 1.64E-10 | chr:8:18651457 |
| 8 rs10094591 | 18653299 T | 732.7  | 2.05E-10 | chr:8:18651457 |
| 8 rs10503633 | 18653742 G | 732.7  | 2.05E-10 | chr:8:18651457 |
| 8 rs11785249 | 18653313 G | 732.7  | 2.05E-10 | chr:8:18651457 |
| 8 rs79655476 | 18630599 A | 0.3304 | 2.56E-10 | chr:8:18651457 |
| 8 rs335250   | 18647042 G | 2.812  | 7.05E-10 | chr:8:18651457 |
| 8 rs335245   | 18645308 A | 0.3556 | 7.75E-10 | chr:8:18651457 |
| 8 rs335221   | 18634283 G | 2.821  | 8.74E-10 | chr:8:18651457 |
| 8 rs10097648 | 18606611 A | 3.388  | 1.27E-09 | chr:8:18651457 |
| 8 rs59437212 | 18610782 T | 3.76   | 1.38E-09 | chr:8:18651457 |
| 8 rs78113778 | 18660607 T | 0.3312 | 1.58E-09 | chr:8:18651457 |
| 8 rs3988321  | 18614241 A | 3.911  | 1.79E-09 | chr:8:18651457 |
| 8 rs7823903  | 18632688 C | 2.77   | 1.84E-09 | chr:8:18651457 |
| 8 rs75313540 | 18634176 A | 0.3082 | 7.33E-09 | chr:8:18651457 |
| 8 rs10099535 | 18604754 C | 4.109  | 1.85E-08 | chr:8:18651457 |
| 8 rs2638654  | 18666503 G | 0.3703 | 1.93E-08 | chr:8:18651457 |
| 8 rs13262834 | 18610111 A | 3.262  | 2.14E-08 | chr:8:18651457 |
| 8 rs17383193 | 18618718 G | 0.3944 | 2.22E-08 | chr:8:18651457 |
| 8 rs2632851  | 18657428 A | 0.3823 | 2.45E-08 | chr:8:18651457 |
| 8 rs35809948 | 18647701 G | 5.574  | 2.49E-08 | chr:8:18651457 |
| 8 rs28447980 | 18606948 T | 3.508  | 3.52E-08 | chr:8:18651457 |
| 8 rs28666704 | 18607201 T | 3.508  | 3.52E-08 | chr:8:18651457 |
| 8 rs10111500 | 18607860 T | 4.067  | 3.62E-08 | chr:8:18651457 |
| 8 rs10086769 | 18664962 C | 3.97   | 7.64E-08 | chr:8:18651457 |
| 8 rs1386688  | 18664294 G | 3.453  | 8.14E-08 | chr:8:18651457 |
| 8 rs335257   | 18650893 C | 3.9    | 1.05E-07 | chr:8:18651457 |
| 8 rs7837572  | 18665140 T | 3.491  | 1.13E-07 | chr:8:18651457 |
| 8 rs2638657  | 18669006 A | 0.3882 | 1.38E-07 | chr:8:18651457 |
| 8 rs13255143 | 18661844 G | 3.625  | 1.56E-07 | chr:8:18651457 |
| 8 rs2306825  | 18656805 A | 3.335  | 1.96E-07 | chr:8:18651457 |
| 8 rs10102692 | 18665202 C | 3.807  | 2.01E-07 | chr:8:18651457 |
| 8 rs6987329  | 18616376 C | 3.618  | 2.02E-07 | chr:8:18651457 |

|               |            |        |          |                |
|---------------|------------|--------|----------|----------------|
| 8 rs7001013   | 18615974 T | 3.618  | 2.02E-07 | chr:8:18651457 |
| 8 rs17467958  | 18670645 A | 0.3976 | 2.18E-07 | chr:8:18651457 |
| 8 rs73666724  | 18662204 A | 3.755  | 2.61E-07 | chr:8:18651457 |
| 8 rs10503636  | 18654794 C | 0.3607 | 3.17E-07 | chr:8:18651457 |
| 8 rs35764685  | 18661342 A | 3.494  | 3.32E-07 | chr:8:18651457 |
| 8 rs7812892   | 18660674 A | 3.211  | 4.99E-07 | chr:8:18651457 |
| 8 rs6986998   | 18573461 G | 2.492  | 1.21E-06 | chr:8:18651457 |
| 8 rs7005422   | 18572480 G | 2.492  | 1.21E-06 | chr:8:18651457 |
| 8 rs10110943  | 18612612 A | 4.663  | 2.48E-06 | chr:8:18651457 |
| 8 rs13276530  | 18658346 G | 0.3841 | 2.53E-06 | chr:8:18651457 |
| 8 rs10107780  | 18606236 T | 2.905  | 2.53E-06 | chr:8:18651457 |
| 8 rs17383368  | 18655746 T | 0.3896 | 3.02E-06 | chr:8:18651457 |
| 8 rs10089453  | 18590065 A | 2.842  | 3.57E-06 | chr:8:18651457 |
| 8 rs28535285  | 18588658 T | 2.842  | 3.57E-06 | chr:8:18651457 |
| 8 rs6980995   | 18590876 G | 2.842  | 3.57E-06 | chr:8:18651457 |
| 8 rs10094957  | 18593473 A | 2.819  | 3.99E-06 | chr:8:18651457 |
| 8 rs13439456  | 18592802 G | 2.819  | 3.99E-06 | chr:8:18651457 |
| 8 rs17127136  | 18593918 C | 2.819  | 3.99E-06 | chr:8:18651457 |
| 8 rs11774165  | 18658950 G | 0.4013 | 5.14E-06 | chr:8:18651457 |
| 8 rs2131183   | 18664444 C | 0.4549 | 5.29E-06 | chr:8:18651457 |
| 8 rs10096440  | 18598419 A | 2.677  | 5.38E-06 | chr:8:18651457 |
| 8 rs2638656   | 18666839 G | 0.4653 | 5.38E-06 | chr:8:18651457 |
| 8 rs2069245   | 18657093 C | 0.3941 | 5.60E-06 | chr:8:18651457 |
| 8 rs10097758  | 18598820 T | 2.632  | 6.88E-06 | chr:8:18651457 |
| 8 rs11203992  | 18597665 C | 2.632  | 6.88E-06 | chr:8:18651457 |
| 8 rs28710938  | 18580395 T | 2.709  | 6.90E-06 | chr:8:18651457 |
| 8 rs11994526  | 18659422 C | 0.2731 | 7.31E-06 | chr:8:18651457 |
| 8 rs34059664  | 18657698 G | 0.4133 | 7.69E-06 | chr:8:18651457 |
| 8 rs74418177  | 18553105 T | 0.4561 | 7.74E-06 | chr:8:18651457 |
| 8 rs10090564  | 18586732 T | 2.694  | 7.87E-06 | chr:8:18651457 |
| 8 rs9325840   | 18585835 T | 2.694  | 7.87E-06 | chr:8:18651457 |
| 8 rs11786923  | 18658007 G | 0.4148 | 9.66E-06 | chr:8:18651457 |
| 8 rs11986109  | 18657632 C | 0.4148 | 9.66E-06 | chr:8:18651457 |
| 8 rs11993401  | 18657427 T | 0.4148 | 9.66E-06 | chr:8:18651457 |
| 8 rs11993467  | 18657661 T | 0.4148 | 9.66E-06 | chr:8:18651457 |
| 8 rs11997879  | 18657450 A | 0.4148 | 9.66E-06 | chr:8:18651457 |
| 8 rs1565138   | 18601848 C | 2.109  | 1.07E-05 | chr:8:18651457 |
| 8 rs111916415 | 18656221 T | 0.4182 | 1.18E-05 | chr:8:18651457 |
| 8 rs28807223  | 18603183 C | 2.327  | 1.21E-05 | chr:8:18651457 |
| 8 rs335238    | 18642319 G | 4.807  | 1.24E-05 | chr:8:18651457 |
| 8 rs6987576   | 18567827 T | 2.406  | 1.29E-05 | chr:8:18651457 |
| 8 rs6987756   | 18567975 A | 2.406  | 1.29E-05 | chr:8:18651457 |
| 8 rs10503630  | 18557664 C | 2.048  | 1.38E-05 | chr:8:18651457 |

|               |            |        |          |                |
|---------------|------------|--------|----------|----------------|
| 8 rs10096367  | 18594868 G | 2.545  | 1.41E-05 | chr:8:18651457 |
| 8 rs1027059   | 18604057 G | 2.167  | 1.79E-05 | chr:8:18651457 |
| 8 rs1565137   | 18604024 G | 2.167  | 1.79E-05 | chr:8:18651457 |
| 8 rs11203999  | 18665836 G | 0.2214 | 1.98E-05 | chr:8:18651457 |
| 8 rs2200620   | 18666972 G | 0.2214 | 1.98E-05 | chr:8:18651457 |
| 8 rs62498293  | 18665861 G | 0.2214 | 1.98E-05 | chr:8:18651457 |
| 8 rs79965841  | 18656209 A | 0.4292 | 2.10E-05 | chr:8:18651457 |
| 8 rs11203982  | 18546937 C | 2.19   | 2.14E-05 | chr:8:18651457 |
| 8 rs12546585  | 18546783 C | 2.19   | 2.14E-05 | chr:8:18651457 |
| 8 rs79888207  | 18558639 T | 2.281  | 2.21E-05 | chr:8:18651457 |
| 8 rs10093710  | 18611809 G | 5.129  | 2.35E-05 | chr:8:18651457 |
| 8 rs7357382   | 18612942 A | 5.129  | 2.35E-05 | chr:8:18651457 |
| 8 rs74889039  | 18562890 C | 2.242  | 2.58E-05 | chr:8:18651457 |
| 8 rs78791675  | 18573788 C | 2.242  | 2.60E-05 | chr:8:18651457 |
| 8 rs7009615   | 18572835 C | 2.047  | 2.95E-05 | chr:8:18651457 |
| 8 rs147984611 | 18665024 A | 4.889  | 3.46E-05 | chr:8:18651457 |
| 8 rs10102455  | 18668748 G | 0.2196 | 3.87E-05 | chr:8:18651457 |
| 8 rs10094532  | 18587676 A | 2.174  | 3.97E-05 | chr:8:18651457 |
| 8 rs73199934  | 18556565 C | 2.168  | 4.14E-05 | chr:8:18651457 |
| 8 rs35884486  | 18656382 C | 0.4541 | 4.71E-05 | chr:8:18651457 |
| 8 rs2898480   | 18602548 T | 1.993  | 5.16E-05 | chr:8:18651457 |
| 8 rs6981452   | 37046050 A | 49.76  | 4.28E-30 | chr:8:37050885 |
| 8 rs4739484   | 37082138 A | 74.09  | 1.99E-29 | chr:8:37050885 |
| 8 rs4739336   | 37043012 A | 70.35  | 5.22E-29 | chr:8:37050885 |
| 8 rs7841889   | 37045176 A | 70.35  | 5.22E-29 | chr:8:37050885 |
| 8 rs4739476   | 37046991 A | 33.18  | 2.38E-25 | chr:8:37050885 |
| 8 rs12334605  | 37045753 G | 32.8   | 3.30E-25 | chr:8:37050885 |
| 8 rs12334611  | 37045986 C | 32.8   | 3.30E-25 | chr:8:37050885 |
| 8 rs16875909  | 37043868 T | 43.96  | 2.15E-24 | chr:8:37050885 |
| 8 rs34456013  | 37049781 A | 50.72  | 2.73E-24 | chr:8:37050885 |
| 8 rs74571086  | 37049958 G | 50.41  | 3.34E-24 | chr:8:37050885 |
| 8 rs576019    | 37044187 T | 49.07  | 7.27E-24 | chr:8:37050885 |
| 8 rs6988617   | 37042895 A | 49.07  | 7.27E-24 | chr:8:37050885 |
| 8 rs240519    | 37085713 T | 804.6  | 2.13E-21 | chr:8:37050885 |
| 8 rs240524    | 37088271 T | 1220   | 3.22E-21 | chr:8:37050885 |
| 8 rs240523    | 37087732 T | 946.2  | 4.90E-21 | chr:8:37050885 |
| 8 rs11985899  | 37083414 C | 40.83  | 3.07E-20 | chr:8:37050885 |
| 8 rs990711    | 37058871 C | 9.722  | 3.62E-20 | chr:8:37050885 |
| 8 rs240521    | 37086908 A | 1936   | 5.16E-20 | chr:8:37050885 |
| 8 rs240522    | 37087609 T | 1936   | 5.16E-20 | chr:8:37050885 |
| 8 rs77442378  | 37050480 A | 48.2   | 5.79E-20 | chr:8:37050885 |
| 8 rs9642715   | 37038245 C | 7.013  | 8.38E-20 | chr:8:37050885 |
| 8 rs4739483   | 37076718 T | 8.091  | 2.89E-19 | chr:8:37050885 |

|                     |            |        |          |                |
|---------------------|------------|--------|----------|----------------|
| 8 rs4739338         | 37067007 T | 41.67  | 1.08E-18 | chr:8:37050885 |
| 8 rs240518          | 37085509 C | 2681   | 1.14E-18 | chr:8:37050885 |
| 8 rs240517          | 37085448 A | 1379   | 4.24E-18 | chr:8:37050885 |
| 8 rs240520          | 37086850 T | 1379   | 4.24E-18 | chr:8:37050885 |
| 8 rs553163          | 37085269 A | 1379   | 4.24E-18 | chr:8:37050885 |
| 8 rs13279893        | 37057678 G | 0.1735 | 7.38E-18 | chr:8:37050885 |
| 8 rs1850650         | 37065784 A | 0.1741 | 9.43E-18 | chr:8:37050885 |
| 8 rs4237086         | 37088022 G | 0.1784 | 1.61E-17 | chr:8:37050885 |
| 8 rs12545061        | 37056695 T | 0.1844 | 1.81E-17 | chr:8:37050885 |
| 8 rs575589          | 37077120 A | 3438   | 1.92E-17 | chr:8:37050885 |
| 8 rs495428          | 37079790 A | 3848   | 3.76E-17 | chr:8:37050885 |
| 8 rs7840173         | 37049981 G | 4.67   | 8.41E-17 | chr:8:37050885 |
| 8 rs4739477         | 37047490 G | 4.505  | 2.02E-16 | chr:8:37050885 |
| 8 rs7826398         | 37048751 G | 4.505  | 2.02E-16 | chr:8:37050885 |
| 8 rs9642765         | 37046467 C | 4.468  | 2.98E-16 | chr:8:37050885 |
| 8 rs9642766         | 37046589 G | 4.468  | 2.98E-16 | chr:8:37050885 |
| 8 rs9642768         | 37046812 C | 4.468  | 2.98E-16 | chr:8:37050885 |
| 8 rs509011          | 37084128 C | 4302   | 3.45E-16 | chr:8:37050885 |
| 8 rs2697894         | 37076650 C | 6997   | 3.60E-15 | chr:8:37050885 |
| 8 rs2843834         | 37078884 T | 6997   | 3.60E-15 | chr:8:37050885 |
| 8 rs2843835         | 37078820 T | 6997   | 3.60E-15 | chr:8:37050885 |
| 8 rs525751          | 37080834 A | 6997   | 3.60E-15 | chr:8:37050885 |
| 8 rs526765          | 37080954 A | 6997   | 3.60E-15 | chr:8:37050885 |
| 8 rs539797          | 37077235 G | 6997   | 3.60E-15 | chr:8:37050885 |
| 8 rs547855          | 37078106 A | 6997   | 3.60E-15 | chr:8:37050885 |
| 8 rs571788          | 37078413 T | 6997   | 3.60E-15 | chr:8:37050885 |
| 8 rs571824          | 37077544 G | 6997   | 3.60E-15 | chr:8:37050885 |
| 8 rs577113          | 37077012 G | 6997   | 3.60E-15 | chr:8:37050885 |
| 8 rs2697887         | 37078928 G | 3475   | 4.05E-13 | chr:8:37050885 |
| 8 rs2843836         | 37076582 T | 3475   | 4.05E-13 | chr:8:37050885 |
| 8 rs473731          | 37082568 G | 3475   | 4.05E-13 | chr:8:37050885 |
| 8 rs490027          | 37079215 C | 3475   | 4.05E-13 | chr:8:37050885 |
| 8 rs494545          | 37079696 C | 3475   | 4.05E-13 | chr:8:37050885 |
| 8 rs511544          | 37076504 G | 3475   | 4.05E-13 | chr:8:37050885 |
| 8 rs543162          | 37078419 C | 3475   | 4.05E-13 | chr:8:37050885 |
| 8 rs7843213;rs56533 | 37045329 C | 5.026  | 2.40E-09 | chr:8:37050885 |
| 8 rs567469          | 37064847 A | 0.3482 | 6.72E-08 | chr:8:37050885 |
| 8 rs16886251        | 37086493 A | 15.15  | 6.95E-08 | chr:8:37050885 |
| 8 rs7812447         | 37036800 C | 2.763  | 1.30E-07 | chr:8:37050885 |
| 8 rs190490545       | 37139037 C | 5.205  | 4.02E-07 | chr:8:37050885 |
| 8 rs368904194       | 37114502 A | 5.228  | 4.61E-07 | chr:8:37050885 |
| 8 rs369590696       | 37095703 T | 5.337  | 1.68E-06 | chr:8:37050885 |
| 8 rs560737472       | 37067370 A | 0.2055 | 1.72E-06 | chr:8:37050885 |

|               |            |        |          |                |
|---------------|------------|--------|----------|----------------|
| 8 rs16886315  | 37118550 T | 3.016  | 6.71E-06 | chr:8:37050885 |
| 8 rs3015657   | 37121241 A | 0.4684 | 3.45E-05 | chr:8:37050885 |
| 8 rs471141    | 37067066 G | 68.56  | 3.91E-05 | chr:8:37050885 |
| 8 rs490827    | 37079275 G | 68.56  | 3.91E-05 | chr:8:37050885 |
| 8 rs511629    | 37060493 T | 68.56  | 3.91E-05 | chr:8:37050885 |
| 8 rs526525    | 37080867 C | 68.56  | 3.91E-05 | chr:8:37050885 |
| 8 rs472223    | 37073040 C | 0.4195 | 5.53E-05 | chr:8:37050885 |
| 8 rs475813    | 37065499 A | 0.4195 | 5.53E-05 | chr:8:37050885 |
| 8 rs481015    | 37075475 T | 0.4195 | 5.53E-05 | chr:8:37050885 |
| 8 rs516821    | 37070490 A | 0.4195 | 5.53E-05 | chr:8:37050885 |
| 8 rs144460864 | 7336269 C  | 174.8  | 1.76E-20 | chr:8:7355397  |
| 8 rs148764079 | 7370001 A  | 71.38  | 2.25E-20 | chr:8:7355397  |
| 8 rs28548808  | 7341290 C  | 270.2  | 8.82E-19 | chr:8:7355397  |
| 8 rs192344122 | 7659673 A  | 39.18  | 2.56E-18 | chr:8:7355397  |
| 8 rs76206197  | 7371208 C  | 38.25  | 4.71E-17 | chr:8:7355397  |
| 8 rs62639800  | 7372247 T  | 40.86  | 6.52E-17 | chr:8:7355397  |
| 8 rs544637792 | 7352785 C  | 77.66  | 7.95E-15 | chr:8:7355397  |
| 8 rs147761532 | 7403367 G  | 12.19  | 1.55E-12 | chr:8:7355397  |
| 8 rs561138974 | 7404320 C  | 12.19  | 1.55E-12 | chr:8:7355397  |
| 8 rs202062989 | 7596038 C  | 5.367  | 1.04E-11 | chr:8:7355397  |
| 8 rs550449040 | 7206427 C  | 5.813  | 1.00E-08 | chr:8:7355397  |
| 8 rs61090751  | 7198056 T  | 5.717  | 1.54E-08 | chr:8:7355397  |
| 8 rs11985410  | 7202400 A  | 5.099  | 7.23E-08 | chr:8:7355397  |
| 8 rs191142379 | 7207593 C  | 6.7    | 7.96E-08 | chr:8:7355397  |
| 8 rs554099664 | 7199202 A  | 6.145  | 9.73E-08 | chr:8:7355397  |
| 8 rs144469733 | 7204363 C  | 4.618  | 9.77E-08 | chr:8:7355397  |
| 8 rs79674572  | 7204282 C  | 4.691  | 9.95E-08 | chr:8:7355397  |
| 8 rs529423344 | 7206564 A  | 6.293  | 1.47E-07 | chr:8:7355397  |
| 8 rs554462677 | 7198613 A  | 4.393  | 2.04E-07 | chr:8:7355397  |
| 8 rs187151002 | 7198924 G  | 4.364  | 2.25E-07 | chr:8:7355397  |
| 8 rs577501483 | 7198691 A  | 4.364  | 2.25E-07 | chr:8:7355397  |
| 8 rs142492334 | 7204778 C  | 5.553  | 2.59E-07 | chr:8:7355397  |
| 8 rs147080295 | 7201567 G  | 5.553  | 2.59E-07 | chr:8:7355397  |
| 8 rs186632570 | 7202180 G  | 5.553  | 2.59E-07 | chr:8:7355397  |
| 8 rs190745841 | 7204724 C  | 5.553  | 2.59E-07 | chr:8:7355397  |
| 8 rs367822384 | 7201698 G  | 5.553  | 2.59E-07 | chr:8:7355397  |
| 8 rs370208473 | 7204840 A  | 5.553  | 2.59E-07 | chr:8:7355397  |
| 8 rs377734924 | 7201411 T  | 5.553  | 2.59E-07 | chr:8:7355397  |
| 8 rs552745709 | 7202423 G  | 5.553  | 2.59E-07 | chr:8:7355397  |
| 8 rs570398560 | 7199490 A  | 4.315  | 2.74E-07 | chr:8:7355397  |
| 8 rs80002629  | 7199223 G  | 4.315  | 2.74E-07 | chr:8:7355397  |
| 8 rs542348161 | 7198919 A  | 4.276  | 2.86E-07 | chr:8:7355397  |
| 8 rs147735332 | 7208812 T  | 5.873  | 2.96E-07 | chr:8:7355397  |

|               |           |       |           |               |
|---------------|-----------|-------|-----------|---------------|
| 8 rs571047179 | 7205124 C | 5.659 | 3.58E-07  | chr:8:7355397 |
| 8 rs541149215 | 7205881 T | 5.37  | 3.76E-07  | chr:8:7355397 |
| 8 rs142655573 | 7206699 T | 5.641 | 4.64E-07  | chr:8:7355397 |
| 8 rs535743894 | 7206300 G | 5.641 | 4.64E-07  | chr:8:7355397 |
| 8 rs116727004 | 7202704 C | 4.114 | 6.44E-07  | chr:8:7355397 |
| 8 rs575709379 | 7205156 G | 5.131 | 9.15E-07  | chr:8:7355397 |
| 8 rs142491195 | 7206166 C | 3.919 | 2.15E-06  | chr:8:7355397 |
| 8 rs369860009 | 7774251 C | 5.154 | 2.41E-06  | chr:8:7355397 |
| 8 rs553676134 | 7829449 C | 2.405 | 2.70E-06  | chr:8:7355397 |
| 8 rs373416097 | 7829488 G | 2.28  | 3.47E-06  | chr:8:7355397 |
| 8 rs549871111 | 7772847 A | 4.601 | 4.12E-06  | chr:8:7355397 |
| 8 rs187300358 | 7829925 G | 2.259 | 4.53E-06  | chr:8:7355397 |
| 8 rs546887922 | 7829939 T | 2.259 | 4.53E-06  | chr:8:7355397 |
| 8 rs567019282 | 7829945 A | 2.259 | 4.53E-06  | chr:8:7355397 |
| 8 rs371952754 | 7771476 G | 4.367 | 6.72E-06  | chr:8:7355397 |
| 8 rs534714673 | 7749770 T | 3.718 | 7.34E-06  | chr:8:7355397 |
| 8 rs201927052 | 7830630 T | 2.833 | 2.20E-05  | chr:8:7355397 |
| 8 rs4840280   | 7308798 A | 3.794 | 2.37E-05  | chr:8:7355397 |
| 8 rs556910619 | 7752889 G | 2.896 | 2.84E-05  | chr:8:7355397 |
| 8 rs539058606 | 7748025 T | 2.917 | 4.74E-05  | chr:8:7355397 |
| 8 rs183160340 | 7752684 T | 2.745 | 7.19E-05  | chr:8:7355397 |
| 8 rs568234570 | 7752712 T | 2.745 | 7.19E-05  | chr:8:7355397 |
| 8 rs184684947 | 7404860 C | 5.052 | 0.0001368 | chr:8:7355397 |
| 8 rs572557275 | 7748205 G | 2.666 | 0.000142  | chr:8:7355397 |

**Table S4: List of HERV-K insertion sites whose hiSNP sets contain eQTL and corresponding list of differentially expressed genes across all tissue types**

| HERV-K Location | eQTL Genes                                                                                                                                                                                                                                                                                                                                                                                                                                                                                                     |
|-----------------|----------------------------------------------------------------------------------------------------------------------------------------------------------------------------------------------------------------------------------------------------------------------------------------------------------------------------------------------------------------------------------------------------------------------------------------------------------------------------------------------------------------|
| chr1:111802591  | CHI3L2, CHIA, CHIAP2, OVGP1, RP11-552M11.8 DDX20, DRAM2, ATP5F1, CD53, UBE2FP3, HIGD1AP12, PGCP1, PIFO, RP11-284N8.3                                                                                                                                                                                                                                                                                                                                                                                           |
| chr10:135355522 | SYCE1 CYP2E1, PAOX                                                                                                                                                                                                                                                                                                                                                                                                                                                                                             |
| chr12:124066477 | ATP6V0A2, DDX55, DNAH10, DNAH10OS, EIF2B1, RP11-486O12.2, TCTN2, RP11-282O18.7, TMED2, C12orf65, MPHOSPH9, HCAR2, GTF2H3, RP11-282O18.3, SNRNP35, PITPNM2, ZNF664, RILPL2, VPS37B, RILPL1, ABCB9, RPL27P12, SETD8                                                                                                                                                                                                                                                                                              |
| chr12:44313657  | PUS7L RP11-350F4.2, TWF1, TMEM117, RP11-210N13.1                                                                                                                                                                                                                                                                                                                                                                                                                                                               |
| chr12:55727213  | DNAJC14, TESPA1, RAB5B                                                                                                                                                                                                                                                                                                                                                                                                                                                                                         |
| chr13:90743183  | LINC00559                                                                                                                                                                                                                                                                                                                                                                                                                                                                                                      |
| chr14:20552746  | PNP                                                                                                                                                                                                                                                                                                                                                                                                                                                                                                            |
| chr15:63374594  | APH1B, LACTB, RP11-244F12.3, RPS27L, TPM1 RP11-1069G10.1, CA12, RP11-321G12.1, USP3 ARL17A, ARL17B, CRHR1, CRHR1-IT1, DND1P1, KANSL1, KANSL1-AS1, LRRC37A, LRRC37A2, LRRC37A4P, NSFP1, PLEKHM1, RP11-259G18.2, RP11-259G18.3, RP11-707O23.5, RPS26P8, WNT3, MAPT, RP11-259G18.1, RP11-669E14.6, RP11-798G7.8, ARHGAP27, CTD-2020K17.1, FMNL1, LRRC37A17P, RP11-798G7.5, SPPL2C, AC091132.1, FAM215B, MAP3K14, MAPT-AS1, RP11-798G7.6, NSF, NMT1, CTB-39G8.3, RP11-669E14.4, RP11-293E1.1, RPRML, RP11-995C19.2 |
| chr17:44361947  | RP11-420K14.3, RP11-420K14.6, RP11-678G14.2, RP11-678G14.3, VN1R84P, ZNF100, ZNF429, ZNF626, ZNF708 ZNF43, CTD-2561J22.5, ZNF66, ZNF85, RP11-420K14.1, RP11-157B13.7, RP11-420K14.2                                                                                                                                                                                                                                                                                                                            |
| chr19:21841536  | RP11-678G14.3, ZNF208, ZNF257, ZNF429, ZNF98, RP11-678G14.2, ZNF738 CTB-176F20.3, CTD-2561J22.5, RP11-420K14.1, RP11-420K14.2, AC025811.3, CTB-135N1.2, ZNF100, LINC00664, ZNF676, AC003973.6, CTD-2561J22.2, CTC-457E21.3, RP11-420K14.6, ZNF431, AC011516.1, CTD-2291D10.2, RP11-157B13.6, RP11-157B13.7, ZNF209P, ZNF729, AC004004.2, CTD-2561J22.6, VN1R85P, ZNF492, RP11-420K14.3, ZNF708                                                                                                                 |
| chr19:22414379  | CTC-525D6.5                                                                                                                                                                                                                                                                                                                                                                                                                                                                                                    |
| chr19:29855781  | ABCC13, RBM11                                                                                                                                                                                                                                                                                                                                                                                                                                                                                                  |
| chr21:15654234  | FAM86JP, RP11-379B18.5, SLC41A3, ALDH1L1-AS1, RP11-379B18.1, RP11-666A20.4 ENPP7P4, ALG1L, RP11-666A20.3, ROPN1B, GS1-388B5.1, OR7E29P, OR7E53P, RPS3AP14                                                                                                                                                                                                                                                                                                                                                      |
| chr3:125609298  | COL6A4P2, FAM86HP, RP11-77P16.4, ALG1L2, COL6A6 RP11-93K22.13, TRH, TMCC1-AS1                                                                                                                                                                                                                                                                                                                                                                                                                                  |
| chr3:129776131  | AC024937.6, RP11-480A16.1 SDHAP2, SDHAP1                                                                                                                                                                                                                                                                                                                                                                                                                                                                       |
| chr3:195654394  | C4orf3, RP11-21I10.2, RP11-33B1.1, RP11-384K6.6, RP11-548H18.2, FABP2, RP11-33B1.4, METTL14, KLHL2P1, RP11-33B1.3, RP11-455G16.1, USP53, MYOZ2, PDE5A, RP11-33B1.2                                                                                                                                                                                                                                                                                                                                             |
| chr4:120263688  | ENPP7P10, RP11-1396O13.1, ENPP7P11, FAM86KP, OR7E83P, OR7E84P, OR7E85P, OR7E86P, RP11-1396O13.13, RP11-1396O13.22, RP11-747H12.6, UNC93B7                                                                                                                                                                                                                                                                                                                                                                      |
| chr4:9603240    | ADAMTS6 PPWD1                                                                                                                                                                                                                                                                                                                                                                                                                                                                                                  |
| chr5:64388440   | RASGRF2 CKMT2-AS1                                                                                                                                                                                                                                                                                                                                                                                                                                                                                              |
| chr5:80442266   | SEMA5A                                                                                                                                                                                                                                                                                                                                                                                                                                                                                                         |
| chr5:8937853    | SLC22A3, RP3-428L16.1, RP11-235G24.3                                                                                                                                                                                                                                                                                                                                                                                                                                                                           |
| chr6:161270898  | C4A, C4B, CYP21A1P, CYP21A2, HCG23, HLA-DPB2, HLA-DQA1, HLA-DQA2, HLA-DQB1, HLA-DQB1-AS1, HLA-DQB2, HLA-DRA, HLA-DRB1, HLA-DRB5, HLA-DRB6, MICB, NOTCH4, RPL32P1, STK19P, XXbac-BPG254F23.6, PSMB9, RNF5, STK19, TNXA, TNXB, ATF6B, CFB, HLA-DOB, PRRT1, SKIV2L, HLA-DMA, PPT2, EGFL8, HLA-DPB1, AGER, DDAH2, HLA-DMB, C6orf25, CSNK2B, GPANK1, LY6G6C, TAP2, LY6G5B, SLC44A4, VWA7, APOM, AGPAT1, DXO, HLA-DPA1, BTNL2, WASF5P, HLA-DRB9, MSH5, TAP1, XXbac-BPG254F23.7, PBX2, C2                             |
| chr6:32505702   |                                                                                                                                                                                                                                                                                                                                                                                                                                                                                                                |



|                |                                                                                                                                                                                                                                                                                                                                                                                                                                                                                                                                                                                                                                                       |
|----------------|-------------------------------------------------------------------------------------------------------------------------------------------------------------------------------------------------------------------------------------------------------------------------------------------------------------------------------------------------------------------------------------------------------------------------------------------------------------------------------------------------------------------------------------------------------------------------------------------------------------------------------------------------------|
|                | ATP6V1G2, BAG6, C2, C4A, C4B, CFB, CYP21A1P, CYP21A2, HCG23, HLA-DOB, HLA-DPB1, HLA-DPB2, HLA-DQA1, HLA-DQA2, HLA-DQB1, HLA-DQB1-AS1, HLA-DQB2, HLA-DRA, HLA-DRB1, HLA-DRB5, HLA-DRB6, LSM2, LY6G5B, NOTCH4, PRRT1, RPL32P1, SKIV2L, STK19P, TAP2, XXbac-BPG254F23.6, TNXA, AGER, RNF5, STK19, TNXB, MICB, ATF6B, HLA-DPA1, PPT2, EGFL8, HLA-DMA, HSPA1A, HSPA1B, LY6G6C, XXbac-BPG154L12.4, HLA-DMB, PBX2, TAPBP, MICA, RPS18, C6orf25, CSNK2B, GPANK1, LY6G6E, SLC44A4, VWA7, AGPAT1, DXO, LY6G5C, MSH5, APOM, FKBPL, BTNL2, PSMB9, LYPLA2P1, XXbac-BPG181B23.7, HLA-DRB9, LY6G6D, C6orf47, NELFE, C6orf10, PSMB8, TAP1, XXbac-BPG254F23.7, SYNGAP1 |
| chr6:32648036  | HLA-DOB, HLA-DQA1, HLA-DQA2, HLA-DQB1, HLA-DQB1-AS1, HLA-DQB2, HLA-DRB1, HLA-DRB5, HLA-DRB6, NOTCH4, PRRT1, TAP2, XXbac-BPG254F23.6, C4A, TAPBP, RNF5, HSD17B8, ATF6B, CYP21A2, TAP1, XXbac-BPG254F23.7, NONE                                                                                                                                                                                                                                                                                                                                                                                                                                         |
| chr6:32746812  | NONE                                                                                                                                                                                                                                                                                                                                                                                                                                                                                                                                                                                                                                                  |
| chr7:158029482 | RPL35P6, ASAH1                                                                                                                                                                                                                                                                                                                                                                                                                                                                                                                                                                                                                                        |
| chr8:18651457  | NONE                                                                                                                                                                                                                                                                                                                                                                                                                                                                                                                                                                                                                                                  |
| chr8:37050885  | NONE                                                                                                                                                                                                                                                                                                                                                                                                                                                                                                                                                                                                                                                  |
| chr8:7355397   | NONE                                                                                                                                                                                                                                                                                                                                                                                                                                                                                                                                                                                                                                                  |
| chr8:7671216   | NONE                                                                                                                                                                                                                                                                                                                                                                                                                                                                                                                                                                                                                                                  |

Table S5: Experimental Factor Ontology enrichment results for all hiSNPs in the European continental population

| Term ID         | Term Name                                                                | # of SNPs annotated | Z-score | P-value  | FDR      | # of SNPs overlapped | SNPs                                                                                                                                                                                                                                                                                                                                                                                                                                                    |
|-----------------|--------------------------------------------------------------------------|---------------------|---------|----------|----------|----------------------|---------------------------------------------------------------------------------------------------------------------------------------------------------------------------------------------------------------------------------------------------------------------------------------------------------------------------------------------------------------------------------------------------------------------------------------------------------|
| EFO:0005140     | autoimmune disease                                                       | 1733                | 8.16    | 2.80E-11 | 1.80E-09 | 30                   | rs9268923, rs2395185, rs477515, rs3129720, rs9275563, rs3817963, rs1816854, rs9271100, rs1063355, rs9268877, rs9268853, rs6927022, rs9271060, rs9271588, rs9268480, rs9272346, rs2647012, rs3806156, rs7411387, rs7748270, rs12194148, rs9268839, rs2070676, rs2070677, rs12525220, rs660895, rs9275406, rs2395148, rs2157337, rs111945767, rs8070723, rs12185268, rs183211, rs9275326, rs415430, rs2395163, rs199515, rs199533, rs17577094, rs17649553 |
| EFO:0002508     | Parkinson's disease                                                      | 136                 | 12      | 3.30E-11 | 1.80E-09 | 10                   | rs9303525, rs8072451, rs17689882                                                                                                                                                                                                                                                                                                                                                                                                                        |
| EFO:0004886     | intra cranial volume                                                     | 5                   | 19.8    | 2.00E-09 | 4.40E-08 | 3                    | rs9268905, rs4252134, rs9275592                                                                                                                                                                                                                                                                                                                                                                                                                         |
| EFO:1001209     | temporal arteritis                                                       | 5                   | 19.8    | 2.00E-09 | 4.40E-08 | 3                    | rs9268905, rs4252134, rs9275592                                                                                                                                                                                                                                                                                                                                                                                                                         |
| EFO:0006803     | vasculitis                                                               | 5                   | 19.8    | 2.00E-09 | 4.40E-08 | 3                    | rs9268905, rs4252134, rs9275592                                                                                                                                                                                                                                                                                                                                                                                                                         |
| EFO:0000574     | lymphoma                                                                 | 42                  | 11      | 3.60E-08 | 6.50E-07 | 5                    | rs2395185, rs9268853, rs2647045, rs2647046, rs6903608                                                                                                                                                                                                                                                                                                                                                                                                   |
| EFO:0005206     | oligoclonal band measurement                                             | 9                   | 14.7    | 5.10E-08 | 7.90E-07 | 3                    | rs3129720, rs9275563, rs3817963                                                                                                                                                                                                                                                                                                                                                                                                                         |
| EFO:0004194     | IGA glomerulonephritis                                                   | 32                  | 10.1    | 3.30E-07 | 0.000045 | 4                    | rs9275596, rs660895, rs2856717, rs7763262                                                                                                                                                                                                                                                                                                                                                                                                               |
| EFO:0005129     | hepatitis C induced liver cirrhosis                                      | 5                   | 13.1    | 9.10E-07 | 0.000011 | 2                    | rs3817963, rs3135363                                                                                                                                                                                                                                                                                                                                                                                                                                    |
| EFO:0004614     | apolipoprotein A 1 measurement                                           | 7                   | 11.1    | 0.000032 | 0.000031 | 2                    | rs783147, rs770628, rs7748270, rs12194148, rs9268839, rs2070676, rs2070677, rs12525220, rs660895, rs9275406, rs2395148, rs2157337                                                                                                                                                                                                                                                                                                                       |
| EFO:0005856     | arthritis                                                                | 409                 | 6.02    | 0.000028 | 0.000031 | 10                   | rs2395148, rs2157337                                                                                                                                                                                                                                                                                                                                                                                                                                    |
| EFO:0001642     | lymphoid neoplasm                                                        | 266                 | 6.22    | 0.000037 | 0.000034 | 8                    | rs2395185, rs9268853, rs2647045, rs2647046, rs2647012, rs674313, rs6903608, rs12195582, rs9271100, rs9275390, rs3129763, rs2647012, rs7411387, rs7748270, rs12194148, rs9268839, rs2070676, rs2070677, rs12525220, rs660895, rs9275406, rs2395148, rs2157337                                                                                                                                                                                            |
| EFO:0002461     | skeletal system disease                                                  | 918                 | 5.4     | 0.000043 | 0.000036 | 15                   | rs2070676, rs2070677, rs12525220, rs660895, rs9275406, rs2395148, rs2157337                                                                                                                                                                                                                                                                                                                                                                             |
| EFO:0007790     | Epstein Barr virus nuclear antigen 1 IgG measurement                     | 8                   | 10.3    | 0.000051 | 0.000037 | 2                    | rs9268923, rs2516049                                                                                                                                                                                                                                                                                                                                                                                                                                    |
| EFO:0000729     | ulcerative colitis                                                       | 274                 | 6.09    | 0.000048 | 0.000037 | 8                    | rs9268923, rs2395185, rs9271100, rs1063355, rs9268877, rs9268853, rs6927022, rs9268480, rs9268923, rs2395185, rs477515, rs3817963, rs774434, rs3828805, rs1816854, rs9271100, rs3135363, rs1063355, rs9268877, rs9268853, rs6927022, rs9271060, rs9271588, rs9275319, rs9272105, rs9268480                                                                                                                                                              |
| EFO:0000405     | digestive system disease                                                 | 1291                | 5.14    | 0.000059 | 0.00004  | 18                   | rs9272105, rs9268480, rs9271100, rs2647012, rs7411387, rs7748270, rs12194148, rs9268839, rs2070676, rs2070677, rs12525220, rs660895, rs9275406, rs2395148, rs2157337                                                                                                                                                                                                                                                                                    |
| EFO:0005755     | rheumatic disease                                                        | 738                 | 5.35    | 0.000007 | 0.000045 | 13                   | rs12525220, rs660895, rs9275406, rs2395148, rs2157337                                                                                                                                                                                                                                                                                                                                                                                                   |
| EFO:0005803     | hematological system disease                                             | 297                 | 5.76    | 0.000091 | 0.000054 | 8                    | rs2395185, rs9268853, rs2647045, rs2647046, rs2647012, rs674313, rs6903608, rs12195582                                                                                                                                                                                                                                                                                                                                                                  |
| Orphanet:101435 | Rare genetic eye disease                                                 | 62                  | 7.02    | 0.000095 | 0.000054 | 4                    | rs9268838, rs8070723, rs9275390, rs3129763                                                                                                                                                                                                                                                                                                                                                                                                              |
| EFO:0000685     | rheumatoid arthritis                                                     | 317                 | 5.5     | 0.000015 | 0.000083 | 8                    | rs7748270, rs12194148, rs9268839, rs12525220, rs660895, rs9275406, rs2395148, rs2157337                                                                                                                                                                                                                                                                                                                                                                 |
| EFO:0000508     | genetic disorder                                                         | 328                 | 5.37    | 0.00002  | 0.000099 | 8                    | rs9268905, rs9268838, rs8070723, rs12185268, rs12373124, rs9275390, rs9268947, rs3129763                                                                                                                                                                                                                                                                                                                                                                |
| EFO:0000182     | hepatocellular carcinoma                                                 | 12                  | 8.34    | 0.00002  | 0.000099 | 2                    | rs9275319, rs9272105                                                                                                                                                                                                                                                                                                                                                                                                                                    |
| EFO:0001379     | endocrine system disease                                                 | 333                 | 5.31    | 0.000023 | 0.00011  | 8                    | rs3129720, rs3817963, rs9268905, rs774434, rs3135363, rs9275319, rs9272105, rs9268947                                                                                                                                                                                                                                                                                                                                                                   |
| EFO:0000783     | myositis                                                                 | 15                  | 7.41    | 0.00004  | 0.00018  | 2                    | rs9275338, rs9275330                                                                                                                                                                                                                                                                                                                                                                                                                                    |
| Orphanet:586    | Cystic fibrosis                                                          | 17                  | 6.93    | 0.00006  | 0.00019  | 2                    | rs9268905, rs9268947                                                                                                                                                                                                                                                                                                                                                                                                                                    |
| Orphanet:306708 | Frontotemporal neurodegeneration with movement disorder                  | 16                  | 7.16    | 0.000049 | 0.00019  | 2                    | rs8070723, rs12185268                                                                                                                                                                                                                                                                                                                                                                                                                                   |
| Orphanet:165661 | Genetic pancreatic disease                                               | 17                  | 6.93    | 0.00006  | 0.00019  | 2                    | rs9268905, rs9268947                                                                                                                                                                                                                                                                                                                                                                                                                                    |
| EFO:0000183     | Hodgkins lymphoma                                                        | 16                  | 7.16    | 0.000049 | 0.00019  | 2                    | rs2395185, rs6903608                                                                                                                                                                                                                                                                                                                                                                                                                                    |
| EFO:0003767     | inflammatory bowel disease                                               | 658                 | 4.69    | 0.000048 | 0.00019  | 11                   | rs9268923, rs2395185, rs477515, rs1816854, rs9271100, rs1063355, rs9268877, rs9268853, rs6927022, rs9271060, rs9268480                                                                                                                                                                                                                                                                                                                                  |
| EFO:0001421     | liver disease                                                            | 143                 | 5.42    | 0.00005  | 0.00019  | 5                    | rs3817963, rs774434, rs3135363, rs9275319, rs9272105                                                                                                                                                                                                                                                                                                                                                                                                    |
| Orphanet:399998 | Male infertility due to obstructive azoospermia of genetic origin        | 17                  | 6.93    | 0.00006  | 0.00019  | 2                    | rs9268905, rs9268947                                                                                                                                                                                                                                                                                                                                                                                                                                    |
| Orphanet:307058 | Miscellaneous movement disorder due to genetic neurodegenerative disease | 16                  | 7.16    | 0.000049 | 0.00019  | 2                    | rs8070723, rs12185268                                                                                                                                                                                                                                                                                                                                                                                                                                   |
| Orphanet:400003 | Rare genetic disorder with obstructive azoospermia                       | 17                  | 6.93    | 0.00006  | 0.00019  | 2                    | rs9268905, rs9268947                                                                                                                                                                                                                                                                                                                                                                                                                                    |
| Orphanet:156610 | Rare genetic respiratory disease                                         | 17                  | 6.93    | 0.00006  | 0.00019  | 2                    | rs9268905, rs9268947                                                                                                                                                                                                                                                                                                                                                                                                                                    |
| Orphanet:183521 | Rare genetic movement disorder                                           | 19                  | 6.52    | 0.000084 | 0.00026  | 2                    | rs8070723, rs12185268                                                                                                                                                                                                                                                                                                                                                                                                                                   |
| EFO:0004280     | movement disorder                                                        | 20                  | 6.34    | 0.000099 | 0.0003   | 2                    | rs8070723, rs12185268                                                                                                                                                                                                                                                                                                                                                                                                                                   |
| EFO:0006925     | lipoprotein A measurement                                                | 29                  | 5.16    | 0.00031  | 0.00091  | 2                    | rs1620921, rs9355814                                                                                                                                                                                                                                                                                                                                                                                                                                    |
| EFO:1001986     | connective tissue disease                                                | 31                  | 4.96    | 0.00038  | 0.00095  | 2                    | rs9275390, rs3129763                                                                                                                                                                                                                                                                                                                                                                                                                                    |
| Orphanet:98702  | Connective tissue disease with eye involvement                           | 31                  | 4.96    | 0.00038  | 0.00095  | 2                    | rs9275390, rs3129763                                                                                                                                                                                                                                                                                                                                                                                                                                    |
| Orphanet:165652 | Rare genetic gastroenterological disease                                 | 30                  | 5.06    | 0.00034  | 0.00095  | 2                    | rs9268905, rs9268947                                                                                                                                                                                                                                                                                                                                                                                                                                    |
| EFO:1001993     | scleroderma                                                              | 31                  | 4.96    | 0.00038  | 0.00095  | 2                    | rs9275390, rs3129763                                                                                                                                                                                                                                                                                                                                                                                                                                    |
| EFO:0000717     | systemic scleroderma                                                     | 31                  | 4.96    | 0.00038  | 0.00095  | 2                    | rs9275390, rs3129763                                                                                                                                                                                                                                                                                                                                                                                                                                    |
| EFO:0004505     | telomere length                                                          | 30                  | 5.06    | 0.00034  | 0.00095  | 2                    | rs412658, rs1975174                                                                                                                                                                                                                                                                                                                                                                                                                                     |
| EFO:0003956     | seasonal allergic rhinitis                                               | 37                  | 4.48    | 0.00064  | 0.0016   | 2                    | rs7775228, rs9273373, rs2395185, rs3817963, rs774434, rs3828805, rs9268853, rs9275319, rs9272105, rs9272143, rs183211, rs28421666, rs2647045, rs2647046, rs2647012, rs674313, rs6903608, rs9275642, rs12195582                                                                                                                                                                                                                                          |
| EFO:0000616     | neoplasm                                                                 | 1719                | 3.4     | 0.00078  | 0.0019   | 17                   | rs12195582                                                                                                                                                                                                                                                                                                                                                                                                                                              |
| EFO:0004554     | genomic measurement                                                      | 41                  | 4.21    | 0.00086  | 0.002    | 2                    | rs412658, rs1975174                                                                                                                                                                                                                                                                                                                                                                                                                                     |
| Orphanet:275742 | Genetic infertility                                                      | 46                  | 3.93    | 0.0012   | 0.0027   | 2                    | rs9268905, rs9268947                                                                                                                                                                                                                                                                                                                                                                                                                                    |
| Orphanet:399980 | Rare genetic male infertility                                            | 46                  | 3.93    | 0.0012   | 0.0027   | 2                    | rs9268905, rs9268947                                                                                                                                                                                                                                                                                                                                                                                                                                    |
| EFO:1001513     | liver neoplasm                                                           | 105                 | 3.66    | 0.0014   | 0.003    | 3                    | rs7774434, rs9275319, rs9272105                                                                                                                                                                                                                                                                                                                                                                                                                         |
| EFO:0006930     | brain volume measurement                                                 | 107                 | 3.62    | 0.0015   | 0.0032   | 3                    | rs9303525, rs8072451, rs17689882, rs8070723, rs12185268, rs183211, rs9275326, rs415430, rs2395163, rs199515, rs199533, rs9271192, rs17577094, rs17649553                                                                                                                                                                                                                                                                                                |
| EFO:0005772     | neurodegenerative disease                                                | 967                 | 3.21    | 0.0015   | 0.0033   | 11                   | rs2395185, rs3817963, rs3828805, rs9268853, rs9275319, rs9272105, rs9272143, rs183211, rs2647045, rs2647046, rs2647012, rs674313, rs6903608, rs9275642, rs12195582                                                                                                                                                                                                                                                                                      |
| EFO:0000311     | cancer                                                                   | 1541                | 3.11    | 0.0017   | 0.0035   | 15                   | rs2647045, rs2647046, rs2647012, rs674313, rs6903608, rs9275642, rs12195582                                                                                                                                                                                                                                                                                                                                                                             |
| Orphanet:71859  | Rare genetic neurological disorder                                       | 53                  | 3.59    | 0.0018   | 0.0038   | 2                    | rs8070723, rs12185268                                                                                                                                                                                                                                                                                                                                                                                                                                   |
| EFO:0003819     | dental caries                                                            | 122                 | 3.3     | 0.0024   | 0.0048   | 3                    | rs931608, rs1865075, rs10404998                                                                                                                                                                                                                                                                                                                                                                                                                         |
| EFO:0003086     | kidney disease                                                           | 301                 | 3.13    | 0.0026   | 0.0051   | 3                    | rs9275596, rs2647012, rs660895, rs2856717, rs7763262                                                                                                                                                                                                                                                                                                                                                                                                    |
| EFO:0003966     | eye disease                                                              | 303                 | 3.11    | 0.0027   | 0.0052   | 5                    | rs9271588, rs9268838, rs8070723, rs9275390, rs3129763                                                                                                                                                                                                                                                                                                                                                                                                   |
| EFO:0004343     | waist-hip ratio                                                          | 129                 | 3.16    | 0.0029   | 0.0055   | 3                    | rs7759742, rs5020946, rs2076529                                                                                                                                                                                                                                                                                                                                                                                                                         |
| EFO:0003785     | allergy                                                                  | 217                 | 3.05    | 0.0032   | 0.006    | 4                    | rs7775228, rs9273373, rs9469099, rs4713555                                                                                                                                                                                                                                                                                                                                                                                                              |
| EFO:0005854     | allergic rhinitis                                                        | 66                  | 3.11    | 0.0034   | 0.0063   | 2                    | rs7775228, rs9273373                                                                                                                                                                                                                                                                                                                                                                                                                                    |
| EFO:0004274     | gout                                                                     | 69                  | 3.02    | 0.0039   | 0.007    | 2                    | rs2070676, rs2070677                                                                                                                                                                                                                                                                                                                                                                                                                                    |
| EFO:0004732     | lipoprotein measurement                                                  | 681                 | 2.83    | 0.004    | 0.0071   | 8                    | rs931608, rs783147, rs7770628, rs2858310, rs9378212, rs1620921, rs9275052, rs9355814                                                                                                                                                                                                                                                                                                                                                                    |
| EFO:0000096     | neoplasm of mature B-cells                                               | 146                 | 2.88    | 0.0045   | 0.0079   | 3                    | rs2647012, rs674313, rs12195582                                                                                                                                                                                                                                                                                                                                                                                                                         |
| EFO:0003853     | respiratory system neoplasm                                              | 154                 | 2.76    | 0.0054   | 0.0094   | 3                    | rs2395185, rs3817963, rs3828805                                                                                                                                                                                                                                                                                                                                                                                                                         |
| EFO:0004872     | inflammatory biomarker measurement                                       | 262                 | 2.59    | 0.007    | 0.012    | 4                    | rs783147, rs770628, rs2858310, rs9378212                                                                                                                                                                                                                                                                                                                                                                                                                |
| EFO:0000524     | head disease                                                             | 385                 | 2.48    | 0.0085   | 0.014    | 5                    | rs931608, rs3828805, rs9271588, rs1865075, rs10404998                                                                                                                                                                                                                                                                                                                                                                                                   |
| EFO:0007861     | body ratio measurement                                                   | 178                 | 2.45    | 0.009    | 0.015    | 3                    | rs7759742, rs5020946, rs2076529                                                                                                                                                                                                                                                                                                                                                                                                                         |
| EFO:0003769     | endocrine neoplasm                                                       | 187                 | 2.34    | 0.011    | 0.017    | 3                    | rs7774434, rs9275319, rs9272105                                                                                                                                                                                                                                                                                                                                                                                                                         |

|             |                                  |      |      |       |       |                                                                                         |
|-------------|----------------------------------|------|------|-------|-------|-----------------------------------------------------------------------------------------|
| EFO:0000684 | respiratory system disease       | 1556 | 2.3  | 0.011 | 0.018 | rs2395185, rs3817963, rs9268905, rs3828805, rs9268947, rs9272346, rs2076530, rs7775228, |
| EFO:0000274 | atopic eczema                    | 110  | 2.13 | 0.014 | 0.022 | 13 rs17690703, rs3117098, rs9268516, rs1981997, rs9273373                               |
| EFO:0000701 | skin disease                     | 561  | 2.19 | 0.014 | 0.022 | 2 rs9469099, rs4713555                                                                  |
| EFO:0000270 | asthma                           | 449  | 2.09 | 0.017 | 0.025 | 6 rs12373124, rs9275390, rs3129763, rs9469099, rs3806156, rs4713555                     |
| EFO:0006846 | autoimmune disease biomarker     | 117  | 2.02 | 0.016 | 0.025 | 5 rs9272346, rs7775228, rs3117098, rs9268516, rs9273373                                 |
| EFO:0005036 | platelet measurement             | 117  | 2.02 | 0.016 | 0.025 | 2 rs11071720, rs2395185                                                                 |
| EFO:0004264 | vascular disease                 | 215  | 2.06 | 0.017 | 0.025 | 2 rs11071720, rs3809566                                                                 |
| EFO:0003885 | multiple sclerosis               | 221  | 2    | 0.019 | 0.027 | 3 rs9268905, rs4252134, rs9275592                                                       |
| EFO:0004464 | brain measurement                | 347  | 1.94 | 0.021 | 0.03  | 3 rs3129720, rs9275563, rs3817963                                                       |
| EFO:0001071 | lung carcinoma                   | 129  | 1.85 | 0.021 | 0.03  | 4 rs9303525, rs34075049, rs8072451, rs17689882                                          |
| EFO:0004458 | C-reactive protein measurement   | 139  | 1.73 | 0.026 | 0.036 | 2 rs2395185, rs3817963                                                                  |
| EFO:0004645 | response to vaccine              | 154  | 1.56 | 0.033 | 0.046 | 2 rs2858310, rs9378212                                                                  |
| EFO:0005105 | lipid or lipoprotein measurement | 1016 | 1.6  | 0.043 | 0.058 | 2 rs477515, rs3135363                                                                   |
|             |                                  |      |      |       |       | 8 rs931608, rs783147, rs7770628, rs2858310, rs9378212, rs1620921, rs9275052, rs9355814  |

**Table S6: List of HERV-K insertions without hiSNPs that occur within genes**

| <b>HERV-K</b>                                                                        | <b>Chromosome</b> | <b>Gene Start</b> | <b>Gene End</b> | <b>Gene Name</b> |
|--------------------------------------------------------------------------------------|-------------------|-------------------|-----------------|------------------|
| chr1_144603408                                                                       | chr1              | 144146810         | 144830407       | NBPF9            |
| chr1_144603408                                                                       | chr1              | 144146810         | 144830407       | NBPF8            |
| chr1_144603408                                                                       | chr1              | 144596310         | 144604297       | BC073801         |
| chr1_145502680, chr1_146069249,<br>chr1_146119262, chr1_146343450,<br>chr1_146383502 | chr1              | 145293370         | 146467744       | NBPF10           |
| chr1_146069249                                                                       | chr1              | 146032541         | 146082431       | NBPF24           |
| chr1_146343450, chr1_146383502                                                       | chr1              | 146334189         | 146460493       | NBPF12           |
| chr1_148565785                                                                       | chr1              | 148558187         | 148596267       | NBPF15           |
| chr1_15462793                                                                        | chr1              | 15438310          | 15478960        | TMEM51-AS1       |
| chr1_160660573                                                                       | chr1              | 160648535         | 160681641       | CD48             |
| chr1_246245987                                                                       | chr1              | 245912641         | 246580714       | SMYD3            |
| chr1_45979181                                                                        | chr1              | 45976706          | 45987610        | PRDX1            |
| chr1_75842769                                                                        | chr1              | 75667815          | 76076799        | SLC44A5          |
| chr2_112721387                                                                       | chr2              | 112656190         | 112786945       | MERTK            |
| chr2_3109196                                                                         | chr2              | 2898819           | 3129798         | AK095310         |
| chr2_98747295                                                                        | chr2              | 98703594          | 98833427        | VWA3B            |
| chr21_19306004                                                                       | chr21             | 19273579          | 19639687        | CHODL            |
| chr3_100056136                                                                       | chr3              | 100053561         | 100068855       | NIT2             |
| chr3_100384984                                                                       | chr3              | 100328432         | 100414323       | GPR128           |
| chr3_130166558                                                                       | chr3              | 130064358         | 130203690       | COL6A5           |
| chr3_134235732                                                                       | chr3              | 134204574         | 134283870       | CEP63            |
| chr3_188969159                                                                       | chr3              | 188665002         | 189041271       | TPRG1            |
| chr3_9889344                                                                         | chr3              | 9834231           | 9896822         | ARPC4-TTLL3      |
| chr3_99991338                                                                        | chr3              | 99979660          | 100044096       | TBC1D23          |
| chr5_180694828                                                                       | chr5              | 180688212         | 180699308       | LOC100507602     |
| chr5_55452824                                                                        | chr5              | 55395506          | 55529186        | ANKRD55          |
| chr6_160215763                                                                       | chr6              | 160211021         | 160219461       | MRPL18           |
| chr6_74514859                                                                        | chr6              | 74405507          | 74538041        | CD109            |
| chr7_139152150                                                                       | chr7              | 139138087         | 139168457       | KLRG2            |
| chr7_140252784                                                                       | chr7              | 140218219         | 140302342       | DENND2A          |
| chr7_27781273                                                                        | chr7              | 27778991          | 27869386        | TAX1BP1          |
| chr8_113784400                                                                       | chr8              | 113235158         | 114389382       | CSMD3            |
| chr8_91696260                                                                        | chr8              | 91634222          | 91803859        | TMEM64           |
| chr10_101580568                                                                      | chr10             | 101542462         | 101611662       | ABCC2            |
| chr10_104215093                                                                      | chr10             | 104209573         | 104216050       | LOC100505761     |
| chr10_104215093                                                                      | chr10             | 104213596         | 104216049       | AX746750         |
| chr10_19799694                                                                       | chr10             | 19778022          | 19896829        | C10orf112        |
| chr11_60481953                                                                       | chr11             | 60467046          | 60483285        | MS4A8            |
| chr11_62625990                                                                       | chr11             | 62623483          | 62656355        | SLC3A2           |
| chr12_21797876                                                                       | chr12             | 21788274          | 21810728        | LDHB             |

|                |       |           |           |                |
|----------------|-------|-----------|-----------|----------------|
| chr12_4831367  | chr12 | 4829751   | 4881892   | GALNT8         |
| chr13_43615646 | chr13 | 43597361  | 43683306  | DNAJC15        |
| chr15_59126496 | chr15 | 59063392  | 59149734  | FAM63B         |
| chr16_14729998 | chr16 | 14726667  | 14763093  | BFAR           |
| chr18_66610471 | chr18 | 66382490  | 66722426  | CCDC102B       |
| chr19_12214752 | chr19 | 12203077  | 12225494  | ZNF788         |
| chr19_36725235 | chr19 | 36705503  | 36729675  | ZNF146         |
| chr19_38021670 | chr19 | 37997840  | 38034239  | ZNF793         |
| chr19_39122732 | chr19 | 39109721  | 39126125  | EIF3K          |
| chr19_55462618 | chr19 | 55434876  | 55477611  | NLRP7          |
| chrX_122813497 | chrX  | 122734411 | 122866904 | THOC2          |
| chrX_134437628 | chrX  | 134382887 | 134477957 | DKFZp451F083   |
| chrX_134437628 | chrX  | 134382887 | 134478012 | BC029787       |
| chrX_134540021 | chrX  | 134540020 | 134540794 | AB062081       |
| chrX_151298090 | chrX  | 151282520 | 151307050 | MAGEA10-MAGEA5 |
| chrX_154138254 | chrX  | 154064063 | 154250998 | F8             |

## **SUPPORTING INFORMATION CAPTIONS**

**S1 Fig. Schematic representation of the HERVnGoSeq computational pipeline.**

**S2 Fig. Causal diagram of the hypothesized relationship between tagging SNPs, HERV-K insertion polymorphisms, and human disease phenotypes.**

SNPs associated with disease phenotypes via genome-wide association studies are tagging (i.e. in strong LD with) the true causal variant, a polymorphic HERV-K insertion.

**S3-S50 Fig. Manhattan plots for each of the 48 HERV-K insertion sites that are 'taggable' by SNPs.** Logistic regression p-values stratified by 5 super populations. AFR African, AMR Native American, EUR European, EAS East Asian, SAS South Asian.

**S51-S63 Fig. Venn diagrams.** Diagrams show the overlap between hiSNP sets derived by logistic regression of HERVnGoSeq presence/absence calls, logistic regression of dichotomized genotypes called by the 1000 Genomes Structural Variant Group, and the  $r^2$  measure of linkage disequilibrium

**S64 Fig. Hierarchical chart of experimental factor ontology enrichment terms.** Hue intensity is inversely proportional to the magnitude of the p-value for significance.

**S65 Fig. Estimated prevalence of 23 non-reference HERV-K insertion sites detected in the 1000 Genomes population by both HERVnGoSeq (red) and a previous publication (blue).**

**Figure S1**

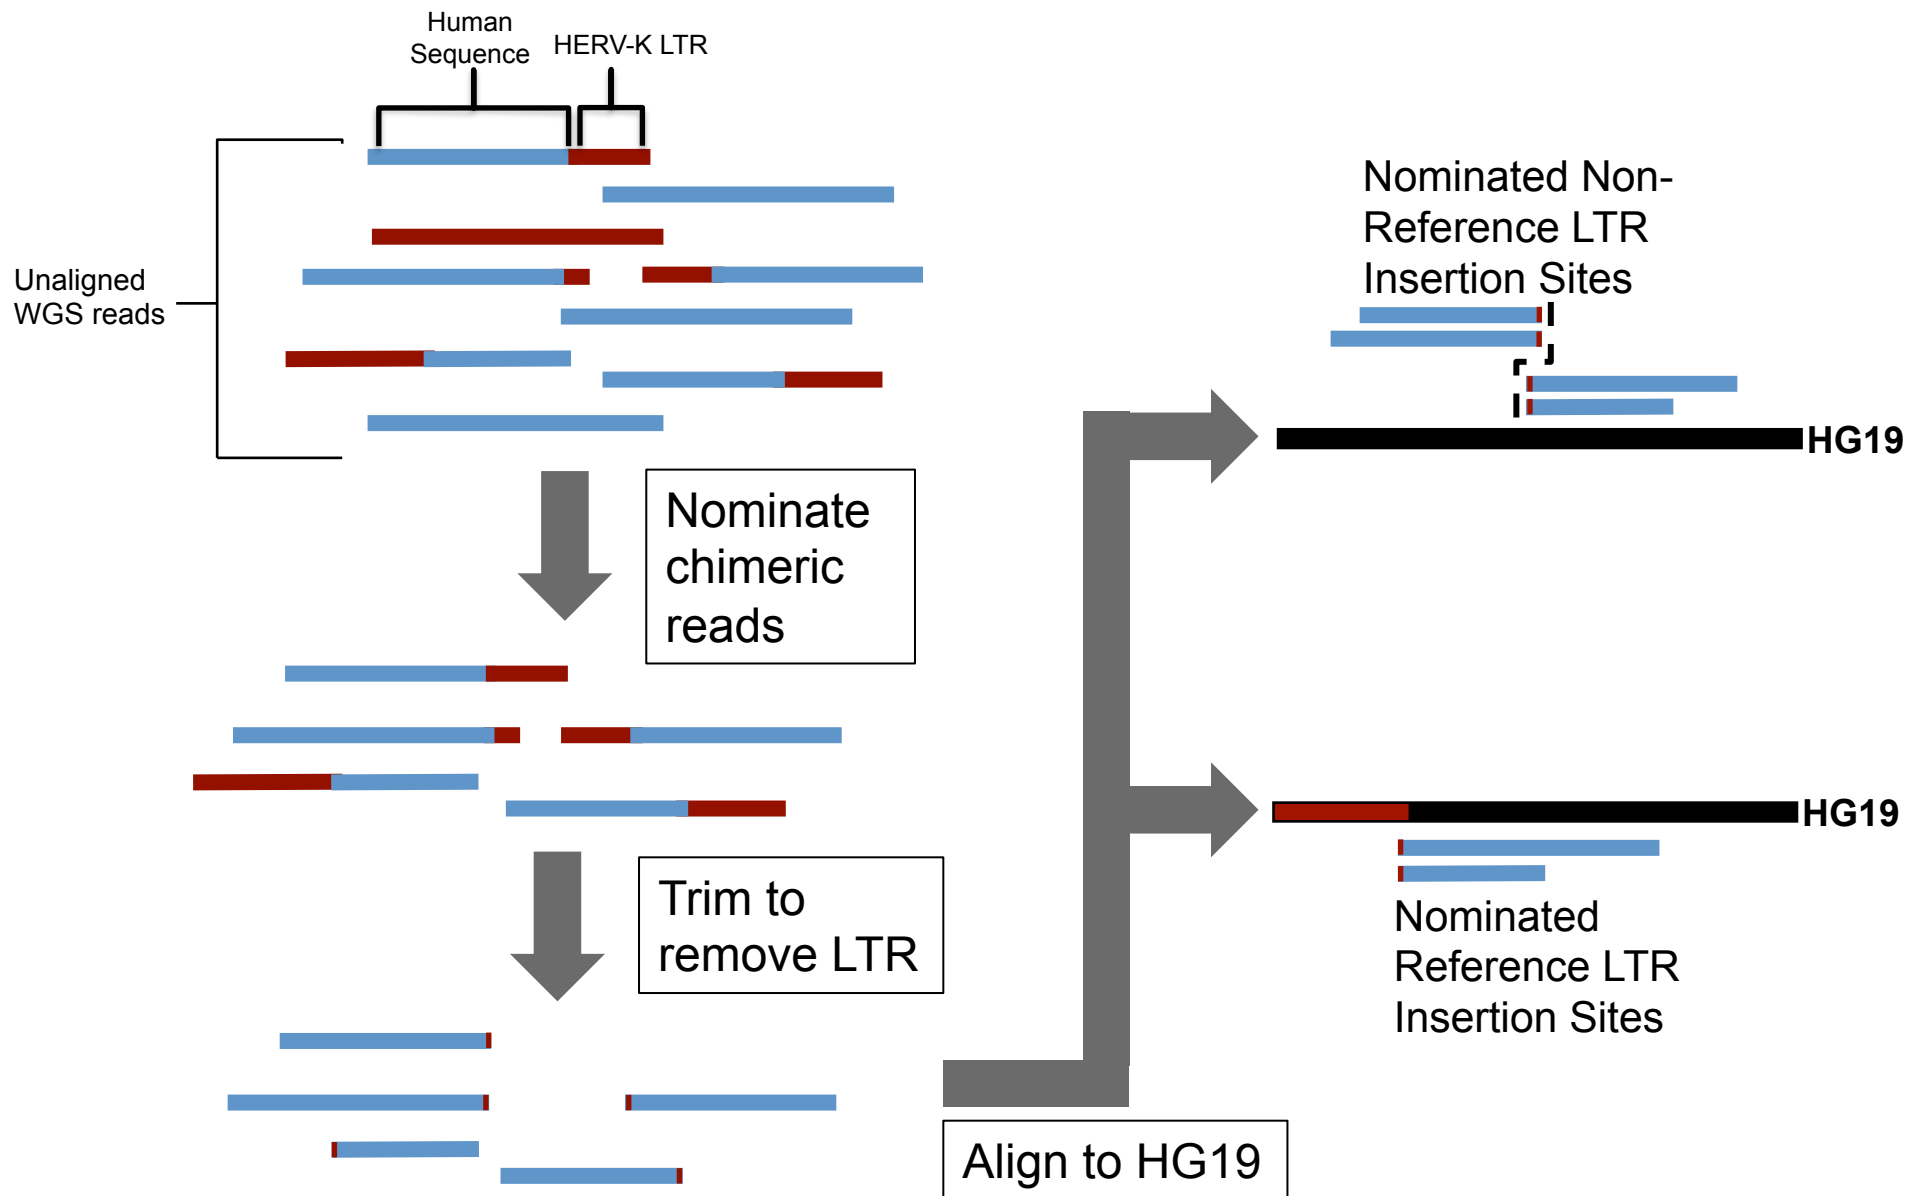

**Figure S2**

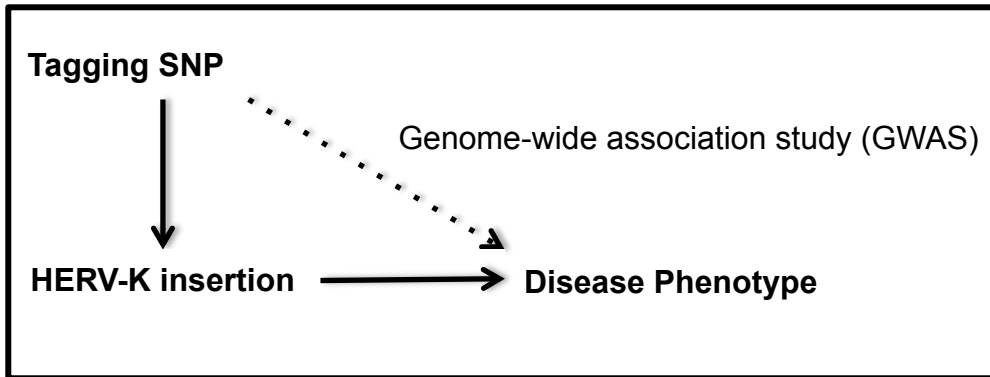



Figure S3-S50

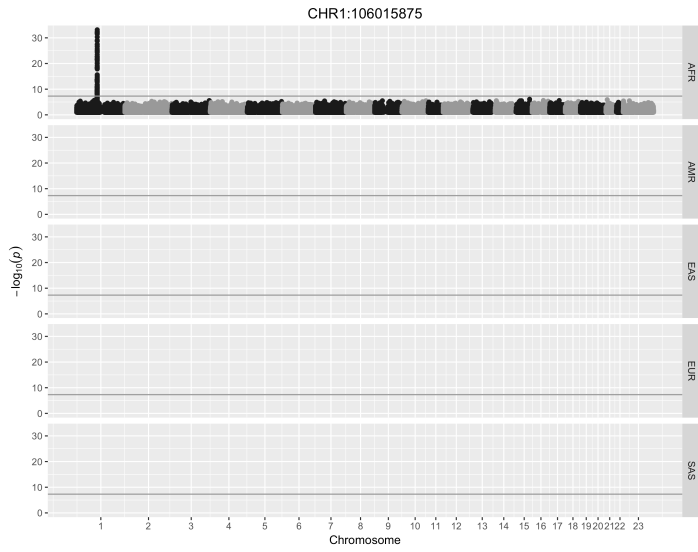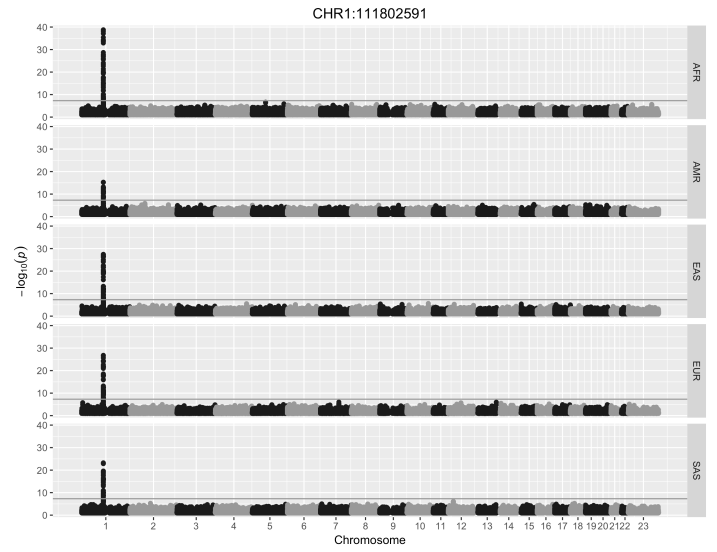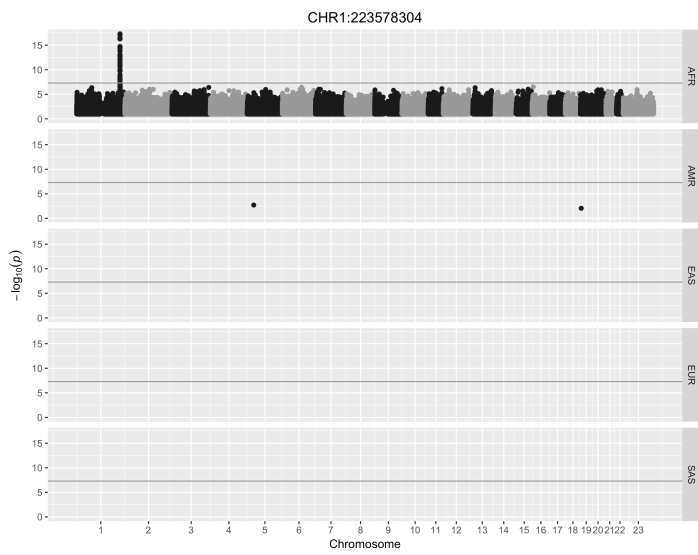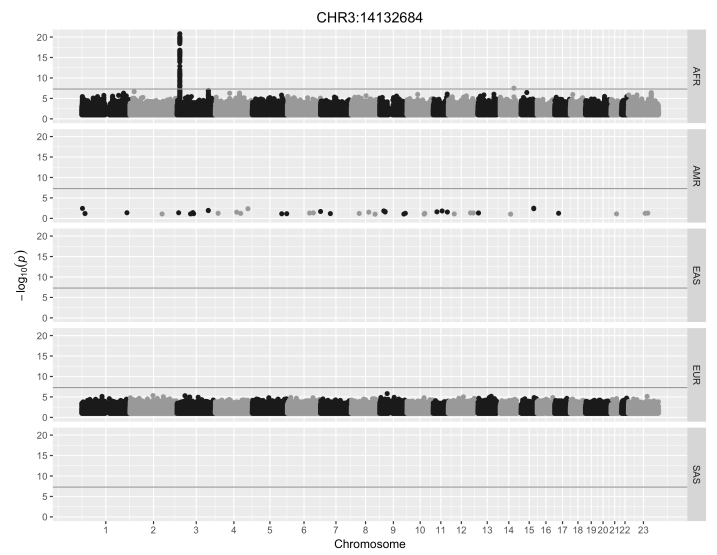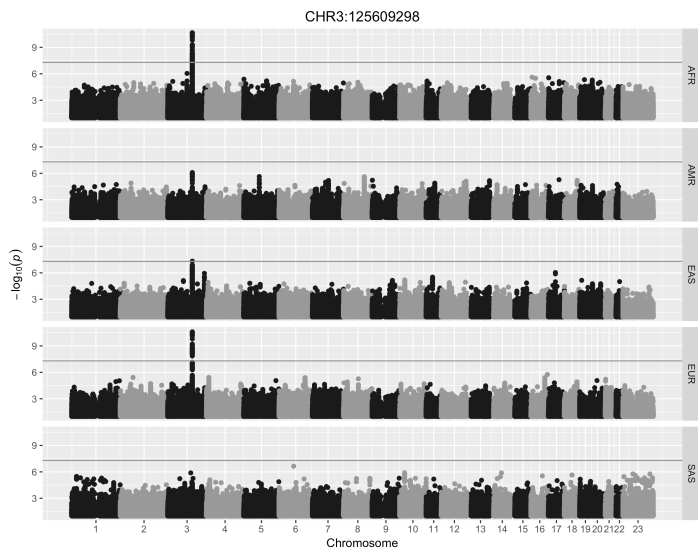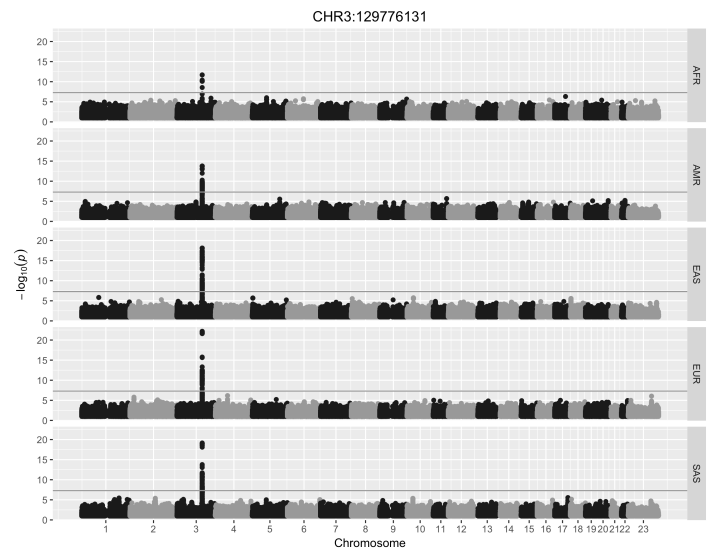

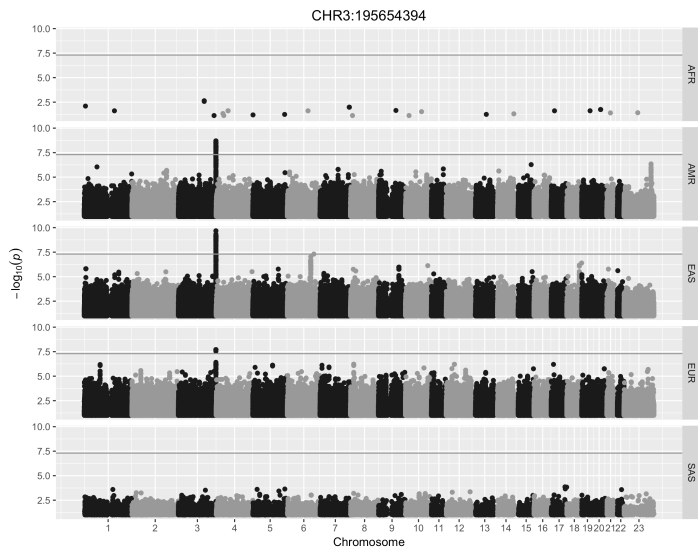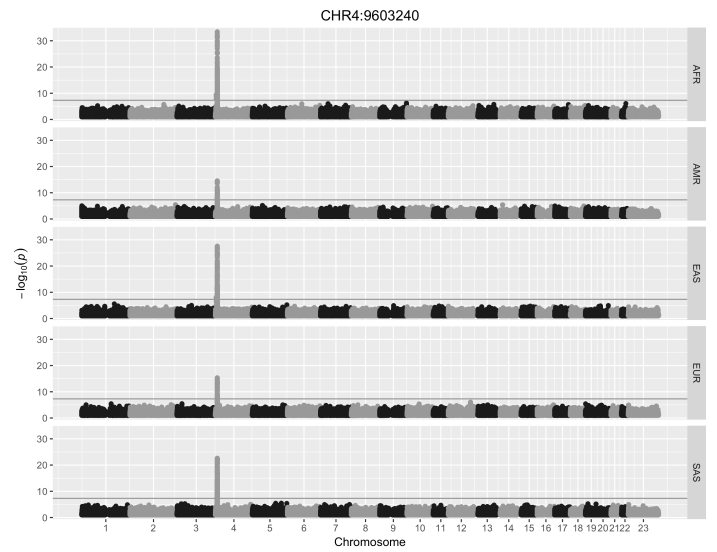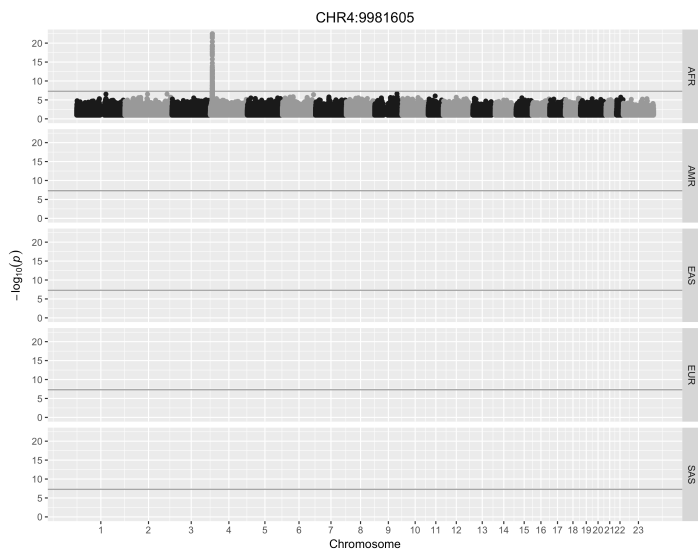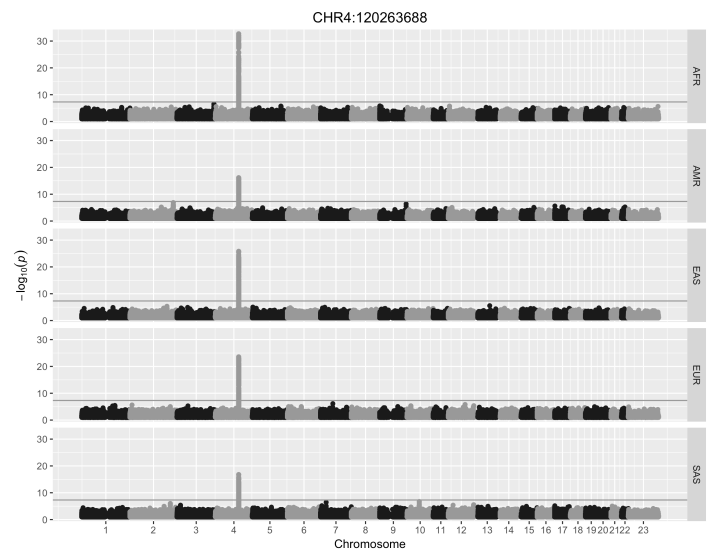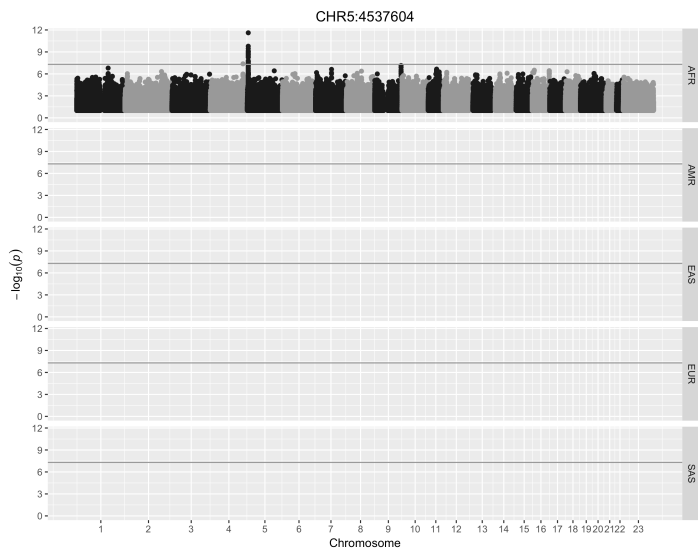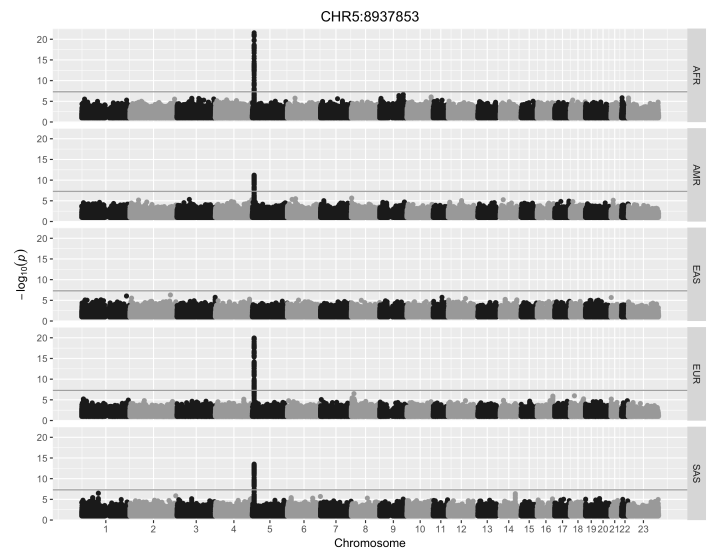

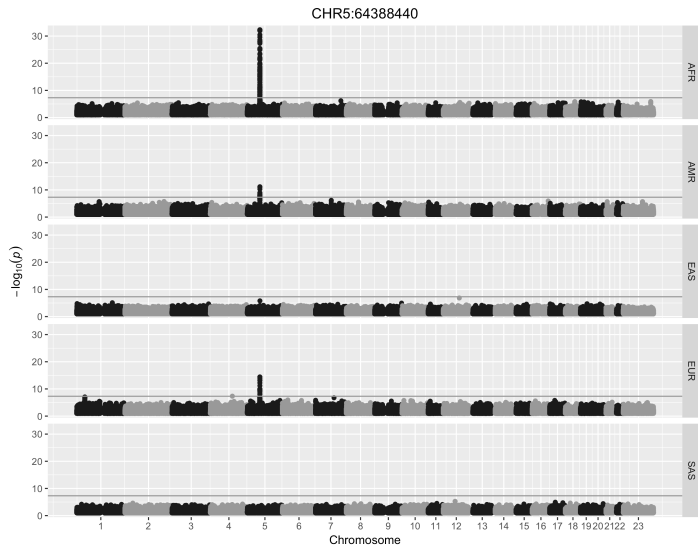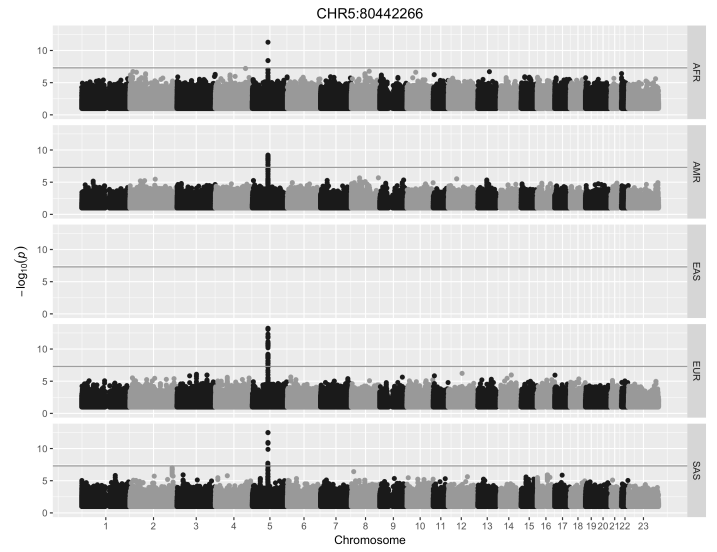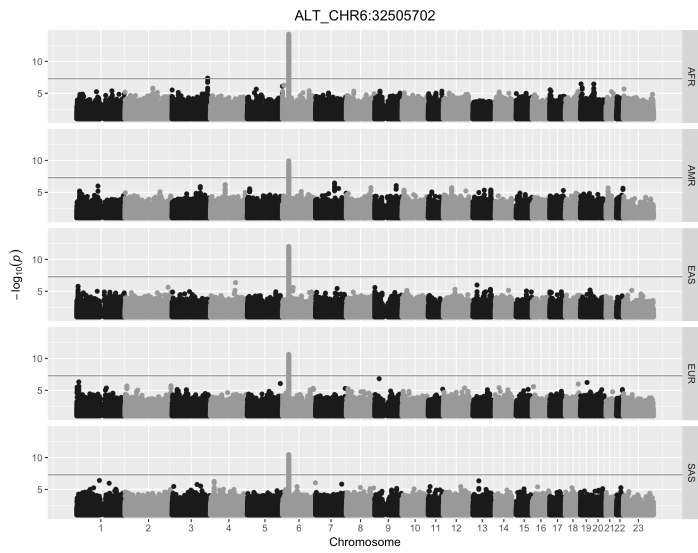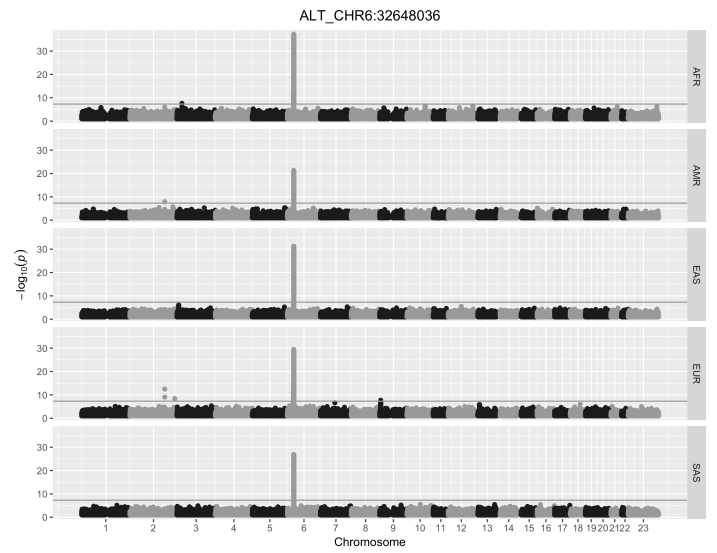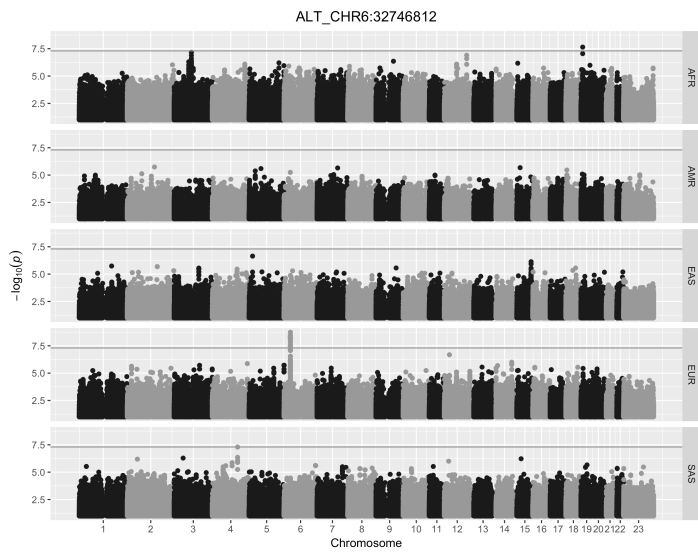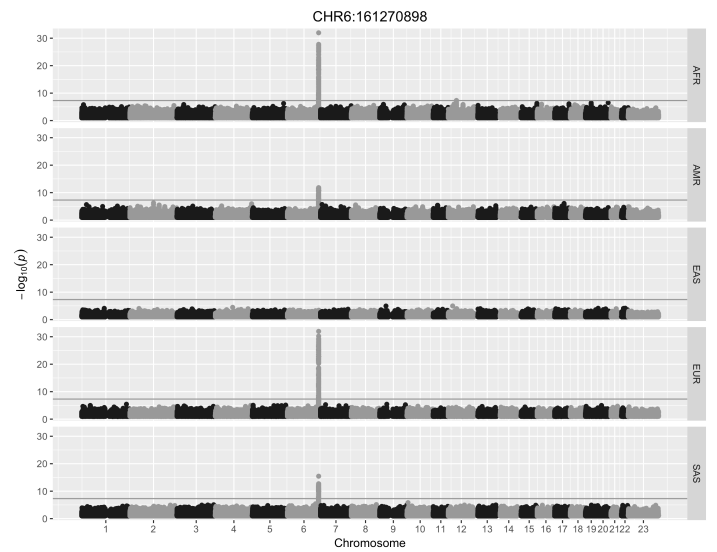

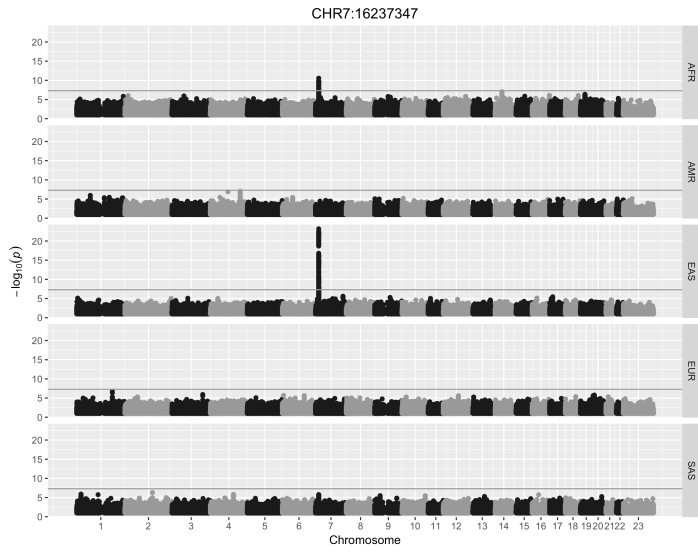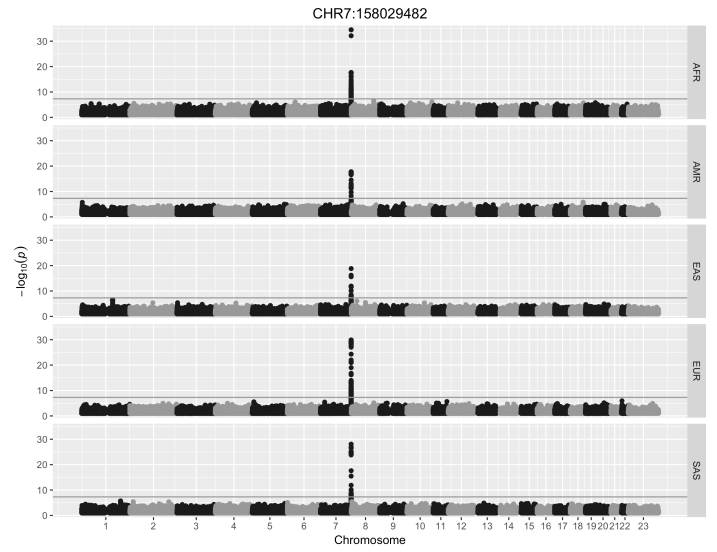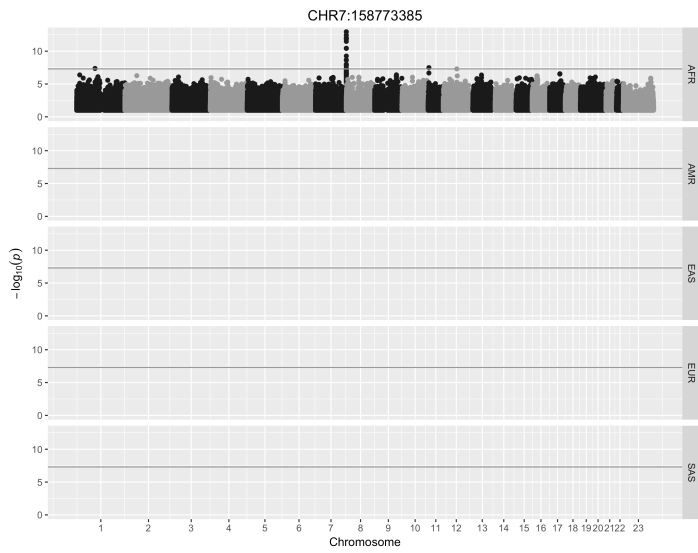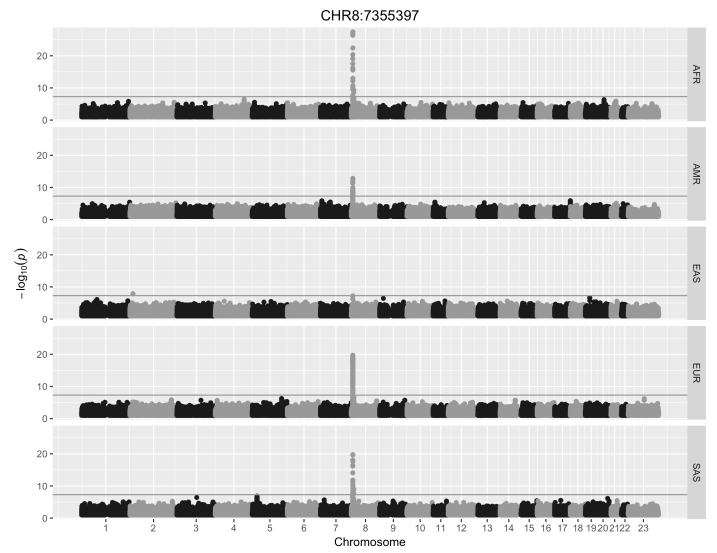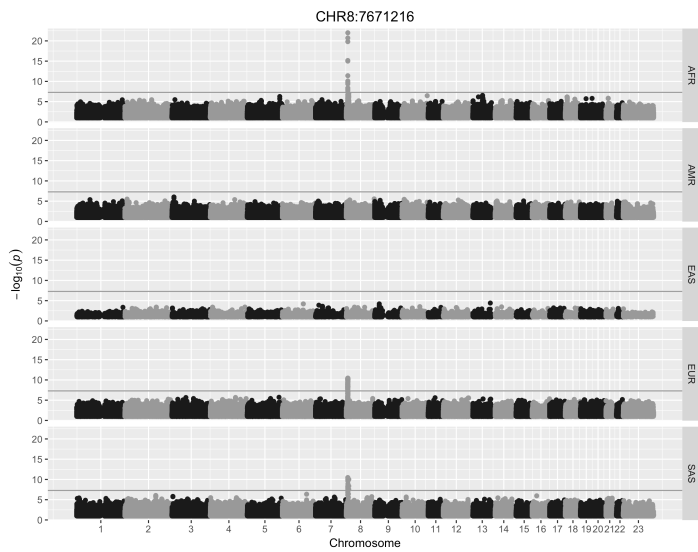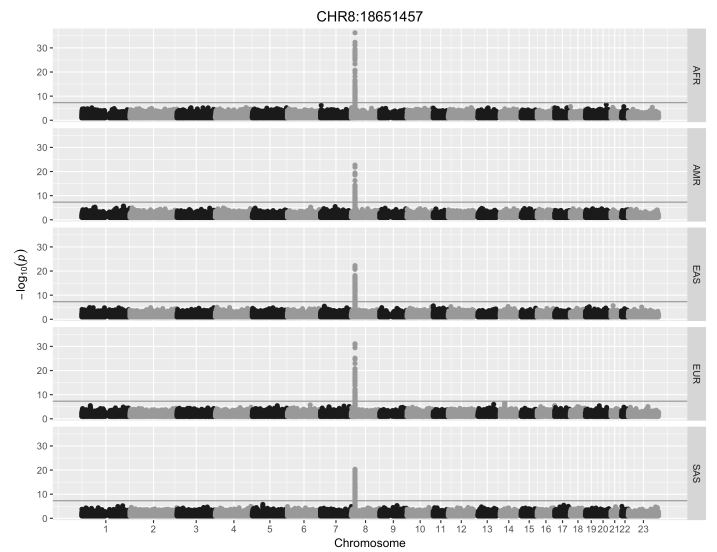

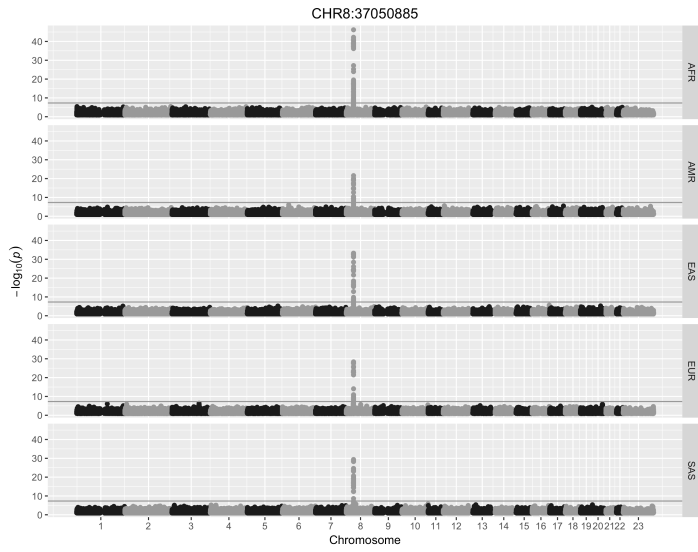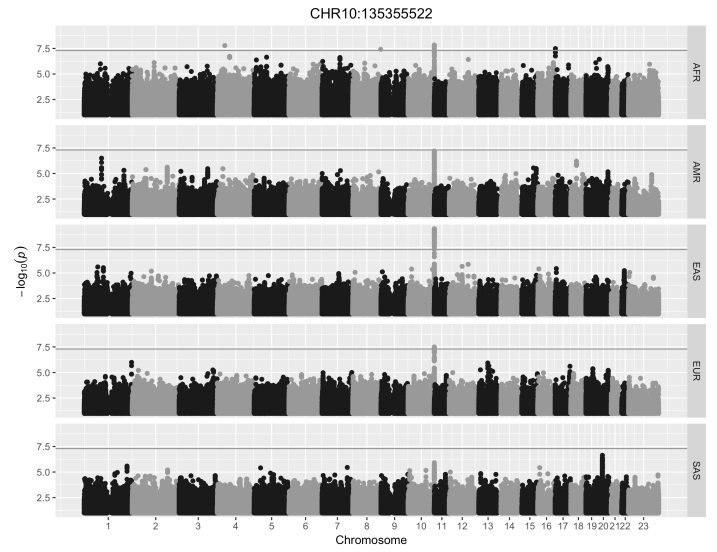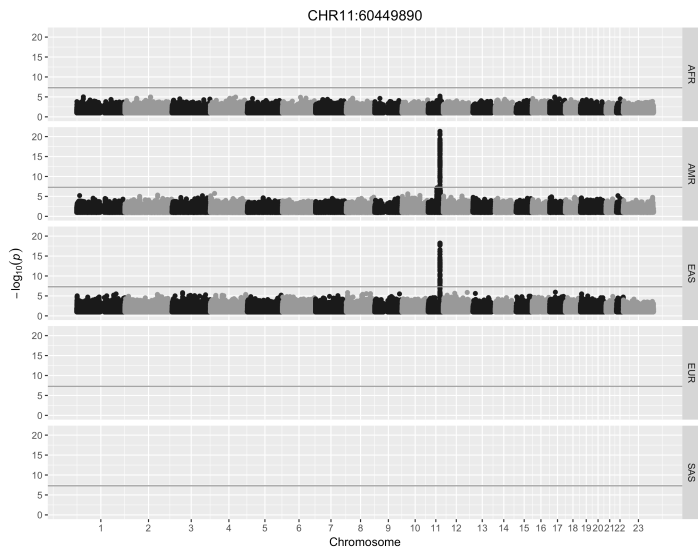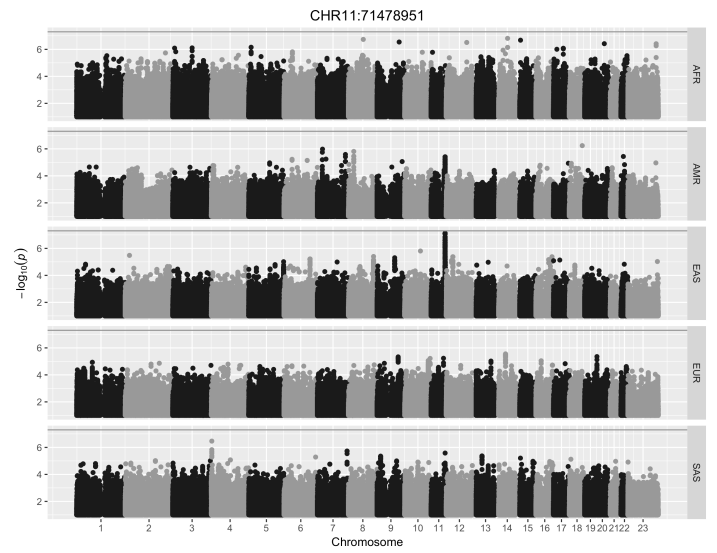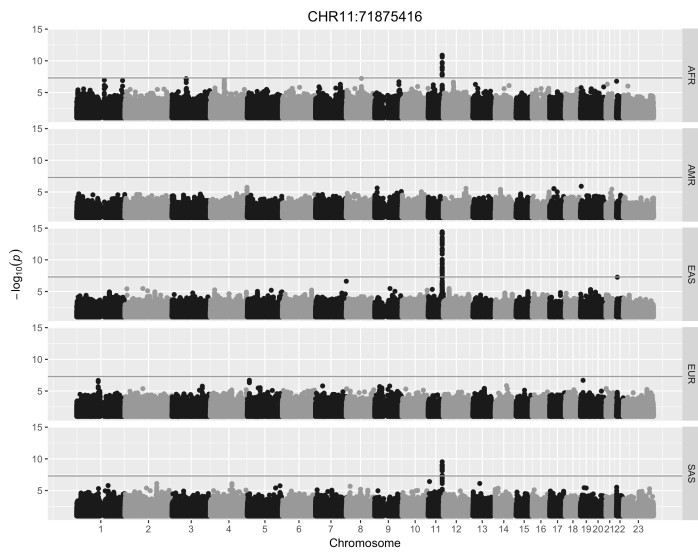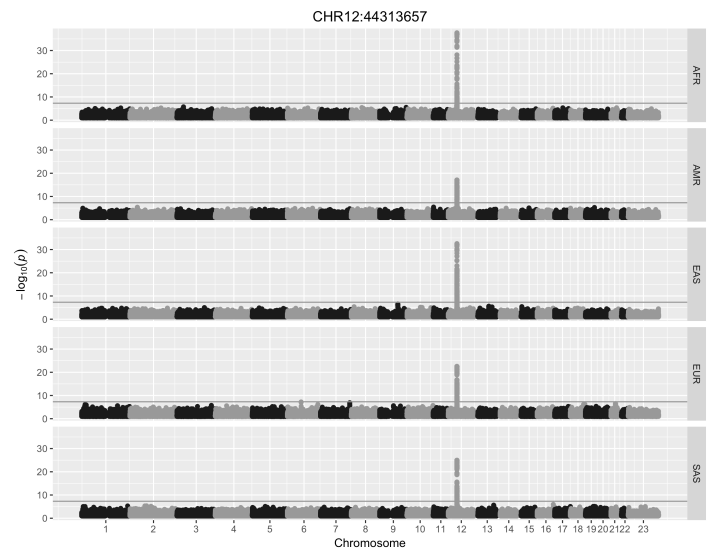

CHR12:55727213

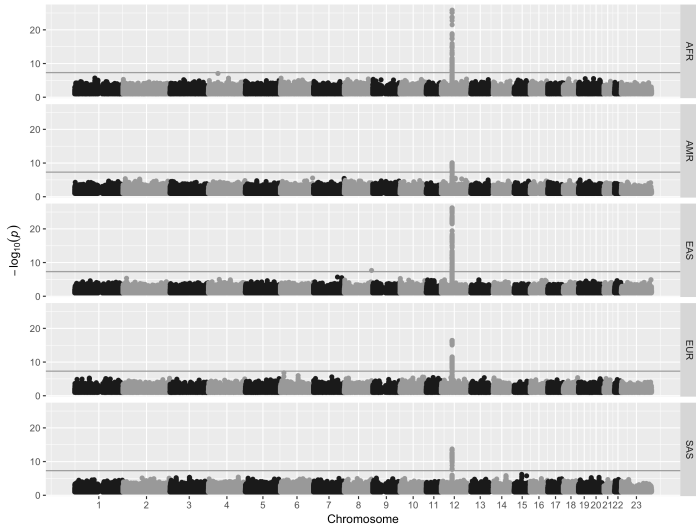

CHR12:124066477

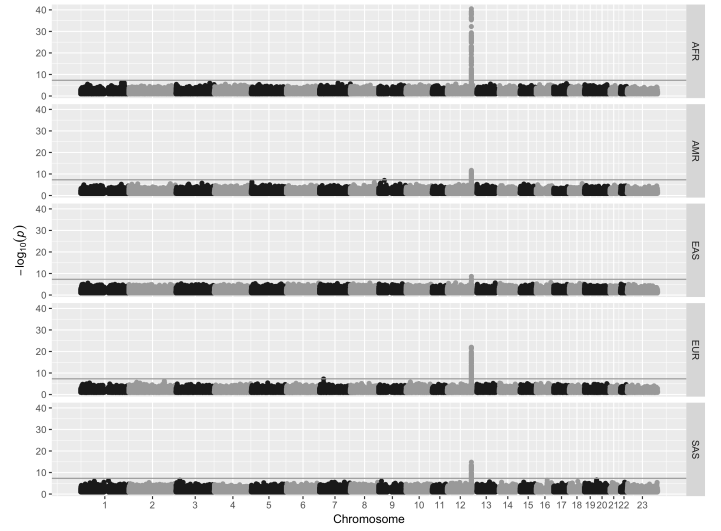

CHR13:54841902

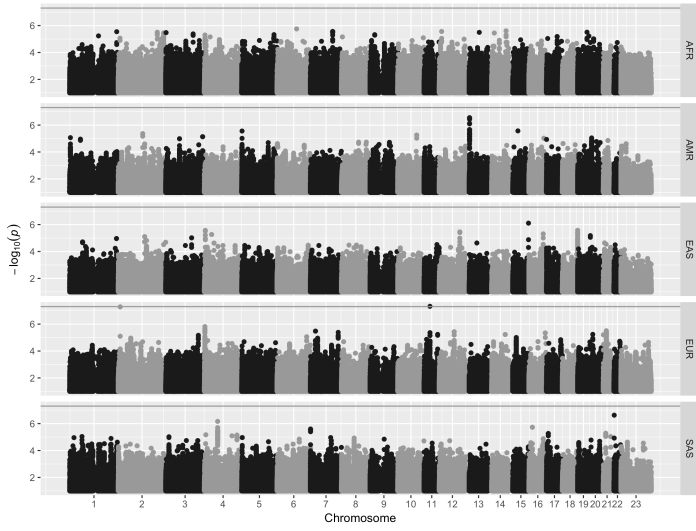

CHR13:90743183

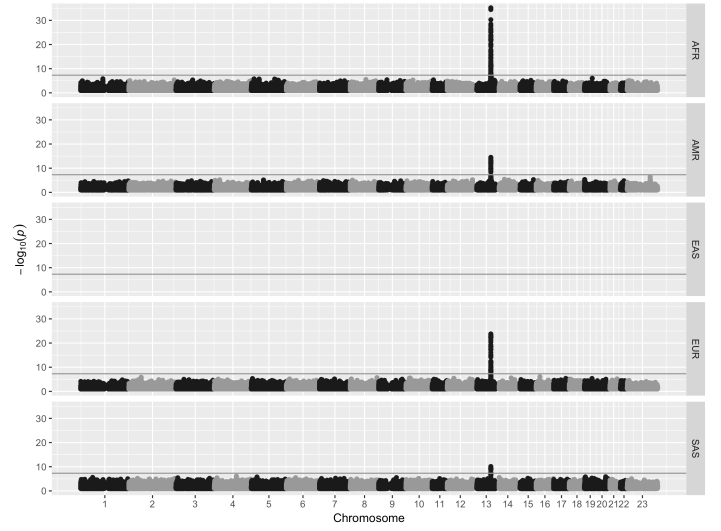

CHR14:20552746

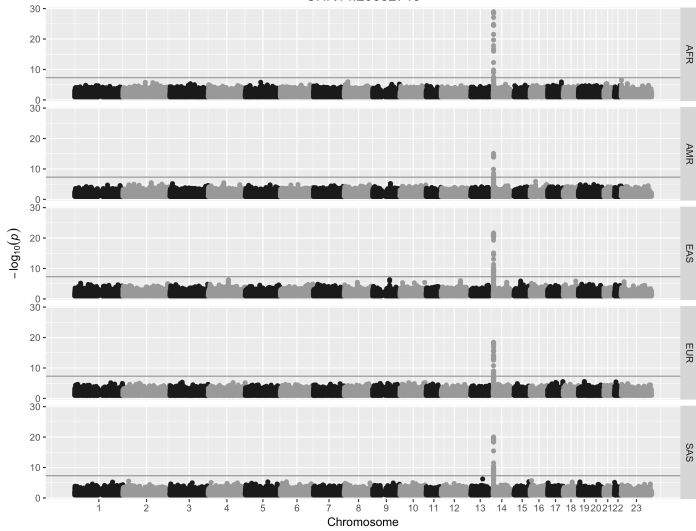

CHR15:63374594

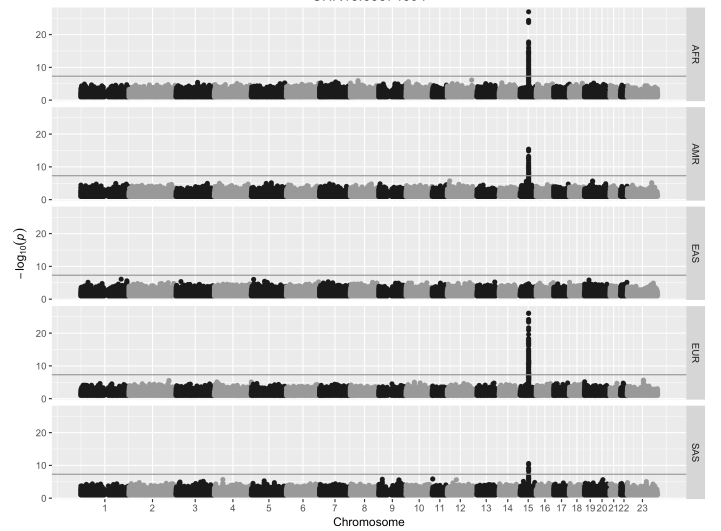

ALT\_CHR17:44361947

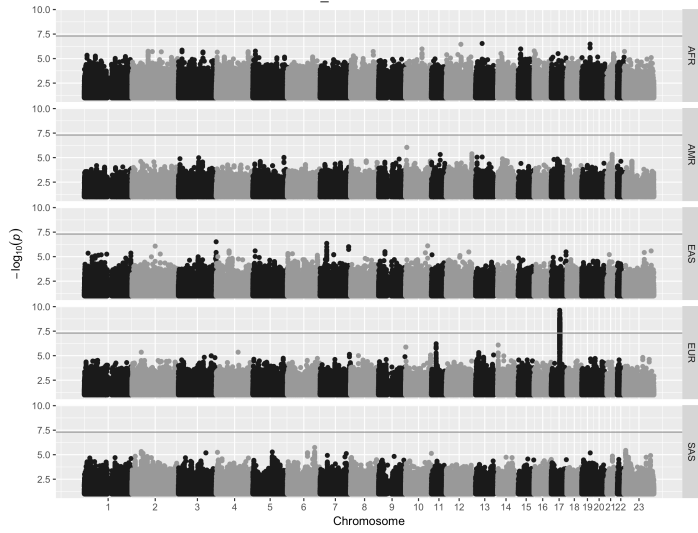

CHR19:386675

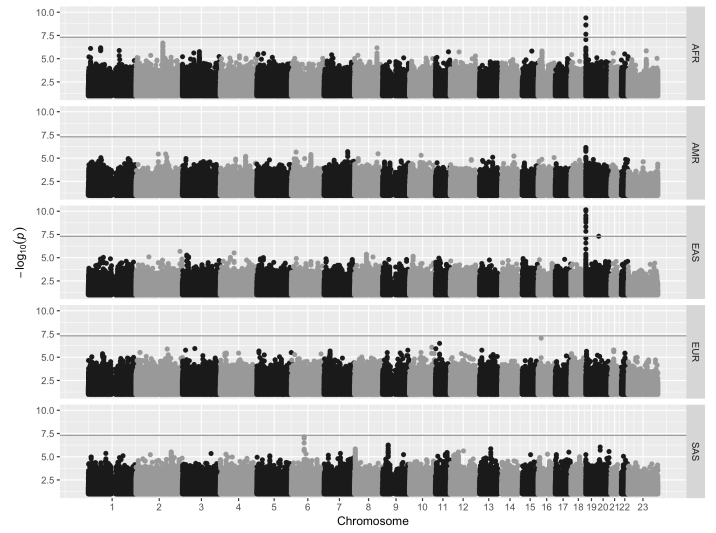

CHR19:21841536

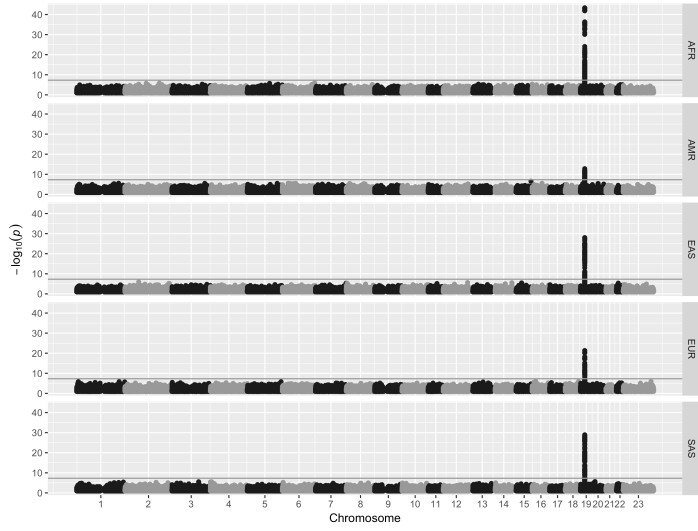

CHR19:22414379

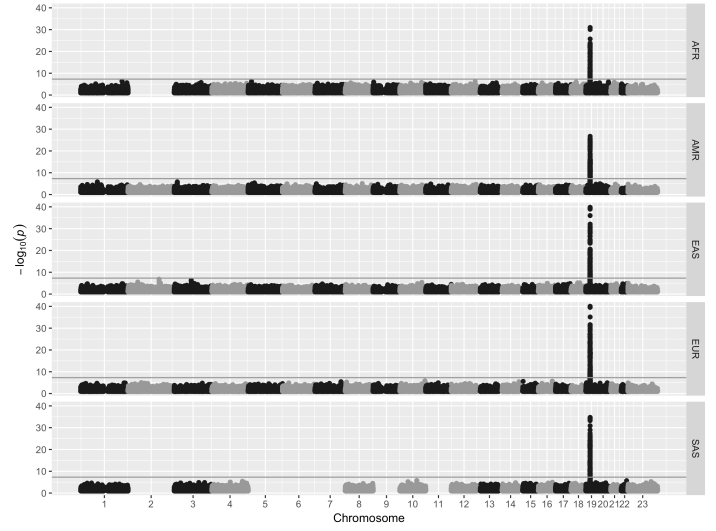

CHR19:22457244

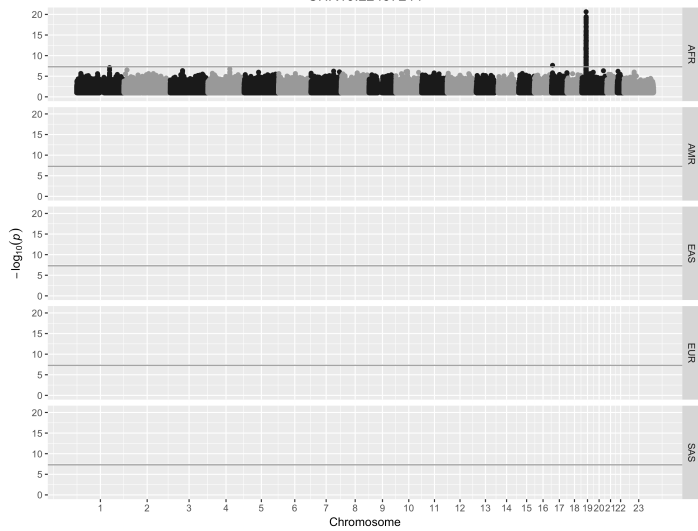

CHR19:29855781

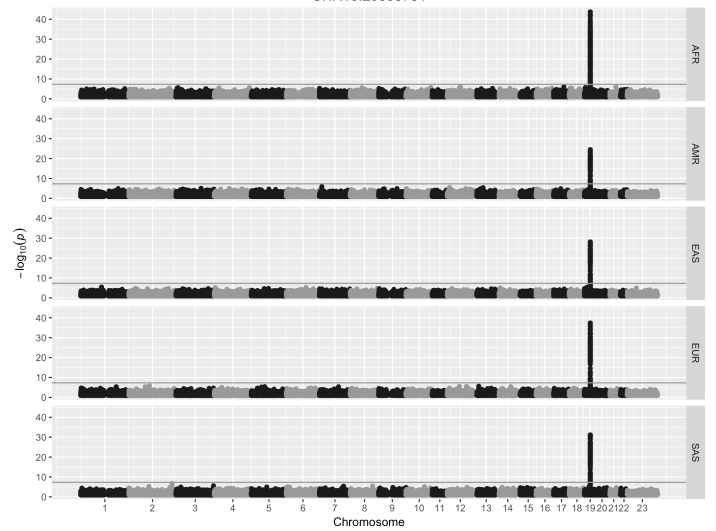

CHR19:52924209

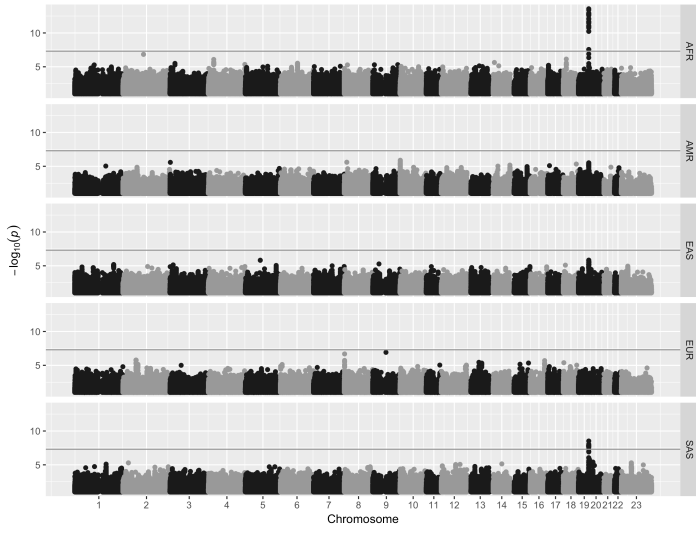

CHR19:57996939

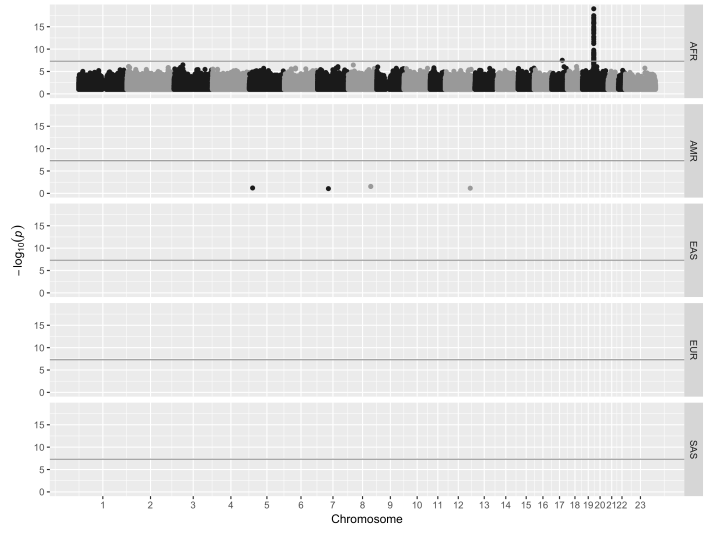

CHR20:12402387

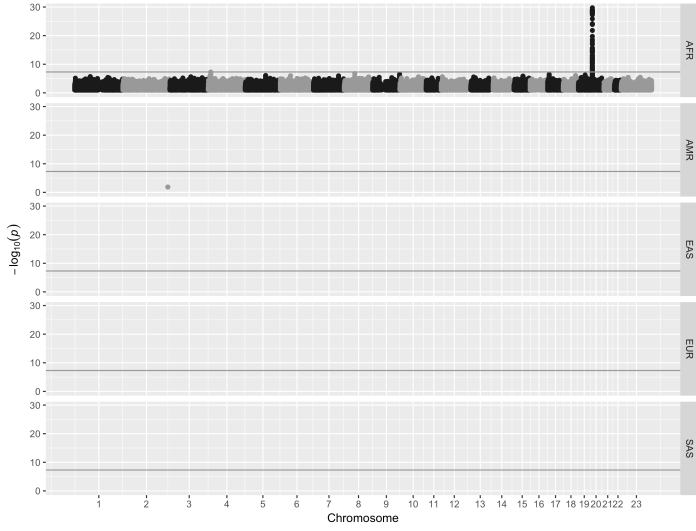

CHR20:25215439

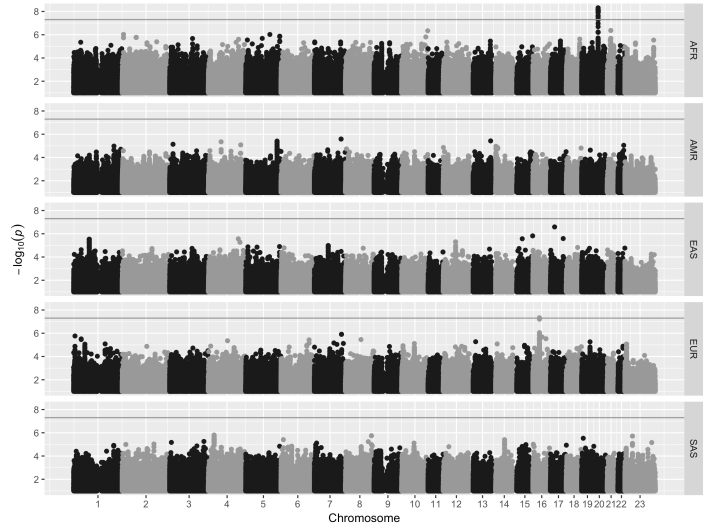

CHR21:15654234

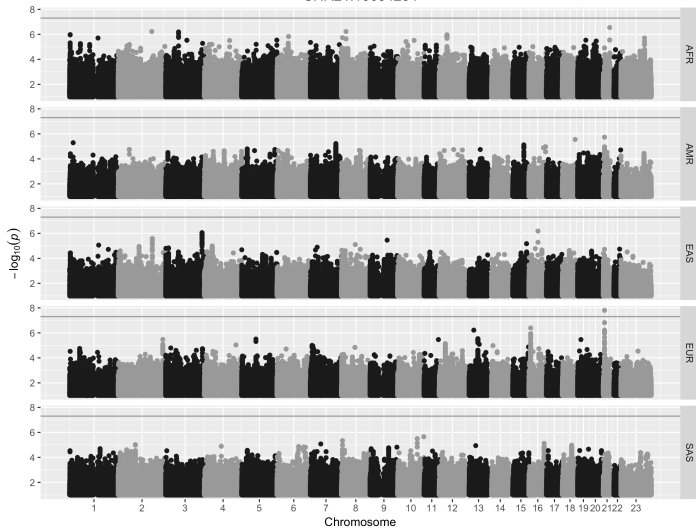

CHR23:93606603

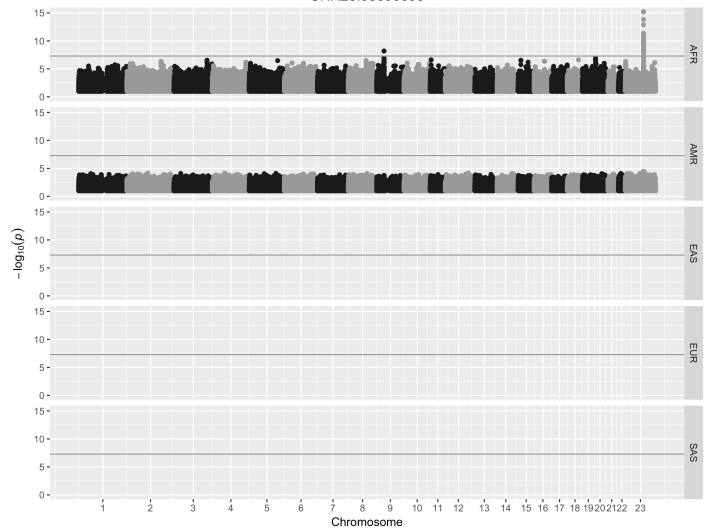



**Figure S51-S63**

**chr8:37050885**

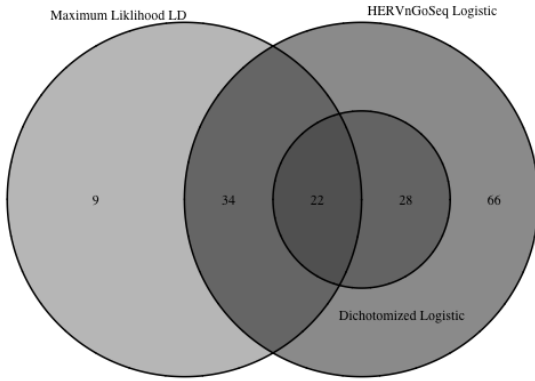

**chr1:111802591**

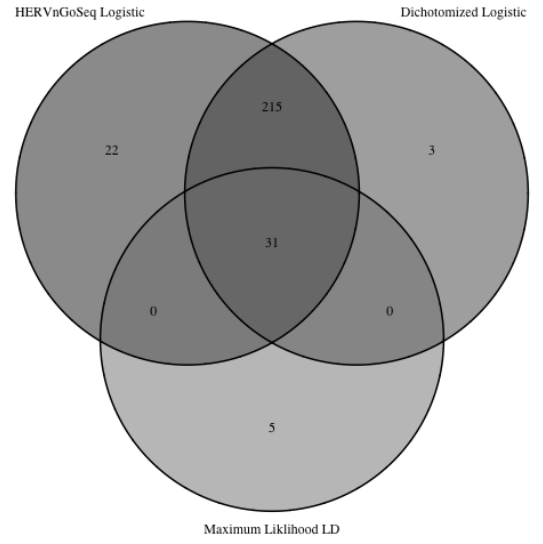

**Lorem ipsum dolor sit**

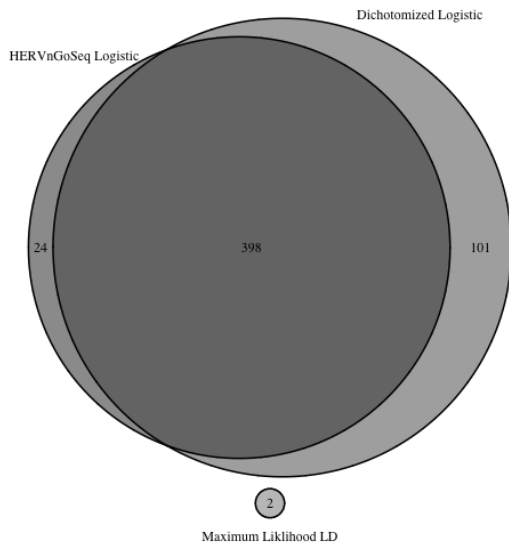

**chr5:64388440**

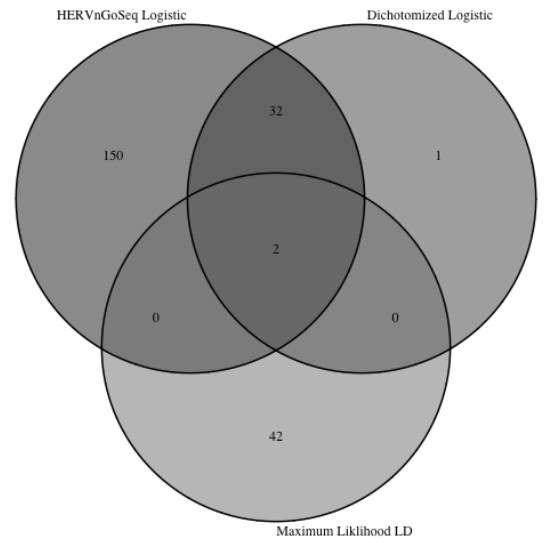

**chr5:80442266**

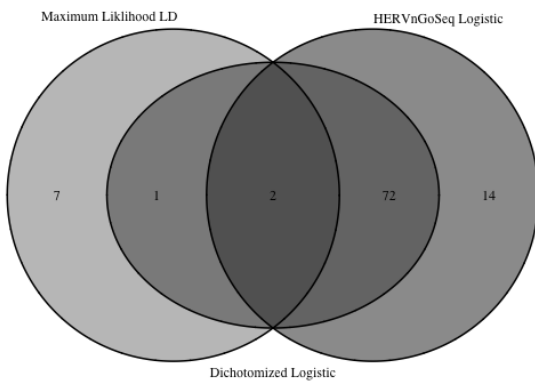

**chr6:161270898**

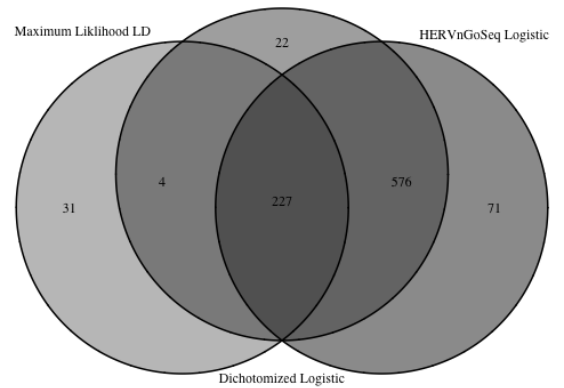

chr12:44313657

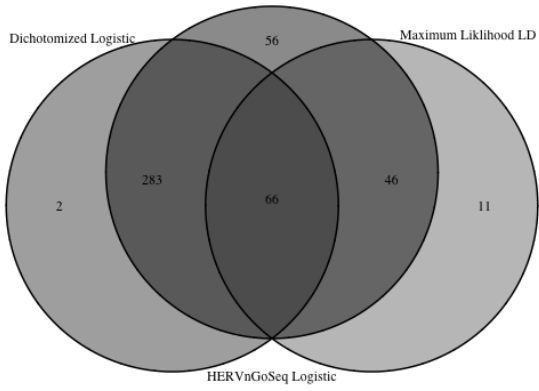

chr12:124066477

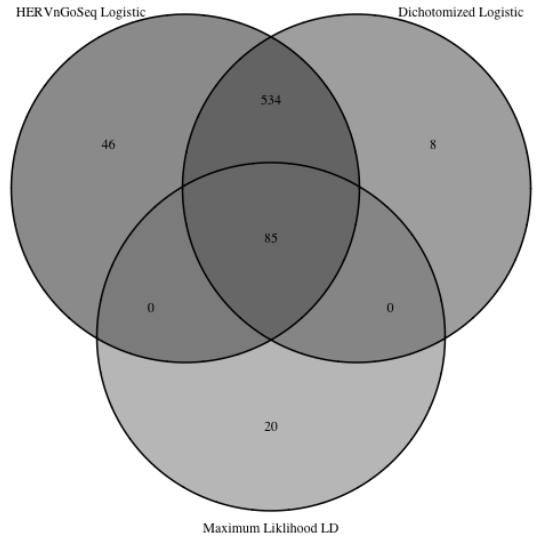

chr13:90743183

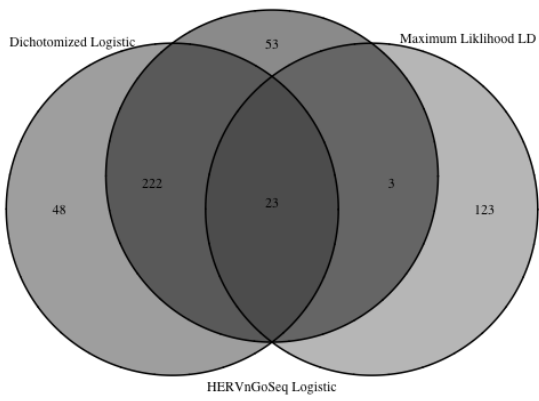

chr15:63374594

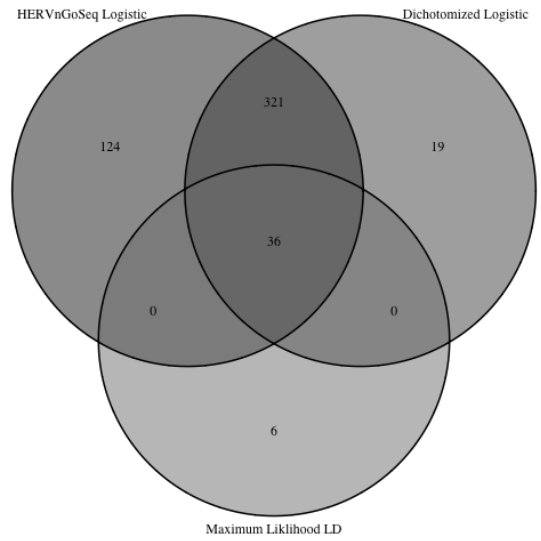

chr19:21841536

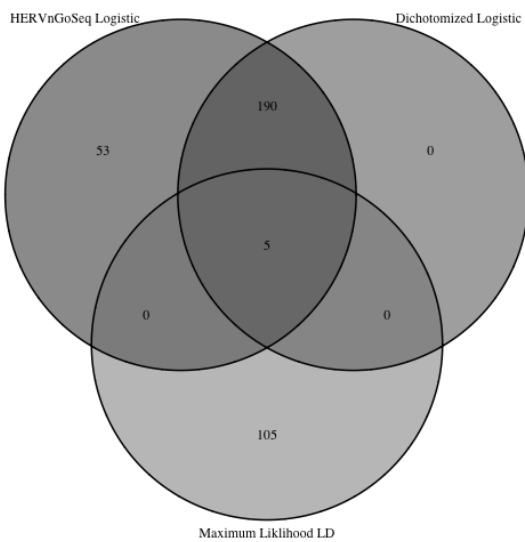

chr19:29855781

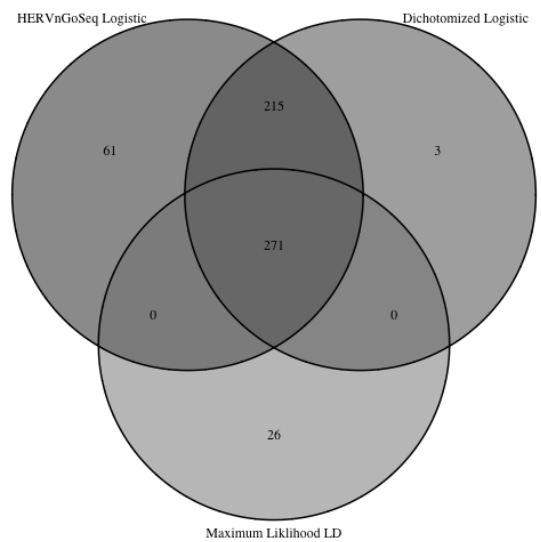

Figure S64

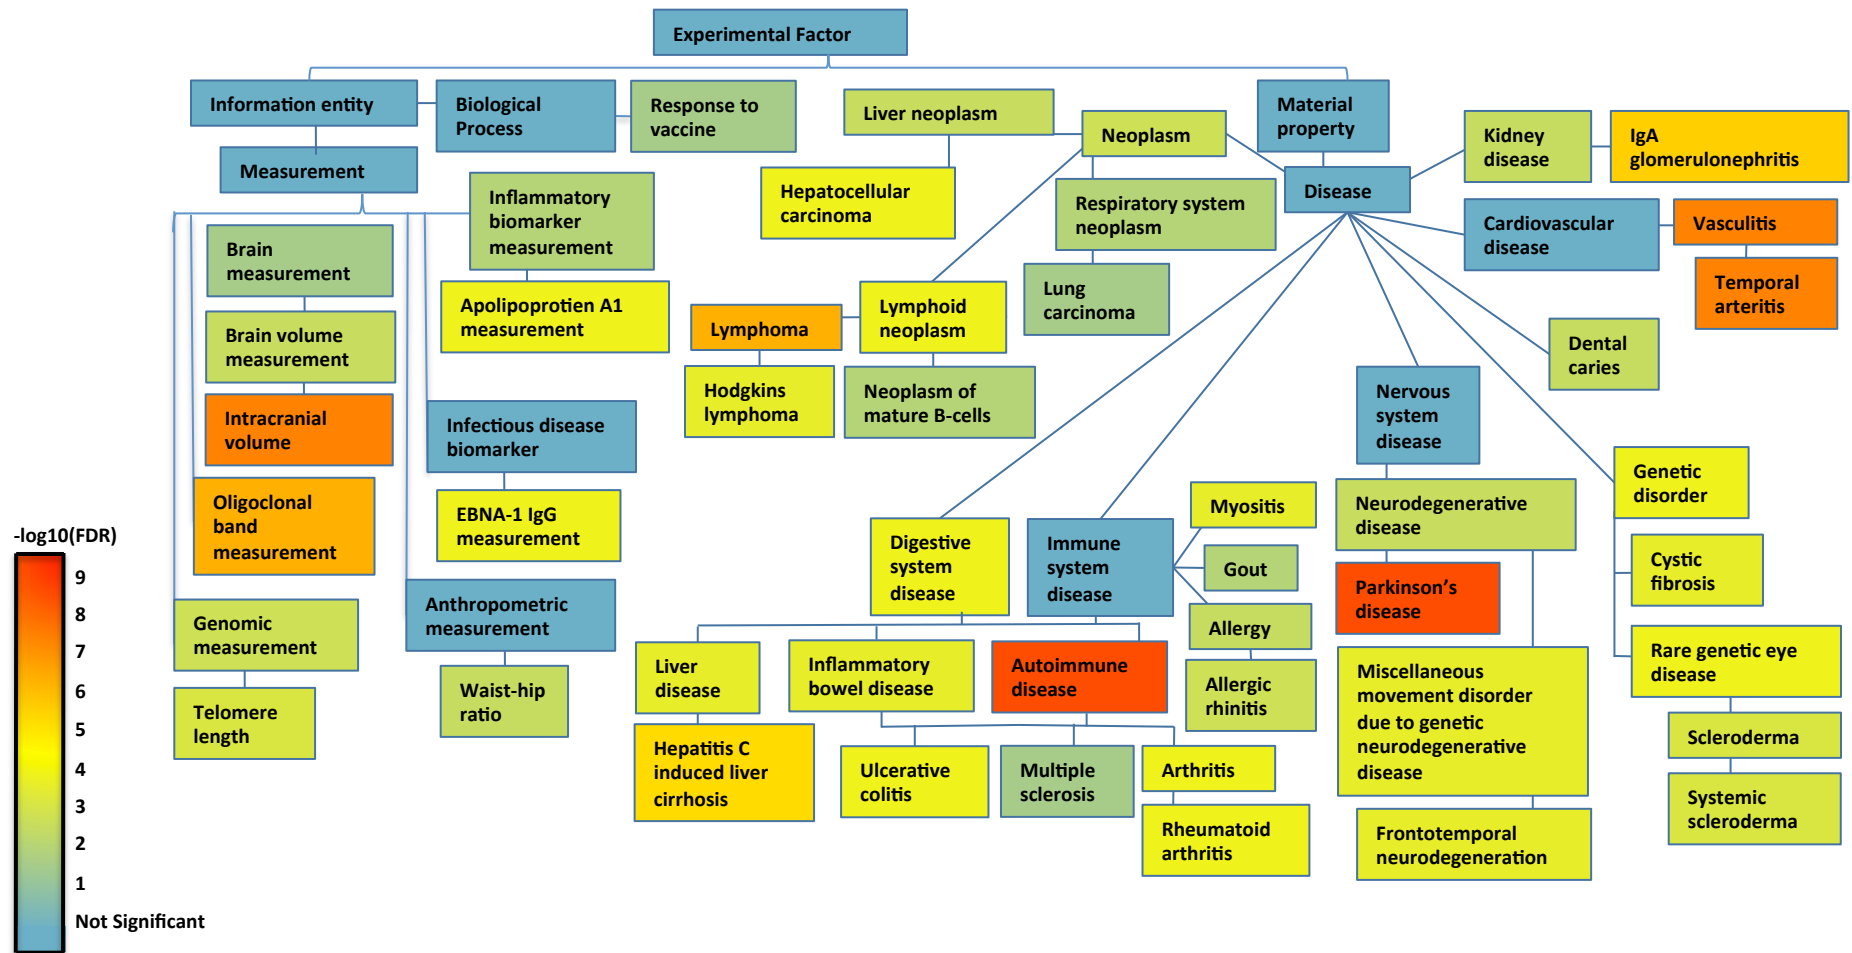

**Figure S65**

Prevalence estimates HERVnGoSeq and Wildshcutte et al.

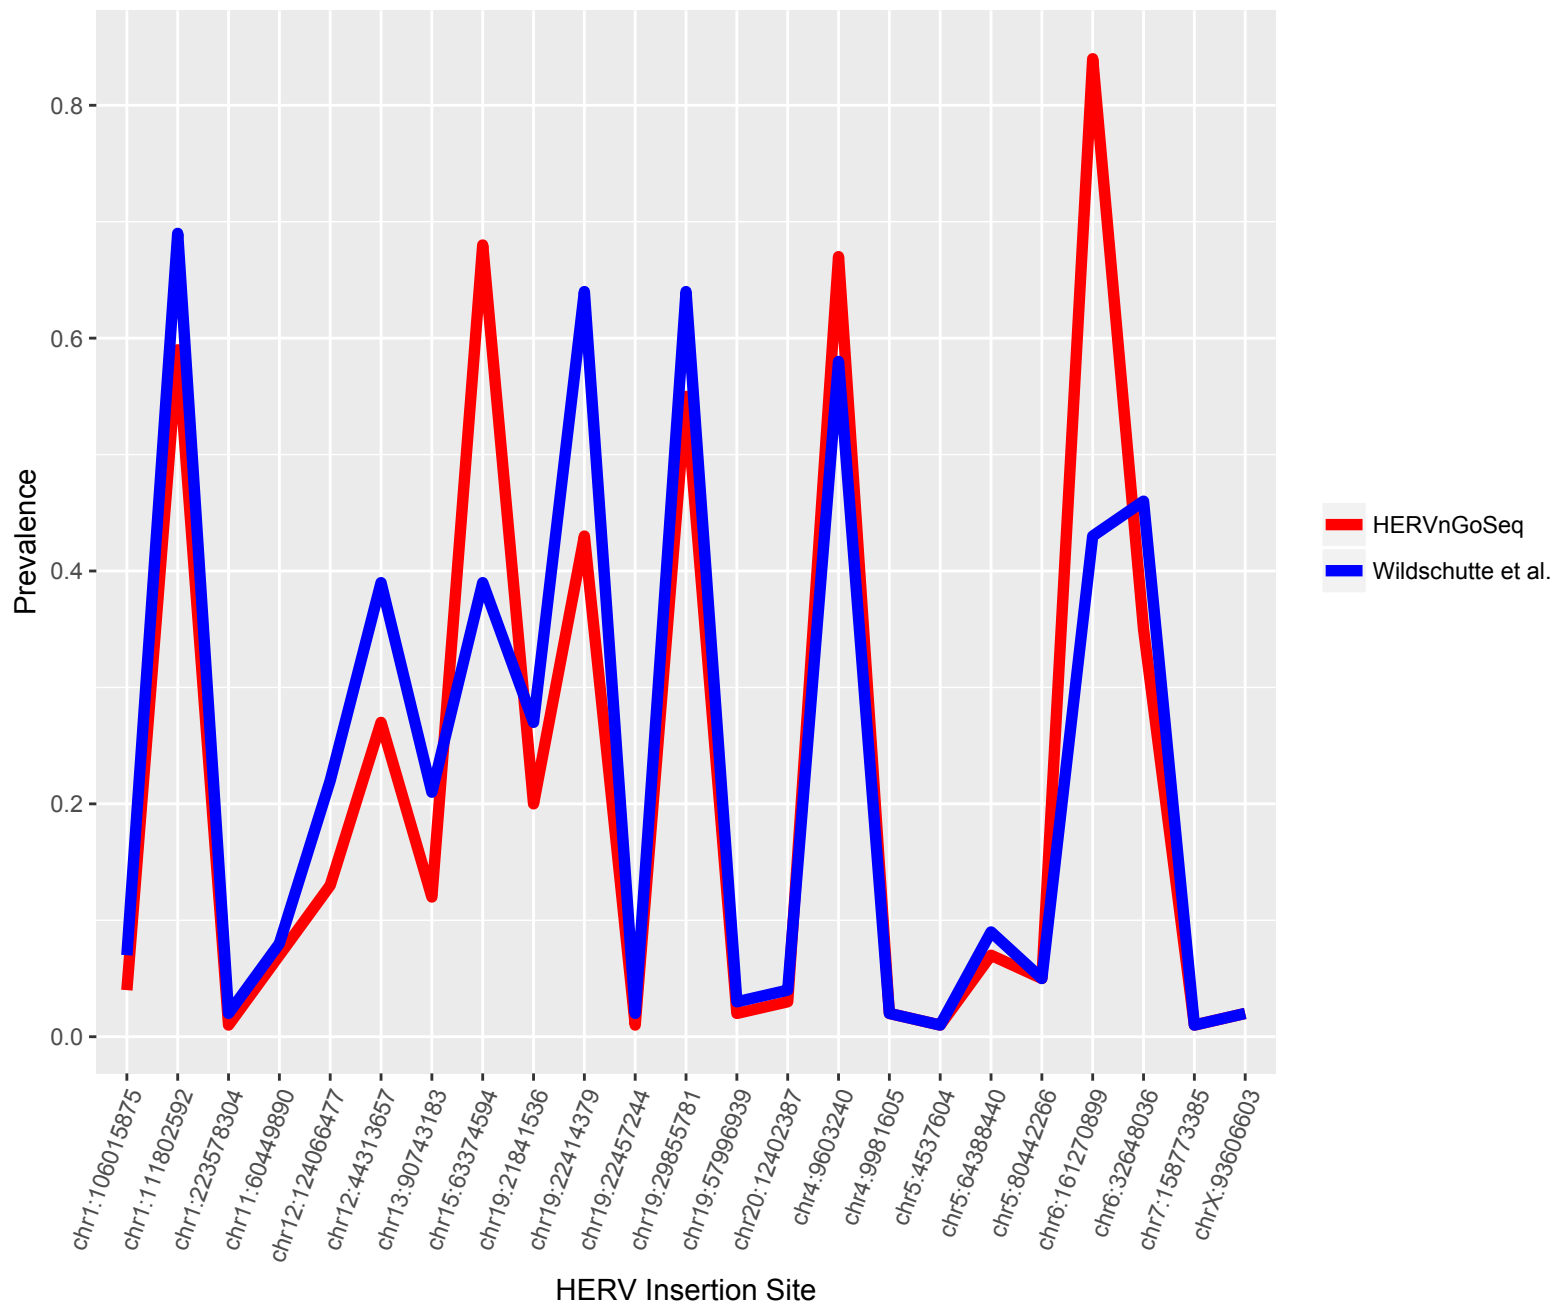

Supplement: Table_1.pdf [file Table_1.pdf]
